# Supplementary material
Source: PubMed Central journal article supplement (PMC2871412)
Supplement: supp_M900487-MCP200_ModificationList.pdf [file supp_M900487-MCP200_ModificationList.pdf]

# Supplementary Tables

Table 1: Universal list of modifications used with PILOT\_PTM.

| Monoisotopic Mass | Residue | Location   | Name                                                                                       |
|-------------------|---------|------------|--------------------------------------------------------------------------------------------|
| 1768.64           | N       | Anywhere   | Fucosylated biantennary (N-linked glycosylation)                                           |
| 1738.87           | C       | Anywhere   | L-selenocysteiny l tungsten bis(molybdopterin guanine dinucleotide) (Post-translational)   |
| 1622.58           | N       | Anywhere   | Biantennary (N-linked glycosylation)                                                       |
| 1620.93           | C       | Anywhere   | L-selenocysteiny l molybdenum bis(molybdopterin guanine dinucleotide) (Post-translational) |
| 1606.59           | N       | Anywhere   | Fucosylated biantennary (-1 galactose) (N-linked glycosylation)                            |
| 1588.98           | S       | Anywhere   | L-seriny l molybdenum bis(molybdopterin guanine dinucleotide) (Post-translational)         |
| 1572.99           | C       | Anywhere   | molybdenum bis(molybdopterin guanine dinucleotide) (Post-translational)                    |
| 1572.99           | D       | Anywhere   | molybdenum bis(molybdopterin guanine dinucleotide) (Post-translational)                    |
| 1460.53           | N       | Anywhere   | Biantennary (-1 galactose) (N-linked glycosylation)                                        |
| 1444.53           | N       | Anywhere   | Fucosylated biantennary (-2 galactose) (N-linked glycosylation)                            |
| 1298.48           | N       | Anywhere   | Biantennary (-2 galactose) (N-linked glycosylation)                                        |
| 1216.42           | N       | Anywhere   | N-linked glycan core (N-linked glycosylation)                                              |
| 1046.35           | K       | Anywhere   | ExacTag Amine label mass for 2-4-7-10 plex (Isotopic label)                                |
| 972.365           | C       | Anywhere   | ExacTag Thiol label mass for 2-4-7-10 plex (Isotopic label)                                |
| 947.323           | N       | Anywhere   | Hex1HexNAc1NeuAc2 (N-linked glycosylation)                                                 |
| 947.323           | S       | Anywhere   | Hex1HexNAc1NeuAc2 (O-linked glycosylation)                                                 |
| 947.323           | T       | Anywhere   | Hex1HexNAc1NeuAc2 (O-linked glycosylation)                                                 |
| 923.291           | N       | Anywhere   | Hex3HexNAc2P1 (N-linked glycosylation)                                                     |
| 922.835           | C       | Anywhere   | copper sulfido molybdopterin cytosine dinucleotide (Post-translational)                    |
| 892.317           | N       | Anywhere   | Hex3HexNAc2 (N-linked glycosylation)                                                       |
| 881.147           | S       | Anywhere   | phosphoribosyl dephospho-coenzyme A (Post-translational)                                   |
| 876.322           | N       | Anywhere   | Hex2HexNAc2dHex1 (N-linked glycosylation)                                                  |
| 862.307           | N       | Anywhere   | Hex2HexNAc2Pent1 (N-linked glycosylation)                                                  |
| 860.327           | N       | Anywhere   | Hex1HexNAc2dHex2 (N-linked glycosylation)                                                  |
| 846.312           | N       | Anywhere   | Hex1HexNAc2dHex1Pent1 (N-linked glycosylation)                                             |
| 821.28            | N       | Anywhere   | Hex3HexNAc1Pent1 (N-linked glycosylation)                                                  |
| 796.239           | C       | Anywhere   | fluorescent dye that labels cysteines (Chemical derivative)                                |
| 783.141           | C       | Anywhere   | Flavin adenine dinucleotide (Post-translational)                                           |
| 783.141           | H       | Anywhere   | Flavin adenine dinucleotide (Post-translational)                                           |
| 783.141           | Y       | Anywhere   | Flavin adenine dinucleotide (Post-translational)                                           |
| 765.1             | C       | Anywhere   | Cysteine modified Coenzyme A (Post-translational)                                          |
| 760.731           | Q       | Anywhere   | L-glutamyl 5-omega-hydroxyceramide ester (Post-translational)                              |
| 730.264           | N       | Anywhere   | Hex2HexNAc2 (N-linked glycosylation)                                                       |
| 714.269           | N       | Anywhere   | Hex1HexNAc2dHex1 (N-linked glycosylation)                                                  |
| 713.093           | C       | Anywhere   | bis-N-I-sulfonylserine (Chemical derivative)                                               |
| 700.254           | N       | Anywhere   | Hex1HexNAc2Pent1 (N-linked glycosylation)                                                  |
| 699.52            | G       | C-Terminus | C-term N-glycyl-1-(phosphatidyl)ethanolamine (Post-translational)                          |
| 698.275           | N       | Anywhere   | HexNAc2dHex2 (N-linked glycosylation)                                                      |
| 684.298           | C       | Anywhere   | Cy5 CyDye DIGE Fluor saturation dye (Chemical derivative)                                  |
| 672.298           | C       | Anywhere   | Cy3 CyDye DIGE Fluor saturation dye (Chemical derivative)                                  |
| 660.428           | C       | Anywhere   | Prostaglandin A1-biotinimide (Other)                                                       |
| 656.228           | N       | Anywhere   | Hex1HexNAc1NeuAc1 (N-linked glycosylation)                                                 |
| 656.228           | S       | Anywhere   | Hex1HexNAc1NeuAc1 (O-linked glycosylation)                                                 |
| 656.228           | T       | Anywhere   | Hex1HexNAc1NeuAc1 (O-linked glycosylation)                                                 |
| 634.663           | C       | Anywhere   | S-diphytanylglycerol diether (Post-translational)                                          |
| 626.387           | C       | Anywhere   | 15-deoxy-delta 12,14-Prostaglandin J2-biotinimide (Other)                                  |

Table 1: Universal list of modifications used with PILOT-PTM.

| Monoisotopic Mass | Residue | Location   | Name                                                                                                                   |
|-------------------|---------|------------|------------------------------------------------------------------------------------------------------------------------|
| 626.264           | C       | Anywhere   | Alkylation by biotinylated form of phenacyl bromide (Chemical derivative)                                              |
| 626.264           | H       | Anywhere   | Alkylation by biotinylated form of phenacyl bromide (Chemical derivative)                                              |
| 626.264           | S       | Anywhere   | Alkylation by biotinylated form of phenacyl bromide (Chemical derivative)                                              |
| 616.177           | C       | Anywhere   | heme (Post-translational)                                                                                              |
| 616.177           | H       | Anywhere   | heme (Post-translational)                                                                                              |
| 614.162           | E       | Anywhere   | hydroxyheme (Post-translational)                                                                                       |
| 601.206           | S       | Anywhere   | EDT-maleimide-PEO-biotin (Chemical derivative)                                                                         |
| 601.206           | T       | Anywhere   | EDT-maleimide-PEO-biotin (Chemical derivative)                                                                         |
| 595.613           | Y       | Anywhere   | tetraiodo (Post-translational)                                                                                         |
| 592.076           | K       | Anywhere   | 4,4-diamino-1,1-bimaphthyl-5,5-disulfonic acid (Chemical derivative)                                                   |
| 588.295           | C       | Anywhere   | phycoerythrobilin (Post-translational)                                                                                 |
| 586.279           | C       | Anywhere   | phycocyanobilin (Post-translational)                                                                                   |
| 584.263           | C       | Anywhere   | phytochromobilin (Post-translational)                                                                                  |
| 576.512           | C       | Anywhere   | diacylglycerol (Post-translational)                                                                                    |
| 573.189           | n       | N-Terminus | N-term tris(2,4,6-trimethoxyphenyl)phosphonium acetic acid N-hydroxysuccinimide ester derivative (Chemical derivative) |
| 572.316           | S       | Anywhere   | 10-ethoxyphosphiny-N-(biotinamidopentyl)decanamide (Chemical derivative)                                               |
| 572.316           | T       | Anywhere   | 10-ethoxyphosphiny-N-(biotinamidopentyl)decanamide (Chemical derivative)                                               |
| 572.316           | Y       | Anywhere   | 10-ethoxyphosphiny-N-(biotinamidopentyl)decanamide (Chemical derivative)                                               |
| 568.212           | N       | Anywhere   | Hex1HexNAc2 (N-linked glycosylation)                                                                                   |
| 552.217           | N       | Anywhere   | HexNAc2dHex1 (N-linked glycosylation)                                                                                  |
| 541.061           | C       | Anywhere   | ADP Ribose addition (Other glycosylation)                                                                              |
| 541.061           | E       | Anywhere   | ADP Ribose addition (Other glycosylation)                                                                              |
| 541.061           | N       | Anywhere   | ADP Ribose addition (Other glycosylation)                                                                              |
| 541.061           | R       | Anywhere   | ADP Ribose addition (Other glycosylation)                                                                              |
| 541.061           | S       | Anywhere   | ADP Ribose addition (Other glycosylation)                                                                              |
| 525.226           | C       | Anywhere   | Maleimide-PEO2-Biotin (Chemical derivative)                                                                            |
| 525.143           | Y       | Anywhere   | thiophosphate labeled with biotin-HPDP (Chemical derivative)                                                           |
| 521.884           | C       | Anywhere   | molybdopterin (Post-translational)                                                                                     |
| 516.17            | E       | Anywhere   | tetraglutamyl (Post-translational)                                                                                     |
| 511.19            | N       | Anywhere   | Hex1HexNAc1dHex1 (N-linked glycosylation)                                                                              |
| 495.195           | N       | Anywhere   | HexNAc1dHex2 (N-linked glycosylation)                                                                                  |
| 494.301           | C       | Anywhere   | Gygi ICAT(TM) d8 (Isotopic label)                                                                                      |
| 490.174           | S       | Anywhere   | EDT-iodo-PEO-biotin (Chemical derivative)                                                                              |
| 490.174           | T       | Anywhere   | EDT-iodo-PEO-biotin (Chemical derivative)                                                                              |
| 487.246           | c       | C-Terminus | C-term Pierce EZ link biotin hydrazide prod no. 21360 (Chemical derivative)                                            |
| 486.251           | C       | Anywhere   | Gygi ICAT(TM) d0 (Isotopic label)                                                                                      |
| 486.158           | N       | Anywhere   | Hex3 (N-linked glycosylation)                                                                                          |
| 484.228           | K       | Anywhere   | Sumo mutant Smt3-WT tail following trypsin digestion (Other)                                                           |
| 469.716           | Y       | Anywhere   | triotodo (Post-translational)                                                                                          |
| 456.105           | C       | Anywhere   | S-(4a-FMN) (Post-translational)                                                                                        |
| 454.089           | C       | Anywhere   | flavin mononucleotide (Post-translational)                                                                             |
| 454.089           | H       | Anywhere   | flavin mononucleotide (Post-translational)                                                                             |
| 452.246           | K       | Anywhere   | Sulfo-NHS-LC-LC-Biotin (Chemical derivative)                                                                           |
| 452.246           | n       | N-Terminus | N-term Sulfo-NHS-LC-LC-Biotin (Chemical derivative)                                                                    |
| 450.275           | C       | Anywhere   | Applied Biosystems original ICAT(TM) d8 (Isotopic label)                                                               |

Table 1: Universal list of modifications used with PILOT\_PT.M.

| Monoisotopic Mass | Residue | Location   | Name                                                                                  |
|-------------------|---------|------------|---------------------------------------------------------------------------------------|
| 447.196           | S       | Anywhere   | 6-N-biotinylaminoethyl isopropyl phosphate (Chemical derivative)                      |
| 447.196           | T       | Anywhere   | 6-N-biotinylaminoethyl isopropyl phosphate (Chemical derivative)                      |
| 447.196           | Y       | Anywhere   | 6-N-biotinylaminoethyl isopropyl phosphate (Chemical derivative)                      |
| 442.225           | C       | Anywhere   | Applied Biosystems original ICAT(TM) d0 (Isotopic label)                              |
| 441.058           | D       | C-Terminus | C-term protein-glycosaminoglycan-protein cross-link (Post-translational)              |
| 438.094           | S       | Anywhere   | O3-(riboflavin phosphoryl) (Post-translational)                                       |
| 438.094           | T       | Anywhere   | O3-(riboflavin phosphoryl) (Post-translational)                                       |
| 428.192           | C       | Anywhere   | Pierce EZ-Link Biotin-HPDP (Chemical derivative)                                      |
| 427.069           | C       | Anywhere   | fluorescein-5-maleimide (Chemical derivative)                                         |
| 426.441           | K       | Anywhere   | silaffin polycationic lysine derivative (Post-translational)                          |
| 421.073           | C       | Anywhere   | fluorescein-5-thiosemicarbazide (Chemical derivative)                                 |
| 421.073           | K       | Anywhere   | fluorescein-5-thiosemicarbazide (Chemical derivative)                                 |
| 421.073           | P       | Anywhere   | fluorescein-5-thiosemicarbazide (Chemical derivative)                                 |
| 421.073           | R       | Anywhere   | fluorescein-5-thiosemicarbazide (Chemical derivative)                                 |
| 421.073           | S       | Anywhere   | fluorescein-5-thiosemicarbazide (Chemical derivative)                                 |
| 418.138           | C       | Anywhere   | dipyrrolylmethanemethyl (Post-translational)                                          |
| 414.194           | C       | Anywhere   | Biotinyl-iodoacetamidyl-3,6-dioxaoctanediamine (Chemical derivative)                  |
| 406.159           | N       | Anywhere   | HexNAc2 (N-linked glycosylation)                                                      |
| 388.082           | C       | Anywhere   | 5-Iodoacetamidofluorescein (Molecular Probe, Eugene, OR) (Chemical derivative)        |
| 387.128           | E       | Anywhere   | triglutamyl (Post-translational)                                                      |
| 383.228           | K       | Anywhere   | Ubiquitination (Chemical derivative)                                                  |
| 380.147           | C       | Anywhere   | nucleophilic addition to cytopiloyne+H2O (Chemical derivative)                        |
| 380.147           | K       | Anywhere   | nucleophilic addition to cytopiloyne+H2O (Chemical derivative)                        |
| 380.147           | R       | Anywhere   | nucleophilic addition to cytopiloyne+H2O (Chemical derivative)                        |
| 380.147           | S       | Anywhere   | nucleophilic addition to cytopiloyne+H2O (Chemical derivative)                        |
| 380.147           | T       | Anywhere   | nucleophilic addition to cytopiloyne+H2O (Chemical derivative)                        |
| 380.147           | Y       | Anywhere   | nucleophilic addition to cytopiloyne+H2O (Chemical derivative)                        |
| 380.147           | n       | N-Terminus | N-term nucleophilic addition to cytopiloyne+H2O (Chemical derivative)                 |
| 377.69            | Y       | Anywhere   | tri-Iodination (Chemical derivative)                                                  |
| 371.199           | P       | Anywhere   | Oxidized proline biotinylated with biotin-LC-hydrazide, reduced (Chemical derivative) |
| 369.183           | P       | Anywhere   | Oxidized Proline biotinylated with biotin-LC-hydrazide (Chemical derivative)          |
| 365.132           | S       | Anywhere   | Hex1HexNAc1 (O-linked glycosylation)                                                  |
| 365.132           | T       | Anywhere   | Hex1HexNAc1 (O-linked glycosylation)                                                  |
| 362.137           | C       | Anywhere   | nucleophilic addition to cytopiloyne (Chemical derivative)                            |
| 362.137           | K       | Anywhere   | nucleophilic addition to cytopiloyne (Chemical derivative)                            |
| 362.137           | P       | Anywhere   | nucleophilic addition to cytopiloyne (Chemical derivative)                            |
| 362.137           | R       | Anywhere   | nucleophilic addition to cytopiloyne (Chemical derivative)                            |
| 362.137           | S       | Anywhere   | nucleophilic addition to cytopiloyne (Chemical derivative)                            |
| 362.137           | Y       | Anywhere   | nucleophilic addition to cytopiloyne (Chemical derivative)                            |
| 362.137           | n       | N-Terminus | N-term nucleophilic addition to cytopiloyne (Chemical derivative)                     |
| 356.188           | D       | Anywhere   | Biotin polyethyleneoxide amine (Chemical derivative)                                  |
| 356.188           | E       | Anywhere   | Biotin polyethyleneoxide amine (Chemical derivative)                                  |
| 354.173           | K       | Anywhere   | Oxidized lysine biotinylated with biotin-LC-hydrazide, reduced (Chemical derivative)  |
| 352.157           | K       | Anywhere   | Oxidized lysine biotinylated with biotin-LC-hydrazide (Chemical derivative)           |
| 351.118           | C       | Anywhere   | N-iodoacetyl, p-chlorobenzyl-13C6-glucamine (Isotopic label)                          |
| 349.137           | N       | Anywhere   | HexNAc1dHex1 (N-linked glycosylation)                                                 |
| 348.24            | K       | Anywhere   | ESP-Tag heavy d10 (Isotopic label)                                                    |
| 348.24            | n       | N-Terminus | N-term ESP-Tag heavy d10 (Isotopic label)                                             |
| 348.194           | K       | Anywhere   | Levuglandinyl - lysine hydroxylactam adduct (Post-translational)                      |
| 345.098           | C       | Anywhere   | N-iodoacetyl, p-chlorobenzyl-12C6-glucamine (Isotopic label)                          |
| 345.047           | H       | Anywhere   | phospho-guanosine (Post-translational)                                                |
| 345.047           | K       | Anywhere   | phospho-guanosine (Post-translational)                                                |
| 344.04            | C       | Anywhere   | S-guanylation (Post-translational)                                                    |
| 342.787           | C       | Anywhere   | hydrogenase diiron subcluster (Post-translational)                                    |
| 340.167           | C       | Anywhere   | Bisphenol A diglycidyl ether derivative (Non-standard residue)                        |
| 340.101           | K       | Anywhere   | O5-glucosylgalactosyl-L-hydroxylysine (Glycosylation)                                 |
| 340.086           | S       | Anywhere   | Phosphopantetheine (Post-translational)                                               |
| 339.162           | K       | Anywhere   | NHS-LC-Biotin (Chemical derivative)                                                   |
| 339.162           | n       | N-Terminus | N-term NHS-LC-Biotin (Chemical derivative)                                            |
| 338.178           | K       | Anywhere   | ESP-Tag light d0 (Isotopic label)                                                     |

Table 1: Universal list of modifications used with PILOT\_PTM.

| Monoisotopic Mass | Residue | Location   | Name                                                                                   |
|-------------------|---------|------------|----------------------------------------------------------------------------------------|
| 338.178           | n       | N-Terminus | N-term ESP-Tag light d0 (Isotopic label)                                               |
| 332.199           | K       | Anywhere   | Levuglandinyl - lysine lactam adduct (Post-translational)                              |
| 329.053           | H       | Anywhere   | AMP binding site (Post-translational)                                                  |
| 329.053           | K       | Anywhere   | AMP binding site (Post-translational)                                                  |
| 329.053           | T       | Anywhere   | AMP binding site (Post-translational)                                                  |
| 329.053           | Y       | Anywhere   | AMP binding site (Post-translational)                                                  |
| 327.241           | C       | Anywhere   | Nitroalkylation by Nitro Oleic Acid (Post-translational)                               |
| 327.241           | H       | Anywhere   | Nitroalkylation by Nitro Oleic Acid (Post-translational)                               |
| 326.141           | C       | Anywhere   | biotinoyl-iodoacetyl-ethylenediamine (Chemical derivative)                             |
| 325.225           | C       | Anywhere   | Nitroalkylation by Nitro Linoleic Acid (Post-translational)                            |
| 325.225           | H       | Anywhere   | Nitroalkylation by Nitro Linoleic Acid (Post-translational)                            |
| 324.106           | K       | Anywhere   | Lactosylation (Other glycosylation)                                                    |
| 324.106           | K       | Anywhere   | glucosylgalactosyl hydroxylysine (O-linked glycosylation)                              |
| 324.106           | R       | Anywhere   | Lactosylation (Other glycosylation)                                                    |
| 322.02            | F       | Anywhere   | Cross-link of (Iodo)-uracil MP with W,F,Y (Chemical derivative)                        |
| 322.02            | W       | Anywhere   | Cross-link of (Iodo)-uracil MP with W,F,Y (Chemical derivative)                        |
| 322.02            | Y       | Anywhere   | Cross-link of (Iodo)-uracil MP with W,F,Y (Chemical derivative)                        |
| 316.138           | C       | Anywhere   | Thio Ether Formation - BTP Adduct (Chemical derivative)                                |
| 312.151           | R       | Anywhere   | Oxidized arginine biotinylated with biotin-LC-hydrazide, reduced (Chemical derivative) |
| 311.167           | Q       | Anywhere   | Used for labeling glutamine-donor substrate of transglutaminase (Chemical derivative)  |
| 310.135           | R       | Anywhere   | Oxidized arginine biotinylated with biotin-LC-hydrazide (Chemical derivative)          |
| 306.172           | R       | Anywhere   | Levuglandinyl - arginine hydroxylactam adduct (Post-translational)                     |
| 306.025           | H       | Anywhere   | uridine phosphodiester (Post-translational)                                            |
| 306.025           | Y       | Anywhere   | uridine phosphodiester (Post-translational)                                            |
| 305.068           | C       | Anywhere   | glutathione disulfide (Post-translational)                                             |
| 304.205           | K       | Anywhere   | Representative mass and accurate mass for 113, 114, 116 & 117 (Isotopic label)         |
| 304.205           | Y       | Anywhere   | Representative mass and accurate mass for 113, 114, 116 & 117 (Isotopic label)         |
| 304.205           | n       | N-Terminus | N-term Representative mass and accurate mass for 113, 114, 116 & 117 (Isotopic label)  |
| 304.199           | K       | Anywhere   | Accurate mass for 115, 118, 119 & 121 (Isotopic label)                                 |
| 304.199           | Y       | Anywhere   | Accurate mass for 115, 118, 119 & 121 (Isotopic label)                                 |
| 304.199           | n       | N-Terminus | N-term Accurate mass for 115, 118, 119 & 121 (Isotopic label)                          |
| 298.023           | C       | Anywhere   | Heavy IDBEST tag for quantitation (Isotopic label)                                     |
| 296.016           | C       | Anywhere   | Light IDBEST tag for quantitation (Isotopic label)                                     |
| 294.183           | D       | Anywhere   | cis-14-hydroxy-10,13-dioxo-7-heptadecenoic ester (Post-translational)                  |
| 290.177           | R       | Anywhere   | Levuglandinyl - arginine lactam adduct (Post-translational)                            |
| 283.046           | S       | Anywhere   | N-acetylglucosamine-1-phosphoryl (Other glycosylation)                                 |
| 282.053           | R       | Anywhere   | 2 Hydroxyphenylglyoxal arginine (Chemical derivative)                                  |
| 272.25            | C       | Anywhere   | Geranyl-geranyl (Post-translational)                                                   |
| 271.149           | K       | Anywhere   | CLIP_TRAQ_3 (Isotopic label)                                                           |
| 271.149           | Y       | Anywhere   | CLIP_TRAQ_3 (Isotopic label)                                                           |
| 271.149           | n       | N-Terminus | N-term CLIP_TRAQ_3 (Isotopic label)                                                    |
| 268.105           | T       | C-Terminus | C-term L-threonyl-pentaglycyl-murein peptidoglycan (Other glycosylation)               |
| 268.105           | A       | C-Terminus | C-term L-alanyl-pentaglycyl-murein peptidoglycan (Glycosylation)                       |
| 268.039           | C       | Anywhere   | Nitroso Sulfamethoxazole semimercaptal thiol adduct (Chemical derivative)              |
| 267.031           | C       | Anywhere   | Nitroso Sulfamethoxazole Sulfinamide thiol adduct (Chemical derivative)                |
| 266.261           | C       | Anywhere   | S-stearoyl-L-cysteine (Post-Translational Modification)                                |
| 266.203           | K       | Anywhere   | retinal (Post-translational)                                                           |
| 266.058           | R       | Anywhere   | Adduct of phenylglyoxal with Arg (Chemical derivative)                                 |
| 264.188           | K       | Anywhere   | 3,4-didehydroretinylidene (Post-translational)                                         |
| 258.115           | P       | Anywhere   | oxidized proline biotinylated with biotin hydrazide (Chemical derivative)              |
| 258.085           | E       | Anywhere   | diglutamyl (Post-translational)                                                        |
| 253.095           | K       | Anywhere   | covalent modification of lysine by cross-linking reagent (Chemical derivative)         |
| 253.01            | H       | Anywhere   | Mass Defect Tag on lysine e-amino (Artefact)                                           |
| 253.01            | K       | Anywhere   | Mass Defect Tag on lysine e-amino (Chemical derivative)                                |
| 253.01            | W       | Anywhere   | Mass Defect Tag on lysine e-amino (Artefact)                                           |
| 253.01            | Y       | Anywhere   | Mass Defect Tag on lysine e-amino (Artefact)                                           |

Table 1: Universal list of modifications used with PILOT\_PTM.

| Monoisotopic Mass | Residue | Location   | Name                                                                                                 |
|-------------------|---------|------------|------------------------------------------------------------------------------------------------------|
| 252.044           | C       | Anywhere   | Nitroso Sulfamethoxazole Sulphenamide thiol adduct (Chemical derivative)                             |
| 251.793           | Y       | Anywhere   | di-Iodination (Chemical derivative)                                                                  |
| 244.101           | K       | Anywhere   | CLIP_TRAQ_4 (Isotopic label)                                                                         |
| 244.101           | Y       | Anywhere   | CLIP_TRAQ_4 (Isotopic label)                                                                         |
| 244.101           | n       | N-Terminus | N-term CLIP_TRAQ_4 (Isotopic label)                                                                  |
| 242.019           | S       | Anywhere   | phosphoglycosyl-D-mannose-1-phosphoryl (Other glycosylation)                                         |
| 241.088           | K       | Anywhere   | oxidized Lysine biotinylated with biotin hydrazide (Chemical derivative)                             |
| 240.115           | C       | Anywhere   | lapachenole photochemically added to cysteine (Chemical derivative)                                  |
| 240.104           | T       | Anywhere   | oxidized Threonine biotinylated with biotin hydrazide (Chemical derivative)                          |
| 238.23            | C       | Anywhere   | Palmitoylation (Post-translational)                                                                  |
| 238.23            | K       | Anywhere   | Palmitoylation (Post-translational)                                                                  |
| 238.23            | S       | Anywhere   | Palmitoylation (Post-translational)                                                                  |
| 238.23            | T       | Anywhere   | Palmitoylation (Post-translational)                                                                  |
| 236.214           | C       | Anywhere   | palmitoleyl (Post-translational)                                                                     |
| 236.157           | C       | Anywhere   | Applied Biosystems cleavable ICAT(TM) heavy (Isotopic label)                                         |
| 234.162           | C       | Anywhere   | Michael addition of t-butyl hydroxylated BHT (BHTOH) to C, H or K (Other)                            |
| 234.162           | H       | Anywhere   | Michael addition of t-butyl hydroxylated BHT (BHTOH) to C, H or K (Other)                            |
| 234.162           | K       | Anywhere   | Michael addition of t-butyl hydroxylated BHT (BHTOH) to C, H or K (Other)                            |
| 233.051           | K       | Anywhere   | 5-dimethylaminonaphthalene-1-sulfonyl (Chemical derivative)                                          |
| 233.051           | n       | N-Terminus | N-term 5-dimethylaminonaphthalene-1-sulfonyl (Chemical derivative)                                   |
| 232.064           | C       | Anywhere   | propyl-1,2-dideoxy-2-methyl-alpha-D-glucopyranosyl-[2,1-d]-Delta2-thiazoline (Other glycosylation)   |
| 229.163           | K       | Anywhere   | Sixplex Tandem Mass Tag (Isotopic label)                                                             |
| 229.163           | n       | N-Terminus | N-term Sixplex Tandem Mass Tag (Isotopic label)                                                      |
| 229.014           | K       | Anywhere   | Pyridoxal phosphate (Post-translational)                                                             |
| 227.225           | K       | Anywhere   | [3-(2,5)-Dioxopyrrolidin-1-yloxy-carbonyl]-propyl dimethyloctylammonium (Chemical derivative)        |
| 227.225           | n       | N-Terminus | N-term [3-(2,5)-Dioxopyrrolidin-1-yloxy-carbonyl]-propyl dimethyloctylammonium (Chemical derivative) |
| 227.127           | C       | Anywhere   | Applied Biosystems cleavable ICAT(TM) light (Isotopic label)                                         |
| 226.078           | K       | Anywhere   | Biotinylation (Post-translational)                                                                   |
| 226.078           | n       | N-Terminus | N-term Biotinylation (Chemical derivative)                                                           |
| 225.156           | K       | Anywhere   | Duplex Tandem Mass Tag (Isotopic label)                                                              |
| 225.156           | n       | N-Terminus | N-term Duplex Tandem Mass Tag (Isotopic label)                                                       |
| 225.094           | K       | Anywhere   | Iminobiotinylation (Chemical derivative)                                                             |
| 225.094           | n       | N-Terminus | N-term Iminobiotinylation (Chemical derivative)                                                      |
| 224.152           | K       | Anywhere   | Native Tandem Mass Tag (Chemical derivative)                                                         |
| 224.152           | n       | N-Terminus | N-term Native Tandem Mass Tag (Chemical derivative)                                                  |
| 220.991           | K       | Anywhere   | 4-sulfophenyl isothiocyanate (Heavy C13) (Chemical derivative)                                       |
| 220.991           | n       | N-Terminus | N-term 4-sulfophenyl isothiocyanate (Heavy C13) (Chemical derivative)                                |
| 220.183           | C       | Anywhere   | hydroxyfarnesyl (Post-translational)                                                                 |
| 220.048           | C       | Anywhere   | Addition of BMOE crosslinker (Chemical derivative)                                                   |
| 219.074           | P       | Anywhere   | O4-glycosyl-hydroxyproline (Other glycosylation)                                                     |
| 218.167           | C       | Anywhere   | Michael addition of BHT quinone methide to Cysteine and Lysine (Other)                               |
| 218.167           | H       | Anywhere   | Michael addition of BHT quinone methide to Cysteine and Lysine (Other)                               |
| 218.167           | K       | Anywhere   | Michael addition of BHT quinone methide to Cysteine and Lysine (Other)                               |
| 214.99            | C       | Anywhere   | Isotope Distribution Encoded Tag (Isotopic label)                                                    |
| 214.971           | K       | Anywhere   | 4-sulfophenyl isothiocyanate (Chemical derivative)                                                   |
| 214.971           | n       | N-Terminus | N-term 4-sulfophenyl isothiocyanate (Chemical derivative)                                            |
| 210.987           | K       | Anywhere   | tri nitro benzene (Chemical derivative)                                                              |
| 210.987           | n       | N-Terminus | N-term tri nitro benzene (Chemical derivative)                                                       |

Table 1: Universal list of modifications used with PILOT\_PTM.

| Monoisotopic Mass | Residue | Location   | Name                                                                                                       |
|-------------------|---------|------------|------------------------------------------------------------------------------------------------------------|
| 210.198           | C       | Anywhere   | Myristoylation (Post-translational)                                                                        |
| 210.198           | G       | N-Terminus | N-term Myristoylation (Post-translational)                                                                 |
| 210.198           | K       | Anywhere   | Myristoylation (Post-translational)                                                                        |
| 204.188           | C       | Anywhere   | Farnesylation (Post-translational)                                                                         |
| 203.998           | K       | Anywhere   | Addition of DFDNB crosslinker (Chemical derivative)                                                        |
| 203.998           | N       | Anywhere   | Addition of DFDNB crosslinker (Chemical derivative)                                                        |
| 203.998           | Q       | Anywhere   | Addition of DFDNB crosslinker (Chemical derivative)                                                        |
| 203.998           | R       | Anywhere   | Addition of DFDNB crosslinker (Chemical derivative)                                                        |
| 203.079           | N       | Anywhere   | N-Acetylhexosamine (N-linked glycosylation)                                                                |
| 203.079           | S       | Anywhere   | N-Acetylhexosamine (Other glycosylation)                                                                   |
| 203.079           | T       | Anywhere   | N-Acetylhexosamine (Other glycosylation)                                                                   |
| 201.971           | C       | Anywhere   | Mercury Mercaptan (Chemical derivative)                                                                    |
| 199.067           | R       | Anywhere   | oxidized Arginine biotinylated with biotin hydrazide (Chemical derivative)                                 |
| 197.045           | E       | Anywhere   | glycerylphosphorylthanolamine (Post-translational)                                                         |
| 192.063           | K       | Anywhere   | Heptose (N-linked glycosylation)                                                                           |
| 192.063           | N       | Anywhere   | Heptose (N-linked glycosylation)                                                                           |
| 192.063           | Q       | Anywhere   | Heptose (N-linked glycosylation)                                                                           |
| 192.063           | R       | Anywhere   | Heptose (N-linked glycosylation)                                                                           |
| 192.063           | S       | Anywhere   | Heptose (O-linked glycosylation)                                                                           |
| 192.063           | T       | Anywhere   | Heptose (O-linked glycosylation)                                                                           |
| 190.074           | C       | Anywhere   | Monobromobimane derivative (Chemical derivative)                                                           |
| 189.189           | C       | Anywhere   | EAPTA d5 (Isotopic label)                                                                                  |
| 188.033           | K       | Anywhere   | Lipoyl (Post-translational)                                                                                |
| 187.084           | S       | Anywhere   | O-acyl-beta-N-acetylglucosaminide (Post-translational)                                                     |
| 184.158           | C       | Anywhere   | EAPTA d0 (Chemical derivative)                                                                             |
| 183.983           | n       | N-Terminus | N-term derivatization by N-term modification using 3-Sulfobenzoic succinimidyl ester (Chemical derivative) |
| 183.035           | H       | Anywhere   | Aminoethylbenzenesulfonylation (Artefact)                                                                  |
| 183.035           | K       | Anywhere   | Aminoethylbenzenesulfonylation (Artefact)                                                                  |
| 183.035           | S       | Anywhere   | Aminoethylbenzenesulfonylation (Artefact)                                                                  |
| 183.035           | Y       | Anywhere   | Aminoethylbenzenesulfonylation (Artefact)                                                                  |
| 178.048           | P       | Anywhere   | O4-glycosyl-hydroxyproline (Other glycosylation)                                                           |
| 176.032           | S       | Anywhere   | N-glucuronylation (Post-translational)                                                                     |
| 175.042           | K       | Anywhere   | naphthalene-2,3-dicarboxaldehyde (Chemical derivative)                                                     |
| 175.042           | n       | N-Terminus | N-term naphthalene-2,3-dicarboxaldehyde (Chemical derivative)                                              |
| 174.169           | C       | Anywhere   | APTA d3 (Isotopic label)                                                                                   |
| 172.052           | C       | Anywhere   | Menadione hydroquinone derivative (Chemical derivative)                                                    |
| 172.052           | K       | Anywhere   | Menadione hydroquinone derivative (Chemical derivative)                                                    |
| 170.142           | C       | Anywhere   | APTA-d0 (Chemical derivative)                                                                              |
| 170.048           | K       | Anywhere   | 6-aminoquinolyl-N-hydroxysuccinimidyl carbamate (Chemical derivative)                                      |
| 170.048           | n       | N-Terminus | N-term 6-aminoquinolyl-N-hydroxysuccinimidyl carbamate (Chemical derivative)                               |
| 170.037           | C       | Anywhere   | Menadione quinone derivative (Chemical derivative)                                                         |
| 170.037           | K       | Anywhere   | Menadione quinone derivative (Chemical derivative)                                                         |
| 167.982           | C       | Anywhere   | Phosphoenolpyruvate cysteine adduct (Post-translational)                                                   |
| 164.06            | S       | Anywhere   | O-Diisopropylphosphorylation (Chemical derivative)                                                         |
| 164.06            | T       | Anywhere   | O-Diisopropylphosphorylation (Chemical derivative)                                                         |
| 164.06            | Y       | Anywhere   | O-Diisopropylphosphorylation (Chemical derivative)                                                         |
| 162.081           | S       | Anywhere   | O-pinacolylmethylphosphonylation (Chemical derivative)                                                     |
| 162.081           | T       | Anywhere   | O-pinacolylmethylphosphonylation (Chemical derivative)                                                     |
| 162.081           | Y       | Anywhere   | O-pinacolylmethylphosphonylation (Chemical derivative)                                                     |

Table 1: Universal list of modifications used with PILOT\_PTM.

| Monoisotopic Mass | Residue | Location   | Name                                                                        |
|-------------------|---------|------------|-----------------------------------------------------------------------------|
| 162.053           | C       | Anywhere   | Hexose (Other glycosylation)                                                |
| 162.053           | K       | Anywhere   | Hexose (Other glycosylation)                                                |
| 162.053           | N       | Anywhere   | Hexose (N-linked glycosylation)                                             |
| 162.053           | R       | Anywhere   | Hexose (Other glycosylation)                                                |
| 162.053           | T       | Anywhere   | Hexose (Other glycosylation)                                                |
| 162.053           | W       | Anywhere   | Hexose (Other glycosylation)                                                |
| 162.053           | Y       | Anywhere   | Hexose (Other glycosylation)                                                |
| 162.053           | n       | N-Terminus | N-term Hexose (Other glycosylation)                                         |
| 161.069           | K       | Anywhere   | Hexosamine (Synth. pep. protect. gp.)                                       |
| 161.069           | N       | Anywhere   | Hexosamine (N-linked glycosylation)                                         |
| 161.069           | T       | Anywhere   | Hexosamine (O-linked glycosylation)                                         |
| 161.069           | W       | Anywhere   | Hexosamine (N-linked glycosylation)                                         |
| 161.024           | D       | Anywhere   | Heavy Sulfanilic Acid (SA) C13 (Chemical derivative)                        |
| 161.024           | E       | Anywhere   | Heavy Sulfanilic Acid (SA) C13 (Chemical derivative)                        |
| 161.024           | c       | C-Terminus | C-term Heavy Sulfanilic Acid (SA) C13 (Chemical derivative)                 |
| 159.009           | W       | Anywhere   | Shimadzu NBS-13C (Chemical derivative)                                      |
| 158.131           | C       | Anywhere   | reduced 4-Hydroxynonenal (Chemical derivative)                              |
| 158.131           | H       | Anywhere   | reduced 4-Hydroxynonenal (Chemical derivative)                              |
| 158.131           | K       | Anywhere   | reduced 4-Hydroxynonenal (Chemical derivative)                              |
| 156.115           | C       | Anywhere   | 4-hydroxynonenal (HNE) (Post-translational)                                 |
| 156.115           | H       | Anywhere   | 4-hydroxynonenal (HNE) (Post-translational)                                 |
| 156.115           | K       | Anywhere   | 4-hydroxynonenal (HNE) (Post-translational)                                 |
| 155.821           | Y       | Anywhere   | Dibromo (Chemical derivative)                                               |
| 155.004           | D       | Anywhere   | Light Sulfanilic Acid (SA) C12 (Isotopic label)                             |
| 155.004           | E       | Anywhere   | Light Sulfanilic Acid (SA) C12 (Isotopic label)                             |
| 155.004           | c       | C-Terminus | C-term Light Sulfanilic Acid (SA) C12 (Isotopic label)                      |
| 154.136           | S       | Anywhere   | lipid (Post-translational)                                                  |
| 154.136           | T       | Anywhere   | lipid (Post-translational)                                                  |
| 154.111           | K       | Anywhere   | One end of crosslink attached, one end free (Chemical derivative)           |
| 154.099           | C       | Anywhere   | 4-Oxononenal (ONE) (Chemical derivative)                                    |
| 154.099           | H       | Anywhere   | 4-Oxononenal (ONE) (Chemical derivative)                                    |
| 154.099           | K       | Anywhere   | 4-Oxononenal (ONE) (Chemical derivative)                                    |
| 154.003           | S       | Anywhere   | glycerophospho (Post-translational)                                         |
| 152.988           | W       | Anywhere   | Shimadzu NBS-12C (Chemical derivative)                                      |
| 150.042           | C       | Anywhere   | S-guanylation-2 (Post-translational)                                        |
| 148.037           | P       | Anywhere   | glycosyl-L-hydroxyproline (O-linked glycosylation)                          |
| 146.058           | S       | Anywhere   | Fucose (O-linked glycosylation)                                             |
| 146.058           | T       | Anywhere   | Fucose (O-linked glycosylation)                                             |
| 146.037           | C       | Anywhere   | hydroxycinnamyl (Post-translational)                                        |
| 145.02            | K       | Anywhere   | 3-(carbamidomethylthio)propanoyl (Chemical derivative)                      |
| 144.106           | K       | Anywhere   | Accurate mass for 114 (Isotopic label)                                      |
| 144.106           | Y       | Anywhere   | Accurate mass for 114 (Isotopic label)                                      |
| 144.106           | n       | N-Terminus | N-term Accurate mass for 114 (Isotopic label)                               |
| 144.102           | K       | Anywhere   | Representative mass and accurate mass for 116 & 117 (Isotopic label)        |
| 144.102           | Y       | Anywhere   | Representative mass and accurate mass for 116 & 117 (Isotopic label)        |
| 144.102           | n       | N-Terminus | N-term Representative mass and accurate mass for 116 & 117 (Isotopic label) |
| 144.1             | K       | Anywhere   | Accurate mass for 115 (Isotopic label)                                      |
| 144.1             | Y       | Anywhere   | Accurate mass for 115 (Isotopic label)                                      |
| 144.1             | n       | N-Terminus | N-term Accurate mass for 115 (Isotopic label)                               |
| 143.118           | H       | Anywhere   | Diphthamide (Post-translational)                                            |
| 143.058           | C       | Anywhere   | Nethylmaleimidehydrolysis (Chemical derivative)                             |
| 143.058           | K       | Anywhere   | Nethylmaleimidehydrolysis (Chemical derivative)                             |

Table 1: Universal list of modifications used with PILOT\_PTM.

| Monoisotopic Mass | Residue | Location   | Name                                                                                             |
|-------------------|---------|------------|--------------------------------------------------------------------------------------------------|
| 142.039           | S       | Anywhere   | Isotopically labeled Dithiothreitol (DTT) modification of serines or threonines (Isotopic label) |
| 142.039           | T       | Anywhere   | Isotopically labeled Dithiothreitol (DTT) modification of serines or threonines (Isotopic label) |
| 141.098           | K       | Anywhere   | CLIP_TRAQ_2 (Isotopic label)                                                                     |
| 141.098           | Y       | Anywhere   | CLIP_TRAQ_2 (Isotopic label)                                                                     |
| 141.098           | n       | N-Terminus | N-term CLIP_TRAQ_2 (Isotopic label)                                                              |
| 140.095           | K       | Anywhere   | CLIP_TRAQ_1 (Isotopic label)                                                                     |
| 140.095           | Y       | Anywhere   | CLIP_TRAQ_1 (Isotopic label)                                                                     |
| 140.095           | n       | N-Terminus | N-term CLIP_TRAQ_1 (Isotopic label)                                                              |
| 138.104           | C       | Anywhere   | Dehydrated 4-hydroxynonenal (Chemical derivative)                                                |
| 138.104           | H       | Anywhere   | Dehydrated 4-hydroxynonenal (Chemical derivative)                                                |
| 138.104           | K       | Anywhere   | Dehydrated 4-hydroxynonenal (Chemical derivative)                                                |
| 136.125           | W       | Anywhere   | 3'-geranyl-2',3'-dihydro-2',N2-cyclo-L-tryptophan (Post-translational)                           |
| 136.089           | C       | Anywhere   | Dehydrated 4-Oxononenal Michael adduct (Chemical derivative)                                     |
| 136.089           | H       | Anywhere   | Dehydrated 4-Oxononenal Michael adduct (Chemical derivative)                                     |
| 136.089           | K       | Anywhere   | Dehydrated 4-Oxononenal Michael adduct (Chemical derivative)                                     |
| 136.029           | S       | Anywhere   | O-Diethylphosphorylation (Chemical derivative)                                                   |
| 136.029           | T       | Anywhere   | O-Diethylphosphorylation (Chemical derivative)                                                   |
| 136.029           | Y       | Anywhere   | O-Diethylphosphorylation (Chemical derivative)                                                   |
| 136.002           | S       | Anywhere   | Dithiothreitol (DTT) (Chemical derivative)                                                       |
| 136.002           | T       | Anywhere   | Dithiothreitol (DTT) (Chemical derivative)                                                       |
| 135.983           | n       | N-Terminus | N-term sulfonation of N-terminus (Chemical derivative)                                           |
| 134.048           | n       | N-Terminus | N-term 3-methyl-2-pyridyl isocyanate (Chemical derivative)                                       |
| 132.042           | S       | Anywhere   | O-glycosylserine (Other glycosylation)                                                           |
| 132.021           | R       | Anywhere   | Hydroxyphenylglyoxal arginine (Chemical derivative)                                              |
| 130.079           | C       | Anywhere   | D5 N-ethylmaleimide on cysteines (Chemical derivative)                                           |
| 129.058           | G       | Anywhere   | Gly->Trp substitution (AA substitution)                                                          |
| 129.043           | C       | Anywhere   | Nmethylmaleimidehydrolysis (Chemical derivative)                                                 |
| 129.043           | E       | Anywhere   | monoglutamyl (Post-translational)                                                                |
| 127.063           | K       | Anywhere   | N-Succinimidyl-3-morpholine acetate (Chemical derivative)                                        |
| 127.063           | n       | N-Terminus | N-term N-Succinimidyl-3-morpholine acetate (Chemical derivative)                                 |
| 126.104           | S       | Anywhere   | octanoyl (Post-translational)                                                                    |
| 126.104           | T       | Anywhere   | octanoyl (Post-translational)                                                                    |
| 126.068           | K       | N-Terminus | N-term Dipropionylated Amide (Methylated) (Post-translational)                                   |
| 126.062           | C       | Anywhere   | Isotopically labeled Dithiothreitol (DTT) modification of cysteines (Isotopic label)             |
| 125.897           | H       | Anywhere   | Iodination (Chemical derivative)                                                                 |
| 125.897           | Y       | Anywhere   | Iodination (Chemical derivative)                                                                 |
| 125.048           | C       | Anywhere   | N-ethylmaleimide on cysteines (Chemical derivative)                                              |
| 124.068           | n       | N-Terminus | N-term d5-phenyl isocyanate (Chemical derivative)                                                |
| 123.009           | D       | Anywhere   | N-aspartyl-glycosylphosphatidylinositoethanolamine (Other glycosylation)                         |
| 123.008           | A       | C-Terminus | C-term N-alanyl-glycosylphosphatidylinositoethanolamine (Glycosylation)                          |
| 122.084           | K       | Anywhere   | Both ends of crosslink attached to same peptide (Chemical derivative)                            |
| 122.013           | S       | Anywhere   | O-Isopropylphosphorylation (Chemical derivative)                                                 |
| 122.013           | T       | Anywhere   | O-Isopropylphosphorylation (Chemical derivative)                                                 |
| 122.013           | Y       | Anywhere   | O-Isopropylphosphorylation (Chemical derivative)                                                 |
| 121.035           | S       | Anywhere   | phosphorylation to pyridyl thiol (Chemical derivative)                                           |
| 121.035           | T       | Anywhere   | phosphorylation to pyridyl thiol (Chemical derivative)                                           |
| 120.063           | K       | Anywhere   | 13C6 labeled ubiquitinylation residue (Isotopic label)                                           |
| 120.034           | S       | Anywhere   | O-Isopropylmethylphosphonylation (Chemical derivative)                                           |
| 120.034           | T       | Anywhere   | O-Isopropylmethylphosphonylation (Chemical derivative)                                           |
| 120.034           | Y       | Anywhere   | O-Isopropylmethylphosphonylation (Chemical derivative)                                           |
| 120.025           | C       | Anywhere   | Dithiothreitol (DTT) on Cys (Chemical derivative)                                                |
| 119.037           | K       | Anywhere   | pyridylacetyl (Chemical derivative)                                                              |
| 119.037           | n       | N-Terminus | N-term pyridylacetyl (Chemical derivative)                                                       |
| 119.037           | n       | N-Terminus | N-term phenyl isocyanate (Chemical derivative)                                                   |
| 119.004           | C       | Anywhere   | Cysteinylation (Multiple)                                                                        |
| 118.068           | K       | Anywhere   | Ubiquitination 13C4 lysine (Post-translational)                                                  |
| 118.066           | C       | Anywhere   | Dehydropyrolizidine alkaloid (dehydronecine) on cysteines (Chemical derivative)                  |
| 116.939           | H       | Anywhere   | tele-vanadatohistidine (Post-translational)                                                      |



Table 1: Universal list of modifications used with PILOT\_PTM.

| Monoisotopic Mass | Residue | Location   | Name                                                                                              |
|-------------------|---------|------------|---------------------------------------------------------------------------------------------------|
| 114.043           | C       | Anywhere   | ubiquitinylation residue (Other)                                                                  |
| 114.043           | K       | Anywhere   | ubiquitinylation residue (Other)                                                                  |
| 114.043           | S       | Anywhere   | ubiquitinylation residue (Other)                                                                  |
| 114.043           | T       | Anywhere   | ubiquitinylation residue (Other)                                                                  |
| 112.052           | K       | Anywhere   | Acrolein addition +112 (Other)                                                                    |
| 111.042           | K       | Anywhere   | Bruker Daltonics SERVA-ICPL(TM) quantification chemistry, heavy form (Isotopic label)             |
| 111.042           | n       | N-Terminus | N-term Bruker Daltonics SERVA-ICPL(TM) quantification chemistry, heavy form (Isotopic label)      |
| 111.032           | C       | Anywhere   | Nmethylnmaleimide (Chemical derivative)                                                           |
| 111.032           | K       | Anywhere   | Nmethylnmaleimide (Chemical derivative)                                                           |
| 109.053           | K       | Anywhere   | 4-methyl-delta-1-pyrroline-5-carboxyl (Post-translational)                                        |
| 109.048           | n       | N-Terminus | N-term deuterated Nicotinic Acid (Isotopic label)                                                 |
| 109.047           | K       | Anywhere   | Bruker Daltonics SERVA-ICPL(TM) quantification chemistry, medium form (Isotopic label)            |
| 109.047           | n       | N-Terminus | N-term Bruker Daltonics SERVA-ICPL(TM) quantification chemistry, medium form (Isotopic label)     |
| 107.998           | S       | Anywhere   | O-Dimethylphosphorylation (Chemical derivative)                                                   |
| 107.998           | S       | Anywhere   | O-Ethylphosphorylation (Chemical derivative)                                                      |
| 107.998           | T       | Anywhere   | O-Dimethylphosphorylation (Chemical derivative)                                                   |
| 107.998           | T       | Anywhere   | O-Ethylphosphorylation (Chemical derivative)                                                      |
| 107.998           | Y       | Anywhere   | O-Dimethylphosphorylation (Chemical derivative)                                                   |
| 107.998           | Y       | Anywhere   | O-Ethylphosphorylation (Chemical derivative)                                                      |
| 105.058           | C       | Anywhere   | S-pyridylethylolation (Chemical derivative)                                                       |
| 105.021           | K       | Anywhere   | Bruker Daltonics SERVA-ICPL(TM) quantification chemistry, light form (Isotopic label)             |
| 105.021           | n       | N-Terminus | N-term Bruker Daltonics SERVA-ICPL(TM) quantification chemistry, light form (Isotopic label)      |
| 105.021           | n       | N-Terminus | N-term Nicotinic Acid (Isotopic label)                                                            |
| 104.041           | K       | N-Terminus | Succinic anhydride labeling reagent, heavy form (+4amu, 4H2), N-term & K (Isotopic label)         |
| 104.041           | n       | N-Terminus | N-term Succinic anhydride labeling reagent, heavy form (+4amu, 4H2), N-term & K (Isotopic label)  |
| 104.029           | K       | N-Terminus | Succinic anhydride labeling reagent, heavy form (+4amu, 4C13), N-term & K (Isotopic label)        |
| 104.029           | n       | N-Terminus | N-term Succinic anhydride labeling reagent, heavy form (+4amu, 4C13), N-term & K (Isotopic label) |
| 104.026           | K       | N-Terminus | labeling reagent light form (N-term & K) (Isotopic label)                                         |
| 104.026           | n       | N-Terminus | N-term labeling reagent light form (N-term & K) (Isotopic label)                                  |
| 100.016           | K       | N-Terminus | Succinic anhydride labeling reagent light form (N-term & K) (Isotopic label)                      |
| 100.016           | n       | N-Terminus | N-term Succinic anhydride labeling reagent light form (N-term & K) (Isotopic label)               |
| 99.0796           | G       | Anywhere   | Gly->Arg substitution (AA substitution)                                                           |
| 99.0684           | C       | Anywhere   | N-isopropylcarboxamidomethyl (Chemical derivative)                                                |
| 99.0473           | S       | Anywhere   | Ser->Trp substitution (AA substitution)                                                           |
| 98.0743           | K       | N-Terminus | N-term Propionylated Amide (Trimethylated) (Post-translational)                                   |
| 98.0369           | K       | N-Terminus | N-term Propionylated Amide (Acetylated) (Post-translational)                                      |
| 97.9769           | C       | Anywhere   | Phosphorylation (Post-translational)                                                              |
| 97.9769           | D       | Anywhere   | Phosphorylation (Post-translational)                                                              |
| 97.9769           | H       | Anywhere   | Phosphorylation (Post-translational)                                                              |
| 97.9769           | R       | Anywhere   | Phosphorylation (Post-translational)                                                              |
| 97.9769           | T       | Anywhere   | Phosphorylation (Post-translational)                                                              |
| 97.9769           | Y       | Anywhere   | Phosphorylation (Post-translational)                                                              |
| 97.0164           | C       | Anywhere   | maleimide (Chemical derivative)                                                                   |
| 97.0164           | K       | Anywhere   | maleimide (Chemical derivative)                                                                   |
| 95.9435           | S       | Anywhere   | Thiophosphorylation (Other)                                                                       |
| 95.9435           | T       | Anywhere   | Thiophosphorylation (Other)                                                                       |
| 95.9435           | Y       | Anywhere   | Thiophosphorylation (Other)                                                                       |

Table 1: Universal list of modifications used with PILOT\_PTM.

| Monoisotopic Mass | Residue | Location   | Name                                                                              |
|-------------------|---------|------------|-----------------------------------------------------------------------------------|
| 94.0419           | K       | Anywhere   | Acrolein addition +94 (Other)                                                     |
| 93.982            | S       | Anywhere   | O-Methylphosphorylation (Chemical derivative)                                     |
| 93.982            | T       | Anywhere   | O-Methylphosphorylation (Chemical derivative)                                     |
| 93.982            | Y       | Anywhere   | O-Methylphosphorylation (Chemical derivative)                                     |
| 90.0841           | C       | Anywhere   | N-ethyl iodoacetamide-d5 (Isotopic label)                                         |
| 90.0841           | Y       | Anywhere   | N-ethyl iodoacetamide-d5 (Isotopic label)                                         |
| 90.0317           | H       | Anywhere   | N(epsilon)-histidine dihydroxyacetone adduct (Post-translational)                 |
| 88.9965           | Y       | Anywhere   | C13 label (Phosphotyrosine) (Isotopic label)                                      |
| 87.9983           | K       | N-Terminus | thioacylation of primary amines (N-term and Lys) (Other)                          |
| 87.9983           | n       | N-Terminus | N-term thioacylation of primary amines (N-term and Lys) (Other)                   |
| 87.0684           | K       | Anywhere   | hypusine (Post-translational)                                                     |
| 87.0507           | S       | Anywhere   | phosphorylation to amine thiol (Chemical derivative)                              |
| 87.0507           | T       | Anywhere   | phosphorylation to amine thiol (Chemical derivative)                              |
| 87.0143           | K       | Anywhere   | dimethyl 3,3-dithiobispropionimidate (Chemical derivative)                        |
| 87.0143           | N       | Anywhere   | dimethyl 3,3-dithiobispropionimidate (Chemical derivative)                        |
| 87.0143           | Q       | Anywhere   | dimethyl 3,3-dithiobispropionimidate (Chemical derivative)                        |
| 87.0143           | R       | Anywhere   | dimethyl 3,3-dithiobispropionimidate (Chemical derivative)                        |
| 86.0368           | C       | Anywhere   | Michael addition of hydroxymethylvinyl ketone to cysteine (Chemical derivative)   |
| 86.0004           | C       | Anywhere   | Malonylation of C and S residues (Chemical derivative)                            |
| 86.0004           | S       | Anywhere   | Malonylation of C and S residues (Chemical derivative)                            |
| 85.0891           | Q       | Anywhere   | Labeling transglutaminase substrate on glutamine side chain (Chemical derivative) |
| 85.0528           | C       | Anywhere   | N-ethyl iodoacetamide-d0 (Isotopic label)                                         |
| 85.0528           | Y       | Anywhere   | N-ethyl iodoacetamide-d0 (Isotopic label)                                         |
| 84.0577           | K       | N-Terminus | N-term Propionylation (Dimethylated) (Post-translational)                         |
| 83.0701           | C       | Anywhere   | Cys->Trp substitution (AA substitution)                                           |
| 80.9851           | R       | Anywhere   | Arginine replacement by Nitroimidazole ornithine (Chemical derivative)            |
| 79.9663           | C       | Anywhere   | S-Phosphorylation (Post-translational)                                            |
| 79.9663           | D       | Anywhere   | Beta-aspartyl phosphate (Post-translational)                                      |
| 79.9663           | H       | Anywhere   | Phosphorylation (Post-translational)                                              |
| 79.9663           | R       | Anywhere   | Phosphorylation (Post-translational)                                              |
| 79.9663           | S       | Anywhere   | Phosphorylation (Post-translational)                                              |
| 79.9663           | T       | Anywhere   | Phosphorylation (Post-translational)                                              |
| 79.9663           | Y       | Anywhere   | Phosphorylation (Post-translational)                                              |
| 79.9568           | C       | Anywhere   | O-Sulfonation (Post-translational)                                                |
| 79.9568           | S       | Anywhere   | O-Sulfonation (Post-translational)                                                |
| 79.9568           | T       | Anywhere   | O-Sulfonation (Post-translational)                                                |
| 79.9568           | Y       | Anywhere   | O-Sulfonation (Post-translational)                                                |
| 79.9165           | C       | Anywhere   | selenyl (Post-translational)                                                      |
| 78.0469           | K       | Anywhere   | 2,5-dimethylpyrrole (Chemical derivative)                                         |
| 77.9871           | S       | Anywhere   | Methylphosphonylation (Chemical derivative)                                       |
| 77.9871           | T       | Anywhere   | Methylphosphonylation (Chemical derivative)                                       |
| 77.9871           | Y       | Anywhere   | Methylphosphonylation (Chemical derivative)                                       |
| 77.9105           | F       | Anywhere   | bromination (Post-translational)                                                  |
| 77.9105           | H       | Anywhere   | bromination (Post-translational)                                                  |
| 77.9105           | W       | Anywhere   | bromination (Post-translational)                                                  |
| 76.0313           | K       | Anywhere   | Acrolein addition +76 (Other)                                                     |
| 76.0313           | S       | Anywhere   | Ser->Tyr substitution (AA substitution)                                           |
| 75.9983           | C       | Anywhere   | Cysteine mercaptoethanol (Chemical derivative)                                    |
| 75.9805           | S       | Anywhere   | EDT (Chemical derivative)                                                         |
| 75.9805           | T       | Anywhere   | EDT (Chemical derivative)                                                         |
| 75.9619           | D       | Anywhere   | 4-aspartylloxysulfanylcarbonate (Post-translational)                              |
| 74.0559           | C       | Anywhere   | Acrylamide d3 (Isotopic label)                                                    |
| 72.9952           | L       | Anywhere   | Leu->Trp substitution (AA substitution)                                           |
| 72.0626           | K       | Anywhere   | IMID d4 (Isotopic label)                                                          |

Table 1: Universal list of modifications used with PILOT\_PTM.

| Monoisotopic Mass | Residue | Location   | Name                                                                                     |
|-------------------|---------|------------|------------------------------------------------------------------------------------------|
| 72.0211           | G       | Anywhere   | Gly->Glu substitution (AA substitution)                                                  |
| 72.0211           | K       | Anywhere   | carboxyethyl (Post-translational)                                                        |
| 72.0211           | R       | Anywhere   | Dihydroxy methylglyoxal adduct (Multiple)                                                |
| 71.0371           | C       | Anywhere   | Acrylamide adduct (Artefact)                                                             |
| 70.0419           | C       | Anywhere   | Crotonaldehyde (Other)                                                                   |
| 70.0419           | H       | Anywhere   | Crotonaldehyde (Other)                                                                   |
| 70.0419           | K       | Anywhere   | Propionylation (Methylated) (Post-translational)                                         |
| 70.0055           | K       | Anywhere   | N-pyruvic acid 2-iminyl (Post-translational)                                             |
| 69.0691           | S       | Anywhere   | Ser->Arg substitution (AA substitution)                                                  |
| 68.13             | n       | N-Terminus | N-term d9-4-trimethylammoniumbutyryl- (Isotopic label)                                   |
| 68.13             | n       | N-Terminus | N-term Quaternary amine labeling reagent heavy form (+9amu), N-term & K (Isotopic label) |
| 68.0626           | K       | Anywhere   | Piperidination (Chemical derivative)                                                     |
| 68.0626           | n       | N-Terminus | N-term Piperidination (Chemical derivative)                                              |
| 68.0374           | K       | Anywhere   | IMID d0 (Isotopic label)                                                                 |
| 65.1112           | n       | N-Terminus | N-term Quaternary amine labeling reagent heavy form (+6amu), N-term & K (Isotopic label) |
| 63.0445           | S       | Anywhere   | deuterium cysteamine modification to S or T (Isotopic label)                             |
| 63.0445           | T       | Anywhere   | deuterium cysteamine modification to S or T (Isotopic label)                             |
| 62.0923           | n       | N-Terminus | N-term Quaternary amine labeling reagent heavy (+3amu) form, N-term & K (Isotopic label) |
| 62.0157           | K       | Anywhere   | MDA adduct +62 (Chemical derivative)                                                     |
| 61.9218           | D       | Anywhere   | Replacement of proton by copper (Artefact)                                               |
| 61.9218           | E       | Anywhere   | Replacement of proton by copper (Artefact)                                               |
| 61.9218           | c       | C-Terminus | C-term Replacement of proton by copper (Artefact)                                        |
| 60.0541           | C       | Anywhere   | Cys->Tyr substitution (AA substitution)                                                  |
| 60.0364           | S       | Anywhere   | Ser->Phe substitution (AA substitution)                                                  |
| 60.0122           | C       | Anywhere   | Iodoacetic acid derivative w/ 13C label (Chemical derivative)                            |
| 59.0735           | n       | N-Terminus | N-term 4-trimethylammoniumbutyryl- (Isotopic label)                                      |
| 59.0735           | n       | N-Terminus | N-term Quaternary amine labeling reagent light form (N-term & K) (Isotopic label)        |
| 59.0497           | K       | Anywhere   | 5-hydroxy-N6,N6-trimethyl (Post-translational)                                           |
| 59.0483           | P       | Anywhere   | Pro->Arg substitution (AA substitution)                                                  |
| 59.045            | K       | Anywhere   | Mono-methylated lysine labelled with Acetyl_heavy (Isotopic label)                       |
| 59.0363           | K       | N-Terminus | Propionate labeling reagent heavy form (+3amu), N-term & K (Isotopic label)              |
| 59.0363           | n       | N-Terminus | N-term Propionate labeling reagent heavy form (+3amu), N-term & K (Isotopic label)       |
| 59.0194           | S       | Anywhere   | aminoethylcysteine (Chemical derivative)                                                 |
| 59.0194           | T       | Anywhere   | aminoethylcysteine (Chemical derivative)                                                 |
| 58.0055           | A       | Anywhere   | Ala->Glu substitution (AA substitution)                                                  |
| 58.0055           | C       | Anywhere   | Iodoacetic acid derivative (Chemical derivative)                                         |
| 58.0055           | G       | Anywhere   | Gly->Asp substitution (AA substitution)                                                  |
| 58.0055           | K       | Anywhere   | Iodoacetic acid derivative (Artefact)                                                    |
| 58.0055           | W       | Anywhere   | Iodoacetic acid derivative (Chemical derivative)                                         |
| 58.0055           | n       | N-Terminus | N-term Iodoacetic acid derivative (Artefact)                                             |
| 57.0215           | C       | Anywhere   | Iodoacetamide derivaive (Chemical derivative)                                            |
| 57.0215           | D       | Anywhere   | Iodoacetamide derivative (Artefact)                                                      |
| 57.0215           | E       | Anywhere   | Iodoacetamide derivative (Artefact)                                                      |
| 57.0215           | H       | Anywhere   | Iodoacetamide derivative (Artefact)                                                      |
| 57.0215           | K       | Anywhere   | Iodoacetamide derivative (Artefact)                                                      |

Table 1: Universal list of modifications used with PILOT\_PTM.

| Monoisotopic Mass | Residue | Location   | Name                                                                              |
|-------------------|---------|------------|-----------------------------------------------------------------------------------|
| 57.0215           | n       | N-Terminus | N-term Iodoacetamide derivative (Artefact)                                        |
| 56.0626           | K       | Anywhere   | Diethylation, analogous to Dimethylation (Chemical derivative)                    |
| 56.0626           | n       | N-Terminus | N-term Diethylation, analogous to Dimethylation (Chemical derivative)             |
| 56.0262           | C       | Anywhere   | Acrolein addition +56 (Other)                                                     |
| 56.0262           | H       | Anywhere   | Acrolein addition +56 (Other)                                                     |
| 56.0262           | K       | Anywhere   | Acrolein addition +56 (Other)                                                     |
| 56.0262           | K       | N-Terminus | Propionate labeling reagent light form (N-term & K) (Isotopic label)              |
| 56.0262           | n       | N-Terminus | N-term Propionate labeling reagent light form (N-term & K) (Isotopic label)       |
| 55.0534           | T       | Anywhere   | Thr->Arg substitution (AA substitution)                                           |
| 54.0106           | K       | Anywhere   | MDA adduct +54 (Chemical derivative)                                              |
| 54.0106           | R       | Anywhere   | MDA adduct +54 (Chemical derivative)                                              |
| 53.9717           | L       | Anywhere   | trifluoroisoleucine replacement of leucine (Non-standard residue)                 |
| 53.0919           | C       | Anywhere   | Cys->Arg substitution (AA substitution)                                           |
| 50.0248           | K       | Anywhere   | Acetyl_13C(6) 15N(2) Silac label (Isotopic label)                                 |
| 49.0204           | N       | Anywhere   | Asn->Tyr substitution (AA substitution)                                           |
| 48.0364           | D       | Anywhere   | Asp->Tyr substitution (AA substitution)                                           |
| 48.0307           | K       | Anywhere   | Acetyl_13C(6) Silac label (Isotopic label)                                        |
| 48                | V       | Anywhere   | Val->Phe substitution (AA substitution)                                           |
| 47.9847           | C       | Anywhere   | cysteine oxidation to cysteic acid (Chemical derivative)                          |
| 47.9444           | C       | Anywhere   | Selenium replaces sulphur (Non-standard residue)                                  |
| 47.9444           | M       | Anywhere   | Selenium replaces sulphur (Non-standard residue)                                  |
| 46.0357           | K       | Anywhere   | Acetyl 4,4,5,5-D4 Lysine (Isotopic label)                                         |
| 45.9877           | C       | Anywhere   | Beta-methylthiolation (Multiple)                                                  |
| 45.9877           | D       | Anywhere   | Beta-methylthiolation (Post-translational)                                        |
| 45.9877           | G       | Anywhere   | Gly->Cys substitution (AA substitution)                                           |
| 45.9877           | N       | Anywhere   | Beta-methylthiolation (Post-translational)                                        |
| 45.0294           | K       | N-Terminus | Acetate labeling reagent (N-term & K) (heavy form, +3amu) (Isotopic label)        |
| 45.0294           | n       | N-Terminus | N-term Acetate labeling reagent (N-term & K) (heavy form, +3amu) (Isotopic label) |
| 44.9851           | W       | Anywhere   | Oxidation to nitro (Chemical derivative)                                          |
| 44.9851           | Y       | Anywhere   | Oxidation to nitro (Chemical derivative)                                          |
| 44.0592           | C       | Anywhere   | Cys->Phe substitution (AA substitution)                                           |
| 44.0262           | C       | Anywhere   | Ethanolation of Cys (Chemical derivative)                                         |
| 44.0085           | S       | Anywhere   | S-Ethylcysteine from Serine (Chemical derivative)                                 |
| 43.9898           | A       | Anywhere   | Ala->Asp substitution (AA substitution)                                           |
| 43.9898           | D       | Anywhere   | Carboxylation (Post-translational)                                                |
| 43.9898           | E       | Anywhere   | Carboxylation (Post-translational)                                                |
| 43.9898           | K       | Anywhere   | Carboxylation (Post-translational)                                                |
| 43.9898           | W       | Anywhere   | Carboxylation (Chemical derivative)                                               |
| 43.0548           | A       | N-Terminus | N-term tri-Methylation (Post-translational)                                       |
| 43.0422           | D       | Anywhere   | Carboxyl modification with ethanolamine (Chemical derivative)                     |
| 43.0422           | E       | Anywhere   | Carboxyl modification with ethanolamine (Chemical derivative)                     |
| 43.0422           | c       | C-Terminus | C-term Carboxyl modification with ethanolamine (Chemical derivative)              |

Table 1: Universal list of modifications used with PILOT-PTM.

| Monoisotopic Mass | Residue | Location   | Name                                                                                             |
|-------------------|---------|------------|--------------------------------------------------------------------------------------------------|
| 43.017            | I       | Anywhere   | Ile->Arg substitution (AA substitution)                                                          |
| 43.017            | L       | Anywhere   | Leu->Arg substitution (AA substitution)                                                          |
| 43.0058           | C       | Anywhere   | Carbamylation (Artefact)                                                                         |
| 43.0058           | K       | Anywhere   | Carbamylation (Multiple)                                                                         |
| 43.0058           | M       | Anywhere   | Carbamylation (Artefact)                                                                         |
| 43.0058           | R       | Anywhere   | Carbamylation (Artefact)                                                                         |
| 43.0058           | n       | N-Terminus | N-term Carbamylation (Multiple)                                                                  |
| 42.047            | G       | Anywhere   | Gly->Val substitution (AA substitution)                                                          |
| 42.047            | K       | Anywhere   | tri-Methylation (Post-translational)                                                             |
| 42.047            | R       | Anywhere   | tri-Methylation (Chemical derivative)                                                            |
| 42.0218           | C       | Anywhere   | amidino (Post-translational)                                                                     |
| 42.0218           | K       | Anywhere   | Guanidination (Chemical derivative)                                                              |
| 42.0106           | C       | Anywhere   | Acetylation (Post-translational)                                                                 |
| 42.0106           | H       | Anywhere   | Acetylation (Chemical derivative)                                                                |
| 42.0106           | K       | Anywhere   | Acetylation (Multiple)                                                                           |
| 42.0106           | S       | Anywhere   | Acetylation (Post-translational)                                                                 |
| 42.0106           | T       | Anywhere   | Acetylation (Post-translational)                                                                 |
| 42.0106           | Y       | Anywhere   | Acetylation (Chemical derivative)                                                                |
| 42.0106           | n       | N-Terminus | N-term Acetylation (Multiple)                                                                    |
| 41.0265           | K       | N-Terminus | amidination of lysines or N-terminal amines with methyl acetimidate (Chemical derivative)        |
| 41.0265           | n       | N-Terminus | N-term amidination of lysines or N-terminal amines with methyl acetimidate (Chemical derivative) |
| 40.0313           | H       | Anywhere   | Propionaldehyde +40 (Other)                                                                      |
| 40.0313           | K       | Anywhere   | Propionaldehyde +40 (Other)                                                                      |
| 40.0061           | P       | Anywhere   | Pro->His substitution (AA substitution)                                                          |
| 39.9949           | C       | N-Terminus | N-term S-carbamoylmethylcysteine cyclization (N-terminus) (Artefact)                             |
| 38.0157           | K       | Anywhere   | Acrolein addition +38 (Other)                                                                    |
| 37.9559           | D       | Anywhere   | Replacement of proton by potassium (Artefact)                                                    |
| 37.9559           | E       | Anywhere   | Replacement of proton by potassium (Artefact)                                                    |
| 37.9559           | c       | C-Terminus | C-term Replacement of proton by potassium (Artefact)                                             |
| 36.0757           | R       | Anywhere   | dimethylated arginine (Isotopic label)                                                           |
| 34.0631           | K       | Anywhere   | DiMethyl-C13HD2 (Isotopic label)                                                                 |
| 34.0631           | n       | N-Terminus | N-term DiMethyl-C13HD2 (Isotopic label)                                                          |
| 33.9843           | I       | Anywhere   | Ile->Phe substitution (AA substitution)                                                          |
| 33.9843           | L       | Anywhere   | Leu->Phe substitution (AA substitution)                                                          |
| 33.961            | W       | Anywhere   | Chlorination (Post-translational)                                                                |
| 32.0564           | K       | Anywhere   | DiMethyl-CHD2 (Isotopic label)                                                                   |
| 32.0564           | n       | N-Terminus | N-term DiMethyl-CHD2 (Isotopic label)                                                            |
| 31.9898           | C       | Anywhere   | dihydroxy (Post-translational)                                                                   |
| 31.9898           | F       | Anywhere   | dihydroxy (Chemical derivative)                                                                  |
| 31.9898           | K       | Anywhere   | dihydroxy (Post-translational)                                                                   |
| 31.9898           | M       | Anywhere   | dihydroxy (Post-translational)                                                                   |
| 31.9898           | P       | Anywhere   | dihydroxy (Post-translational)                                                                   |
| 31.9898           | R       | Anywhere   | dihydroxy (Post-translational)                                                                   |
| 31.9898           | W       | Anywhere   | dihydroxy (Chemical derivative)                                                                  |
| 31.9898           | Y       | Anywhere   | dihydroxy (Post-translational)                                                                   |
| 31.9721           | C       | Anywhere   | persulfide (Post-translational)                                                                  |

Table 1: Universal list of modifications used with PILOT\_PTM.

| Monoisotopic Mass | Residue | Location   | Name                                                                    |
|-------------------|---------|------------|-------------------------------------------------------------------------|
| 31.9721           | V       | Anywhere   | Val->Met substitution (AA substitution)                                 |
| 31.0058           | P       | Anywhere   | Pro->Gln substitution (AA substitution)                                 |
| 30.0106           | A       | Anywhere   | Ala->Thr substitution (AA substitution)                                 |
| 30.0106           | G       | Anywhere   | Gly->Ser substitution (AA substitution)                                 |
| 30.0106           | N       | Anywhere   | hydroxymethyl (Post-translational)                                      |
| 29.9928           | T       | Anywhere   | Thr->Met substitution (AA substitution)                                 |
| 29.9782           | R       | Anywhere   | Arg->Trp substitution (AA substitution)                                 |
| 29.9742           | V       | Anywhere   | Val->Glu substitution (AA substitution)                                 |
| 29.9742           | W       | Anywhere   | quinone (Post-translational)                                            |
| 29.9742           | Y       | Anywhere   | quinone (Post-translational)                                            |
| 29.0391           | P       | Anywhere   | Dimethylation of proline residue (Post-translational)                   |
| 28.9902           | C       | Anywhere   | S-nitrosylation (Post-translational)                                    |
| 28.0425           | Q       | Anywhere   | Gln->Arg substitution (AA substitution)                                 |
| 28.0313           | A       | Anywhere   | Ala->Val substitution (AA substitution)                                 |
| 28.0313           | E       | Anywhere   | Ethylation (Artefact)                                                   |
| 28.0313           | H       | Anywhere   | Acetaldehyde +28 (Other)                                                |
| 28.0313           | K       | Anywhere   | di-Methylation (Post-translational)                                     |
| 28.0313           | K       | Anywhere   | Acetaldehyde +28 (Other)                                                |
| 28.0313           | K       | Anywhere   | Ethylation (Multiple)                                                   |
| 28.0313           | N       | Anywhere   | di-Methylation (Post-translational)                                     |
| 28.0313           | R       | Anywhere   | di-Methylation (Post-translational)                                     |
| 28.0313           | n       | N-Terminus | N-term Ethylation (Multiple)                                            |
| 28.0313           | n       | N-Terminus | N-term di-Methylation (Chemical derivative)                             |
| 28.0061           | K       | Anywhere   | Lys->Arg substitution (AA substitution)                                 |
| 27.9949           | K       | Anywhere   | Formylation (Artefact)                                                  |
| 27.9949           | S       | Anywhere   | Formylation (Artefact)                                                  |
| 27.9949           | T       | Anywhere   | Formylation (Artefact)                                                  |
| 27.9949           | n       | N-Terminus | N-term Formylation (Artefact)                                           |
| 27.0473           | T       | Anywhere   | Thr->Lys substitution (AA substitution)                                 |
| 27.0109           | S       | Anywhere   | Ser->Asn substitution (AA substitution)                                 |
| 26.052            | S       | Anywhere   | Ser->Ile or Ser->Leu substitution (AA substitution)                     |
| 26.0157           | A       | Anywhere   | Ala->Pro substitution (AA substitution)                                 |
| 26.0157           | H       | Anywhere   | Acetaldehyde +26 (Other)                                                |
| 26.0157           | K       | Anywhere   | Acetaldehyde +26 (Other)                                                |
| 26.0044           | H       | Anywhere   | His->Tyr substitution (AA substitution)                                 |
| 25.0606           | M       | Anywhere   | Met->Arg substitution (AA substitution)                                 |
| 24.9952           | C       | Anywhere   | cyano (Post-translational)                                              |
| 23.9748           | L       | Anywhere   | Leu->His substitution (AA substitution)                                 |
| 23.016            | N       | Anywhere   | Asn->His substitution (AA substitution)                                 |
| 22.032            | D       | Anywhere   | Asp->His substitution (AA substitution)                                 |
| 21.9819           | D       | Anywhere   | Sodium adduct (Artefact)                                                |
| 21.9819           | E       | Anywhere   | Sodium adduct (Artefact)                                                |
| 21.9819           | c       | C-Terminus | C-term Sodium adduct (Artefact)                                         |
| 19.9898           | W       | Anywhere   | tryptophan oxidation to hydroxykynurenin (Chemical derivative)          |
| 19.0422           | H       | Anywhere   | His->Arg substitution (AA substitution)                                 |
| 18.0378           | R       | Anywhere   | monomethylated arginine (Isotopic label)                                |
| 17.9906           | F       | Anywhere   | fluorophenylalanine replacement of phenylalanine (Non-standard residue) |
| 17.9906           | W       | Anywhere   | fluorophenylalanine replacement of phenylalanine (Non-standard residue) |
| 17.9906           | Y       | Anywhere   | fluorophenylalanine replacement of phenylalanine (Non-standard residue) |
| 17.9564           | I       | Anywhere   | Ile->Met substitution (AA substitution)                                 |
| 17.9564           | L       | Anywhere   | Leu->Met substitution (AA substitution)                                 |
| 17.0707           | K       | Anywhere   | 13C(6) 15N(2) (D)9 SILAC label (Isotopic label)                         |
| 17.0345           | D       | Anywhere   | deuterated methyl ester (Isotopic label)                                |
| 17.0345           | E       | Anywhere   | deuterated methyl ester (Isotopic label)                                |
| 17.0345           | c       | C-Terminus | C-term deuterated methyl ester (Isotopic label)                         |
| 16.0313           | P       | Anywhere   | Pro->Leu substitution (AA substitution)                                 |
| 16.0282           | K       | Anywhere   | Deuterium Methylation of Lysine (Isotopic label)                        |

Table 1: Universal list of modifications used with PILOT\_PTM.

| Monoisotopic Mass | Residue | Location   | Name                                                         |
|-------------------|---------|------------|--------------------------------------------------------------|
| 15.9949           | A       | Anywhere   | Ala->Ser substitution (AA substitution)                      |
| 15.9949           | C       | Anywhere   | L-cysteine sulfenic acid (Post-translational)                |
| 15.9949           | D       | Anywhere   | Hydroxylation (Post-translational)                           |
| 15.9949           | F       | Anywhere   | Phe->Tyr substitution (AA substitution)                      |
| 15.9949           | K       | Anywhere   | Hydroxylation (Post-translational)                           |
| 15.9949           | M       | Anywhere   | Oxidation (Chemical derivative)                              |
| 15.9949           | N       | Anywhere   | Hydroxylation (Post-translational)                           |
| 15.9949           | P       | Anywhere   | Hydroxylation (Post-translational)                           |
| 15.9949           | R       | Anywhere   | Hydroxylation (Post-translational)                           |
| 15.9949           | V       | Anywhere   | Hydroxylation (Post-translational)                           |
| 15.9949           | W       | Anywhere   | Oxidation (Chemical derivative)                              |
| 15.9949           | Y       | Anywhere   | Oxidation (Chemical derivative)                              |
| 15.9772           | G       | Anywhere   | 1-Thioglycine                                                |
| 15.9772           | S       | Anywhere   | Ser->Cys substitution (AA substitution)                      |
| 15.9585           | V       | Anywhere   | Val->Asp substitution (AA substitution)                      |
| 15.0109           | I       | Anywhere   | Ile->Lys substitution (AA substitution)                      |
| 15.0109           | Y       | Anywhere   | Tyrosine oxidation to 2-aminotyrosine (Chemical derivative)  |
| 14.9997           | N       | Anywhere   | Deamidation followed by a methylation (Chemical derivative)  |
| 14.9997           | Q       | Anywhere   | Deamidation followed by a methylation (Post-translational)   |
| 14.9745           | L       | Anywhere   | Leu->Gln substitution (AA substitution)                      |
| 14.9633           | K       | Anywhere   | alpha-amino adipic acid (Post-translational)                 |
| 14.052            | N       | Anywhere   | Asn->Lys substitution (AA substitution)                      |
| 14.0157           | C       | Anywhere   | Methylation (Post-translational)                             |
| 14.0157           | D       | Anywhere   | Methylation (Post-translational)                             |
| 14.0157           | D       | Anywhere   | Asp->Glu substitution (AA substitution)                      |
| 14.0157           | E       | Anywhere   | Methylation (Post-translational)                             |
| 14.0157           | G       | Anywhere   | Gly->Ala substitution (AA substitution)                      |
| 14.0157           | H       | Anywhere   | Methylation (Post-translational)                             |
| 14.0157           | I       | Anywhere   | Methylation (Post-translational)                             |
| 14.0157           | K       | Anywhere   | Methylation (Post-translational)                             |
| 14.0157           | L       | Anywhere   | Methylation (Post-translational)                             |
| 14.0157           | N       | Anywhere   | Methylation (Post-translational)                             |
| 14.0157           | Q       | Anywhere   | Methylation (Post-translational)                             |
| 14.0157           | R       | Anywhere   | Methylation (Post-translational)                             |
| 14.0157           | S       | Anywhere   | Methylation (Post-translational)                             |
| 14.0157           | S       | Anywhere   | Ser->Thr substitution (AA substitution)                      |
| 14.0157           | T       | Anywhere   | Methylation (Post-translational)                             |
| 14.0157           | V       | Anywhere   | Val->Ile or Val->Leu substitution (AA substitution)          |
| 14.0157           | c       | C-Terminus | C-term Methylation (Multiple)                                |
| 14.0157           | n       | N-Terminus | N-term Methylation (Chemical derivative)                     |
| 13.9793           | P       | Anywhere   | proline oxidation to pyroglutamic acid (Chemical derivative) |
| 13.9793           | W       | Anywhere   | Tryptophan oxidation to oxolactone (Chemical derivative)     |
| 13.0316           | S       | Anywhere   | Michael addition with methylamine (Artefact)                 |
| 13.0316           | T       | Anywhere   | Michael addition with methylamine (Artefact)                 |
| 12.9952           | T       | Anywhere   | Thr->Asn substitution (AA substitution)                      |
| 12.0364           | T       | Anywhere   | Thr->Ile substitution (AA substitution)                      |
| 10.0272           | F       | Anywhere   | 13C(9) 15N(1) Silac label (Isotopic label)                   |
| 10.0209           | R       | Anywhere   | 13C(8) 15N(2) Silac label (Isotopic label)                   |
| 10.0207           | S       | Anywhere   | Ser->Pro substitution (AA substitution)                      |
| 10.0083           | R       | Anywhere   | 13C(6) 15N(4) Silac label (Isotopic label)                   |
| 9.03019           | F       | Anywhere   | 13C(9) Silac label (Isotopic label)                          |
| 9.03019           | Y       | Anywhere   | 13C(9) Silac label (Isotopic label)                          |
| 9.00033           | Q       | Anywhere   | Gln->His substitution (AA substitution)                      |
| 8.0142            | K       | Anywhere   | 13C(6) 15N(2) Silac label (Isotopic label)                   |
| 7.01716           | I       | Anywhere   | 13C(6) 15N(1) Silac label (Isotopic label)                   |
| 7.01716           | L       | Anywhere   | 13C(6) 15N(1) Silac label (Isotopic label)                   |
| 6.02013           | I       | Anywhere   | 13C(6) Silac label (Isotopic label)                          |
| 6.02013           | K       | Anywhere   | 13C(6) Silac label (Isotopic label)                          |
| 6.02013           | L       | Anywhere   | 13C(6) Silac label (Isotopic label)                          |
| 6.02013           | R       | Anywhere   | 13C(6) Silac label (Isotopic label)                          |
| 6.01381           | V       | Anywhere   | 13C(5) 15N(1) Silac label (Isotopic label)                   |
| 5.01677           | P       | Anywhere   | 13C(5) Silac label (Isotopic label)                          |
| 4.02511           | K       | Anywhere   | 4,4,5,5-D4 Lysine (Isotopic label)                           |

Table 1: Universal list of modifications used with PILOT\_PTM.

| Monoisotopic Mass | Residue | Location   | Name                                                               |
|-------------------|---------|------------|--------------------------------------------------------------------|
| 4.00849           | c       | C-Terminus | C-term O18 label at both C-terminal oxygens (Isotopic label)       |
| 3.99492           | P       | Anywhere   | Pro->Thr substitution (AA substitution)                            |
| 3.99492           | W       | Anywhere   | tryptophan oxidation to kynurenin (Chemical derivative)            |
| 3.01883           | L       | Anywhere   | Trideuteration (Isotopic label)                                    |
| 3.01207           | N       | Anywhere   | glycosylated asparagine 18O labeling (Isotopic label)              |
| 2.98826           | N       | Anywhere   | Deamidation in presence of O18 (Isotopic label)                    |
| 2.98826           | Q       | Anywhere   | Deamidation in presence of O18 (Isotopic label)                    |
| 2.94552           | K       | Anywhere   | Lys->Met substitution (AA substitution)                            |
| 2.00425           | S       | Anywhere   | O18 Labeling (Isotopic label)                                      |
| 2.00425           | T       | Anywhere   | O18 Labeling (Isotopic label)                                      |
| 2.00425           | Y       | Anywhere   | O18 Labeling (Isotopic label)                                      |
| 2.00425           | c       | C-Terminus | C-term O18 Labeling (Isotopic label)                               |
| 0.984016          | N       | Anywhere   | Asn->Asp substitution (AA substitution)                            |
| 0.984016          | N       | Anywhere   | Deamidation (Artefact)                                             |
| 0.984016          | Q       | Anywhere   | Deamidation (Artefact)                                             |
| 0.984016          | Q       | Anywhere   | Gln->Glu substitution (AA substitution)                            |
| 0.984016          | R       | Anywhere   | Deamidation (Post-translational)                                   |
| 0.958863          | I       | Anywhere   | Ile->Asn substitution (AA substitution)                            |
| 0.94763           | K       | Anywhere   | Lys->Glu substitution (AA substitution)                            |
| 0.036386          | Q       | Anywhere   | Gln->Lys substitution (AA substitution)                            |
| -0.036386         | K       | Anywhere   | Lys->Gln substitution (AA substitution)                            |
| -0.94763          | E       | Anywhere   | Glu->Lys substitution (AA substitution)                            |
| -0.958863         | N       | Anywhere   | Asn->Ile substitution (AA substitution)                            |
| -0.984016         | D       | Anywhere   | Asp->Asn substitution (AA substitution)                            |
| -0.984016         | E       | Anywhere   | Glu->Gln substitution (AA substitution)                            |
| -0.984016         | c       | C-Terminus | C-term Amidation (Artefact)                                        |
| -1.00783          | C       | Anywhere   | Half of a disulfide bridge (Multiple)                              |
| -1.03163          | K       | Anywhere   | Lysine oxidation to amino adipic semialdehyde (Post-translational) |
| -2.01565          | S       | Anywhere   | 2-amino-3-oxo-butanoic_acid (Post-translational)                   |
| -2.01565          | T       | Anywhere   | 2-amino-3-oxo-butanoic_acid (Chemical derivative)                  |
| -2.01565          | Y       | Anywhere   | 2-amino-3-oxo-butanoic_acid (Post-translational)                   |
| -2.94552          | M       | Anywhere   | Met->Lys substitution (AA substitution)                            |
| -3.99492          | T       | Anywhere   | Thr->Pro substitution (AA substitution)                            |
| -9.00033          | H       | Anywhere   | His->Gln substitution (AA substitution)                            |
| -10.0207          | P       | Anywhere   | Pro->Ser substitution (AA substitution)                            |
| -12.0364          | I       | Anywhere   | Ile->Thr substitution (AA substitution)                            |
| -12.9952          | N       | Anywhere   | Asn->Thr substitution (AA substitution)                            |
| -14.0157          | A       | Anywhere   | Ala->Gly substitution (AA substitution)                            |
| -14.0157          | E       | Anywhere   | Glu->Asp substitution (AA substitution)                            |
| -14.0157          | I       | Anywhere   | Ile->Val substitution (AA substitution)                            |
| -14.0157          | L       | Anywhere   | Leu->Val substitution (AA substitution)                            |
| -14.0157          | T       | Anywhere   | Thr->Ser substitution (AA substitution)                            |
| -14.052           | K       | Anywhere   | Lys->Asn substitution (AA substitution)                            |
| -14.9745          | Q       | Anywhere   | Gln->Leu substitution (AA substitution)                            |
| -15.0109          | K       | Anywhere   | Lys->Ile substitution (AA substitution)                            |
| -15.9585          | D       | Anywhere   | Asp->Val substitution (AA substitution)                            |
| -15.9772          | C       | Anywhere   | Cys->Ser substitution (AA substitution)                            |
| -15.9949          | D       | Anywhere   | reduction (Post-translational)                                     |
| -15.9949          | S       | Anywhere   | reduction (Chemical derivative)                                    |
| -15.9949          | S       | Anywhere   | Ser->Ala substitution (AA substitution)                            |
| -15.9949          | T       | Anywhere   | reduction (Chemical derivative)                                    |
| -15.9949          | Y       | Anywhere   | Tyr->Phe substitution (AA substitution)                            |
| -16.0313          | L       | Anywhere   | Leu->Pro substitution (AA substitution)                            |
| -17.0265          | C       | N-Terminus | N-term Loss of ammonia (Artefact)                                  |
| -17.0265          | N       | Anywhere   | Loss of ammonia (Chemical derivative)                              |
| -17.0265          | Q       | N-Terminus | N-term Pyro-glu from Q (Artefact)                                  |
| -17.9564          | M       | Anywhere   | Met->Leu substitution (AA substitution)                            |
| -17.9564          | M       | Anywhere   | Met->Ile substitution (AA substitution)                            |
| -17.9928          | C       | Anywhere   | oxoalanine (Post-translational)                                    |
| -18.0106          | C       | N-Terminus | N-term Dehydration (Artefact)                                      |
| -18.0106          | D       | Anywhere   | Dehydration (Chemical derivative)                                  |



Table 1: Universal list of modifications used with PILOT\_PTM.

| Monoisotopic Mass | Residue | Location   | Name                                                                                 |
|-------------------|---------|------------|--------------------------------------------------------------------------------------|
| -18.0106          | E       | N-Terminus | N-term Pyro-glu from E (Artefact)                                                    |
| -18.0106          | S       | Anywhere   | Dehydration (Post-translational)                                                     |
| -18.0106          | T       | Anywhere   | Dehydration (Post-translational)                                                     |
| -18.0106          | Y       | Anywhere   | Dehydration (Post-translational)                                                     |
| -19.0422          | R       | Anywhere   | Arg->His substitution (AA substitution)                                              |
| -22.032           | H       | Anywhere   | histidine oxidation to aspartic acid (AA substitution)                               |
| -23.016           | H       | Anywhere   | histidine oxidation to asparagine (AA substitution)                                  |
| -23.9748          | H       | Anywhere   | His->Leu substitution (AA substitution)                                              |
| -25.0606          | R       | Anywhere   | Arg->Met substitution (AA substitution)                                              |
| -26.0044          | Y       | Anywhere   | Tyr->His substitution (AA substitution)                                              |
| -26.0157          | P       | Anywhere   | Pro->Ala substitution (AA substitution)                                              |
| -26.052           | I       | Anywhere   | Ile->Ser substitution (AA substitution)                                              |
| -26.052           | L       | Anywhere   | Leu->Ser substitution (AA substitution)                                              |
| -27.0109          | N       | Anywhere   | Asn->Ser substitution (AA substitution)                                              |
| -27.0473          | K       | Anywhere   | Lys->Thr substitution (AA substitution)                                              |
| -27.9949          | P       | Anywhere   | Pyrrolidone from Proline (Chemical derivative)                                       |
| -28.0061          | R       | Anywhere   | Arg->Lys substitution (AA substitution)                                              |
| -28.0313          | V       | Anywhere   | Val->Ala substitution (AA substitution)                                              |
| -28.0425          | R       | Anywhere   | Arg->Gln substitution (AA substitution)                                              |
| -29.0027          | c       | C-Terminus | C-term ISD a-series (C-Term) (Other)                                                 |
| -29.9742          | E       | Anywhere   | Glu->Val substitution (AA substitution)                                              |
| -29.9782          | W       | Anywhere   | Trp->Arg substitution (AA substitution)                                              |
| -29.9928          | M       | Anywhere   | Met->Thr substitution (AA substitution)                                              |
| -29.9928          | M       | C-Terminus | C-term Homoserine (Chemical derivative)                                              |
| -30.0106          | P       | Anywhere   | Proline oxidation to pyrrolidinone (Chemical derivative)                             |
| -30.0106          | S       | Anywhere   | Ser->Gly substitution (AA substitution)                                              |
| -30.0106          | T       | Anywhere   | Thr->Ala substitution (AA substitution)                                              |
| -31.0058          | Q       | Anywhere   | Gln->Pro substitution (AA substitution)                                              |
| -31.9721          | M       | Anywhere   | Met->Val substitution (AA substitution)                                              |
| -33.9843          | F       | Anywhere   | Phe->Ile or Phe->Leu substitution (AA substitution)                                  |
| -33.9877          | C       | Anywhere   | Dehydroalanine (from Cysteine) (Chemical derivative)                                 |
| -40.0061          | H       | Anywhere   | His->Pro substitution (AA substitution)                                              |
| -42.0218          | R       | Anywhere   | Ornithine from Arginine (Artefact)                                                   |
| -42.047           | V       | Anywhere   | Val->Gly substitution (AA substitution)                                              |
| -43.017           | R       | Anywhere   | Arg->Ile or Arg->Leu substitution (AA substitution)                                  |
| -43.0534          | R       | Anywhere   | Arginine oxidation to glutamic semialdehyde (Chemical derivative)                    |
| -43.9898          | D       | Anywhere   | Asp->Ala substitution (AA substitution)                                              |
| -44.0592          | F       | Anywhere   | Phe->Cys substitution (AA substitution)                                              |
| -45.9877          | C       | Anywhere   | Cys->Gly substitution (AA substitution)                                              |
| -48               | F       | Anywhere   | Phe->Val substitution (AA substitution)                                              |
| -48.0034          | M       | C-Terminus | C-term Homoserine lactone (Chemical derivative)                                      |
| -48.0034          | M       | Anywhere   | Prompt loss of side chain from oxidised Met (Artefact)                               |
| -48.0364          | Y       | Anywhere   | Tyr->Asp substitution (AA substitution)                                              |
| -49.0204          | Y       | Anywhere   | Tyr->Asn substitution (AA substitution)                                              |
| -53.0919          | R       | Anywhere   | Arg->Cys substitution (AA substitution)                                              |
| -55.0534          | R       | Anywhere   | Arg->Thr substitution (AA substitution)                                              |
| -58.0055          | D       | Anywhere   | Asp->Gly substitution (AA substitution)                                              |
| -58.0055          | E       | Anywhere   | Glu->Ala substitution (AA substitution)                                              |
| -58.0055          | G       | C-Terminus | C-term Enzymatic glycine removal leaving an amidated C-terminus (Post-translational) |
| -59.0483          | R       | Anywhere   | Arg->Pro substitution (AA substitution)                                              |
| -60.0364          | F       | Anywhere   | Phe->Ser substitution (AA substitution)                                              |
| -60.0541          | Y       | Anywhere   | Tyr->Cys substitution (AA substitution)                                              |
| -69.0691          | R       | Anywhere   | Arg->Ser substitution (AA substitution)                                              |
| -72.0211          | E       | Anywhere   | Glu->Gly substitution (AA substitution)                                              |
| -72.9952          | W       | Anywhere   | Trp->Leu substitution (AA substitution)                                              |
| -76.0313          | Y       | Anywhere   | Tyr->Ser substitution (AA substitution)                                              |
| -83.0701          | W       | Anywhere   | Trp->Cys substitution (AA substitution)                                              |
| -94.0419          | Y       | Anywhere   | Dehydroalanine (from Tyrosine) (Post-translational)                                  |
| -99.0473          | W       | Anywhere   | Trp->Ser substitution (AA substitution)                                              |
| -99.0796          | R       | Anywhere   | Arg->Gly substitution (AA substitution)                                              |
| -129.058          | W       | Anywhere   | Trp->Gly substitution (AA substitution)                                              |
