# Supplementary material
Source: PubMed Central journal article supplement (PMC2871412)
Supplement: supp_M900487-MCP200_TestSetA1_Phosphopeptides.pdf [file supp_M900487-MCP200_TestSetA1_Phosphopeptides.pdf]

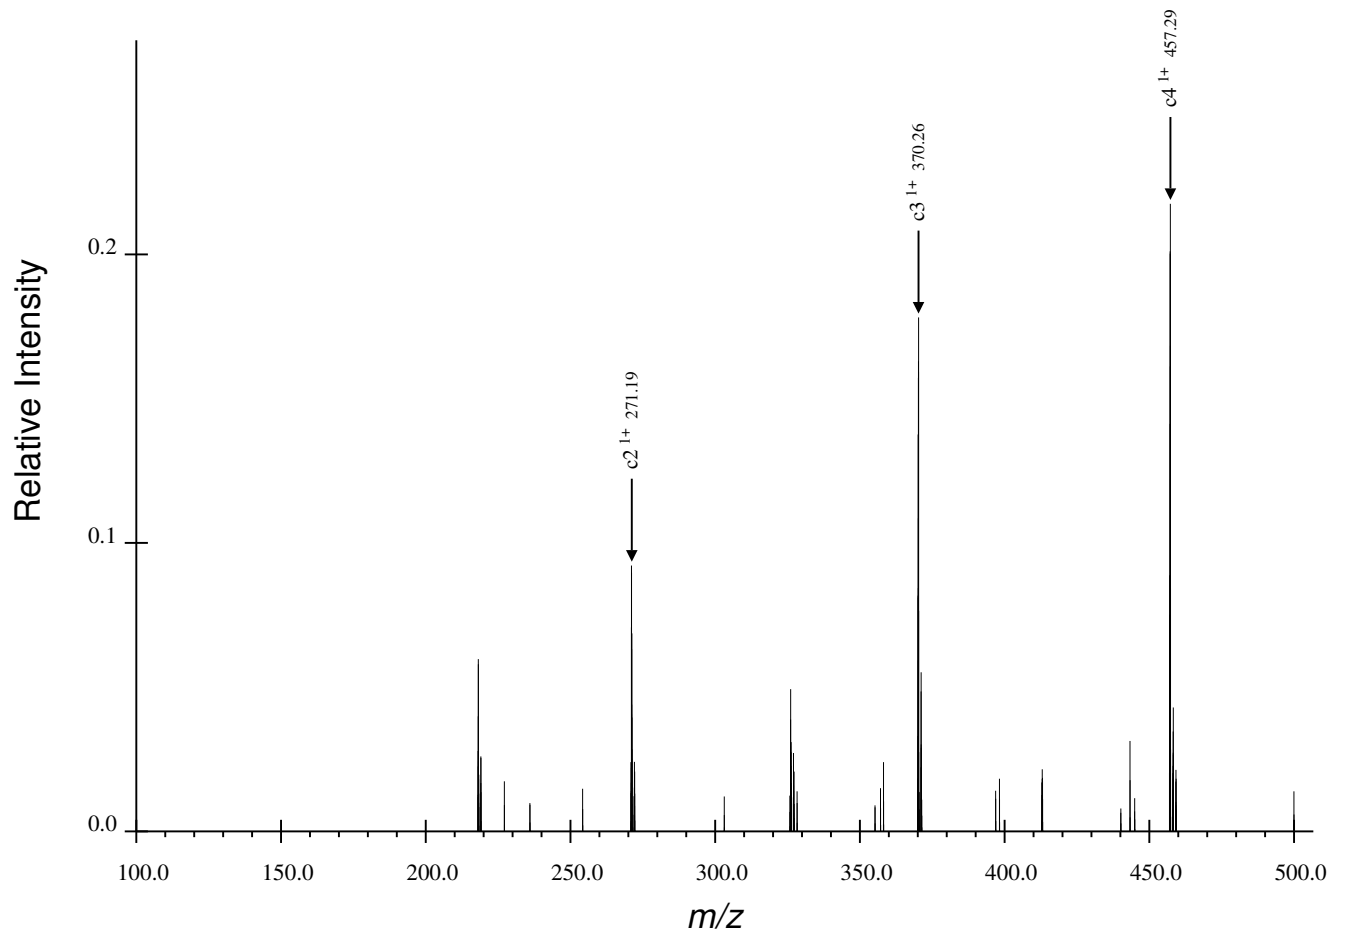

(a) First Region for RPVSSAApSVYAGAC, Spectrum 1.dta

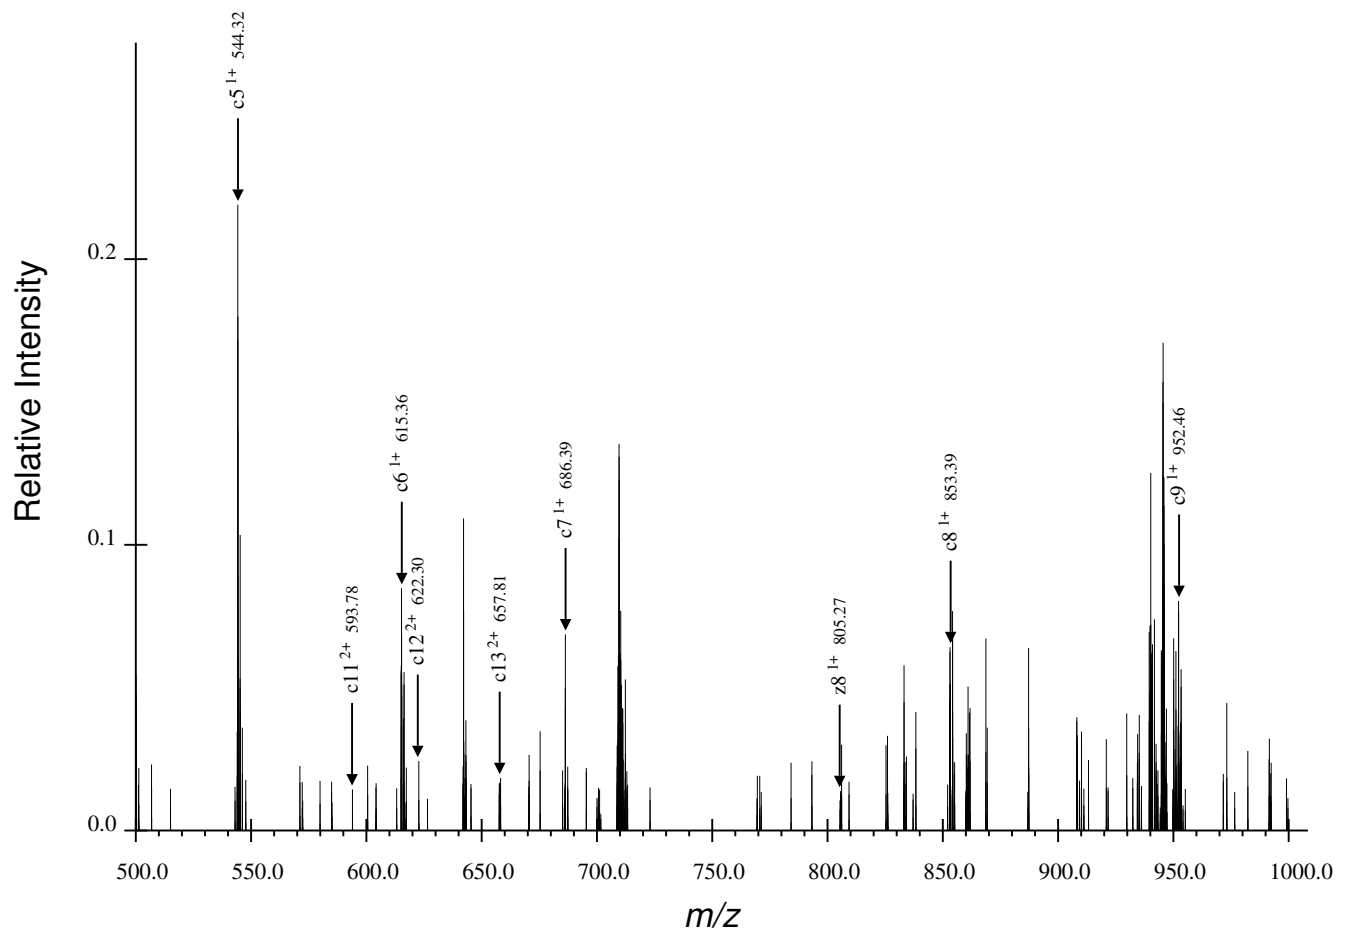

(b) Second Region for RPVSSAApSVYAGAC, Spectrum 1.dta

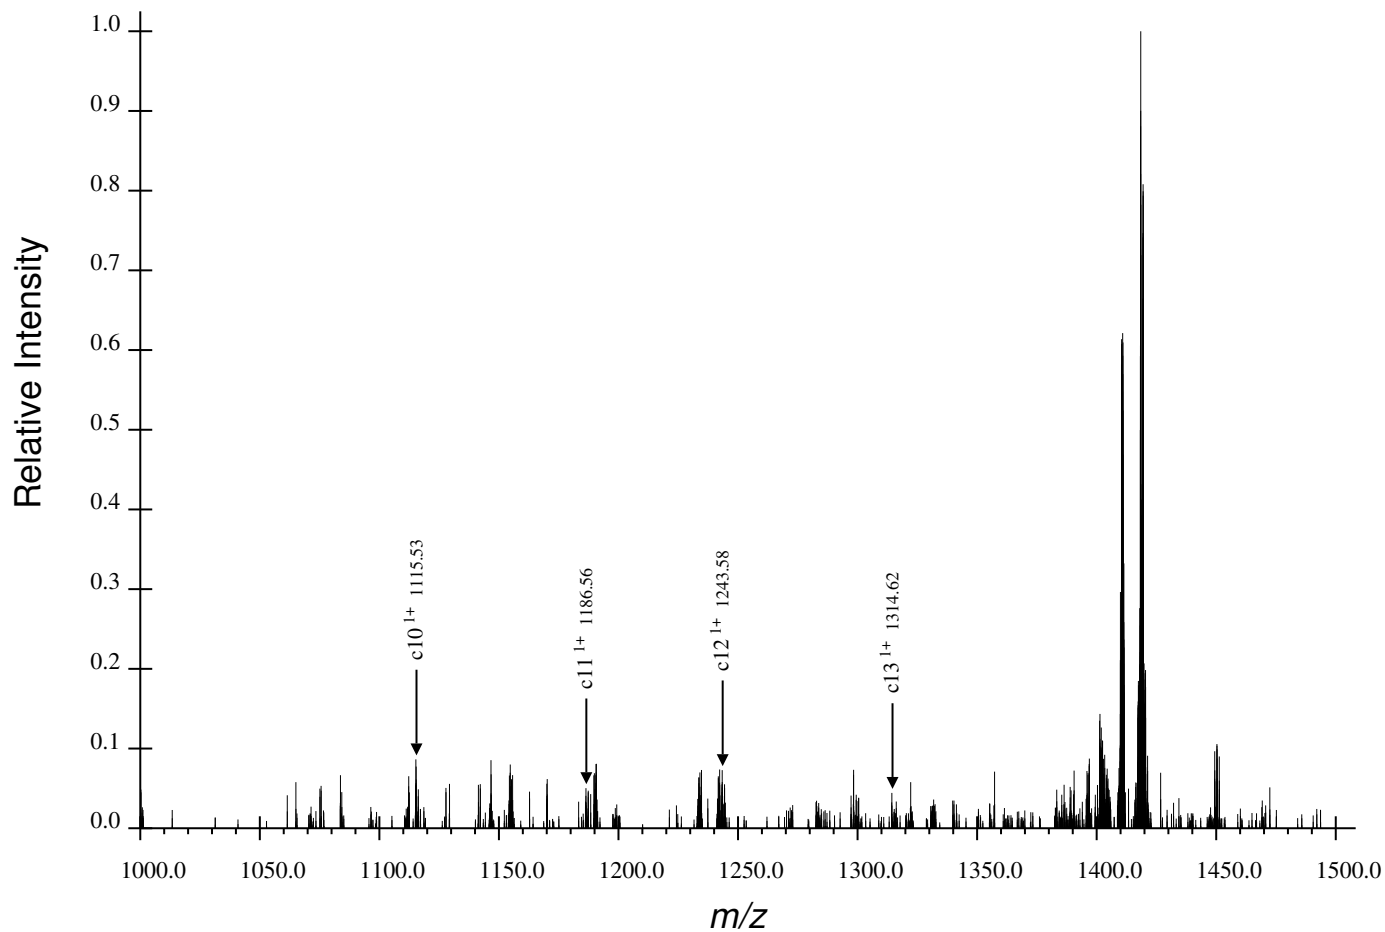

(c) Third Region for RPVSSAApSVYAGAC, Spectrum 1.dta

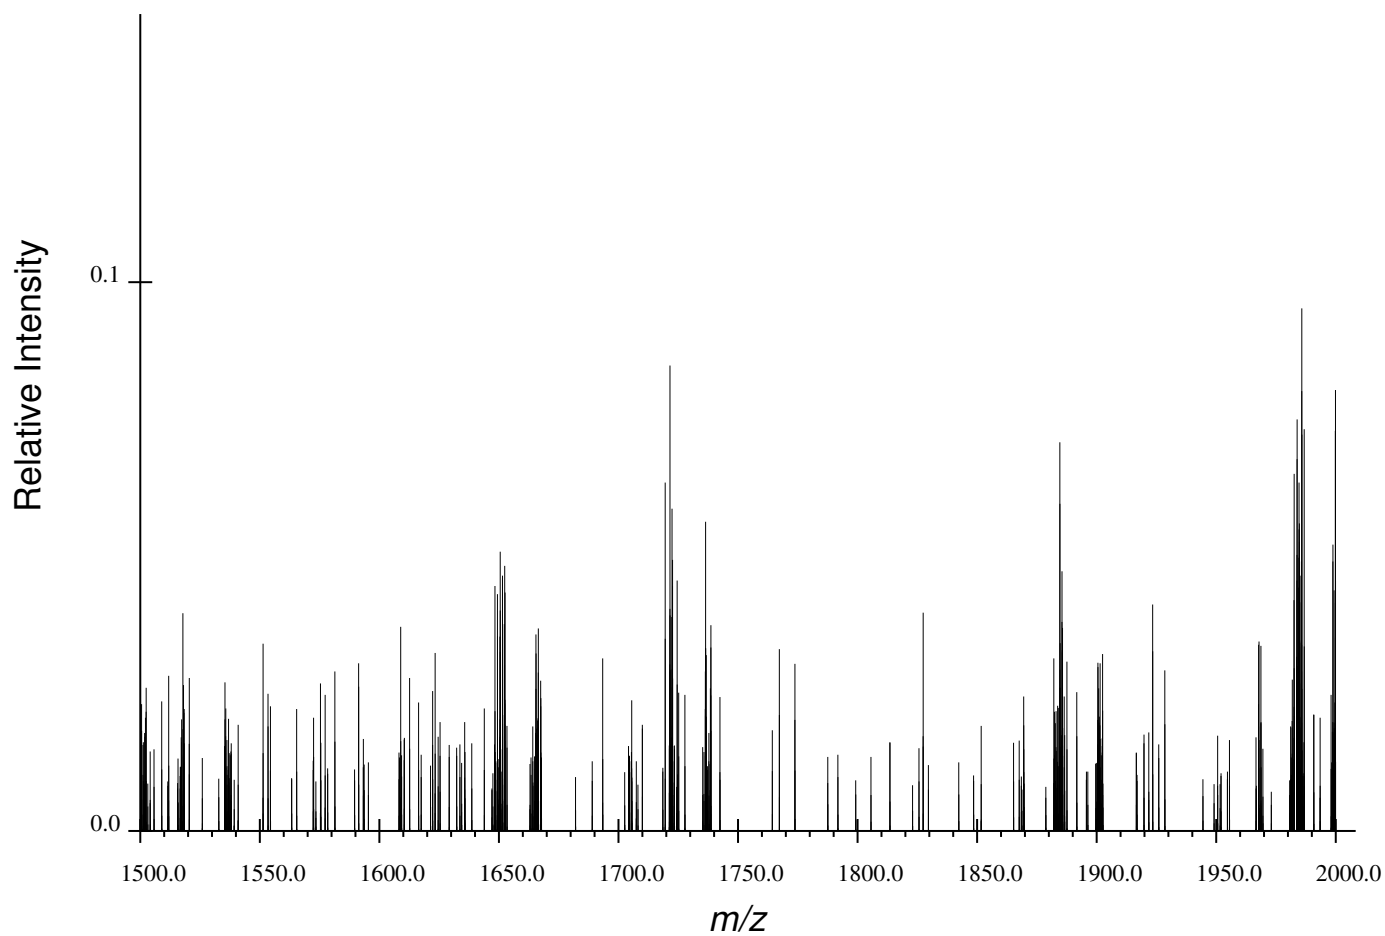

(d) Fourth Region for RPVSSAApSVYAGAC, Spectrum 1.dta

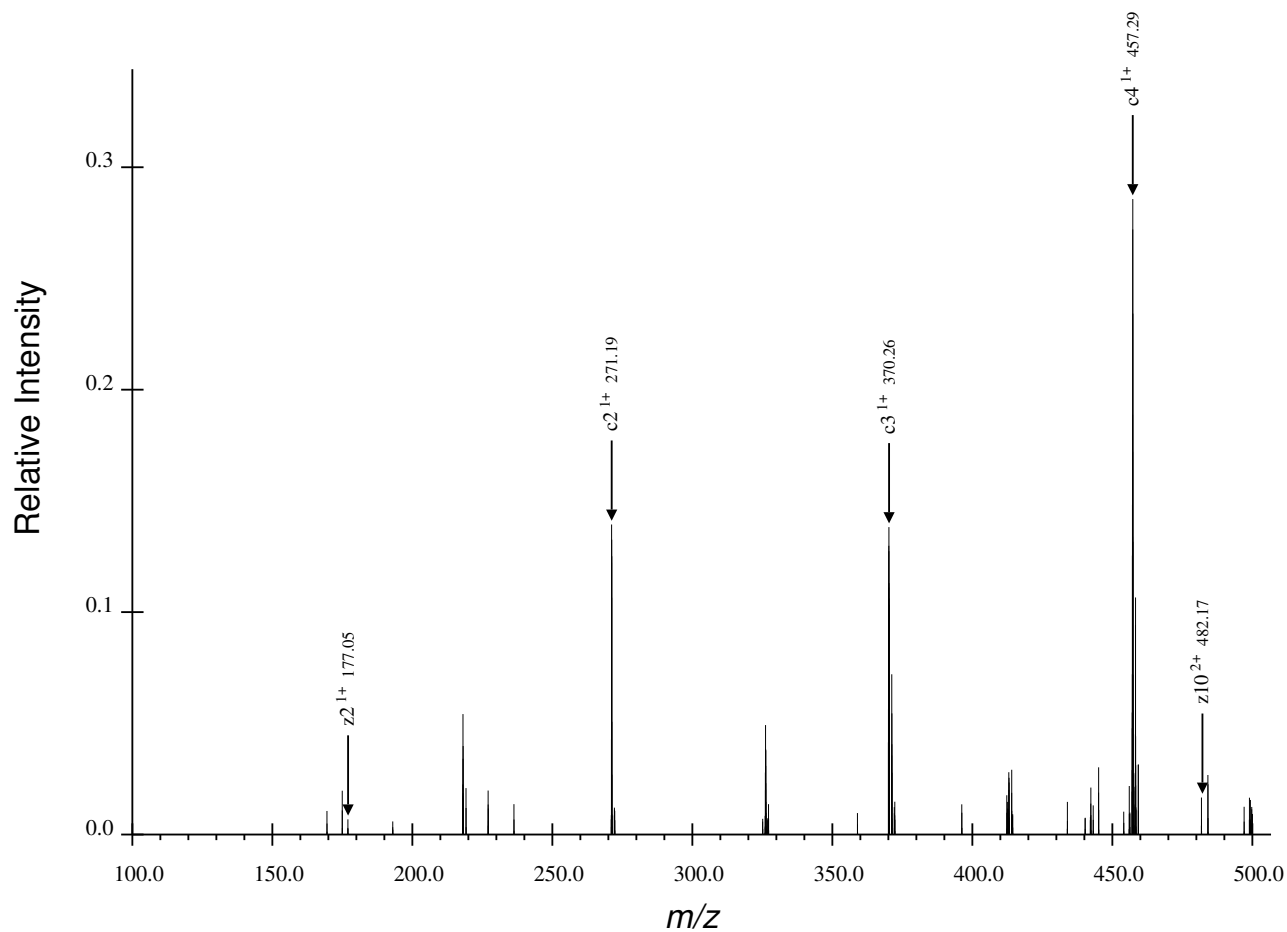

(a) First Region for RPVSSAApSVYAGAC, Spectrum 2.dta

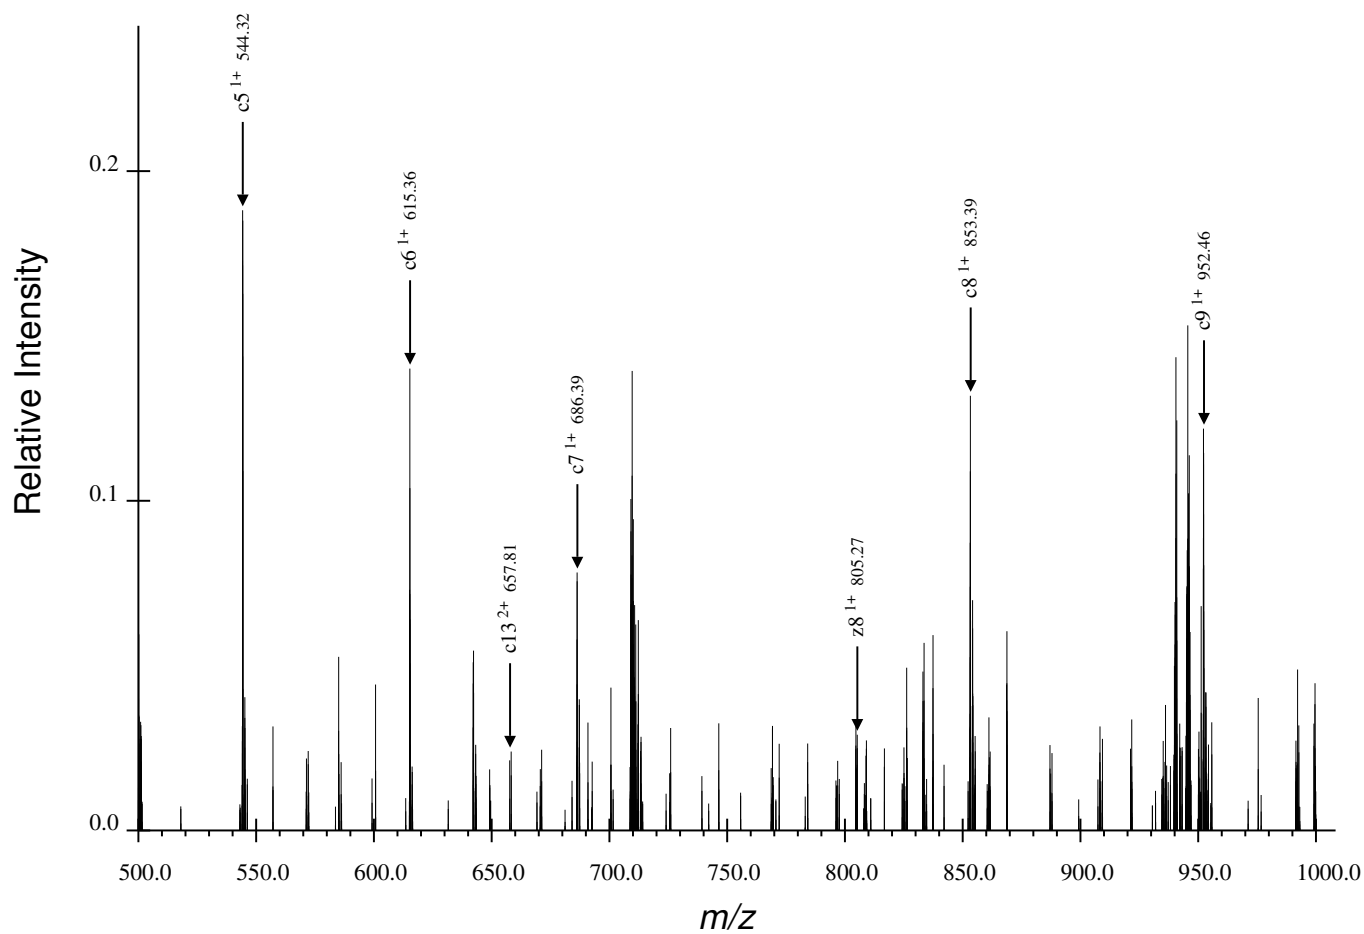

(b) Second Region for RPVSSAApSVYAGAC, Spectrum 2.dta

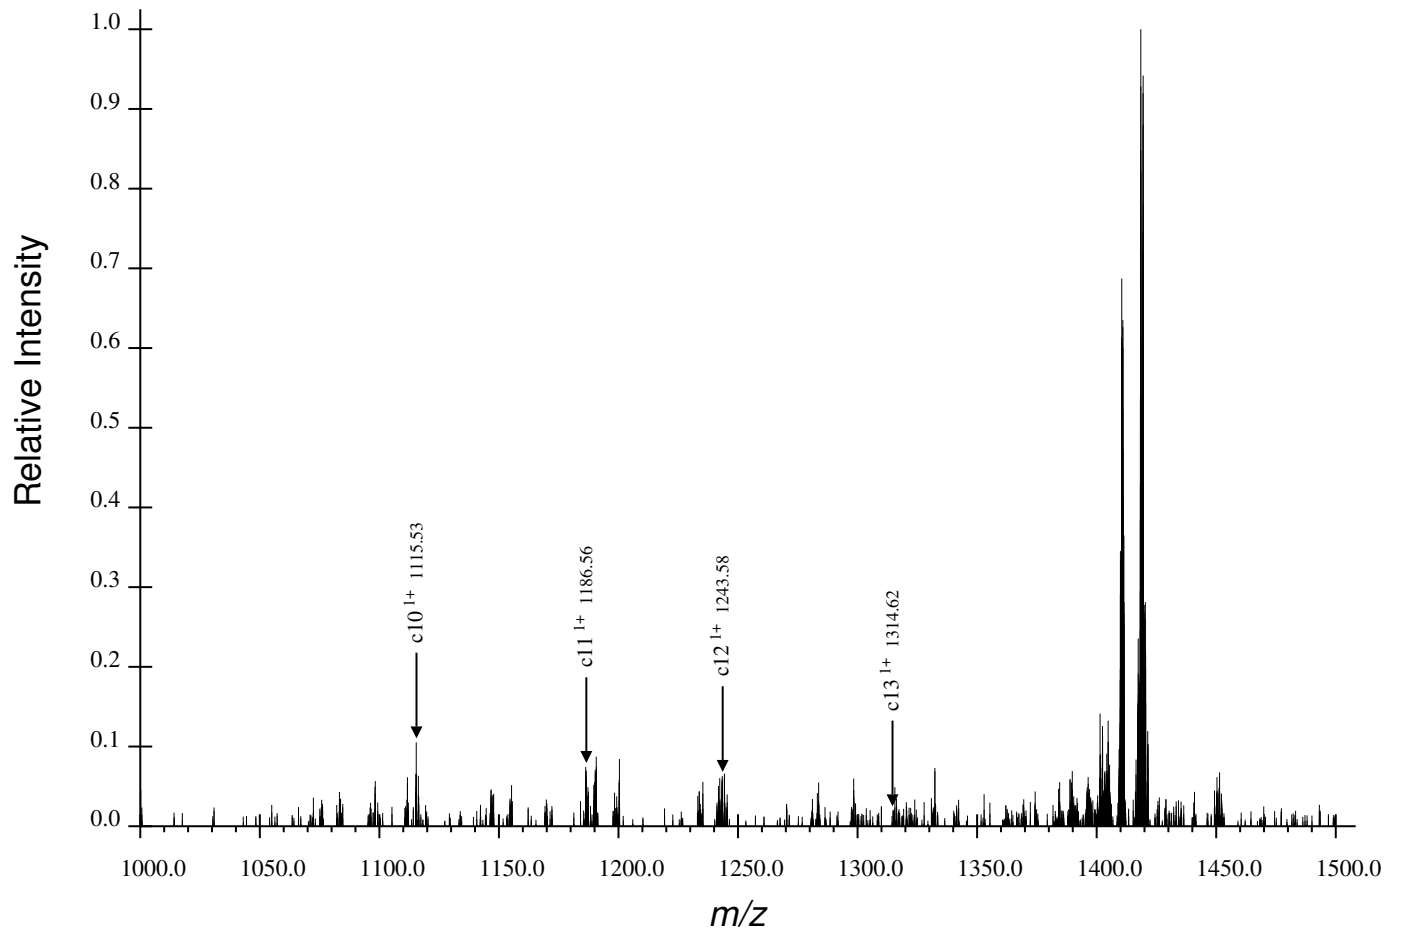

(c) Third Region for RPVSSAApSVYAGAC, Spectrum 2.dta

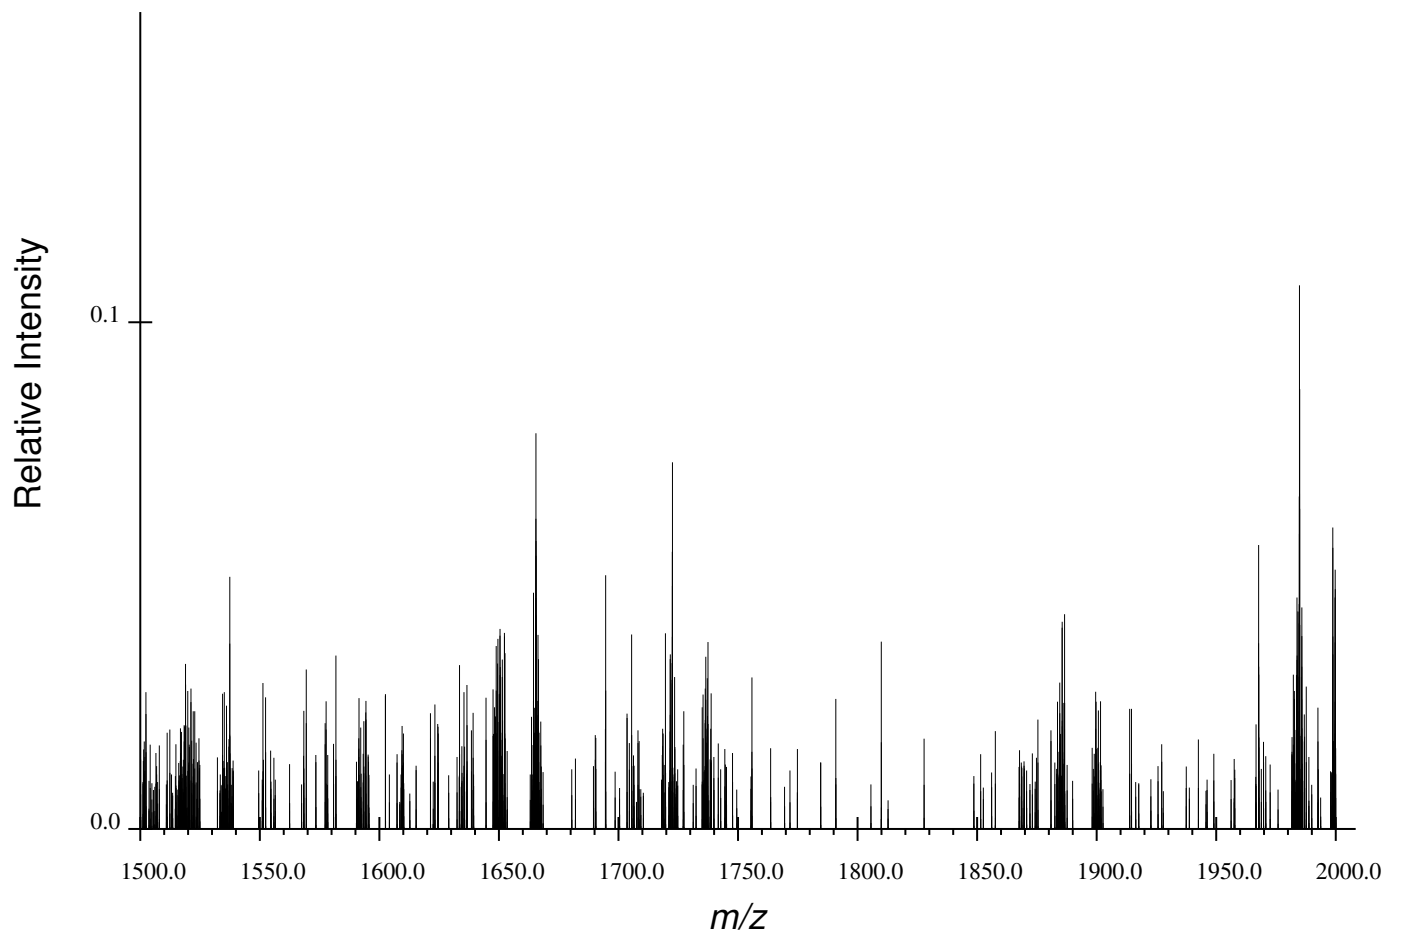

(d) Fourth Region for RPVSSAApSVYAGAC, Spectrum 2.dta

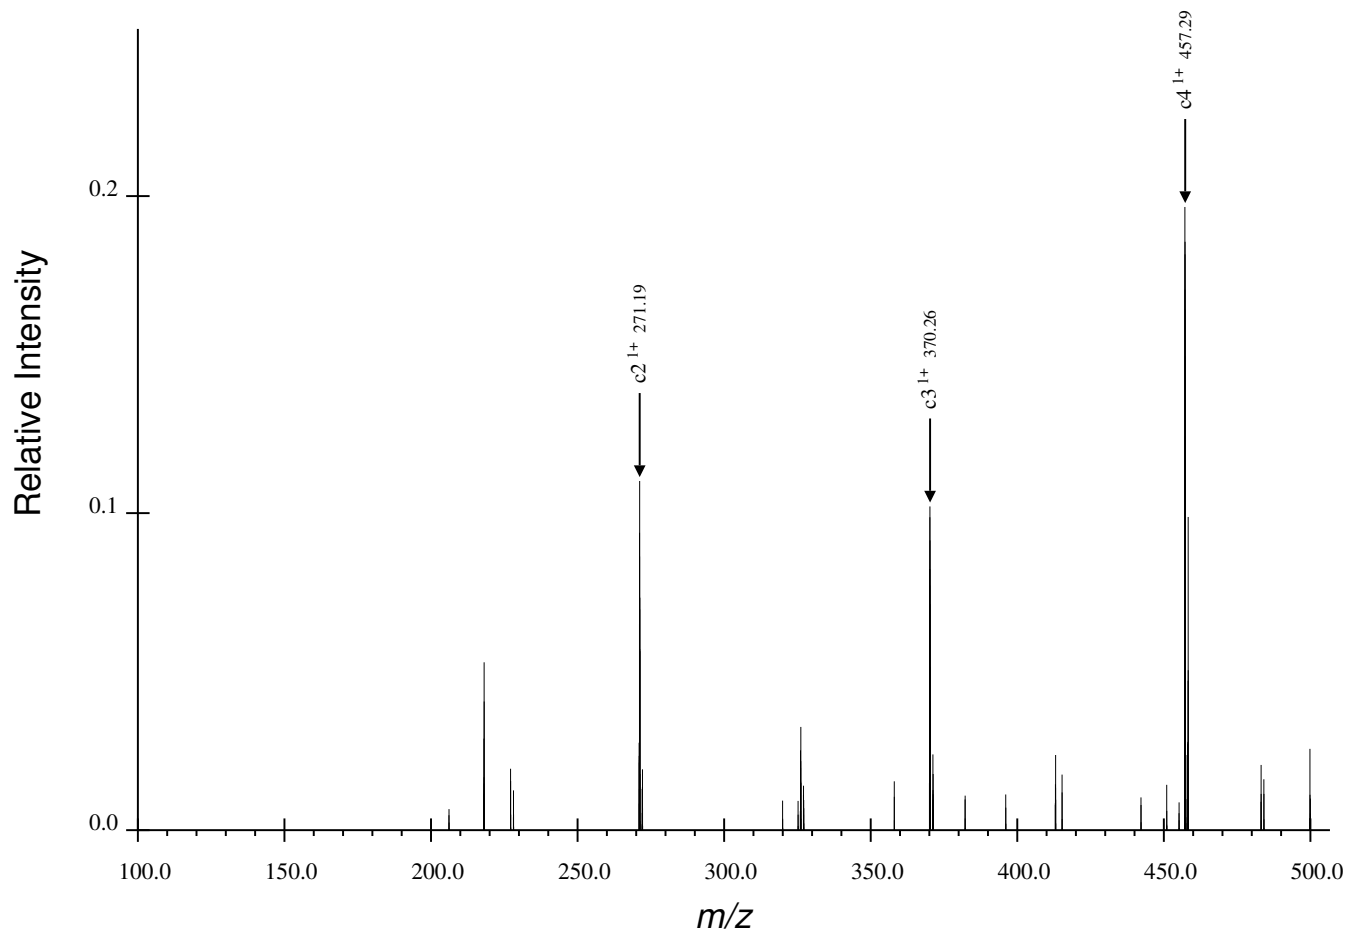

(a) First Region for RPVSSAApSVYAGAC, Spectrum 3.dta

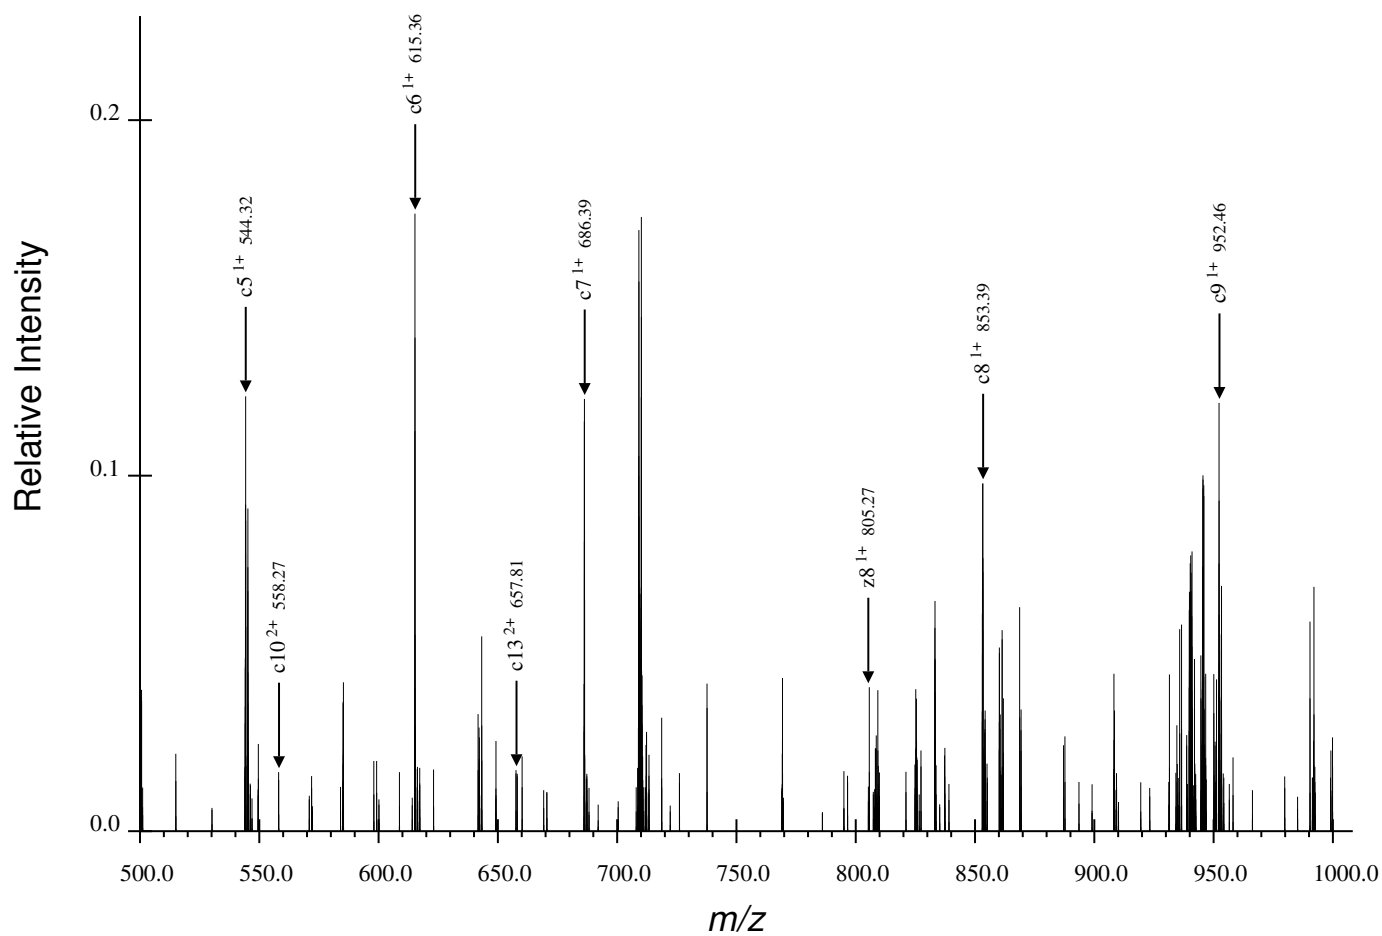

(b) Second Region for RPVSSAApSVYAGAC, Spectrum 3.dta

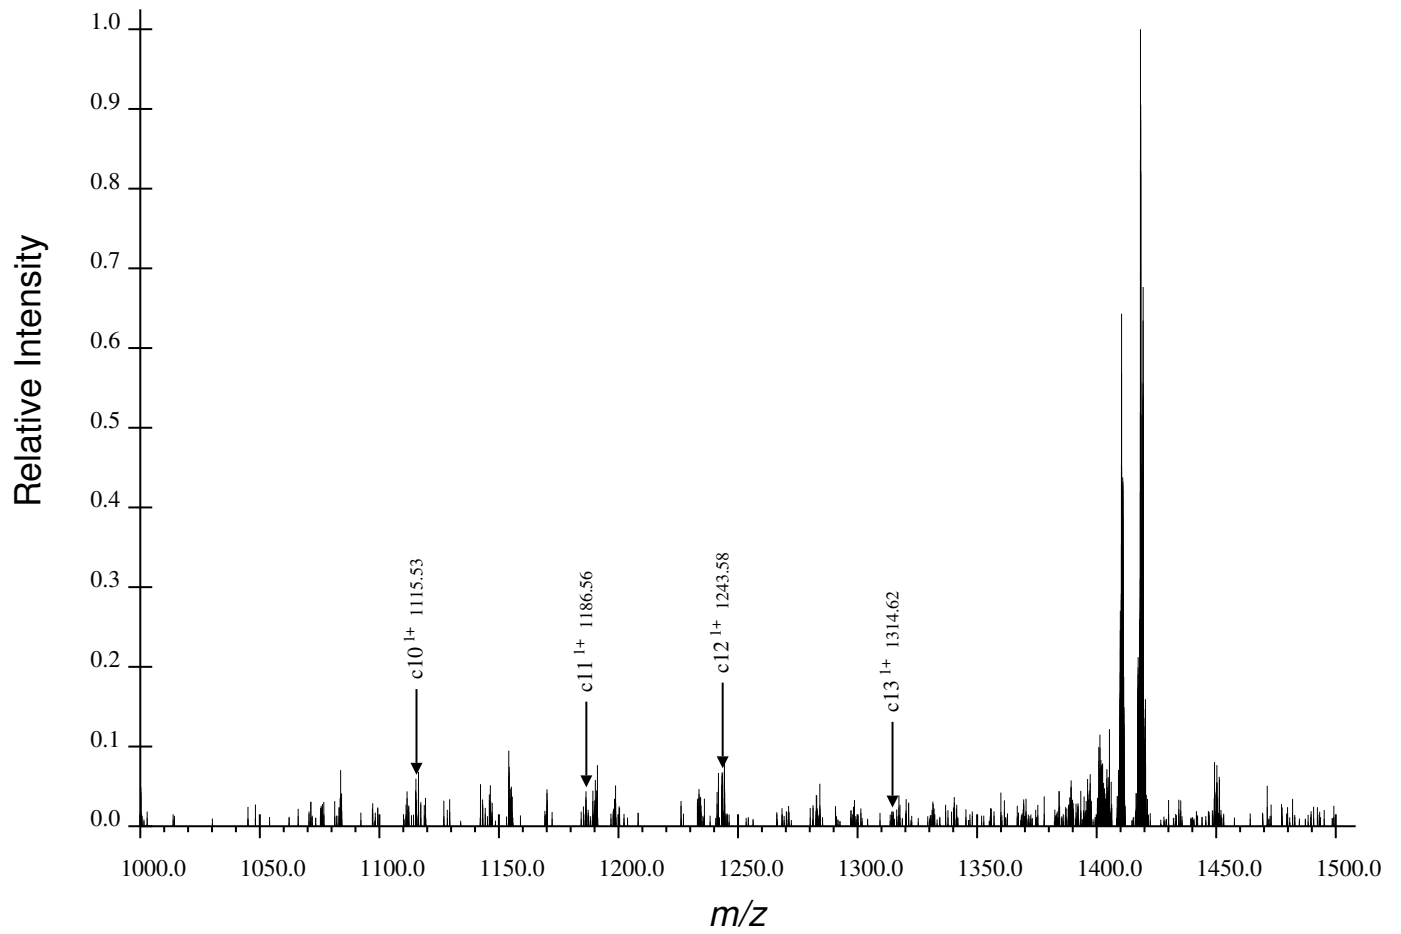

(c) Third Region for RPVSSAApSVYAGAC, Spectrum 3.dta

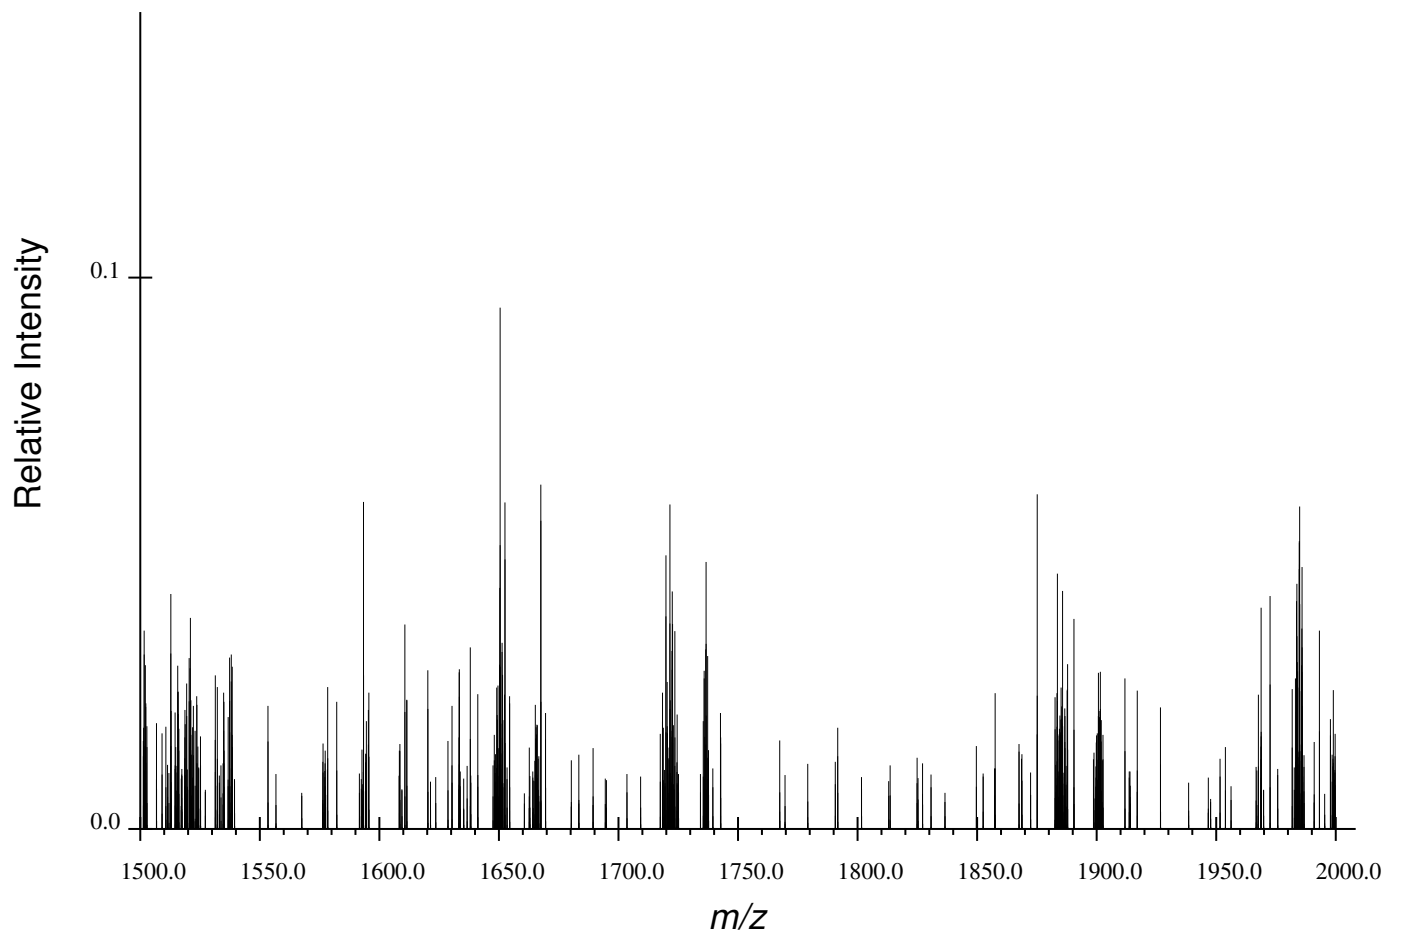

(d) Fourth Region for RPVSSAApSVYAGAC, Spectrum 3.dta

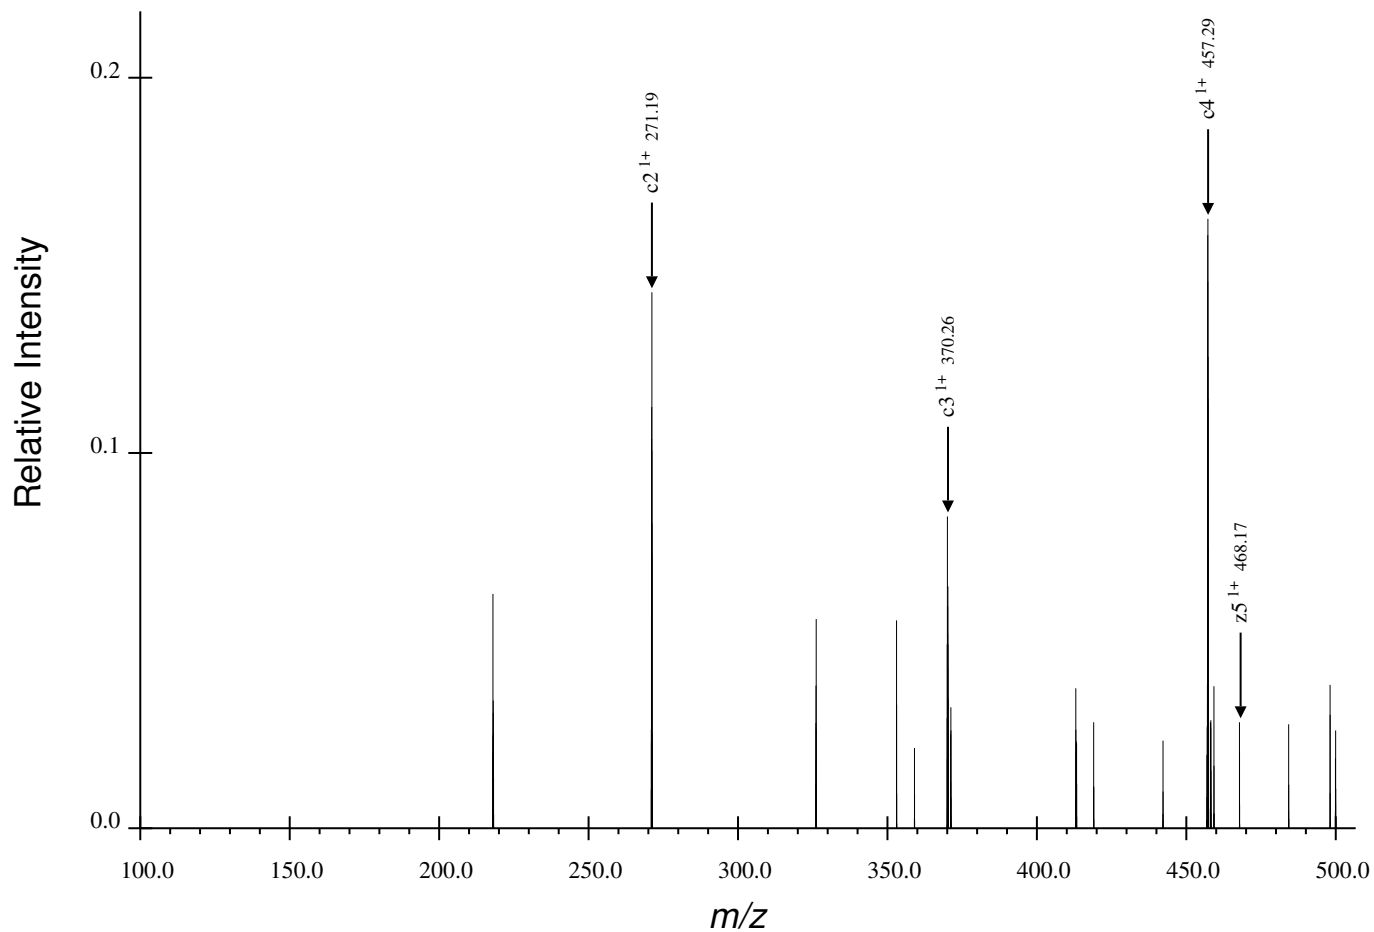

(a) First Region for RPVSSAApSVYAGAC, Spectrum 4.dta

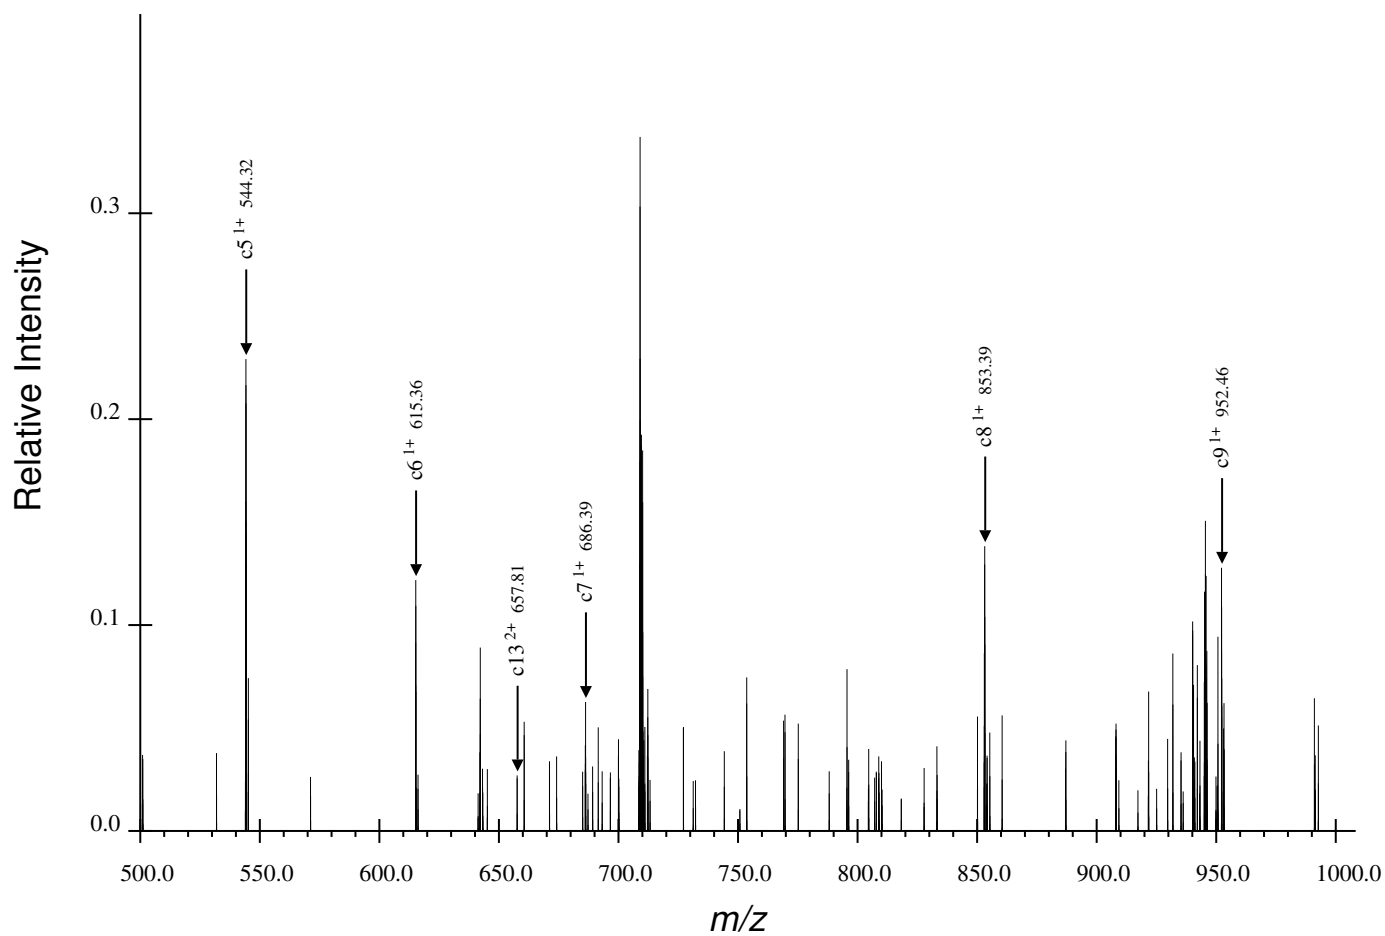

(b) Second Region for RPVSSAApSVYAGAC, Spectrum 4.dta

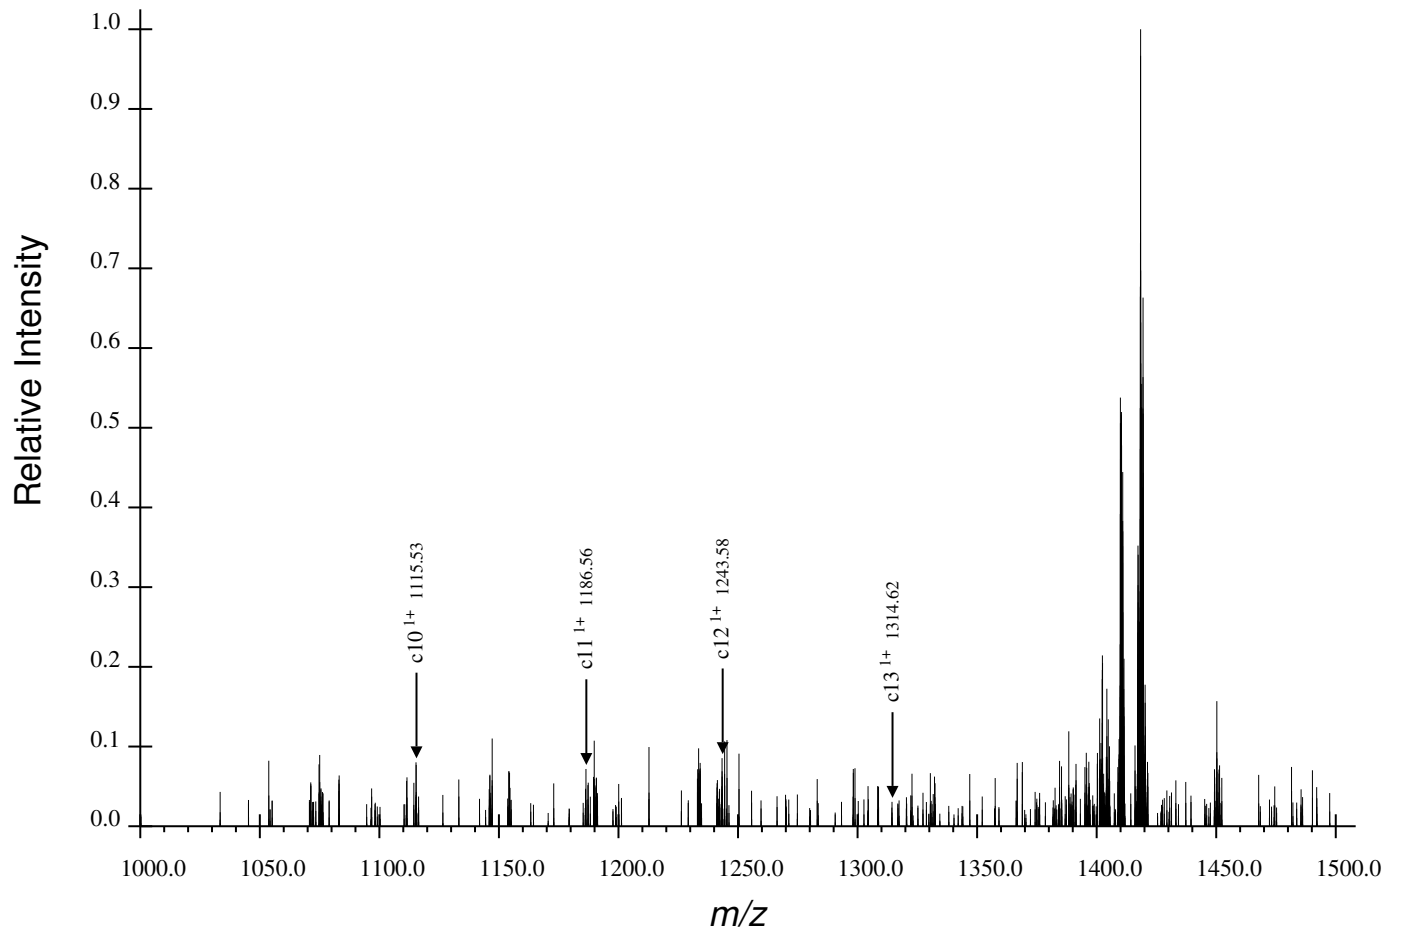

(c) Third Region for RPVSSAApSVYAGAC, Spectrum 4.dta

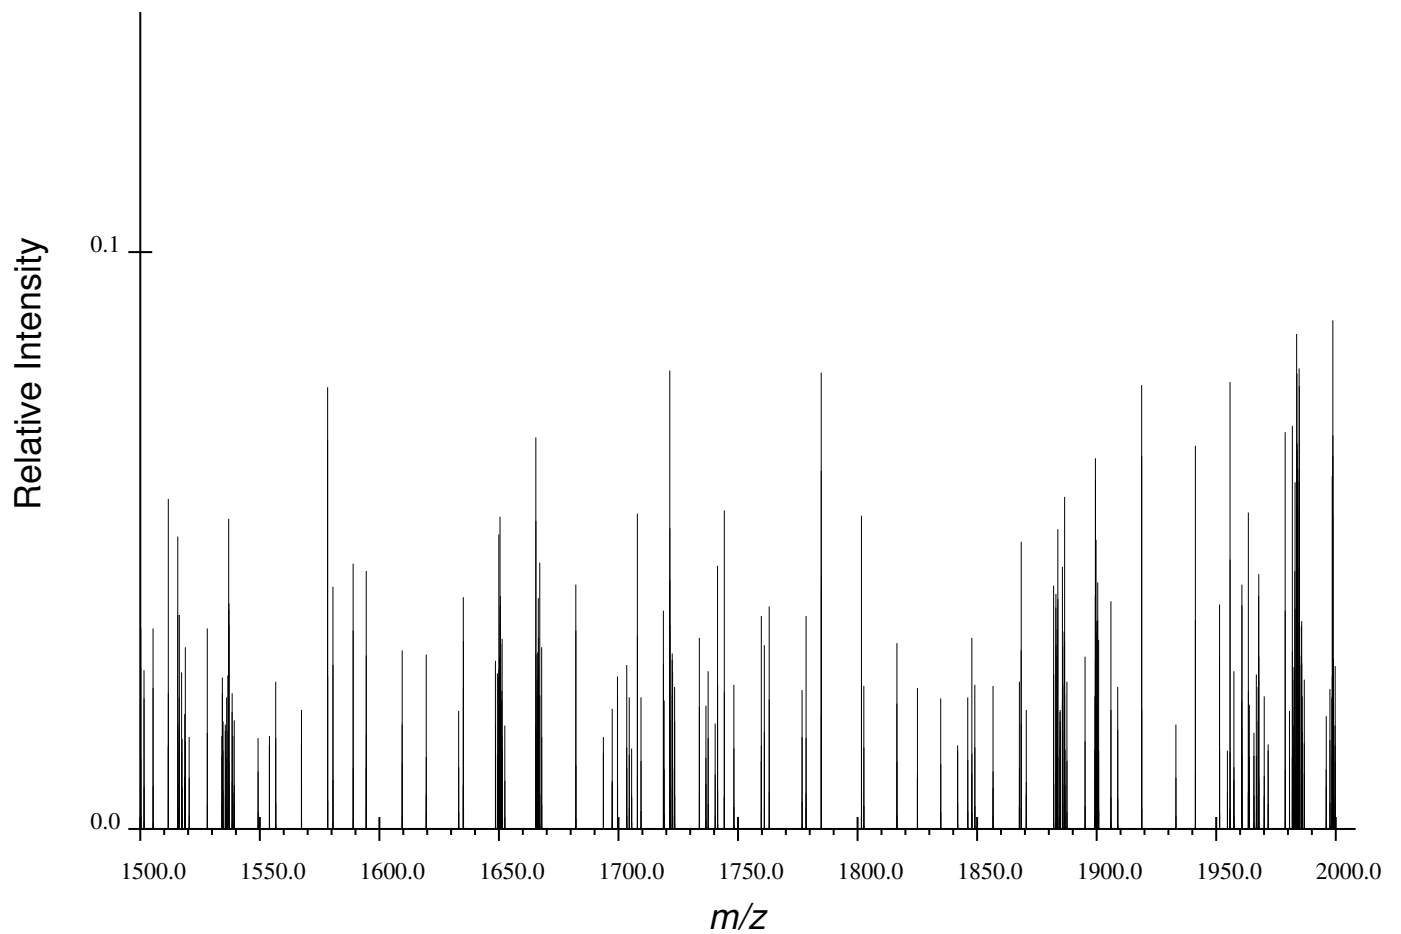

(d) Fourth Region for RPVSSAApSVYAGAC, Spectrum 4.dta



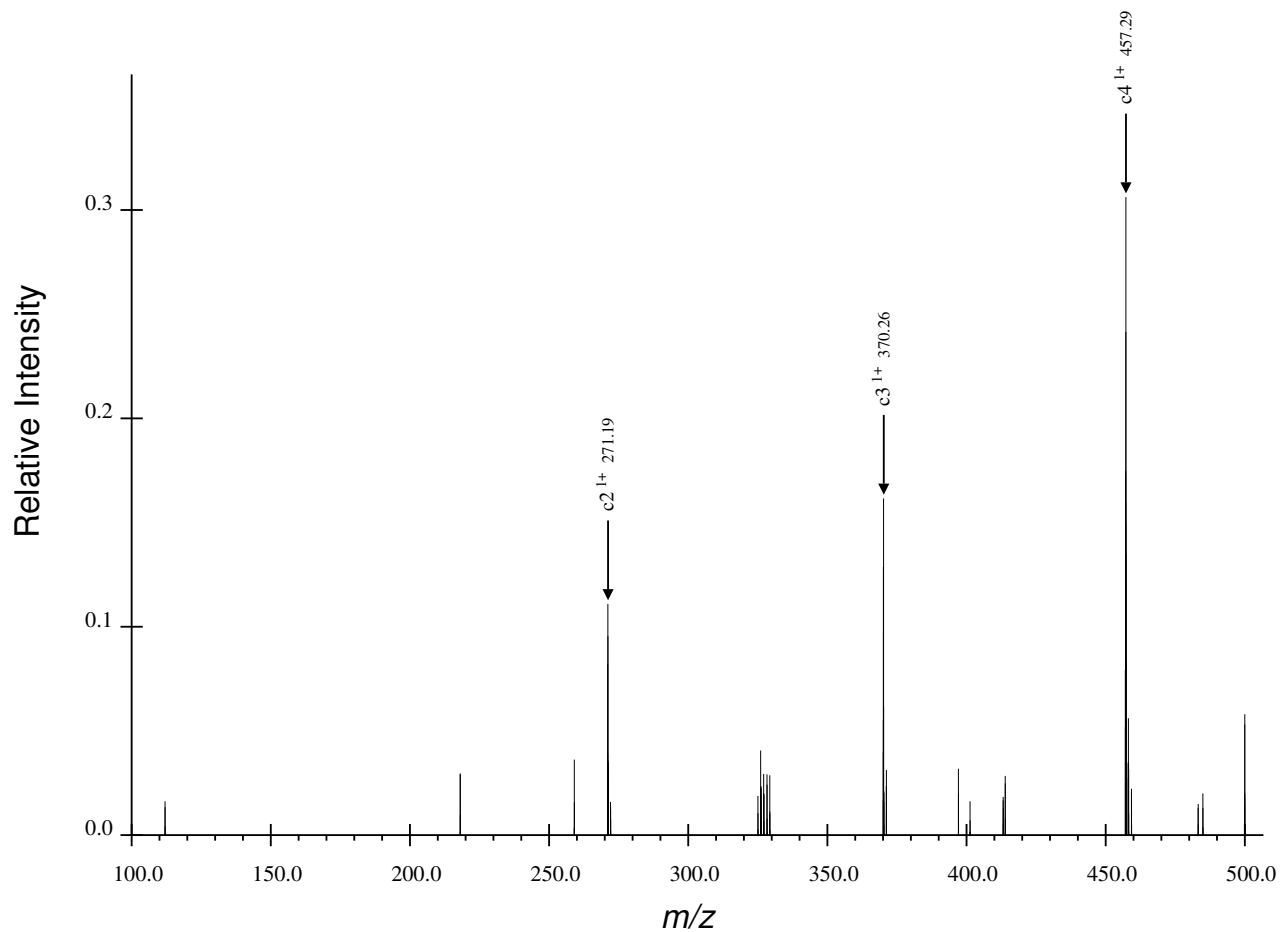

(a) First Region for RPVSSAApSVYAGAC, Spectrum 5.dta

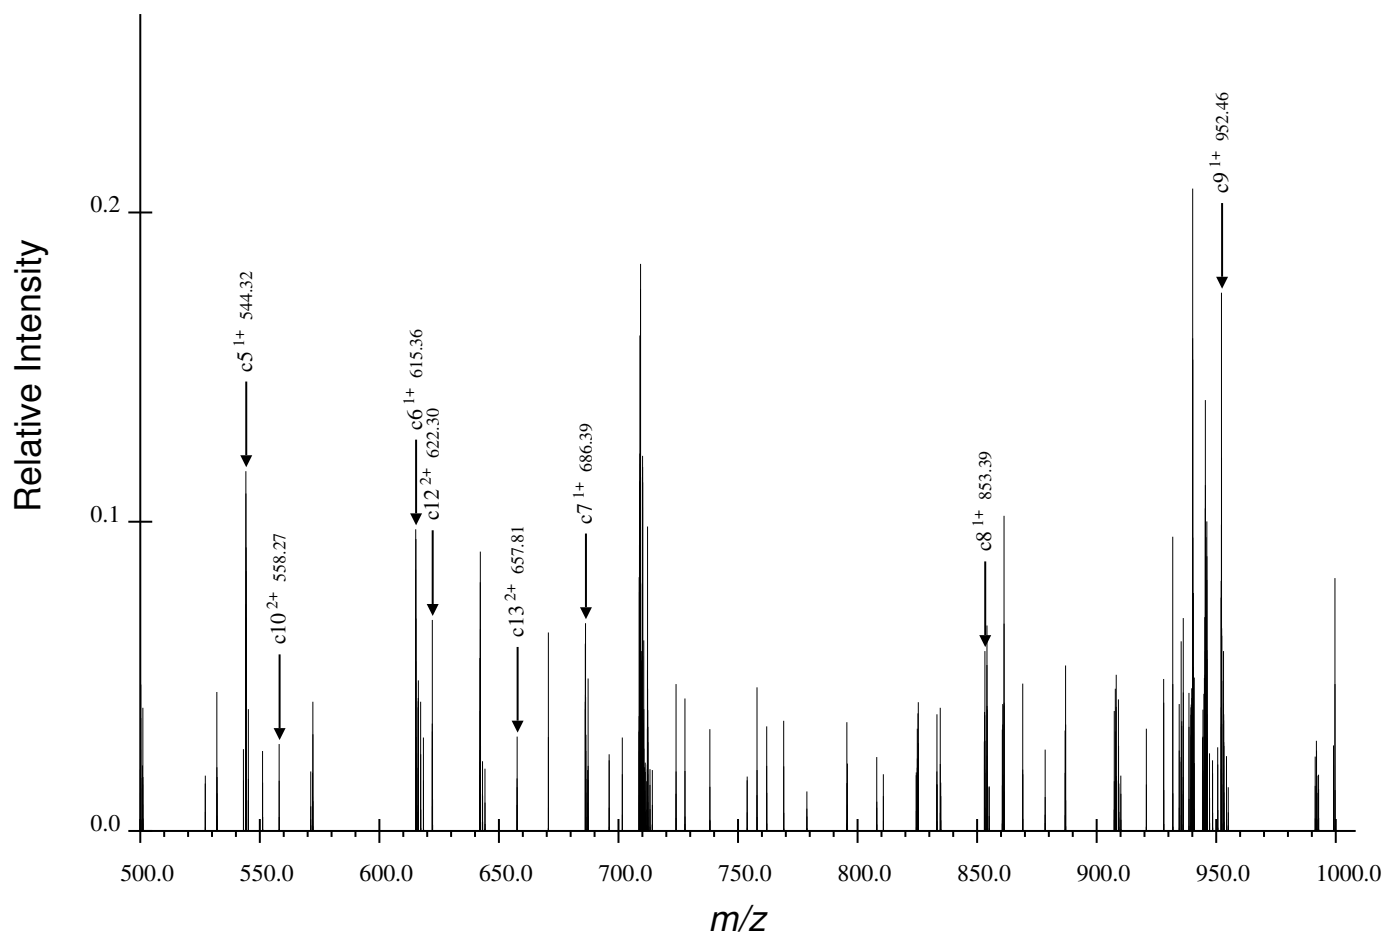

(b) Second Region for RPVSSAApSVYAGAC, Spectrum 5.dta

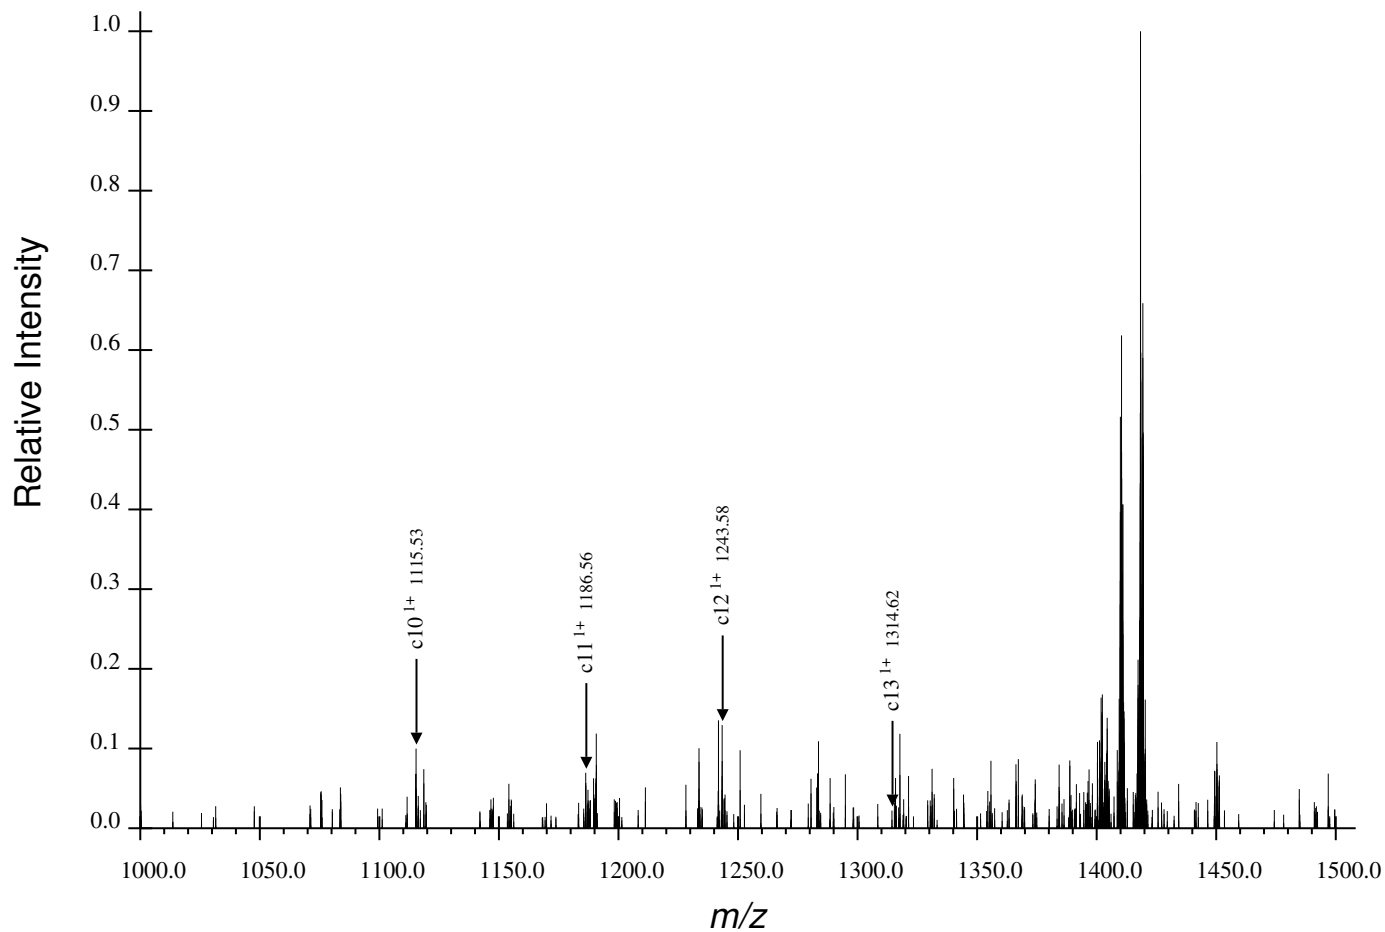

(c) Third Region for RPVSSAApSVYAGAC, Spectrum 5.dta

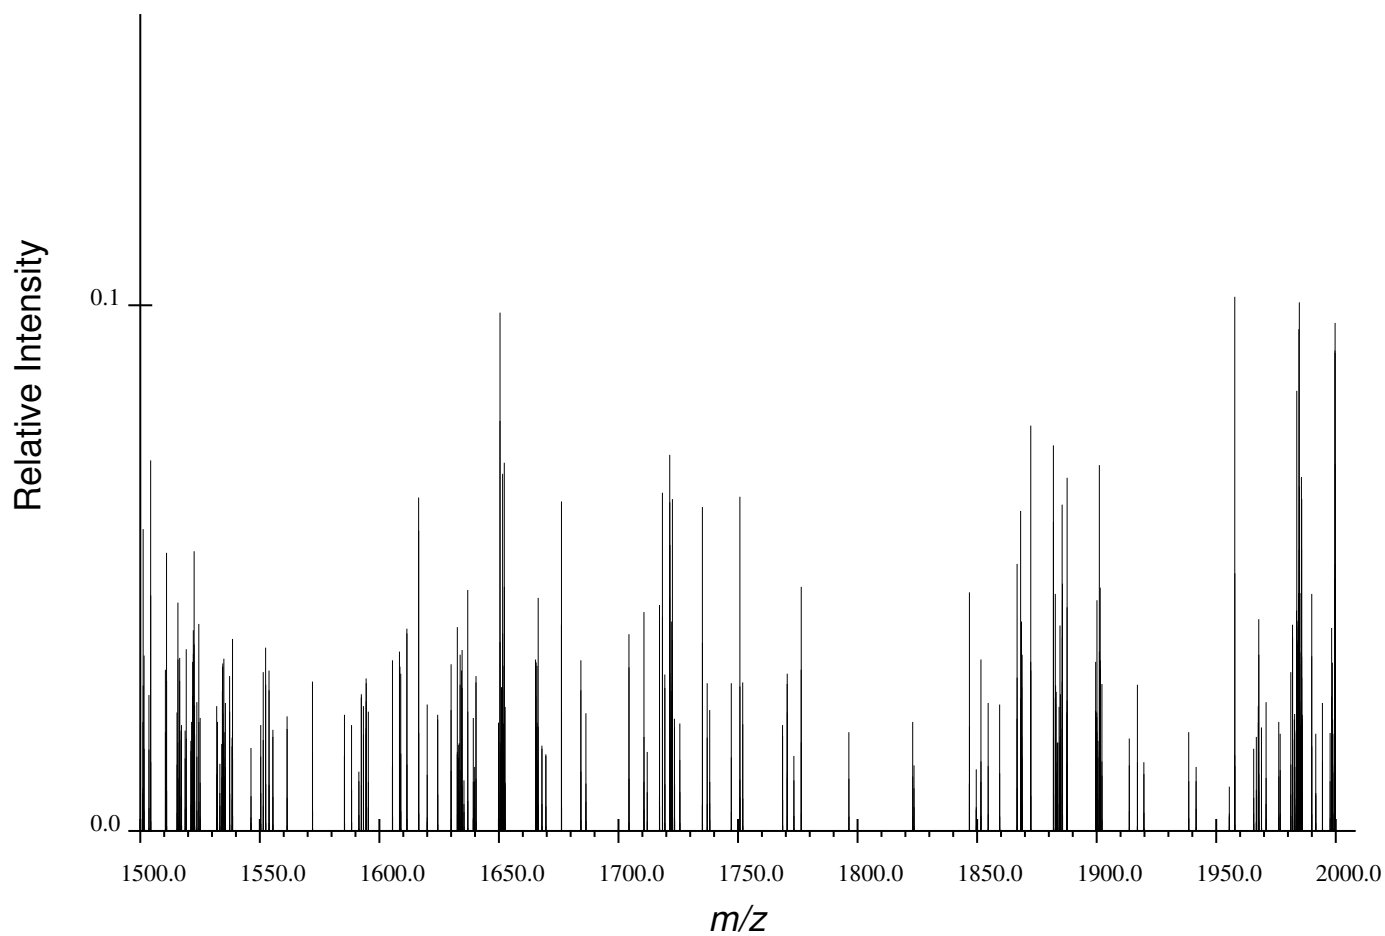

(d) Fourth Region for RPVSSAApSVYAGAC, Spectrum 5.dta

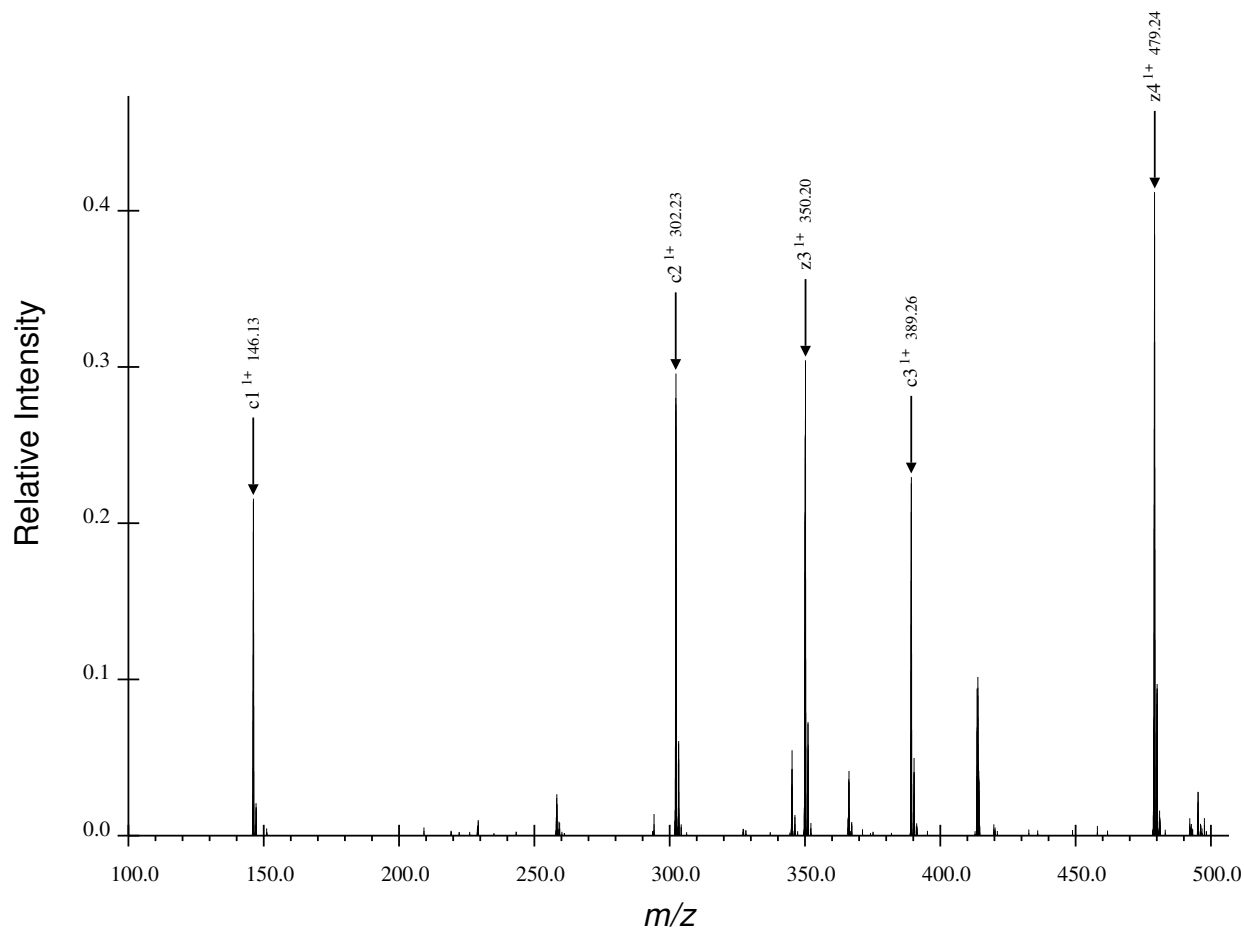

(a) First Region for KRSpYEEHIP, Spectrum 6.dta

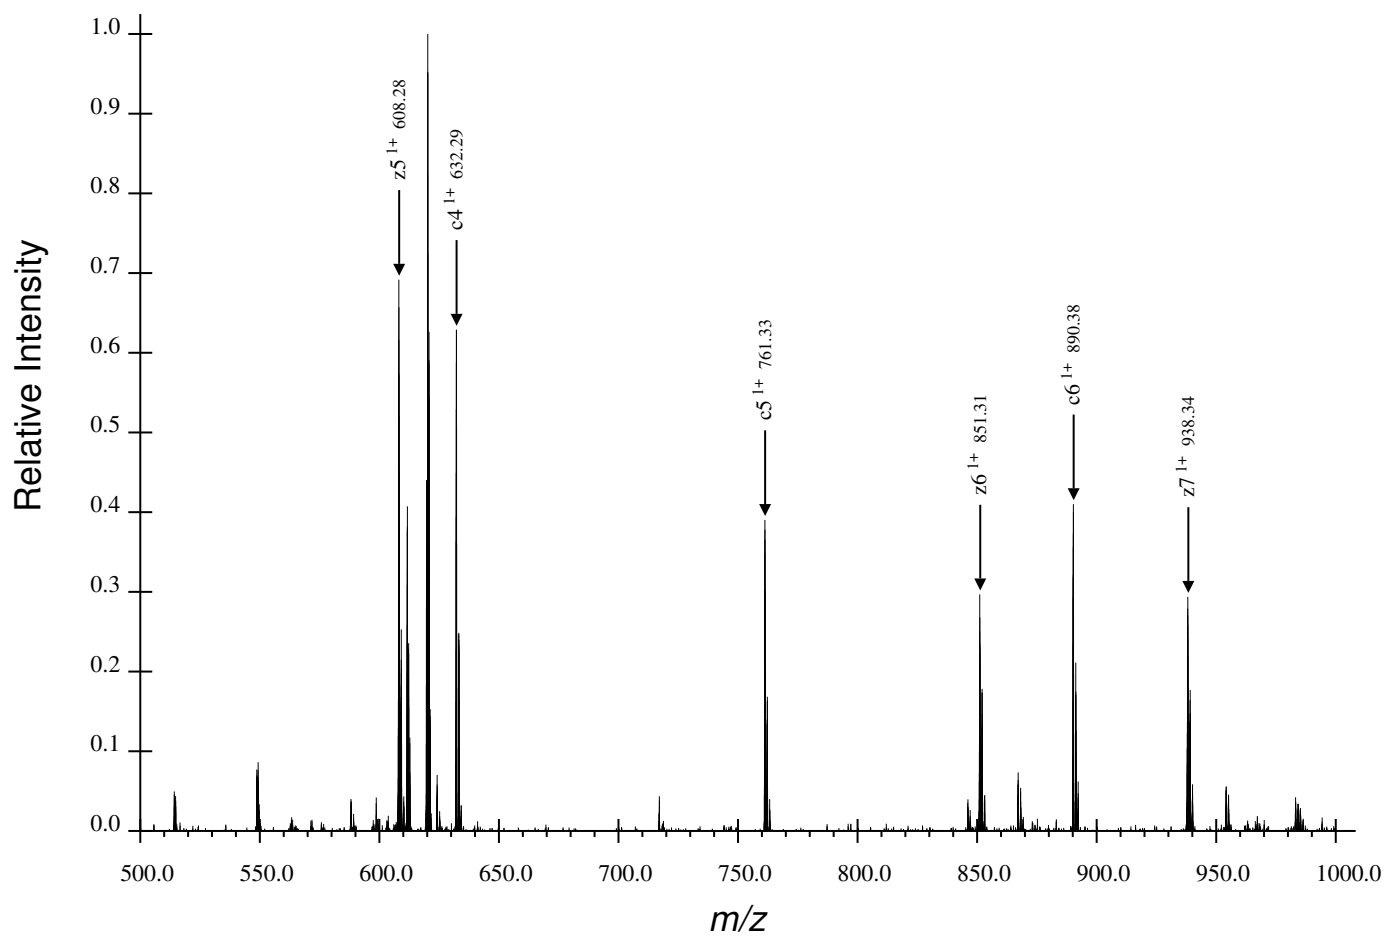

(b) Second Region for KRSpYEEHIP, Spectrum 6.dta

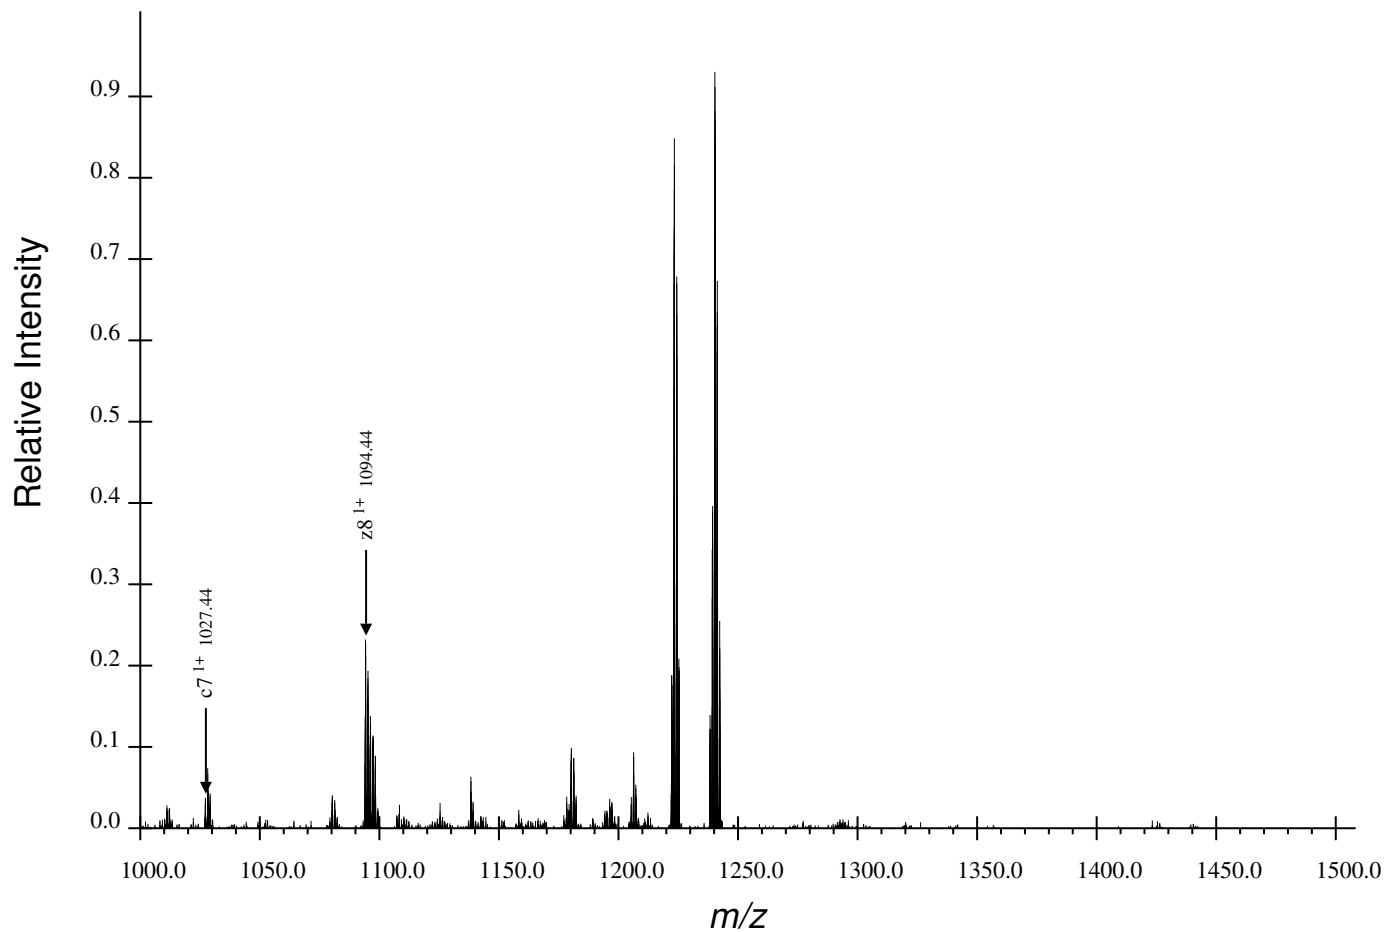

(c) Third Region for KRSpYEEHIP, Spectrum 6.dta

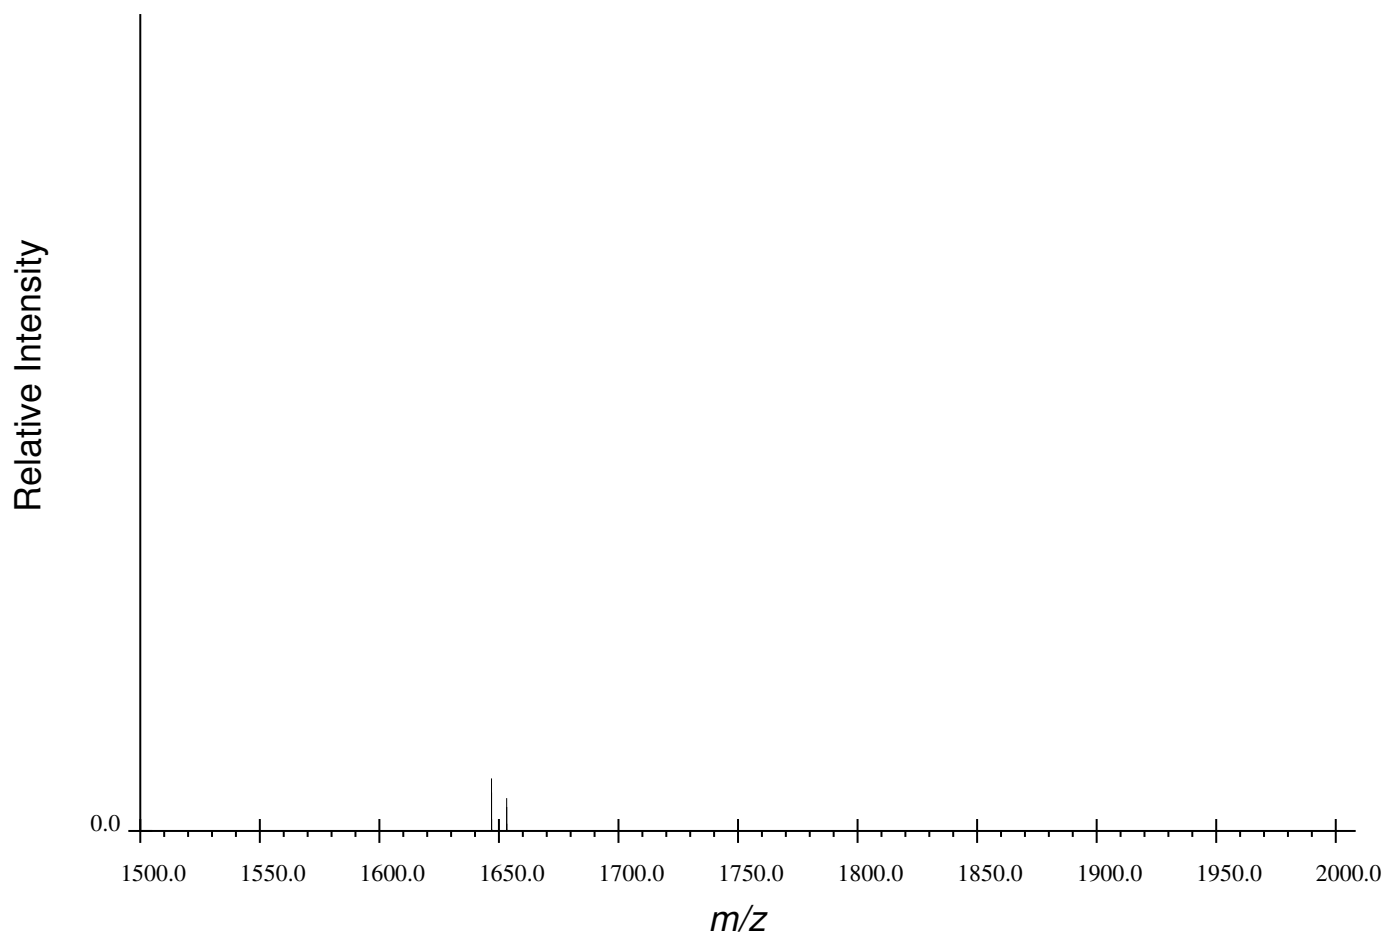

(d) Fourth Region for KRSpYEEHIP, Spectrum 6.dta

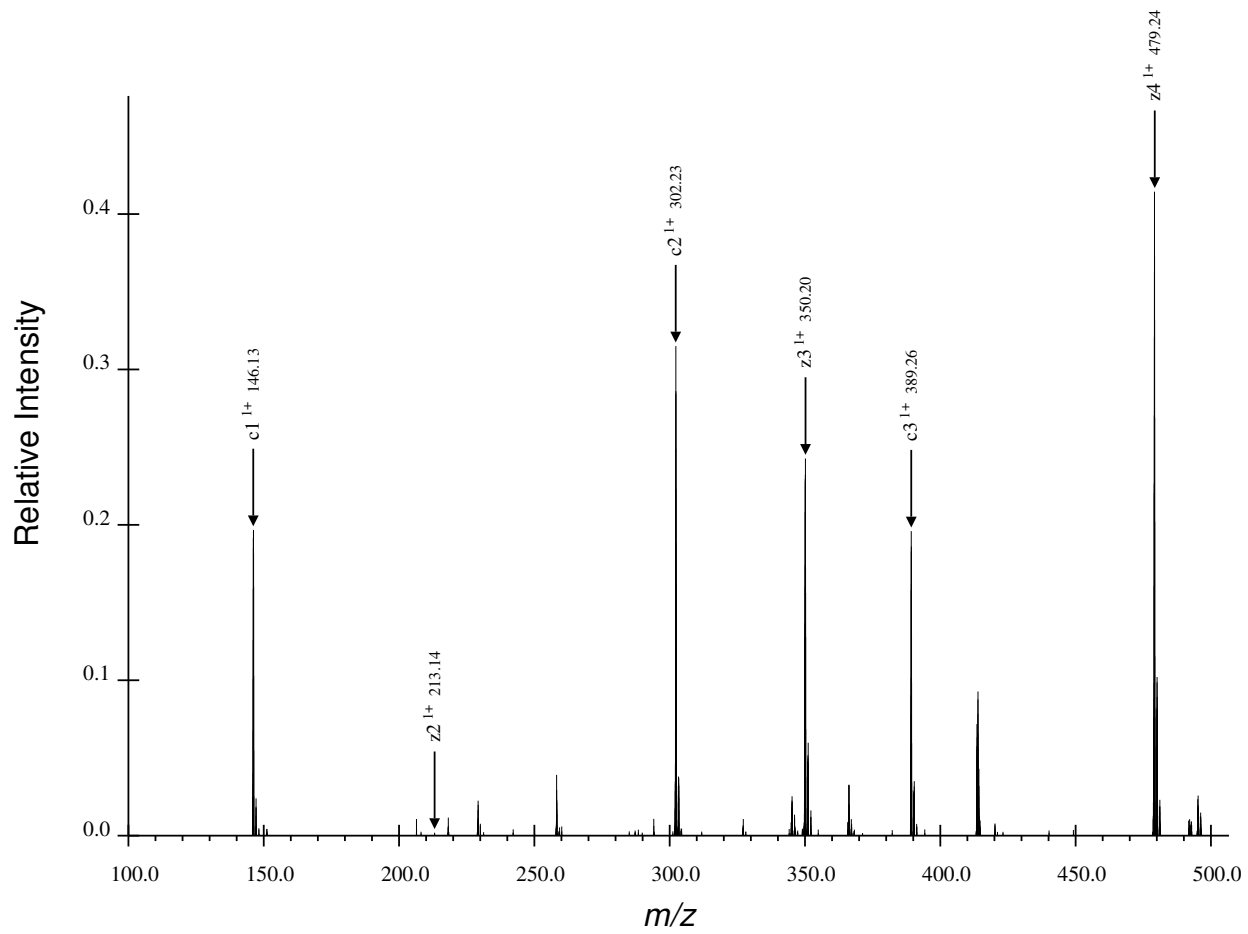

(a) First Region for KRSpYEEHIP, Spectrum 7.dta

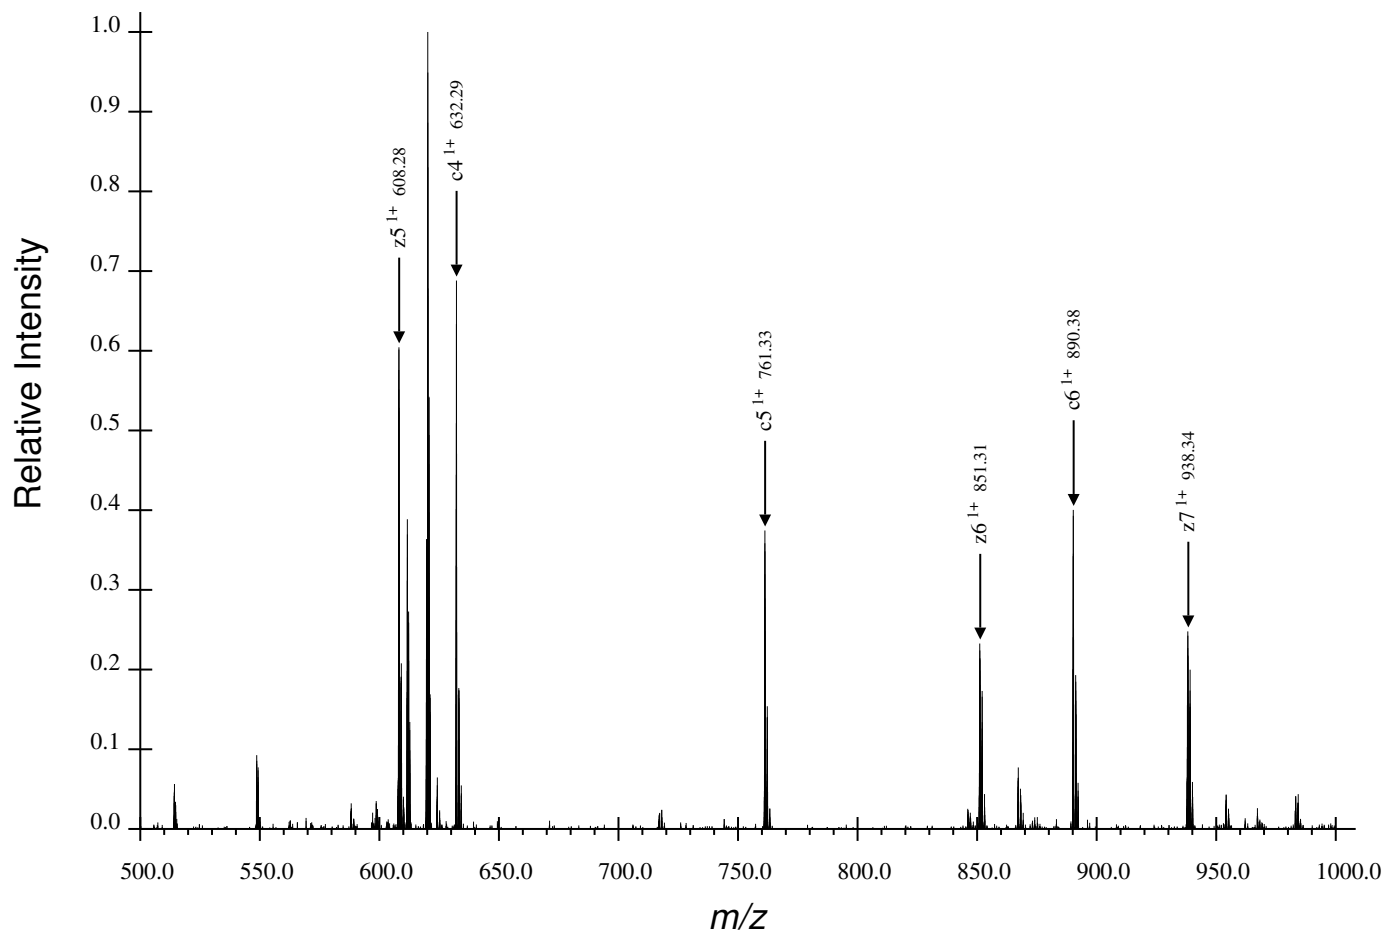

(b) Second Region for KRSpYEEHIP, Spectrum 7.dta

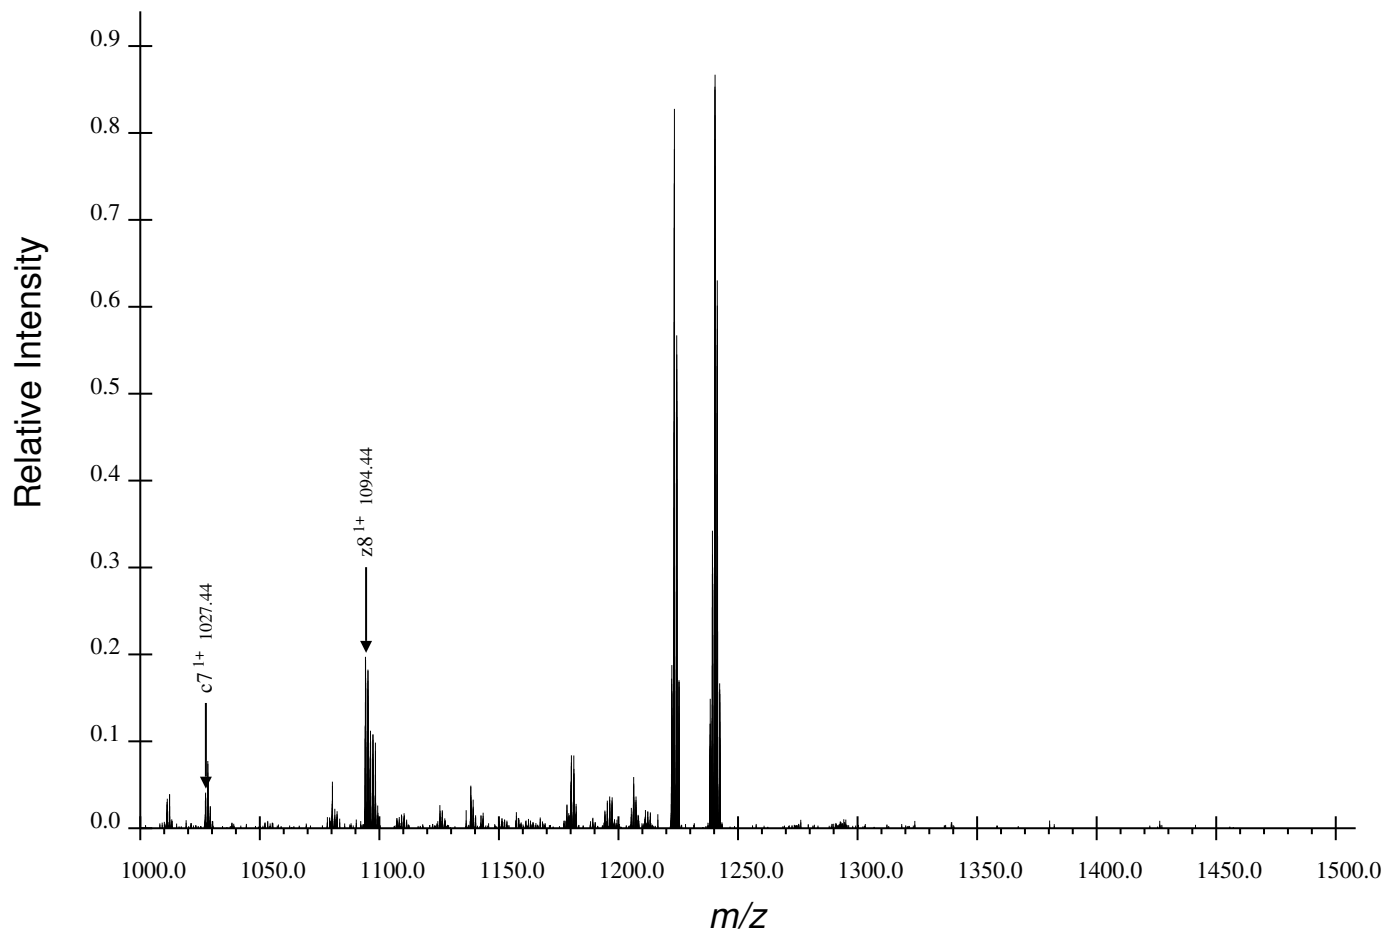

(c) Third Region for KRSpYEEHIP, Spectrum 7.dta

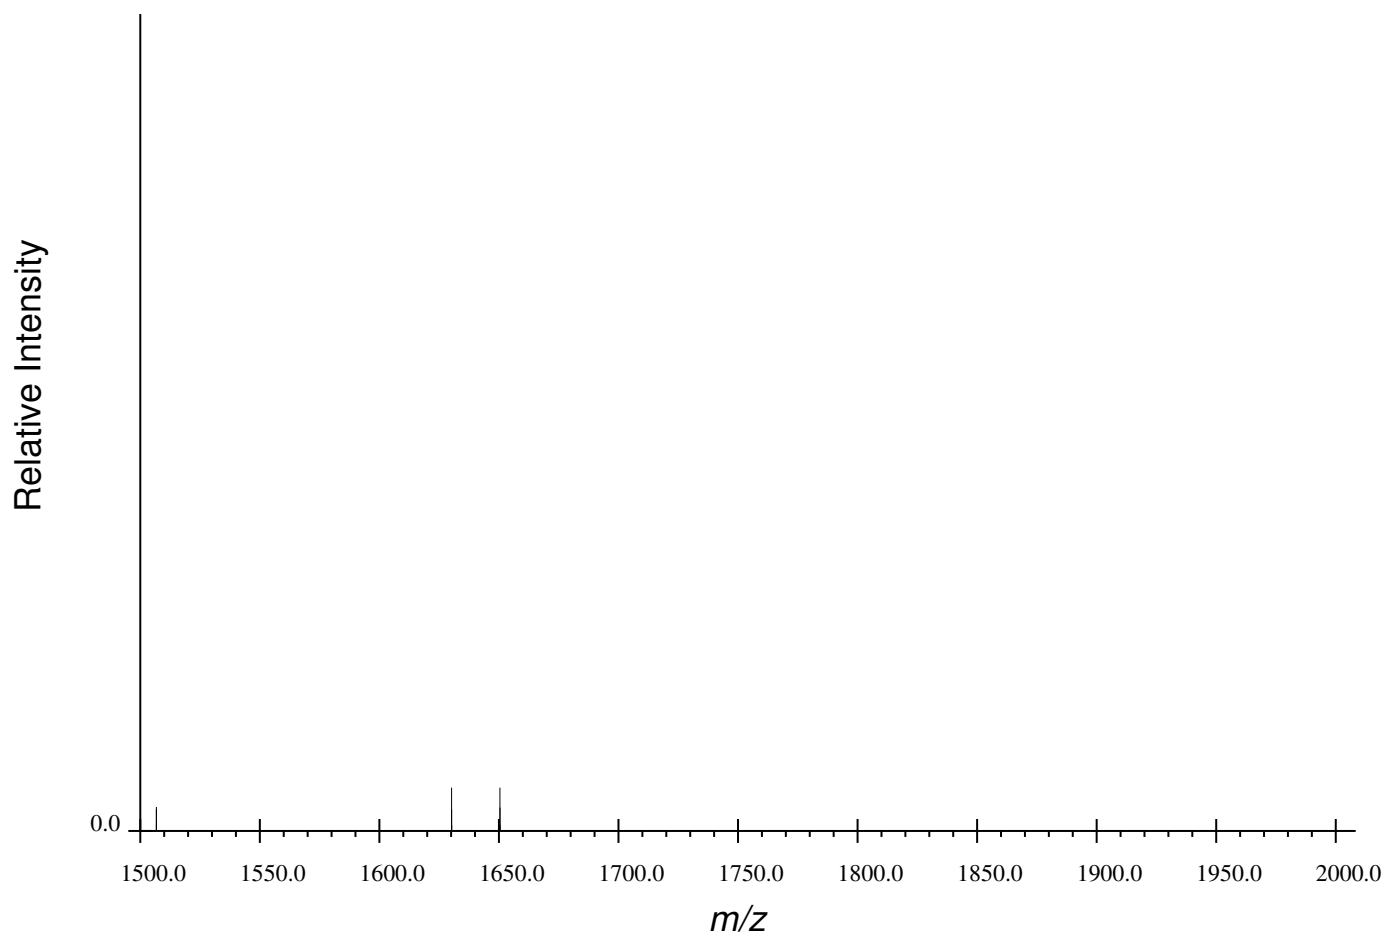

(d) Fourth Region for KRSpYEEHIP, Spectrum 7.dta

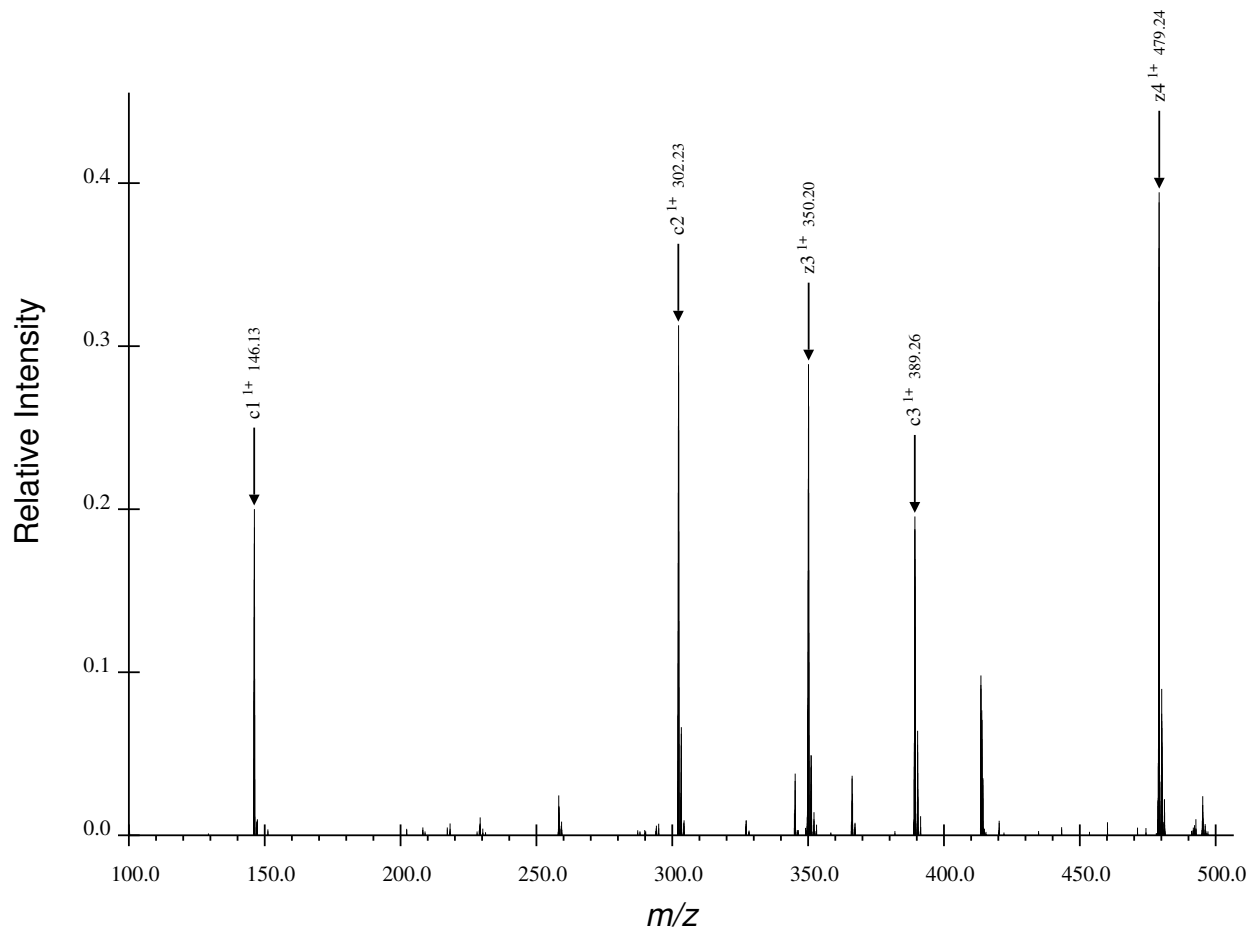

(a) First Region for KRSpYEEHIP, Spectrum 8.dta

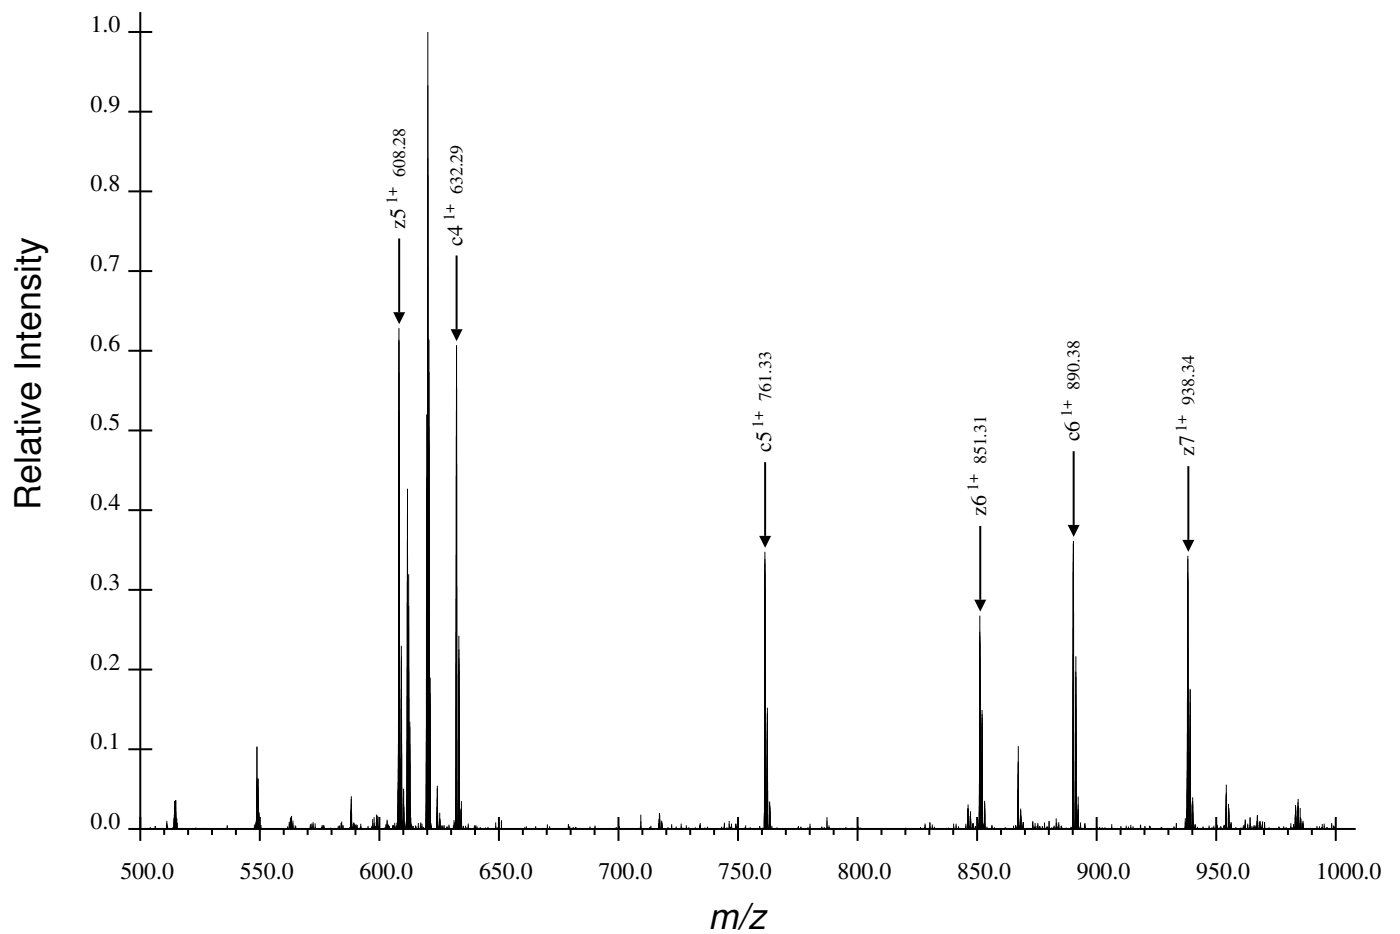

(b) Second Region for KRSpYEEHIP, Spectrum 8.dta

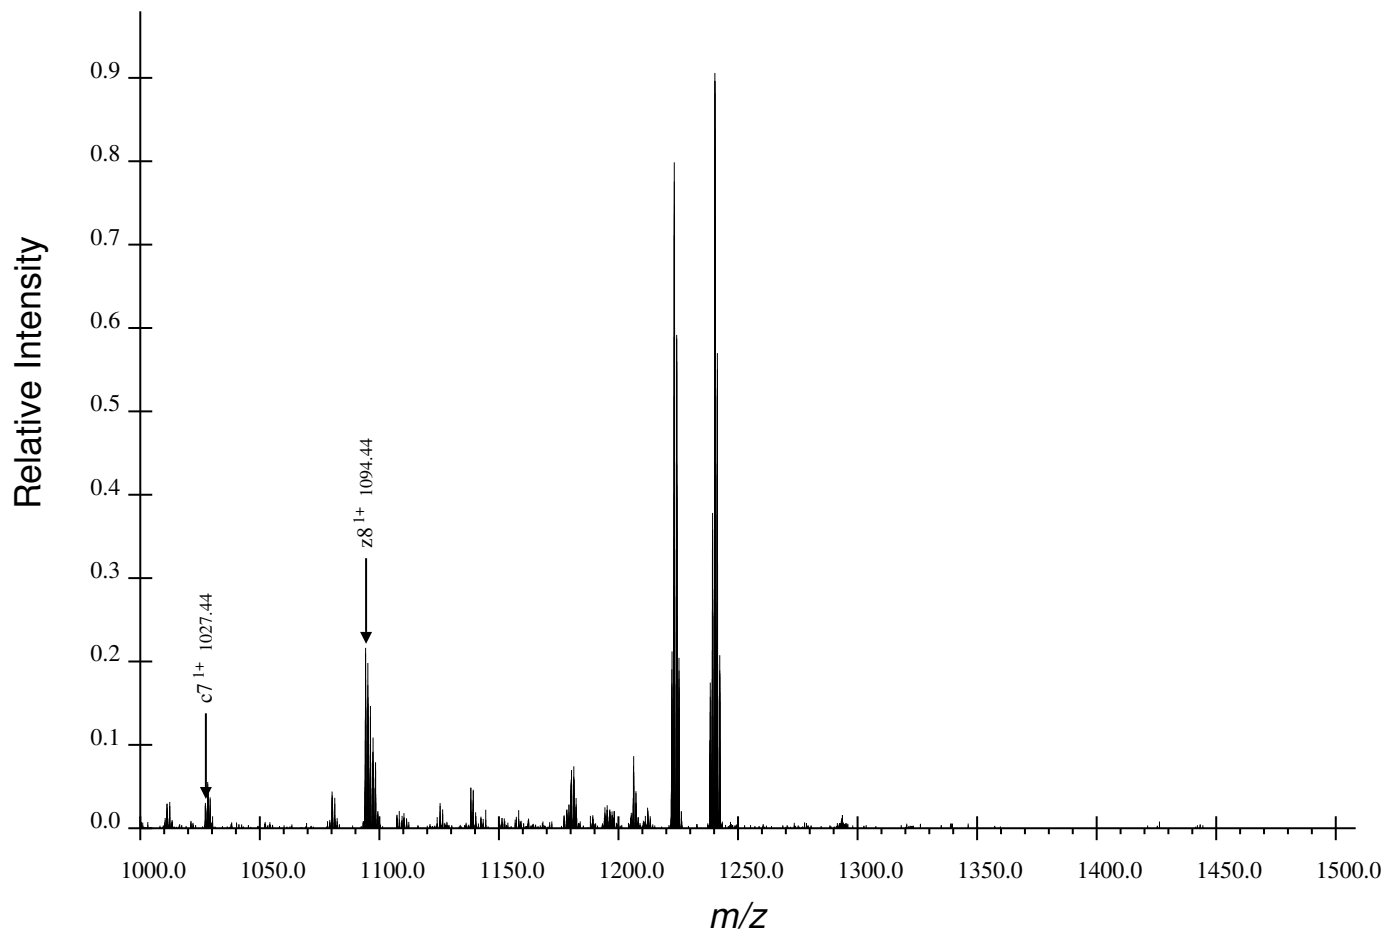

(c) Third Region for KRSpYEEHIP, Spectrum 8.dta

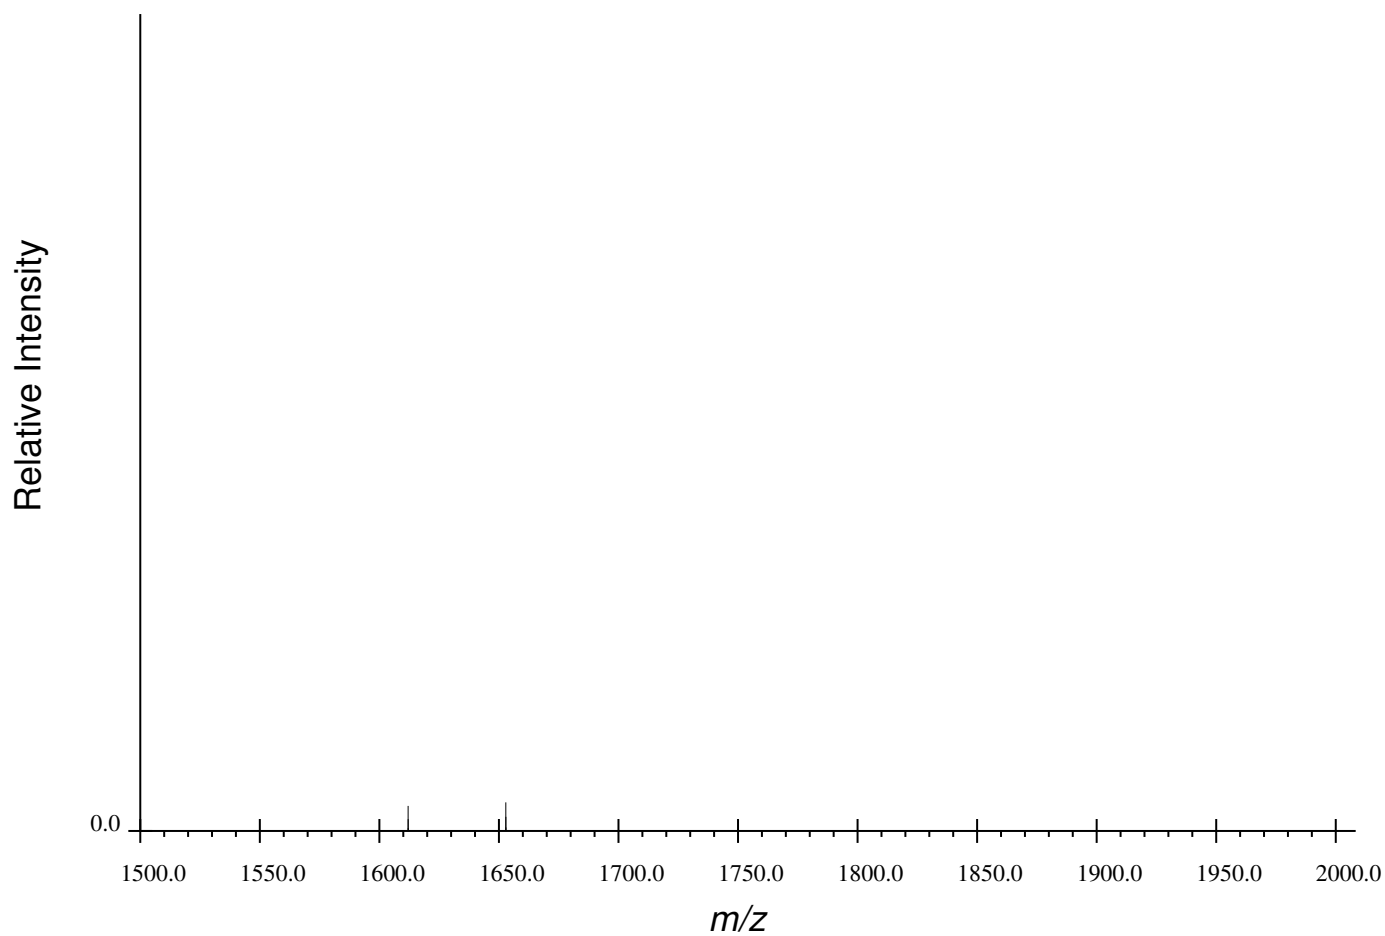

(d) Fourth Region for KRSpYEEHIP, Spectrum 8.dta



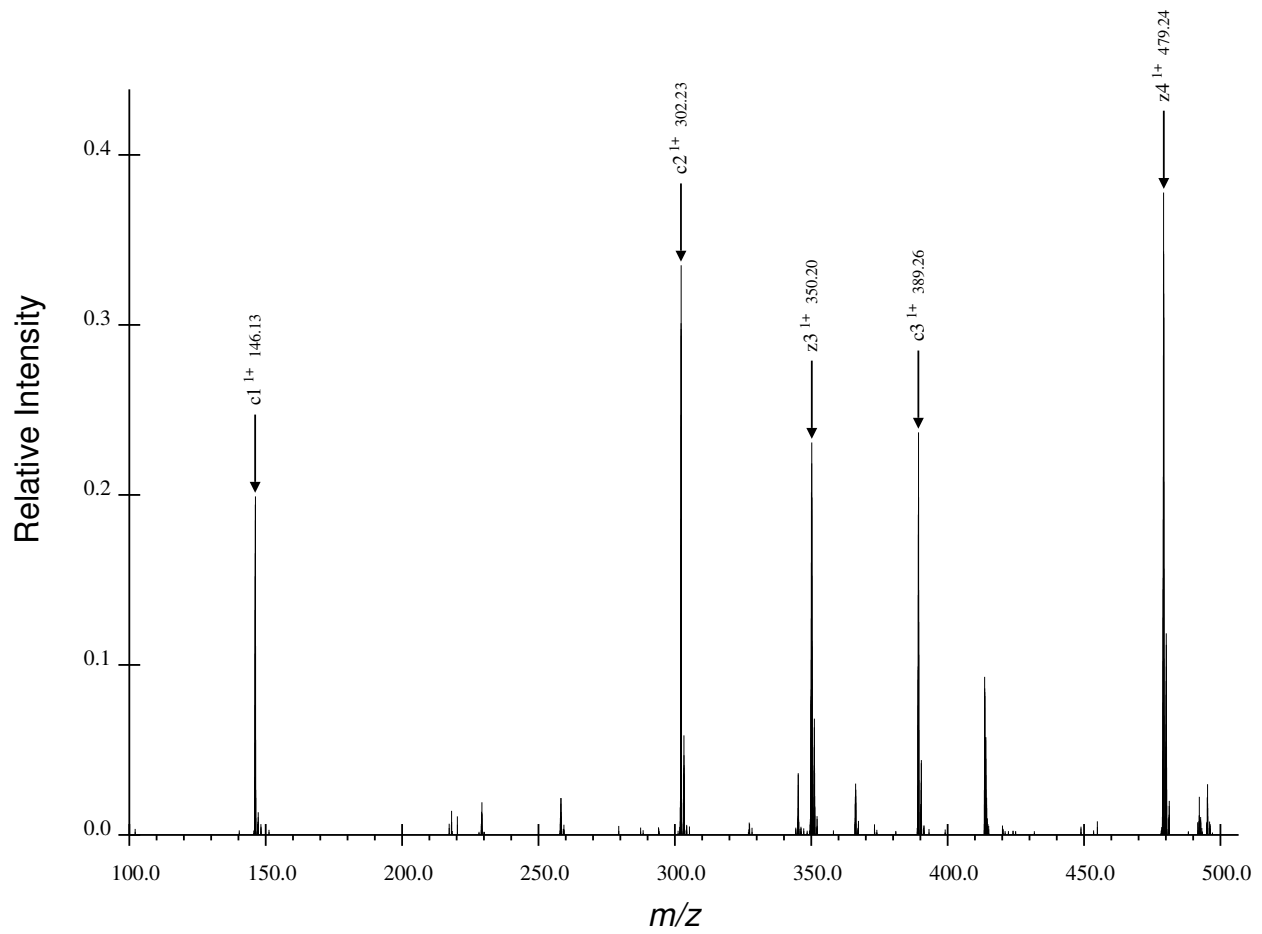

(a) First Region for KRSpYEEHIP, Spectrum 9.dta

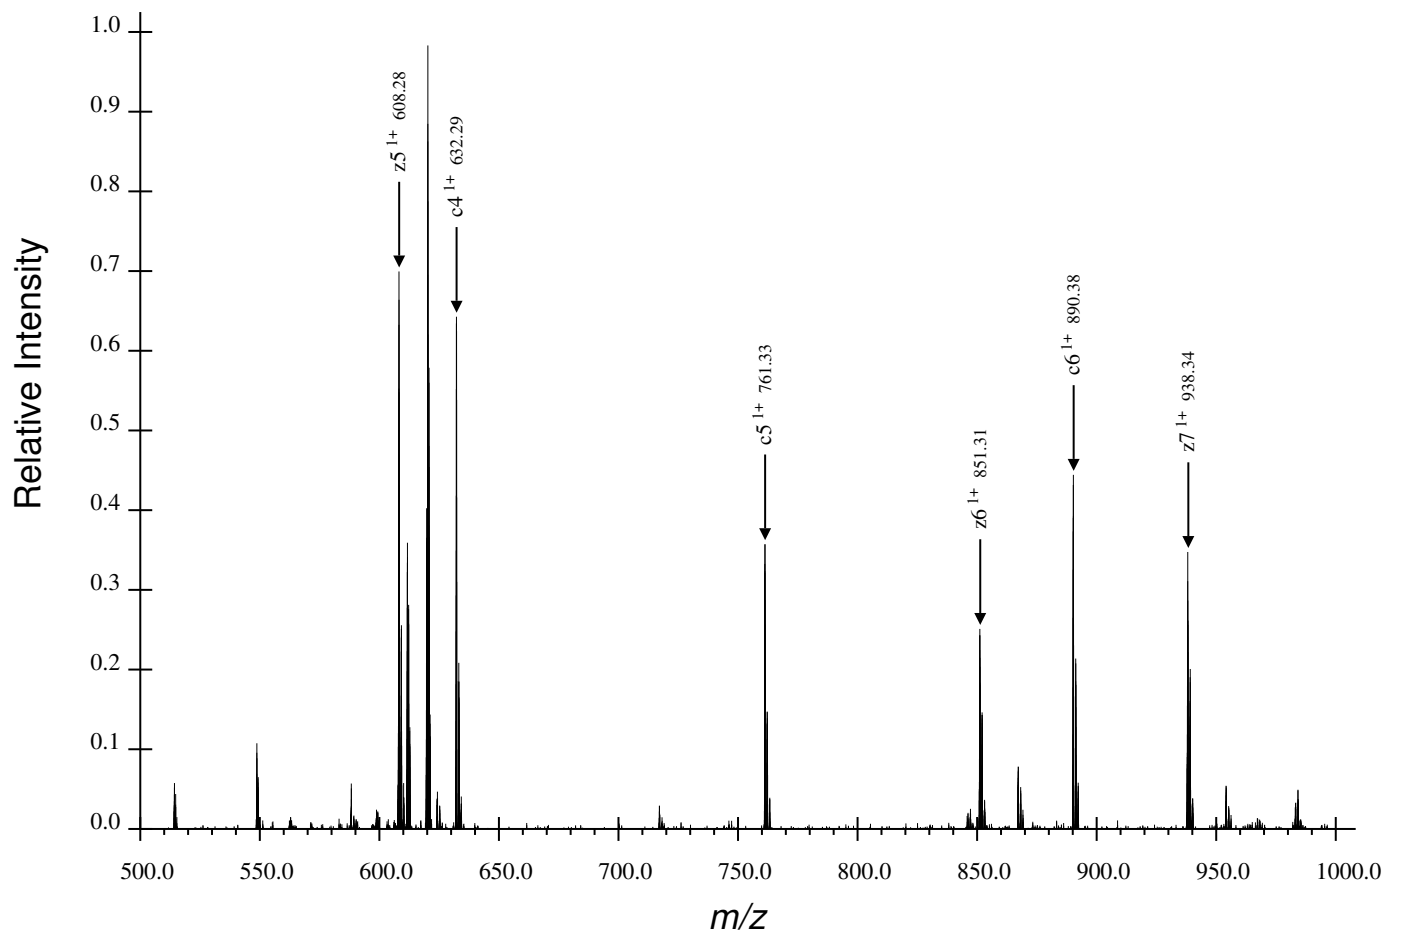

(b) Second Region for KRSpYEEHIP, Spectrum 9.dta

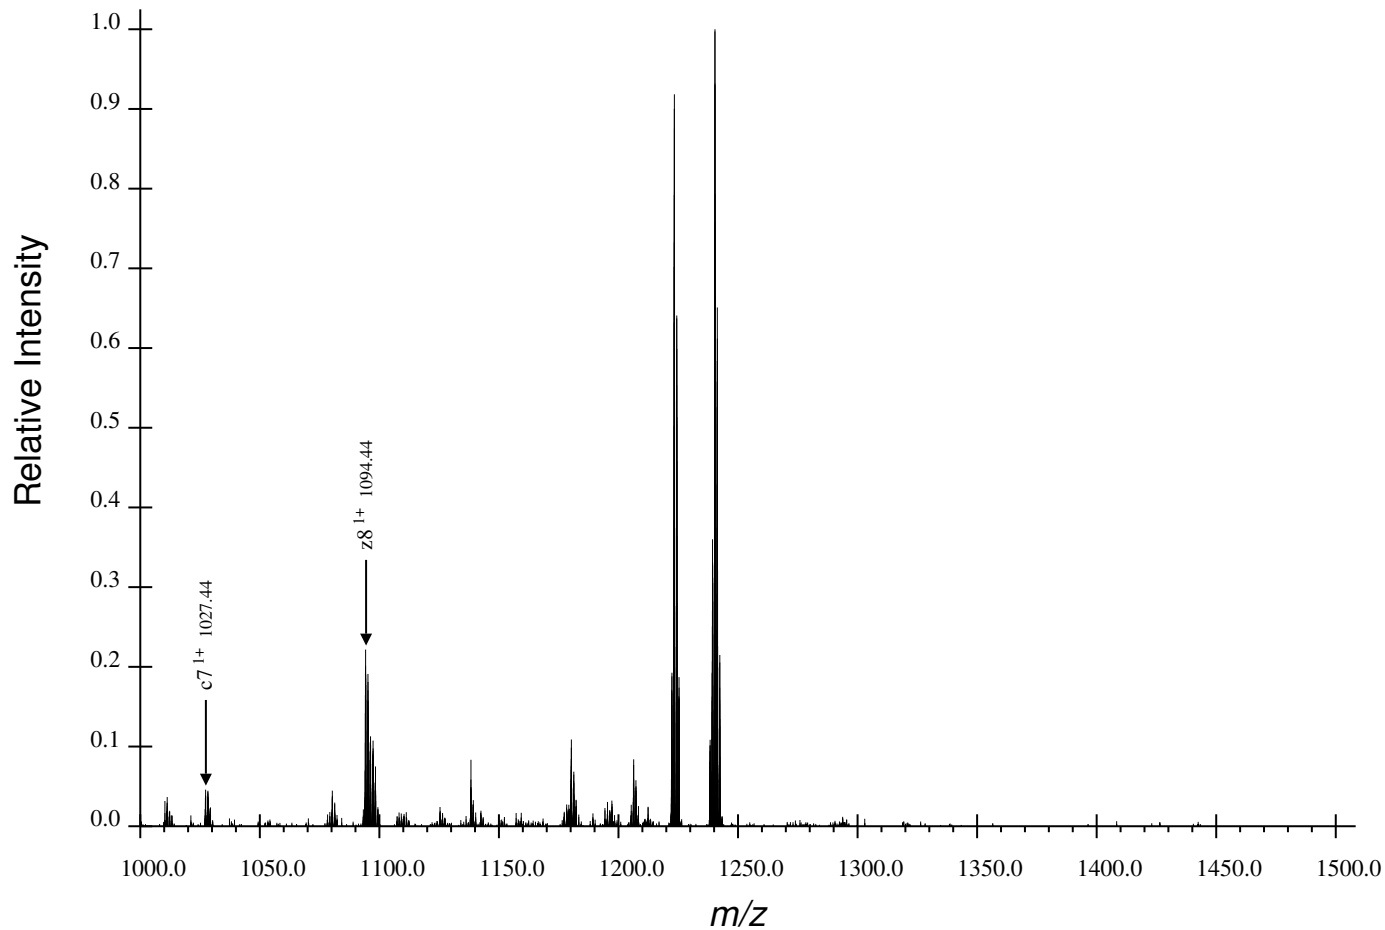

(c) Third Region for KRSpYEEHIP, Spectrum 9.dta

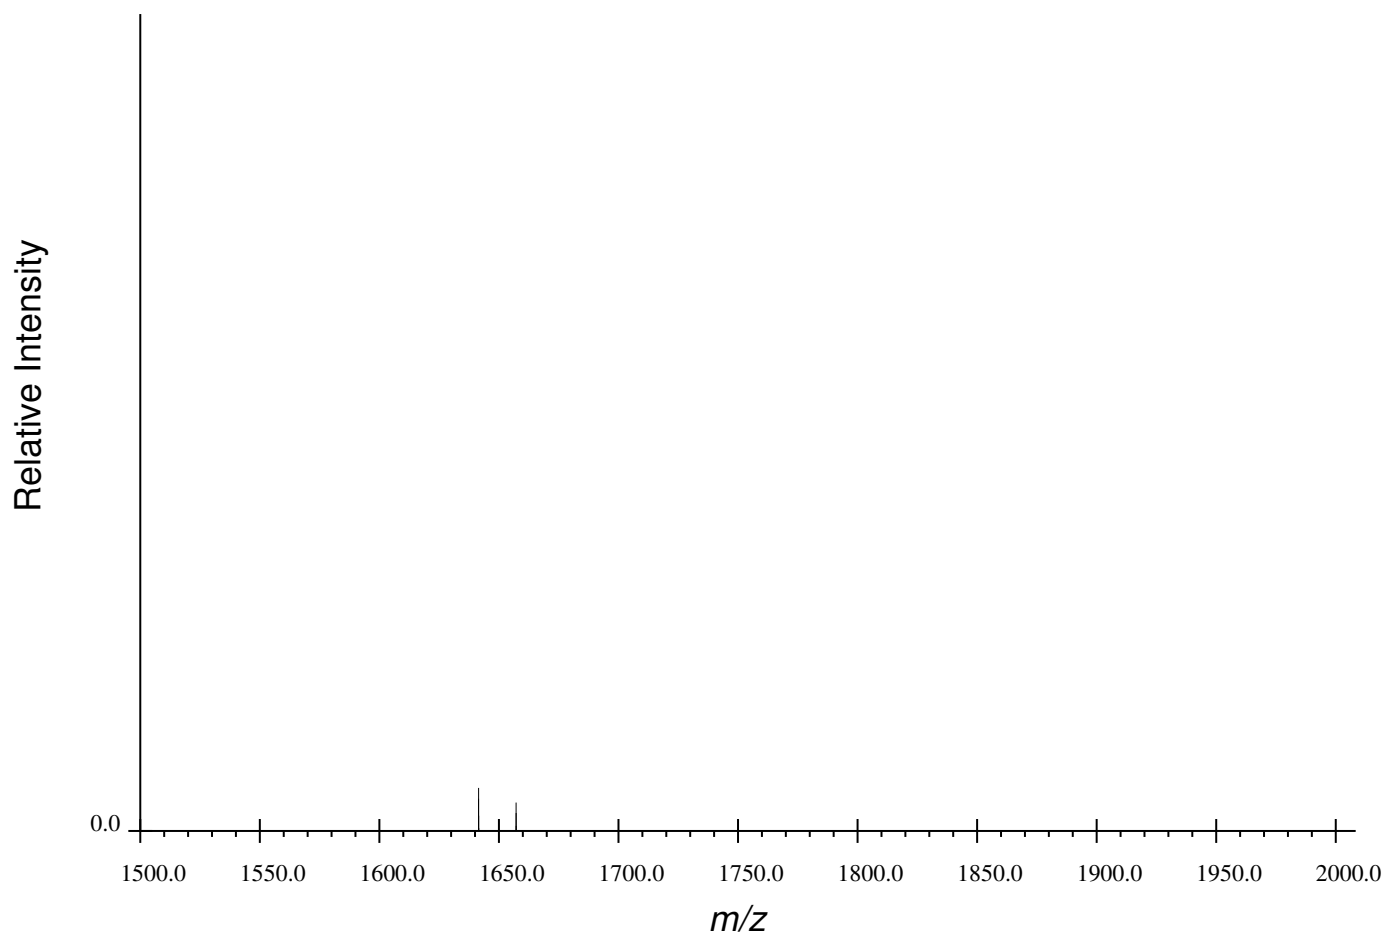

(d) Fourth Region for KRSpYEEHIP, Spectrum 9.dta

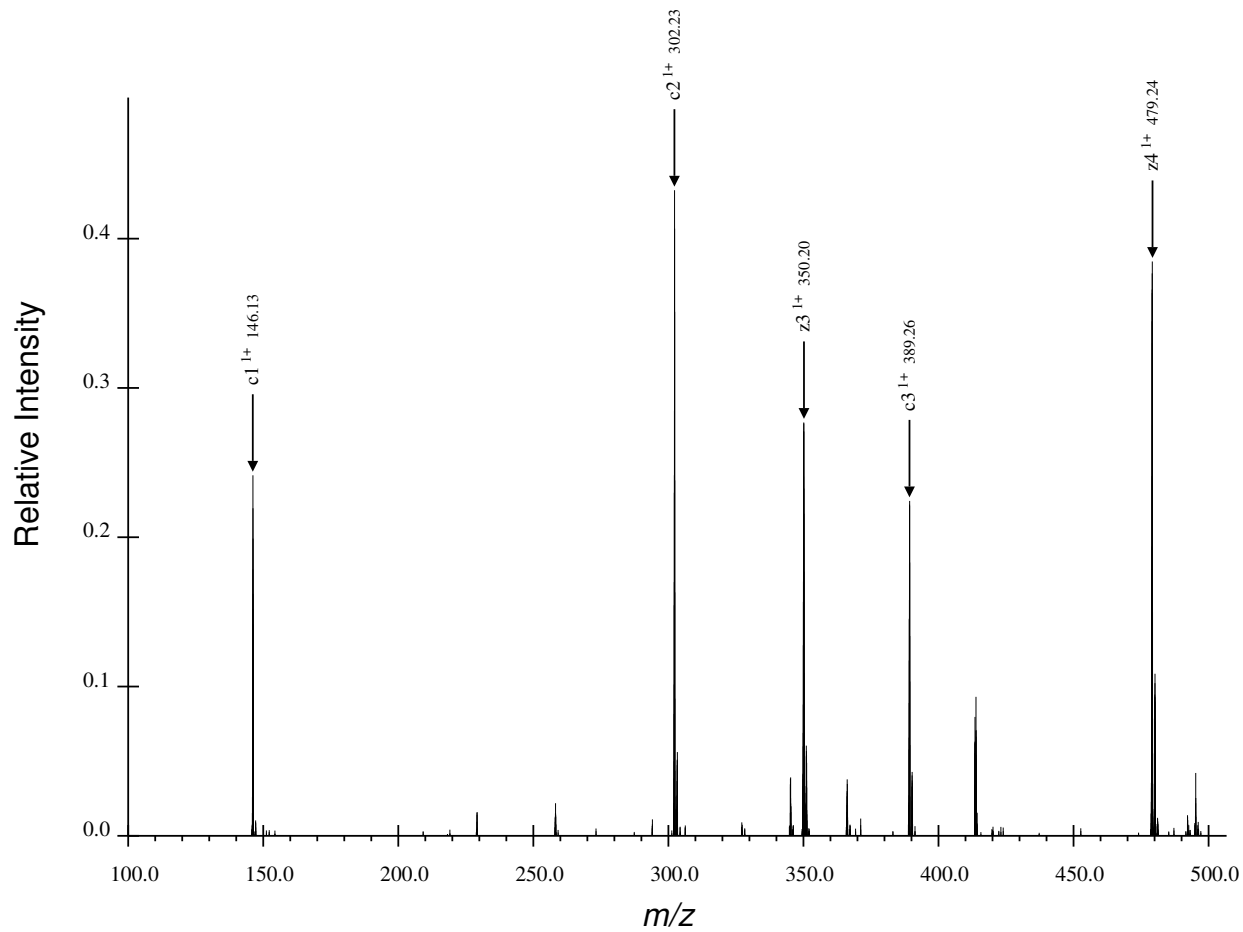

(a) First Region for KRSpYEEHIP, Spectrum 10.dta

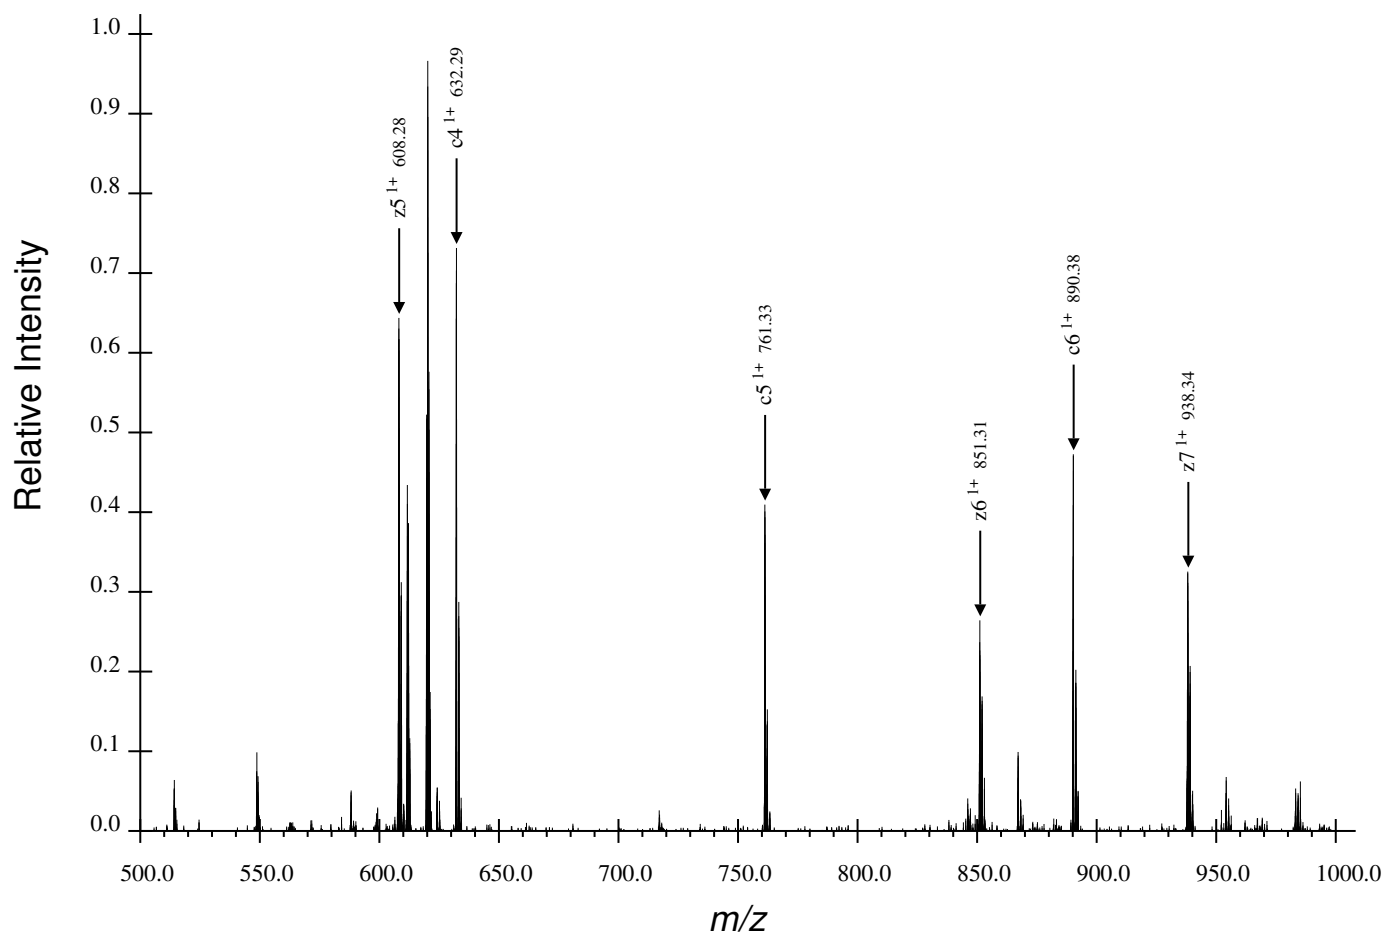

(b) Second Region for KRSpYEEHIP, Spectrum 10.dta

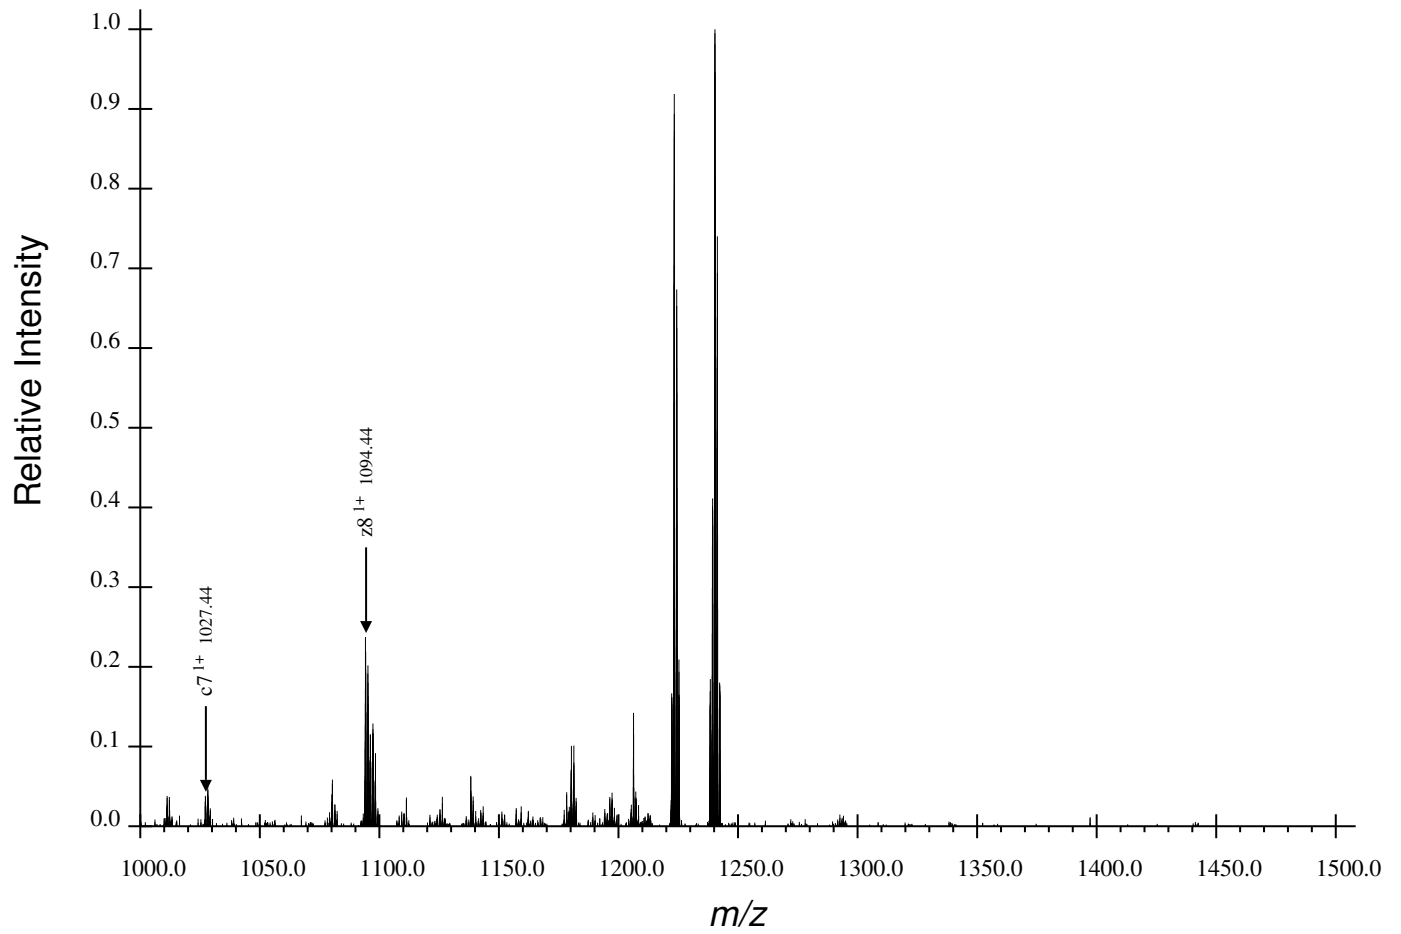

(c) Third Region for KRSpYEEHIP, Spectrum 10.dta

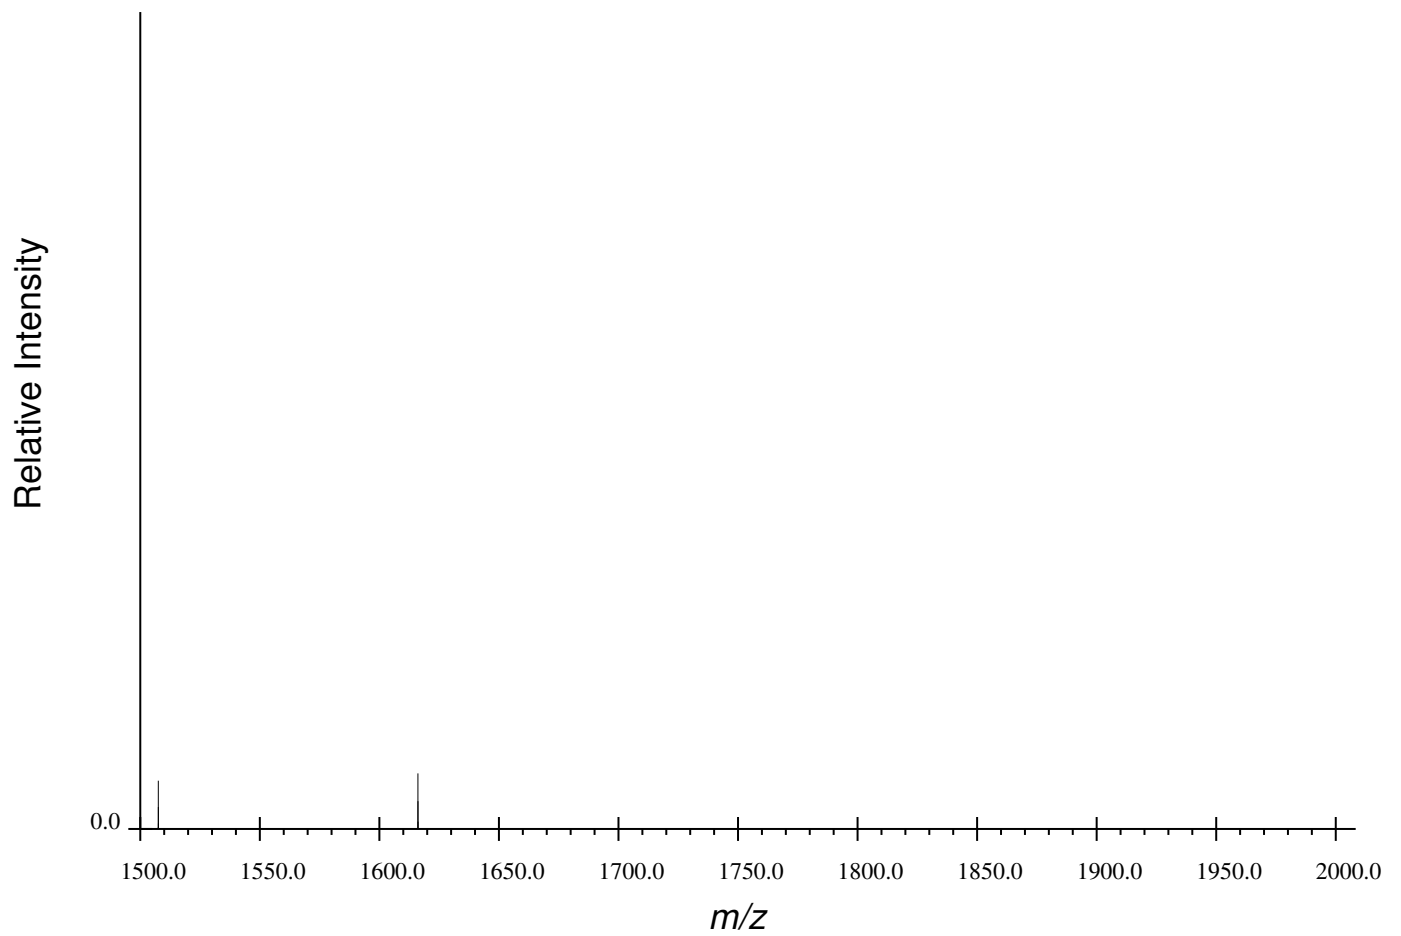

(d) Fourth Region for KRSpYEEHIP, Spectrum 10.dta

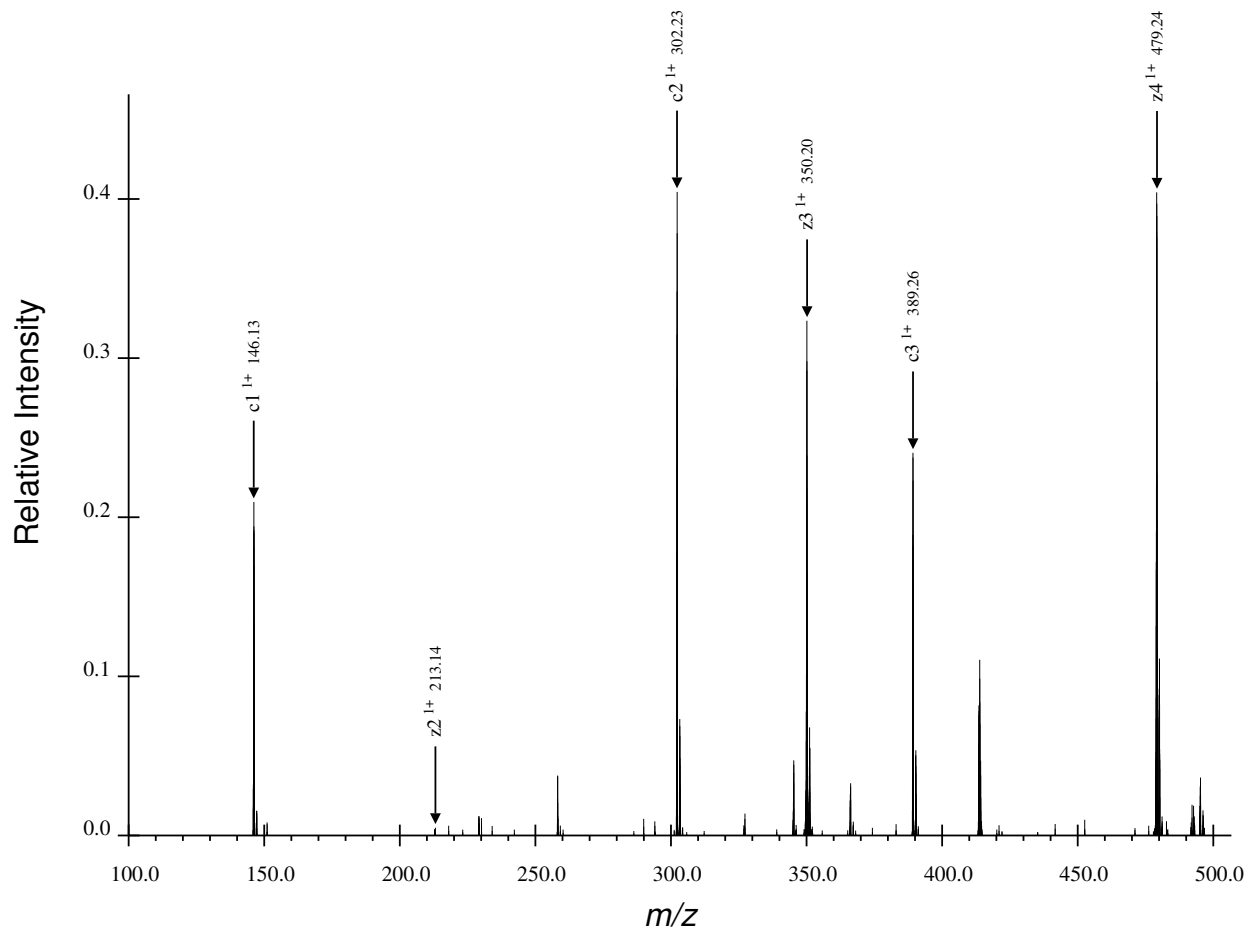

(a) First Region for KRSpYEEHIP, Spectrum 11.dta

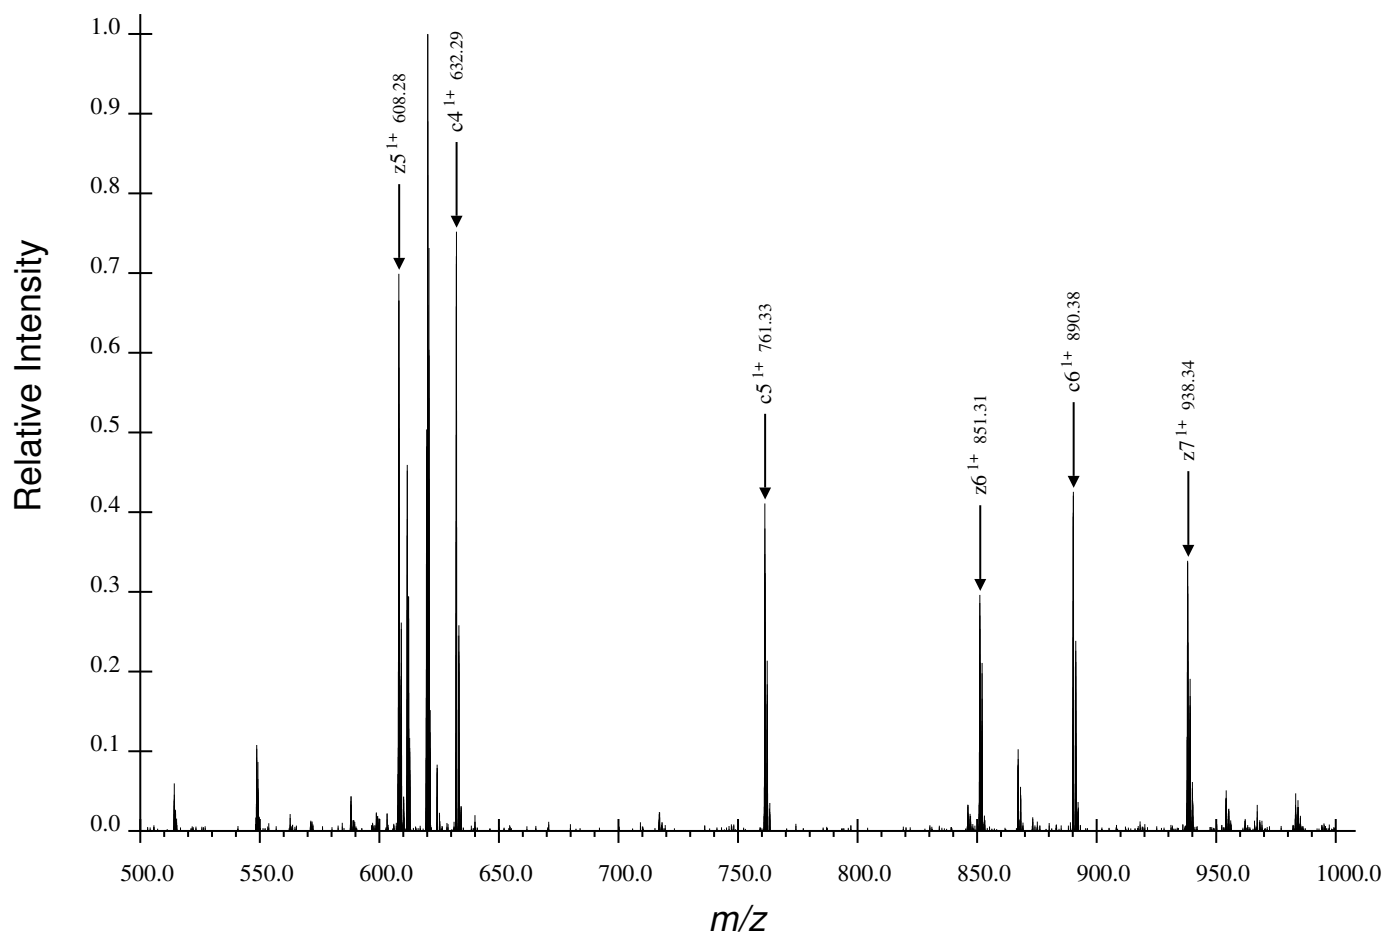

(b) Second Region for KRSpYEEHIP, Spectrum 11.dta

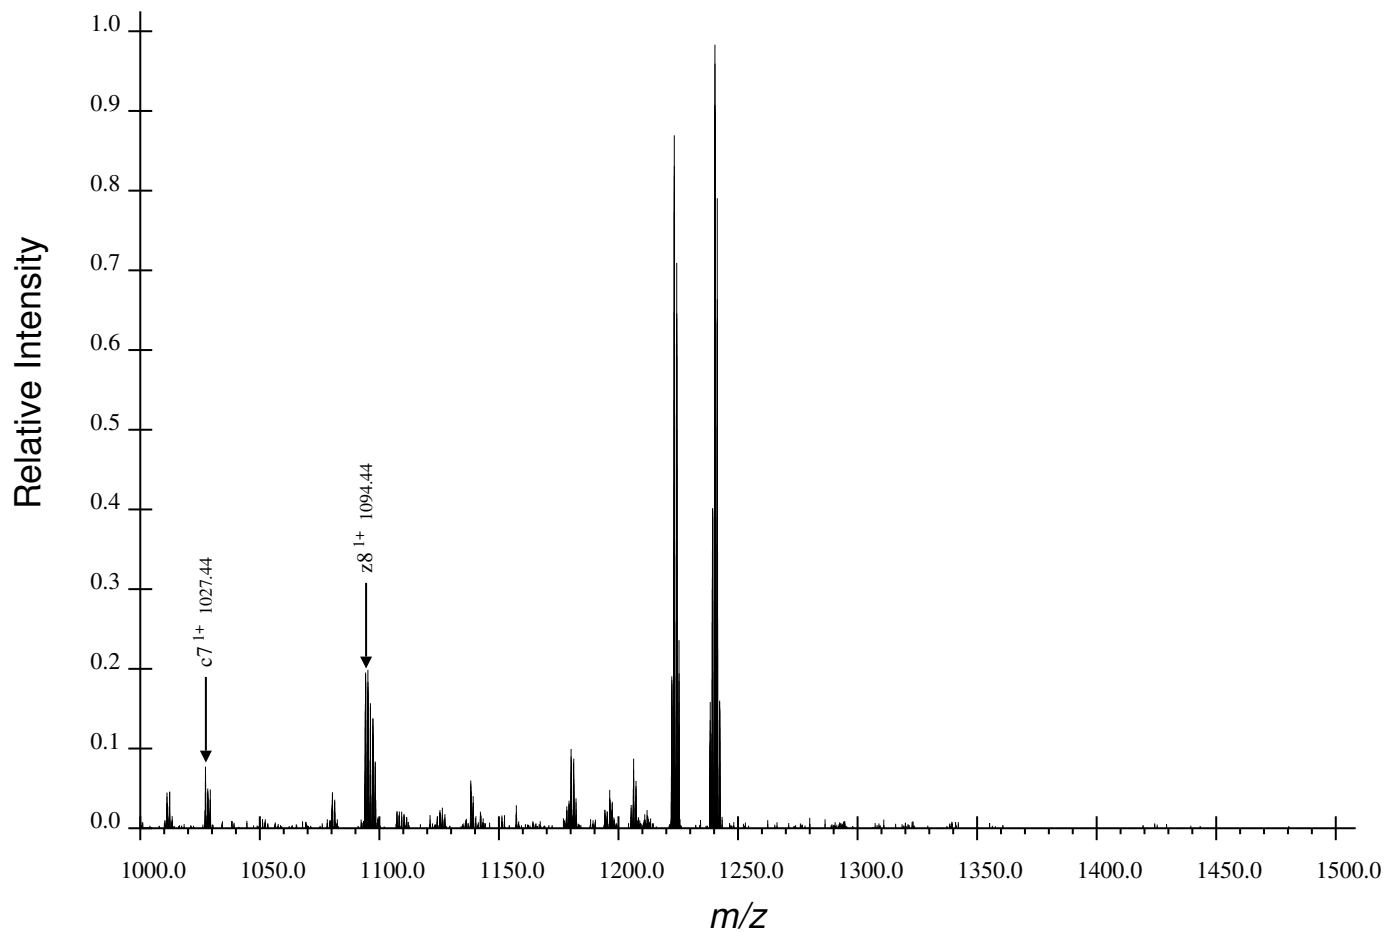

(c) Third Region for KRSpYEEHIP, Spectrum 11.dta

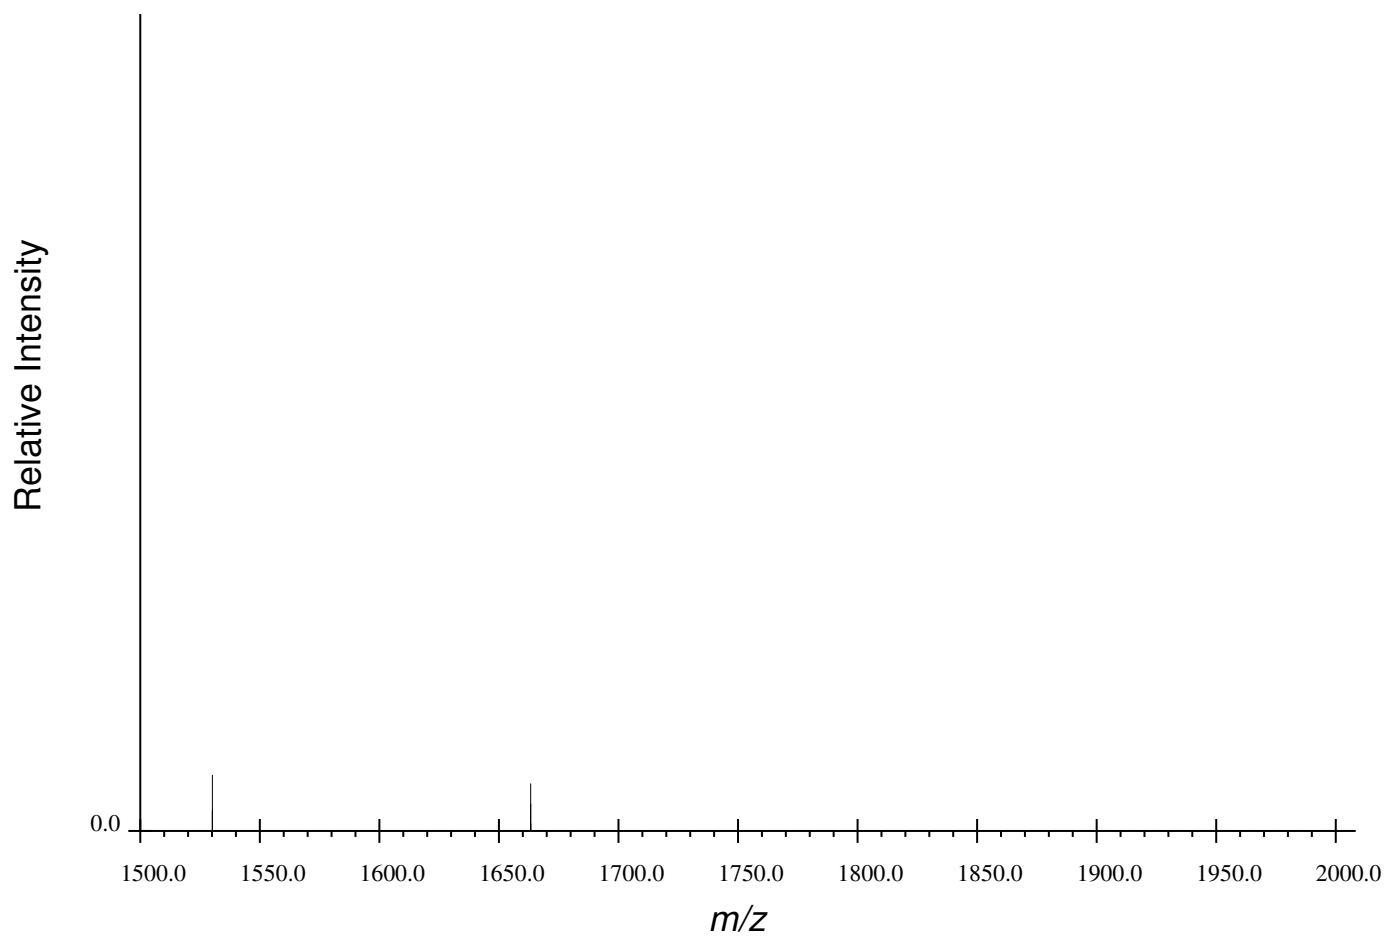

(d) Fourth Region for KRSpYEEHIP, Spectrum 11.dta

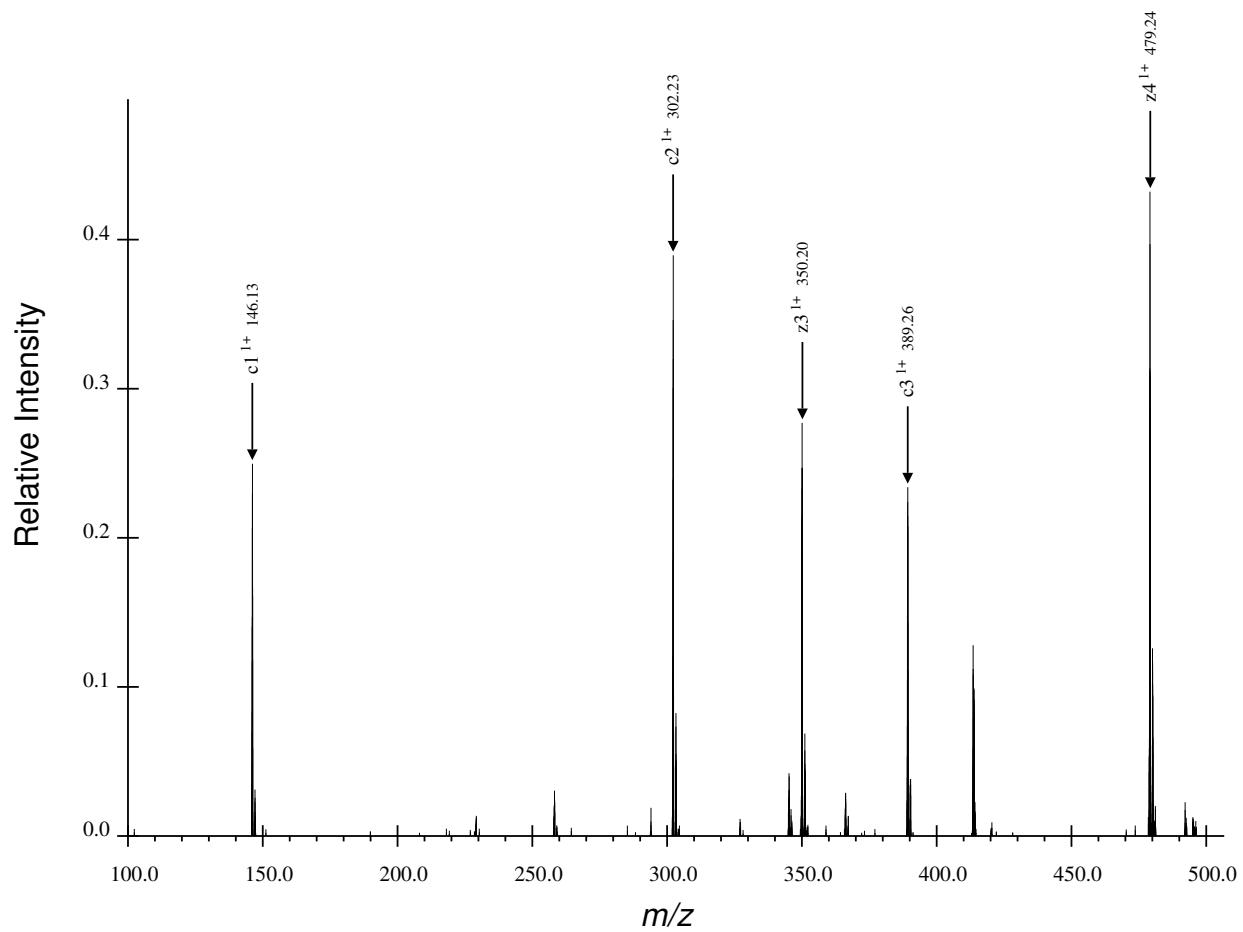

(a) First Region for KRSpYEEHIP, Spectrum 12.dta

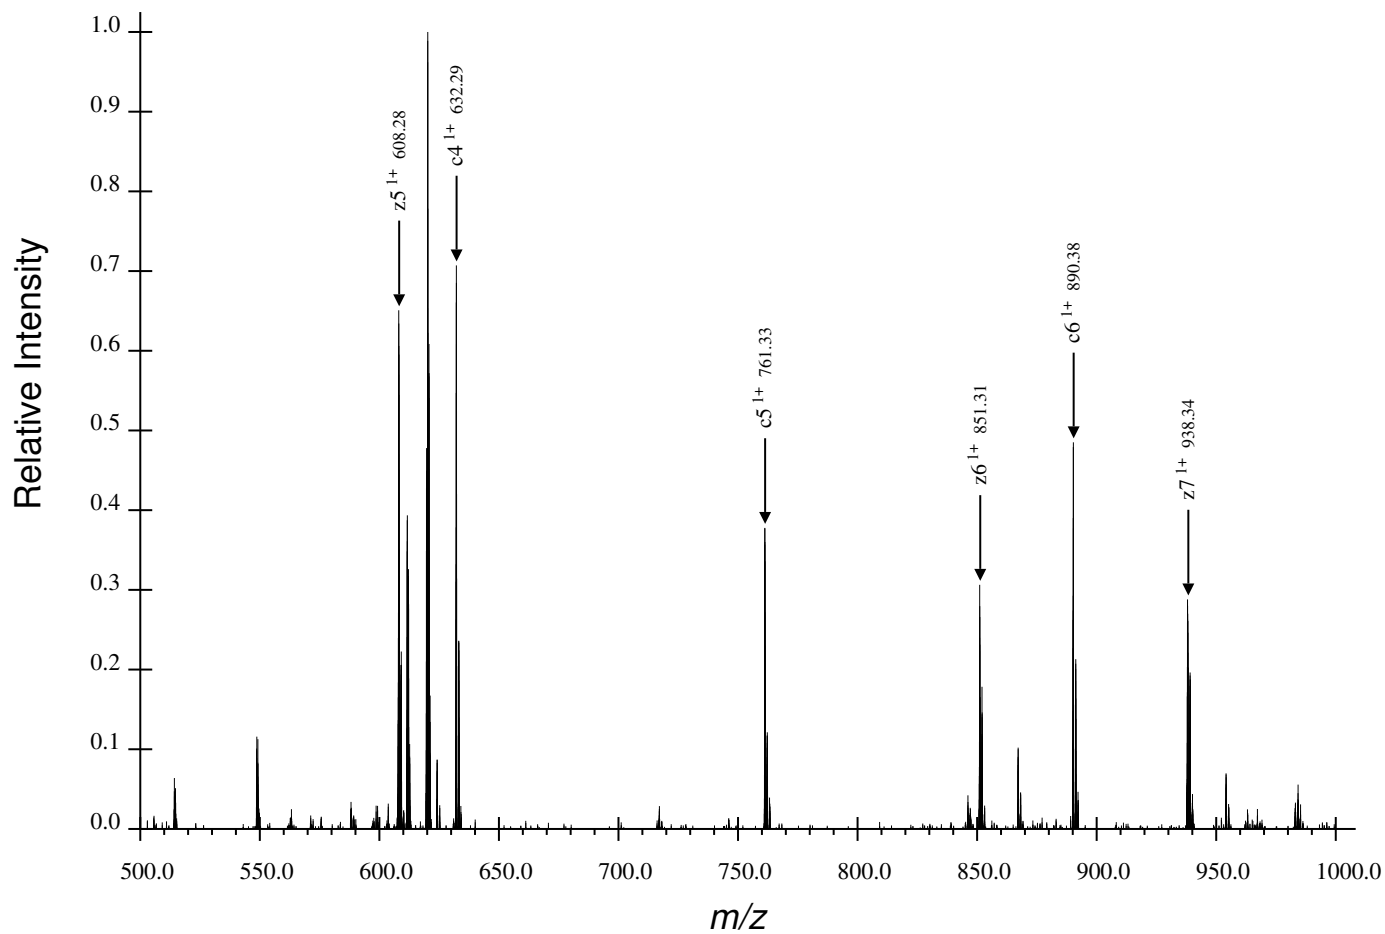

(b) Second Region for KRSpYEEHIP, Spectrum 12.dta

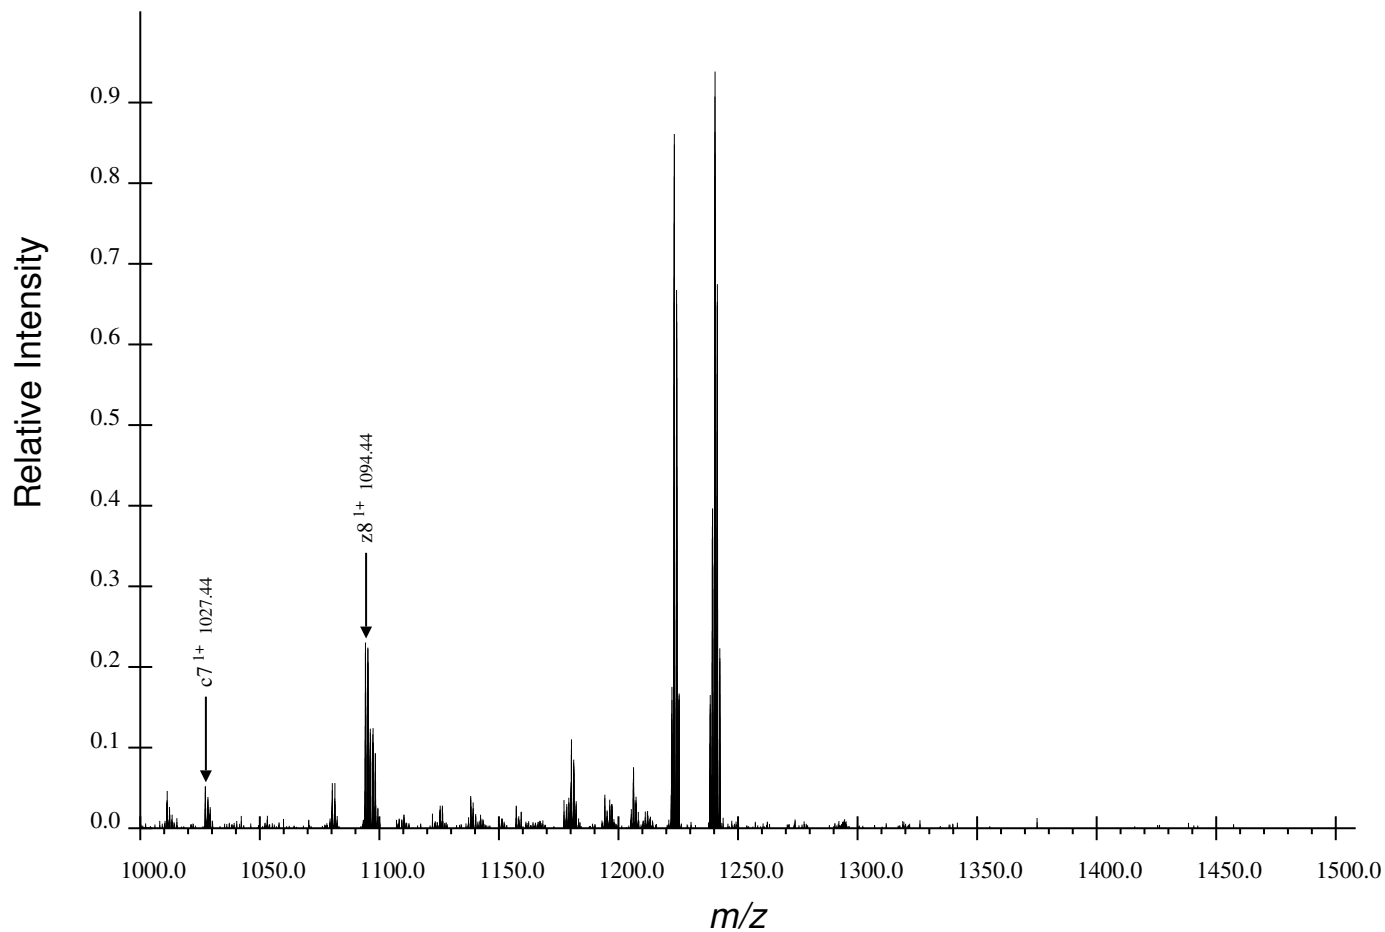

(c) Third Region for KRSpYEEHIP, Spectrum 12.dta

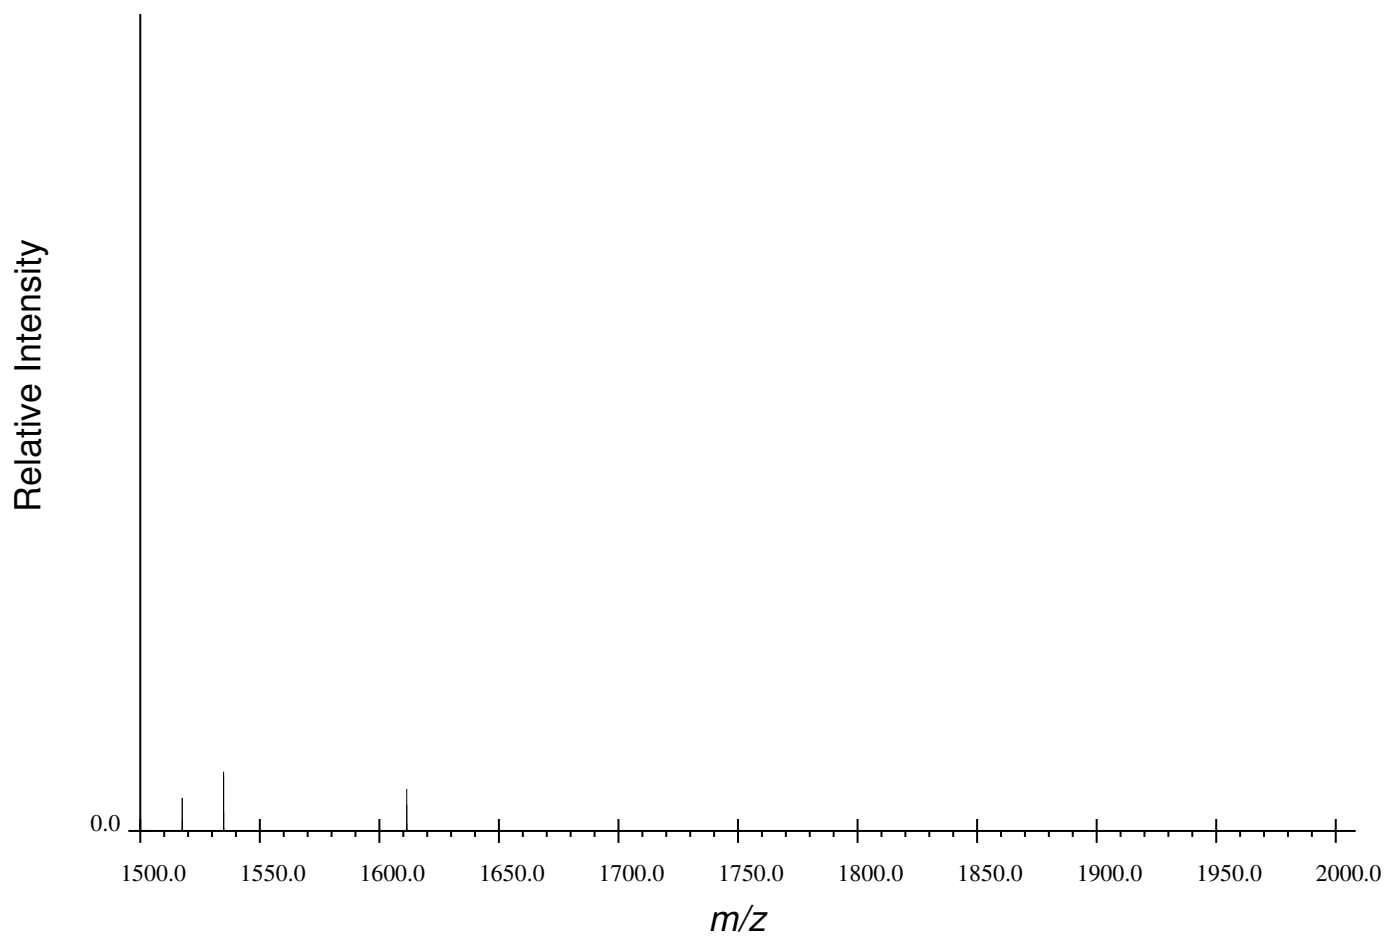

(d) Fourth Region for KRSpYEEHIP, Spectrum 12.dta



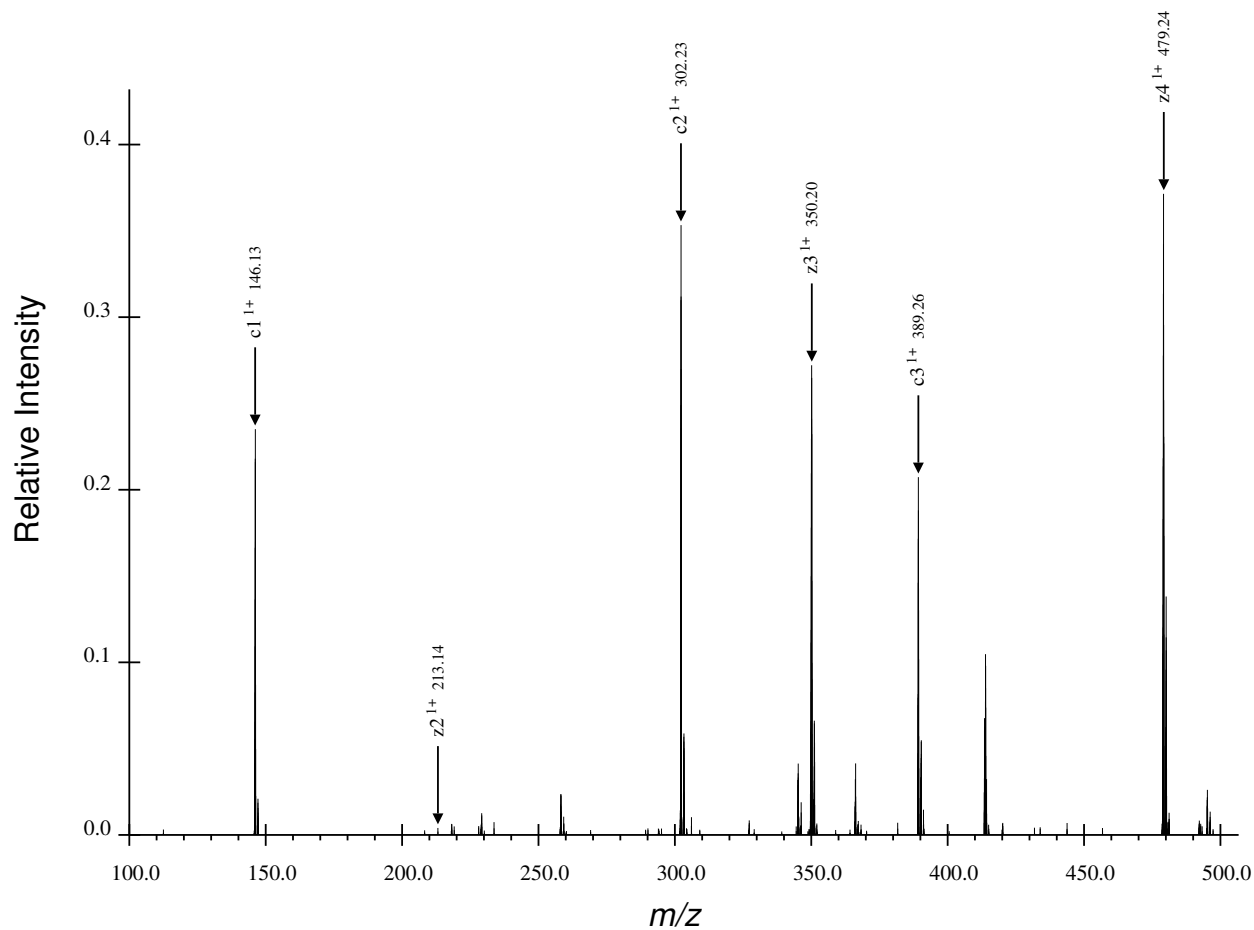

(a) First Region for KRSpYEEHIP, Spectrum 13.dta

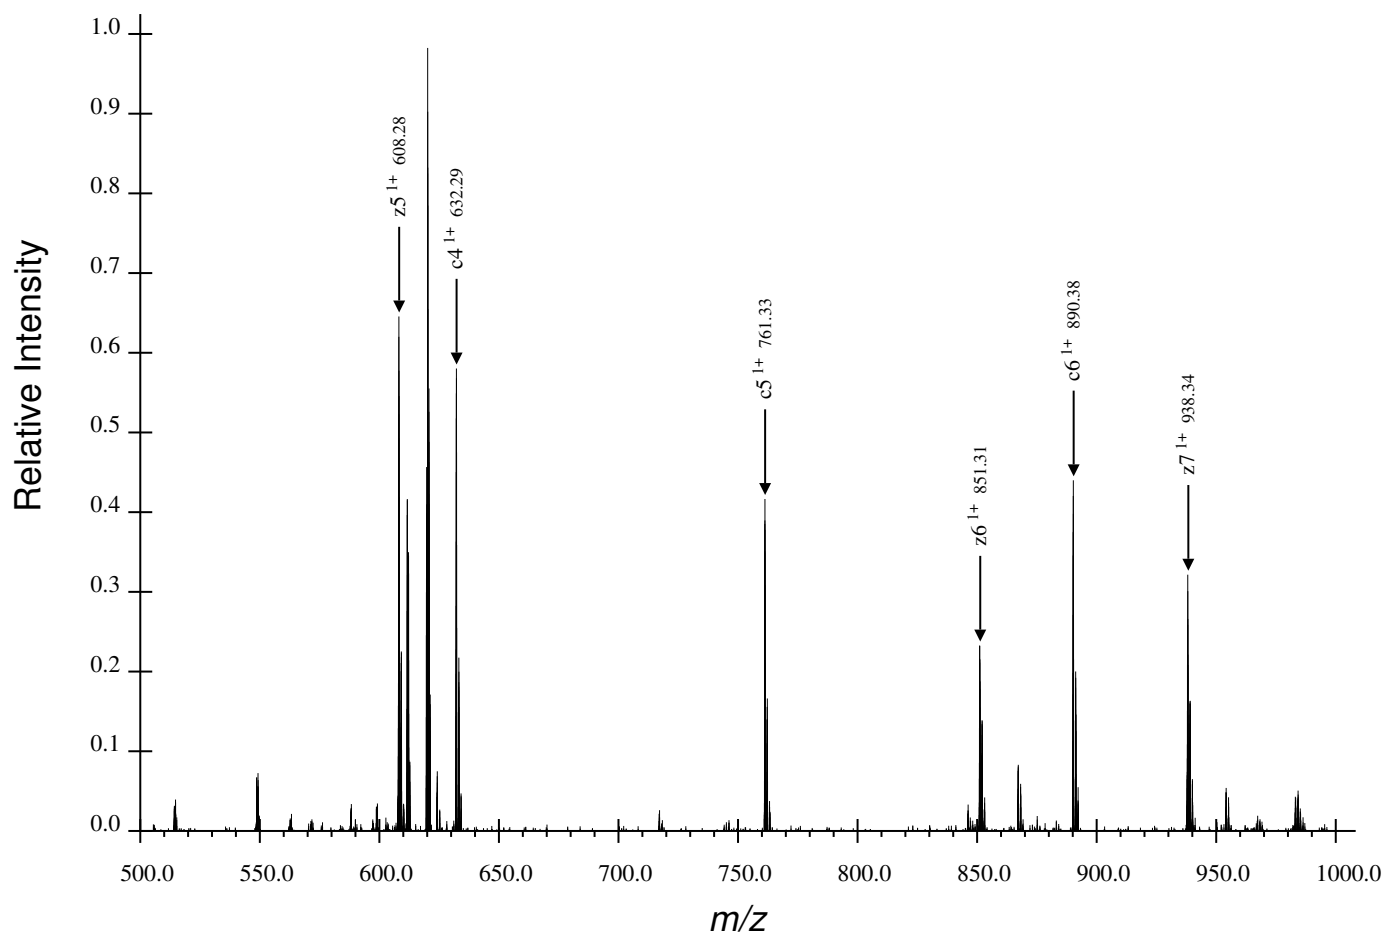

(b) Second Region for KRSpYEEHIP, Spectrum 13.dta

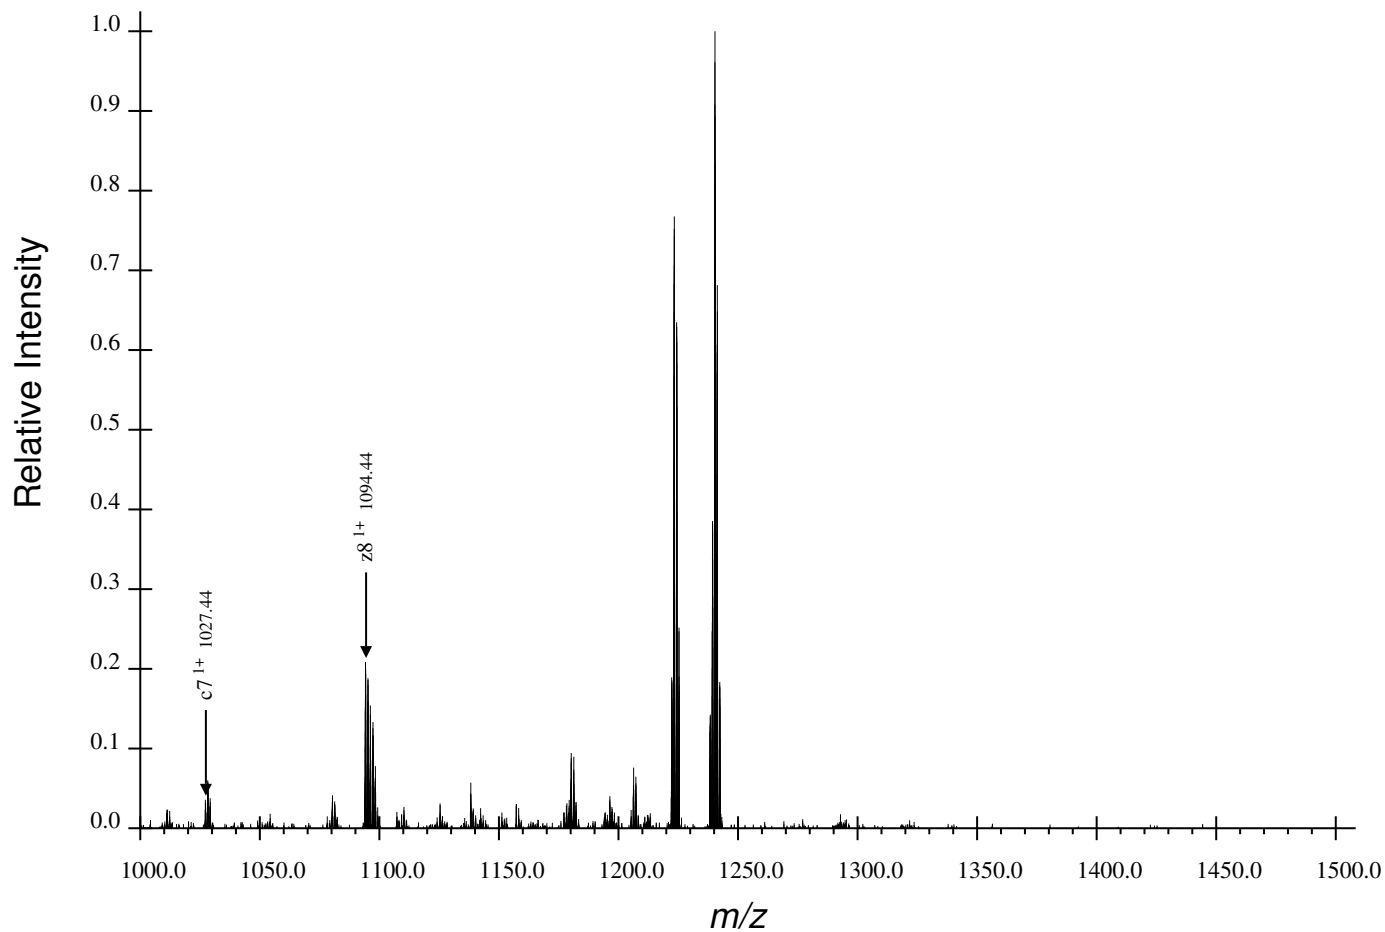

(c) Third Region for KRSpYEEHIP, Spectrum 13.dta

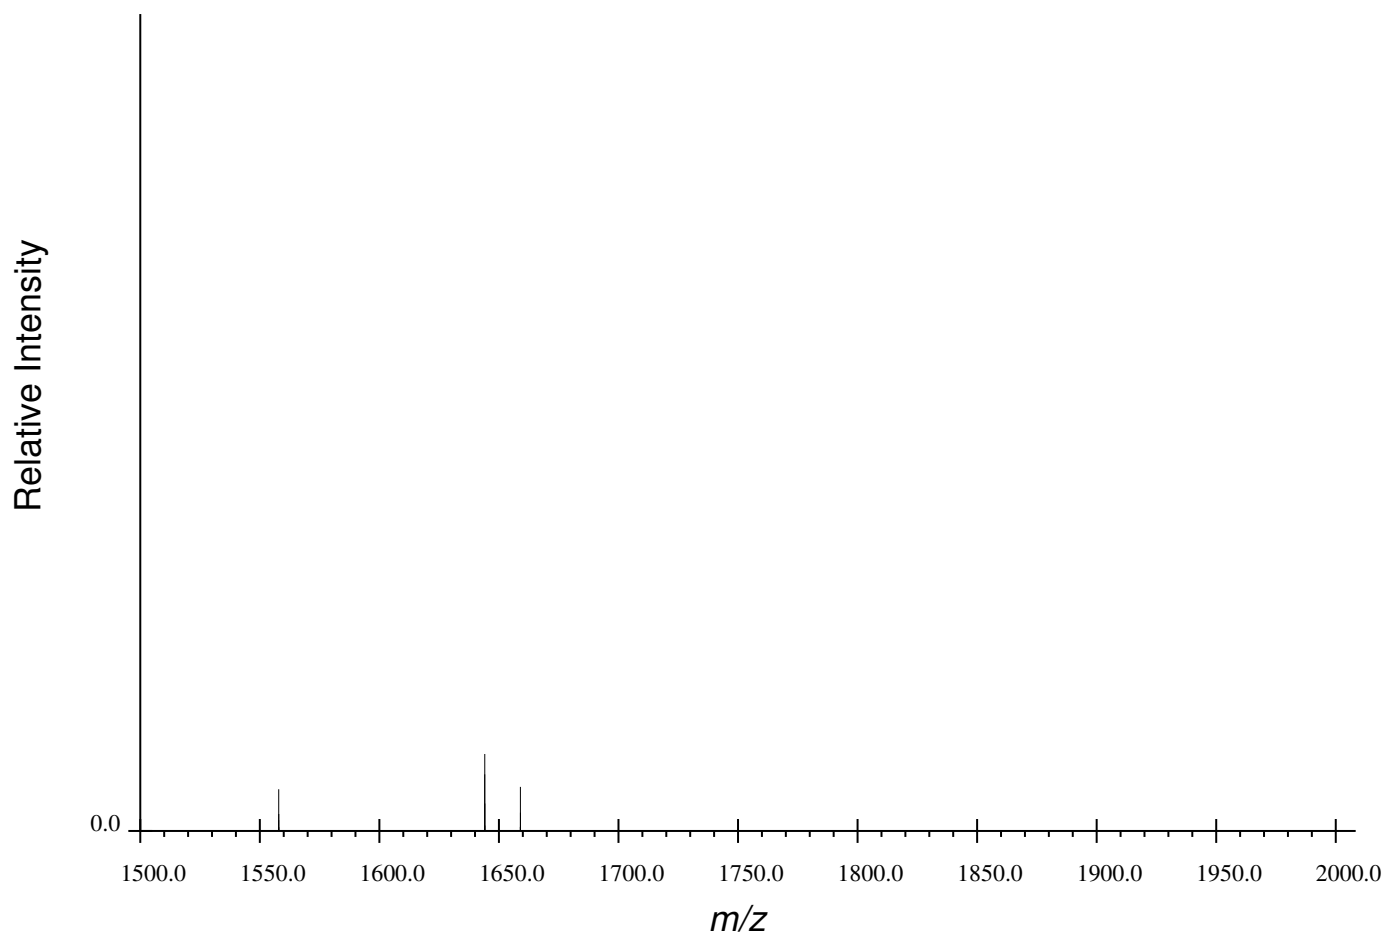

(d) Fourth Region for KRSpYEEHIP, Spectrum 13.dta

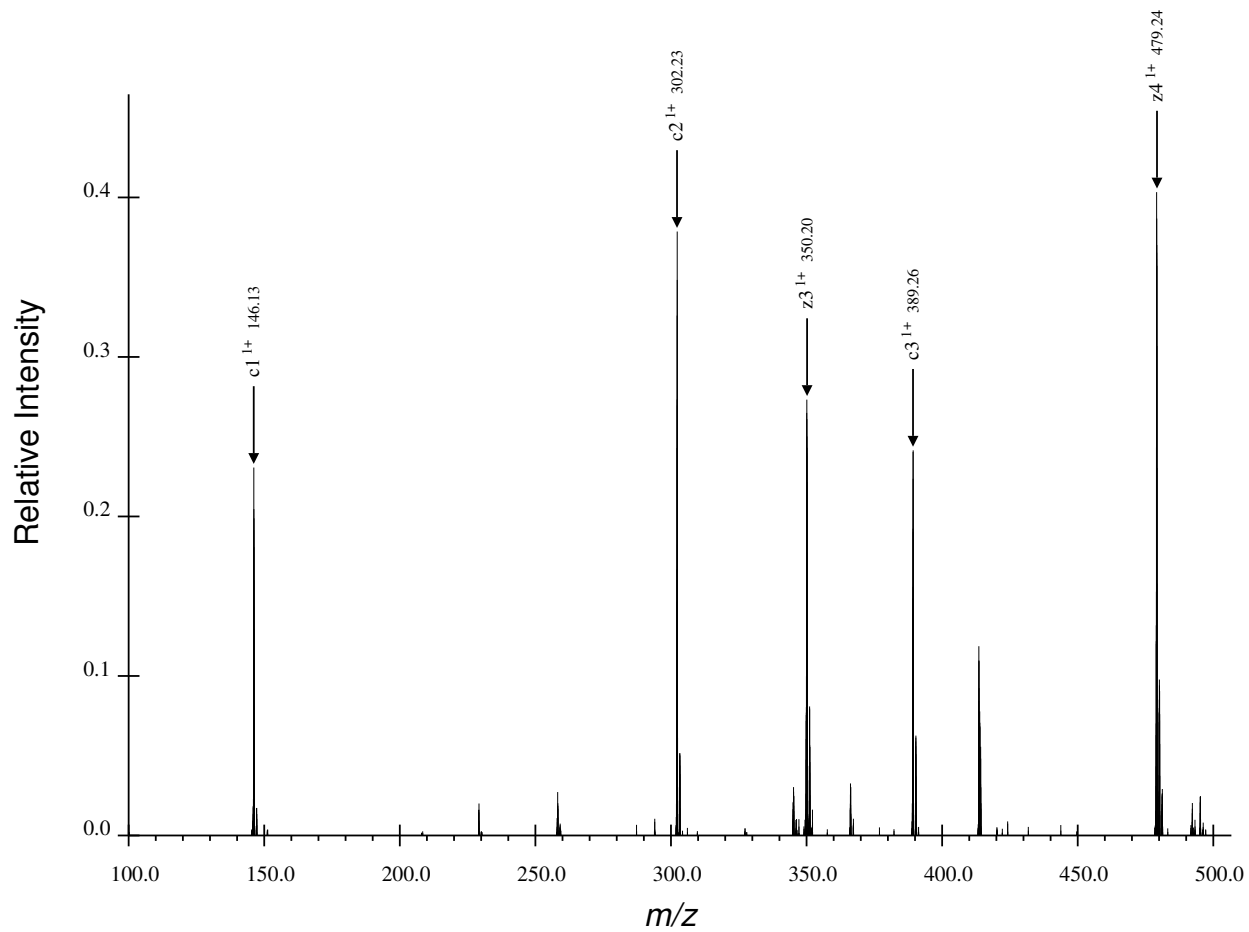

(a) First Region for KRSpYEEHIP, Spectrum 14.dta

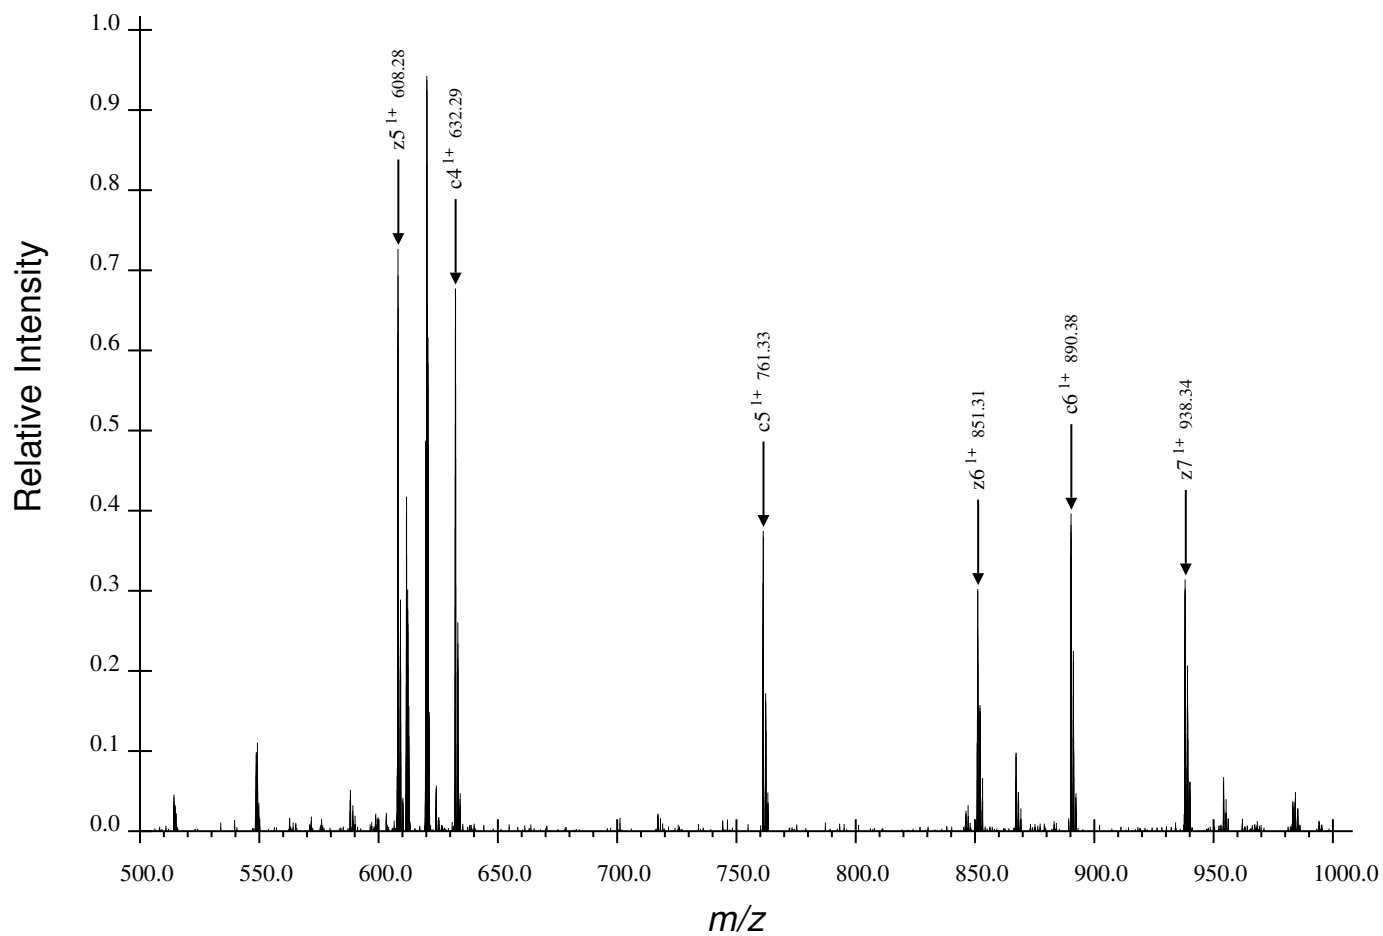

(b) Second Region for KRSpYEEHIP, Spectrum 14.dta

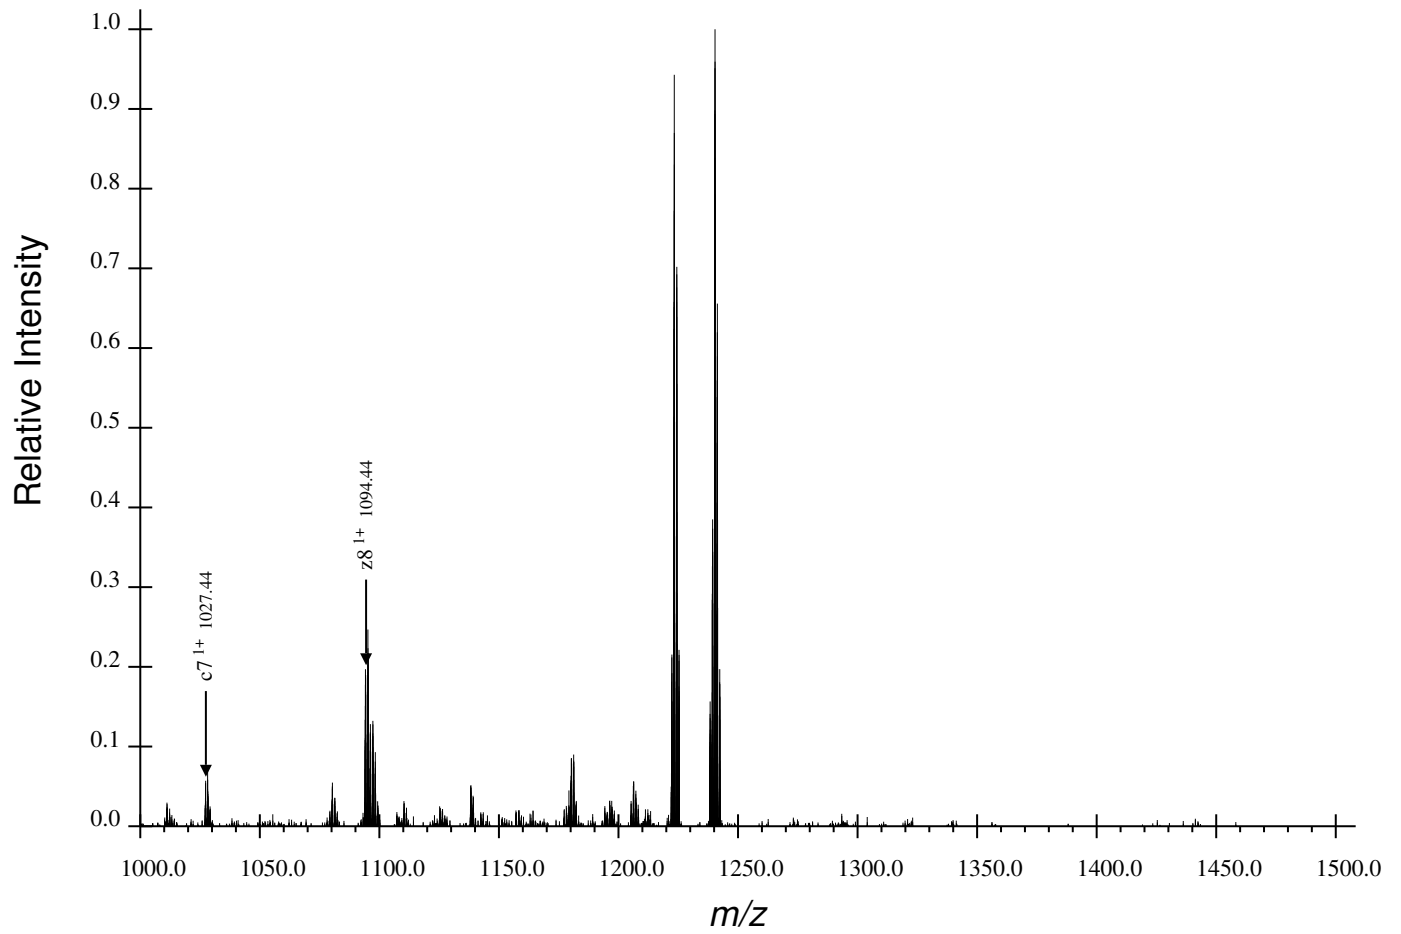

(c) Third Region for KRSpYEEHIP, Spectrum 14.dta

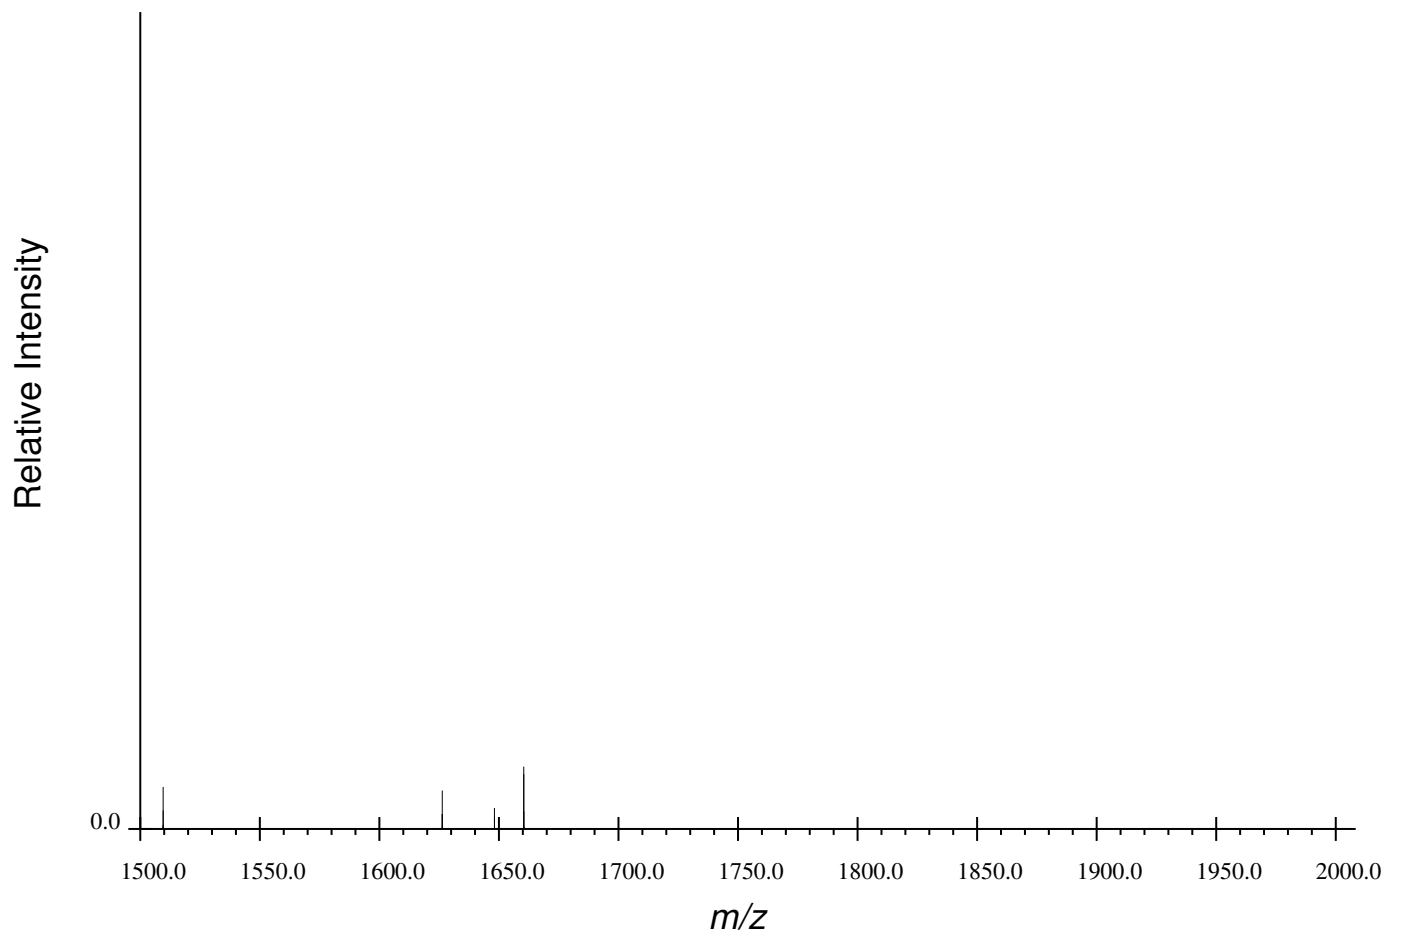

(d) Fourth Region for KRSpYEEHIP, Spectrum 14.dta

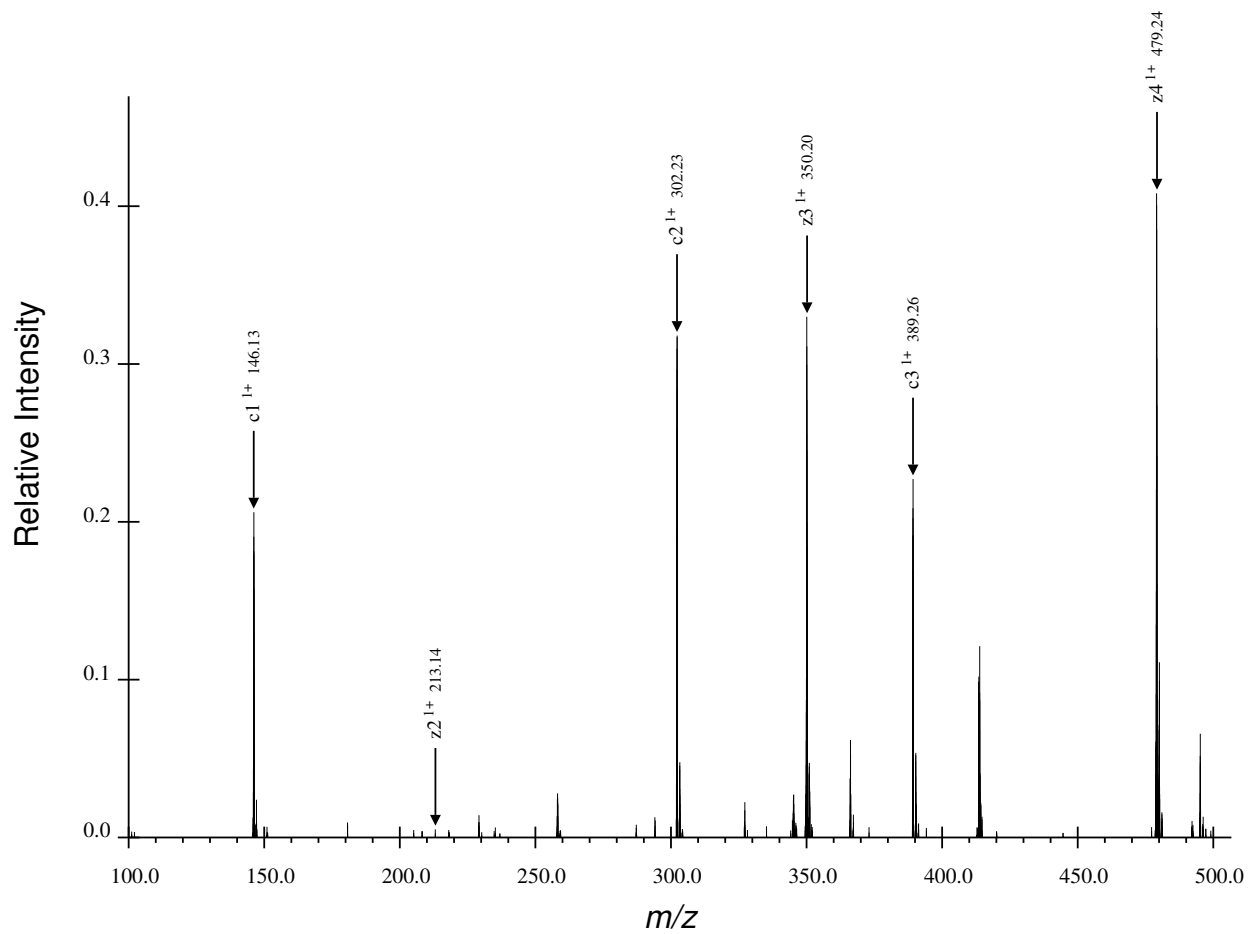

(a) First Region for KRSpYEEHIP, Spectrum 15.dta

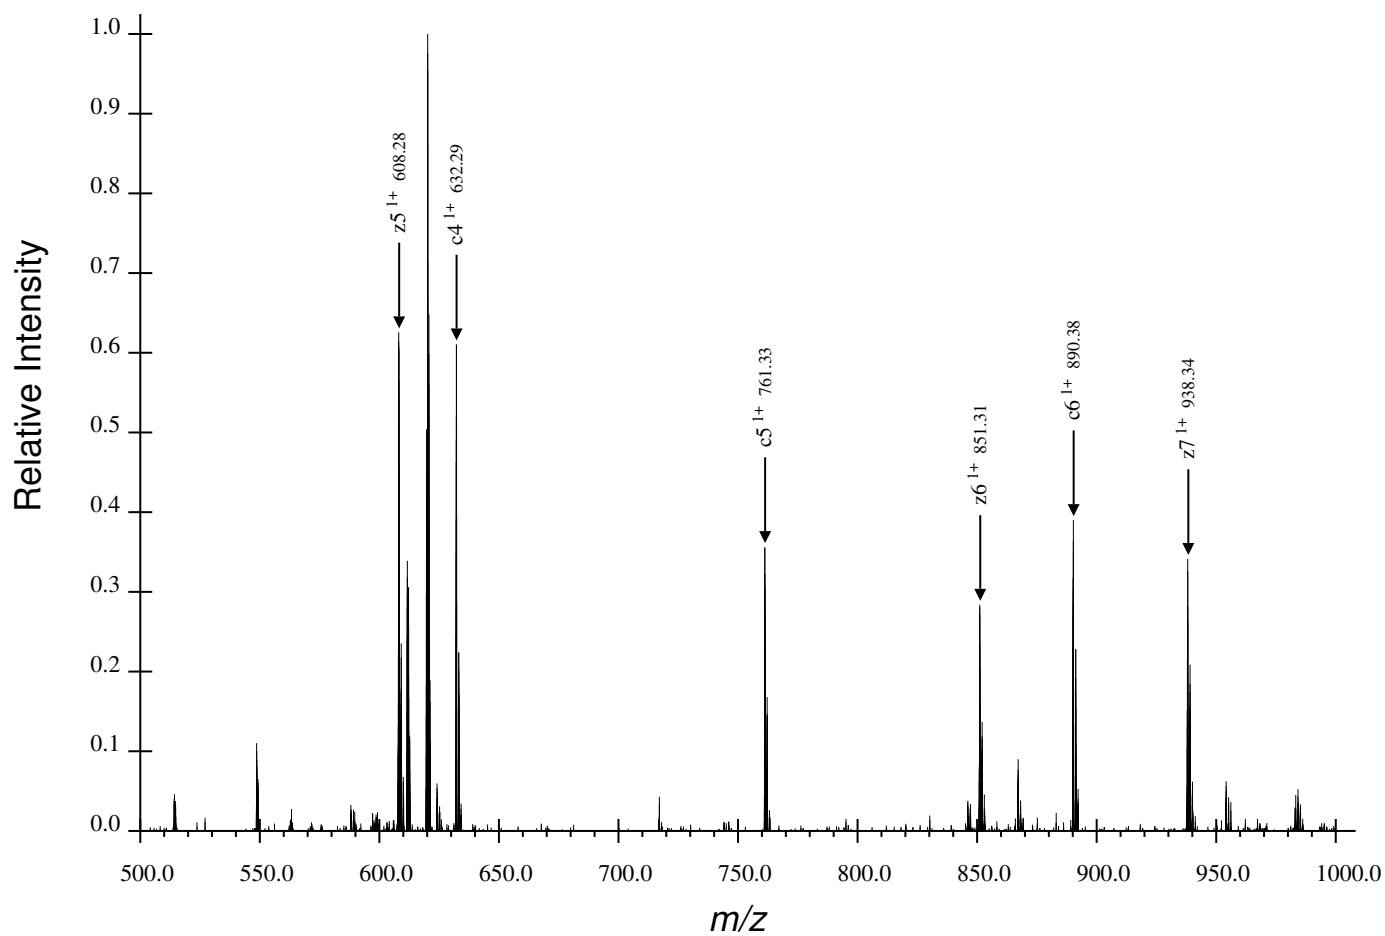

(b) Second Region for KRSpYEEHIP, Spectrum 15.dta

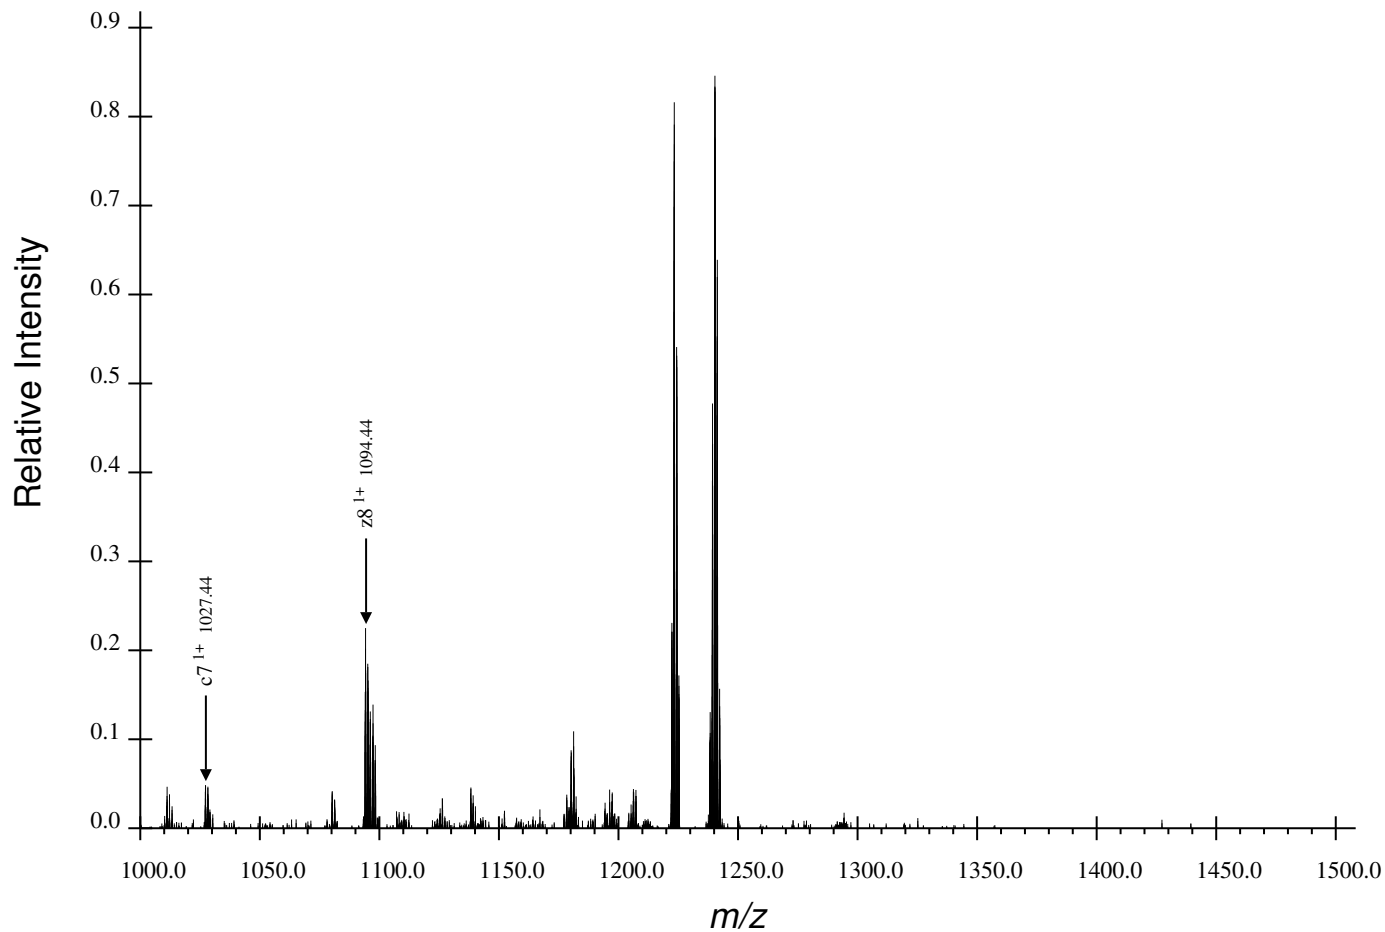

(c) Third Region for KRSpYEEHIP, Spectrum 15.dta

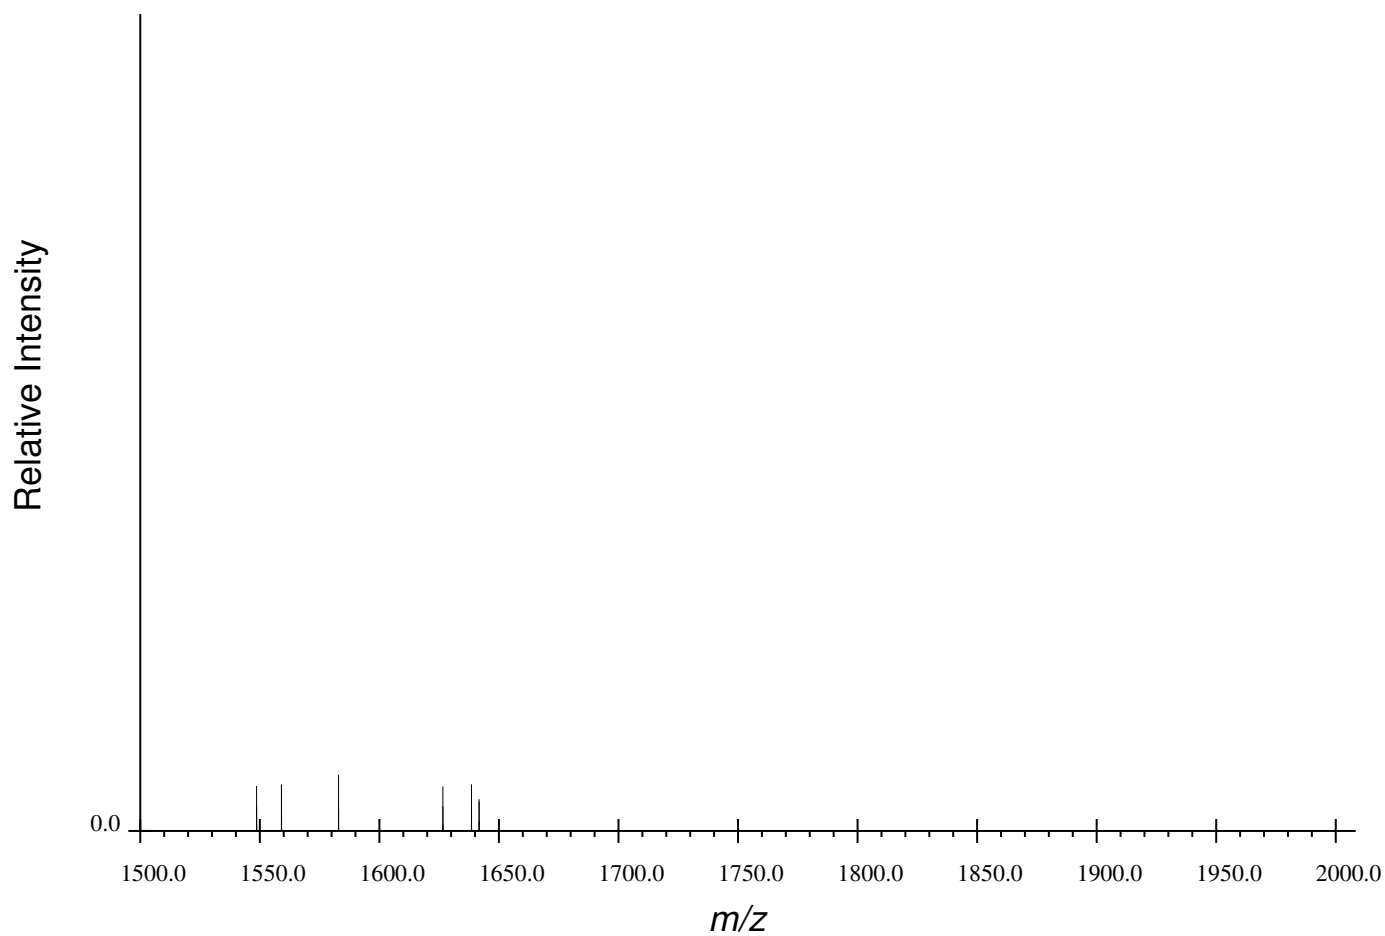

(d) Fourth Region for KRSpYEEHIP, Spectrum 15.dta

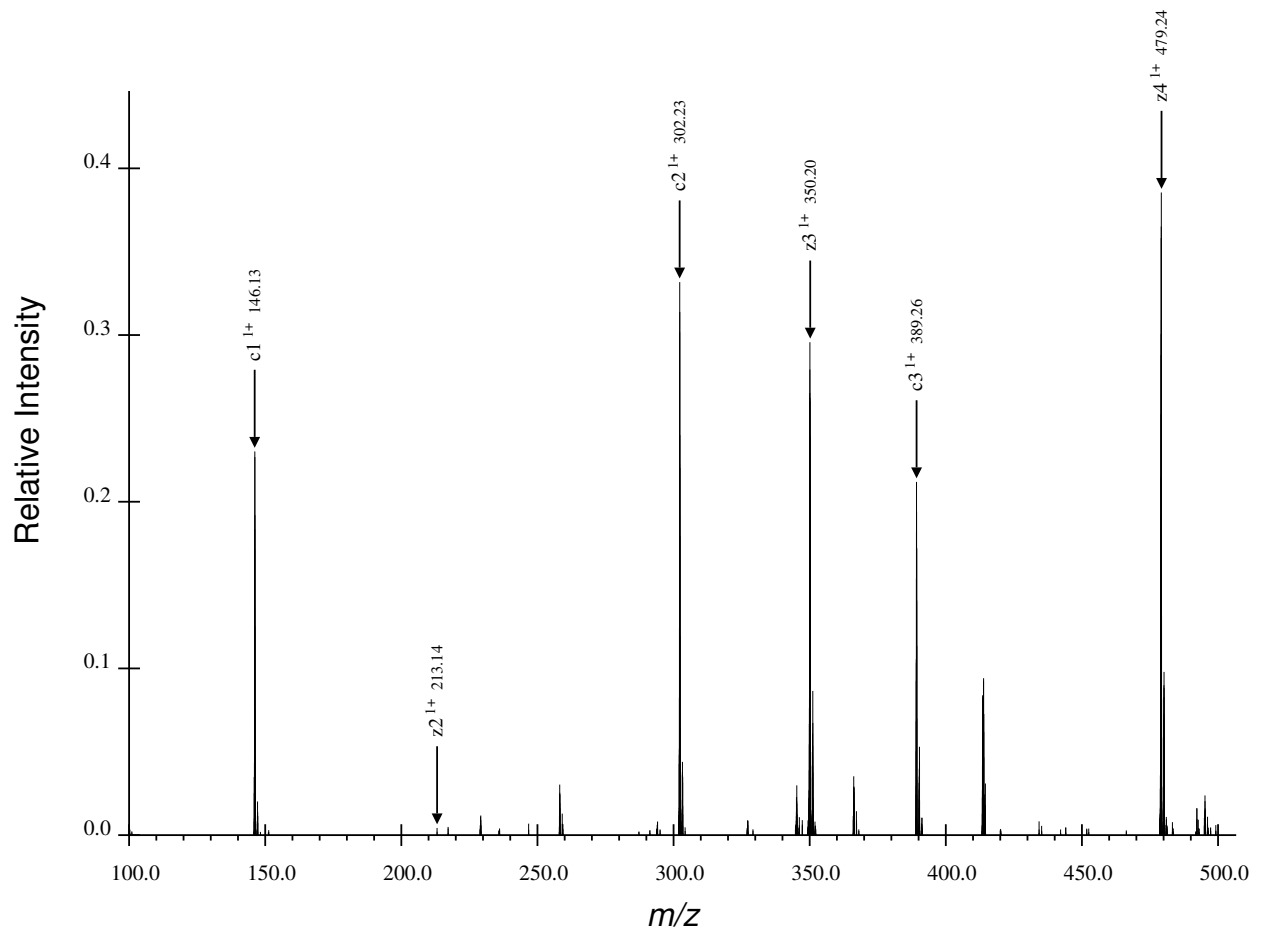

(a) First Region for KRSpYEEHIP, Spectrum 16.dta

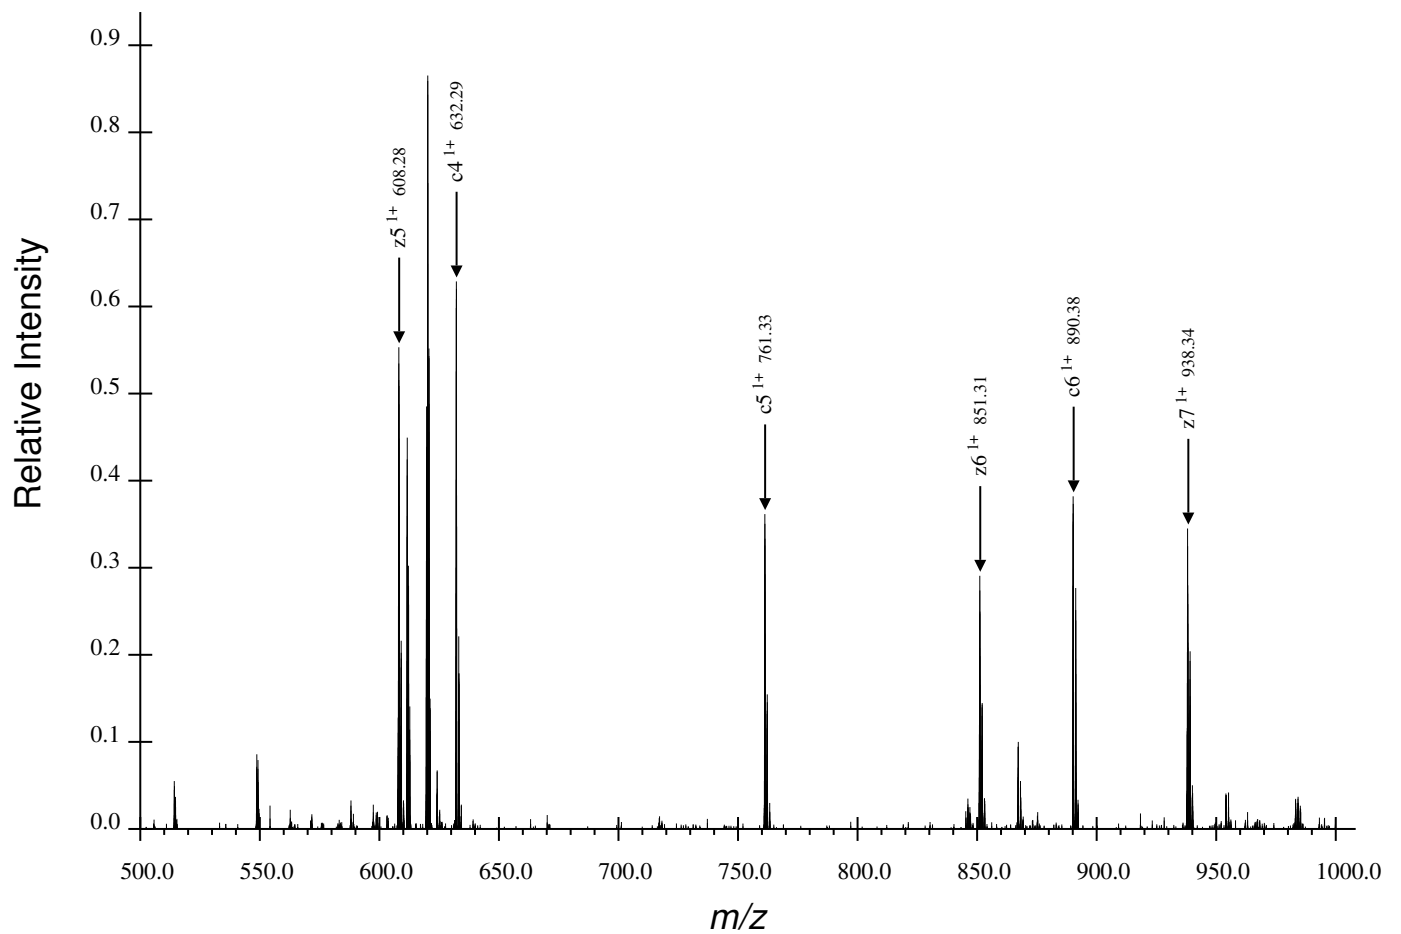

(b) Second Region for KRSpYEEHIP, Spectrum 16.dta

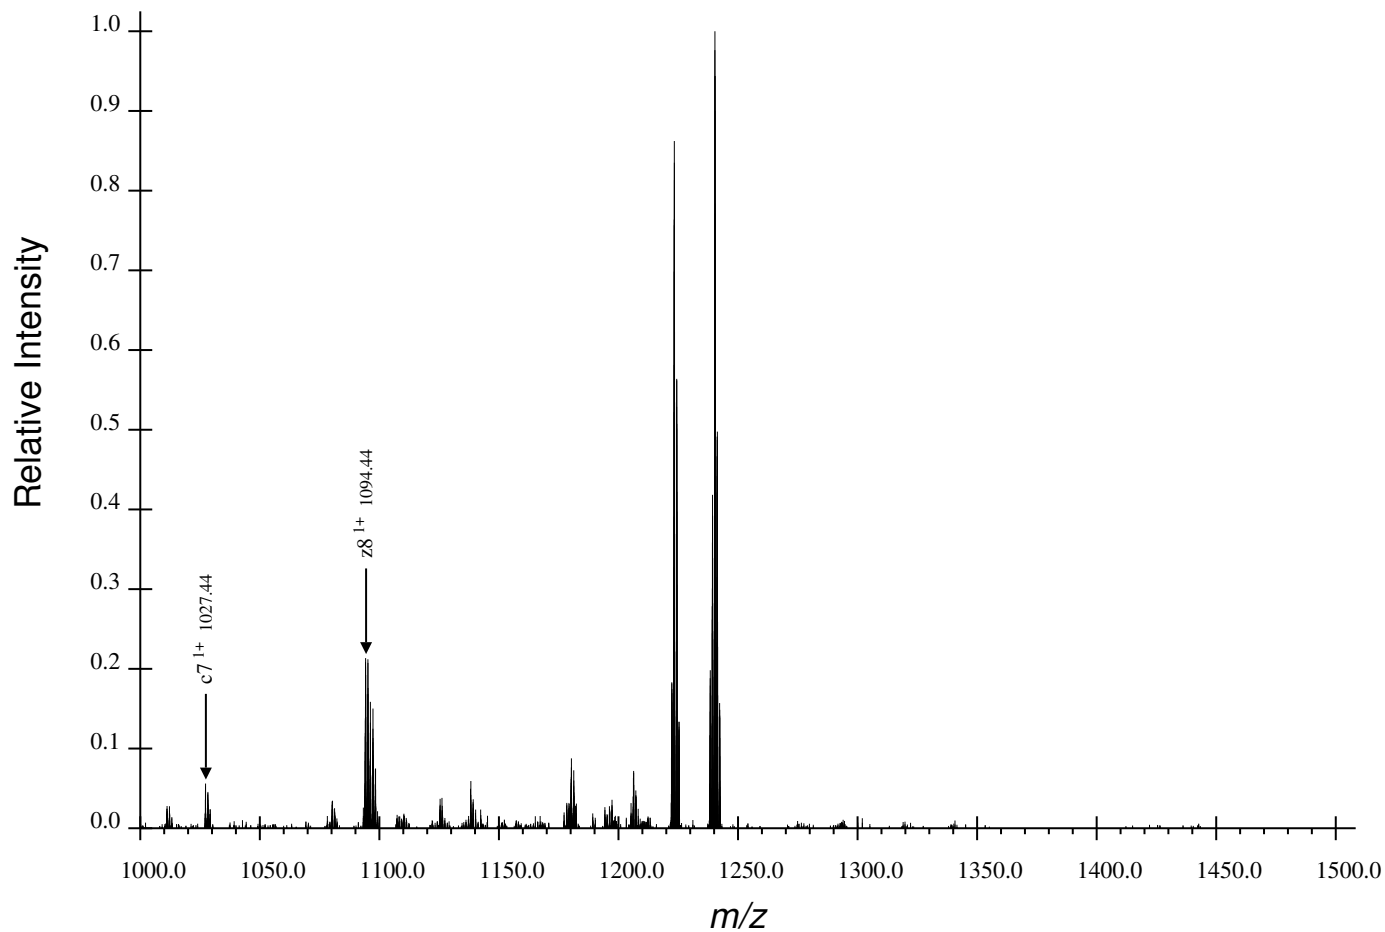

(c) Third Region for KRSpYEEHIP, Spectrum 16.dta

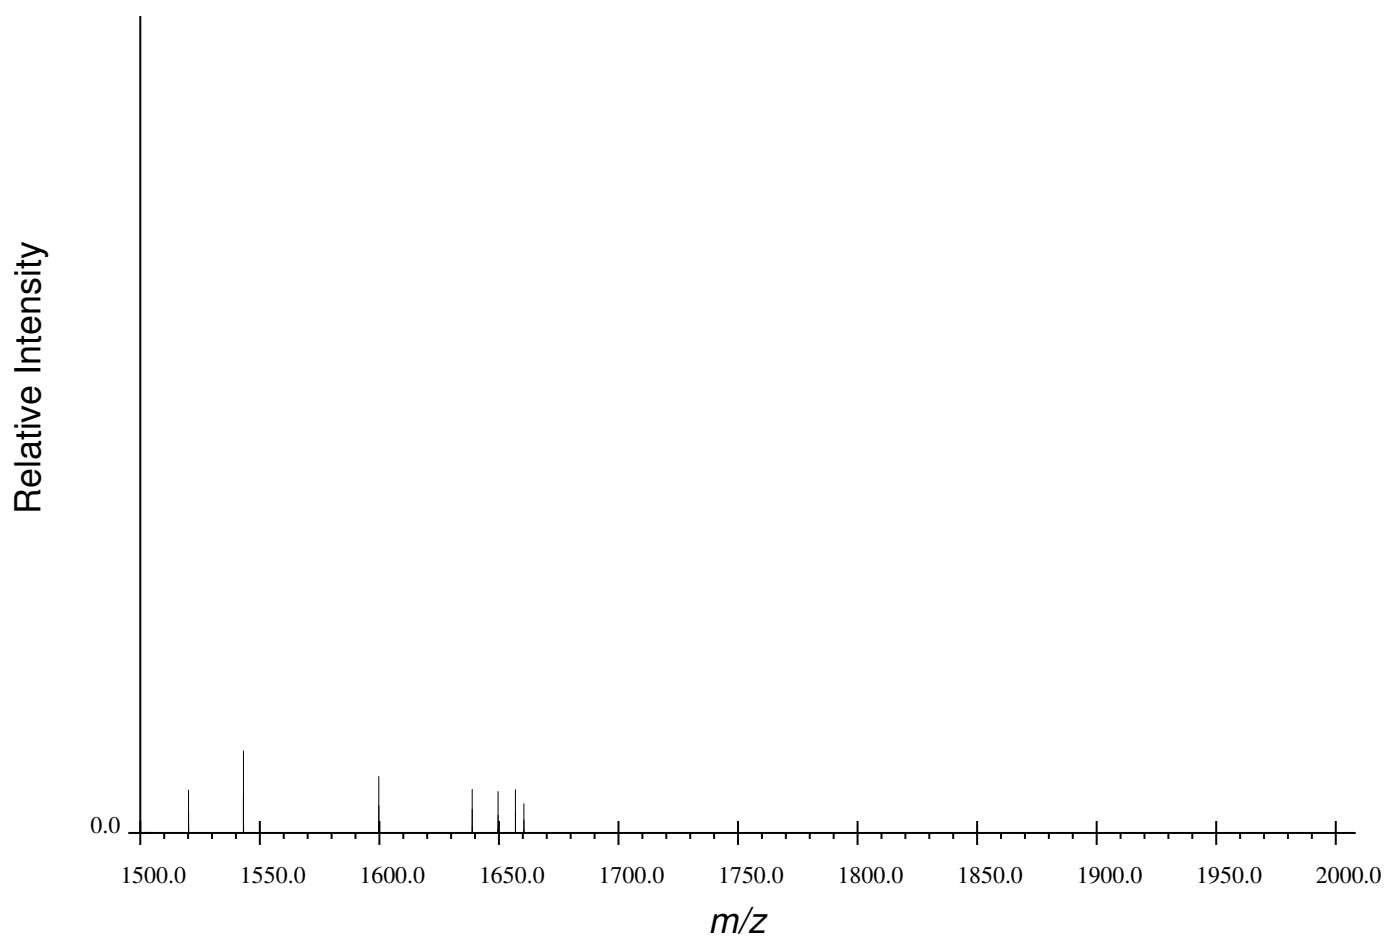

(d) Fourth Region for KRSpYEEHIP, Spectrum 16.dta



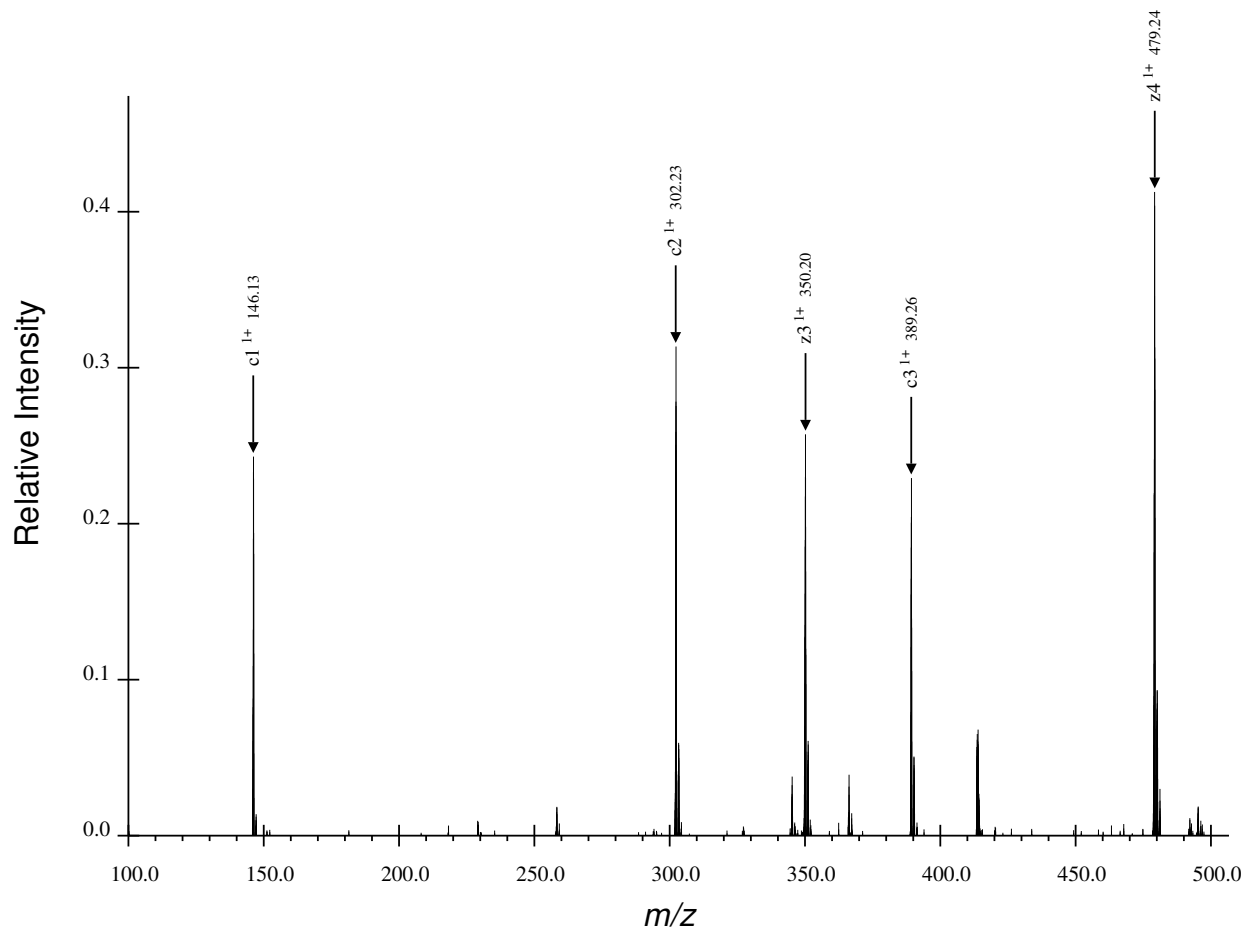

(a) First Region for KRSpYEEHIP, Spectrum 17.dta

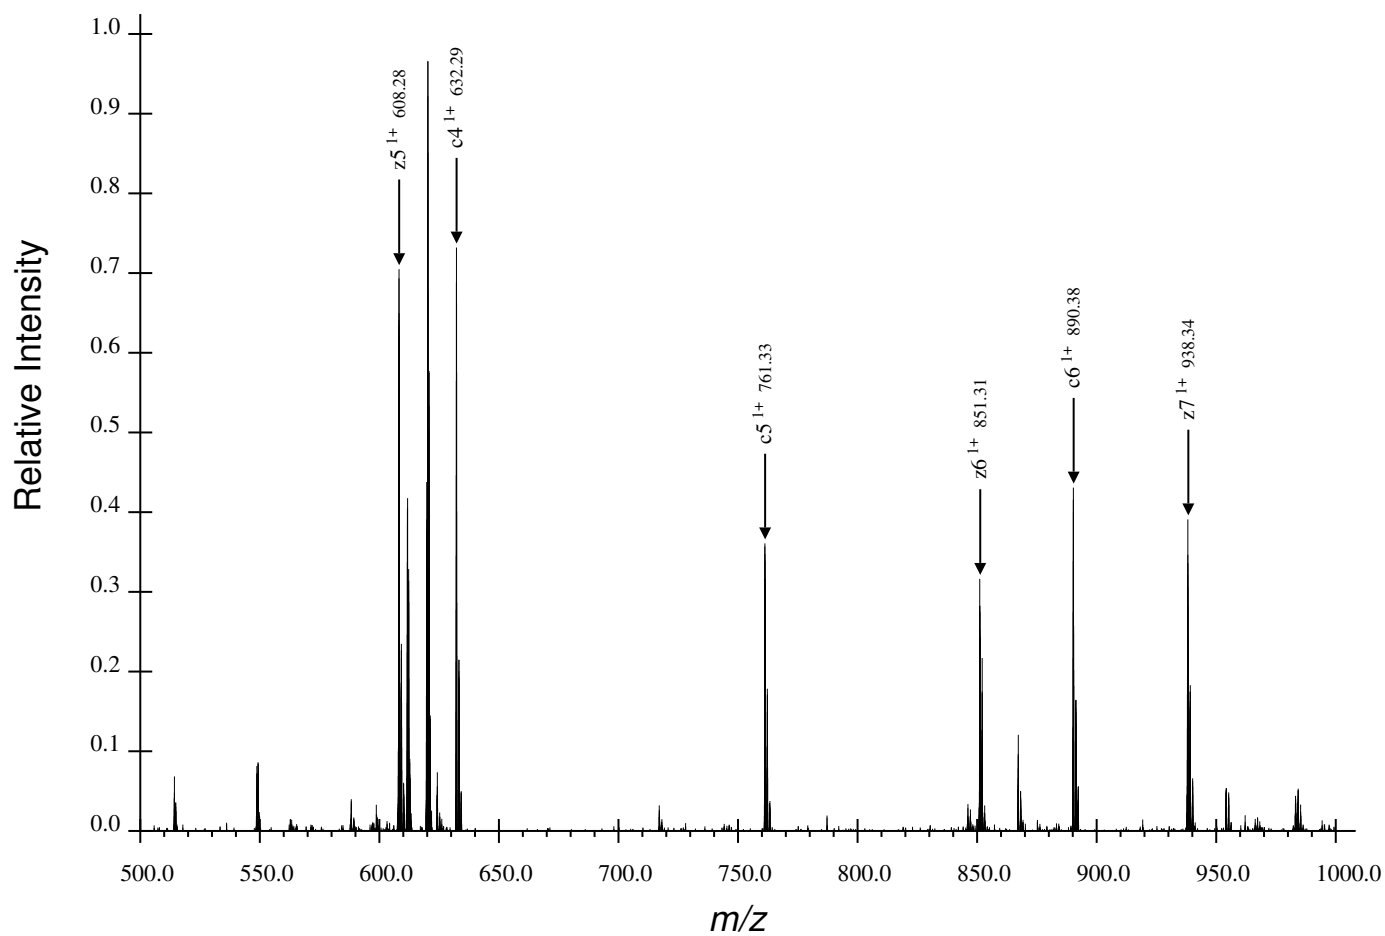

(b) Second Region for KRSpYEEHIP, Spectrum 17.dta

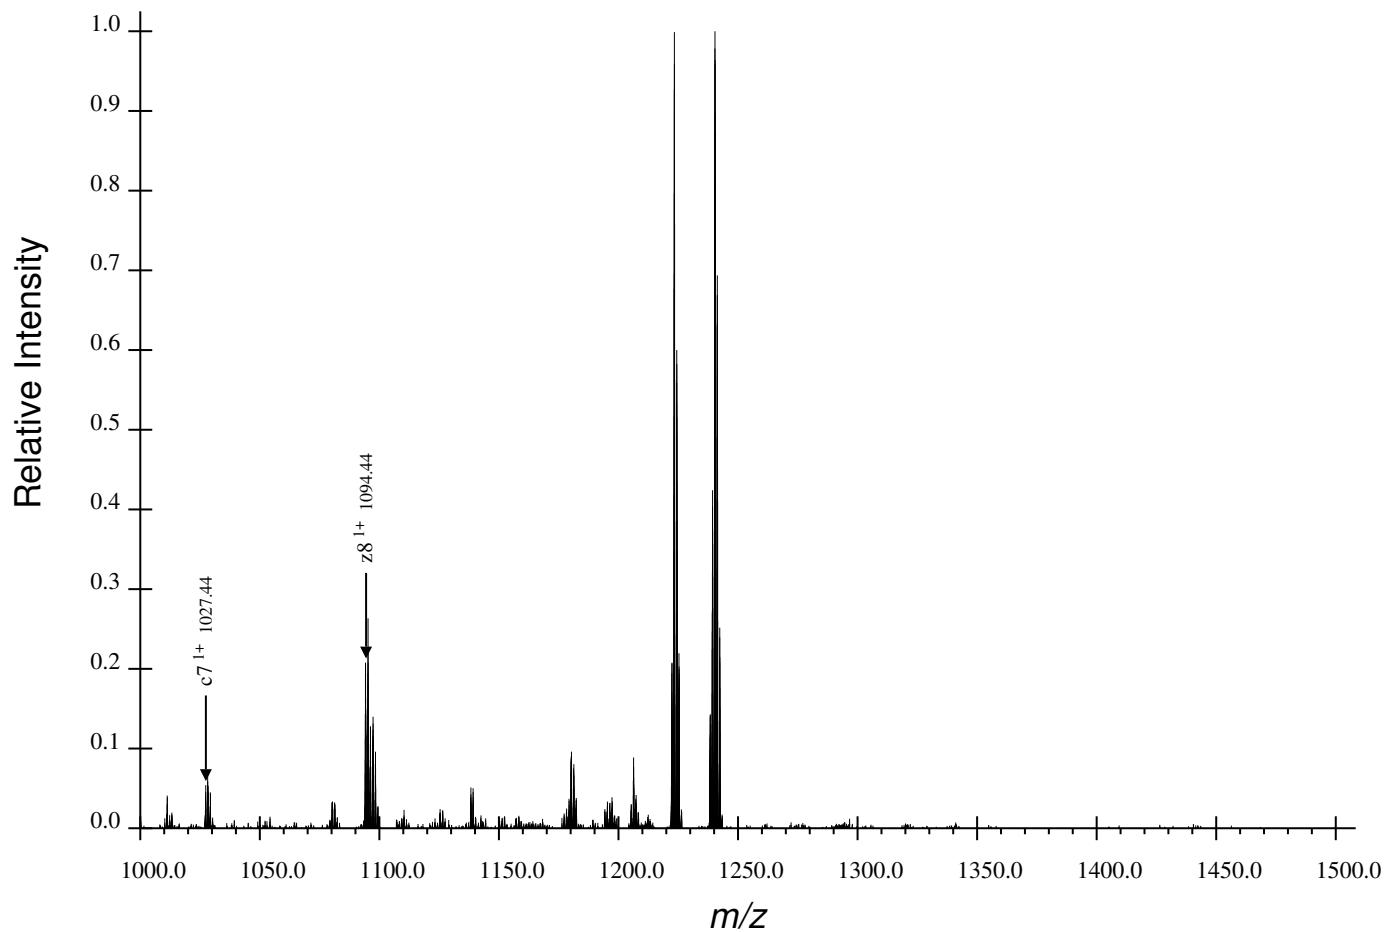

(c) Third Region for KRSpYEEHIP, Spectrum 17.dta

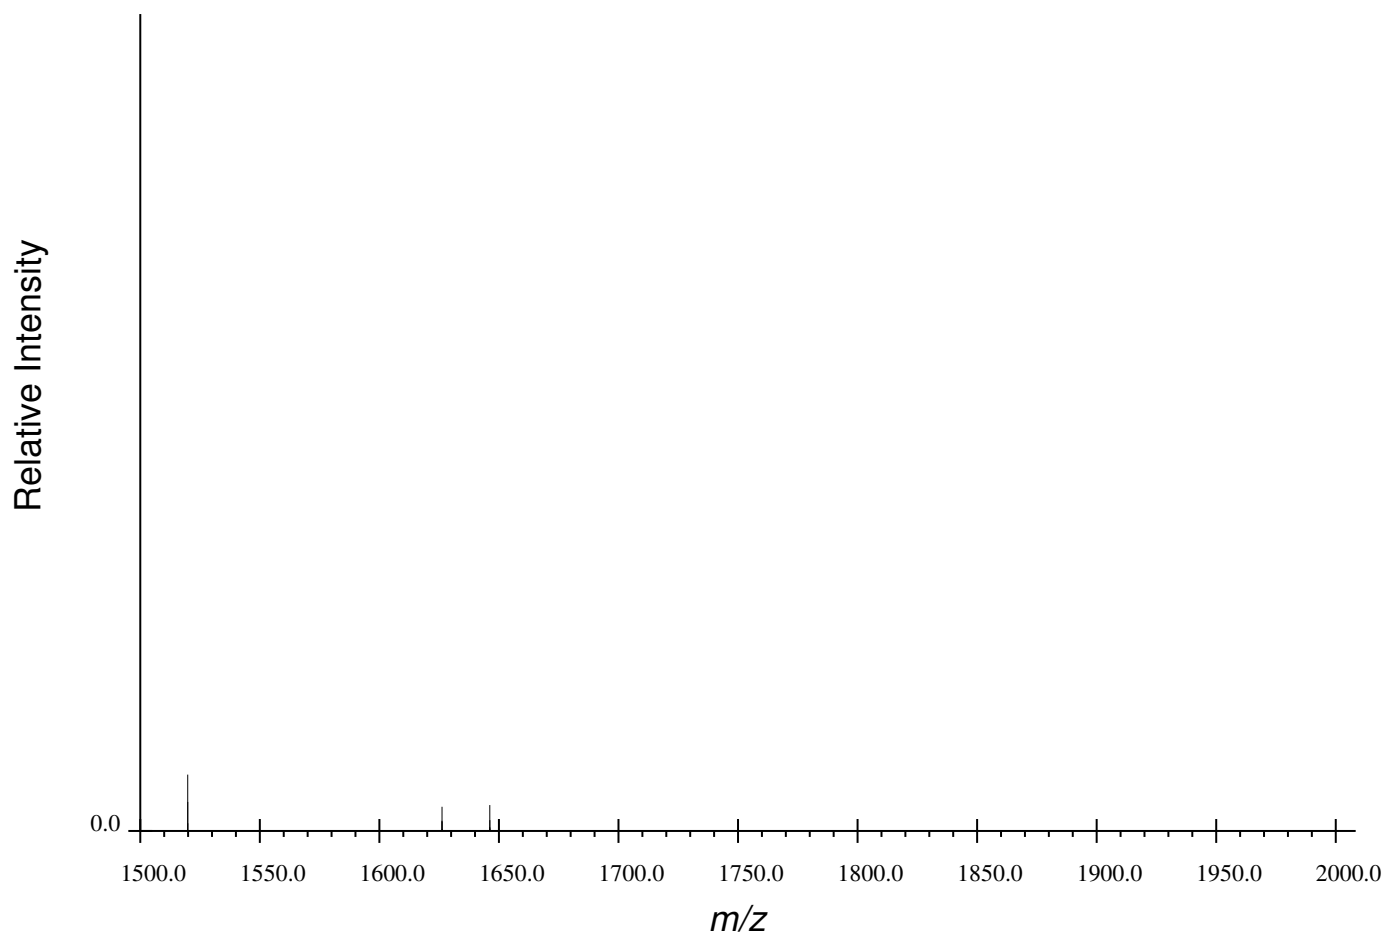

(d) Fourth Region for KRSpYEEHIP, Spectrum 17.dta

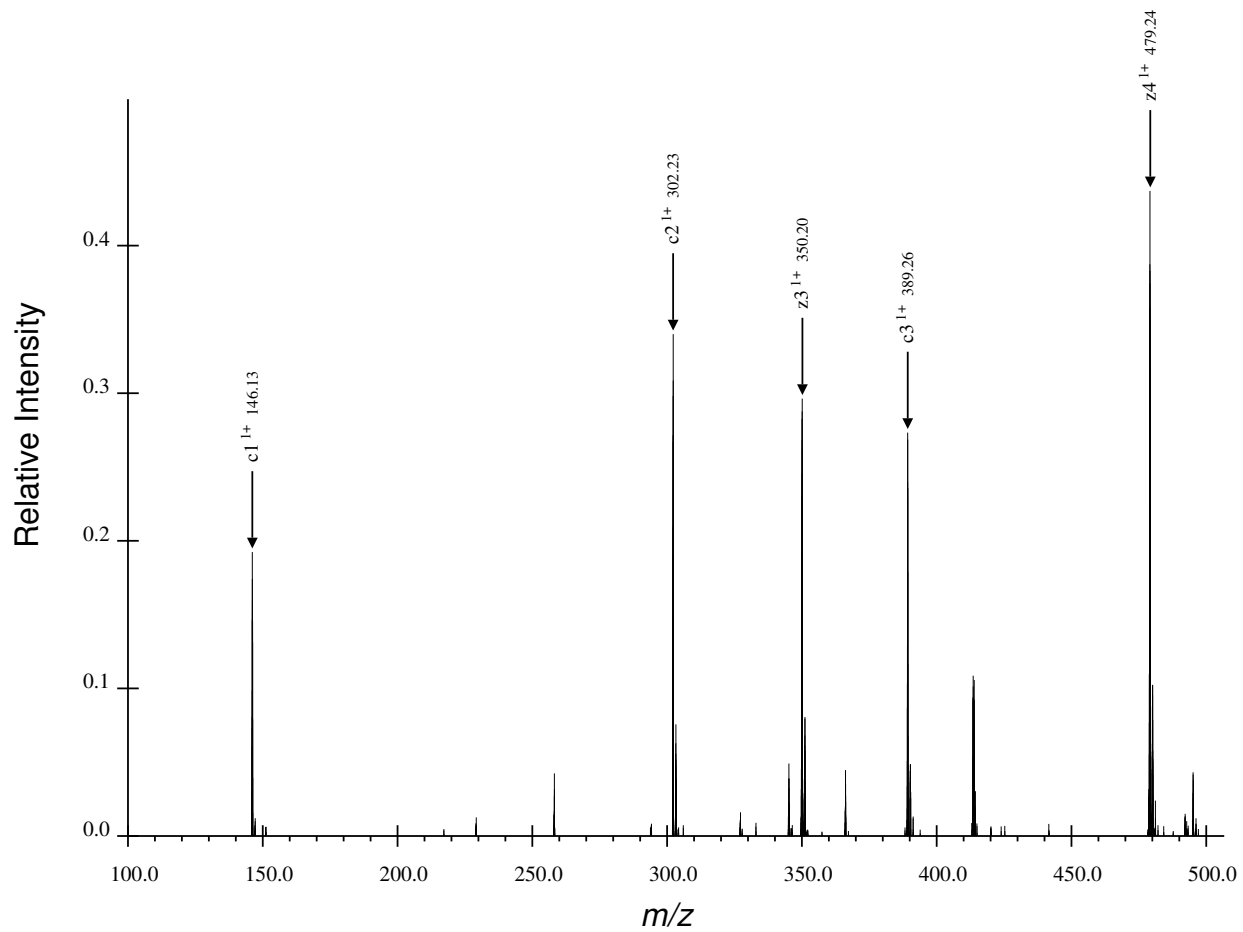

(a) First Region for KRSpYEEHIP, Spectrum 18.dta

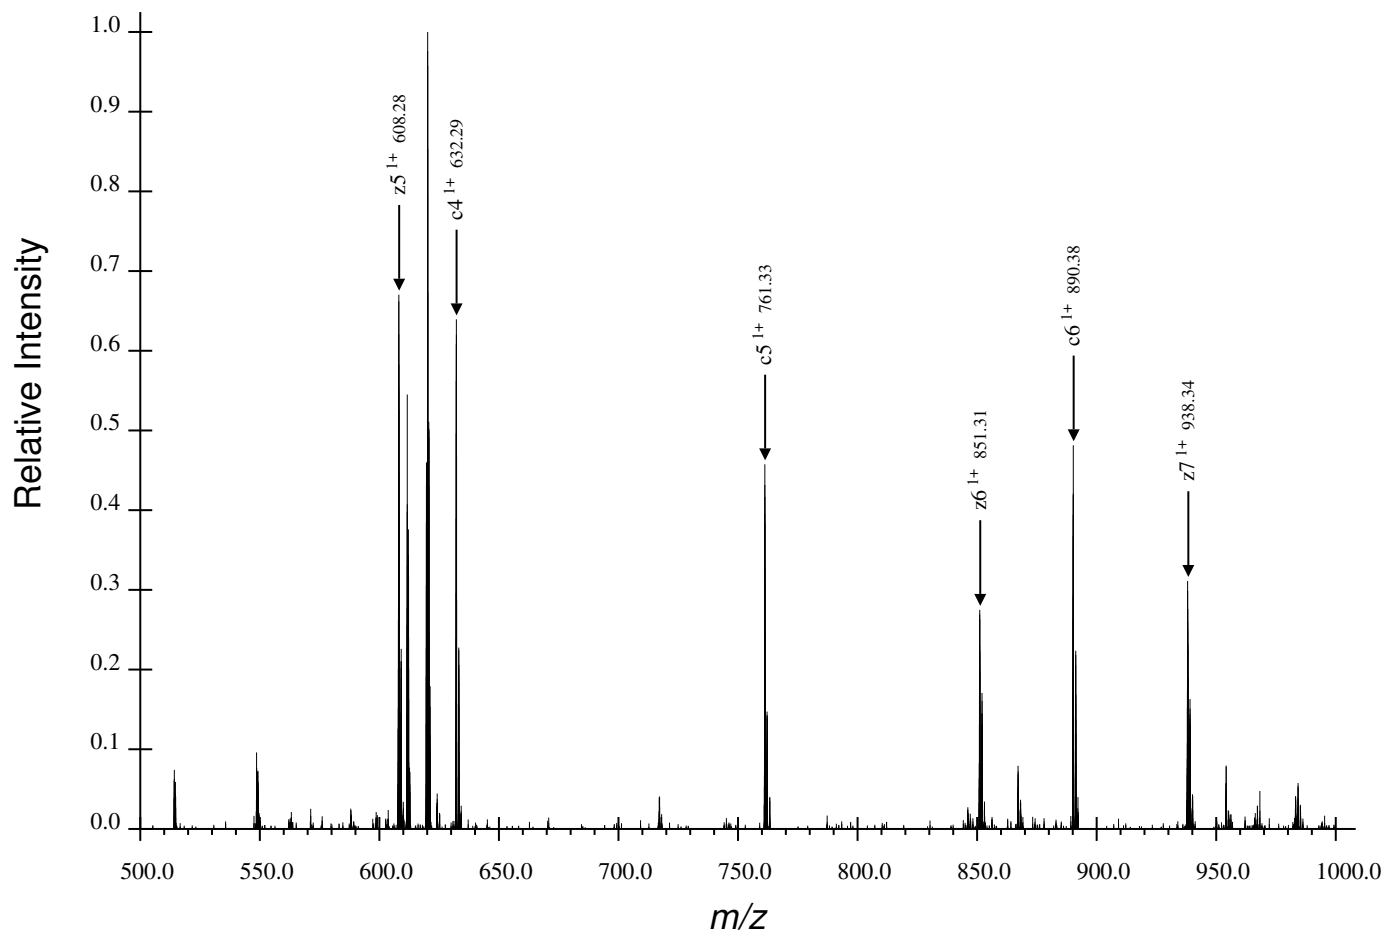

(b) Second Region for KRSpYEEHIP, Spectrum 18.dta

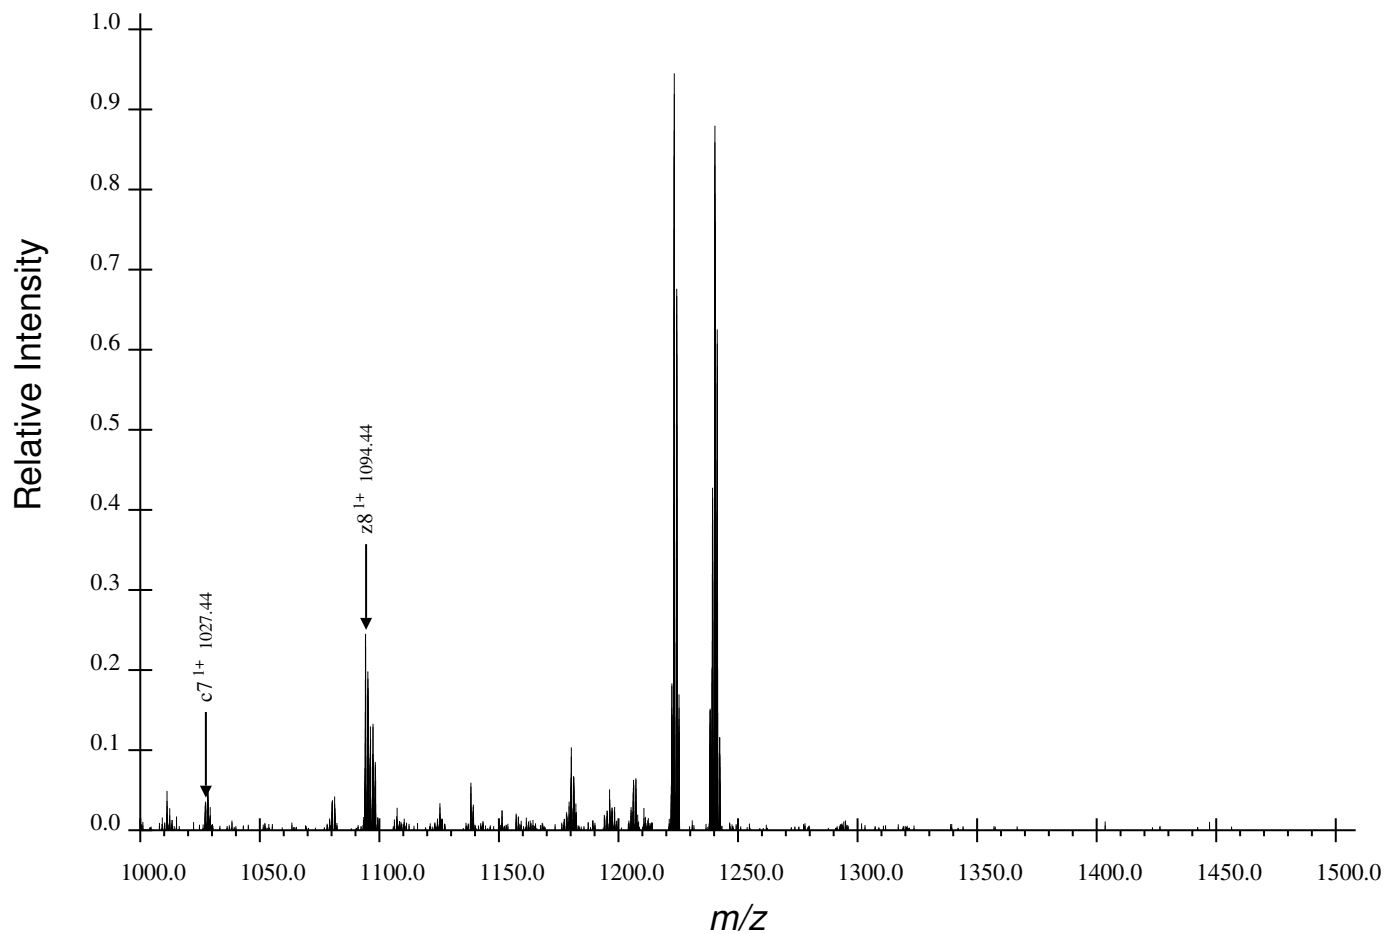

(c) Third Region for KRSpYEEHIP, Spectrum 18.dta

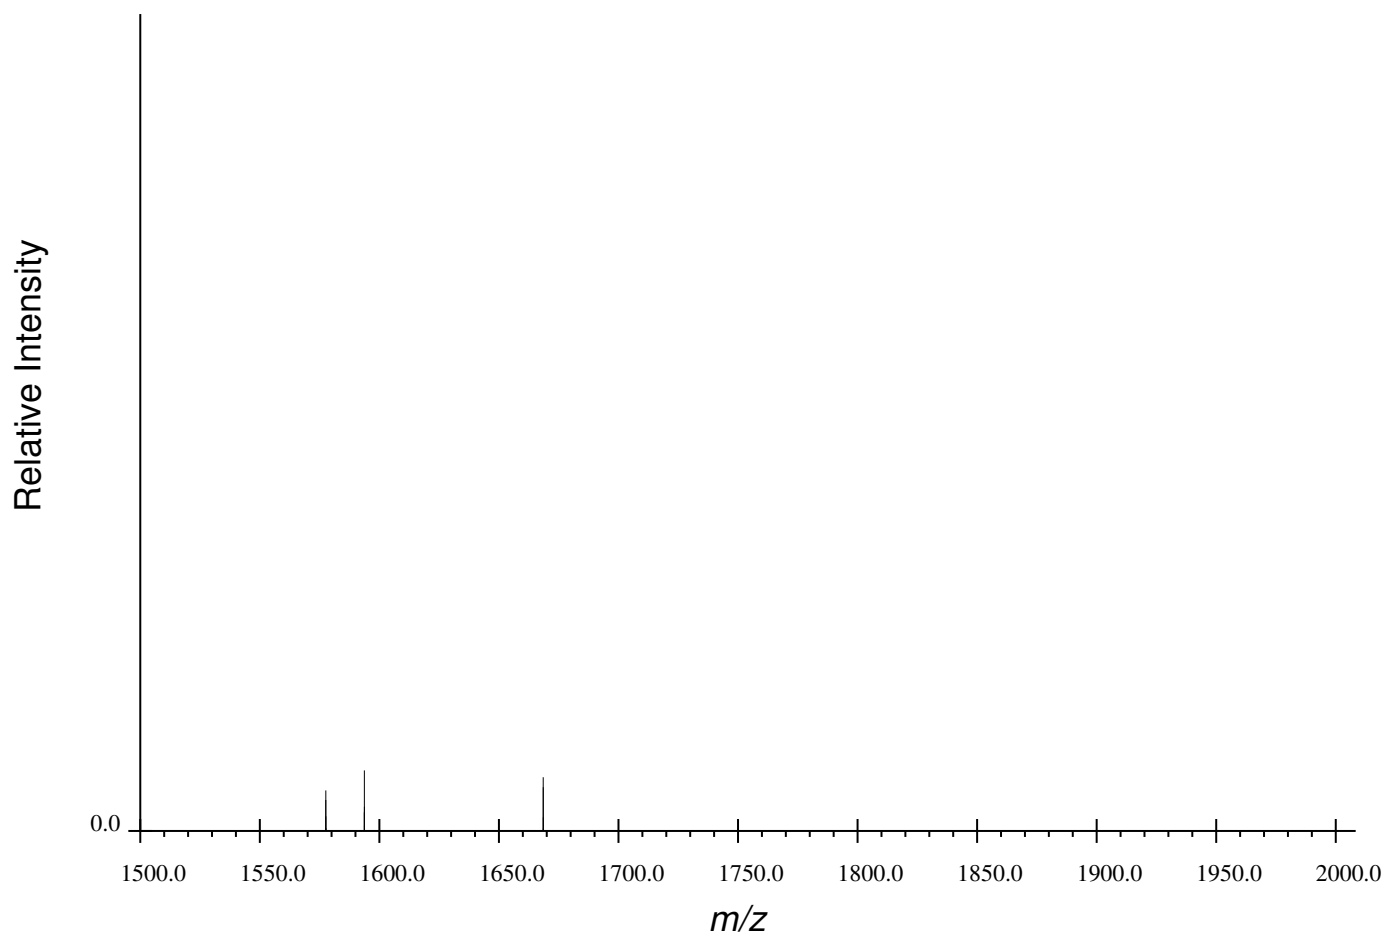

(d) Fourth Region for KRSpYEEHIP, Spectrum 18.dta

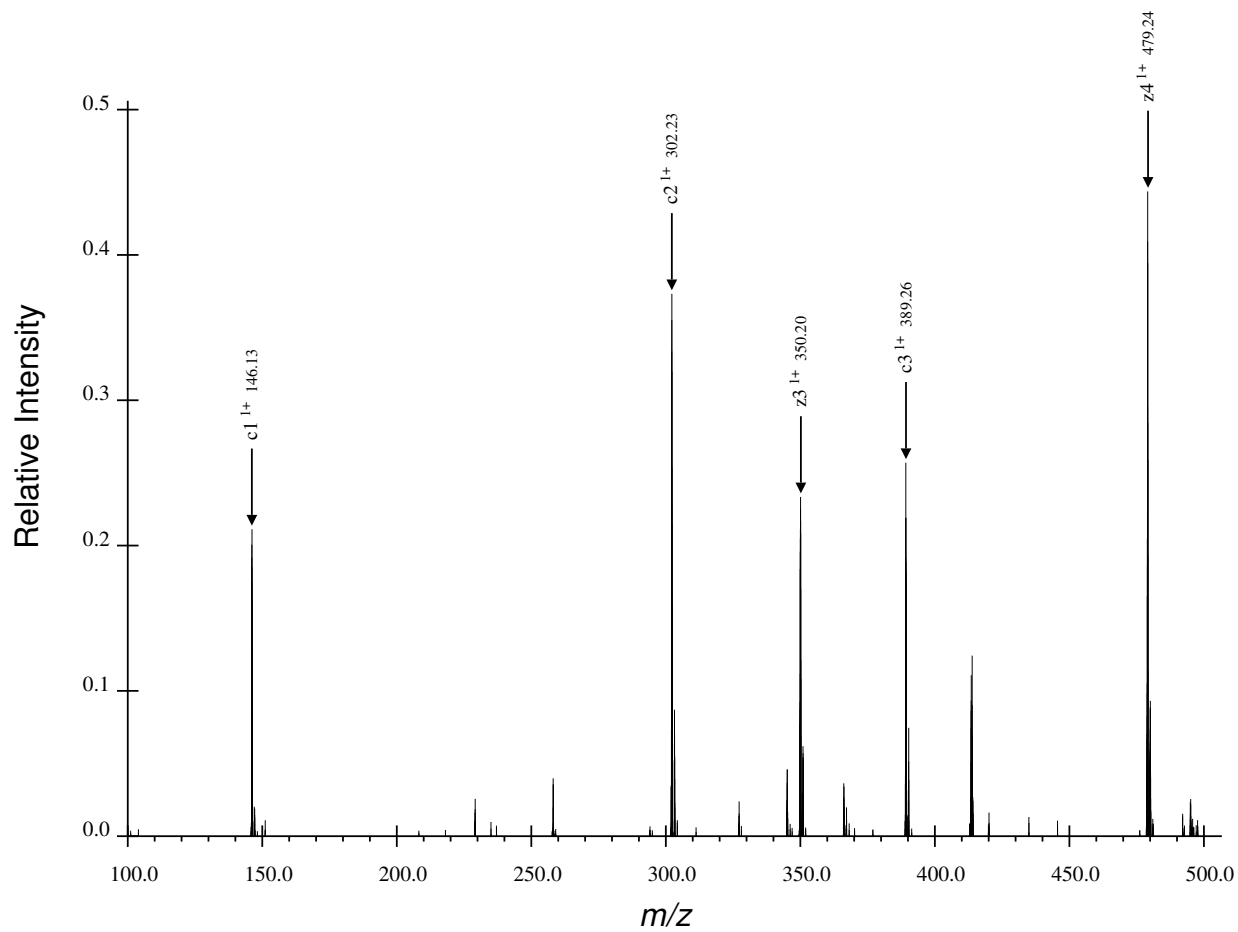

(a) First Region for KRSpYEEHIP, Spectrum 19.dta

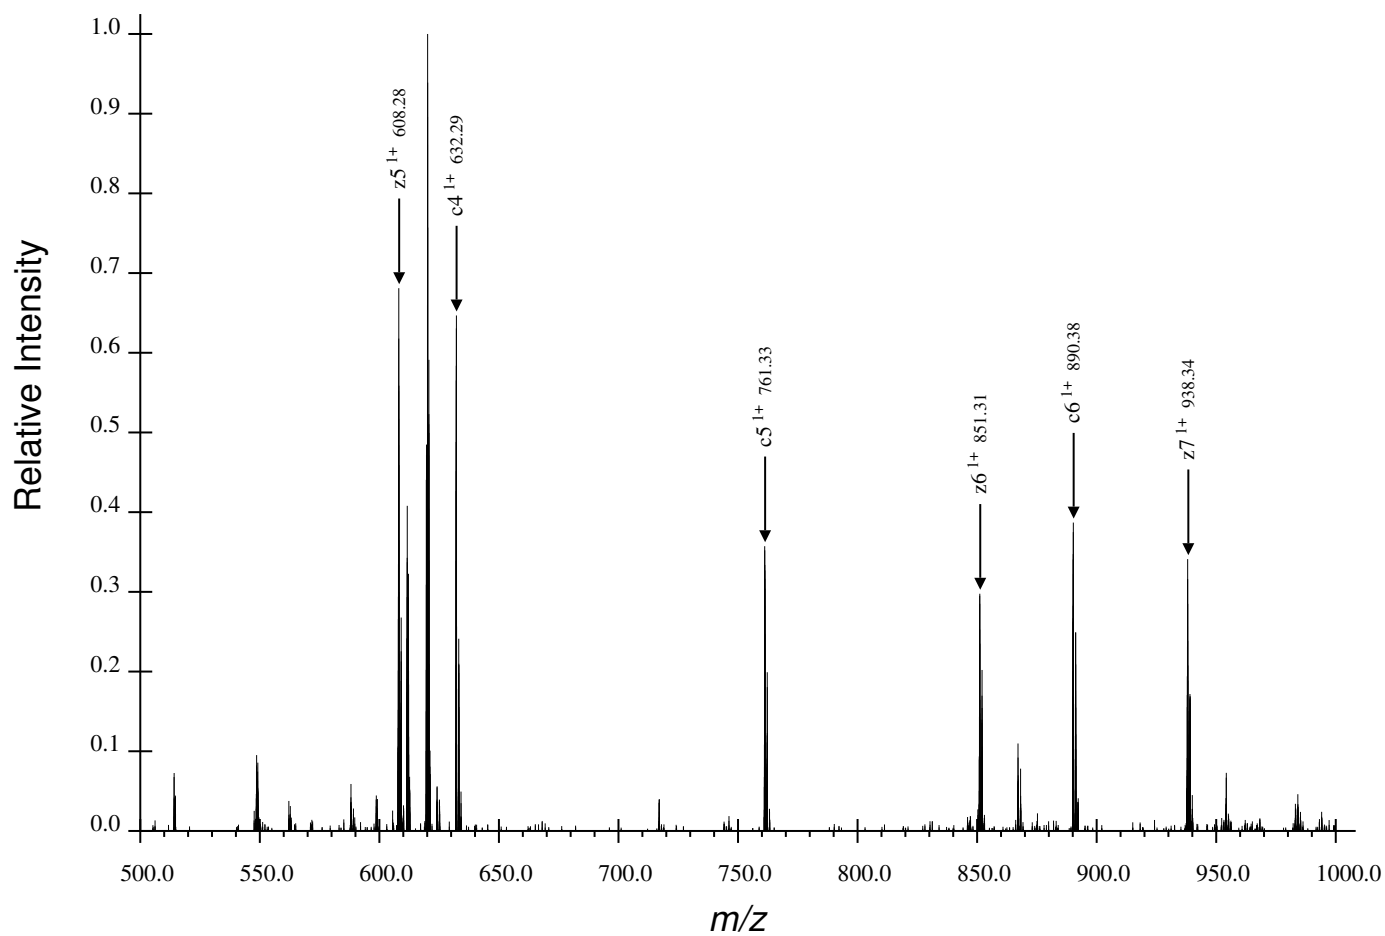

(b) Second Region for KRSpYEEHIP, Spectrum 19.dta

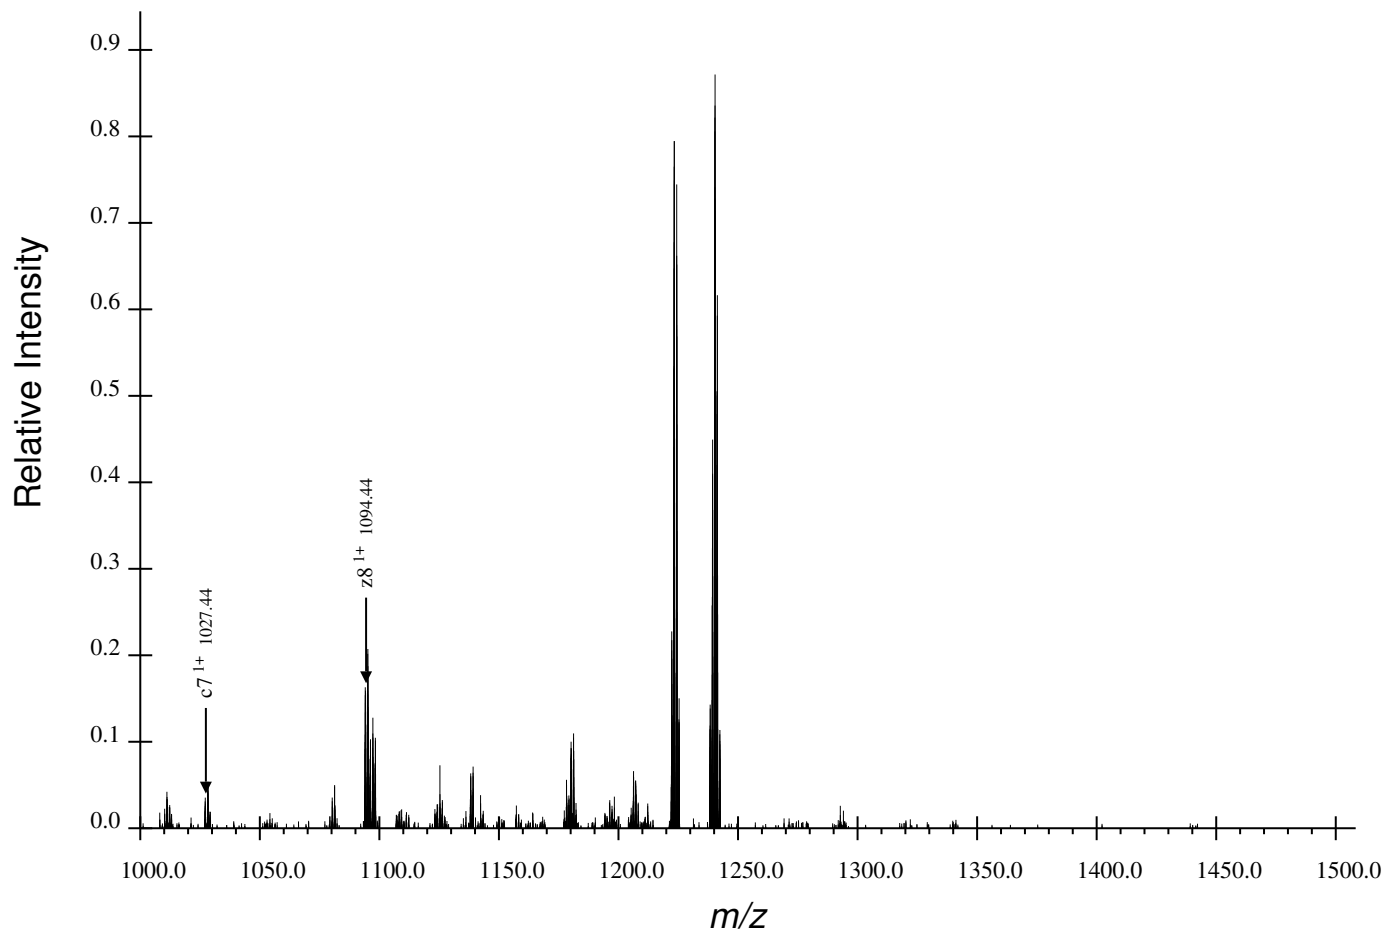

(c) Third Region for KRSpYEEHIP, Spectrum 19.dta

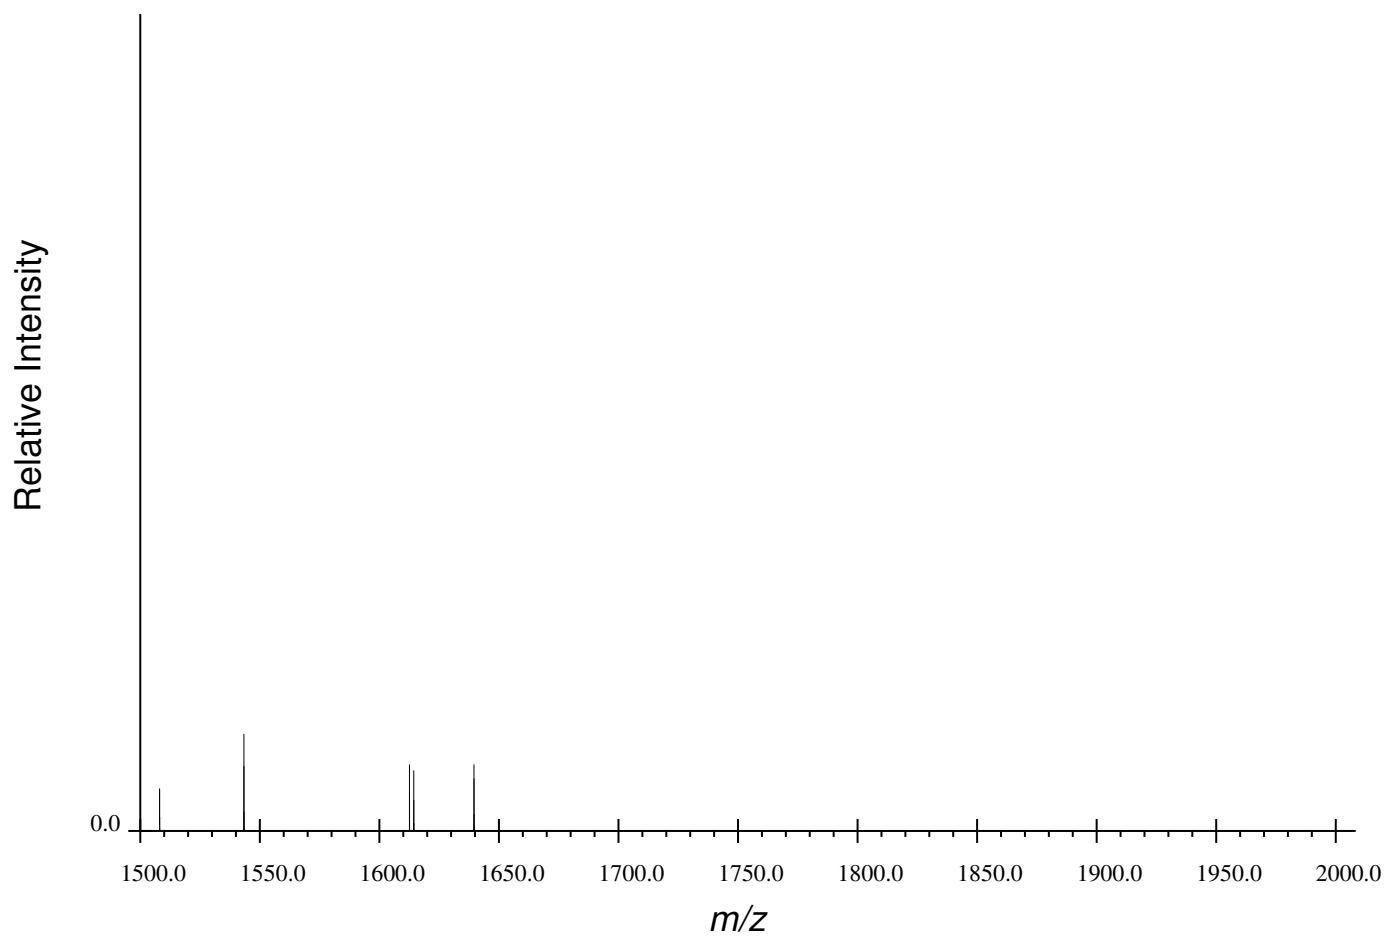

(d) Fourth Region for KRSpYEEHIP, Spectrum 19.dta

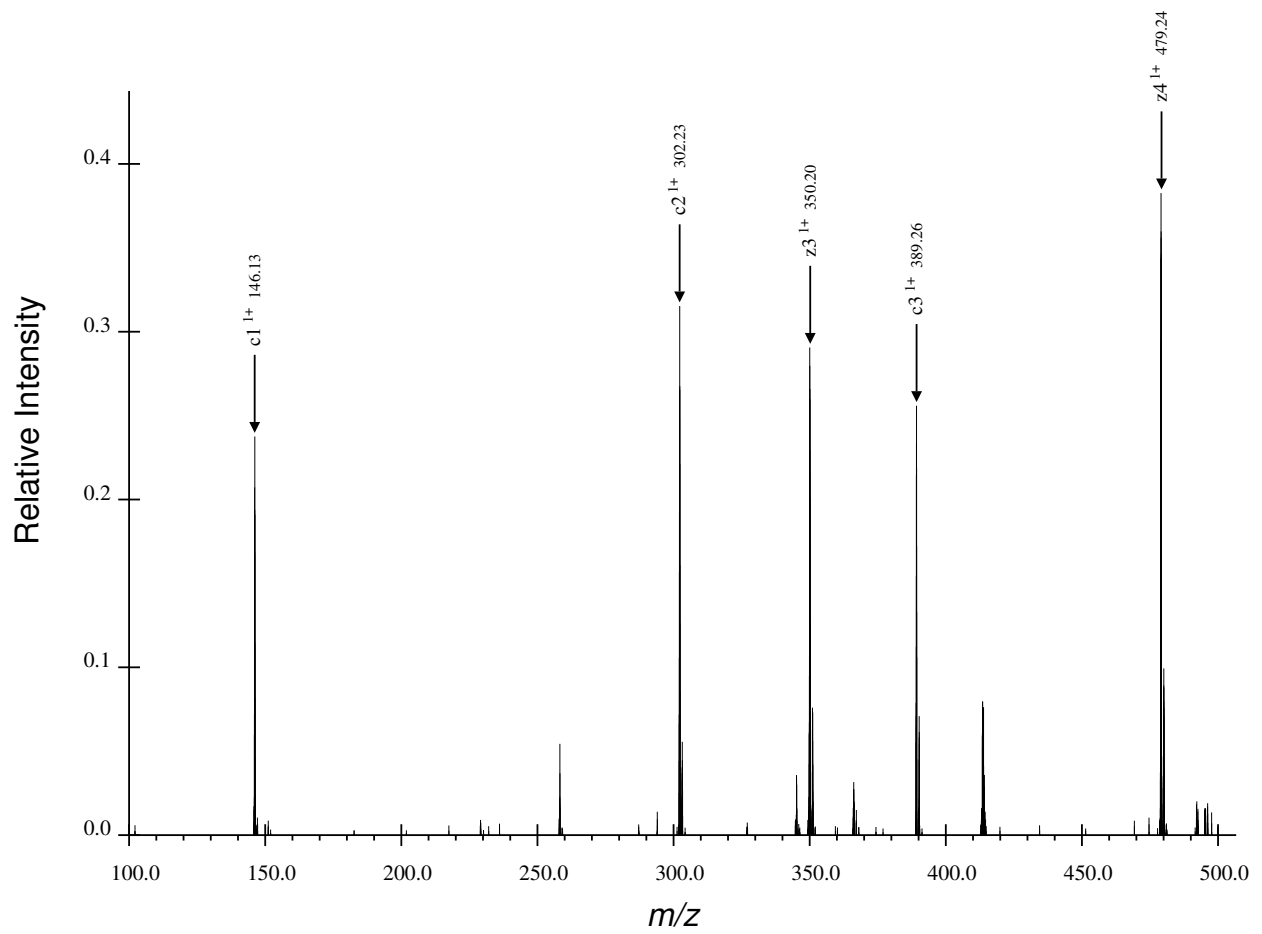

(a) First Region for KRSpYEEHIP, Spectrum 20.dta

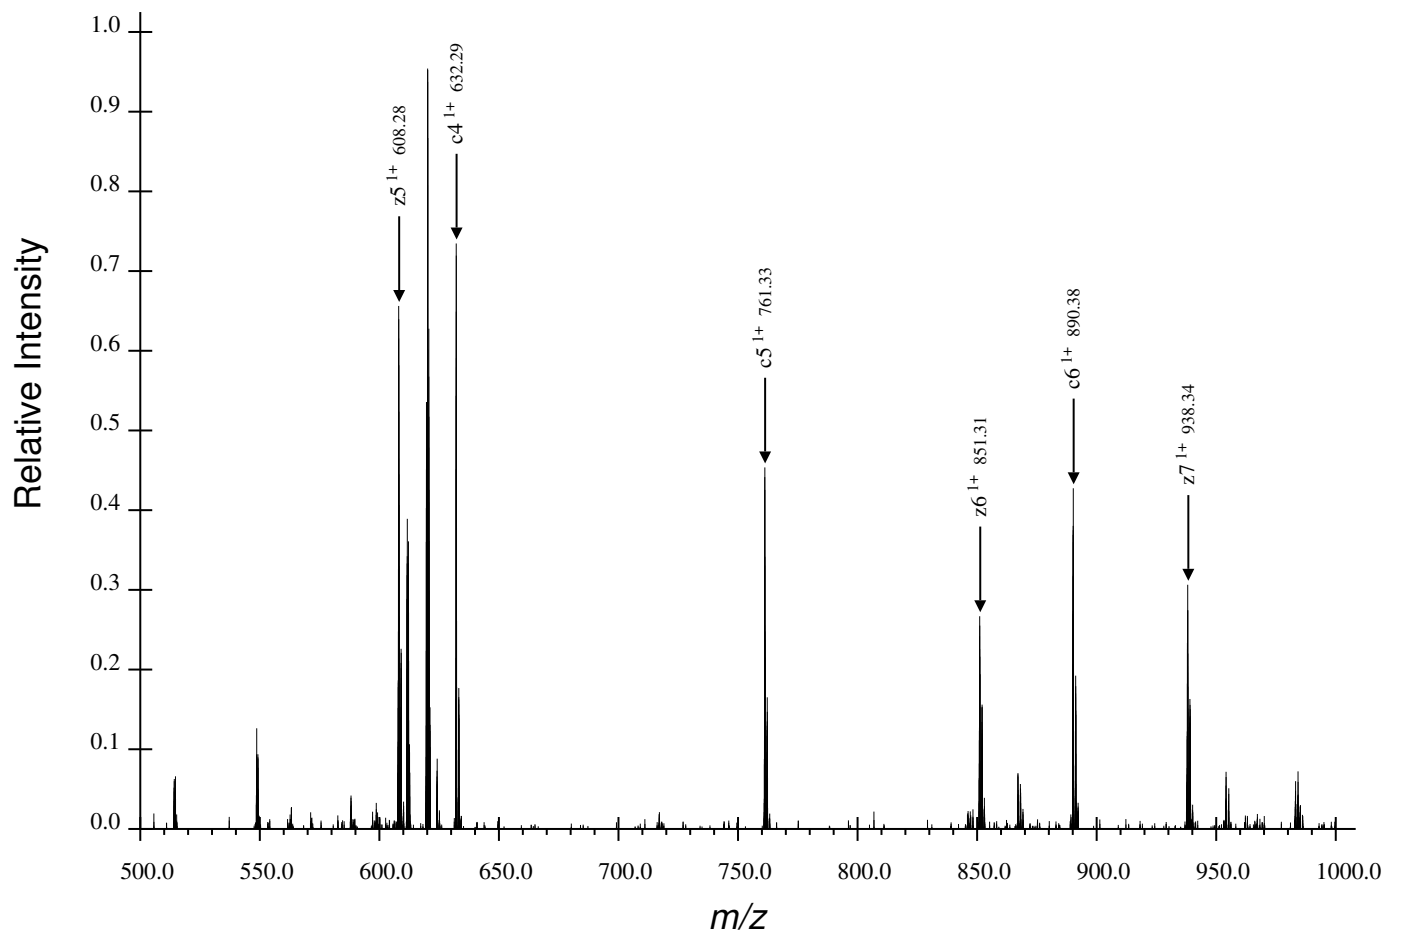

(b) Second Region for KRSpYEEHIP, Spectrum 20.dta

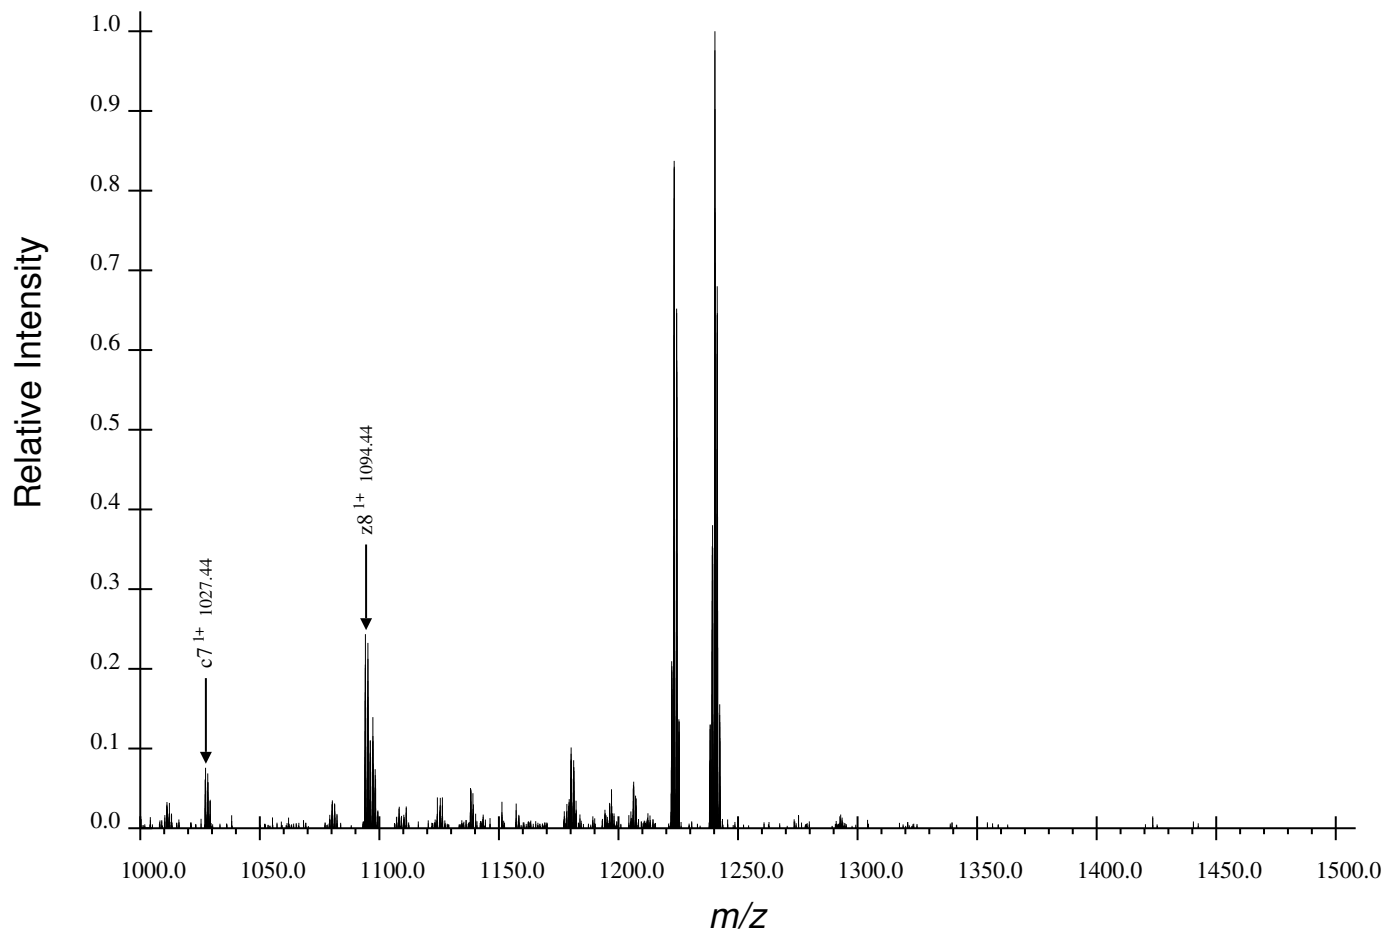

(c) Third Region for KRSpYEEHIP, Spectrum 20.dta

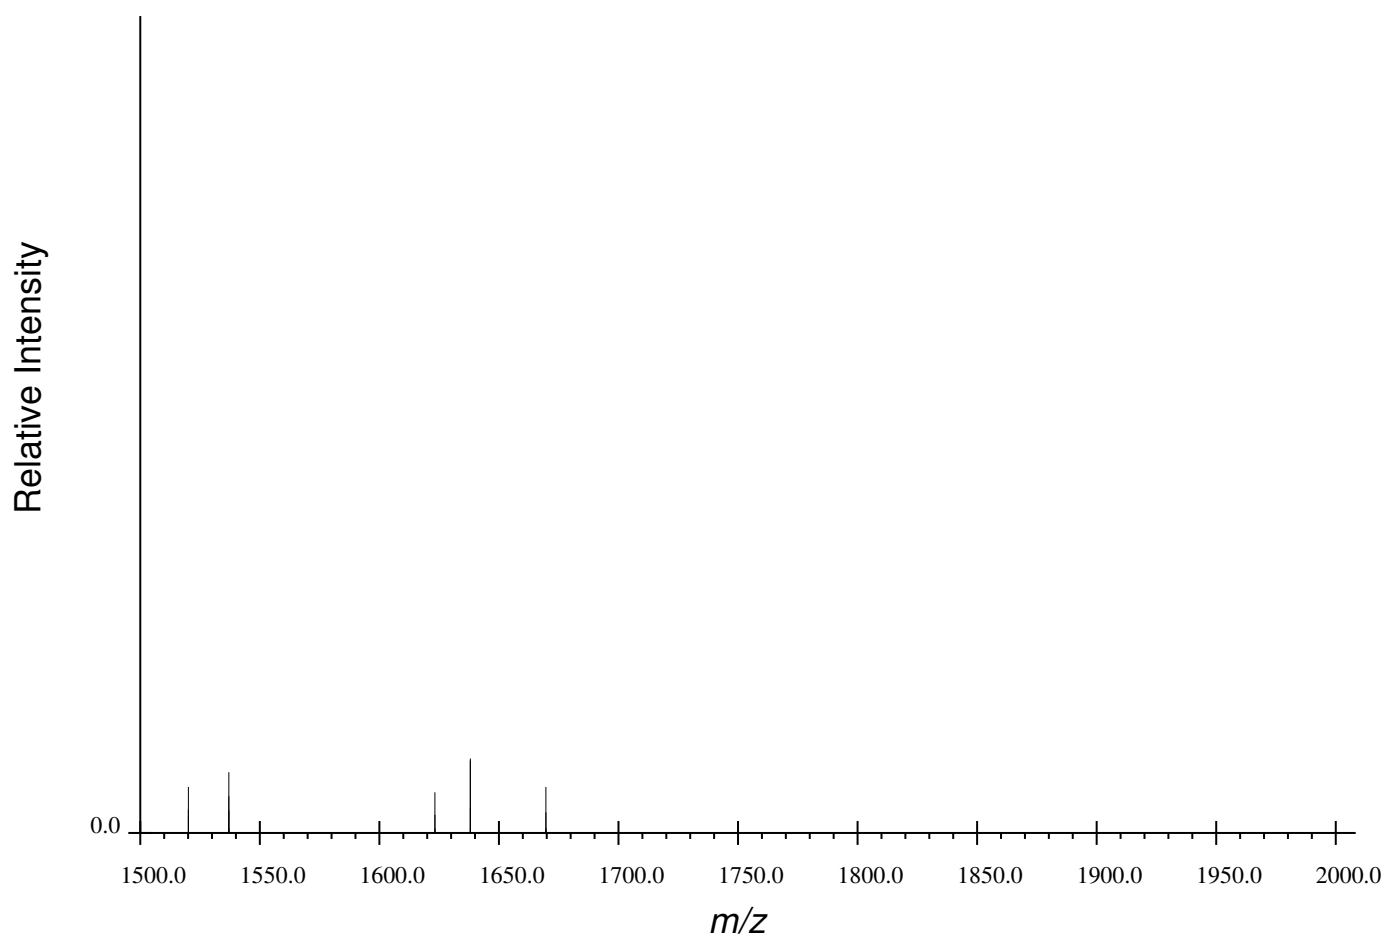

(d) Fourth Region for KRSpYEEHIP, Spectrum 20.dta



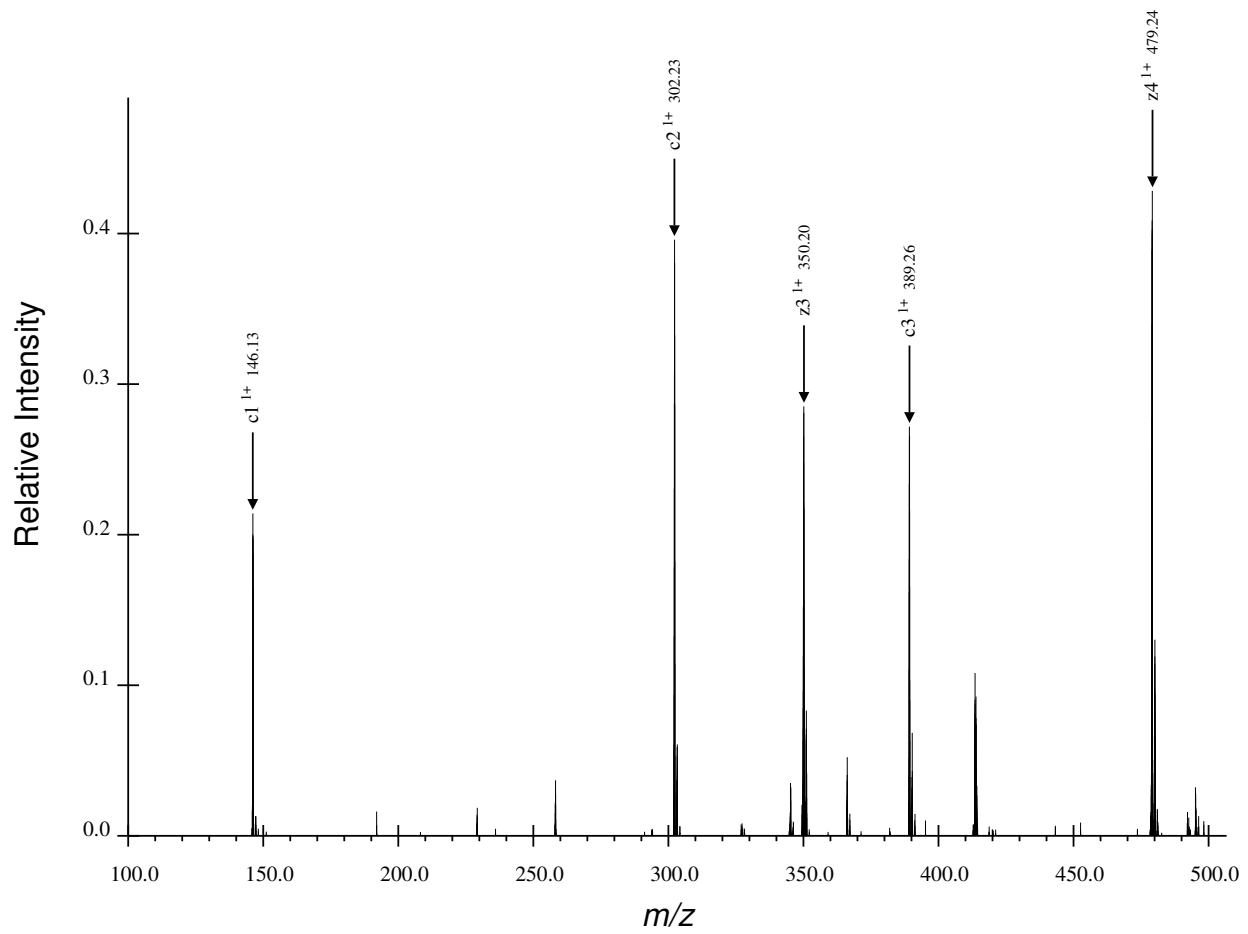

(a) First Region for KRSpYEEHIP, Spectrum 21.dta

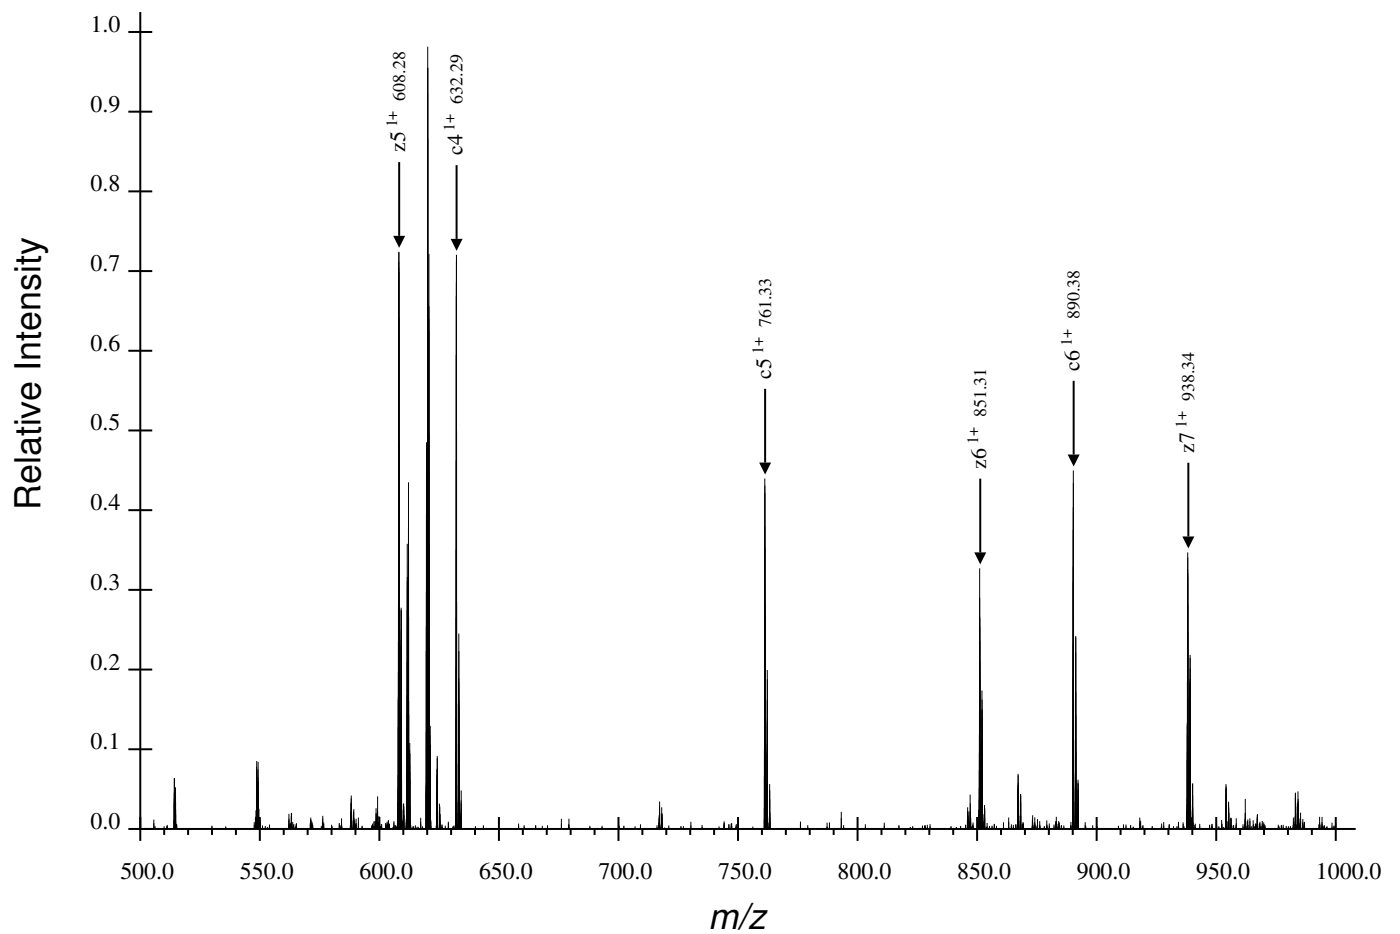

(b) Second Region for KRSpYEEHIP, Spectrum 21.dta

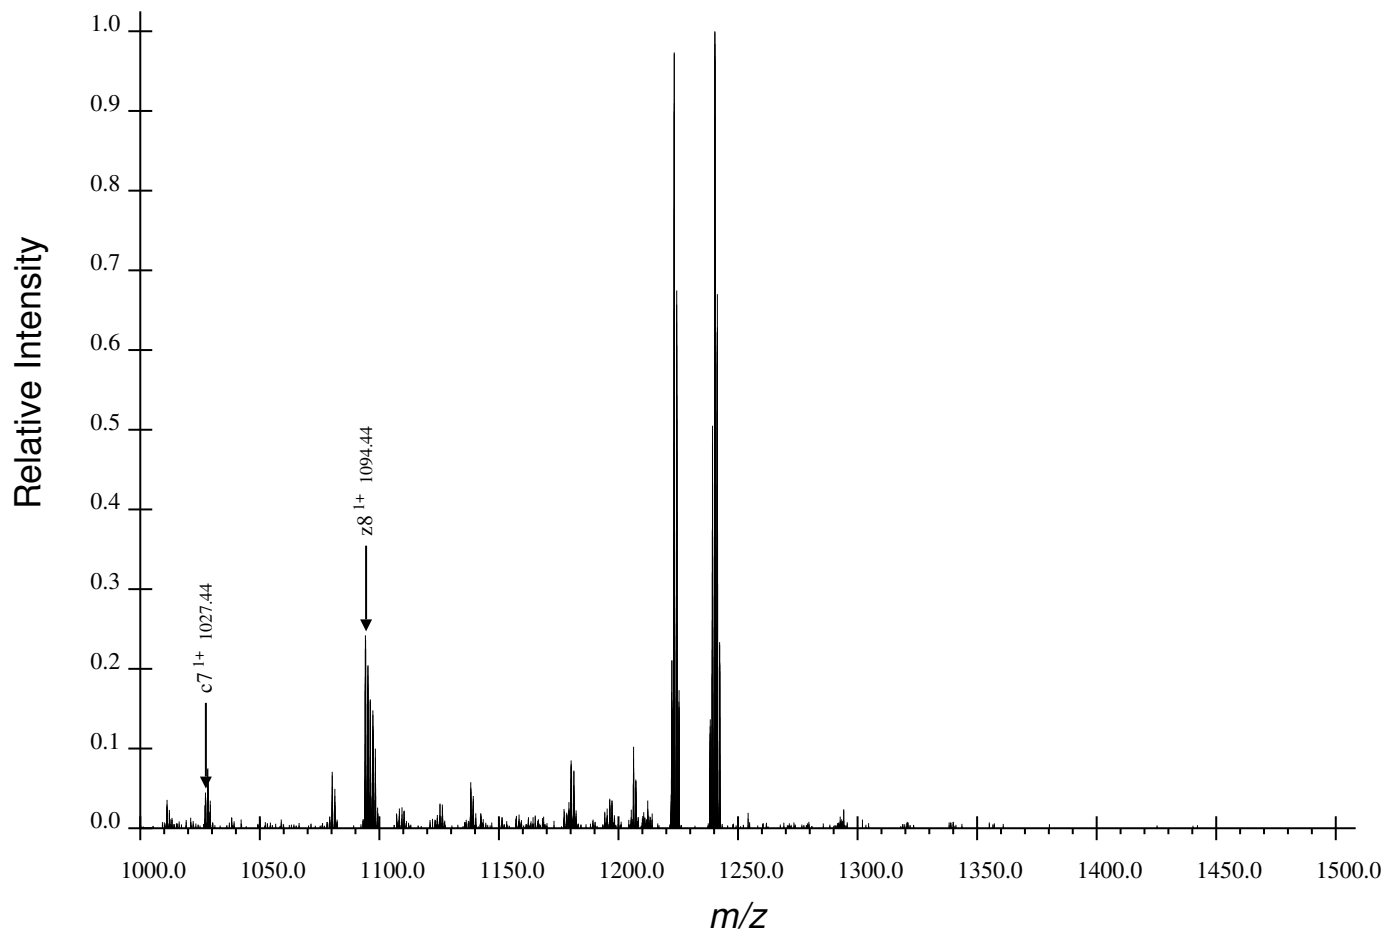

(c) Third Region for KRSpYEEHIP, Spectrum 21.dta

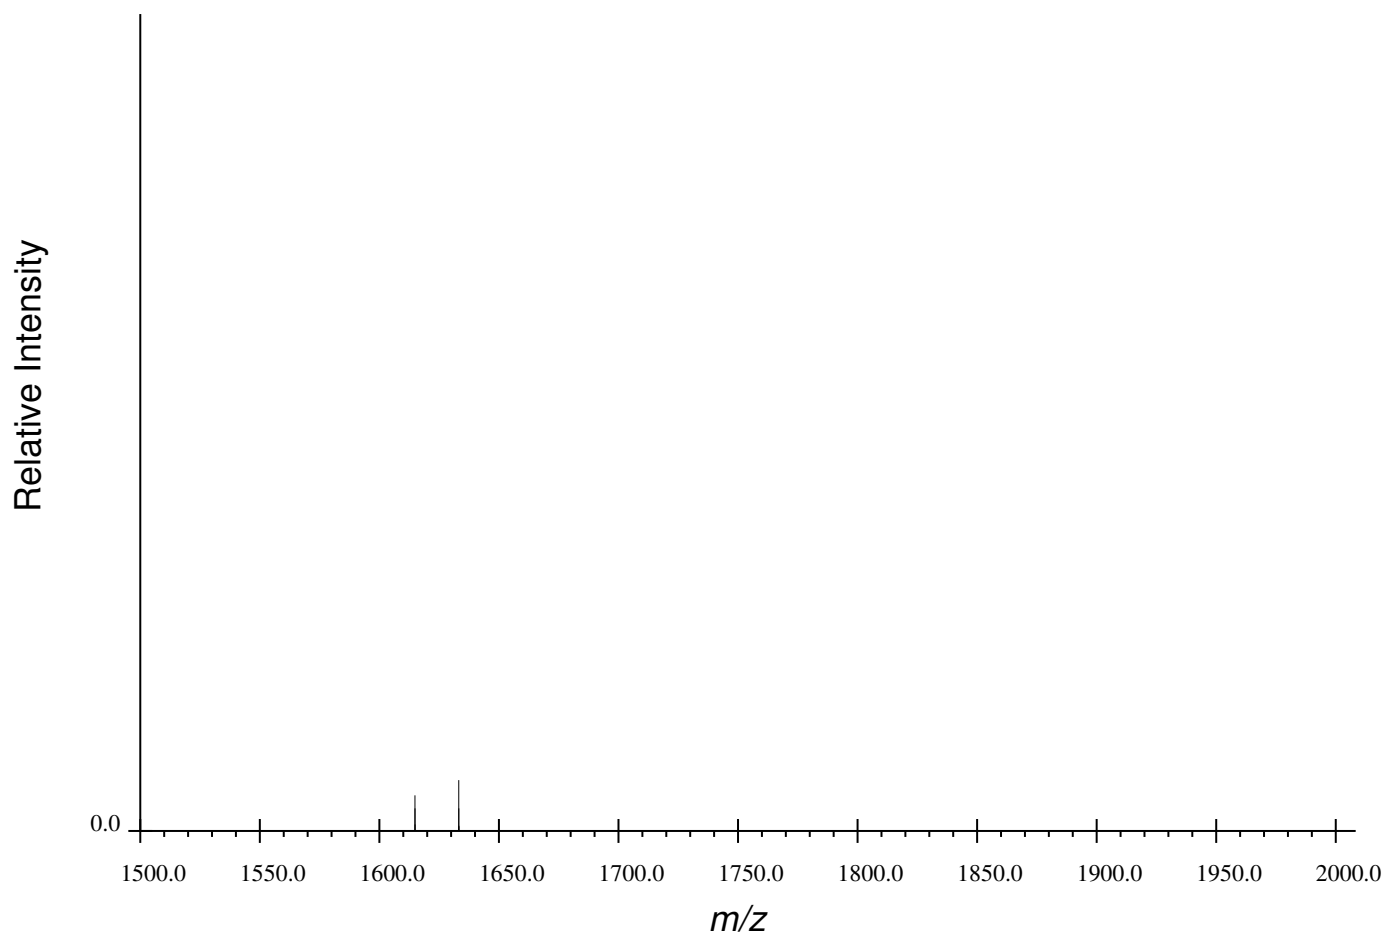

(d) Fourth Region for KRSpYEEHIP, Spectrum 21.dta

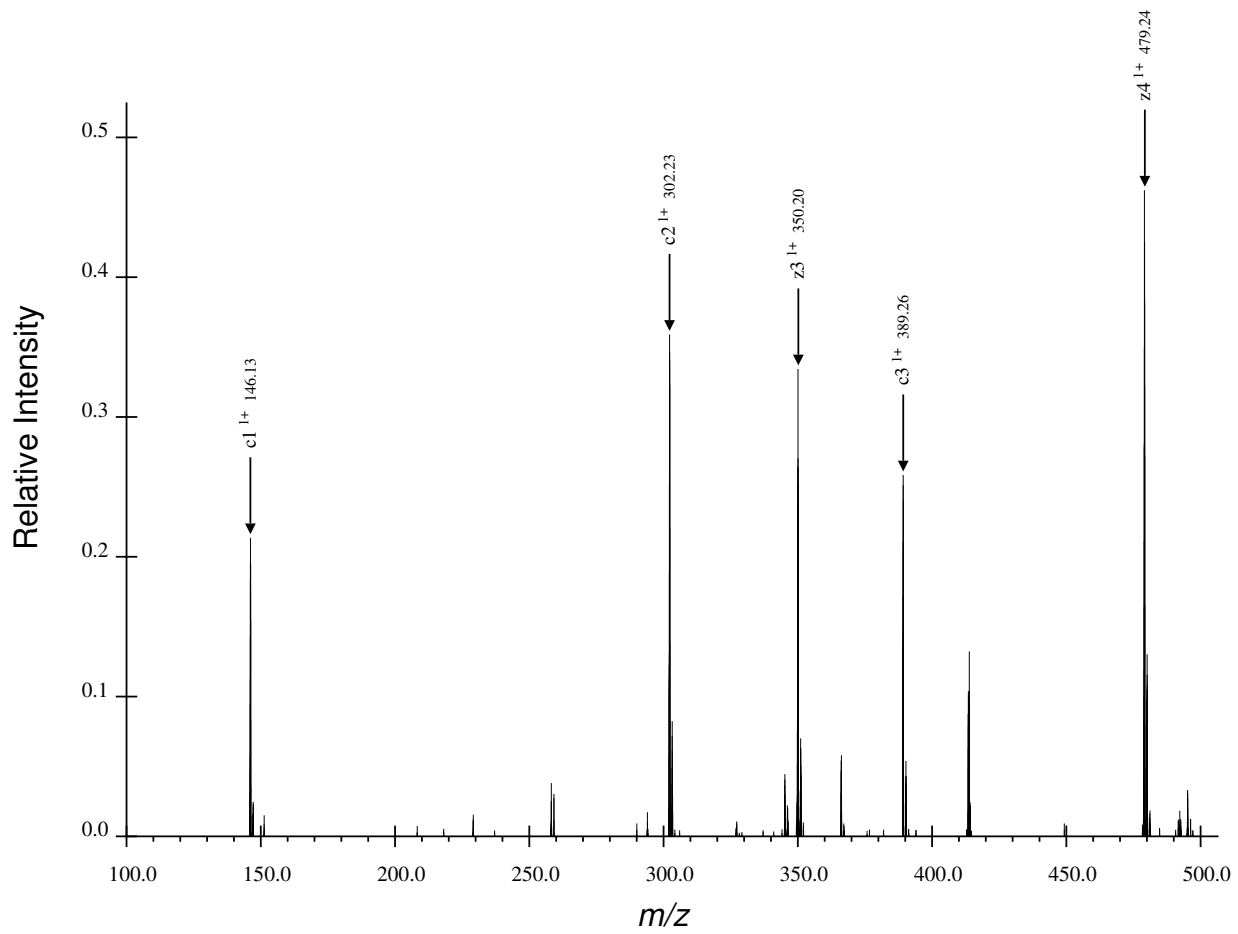

(a) First Region for KRSpYEEHIP, Spectrum 22.dta

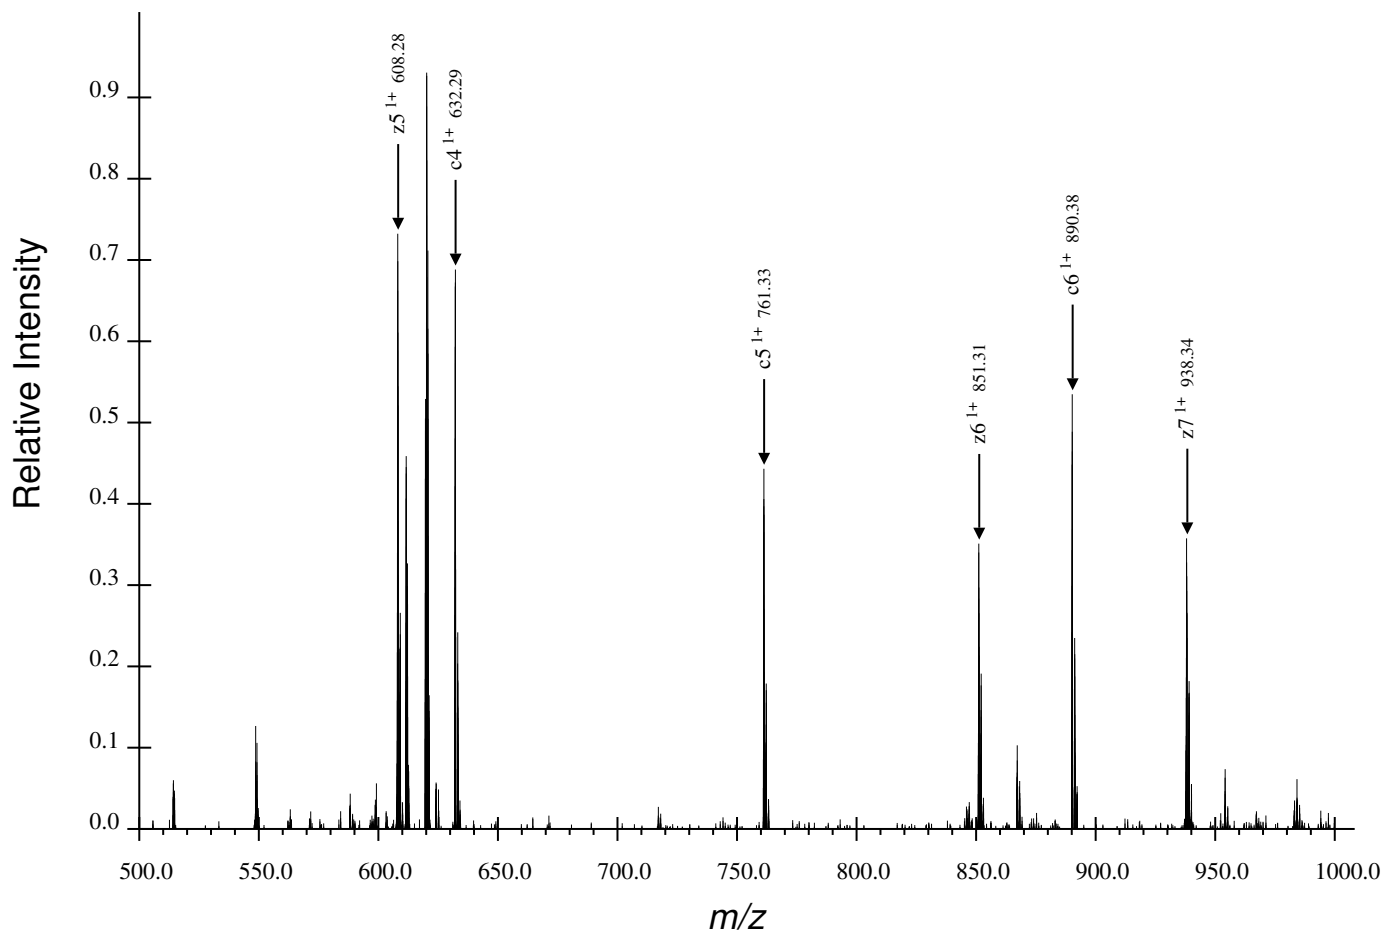

(b) Second Region for KRSpYEEHIP, Spectrum 22.dta

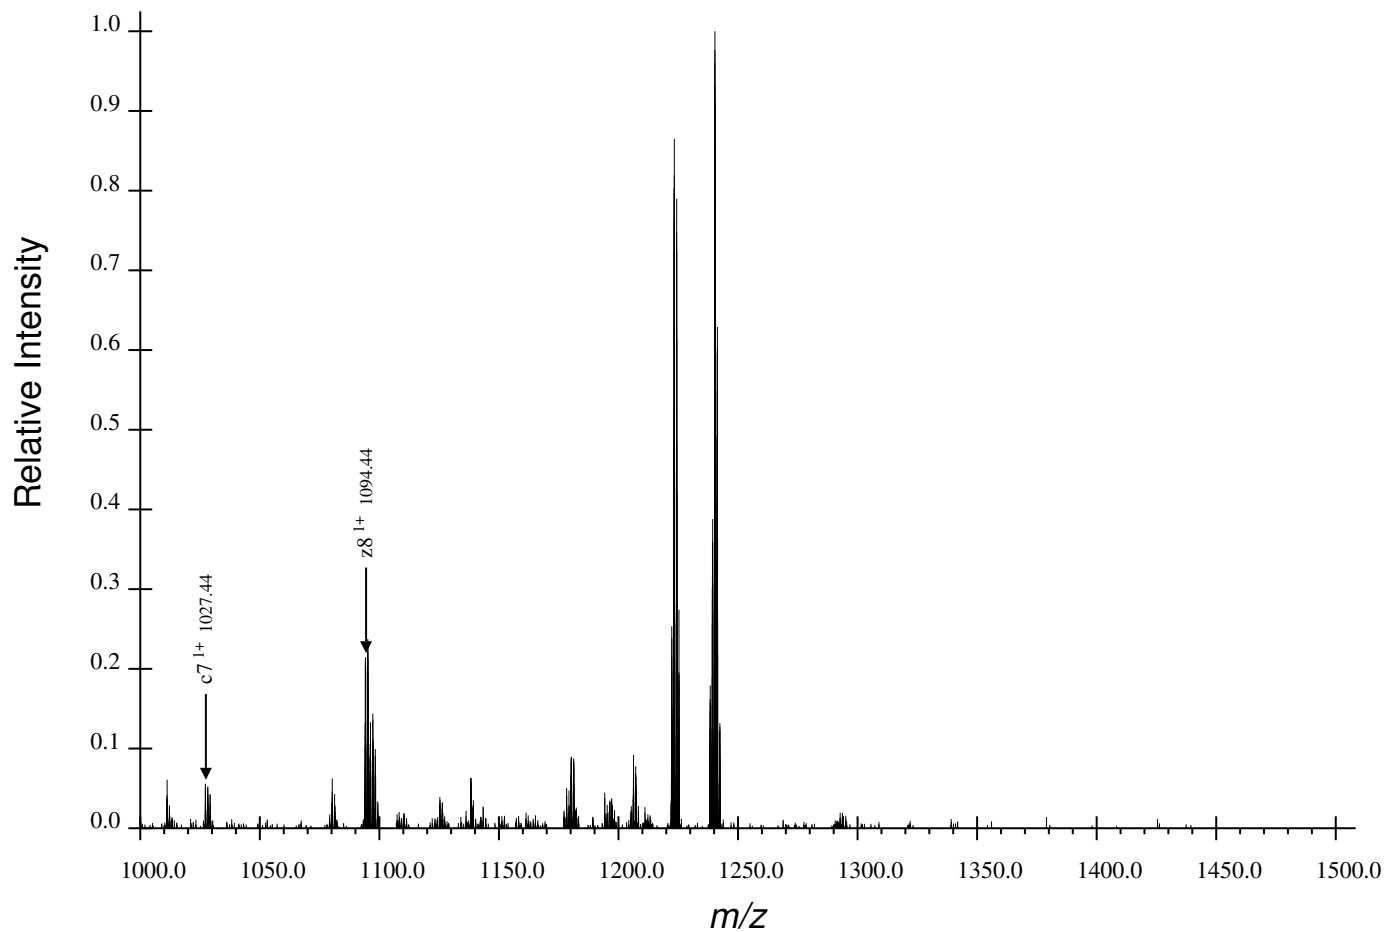

(c) Third Region for KRSpYEEHIP, Spectrum 22.dta

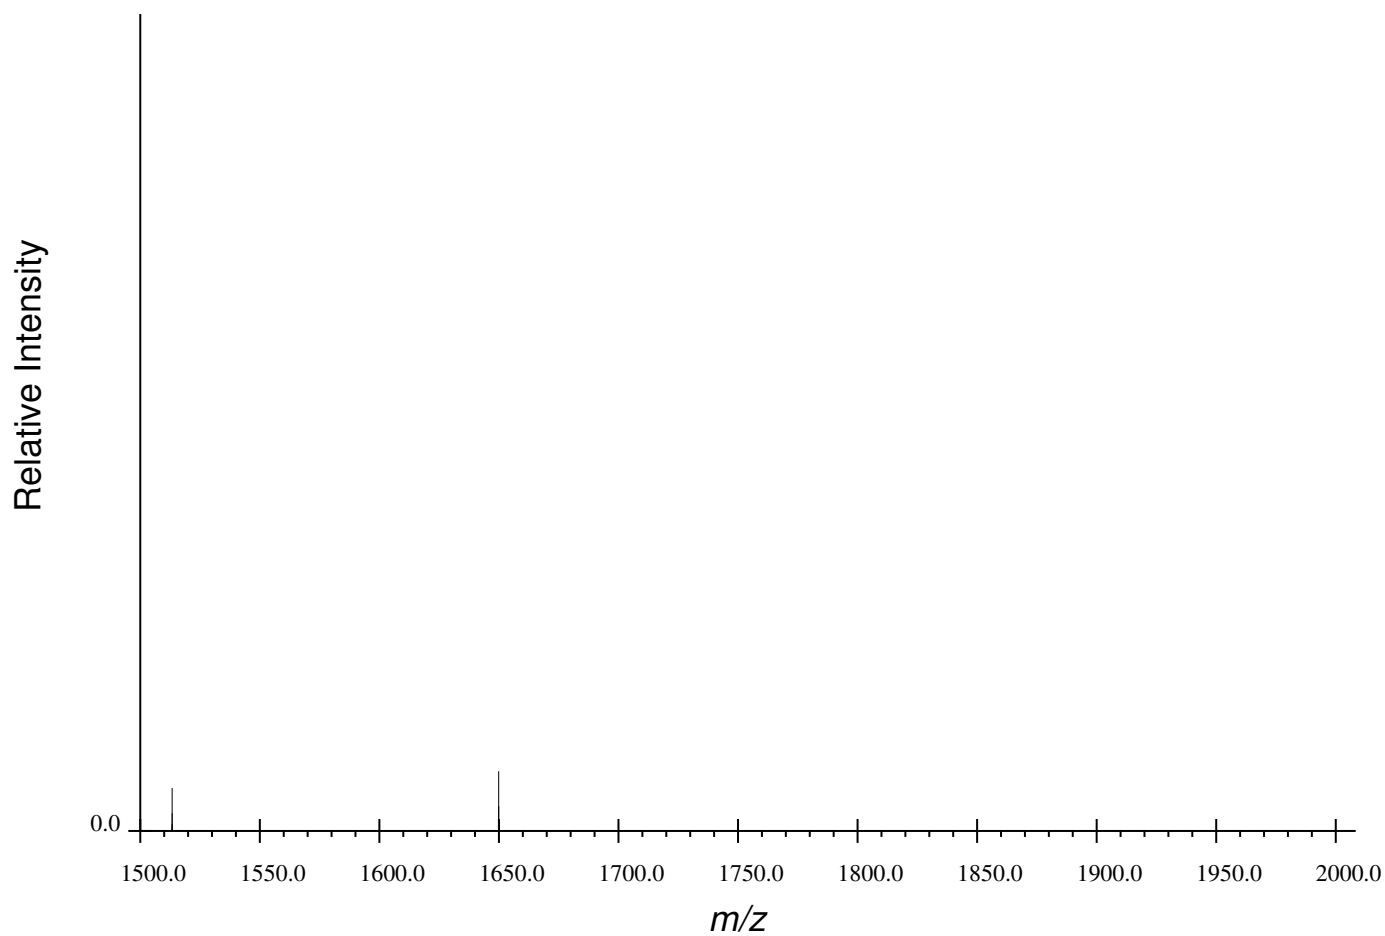

(d) Fourth Region for KRSpYEEHIP, Spectrum 22.dta

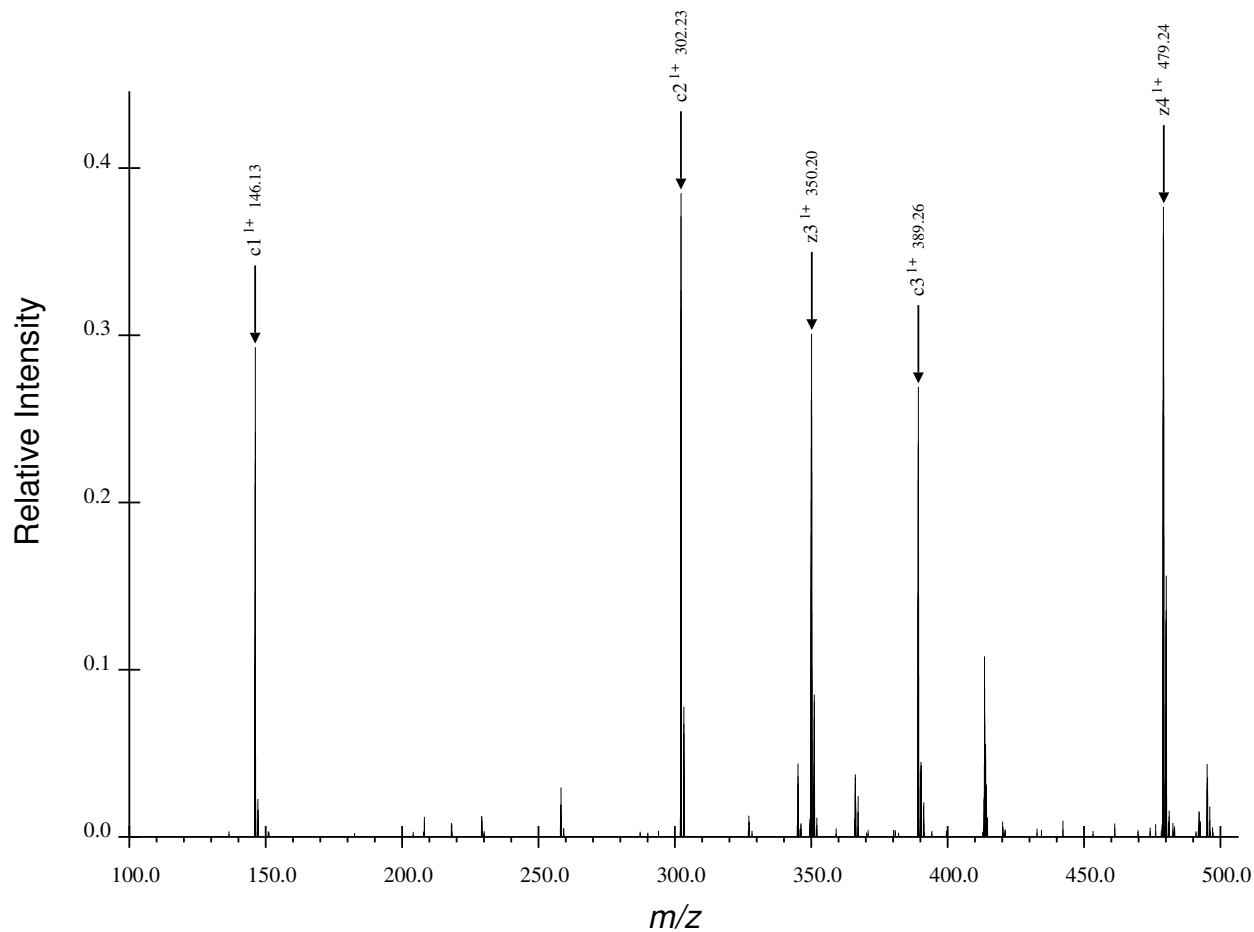

(a) First Region for KRSpYEEHIP, Spectrum 23.dta

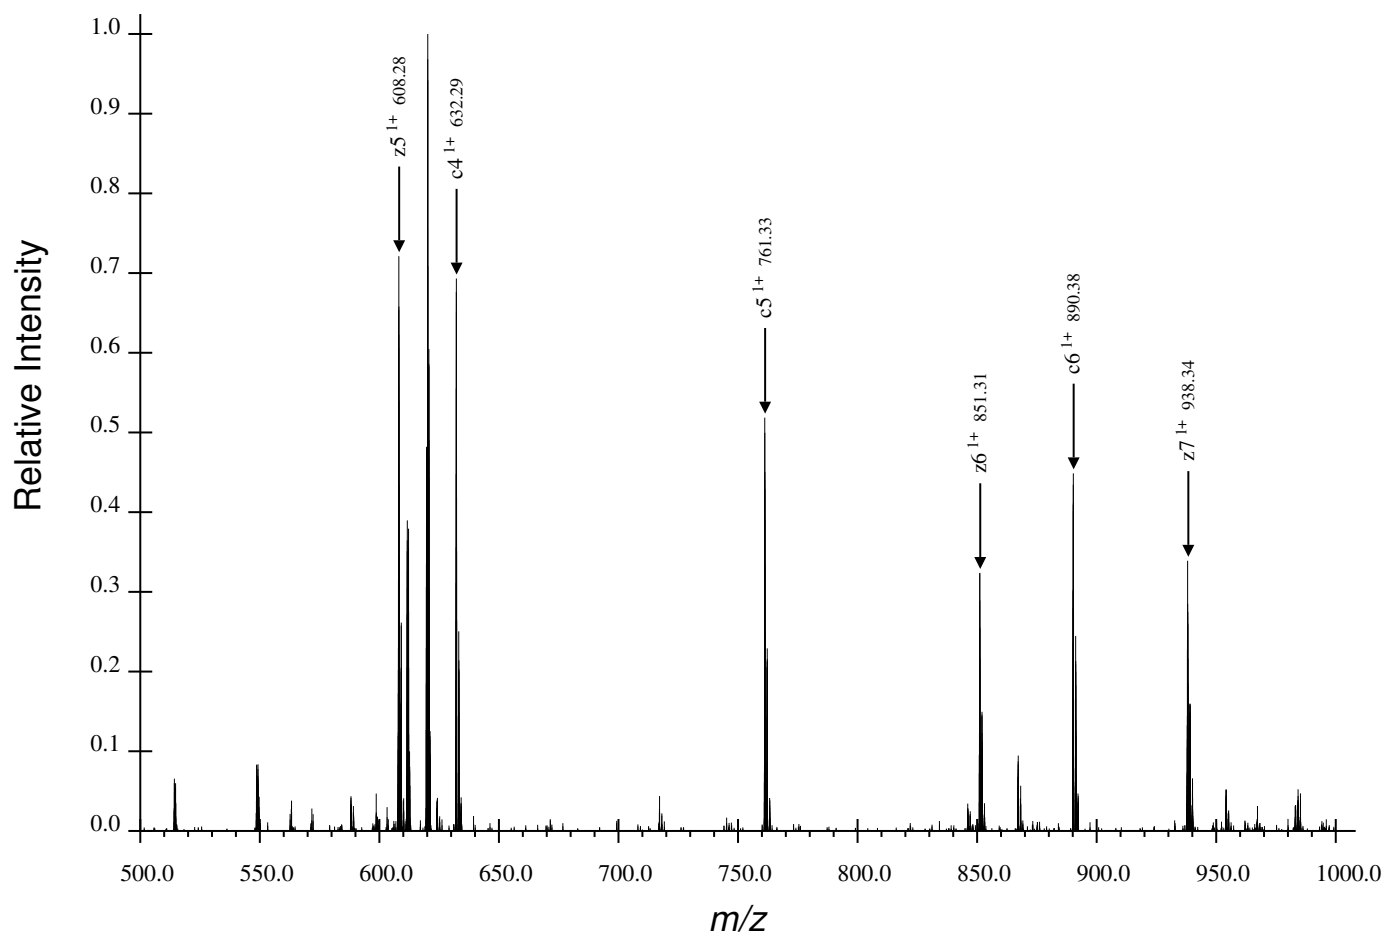

(b) Second Region for KRSpYEEHIP, Spectrum 23.dta

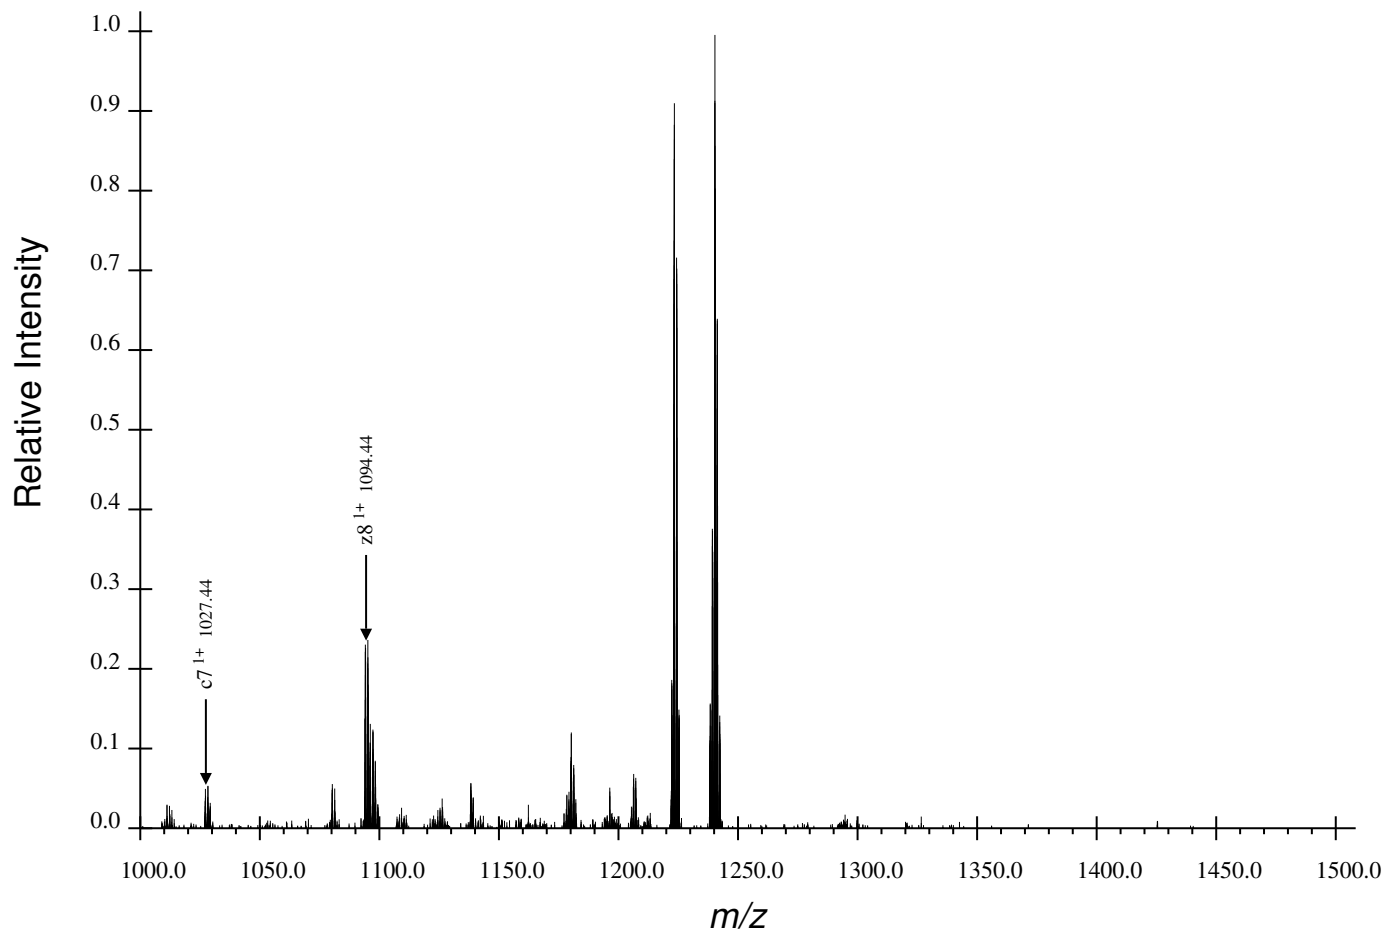

(c) Third Region for KRSpYEEHIP, Spectrum 23.dta

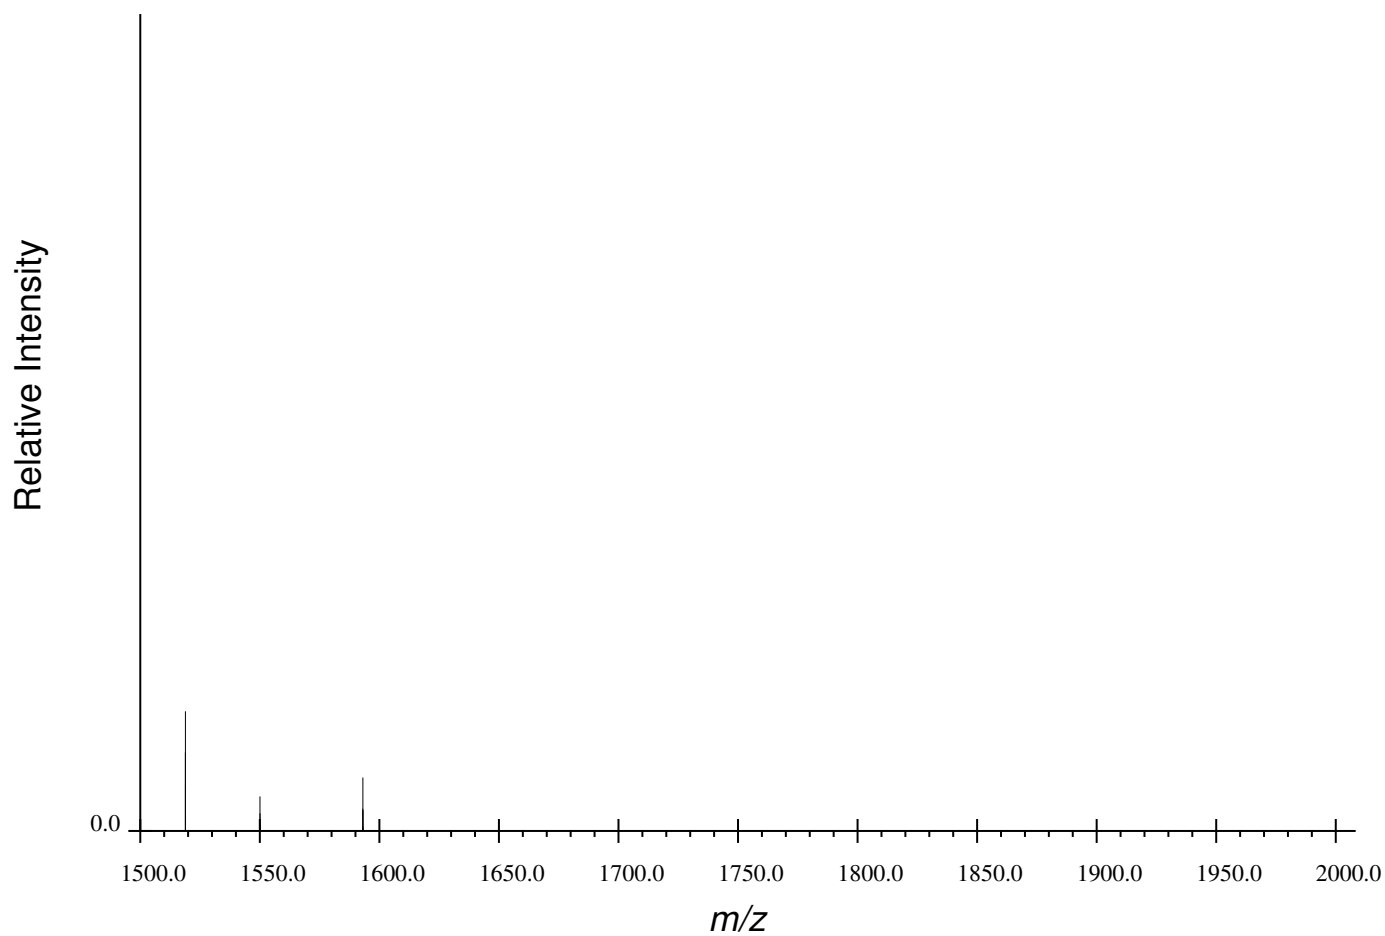

(d) Fourth Region for KRSpYEEHIP, Spectrum 23.dta

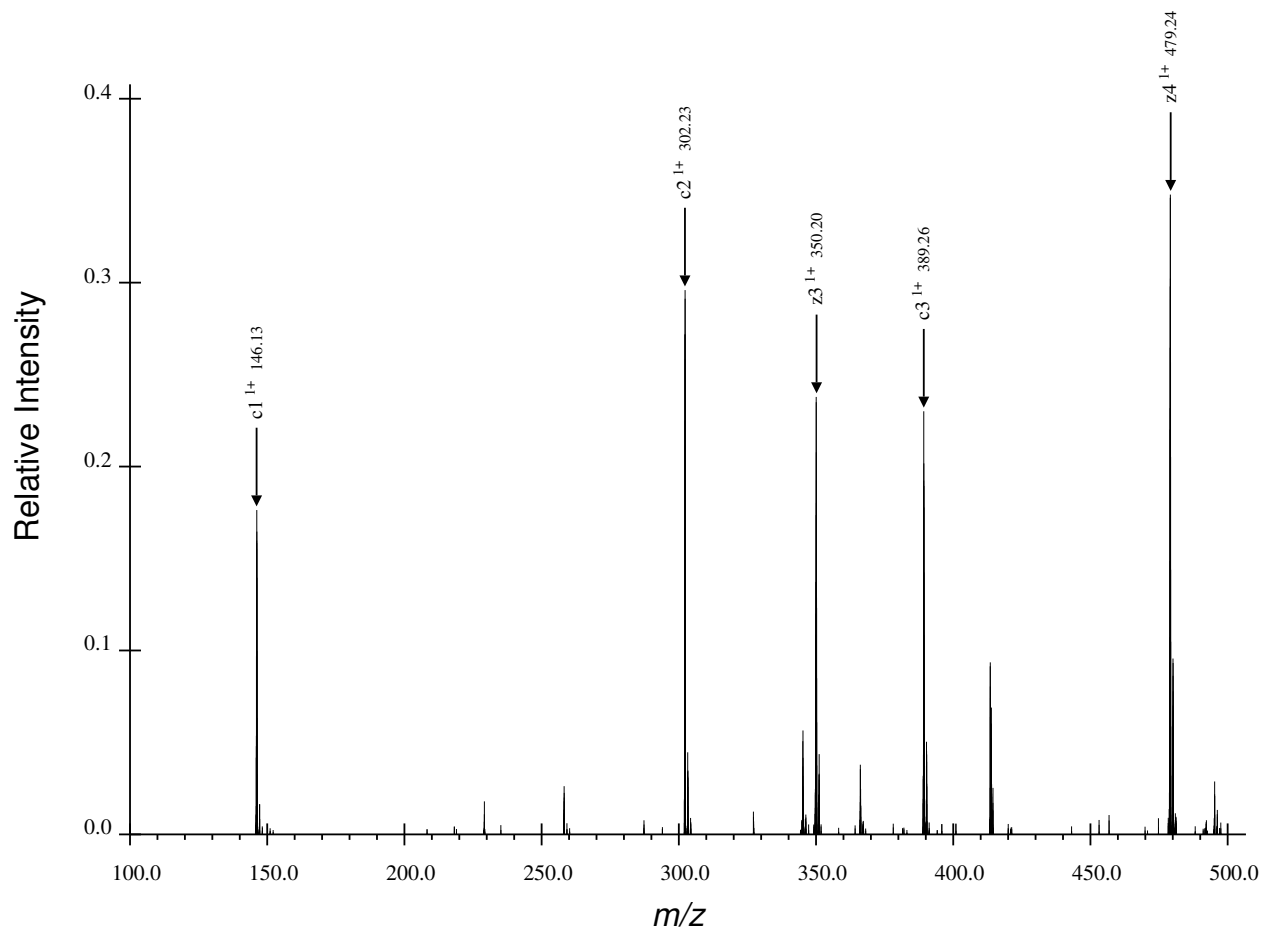

(a) First Region for KRSpYEEHIP, Spectrum 24.dta

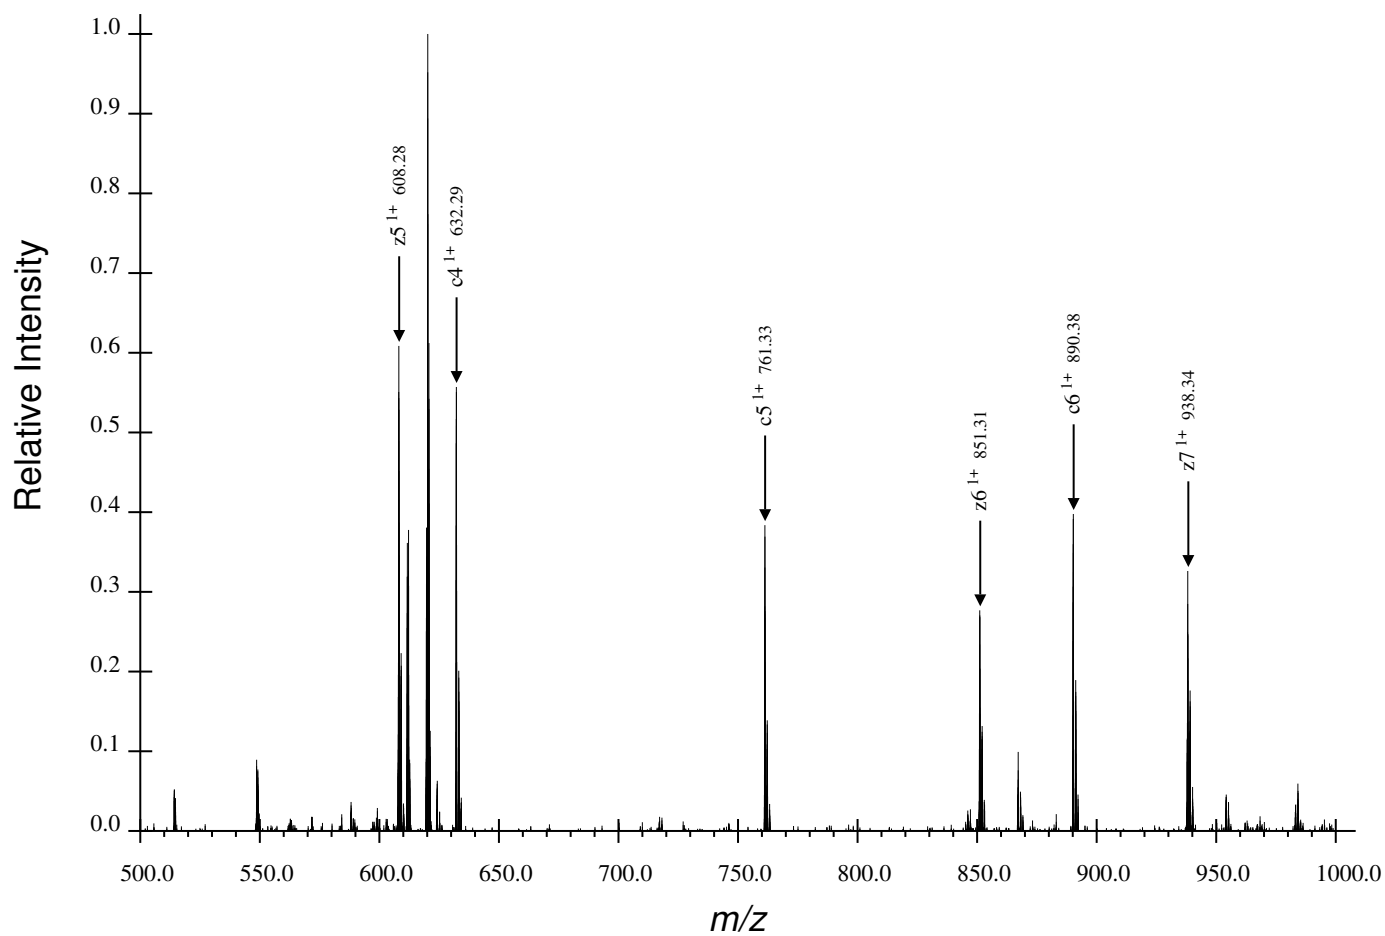

(b) Second Region for KRSpYEEHIP, Spectrum 24.dta

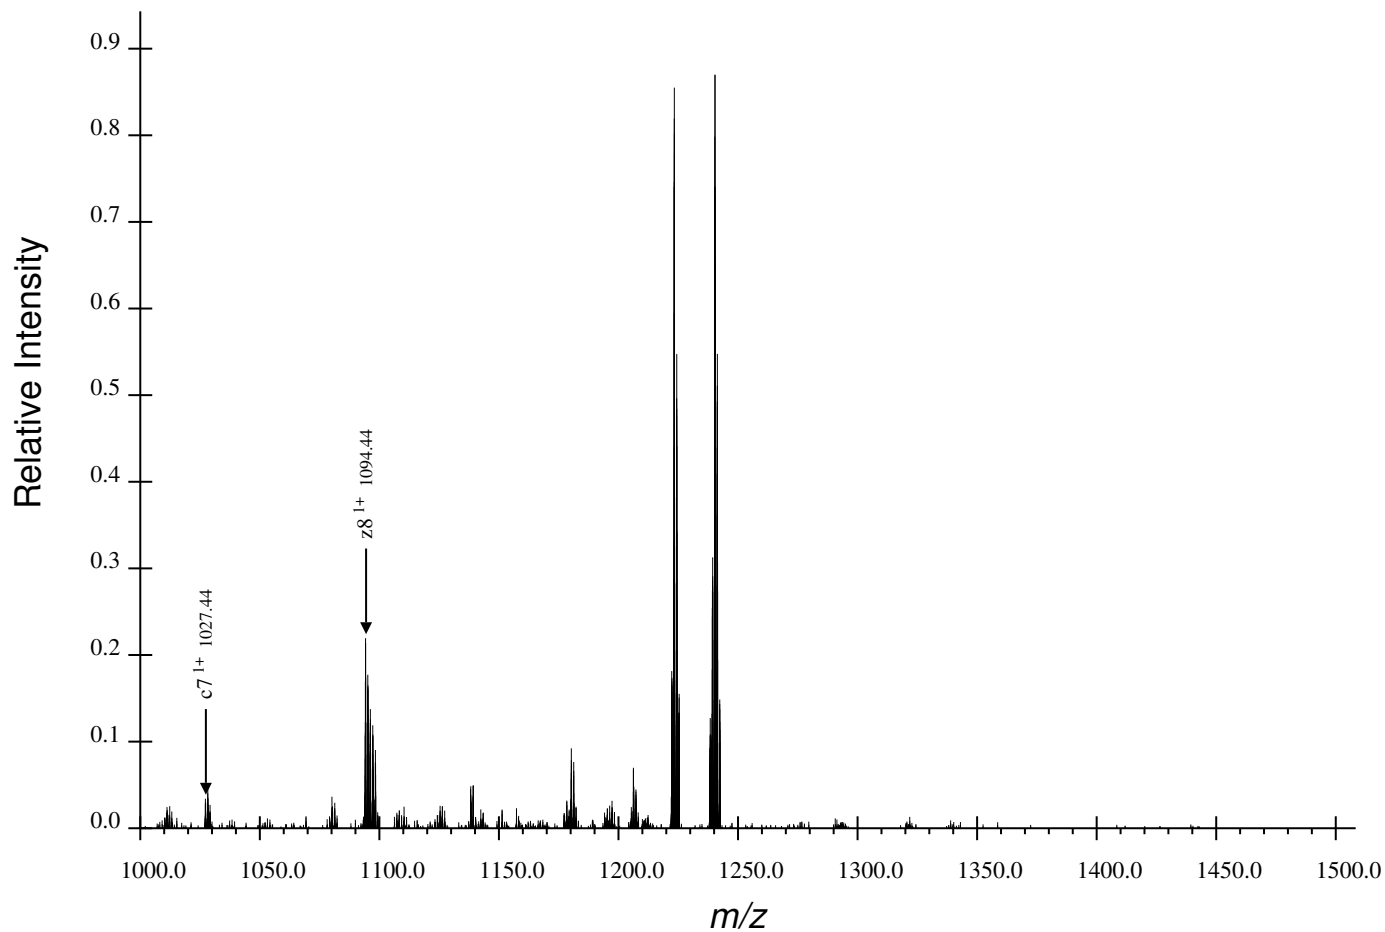

(c) Third Region for KRSpYEEHIP, Spectrum 24.dta

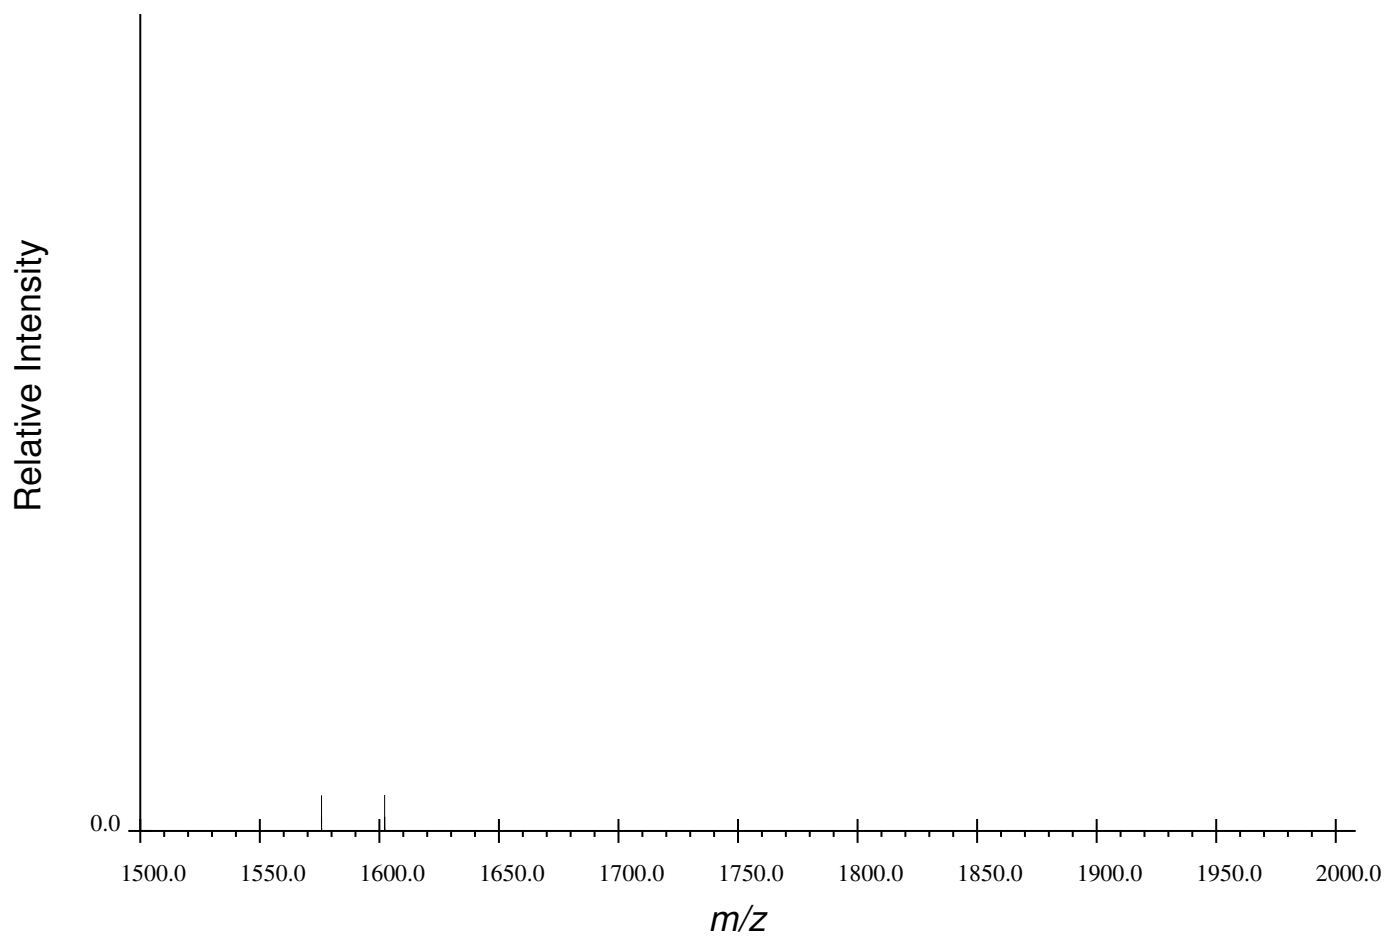

(d) Fourth Region for KRSpYEEHIP, Spectrum 24.dta



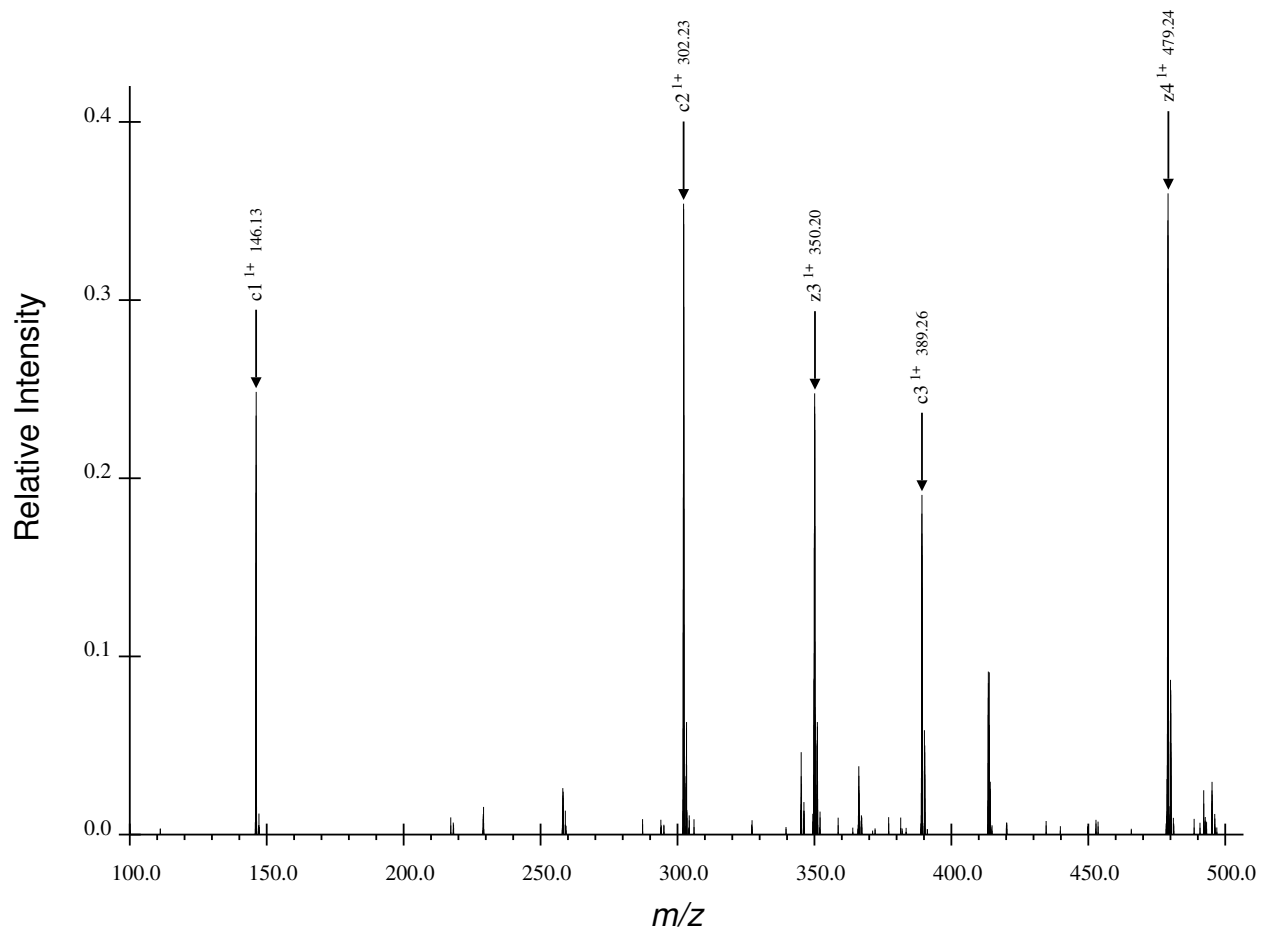

(a) First Region for KRSpYEEHIP, Spectrum 25.dta

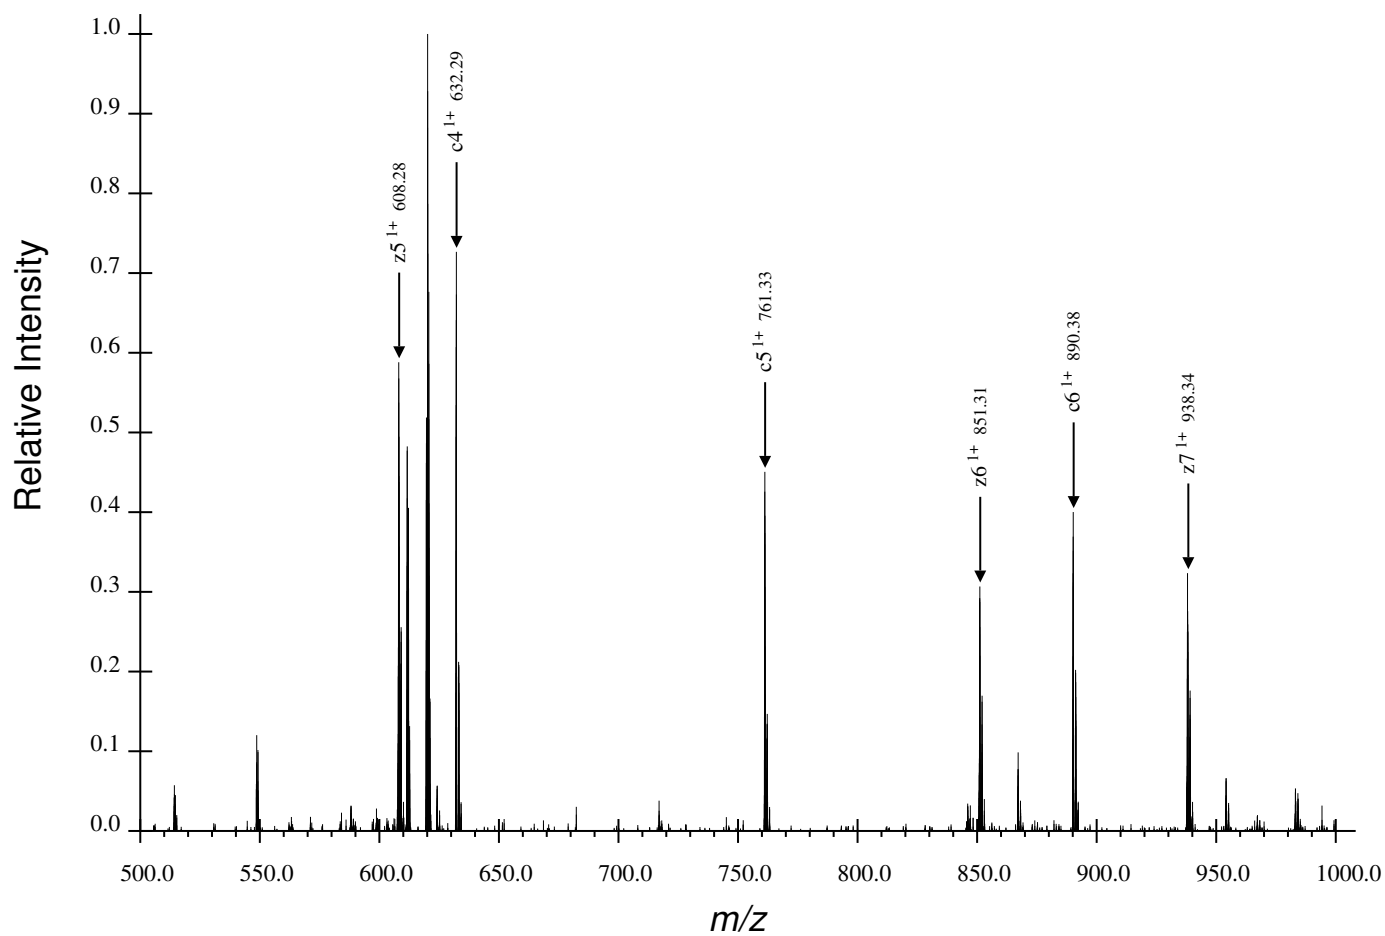

(b) Second Region for KRSpYEEHIP, Spectrum 25.dta

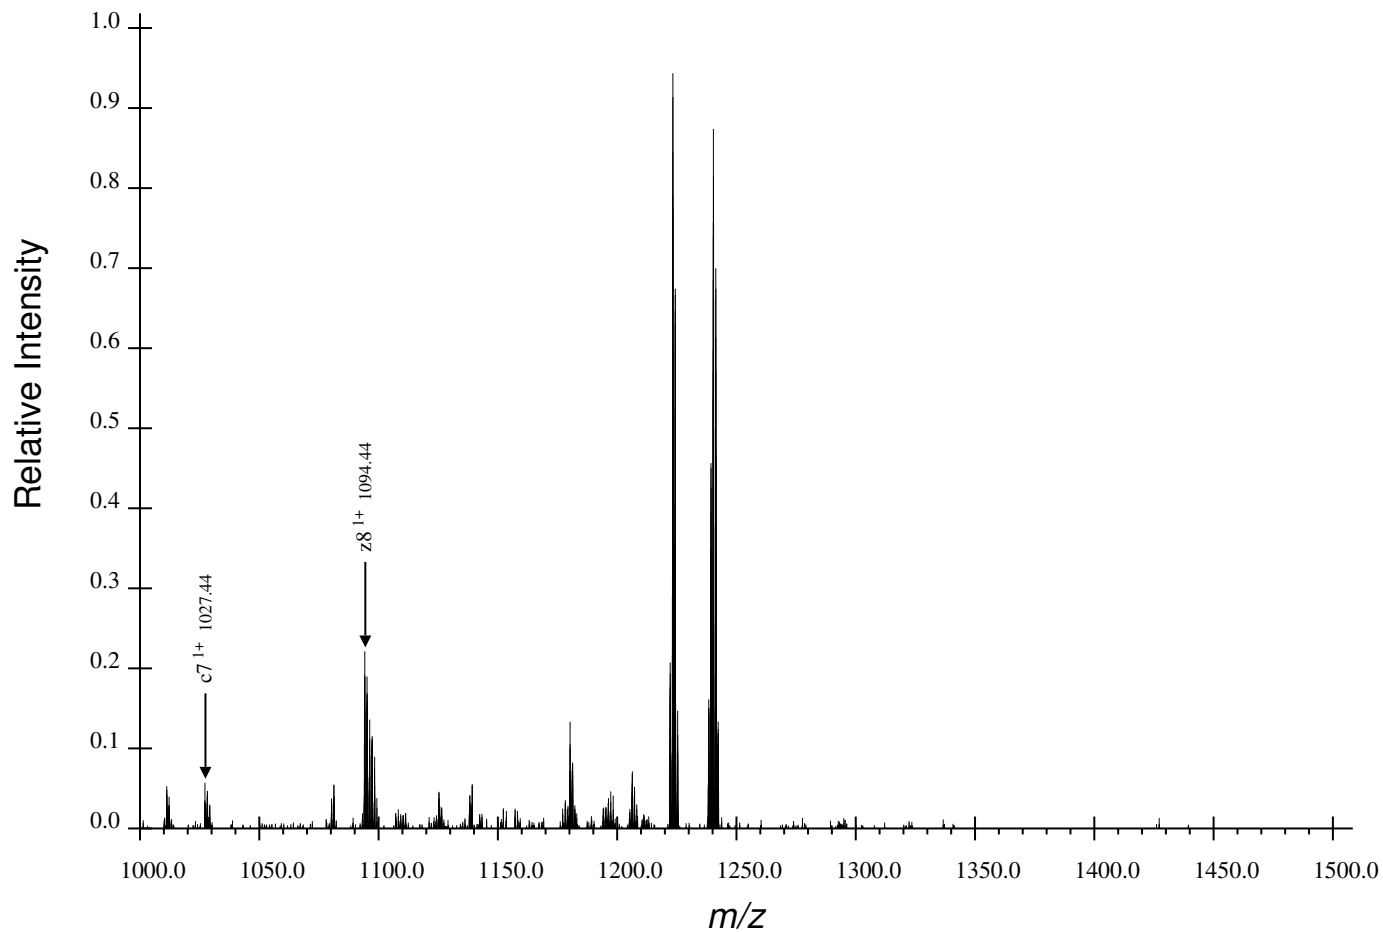

(c) Third Region for KRSpYEEHIP, Spectrum 25.dta

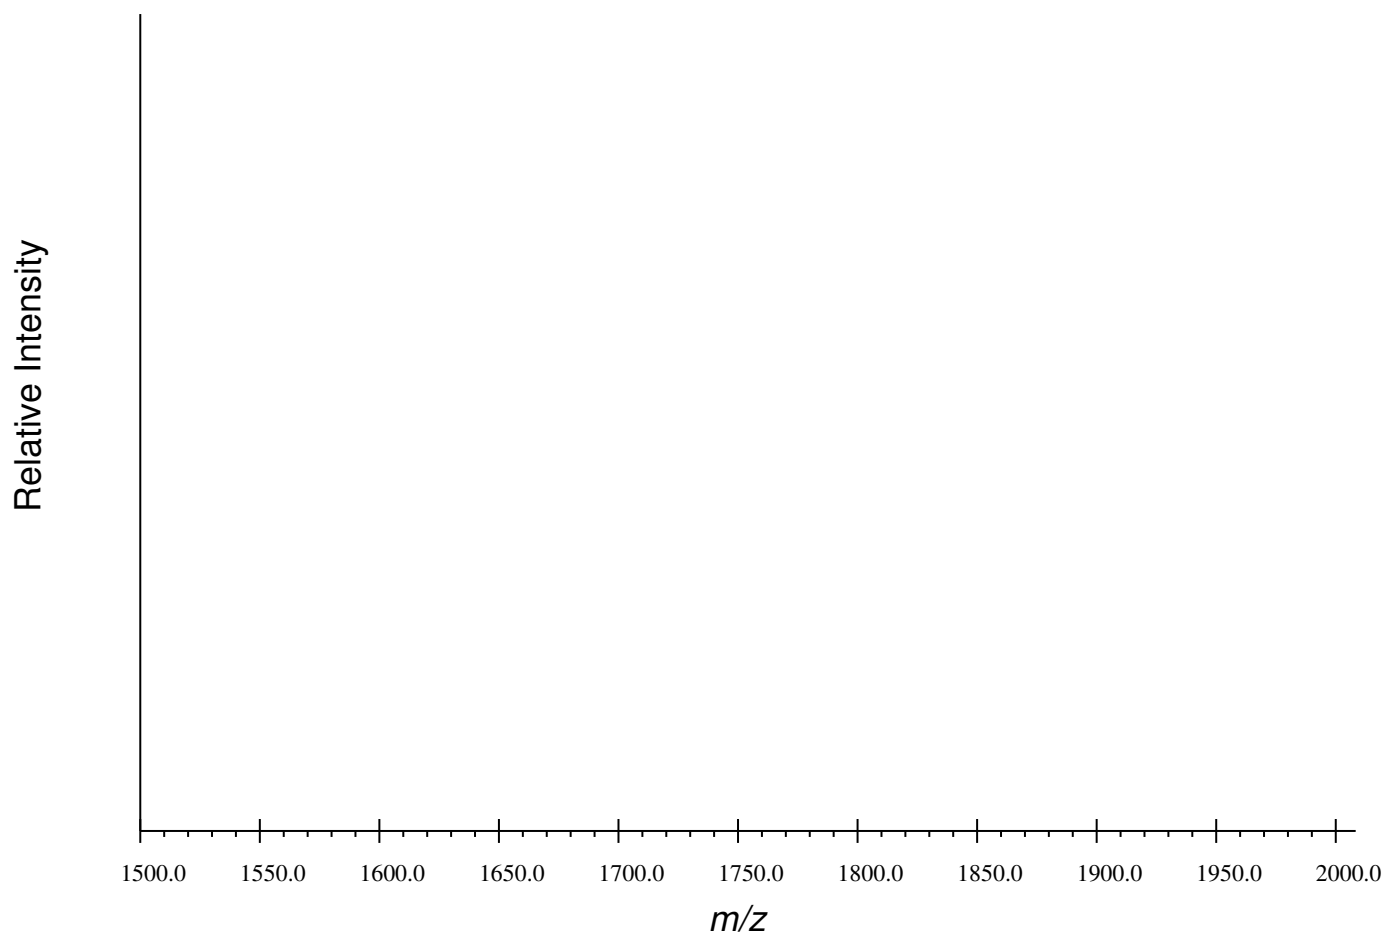

(d) Fourth Region for KRSpYEEHIP, Spectrum 25.dta

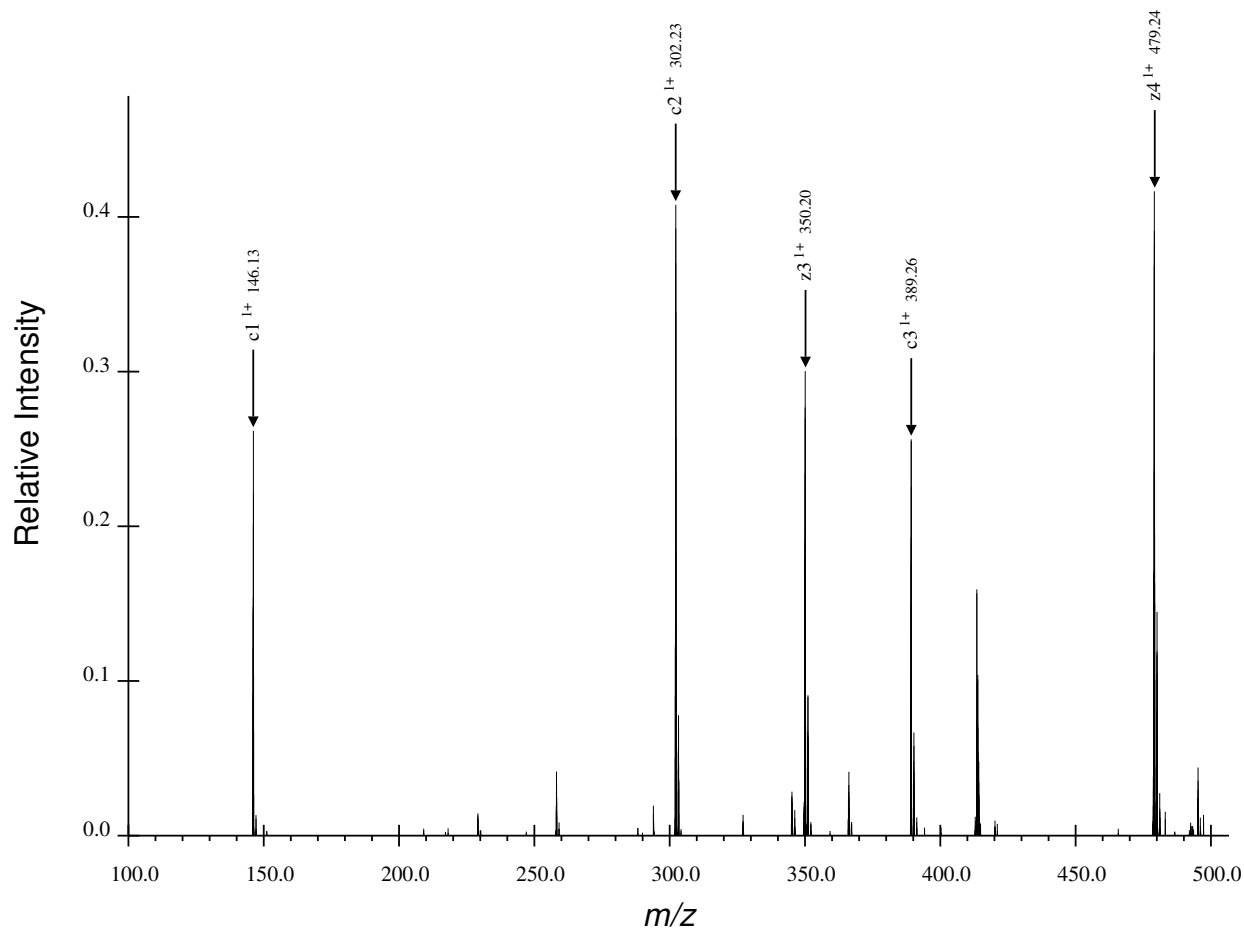

(a) First Region for KRSpYEEHIP, Spectrum 26.dta

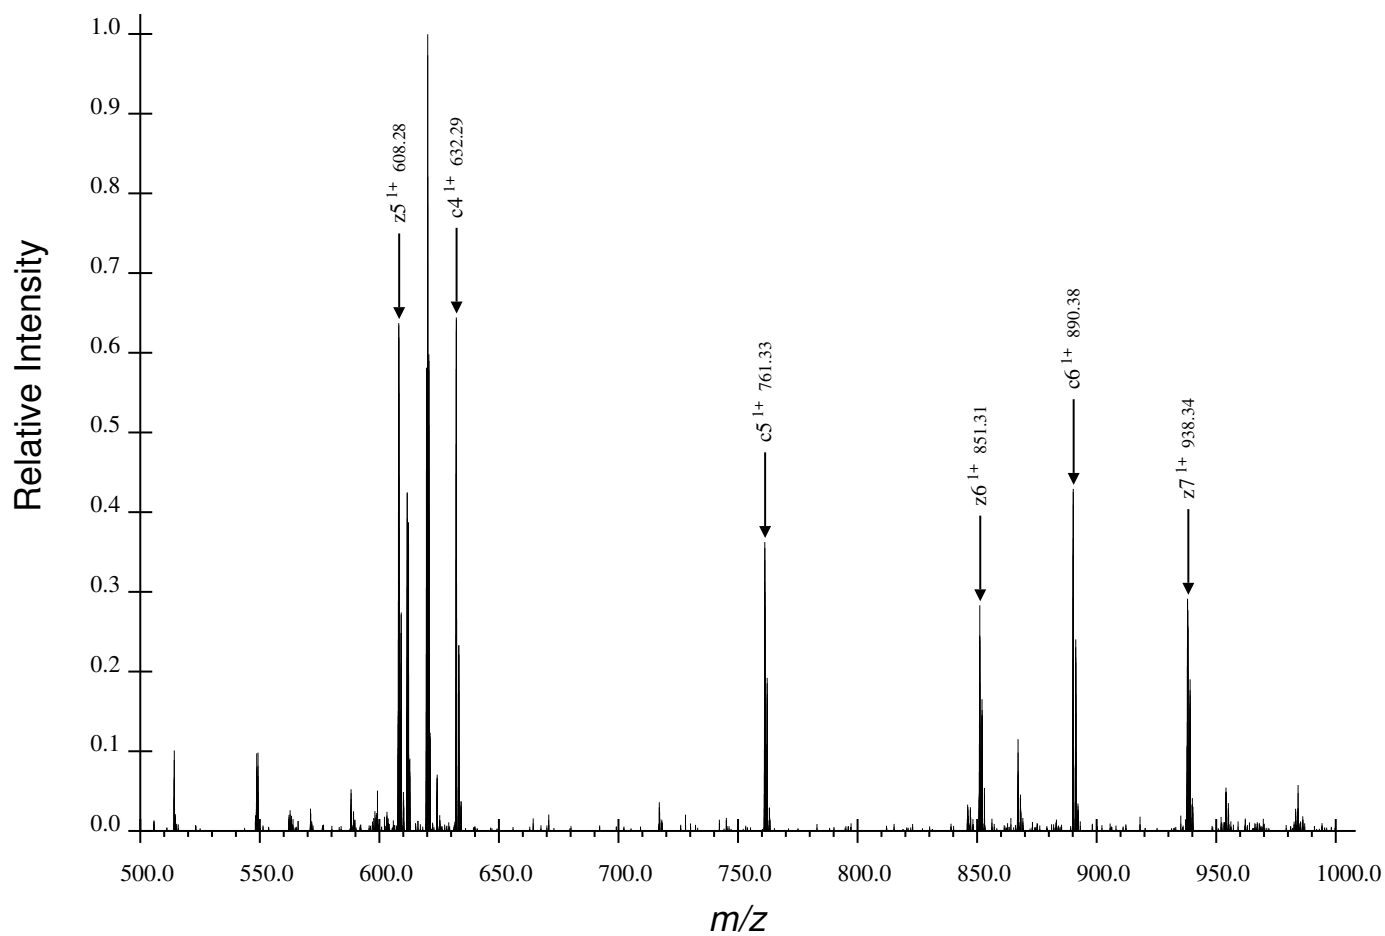

(b) Second Region for KRSpYEEHIP, Spectrum 26.dta

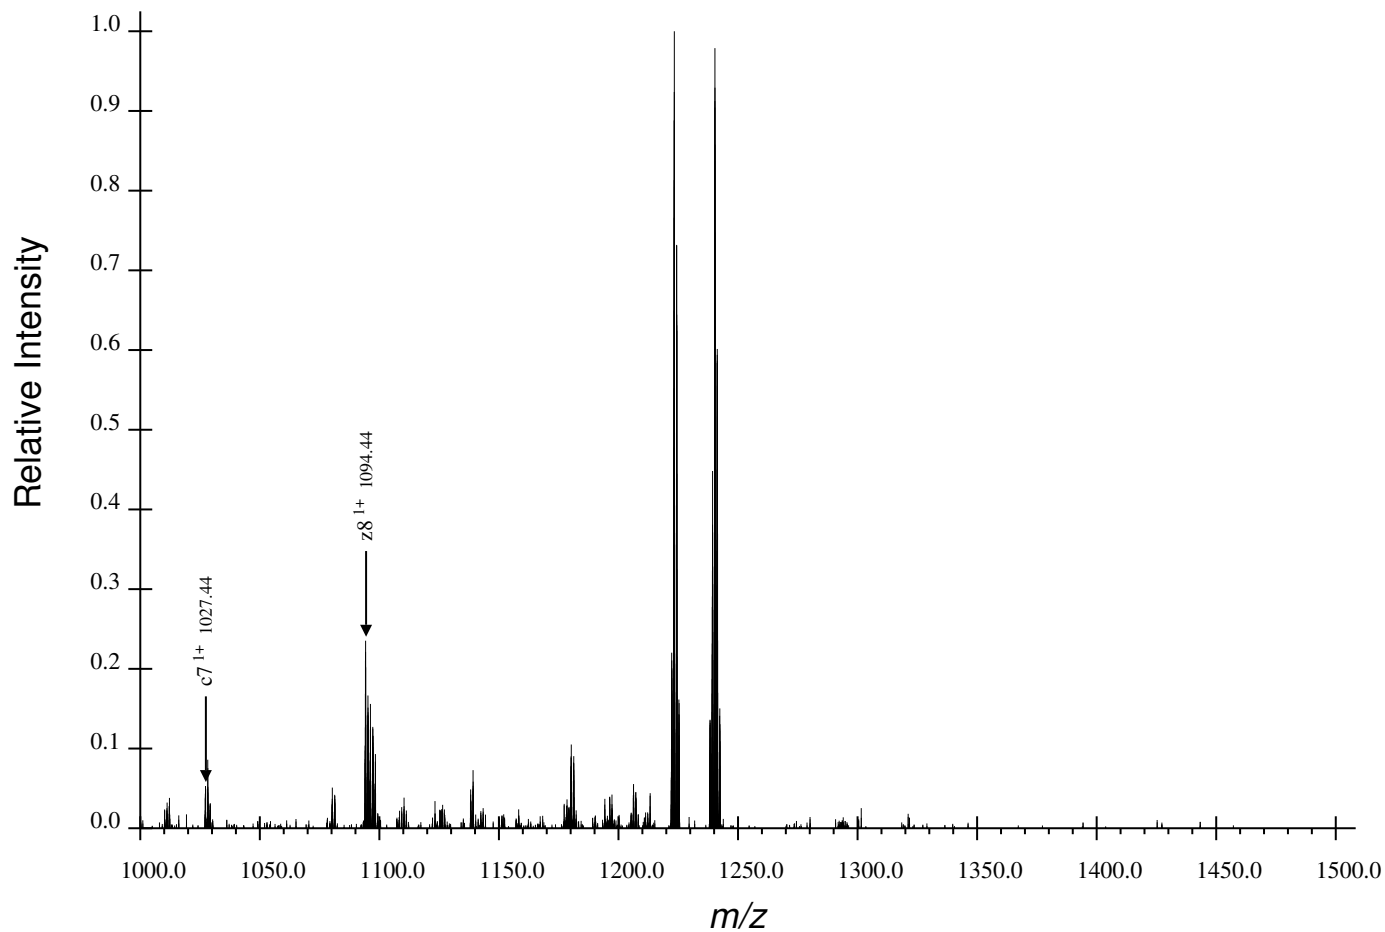

(c) Third Region for KRSpYEEHIP, Spectrum 26.dta

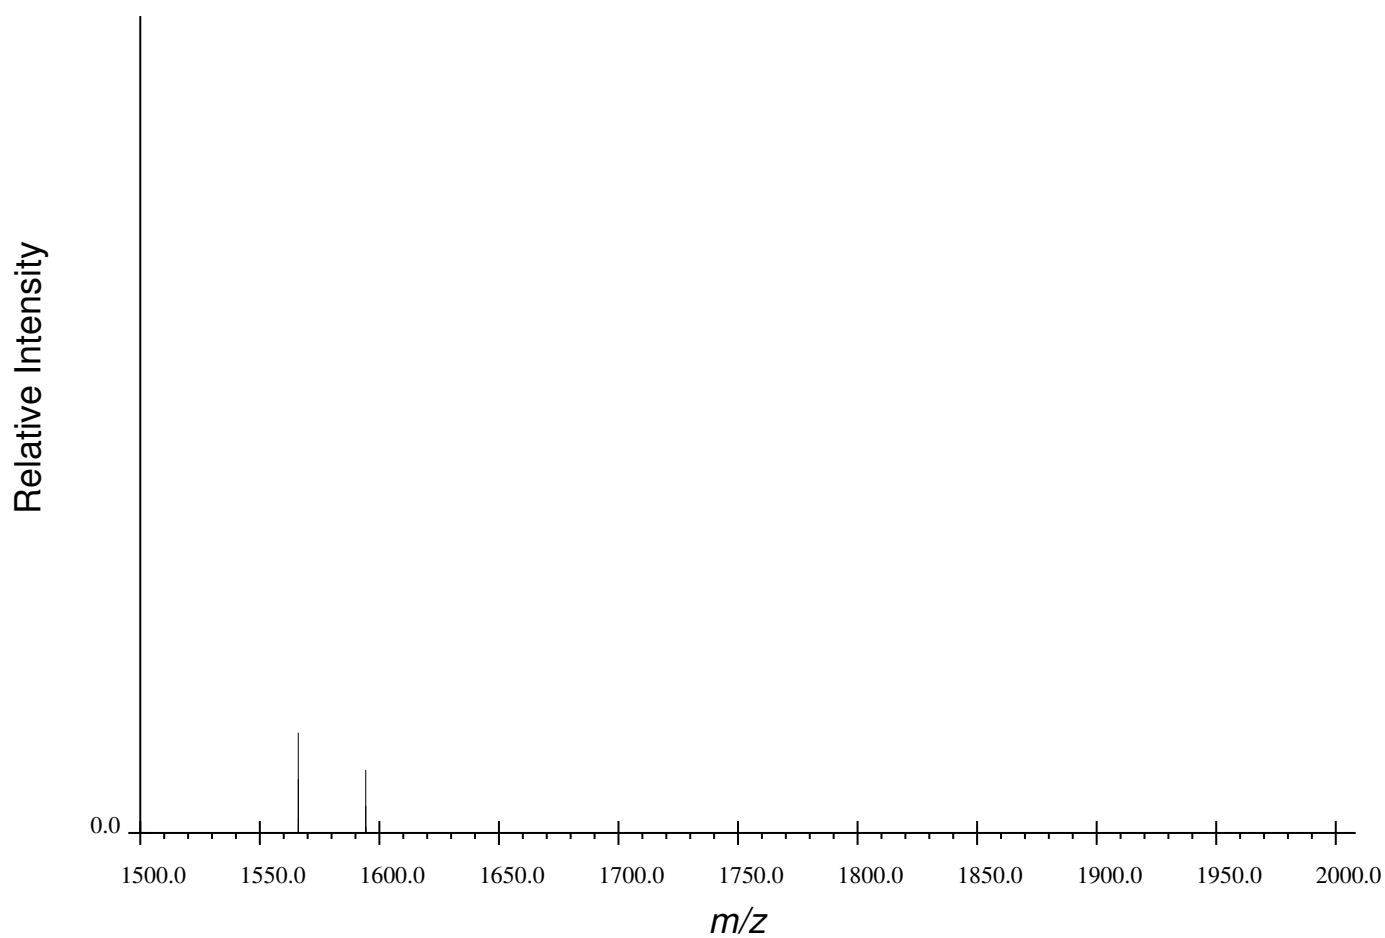

(d) Fourth Region for KRSpYEEHIP, Spectrum 26.dta

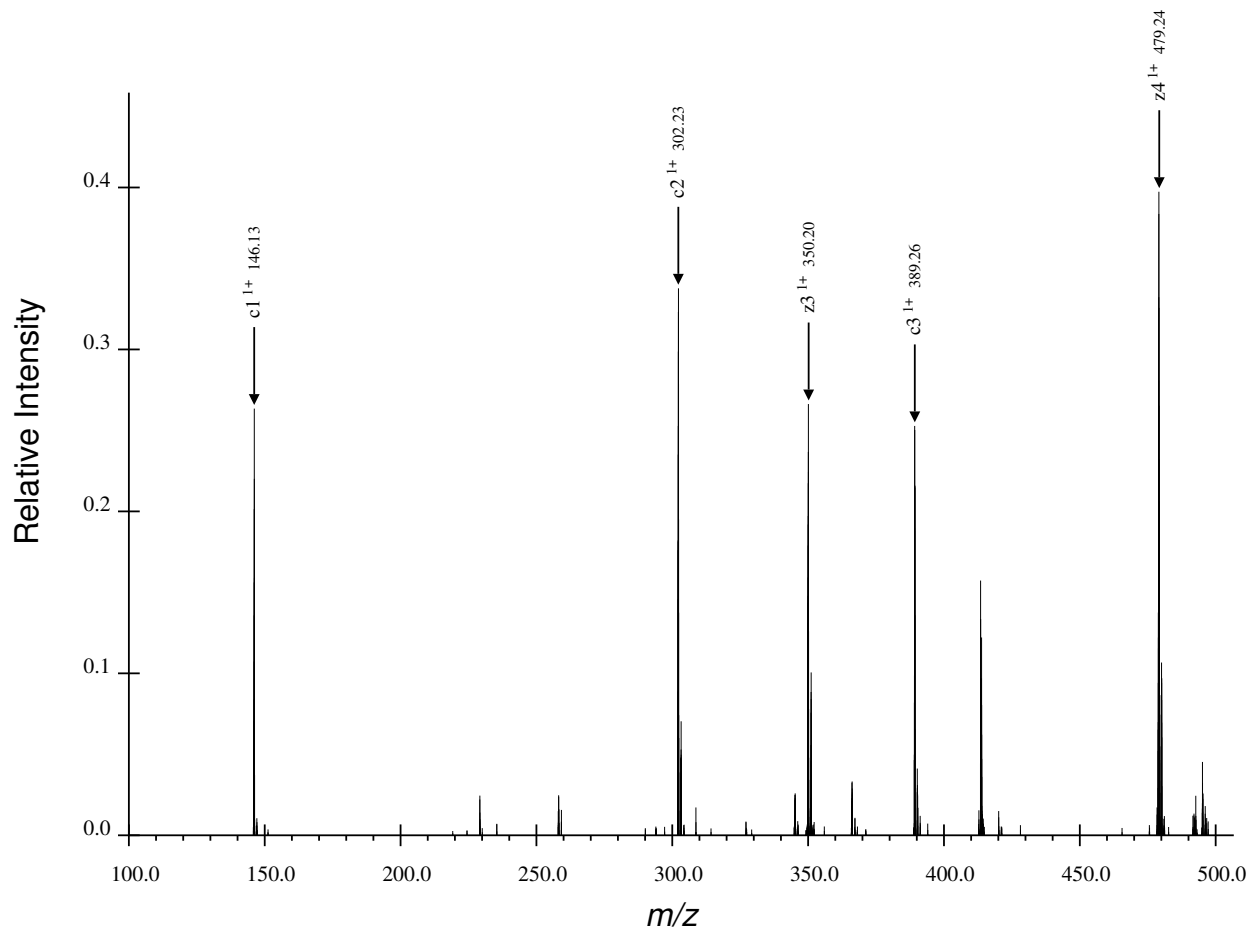

(a) First Region for KRSpYEEHIP, Spectrum 27.dta

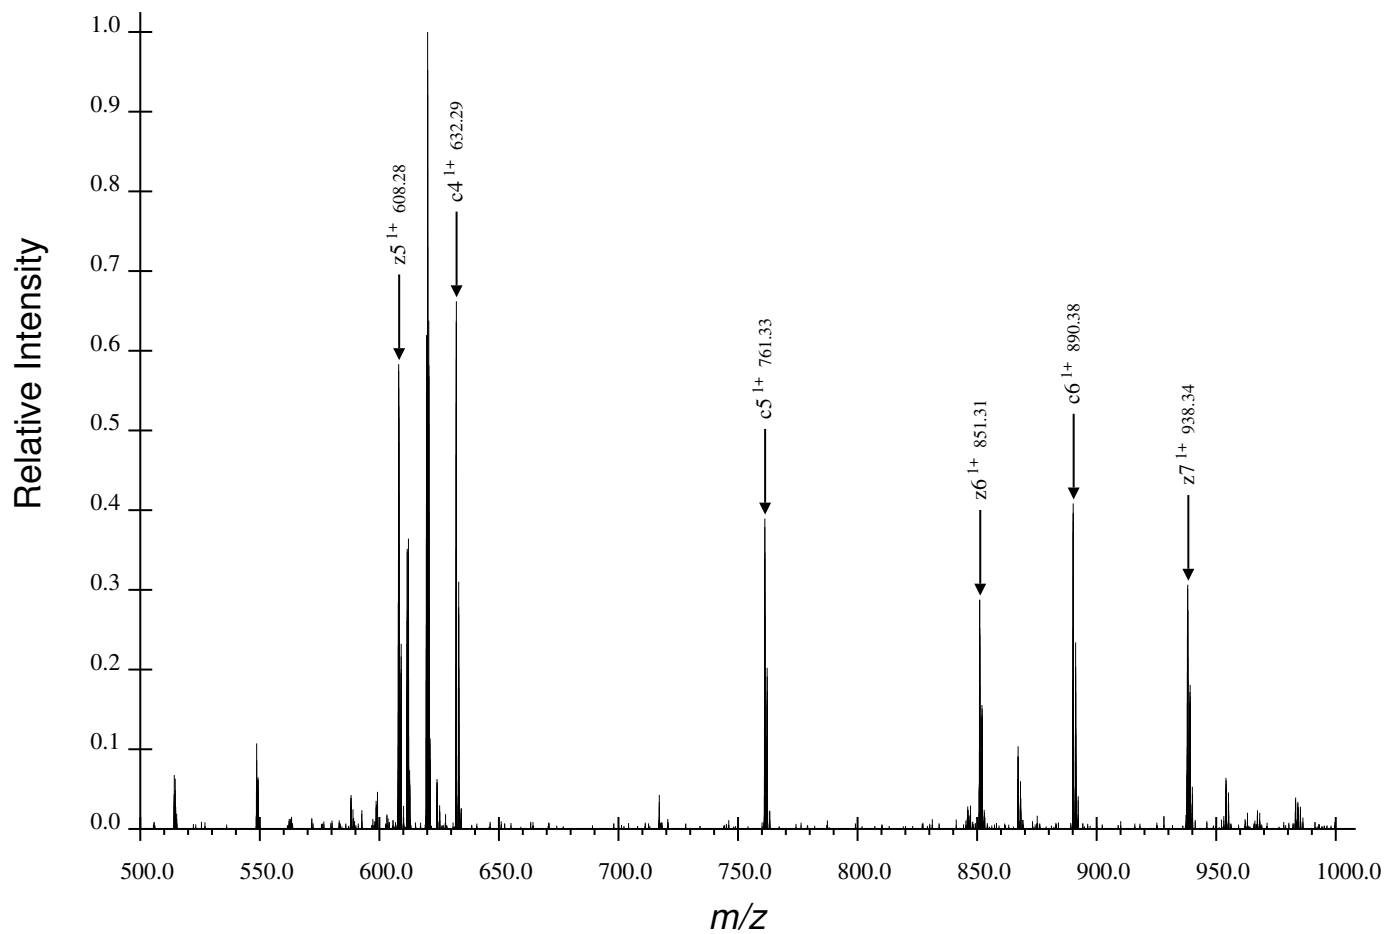

(b) Second Region for KRSpYEEHIP, Spectrum 27.dta

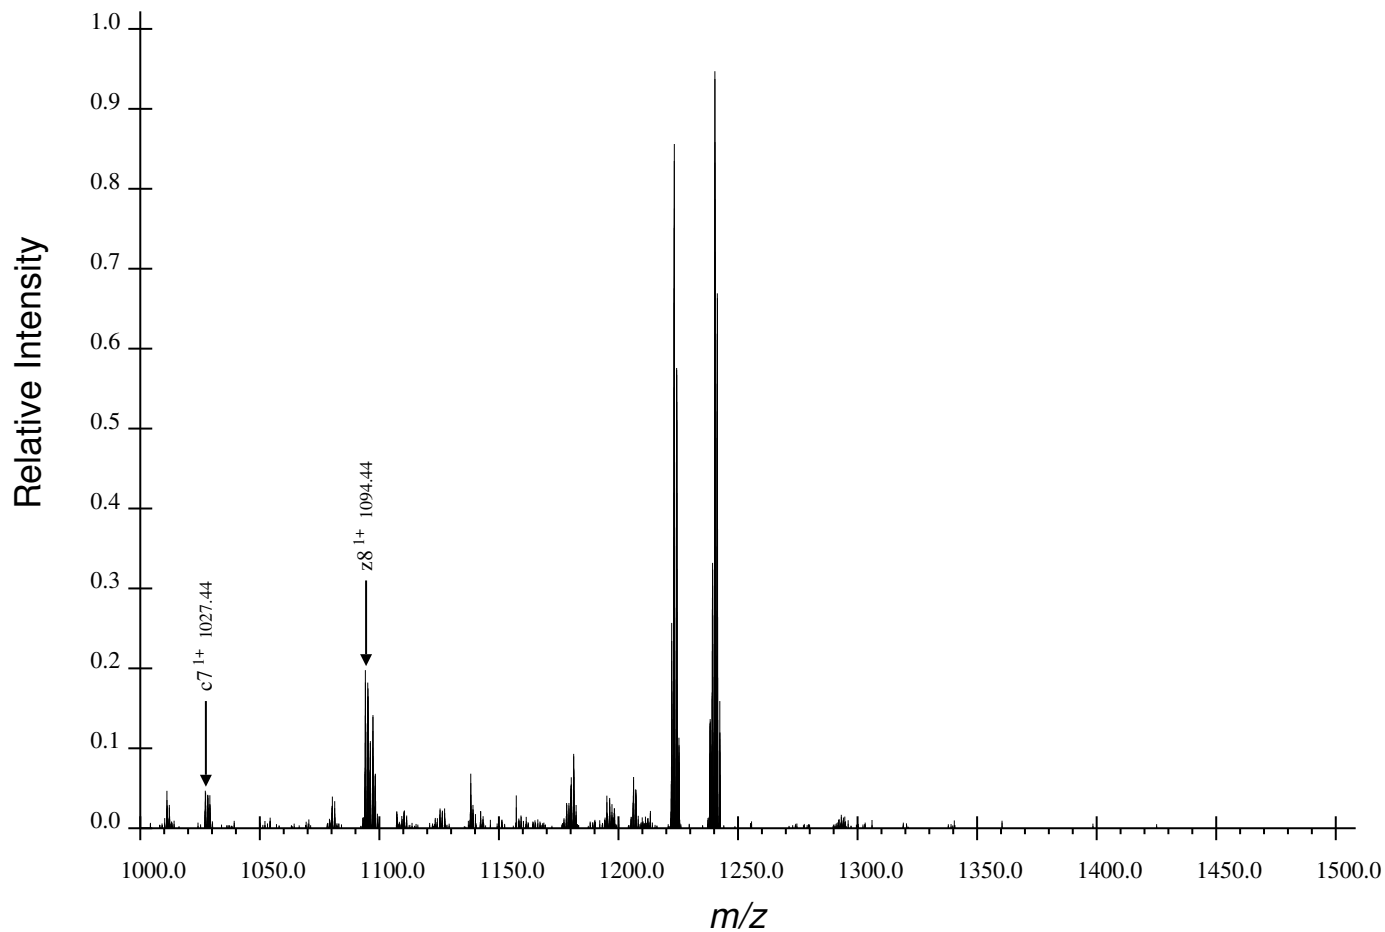

(c) Third Region for KRSpYEEHIP, Spectrum 27.dta

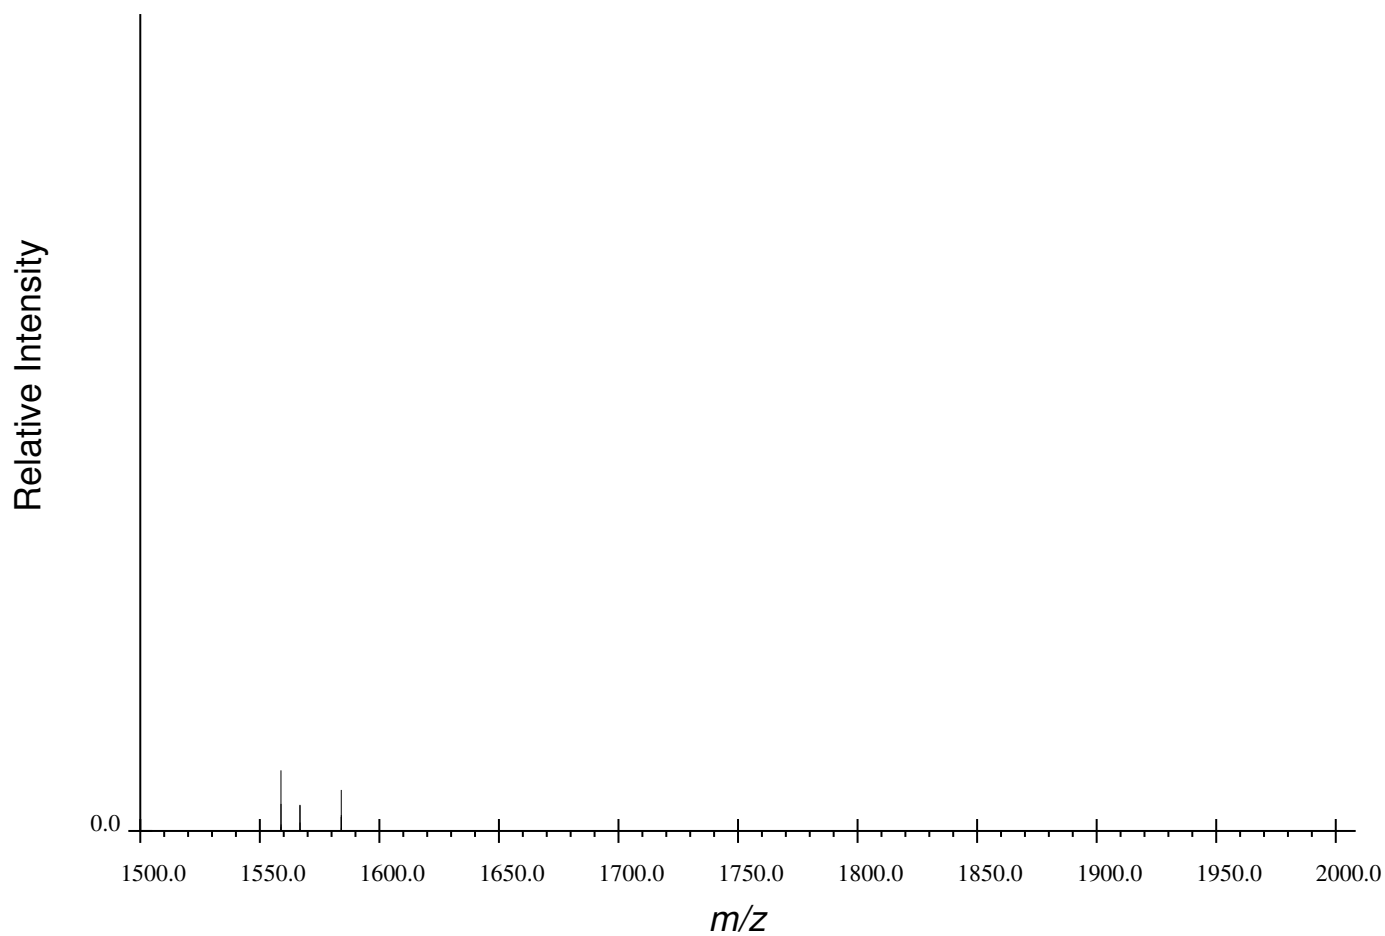

(d) Fourth Region for KRSpYEEHIP, Spectrum 27.dta

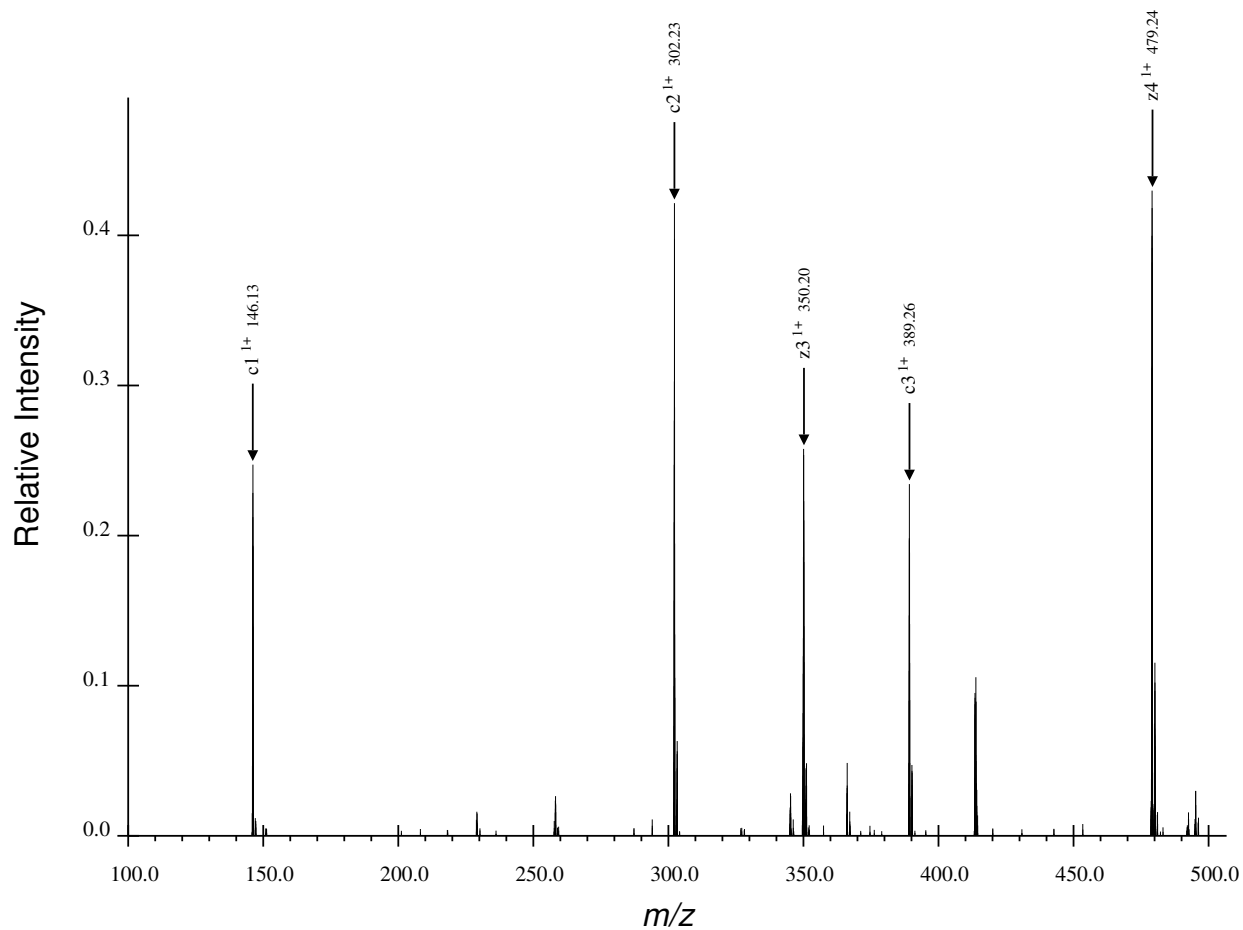

(a) First Region for KRSpYEEHIP, Spectrum 28.dta

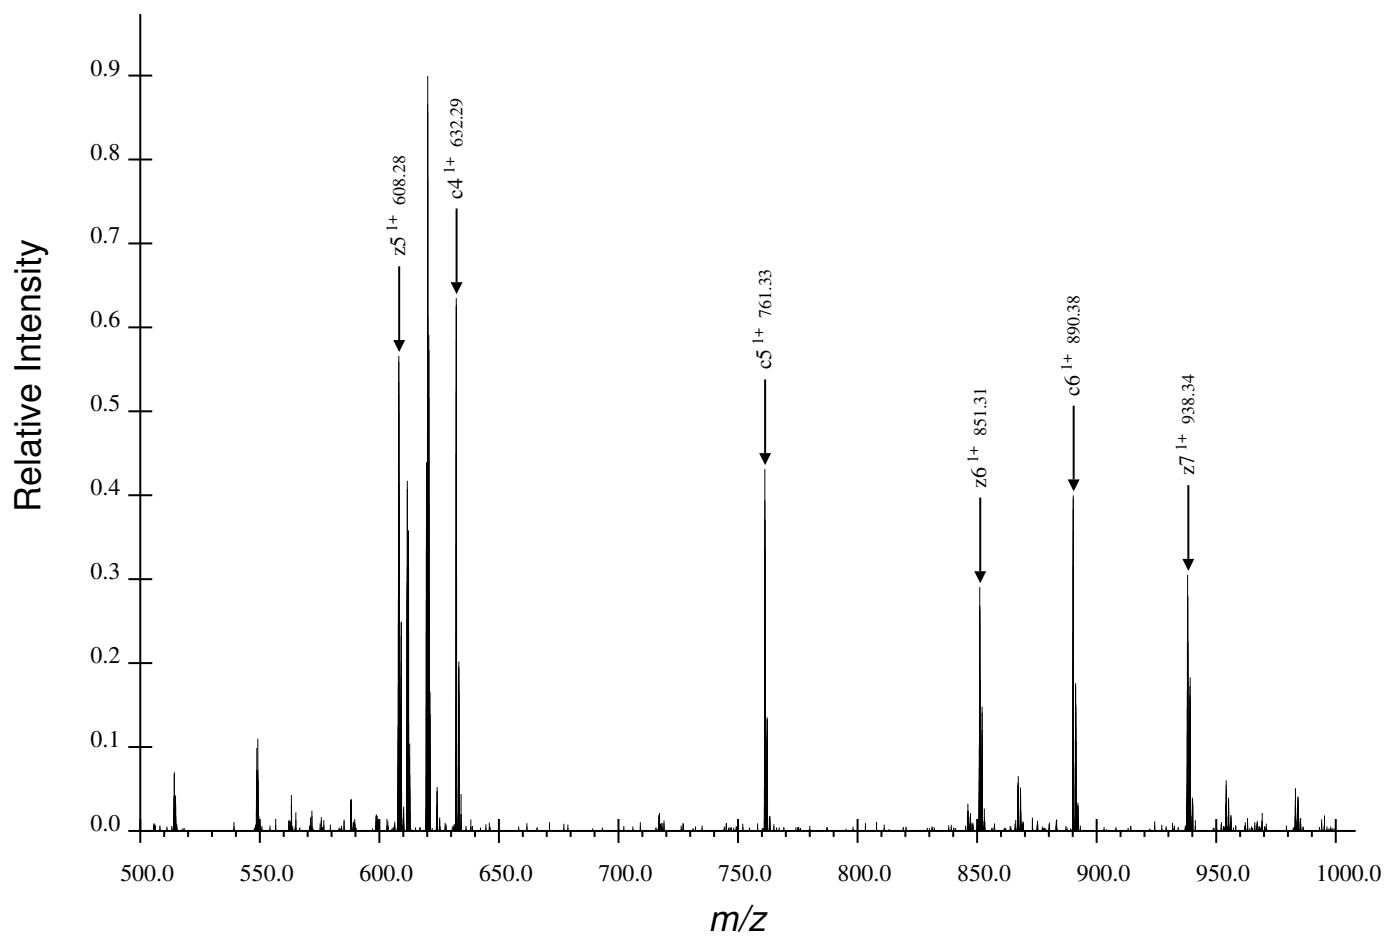

(b) Second Region for KRSpYEEHIP, Spectrum 28.dta

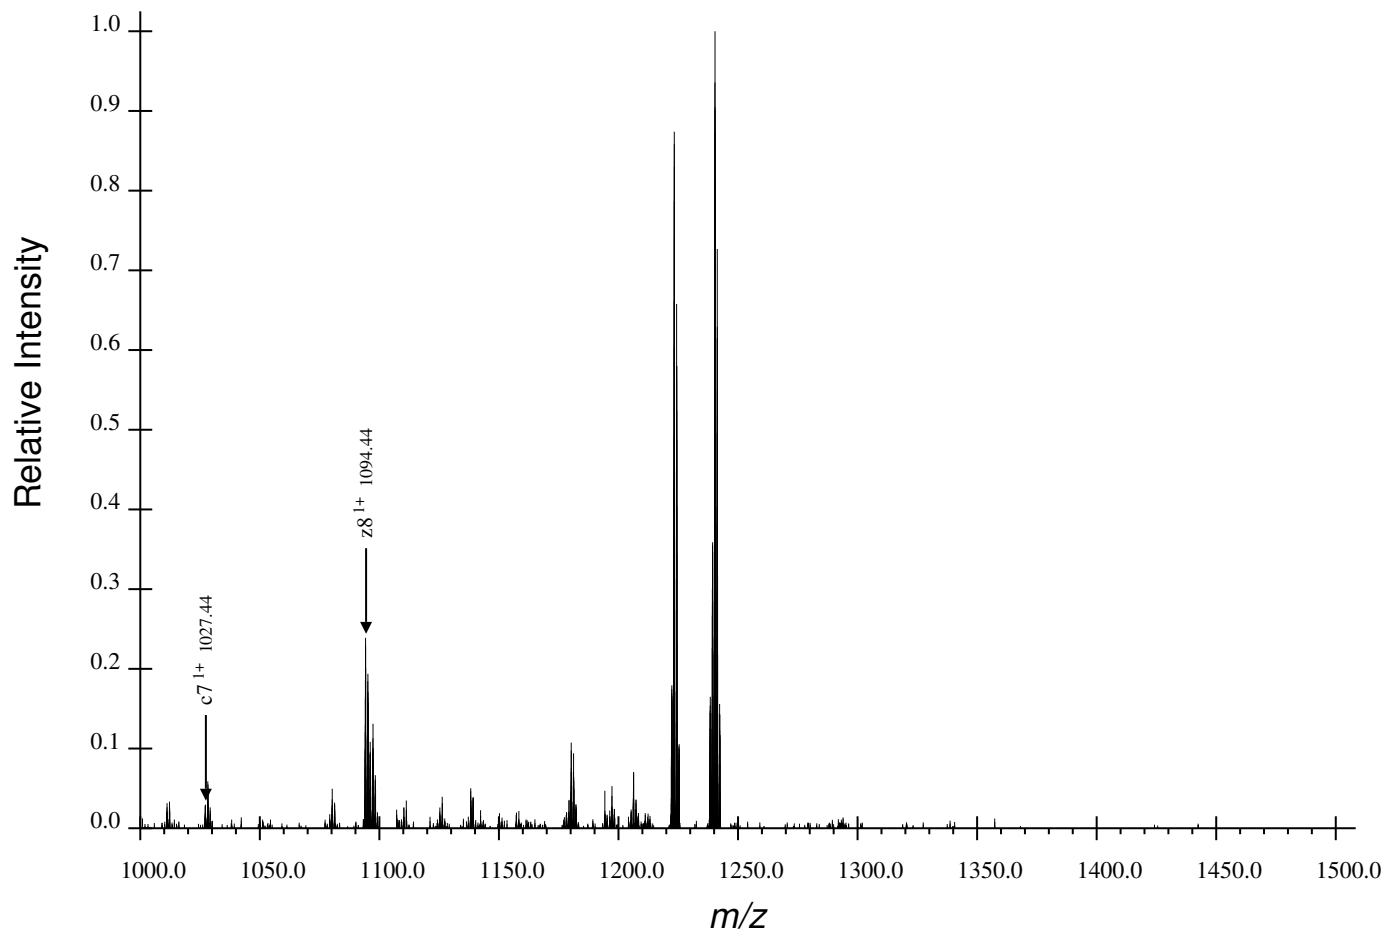

(c) Third Region for KRSpYEEHIP, Spectrum 28.dta

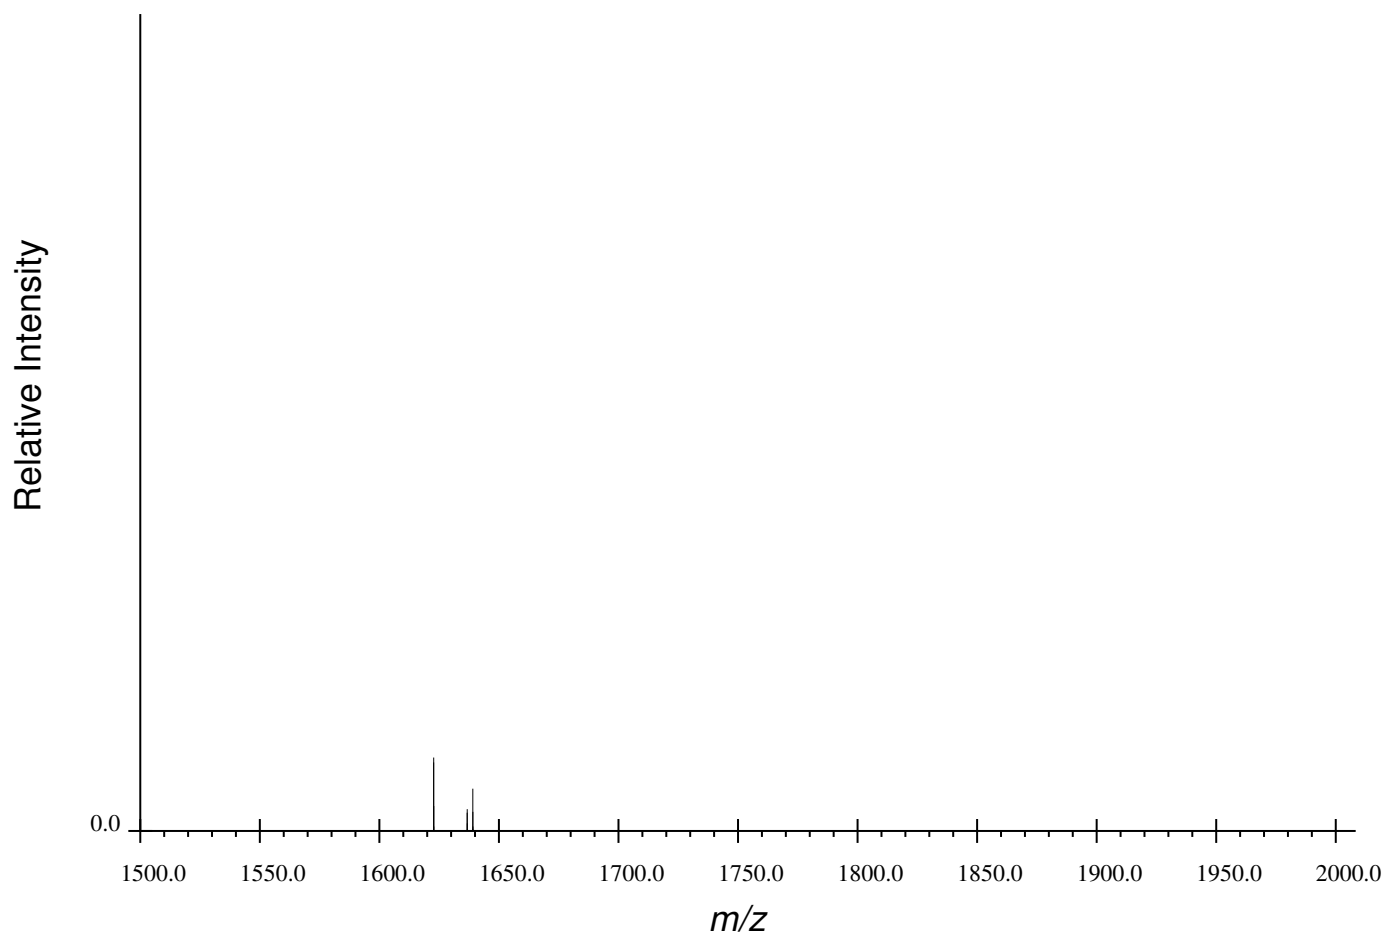

(d) Fourth Region for KRSpYEEHIP, Spectrum 28.dta



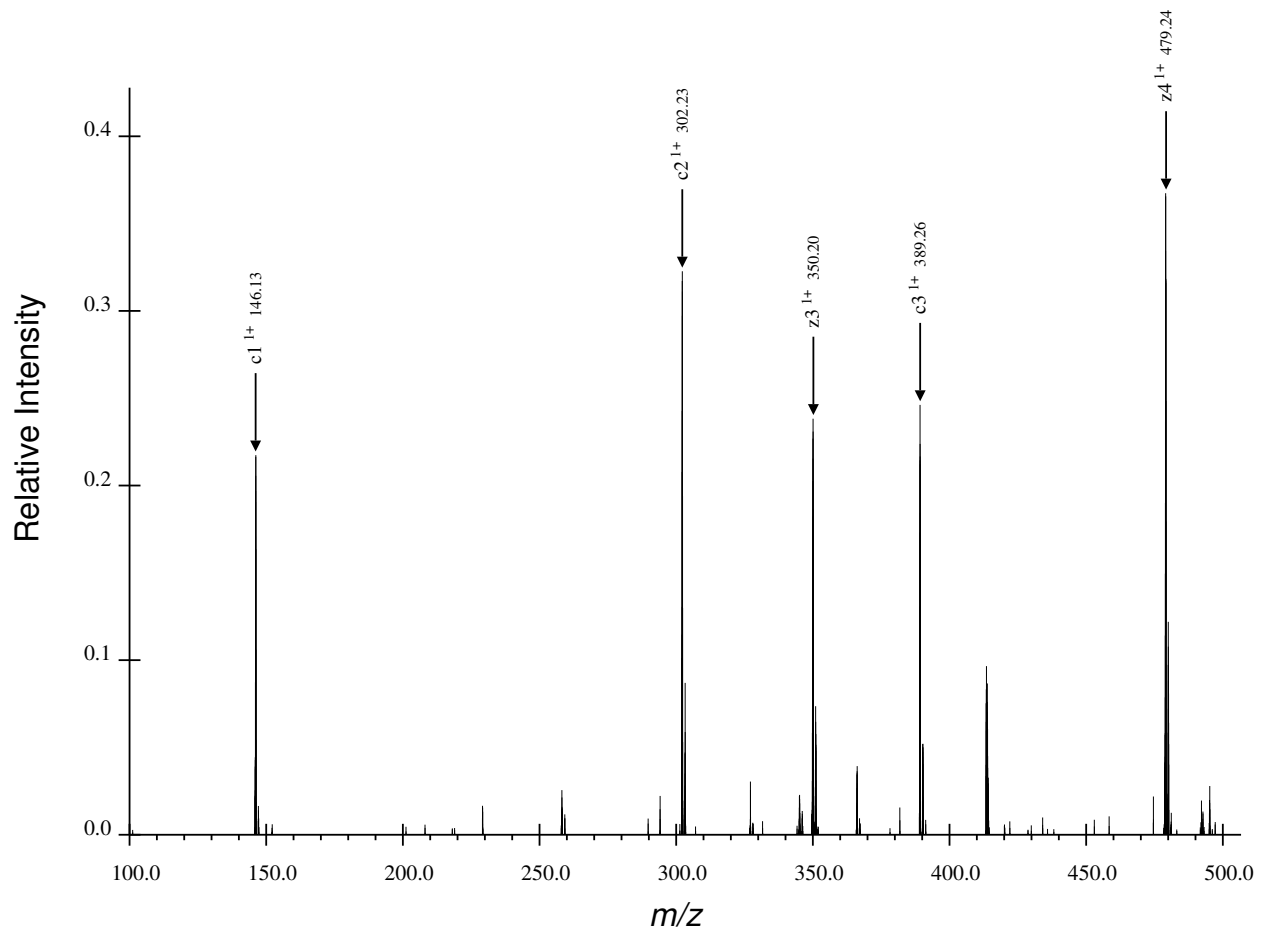

(a) First Region for KRSpYEEHIP, Spectrum 29.dta

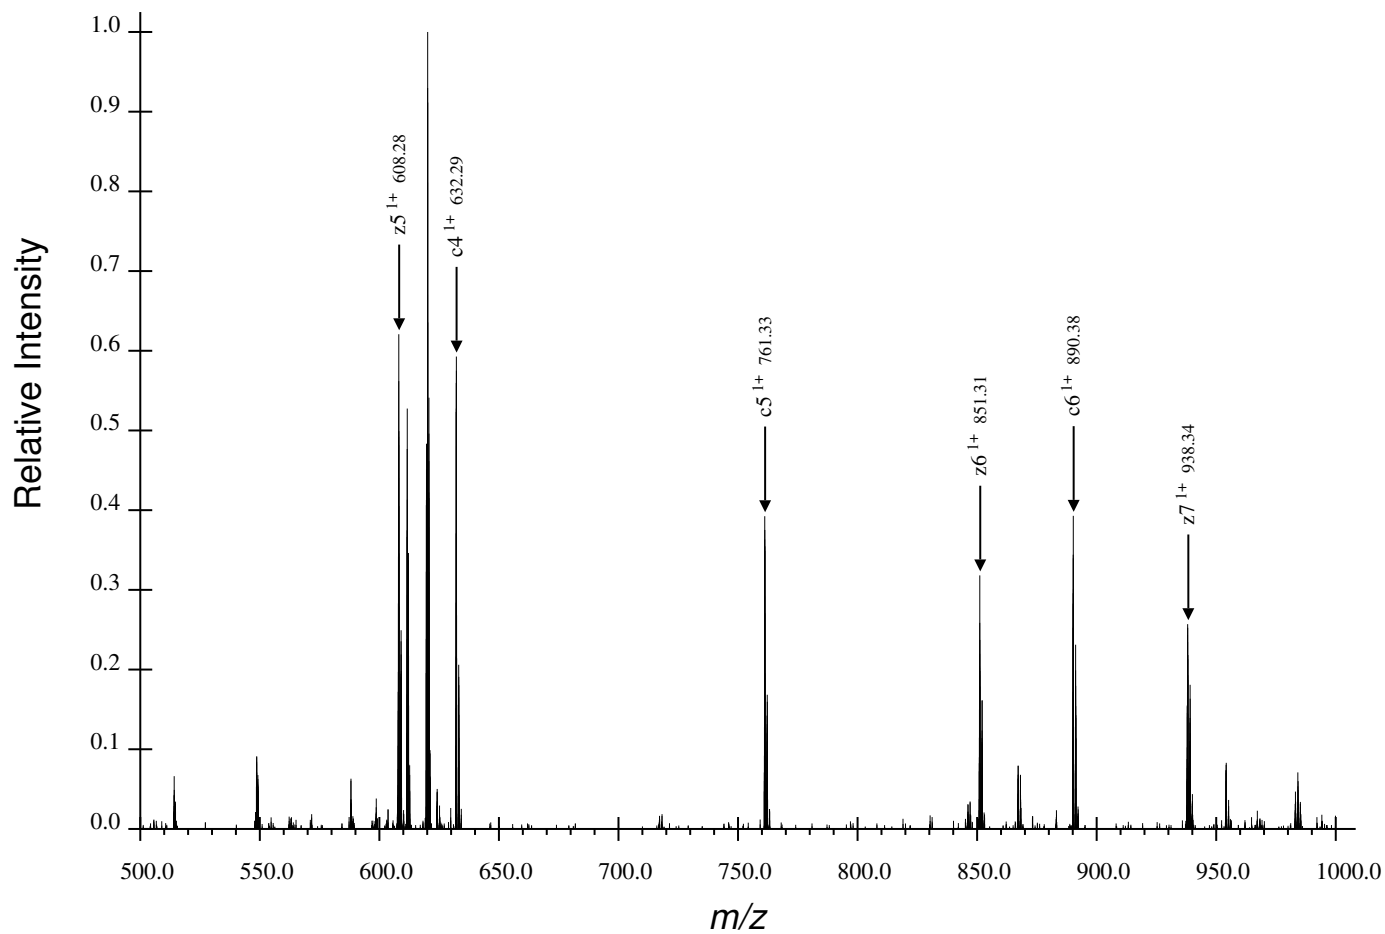

(b) Second Region for KRSpYEEHIP, Spectrum 29.dta

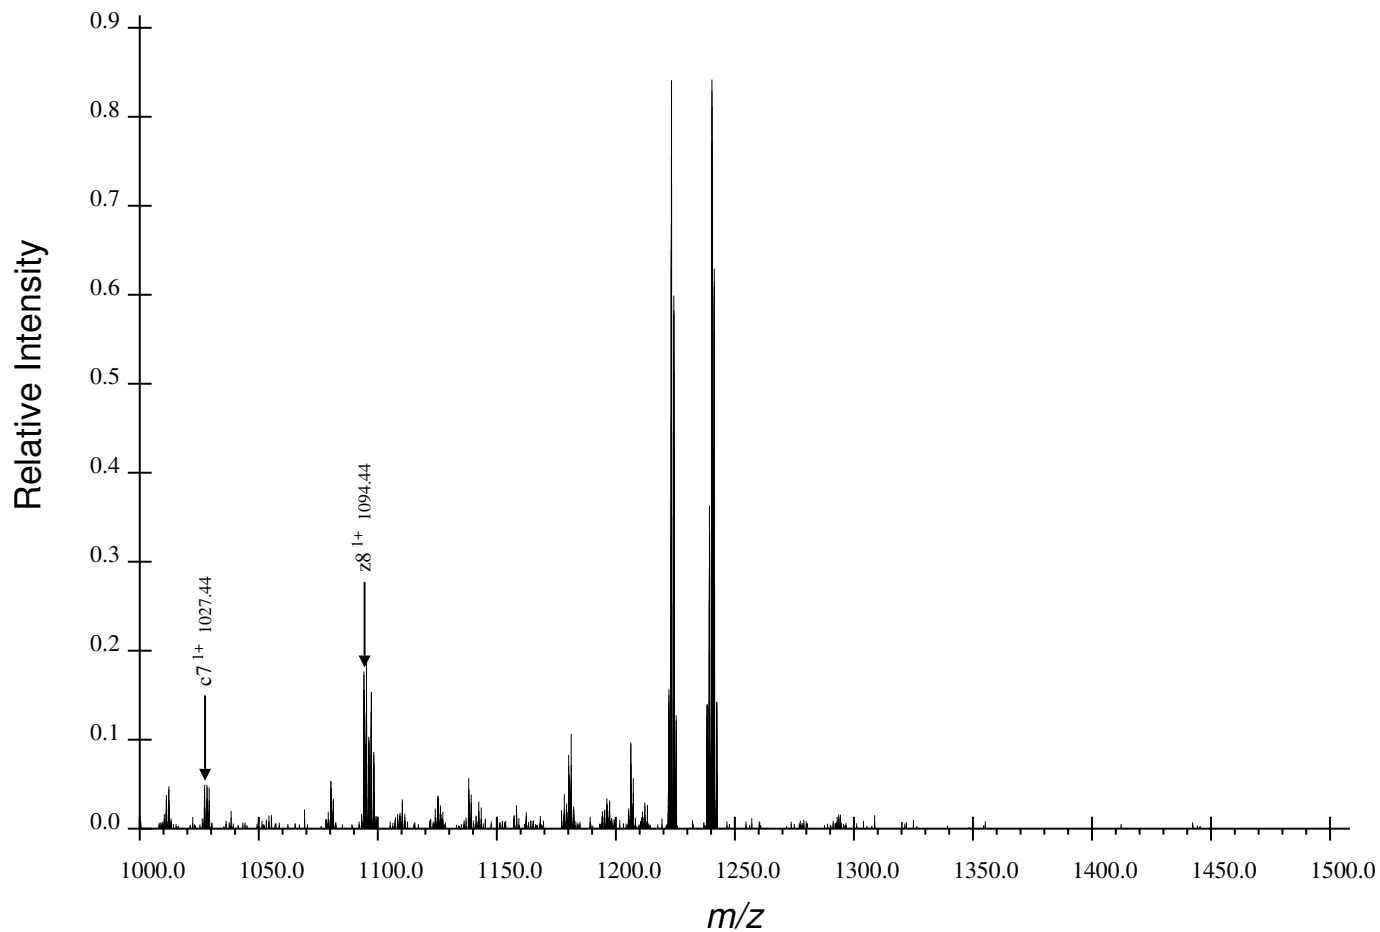

(c) Third Region for KRSpYEEHIP, Spectrum 29.dta

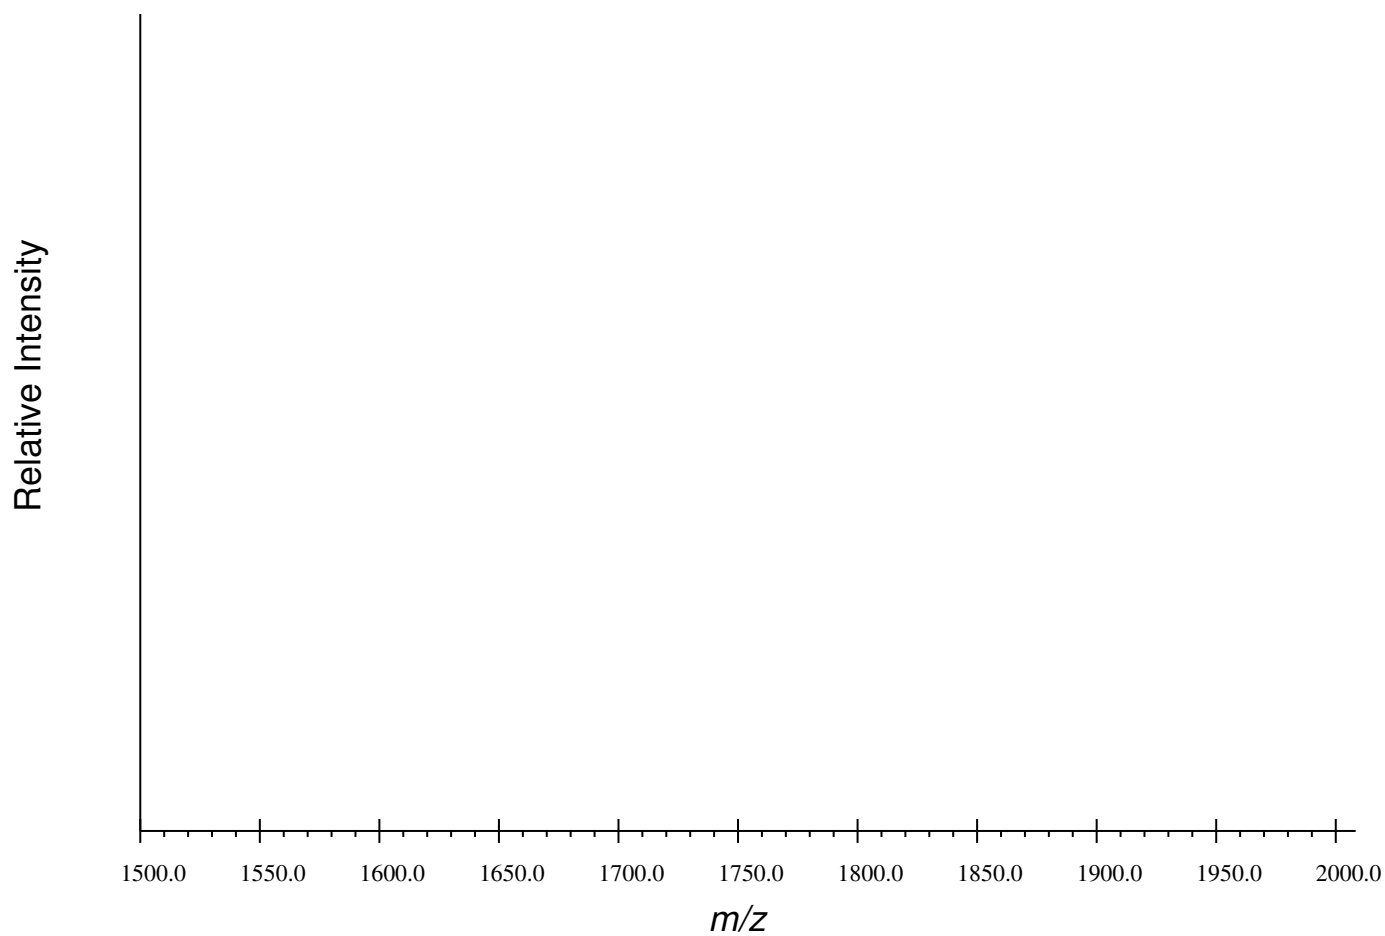

(d) Fourth Region for KRSpYEEHIP, Spectrum 29.dta

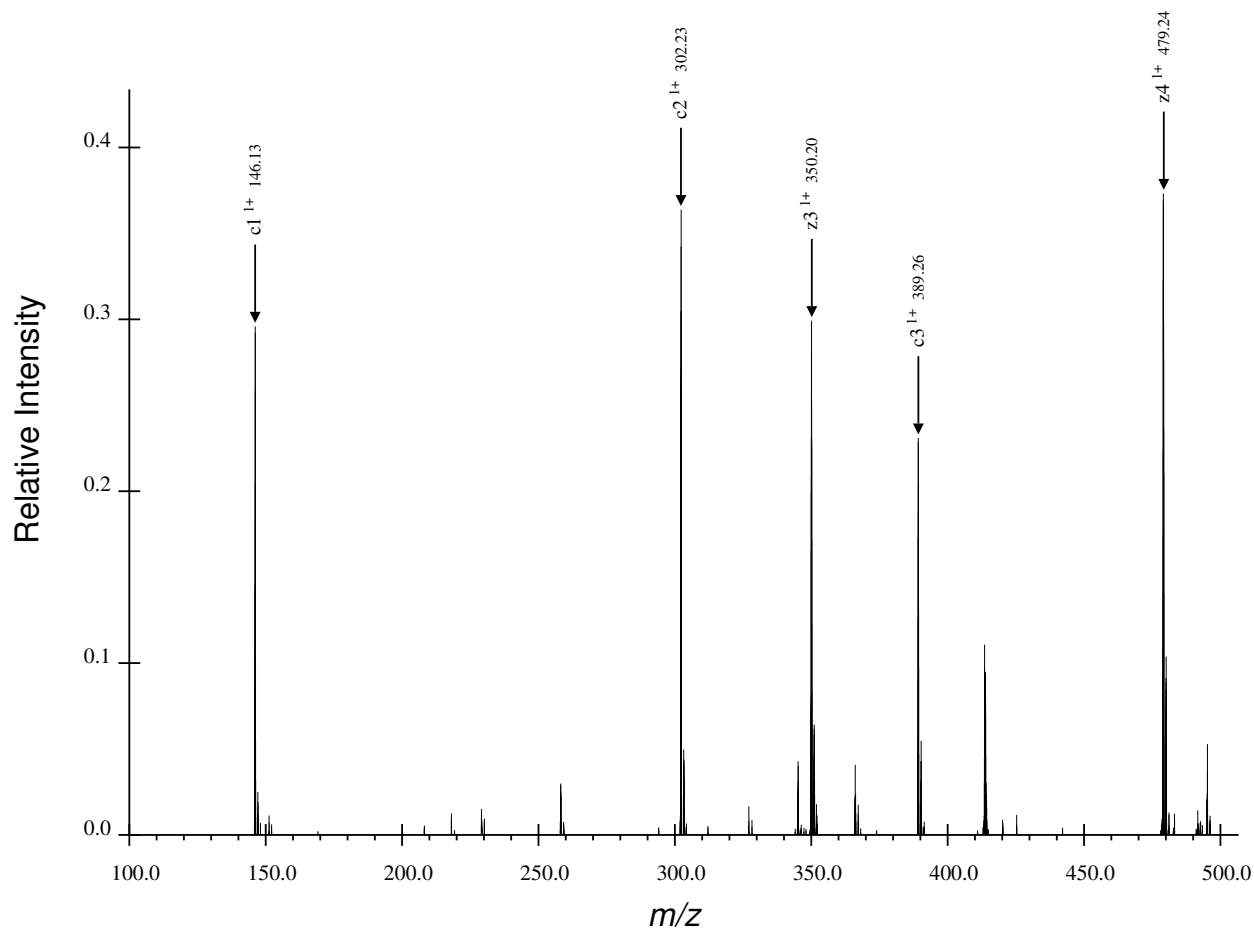

(a) First Region for KRSpYEEHIP, Spectrum 30.dta

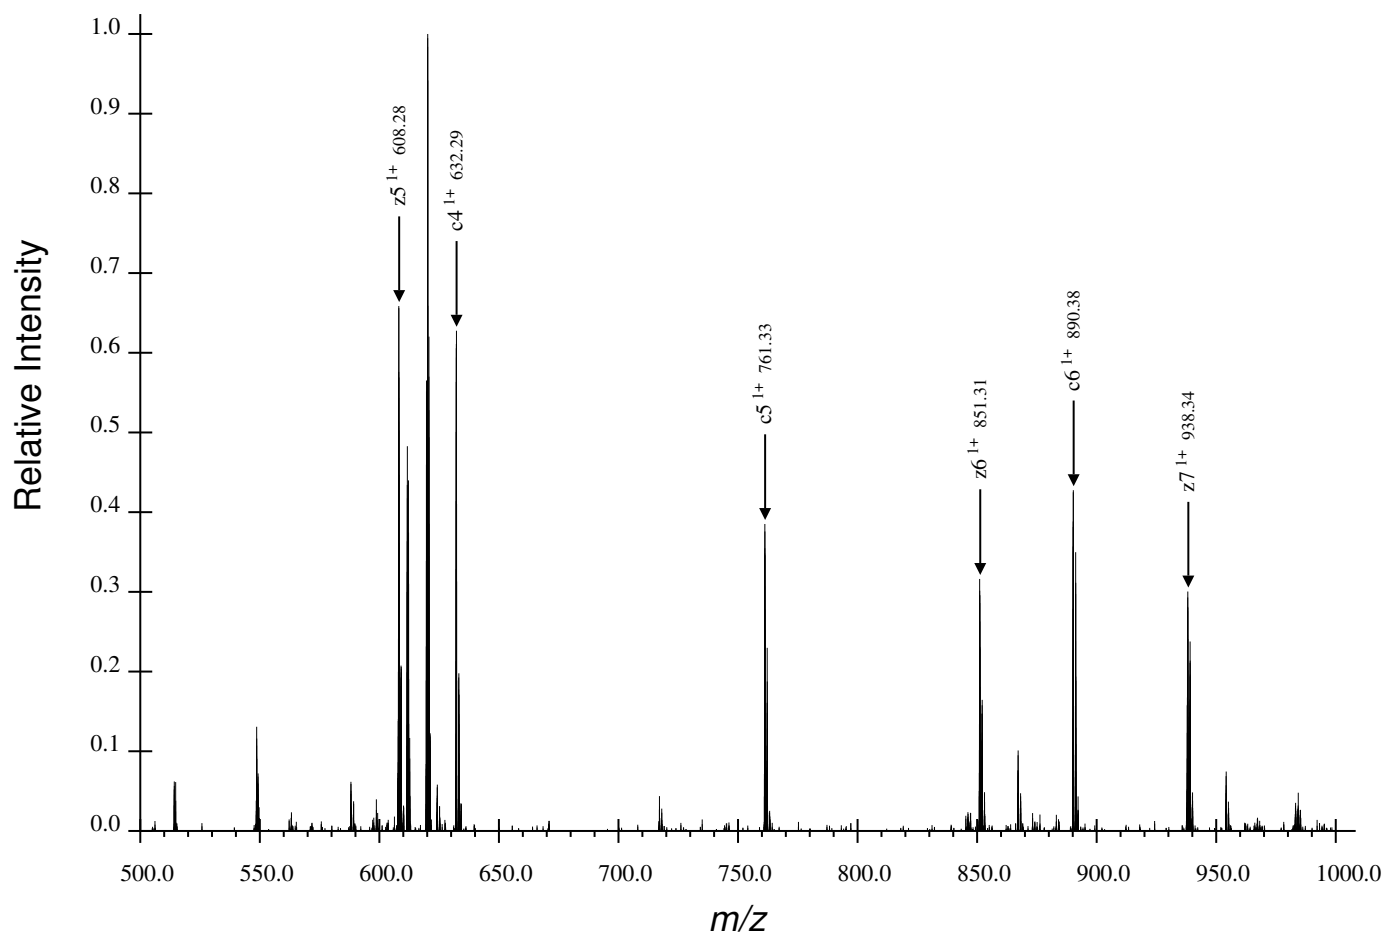

(b) Second Region for KRSpYEEHIP, Spectrum 30.dta

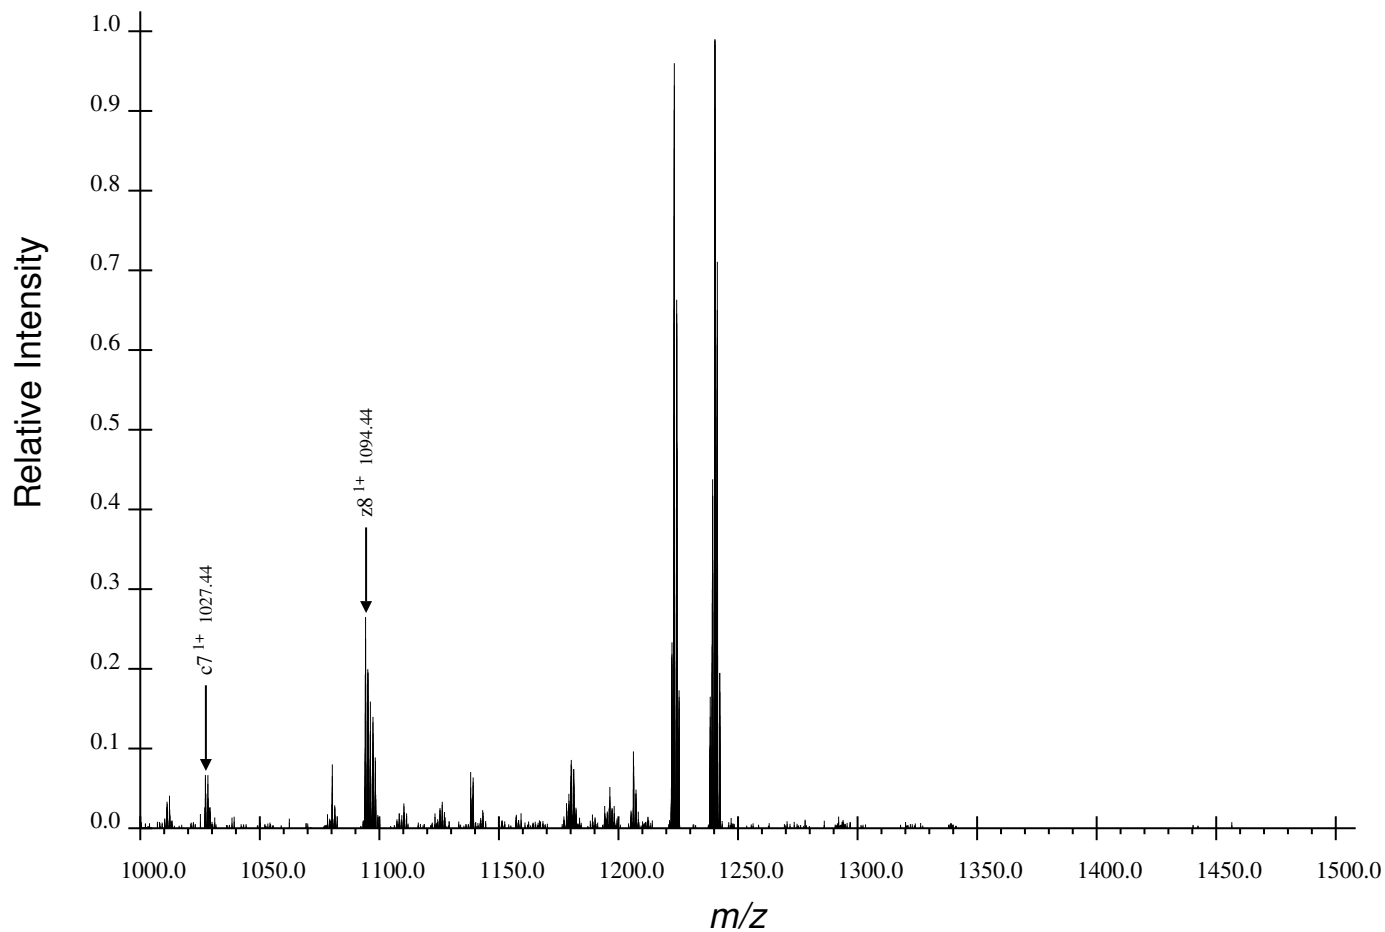

(c) Third Region for KRSpYEEHIP, Spectrum 30.dta

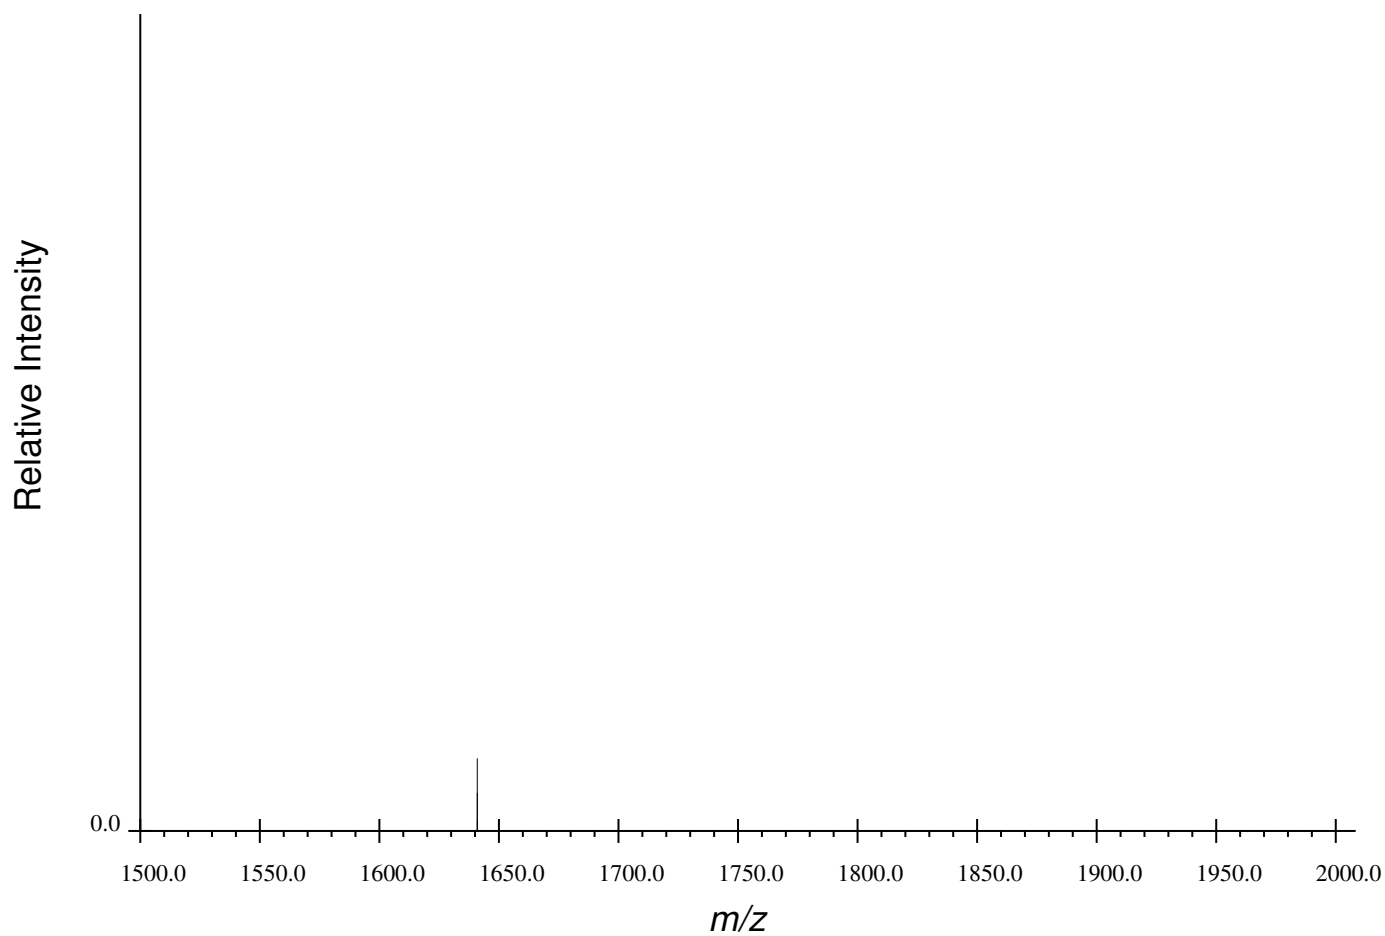

(d) Fourth Region for KRSpYEEHIP, Spectrum 30.dta

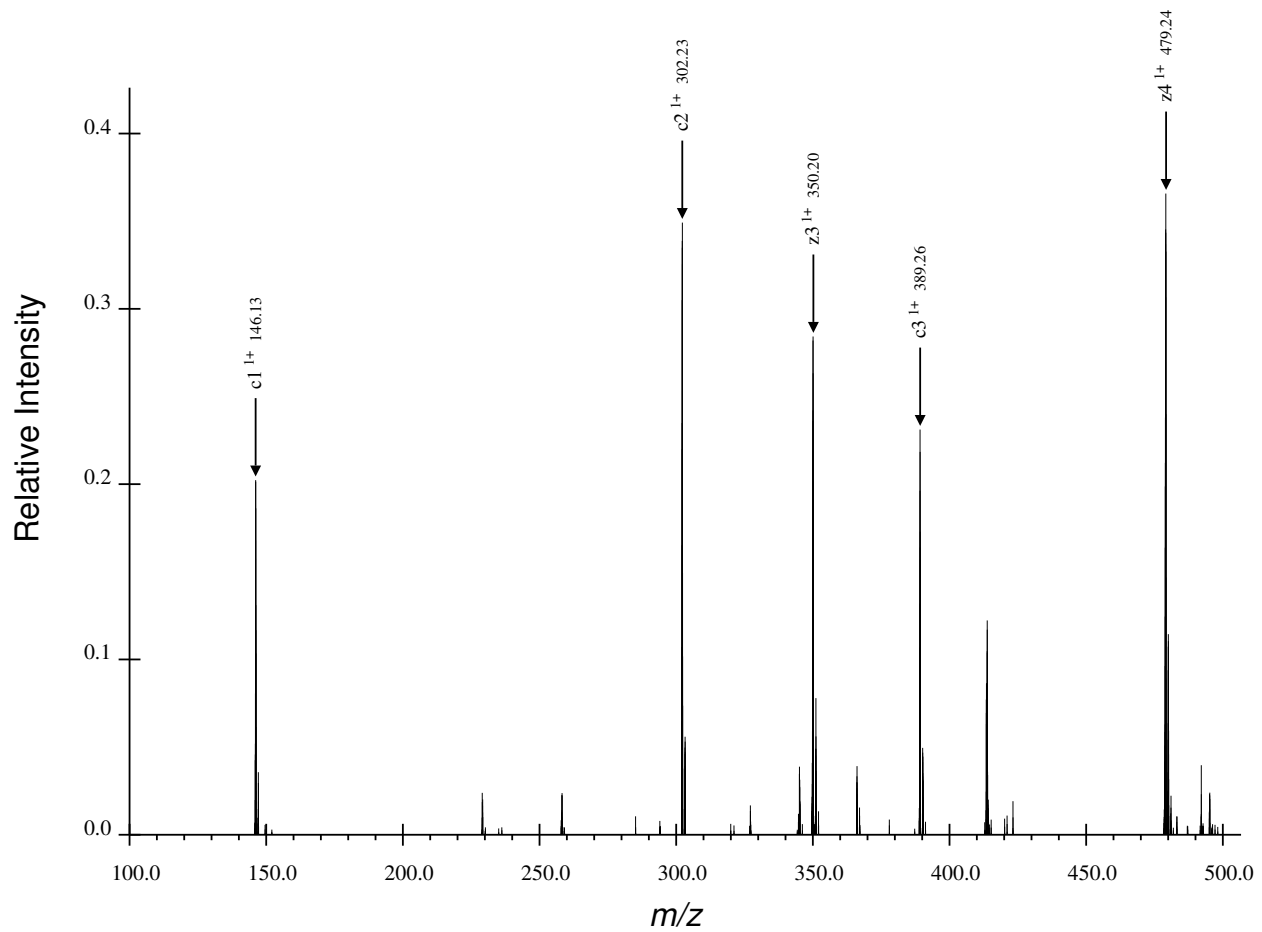

(a) First Region for KRSpYEEHIP, Spectrum 31.dta

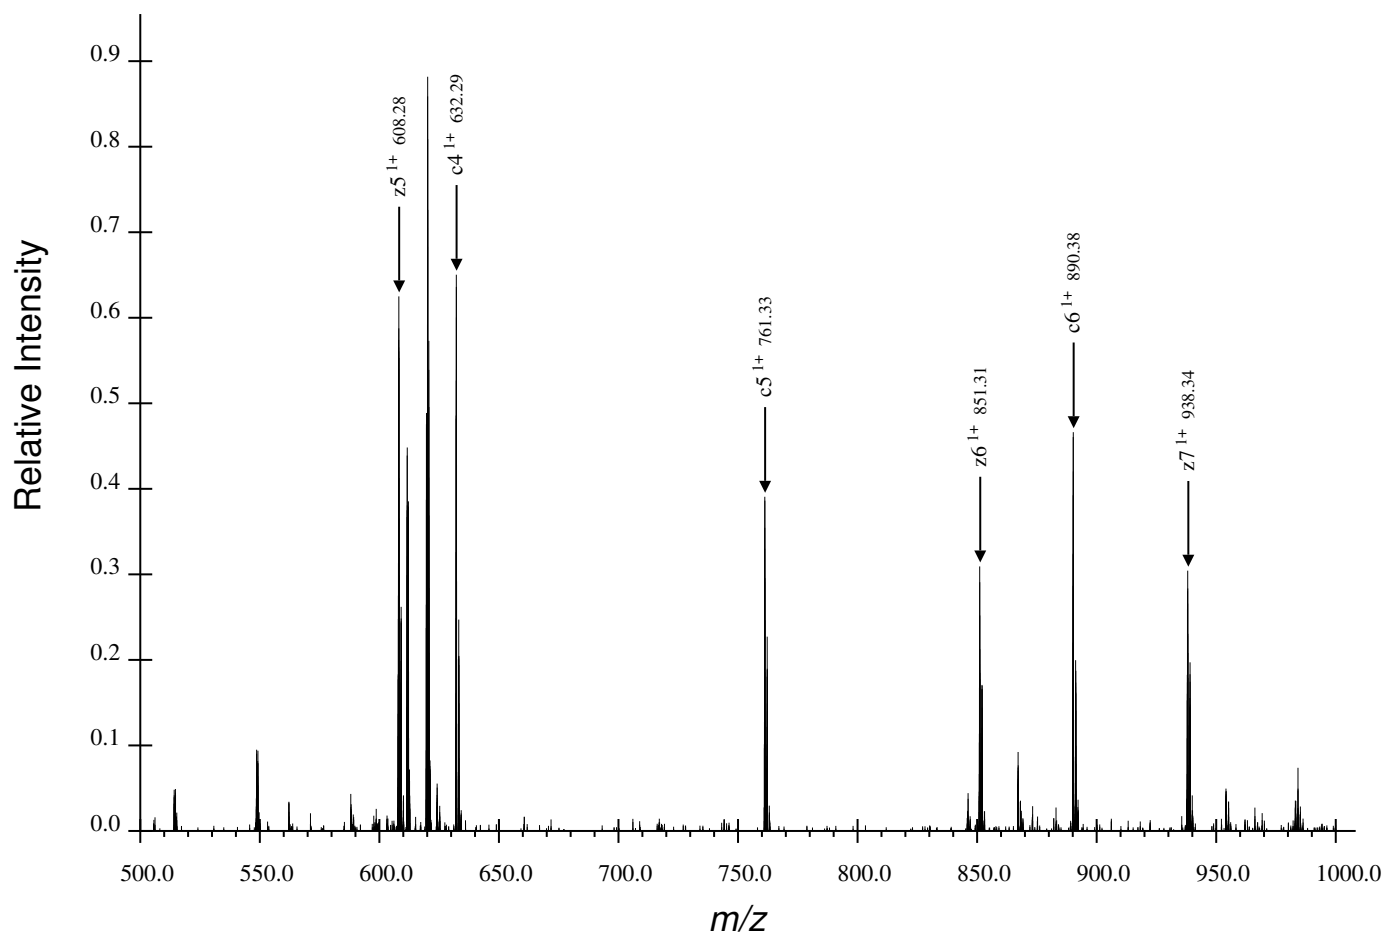

(b) Second Region for KRSpYEEHIP, Spectrum 31.dta

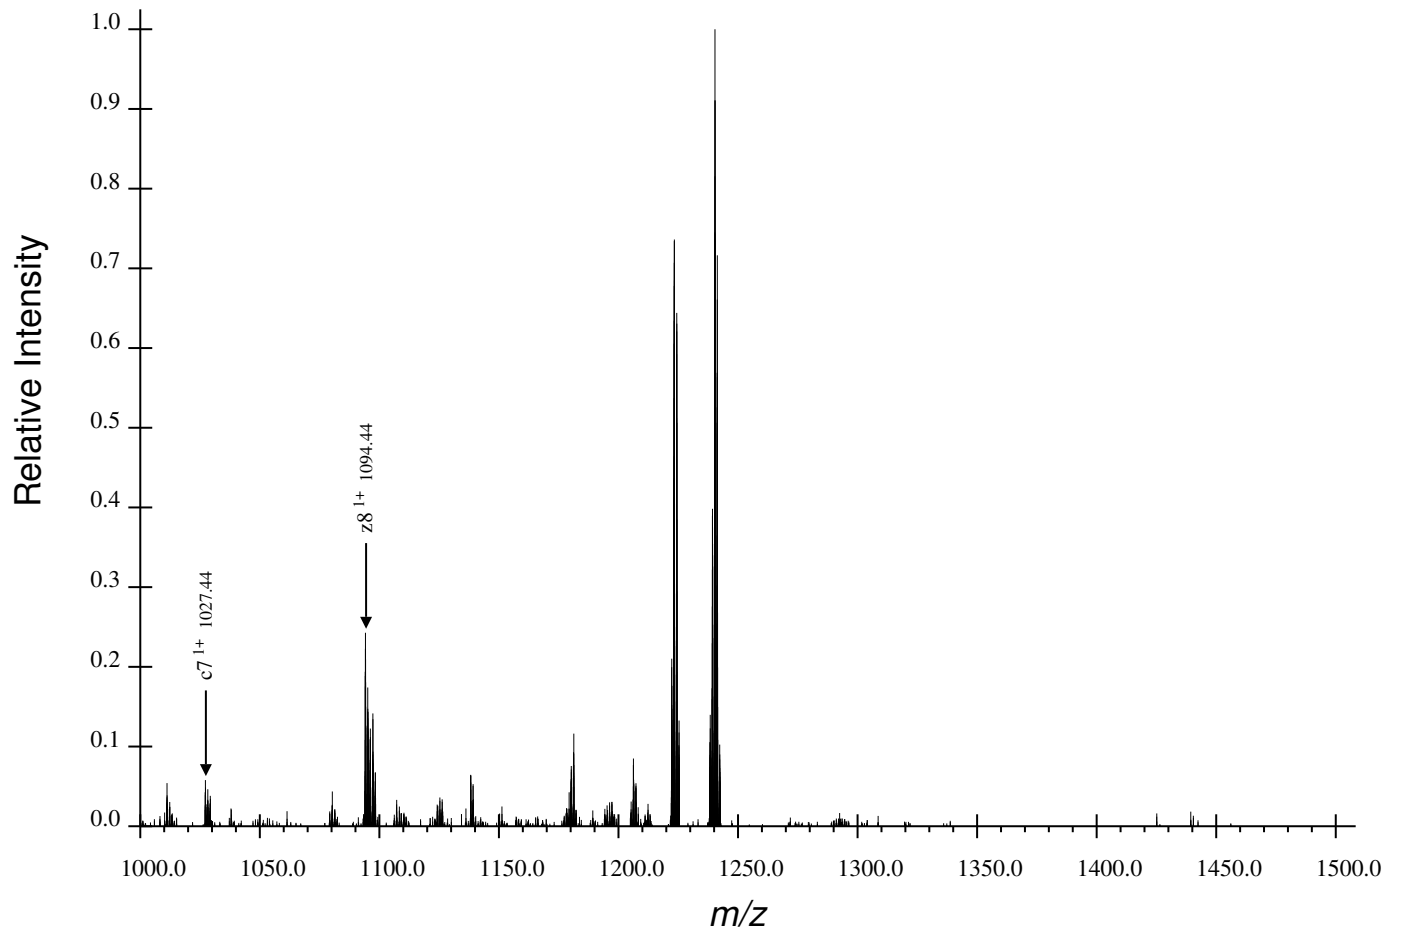

(c) Third Region for KRSpYEEHIP, Spectrum 31.dta

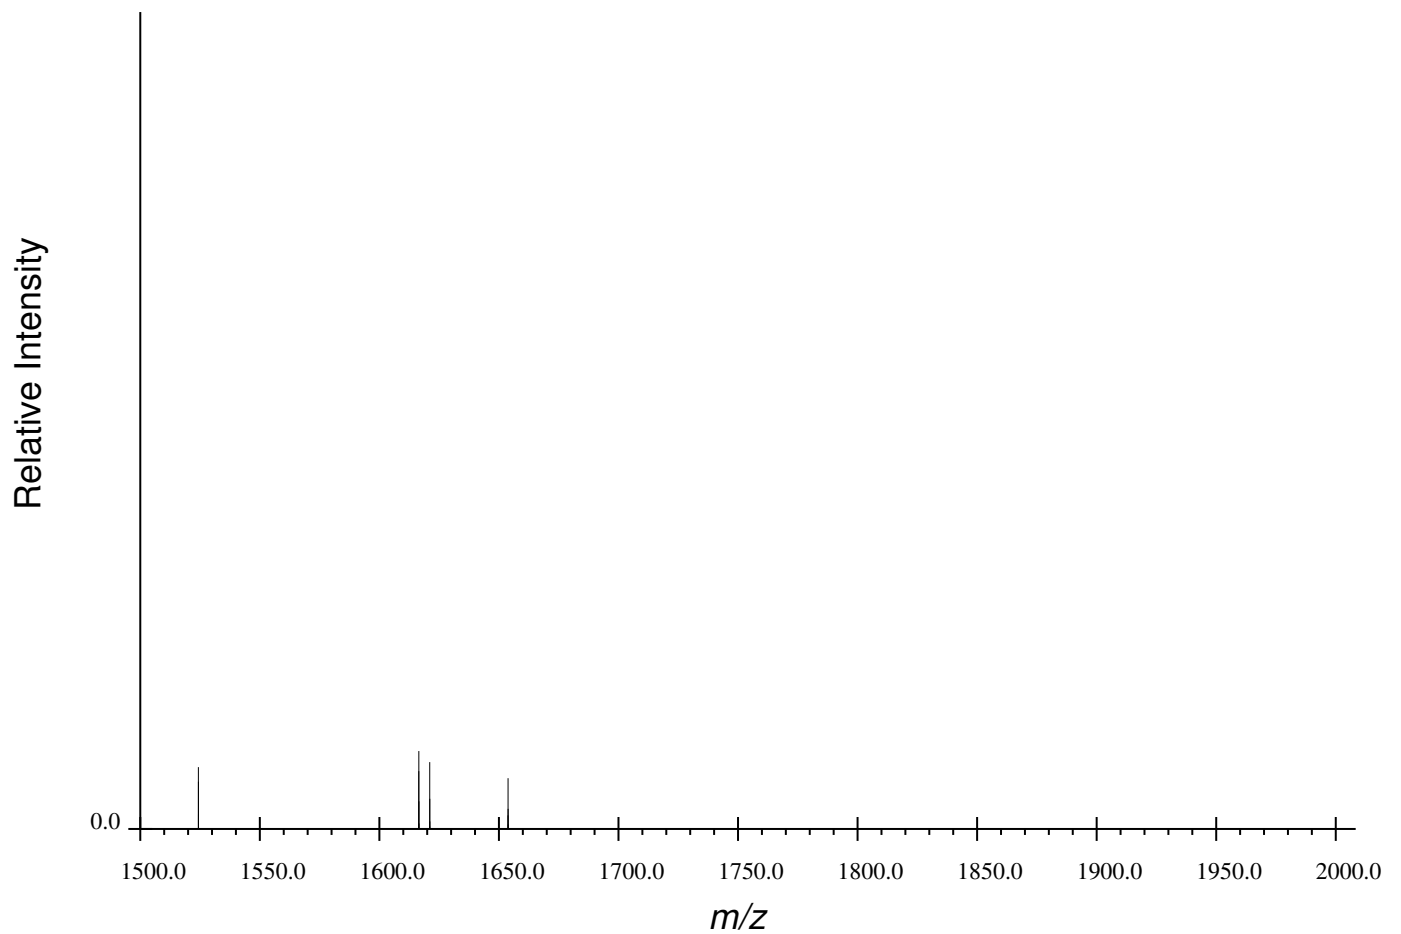

(d) Fourth Region for KRSpYEEHIP, Spectrum 31.dta

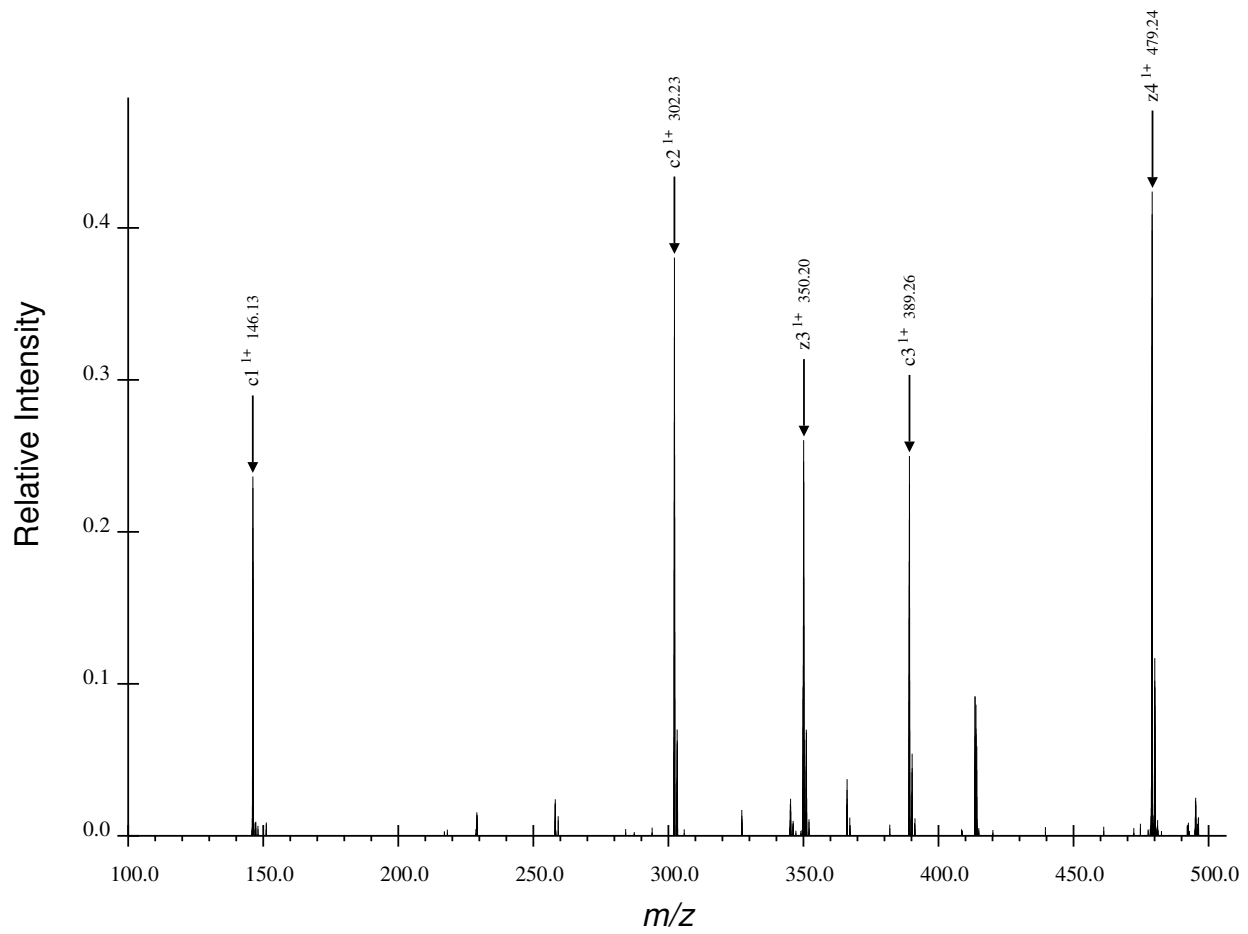

(a) First Region for KRSpYEEHIP, Spectrum 32.dta

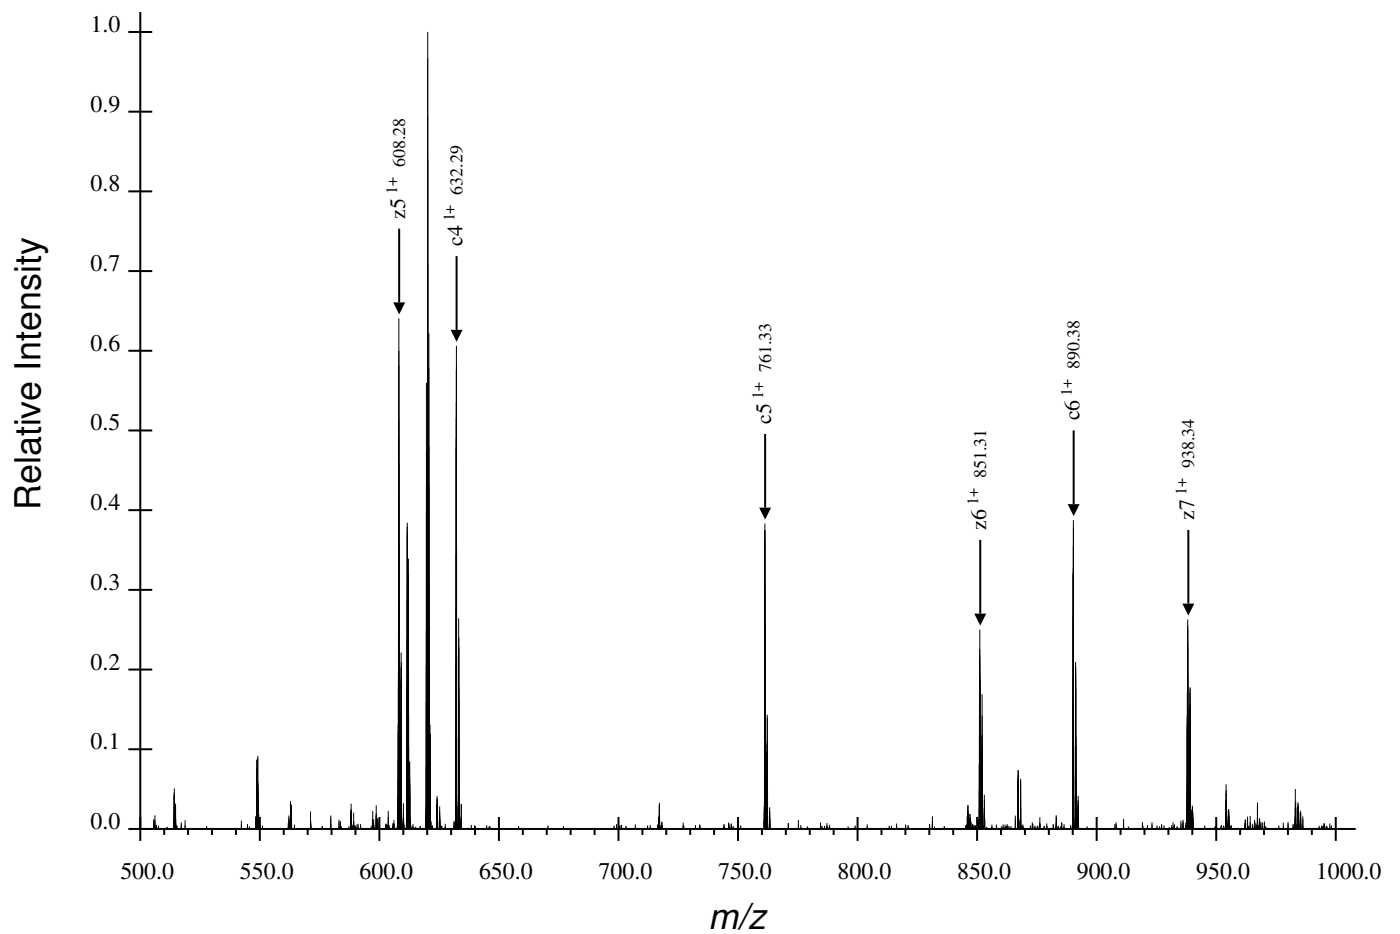

(b) Second Region for KRSpYEEHIP, Spectrum 32.dta

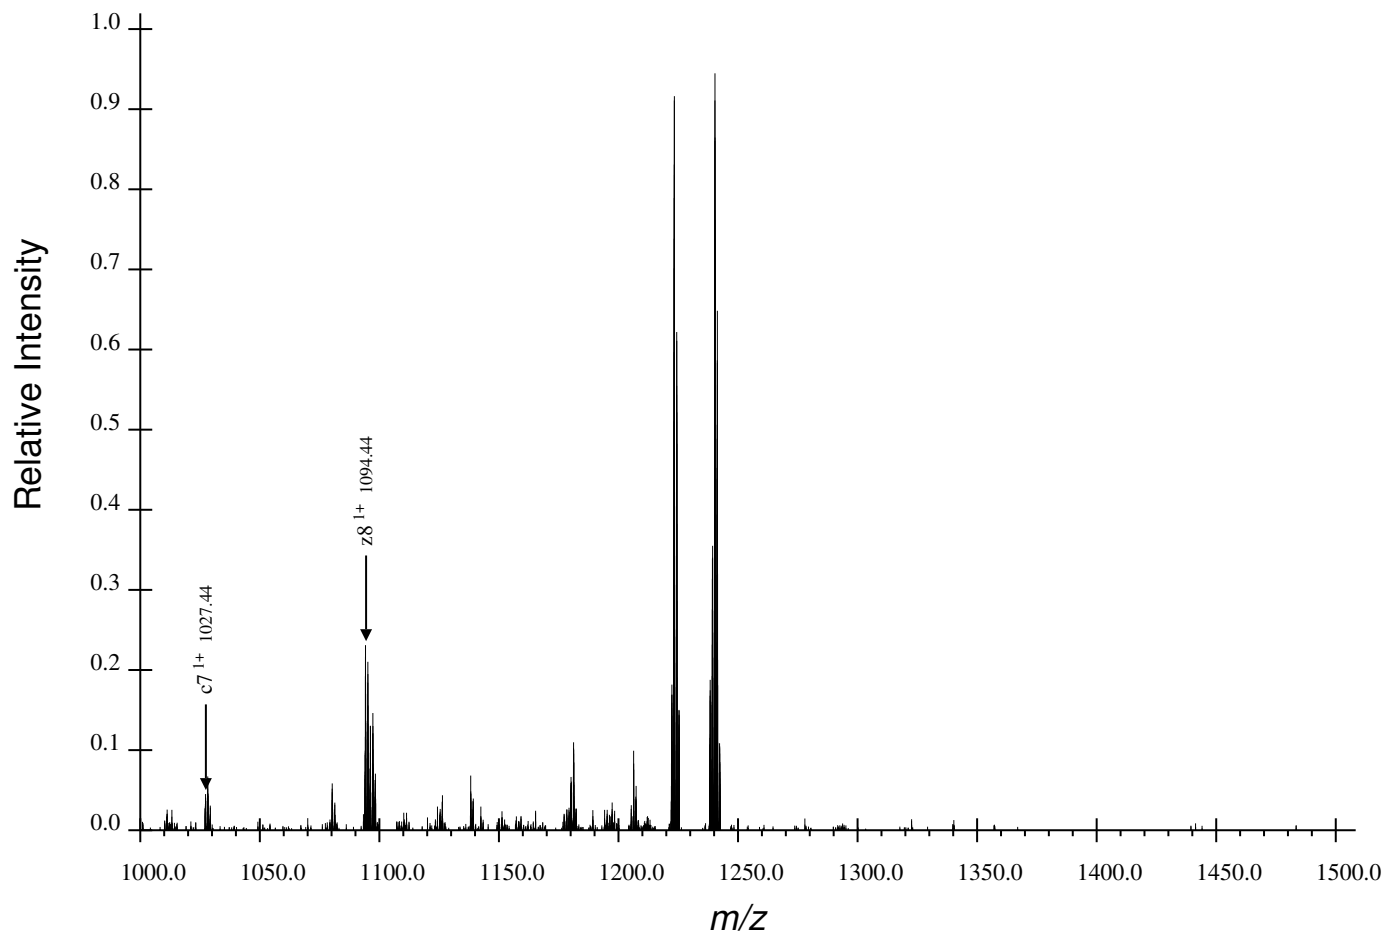

(c) Third Region for KRSpYEEHIP, Spectrum 32.dta

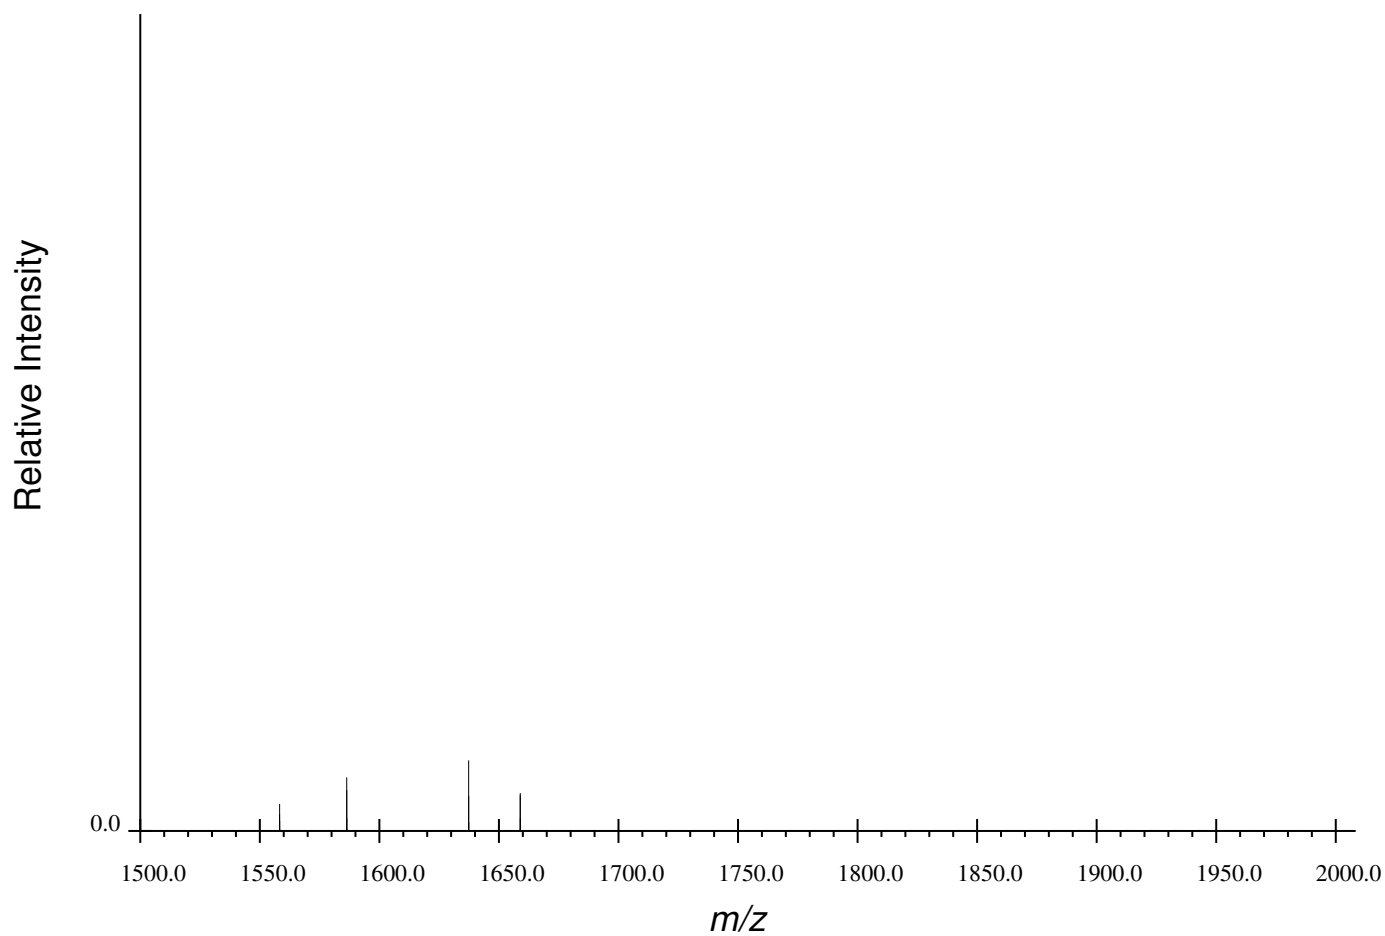

(d) Fourth Region for KRSpYEEHIP, Spectrum 32.dta



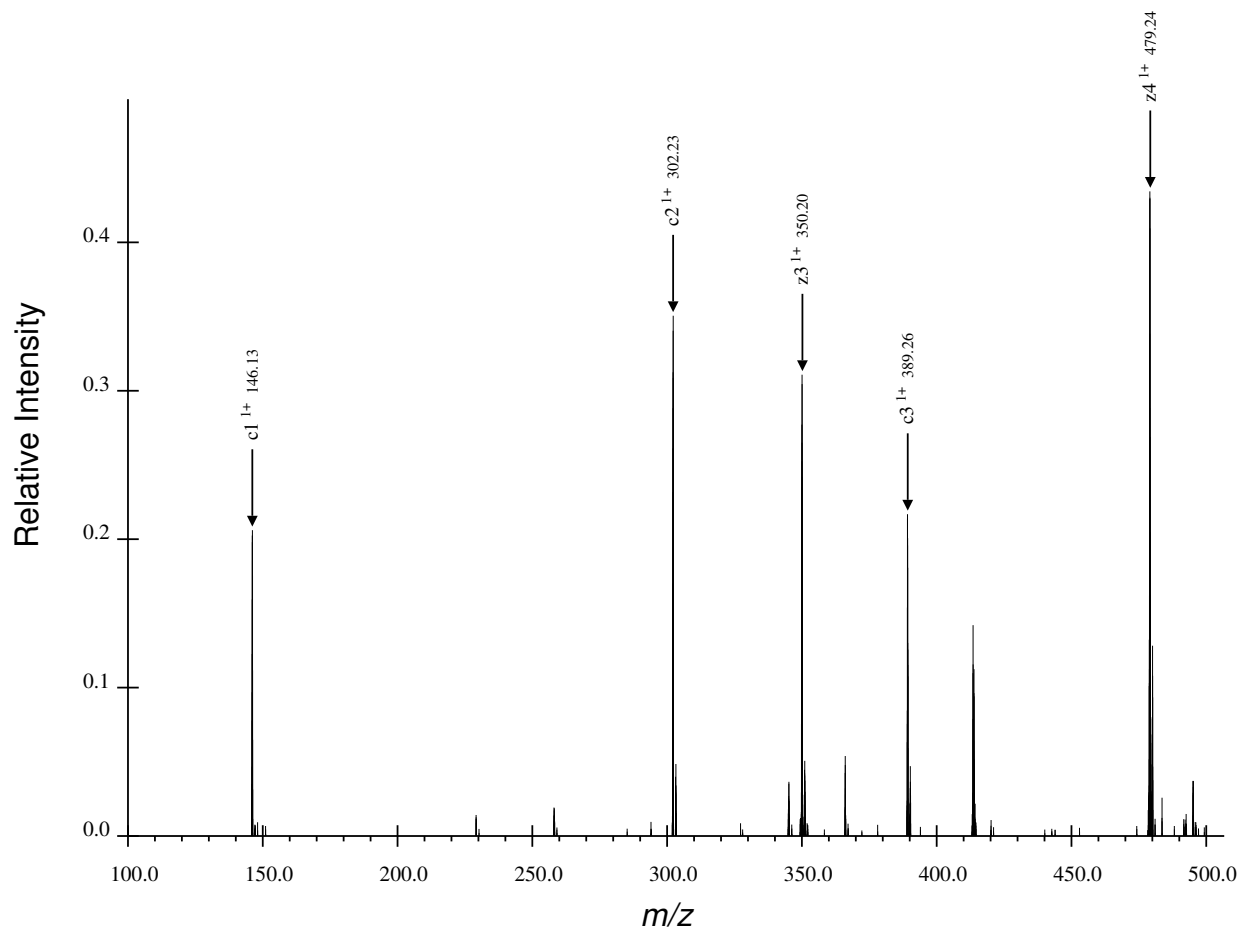

(a) First Region for KRSpYEEHIP, Spectrum 33.dta

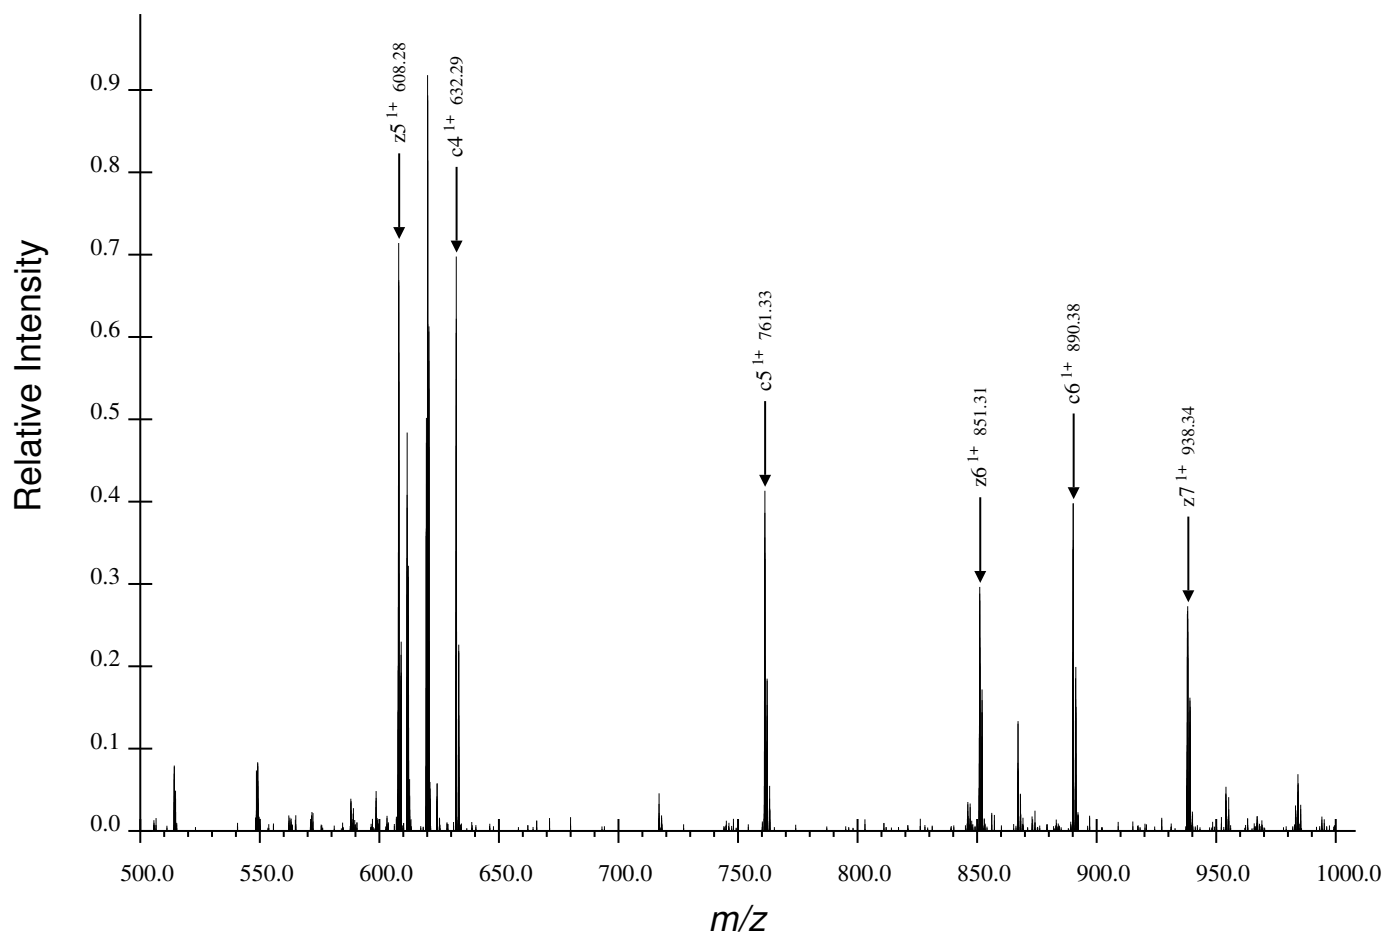

(b) Second Region for KRSpYEEHIP, Spectrum 33.dta

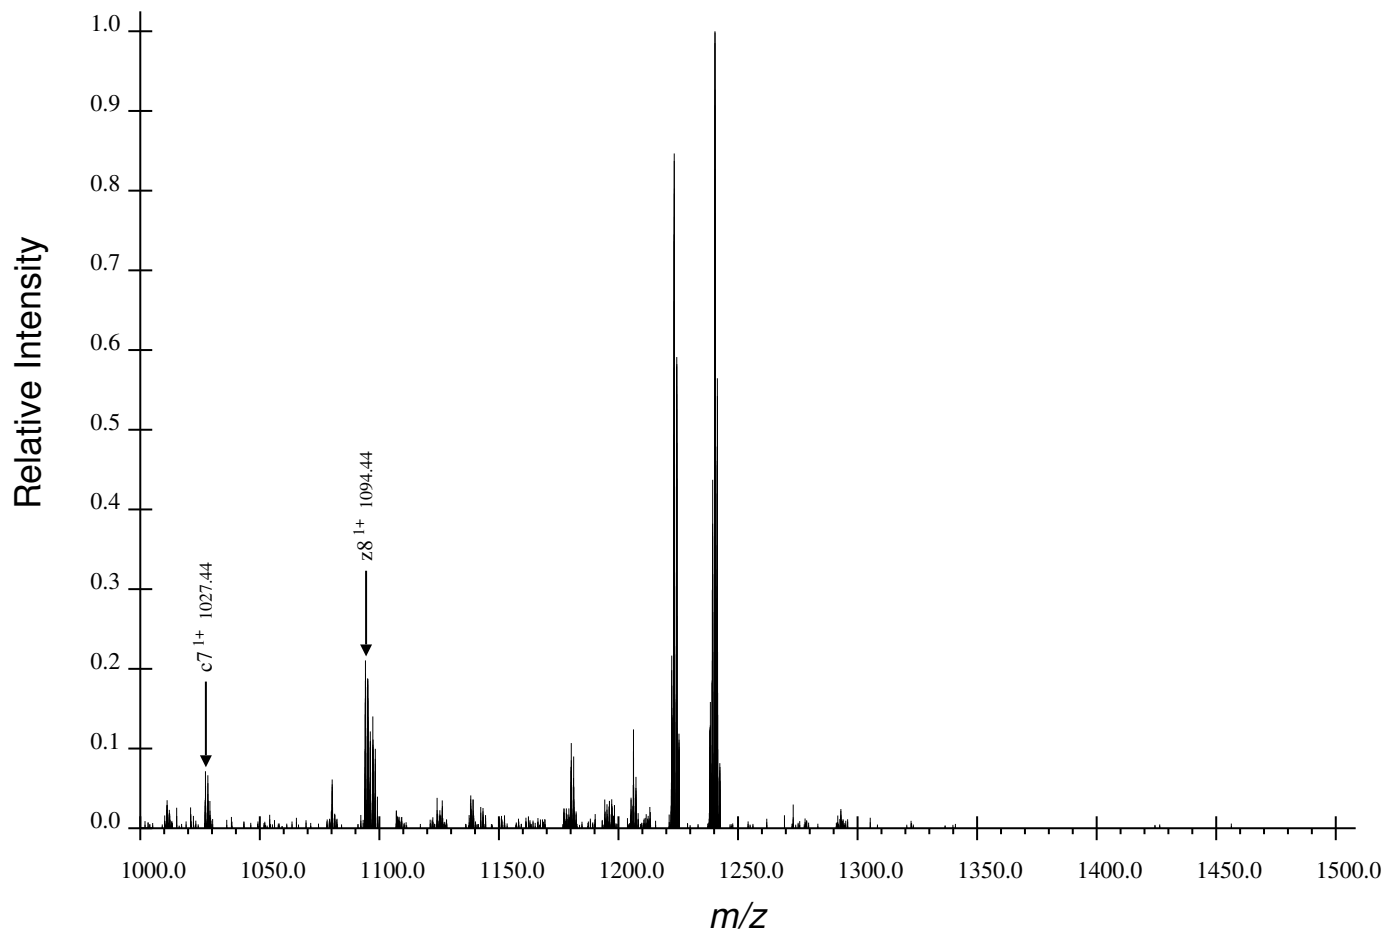

(c) Third Region for KRSpYEEHIP, Spectrum 33.dta



(d) Fourth Region for KRSpYEEHIP, Spectrum 33.dta

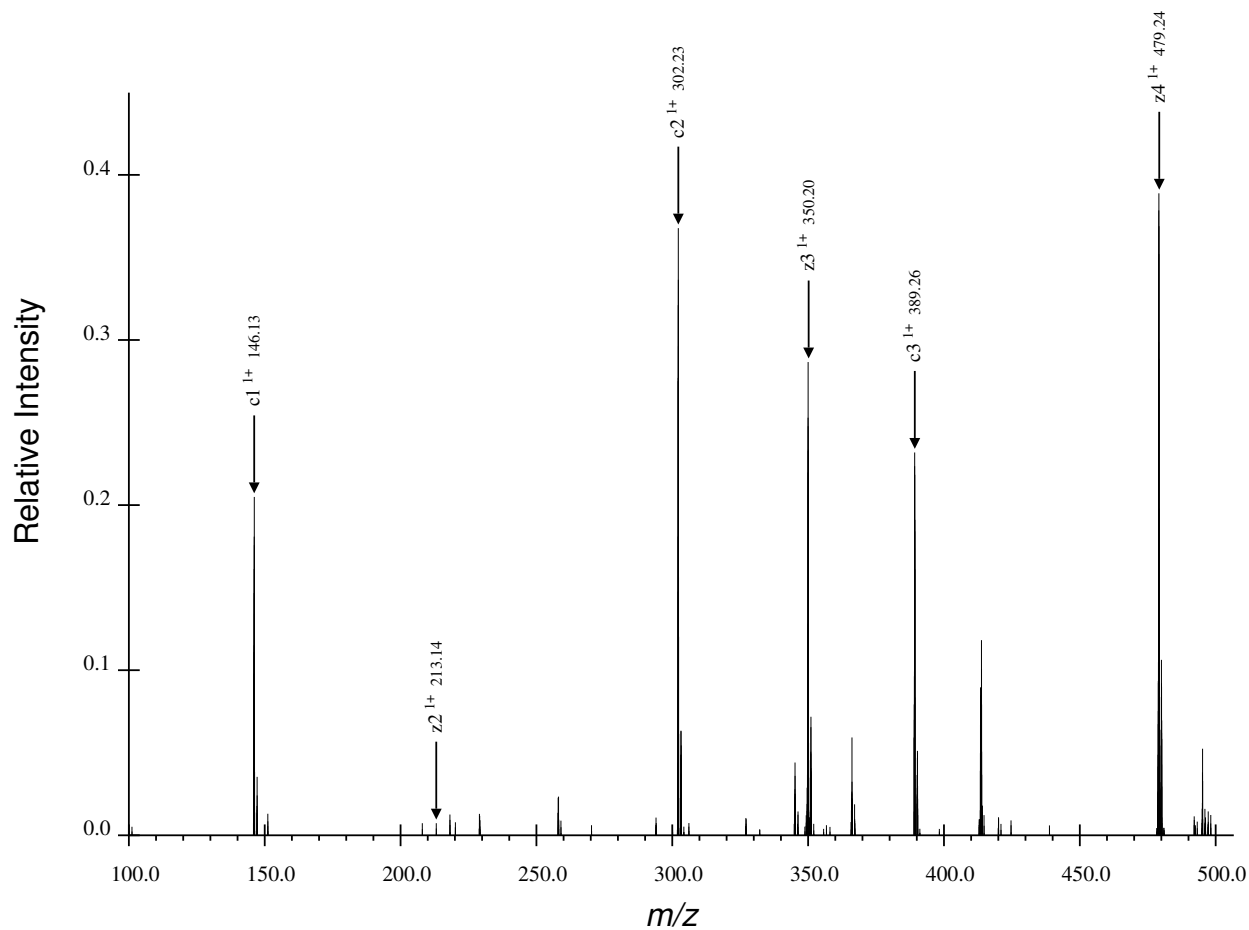

(a) First Region for KRSpYEEHIP, Spectrum 34.dta

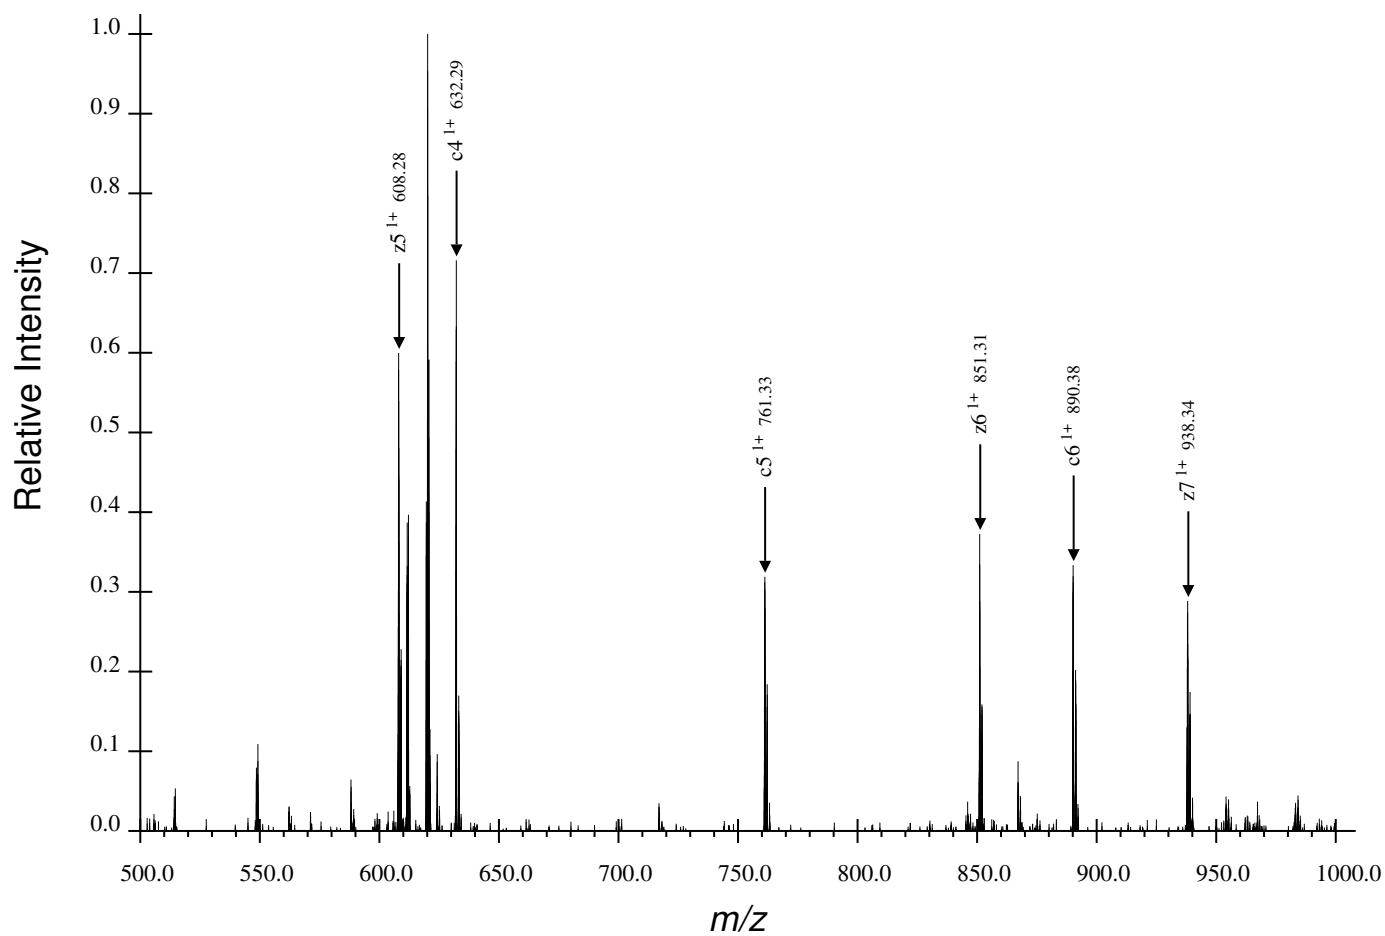

(b) Second Region for KRSpYEEHIP, Spectrum 34.dta

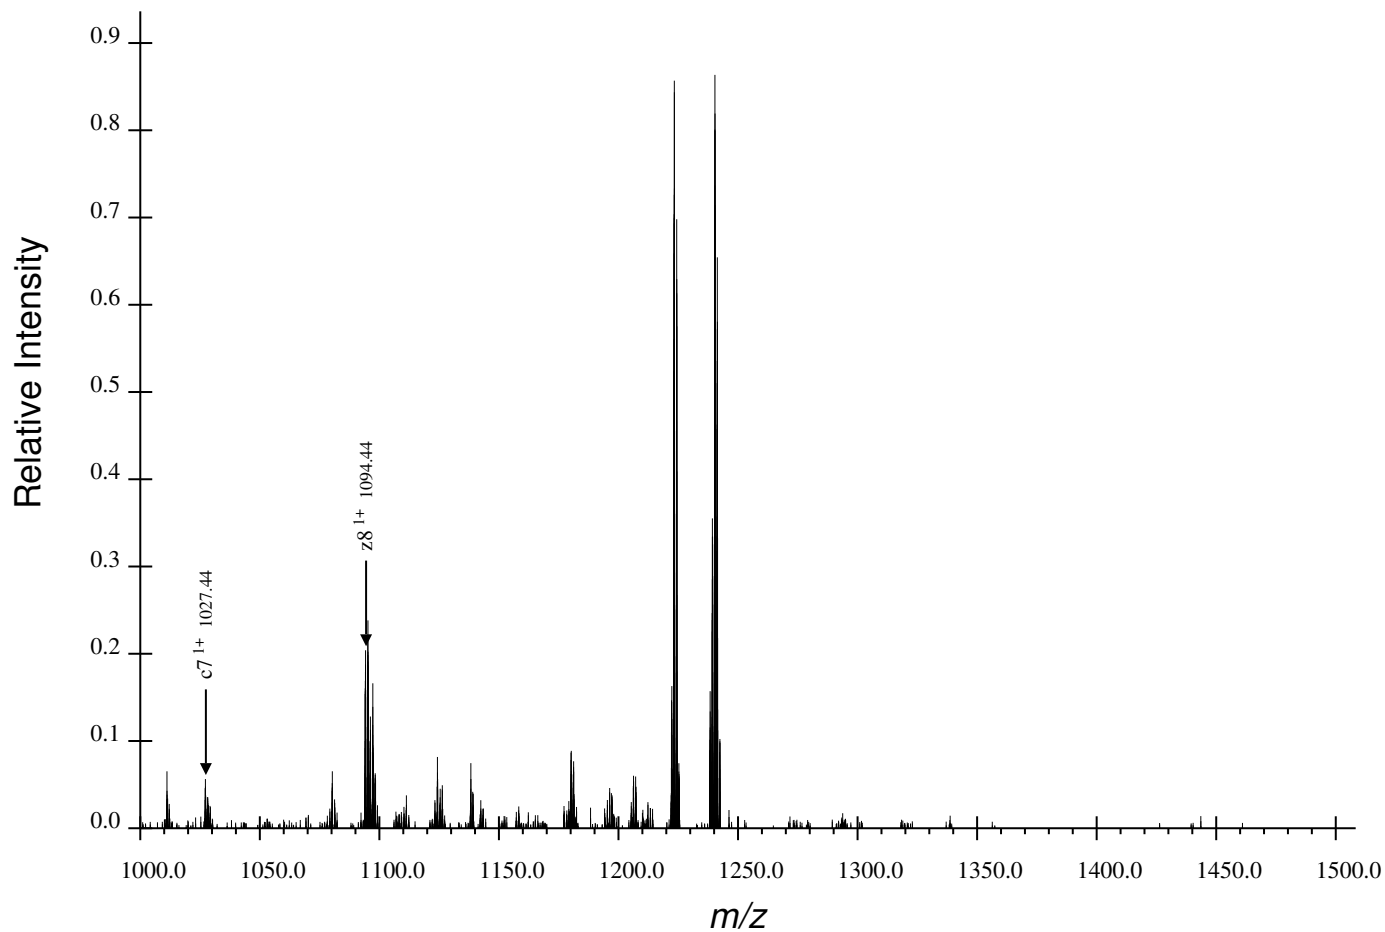

(c) Third Region for KRSpYEEHIP, Spectrum 34.dta

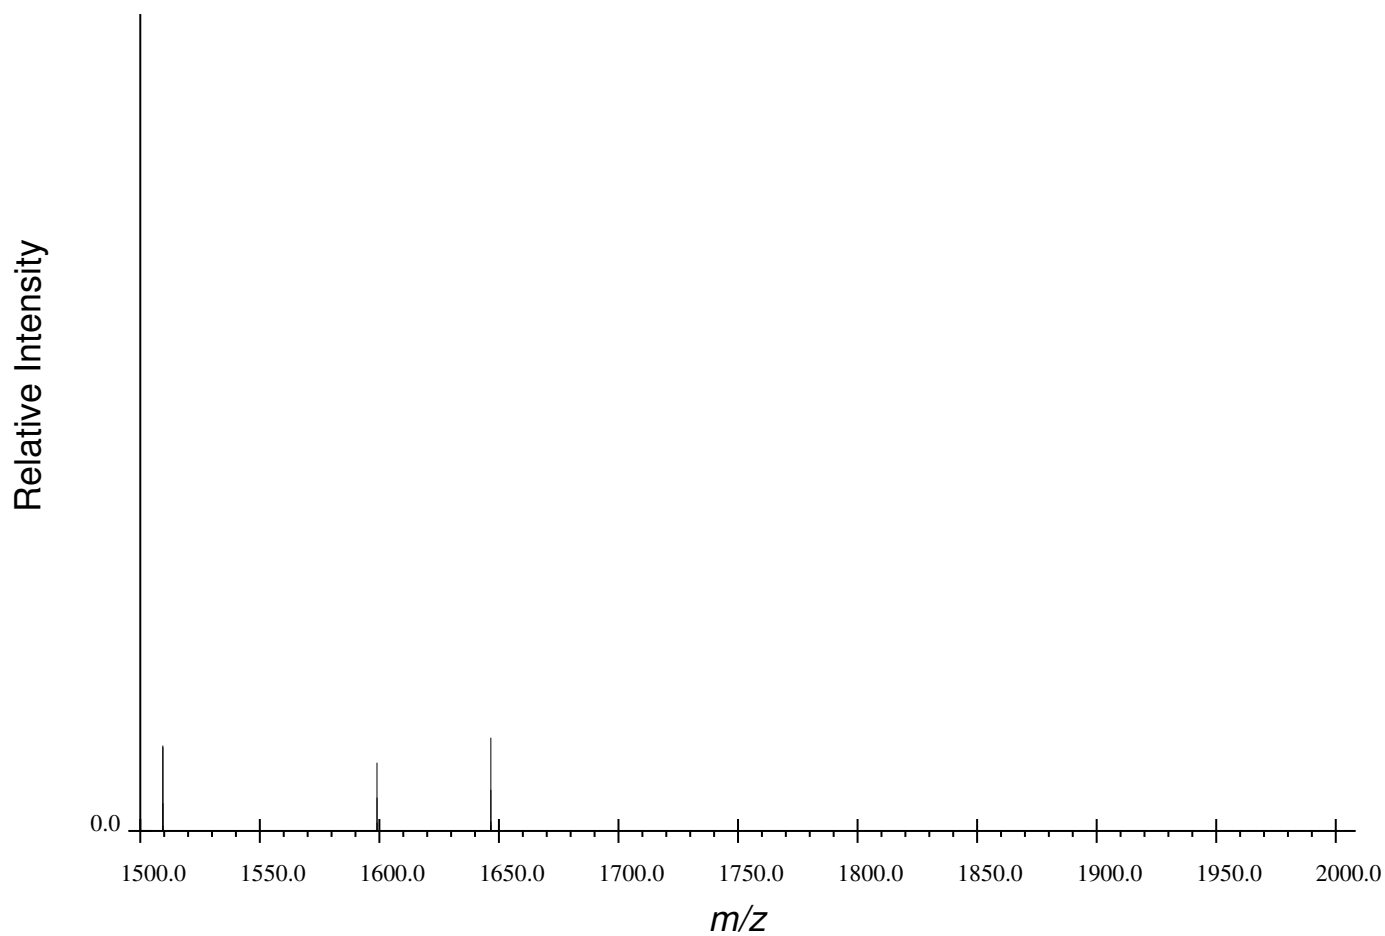

(d) Fourth Region for KRSpYEEHIP, Spectrum 34.dta

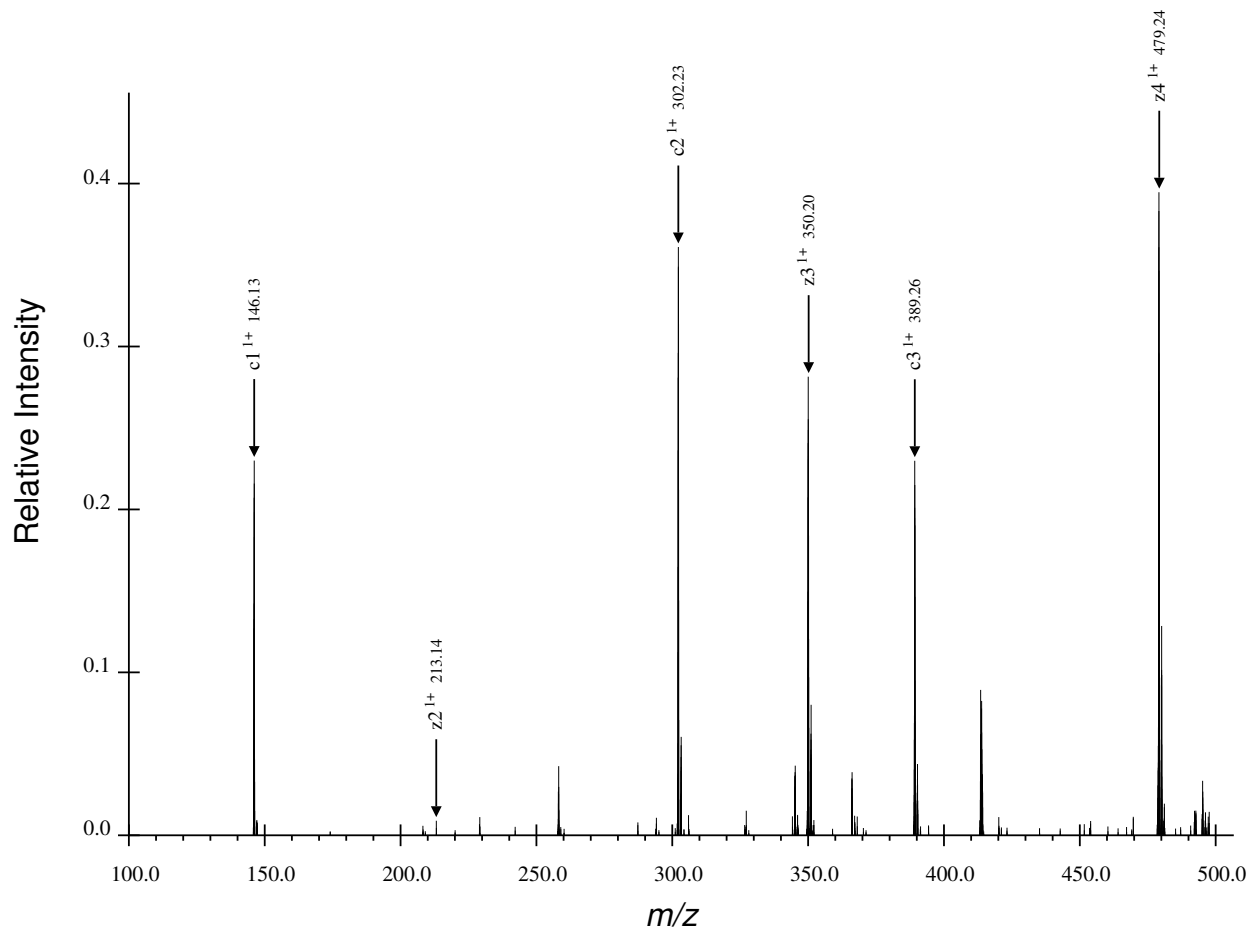

(a) First Region for KRSpYEEHIP, Spectrum 35.dta

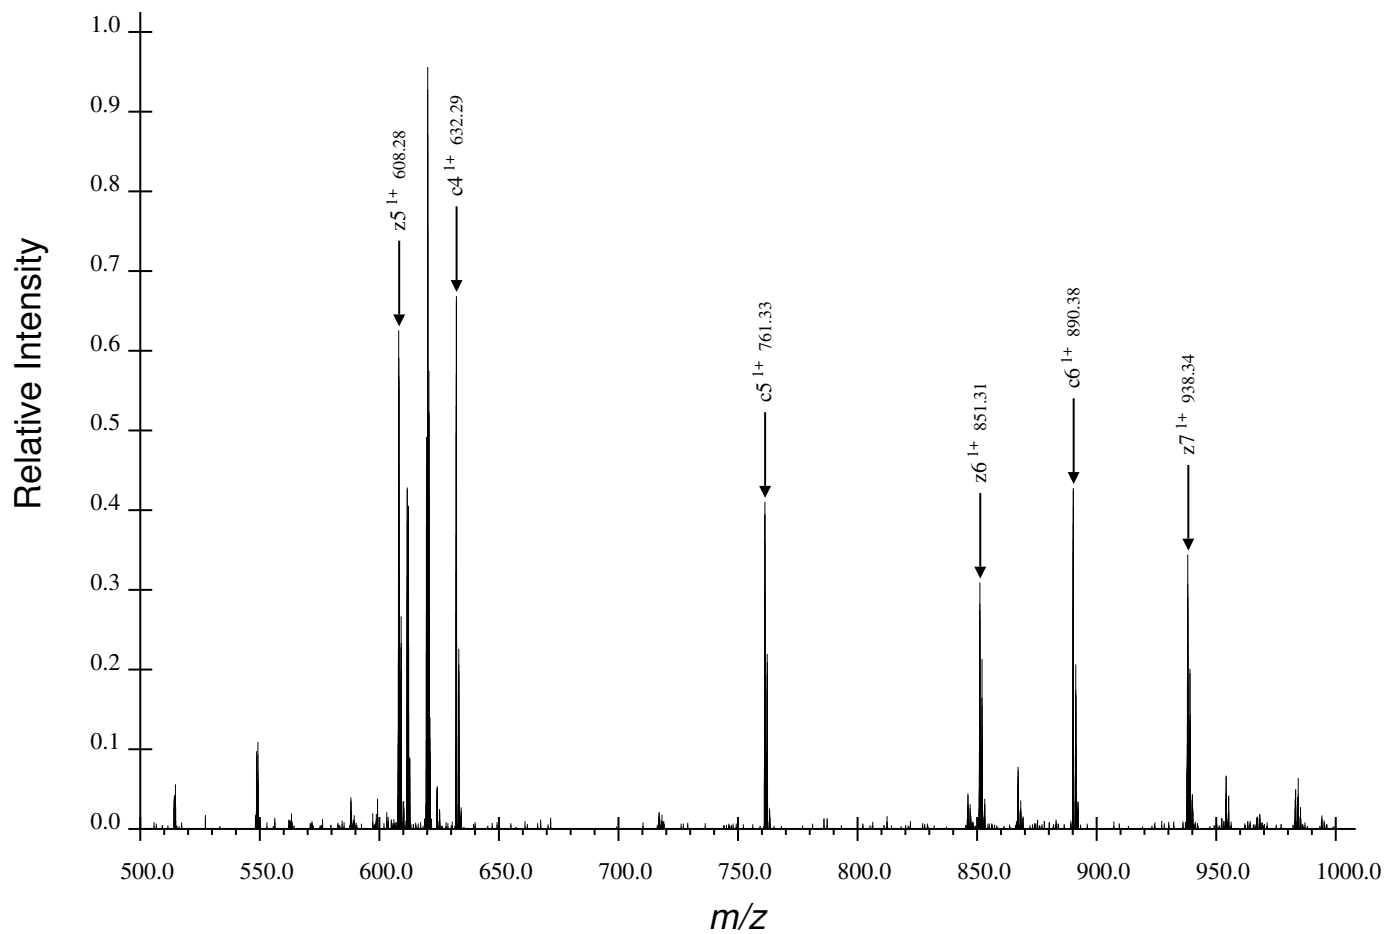

(b) Second Region for KRSpYEEHIP, Spectrum 35.dta

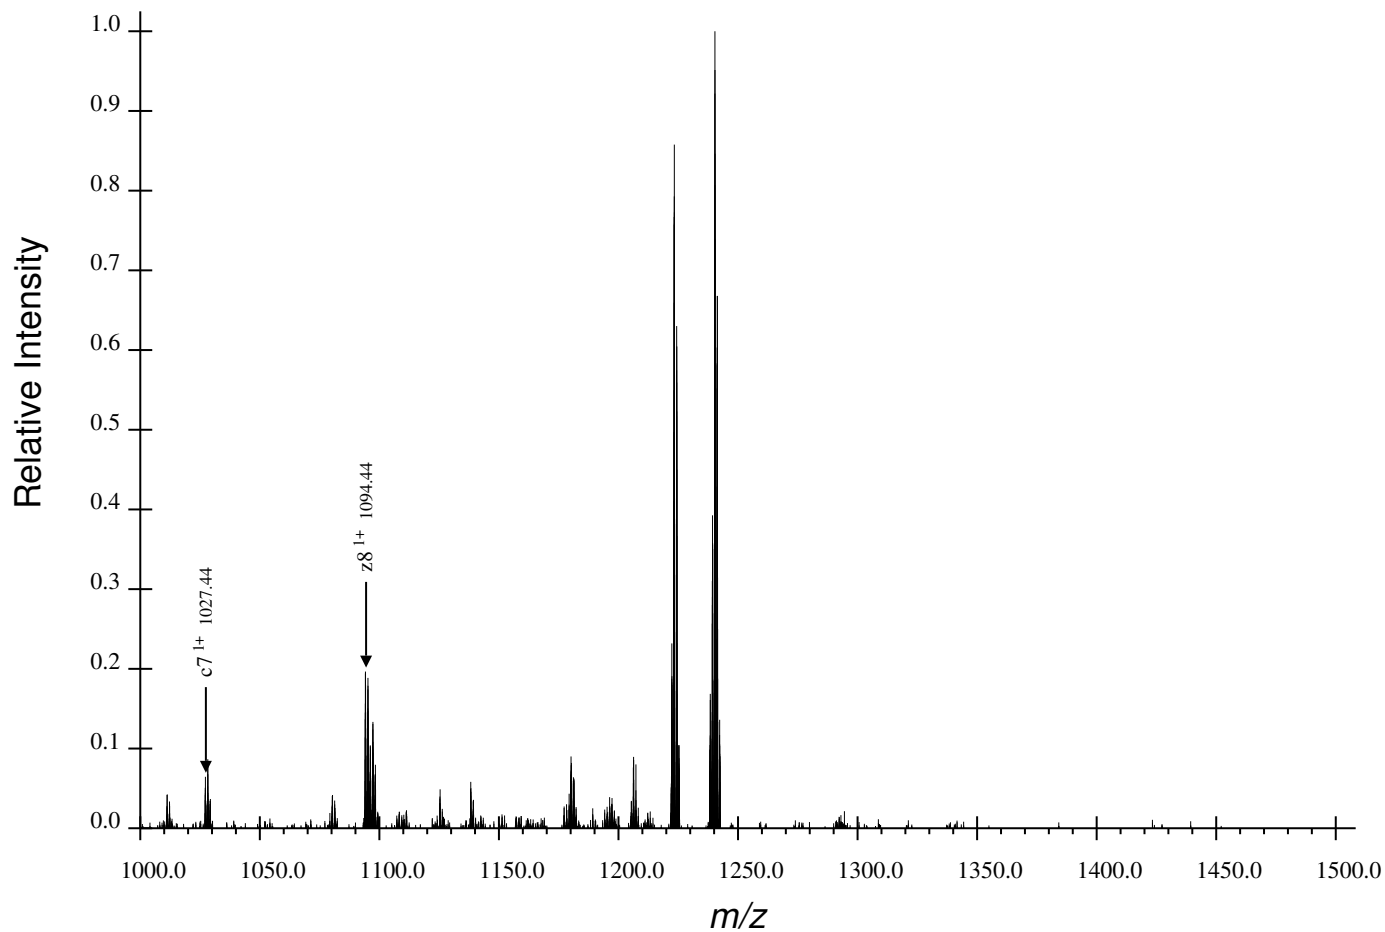

(c) Third Region for KRSpYEEHIP, Spectrum 35.dta

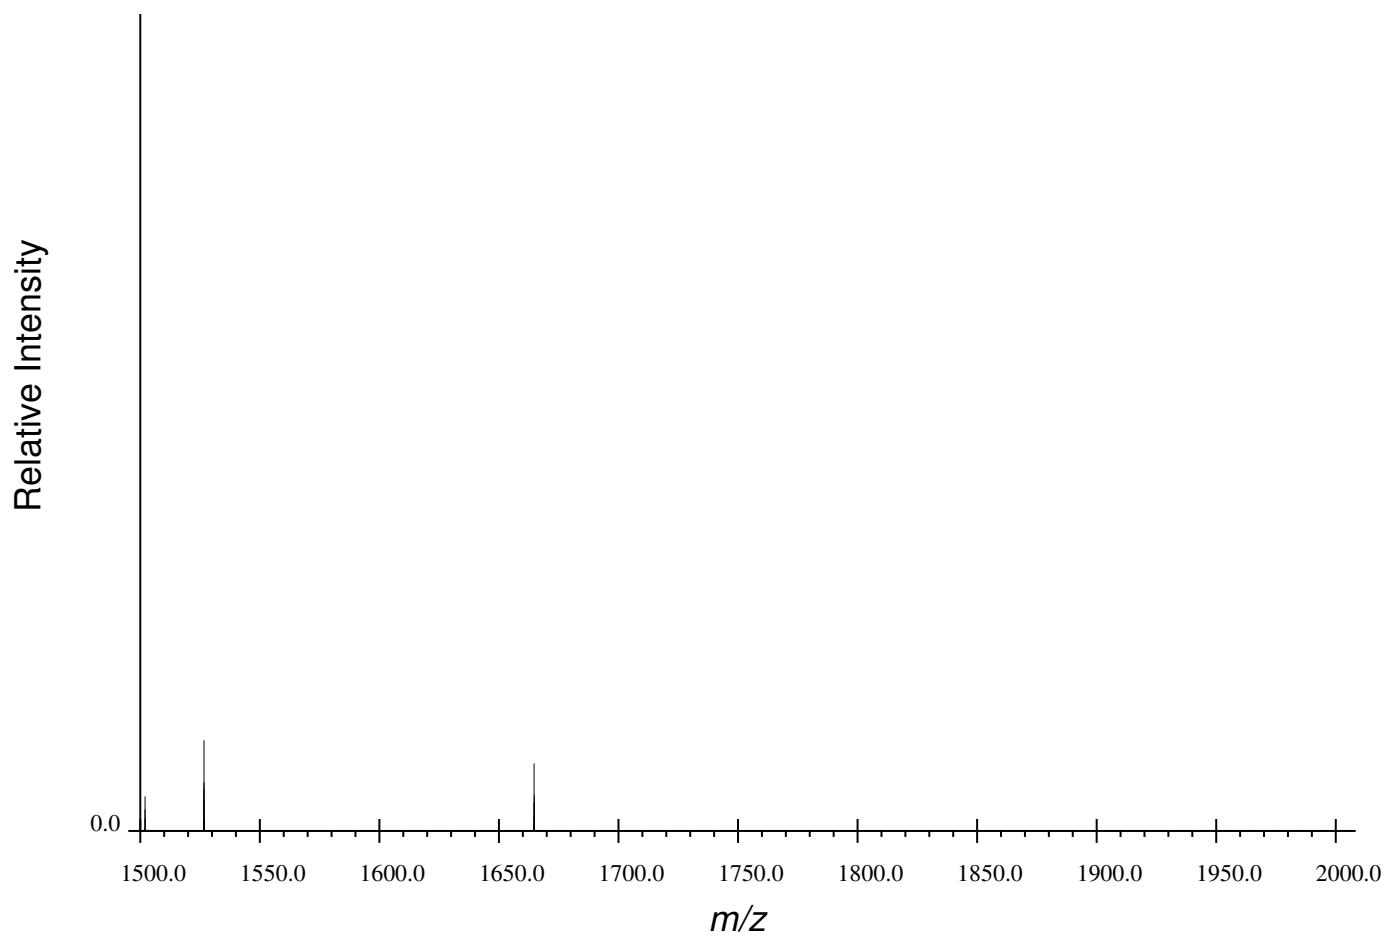

(d) Fourth Region for KRSpYEEHIP, Spectrum 35.dta

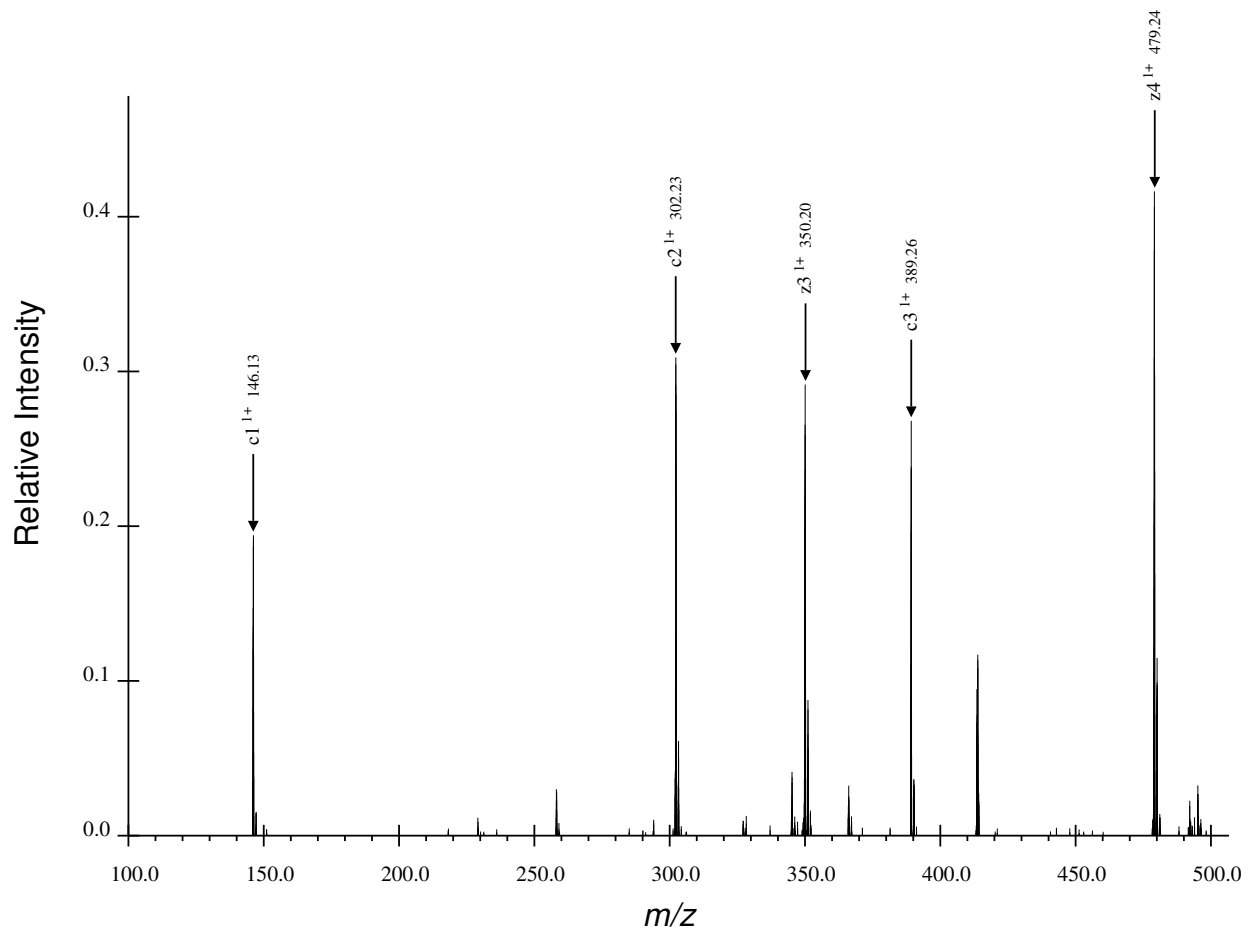

(a) First Region for KRSpYEEHIP, Spectrum 36.dta

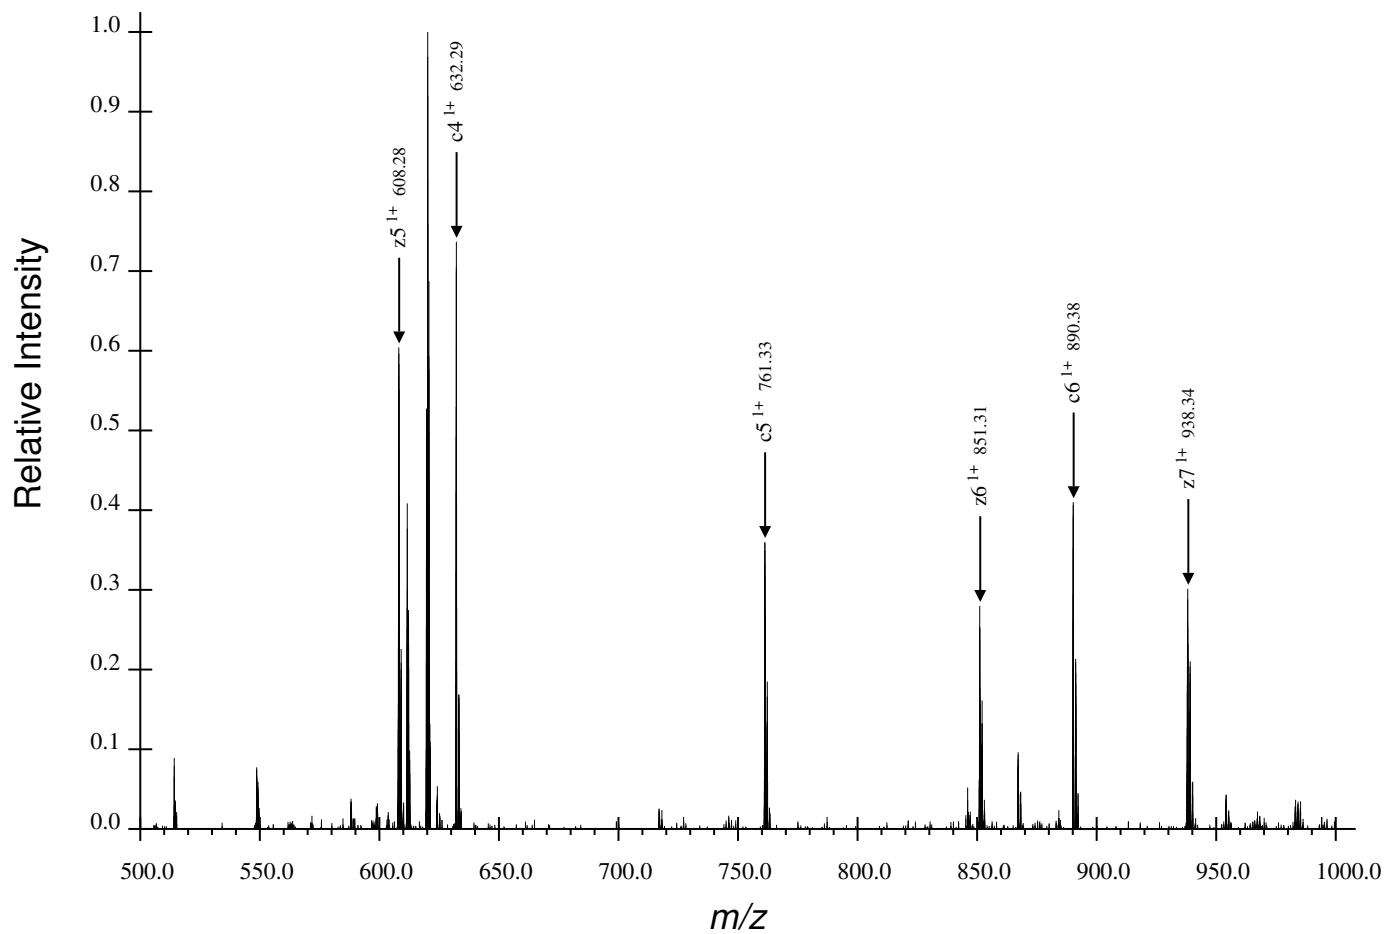

(b) Second Region for KRSpYEEHIP, Spectrum 36.dta

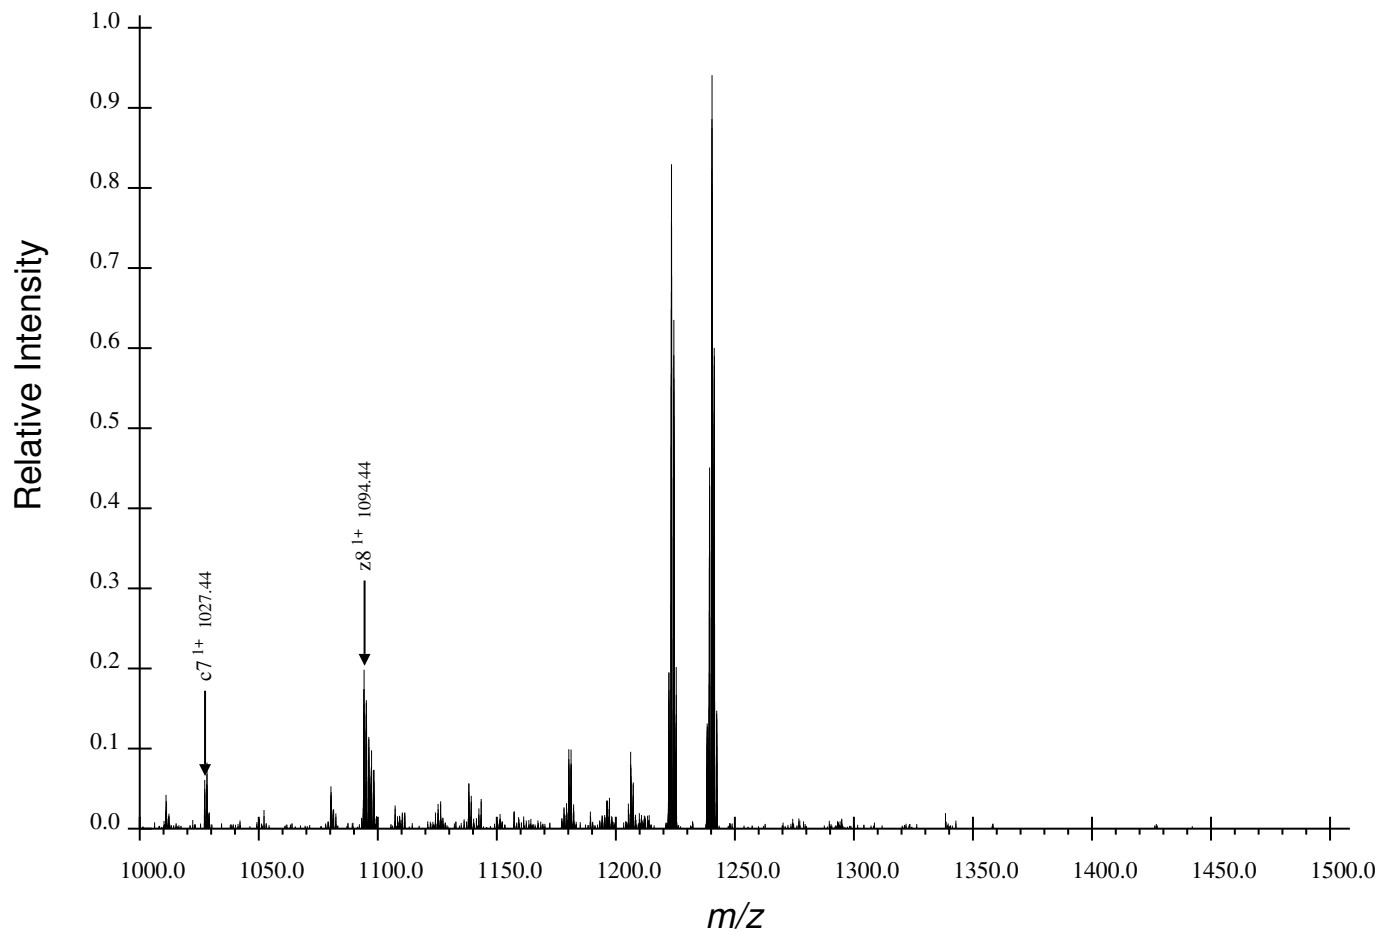

(c) Third Region for KRSpYEEHIP, Spectrum 36.dta

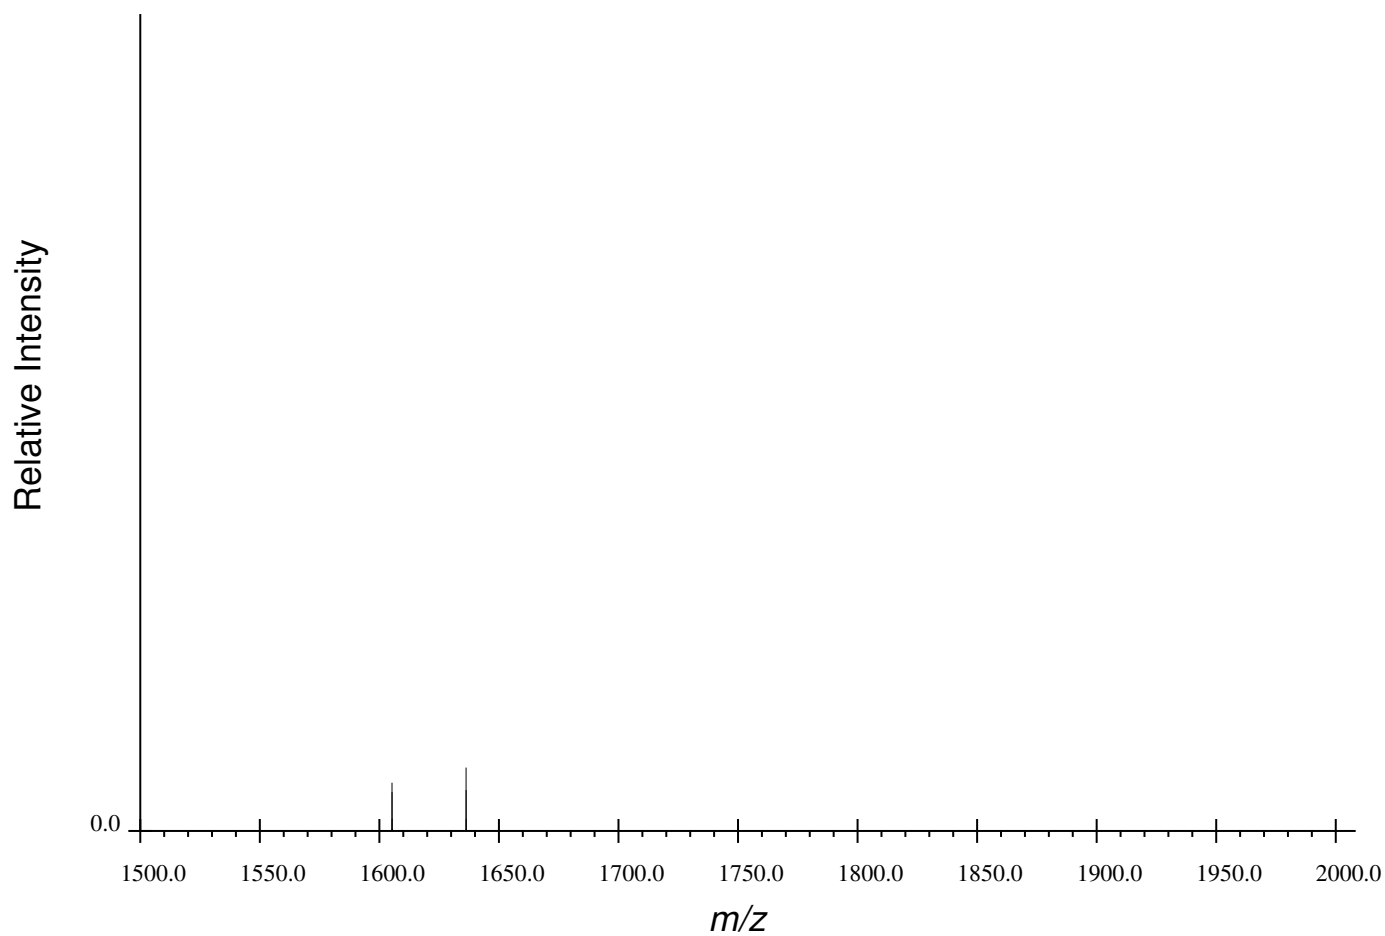

(d) Fourth Region for KRSpYEEHIP, Spectrum 36.dta



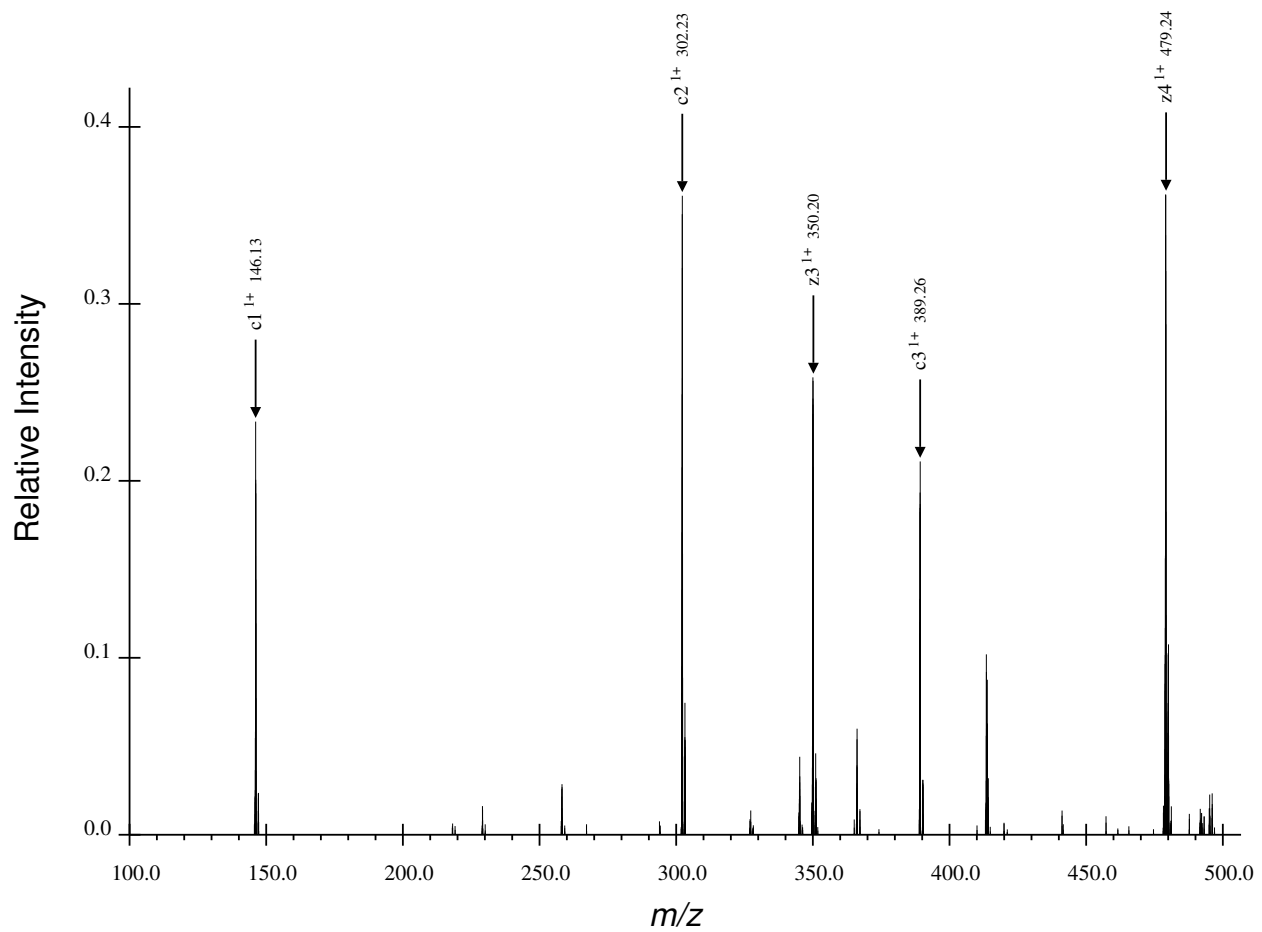

(a) First Region for KRSpYEEHIP, Spectrum 37.dta

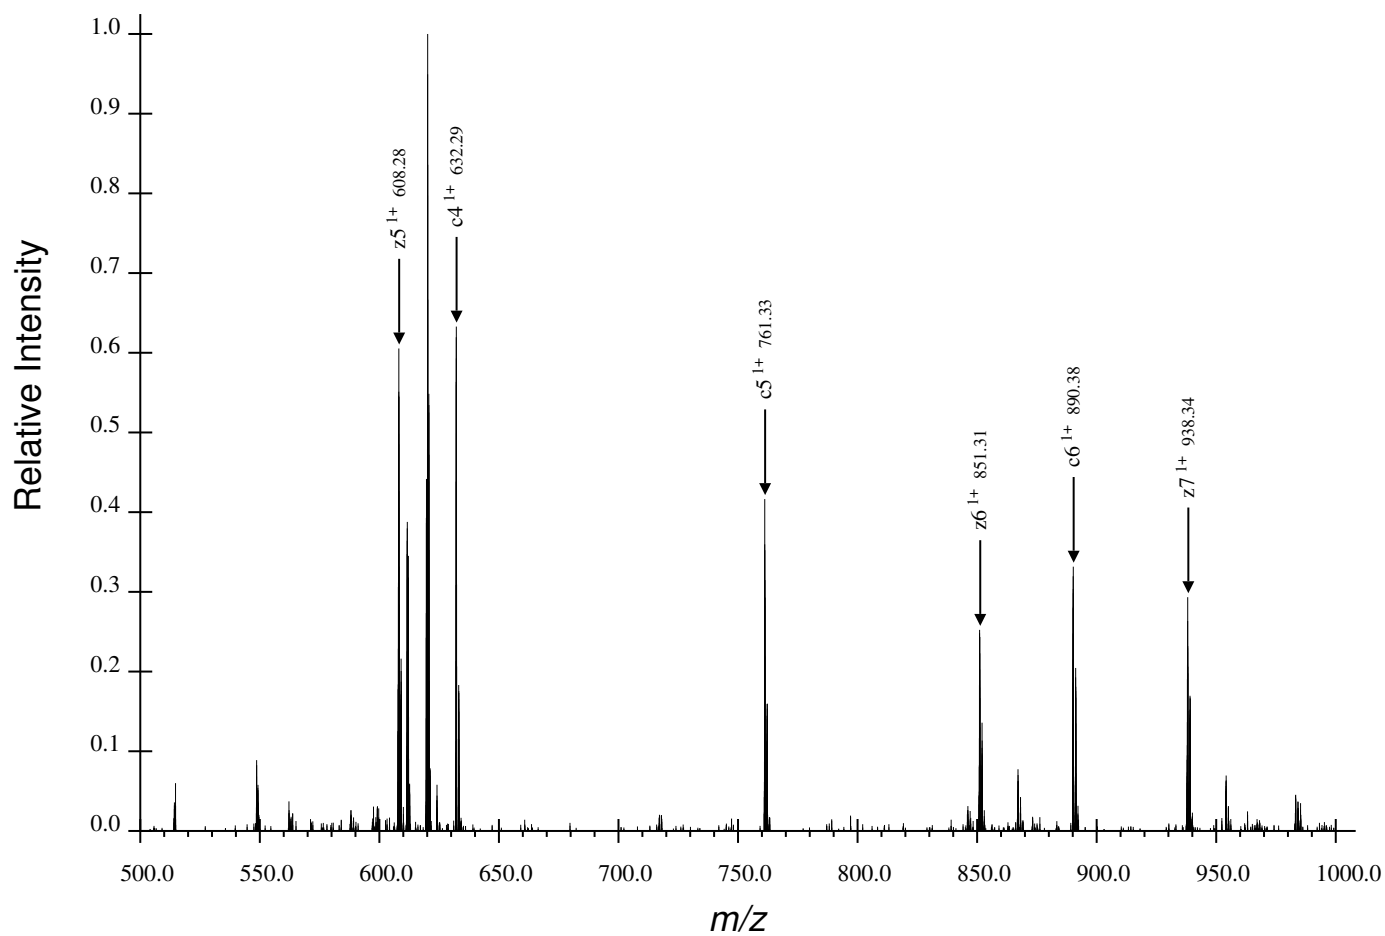

(b) Second Region for KRSpYEEHIP, Spectrum 37.dta

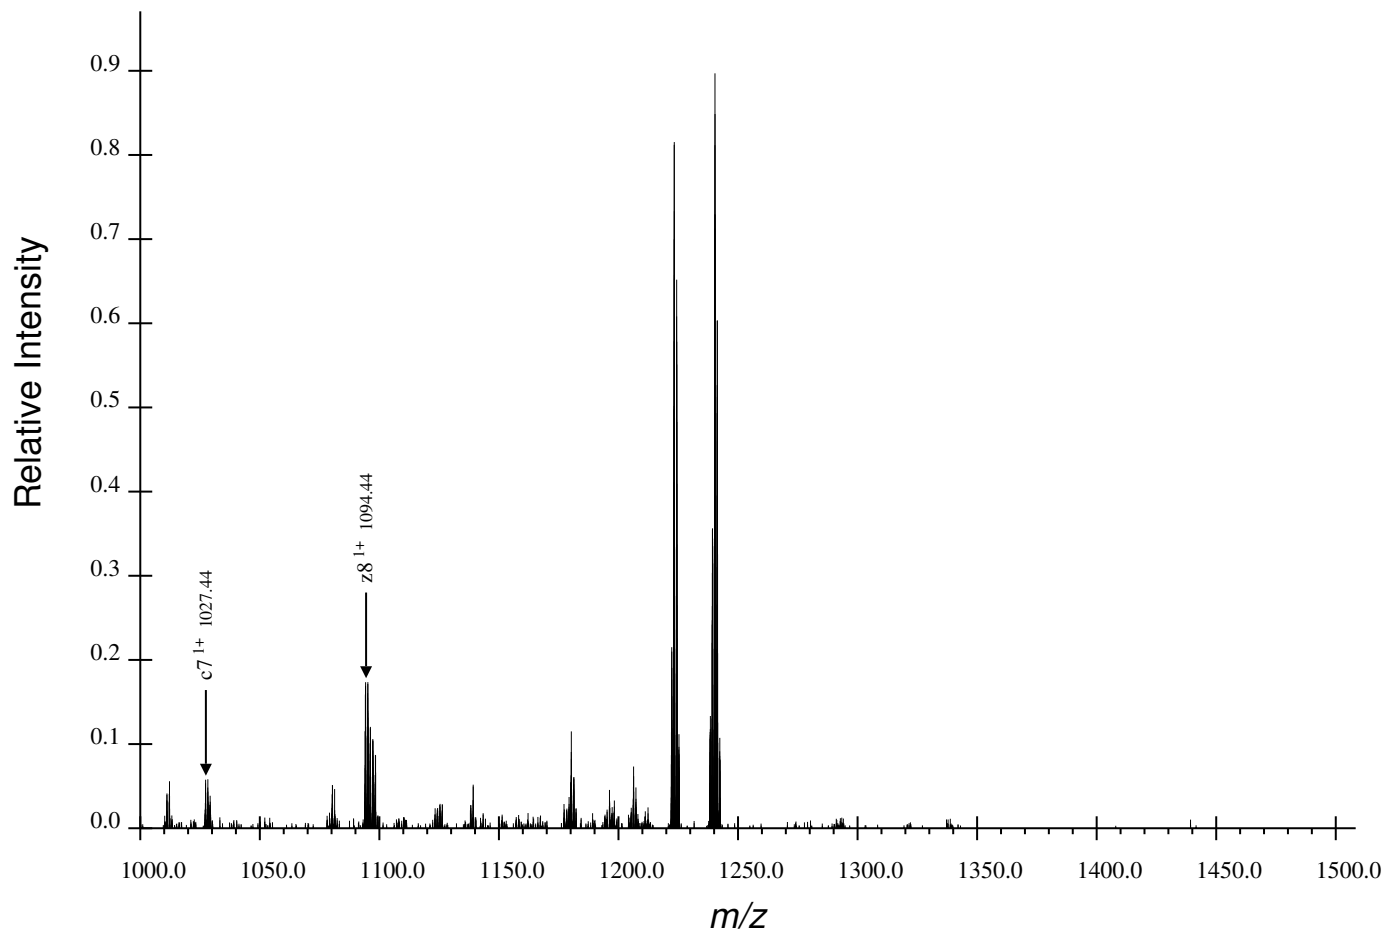

(c) Third Region for KRSpYEEHIP, Spectrum 37.dta

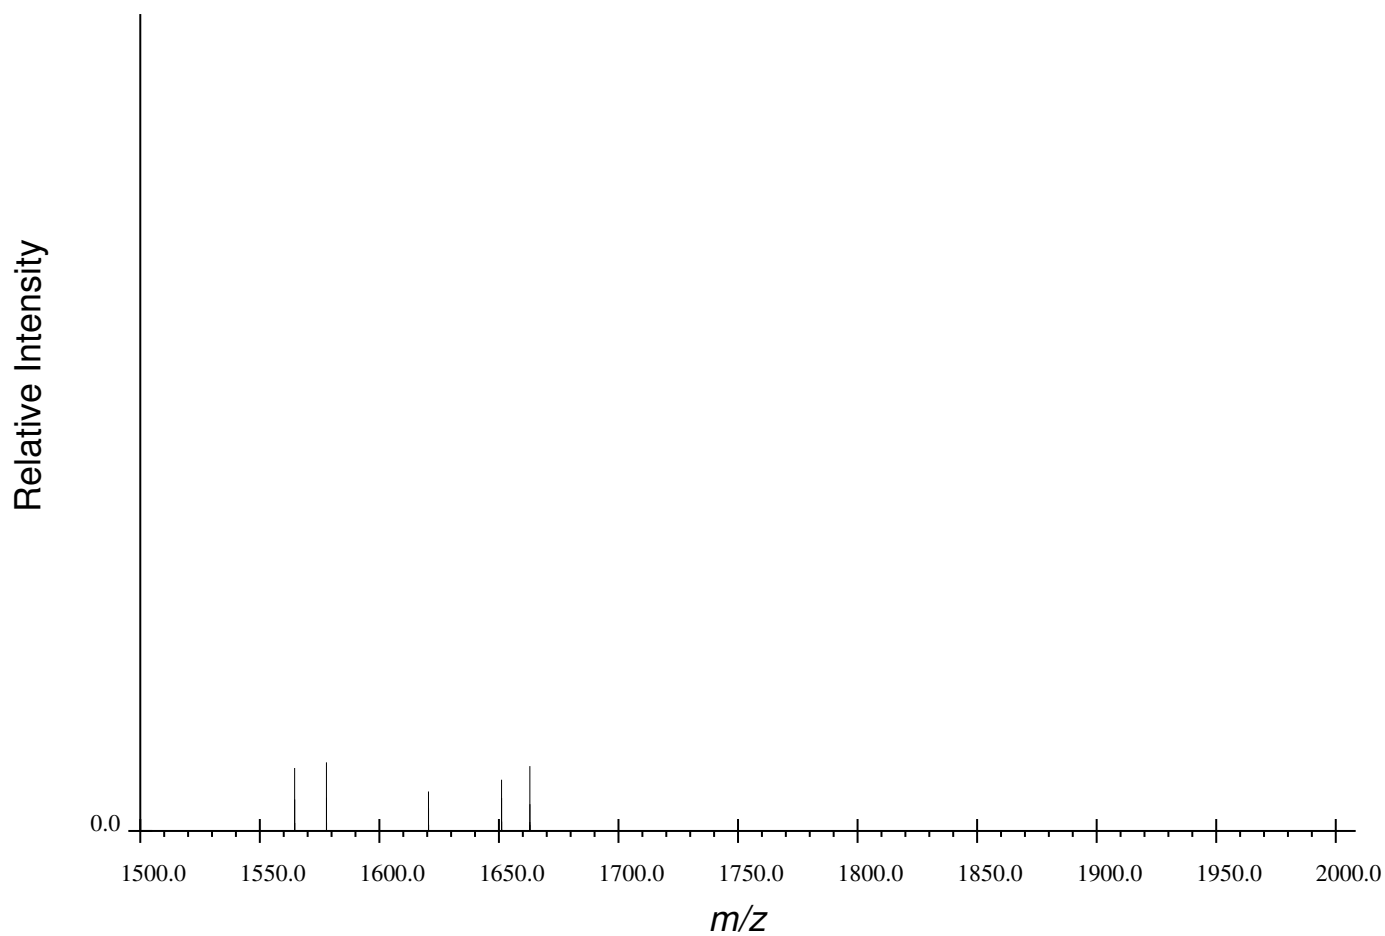

(d) Fourth Region for KRSpYEEHIP, Spectrum 37.dta

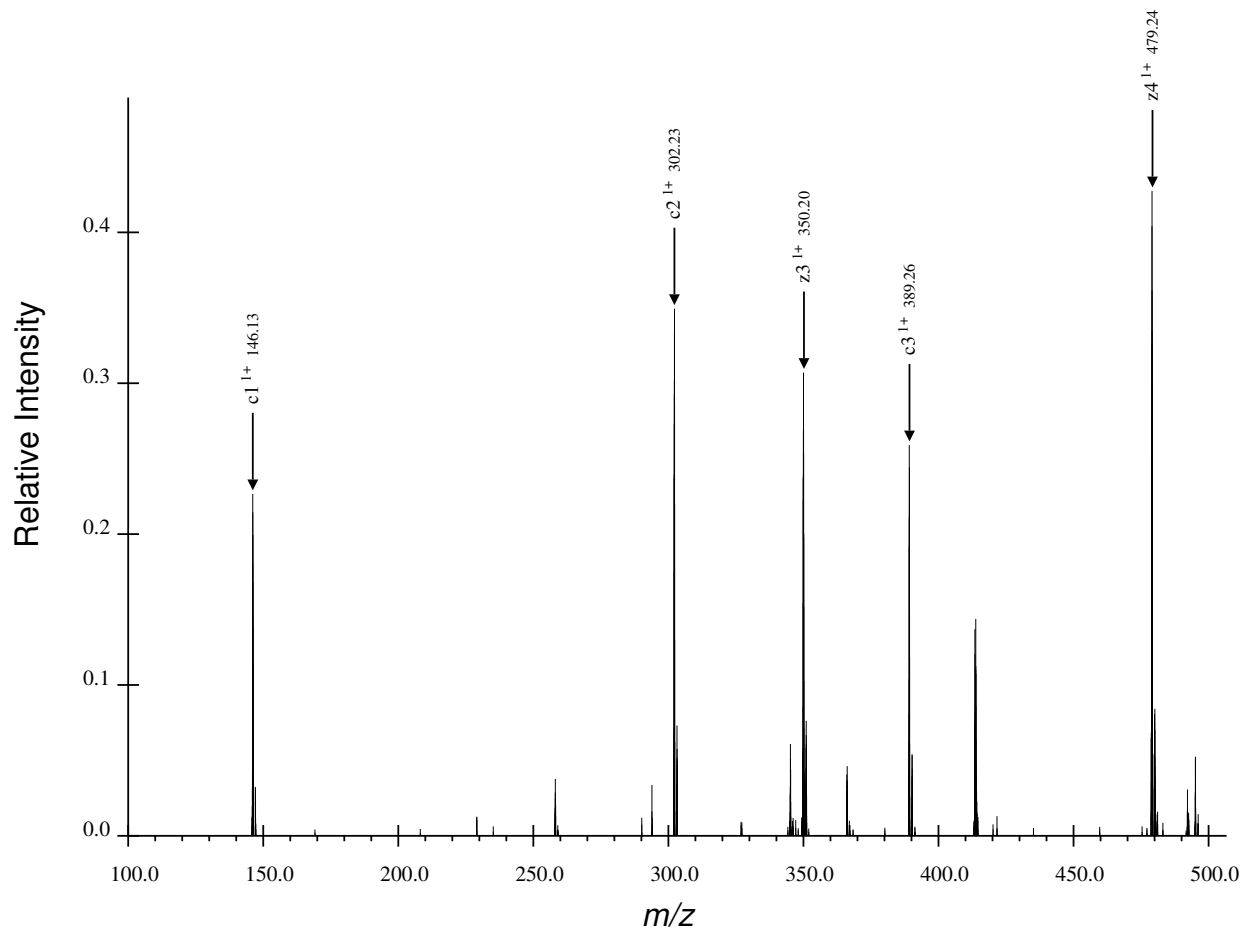

(a) First Region for KRSpYEEHIP, Spectrum 38.dta

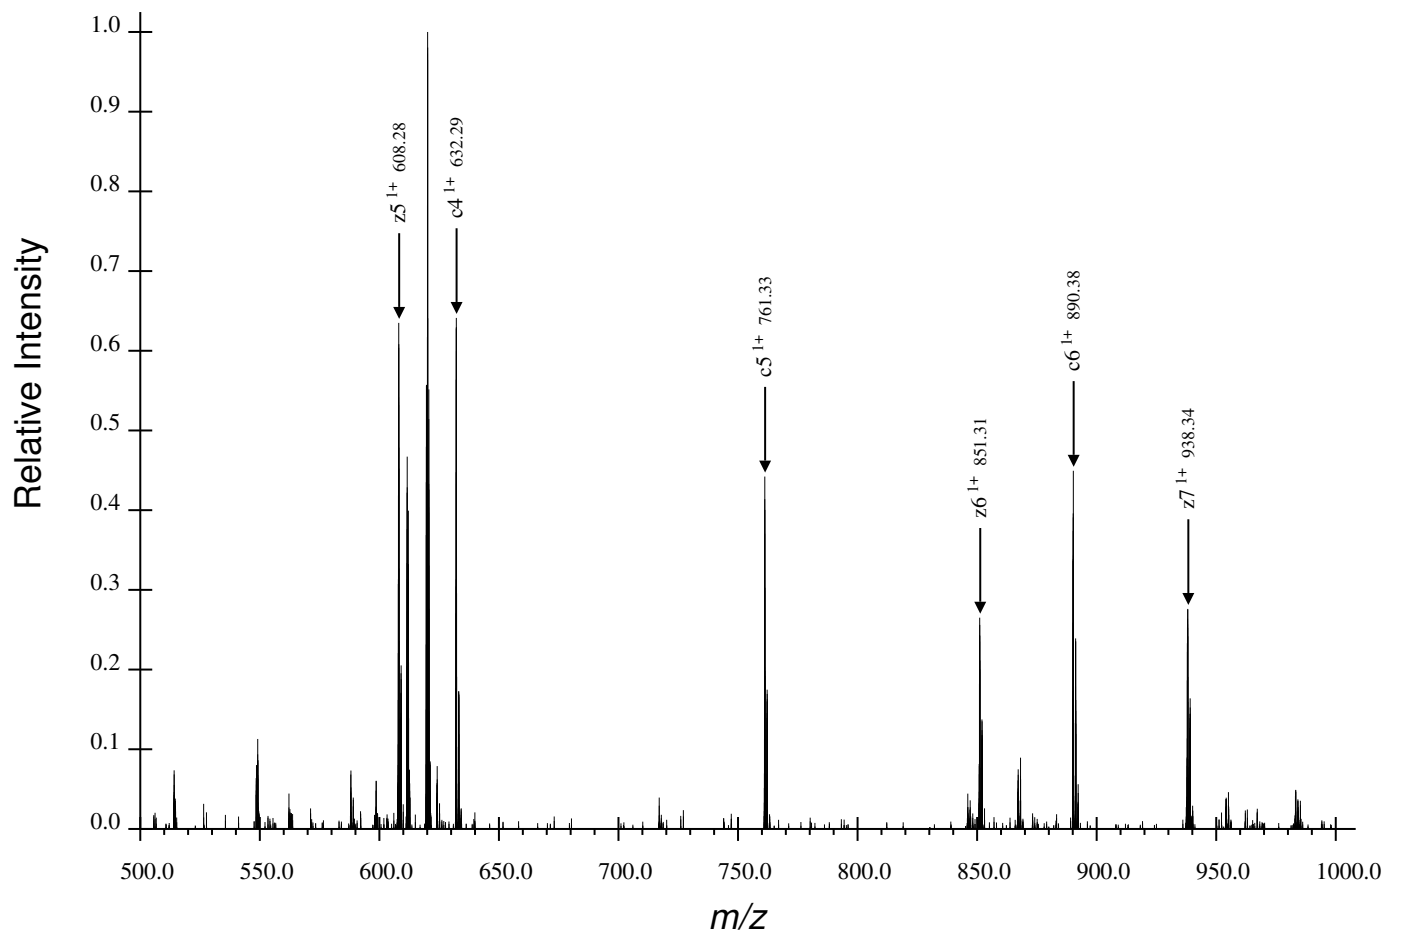

(b) Second Region for KRSpYEEHIP, Spectrum 38.dta

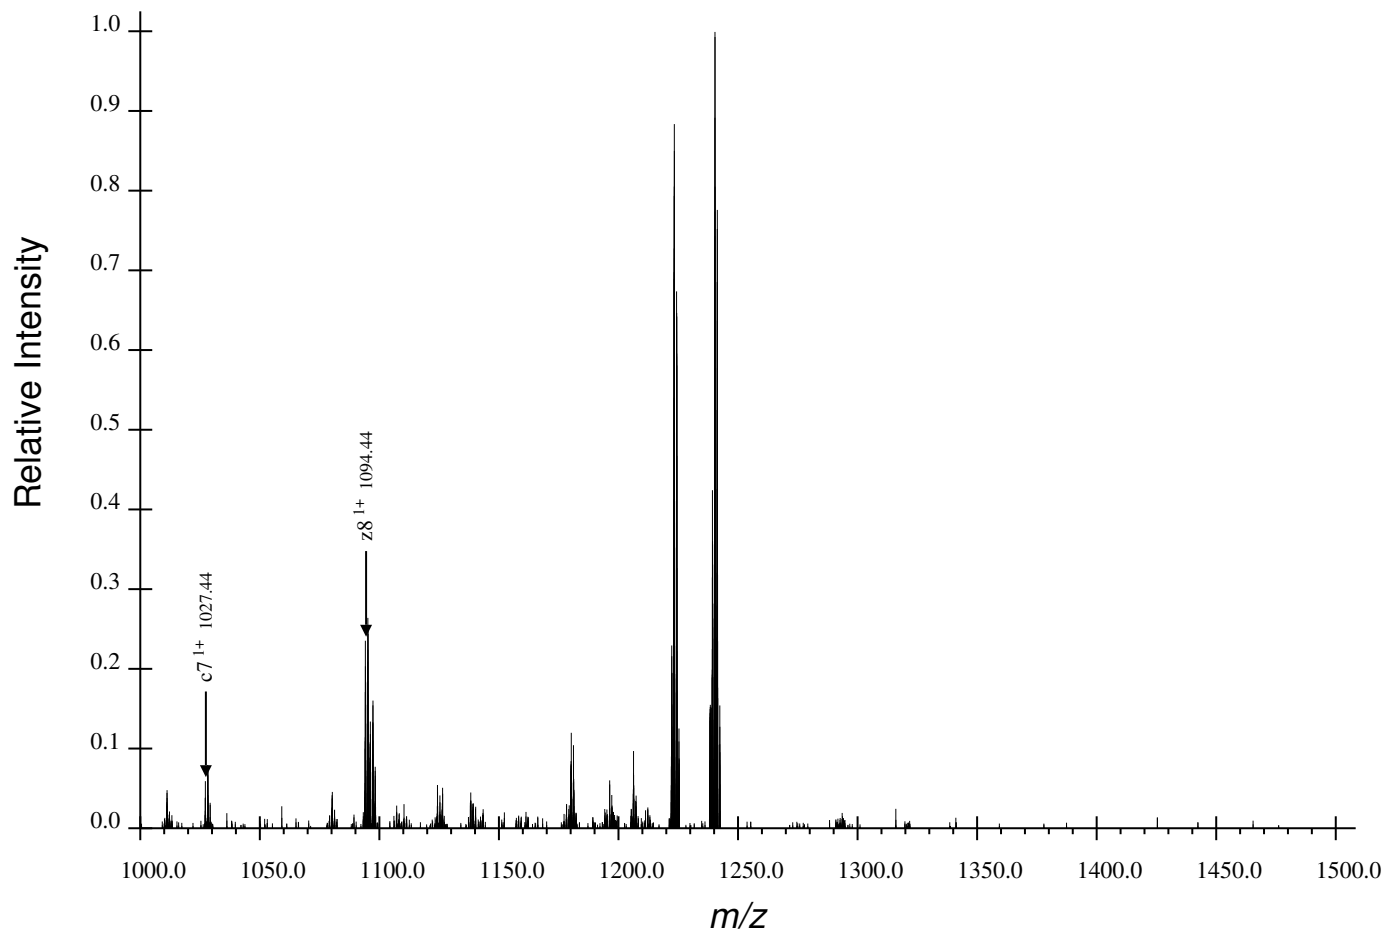

(c) Third Region for KRSpYEEHIP, Spectrum 38.dta

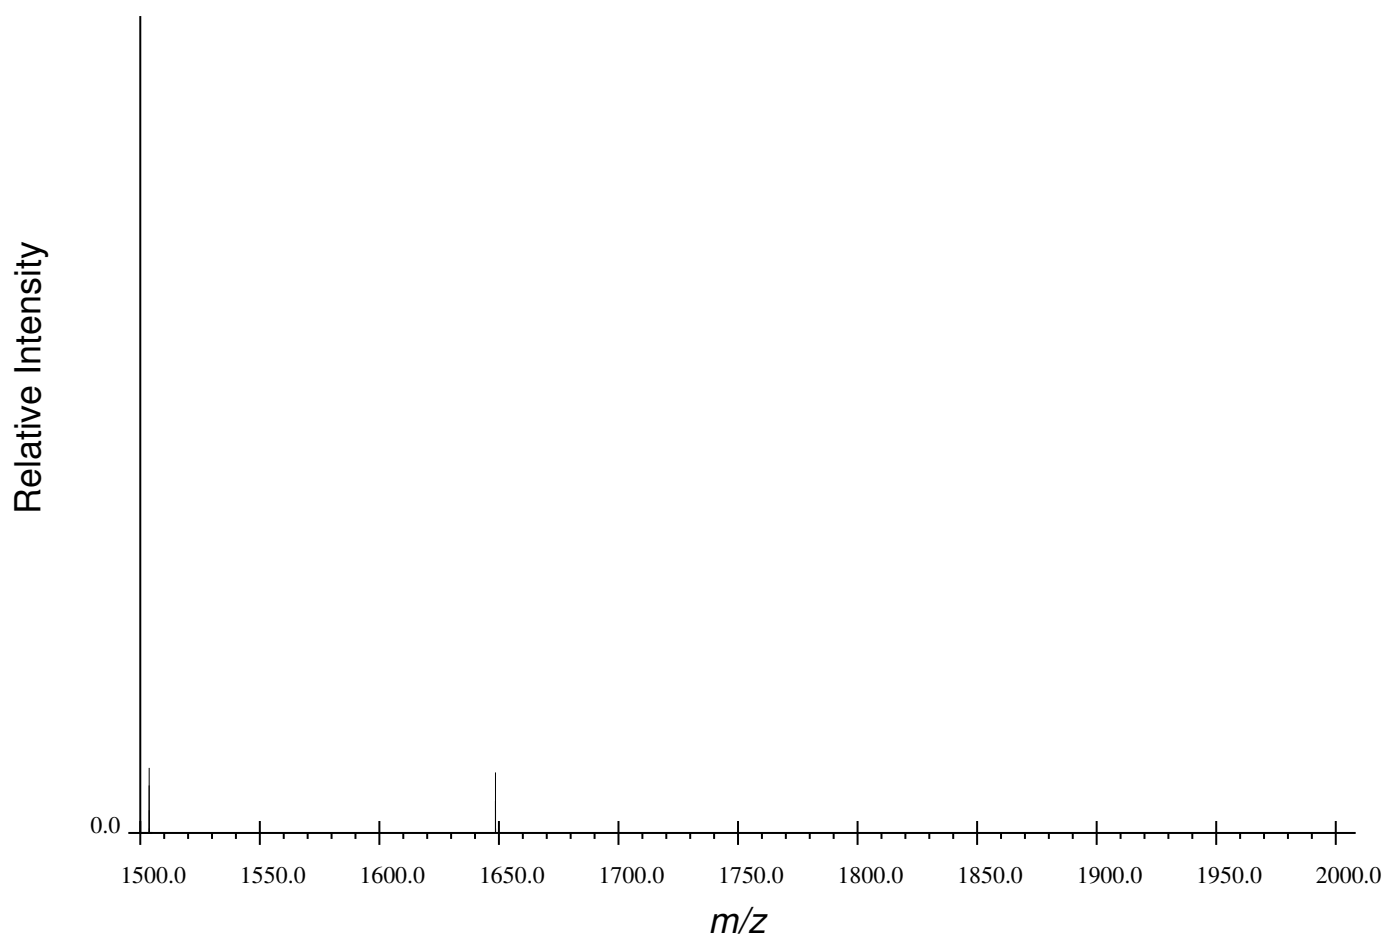

(d) Fourth Region for KRSpYEEHIP, Spectrum 38.dta

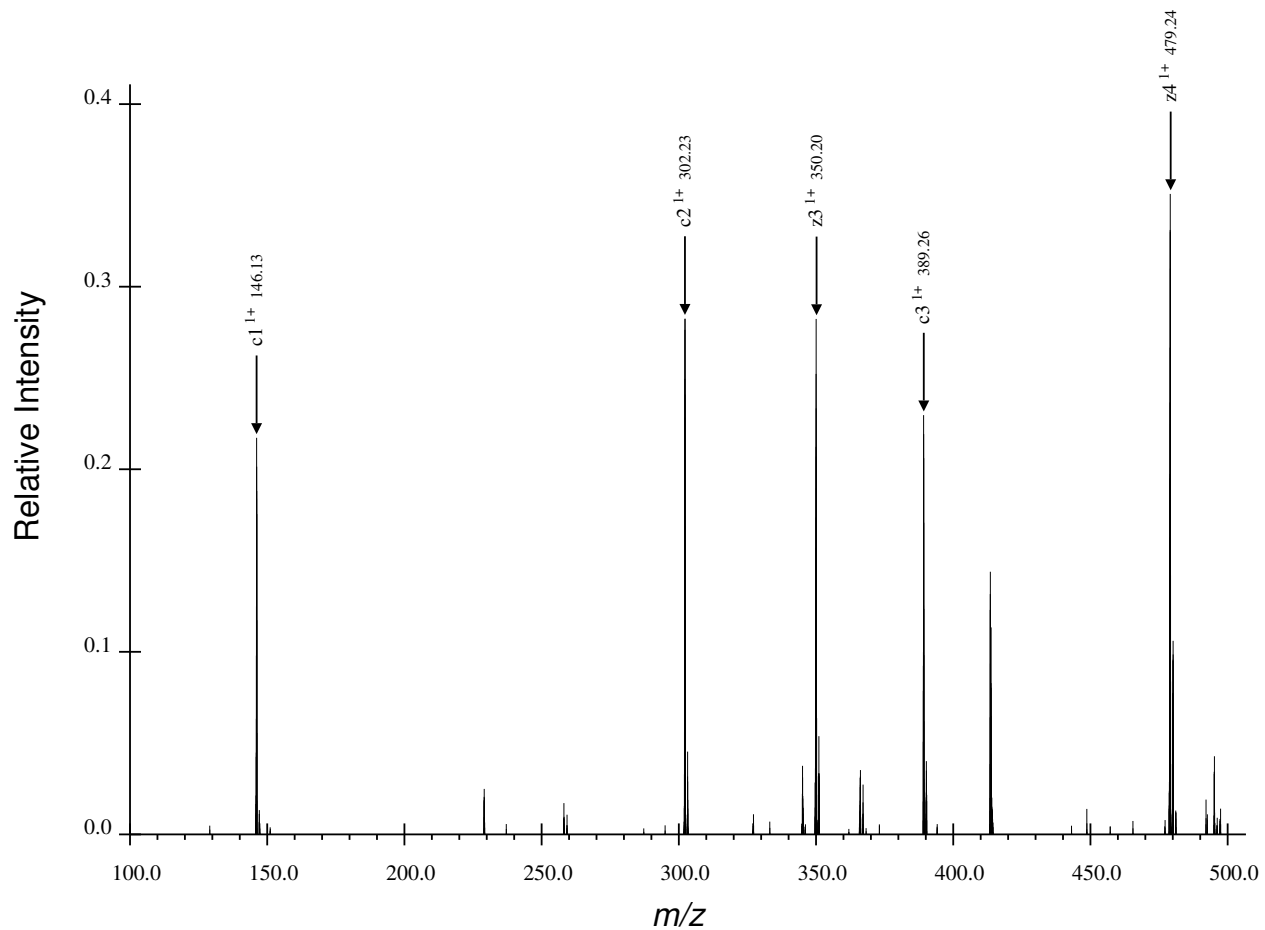

(a) First Region for KRSpYEEHIP, Spectrum 39.dta

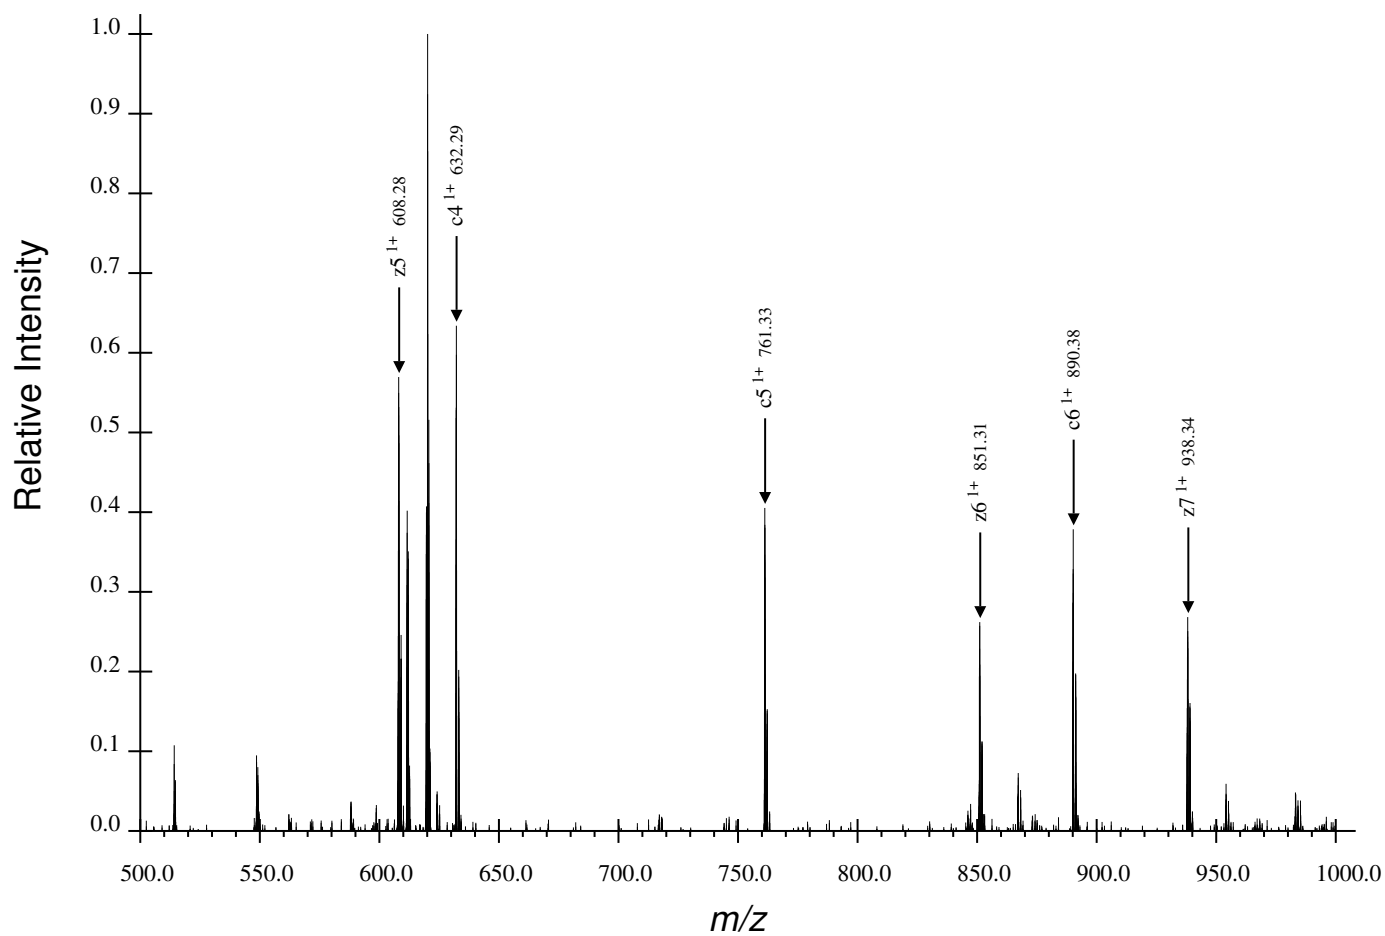

(b) Second Region for KRSpYEEHIP, Spectrum 39.dta

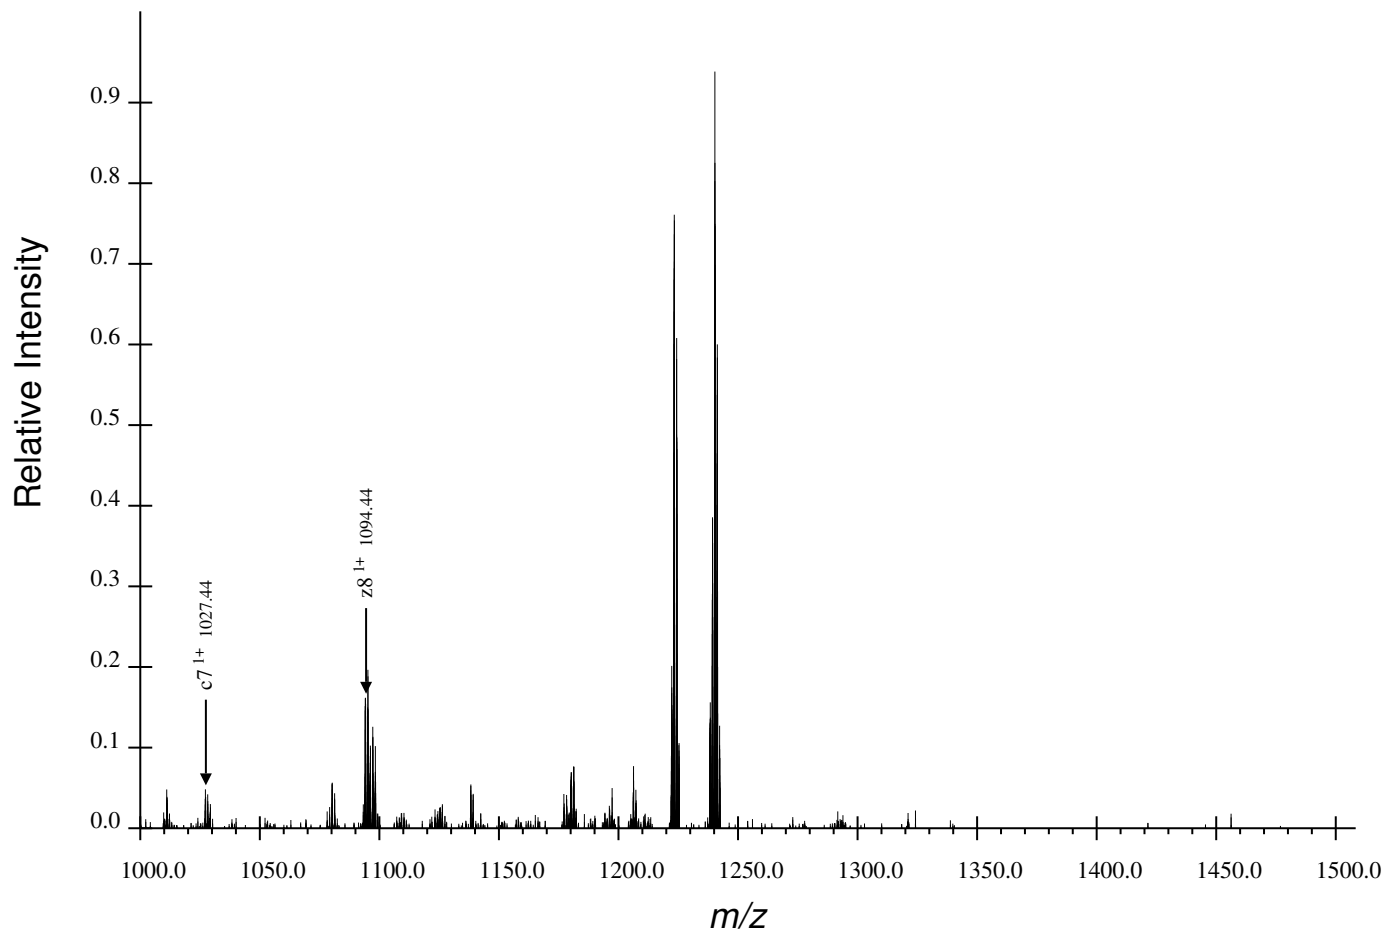

(c) Third Region for KRSpYEEHIP, Spectrum 39.dta

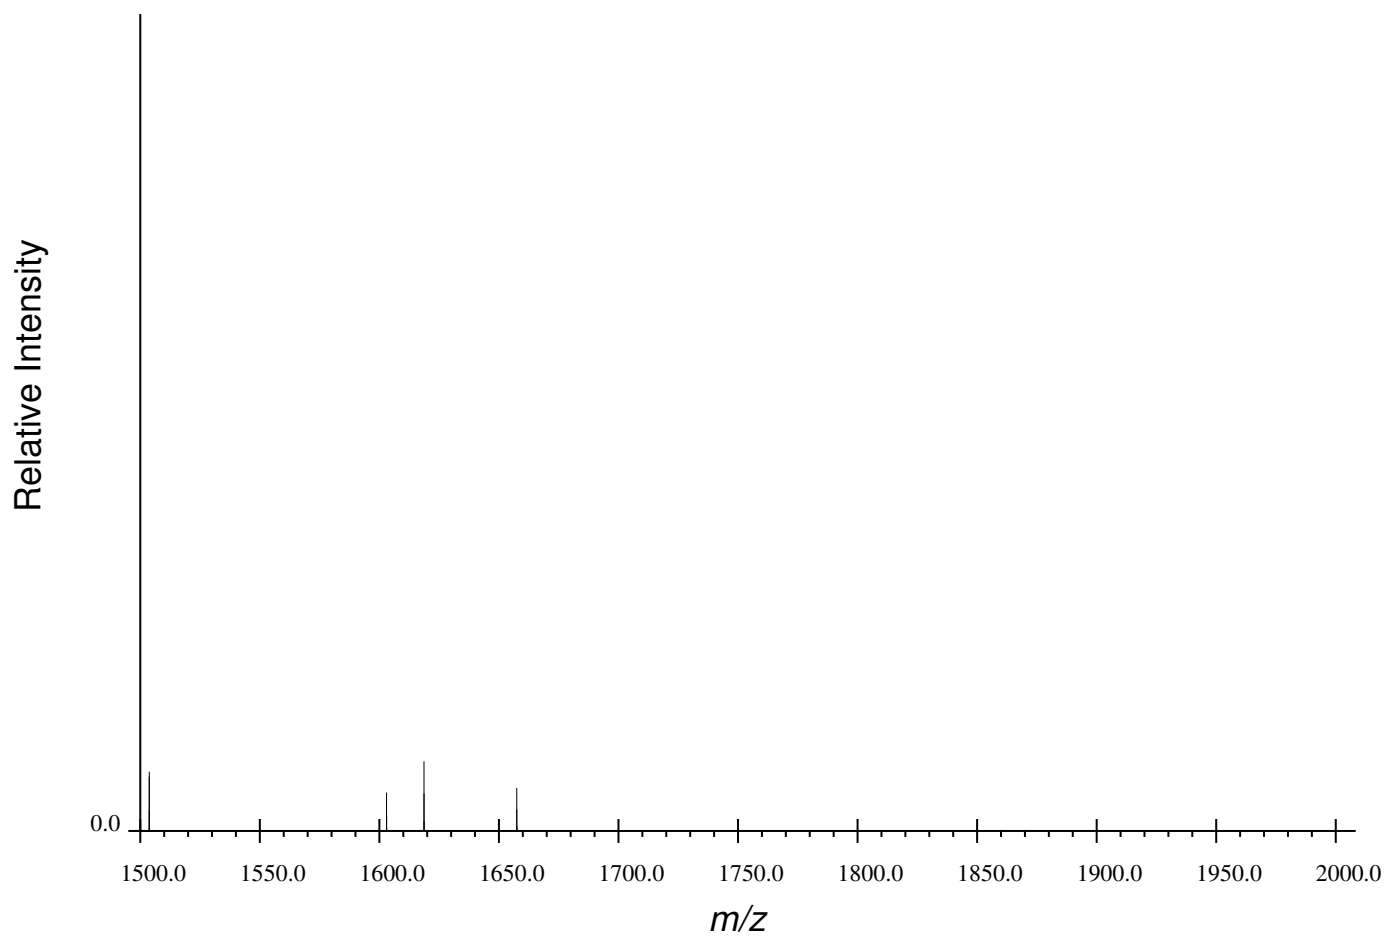

(d) Fourth Region for KRSpYEEHIP, Spectrum 39.dta

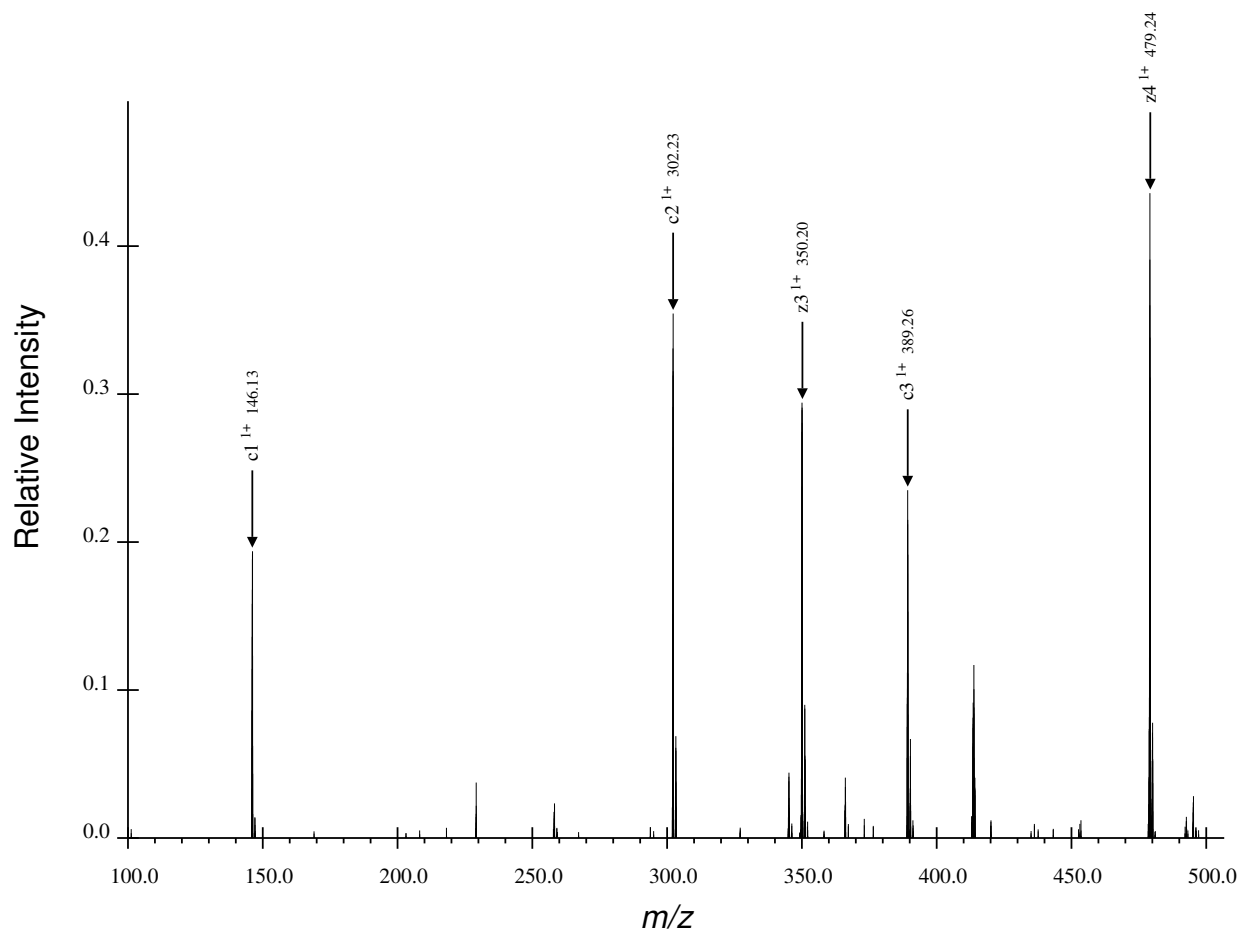

(a) First Region for KRSpYEEHIP, Spectrum 40.dta

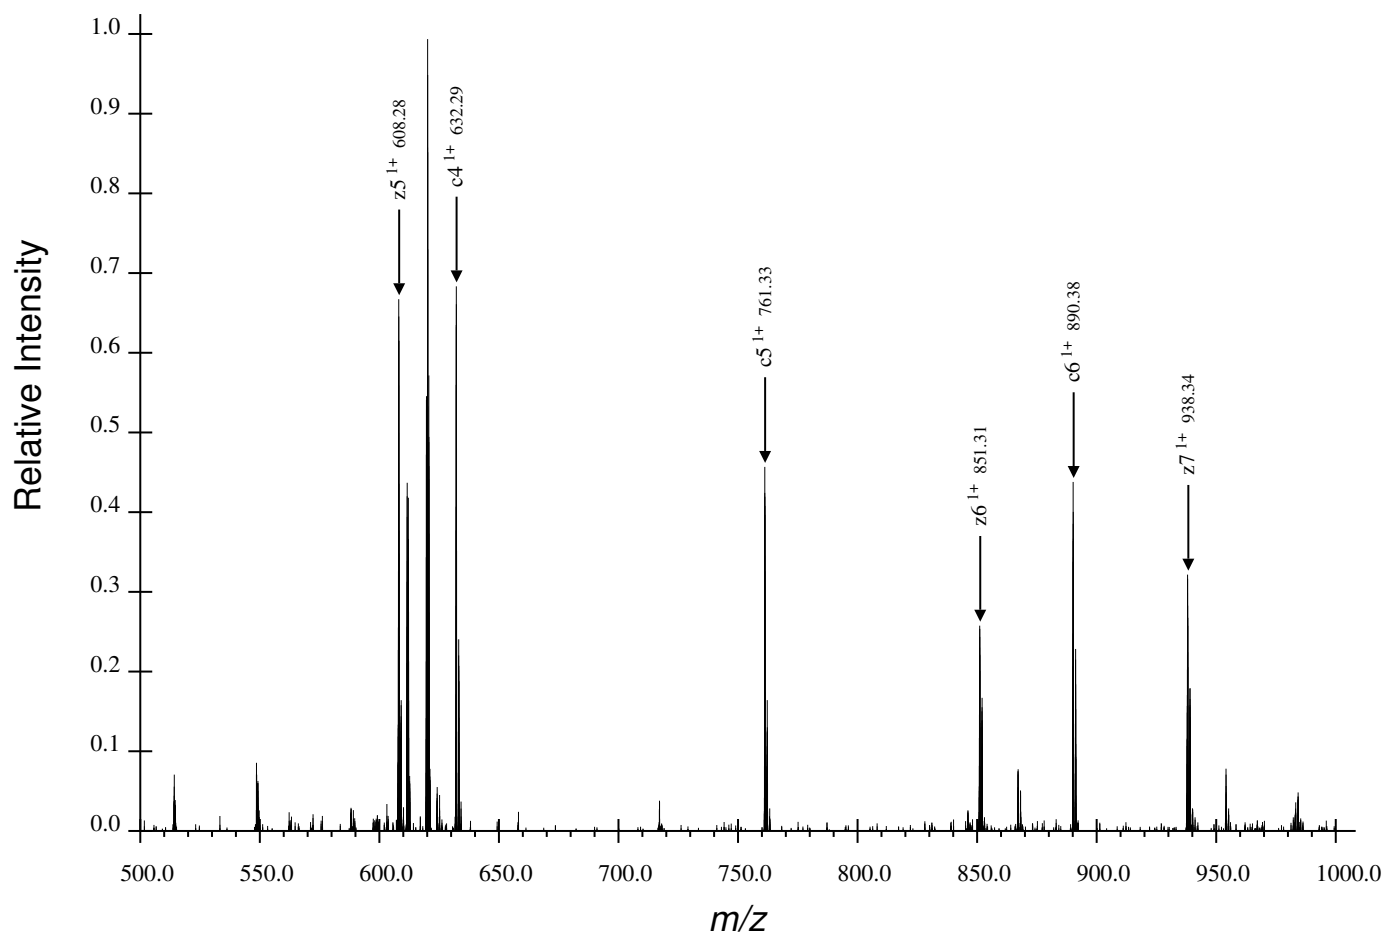

(b) Second Region for KRSpYEEHIP, Spectrum 40.dta

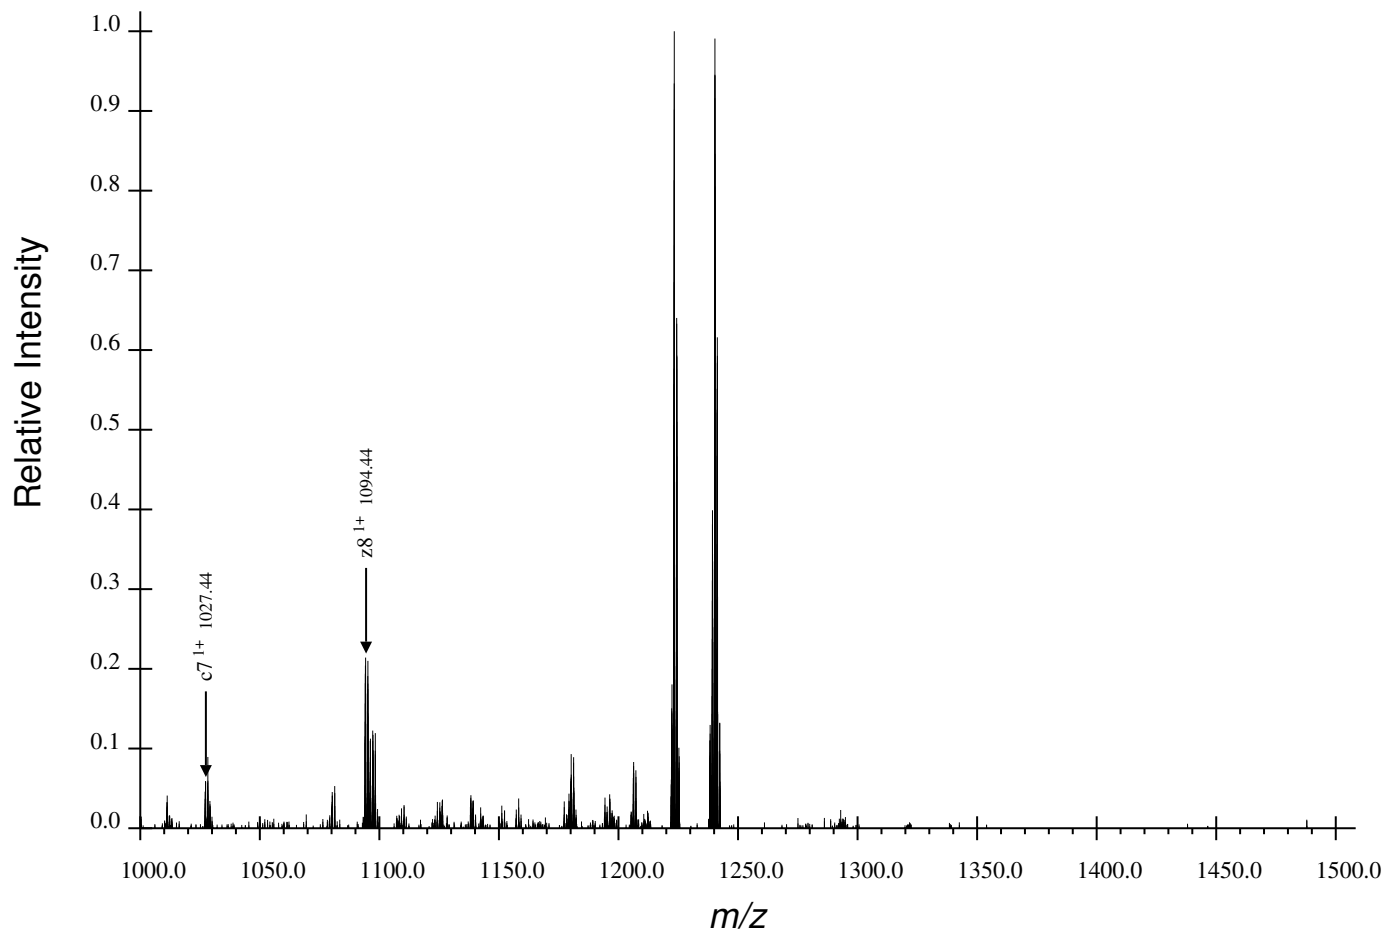

(c) Third Region for KRSpYEEHIP, Spectrum 40.dta

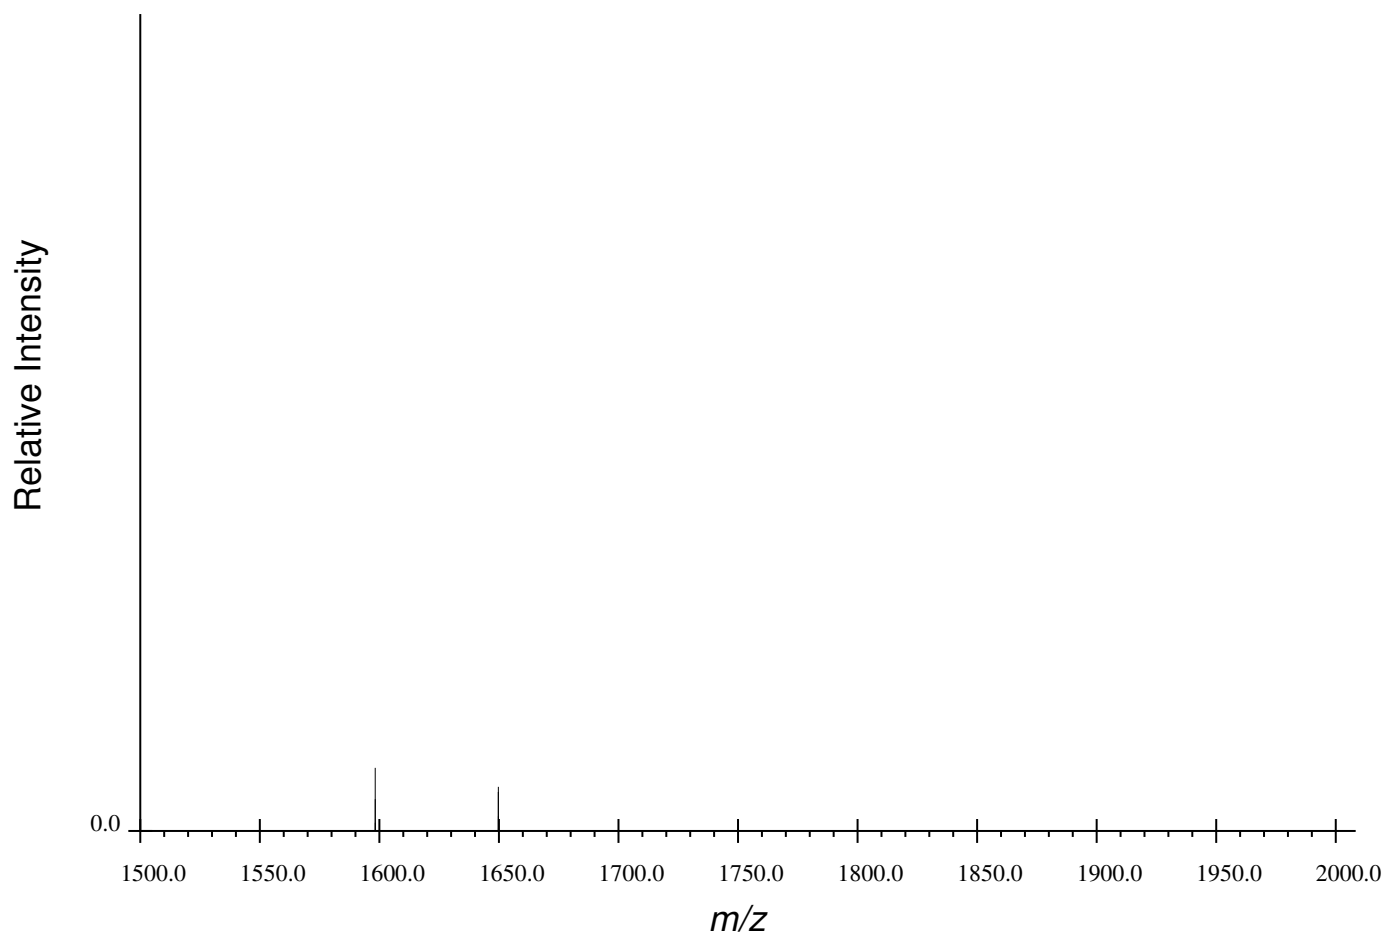

(d) Fourth Region for KRSpYEEHIP, Spectrum 40.dta



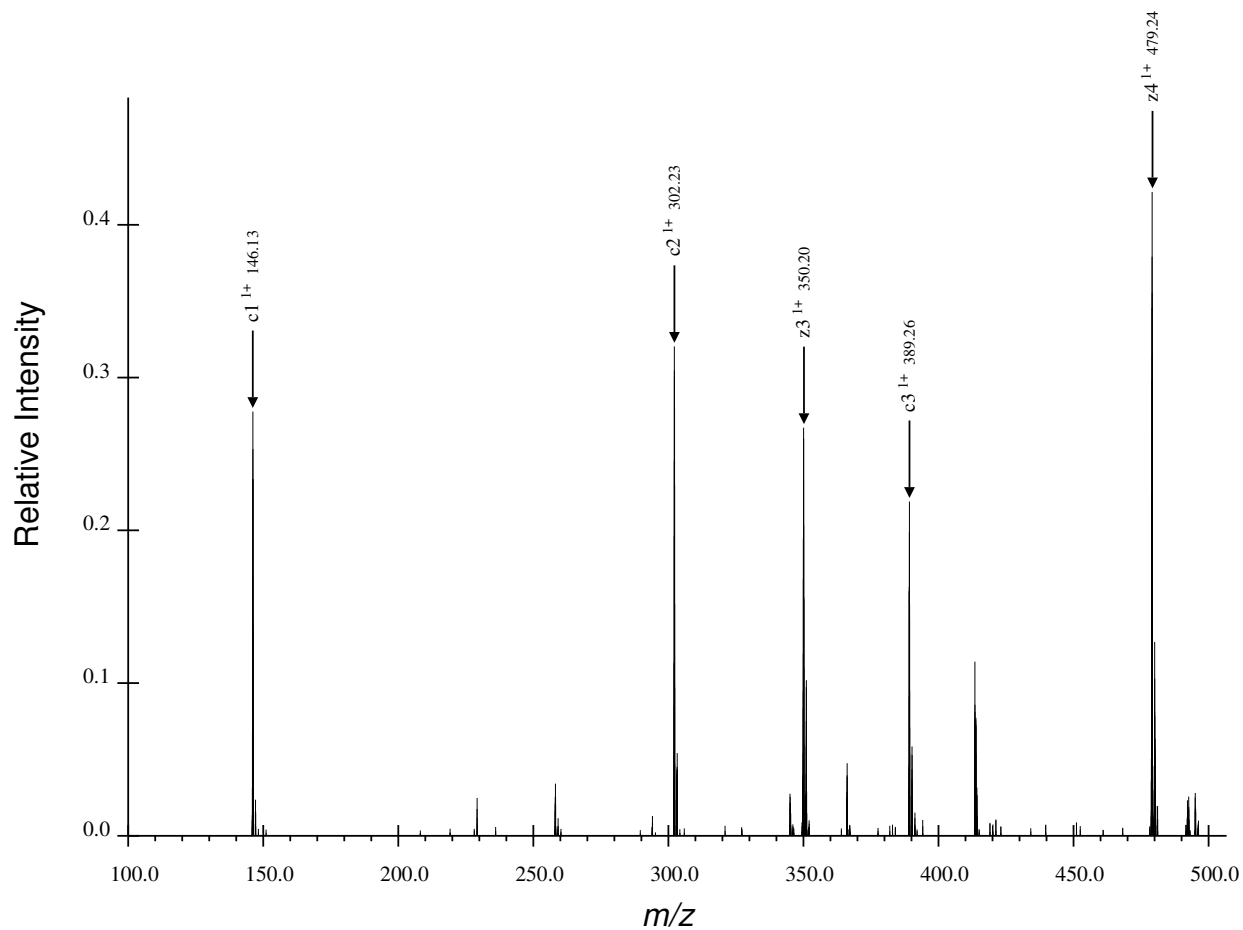

(a) First Region for KRSpYEEHIP, Spectrum 41.dta

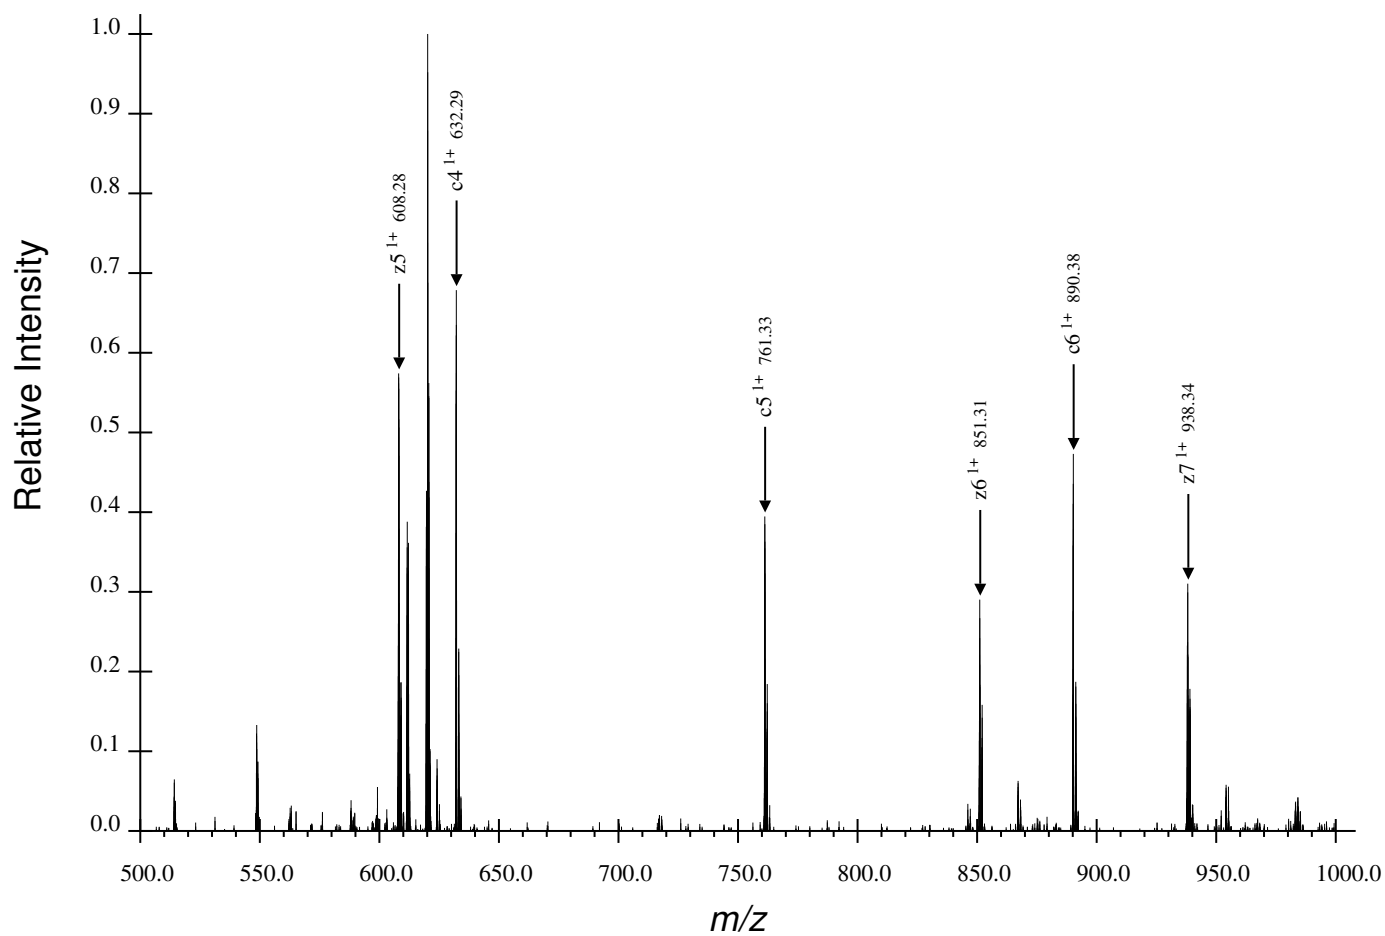

(b) Second Region for KRSpYEEHIP, Spectrum 41.dta

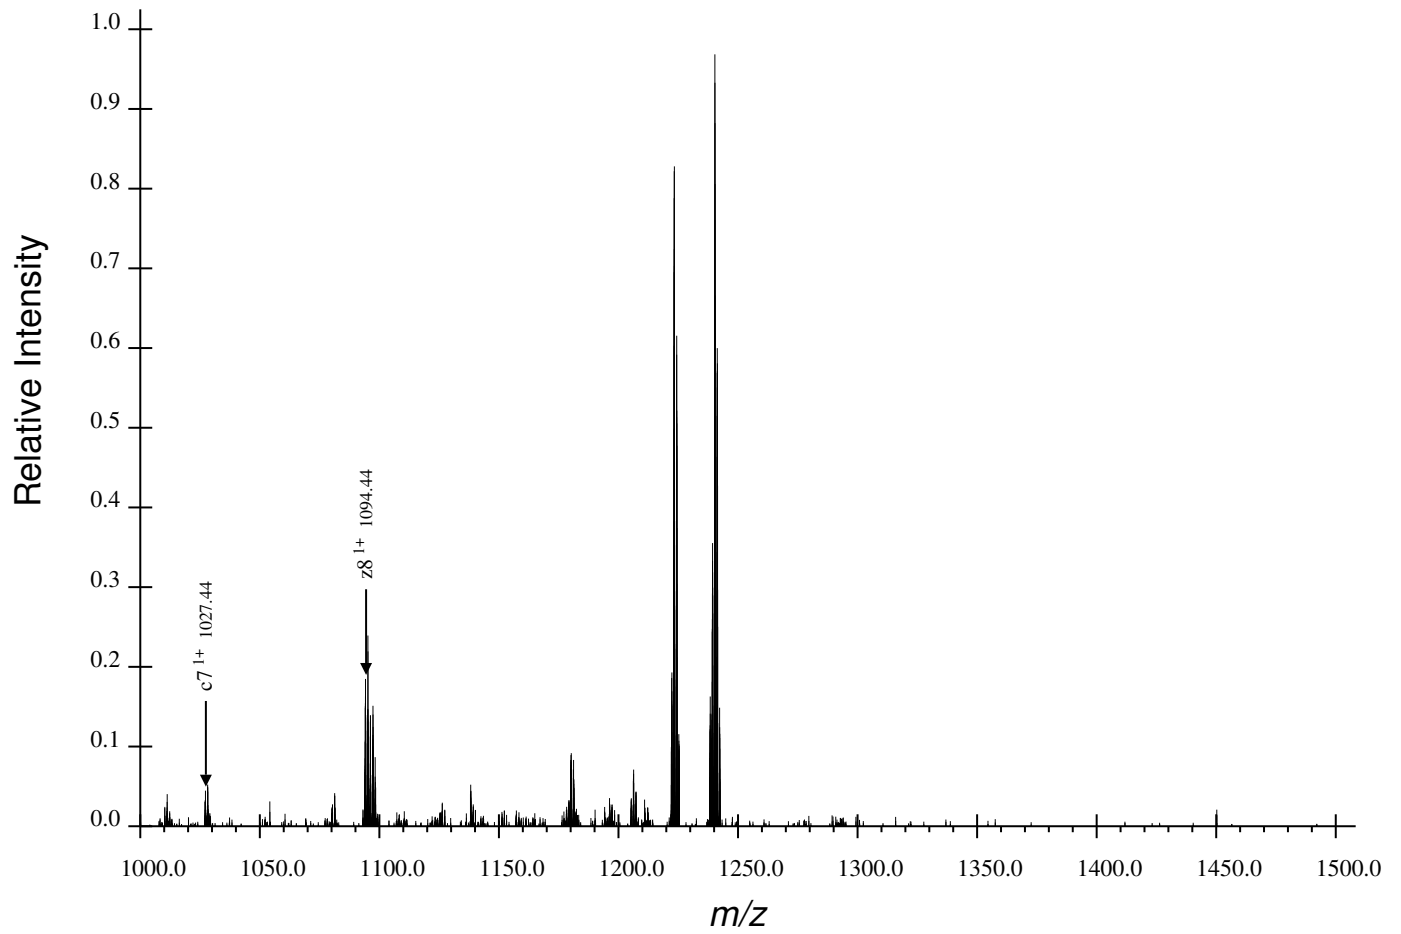

(c) Third Region for KRSpYEEHIP, Spectrum 41.dta

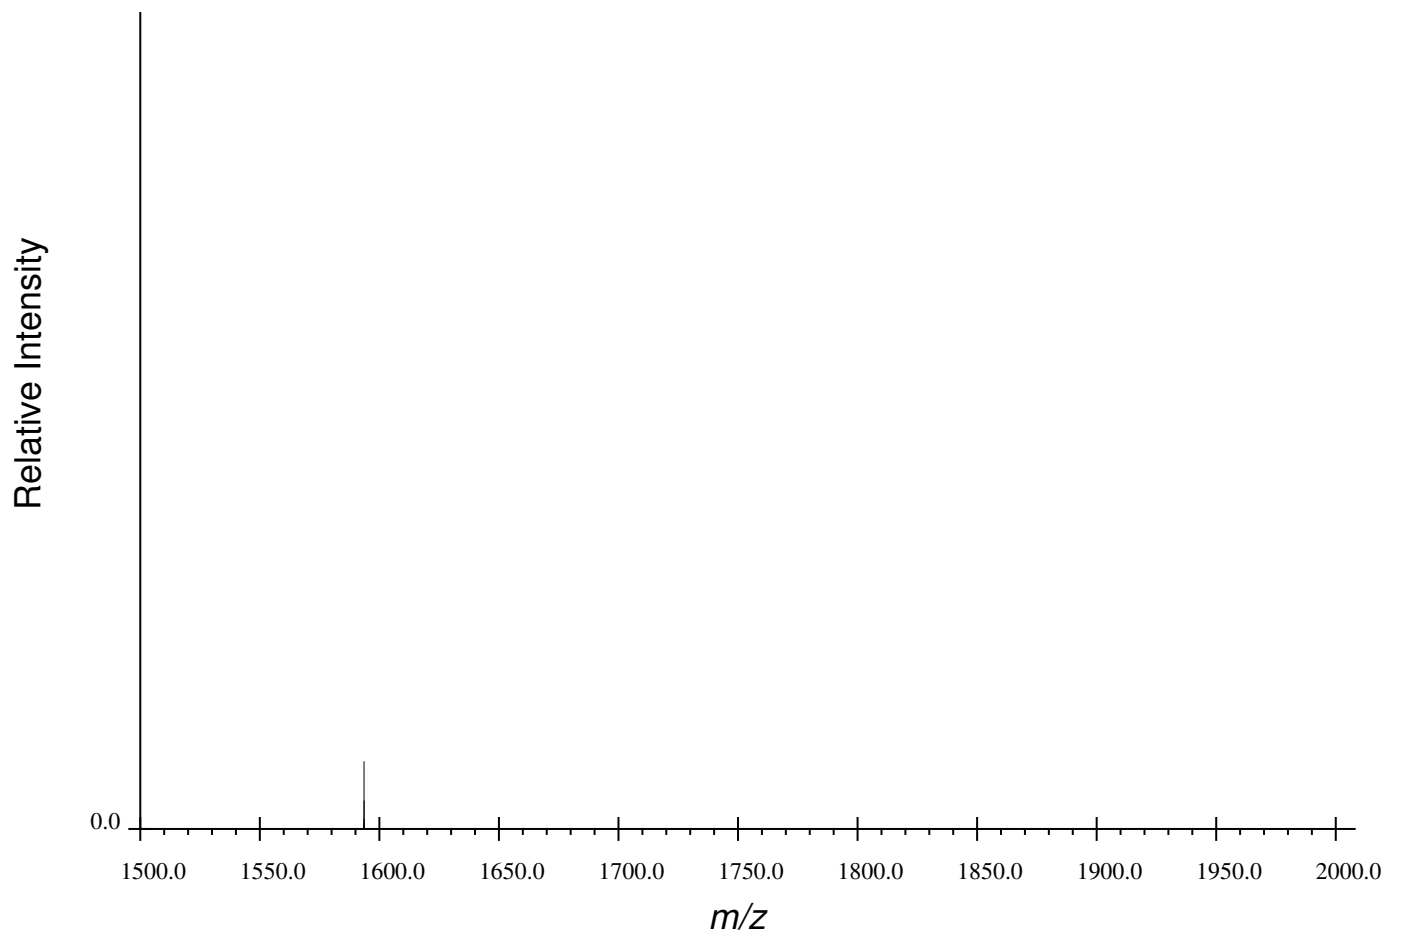

(d) Fourth Region for KRSpYEEHIP, Spectrum 41.dta

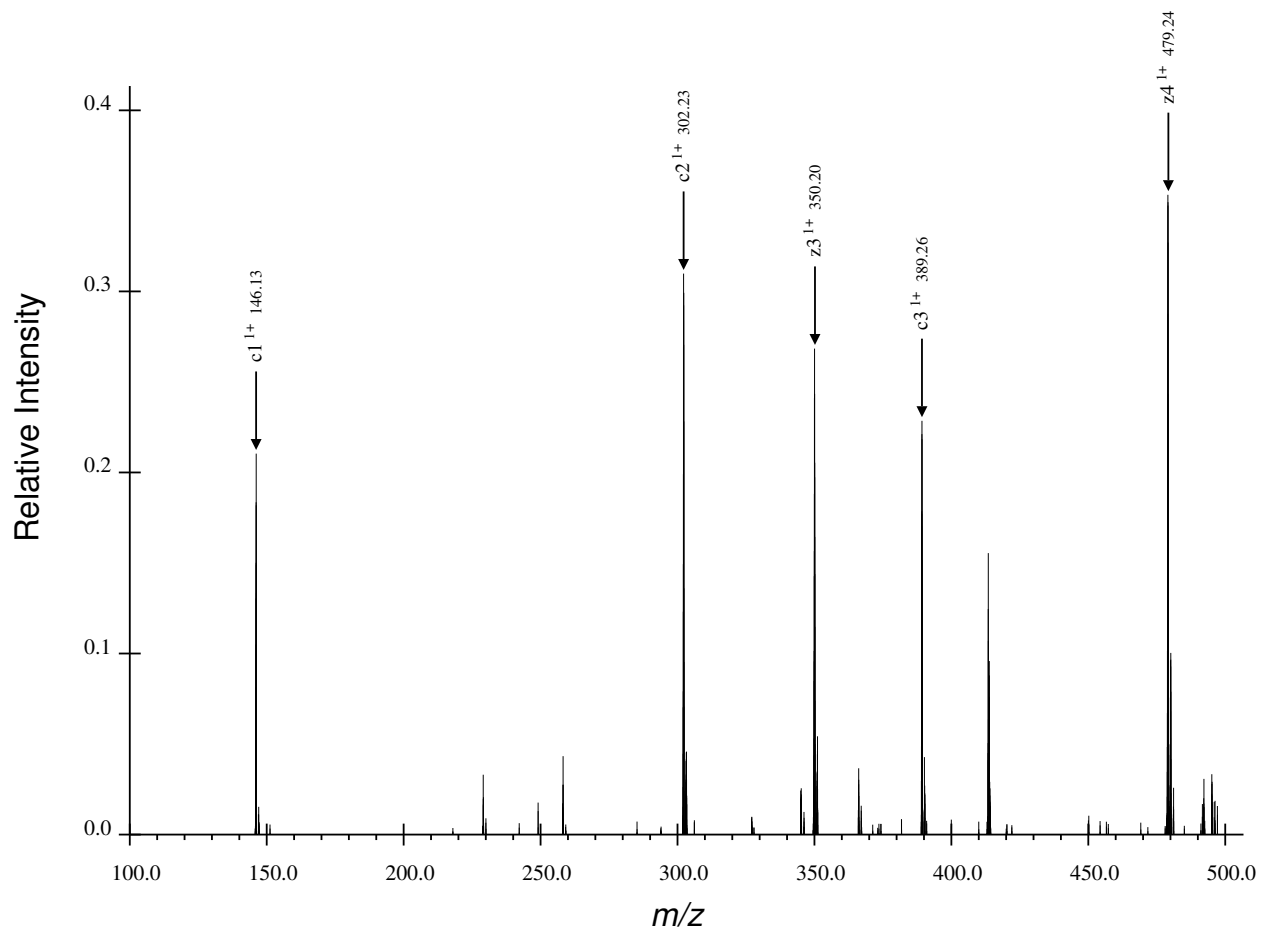

(a) First Region for KRSpYEEHIP, Spectrum 42.dta

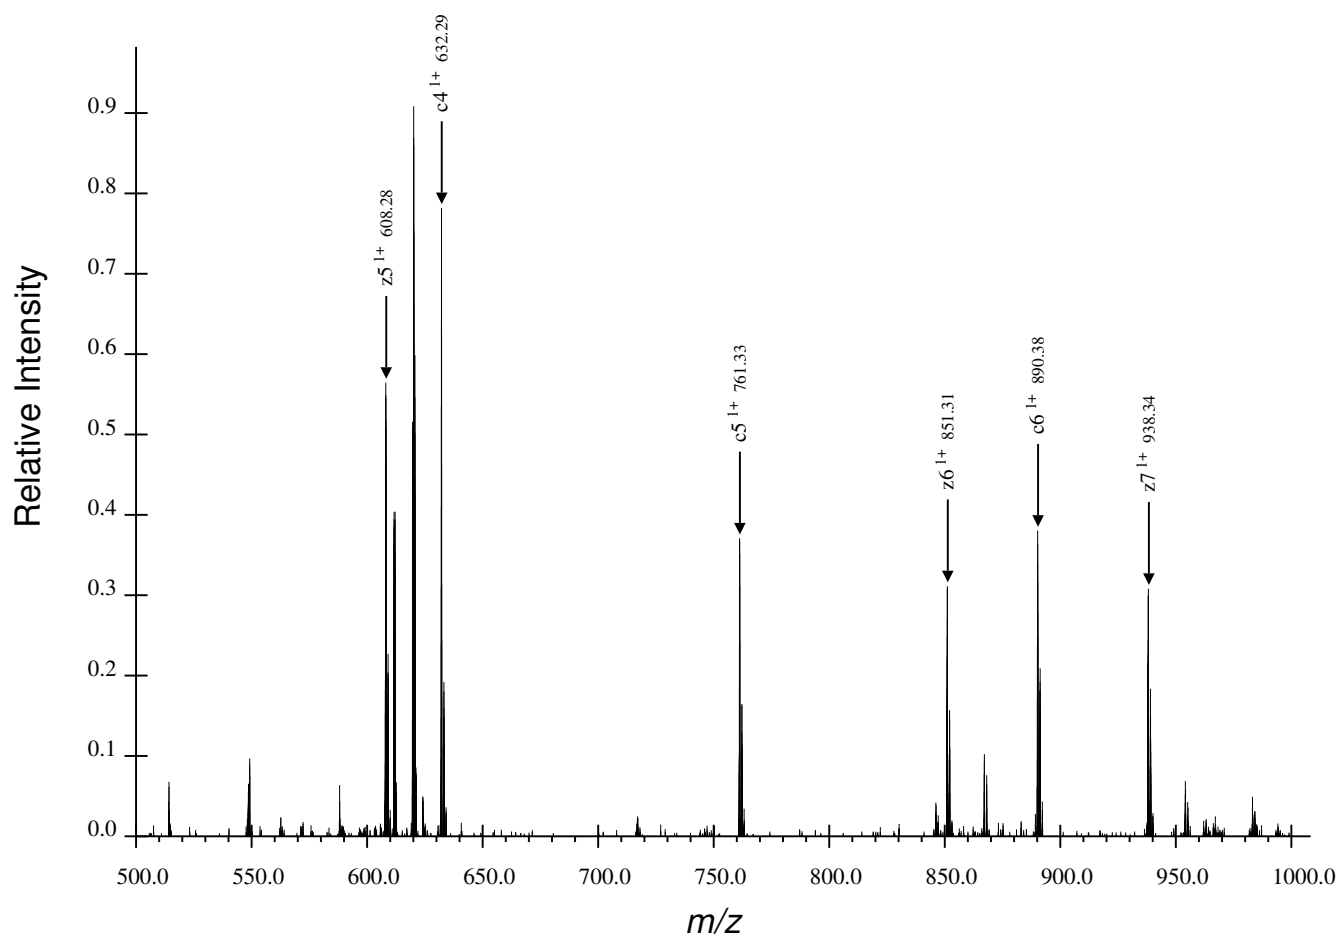

(b) Second Region for KRSpYEEHIP, Spectrum 42.dta

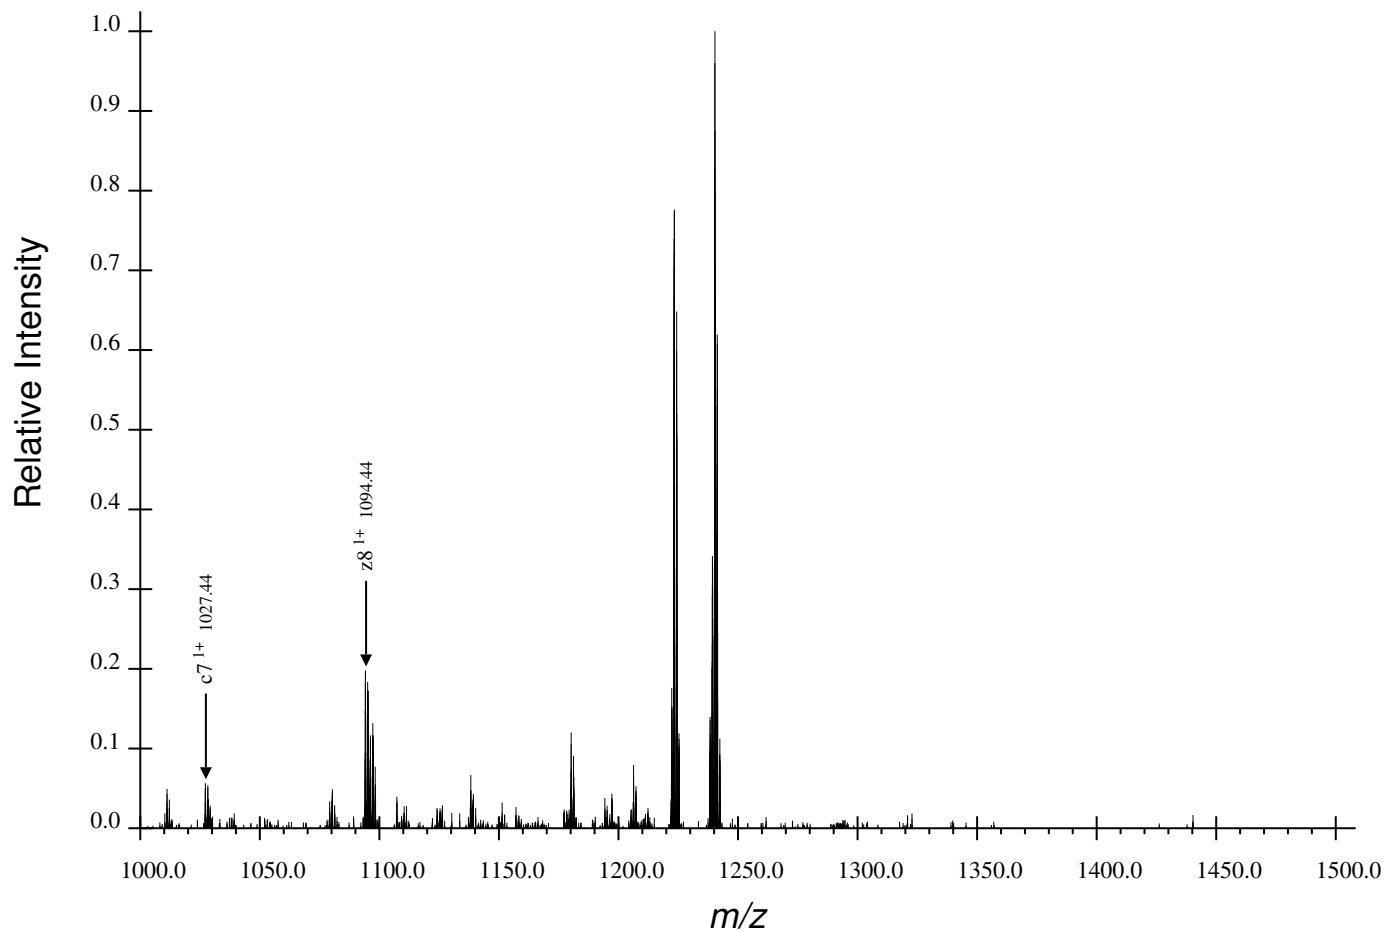

(c) Third Region for KRSpYEEHIP, Spectrum 42.dta

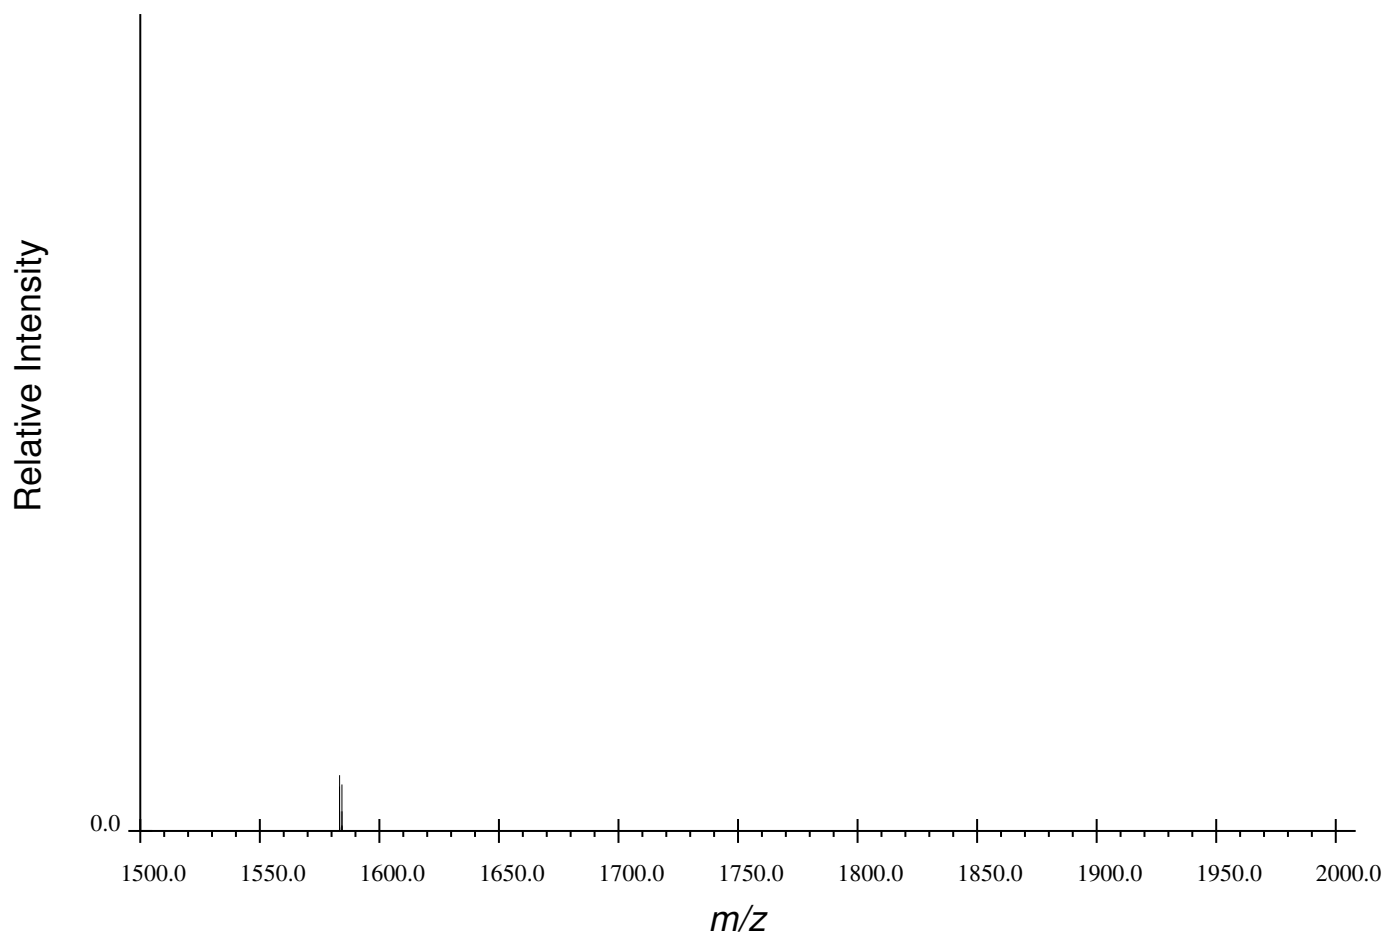

(d) Fourth Region for KRSpYEEHIP, Spectrum 42.dta

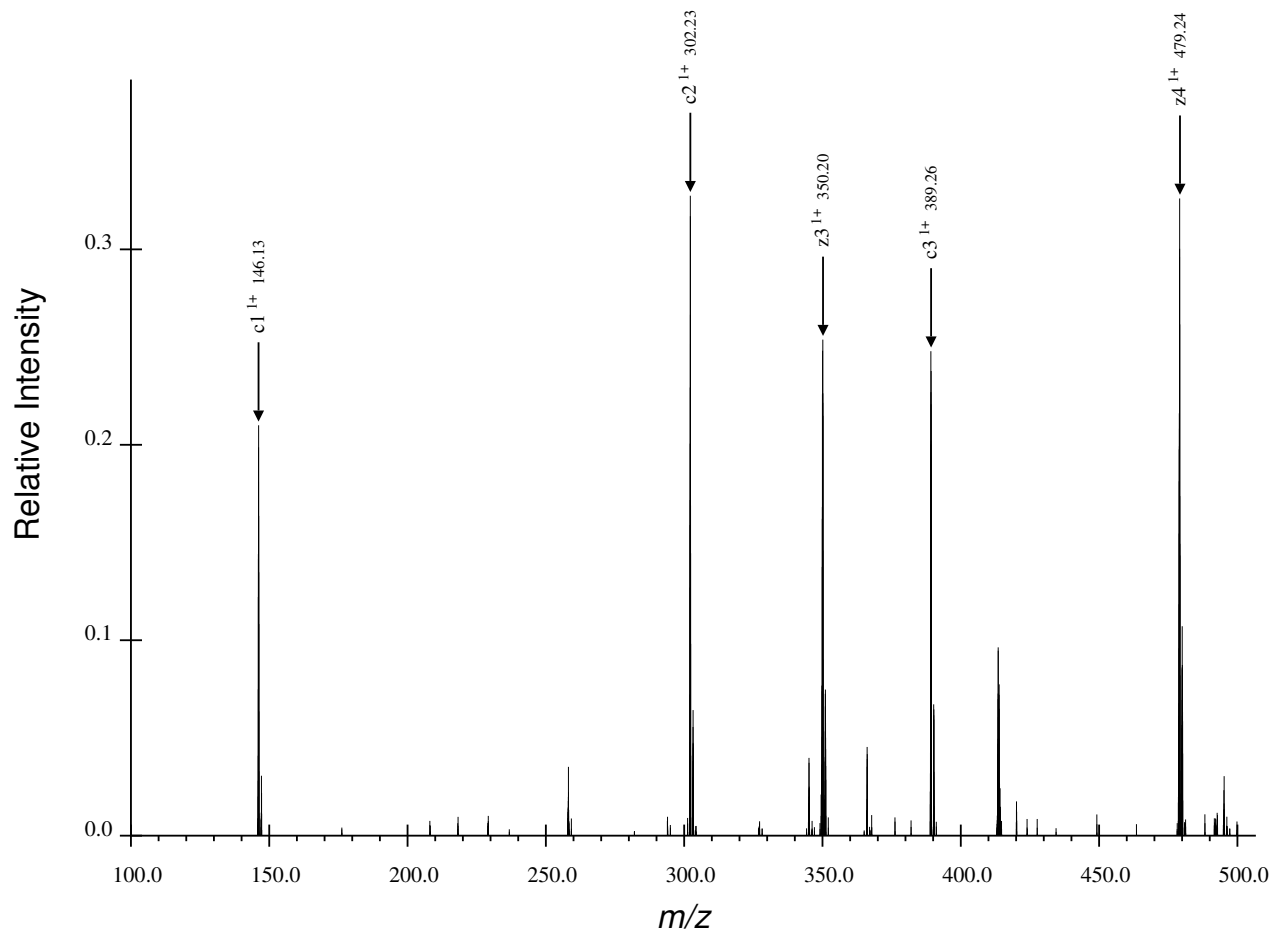

(a) First Region for KRSpYEEHIP, Spectrum 43.dta

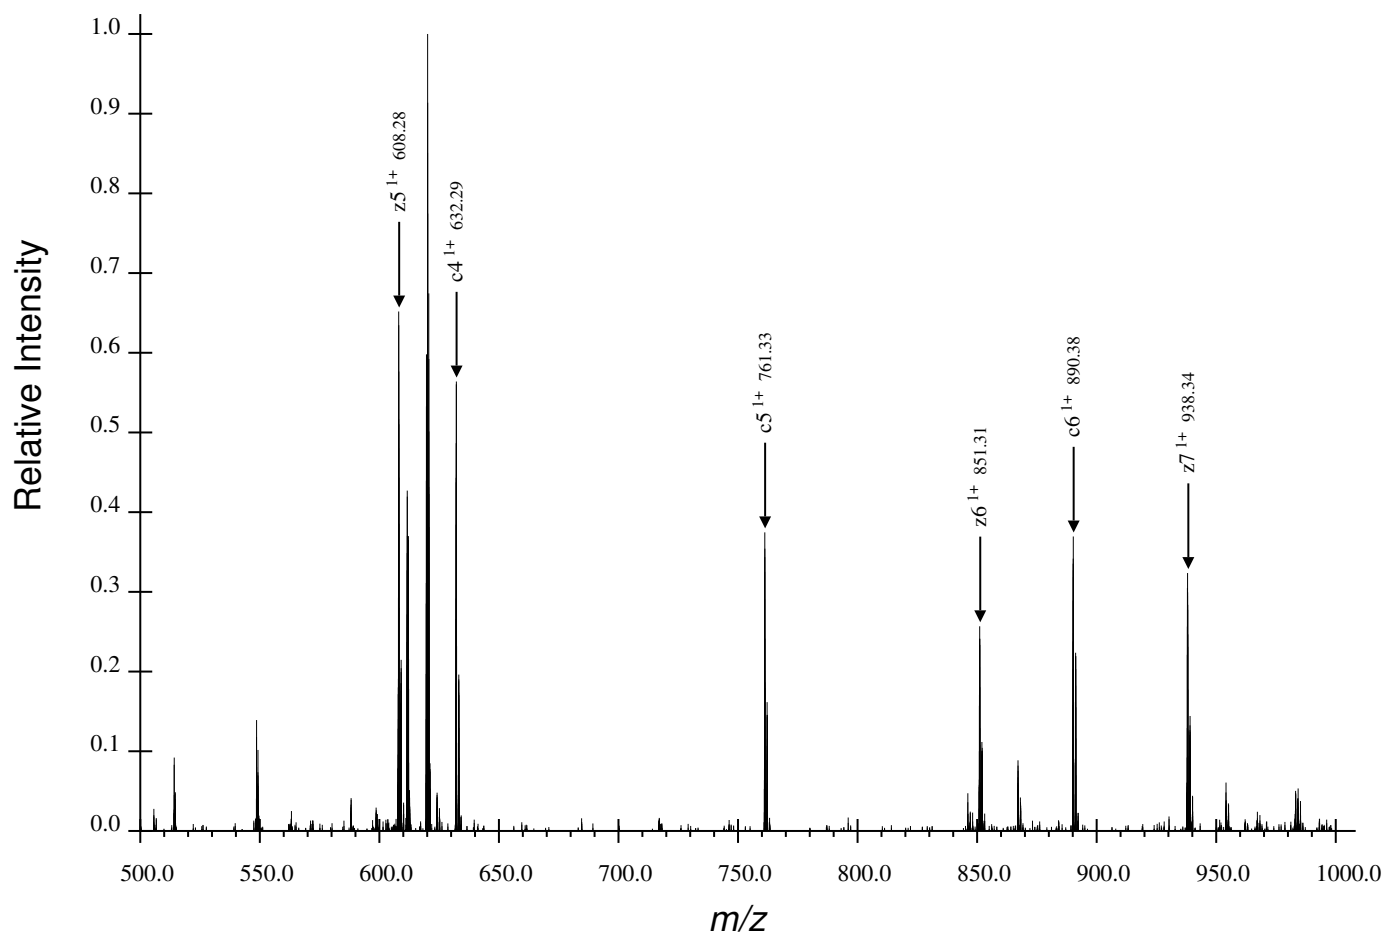

(b) Second Region for KRSpYEEHIP, Spectrum 43.dta

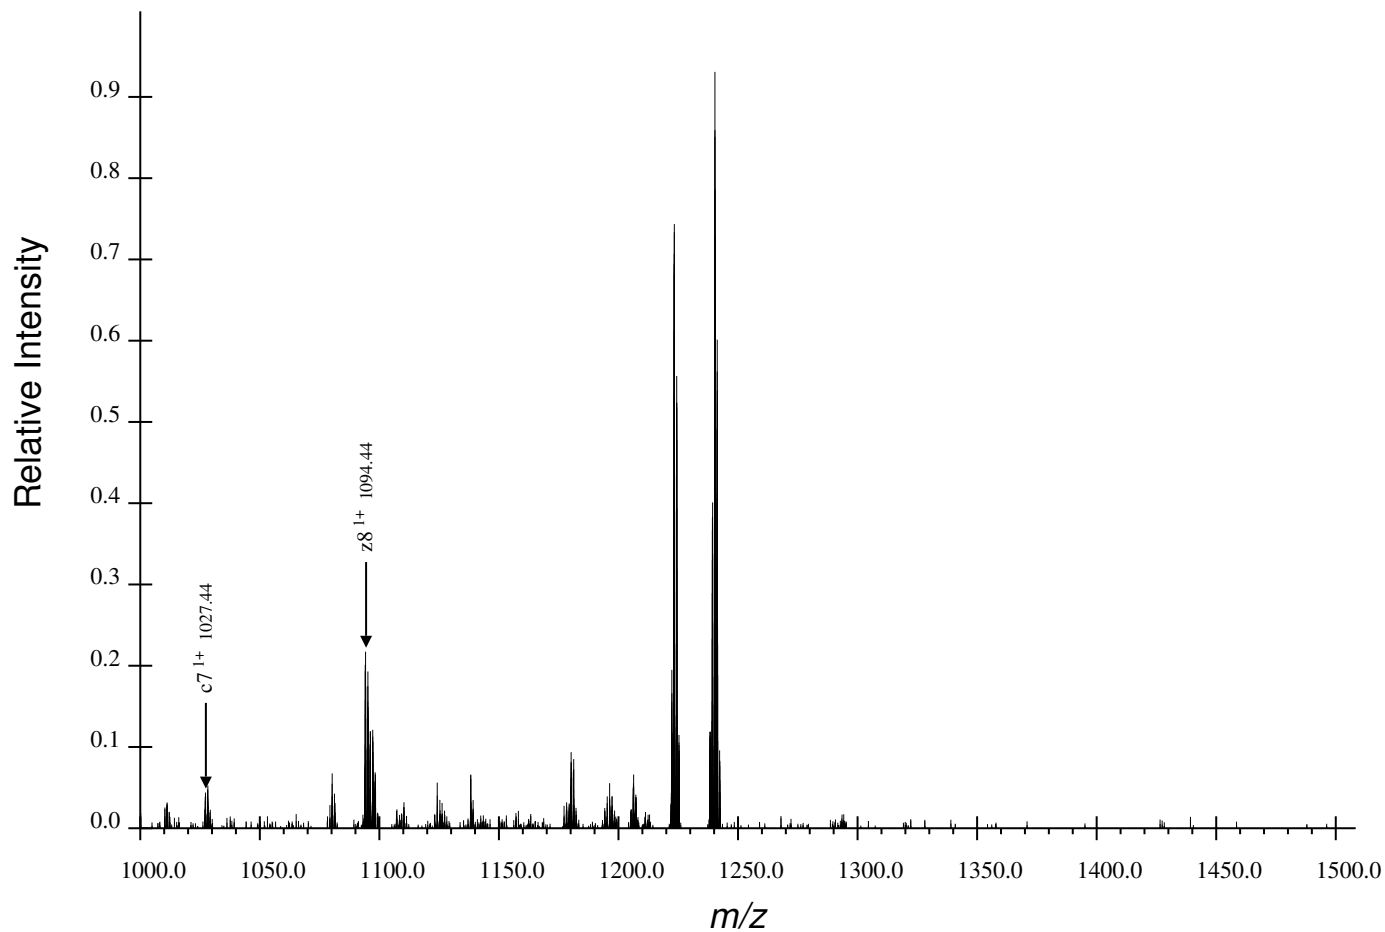

(c) Third Region for KRSpYEEHIP, Spectrum 43.dta

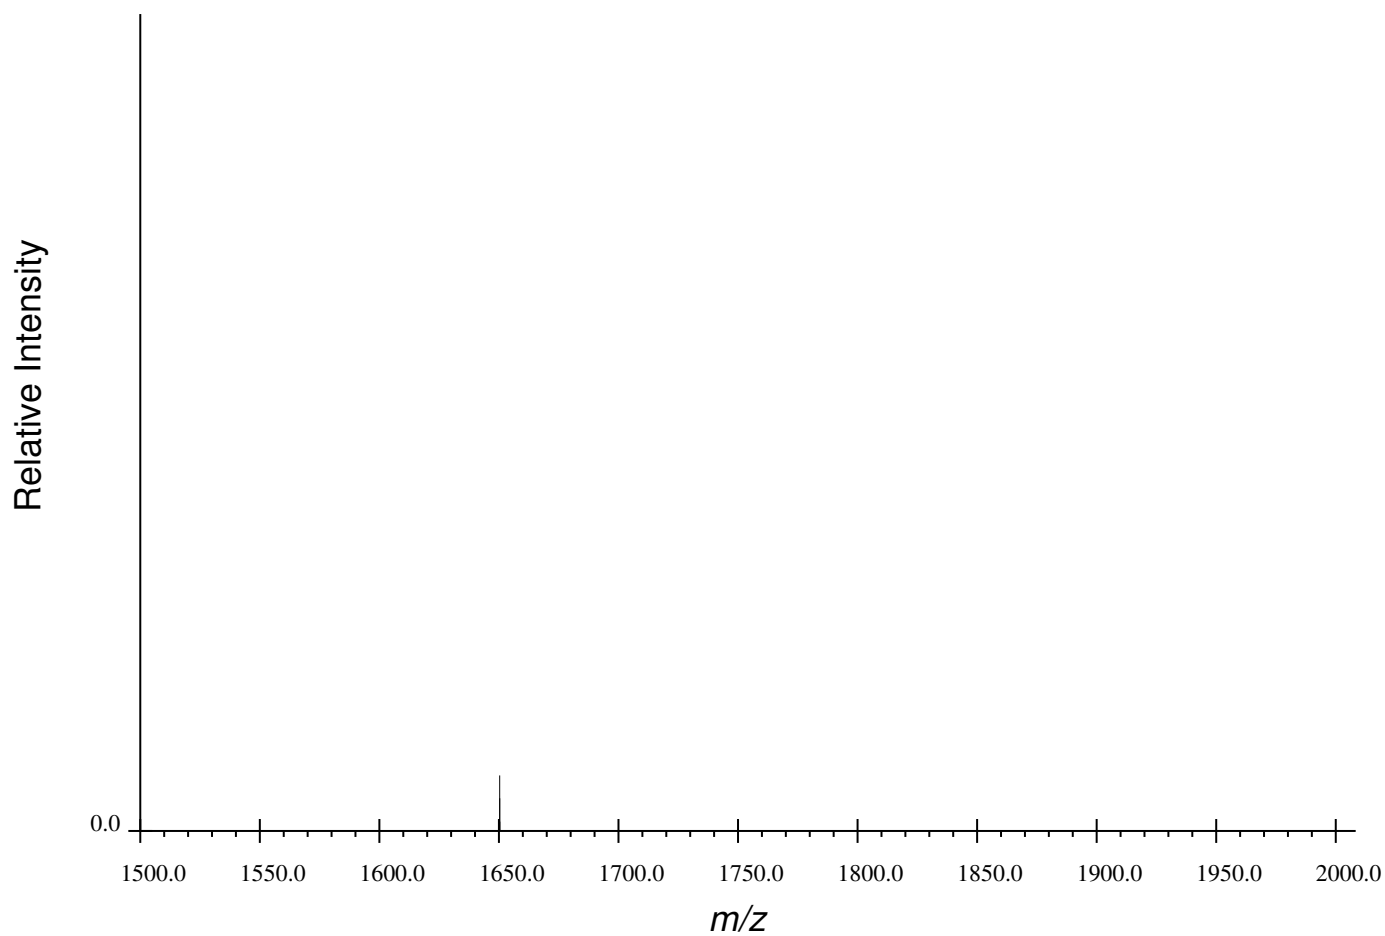

(d) Fourth Region for KRSpYEEHIP, Spectrum 43.dta

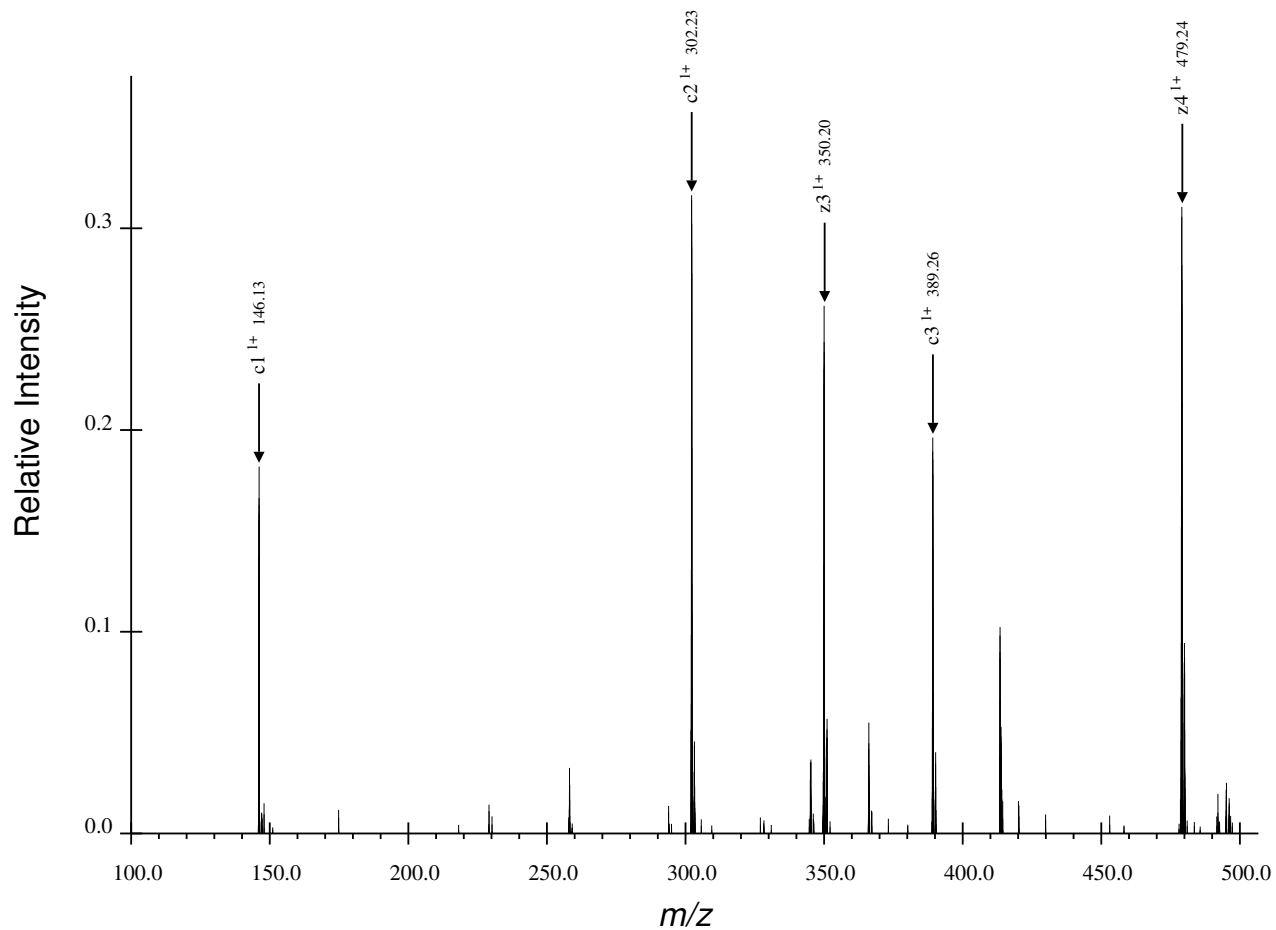

(a) First Region for KRSpYEEHIP, Spectrum 44.dta

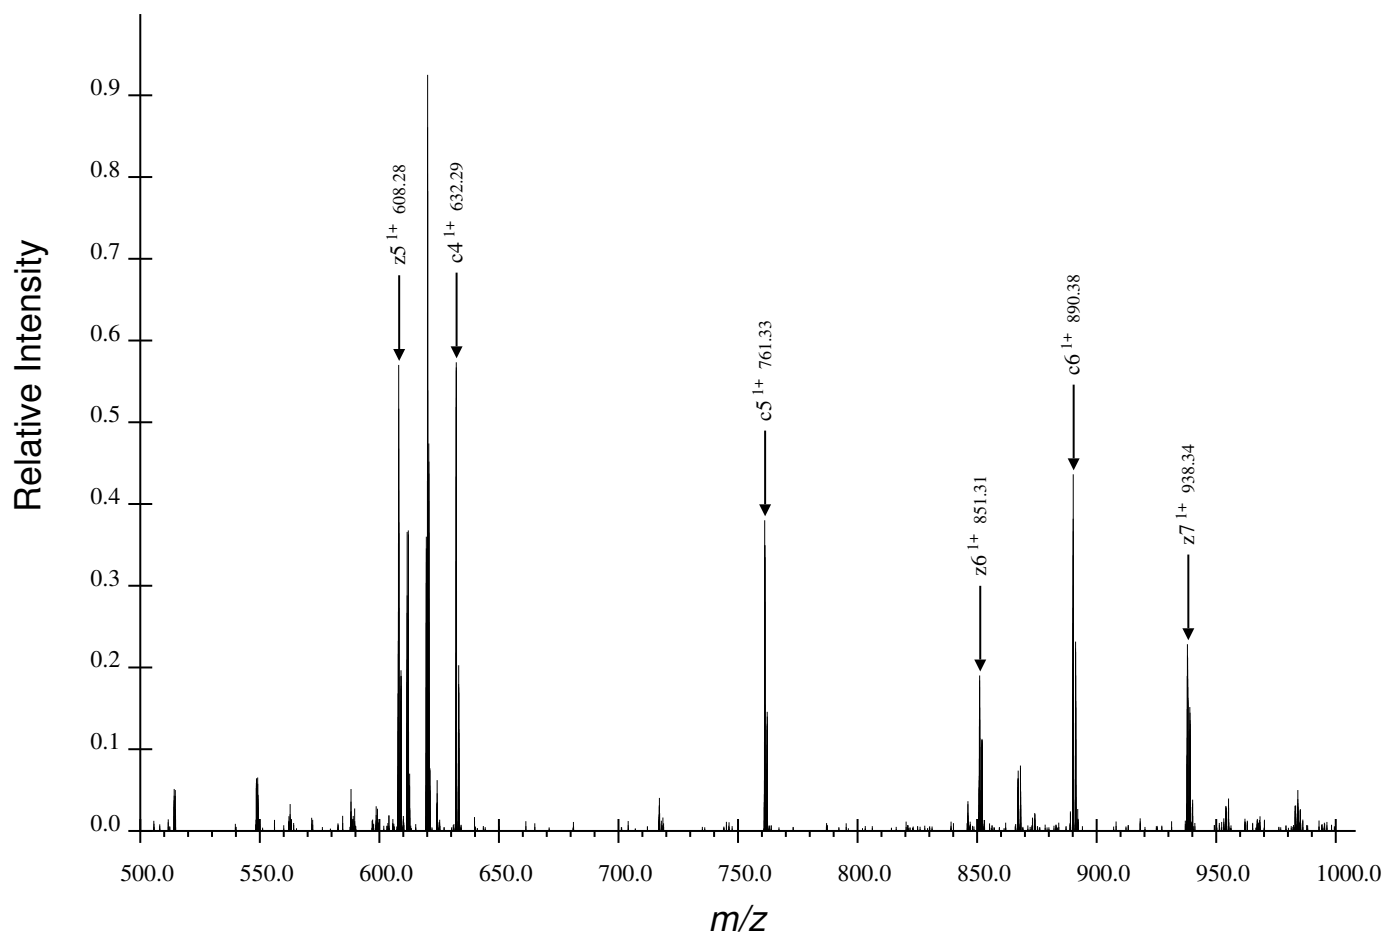

(b) Second Region for KRSpYEEHIP, Spectrum 44.dta

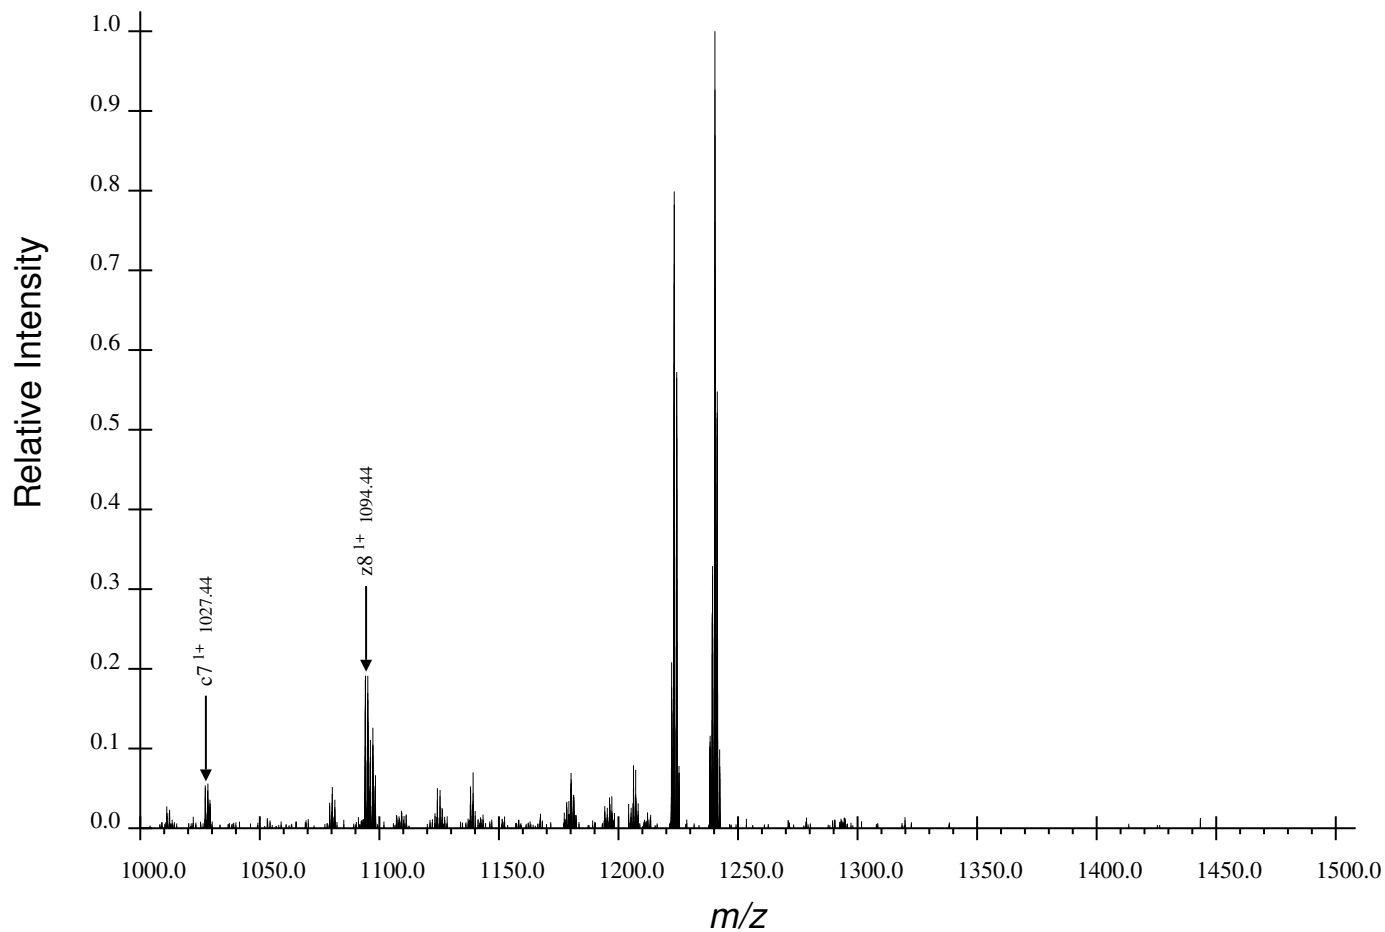

(c) Third Region for KRSpYEEHIP, Spectrum 44.dta

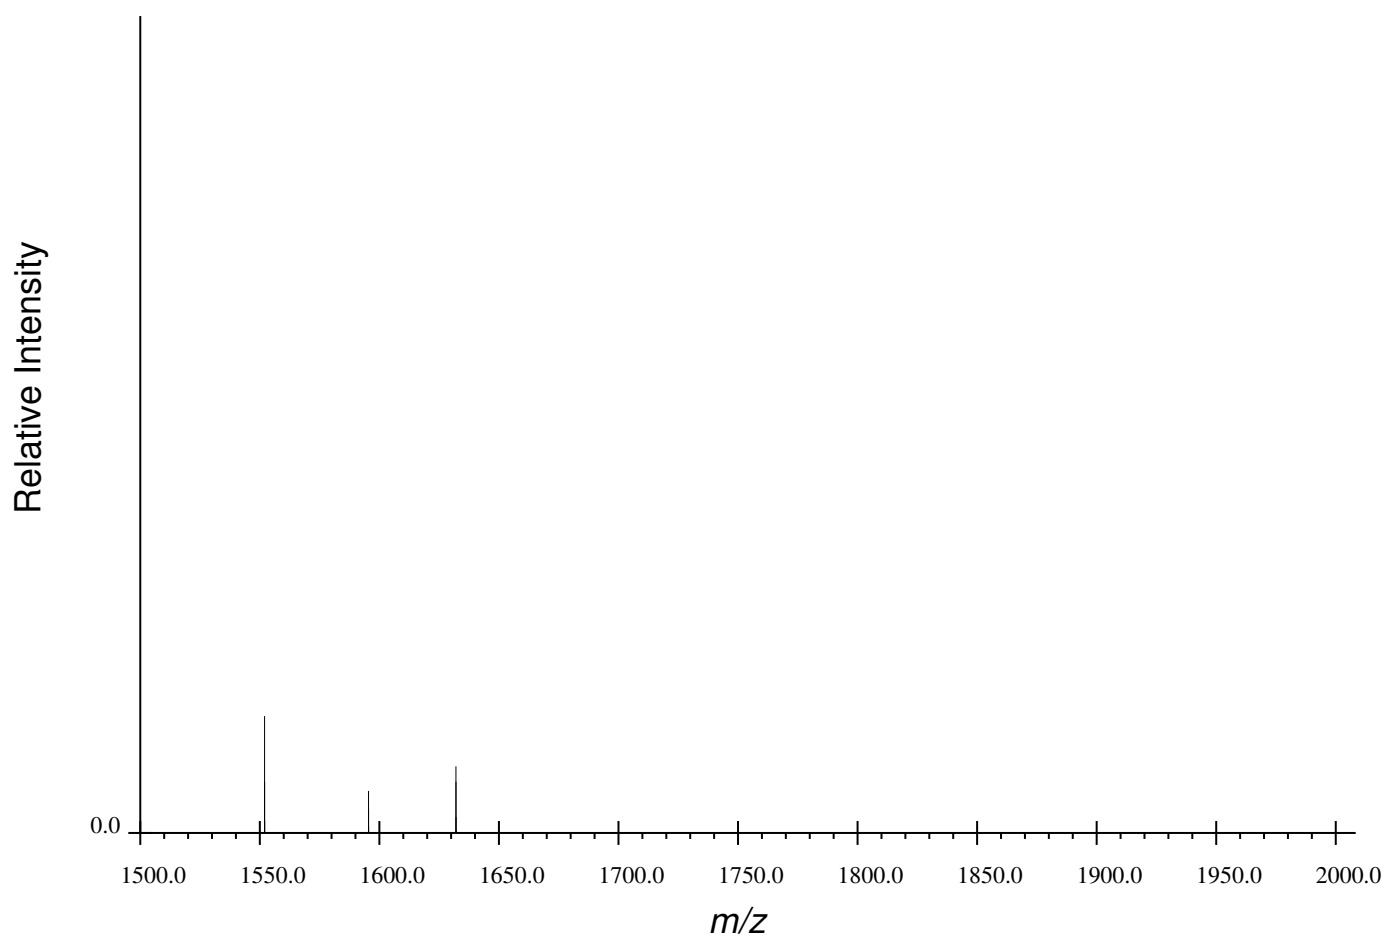

(d) Fourth Region for KRSpYEEHIP, Spectrum 44.dta



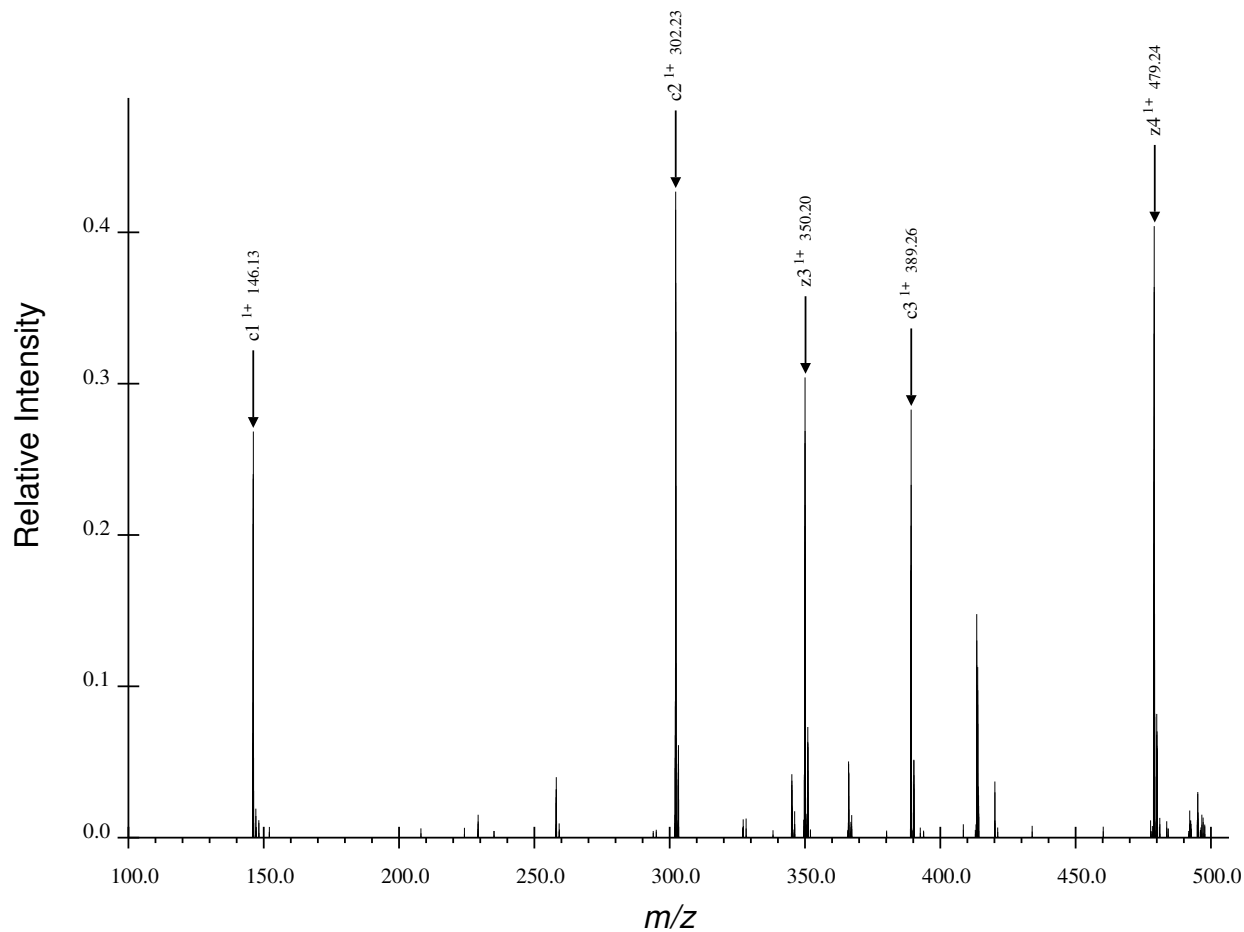

(a) First Region for KRSpYEEHIP, Spectrum 45.dta

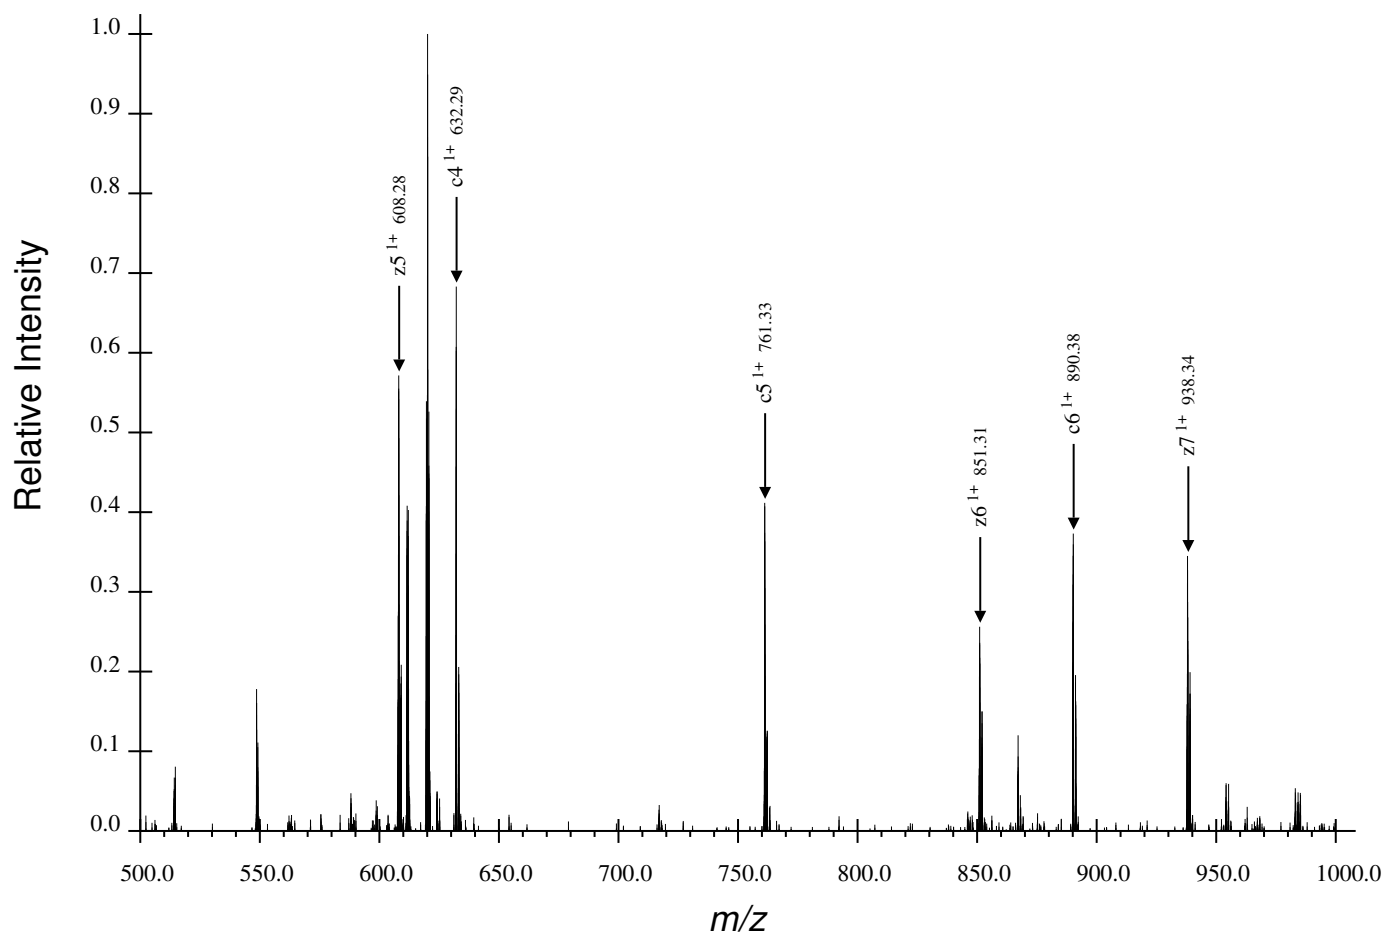

(b) Second Region for KRSpYEEHIP, Spectrum 45.dta

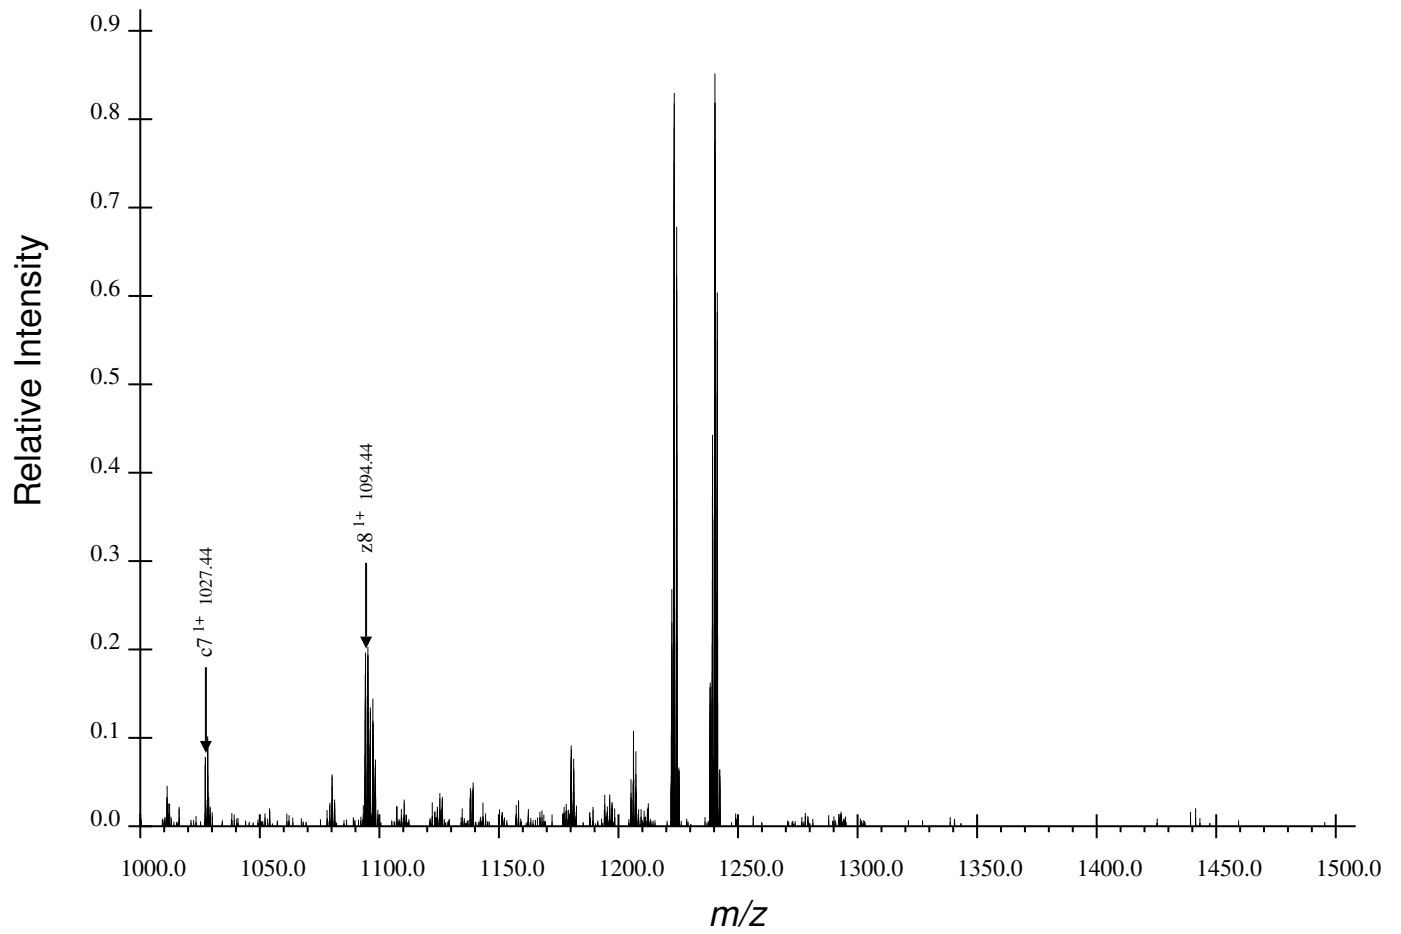

(c) Third Region for KRSpYEEHIP, Spectrum 45.dta

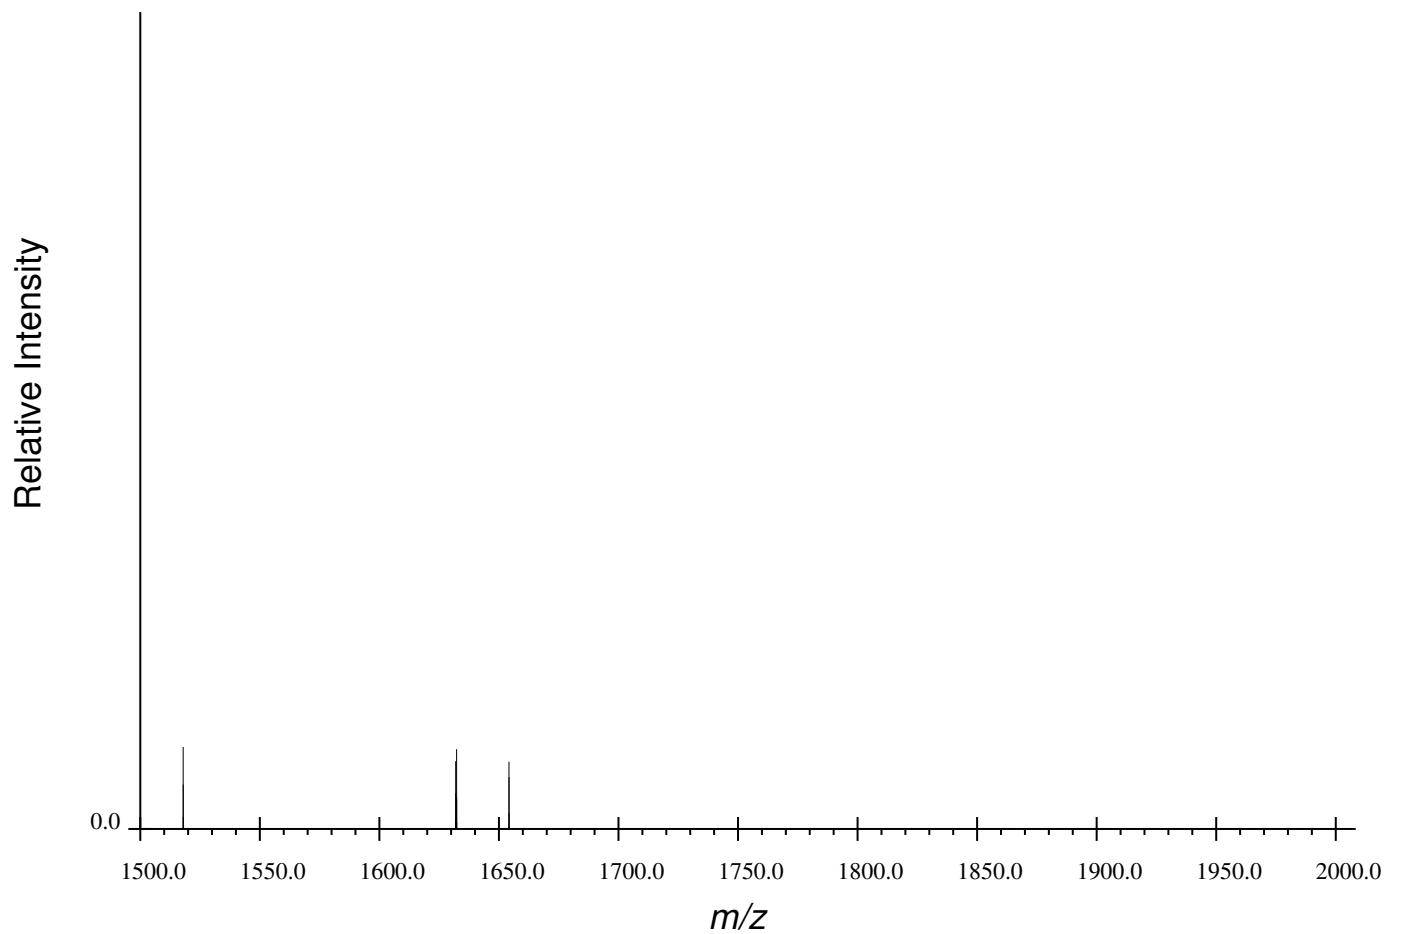

(d) Fourth Region for KRSpYEEHIP, Spectrum 45.dta

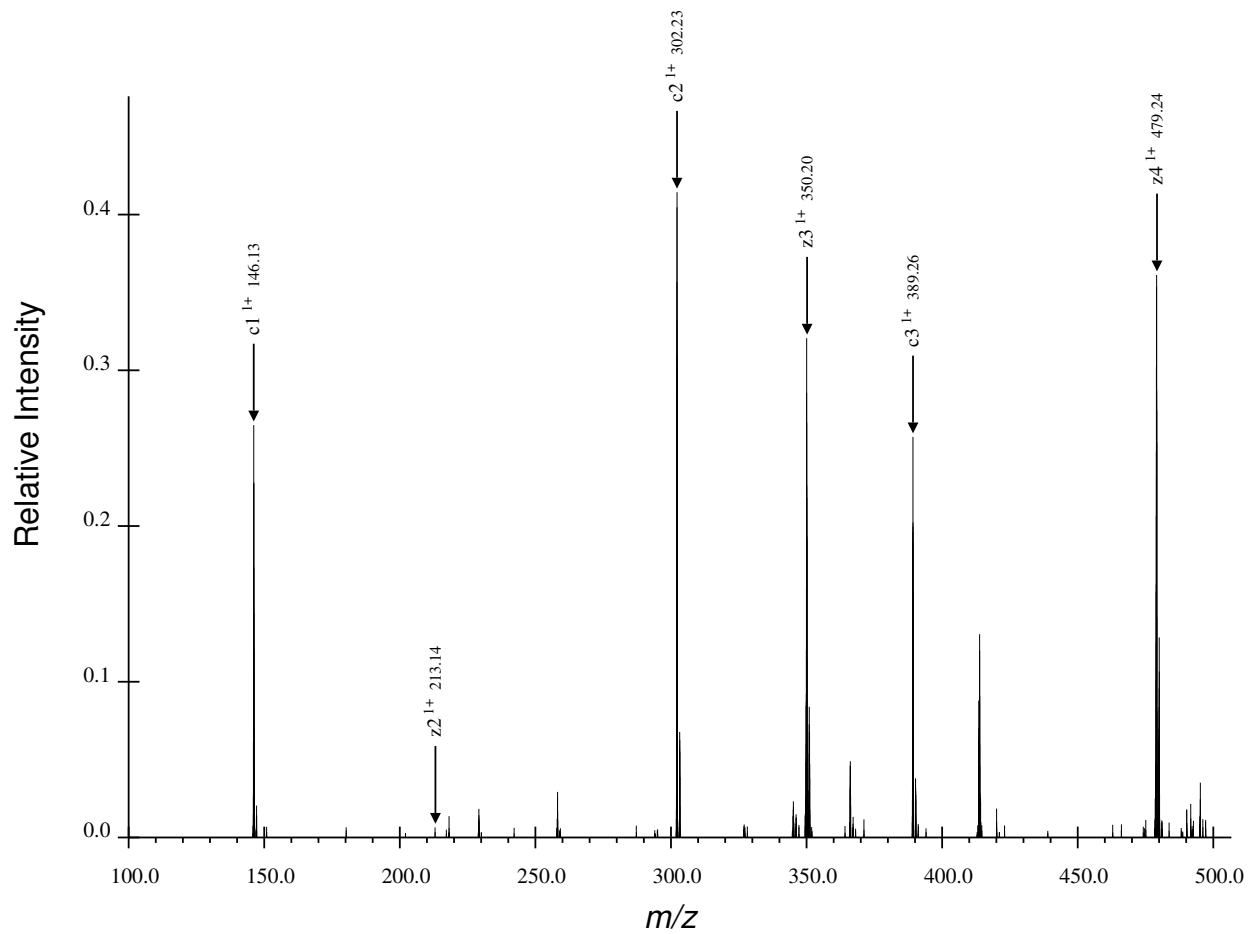

(a) First Region for KRSpYEEHIP, Spectrum 46.dta

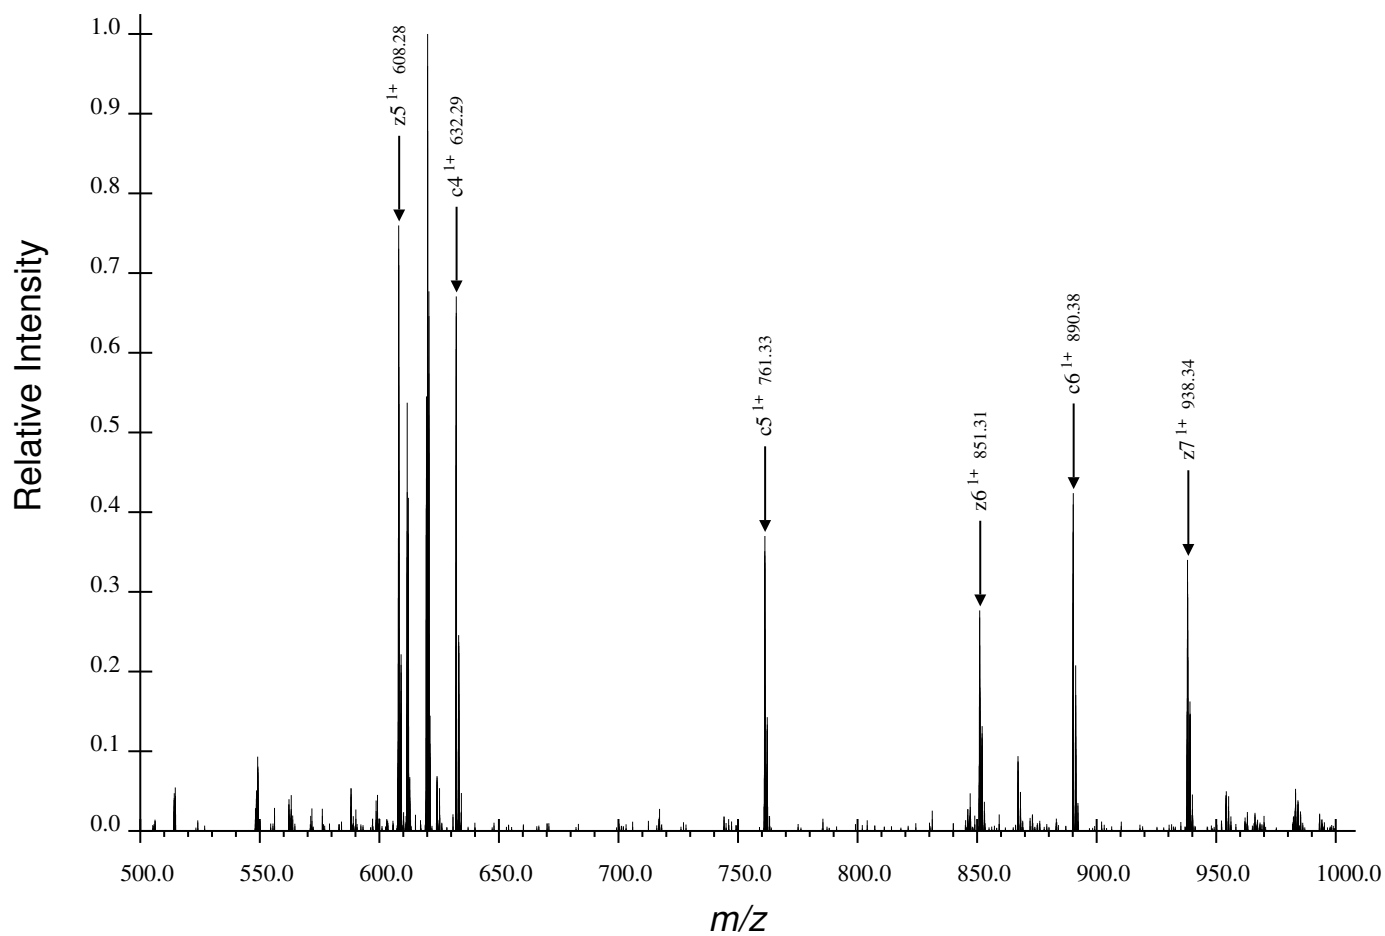

(b) Second Region for KRSpYEEHIP, Spectrum 46.dta

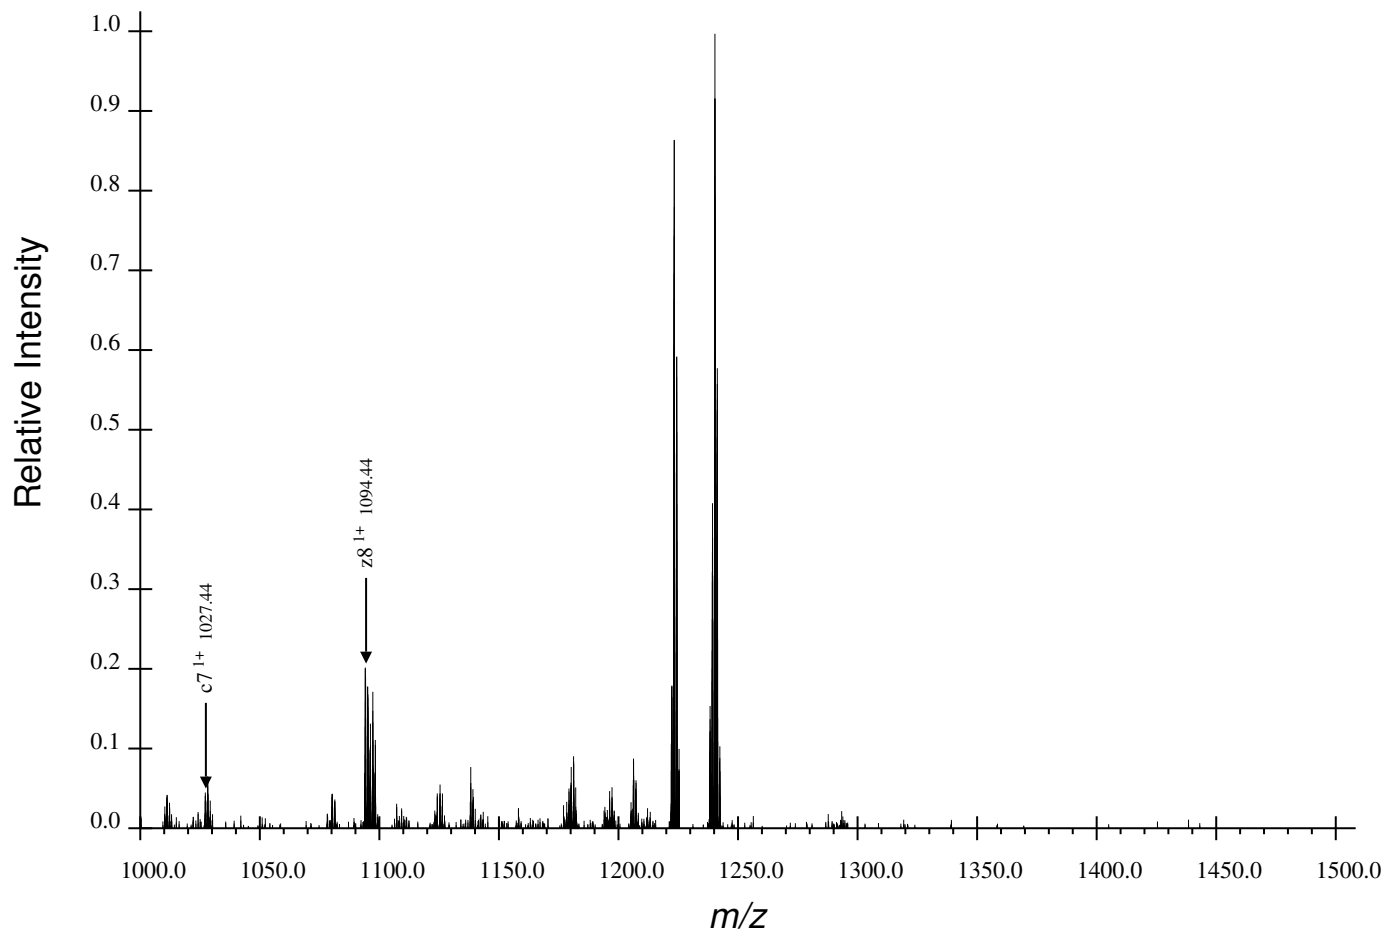

(c) Third Region for KRSpYEEHIP, Spectrum 46.dta

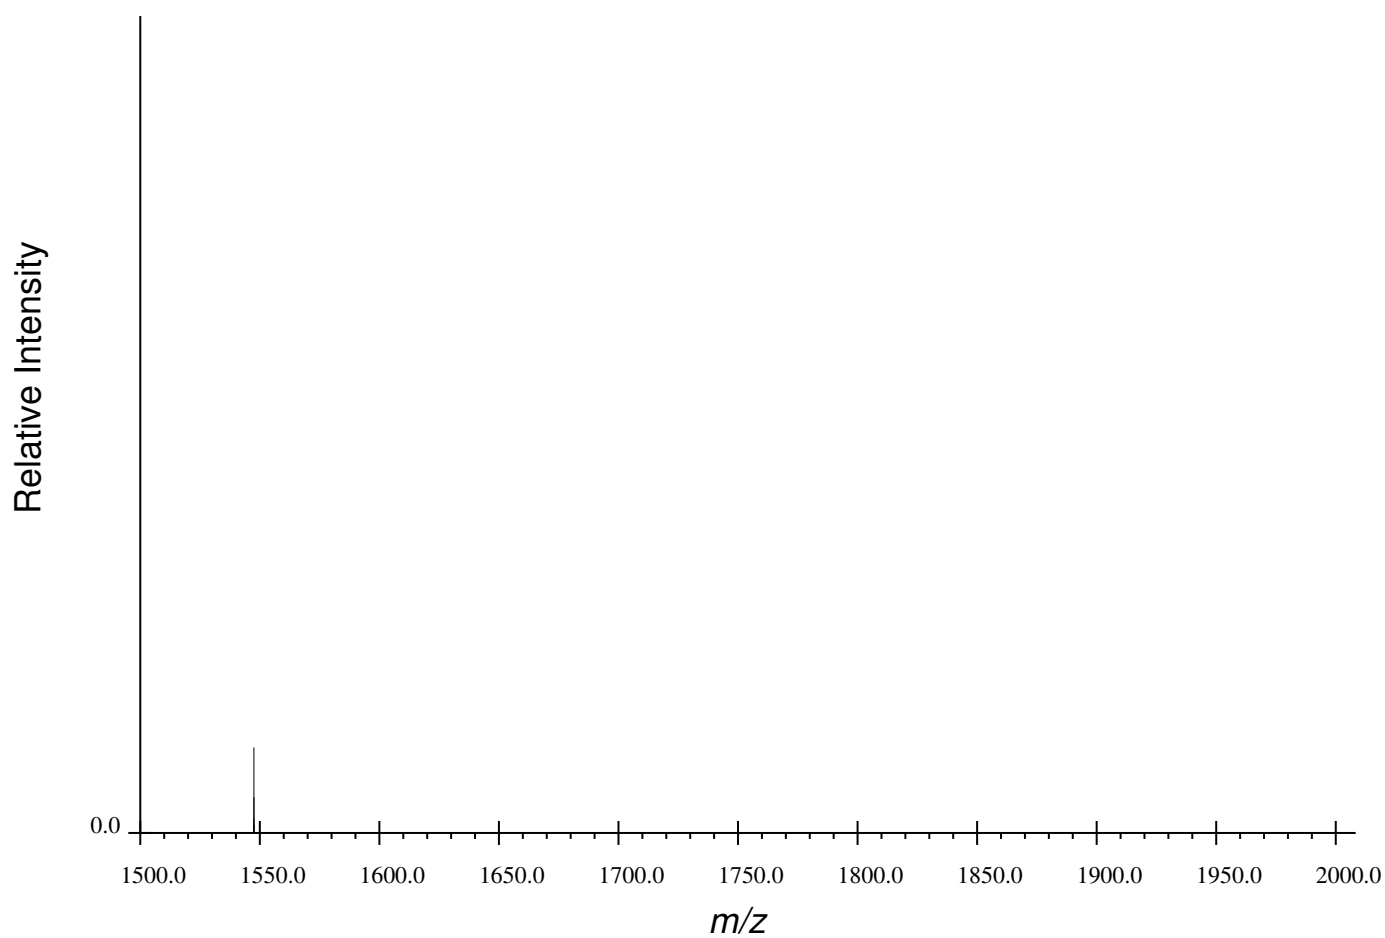

(d) Fourth Region for KRSpYEEHIP, Spectrum 46.dta

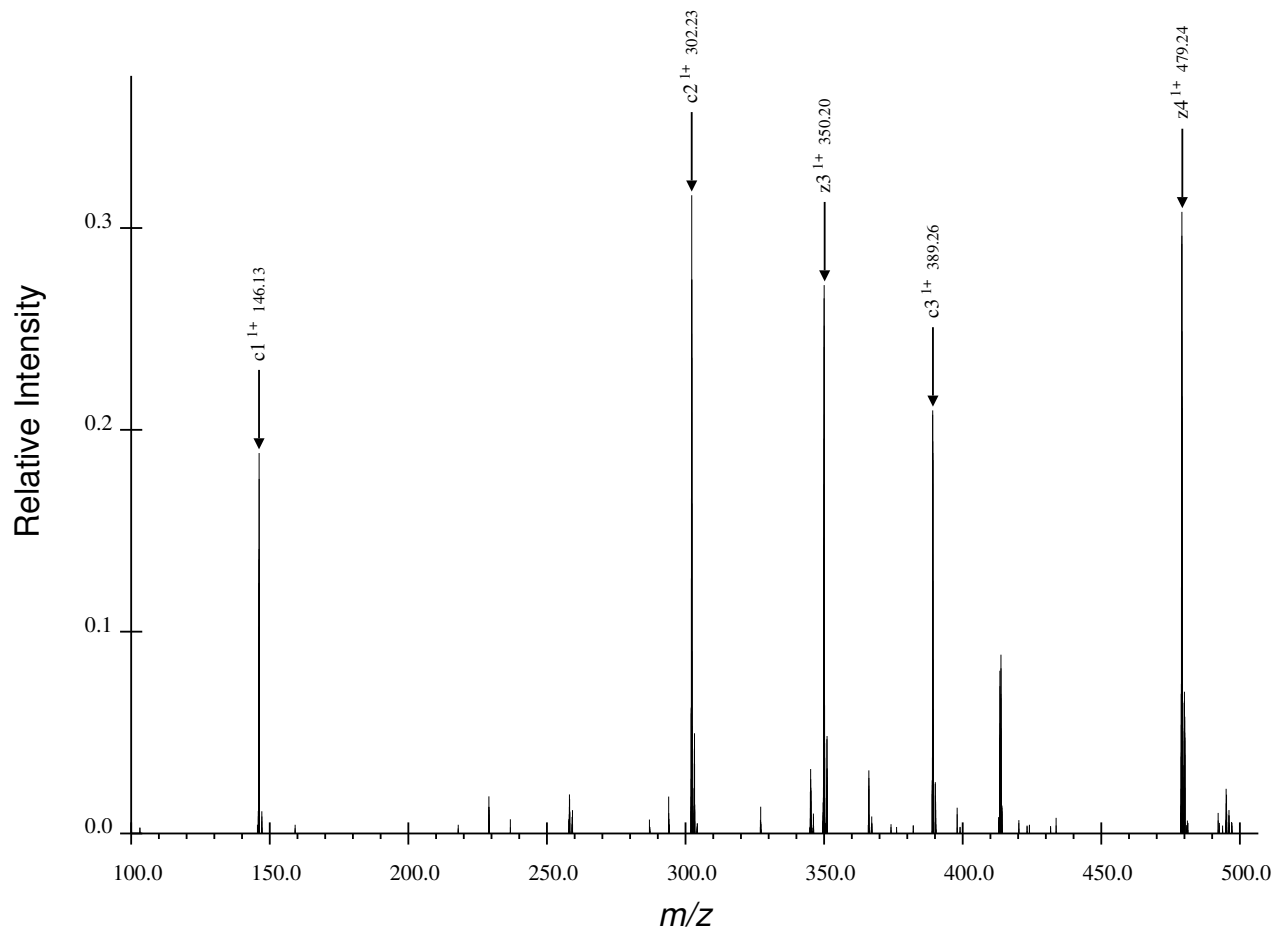

(a) First Region for KRSpYEEHIP, Spectrum 47.dta

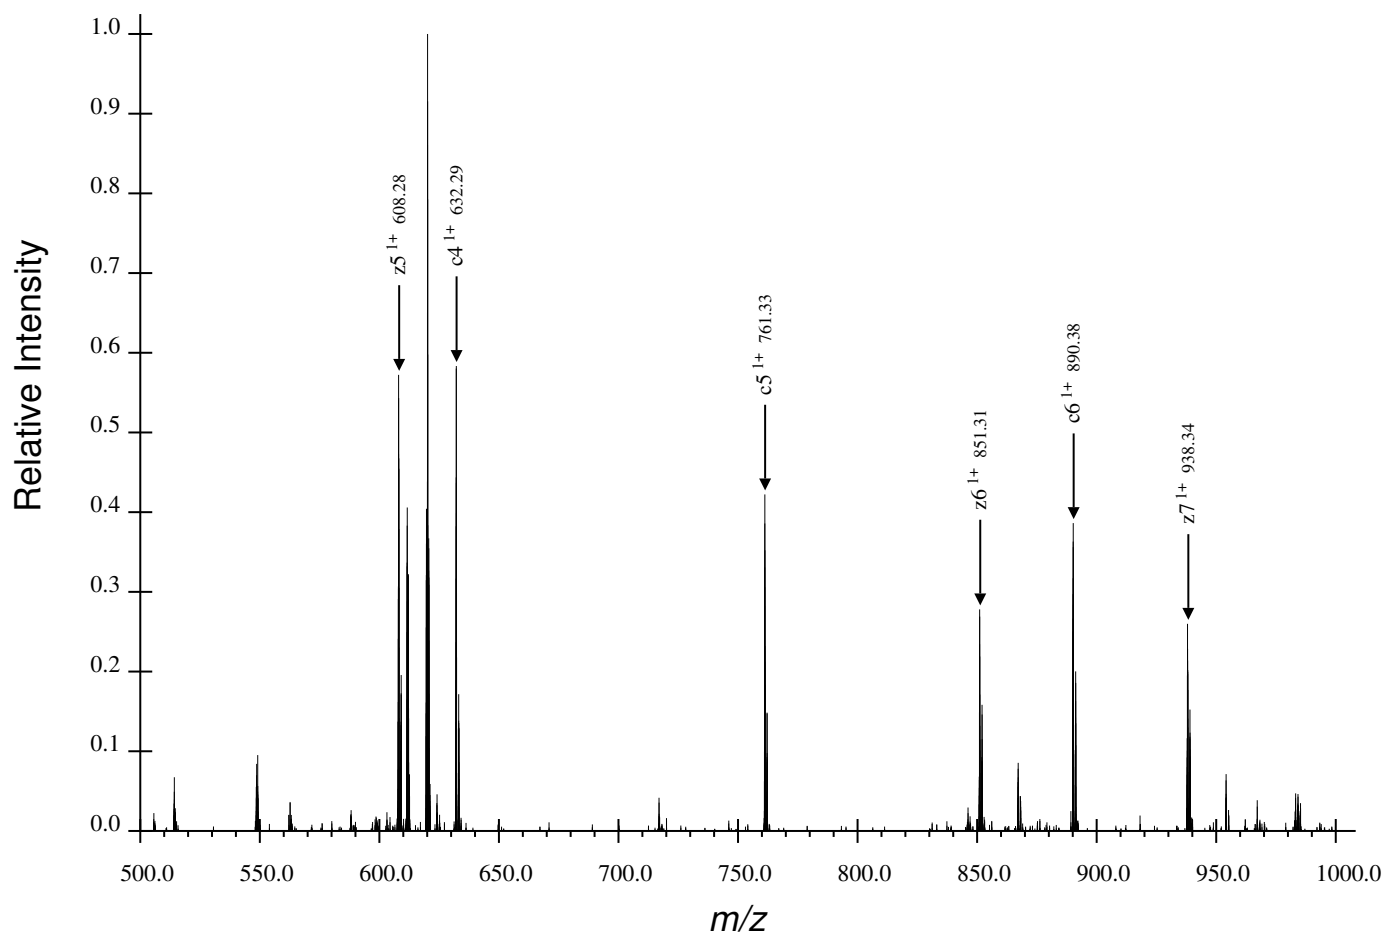

(b) Second Region for KRSpYEEHIP, Spectrum 47.dta

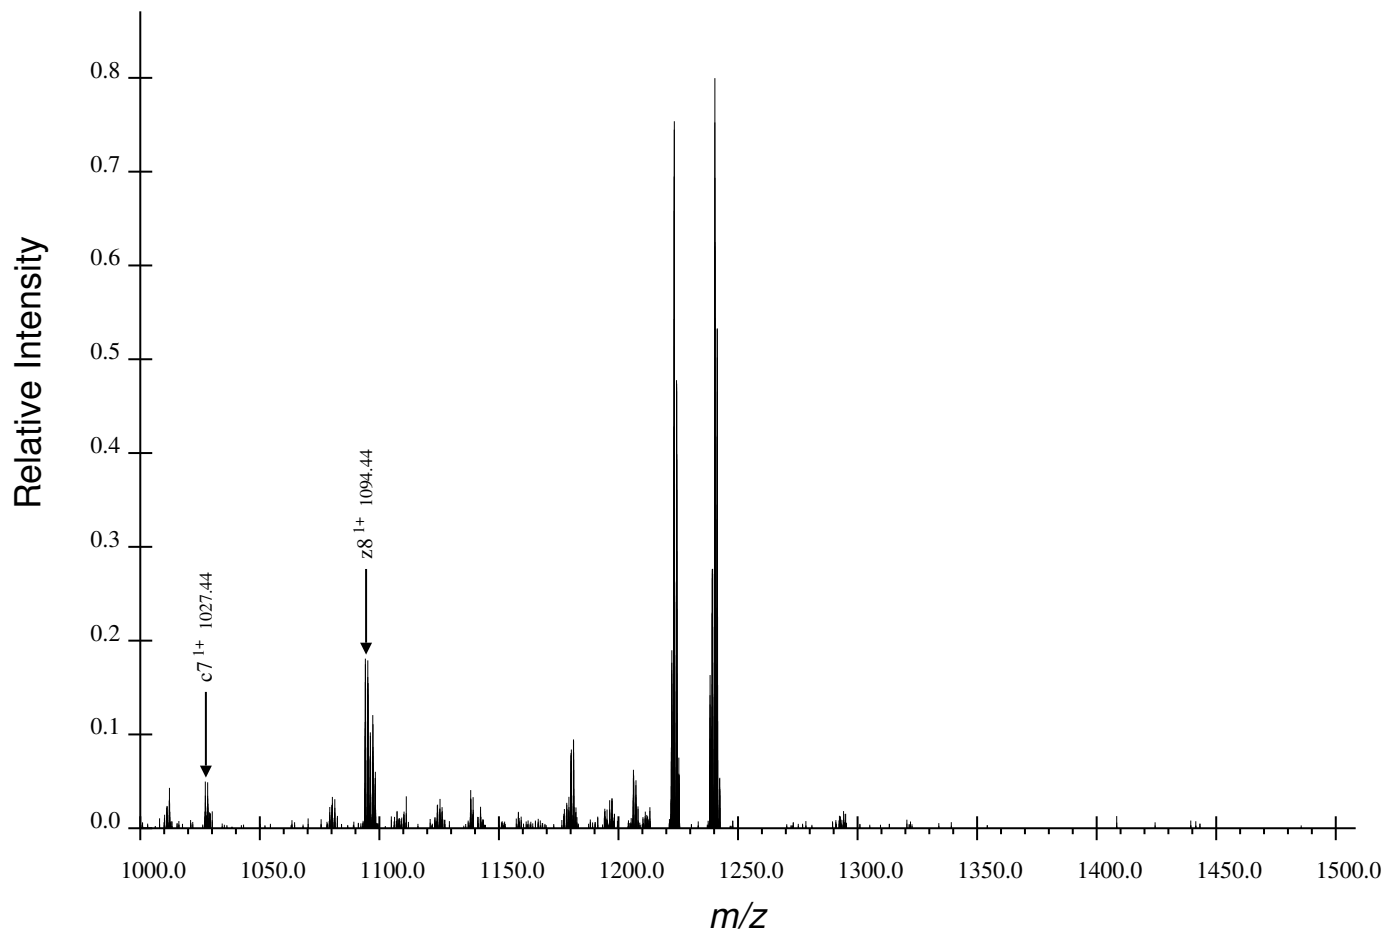

(c) Third Region for KRSpYEEHIP, Spectrum 47.dta

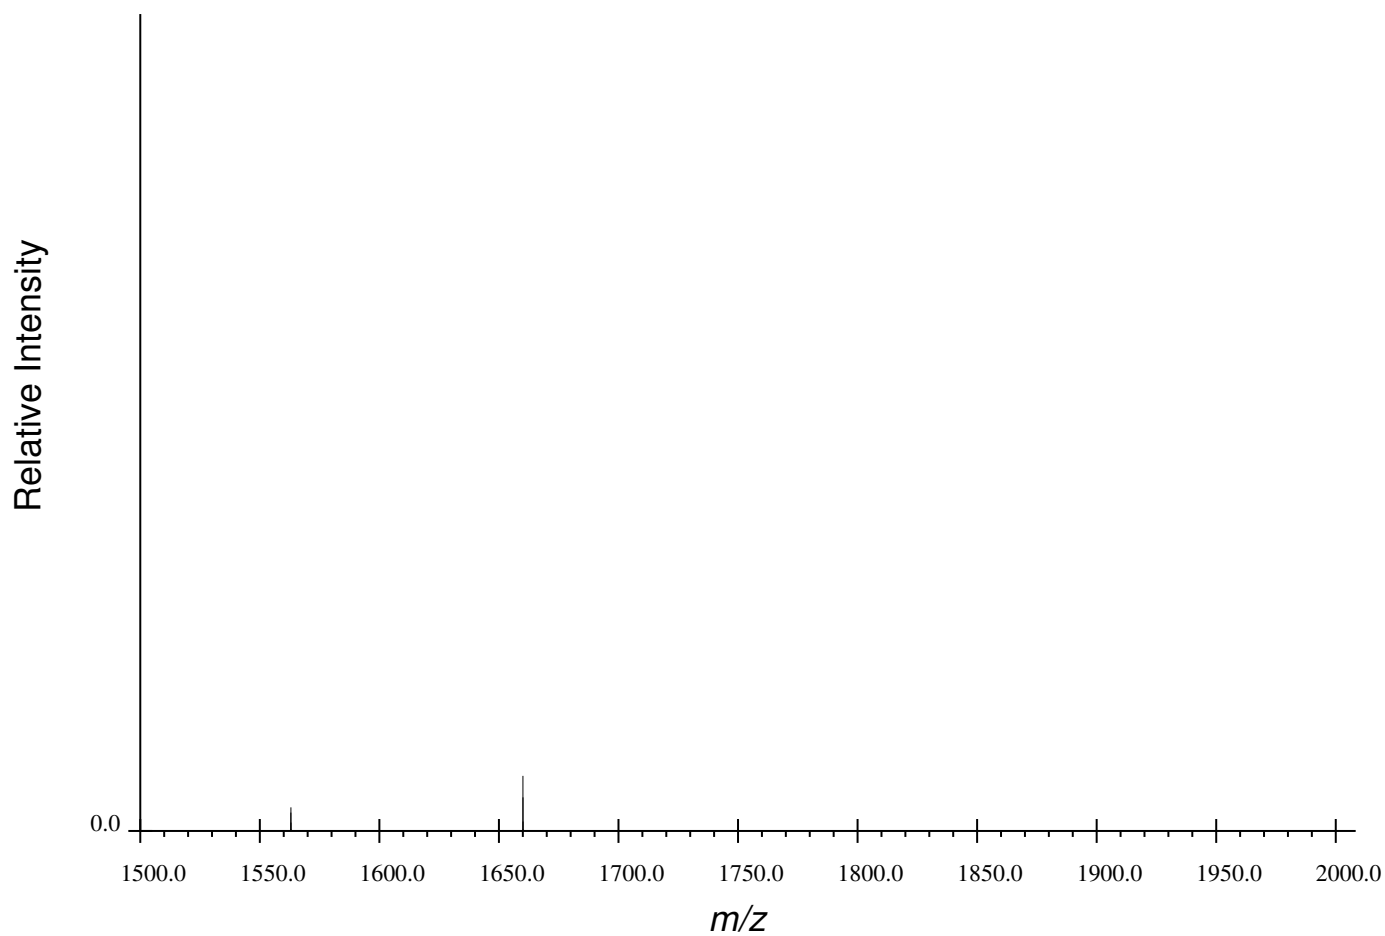

(d) Fourth Region for KRSpYEEHIP, Spectrum 47.dta

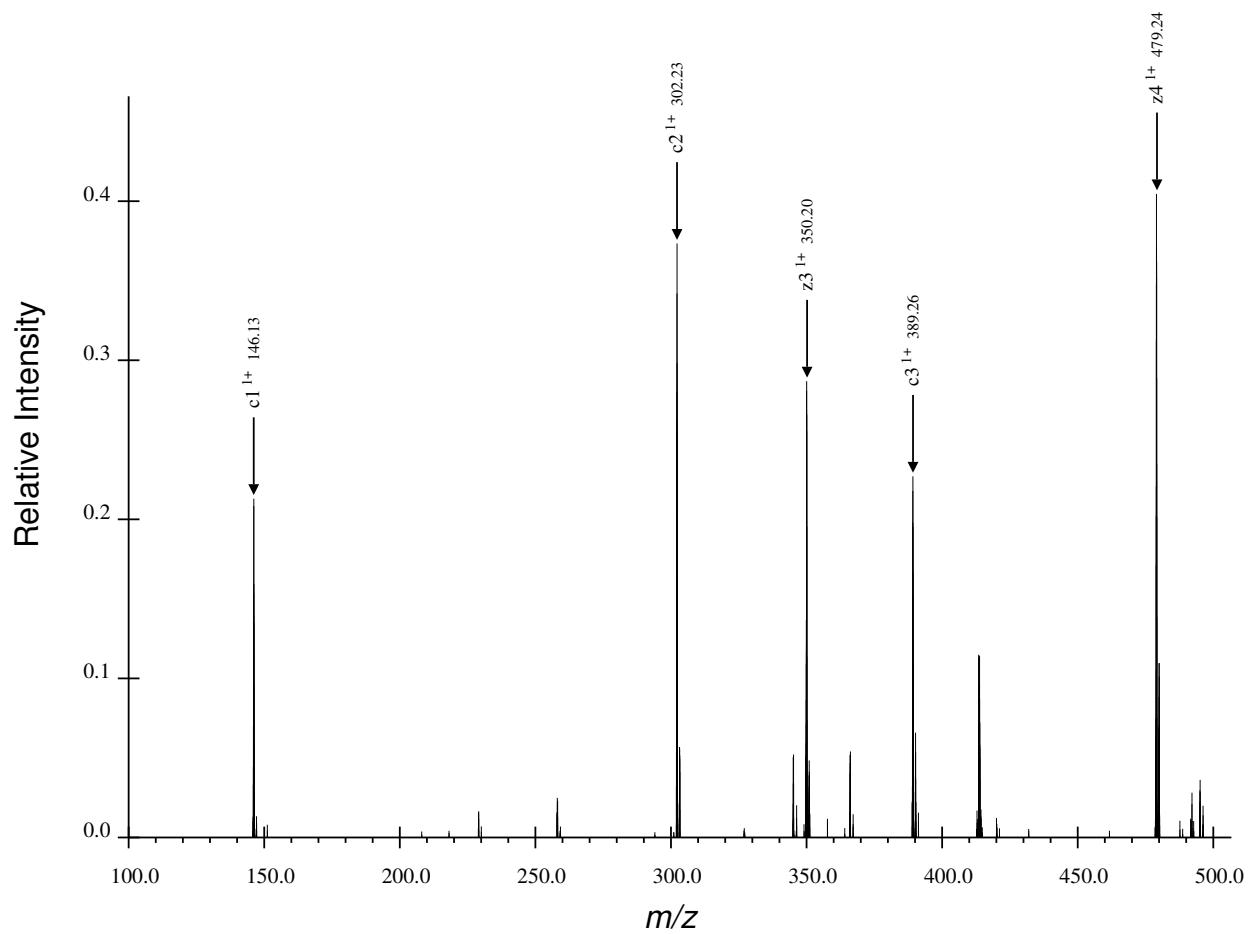

(a) First Region for KRSpYEEHIP, Spectrum 48.dta

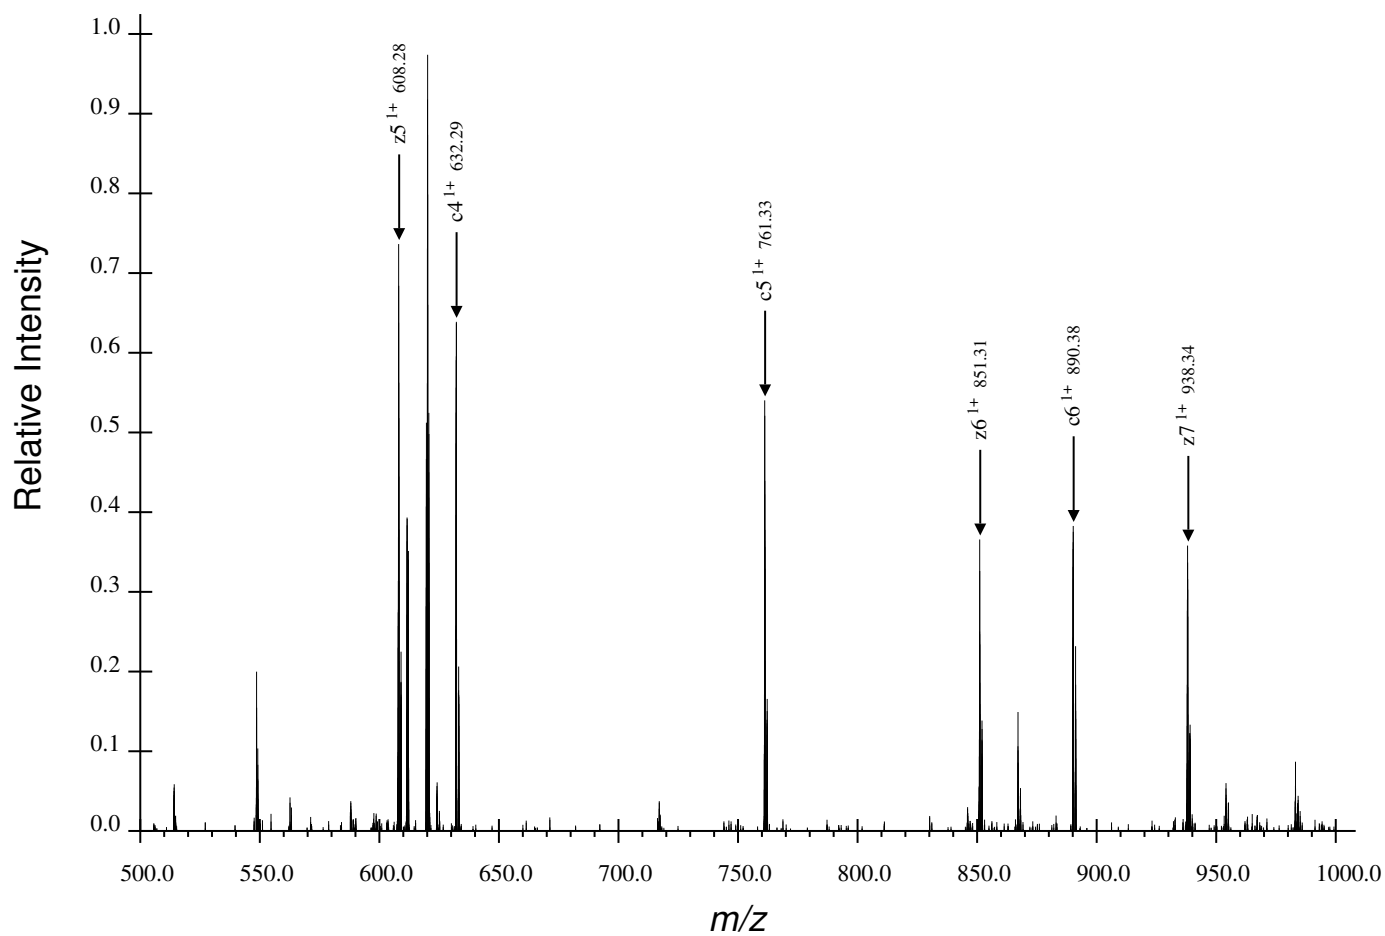

(b) Second Region for KRSpYEEHIP, Spectrum 48.dta

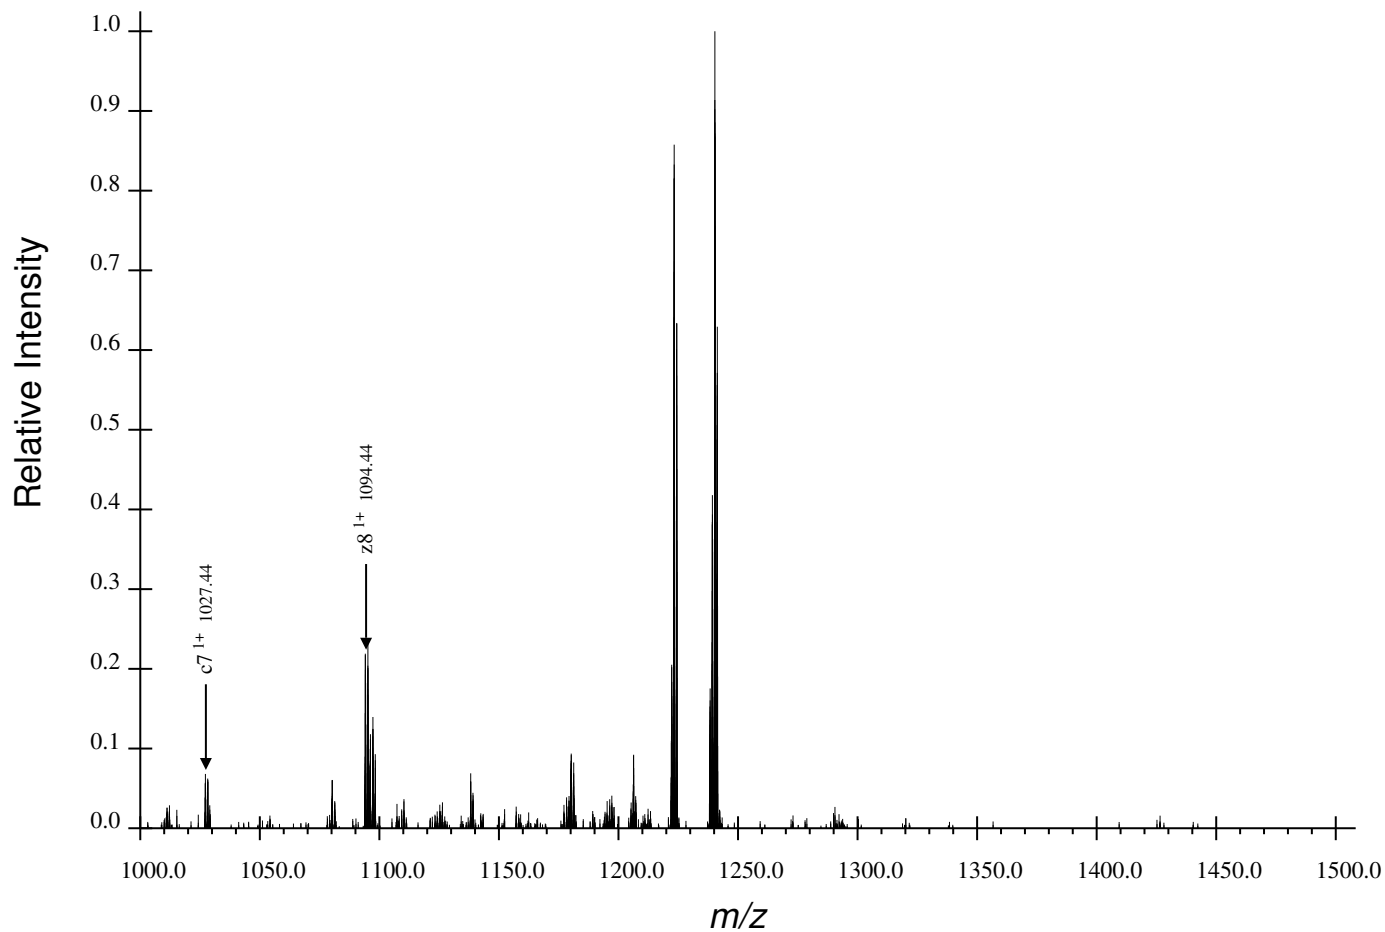

(c) Third Region for KRSpYEEHIP, Spectrum 48.dta

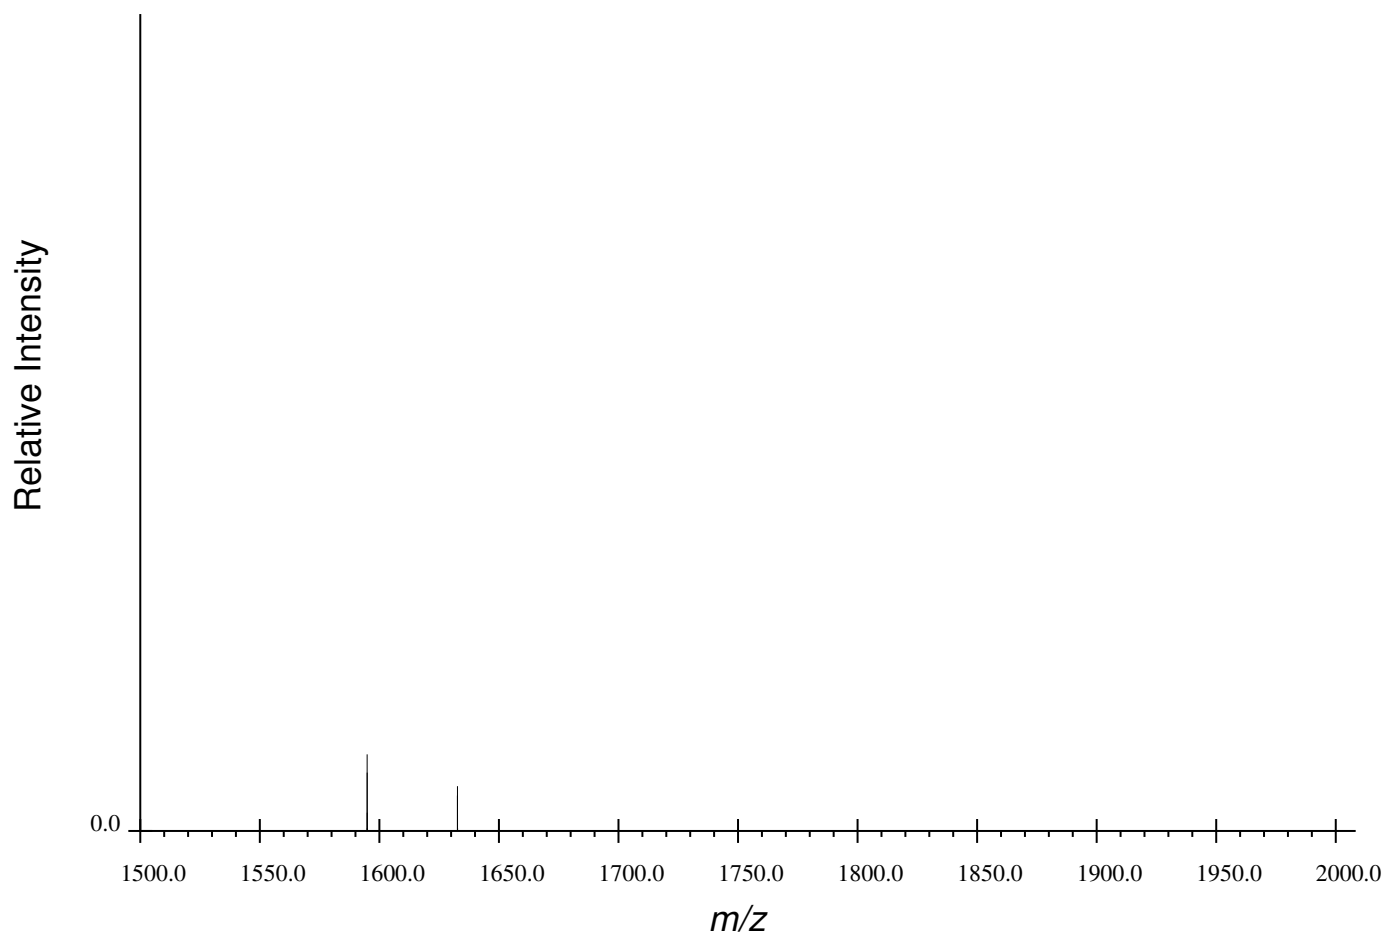

(d) Fourth Region for KRSpYEEHIP, Spectrum 48.dta



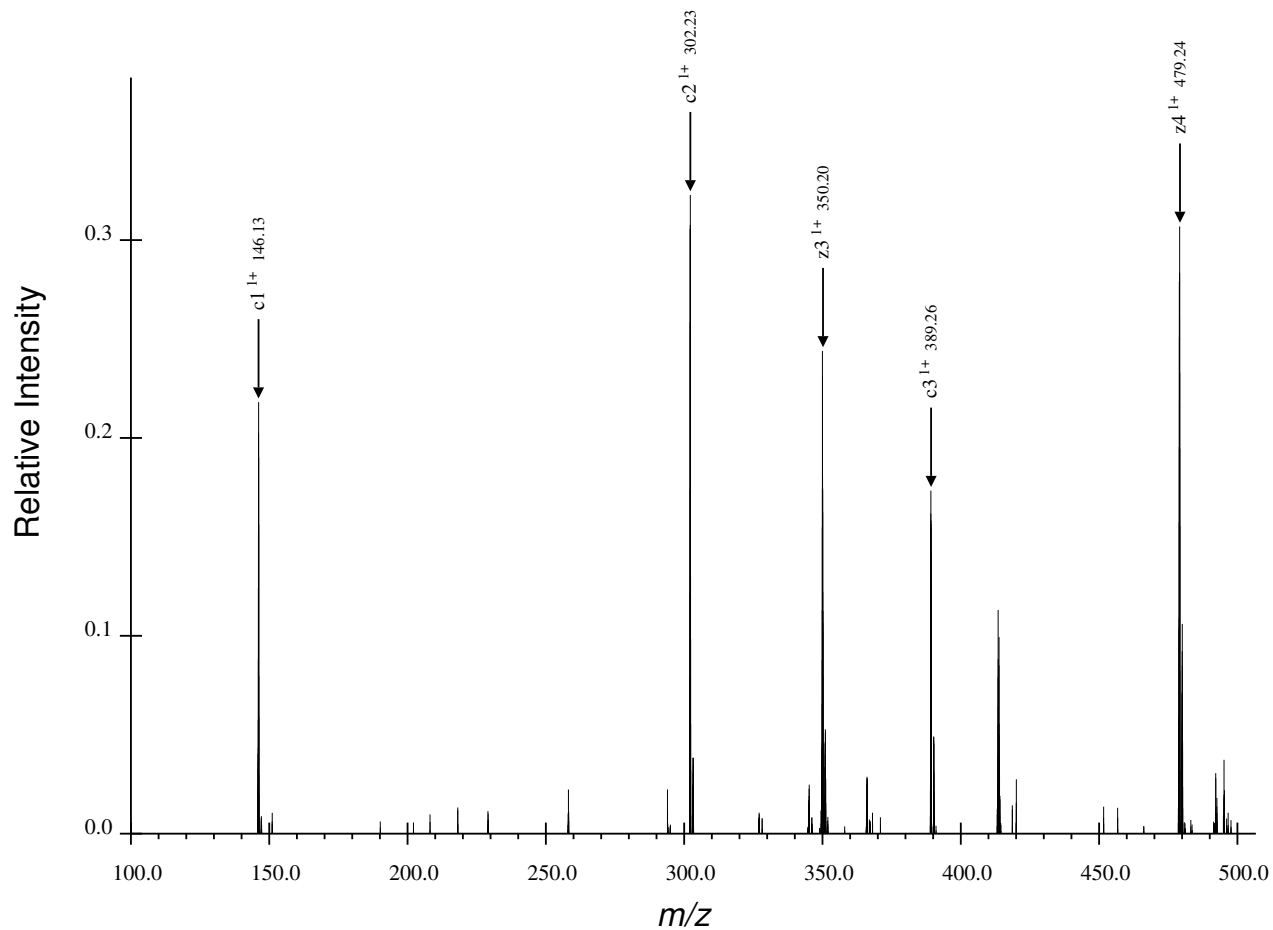

(a) First Region for KRSpYEEHIP, Spectrum 49.dta

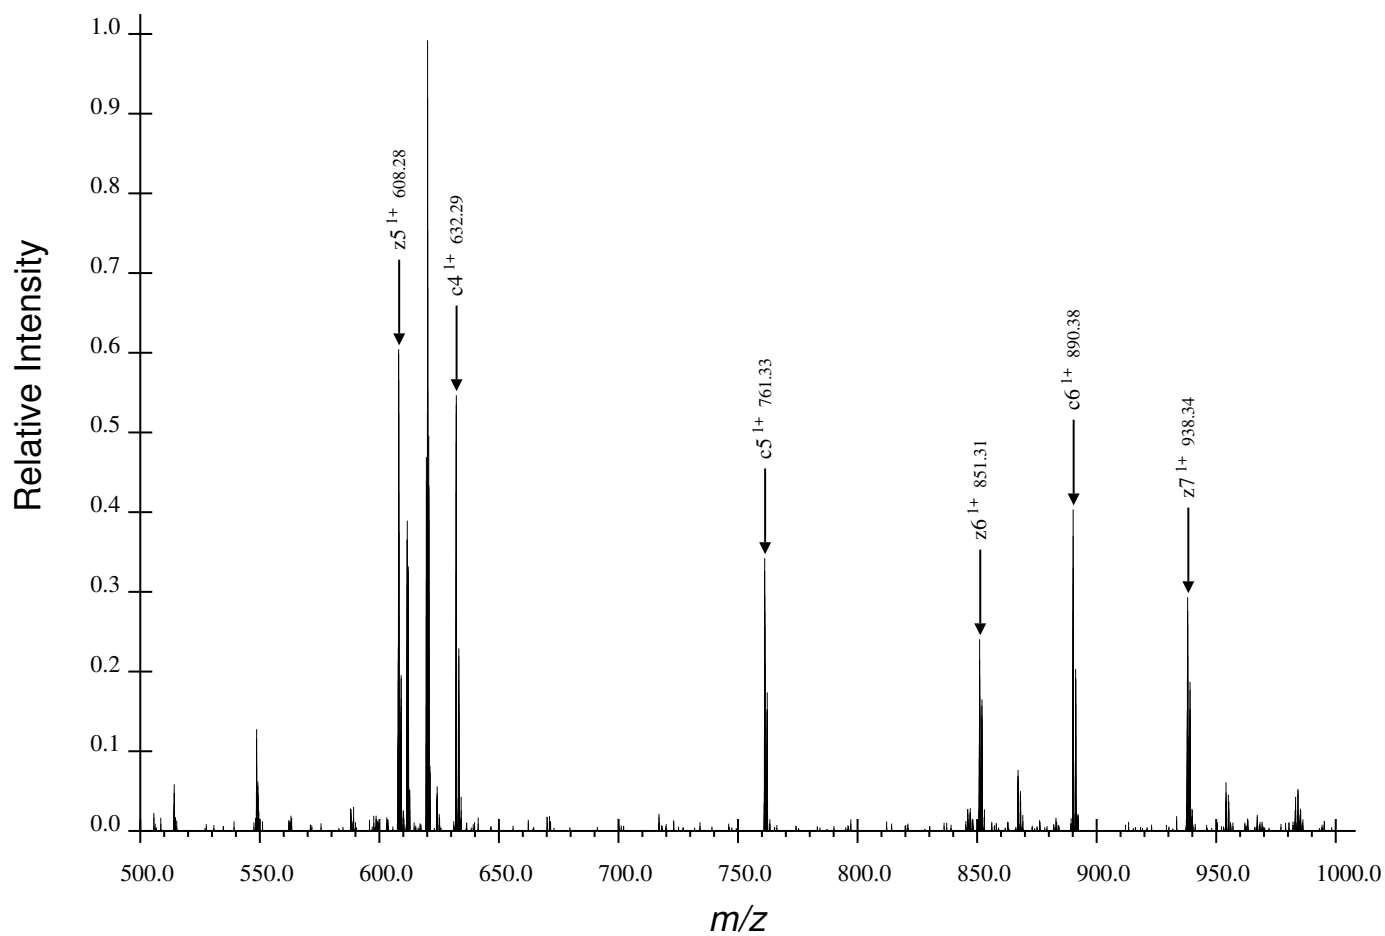

(b) Second Region for KRSpYEEHIP, Spectrum 49.dta

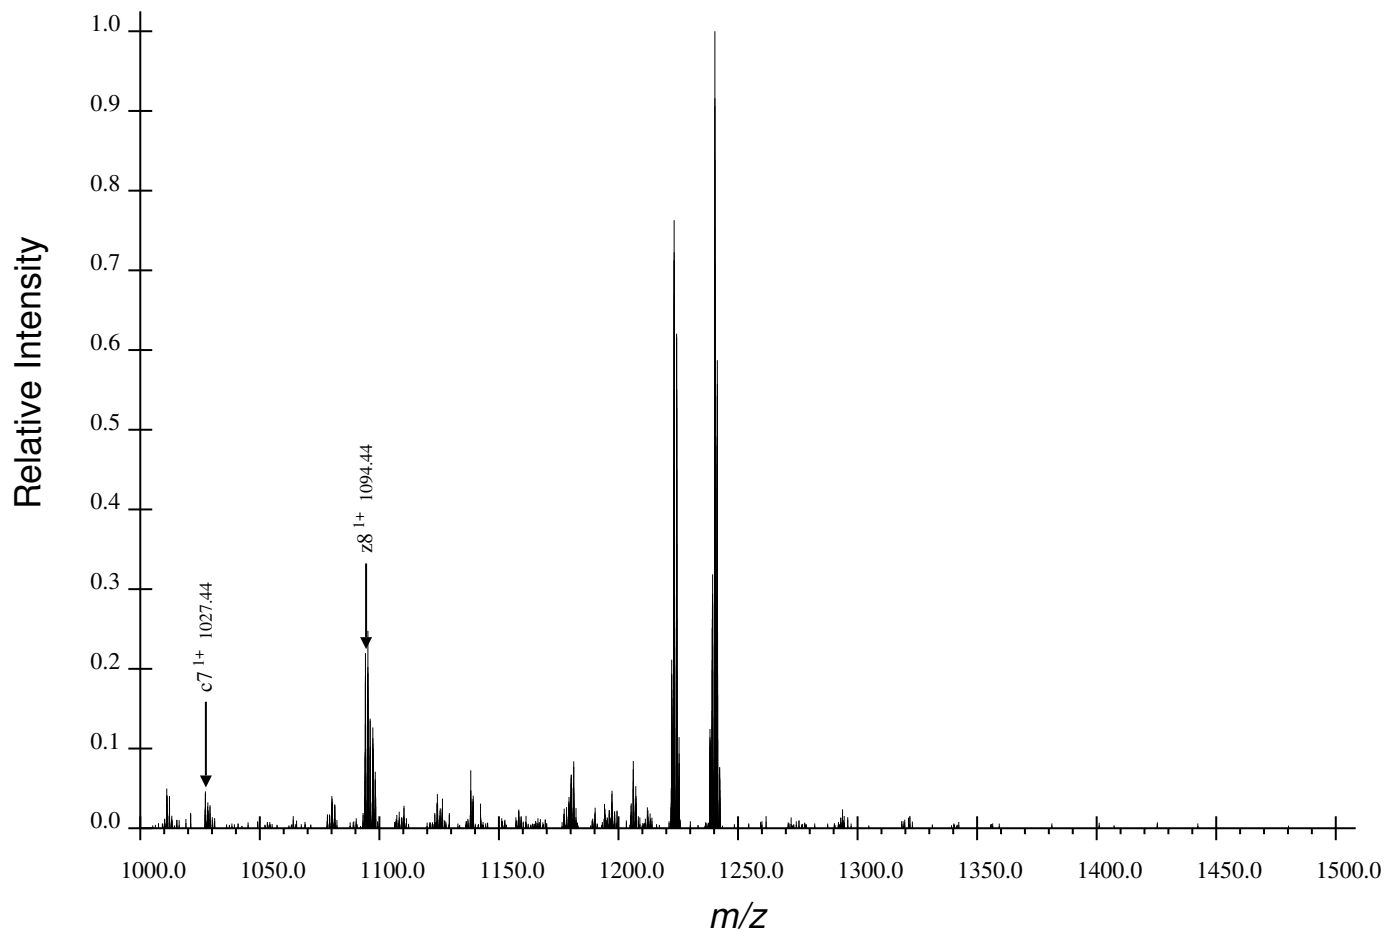

(c) Third Region for KRSpYEEHIP, Spectrum 49.dta

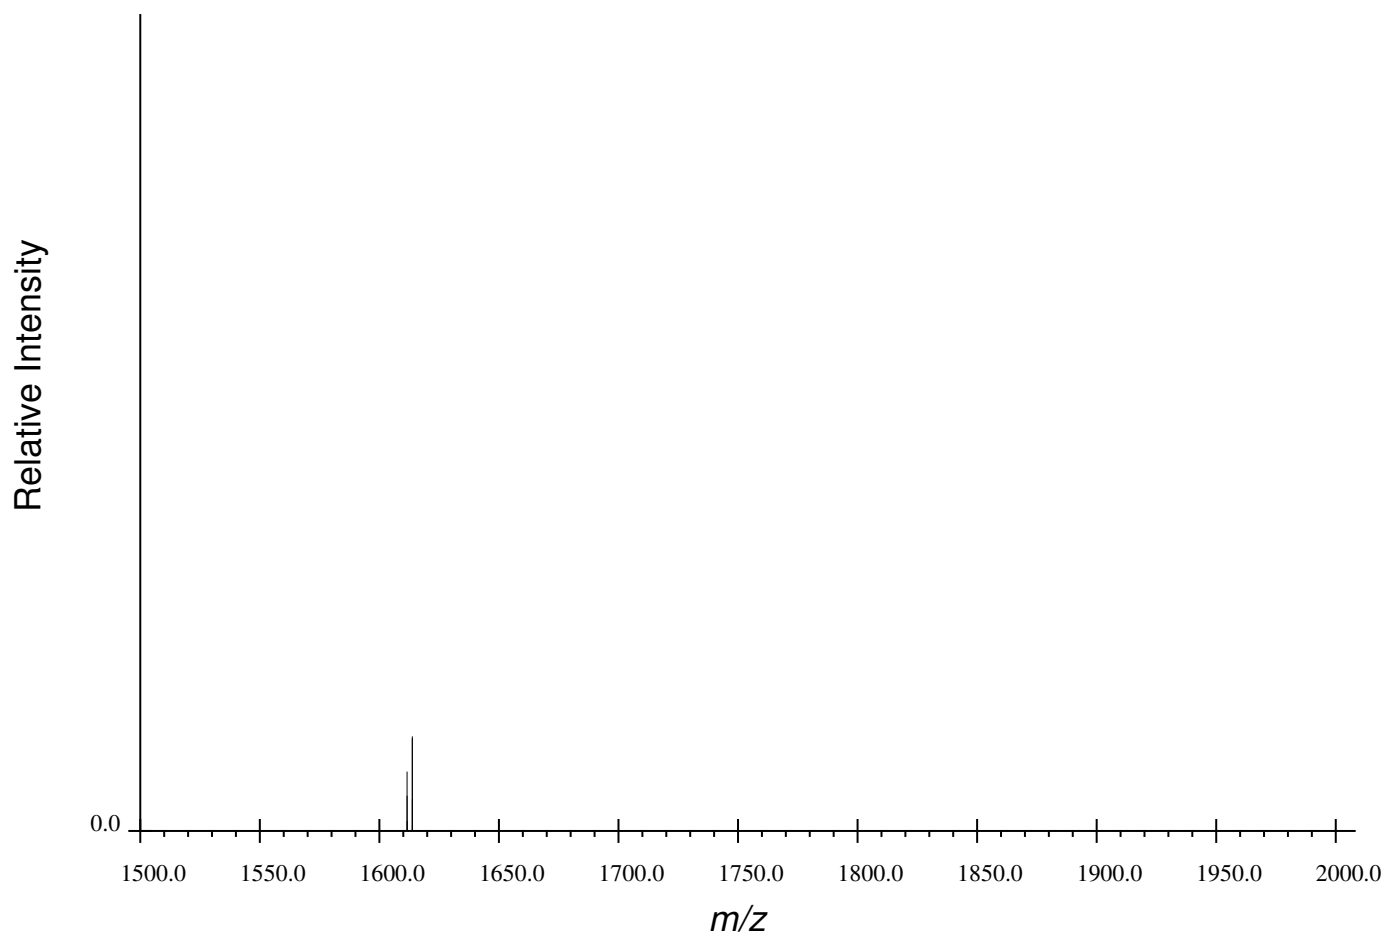

(d) Fourth Region for KRSpYEEHIP, Spectrum 49.dta

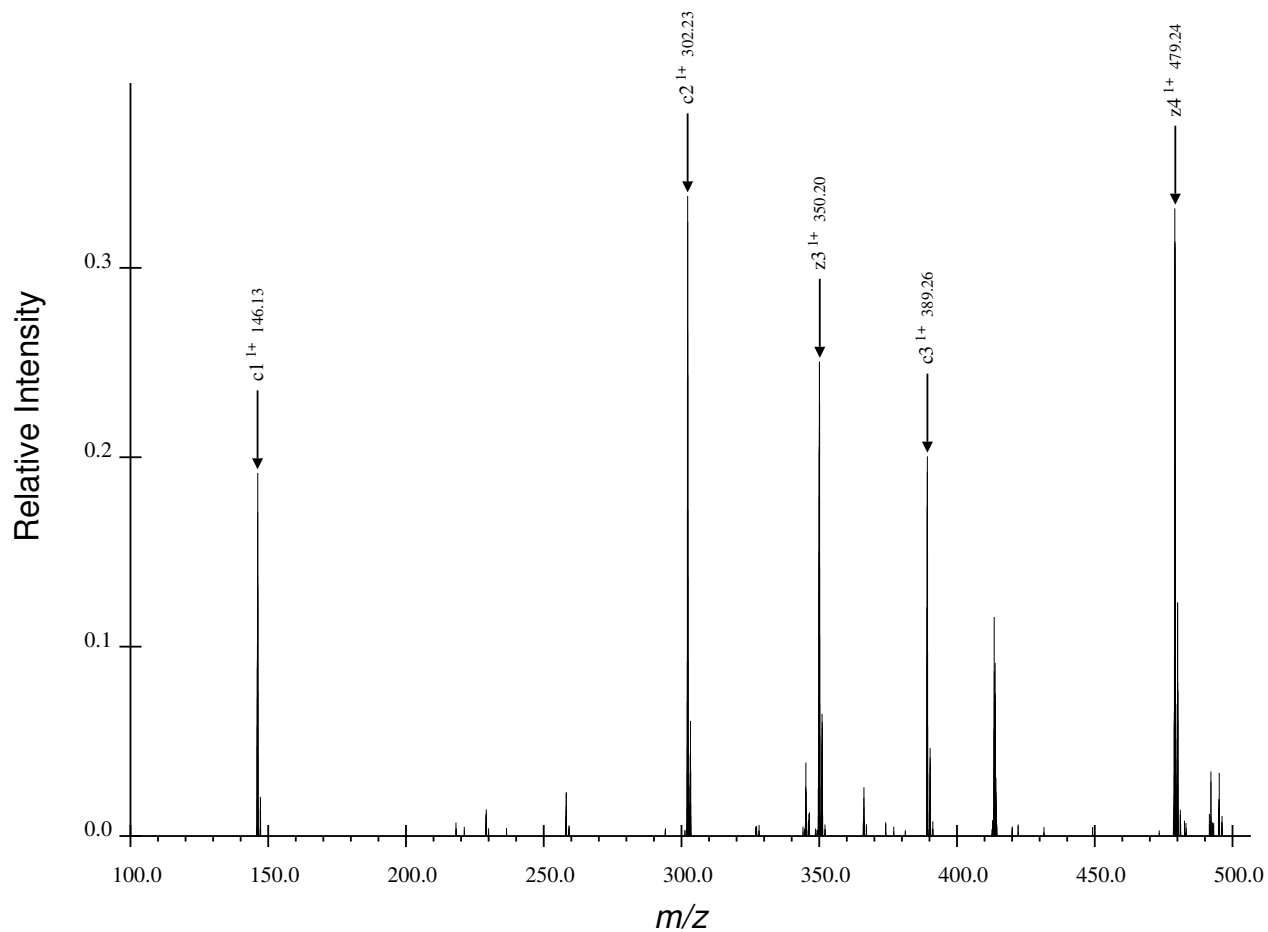

(a) First Region for KRSpYEEHIP, Spectrum 50.dta

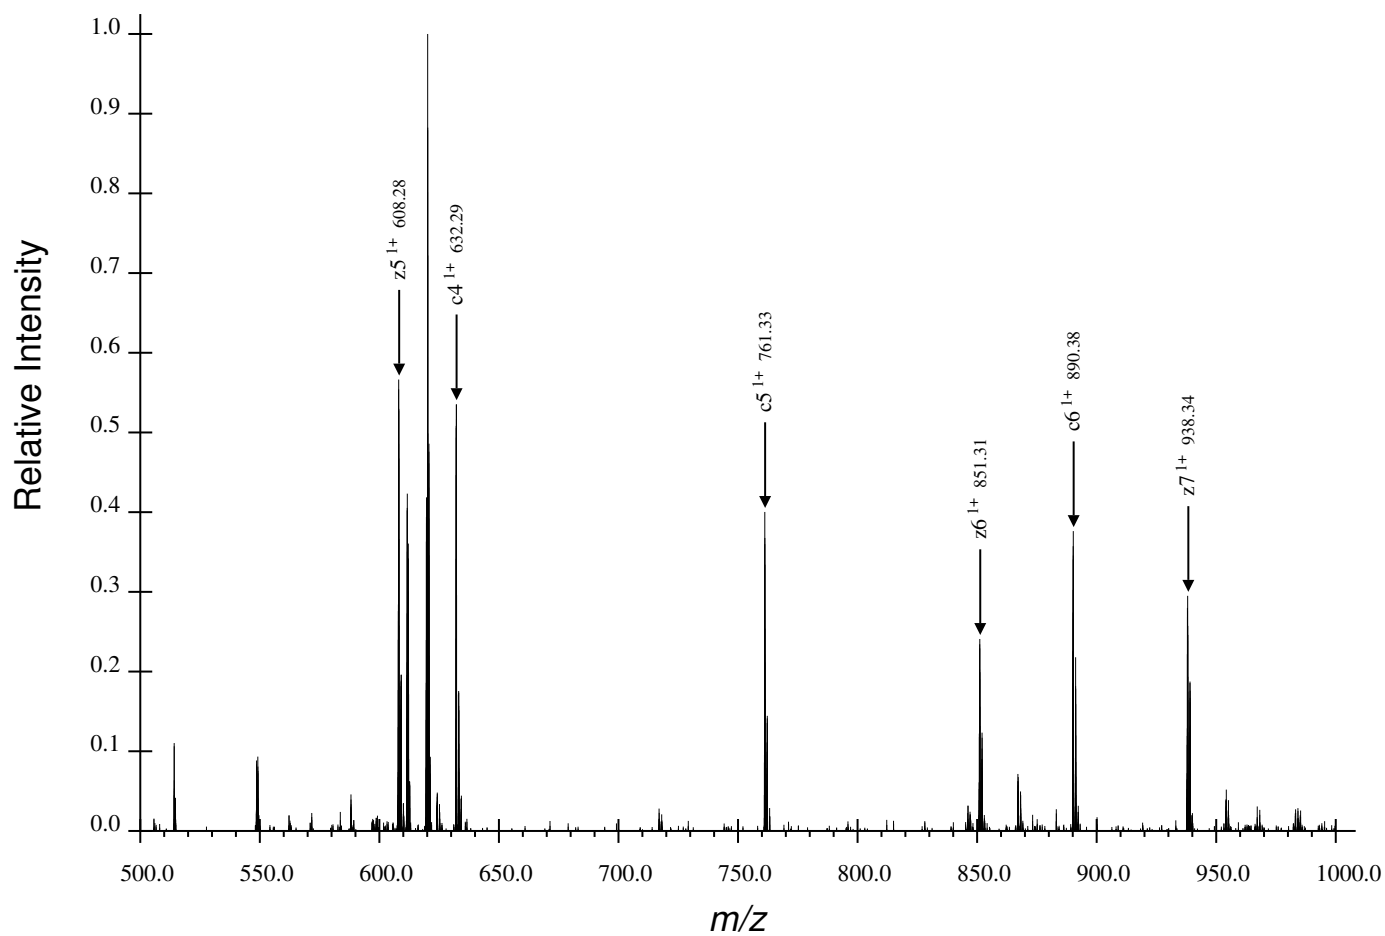

(b) Second Region for KRSpYEEHIP, Spectrum 50.dta

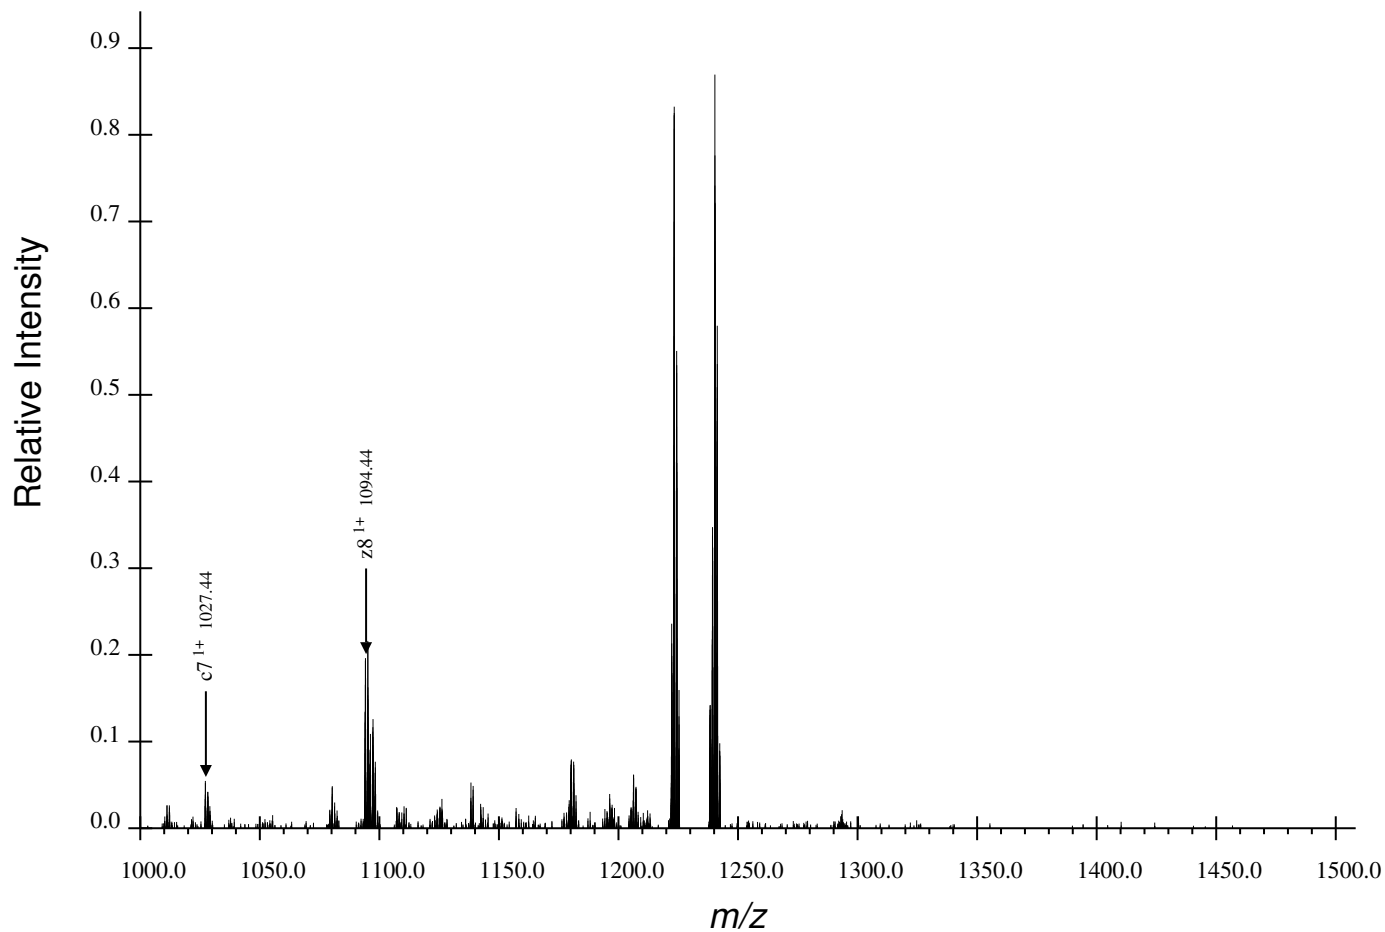

(c) Third Region for KRSpYEEHIP, Spectrum 50.dta

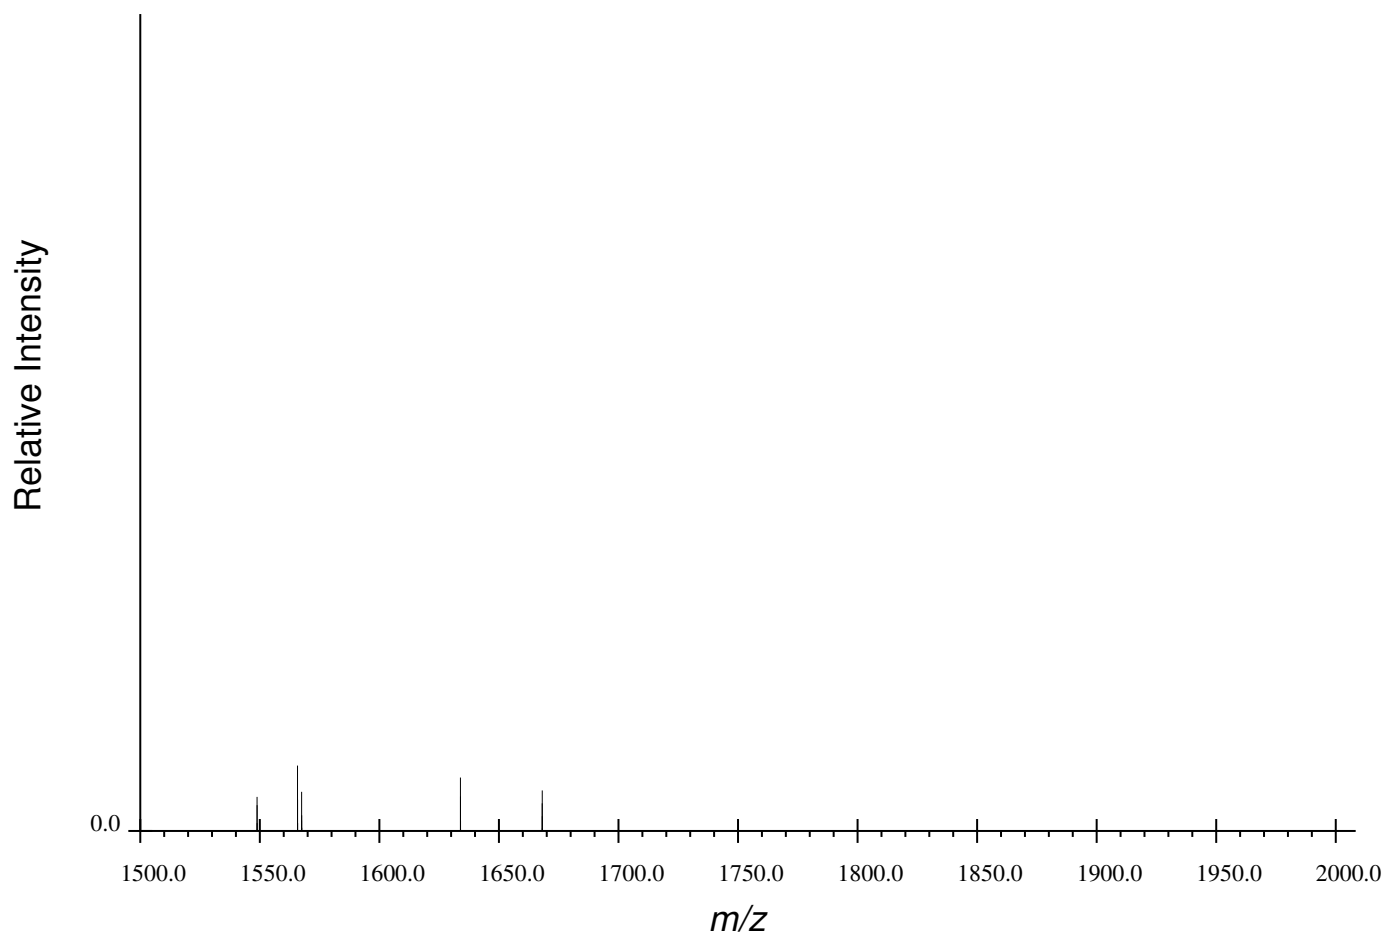

(d) Fourth Region for KRSpYEEHIP, Spectrum 50.dta

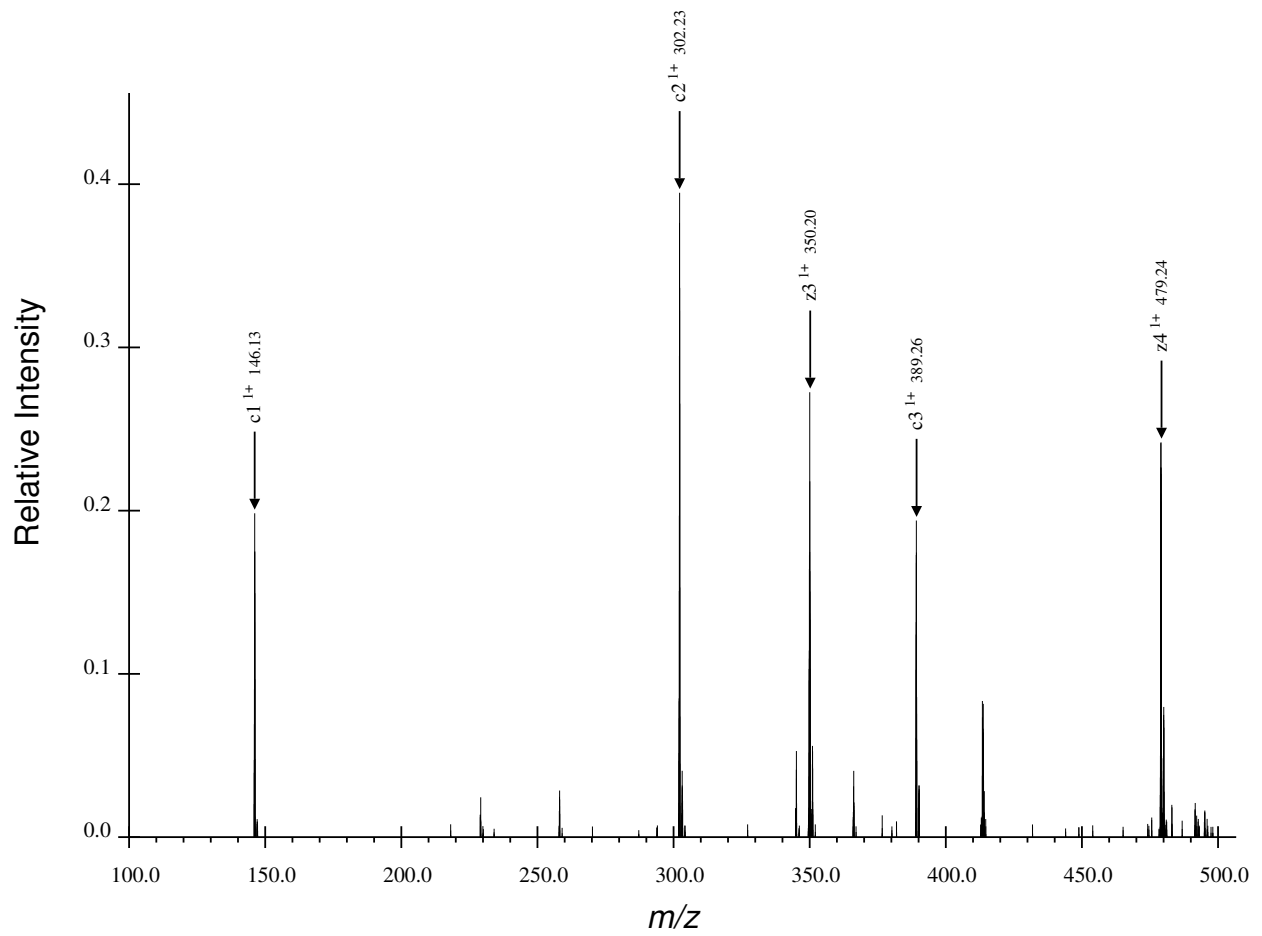

(a) First Region for KRSpYEEHIP, Spectrum 51.dta

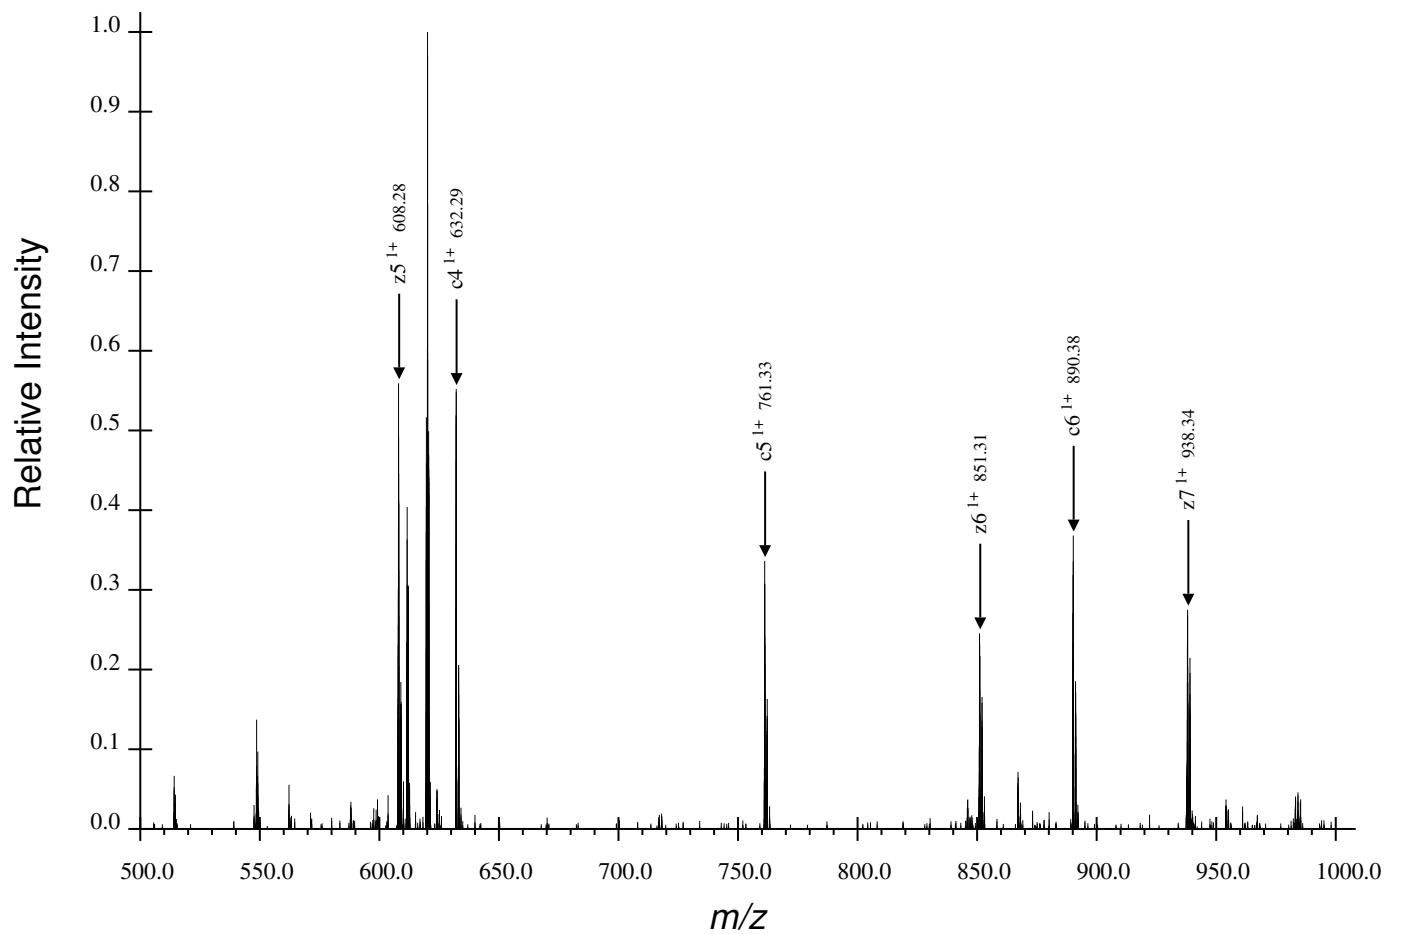

(b) Second Region for KRSpYEEHIP, Spectrum 51.dta

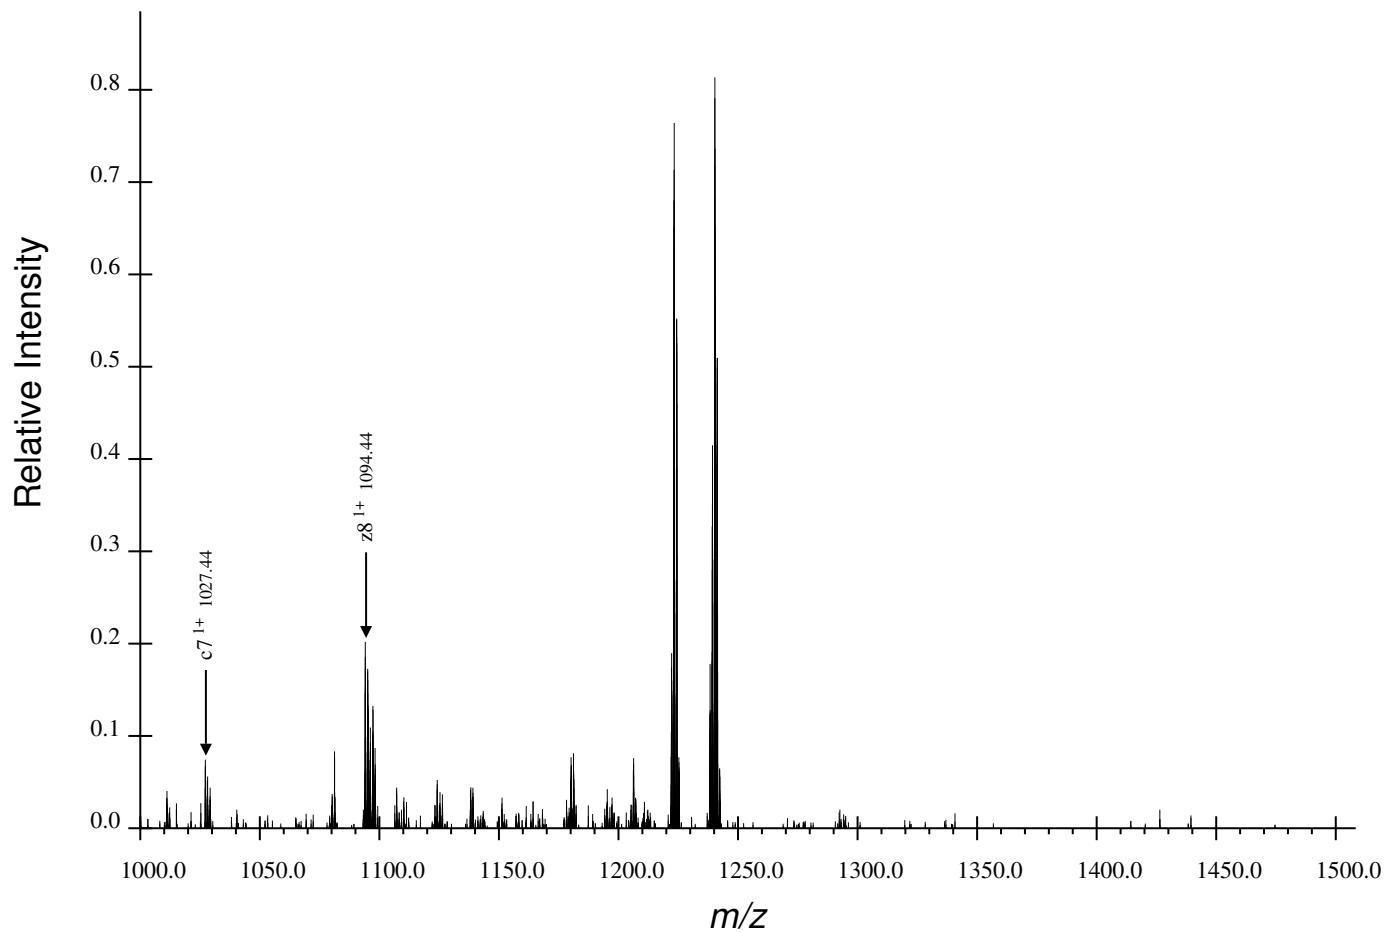

(c) Third Region for KRSpYEEHIP, Spectrum 51.dta

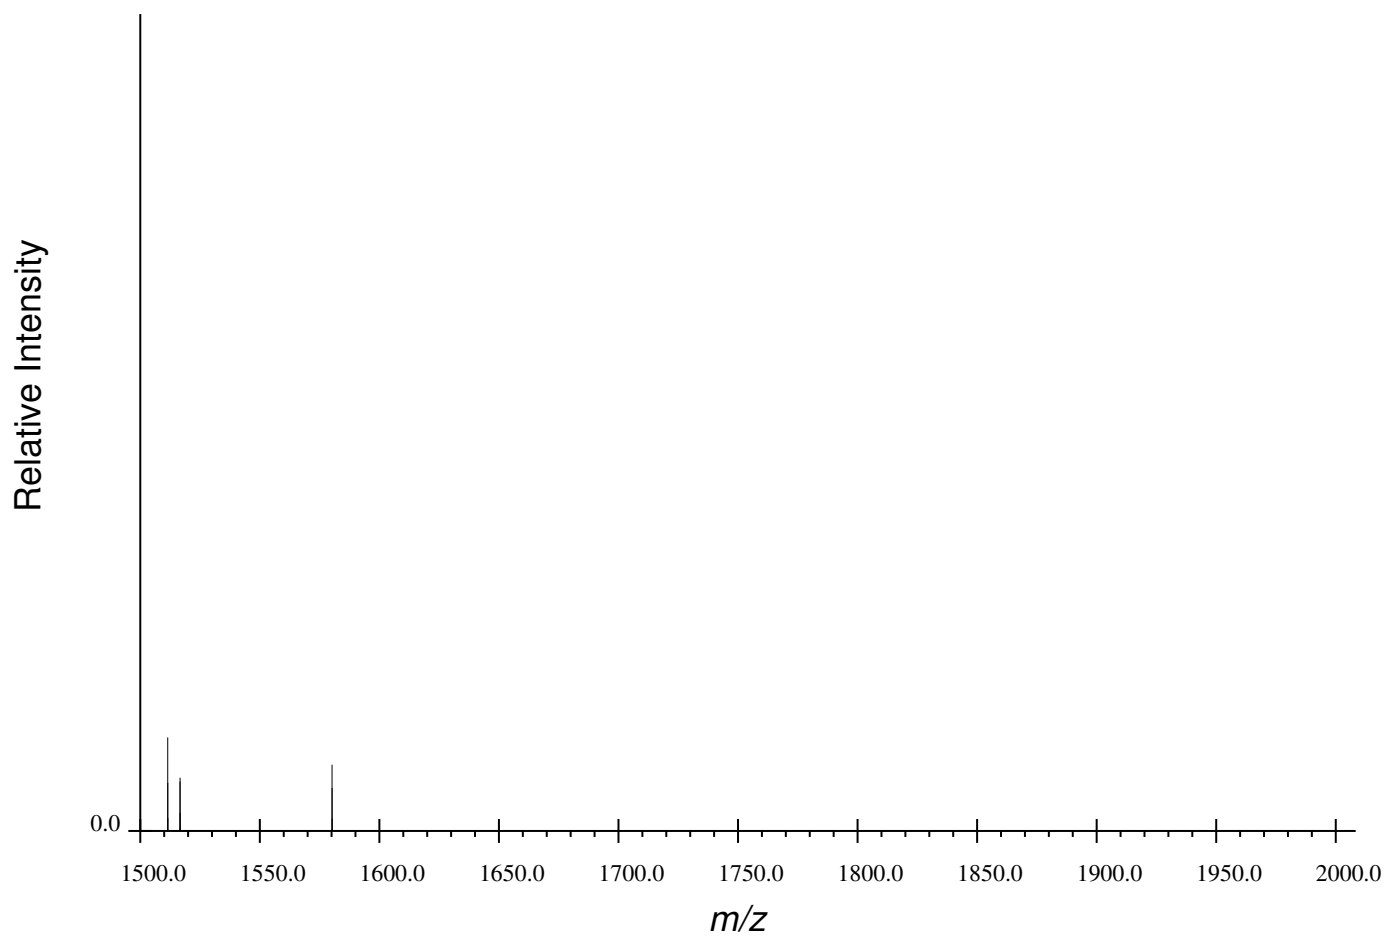

(d) Fourth Region for KRSpYEEHIP, Spectrum 51.dta

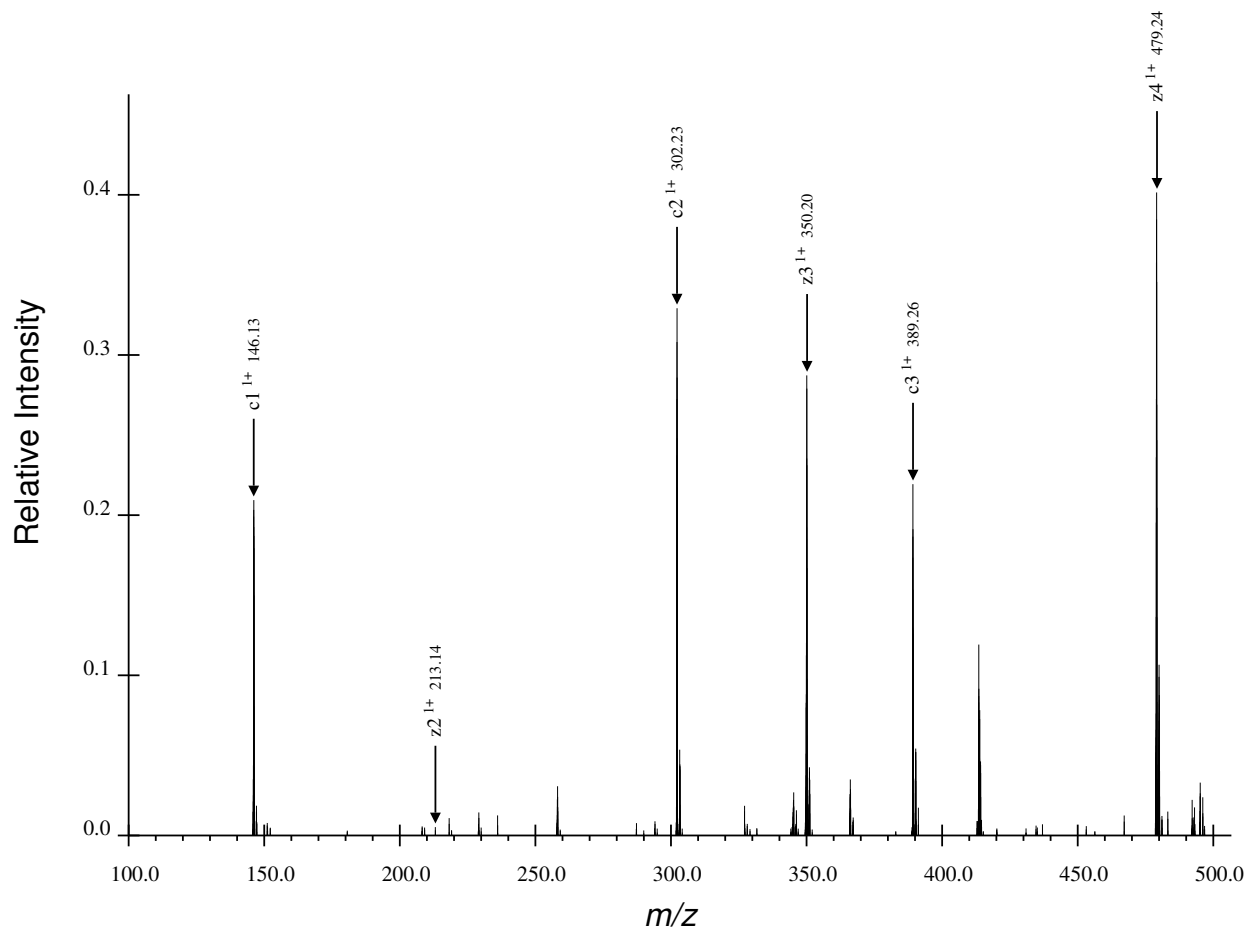

(a) First Region for KRSpYEEHIP, Spectrum 52.dta

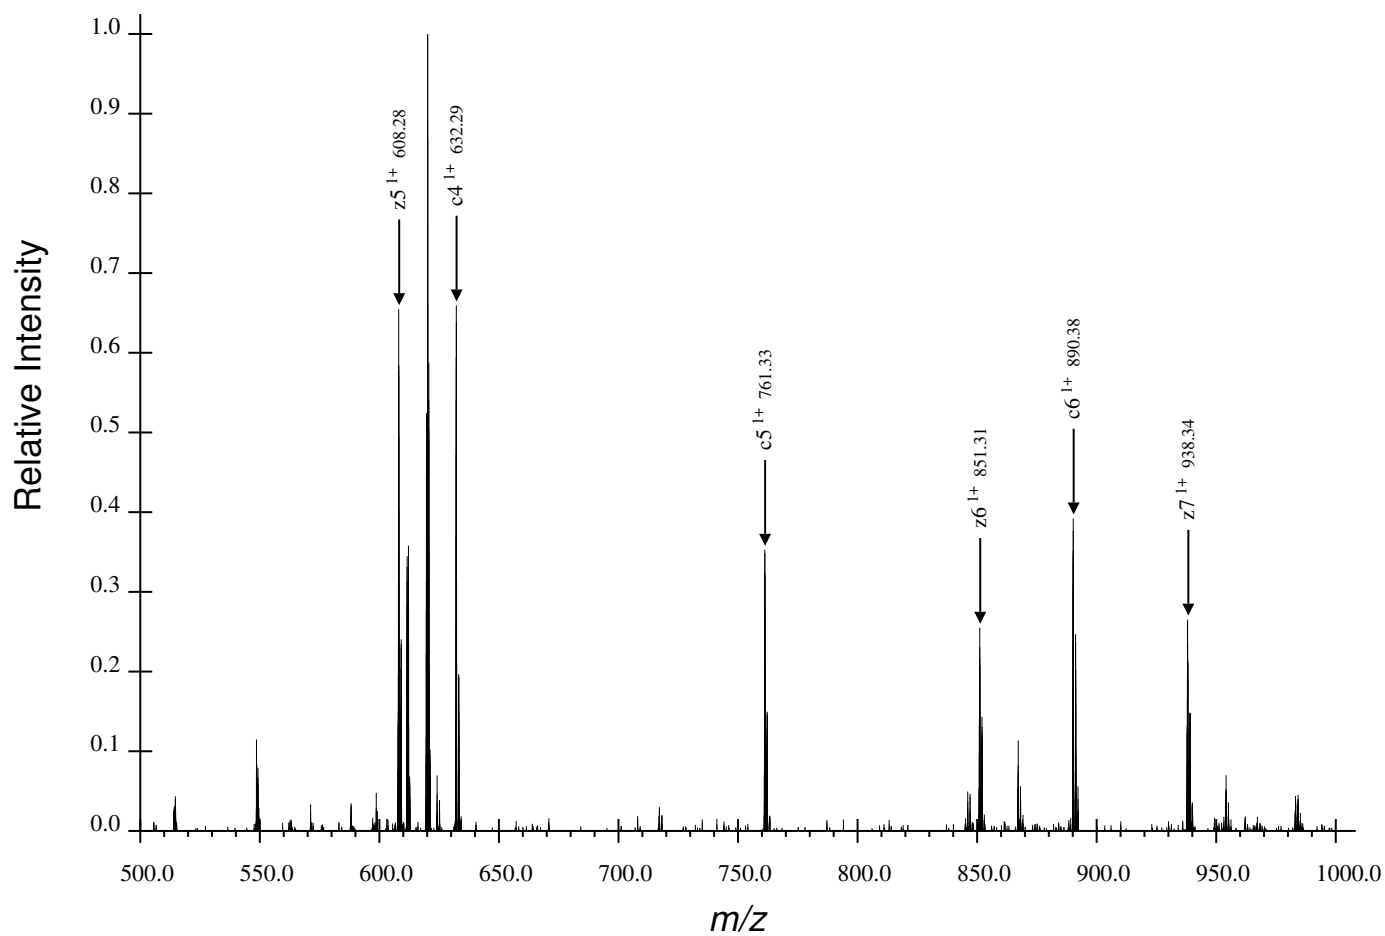

(b) Second Region for KRSpYEEHIP, Spectrum 52.dta

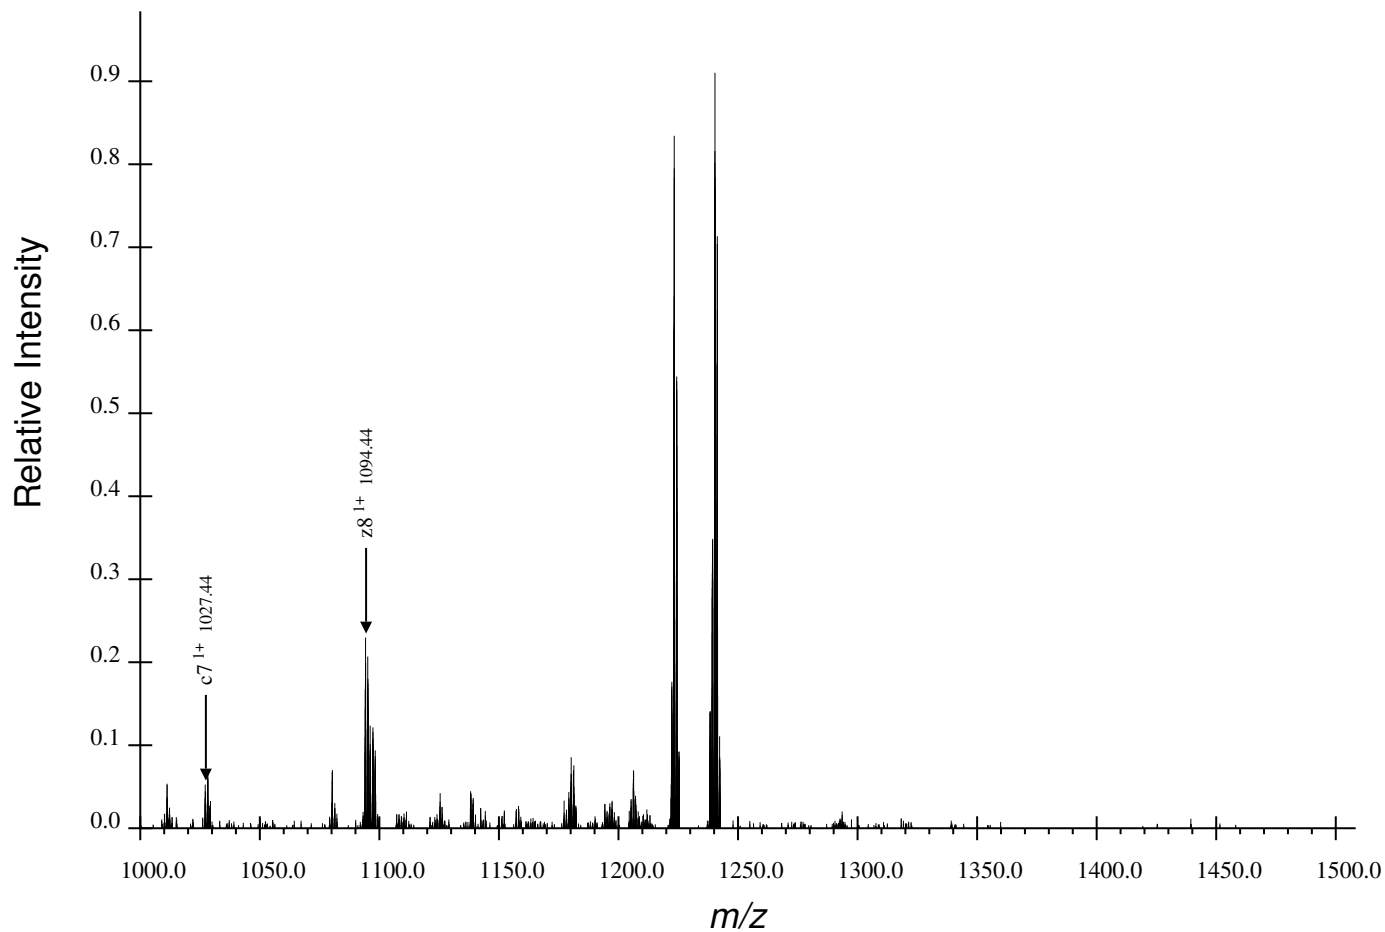

(c) Third Region for KRSpYEEHIP, Spectrum 52.dta

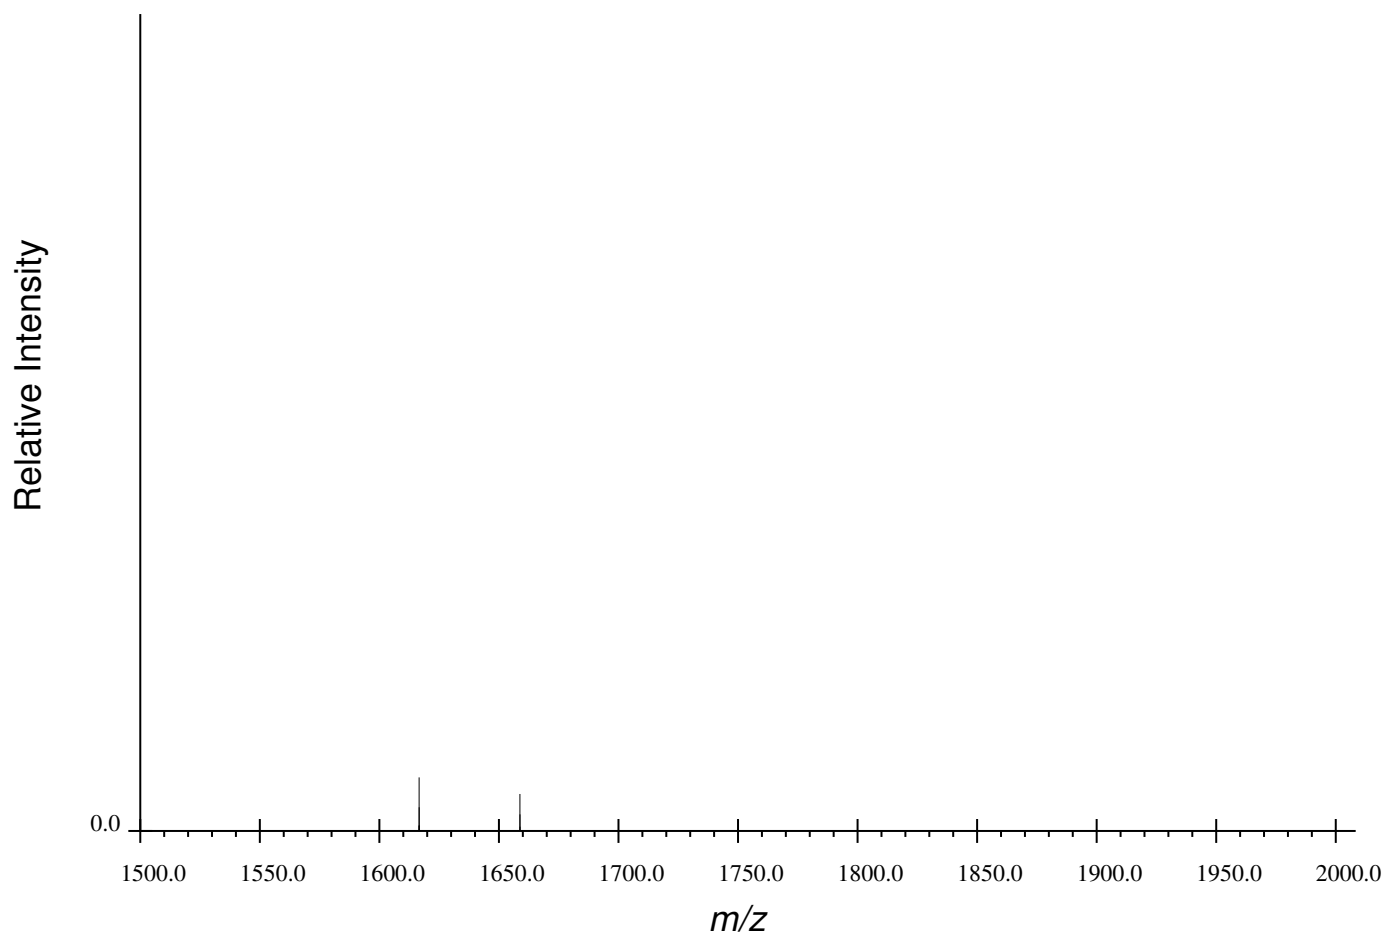

(d) Fourth Region for KRSpYEEHIP, Spectrum 52.dta



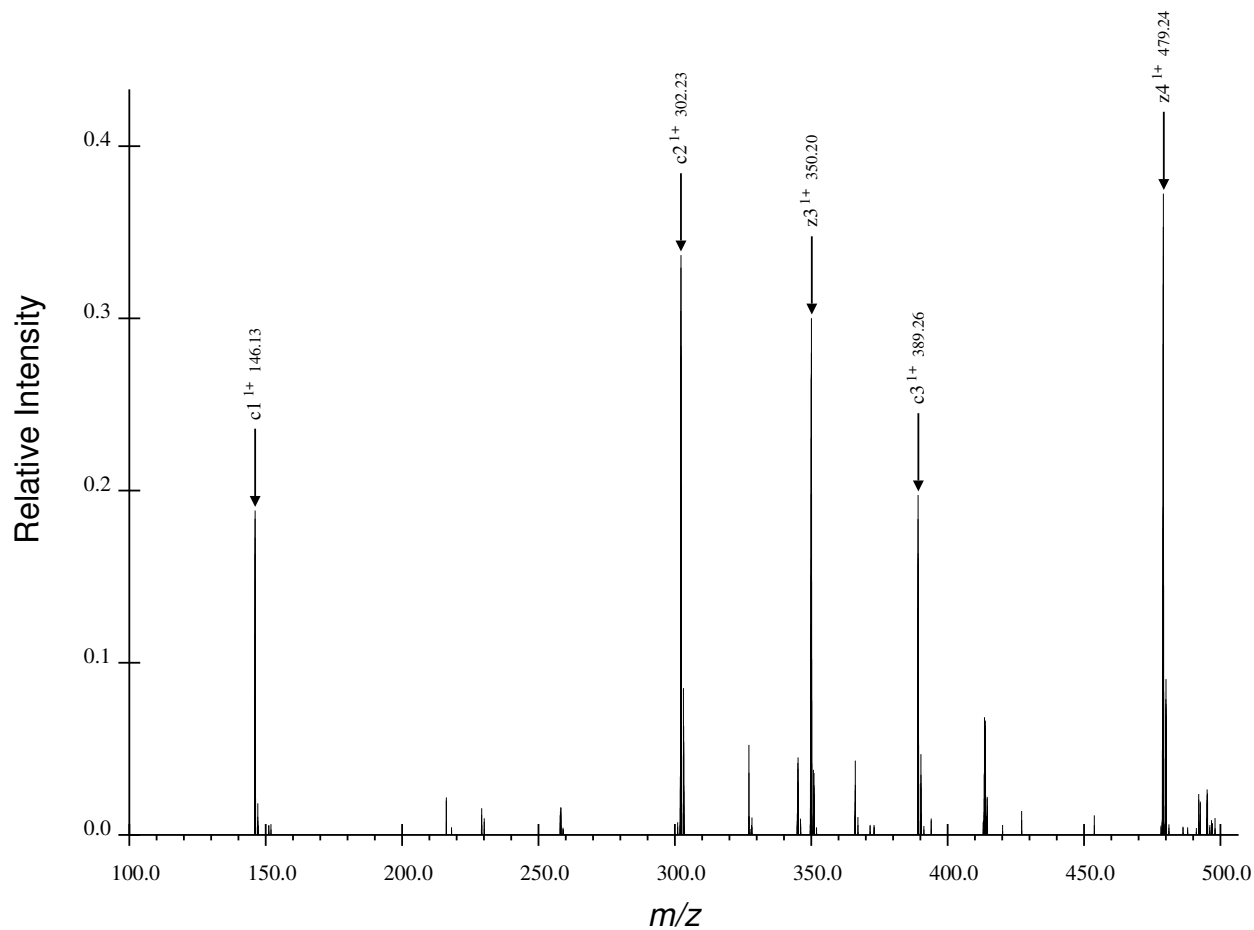

(a) First Region for KRSpYEEHIP, Spectrum 53.dta

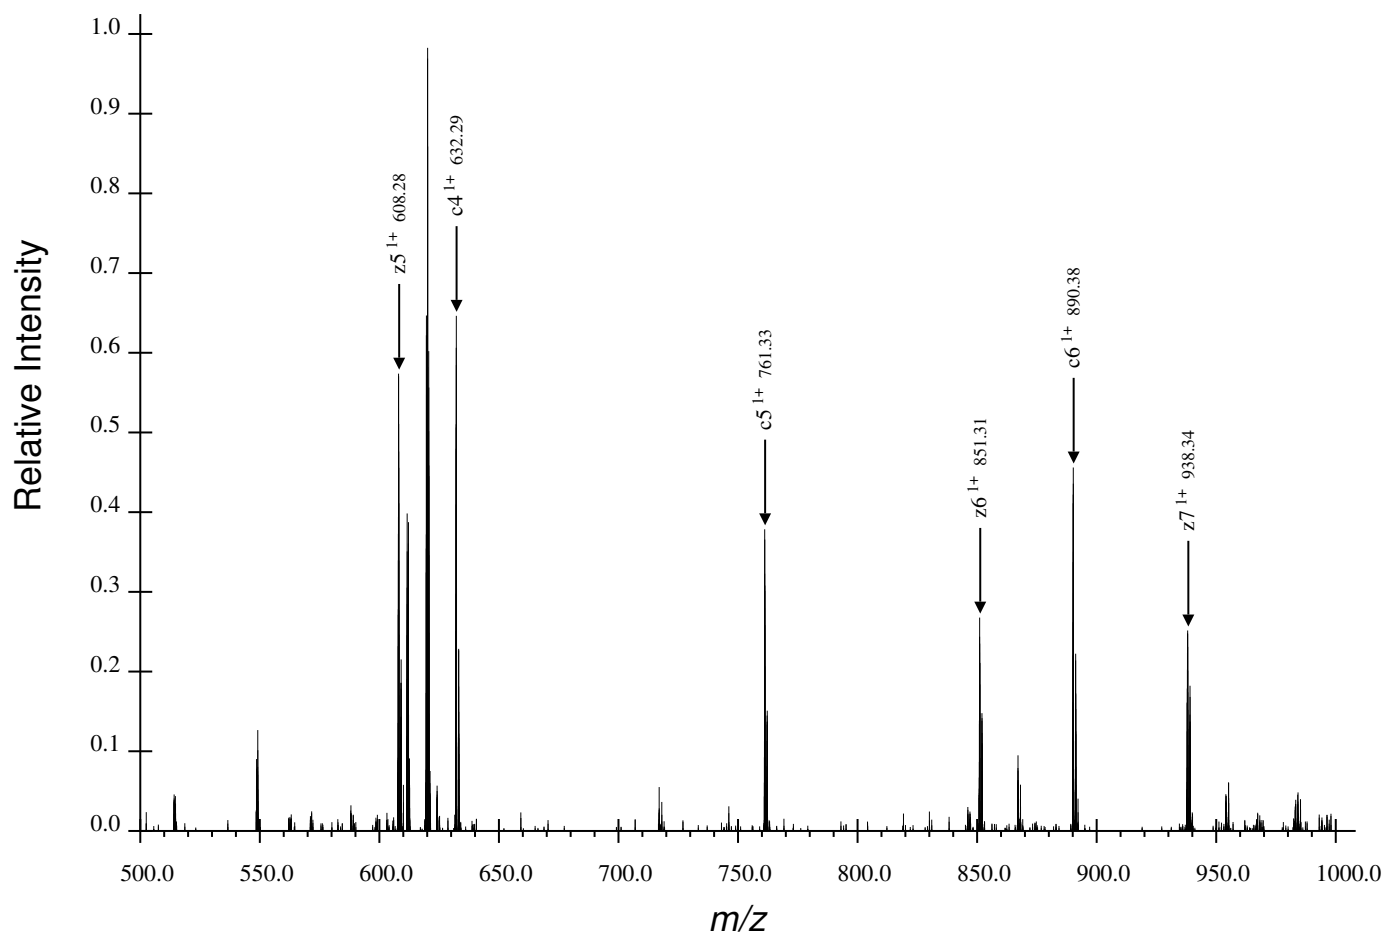

(b) Second Region for KRSpYEEHIP, Spectrum 53.dta

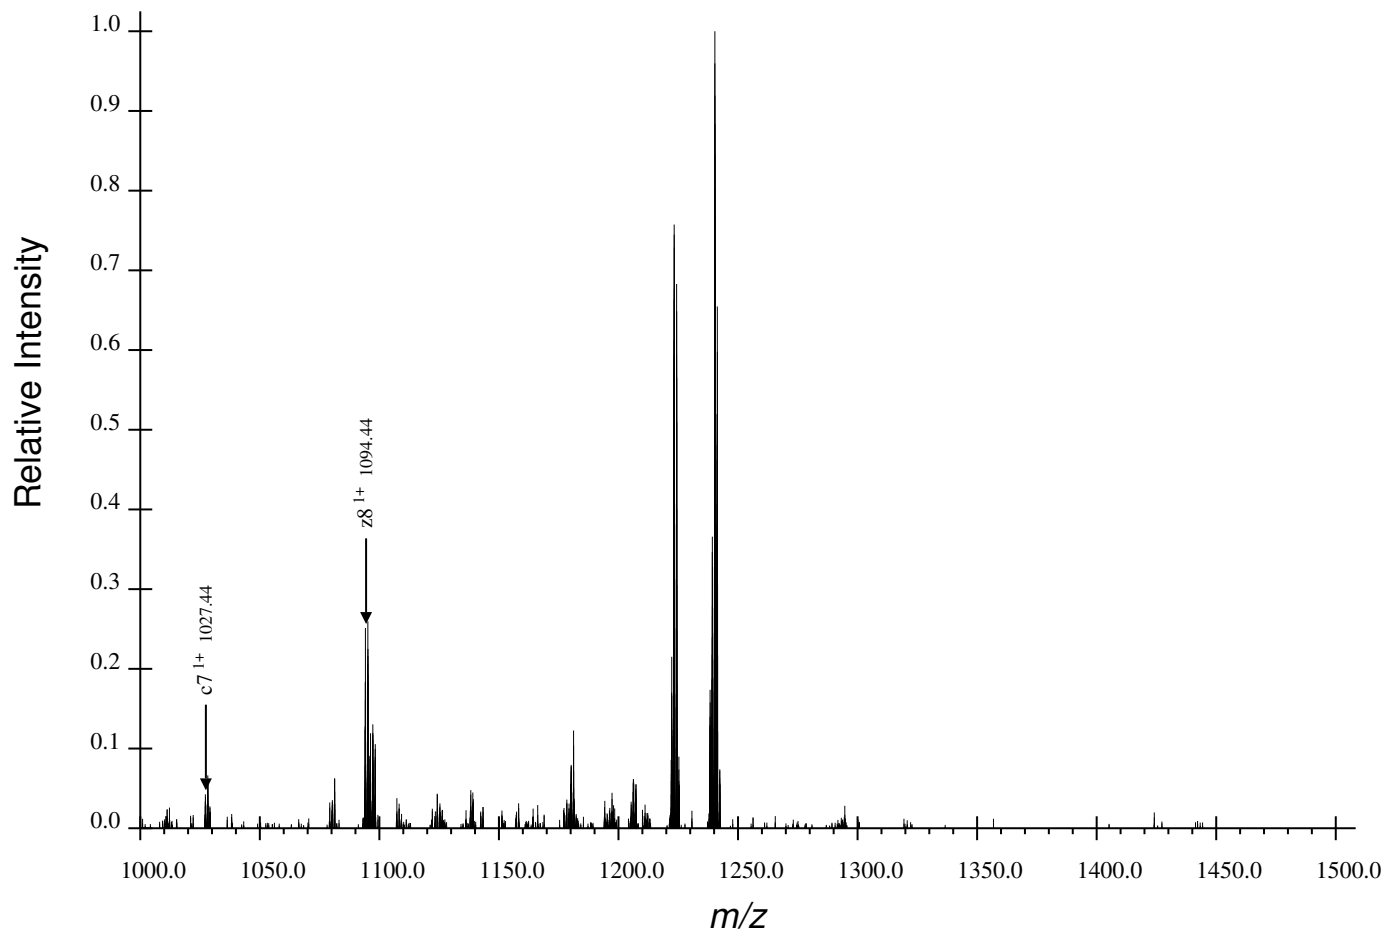

(c) Third Region for KRSpYEEHIP, Spectrum 53.dta



(d) Fourth Region for KRSpYEEHIP, Spectrum 53.dta

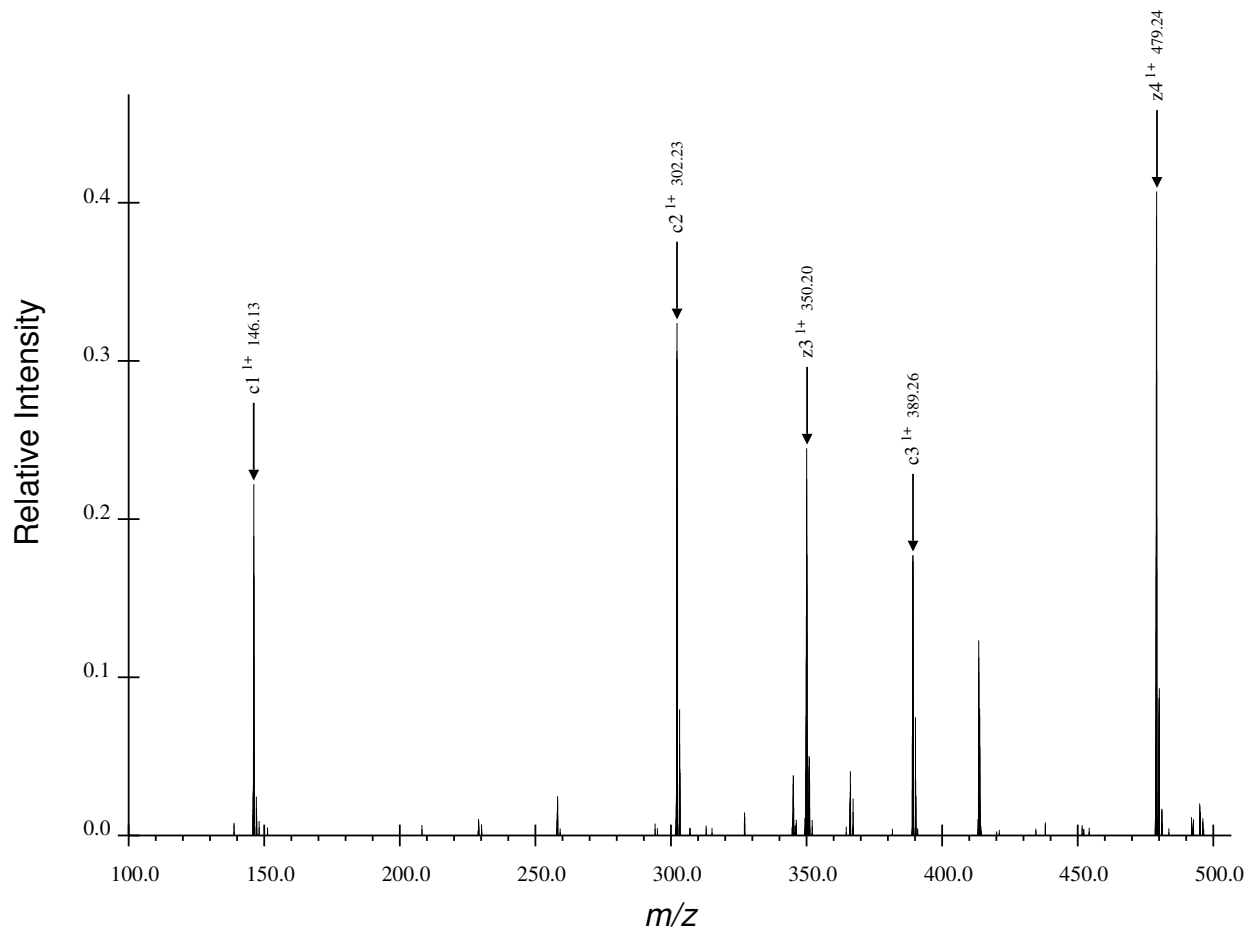

(a) First Region for KRSpYEEHIP, Spectrum 54.dta

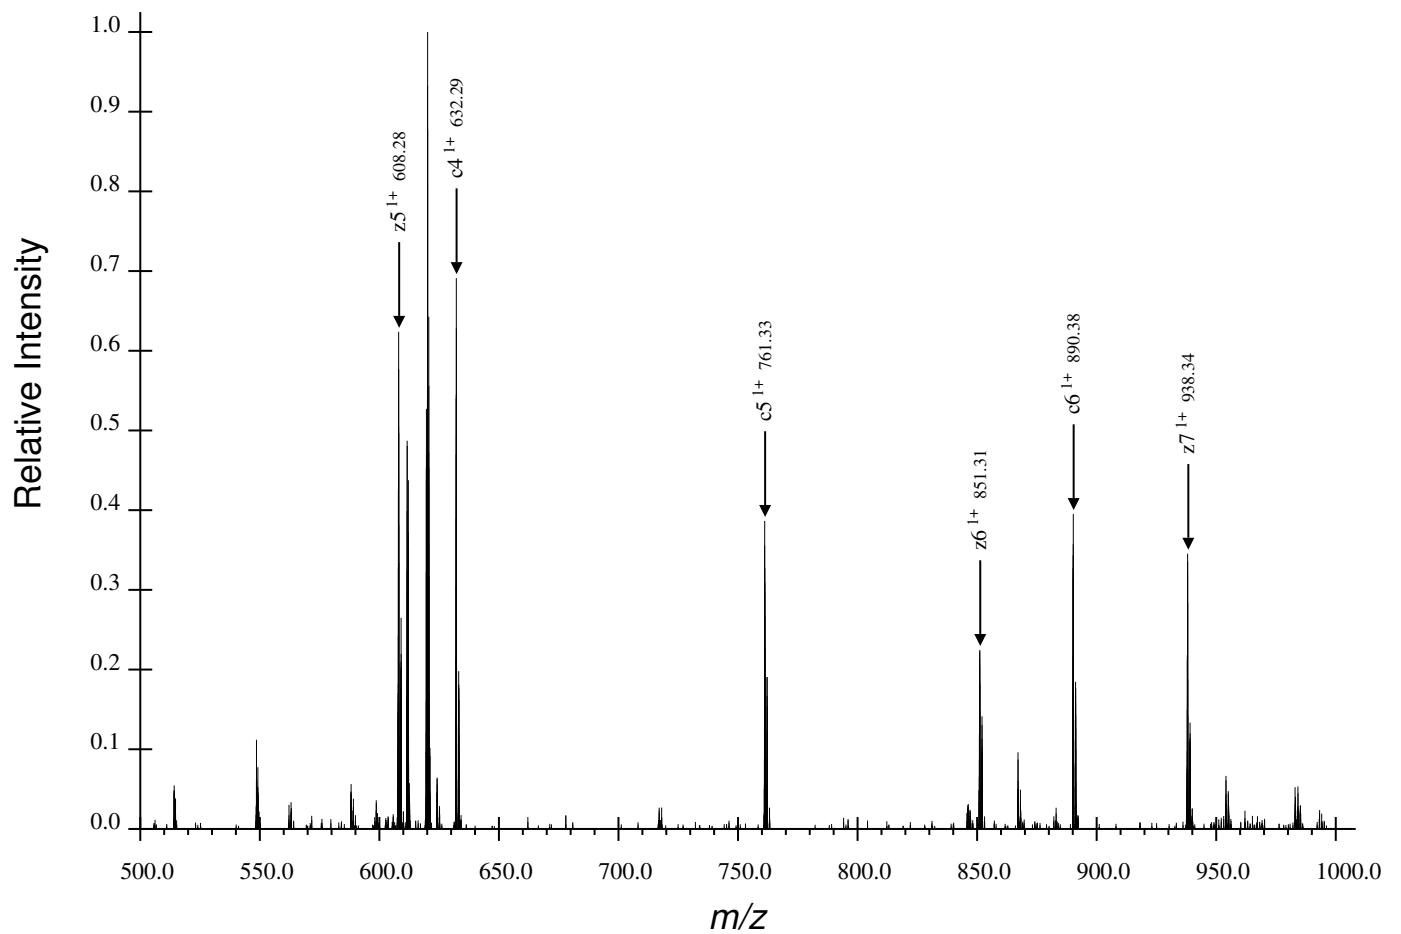

(b) Second Region for KRSpYEEHIP, Spectrum 54.dta

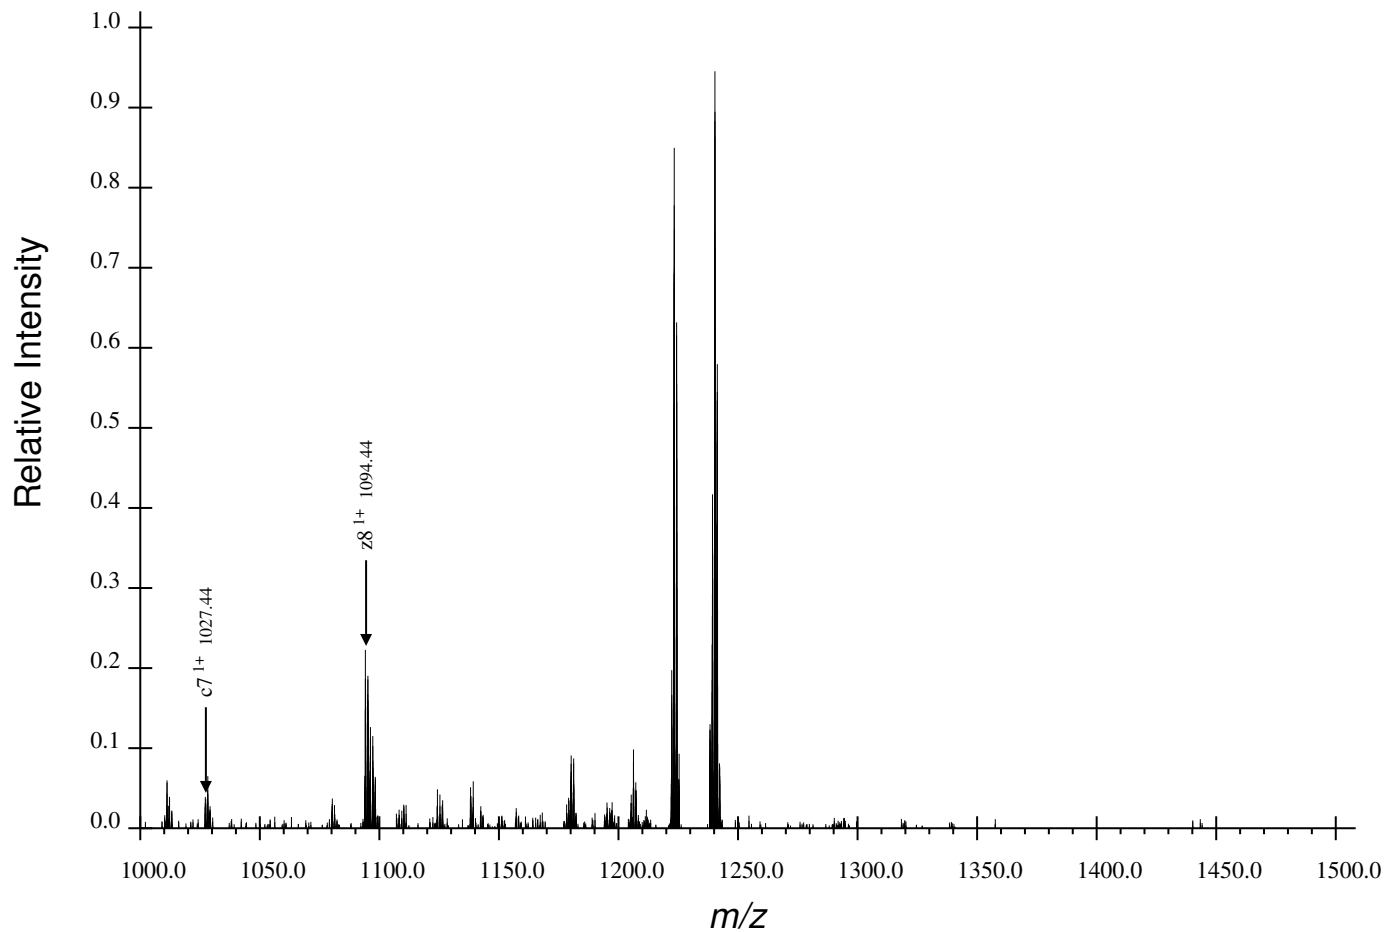

(c) Third Region for KRSpYEEHIP, Spectrum 54.dta

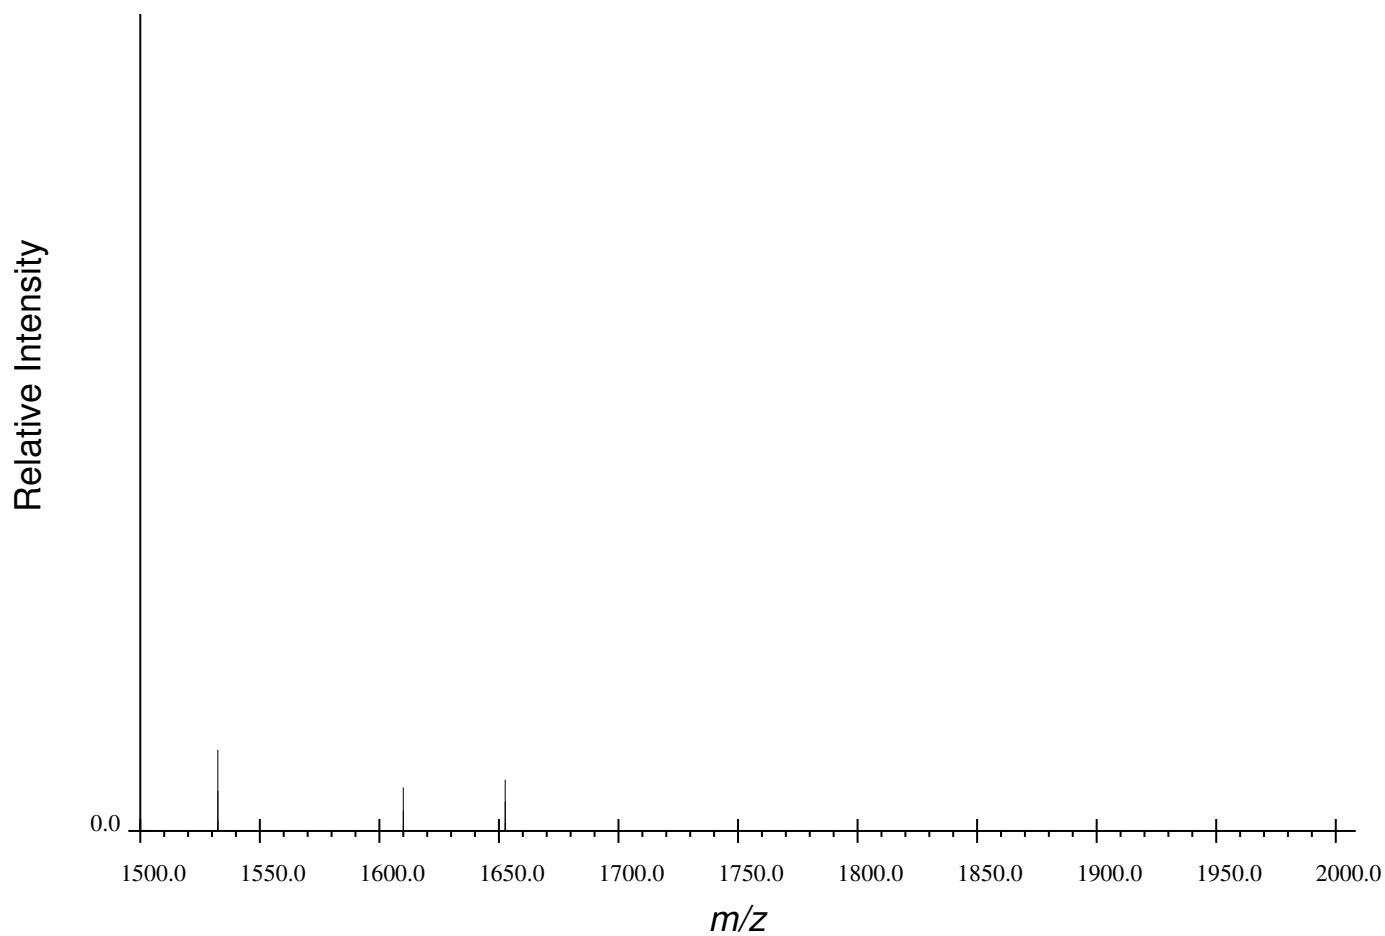

(d) Fourth Region for KRSpYEEHIP, Spectrum 54.dta

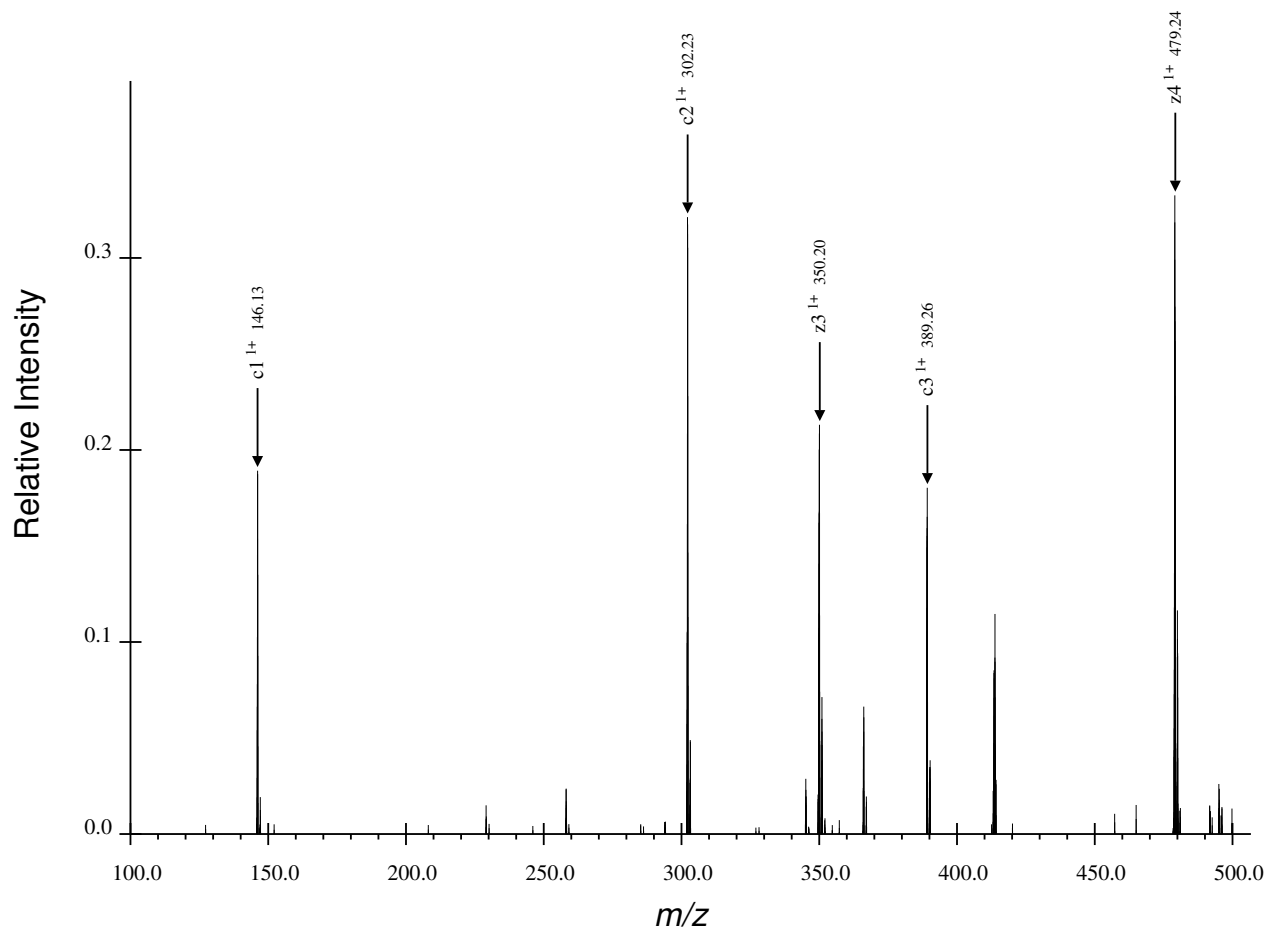

(a) First Region for KRSpYEEHIP, Spectrum 55.dta

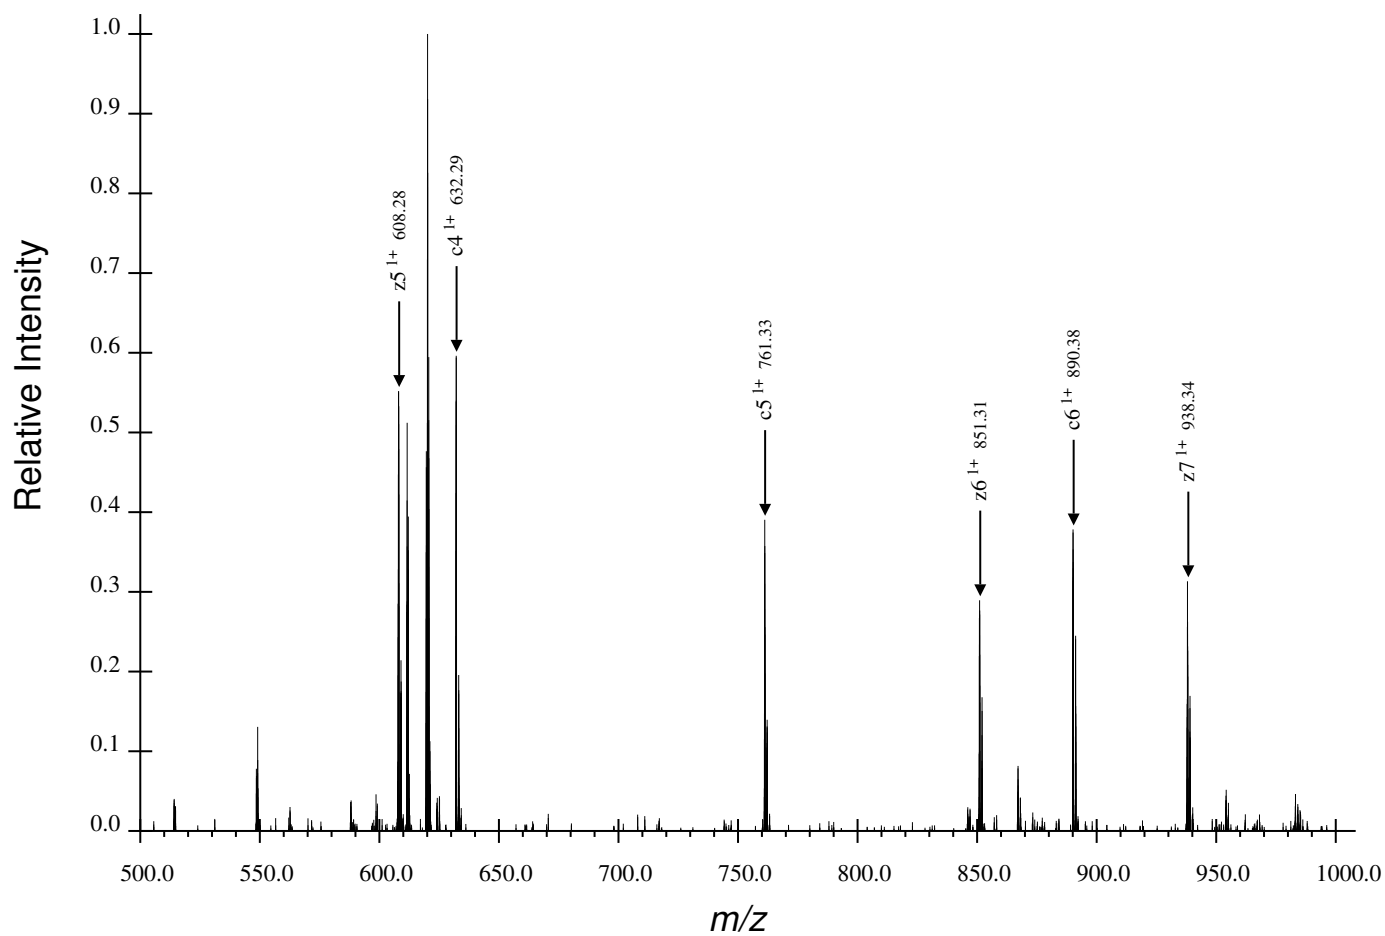

(b) Second Region for KRSpYEEHIP, Spectrum 55.dta

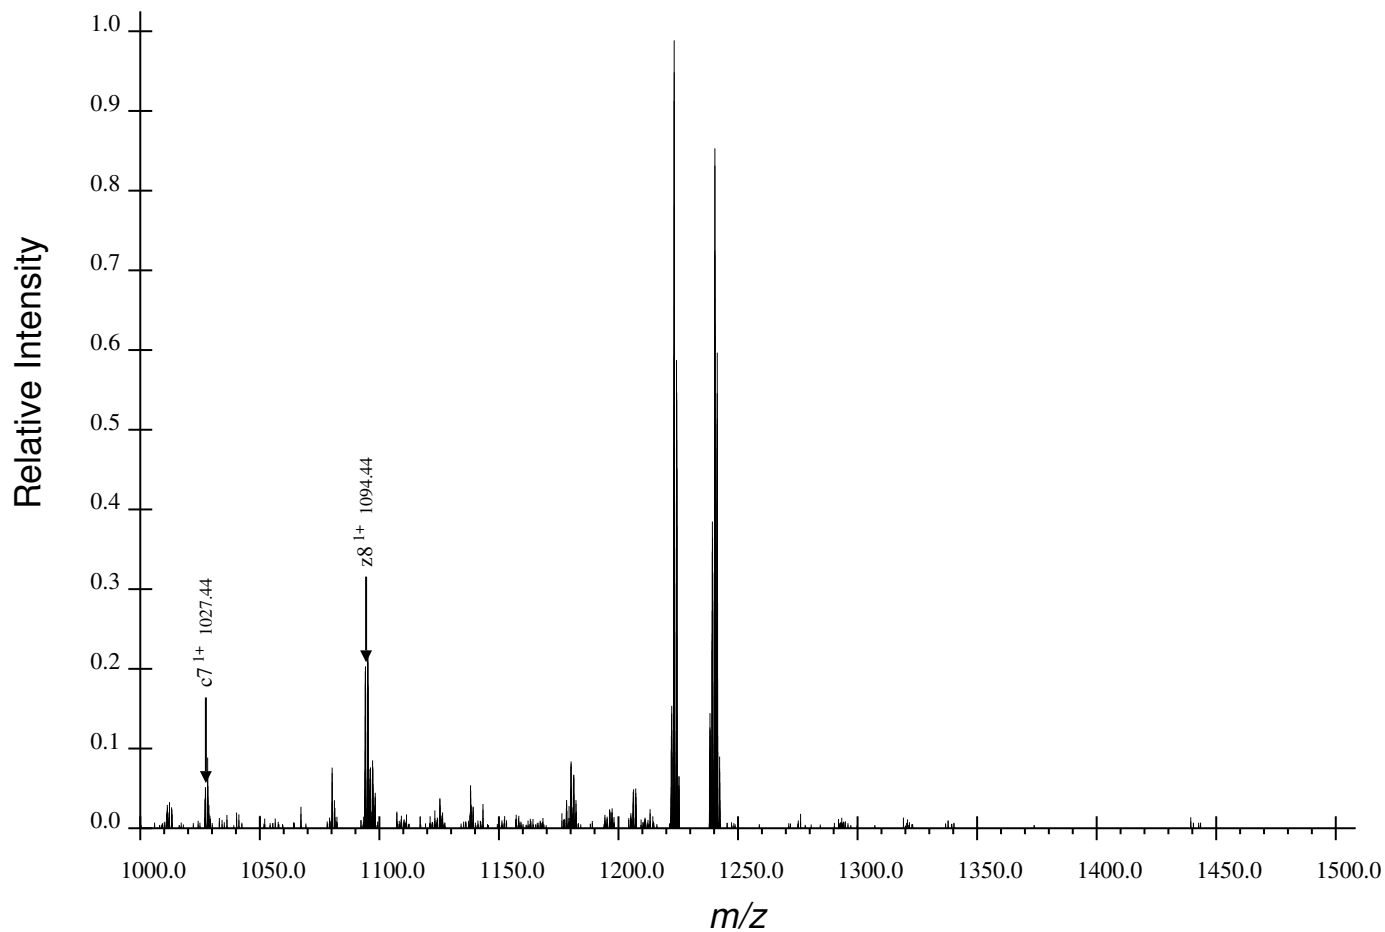

(c) Third Region for KRSpYEEHIP, Spectrum 55.dta

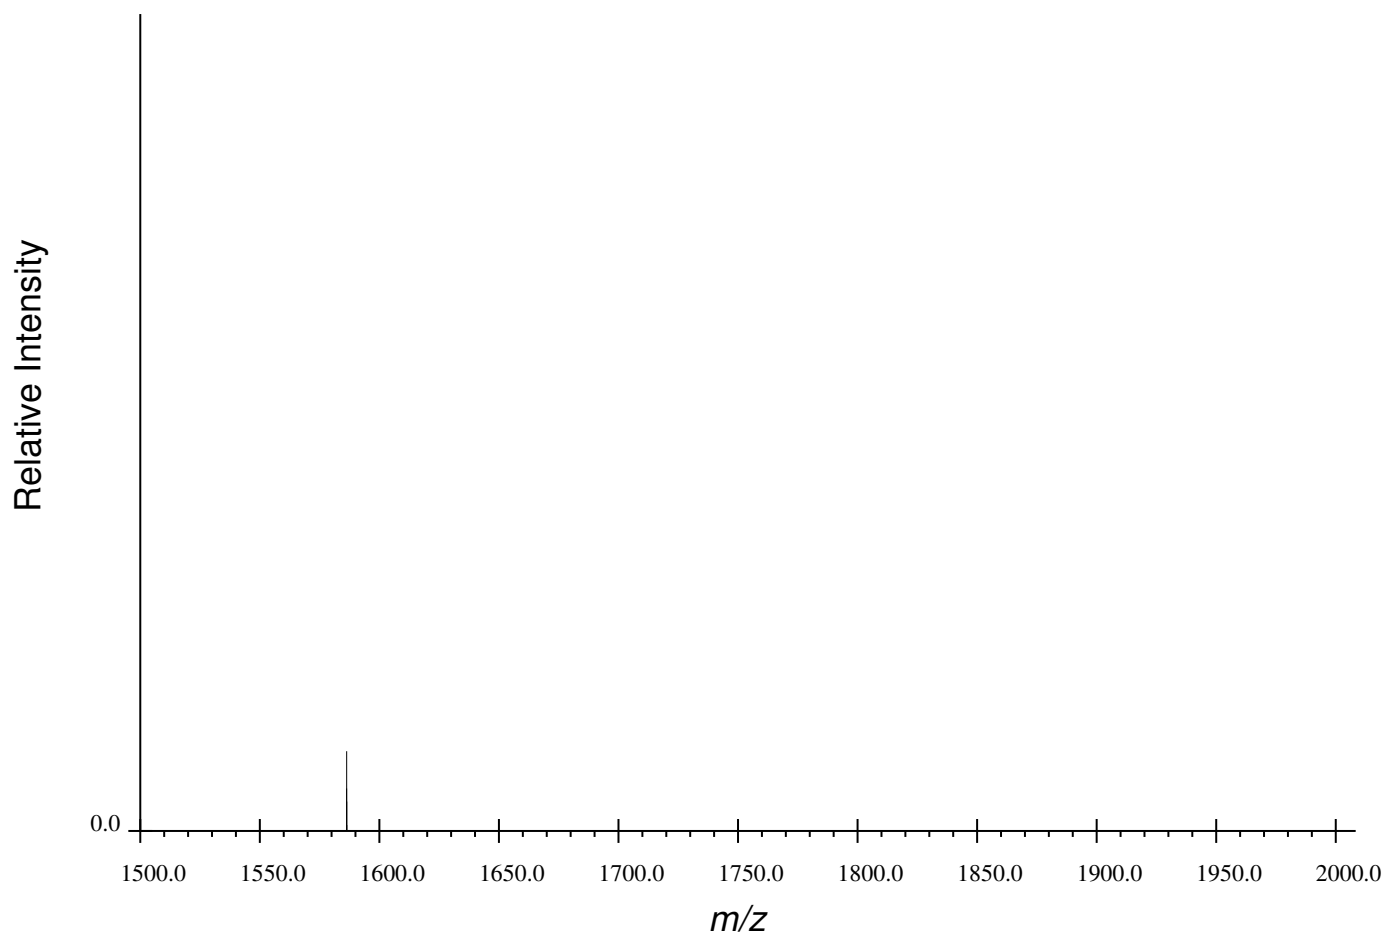

(d) Fourth Region for KRSpYEEHIP, Spectrum 55.dta

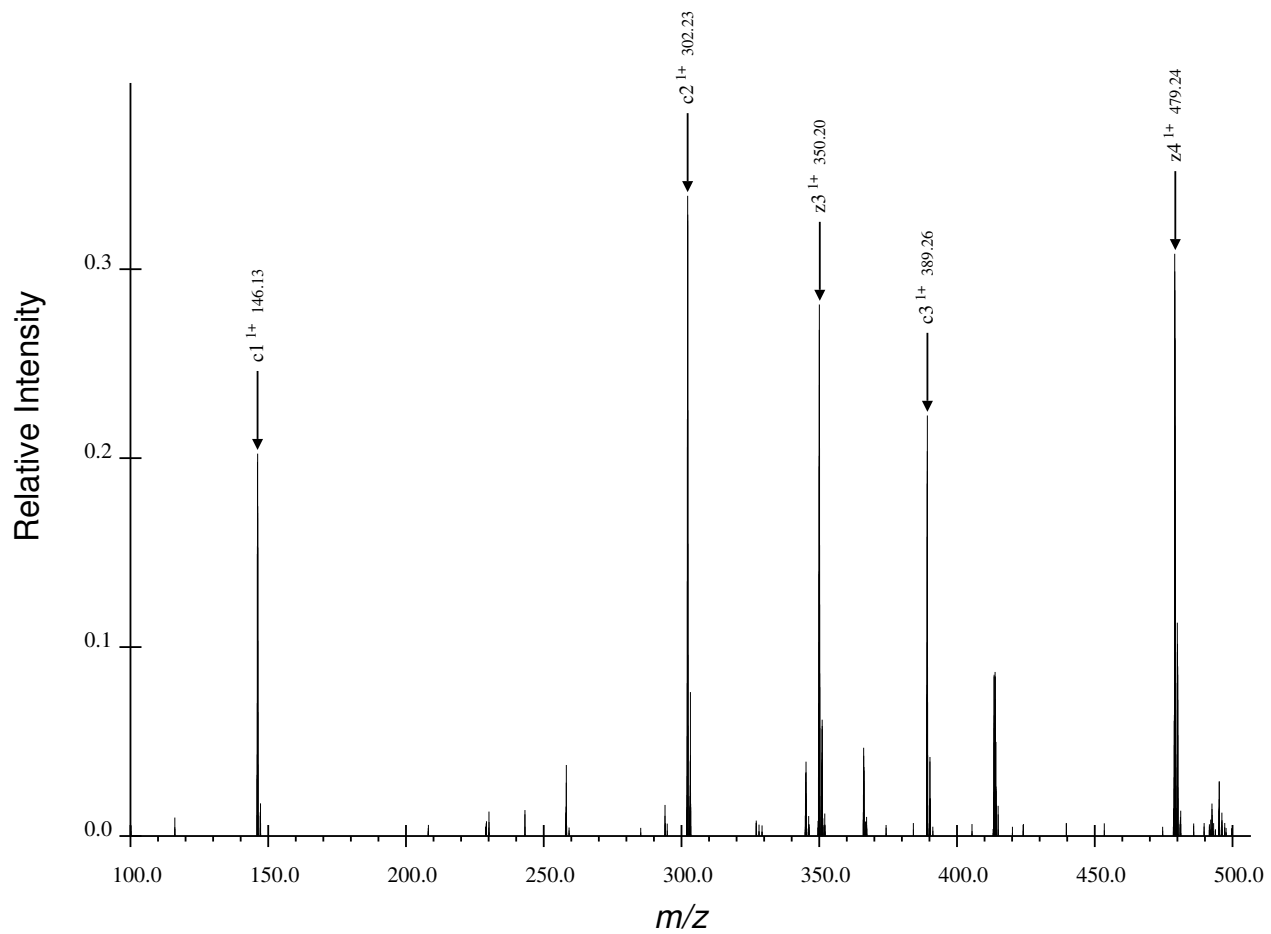

(a) First Region for KRSpYEEHIP, Spectrum 56.dta

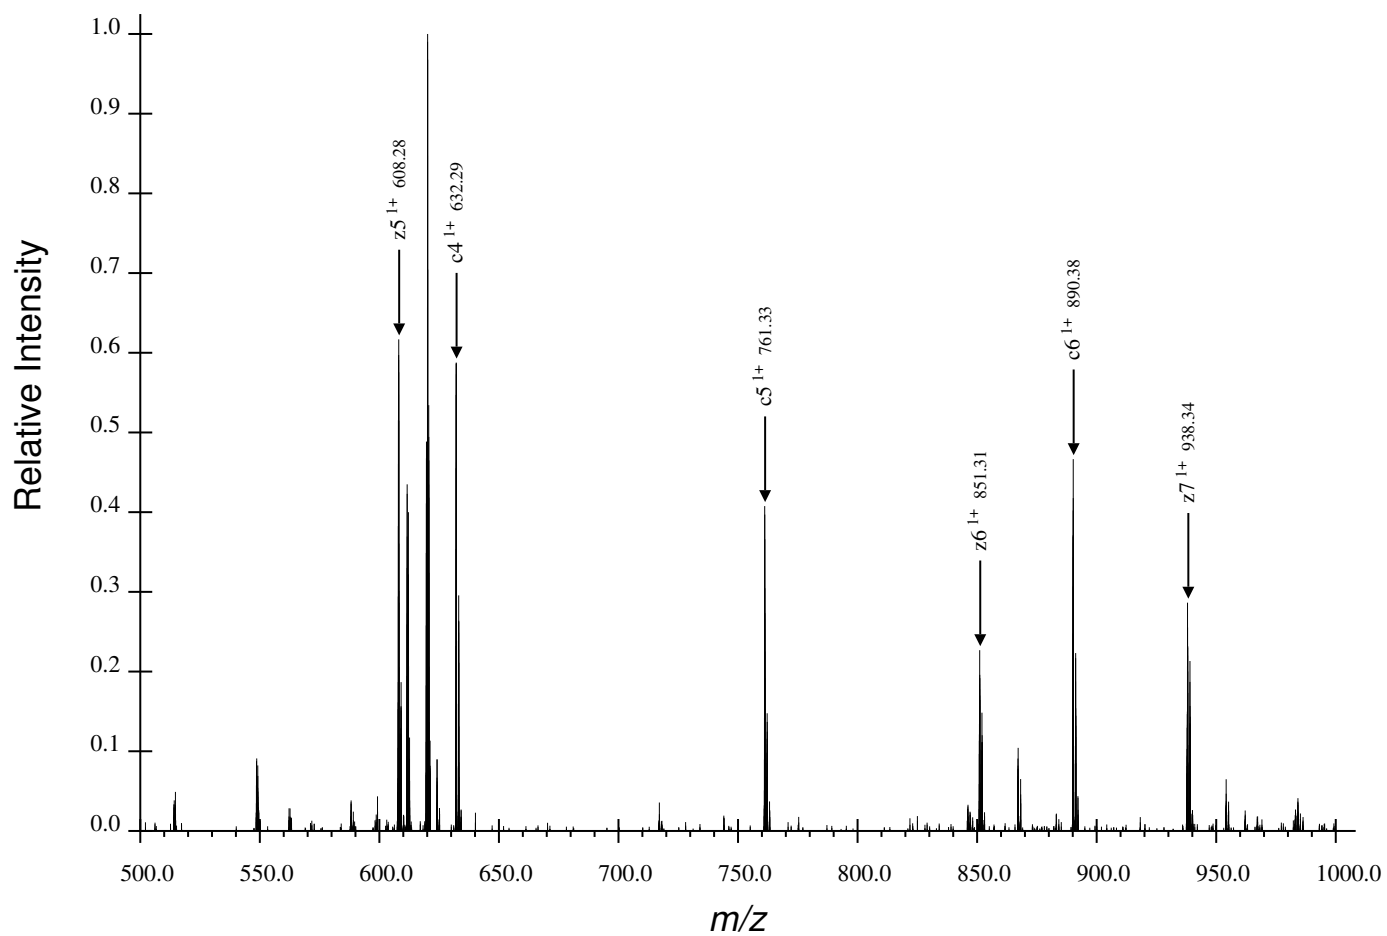

(b) Second Region for KRSpYEEHIP, Spectrum 56.dta

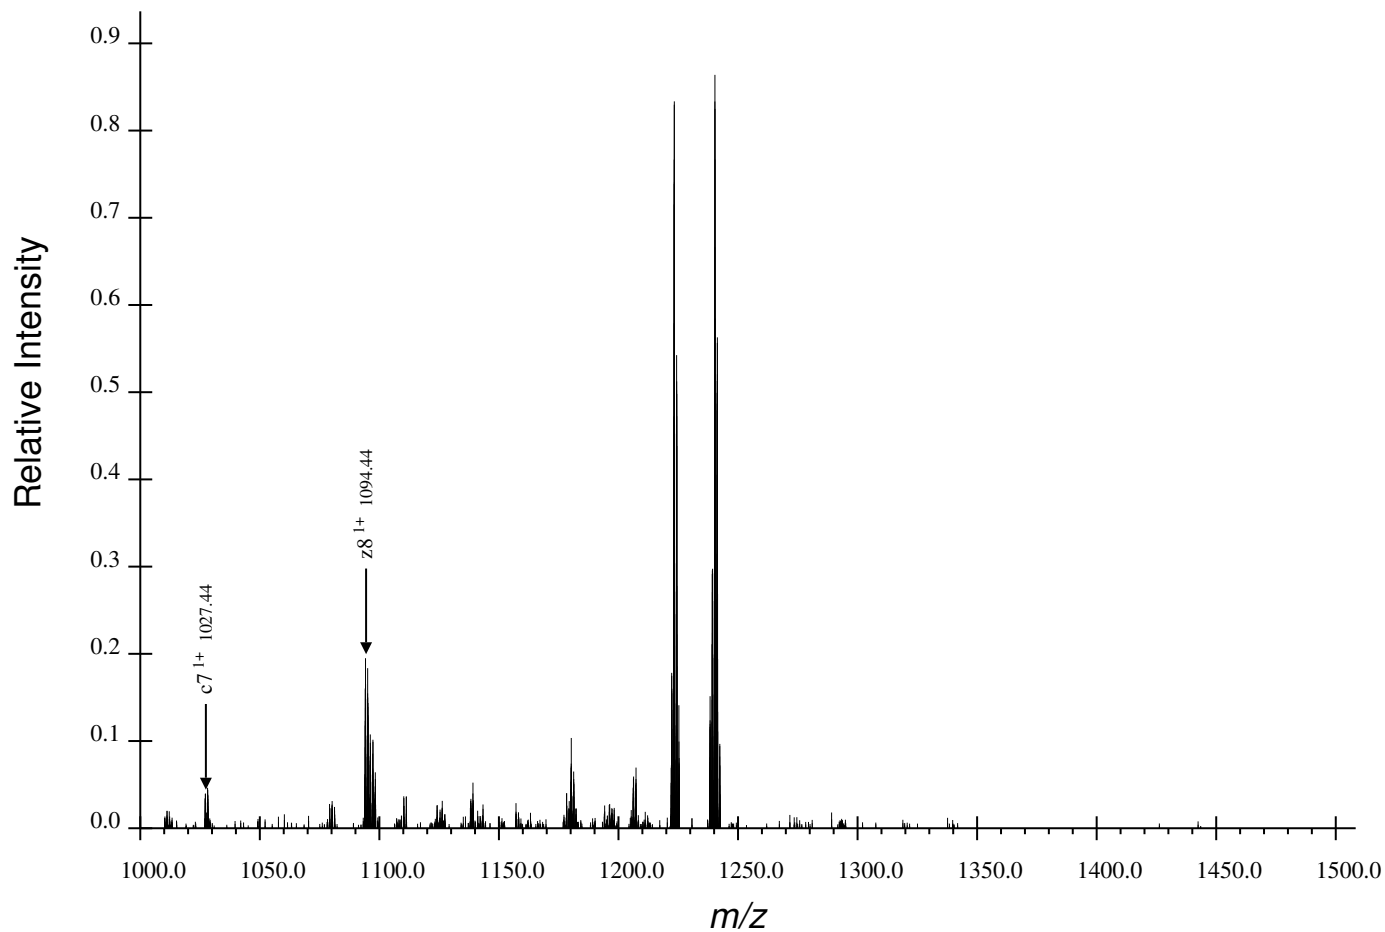

(c) Third Region for KRSpYEEHIP, Spectrum 56.dta

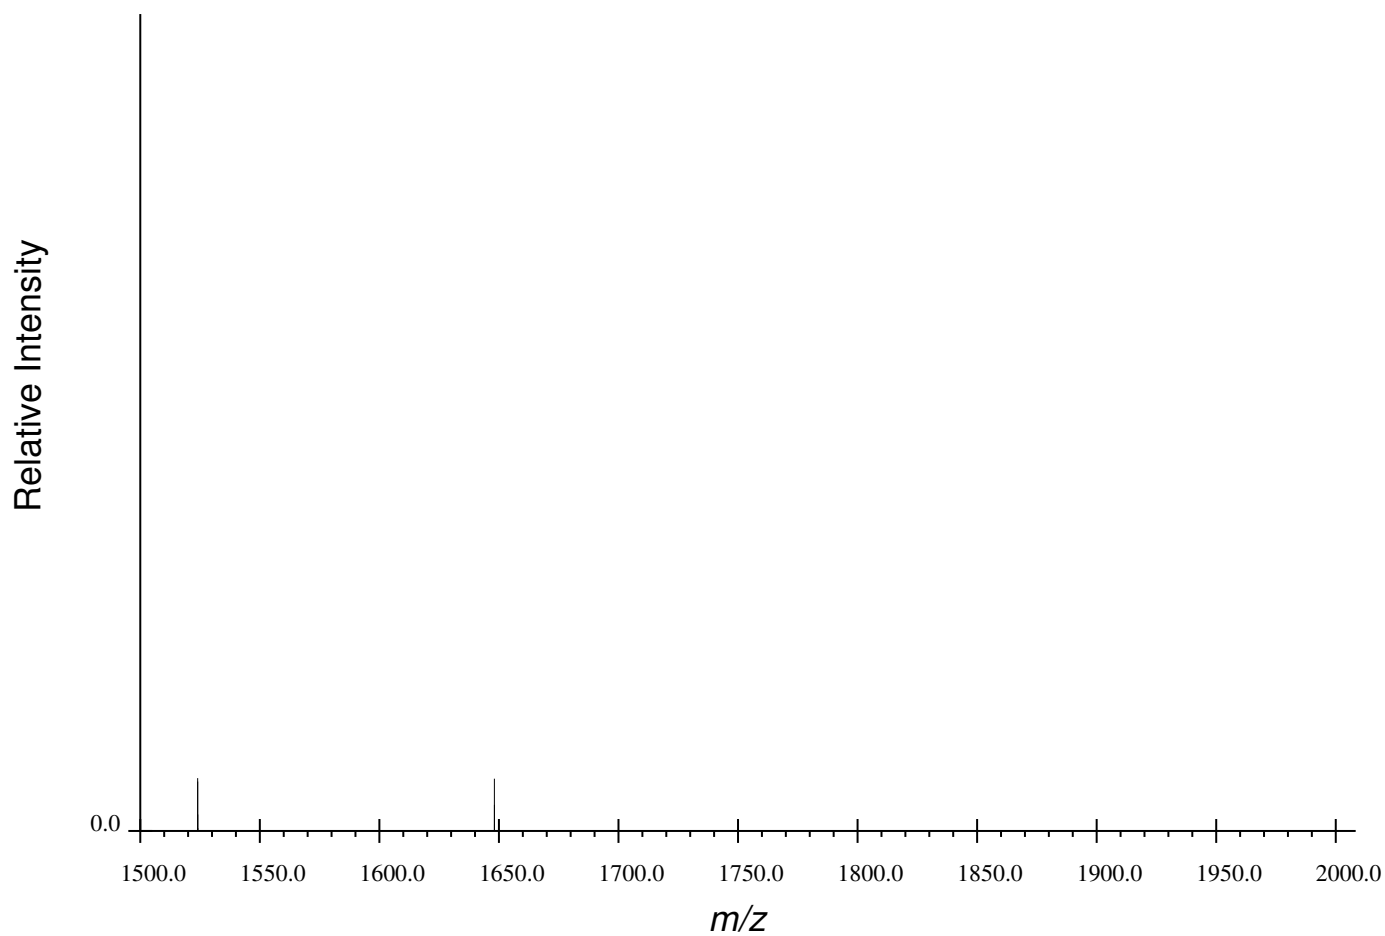

(d) Fourth Region for KRSpYEEHIP, Spectrum 56.dta



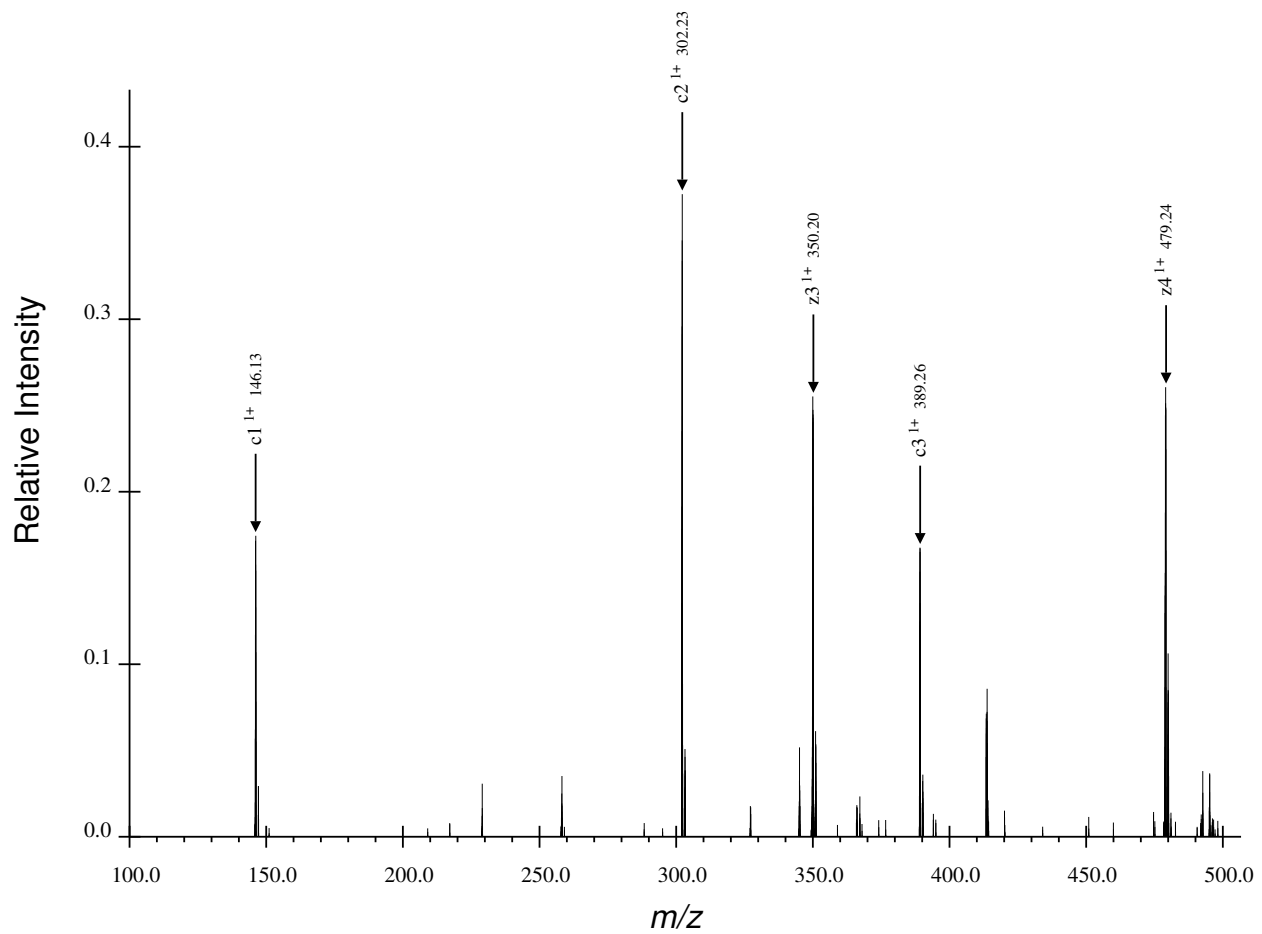

(a) First Region for KRSpYEEHIP, Spectrum 57.dta

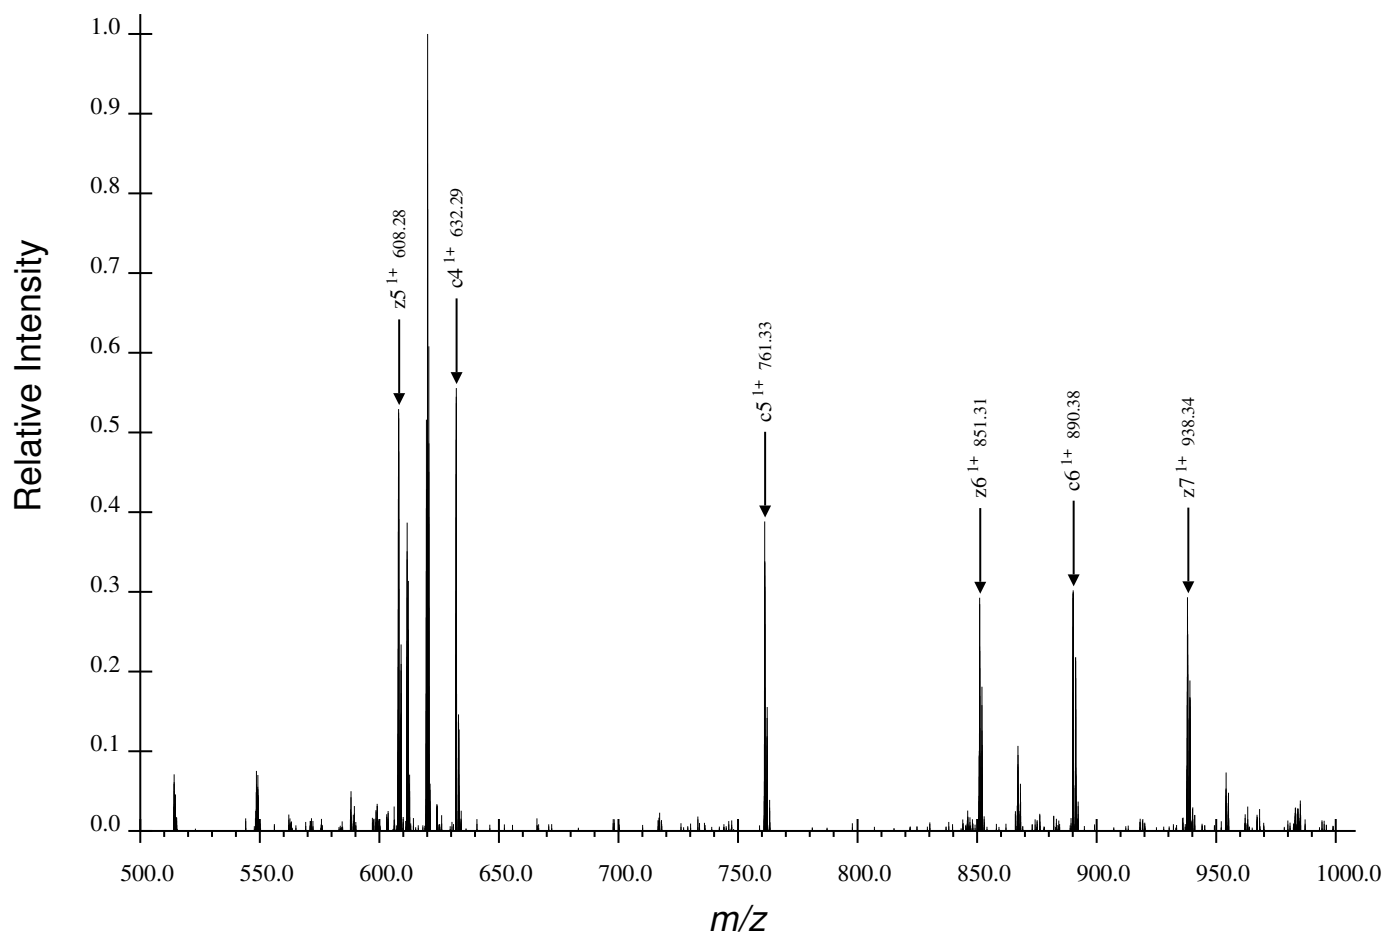

(b) Second Region for KRSpYEEHIP, Spectrum 57.dta

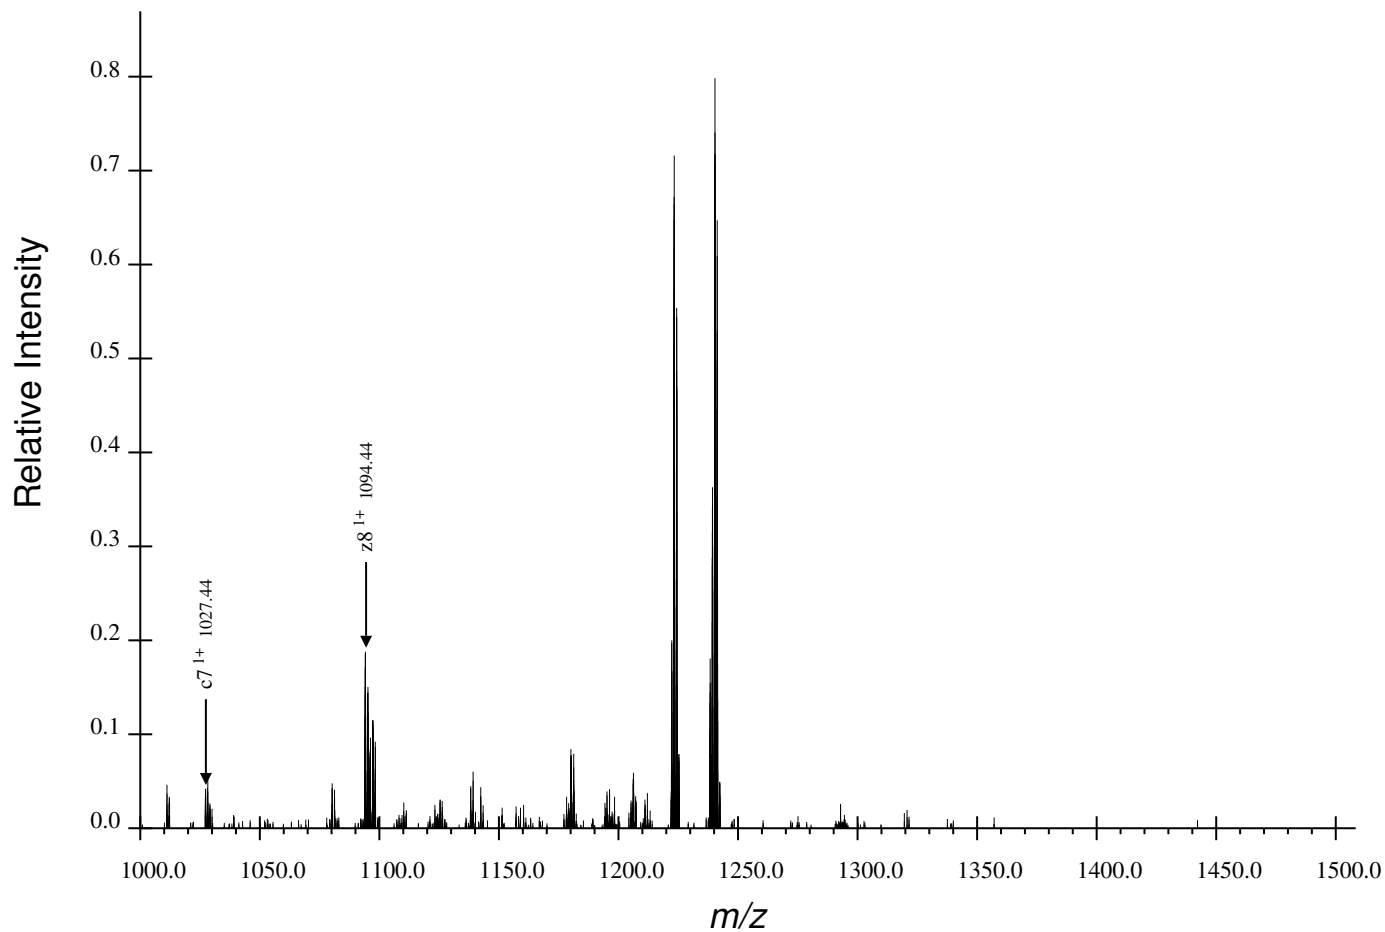

(c) Third Region for KRSpYEEHIP, Spectrum 57.dta

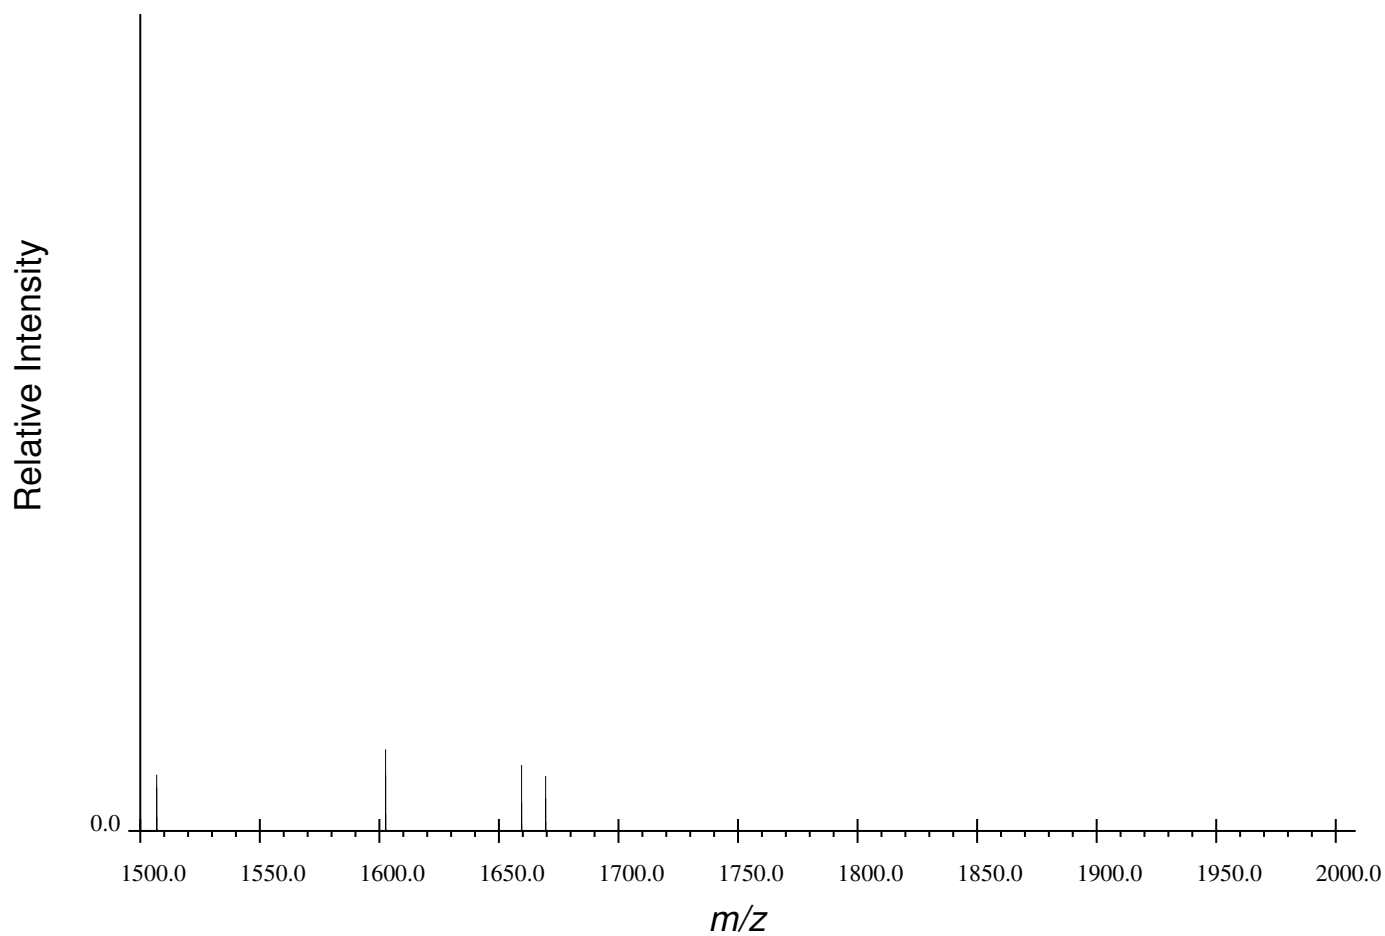

(d) Fourth Region for KRSpYEEHIP, Spectrum 57.dta

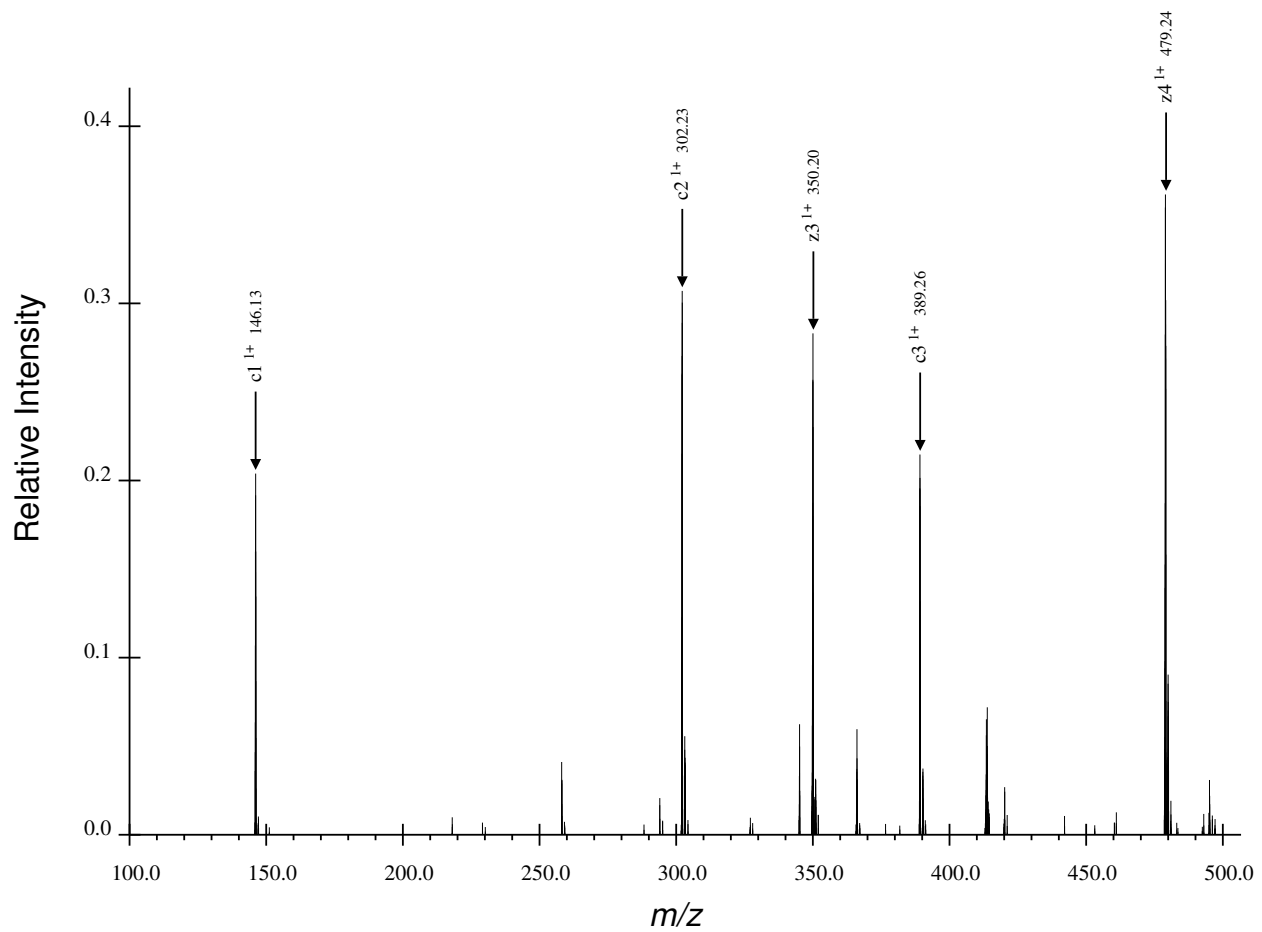

(a) First Region for KRSpYEEHIP, Spectrum 58.dta

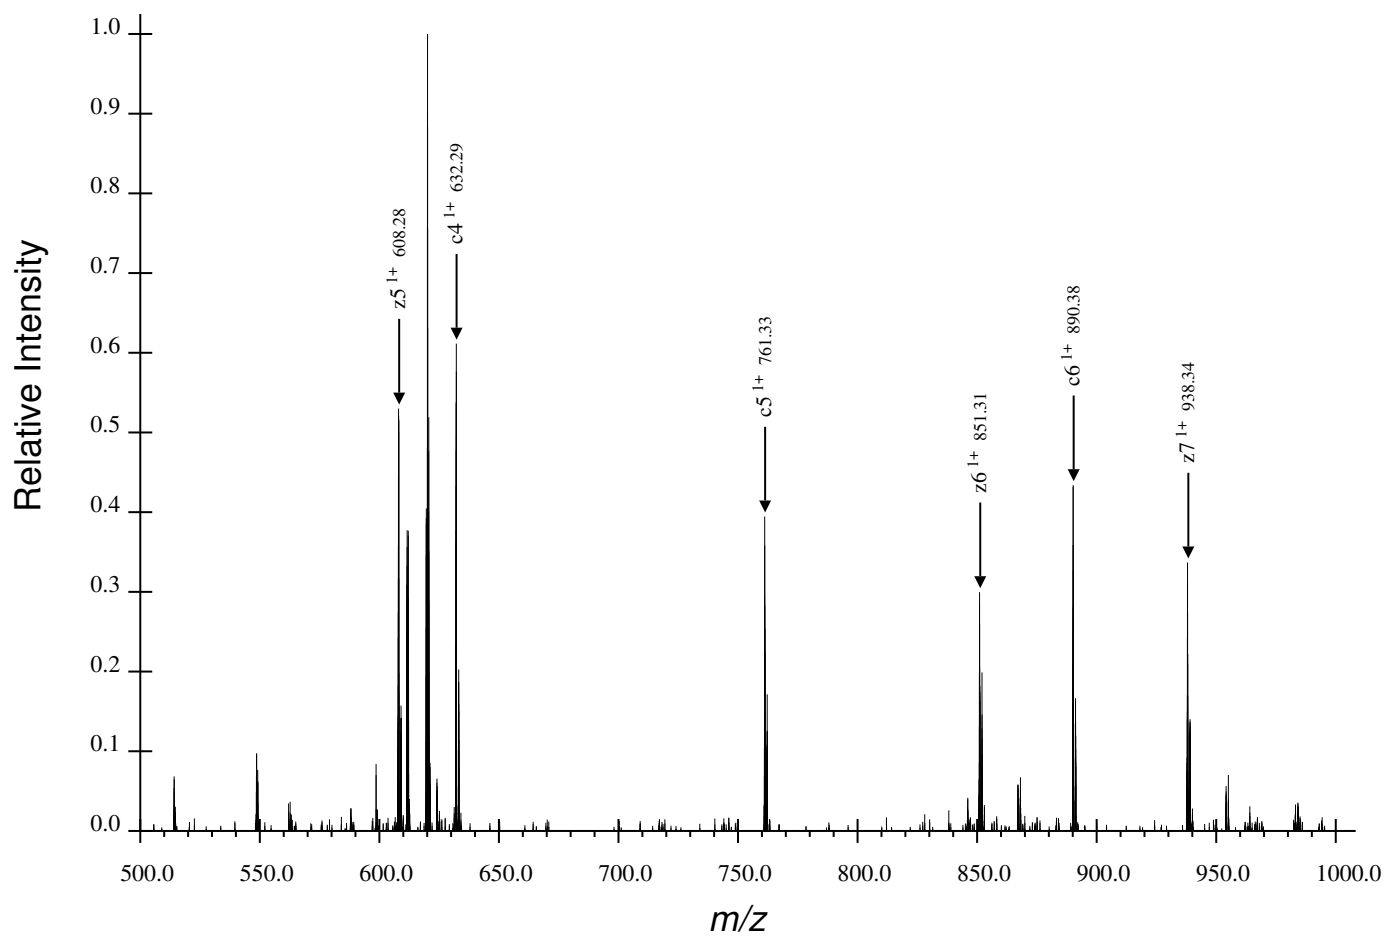

(b) Second Region for KRSpYEEHIP, Spectrum 58.dta

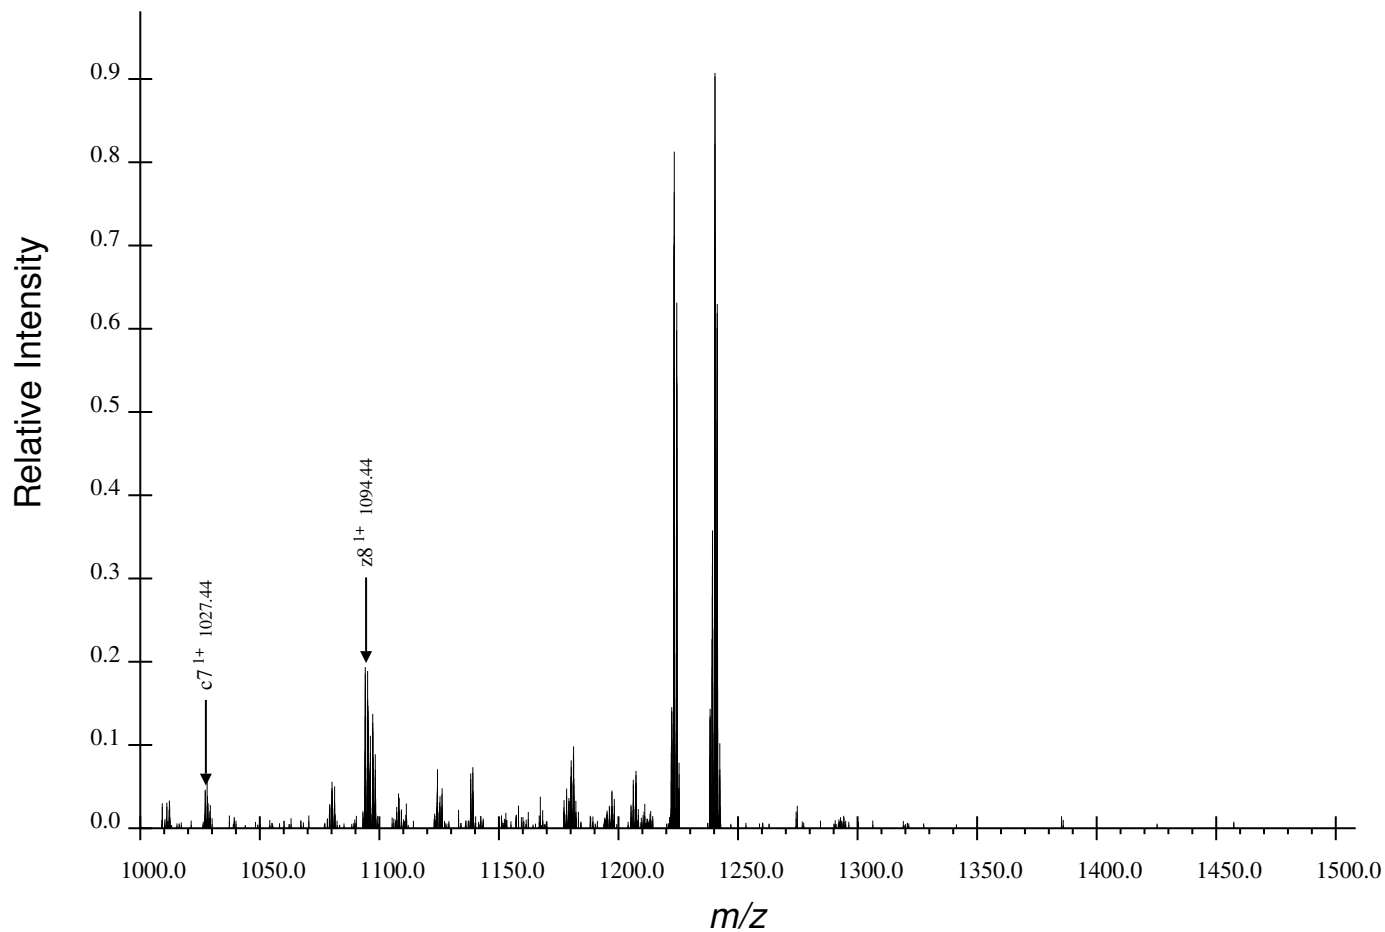

(c) Third Region for KRSpYEEHIP, Spectrum 58.dta

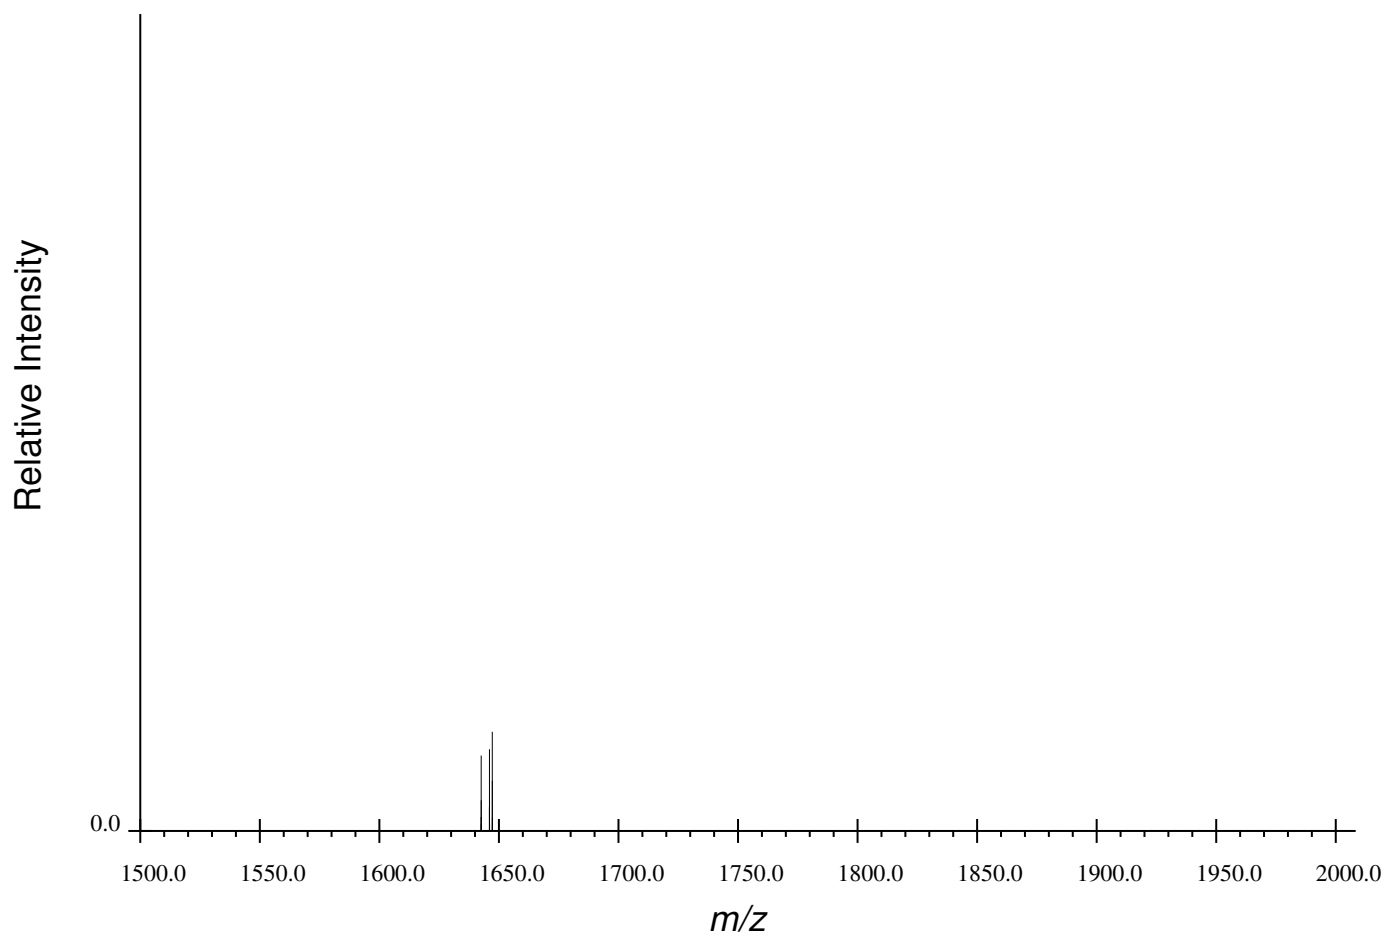

(d) Fourth Region for KRSpYEEHIP, Spectrum 58.dta

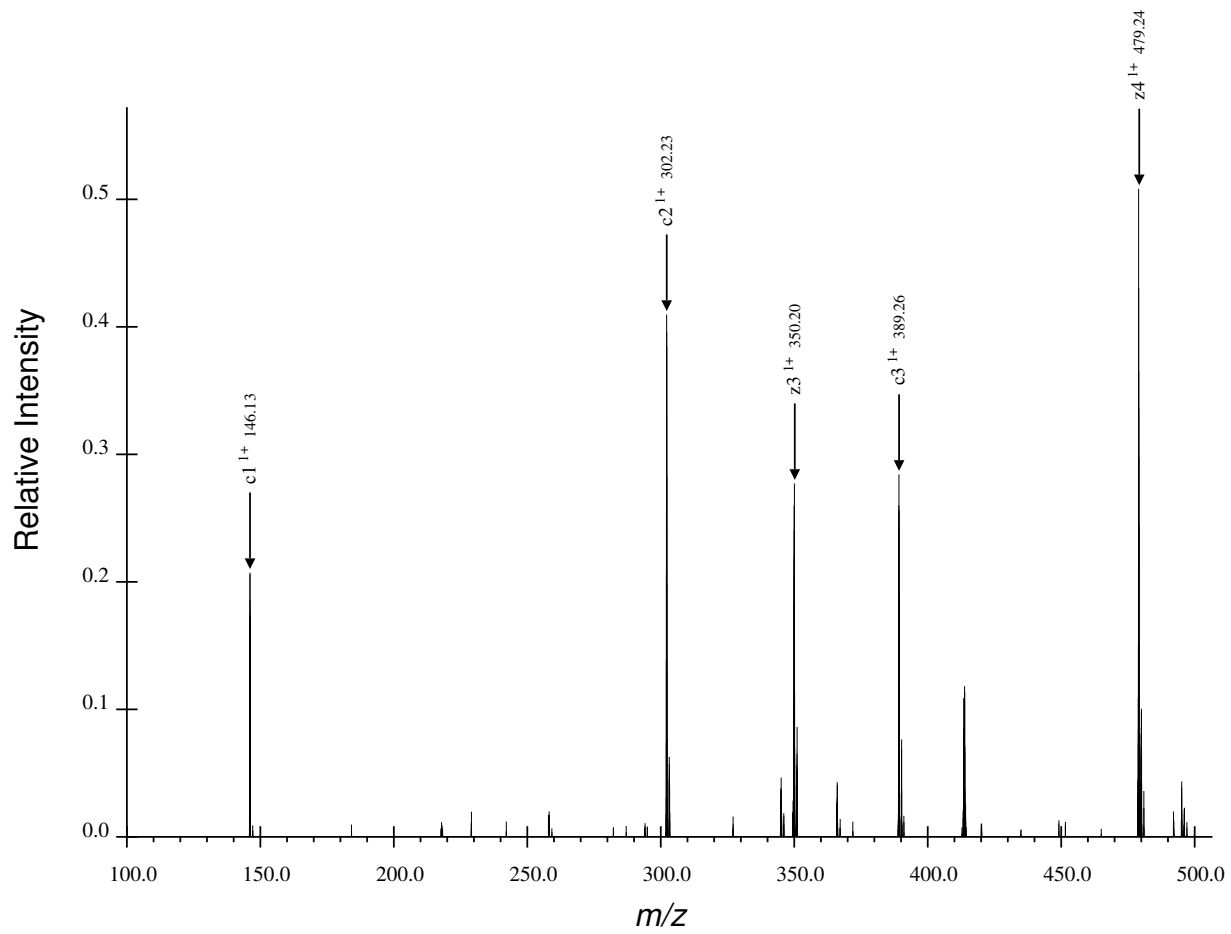

(a) First Region for KRSpYEEHIP, Spectrum 59.dta

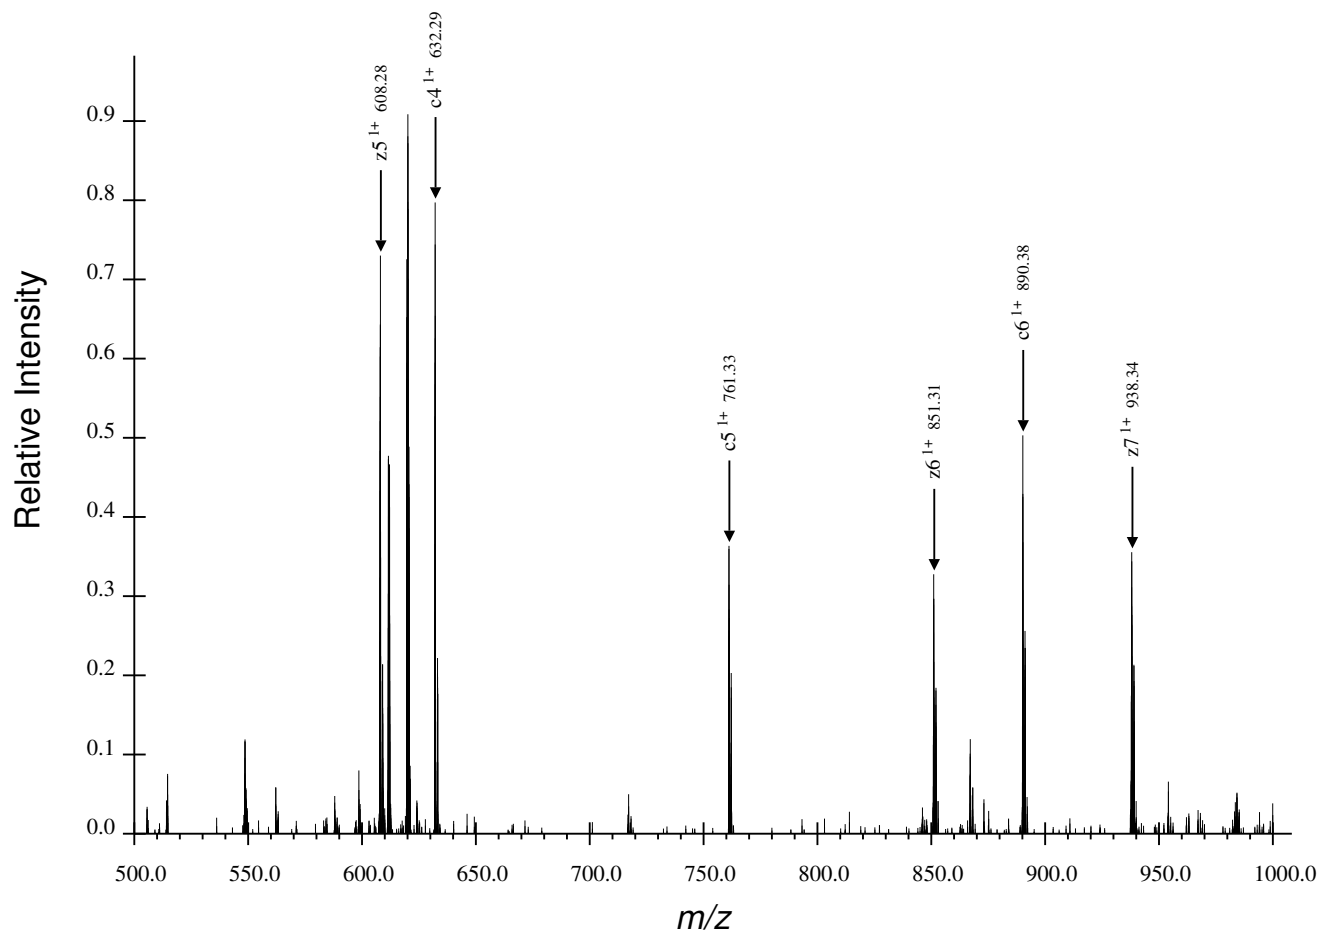

(b) Second Region for KRSpYEEHIP, Spectrum 59.dta

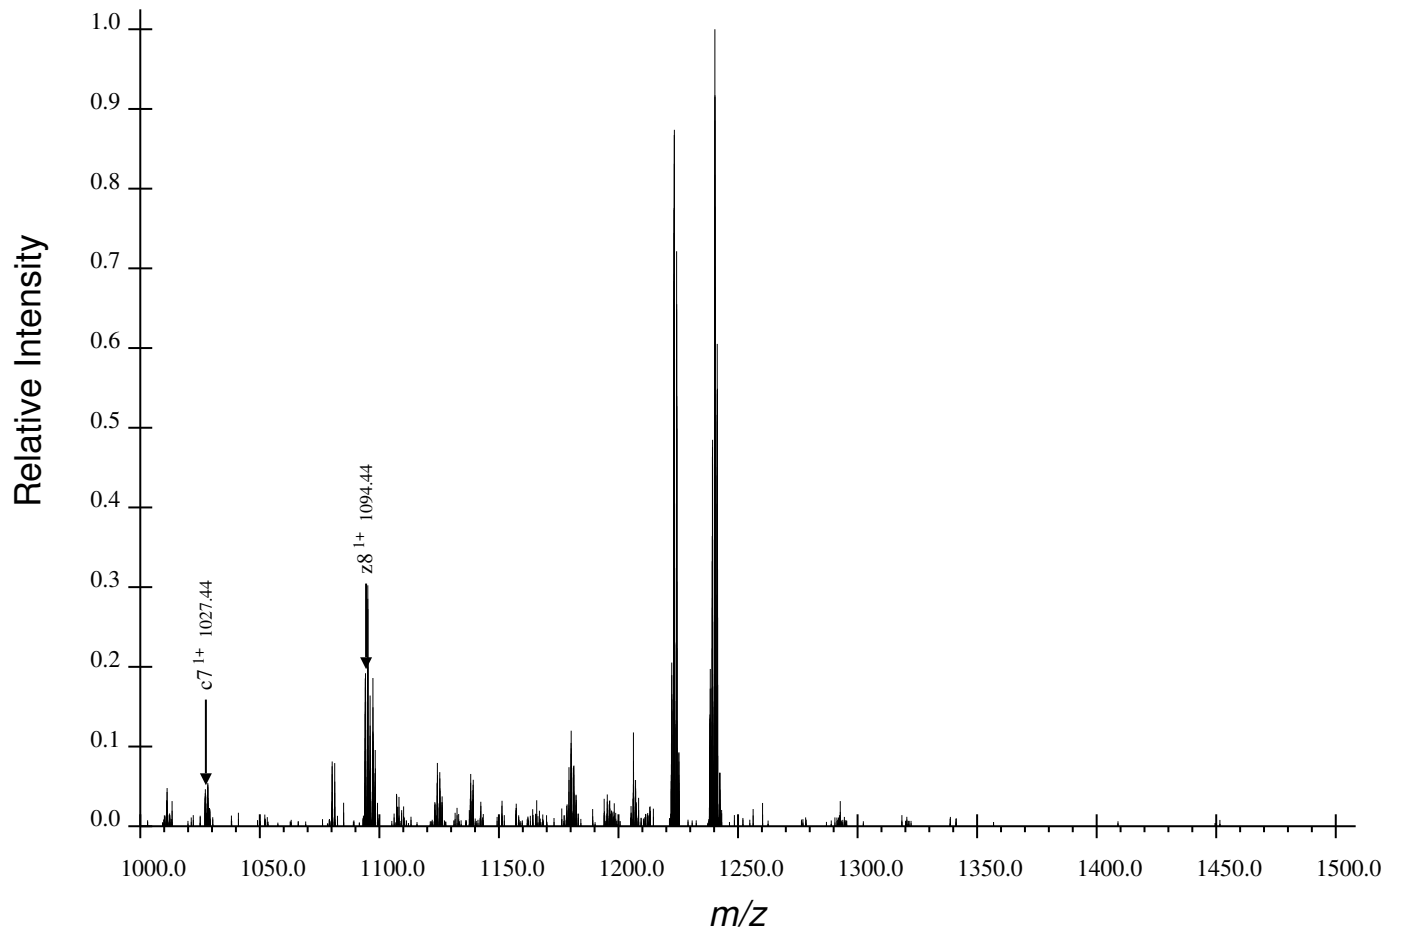

(c) Third Region for KRSpYEEHIP, Spectrum 59.dta

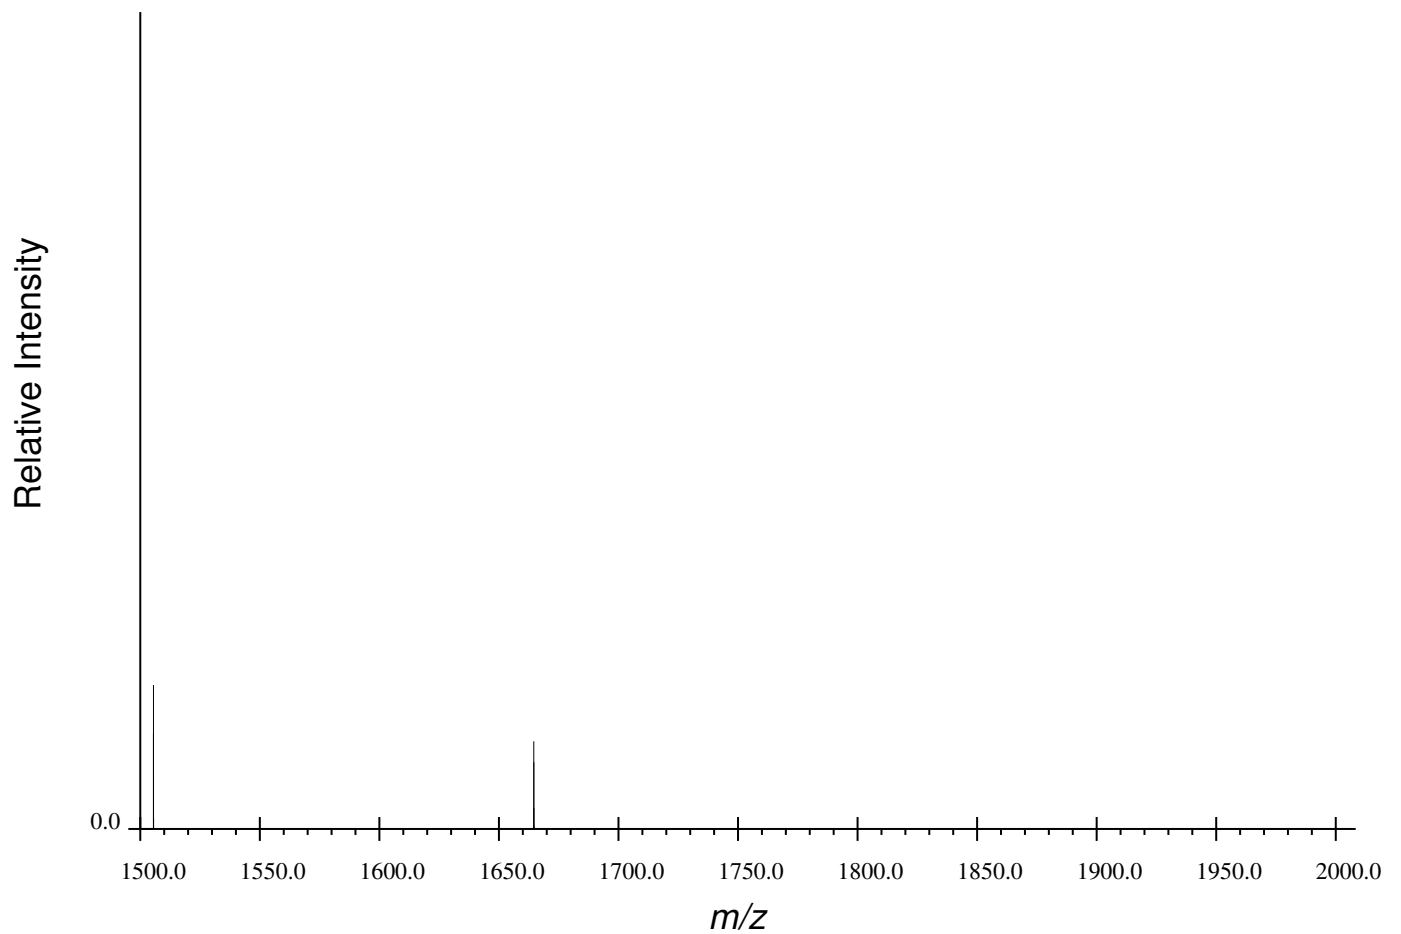

(d) Fourth Region for KRSpYEEHIP, Spectrum 59.dta

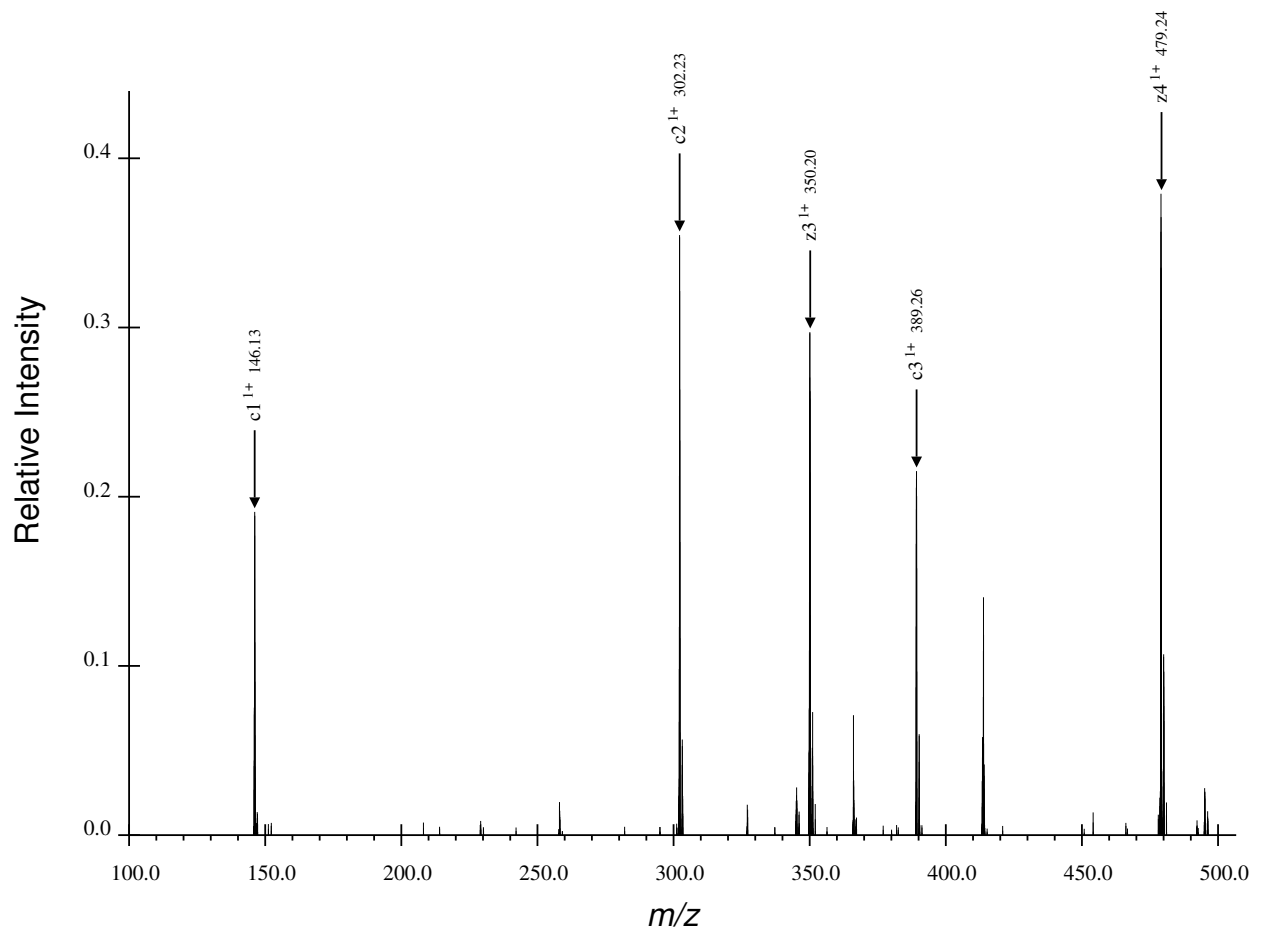

(a) First Region for KRSpYEEHIP, Spectrum 60.dta

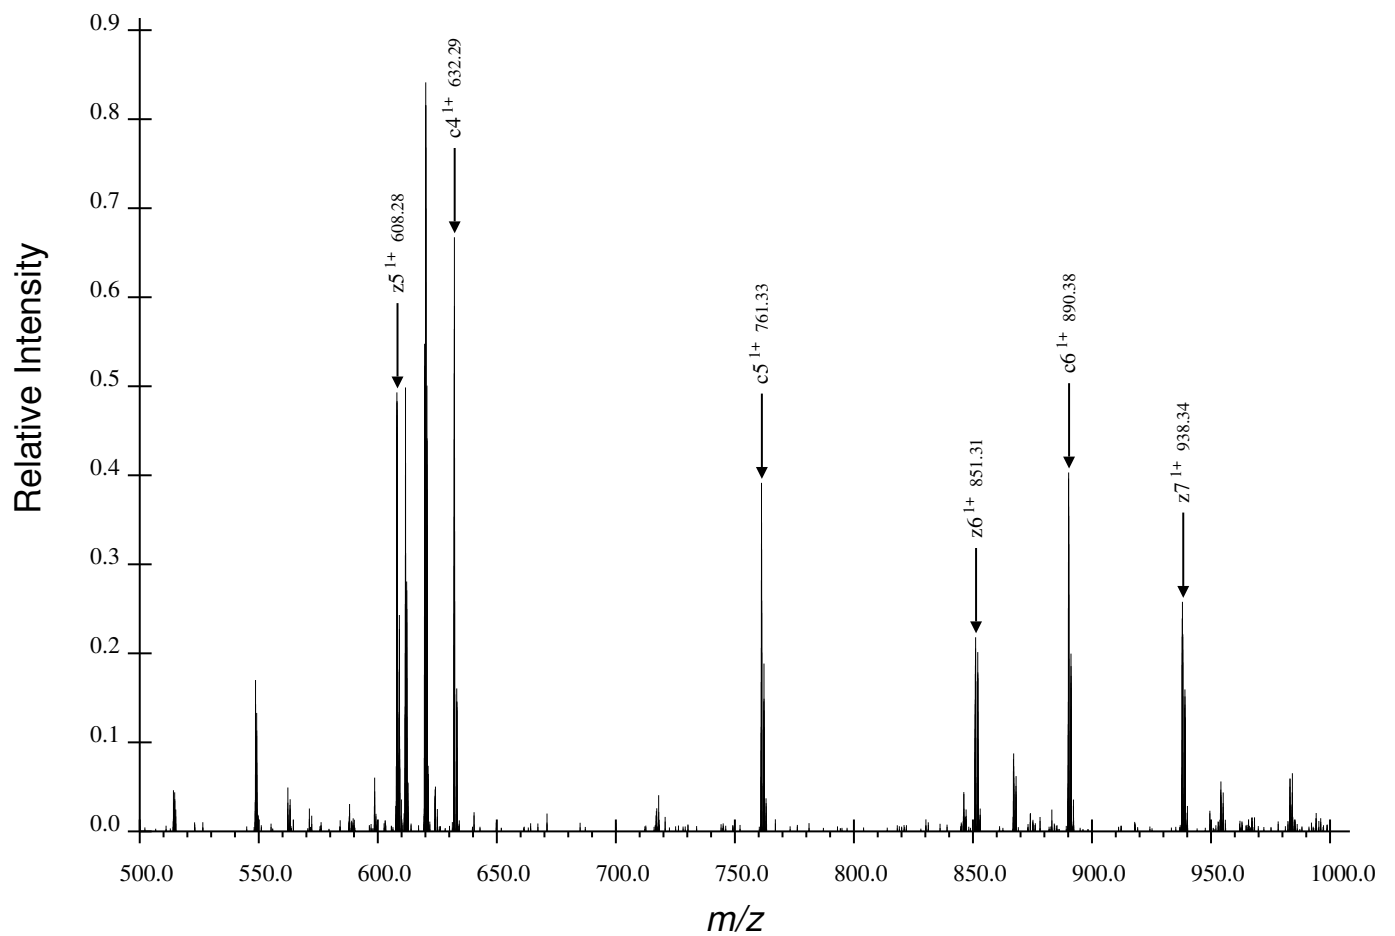

(b) Second Region for KRSpYEEHIP, Spectrum 60.dta

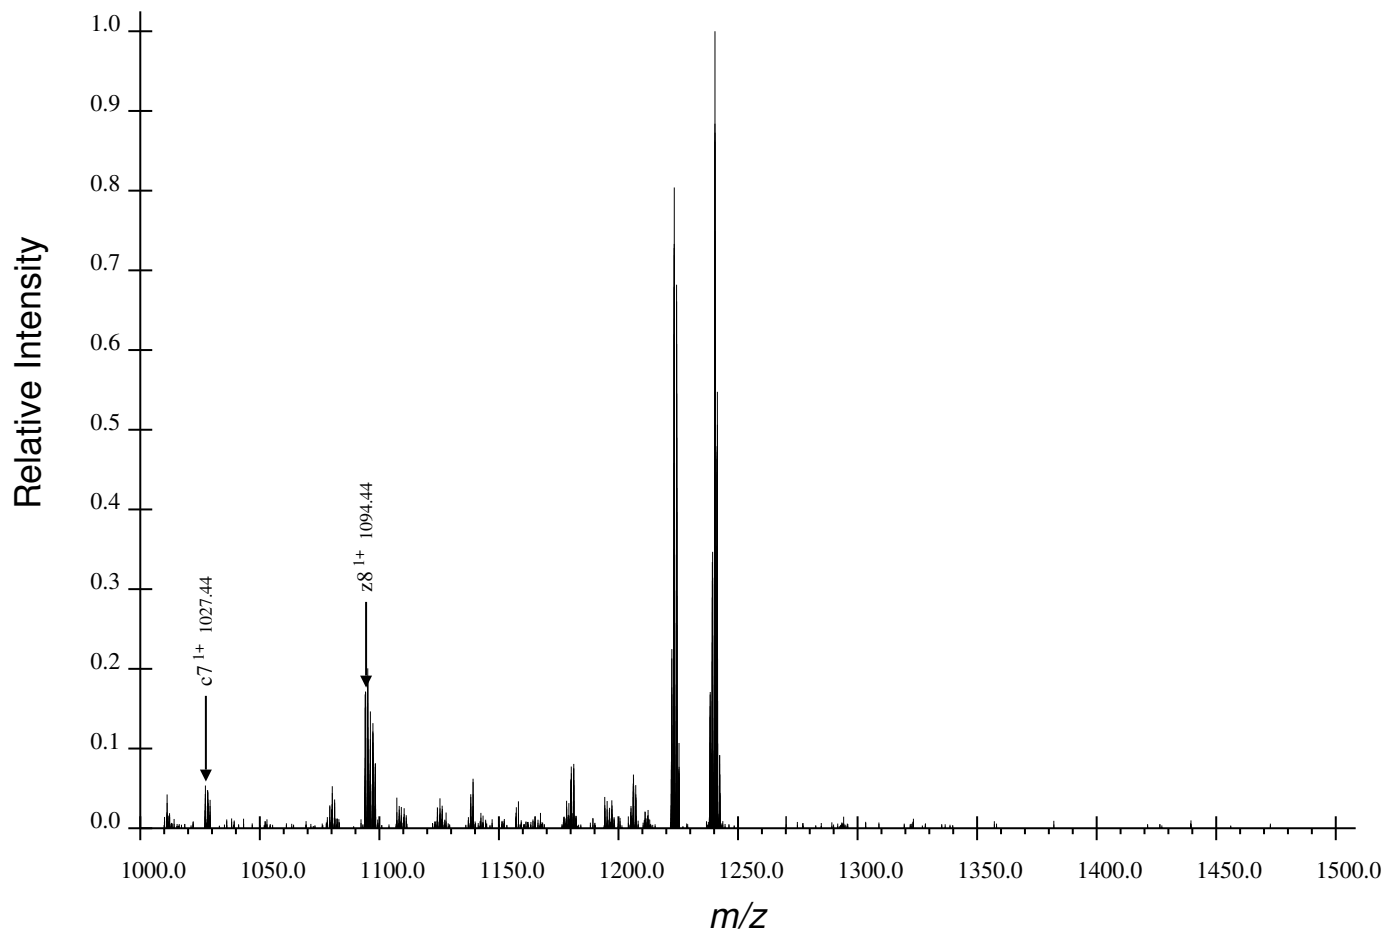

(c) Third Region for KRSpYEEHIP, Spectrum 60.dta

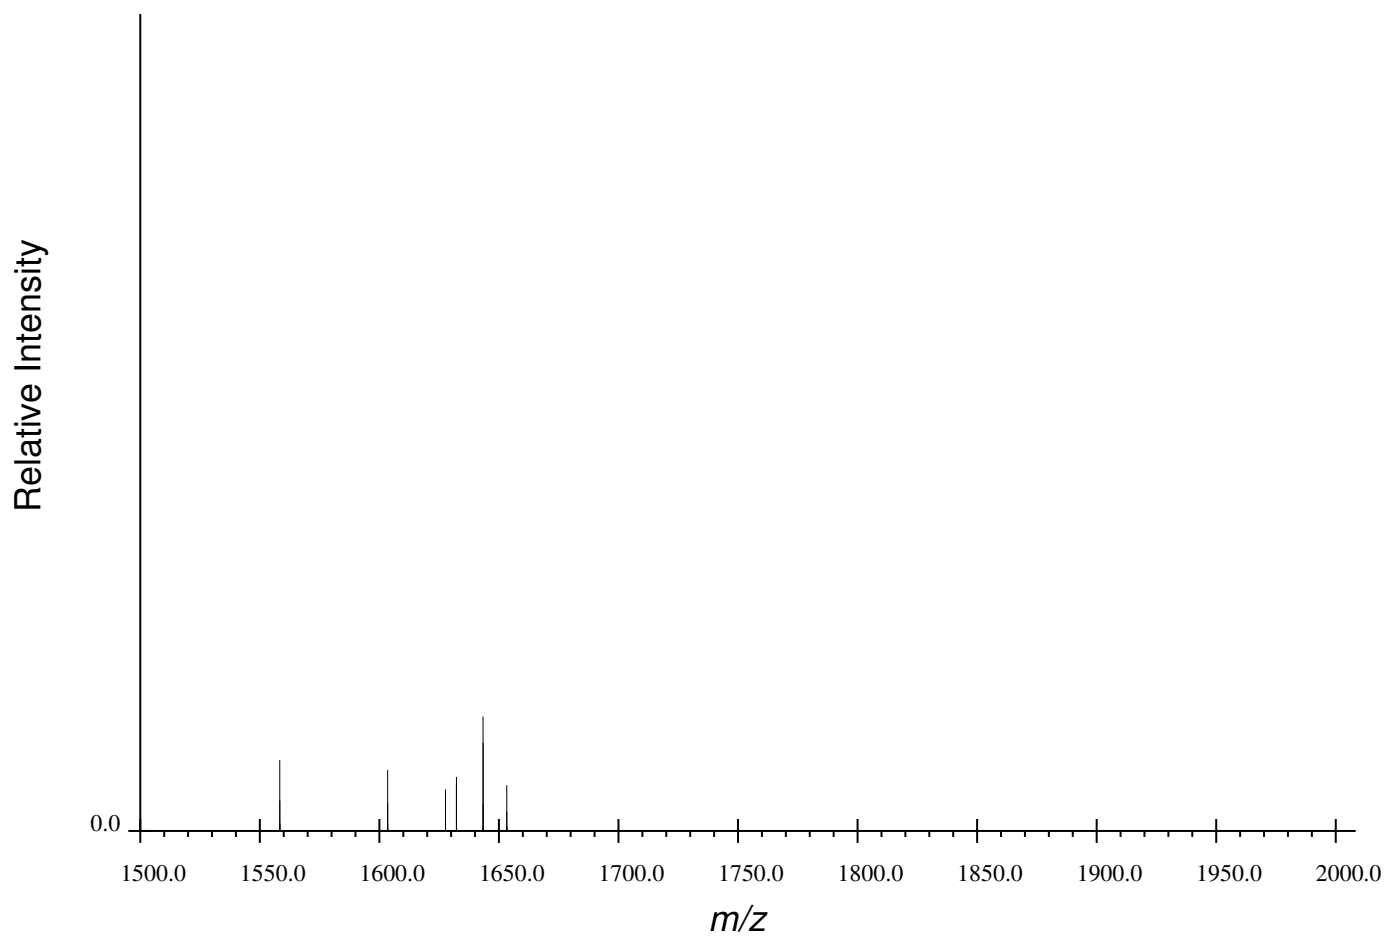

(d) Fourth Region for KRSpYEEHIP, Spectrum 60.dta



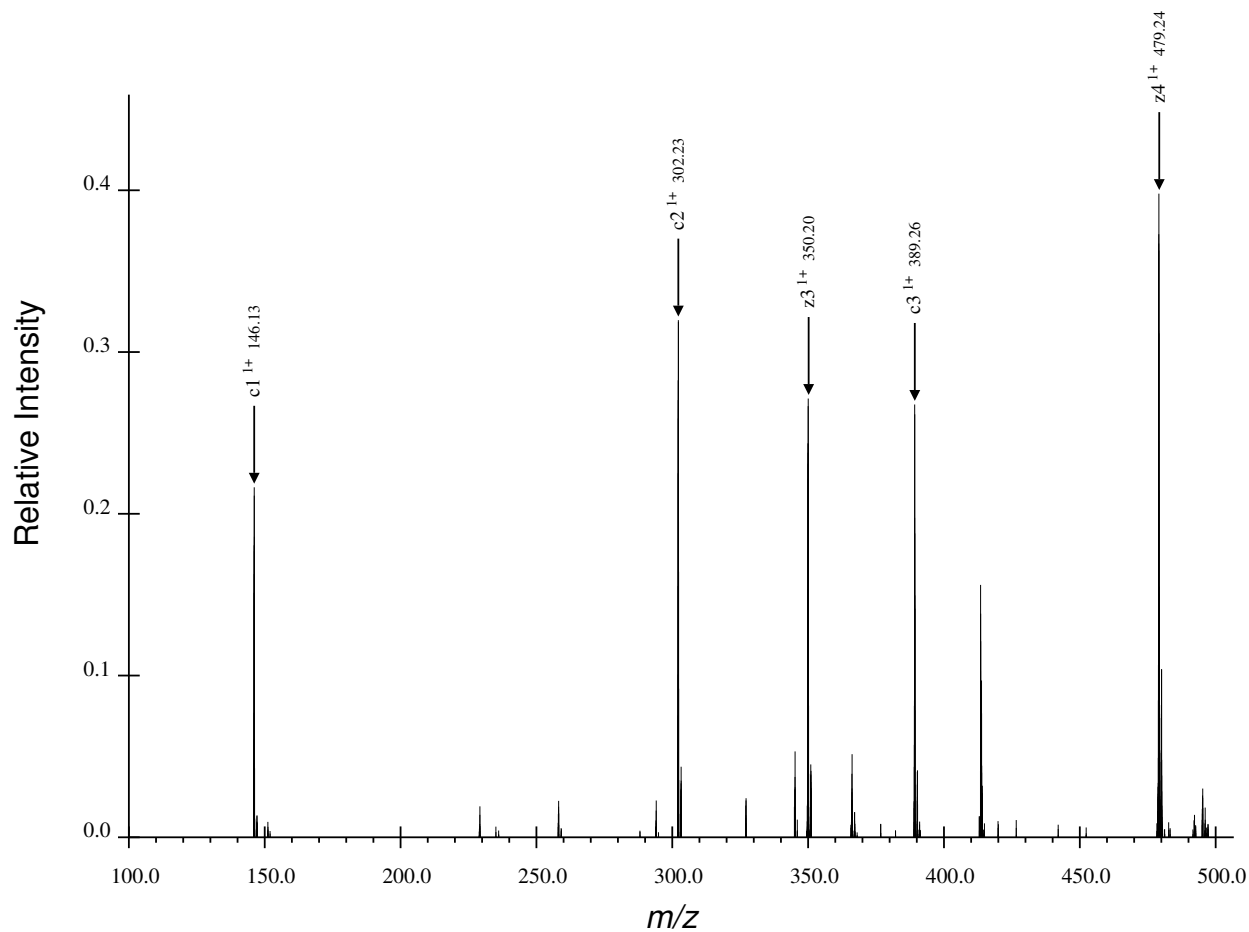

(a) First Region for KRSpYEEHIP, Spectrum 61.dta

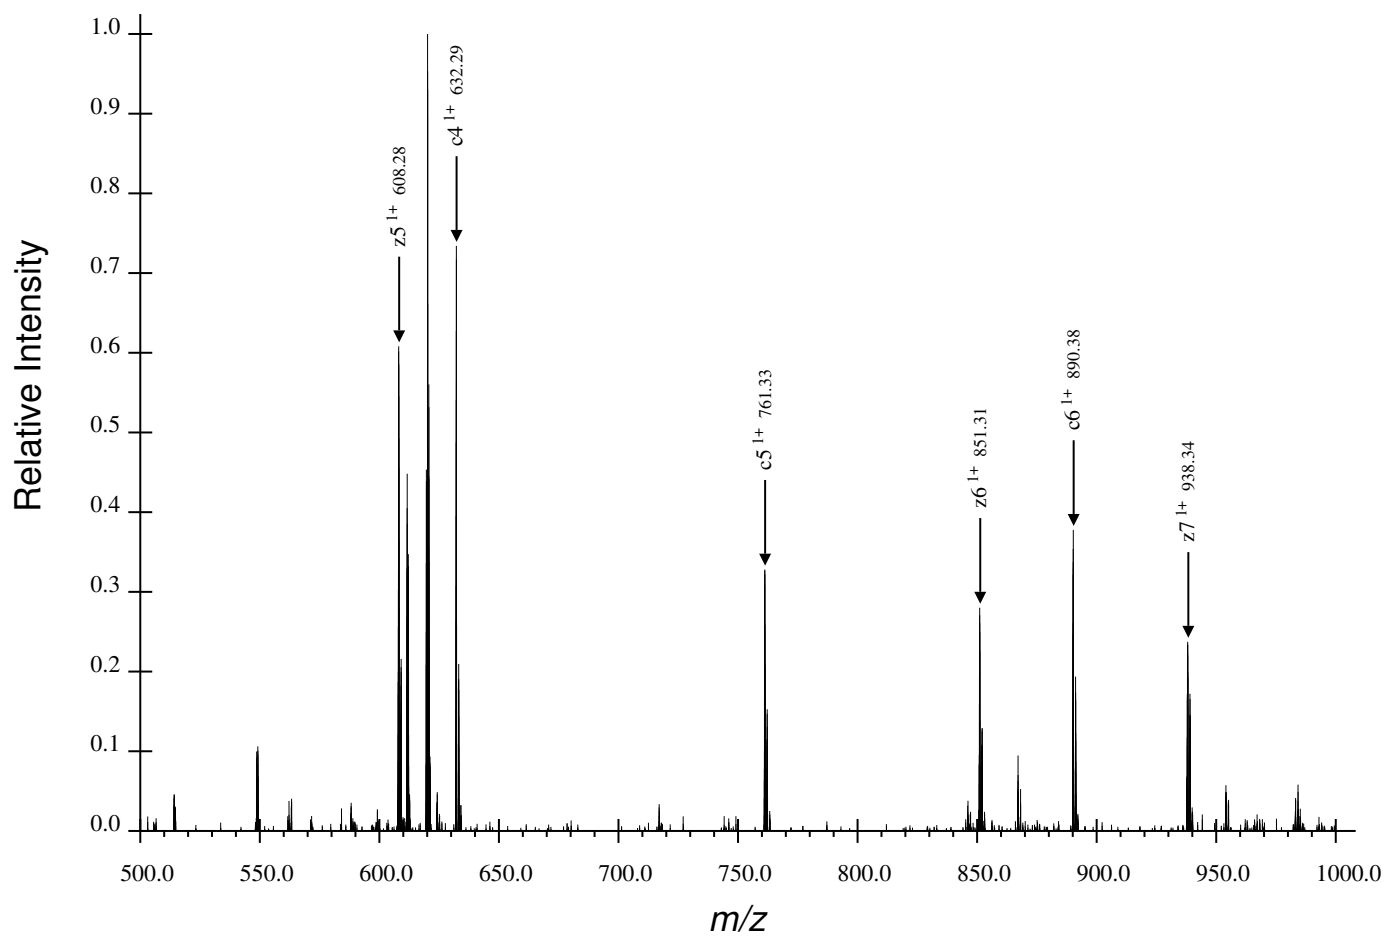

(b) Second Region for KRSpYEEHIP, Spectrum 61.dta

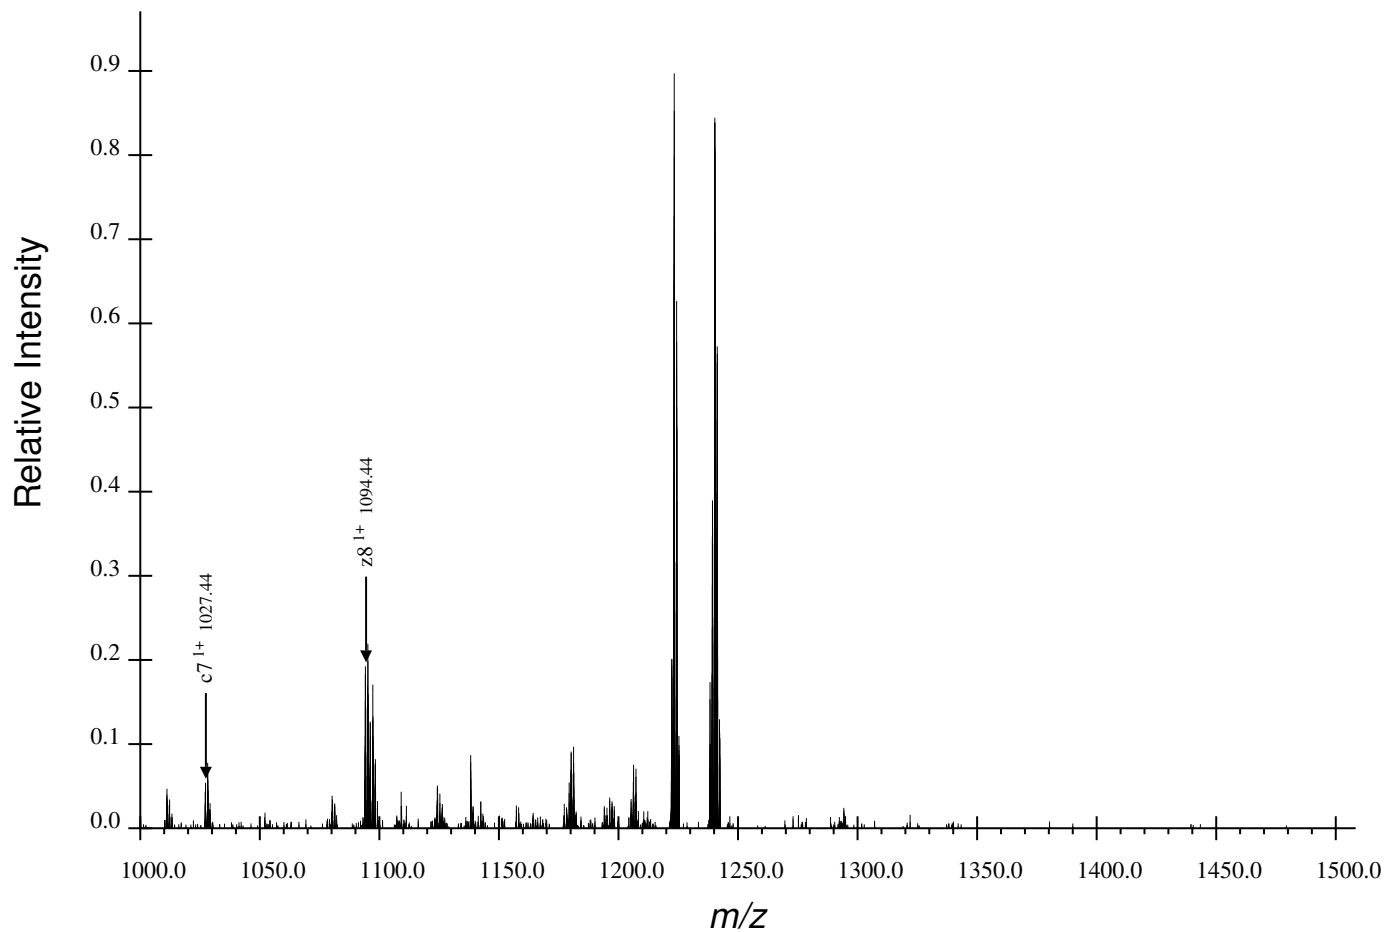

(c) Third Region for KRSpYEEHIP, Spectrum 61.dta

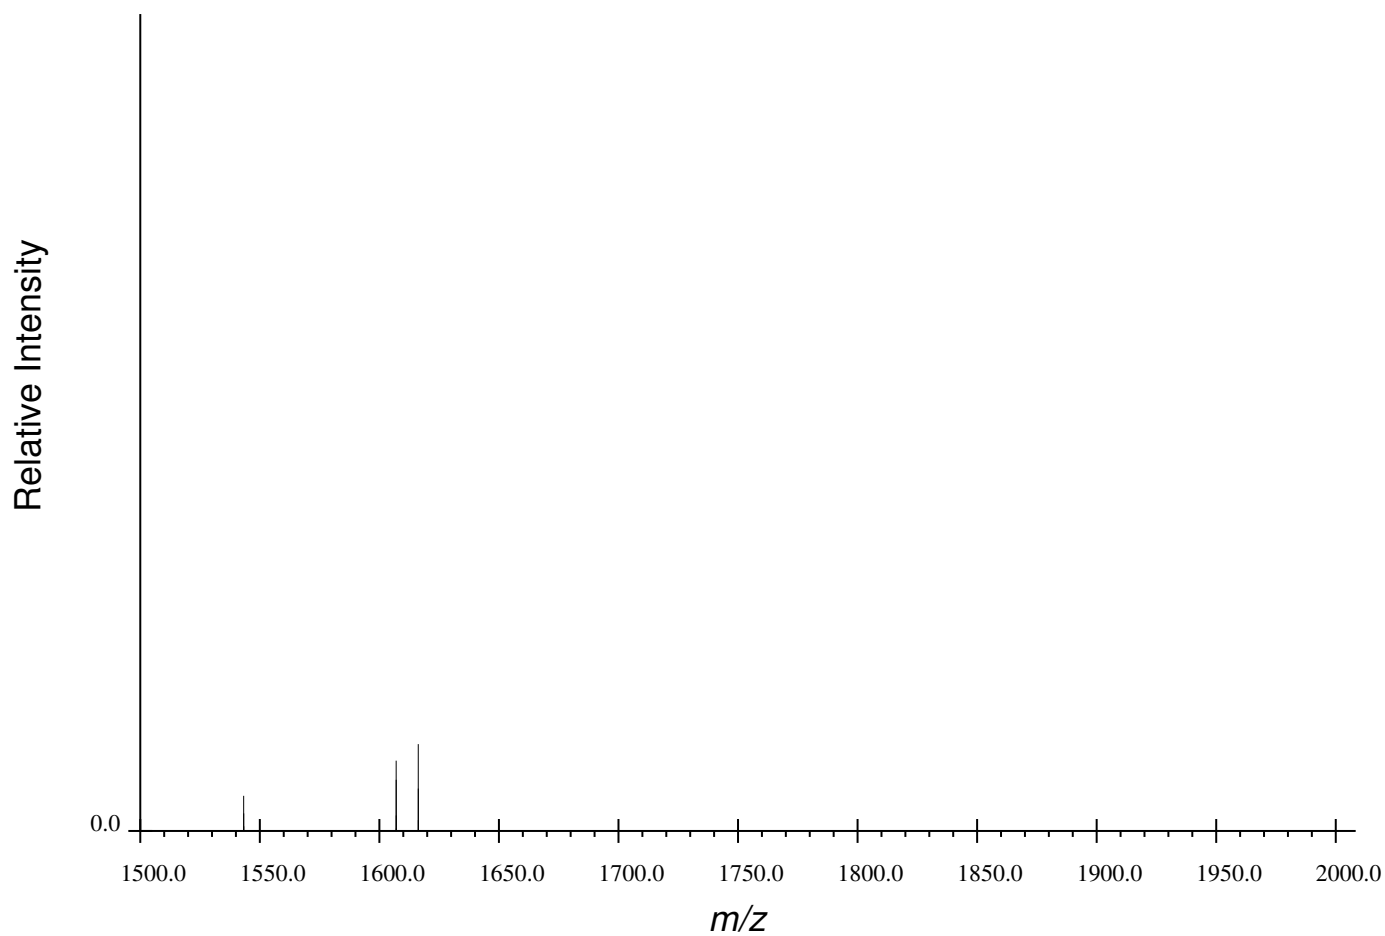

(d) Fourth Region for KRSpYEEHIP, Spectrum 61.dta

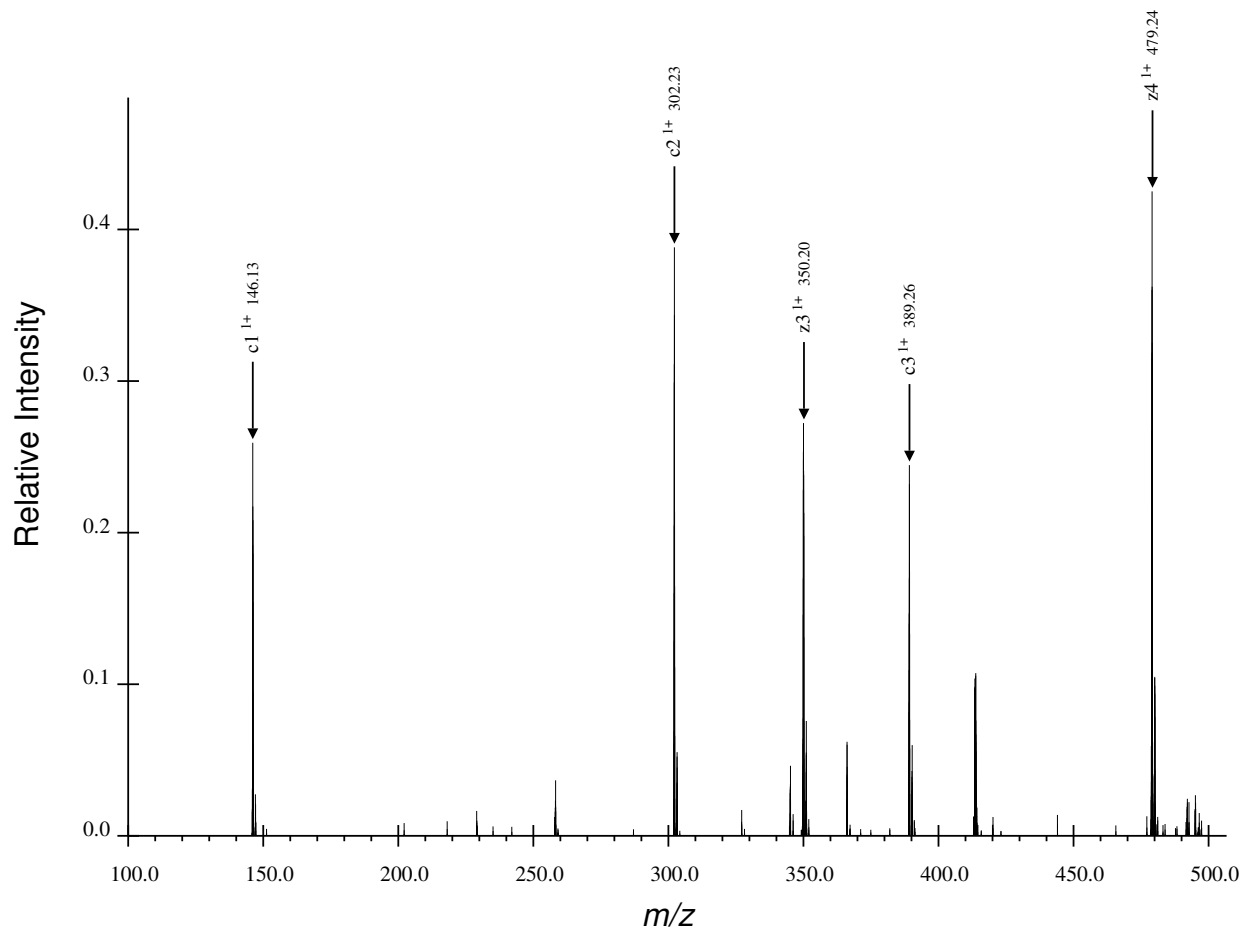

(a) First Region for KRSpYEEHIP, Spectrum 62.dta

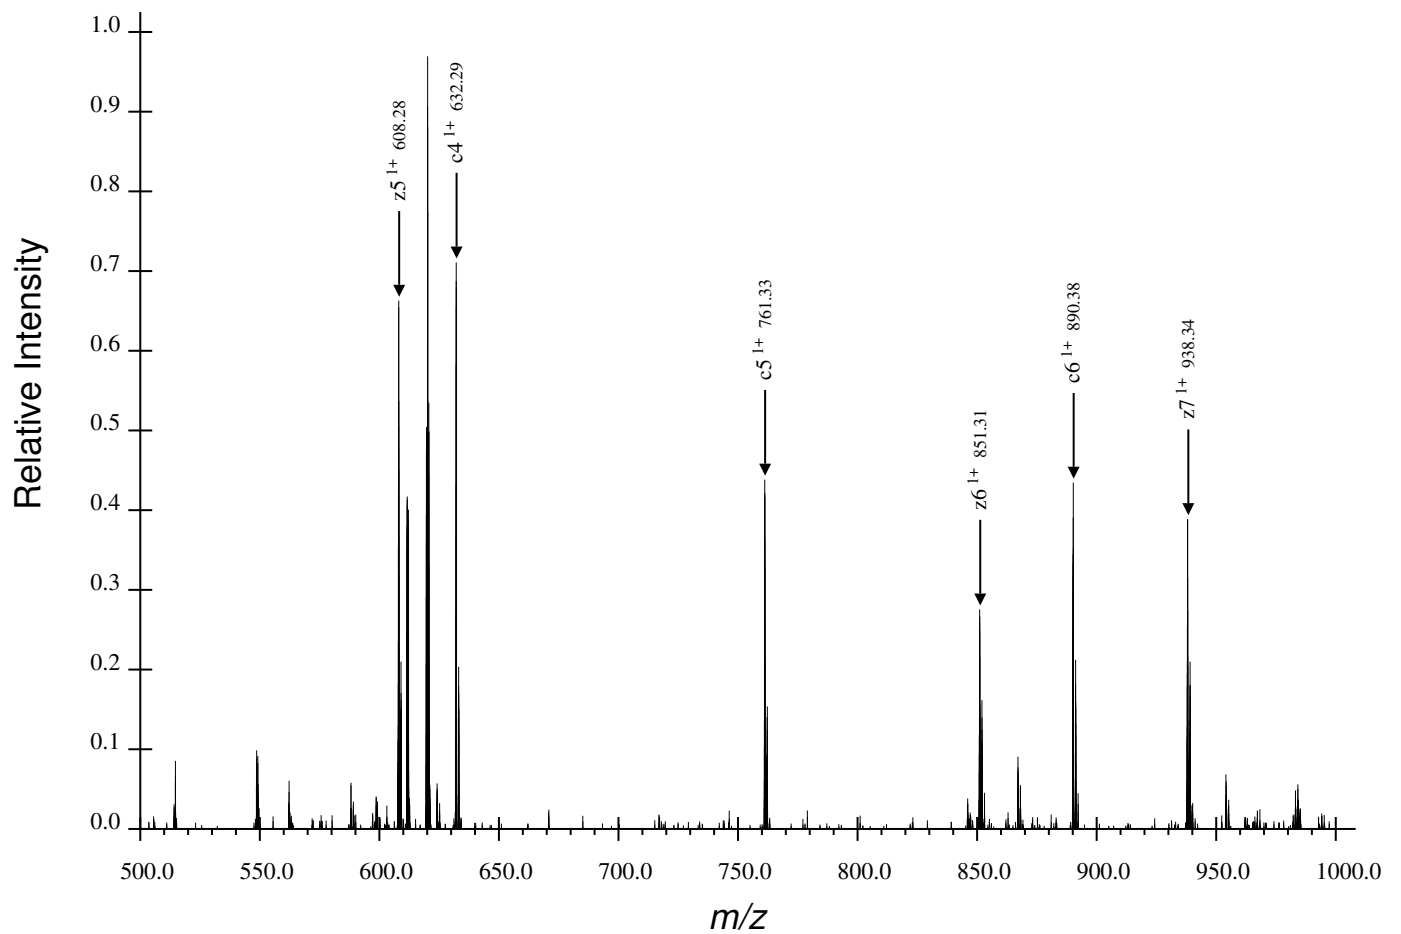

(b) Second Region for KRSpYEEHIP, Spectrum 62.dta

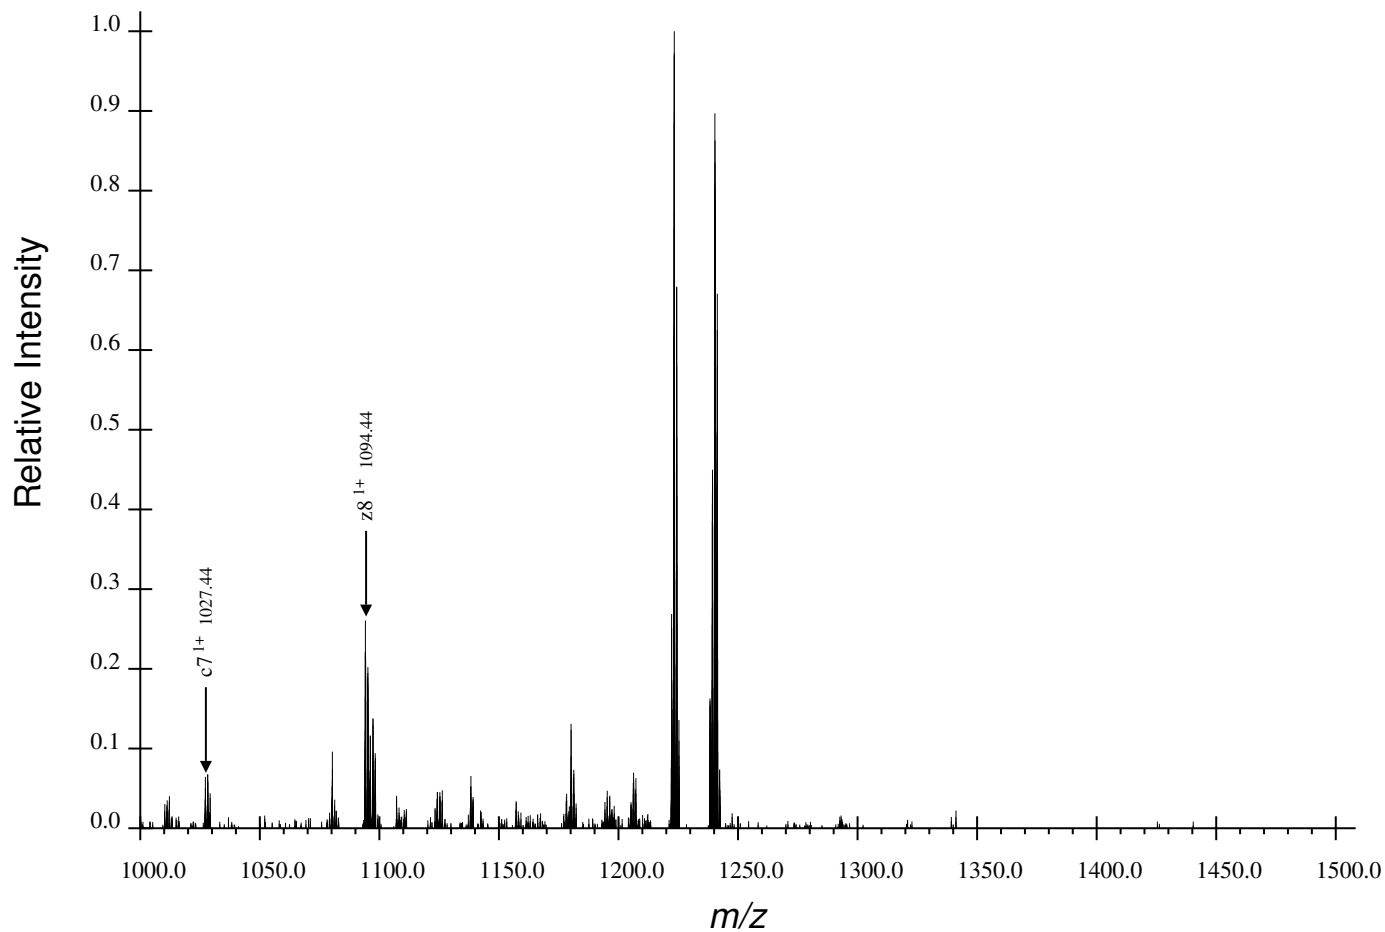

(c) Third Region for KRSpYEEHIP, Spectrum 62.dta

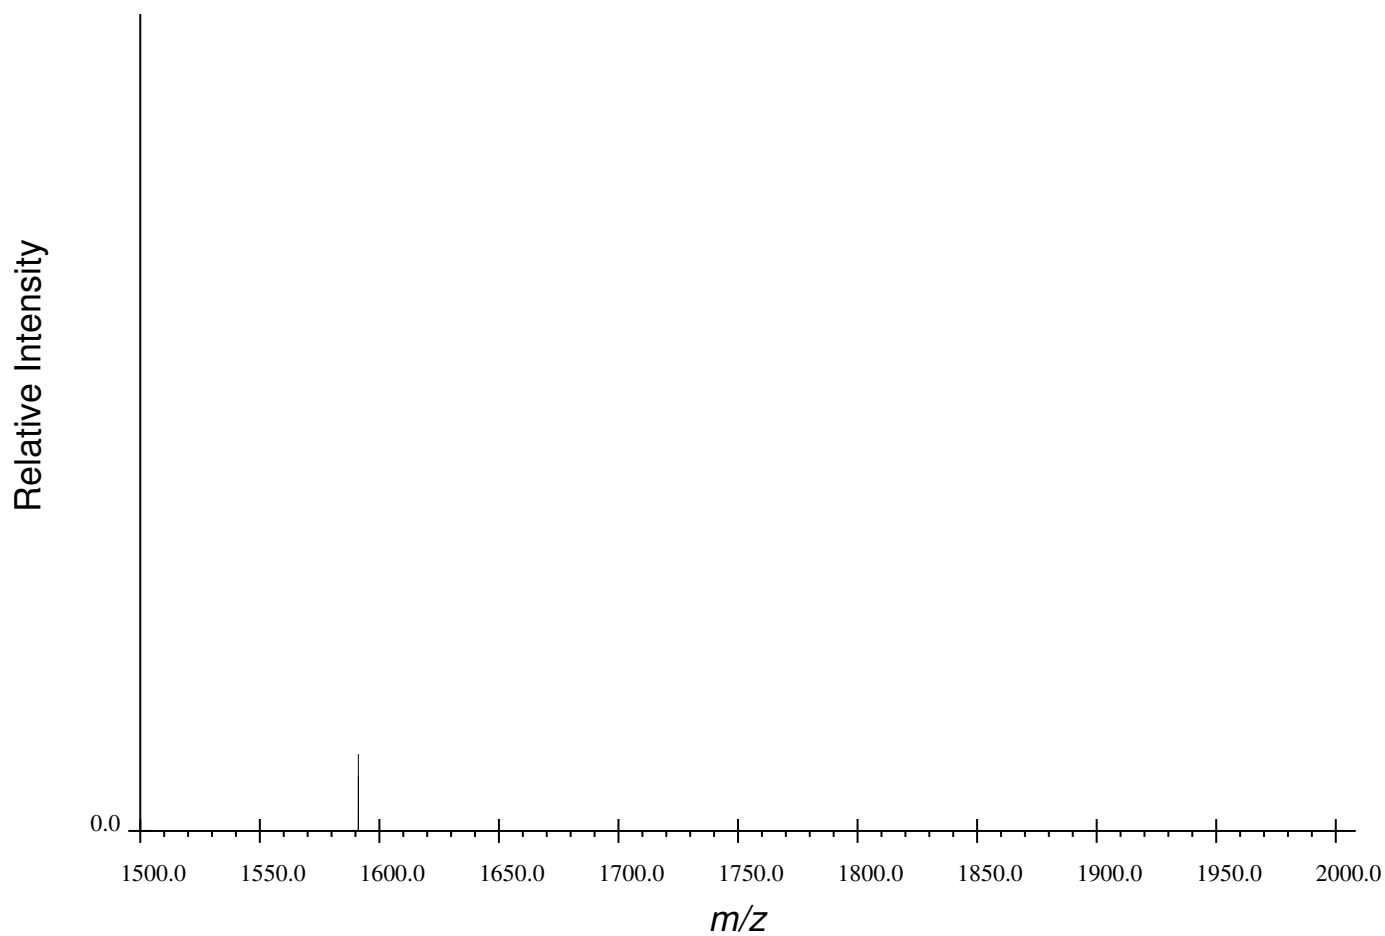

(d) Fourth Region for KRSpYEEHIP, Spectrum 62.dta

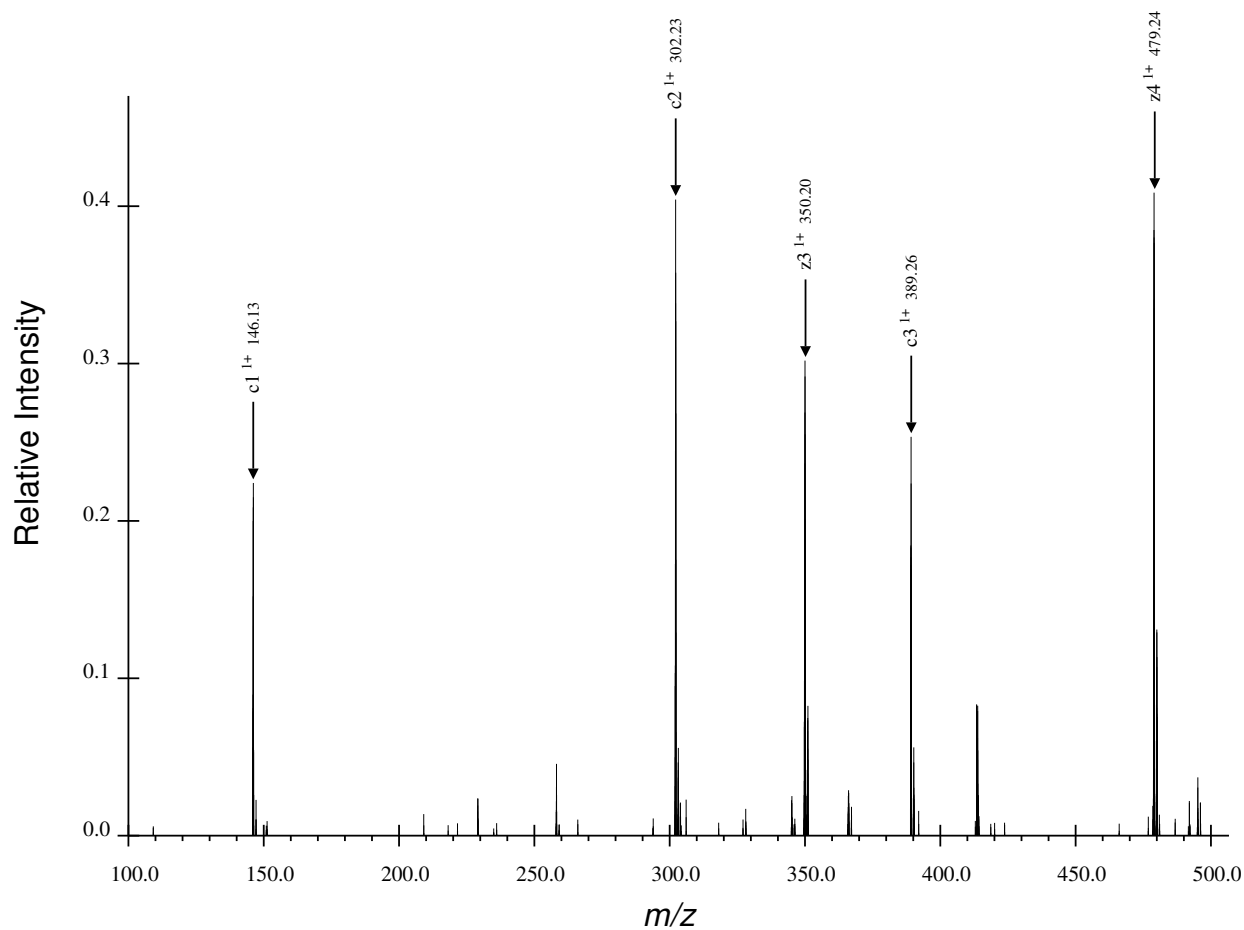

(a) First Region for KRSpYEEHIP, Spectrum 63.dta

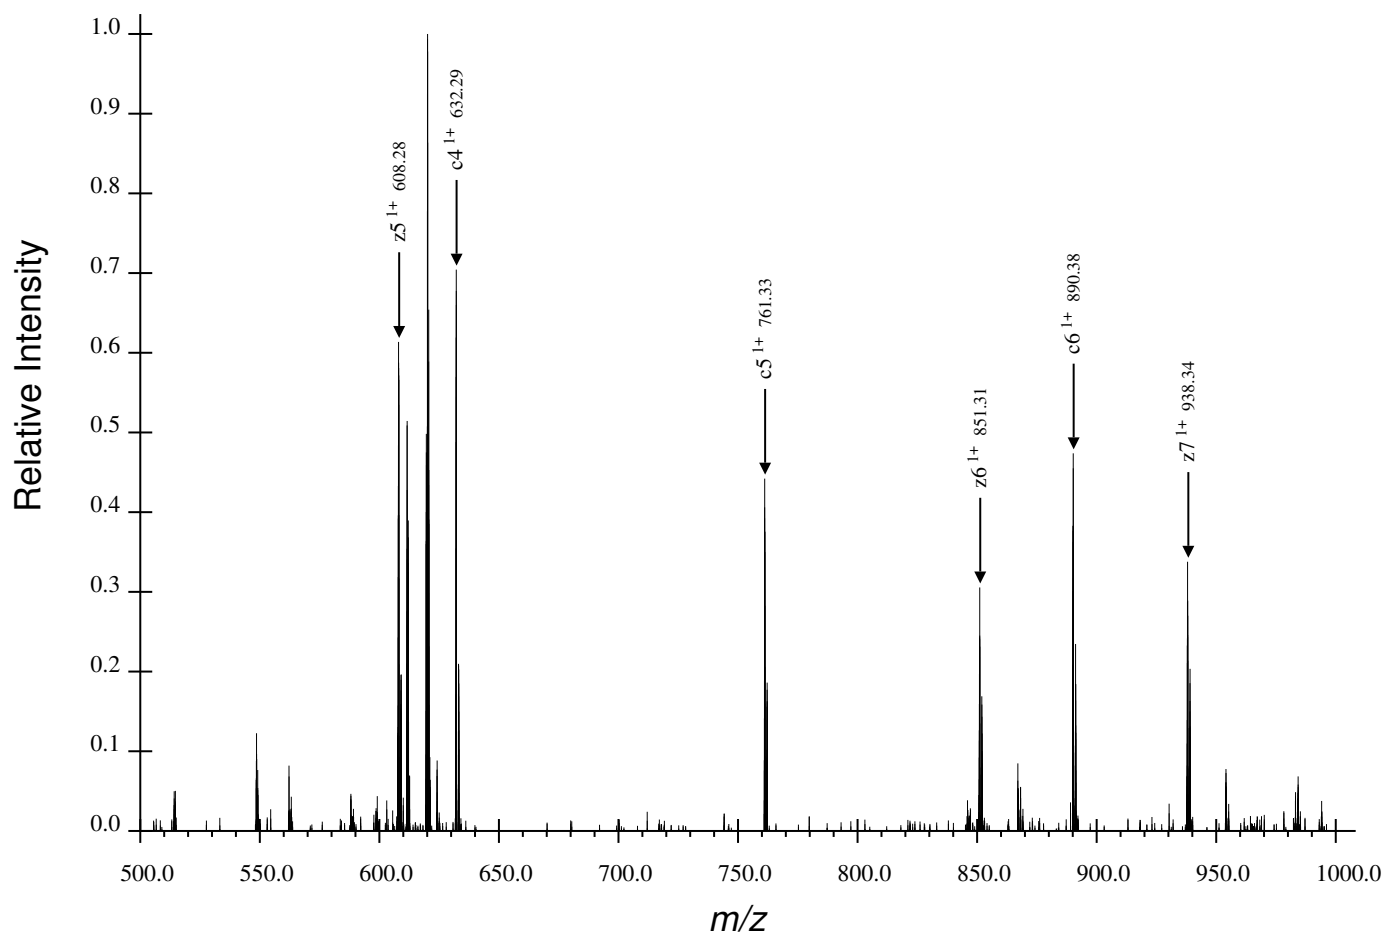

(b) Second Region for KRSpYEEHIP, Spectrum 63.dta

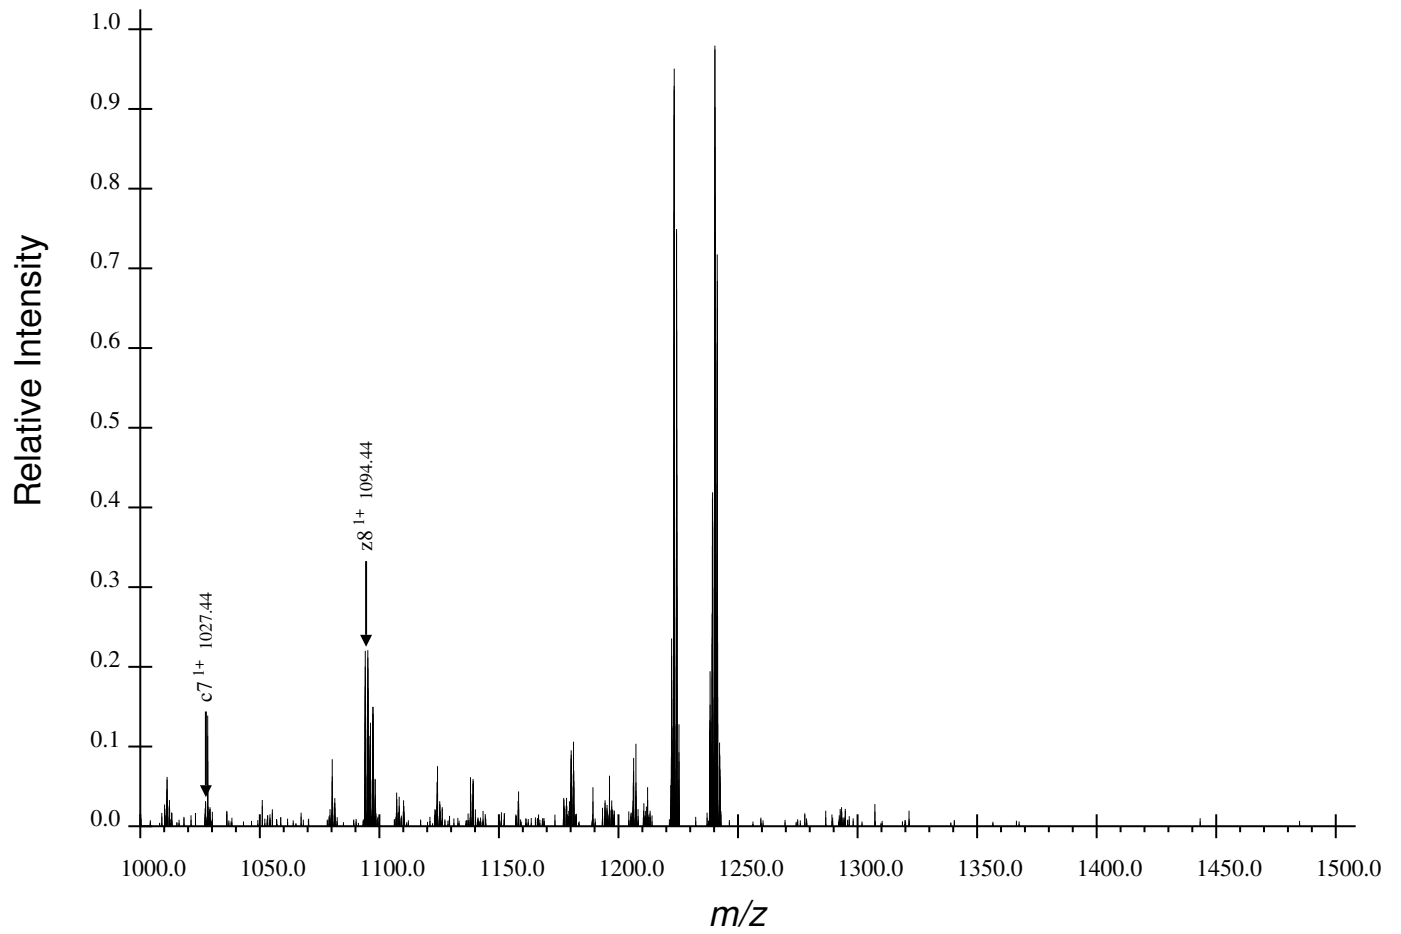

(c) Third Region for KRSpYEEHIP, Spectrum 63.dta

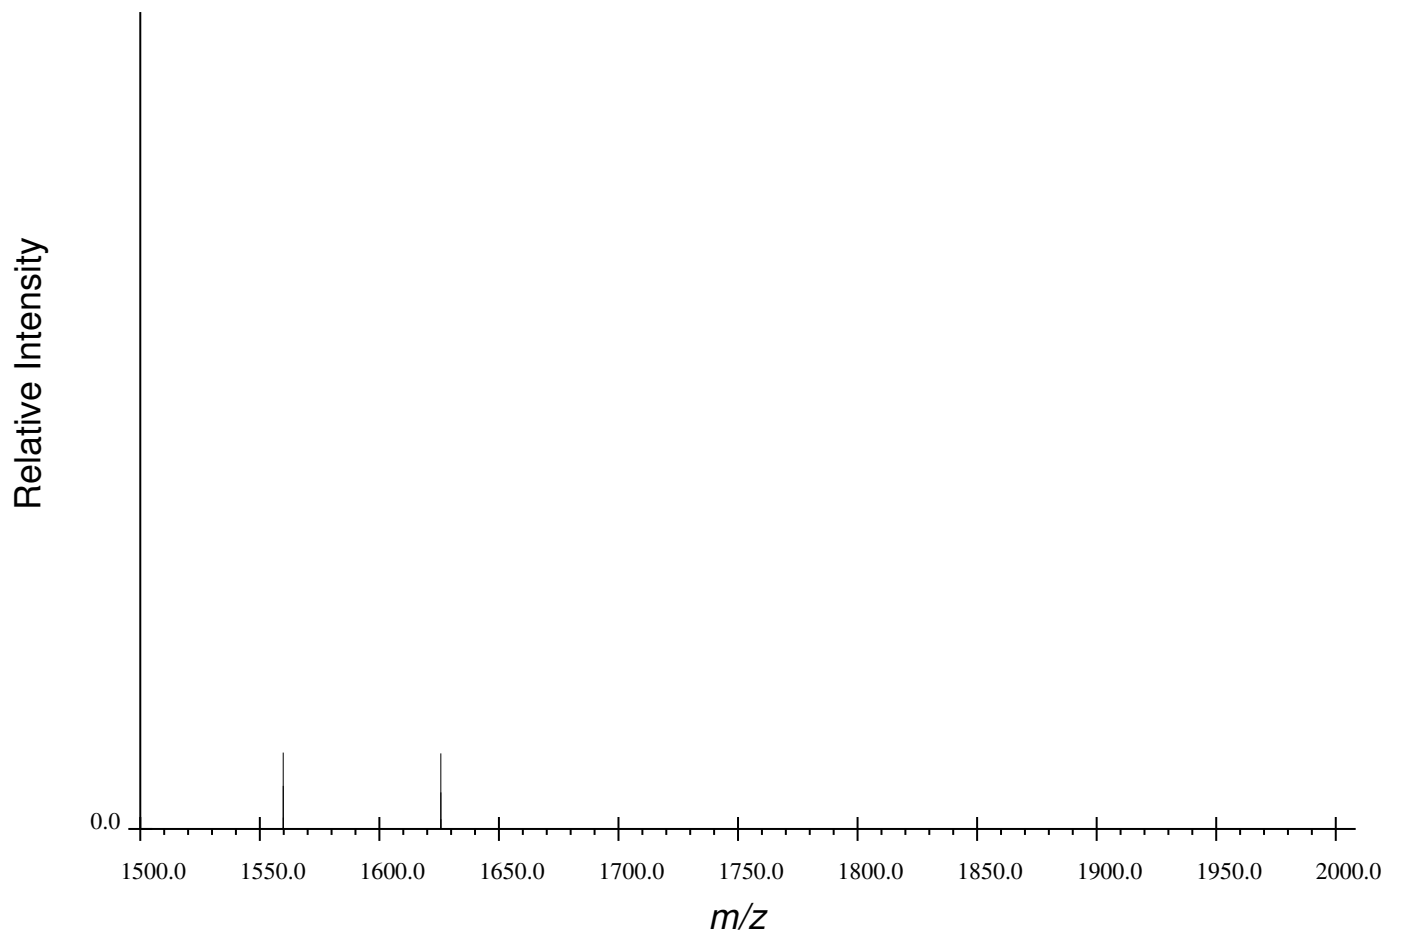

(d) Fourth Region for KRSpYEEHIP, Spectrum 63.dta

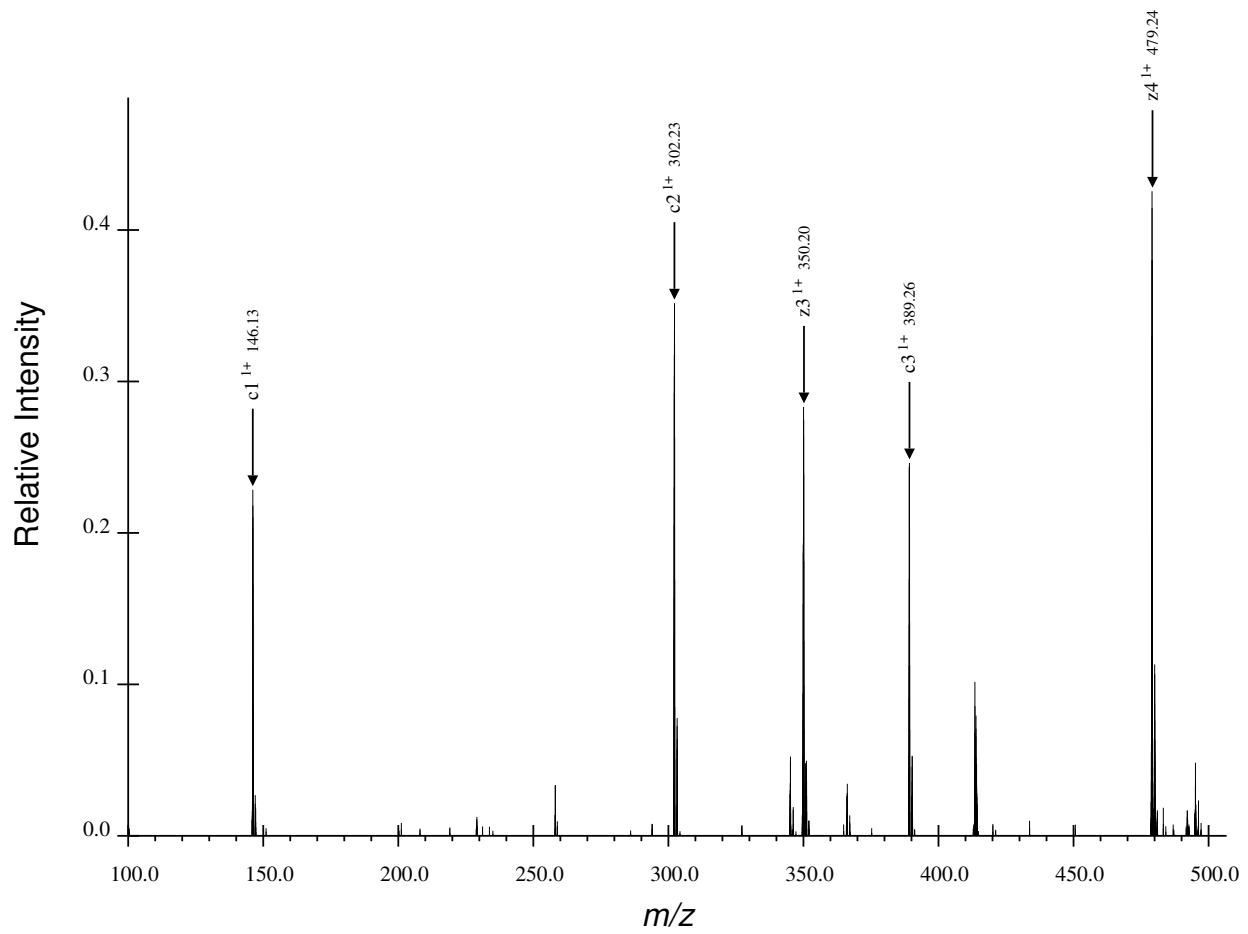

(a) First Region for KRSpYEEHIP, Spectrum 64.dta

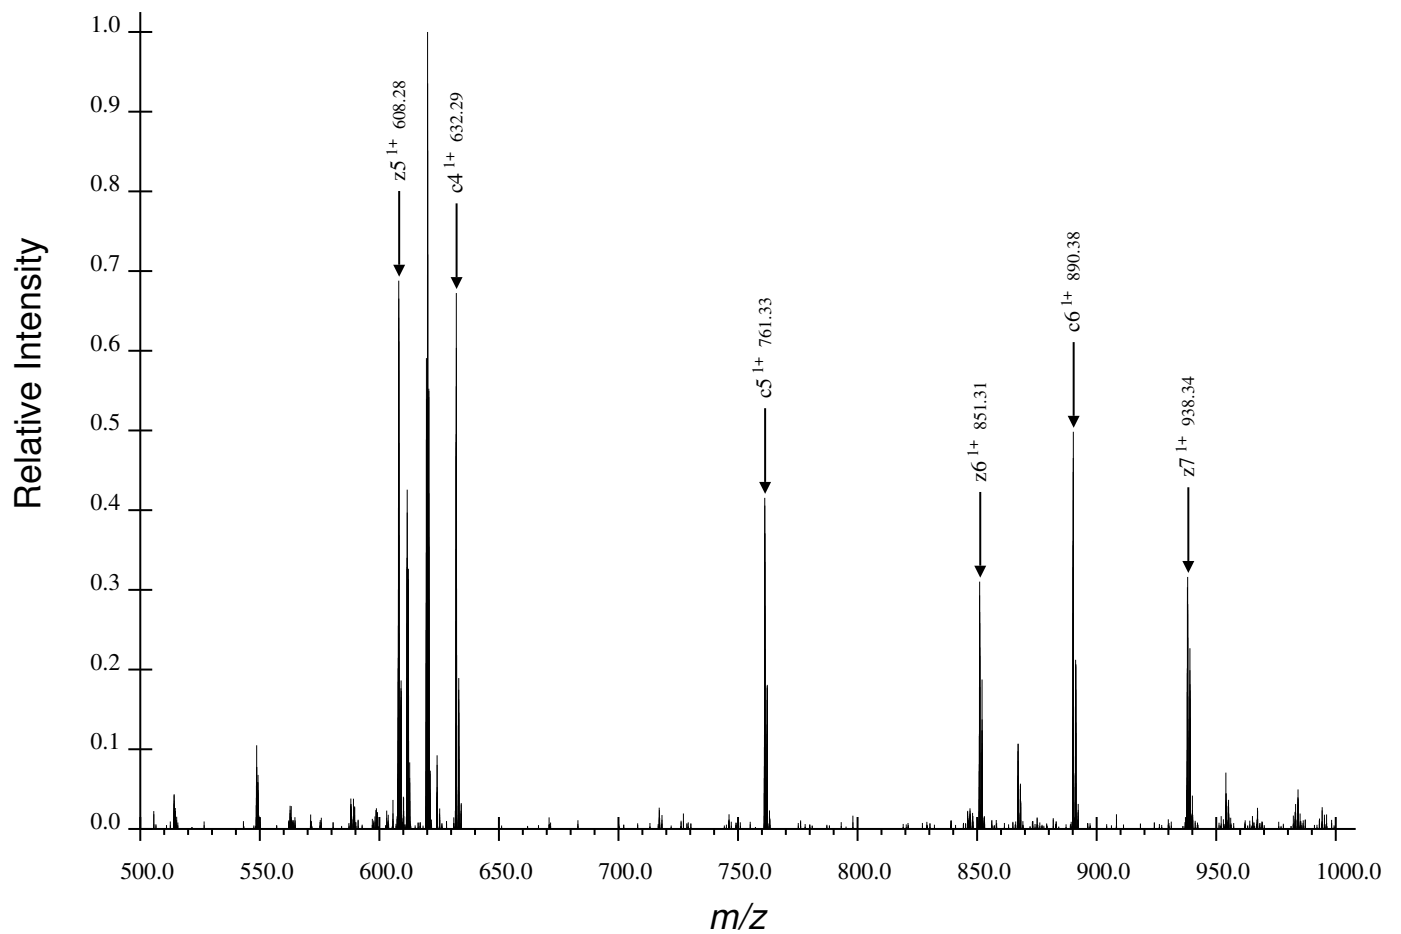

(b) Second Region for KRSpYEEHIP, Spectrum 64.dta

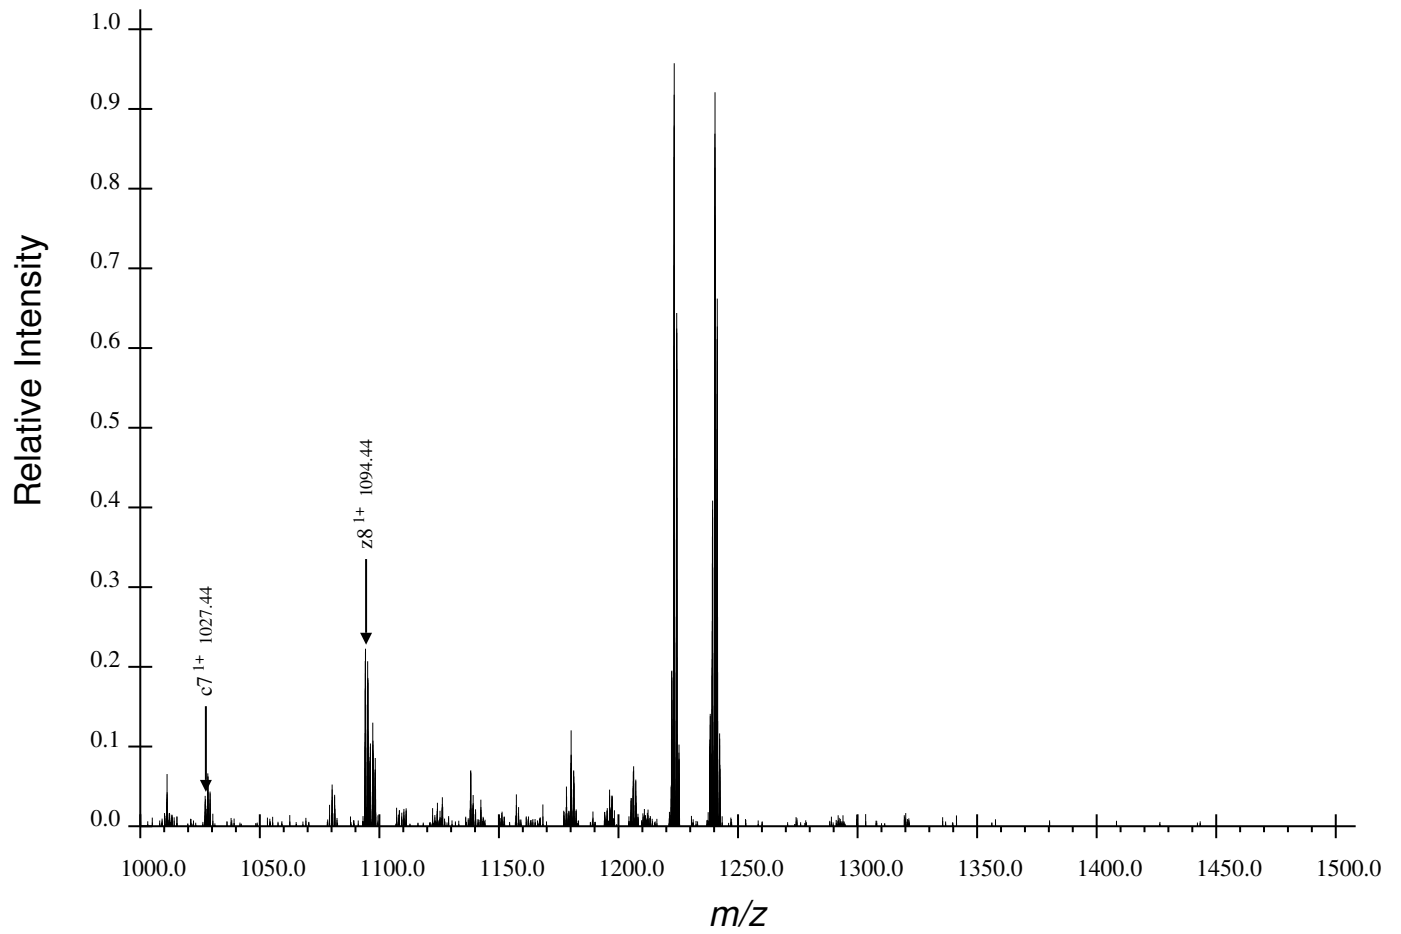

(c) Third Region for KRSpYEEHIP, Spectrum 64.dta

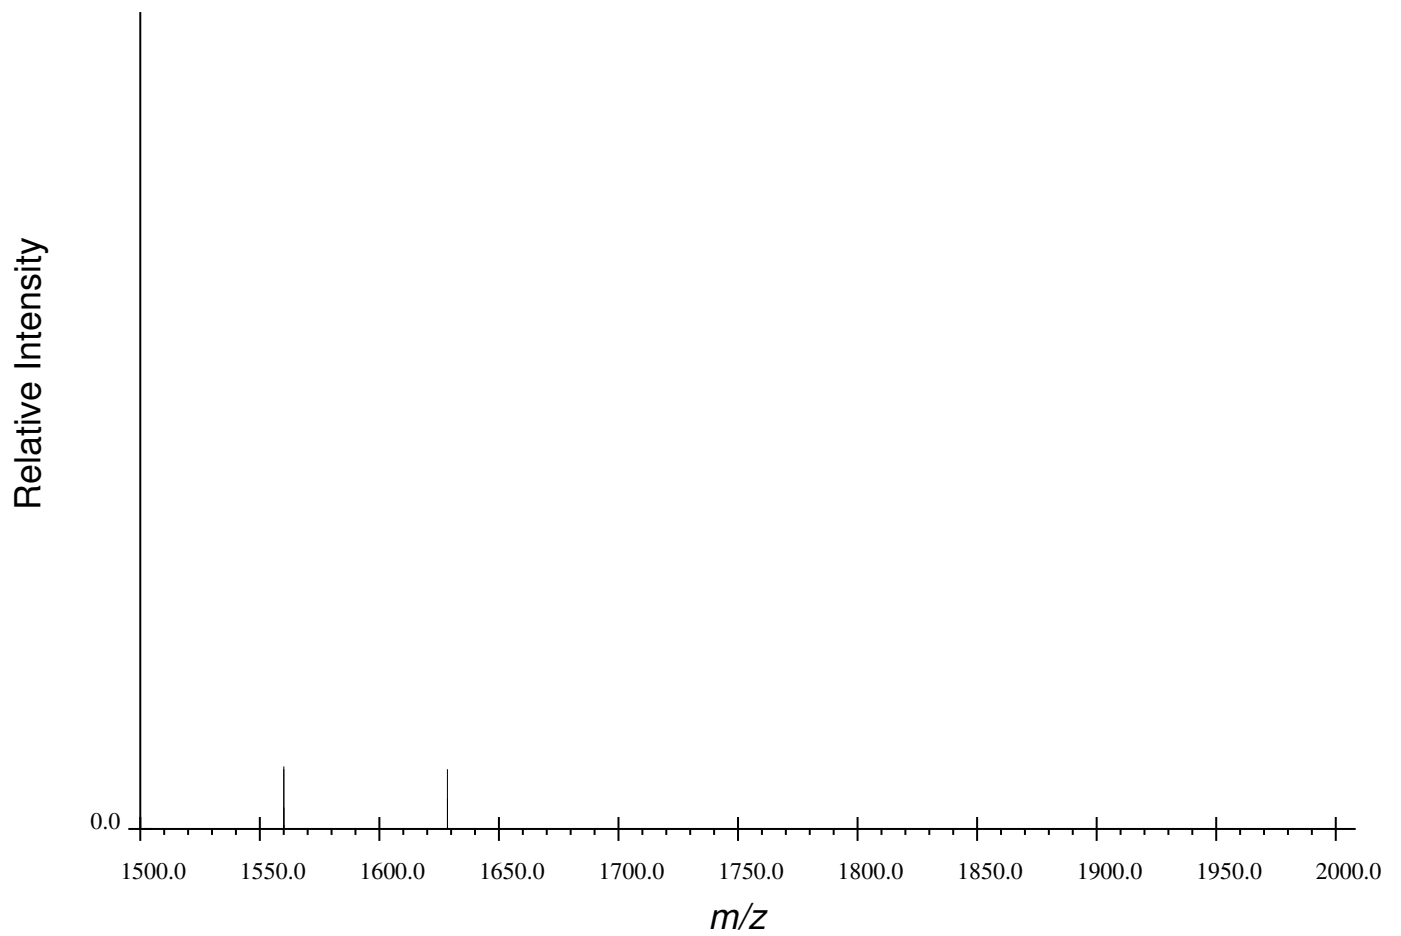

(d) Fourth Region for KRSpYEEHIP, Spectrum 64.dta



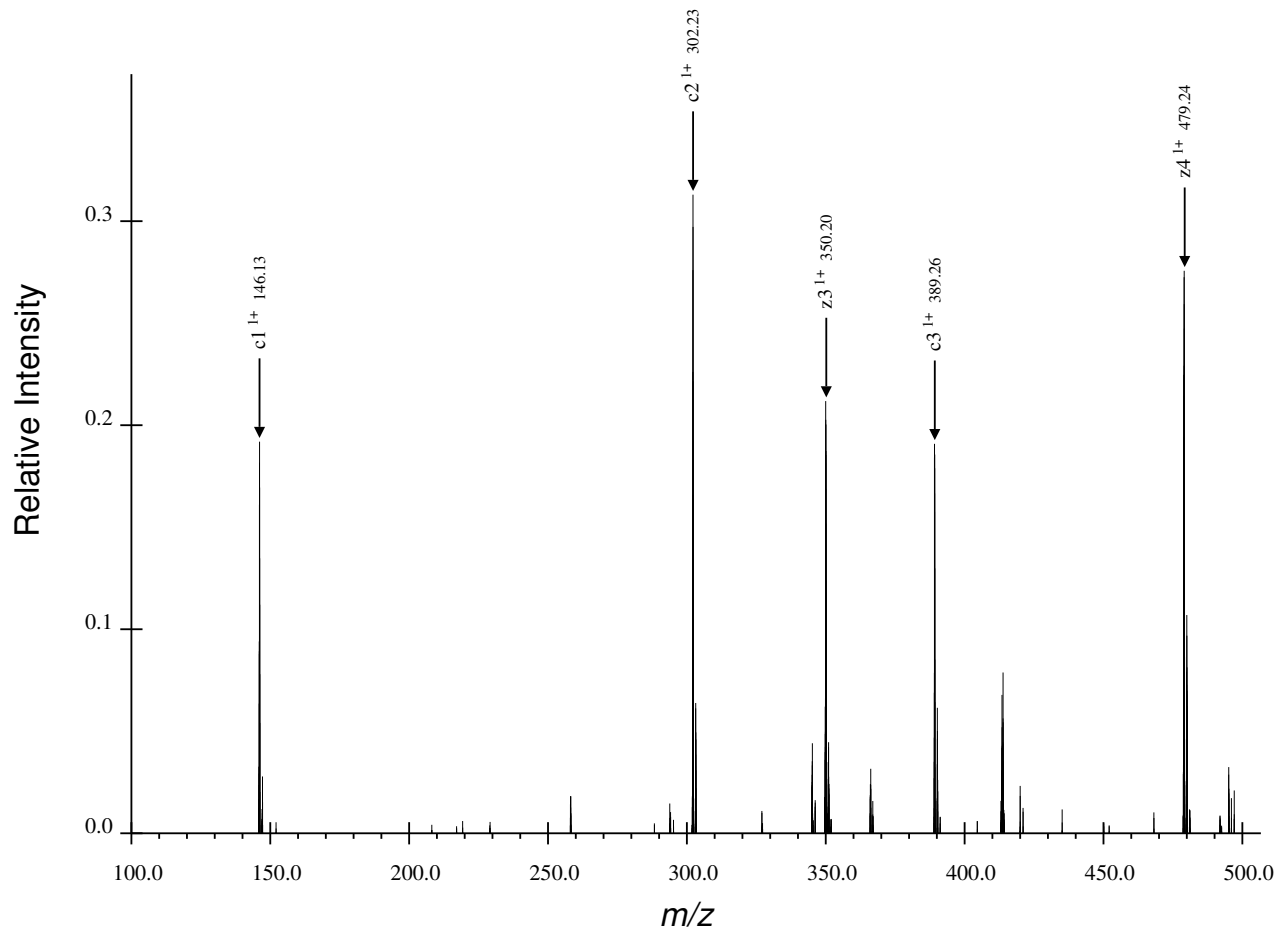

(a) First Region for KRSpYEEHIP, Spectrum 65.dta

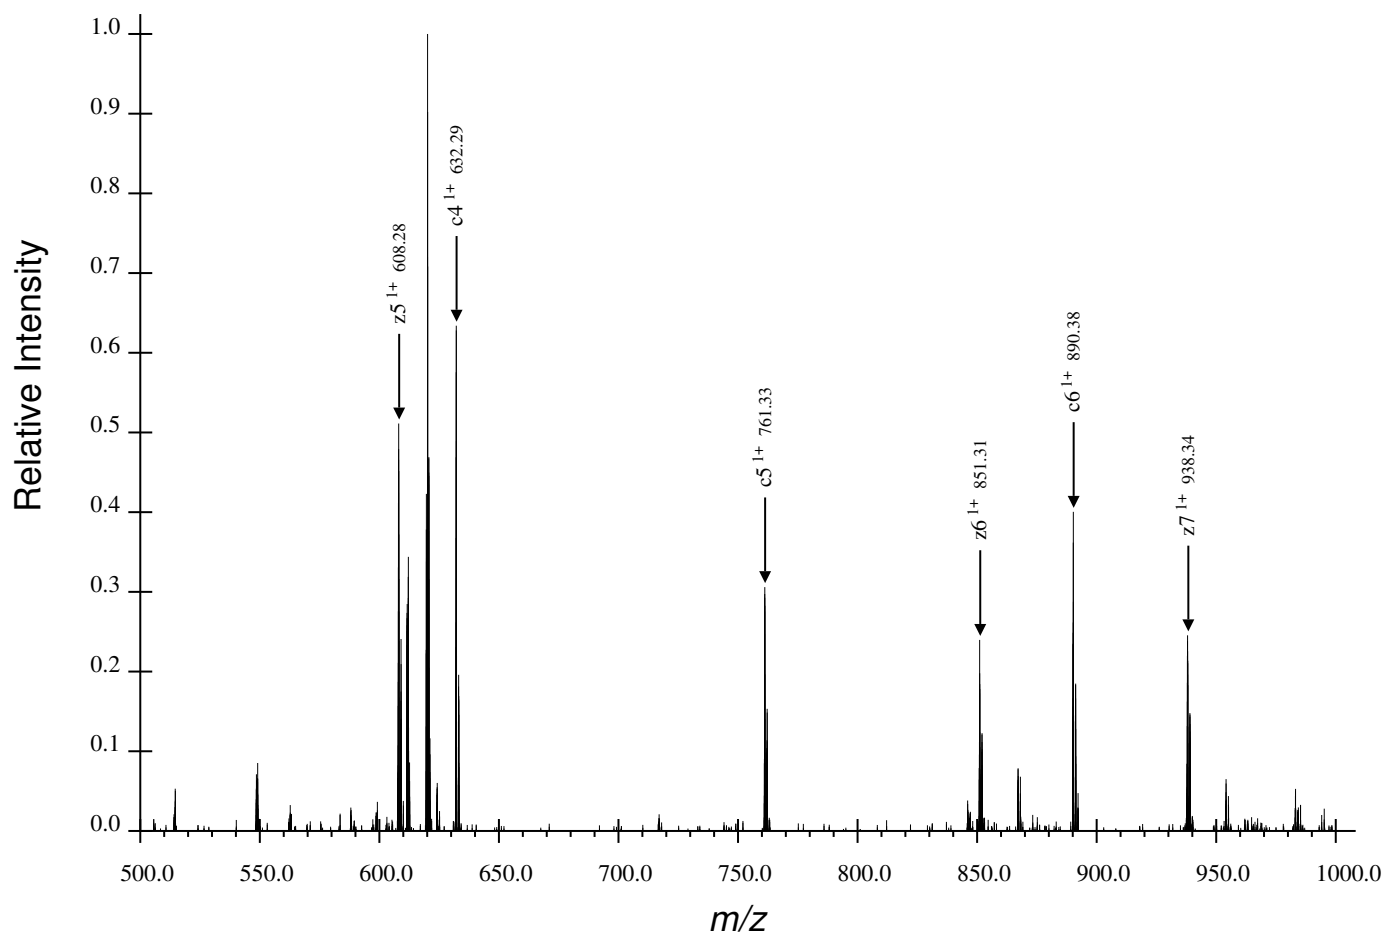

(b) Second Region for KRSpYEEHIP, Spectrum 65.dta

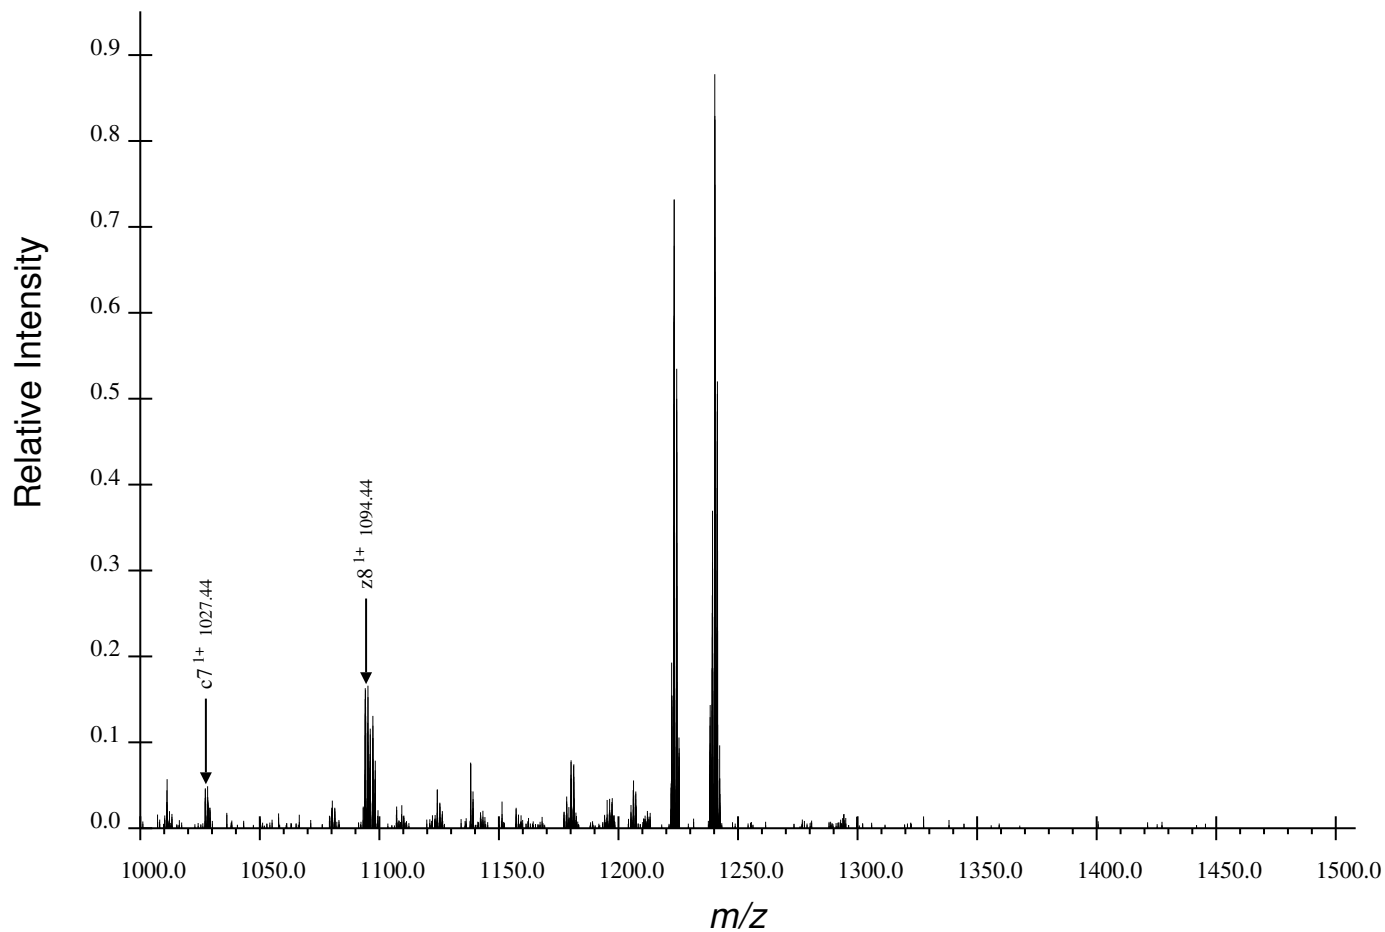

(c) Third Region for KRSpYEEHIP, Spectrum 65.dta



(d) Fourth Region for KRSpYEEHIP, Spectrum 65.dta

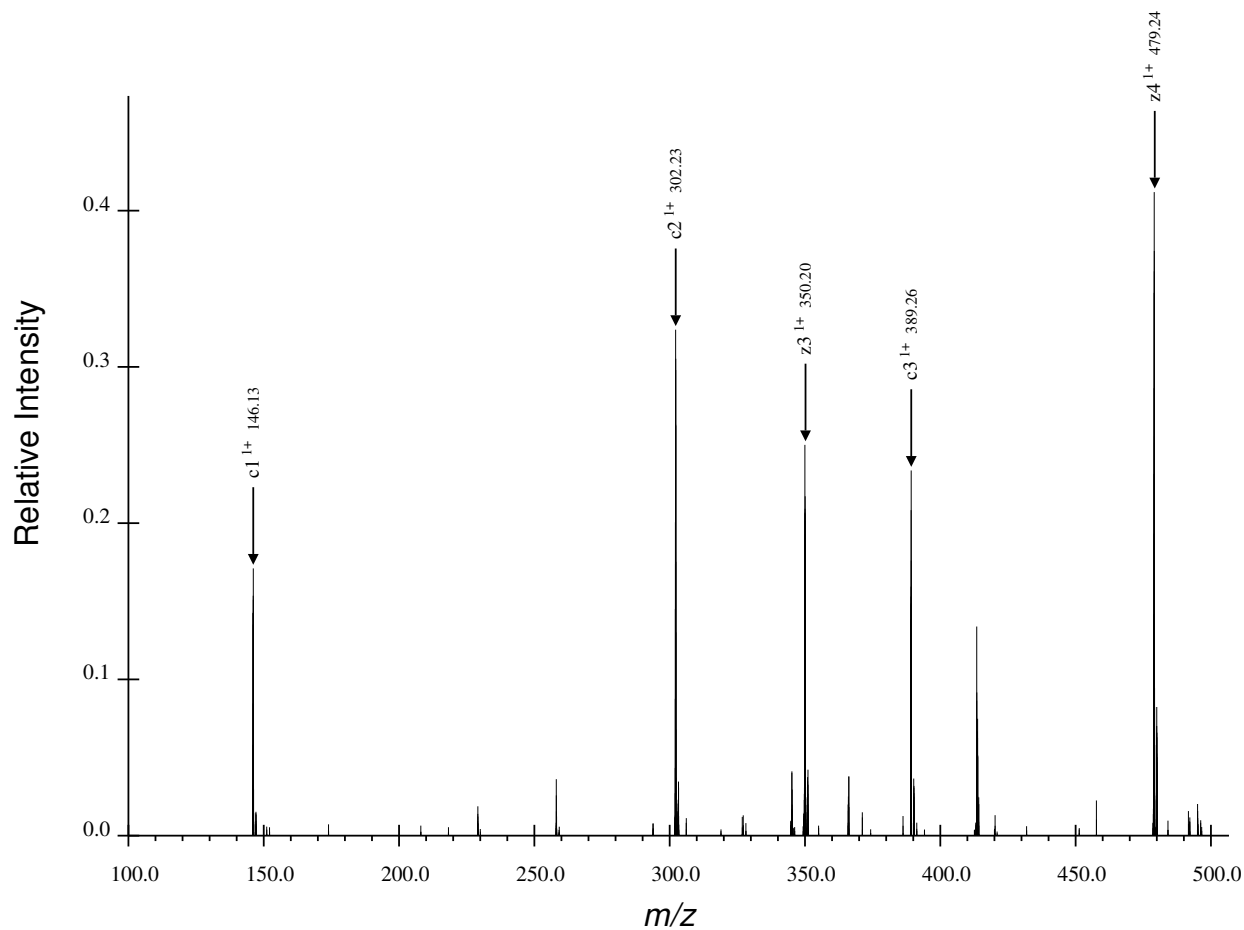

(a) First Region for KRSpYEEHIP, Spectrum 66.dta

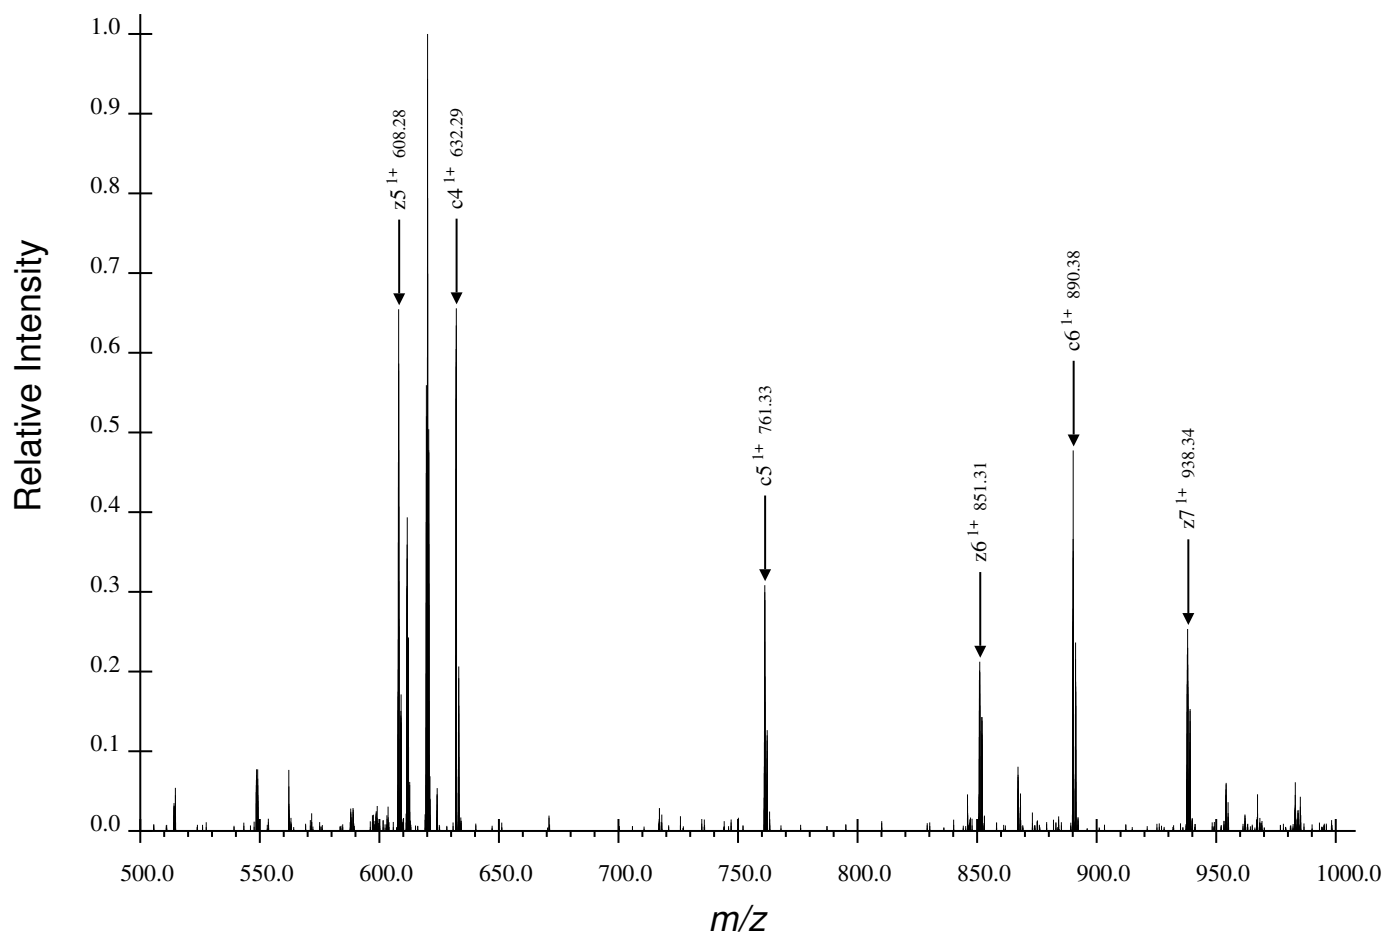

(b) Second Region for KRSpYEEHIP, Spectrum 66.dta

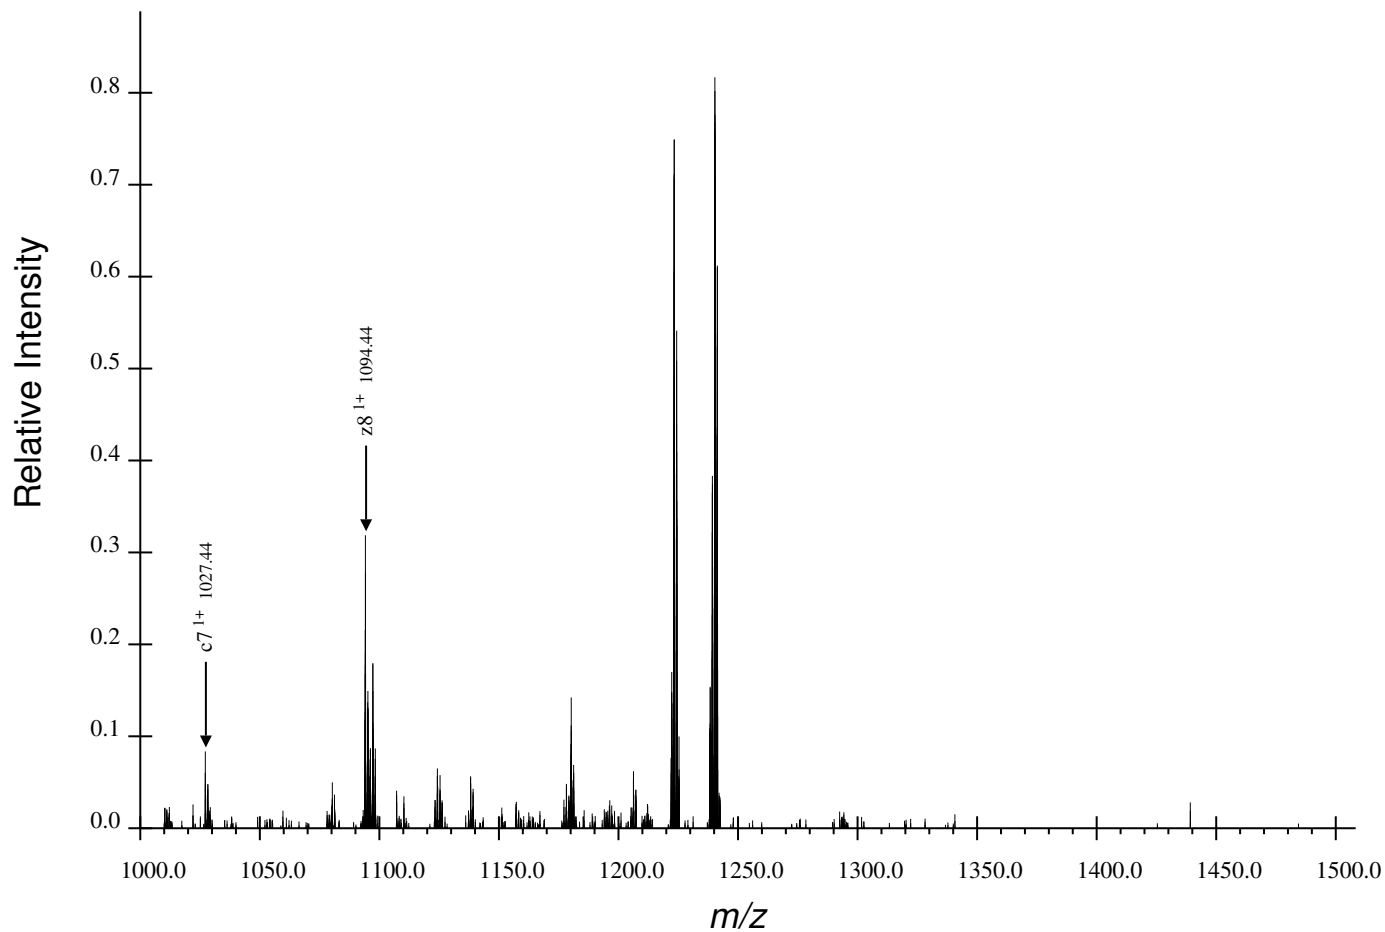

(c) Third Region for KRSpYEEHIP, Spectrum 66.dta

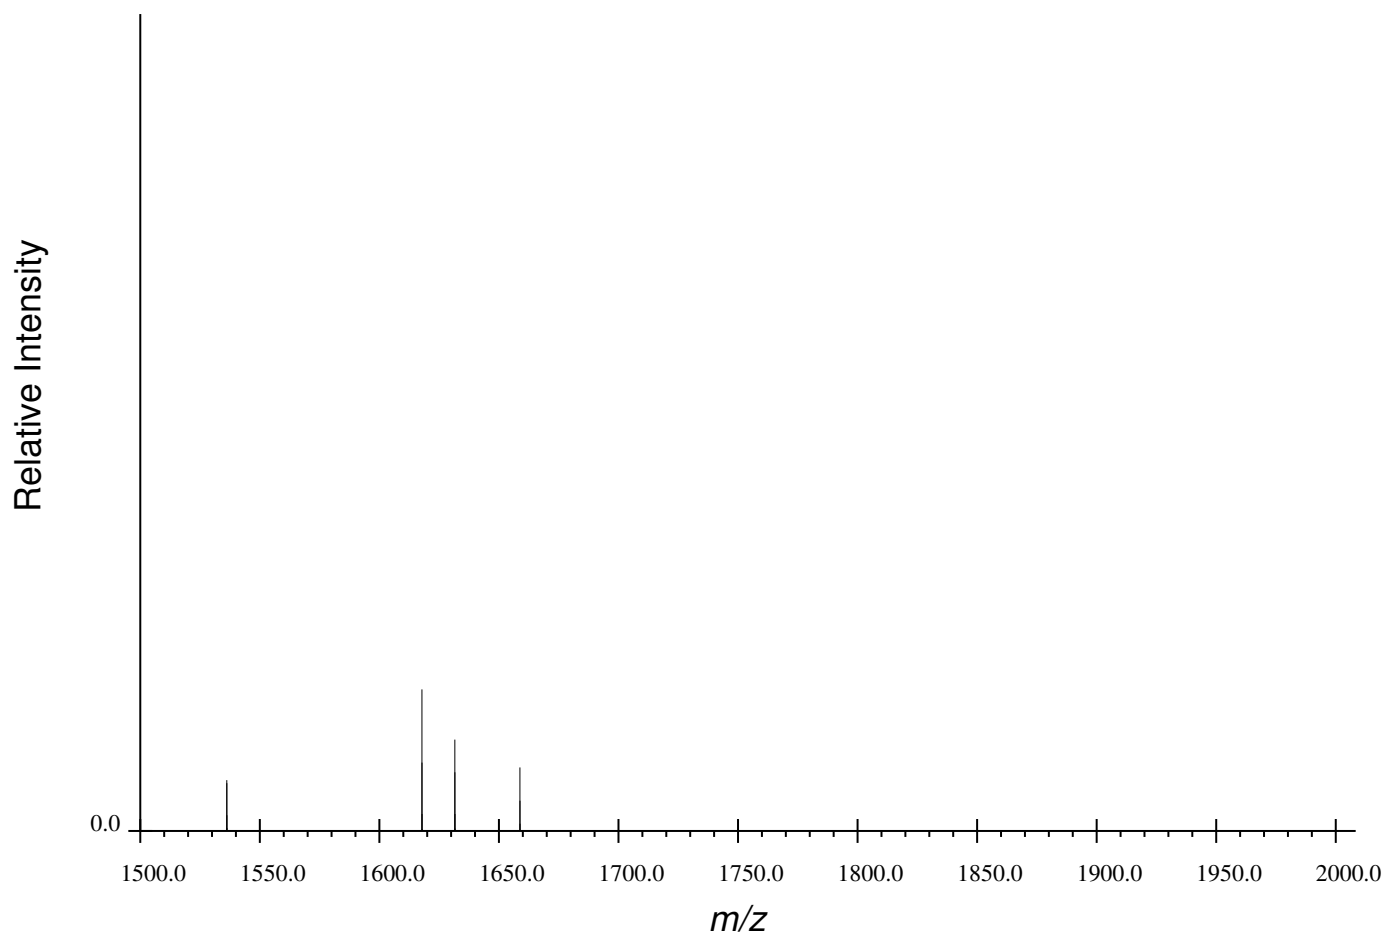

(d) Fourth Region for KRSpYEEHIP, Spectrum 66.dta

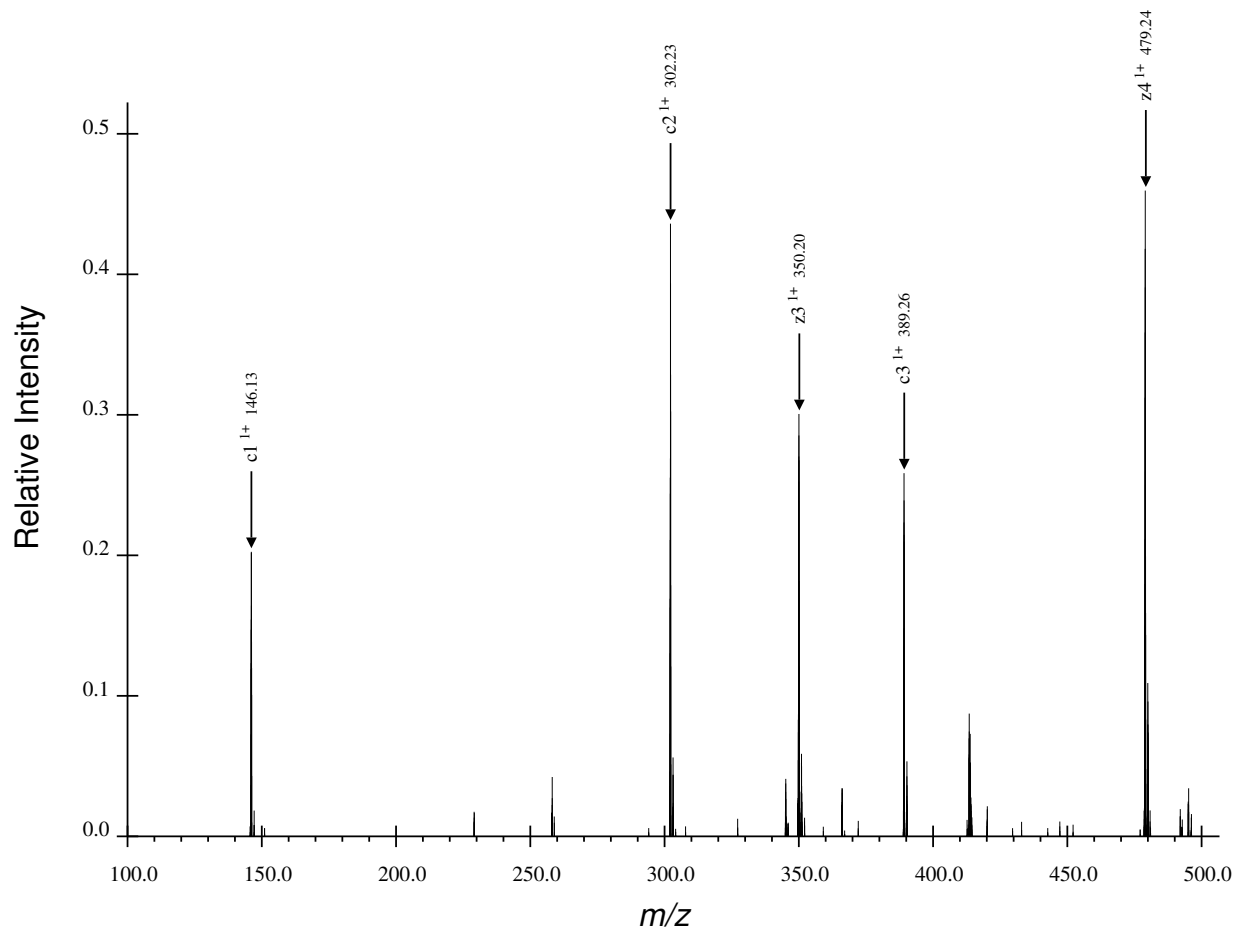

(a) First Region for KRSpYEEHIP, Spectrum 67.dta

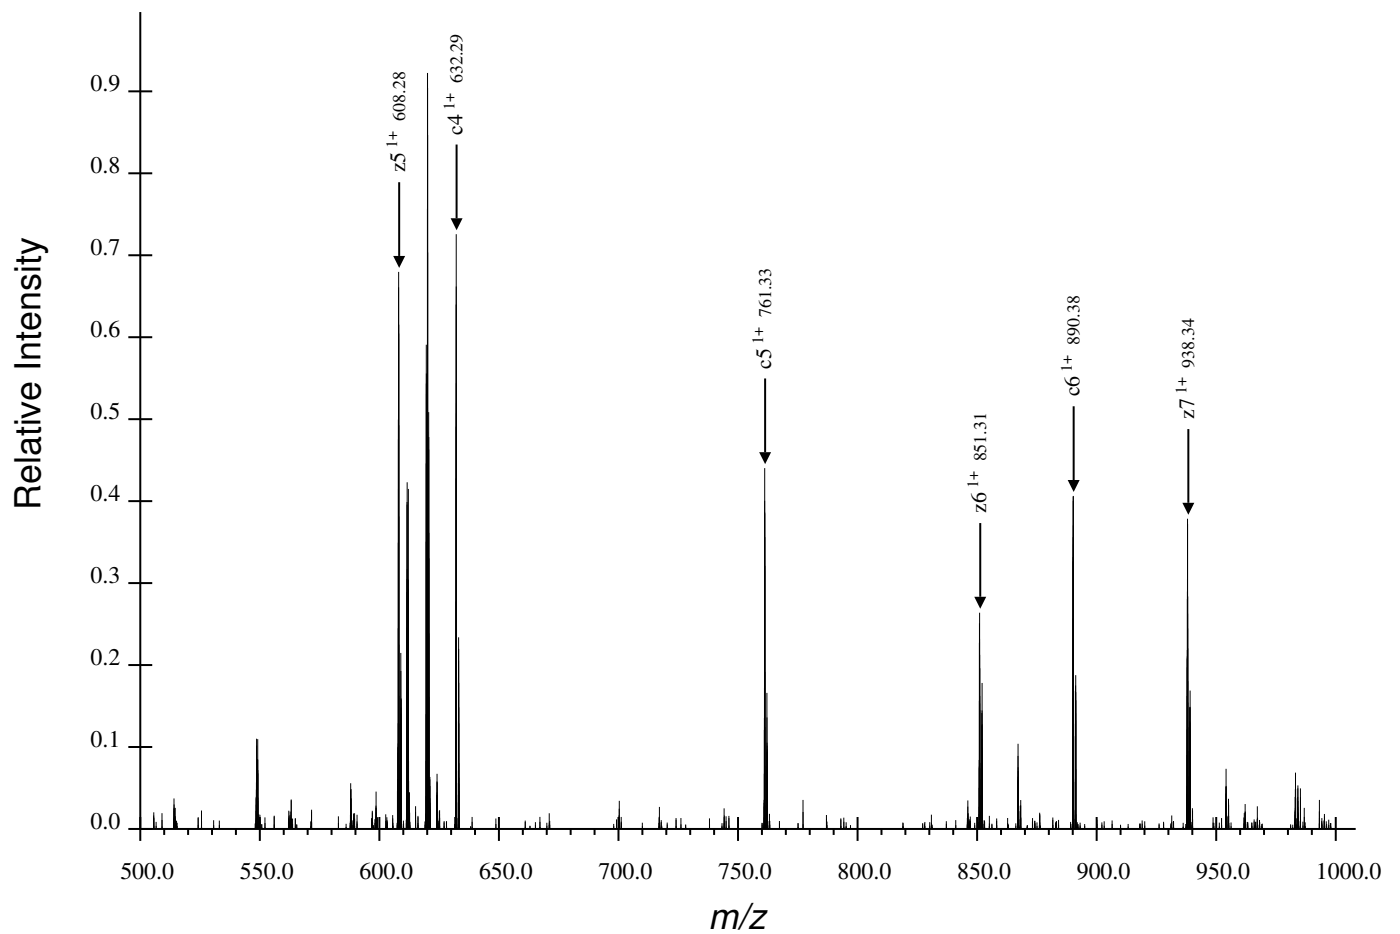

(b) Second Region for KRSpYEEHIP, Spectrum 67.dta

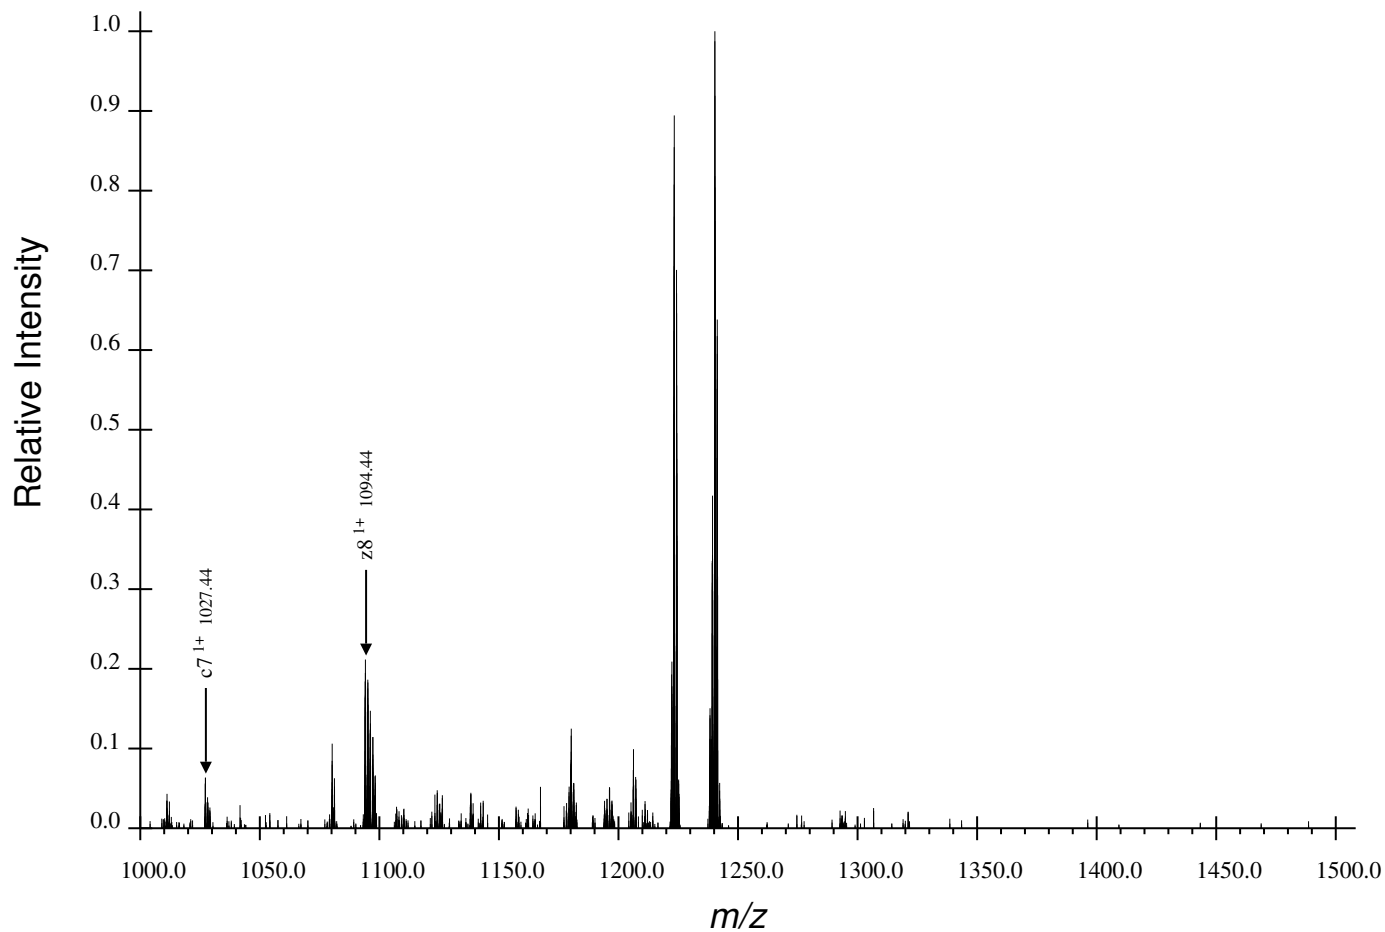

(c) Third Region for KRSpYEEHIP, Spectrum 67.dta

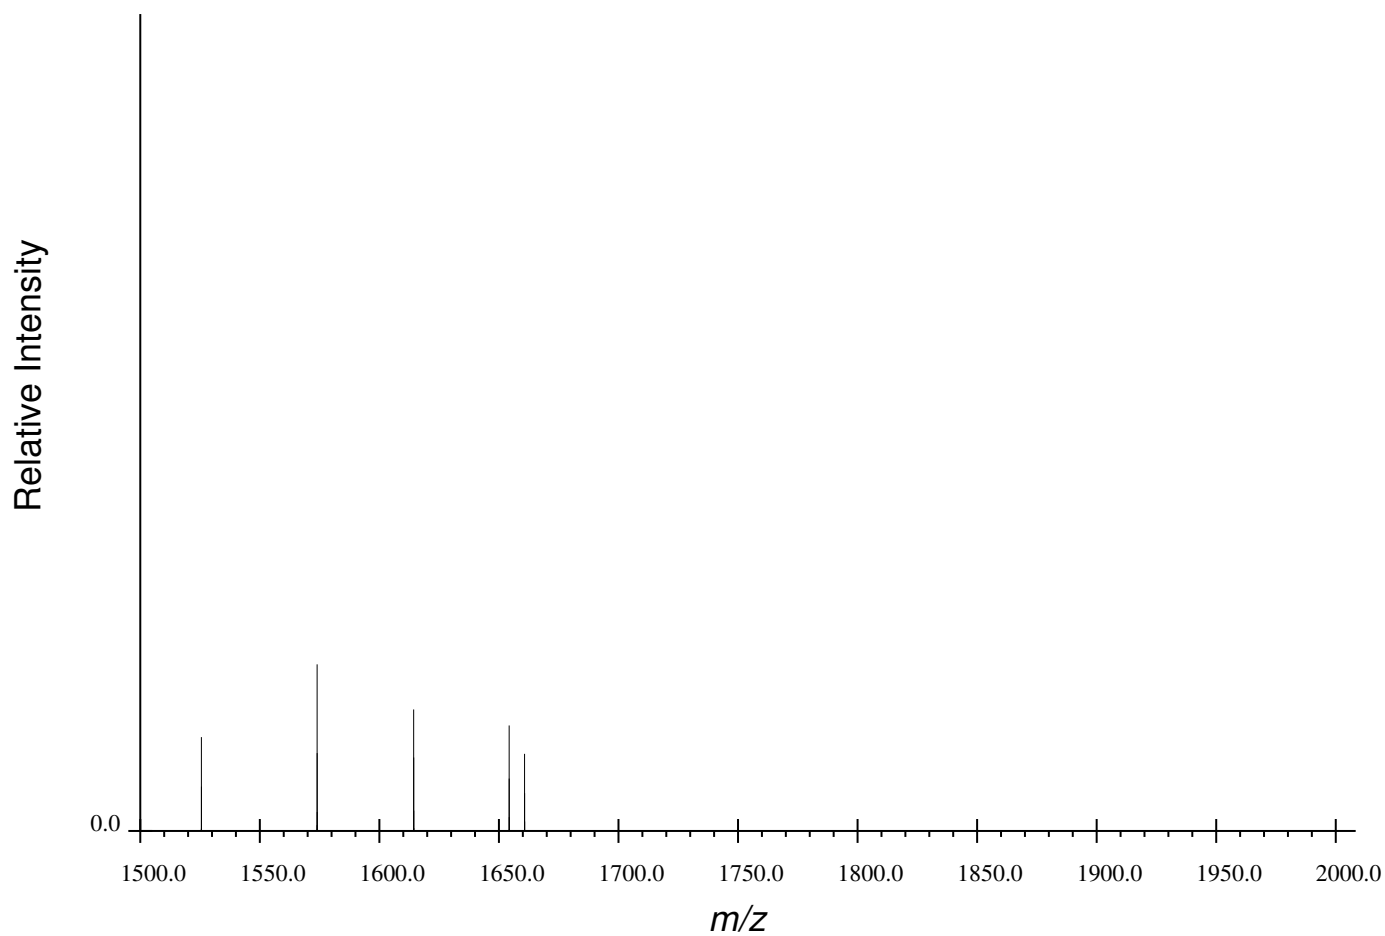

(d) Fourth Region for KRSpYEEHIP, Spectrum 67.dta

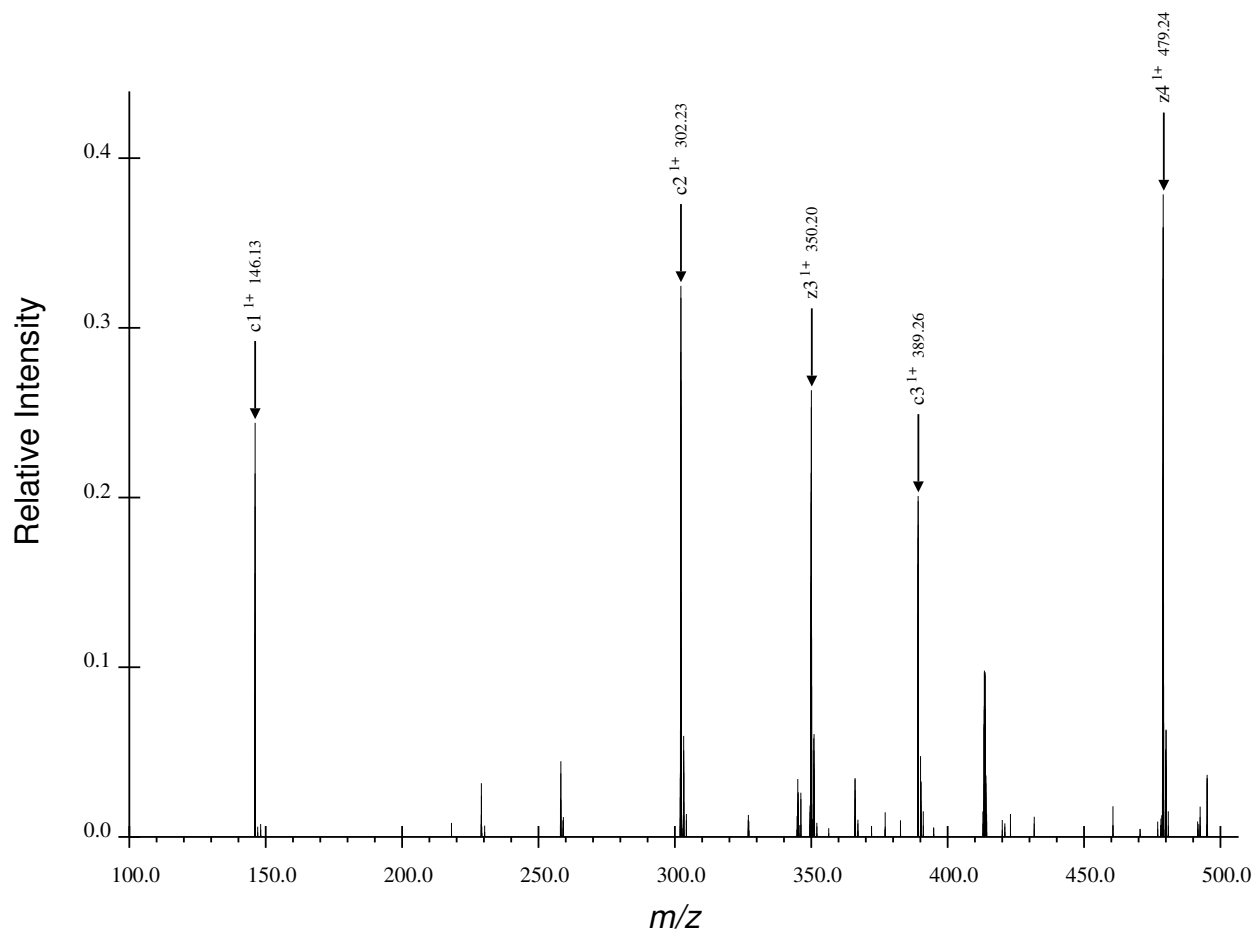

(a) First Region for KRSpYEEHIP, Spectrum 68.dta

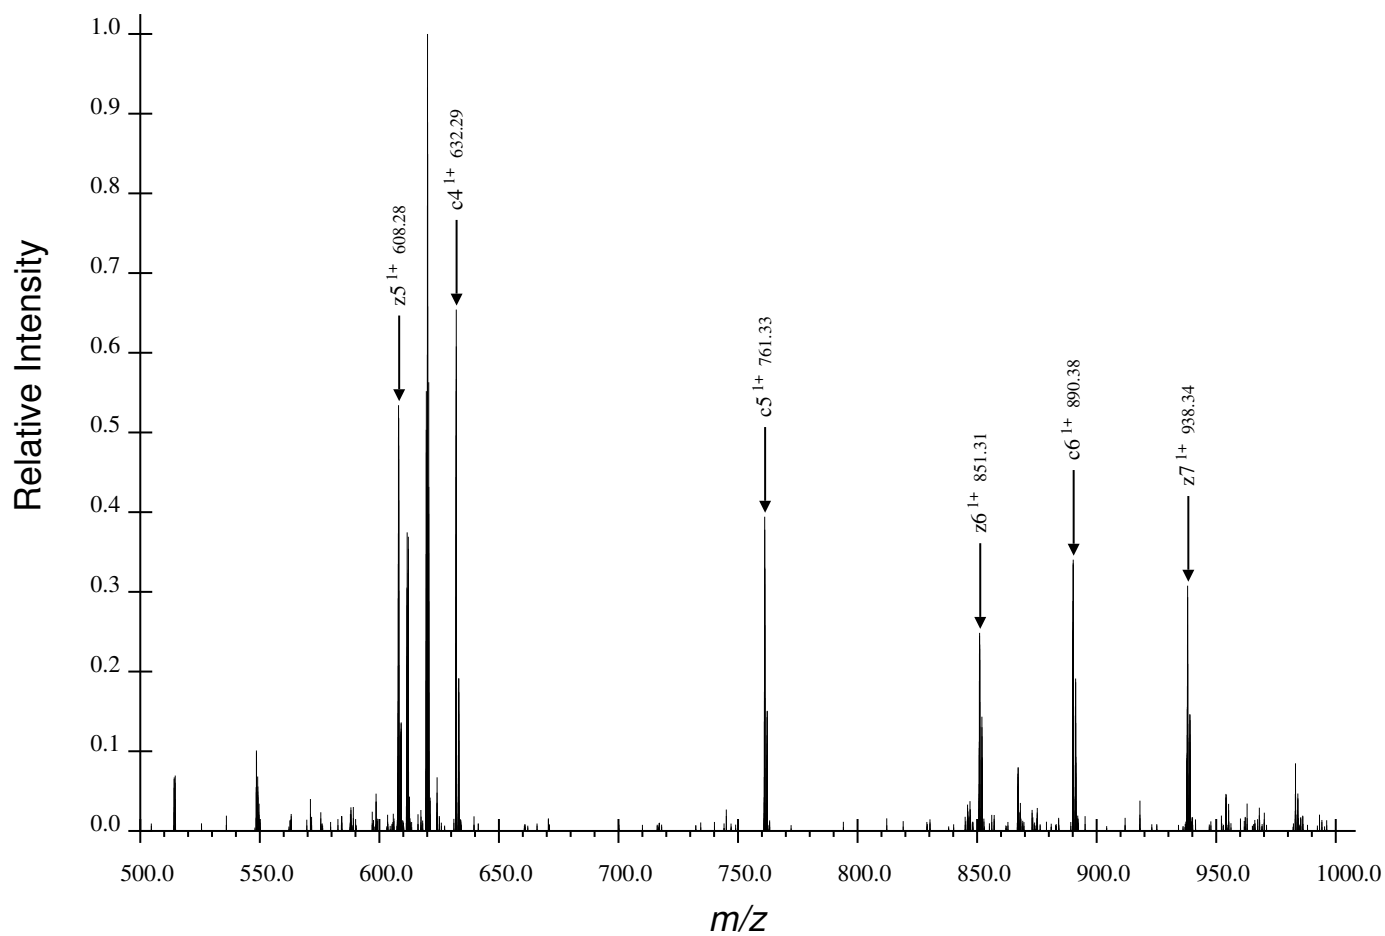

(b) Second Region for KRSpYEEHIP, Spectrum 68.dta

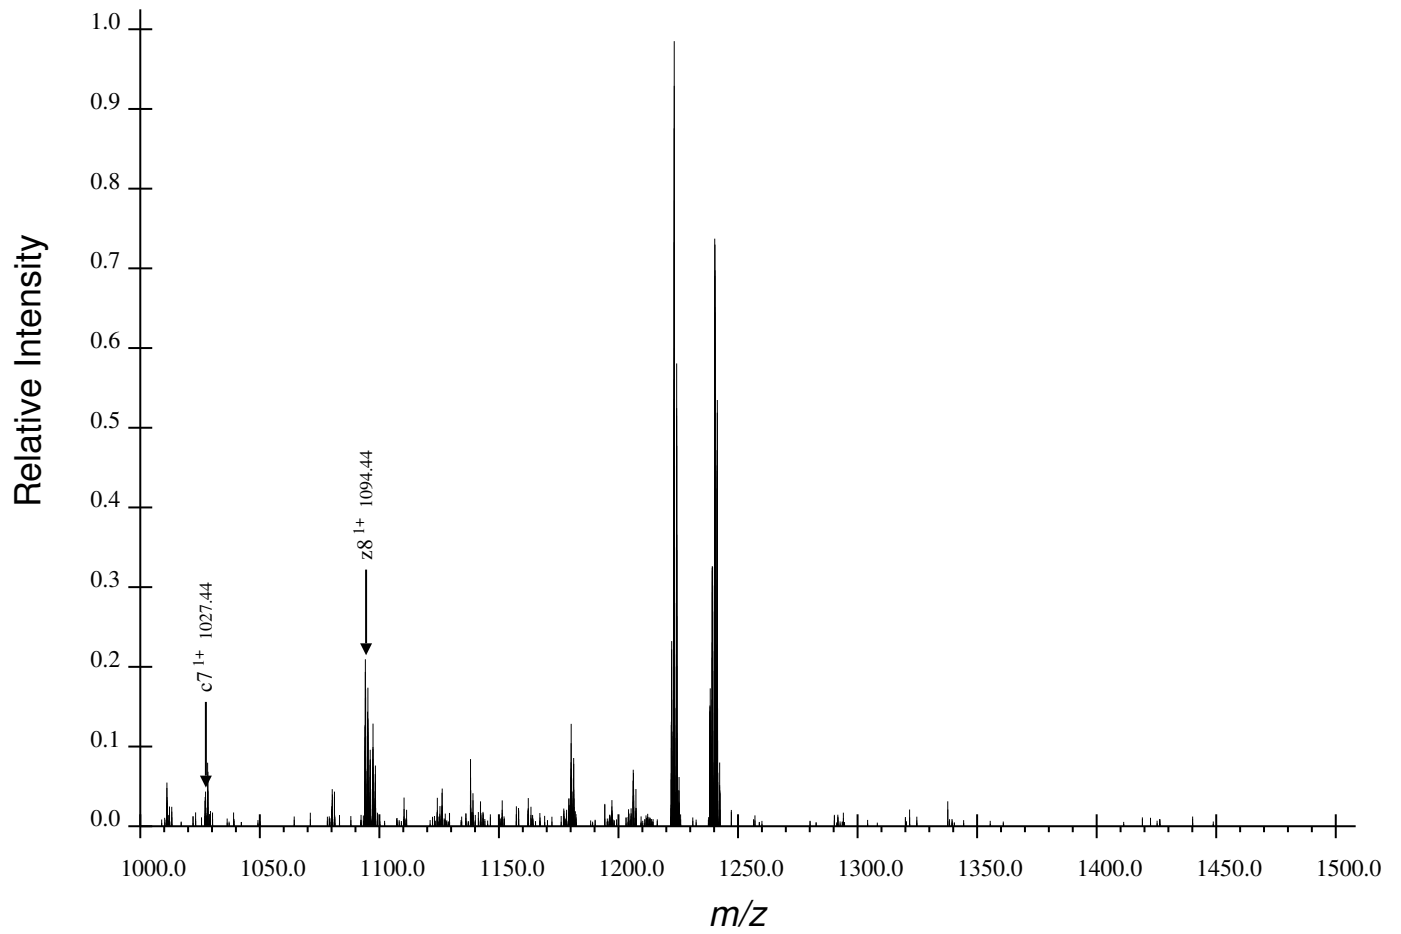

(c) Third Region for KRSpYEEHIP, Spectrum 68.dta

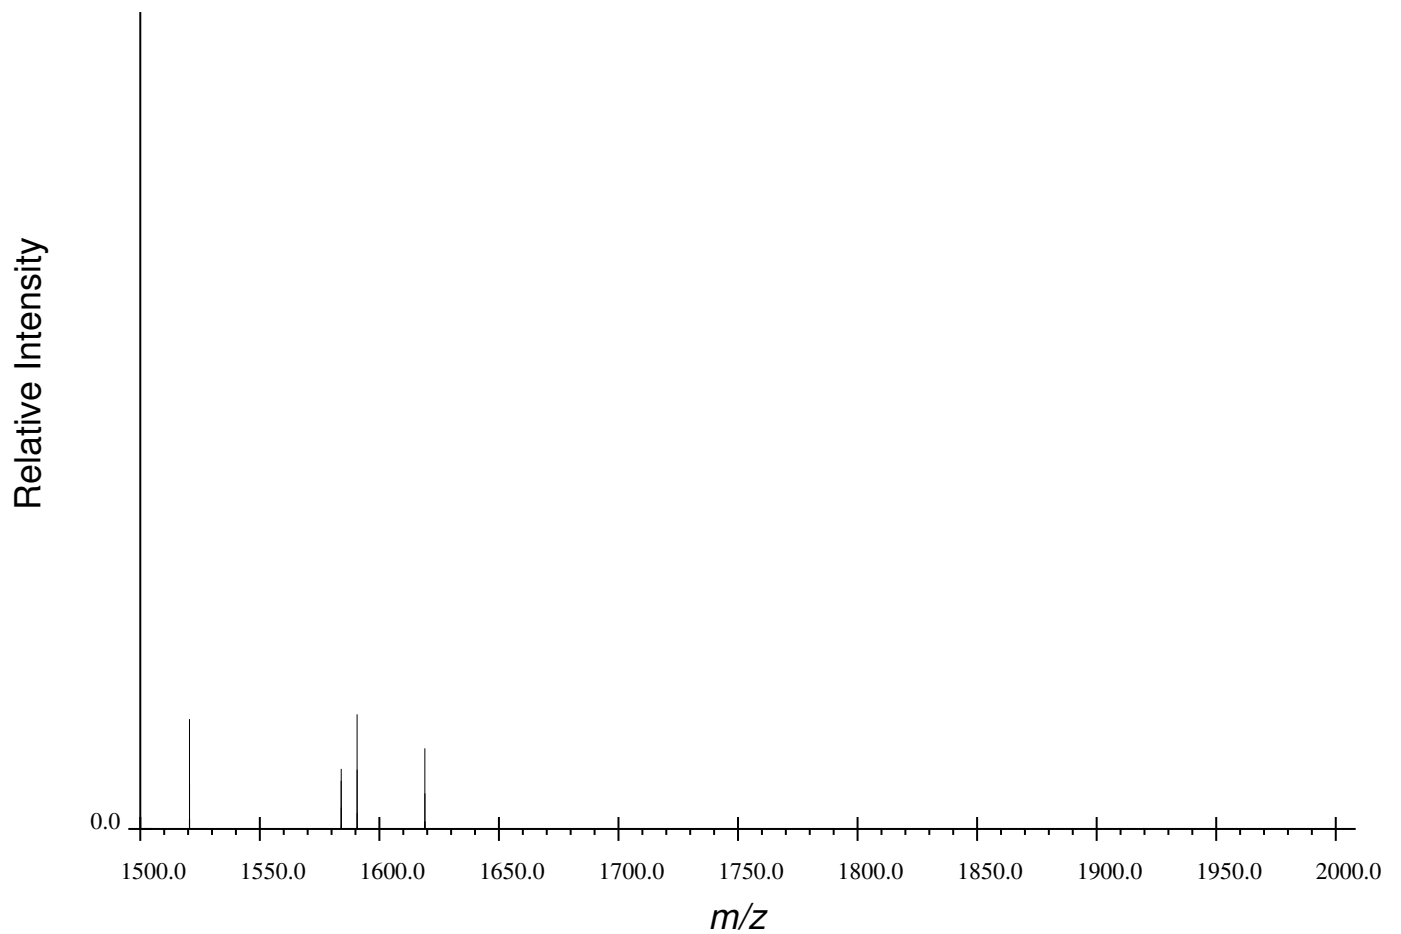

(d) Fourth Region for KRSpYEEHIP, Spectrum 68.dta



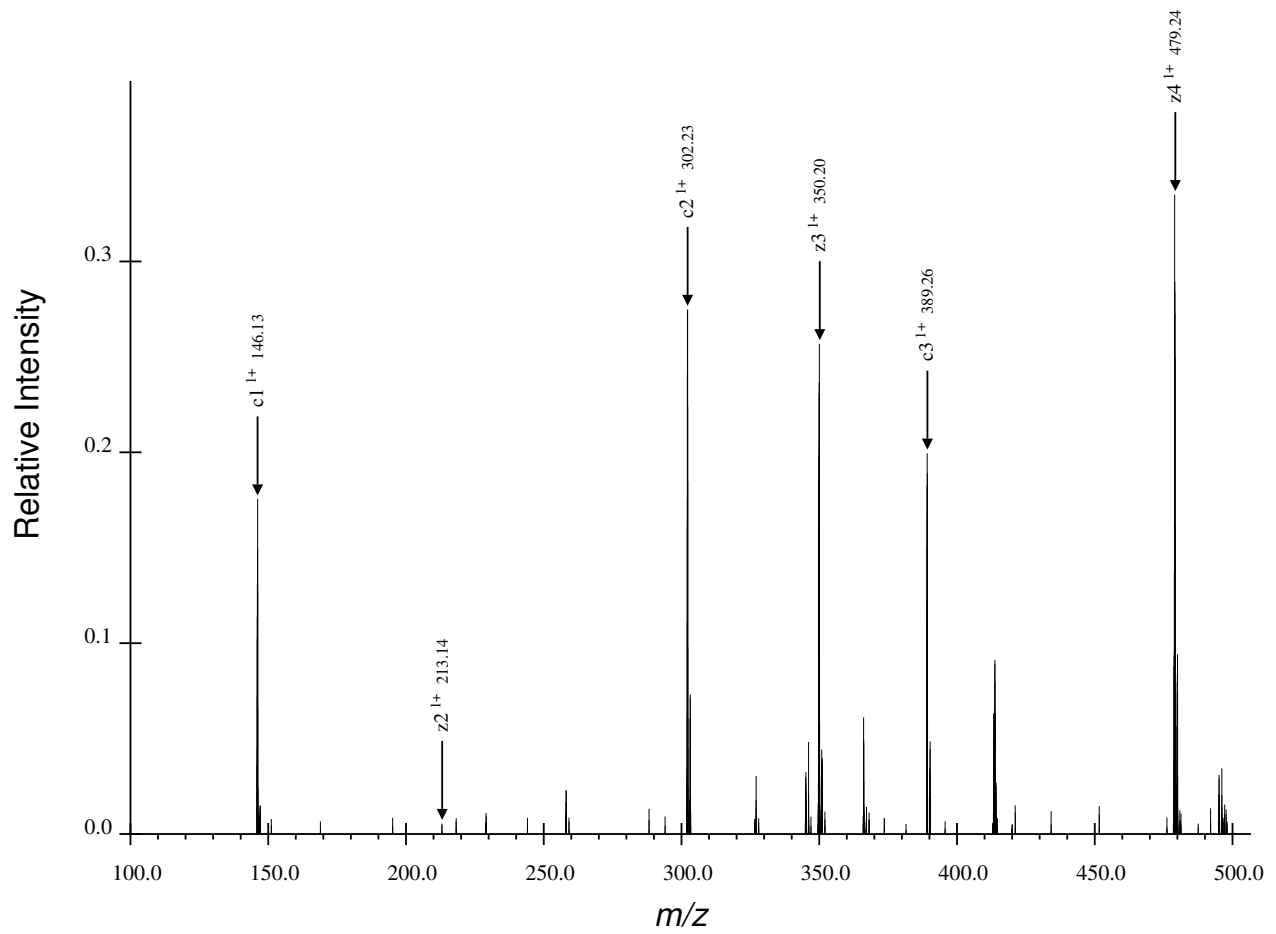

(a) First Region for KRSpYEEHIP, Spectrum 69.dta

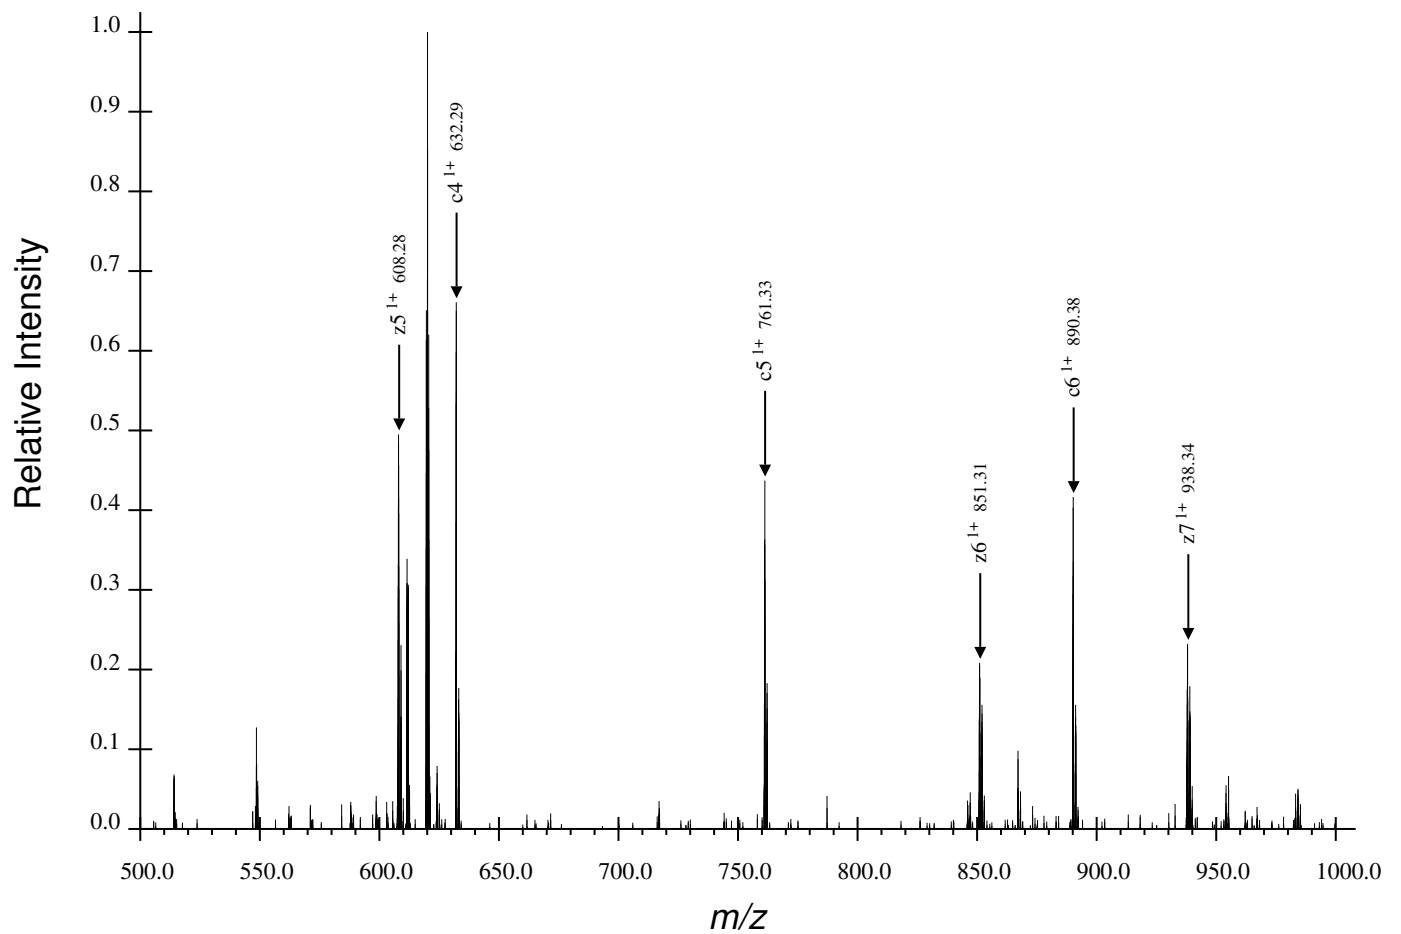

(b) Second Region for KRSpYEEHIP, Spectrum 69.dta

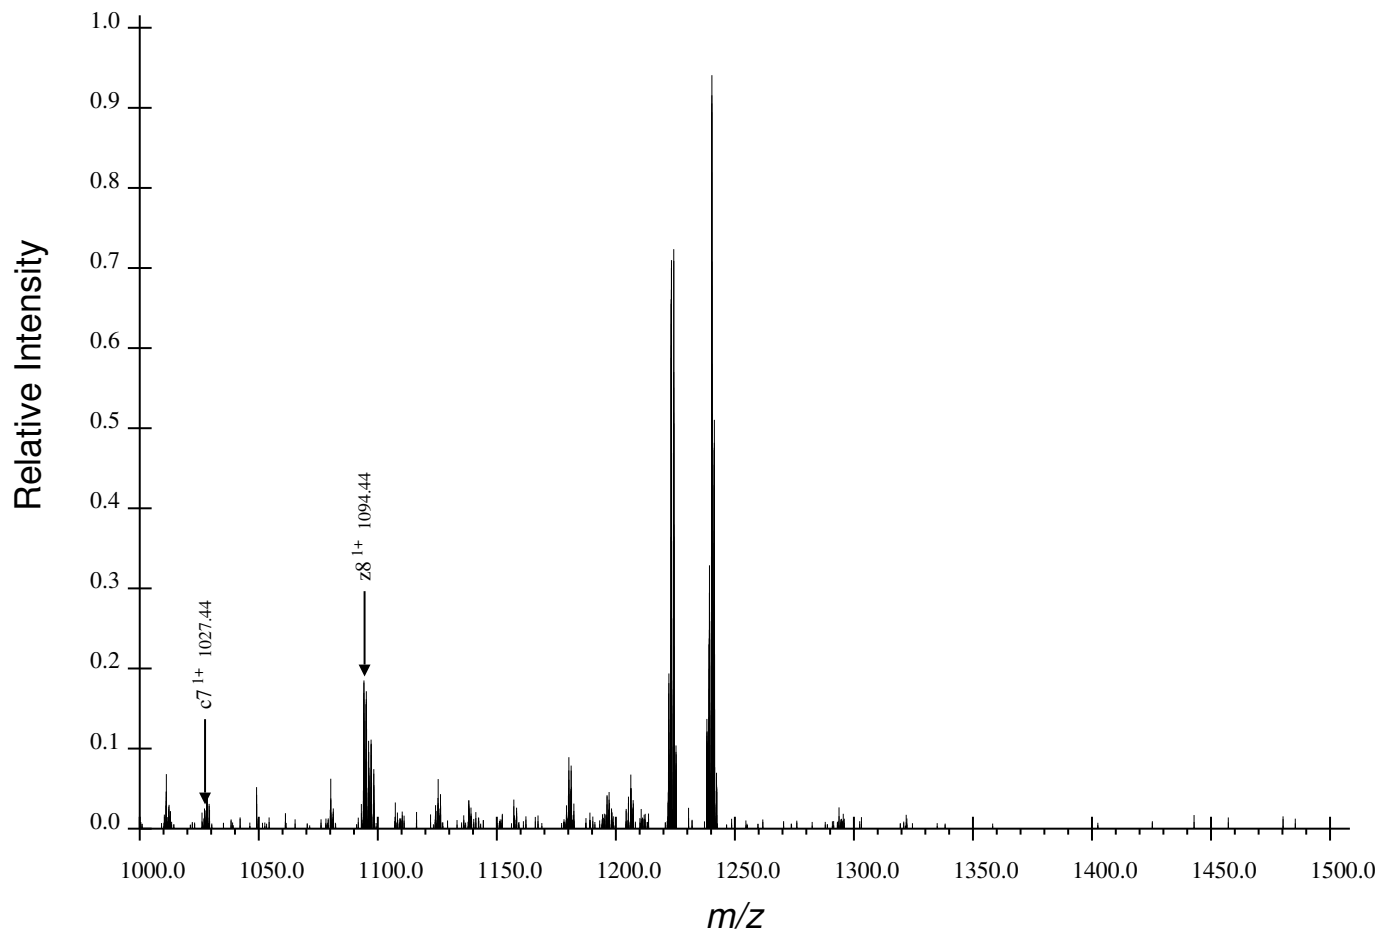

(c) Third Region for KRSpYEEHIP, Spectrum 69.dta

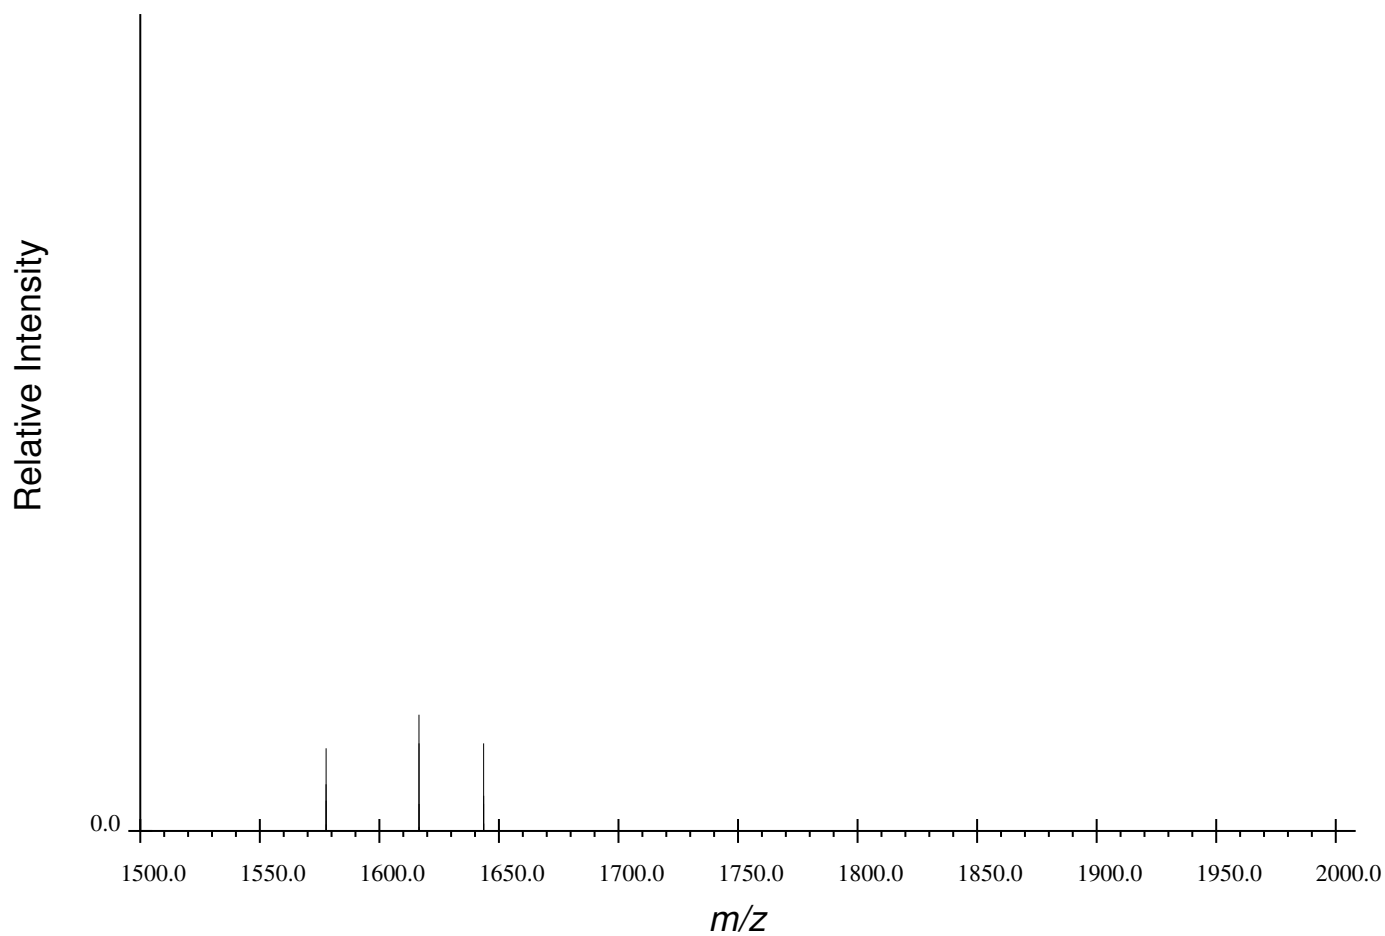

(d) Fourth Region for KRSpYEEHIP, Spectrum 69.dta

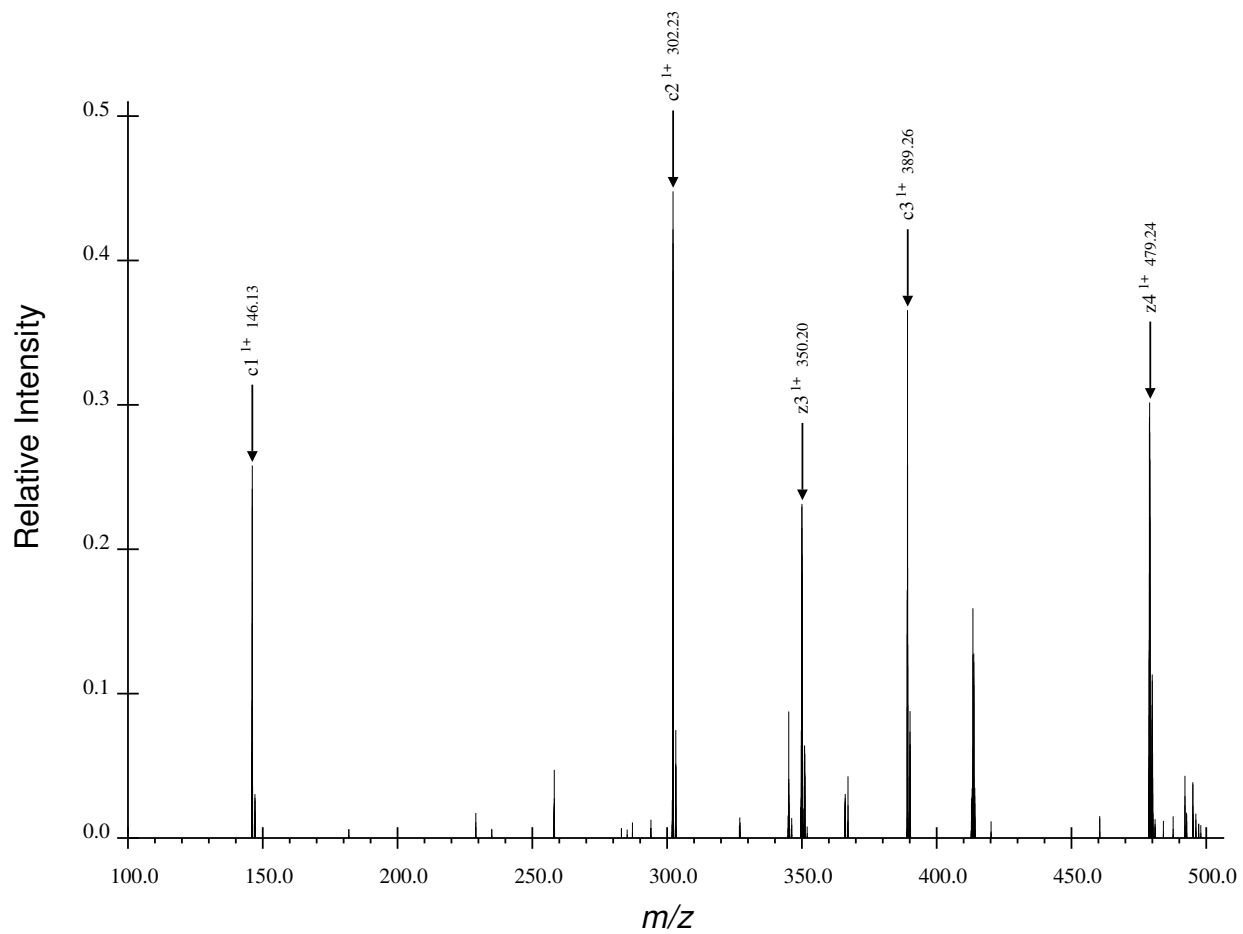

(a) First Region for KRSpYEEHIP, Spectrum 70.dta

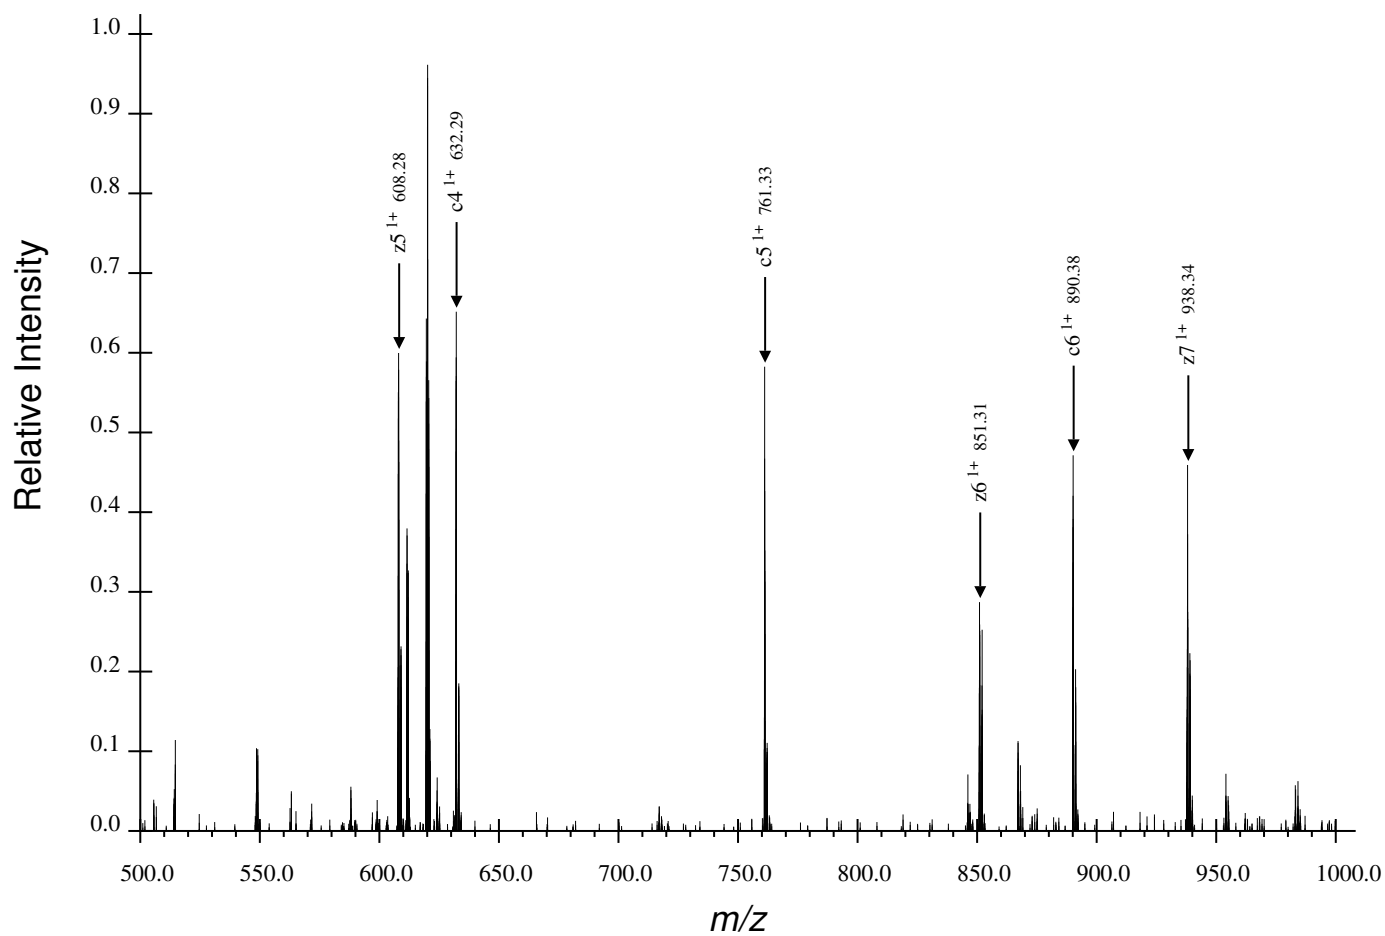

(b) Second Region for KRSpYEEHIP, Spectrum 70.dta

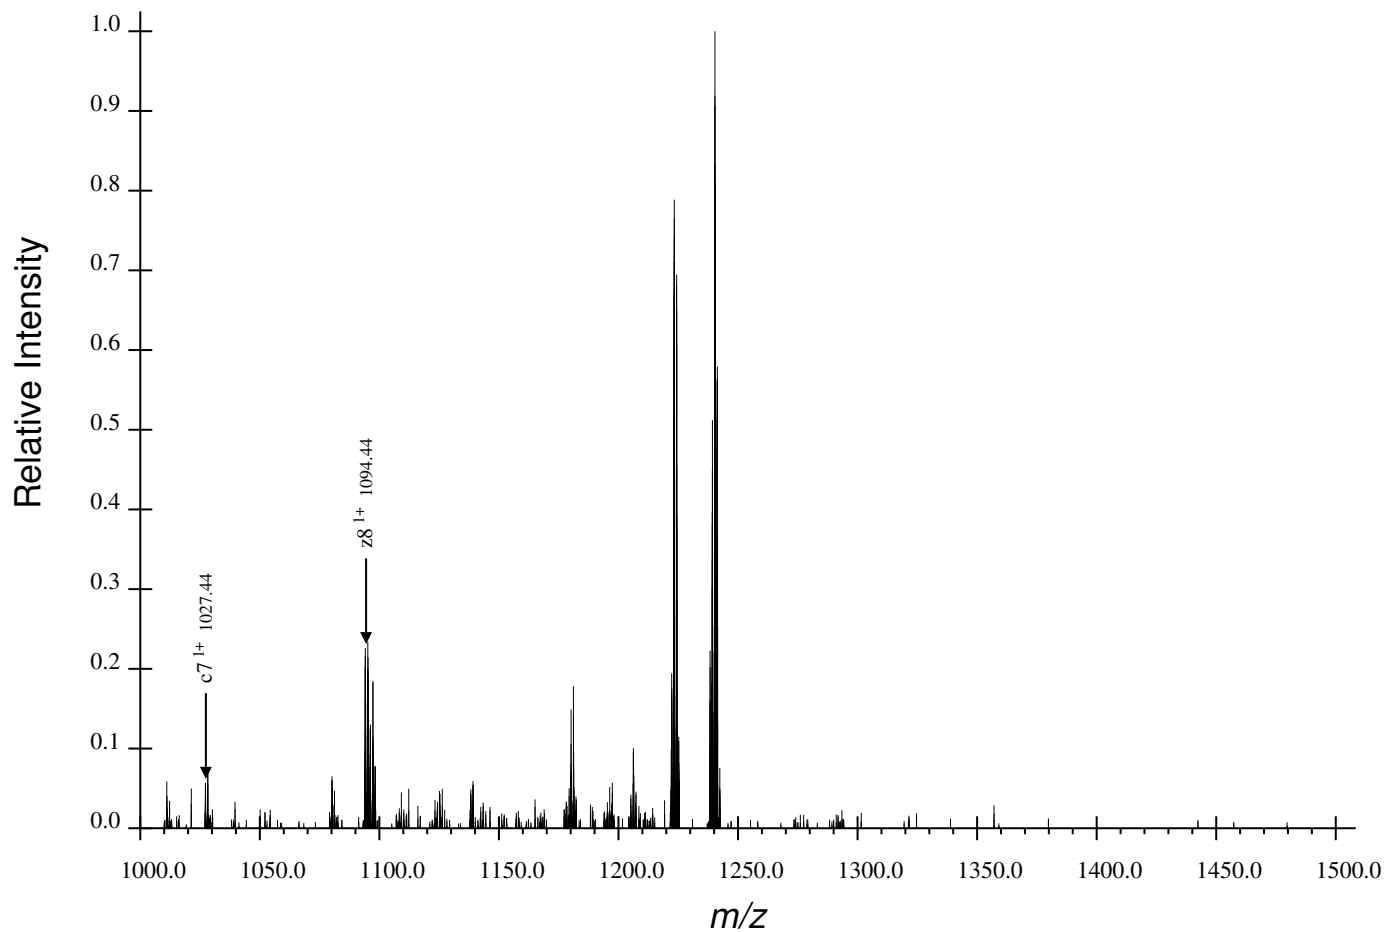

(c) Third Region for KRSpYEEHIP, Spectrum 70.dta

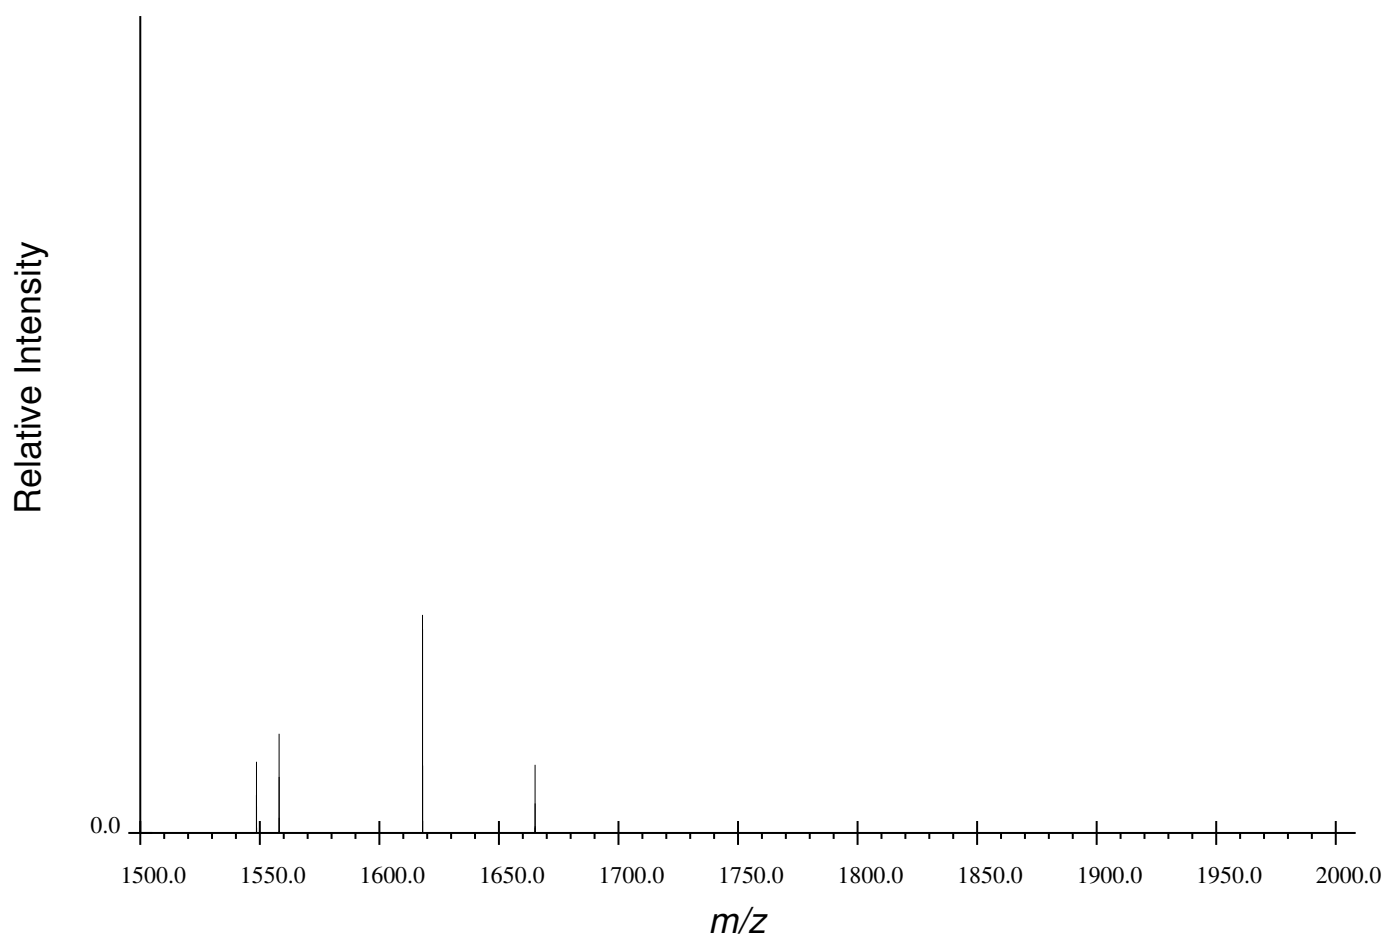

(d) Fourth Region for KRSpYEEHIP, Spectrum 70.dta

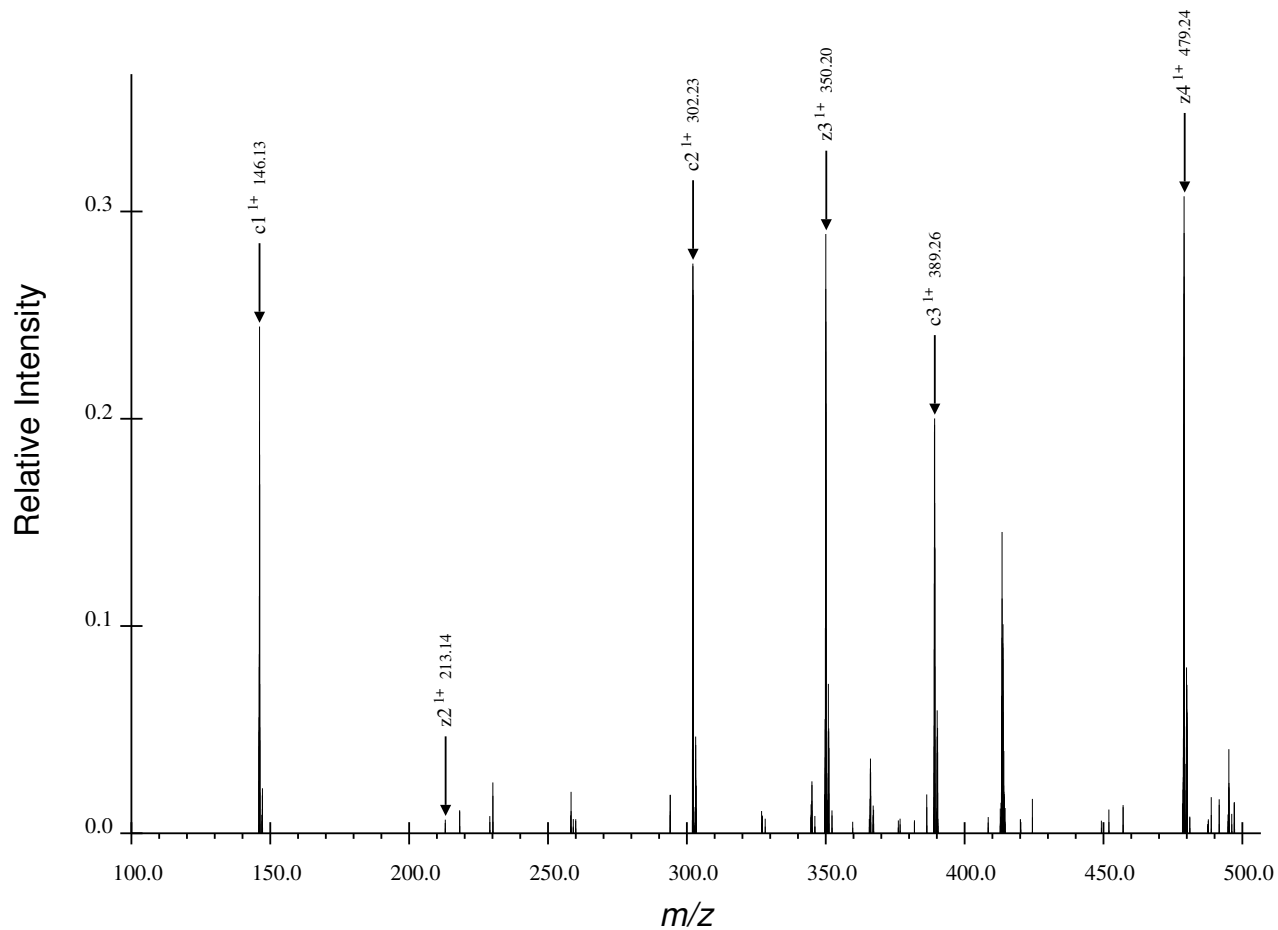

(a) First Region for KRSpYEEHIP, Spectrum 71.dta

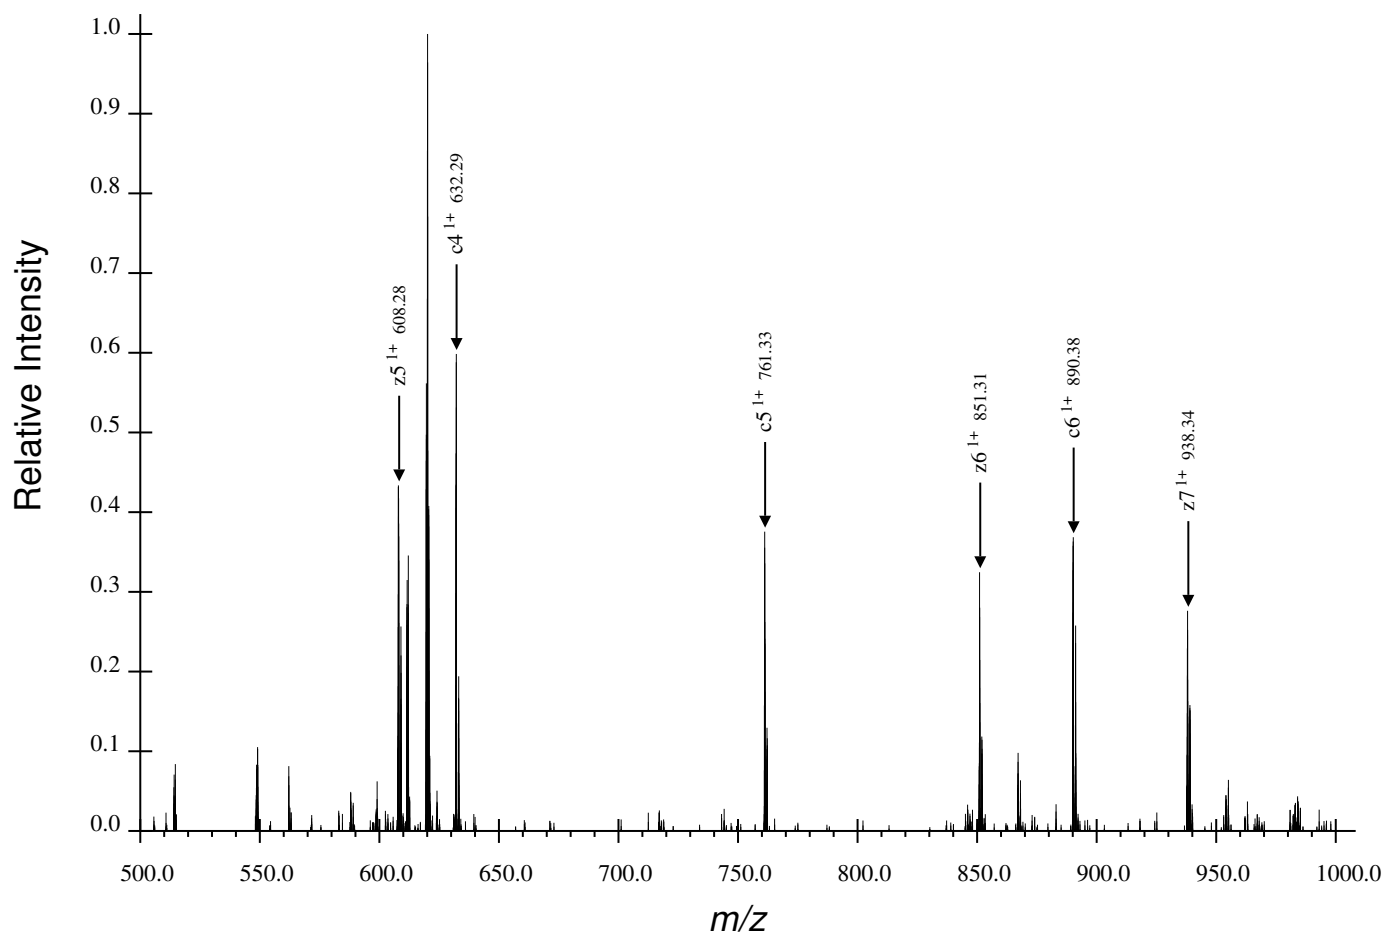

(b) Second Region for KRSpYEEHIP, Spectrum 71.dta

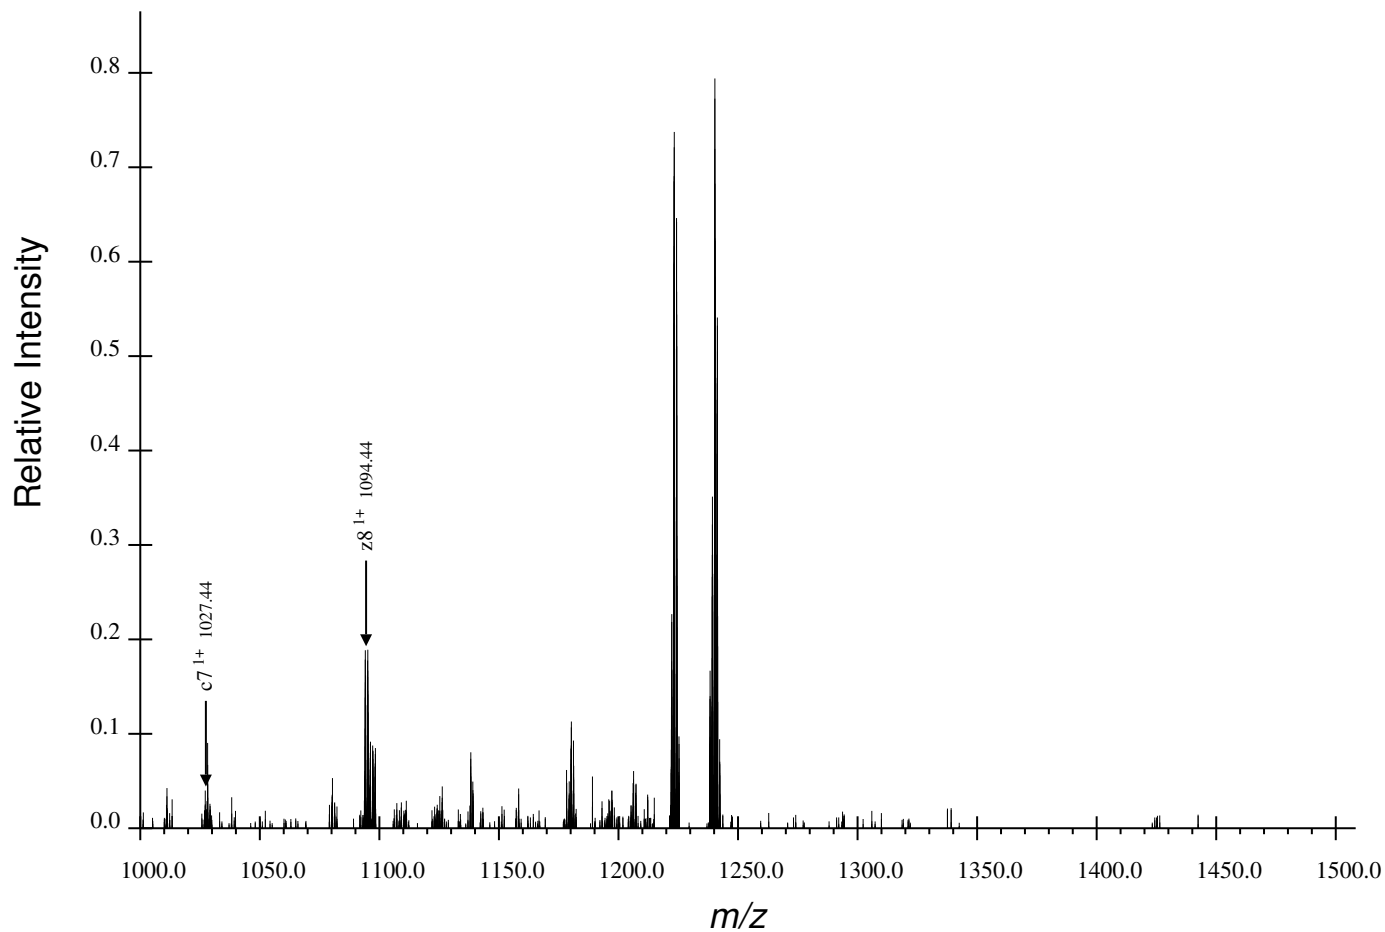

(c) Third Region for KRSpYEEHIP, Spectrum 71.dta

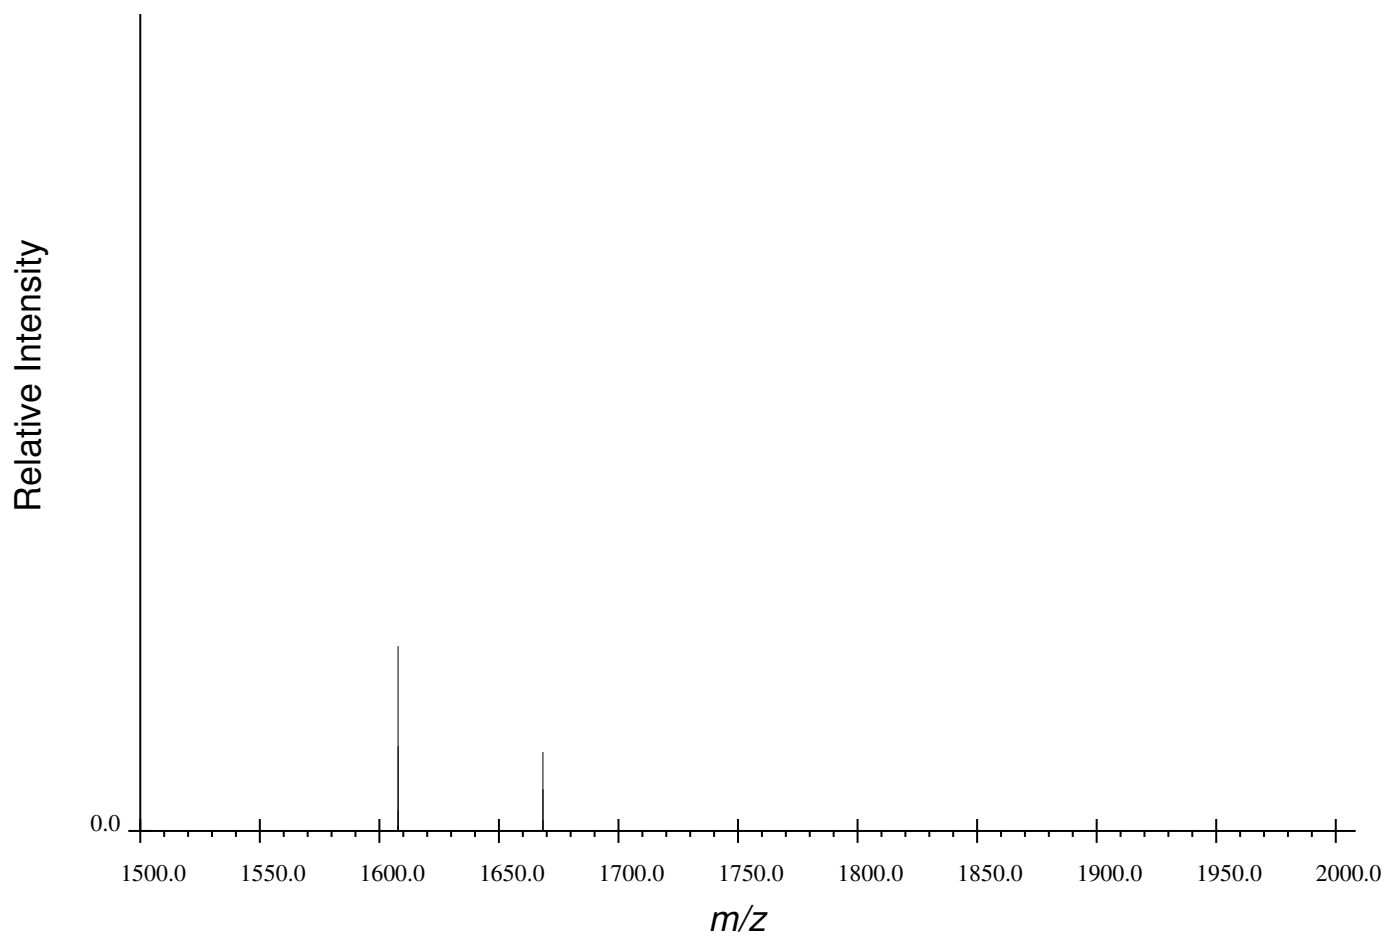

(d) Fourth Region for KRSpYEEHIP, Spectrum 71.dta

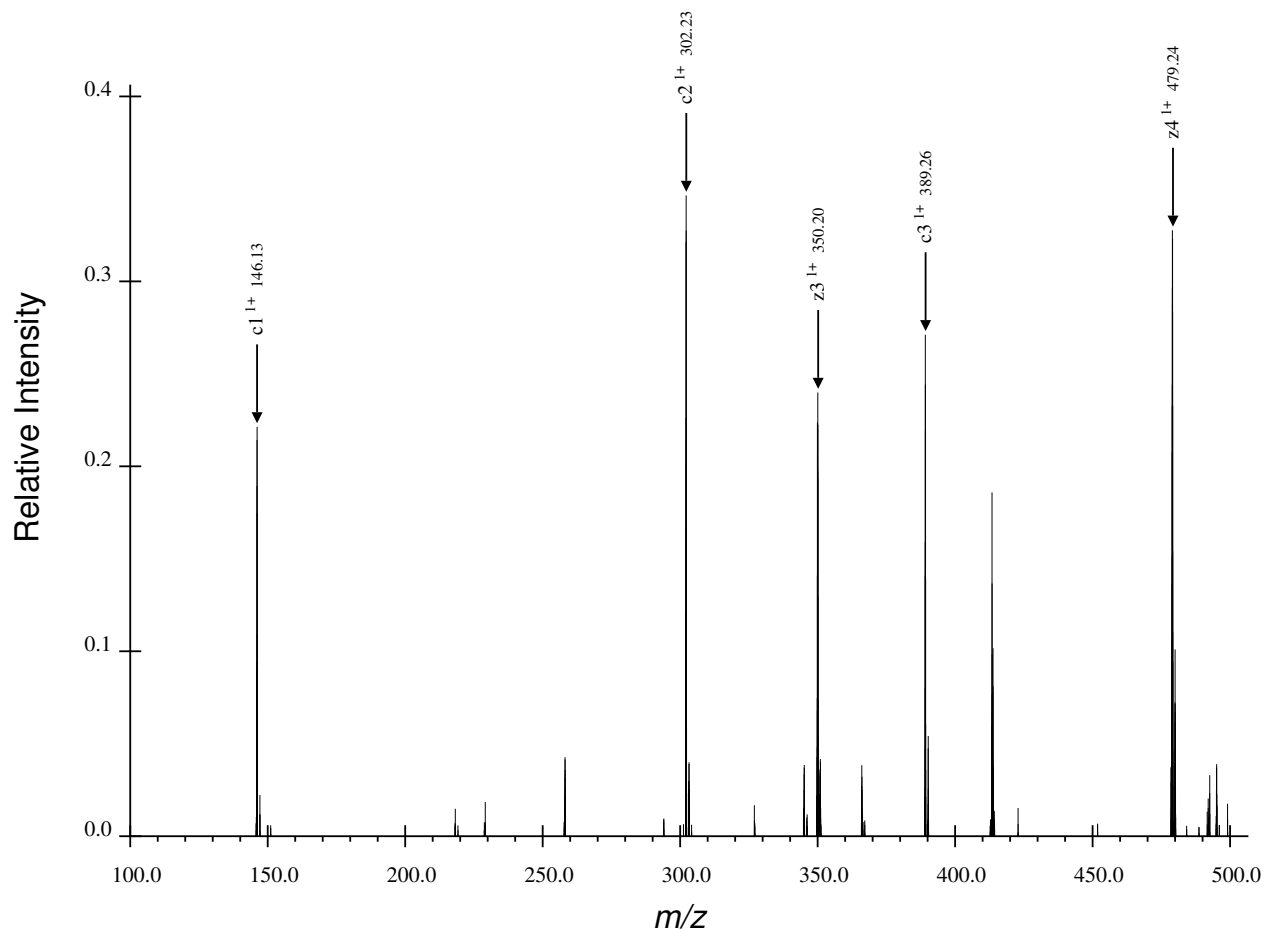

(a) First Region for KRSpYEEHIP, Spectrum 72.dta

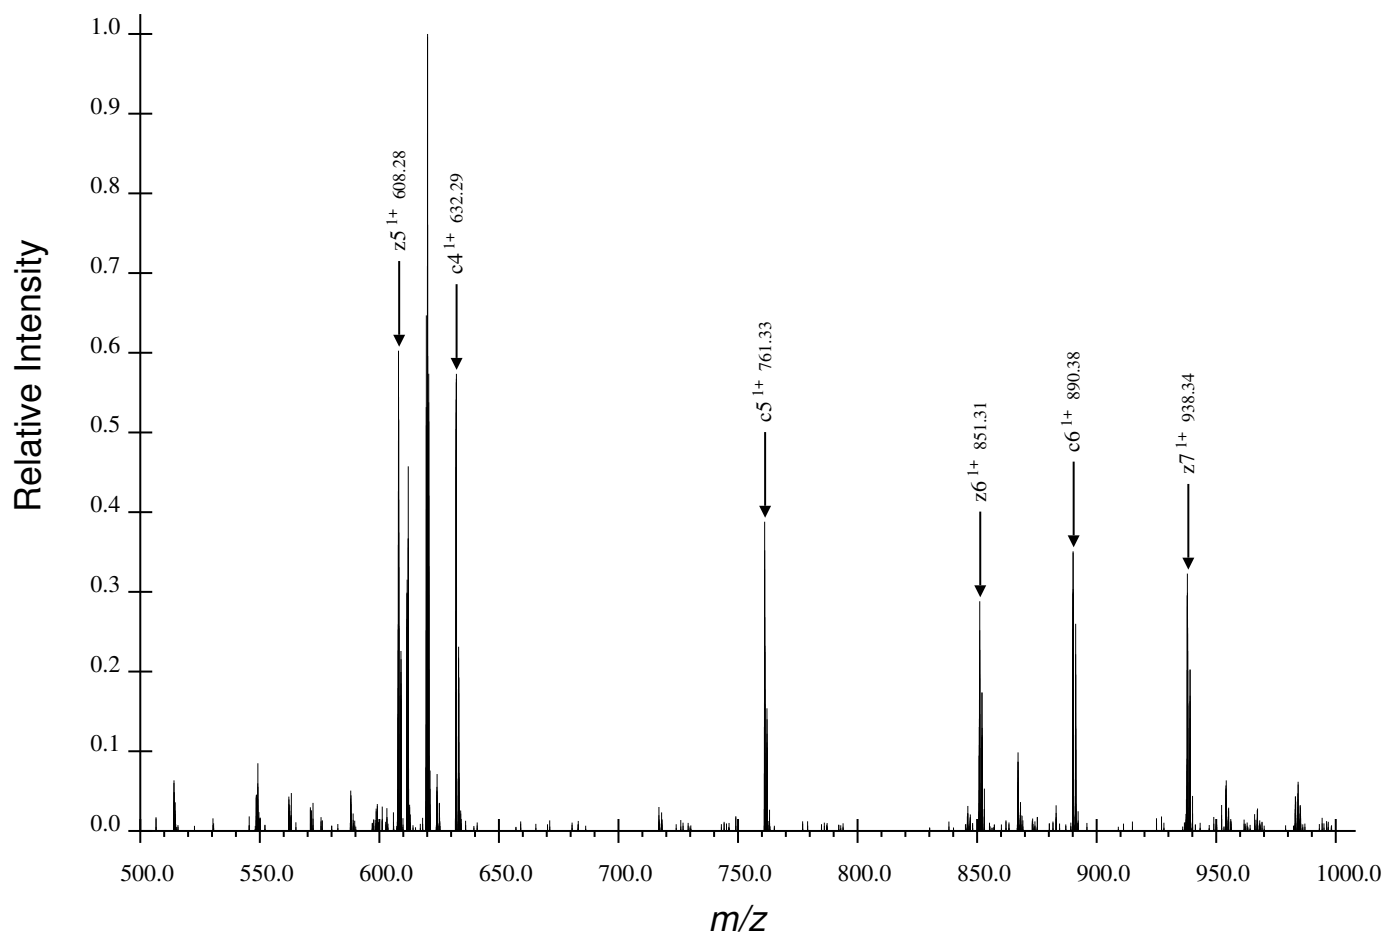

(b) Second Region for KRSpYEEHIP, Spectrum 72.dta

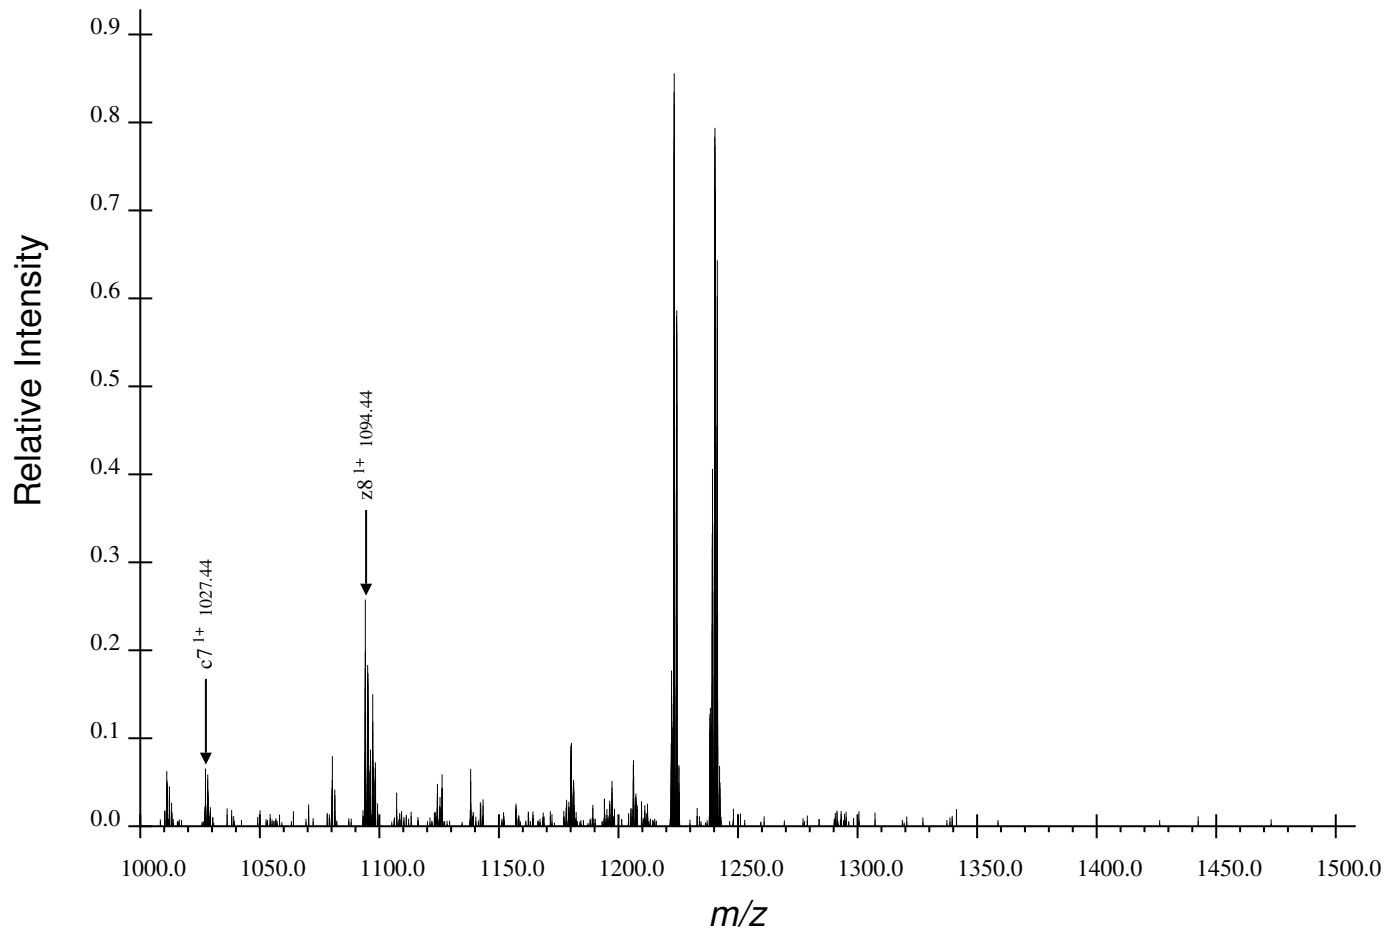

(c) Third Region for KRSpYEEHIP, Spectrum 72.dta

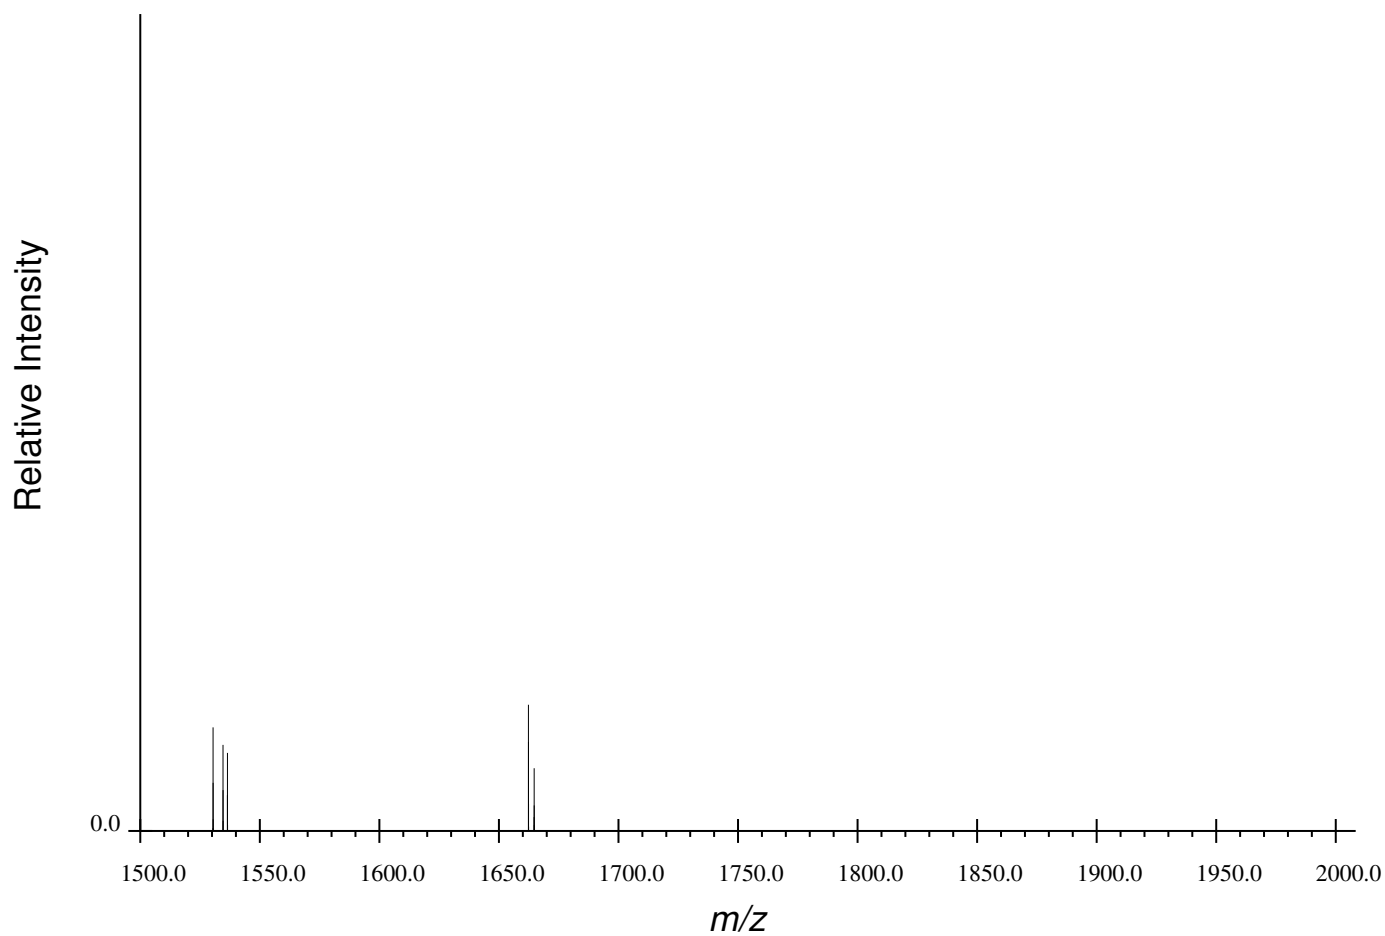

(d) Fourth Region for KRSpYEEHIP, Spectrum 72.dta



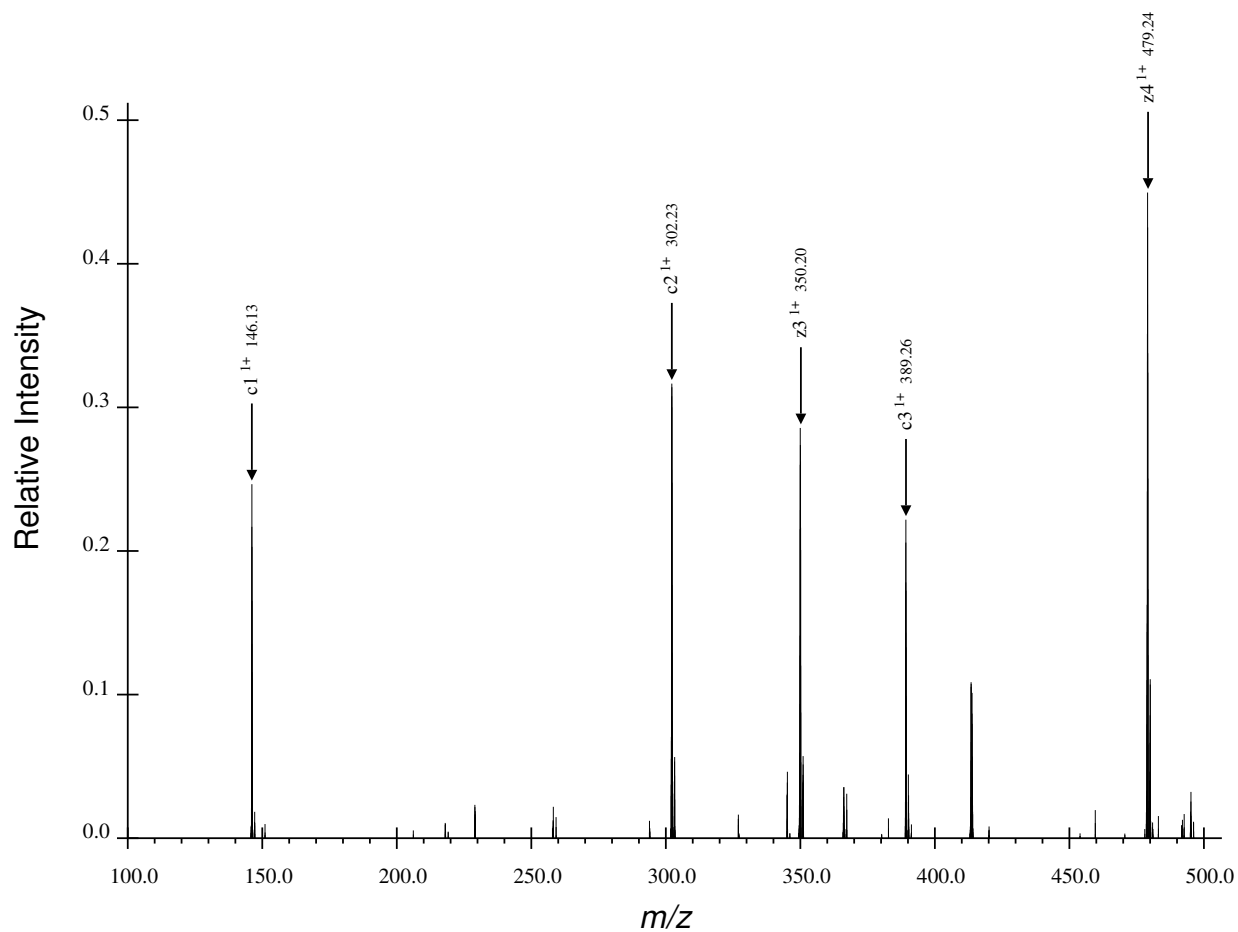

(a) First Region for KRSpYEEHIP, Spectrum 73.dta

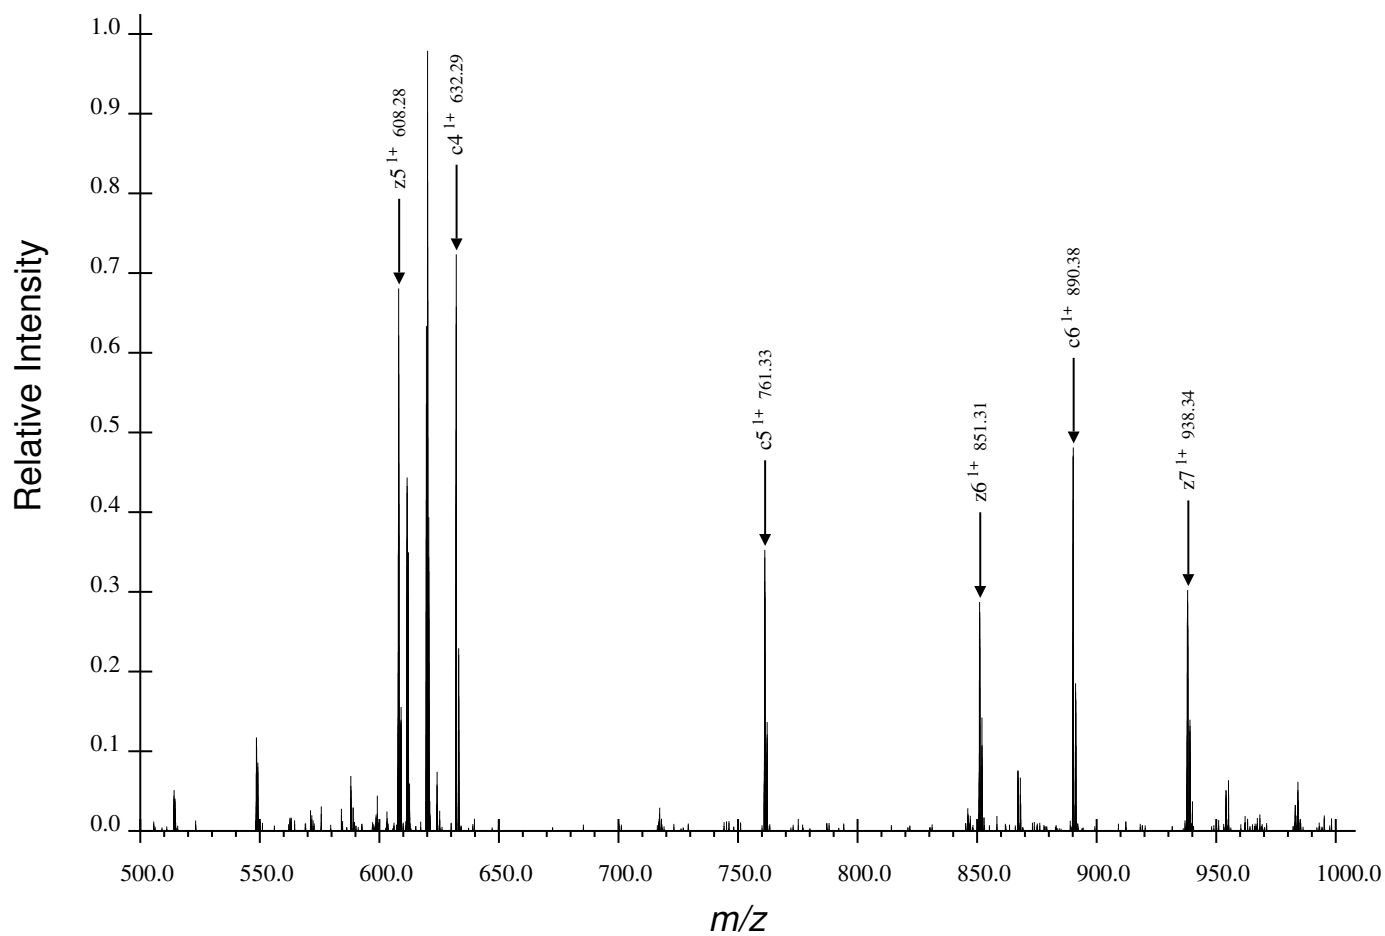

(b) Second Region for KRSpYEEHIP, Spectrum 73.dta

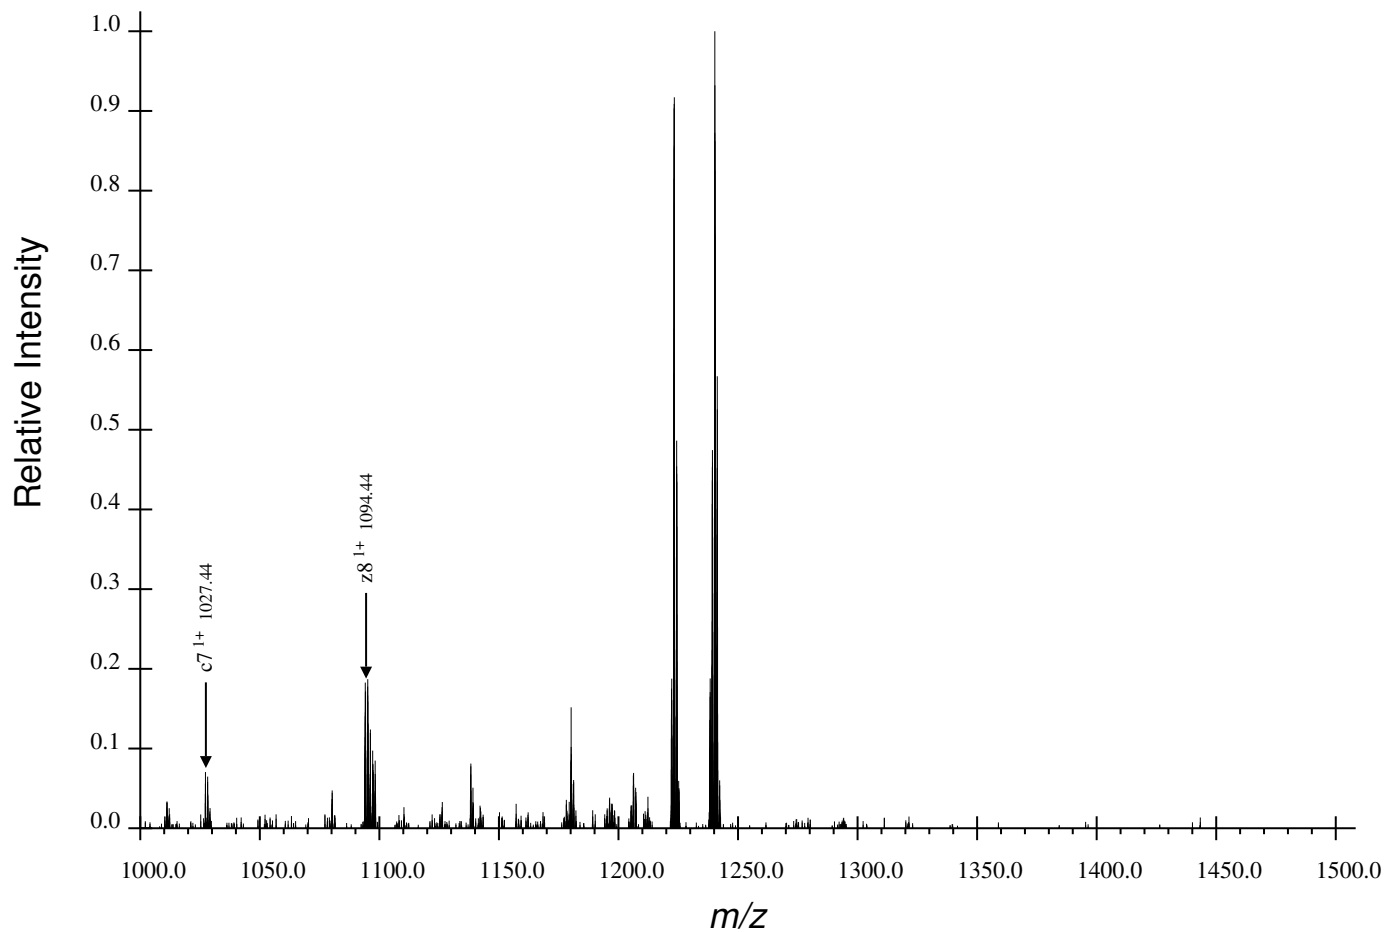

(c) Third Region for KRSpYEEHIP, Spectrum 73.dta

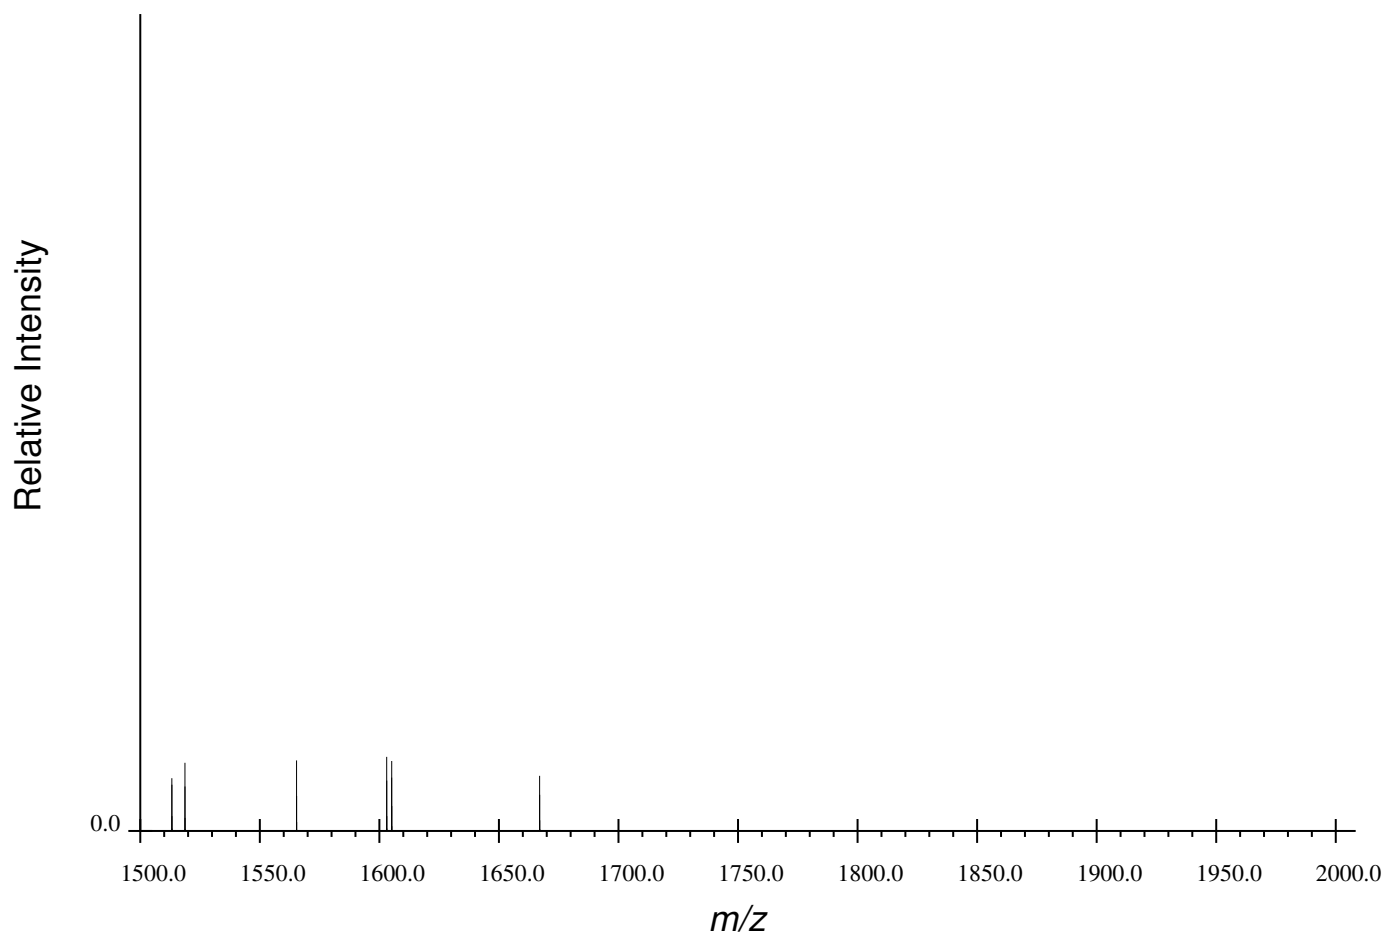

(d) Fourth Region for KRSpYEEHIP, Spectrum 73.dta

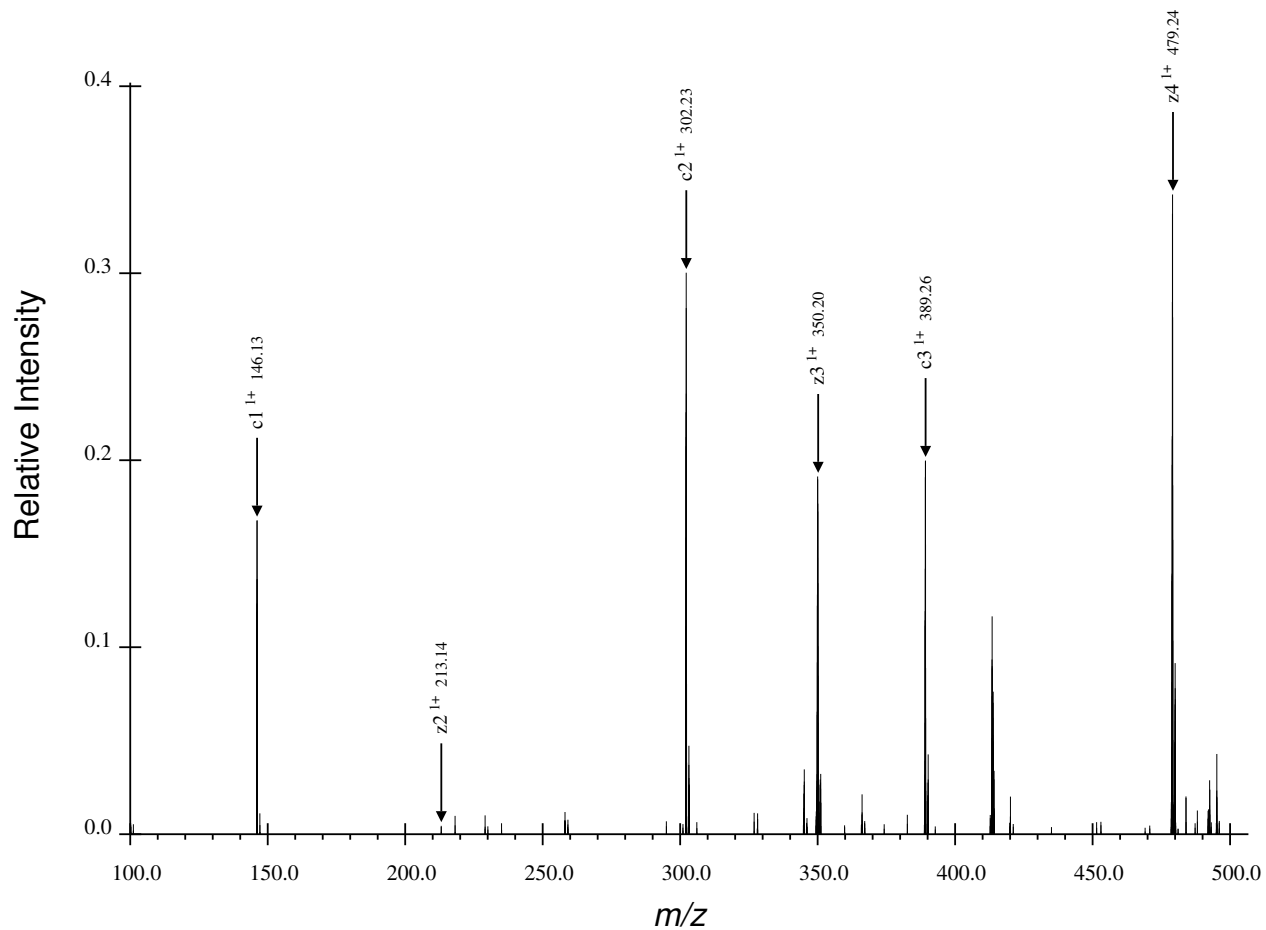

(a) First Region for KRSpYEEHIP, Spectrum 74.dta

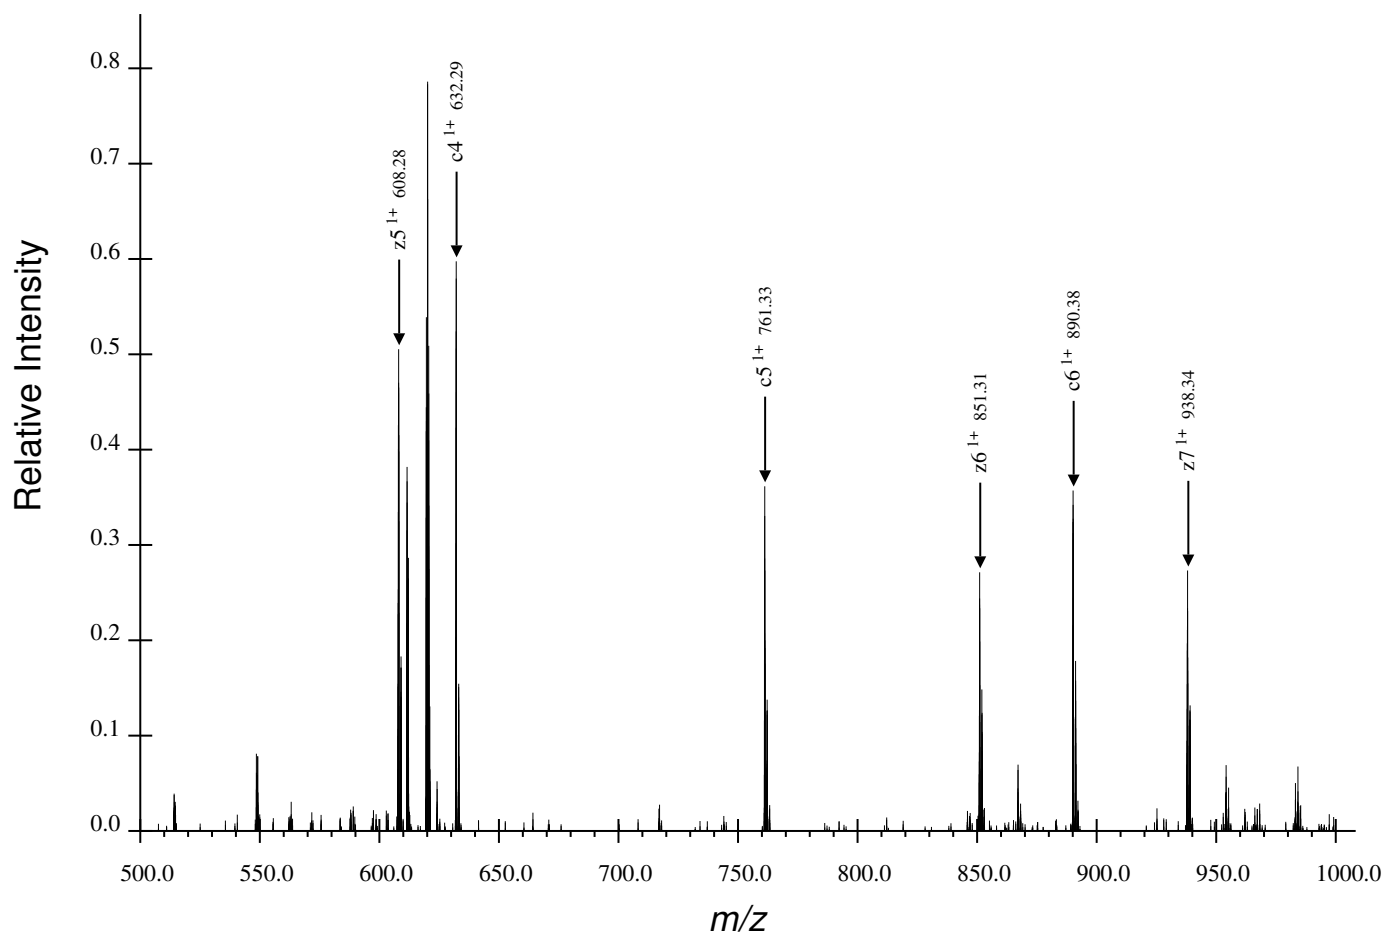

(b) Second Region for KRSpYEEHIP, Spectrum 74.dta

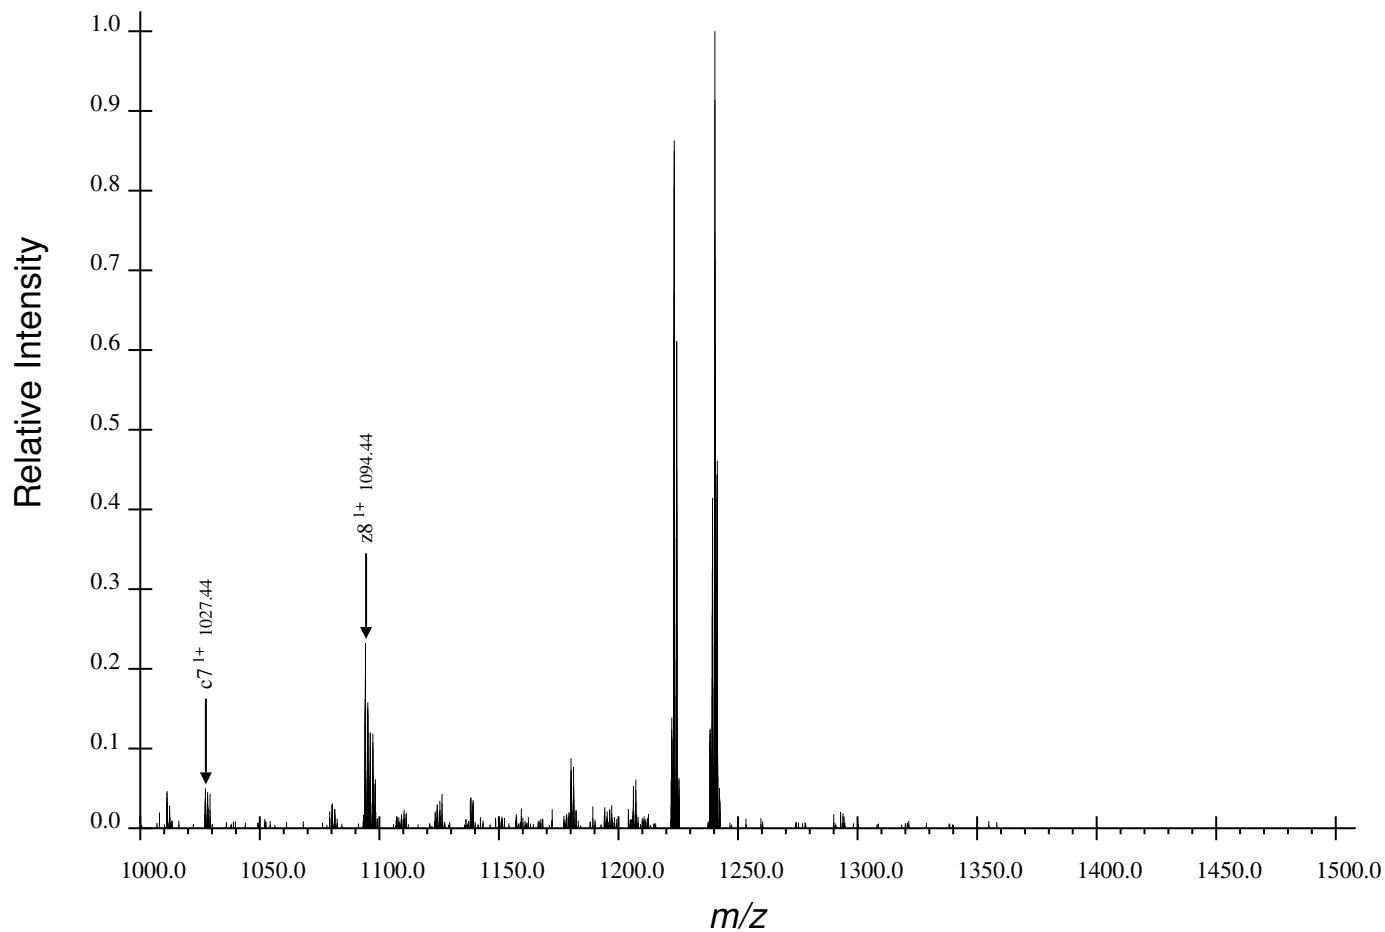

(c) Third Region for KRSpYEEHIP, Spectrum 74.dta

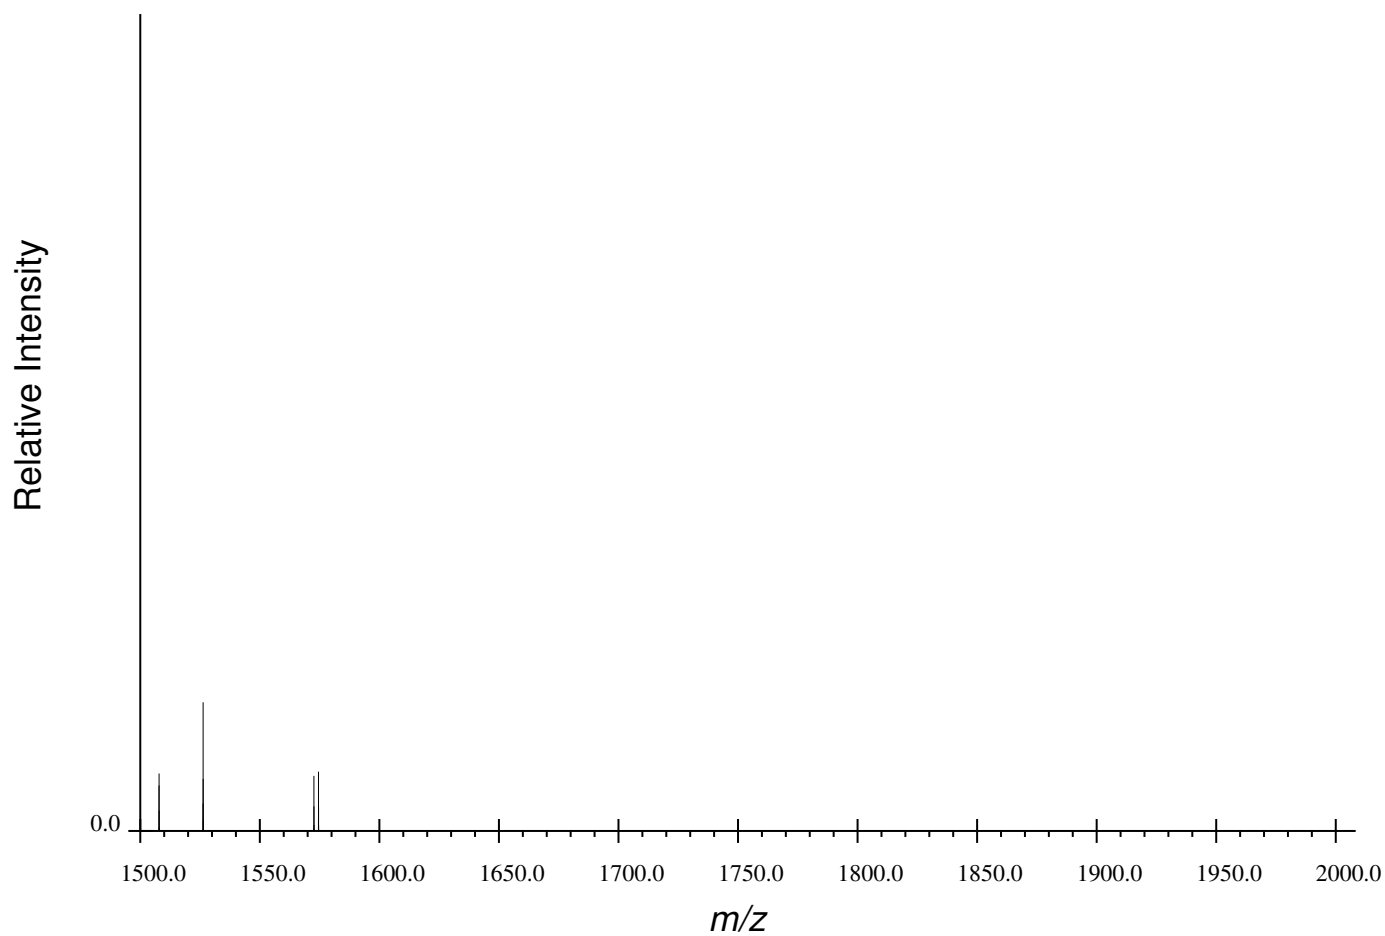

(d) Fourth Region for KRSpYEEHIP, Spectrum 74.dta

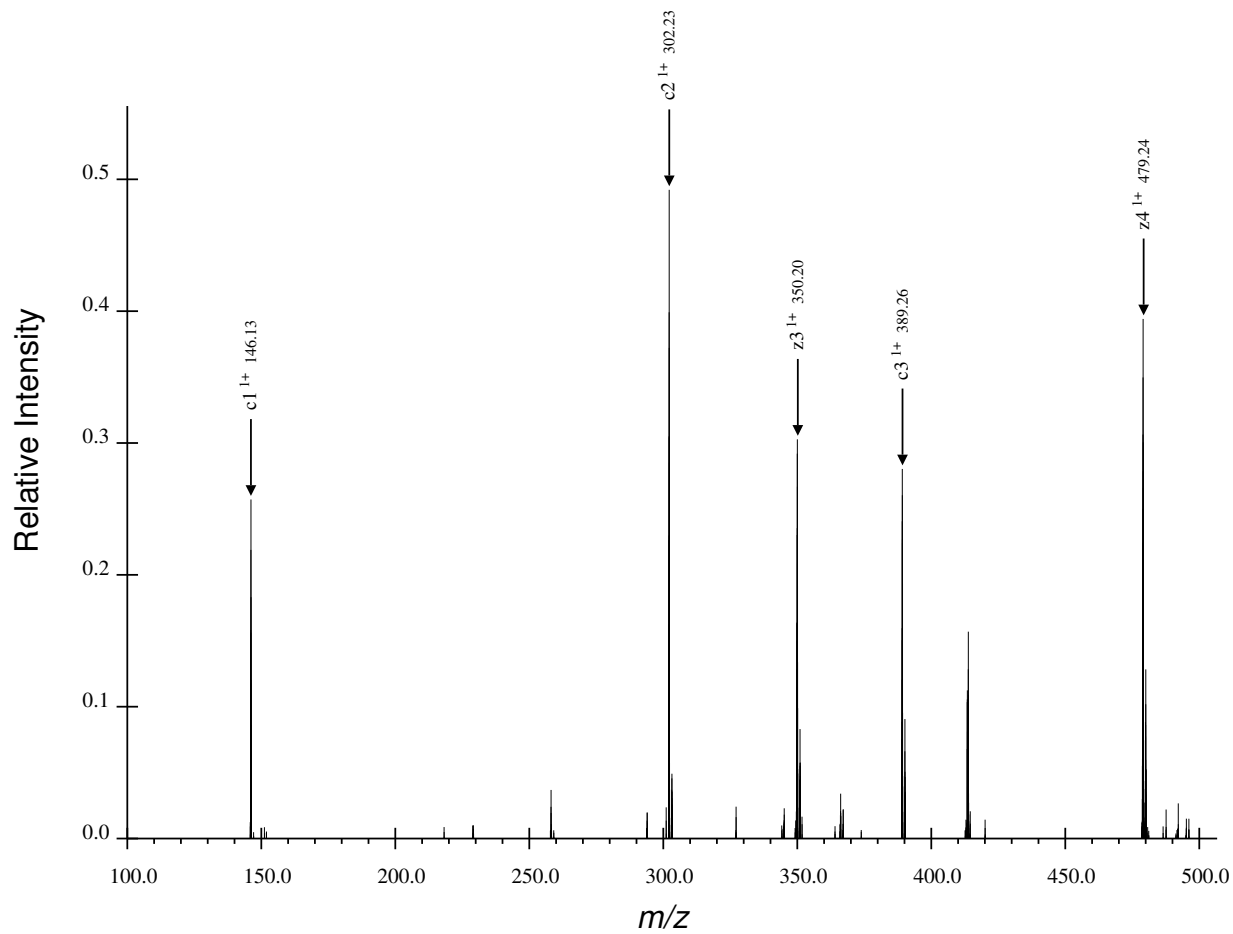

(a) First Region for KRSpYEEHIP, Spectrum 75.dta

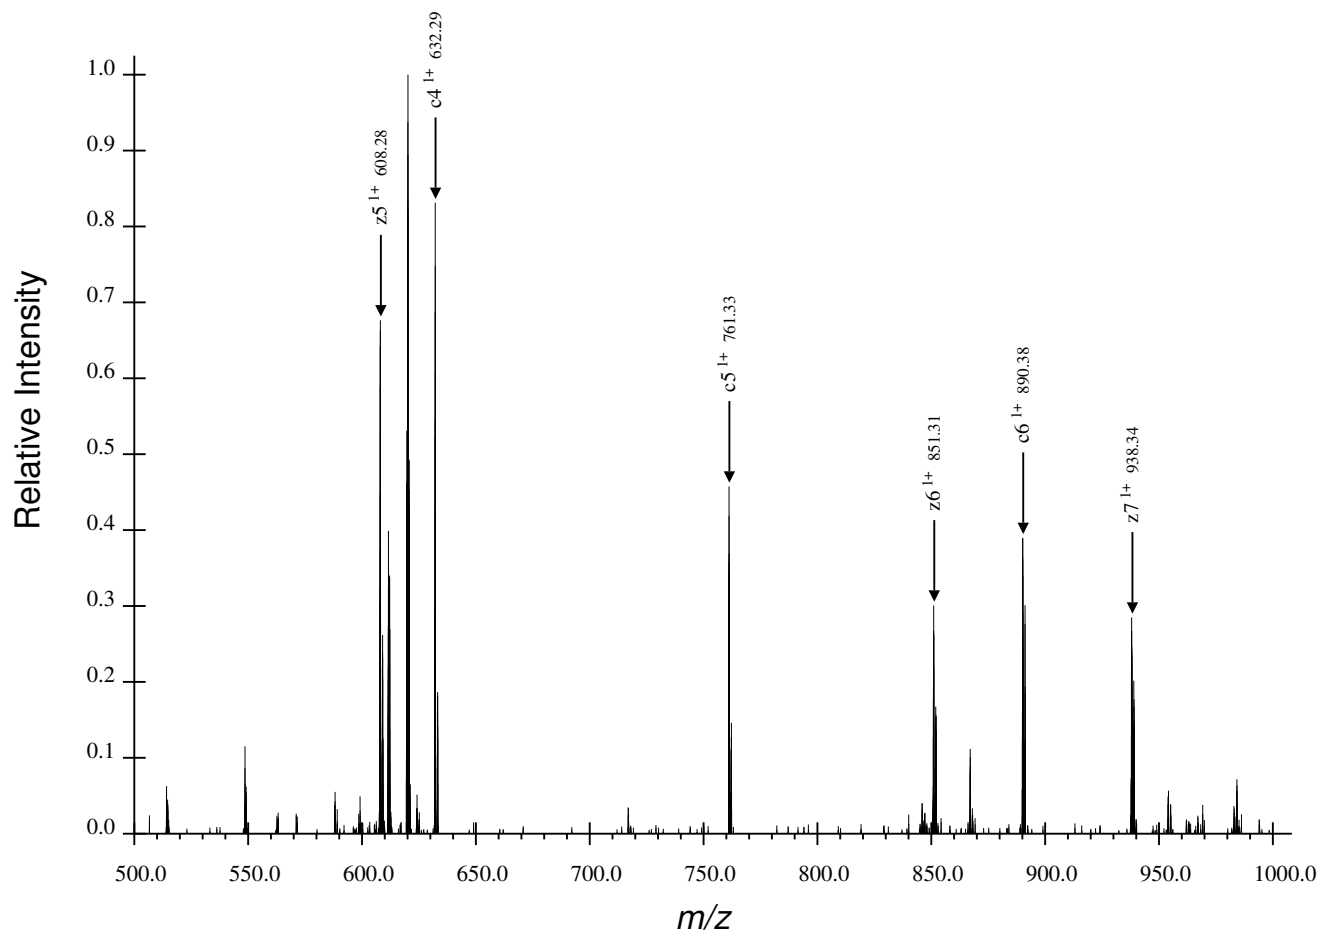

(b) Second Region for KRSpYEEHIP, Spectrum 75.dta

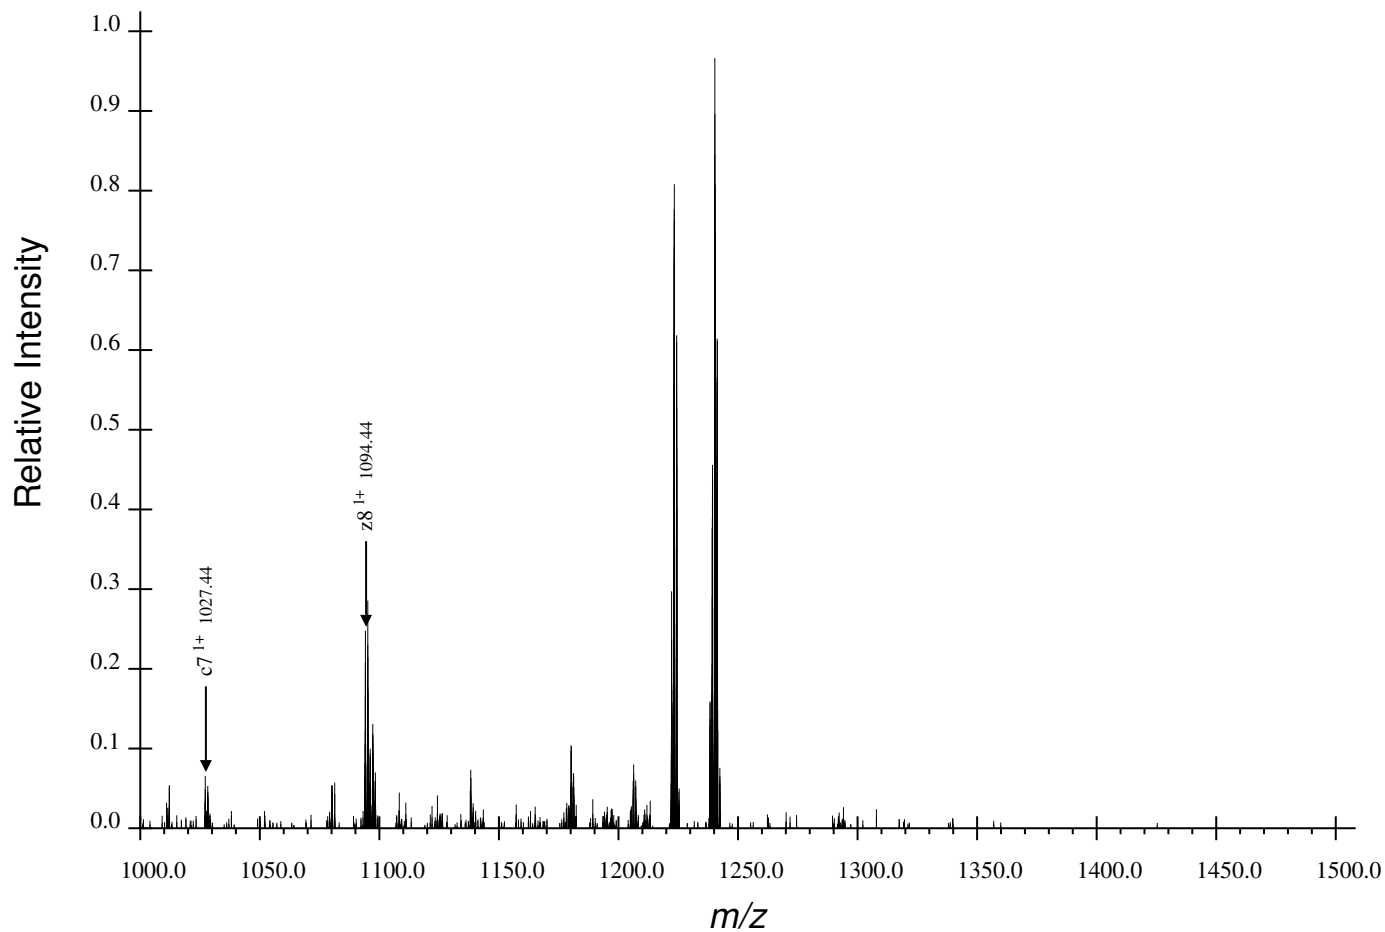

(c) Third Region for KRSpYEEHIP, Spectrum 75.dta

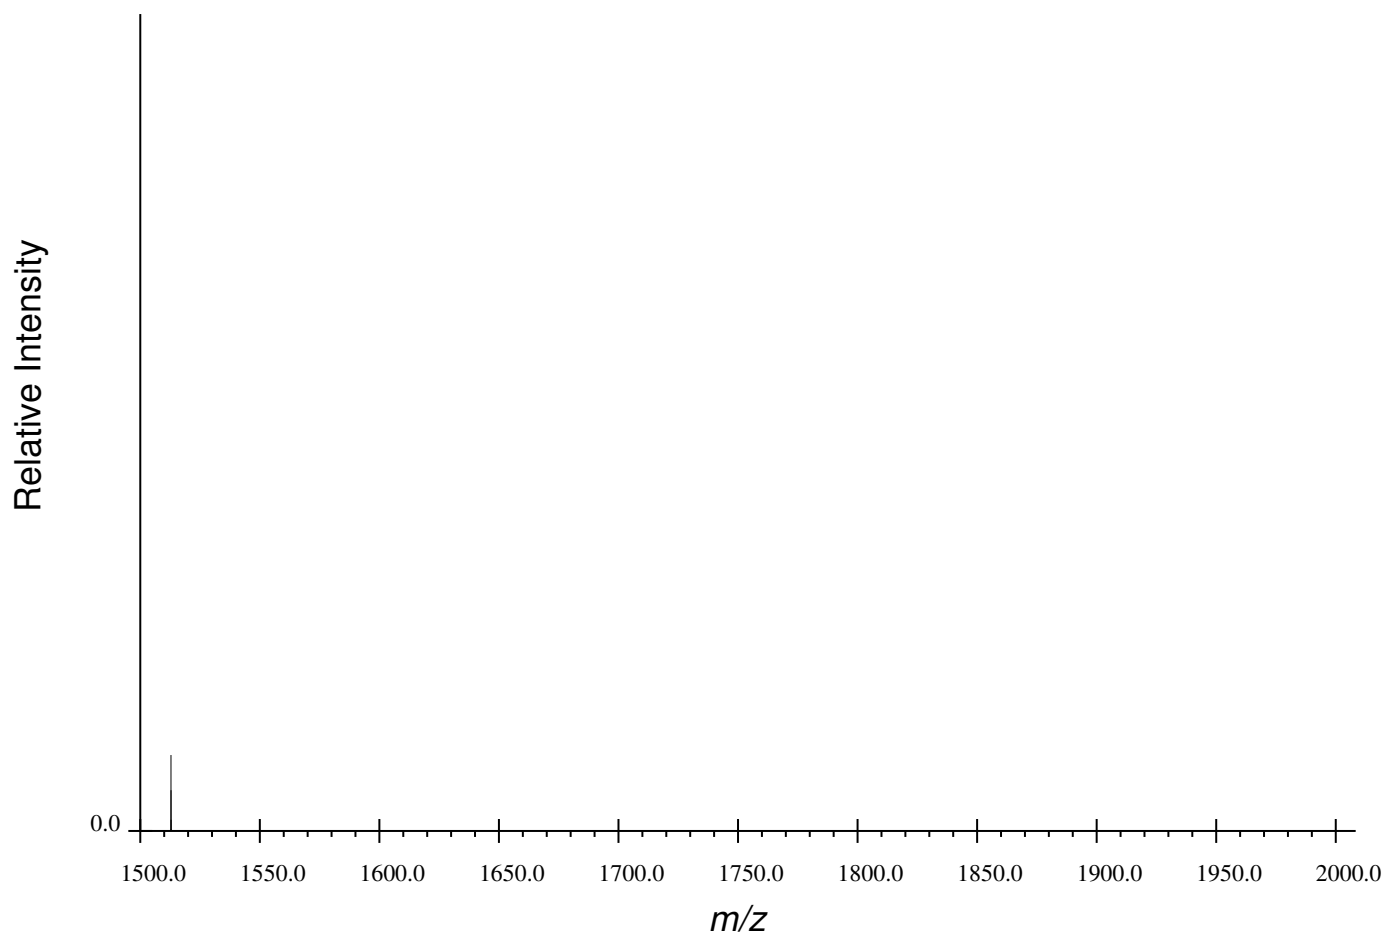

(d) Fourth Region for KRSpYEEHIP, Spectrum 75.dta

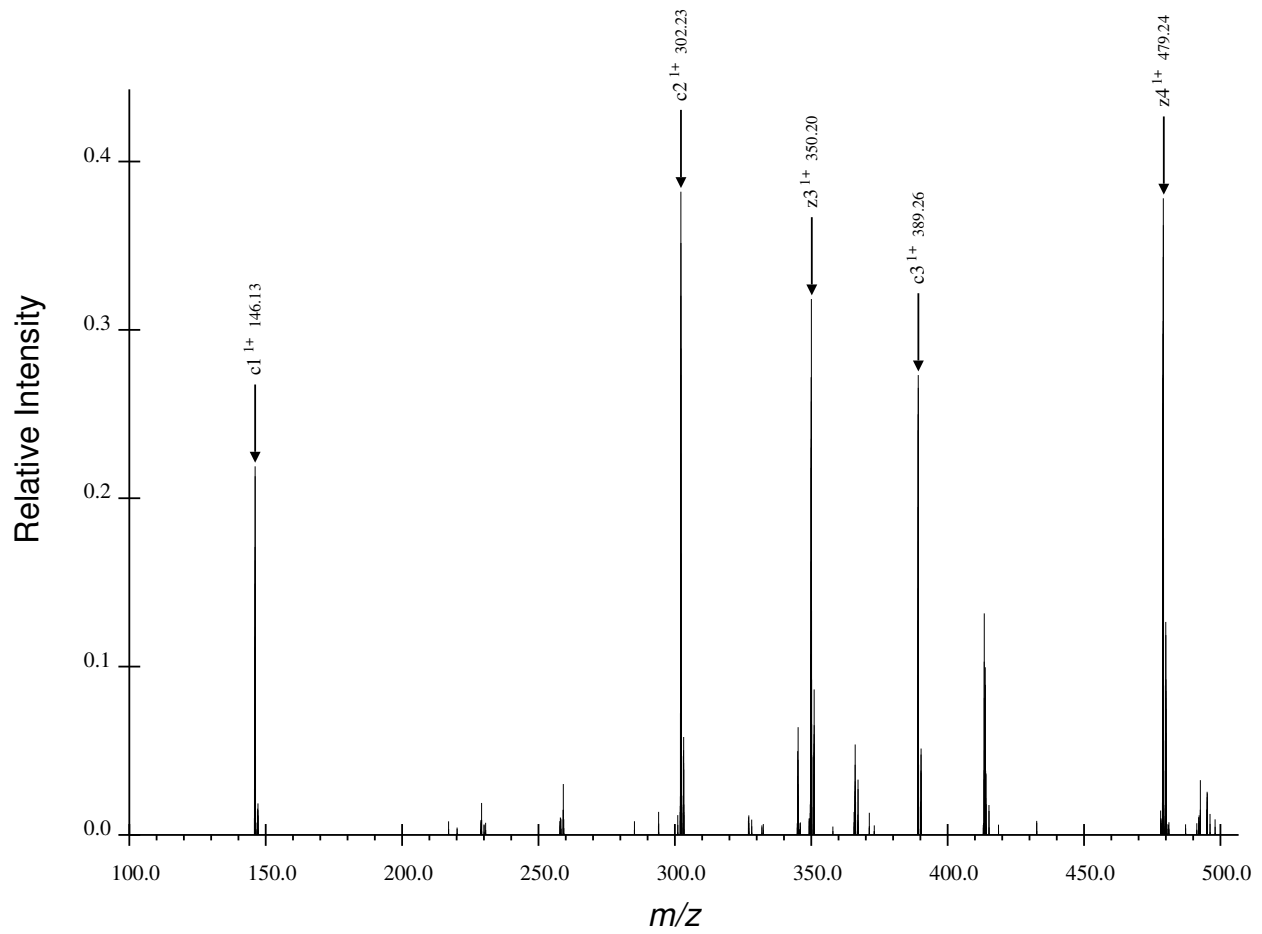

(a) First Region for KRSpYEEHIP, Spectrum 76.dta

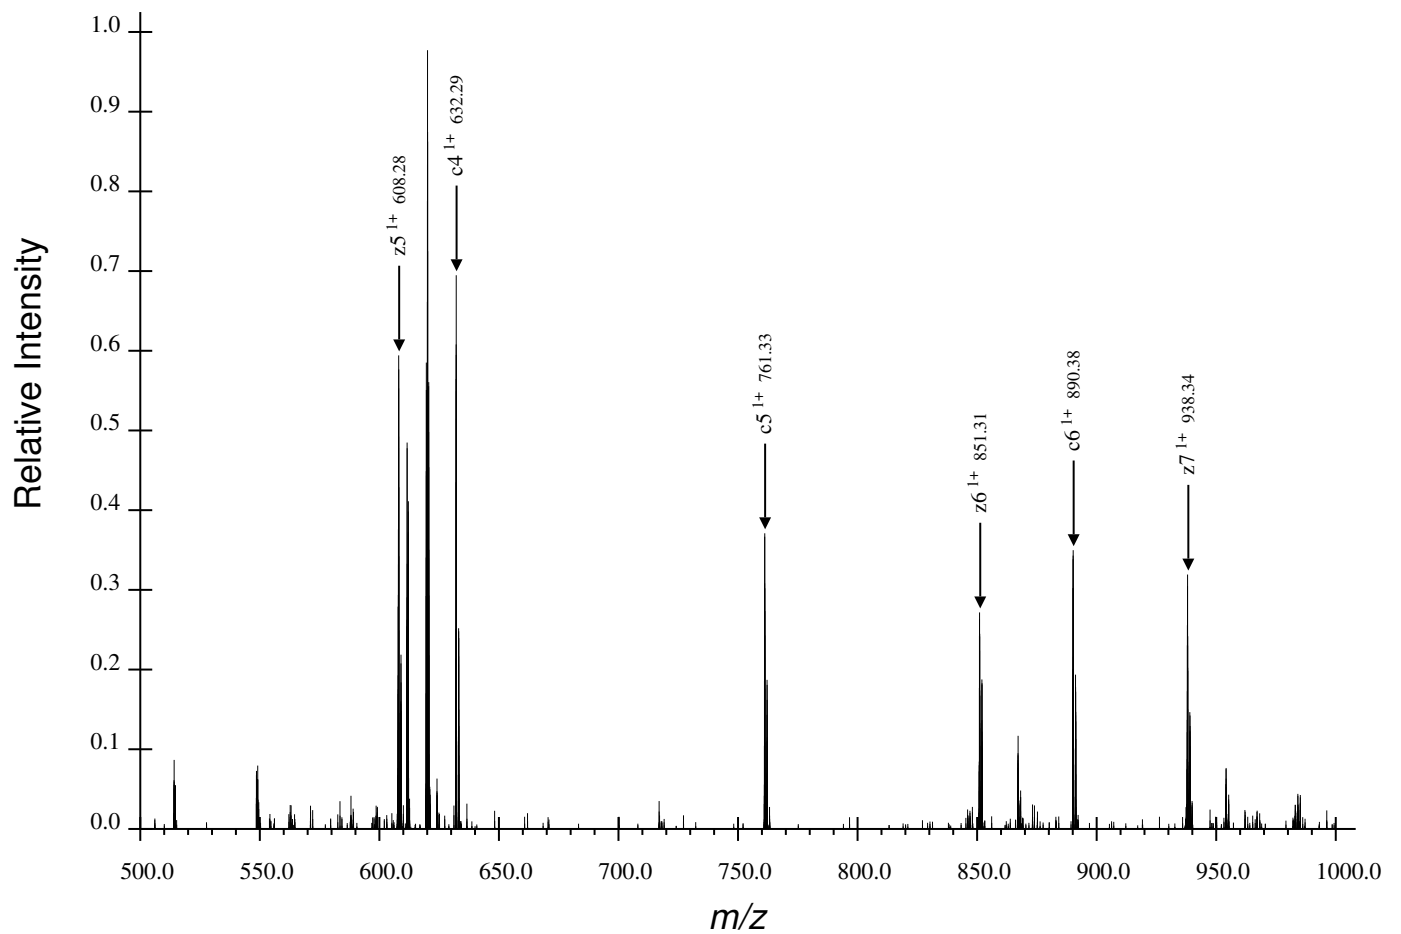

(b) Second Region for KRSpYEEHIP, Spectrum 76.dta

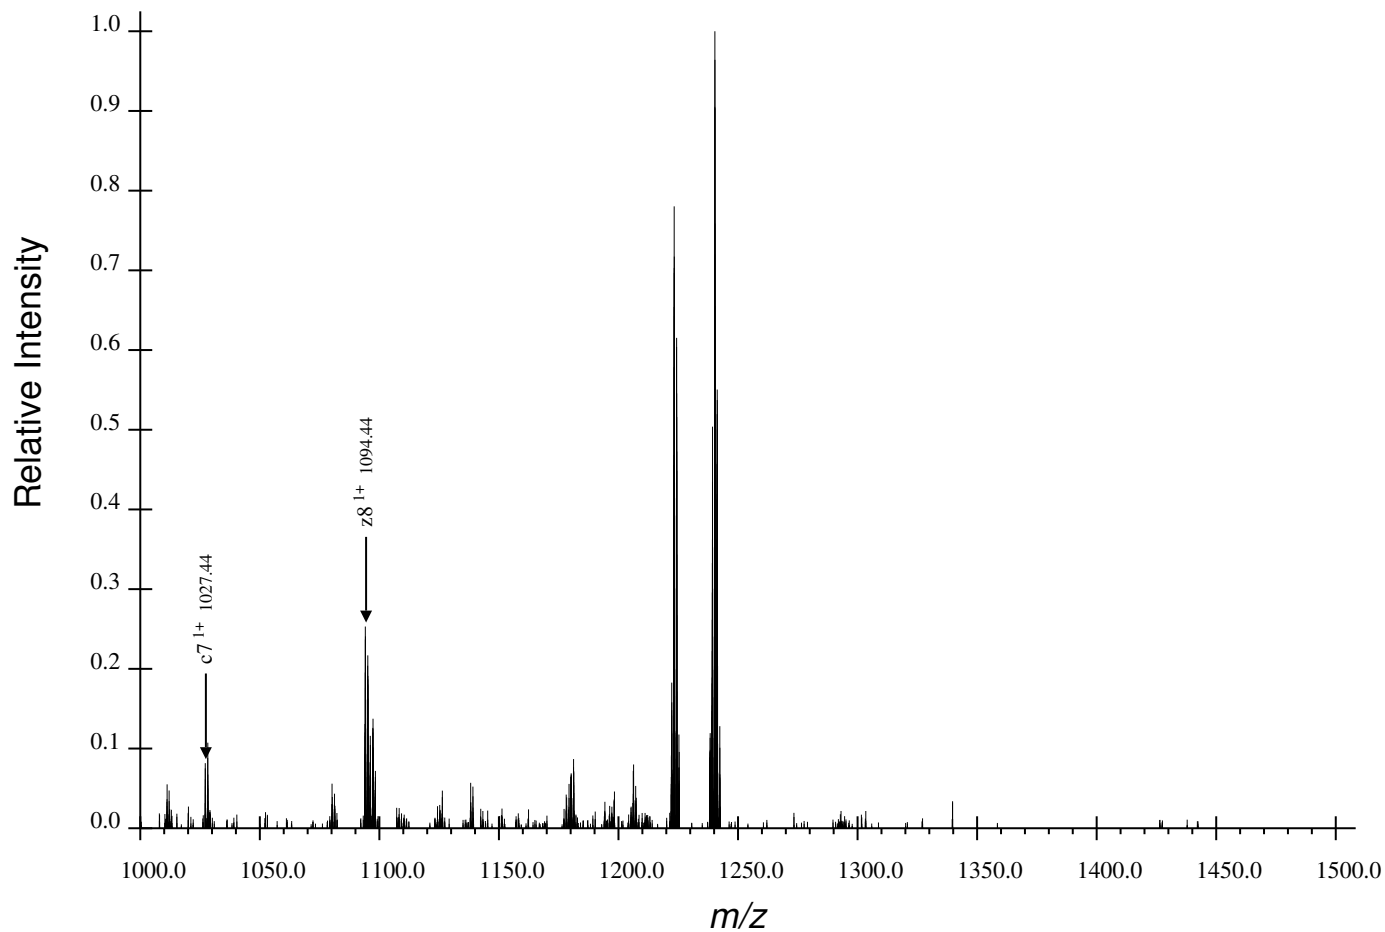

(c) Third Region for KRSpYEEHIP, Spectrum 76.dta

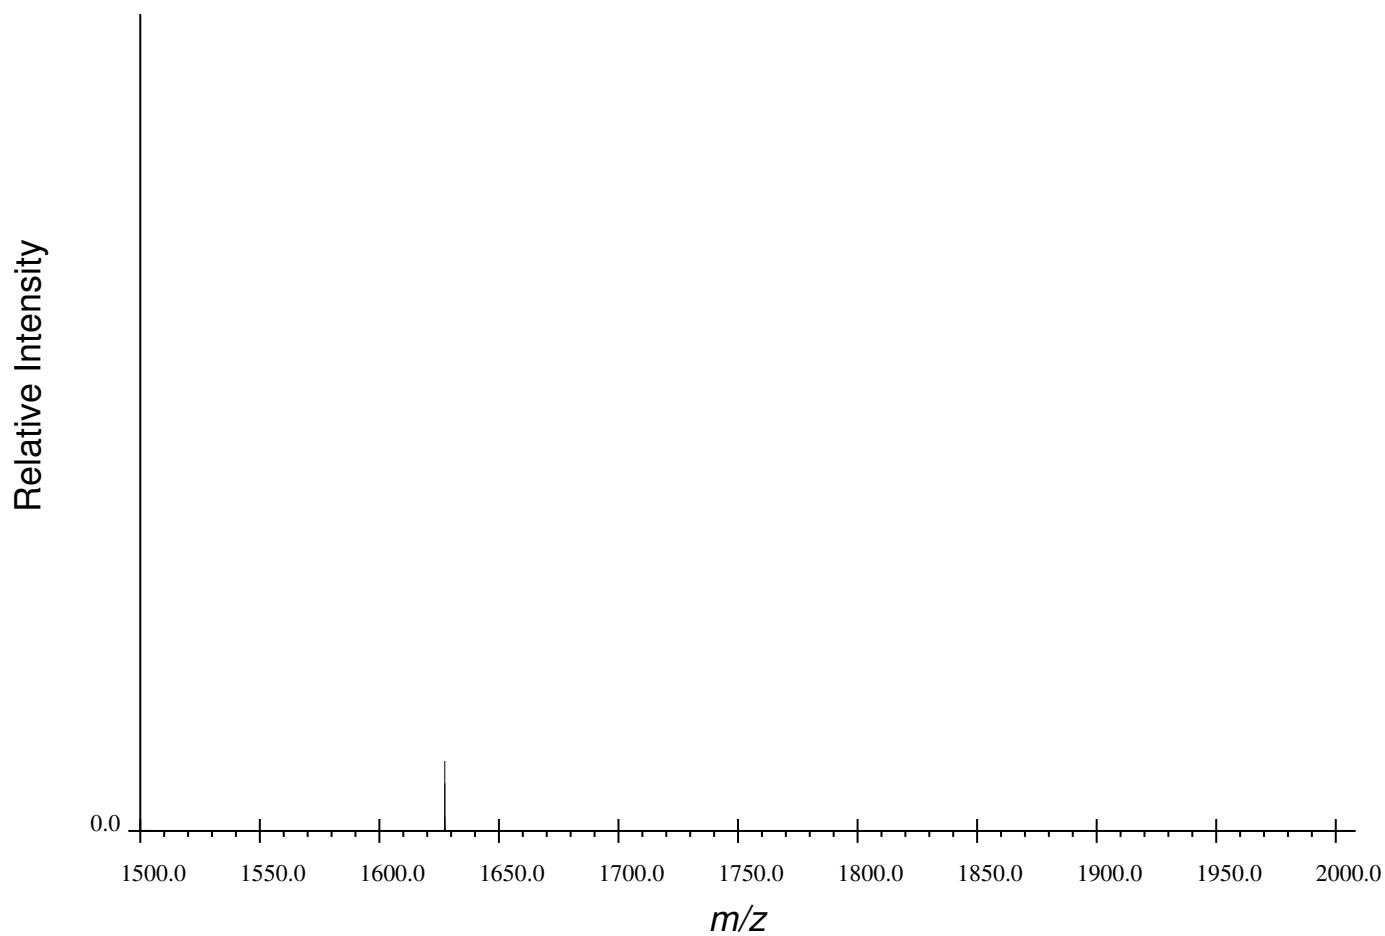

(d) Fourth Region for KRSpYEEHIP, Spectrum 76.dta



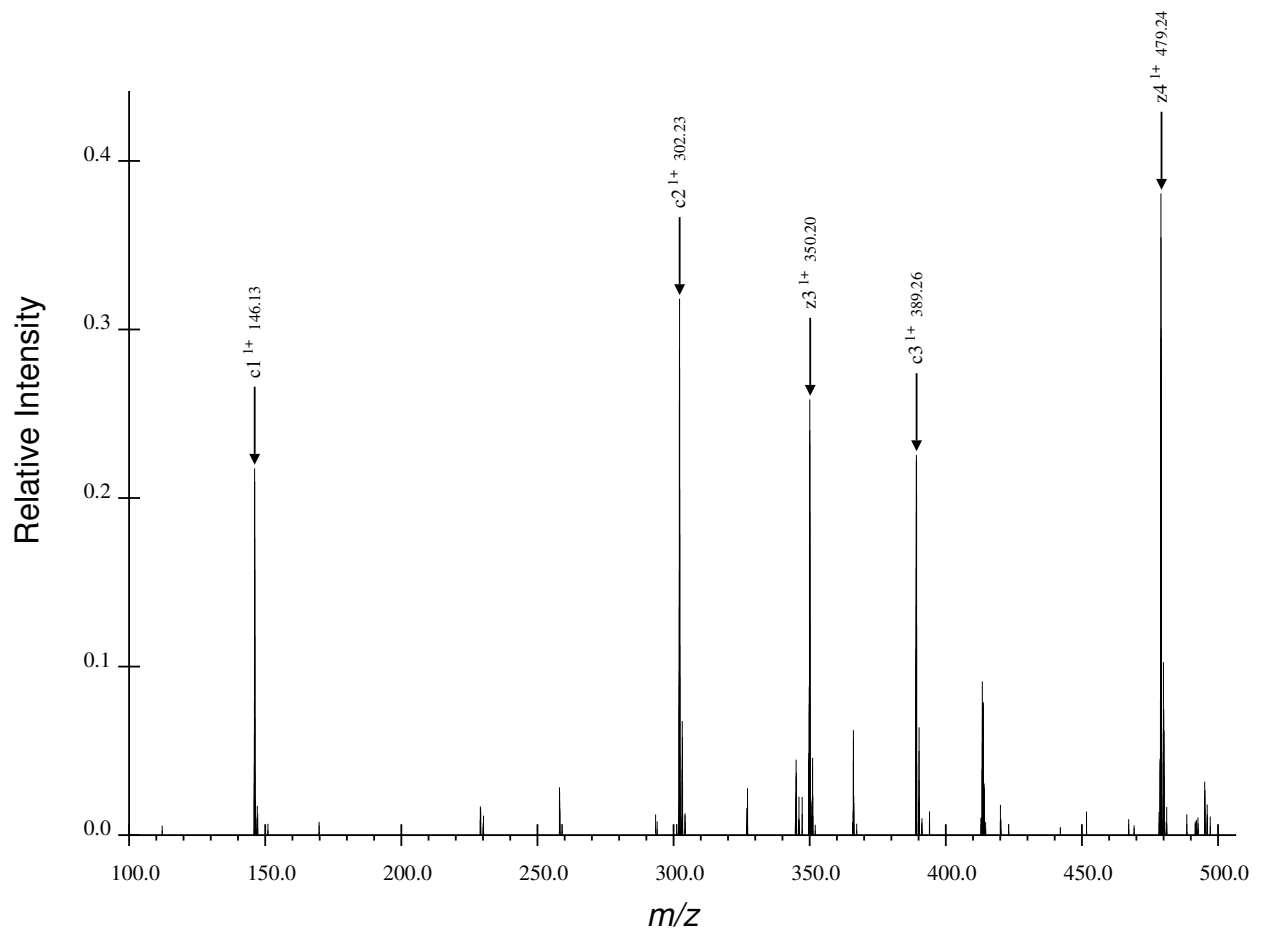

(a) First Region for KRSpYEEHIP, Spectrum 77.dta

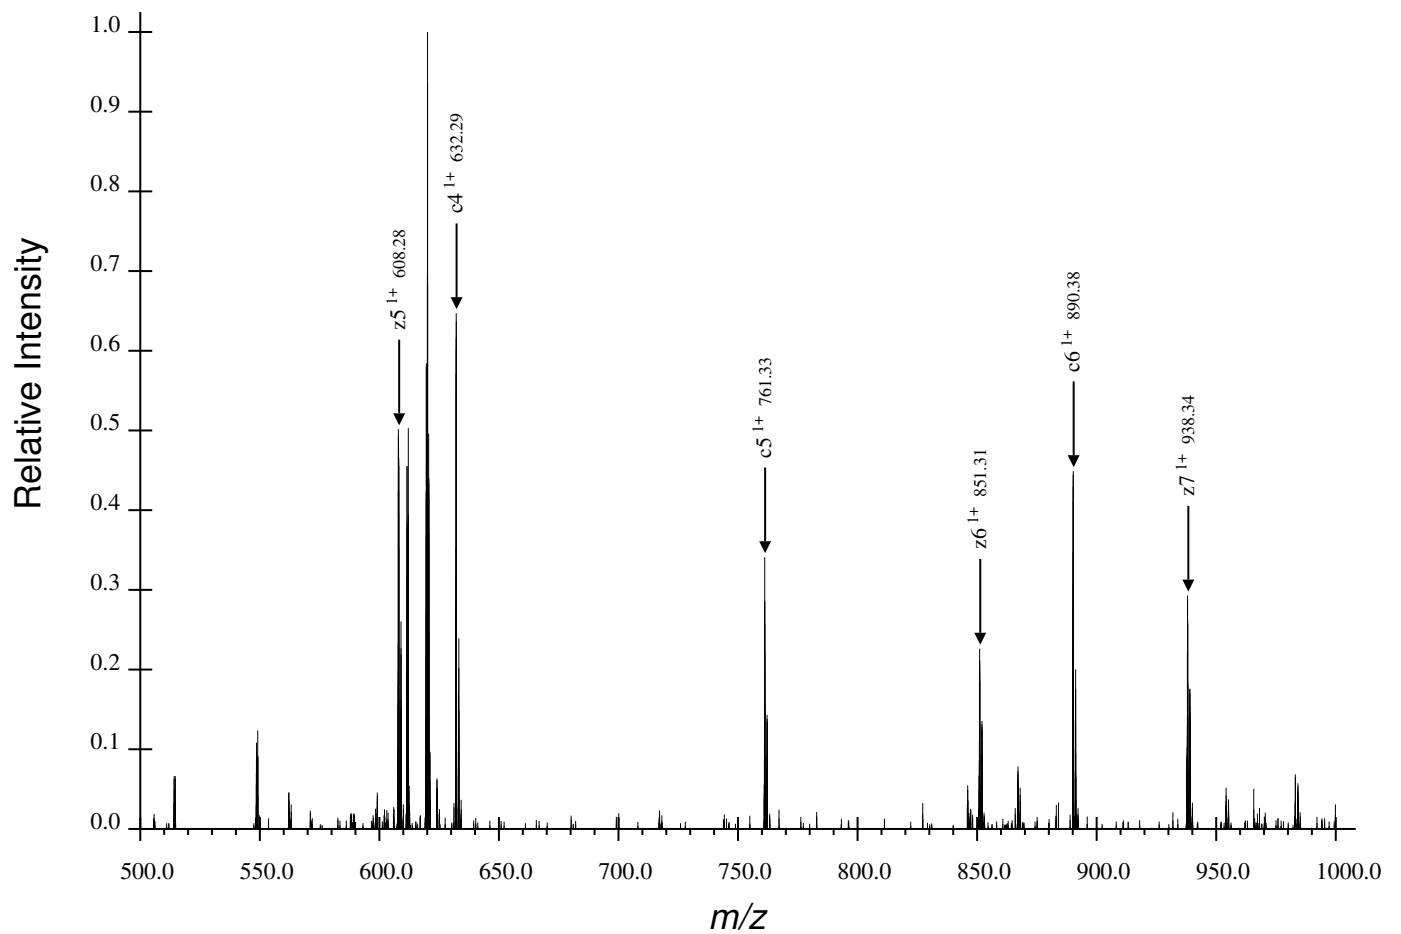

(b) Second Region for KRSpYEEHIP, Spectrum 77.dta

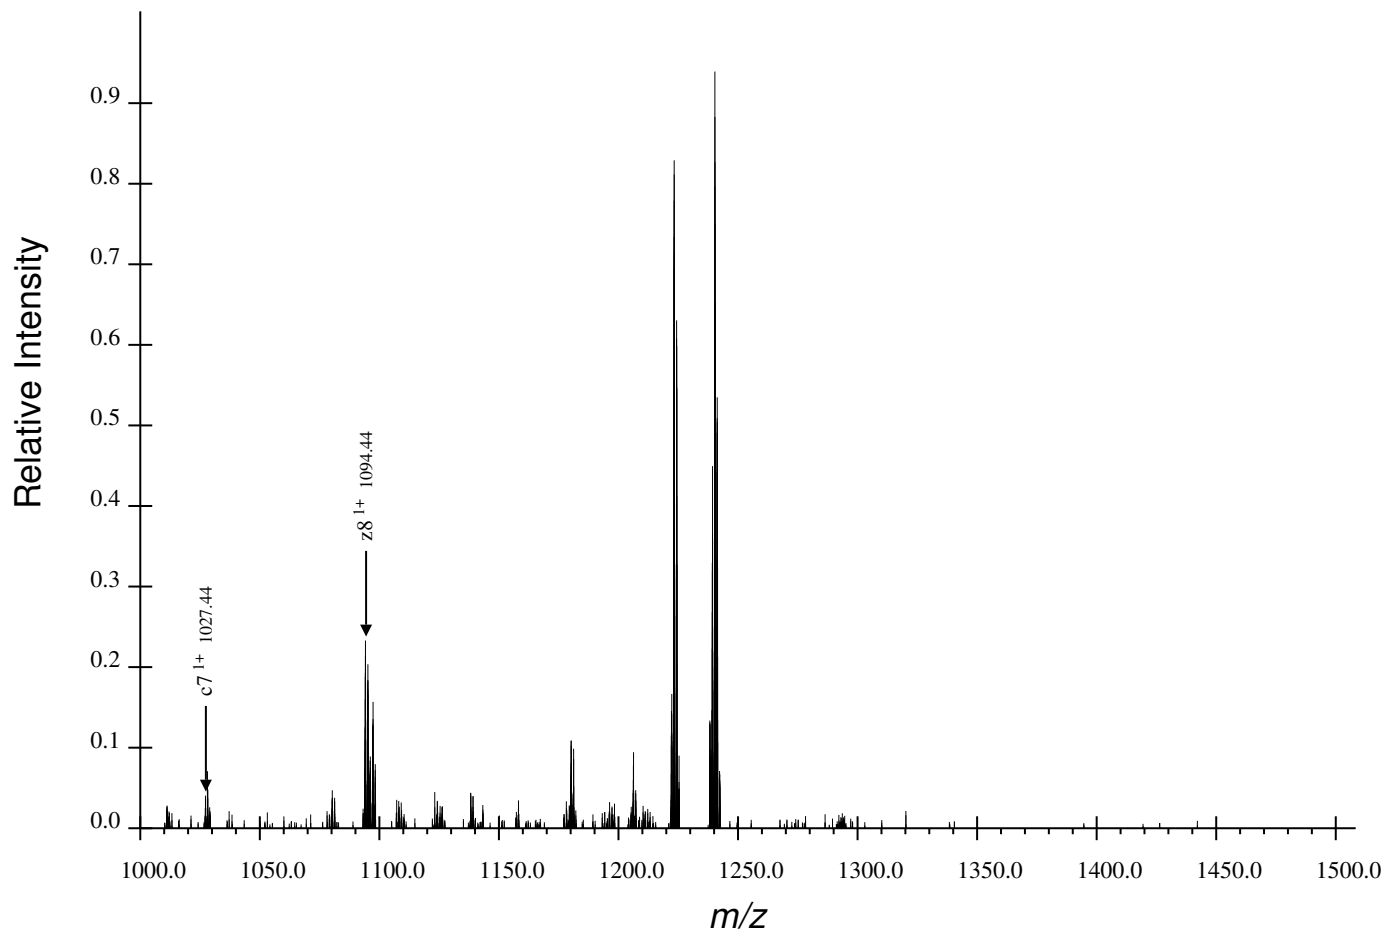

(c) Third Region for KRSpYEEHIP, Spectrum 77.dta

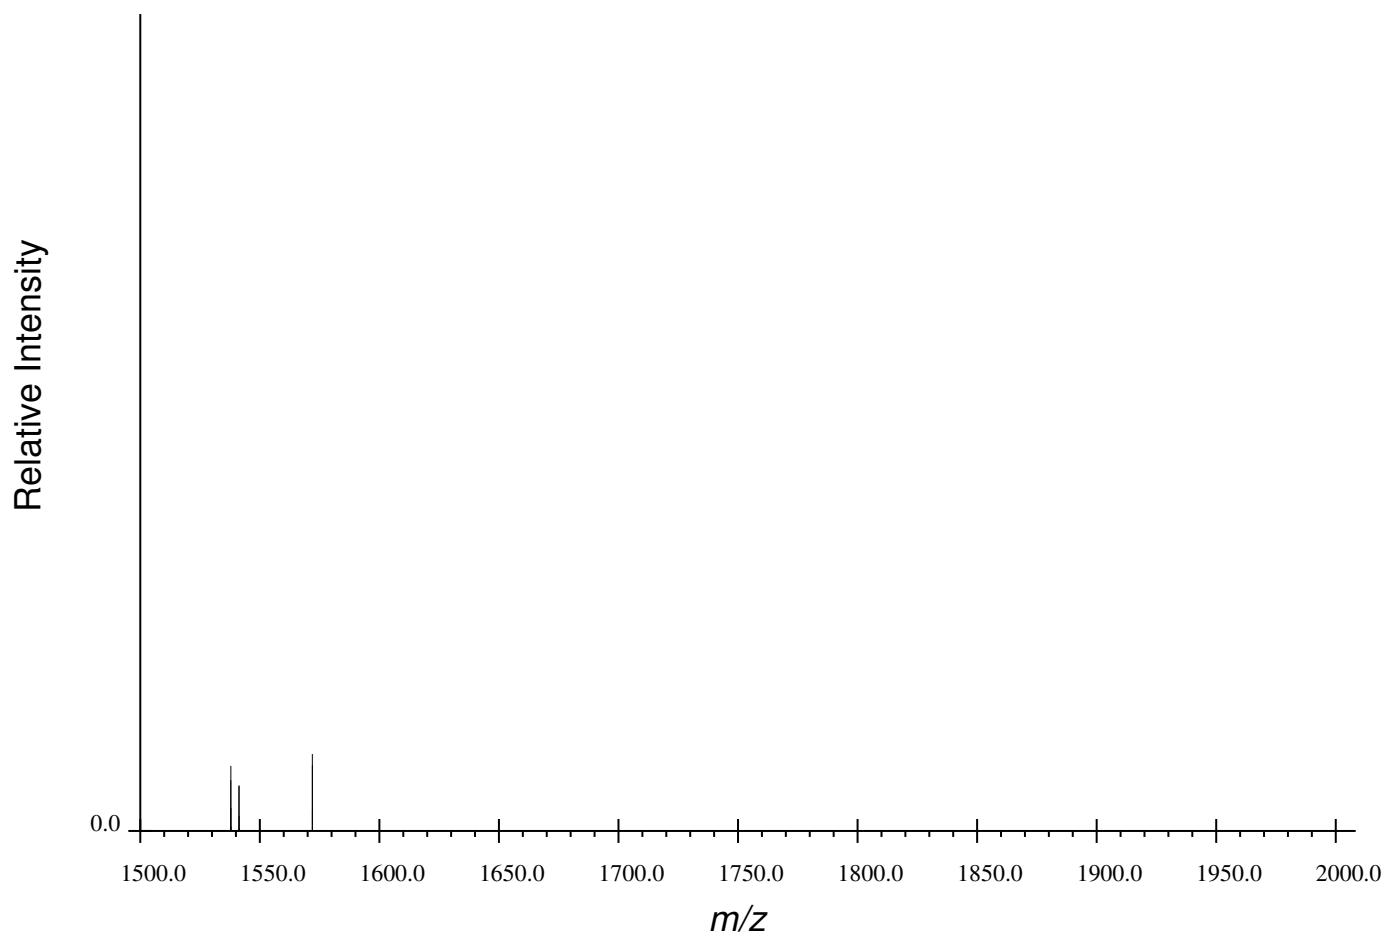

(d) Fourth Region for KRSpYEEHIP, Spectrum 77.dta

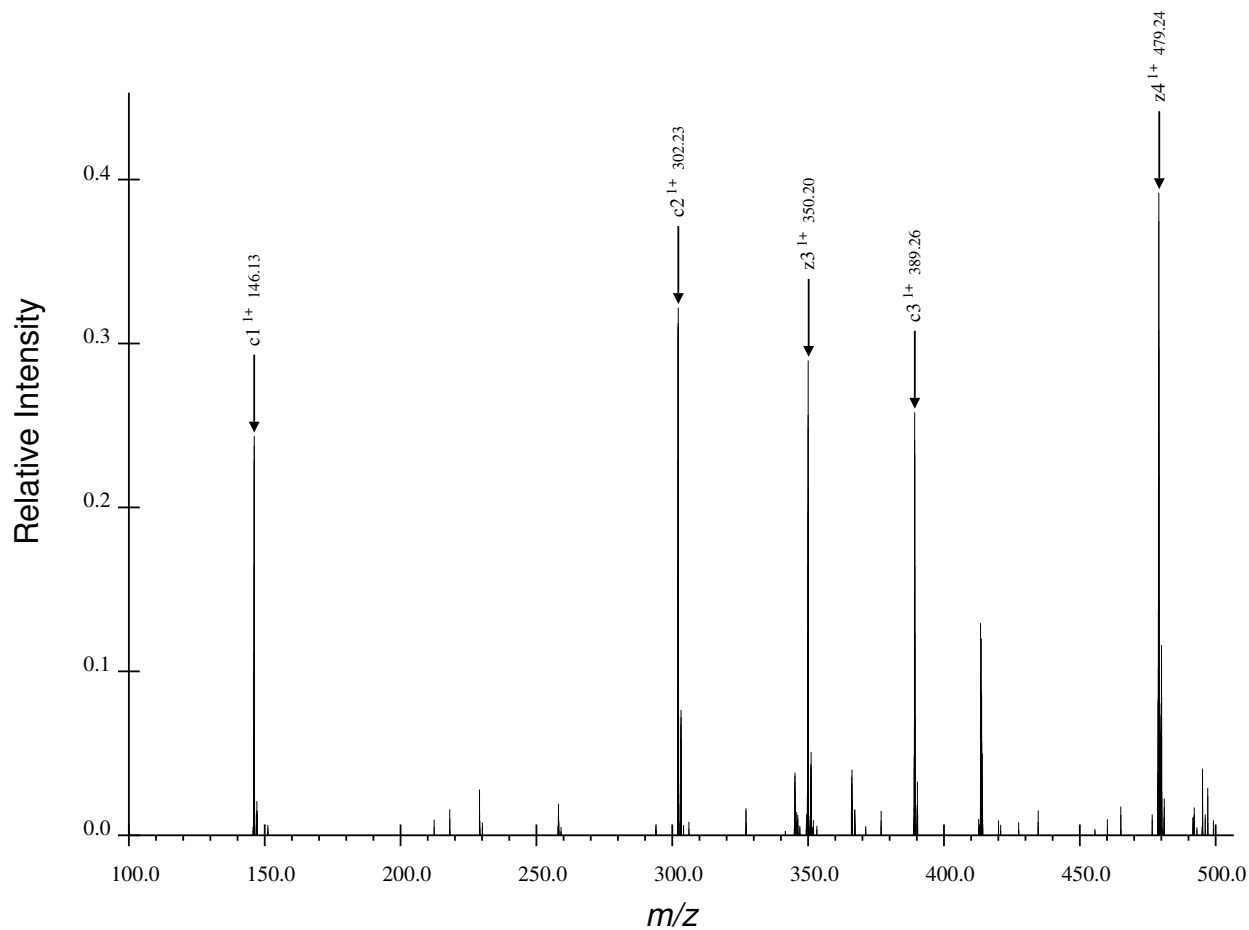

(a) First Region for KRSpYEEHIP, Spectrum 78.dta

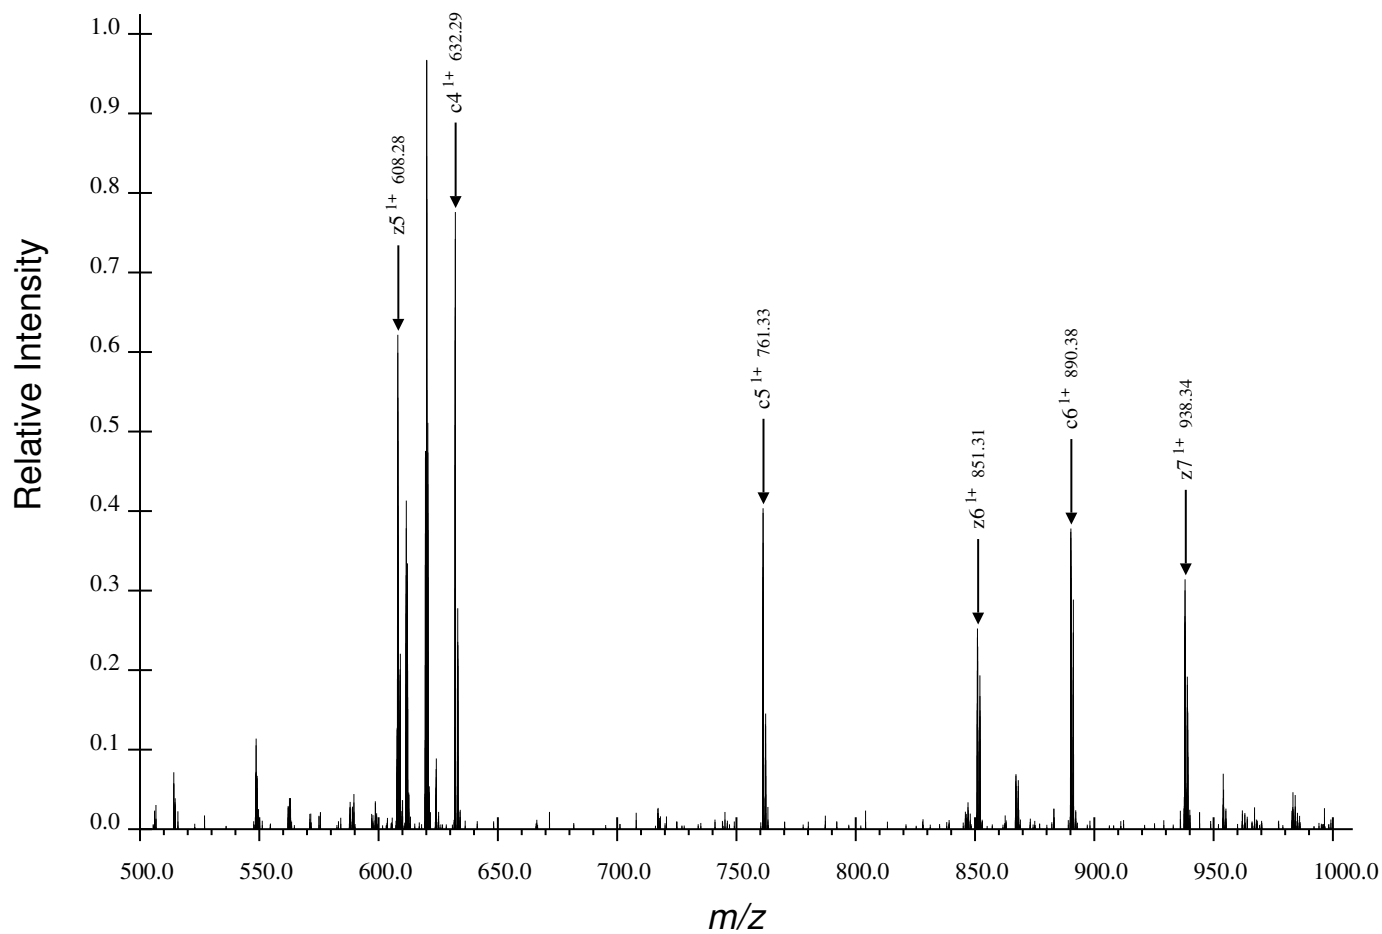

(b) Second Region for KRSpYEEHIP, Spectrum 78.dta

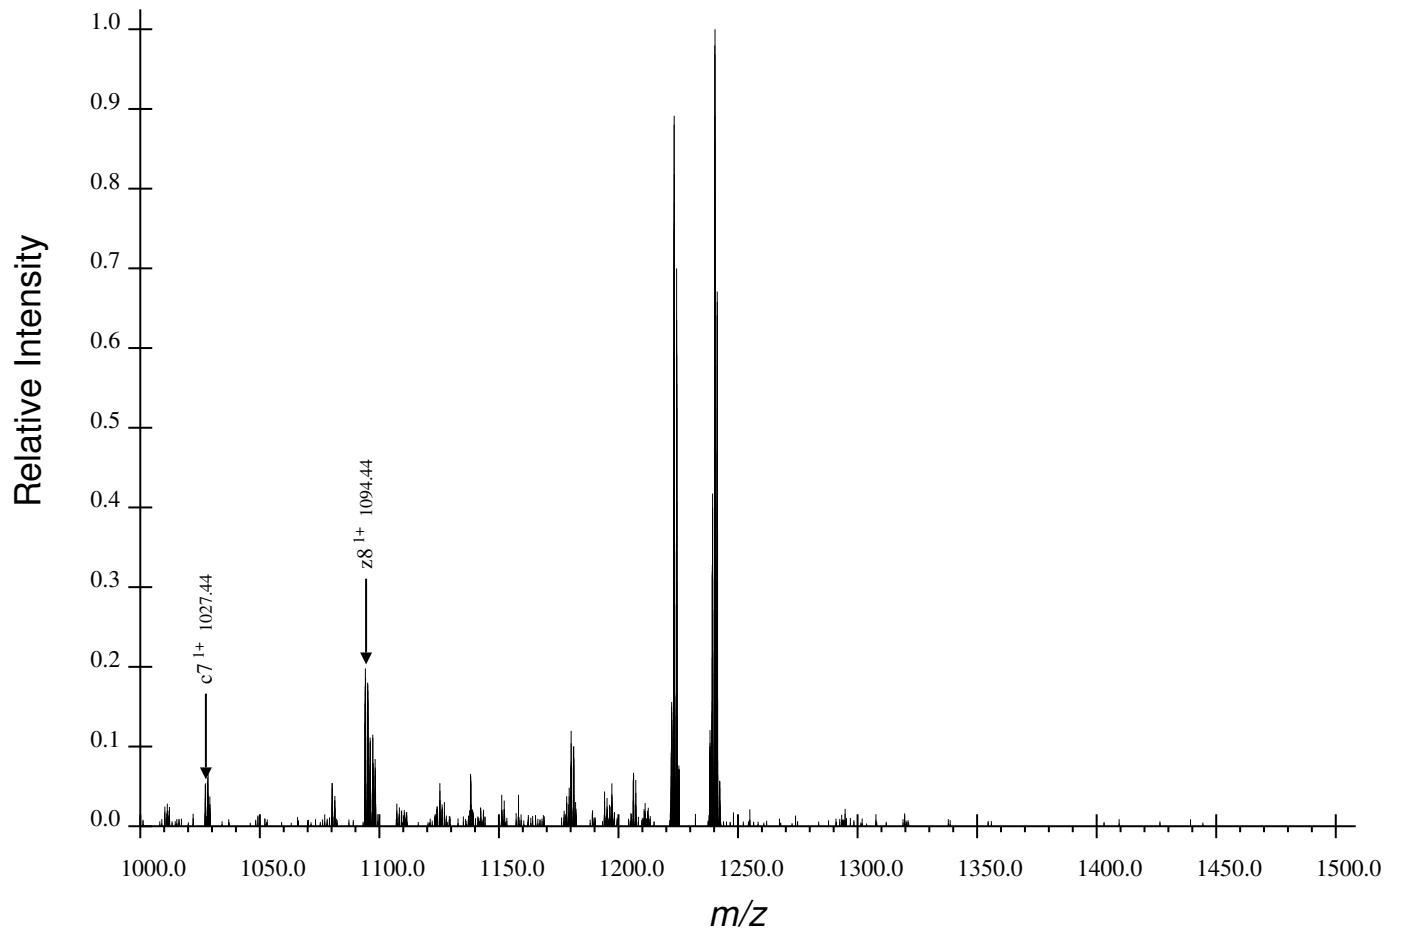

(c) Third Region for KRSpYEEHIP, Spectrum 78.dta

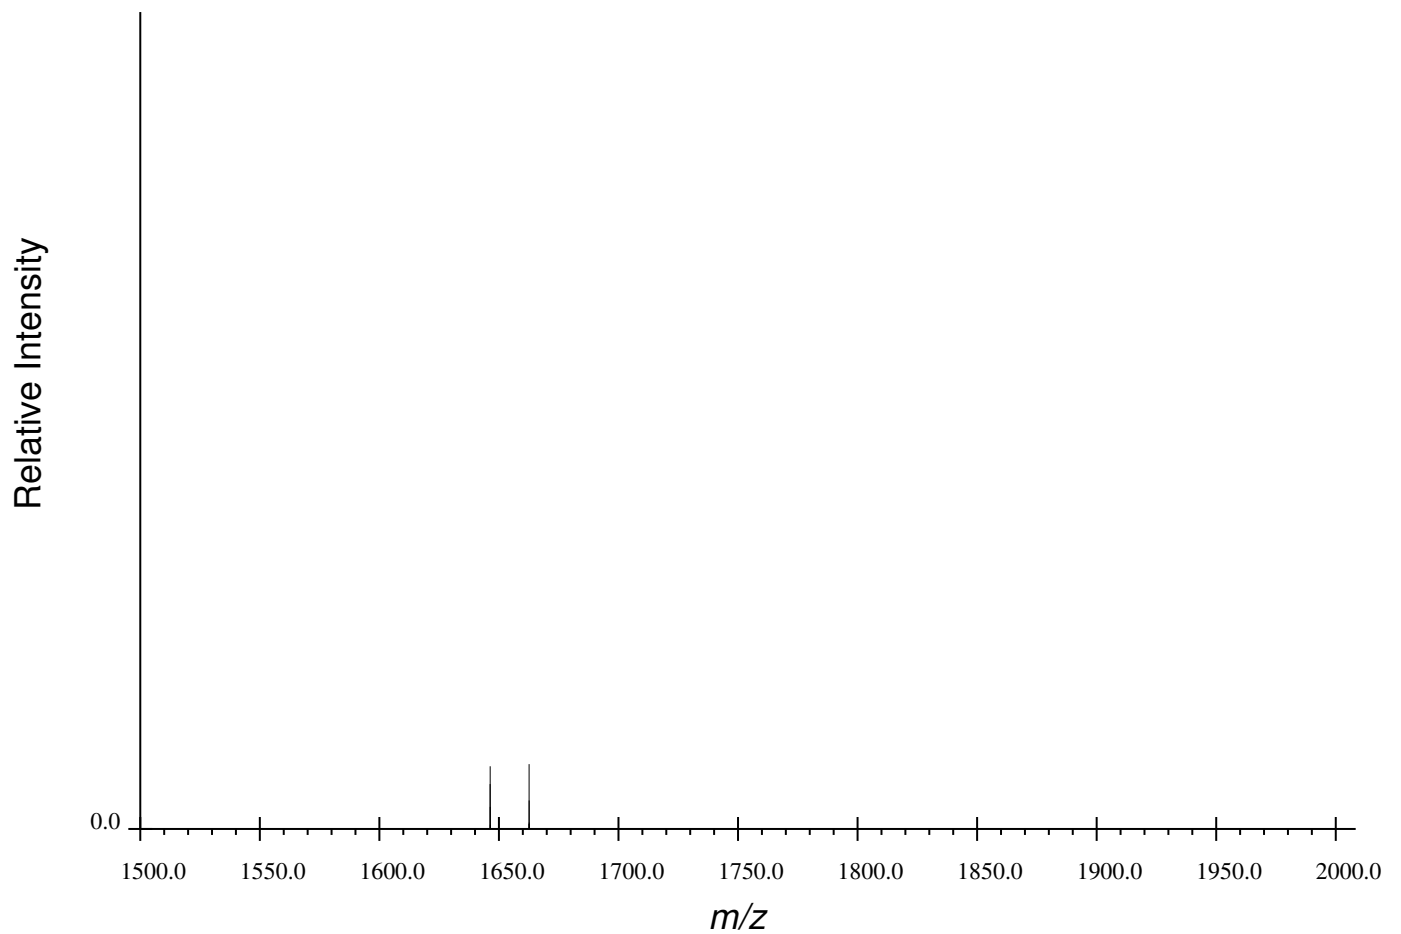

(d) Fourth Region for KRSpYEEHIP, Spectrum 78.dta

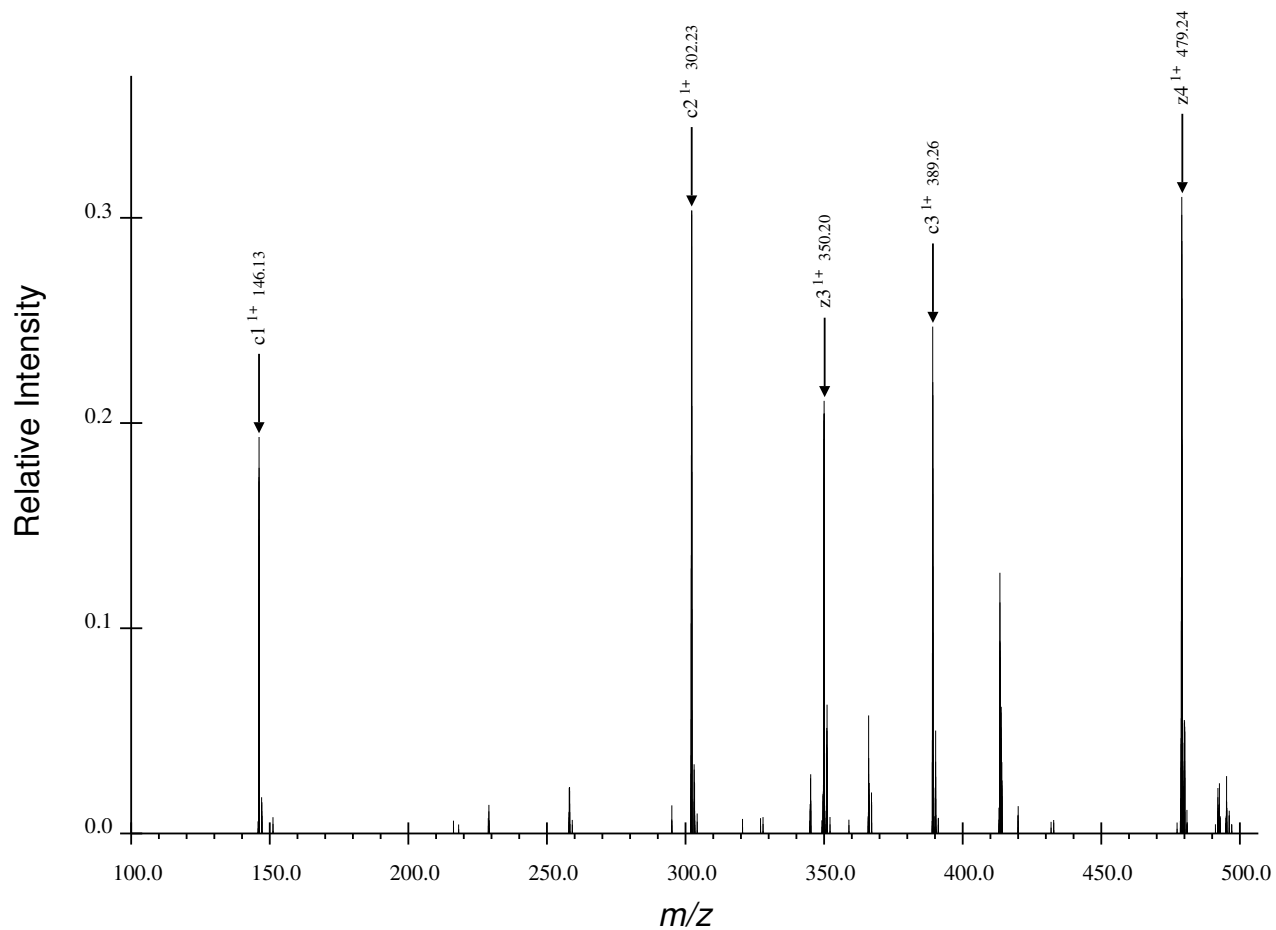

(a) First Region for KRSpYEEHIP, Spectrum 79.dta

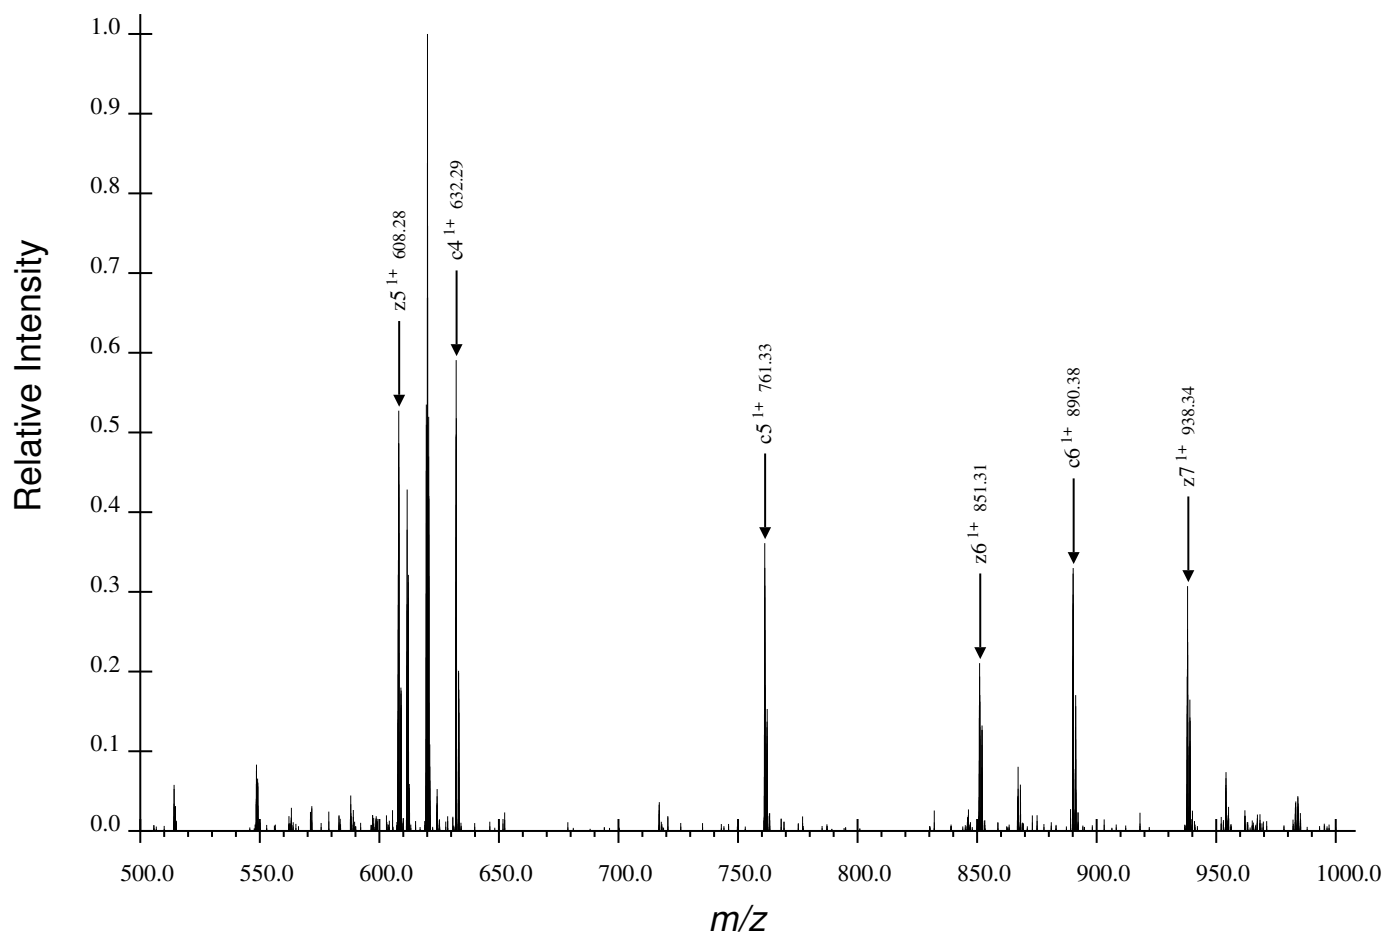

(b) Second Region for KRSpYEEHIP, Spectrum 79.dta

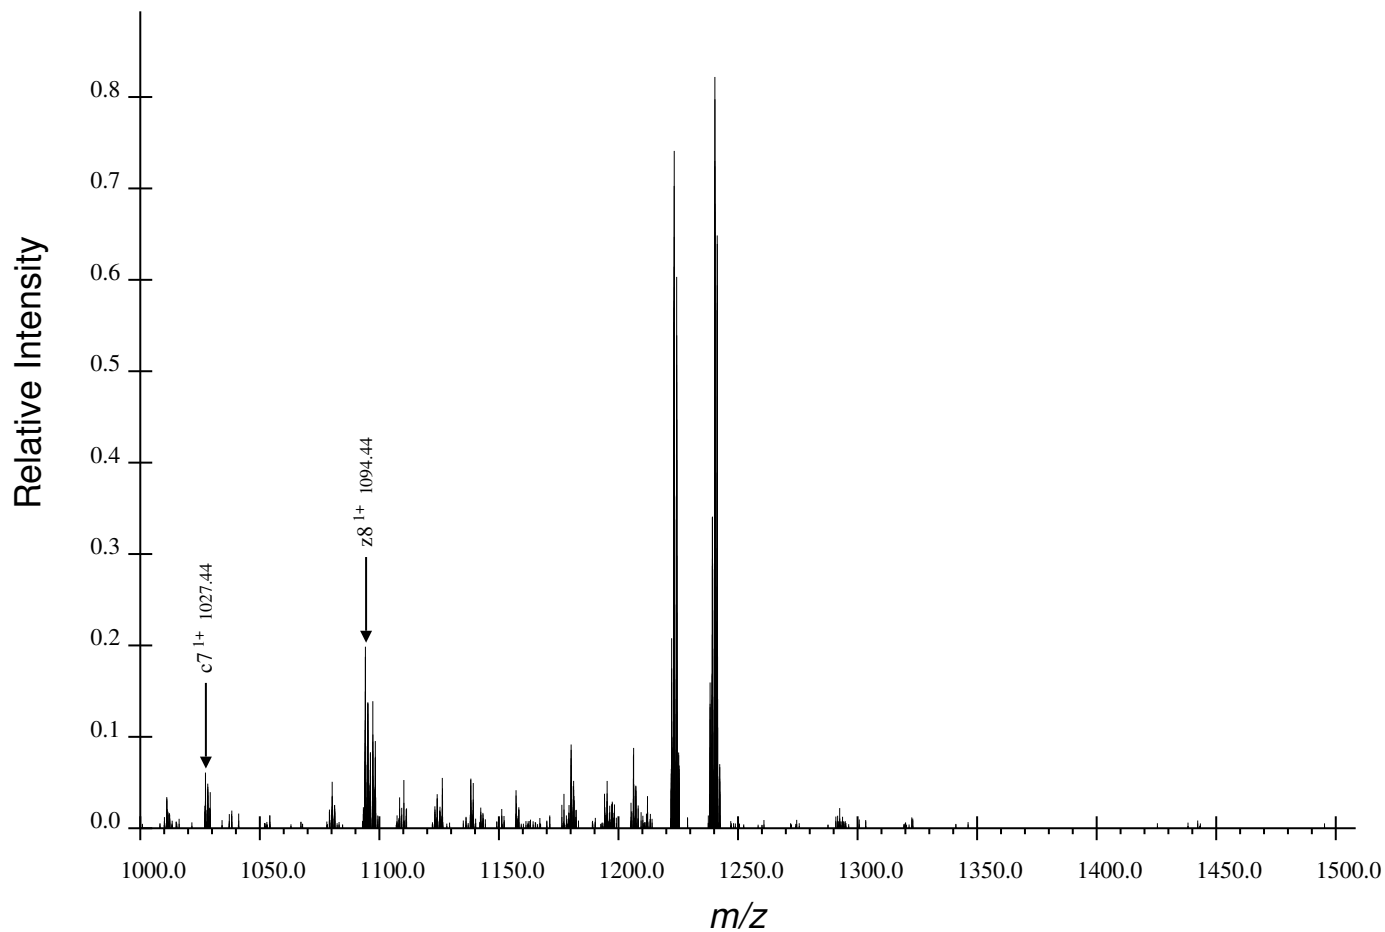

(c) Third Region for KRSpYEEHIP, Spectrum 79.dta

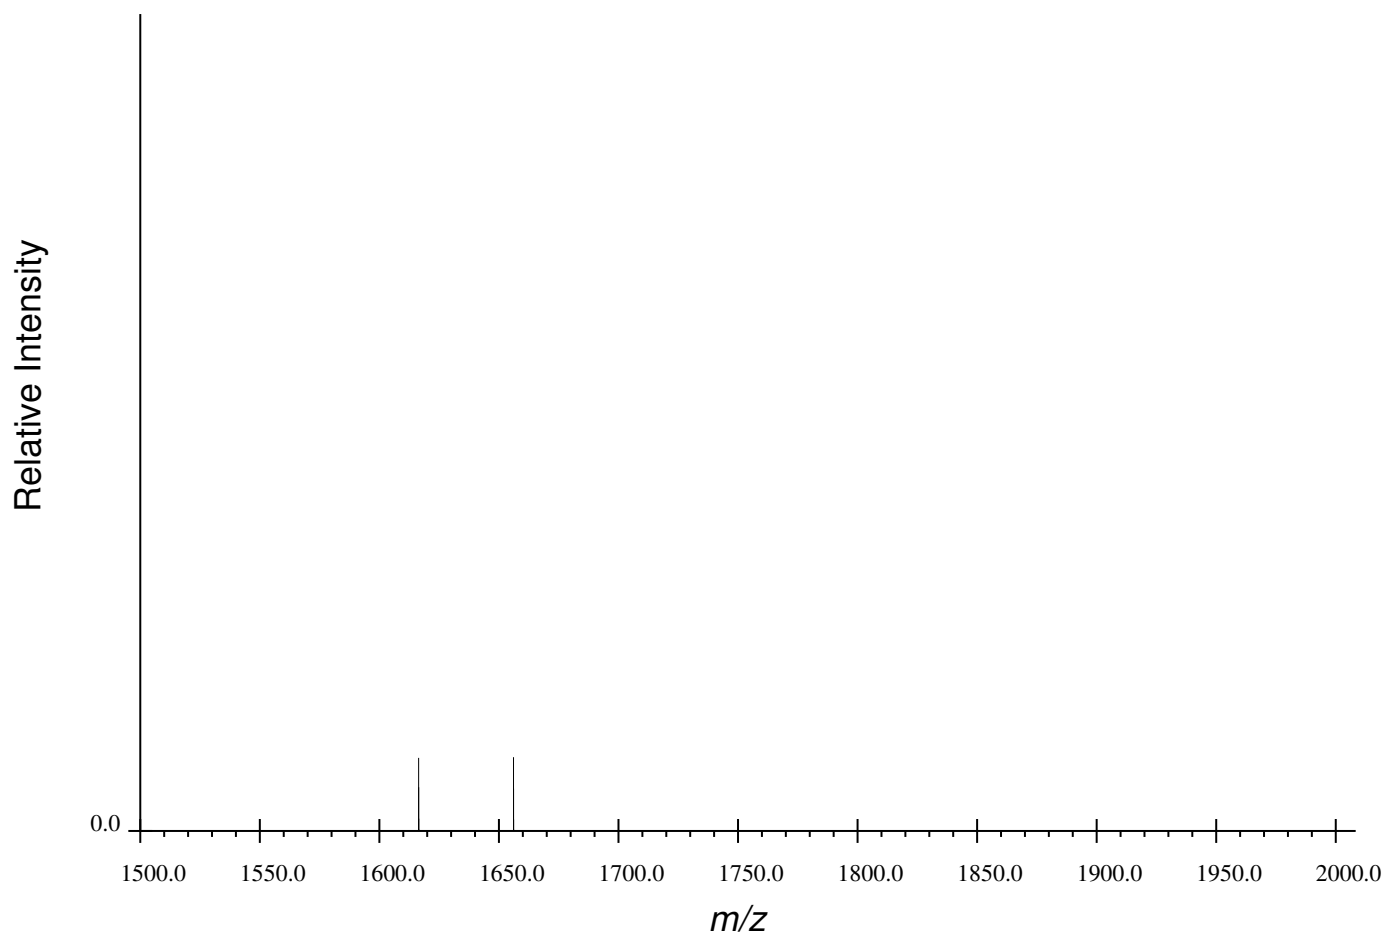

(d) Fourth Region for KRSpYEEHIP, Spectrum 79.dta

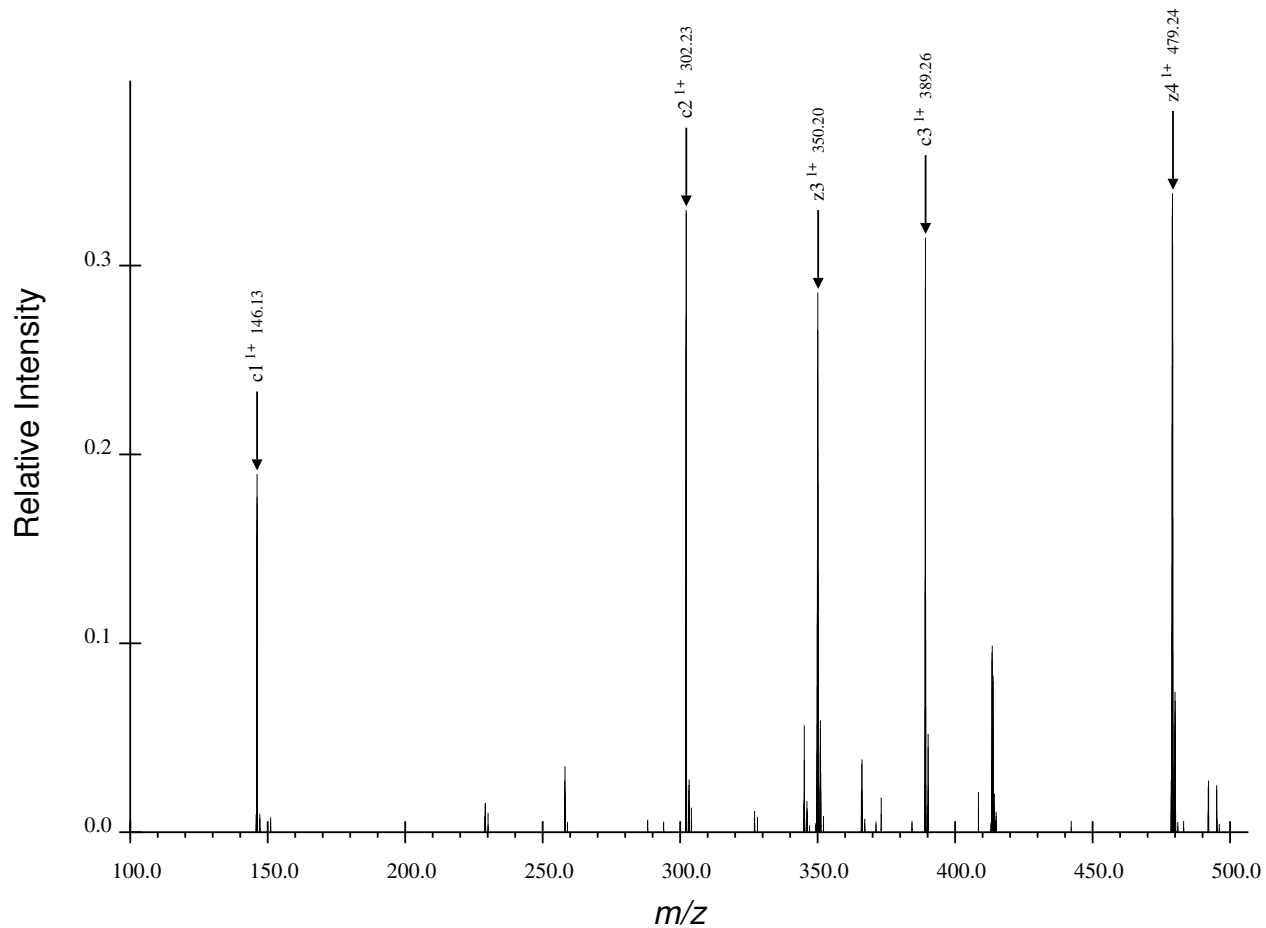

(a) First Region for KRSpYEEHIP, Spectrum 80.dta

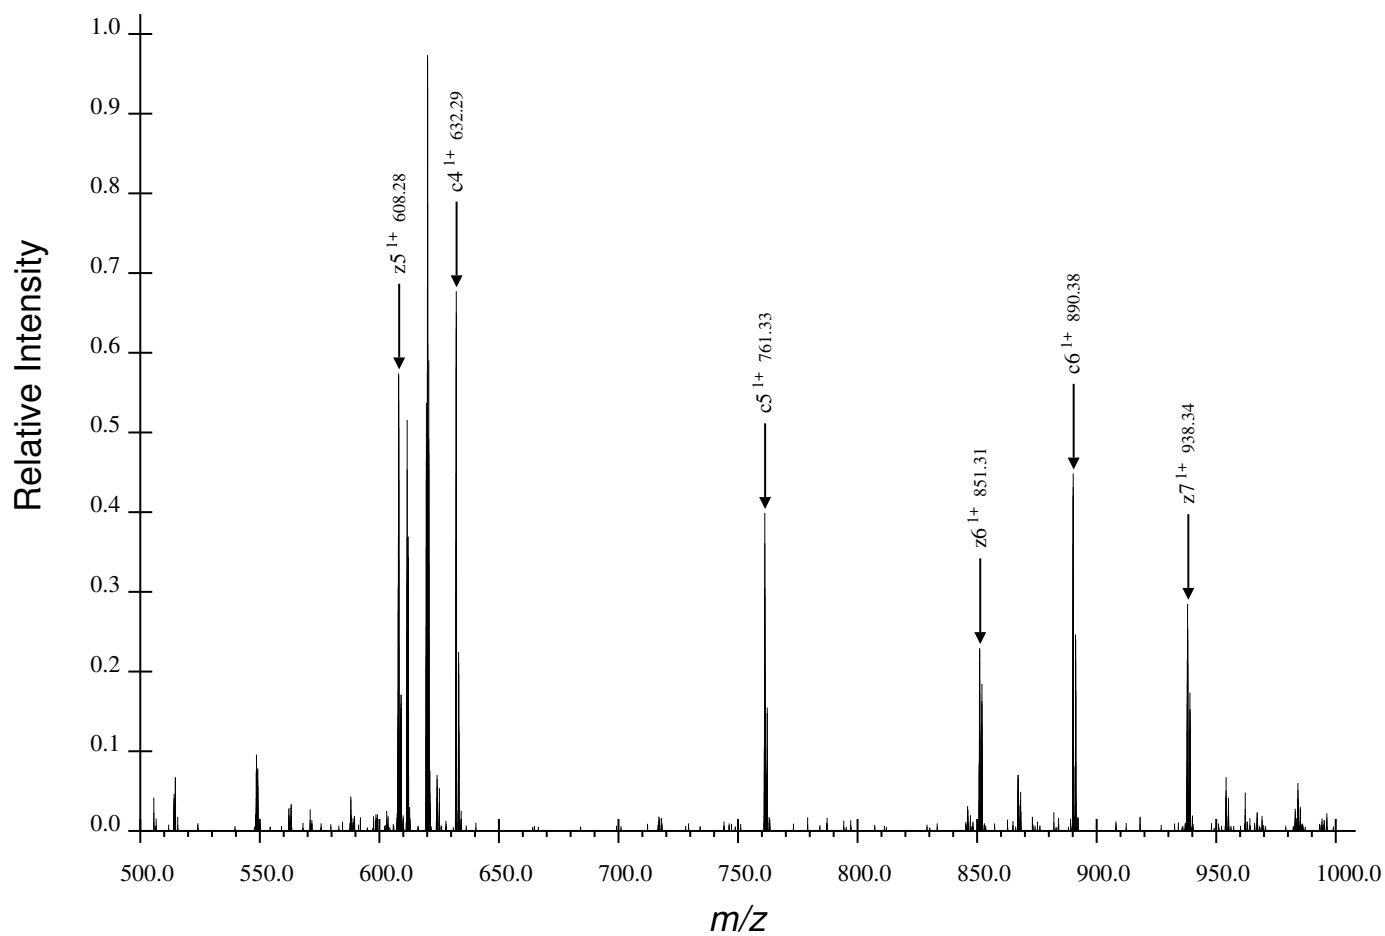

(b) Second Region for KRSpYEEHIP, Spectrum 80.dta

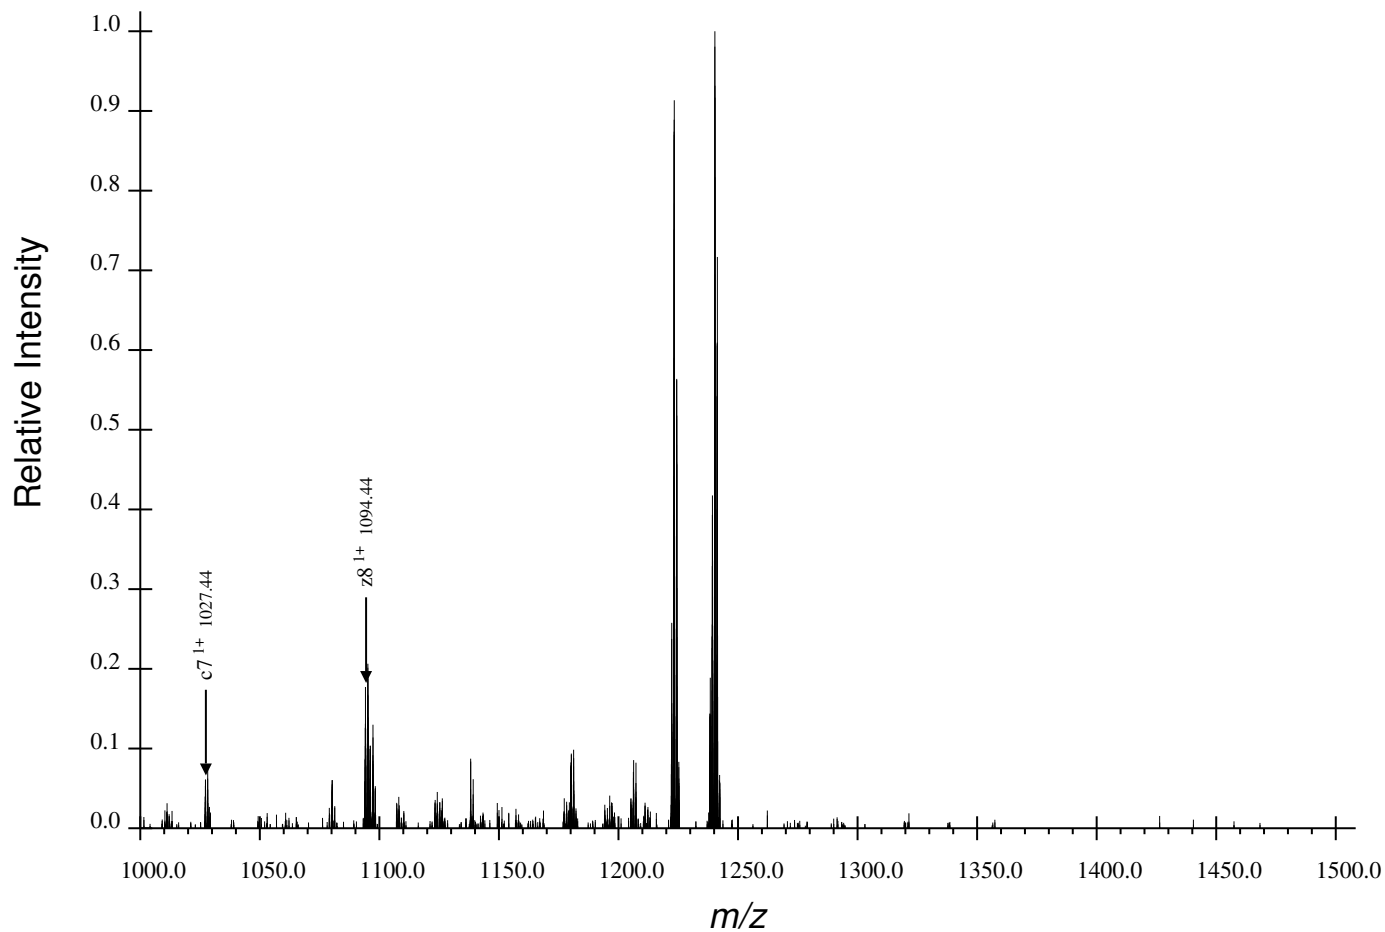

(c) Third Region for KRSpYEEHIP, Spectrum 80.dta

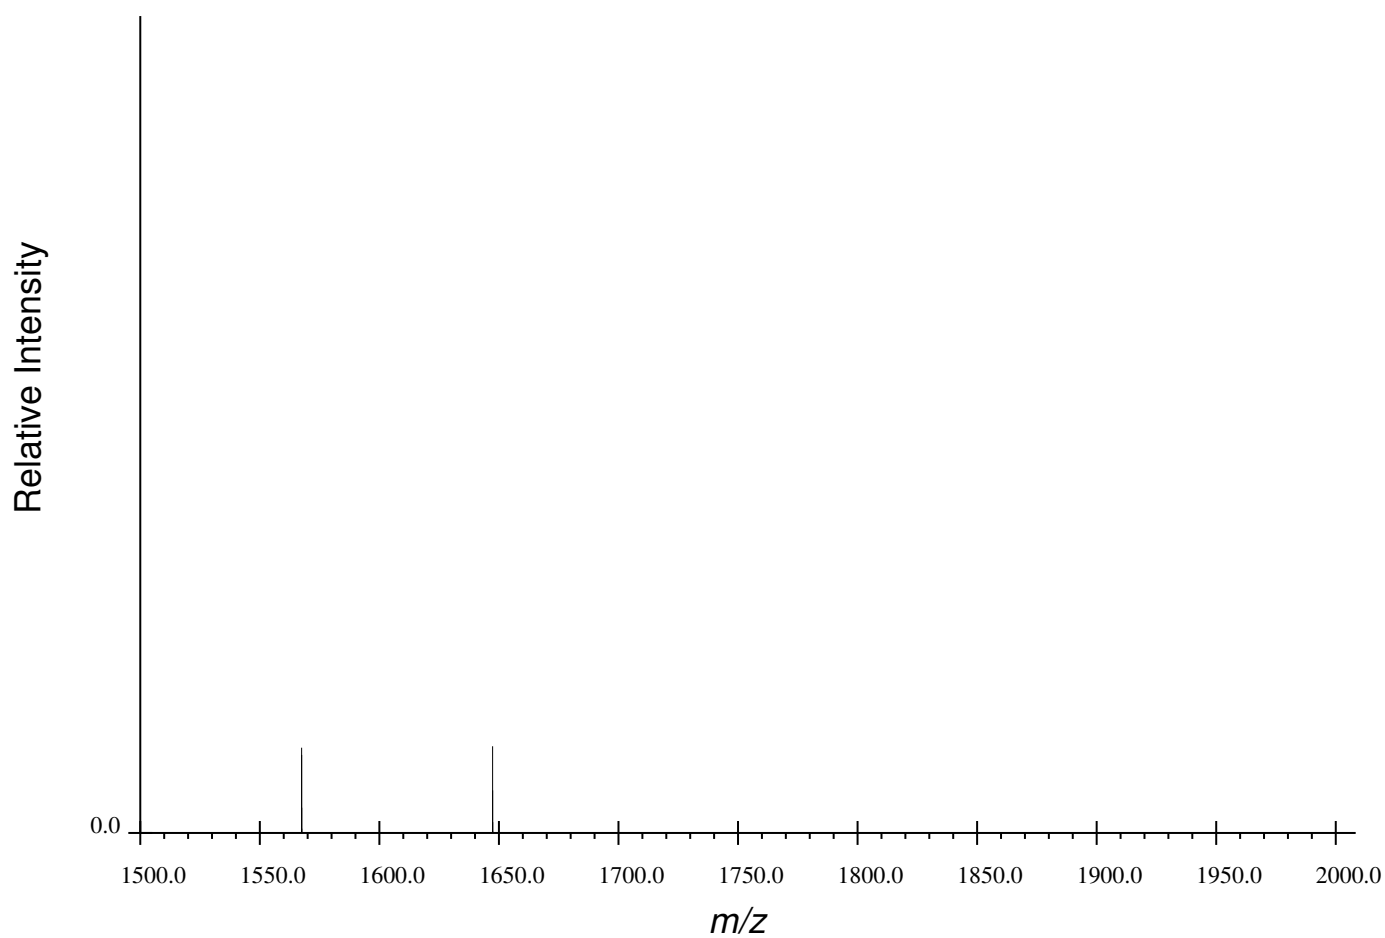

(d) Fourth Region for KRSpYEEHIP, Spectrum 80.dta



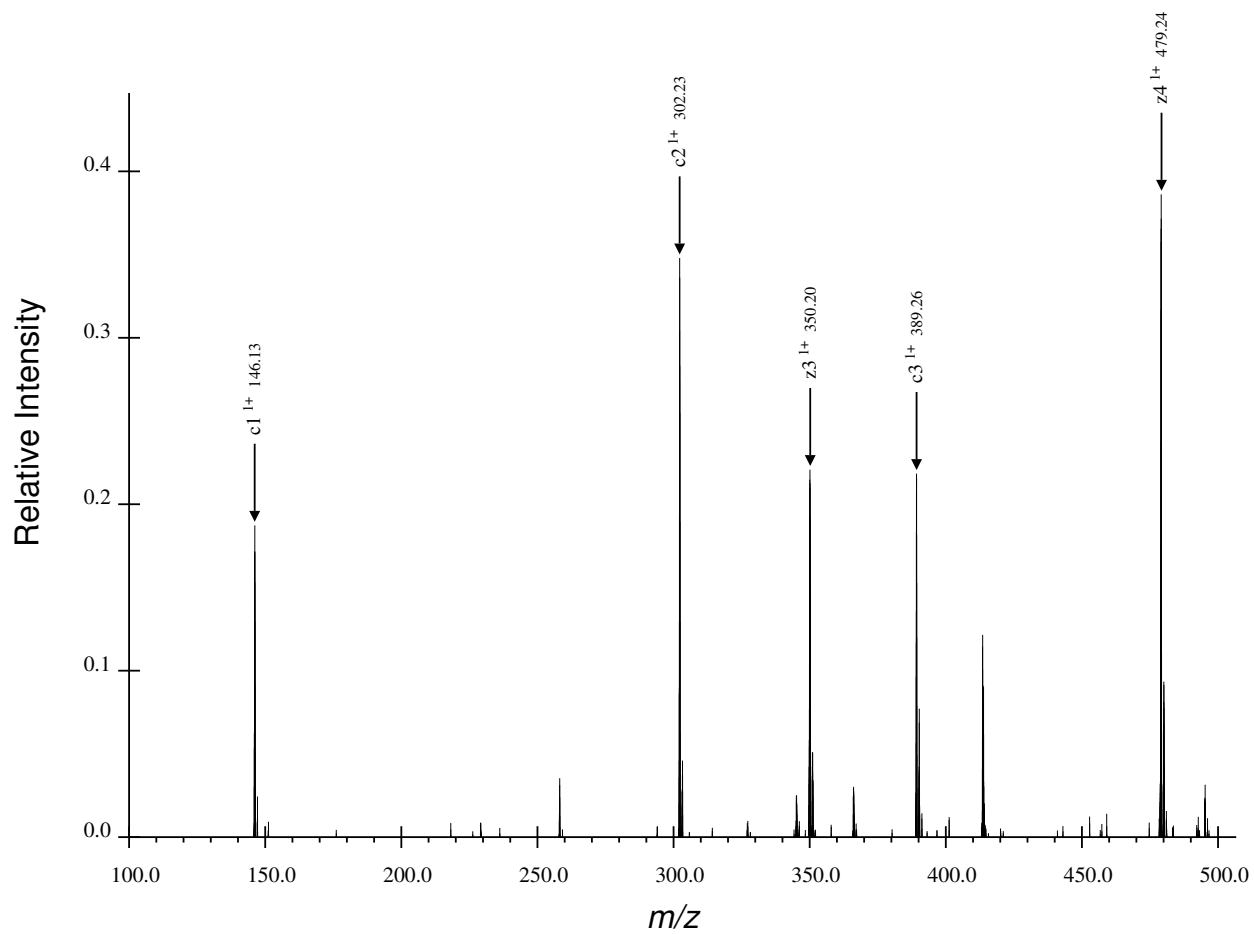

(a) First Region for KRSpYEEHIP, Spectrum 81.dta

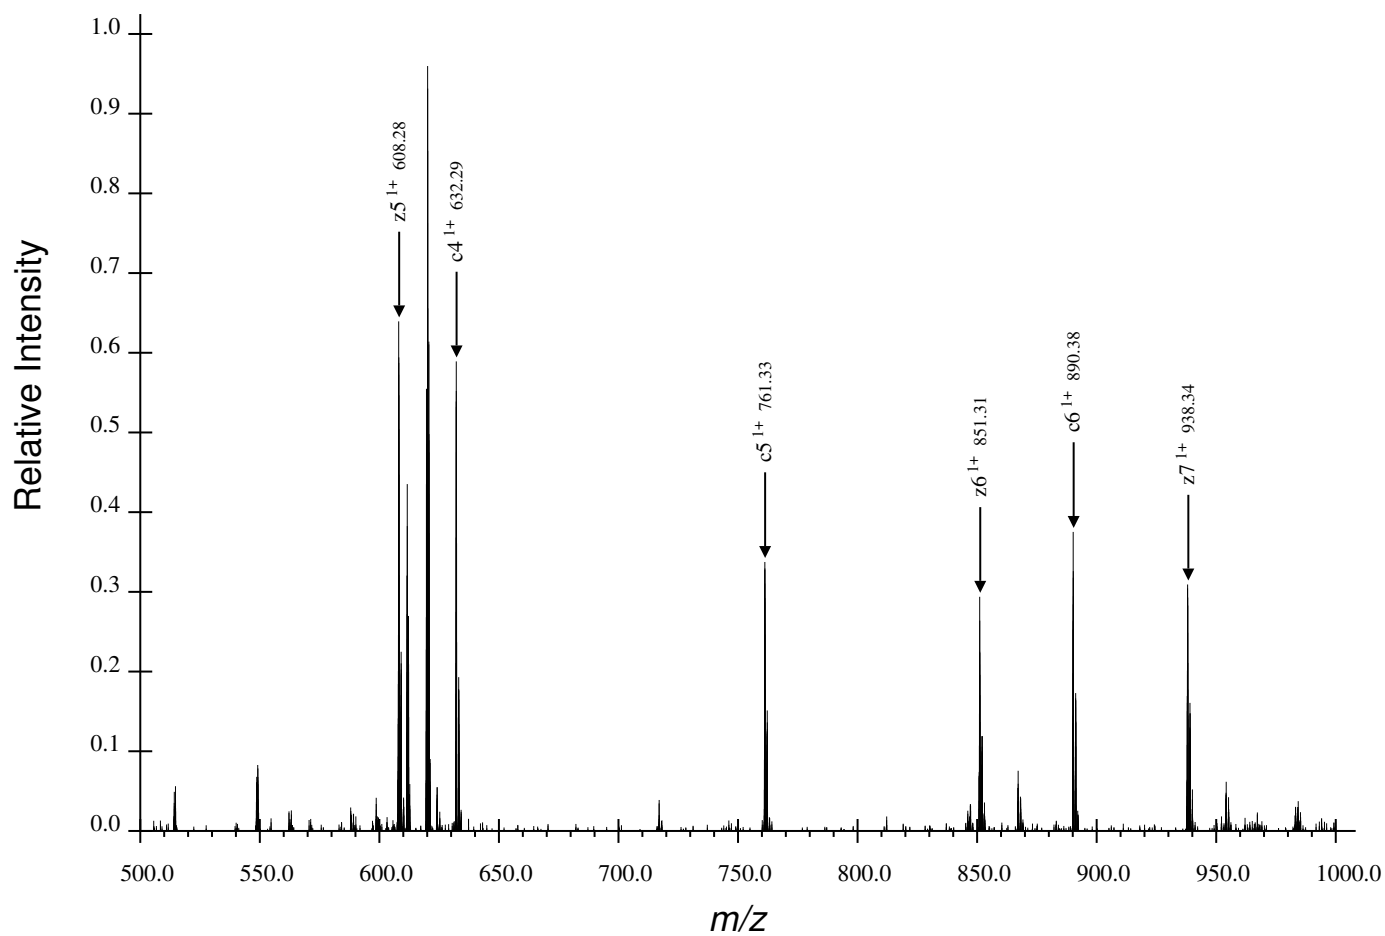

(b) Second Region for KRSpYEEHIP, Spectrum 81.dta

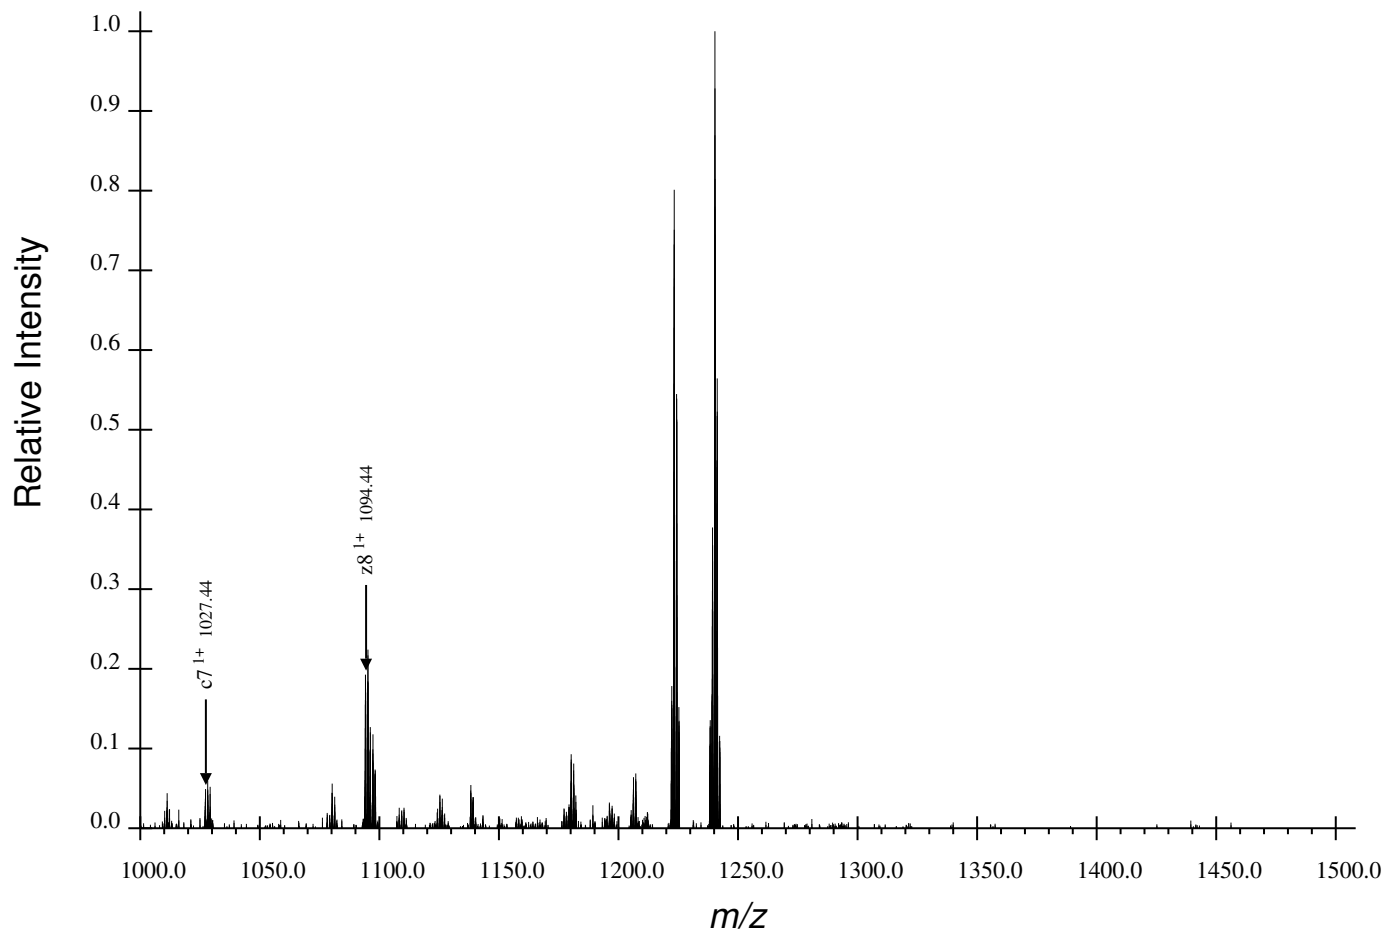

(c) Third Region for KRSpYEEHIP, Spectrum 81.dta

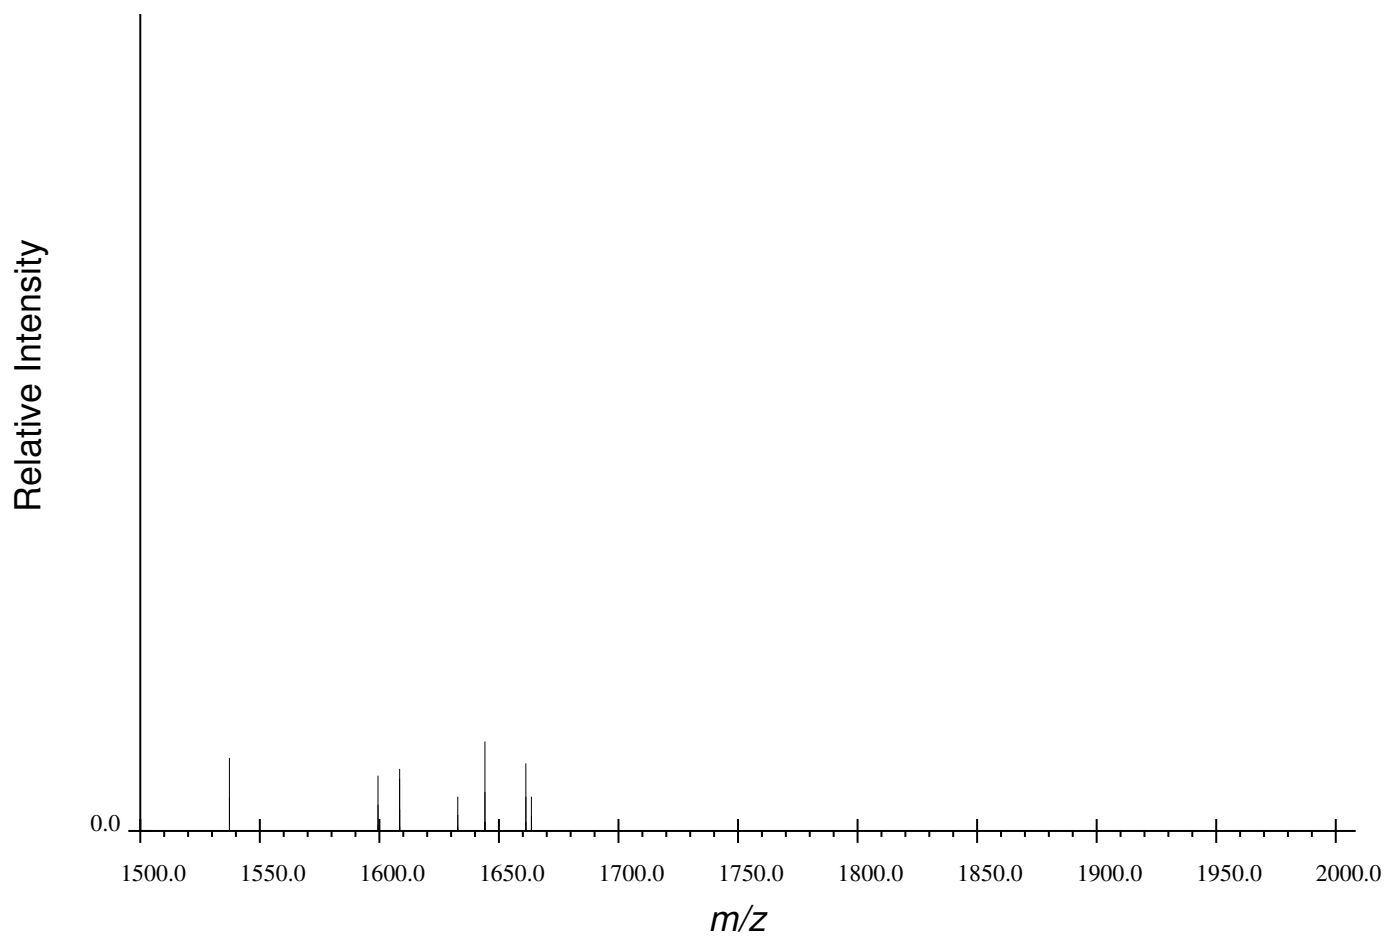

(d) Fourth Region for KRSpYEEHIP, Spectrum 81.dta

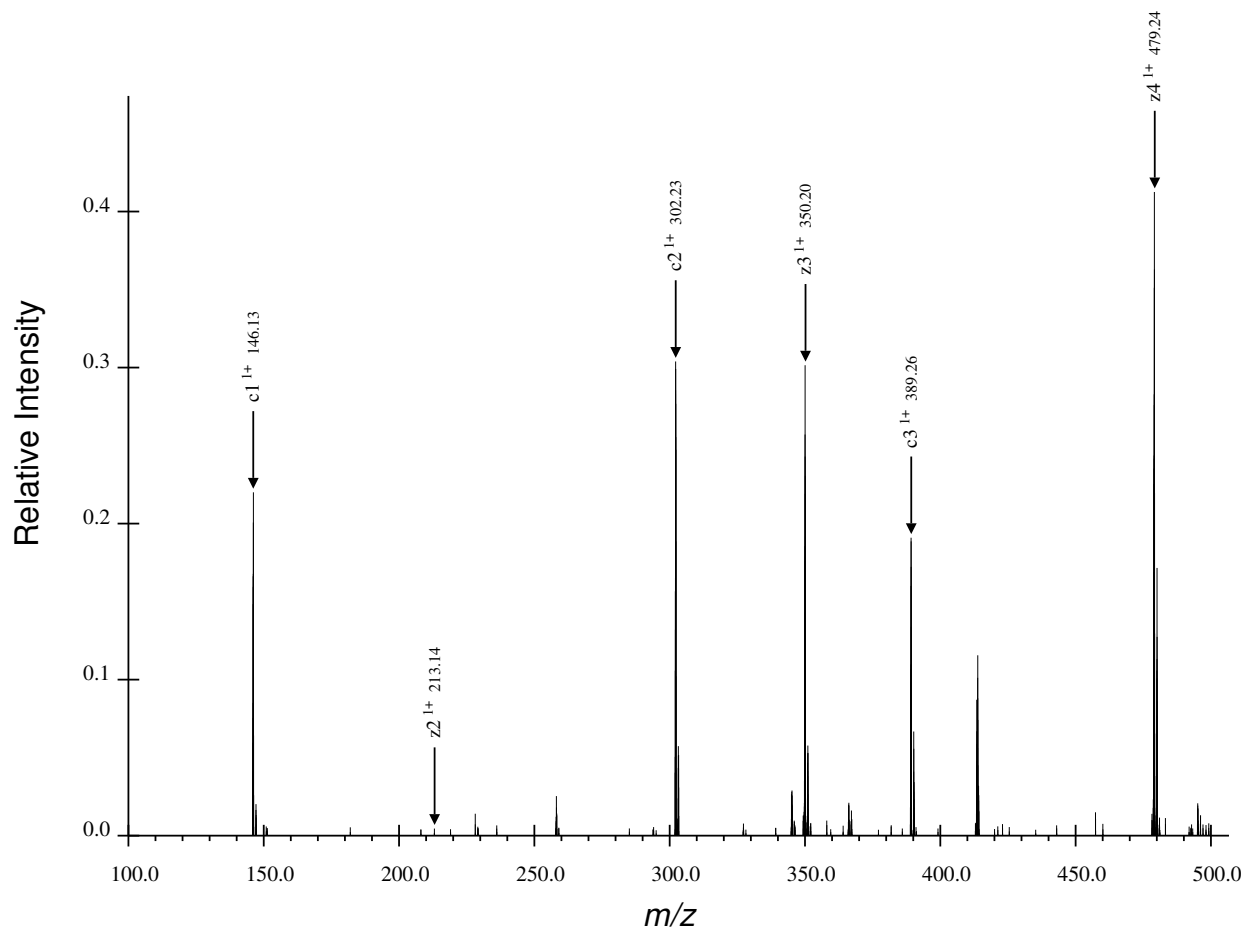

(a) First Region for KRSpYEEHIP, Spectrum 82.dta

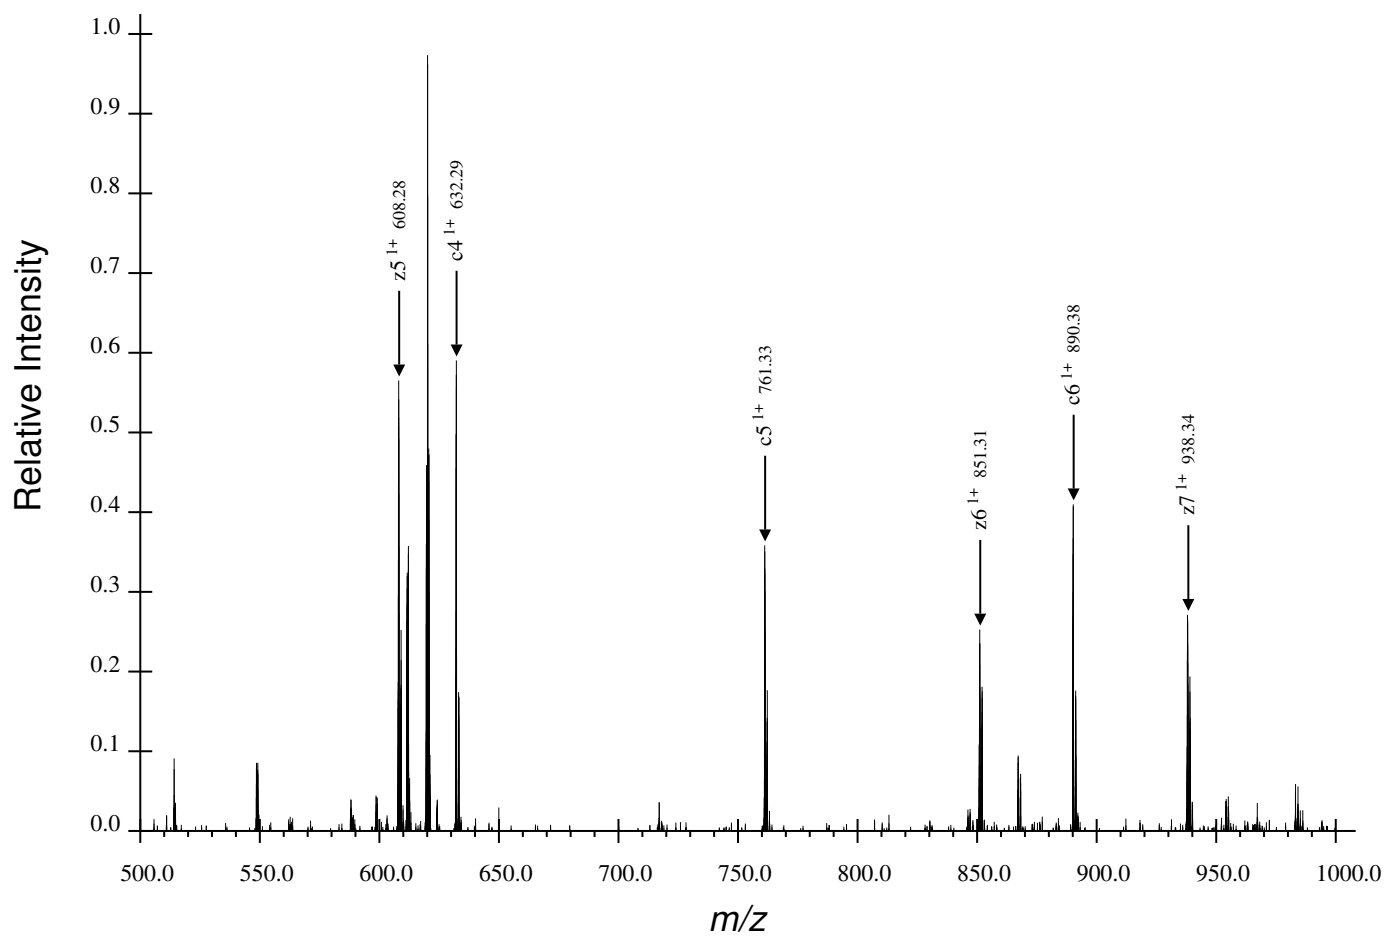

(b) Second Region for KRSpYEEHIP, Spectrum 82.dta

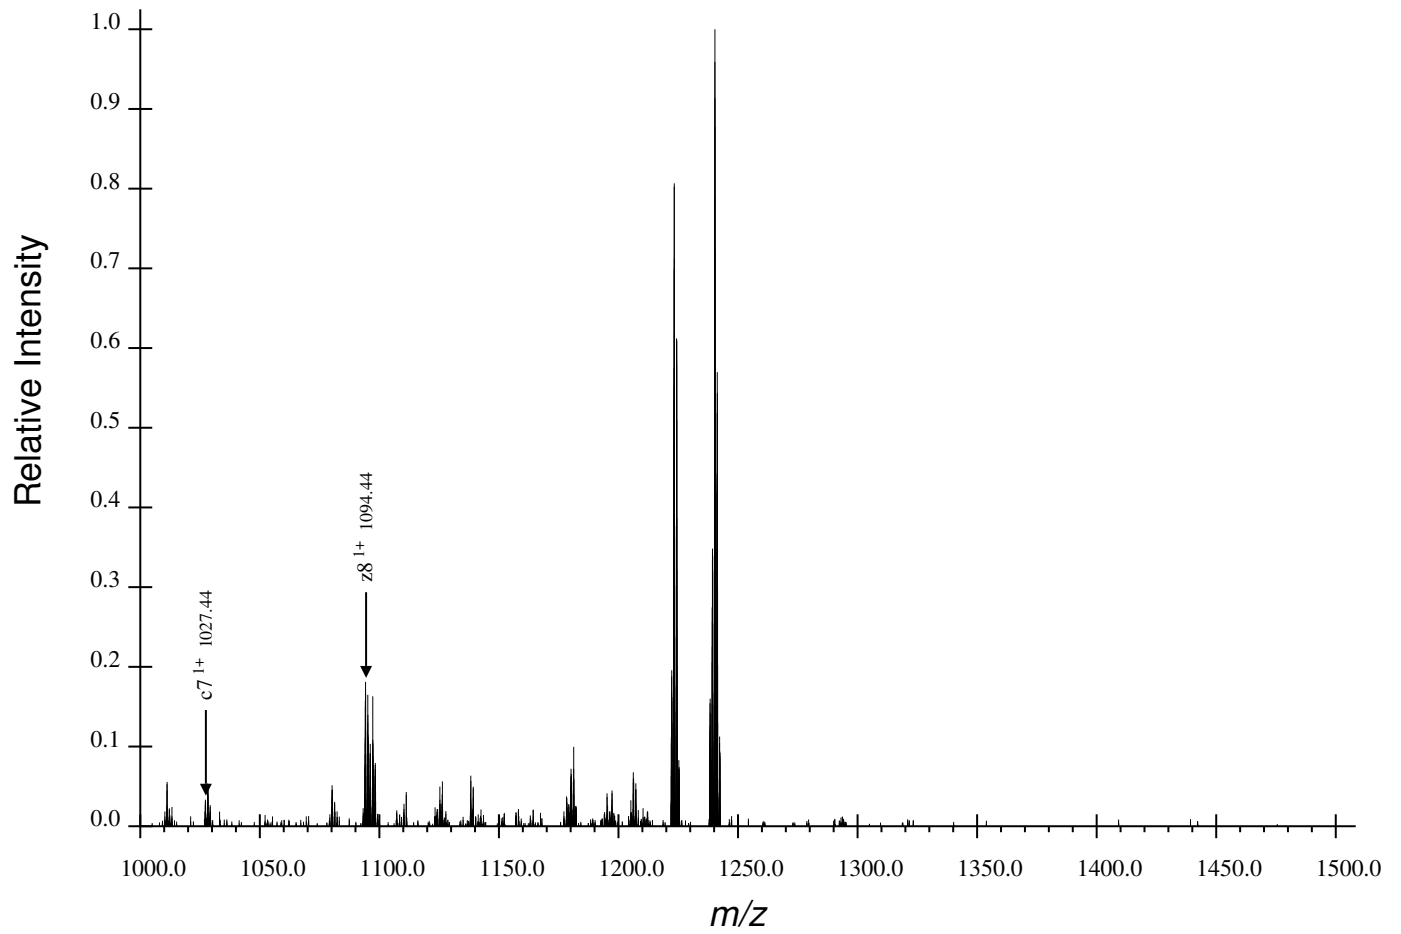

(c) Third Region for KRSpYEEHIP, Spectrum 82.dta

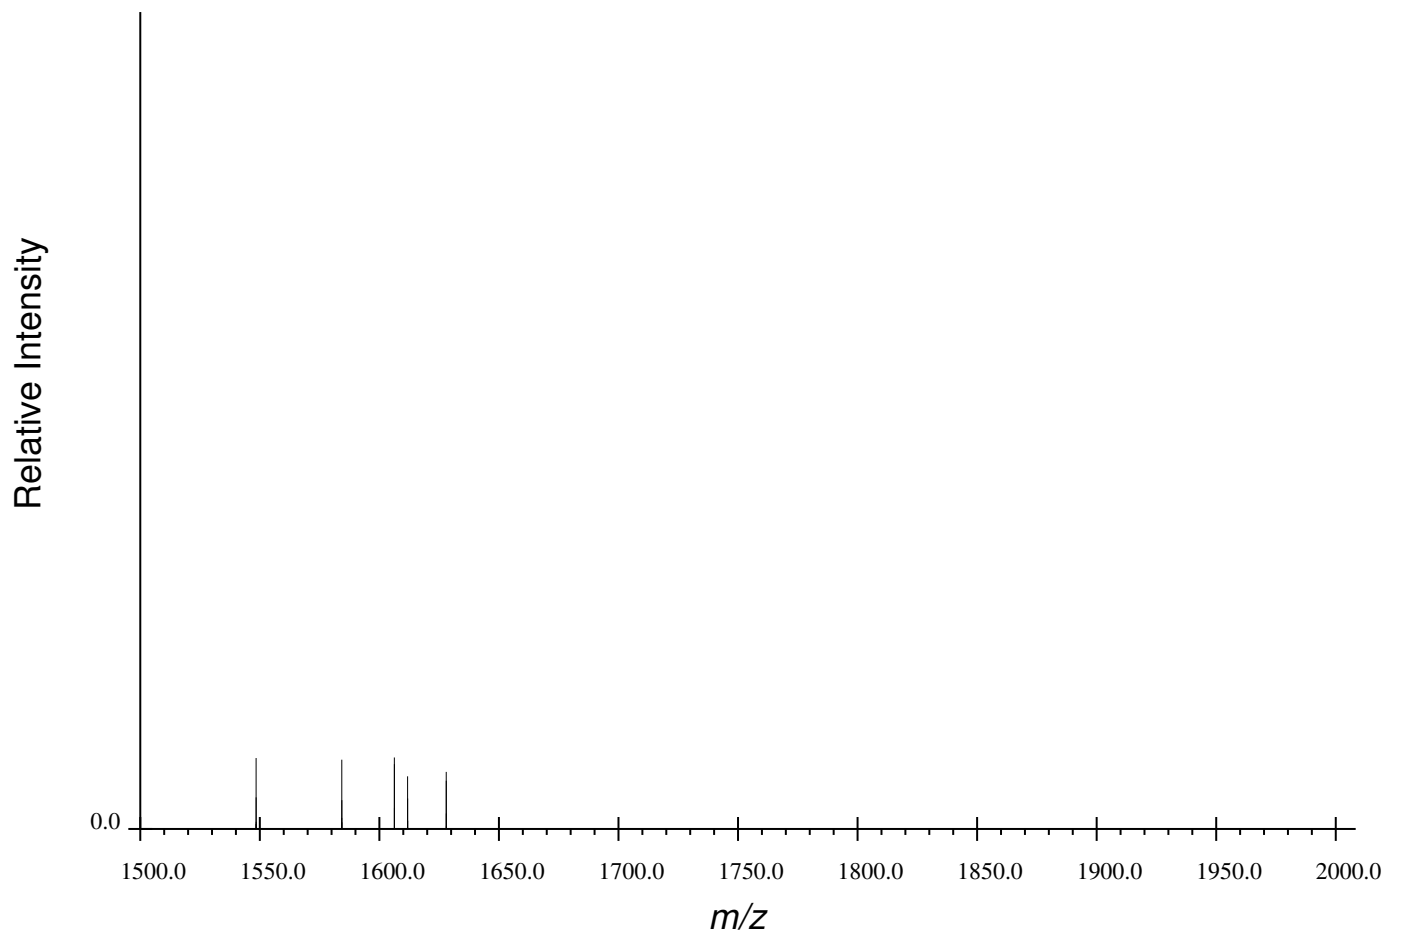

(d) Fourth Region for KRSpYEEHIP, Spectrum 82.dta

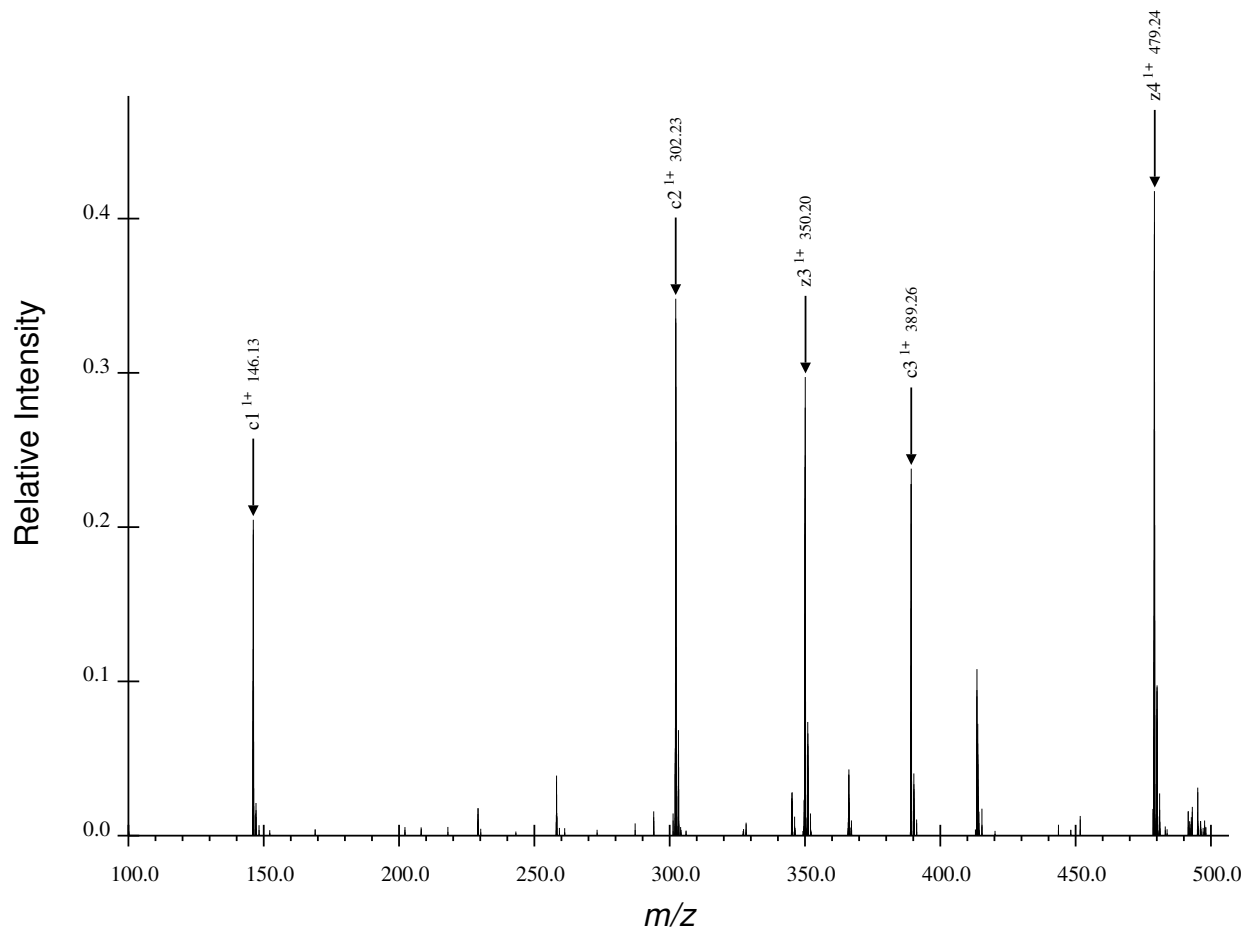

(a) First Region for KRSpYEEHIP, Spectrum 83.dta

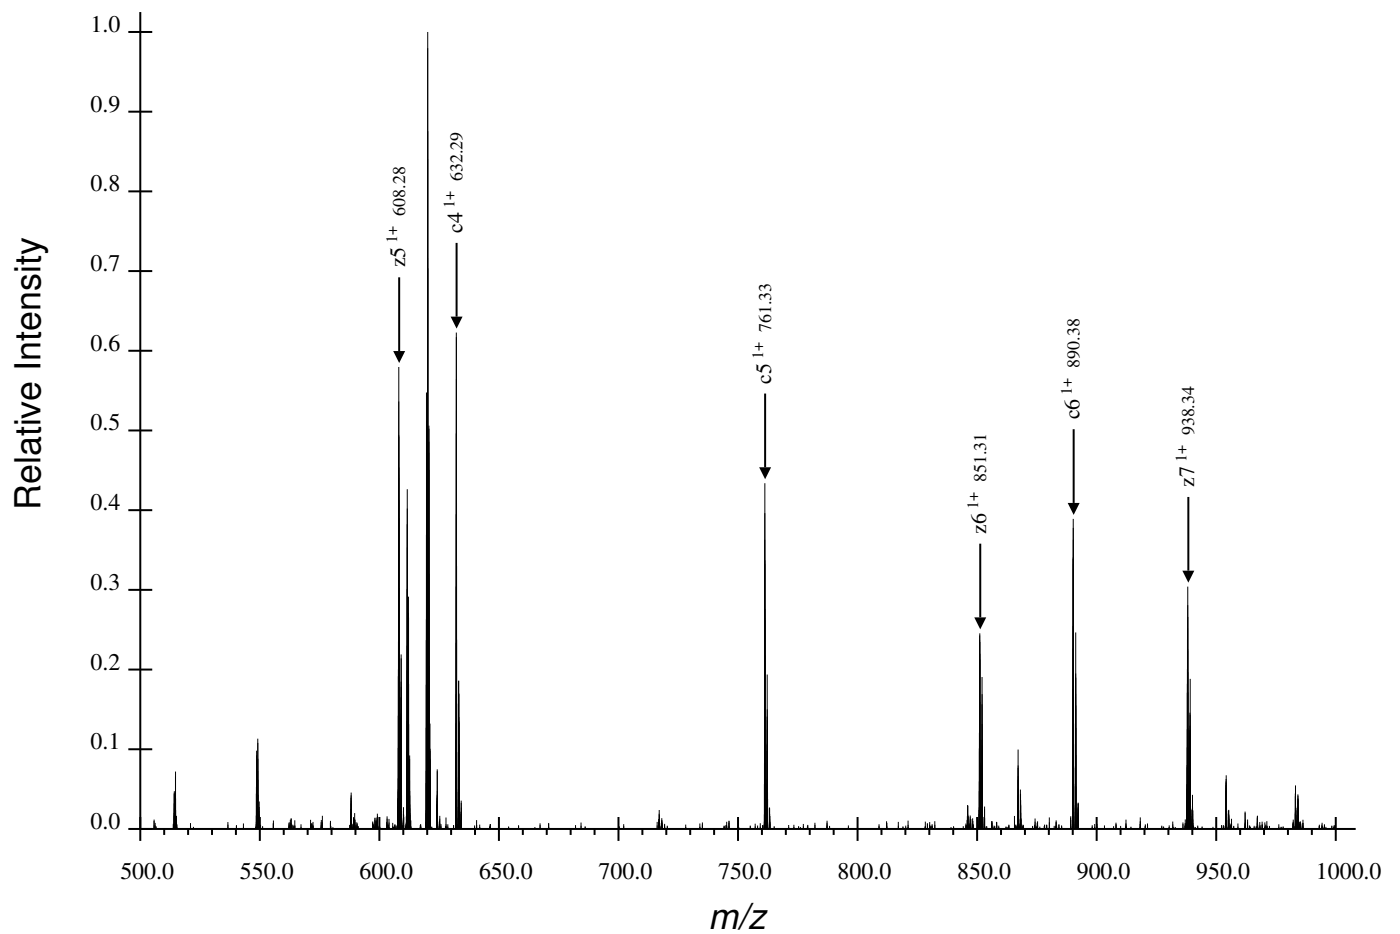

(b) Second Region for KRSpYEEHIP, Spectrum 83.dta

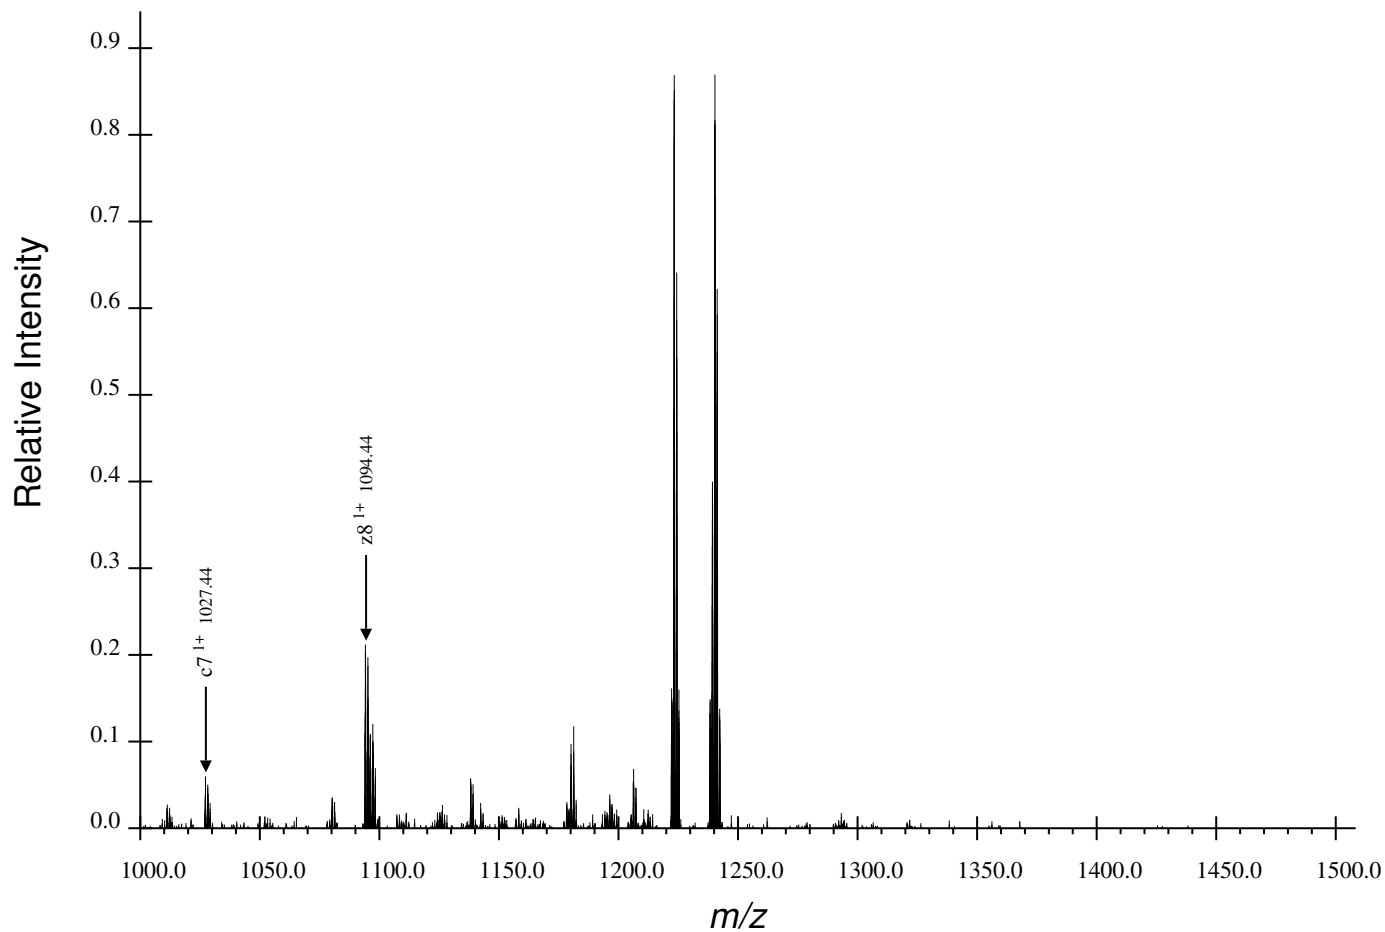

(c) Third Region for KRSpYEEHIP, Spectrum 83.dta



(d) Fourth Region for KRSpYEEHIP, Spectrum 83.dta

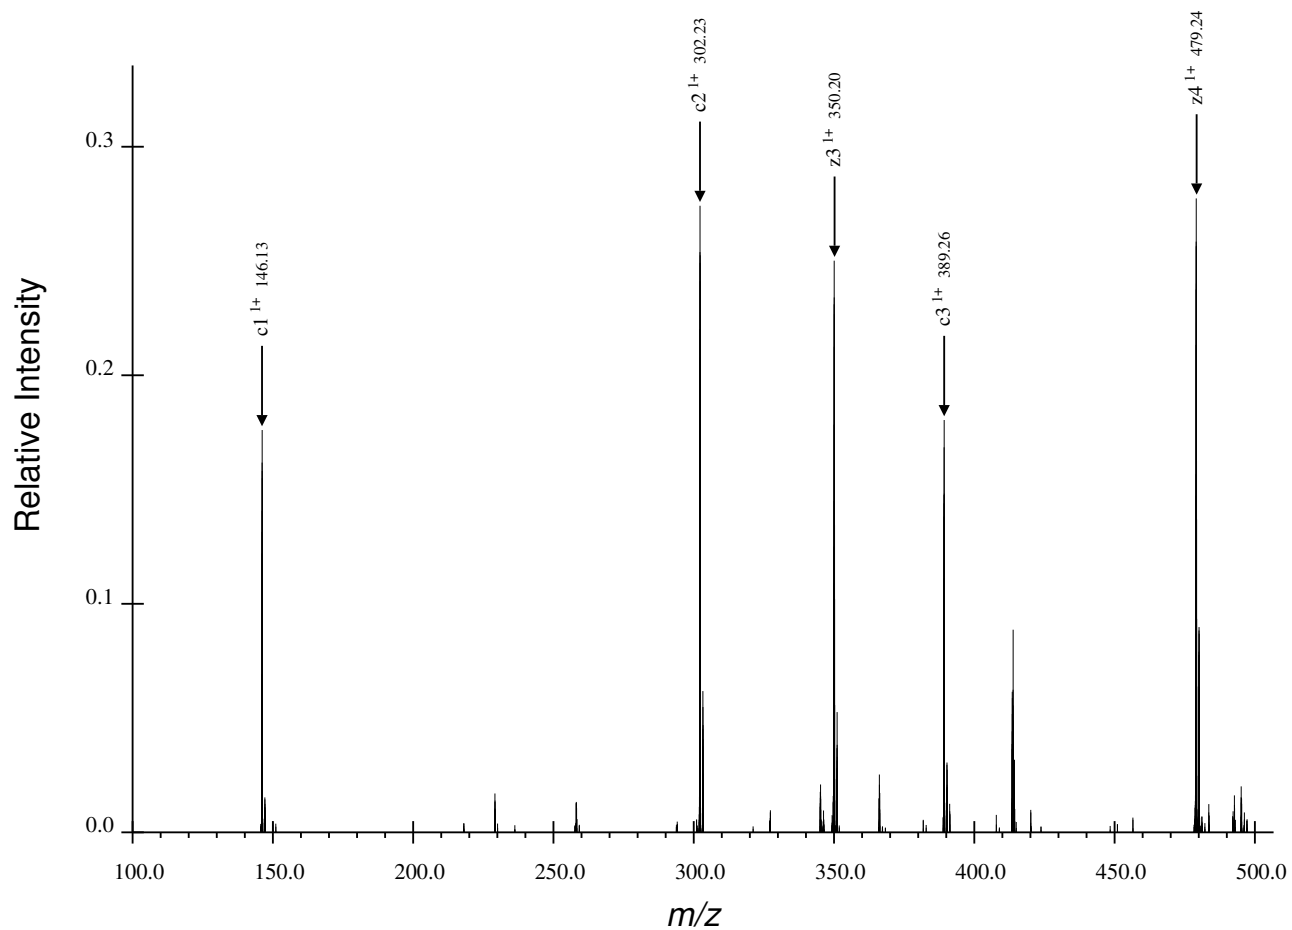

(a) First Region for KRSpYEEHIP, Spectrum 84.dta

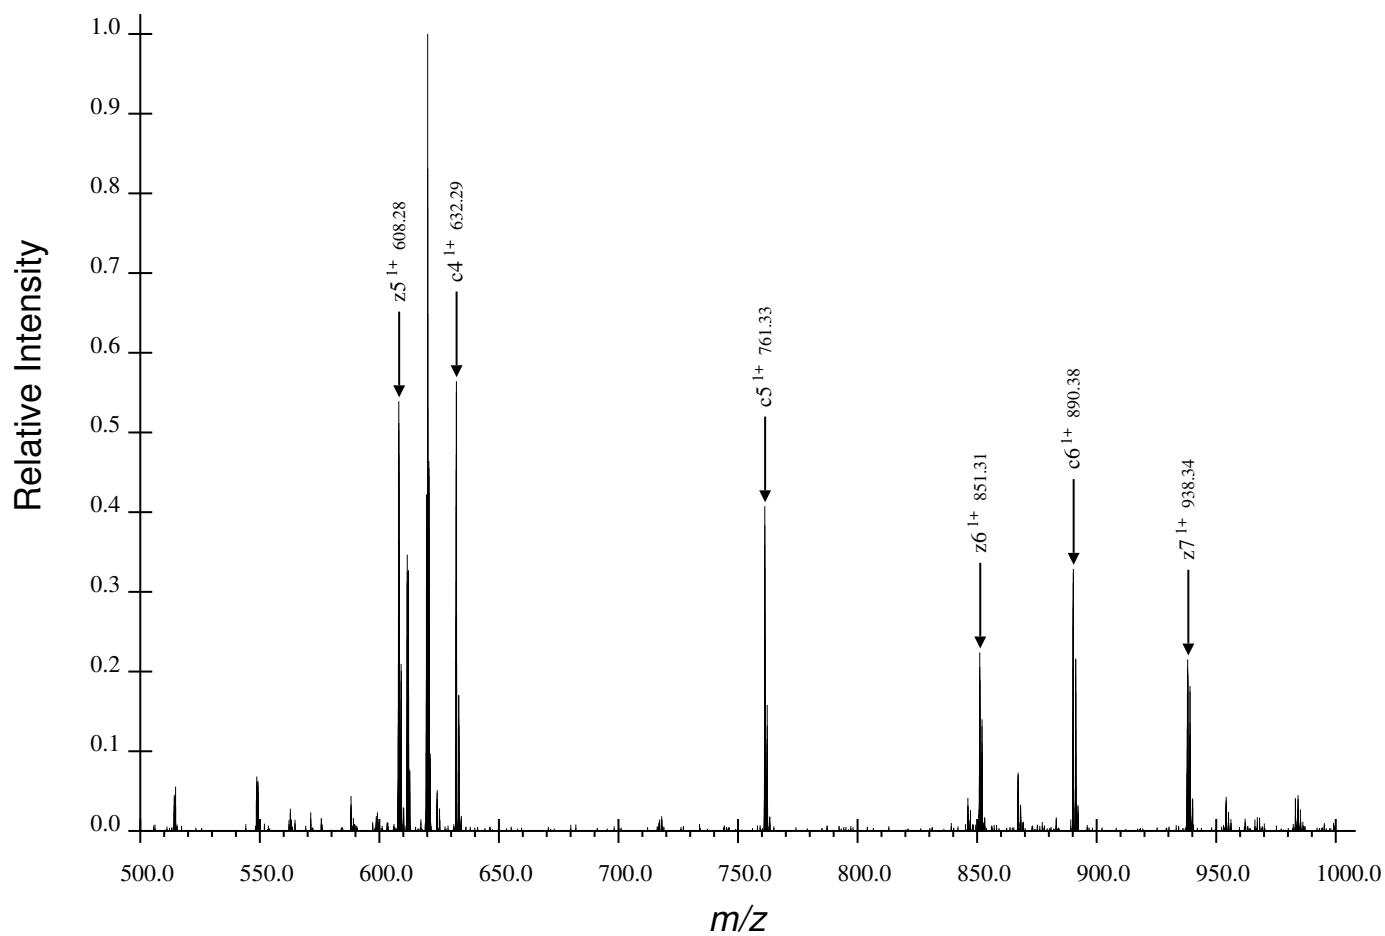

(b) Second Region for KRSpYEEHIP, Spectrum 84.dta

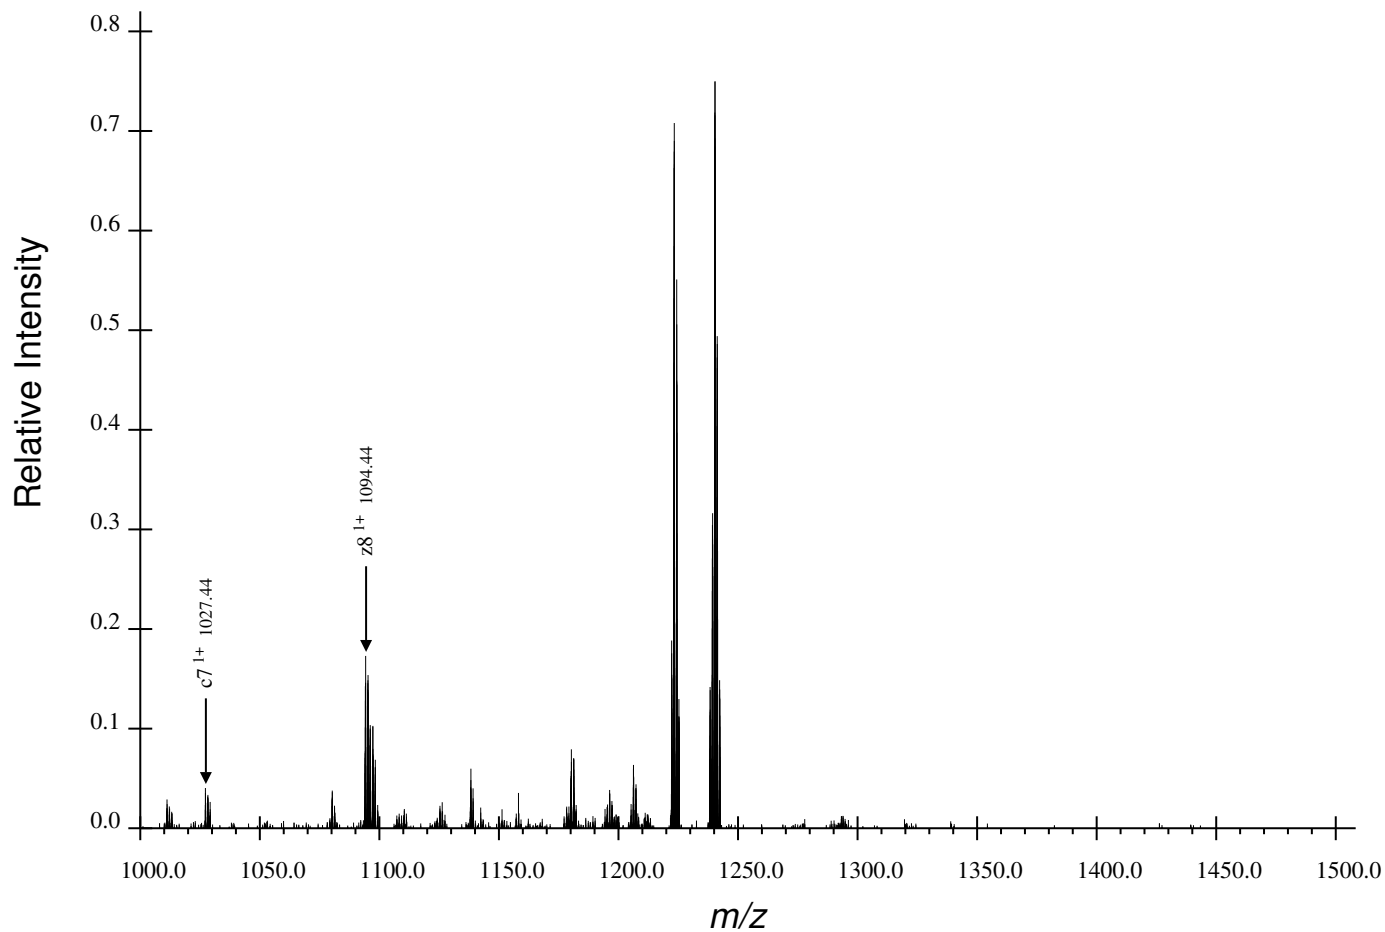

(c) Third Region for KRSpYEEHIP, Spectrum 84.dta

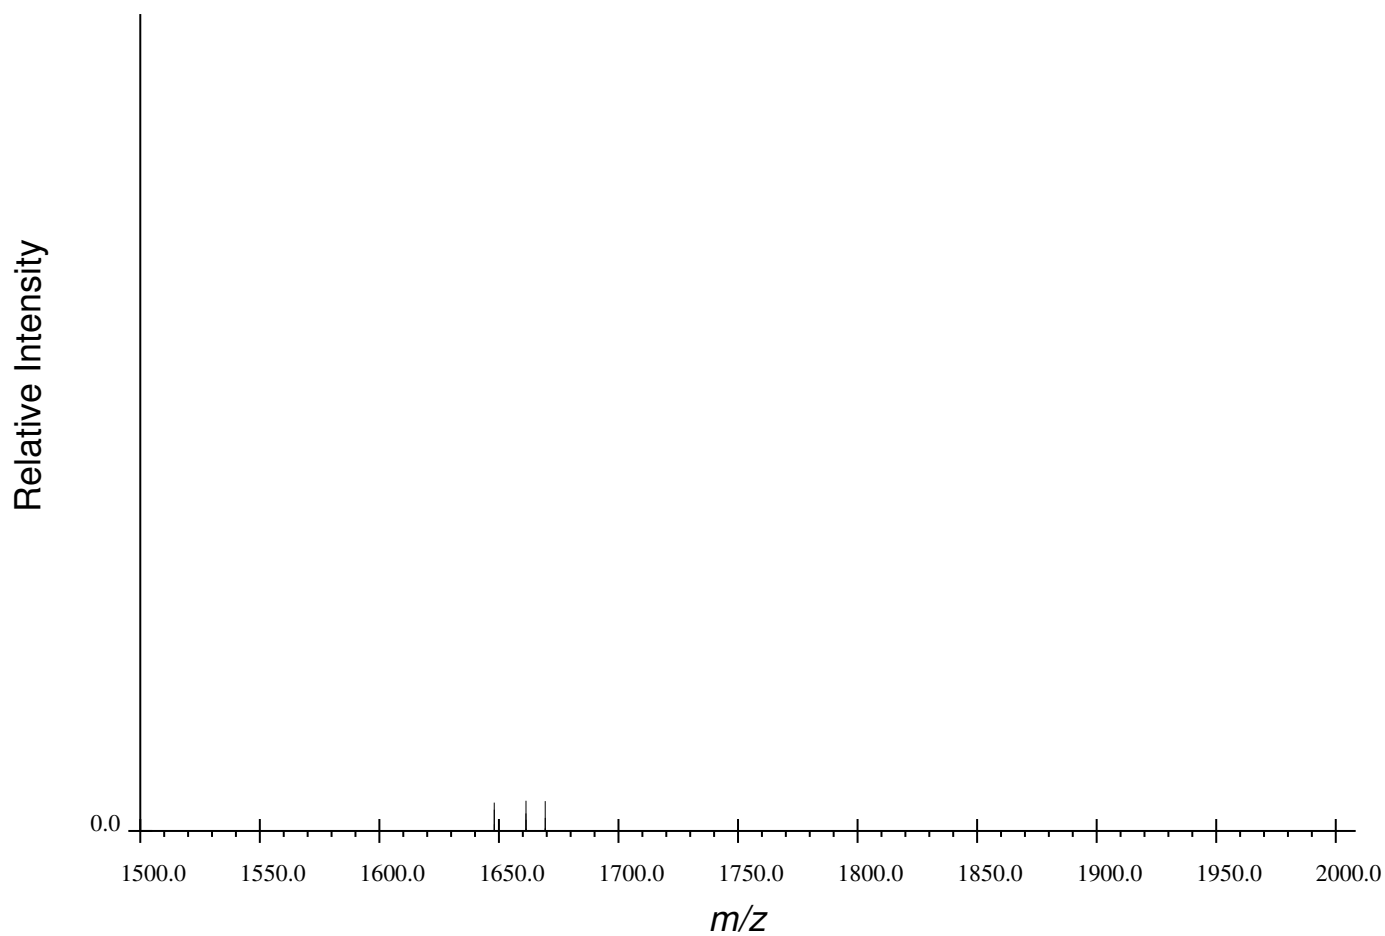

(d) Fourth Region for KRSpYEEHIP, Spectrum 84.dta



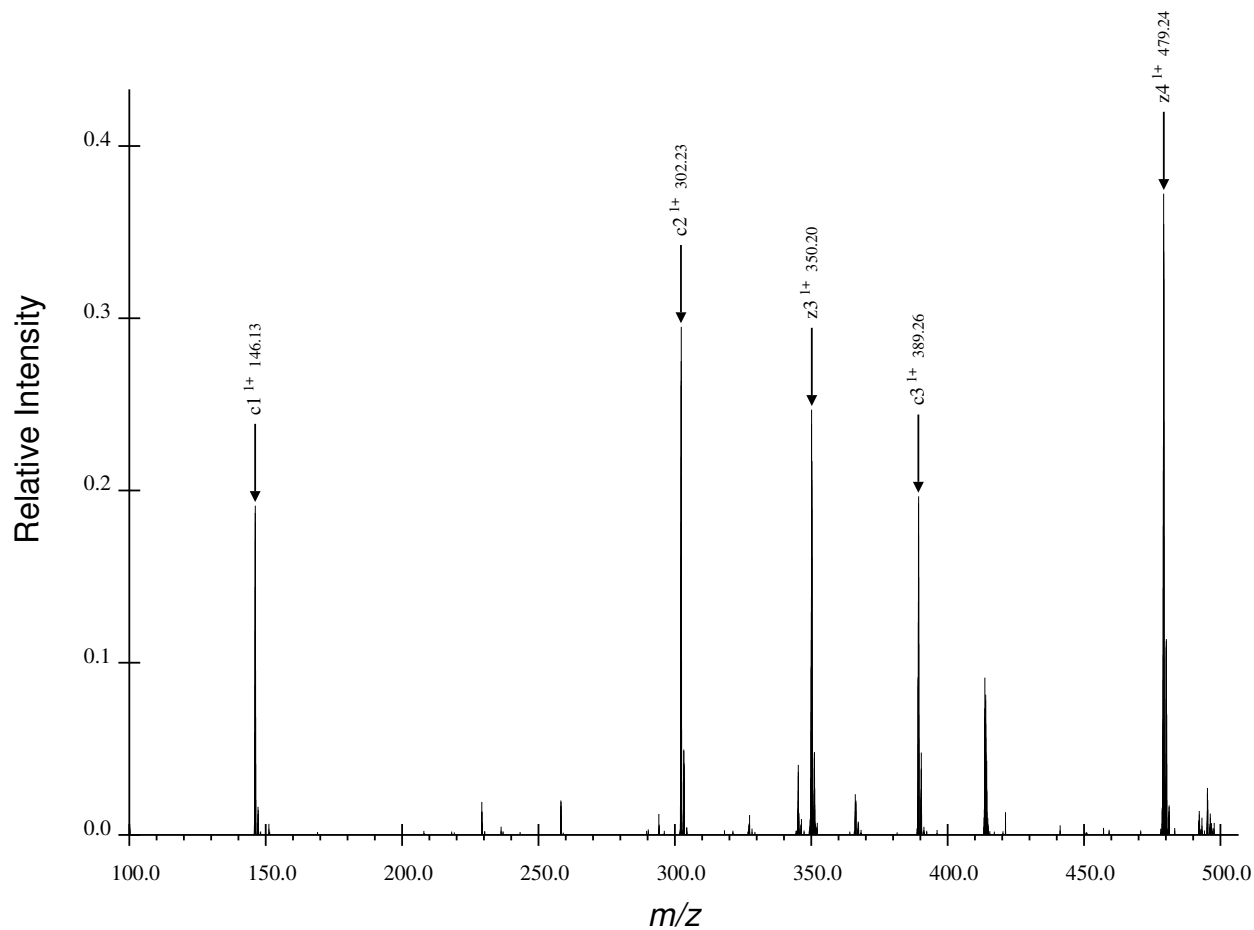

(a) First Region for KRSpYEEHIP, Spectrum 85.dta

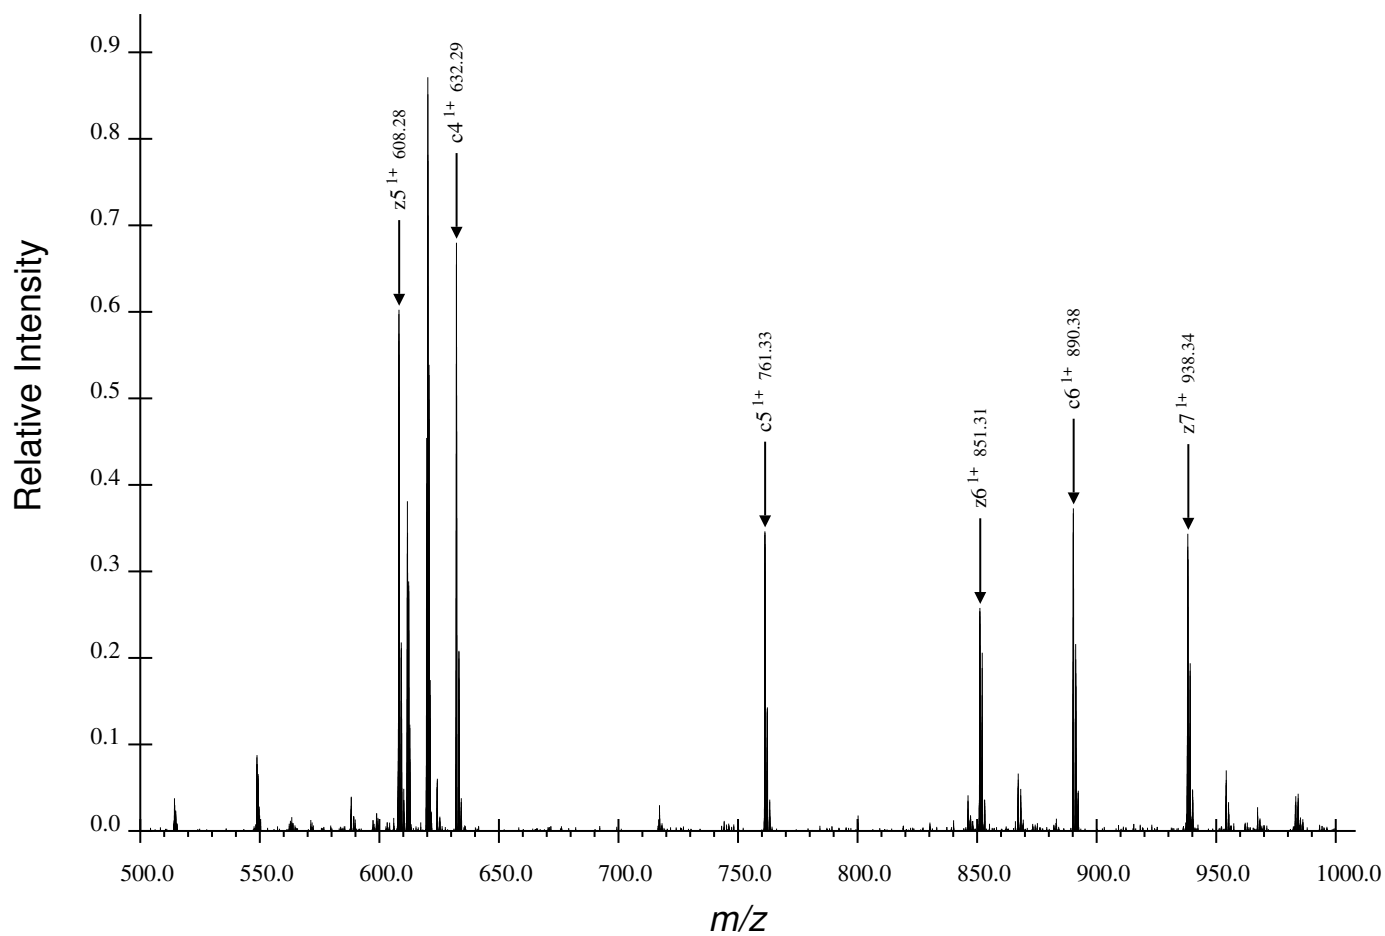

(b) Second Region for KRSpYEEHIP, Spectrum 85.dta

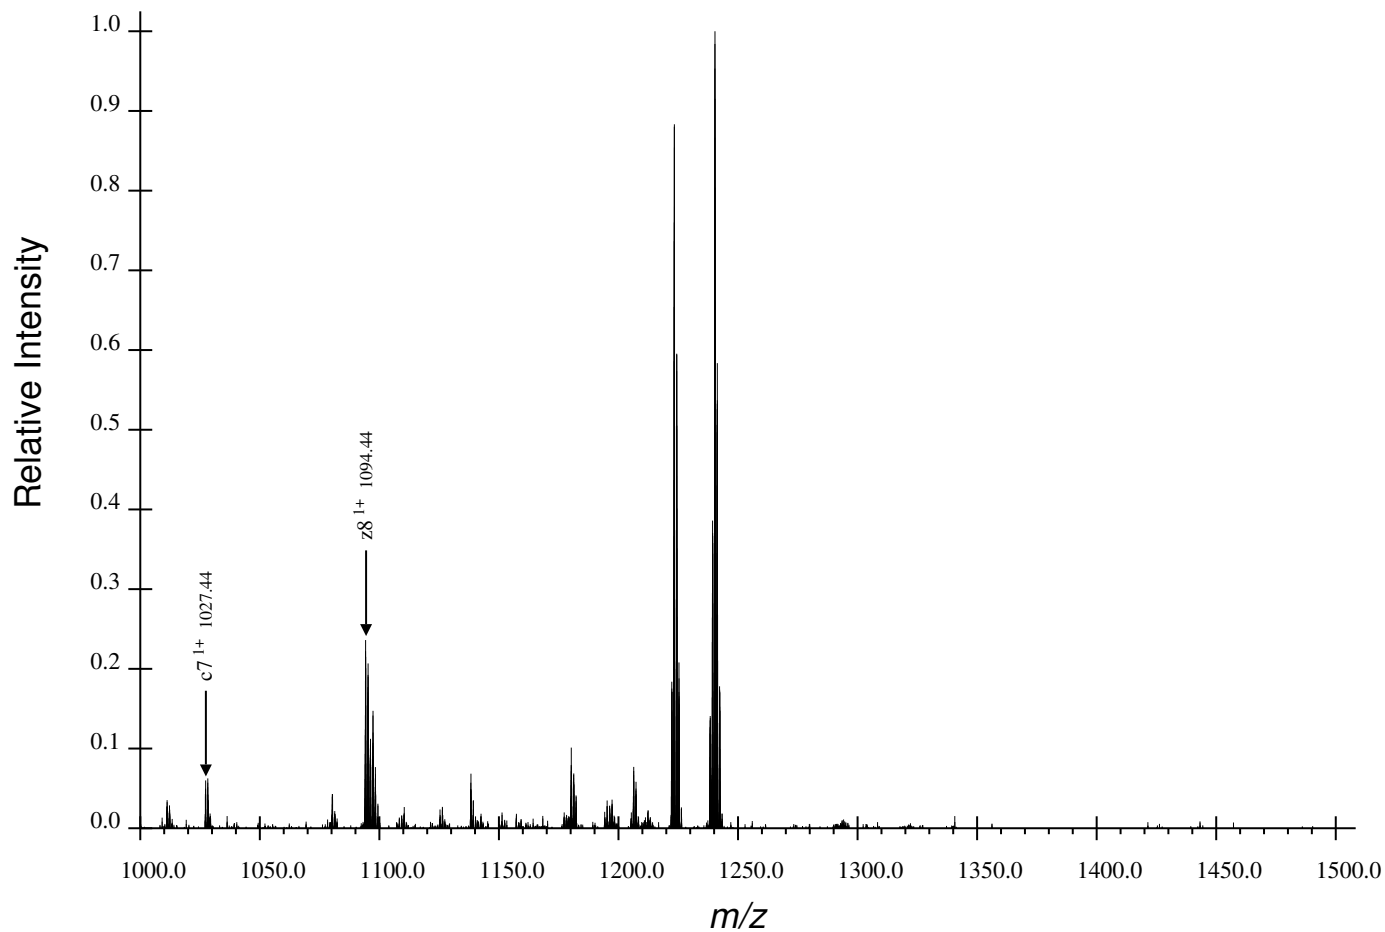

(c) Third Region for KRSpYEEHIP, Spectrum 85.dta

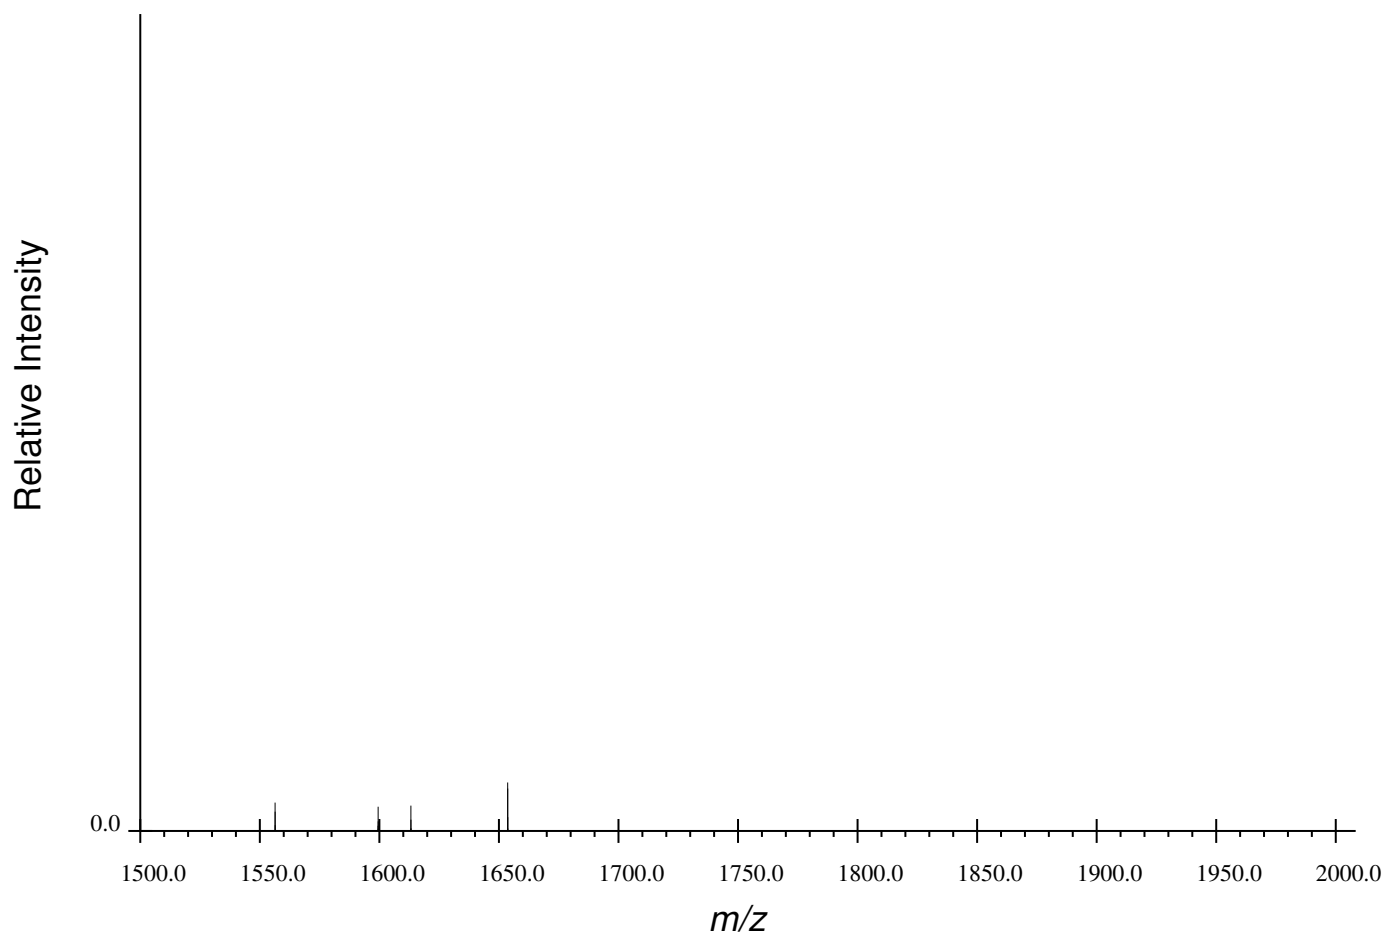

(d) Fourth Region for KRSpYEEHIP, Spectrum 85.dta

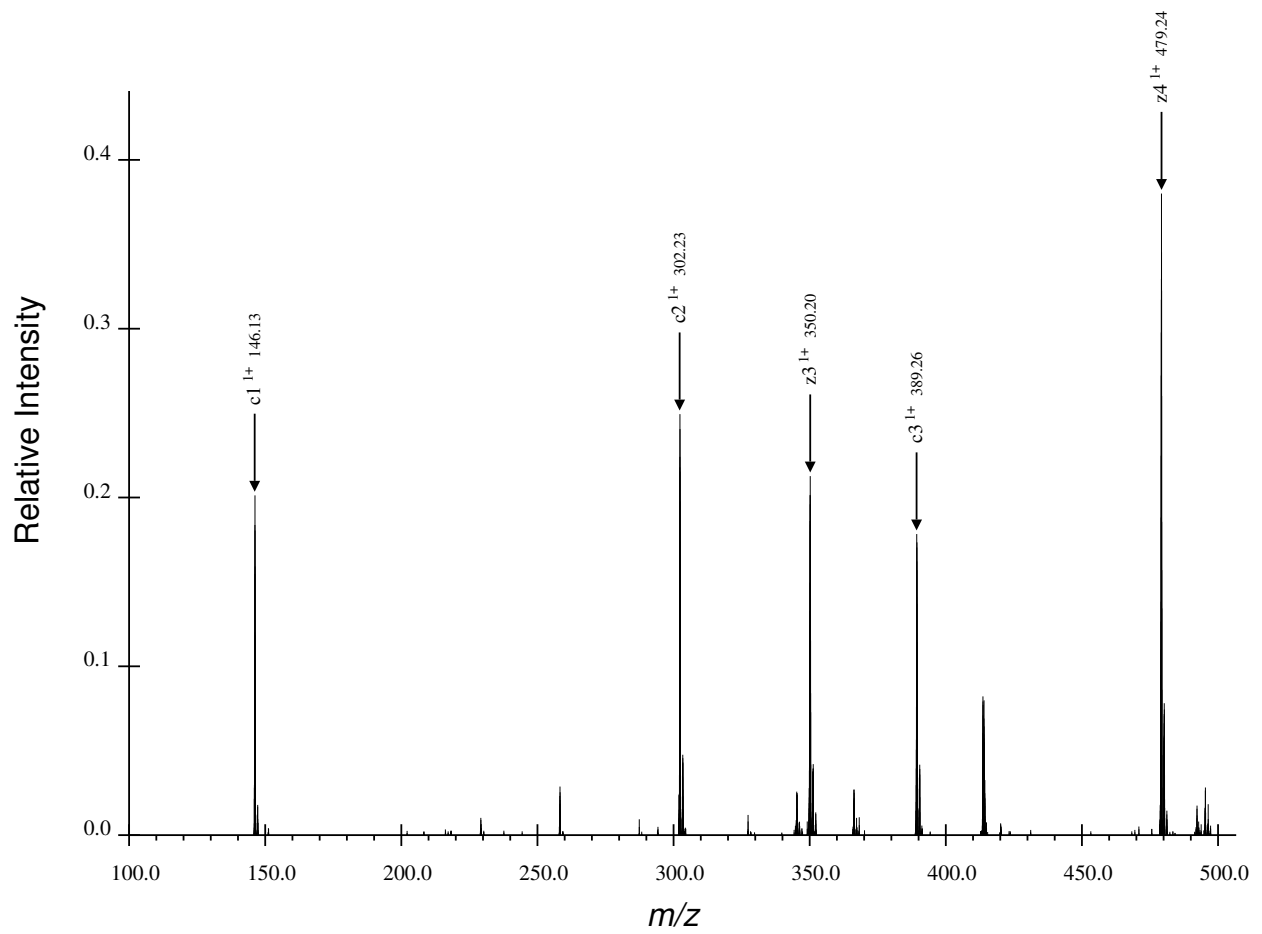

(a) First Region for KRSpYEEHIP, Spectrum 86.dta

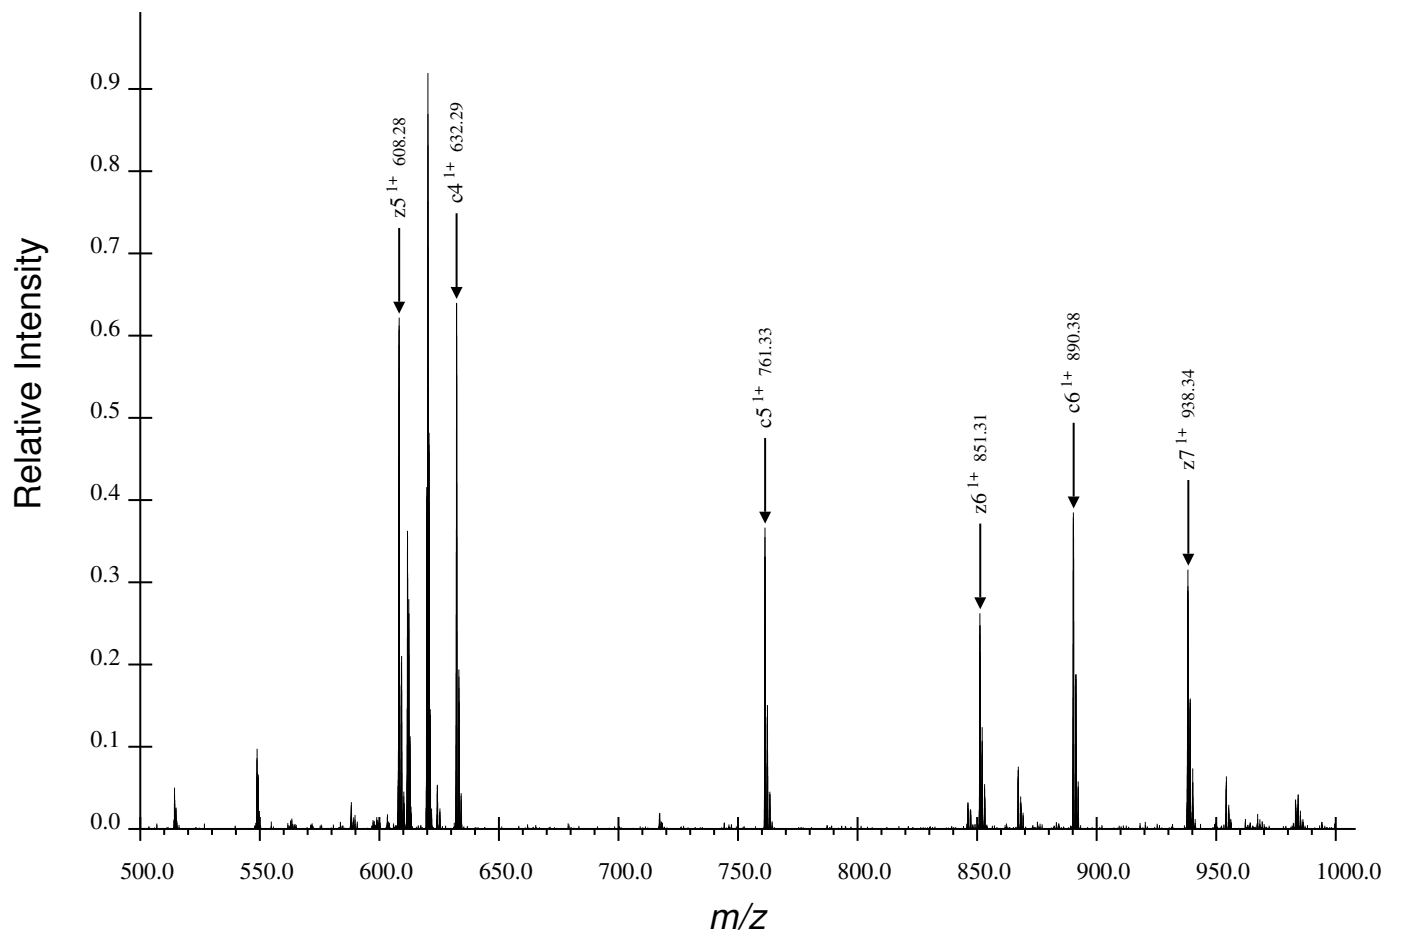

(b) Second Region for KRSpYEEHIP, Spectrum 86.dta

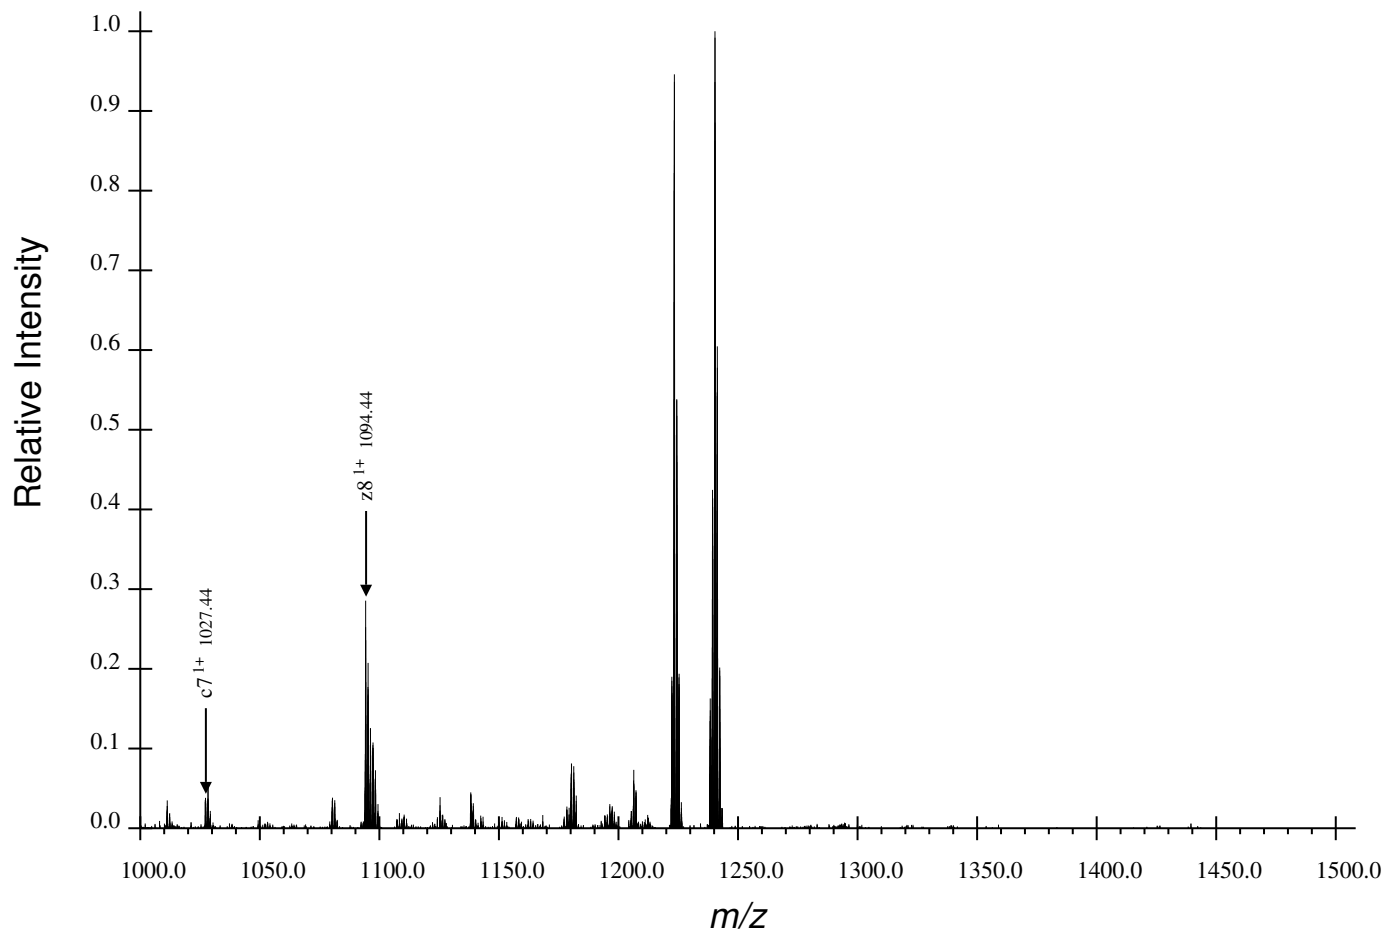

(c) Third Region for KRSpYEEHIP, Spectrum 86.dta

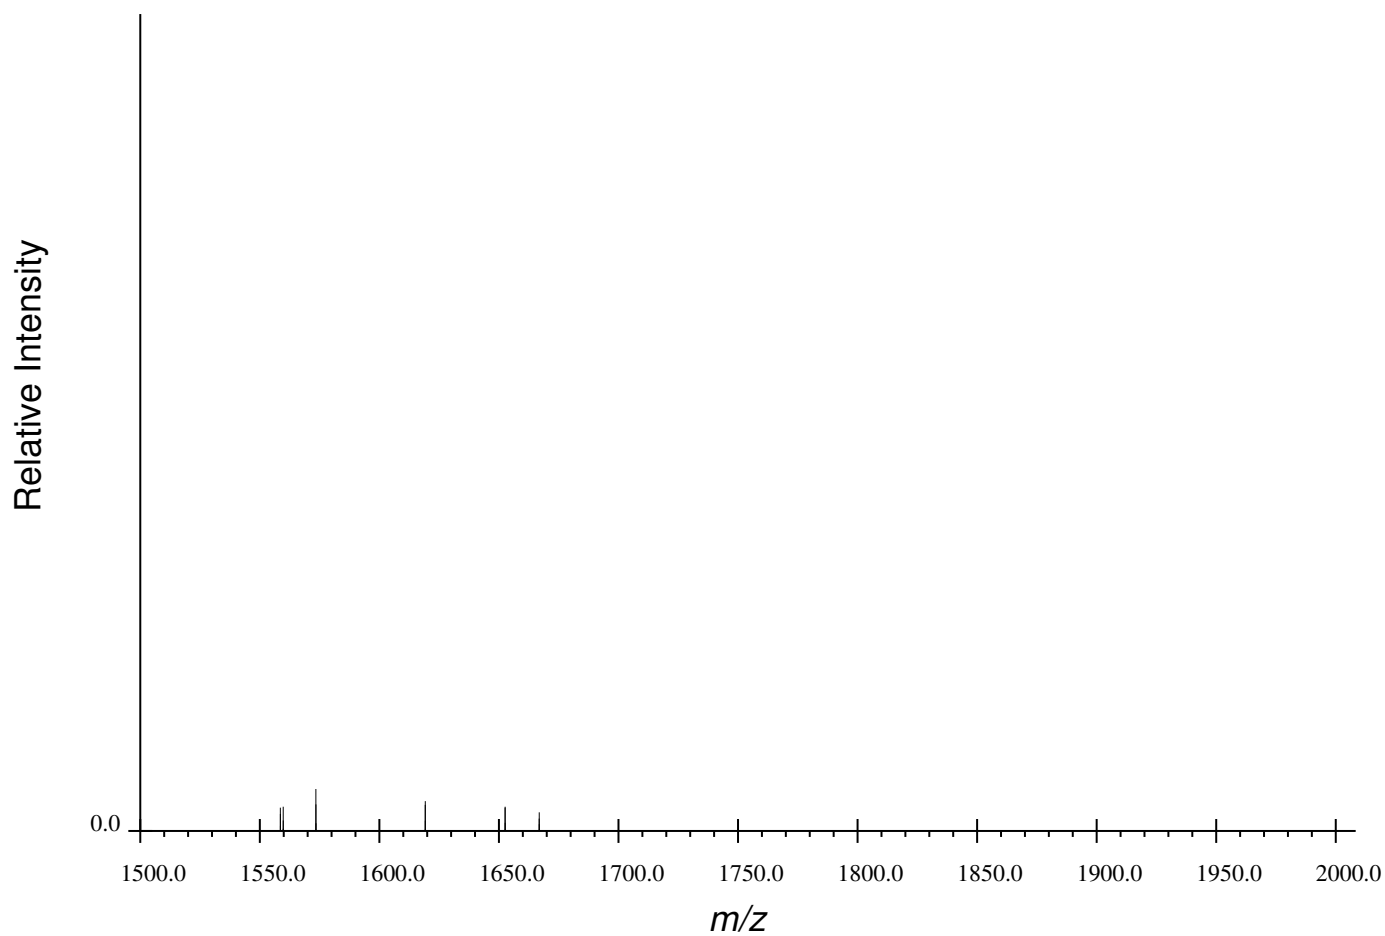

(d) Fourth Region for KRSpYEEHIP, Spectrum 86.dta

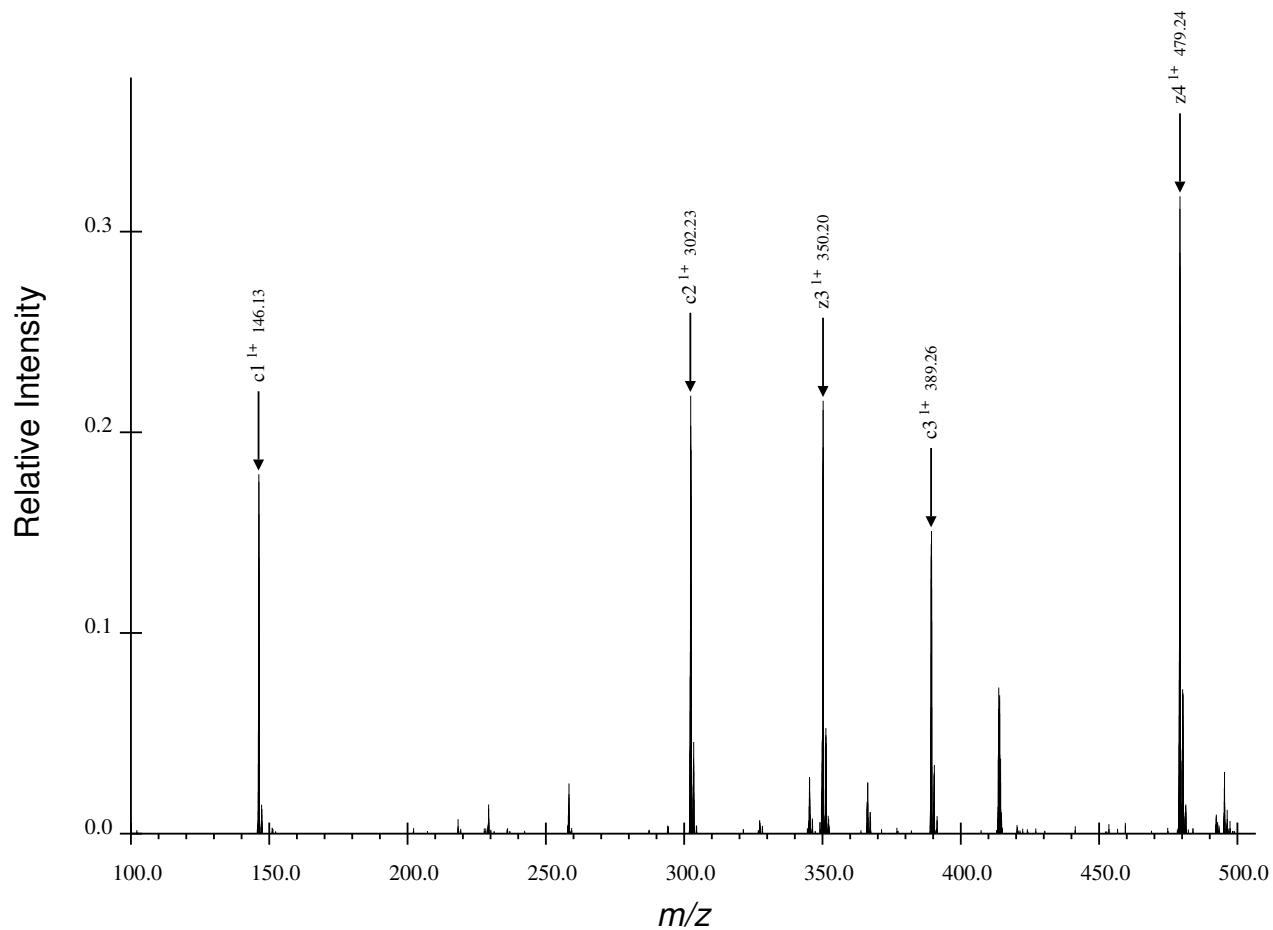

(a) First Region for KRSpYEEHIP, Spectrum 87.dta

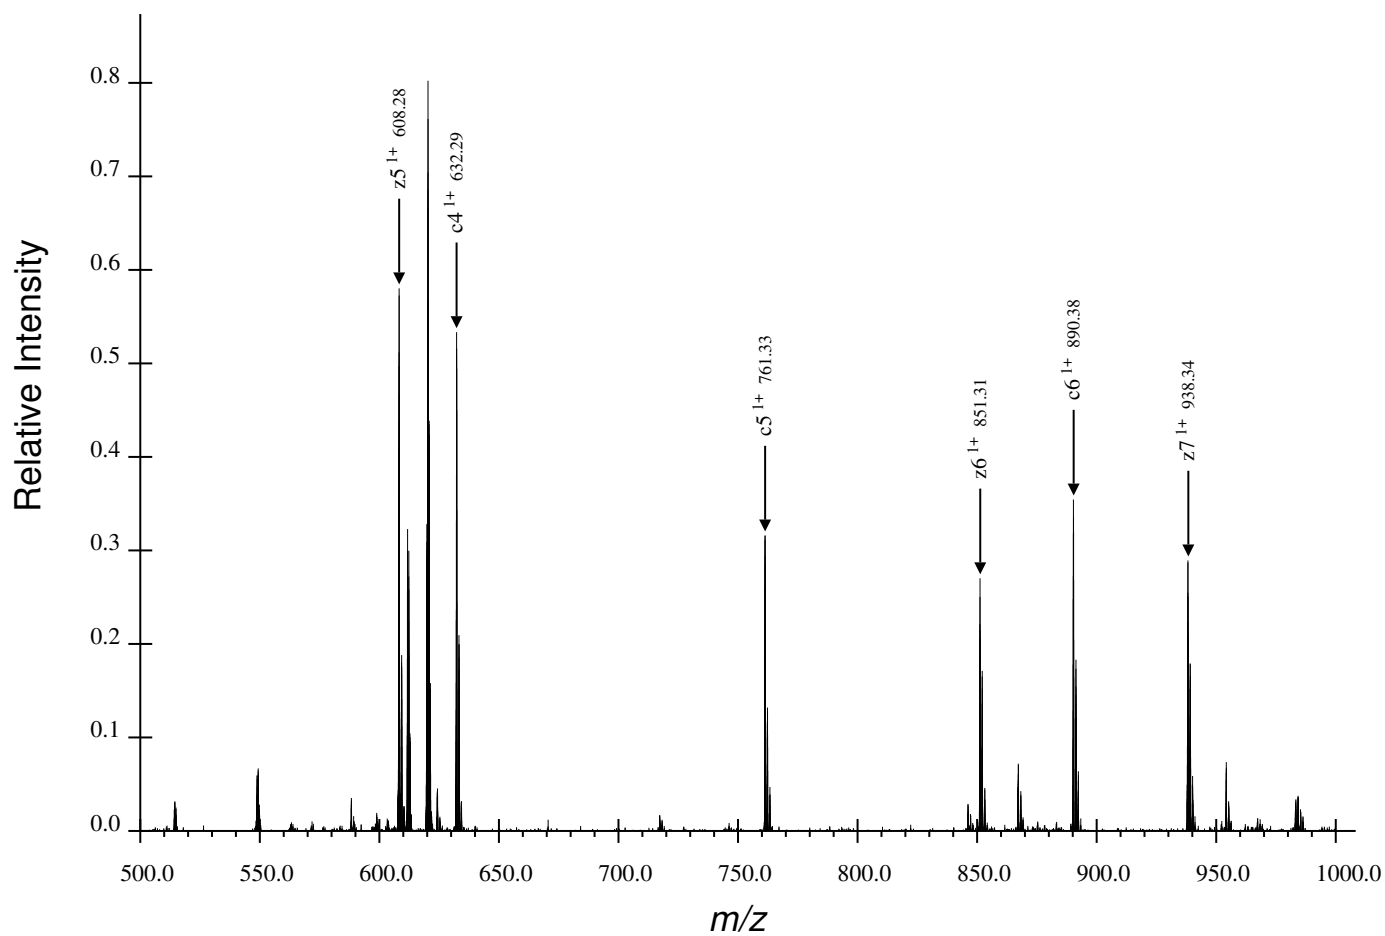

(b) Second Region for KRSpYEEHIP, Spectrum 87.dta

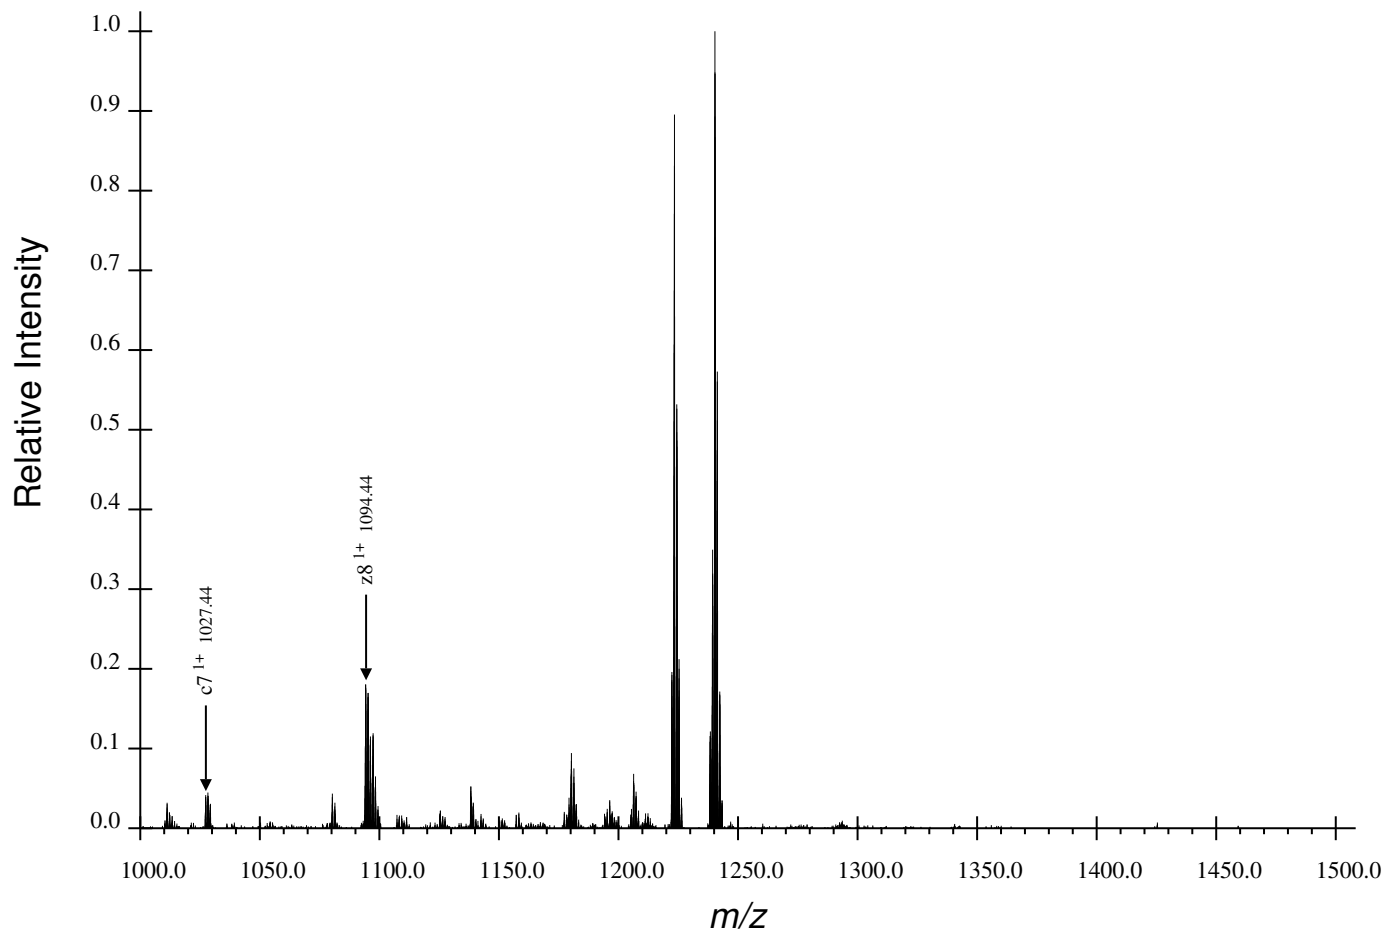

(c) Third Region for KRSpYEEHIP, Spectrum 87.dta

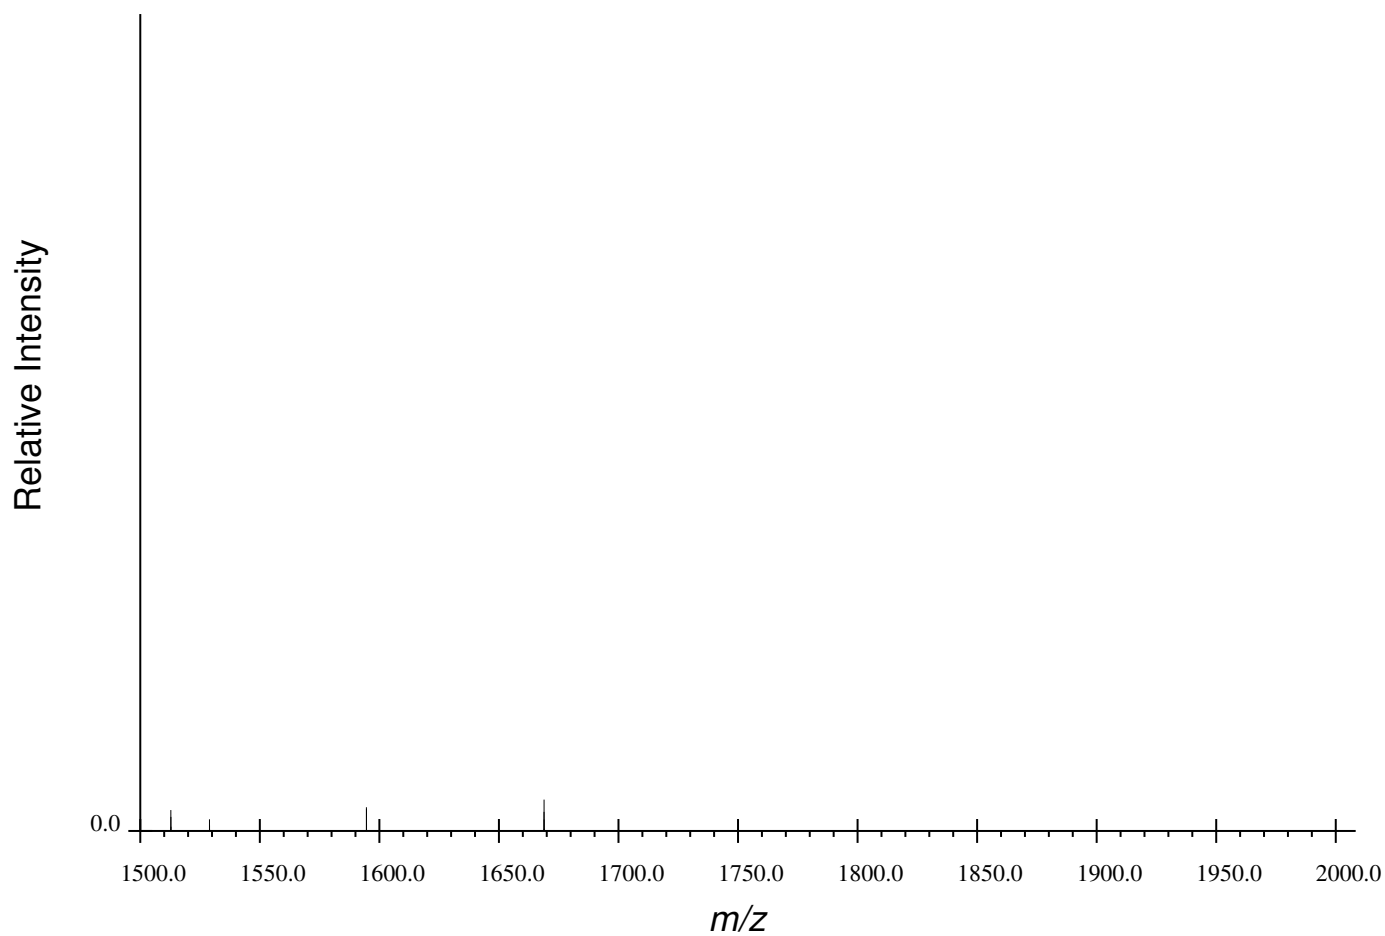

(d) Fourth Region for KRSpYEEHIP, Spectrum 87.dta

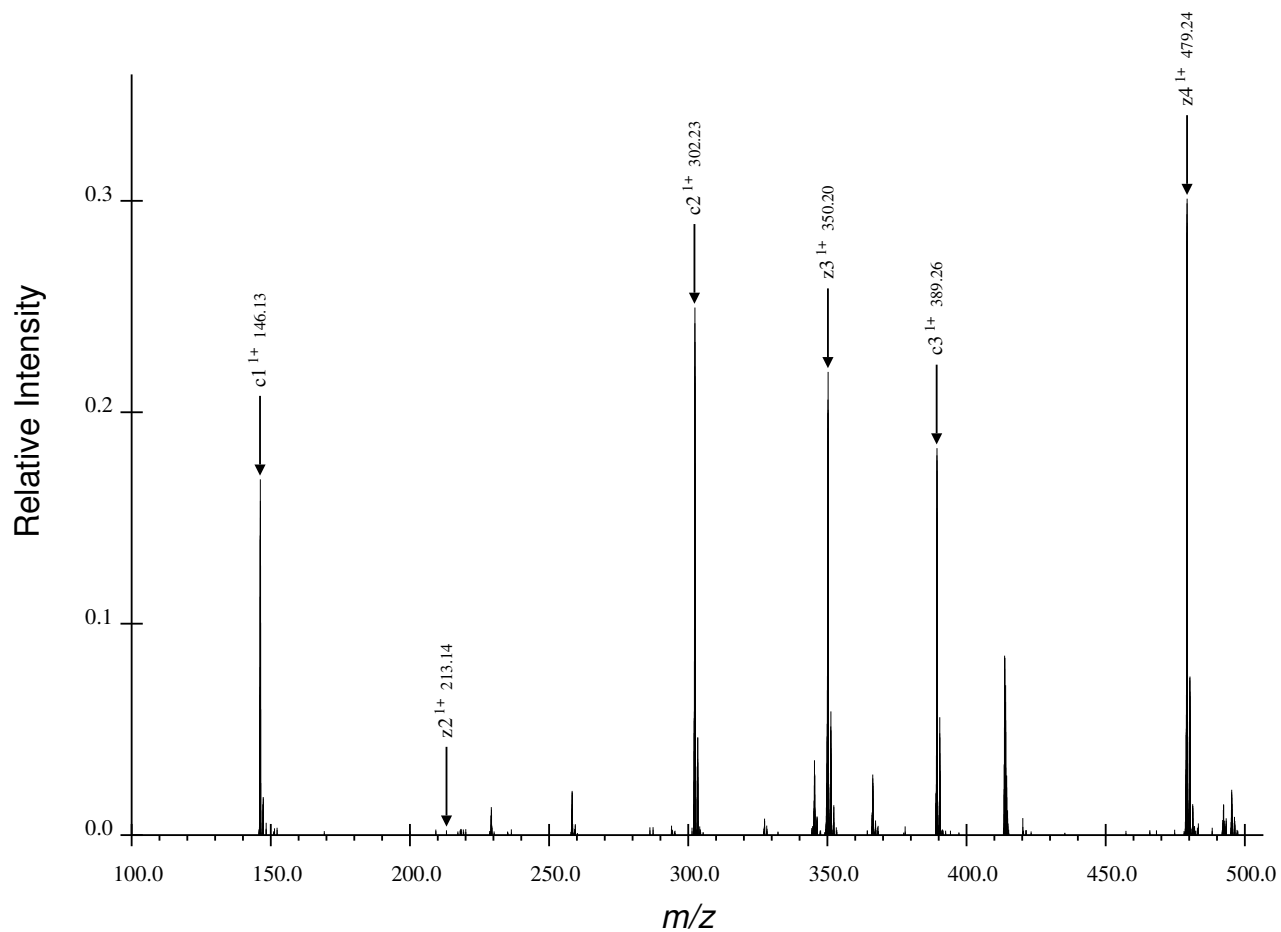

(a) First Region for KRSpYEEHIP, Spectrum 88.dta

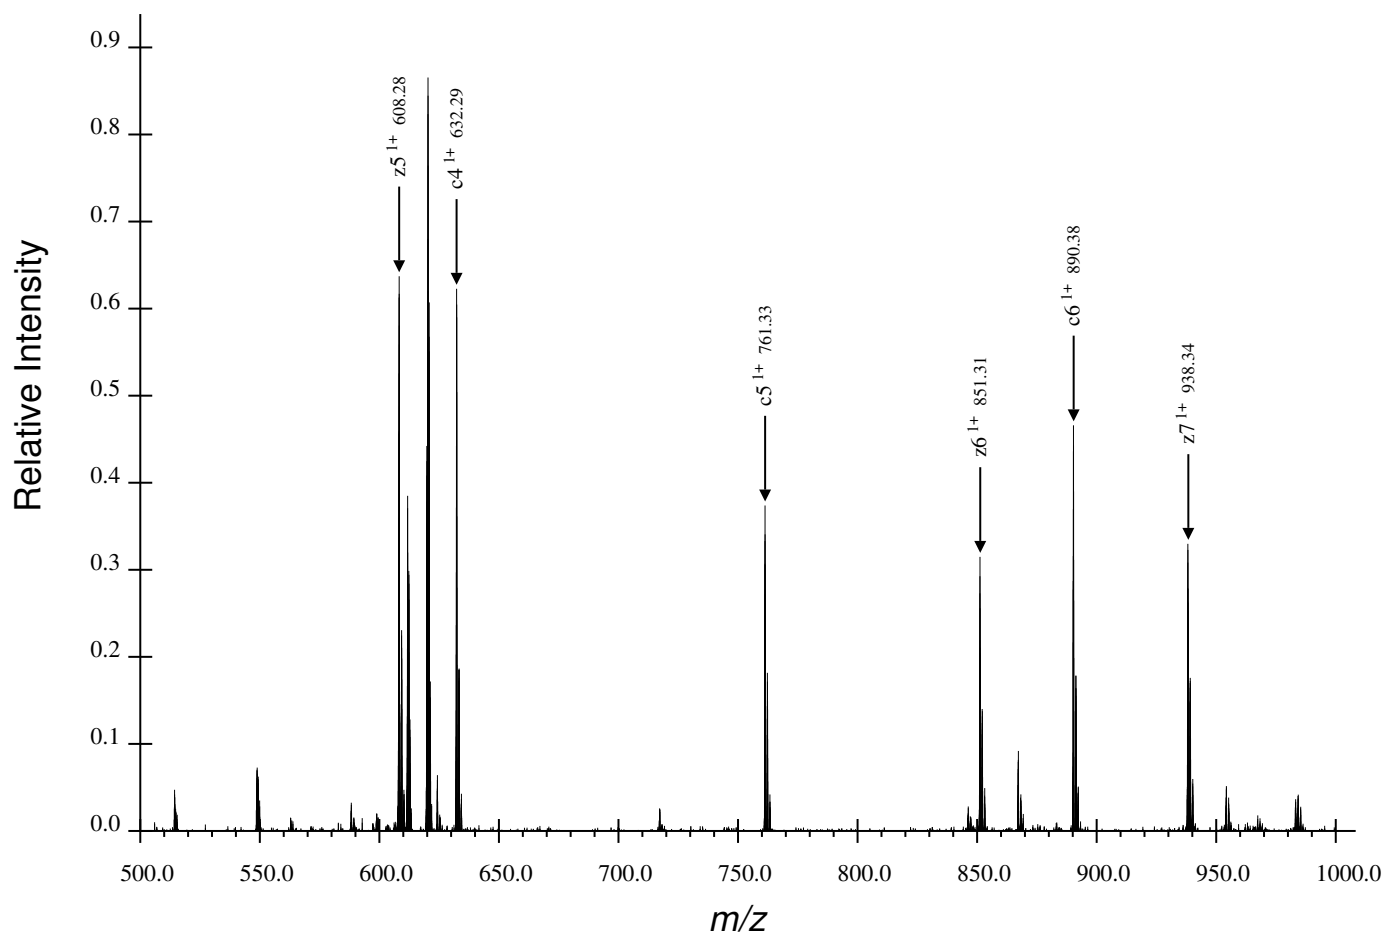

(b) Second Region for KRSpYEEHIP, Spectrum 88.dta

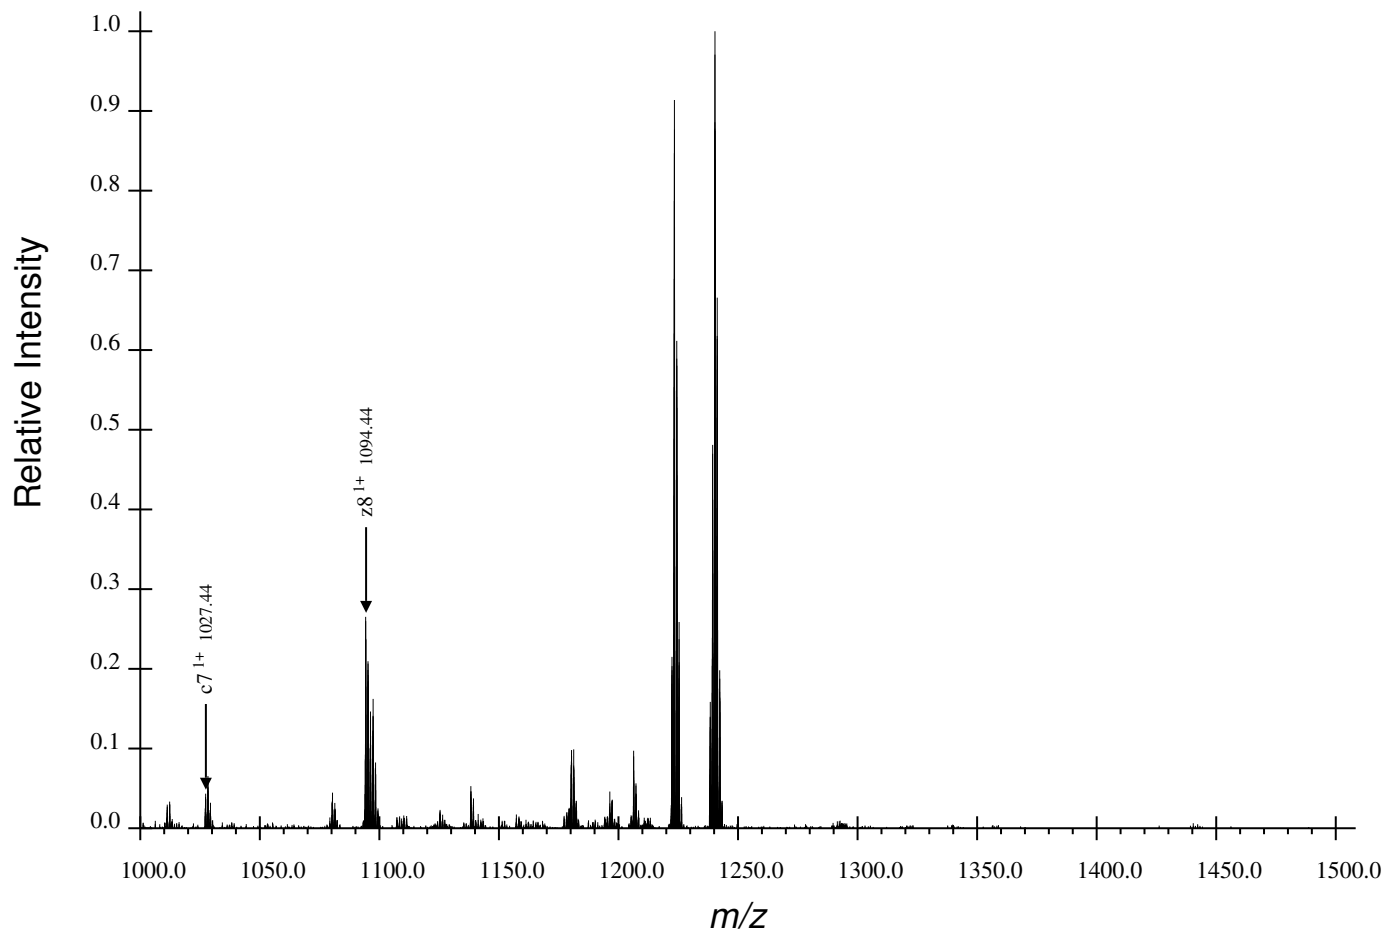

(c) Third Region for KRSpYEEHIP, Spectrum 88.dta

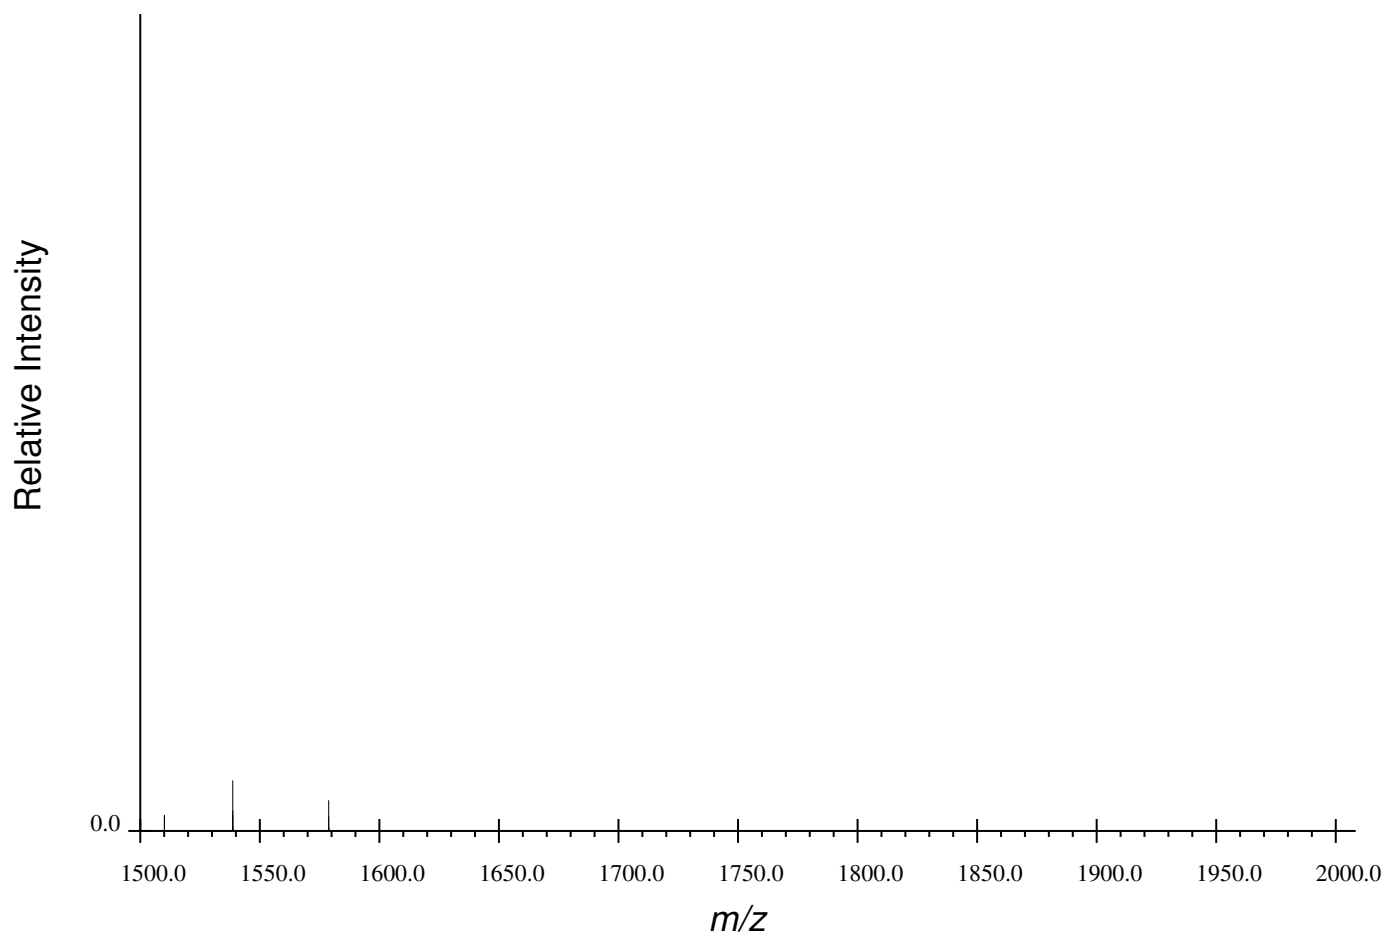

(d) Fourth Region for KRSpYEEHIP, Spectrum 88.dta



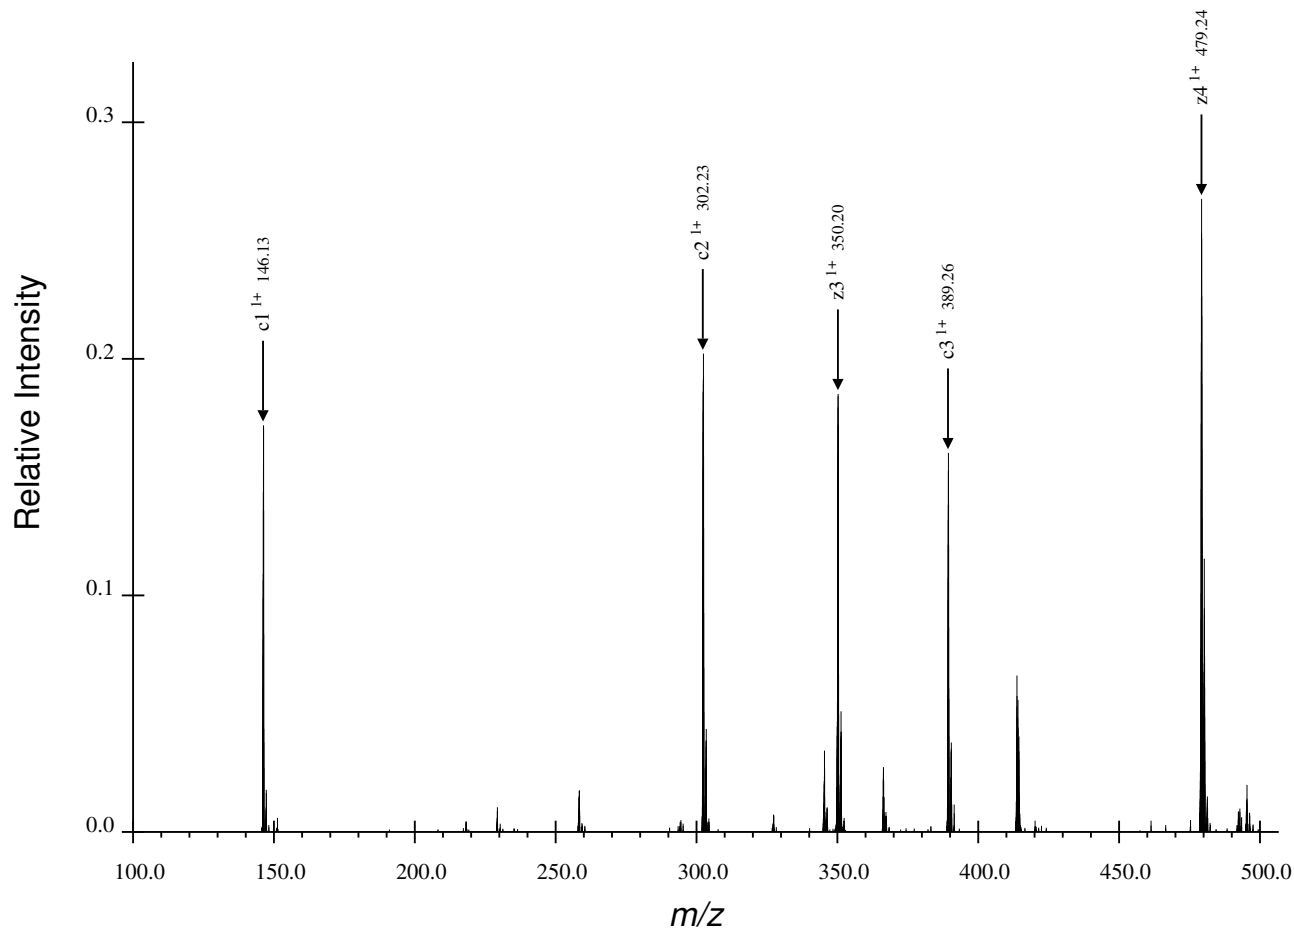

(a) First Region for KRSpYEEHIP, Spectrum 89.dta

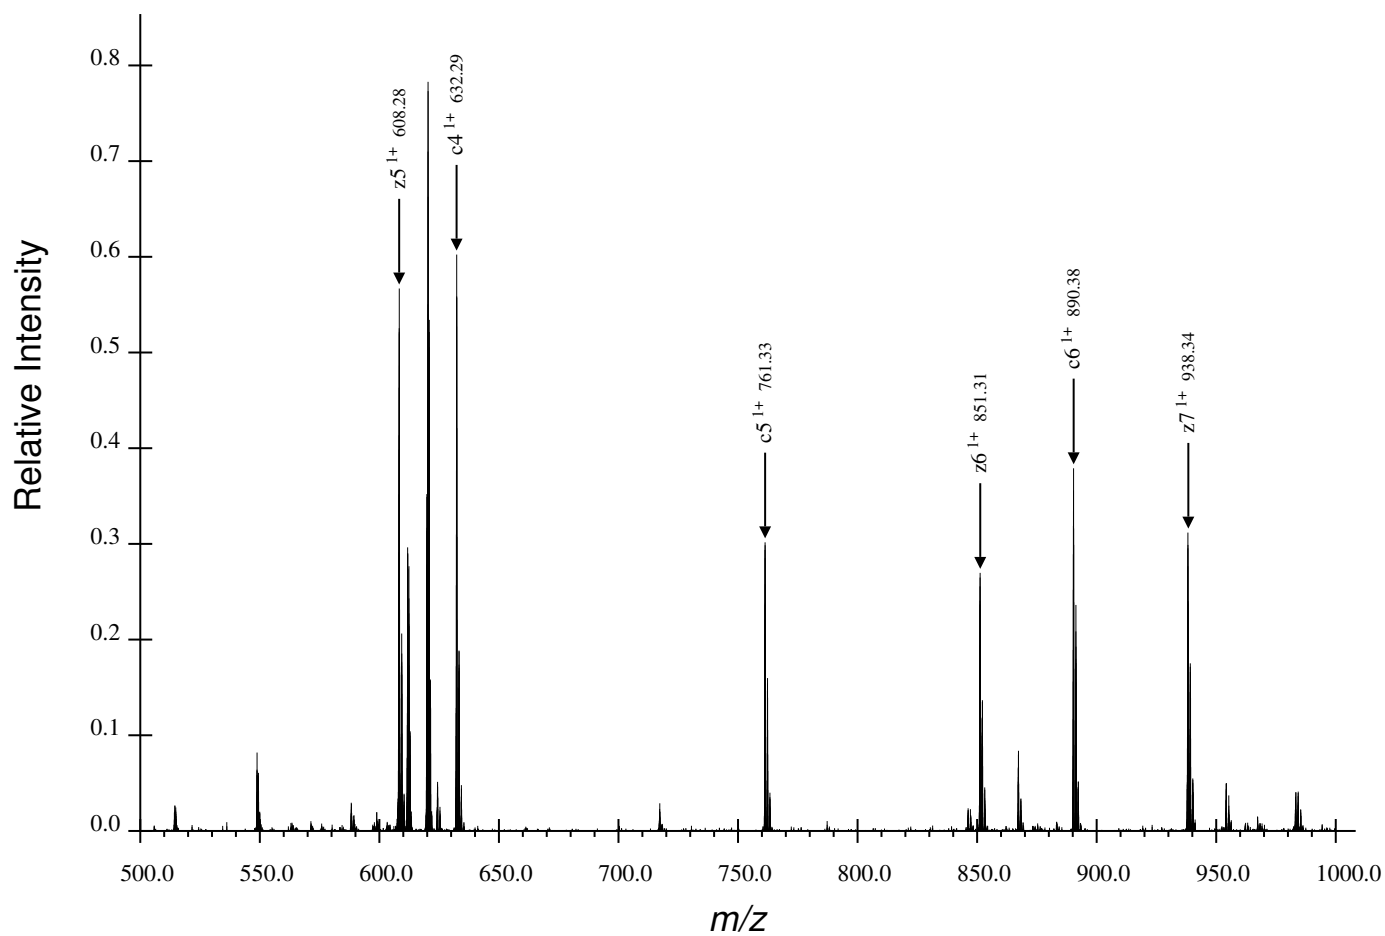

(b) Second Region for KRSpYEEHIP, Spectrum 89.dta

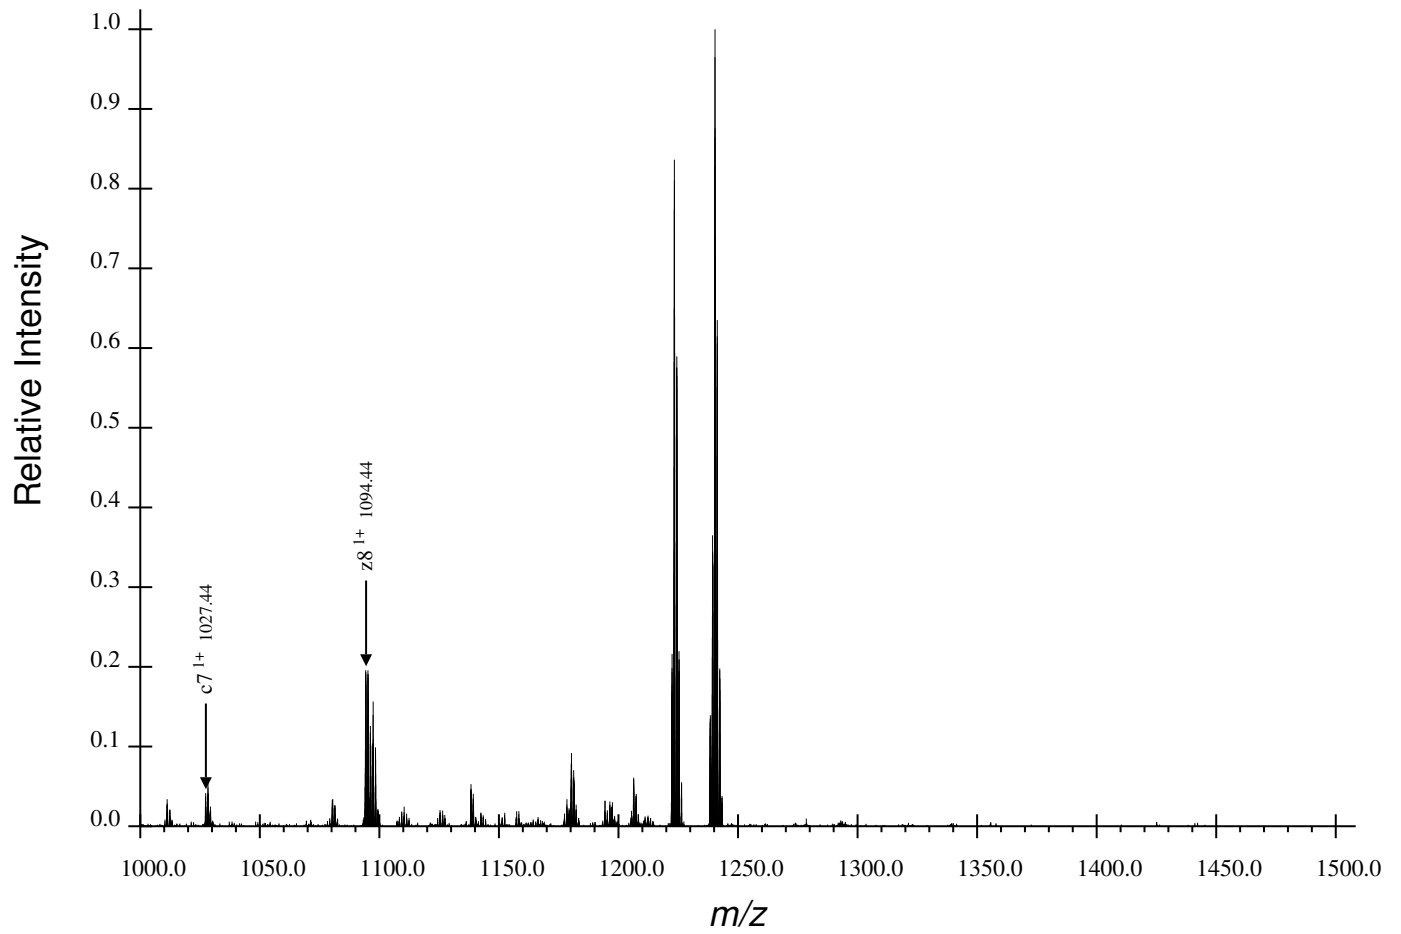

(c) Third Region for KRSpYEEHIP, Spectrum 89.dta

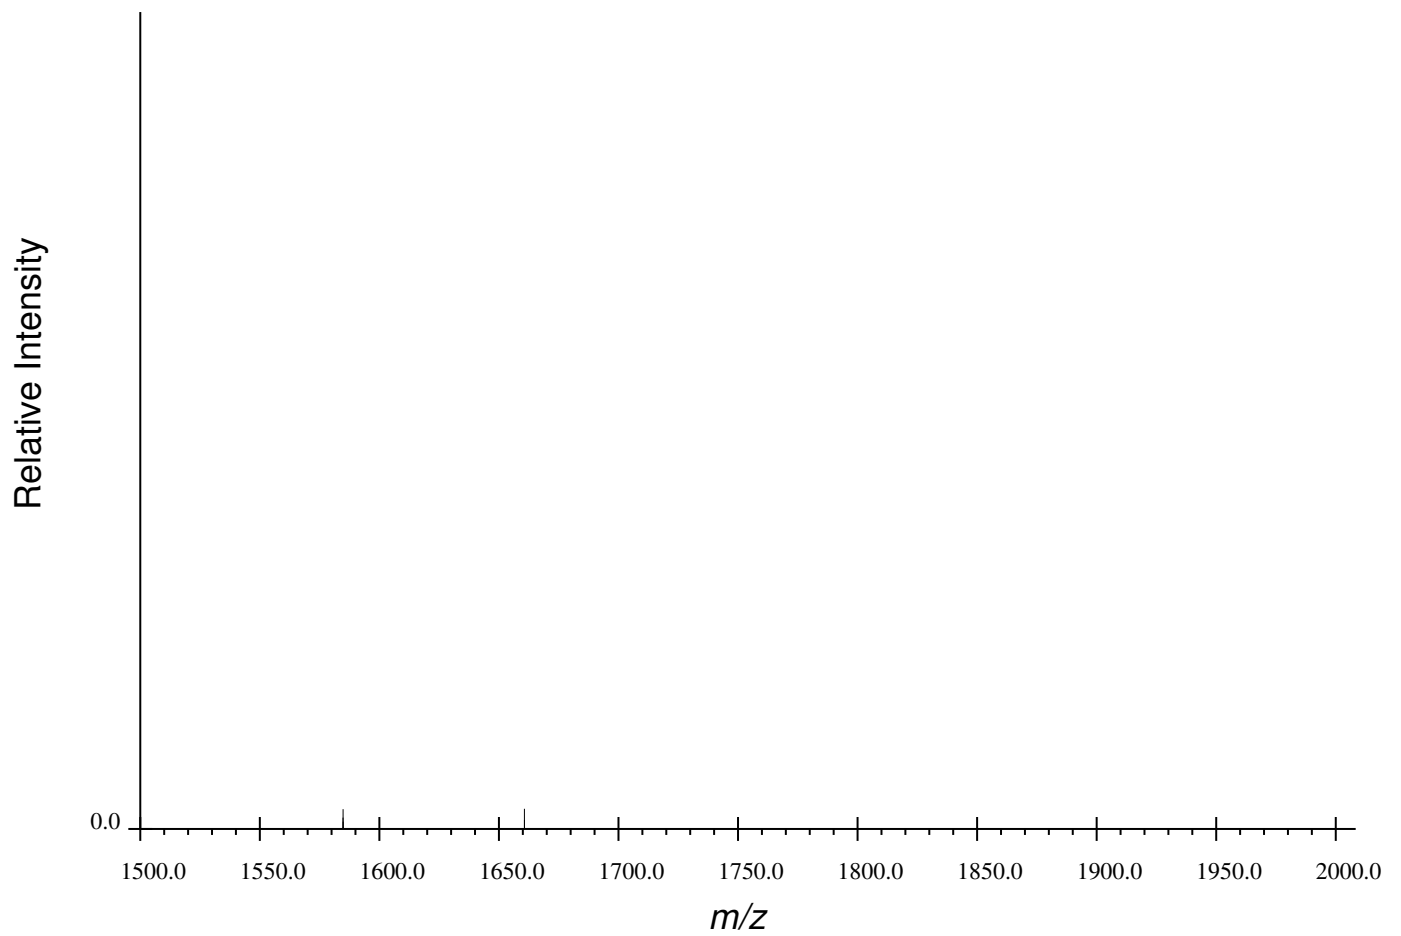

(d) Fourth Region for KRSpYEEHIP, Spectrum 89.dta

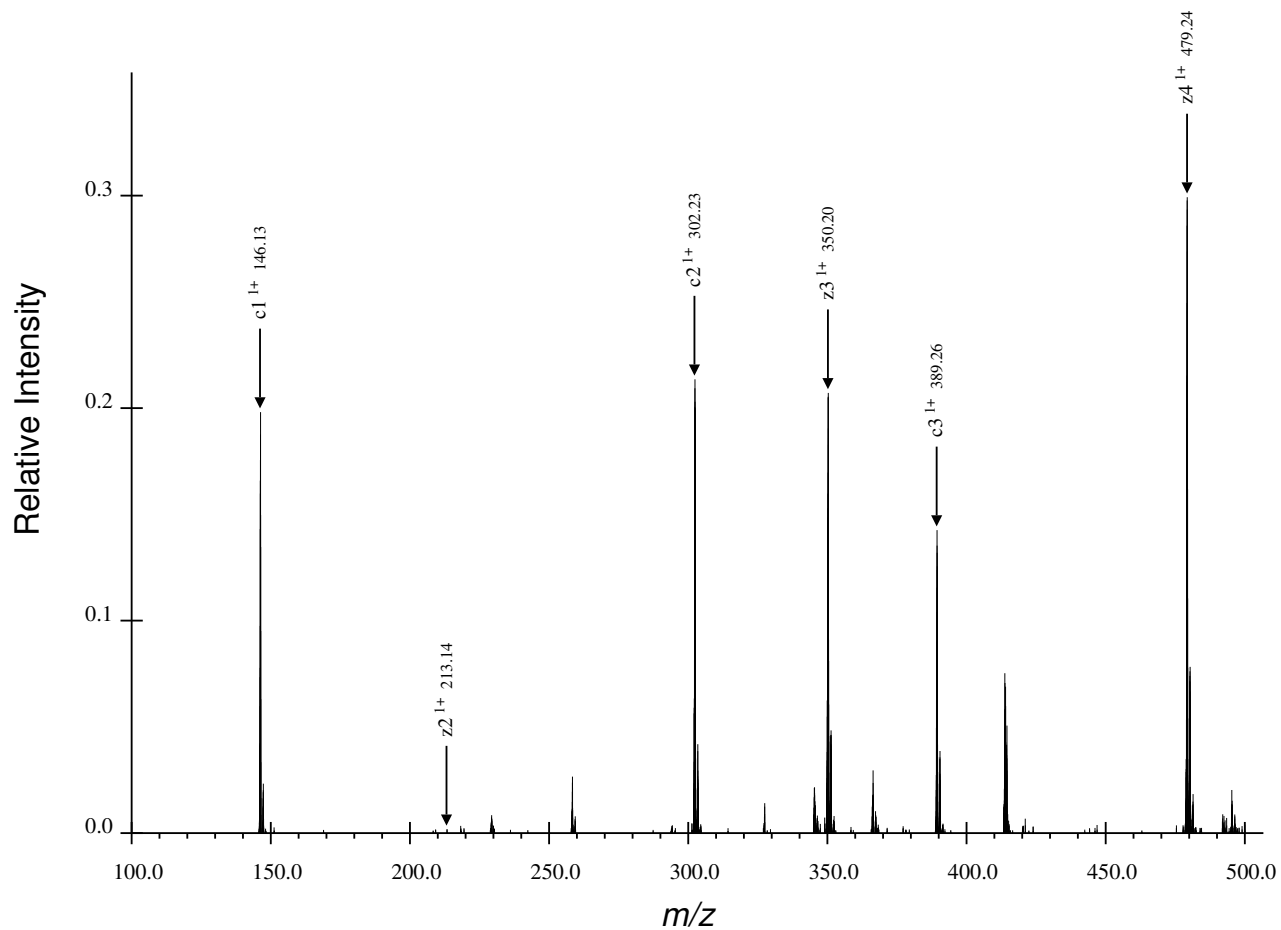

(a) First Region for KRSpYEEHIP, Spectrum 90.dta

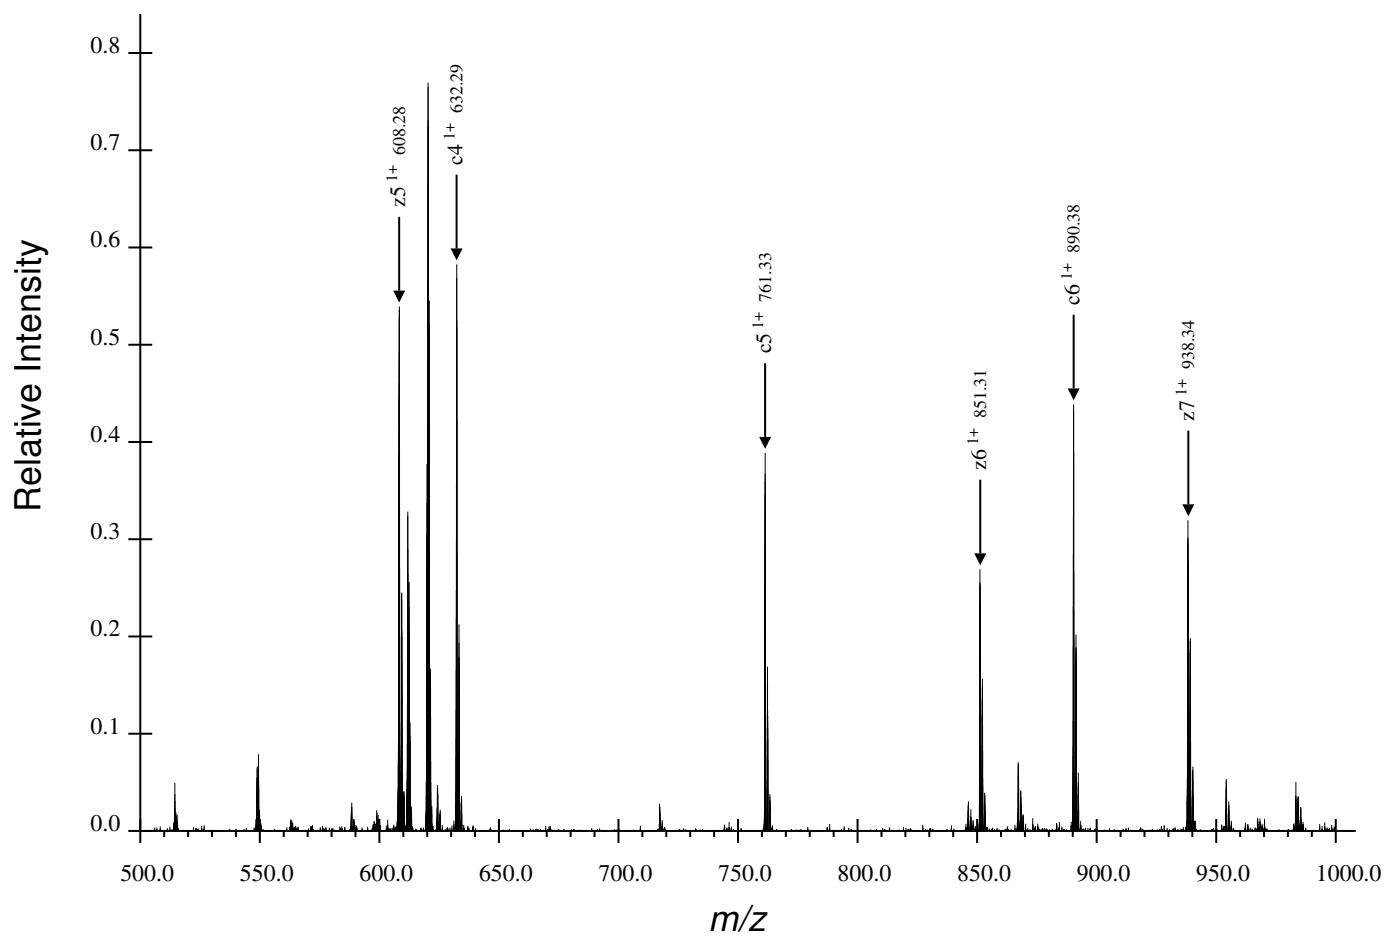

(b) Second Region for KRSpYEEHIP, Spectrum 90.dta

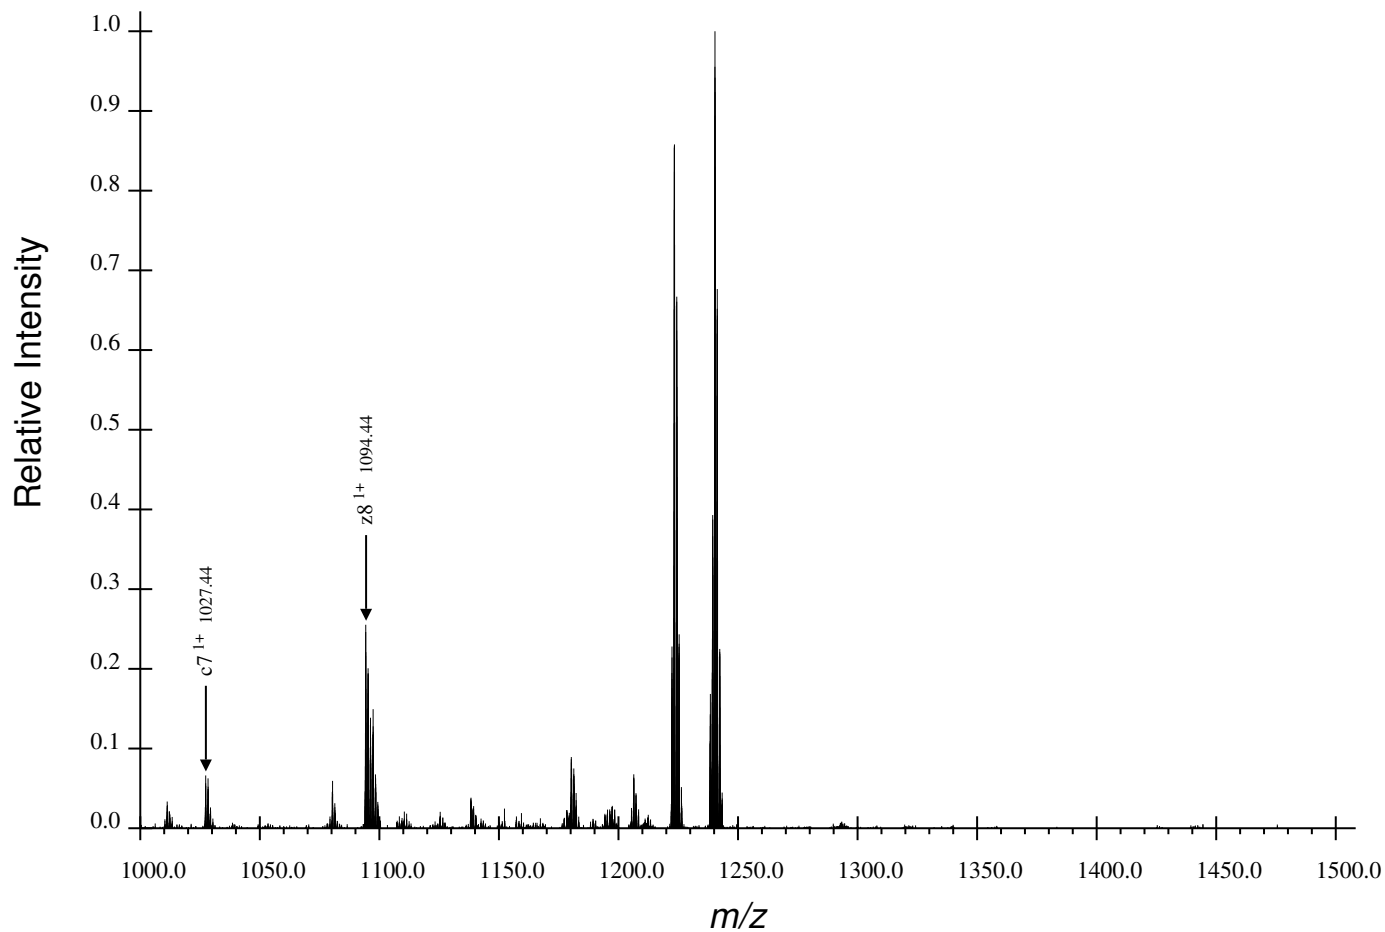

(c) Third Region for KRSpYEEHIP, Spectrum 90.dta

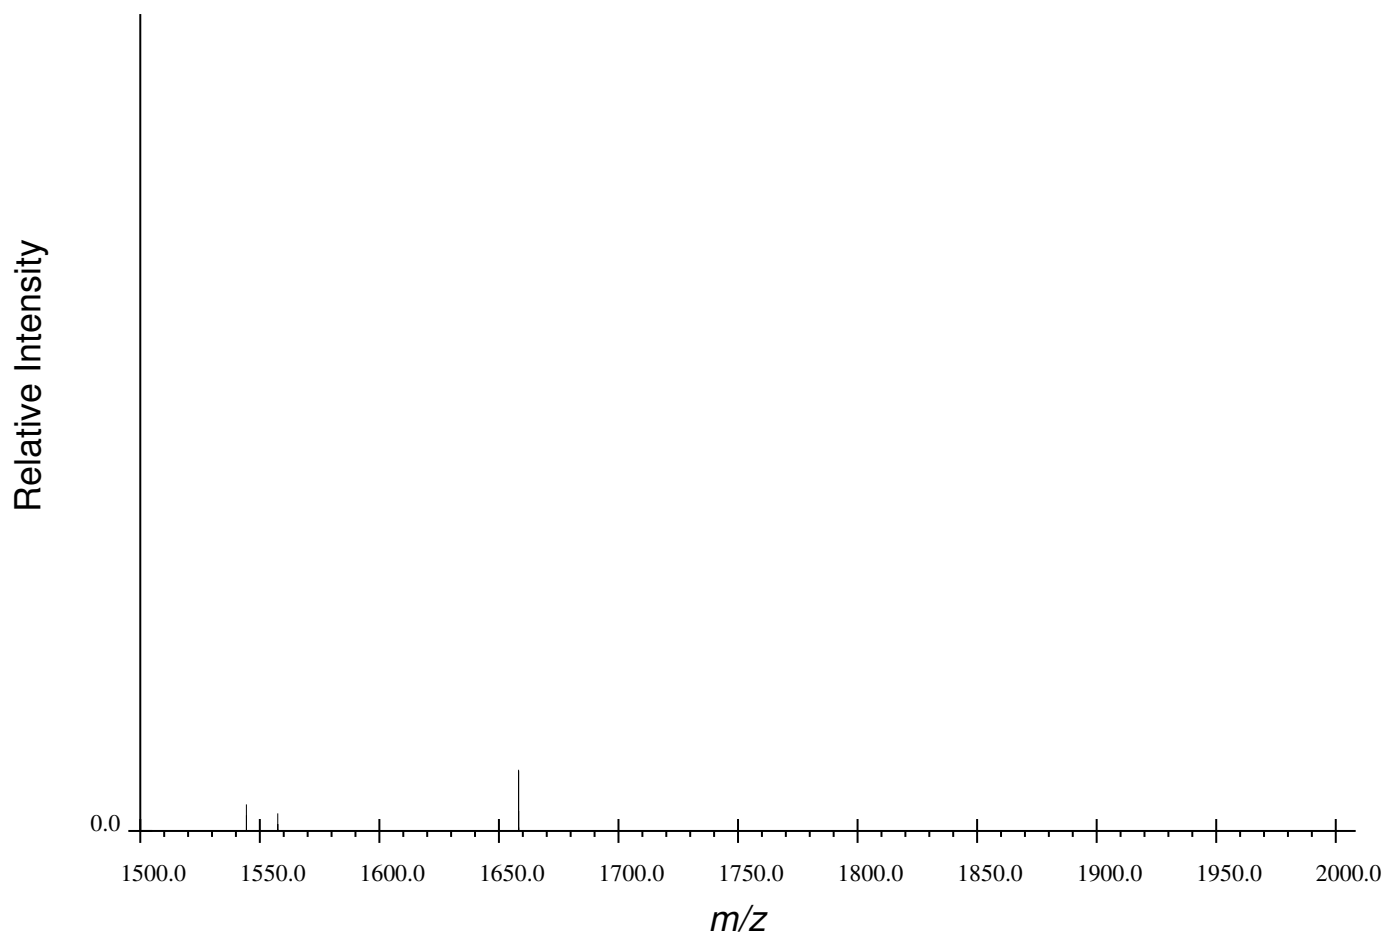

(d) Fourth Region for KRSpYEEHIP, Spectrum 90.dta

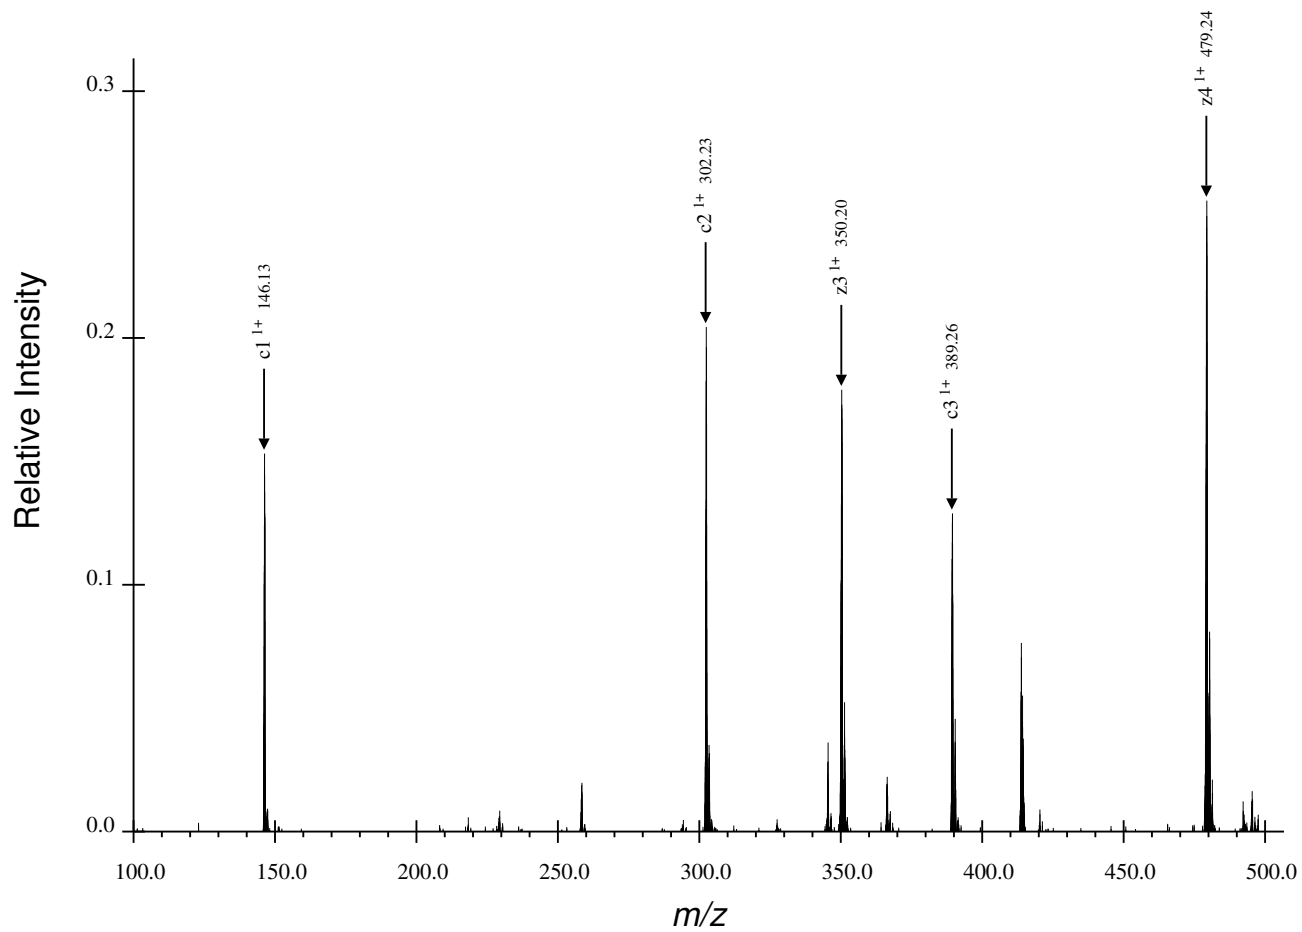

(a) First Region for KRSpYEEHIP, Spectrum 91.dta

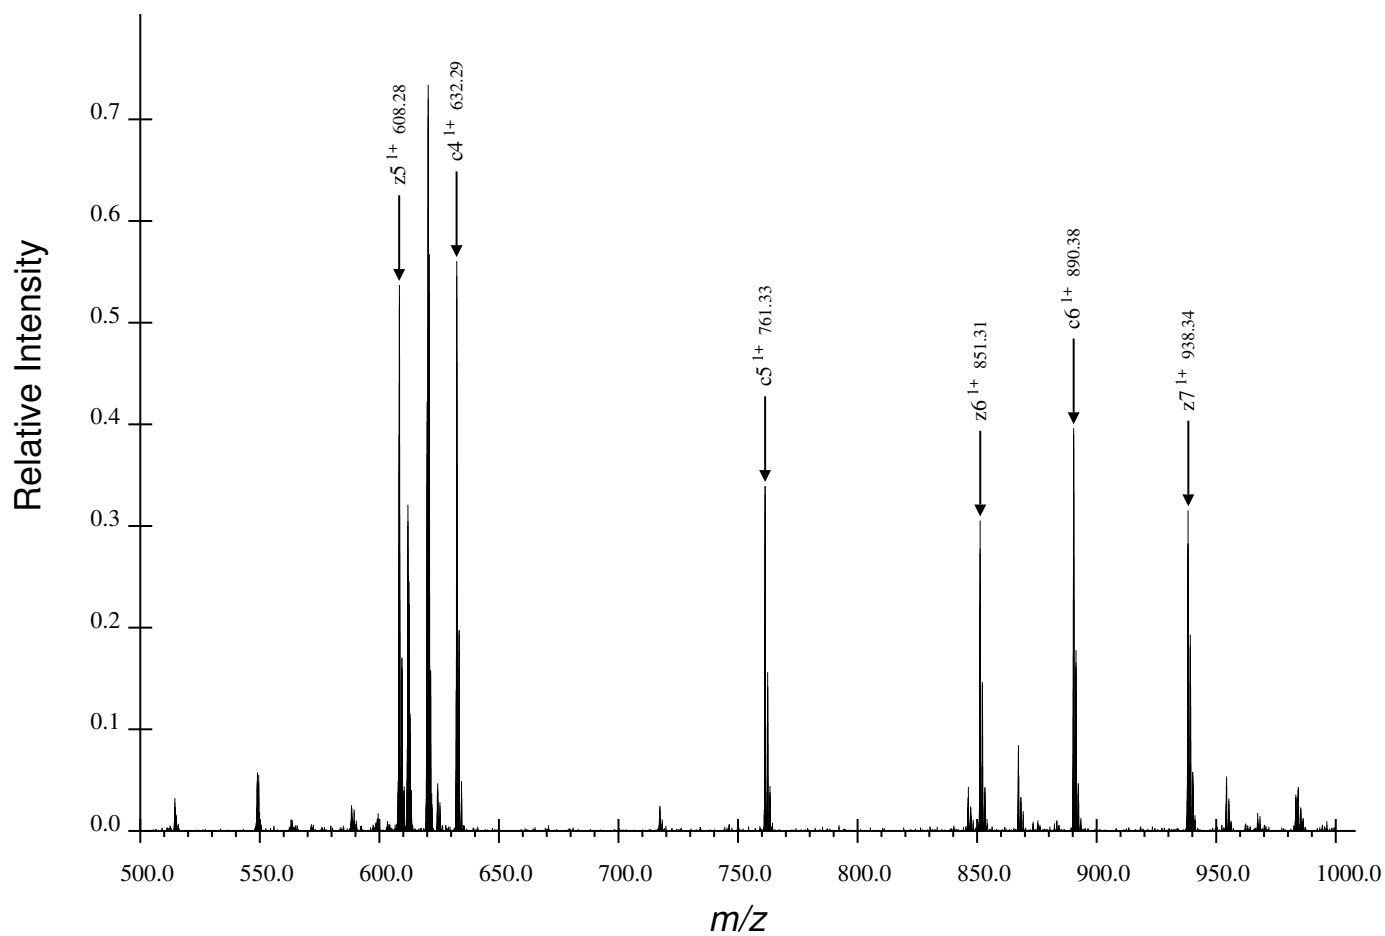

(b) Second Region for KRSpYEEHIP, Spectrum 91.dta

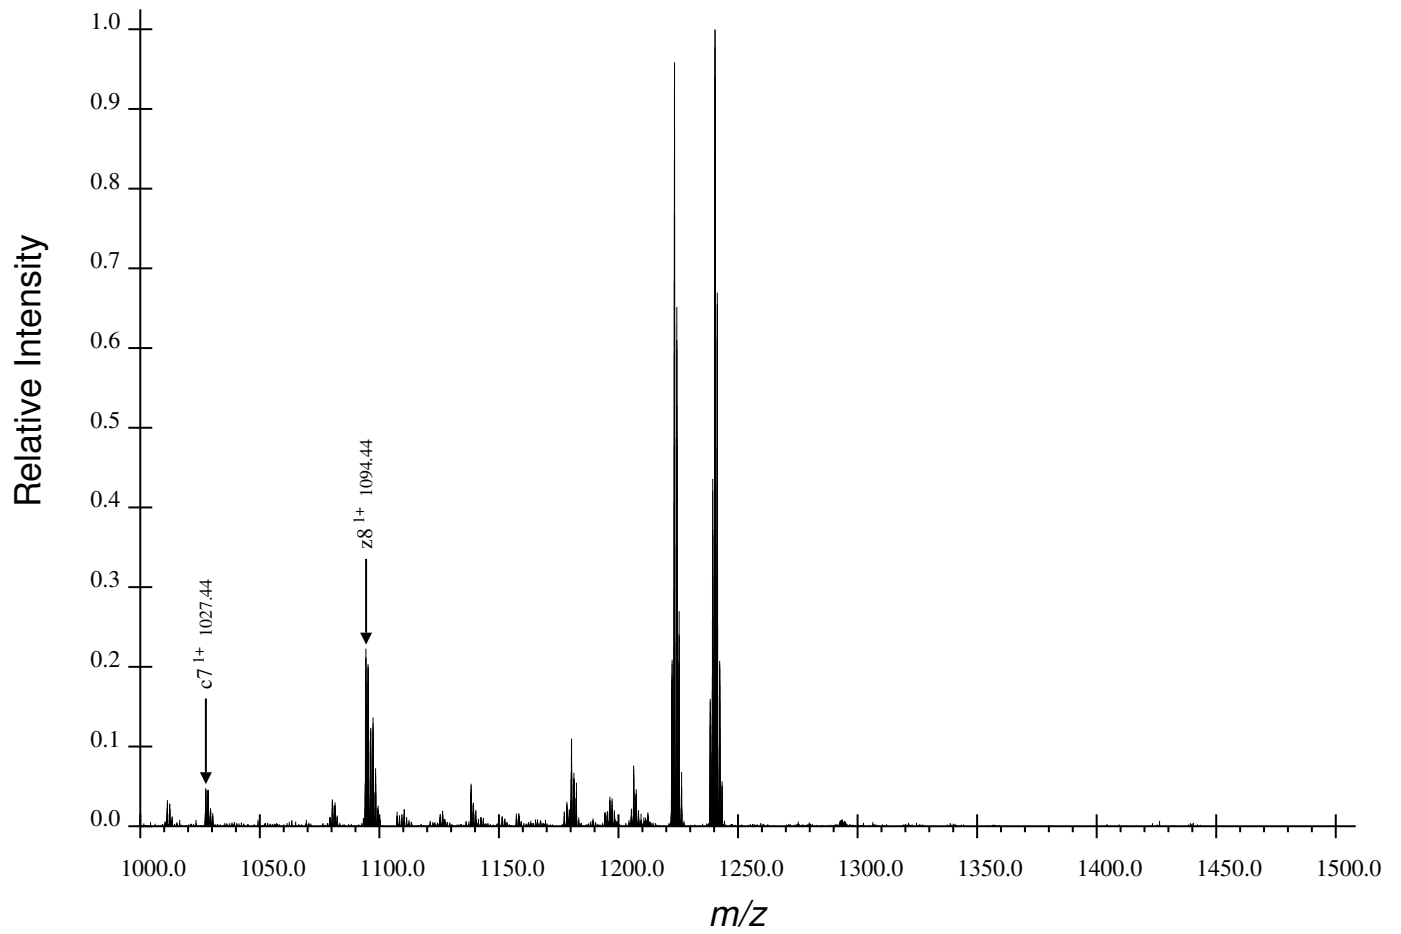

(c) Third Region for KRSpYEEHIP, Spectrum 91.dta

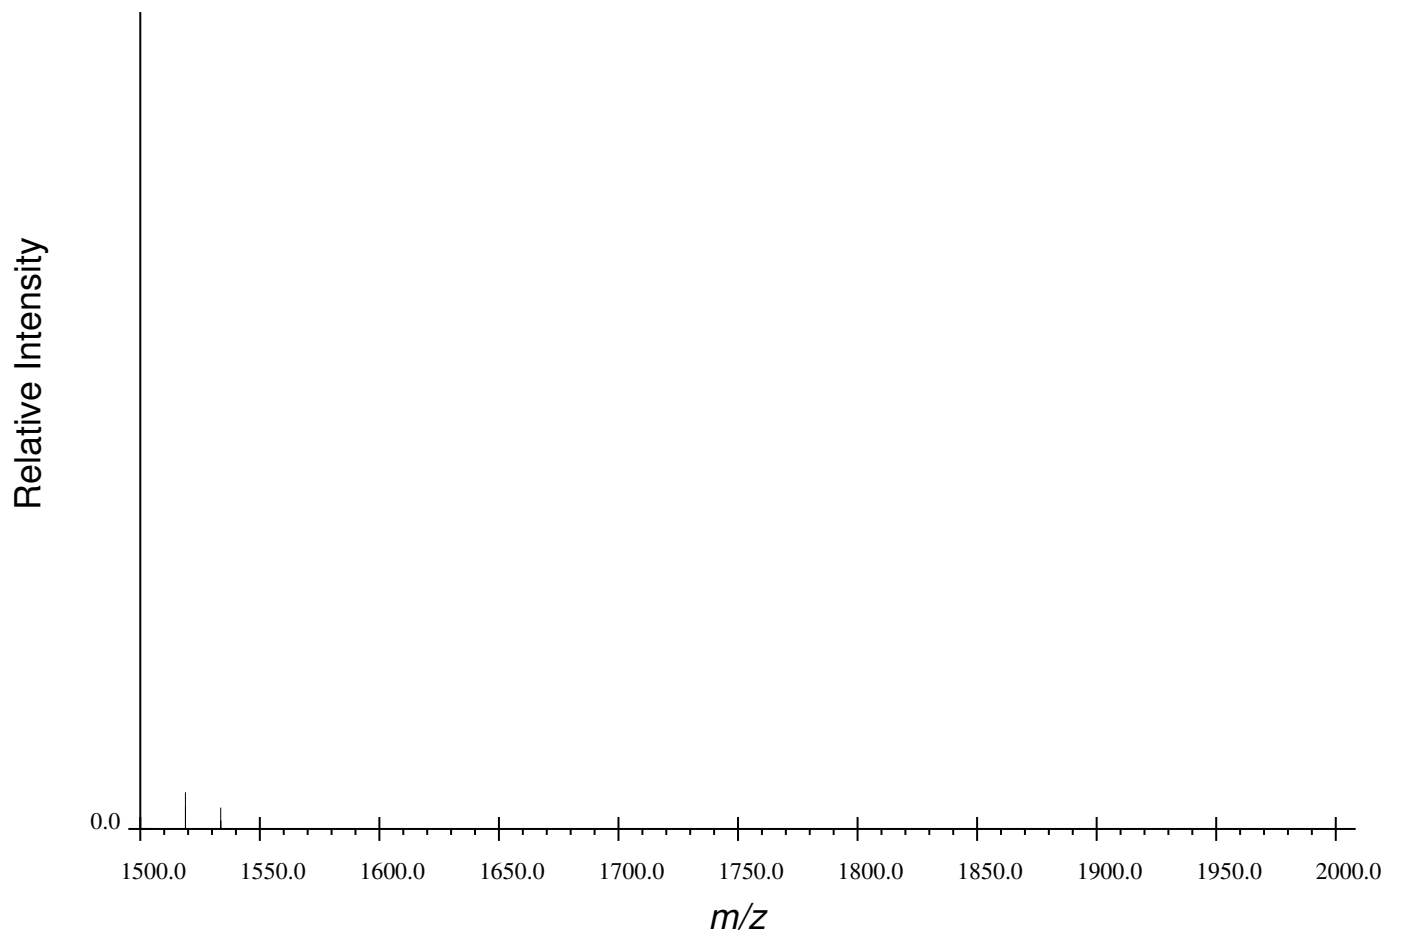

(d) Fourth Region for KRSpYEEHIP, Spectrum 91.dta

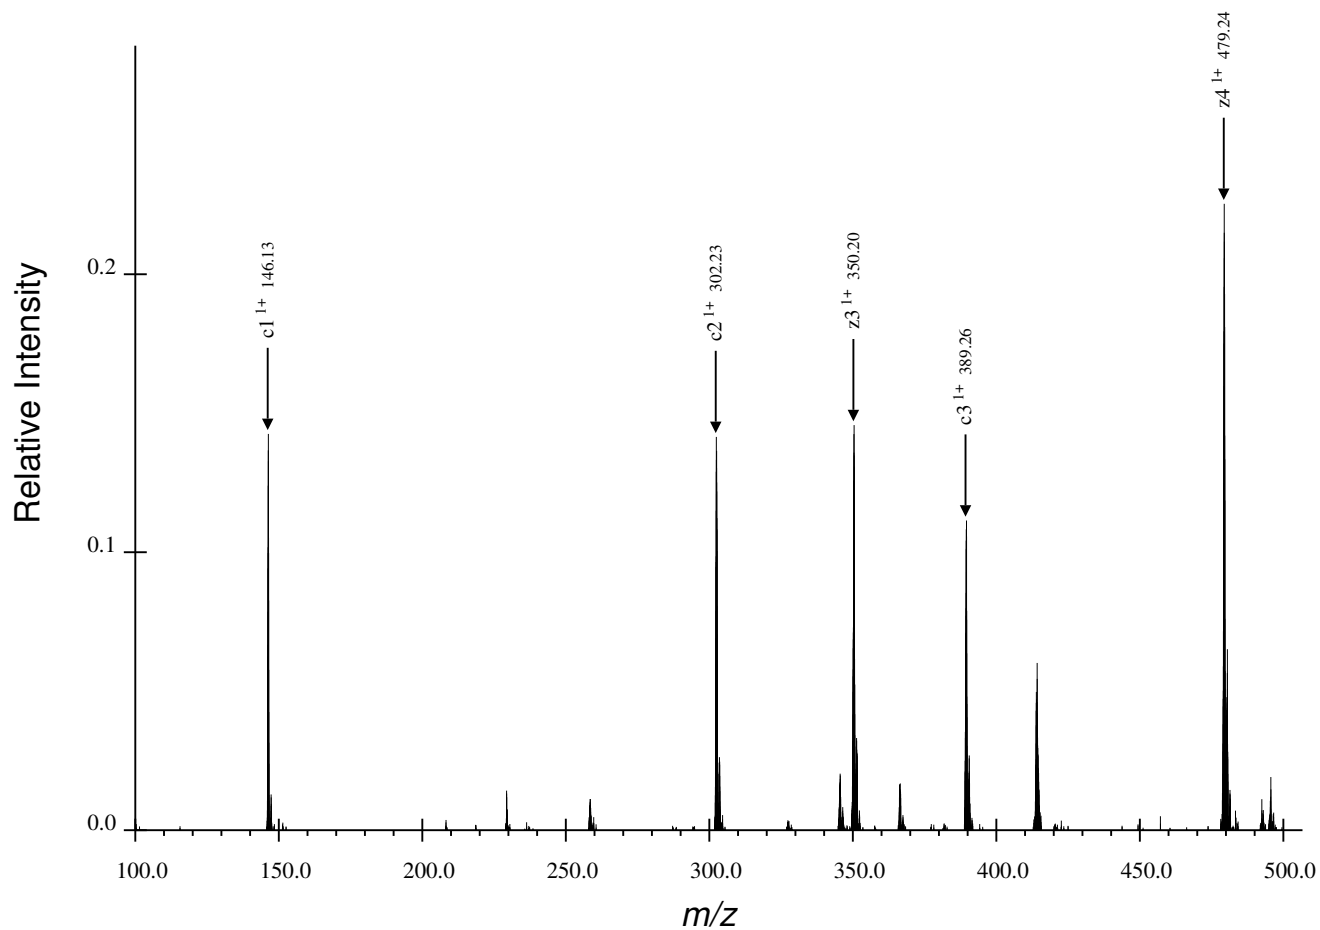

(a) First Region for KRSpYEEHIP, Spectrum 92.dta

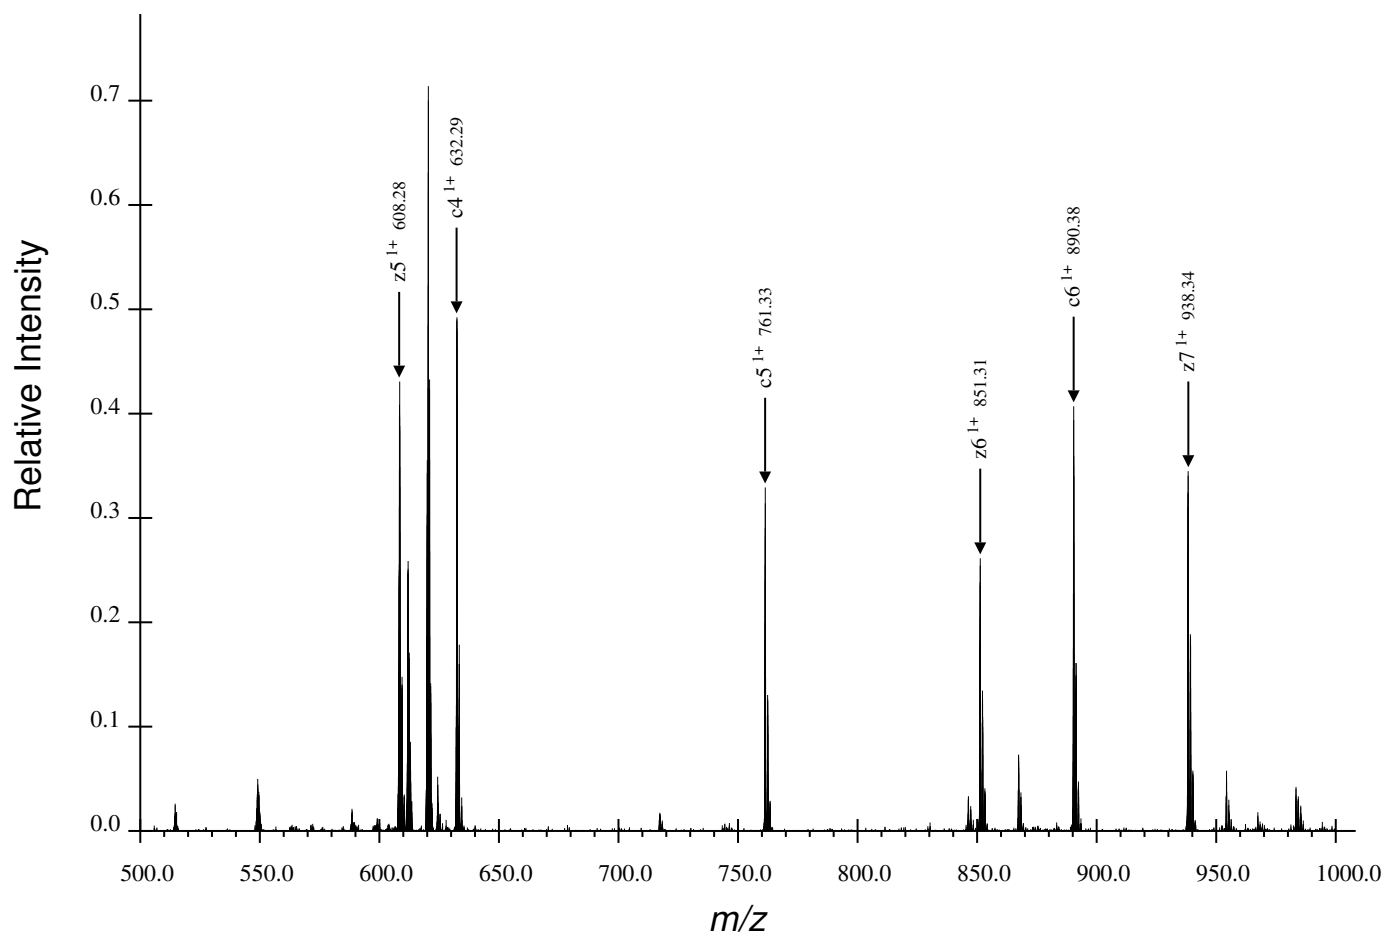

(b) Second Region for KRSpYEEHIP, Spectrum 92.dta

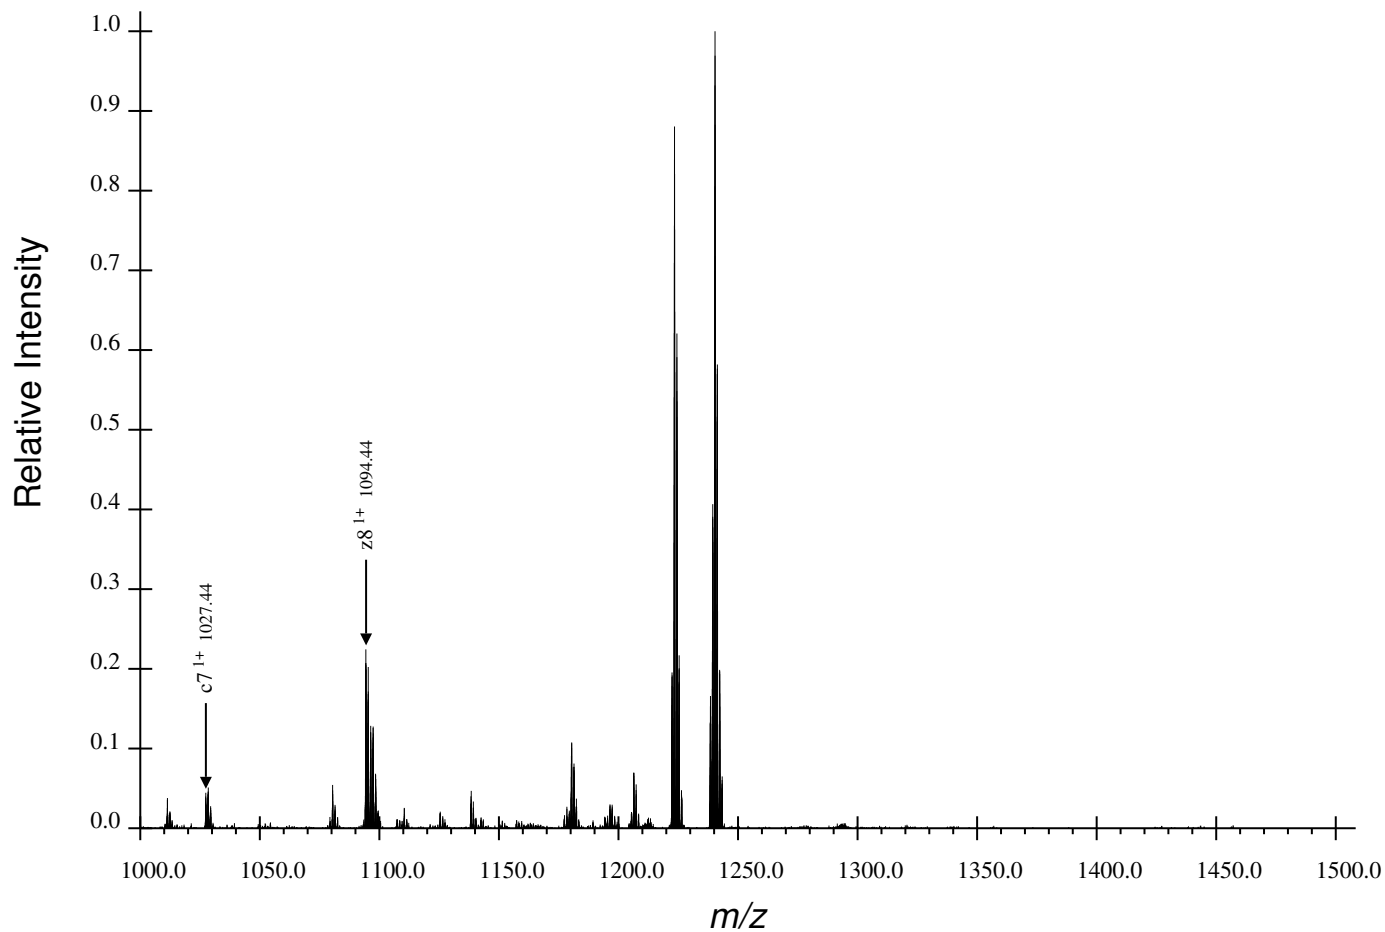

(c) Third Region for KRSpYEEHIP, Spectrum 92.dta

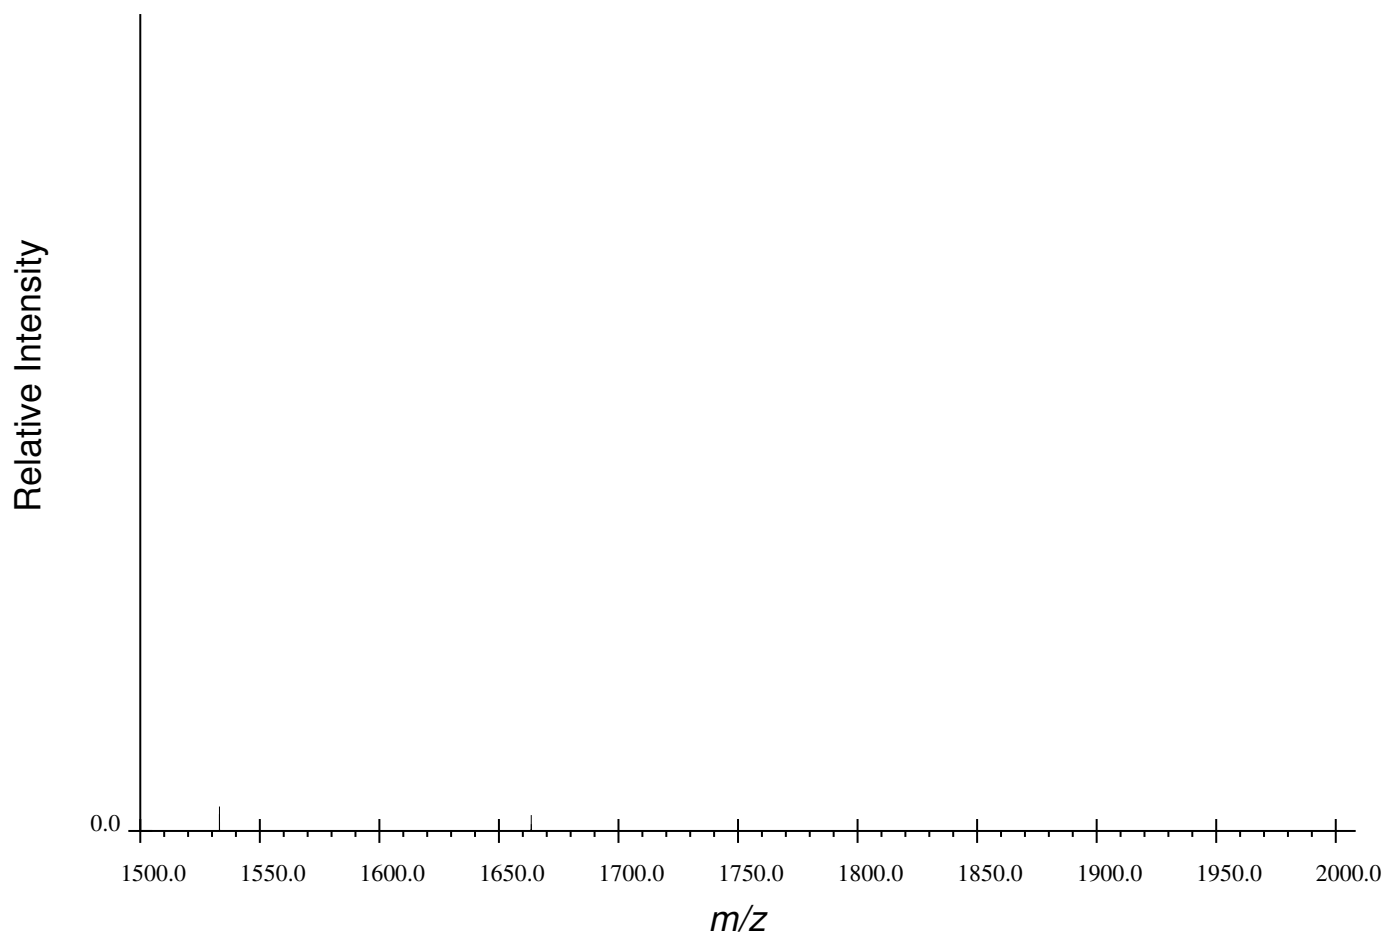

(d) Fourth Region for KRSpYEEHIP, Spectrum 92.dta



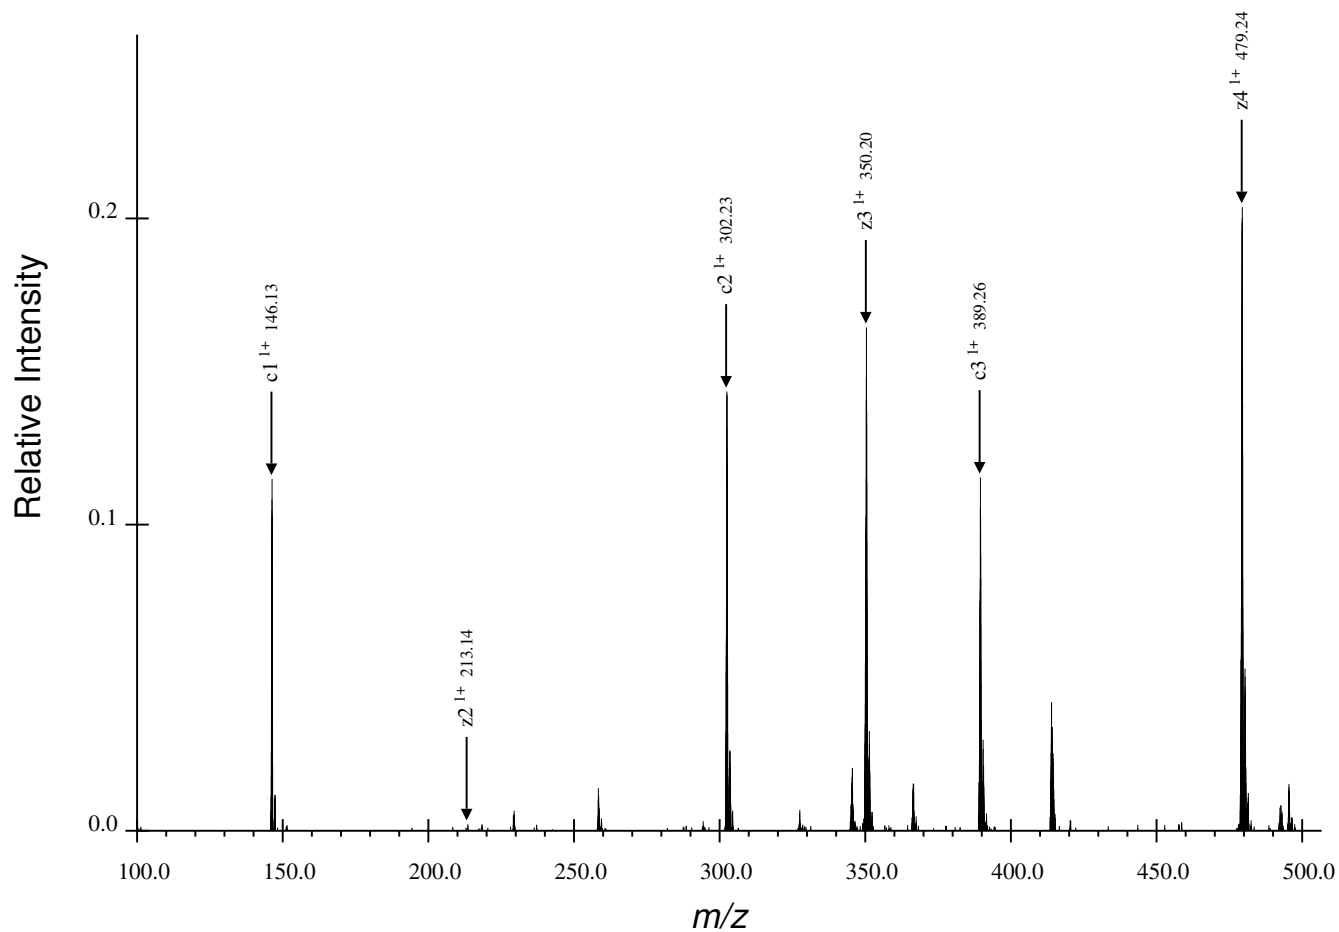

(a) First Region for KRSpYEEHIP, Spectrum 93.dta

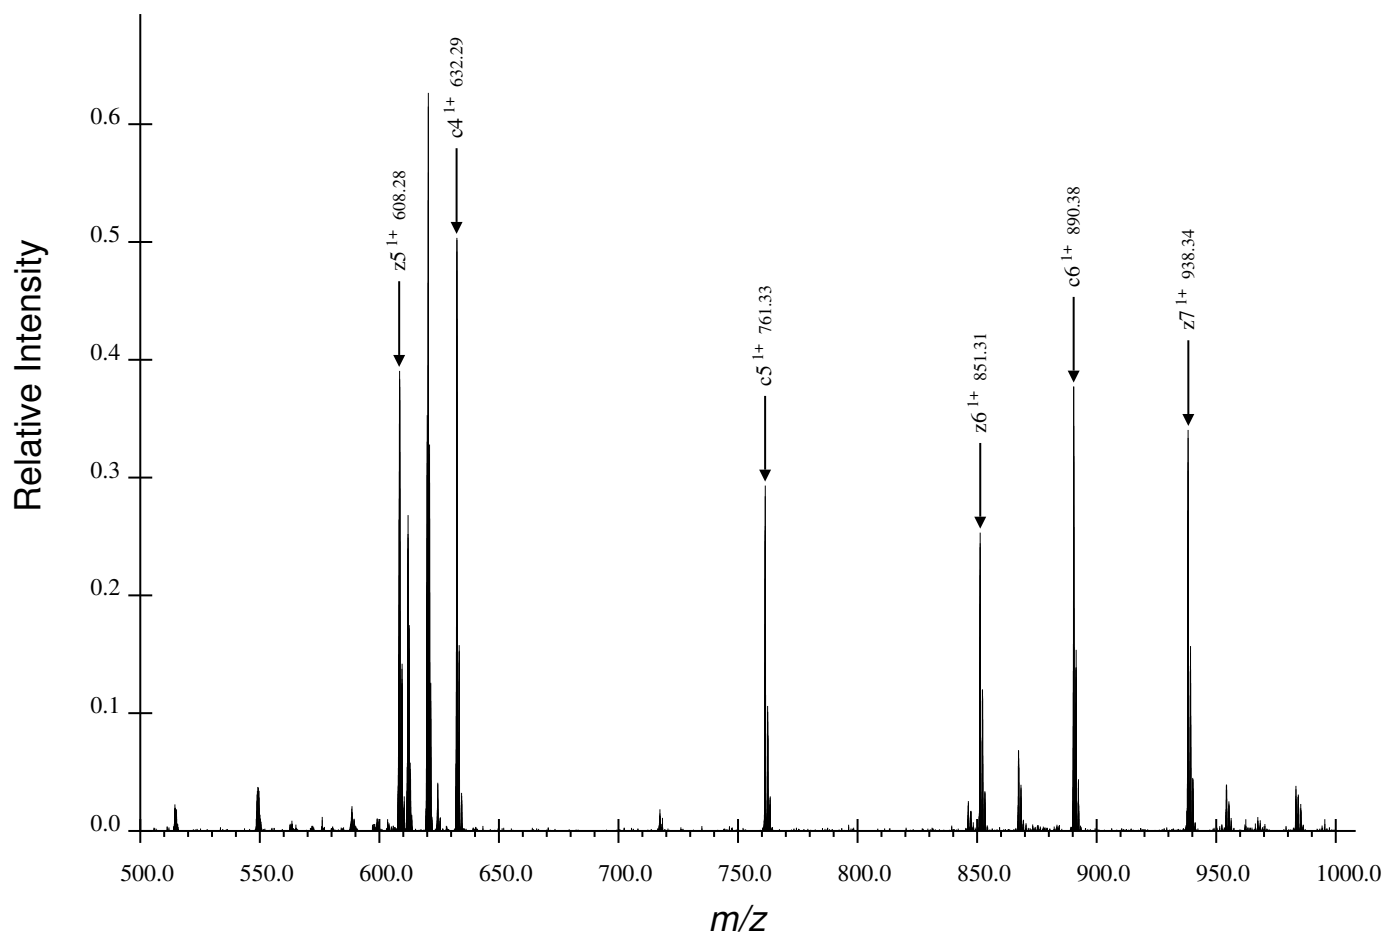

(b) Second Region for KRSpYEEHIP, Spectrum 93.dta

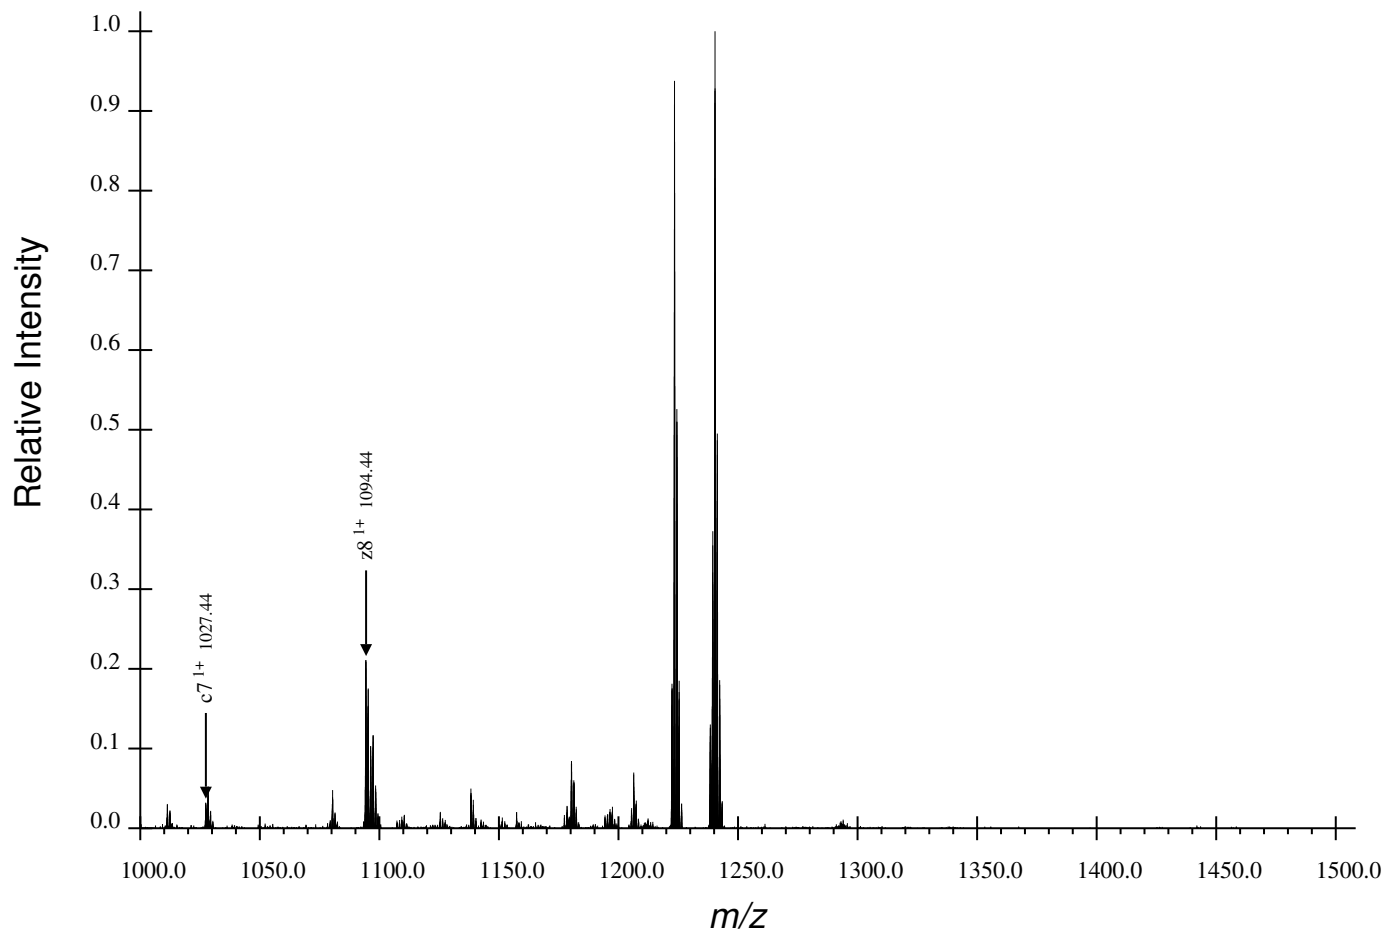

(c) Third Region for KRSpYEEHIP, Spectrum 93.dta

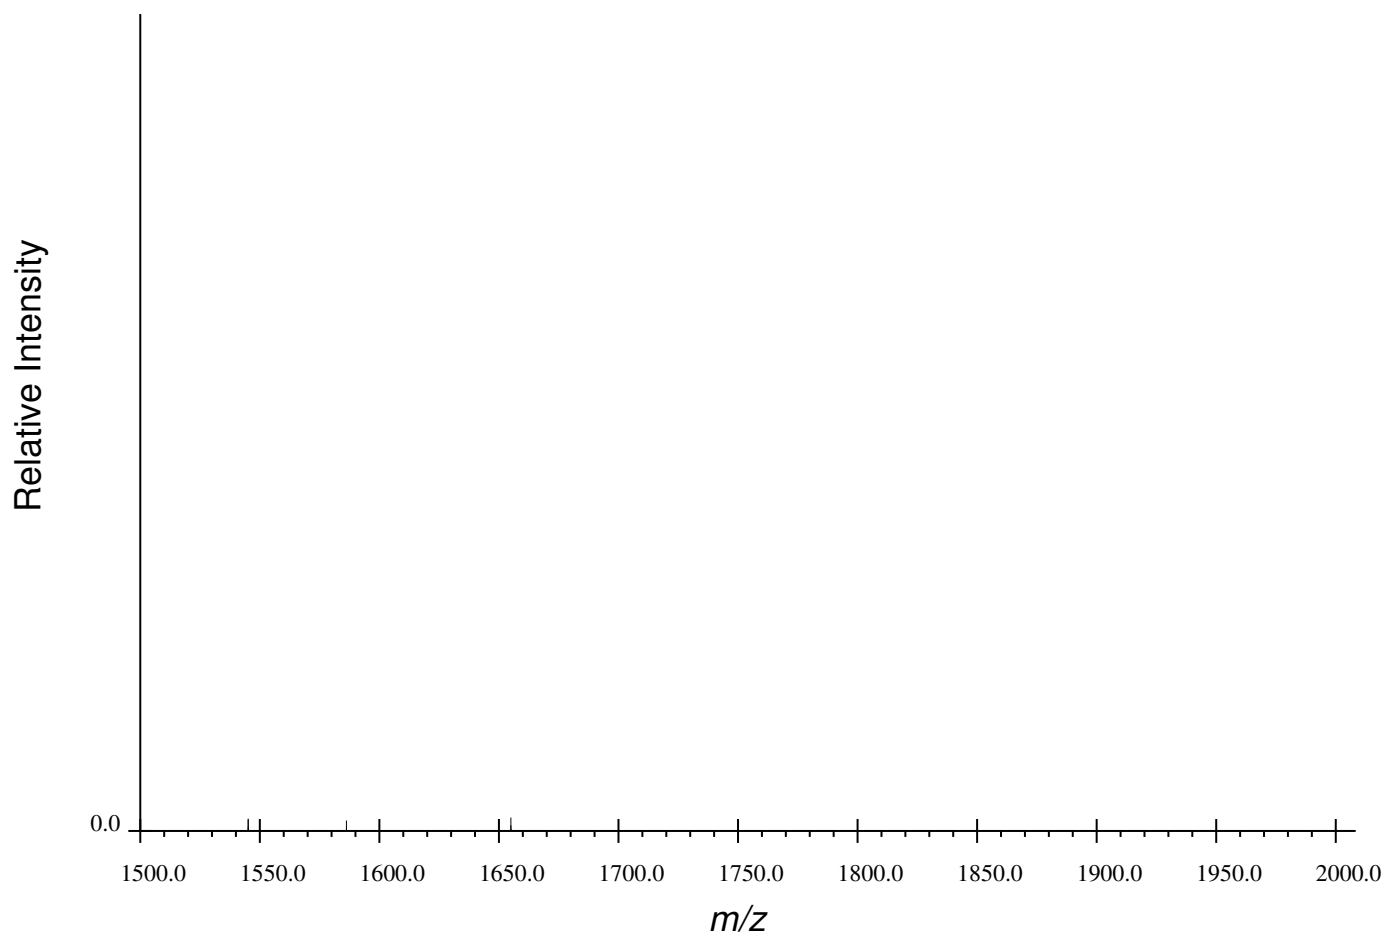

(d) Fourth Region for KRSpYEEHIP, Spectrum 93.dta

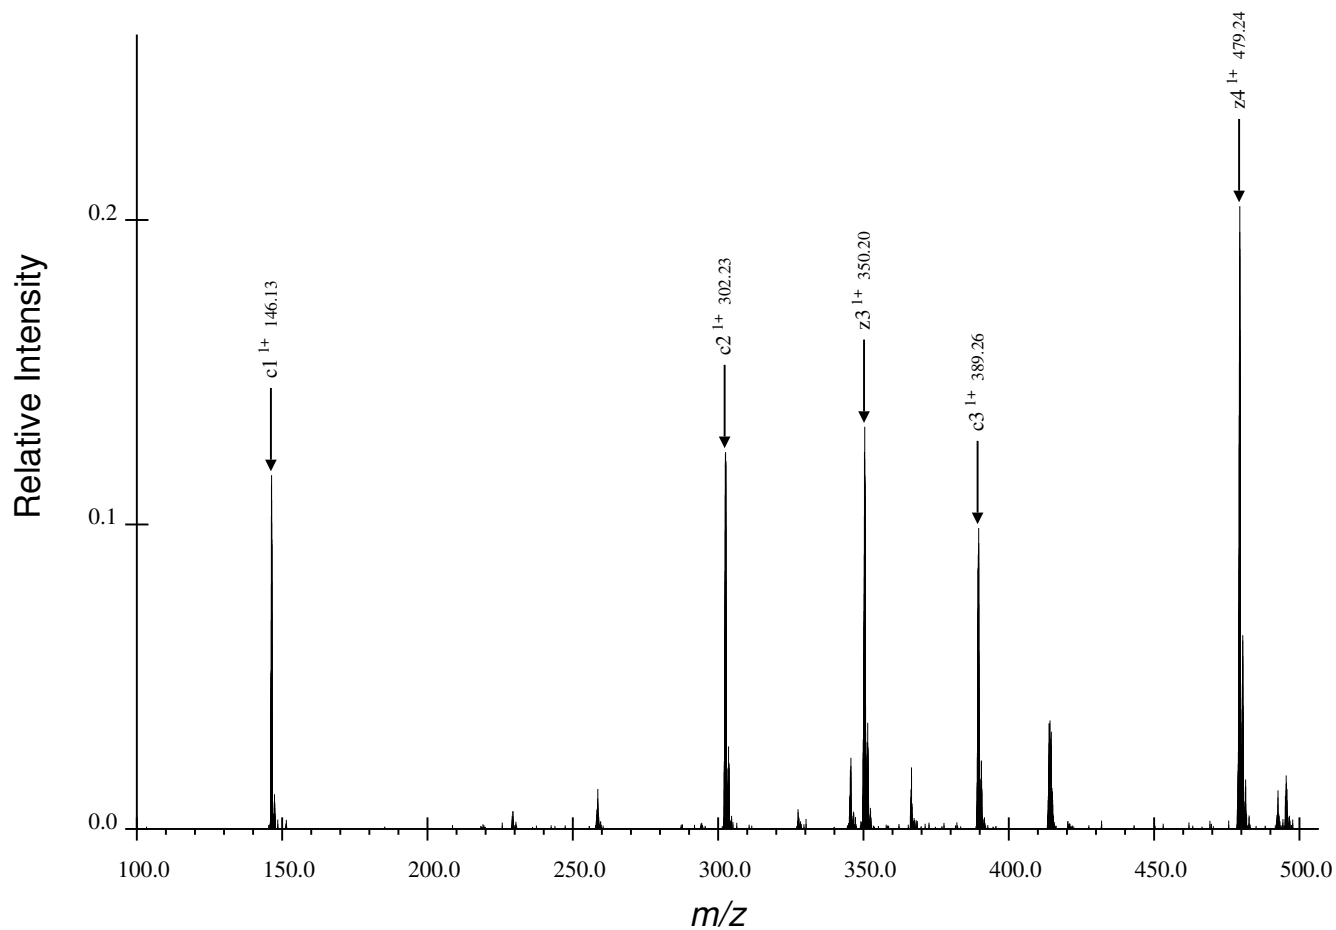

(a) First Region for KRSpYEEHIP, Spectrum 94.dta

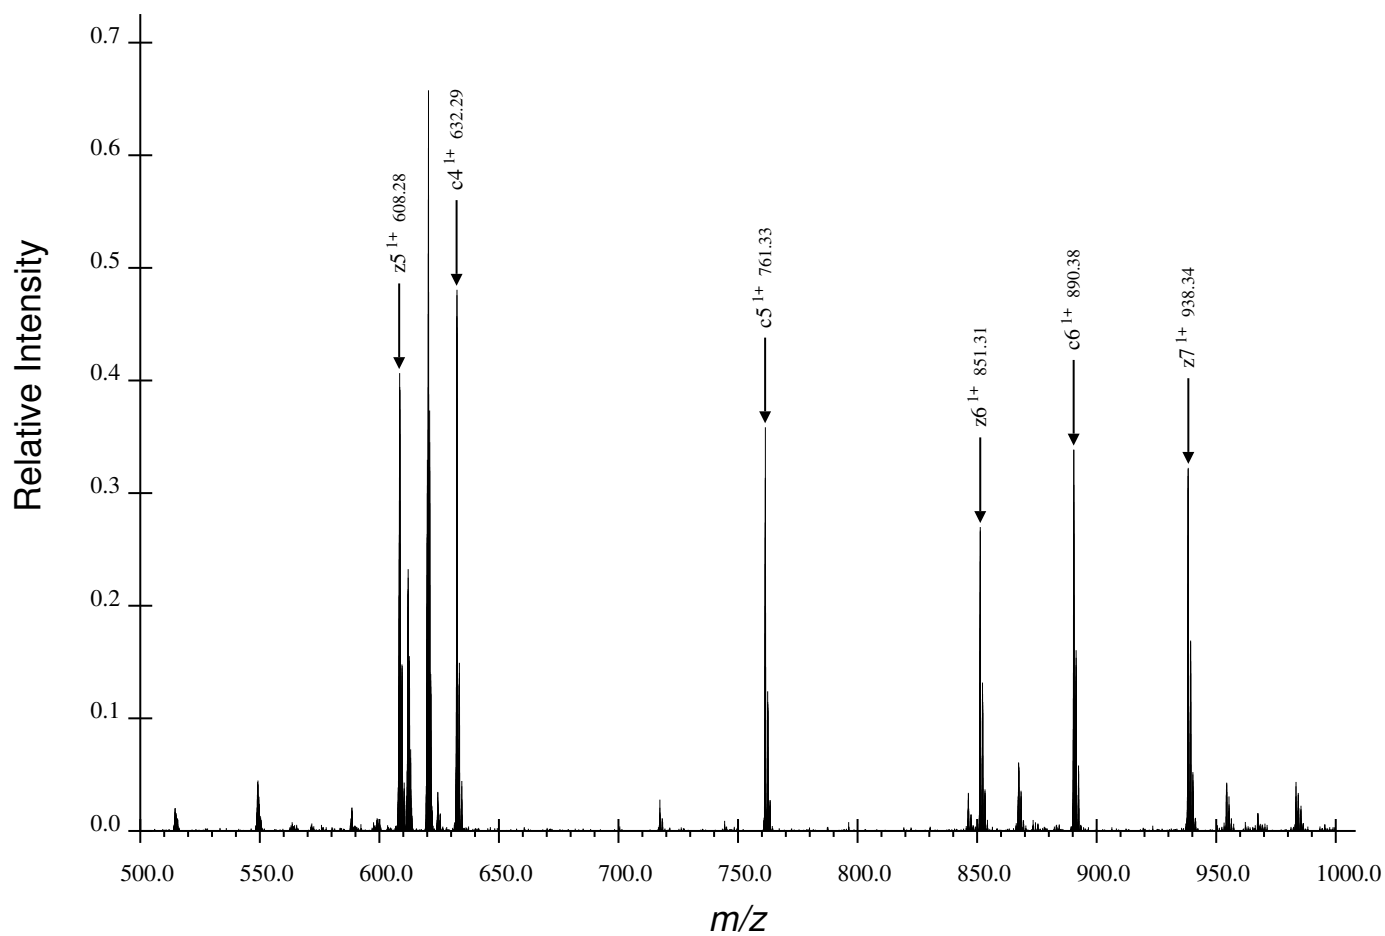

(b) Second Region for KRSpYEEHIP, Spectrum 94.dta

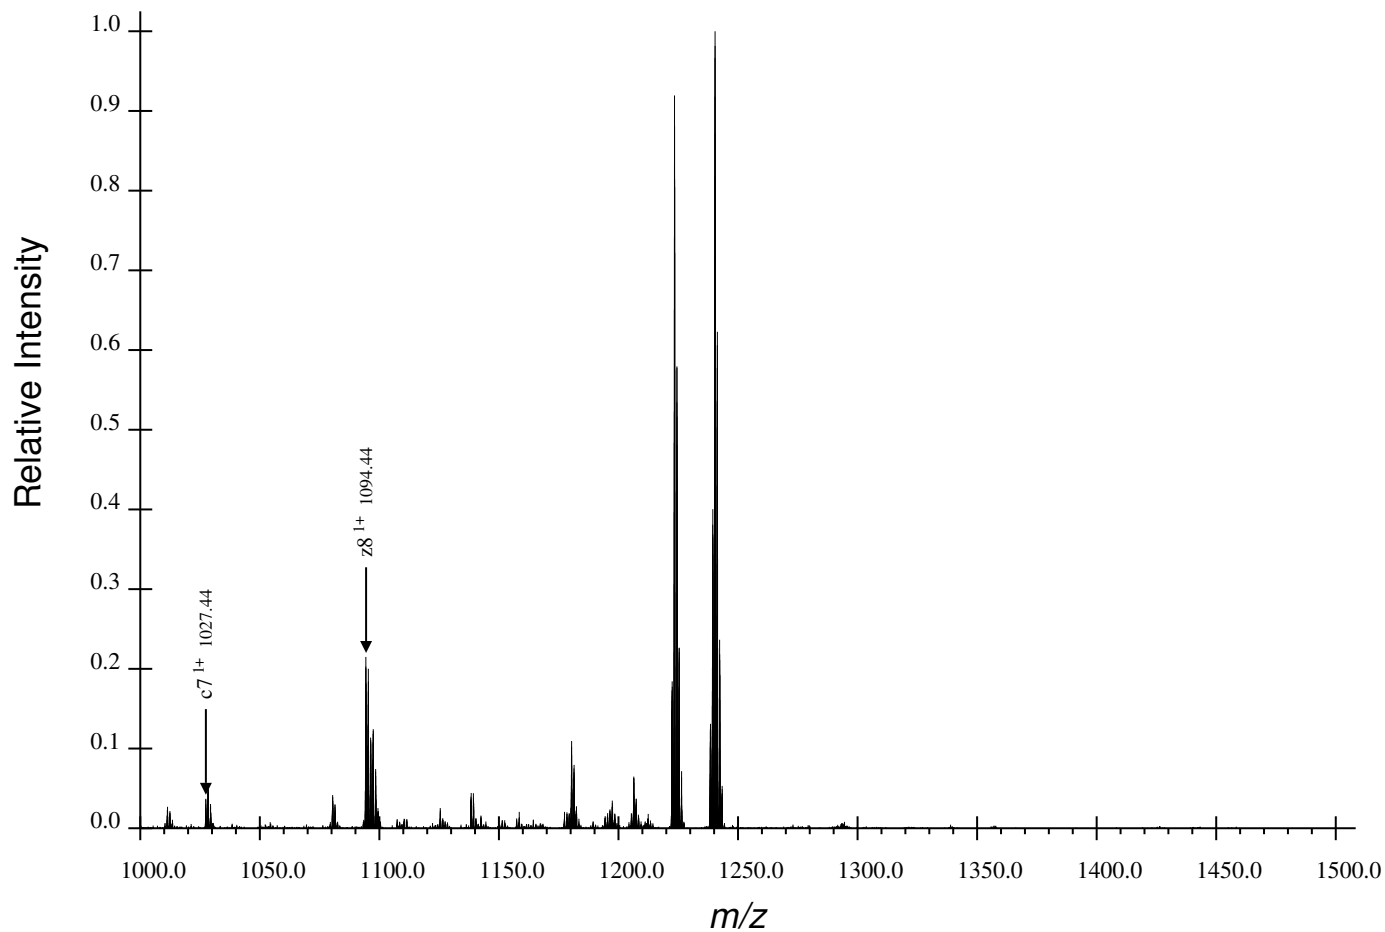

(c) Third Region for KRSpYEEHIP, Spectrum 94.dta

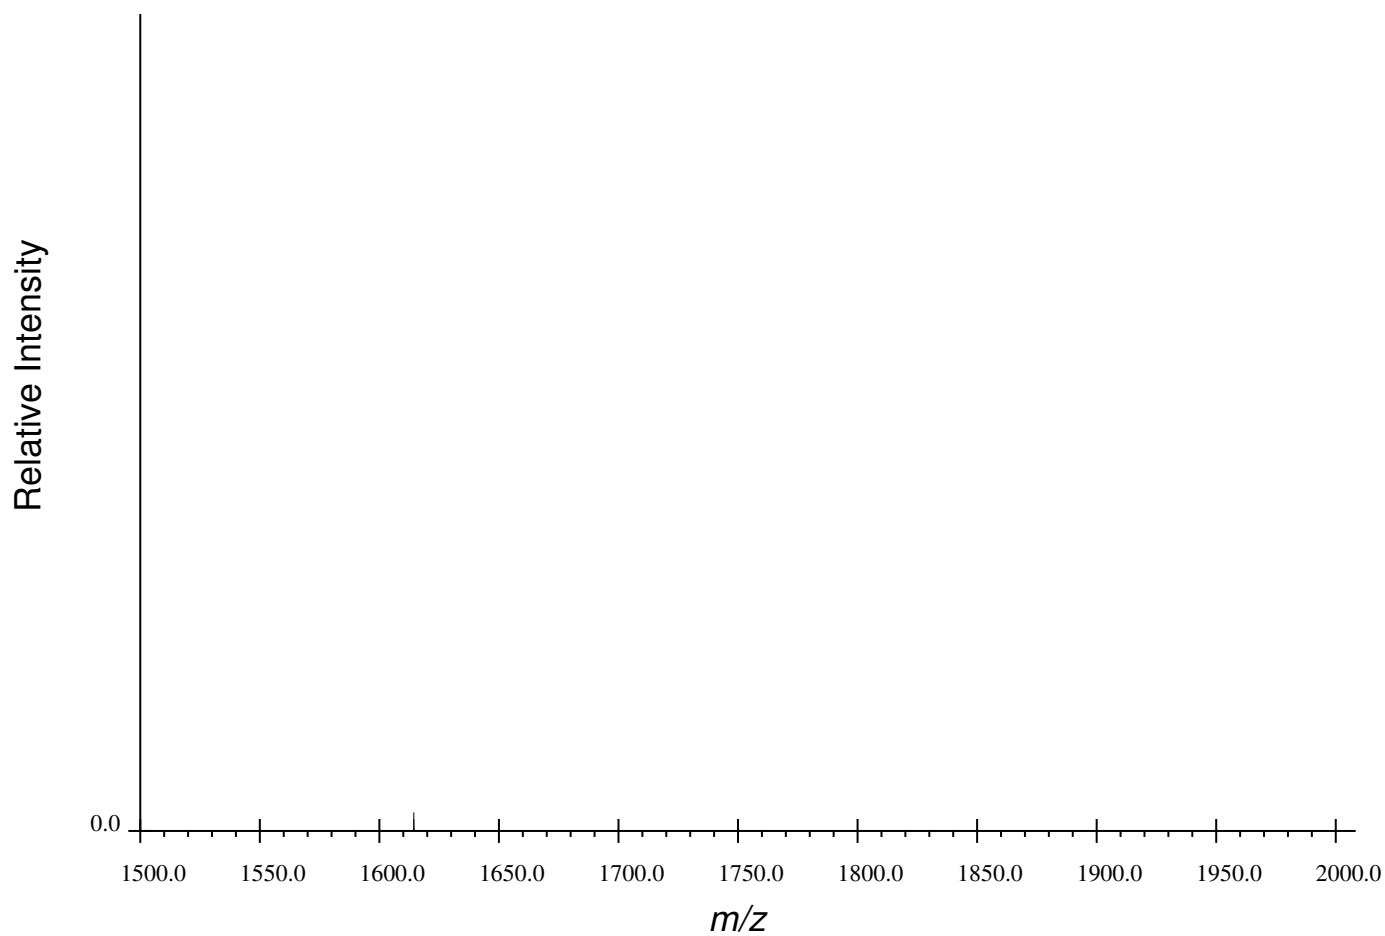

(d) Fourth Region for KRSpYEEHIP, Spectrum 94.dta

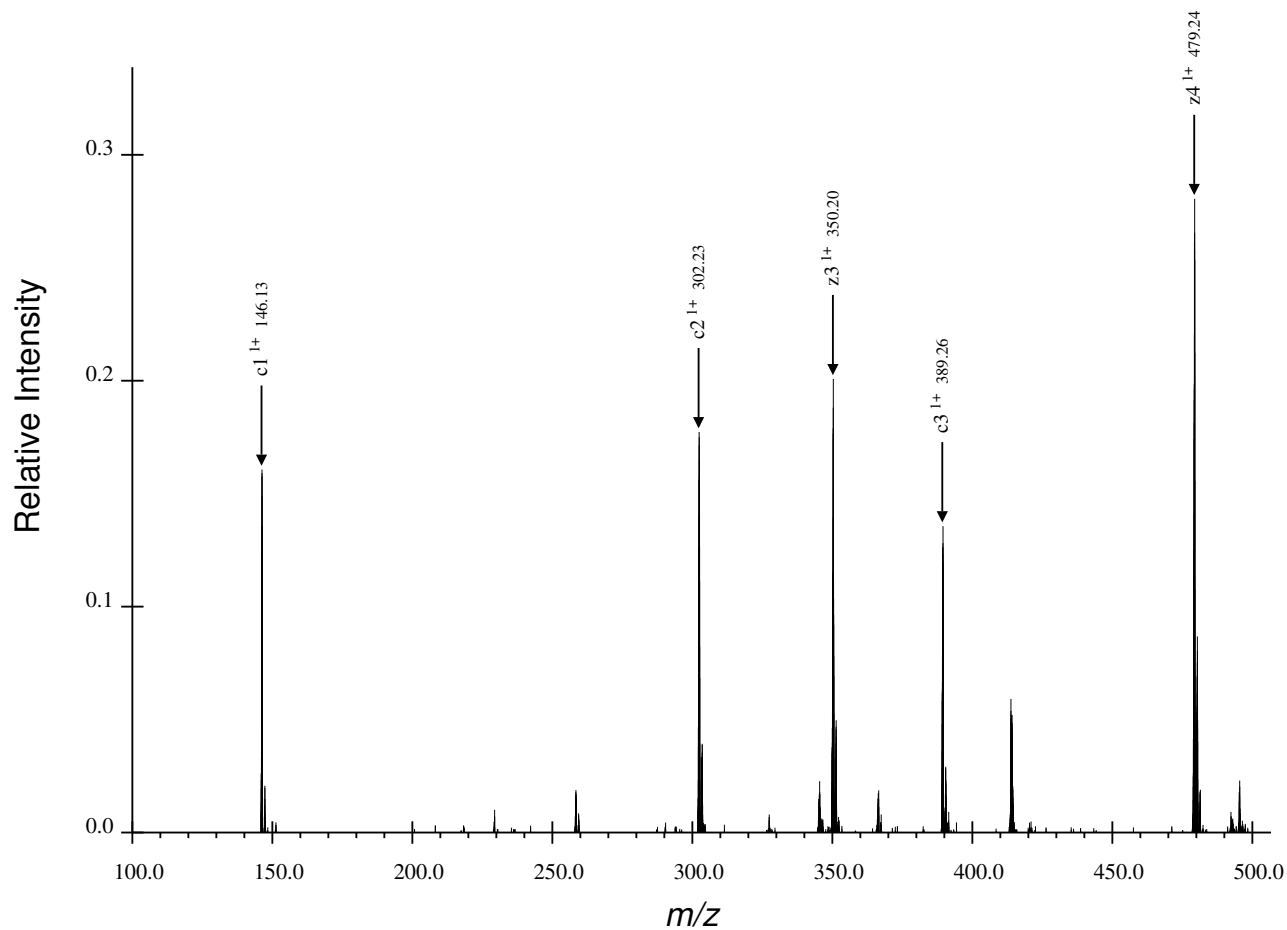

(a) First Region for KRSpYEEHIP, Spectrum 95.dta

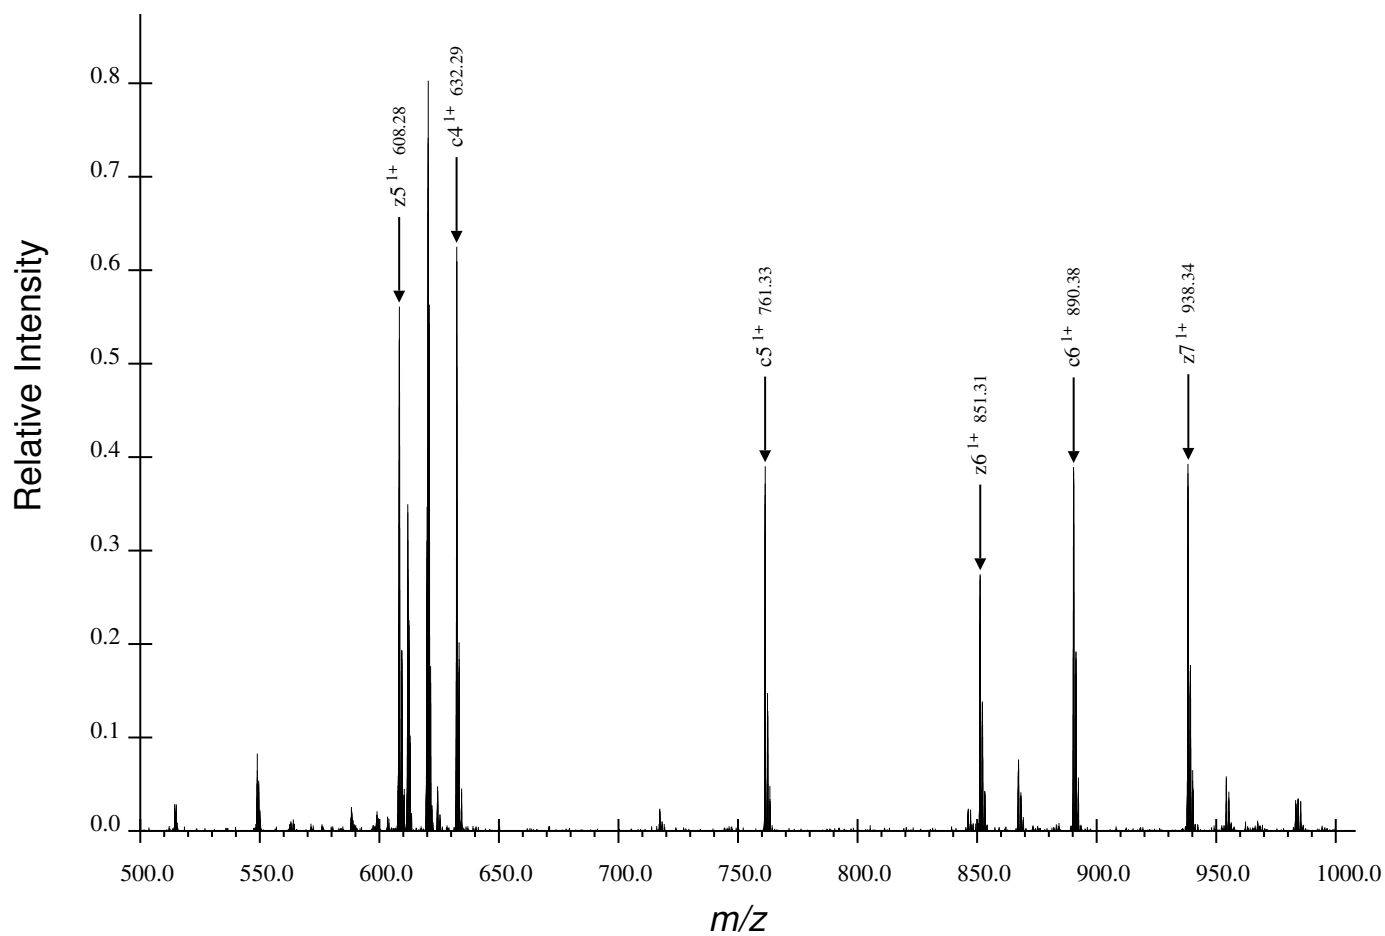

(b) Second Region for KRSpYEEHIP, Spectrum 95.dta

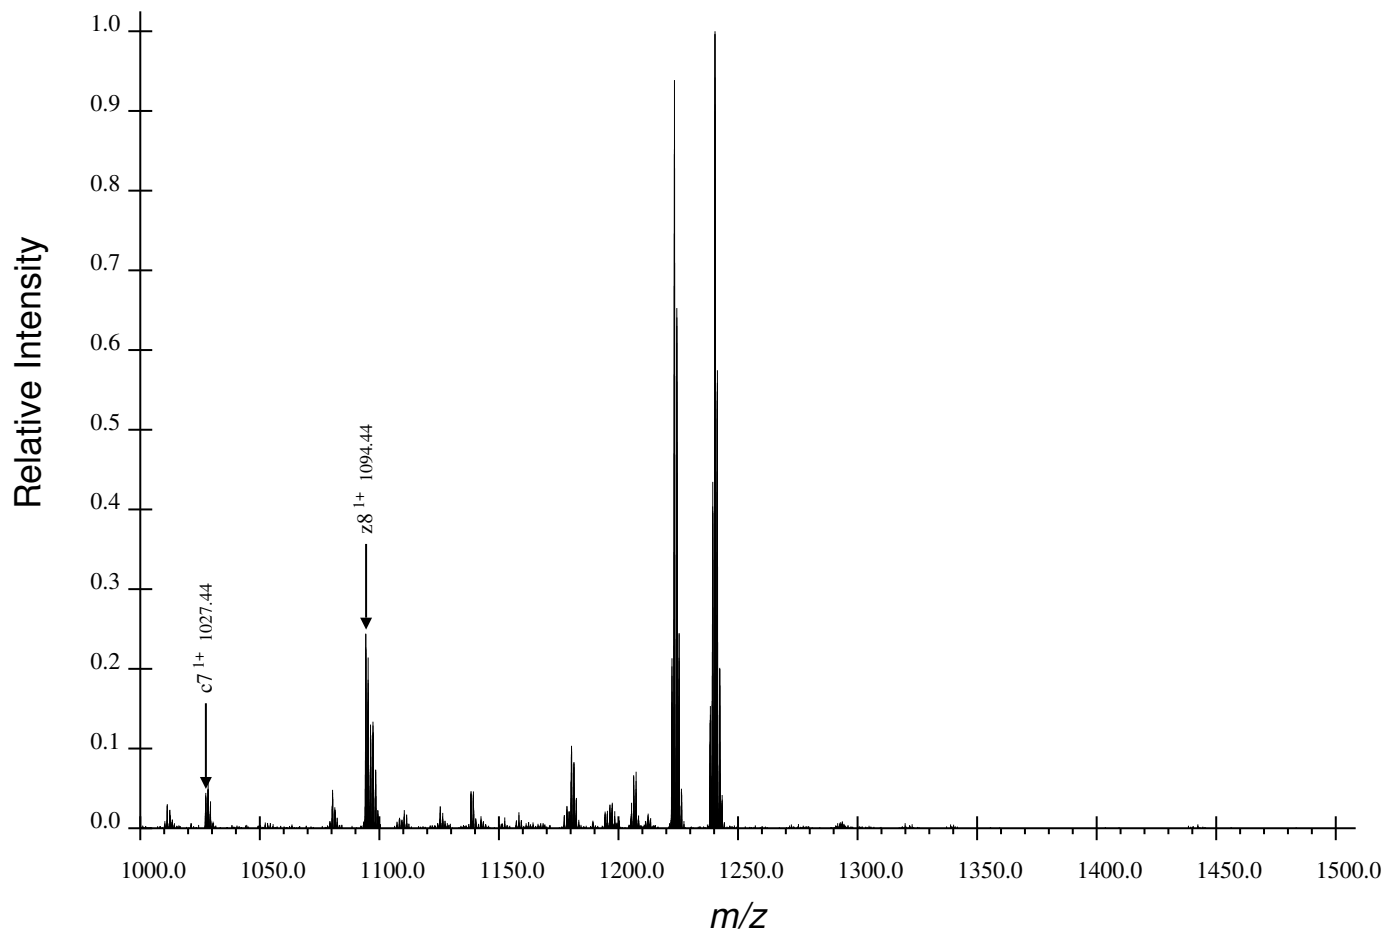

(c) Third Region for KRSpYEEHIP, Spectrum 95.dta

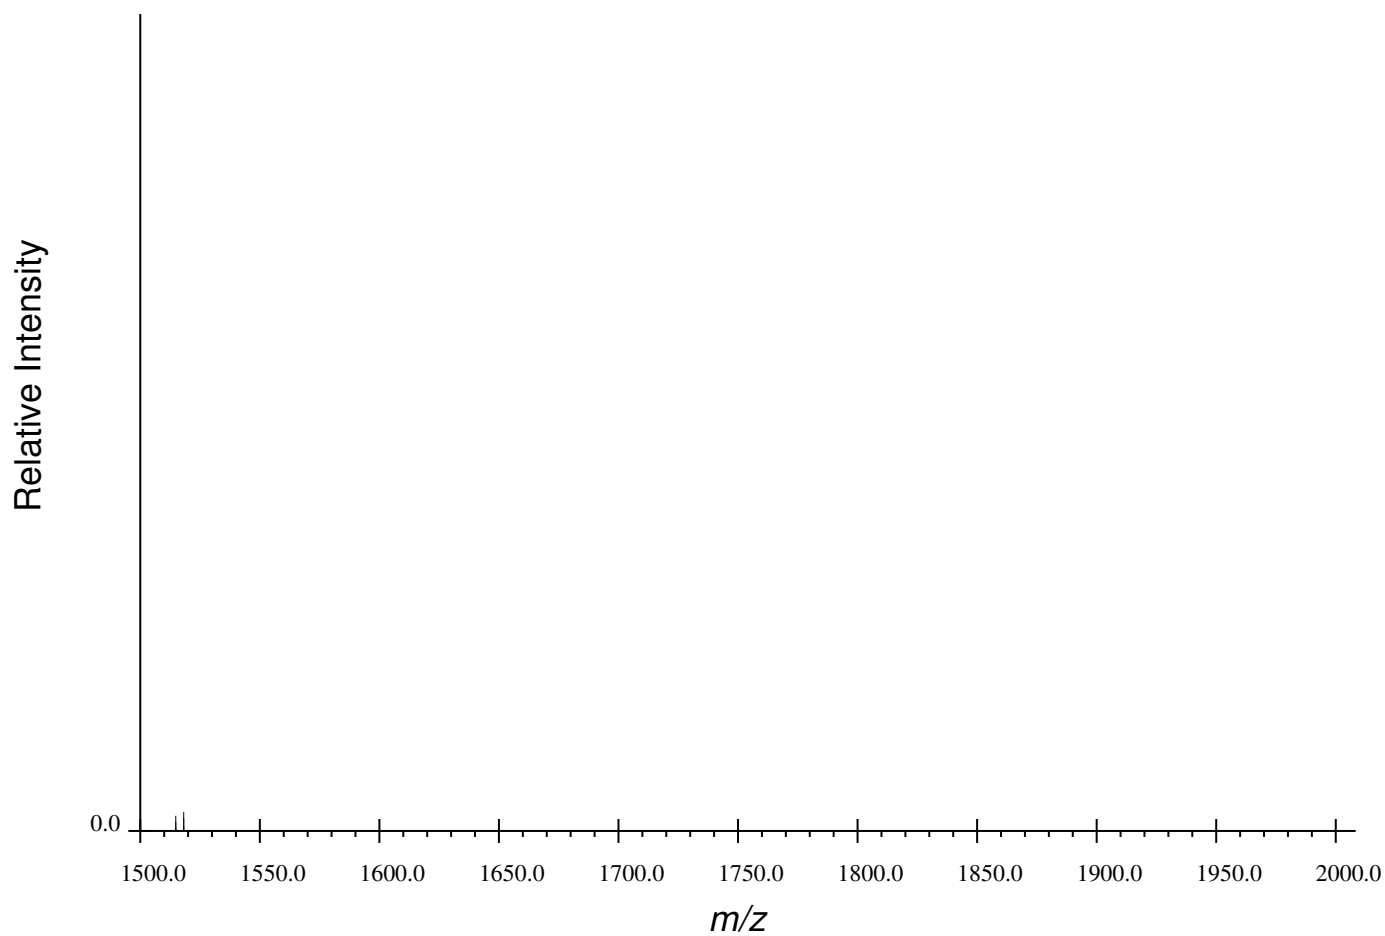

(d) Fourth Region for KRSpYEEHIP, Spectrum 95.dta

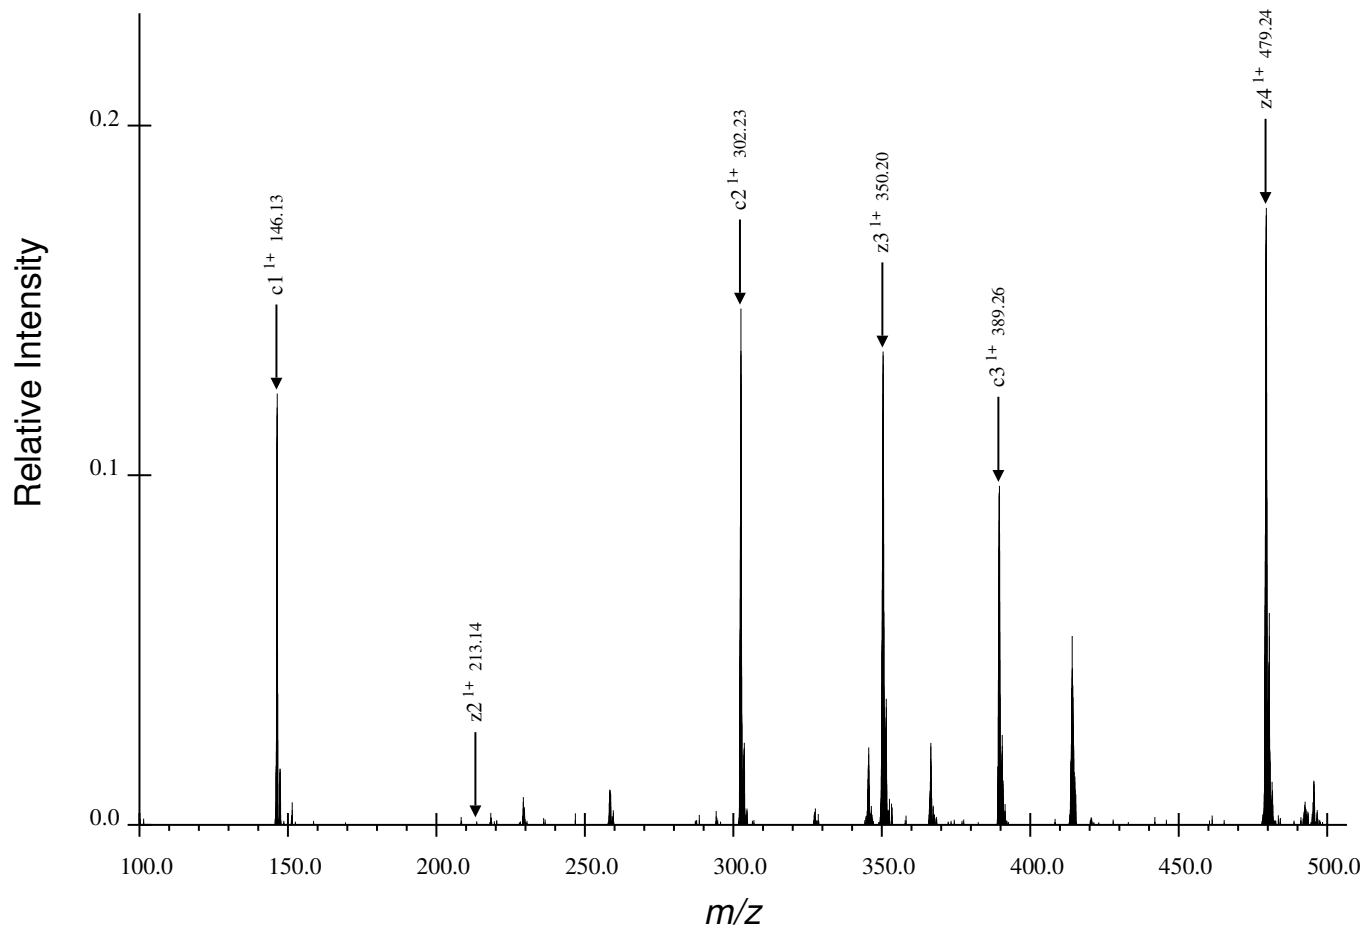

(a) First Region for KRSpYEEHIP, Spectrum 96.dta

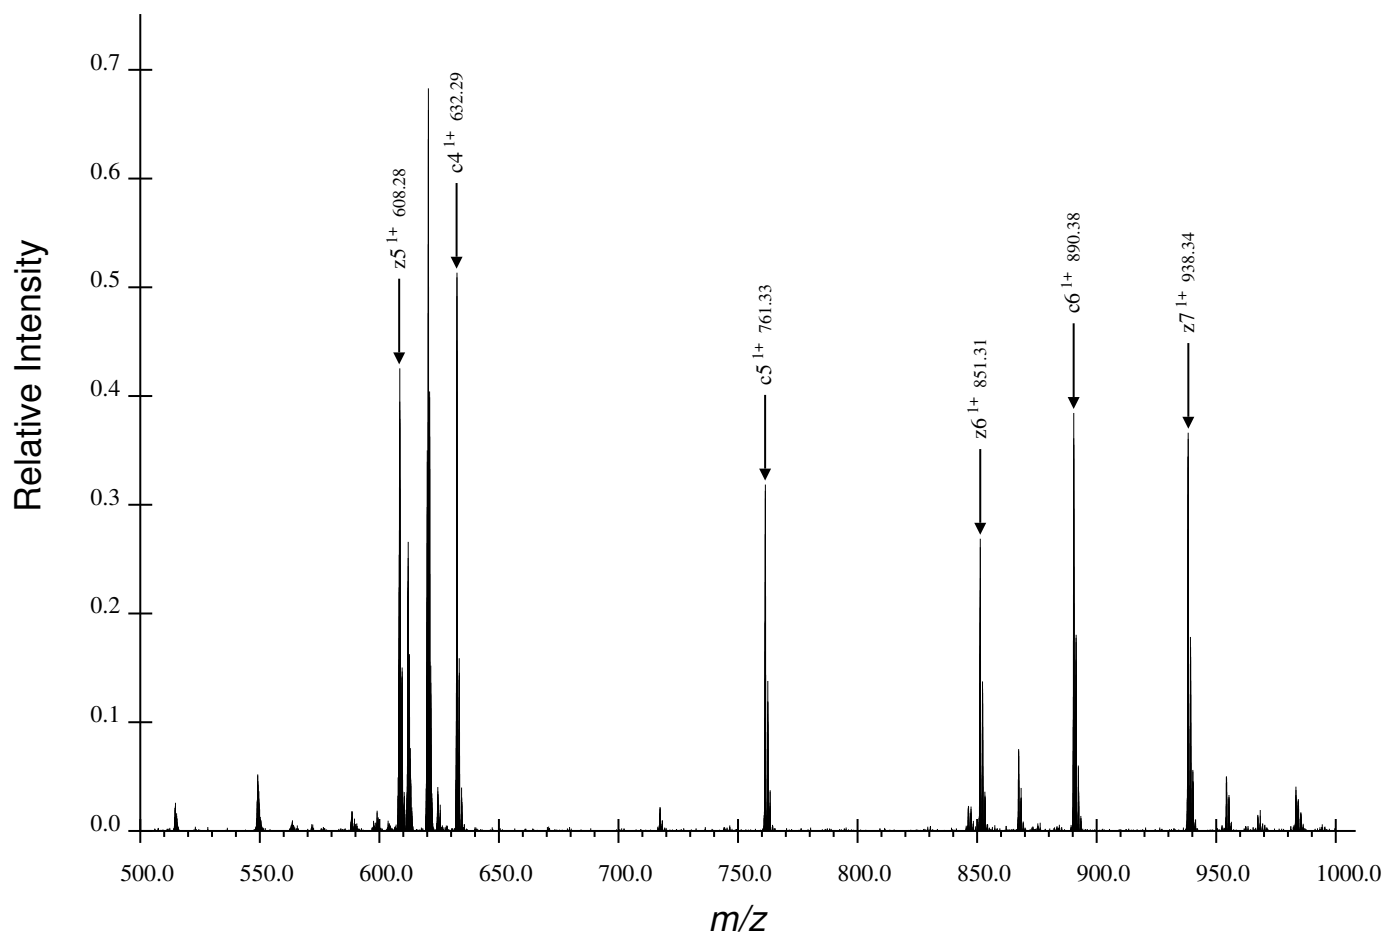

(b) Second Region for KRSpYEEHIP, Spectrum 96.dta

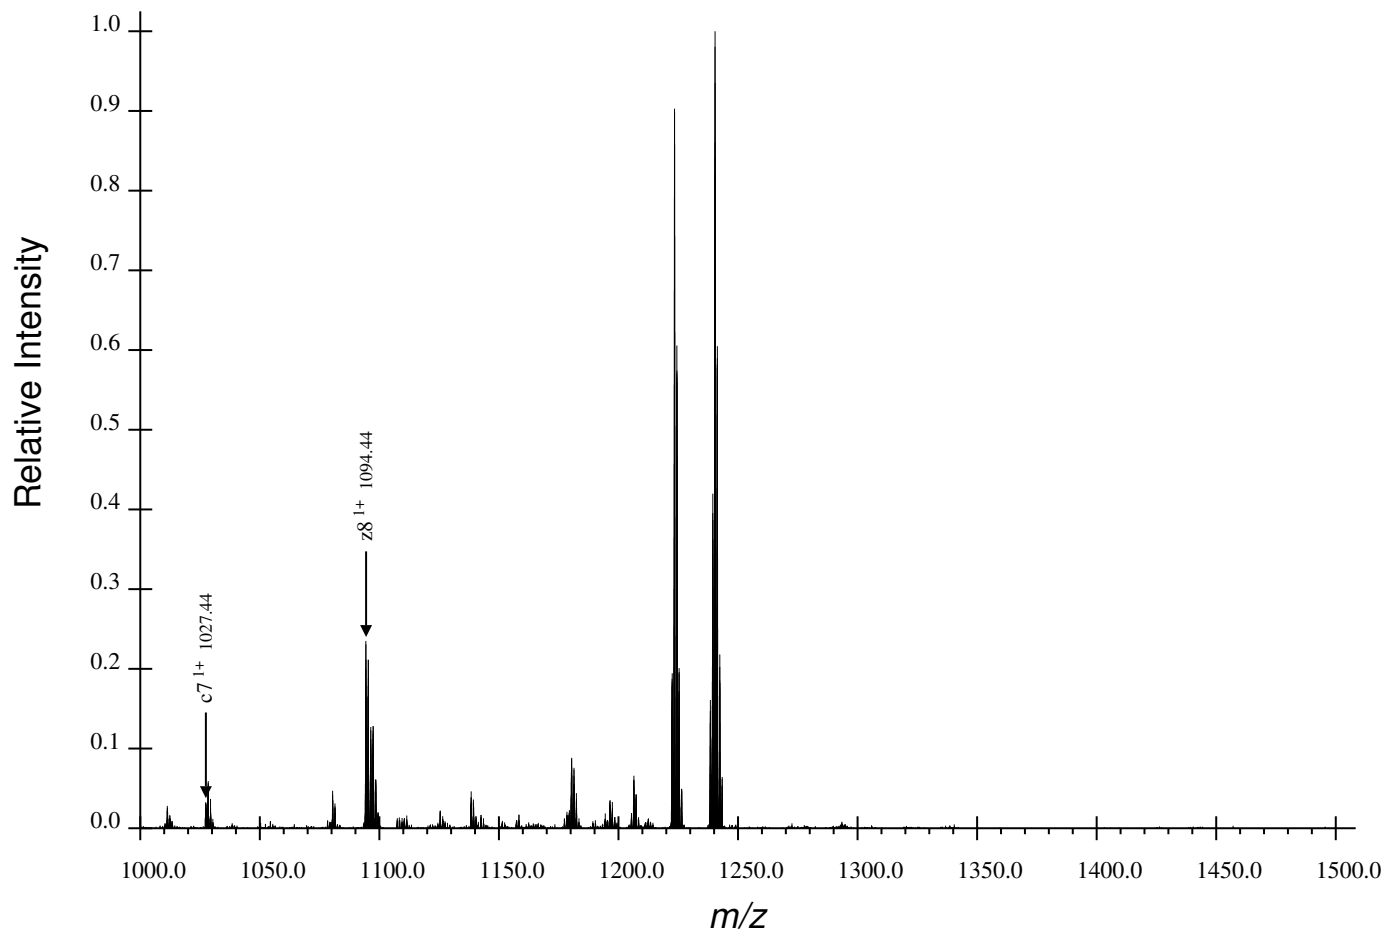

(c) Third Region for KRSpYEEHIP, Spectrum 96.dta

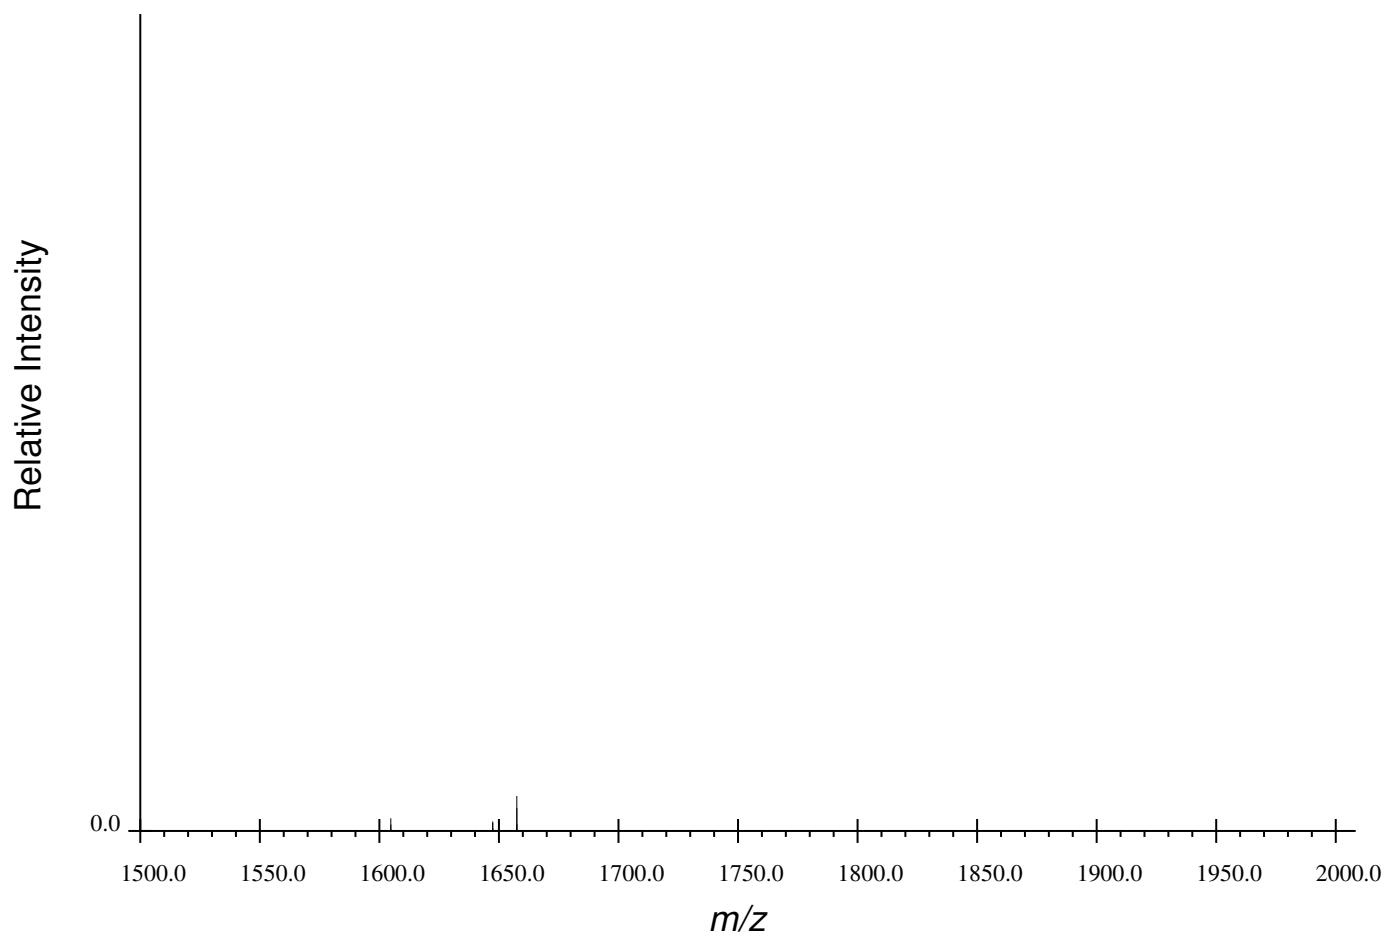

(d) Fourth Region for KRSpYEEHIP, Spectrum 96.dta



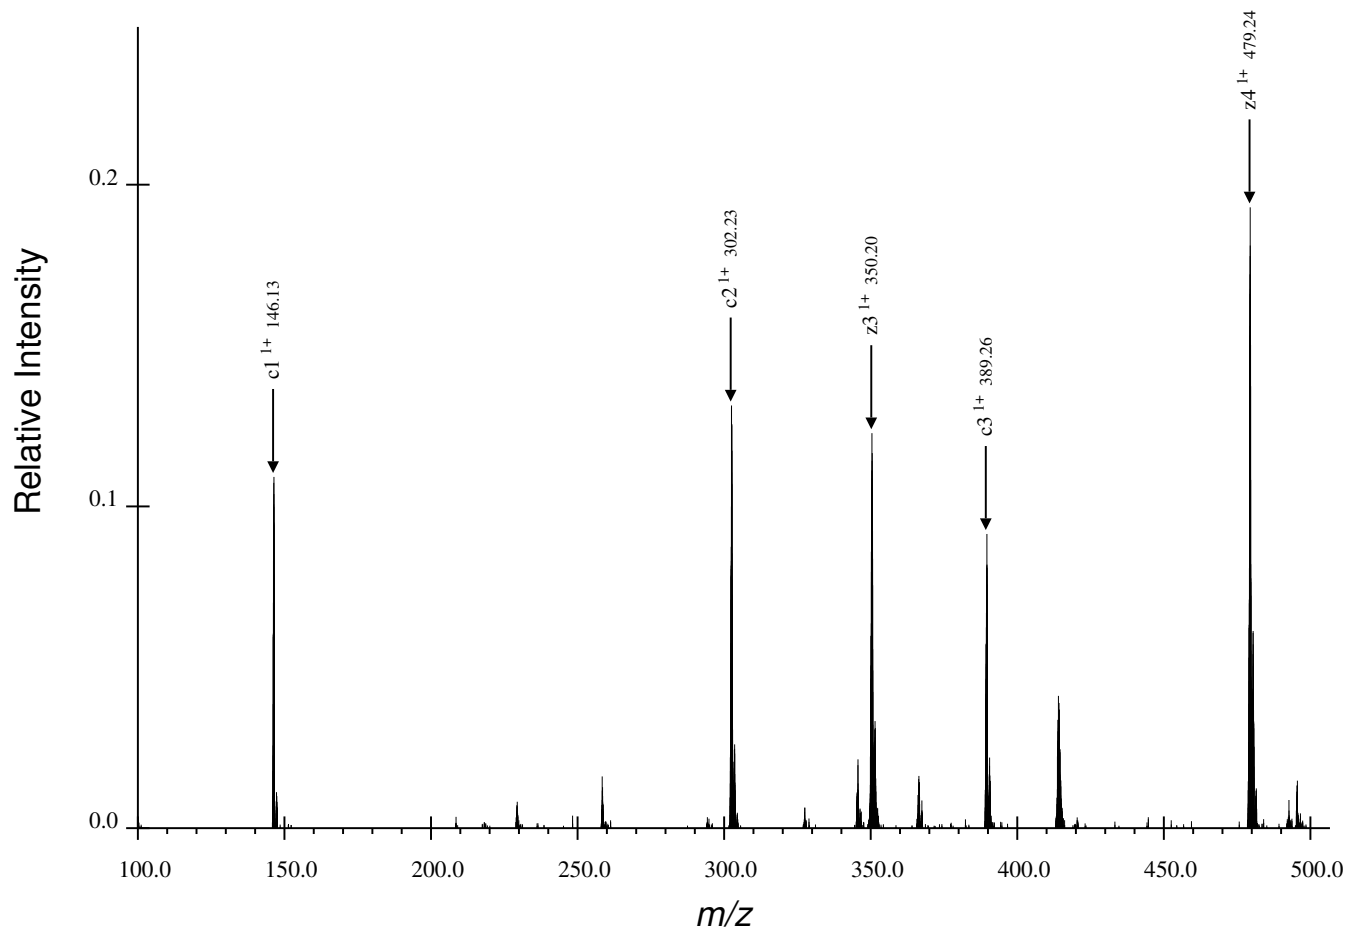

(a) First Region for KRSpYEEHIP, Spectrum 97.dta

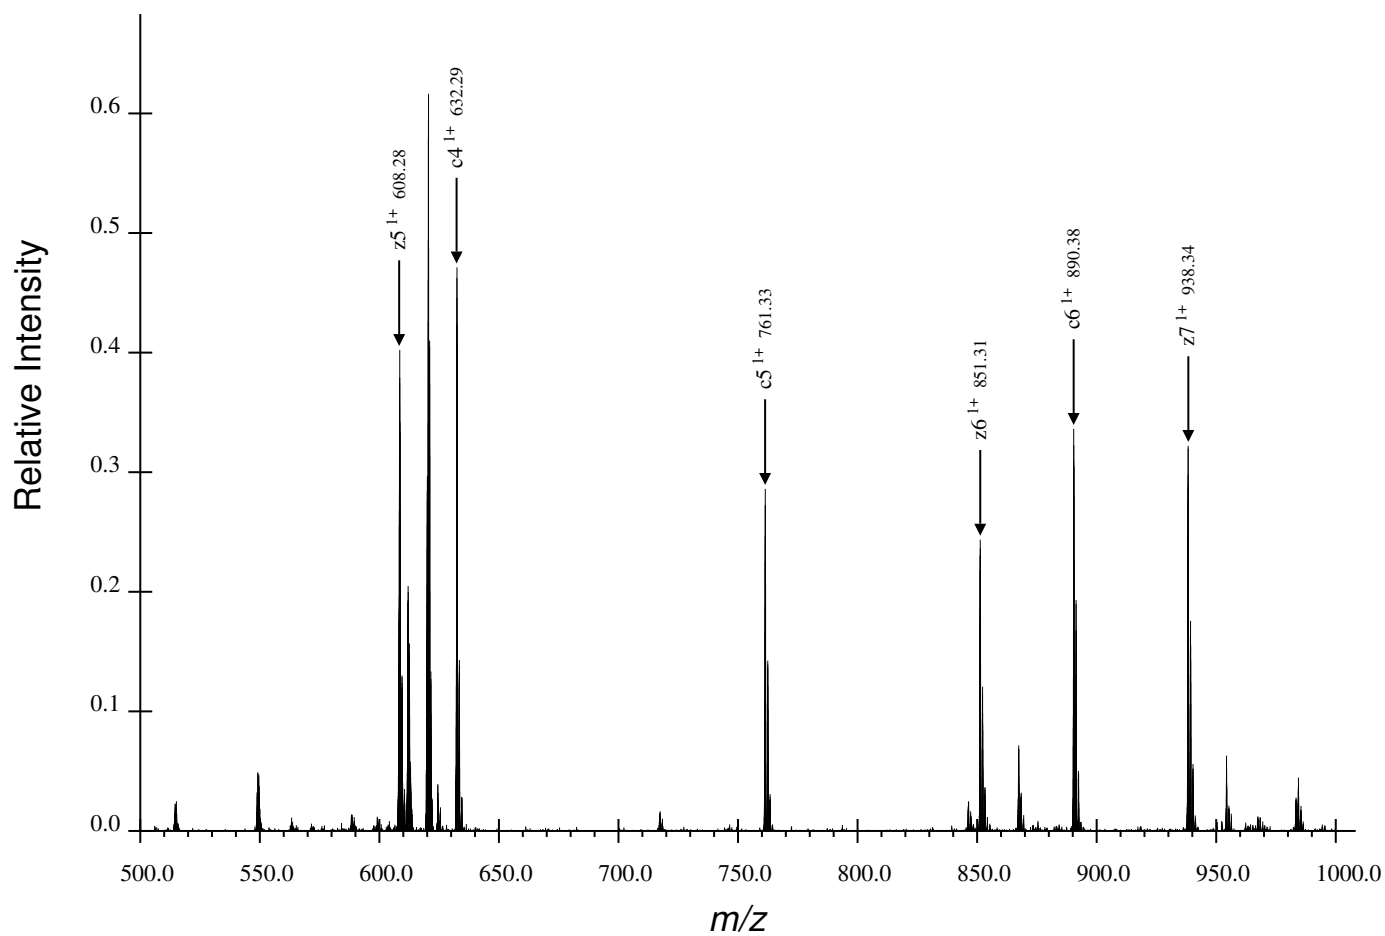

(b) Second Region for KRSpYEEHIP, Spectrum 97.dta

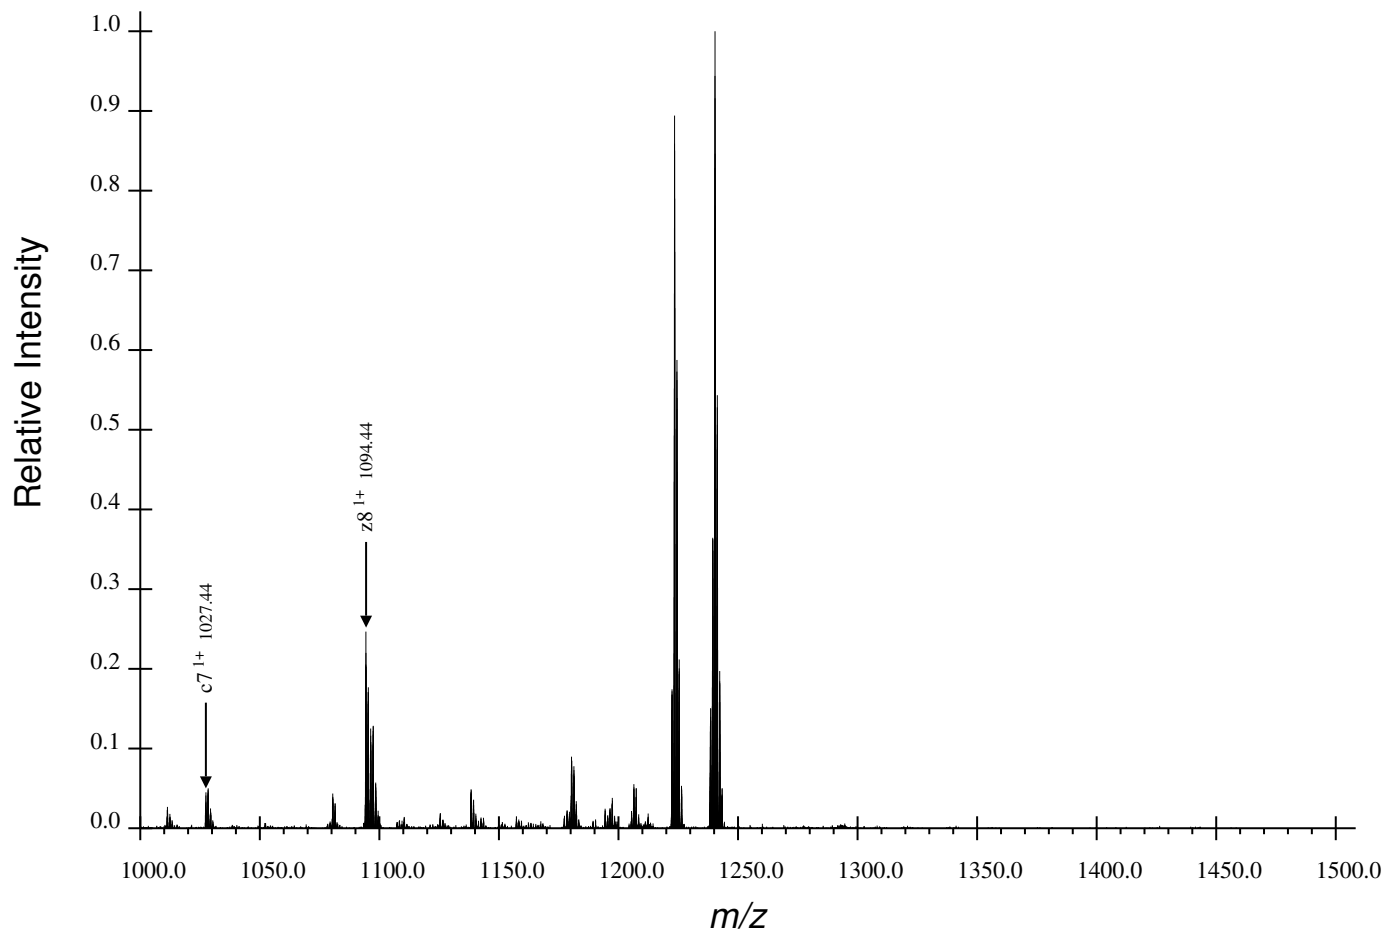

(c) Third Region for KRSpYEEHIP, Spectrum 97.dta

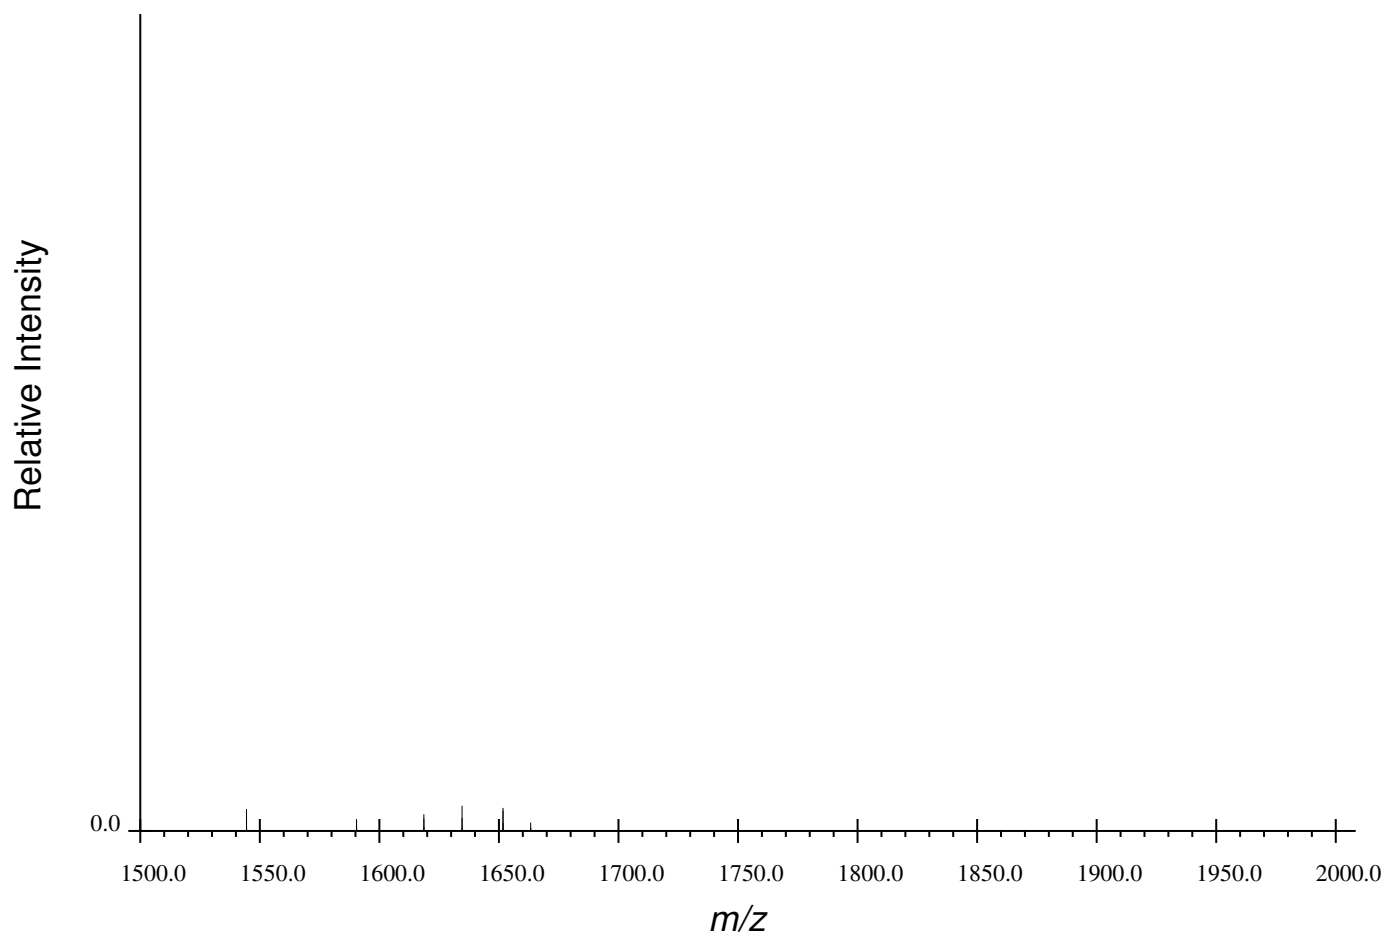

(d) Fourth Region for KRSpYEEHIP, Spectrum 97.dta

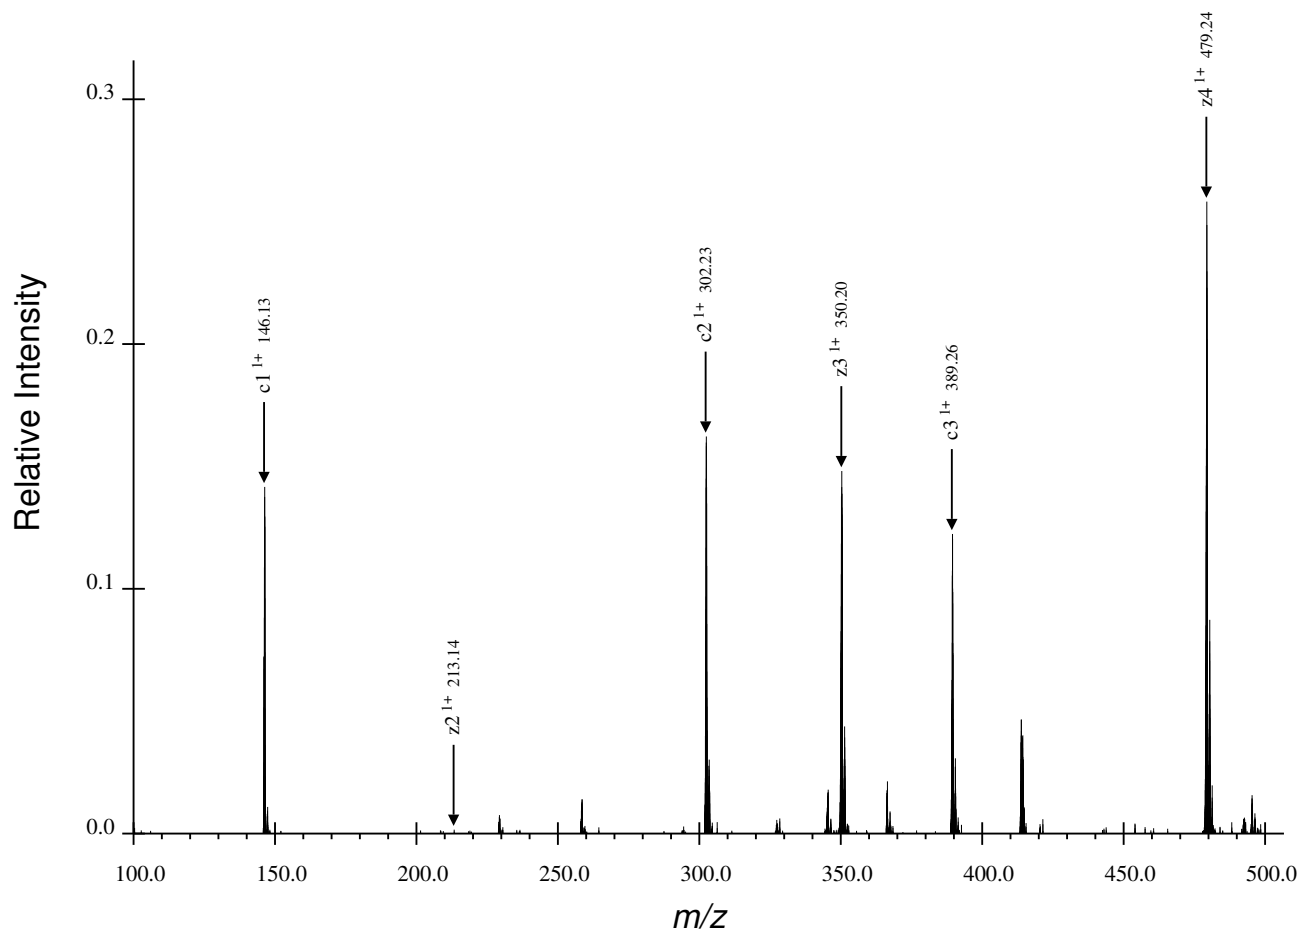

(a) First Region for KRSpYEEHIP, Spectrum 98.dta

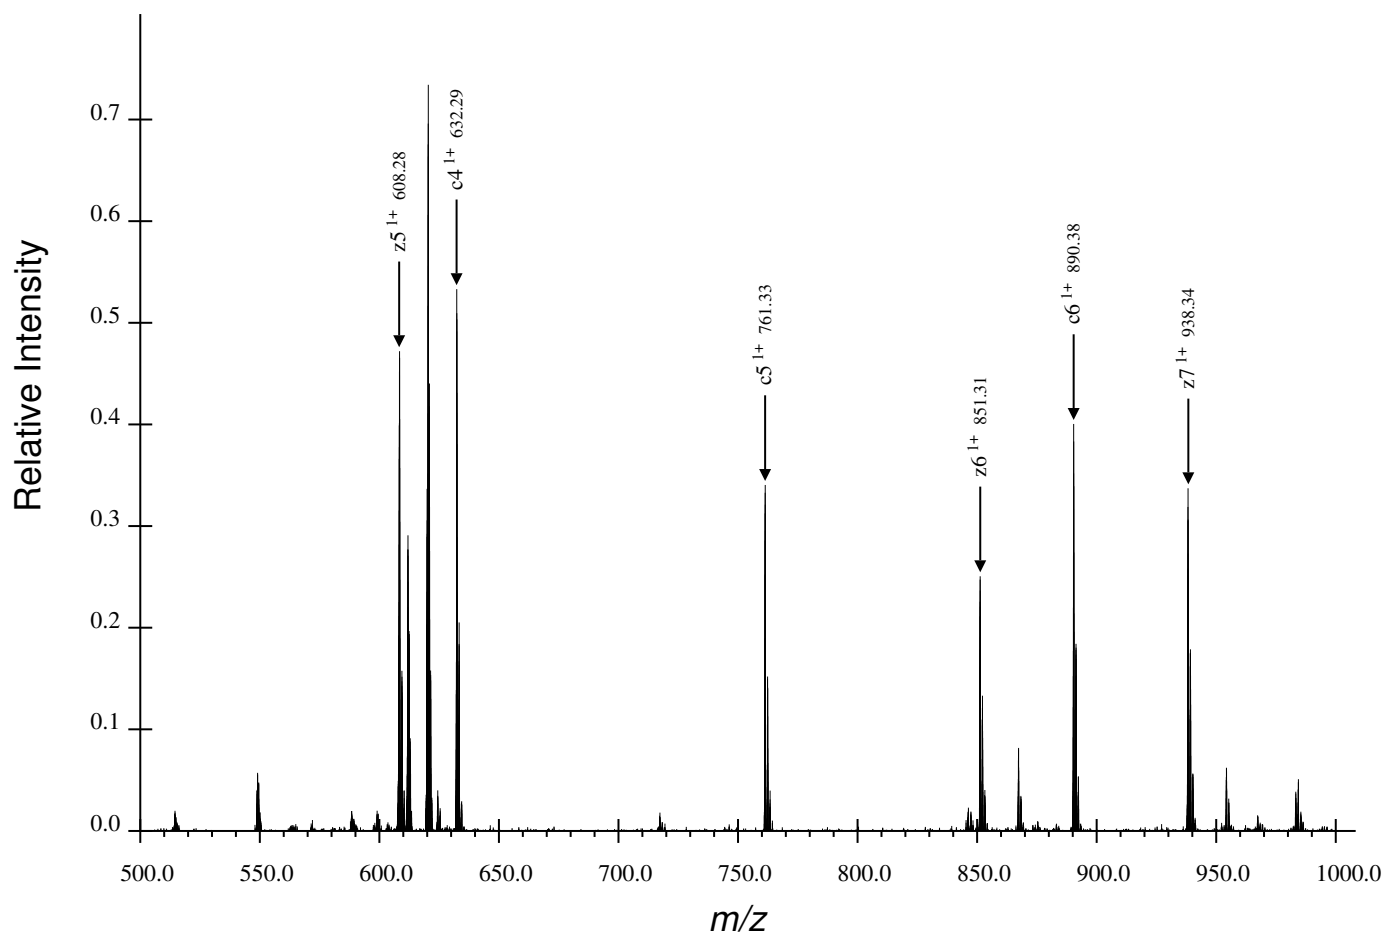

(b) Second Region for KRSpYEEHIP, Spectrum 98.dta

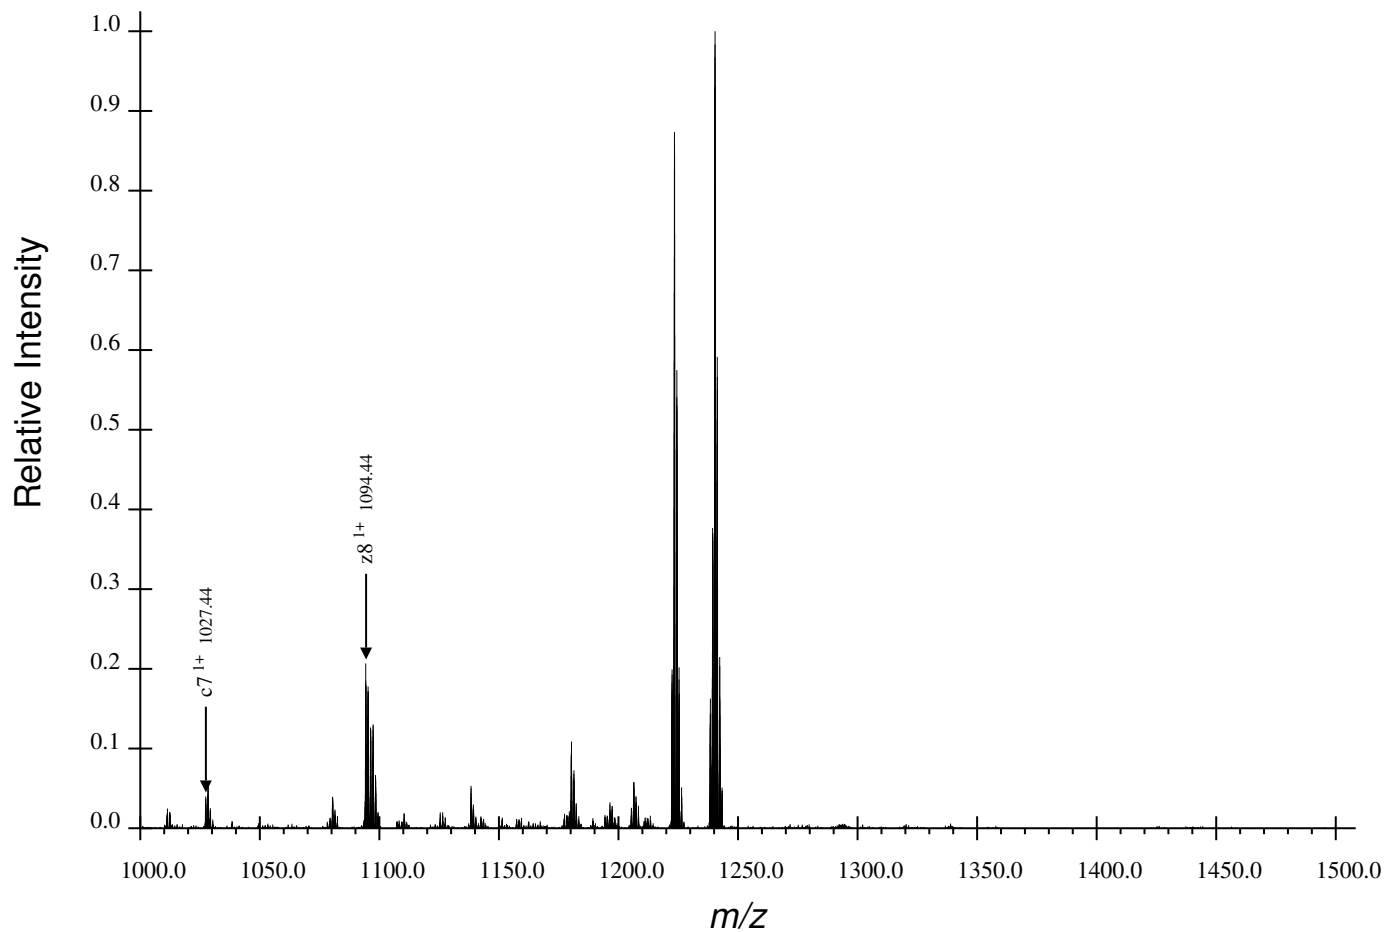

(c) Third Region for KRSpYEEHIP, Spectrum 98.dta

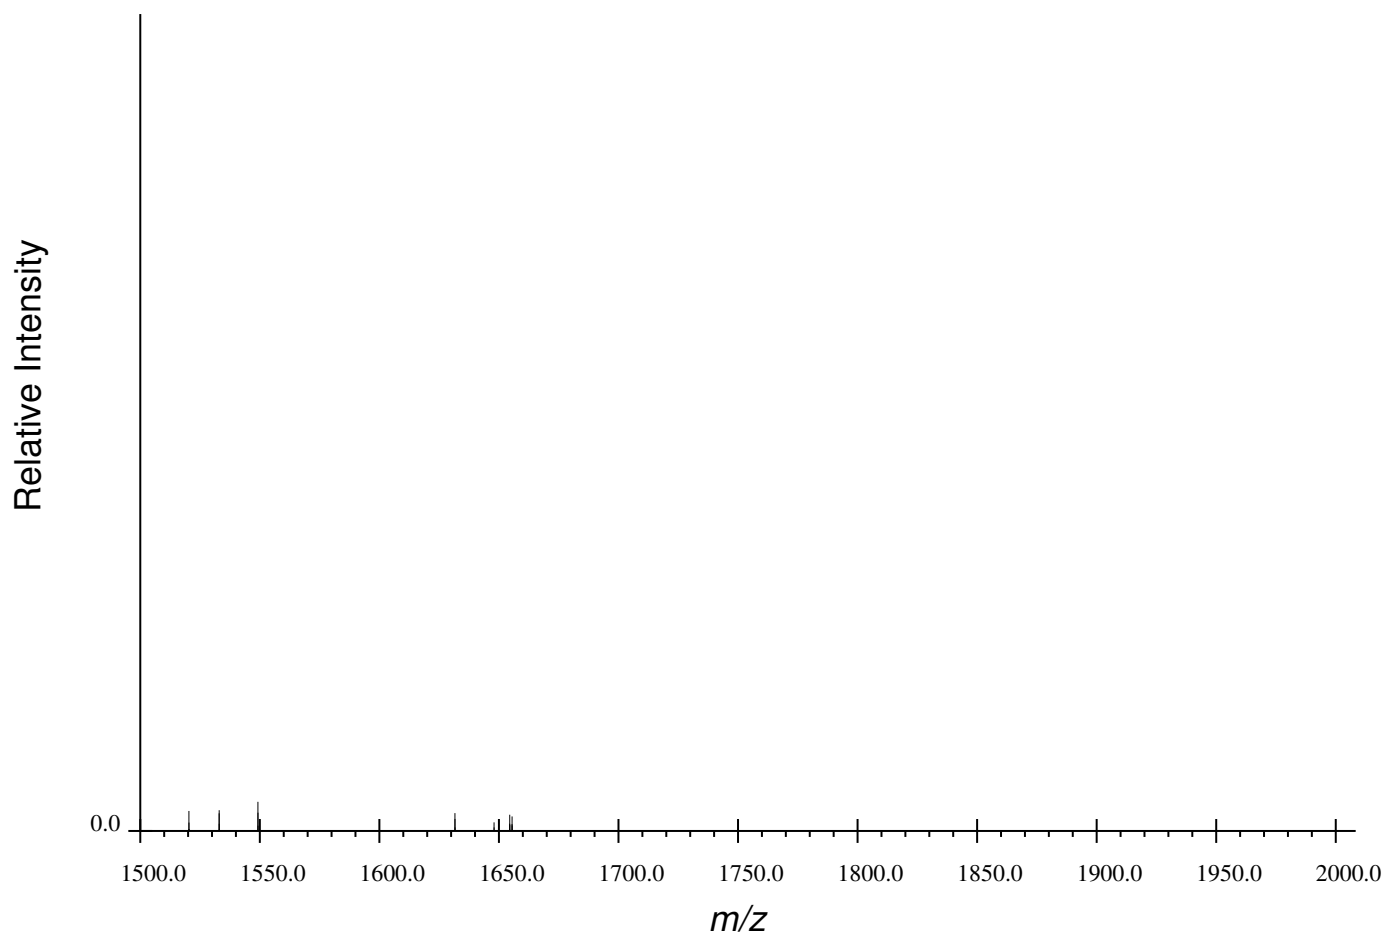

(d) Fourth Region for KRSpYEEHIP, Spectrum 98.dta

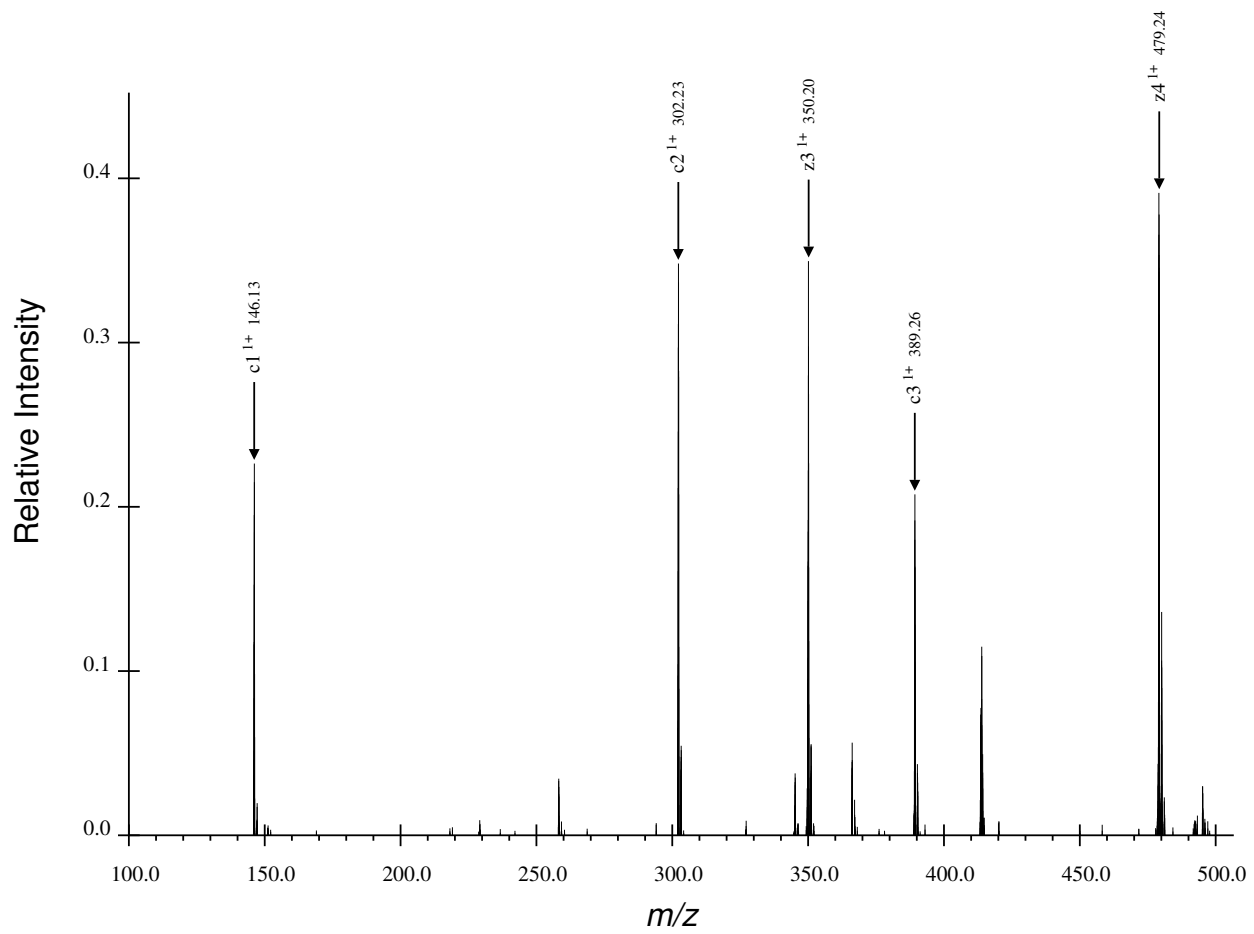

(a) First Region for KRSpYEEHIP, Spectrum 99.dta

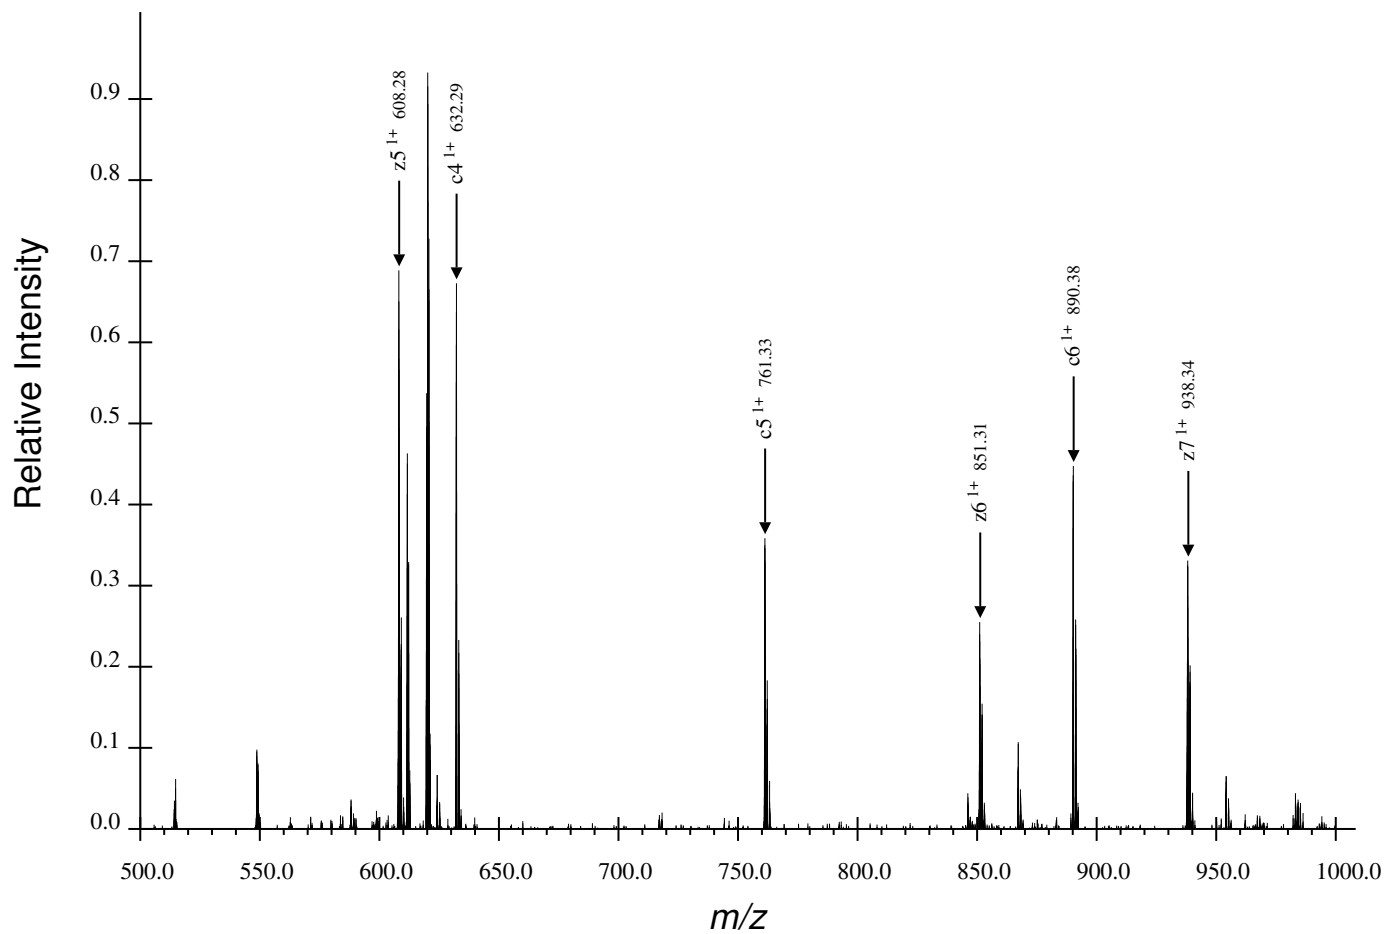

(b) Second Region for KRSpYEEHIP, Spectrum 99.dta

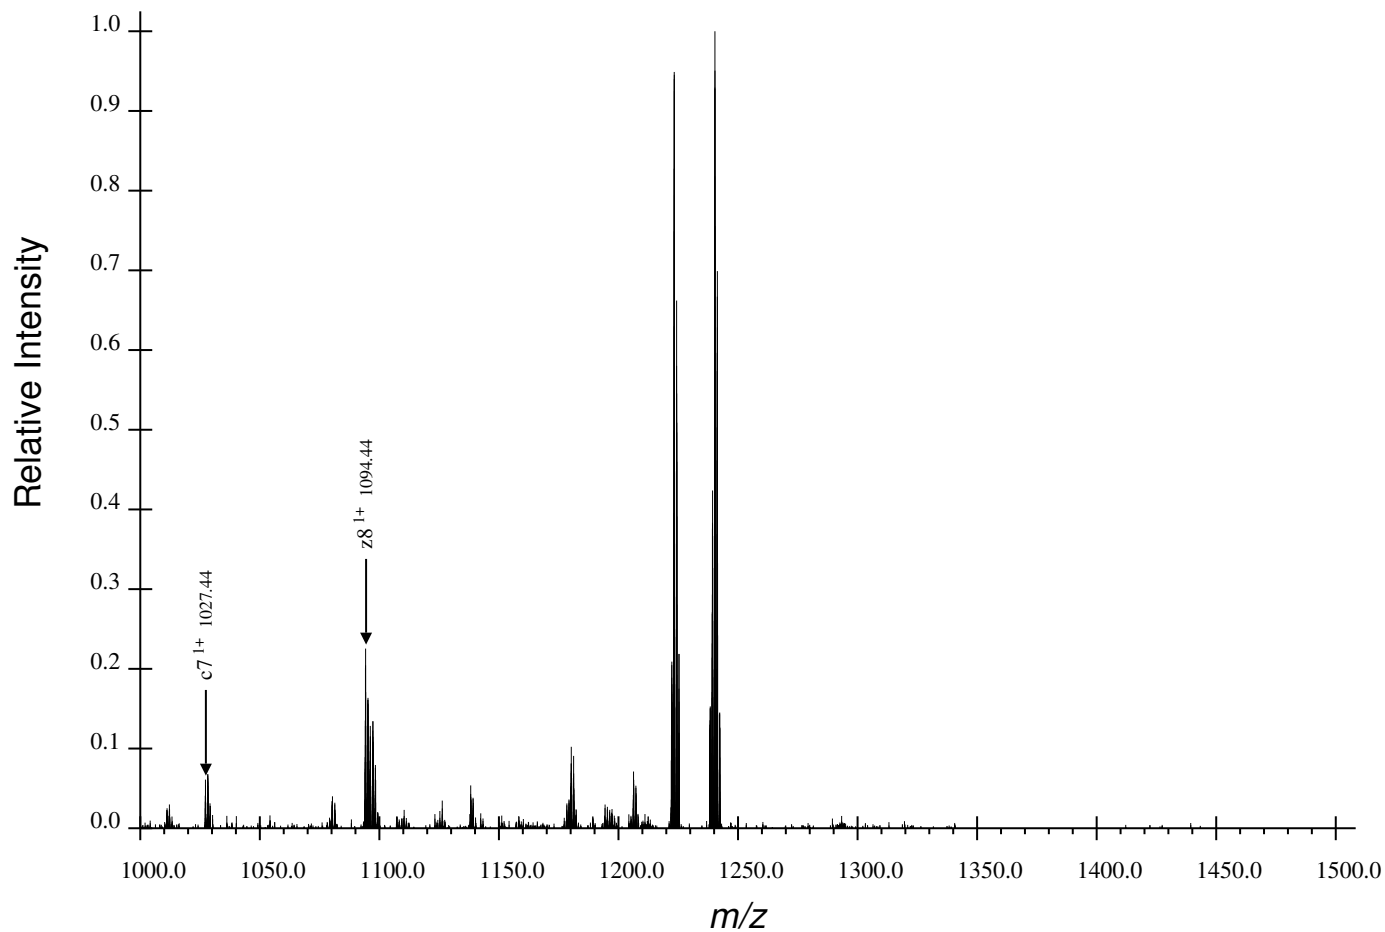

(c) Third Region for KRSpYEEHIP, Spectrum 99.dta

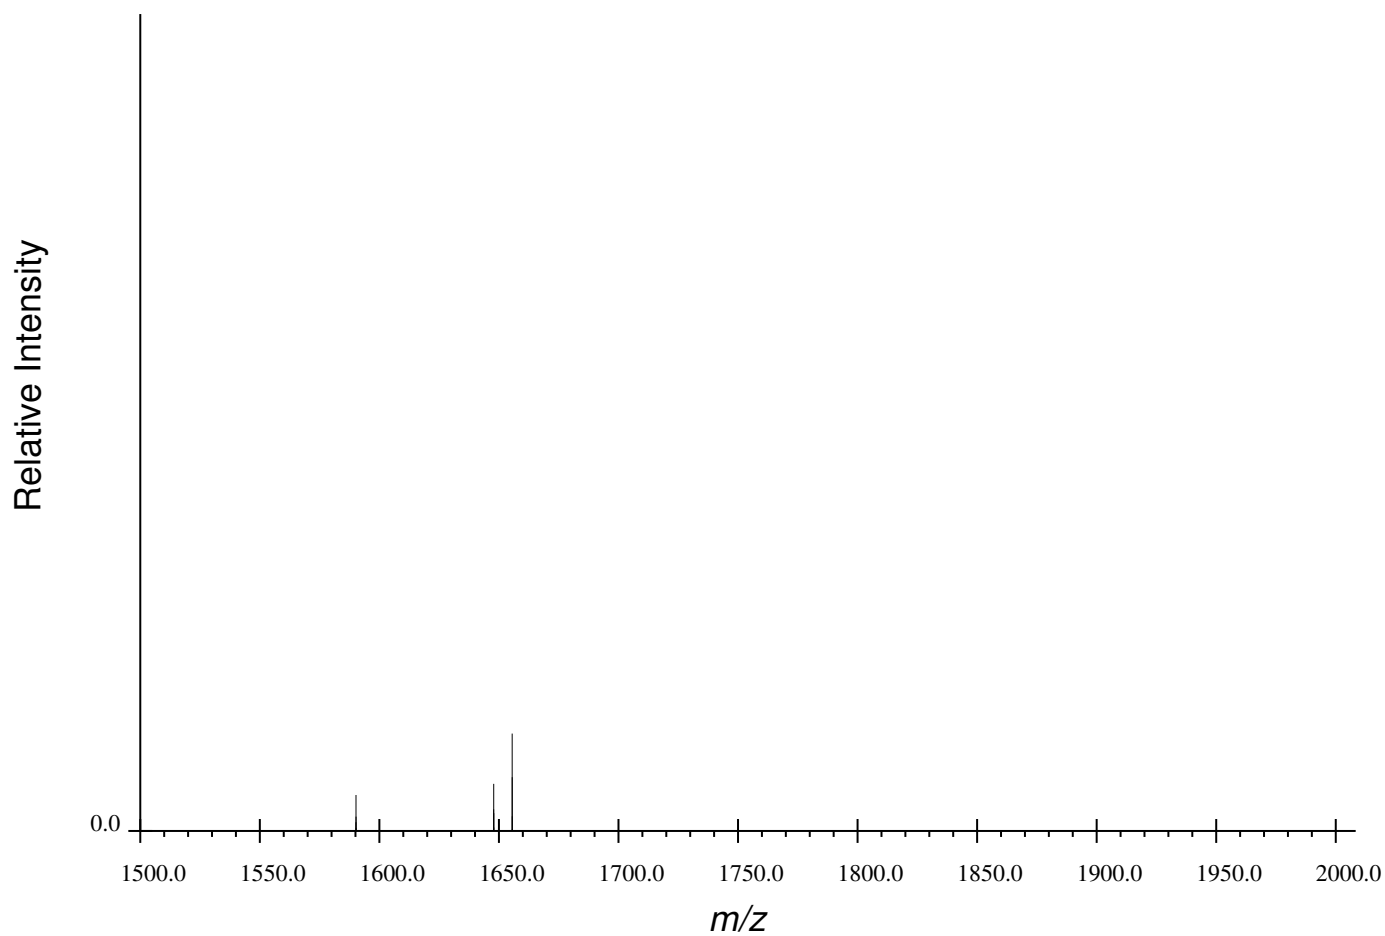

(d) Fourth Region for KRSpYEEHIP, Spectrum 99.dta

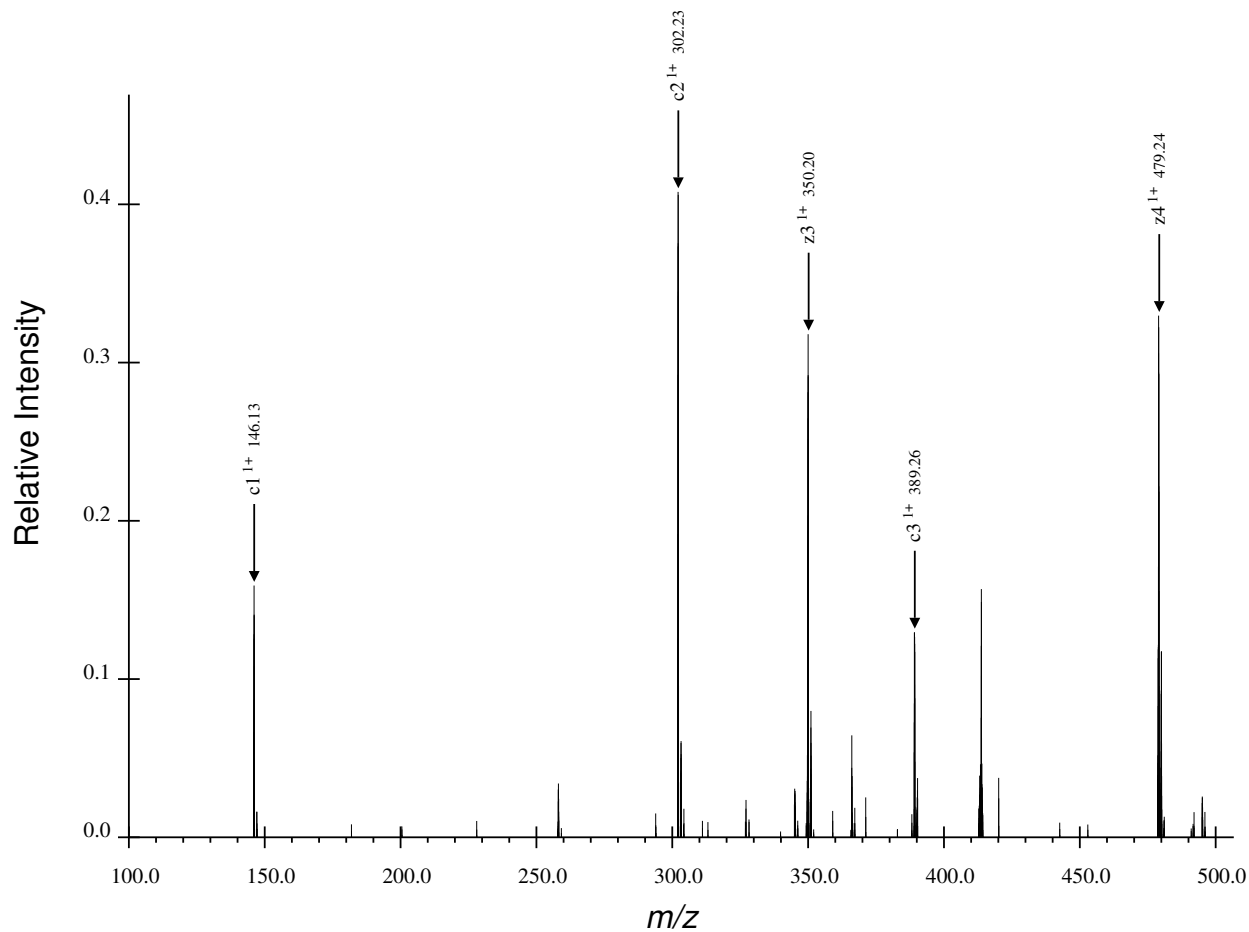

(a) First Region for KRSpYEEHIP, Spectrum 100.dta

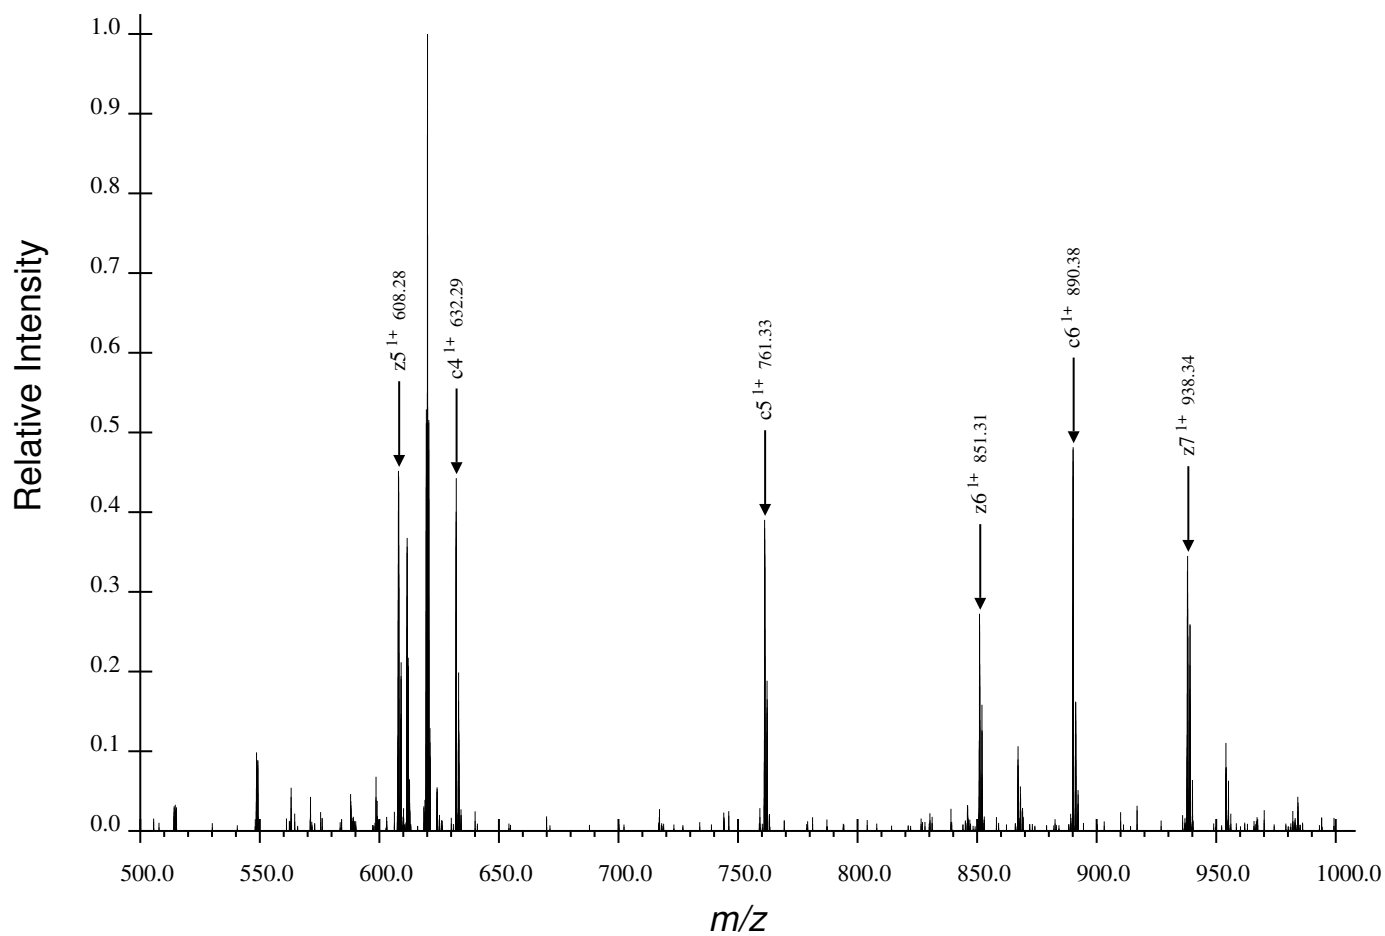

(b) Second Region for KRSpYEEHIP, Spectrum 100.dta

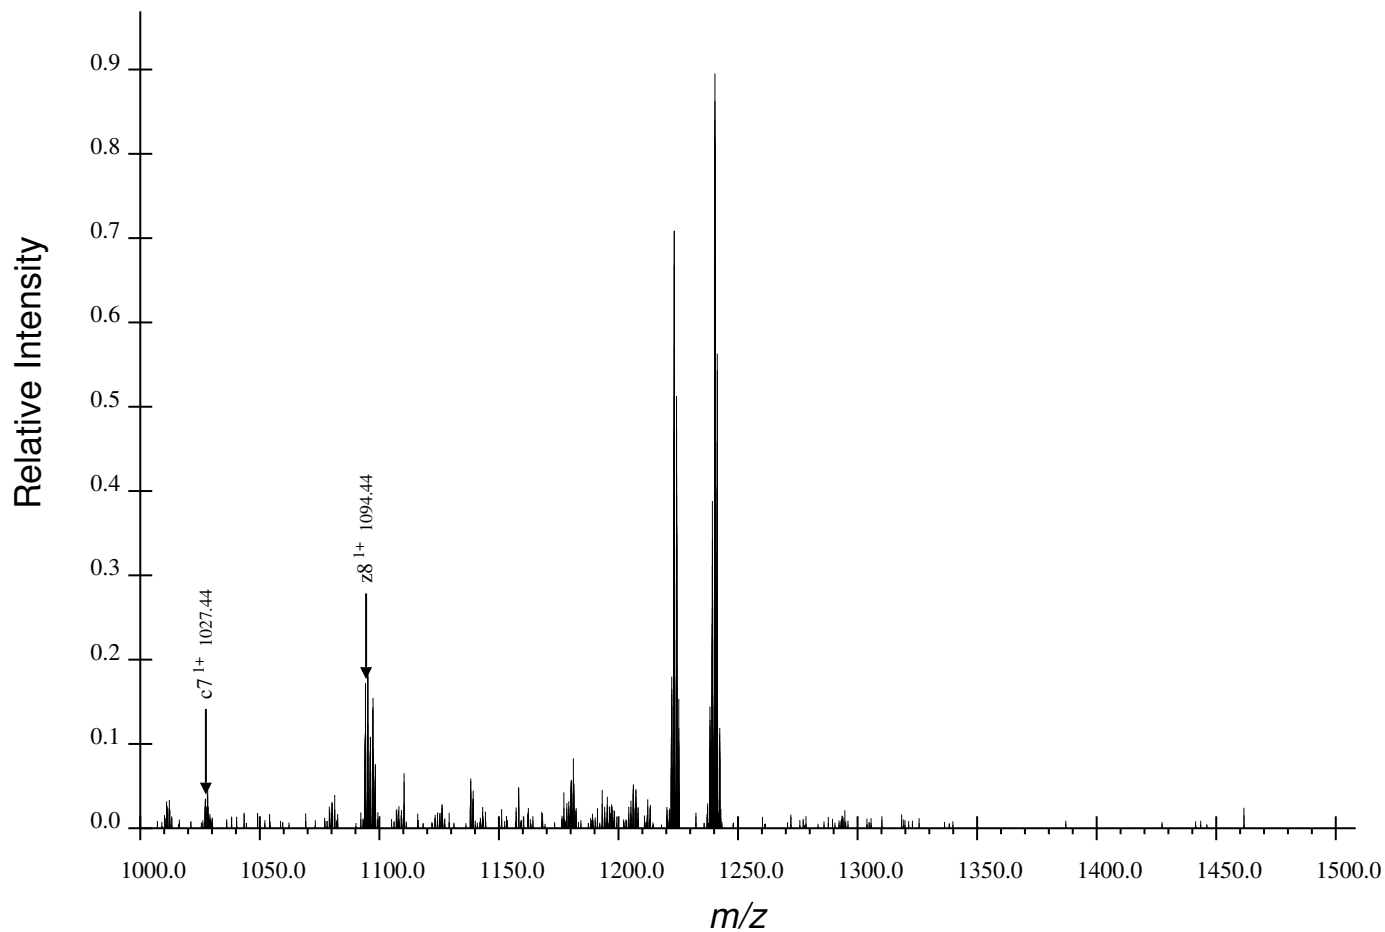

(c) Third Region for KRSpYEEHIP, Spectrum 100.dta

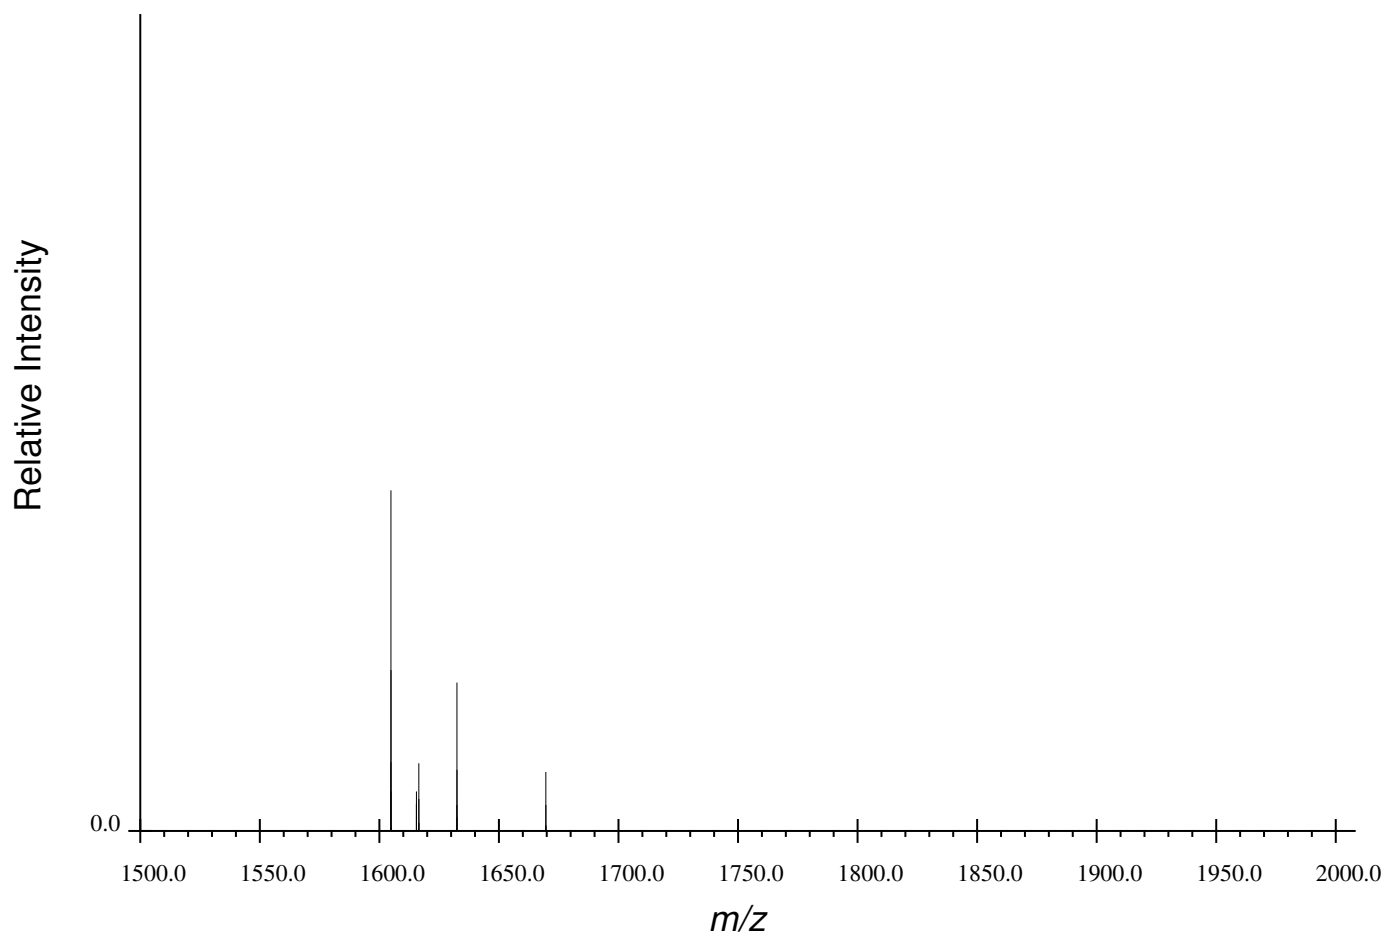

(d) Fourth Region for KRSpYEEHIP, Spectrum 100.dta



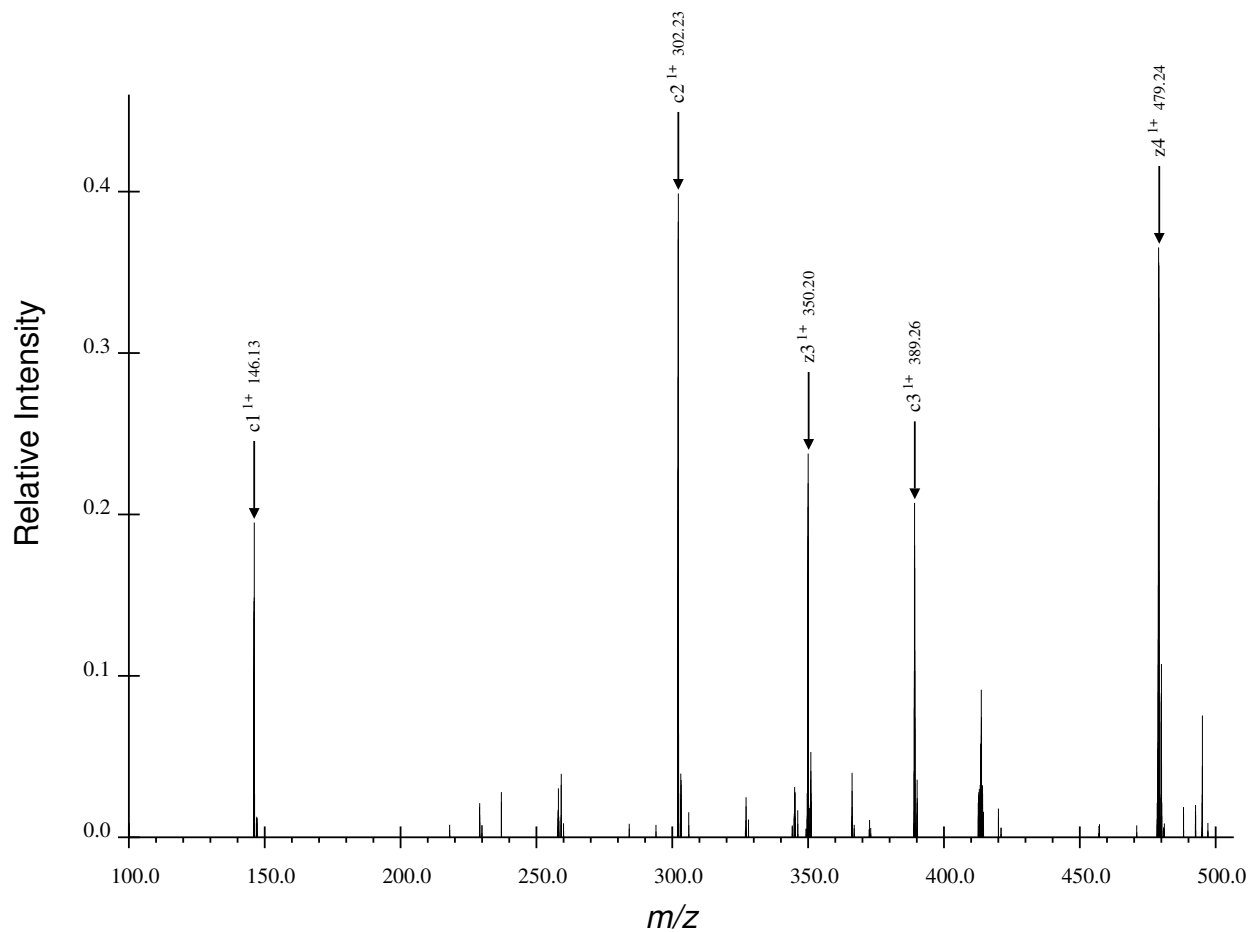

(a) First Region for KRSpYEEHIP, Spectrum 101.dta

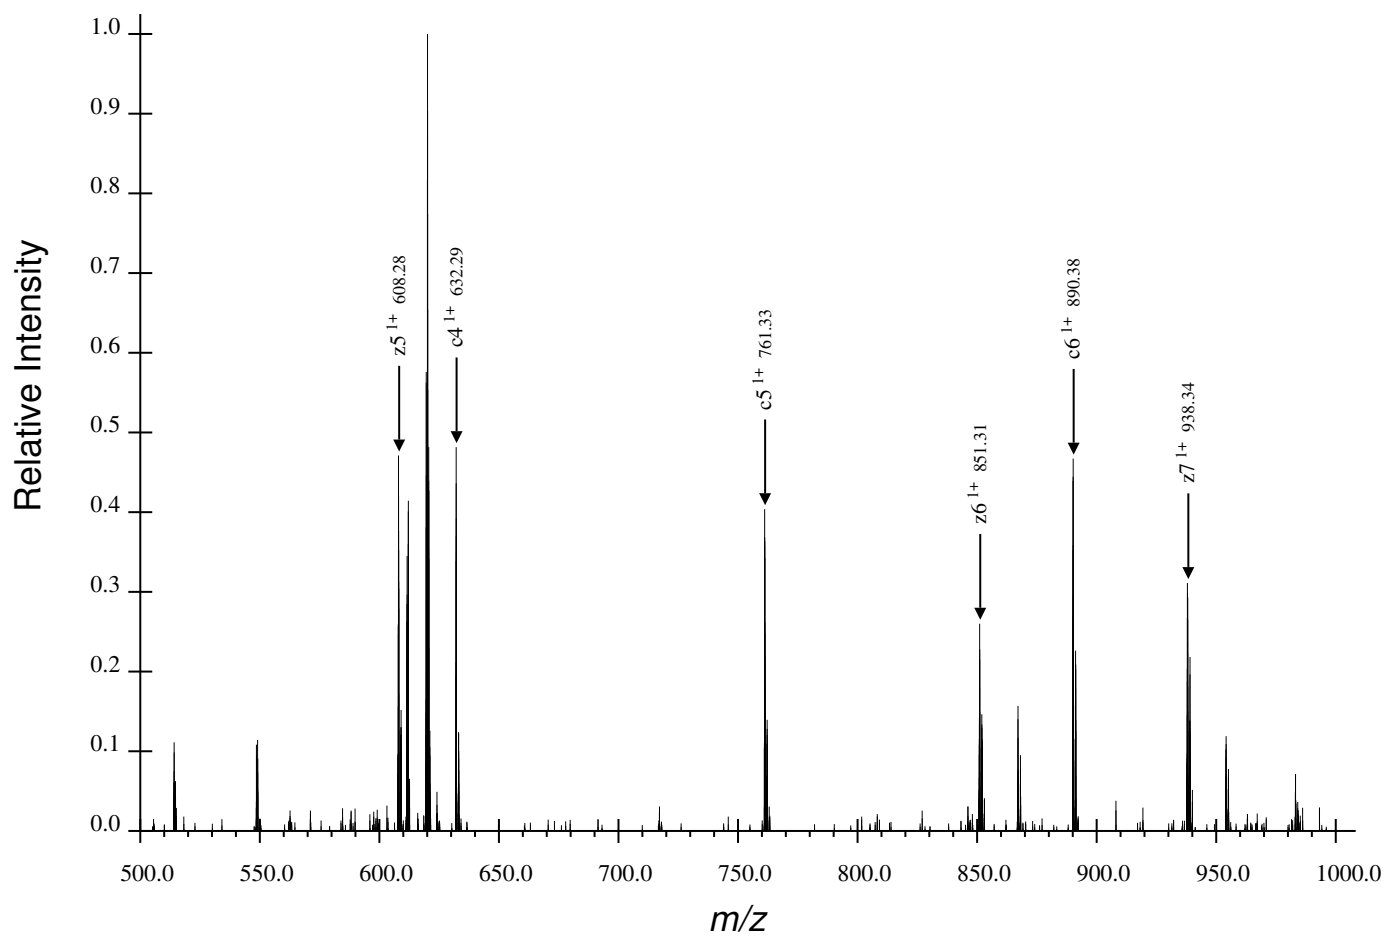

(b) Second Region for KRSpYEEHIP, Spectrum 101.dta

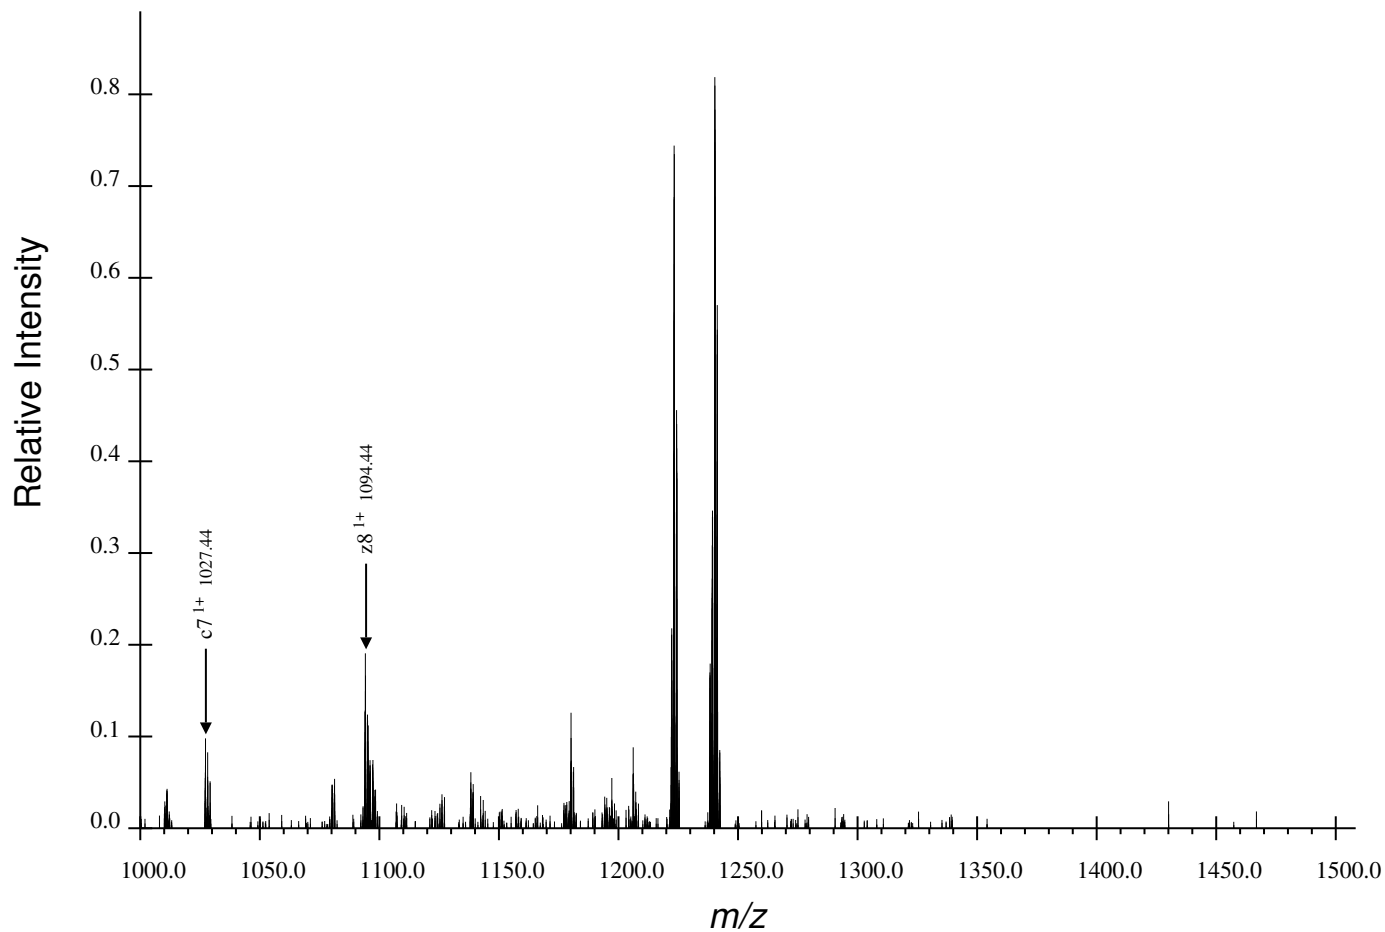

(c) Third Region for KRSpYEEHIP, Spectrum 101.dta

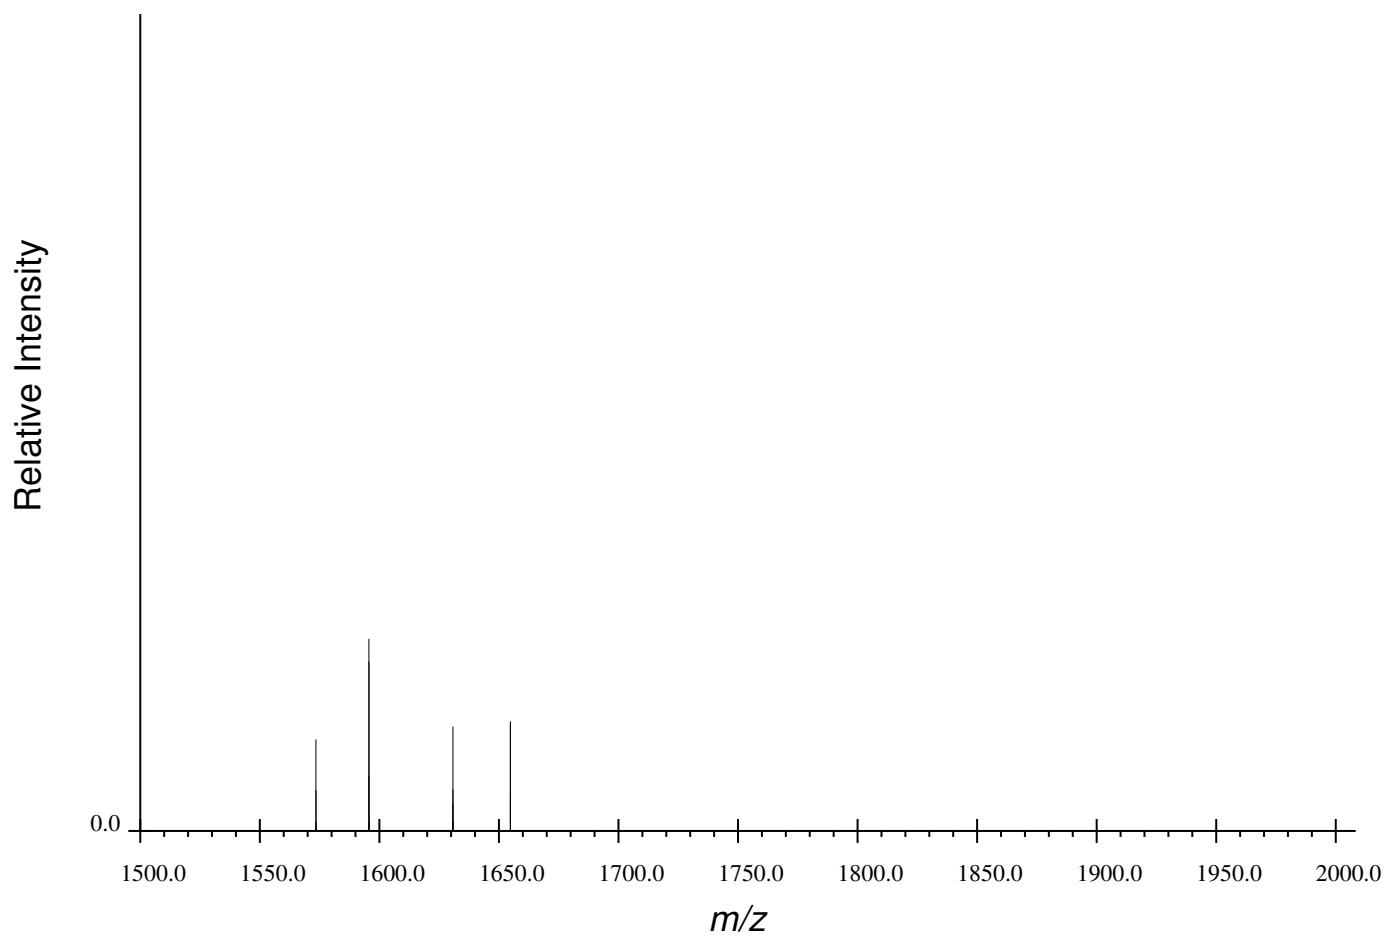

(d) Fourth Region for KRSpYEEHIP, Spectrum 101.dta

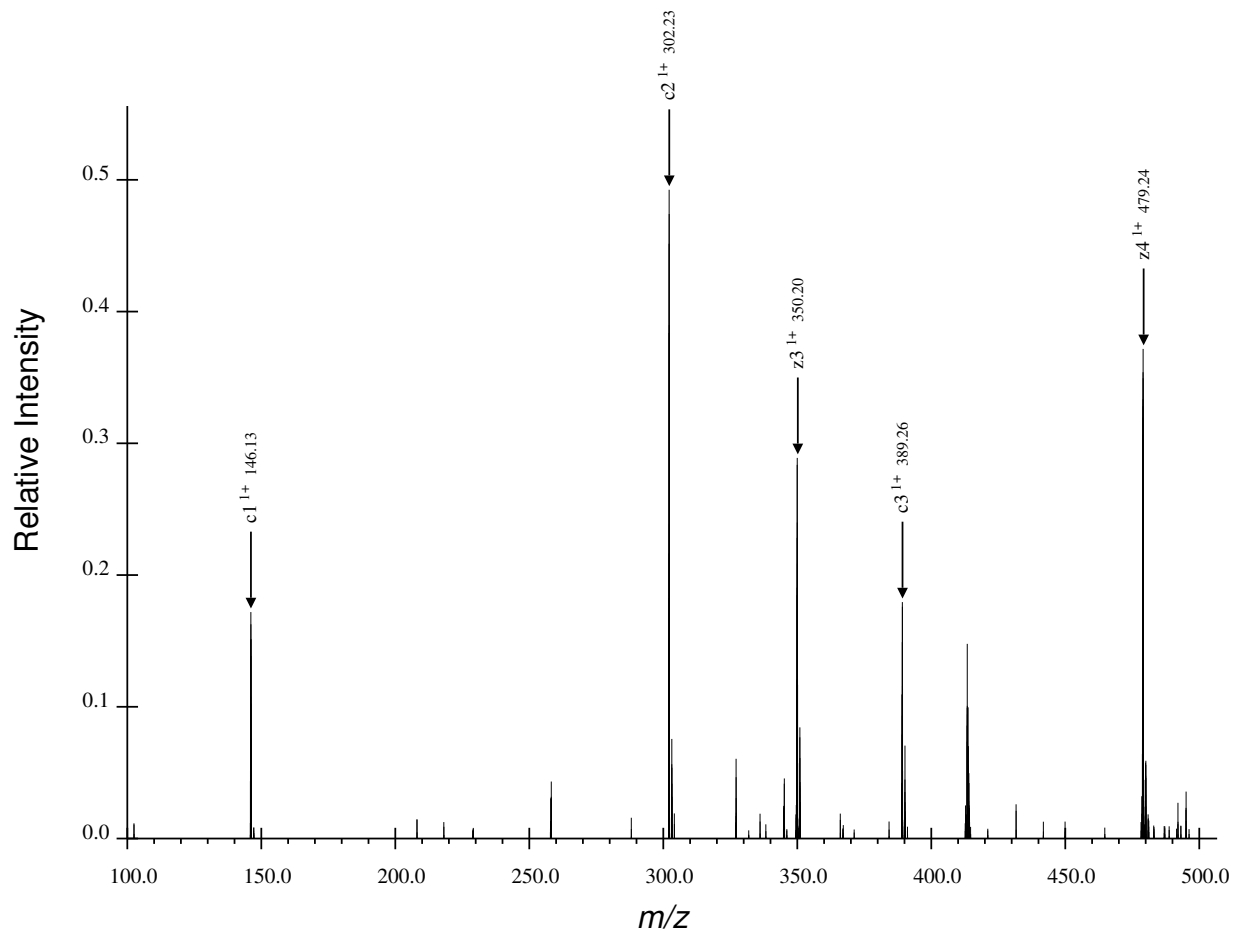

(a) First Region for KRSpYEEHIP, Spectrum 102.dta

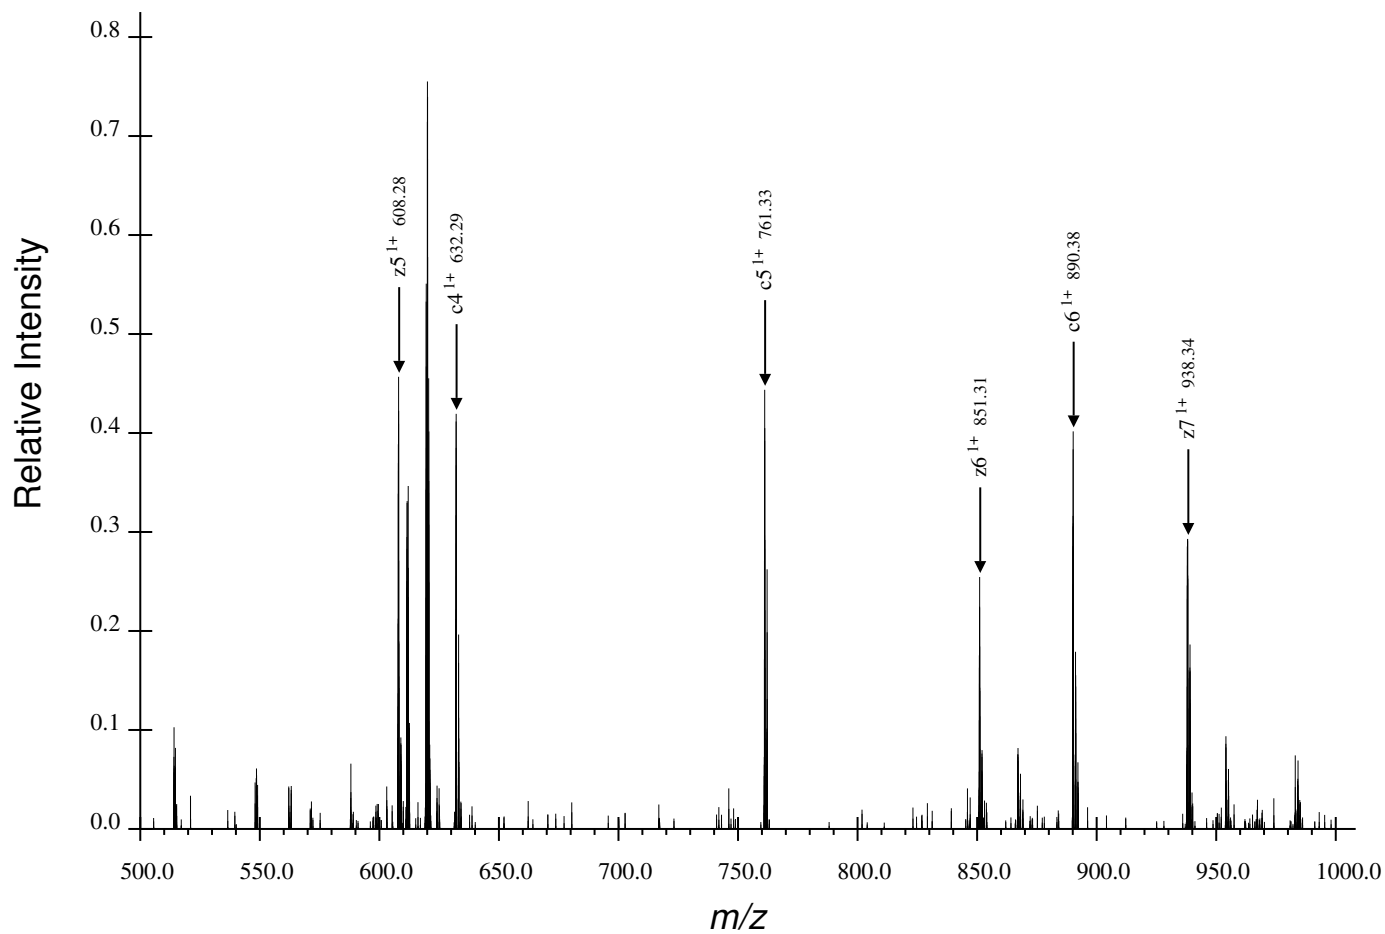

(b) Second Region for KRSpYEEHIP, Spectrum 102.dta

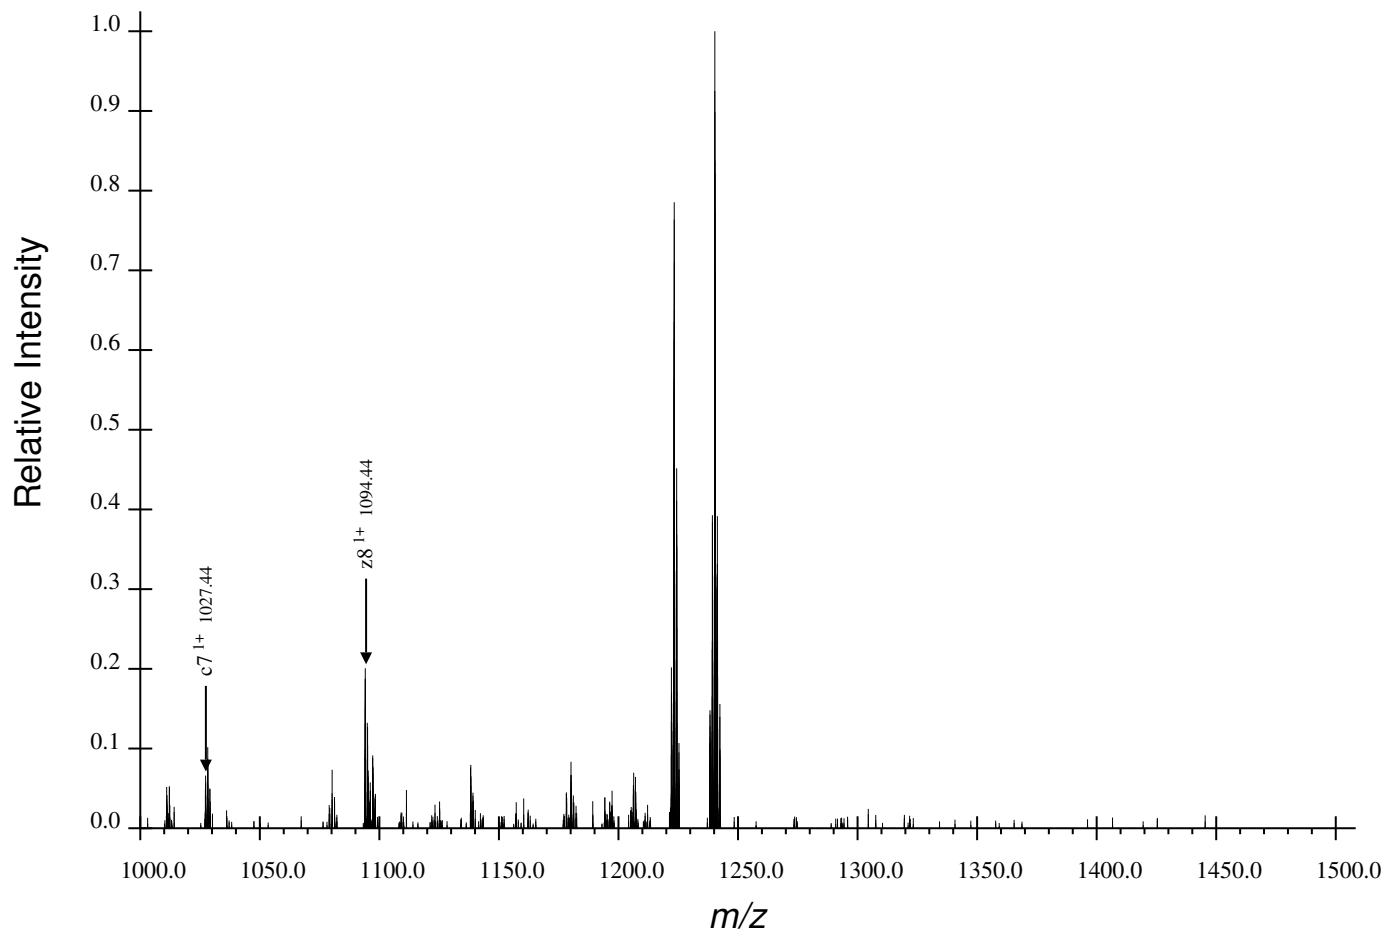

(c) Third Region for KRSpYEEHIP, Spectrum 102.dta

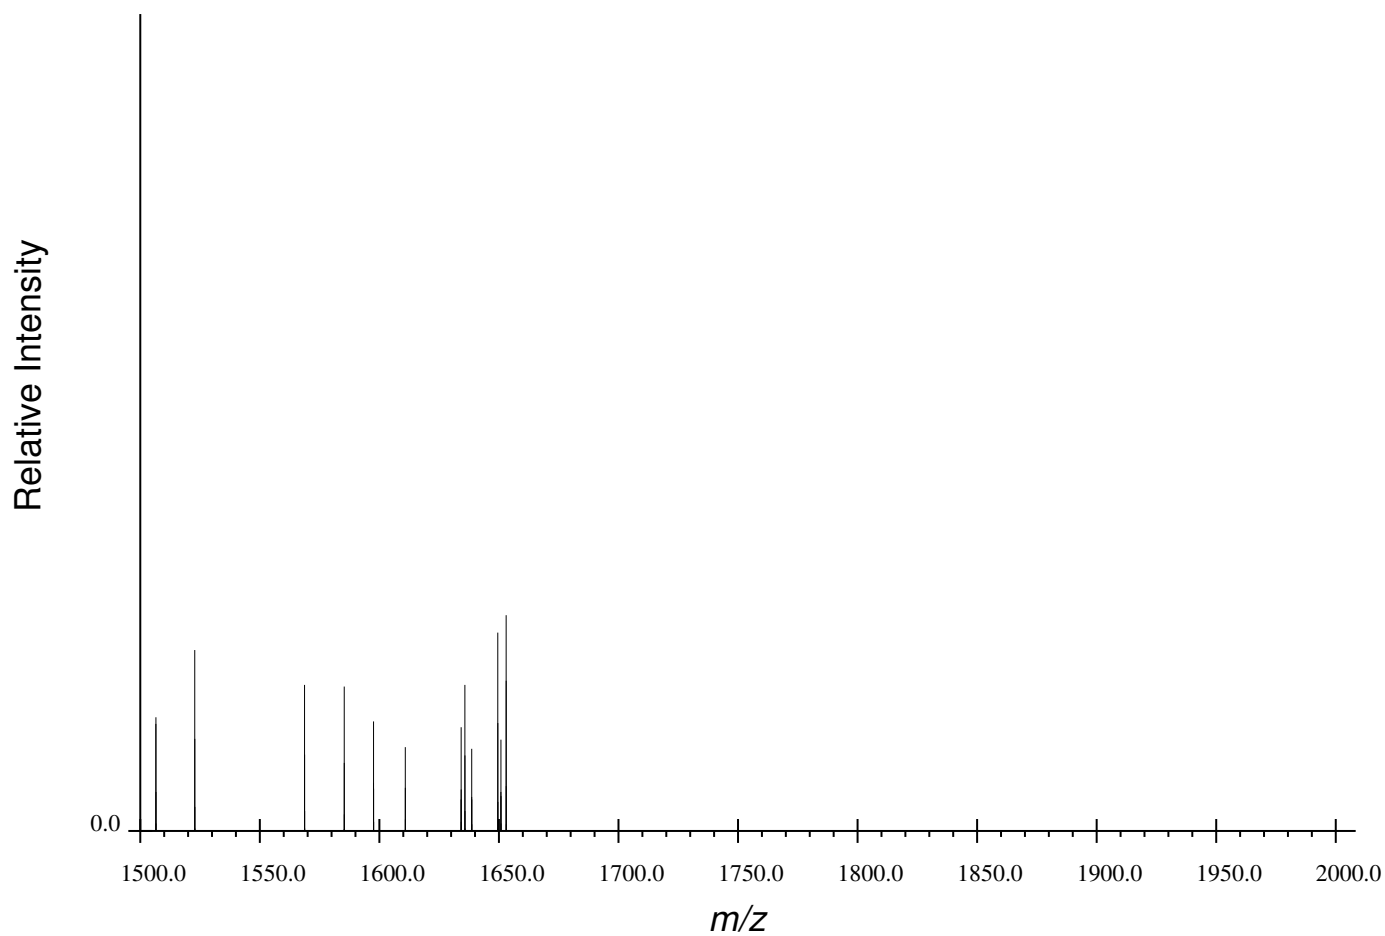

(d) Fourth Region for KRSpYEEHIP, Spectrum 102.dta
