# Supplementary material
Source: PubMed Central journal article supplement (PMC2871412)
Supplement: supp_M900487-MCP200_TestSetA2_Phosphopeptides.pdf [file supp_M900487-MCP200_TestSetA2_Phosphopeptides.pdf]

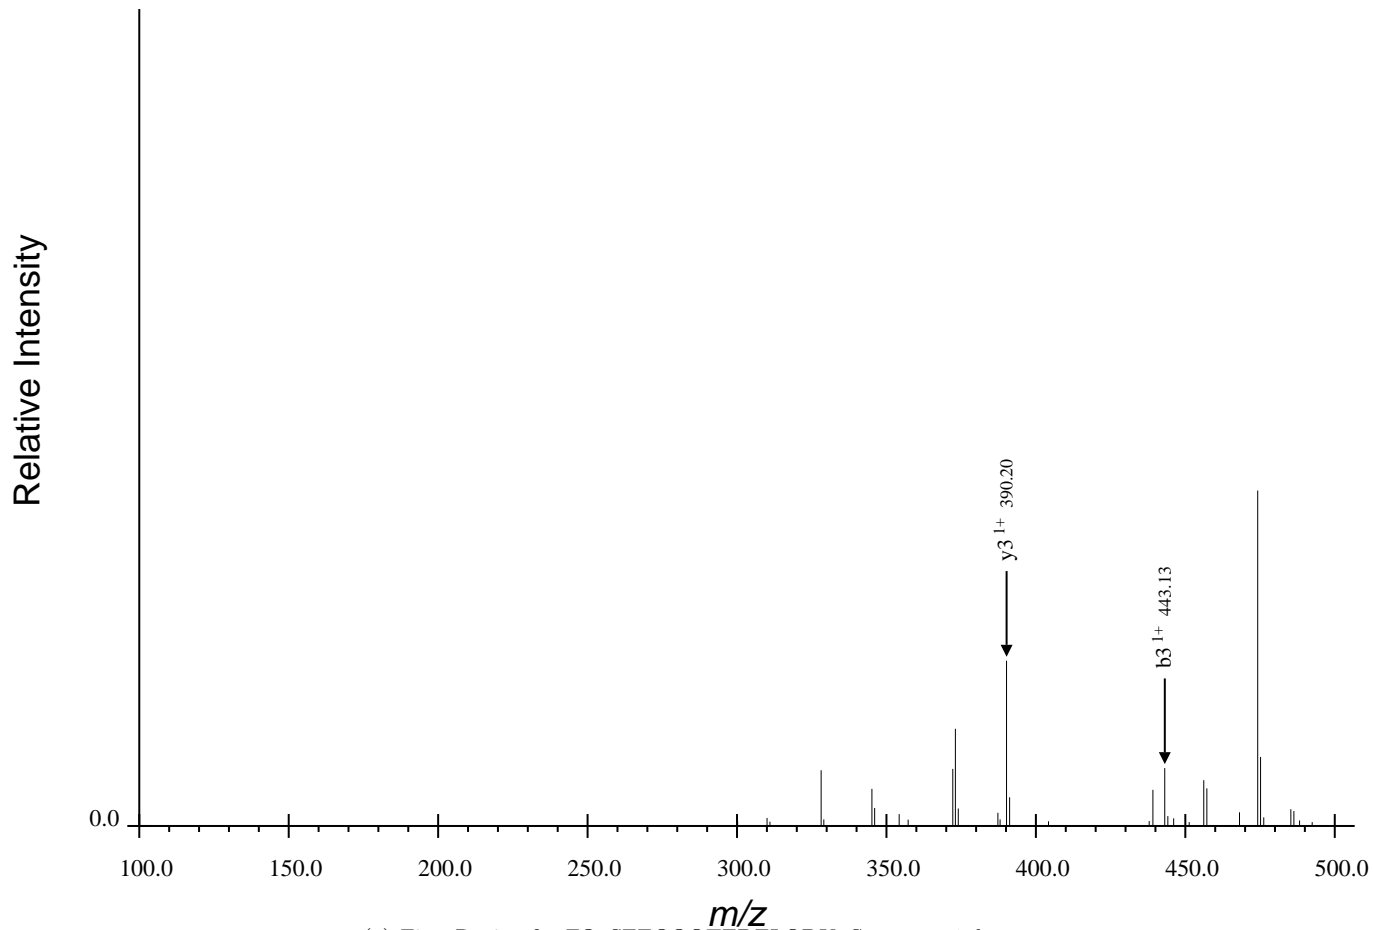

(a) First Region for FQpSEEQQQTEDELQDK, Spectrum 1.dta

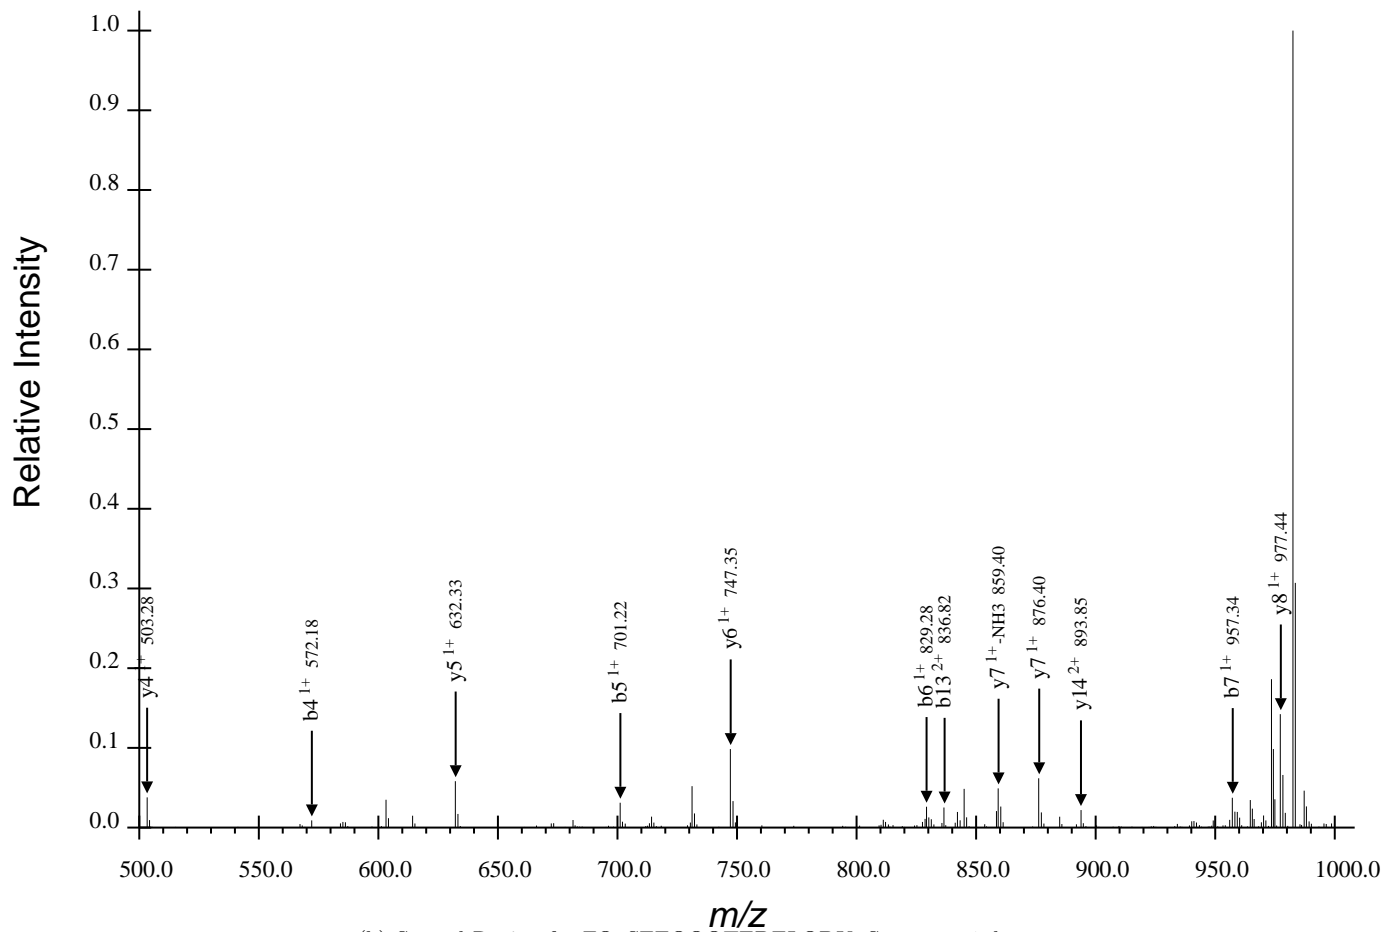

(b) Second Region for FQpSEEQQQTEDELQDK, Spectrum 1.dta

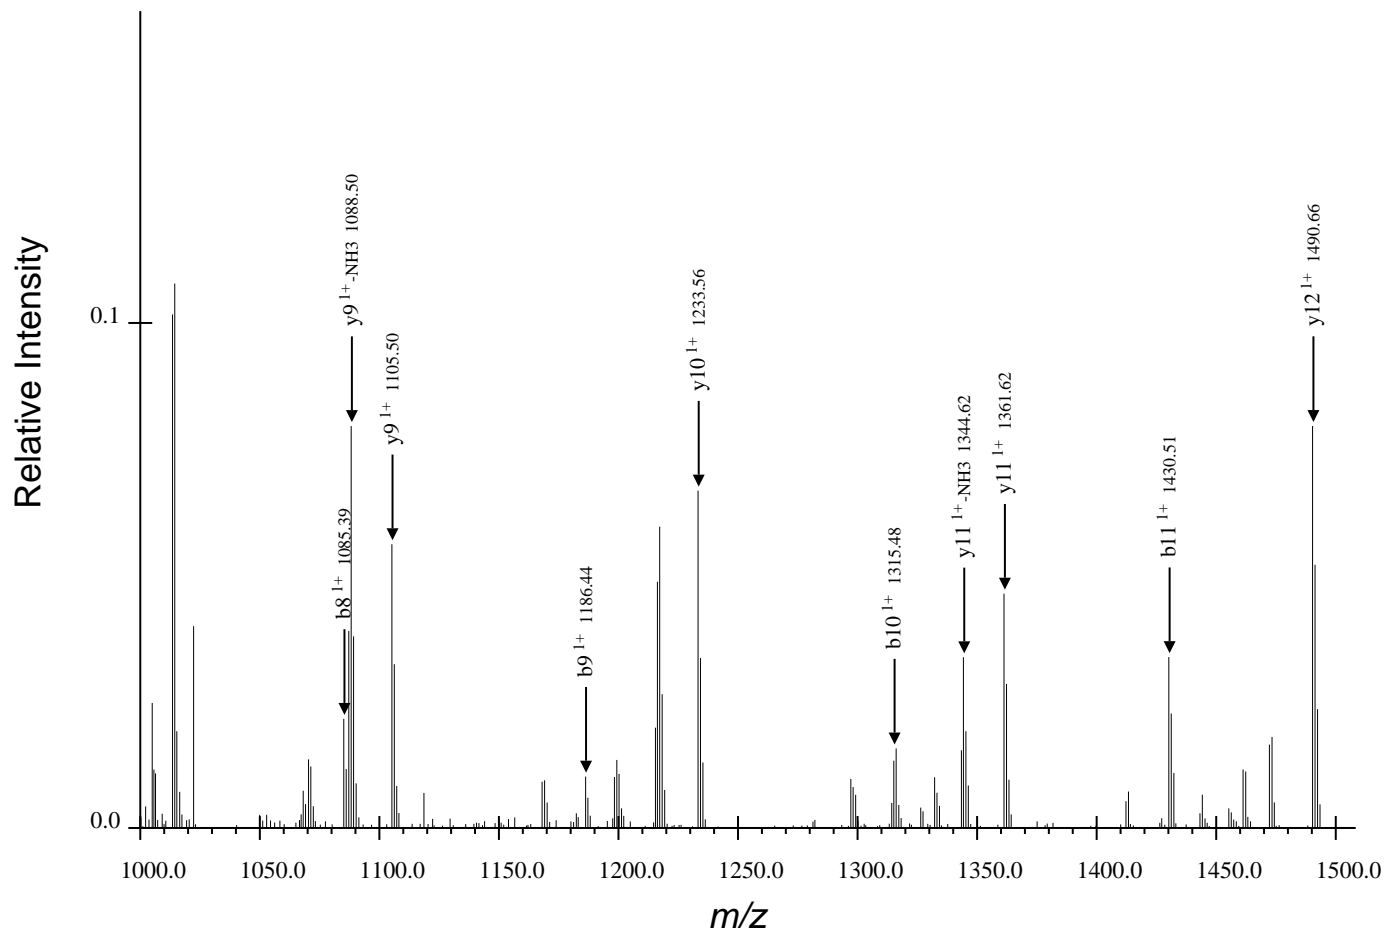

(c) Third Region for FQpSEEQQQTEDELQDK, Spectrum 1.dta

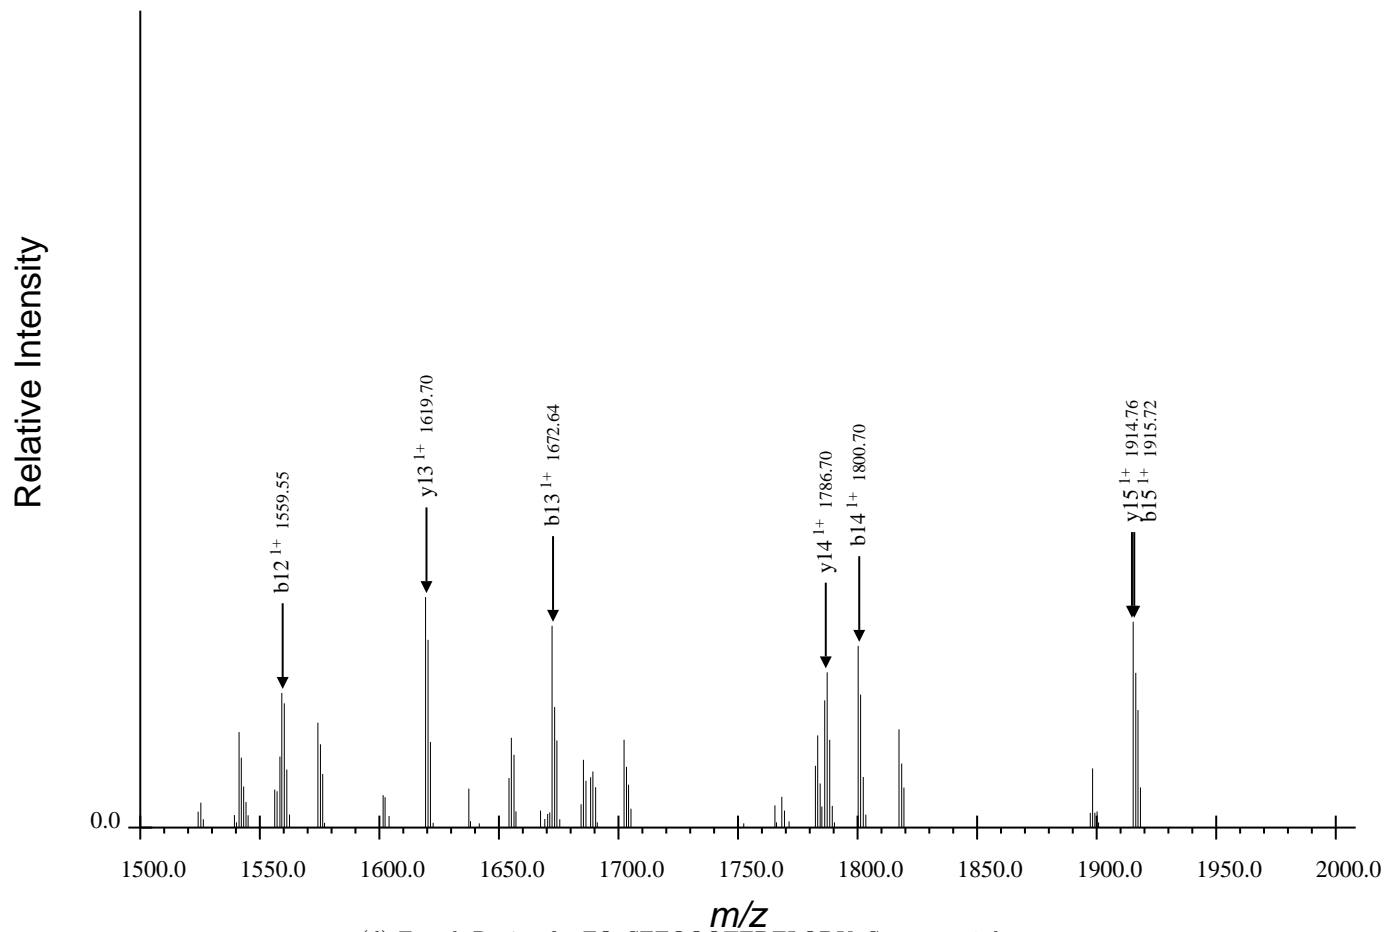

(d) Fourth Region for FQpSEEQQQTEDELQDK, Spectrum 1.dta

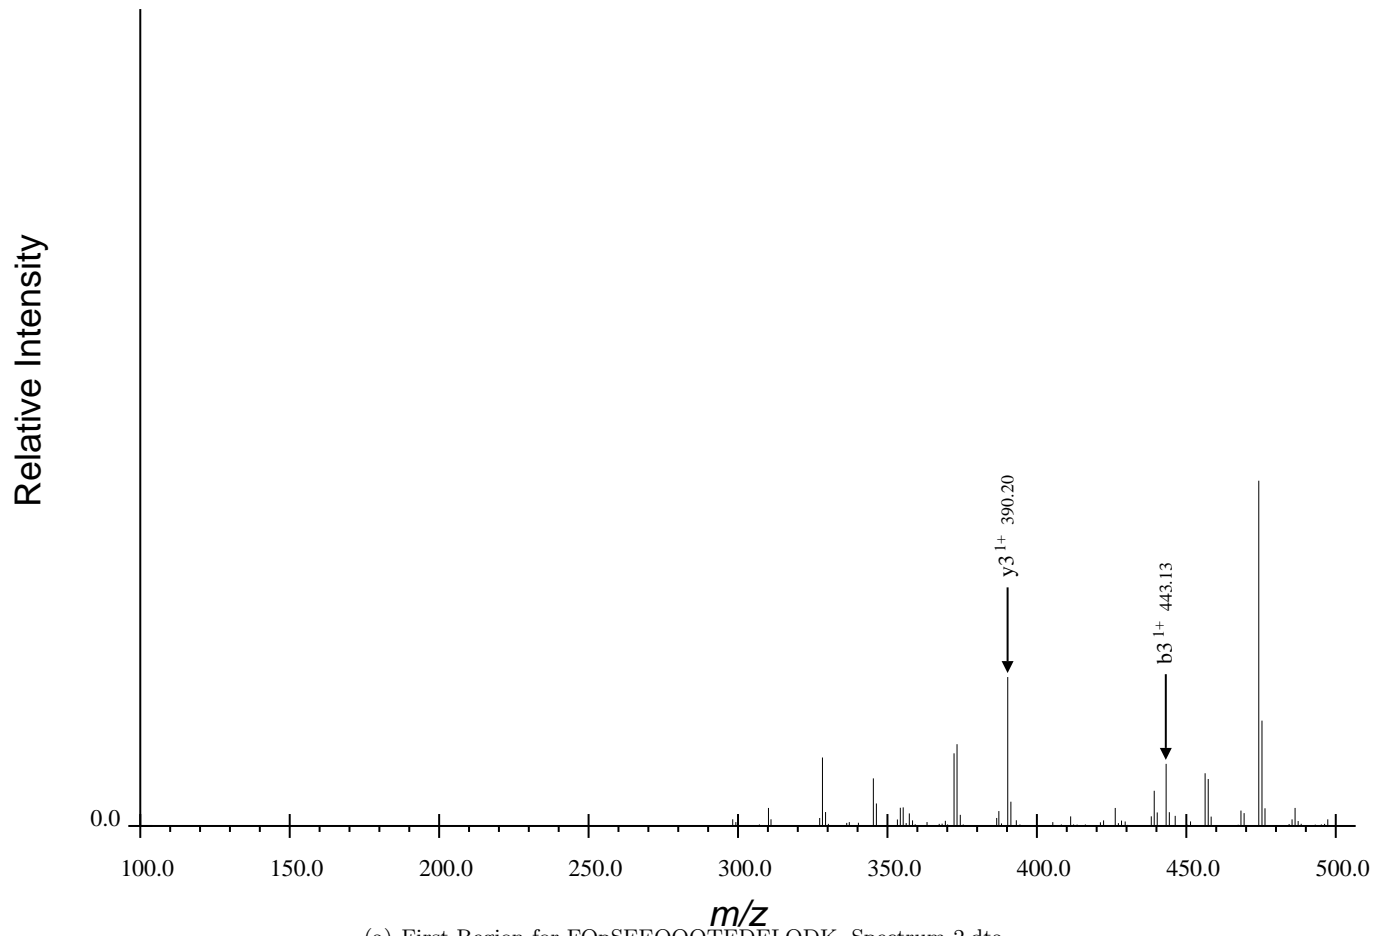

(a) First Region for FQpSEEQQQTEDELQDK, Spectrum 2.dta

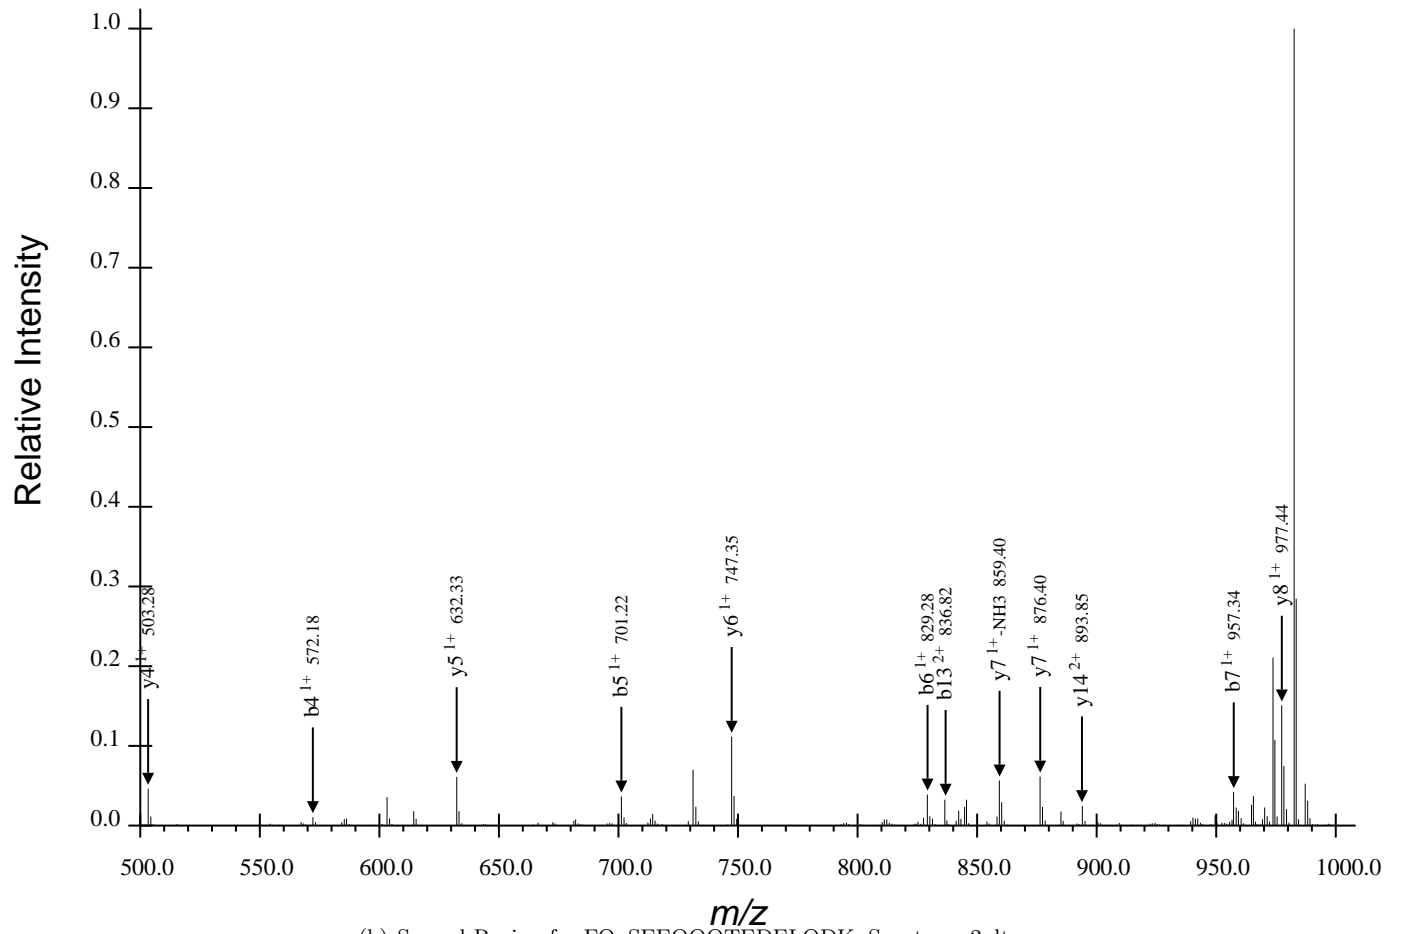

(b) Second Region for FQpSEEQQQTEDELQDK, Spectrum 2.dta

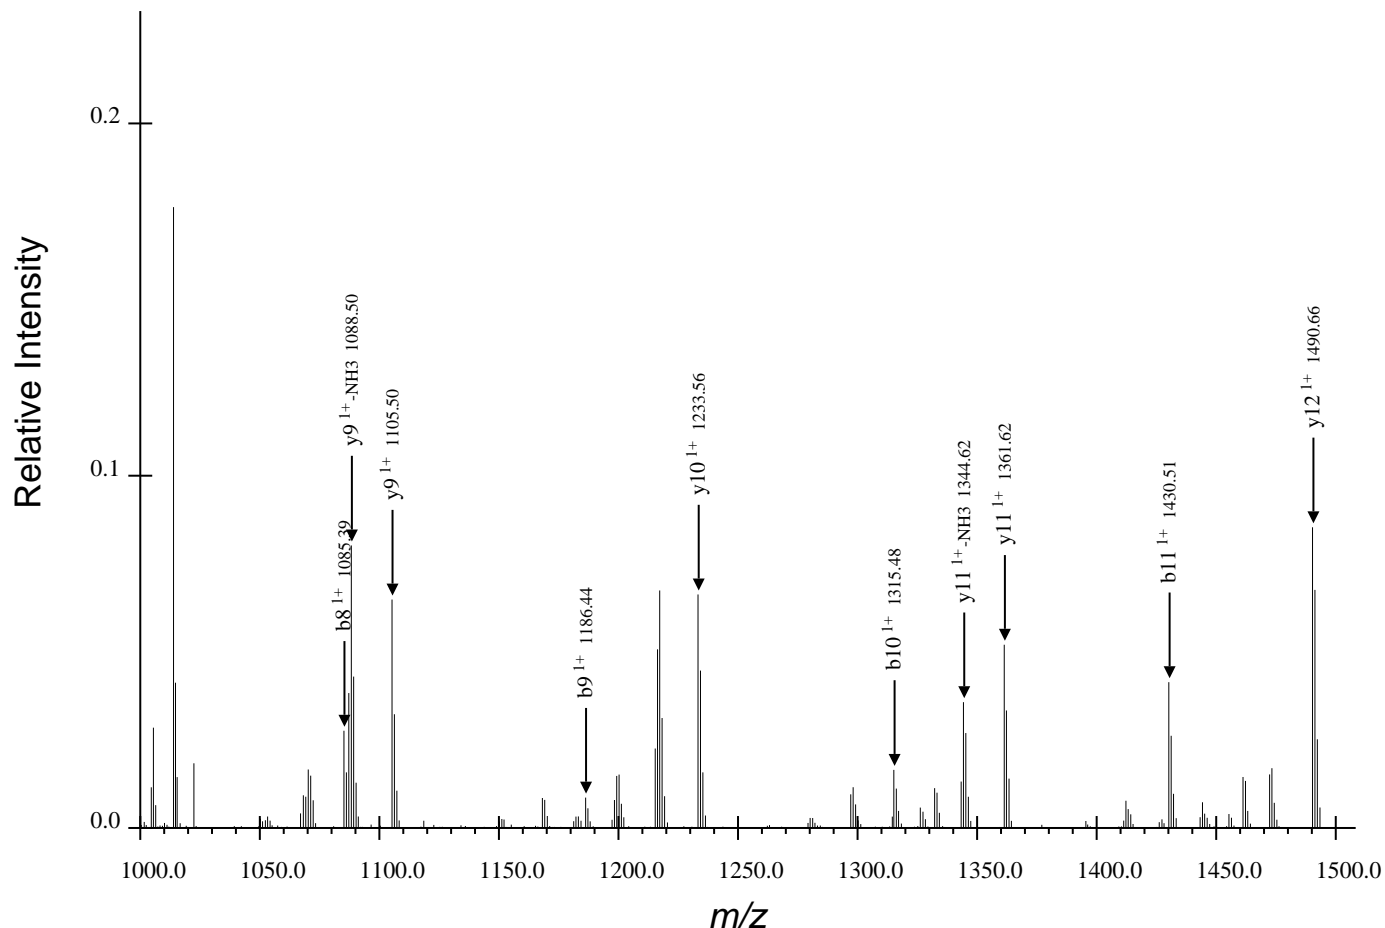

(c) Third Region for FQpSEEQQQTEDELQDK, Spectrum 2.dta

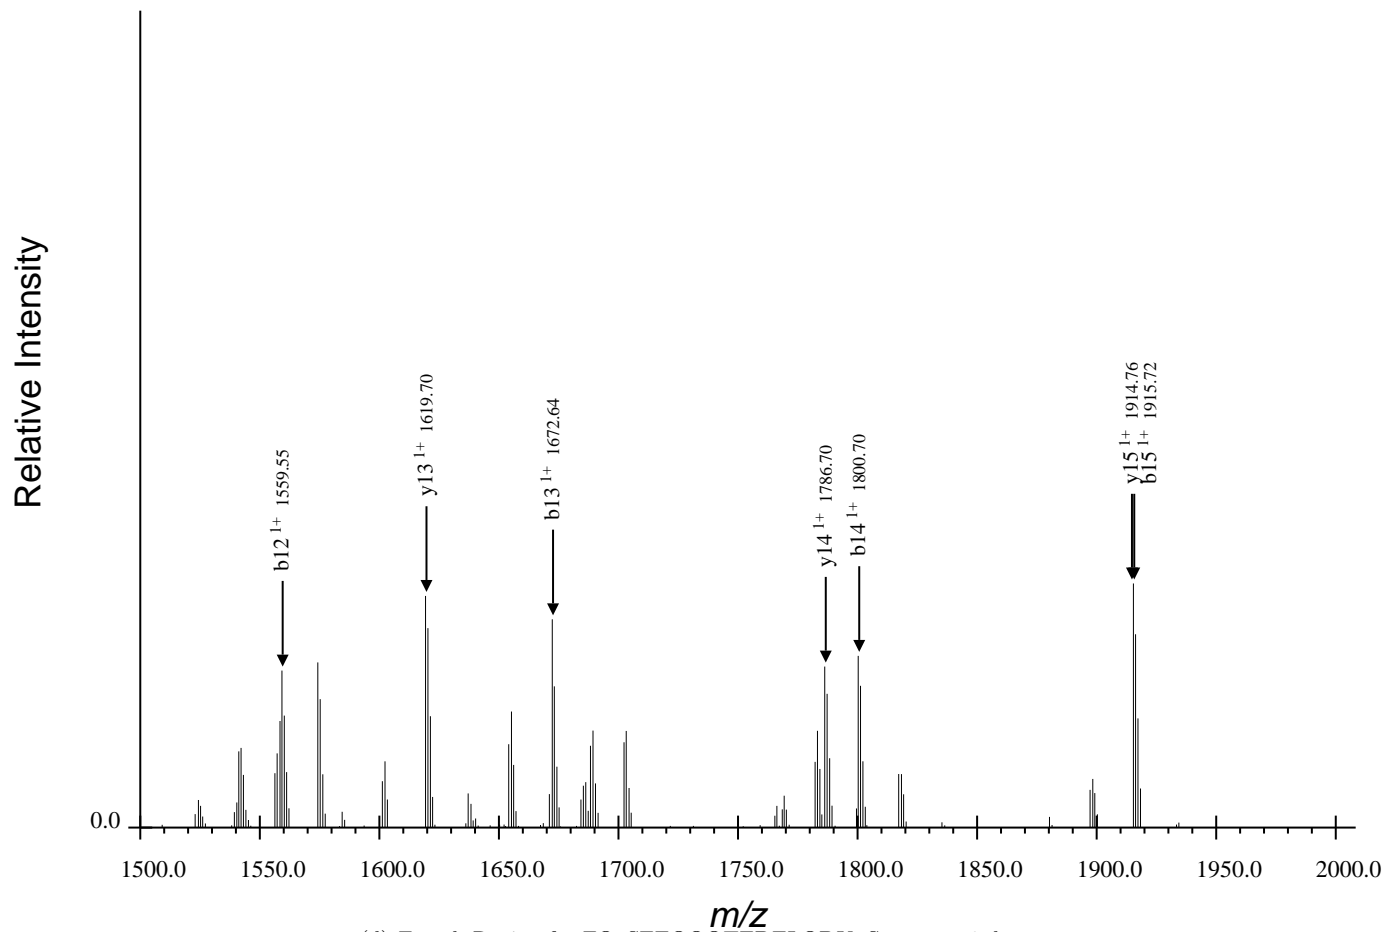

(d) Fourth Region for FQpSEEQQQTEDELQDK, Spectrum 2.dta

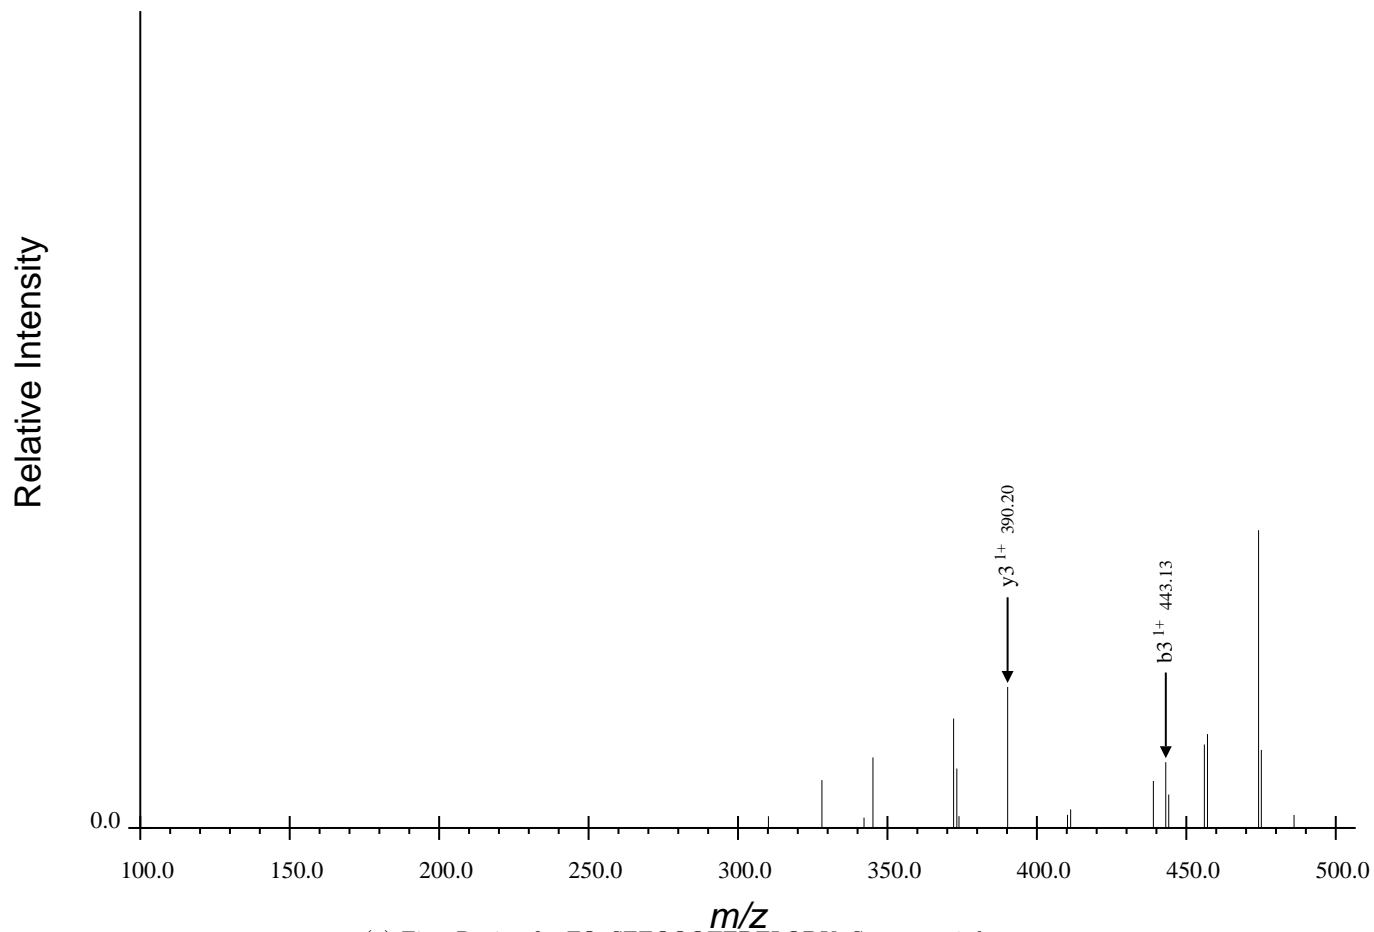

(a) First Region for FQpSEEQQQTEDELQDK, Spectrum 3.dta

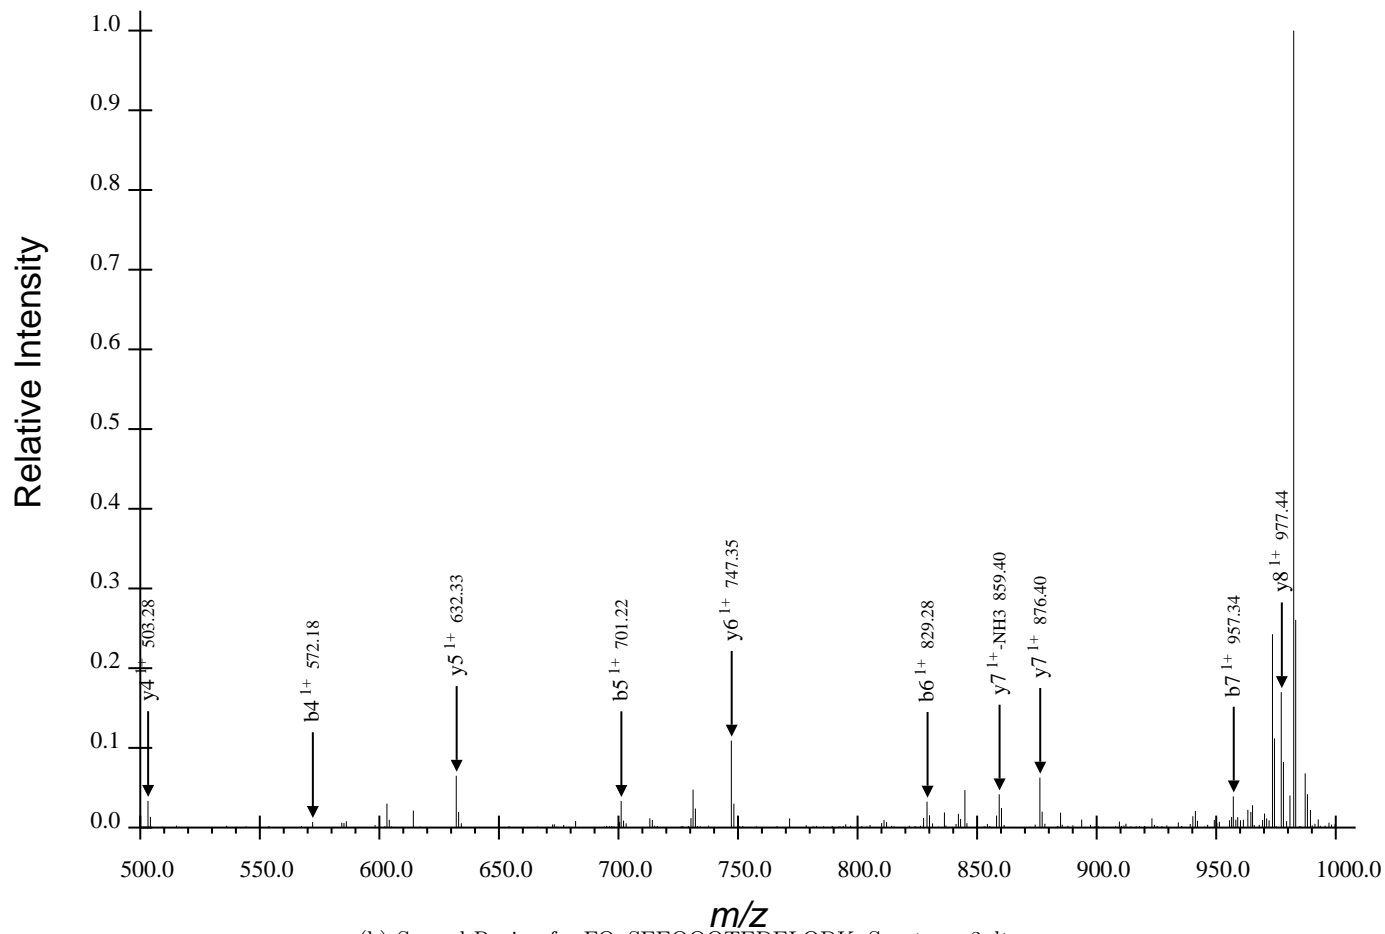

(b) Second Region for FQpSEEQQQTEDELQDK, Spectrum 3.dta

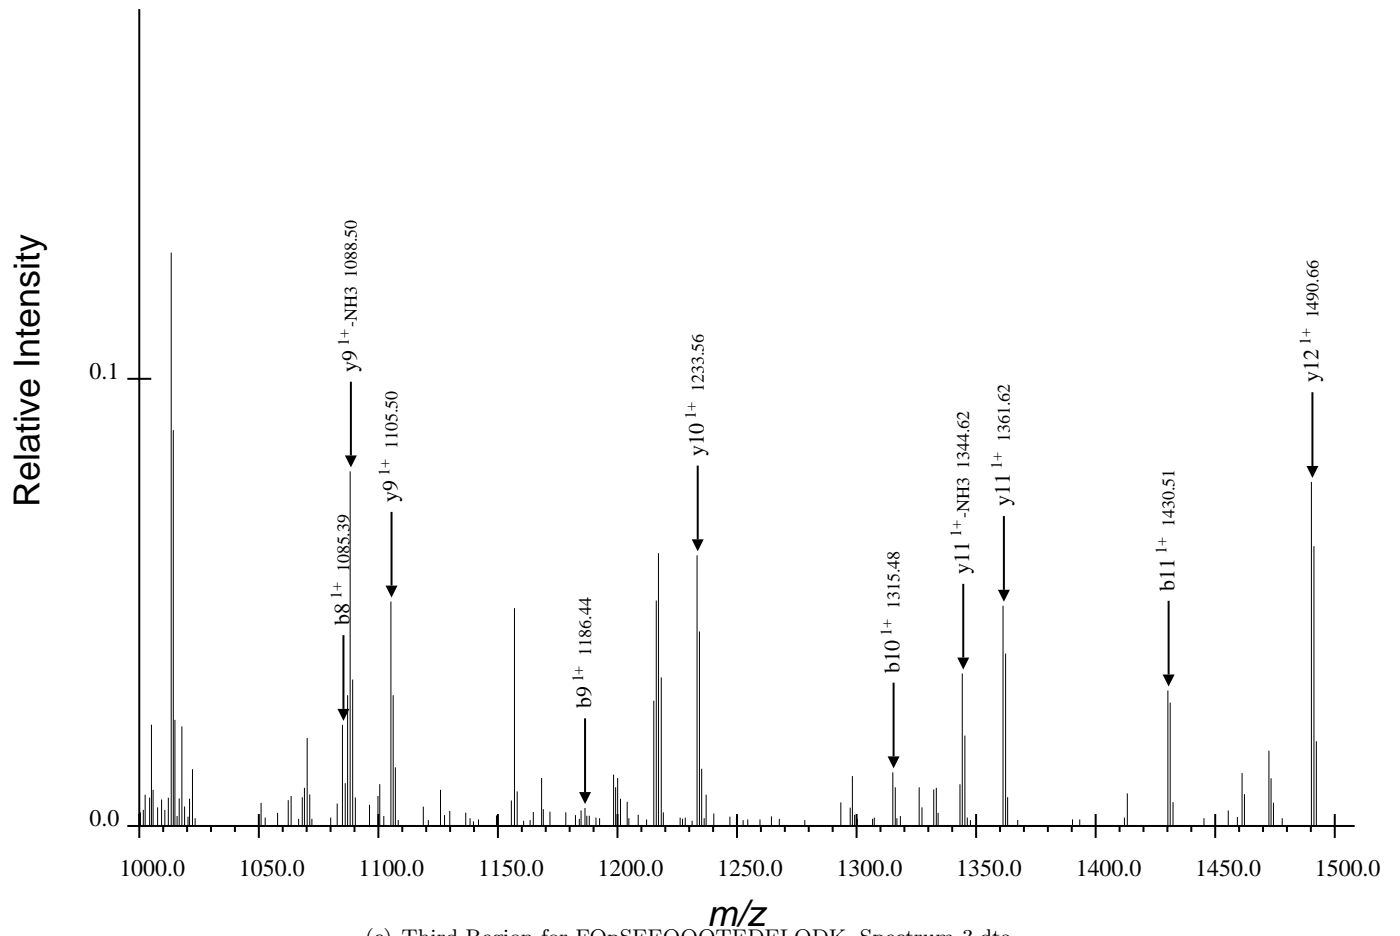

(c) Third Region for FQpSEEQQQTEDELQDK, Spectrum 3.dta

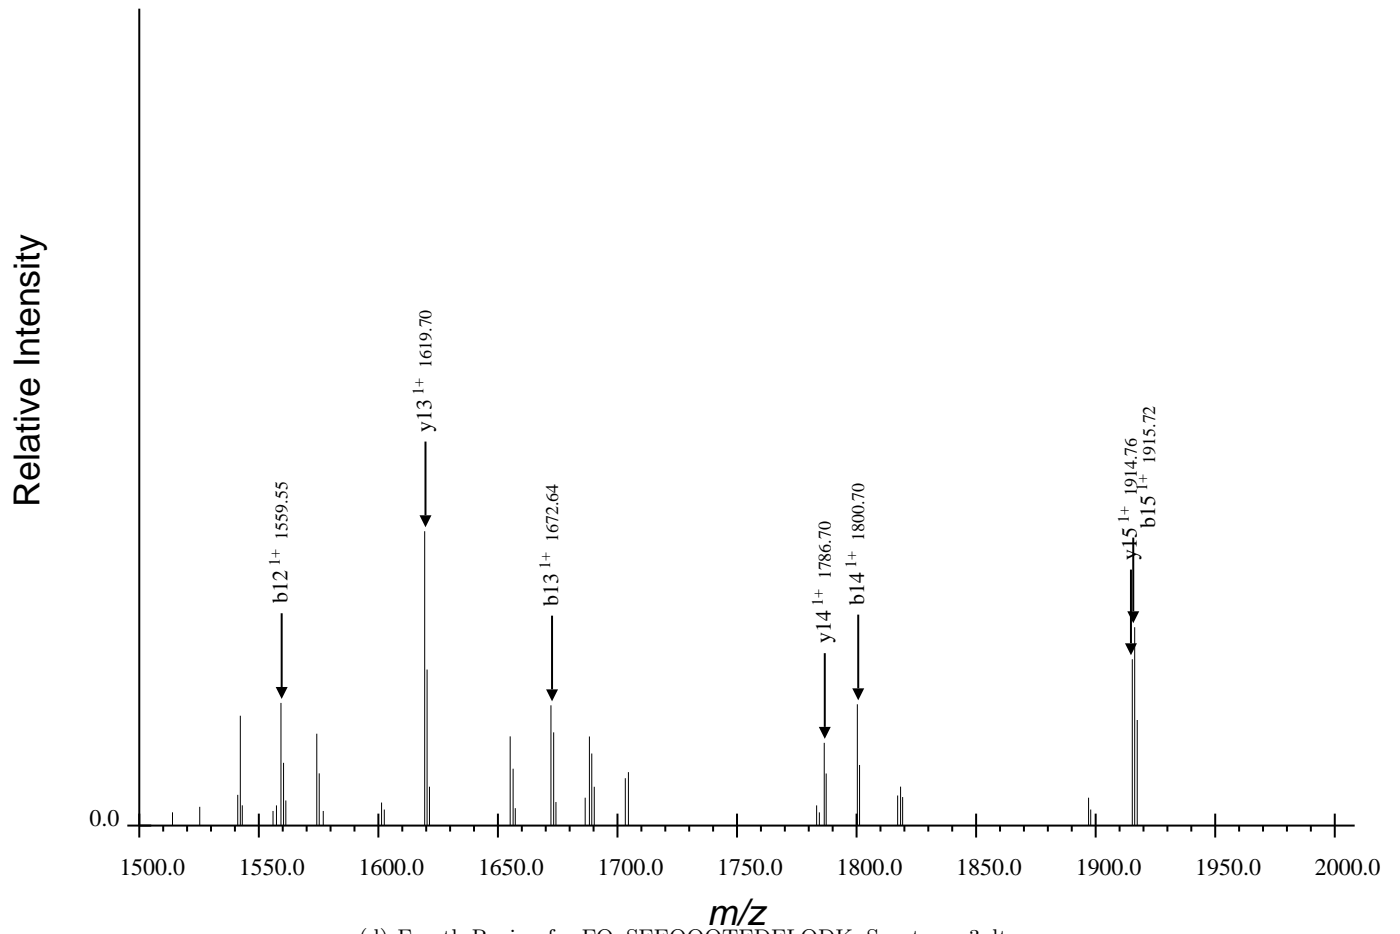

(d) Fourth Region for FQpSEEQQQTEDELQDK, Spectrum 3.dta

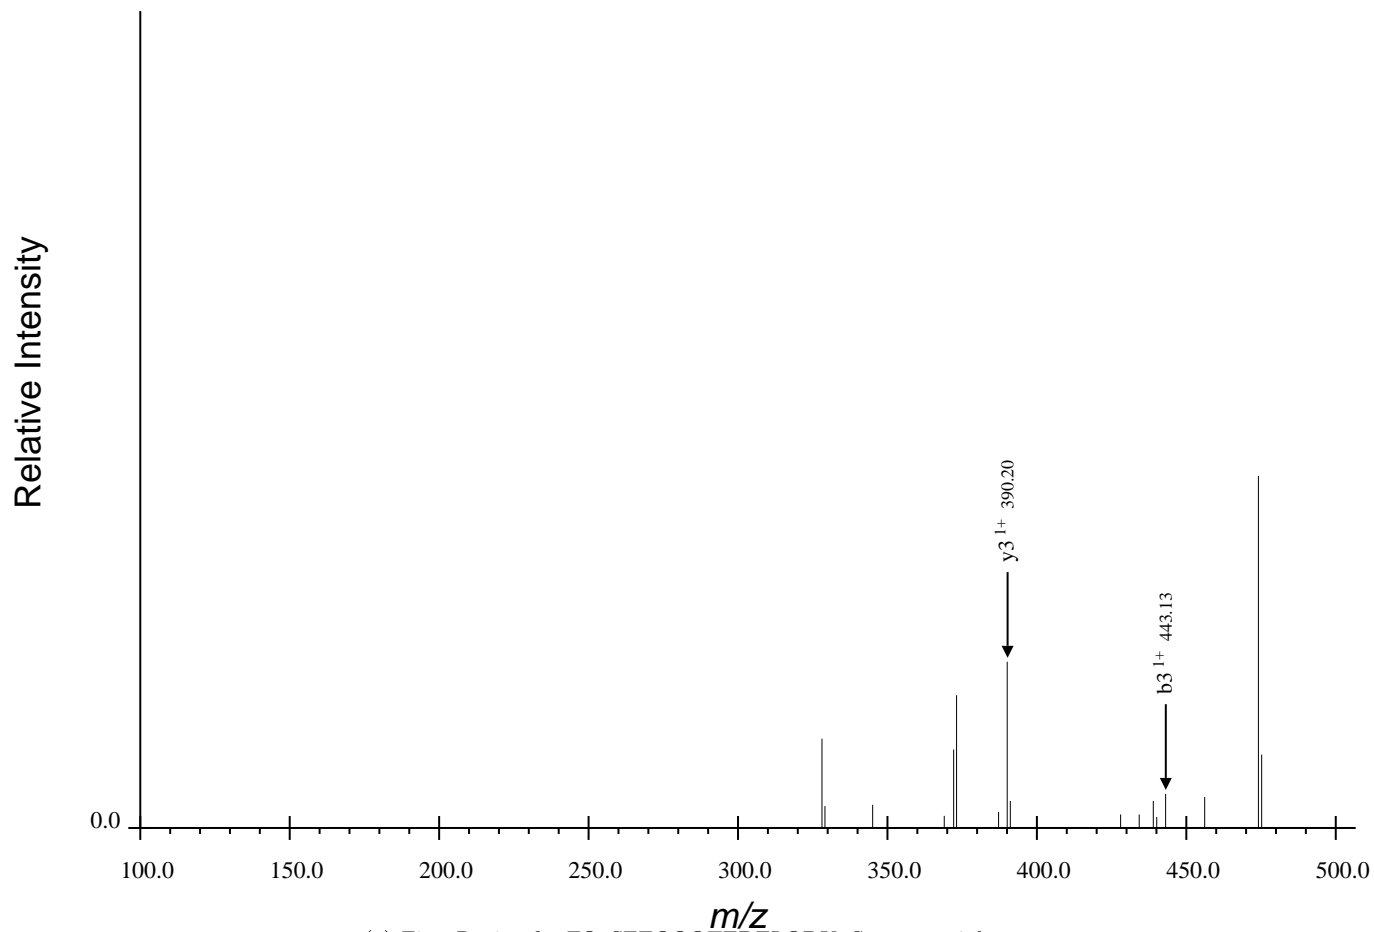

(a) First Region for FQpSEEQQQTEDELQDK, Spectrum 4.dta

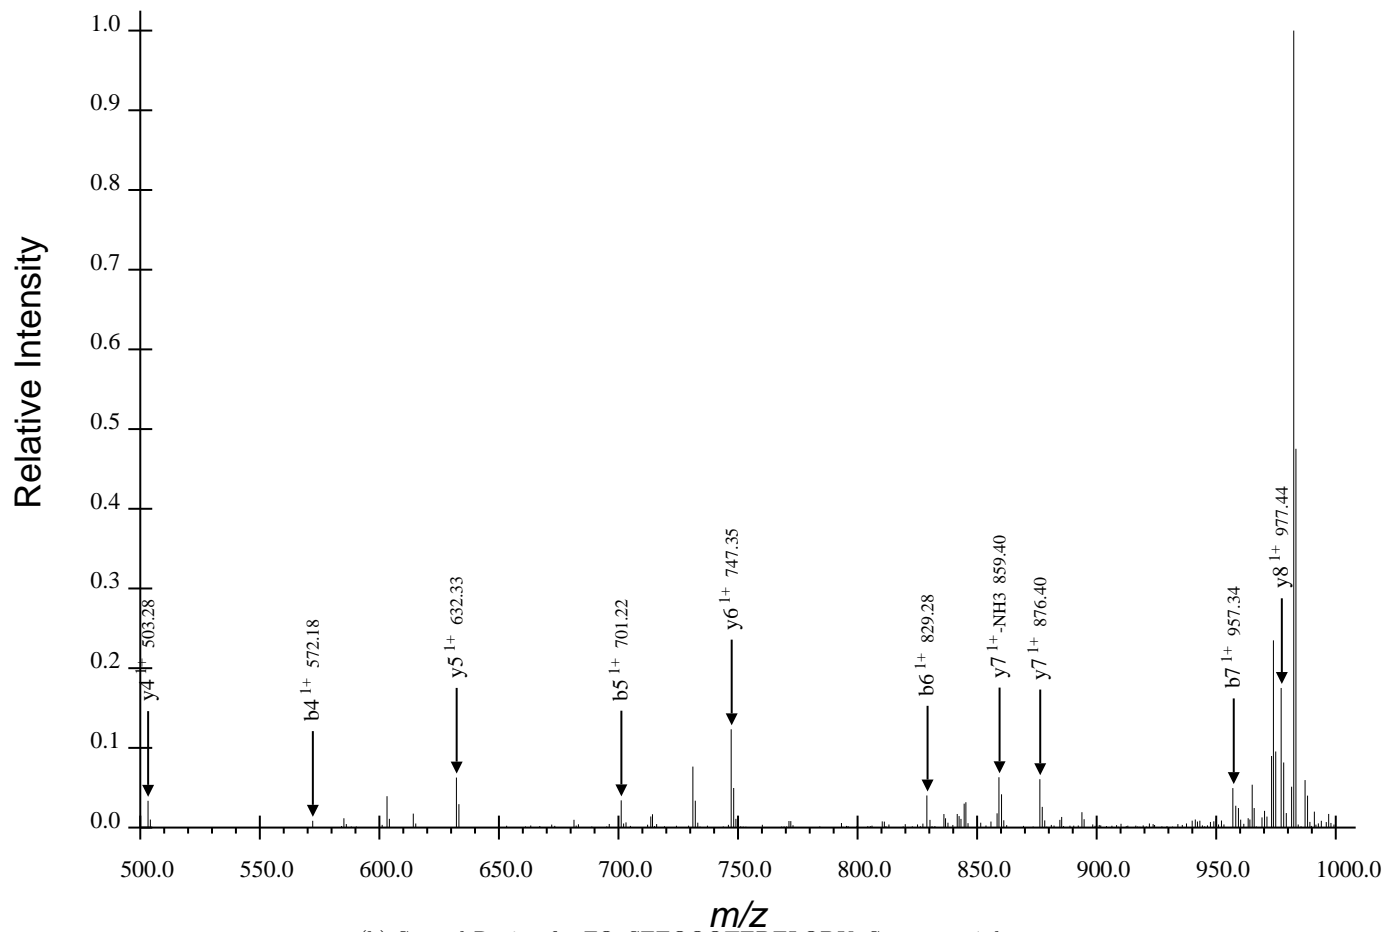

(b) Second Region for FQpSEEQQQTEDELQDK, Spectrum 4.dta

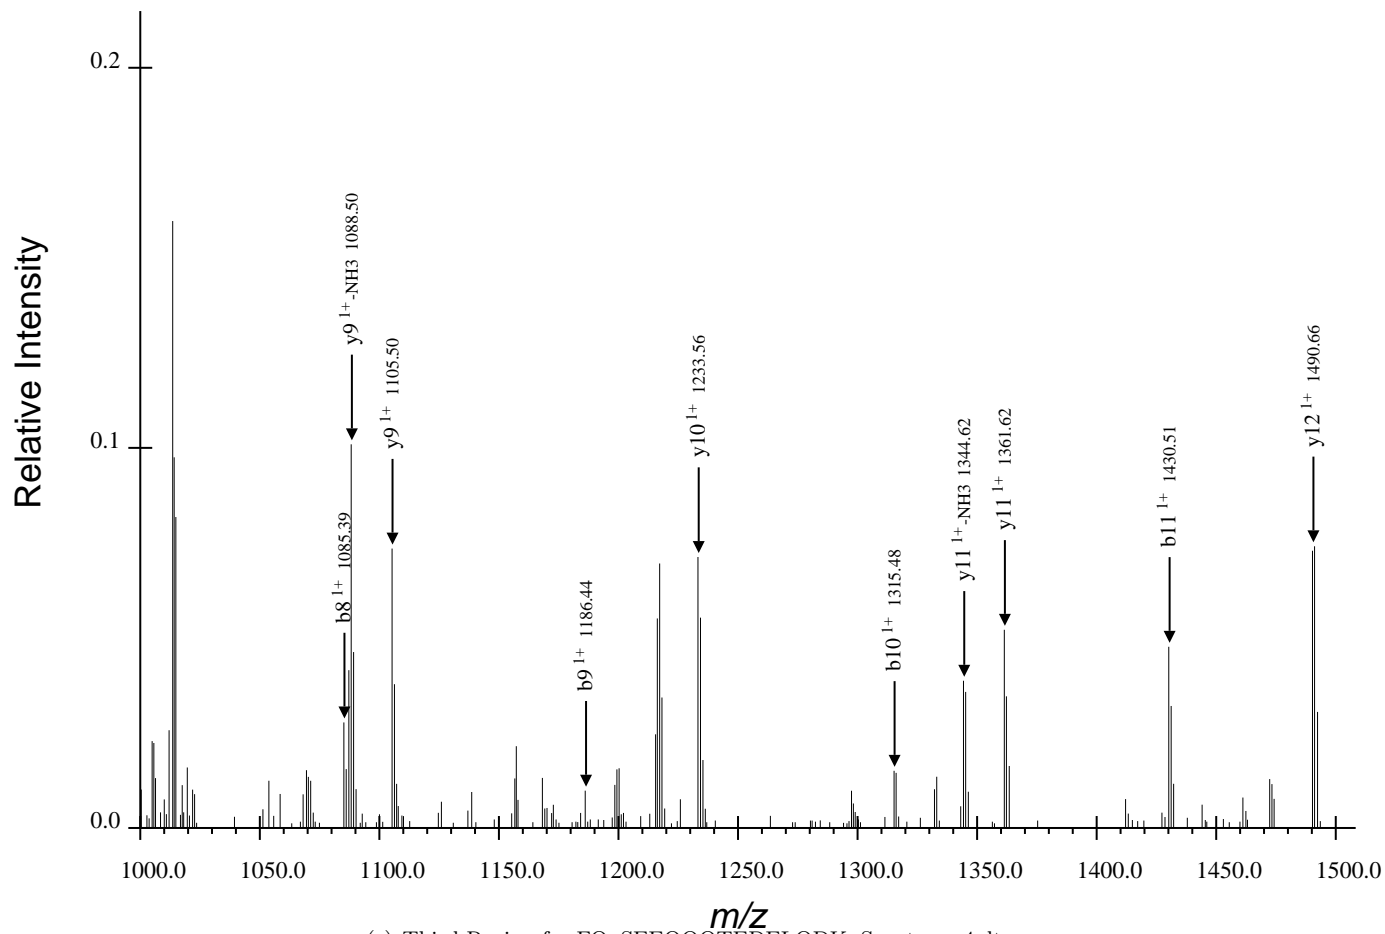

(c) Third Region for FQpSEEQQQTEDELQDK, Spectrum 4.dta

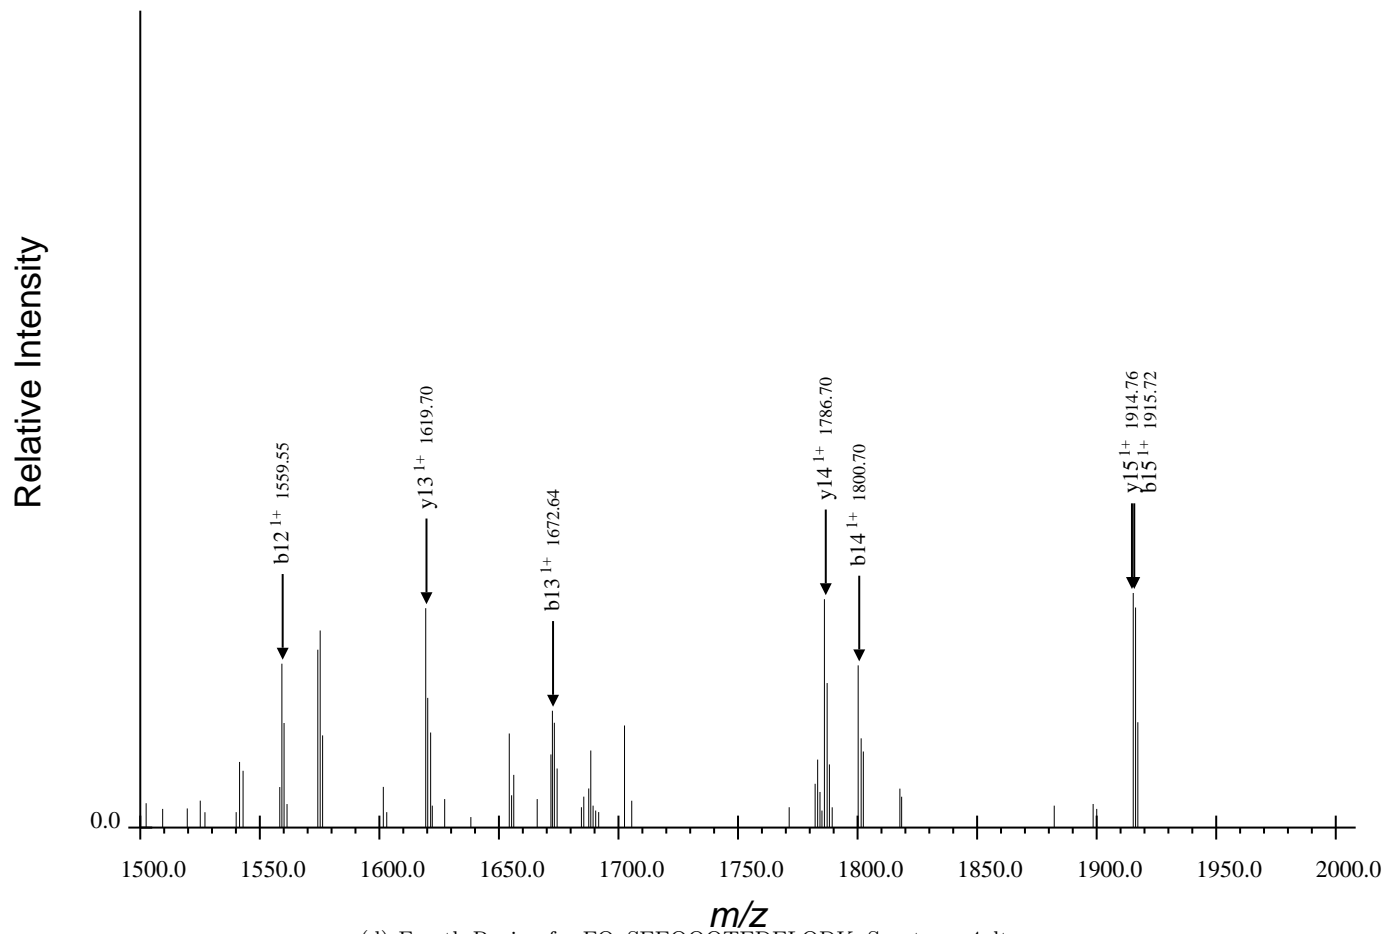

(d) Fourth Region for FQpSEEQQQTEDELQDK, Spectrum 4.dta



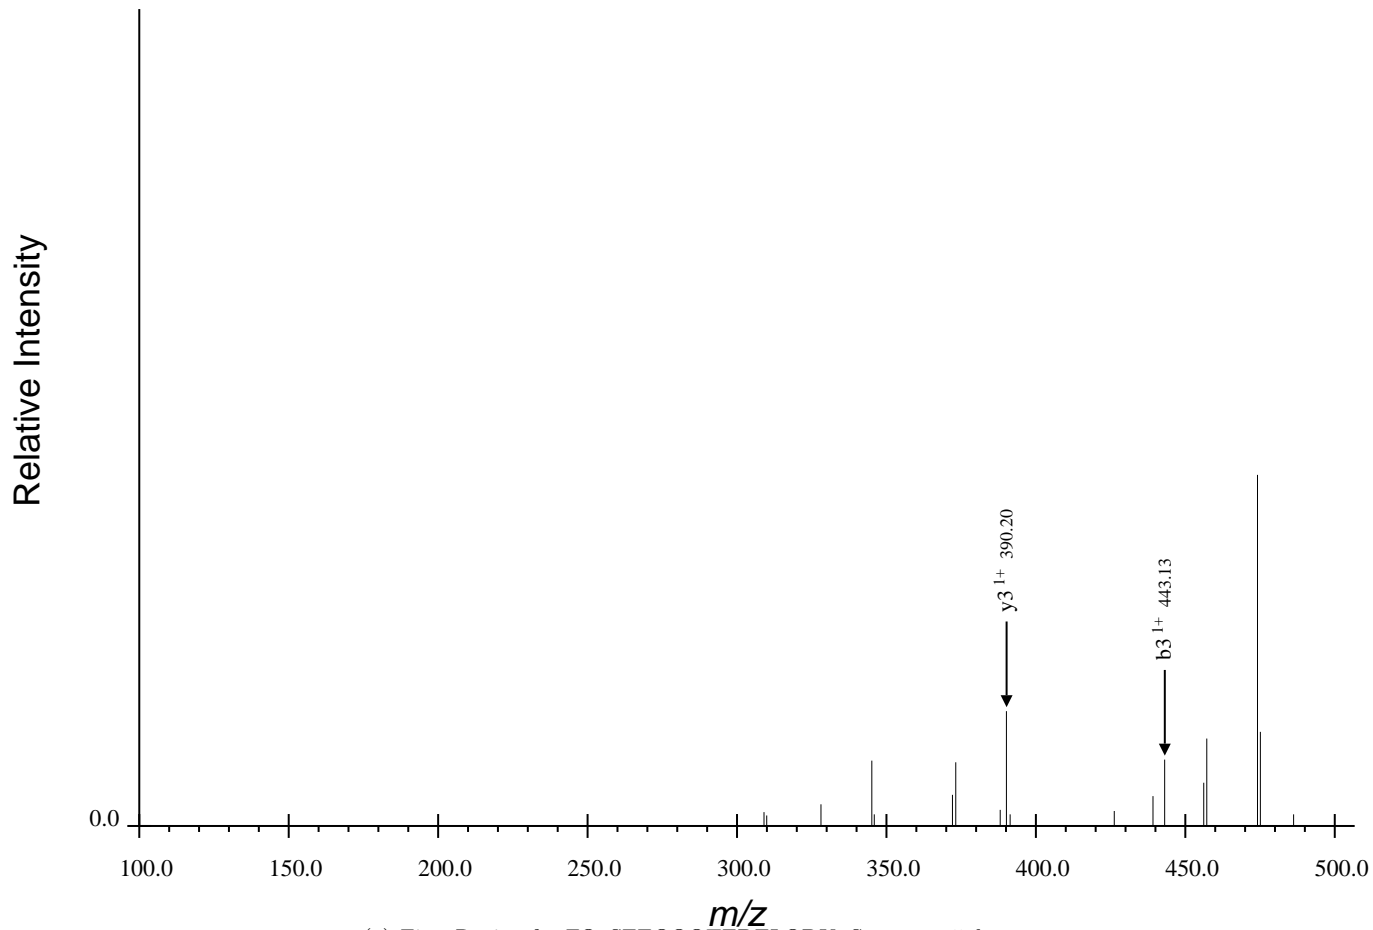

(a) First Region for FQpSEEQQQTEDELQDK, Spectrum 5.dta

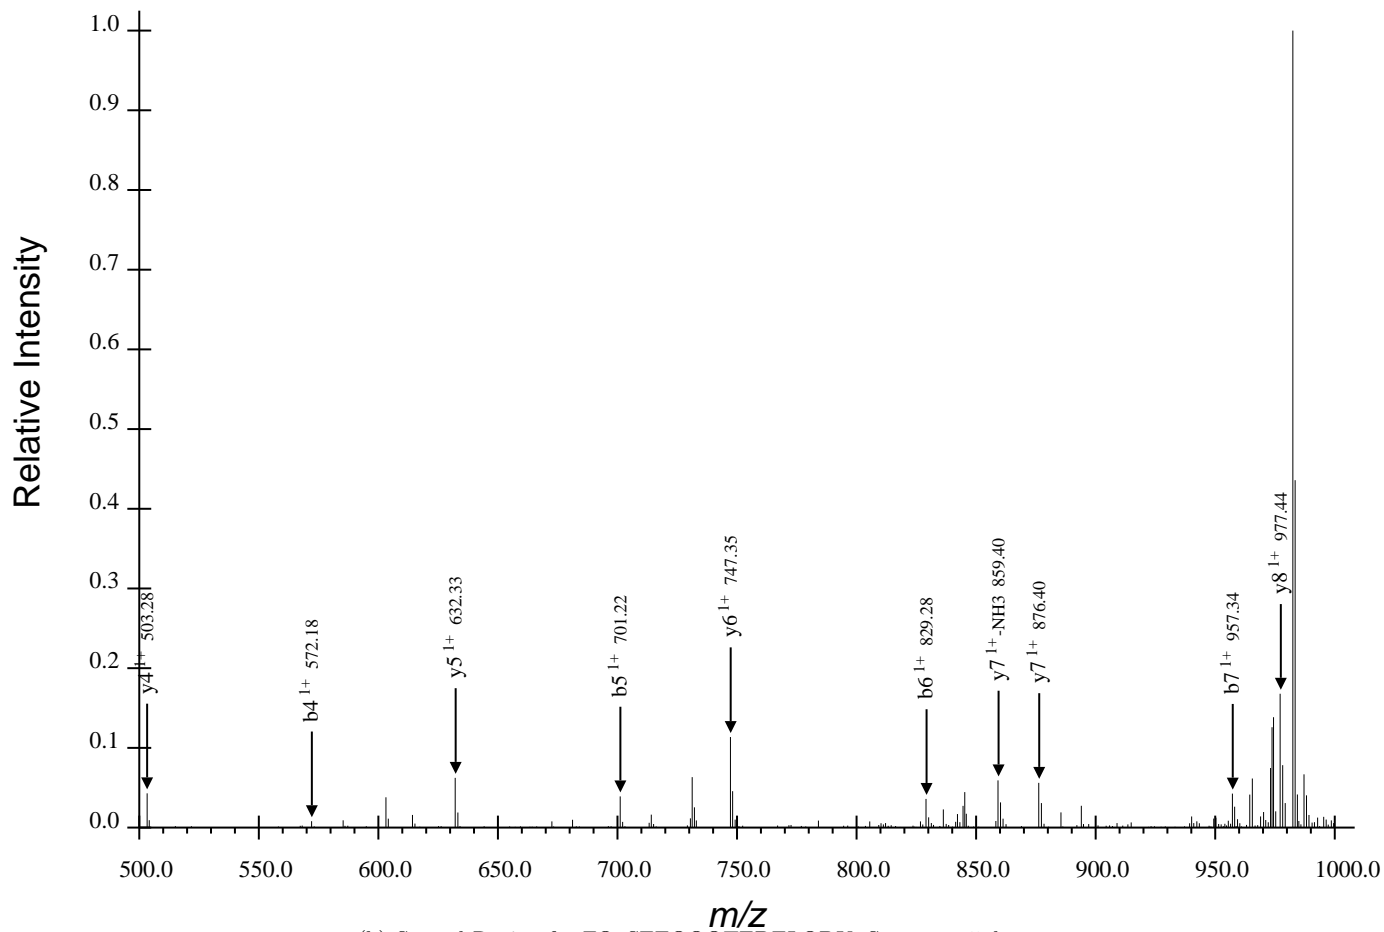

(b) Second Region for FQpSEEQQQTEDELQDK, Spectrum 5.dta

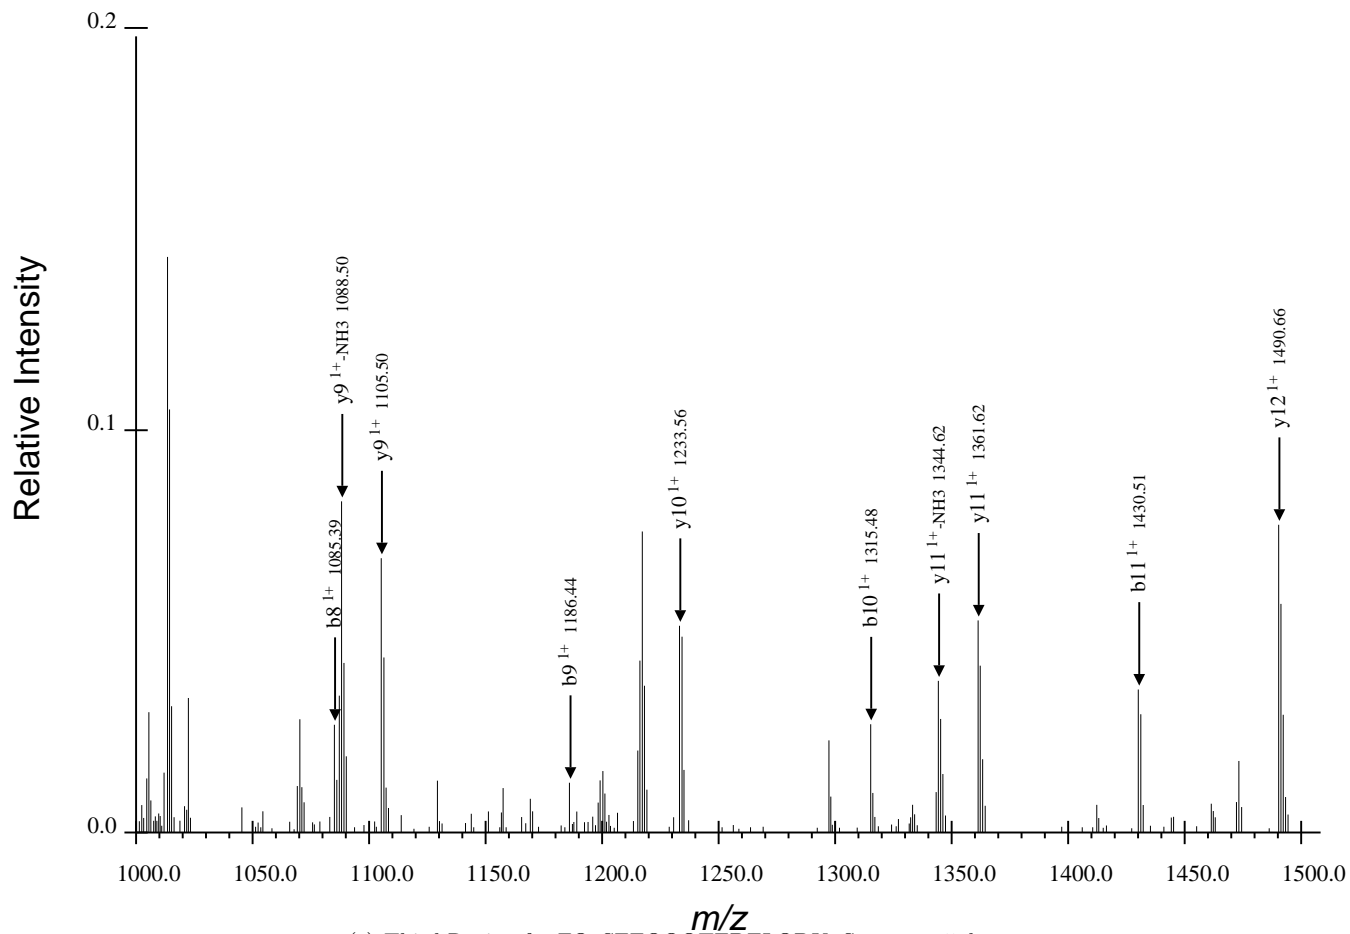

(c) Third Region for FQpSEEQQQTEDELQDK, Spectrum 5.dta

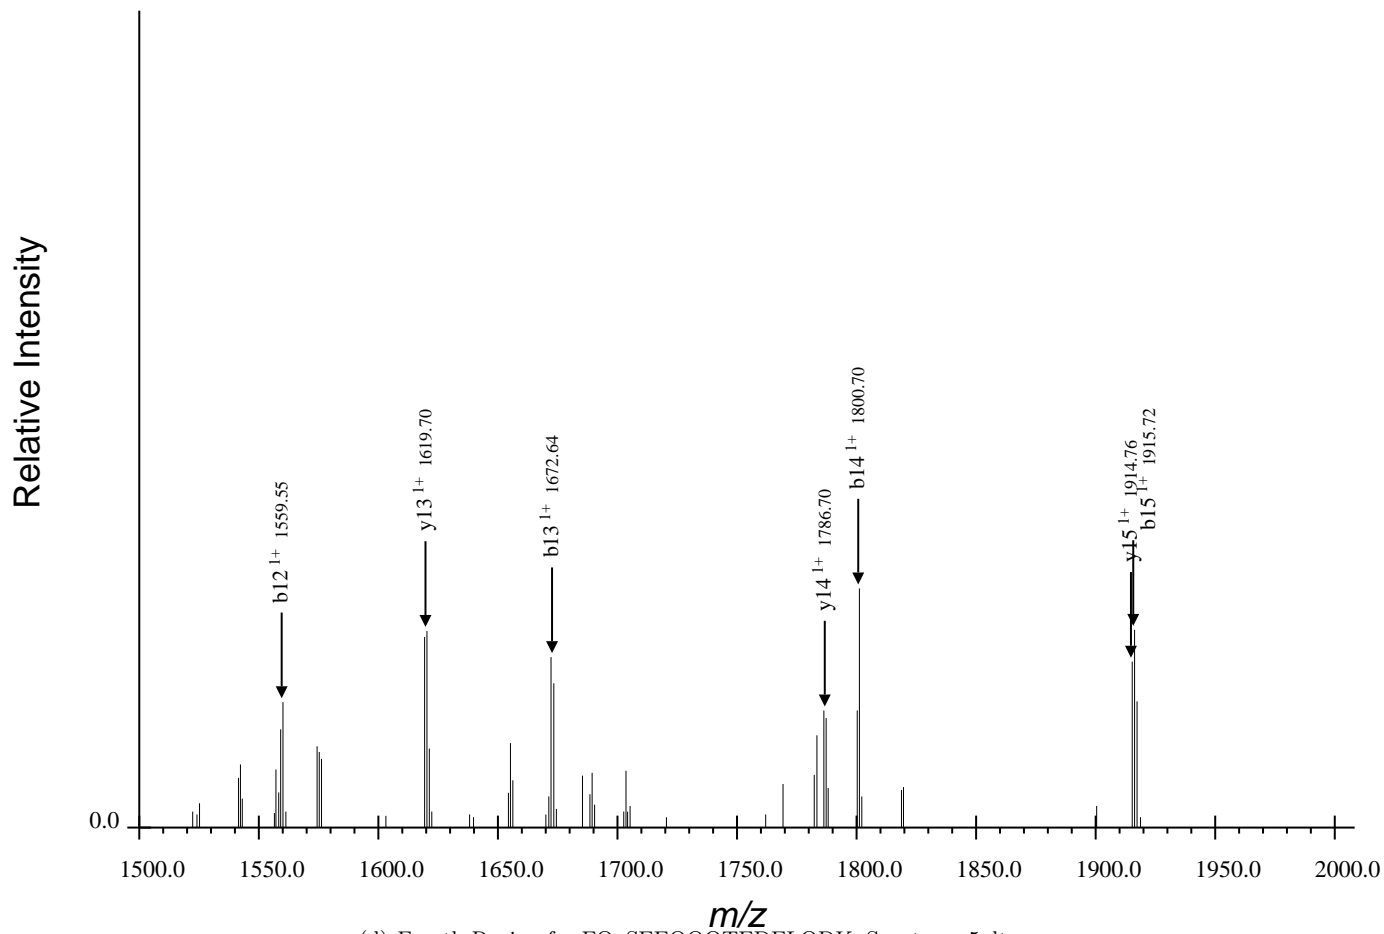

(d) Fourth Region for FQpSEEQQQTEDELQDK, Spectrum 5.dta

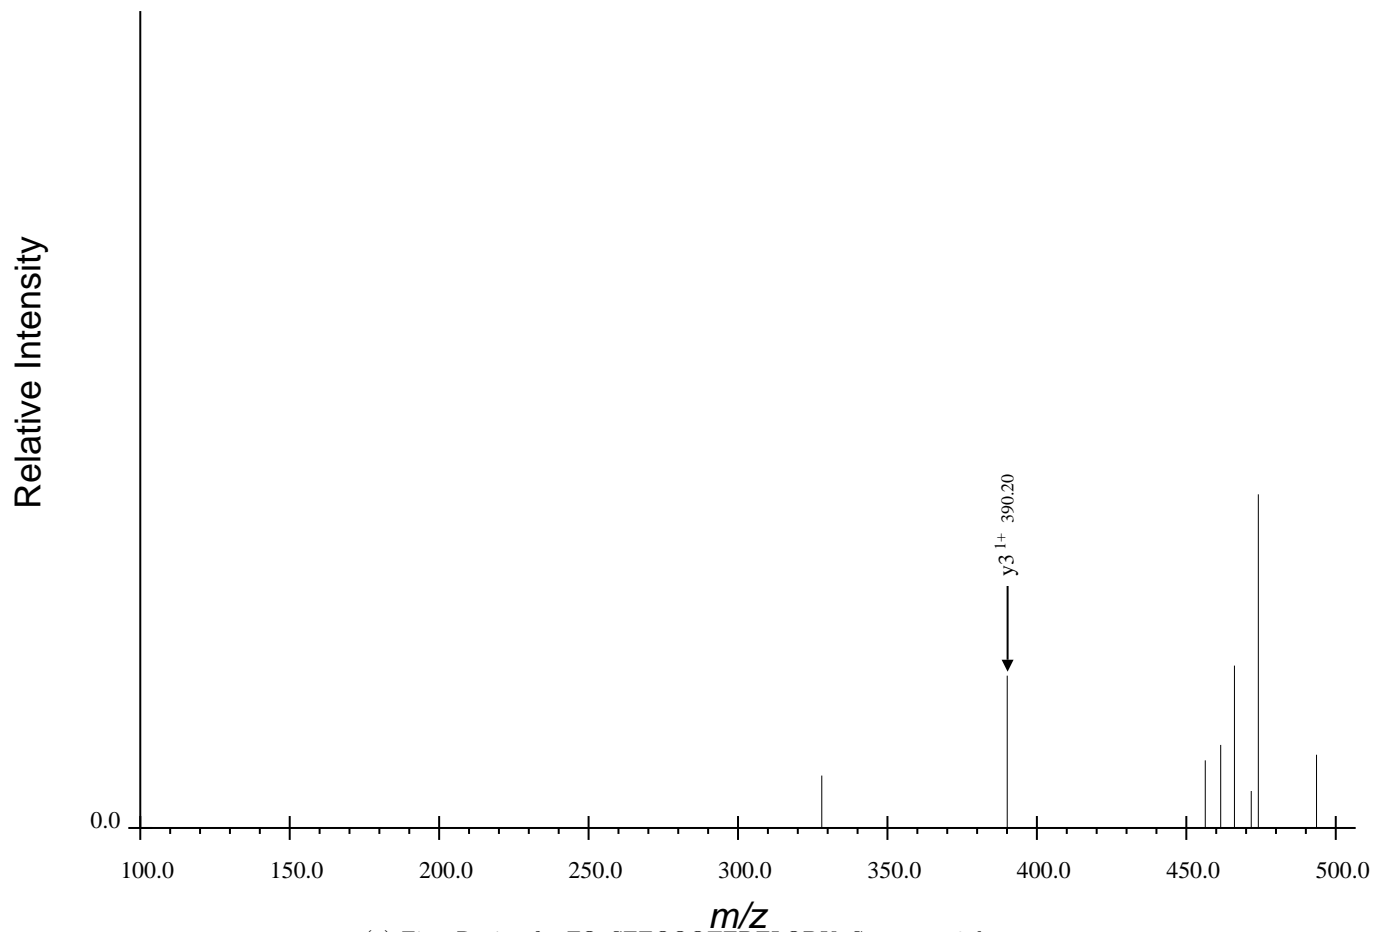

(a) First Region for FQpSEEQQQTEDELQDK, Spectrum 6.dta

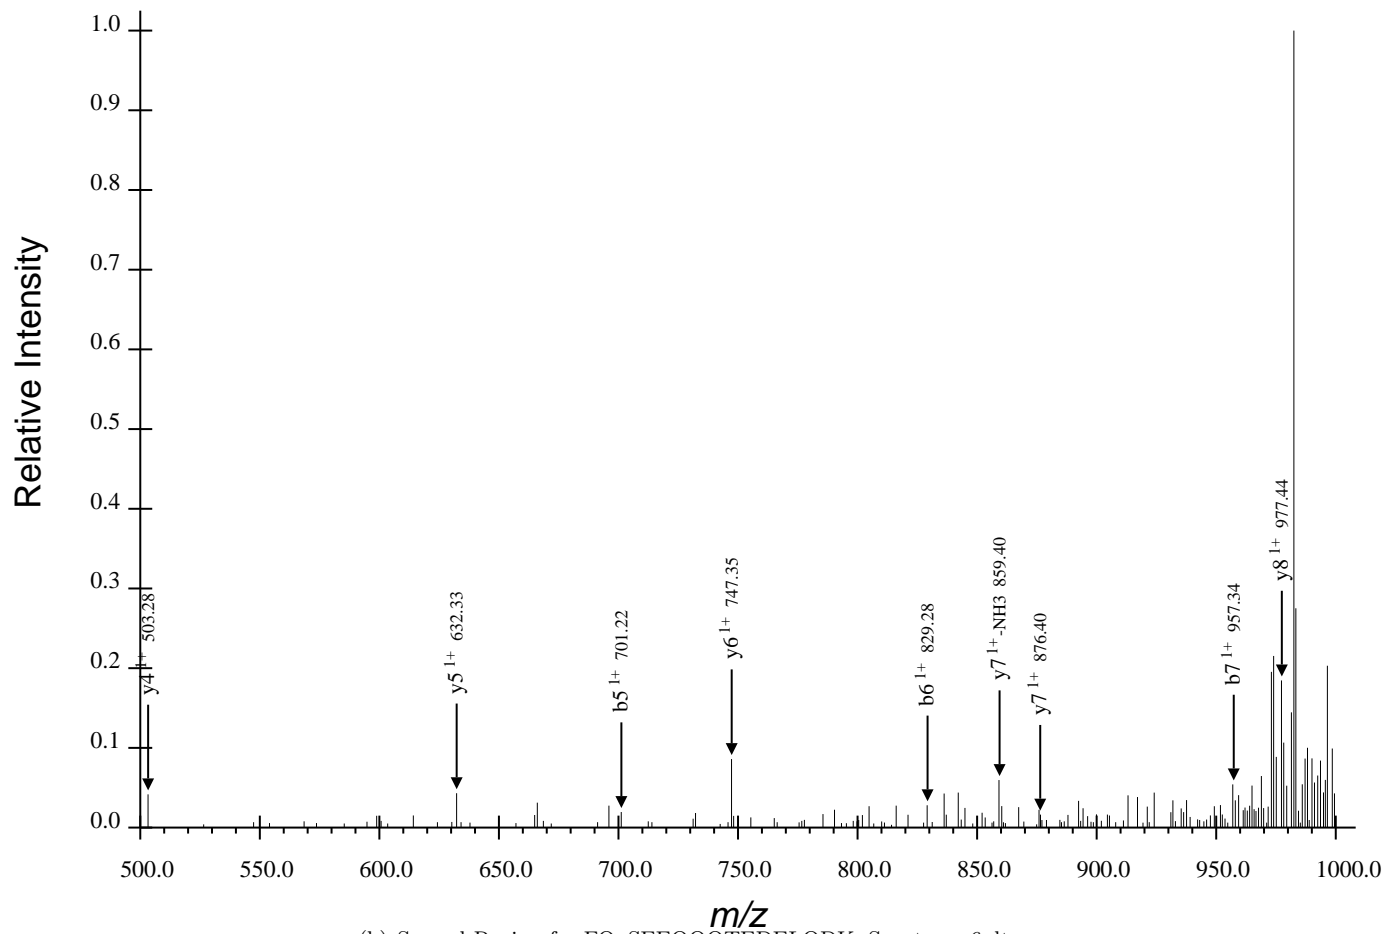

(b) Second Region for FQpSEEQQQTEDELQDK, Spectrum 6.dta

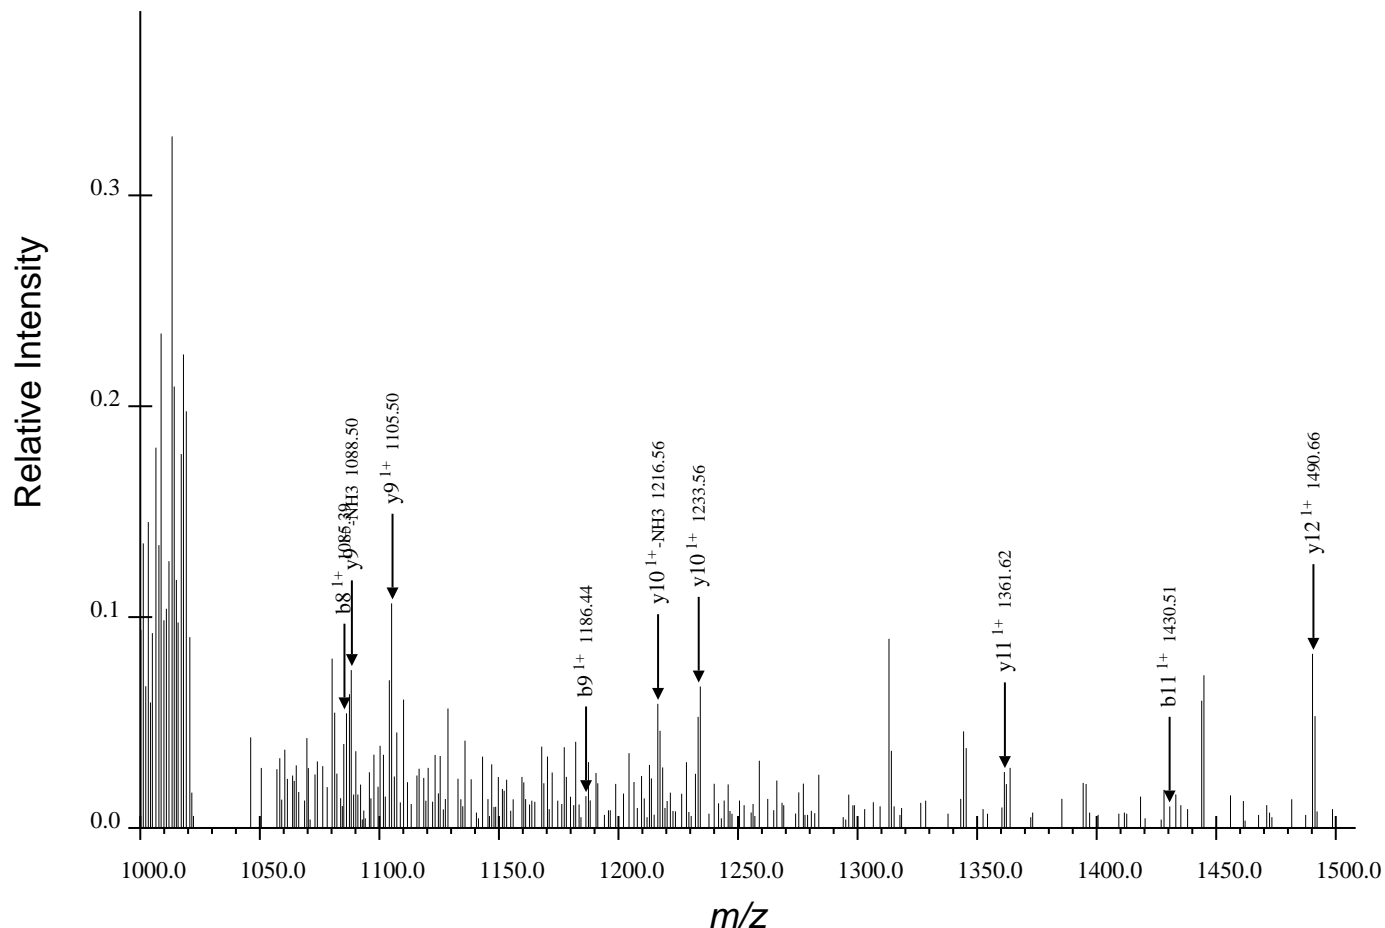

(c) Third Region for FQpSEEQQQTEDELQDK, Spectrum 6.dta

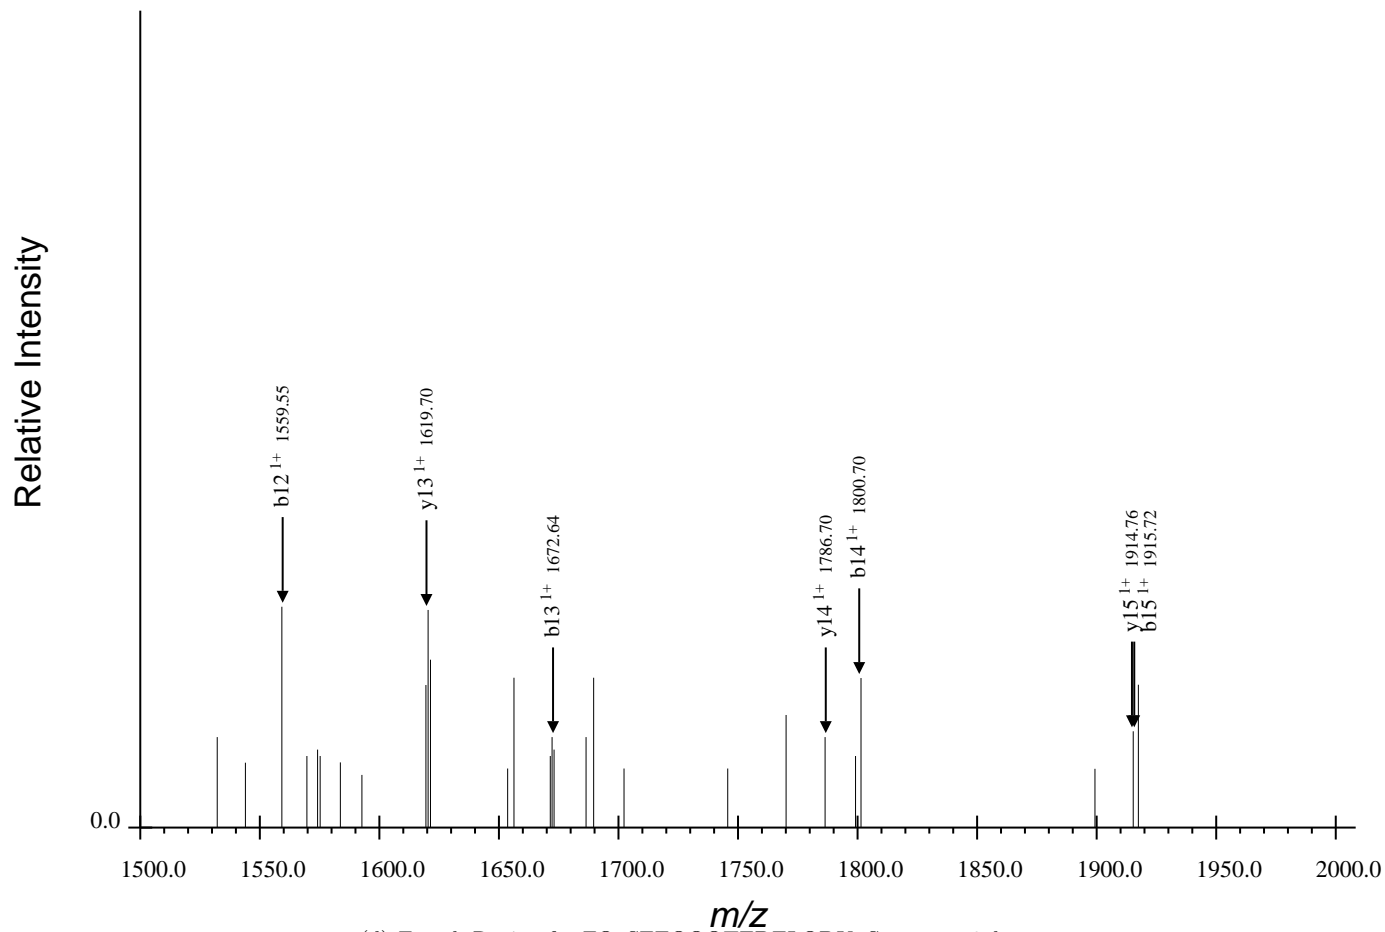

(d) Fourth Region for FQpSEEQQQTEDELQDK, Spectrum 6.dta

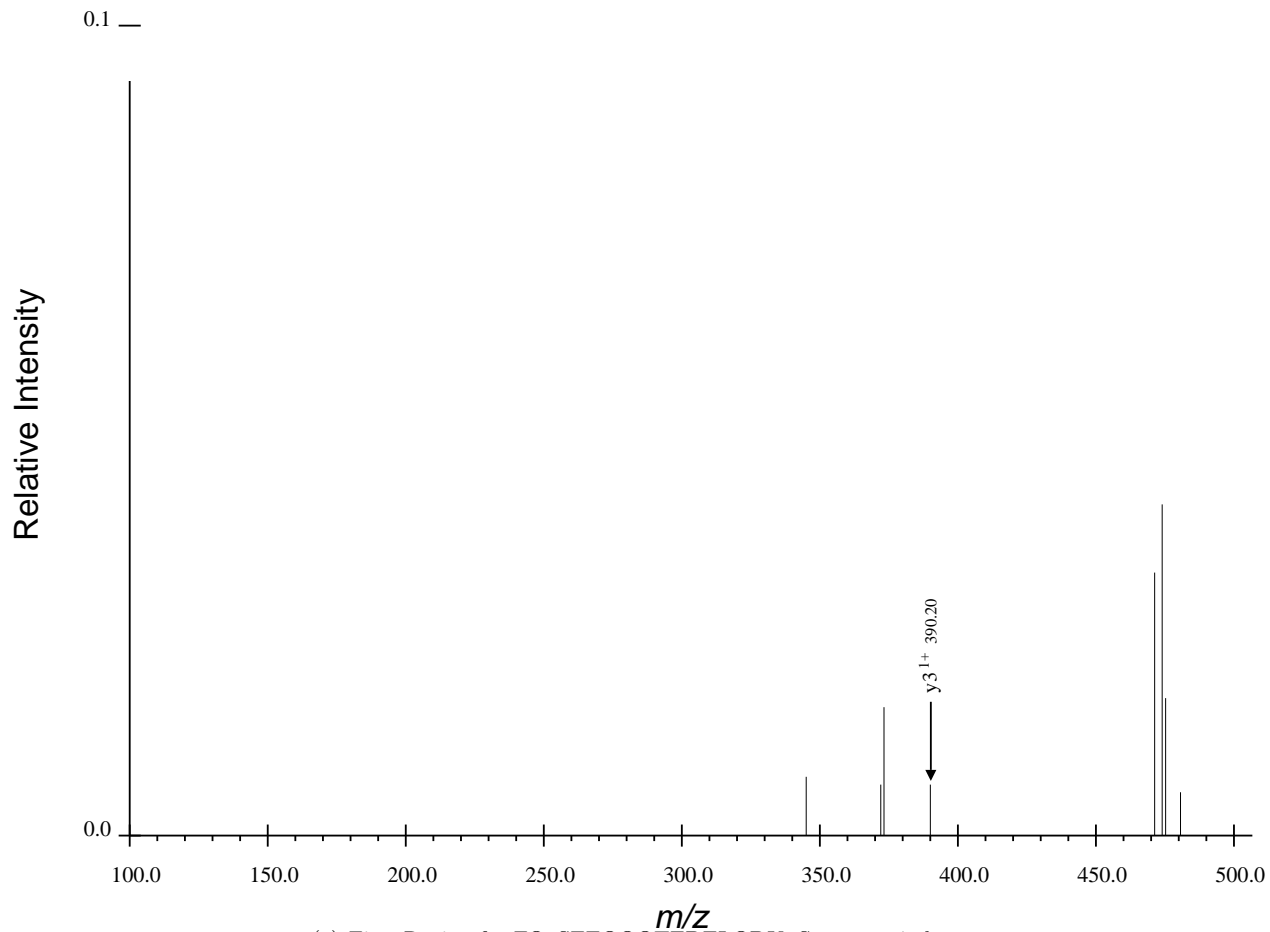

(a) First Region for FQpSEEQQQTEDELQDK, Spectrum 7.dta

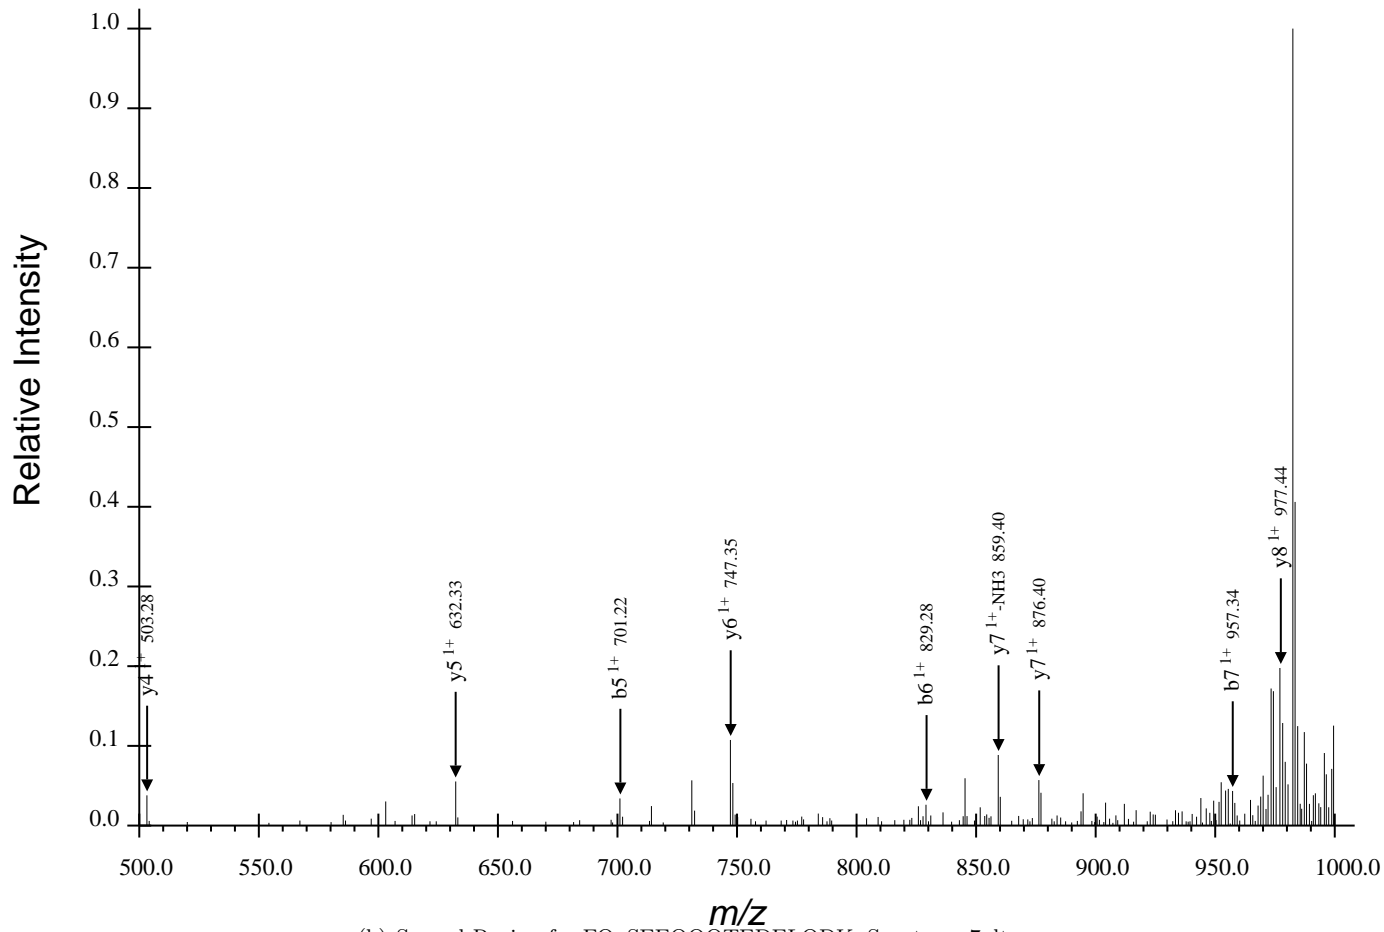

(b) Second Region for FQpSEEQQQTEDELQDK, Spectrum 7.dta

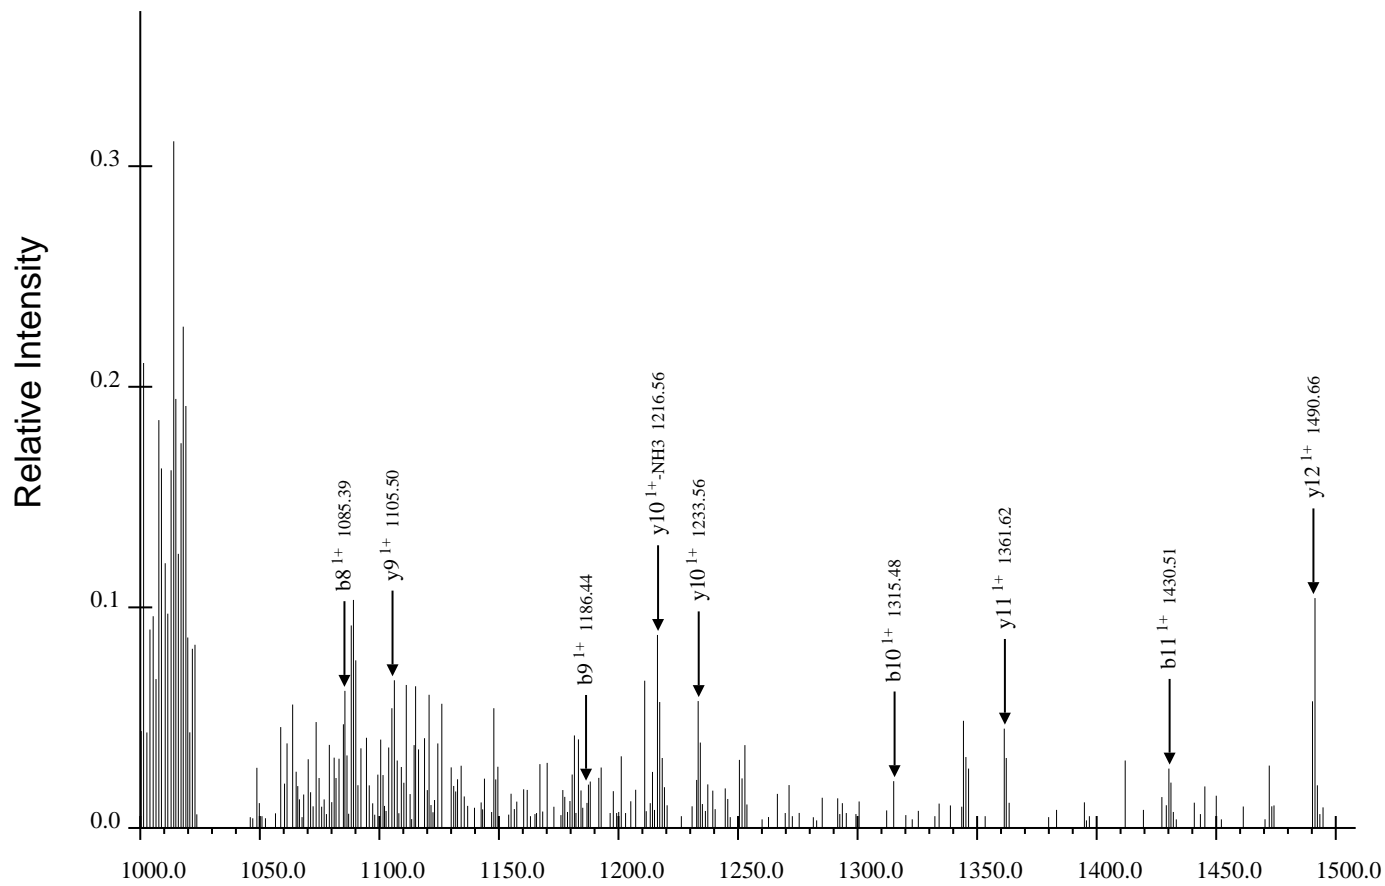

(c) Third Region for FQpSEEQQQTEDELQDK, Spectrum 7.dta

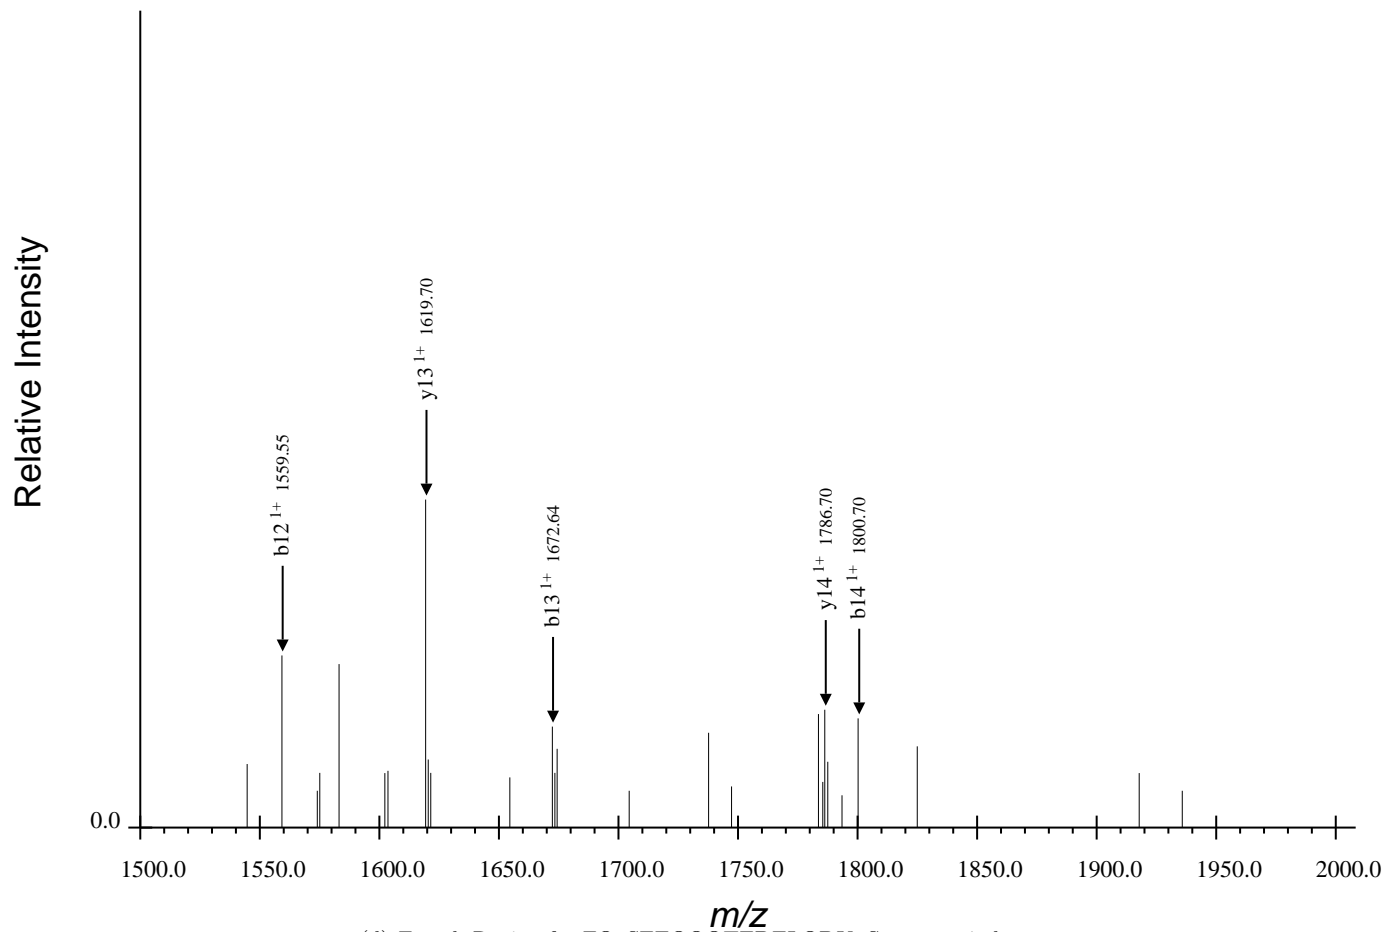

(d) Fourth Region for FQpSEEQQQTEDELQDK, Spectrum 7.dta

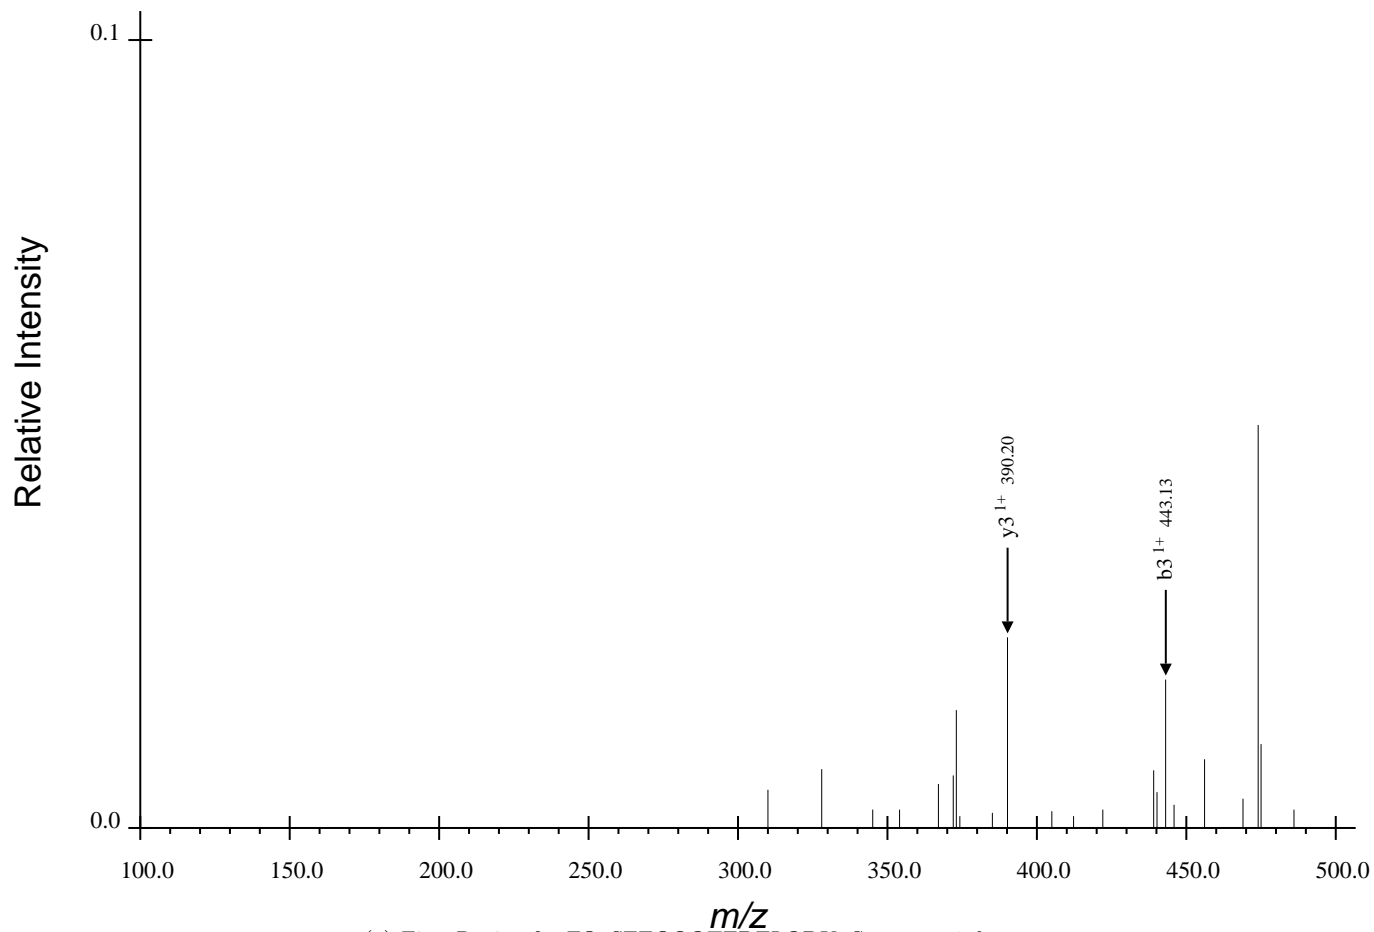

(a) First Region for FQpSEEQQQTEDELQDK, Spectrum 8.dta

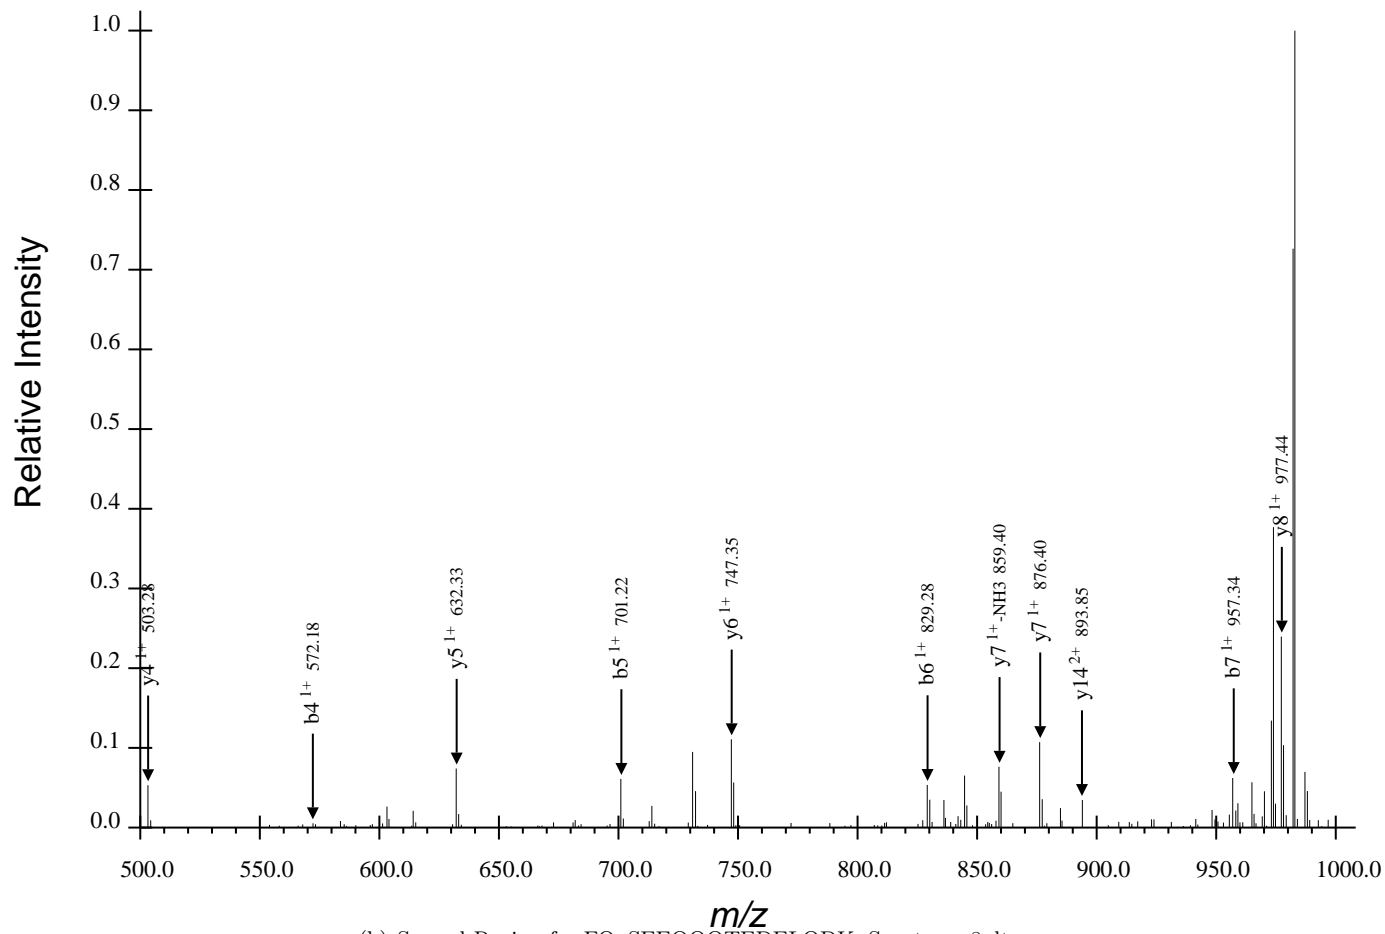

(b) Second Region for FQpSEEQQQTEDELQDK, Spectrum 8.dta

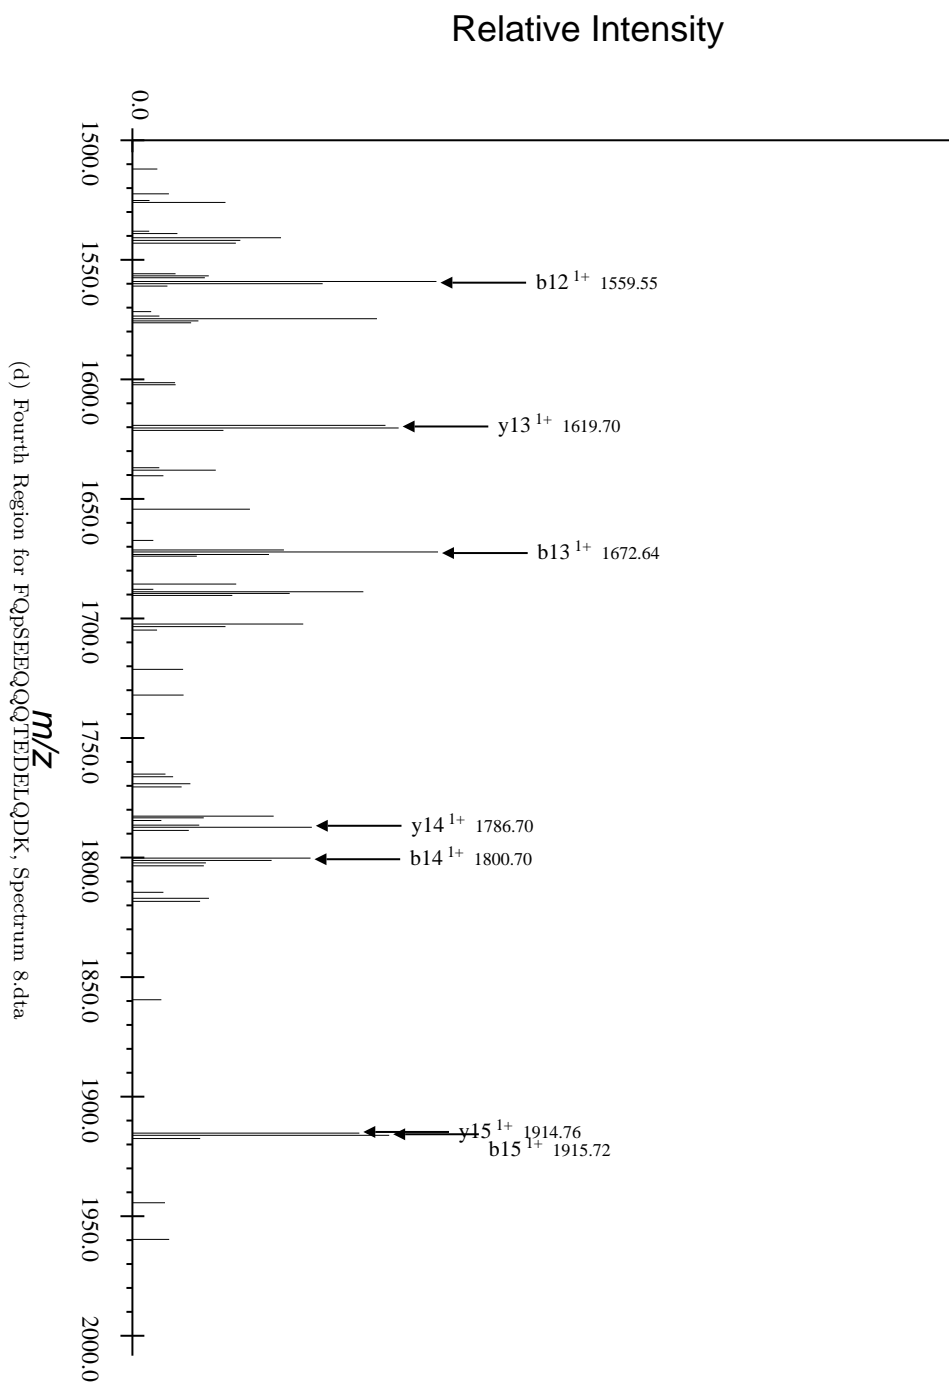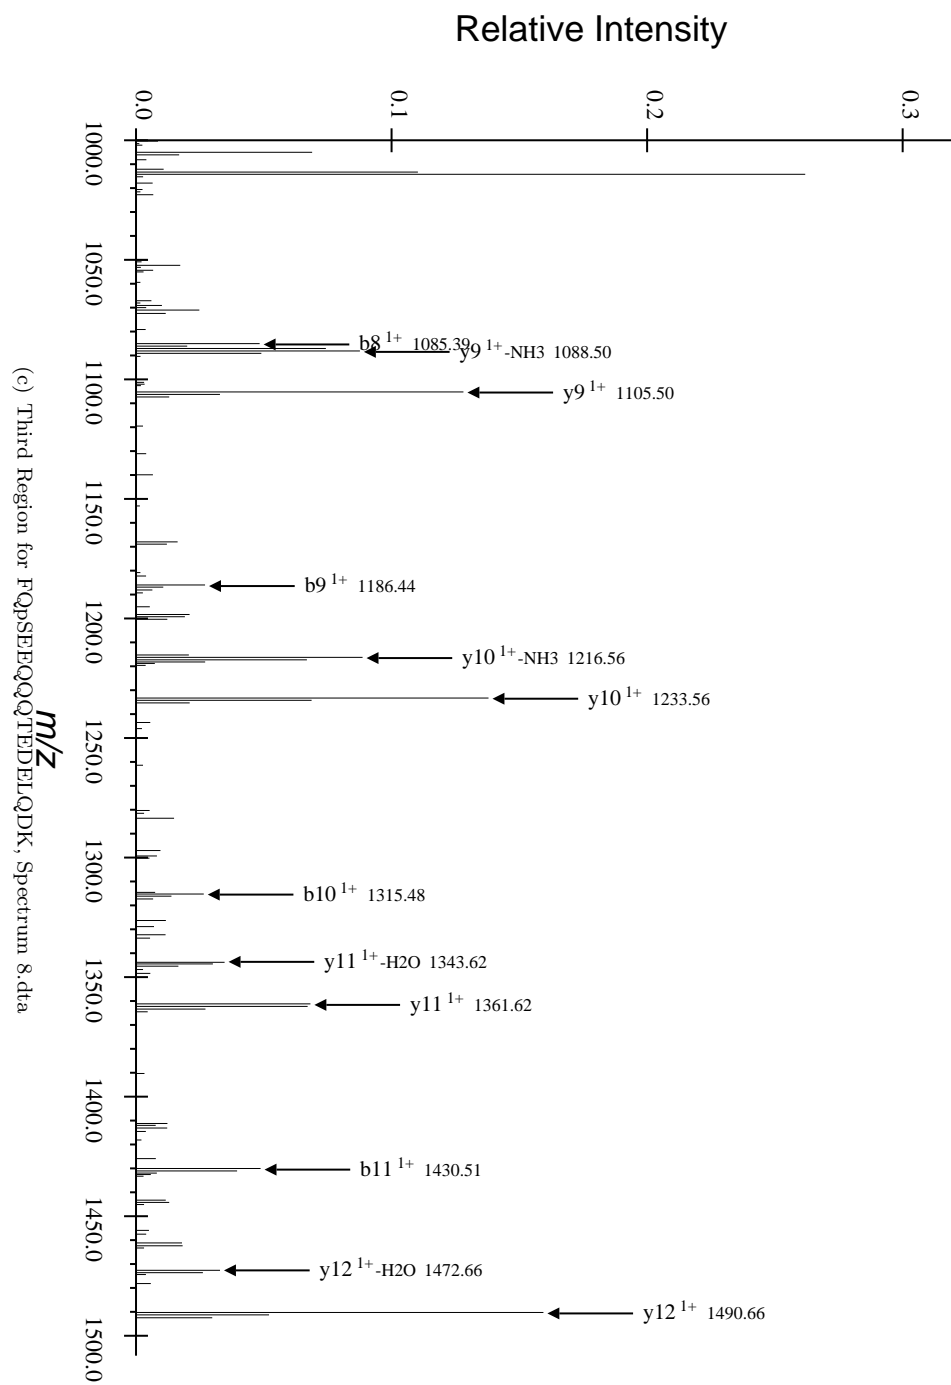



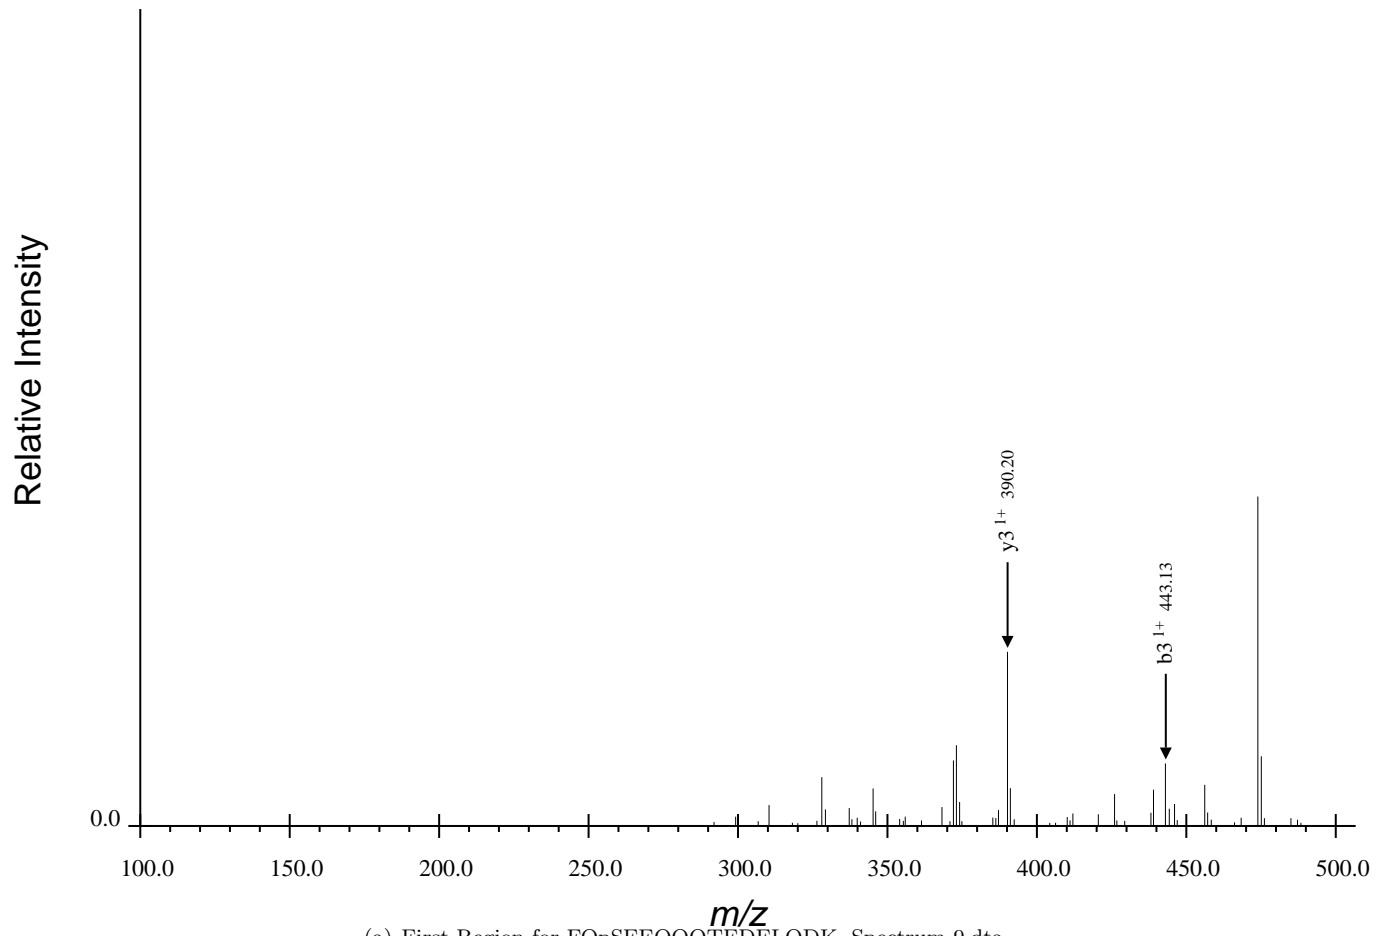

(a) First Region for FQpSEEQQQTEDELQDK, Spectrum 9.dta

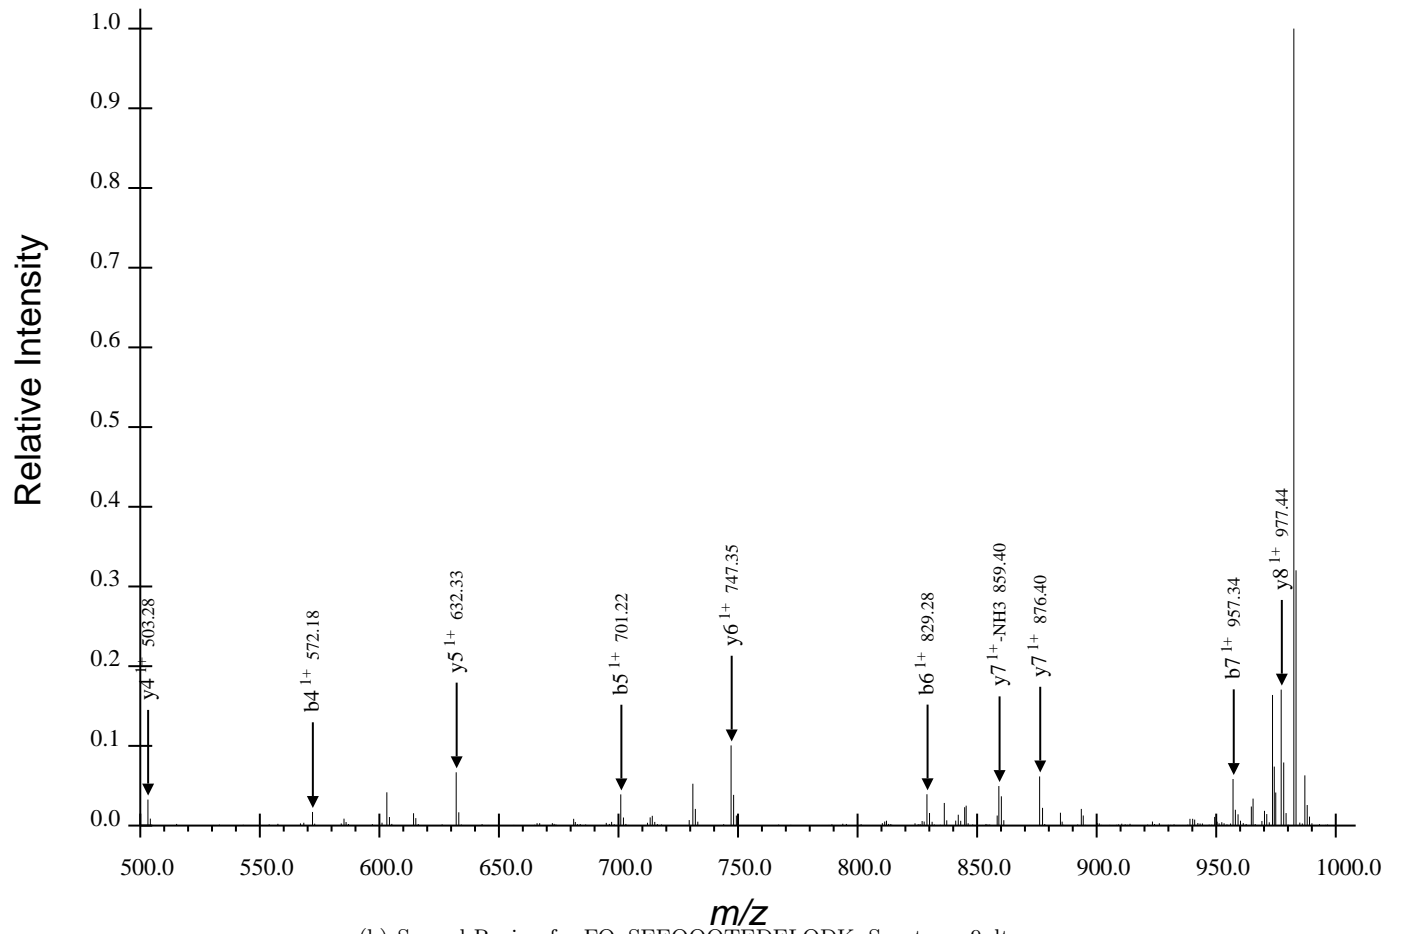

(b) Second Region for FQpSEEQQQTEDELQDK, Spectrum 9.dta

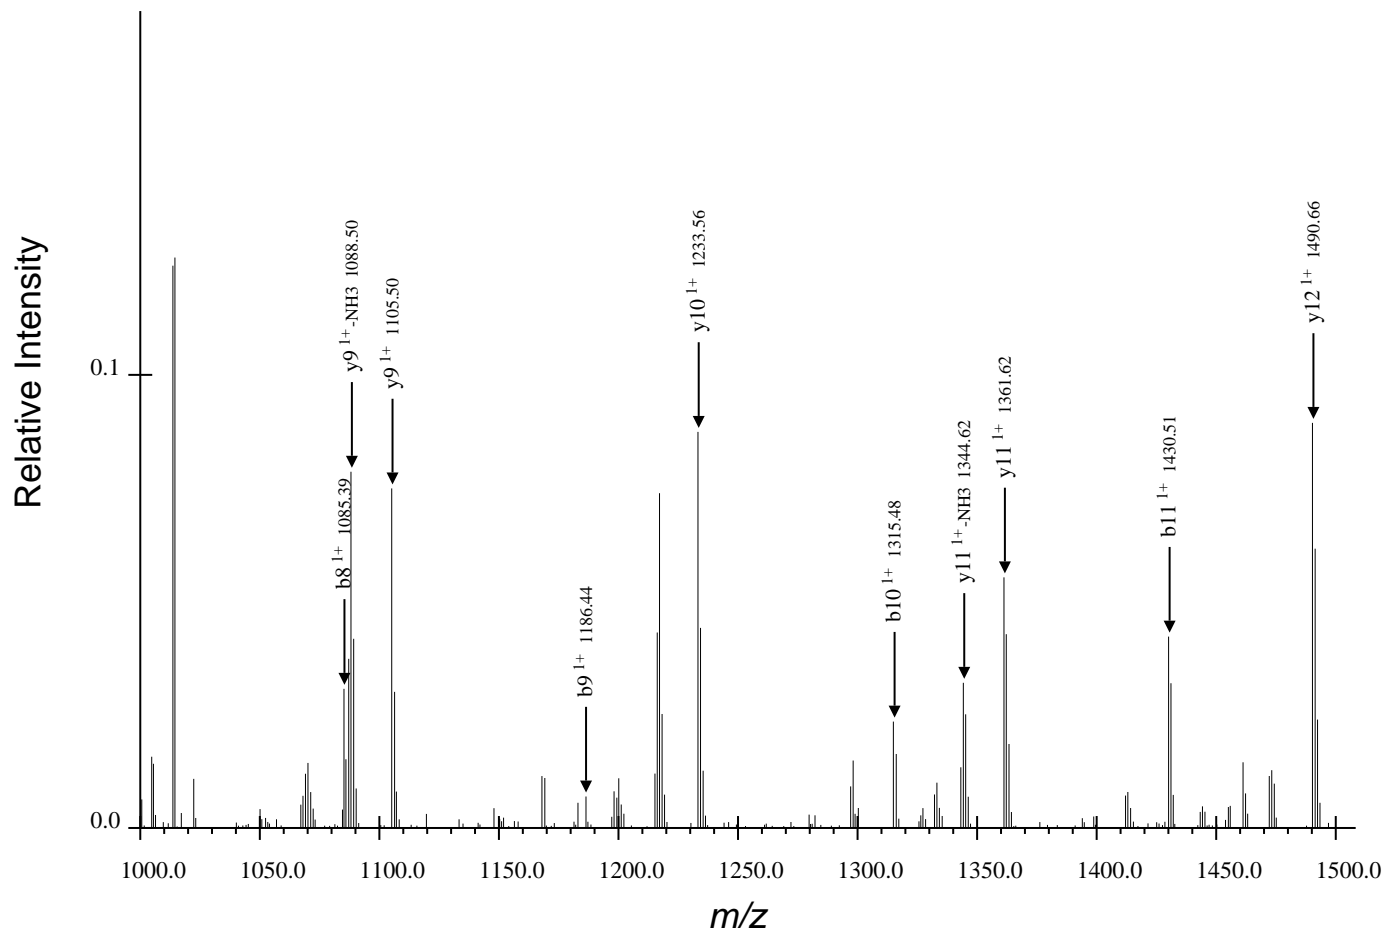

(c) Third Region for FQpSEEQQQTEDELQDK, Spectrum 9.dta

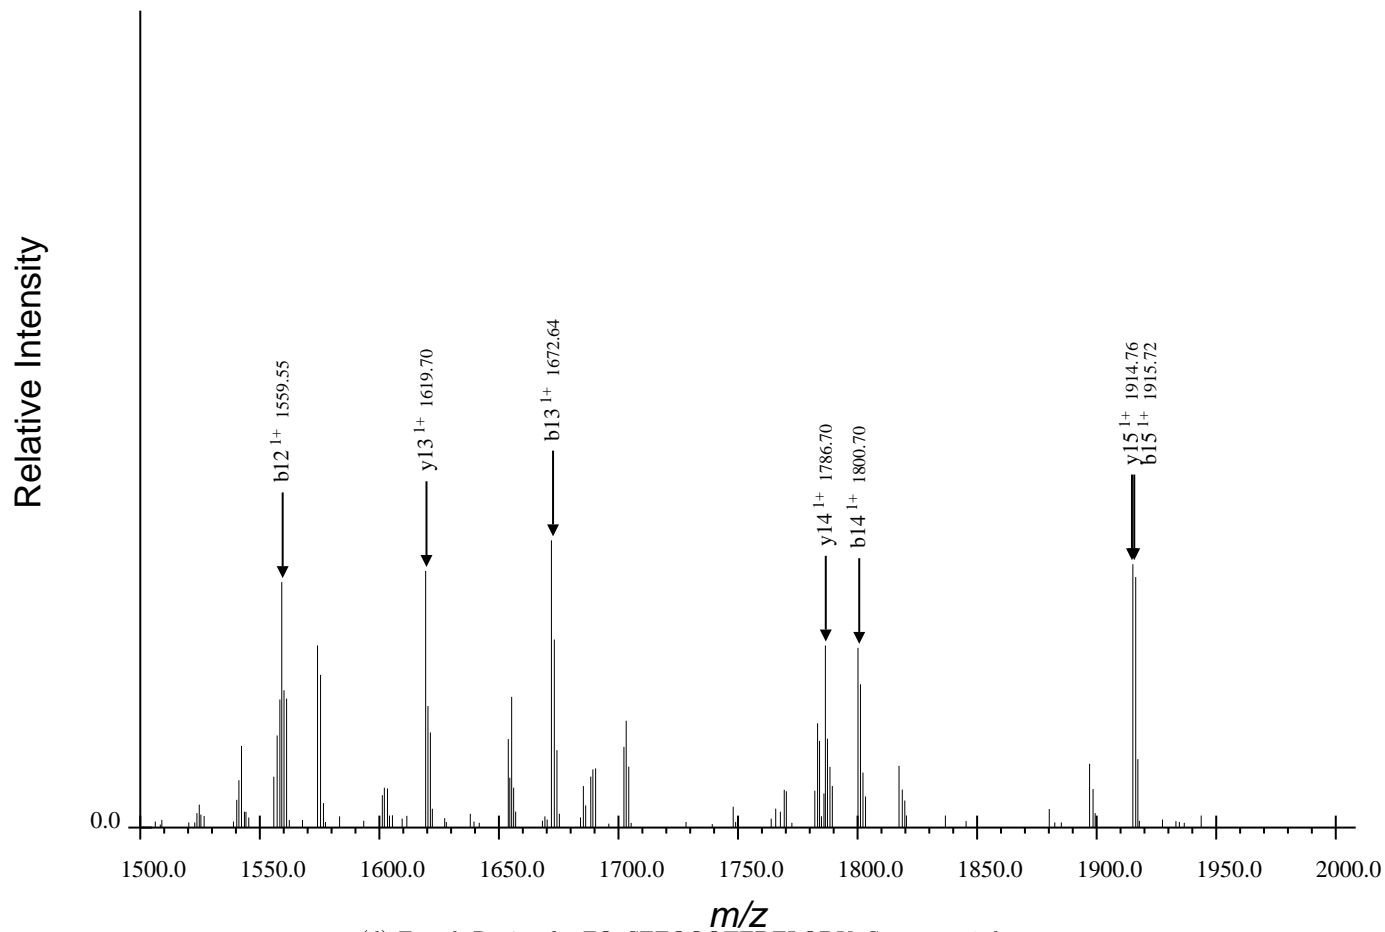

(d) Fourth Region for FQpSEEQQQTEDELQDK, Spectrum 9.dta

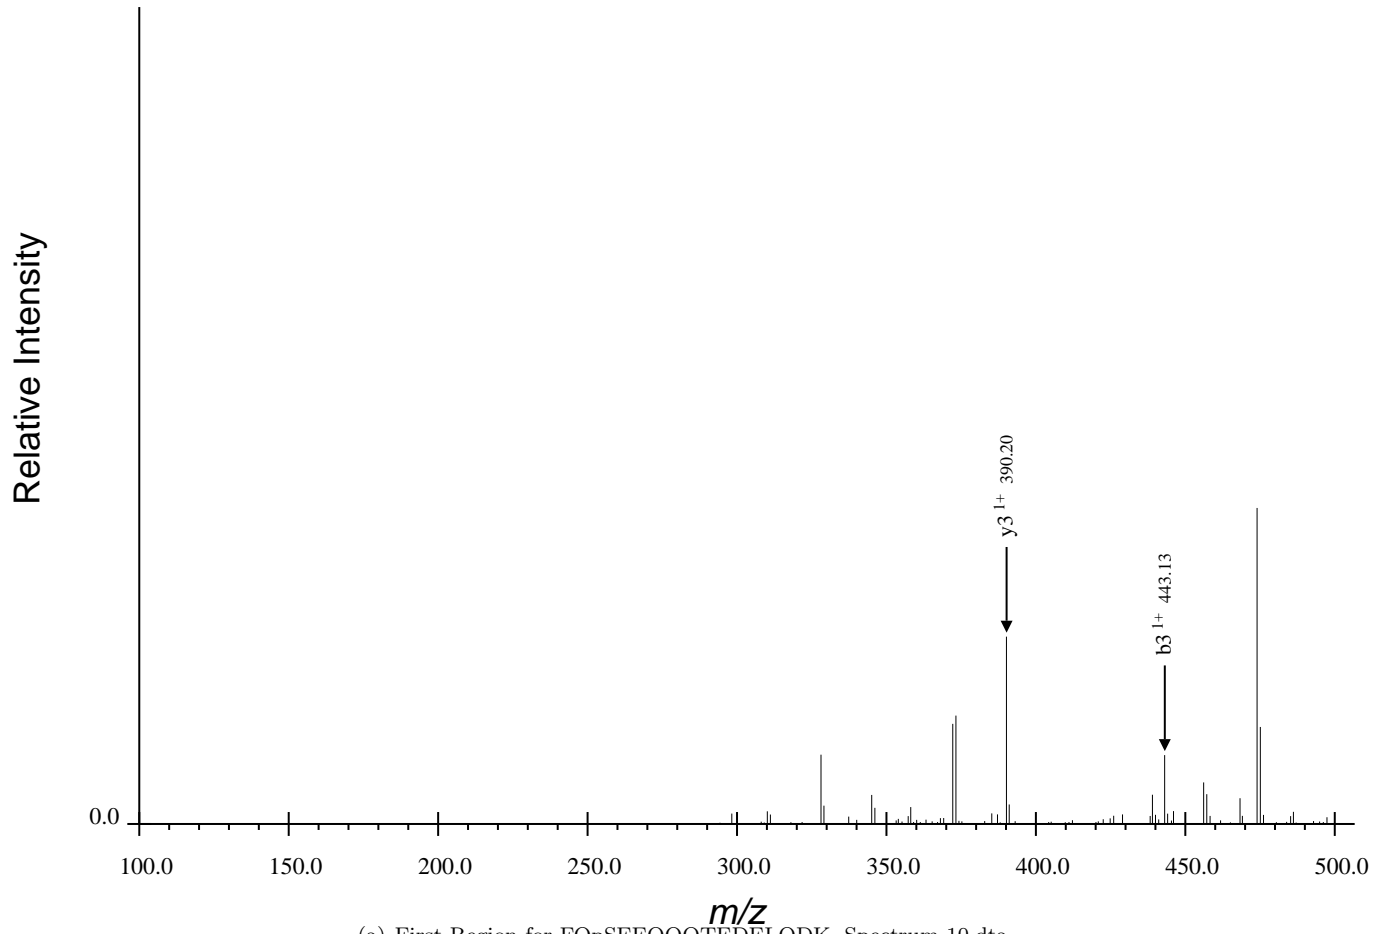

(a) First Region for FQpSEEQQQTEDELQDK, Spectrum 10.dta

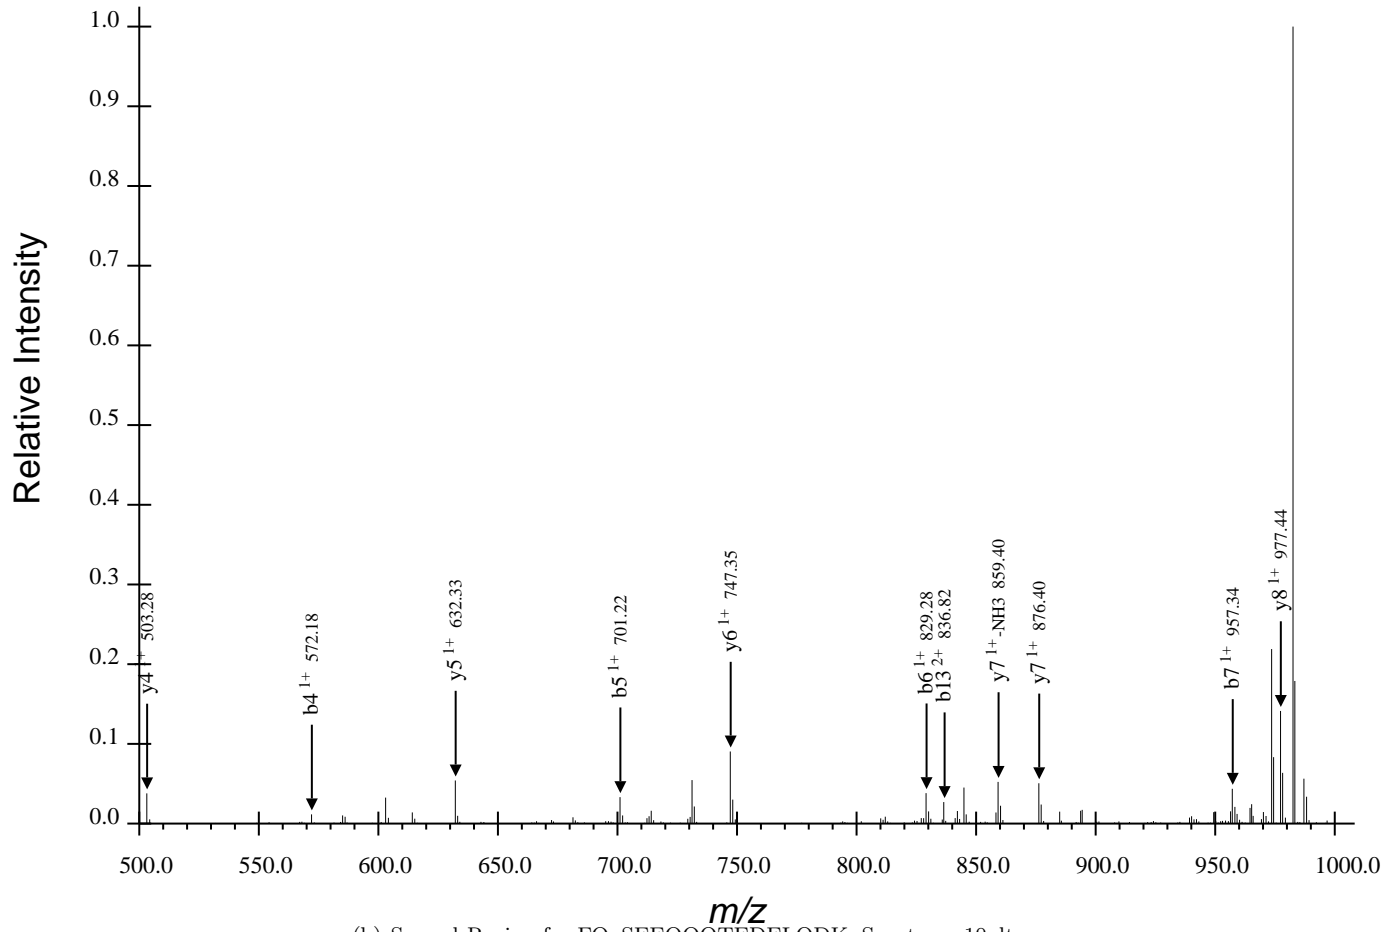

(b) Second Region for FQpSEEQQQTEDELQDK, Spectrum 10.dta

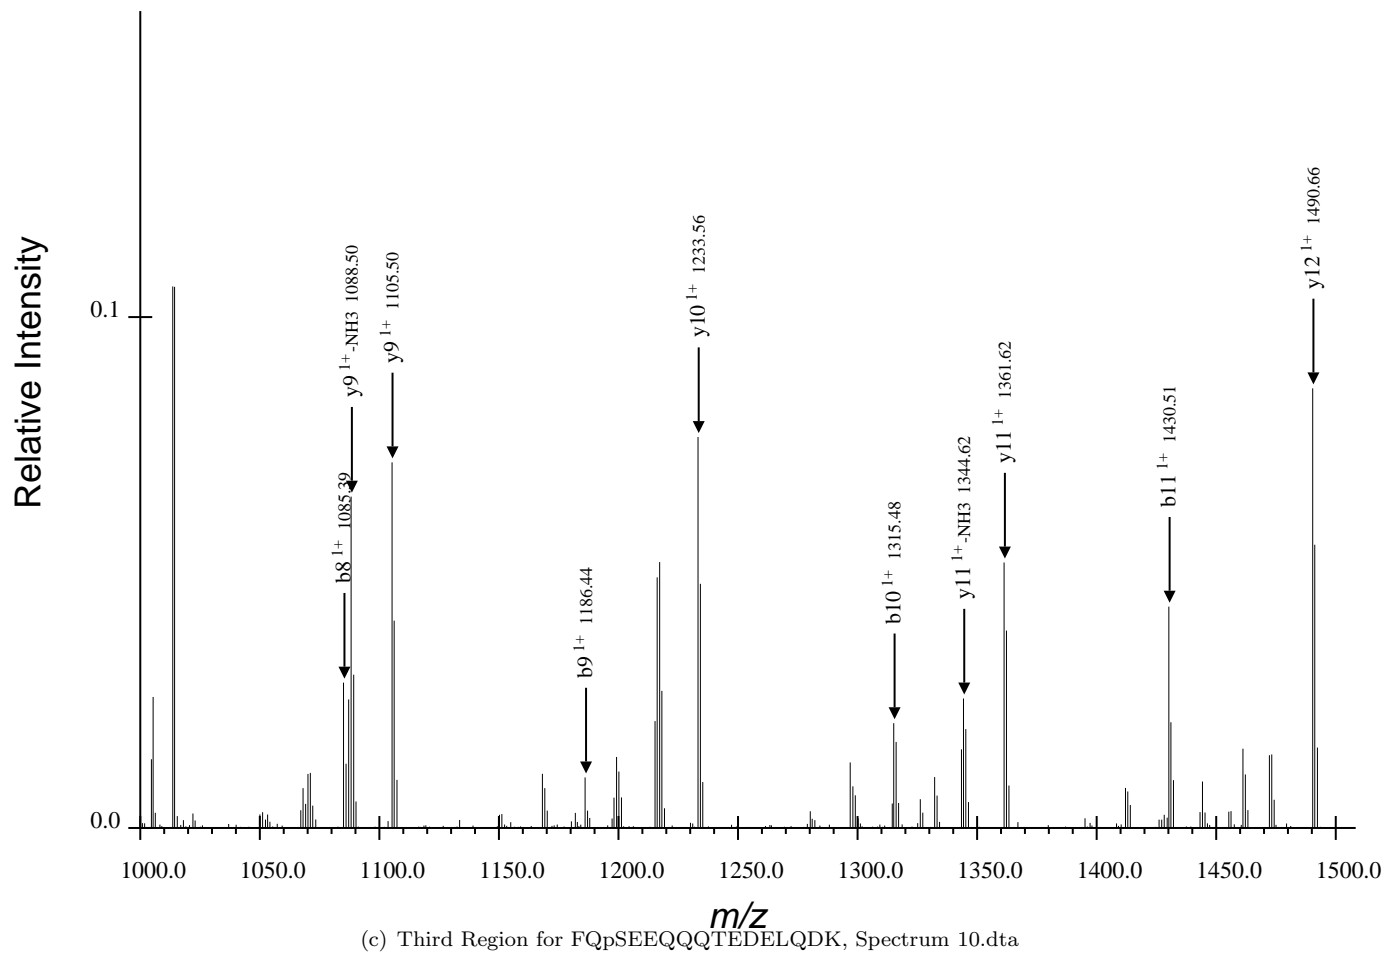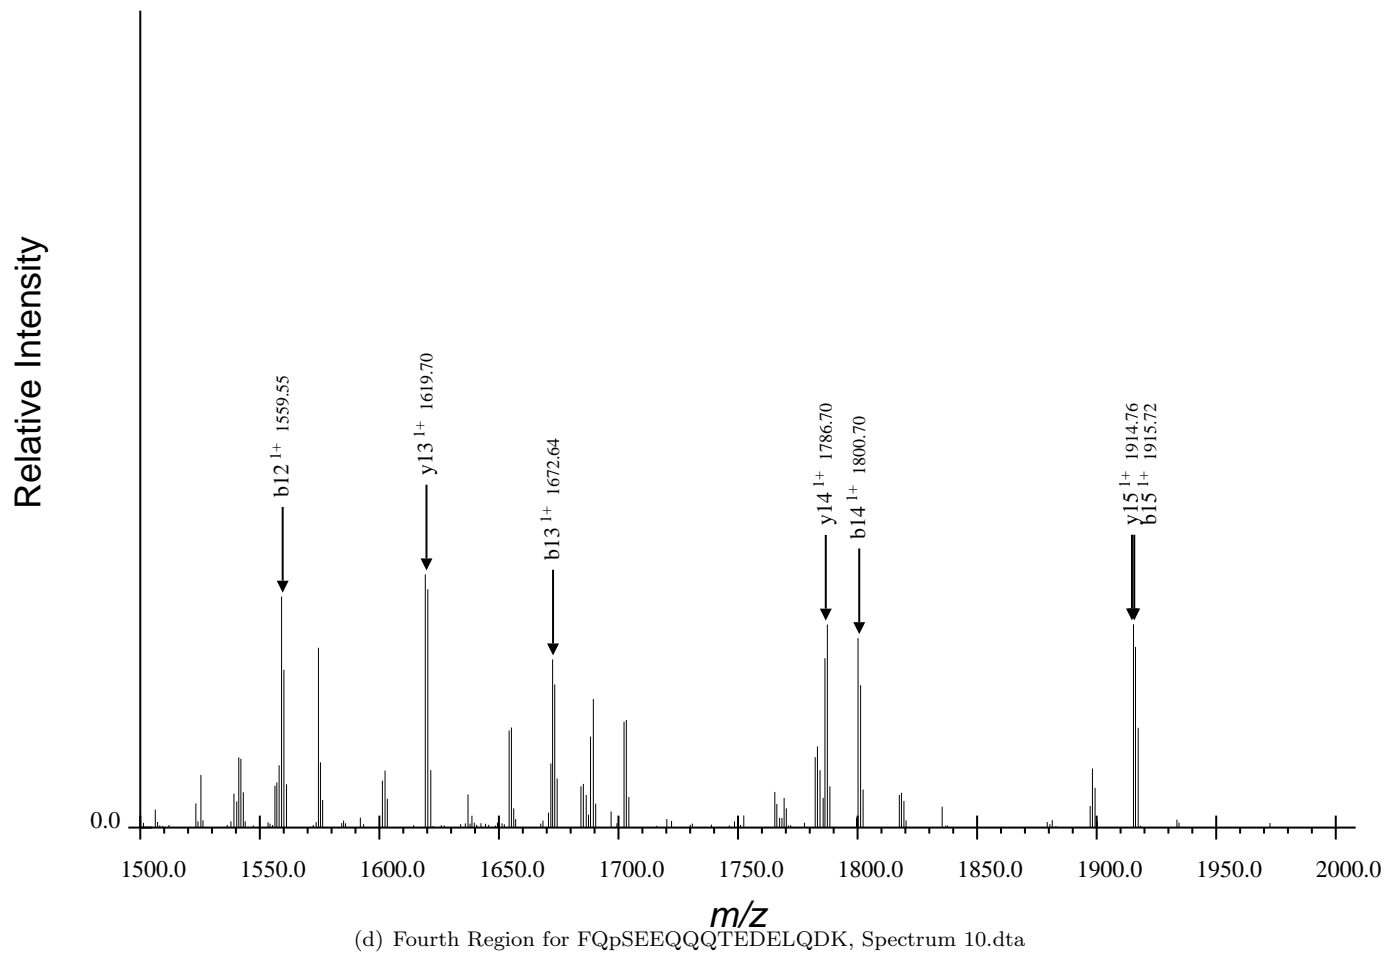

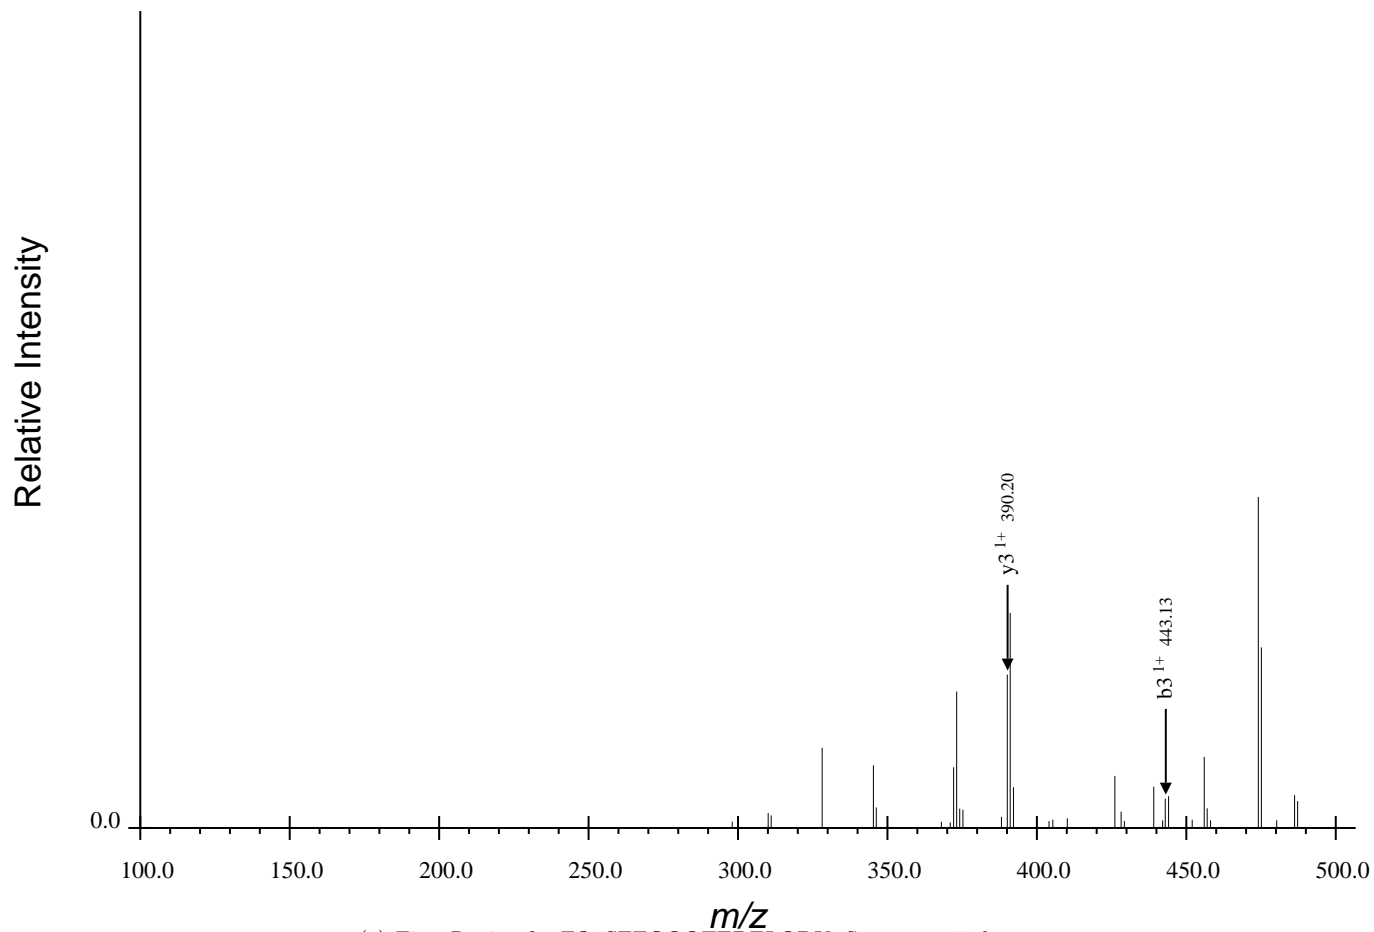

(a) First Region for FQpSEEQQQTEDELQDK, Spectrum 11.dta

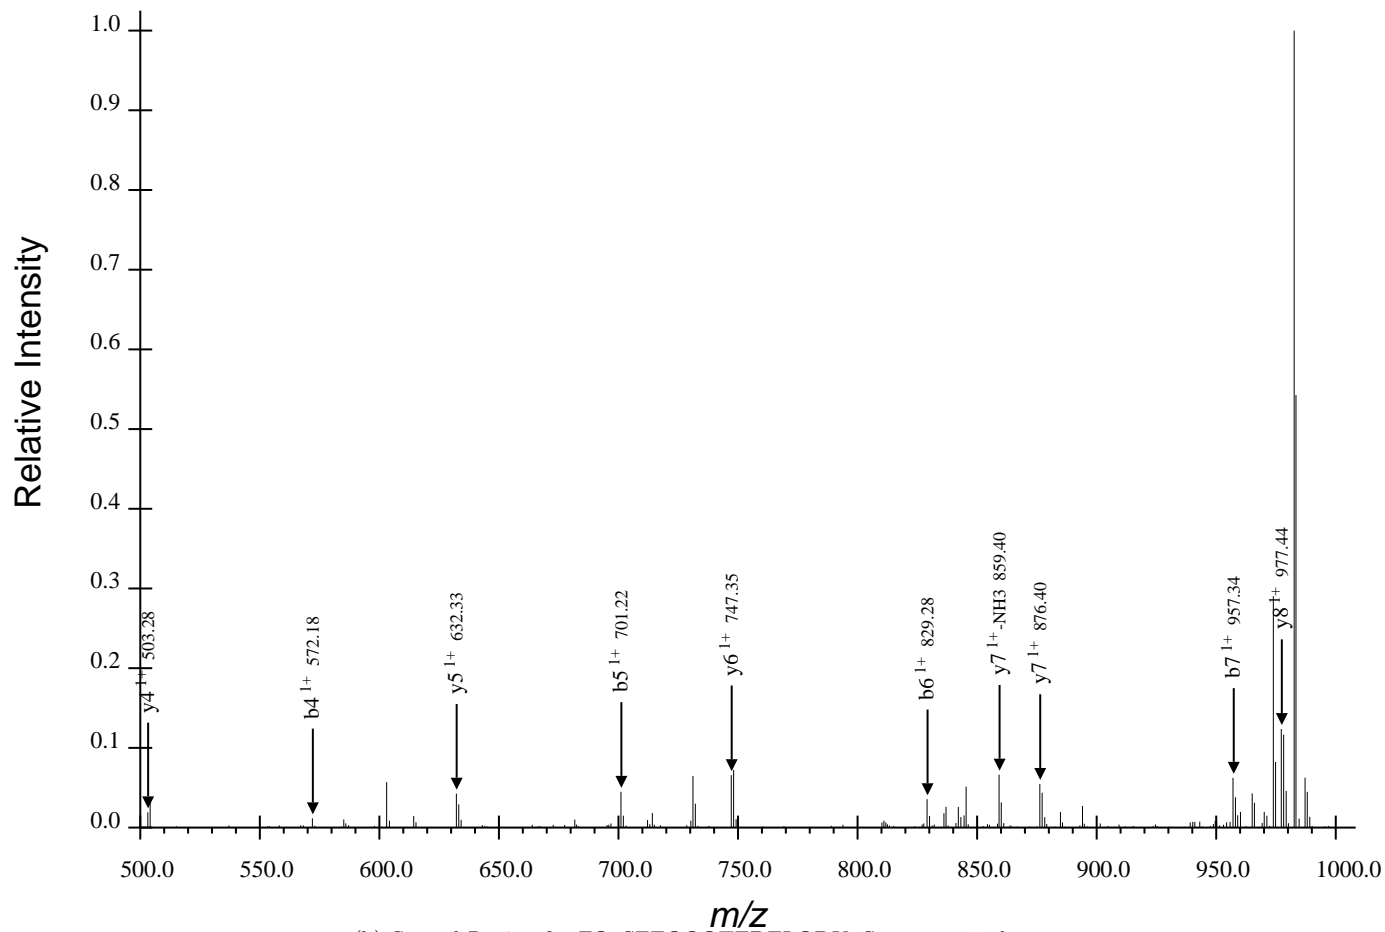

(b) Second Region for FQpSEEQQQTEDELQDK, Spectrum 11.dta

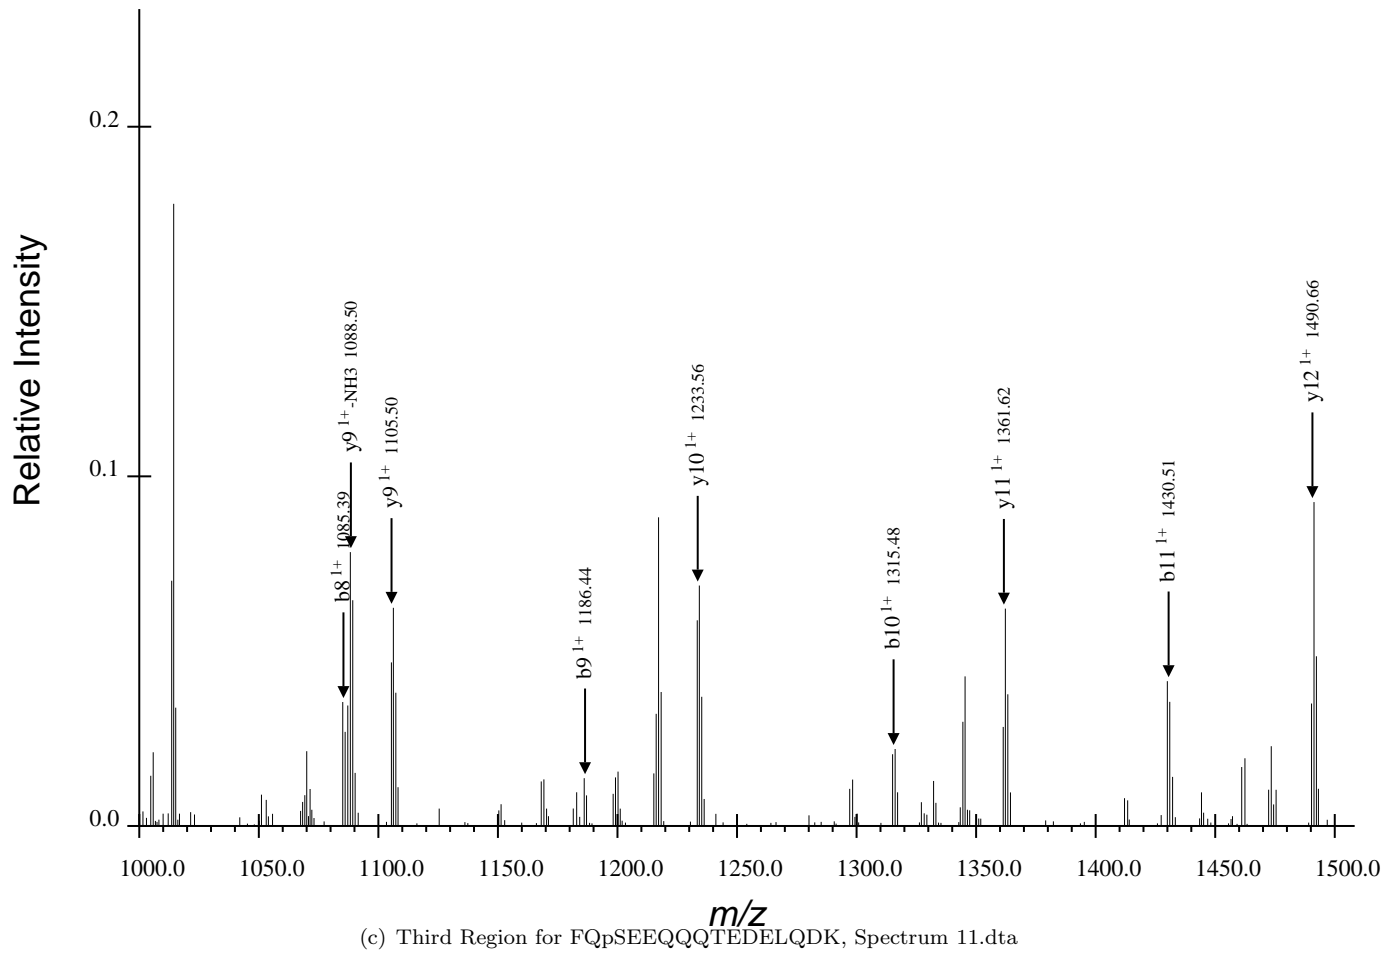

(c) Third Region for FQpSEEQQQTEDELQDK, Spectrum 11.dta

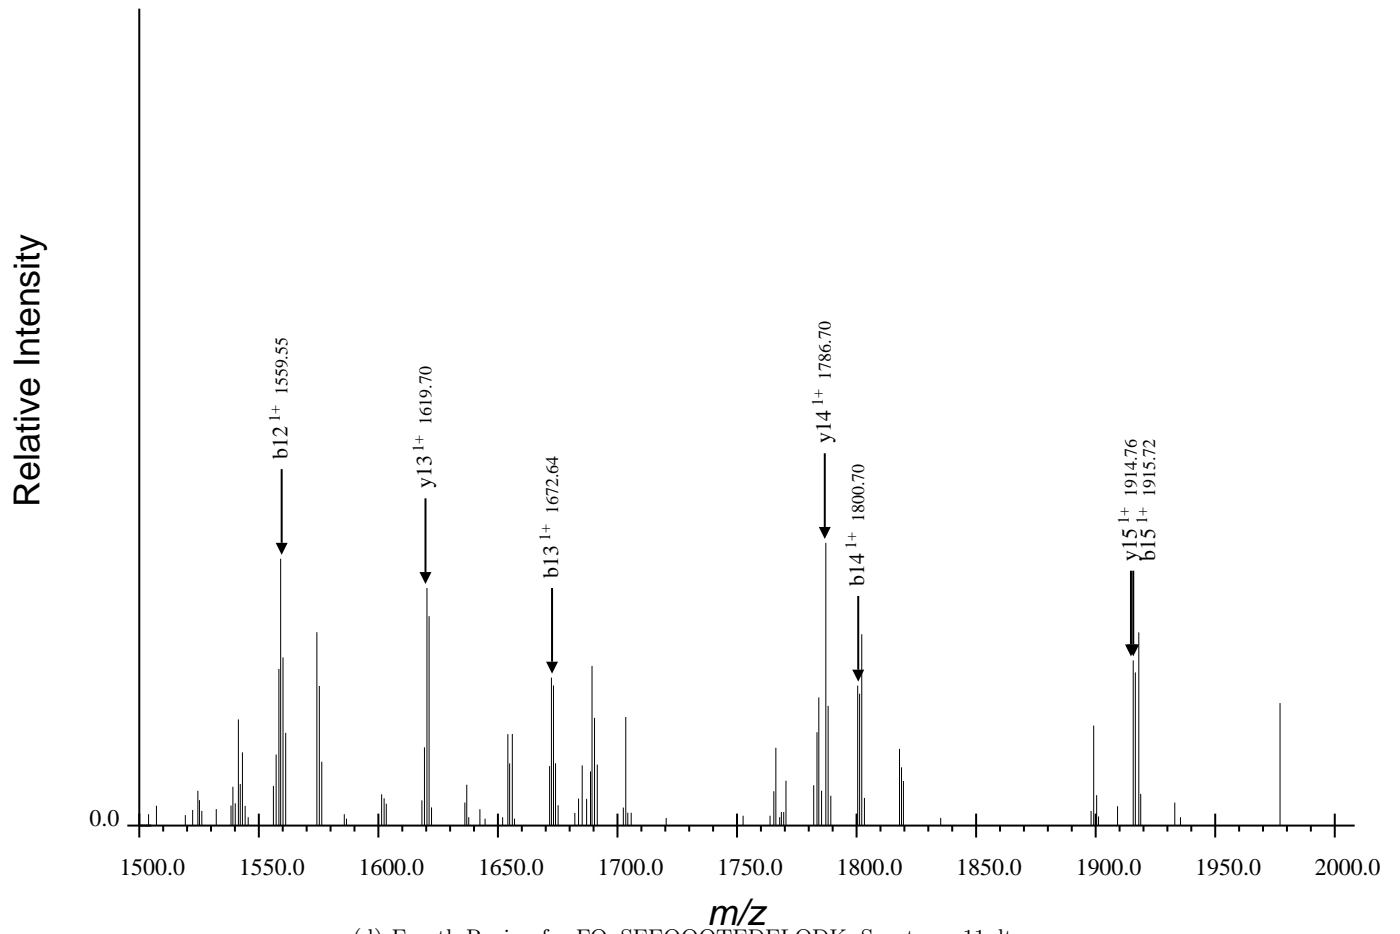

(d) Fourth Region for FQpSEEQQQTEDELQDK, Spectrum 11.dta

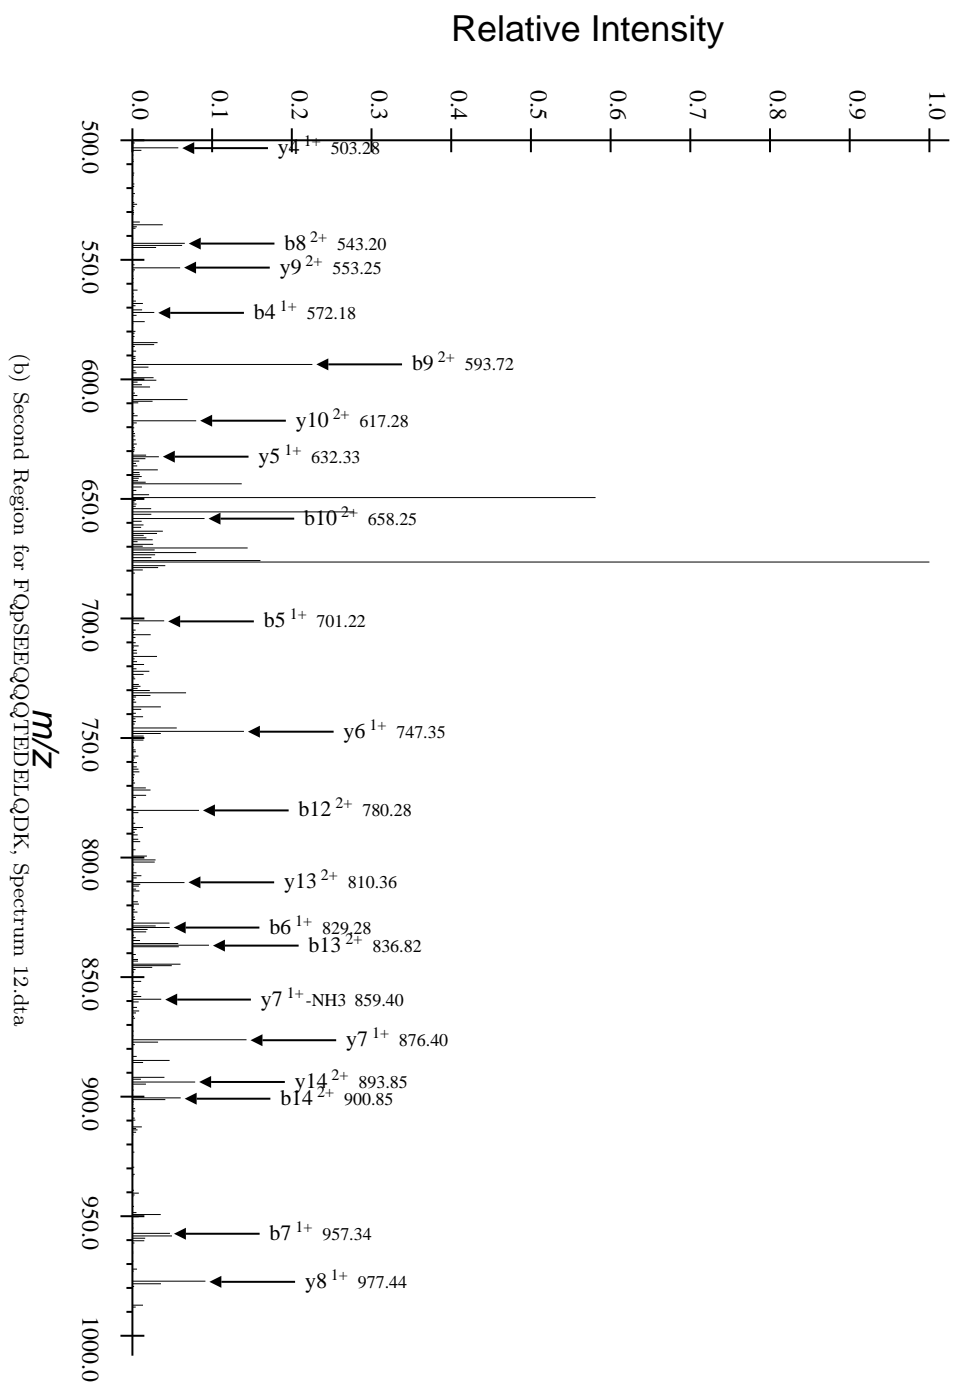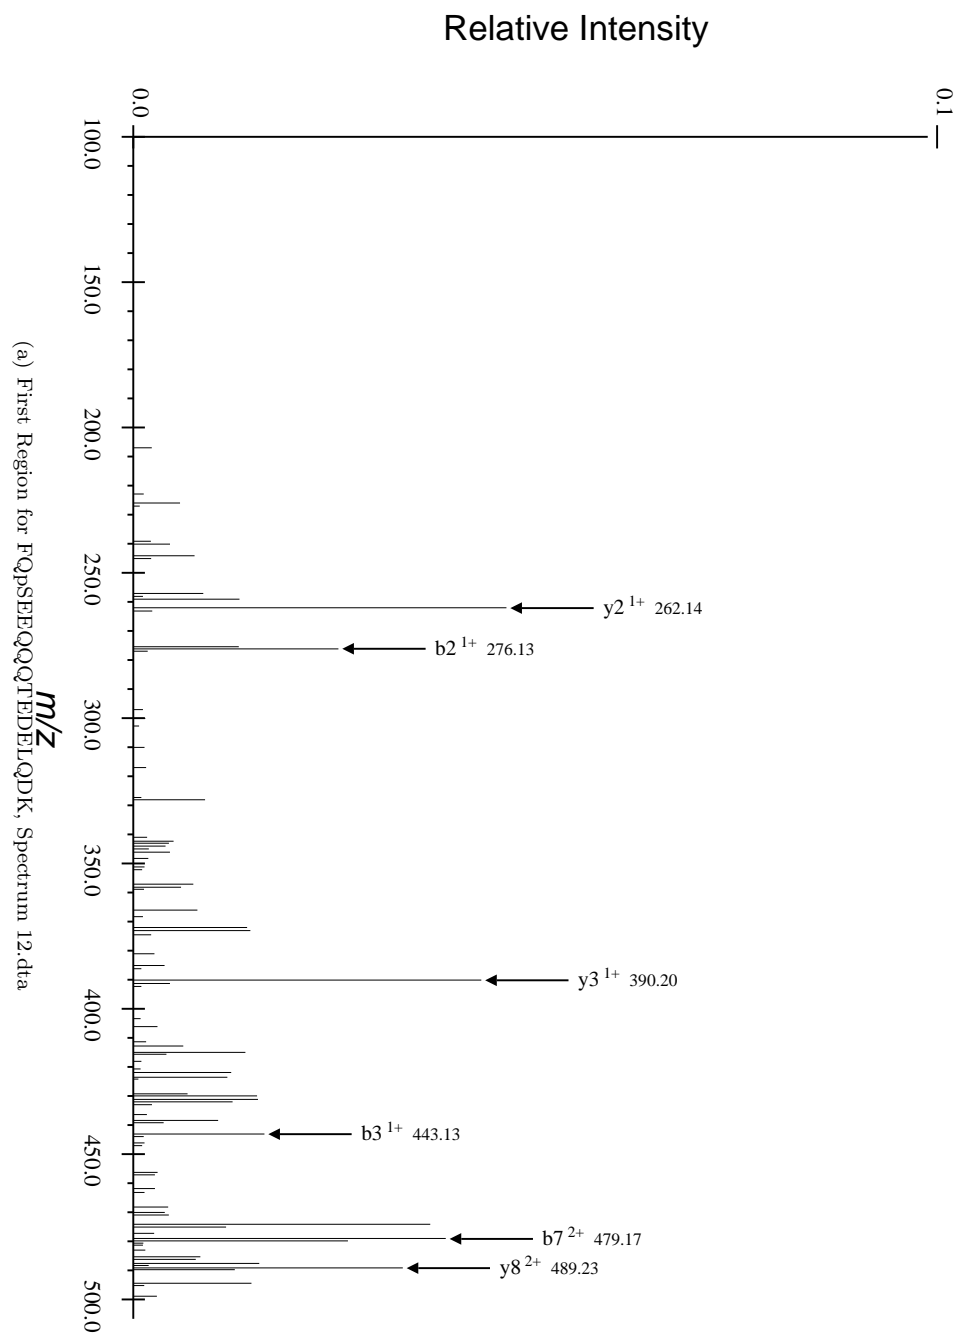

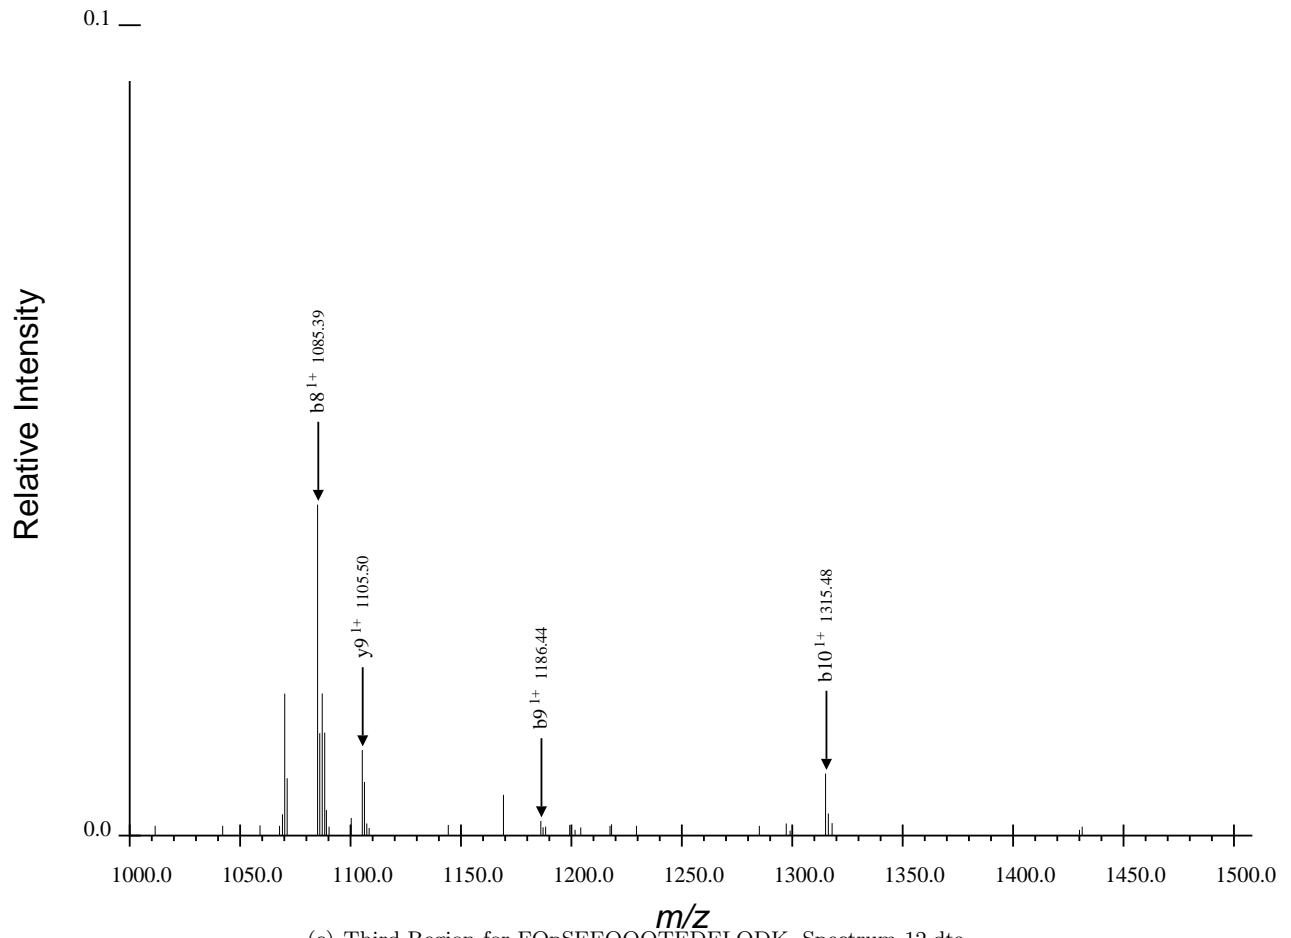

(c) Third Region for FQpSEEQQQTEDELQDK, Spectrum 12.dta

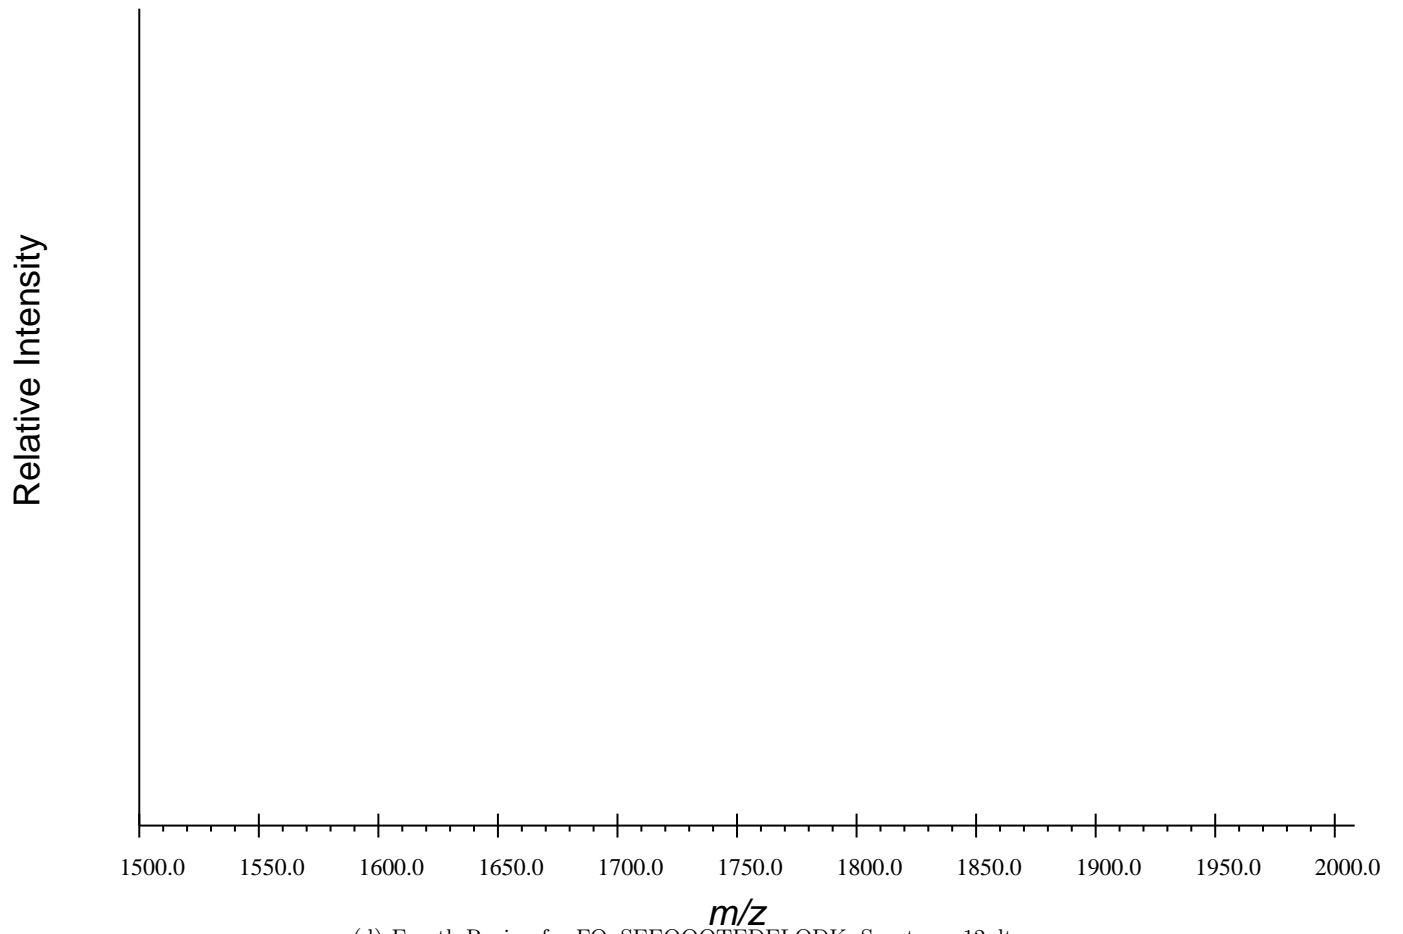

(d) Fourth Region for FQpSEEQQQTEDELQDK, Spectrum 12.dta



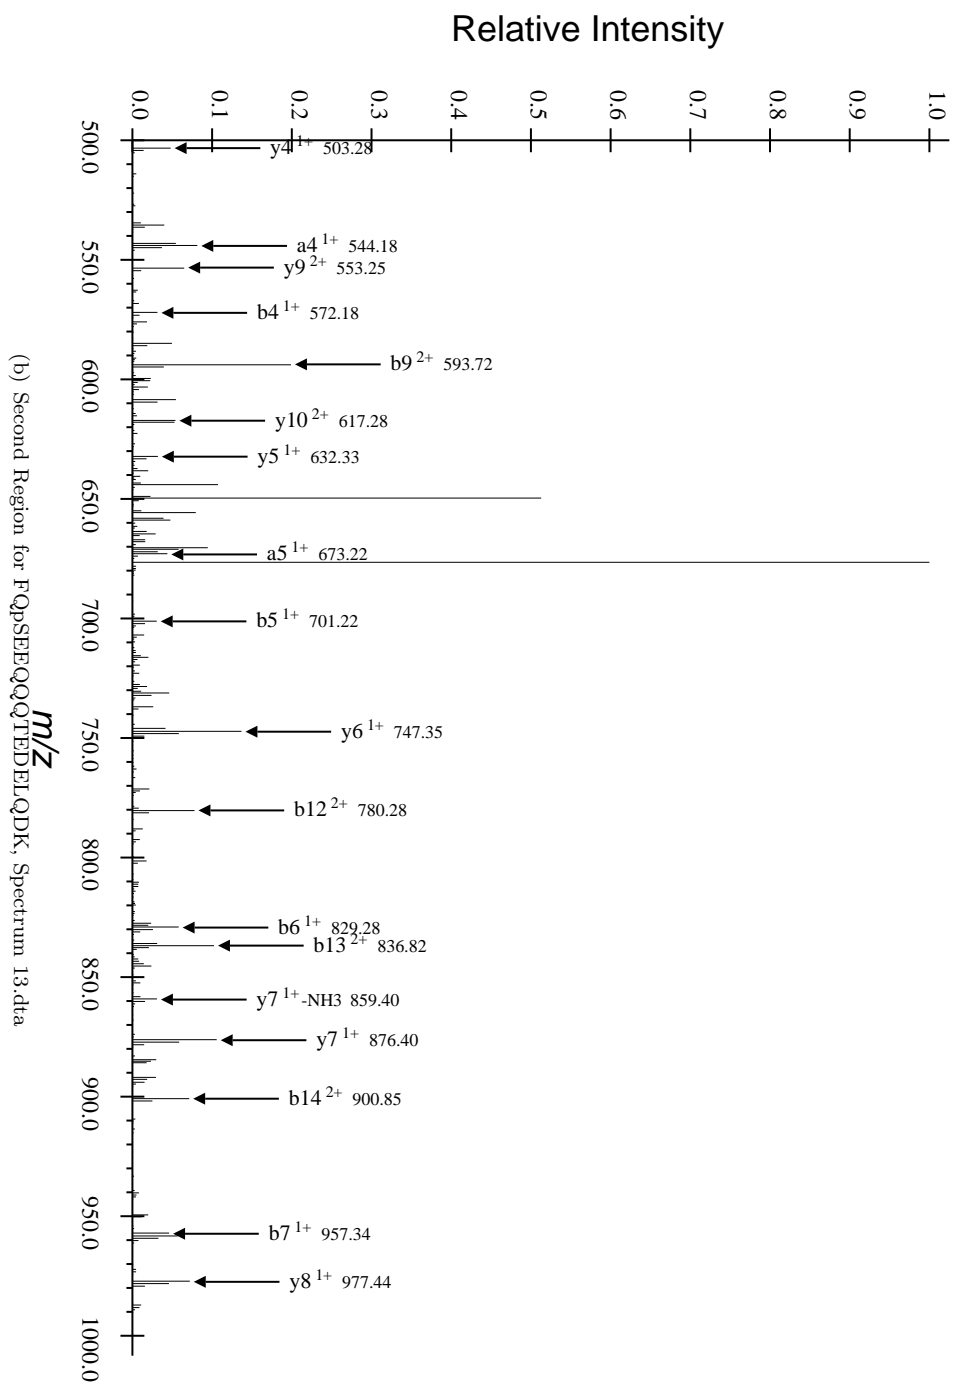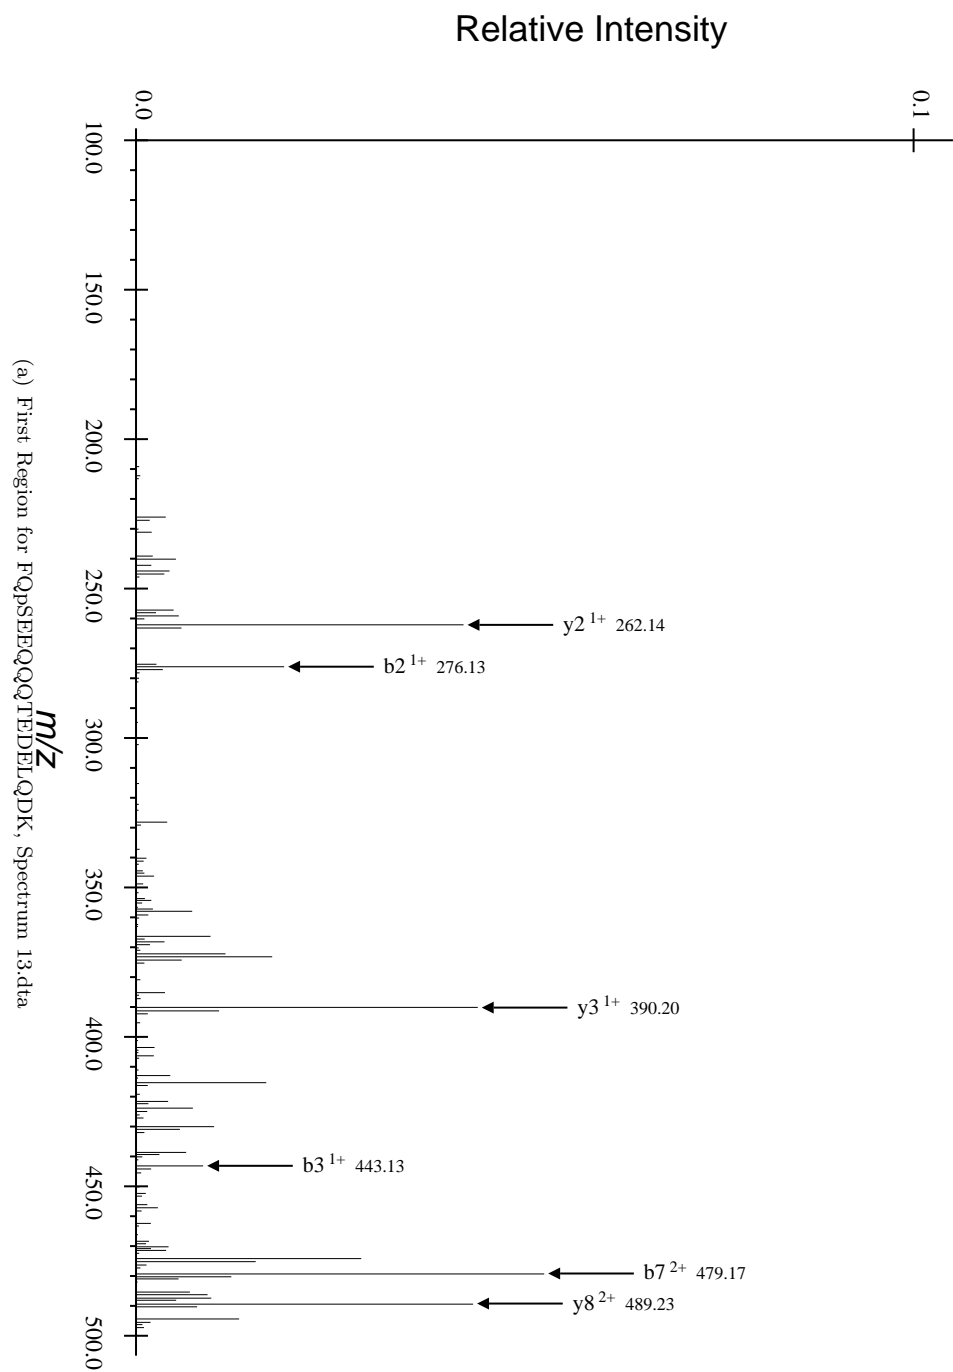

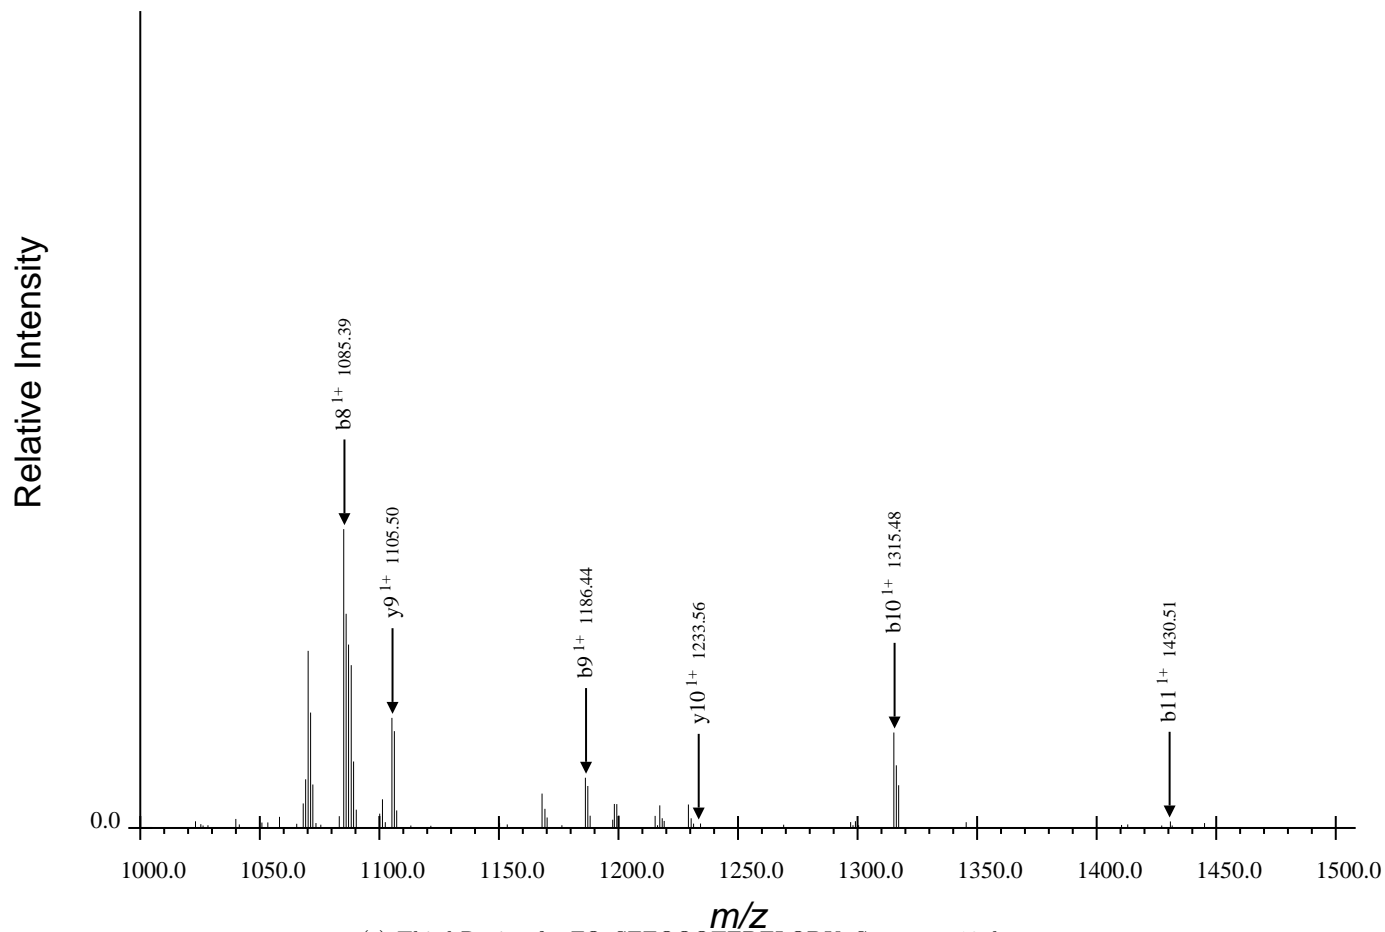

(c) Third Region for FQpSEEQQQTEDELQDK, Spectrum 13.dta

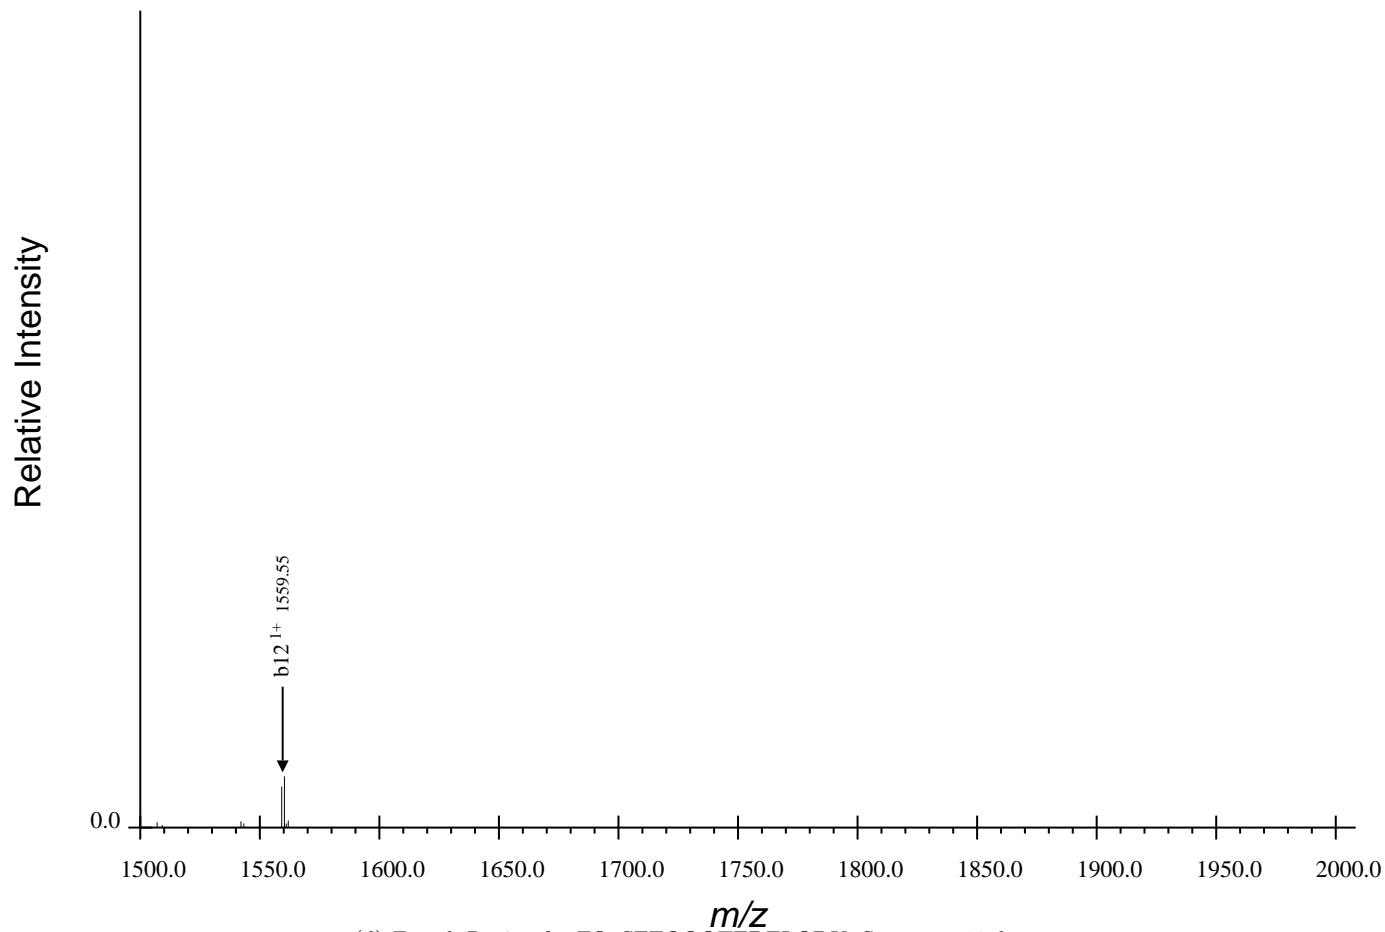

(d) Fourth Region for FQpSEEQQQTEDELQDK, Spectrum 13.dta

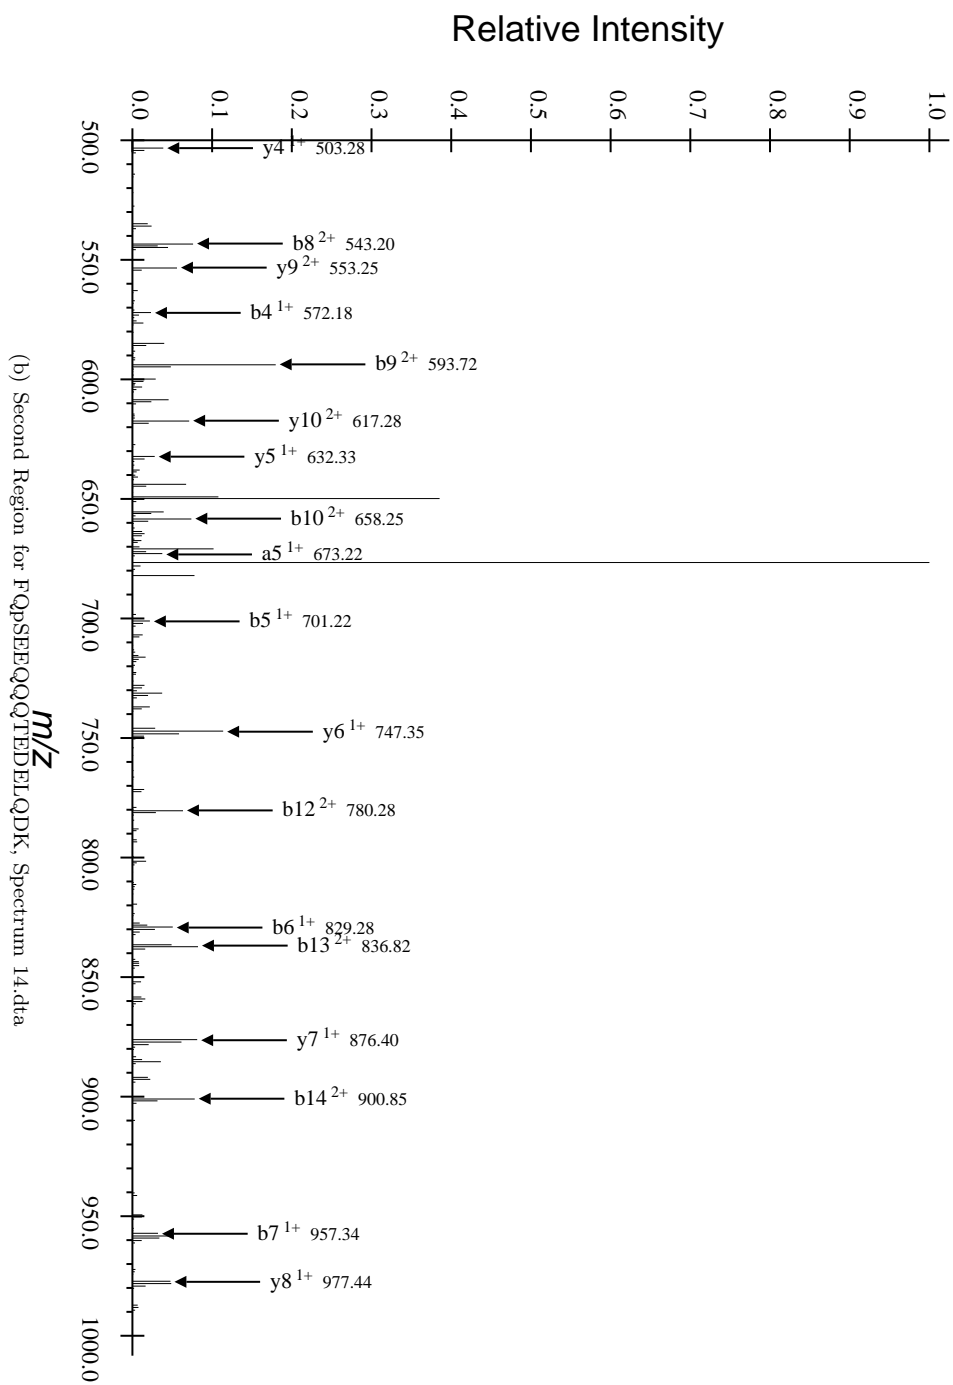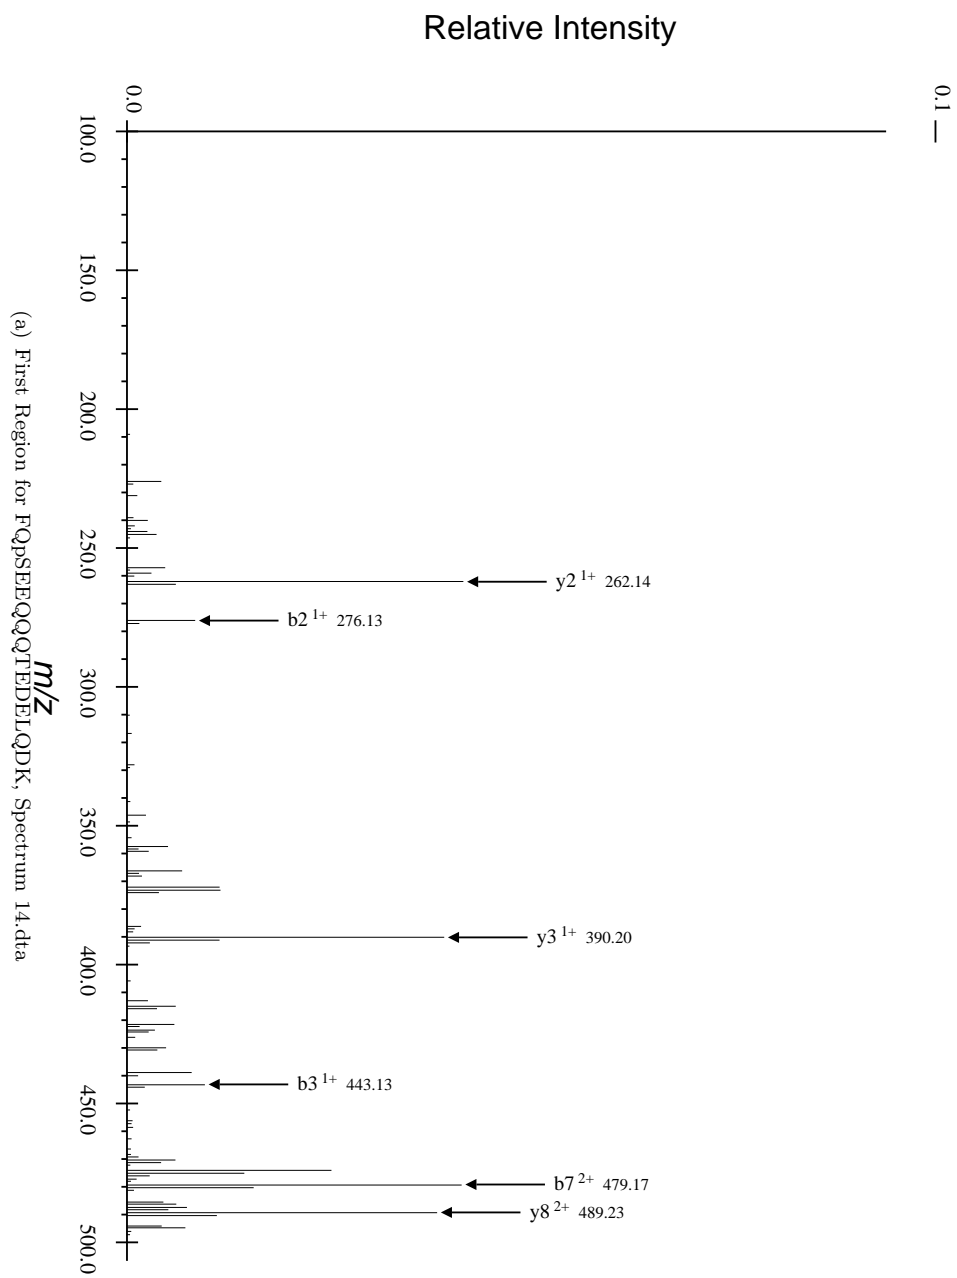

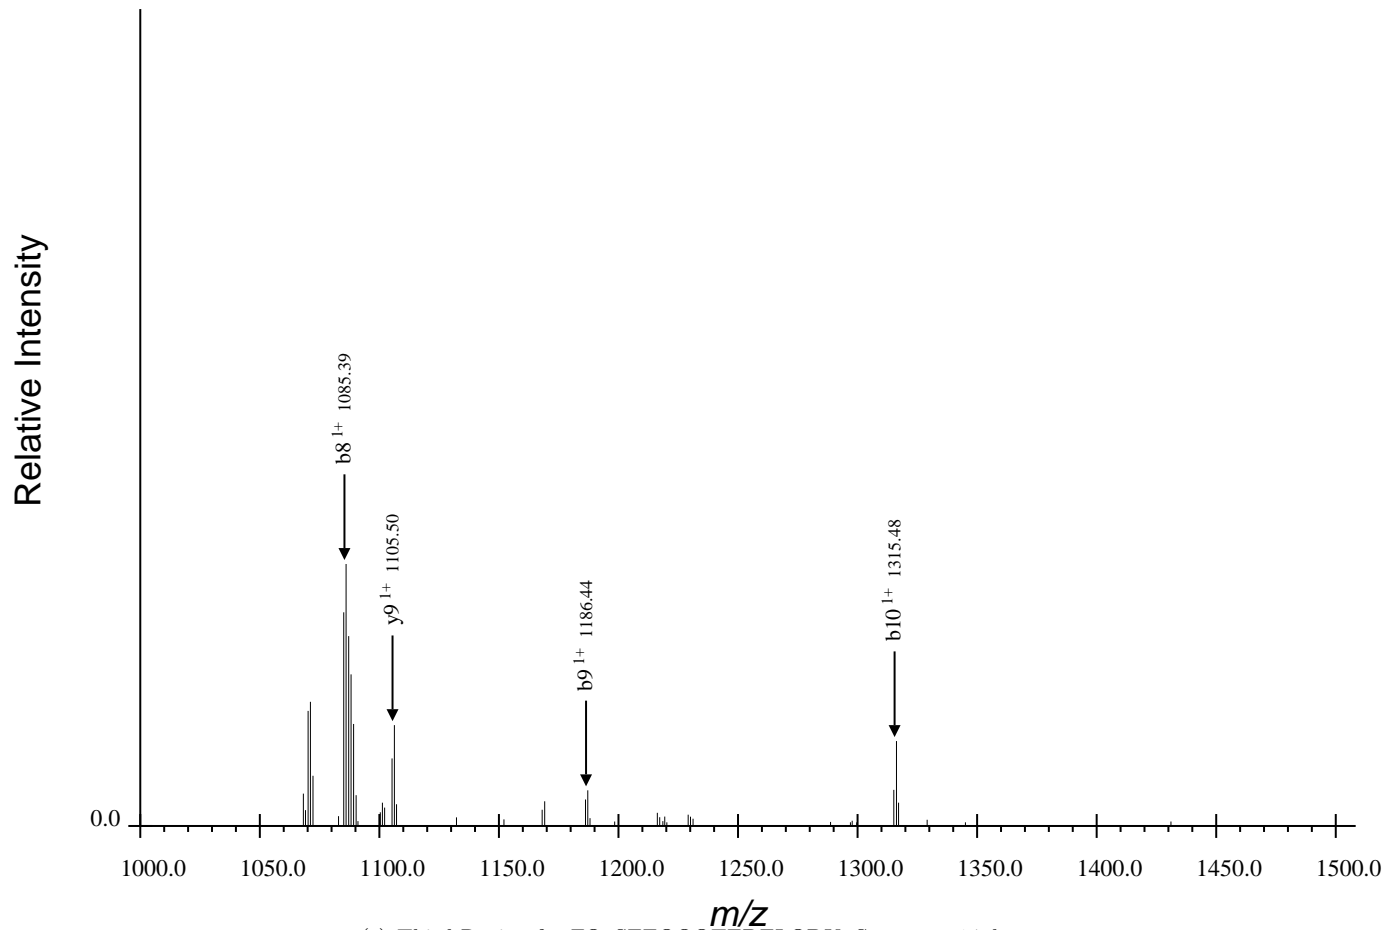

(c) Third Region for FQpSEEQQQTEDELQDK, Spectrum 14.dta

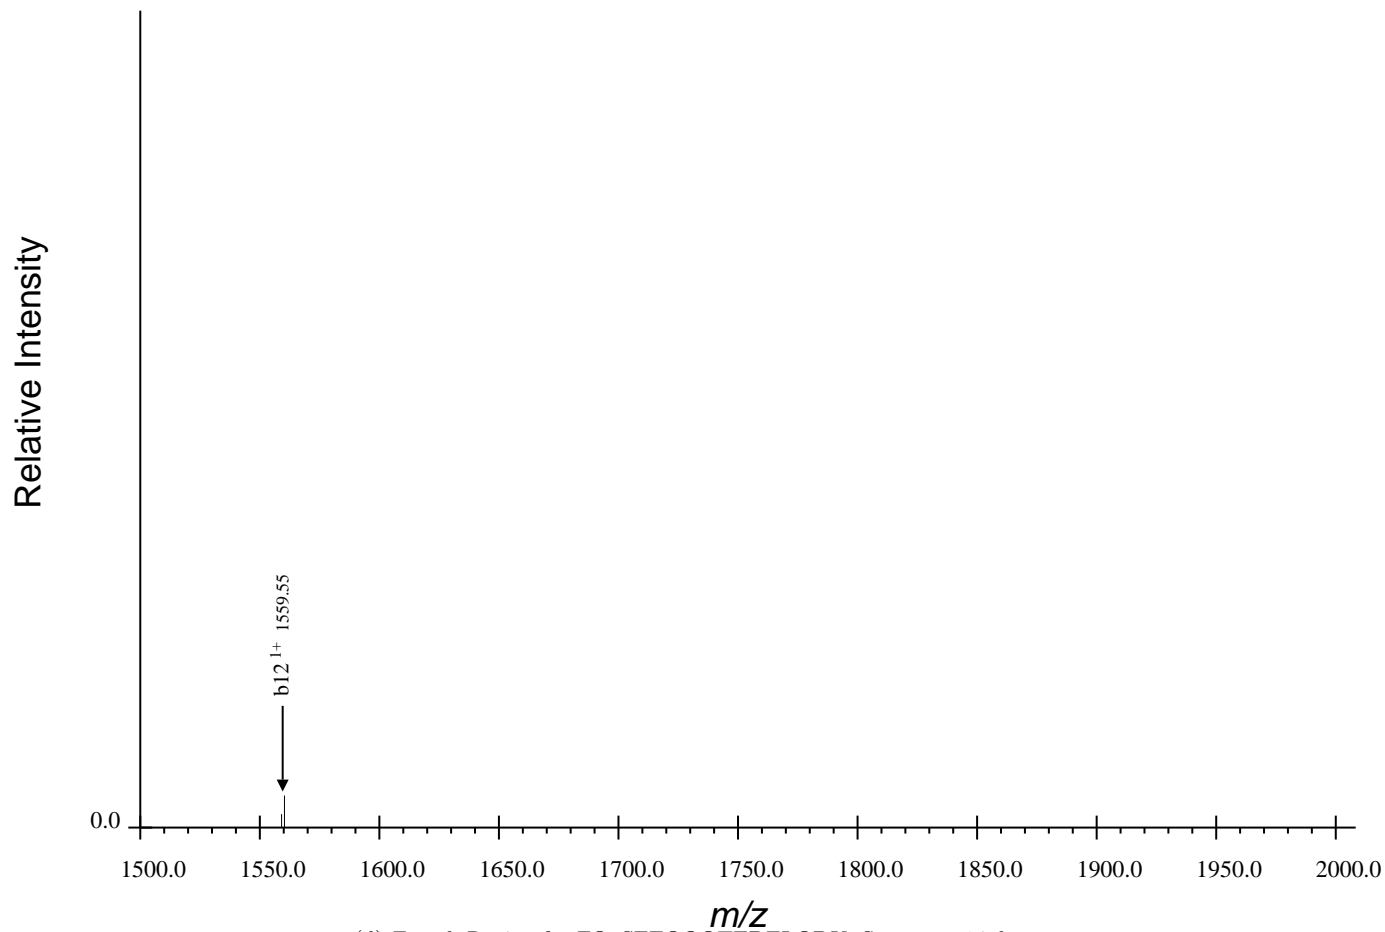

(d) Fourth Region for FQpSEEQQQTEDELQDK, Spectrum 14.dta

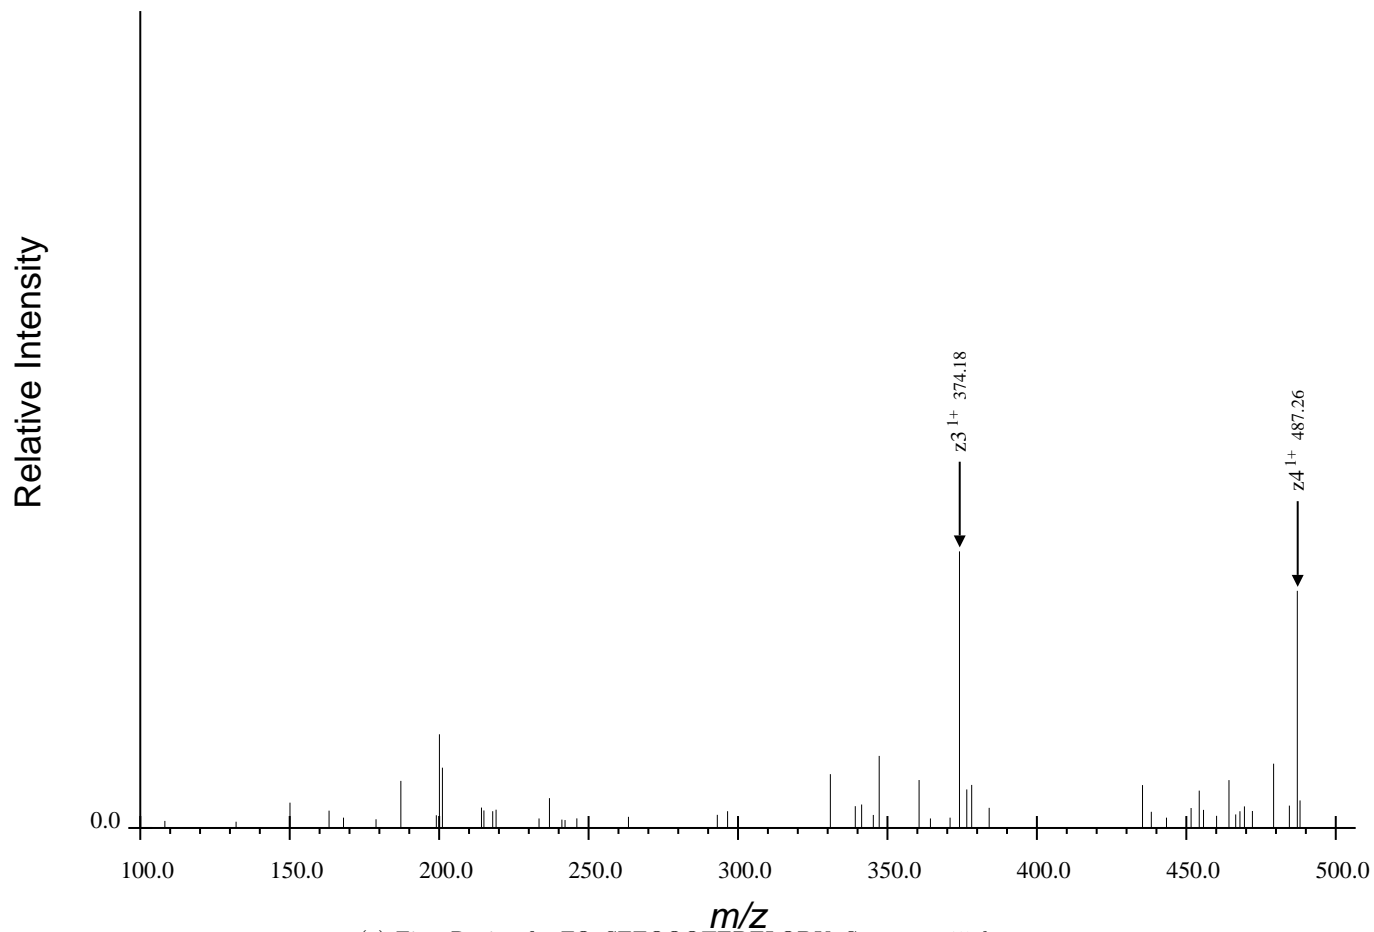

(a) First Region for FQpSEEQQQTEDELQDK, Spectrum 15.dta

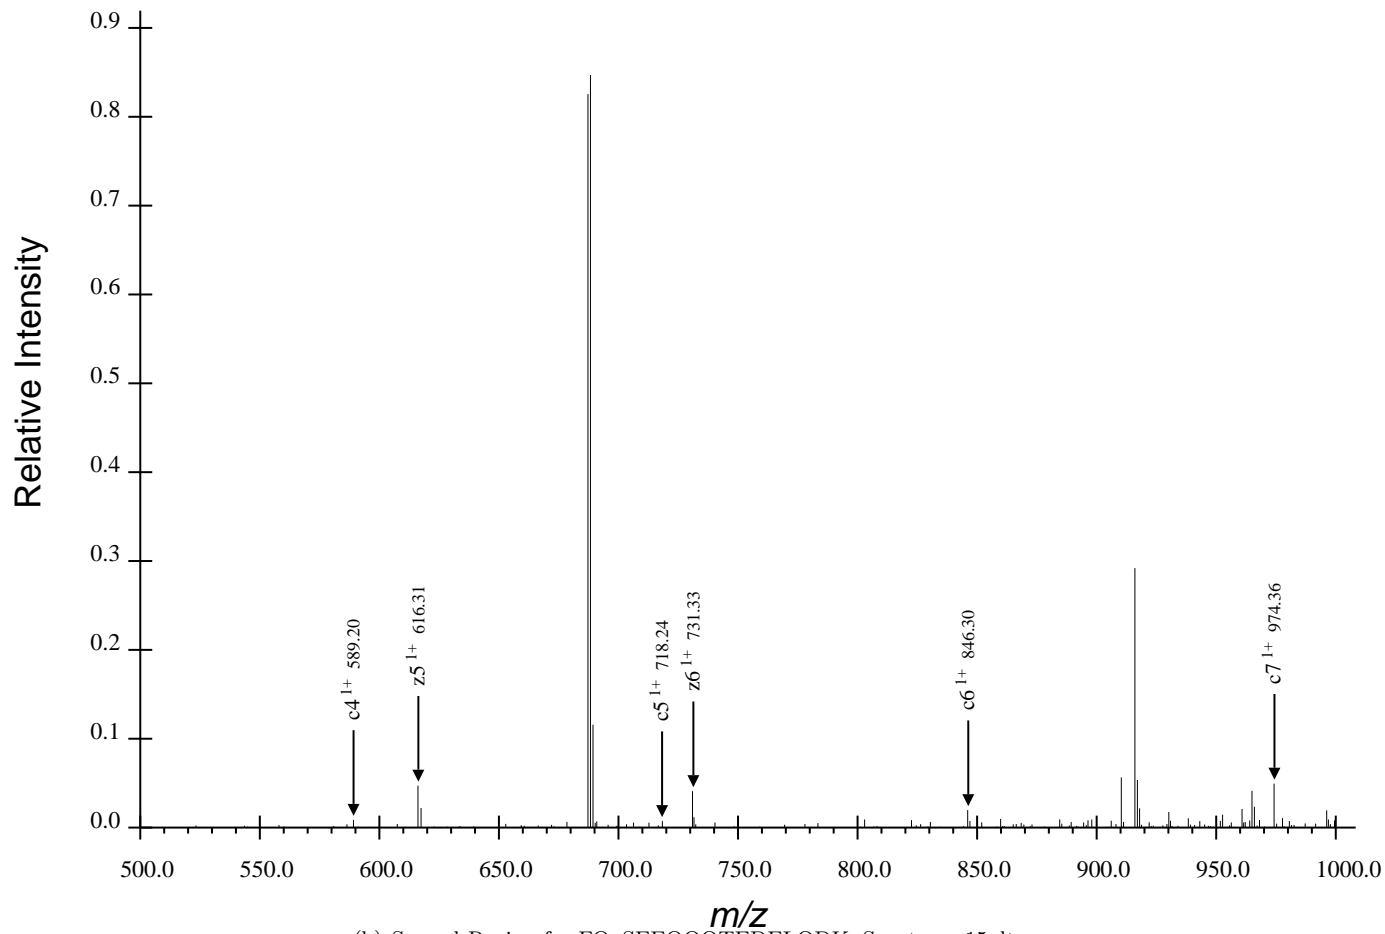

(b) Second Region for FQpSEEQQQTEDELQDK, Spectrum 15.dta

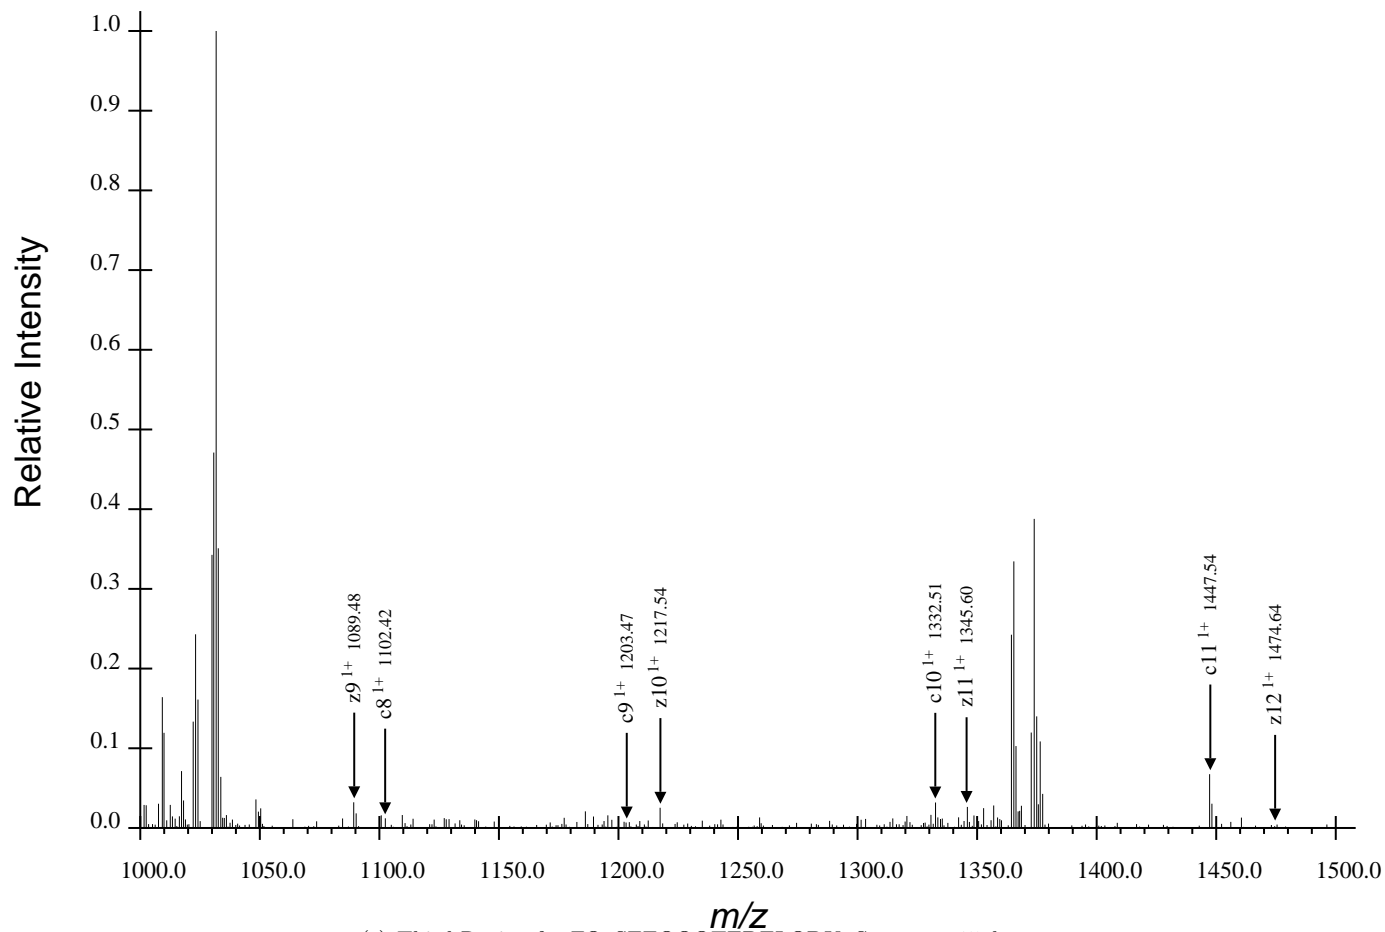

(c) Third Region for FQpSEEQQQTEDELQDK, Spectrum 15.dta

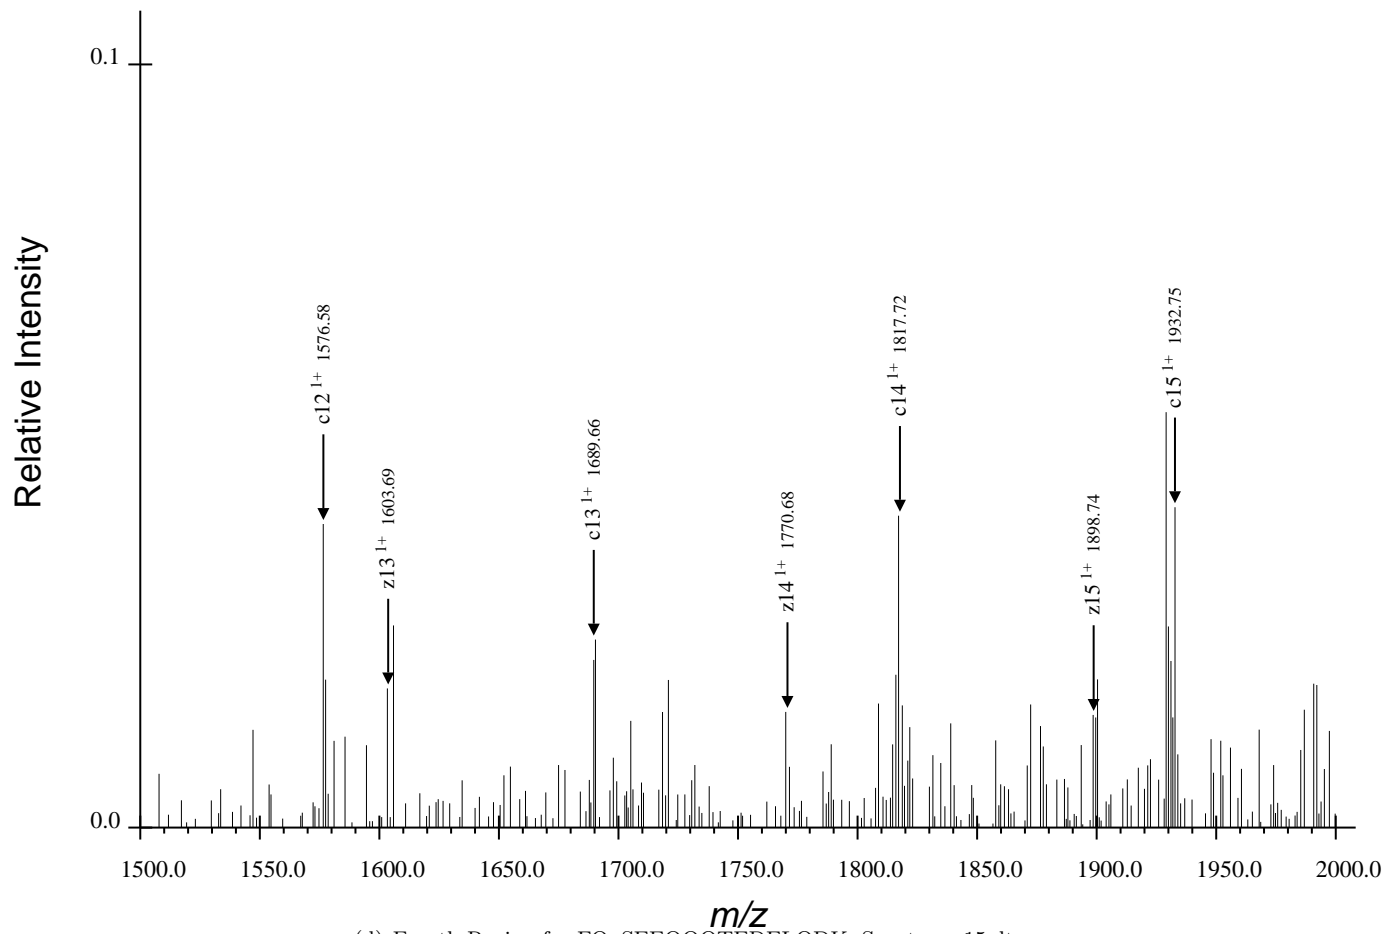

(d) Fourth Region for FQpSEEQQQTEDELQDK, Spectrum 15.dta

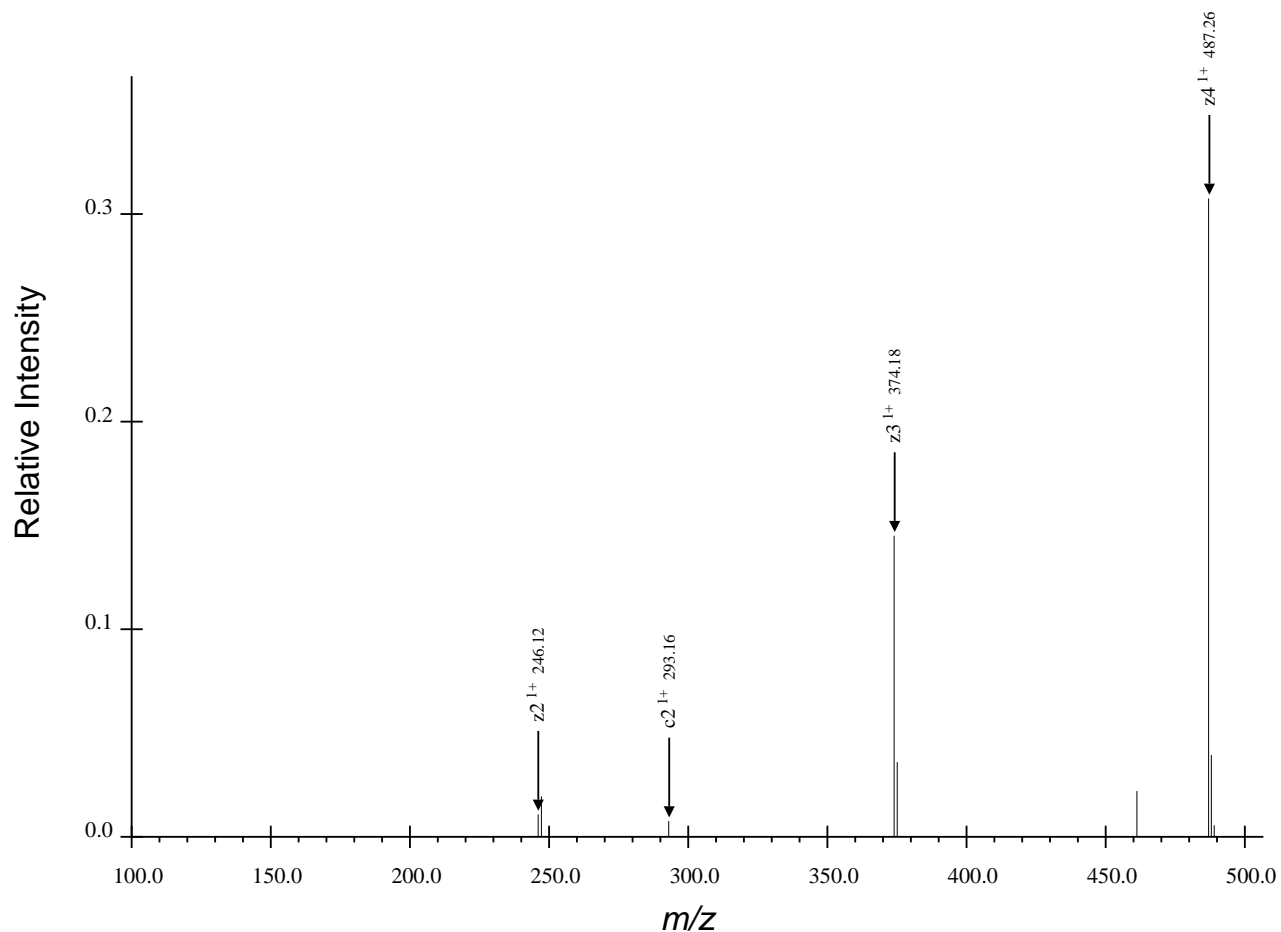

(a) First Region for FQpSEEQQQTEDELQDK, Spectrum 16.dta

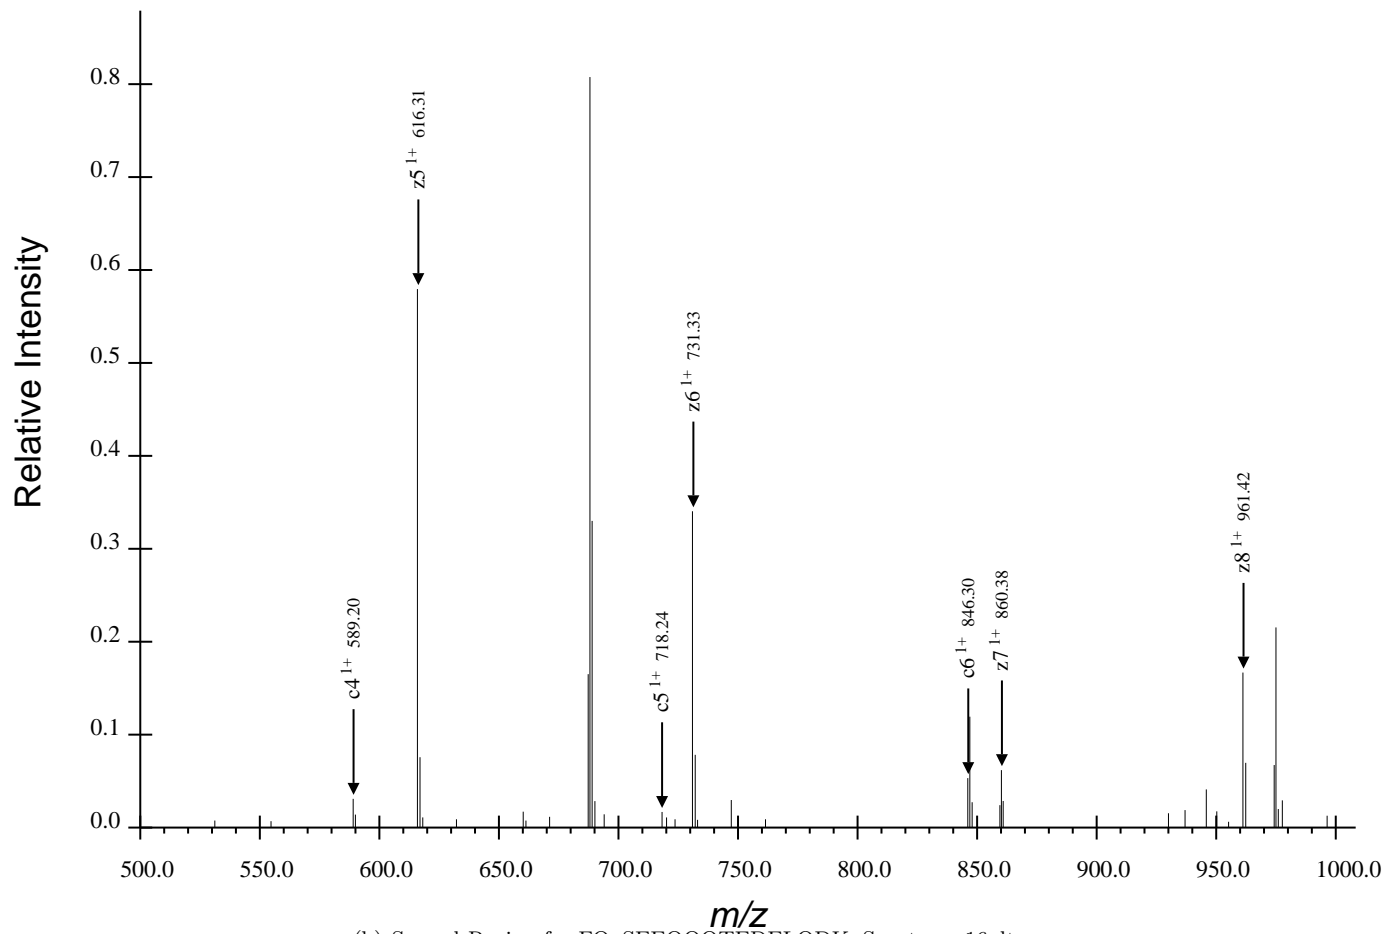

(b) Second Region for FQpSEEQQQTEDELQDK, Spectrum 16.dta

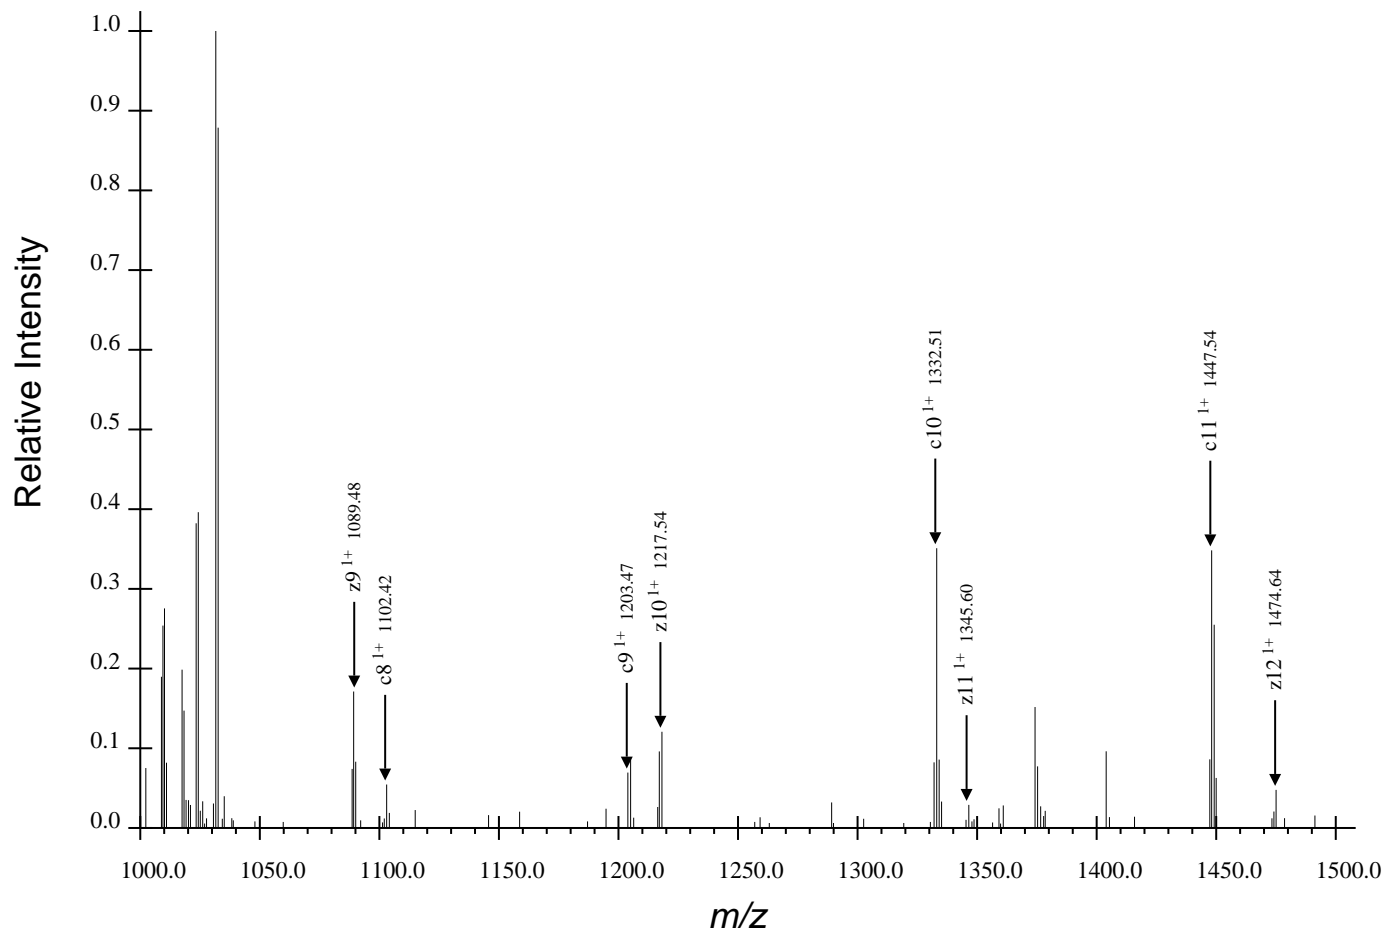

(c) Third Region for FQpSEEQQQTEDELQDK, Spectrum 16.dta

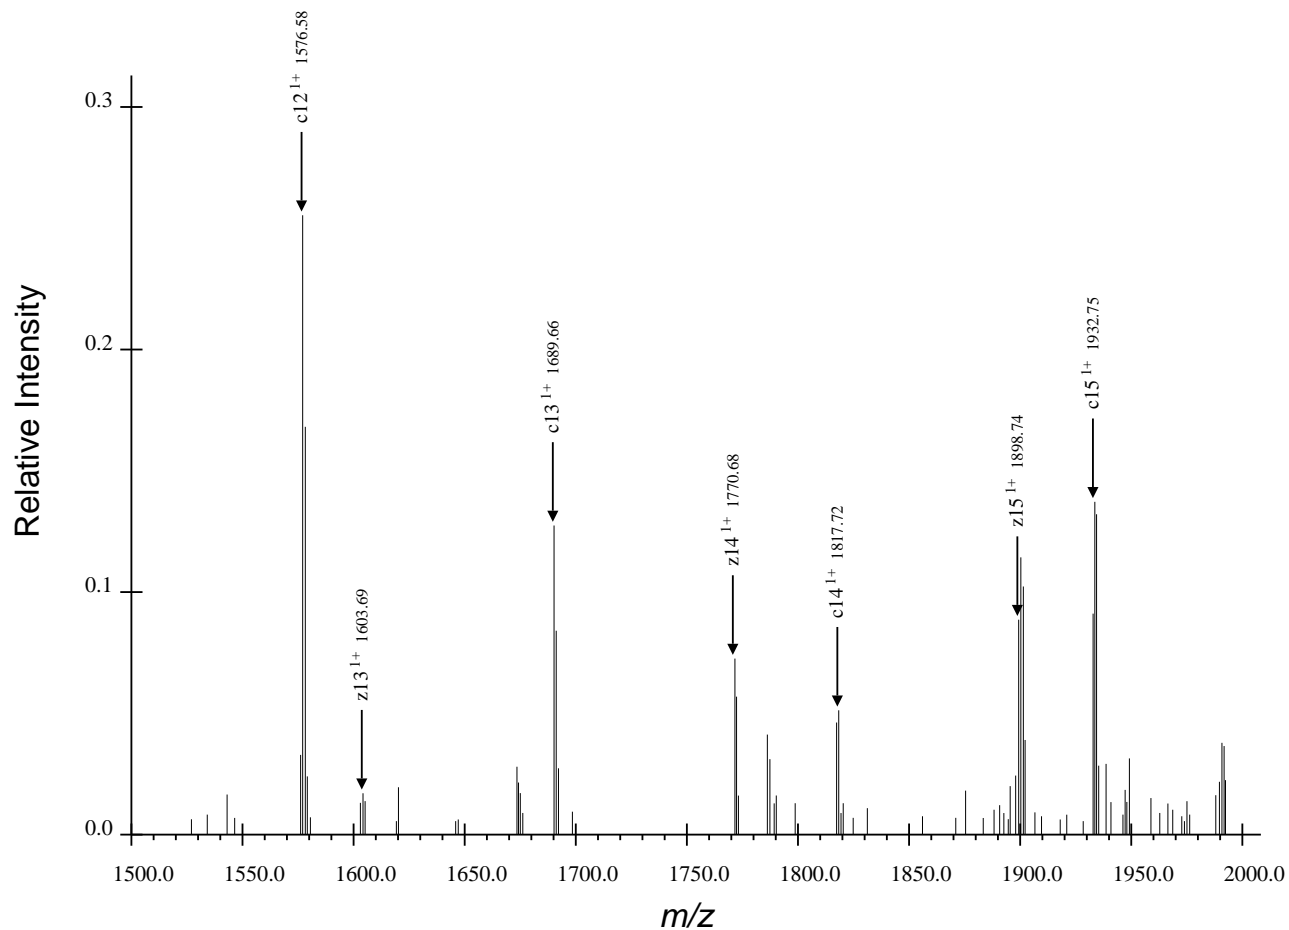

(d) Fourth Region for FQpSEEQQQTEDELQDK, Spectrum 16.dta



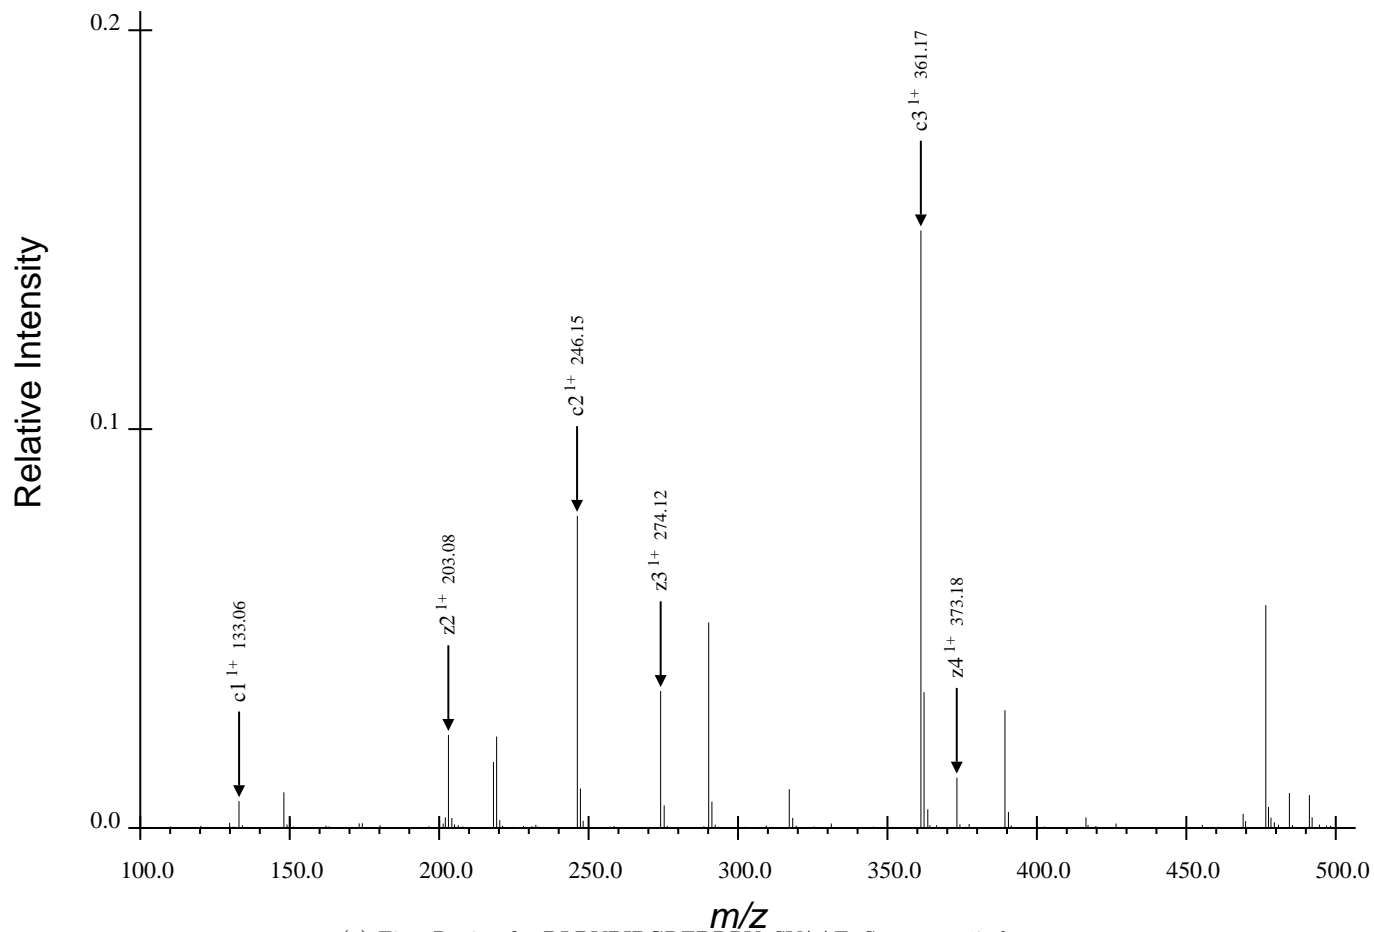

(a) First Region for DLDVPIPGRFDRRVpSVA AE, Spectrum 17.dta

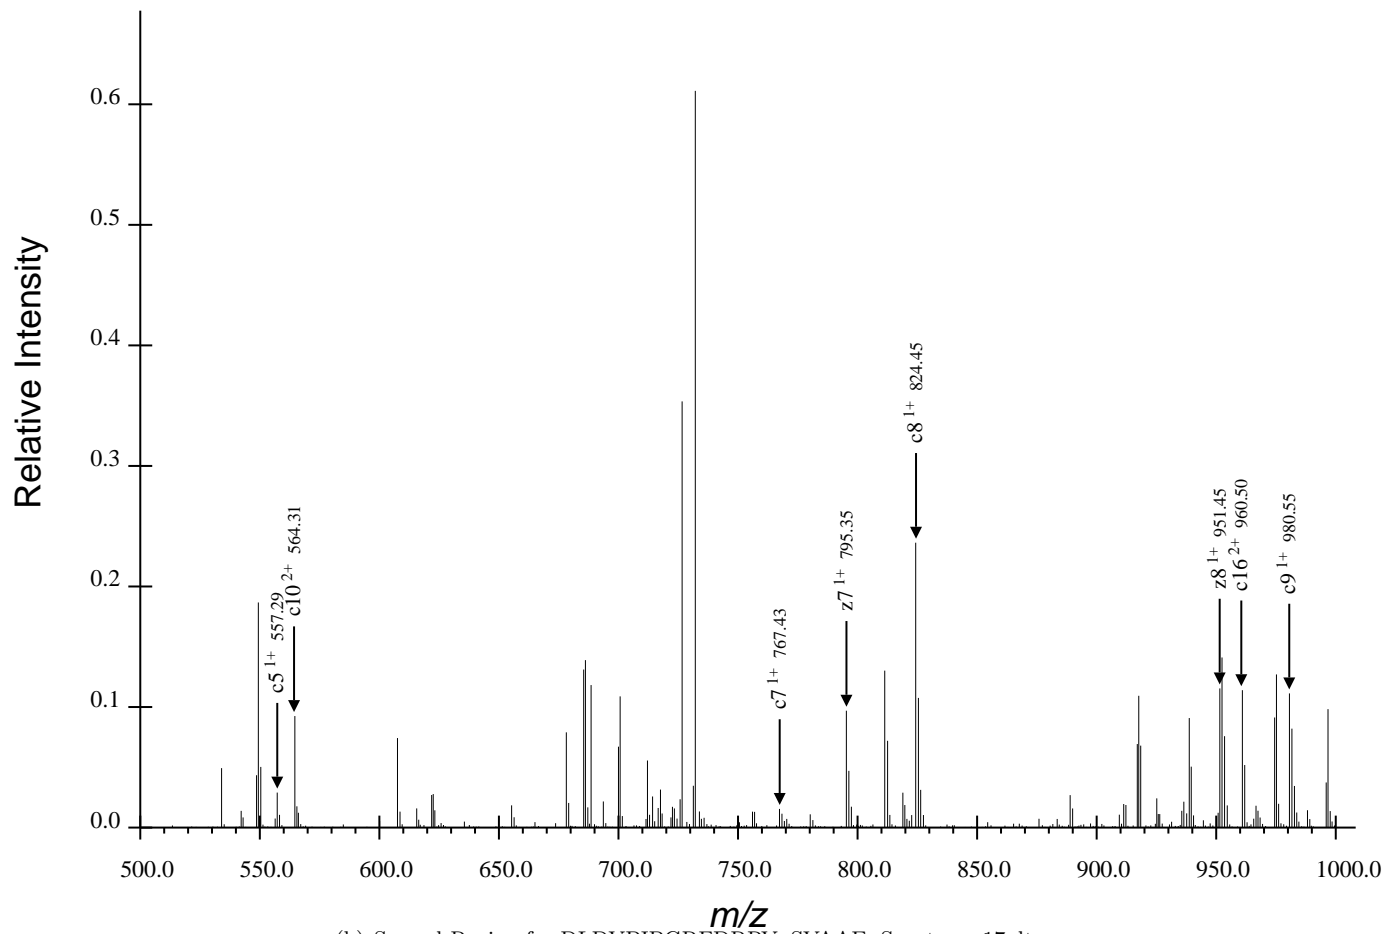

(b) Second Region for DLDVPIPGRFDRRVpSVA AE, Spectrum 17.dta

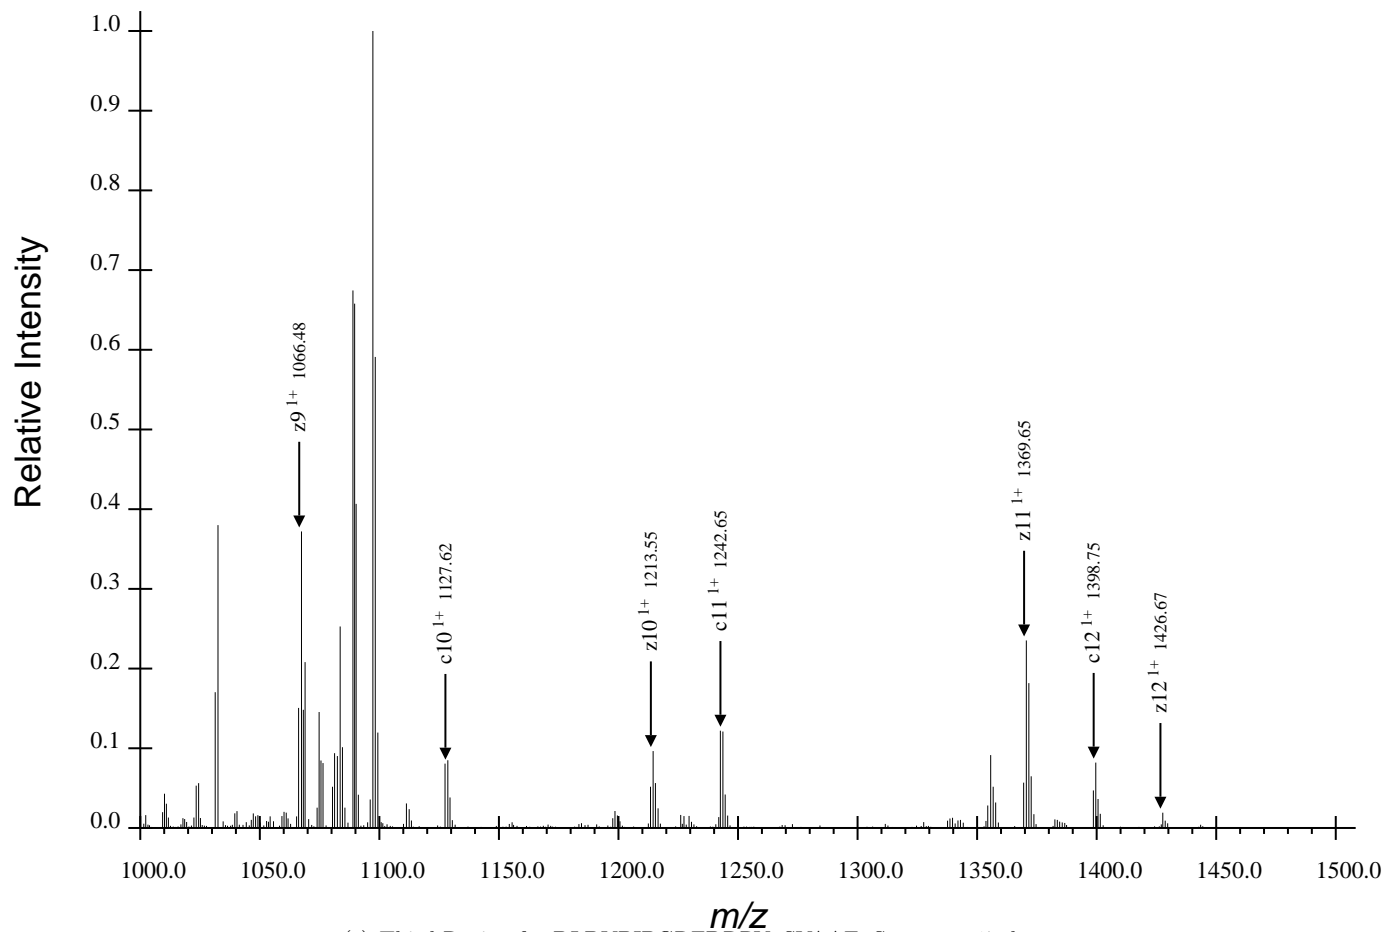

(c) Third Region for DLDVPIPGRFDRRVpSVAEE, Spectrum 17.dta

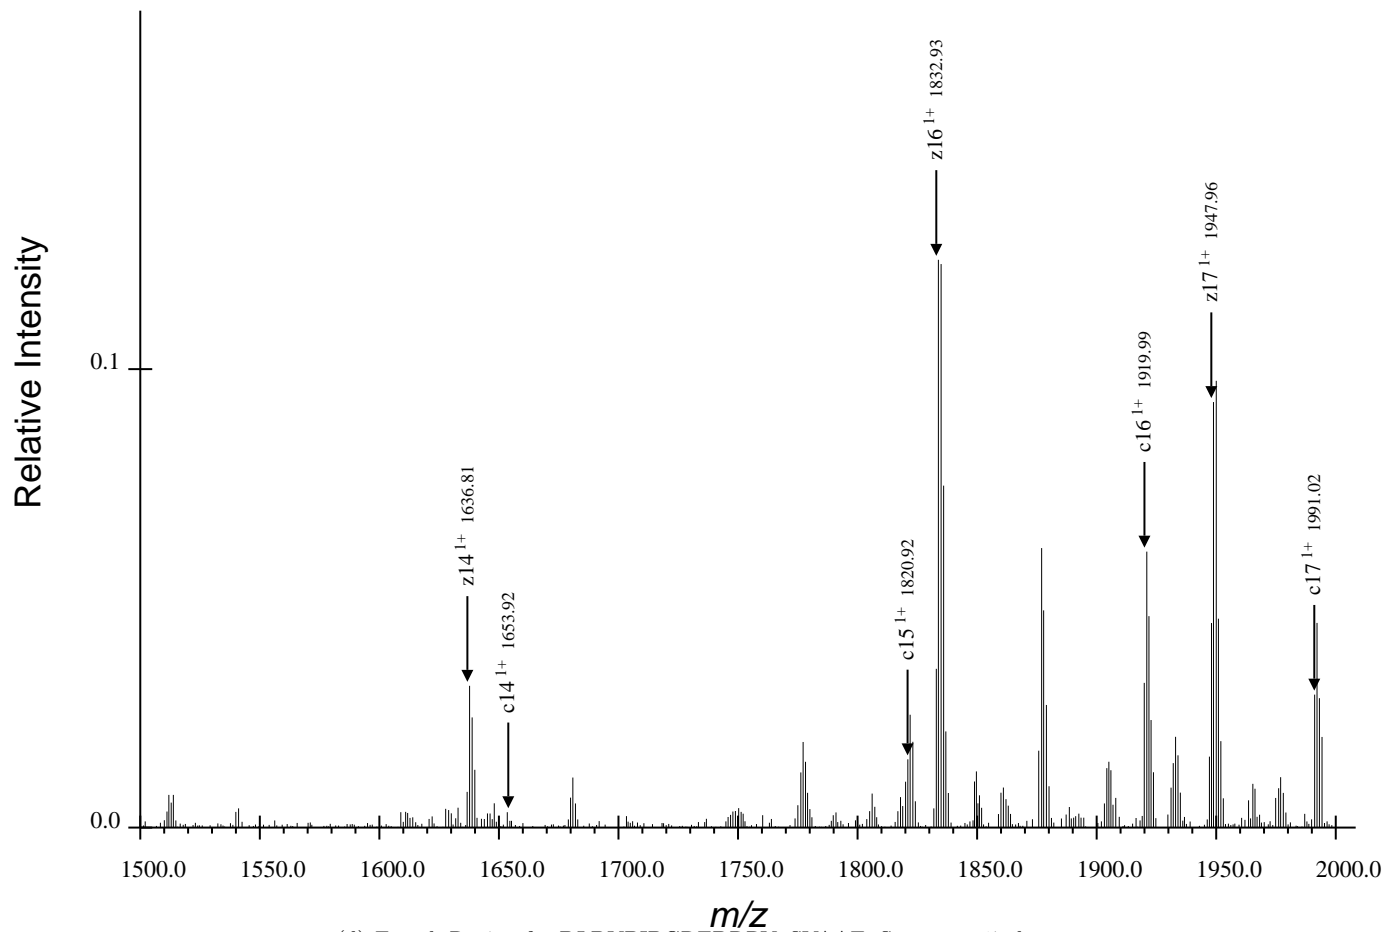

(d) Fourth Region for DLDVPIPGRFDRRVpSVAEE, Spectrum 17.dta

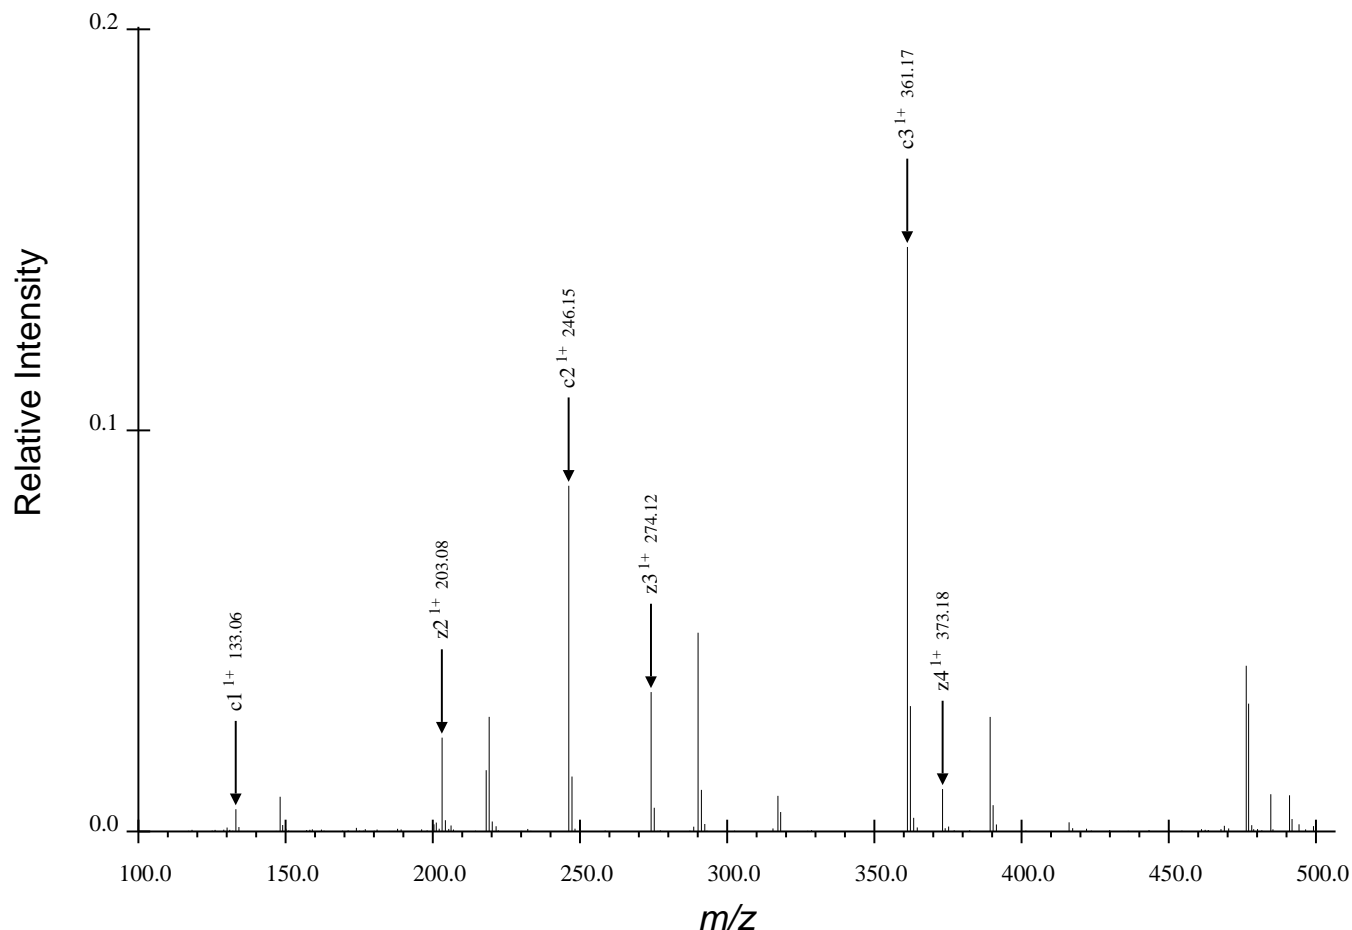

(a) First Region for DLDVPIPGRFDRRVpSVAAE, Spectrum 18.dta

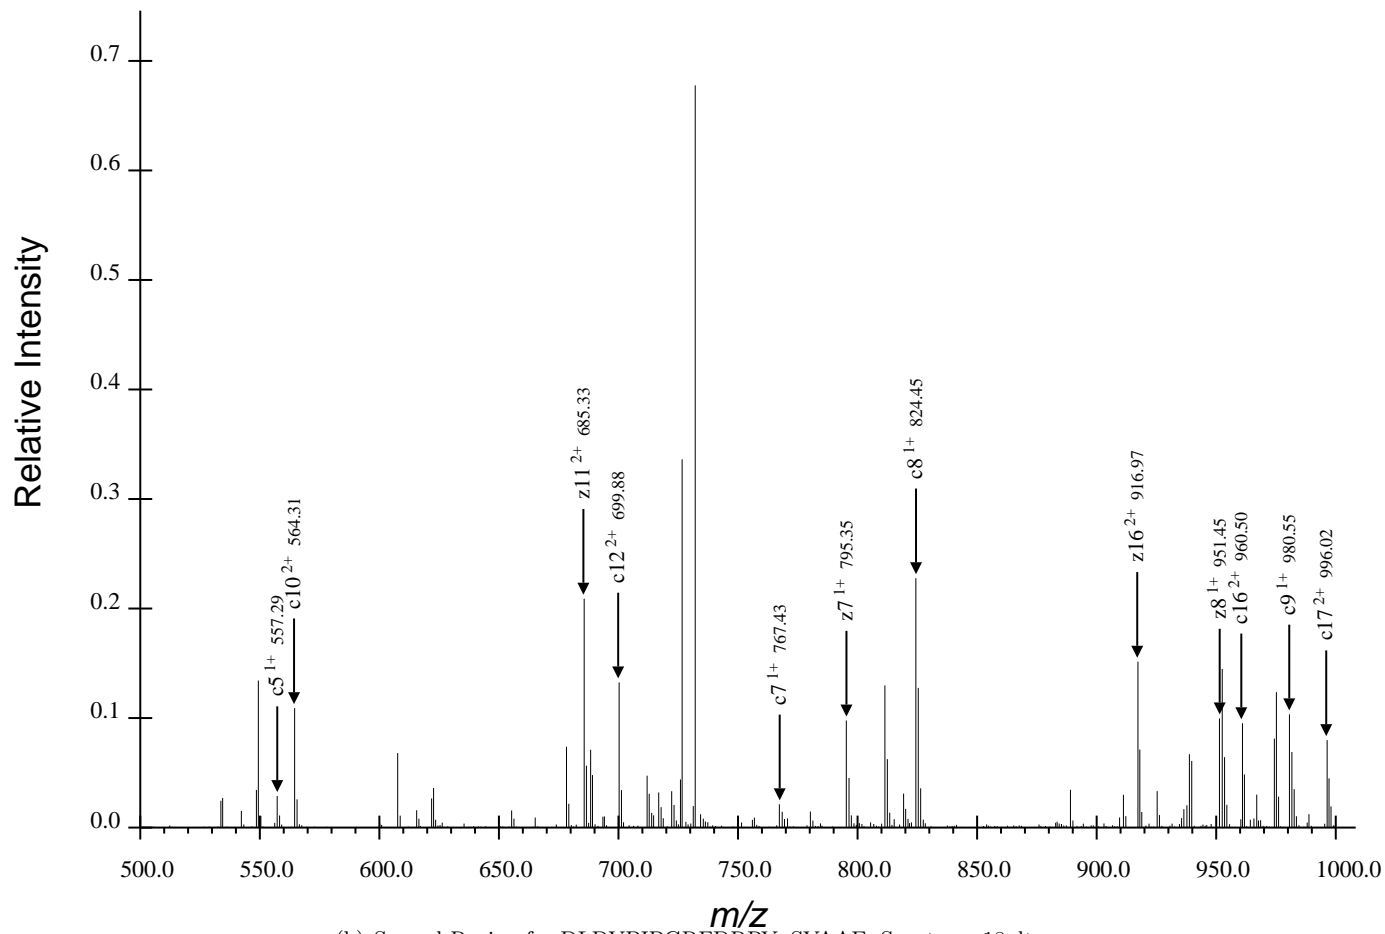

(b) Second Region for DLDVPIPGRFDRRVpSVAAE, Spectrum 18.dta

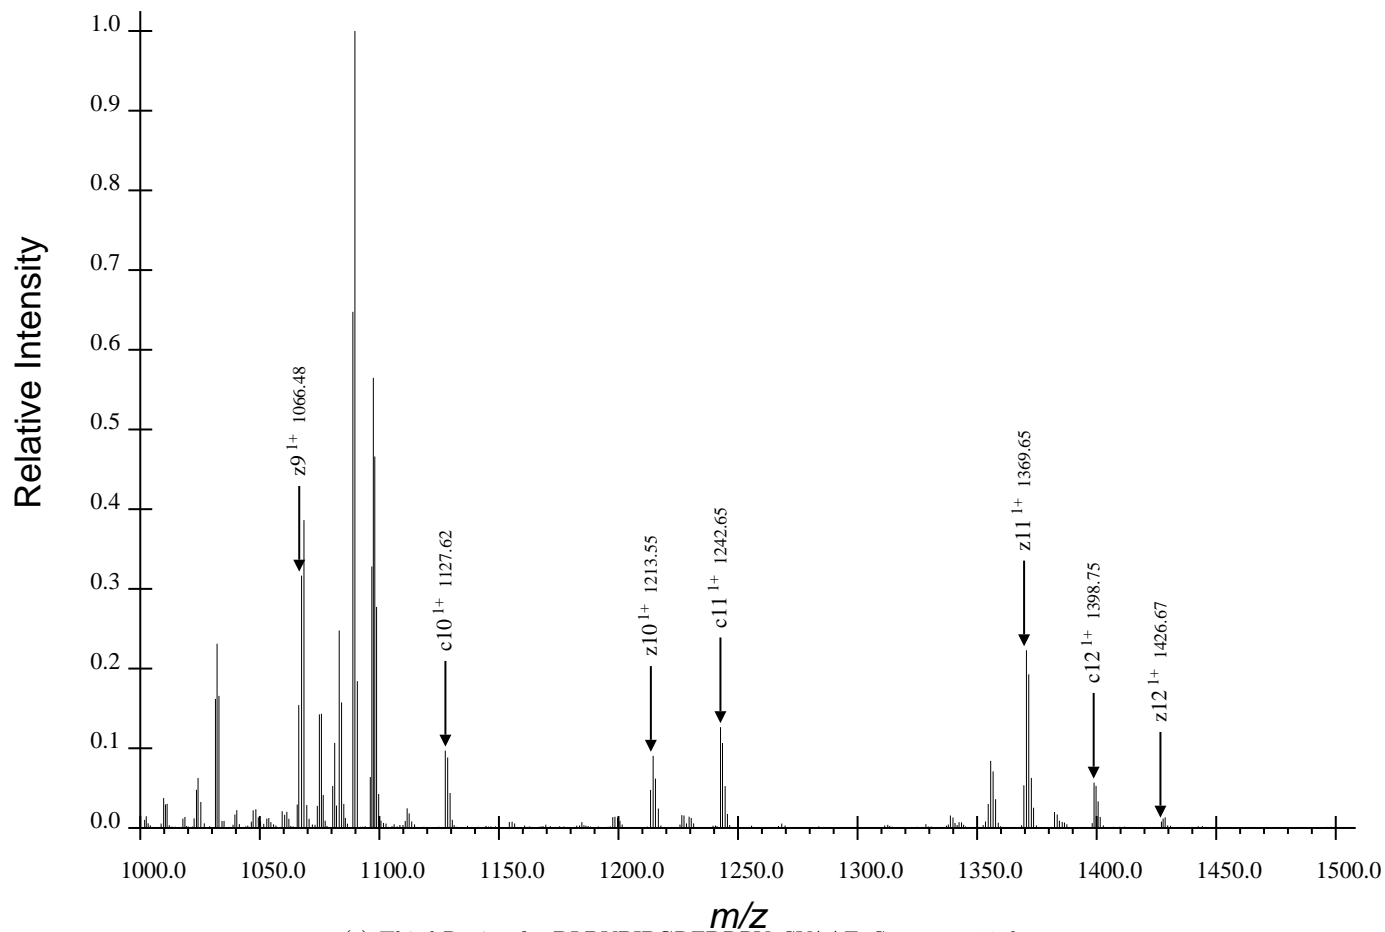

(c) Third Region for DLDVPIPGRFDRRVpSVA AE, Spectrum 18.dta

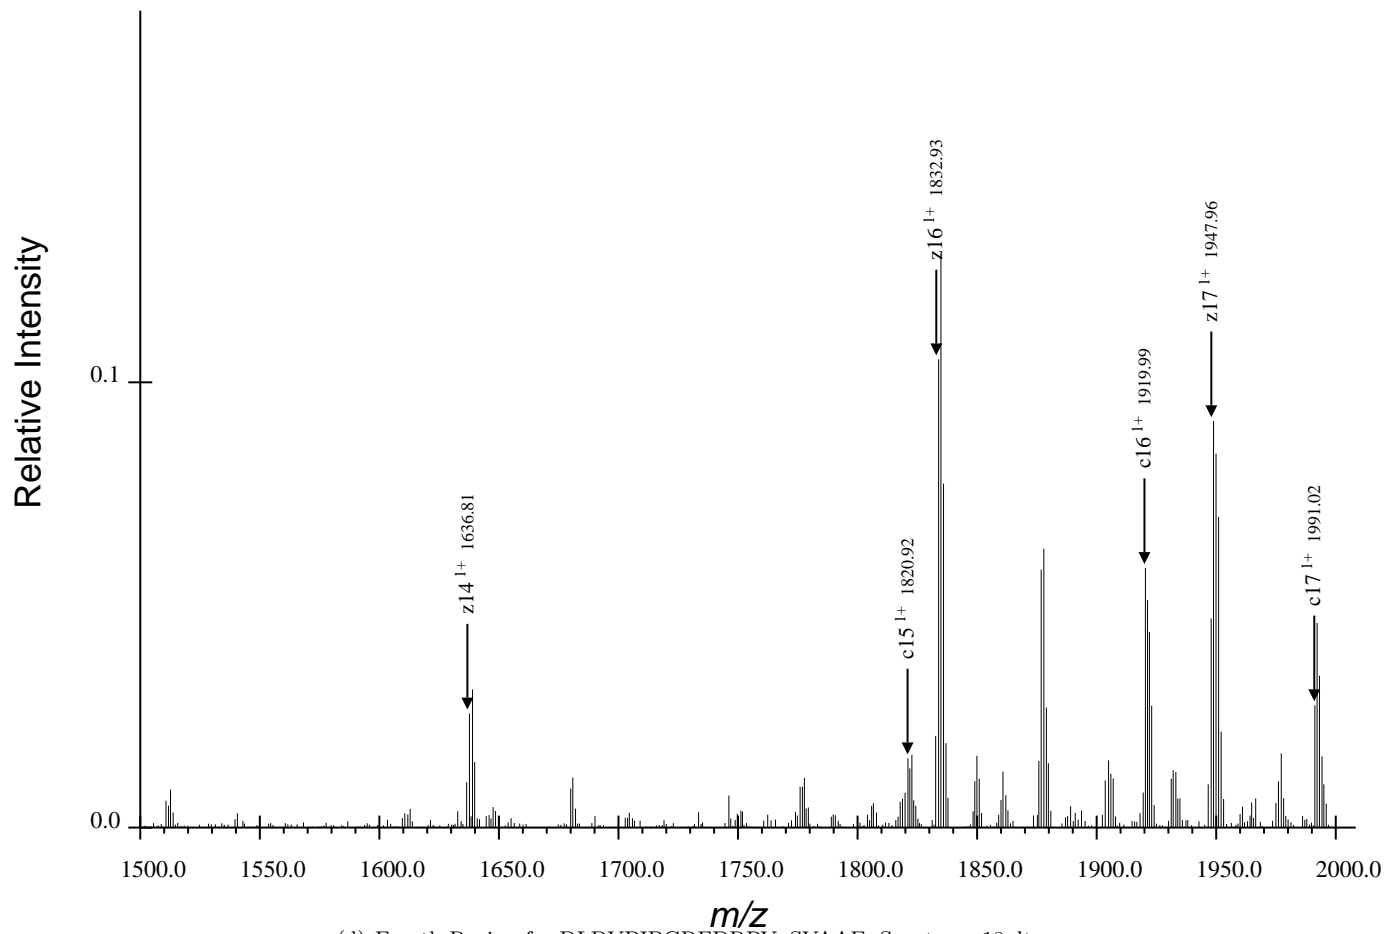

(d) Fourth Region for DLDVPIPGRFDRRVpSVA AE, Spectrum 18.dta

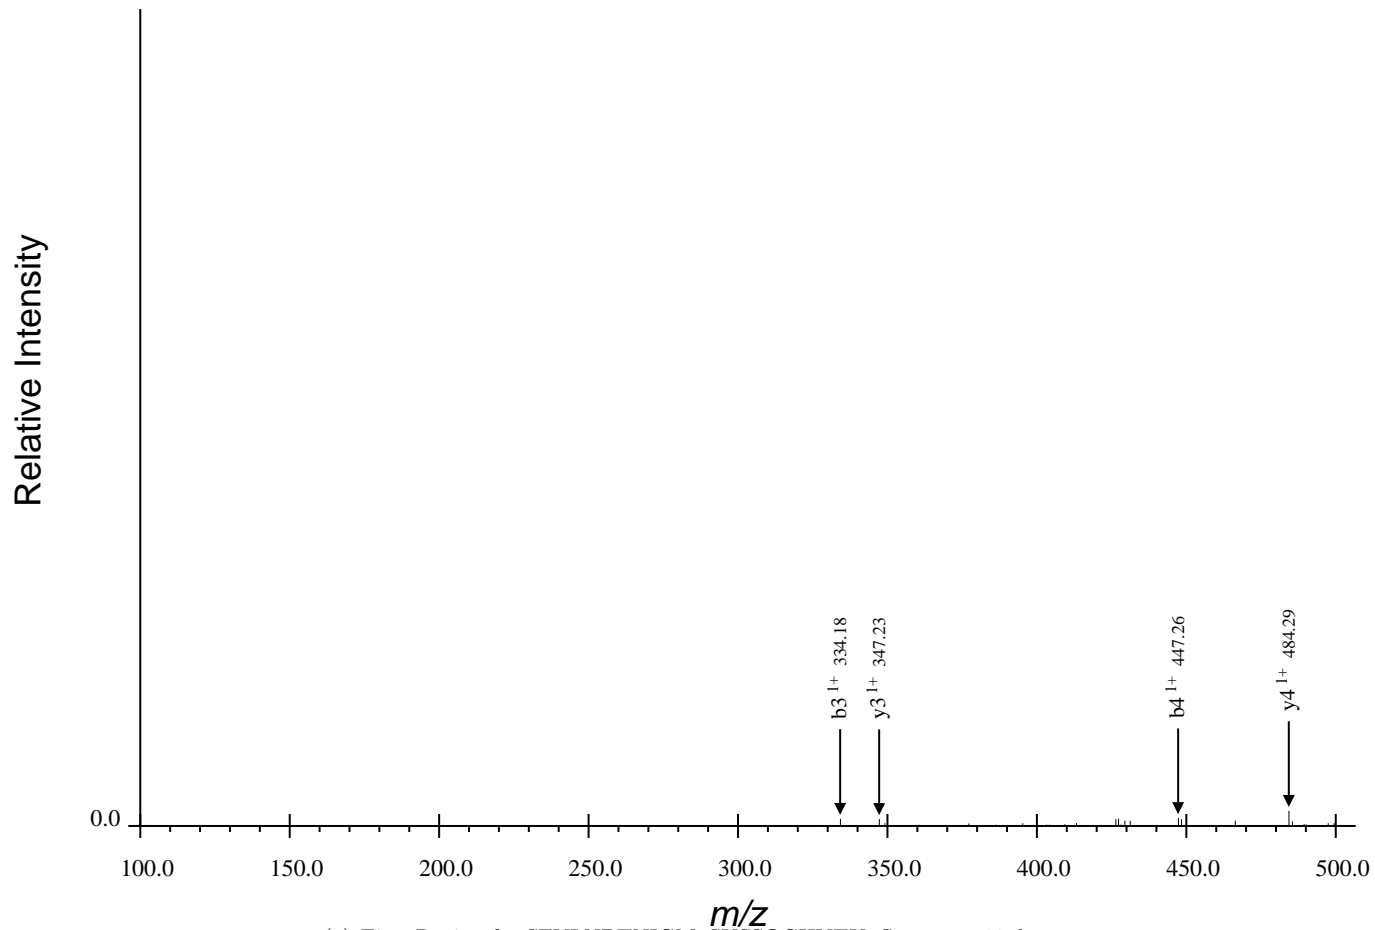

(a) First Region for SFVLNPTNIGMpSKSSQGHVTK, Spectrum 19.dta

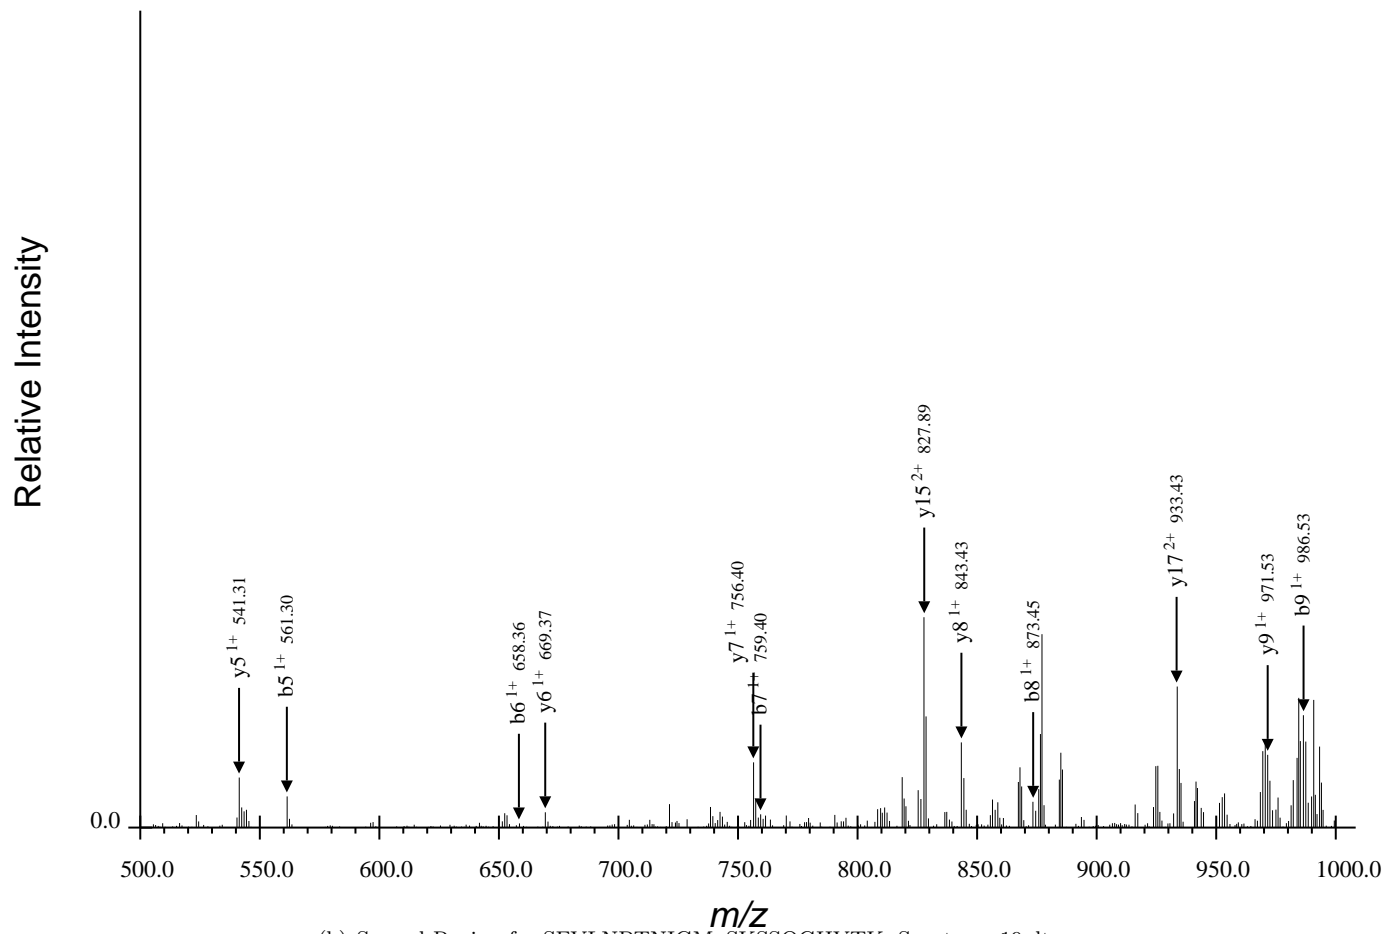

(b) Second Region for SFVLNPTNIGMpSKSSQGHVTK, Spectrum 19.dta

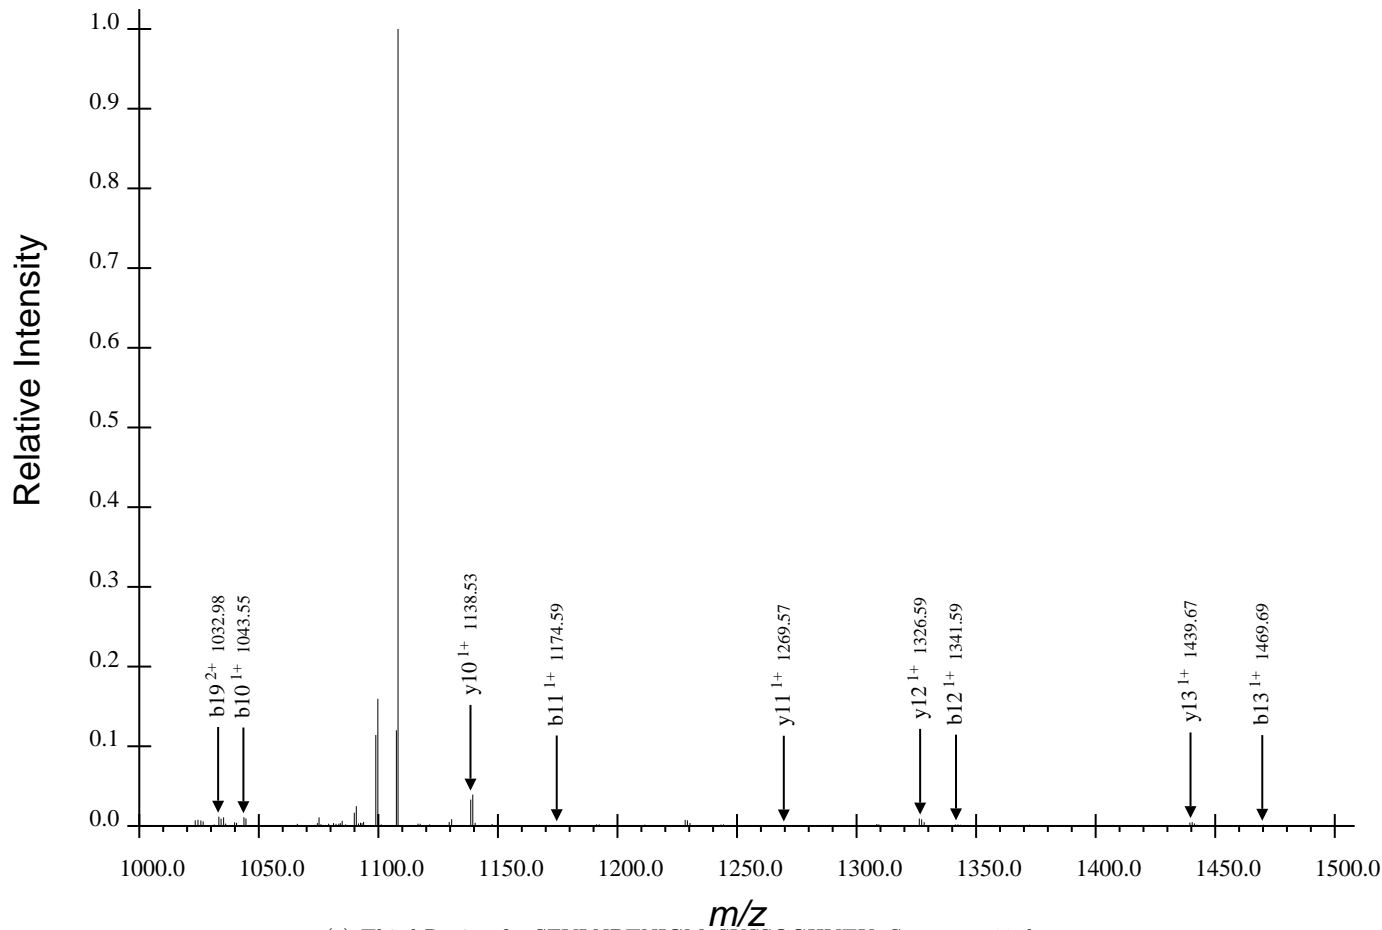

(c) Third Region for SFVLNPTNIGMpSKSSQGHVTK, Spectrum 19.dta

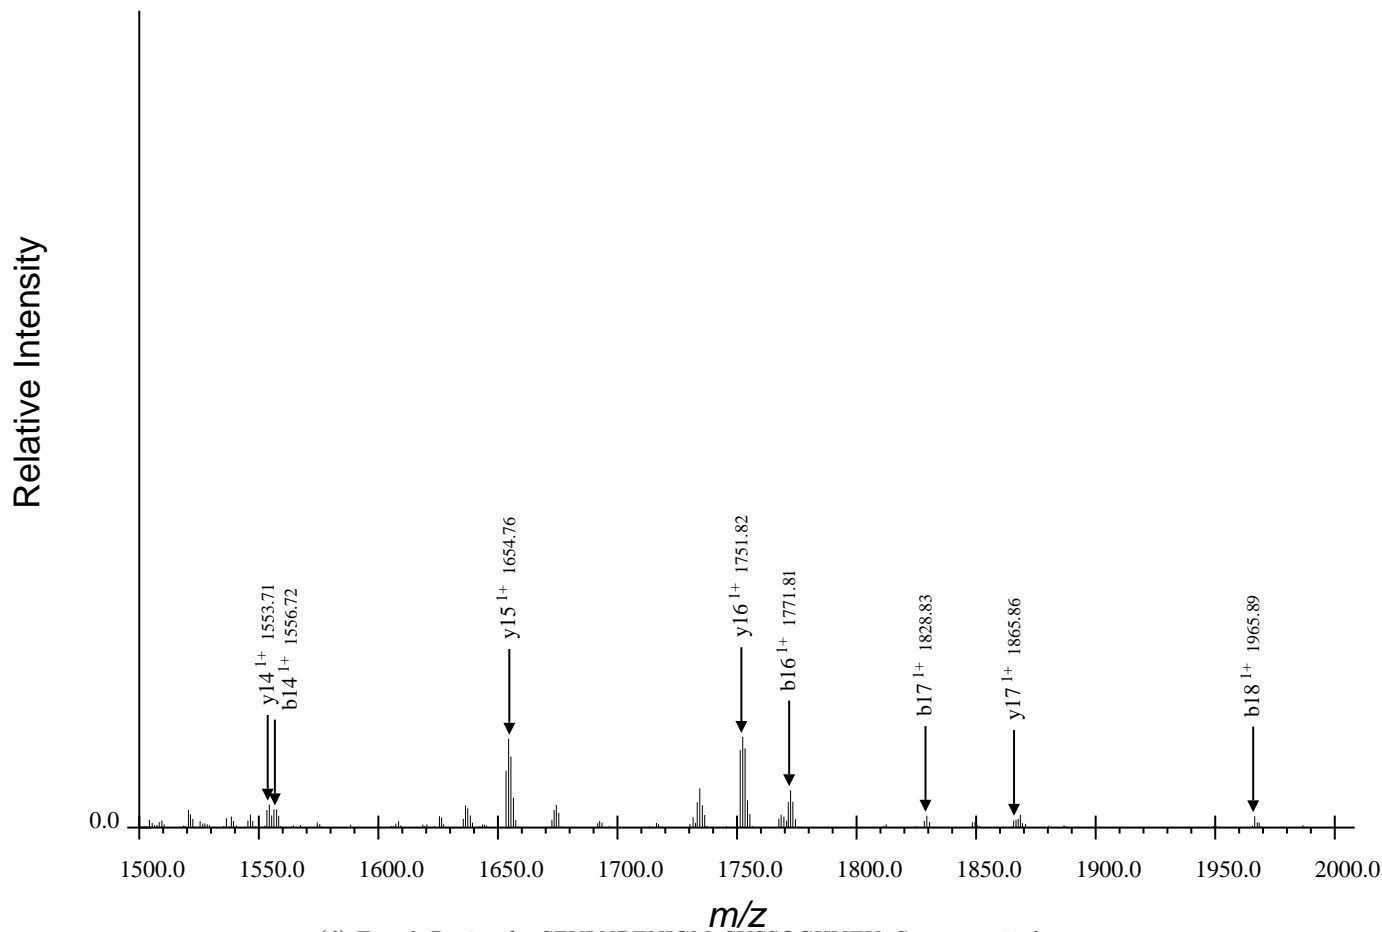

(d) Fourth Region for SFVLNPTNIGMpSKSSQGHVTK, Spectrum 19.dta

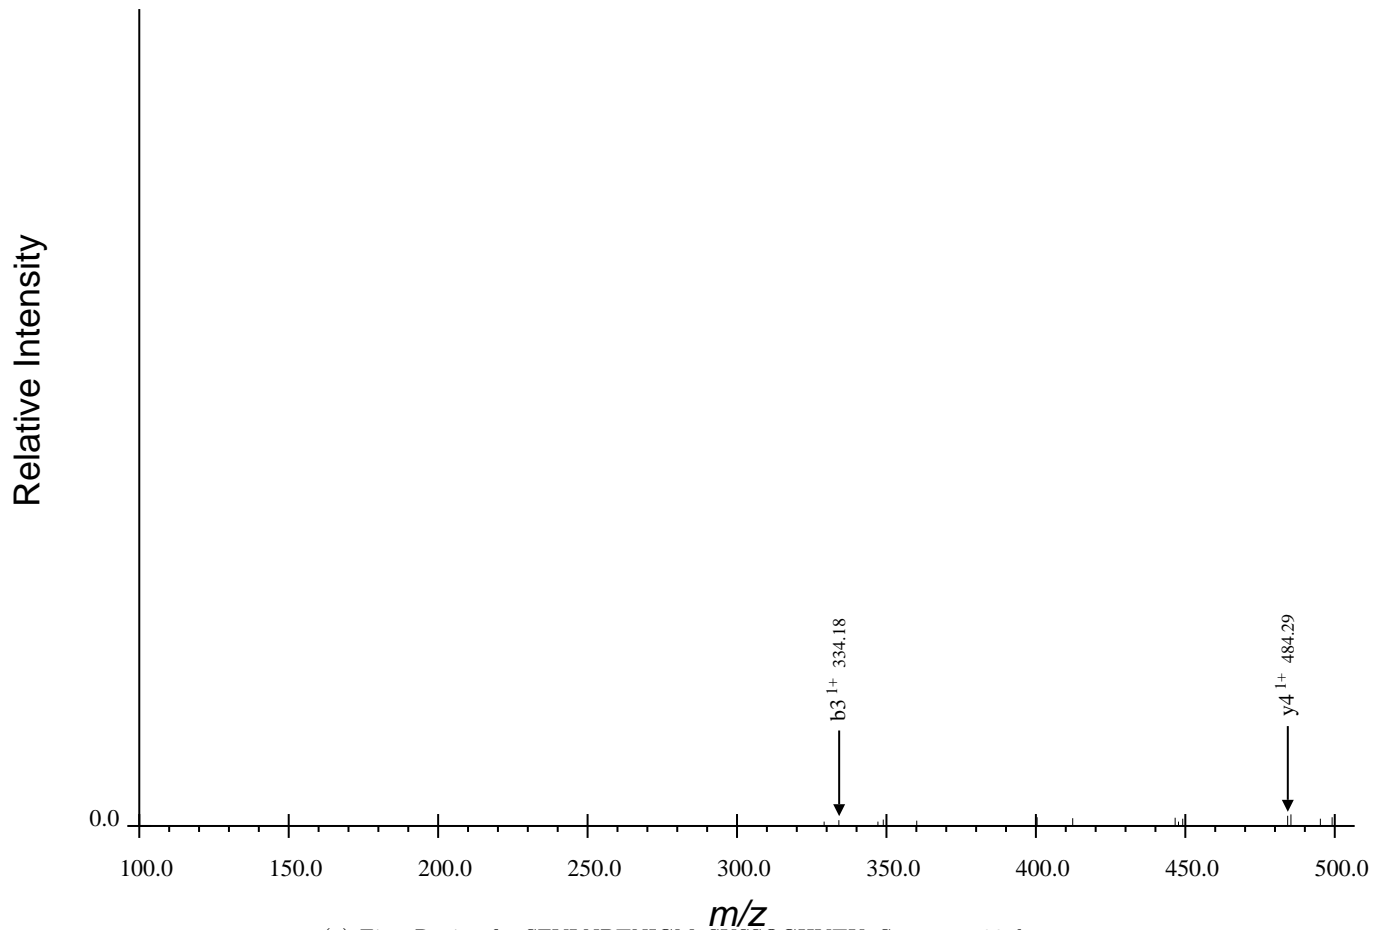

(a) First Region for SFVLNPTNIGMpSKSSQGHVTK, Spectrum 20.dta

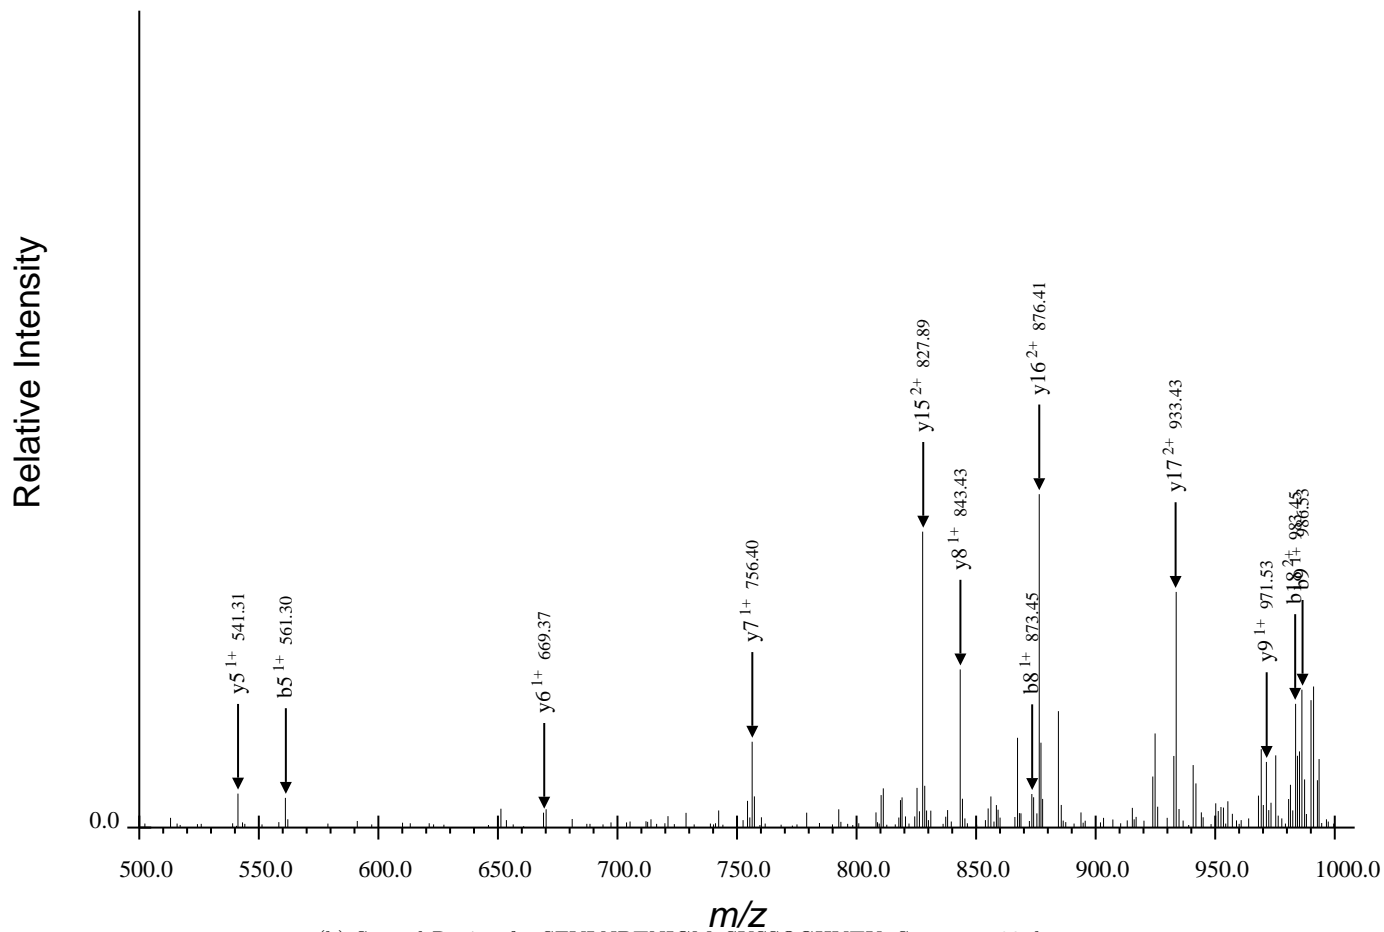

(b) Second Region for SFVLNPTNIGMpSKSSQGHVTK, Spectrum 20.dta

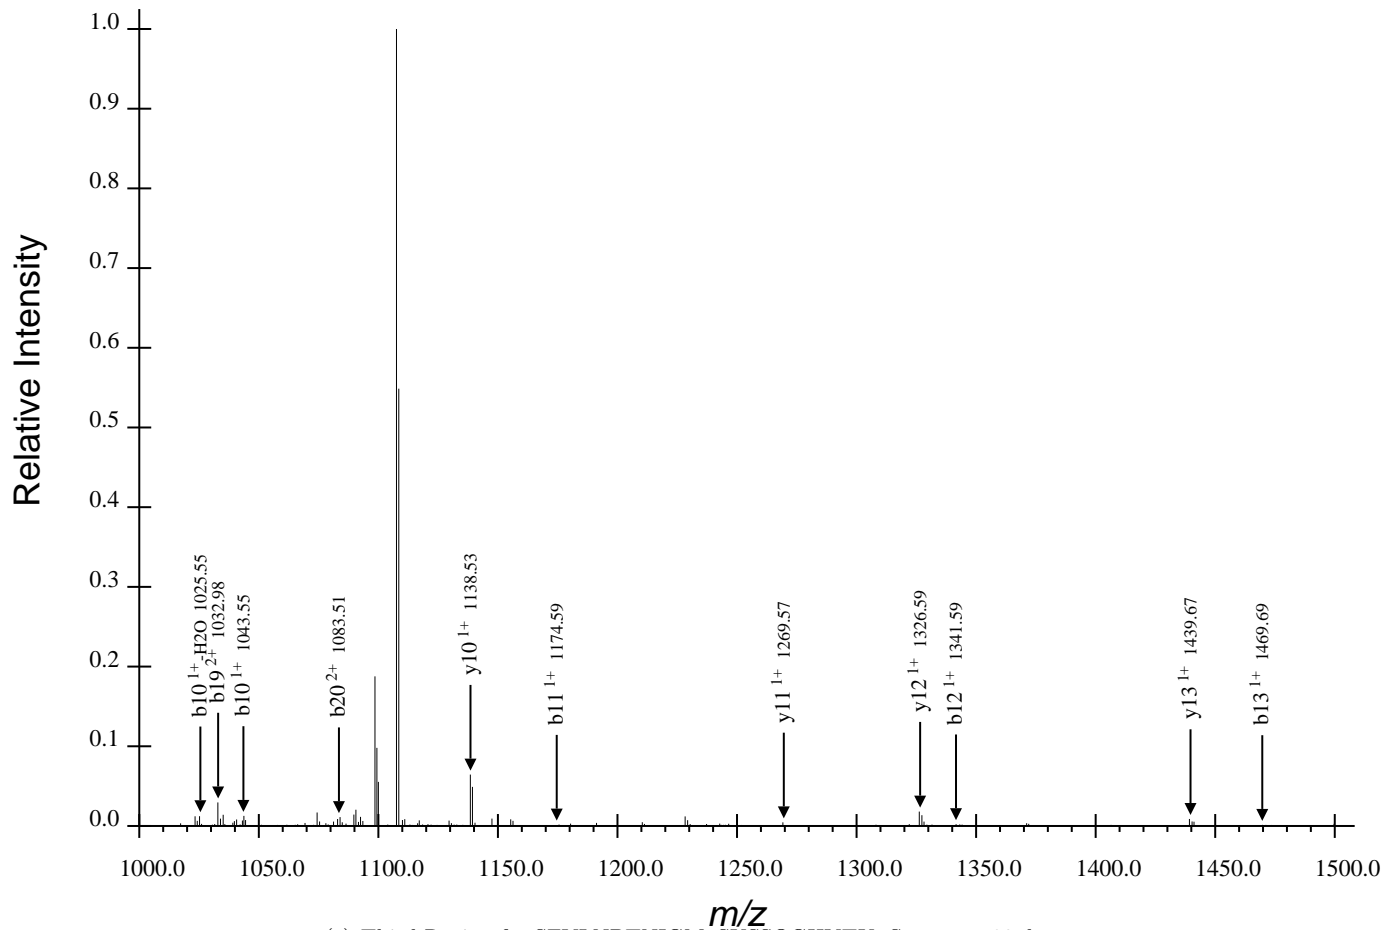

(c) Third Region for SFVLNPTNIGMpSKSSQGHVTK, Spectrum 20.dta

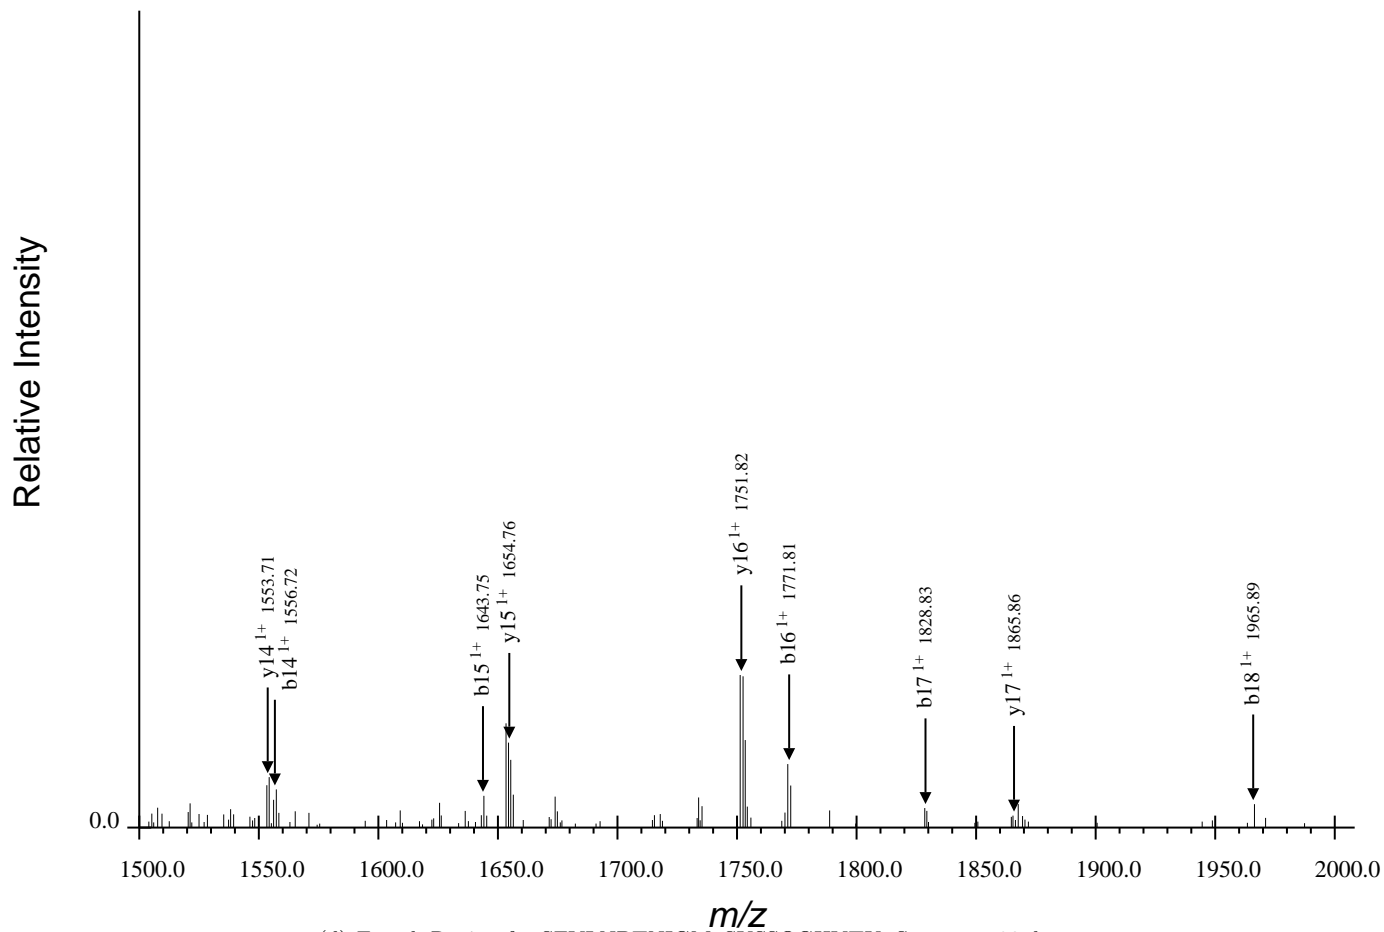

(d) Fourth Region for SFVLNPTNIGMpSKSSQGHVTK, Spectrum 20.dta



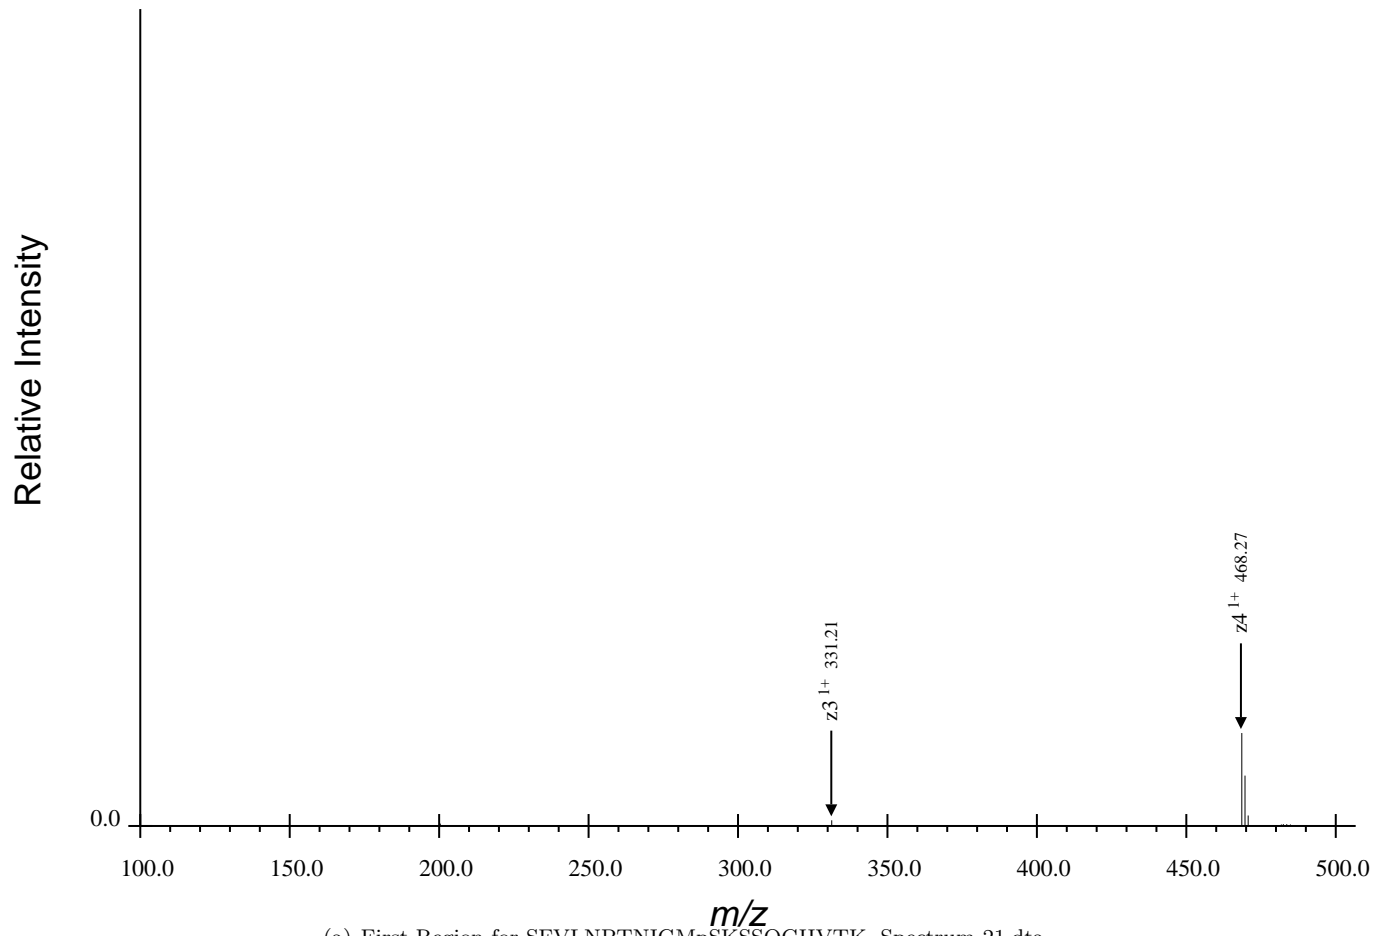

(a) First Region for SFVLNPTNIGMpSKSSQGHVTK, Spectrum 21.dta

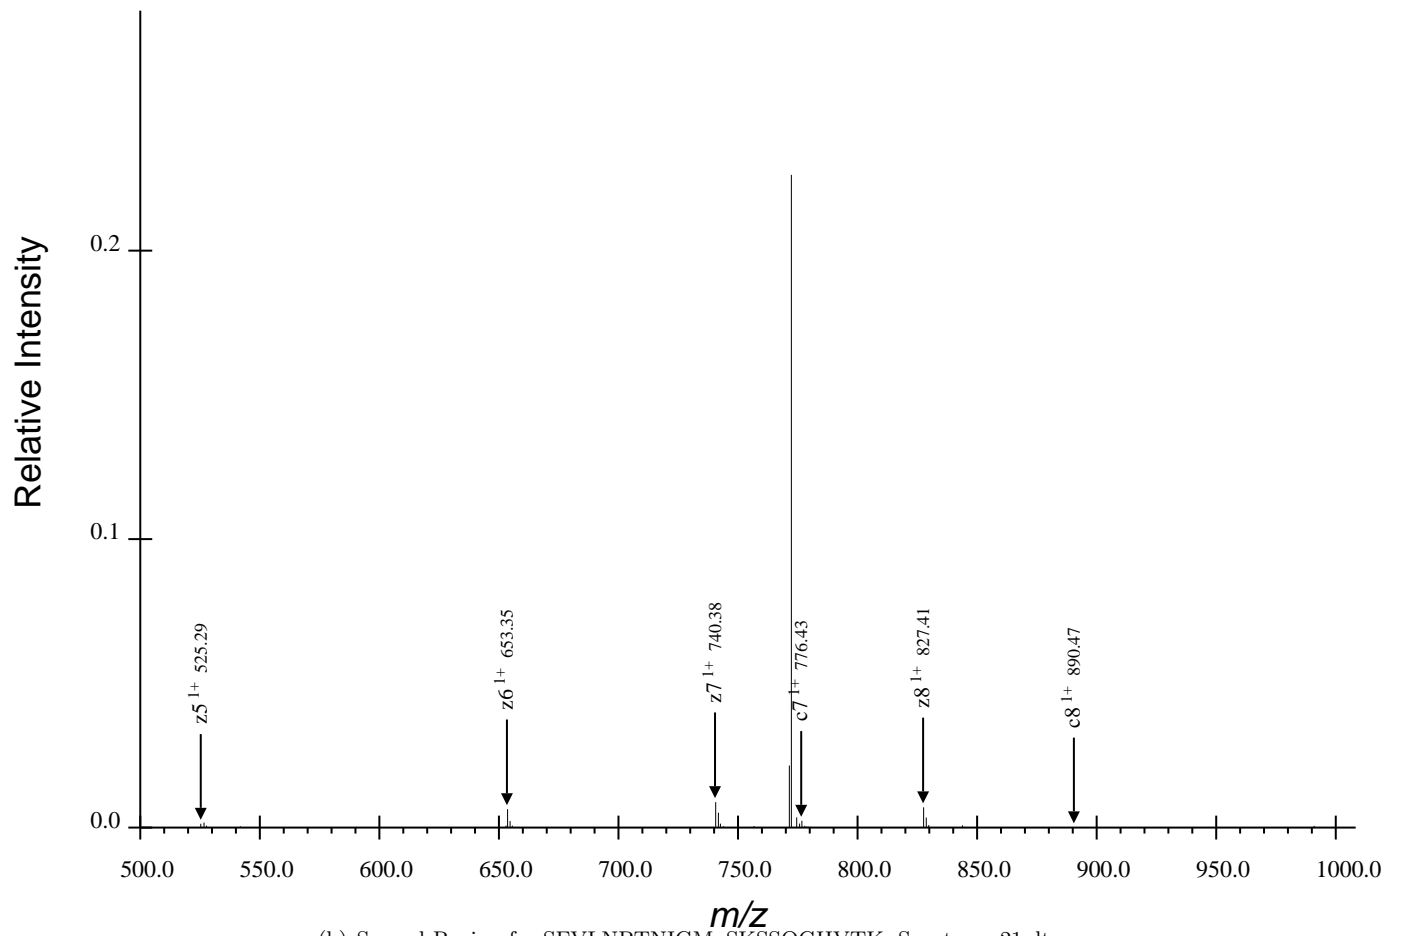

(b) Second Region for SFVLNPTNIGMpSKSSQGHVTK, Spectrum 21.dta

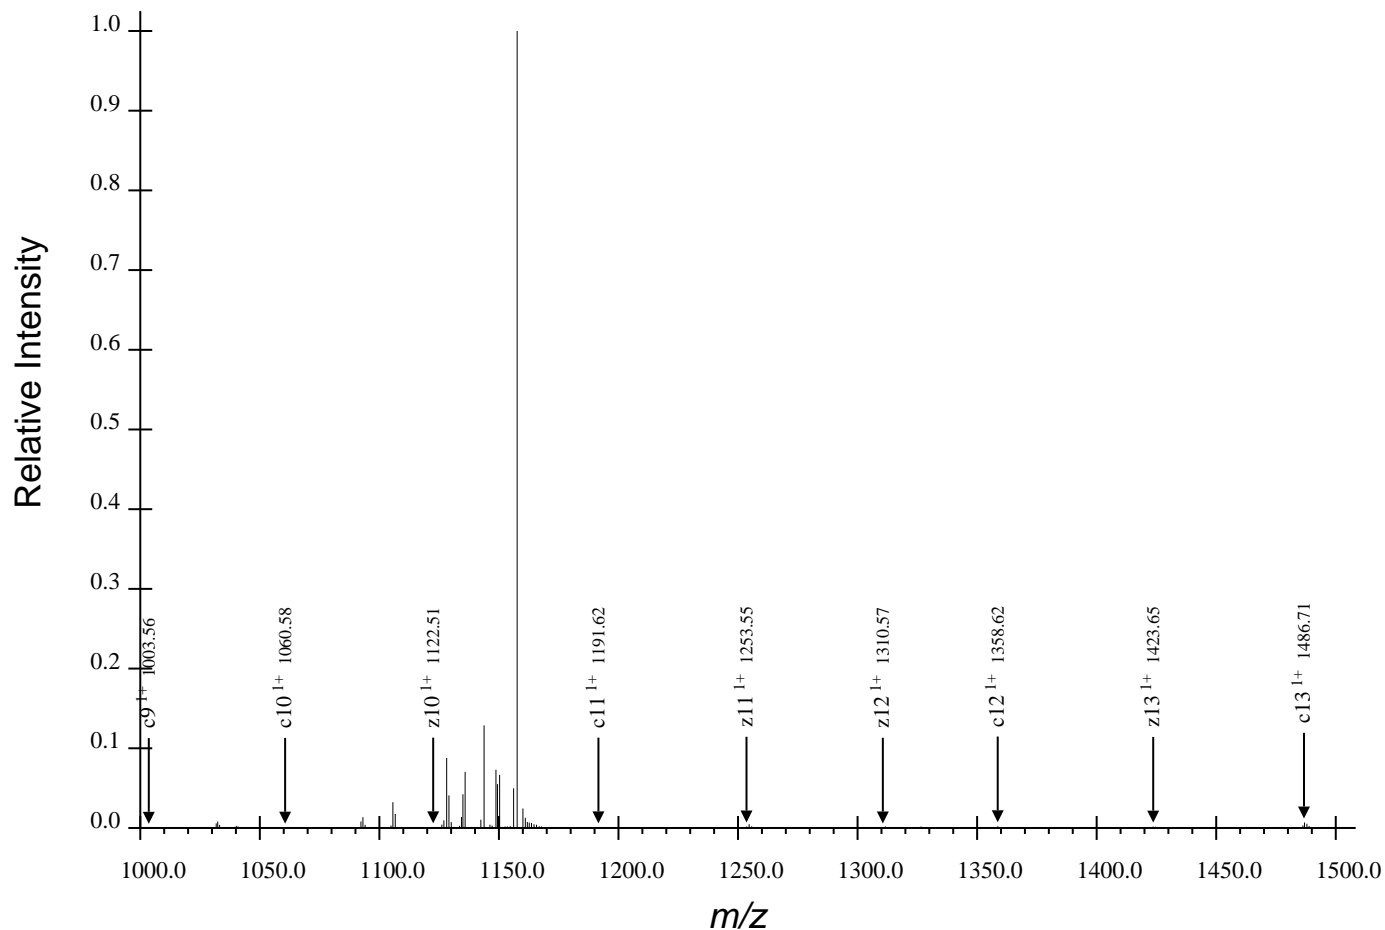

(c) Third Region for SFVLNPTNIGMpSKSSQGHVTK, Spectrum 21.dta

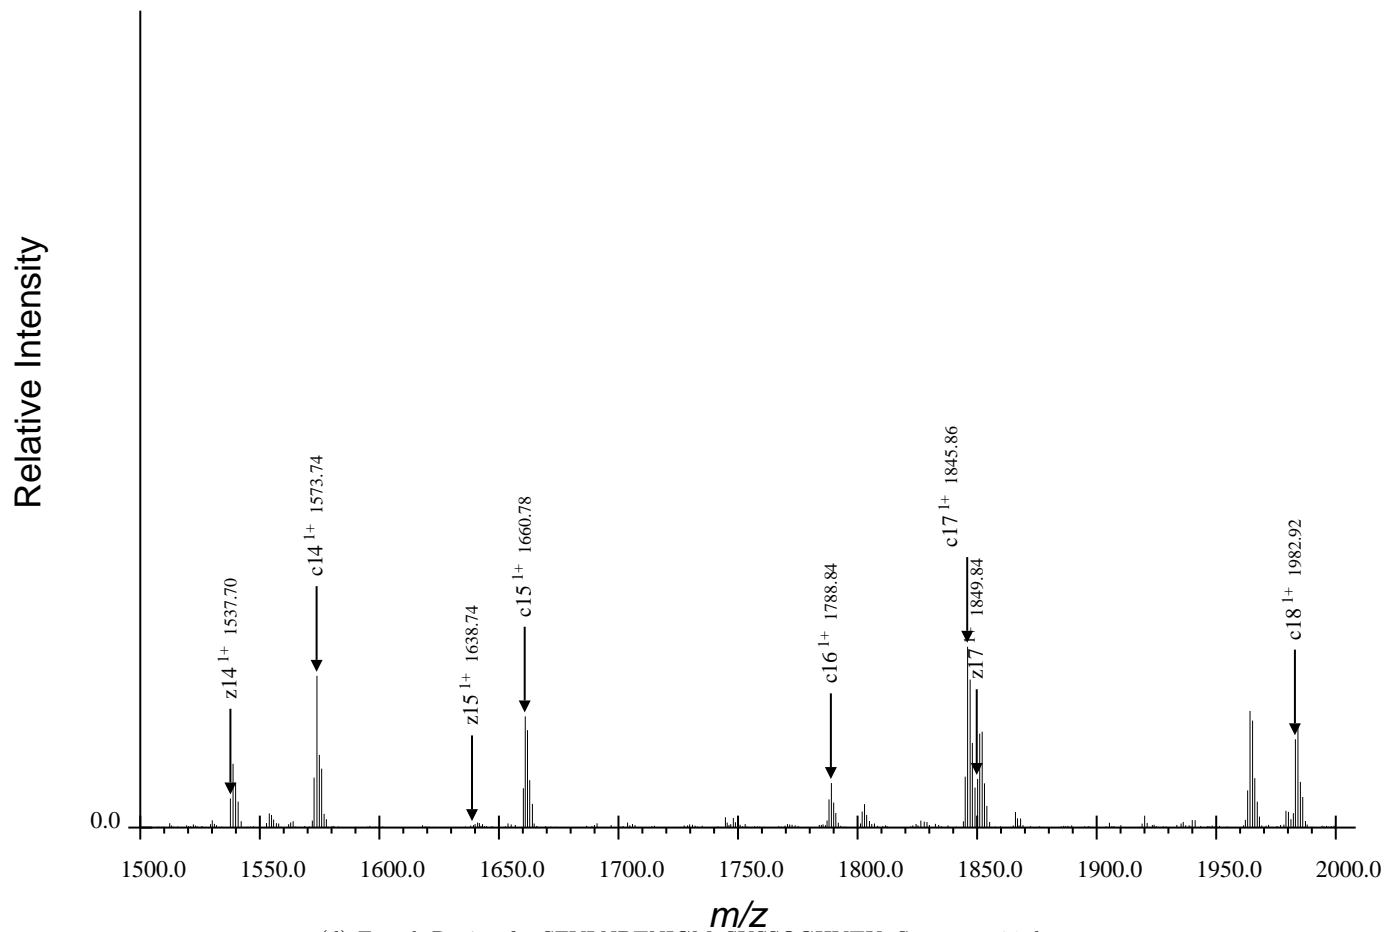

(d) Fourth Region for SFVLNPTNIGMpSKSSQGHVTK, Spectrum 21.dta

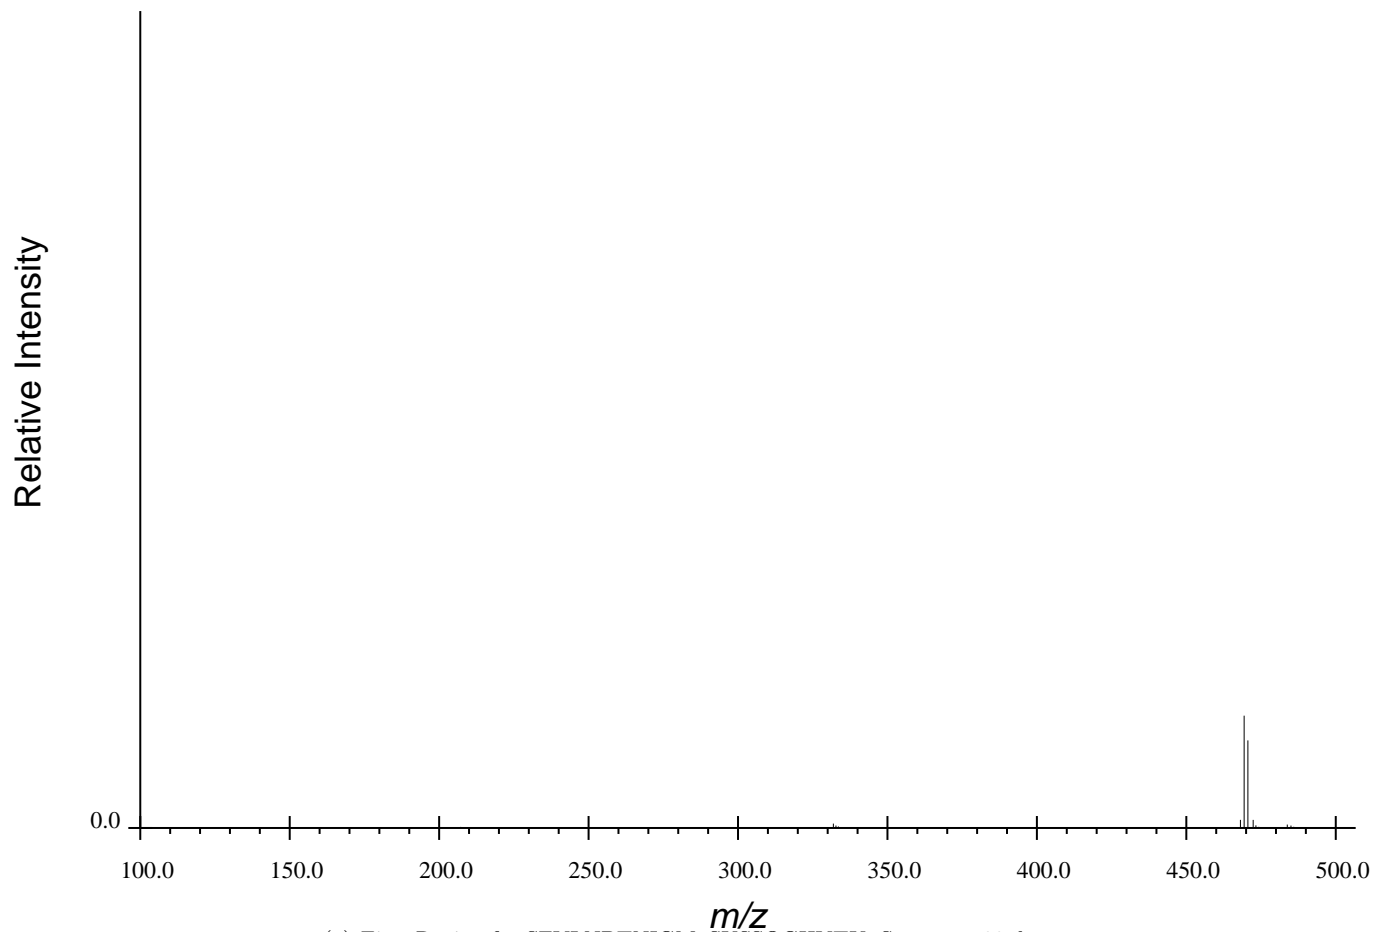

(a) First Region for SFVLNPTNIGMpSKSSQGHVTK, Spectrum 22.dta

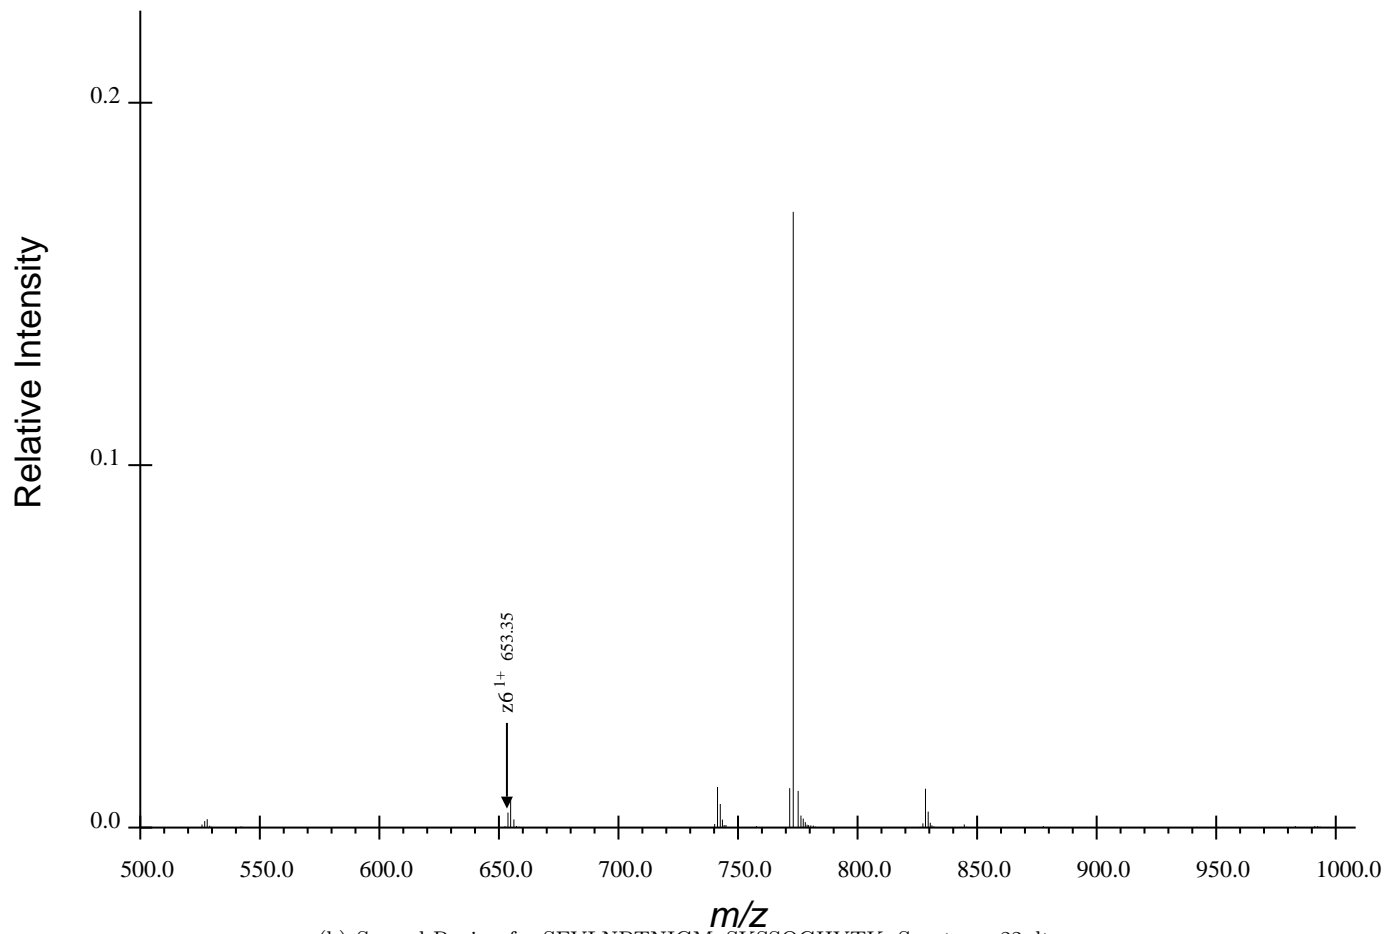

(b) Second Region for SFVLNPTNIGMpSKSSQGHVTK, Spectrum 22.dta

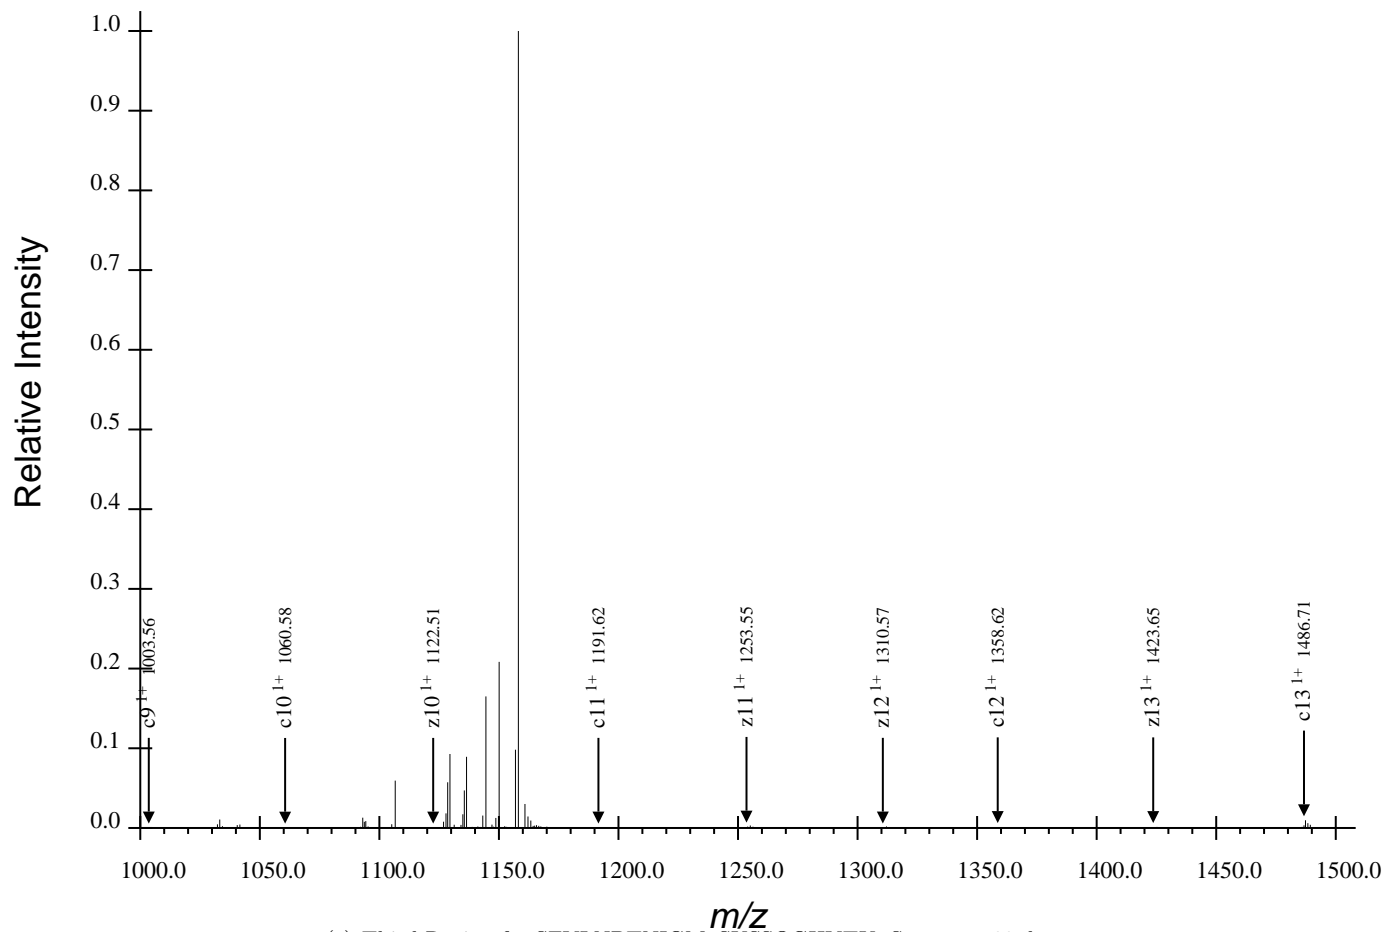

(c) Third Region for SFVLNPTNIGMpSKSSQGHVTK, Spectrum 22.dta

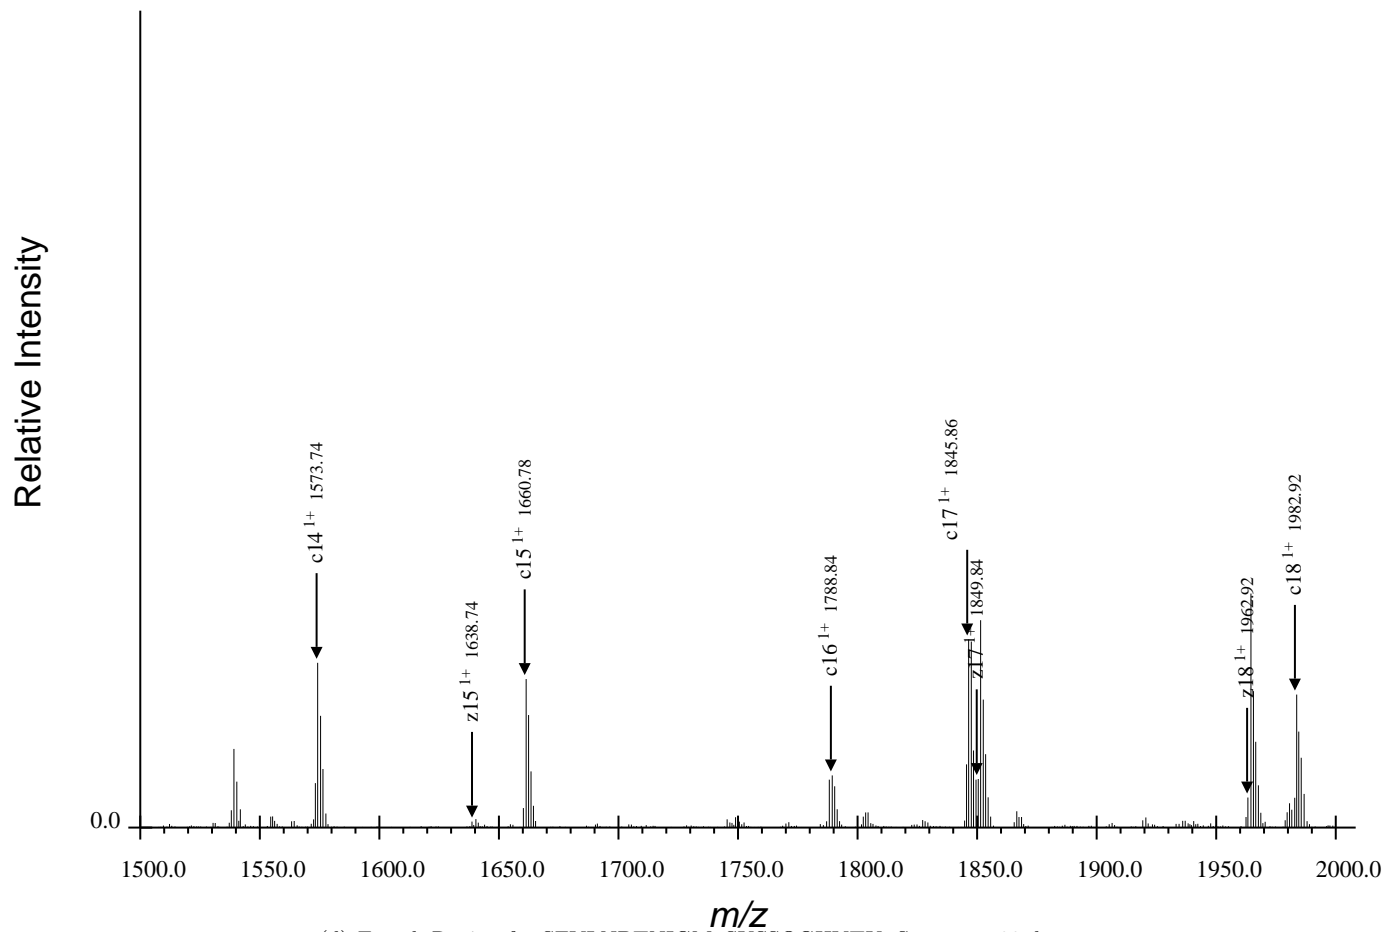

(d) Fourth Region for SFVLNPTNIGMpSKSSQGHVTK, Spectrum 22.dta

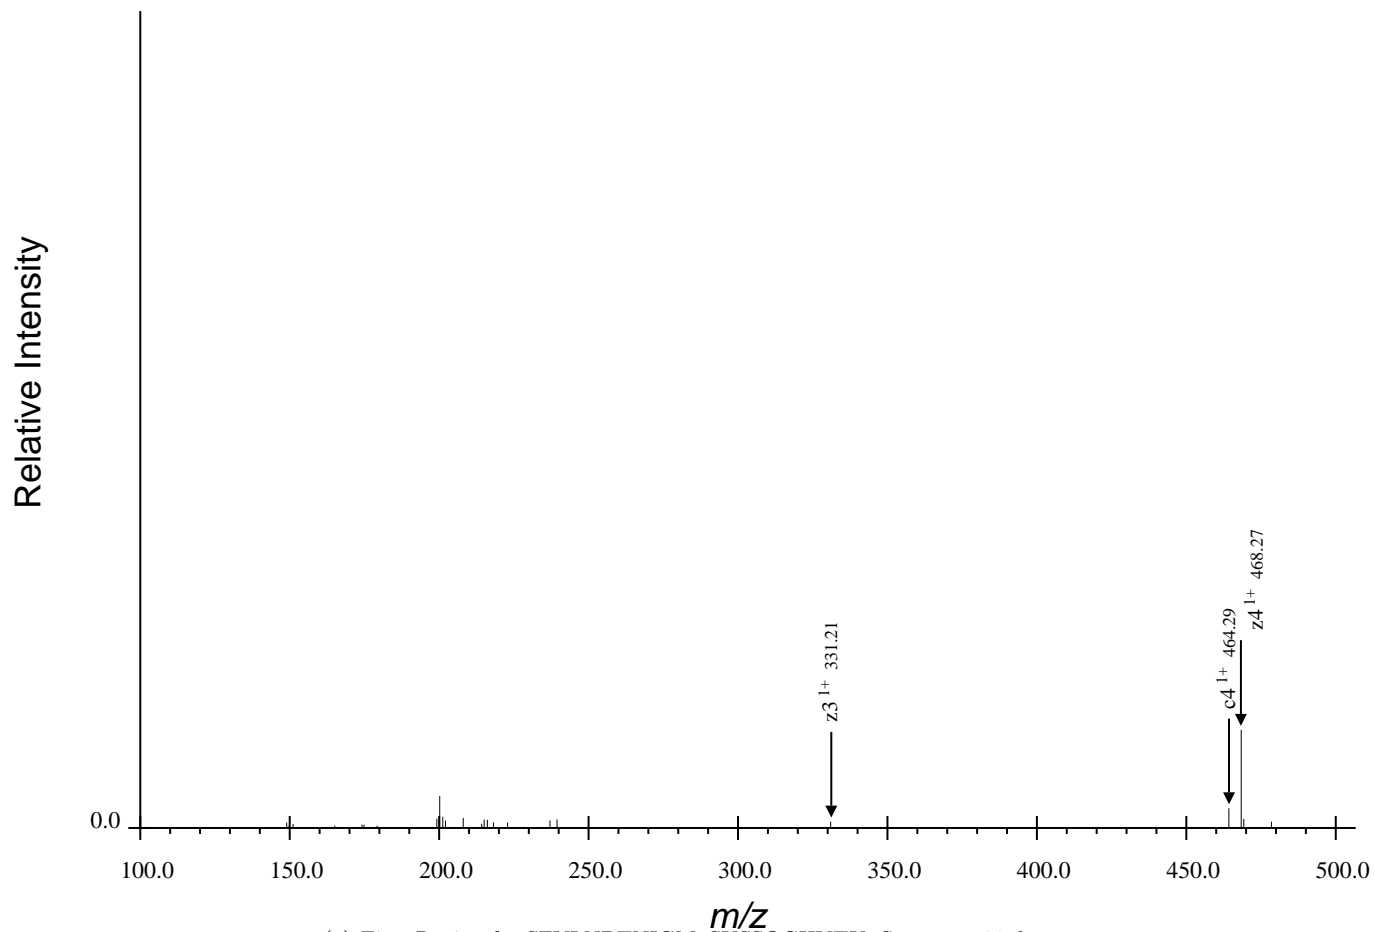

(a) First Region for SFVLNPTNIGMpSKSSQGHVTK, Spectrum 23.dta

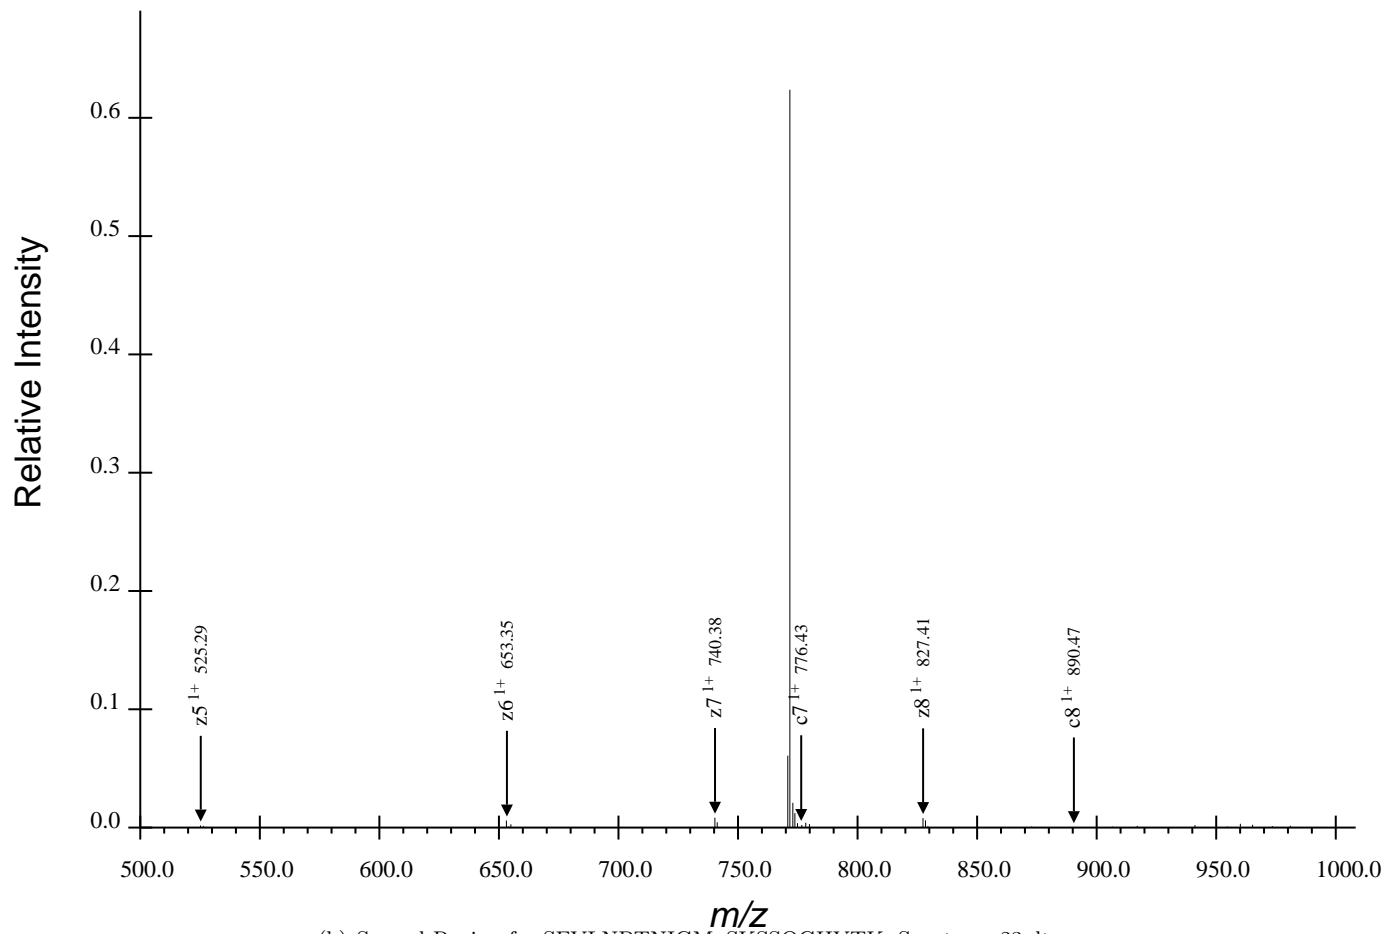

(b) Second Region for SFVLNPTNIGMpSKSSQGHVTK, Spectrum 23.dta

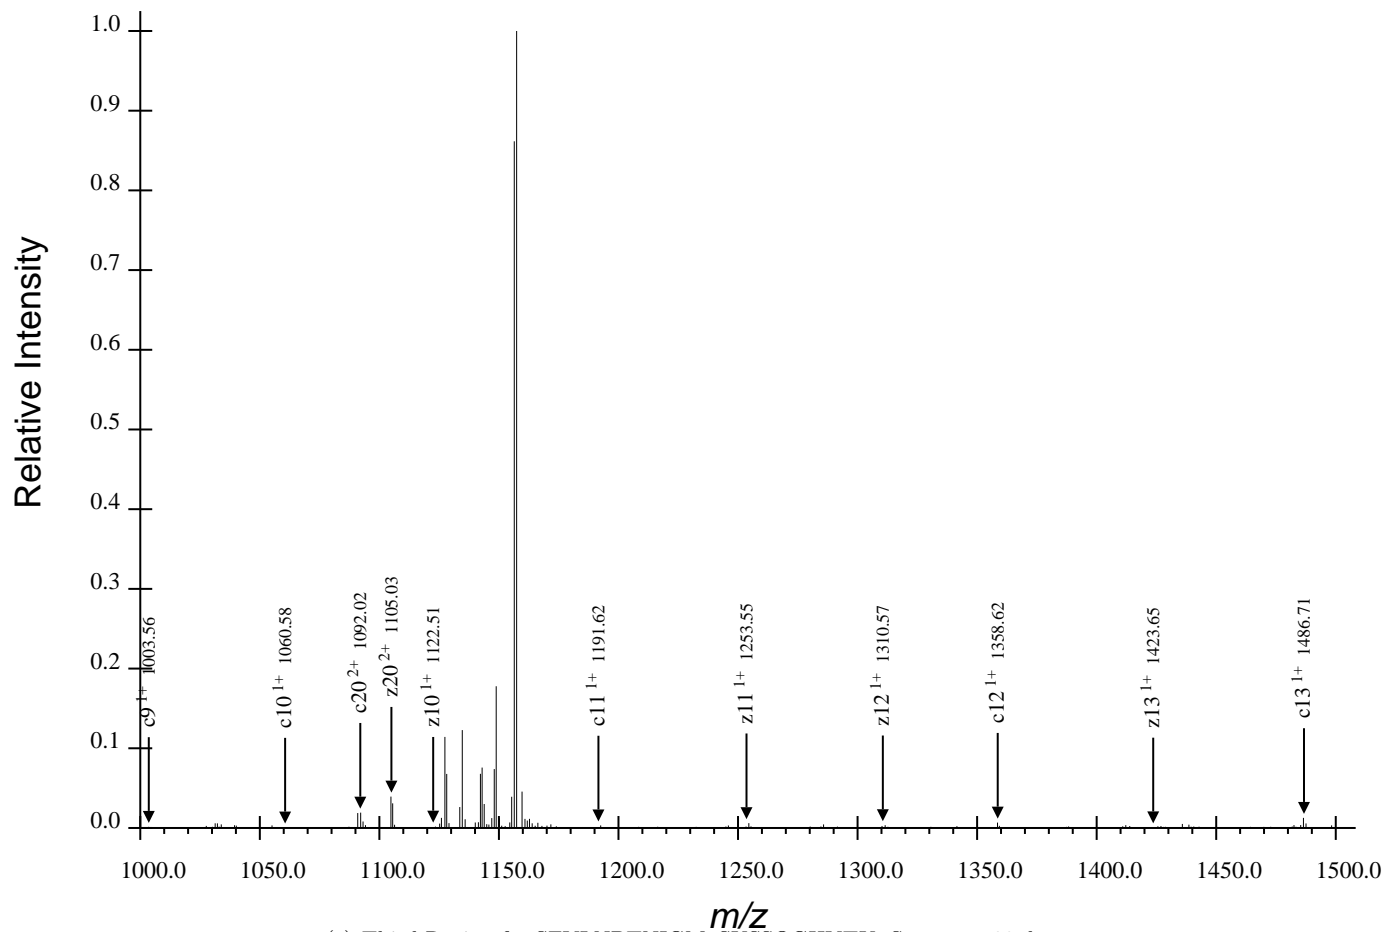

(c) Third Region for SFVLNPTNIGMpSKSSQGHVTK, Spectrum 23.dta

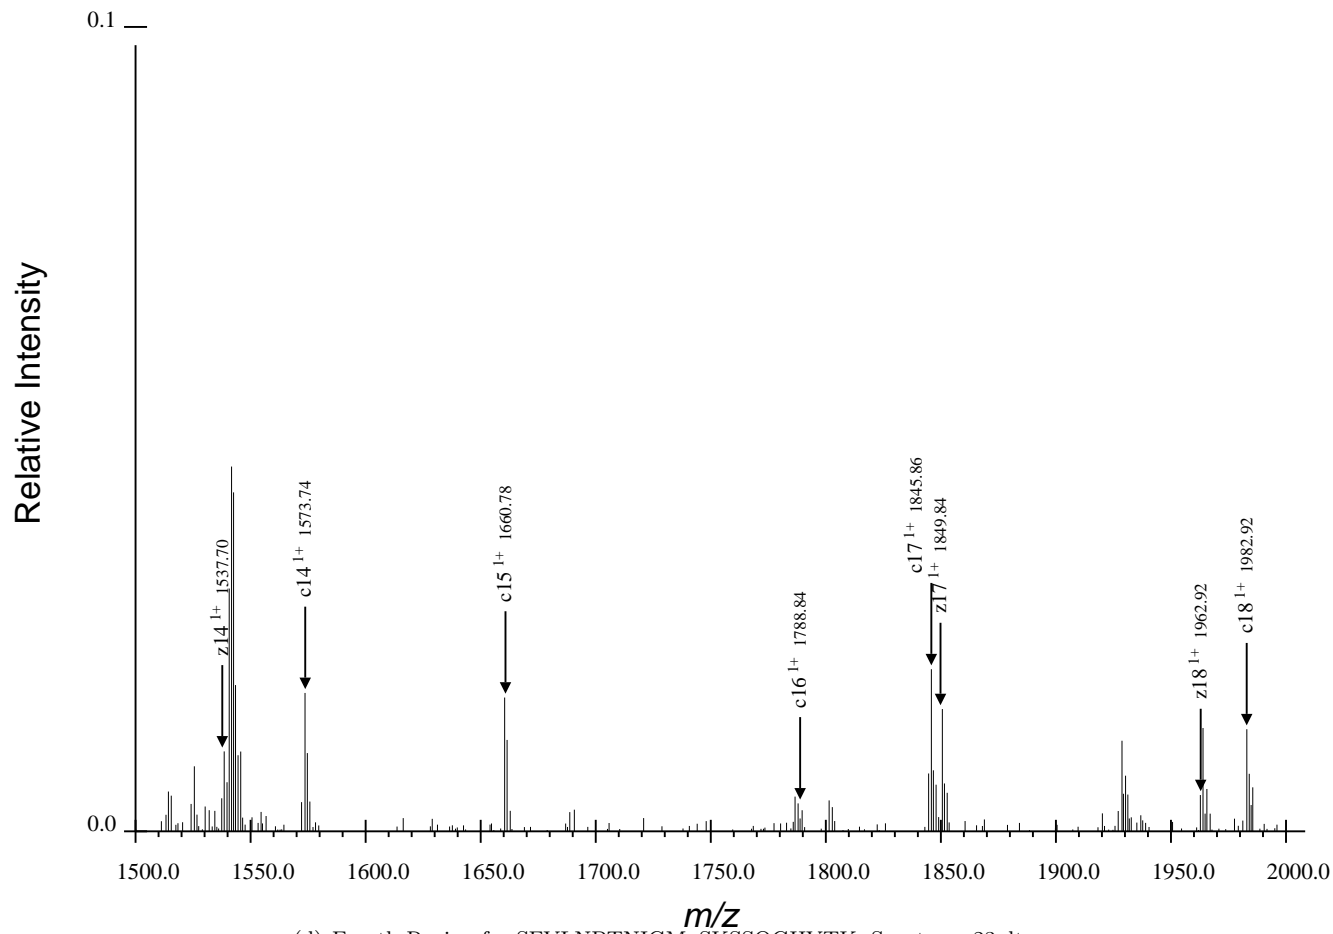

(d) Fourth Region for SFVLNPTNIGMpSKSSQGHVTK, Spectrum 23.dta

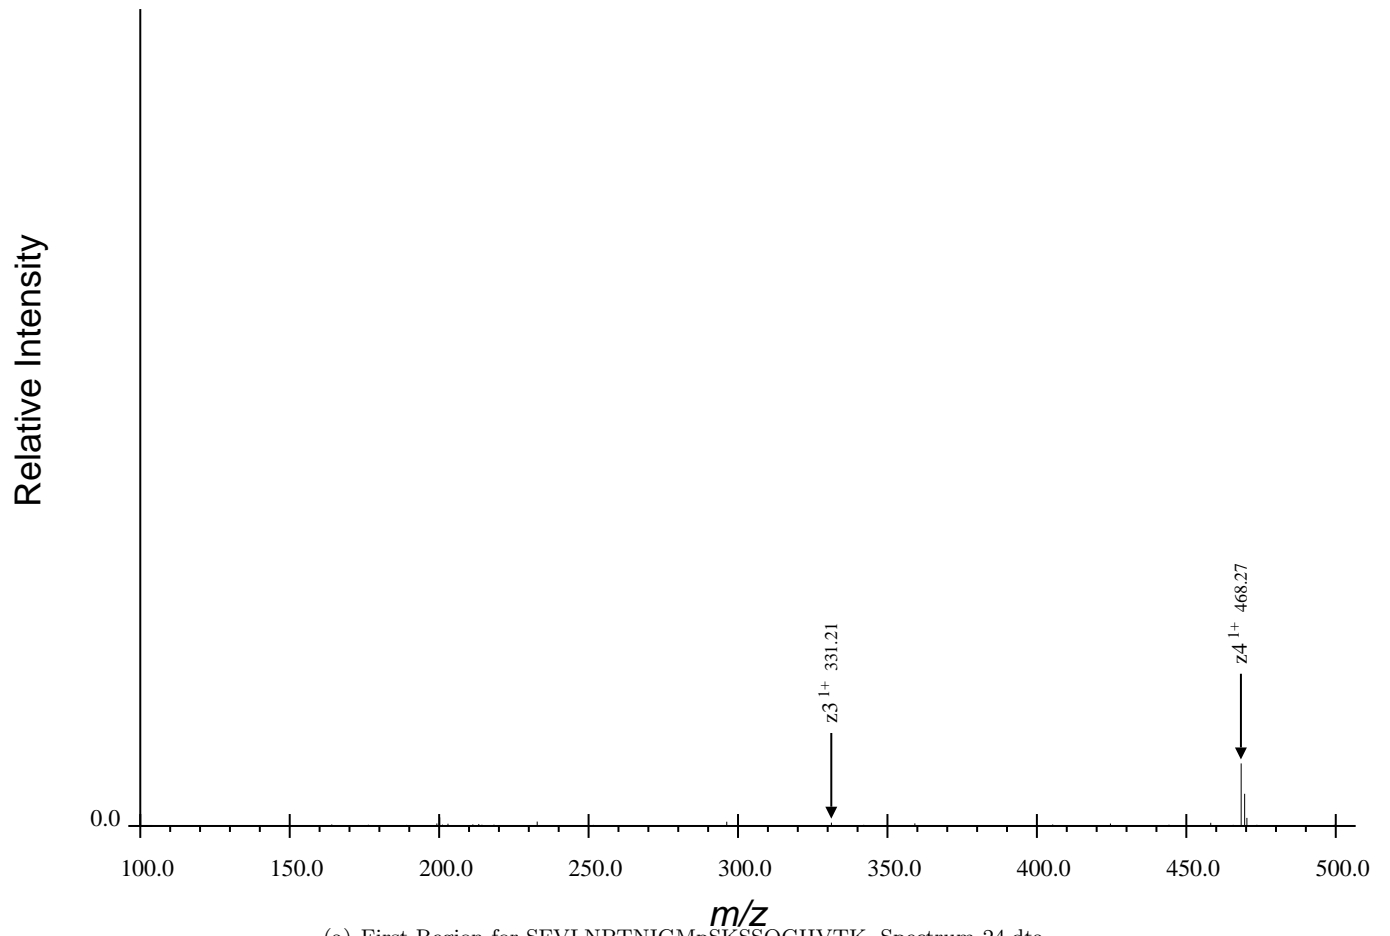

(a) First Region for SFVLNPTNIGMpSKSSQGHVTK, Spectrum 24.dta

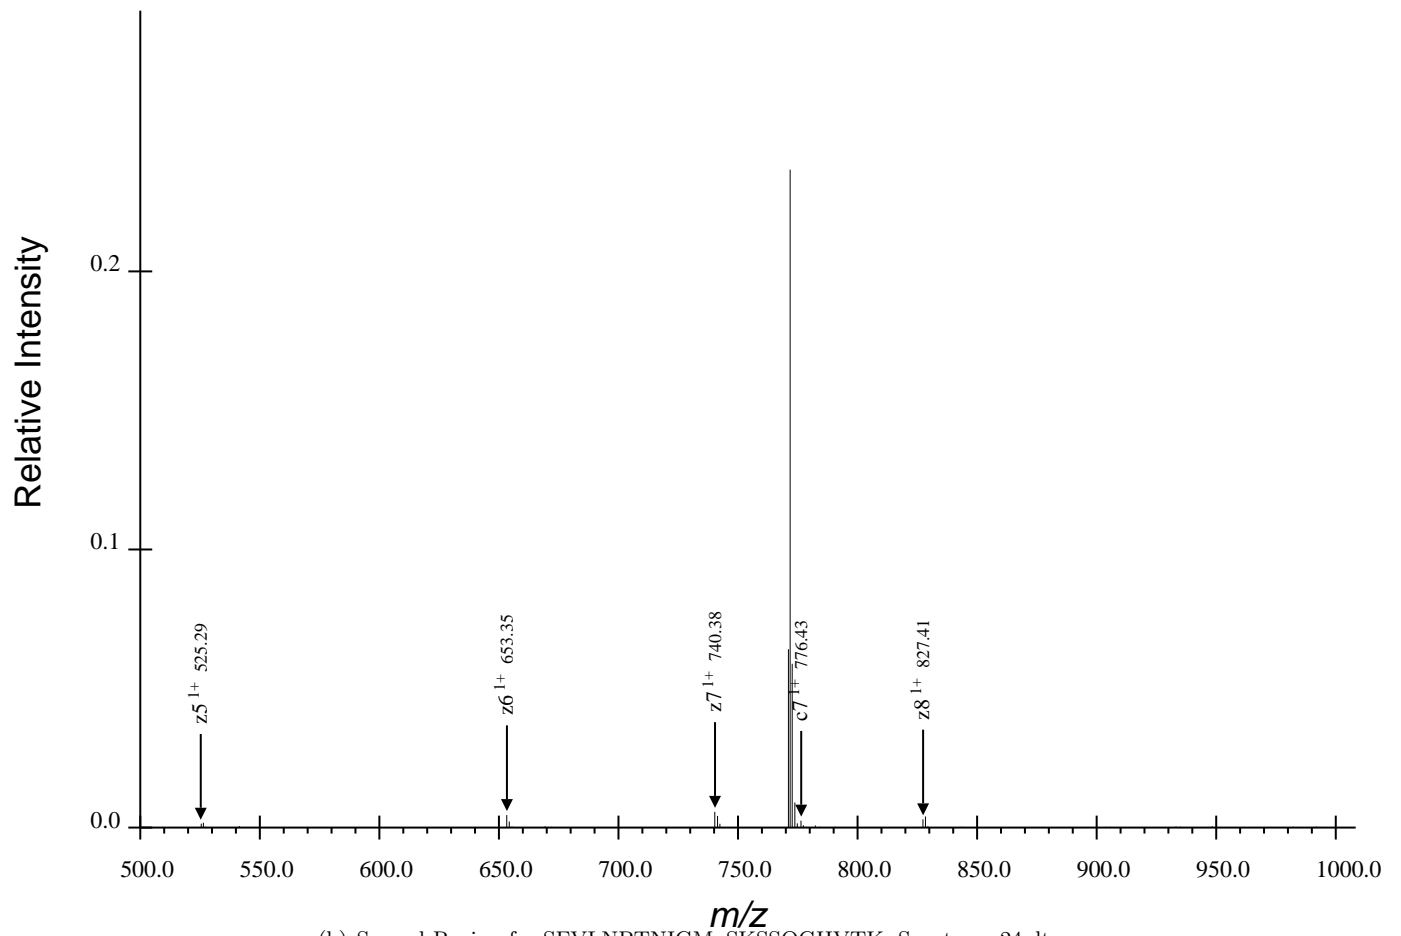

(b) Second Region for SFVLNPTNIGMpSKSSQGHVTK, Spectrum 24.dta

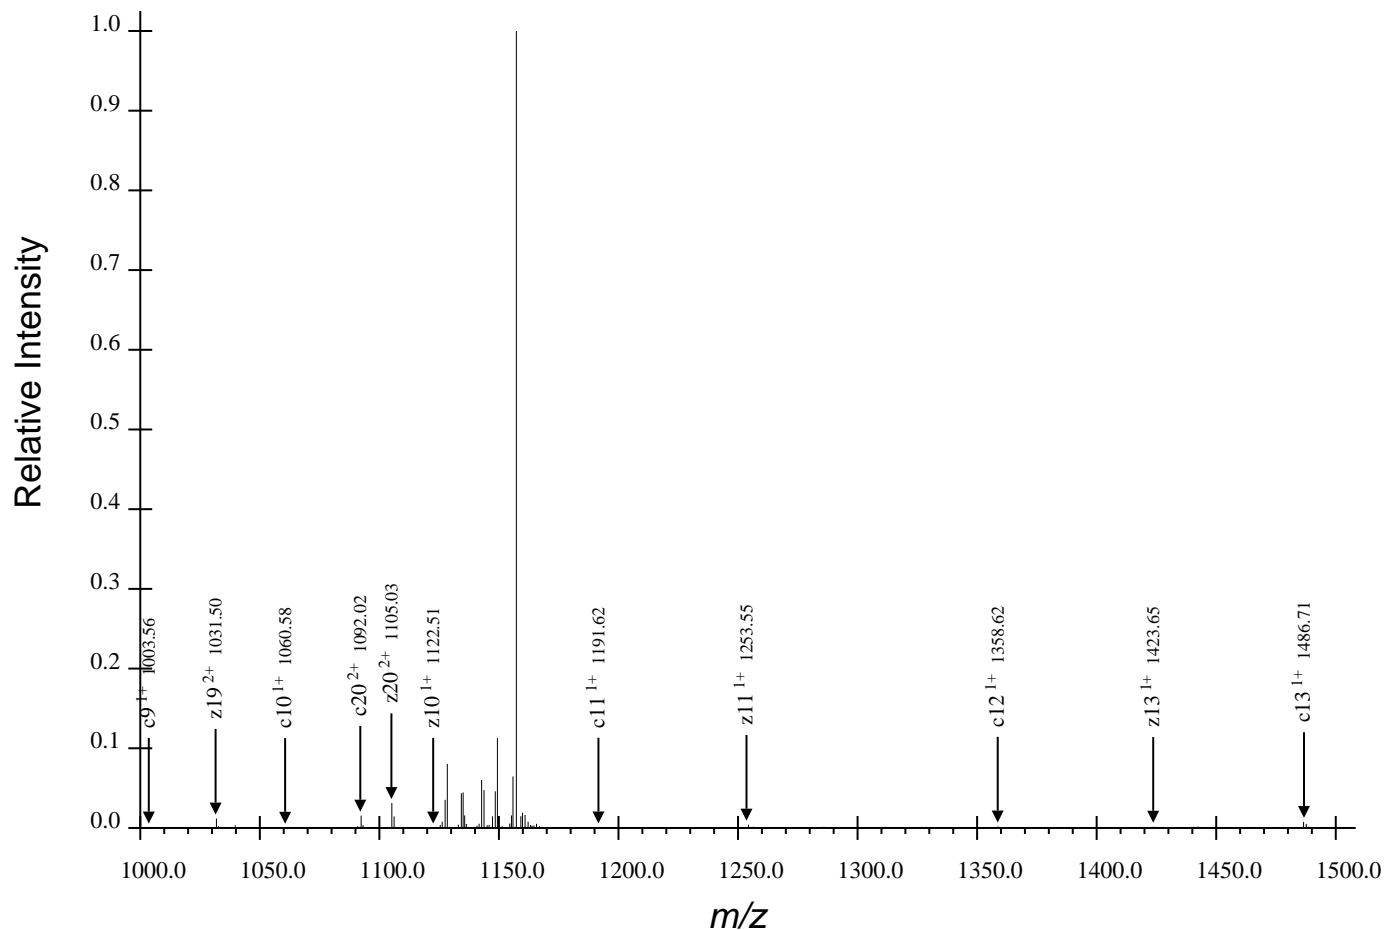

(c) Third Region for SFVLNPTNIGMpSKSSQGHVTK, Spectrum 24.dta

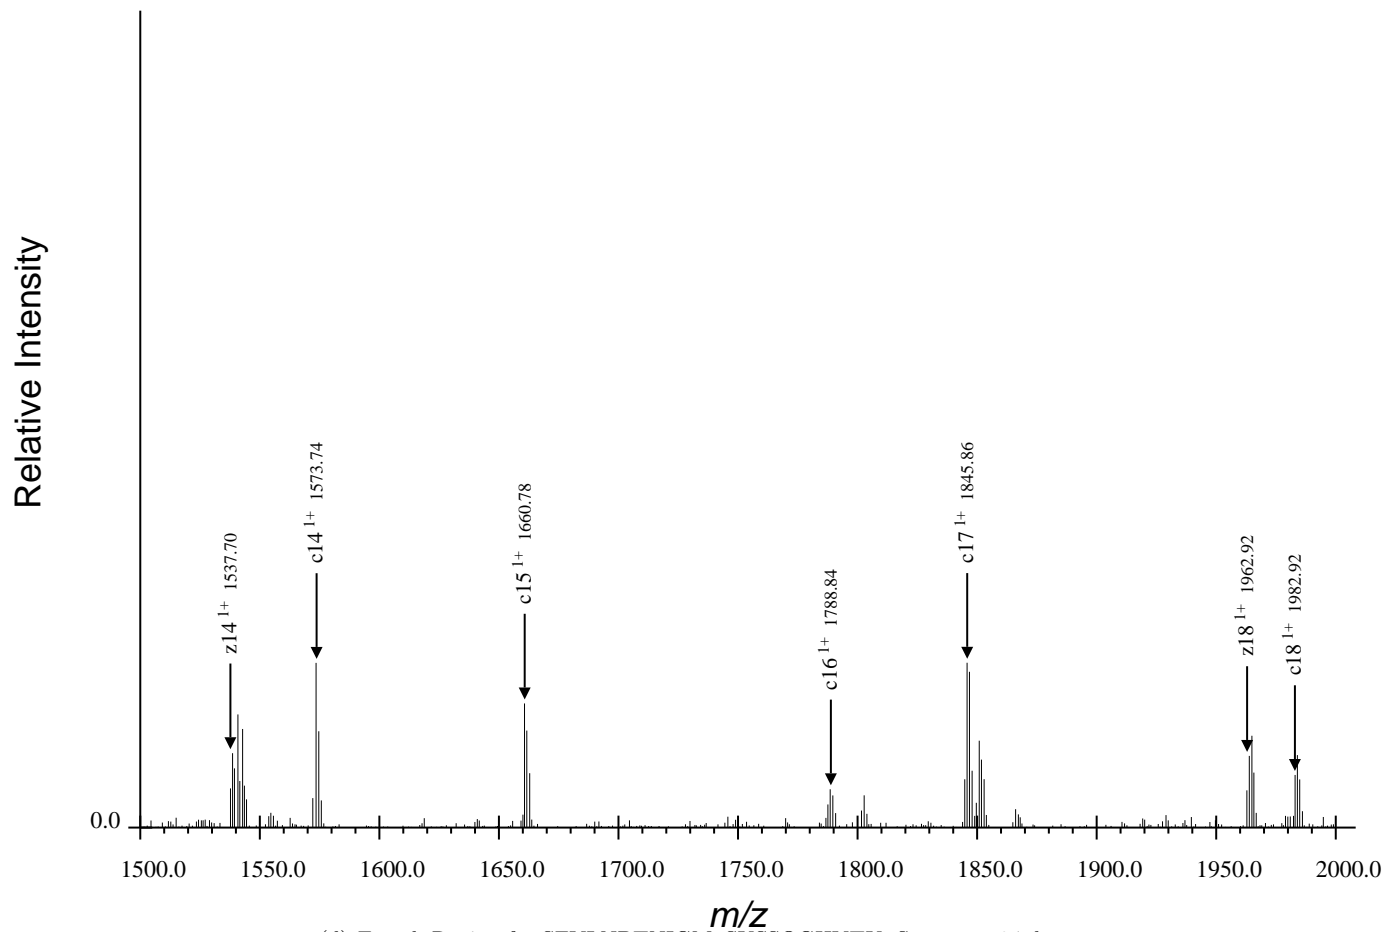

(d) Fourth Region for SFVLNPTNIGMpSKSSQGHVTK, Spectrum 24.dta



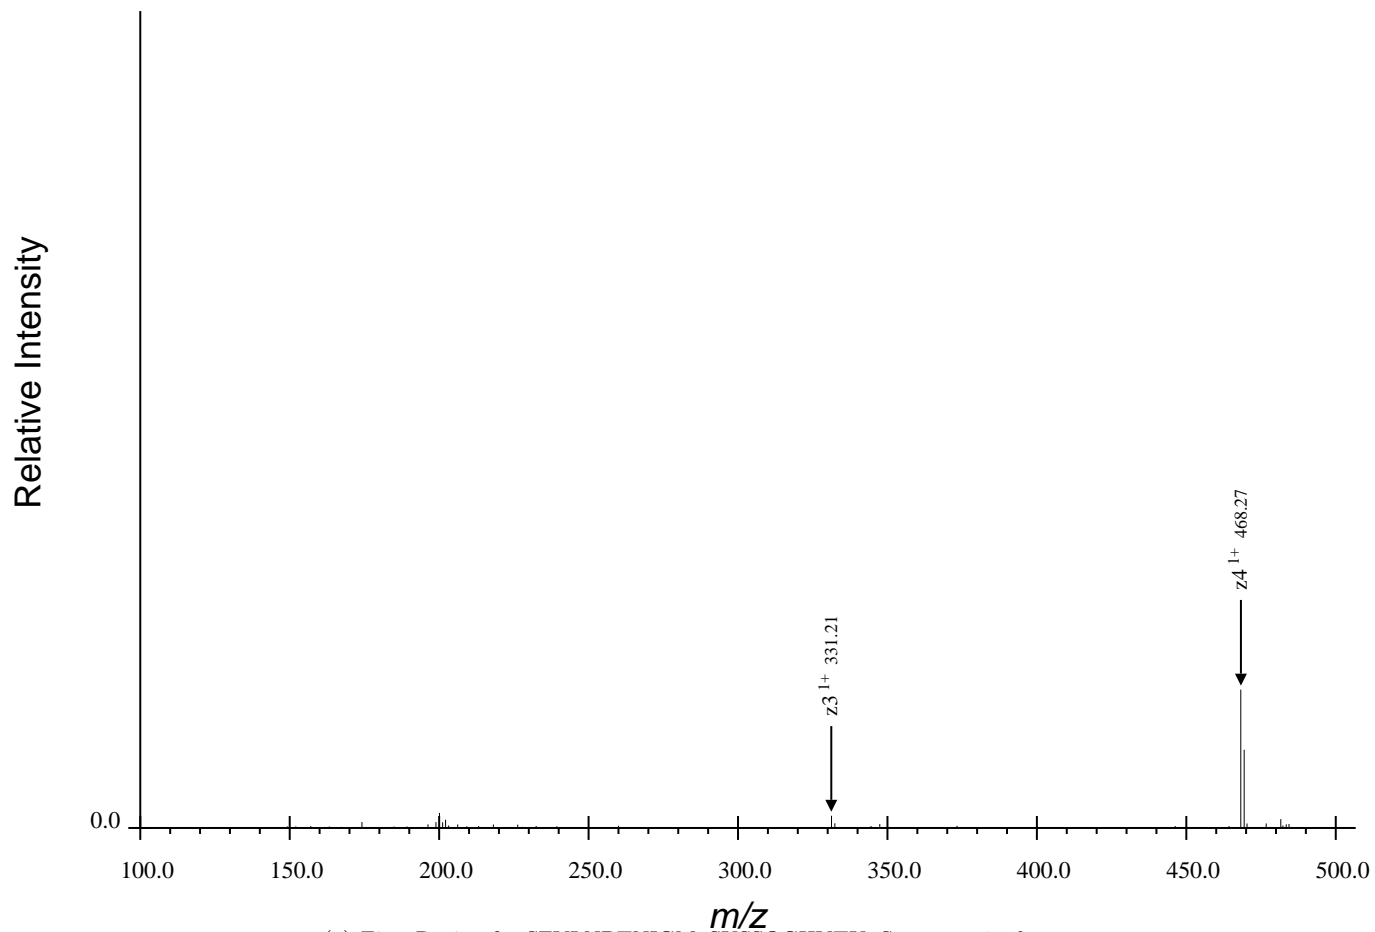

(a) First Region for SFVLNPTNIGMpSKSSQGHVTK, Spectrum 25.dta

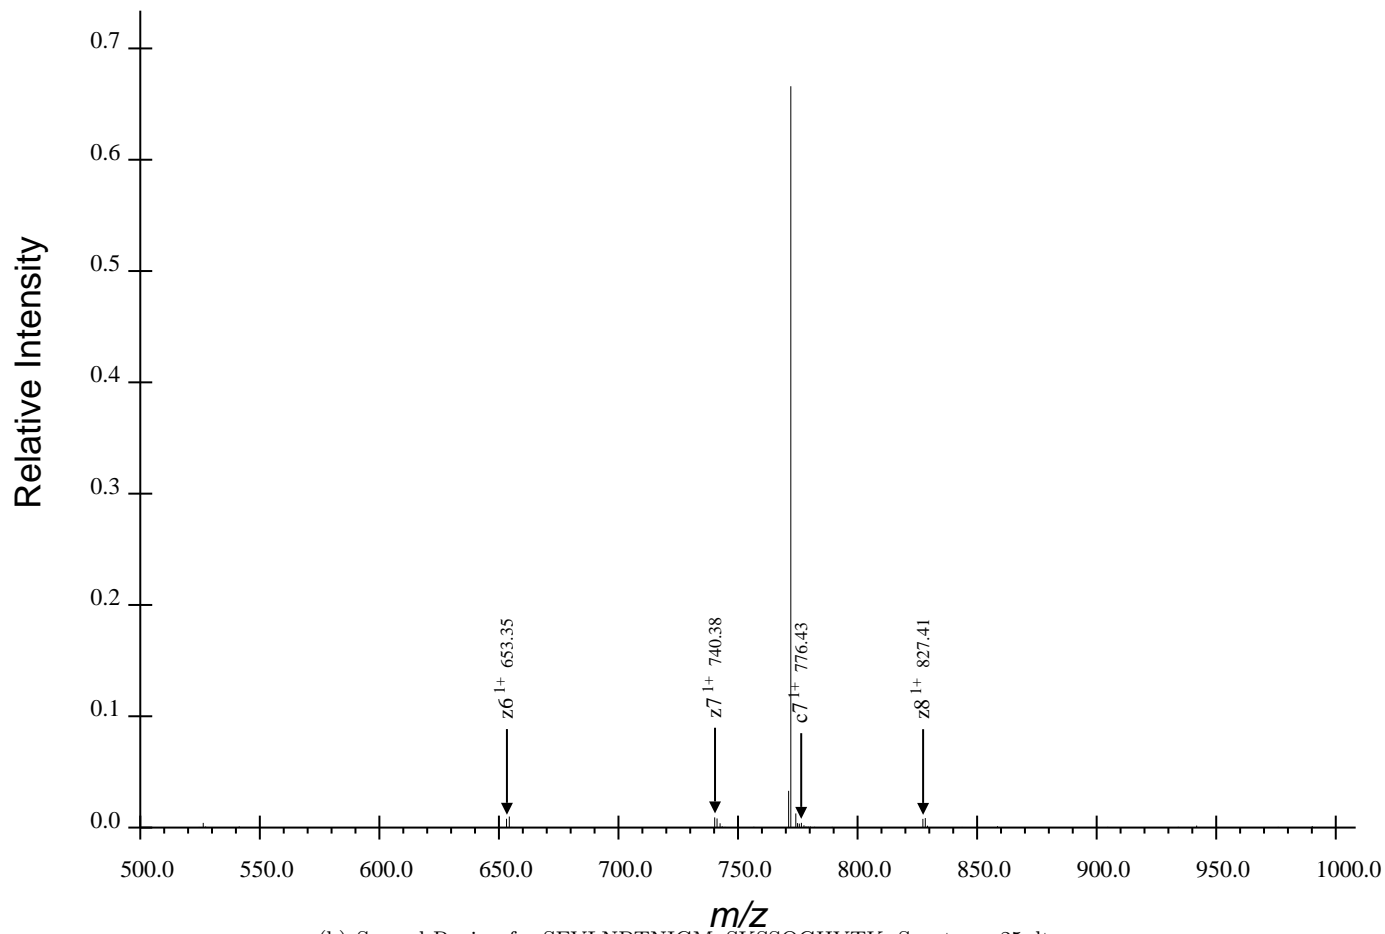

(b) Second Region for SFVLNPTNIGMpSKSSQGHVTK, Spectrum 25.dta

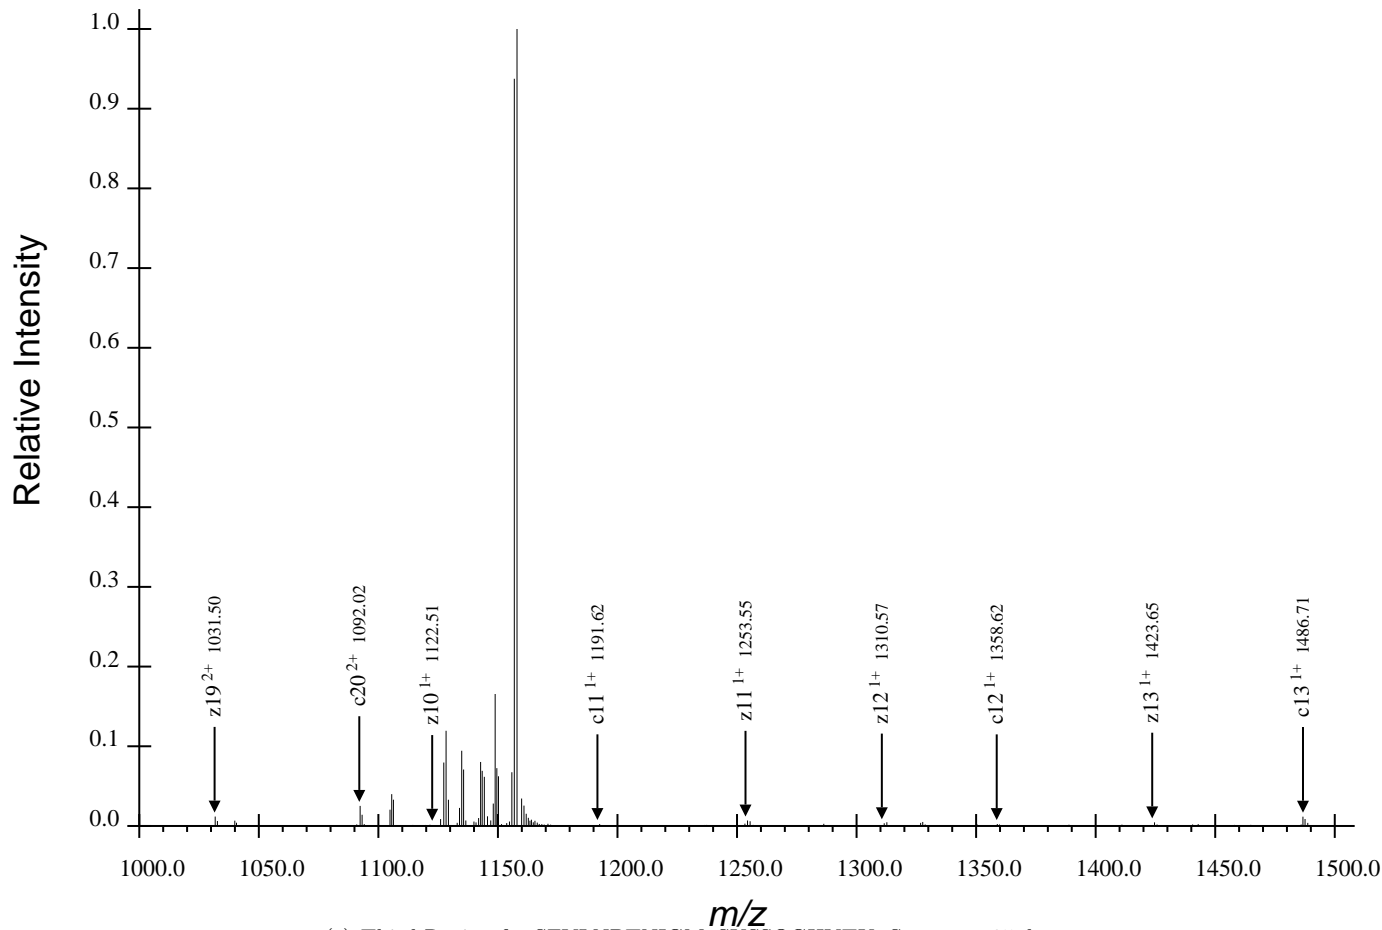

(c) Third Region for SFVLNPTNIGMpSKSSQGHVTK, Spectrum 25.dta

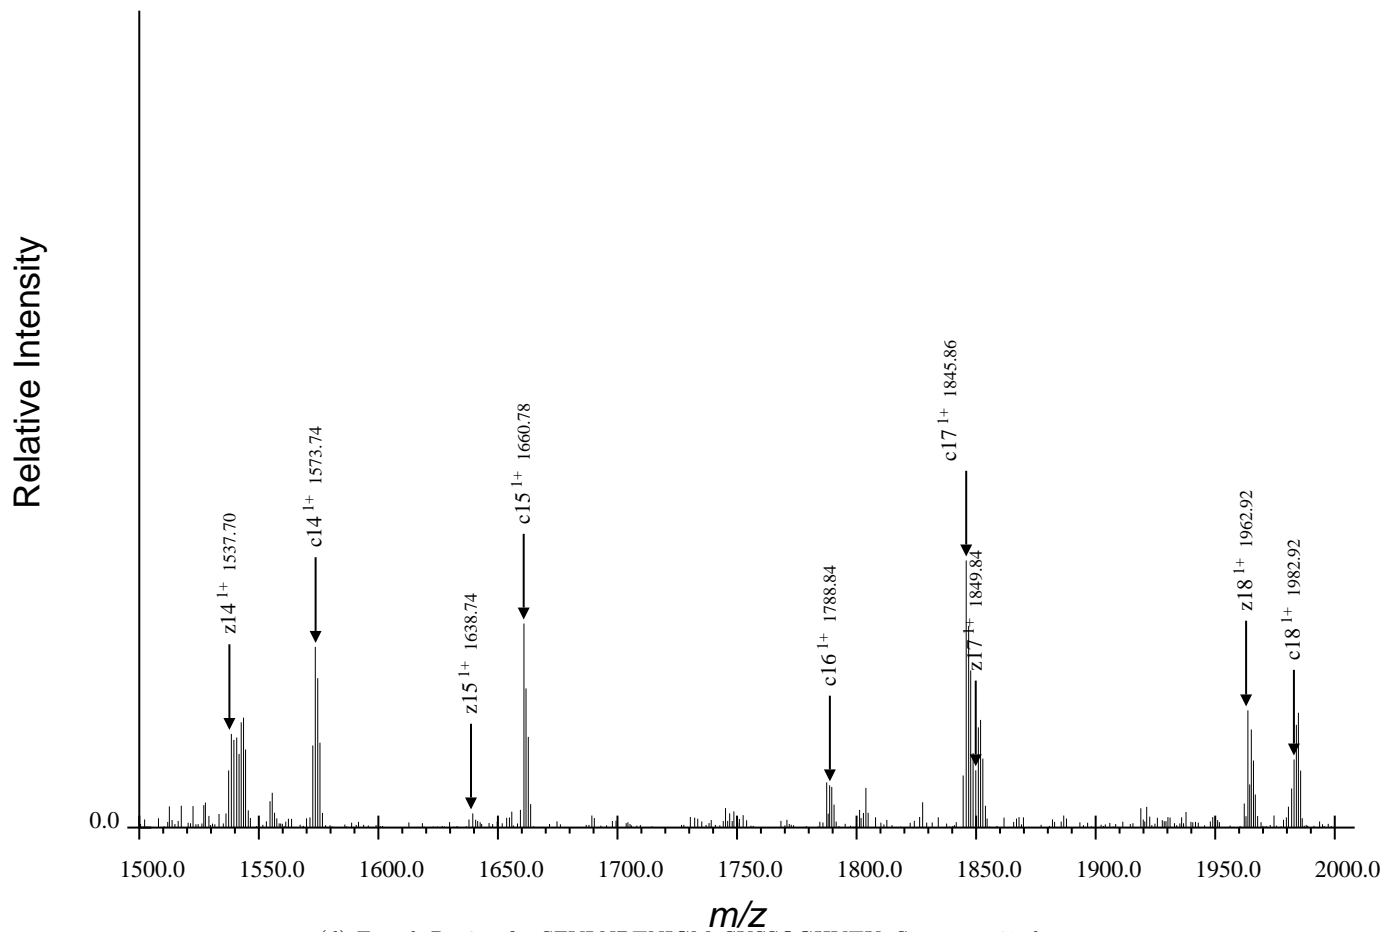

(d) Fourth Region for SFVLNPTNIGMpSKSSQGHVTK, Spectrum 25.dta

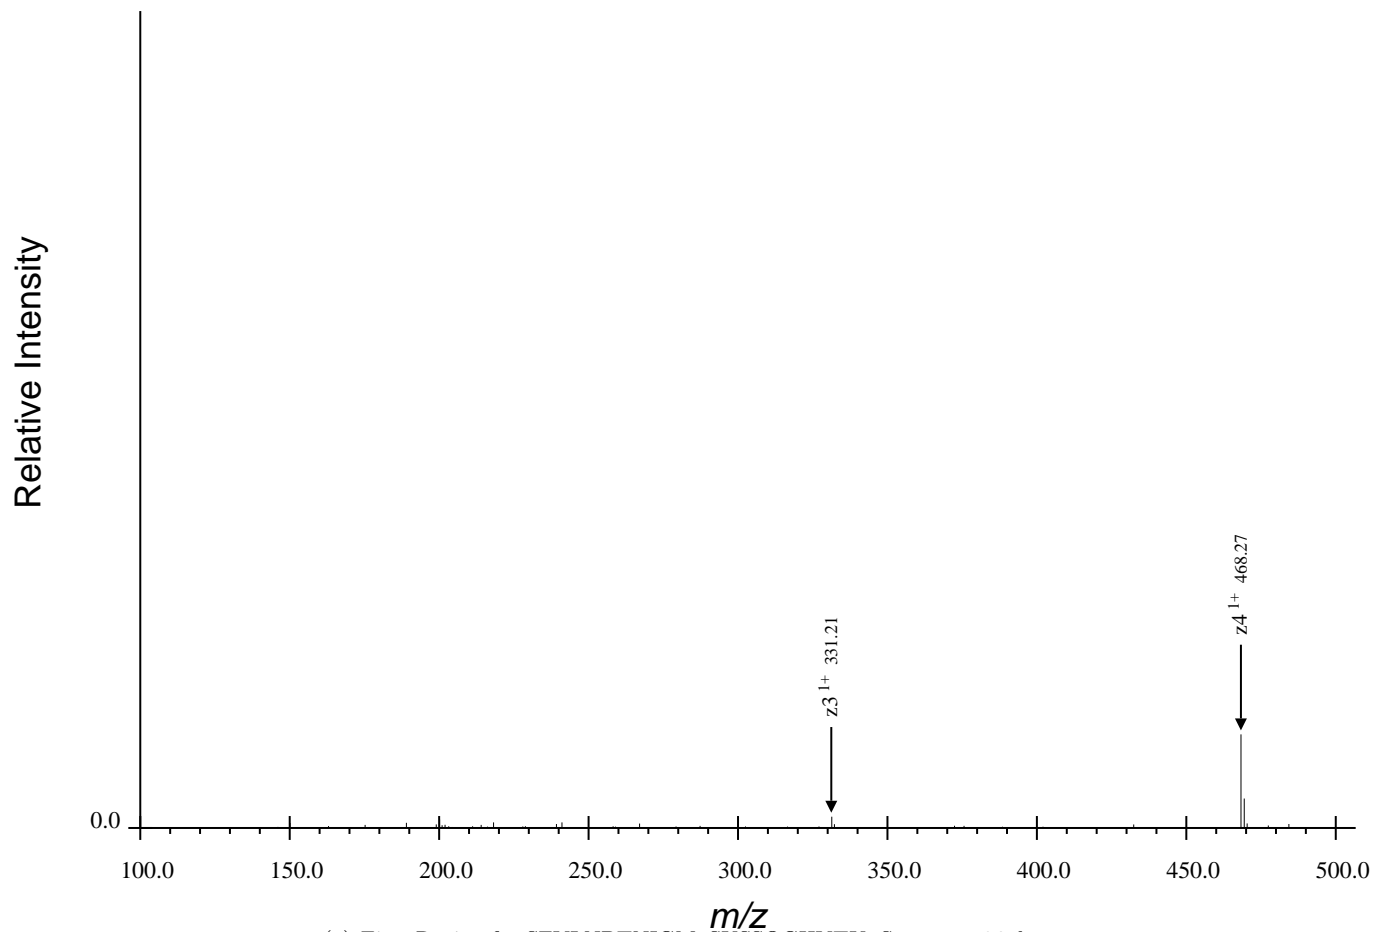

(a) First Region for SFVLNPTNIGMpSKSSQGHVTK, Spectrum 26.dta

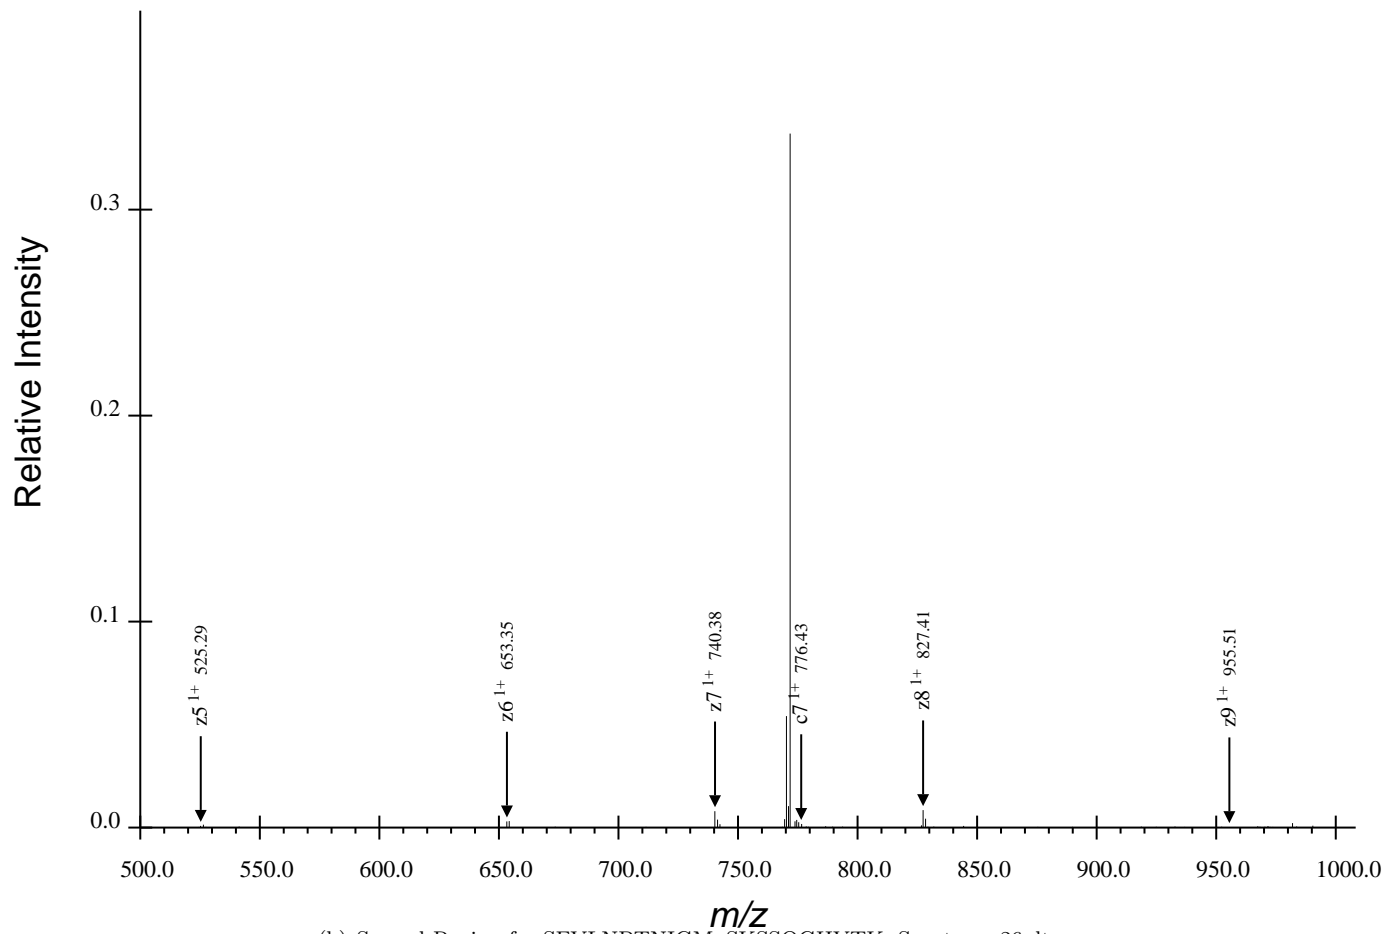

(b) Second Region for SFVLNPTNIGMpSKSSQGHVTK, Spectrum 26.dta

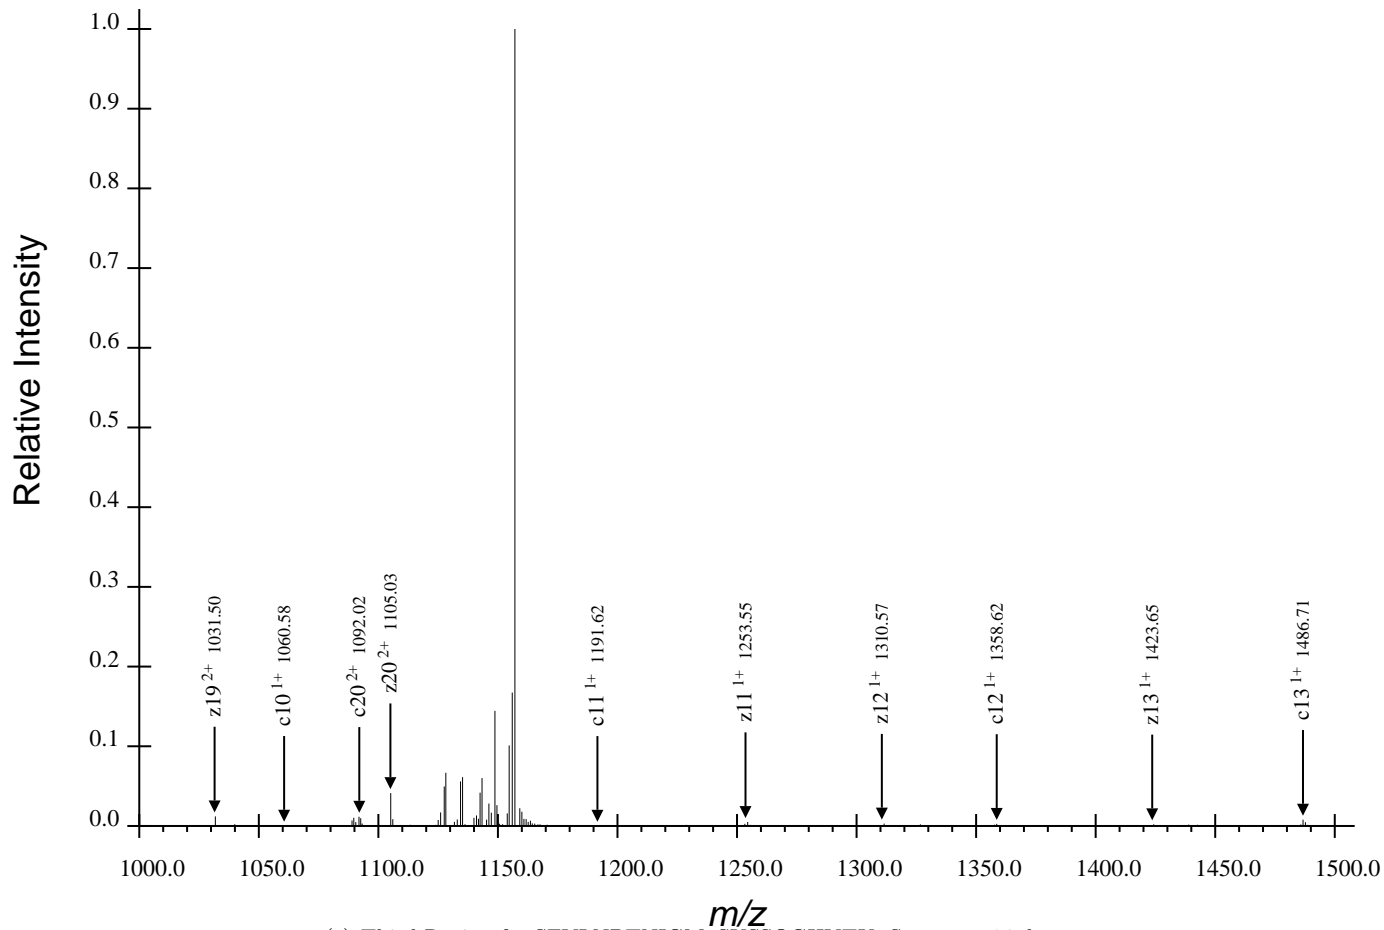

(c) Third Region for SFVLNPTNIGMpSKSSQGHVTK, Spectrum 26.dta

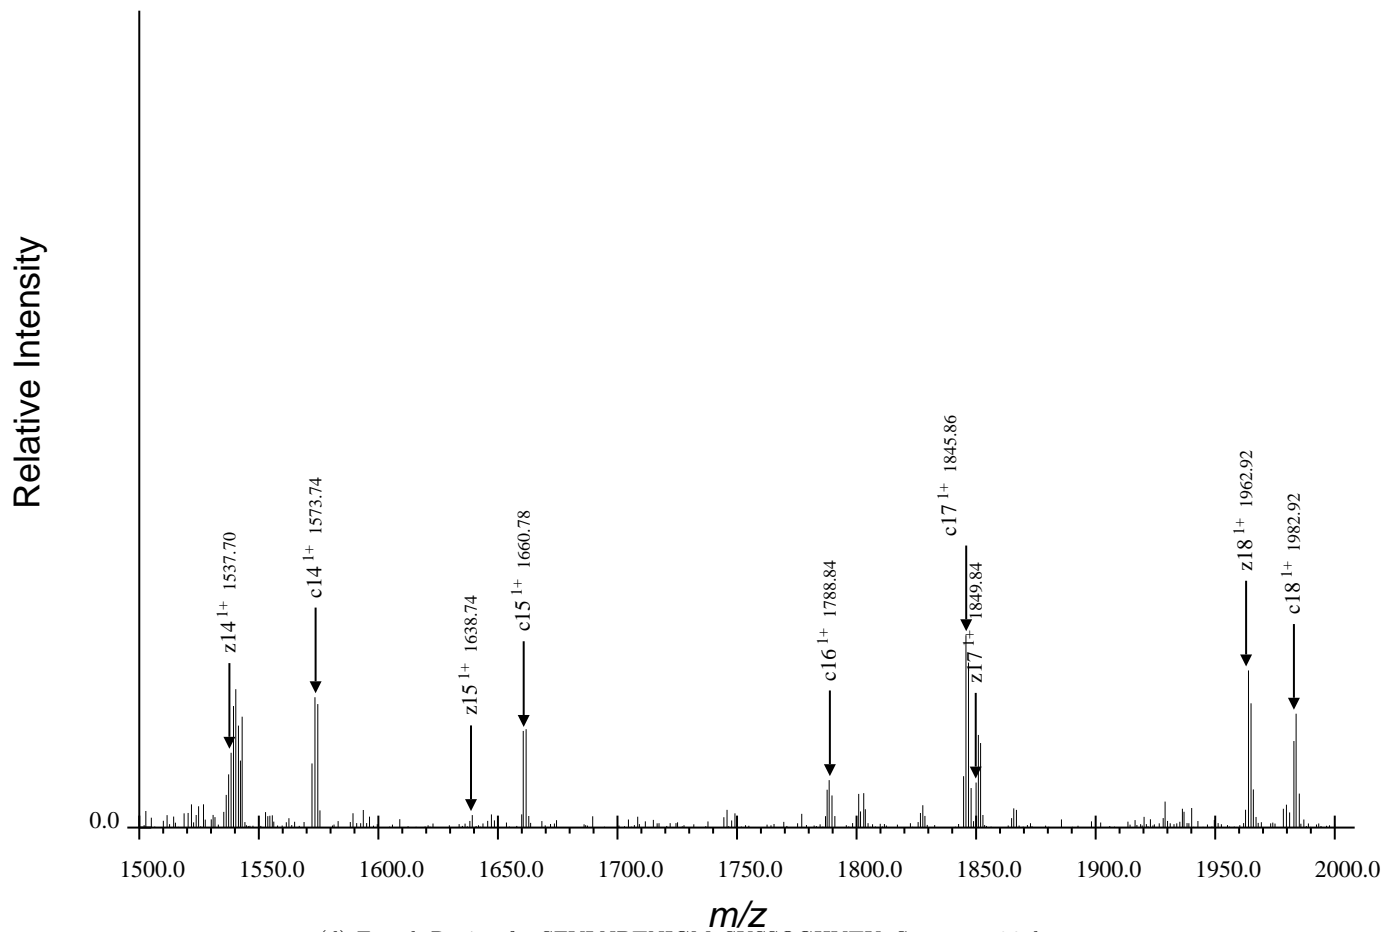

(d) Fourth Region for SFVLNPTNIGMpSKSSQGHVTK, Spectrum 26.dta

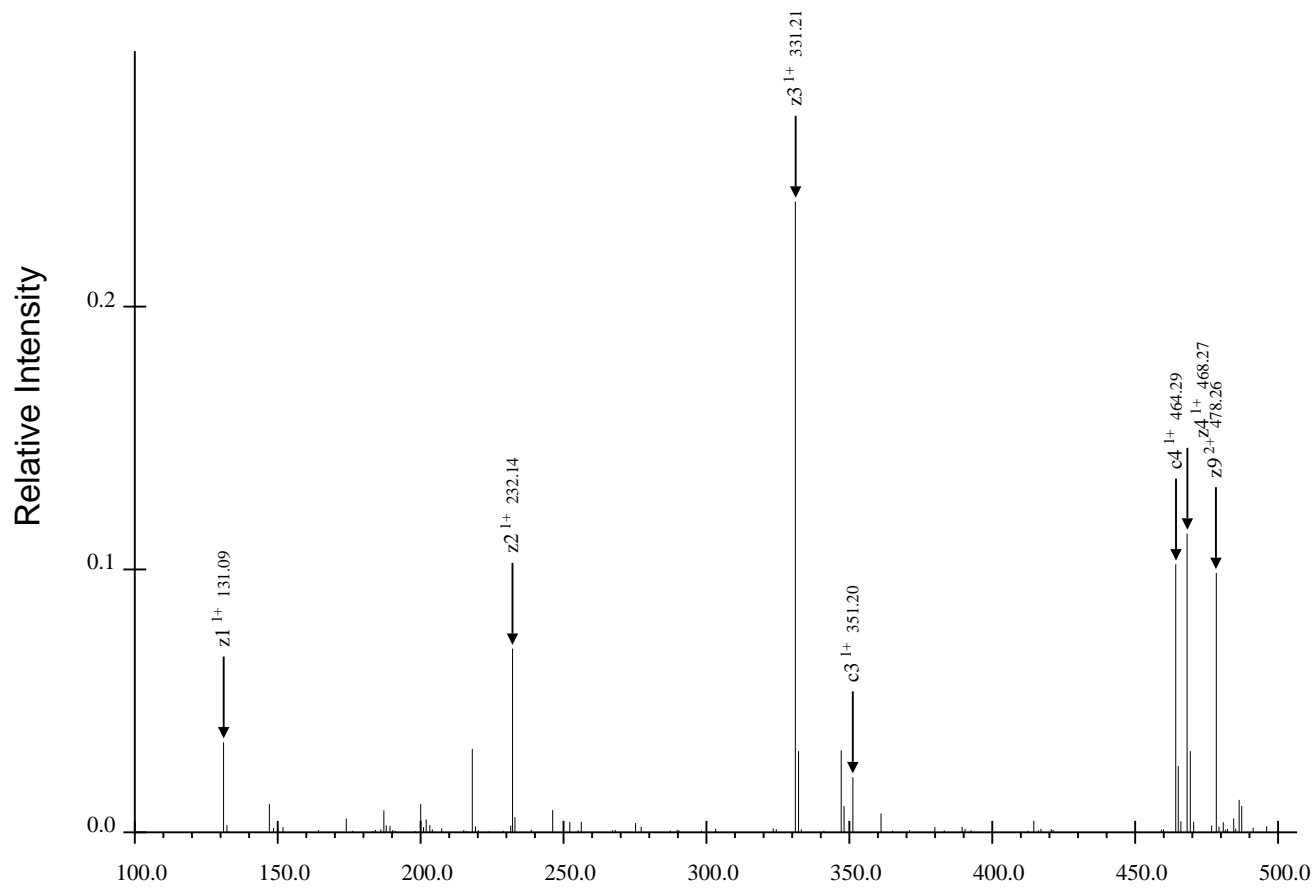

(a) First Region for SFVLNPTNIGMpSKSSQGHVTK, Spectrum 27.dta

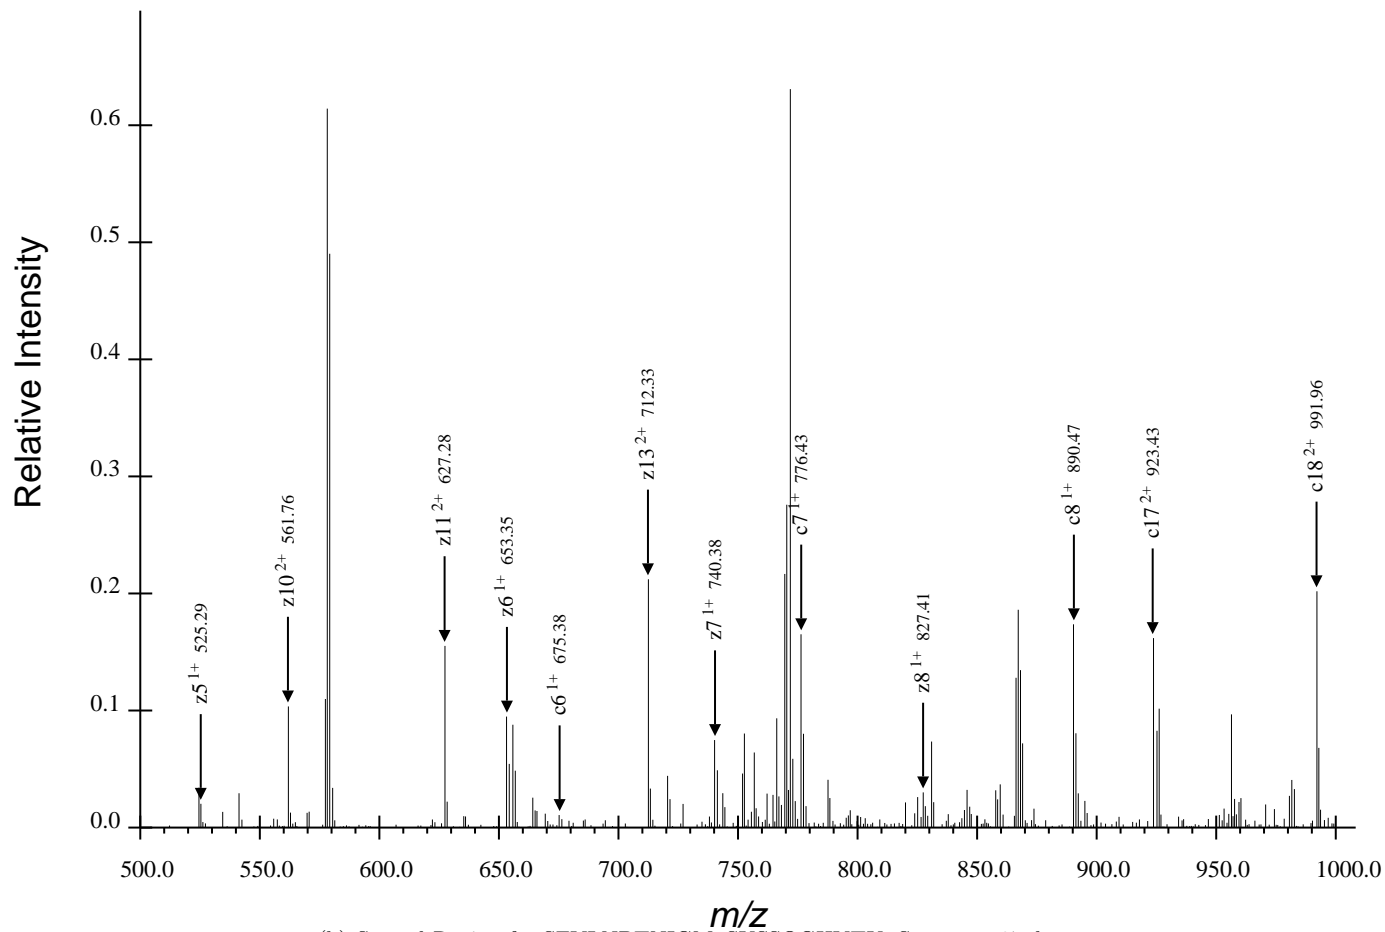

(b) Second Region for SFVLNPTNIGMpSKSSQGHVTK, Spectrum 27.dta

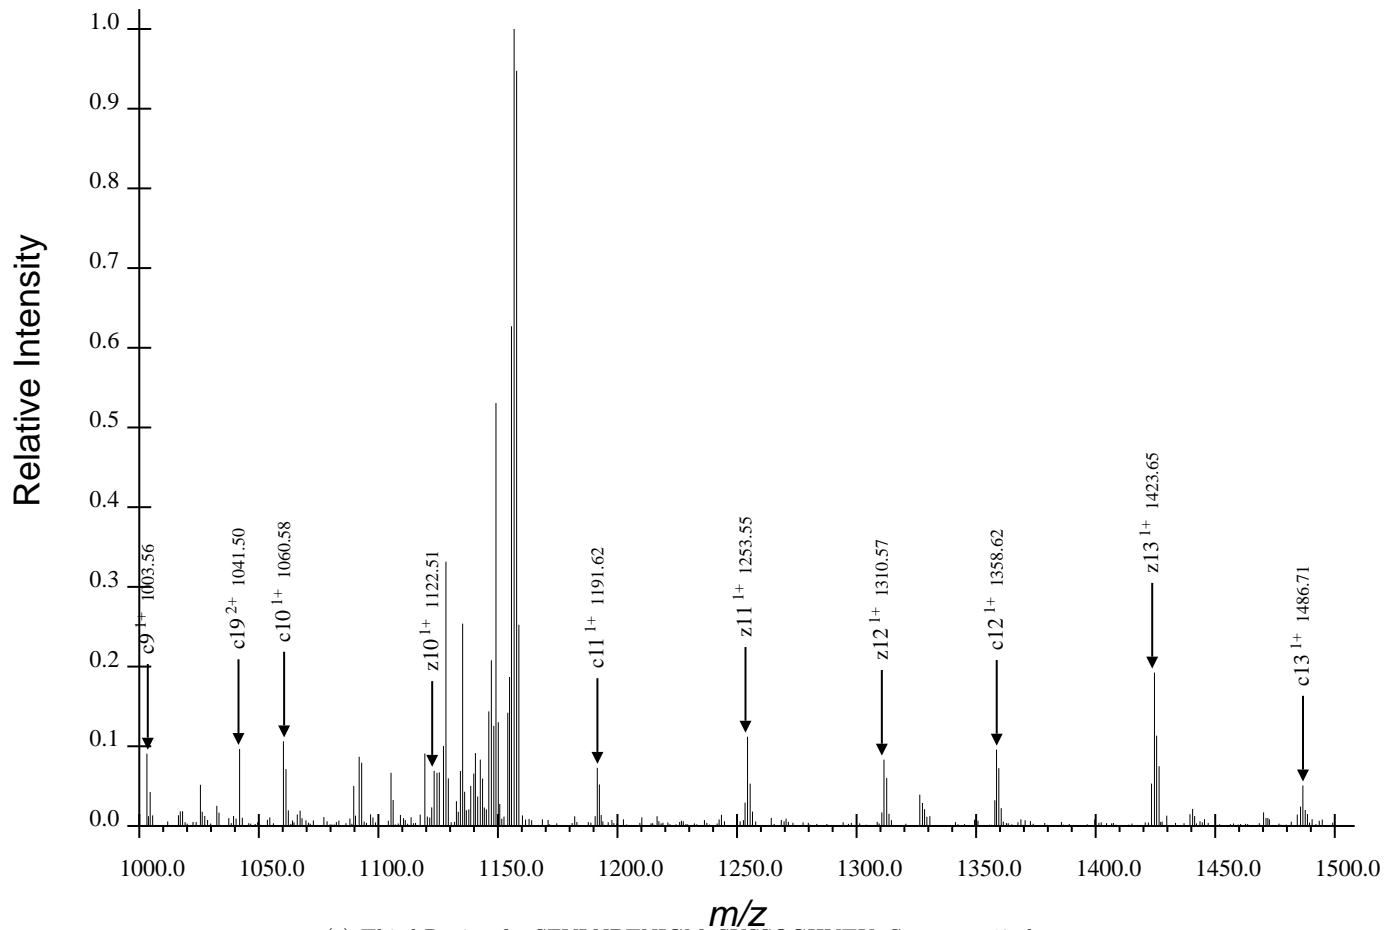

(c) Third Region for SFVLNPTNIGMpSKSSQGHVTK, Spectrum 27.dta

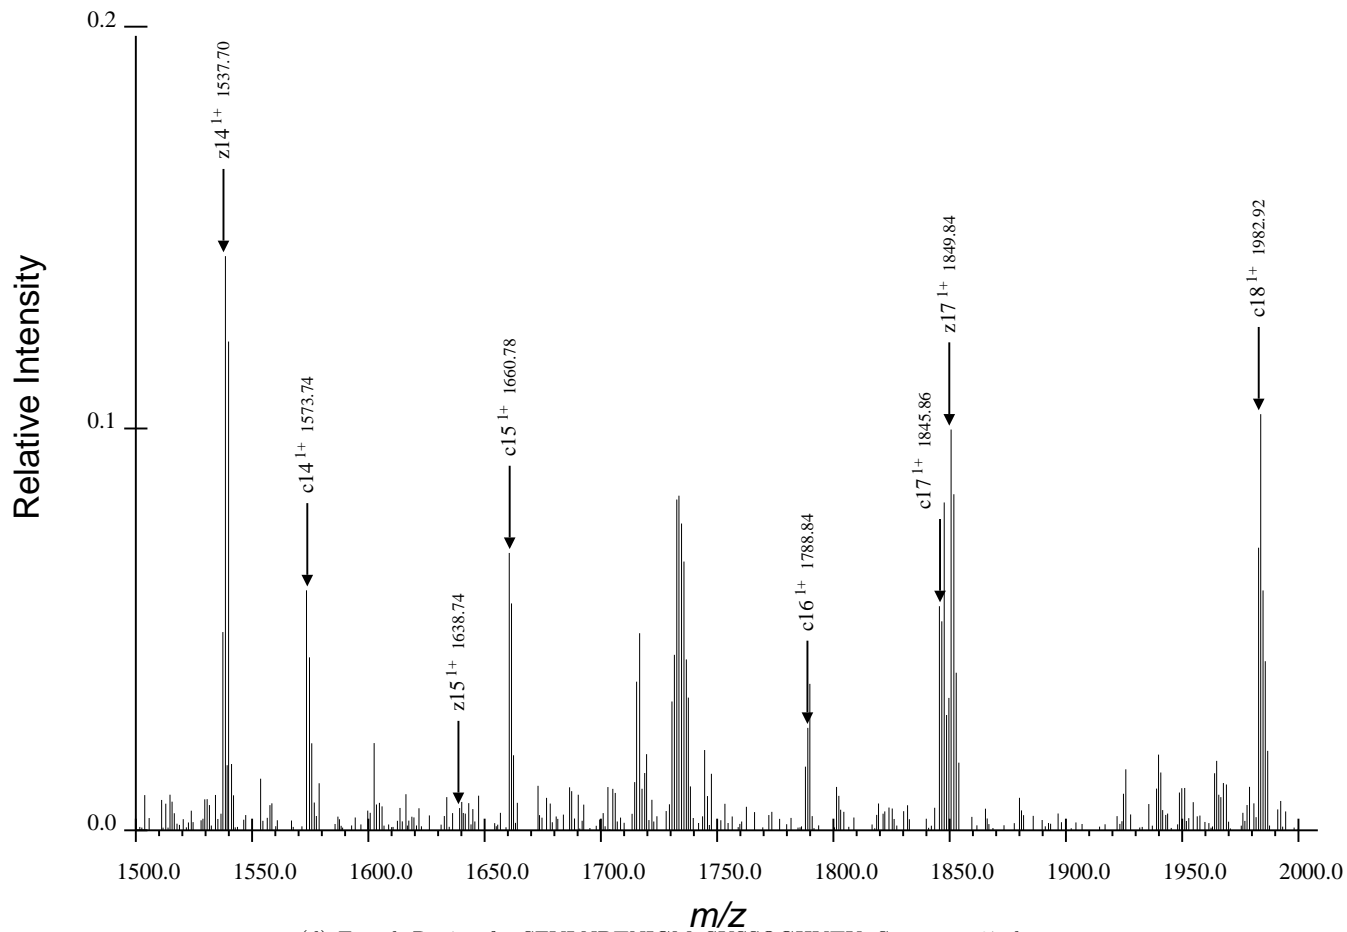

(d) Fourth Region for SFVLNPTNIGMpSKSSQGHVTK, Spectrum 27.dta

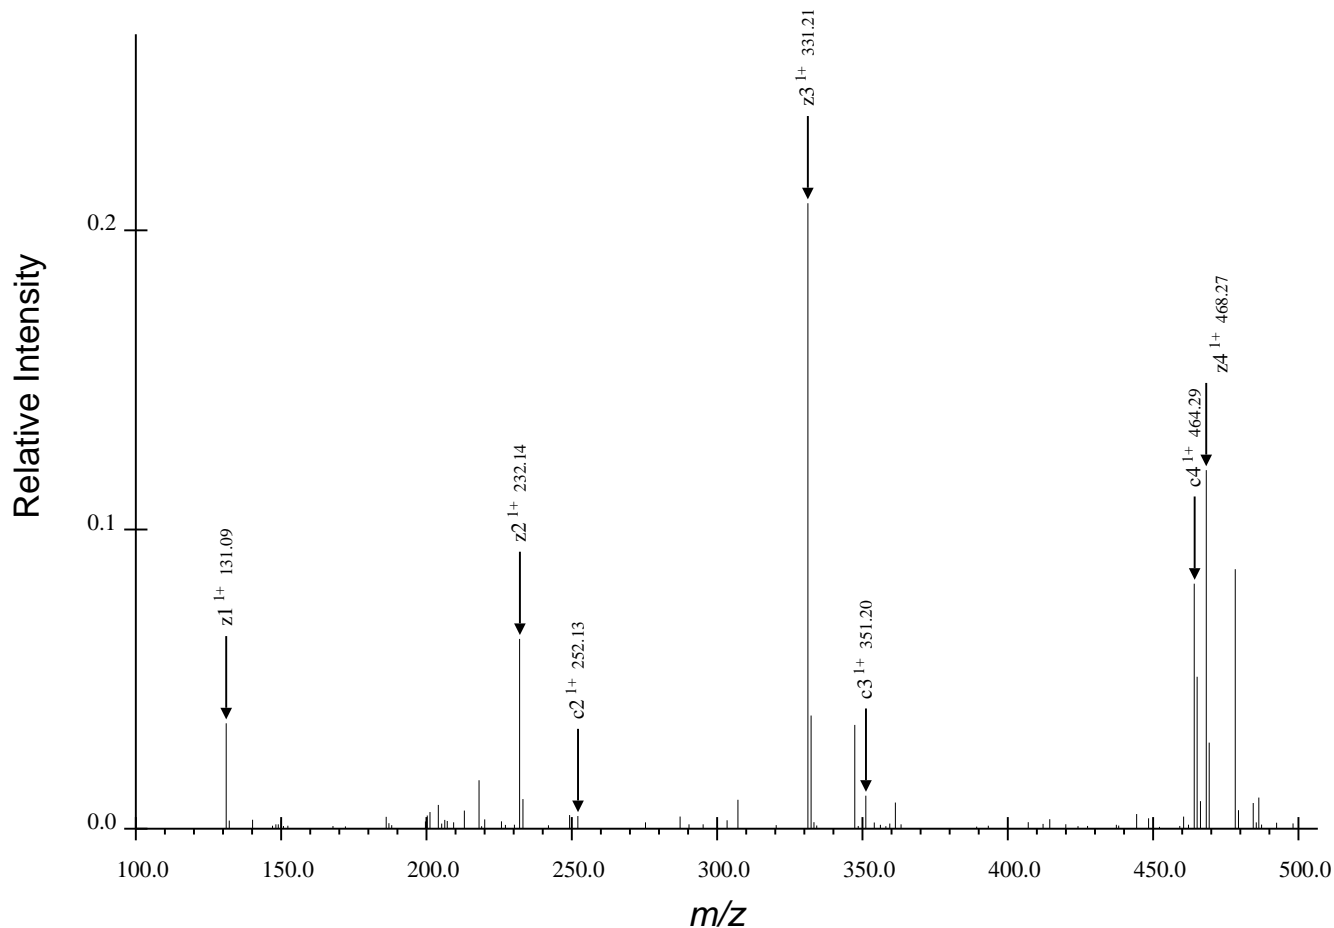

(a) First Region for SFVLNPTNIGMpSKSSQGHVTK, Spectrum 28.dta

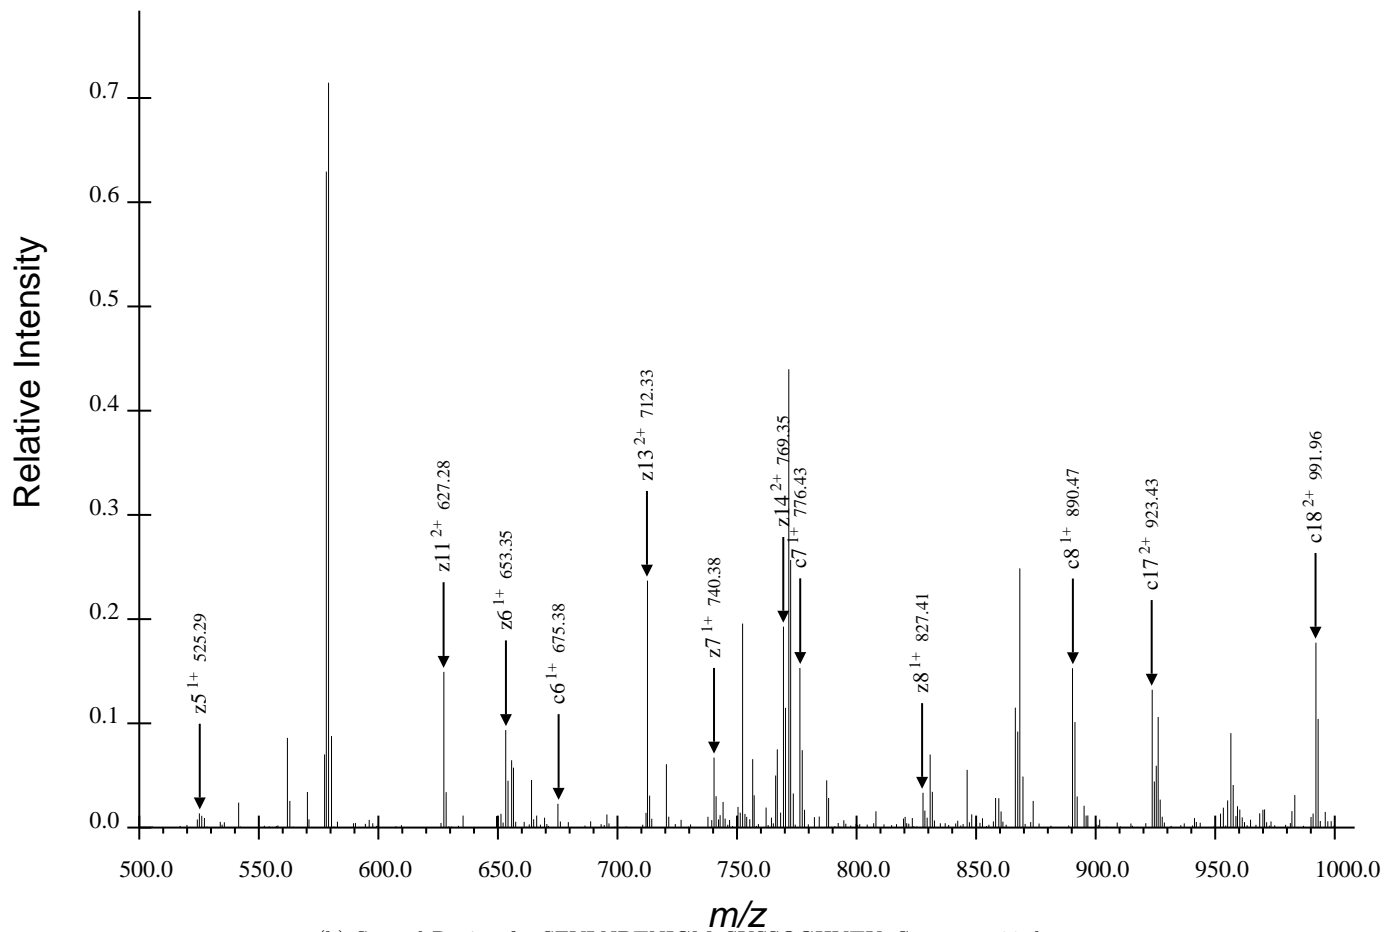

(b) Second Region for SFVLNPTNIGMpSKSSQGHVTK, Spectrum 28.dta

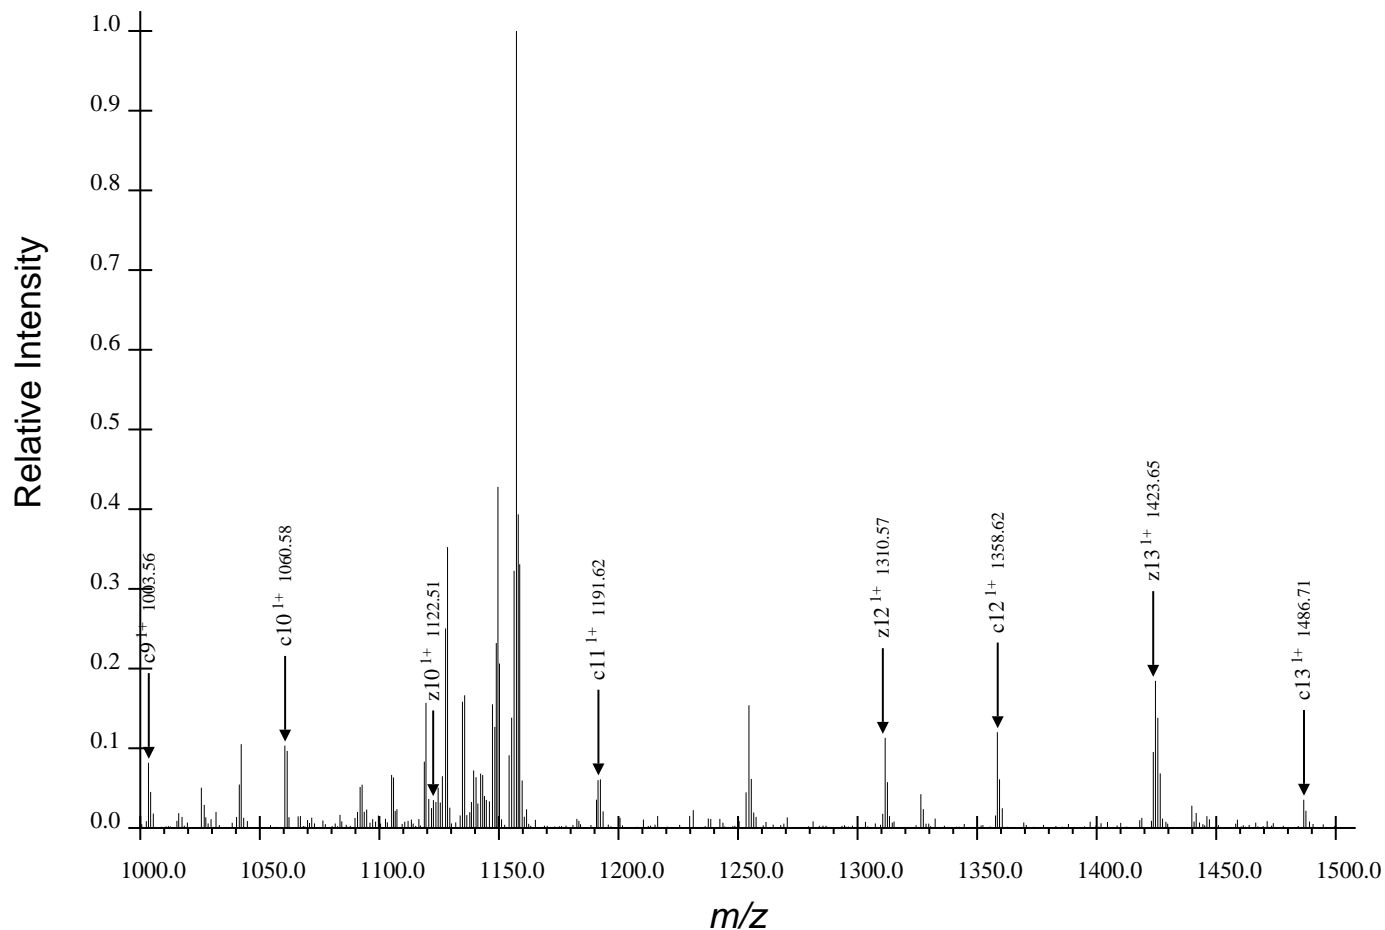

(c) Third Region for SFVLNPTNIGMpSKSSQGHVTK, Spectrum 28.dta

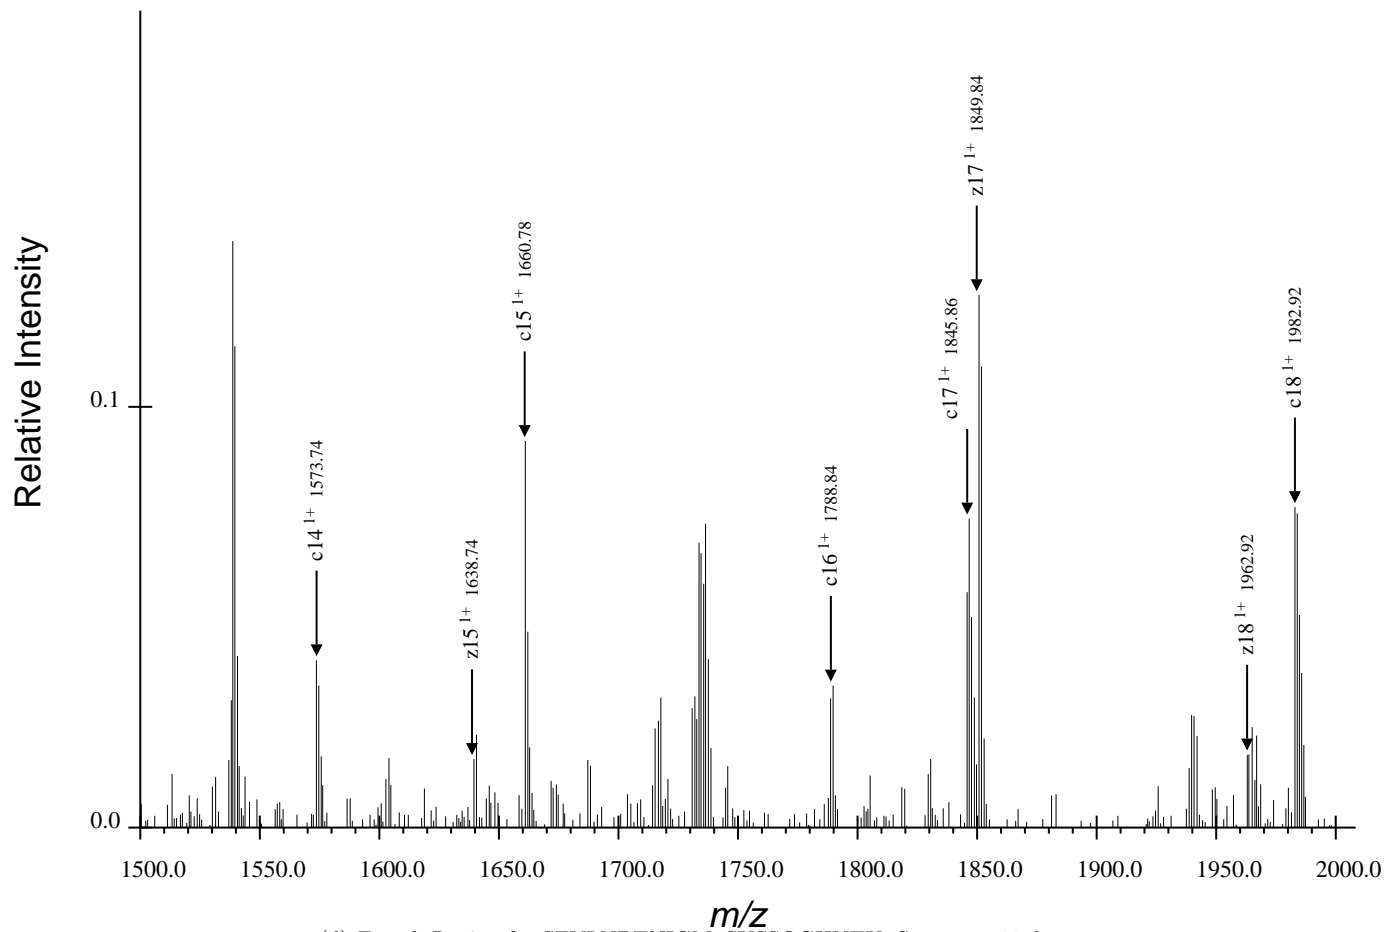

(d) Fourth Region for SFVLNPTNIGMpSKSSQGHVTK, Spectrum 28.dta



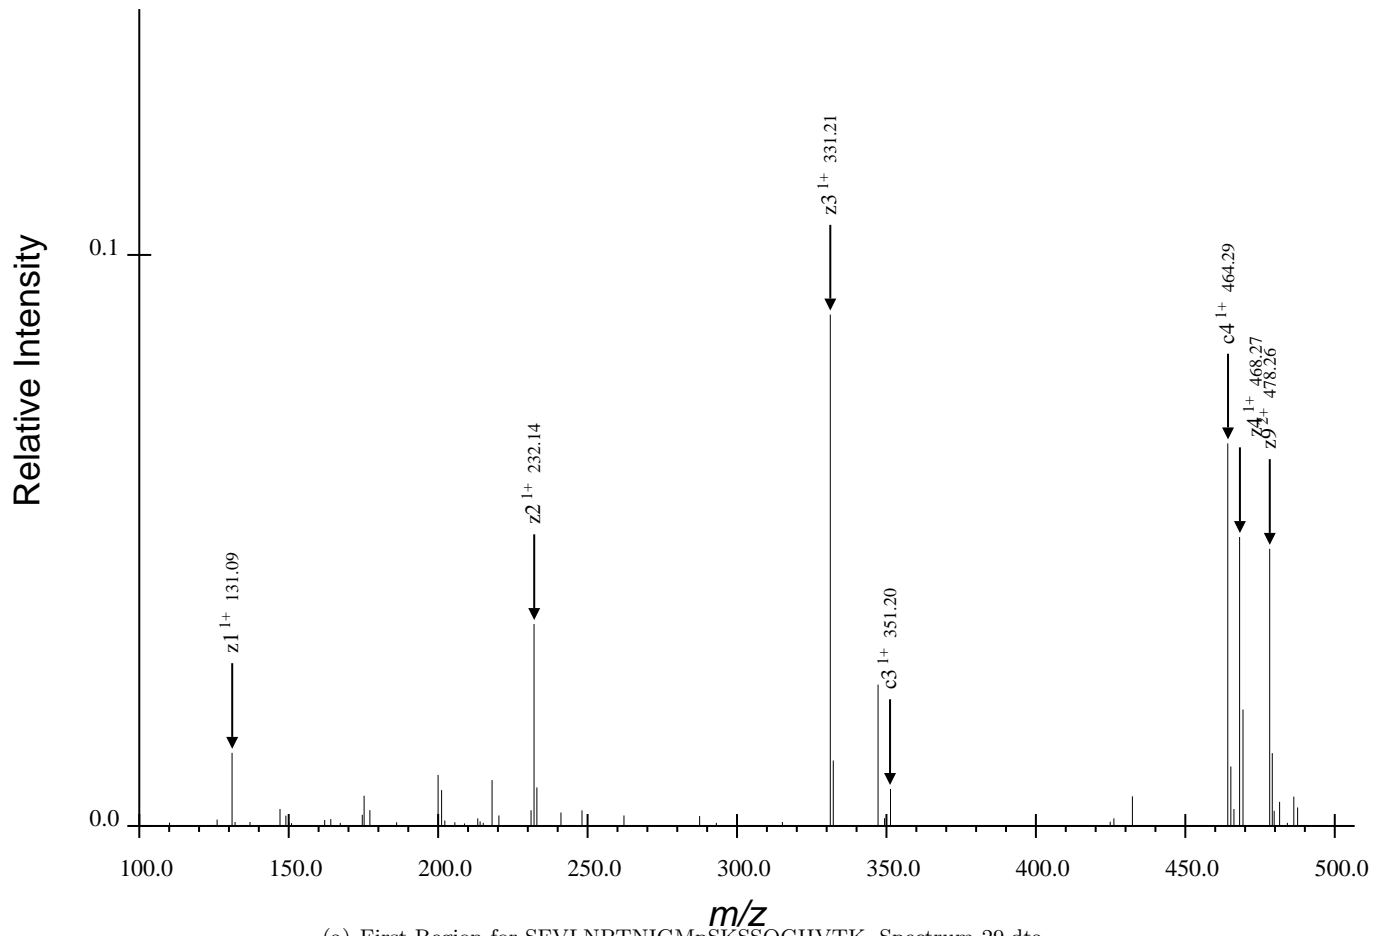

(a) First Region for SFVLNPTNIGMpSKSSQGHVTK, Spectrum 29.dta

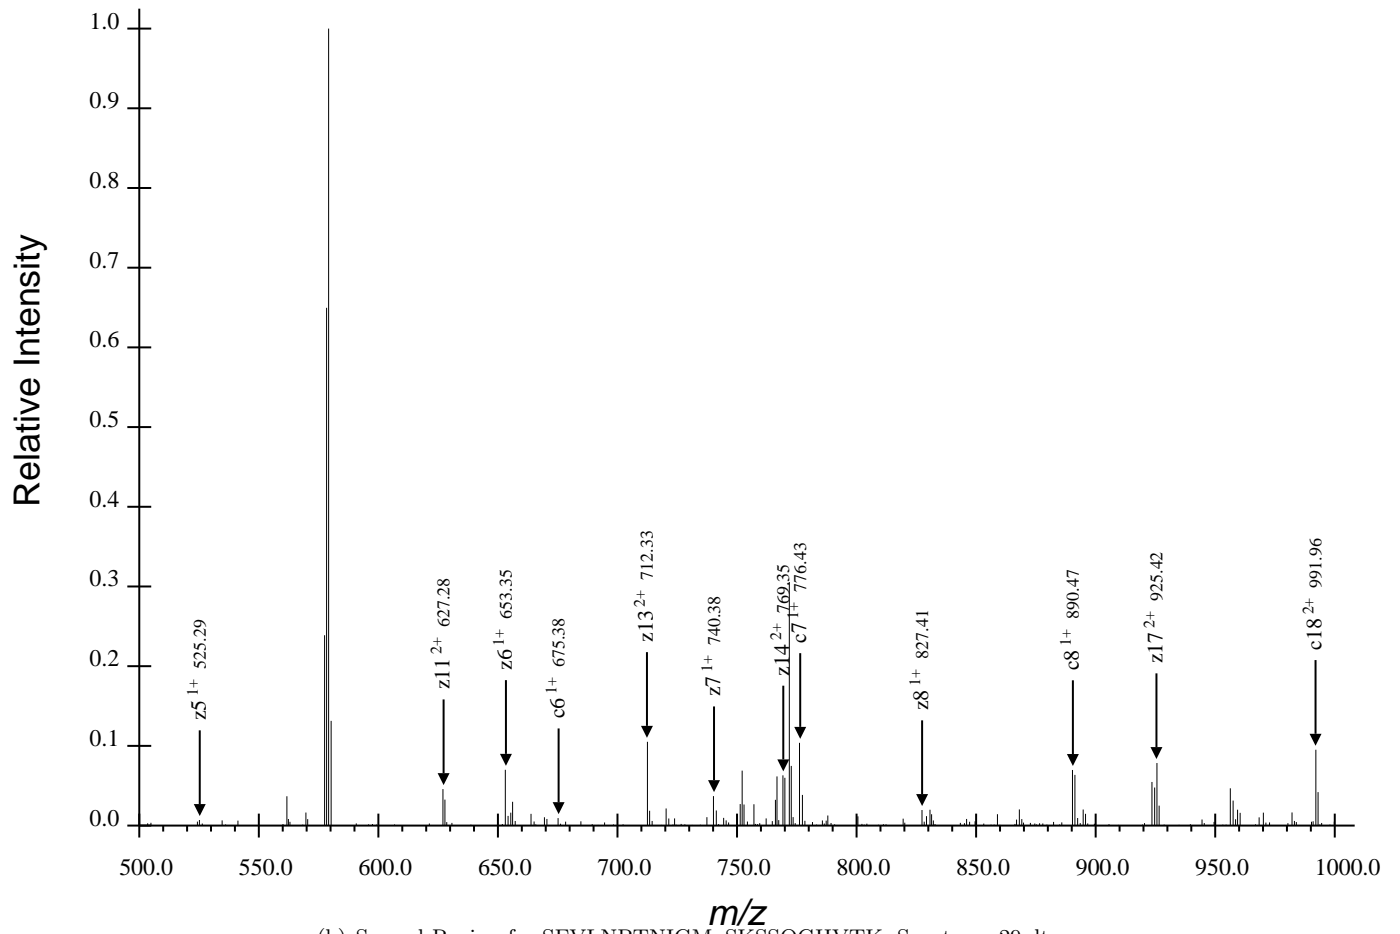

(b) Second Region for SFVLNPTNIGMpSKSSQGHVTK, Spectrum 29.dta

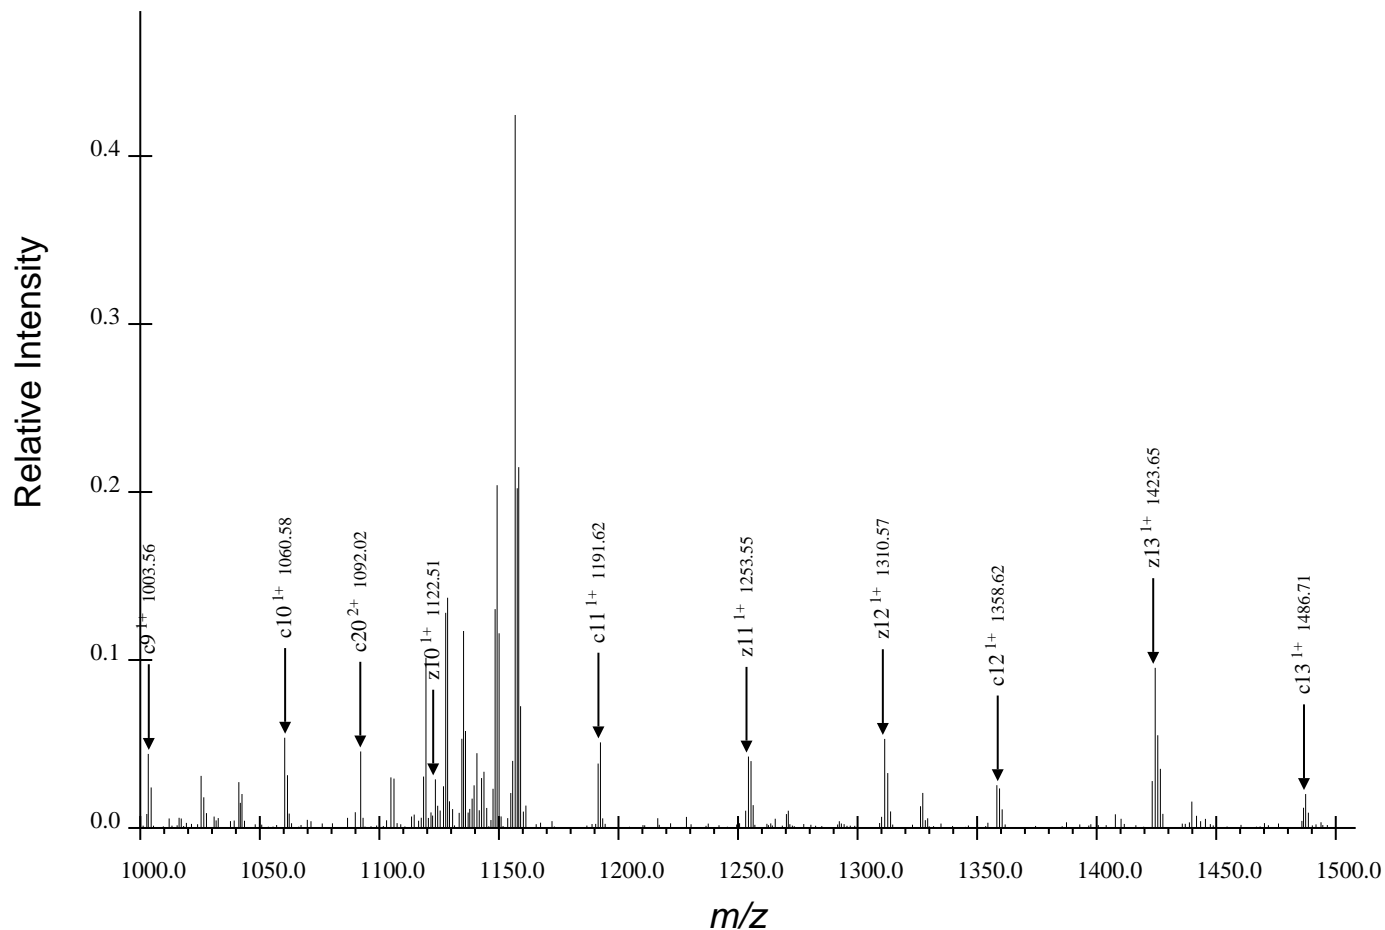

(c) Third Region for SFVLNPTNIGMpSKSSQGHVTK, Spectrum 29.dta

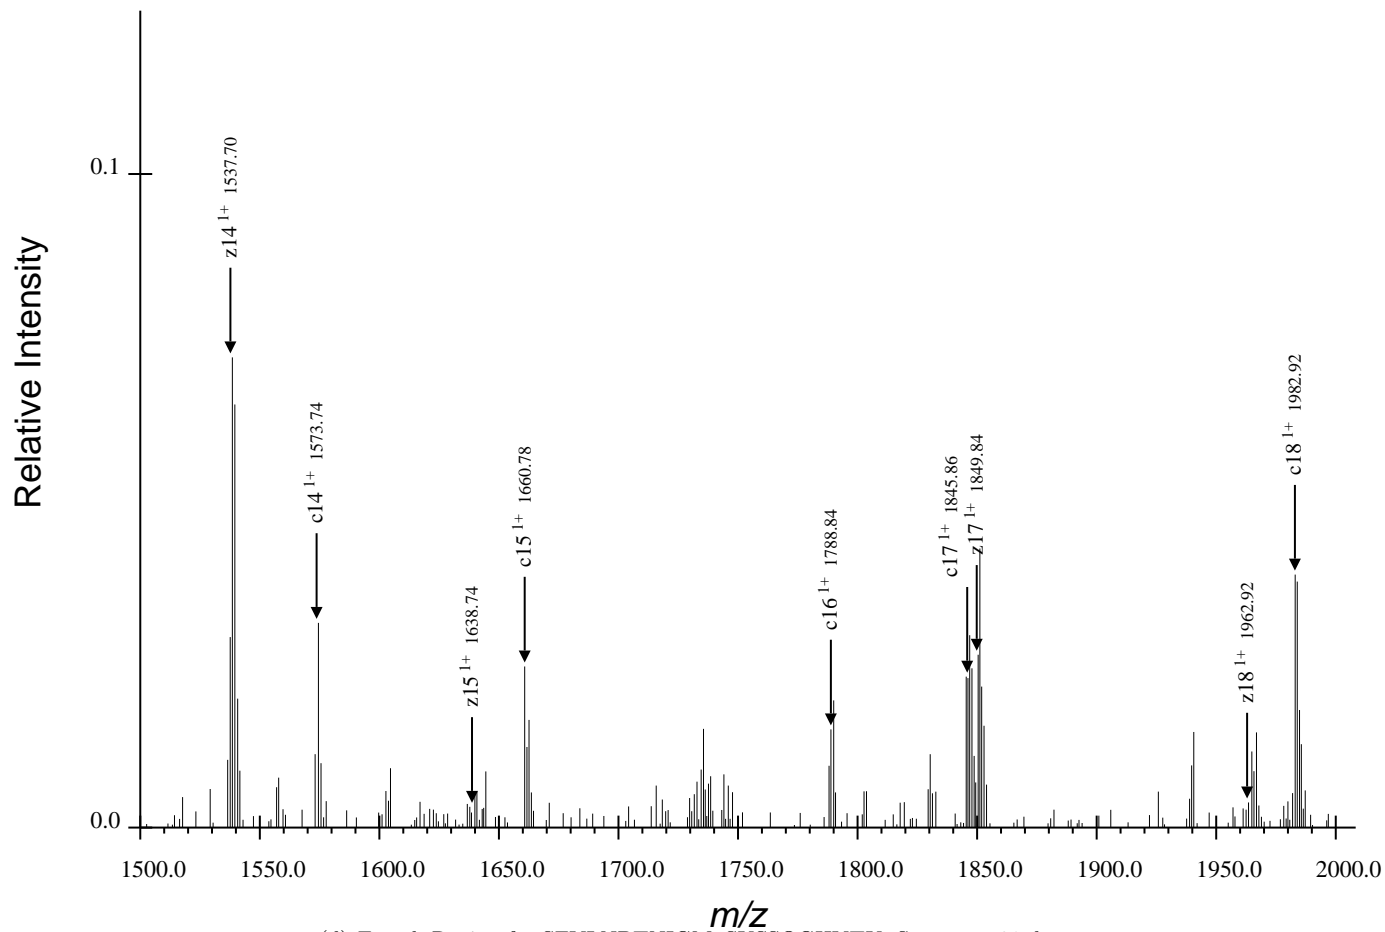

(d) Fourth Region for SFVLNPTNIGMpSKSSQGHVTK, Spectrum 29.dta

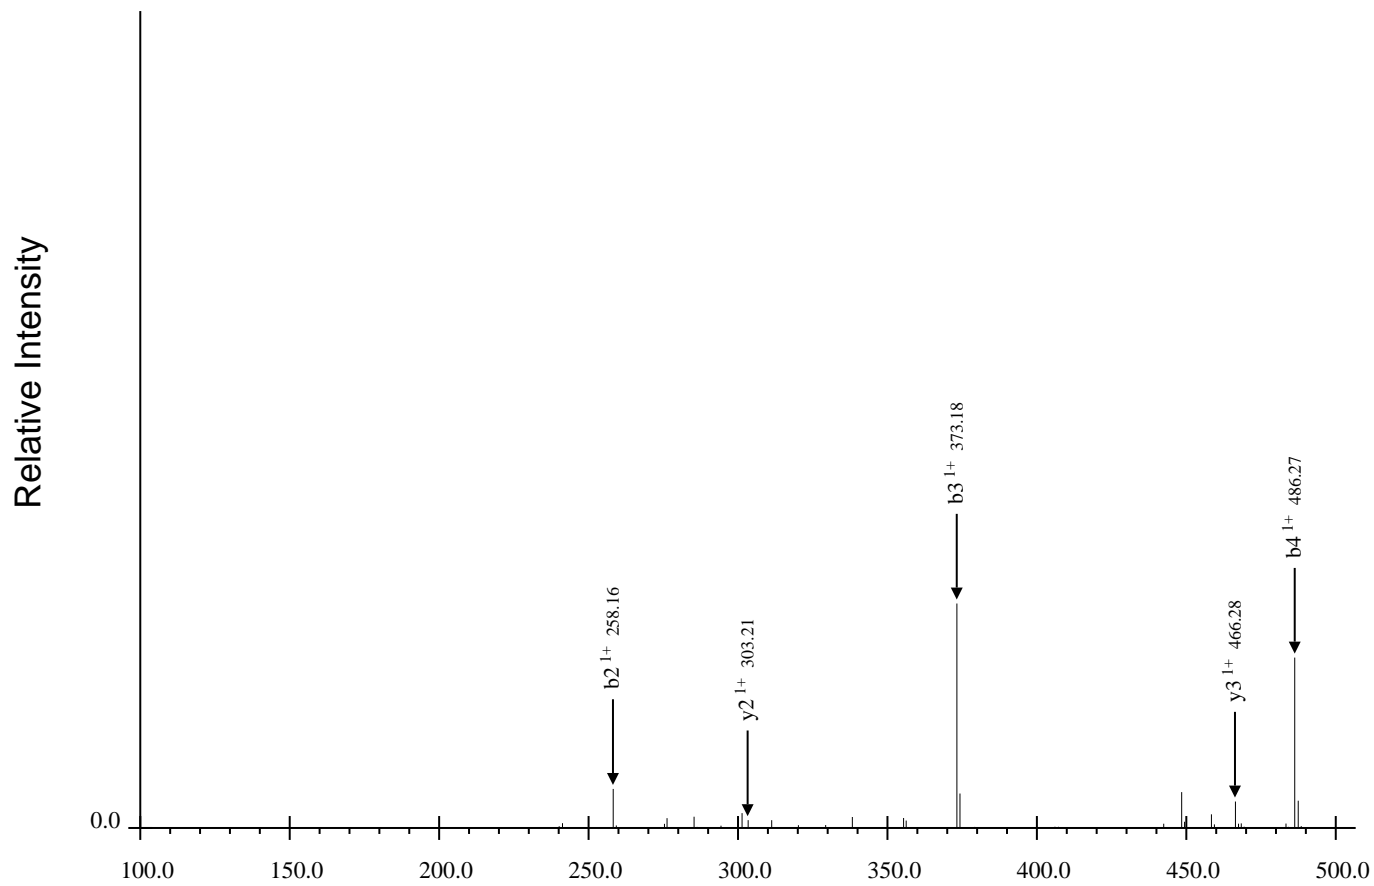

(a) First Region for TRDIYETDpYYRK, Spectrum 30.dta

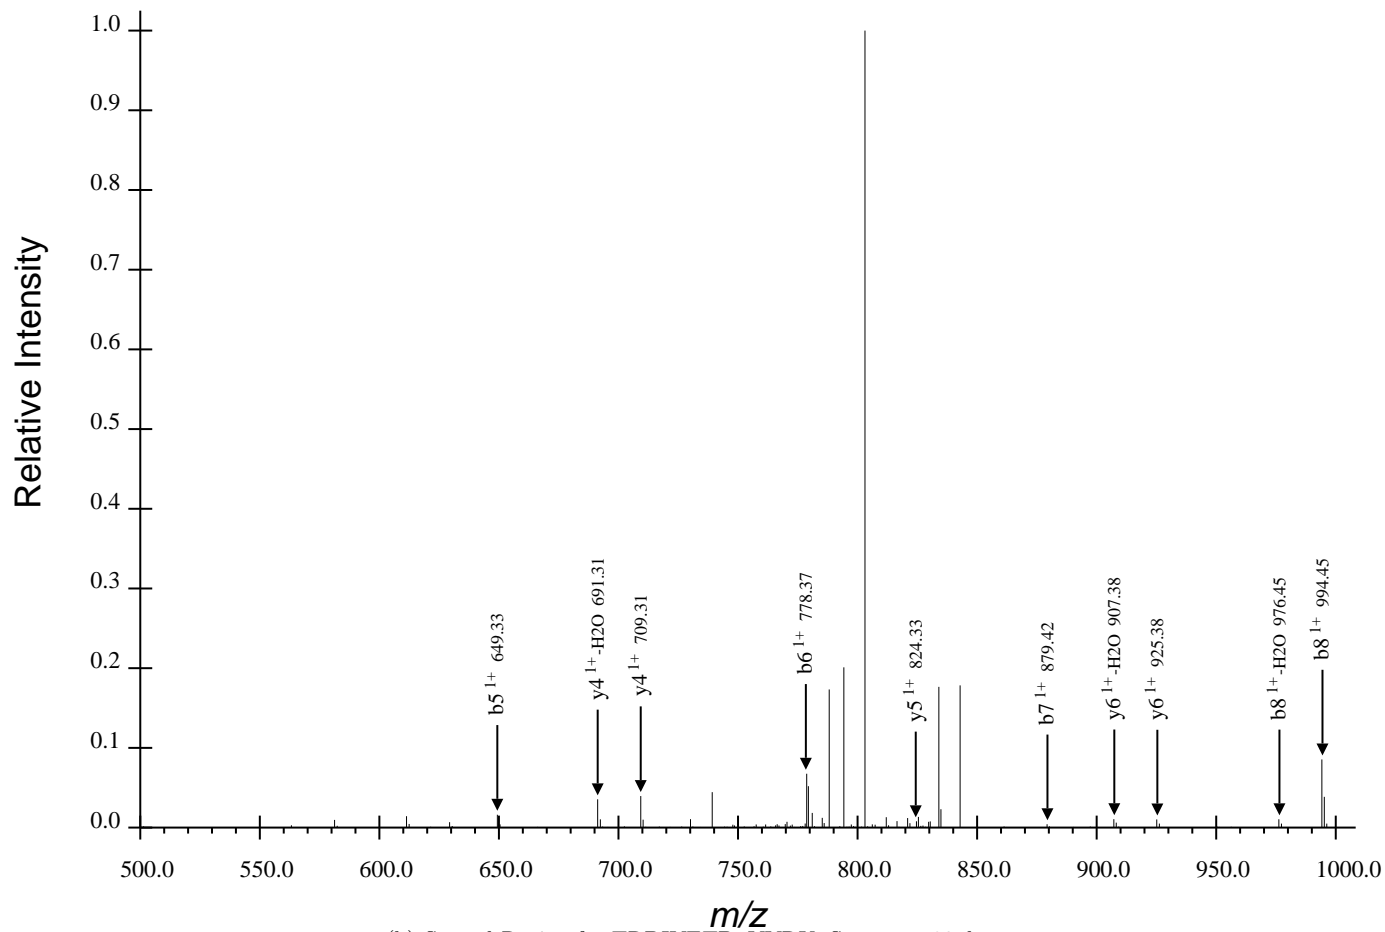

(b) Second Region for TRDIYETDpYYRK, Spectrum 30.dta

Relative Intensity

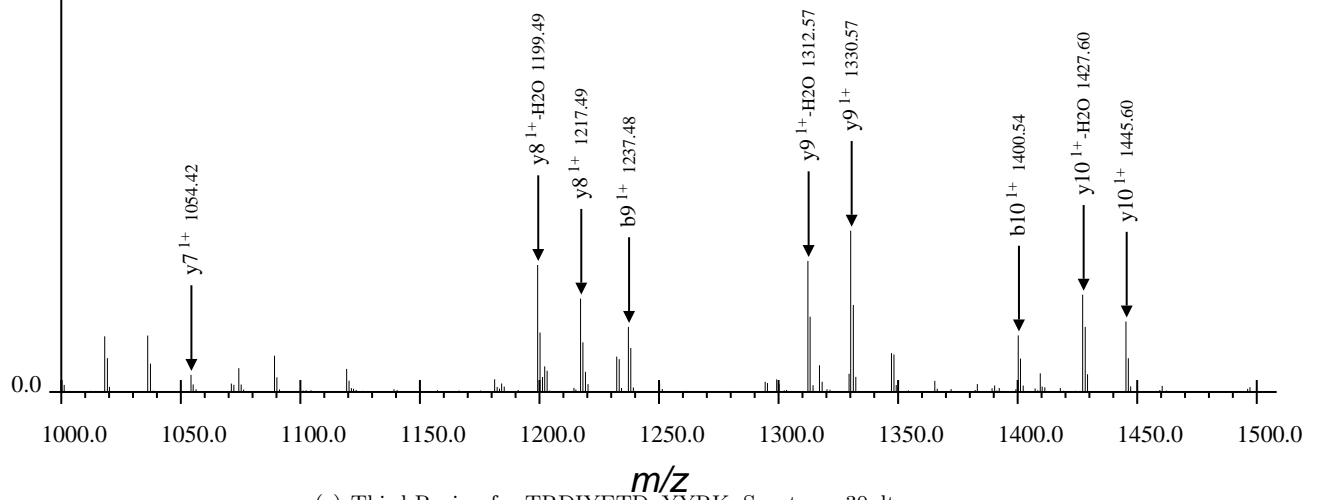

(c) Third Region for TRDIYETDpYYRK, Spectrum 30.dta

Relative Intensity

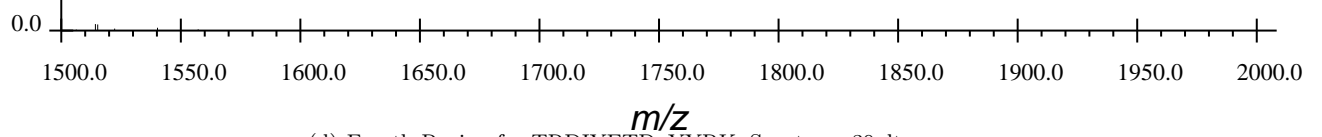

(d) Fourth Region for TRDIYETDpYYRK, Spectrum 30.dta

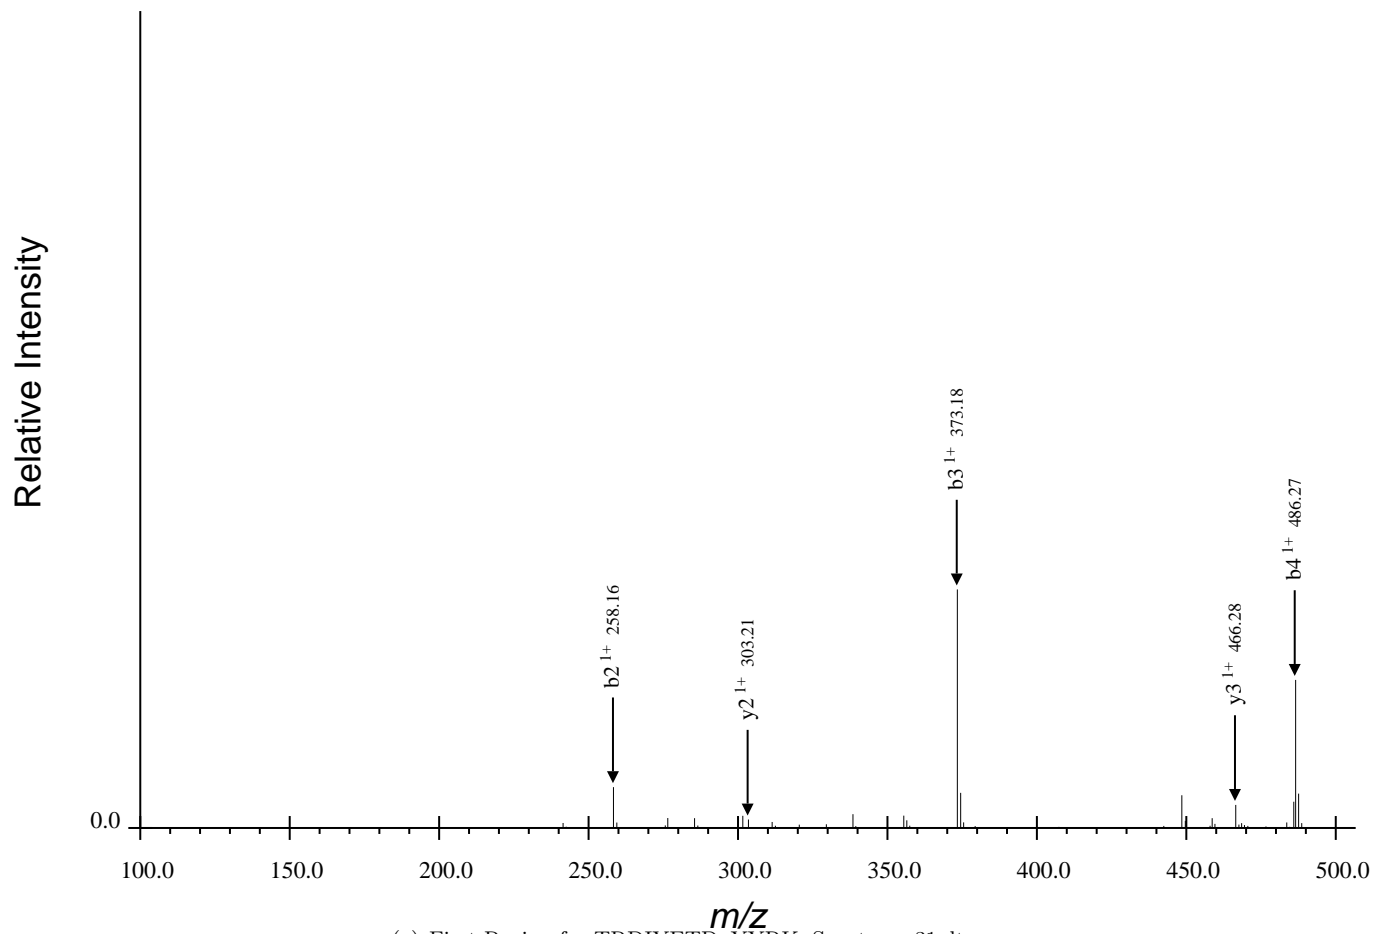

(a) First Region for TRDIYETDpYYRK, Spectrum 31.dta

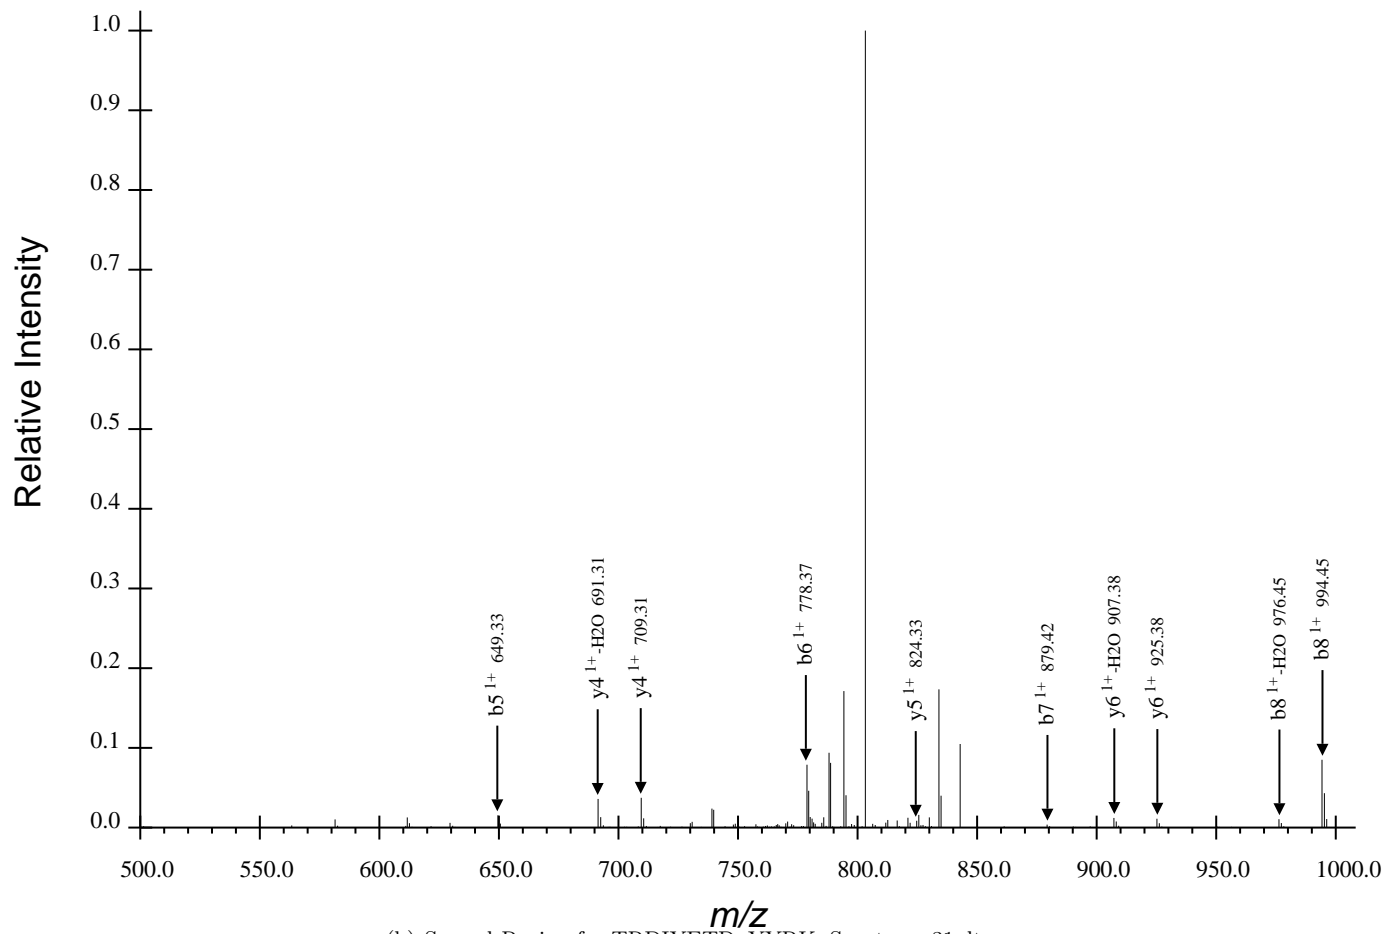

(b) Second Region for TRDIYETDpYYRK, Spectrum 31.dta

Relative Intensity

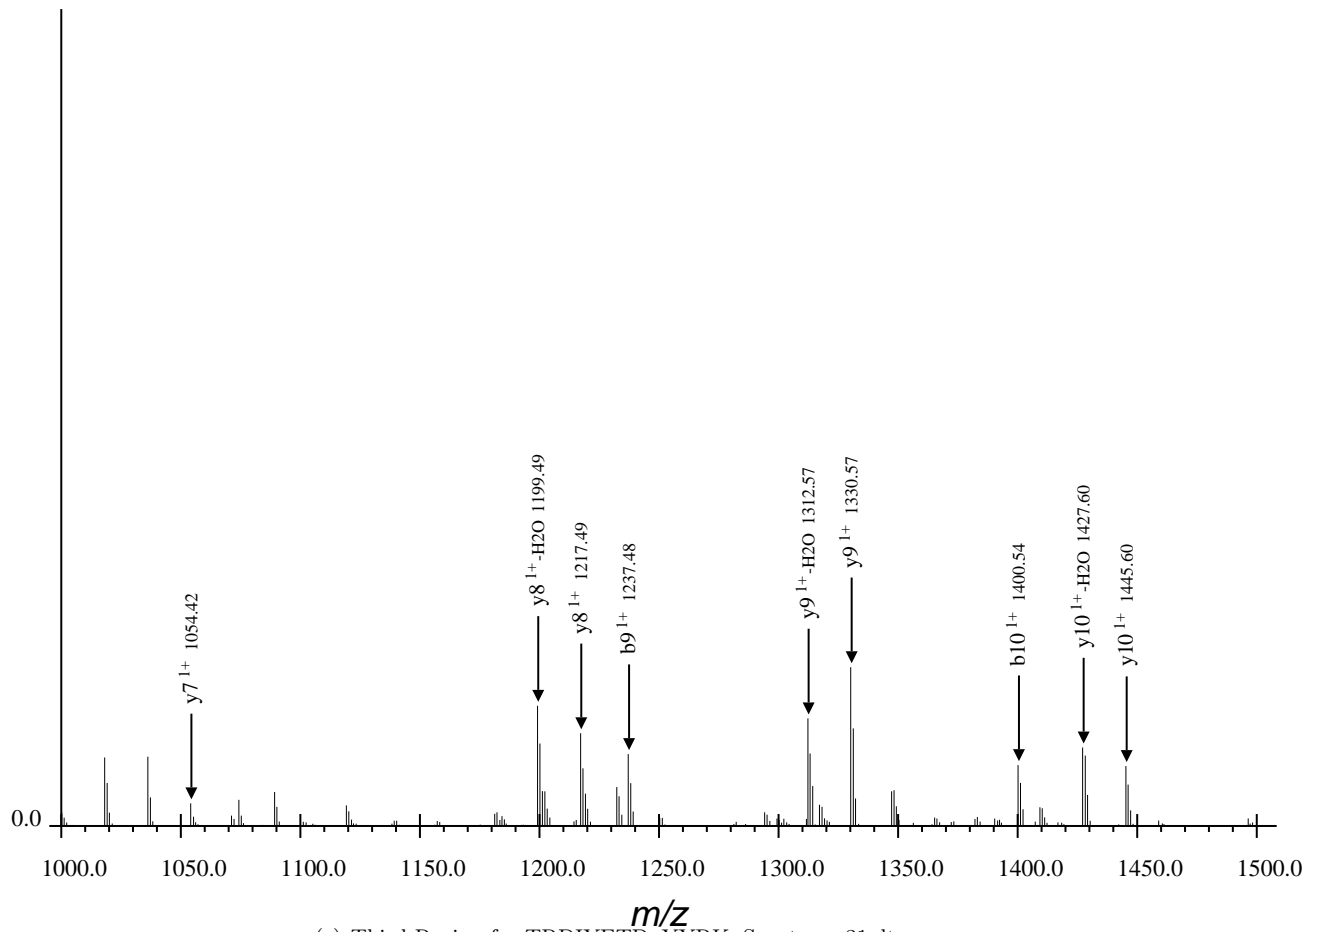

(c) Third Region for TRDIYETDpYYRK, Spectrum 31.dta

Relative Intensity

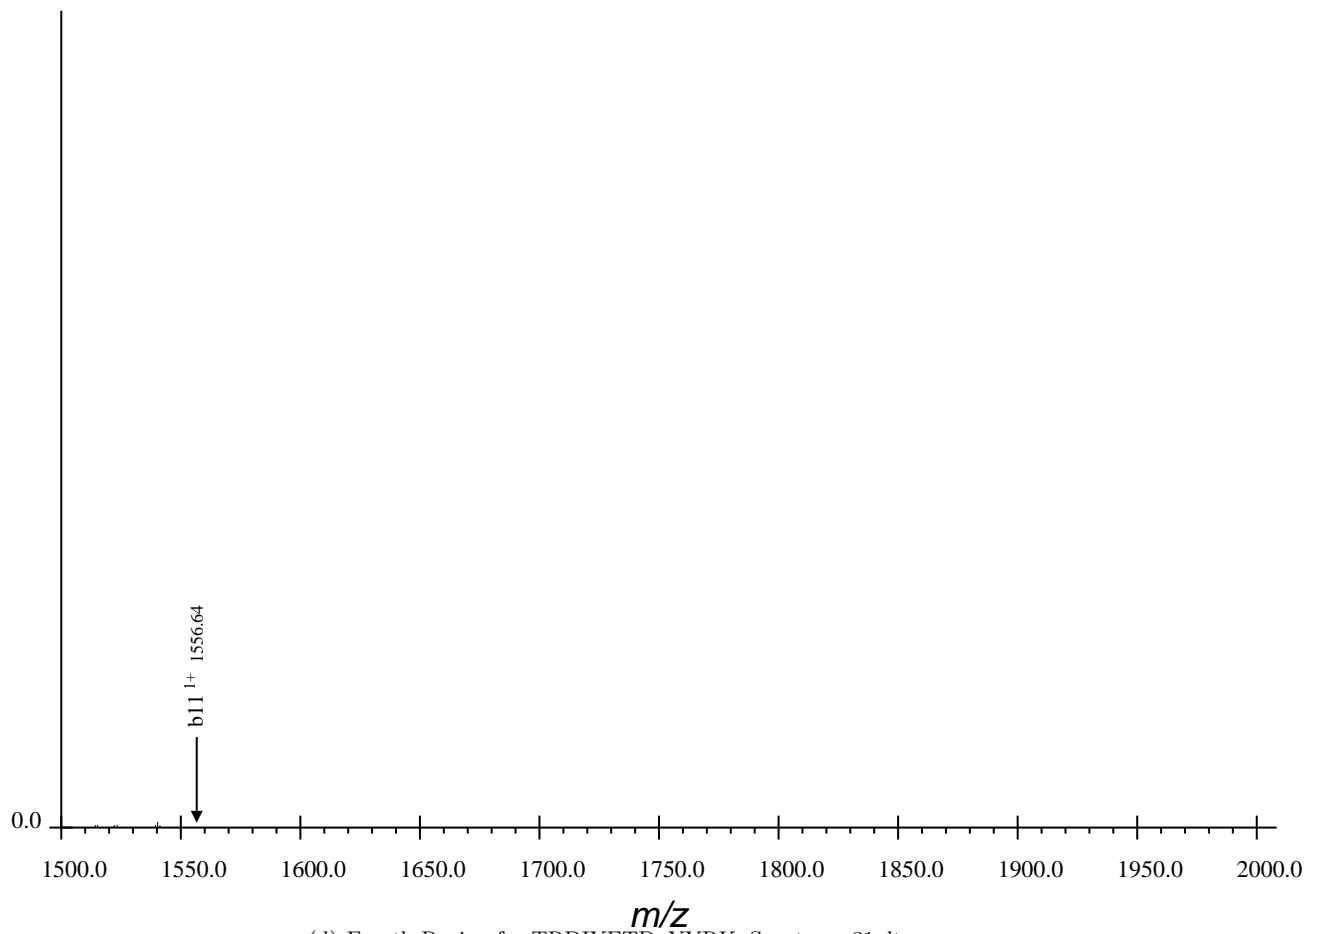

(d) Fourth Region for TRDIYETDpYYRK, Spectrum 31.dta

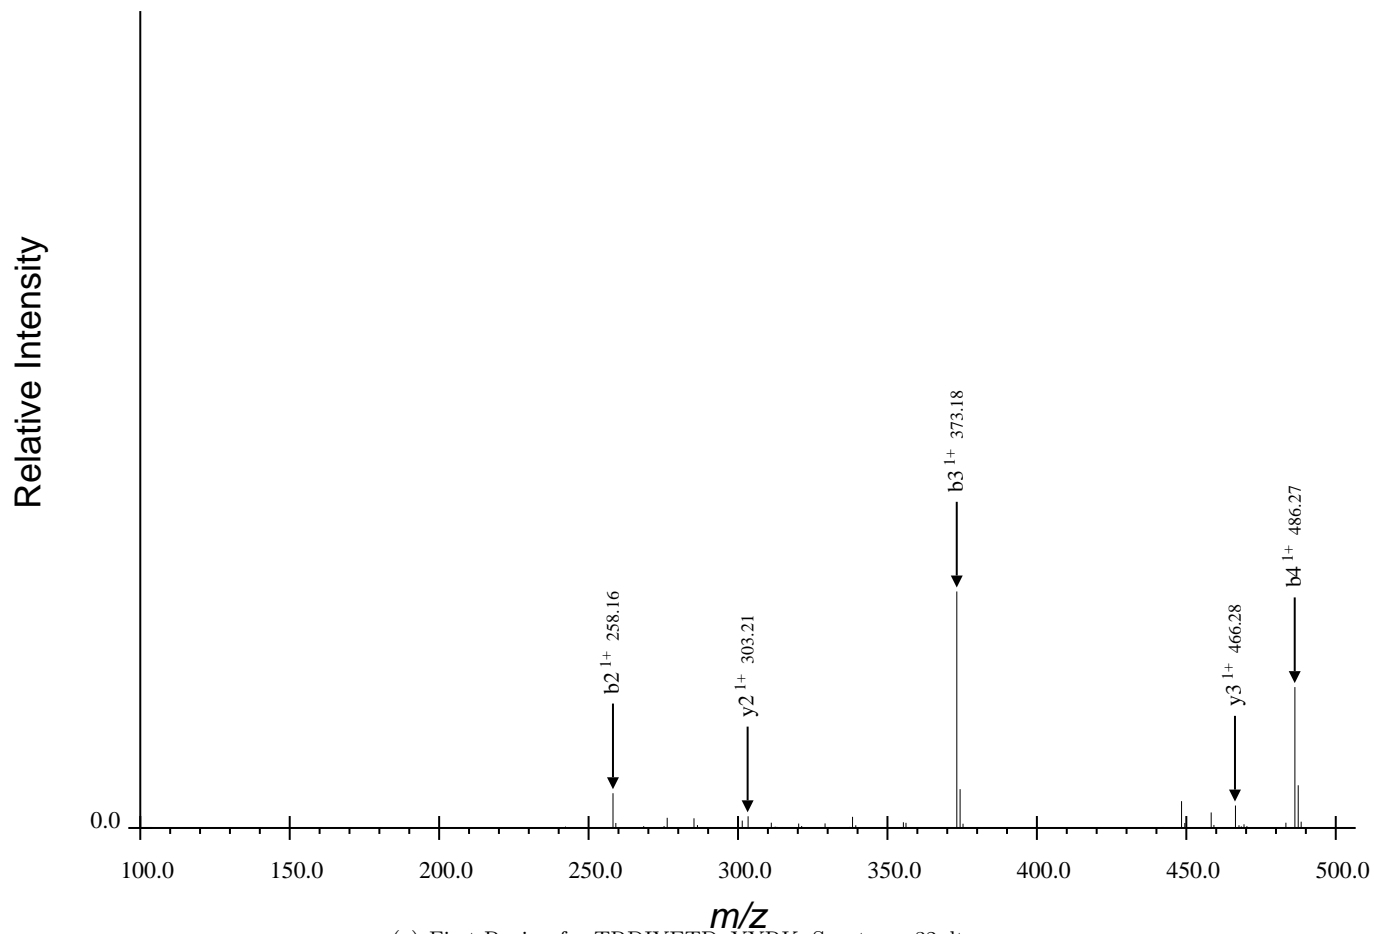

(a) First Region for TRDIYETDpYYRK, Spectrum 32.dta

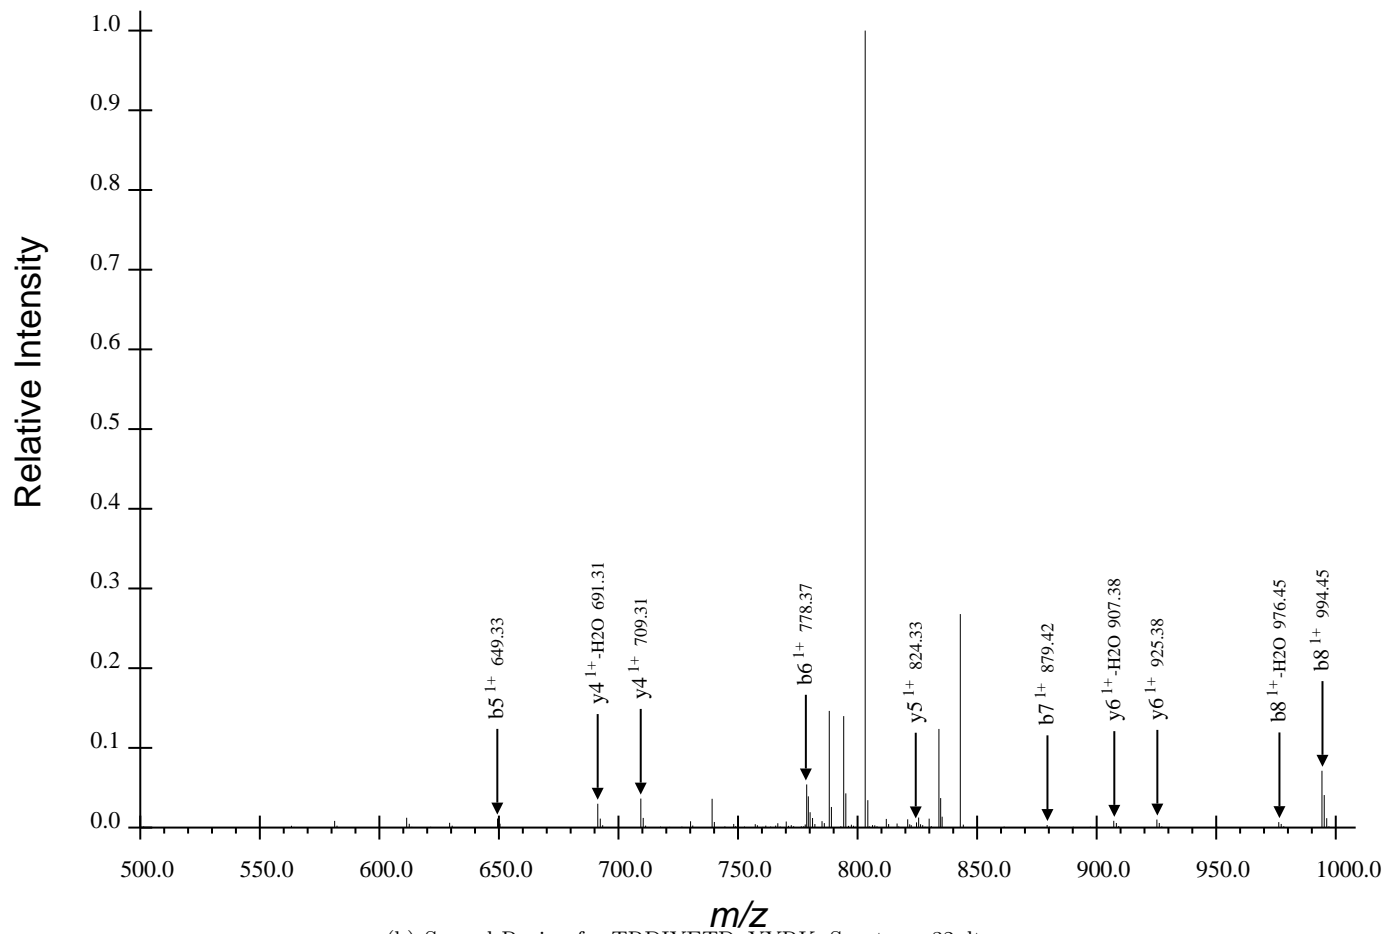

(b) Second Region for TRDIYETDpYYRK, Spectrum 32.dta

Relative Intensity

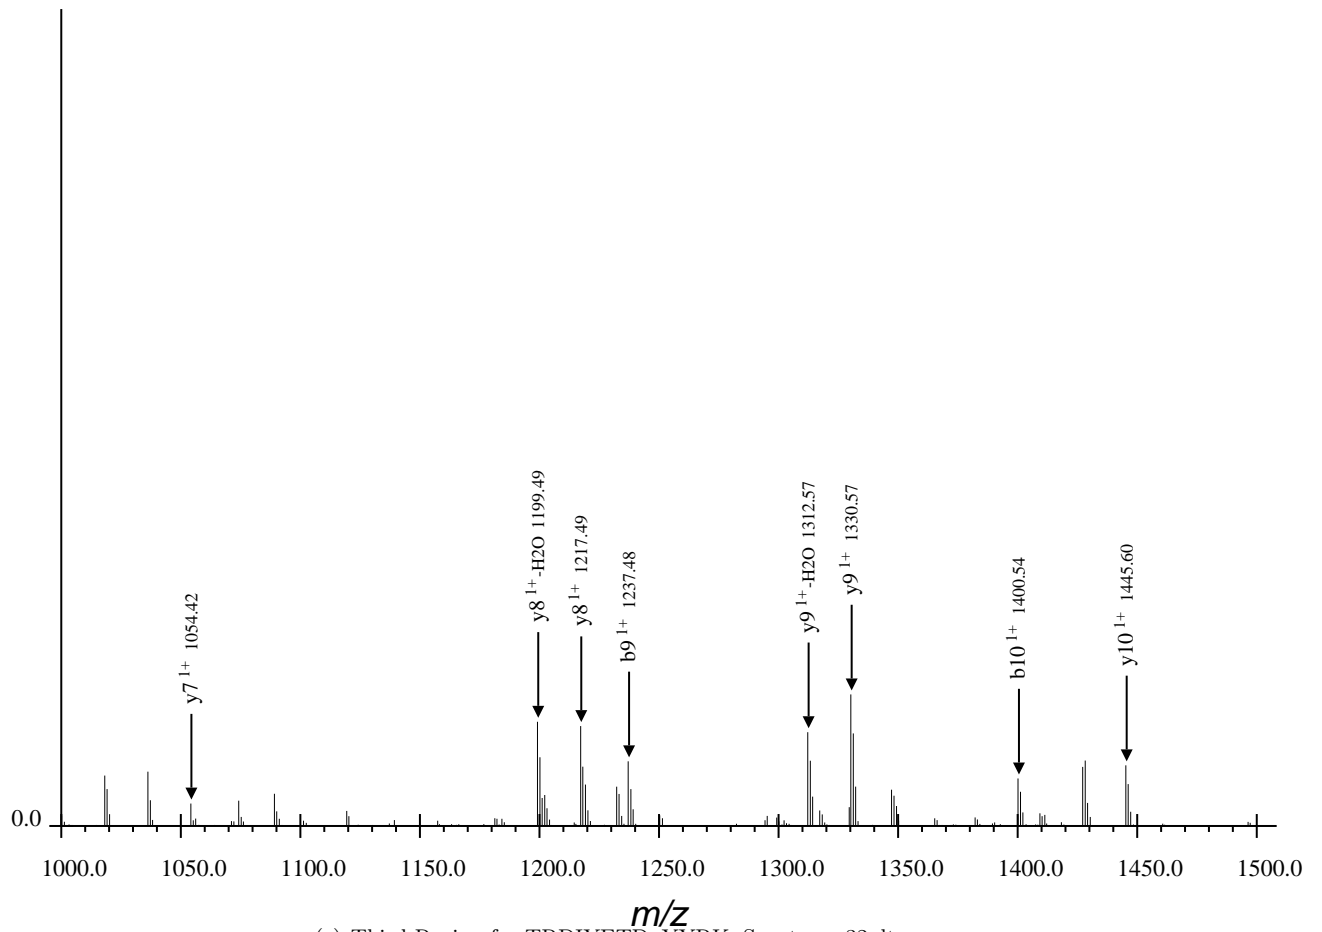

(c) Third Region for TRDIYETDpYYRK, Spectrum 32.dta

Relative Intensity

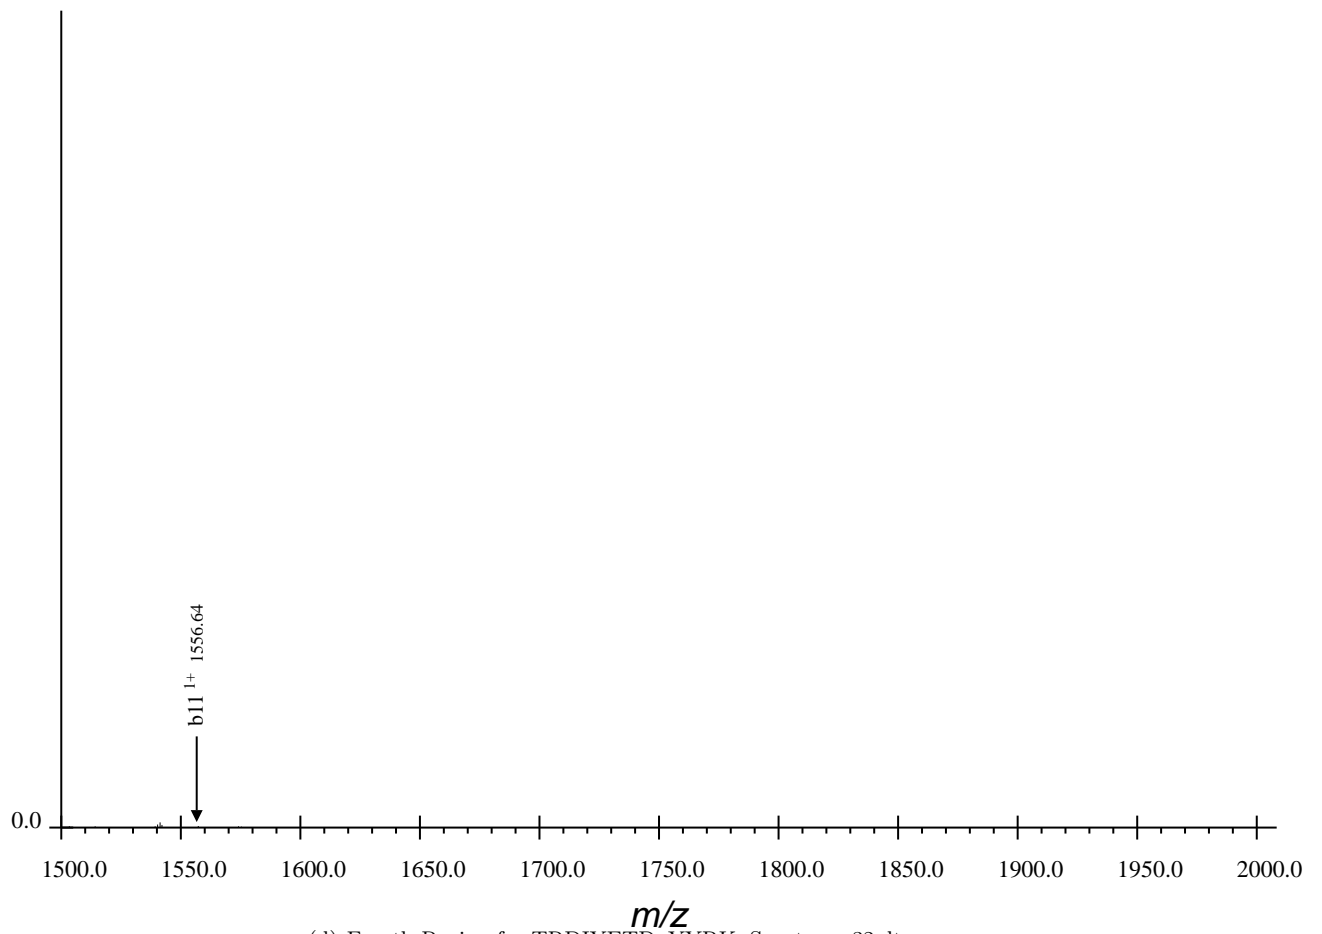

(d) Fourth Region for TRDIYETDpYYRK, Spectrum 32.dta



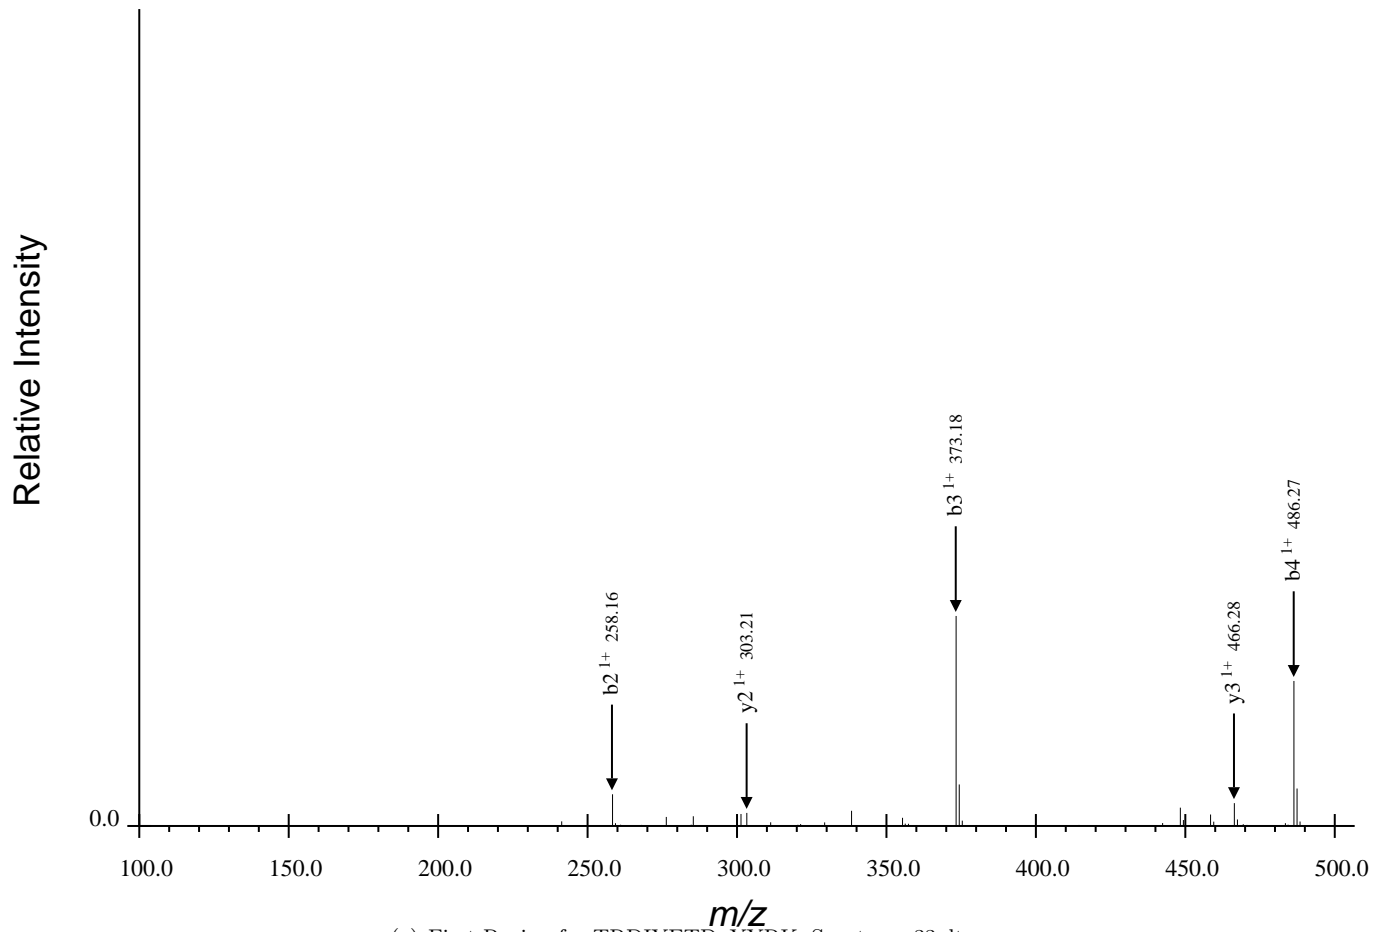

(a) First Region for TRDIYETDpYYRK, Spectrum 33.dta

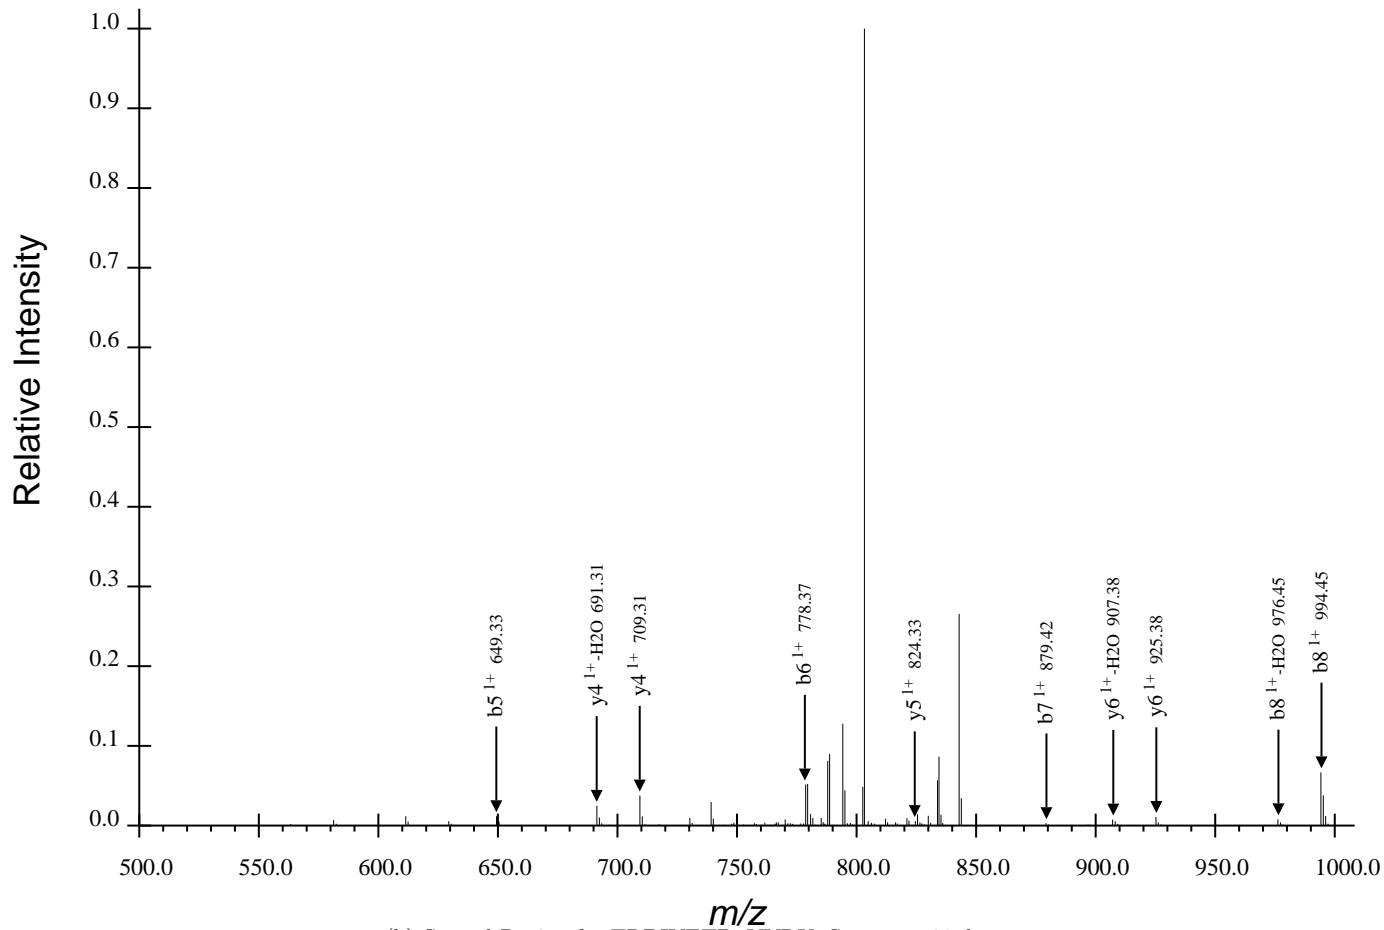

(b) Second Region for TRDIYETDpYYRK, Spectrum 33.dta

Relative Intensity

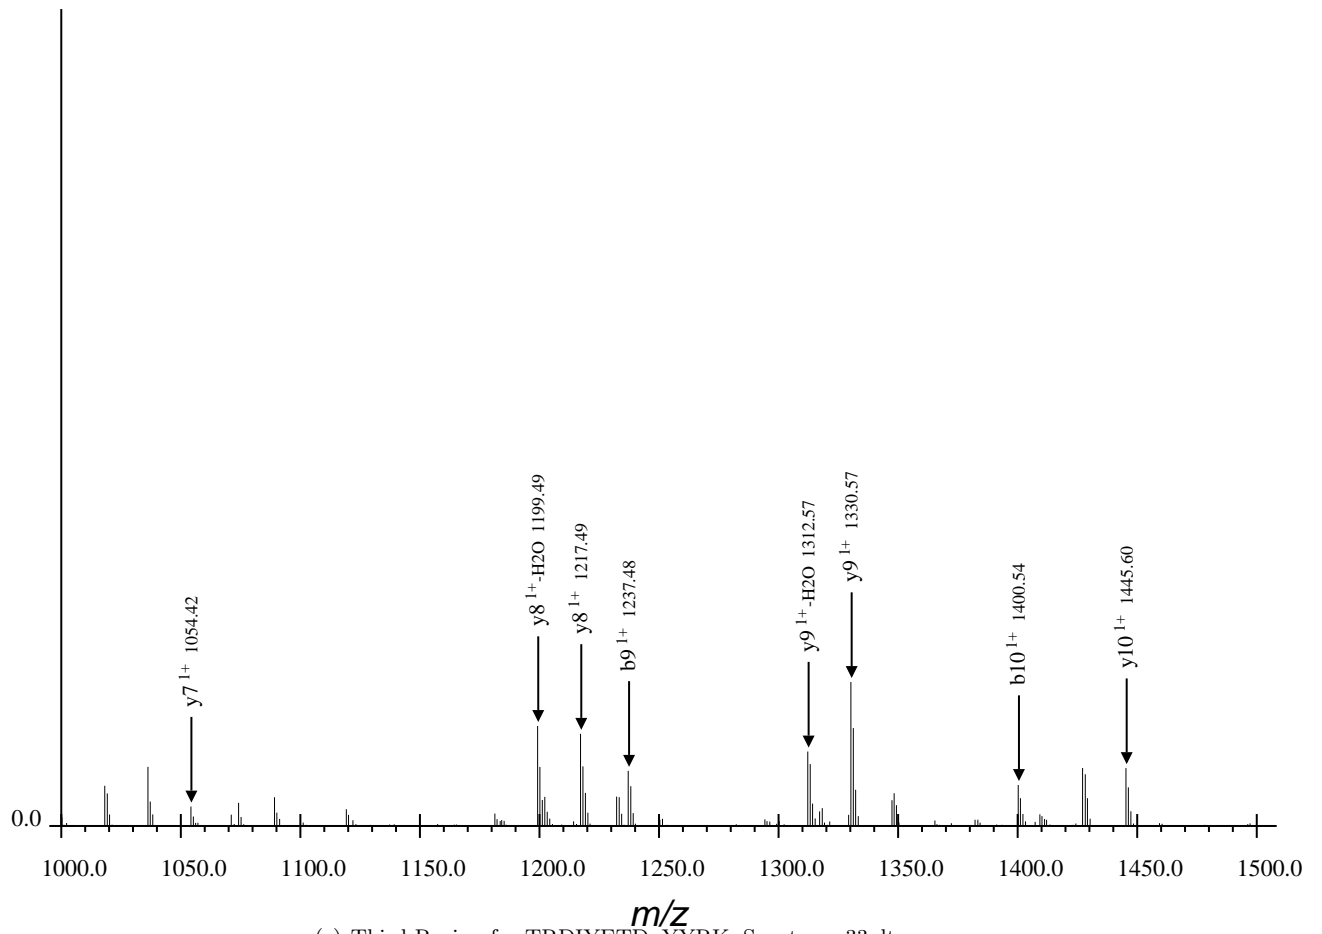

(c) Third Region for TRDIYETDpYYRK, Spectrum 33.dta

Relative Intensity

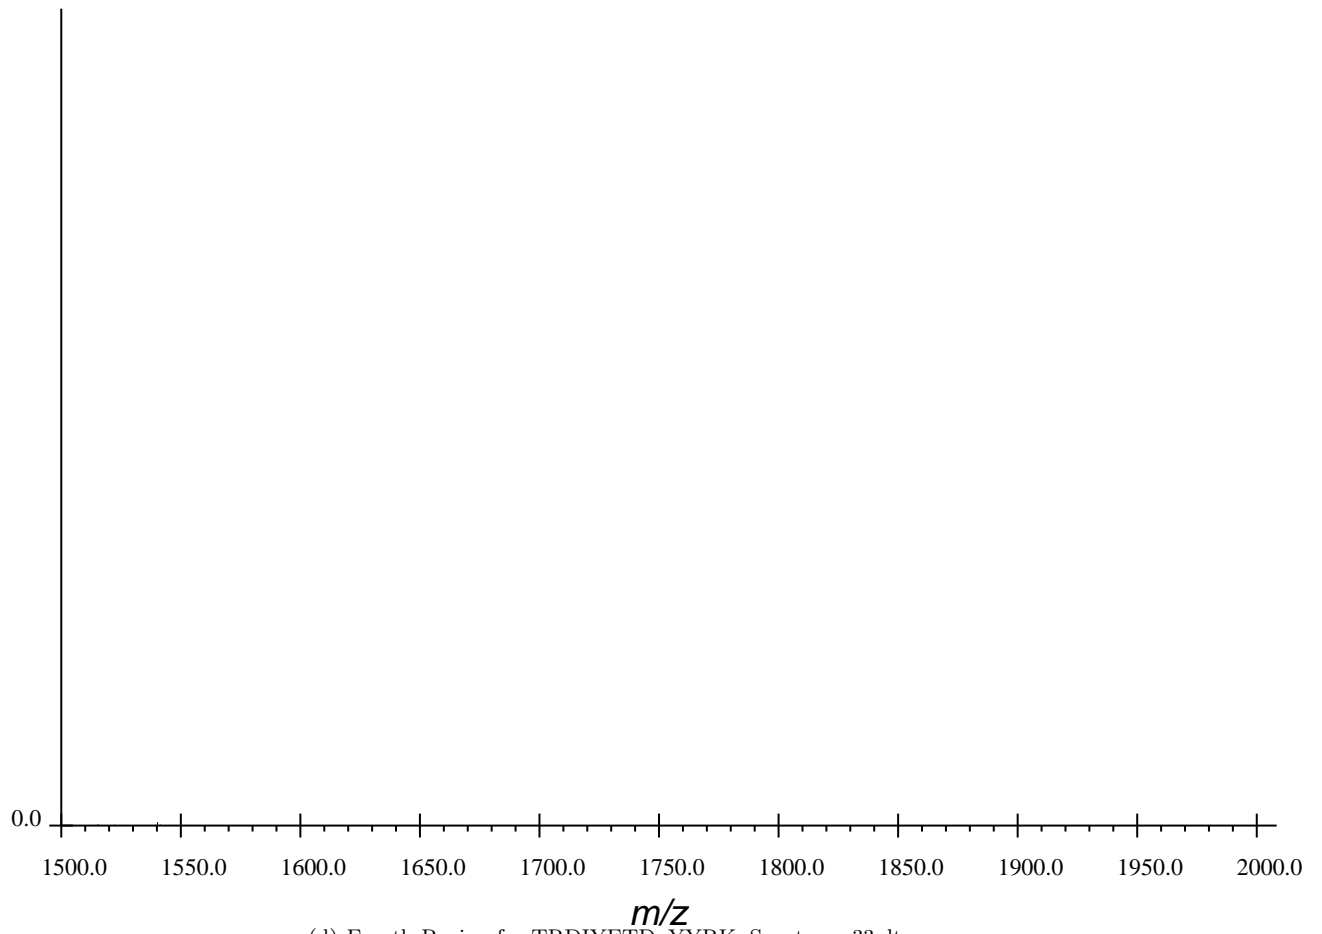

(d) Fourth Region for TRDIYETDpYYRK, Spectrum 33.dta

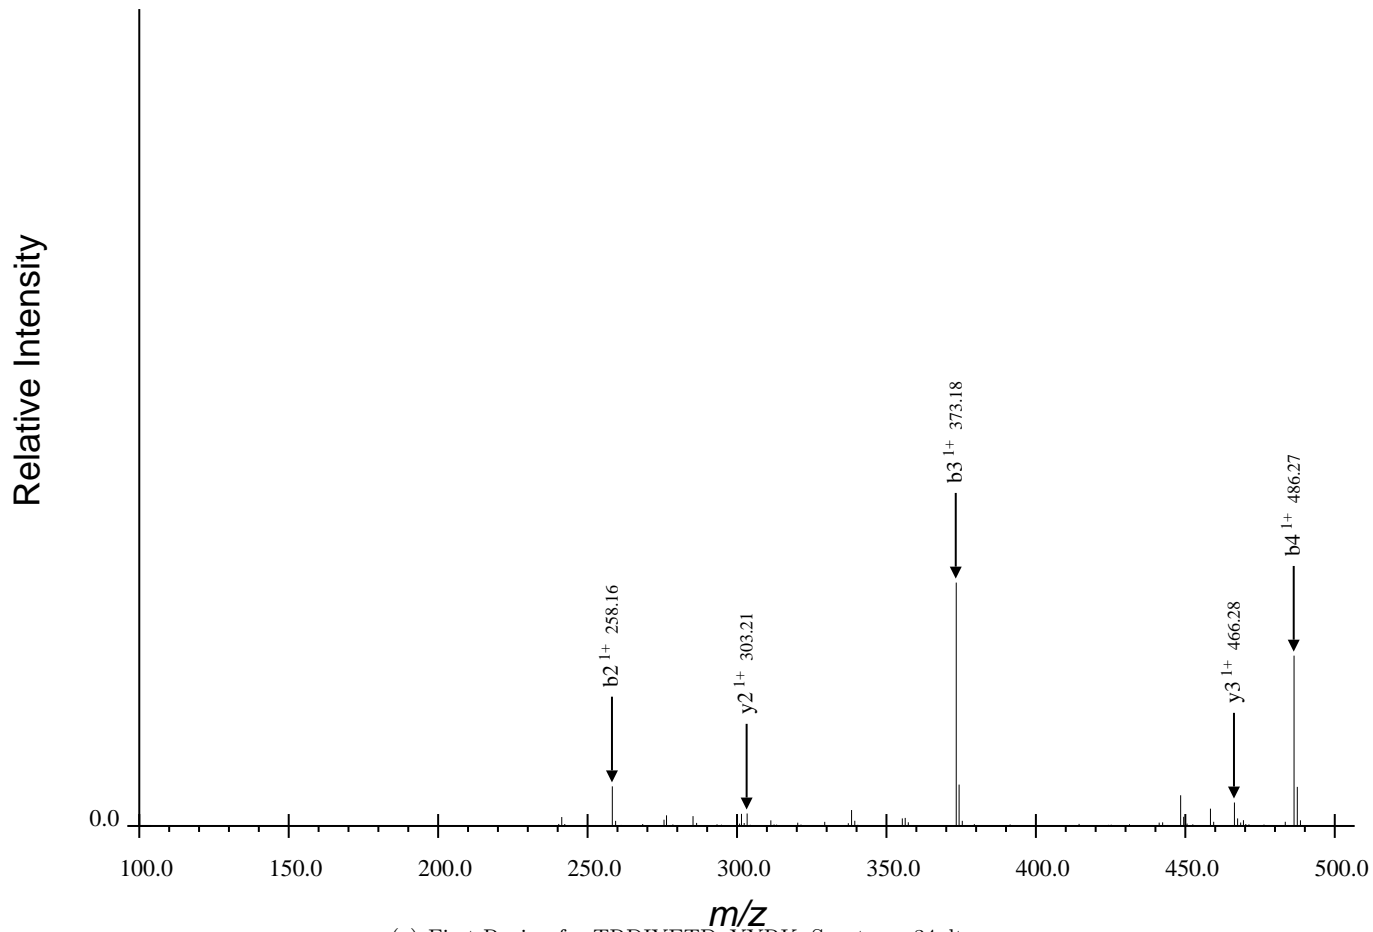

(a) First Region for TRDIYETDpYYRK, Spectrum 34.dta

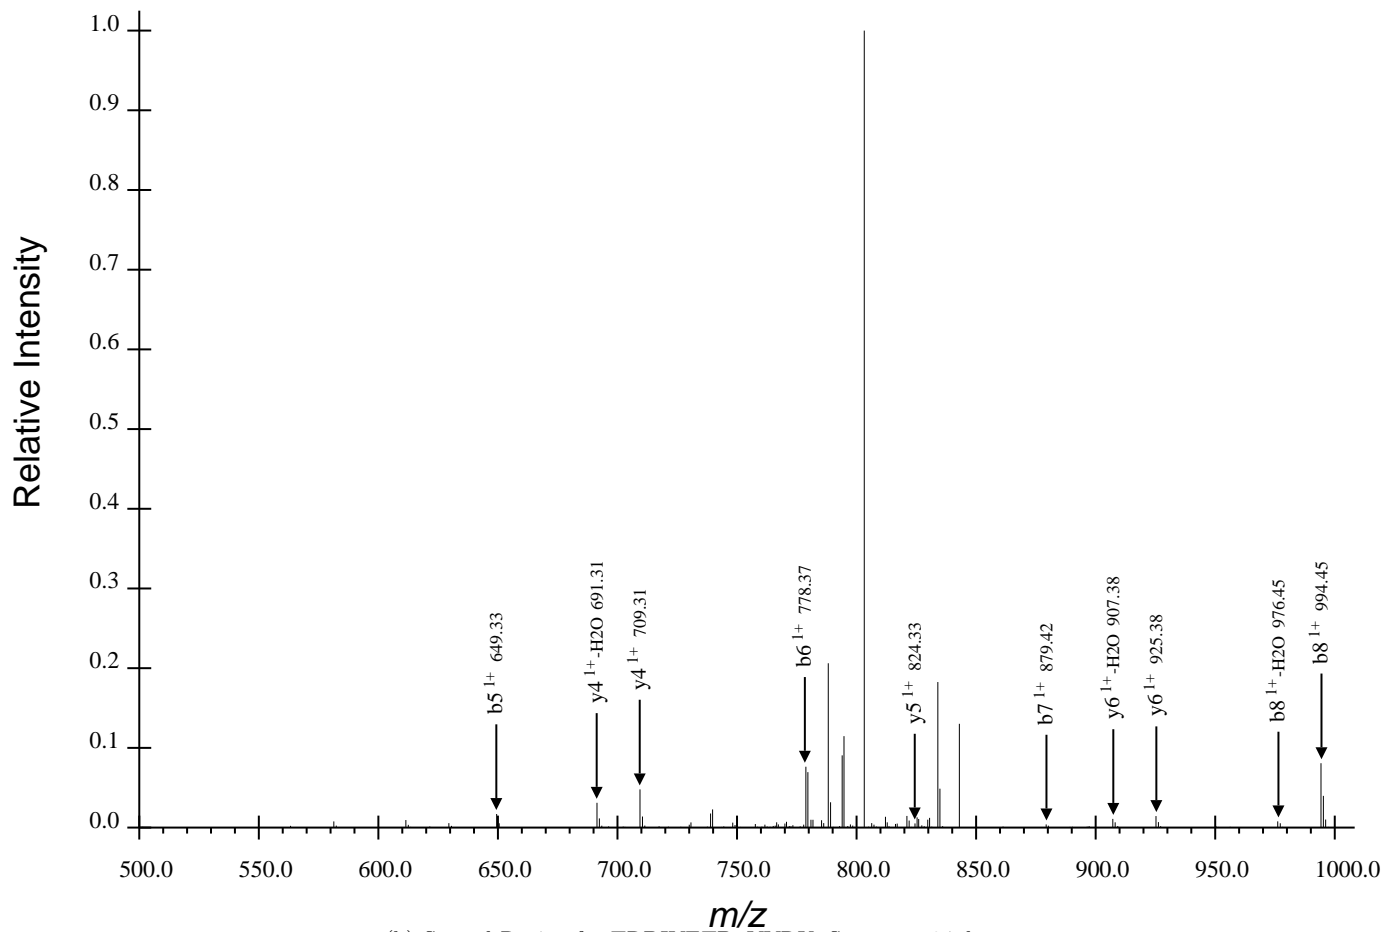

(b) Second Region for TRDIYETDpYYRK, Spectrum 34.dta

Relative Intensity

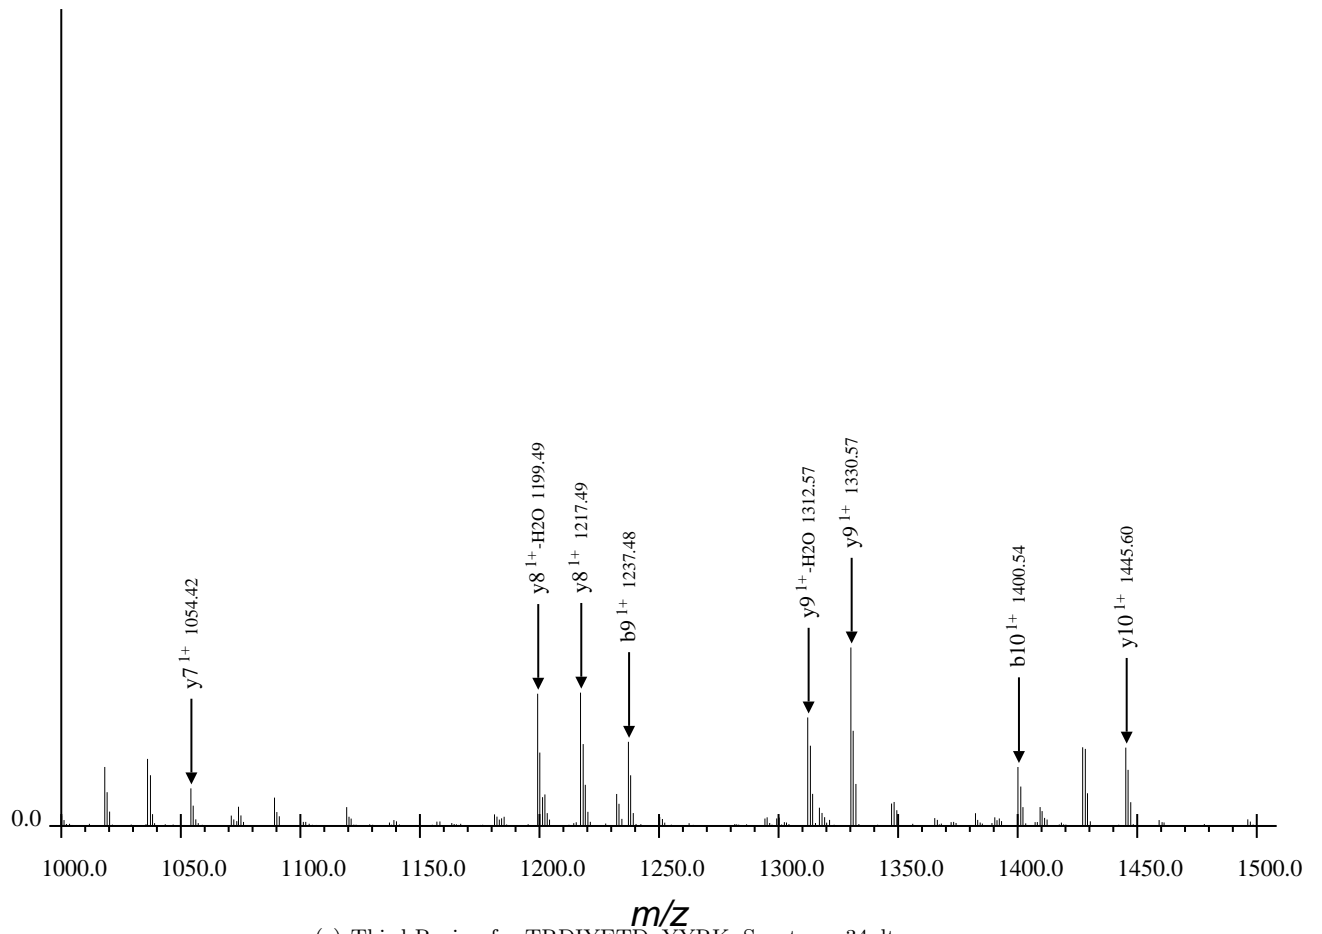

(c) Third Region for TRDIYETDpYYRK, Spectrum 34.dta

Relative Intensity

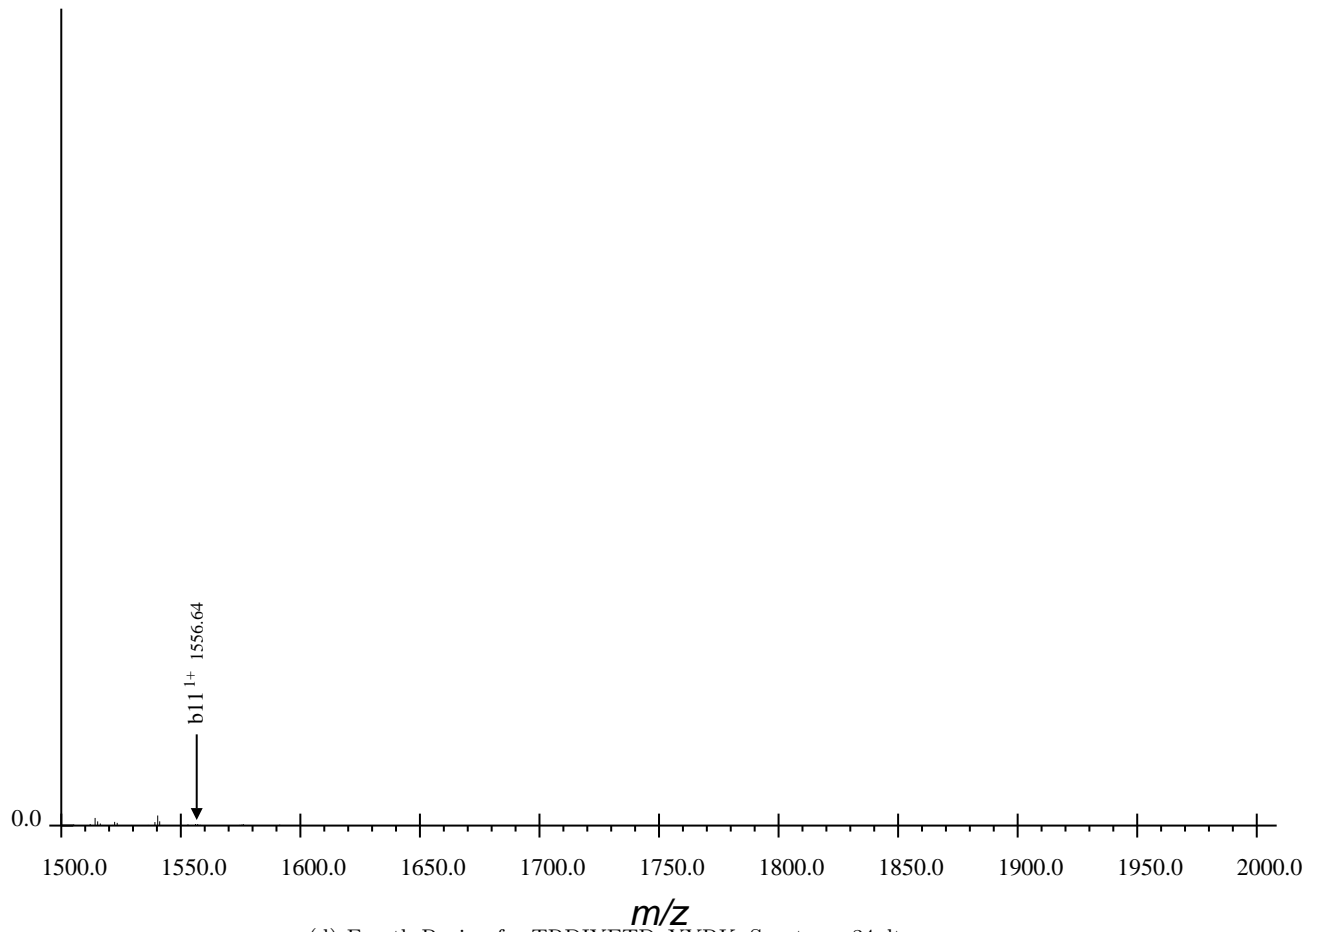

(d) Fourth Region for TRDIYETDpYYRK, Spectrum 34.dta

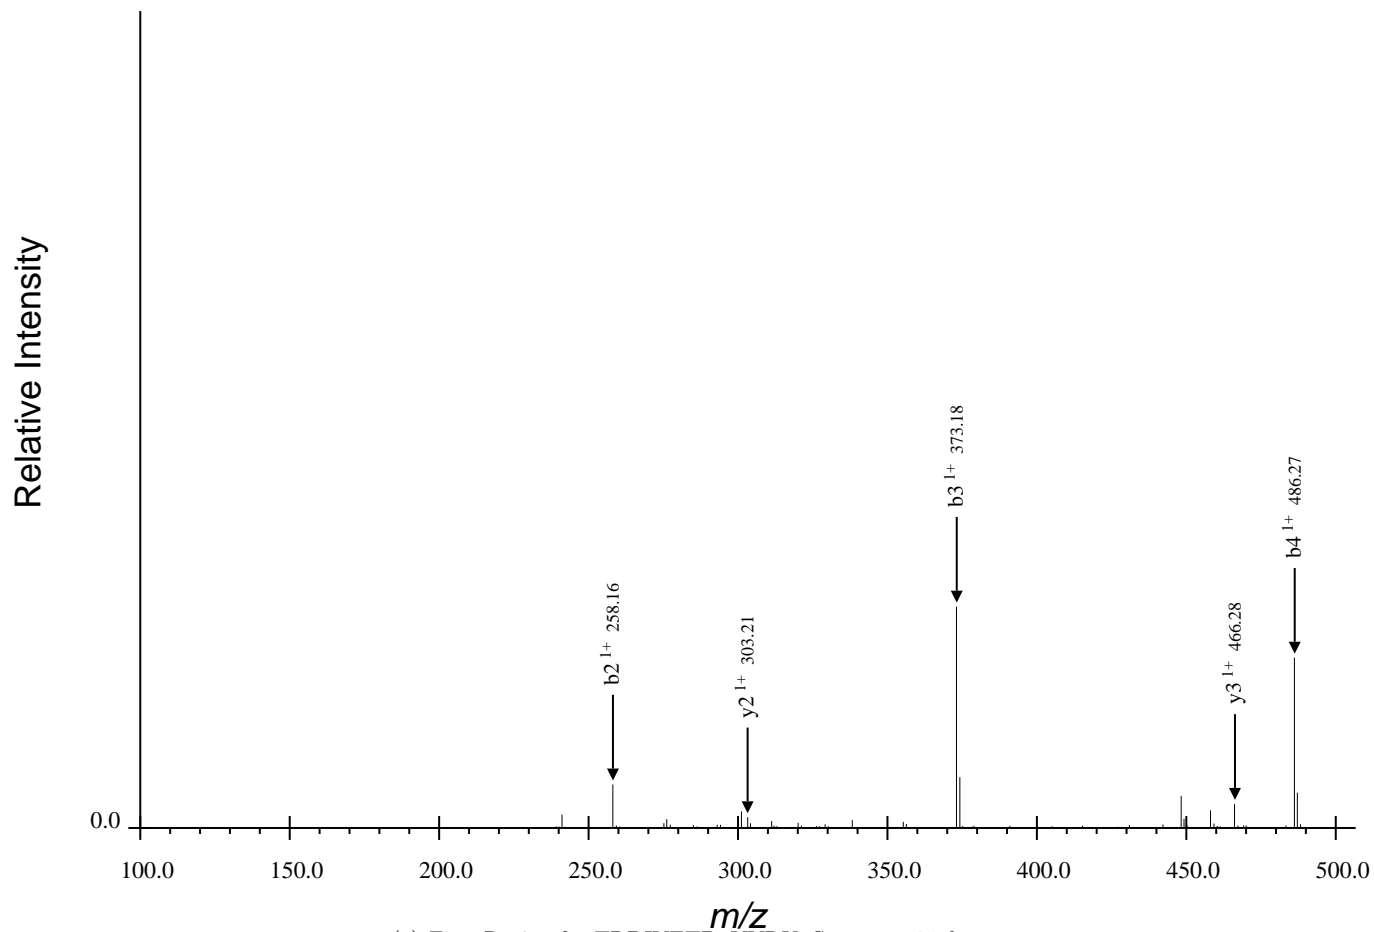

(a) First Region for TRDIYETDpYYRK, Spectrum 35.dta

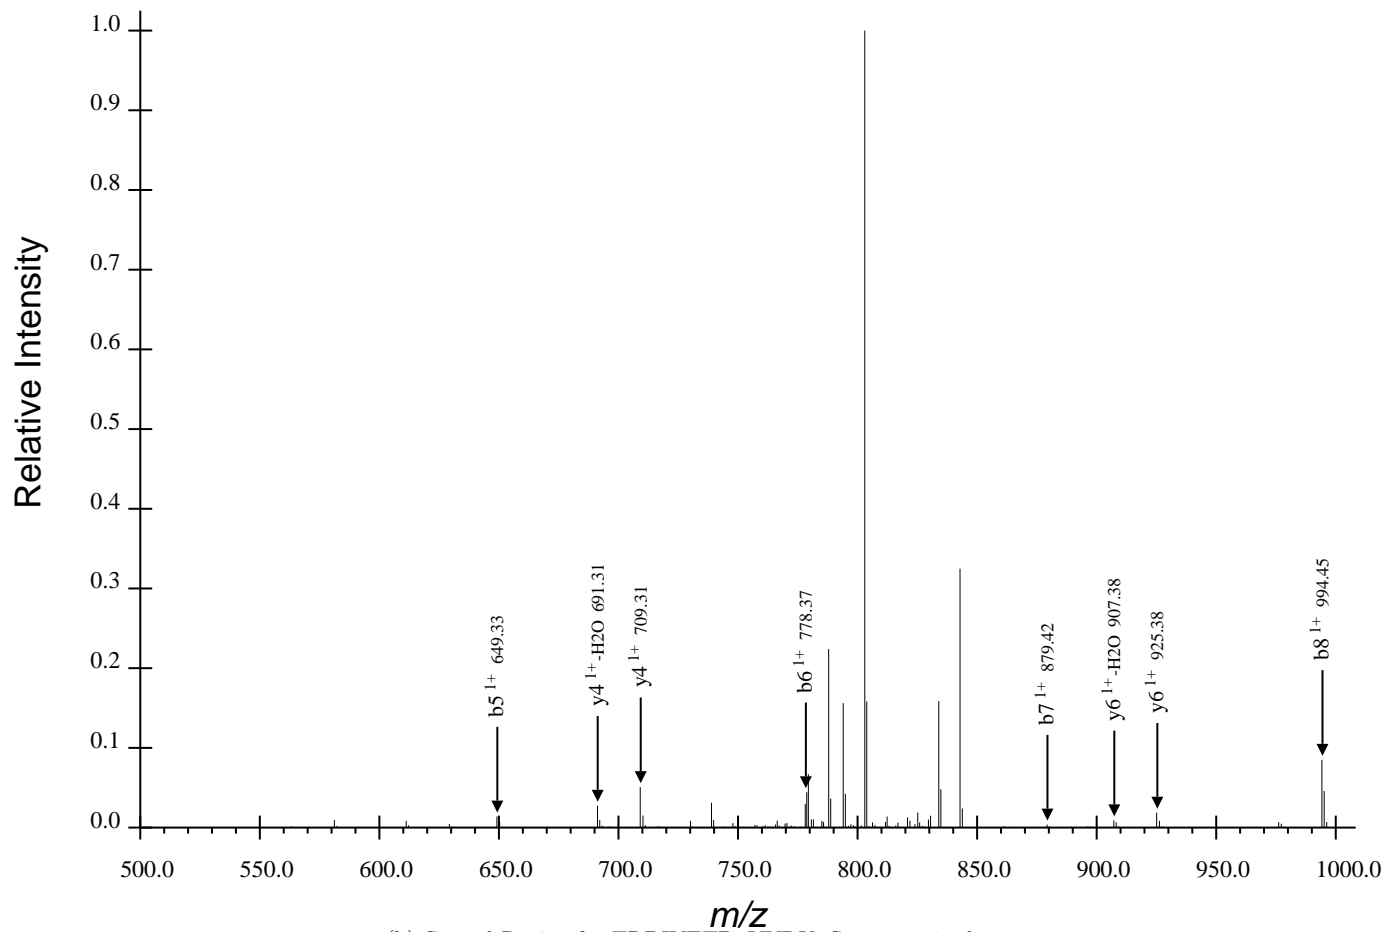

(b) Second Region for TRDIYETDpYYRK, Spectrum 35.dta

Relative Intensity

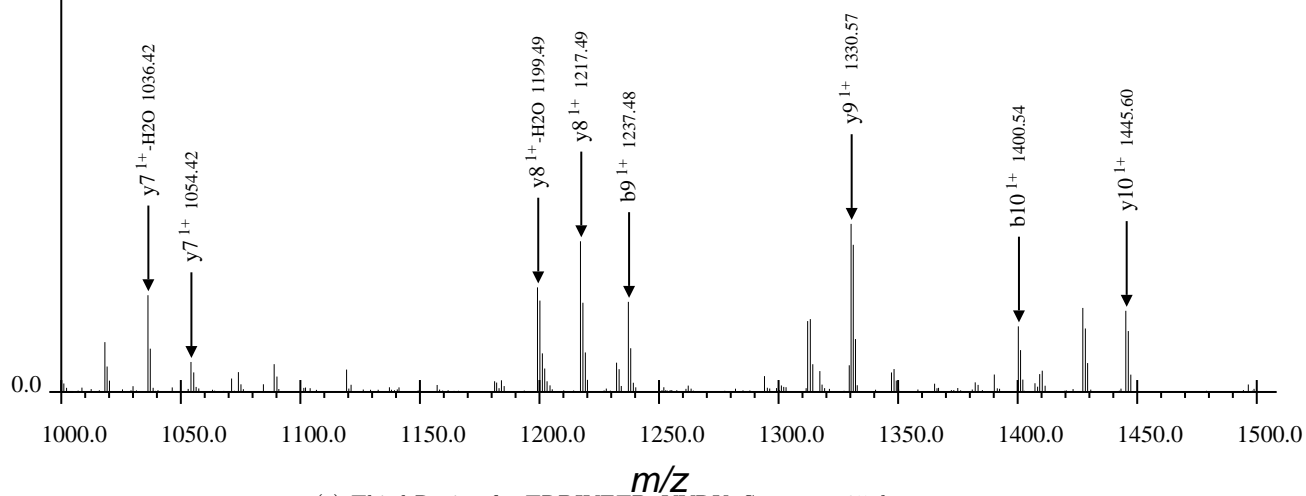

(c) Third Region for TRDIYETDpYYRK, Spectrum 35.dta

Relative Intensity

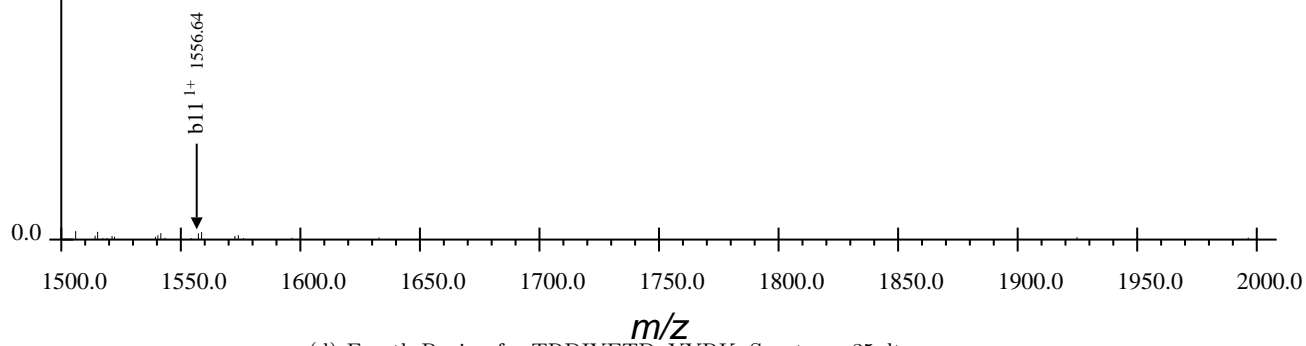

(d) Fourth Region for TRDIYETDpYYRK, Spectrum 35.dta

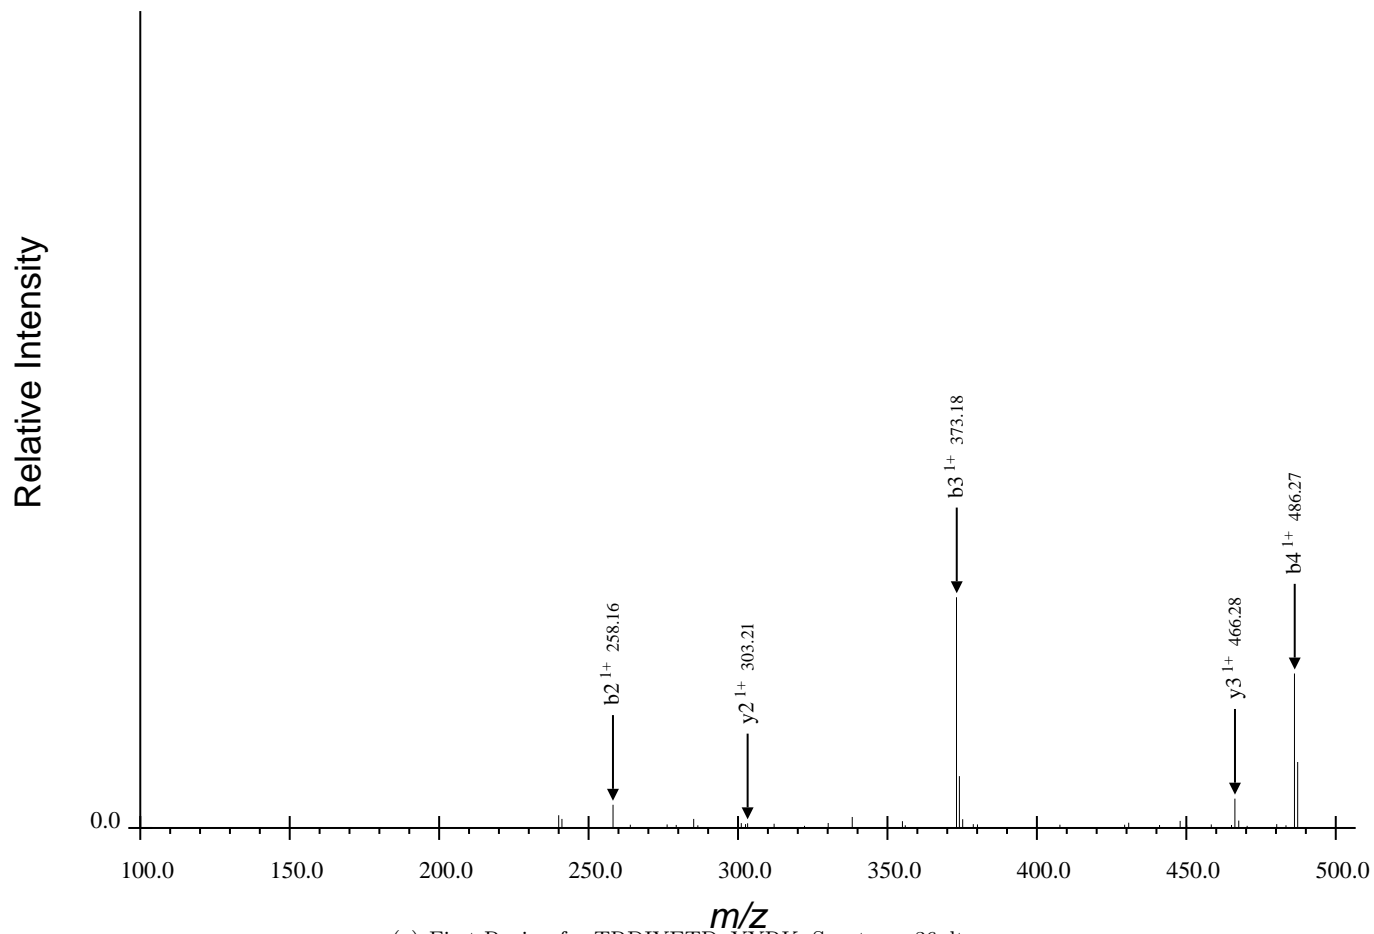

(a) First Region for TRDIYETDpYYRK, Spectrum 36.dta

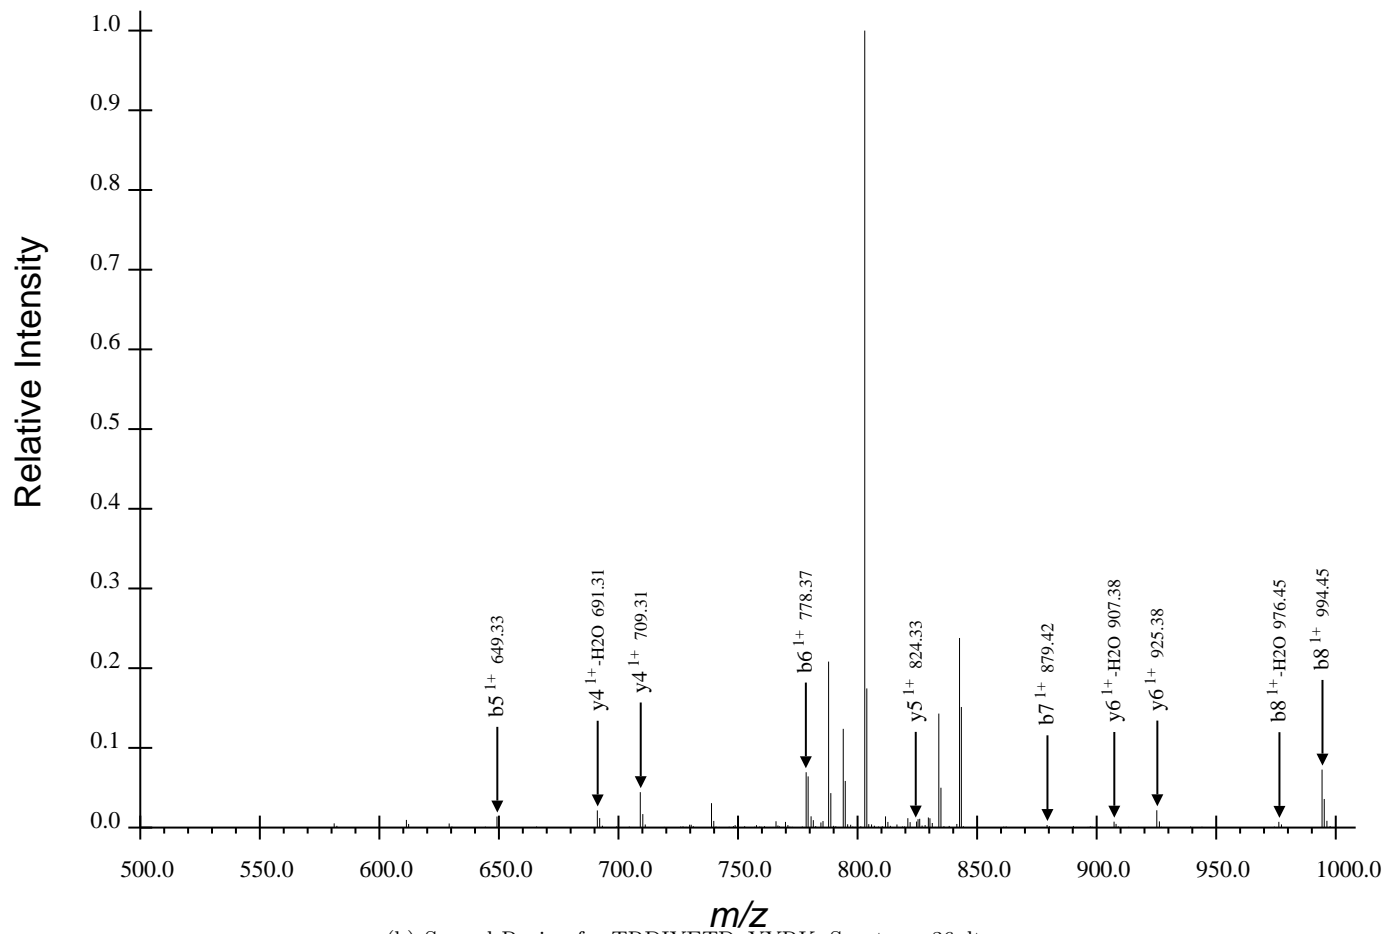

(b) Second Region for TRDIYETDpYYRK, Spectrum 36.dta

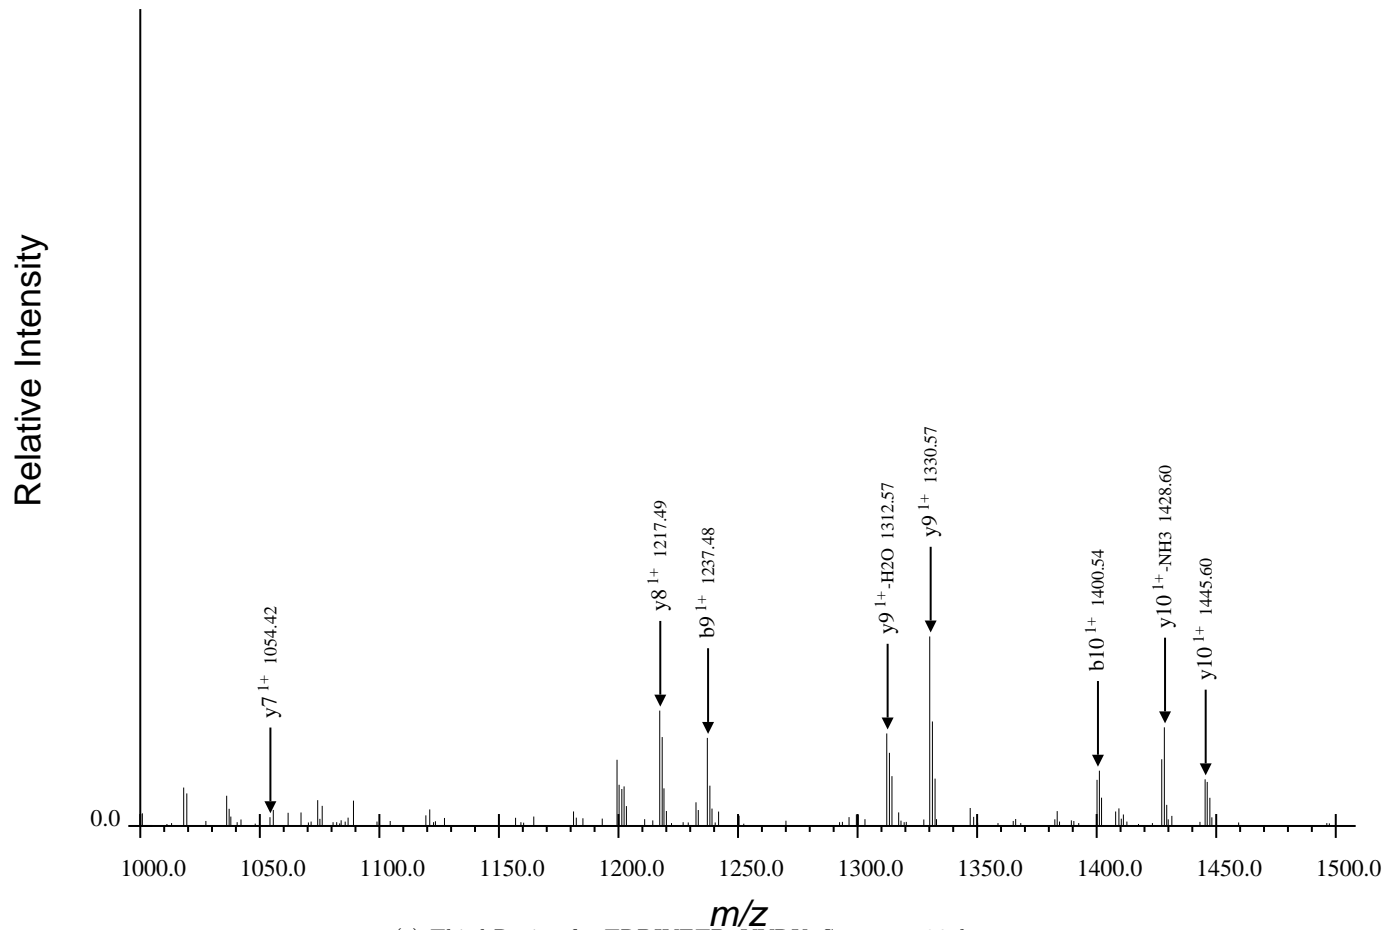

(c) Third Region for TRDIYETDpYYRK, Spectrum 36.dta

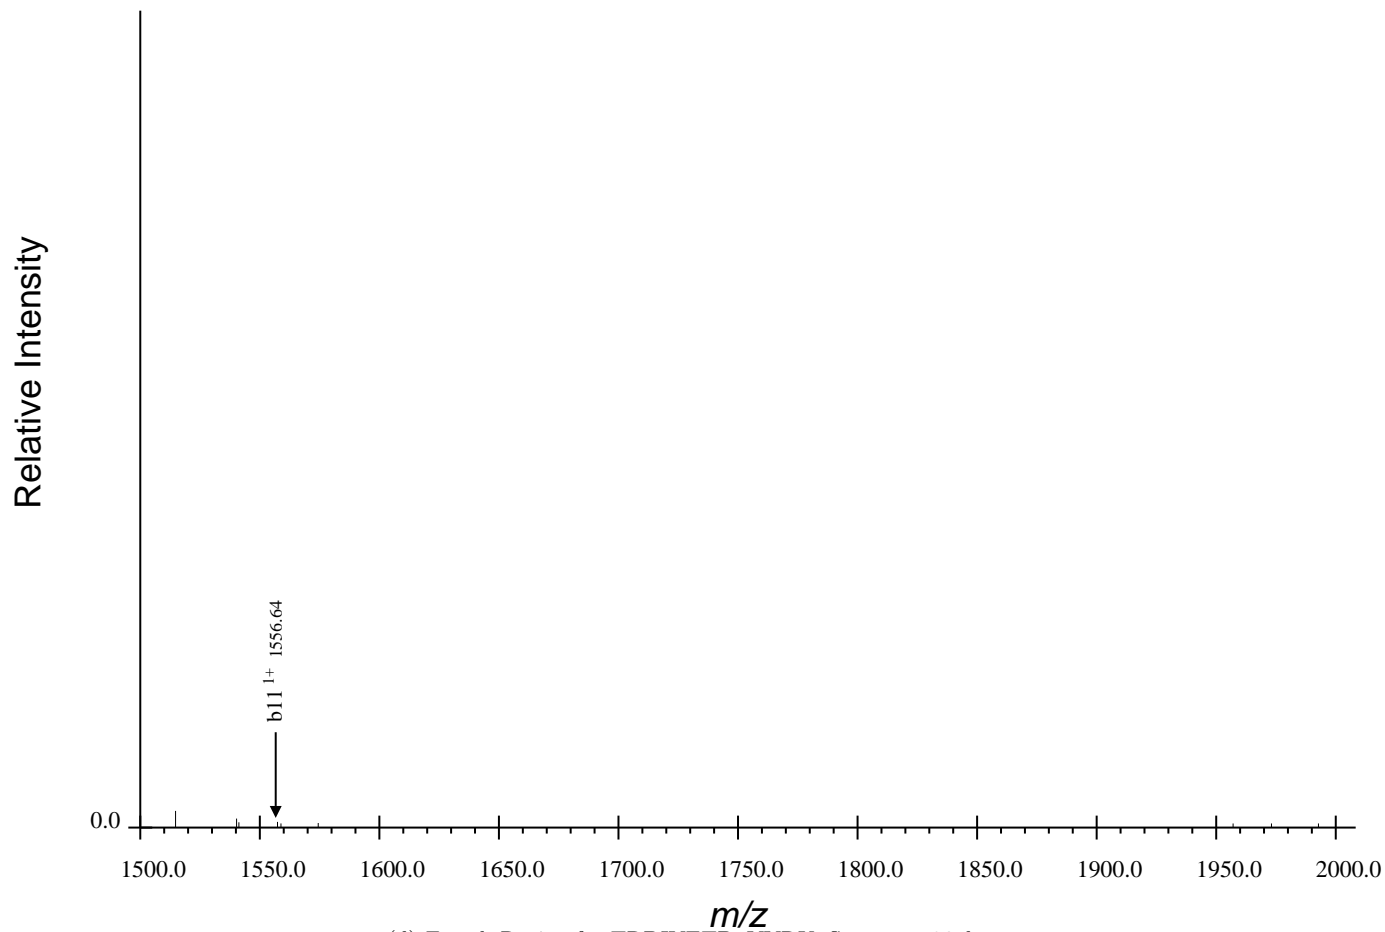

(d) Fourth Region for TRDIYETDpYYRK, Spectrum 36.dta



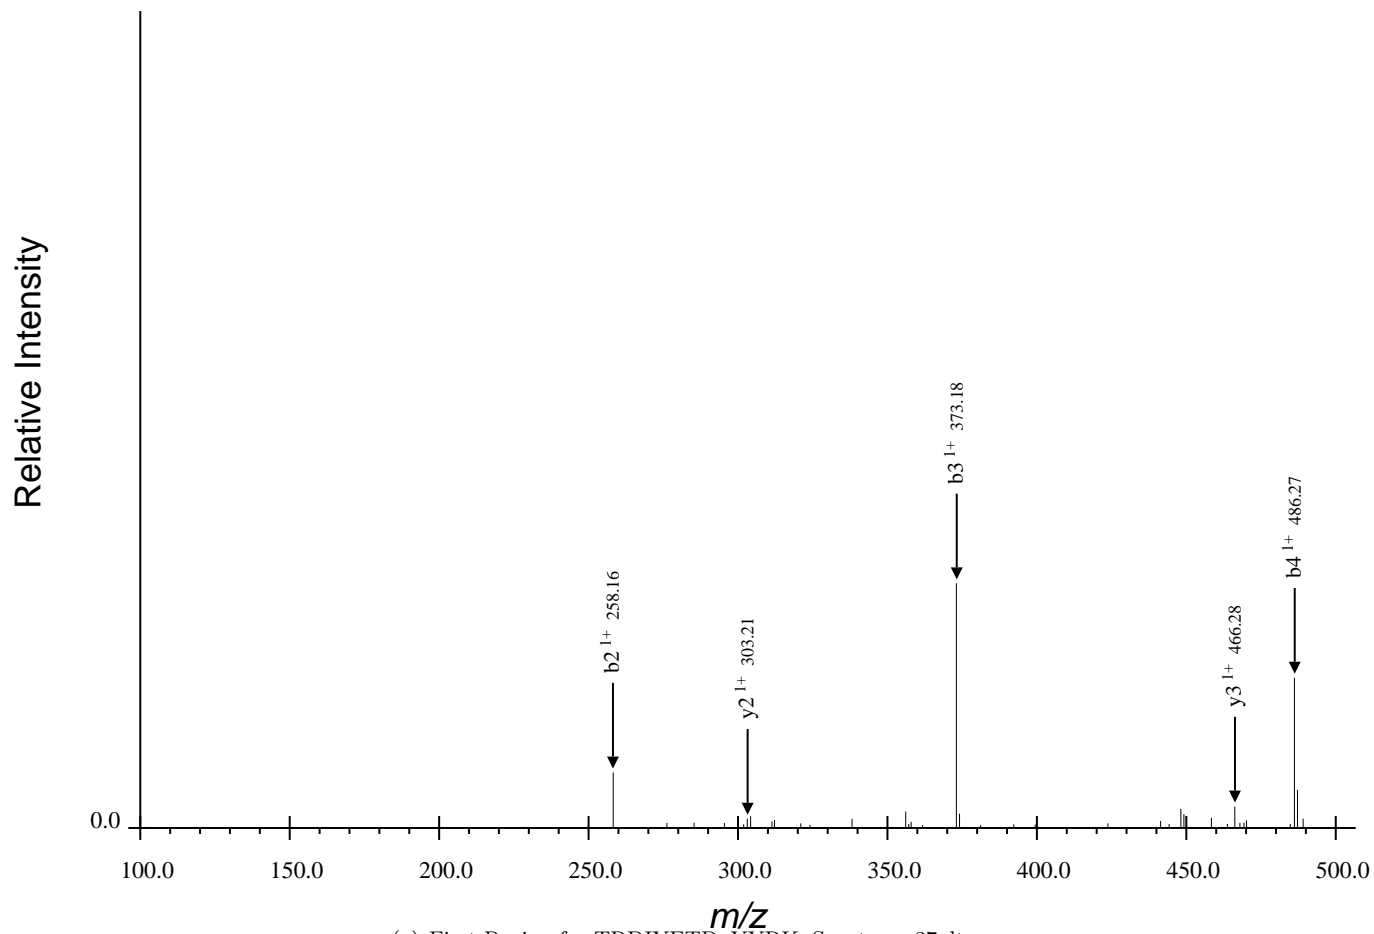

(a) First Region for TRDIYETDpYYRK, Spectrum 37.dta

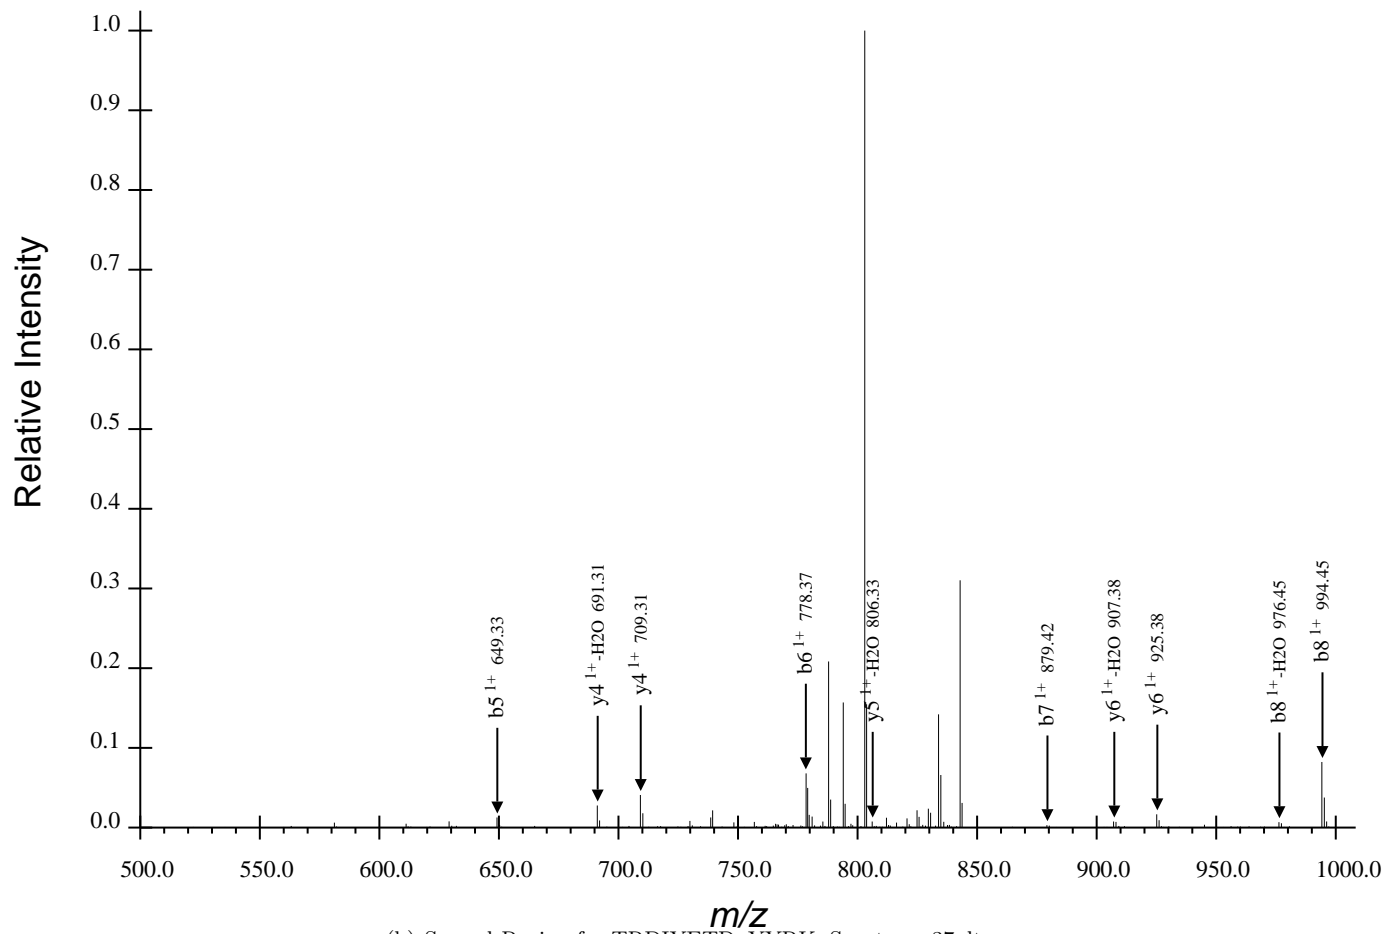

(b) Second Region for TRDIYETDpYYRK, Spectrum 37.dta

Relative Intensity

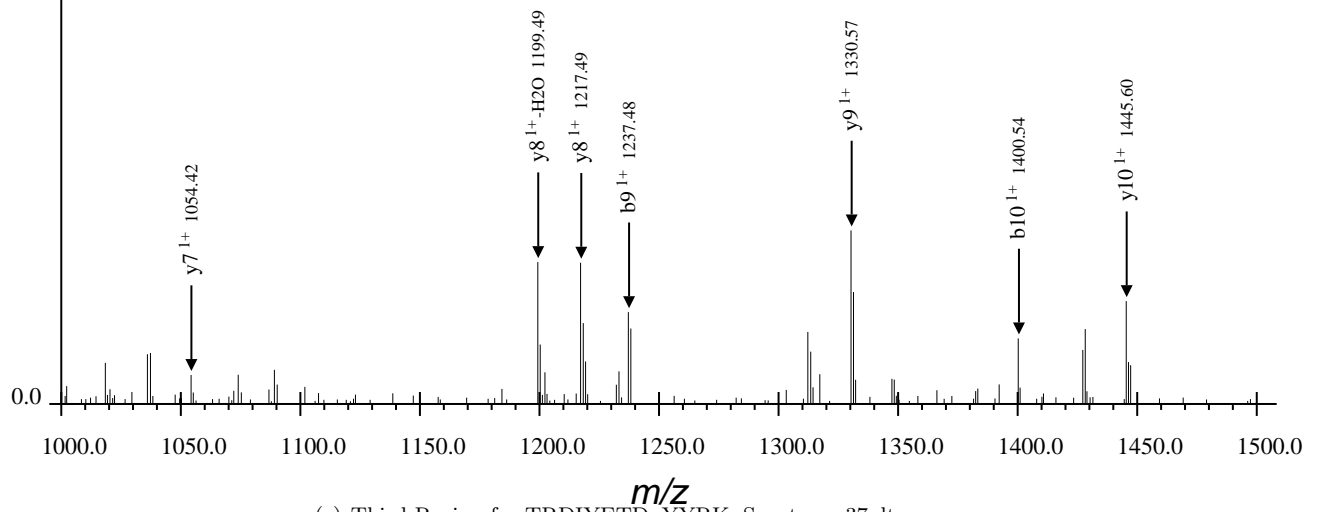

(c) Third Region for TRDIYETDpYYRK, Spectrum 37.dta

Relative Intensity

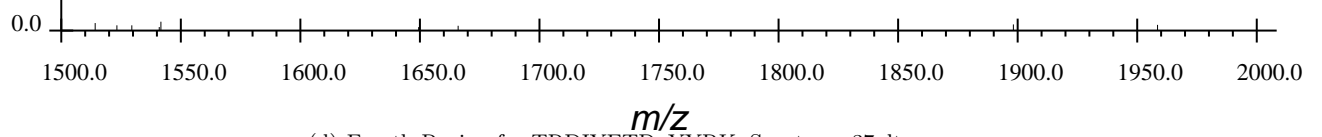

(d) Fourth Region for TRDIYETDpYYRK, Spectrum 37.dta

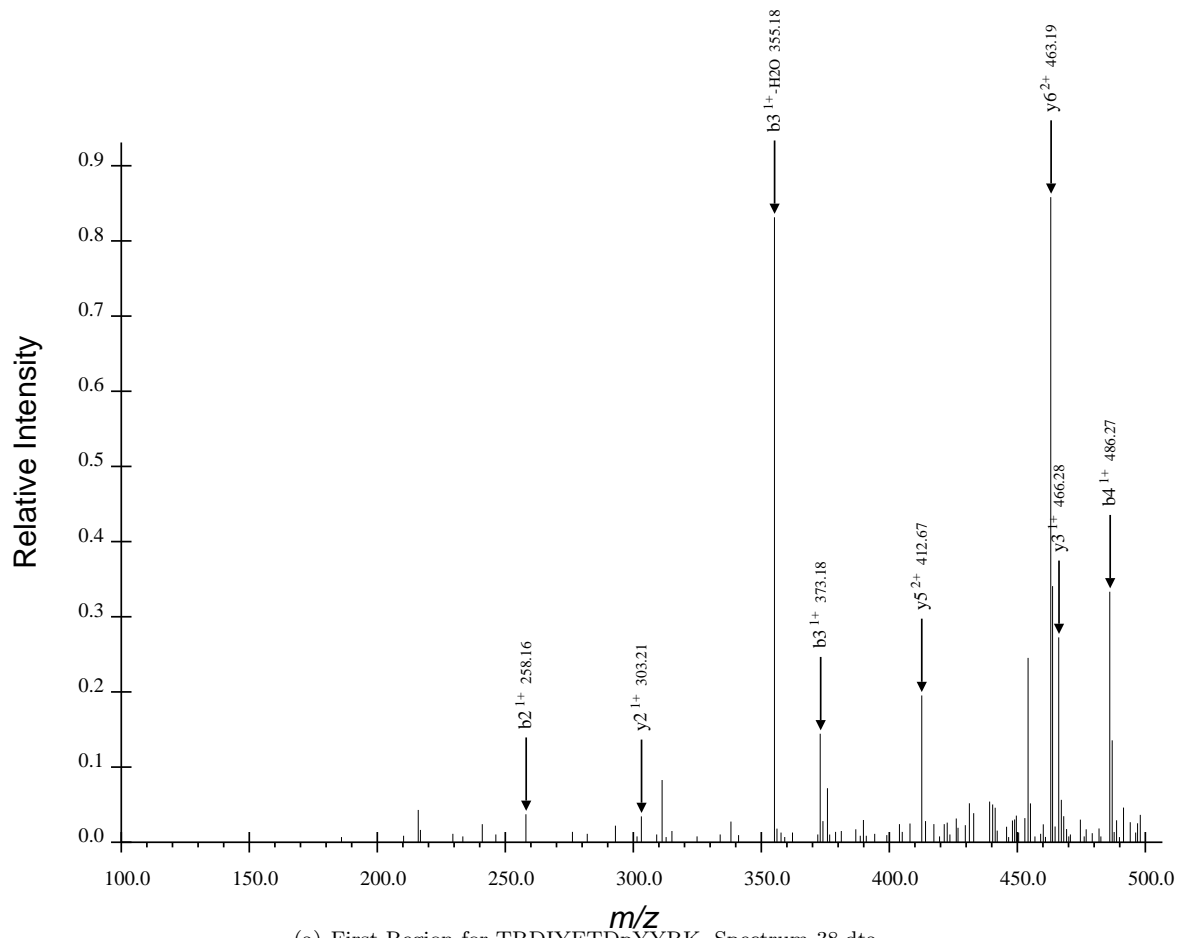

(a) First Region for TRDIYETDpYYRK, Spectrum 38.dta

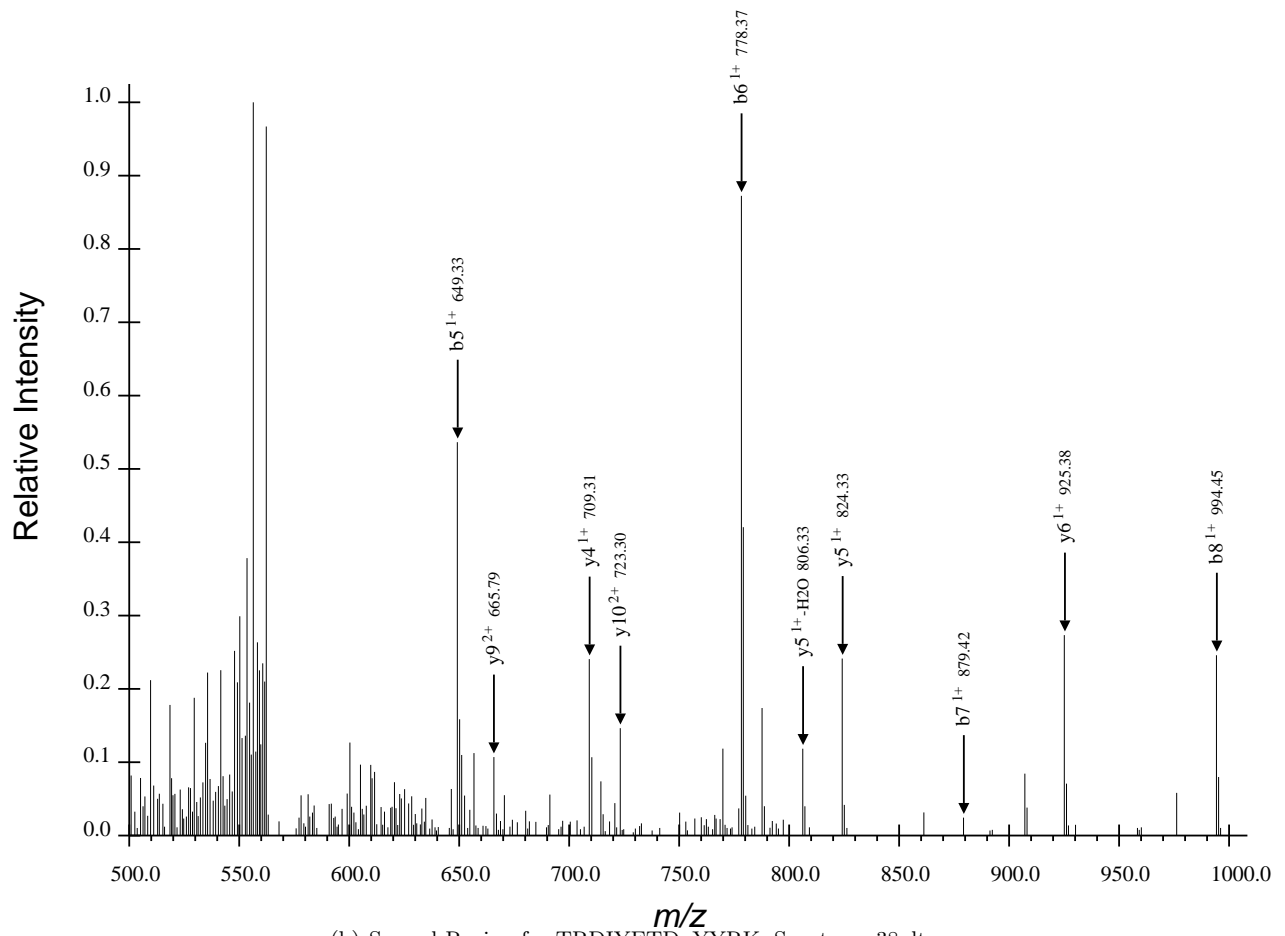

(b) Second Region for TRDIYETDpYYRK, Spectrum 38.dta

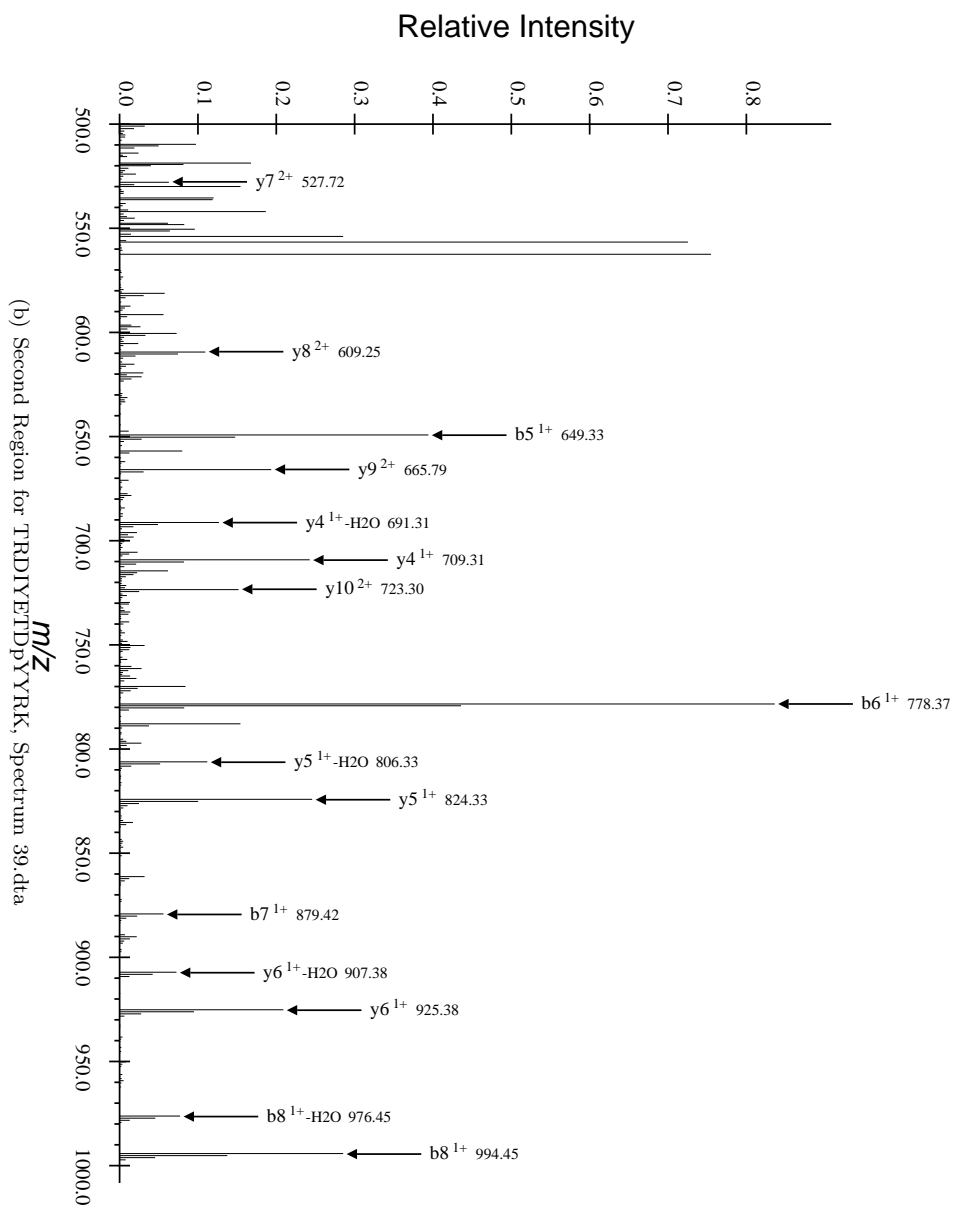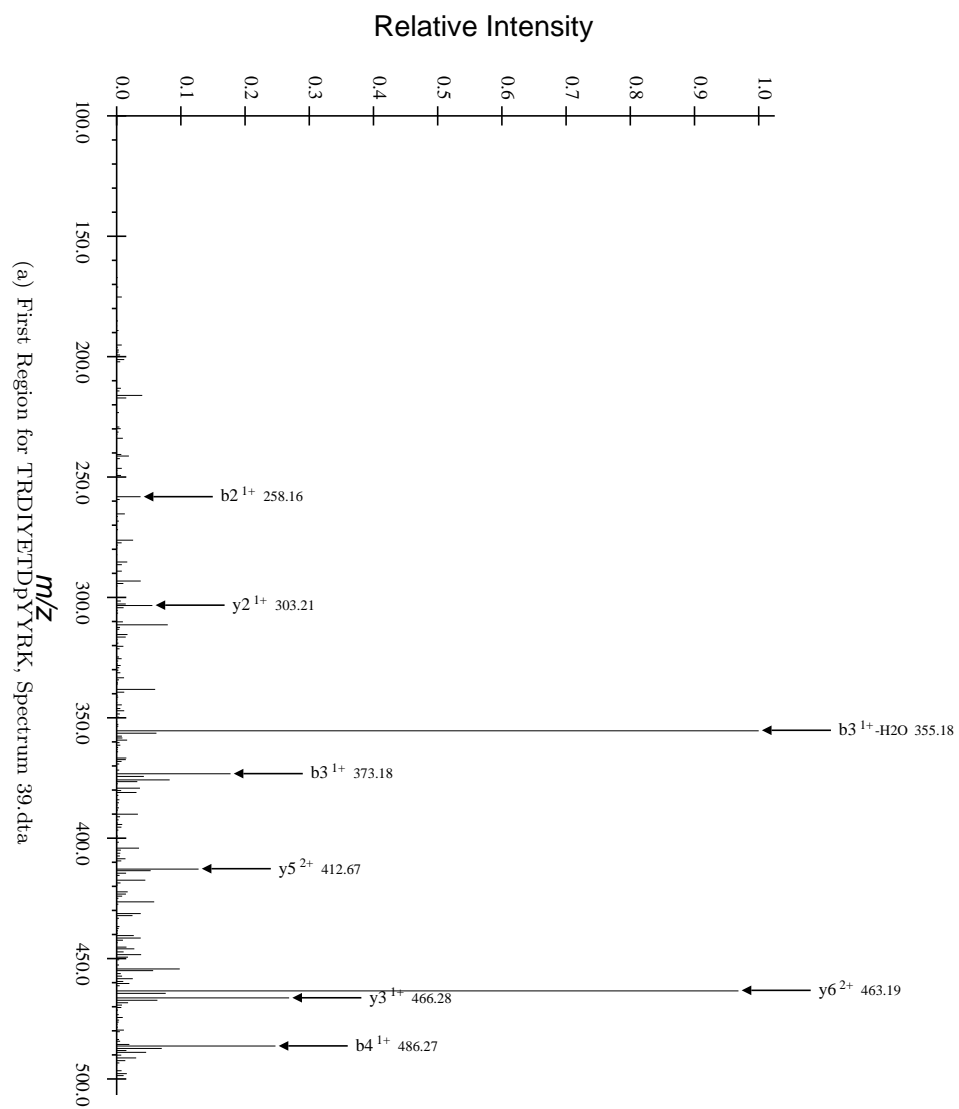

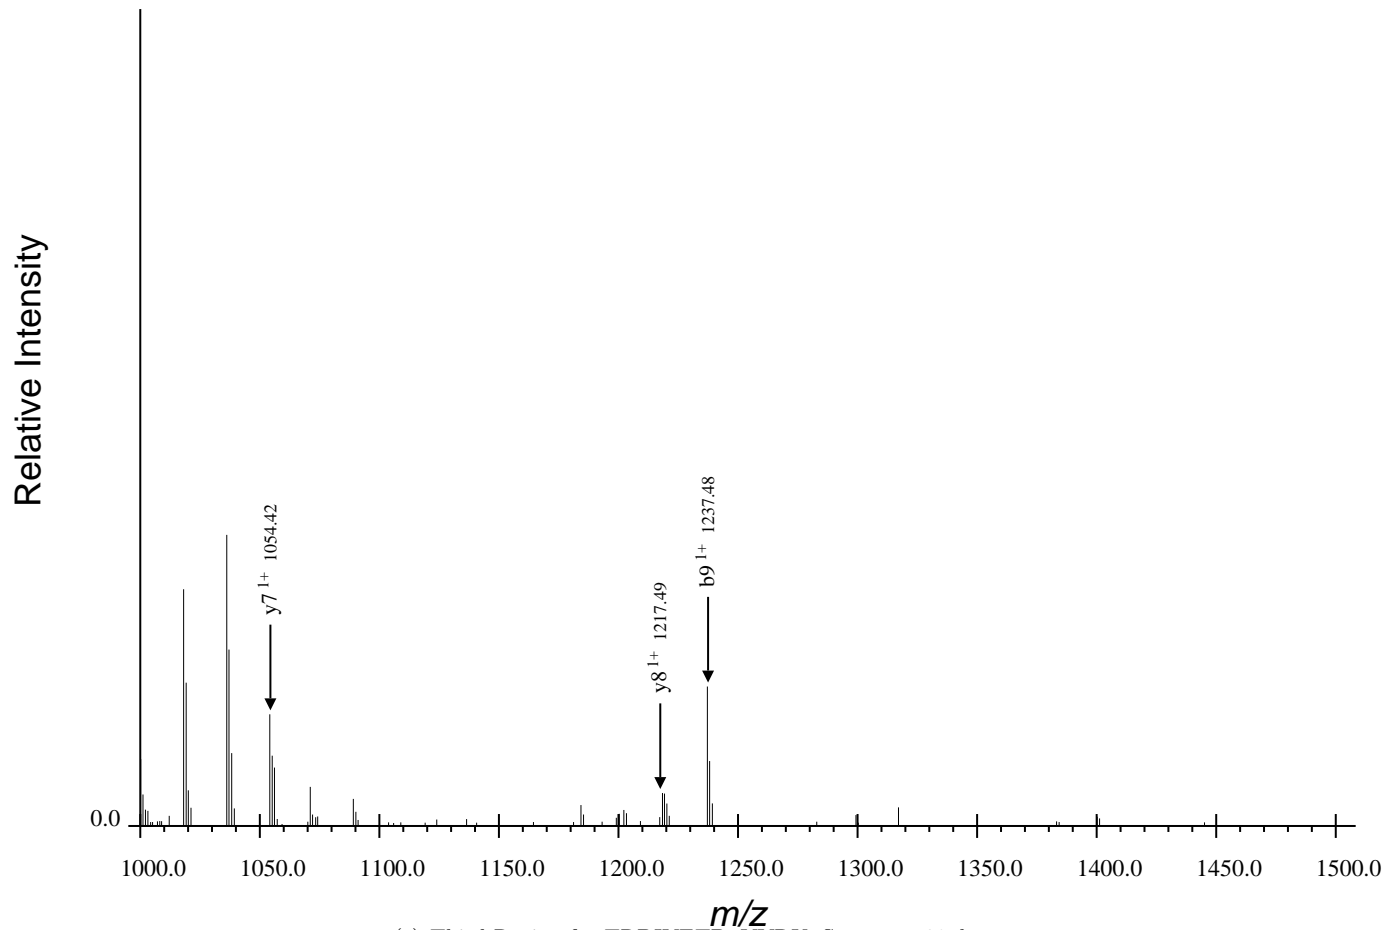

(c) Third Region for TRDIYETDpYYRK, Spectrum 39.dta

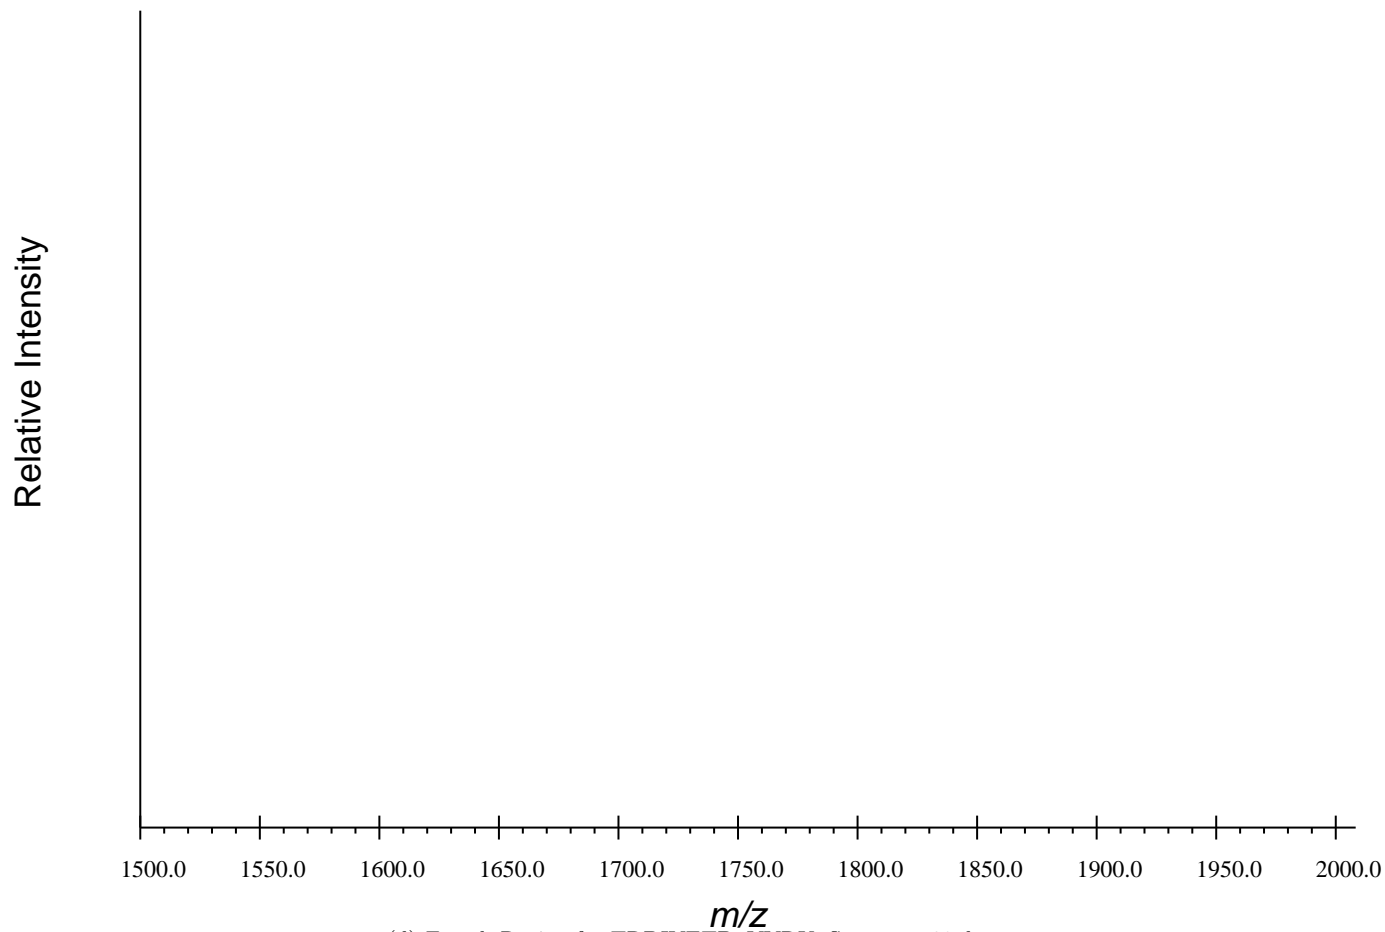

(d) Fourth Region for TRDIYETDpYYRK, Spectrum 39.dta

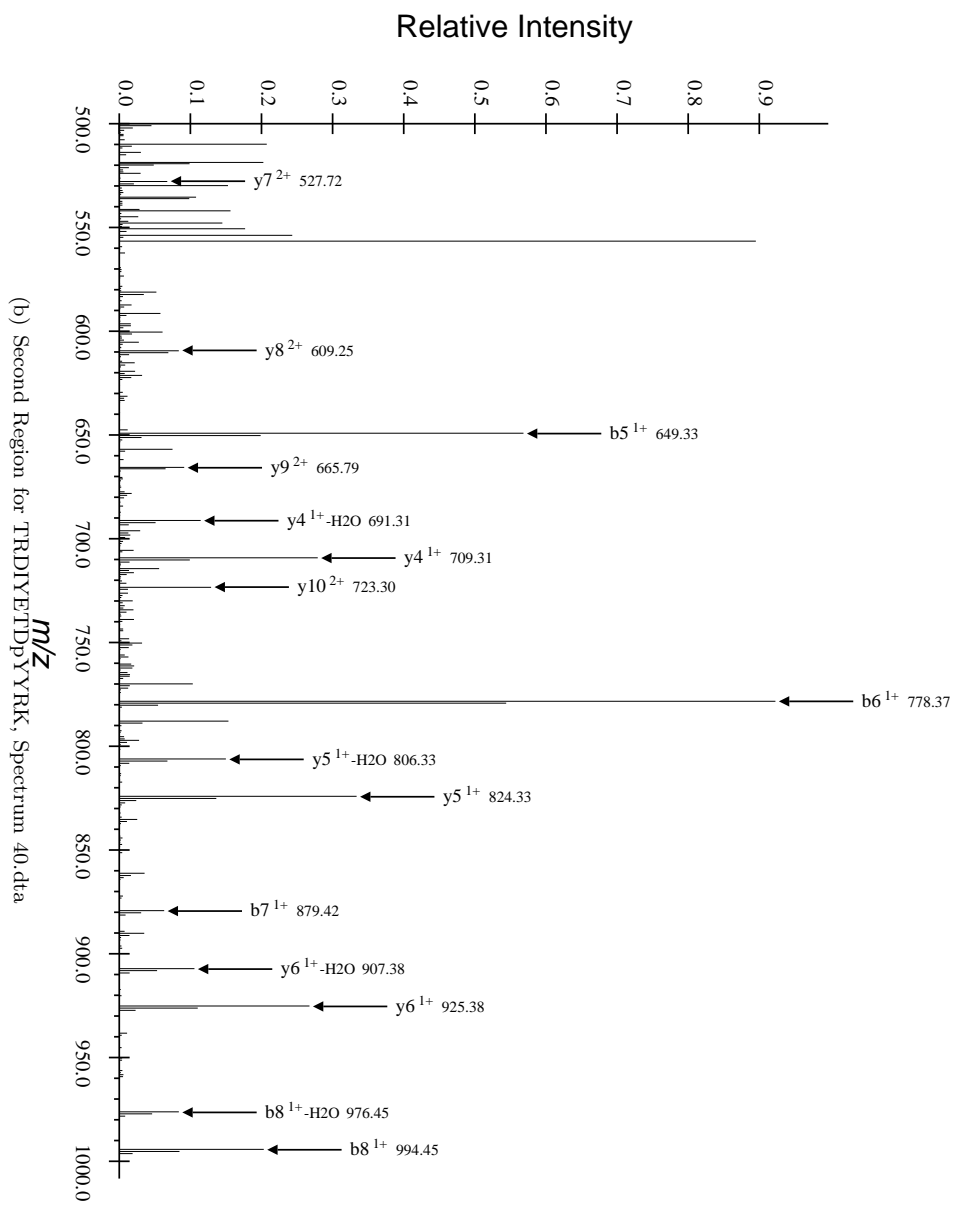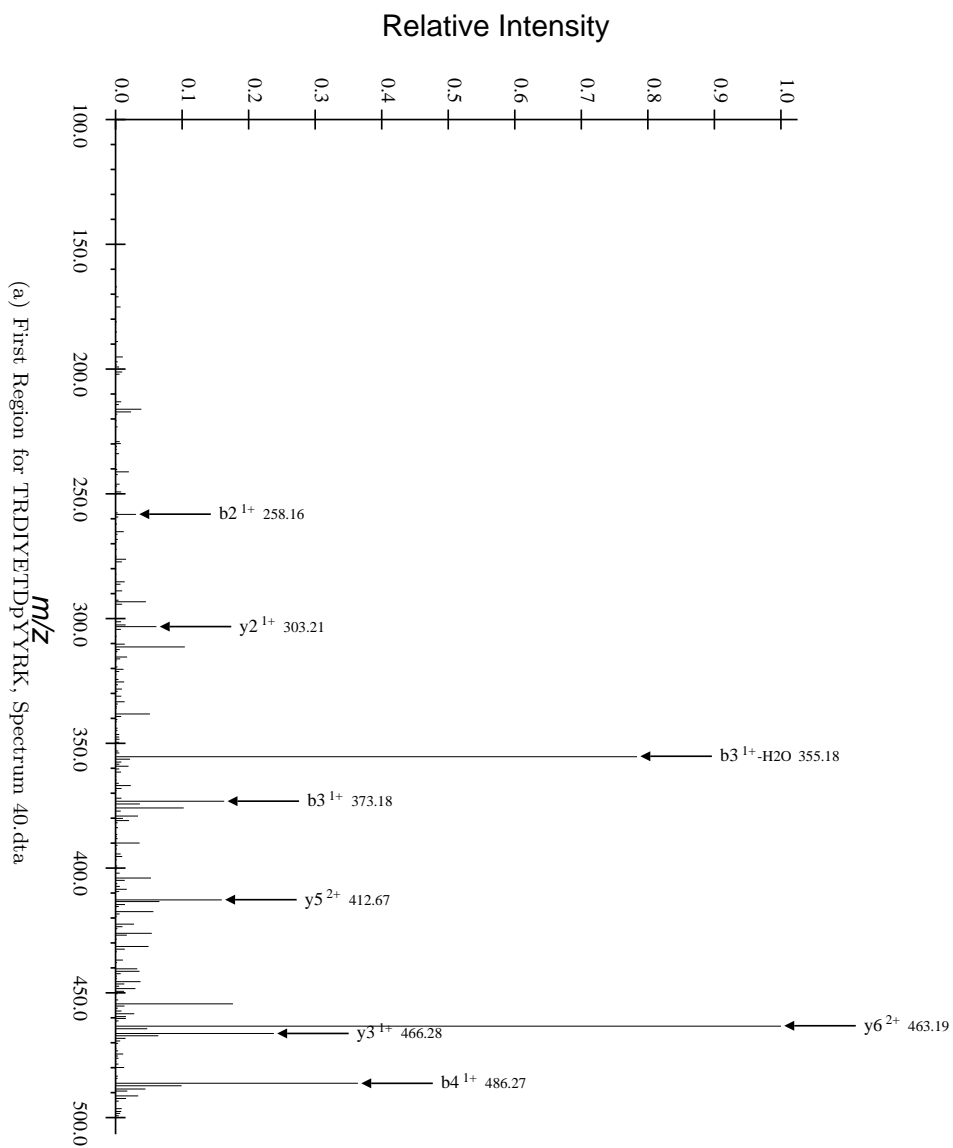

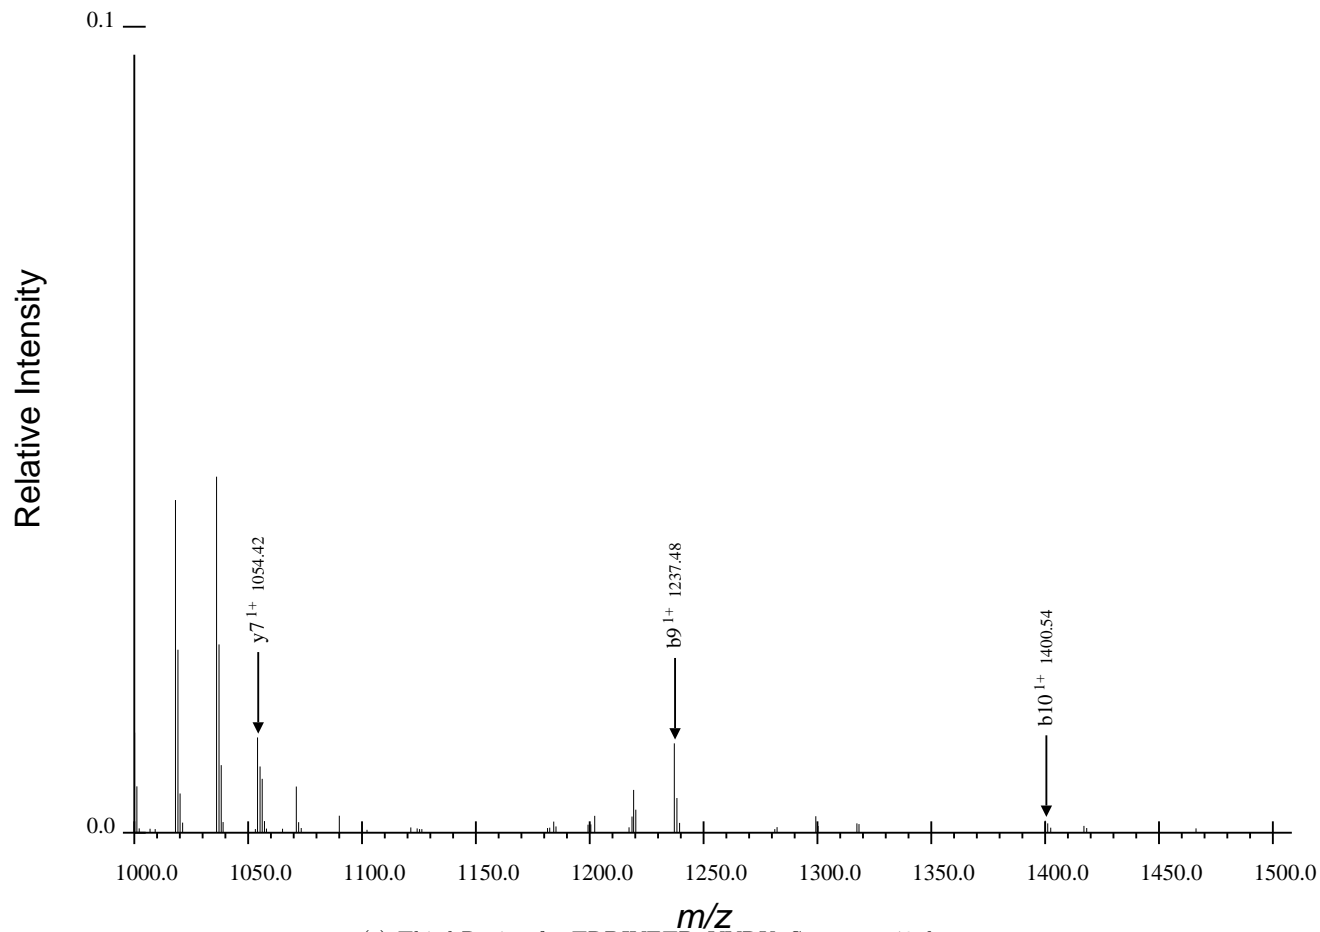

(c) Third Region for TRDIYETDpYYRK, Spectrum 40.dta

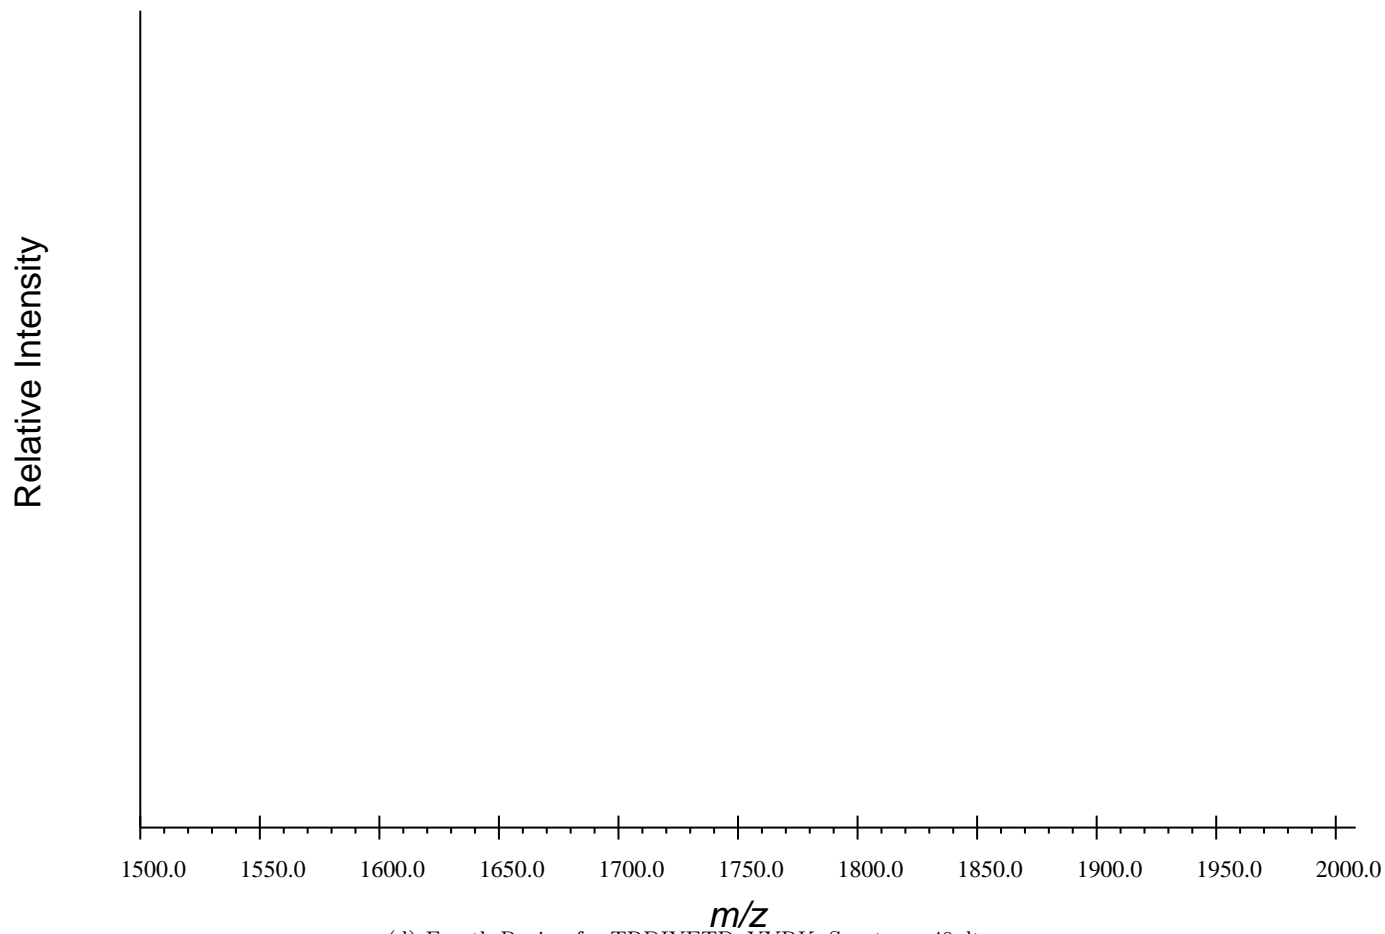

(d) Fourth Region for TRDIYETDpYYRK, Spectrum 40.dta

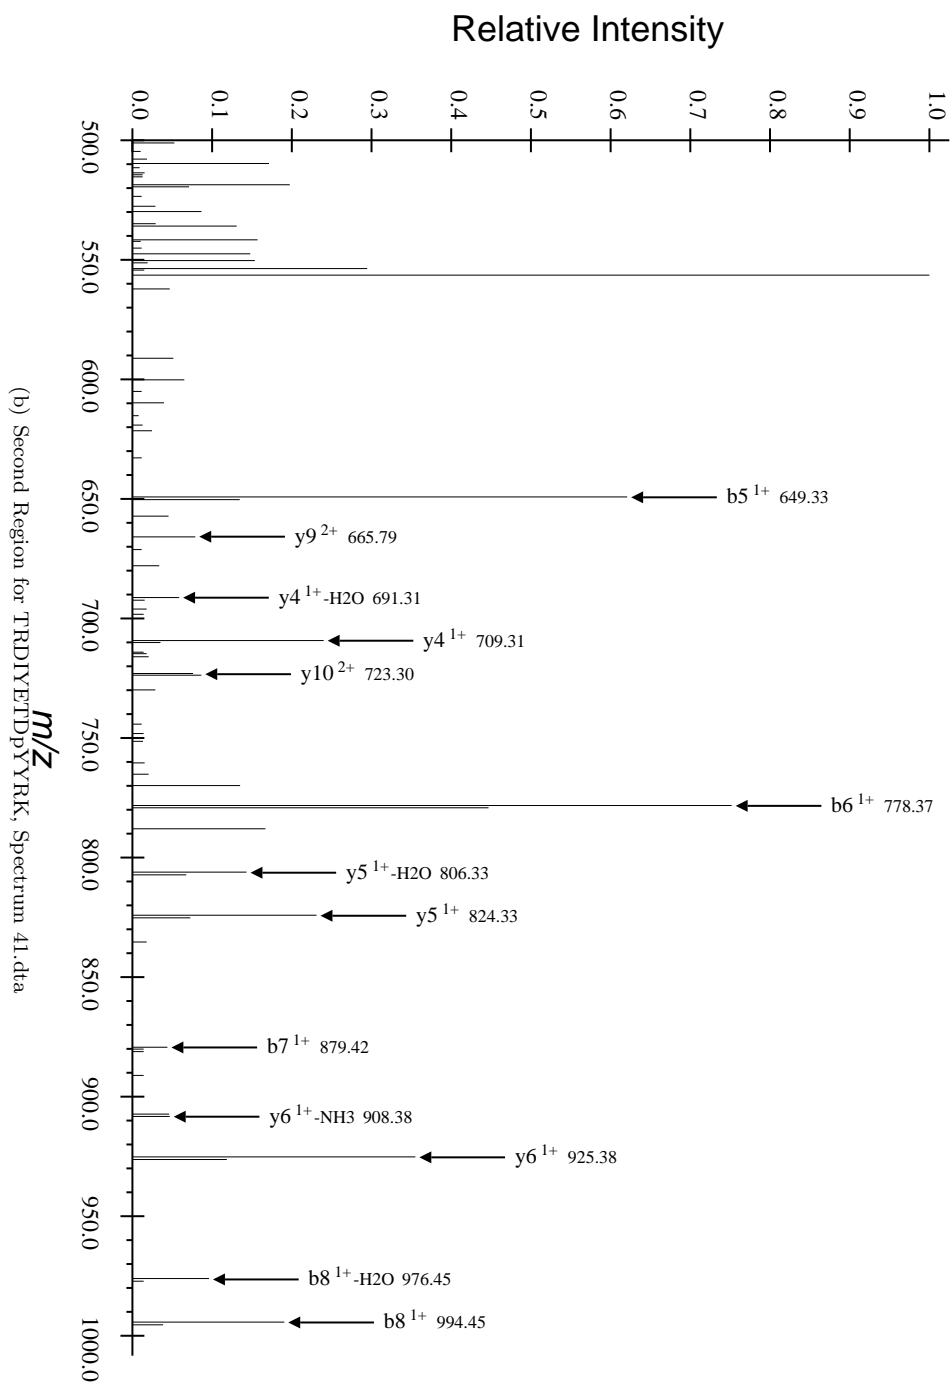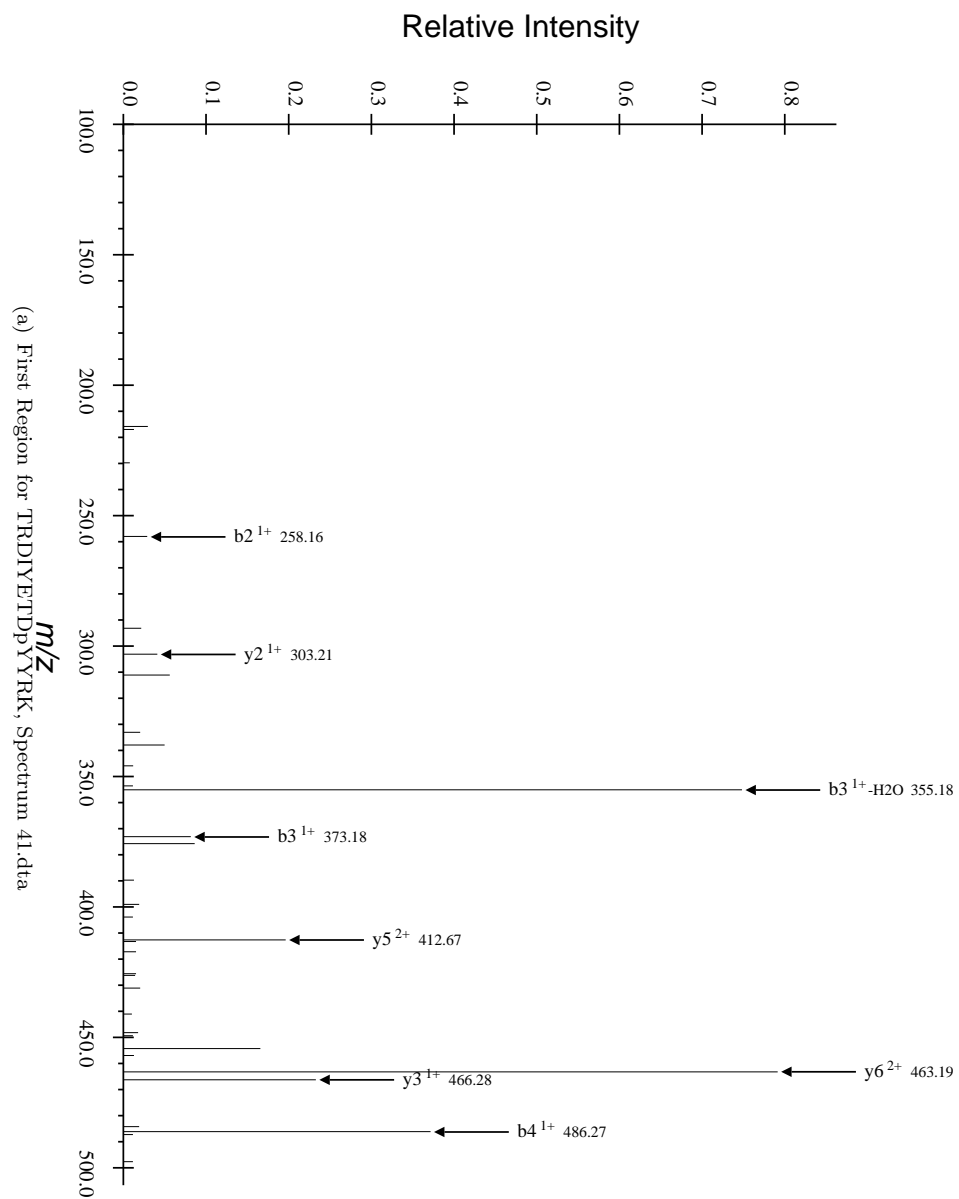



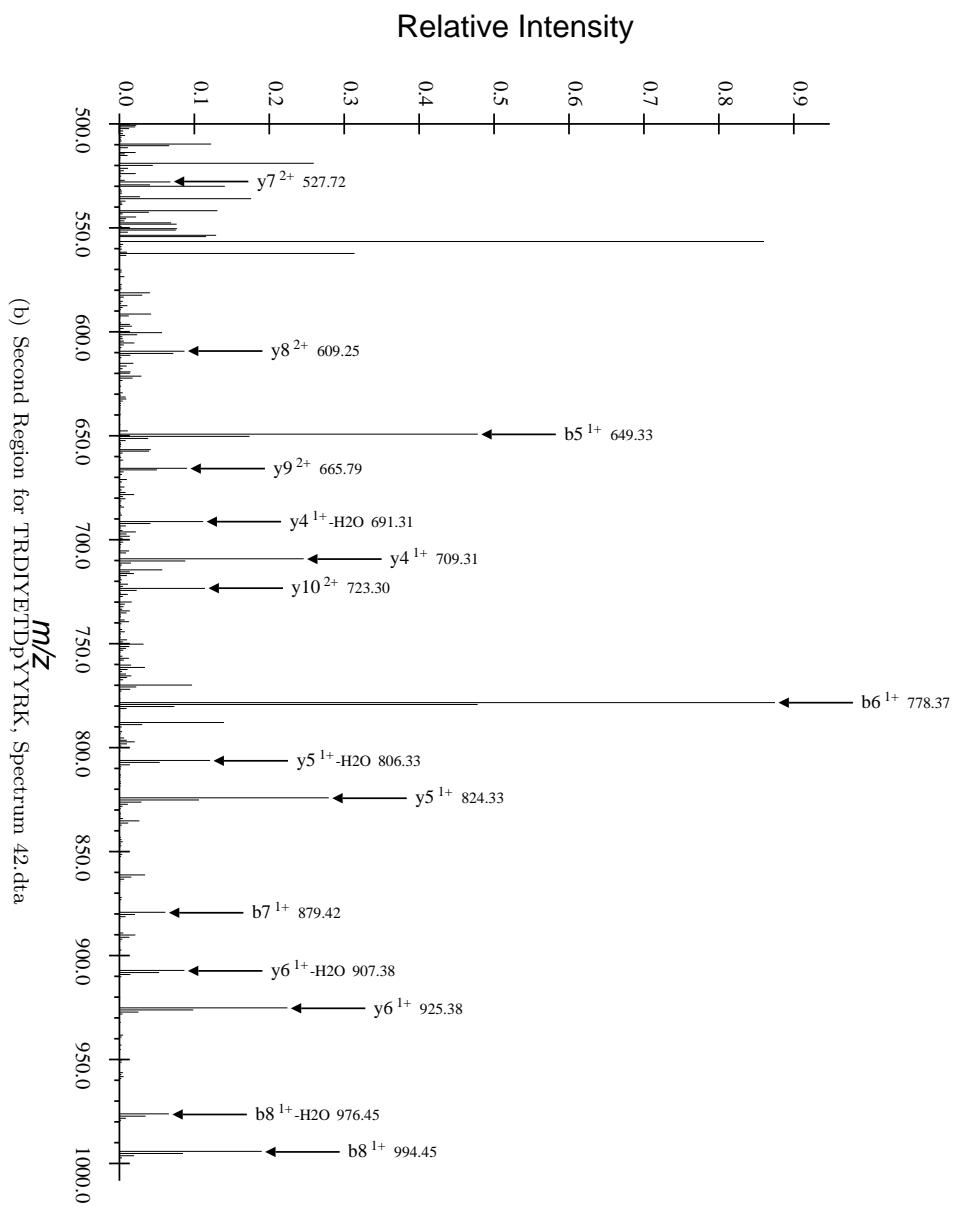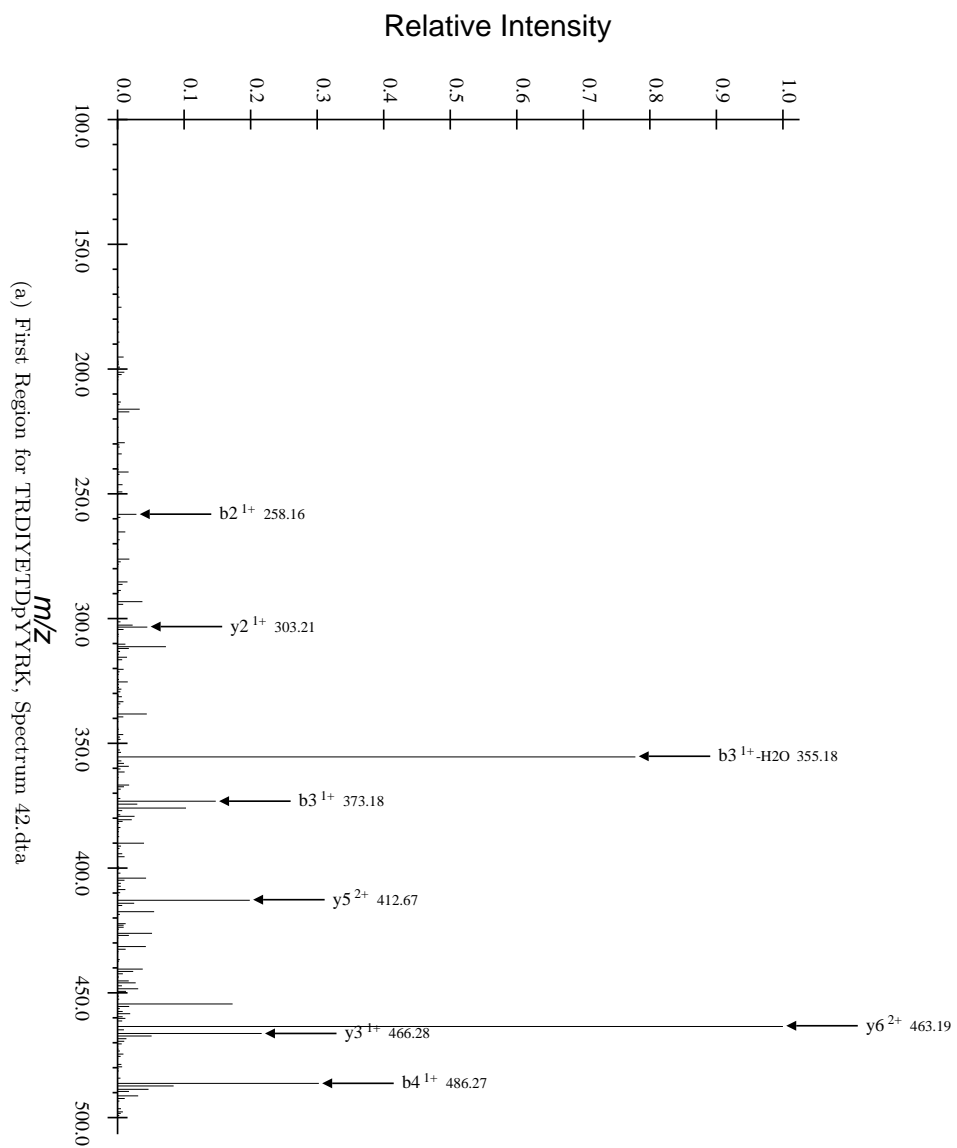

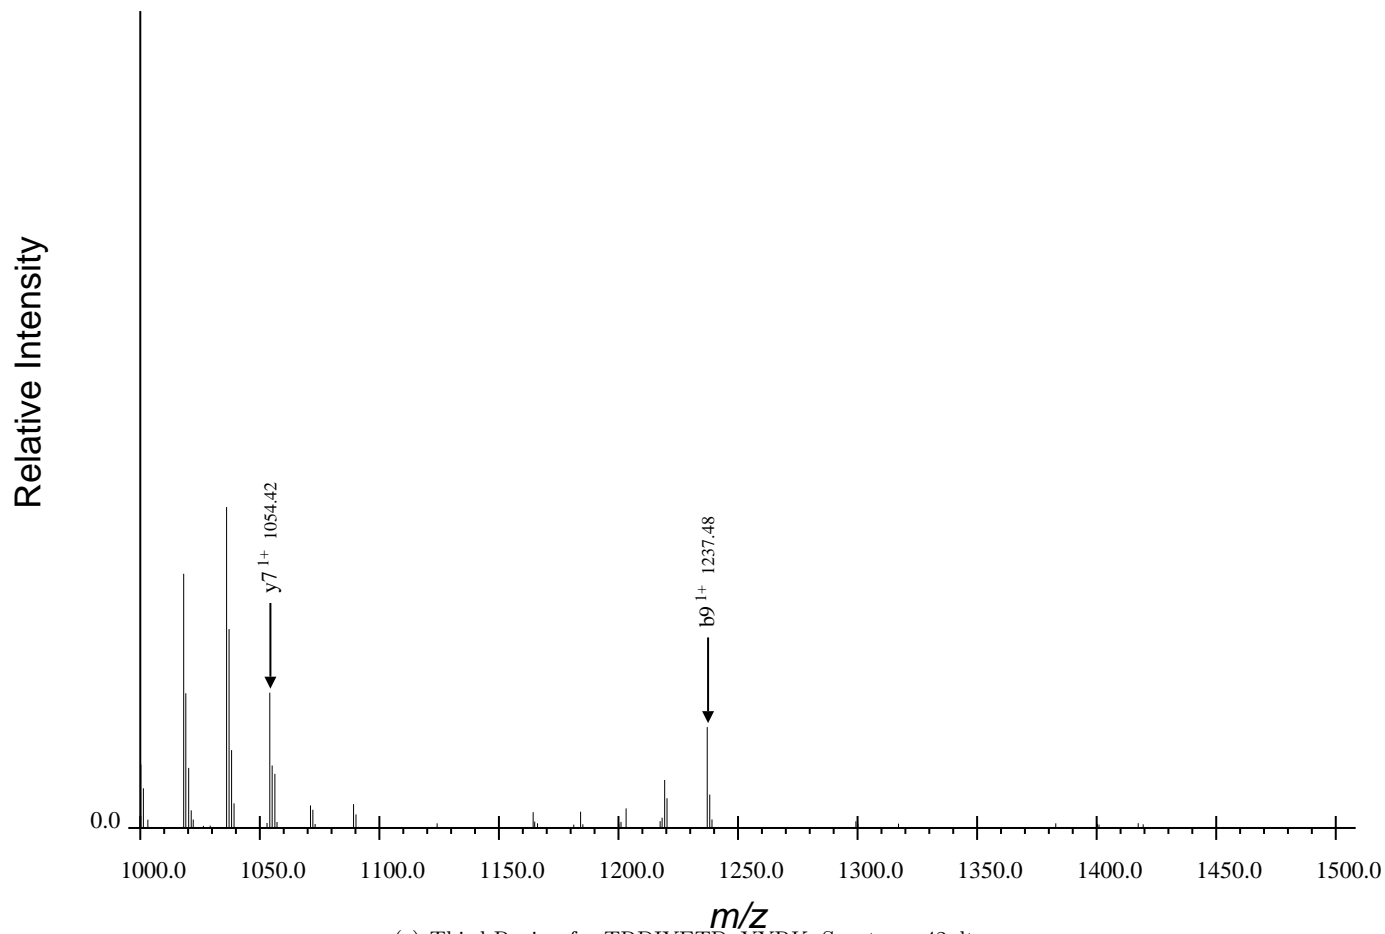

(c) Third Region for TRDIYETDpYYRK, Spectrum 42.dta

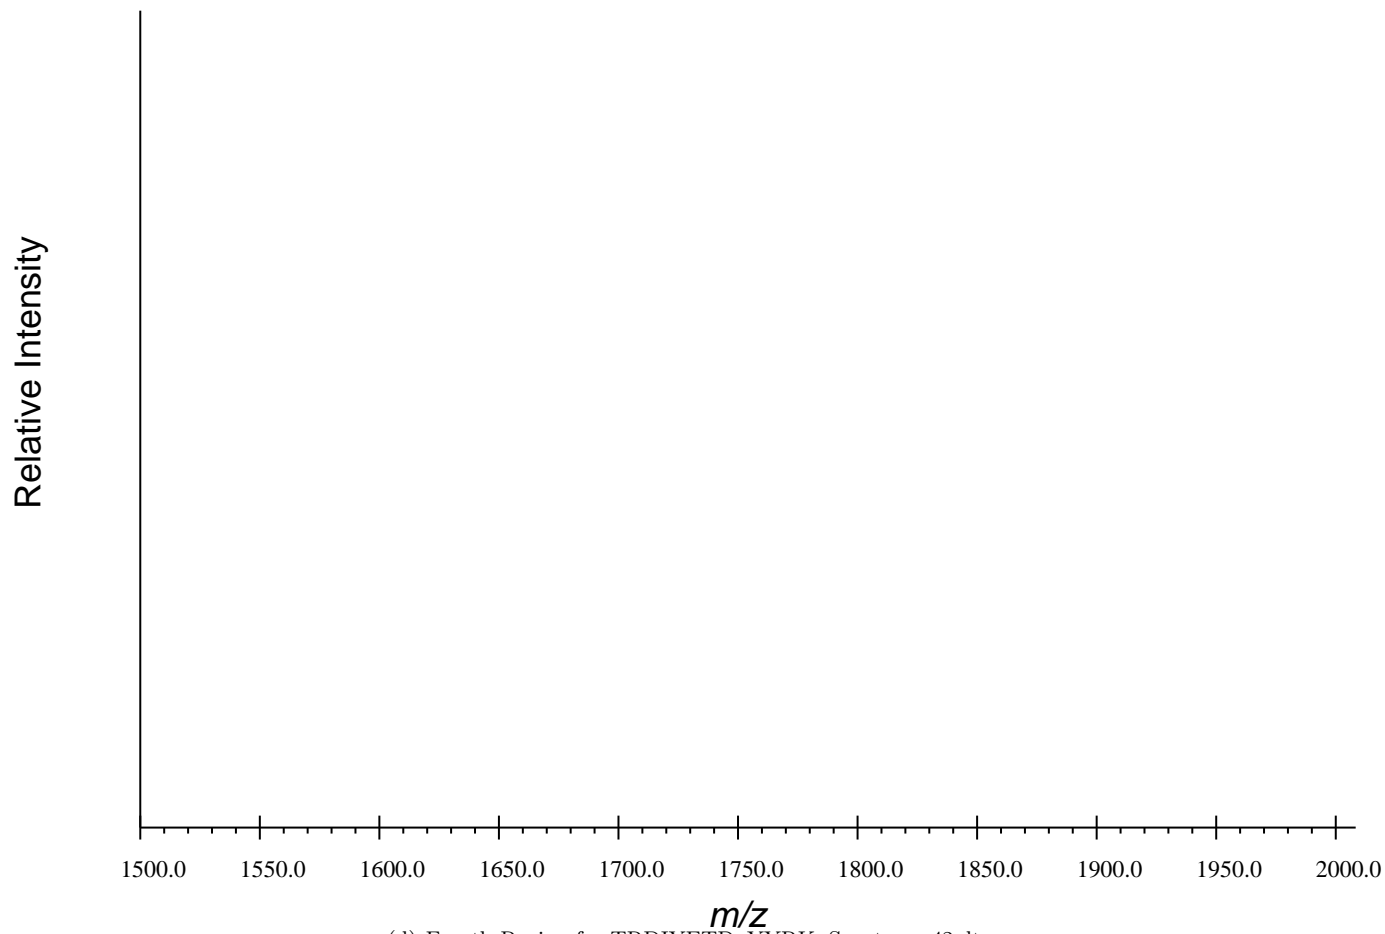

(d) Fourth Region for TRDIYETDpYYRK, Spectrum 42.dta

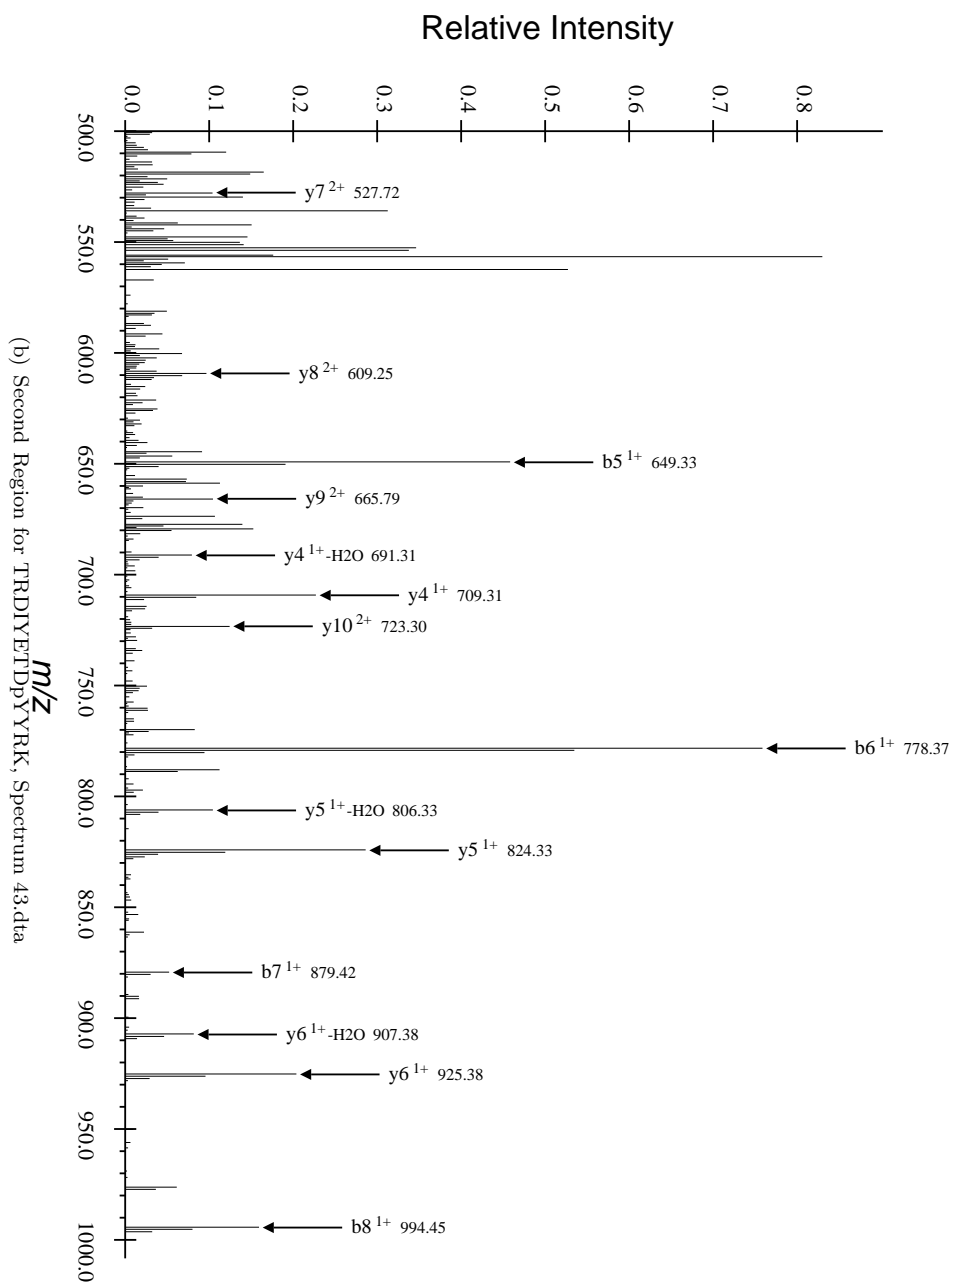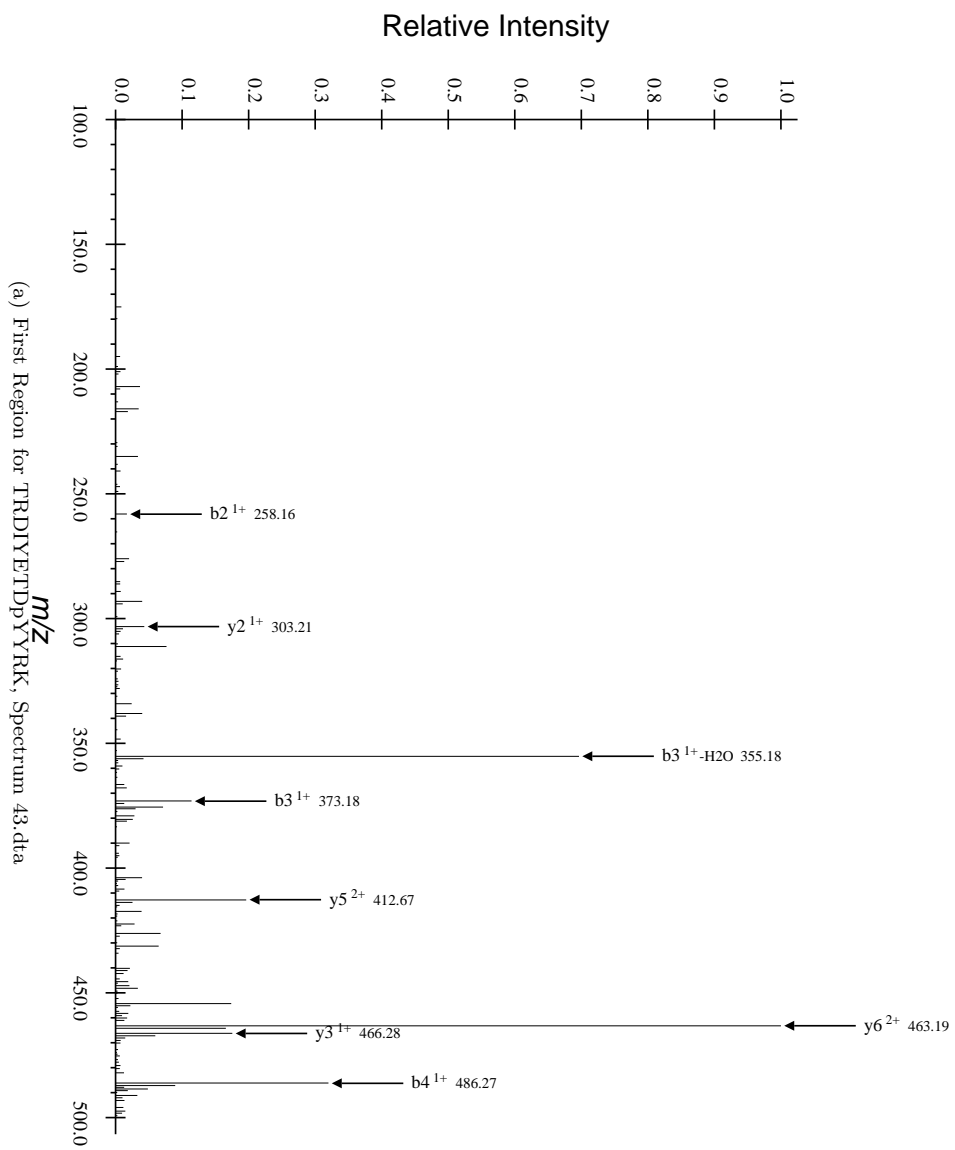

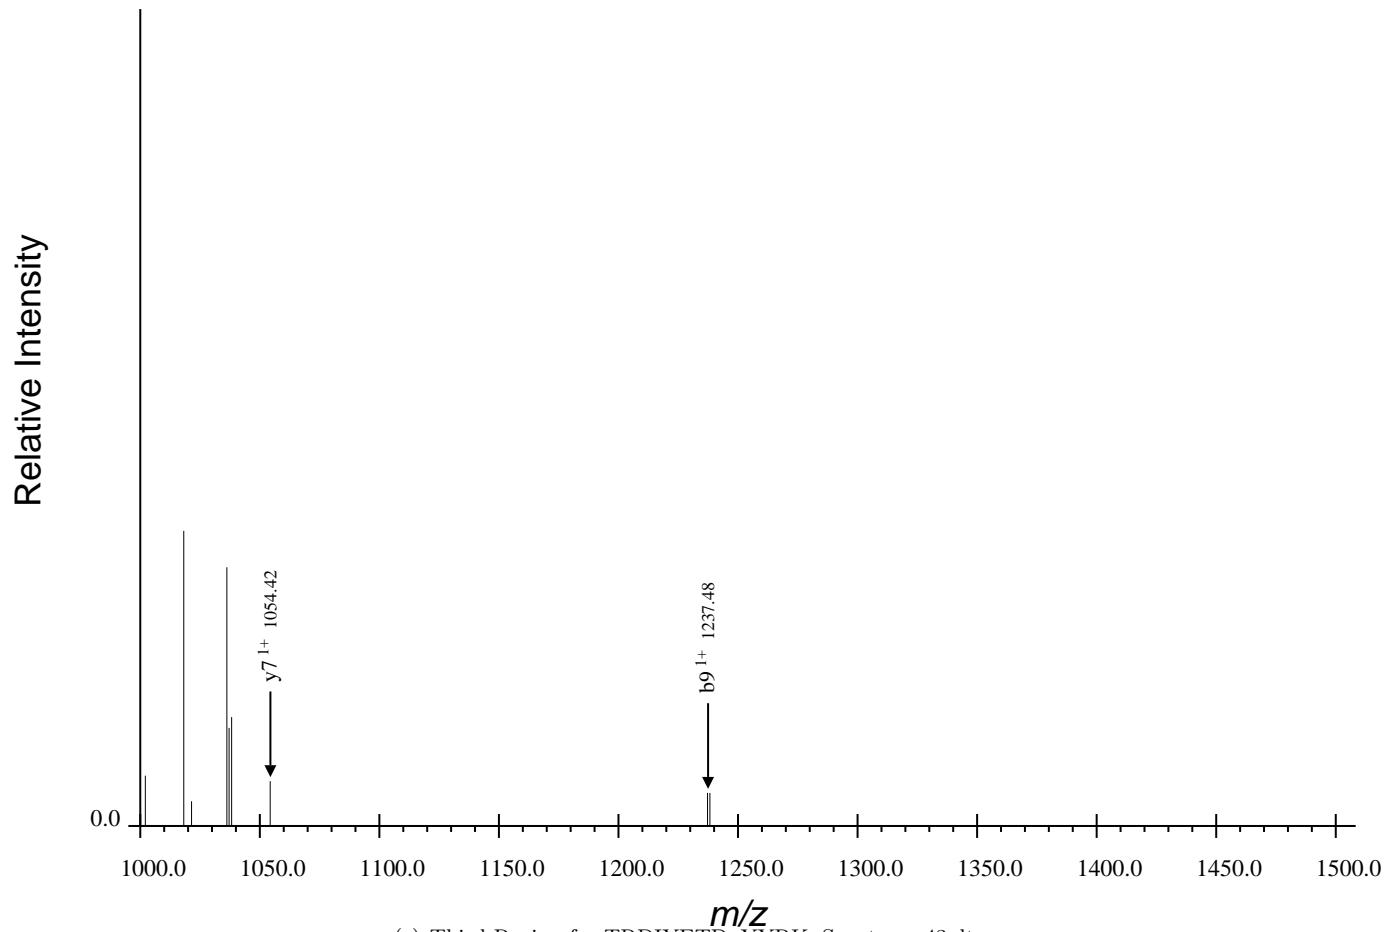

(c) Third Region for TRDIYETDpYYRK, Spectrum 43.dta

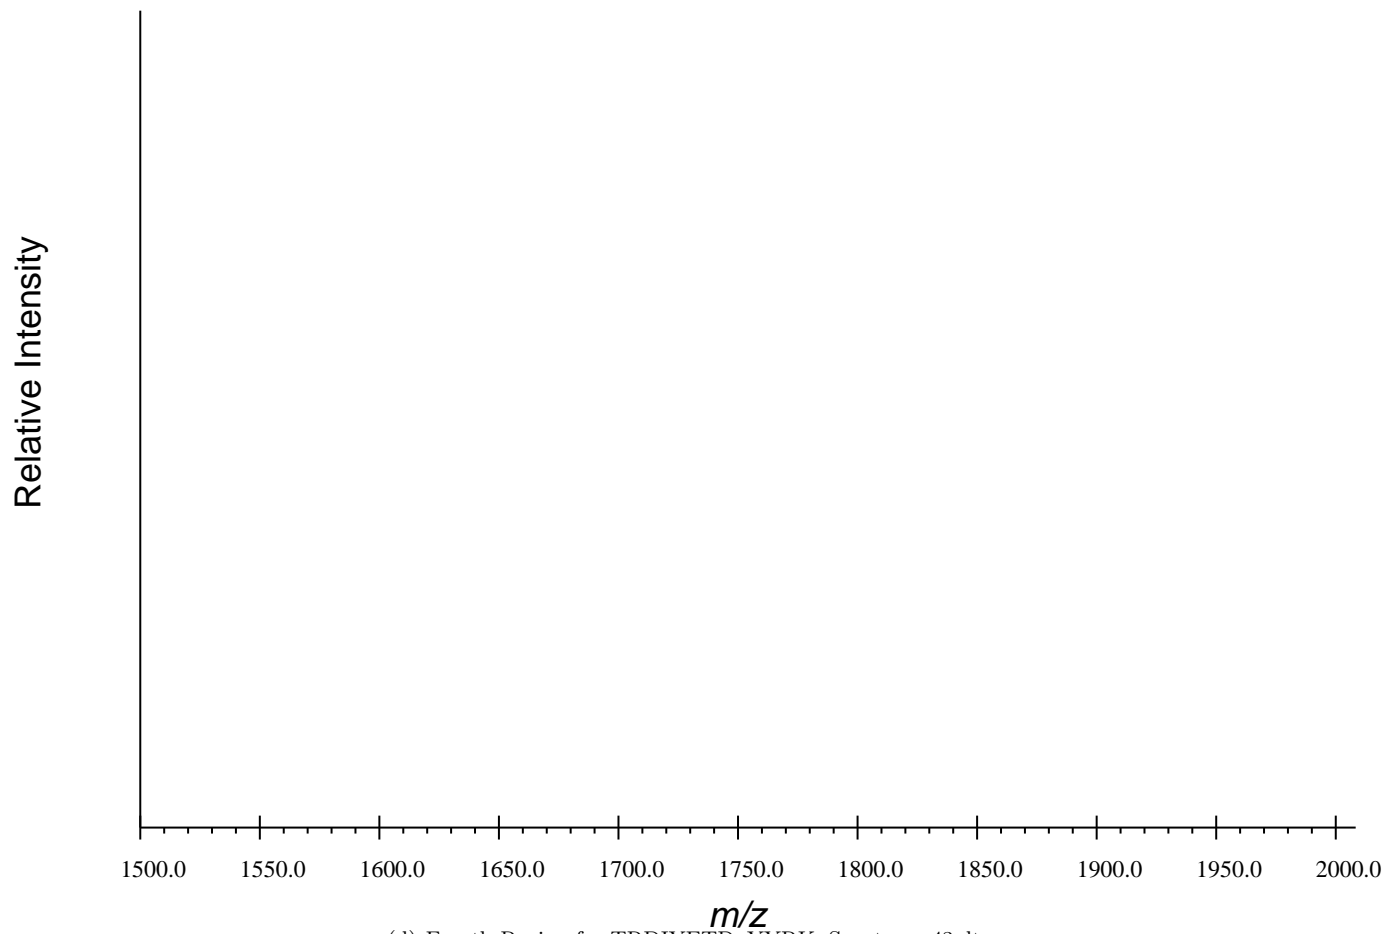

(d) Fourth Region for TRDIYETDpYYRK, Spectrum 43.dta

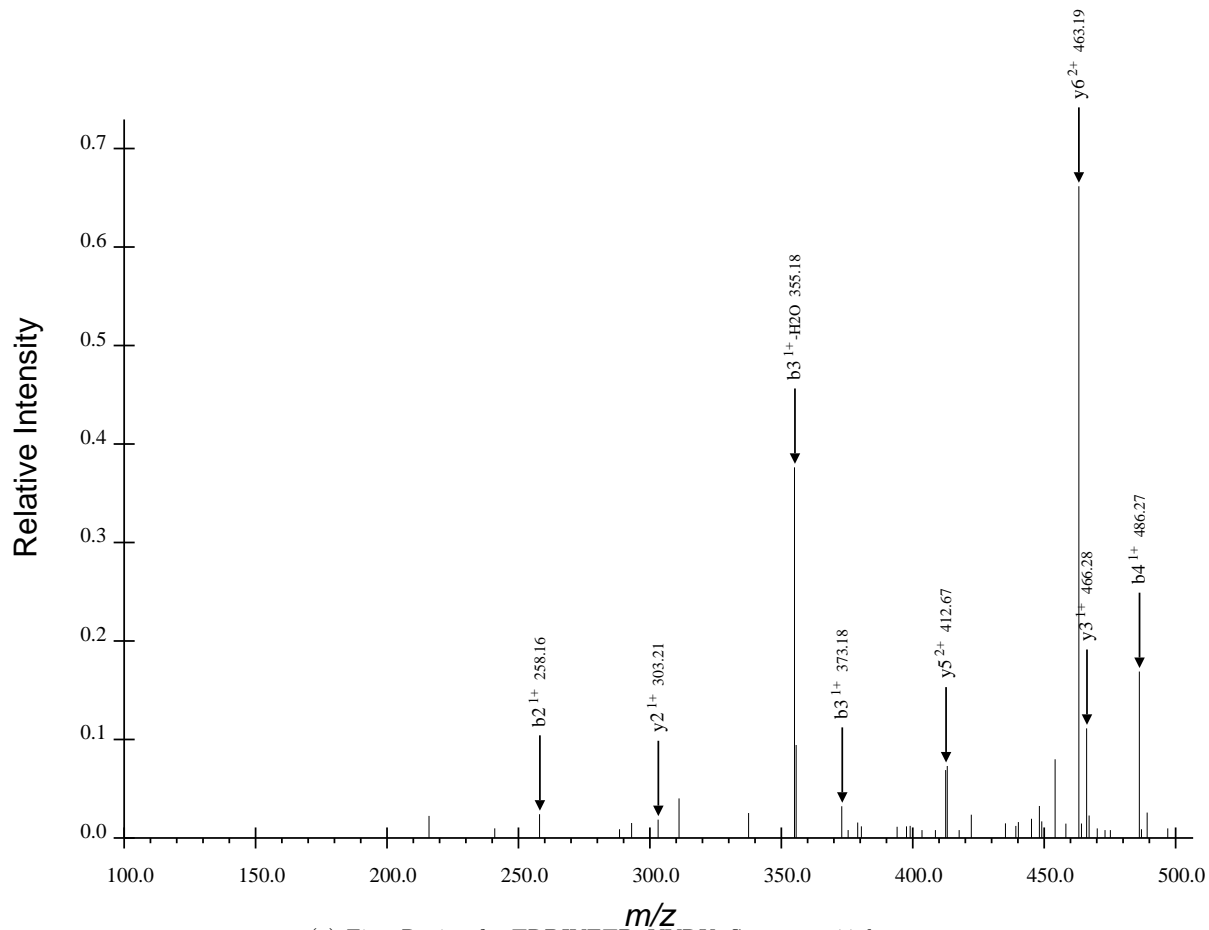

(a) First Region for TRDIYETDpYYRK, Spectrum 44.dta

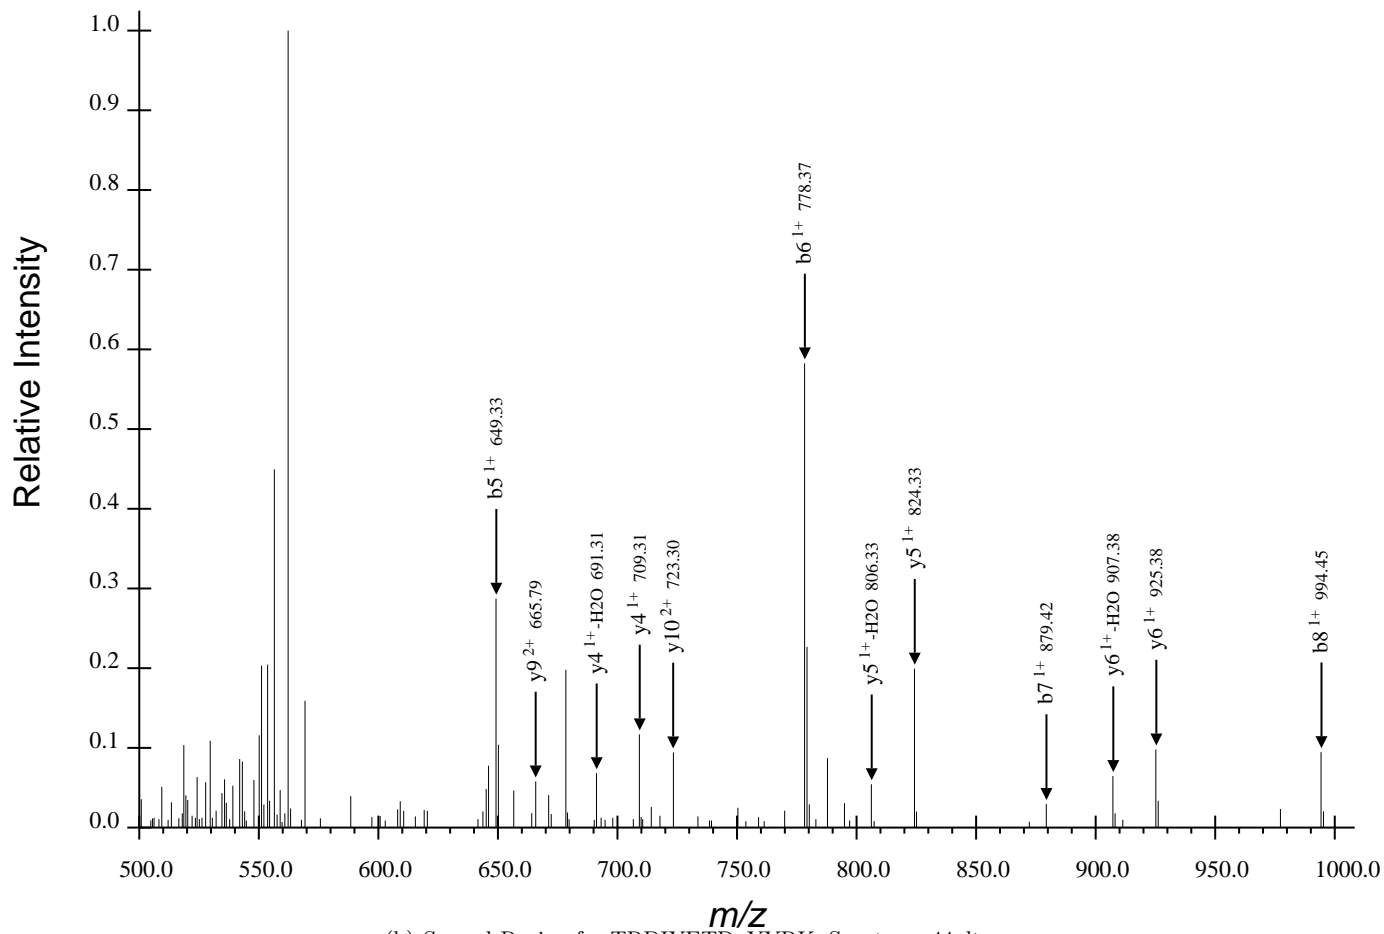

(b) Second Region for TRDIYETDpYYRK, Spectrum 44.dta

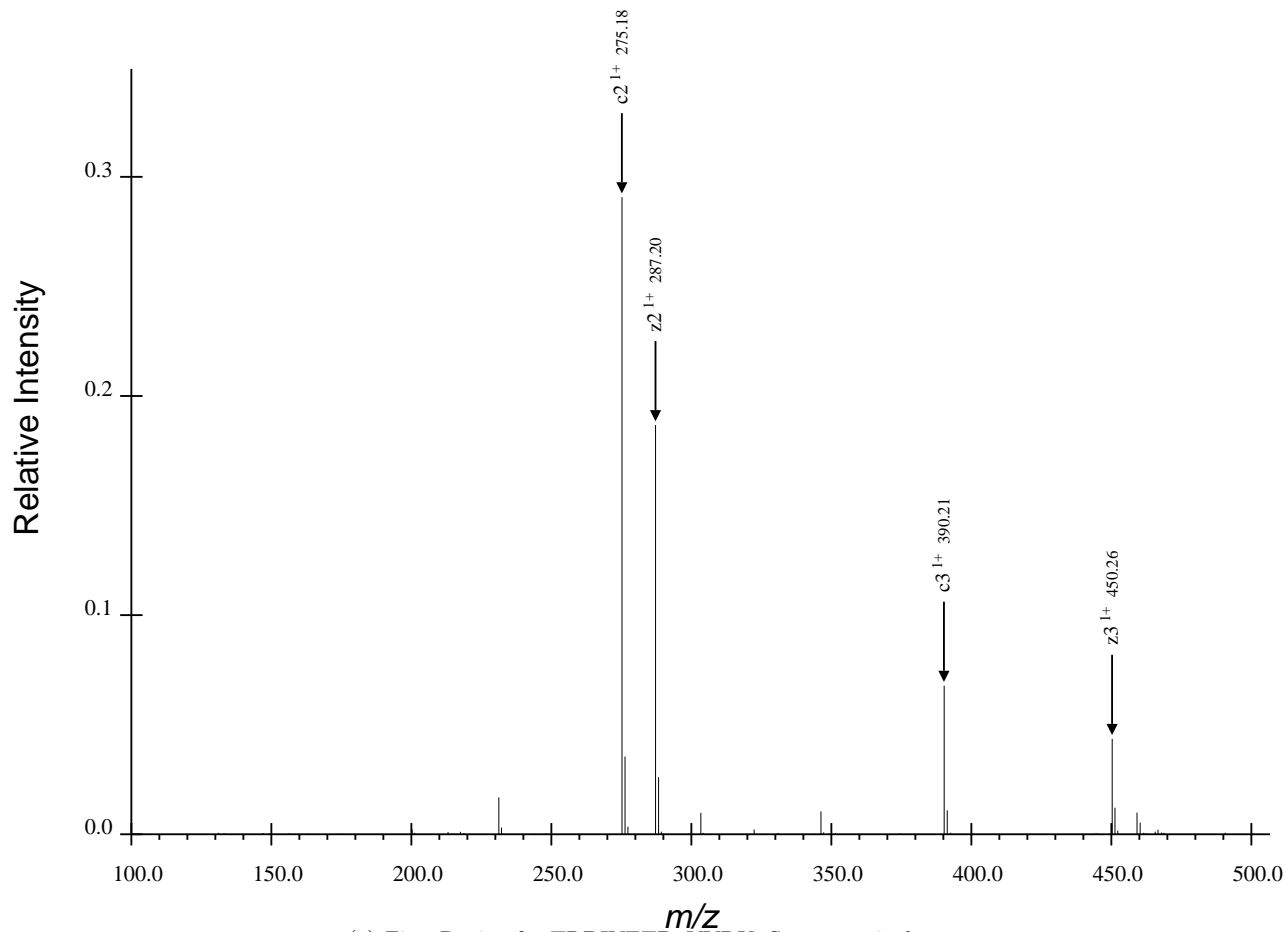

(a) First Region for TRDIYETDpYYRK, Spectrum 45.dta

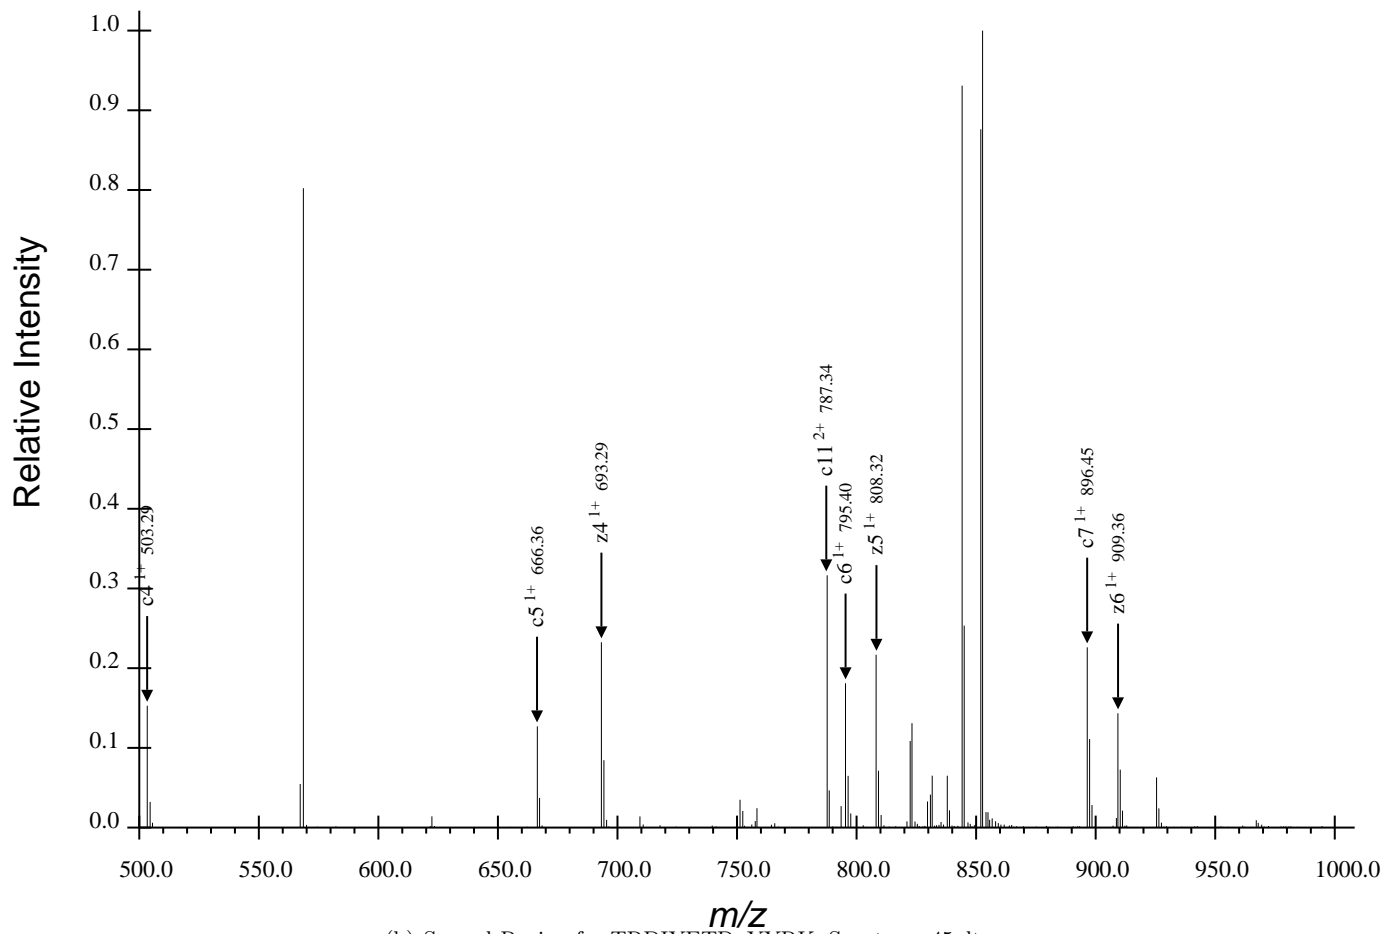

(b) Second Region for TRDIYETDpYYRK, Spectrum 45.dta

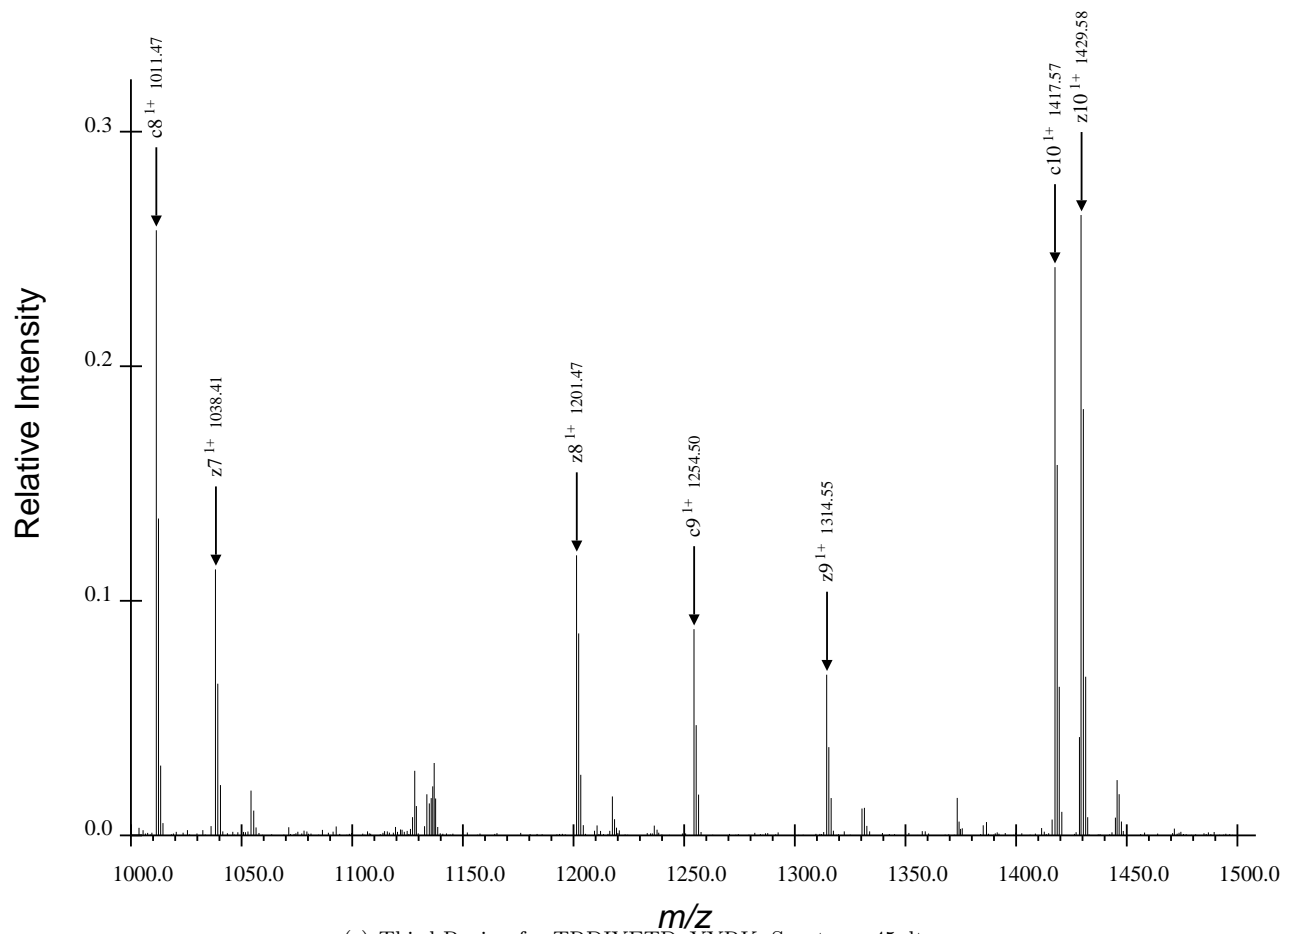

(c) Third Region for TRDIYETDpYYRK, Spectrum 45.dta

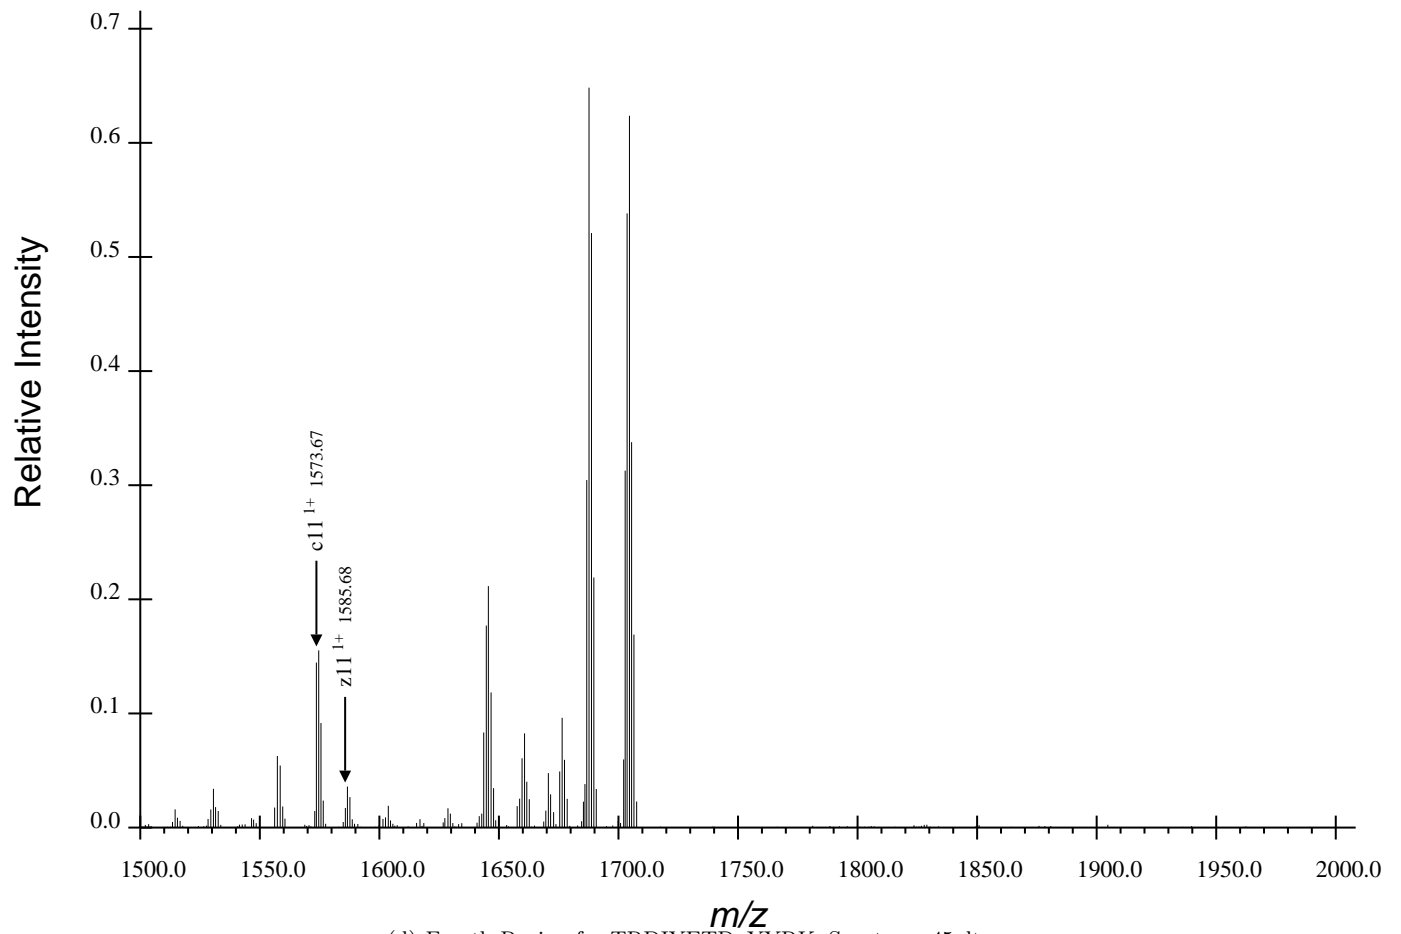

(d) Fourth Region for TRDIYETDpYYRK, Spectrum 45.dta

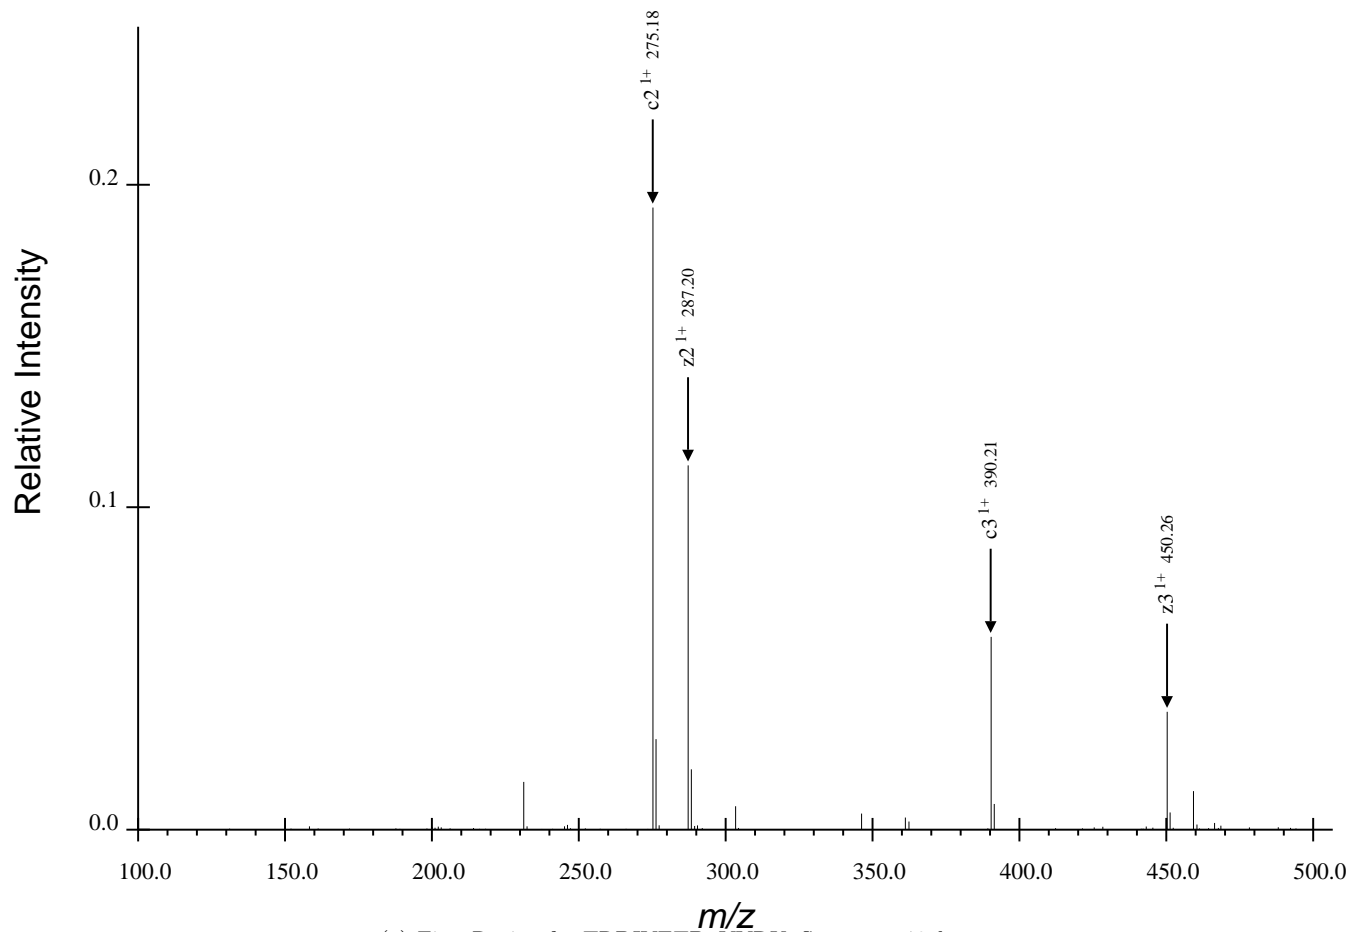

(a) First Region for TRDIYETDpYYRK, Spectrum 46.dta

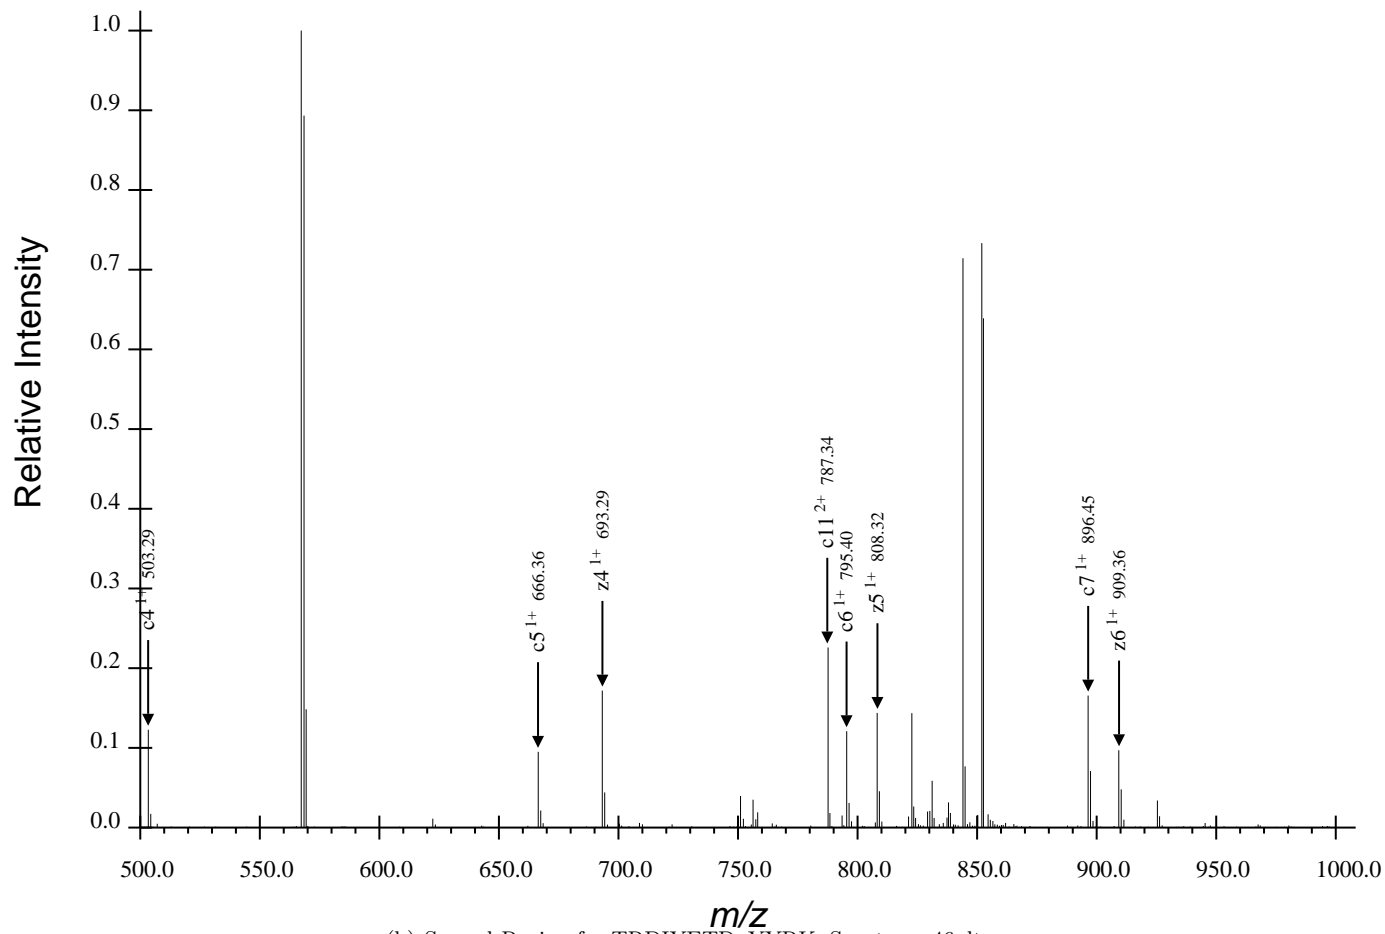

(b) Second Region for TRDIYETDpYYRK, Spectrum 46.dta



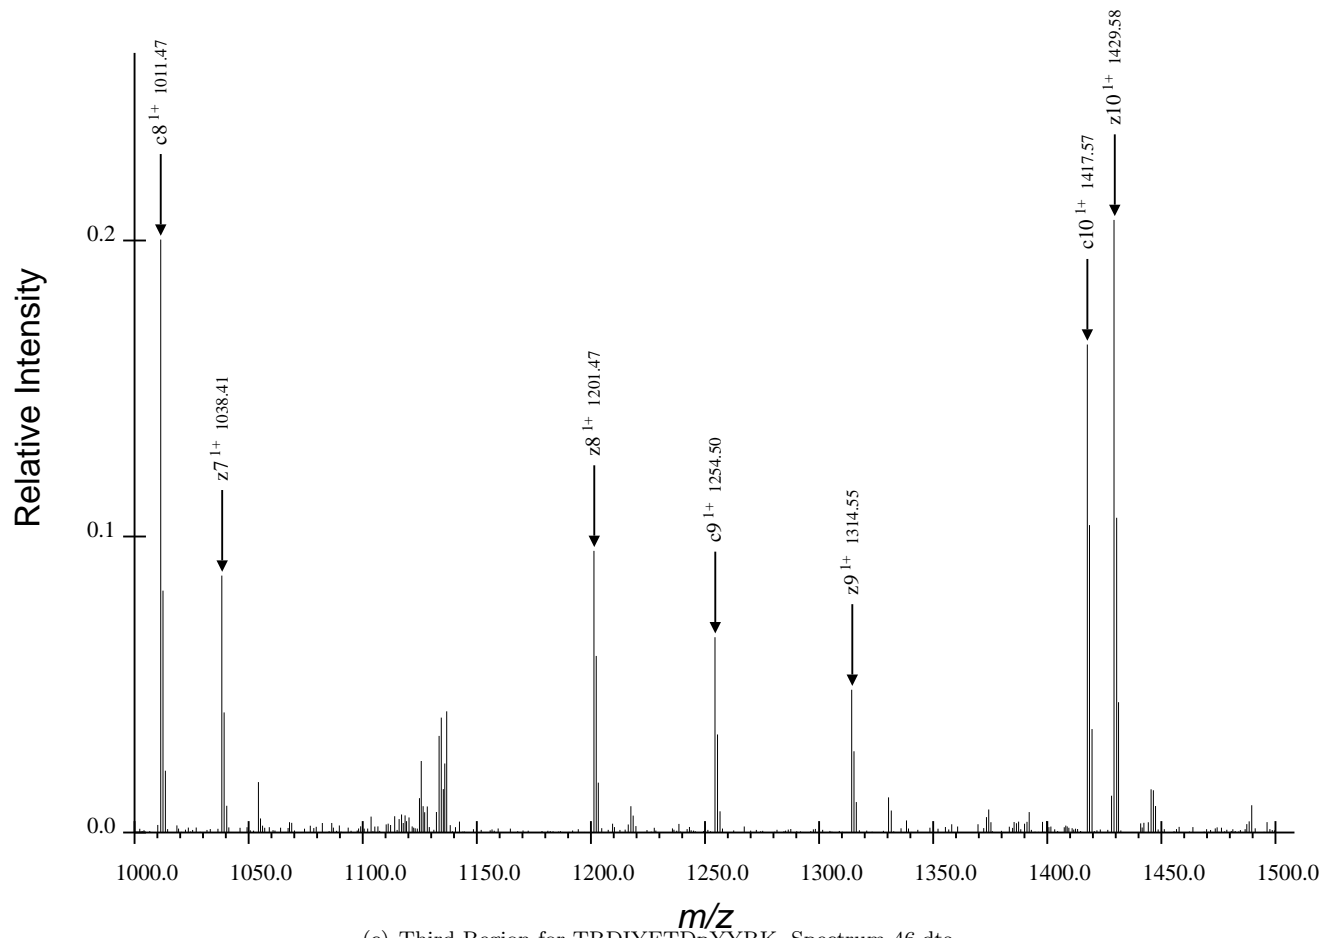

(c) Third Region for TRDIYETDpYYRK, Spectrum 46.dta

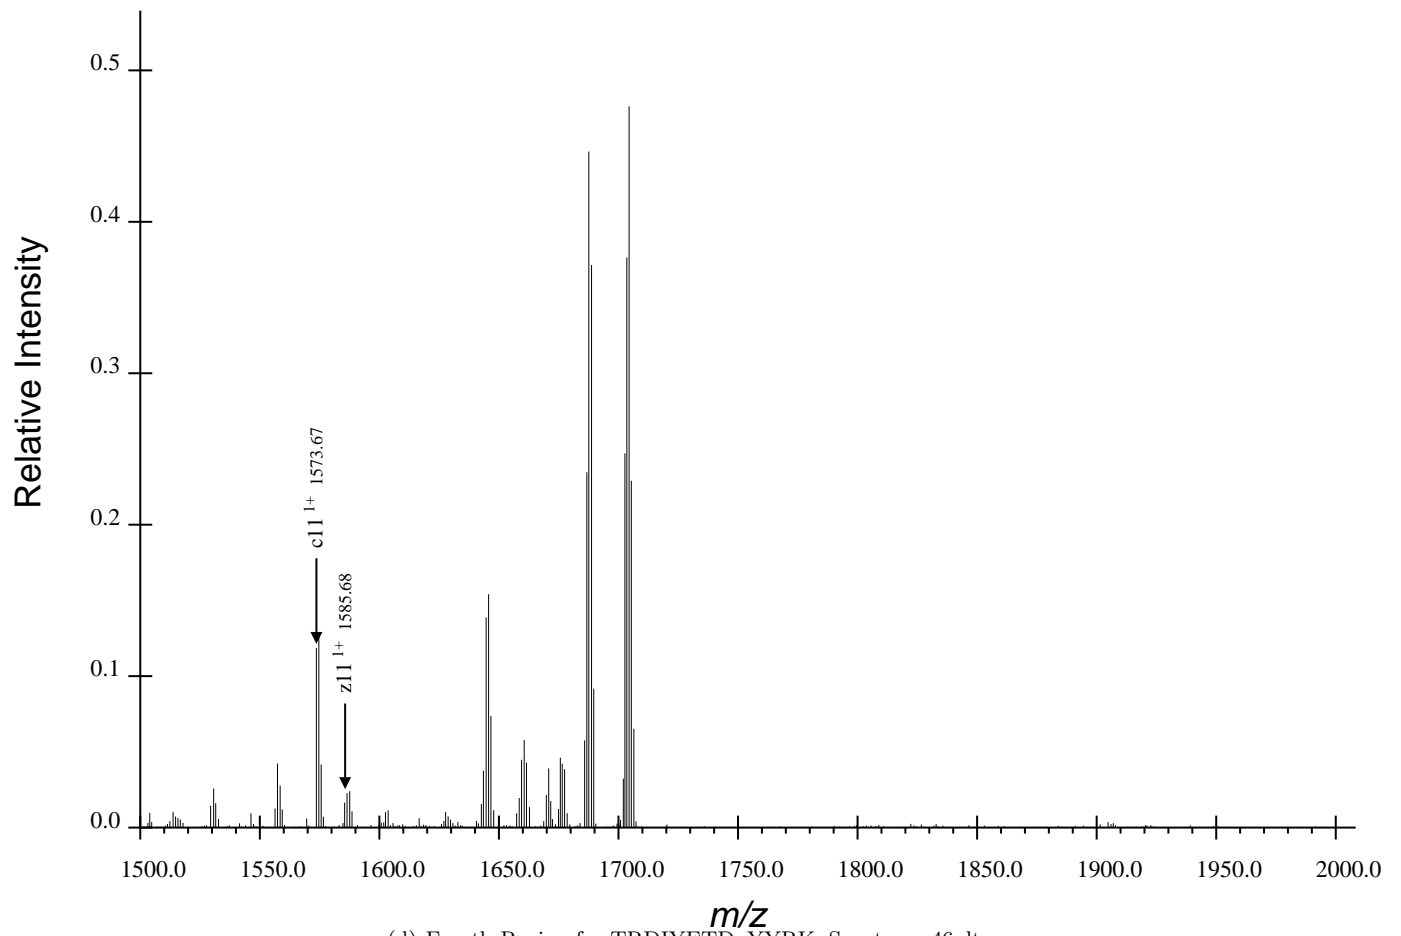

(d) Fourth Region for TRDIYETDpYYRK, Spectrum 46.dta

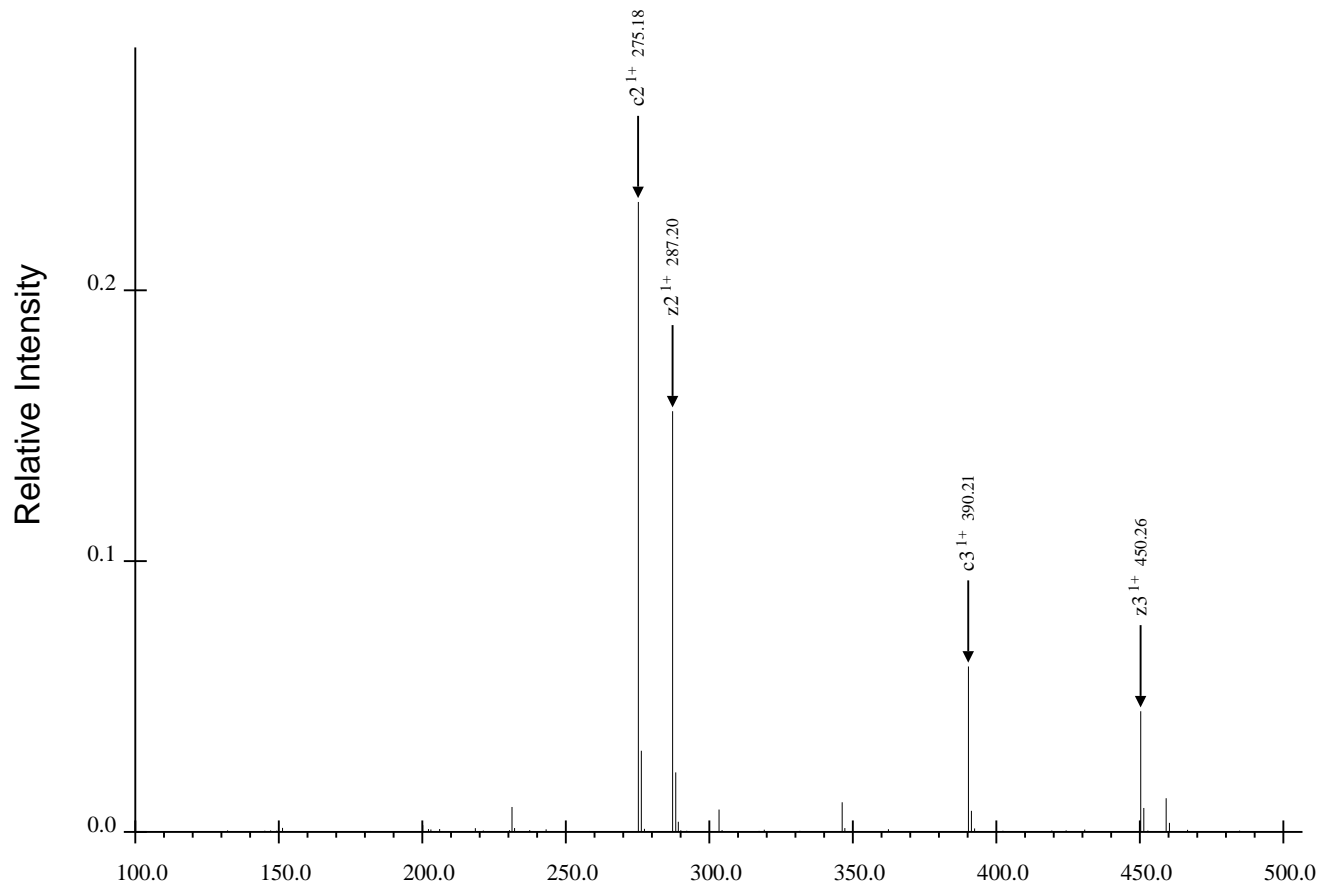

(a) First Region for TRDIYETDpYYRK, Spectrum 47.dta

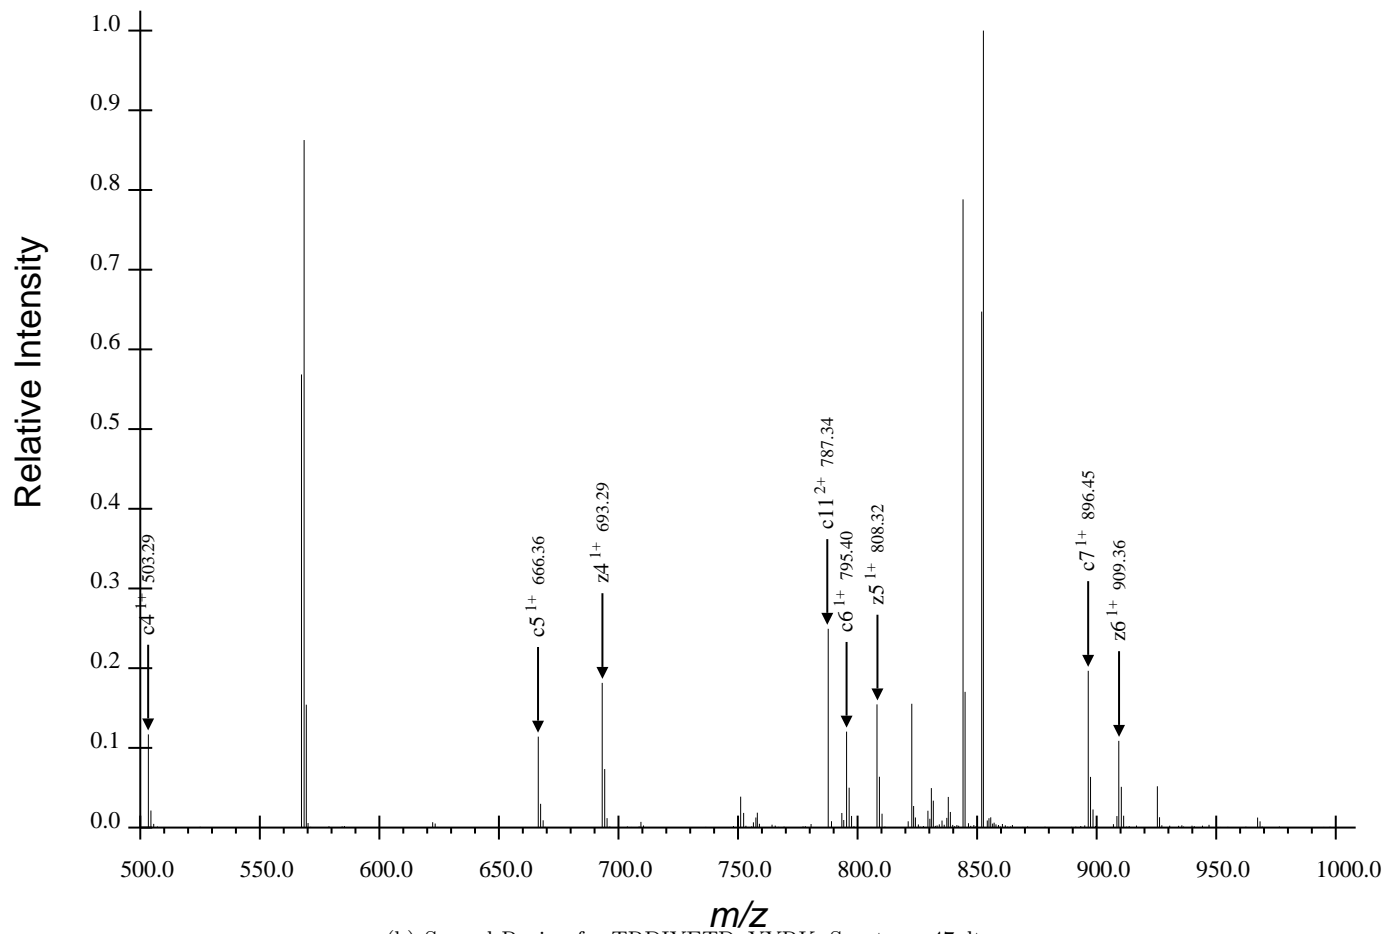

(b) Second Region for TRDIYETDpYYRK, Spectrum 47.dta

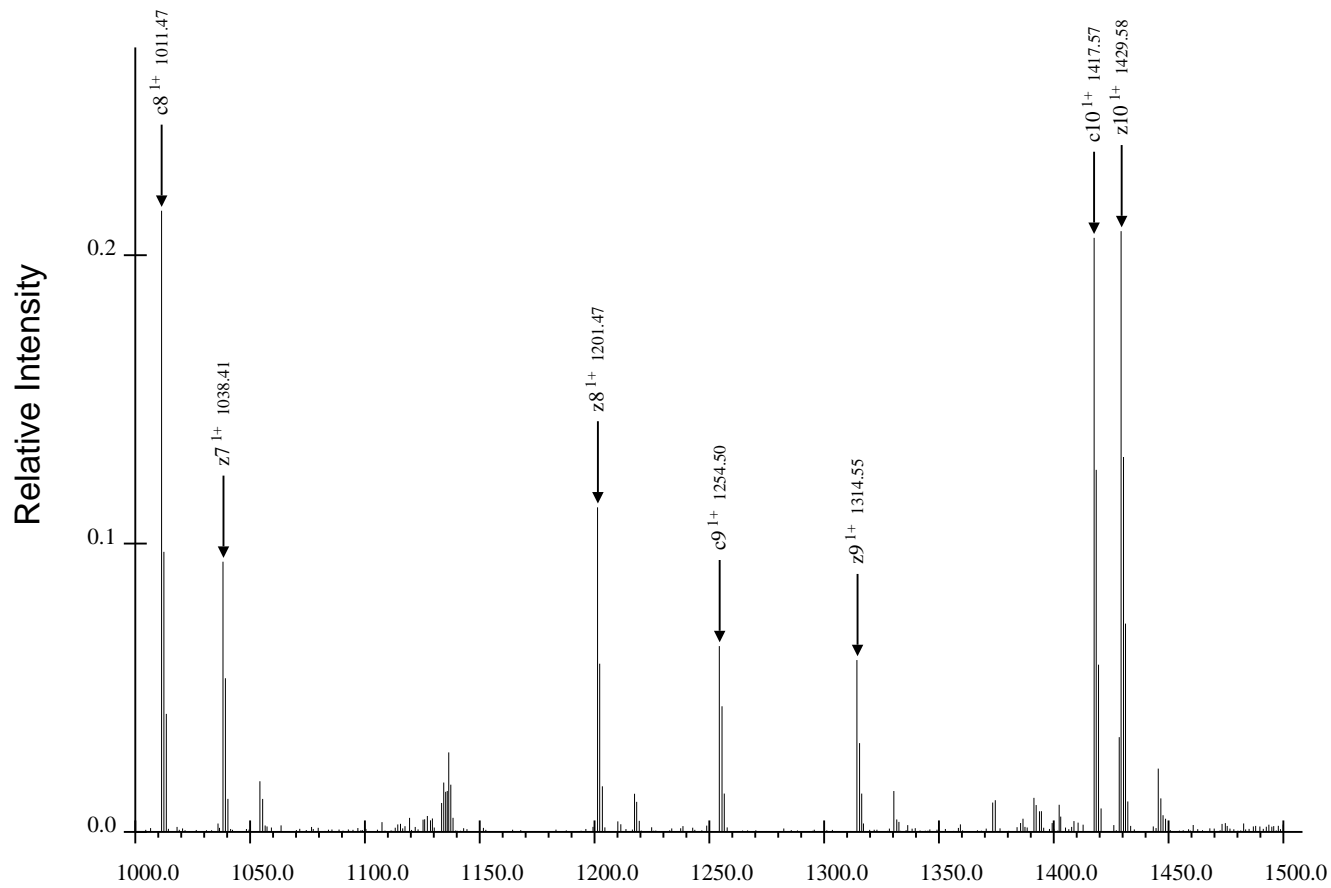

(c) Third Region for TRDIYETDpYYRK, Spectrum 47.dta

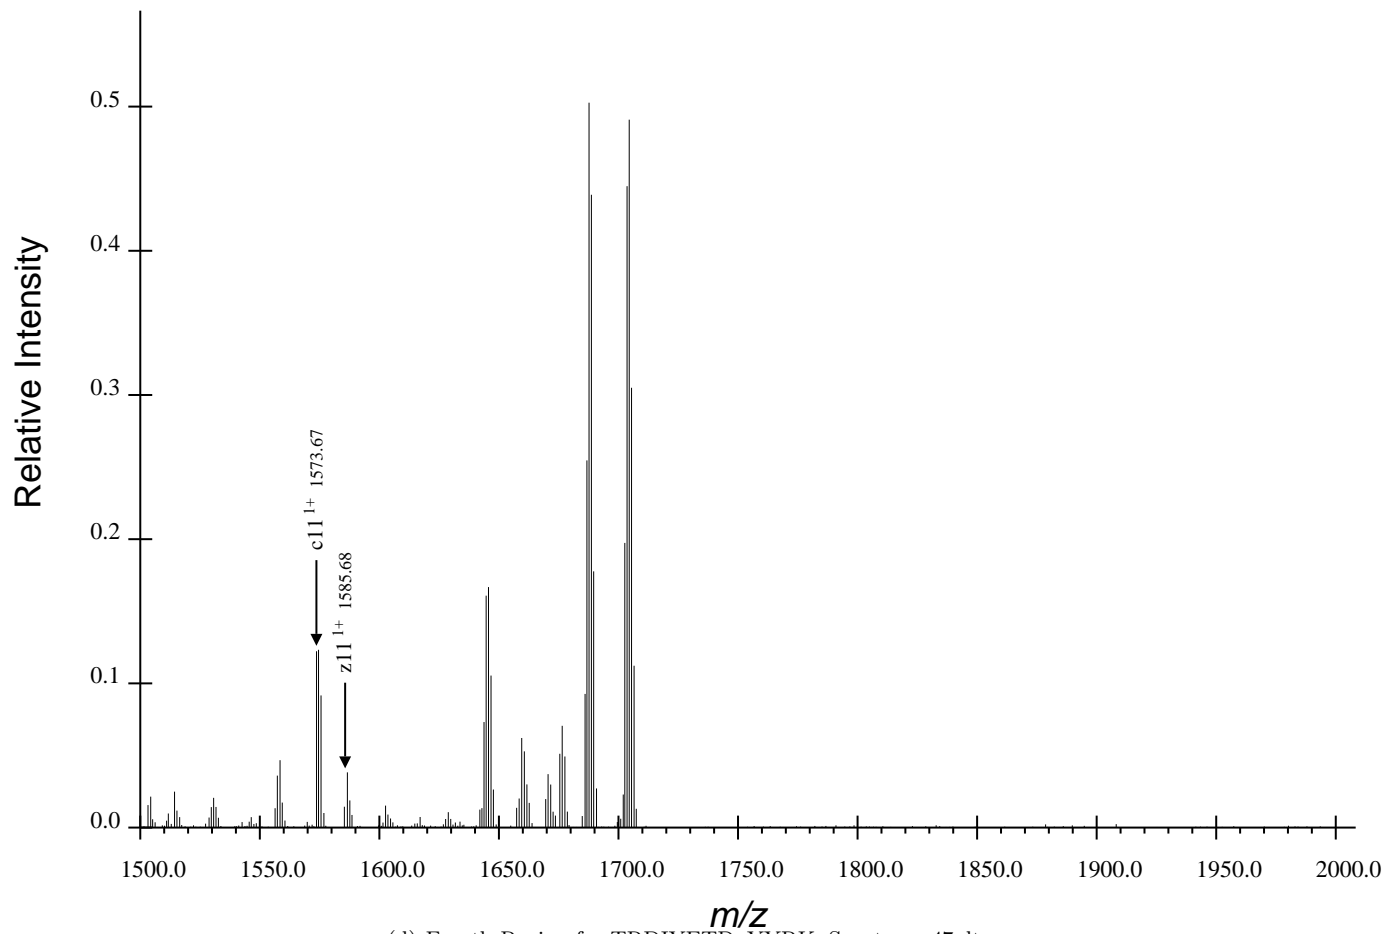

(d) Fourth Region for TRDIYETDpYYRK, Spectrum 47.dta

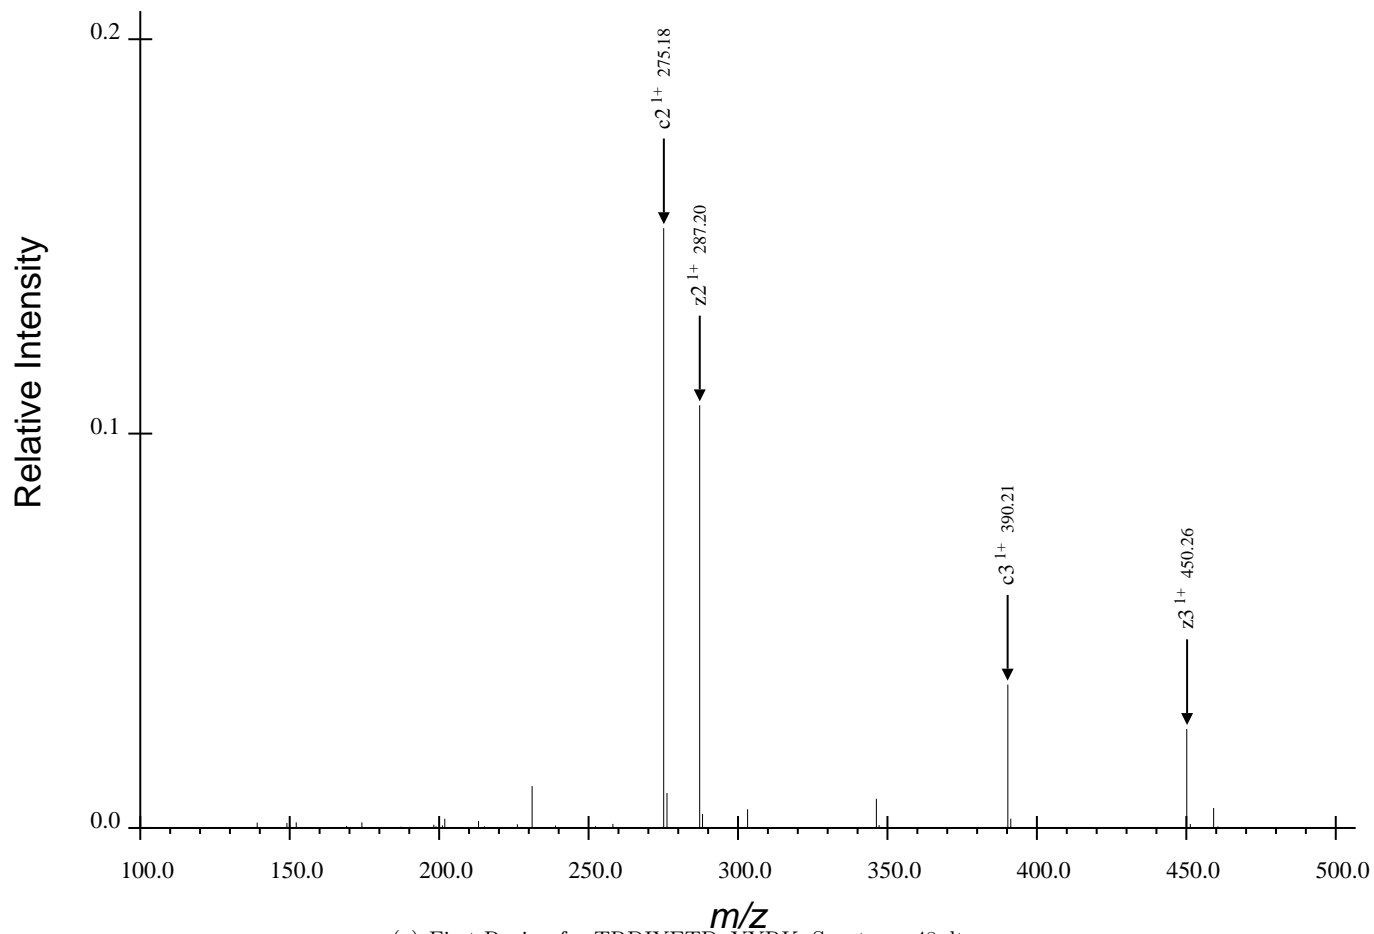

(a) First Region for TRDIYETDpYYRK, Spectrum 48.dta

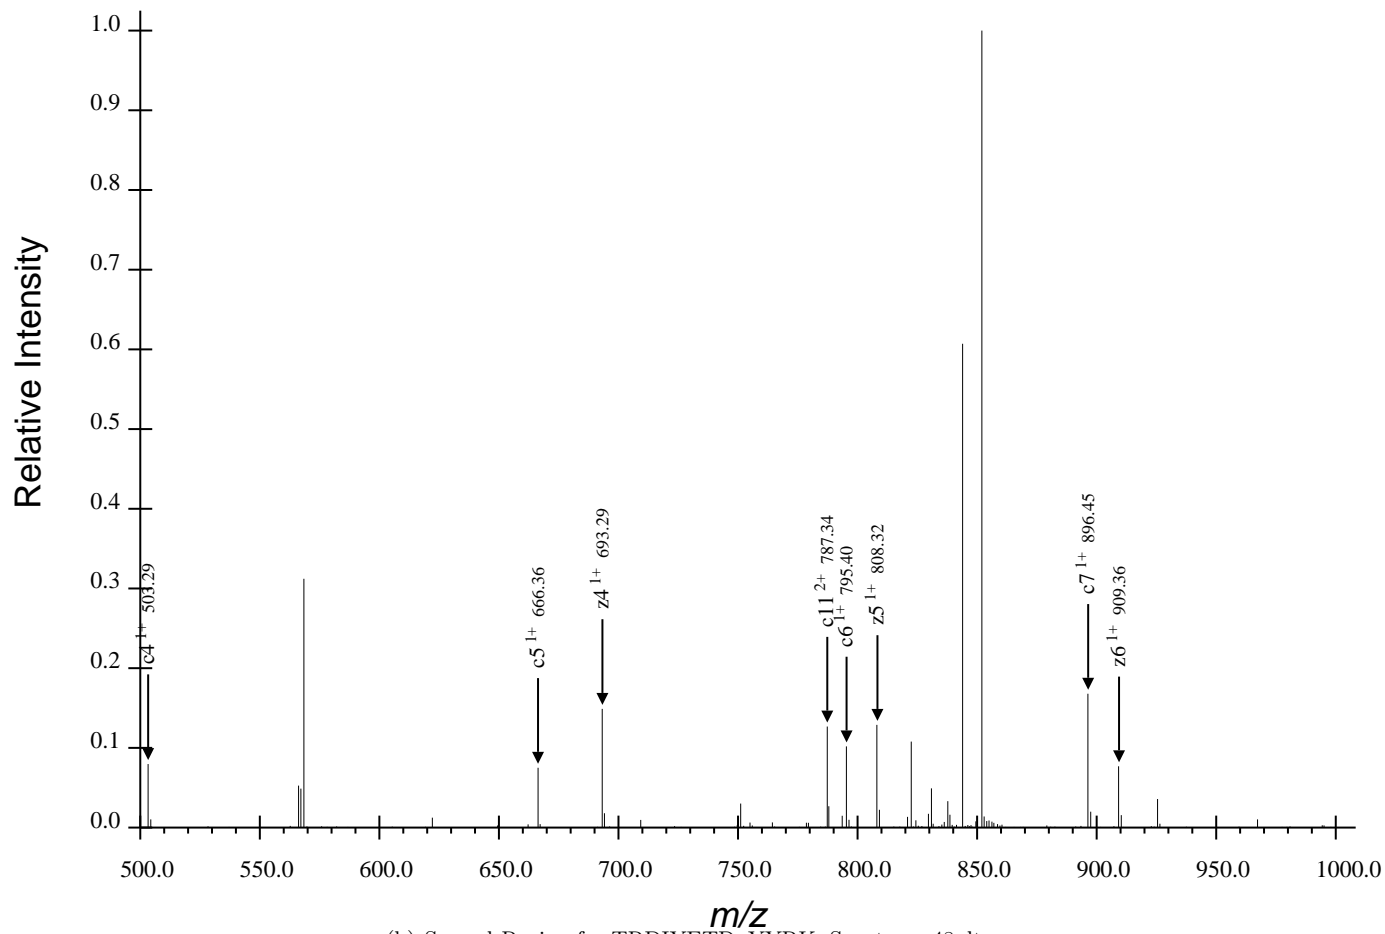

(b) Second Region for TRDIYETDpYYRK, Spectrum 48.dta

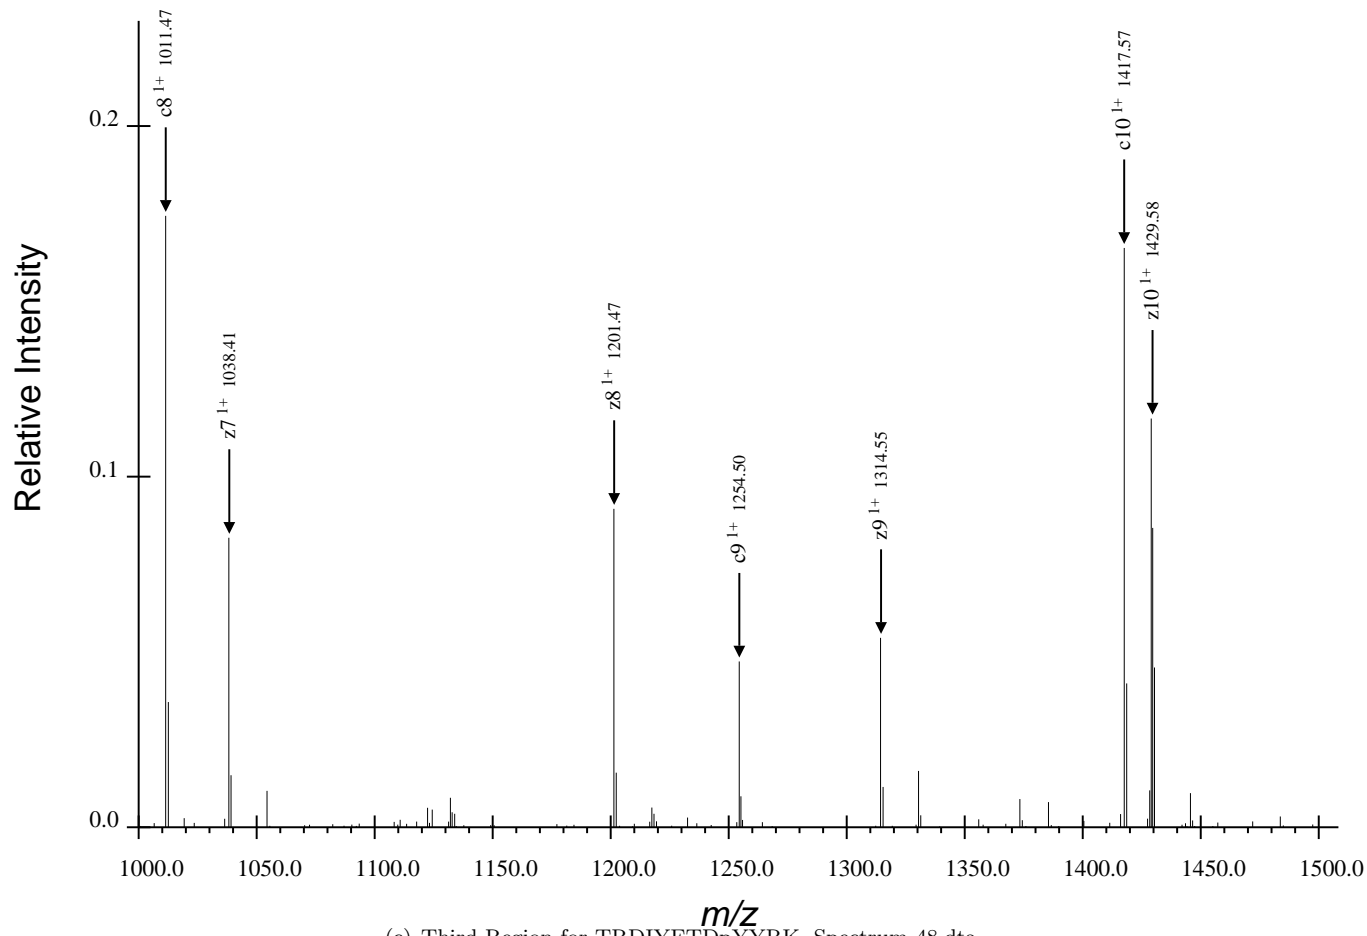

(c) Third Region for TRDIYETDpYYRK, Spectrum 48.dta

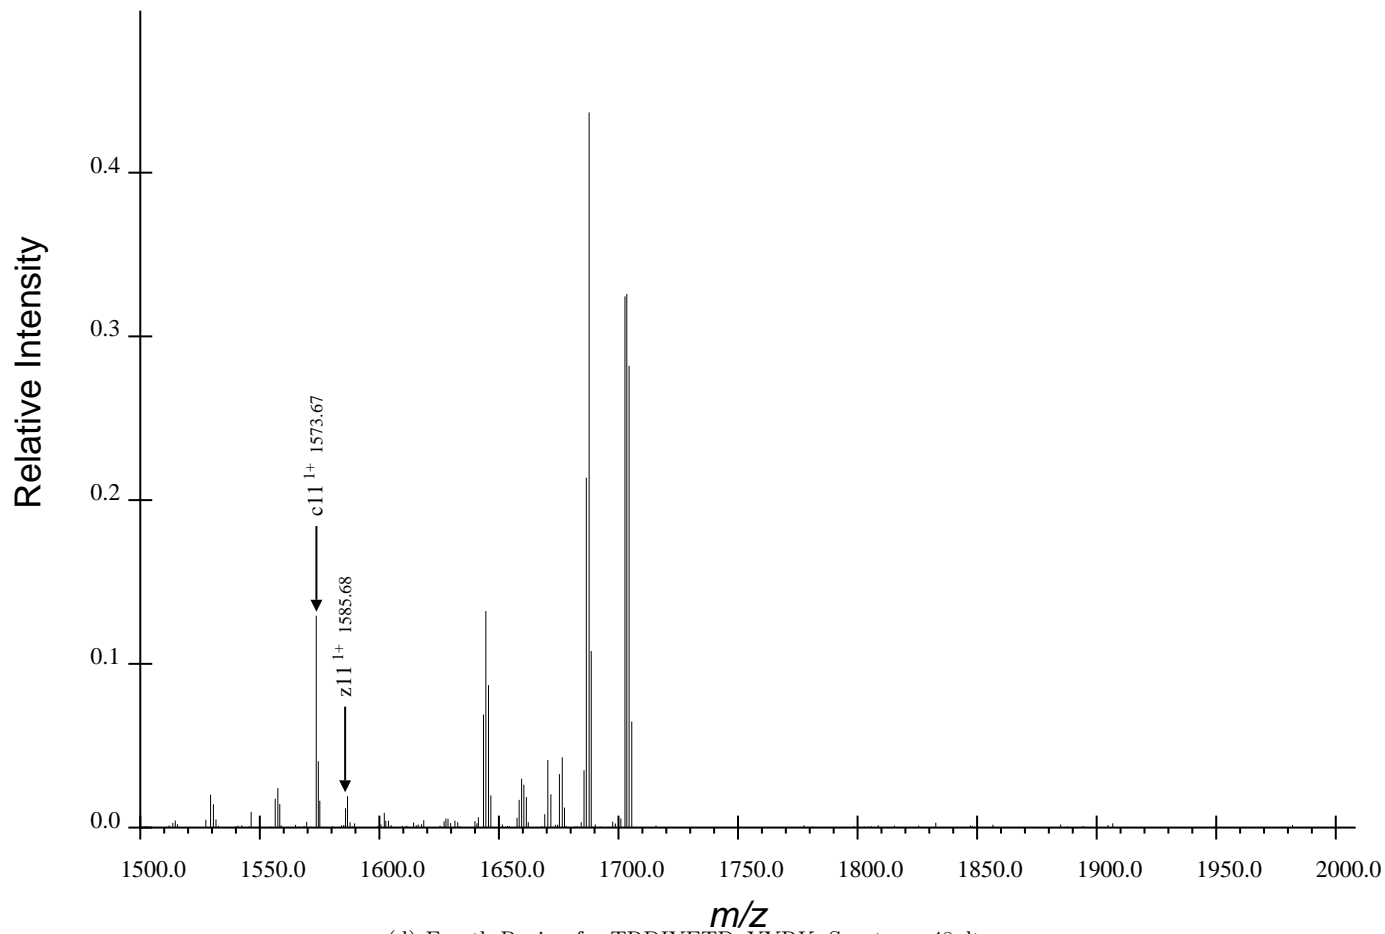

(d) Fourth Region for TRDIYETDpYYRK, Spectrum 48.dta
