# Supplementary material
Source: PubMed Central journal article supplement (PMC2871412)
Supplement: supp_M900487-MCP200_TestSetA3_Phosphopeptides.pdf [file supp_M900487-MCP200_TestSetA3_Phosphopeptides.pdf]

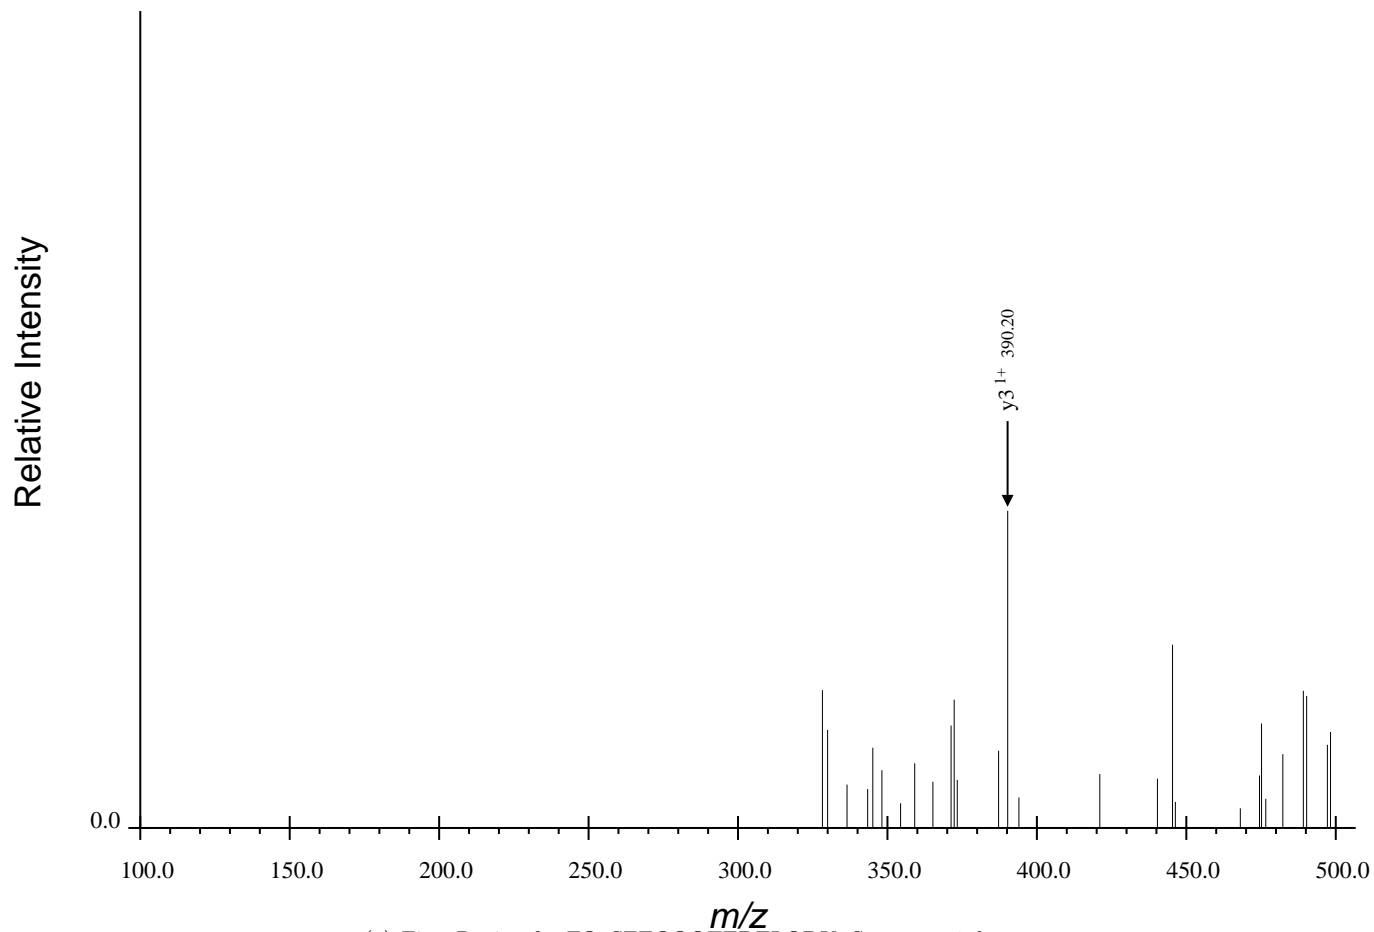

(a) First Region for FQpSEEQQQTEDELQDK, Spectrum 1.dta

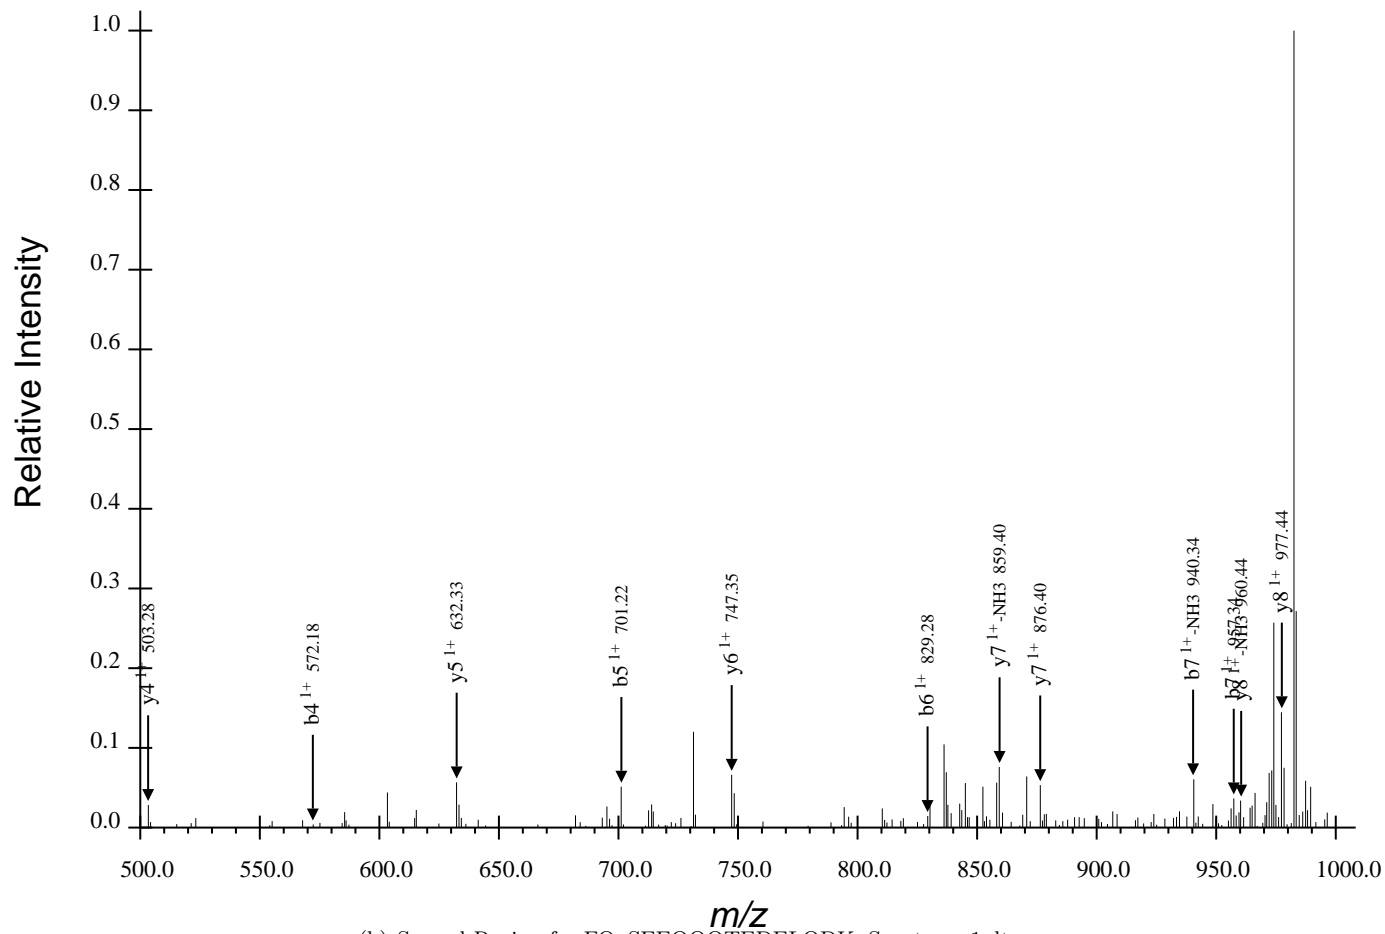

(b) Second Region for FQpSEEQQQTEDELQDK, Spectrum 1.dta

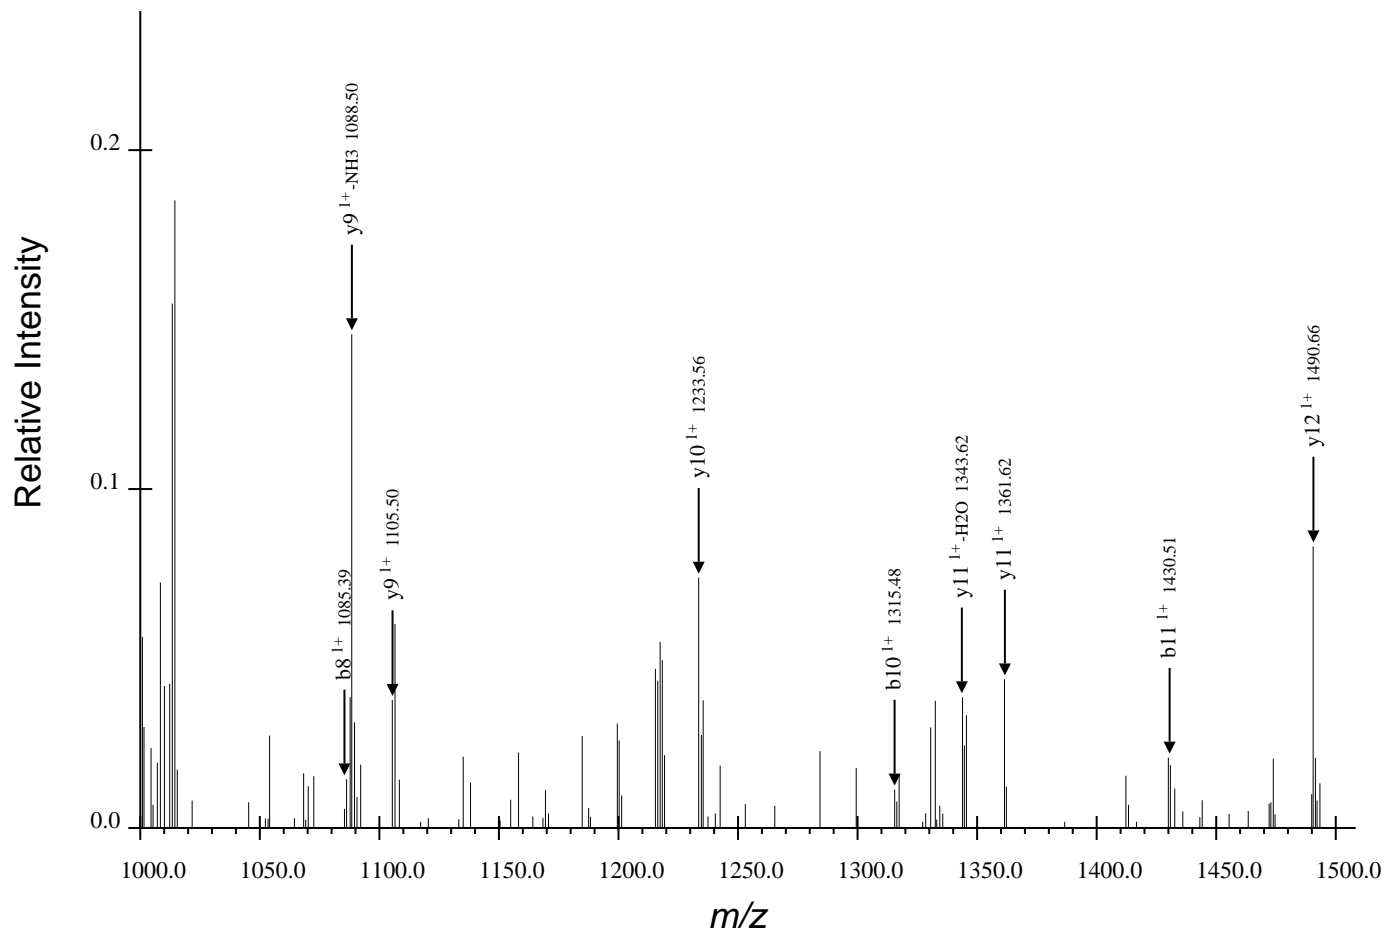

(c) Third Region for FQpSEEQQQTEDELQDK, Spectrum 1.dta

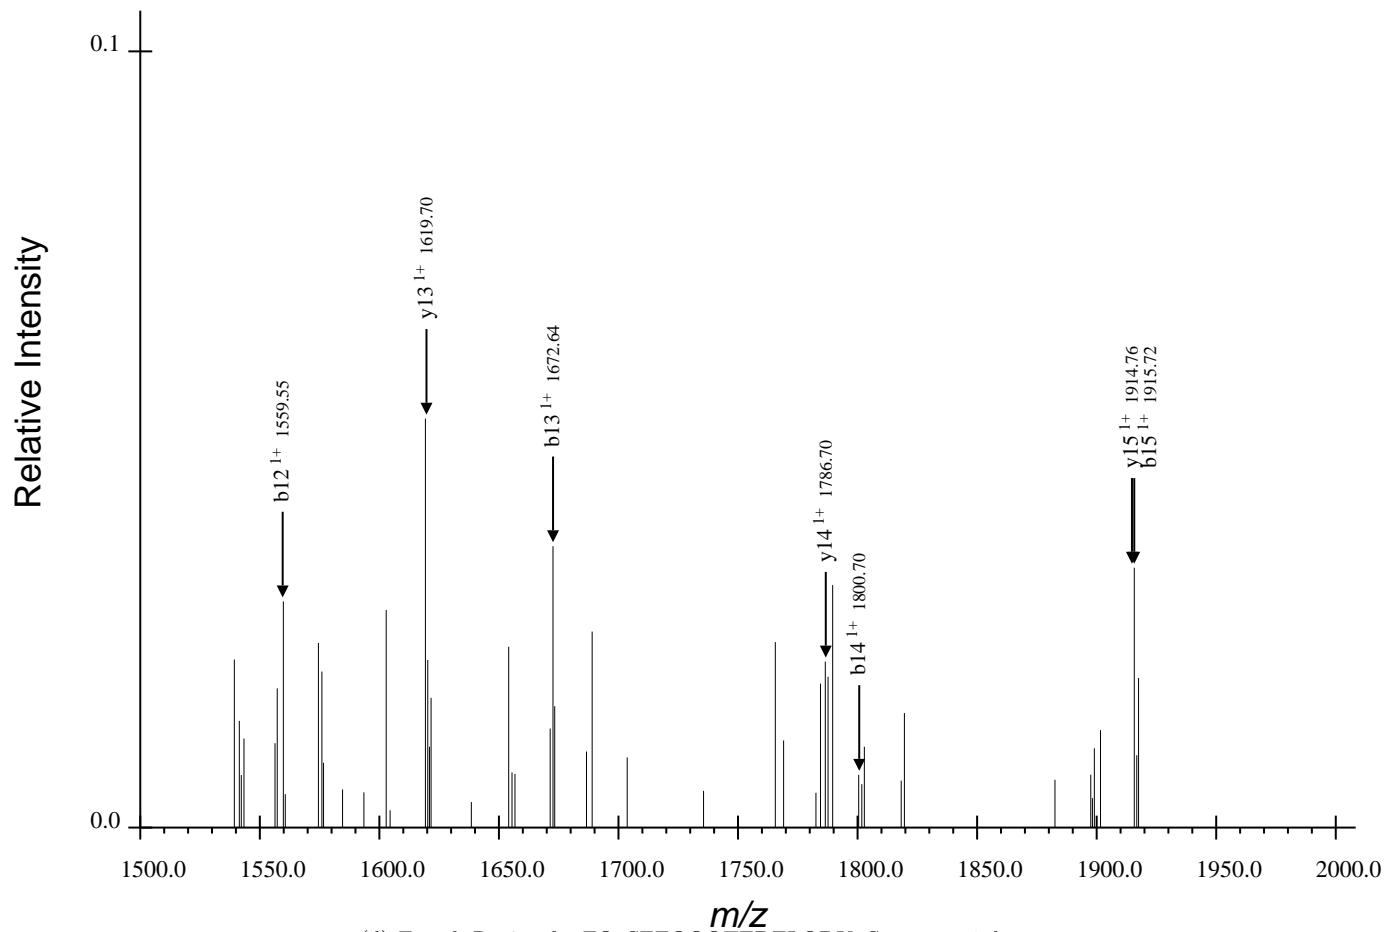

(d) Fourth Region for FQpSEEQQQTEDELQDK, Spectrum 1.dta

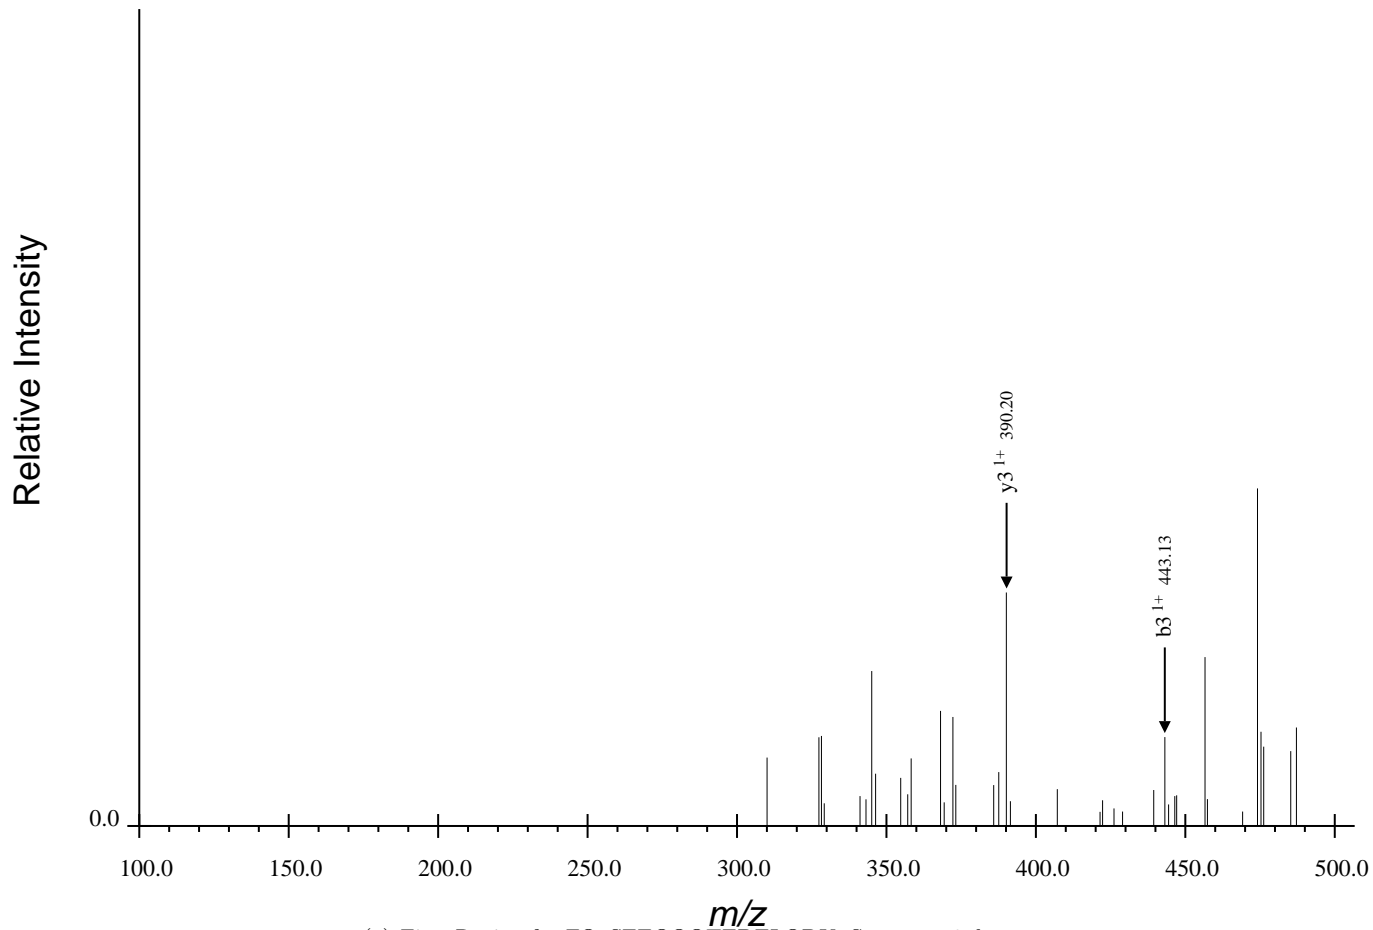

(a) First Region for FQpSEEQQQTEDELQDK, Spectrum 2.dta

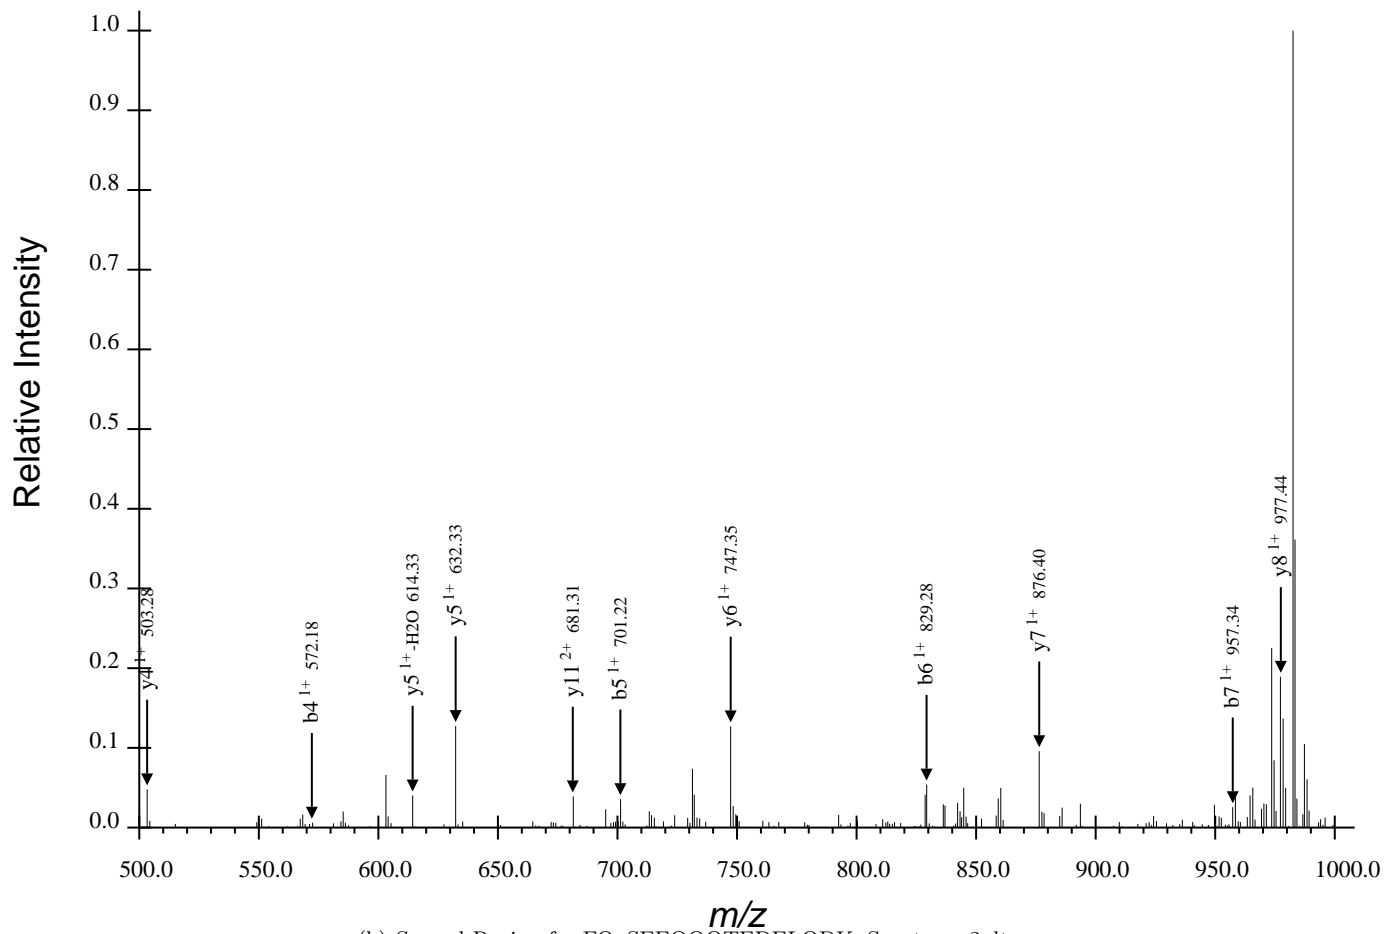

(b) Second Region for FQpSEEQQQTEDELQDK, Spectrum 2.dta

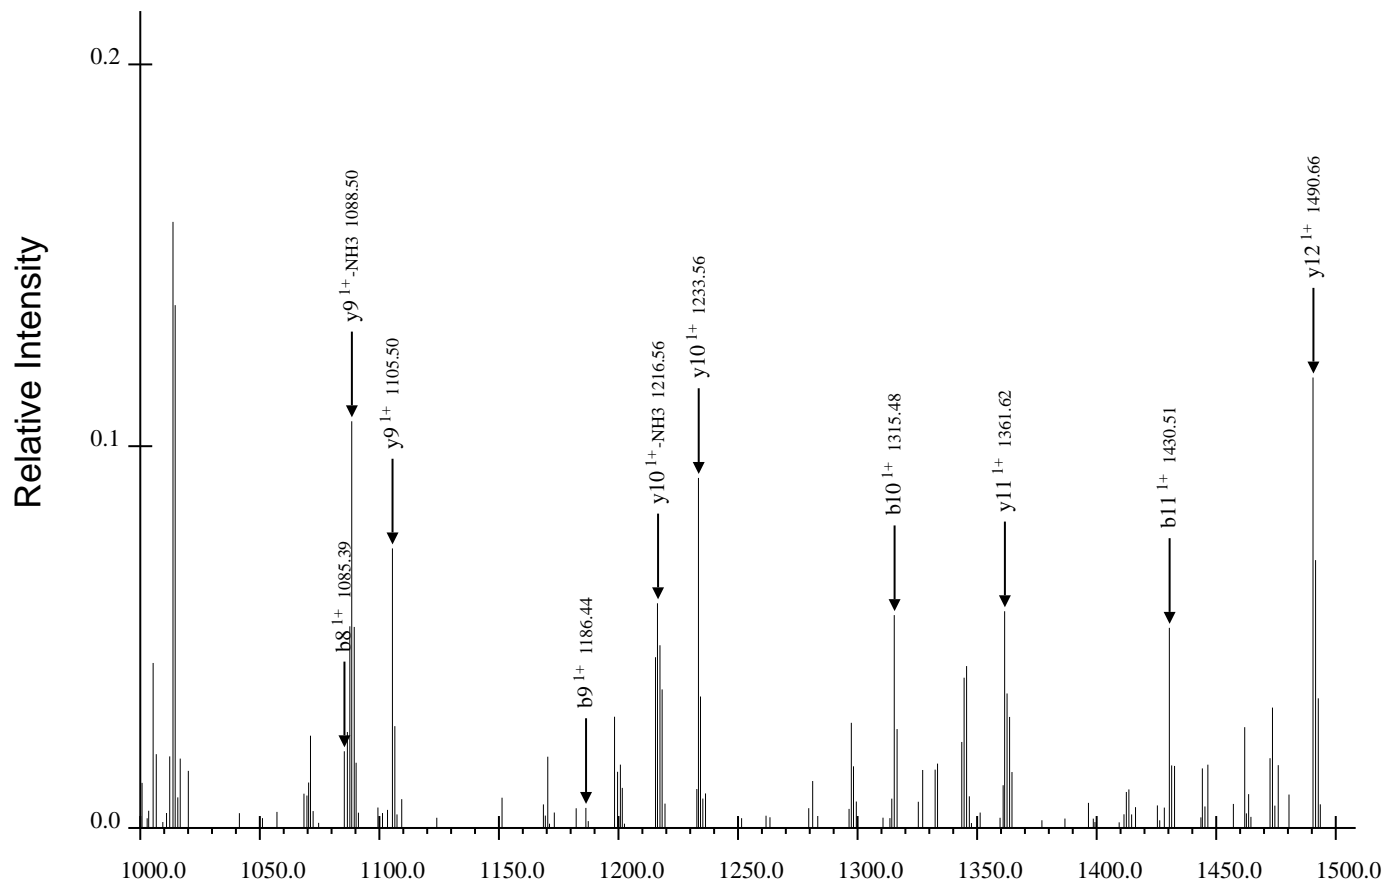

(c) Third Region for FQpSEEQQQTEDELQDK, Spectrum 2.dta

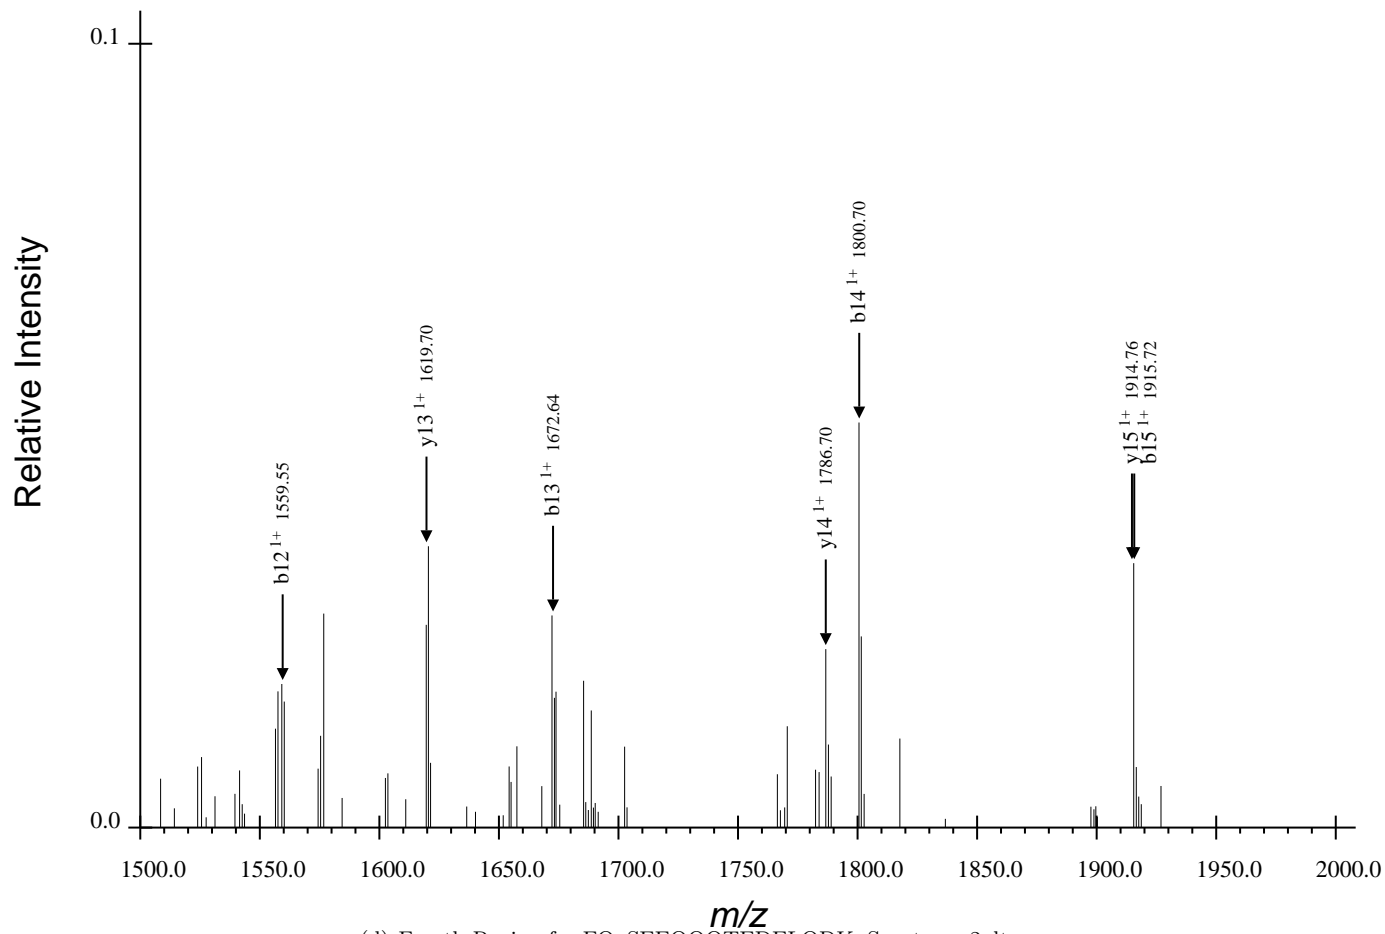

(d) Fourth Region for FQpSEEQQQTEDELQDK, Spectrum 2.dta

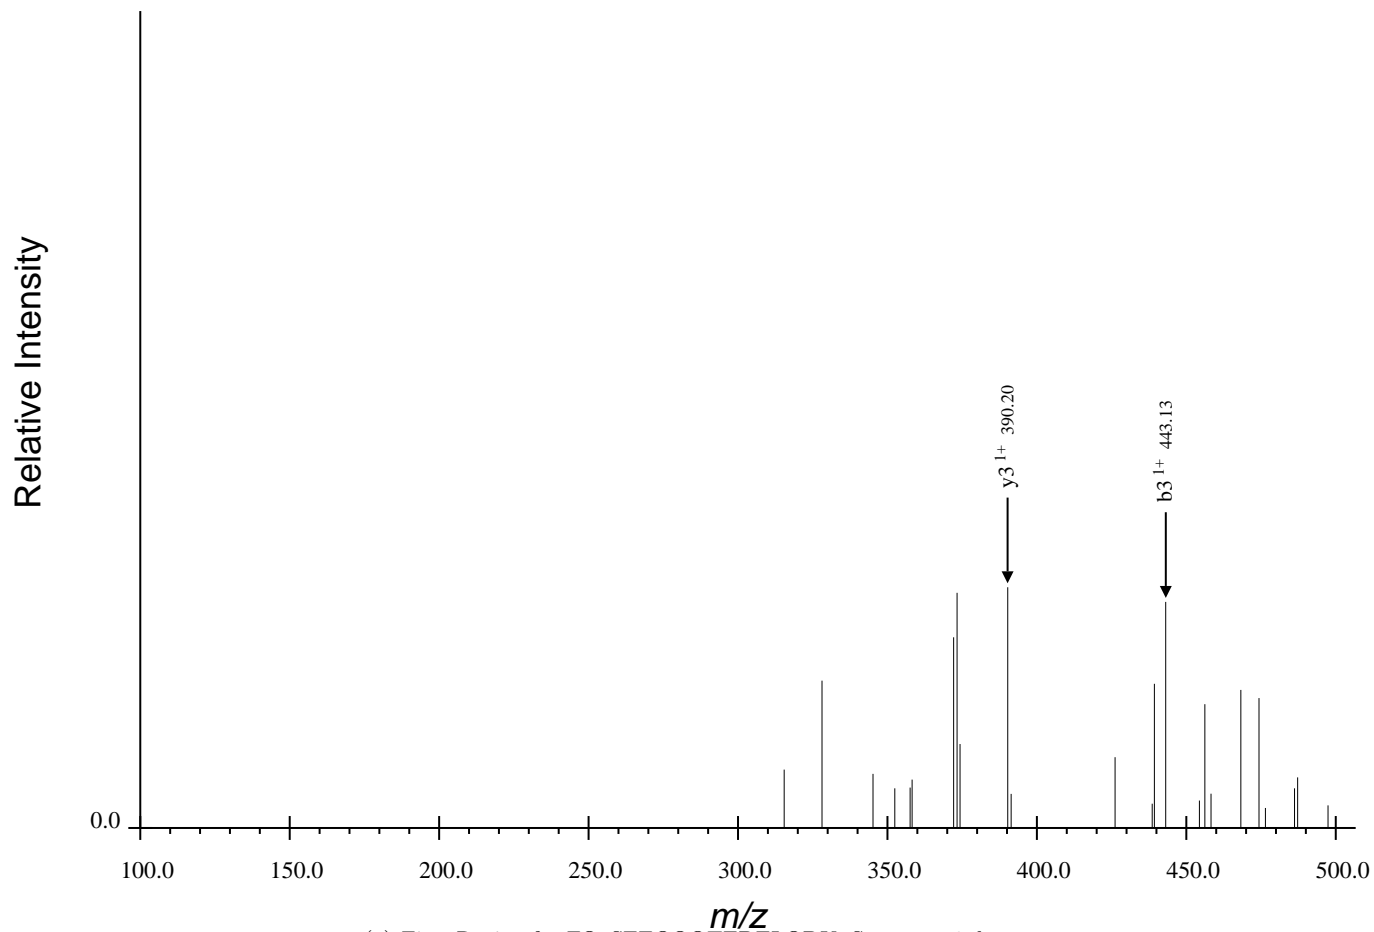

(a) First Region for FQpSEEQQQTEDELQDK, Spectrum 3.dta

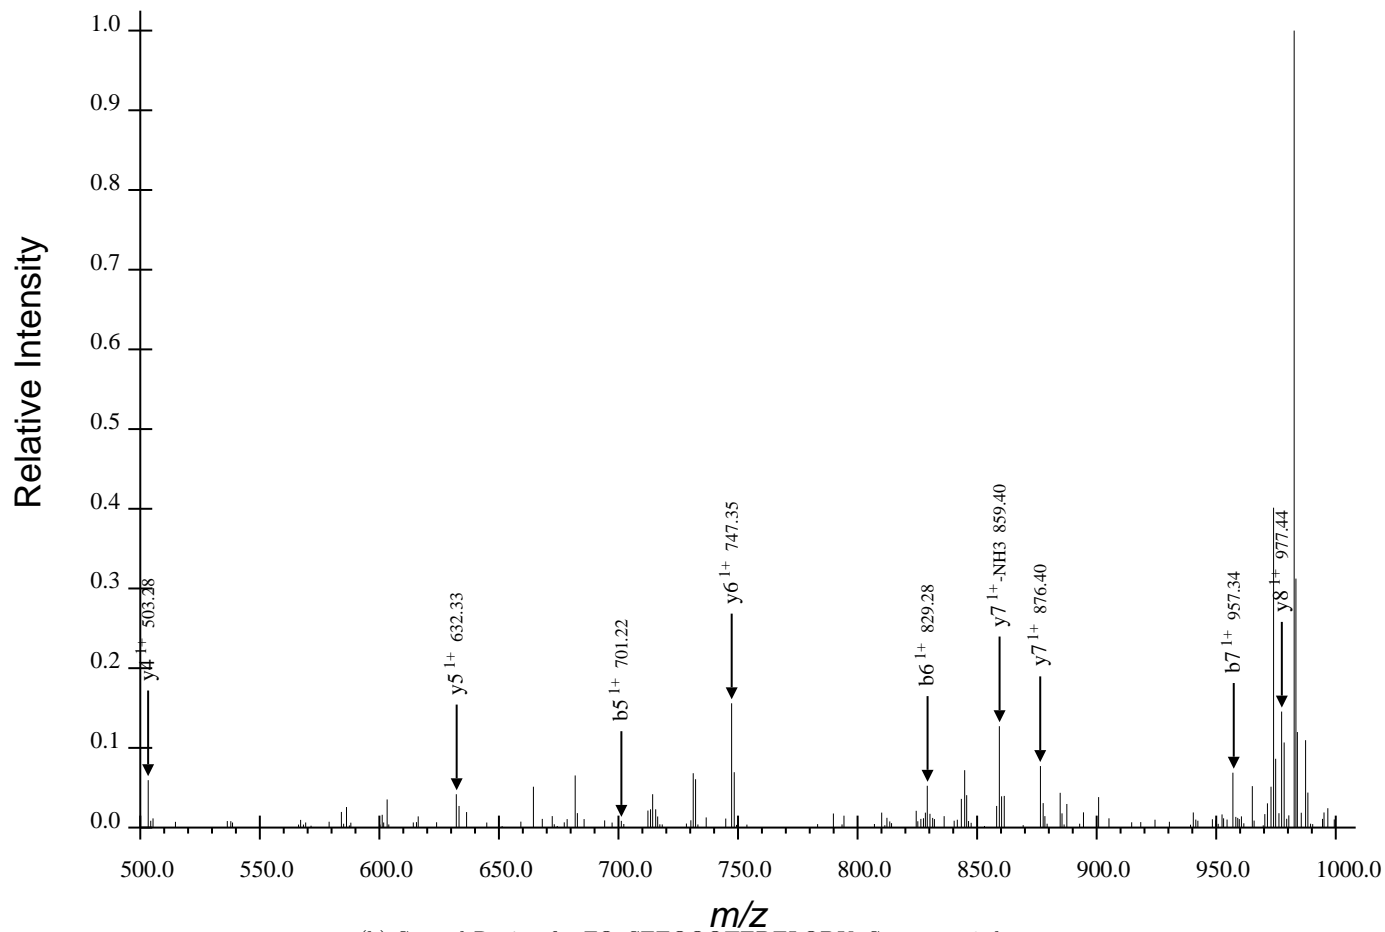

(b) Second Region for FQpSEEQQQTEDELQDK, Spectrum 3.dta

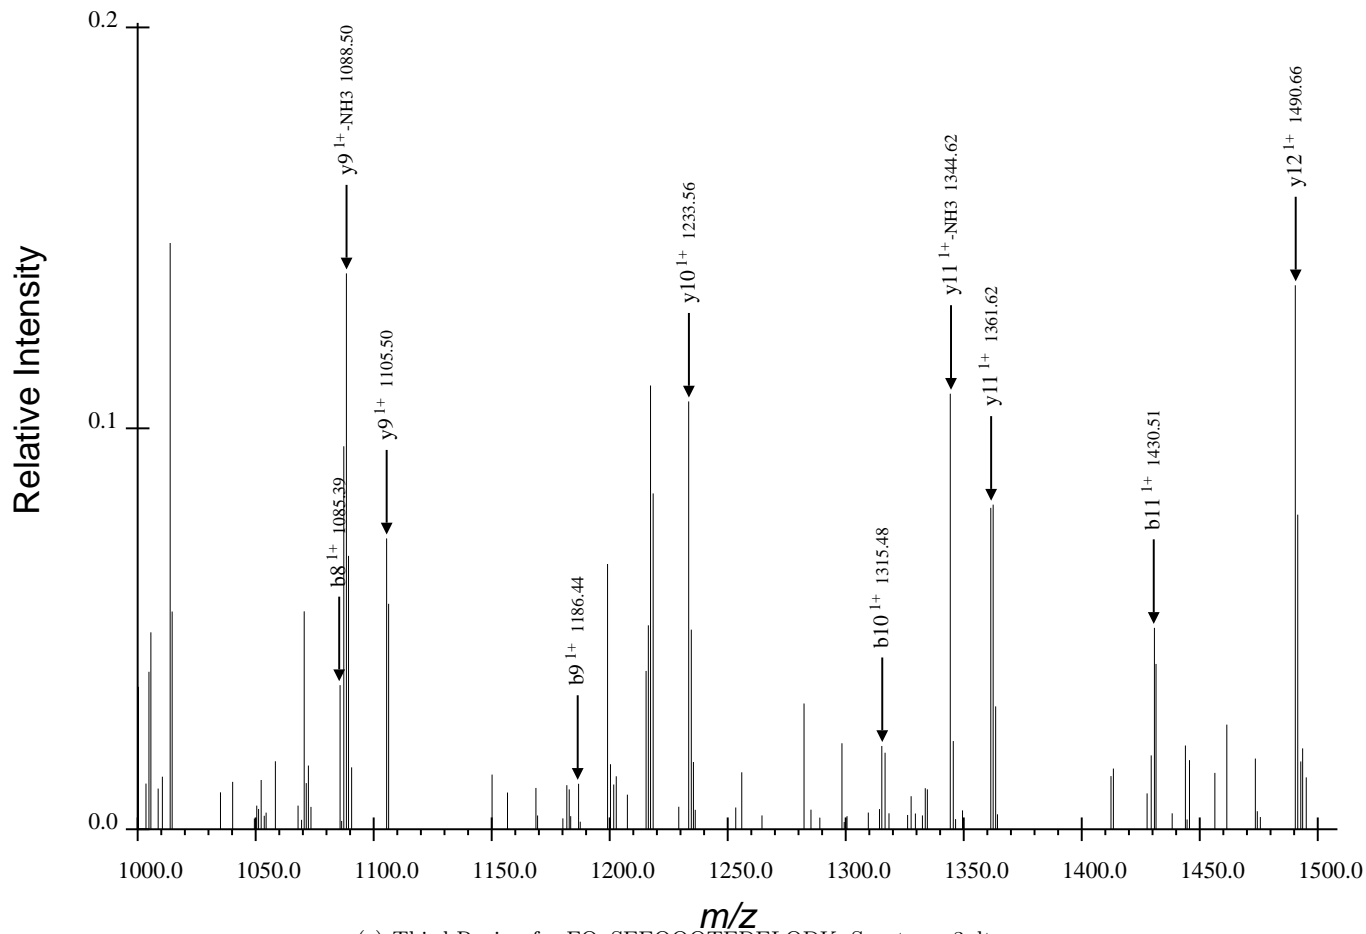

(c) Third Region for FQpSEEQQQTEDELQDK, Spectrum 3.dta

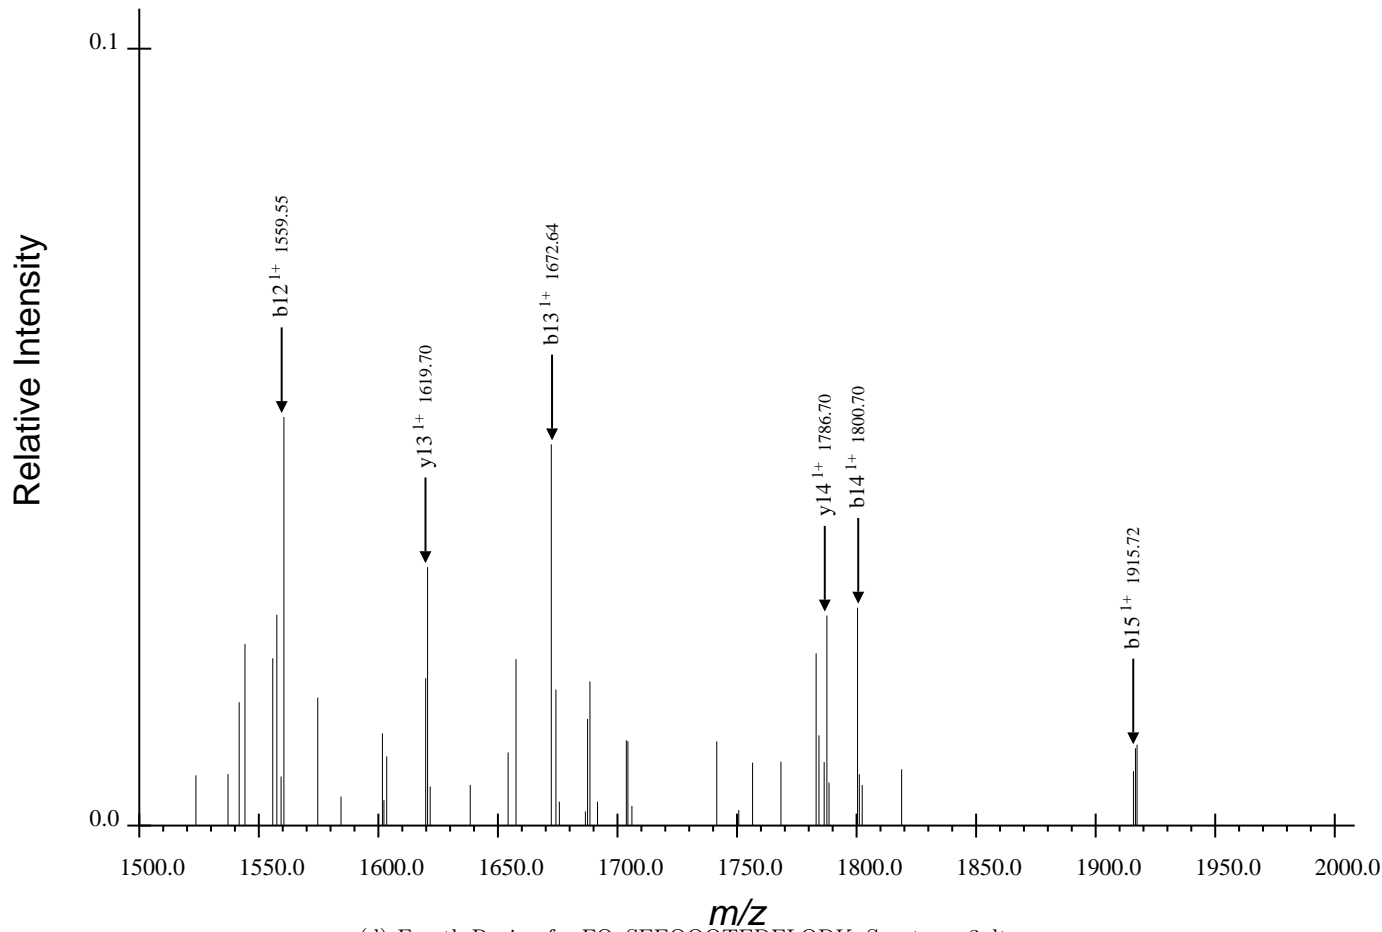

(d) Fourth Region for FQpSEEQQQTEDELQDK, Spectrum 3.dta

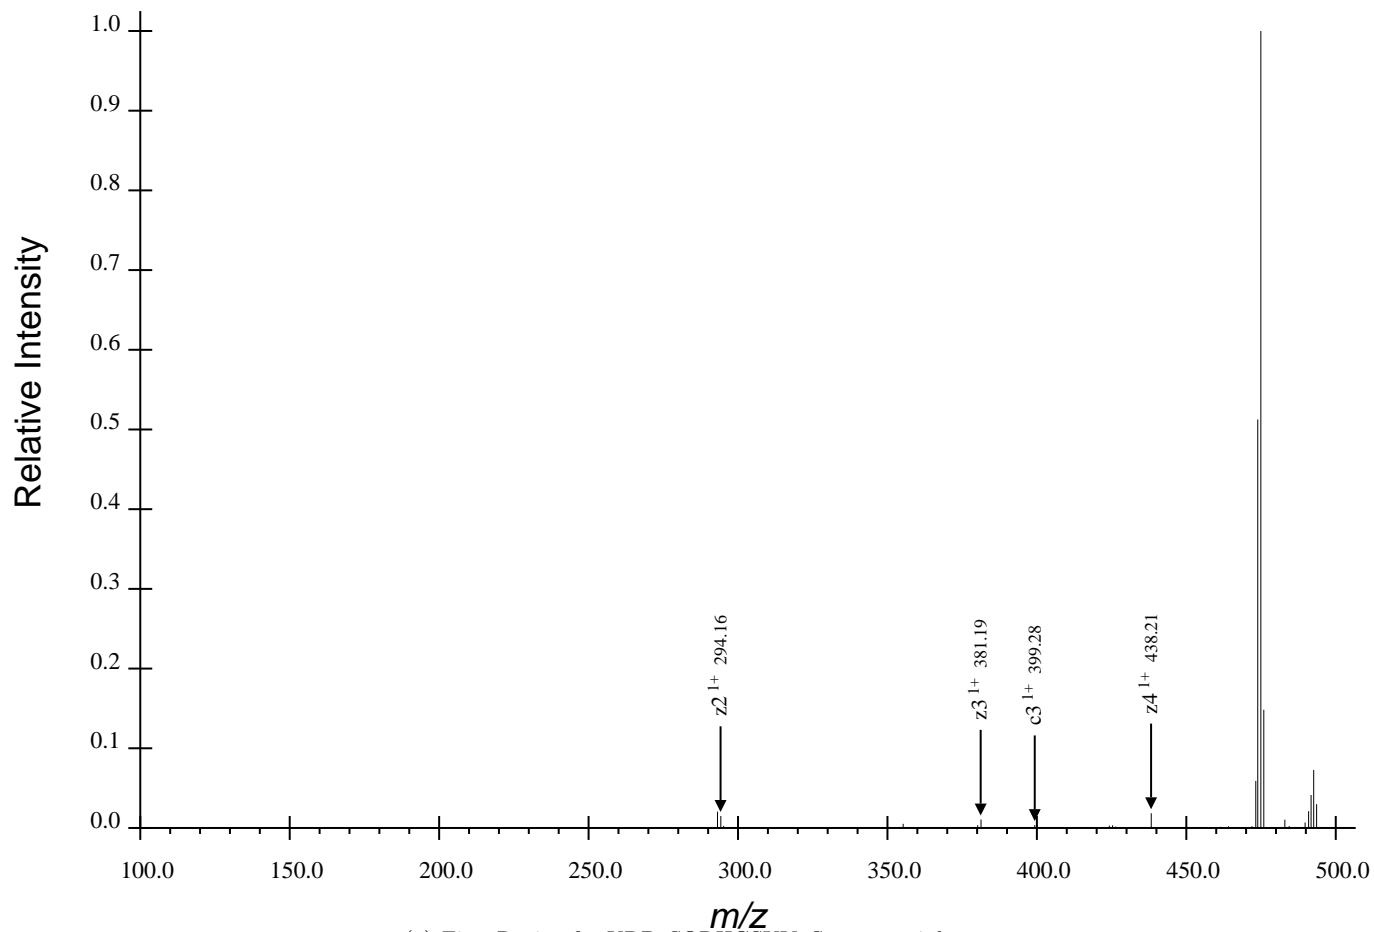

(a) First Region for KRPPSQRHGSKY, Spectrum 4.dta

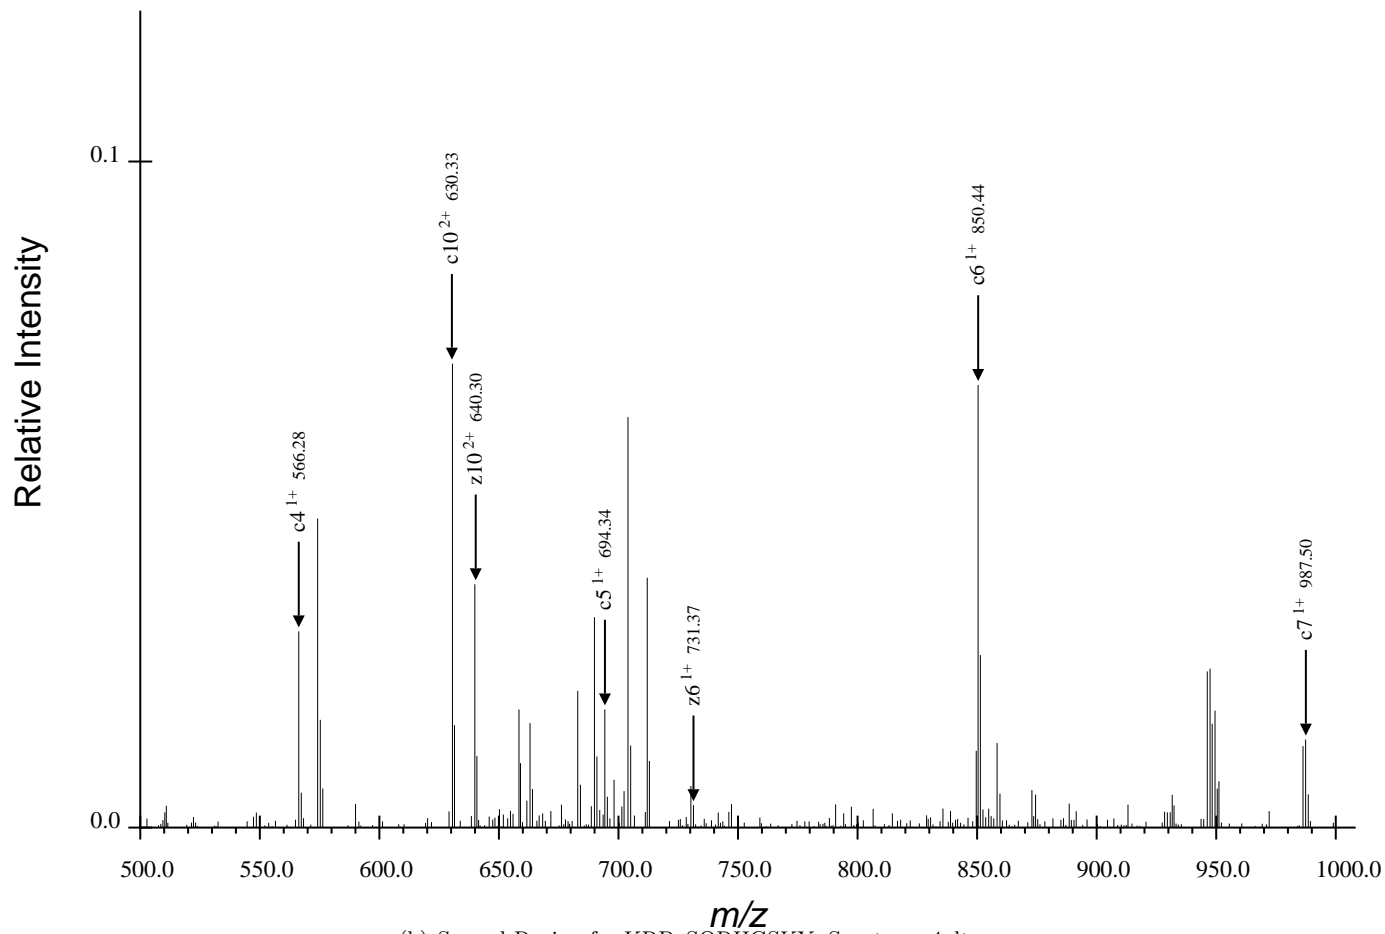

(b) Second Region for KRPPSQRHGSKY, Spectrum 4.dta

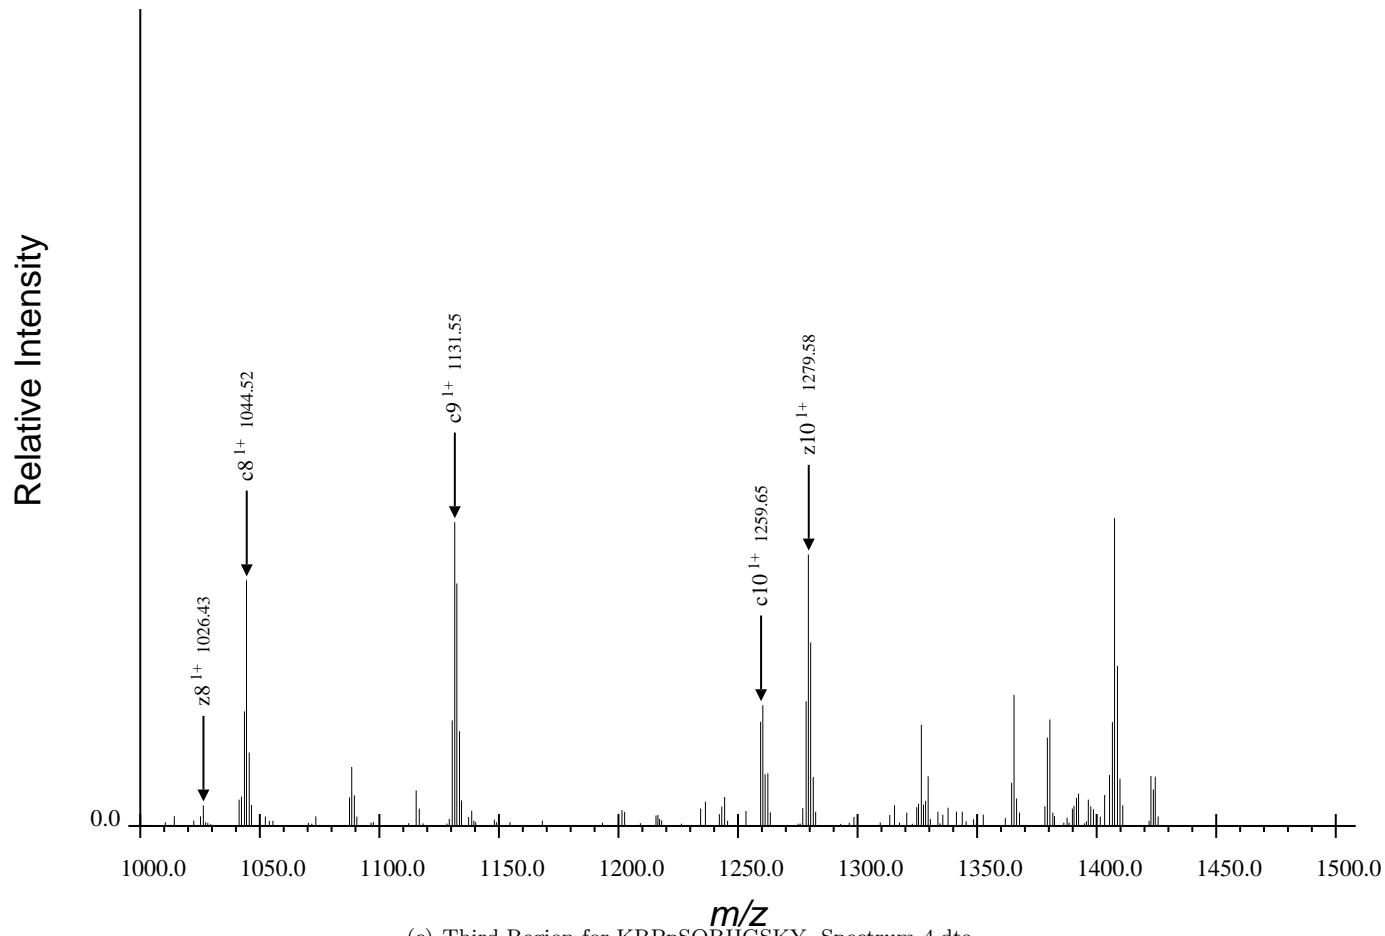

(c) Third Region for KRPpSQRHGSKY, Spectrum 4.dta

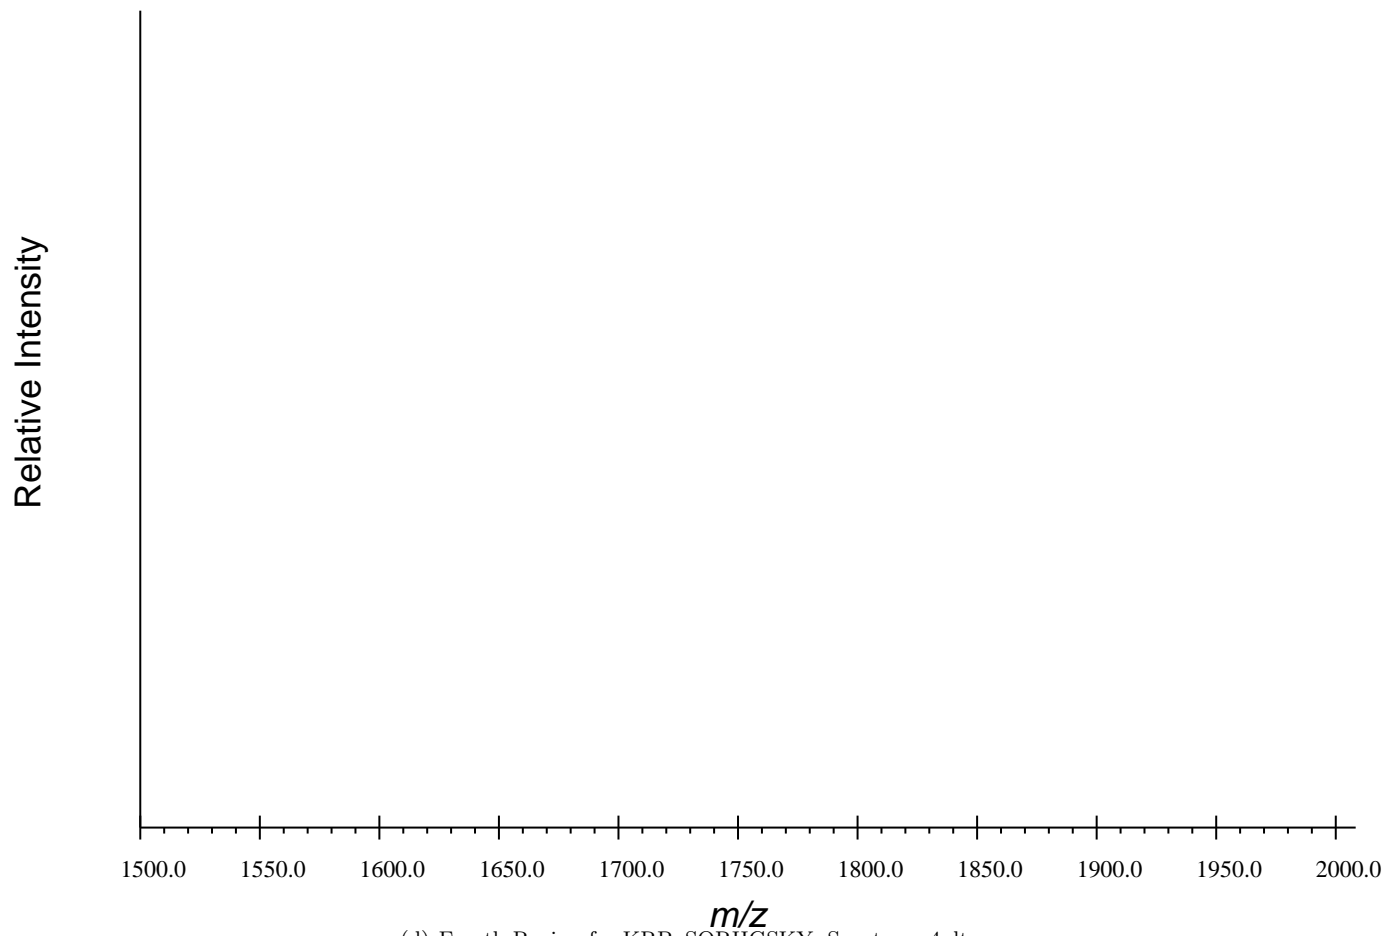

(d) Fourth Region for KRPpSQRHGSKY, Spectrum 4.dta



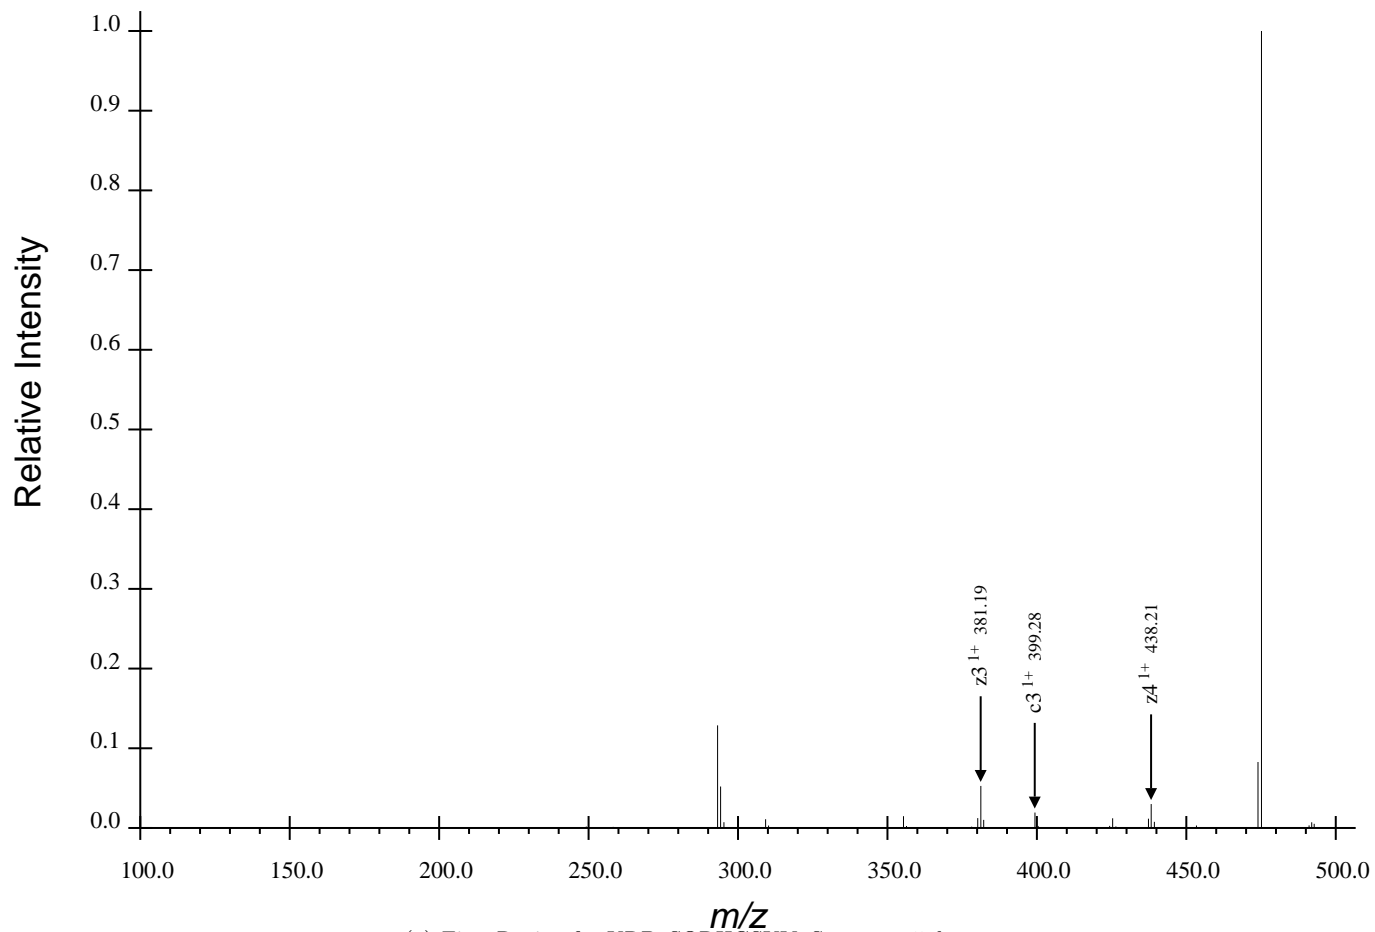

(a) First Region for KRPPSQRHGSKY, Spectrum 5.dta

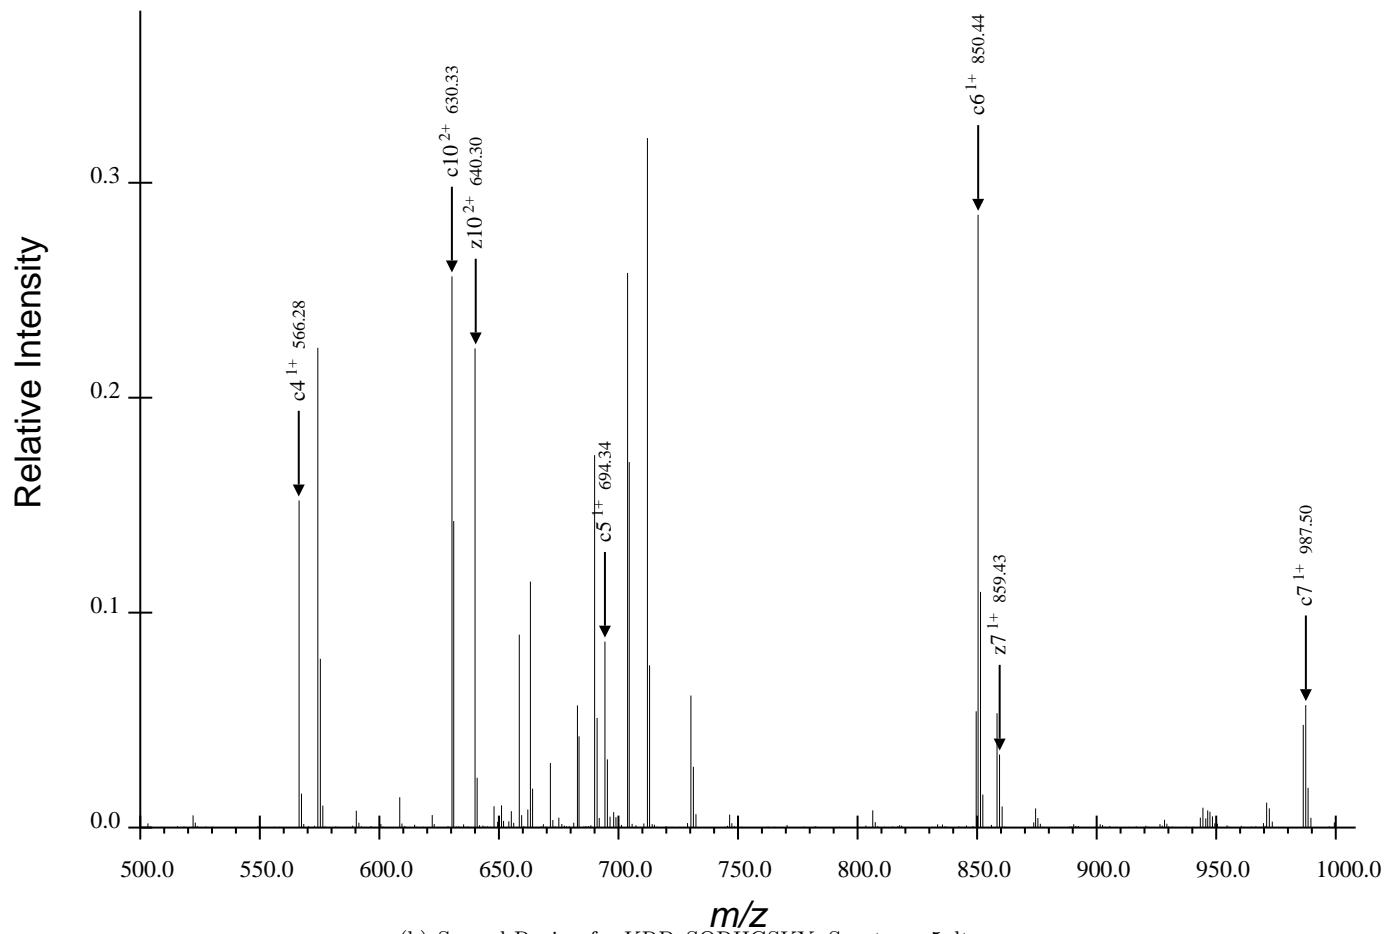

(b) Second Region for KRPPSQRHGSKY, Spectrum 5.dta

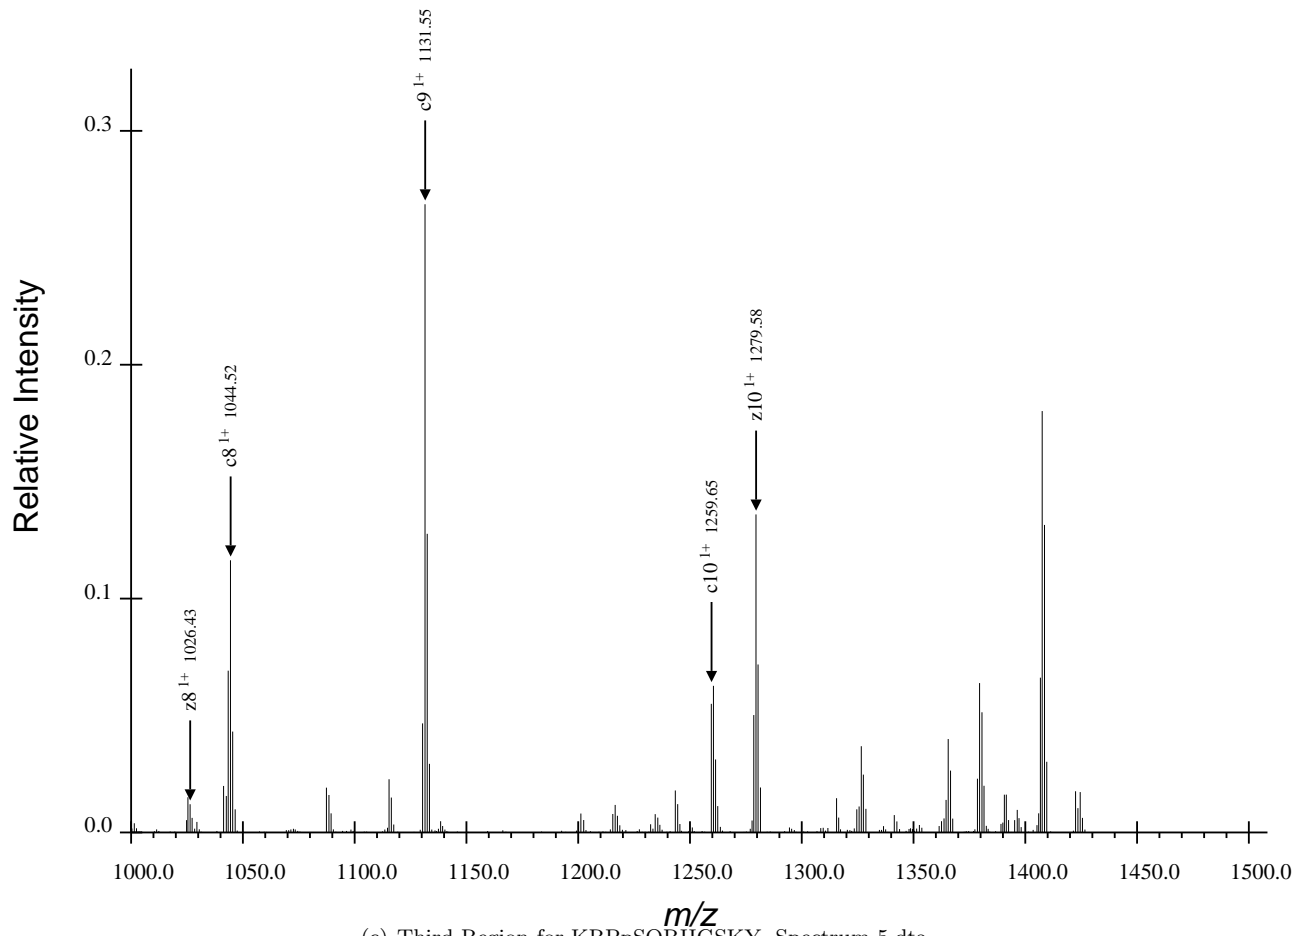

(c) Third Region for KRPPSQRHGSKY, Spectrum 5.dta

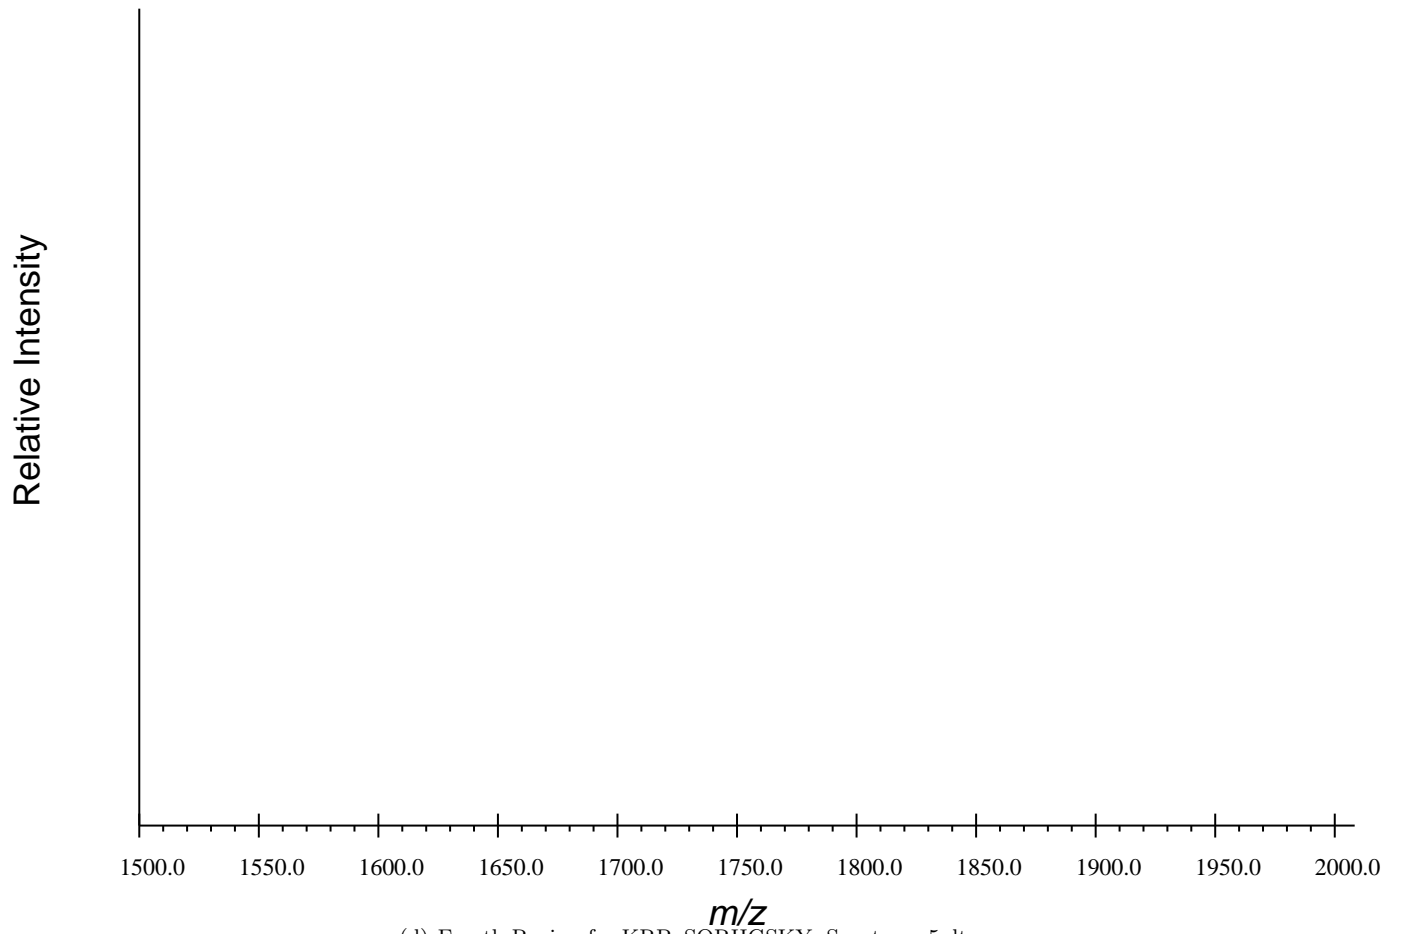

(d) Fourth Region for KRPPSQRHGSKY, Spectrum 5.dta

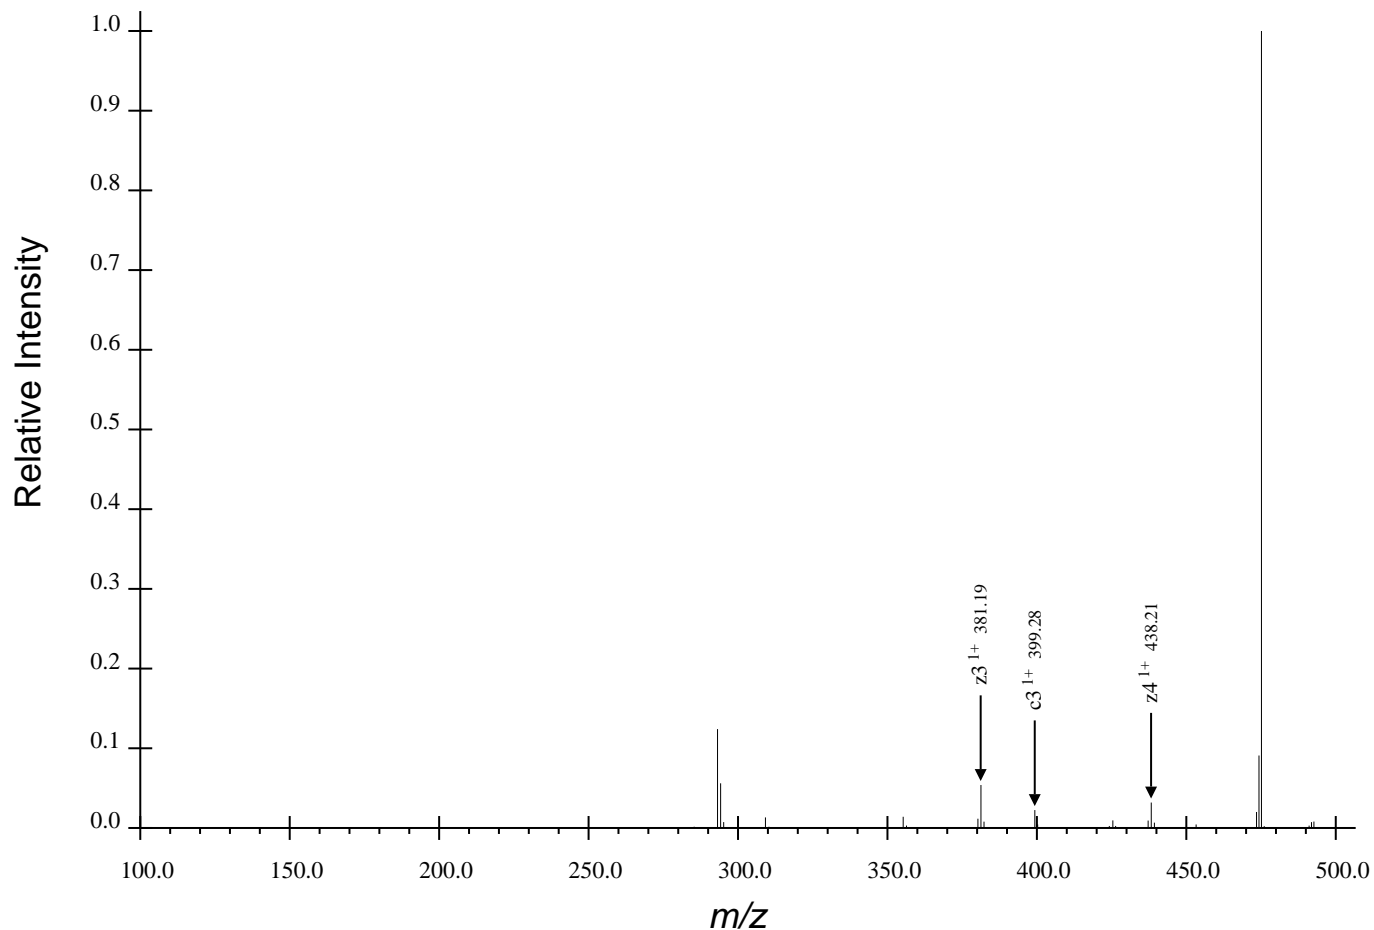

(a) First Region for KRPPSQRHGSKY, Spectrum 6.dta

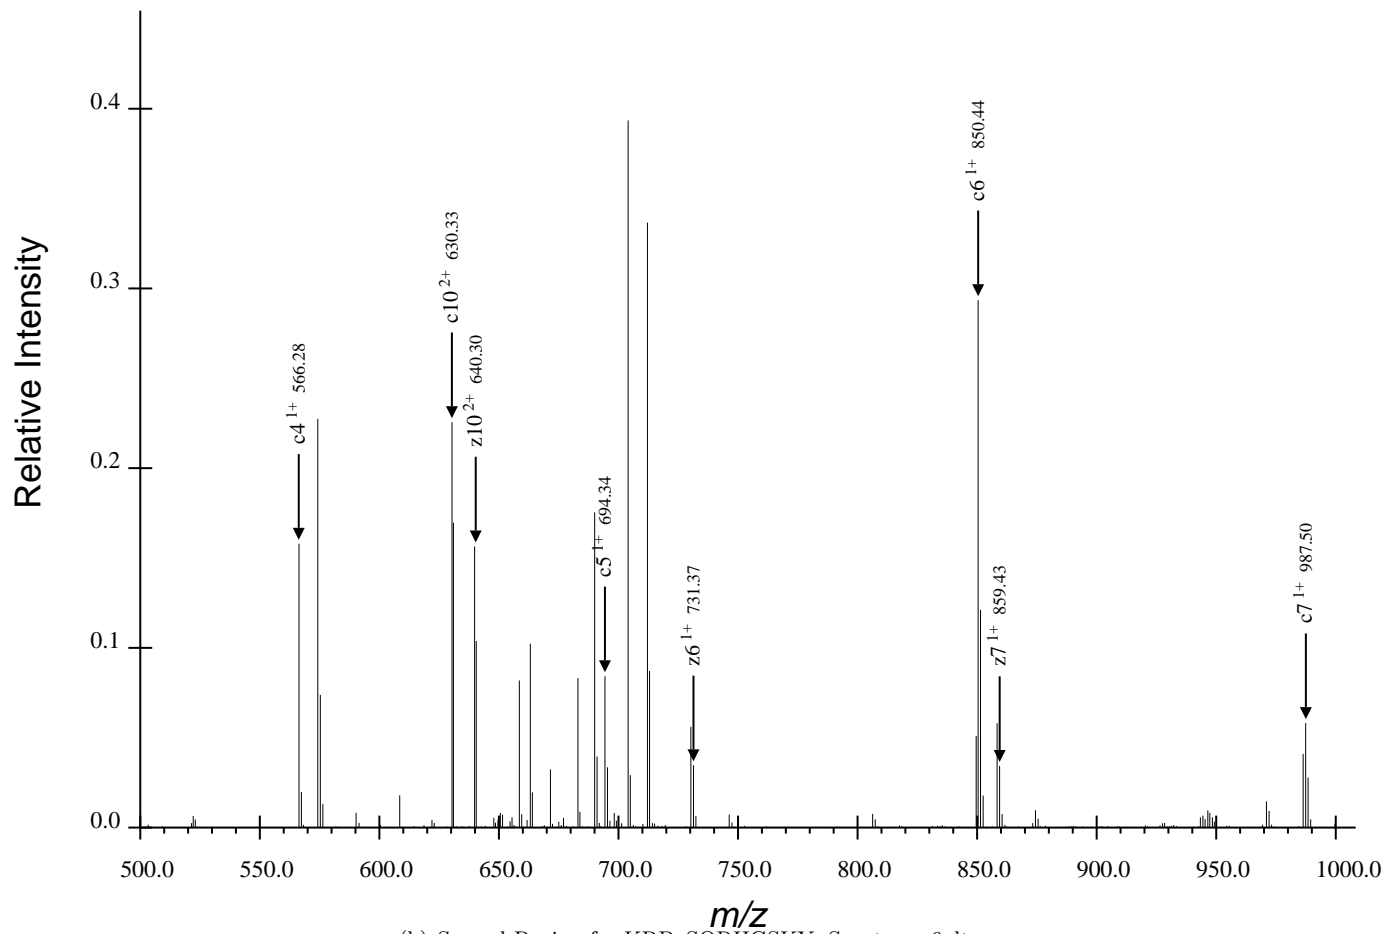

(b) Second Region for KRPPSQRHGSKY, Spectrum 6.dta

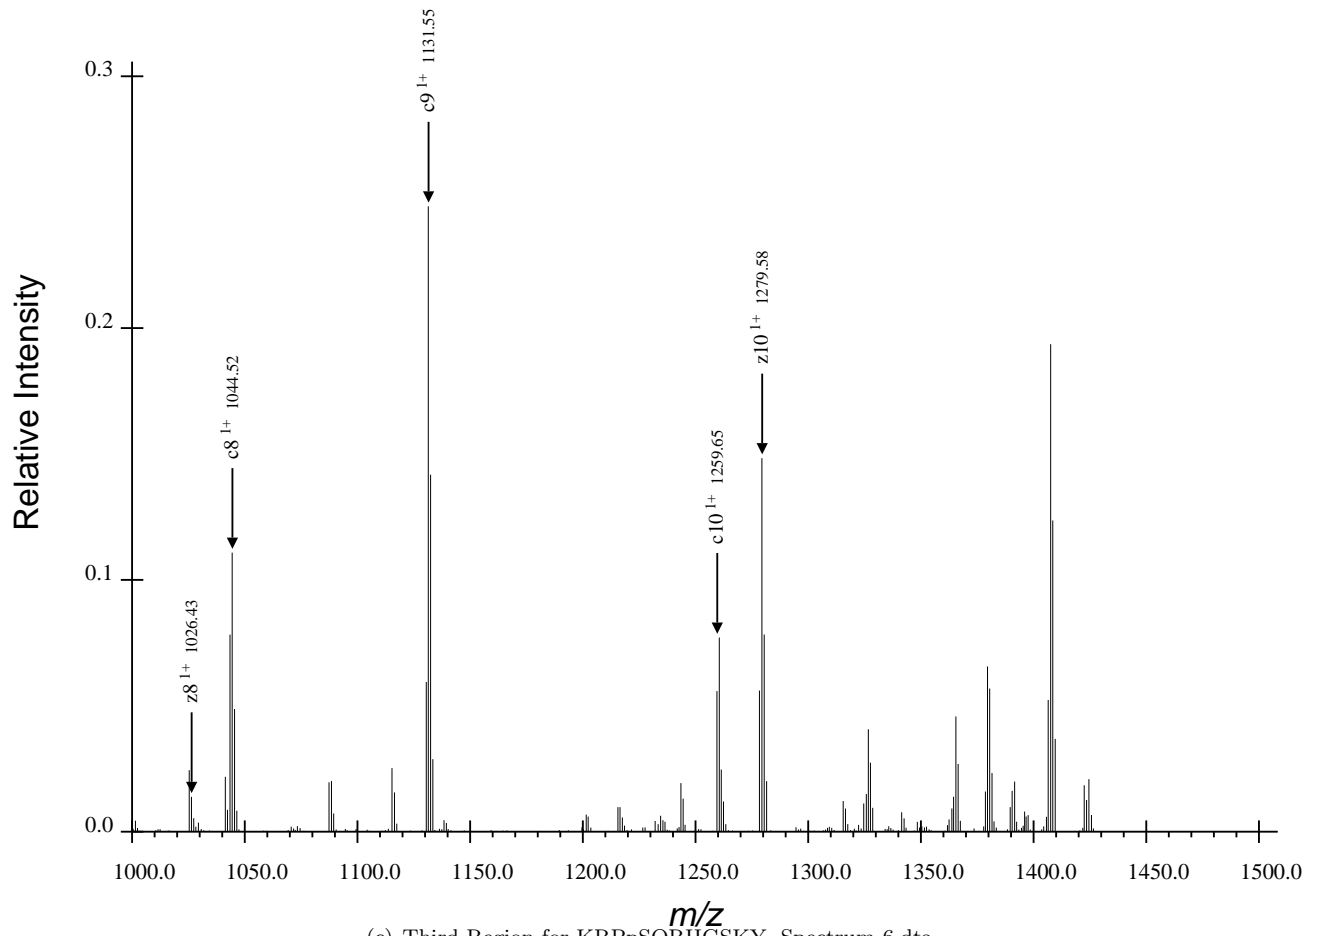

(c) Third Region for KRPpSQRHGSKY, Spectrum 6.dta

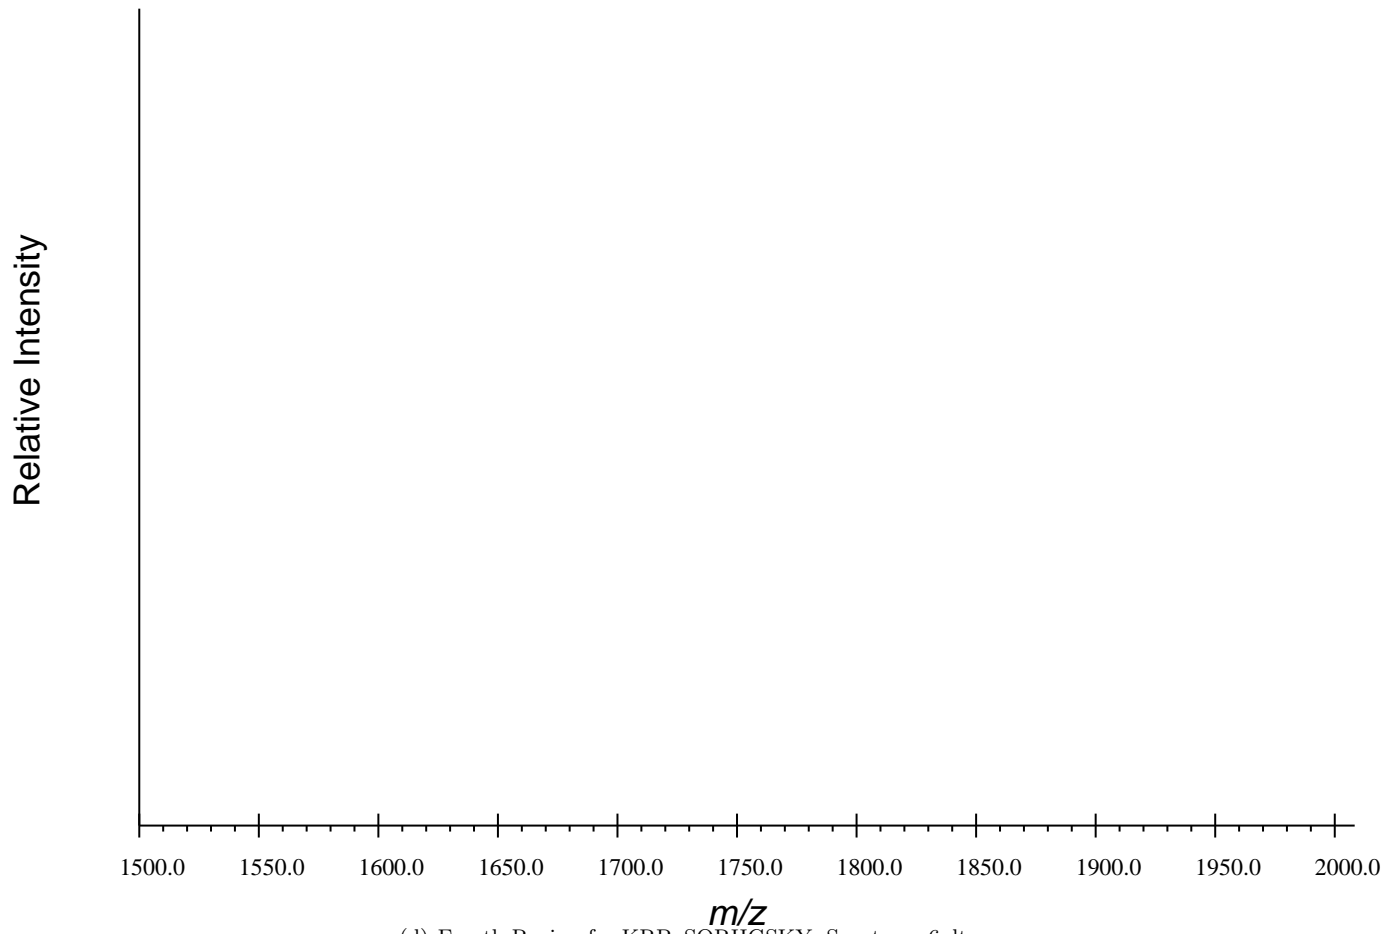

(d) Fourth Region for KRPpSQRHGSKY, Spectrum 6.dta

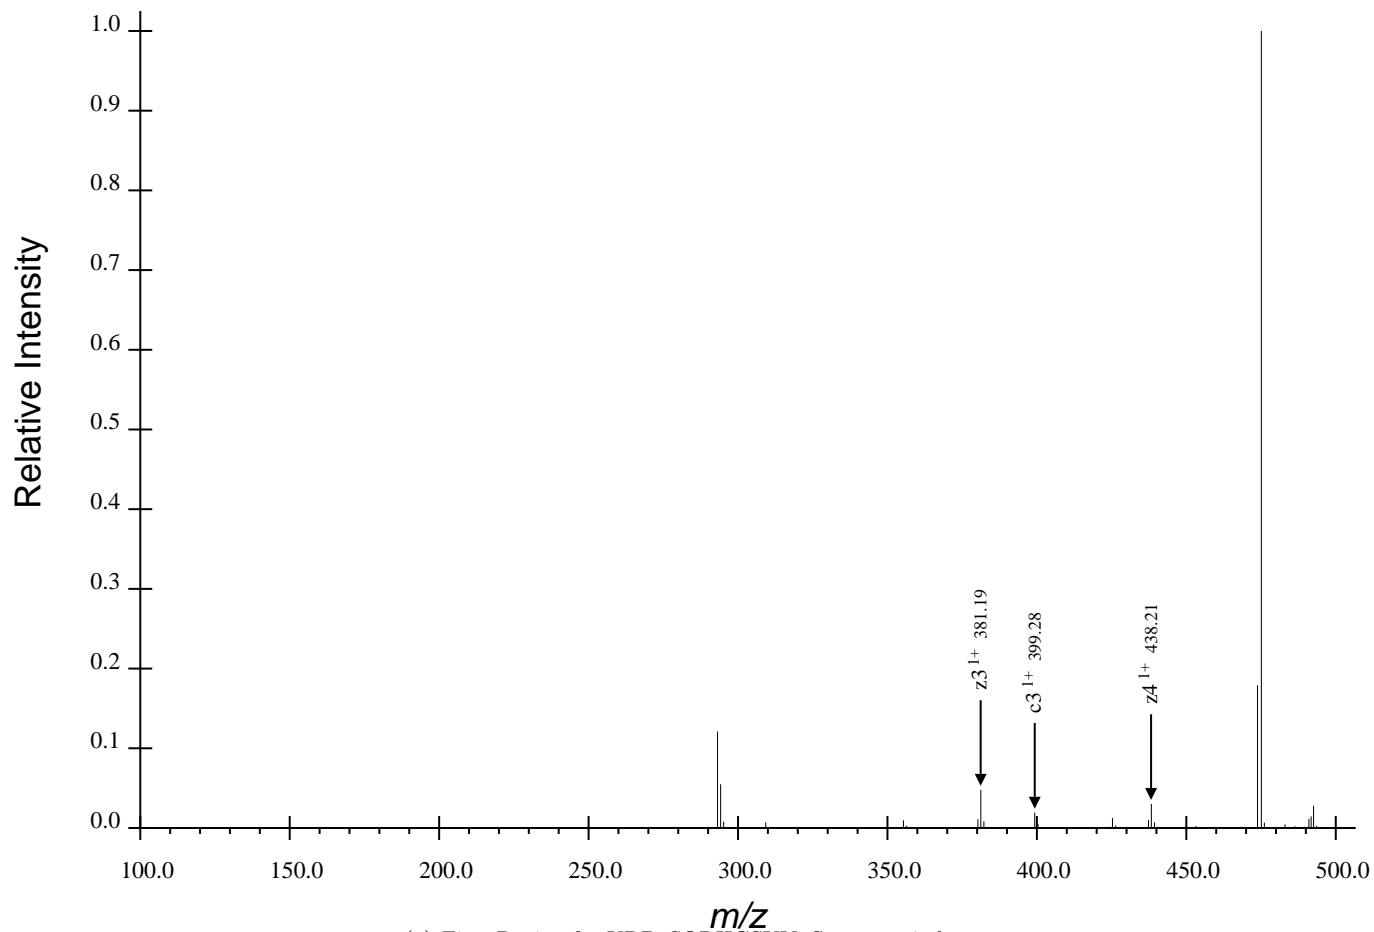

(a) First Region for KRPpSQRHGSKY, Spectrum 7.dta

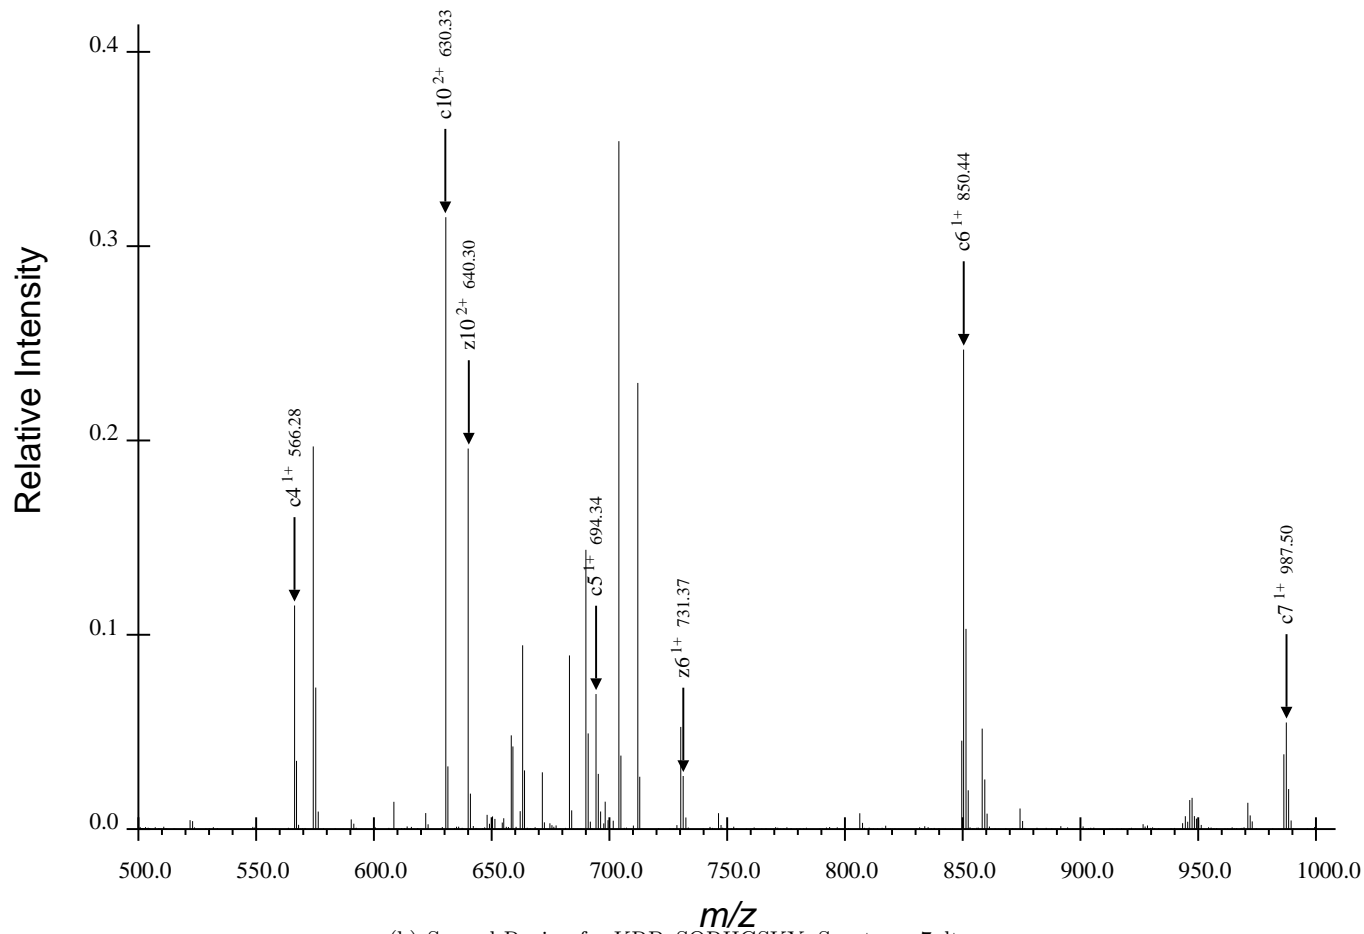

(b) Second Region for KRPpSQRHGSKY, Spectrum 7.dta

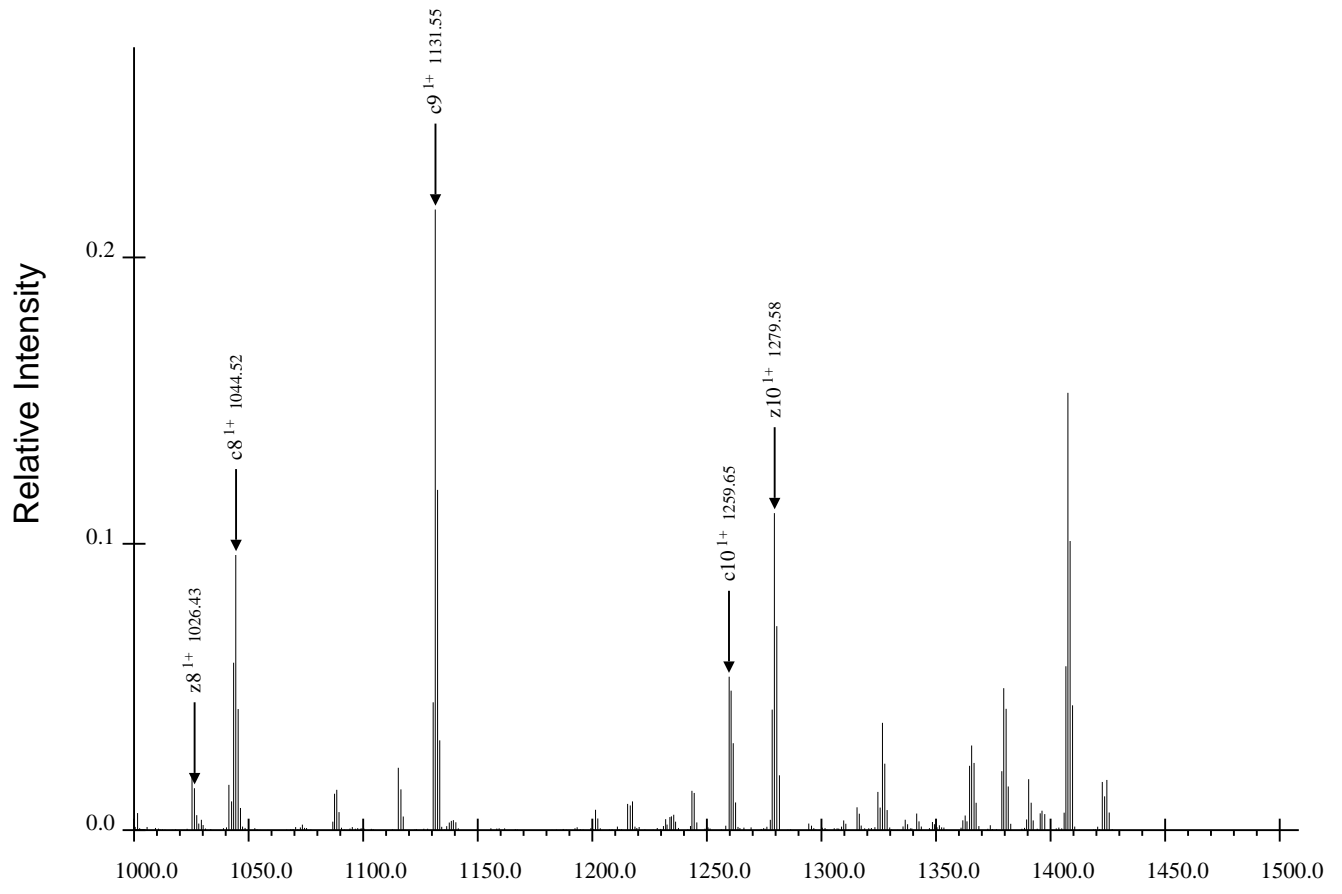

(c) Third Region for KRPPSQRHGSKY, Spectrum 7.dta

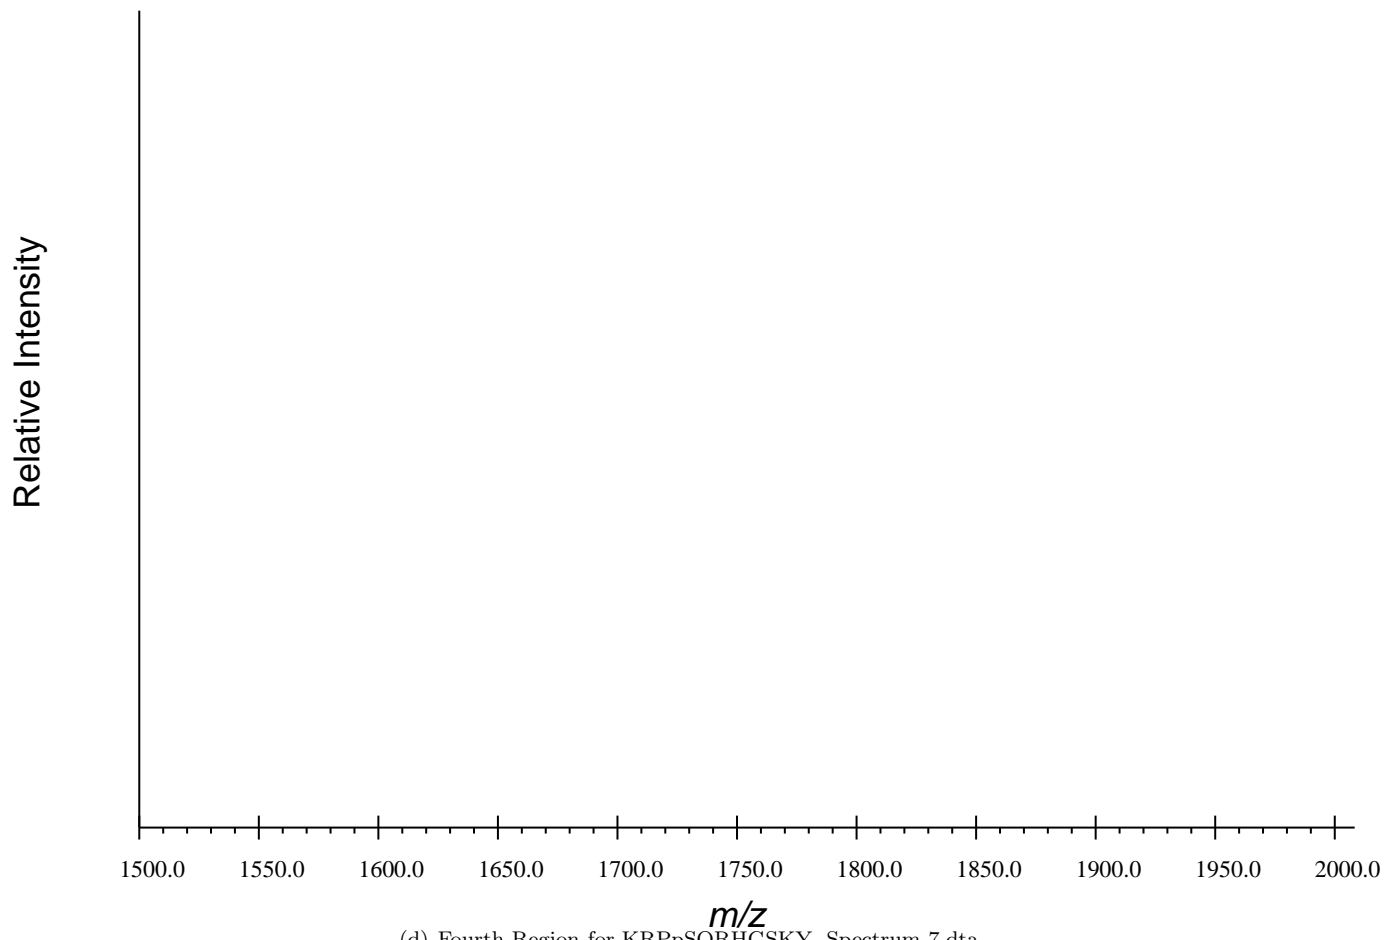

(d) Fourth Region for KRPPSQRHGSKY, Spectrum 7.dta

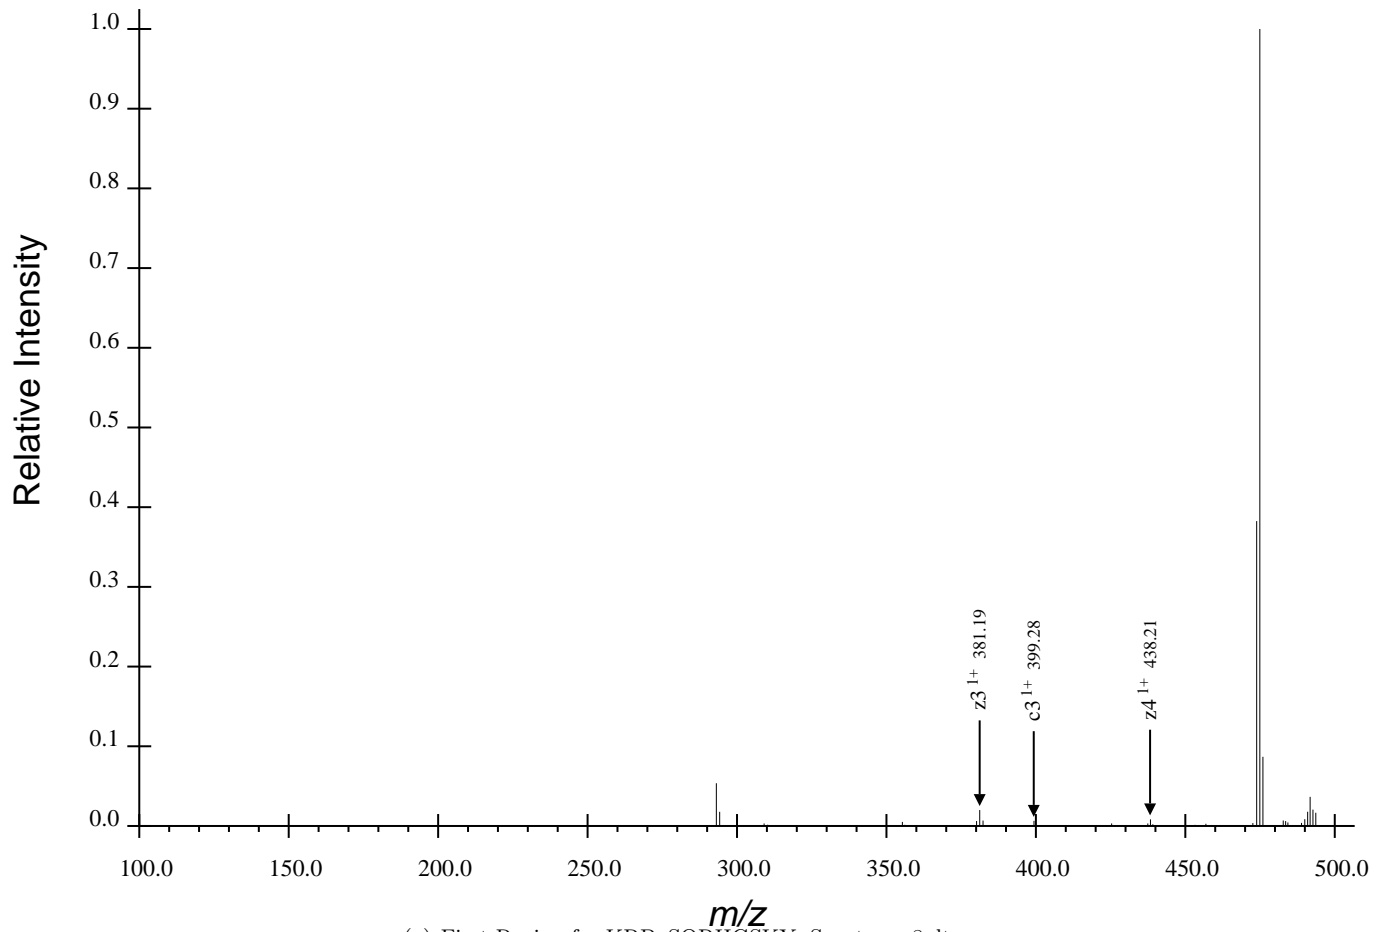

(a) First Region for KRPPSQRHGSKY, Spectrum 8.dta

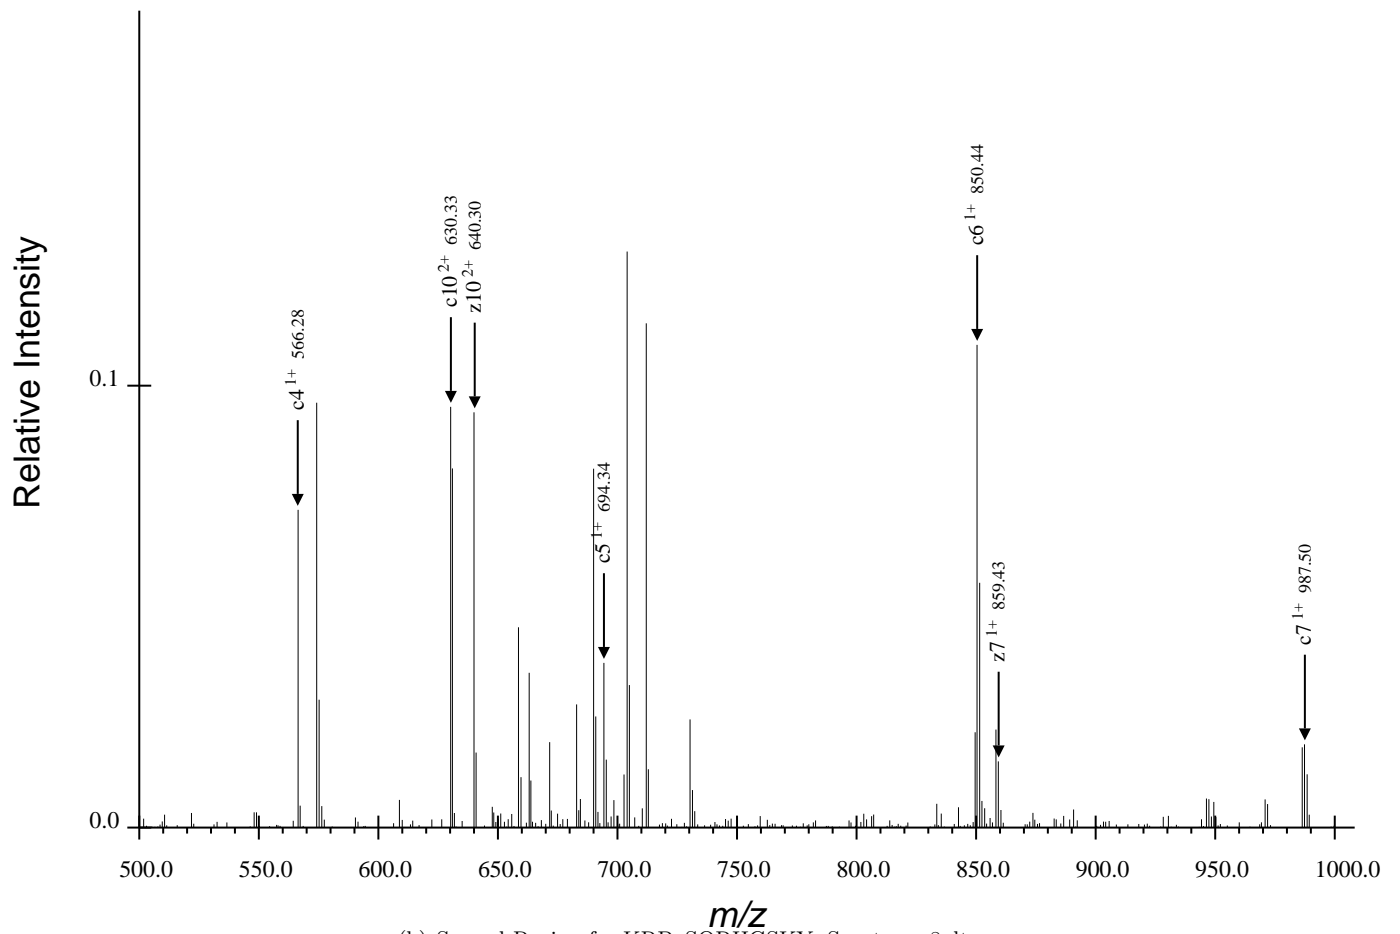

(b) Second Region for KRPPSQRHGSKY, Spectrum 8.dta

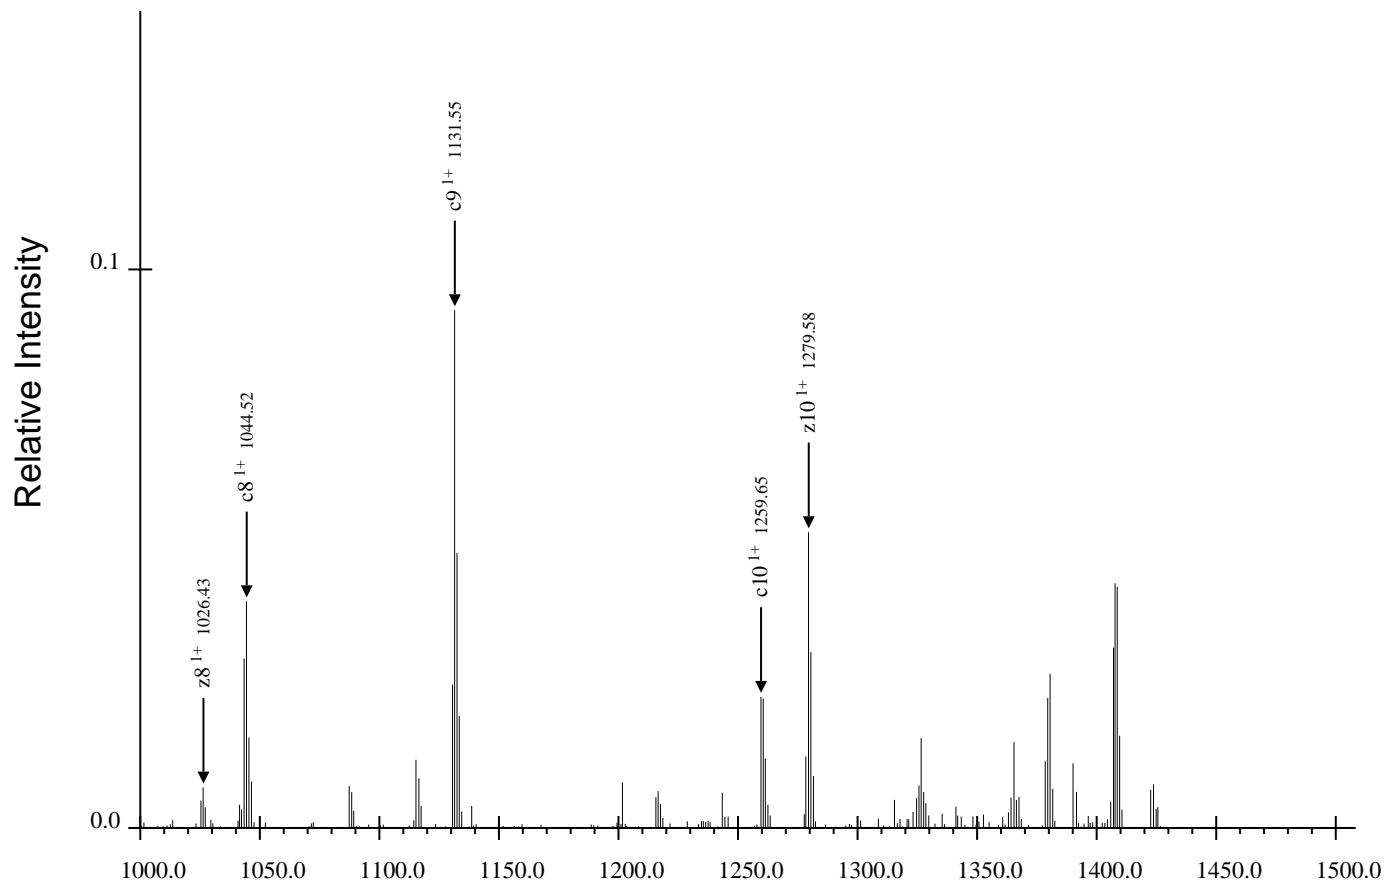

(c) Third Region for KRPPpSQRHGSKY, Spectrum 8.dta

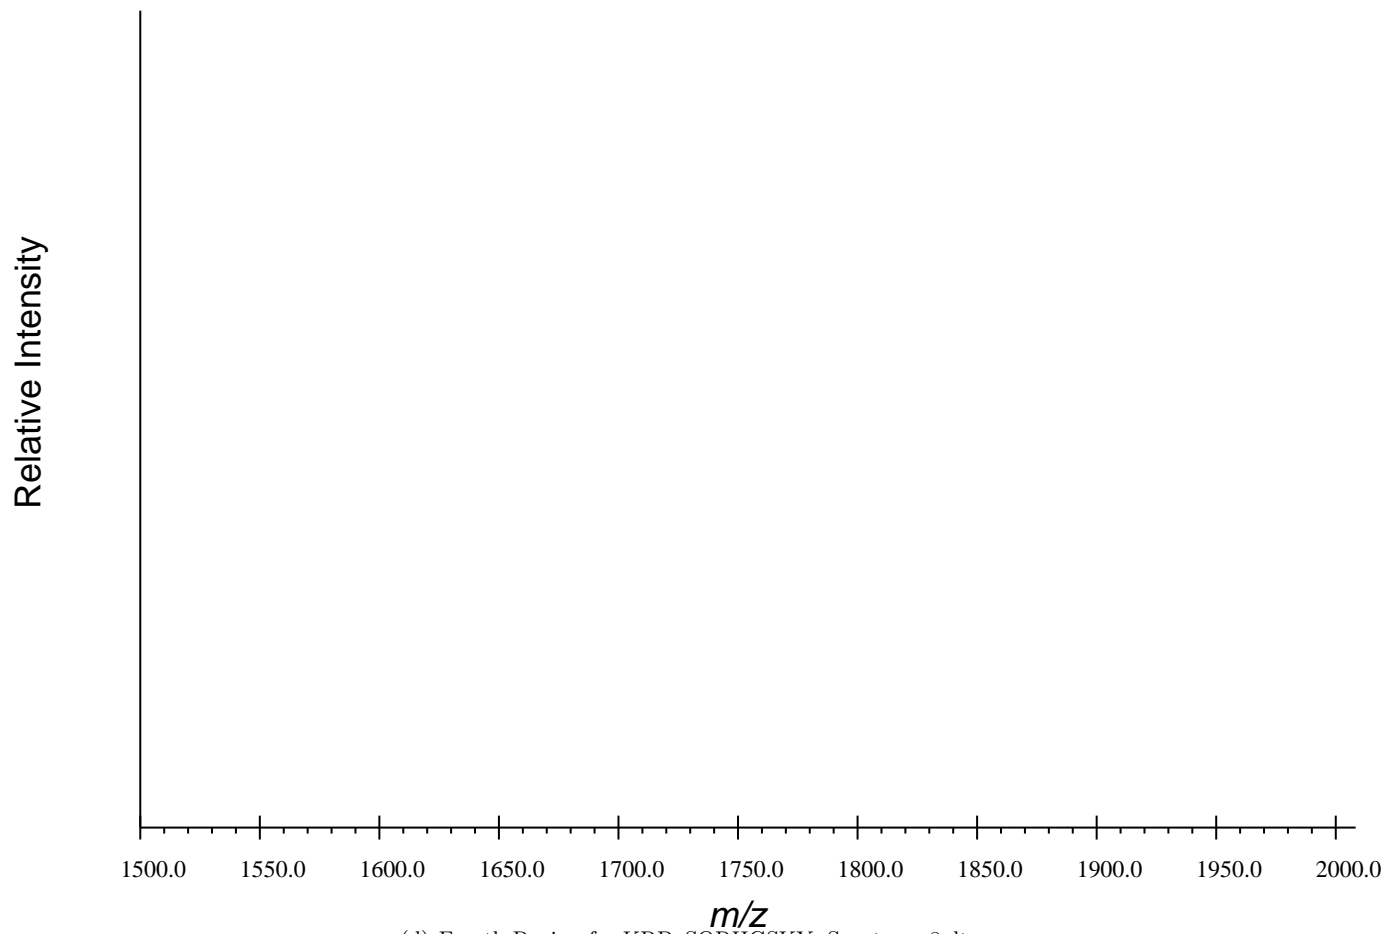

(d) Fourth Region for KRPPpSQRHGSKY, Spectrum 8.dta



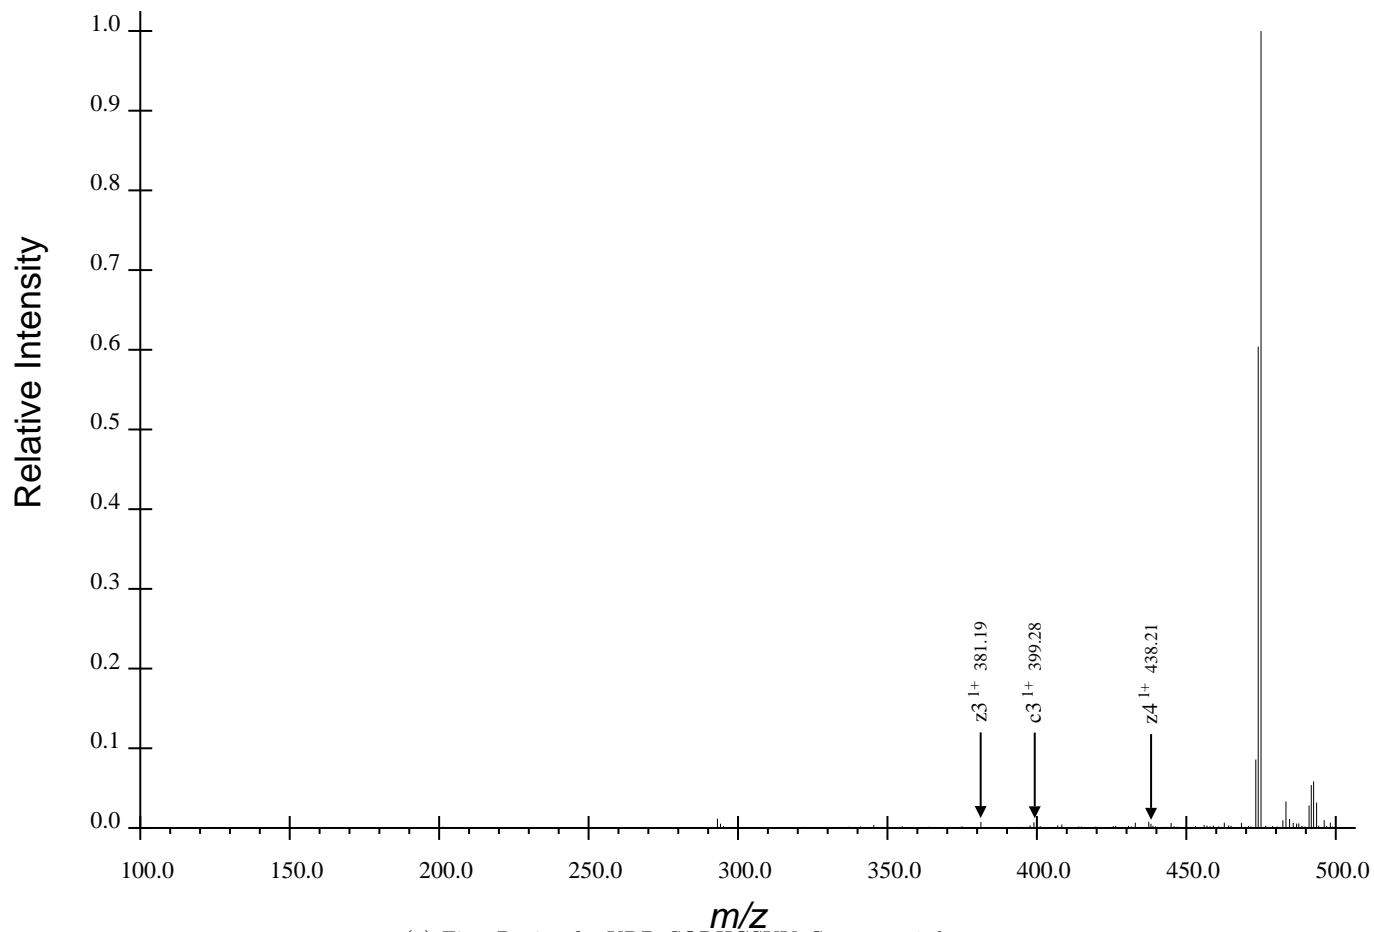

(a) First Region for KRPPSQRHGSKY, Spectrum 9.dta

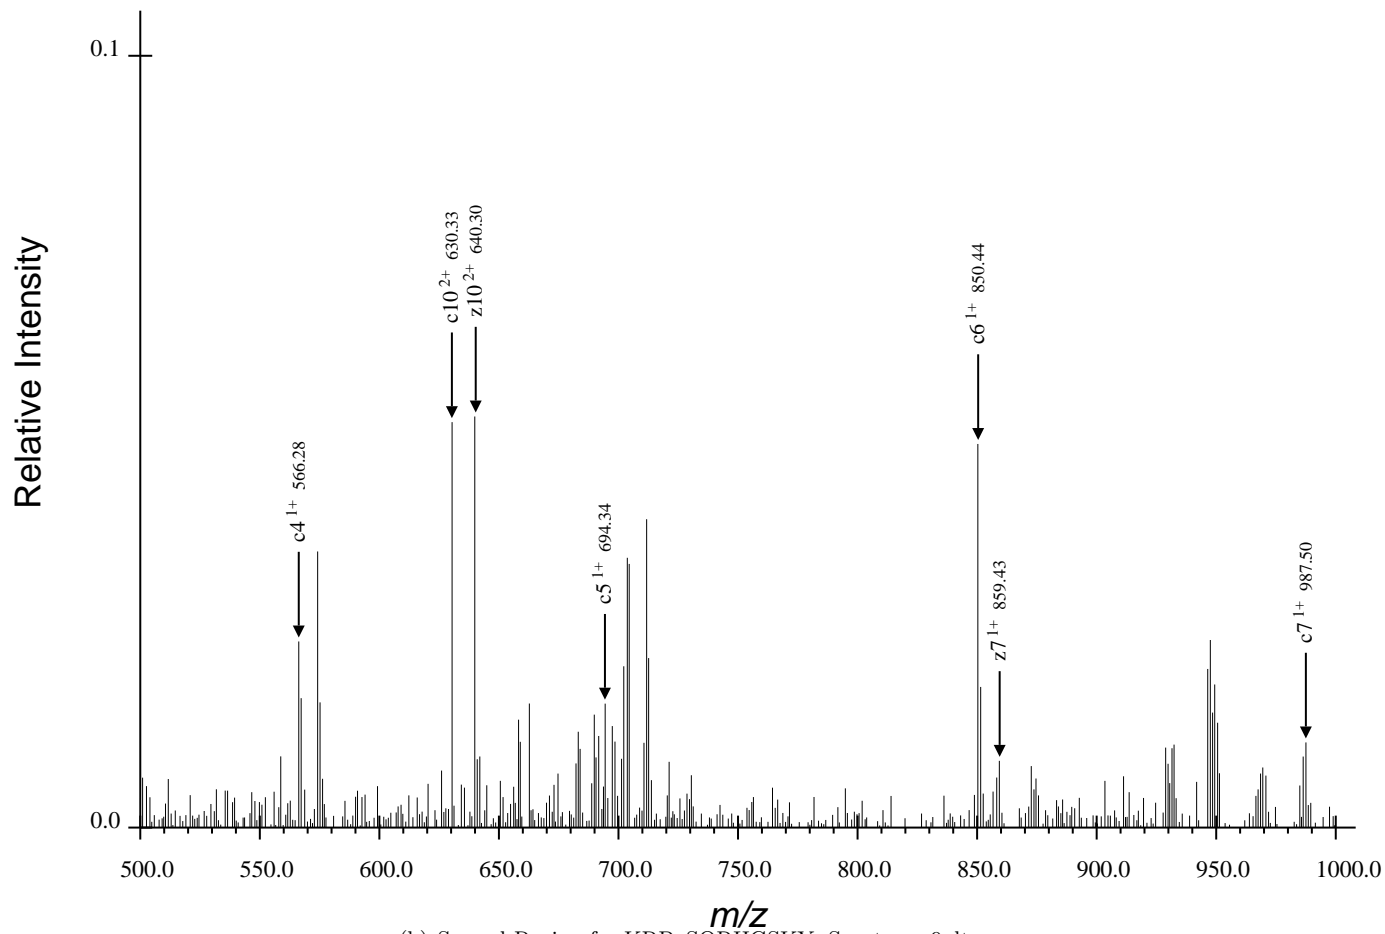

(b) Second Region for KRPPSQRHGSKY, Spectrum 9.dta

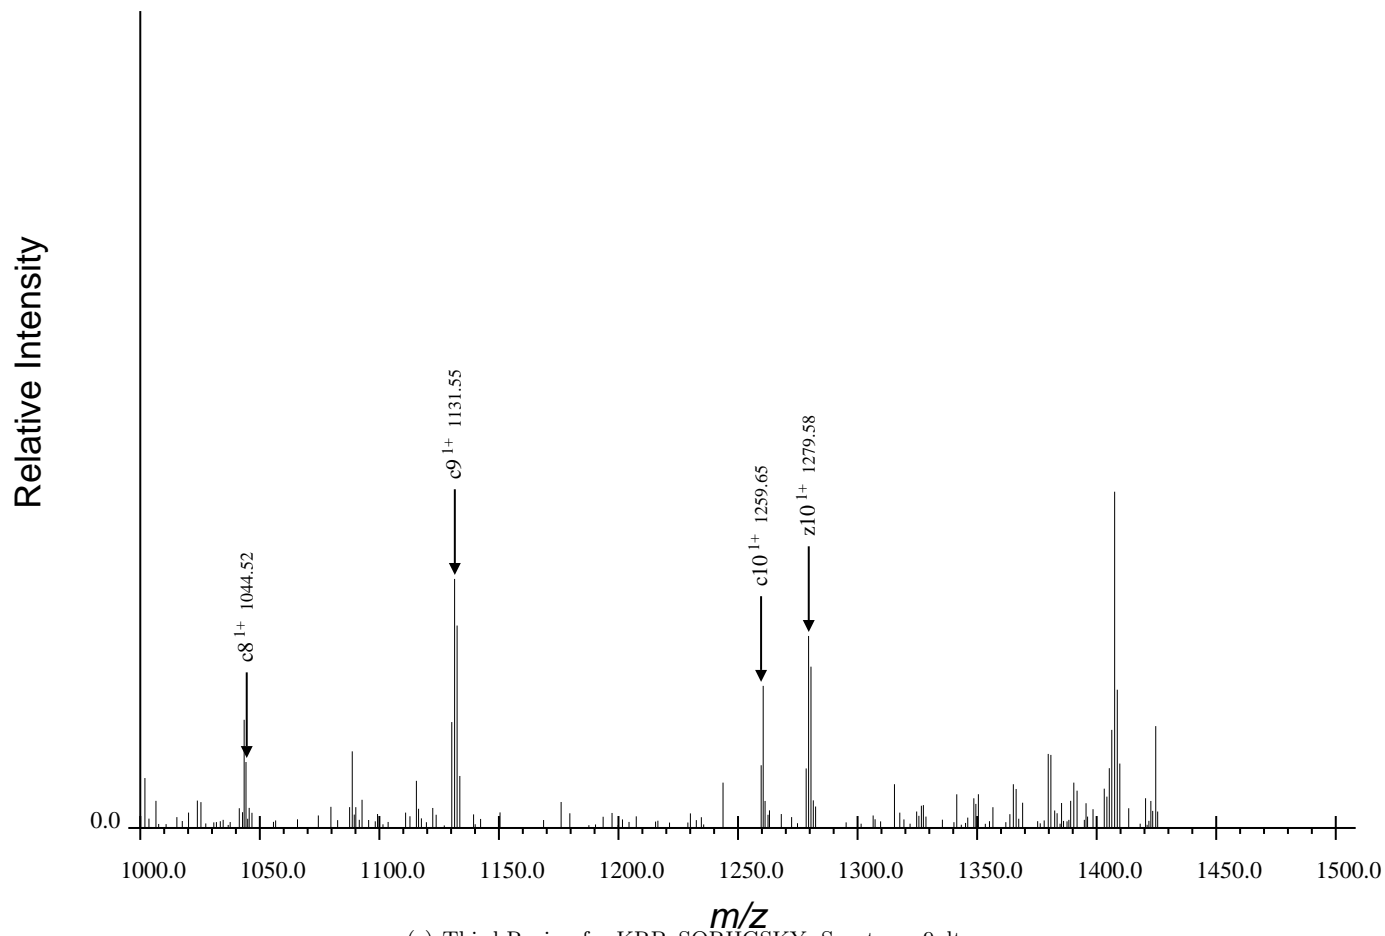

(c) Third Region for KRPpSQRHGSKY, Spectrum 9.dta

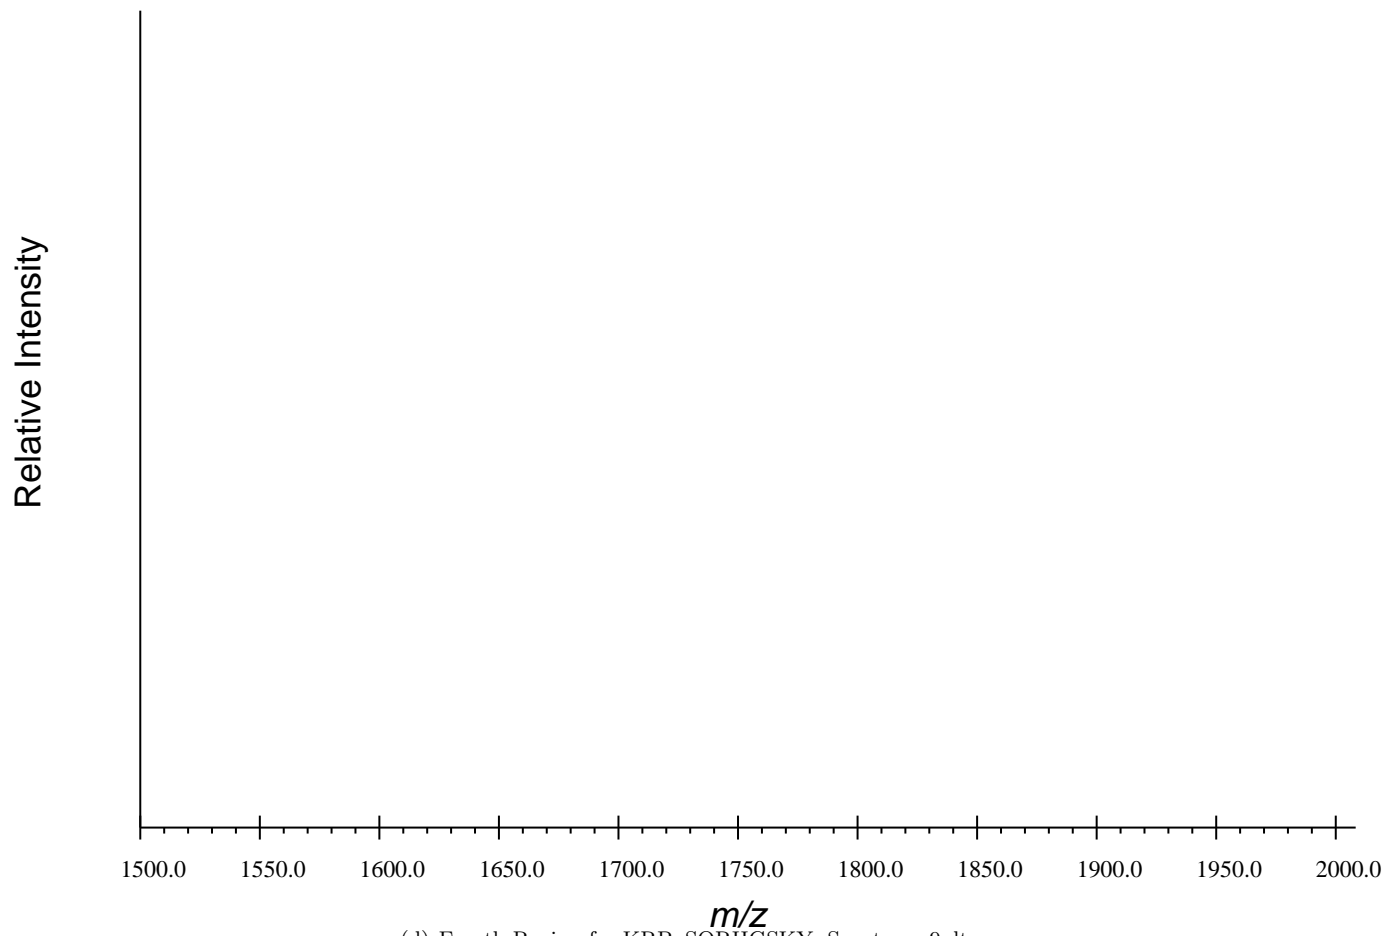

(d) Fourth Region for KRPpSQRHGSKY, Spectrum 9.dta

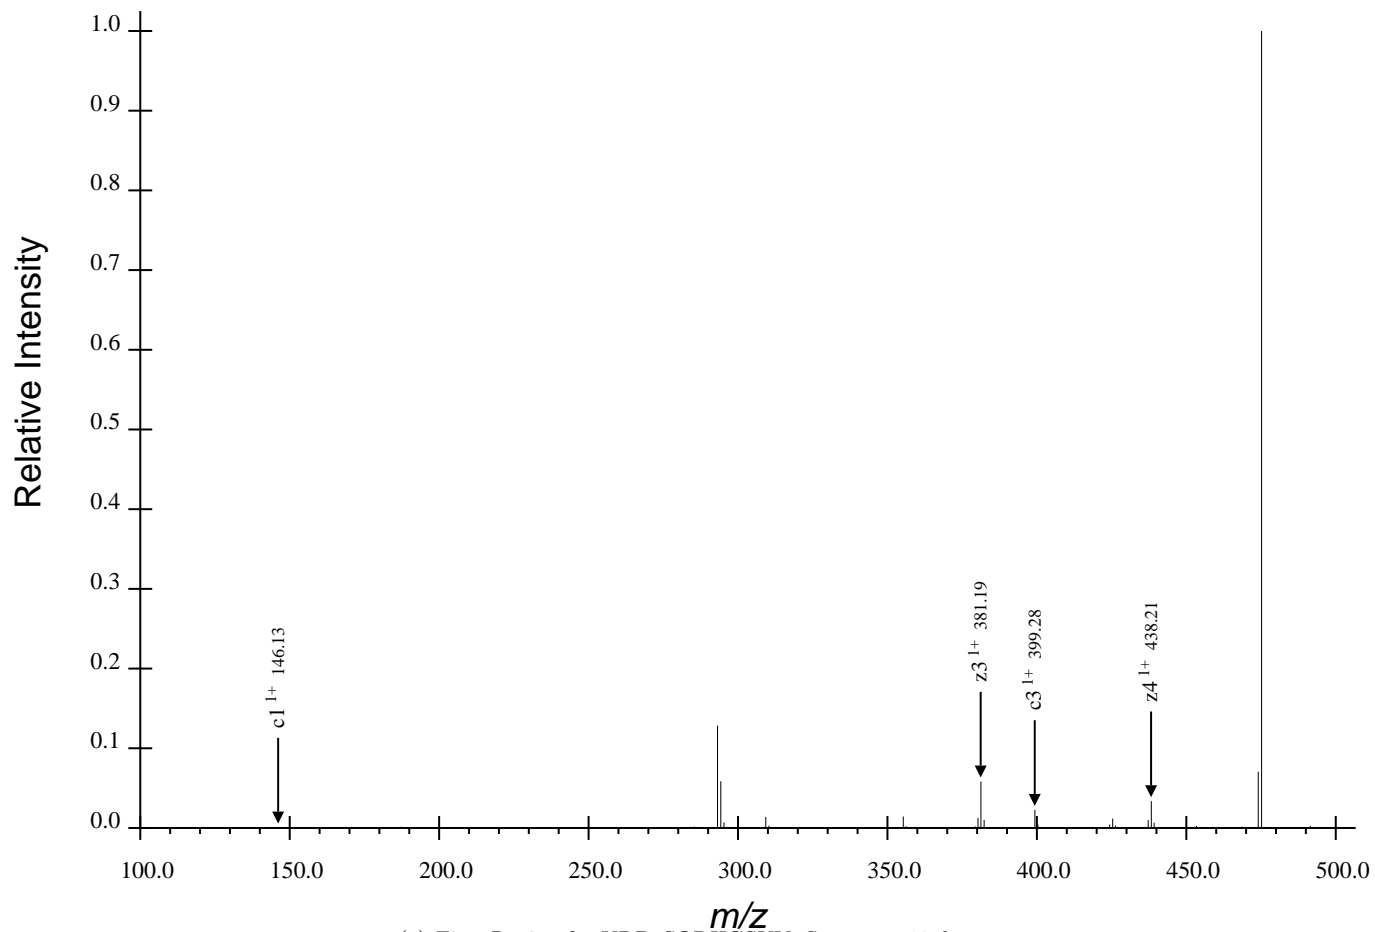

(a) First Region for KRPpSQRHGSKY, Spectrum 10.dta

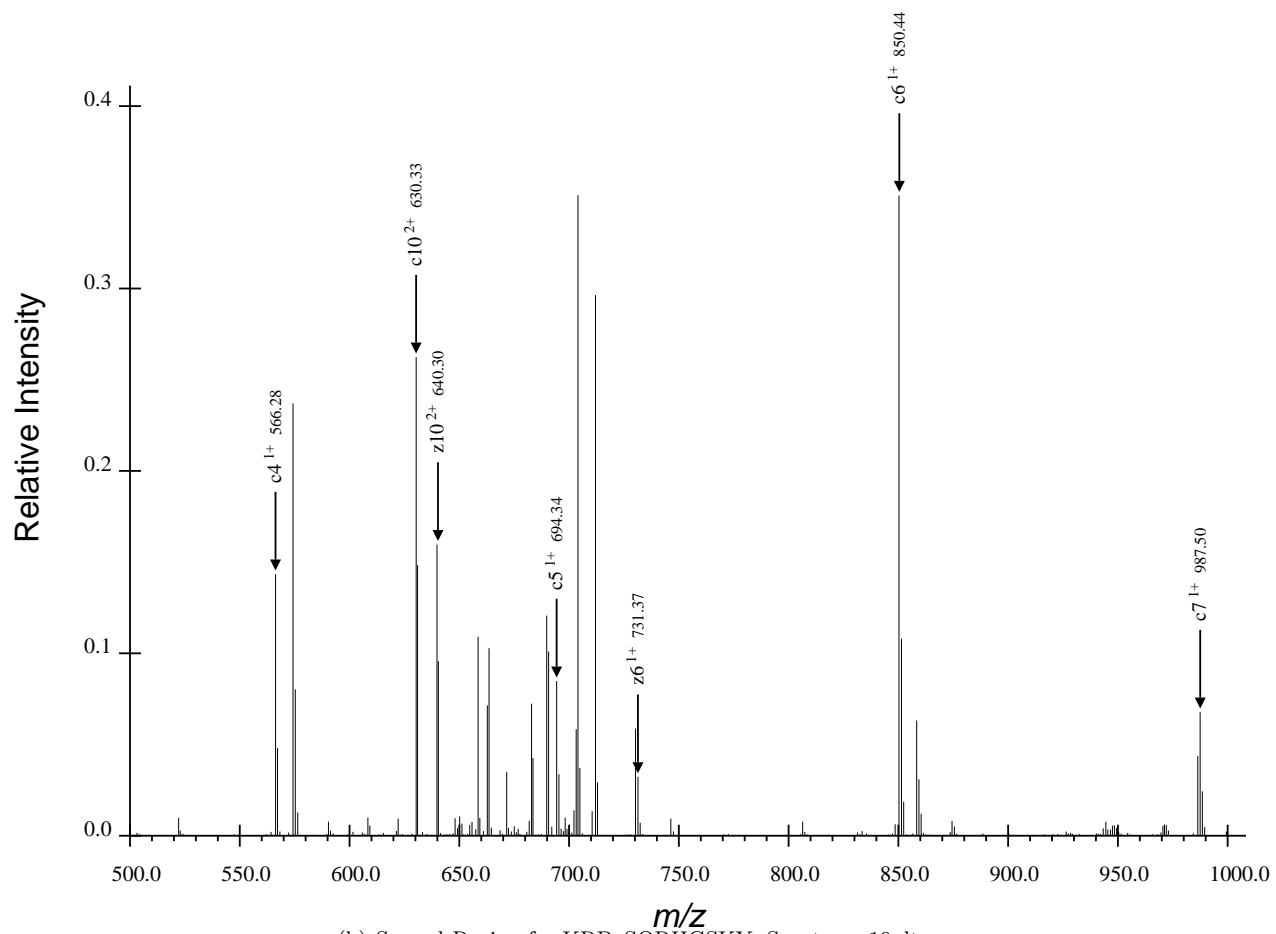

(b) Second Region for KRPpSQRHGSKY, Spectrum 10.dta

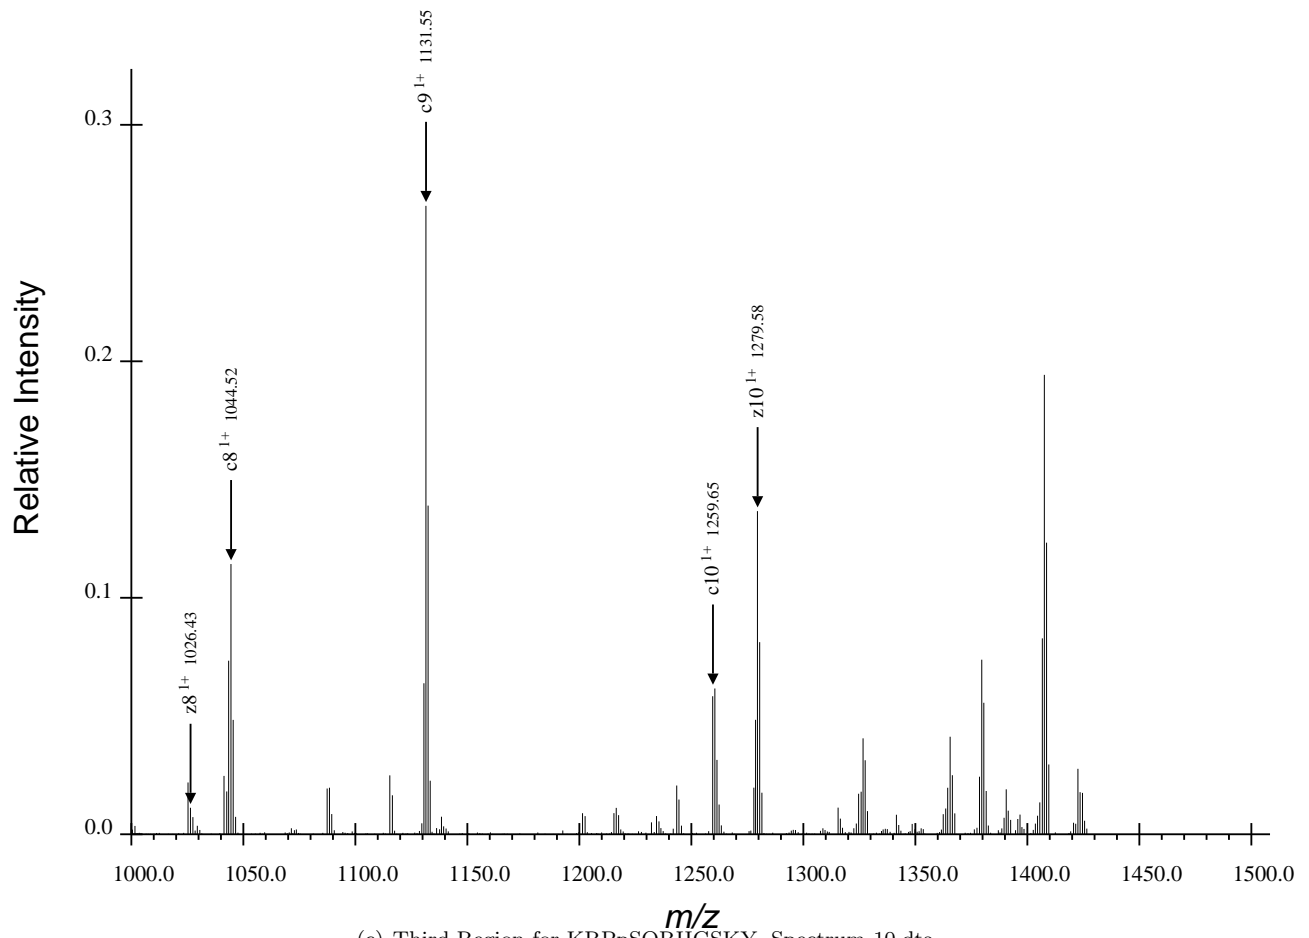

(c) Third Region for KRPpSQRHGSKY, Spectrum 10.dta

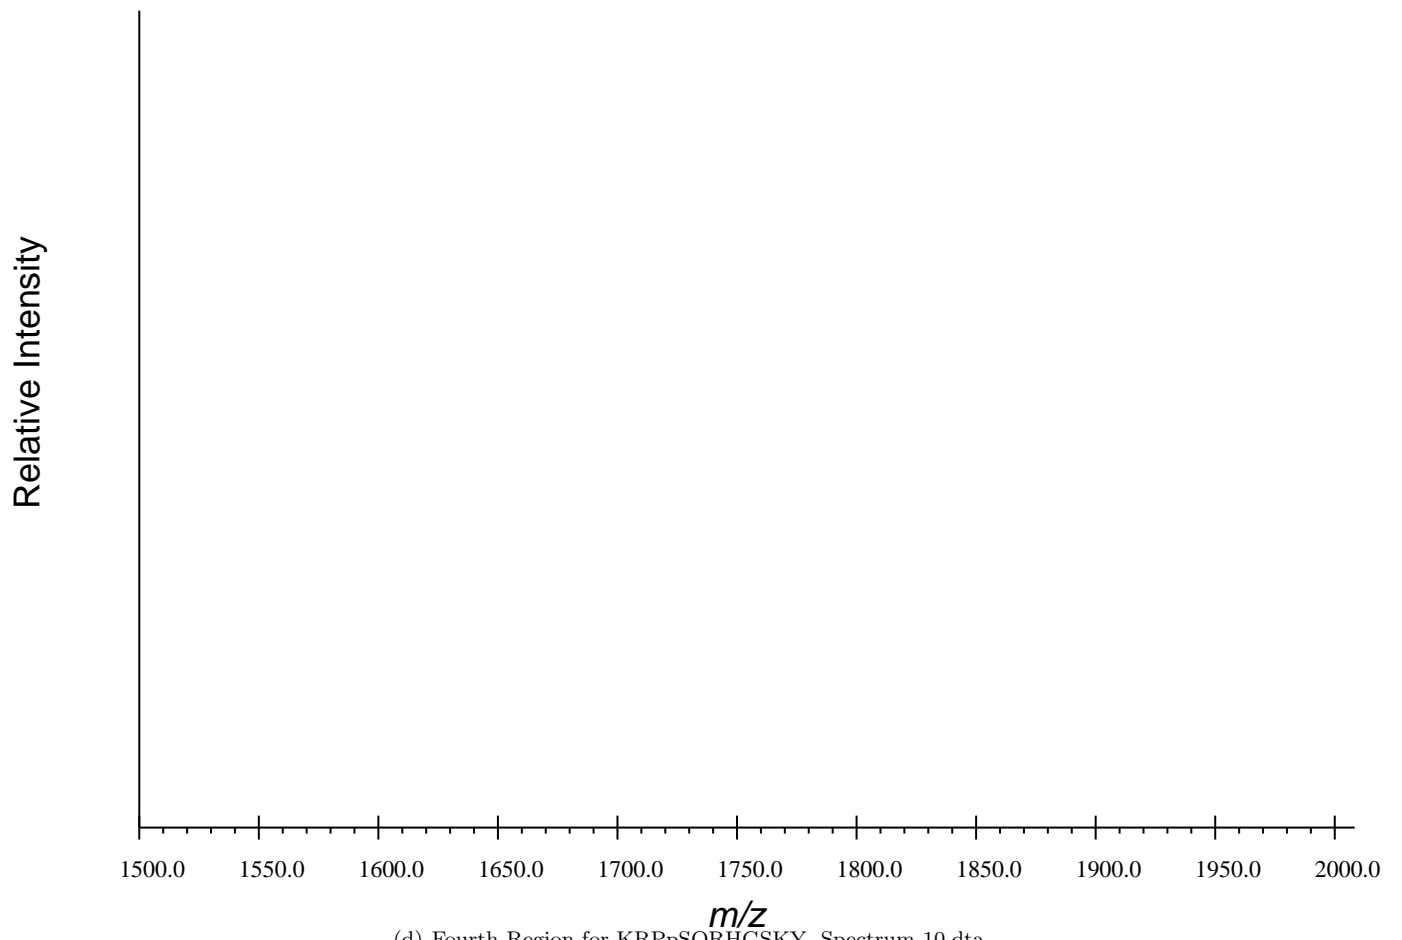

(d) Fourth Region for KRPpSQRHGSKY, Spectrum 10.dta

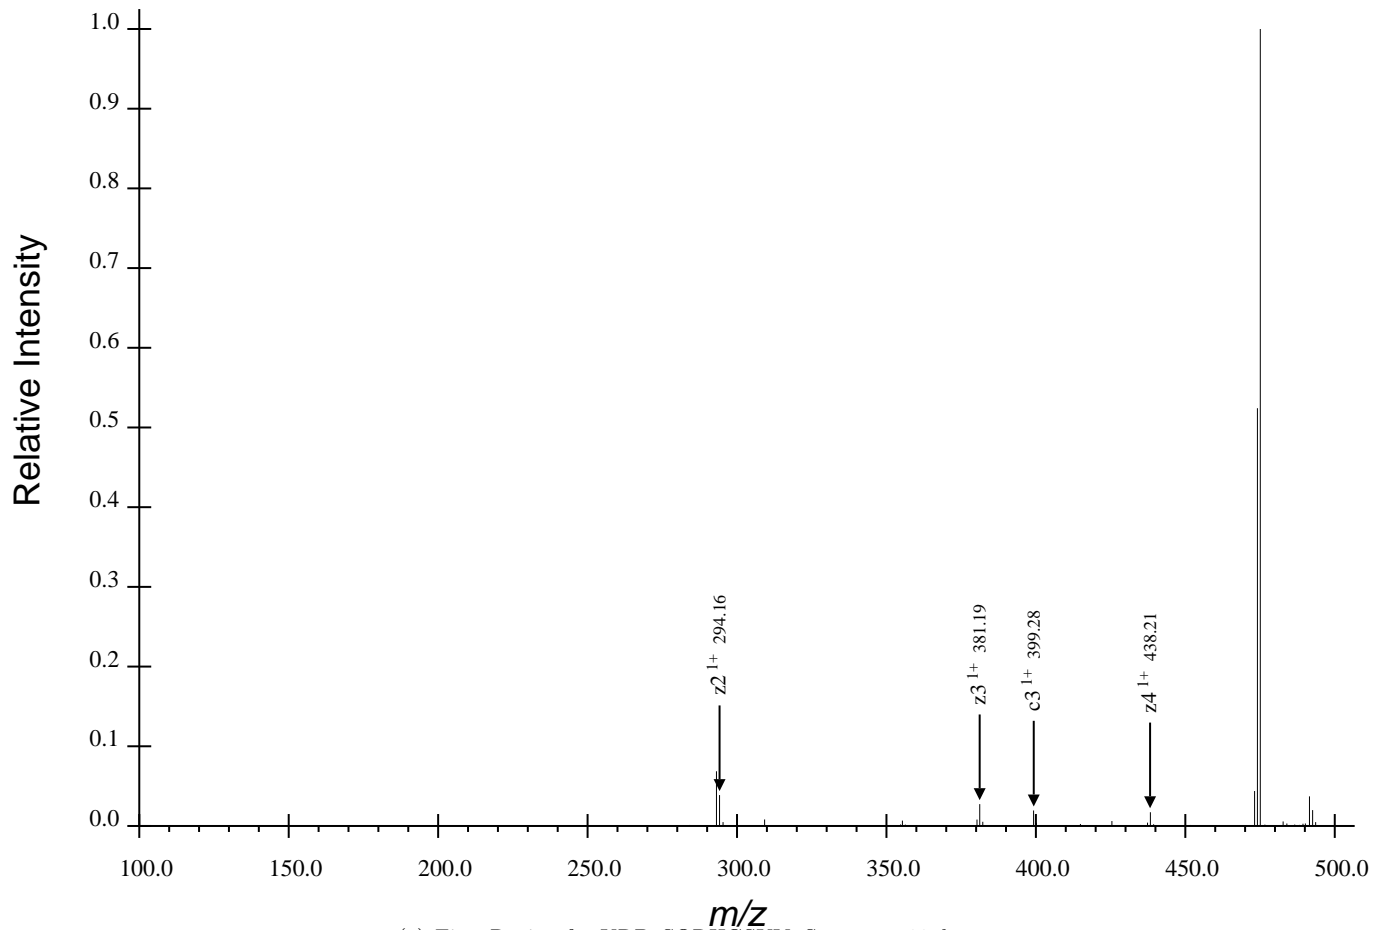

(a) First Region for KRPpSQRHGSKY, Spectrum 11.dta

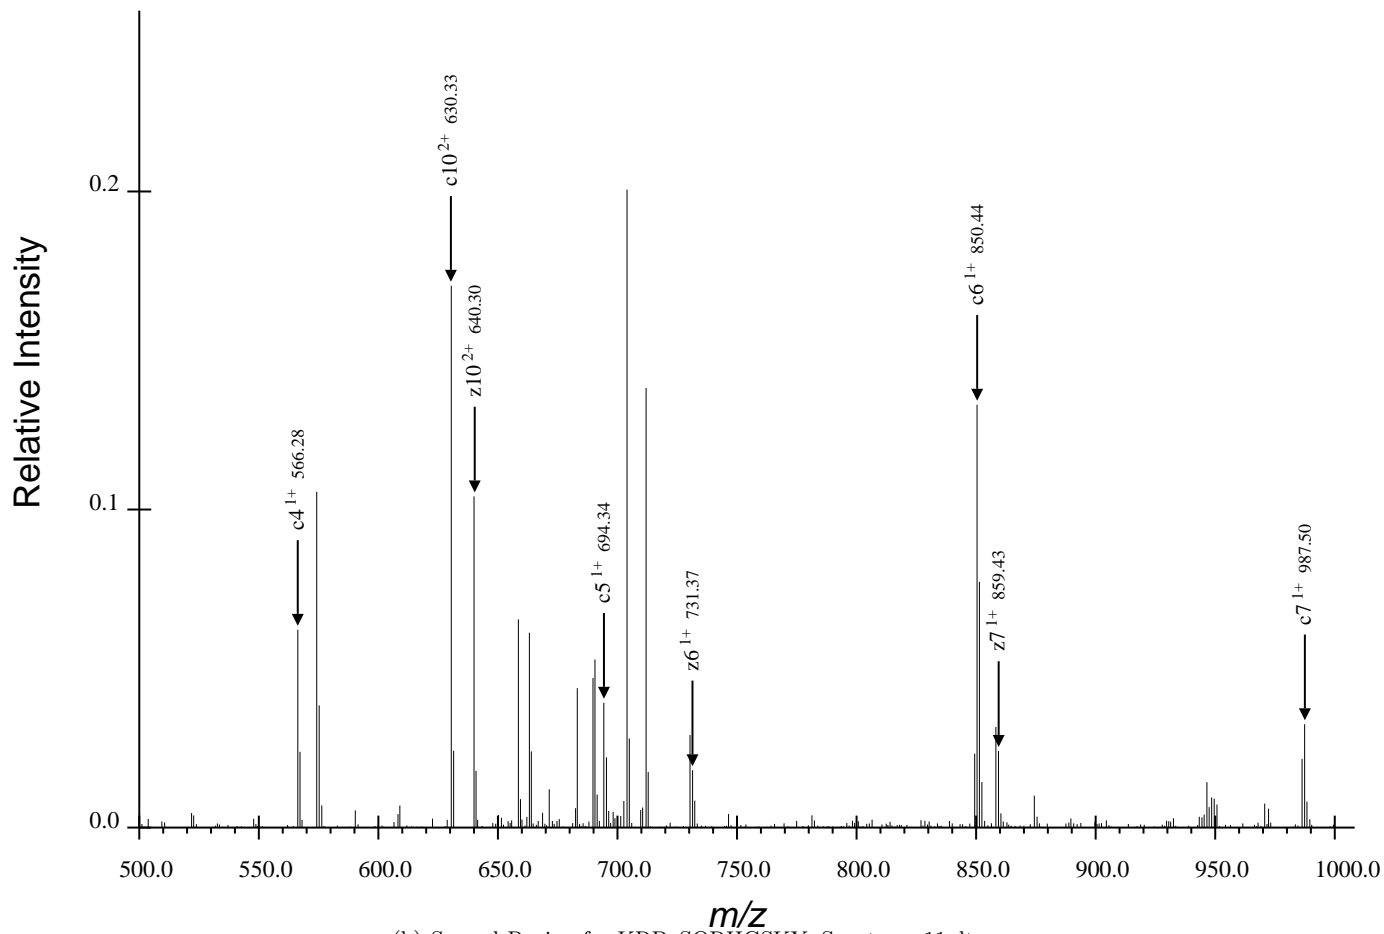

(b) Second Region for KRPpSQRHGSKY, Spectrum 11.dta

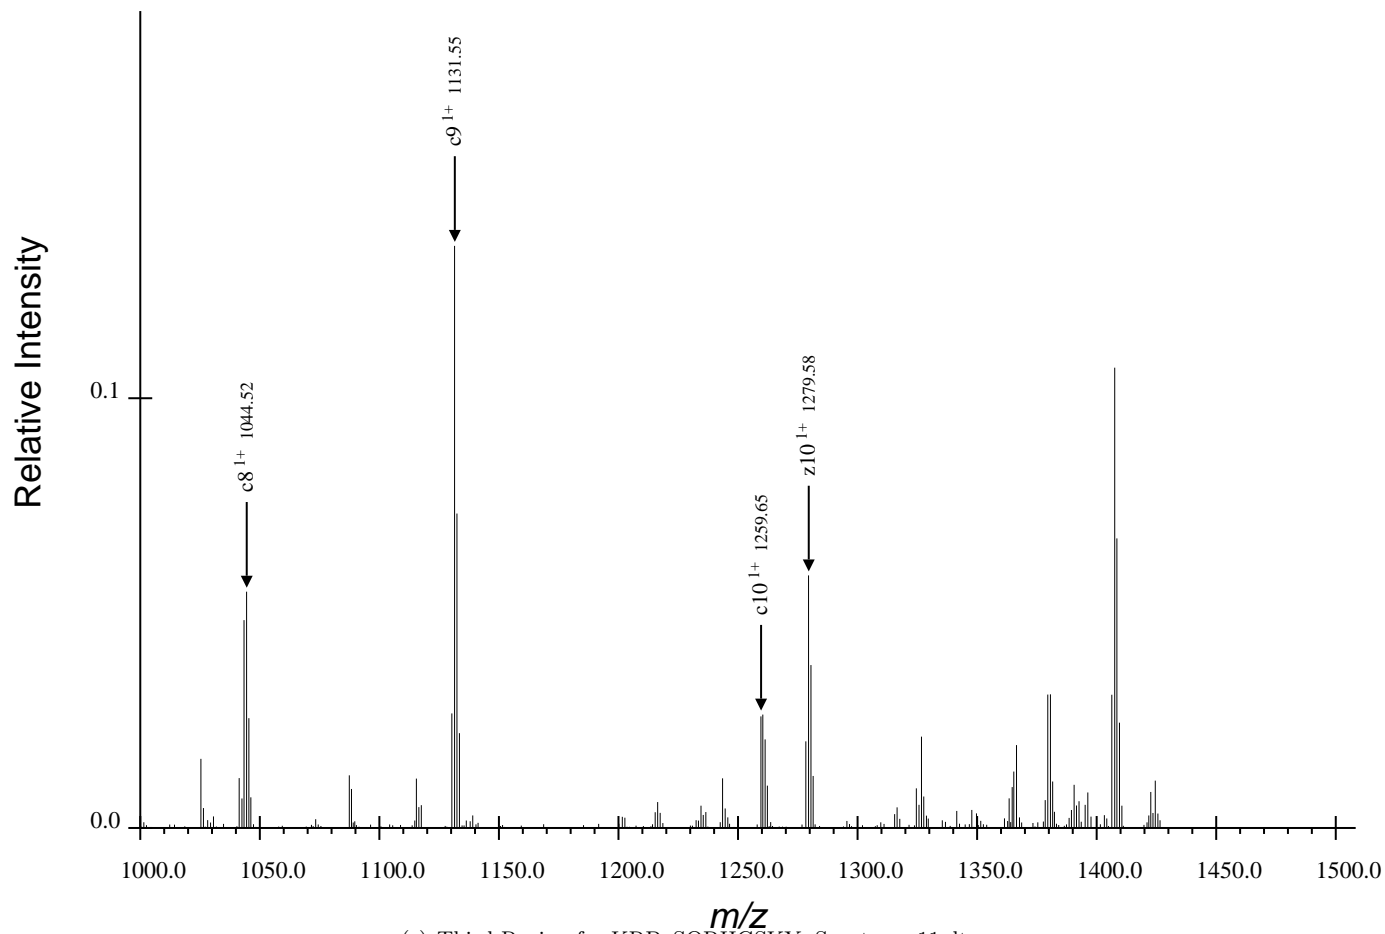

(c) Third Region for KRPpSQRHGSKY, Spectrum 11.dta

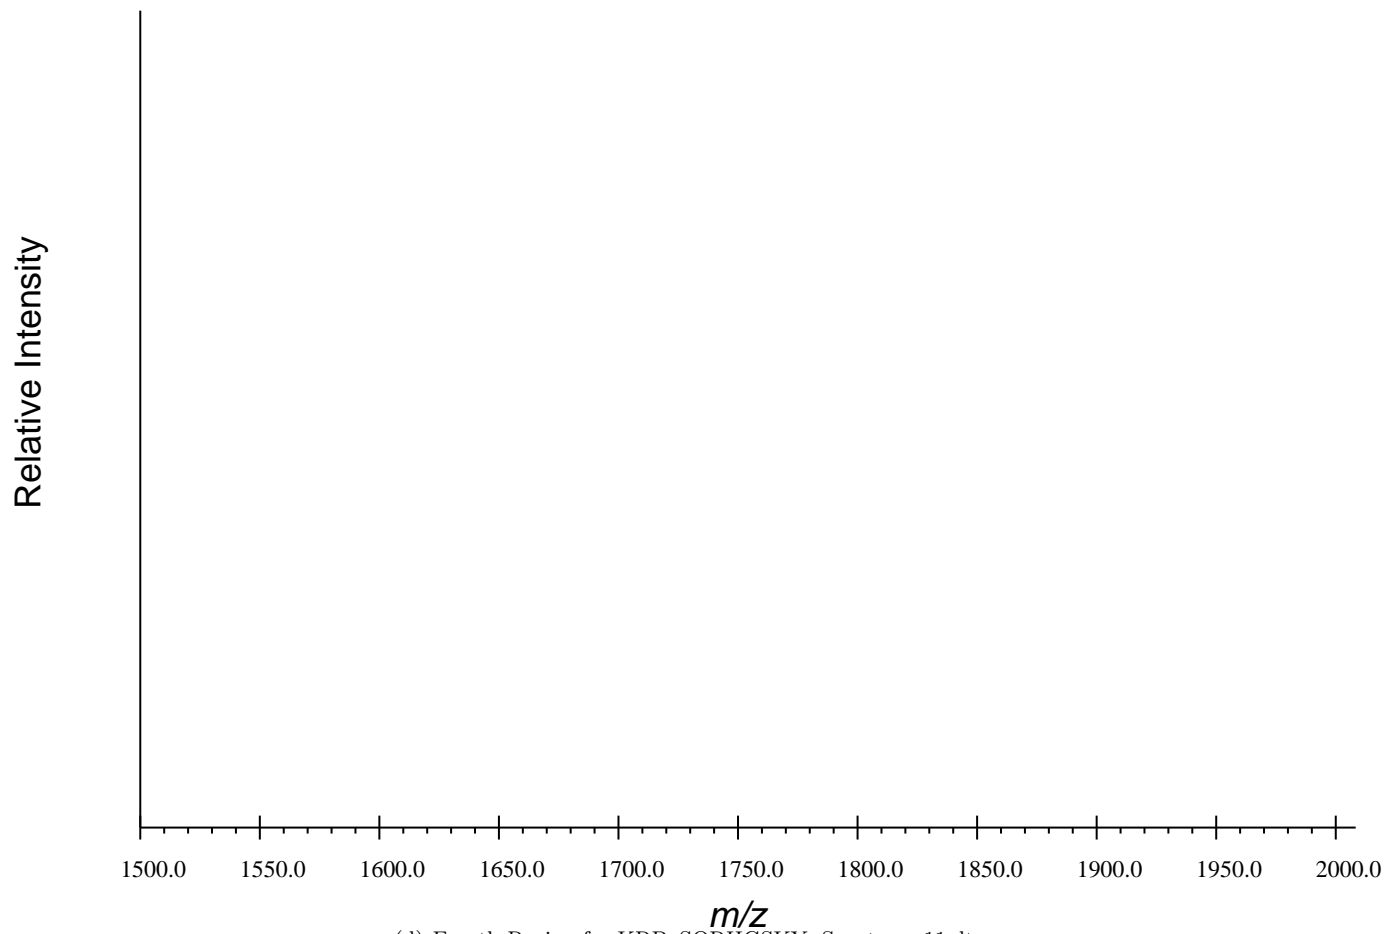

(d) Fourth Region for KRPpSQRHGSKY, Spectrum 11.dta

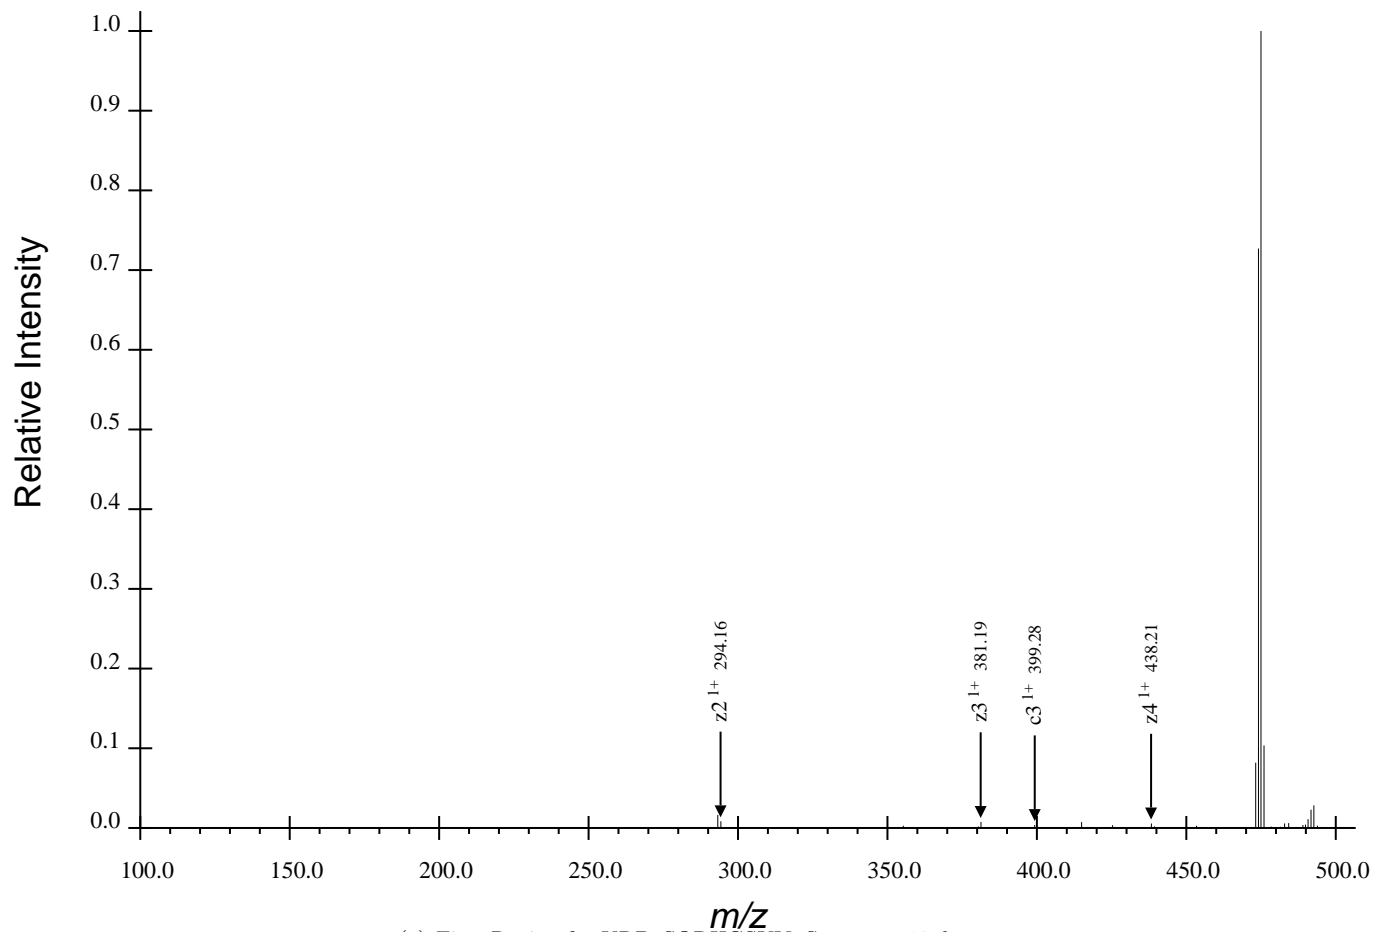

(a) First Region for KRPpSQRHGSKY, Spectrum 12.dta

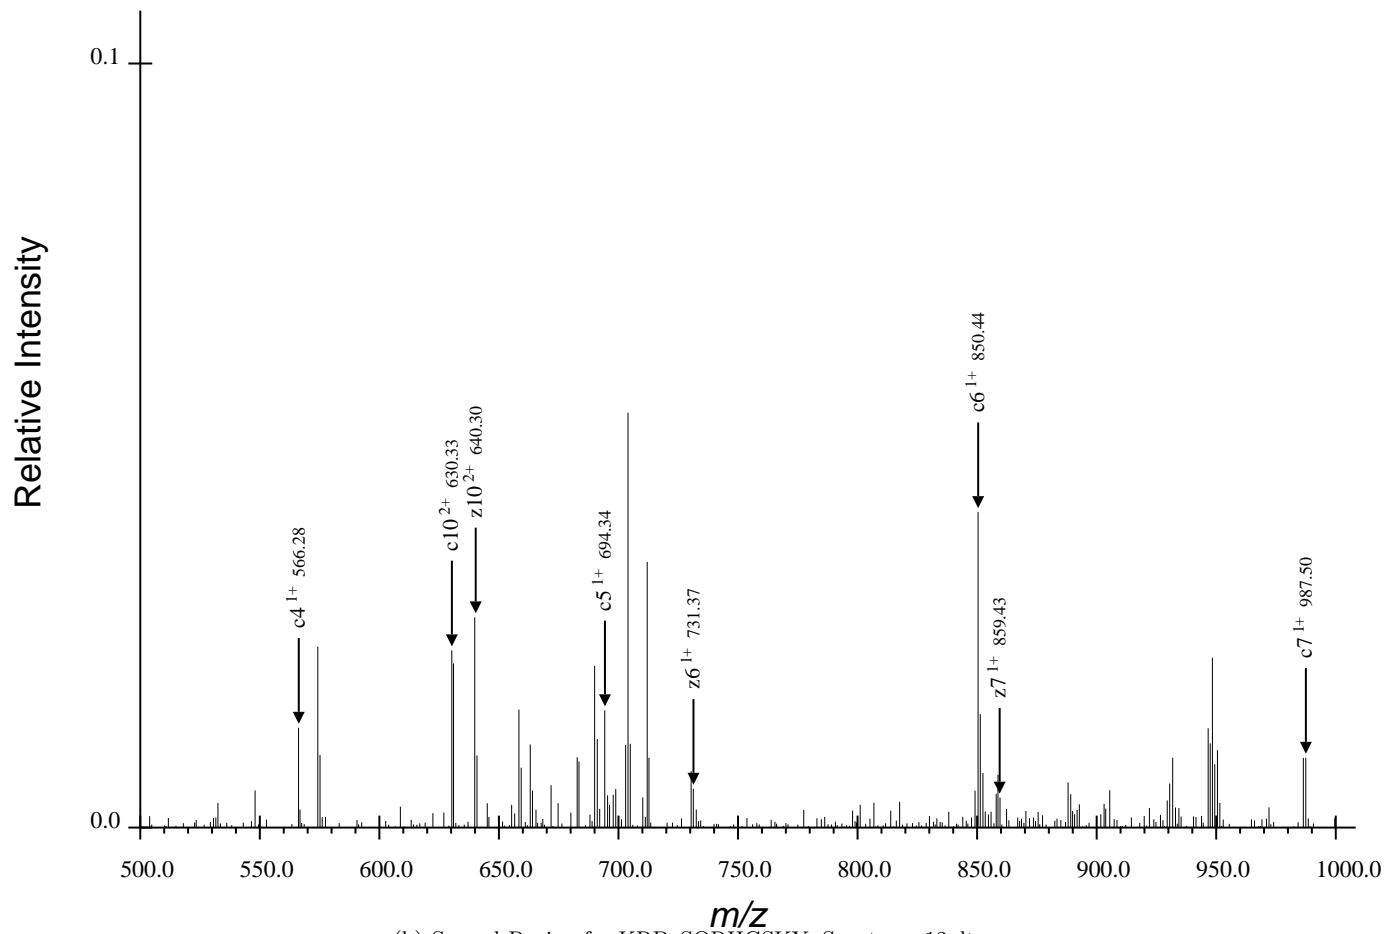

(b) Second Region for KRPpSQRHGSKY, Spectrum 12.dta

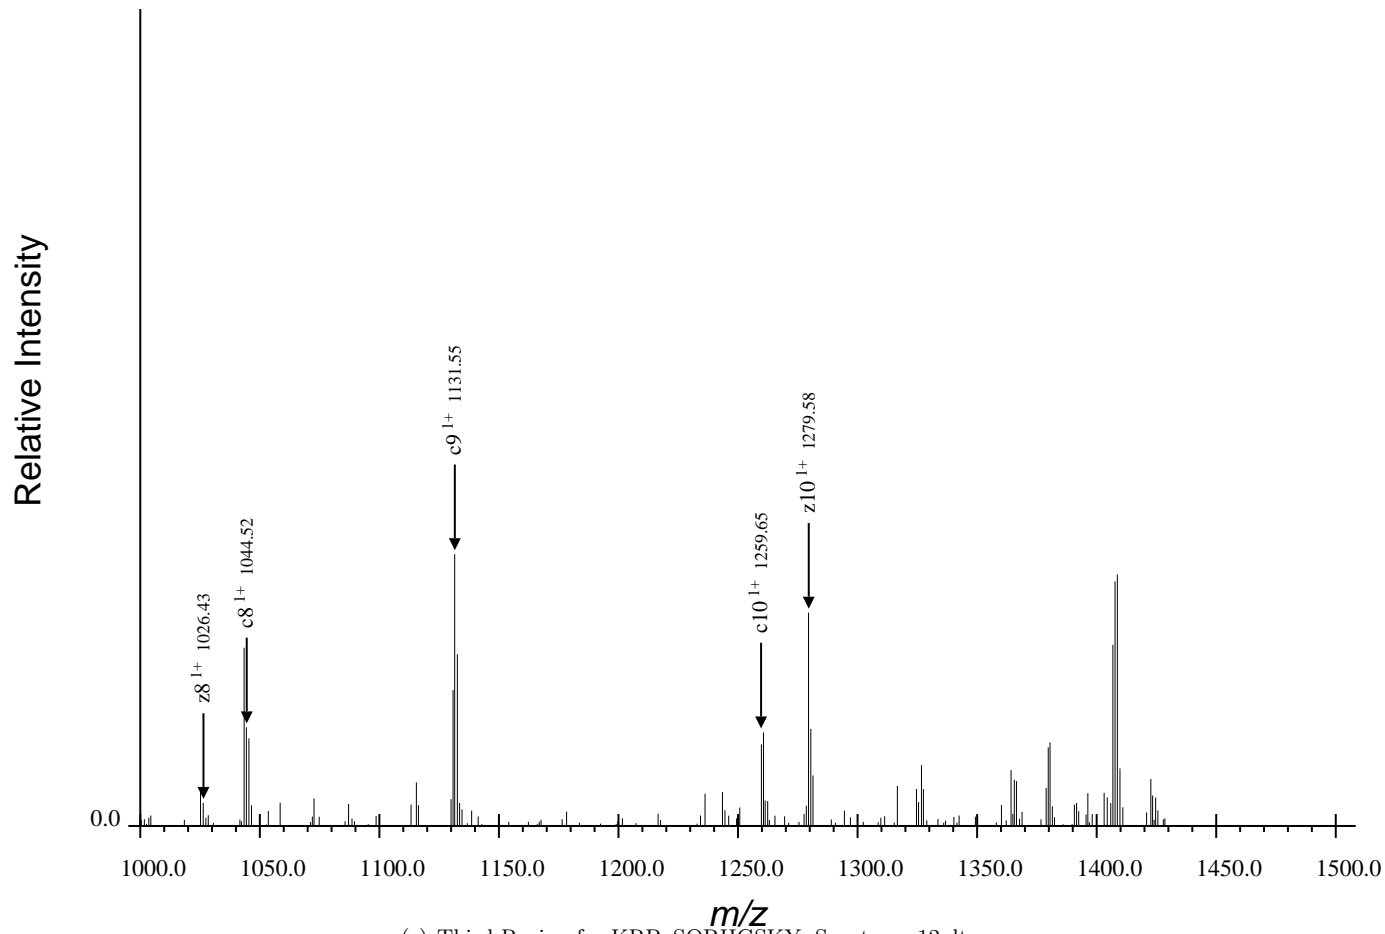

(c) Third Region for KRPpSQRHGSKY, Spectrum 12.dta

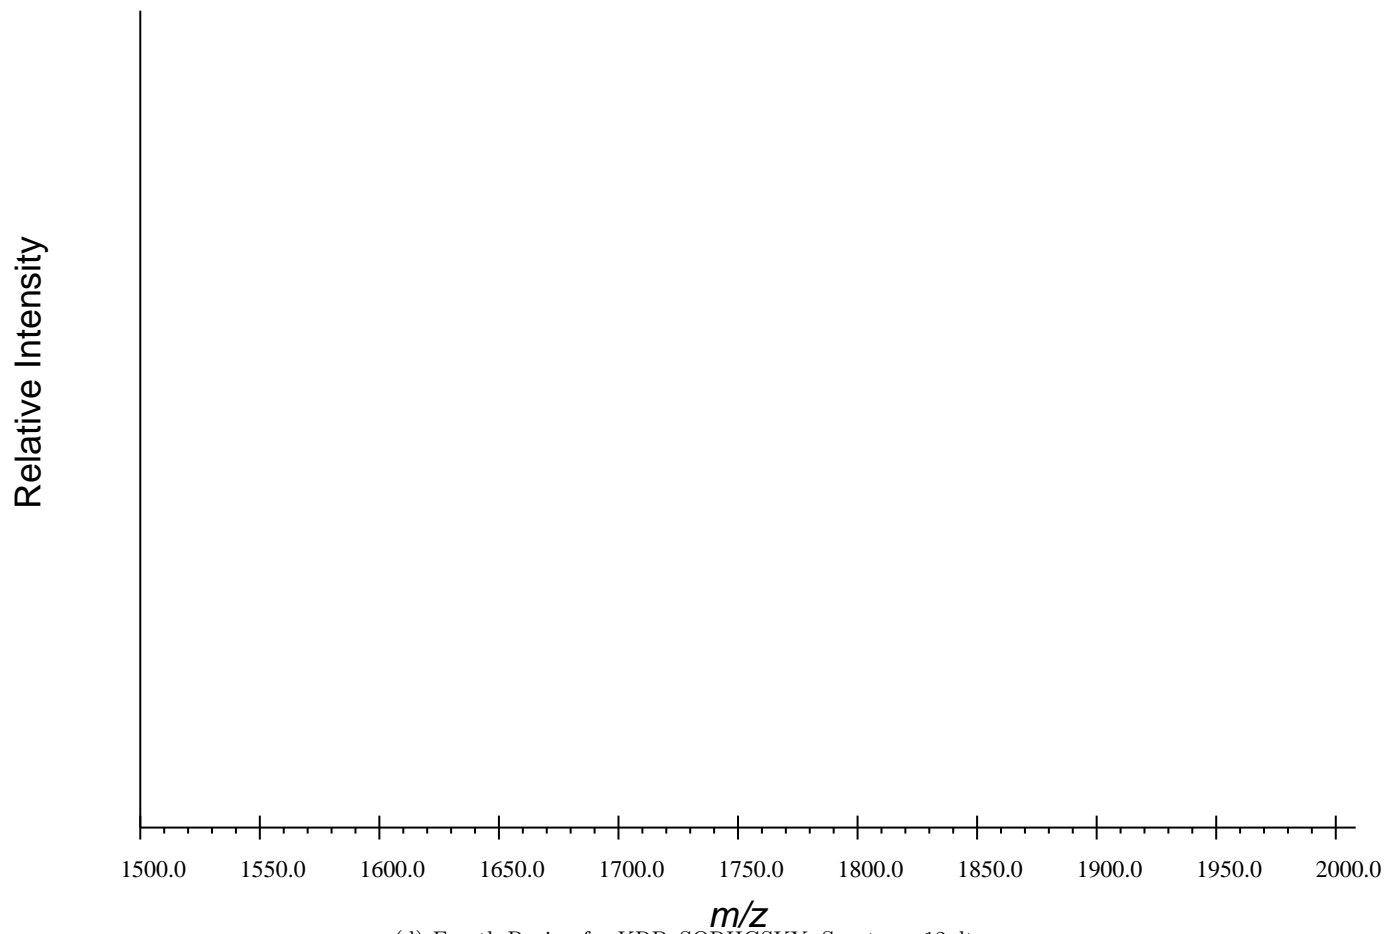

(d) Fourth Region for KRPpSQRHGSKY, Spectrum 12.dta



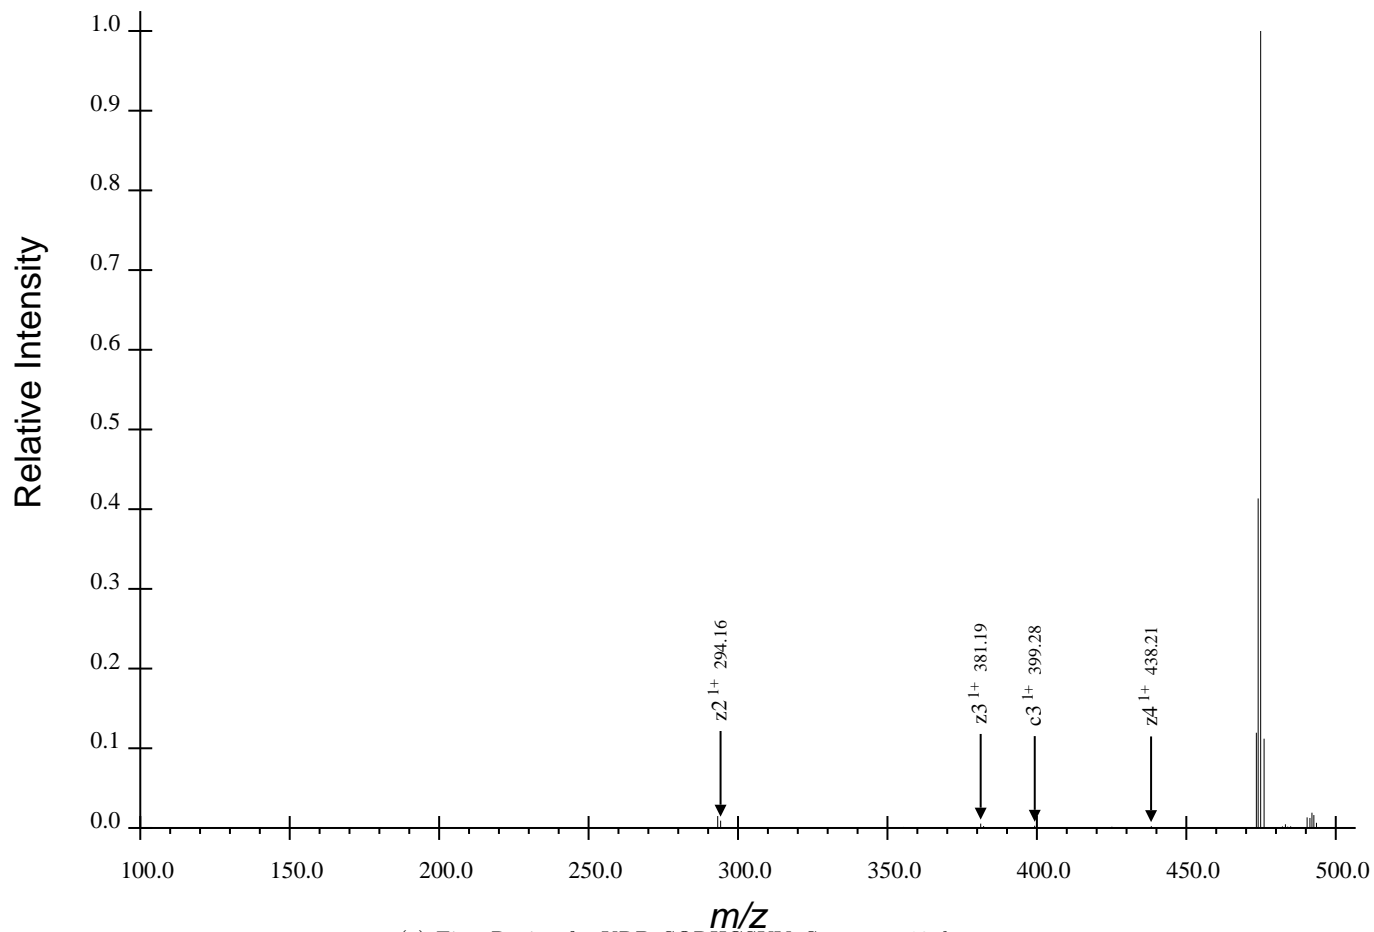

(a) First Region for KRPpSQRHGSKY, Spectrum 13.dta

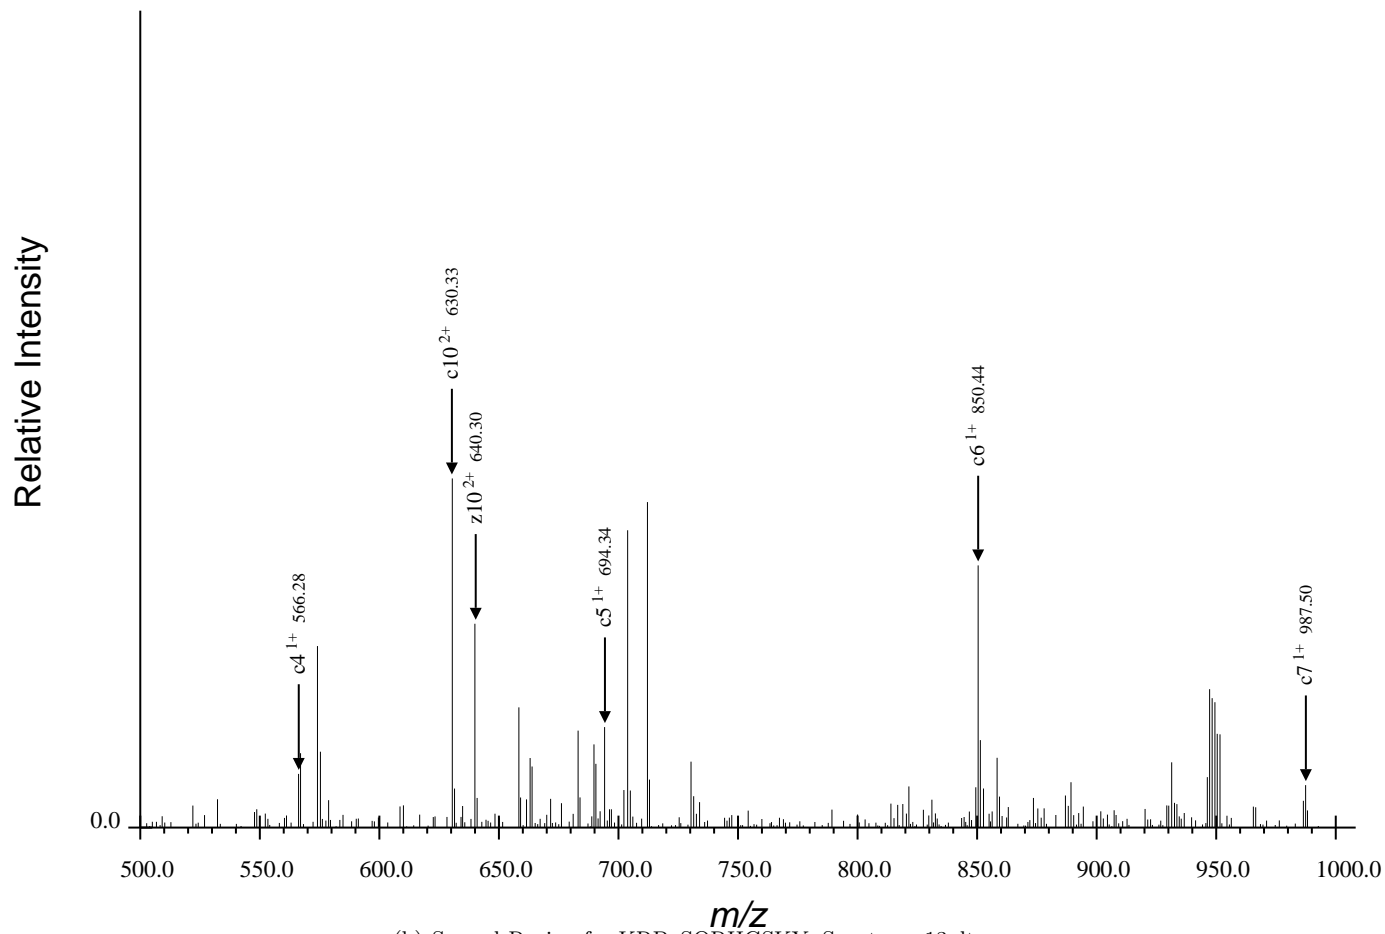

(b) Second Region for KRPpSQRHGSKY, Spectrum 13.dta

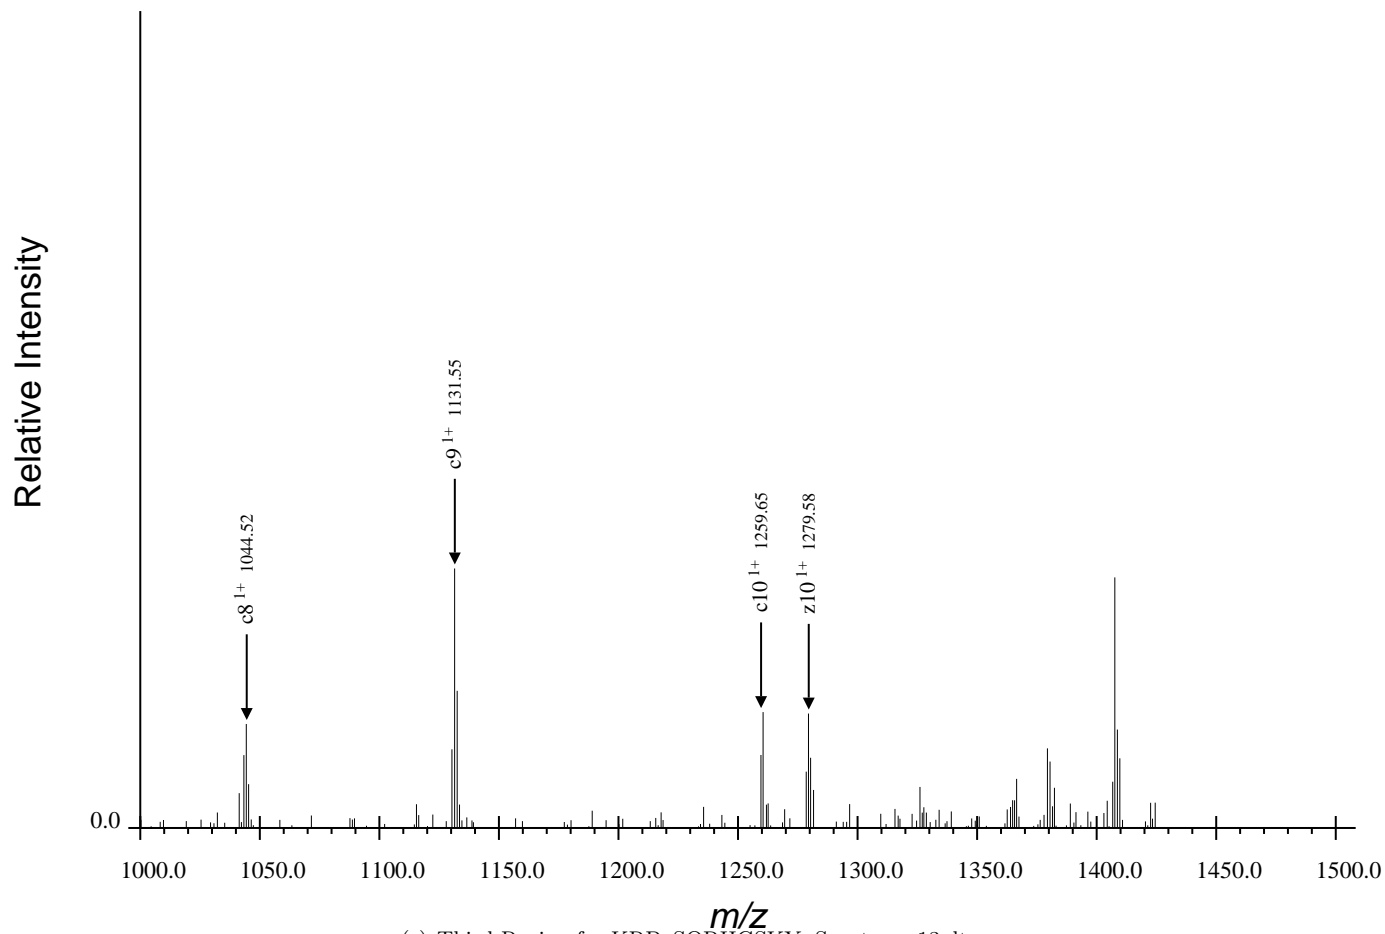

(c) Third Region for KRPPSQRHGSKY, Spectrum 13.dta

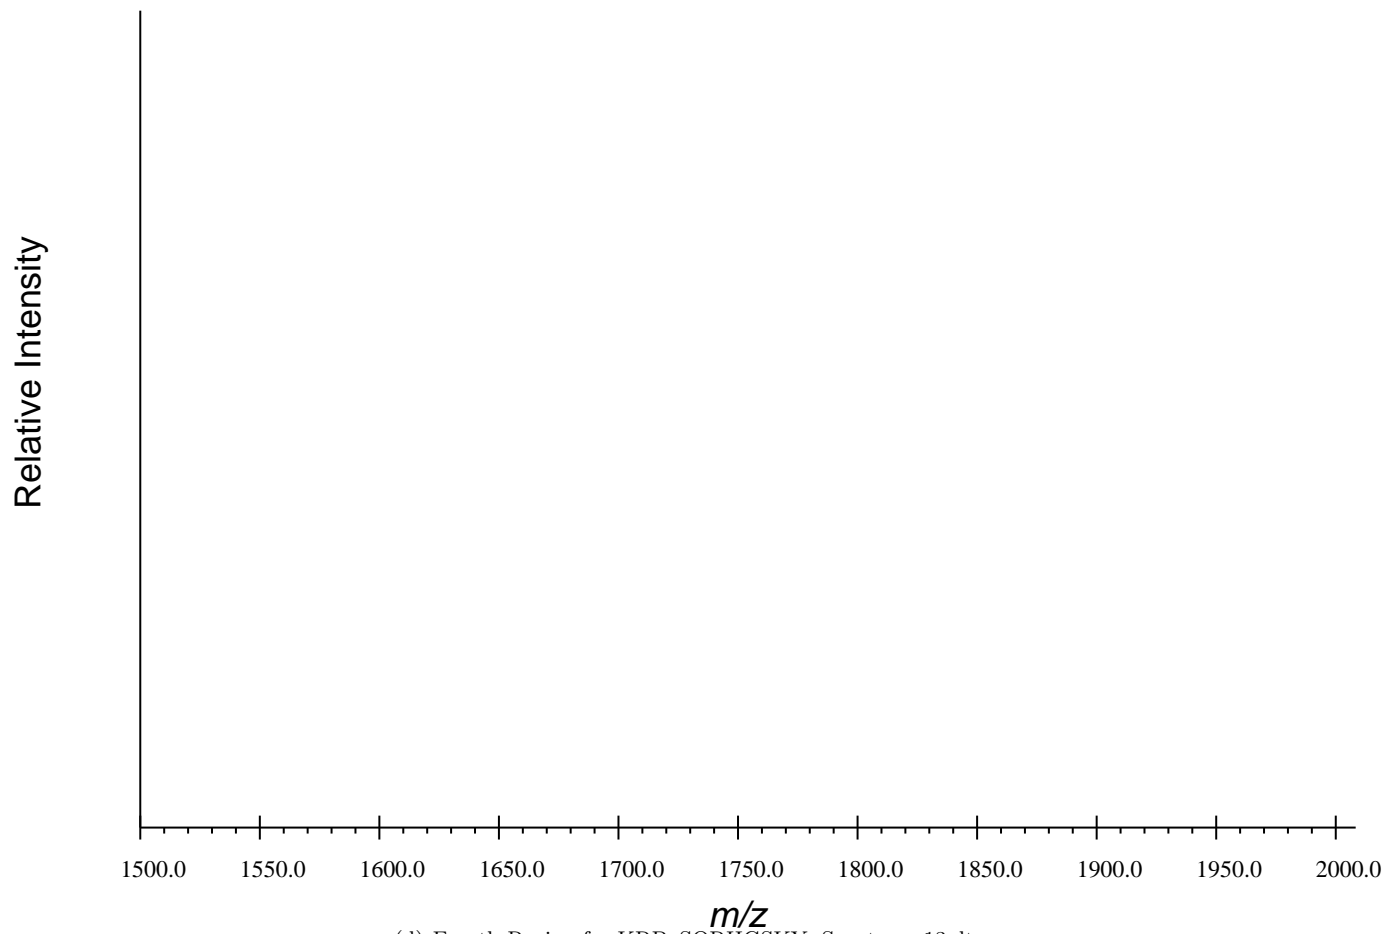

(d) Fourth Region for KRPPSQRHGSKY, Spectrum 13.dta

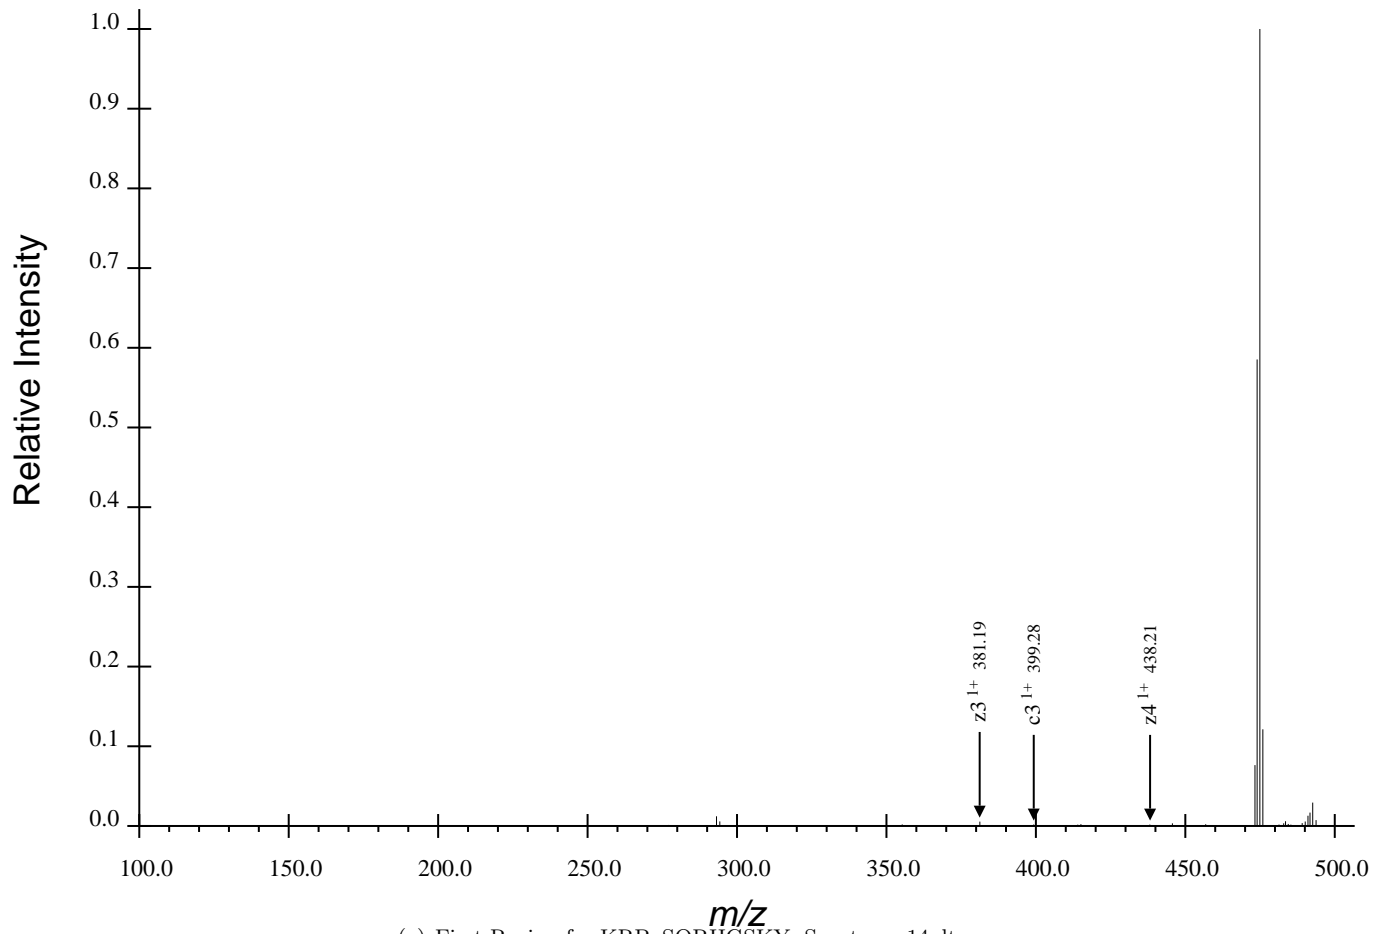

(a) First Region for KRPpSQRHGSKY, Spectrum 14.dta

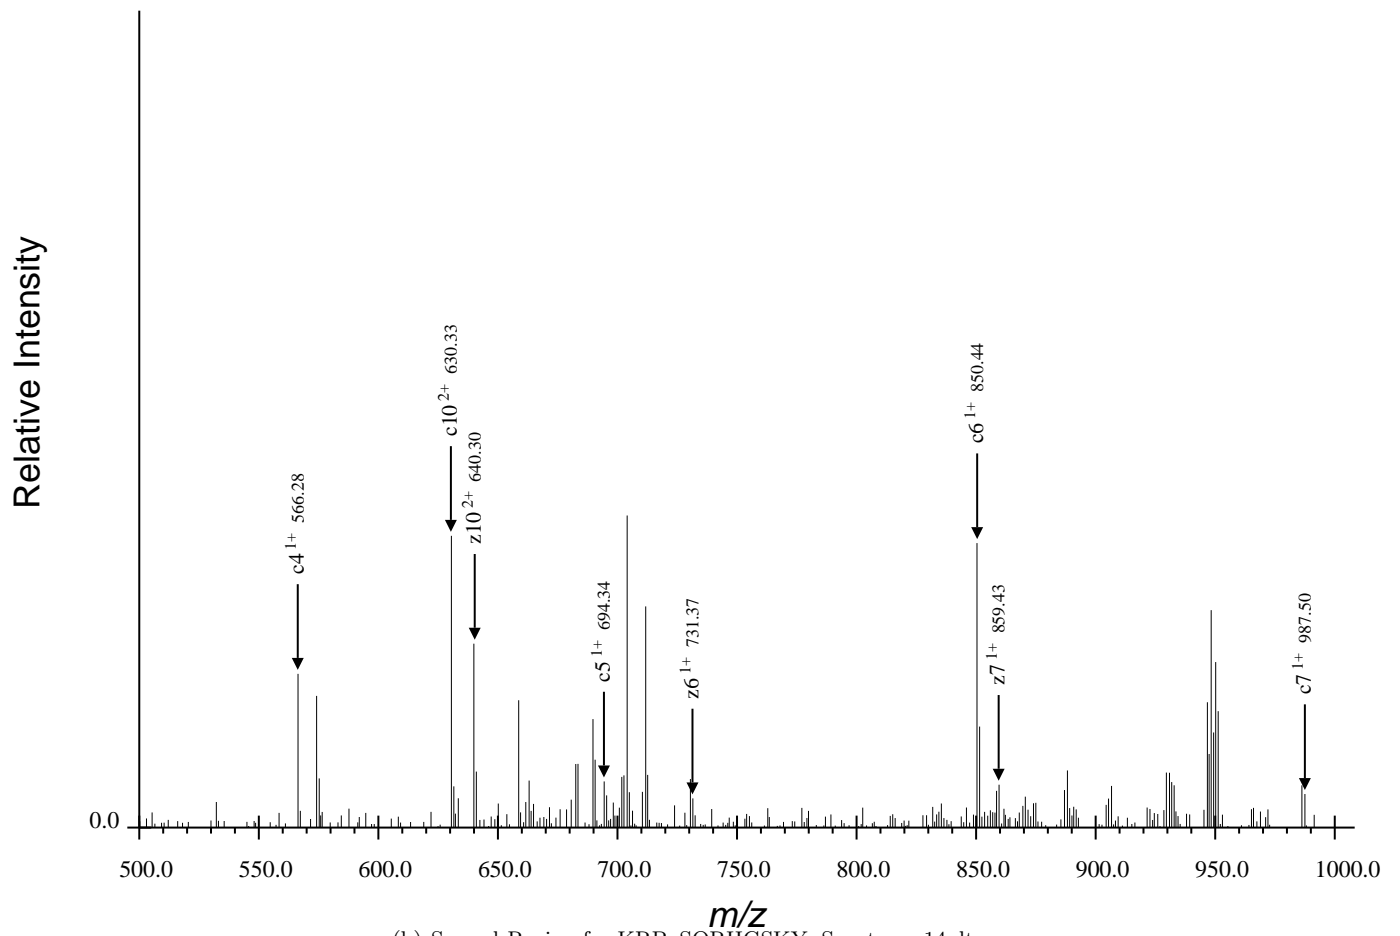

(b) Second Region for KRPpSQRHGSKY, Spectrum 14.dta

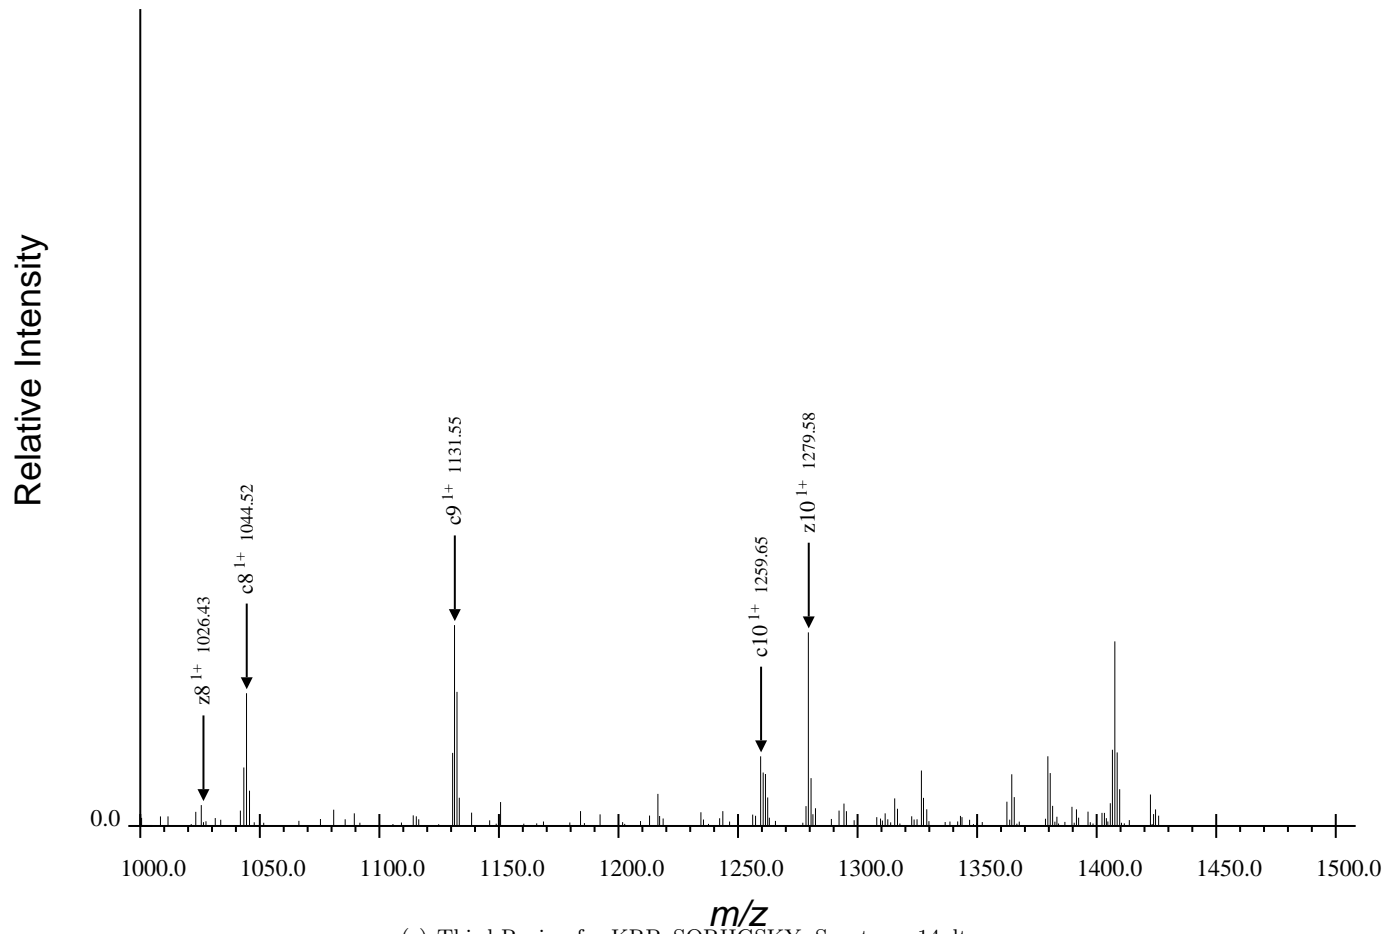

(c) Third Region for KRPpSQRHGSKY, Spectrum 14.dta

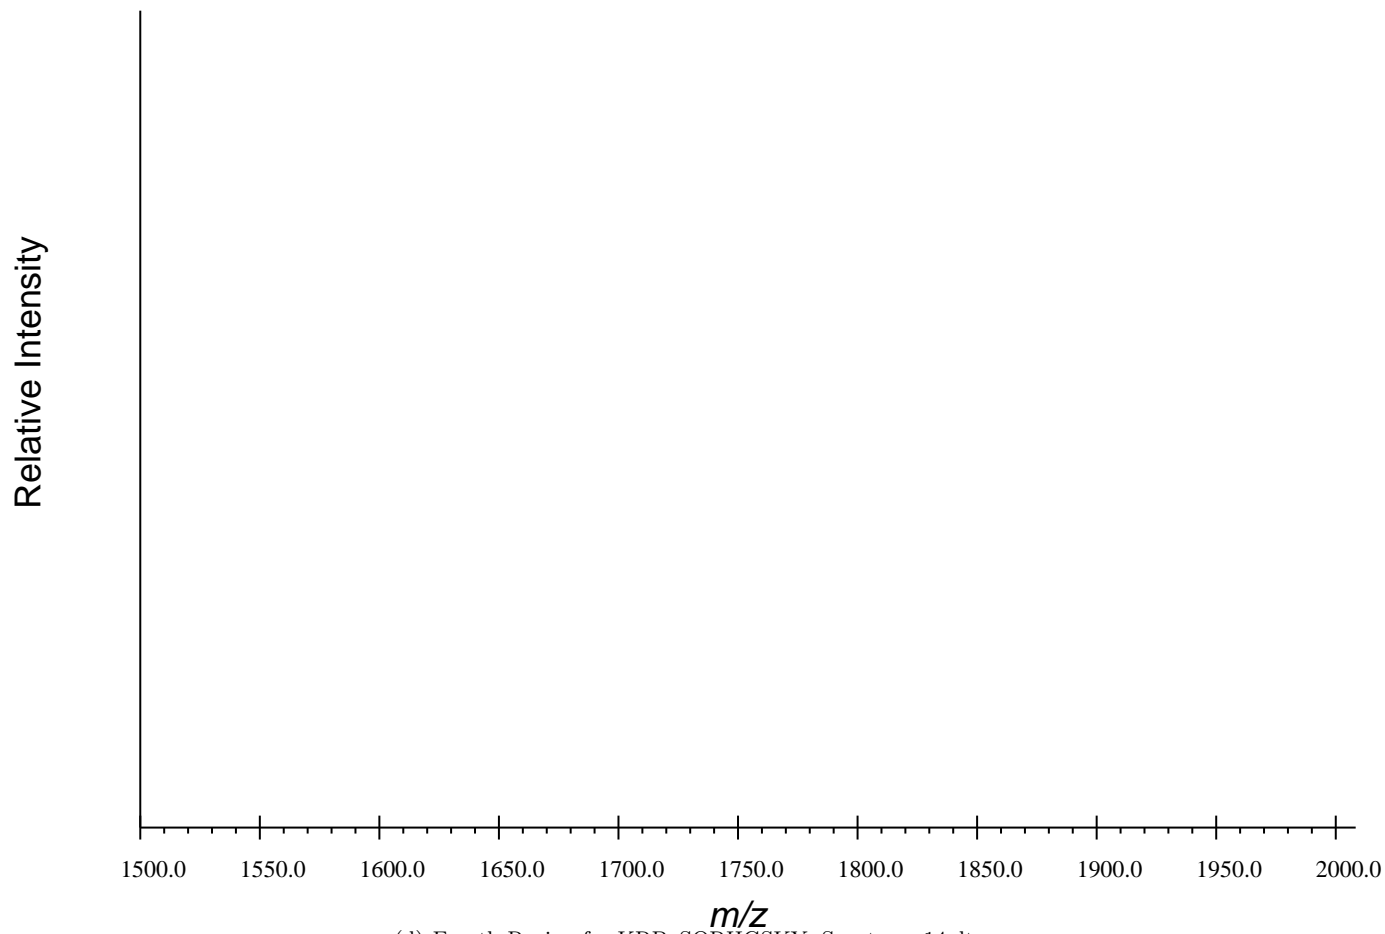

(d) Fourth Region for KRPpSQRHGSKY, Spectrum 14.dta

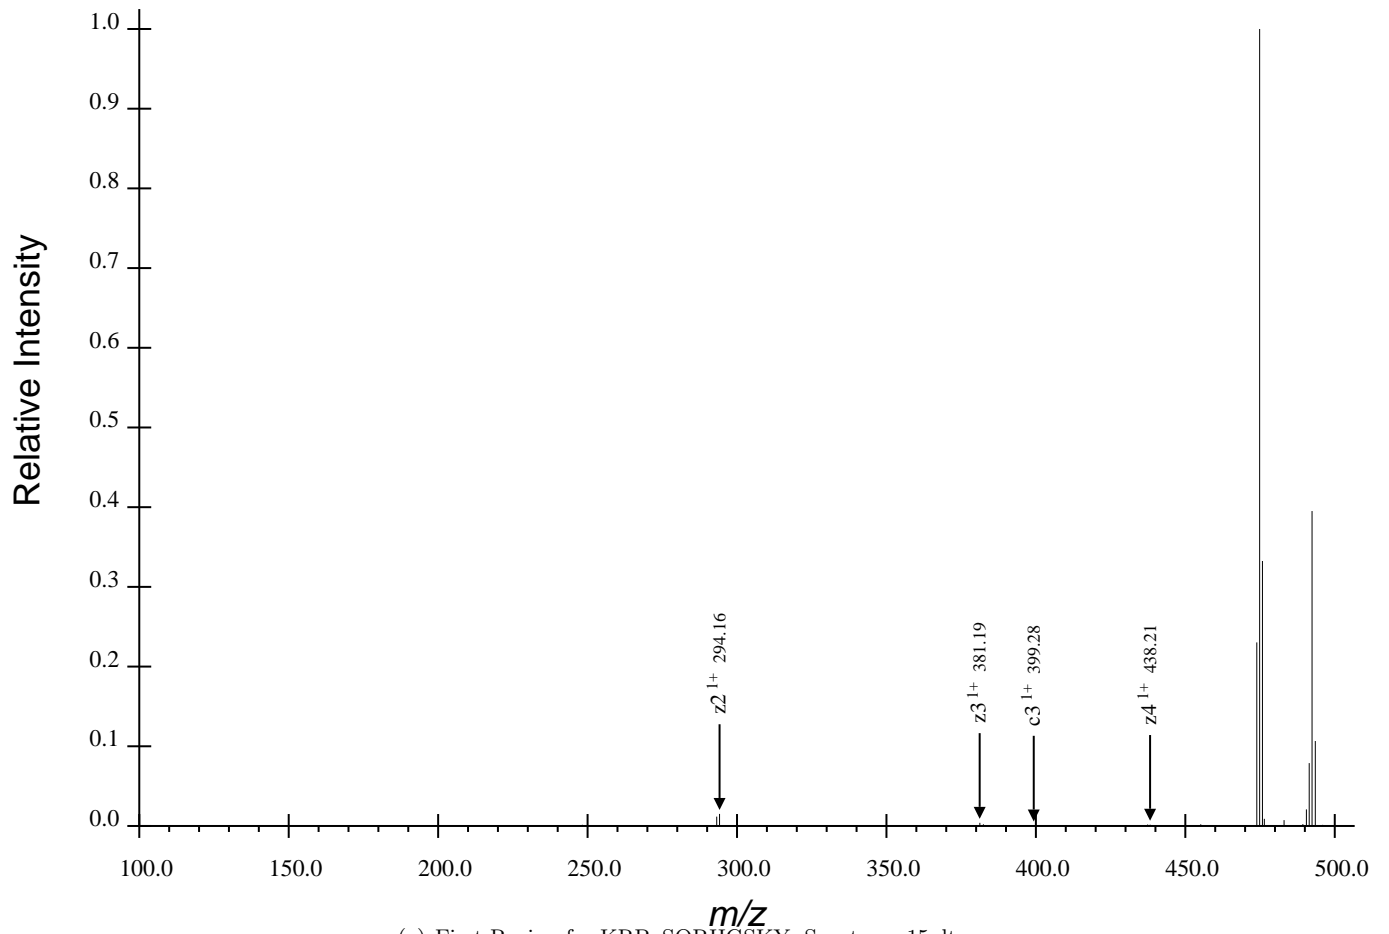

(a) First Region for KRPpSQRHGSKY, Spectrum 15.dta

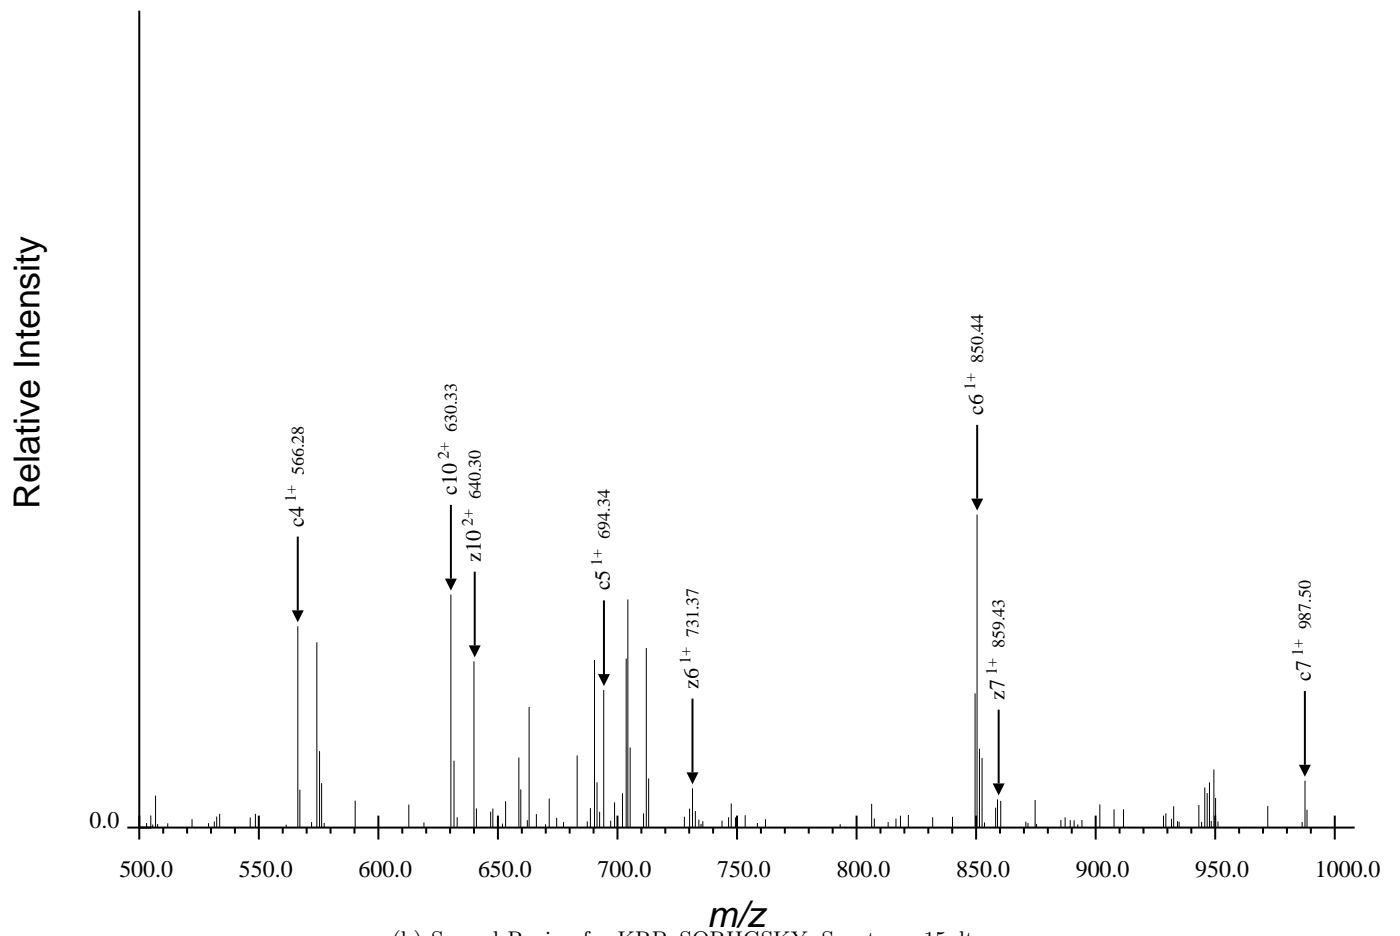

(b) Second Region for KRPpSQRHGSKY, Spectrum 15.dta

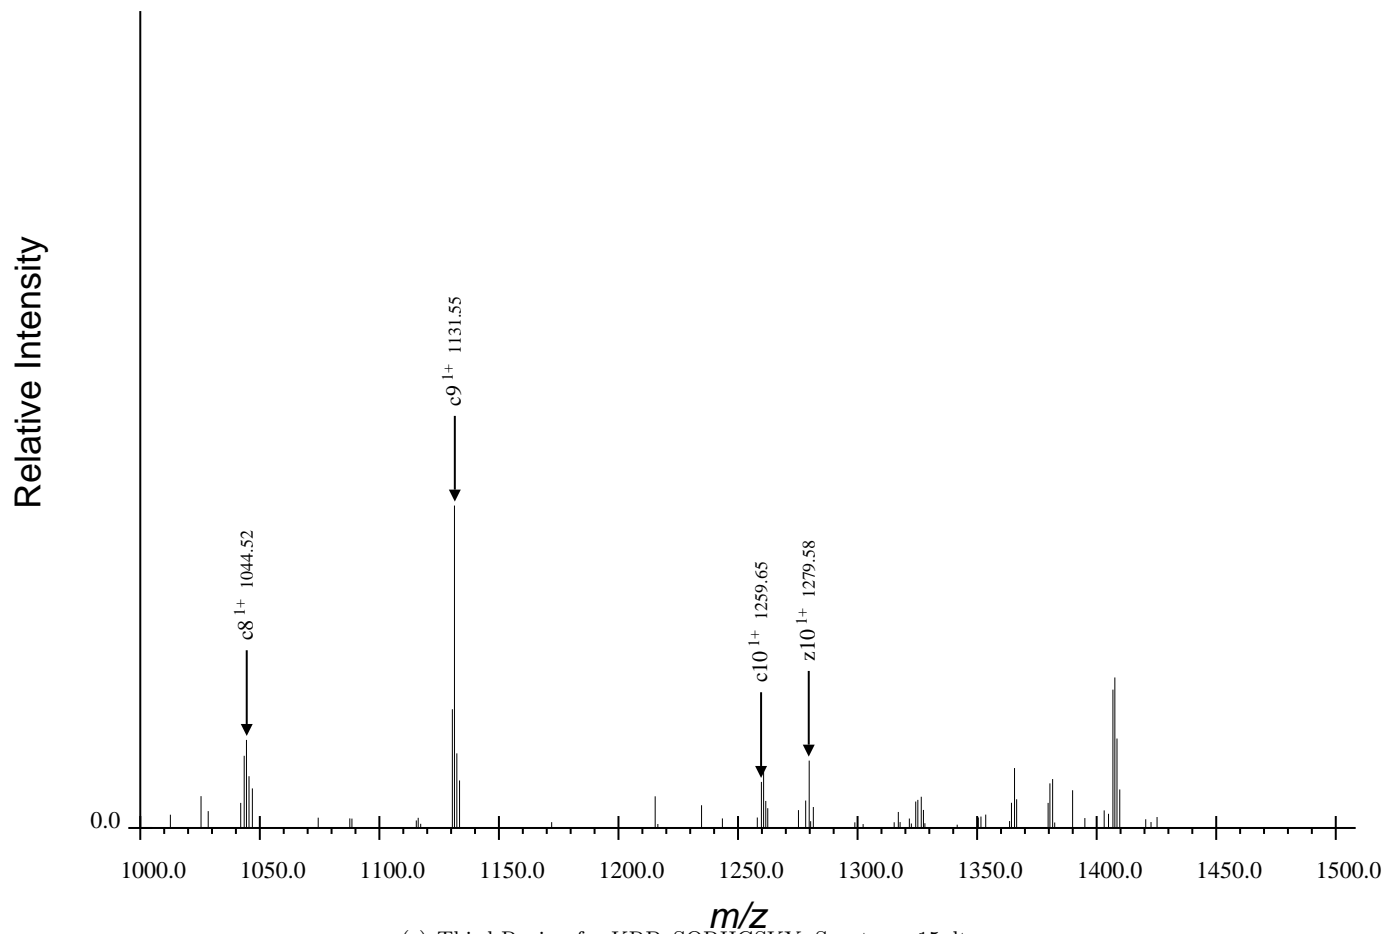

(c) Third Region for KRPPSQRHGSKY, Spectrum 15.dta

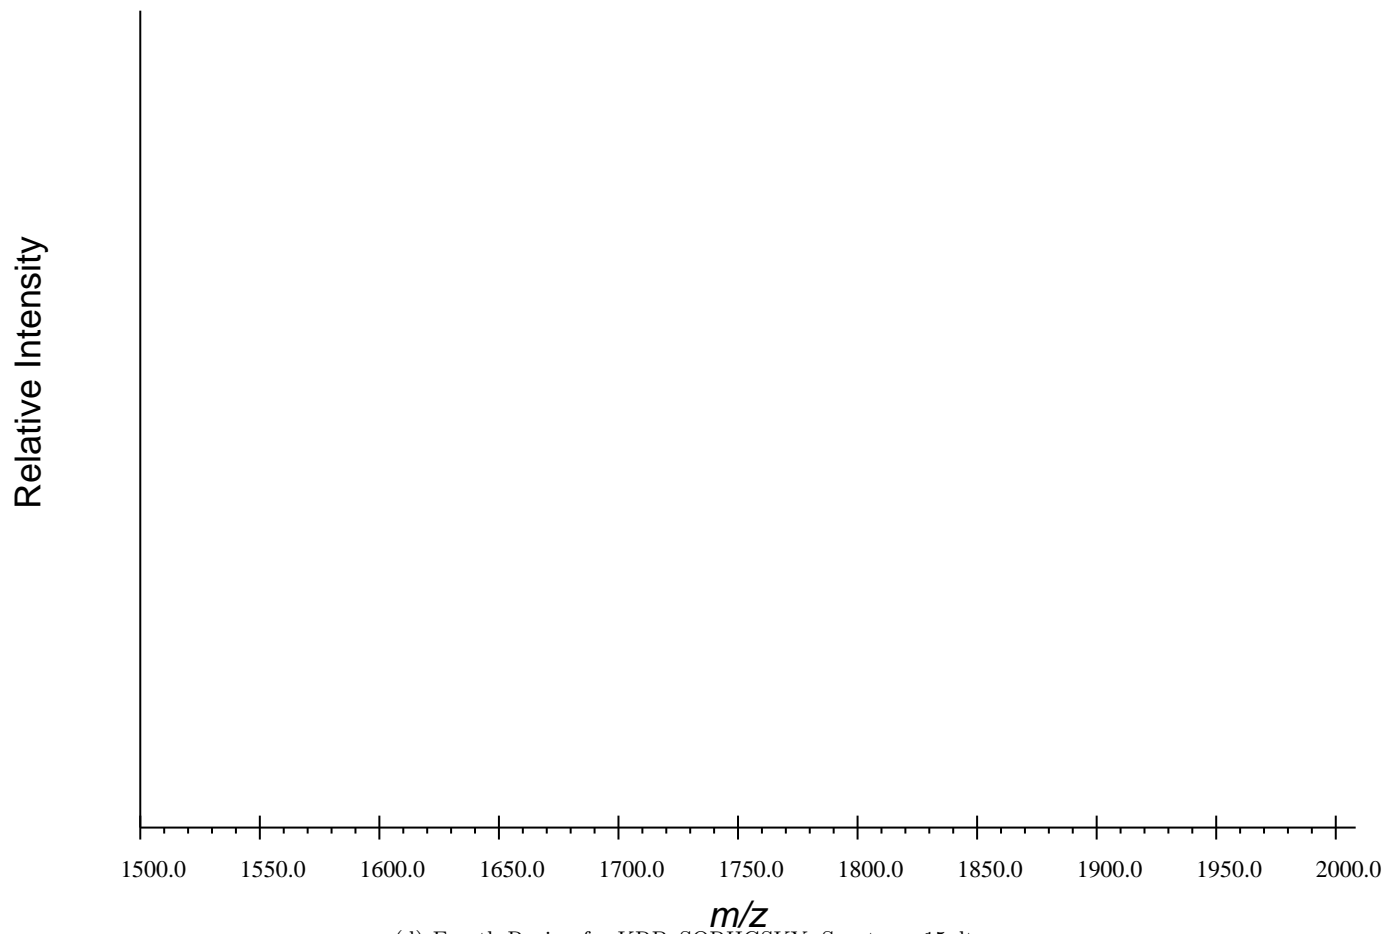

(d) Fourth Region for KRPPSQRHGSKY, Spectrum 15.dta

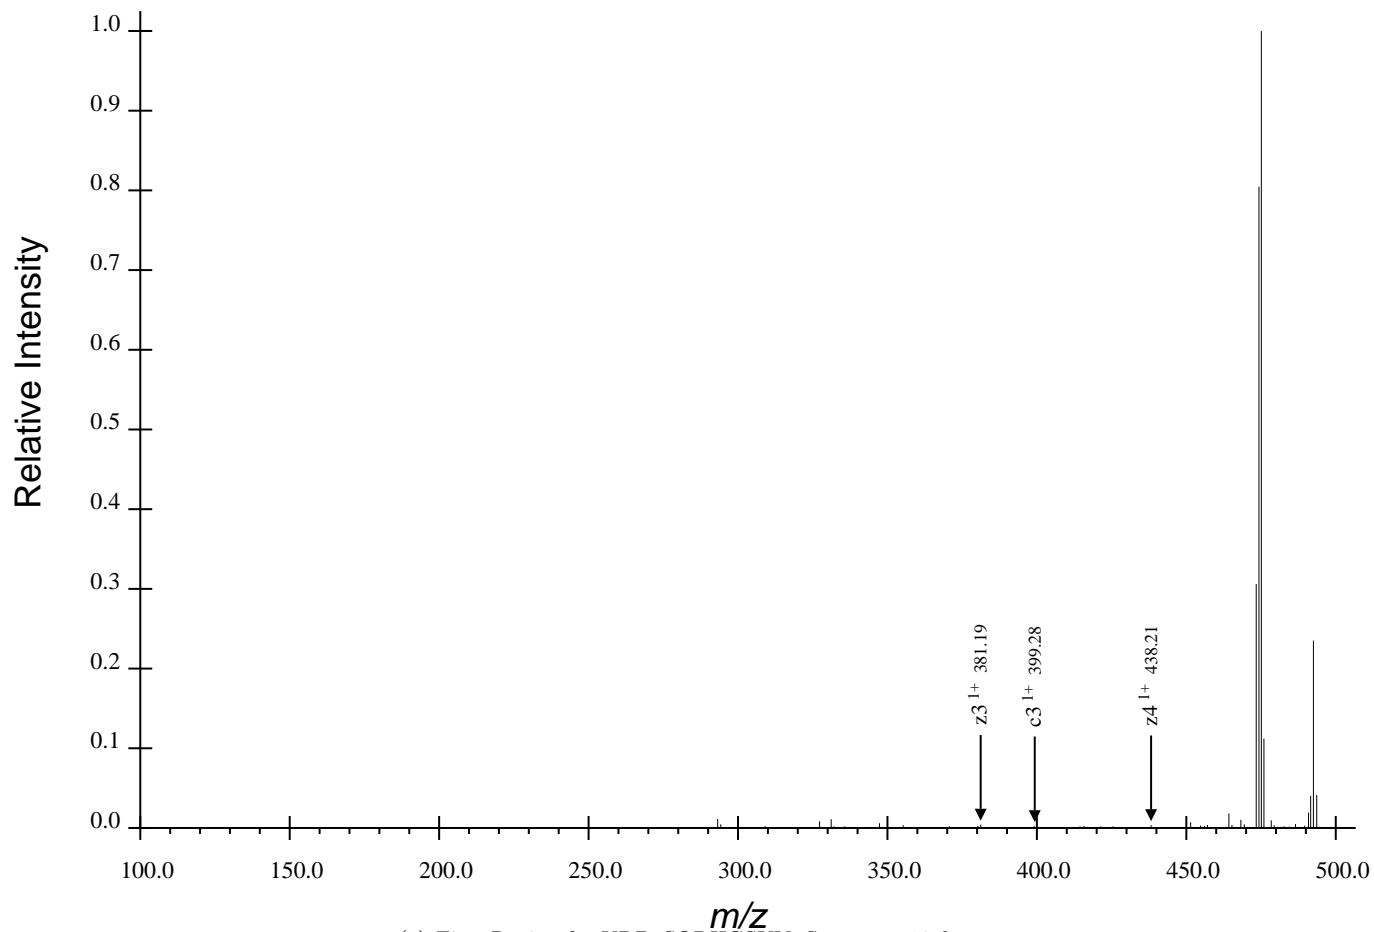

(a) First Region for KRPpSQRHGSKY, Spectrum 16.dta

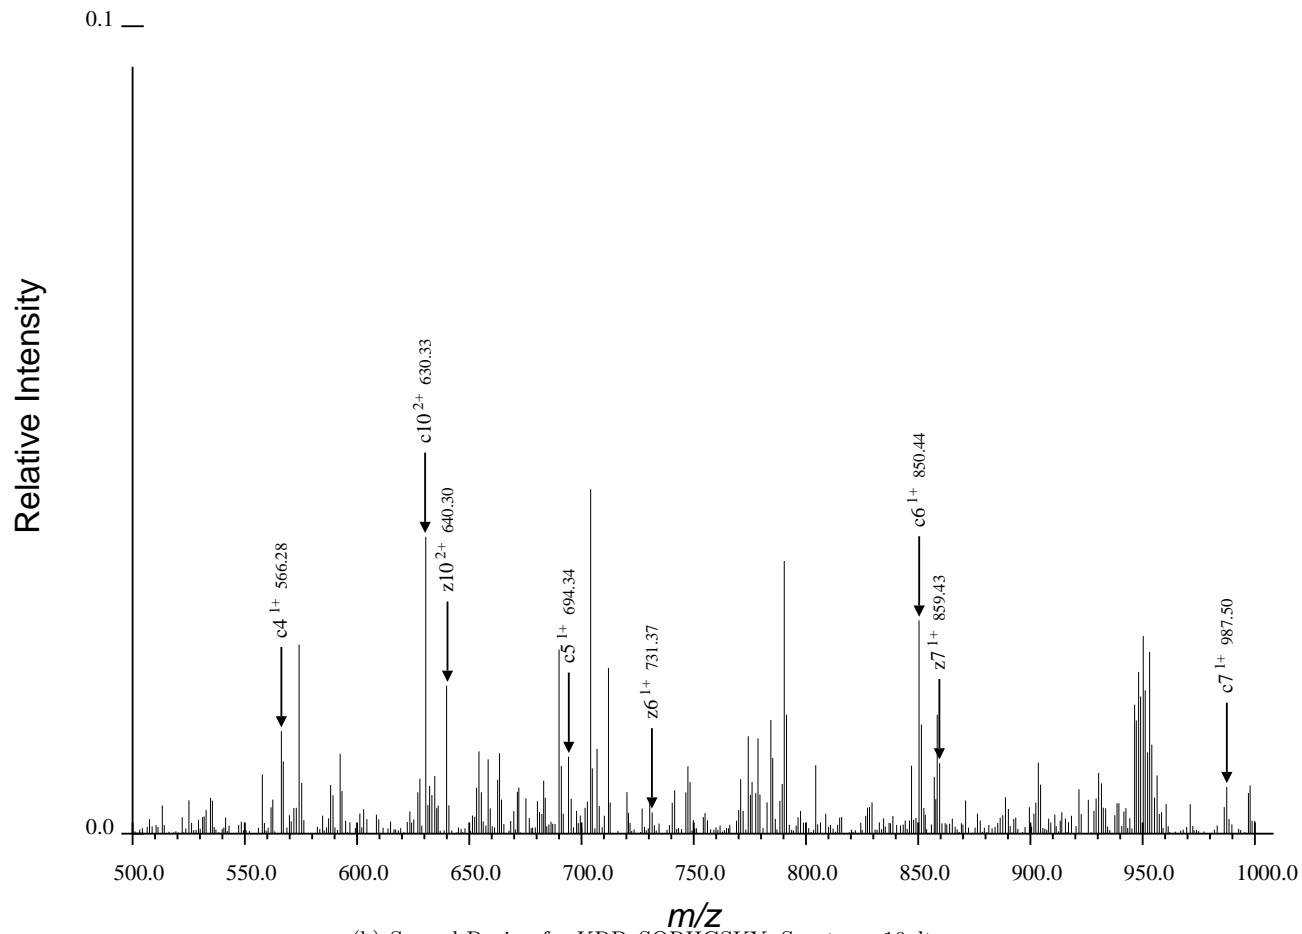

(b) Second Region for KRPpSQRHGSKY, Spectrum 16.dta

Relative Intensity

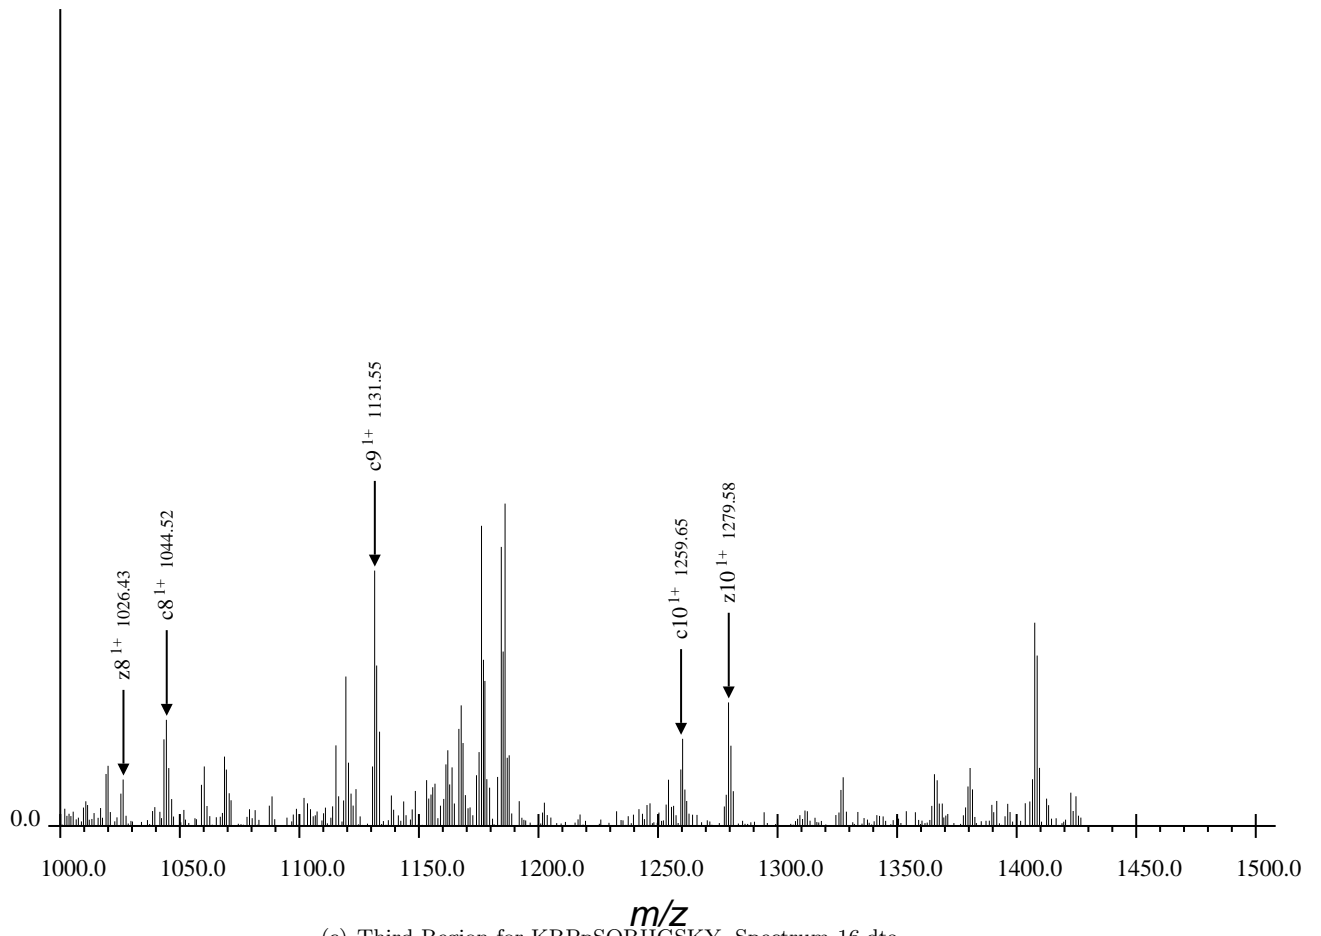

(c) Third Region for KRPPpSQRHGSKY, Spectrum 16.dta

Relative Intensity

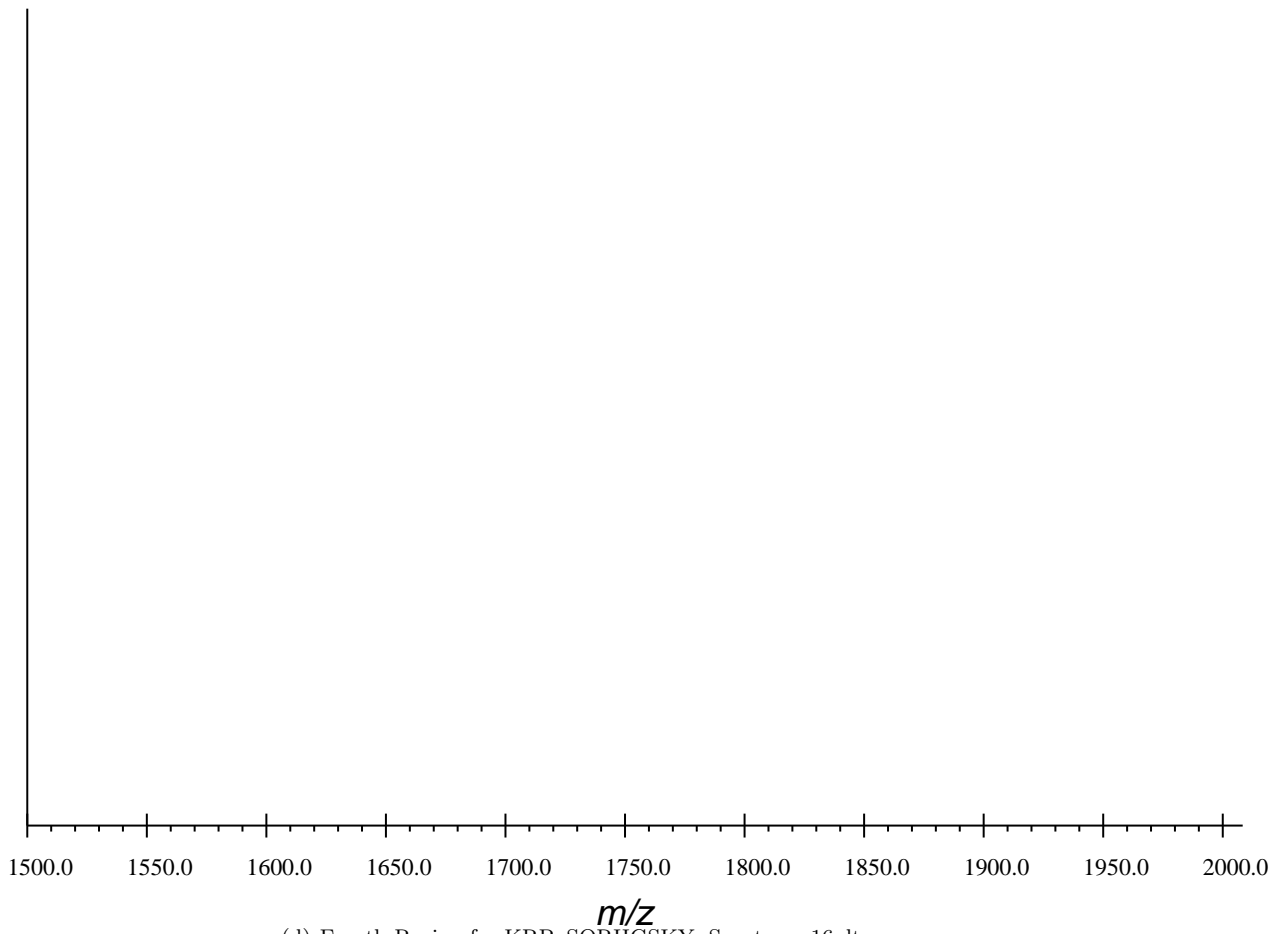

(d) Fourth Region for KRPPpSQRHGSKY, Spectrum 16.dta



Relative Intensity

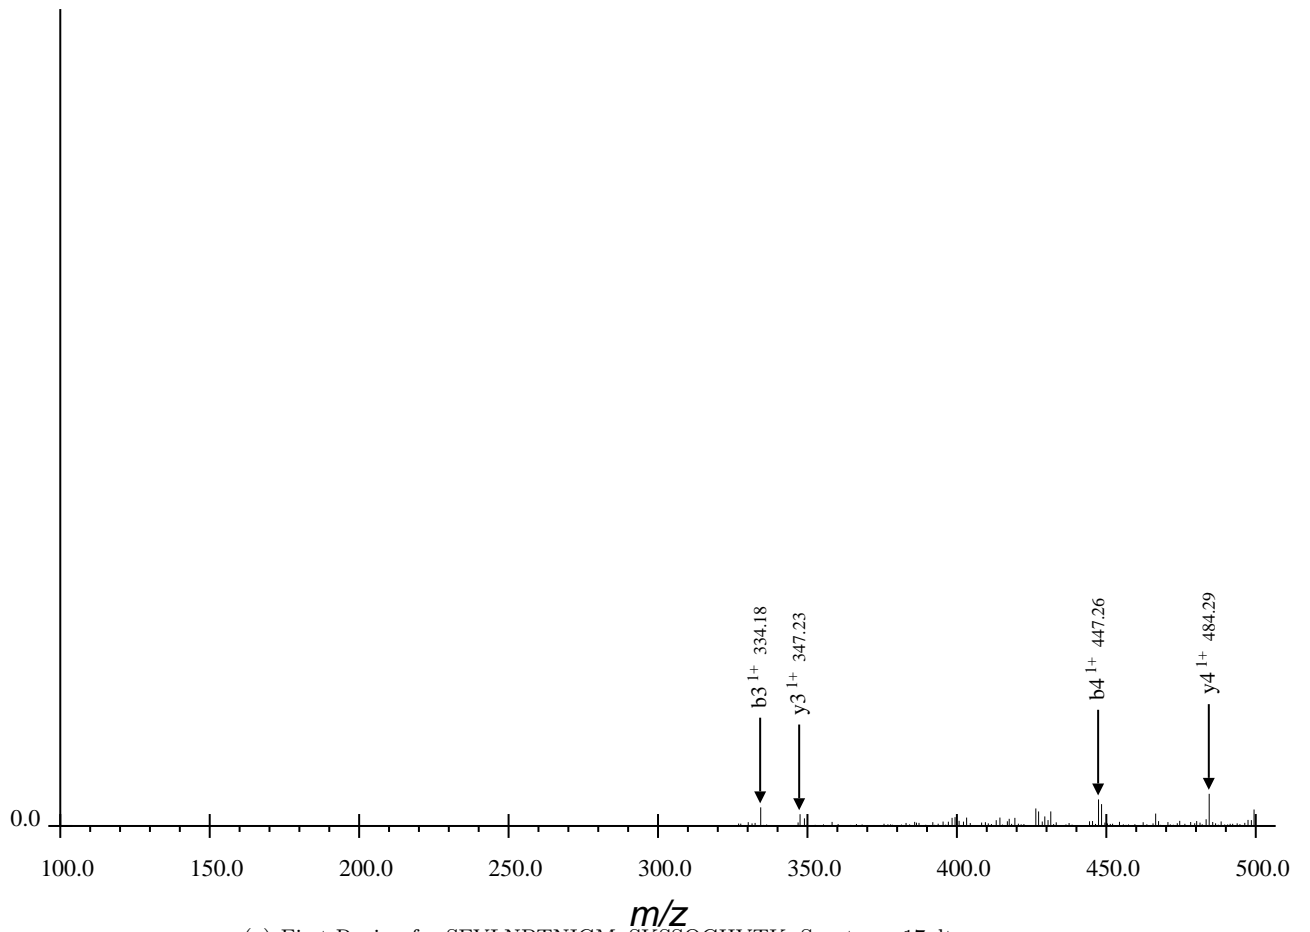

(a) First Region for SFVLNPTNIGMpSKSSQGHVTK, Spectrum 17.dta

Relative Intensity

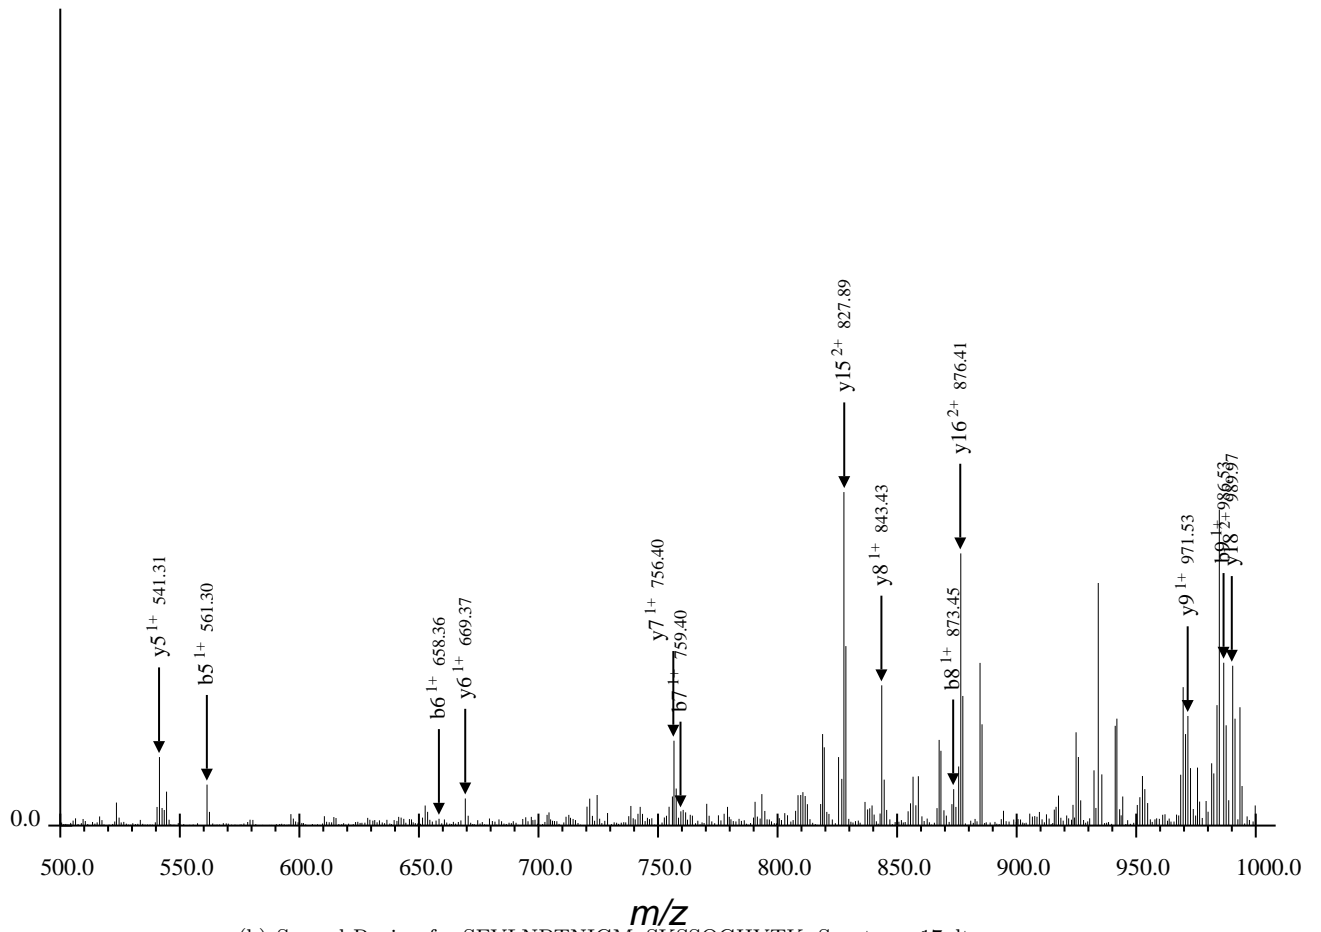

(b) Second Region for SFVLNPTNIGMpSKSSQGHVTK, Spectrum 17.dta

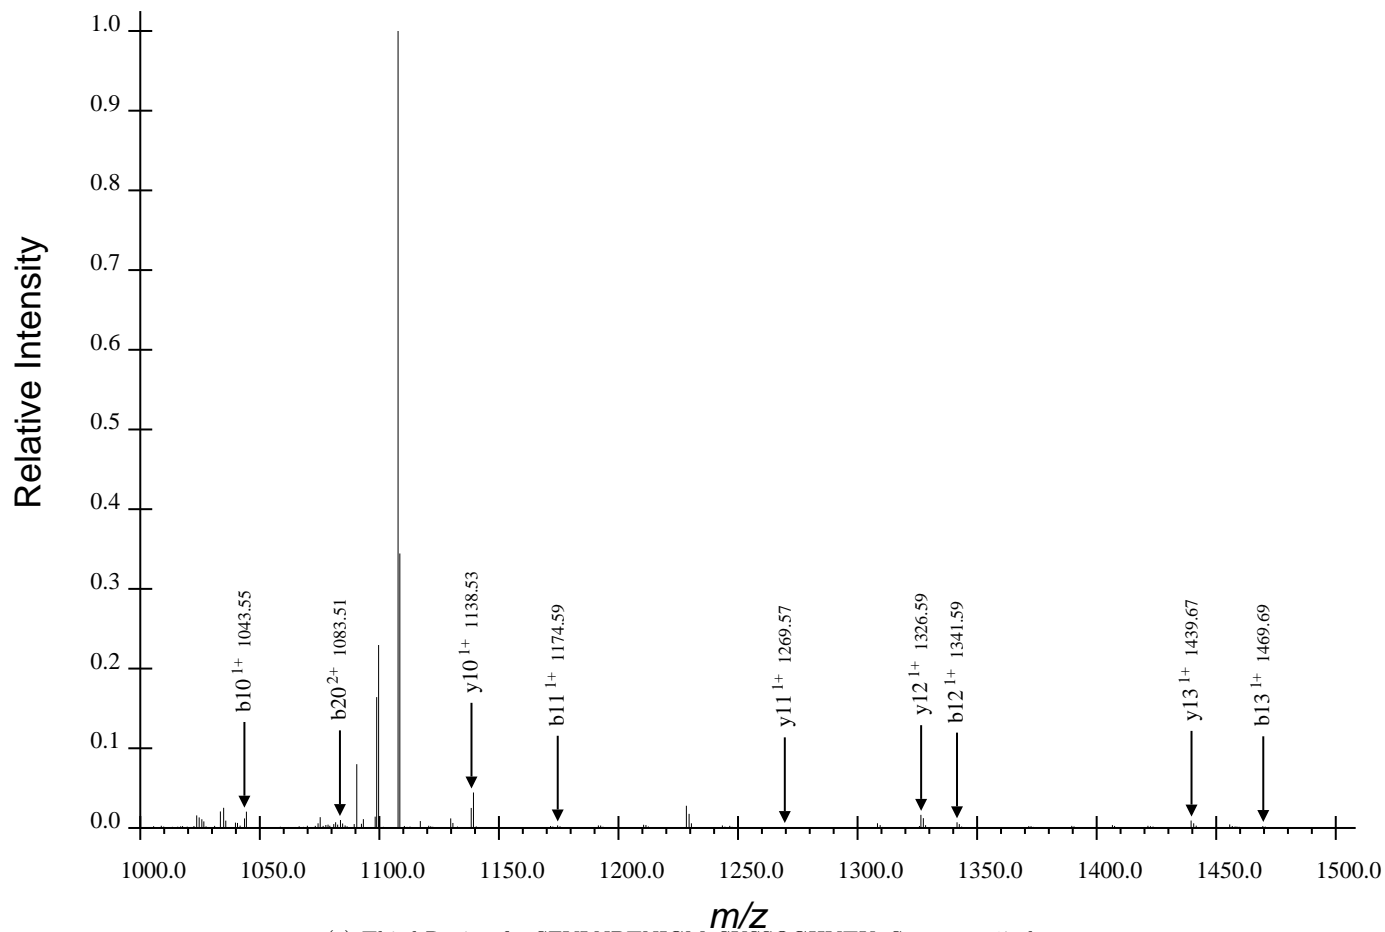

(c) Third Region for SFVLNPTNIGMpSKSSQGHVTK, Spectrum 17.dta

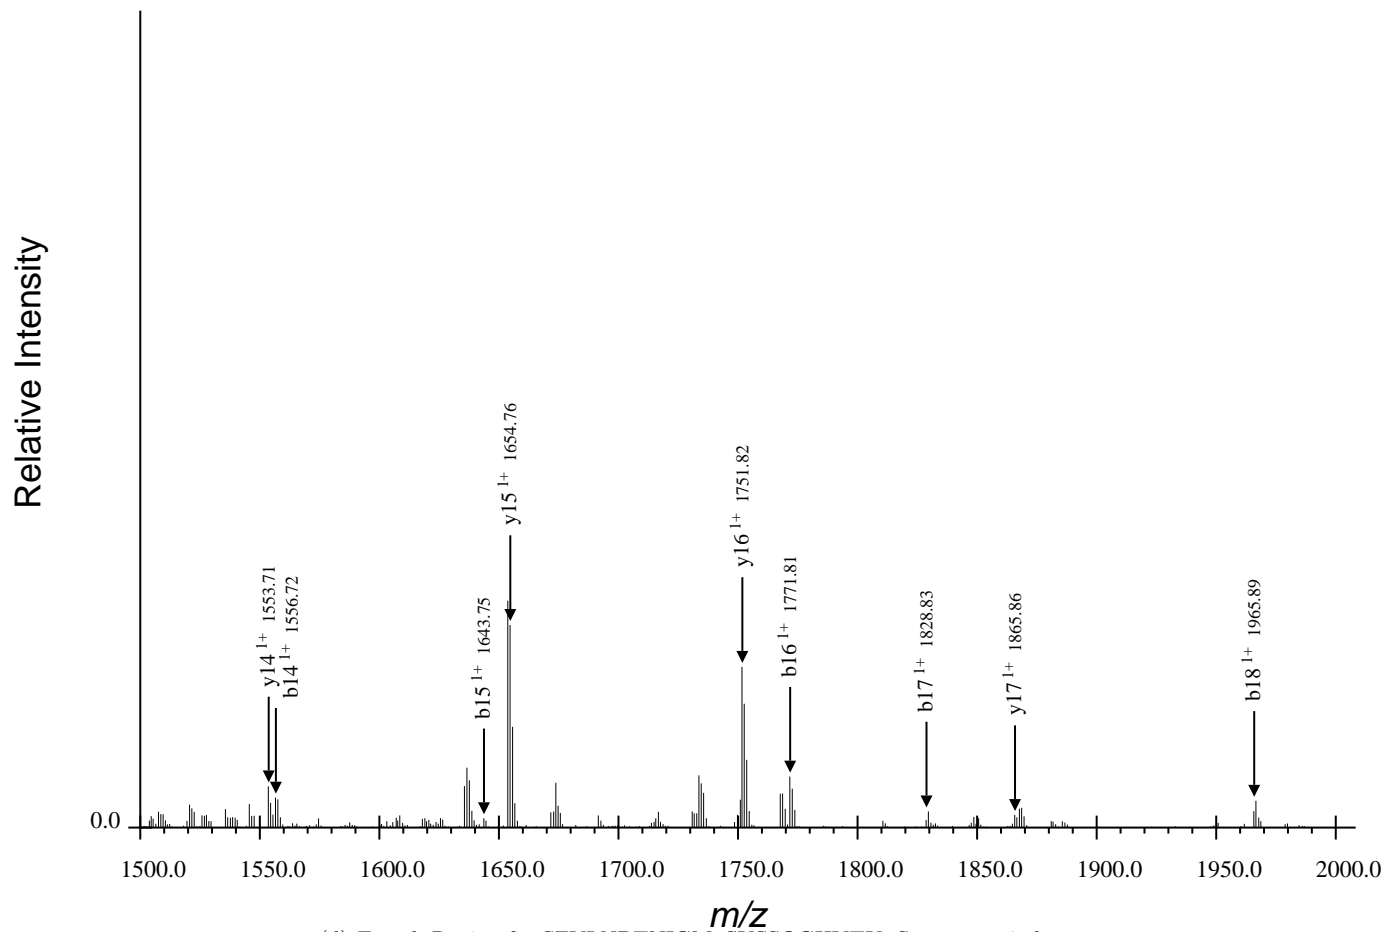

(d) Fourth Region for SFVLNPTNIGMpSKSSQGHVTK, Spectrum 17.dta

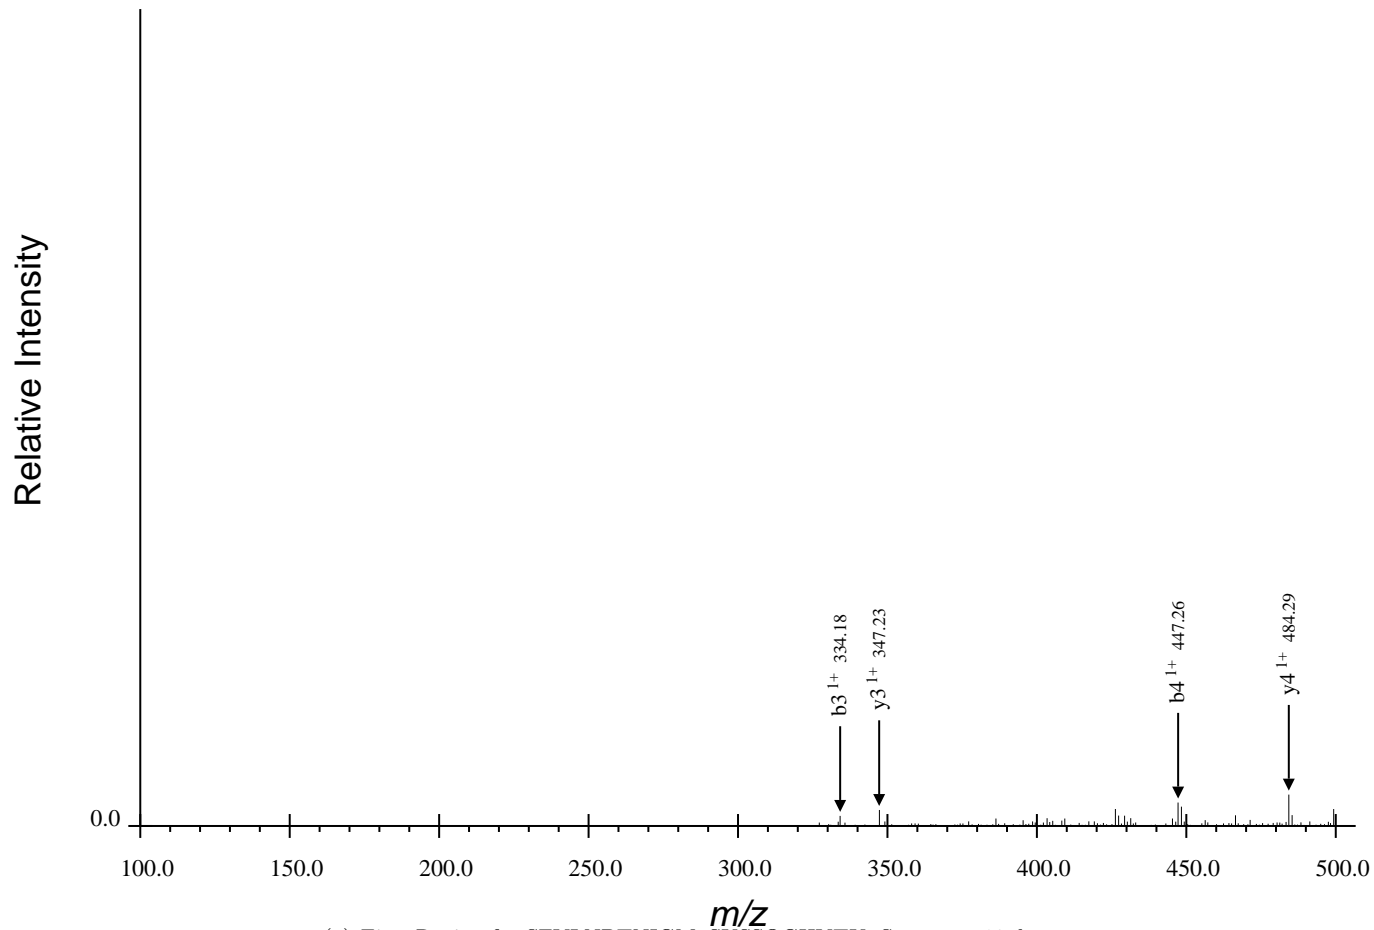

(a) First Region for SFVLNPTNIGMpSKSSQGHVTK, Spectrum 18.dta

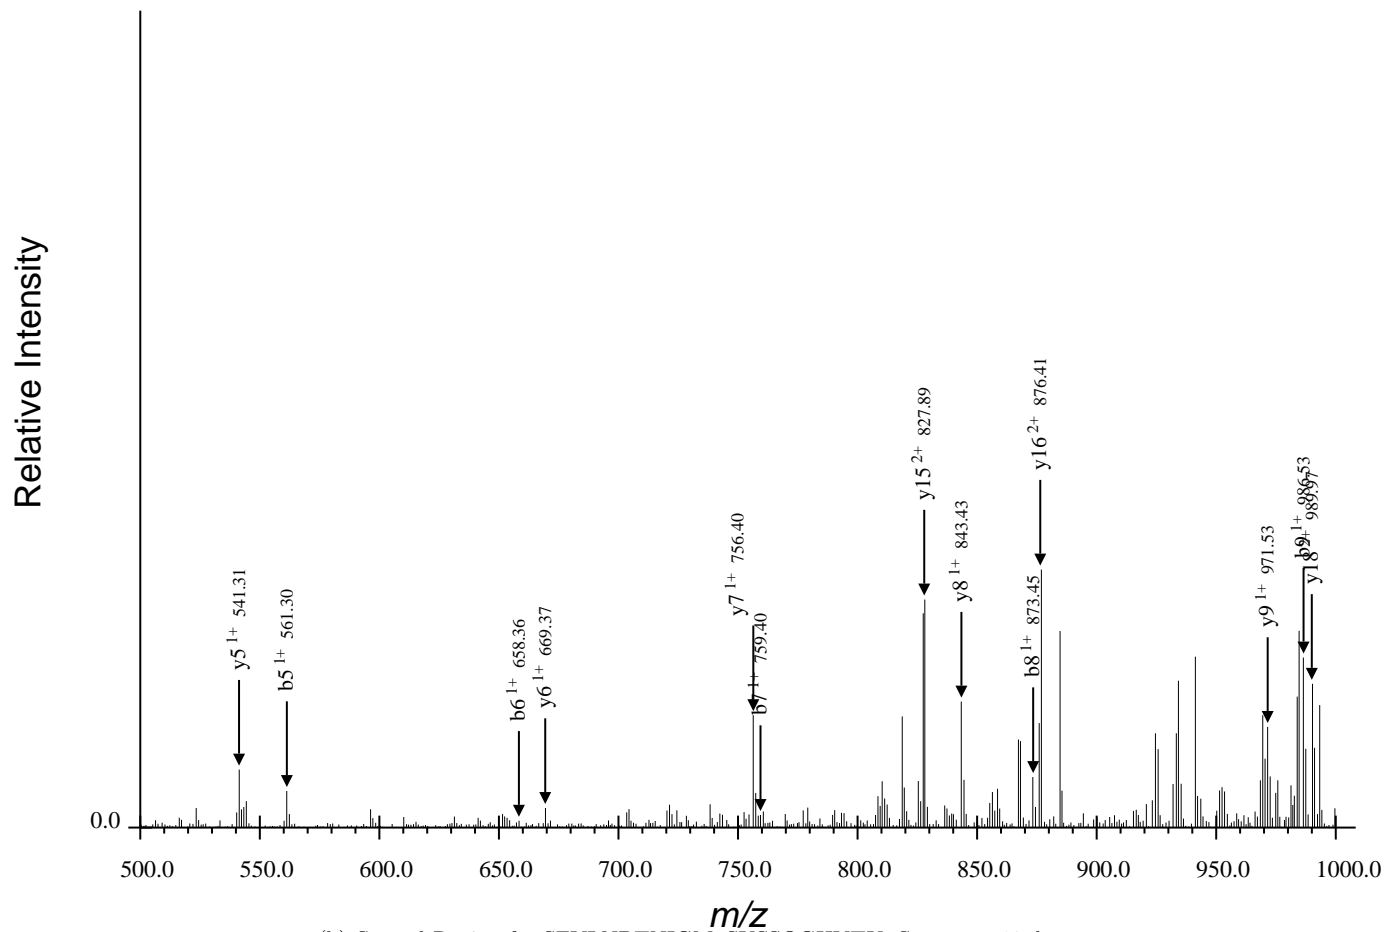

(b) Second Region for SFVLNPTNIGMpSKSSQGHVTK, Spectrum 18.dta

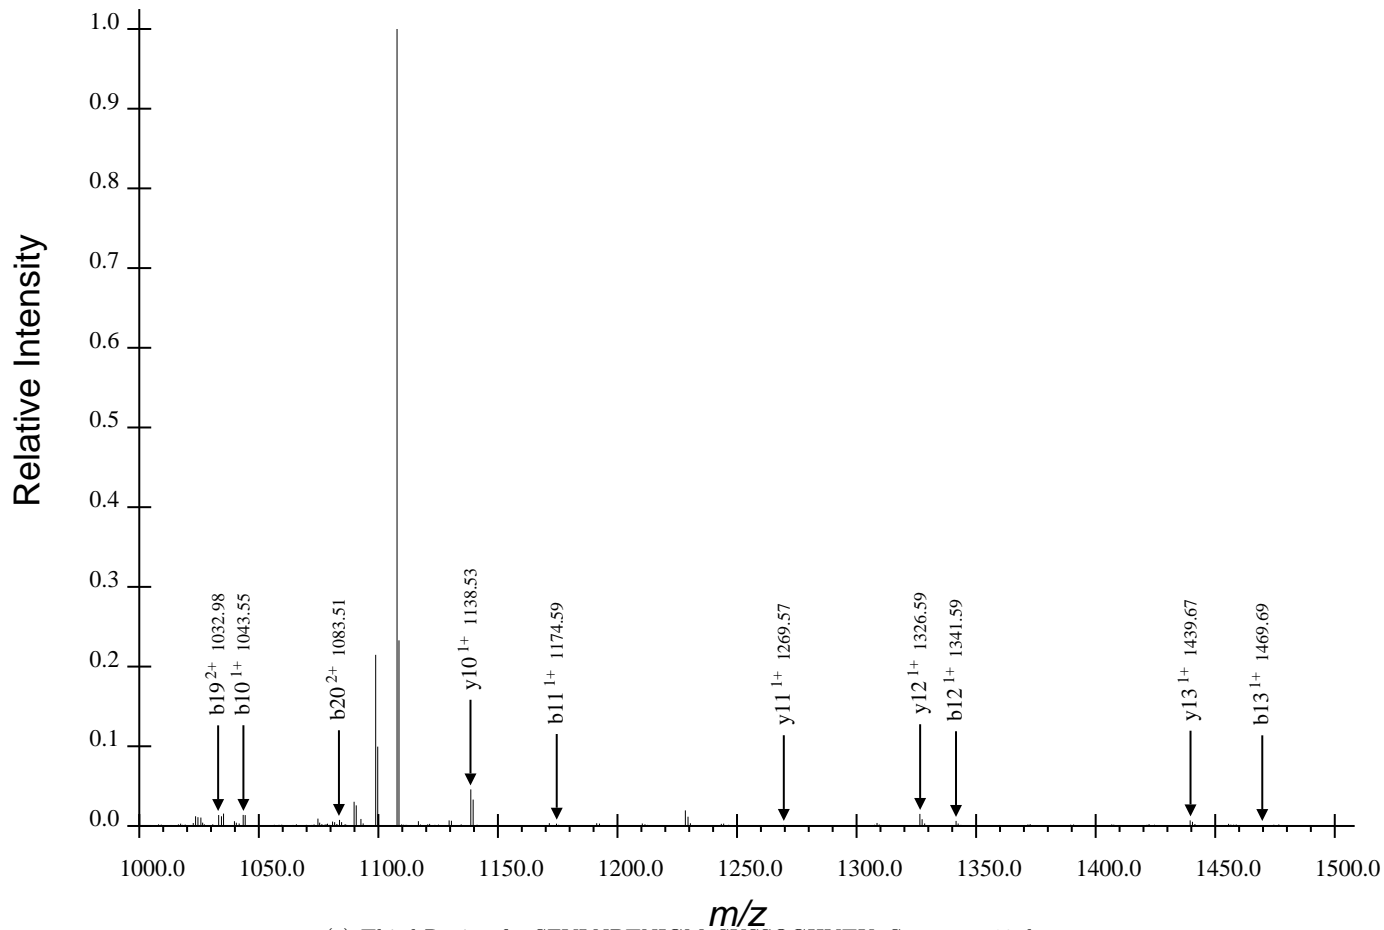

(c) Third Region for SFVLNPTNIGMpSKSSQGHVTK, Spectrum 18.dta

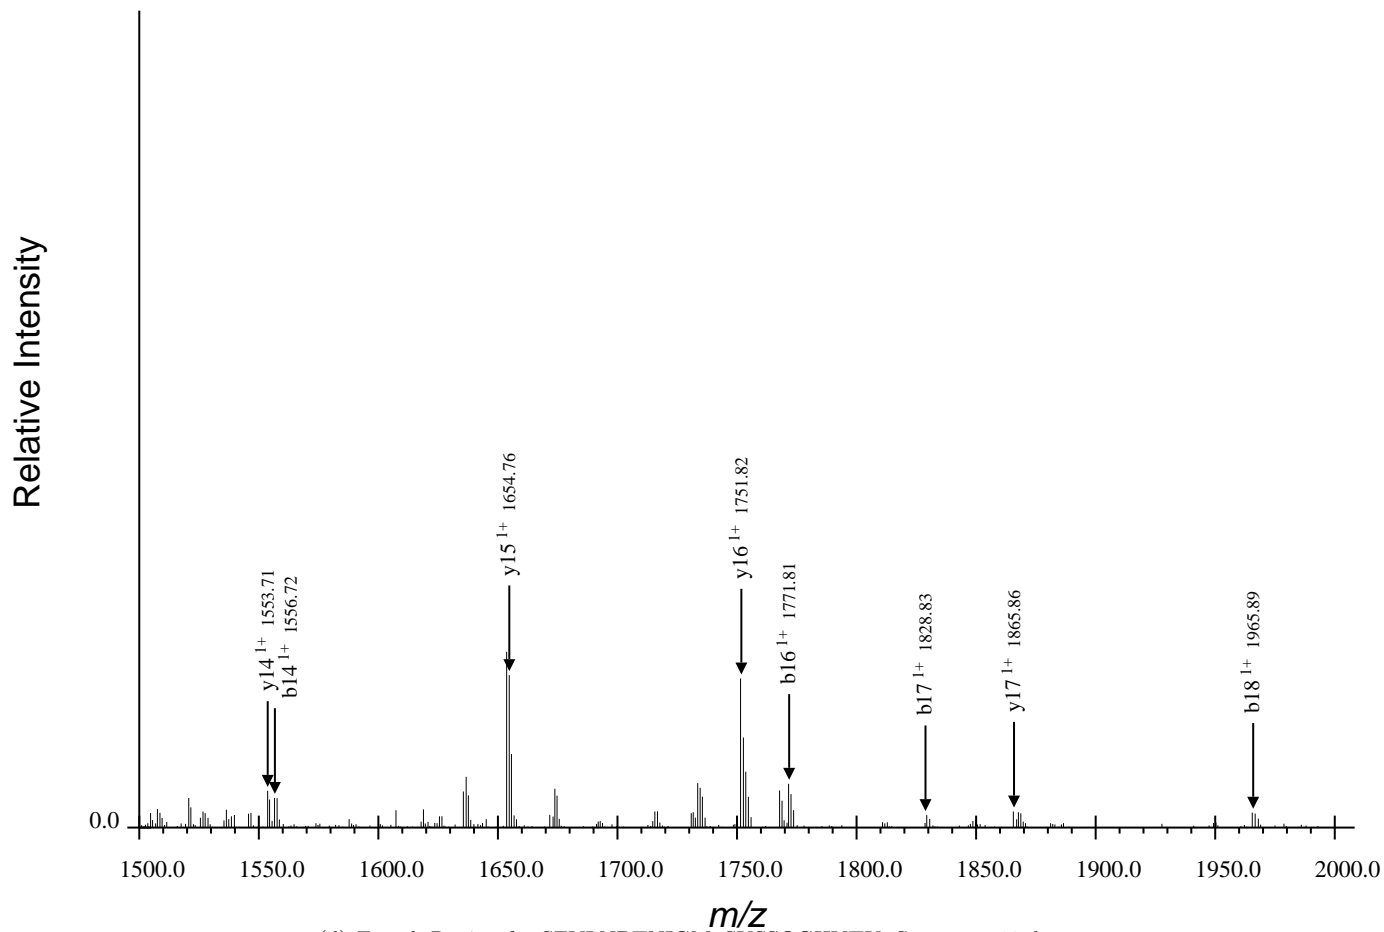

(d) Fourth Region for SFVLNPTNIGMpSKSSQGHVTK, Spectrum 18.dta

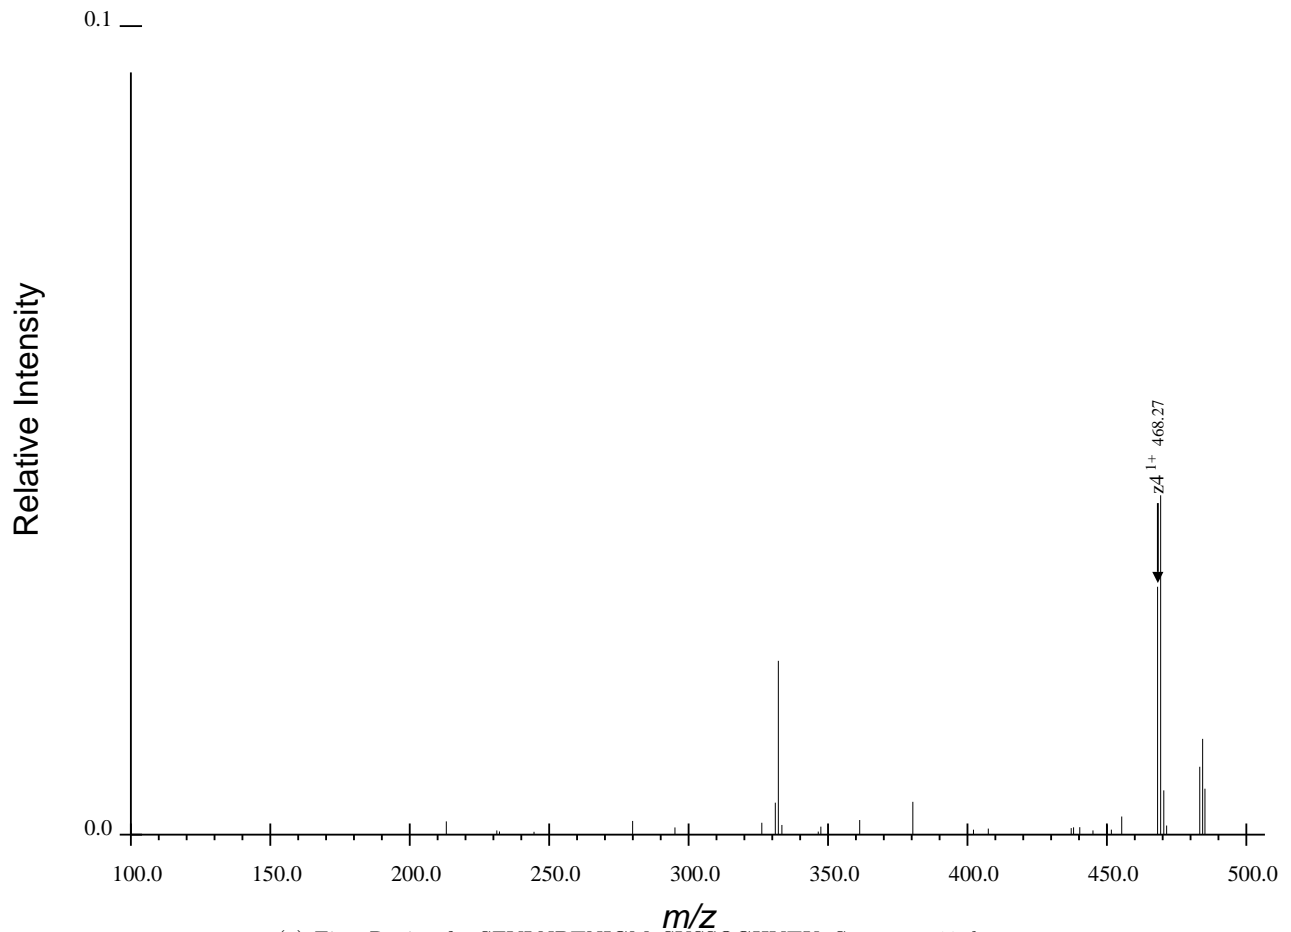

(a) First Region for SFVLNPTNIGMpSKSSQGHVTK, Spectrum 19.dta

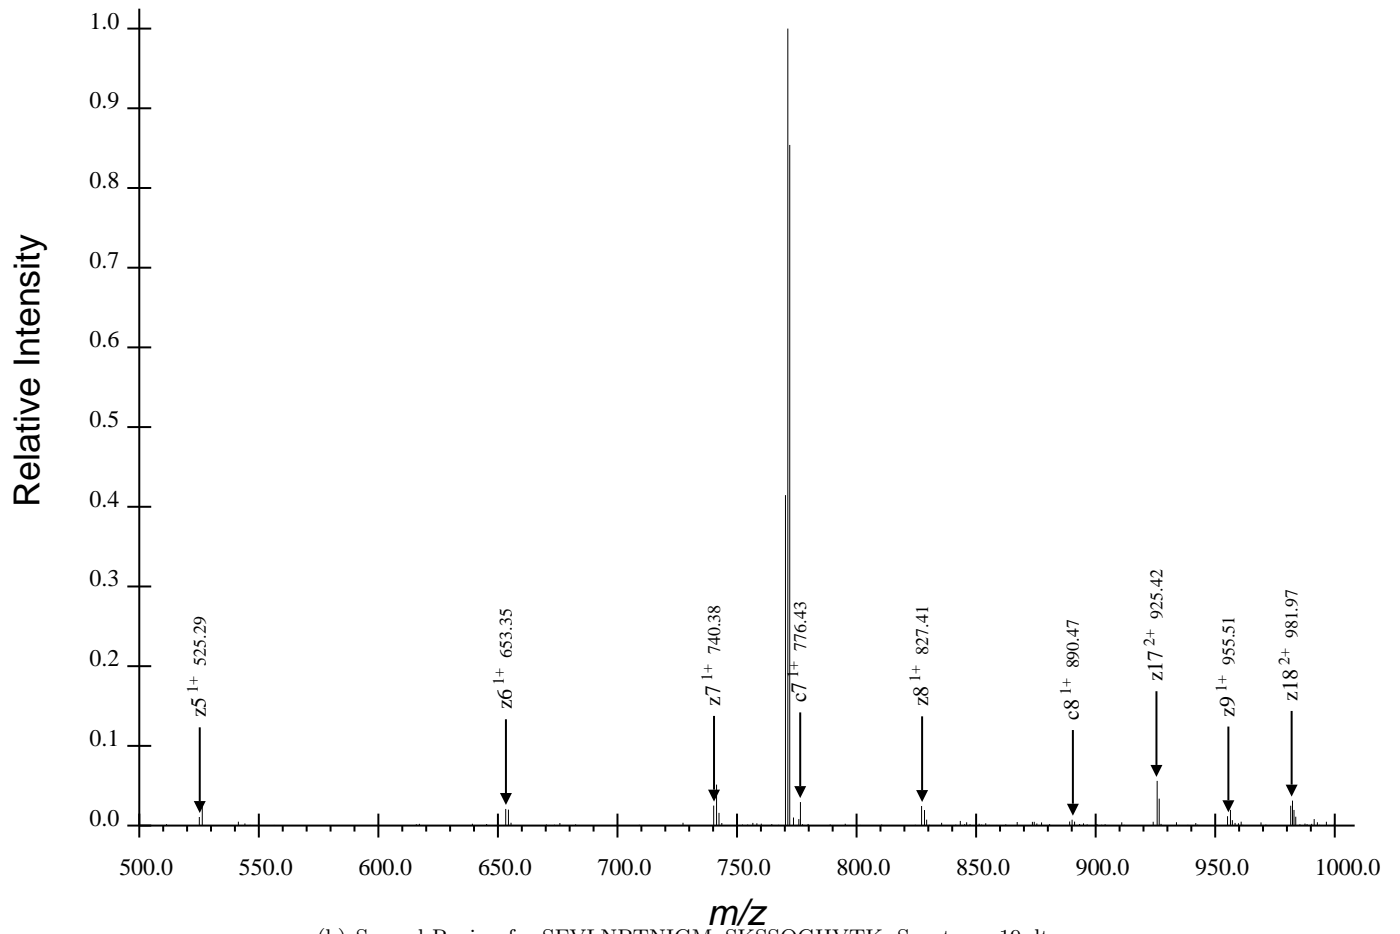

(b) Second Region for SFVLNPTNIGMpSKSSQGHVTK, Spectrum 19.dta

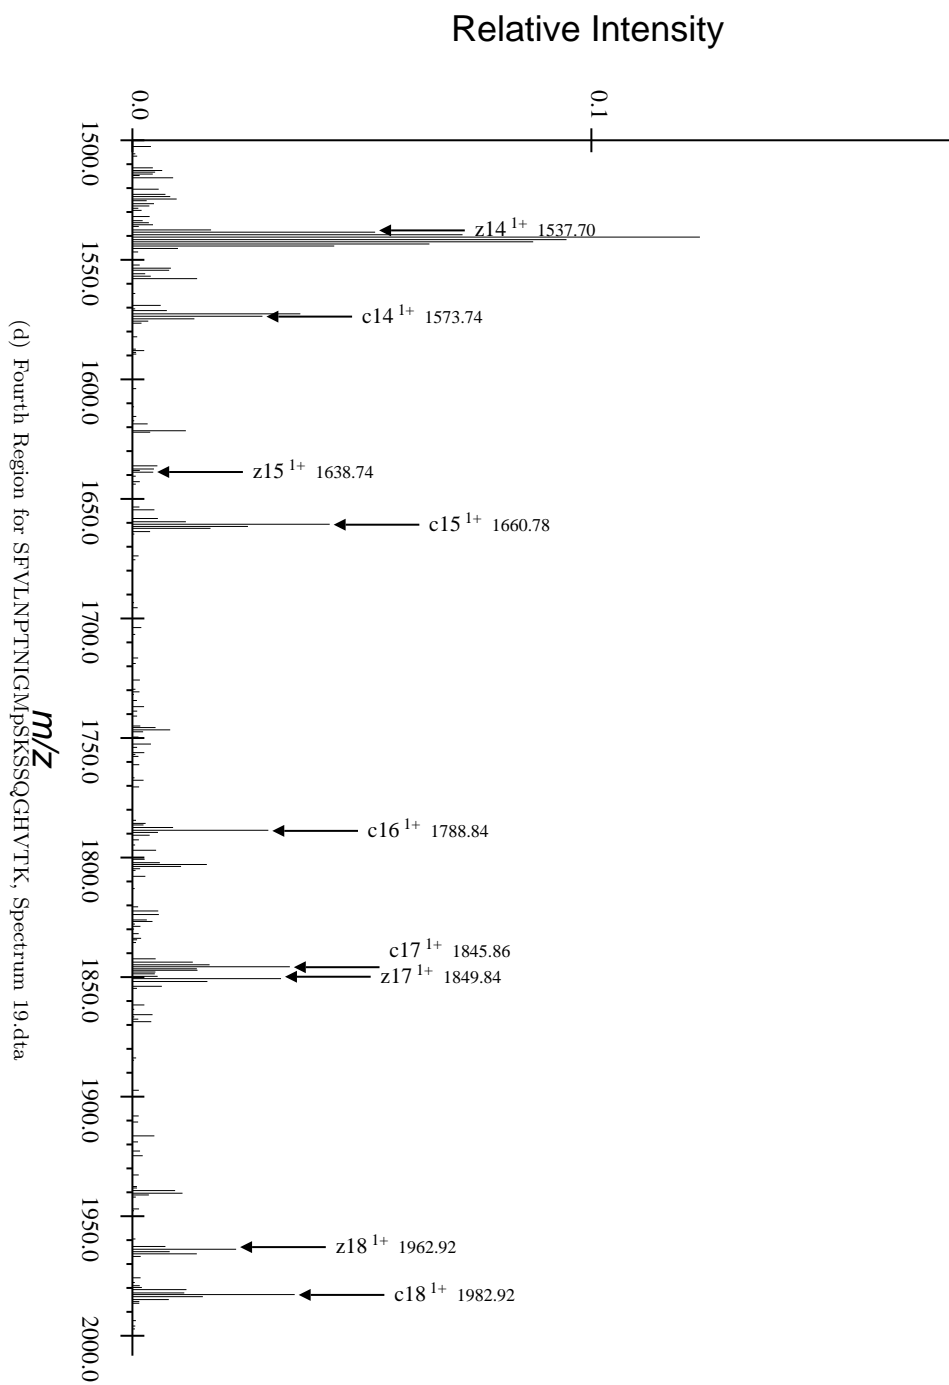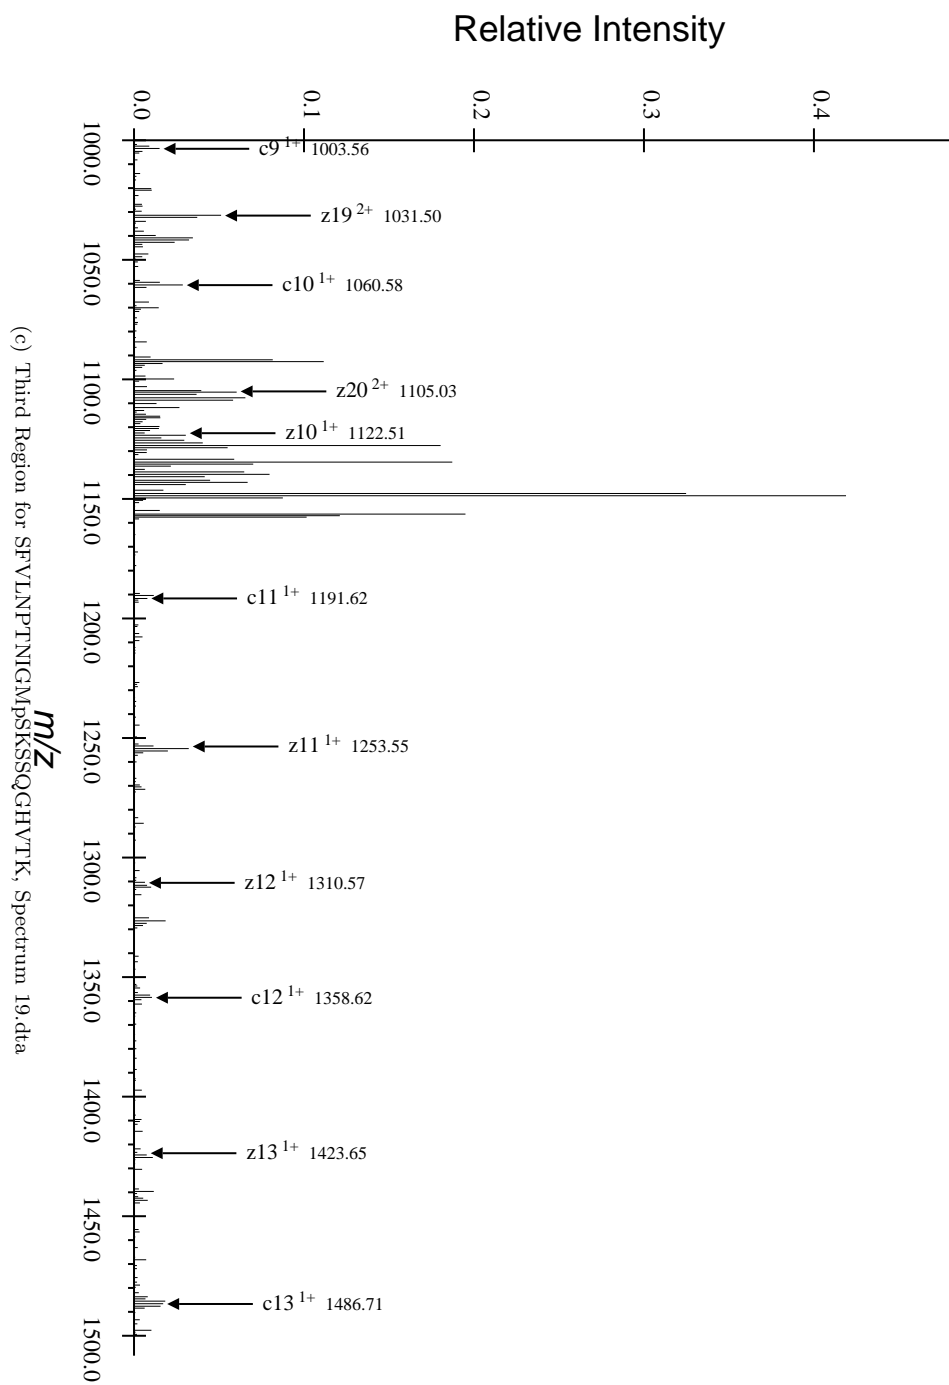

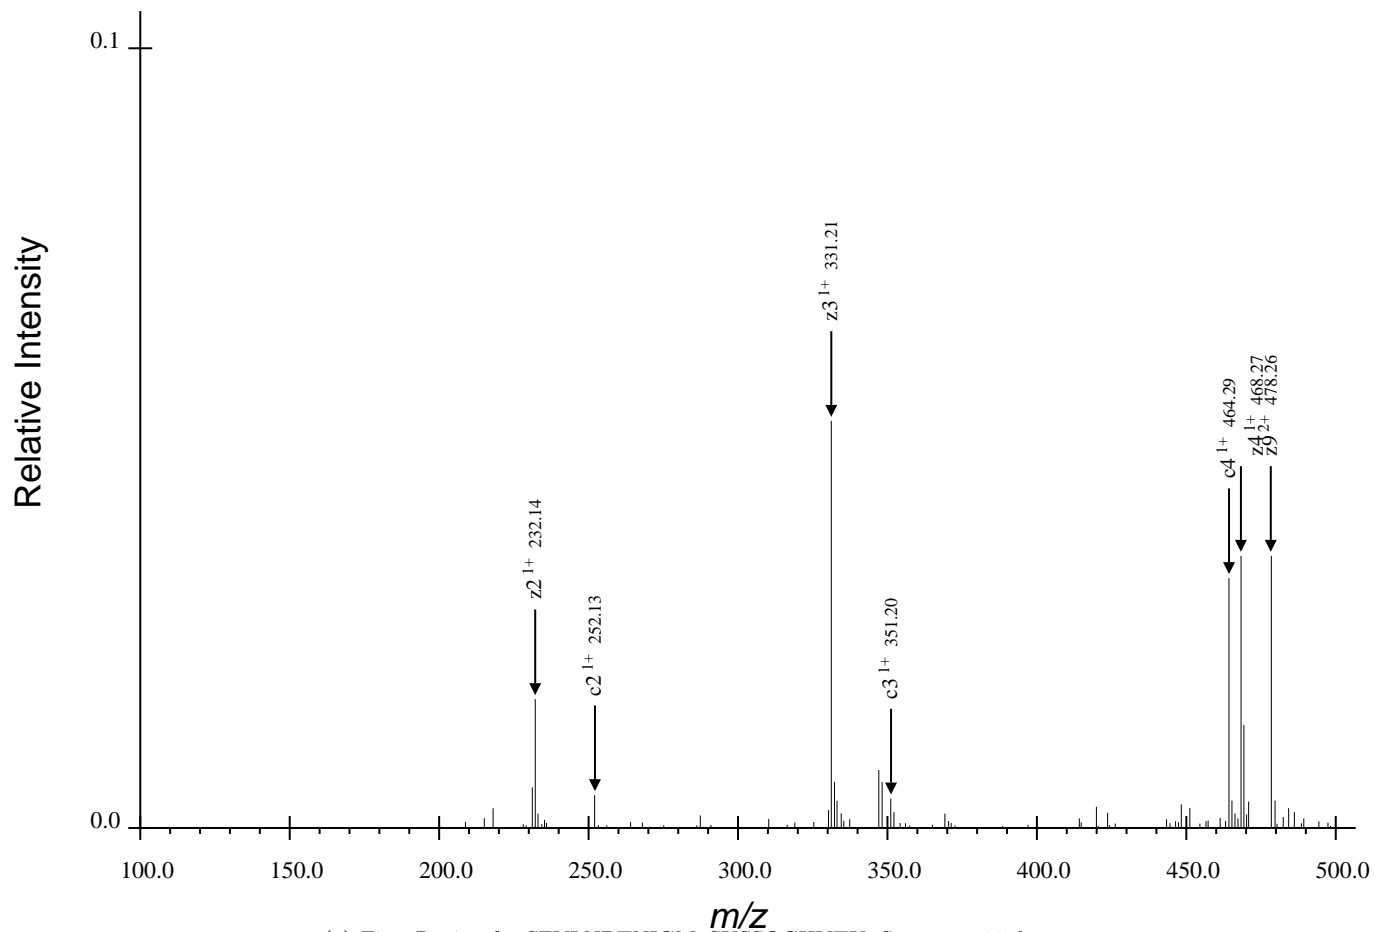

(a) First Region for SFVLNPTNIGMpSKSSQGHVTK, Spectrum 20.dta

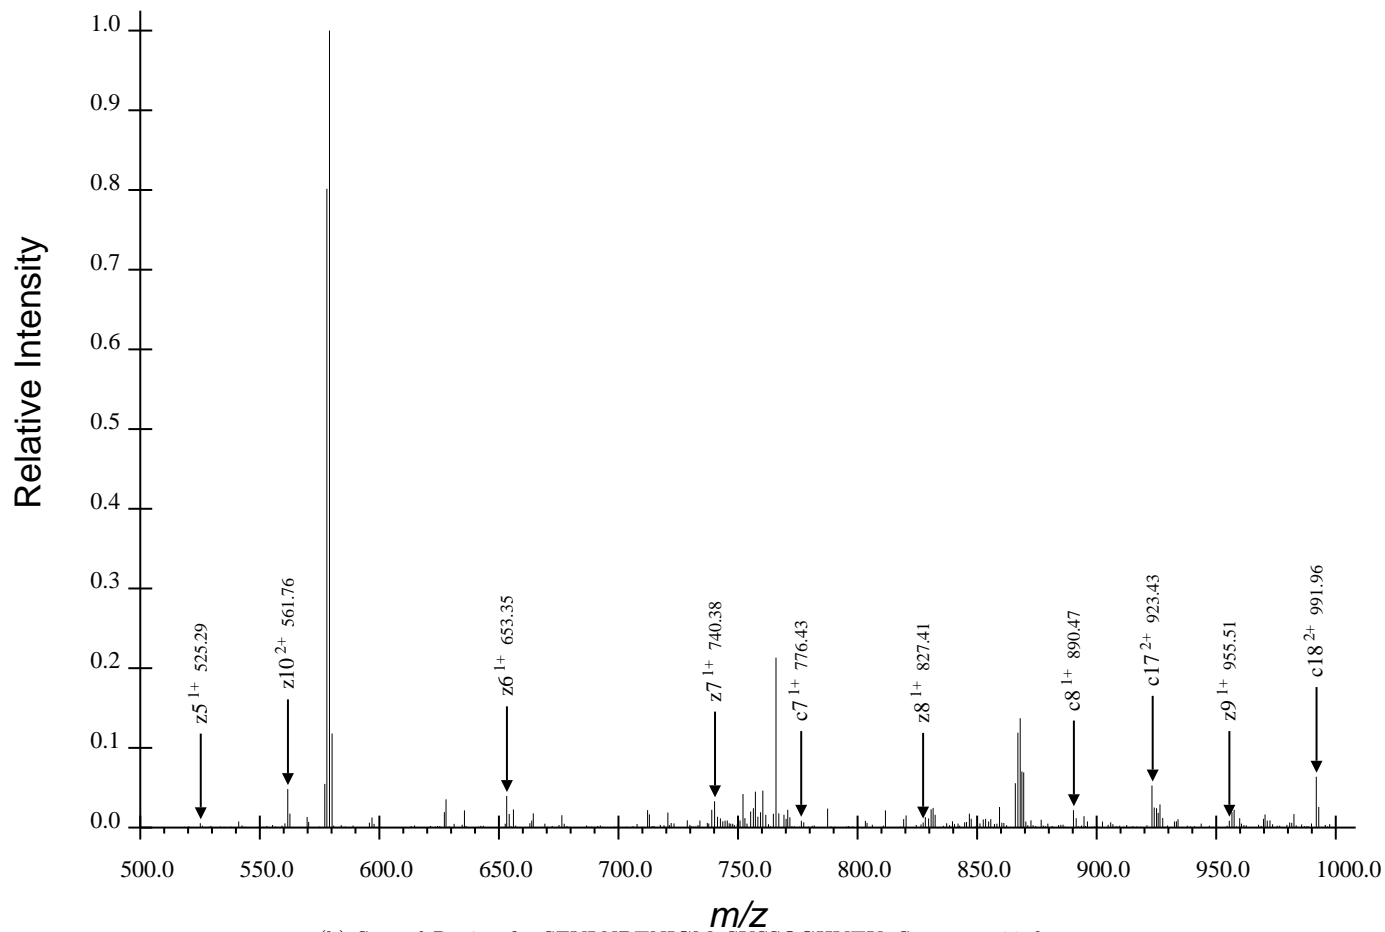

(b) Second Region for SFVLNPTNIGMpSKSSQGHVTK, Spectrum 20.dta

Relative Intensity

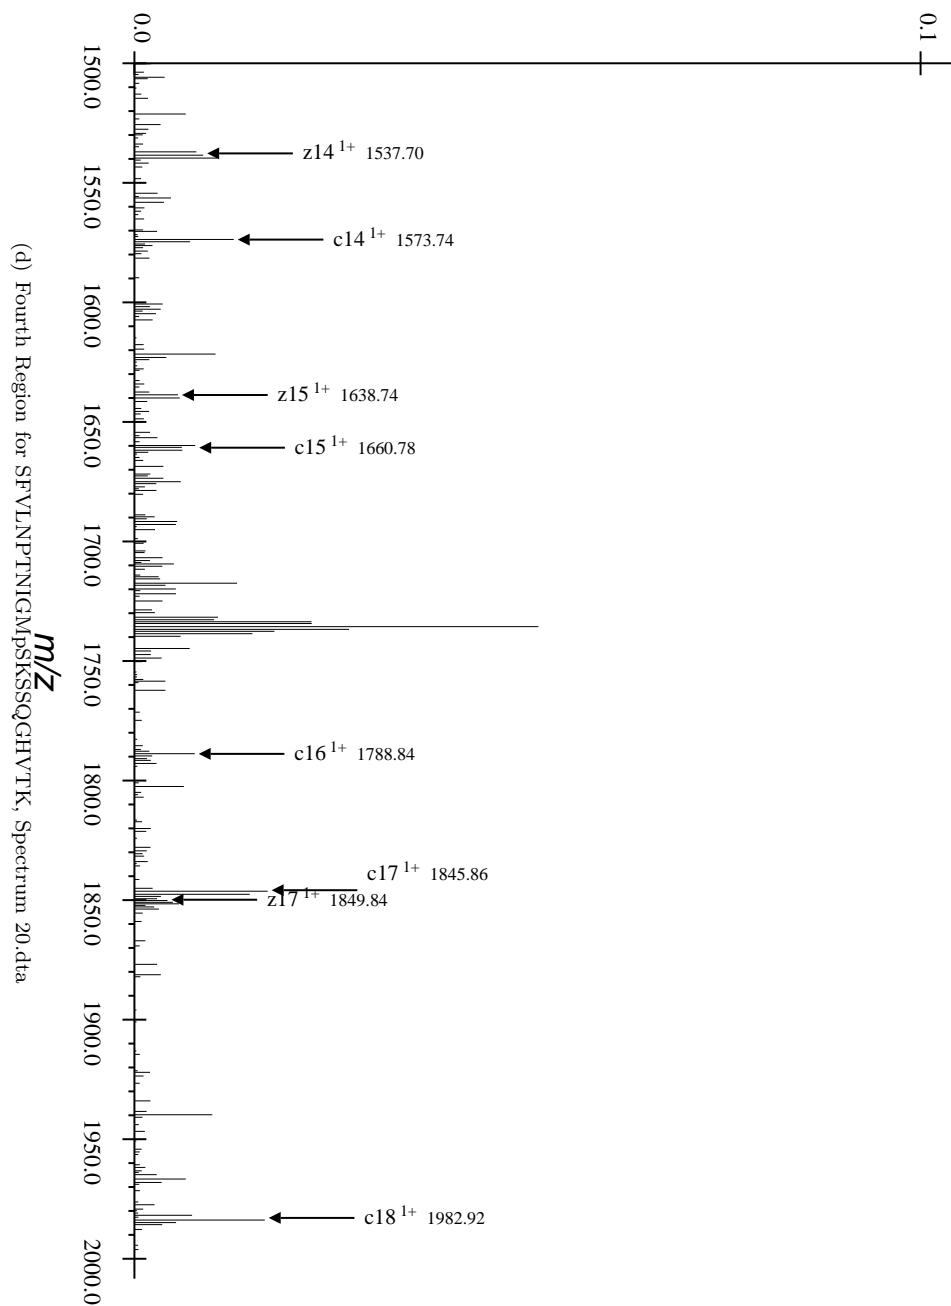

Relative Intensity

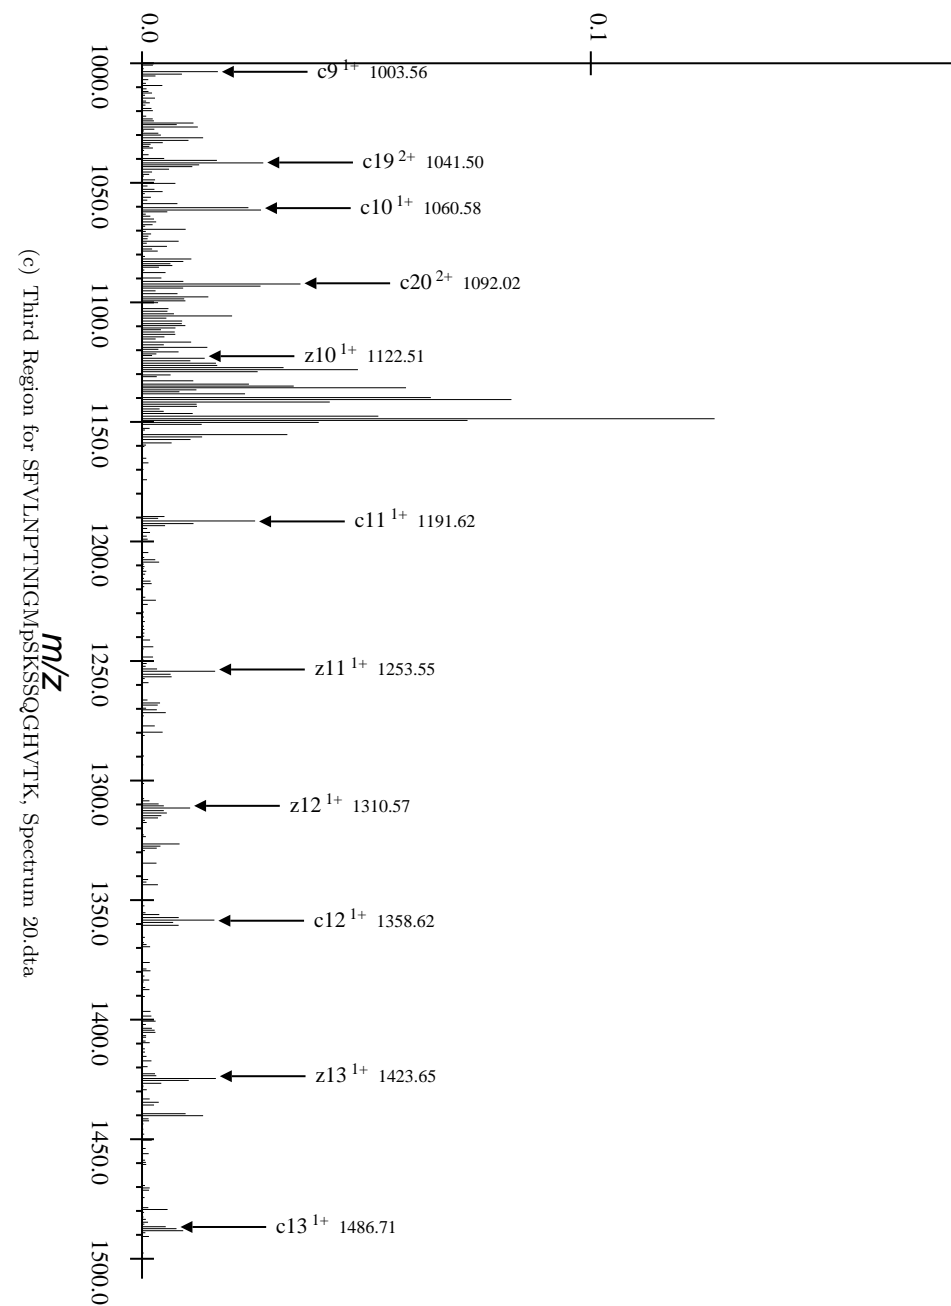



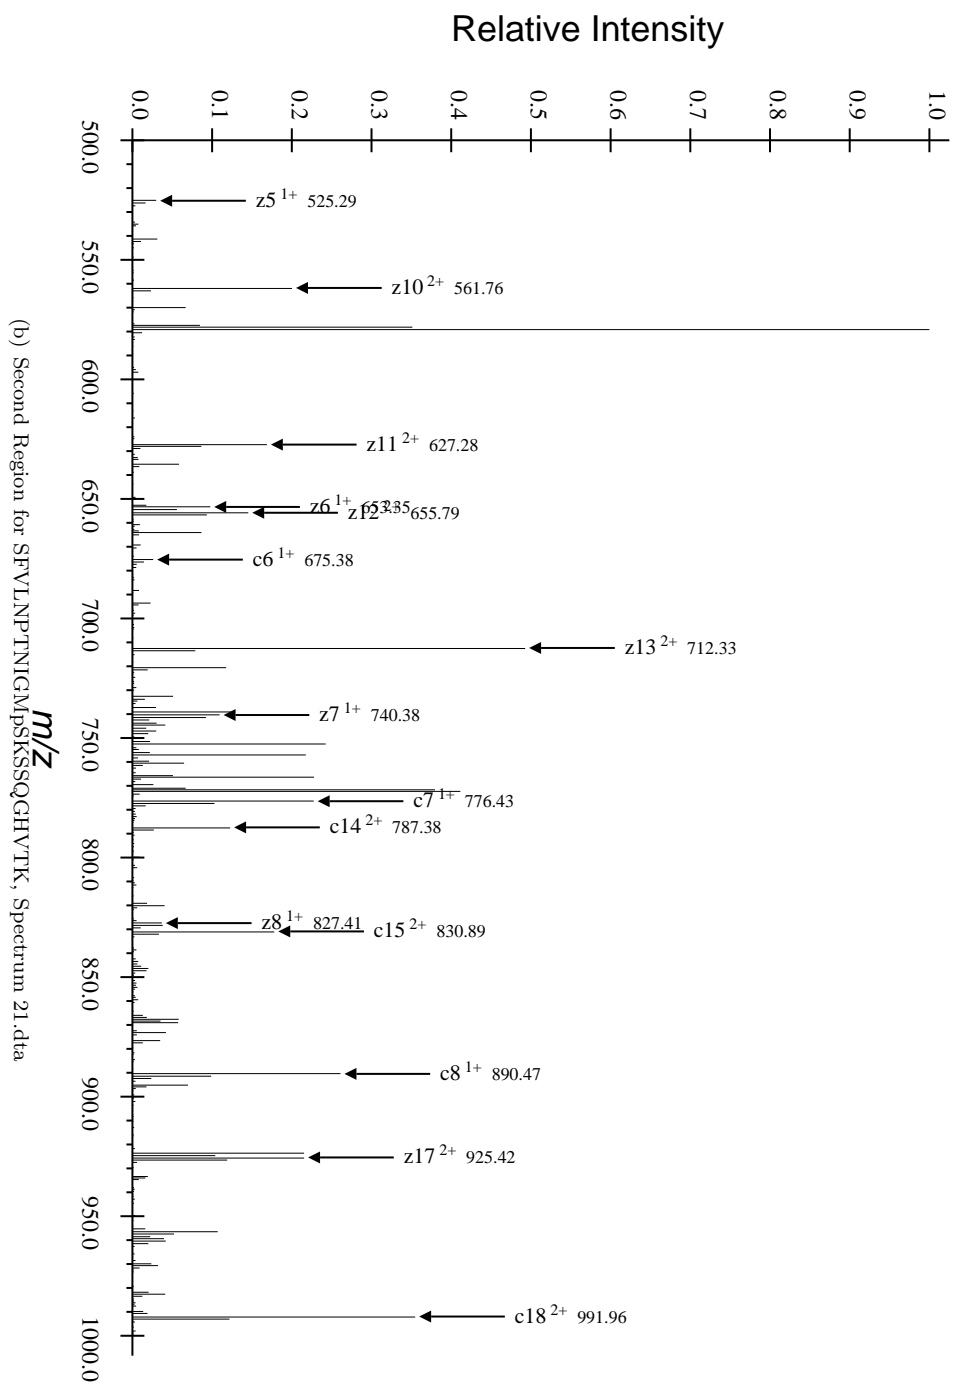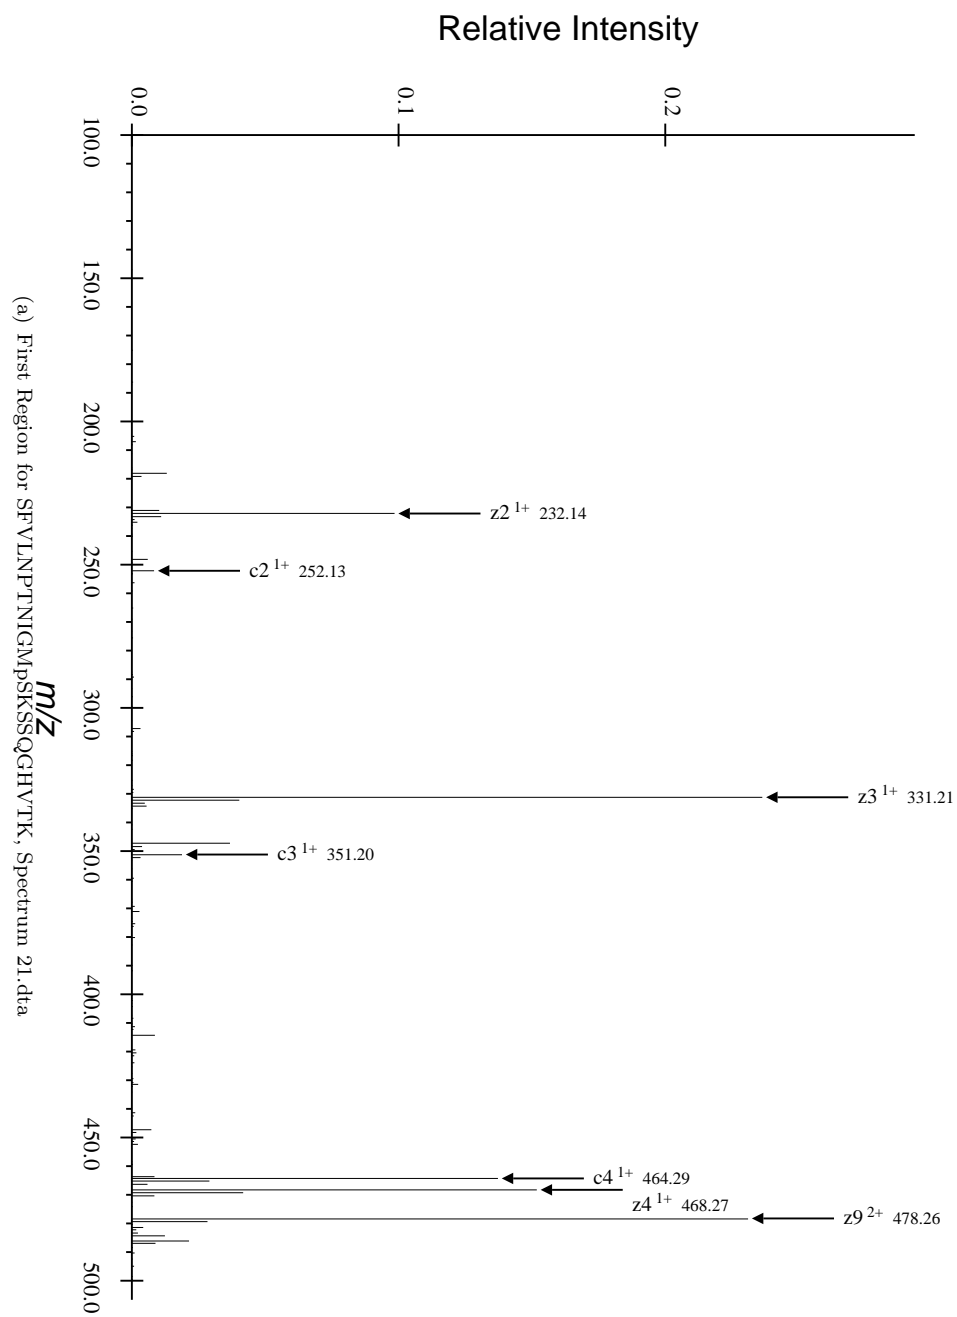

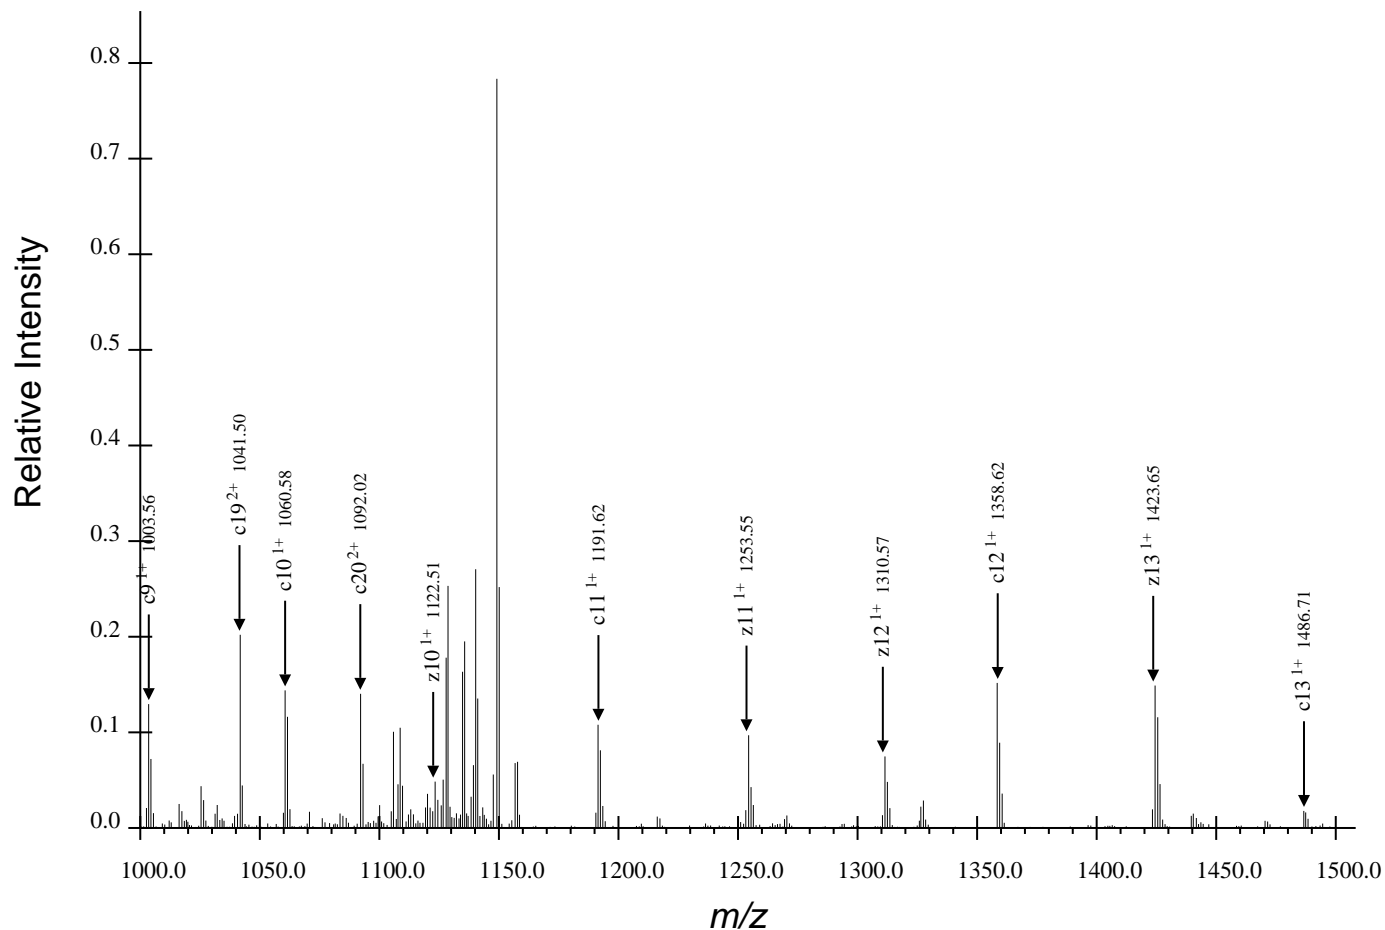

(c) Third Region for SFVLNPTNIGMpSKSSQGHVTK, Spectrum 21.dta

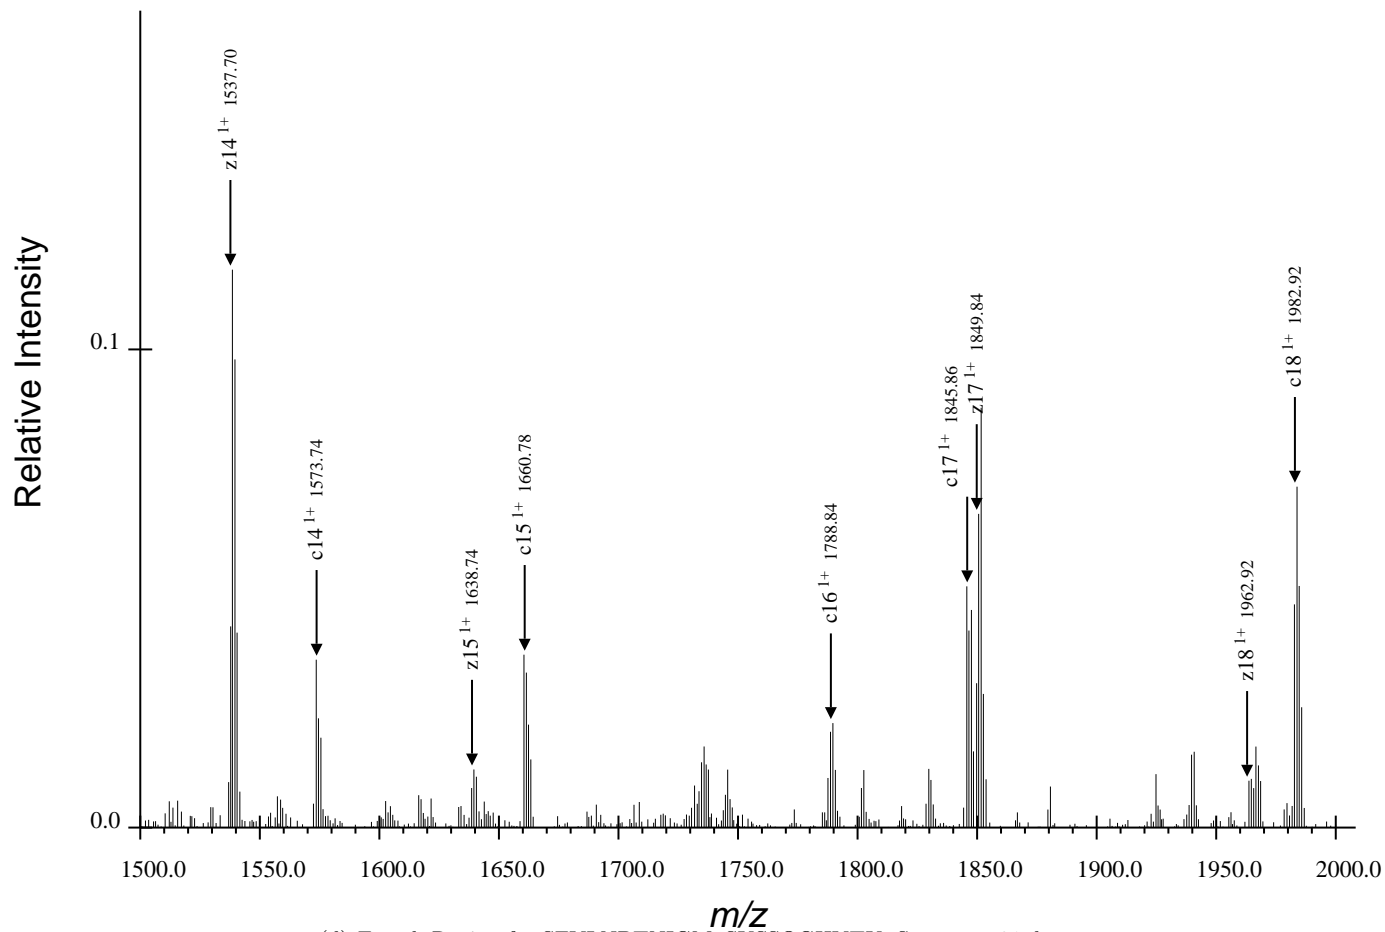

(d) Fourth Region for SFVLNPTNIGMpSKSSQGHVTK, Spectrum 21.dta

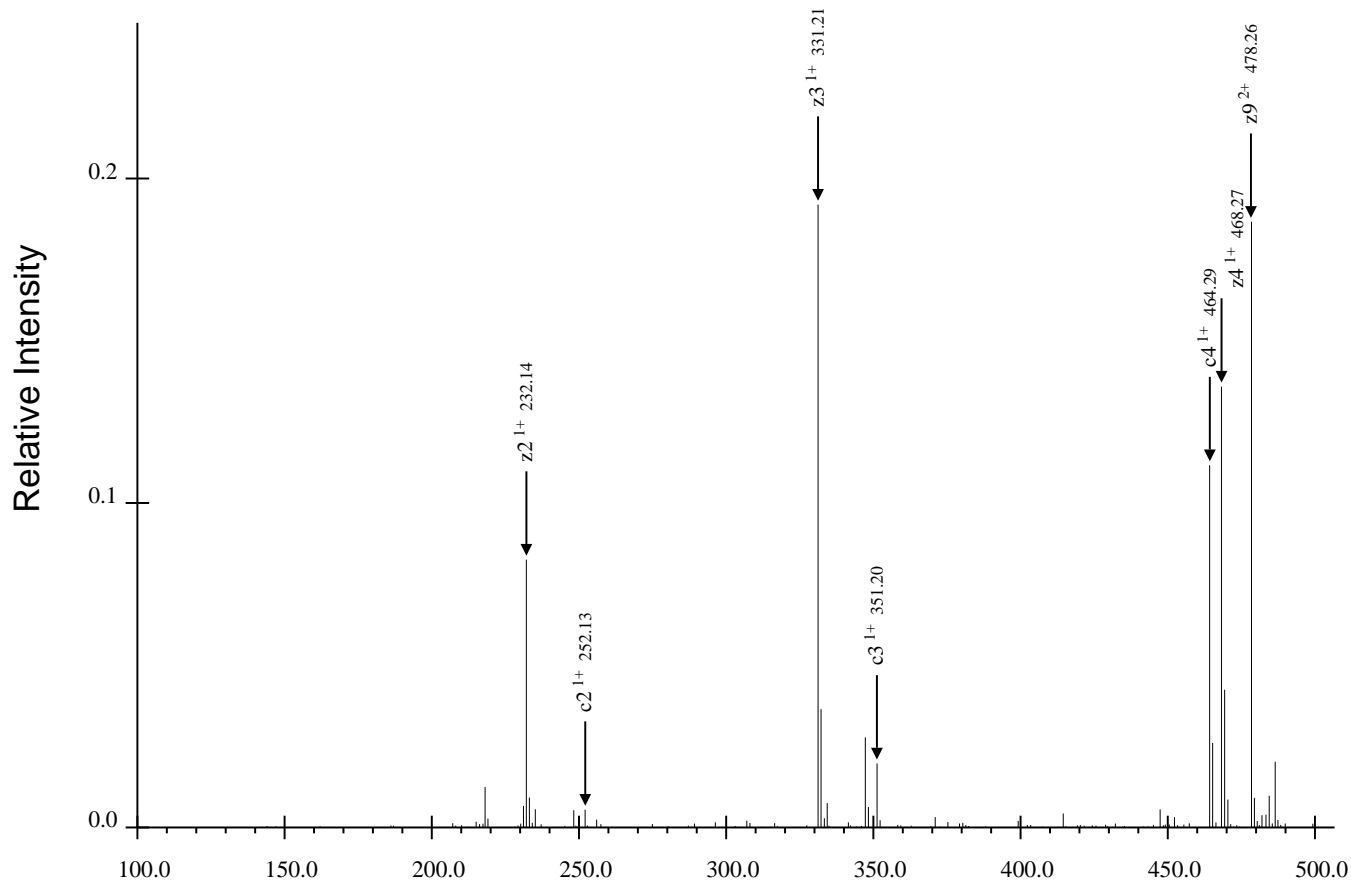

(a) First Region for SFVLNPTNIGMpSKSSQGHVTK, Spectrum 22.dta

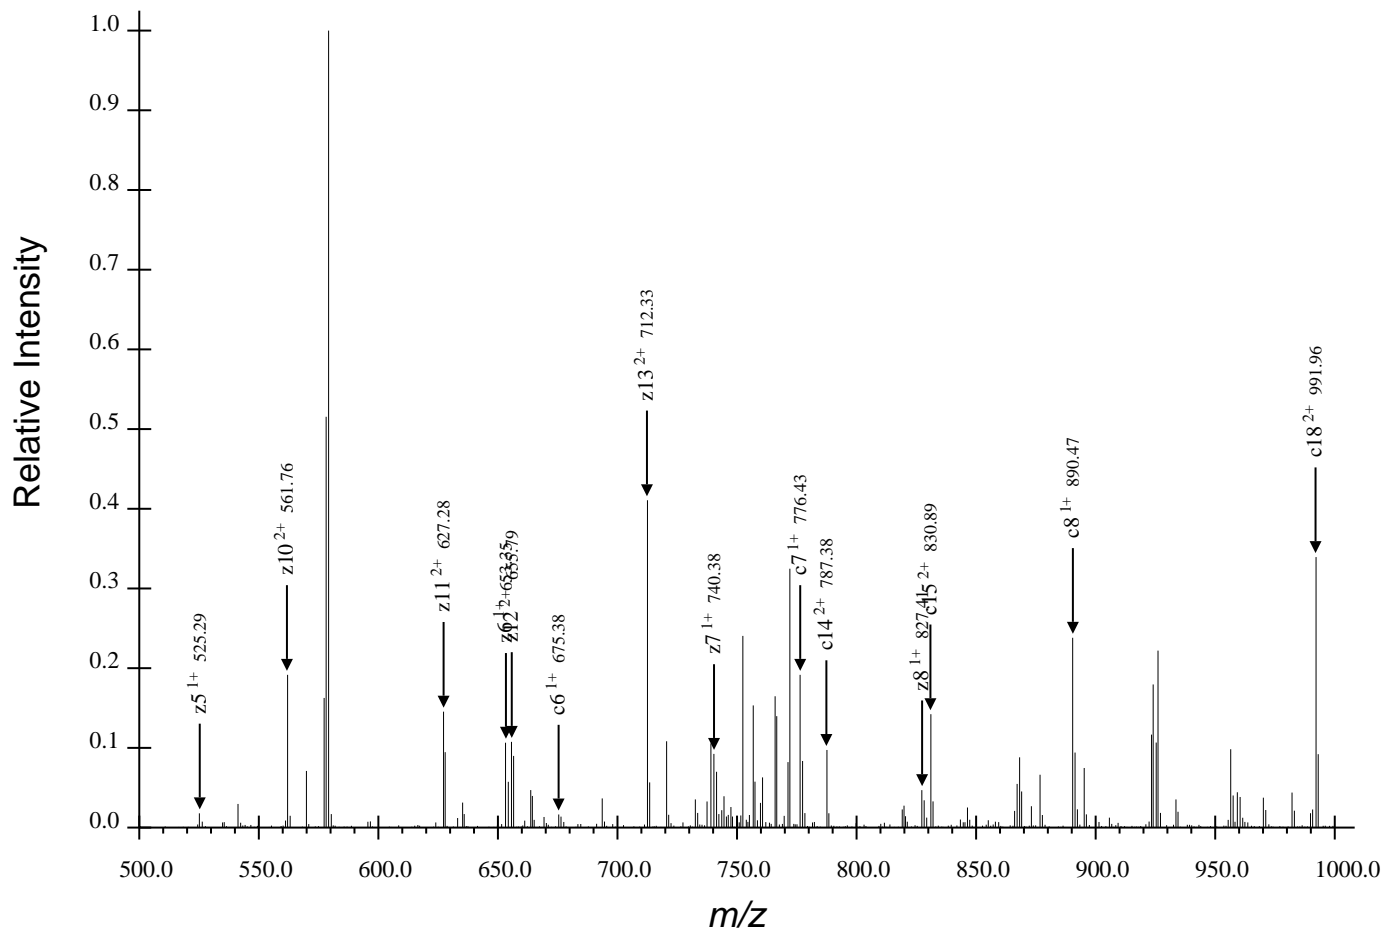

(b) Second Region for SFVLNPTNIGMpSKSSQGHVTK, Spectrum 22.dta

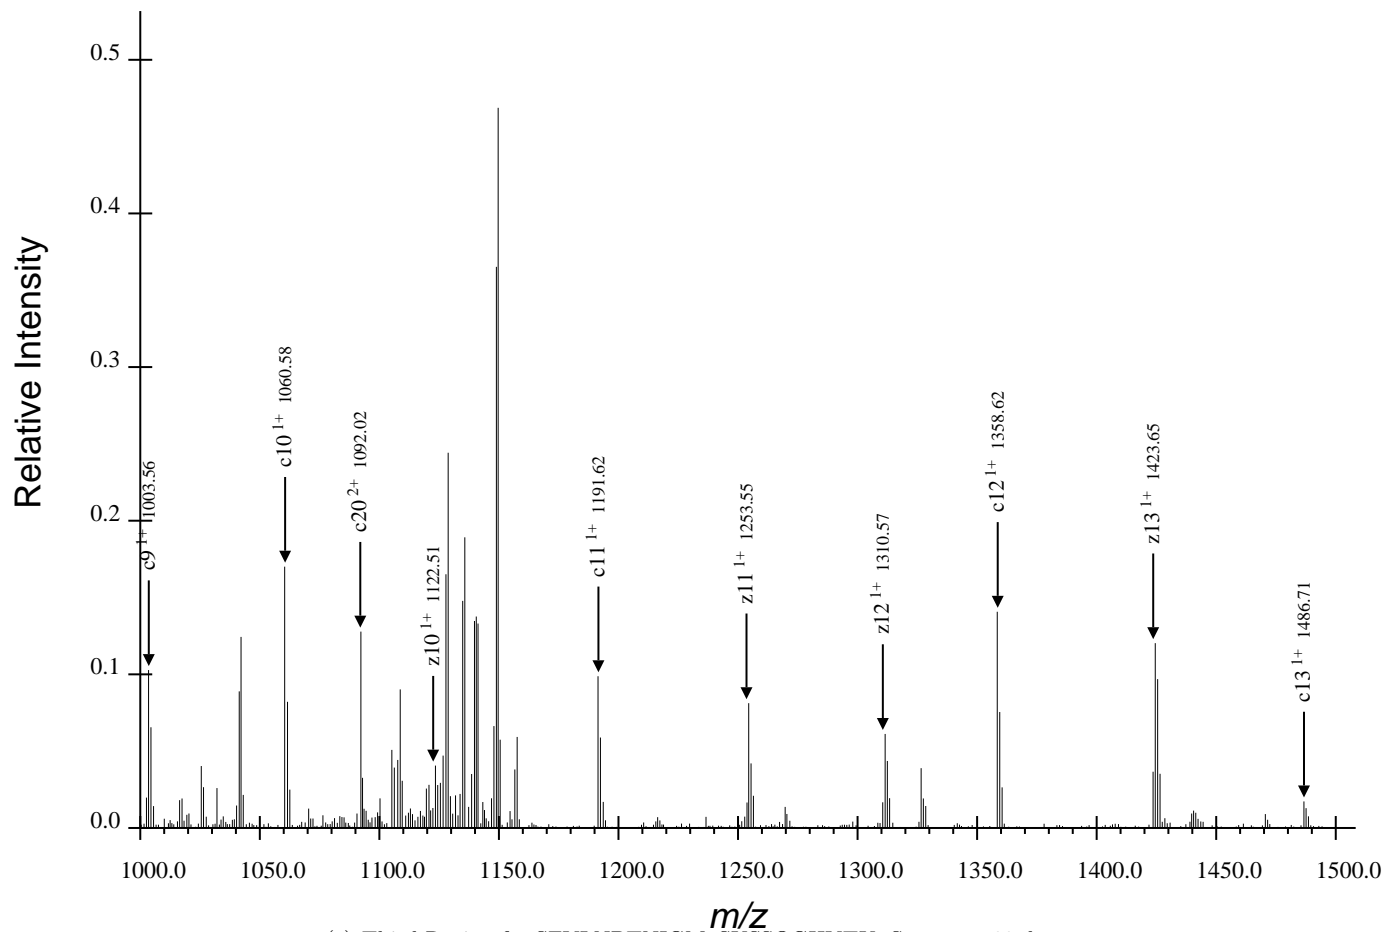

(c) Third Region for SFVLNPTNIGMpSKSSQGHVTK, Spectrum 22.dta

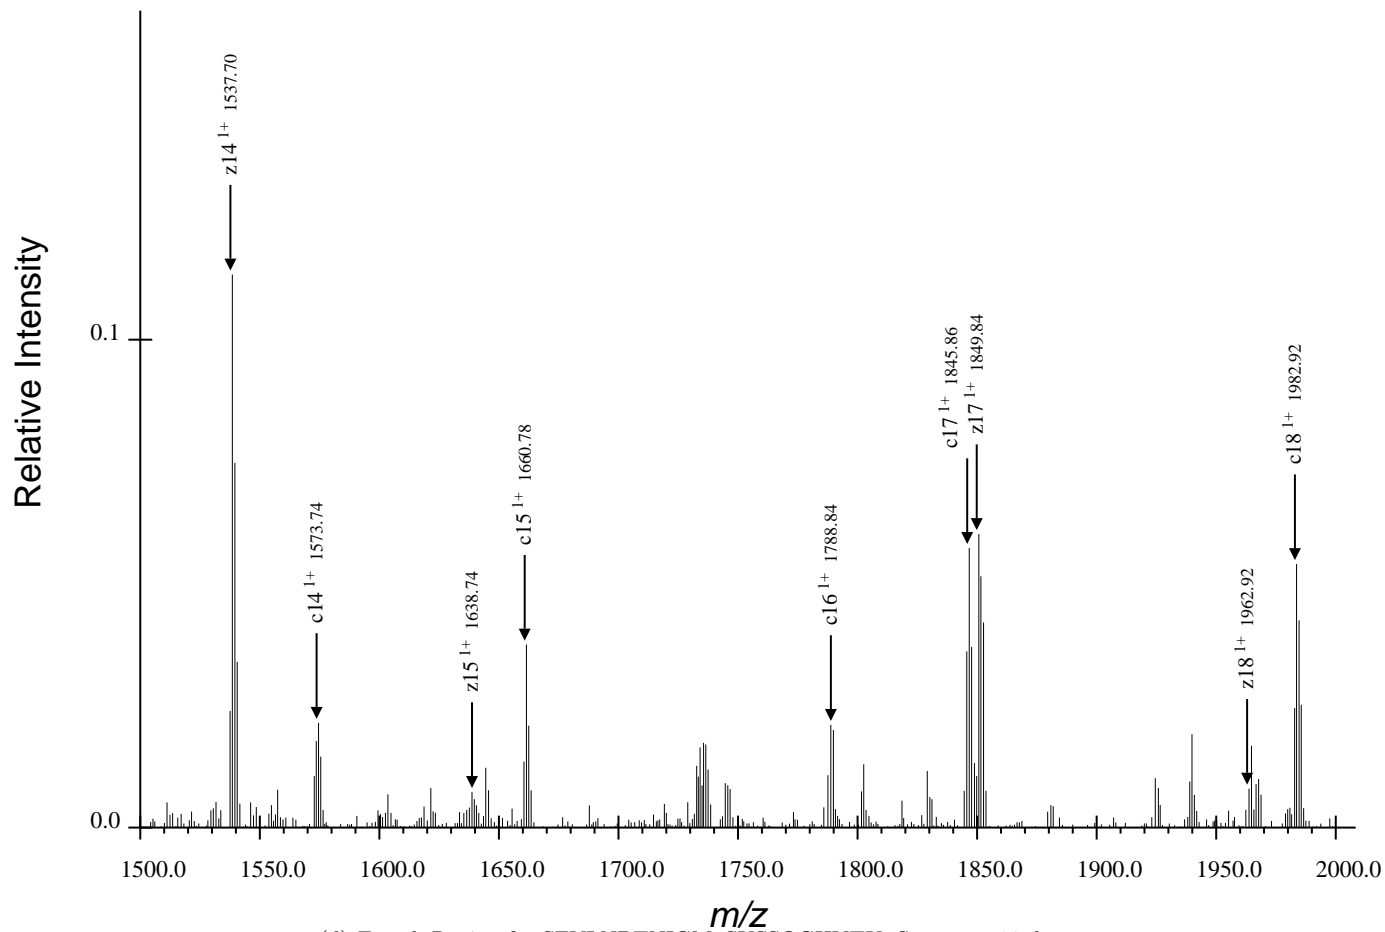

(d) Fourth Region for SFVLNPTNIGMpSKSSQGHVTK, Spectrum 22.dta

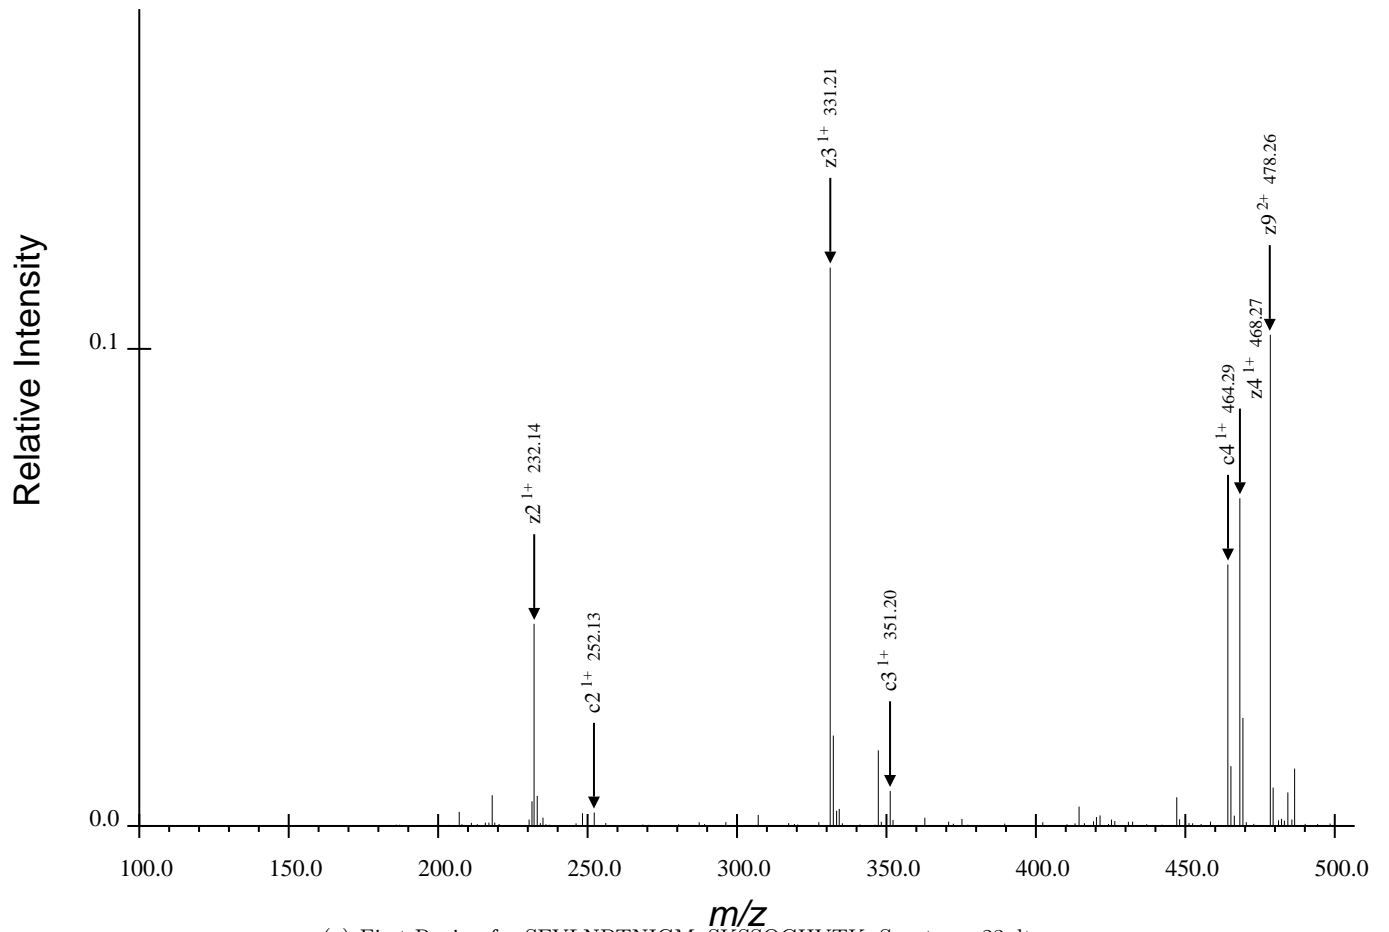

(a) First Region for SFVLNPTNIGMpSKSSQGHVTK, Spectrum 23.dta

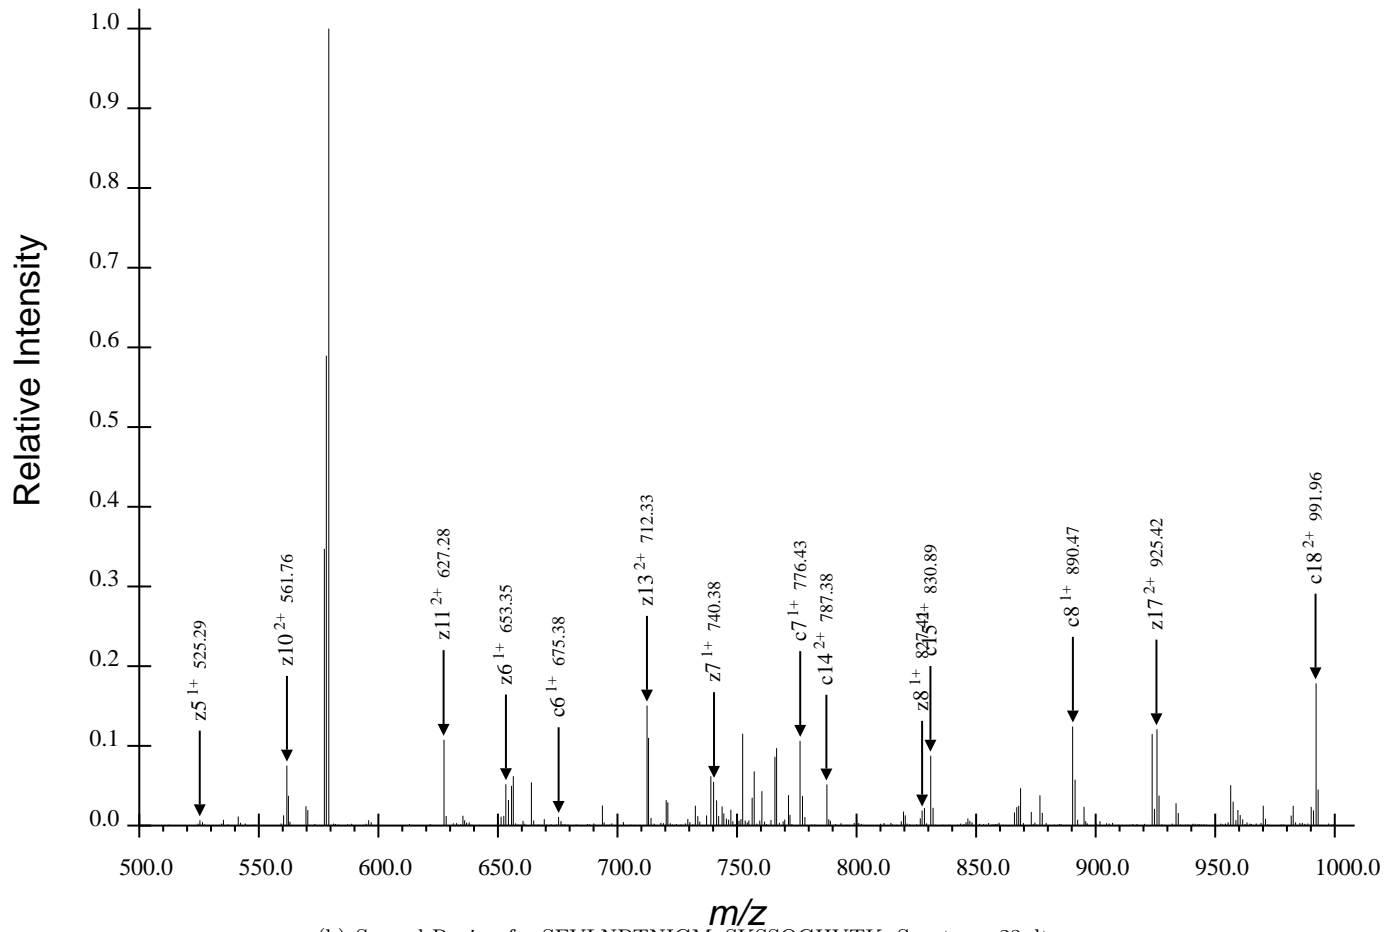

(b) Second Region for SFVLNPTNIGMpSKSSQGHVTK, Spectrum 23.dta

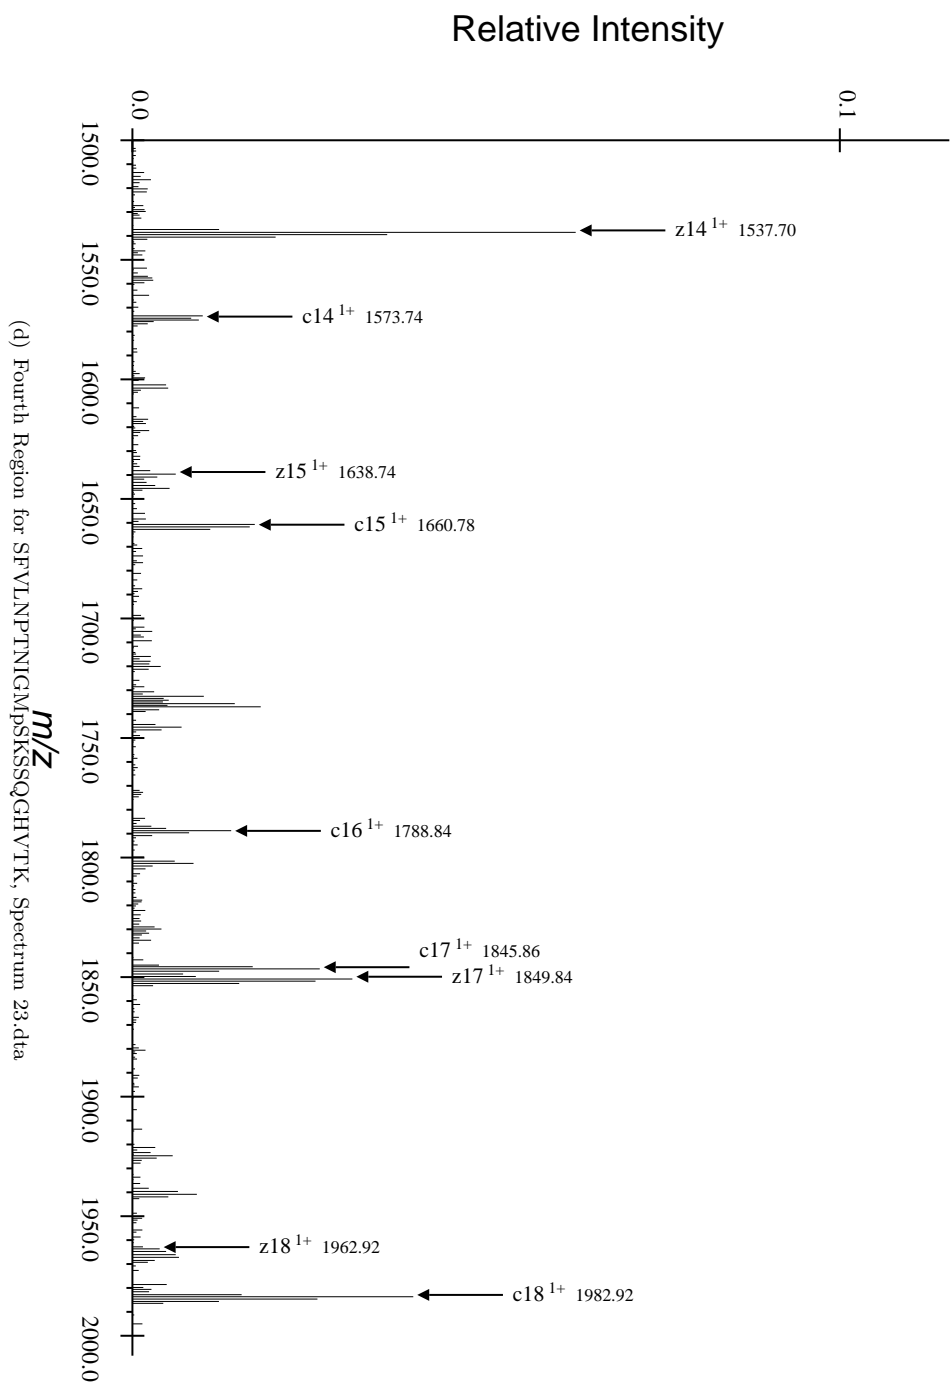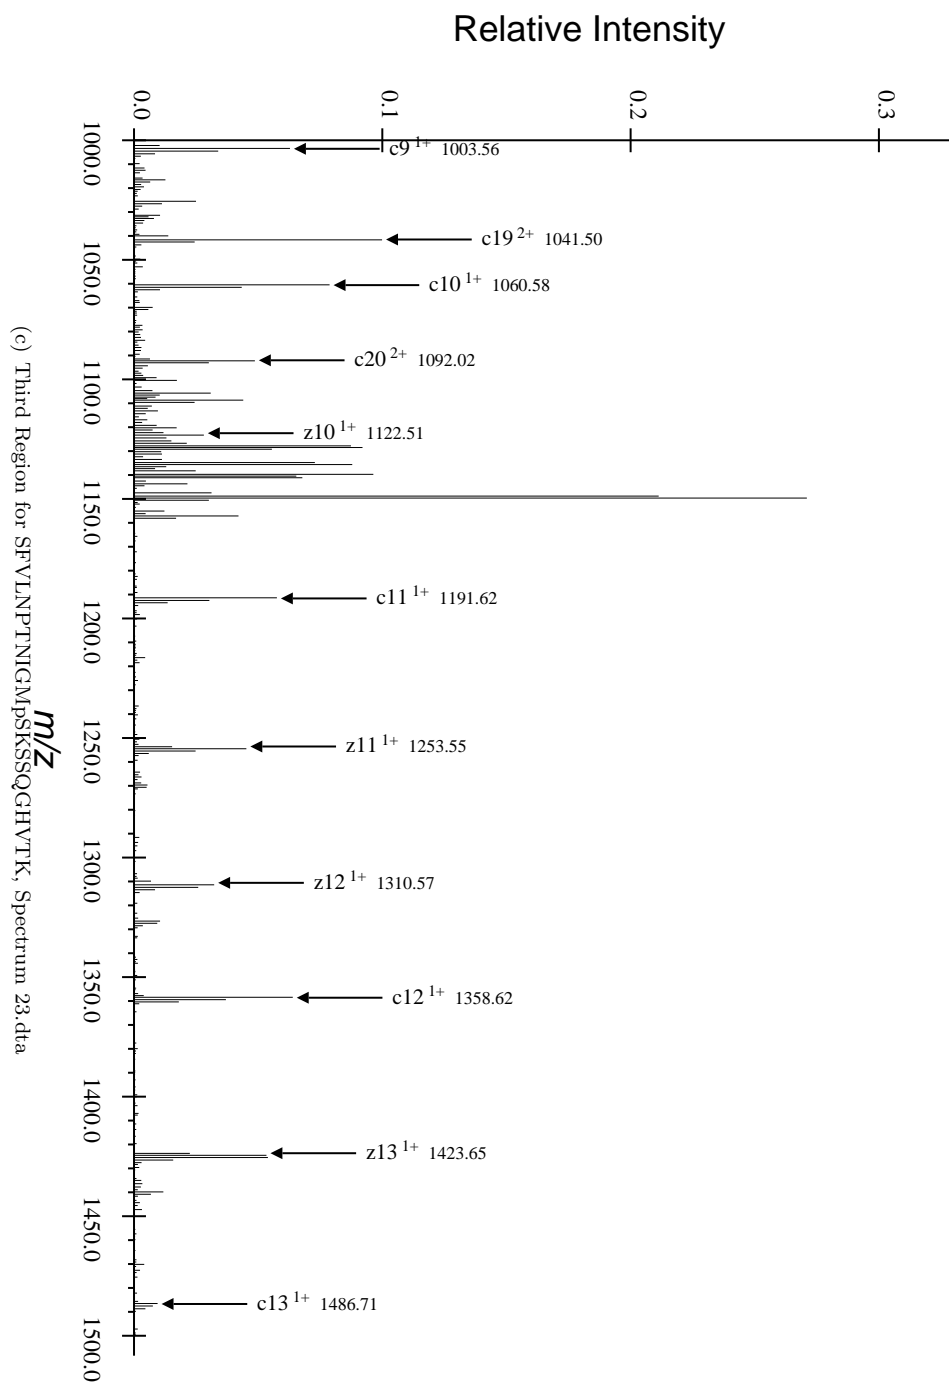

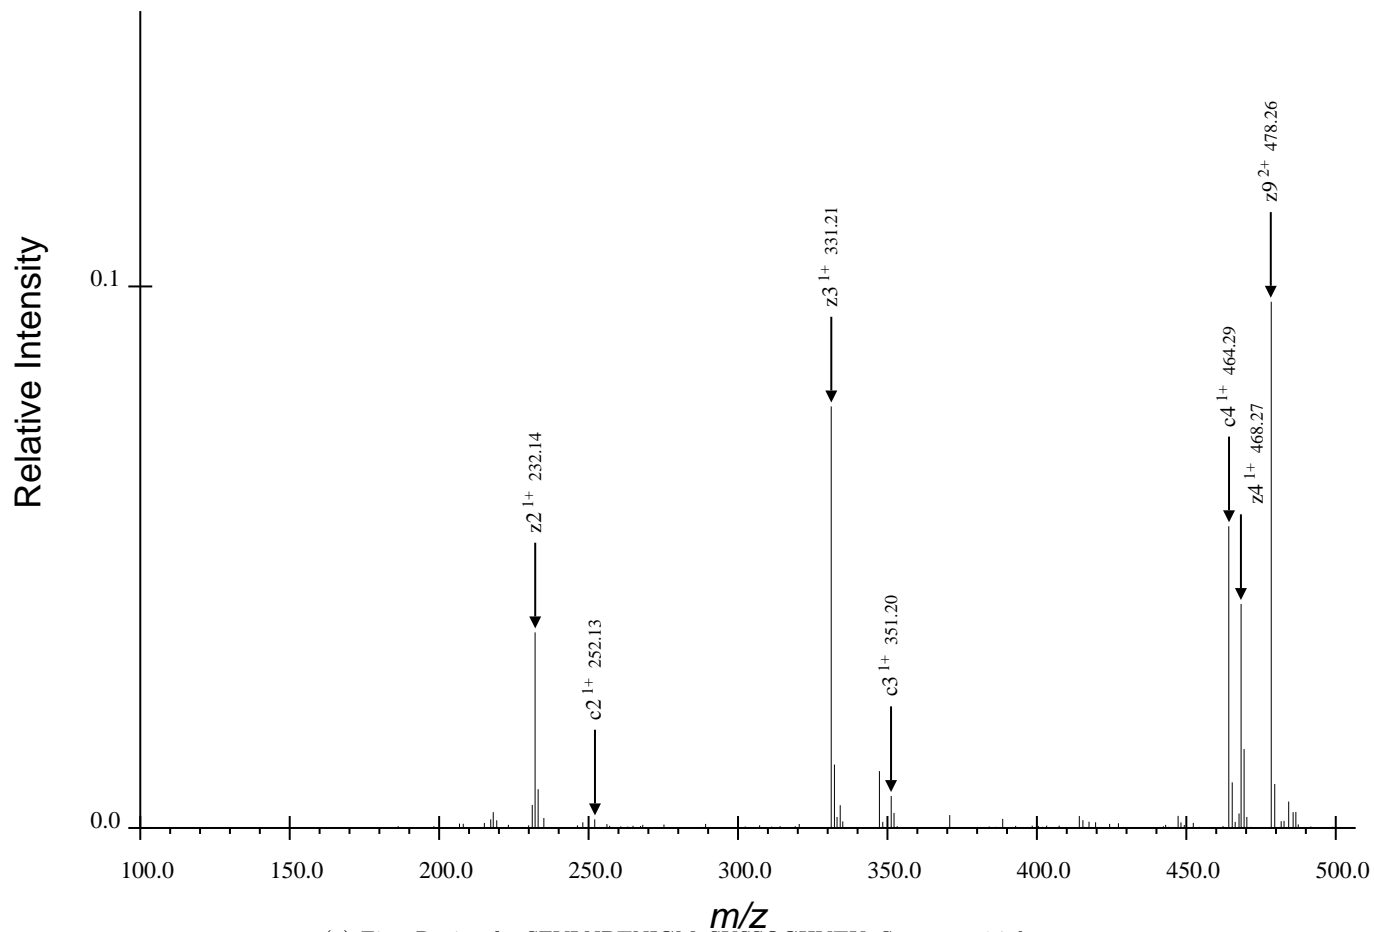

(a) First Region for SFVLNPTNIGMpSKSSQGHVTK, Spectrum 24.dta

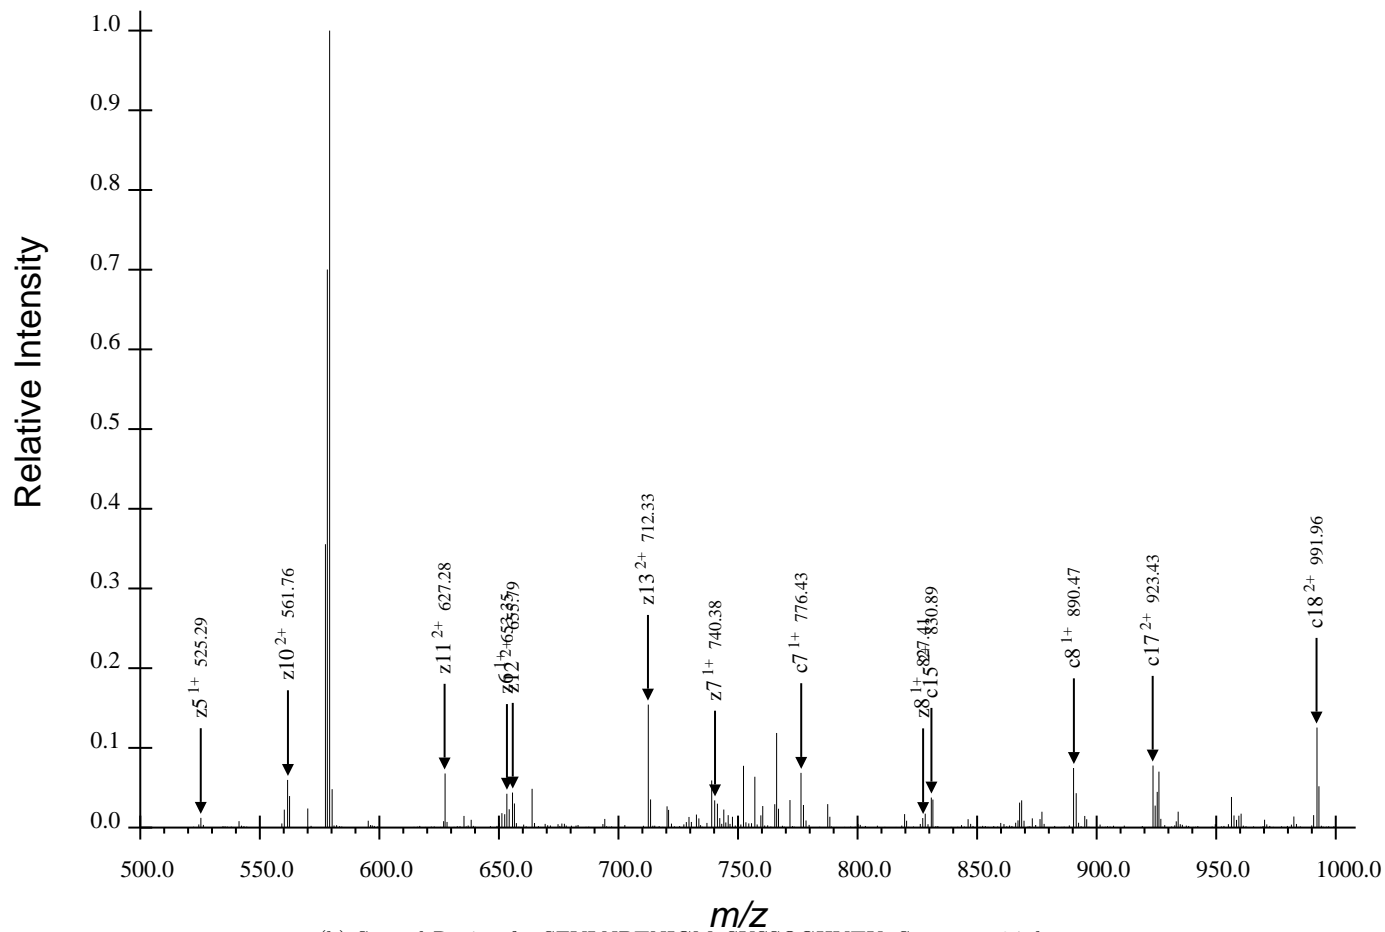

(b) Second Region for SFVLNPTNIGMpSKSSQGHVTK, Spectrum 24.dta

Relative Intensity

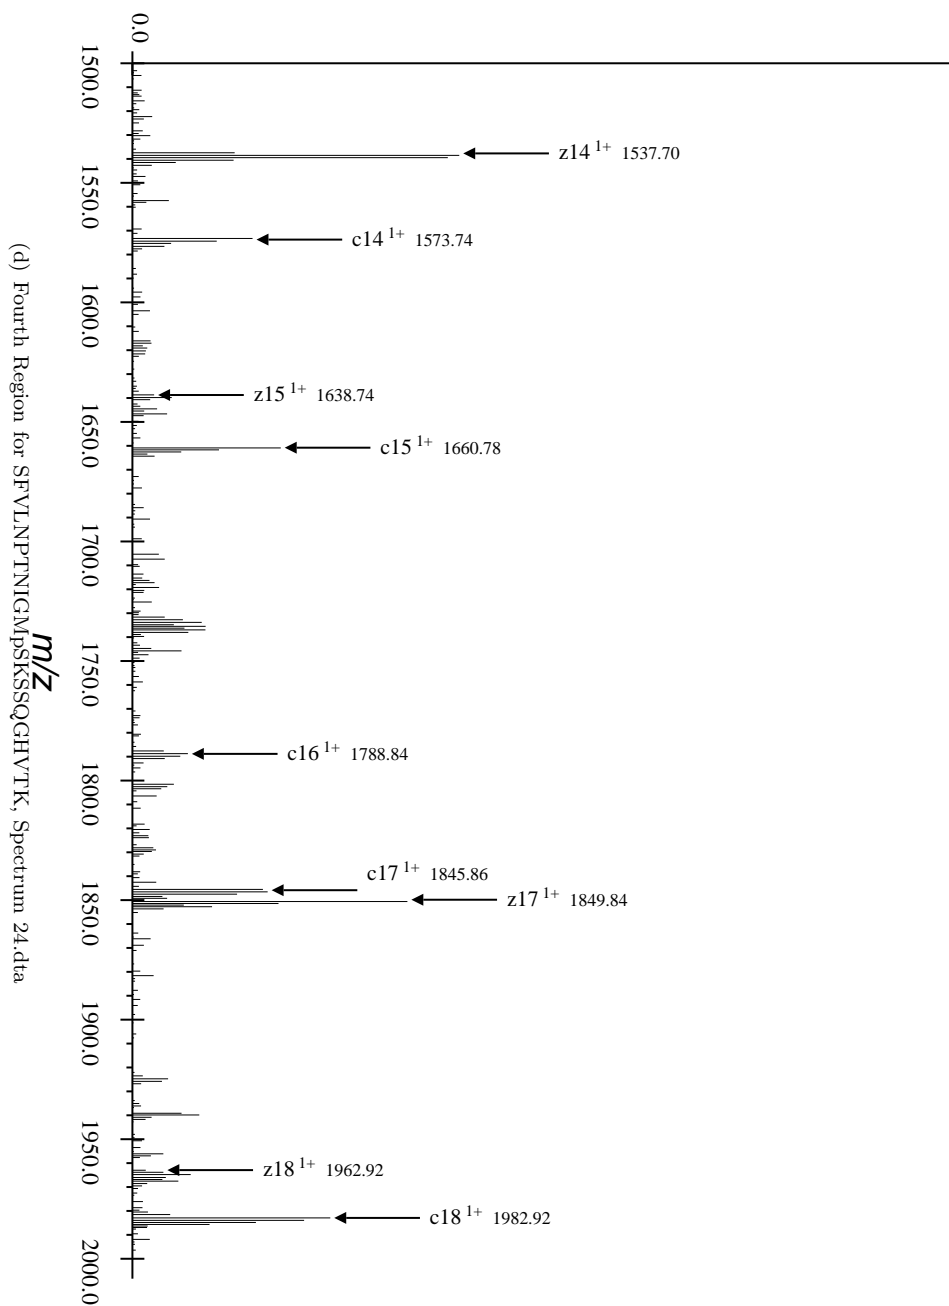

Relative Intensity

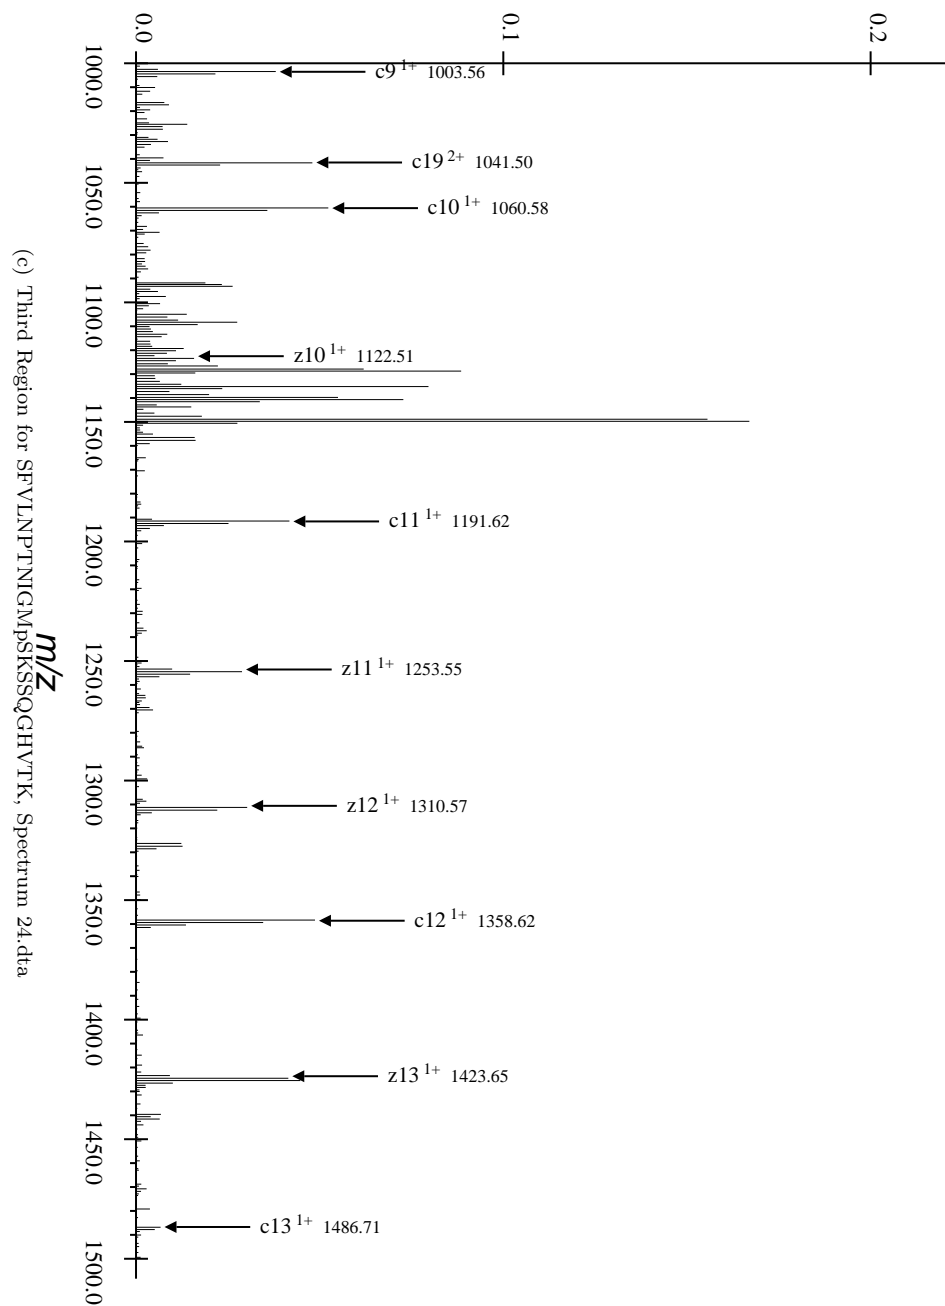



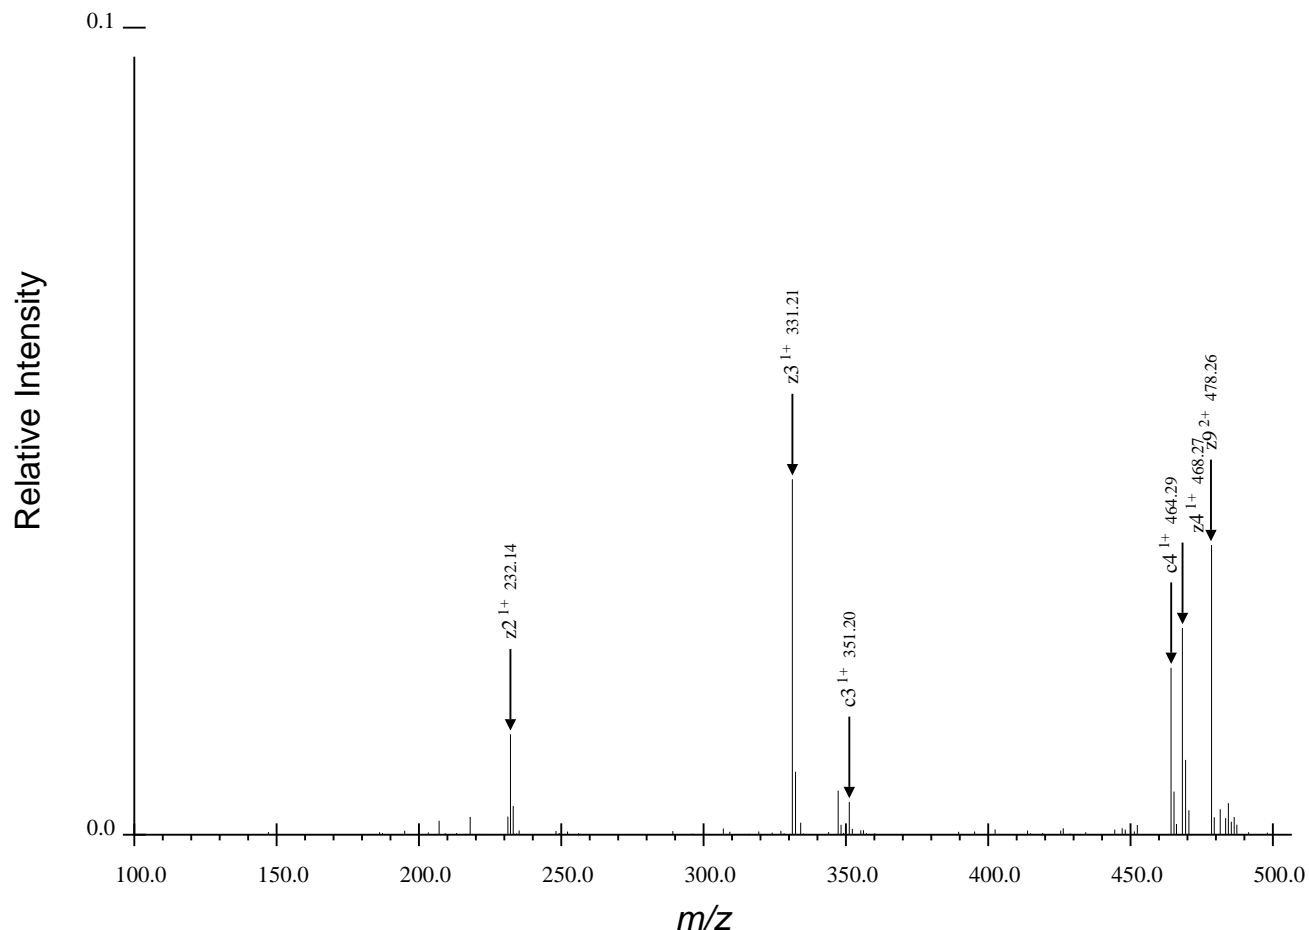

(a) First Region for SFVLNPTNIGMpSKSSQGHVTK, Spectrum 25.dta

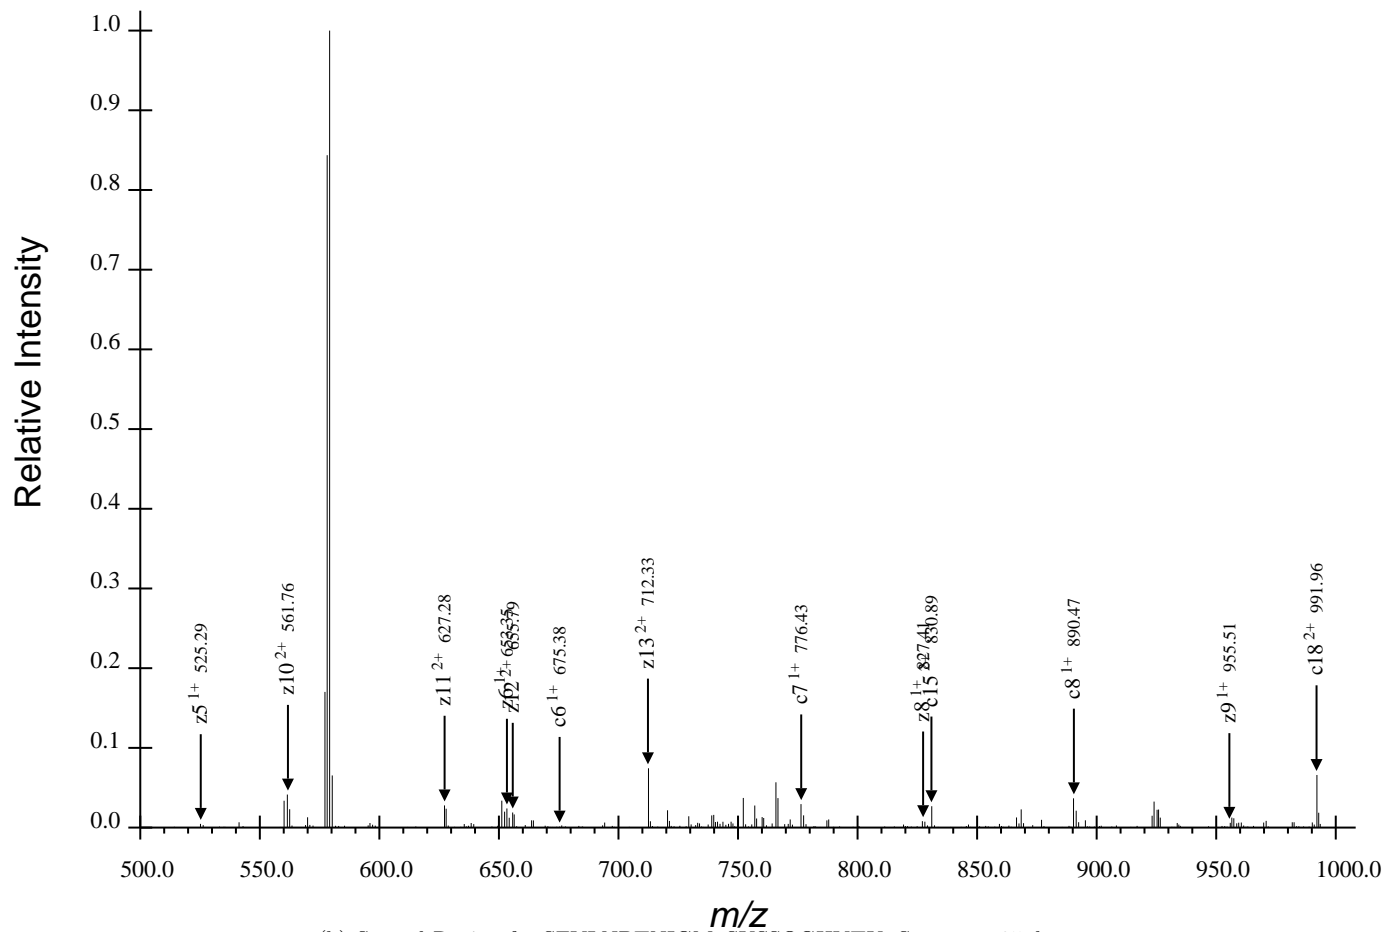

(b) Second Region for SFVLNPTNIGMpSKSSQGHVTK, Spectrum 25.dta

Relative Intensity

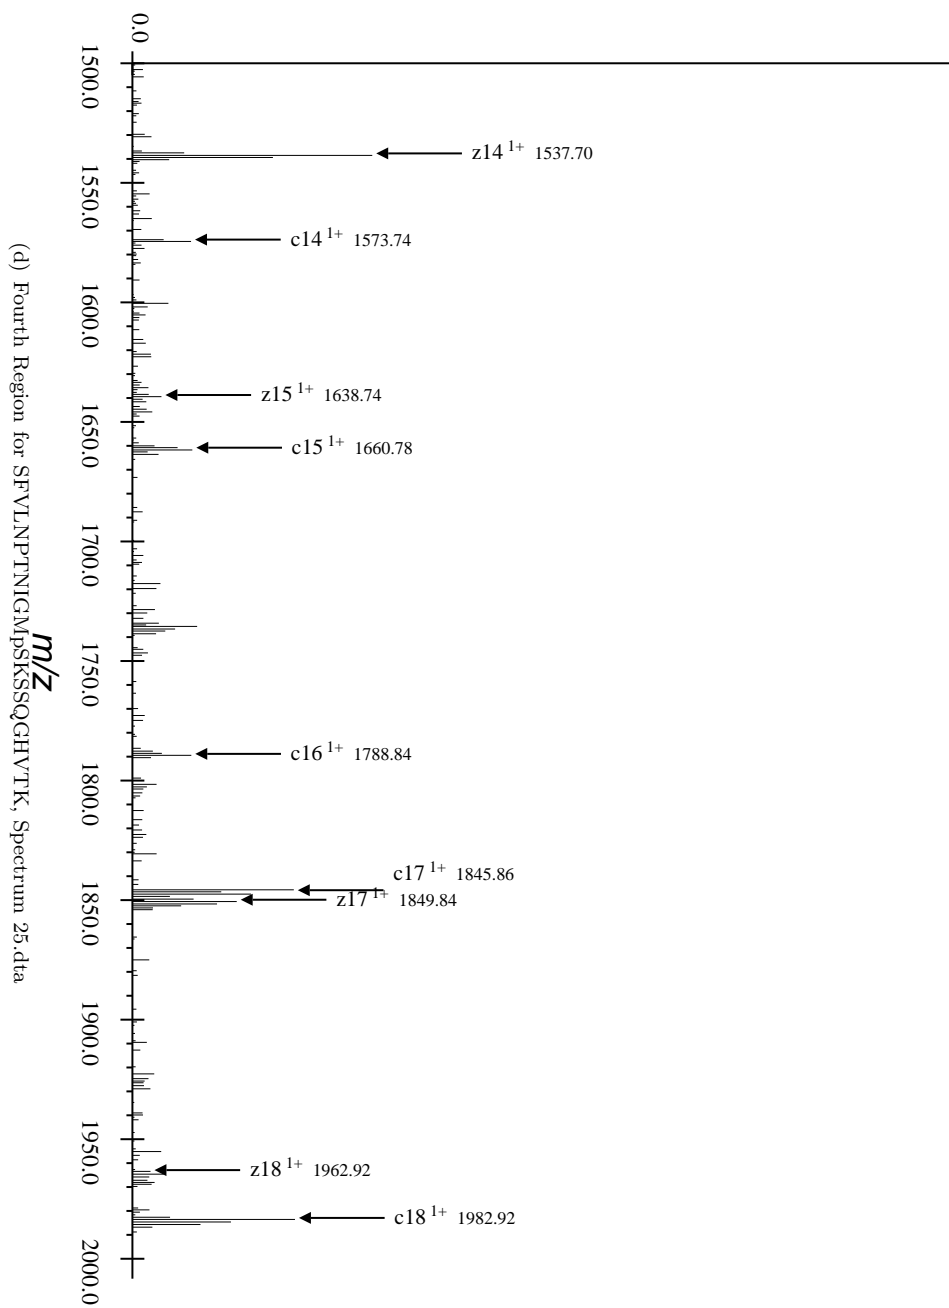

Relative Intensity

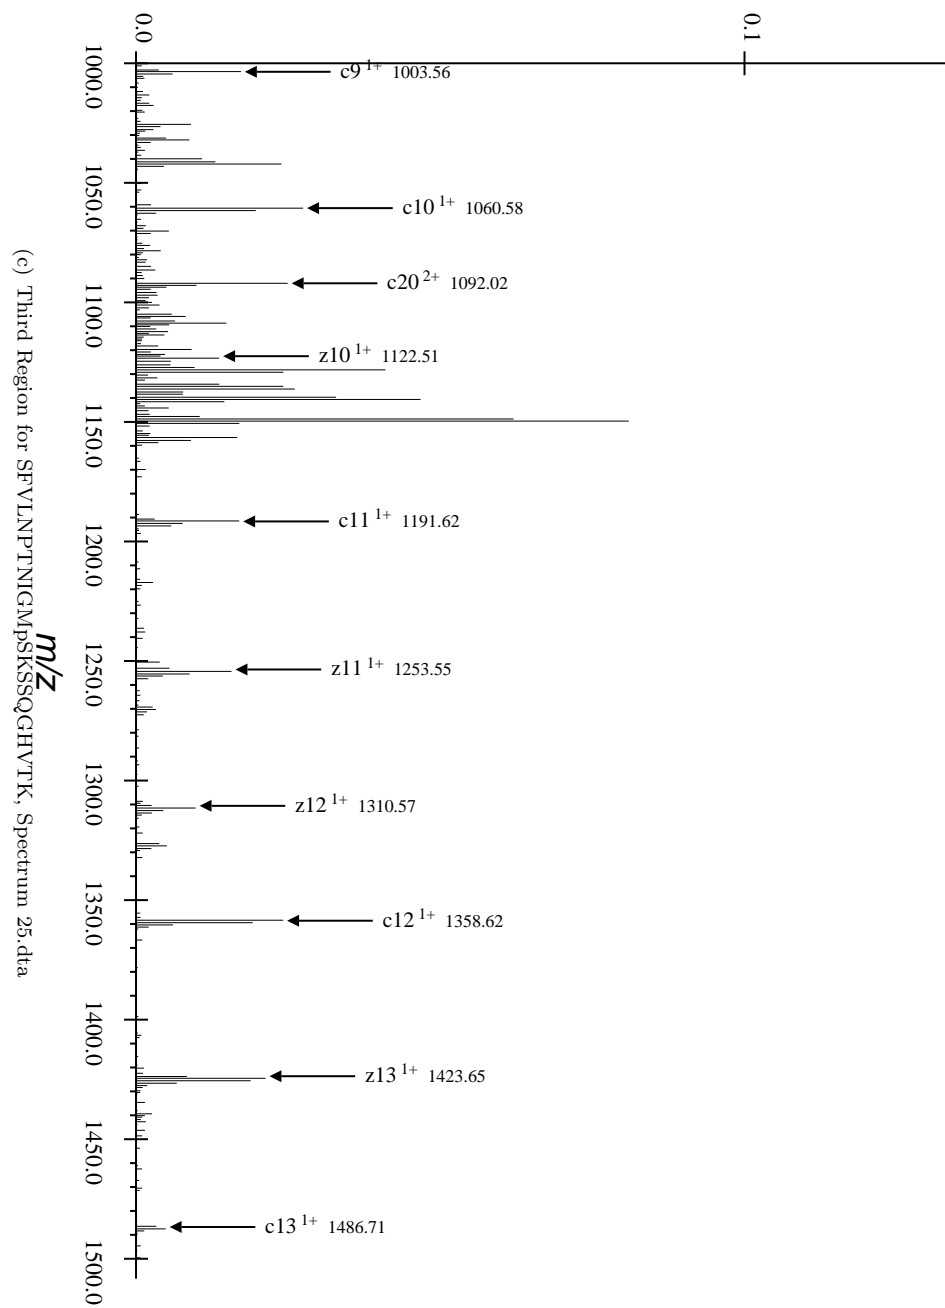

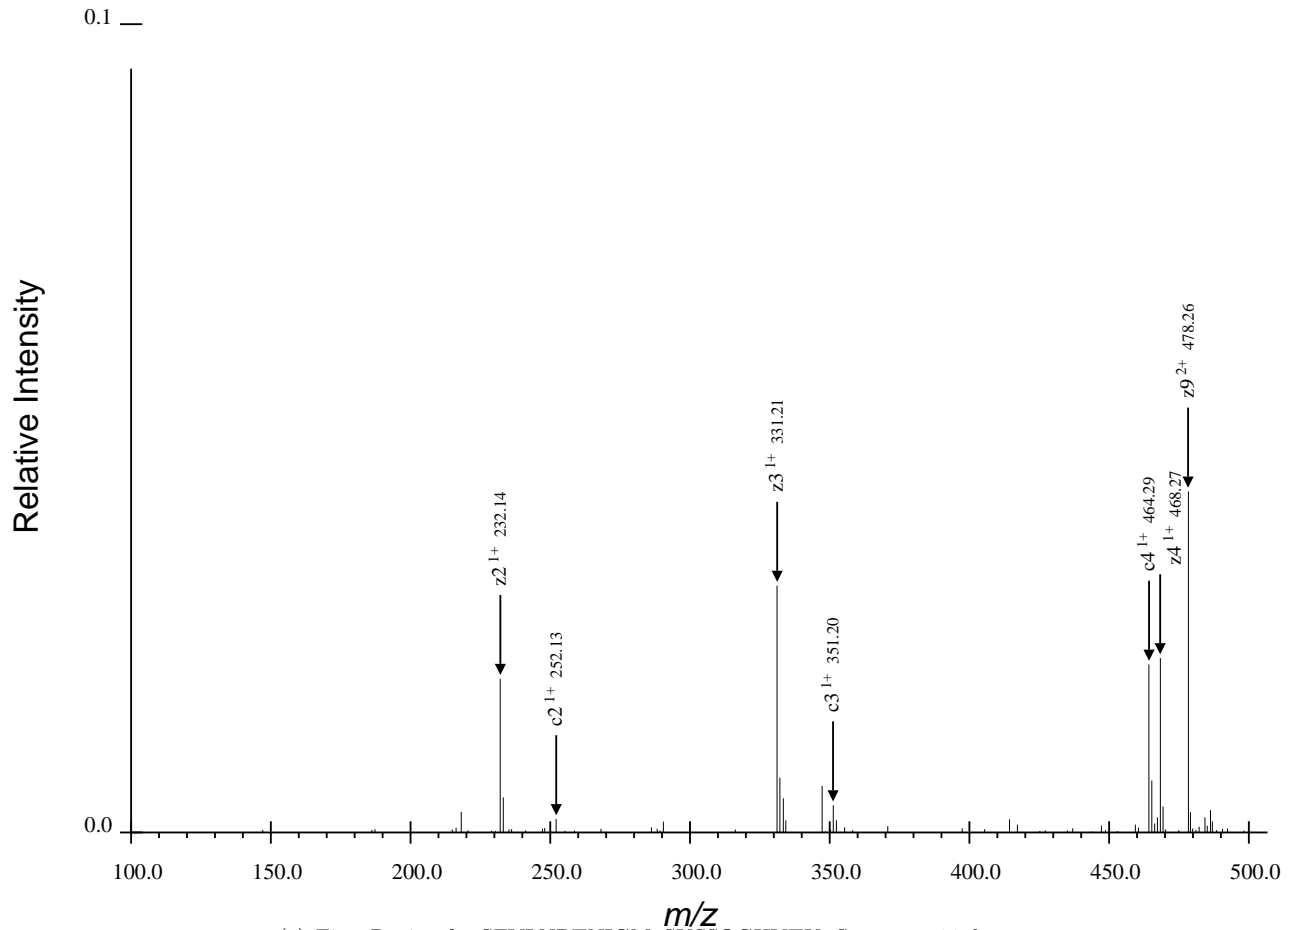

(a) First Region for SFVLNPTNIGMpSKSSQGHVTK, Spectrum 26.dta

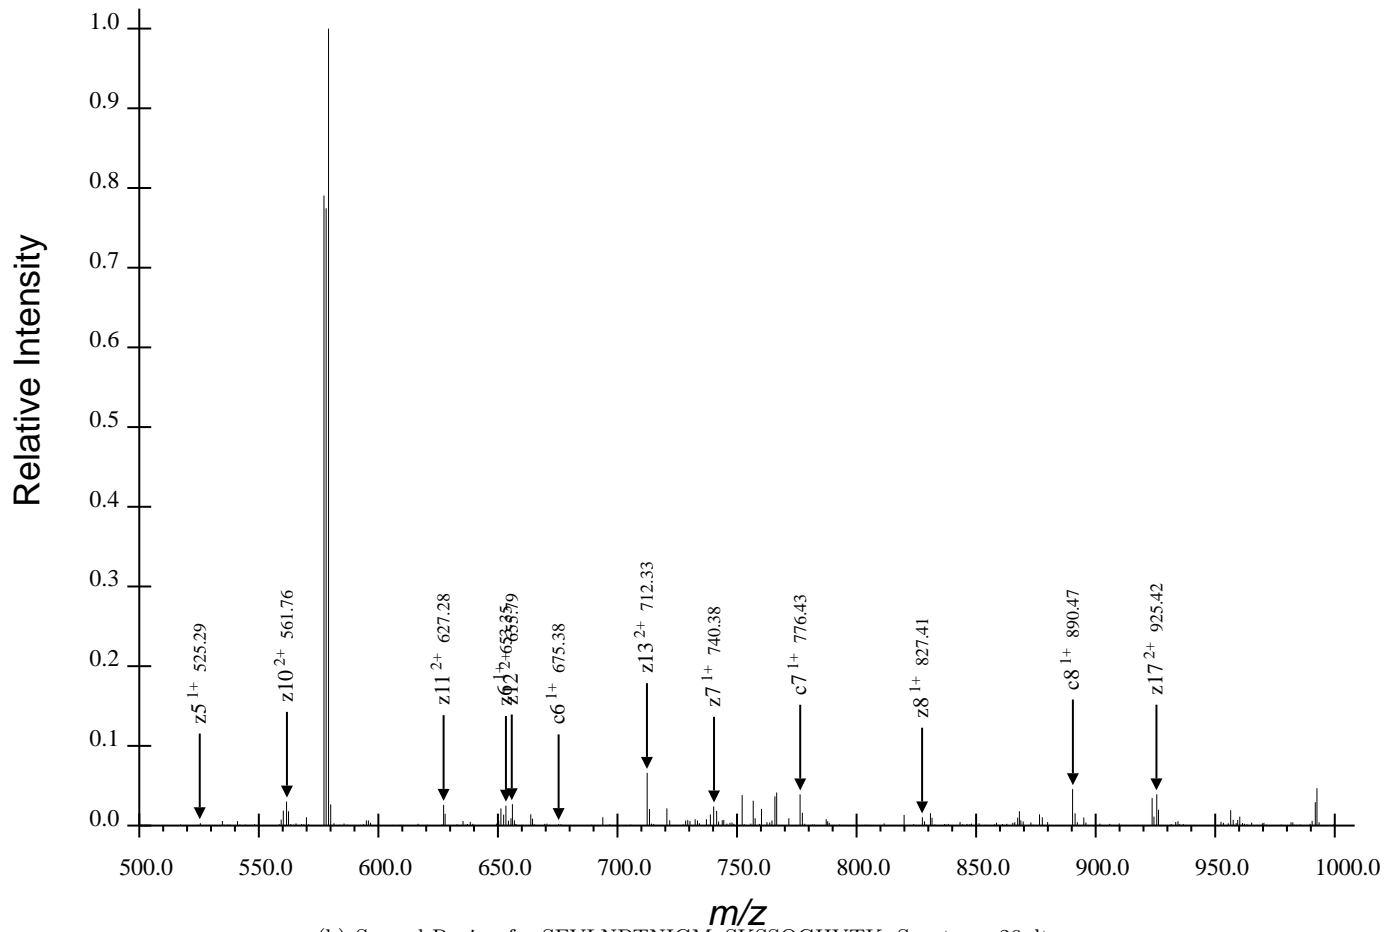

(b) Second Region for SFVLNPTNIGMpSKSSQGHVTK, Spectrum 26.dta

Relative Intensity

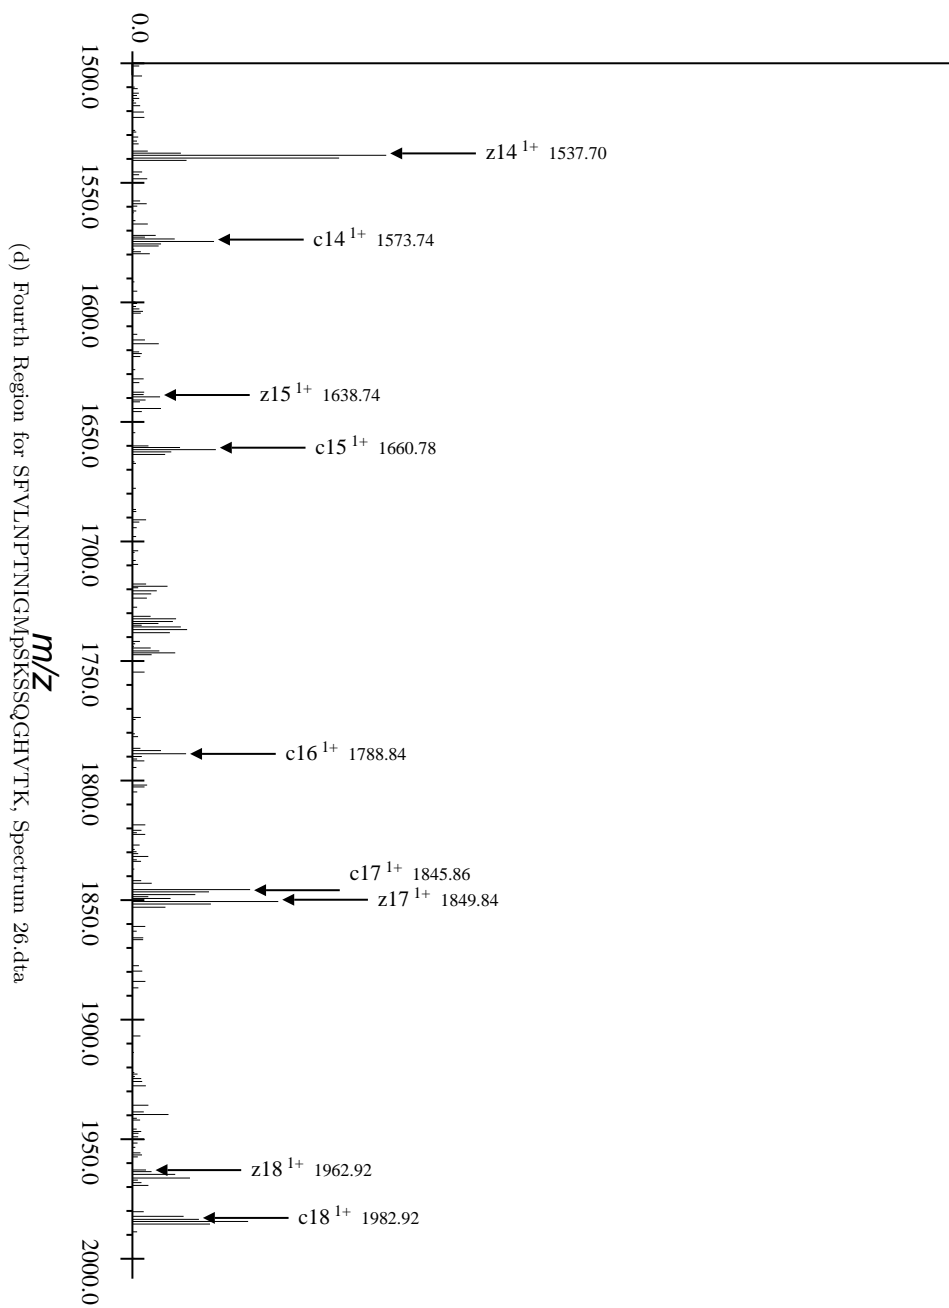

Relative Intensity

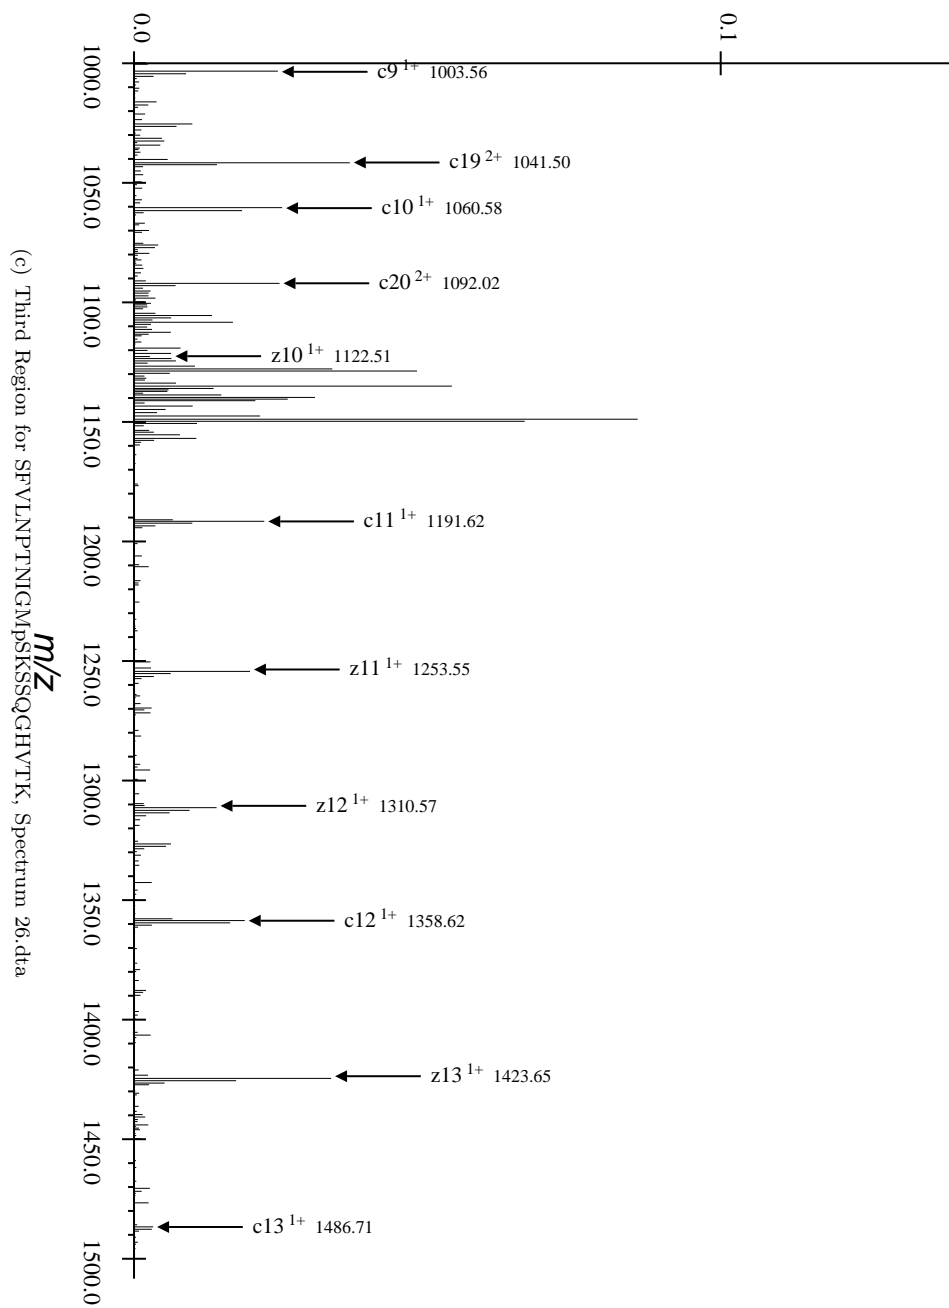

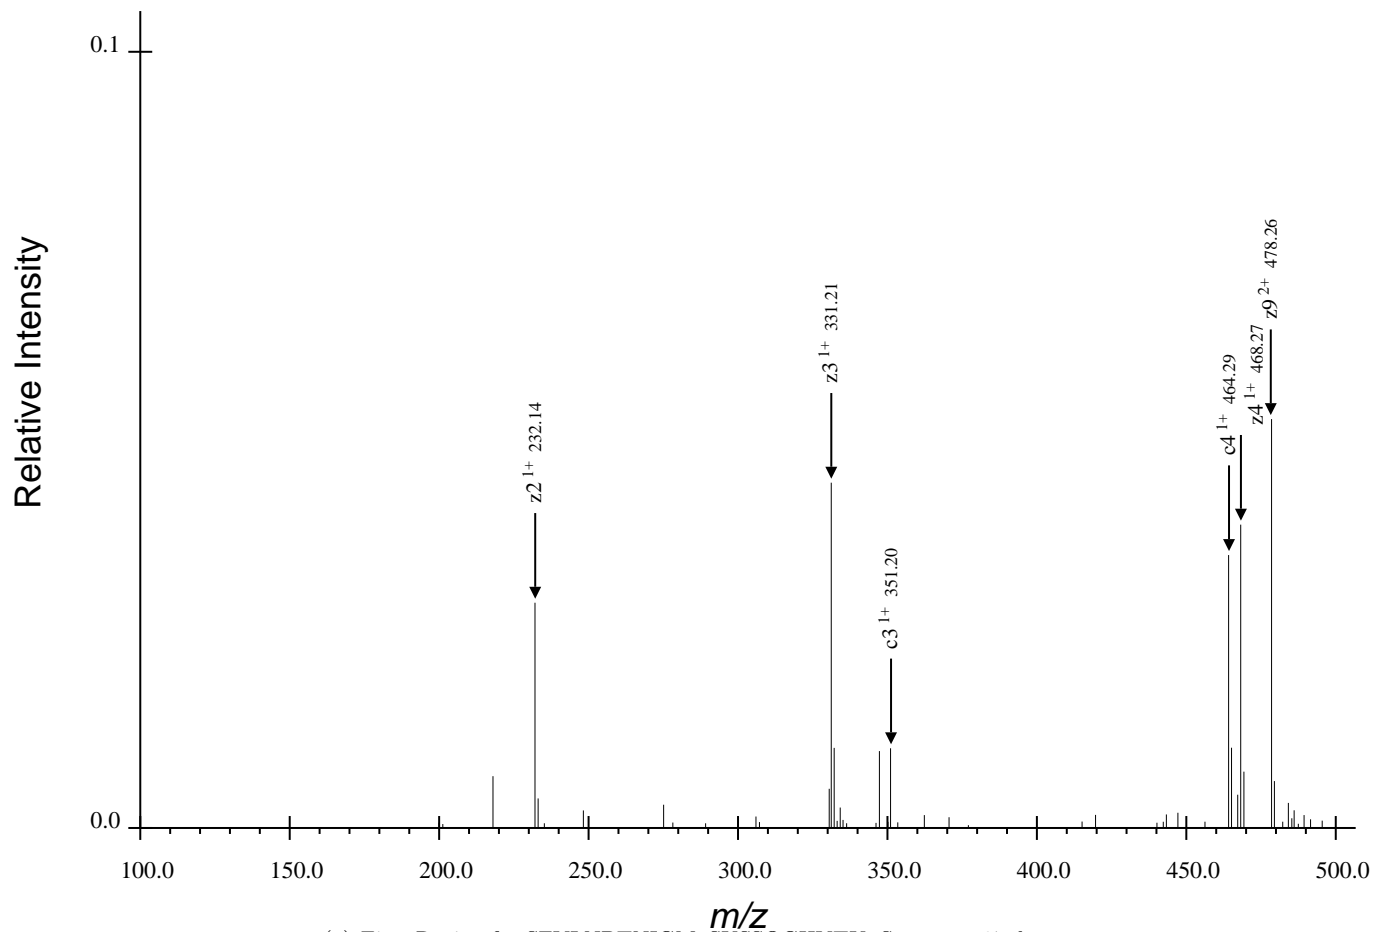

(a) First Region for SFVLNPTNIGMpSKSSQGHVTK, Spectrum 27.dta

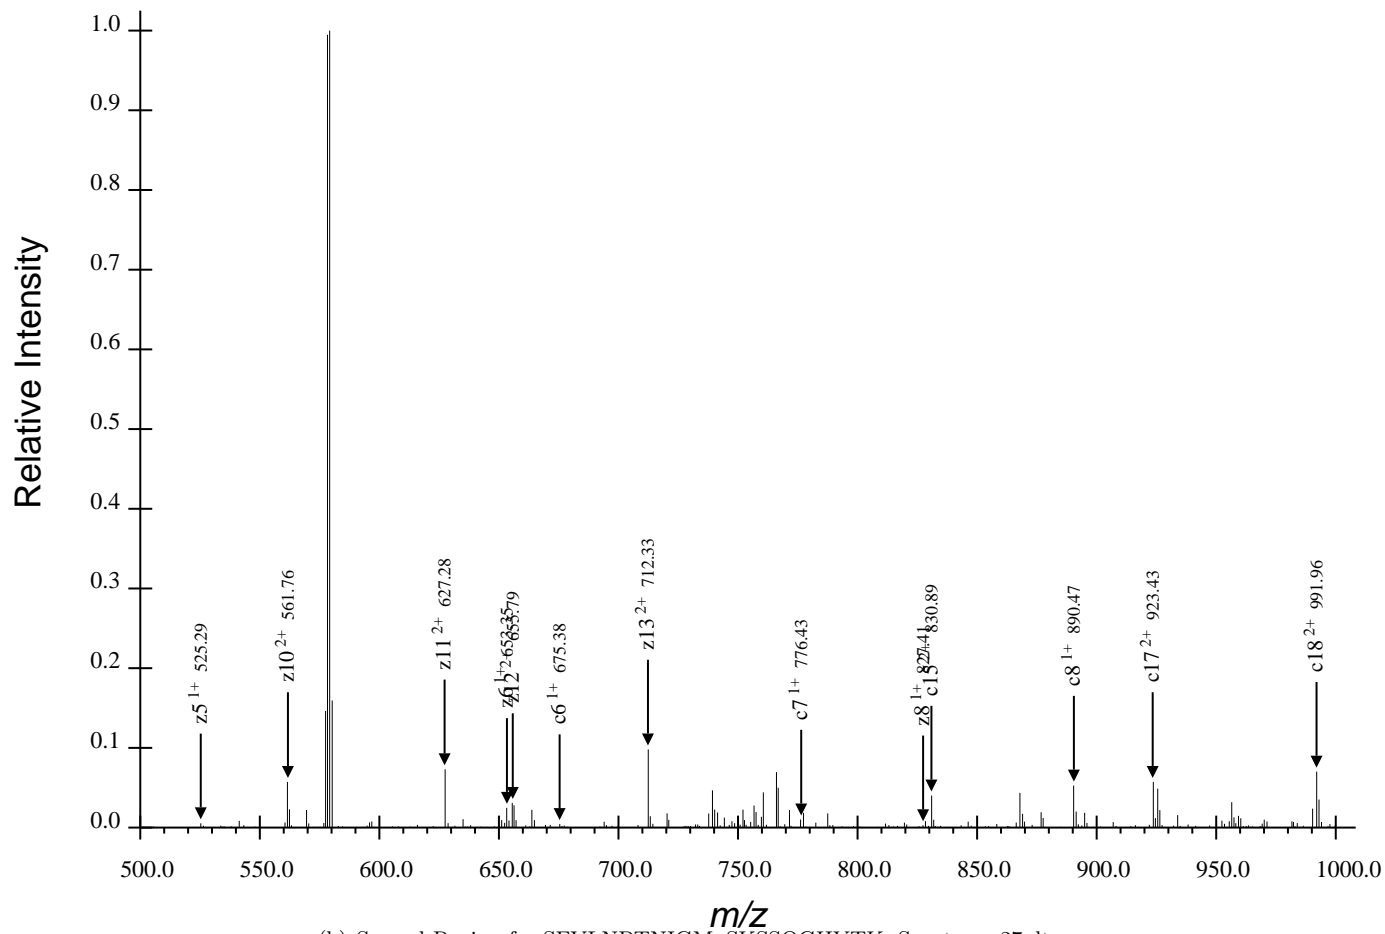

(b) Second Region for SFVLNPTNIGMpSKSSQGHVTK, Spectrum 27.dta

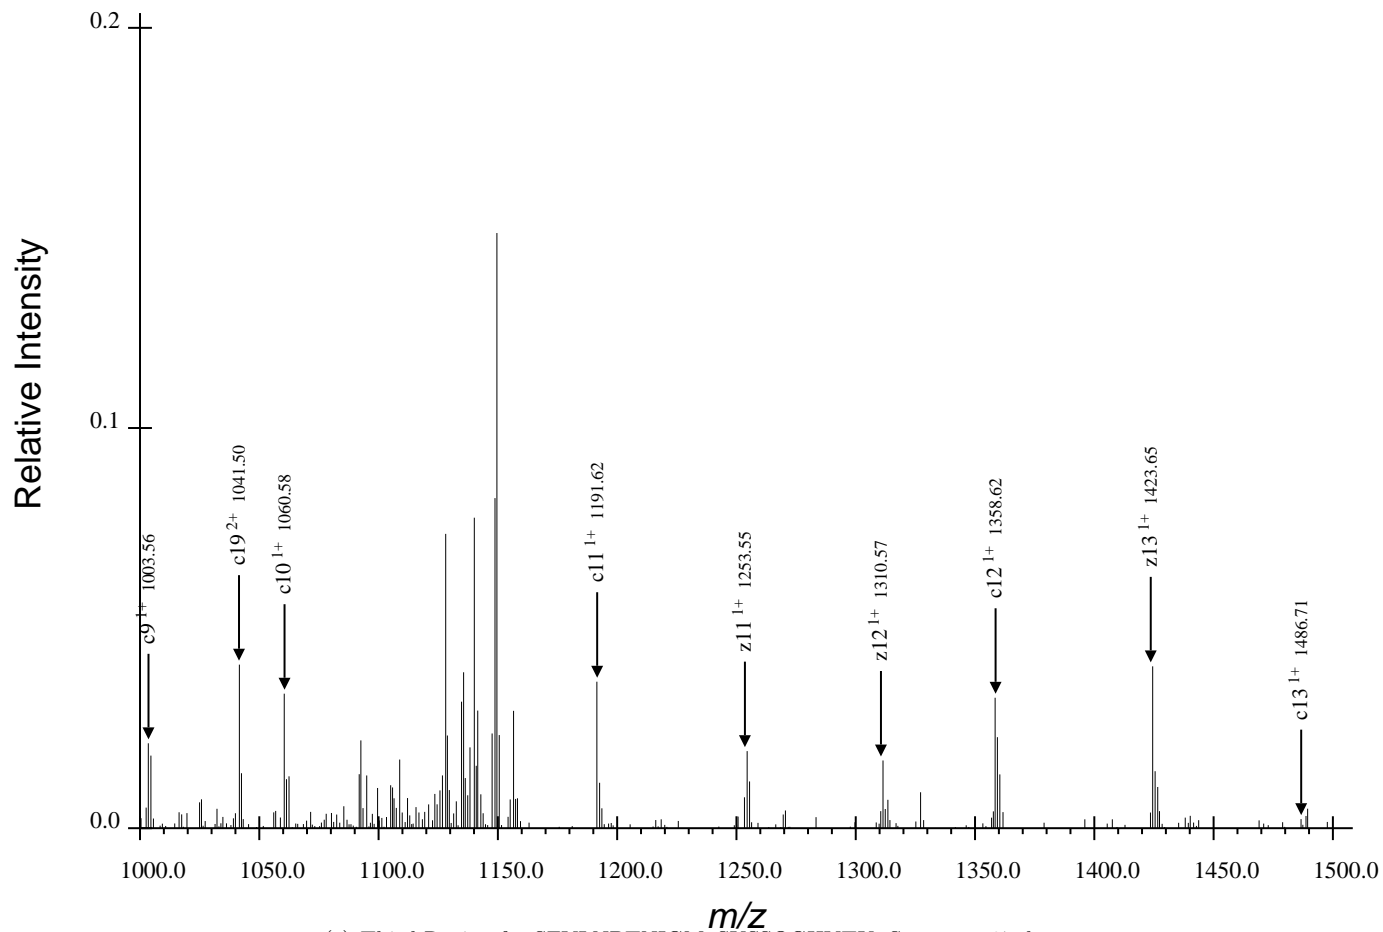

(c) Third Region for SFVLNPTNIGMpSKSSQGHVTK, Spectrum 27.dta

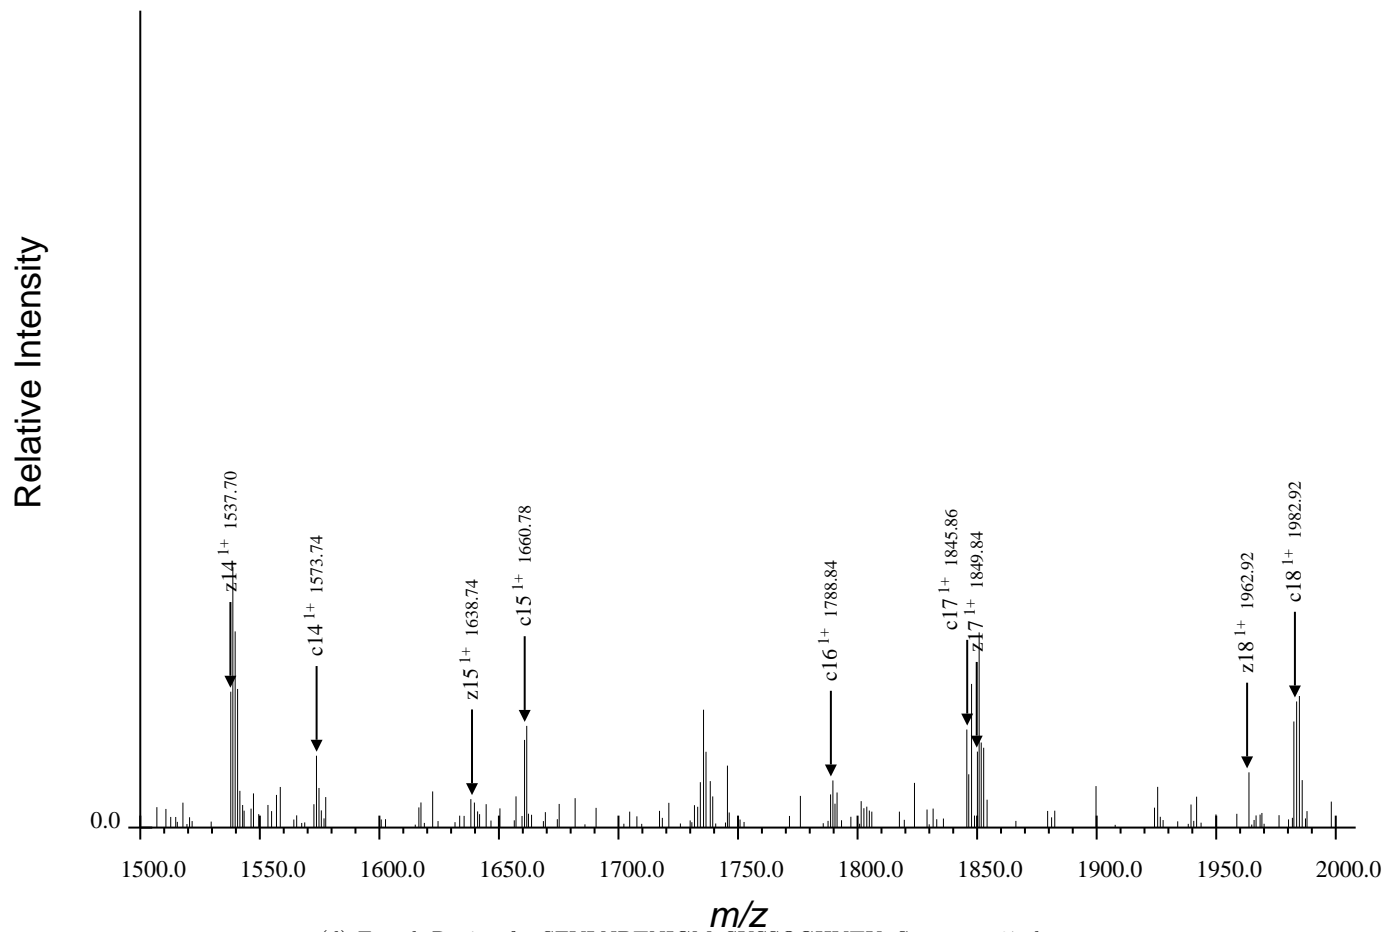

(d) Fourth Region for SFVLNPTNIGMpSKSSQGHVTK, Spectrum 27.dta

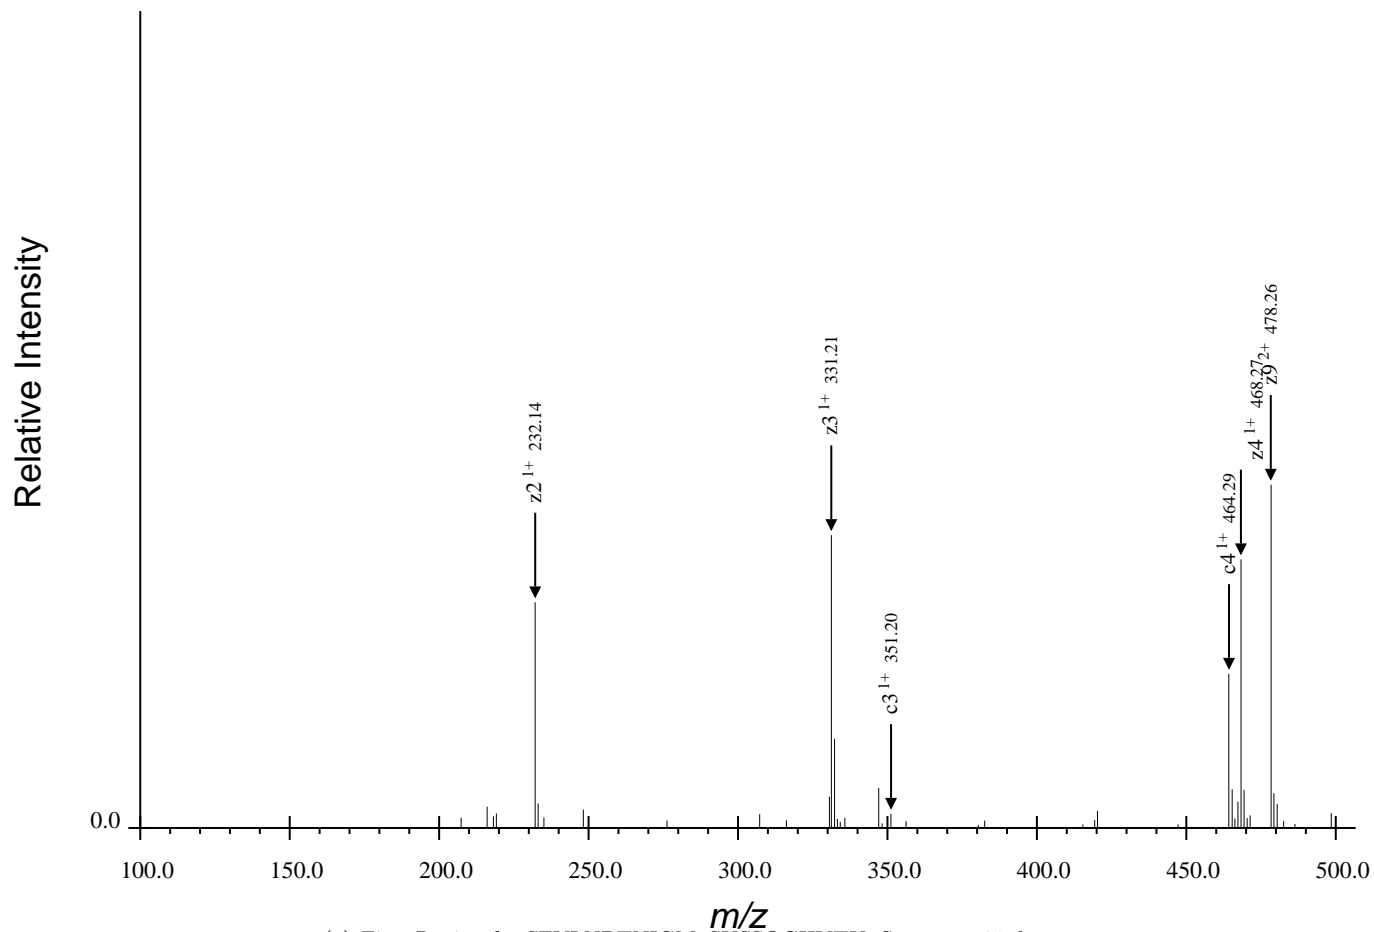

(a) First Region for SFVLNPTNIGMpSKSSQGHVTK, Spectrum 28.dta

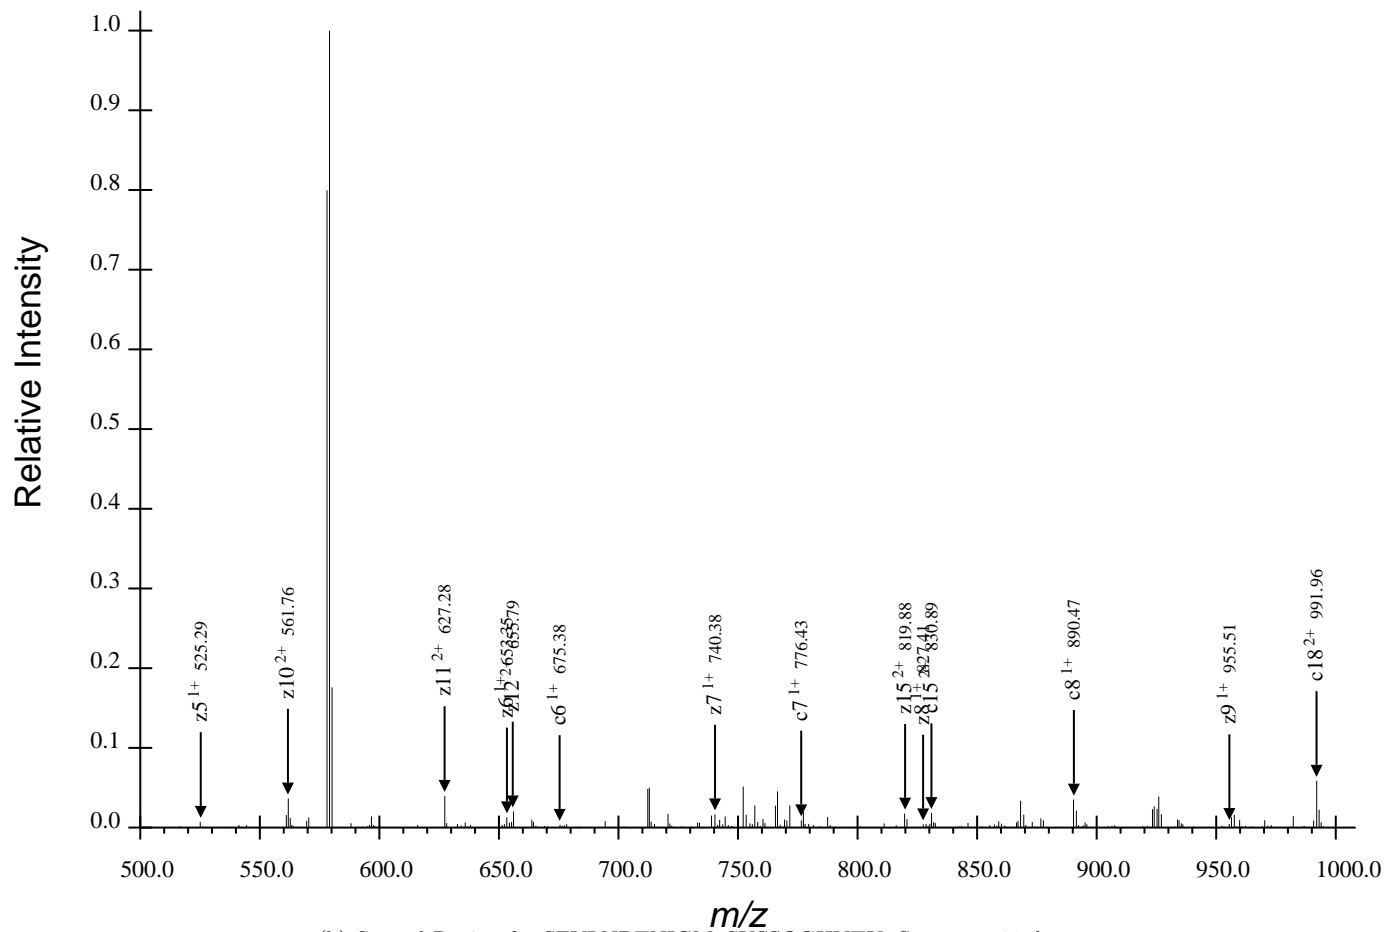

(b) Second Region for SFVLNPTNIGMpSKSSQGHVTK, Spectrum 28.dta

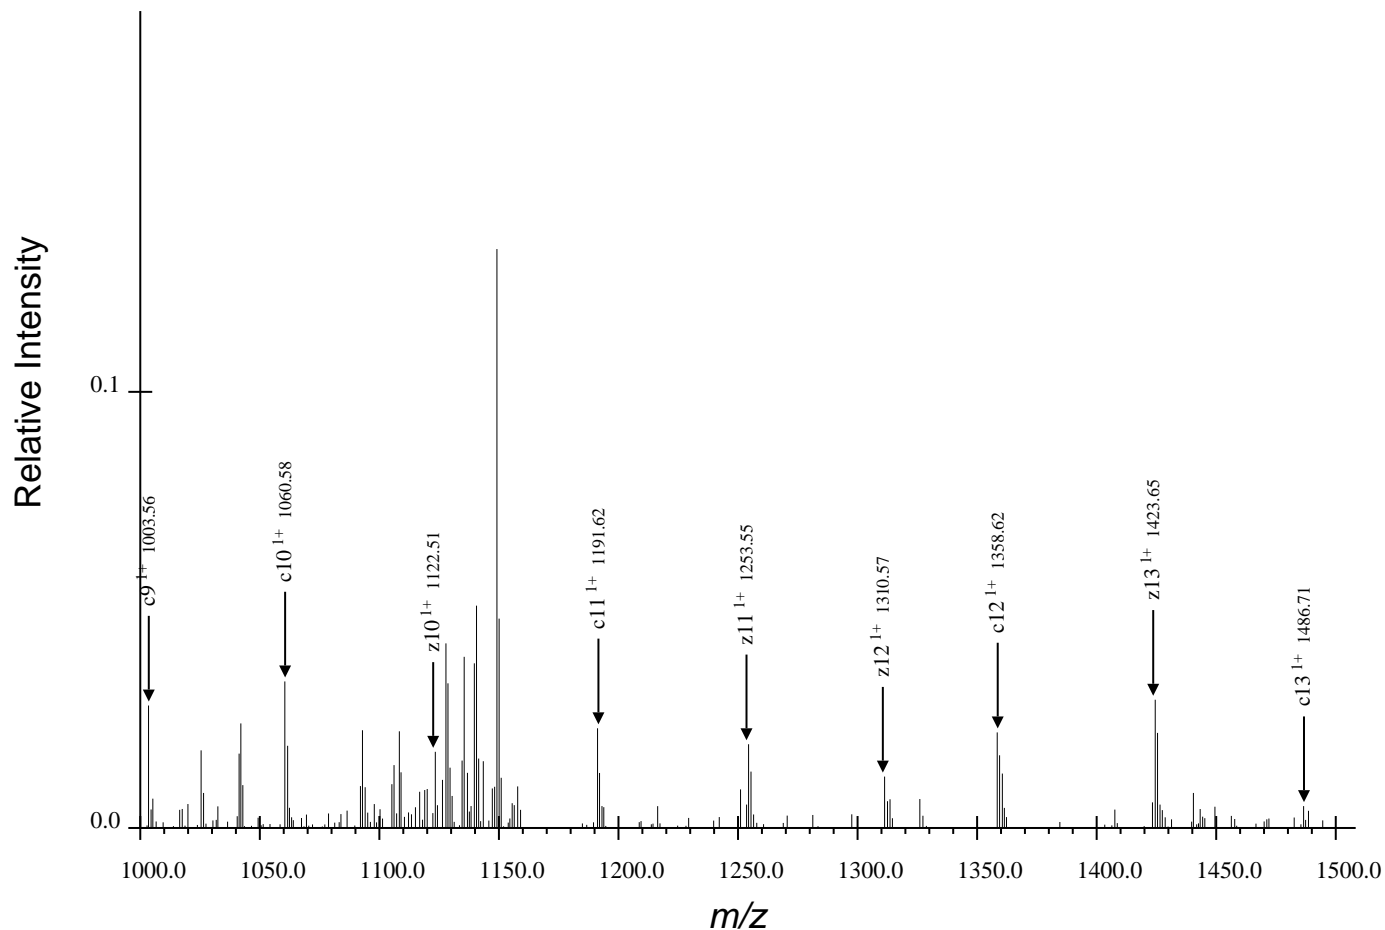

(c) Third Region for SFVLNPTNIGMpSKSSQGHVTK, Spectrum 28.dta

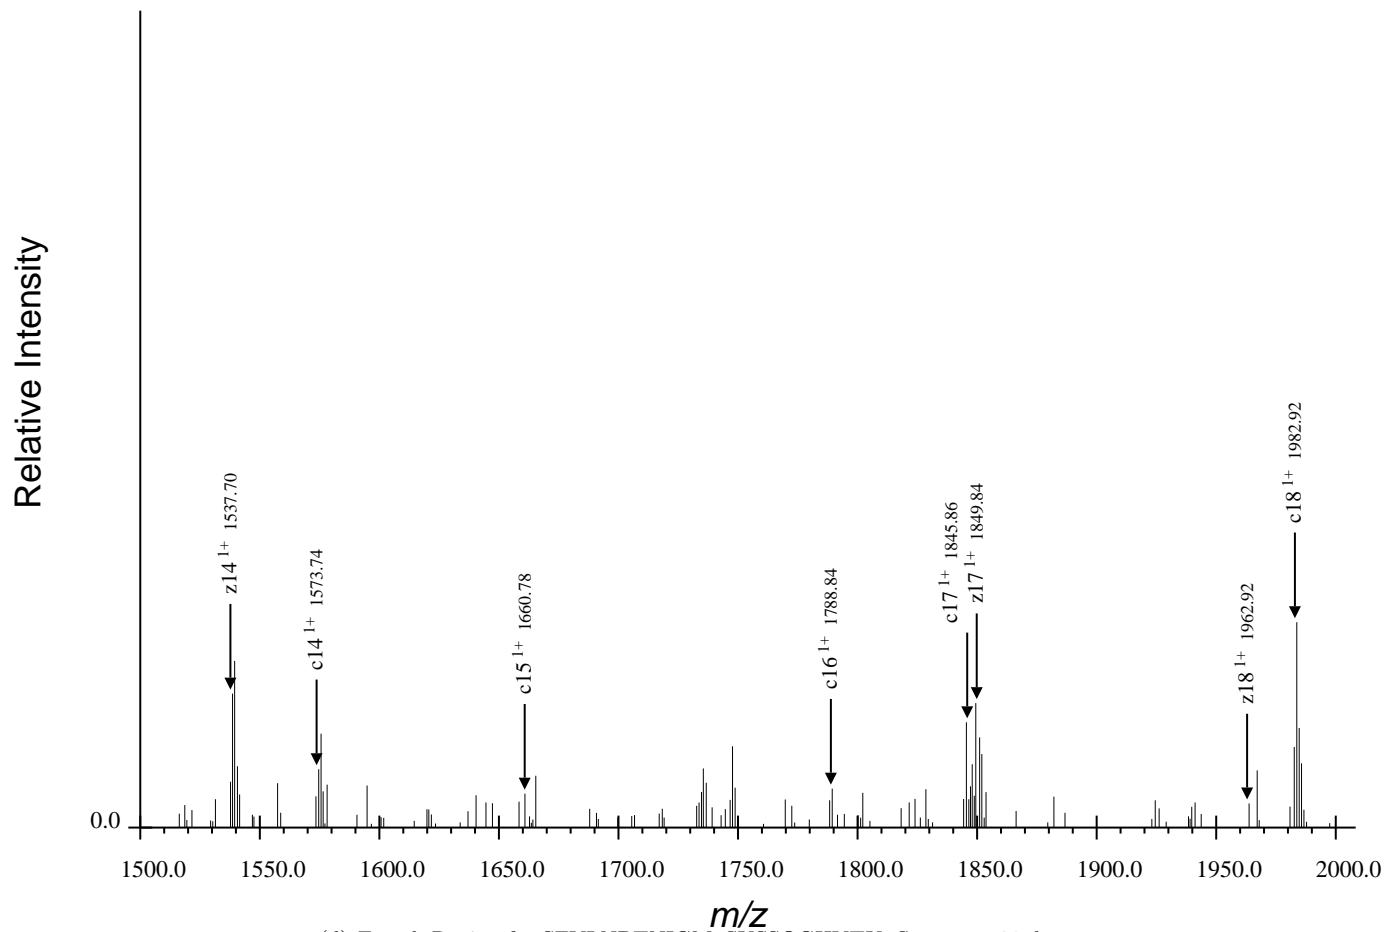

(d) Fourth Region for SFVLNPTNIGMpSKSSQGHVTK, Spectrum 28.dta



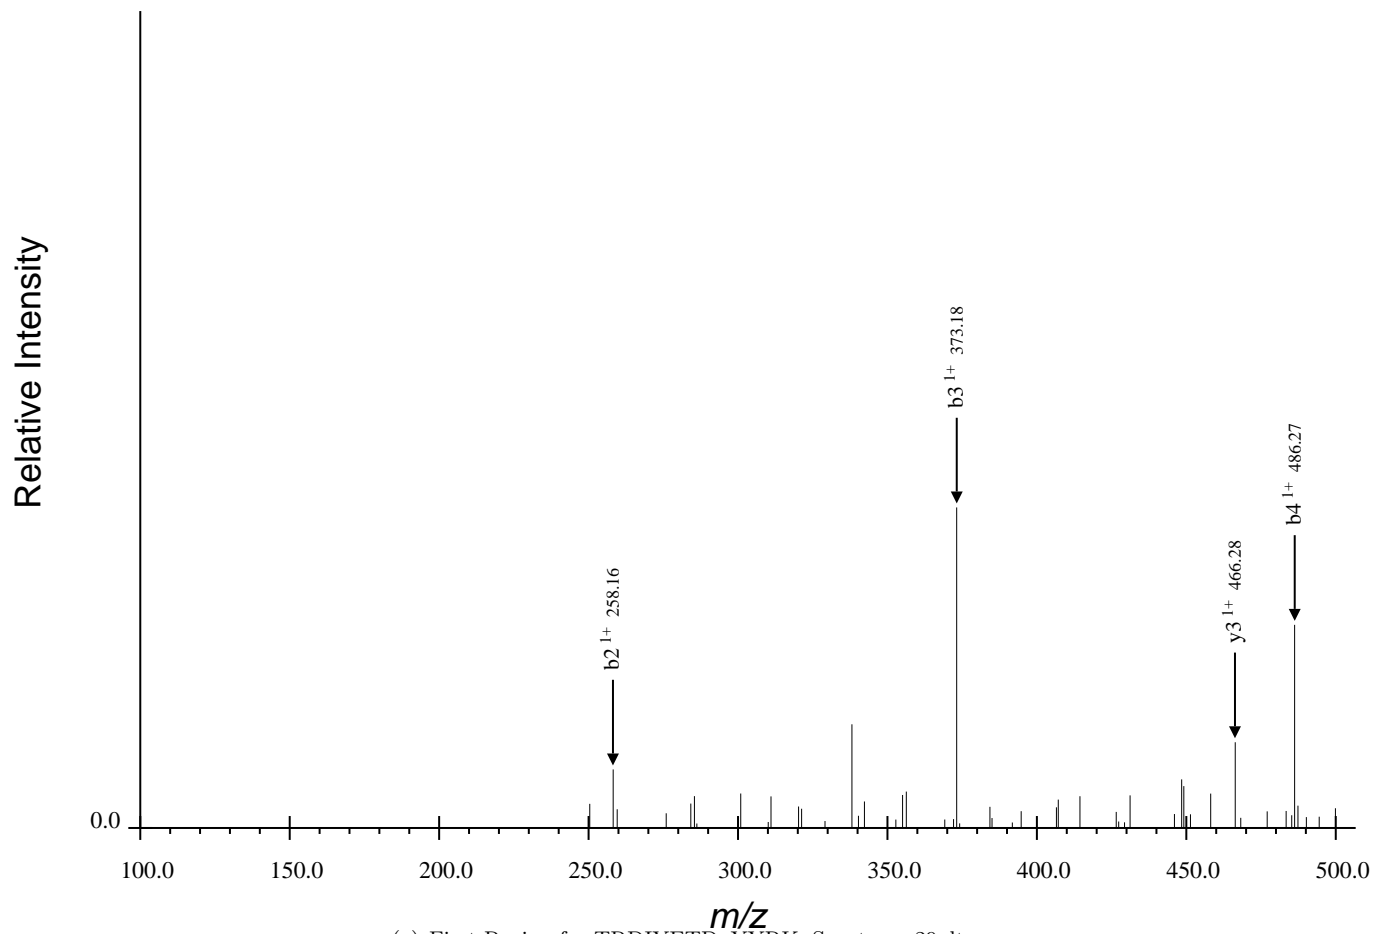

(a) First Region for TRDIYETDpYYRK, Spectrum 29.dta

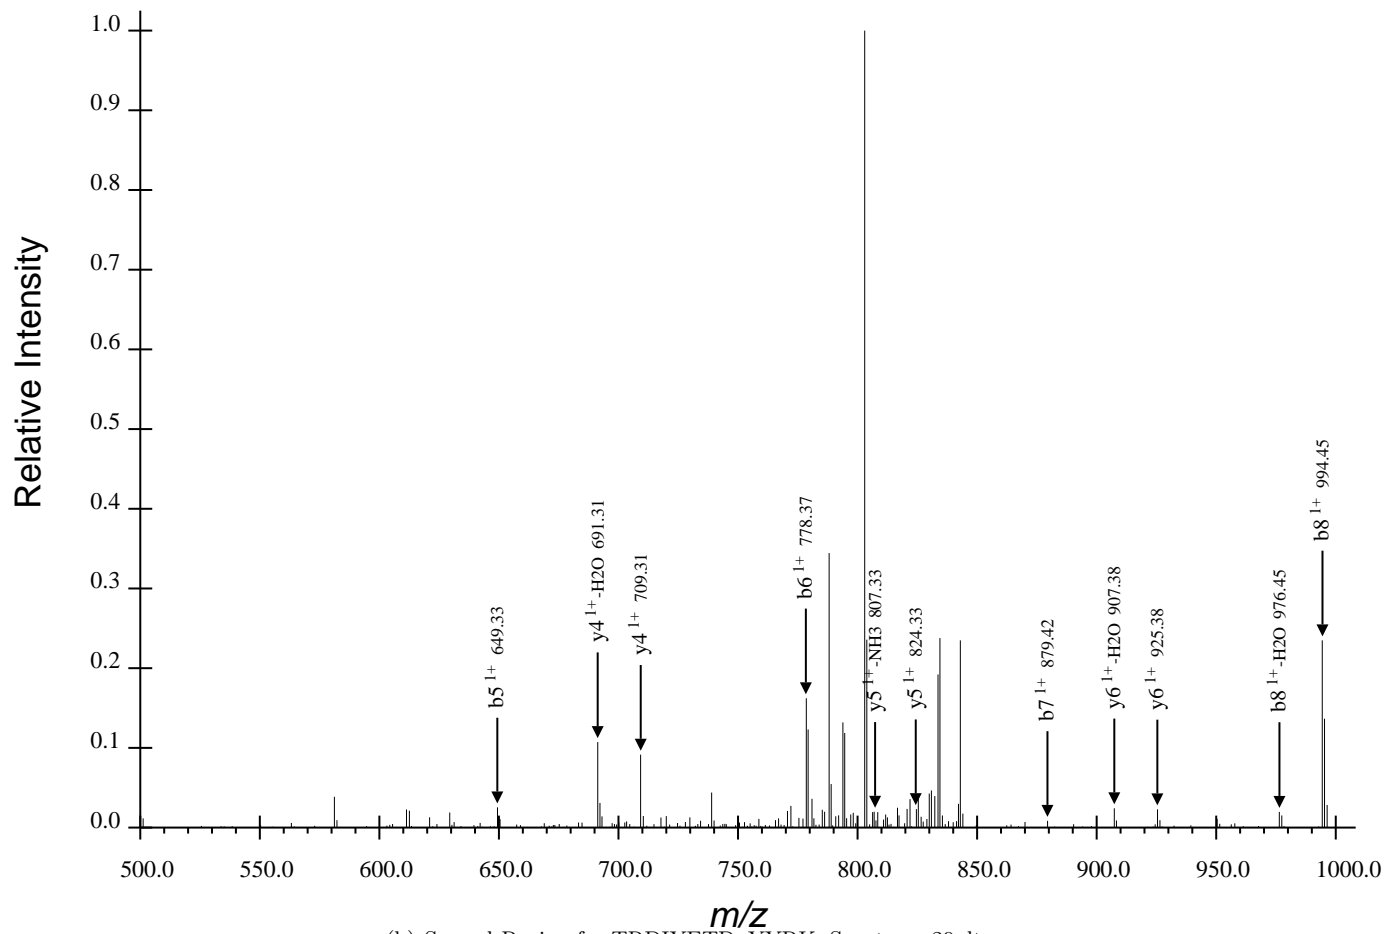

(b) Second Region for TRDIYETDpYYRK, Spectrum 29.dta

Relative Intensity

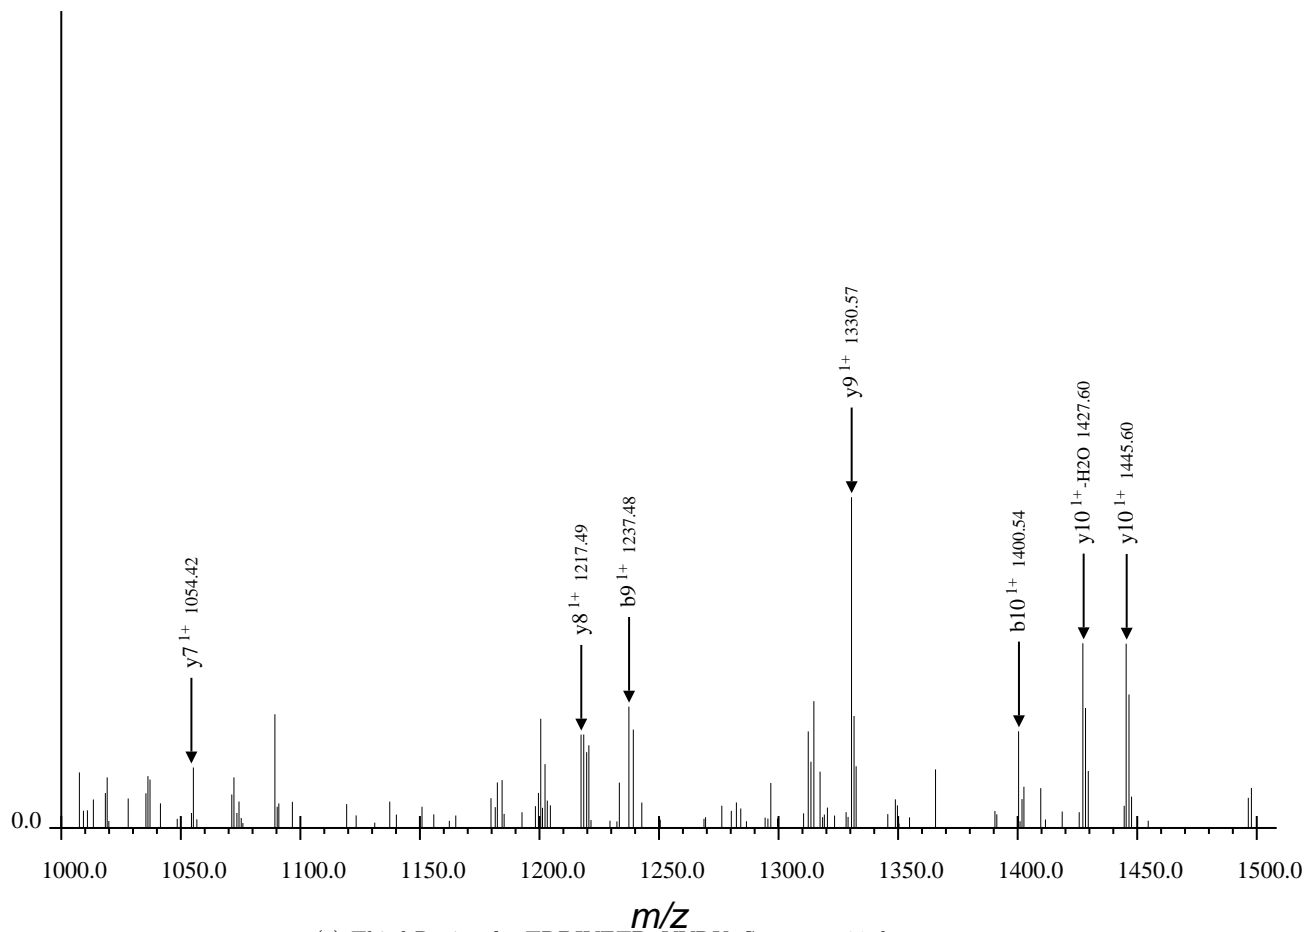

(c) Third Region for TRDIYETDpYYRK, Spectrum 29.dta

Relative Intensity

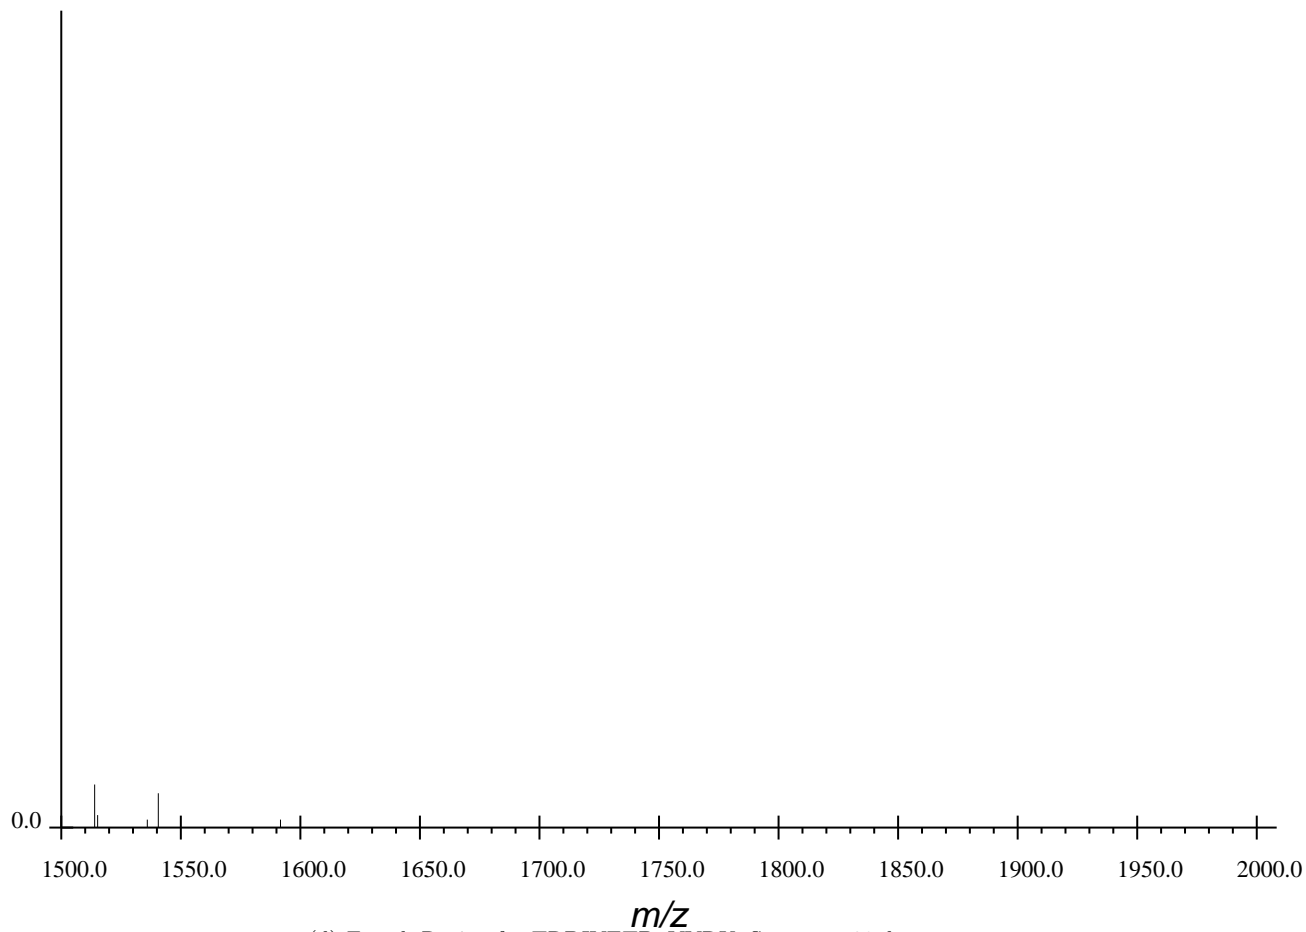

(d) Fourth Region for TRDIYETDpYYRK, Spectrum 29.dta

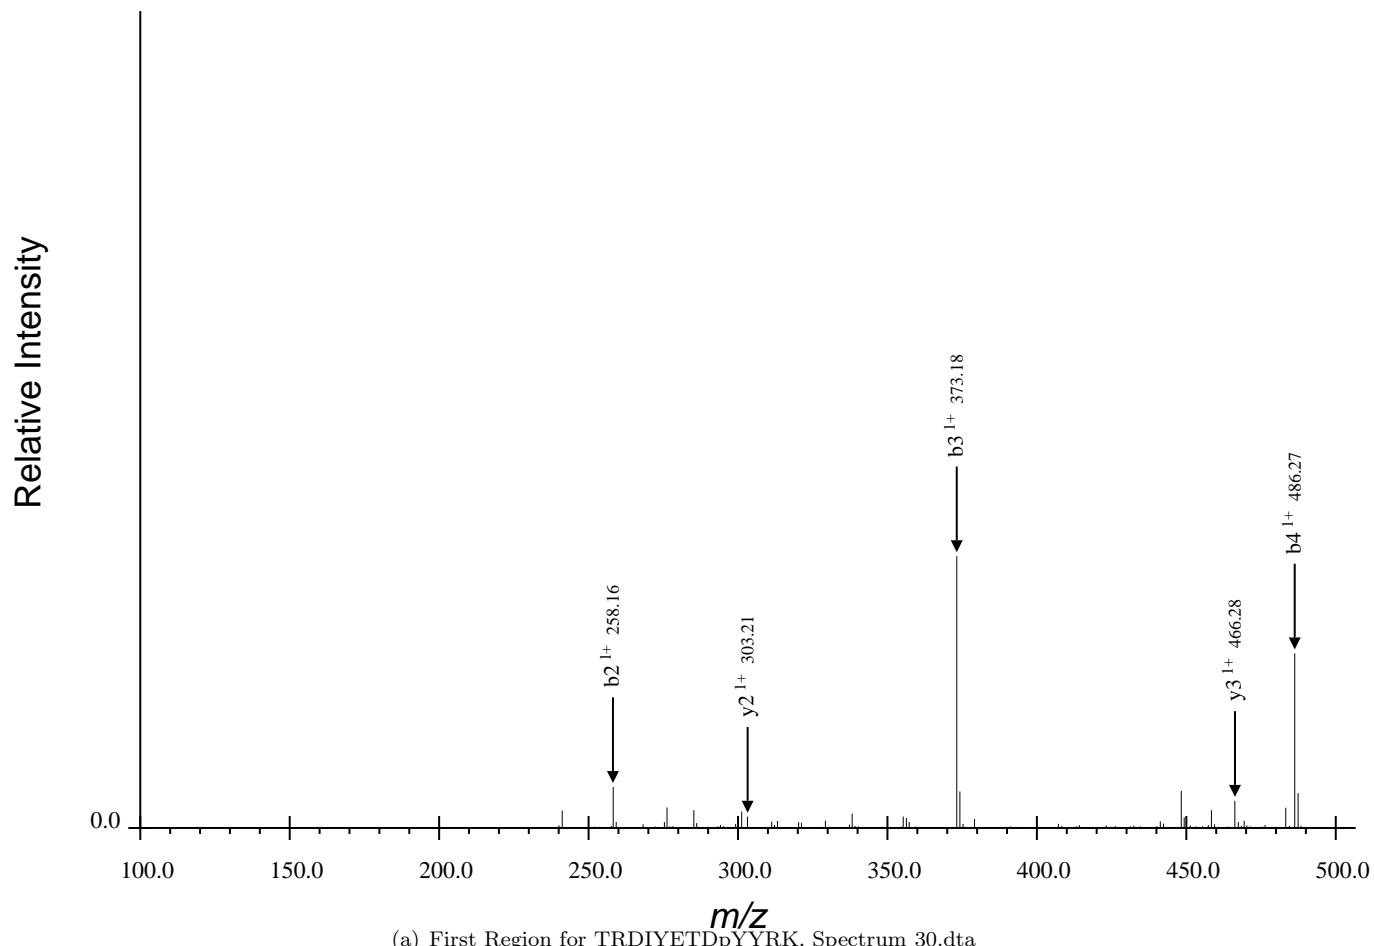

(a) First Region for TRDIYETDpYYRK, Spectrum 30.dta

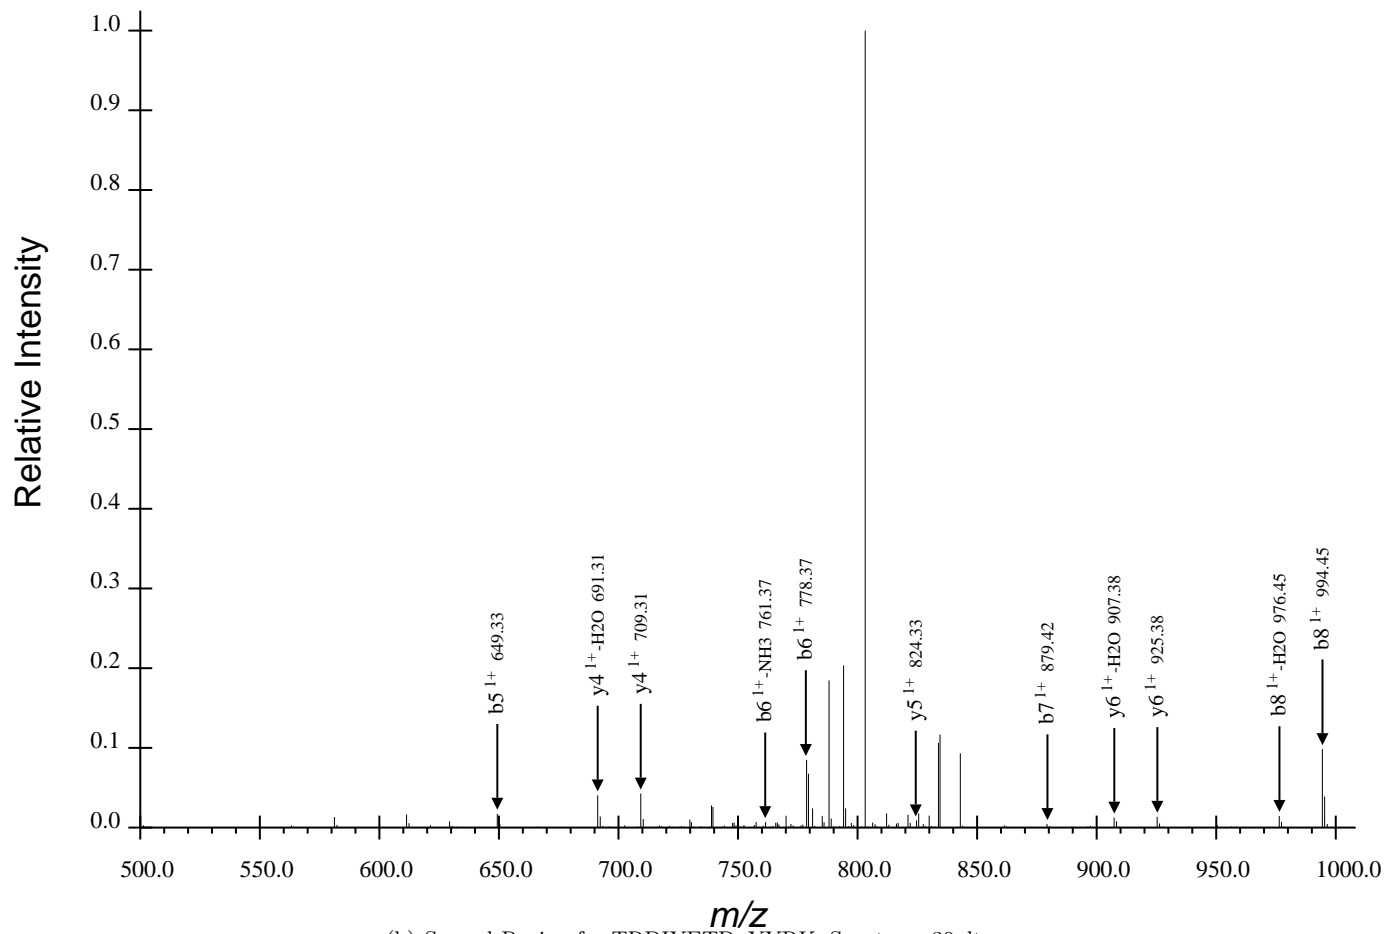

(b) Second Region for TRDIYETDpYYRK, Spectrum 30.dta

Relative Intensity

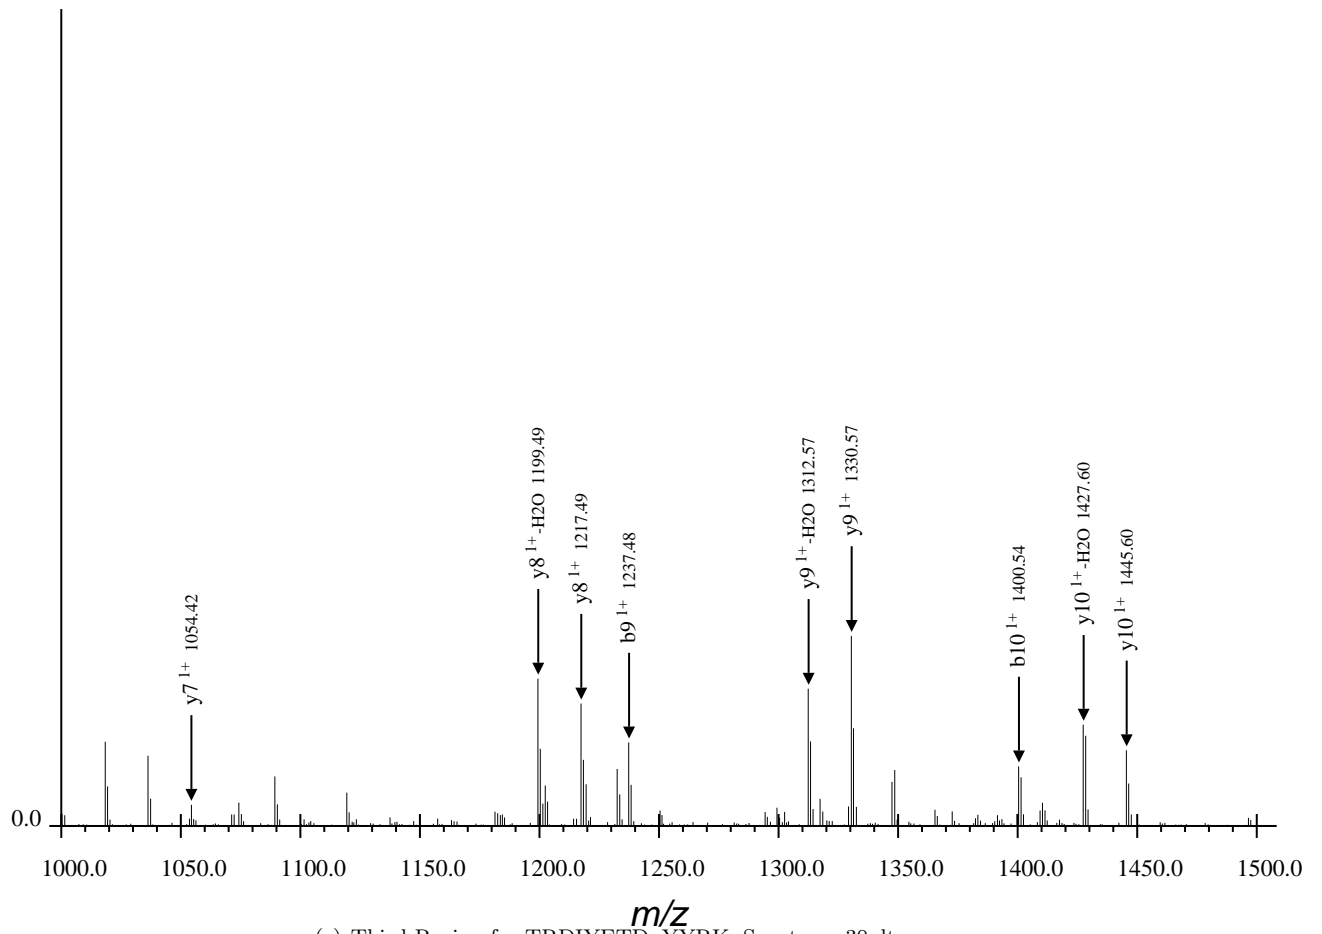

(c) Third Region for TRDIYETDpYYRK, Spectrum 30.dta

Relative Intensity

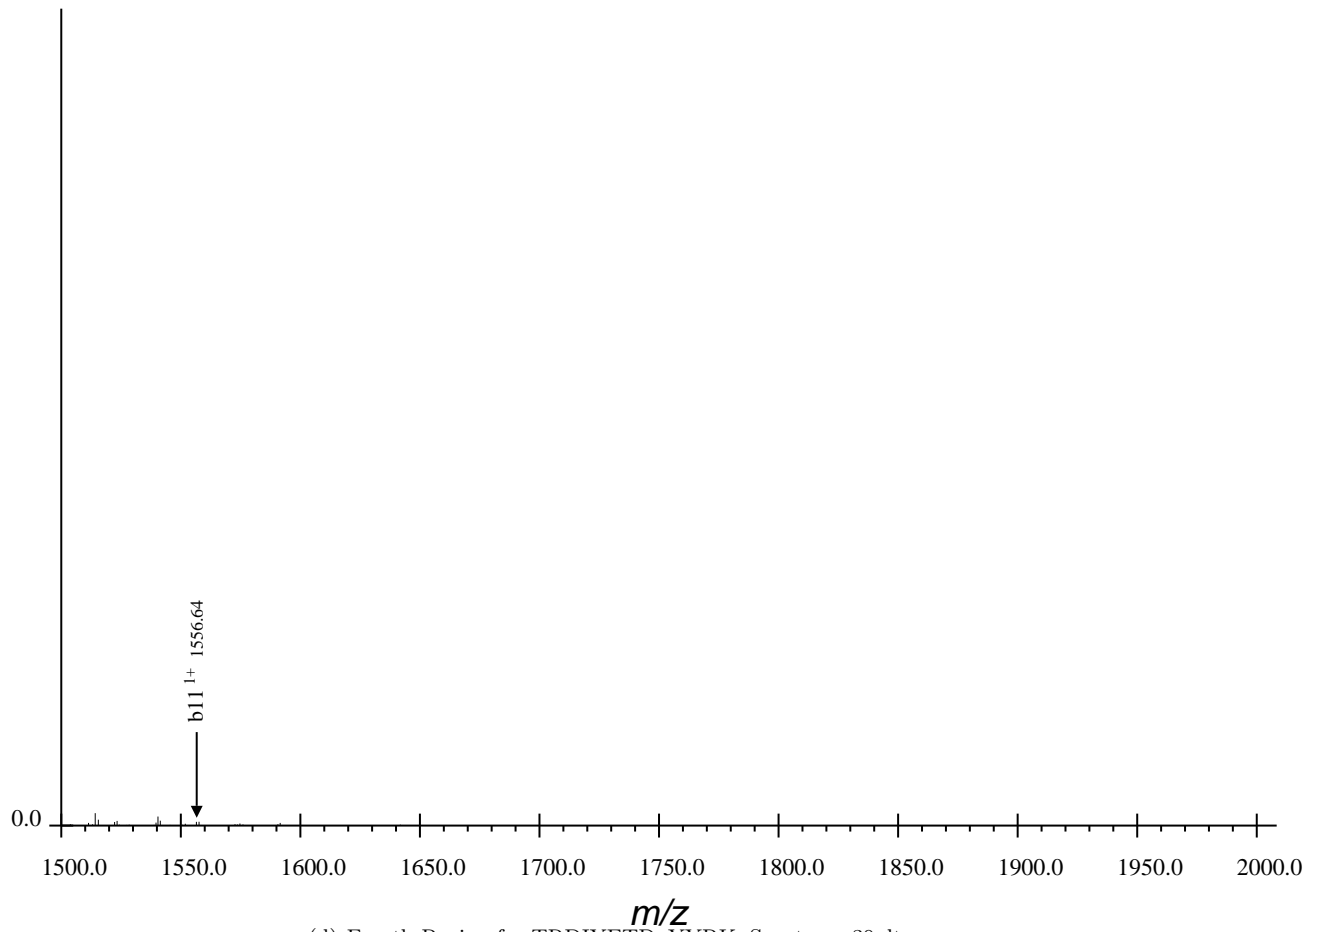

(d) Fourth Region for TRDIYETDpYYRK, Spectrum 30.dta

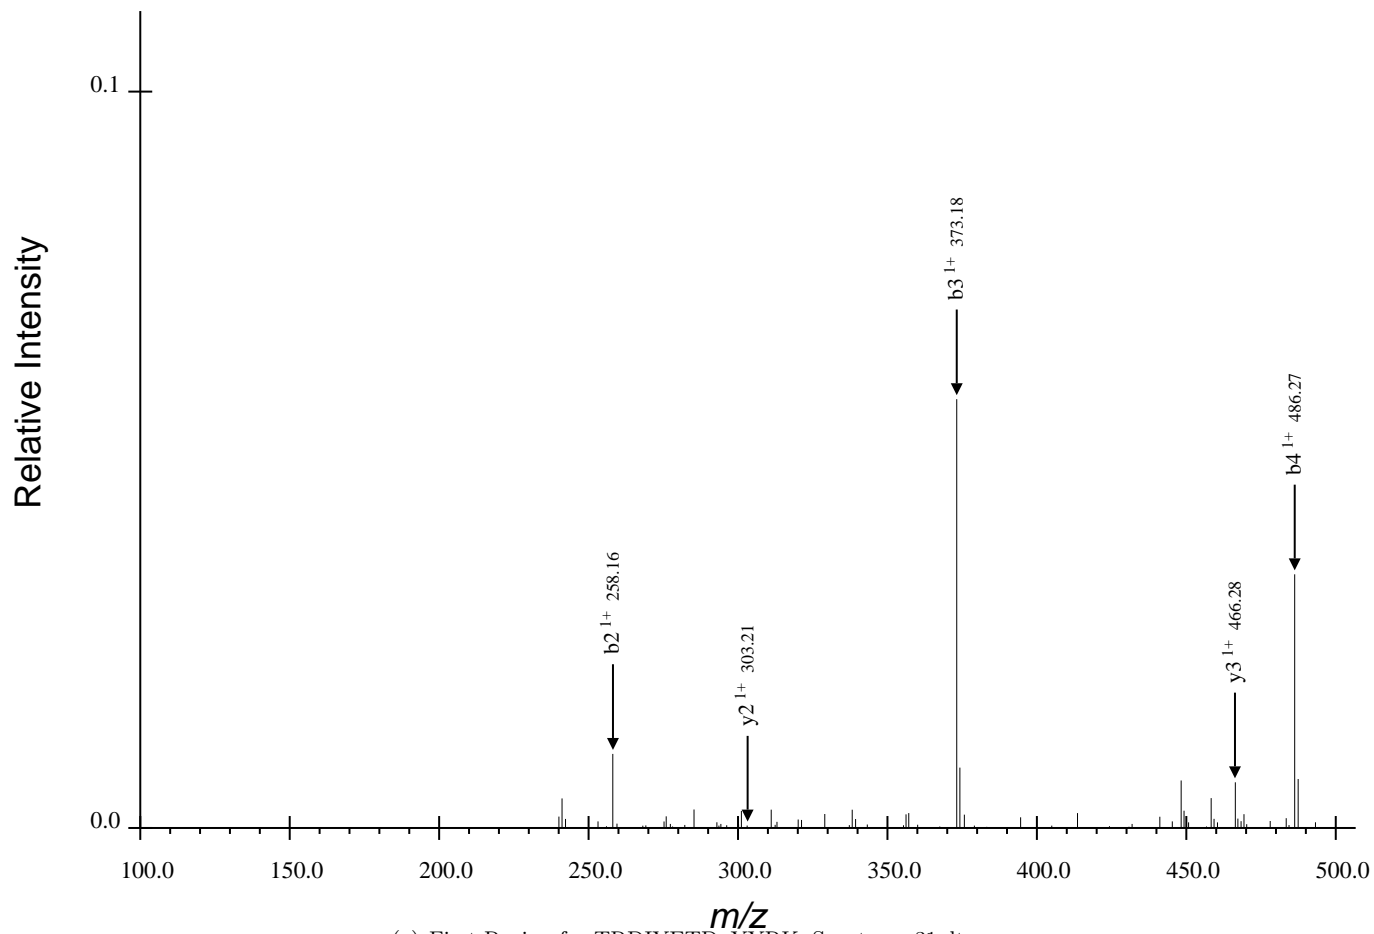

(a) First Region for TRDIYETDpYYRK, Spectrum 31.dta

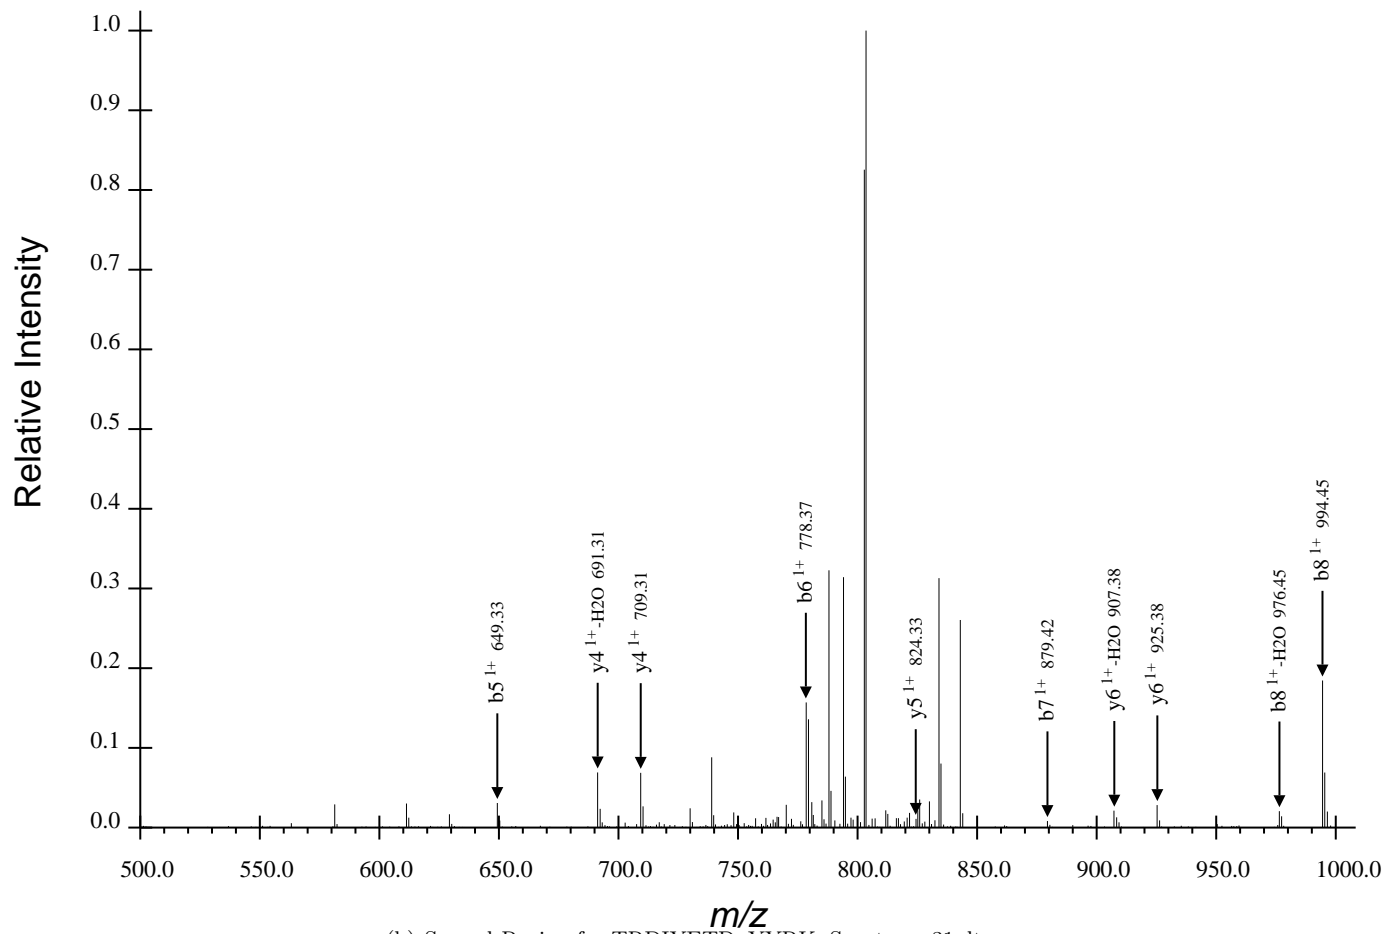

(b) Second Region for TRDIYETDpYYRK, Spectrum 31.dta

Relative Intensity

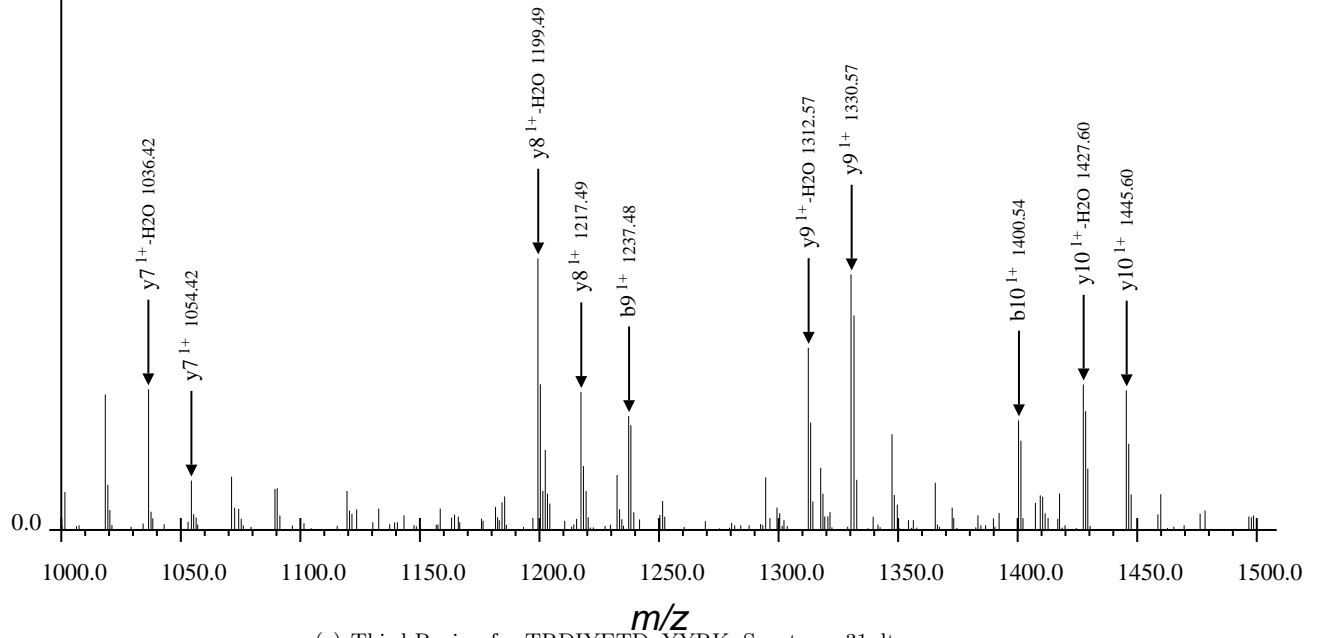

(c) Third Region for TRDIYETDpYYRK, Spectrum 31.dta

Relative Intensity

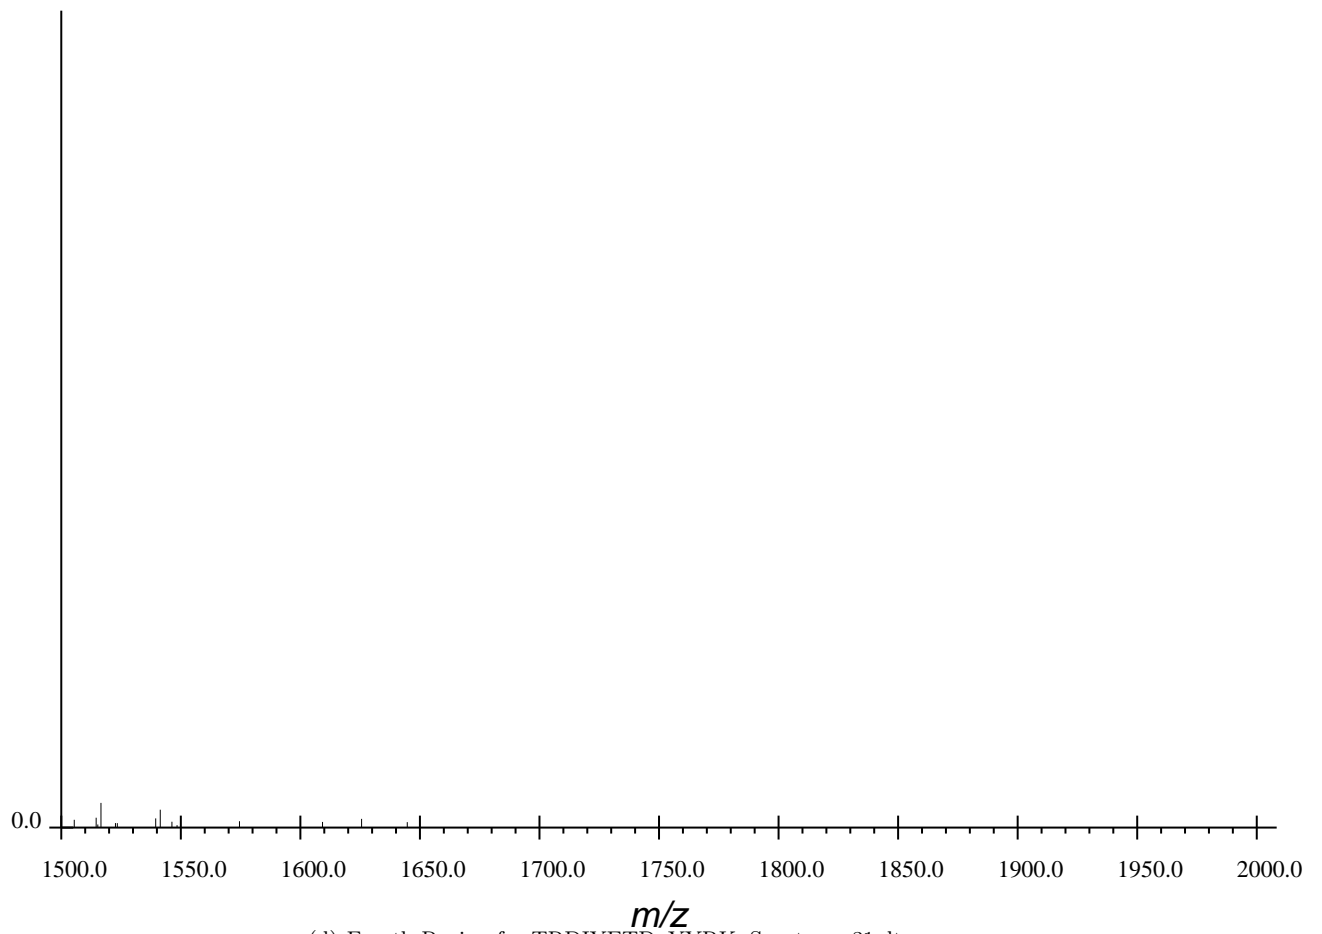

(d) Fourth Region for TRDIYETDpYYRK, Spectrum 31.dta

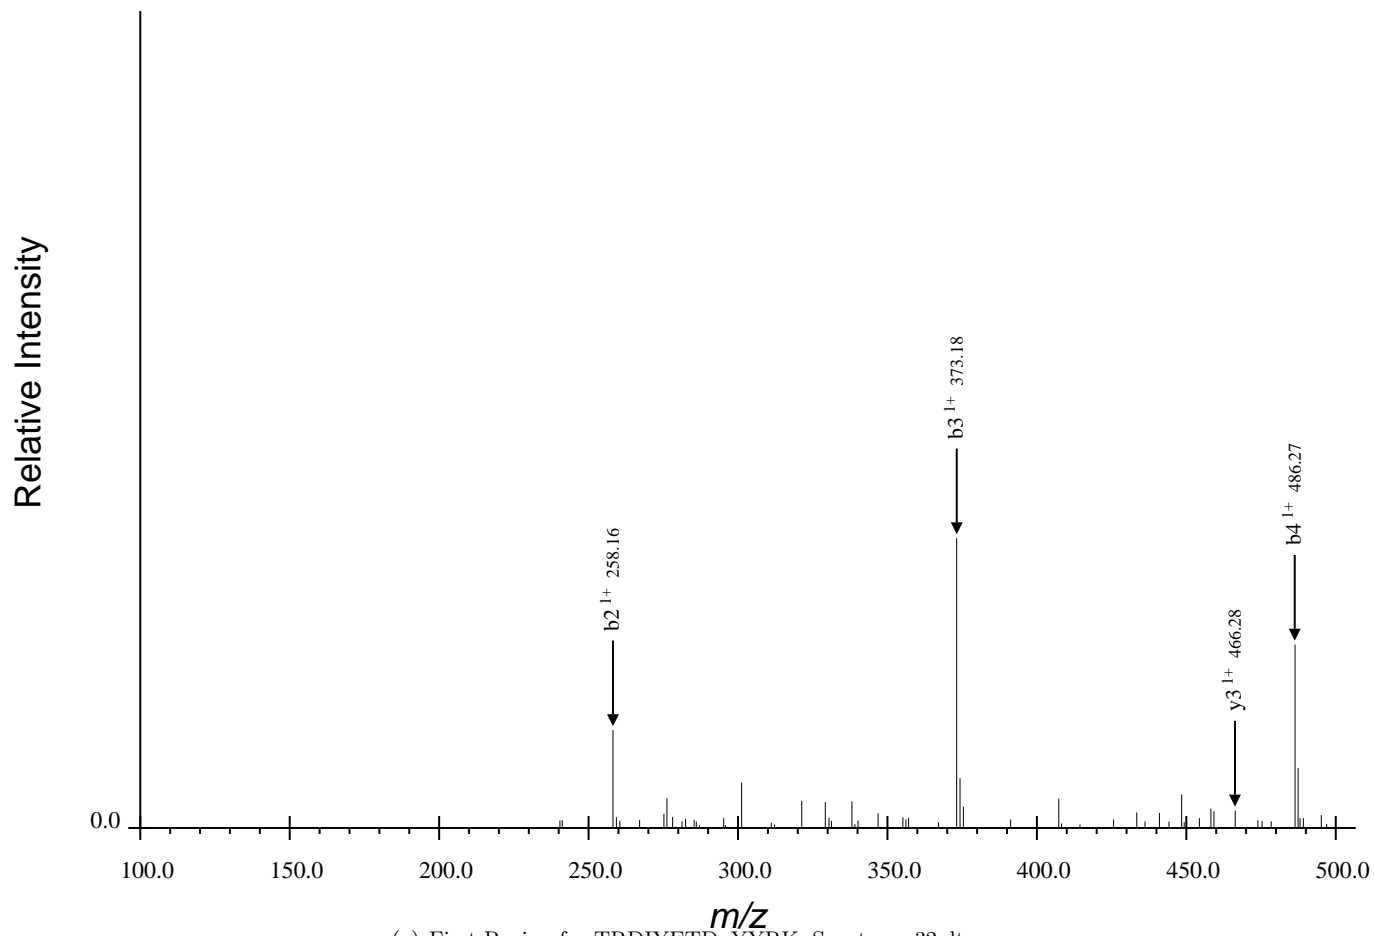

(a) First Region for TRDIYETDpYYRK, Spectrum 32.dta

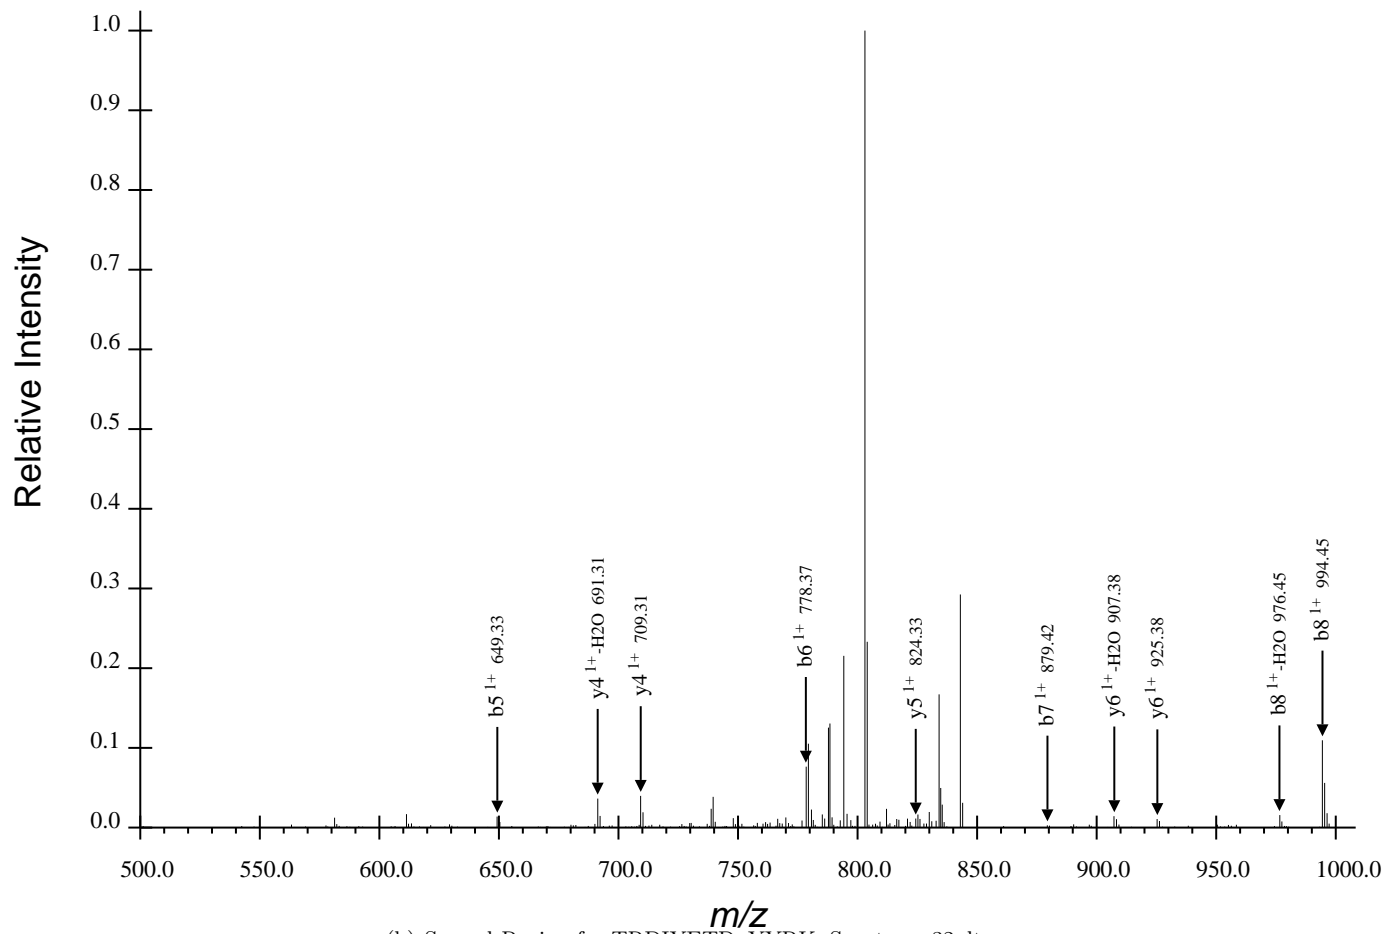

(b) Second Region for TRDIYETDpYYRK, Spectrum 32.dta

Relative Intensity

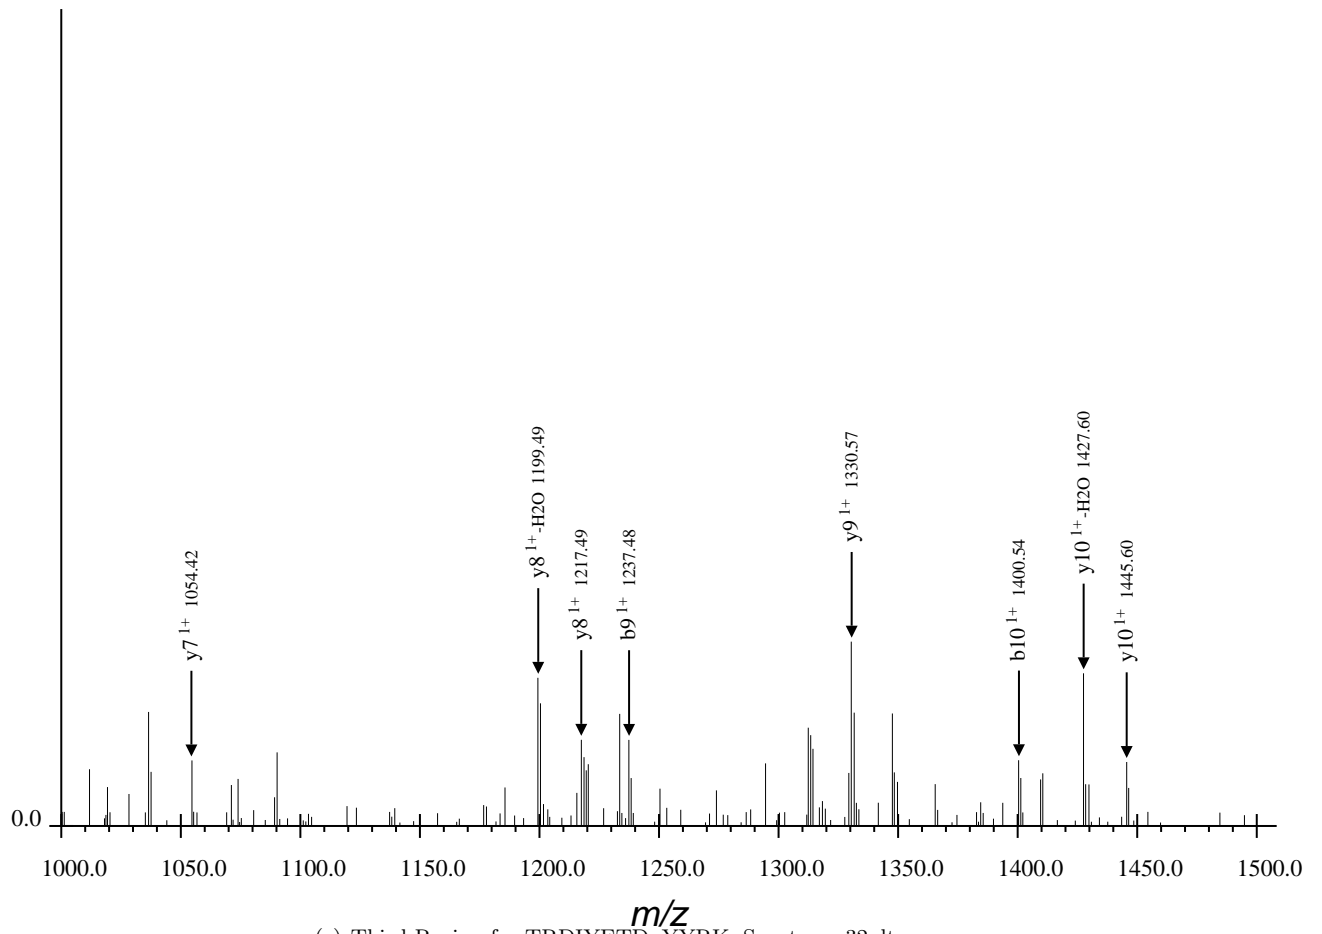

(c) Third Region for TRDIYETDpYYRK, Spectrum 32.dta

Relative Intensity

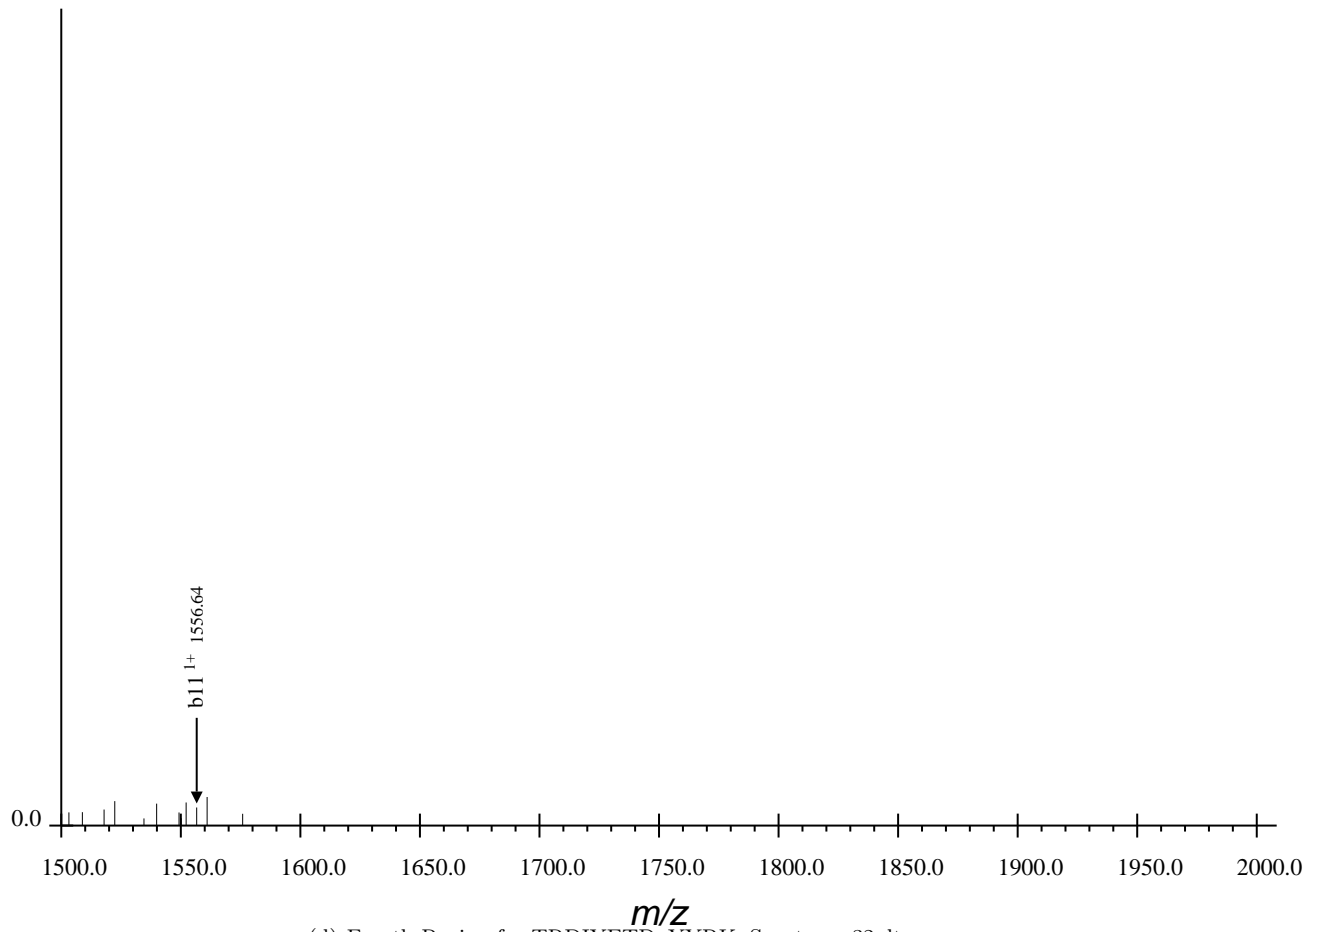

(d) Fourth Region for TRDIYETDpYYRK, Spectrum 32.dta



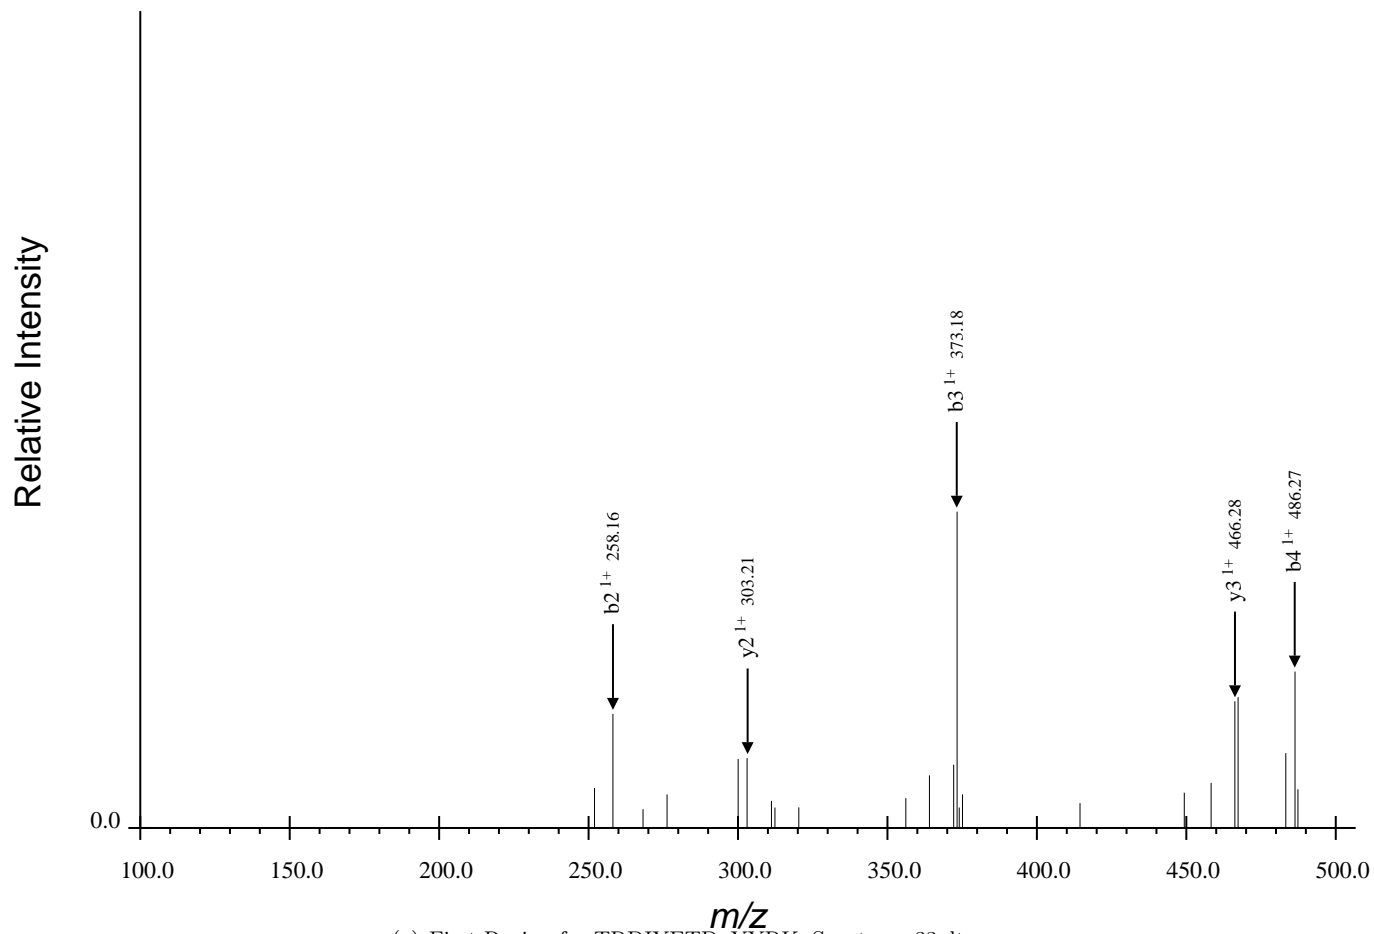

(a) First Region for TRDIYETDpYYRK, Spectrum 33.dta

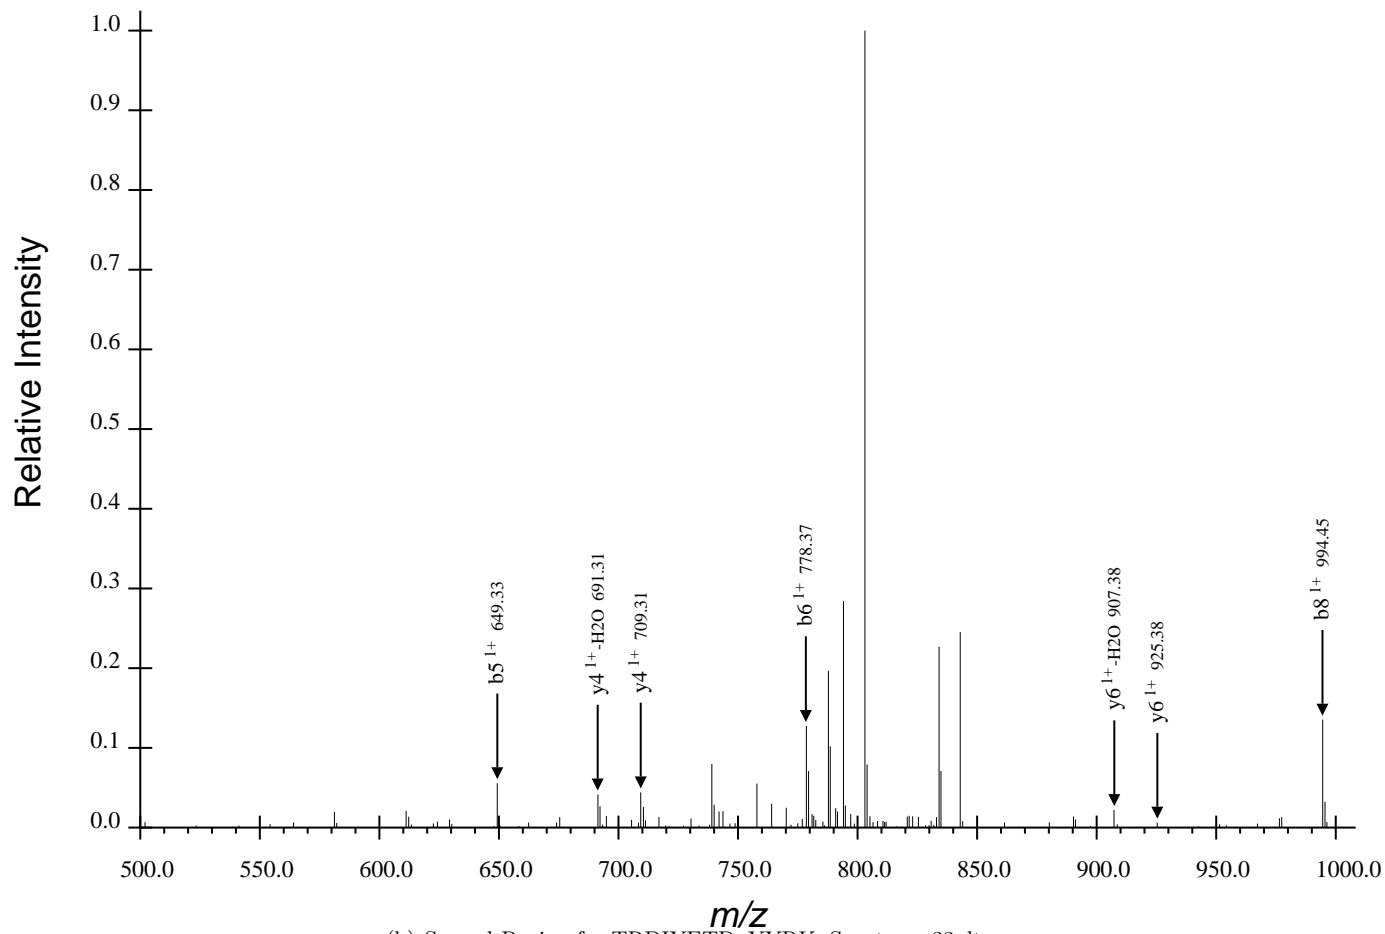

(b) Second Region for TRDIYETDpYYRK, Spectrum 33.dta

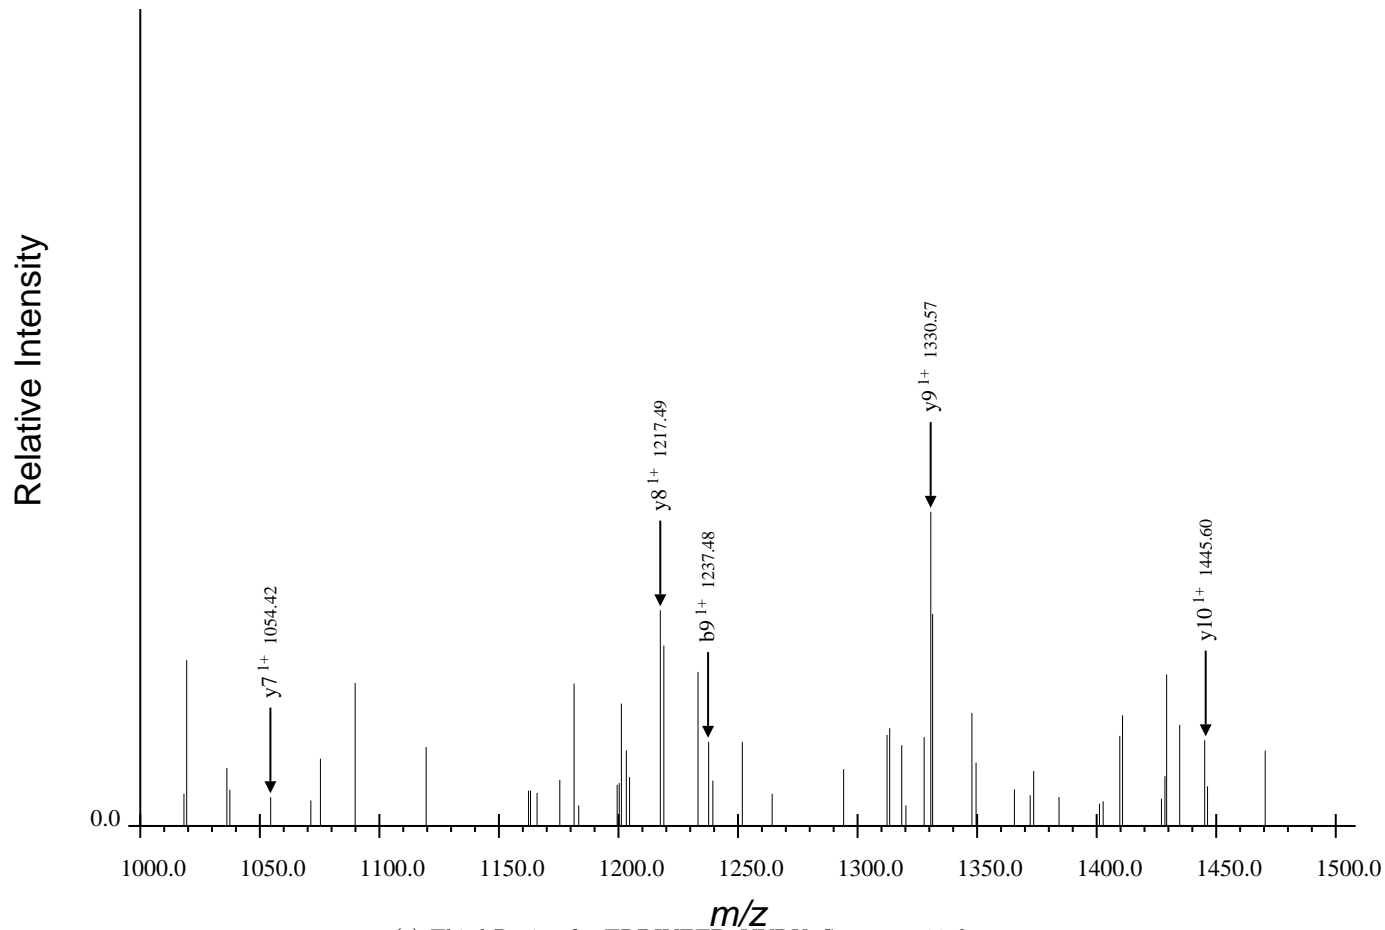

(c) Third Region for TRDIYETDpYYRK, Spectrum 33.dta

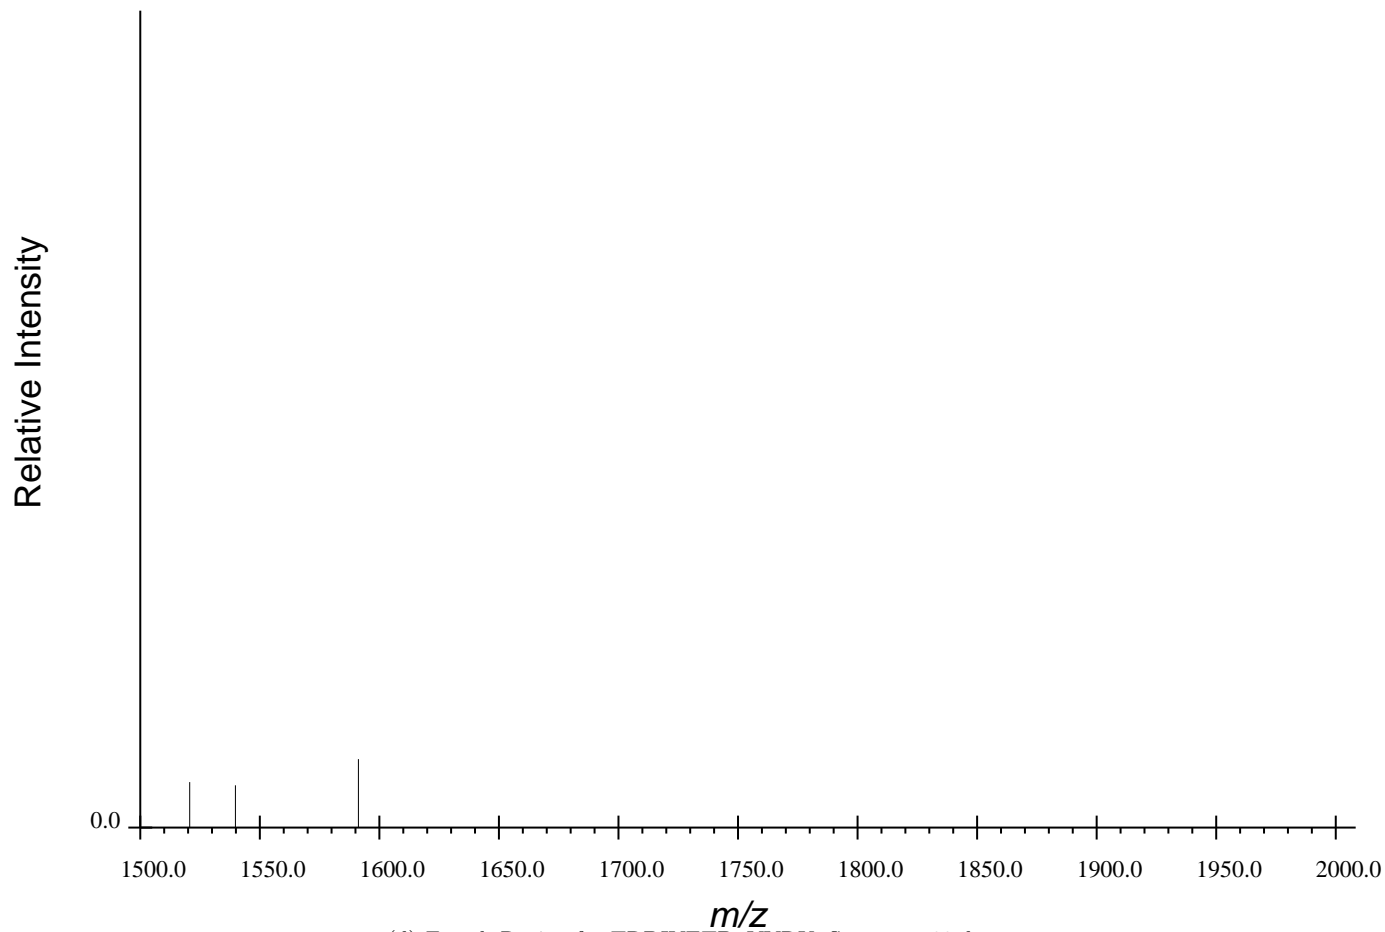

(d) Fourth Region for TRDIYETDpYYRK, Spectrum 33.dta

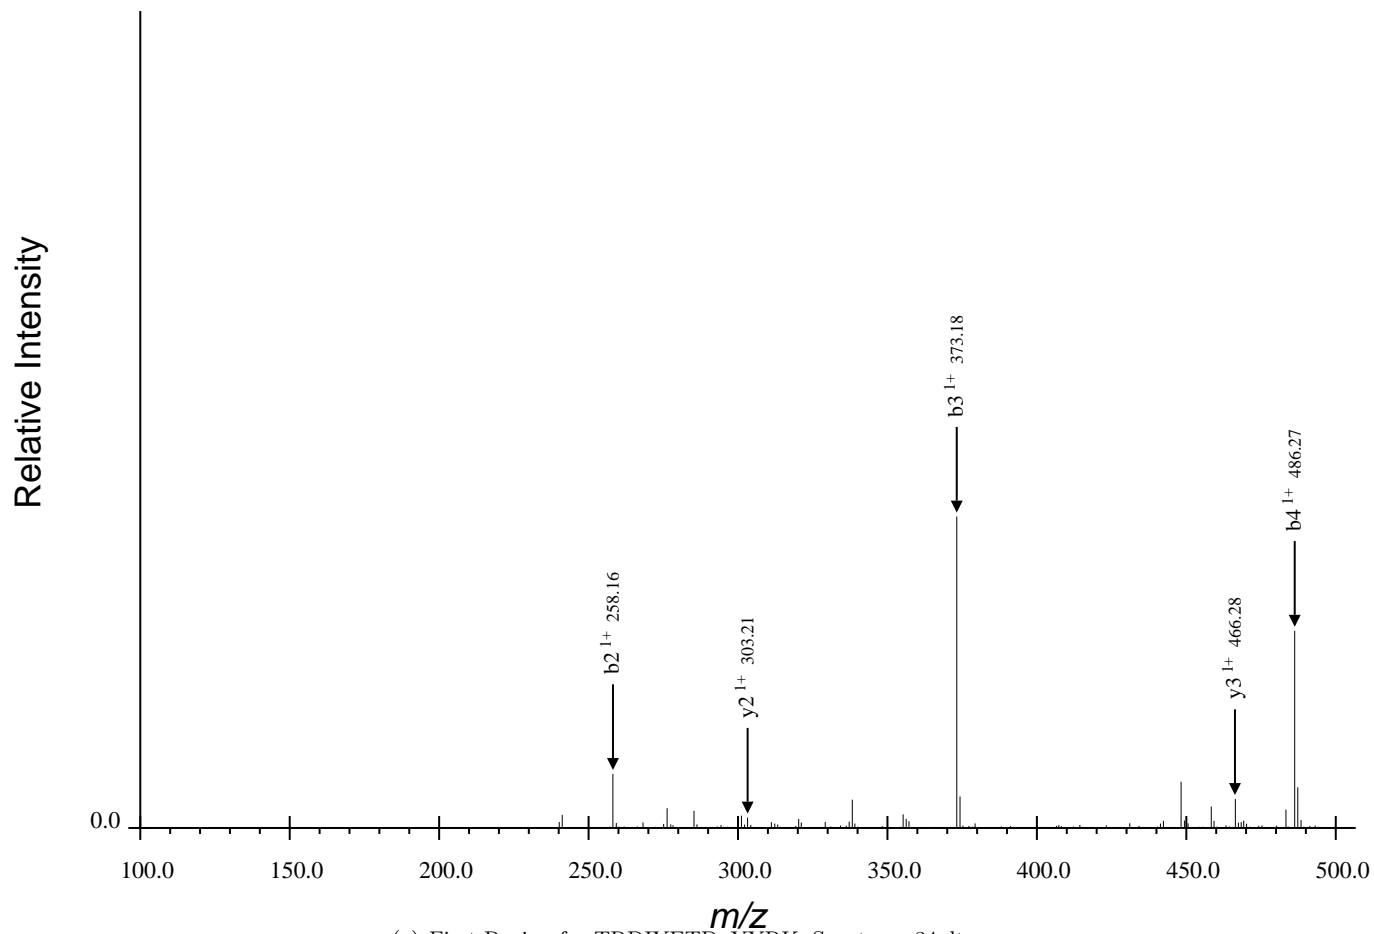

(a) First Region for TRDIYETDpYYRK, Spectrum 34.dta

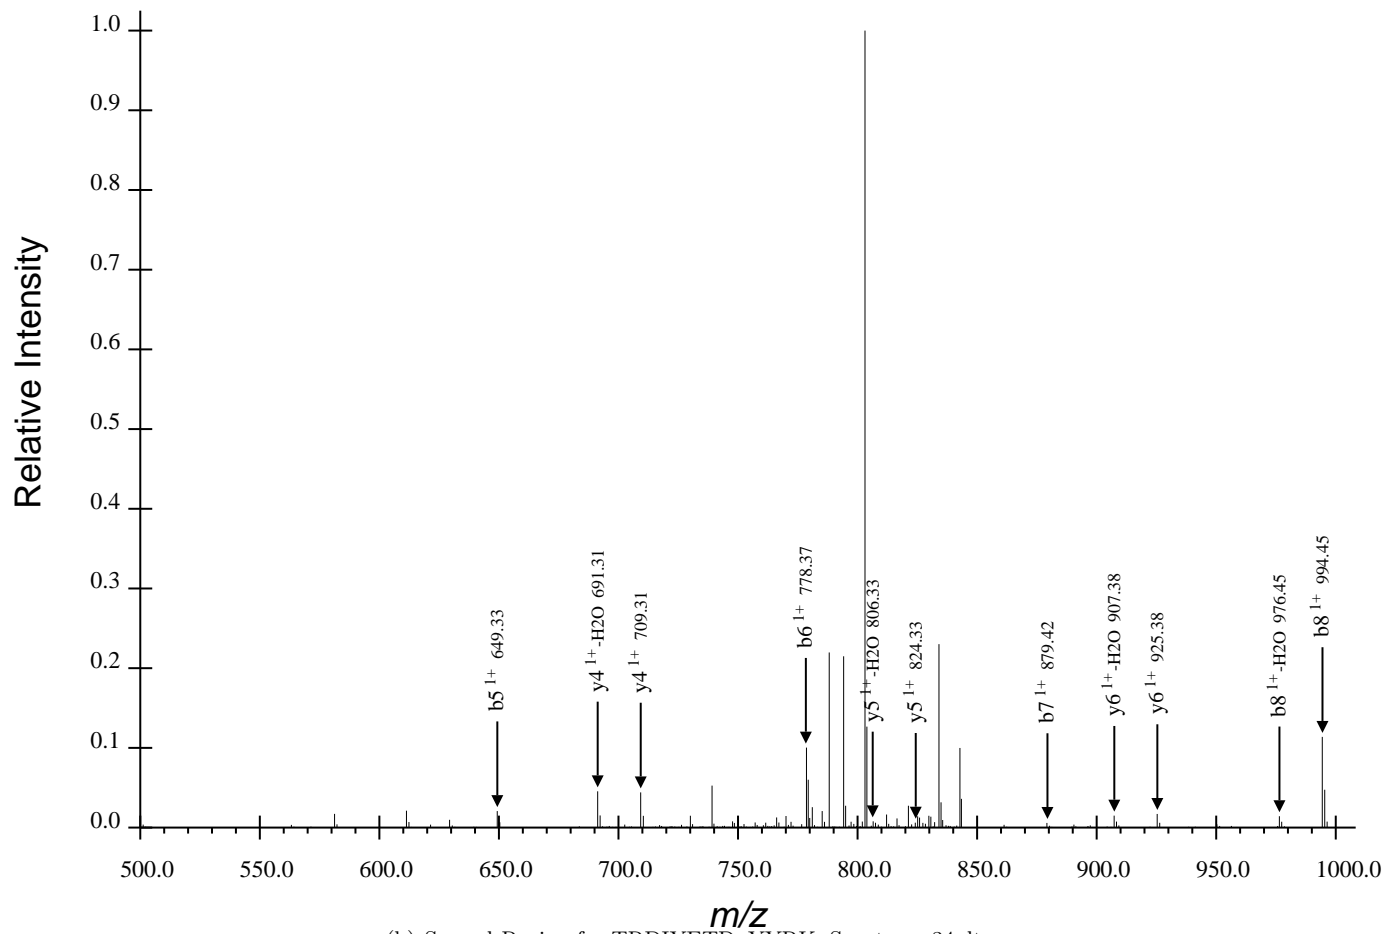

(b) Second Region for TRDIYETDpYYRK, Spectrum 34.dta

Relative Intensity

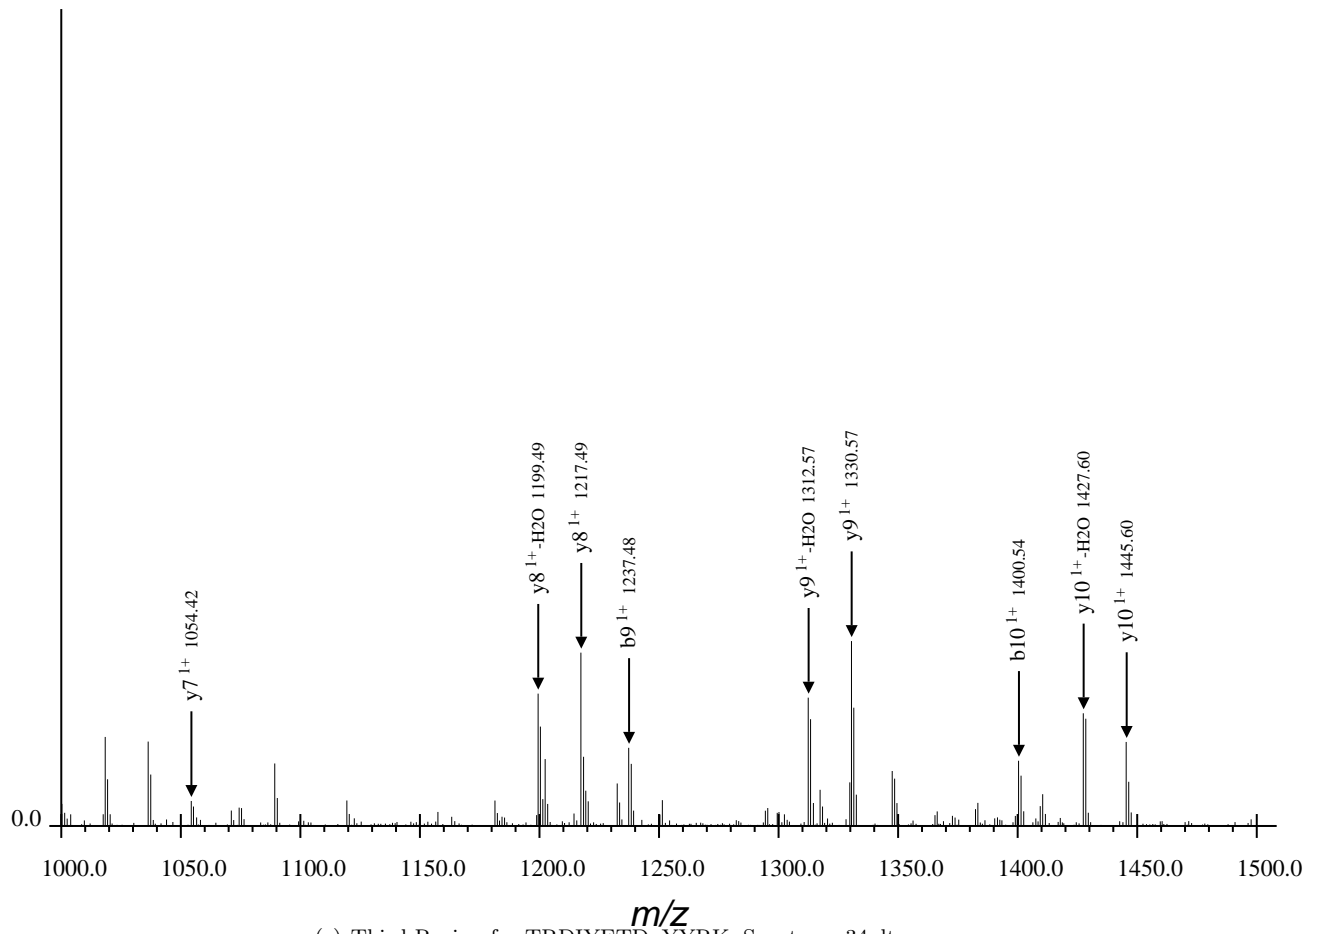

(c) Third Region for TRDIYETDpYYRK, Spectrum 34.dta

Relative Intensity

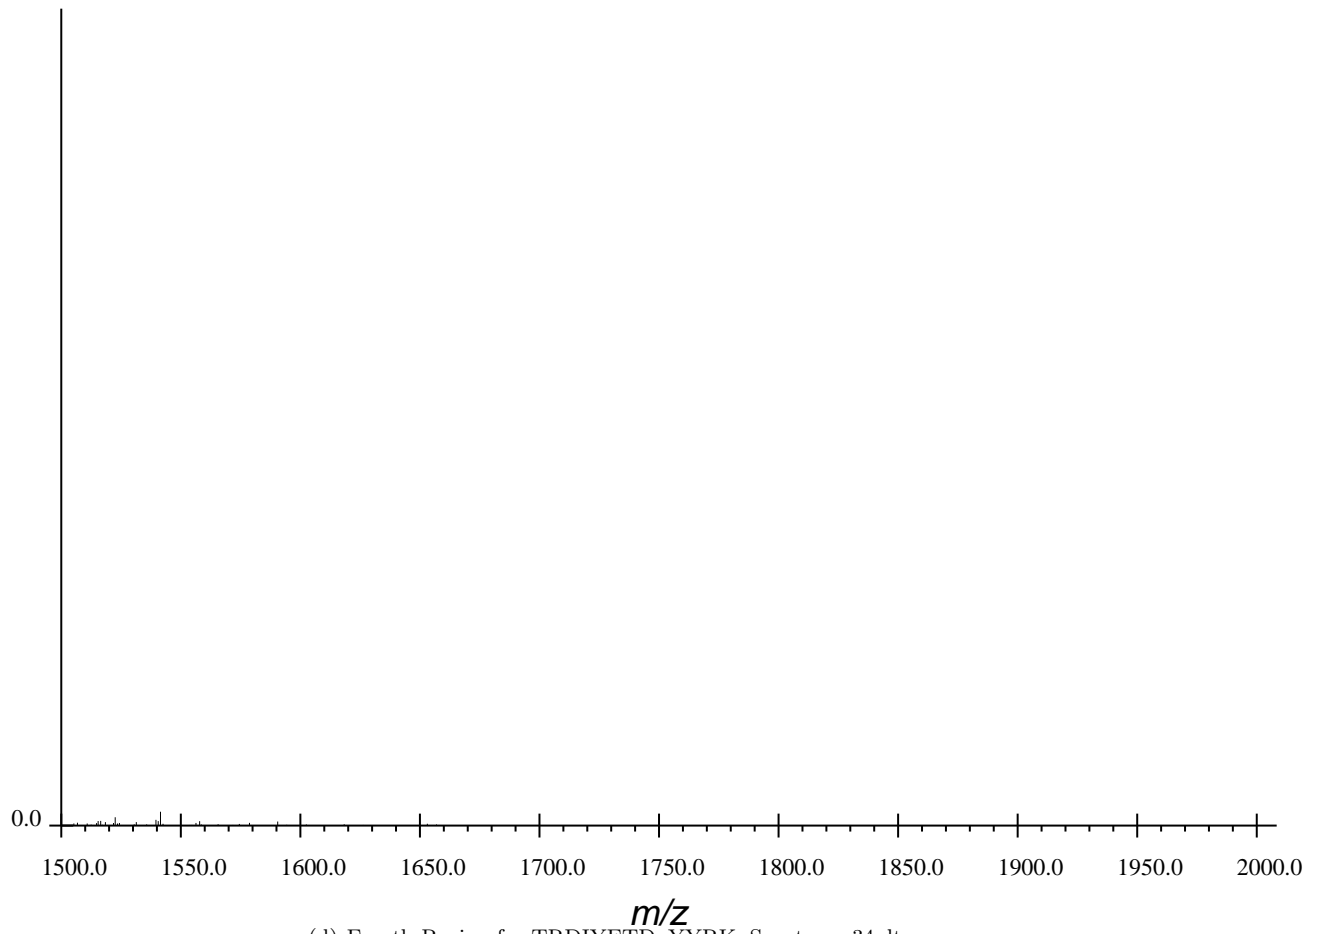

(d) Fourth Region for TRDIYETDpYYRK, Spectrum 34.dta

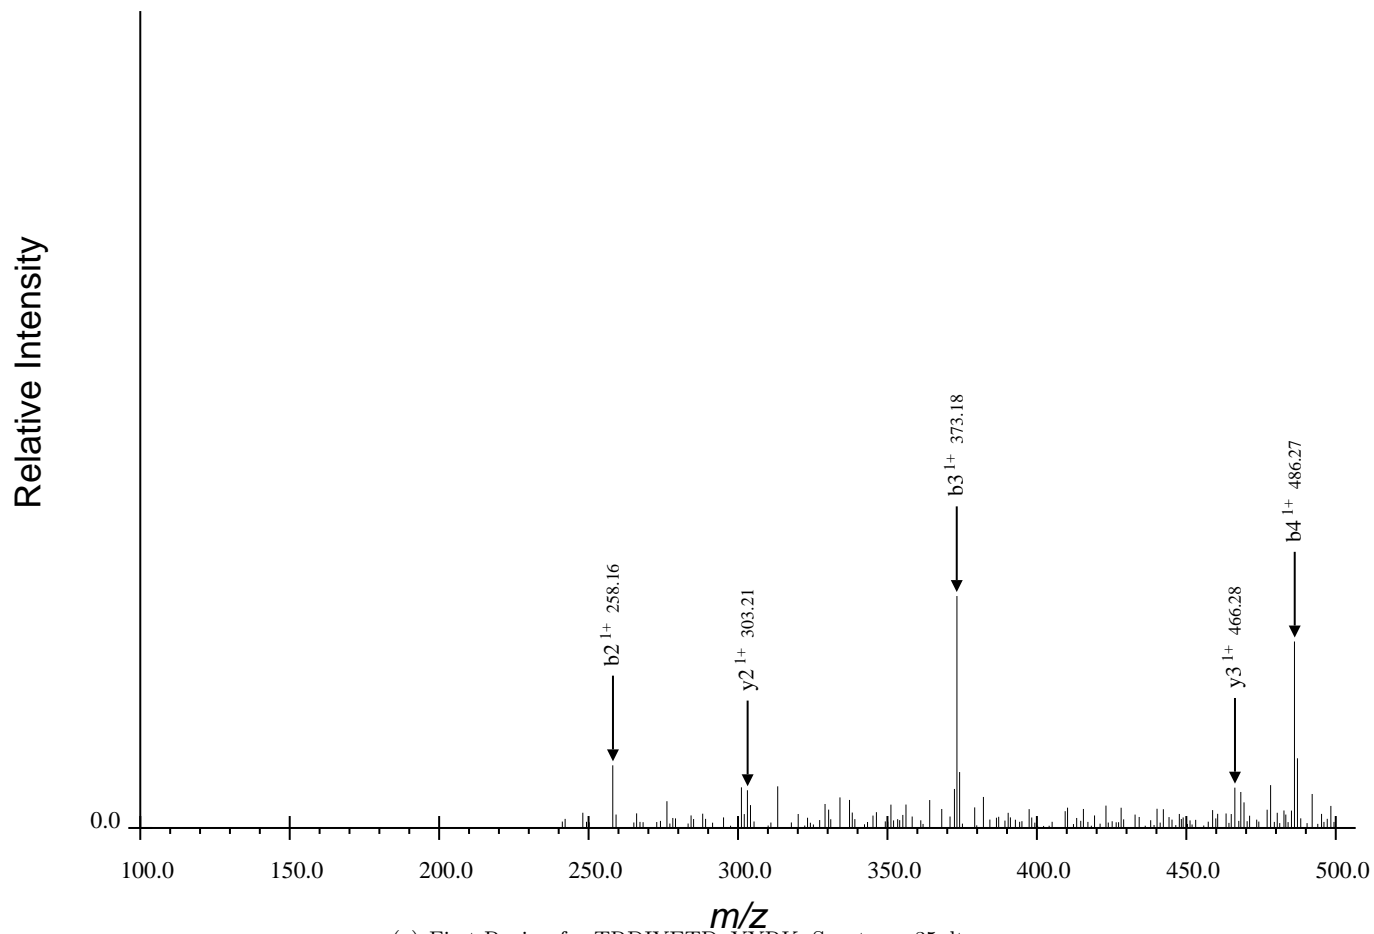

(a) First Region for TRDIYETDpYYRK, Spectrum 35.dta

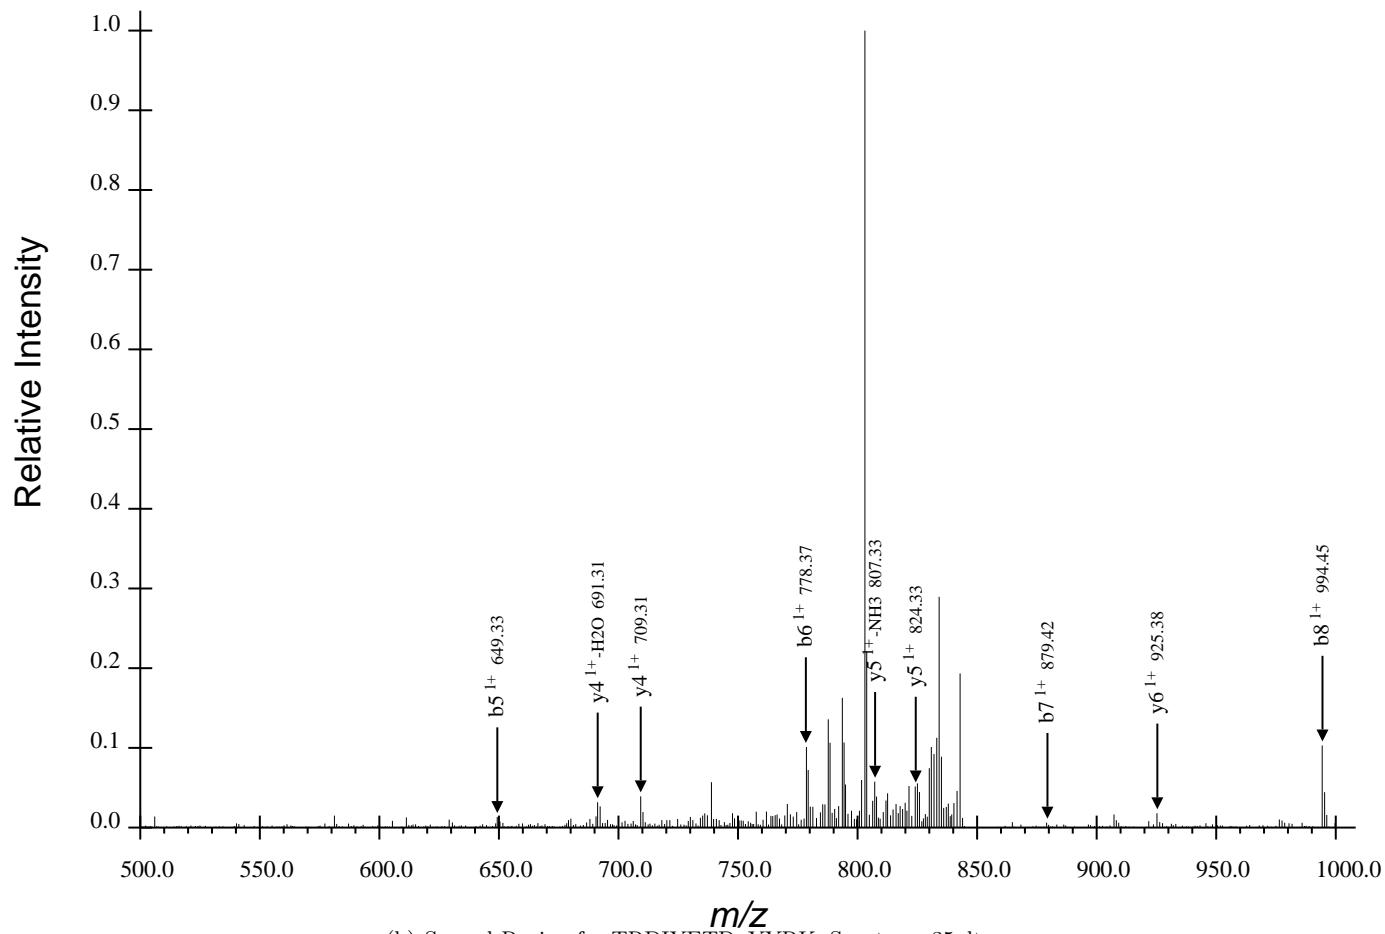

(b) Second Region for TRDIYETDpYYRK, Spectrum 35.dta

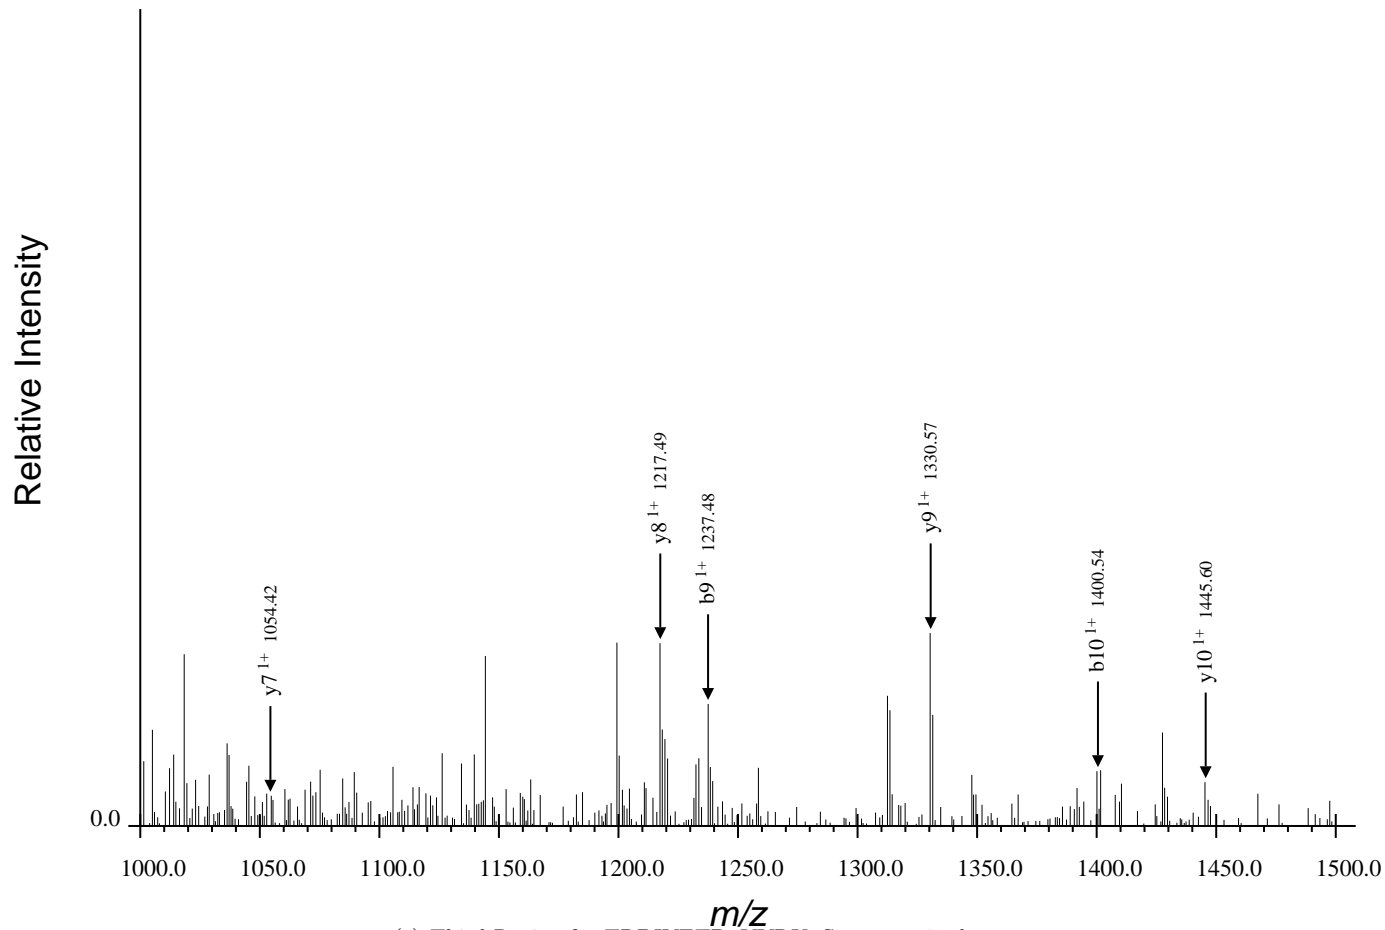

(c) Third Region for TRDIYETDpYYRK, Spectrum 35.dta

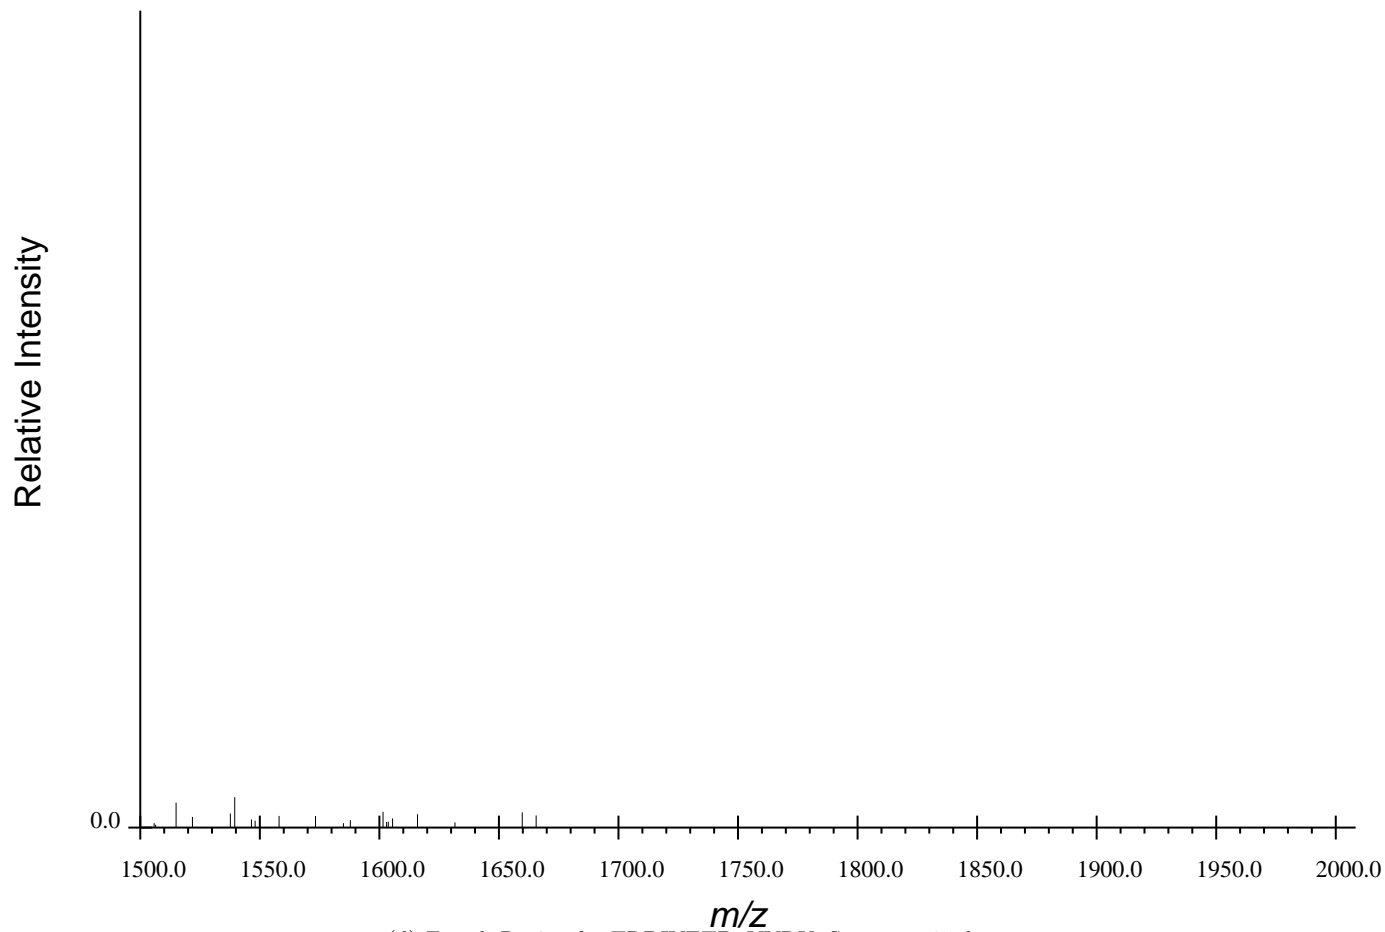

(d) Fourth Region for TRDIYETDpYYRK, Spectrum 35.dta

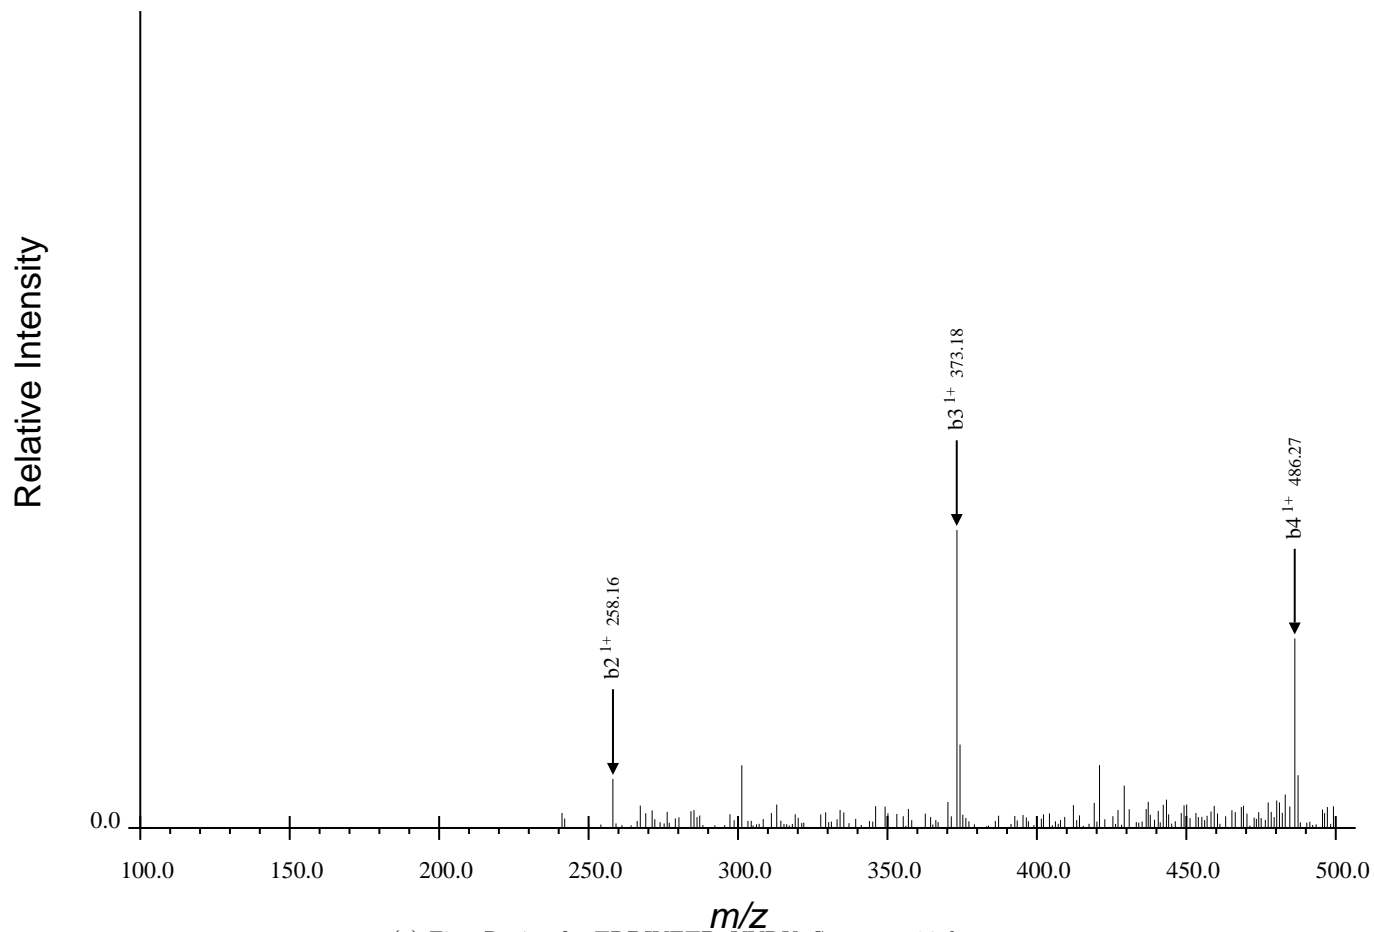

(a) First Region for TRDIYETDpYYRK, Spectrum 36.dta

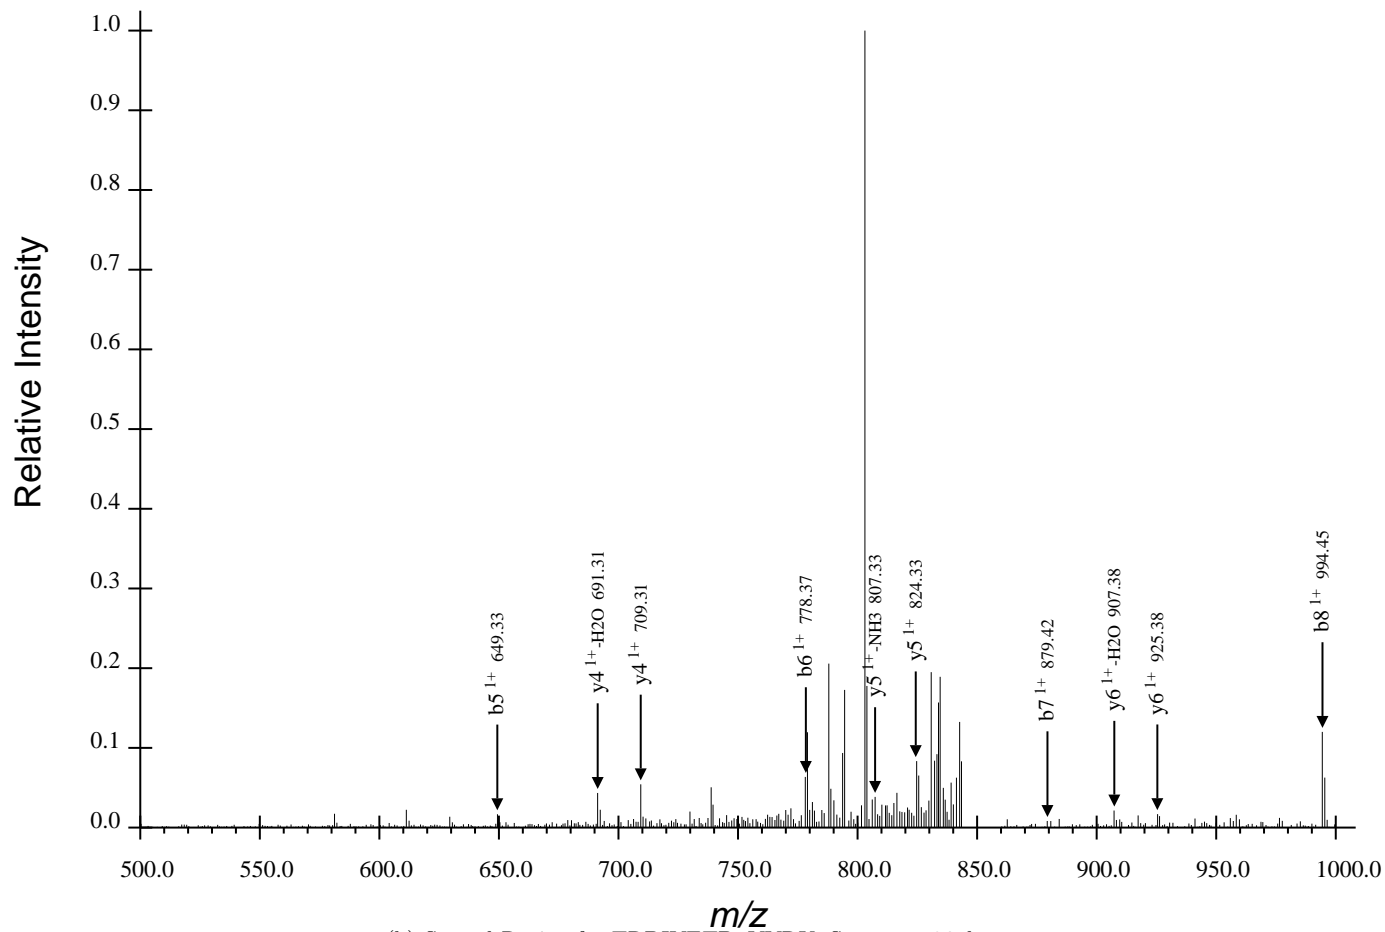

(b) Second Region for TRDIYETDpYYRK, Spectrum 36.dta

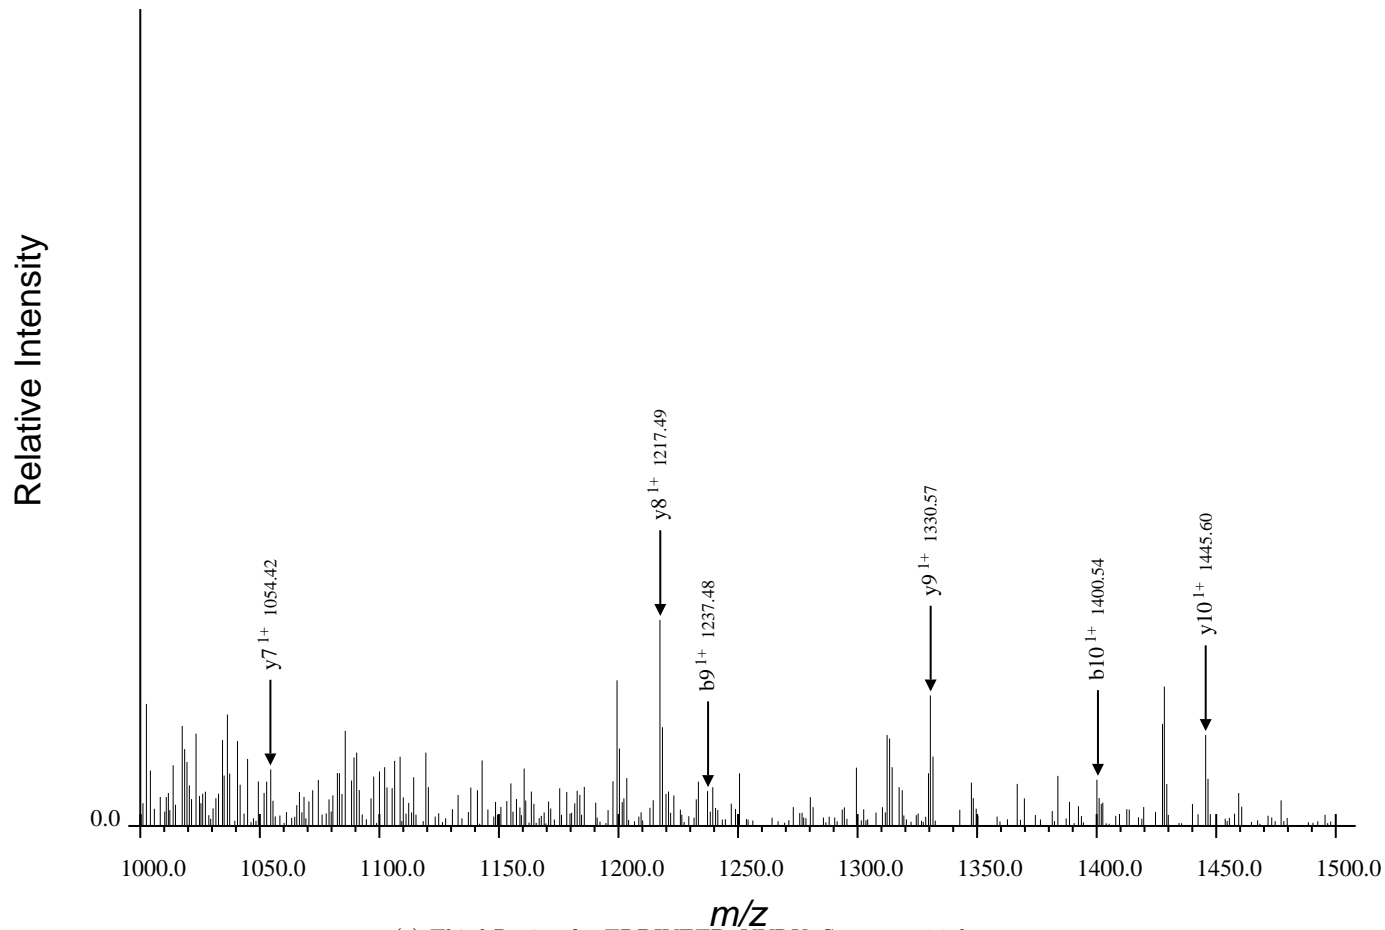

(c) Third Region for TRDIYETDpYYRK, Spectrum 36.dta

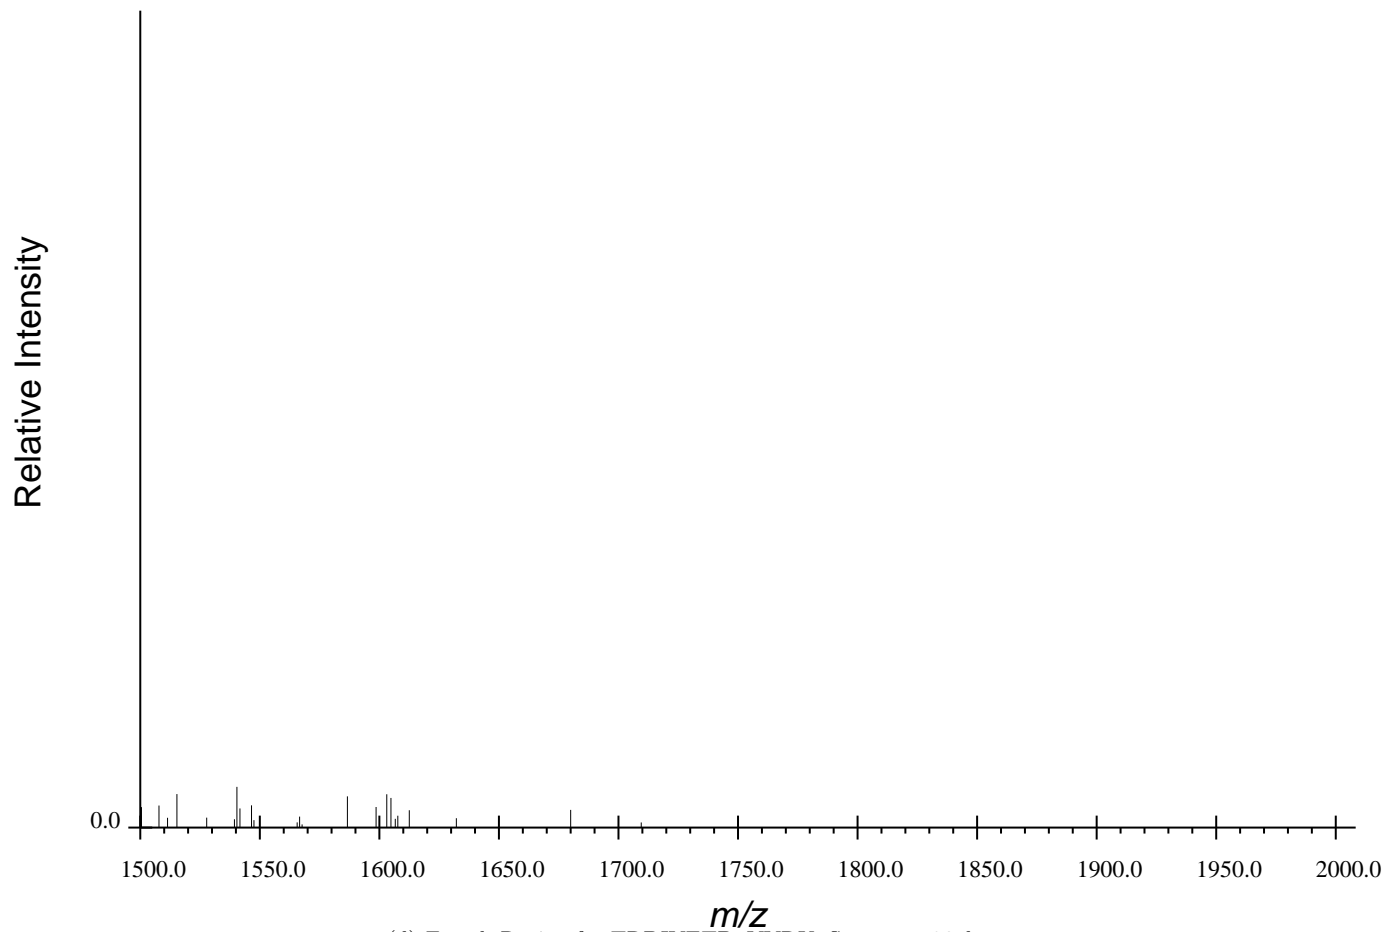

(d) Fourth Region for TRDIYETDpYYRK, Spectrum 36.dta



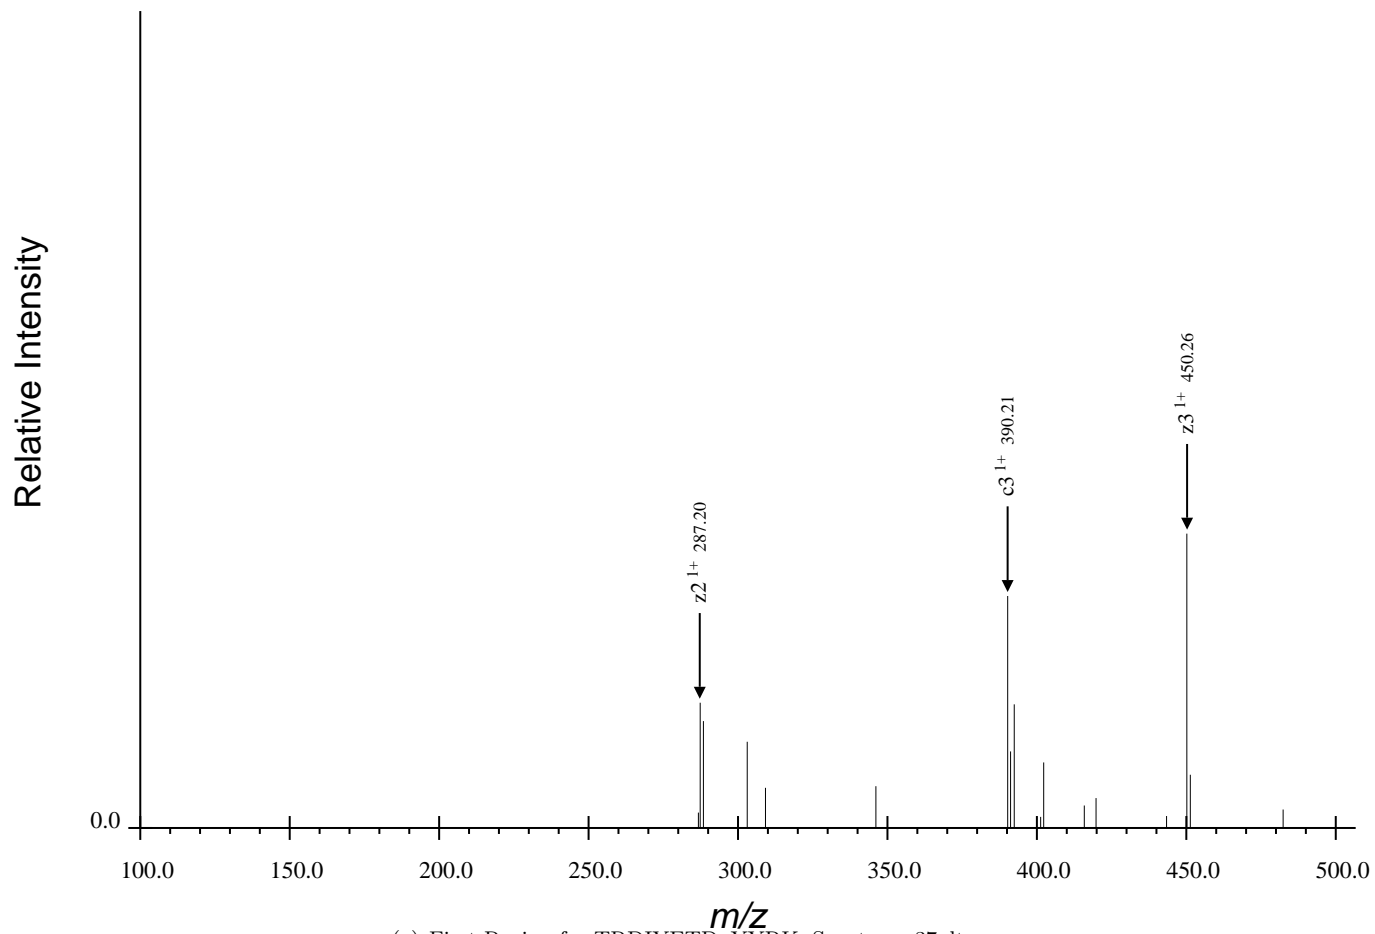

(a) First Region for TRDIYETDpYYRK, Spectrum 37.dta

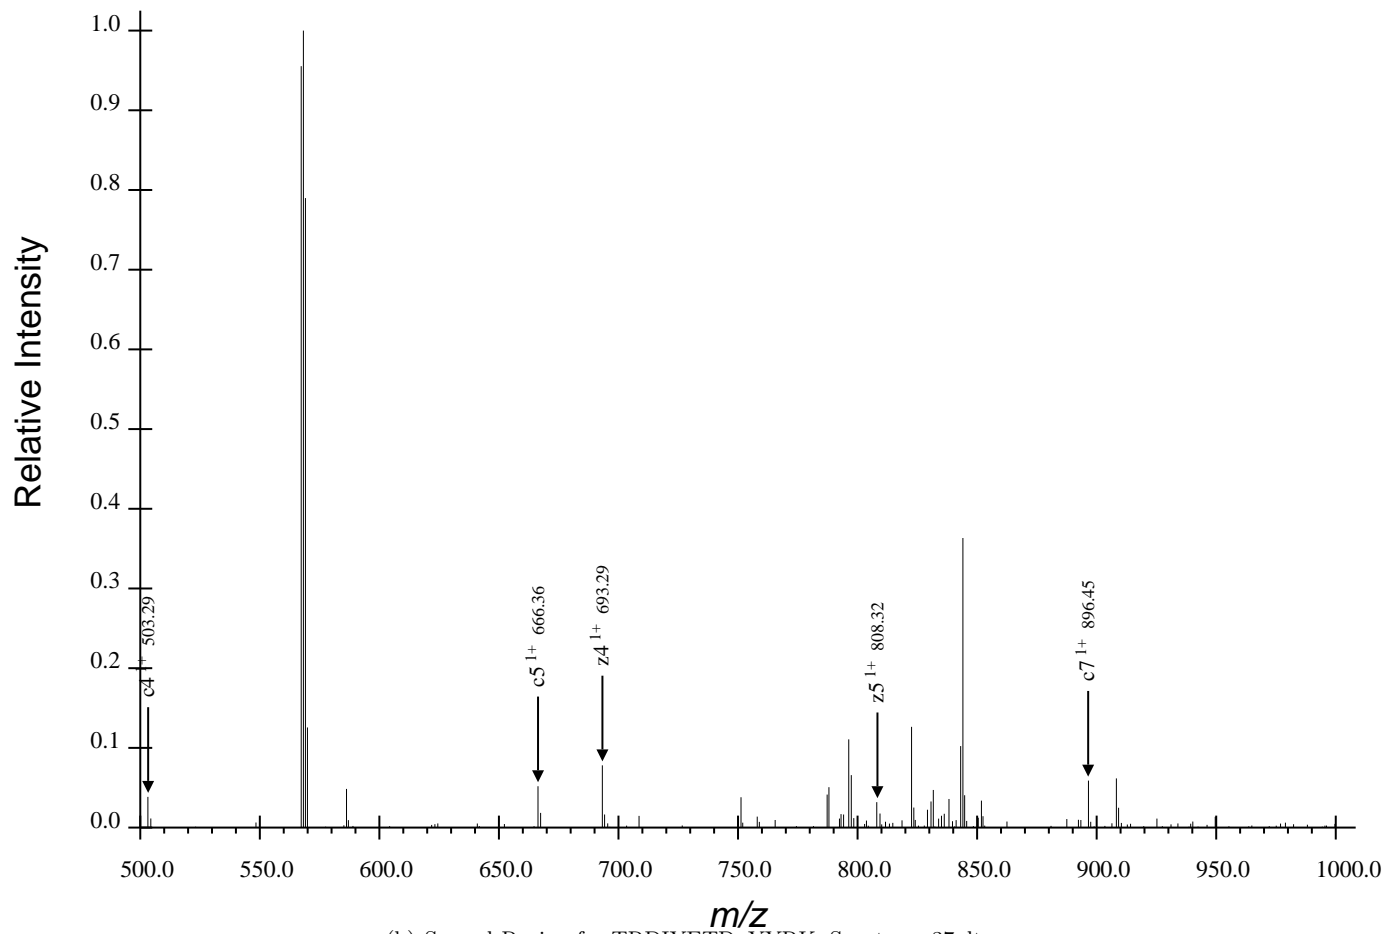

(b) Second Region for TRDIYETDpYYRK, Spectrum 37.dta

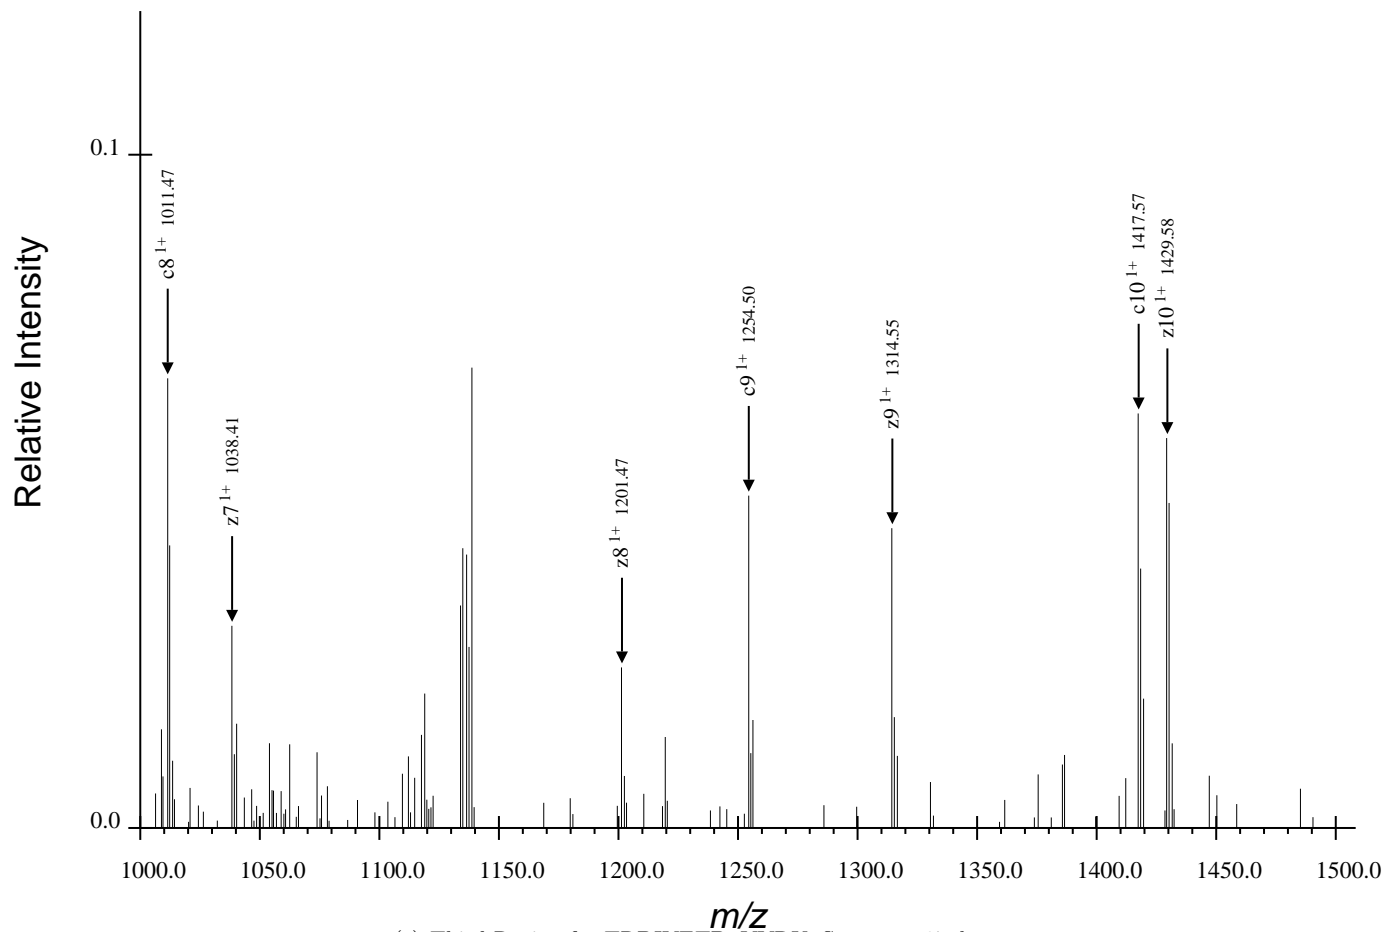

(c) Third Region for TRDIYETDpYYRK, Spectrum 37.dta

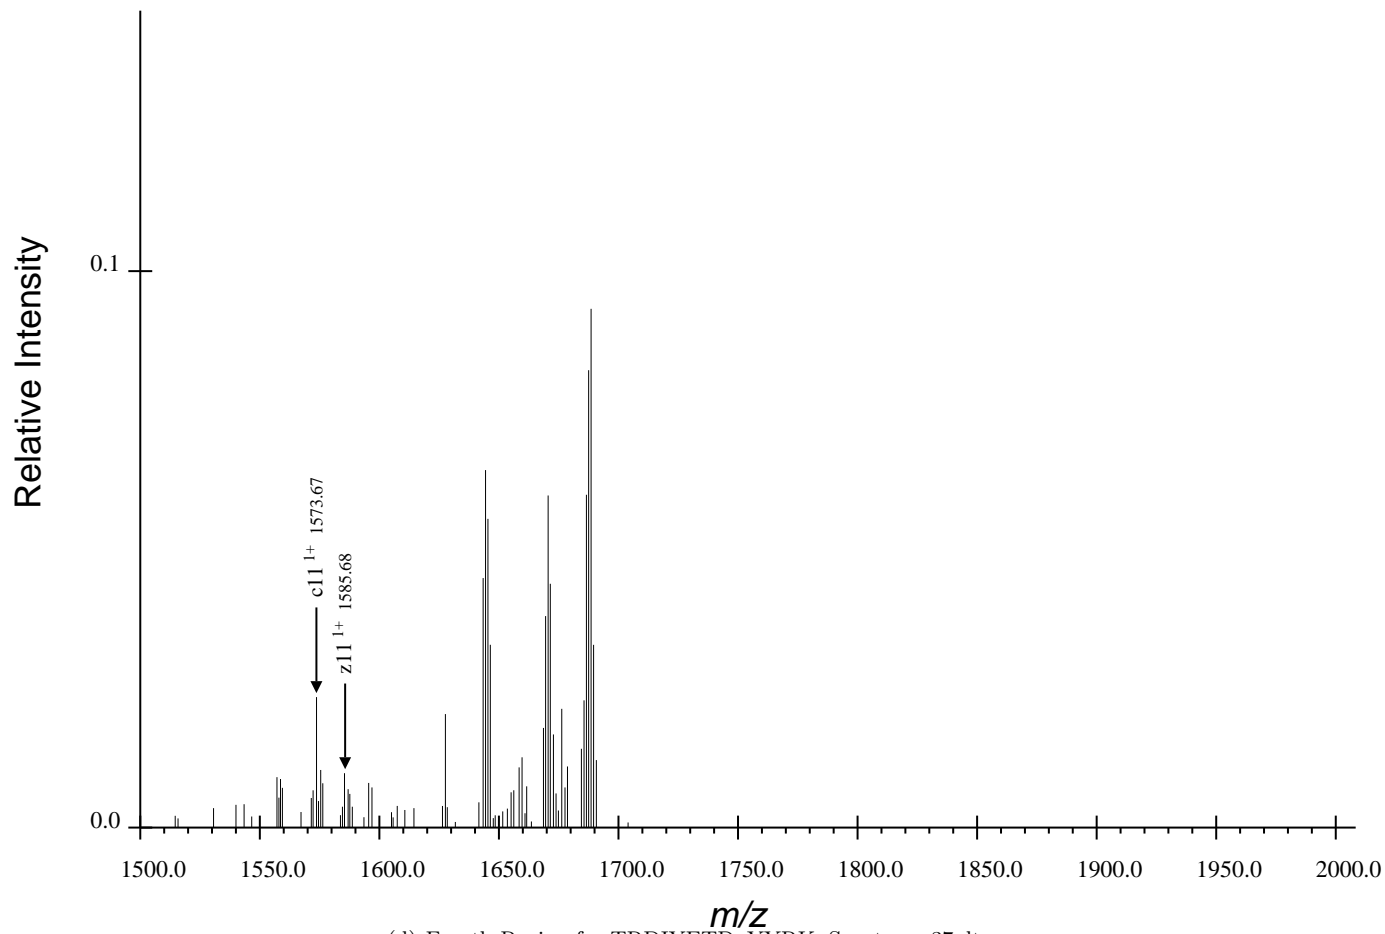

(d) Fourth Region for TRDIYETDpYYRK, Spectrum 37.dta

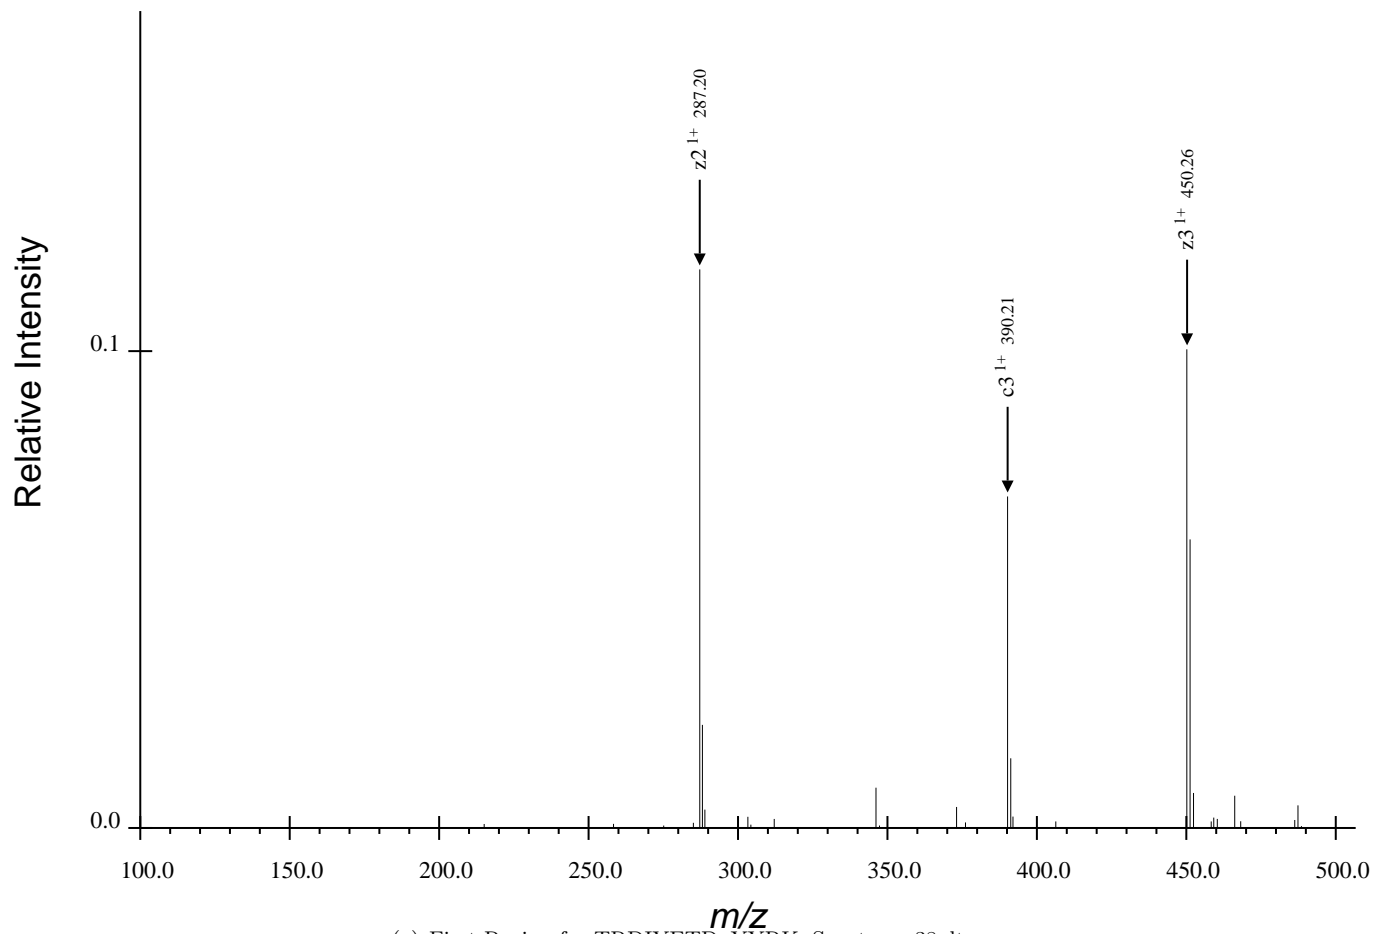

(a) First Region for TRDIYETDpYYRK, Spectrum 38.dta

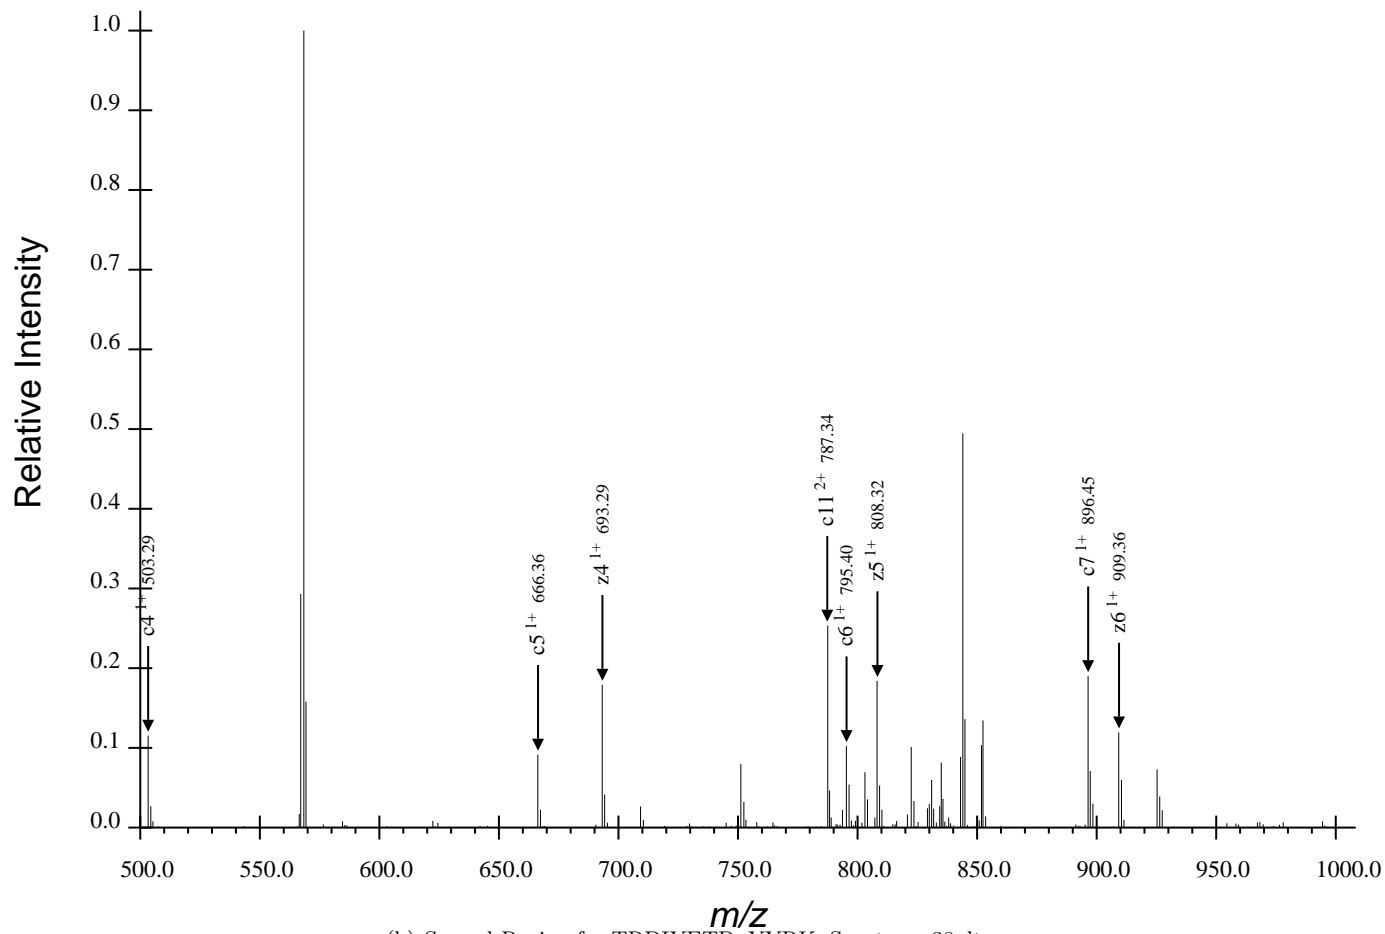

(b) Second Region for TRDIYETDpYYRK, Spectrum 38.dta

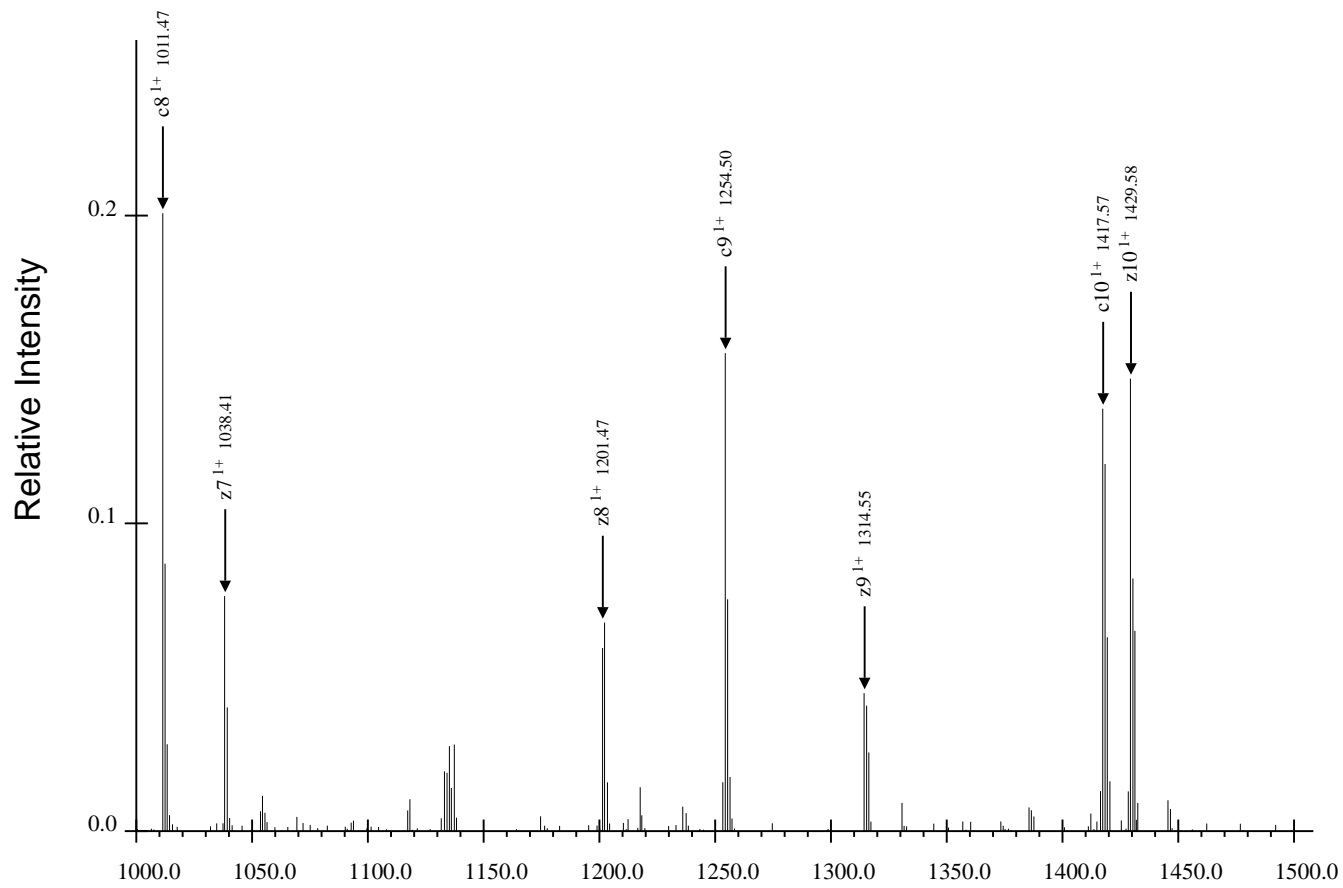

(c) Third Region for TRDIYETDpYYRK, Spectrum 38.dta

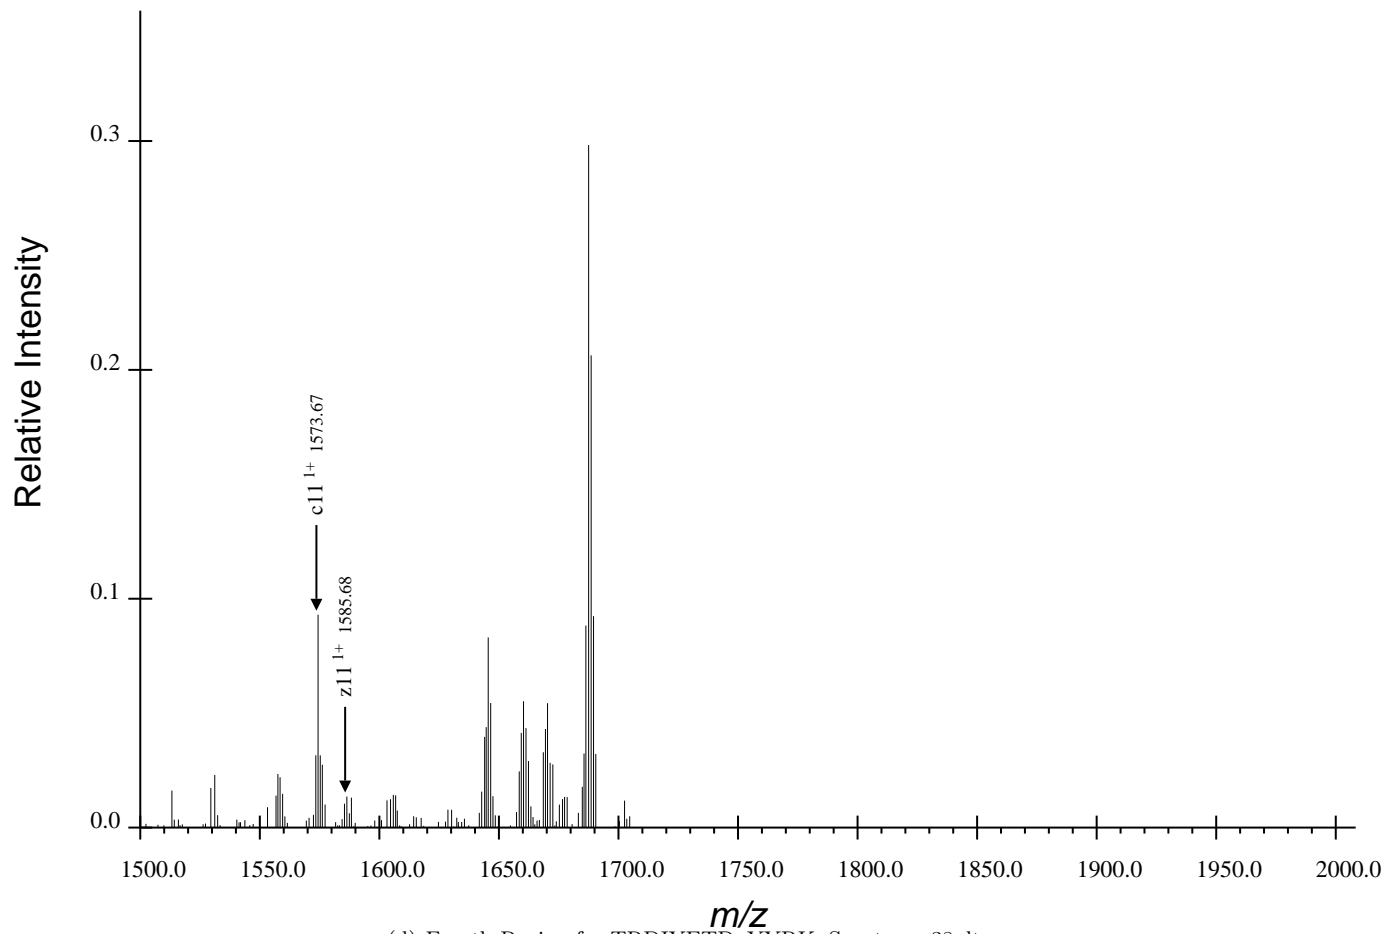

(d) Fourth Region for TRDIYETDpYYRK, Spectrum 38.dta

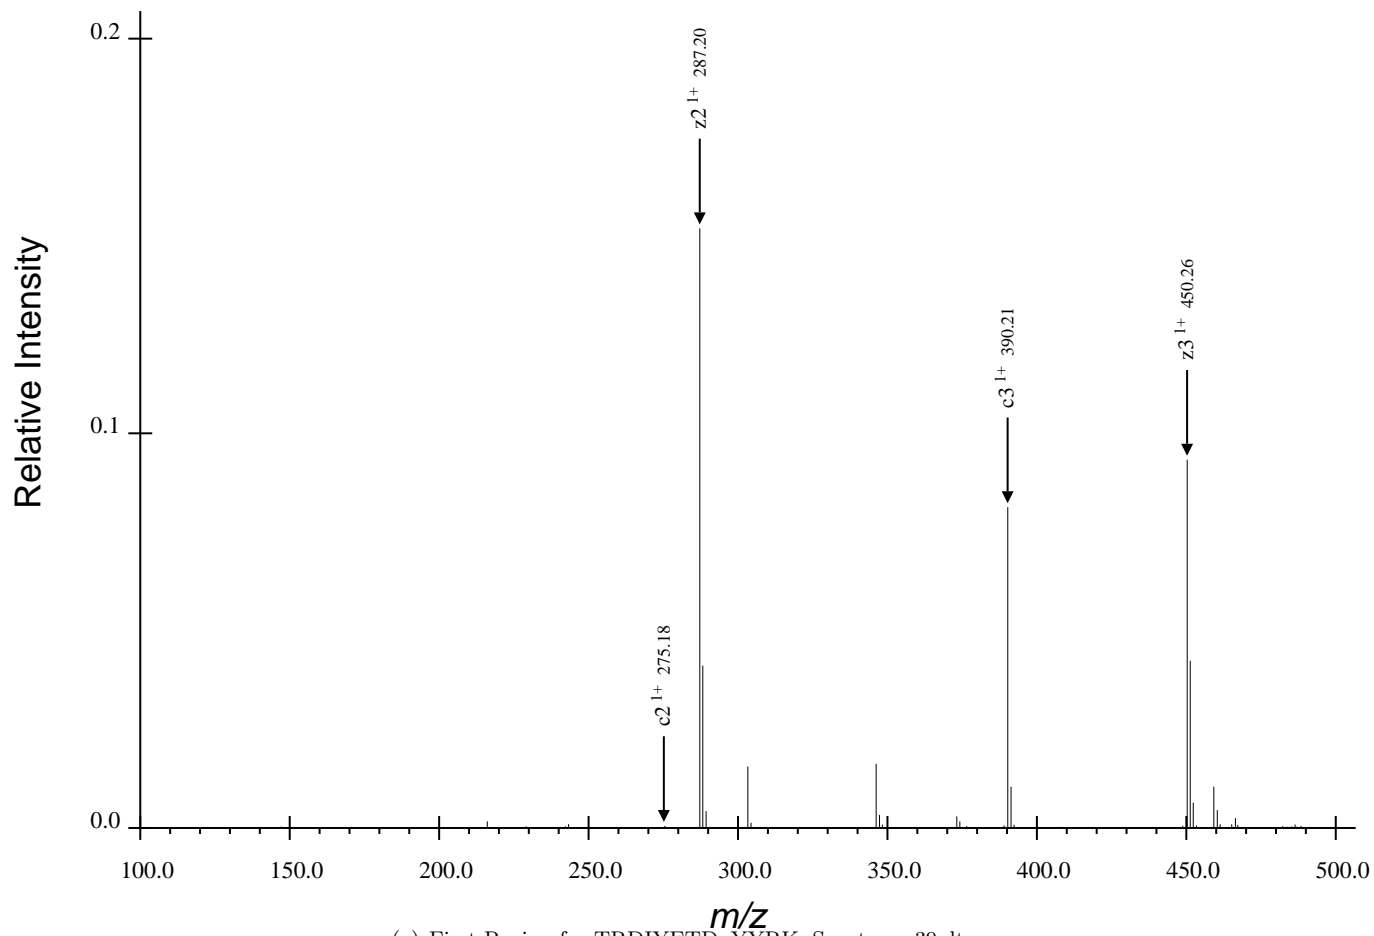

(a) First Region for TRDIYETDpYYRK, Spectrum 39.dta

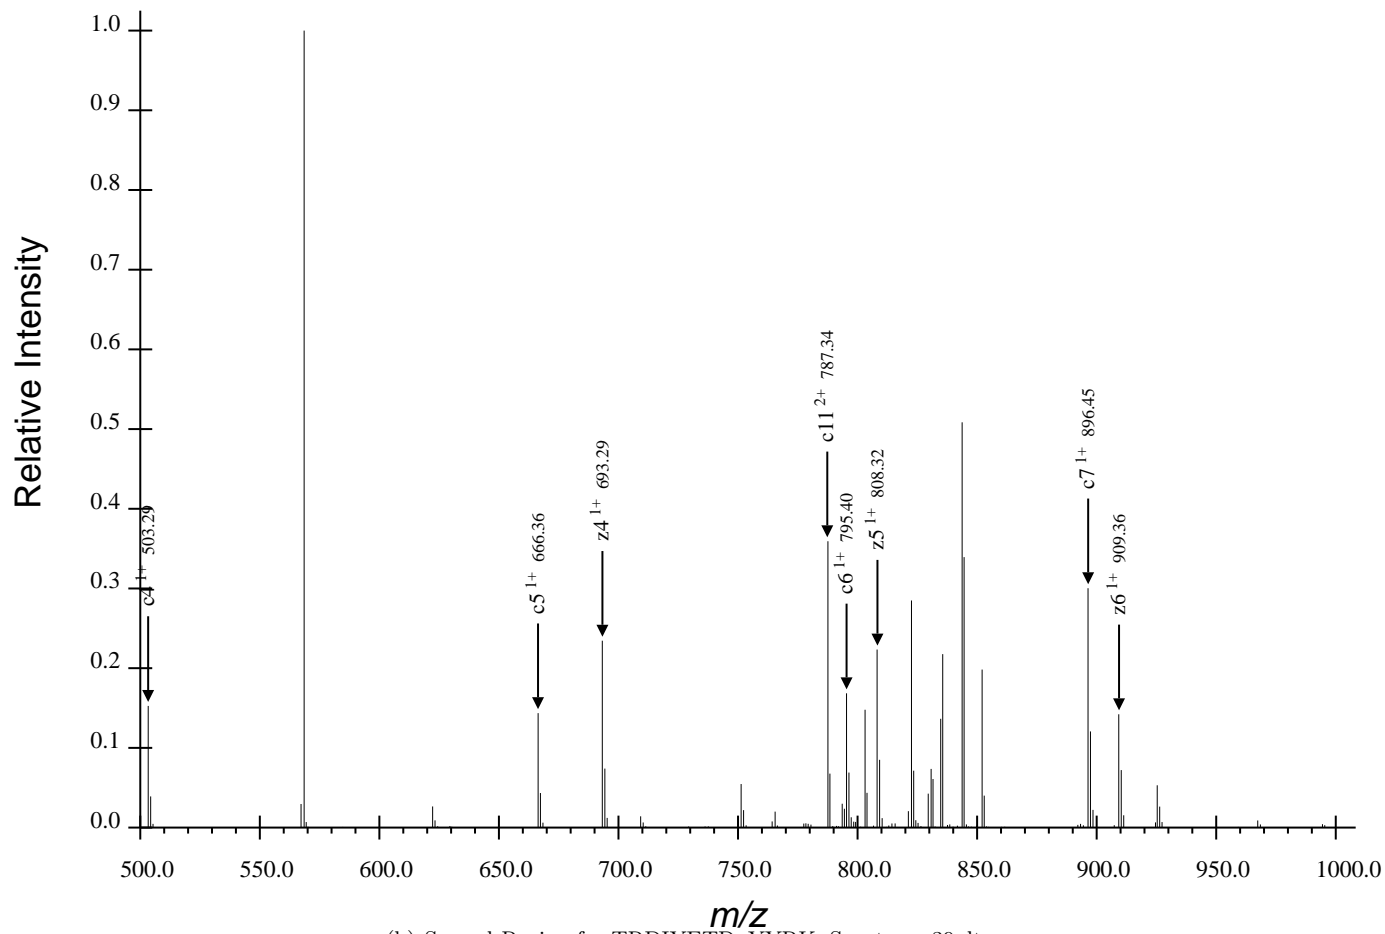

(b) Second Region for TRDIYETDpYYRK, Spectrum 39.dta

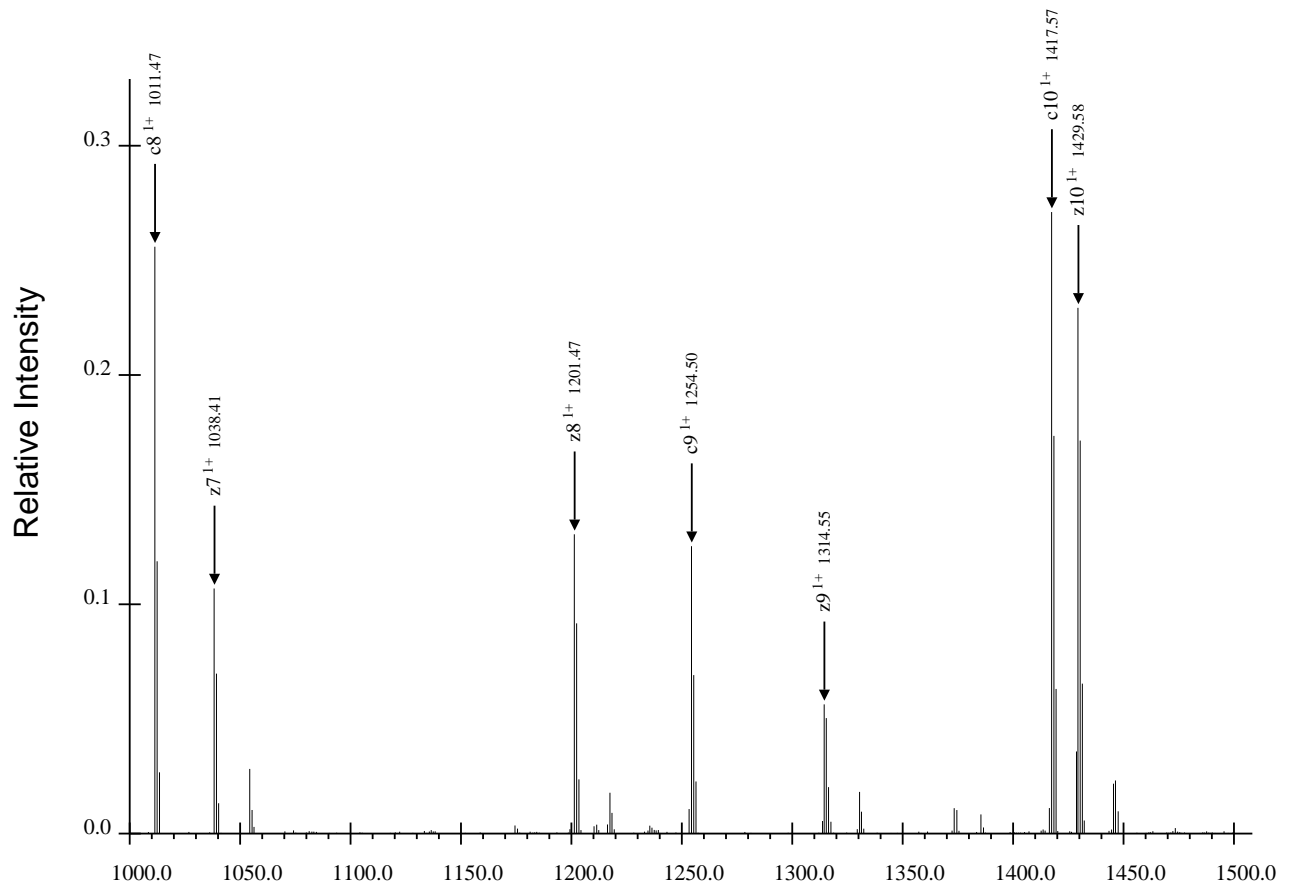

(c) Third Region for TRDIYETDpYYRK, Spectrum 39.dta

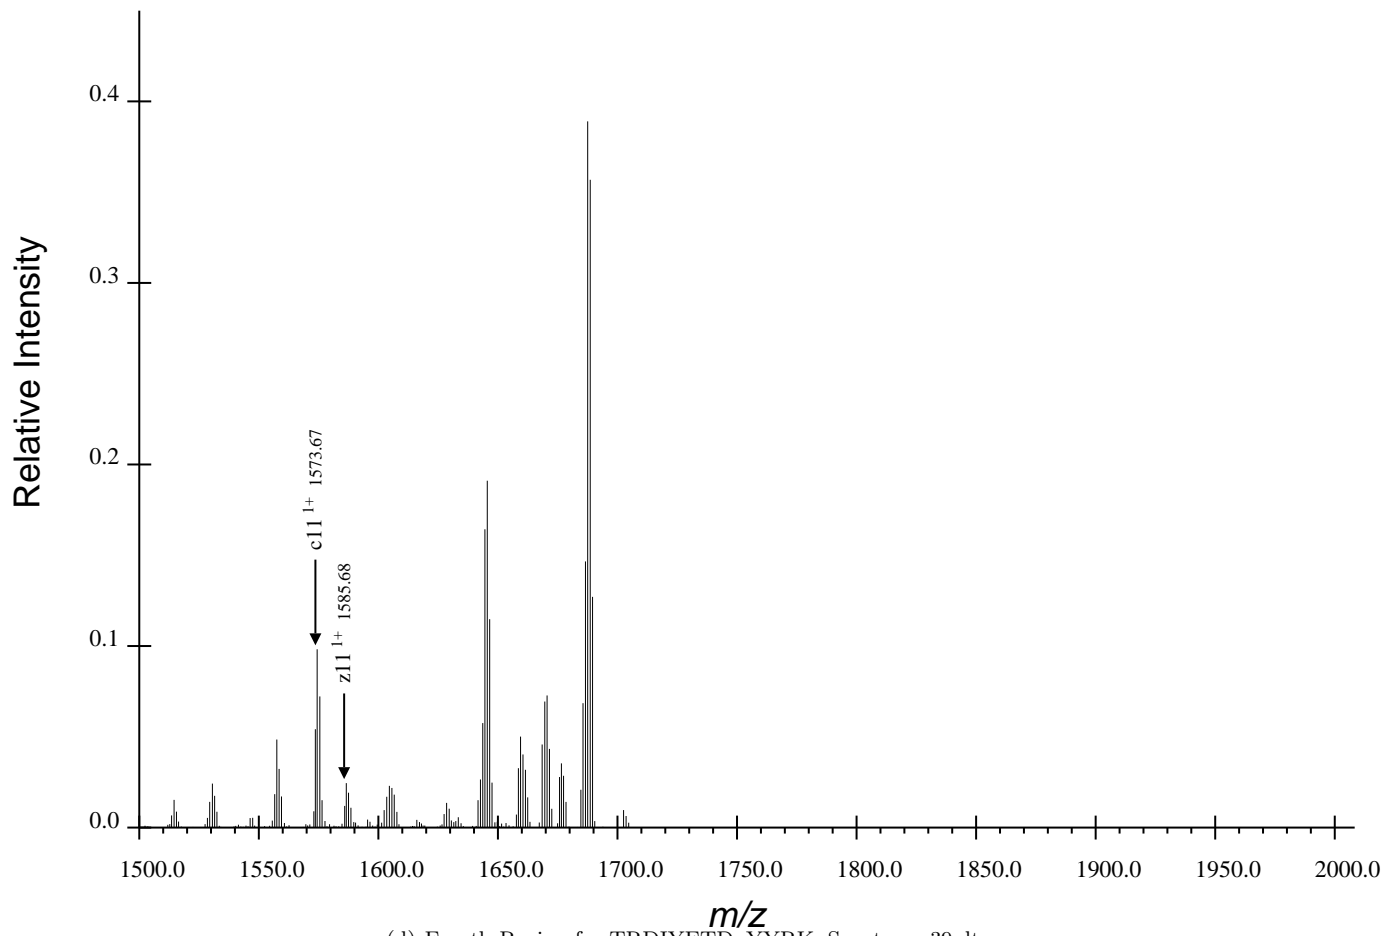

(d) Fourth Region for TRDIYETDpYYRK, Spectrum 39.dta

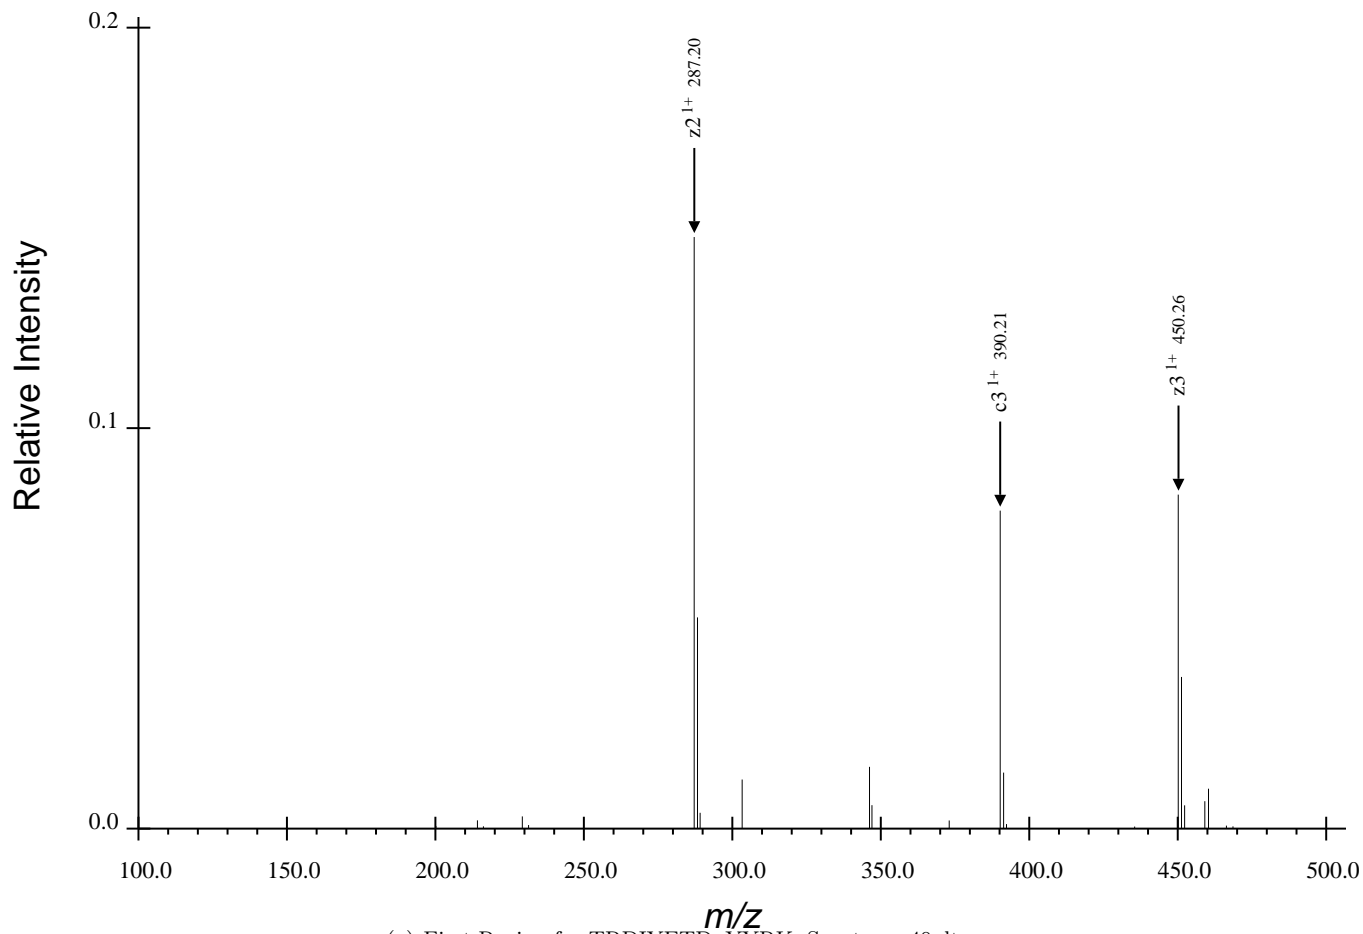

(a) First Region for TRDIYETDpYYRK, Spectrum 40.dta

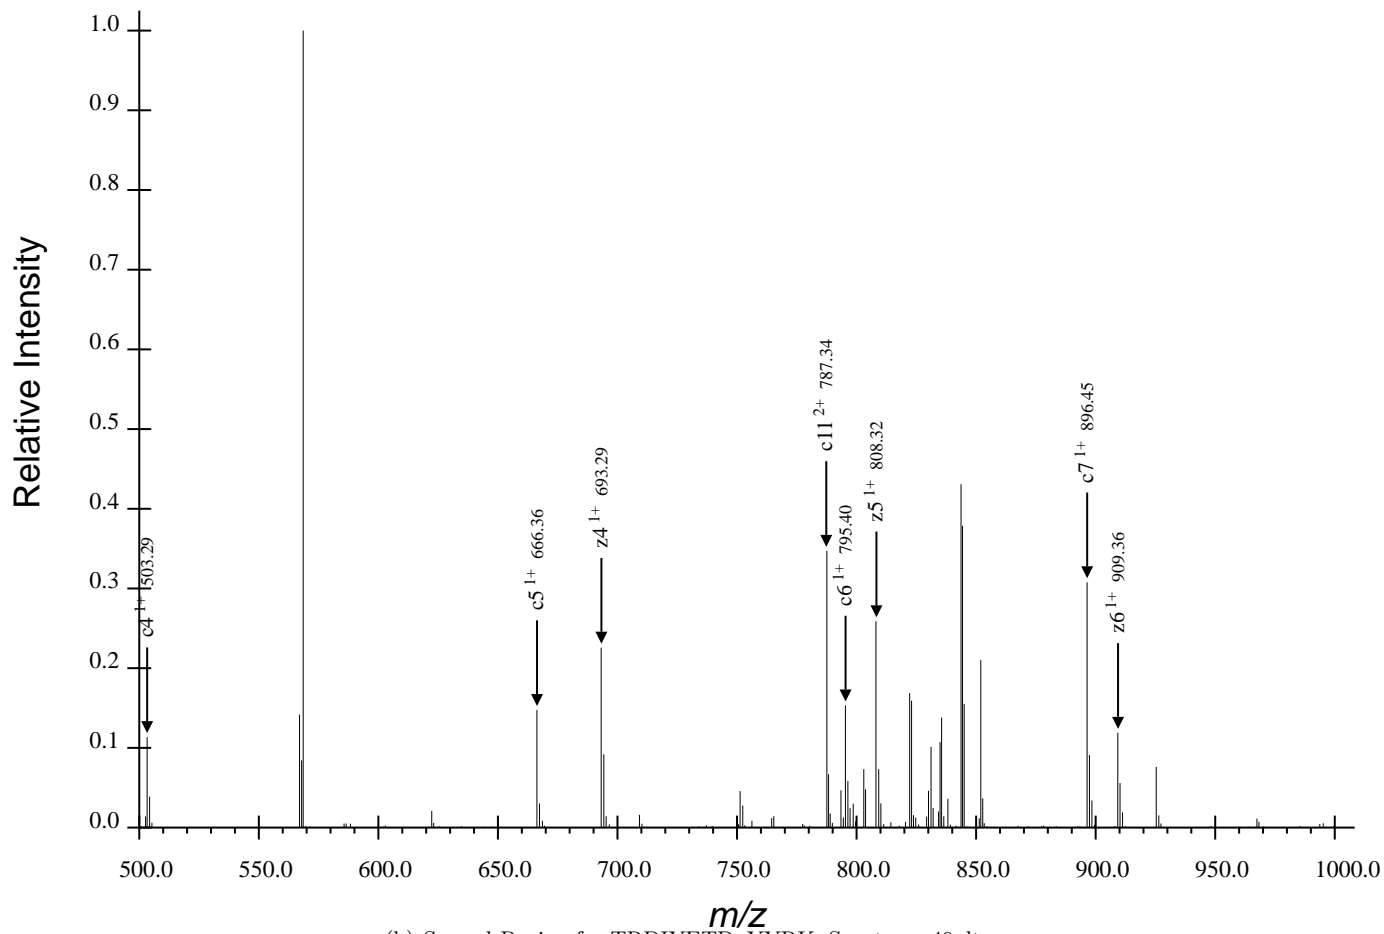

(b) Second Region for TRDIYETDpYYRK, Spectrum 40.dta

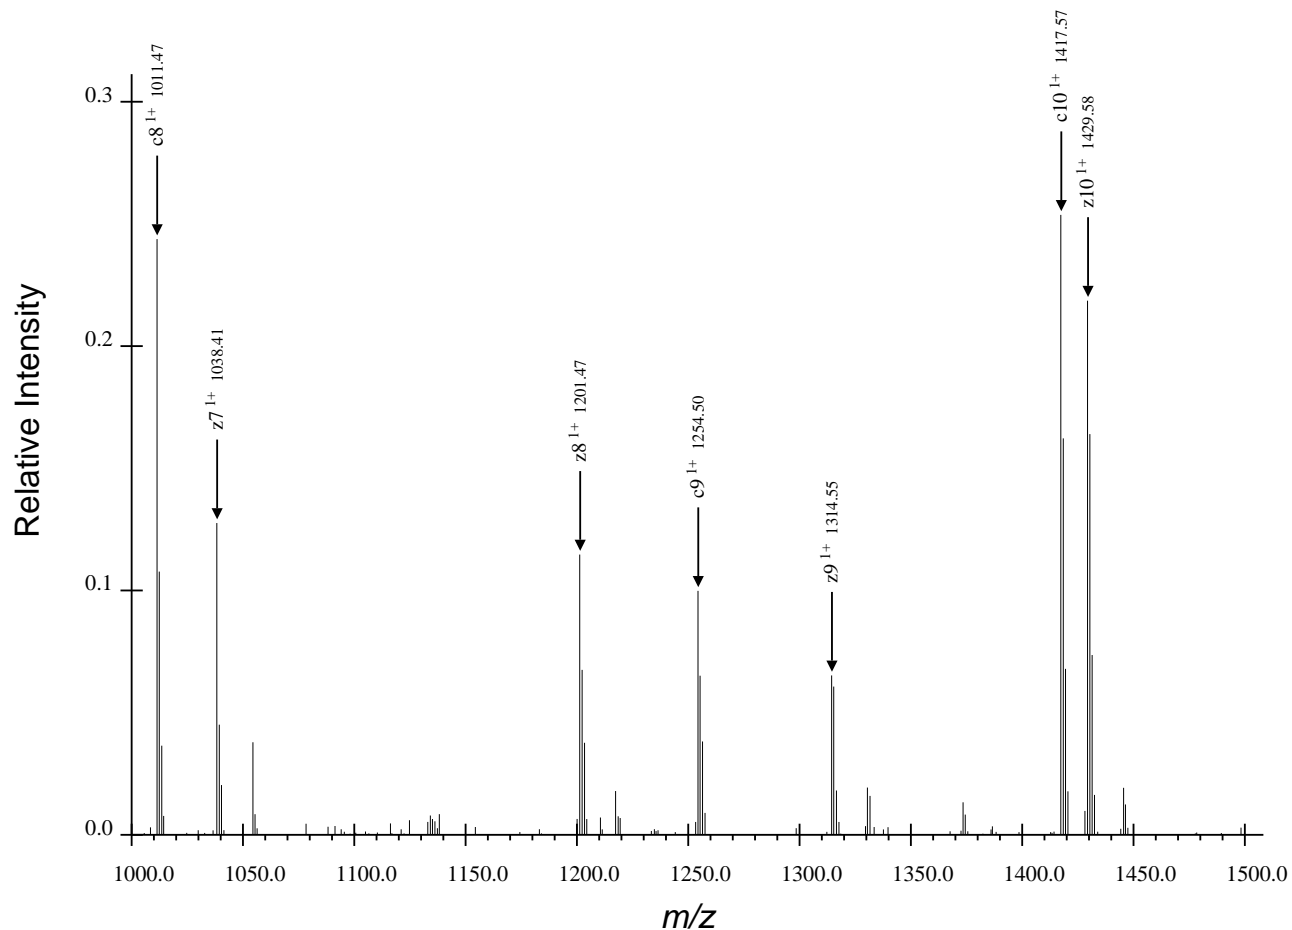

(c) Third Region for TRDIYETDpYYRK, Spectrum 40.dta

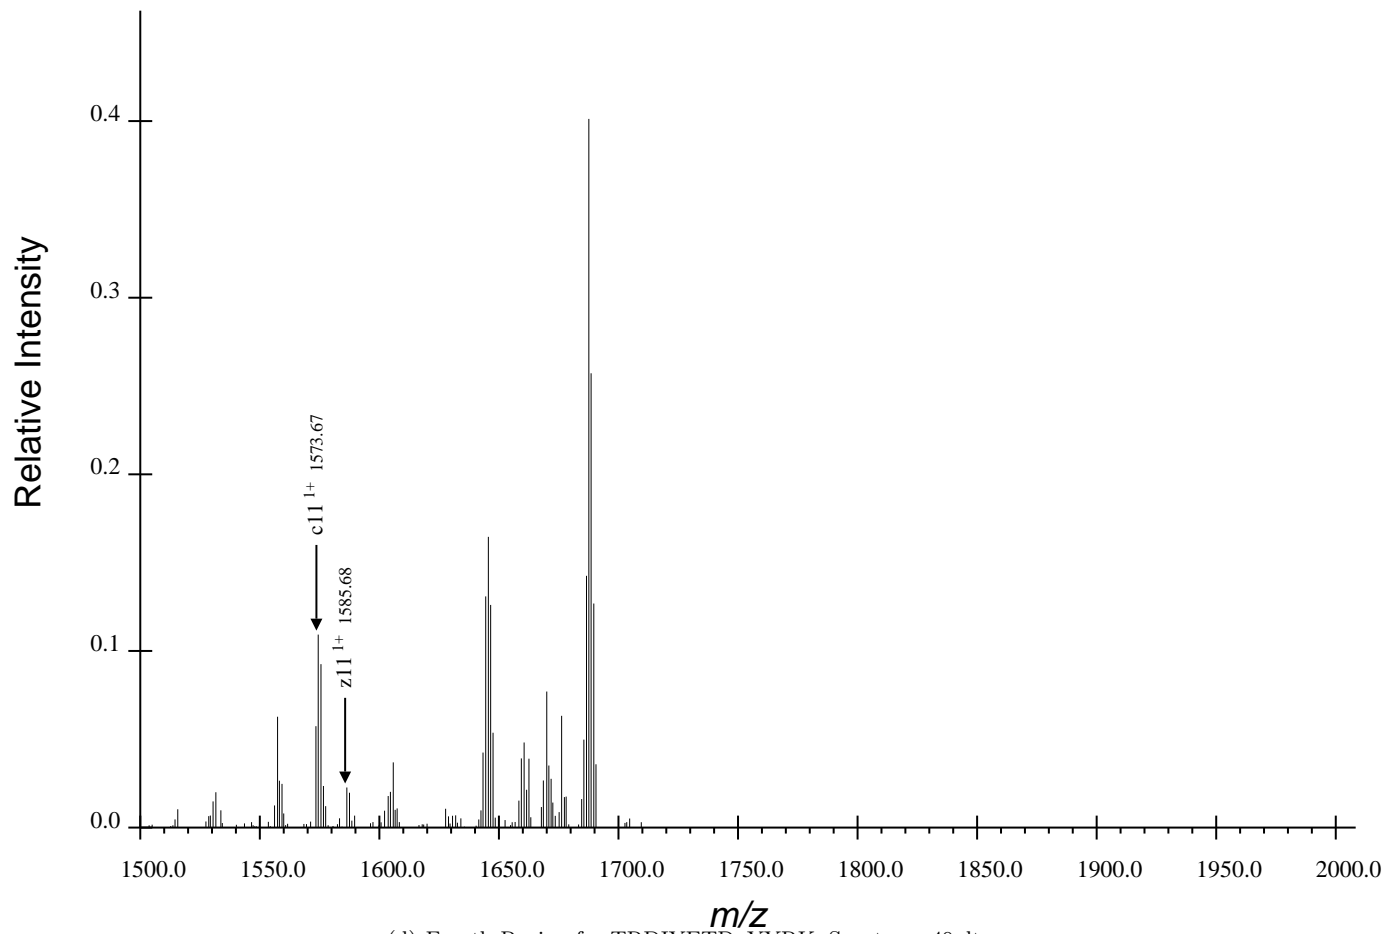

(d) Fourth Region for TRDIYETDpYYRK, Spectrum 40.dta



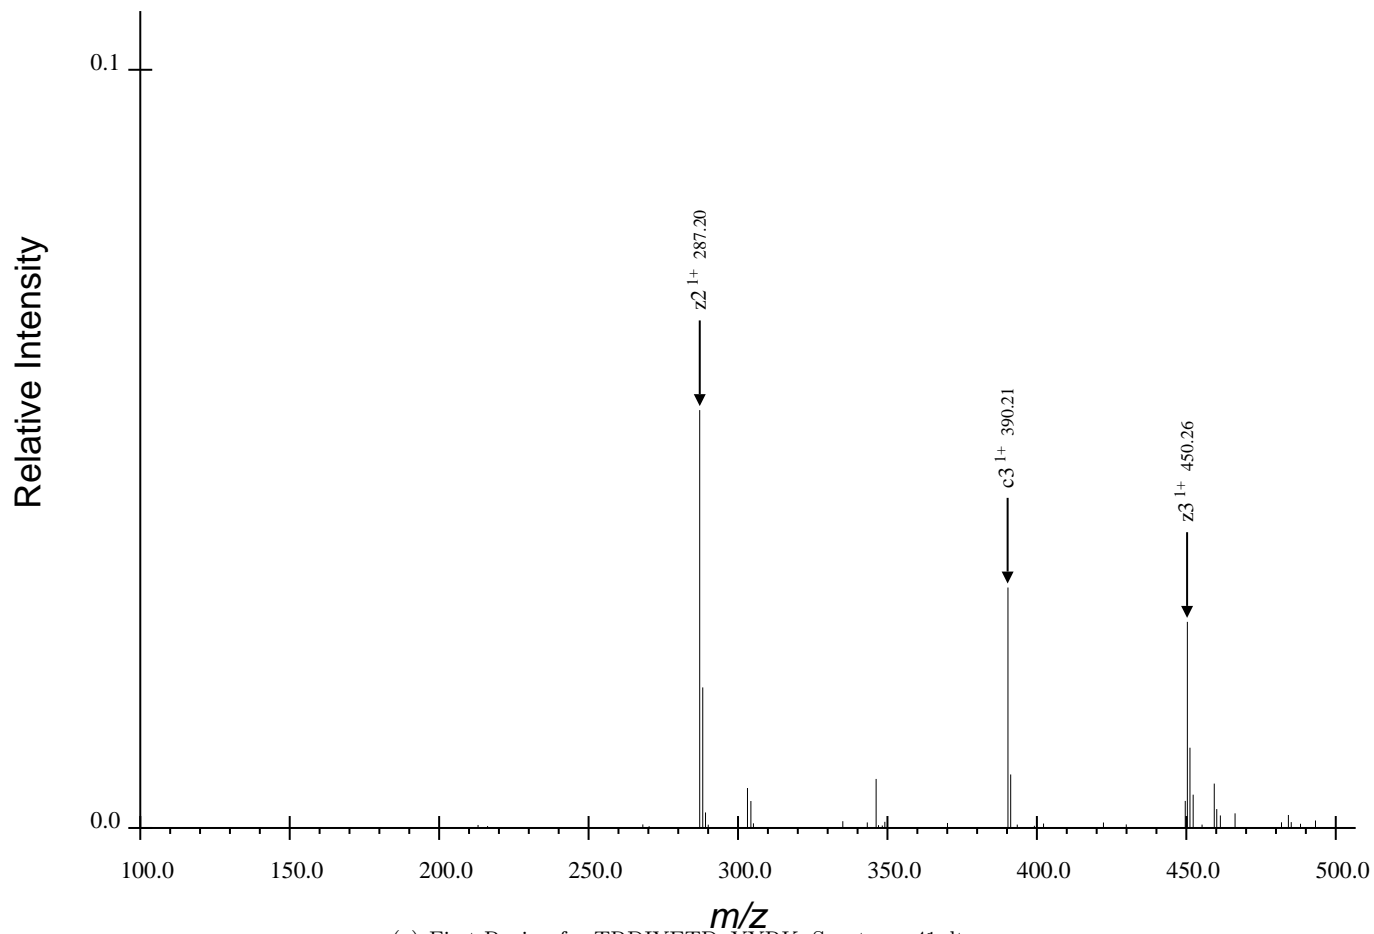

(a) First Region for TRDIYETDpYYRK, Spectrum 41.dta

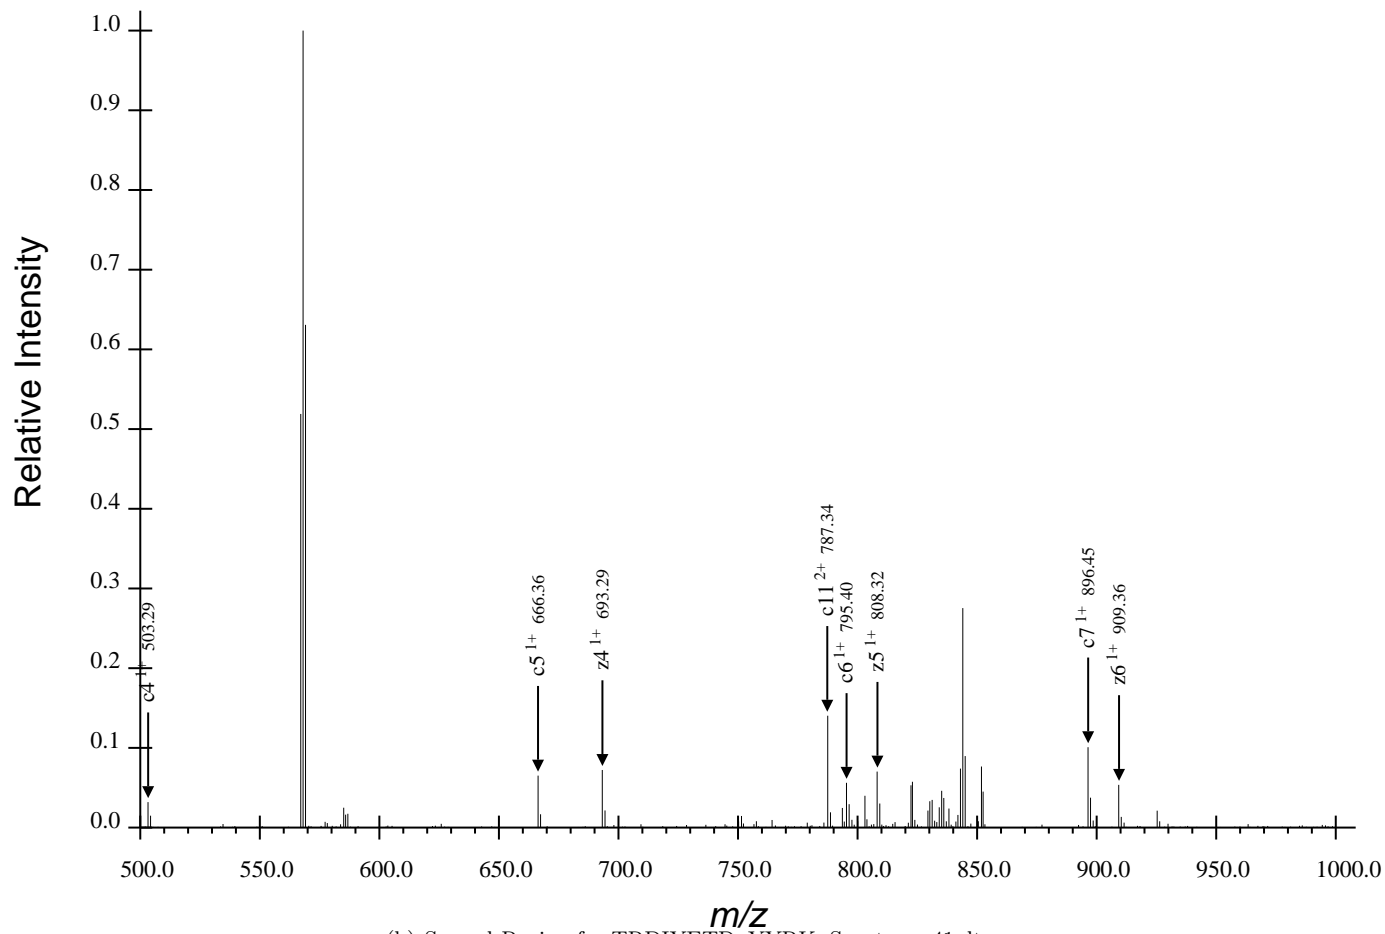

(b) Second Region for TRDIYETDpYYRK, Spectrum 41.dta

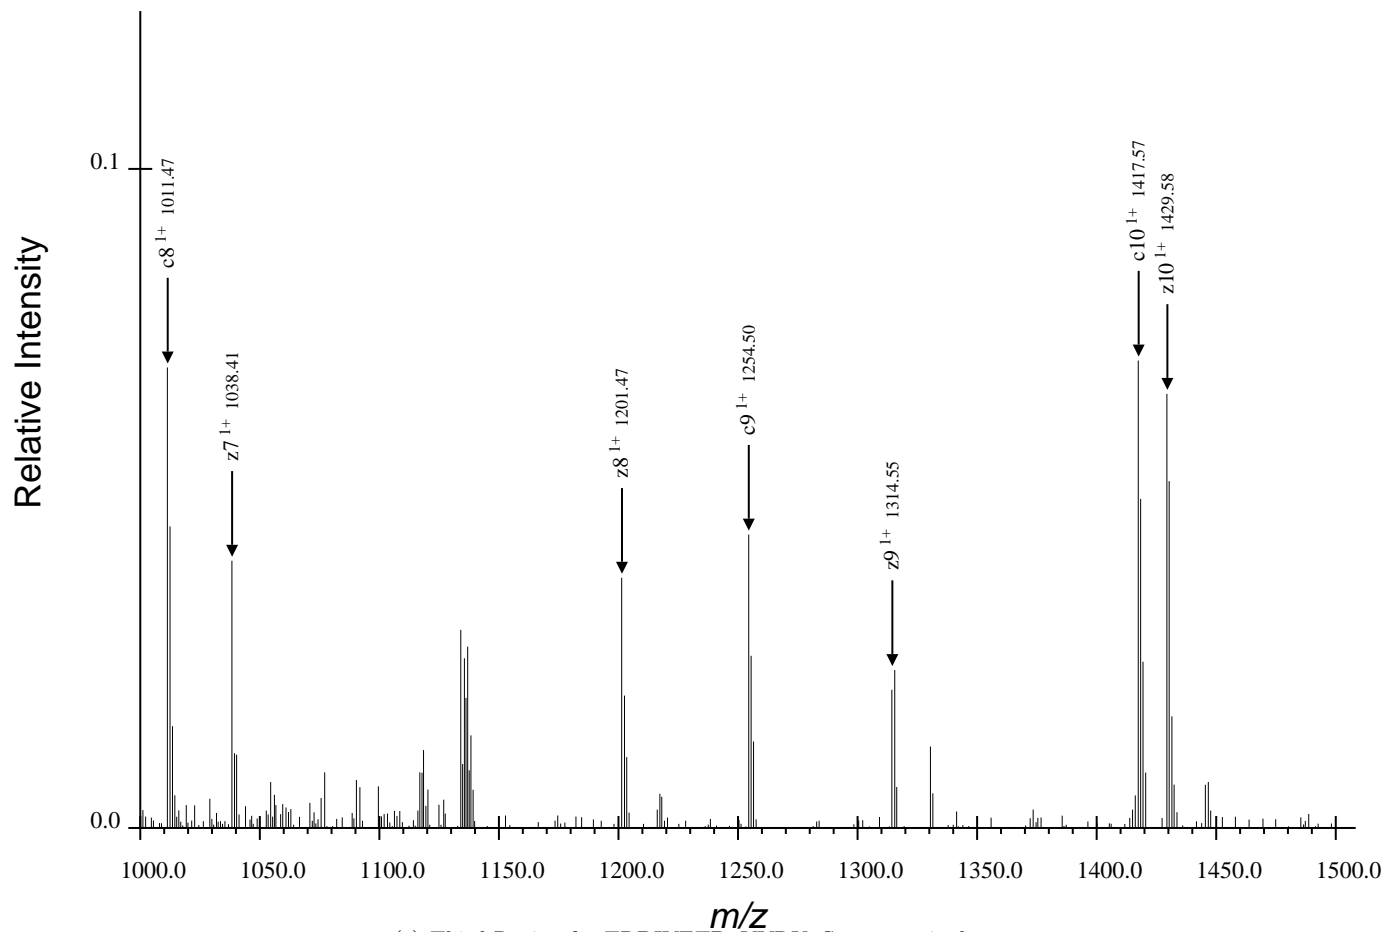

(c) Third Region for TRDIYETDpYYRK, Spectrum 41.dta

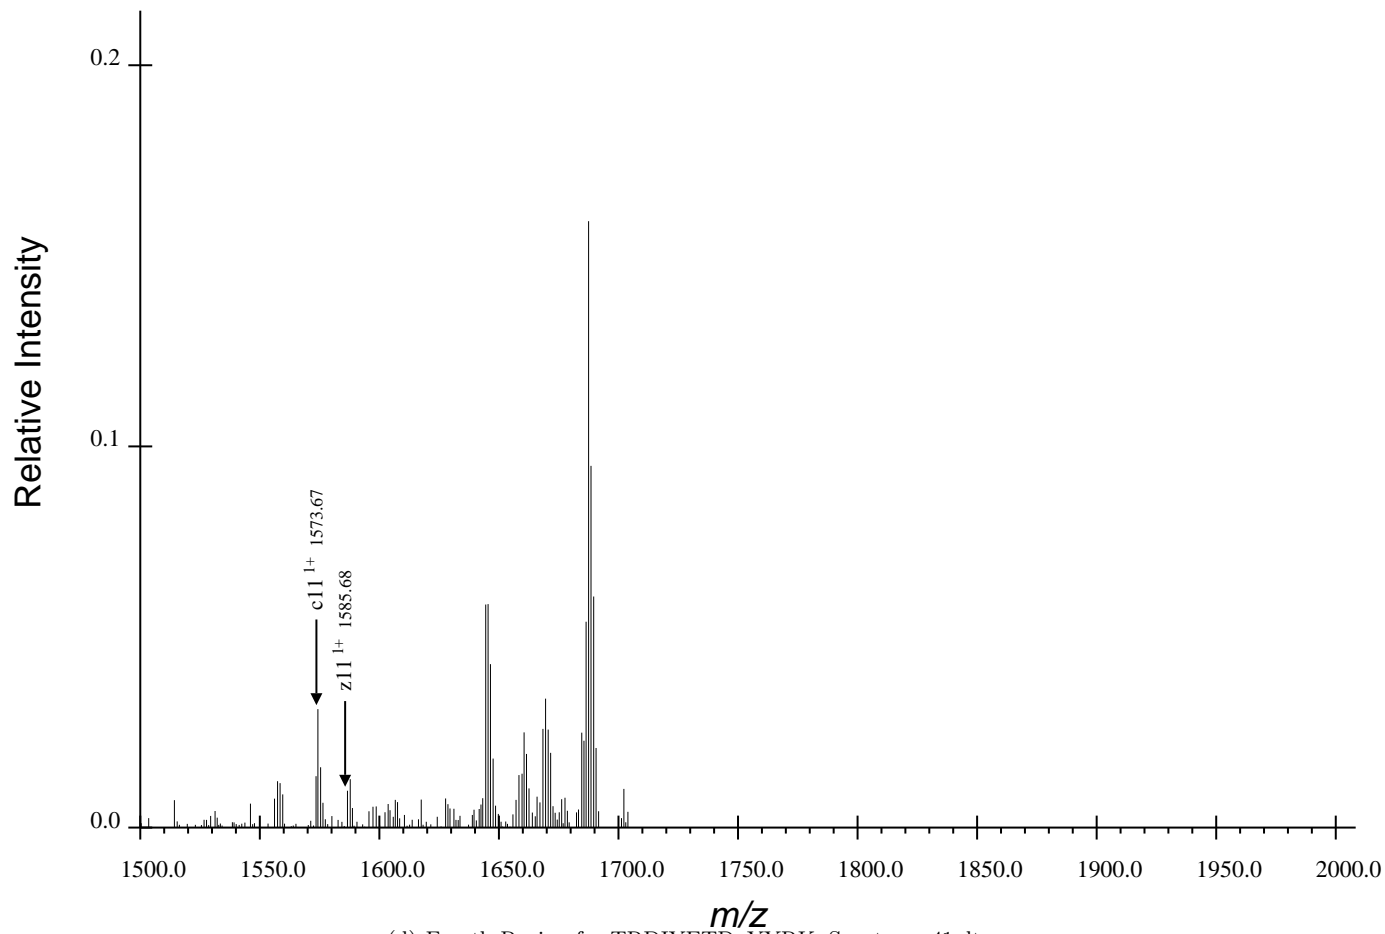

(d) Fourth Region for TRDIYETDpYYRK, Spectrum 41.dta

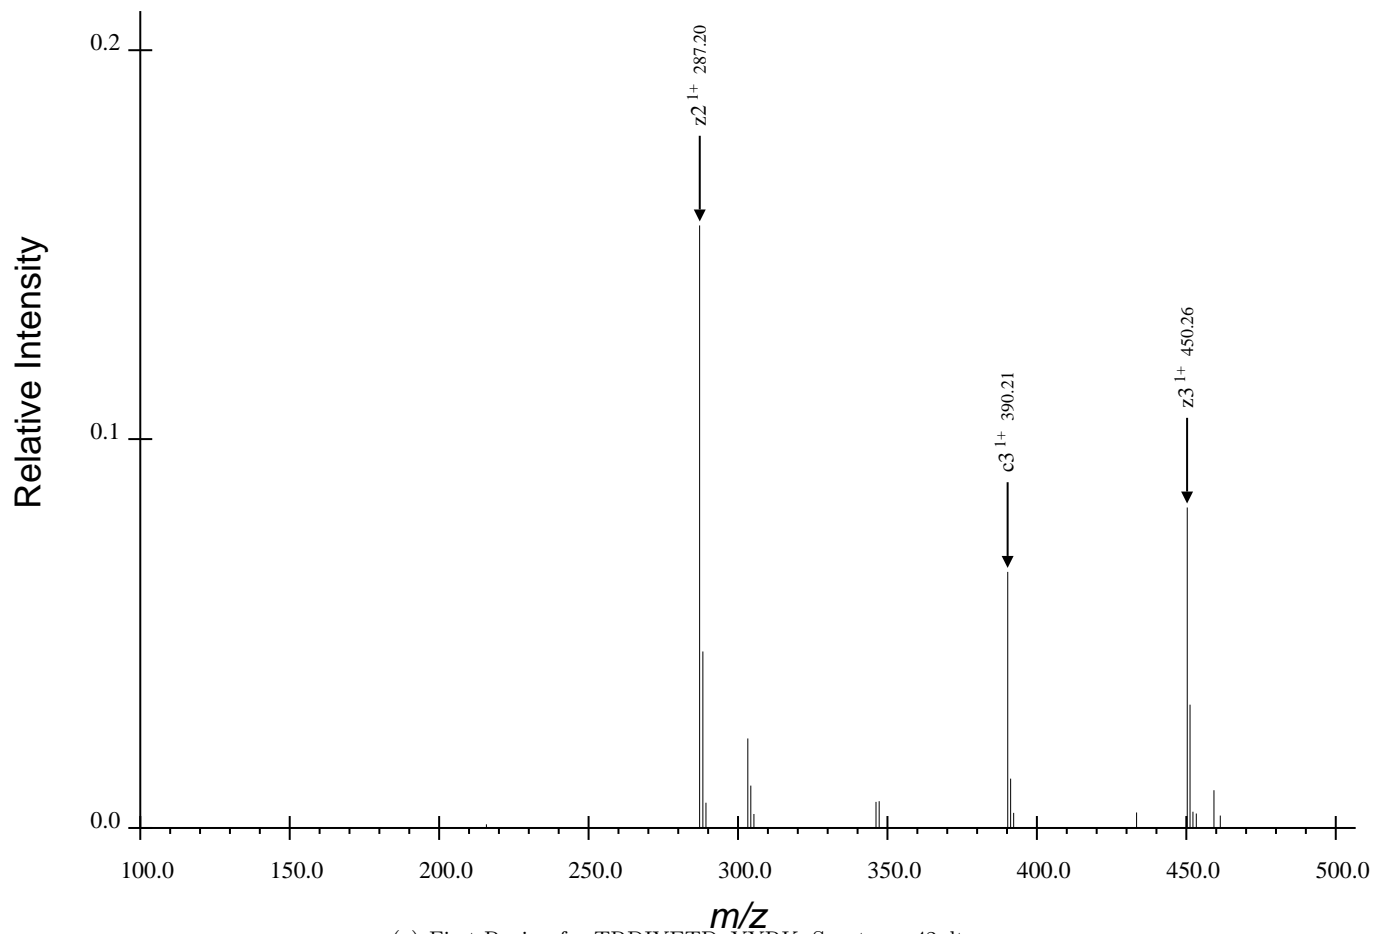

(a) First Region for TRDIYETDpYYRK, Spectrum 42.dta

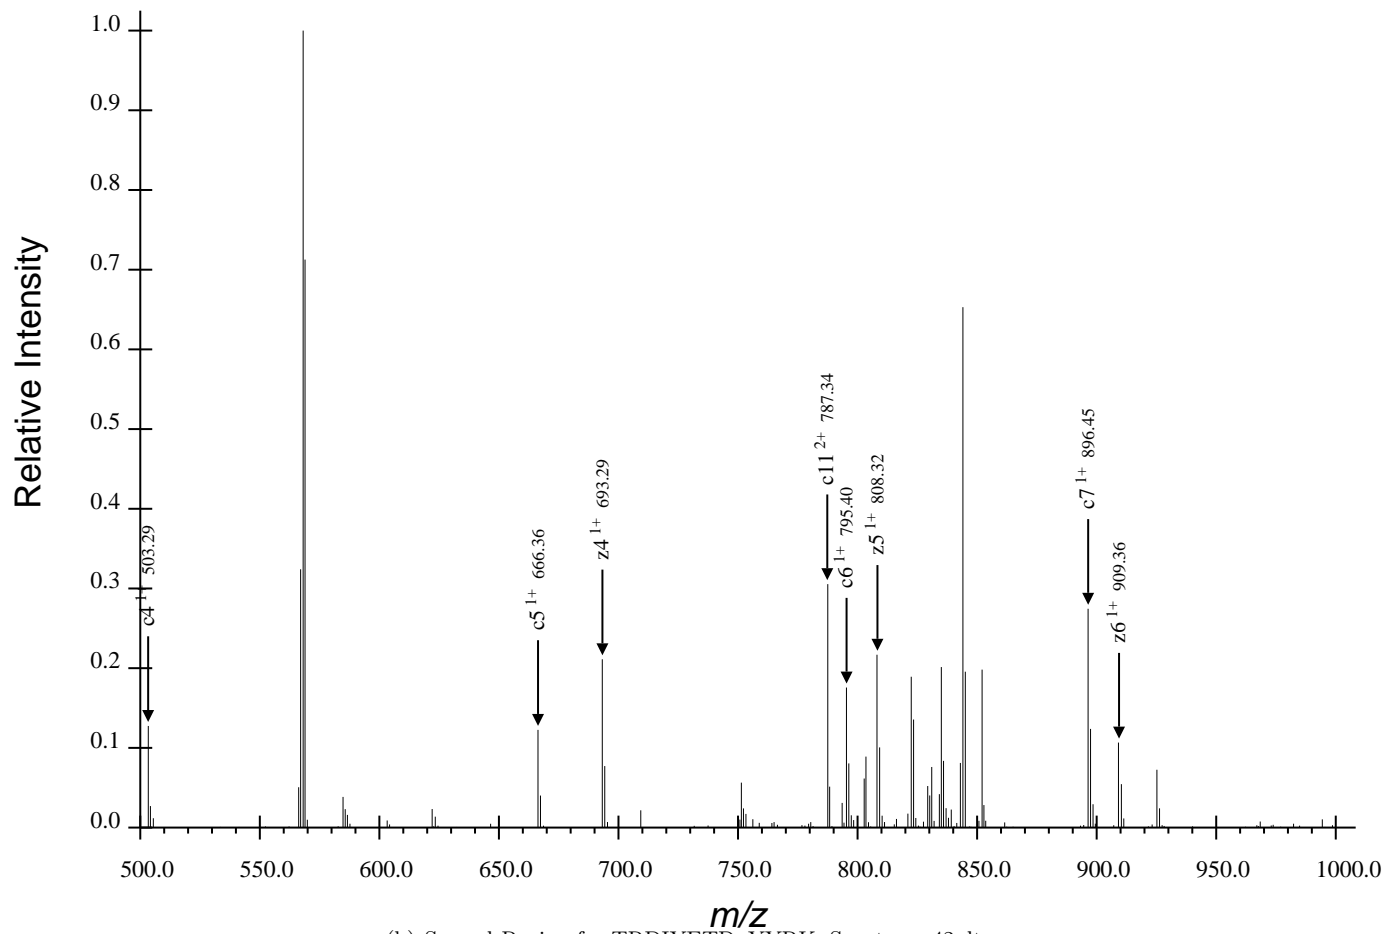

(b) Second Region for TRDIYETDpYYRK, Spectrum 42.dta

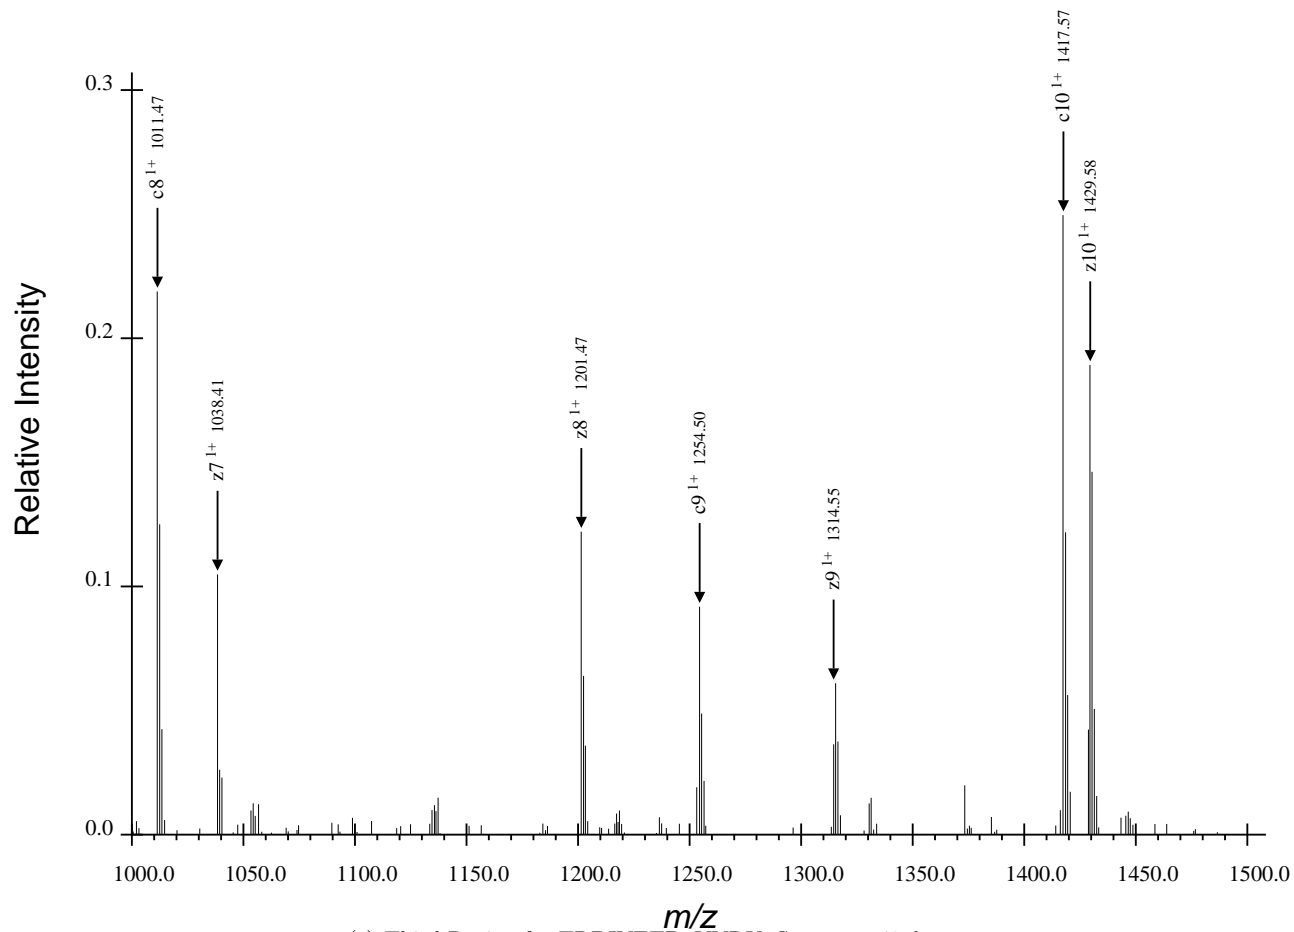

(c) Third Region for TRDIYETDpYYRK, Spectrum 42.dta

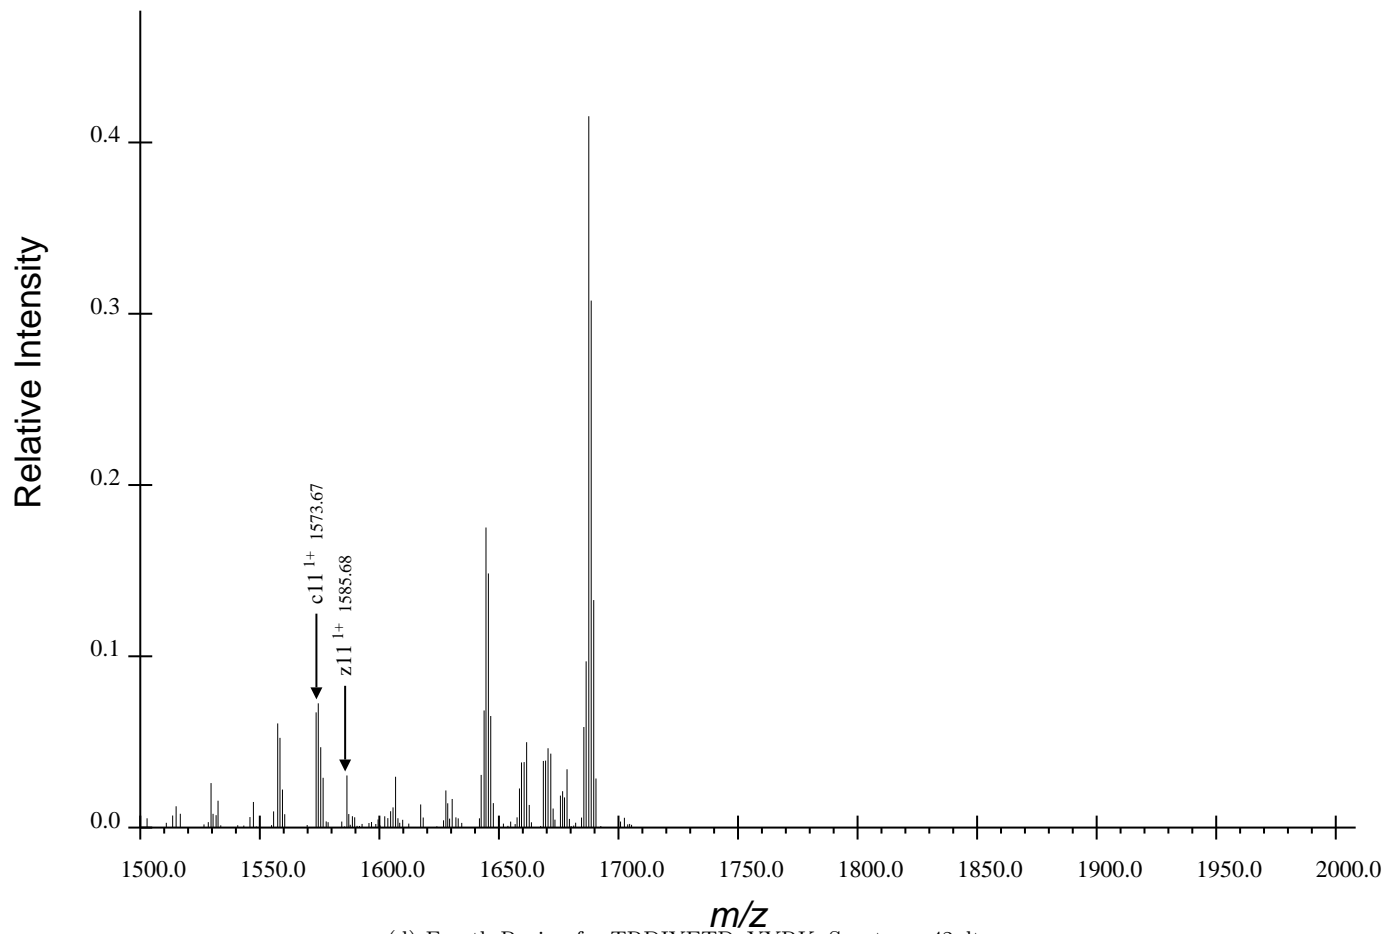

(d) Fourth Region for TRDIYETDpYYRK, Spectrum 42.dta

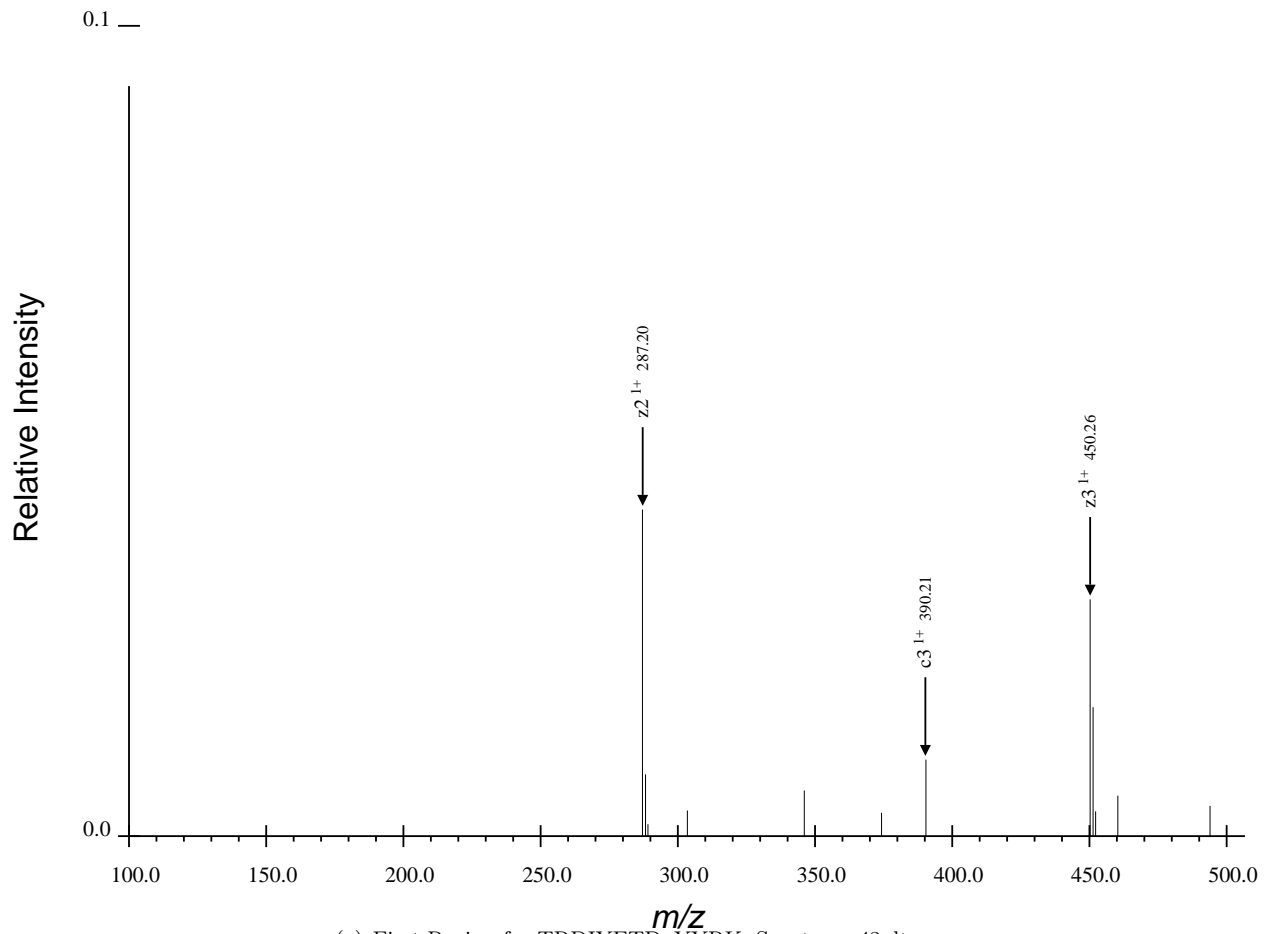

(a) First Region for TRDIYETDpYYRK, Spectrum 43.dta

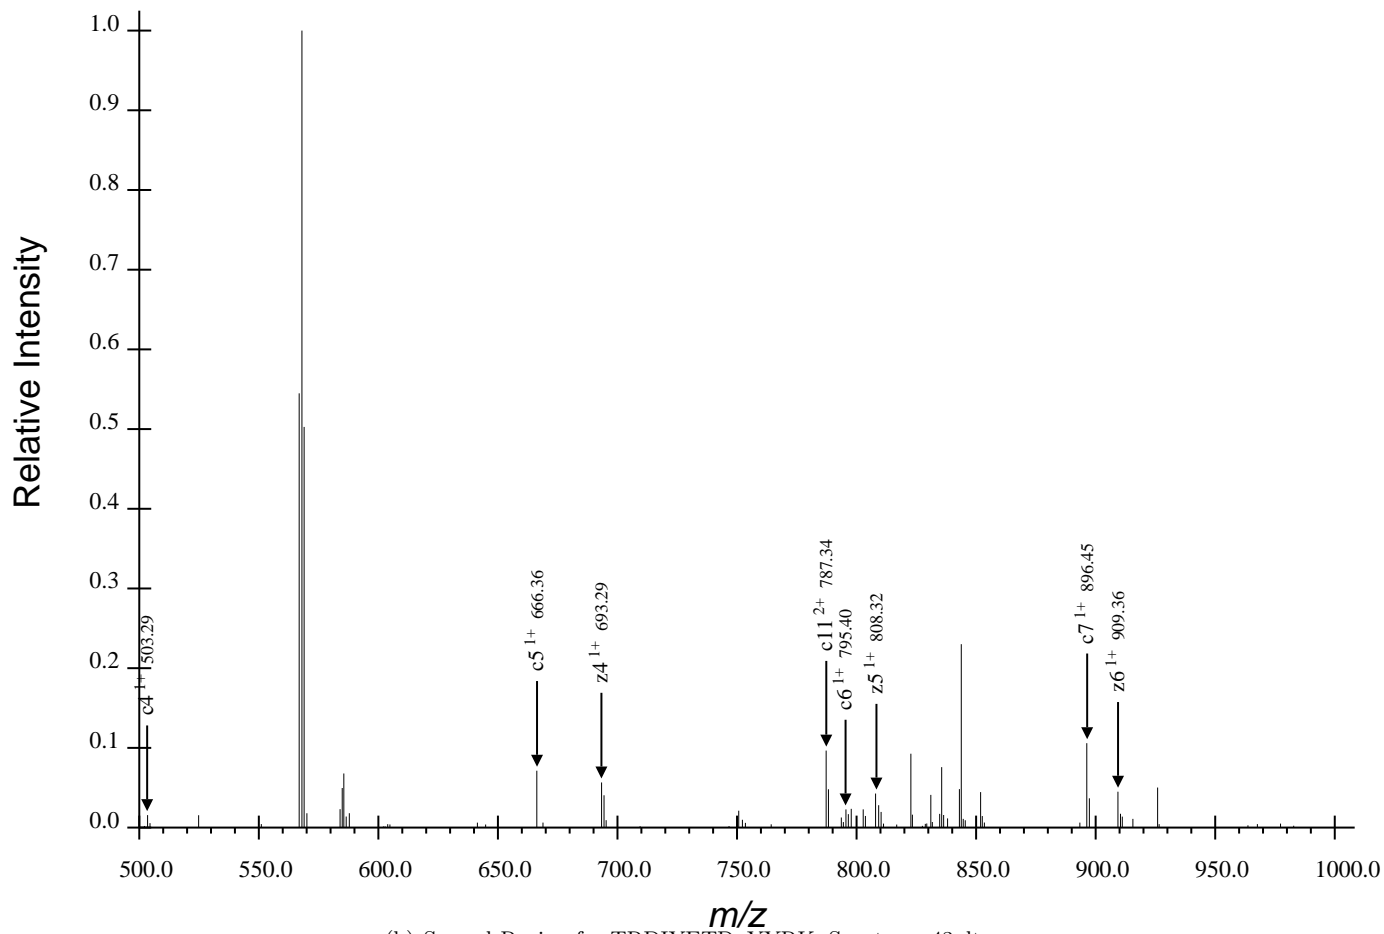

(b) Second Region for TRDIYETDpYYRK, Spectrum 43.dta

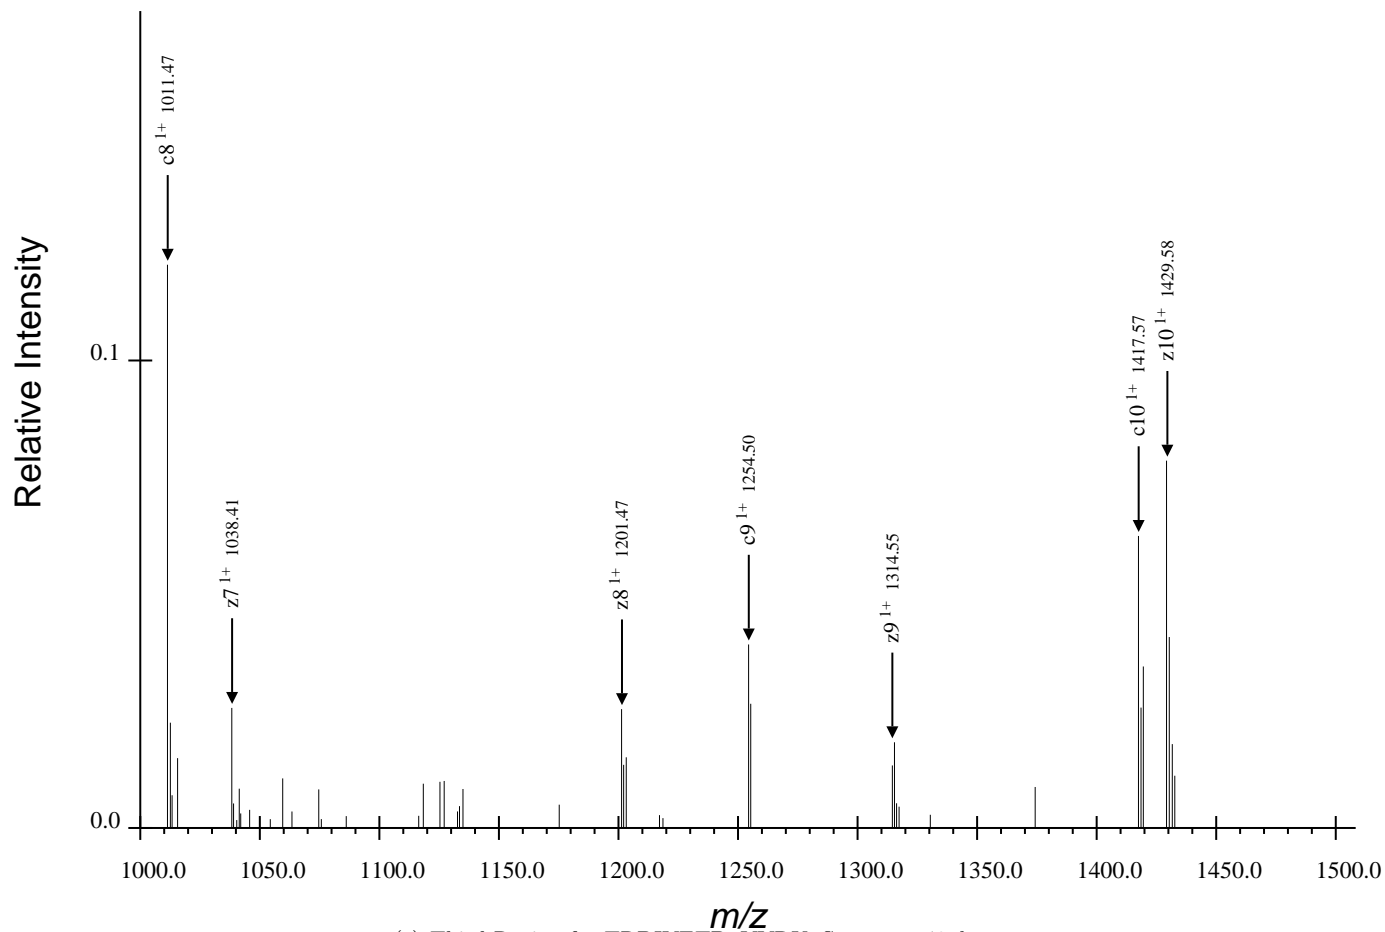

(c) Third Region for TRDIYETDpYYRK, Spectrum 43.dta

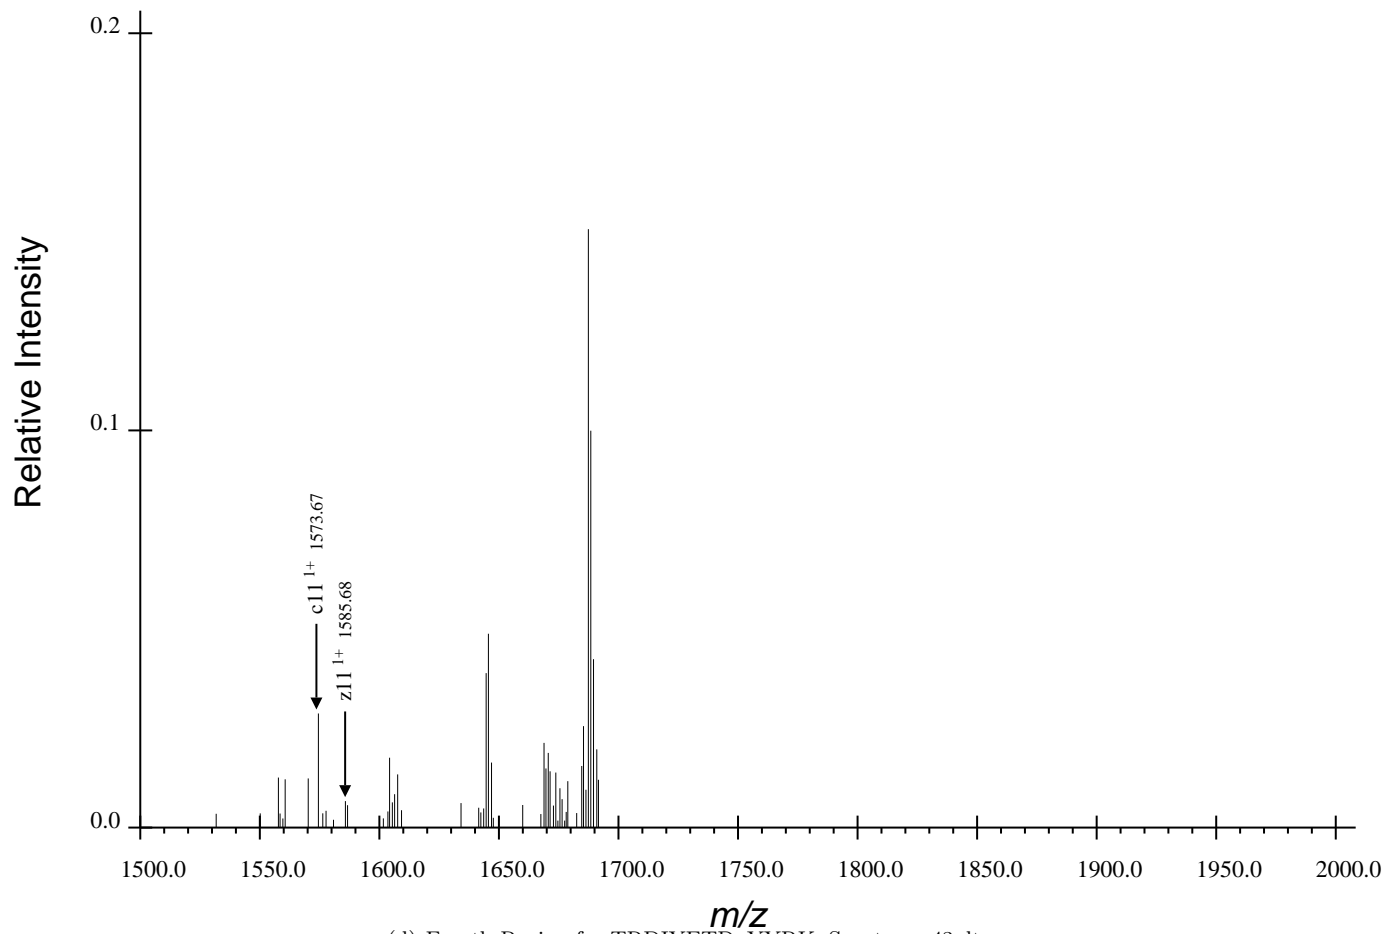

(d) Fourth Region for TRDIYETDpYYRK, Spectrum 43.dta

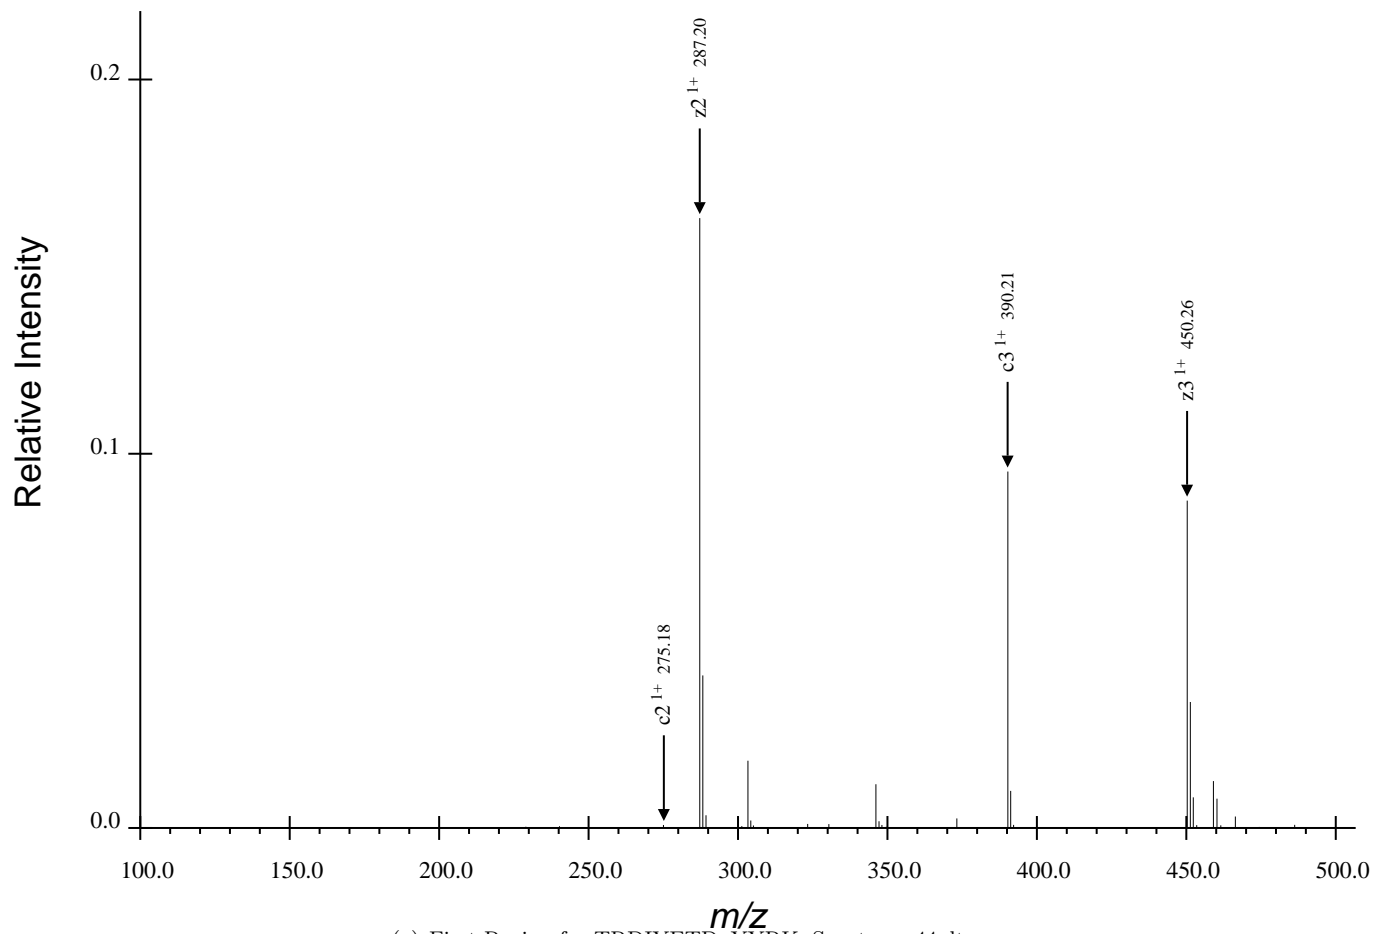

(a) First Region for TRDIYETDpYYRK, Spectrum 44.dta

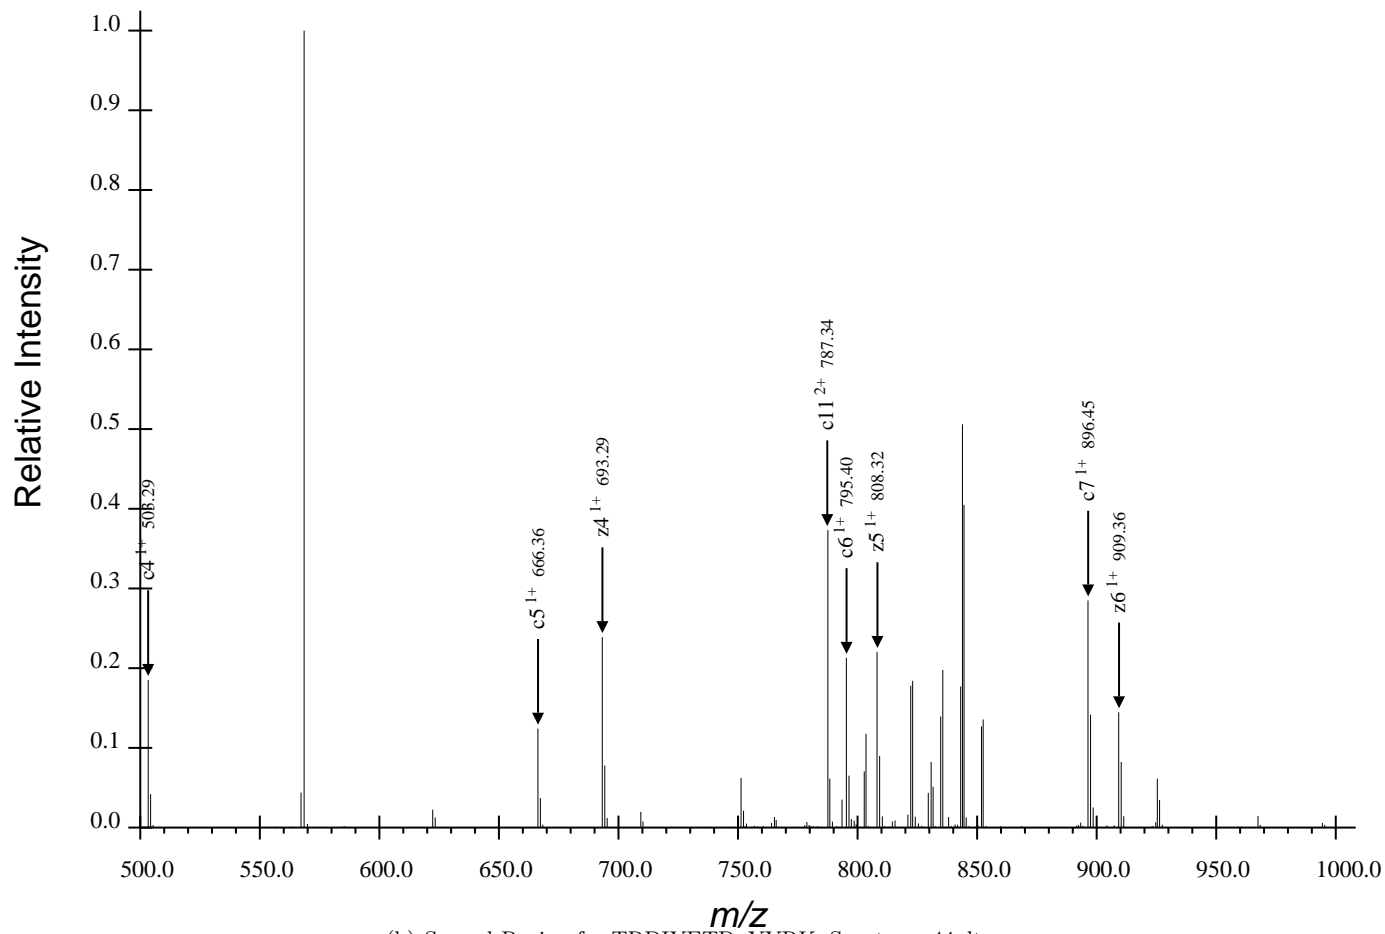

(b) Second Region for TRDIYETDpYYRK, Spectrum 44.dta

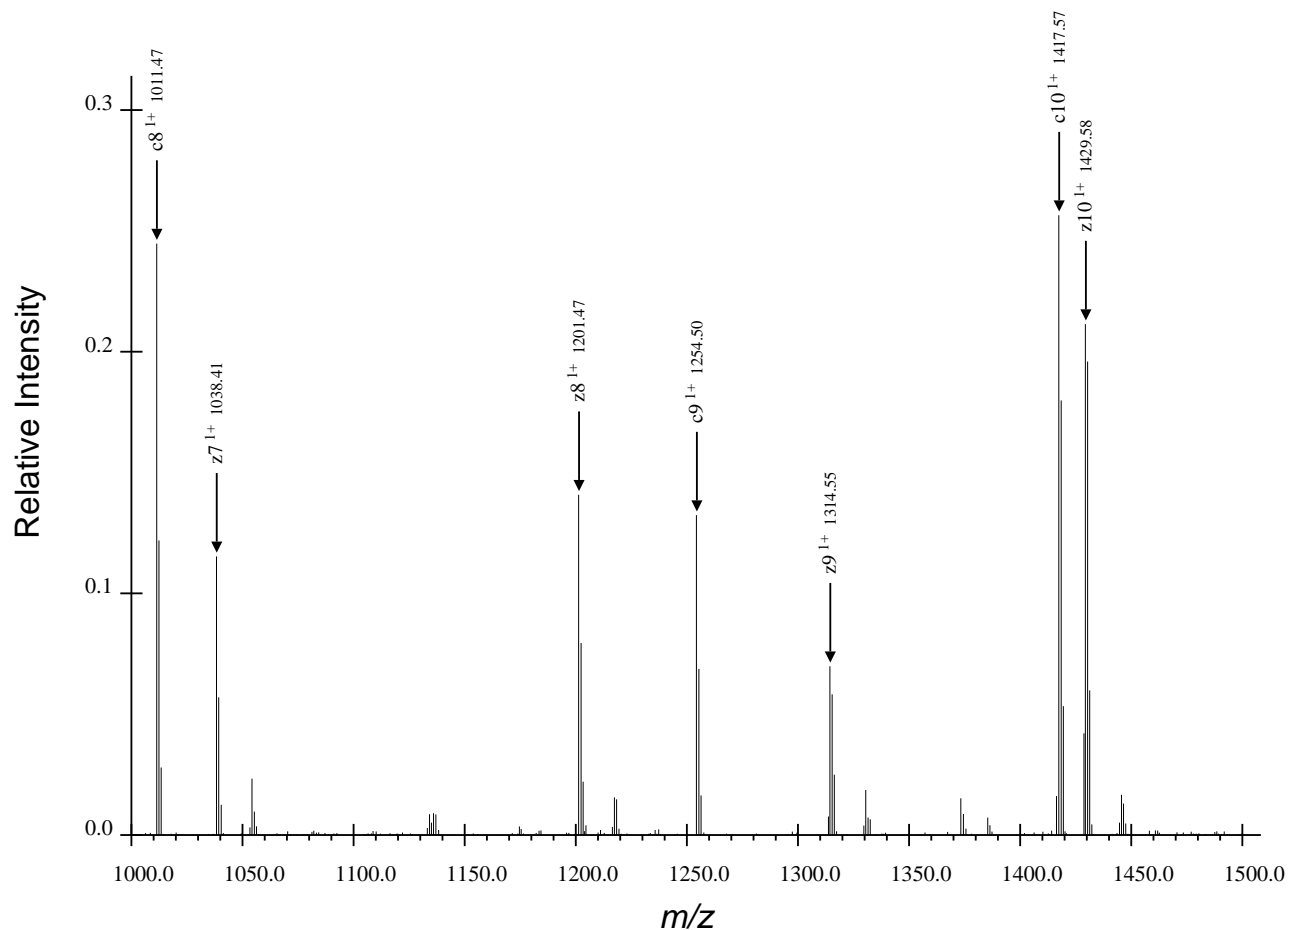

(c) Third Region for TRDIYETDpYYRK, Spectrum 44.dta

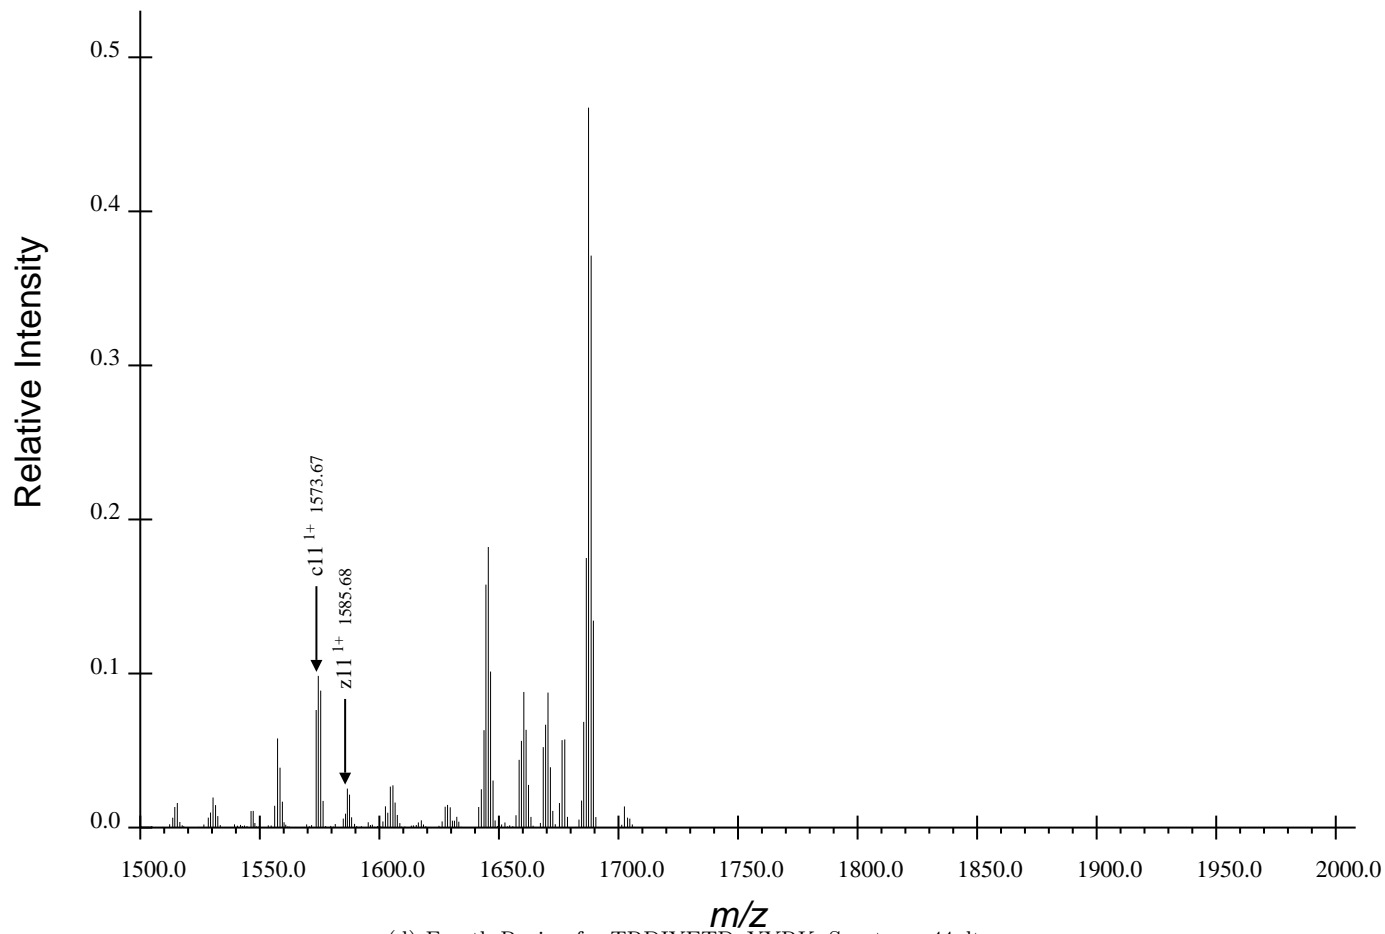

(d) Fourth Region for TRDIYETDpYYRK, Spectrum 44.dta



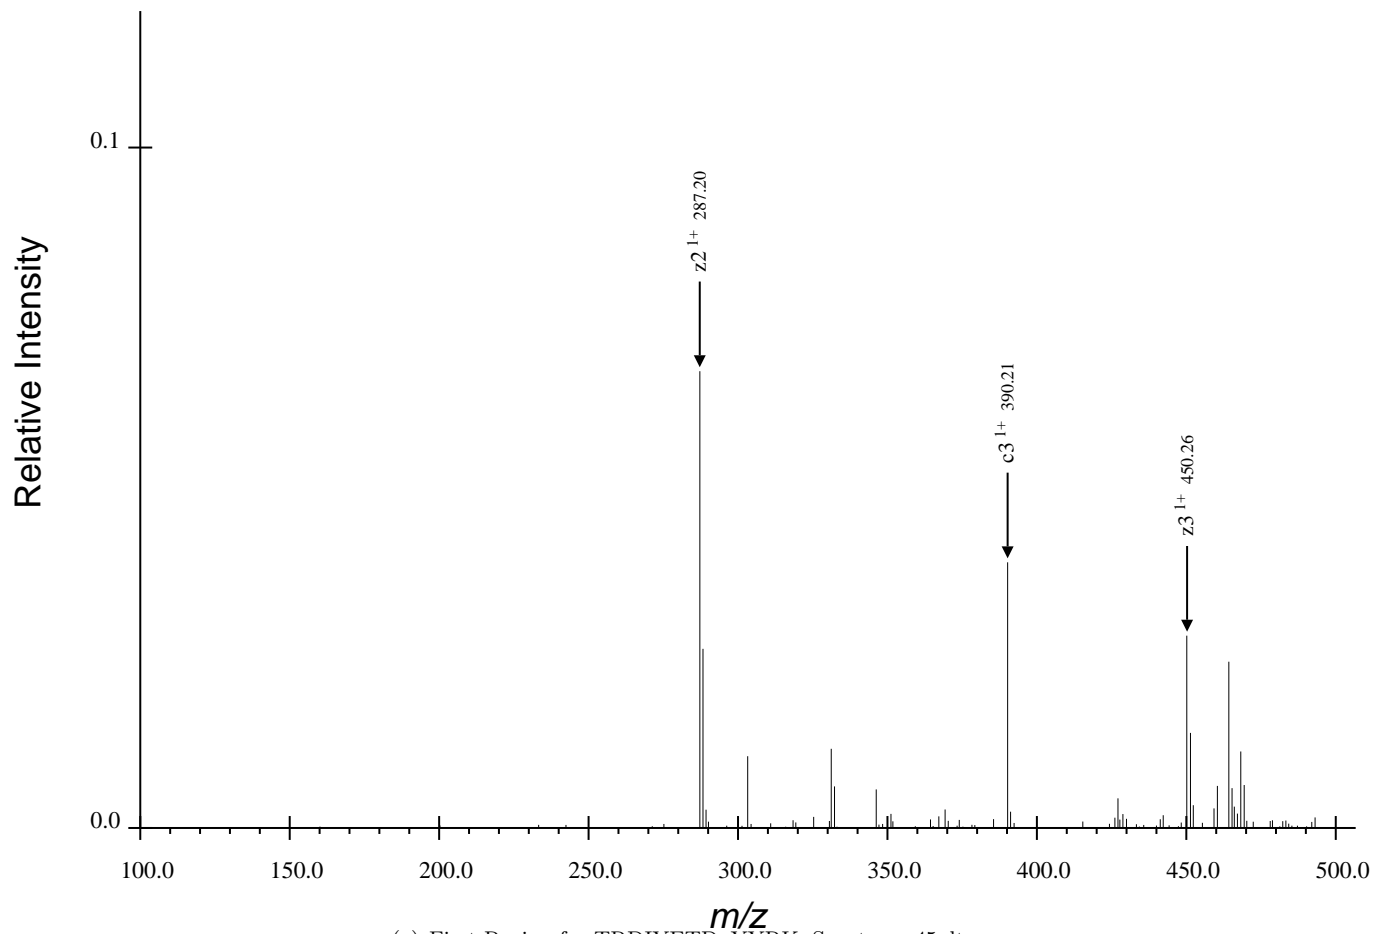

(a) First Region for TRDIYETDpYYRK, Spectrum 45.dta

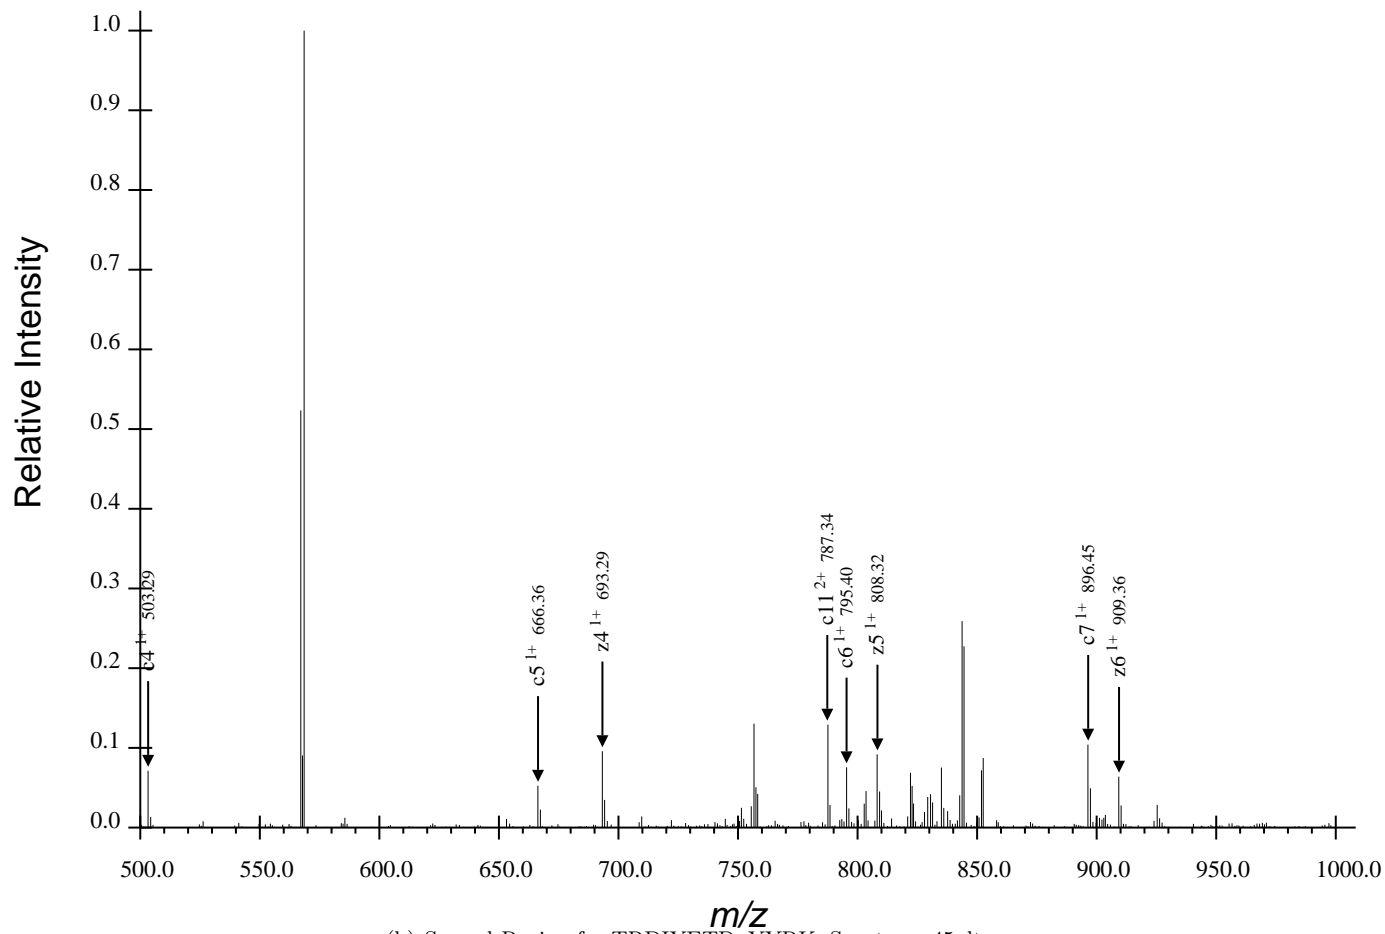

(b) Second Region for TRDIYETDpYYRK, Spectrum 45.dta

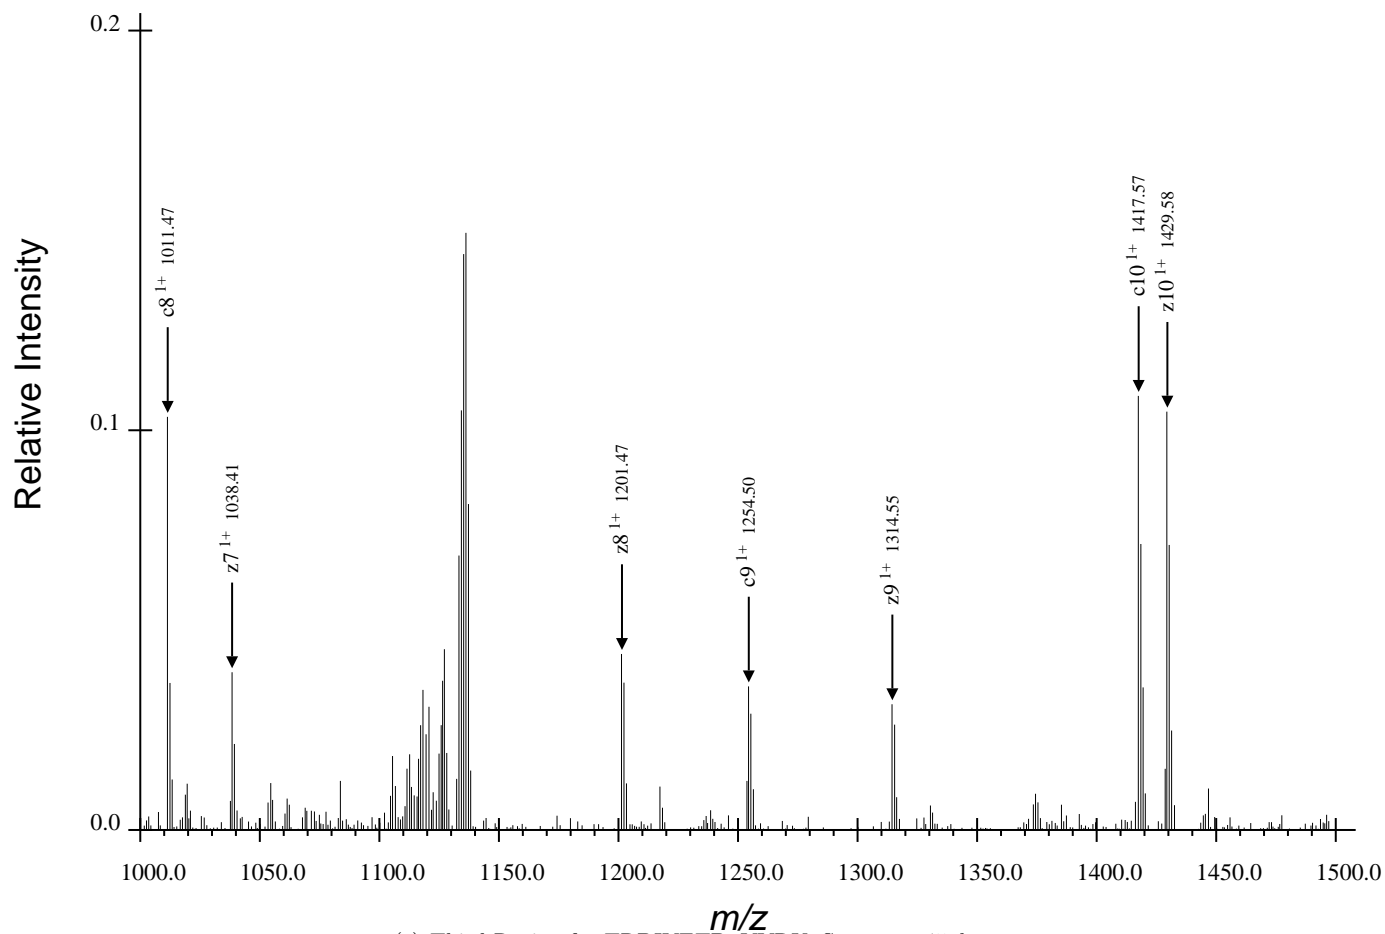

(c) Third Region for TRDIYETDpYYRK, Spectrum 45.dta

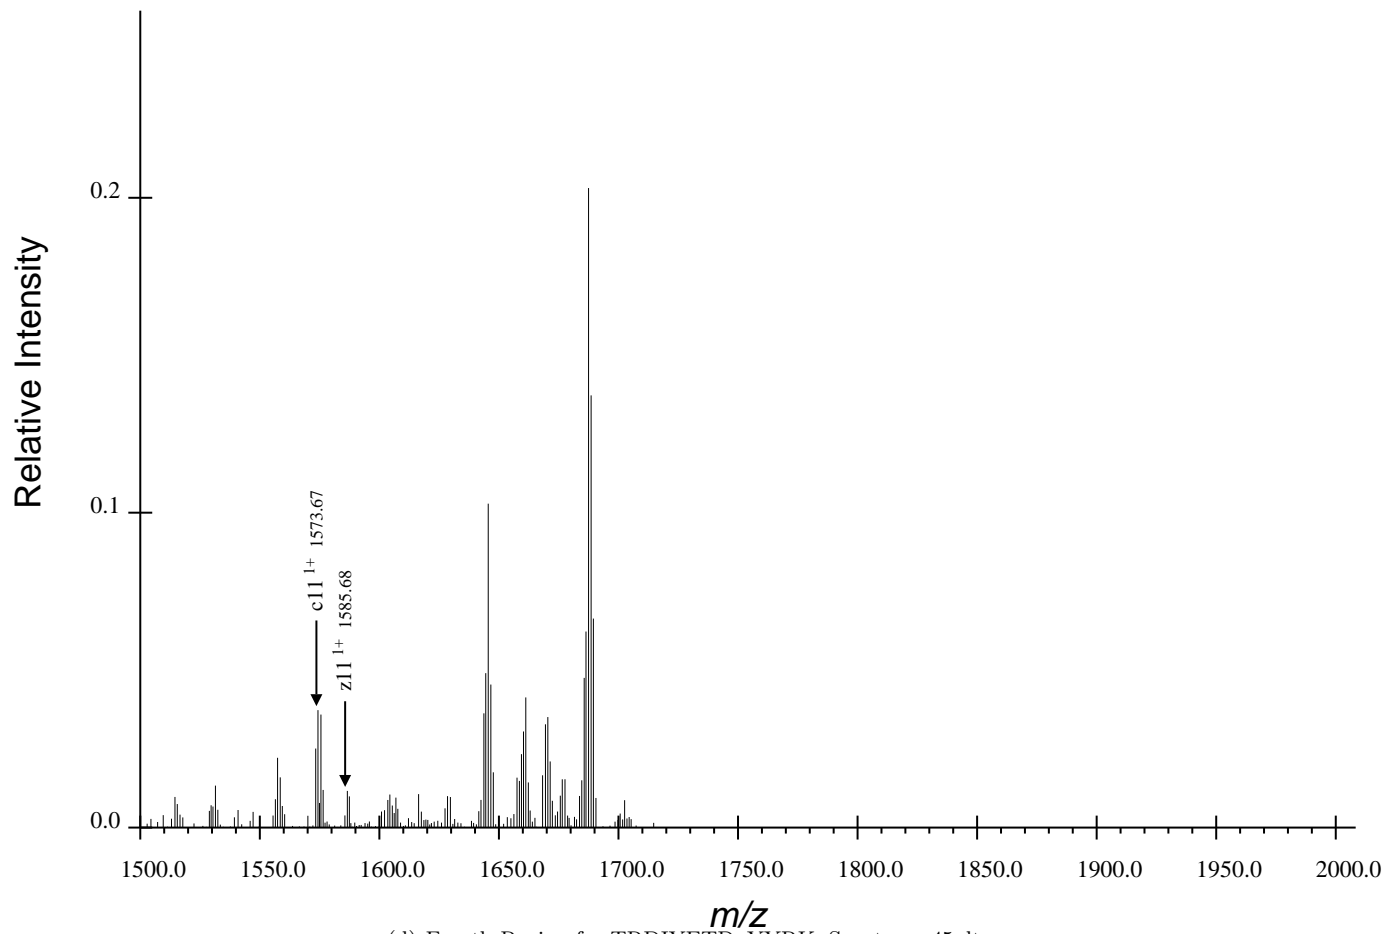

(d) Fourth Region for TRDIYETDpYYRK, Spectrum 45.dta

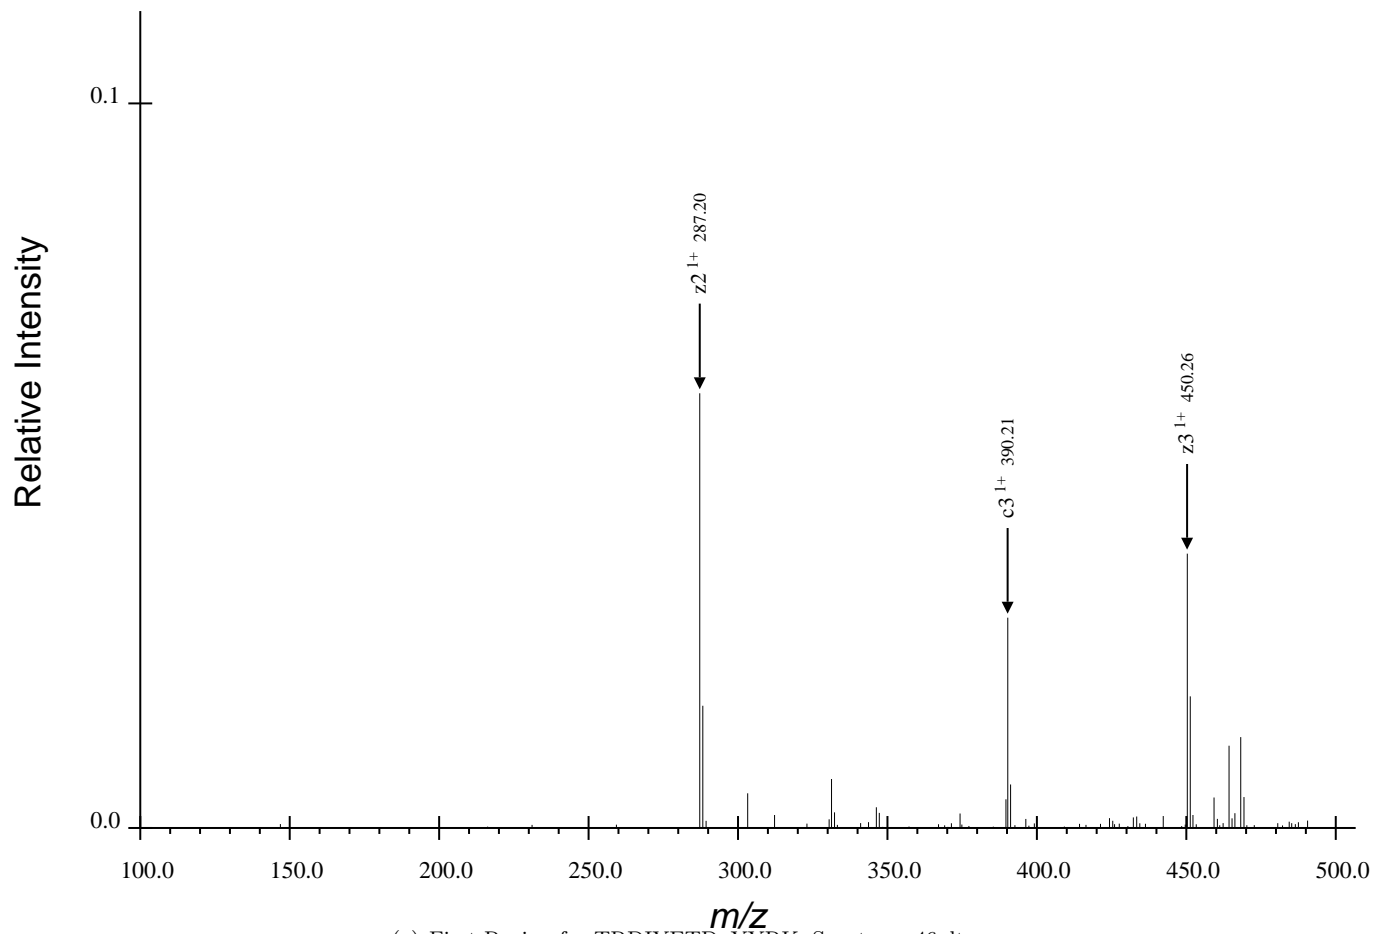

(a) First Region for TRDIYETDpYYRK, Spectrum 46.dta

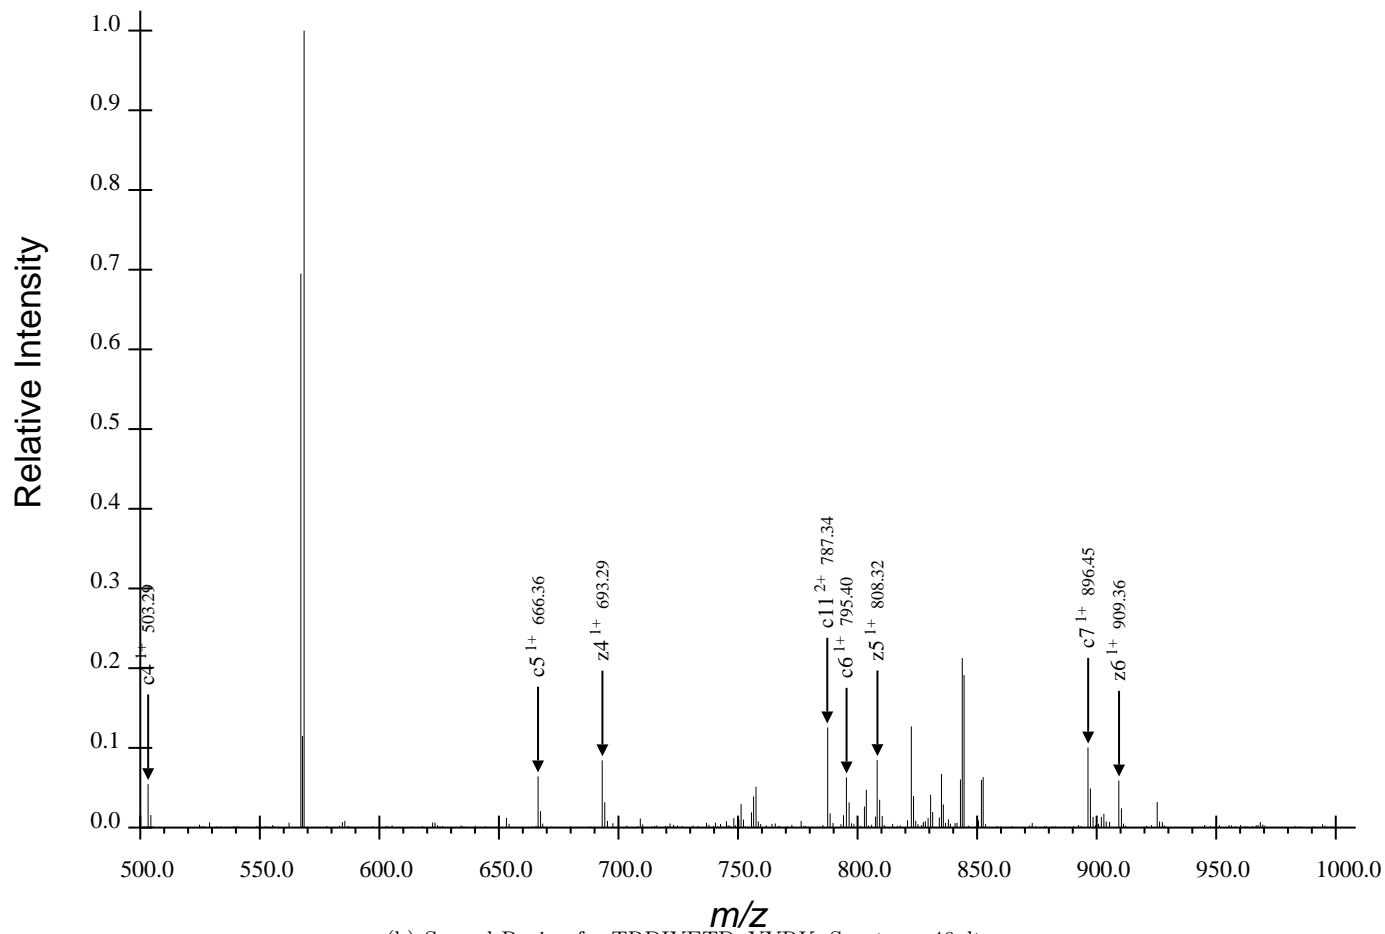

(b) Second Region for TRDIYETDpYYRK, Spectrum 46.dta

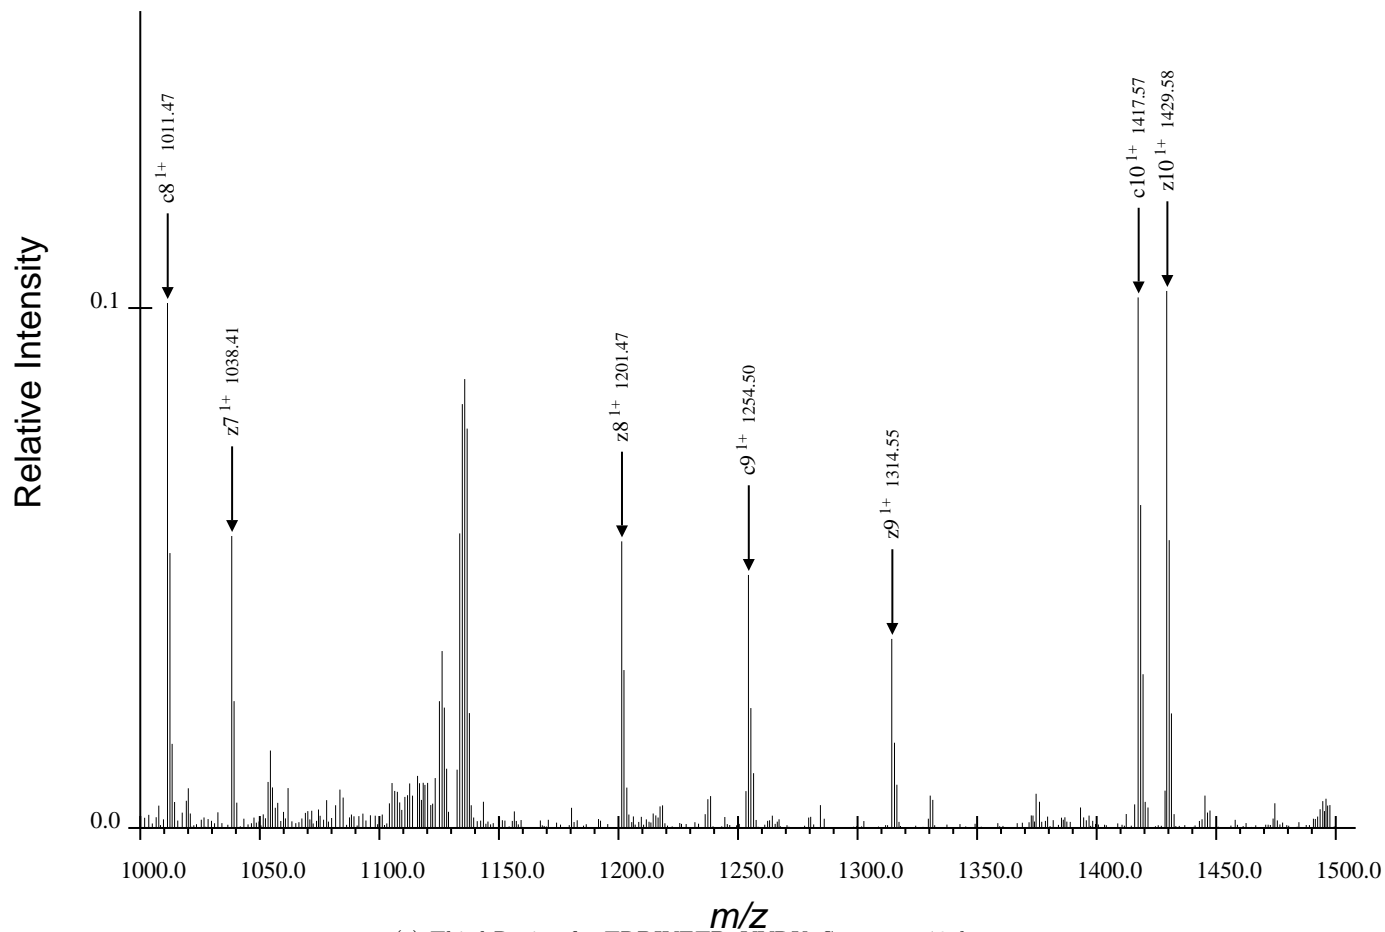

(c) Third Region for TRDIYETDpYYRK, Spectrum 46.dta

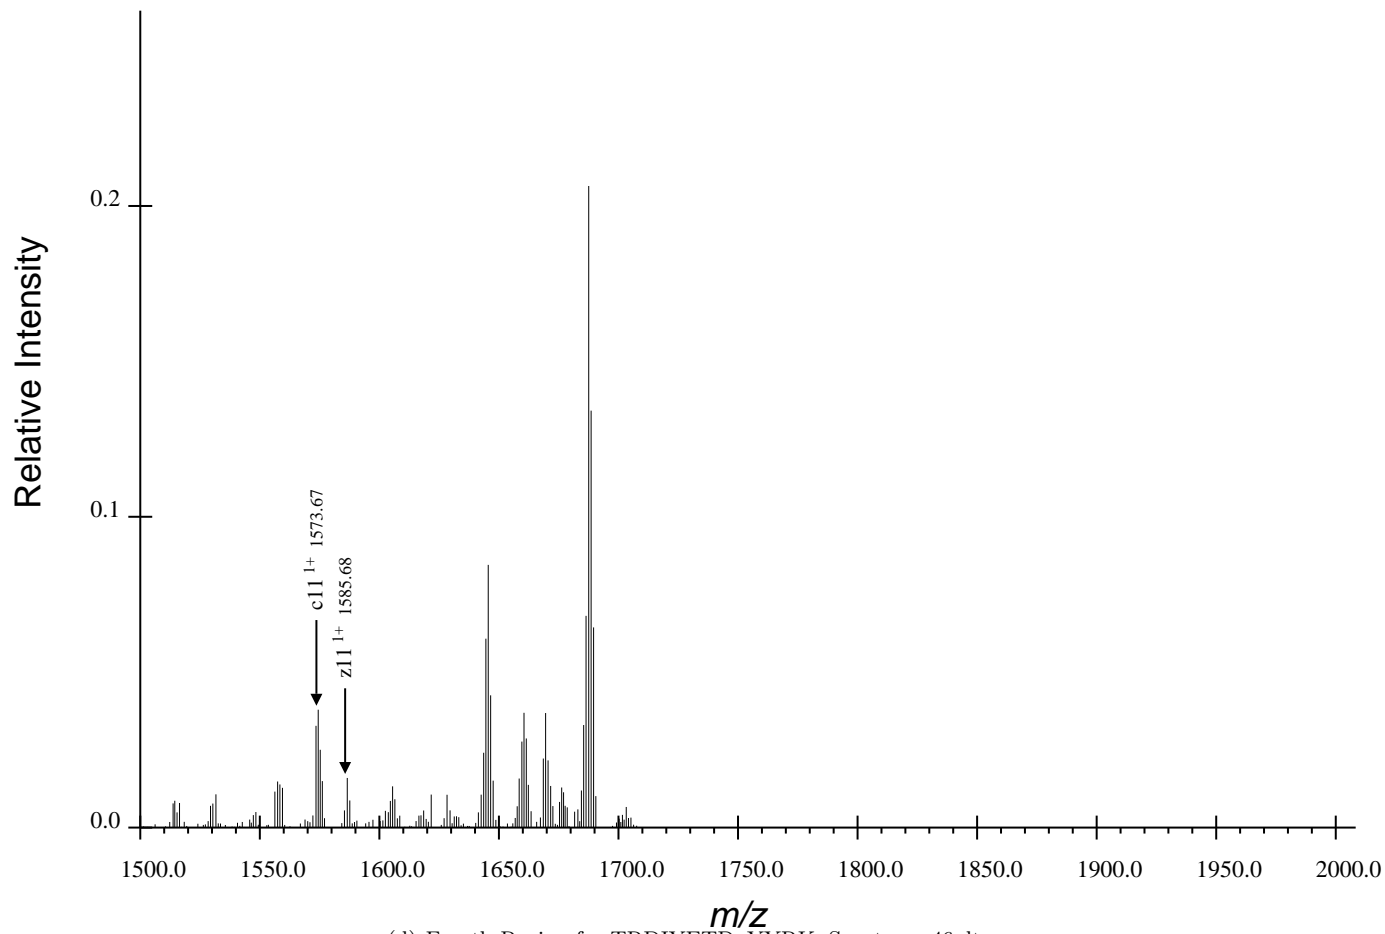

(d) Fourth Region for TRDIYETDpYYRK, Spectrum 46.dta

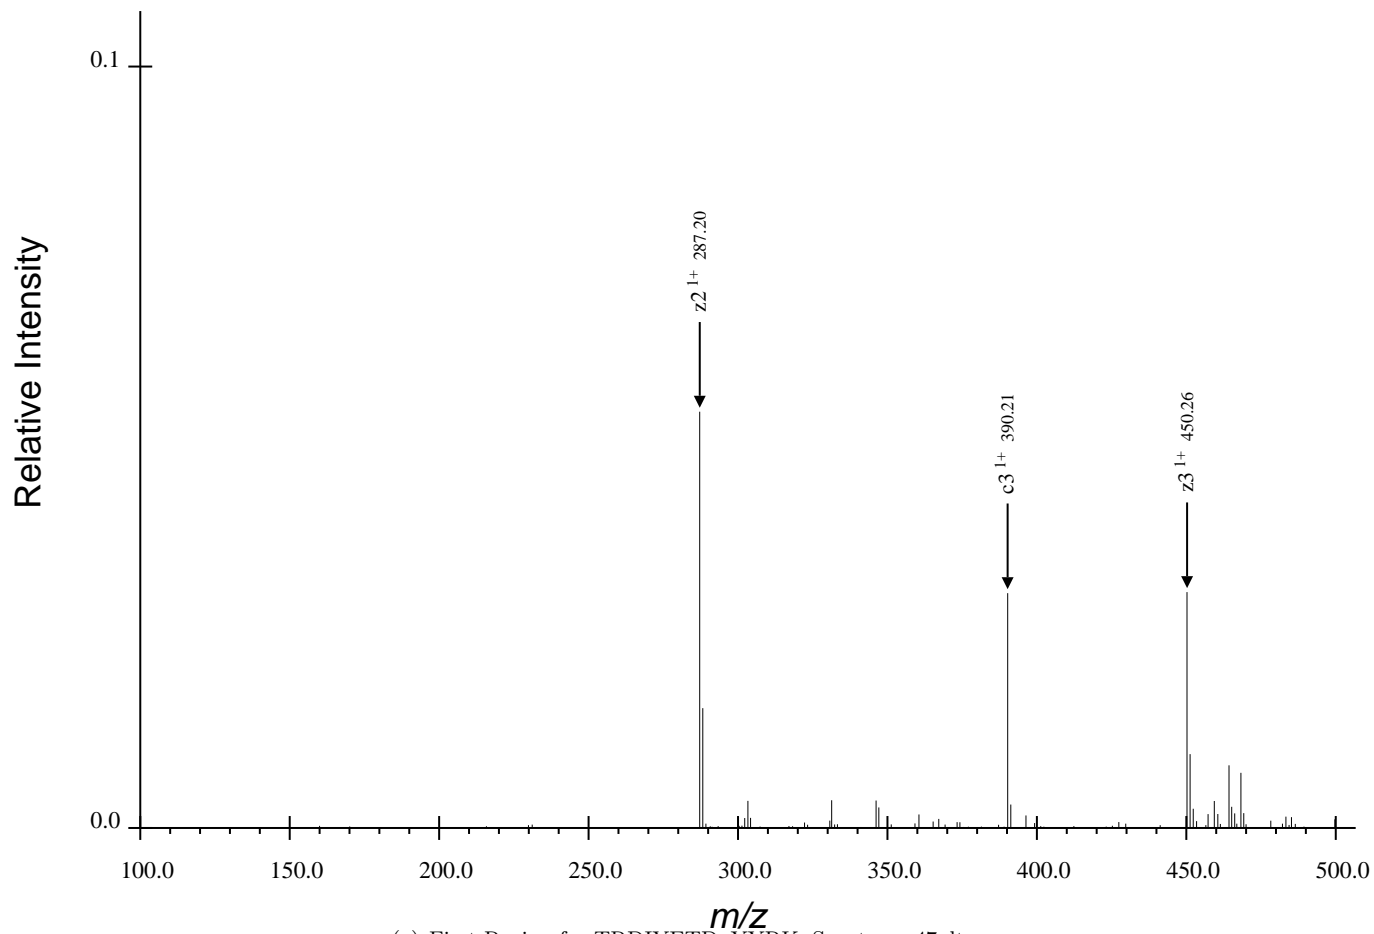

(a) First Region for TRDIYETDpYYRK, Spectrum 47.dta

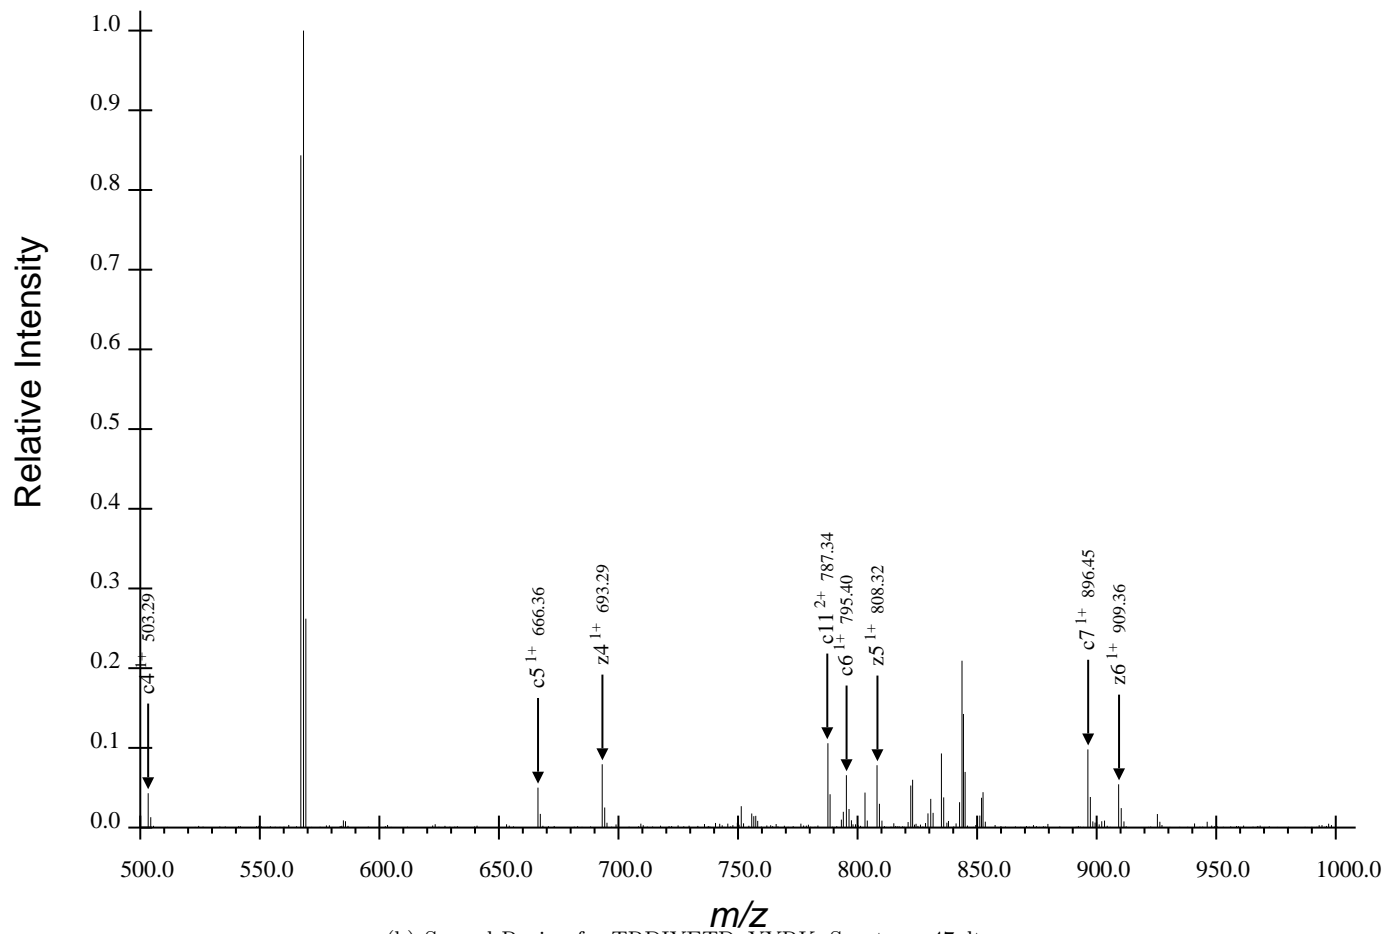

(b) Second Region for TRDIYETDpYYRK, Spectrum 47.dta

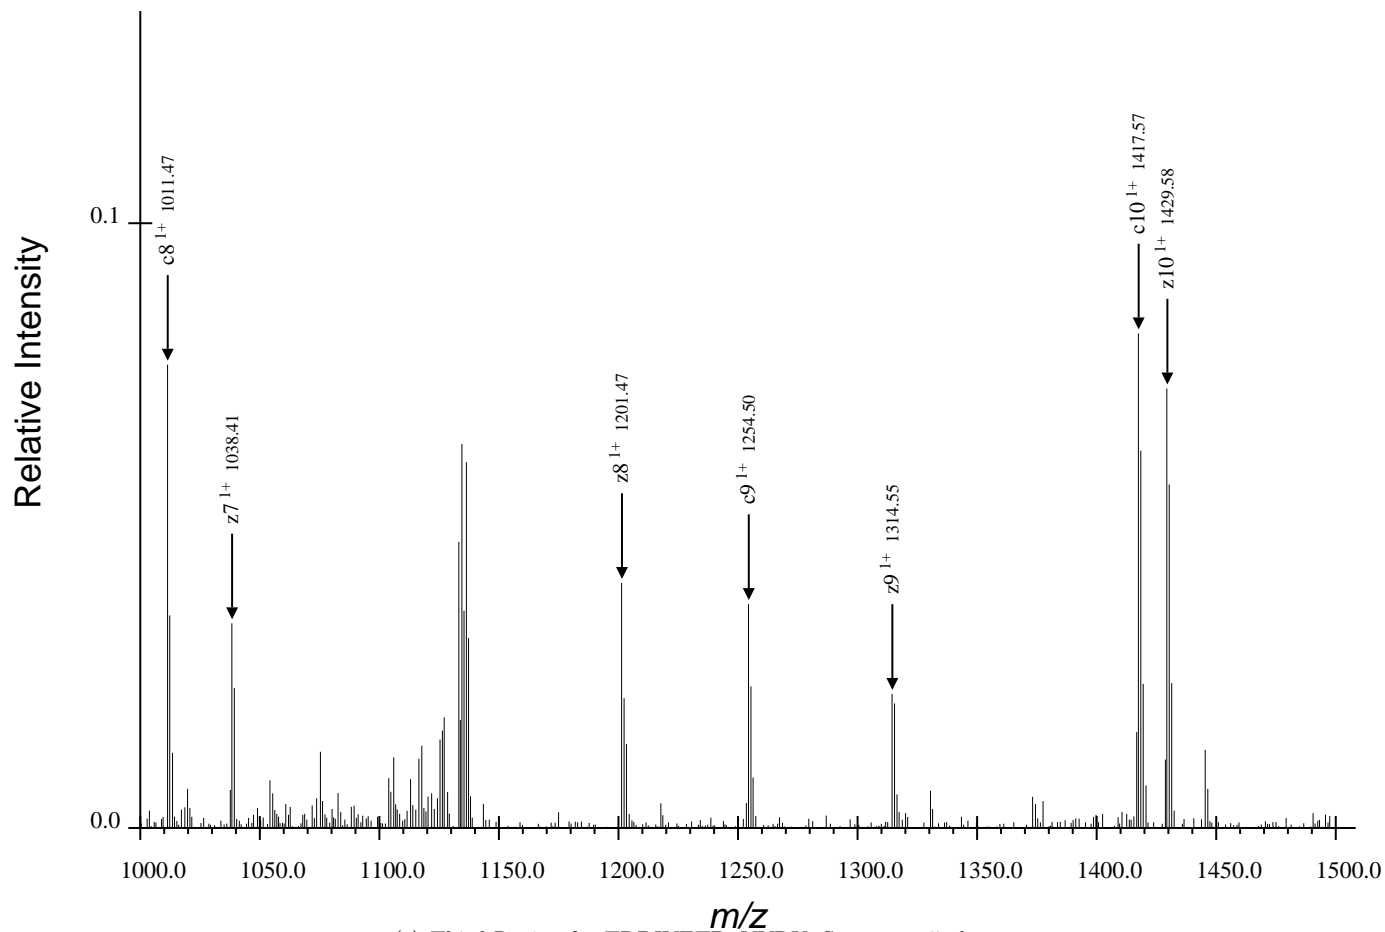

(c) Third Region for TRDIYETDpYYRK, Spectrum 47.dta

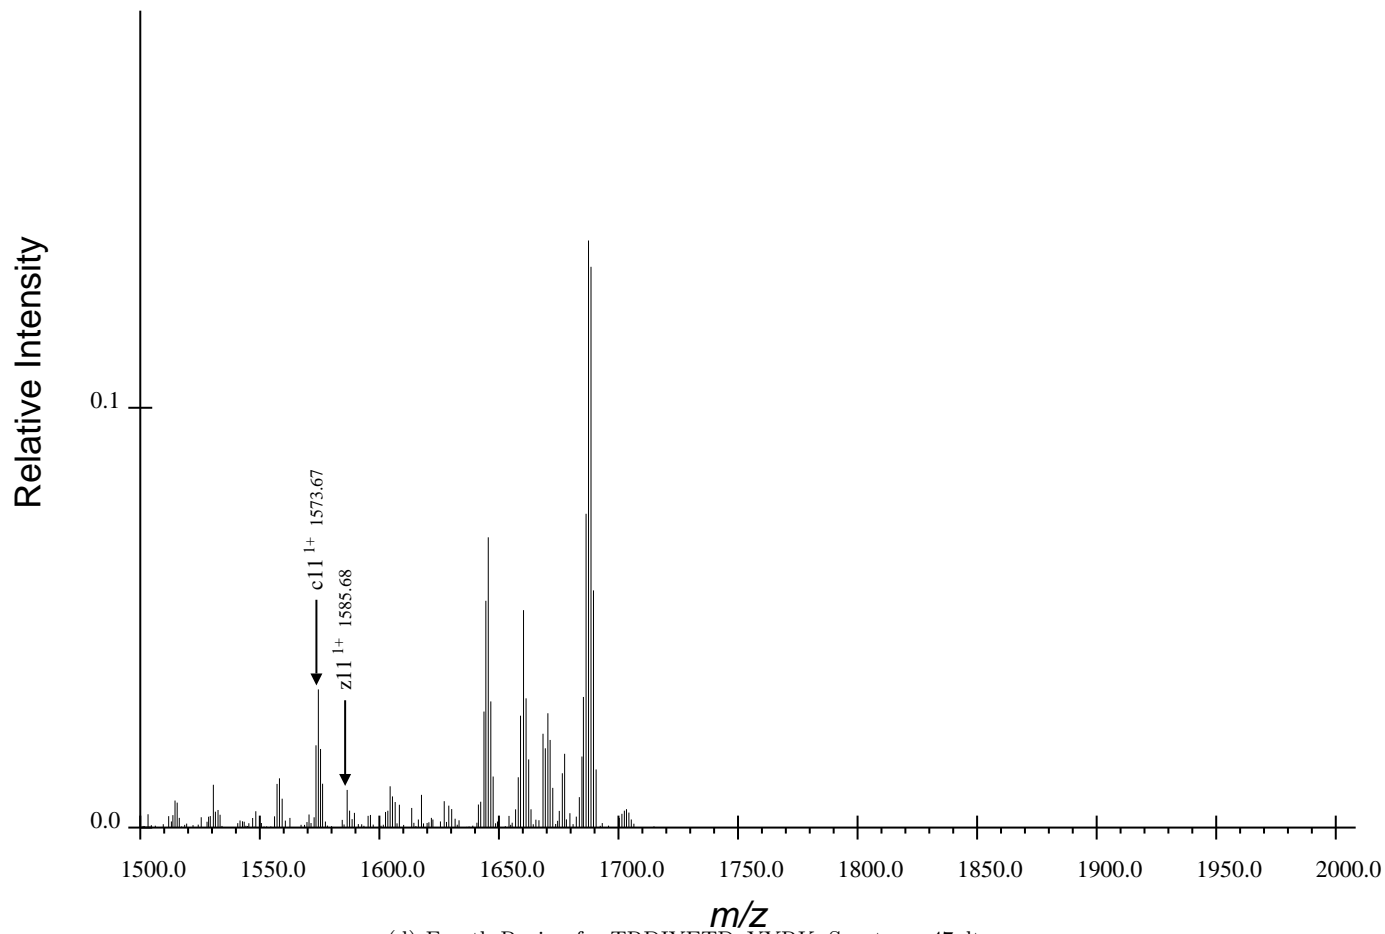

(d) Fourth Region for TRDIYETDpYYRK, Spectrum 47.dta

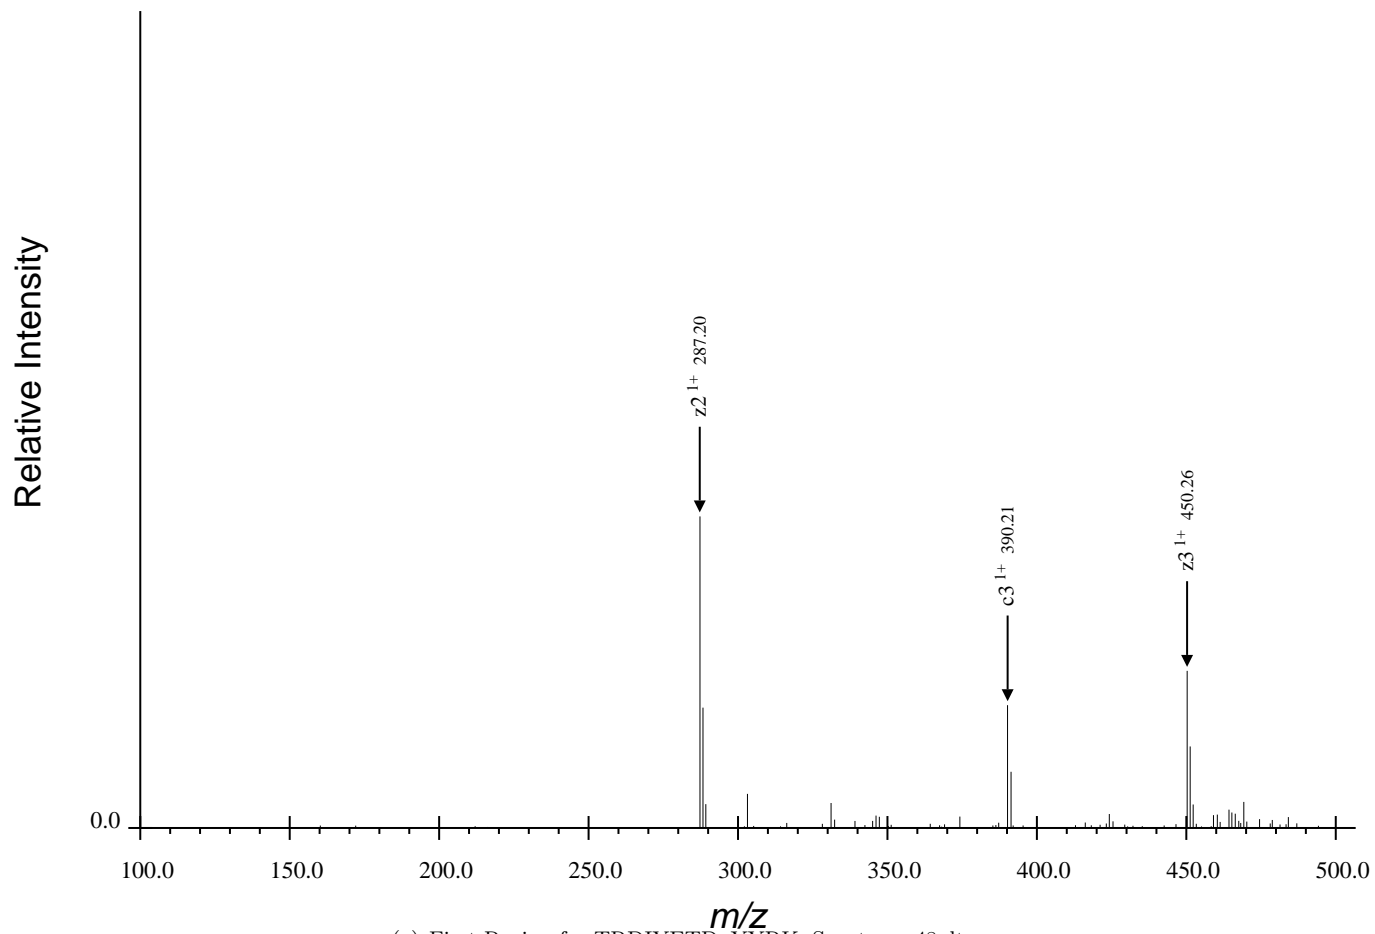

(a) First Region for TRDIYETDpYYRK, Spectrum 48.dta

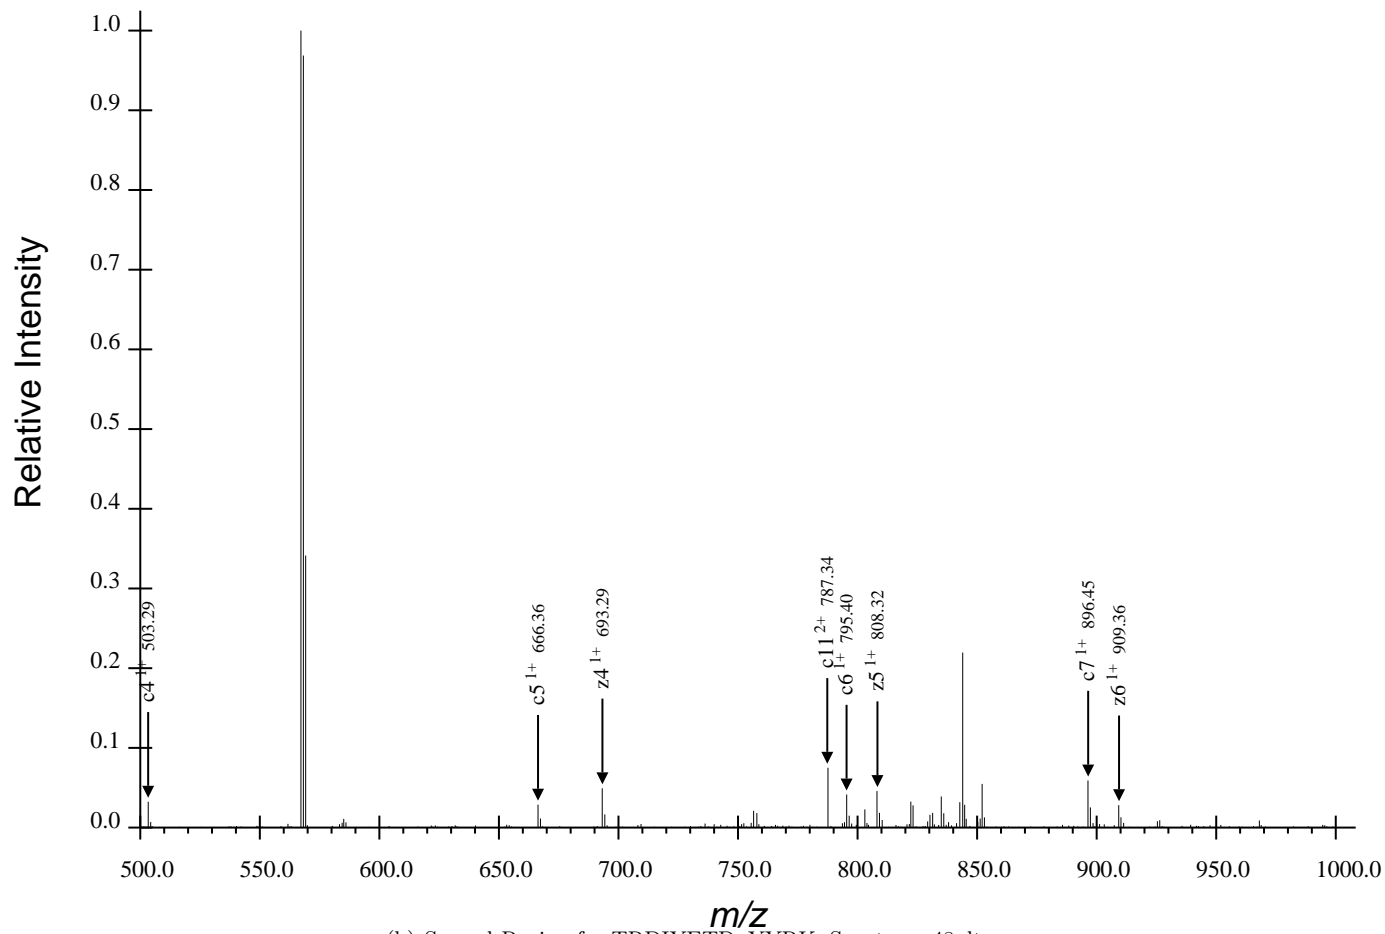

(b) Second Region for TRDIYETDpYYRK, Spectrum 48.dta

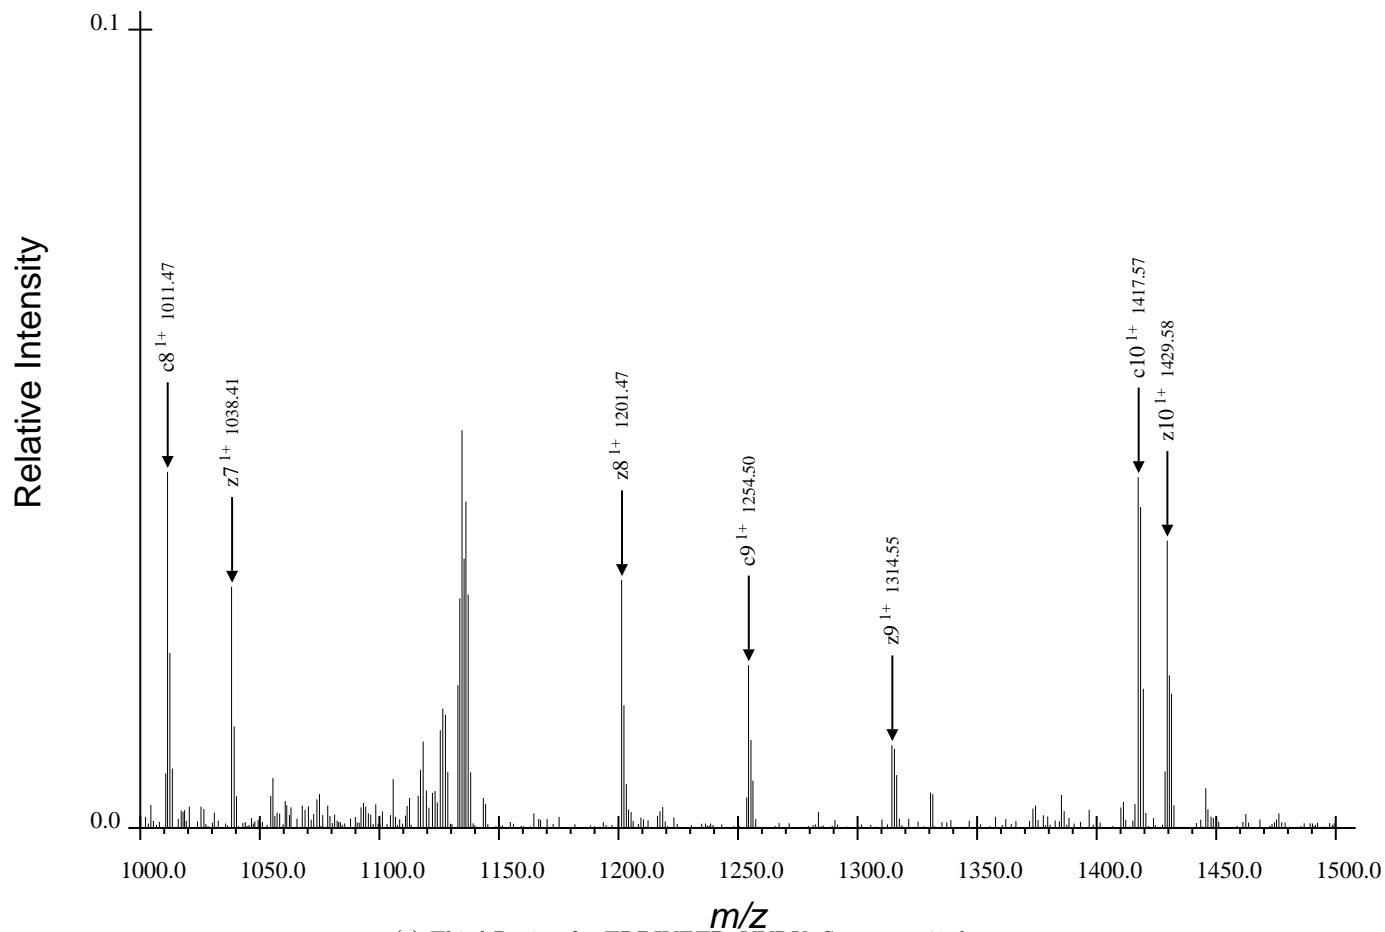

(c) Third Region for TRDIYETDpYYRK, Spectrum 48.dta

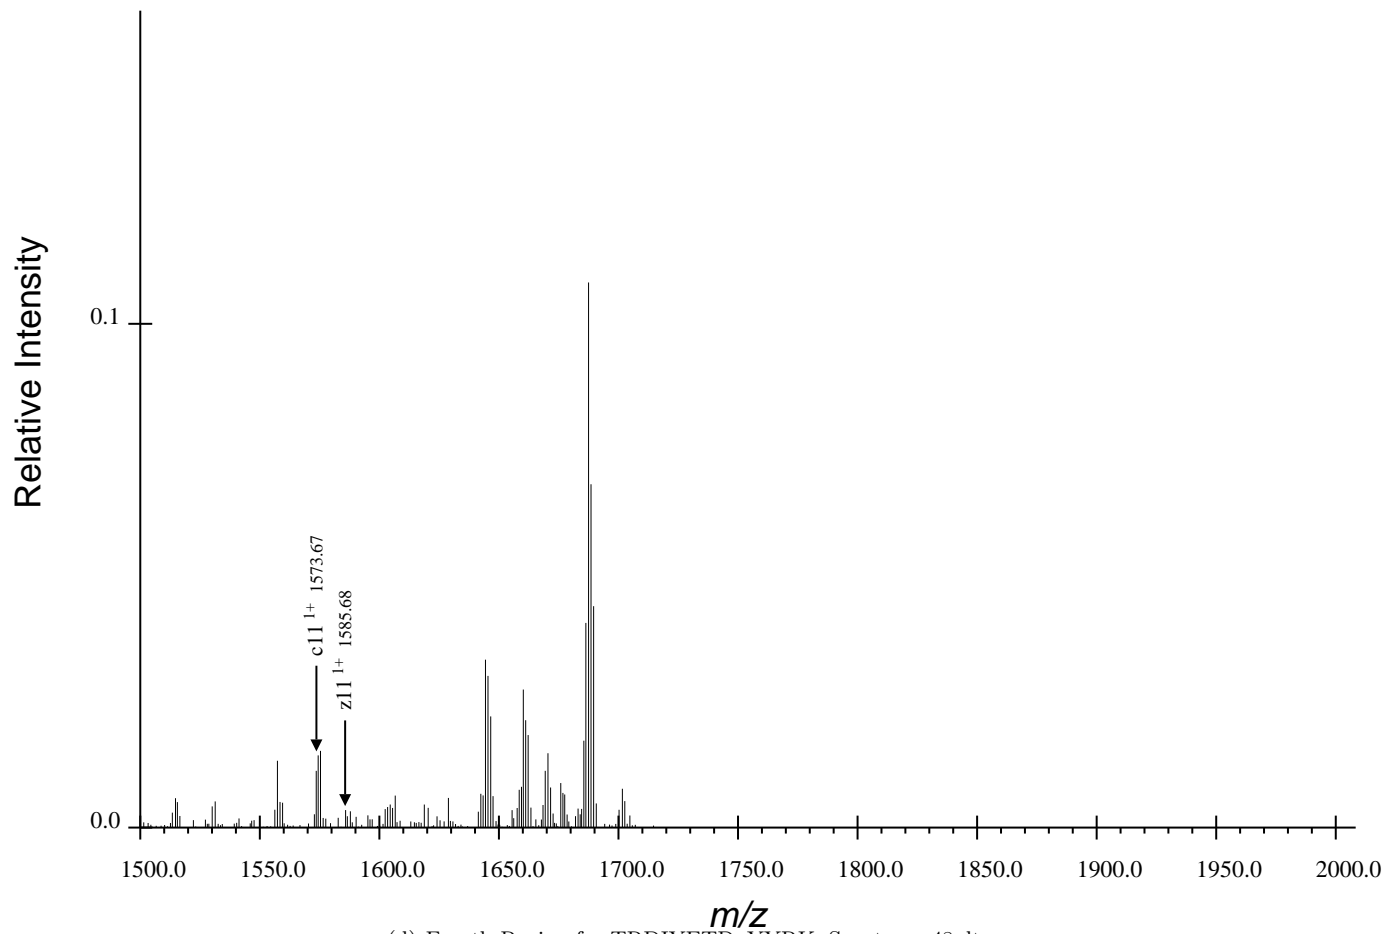

(d) Fourth Region for TRDIYETDpYYRK, Spectrum 48.dta



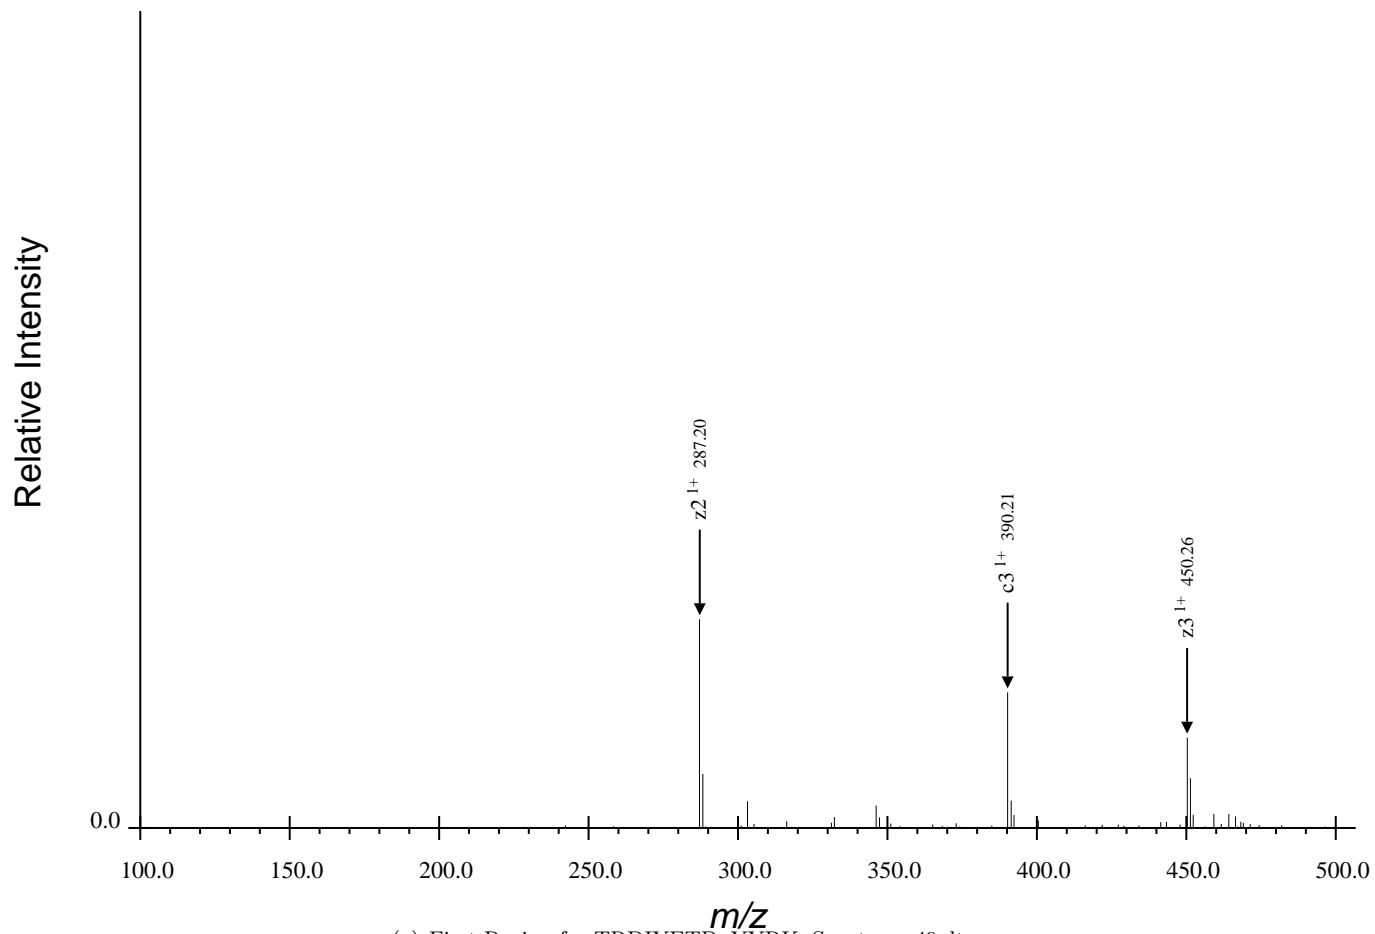

(a) First Region for TRDIYETDpYYRK, Spectrum 49.dta

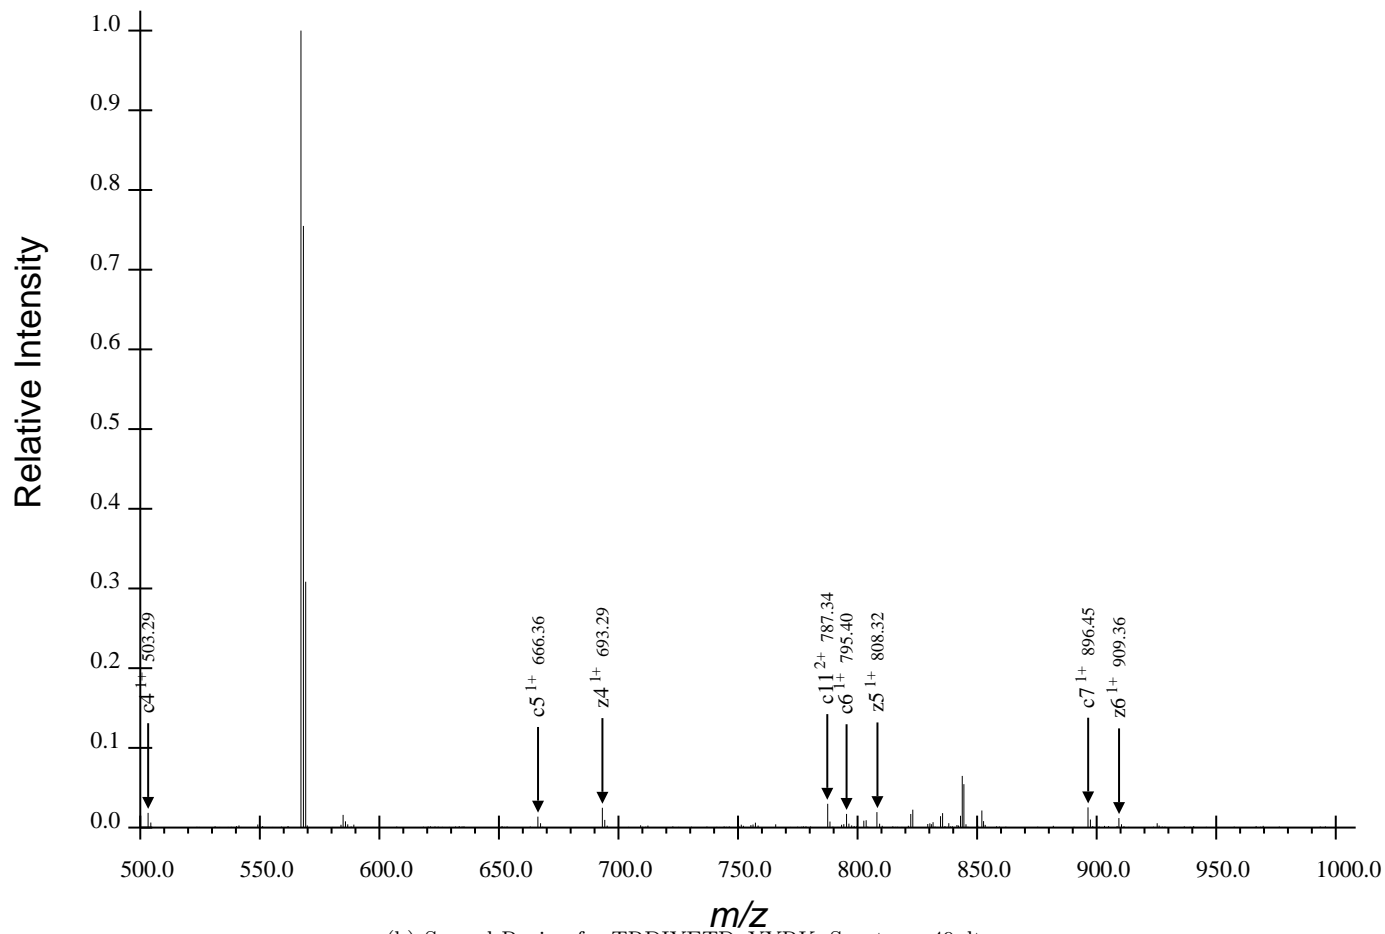

(b) Second Region for TRDIYETDpYYRK, Spectrum 49.dta

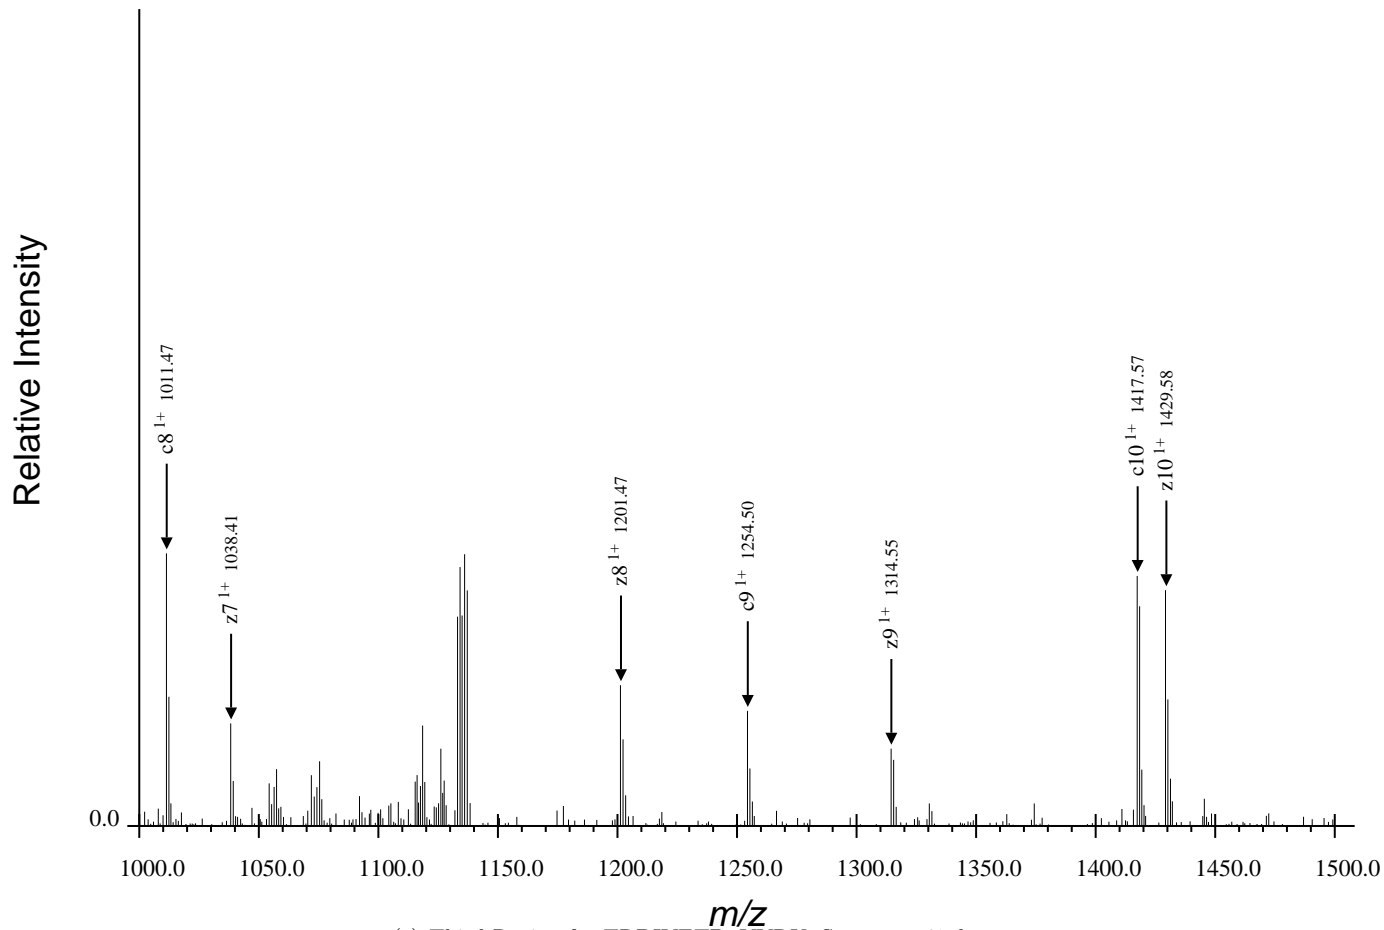

(c) Third Region for TRDIYETDpYYRK, Spectrum 49.dta

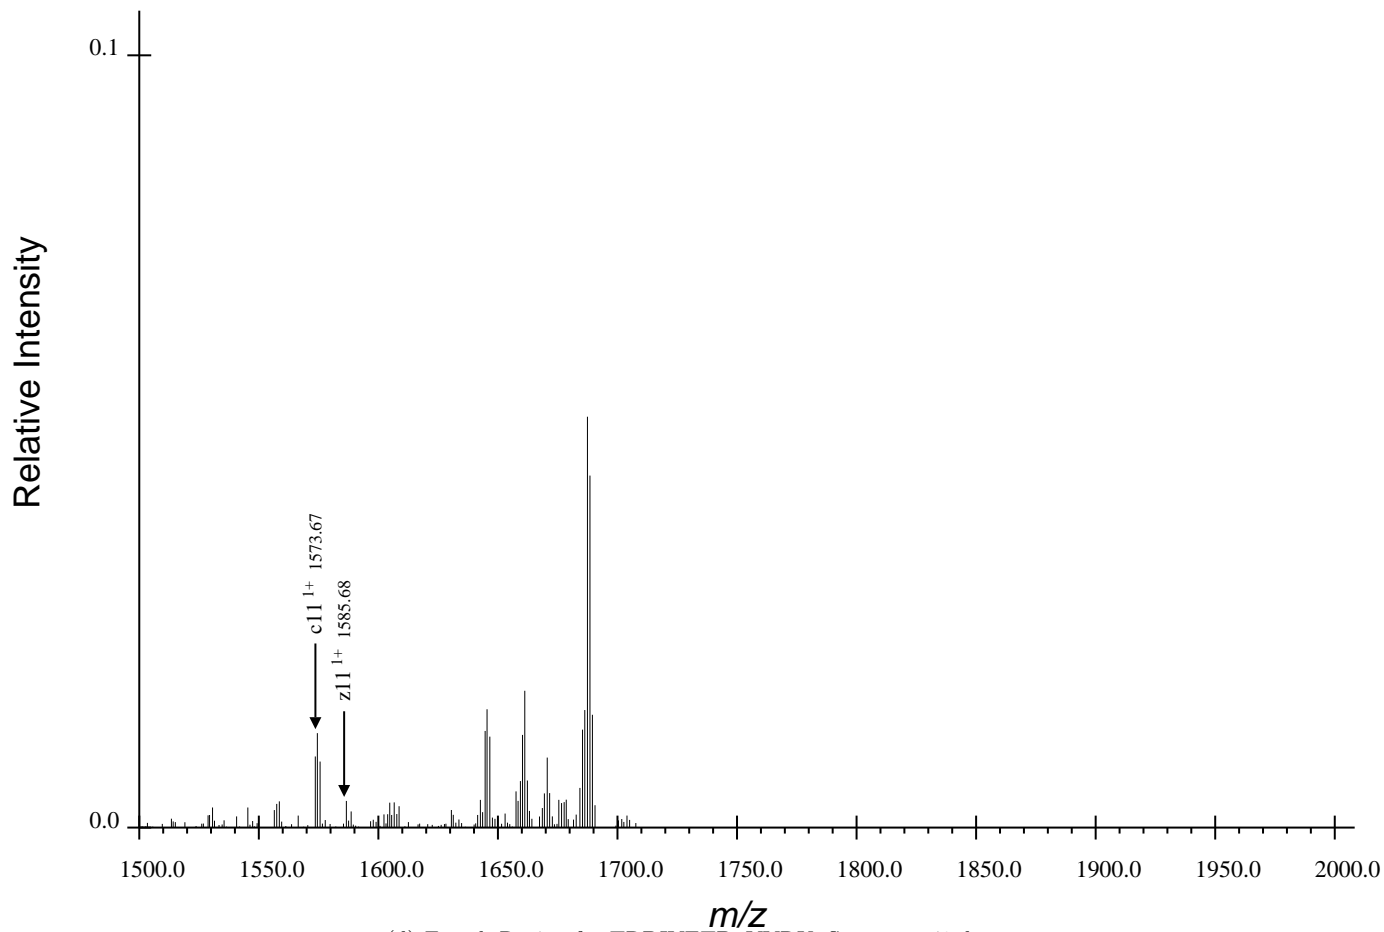

(d) Fourth Region for TRDIYETDpYYRK, Spectrum 49.dta

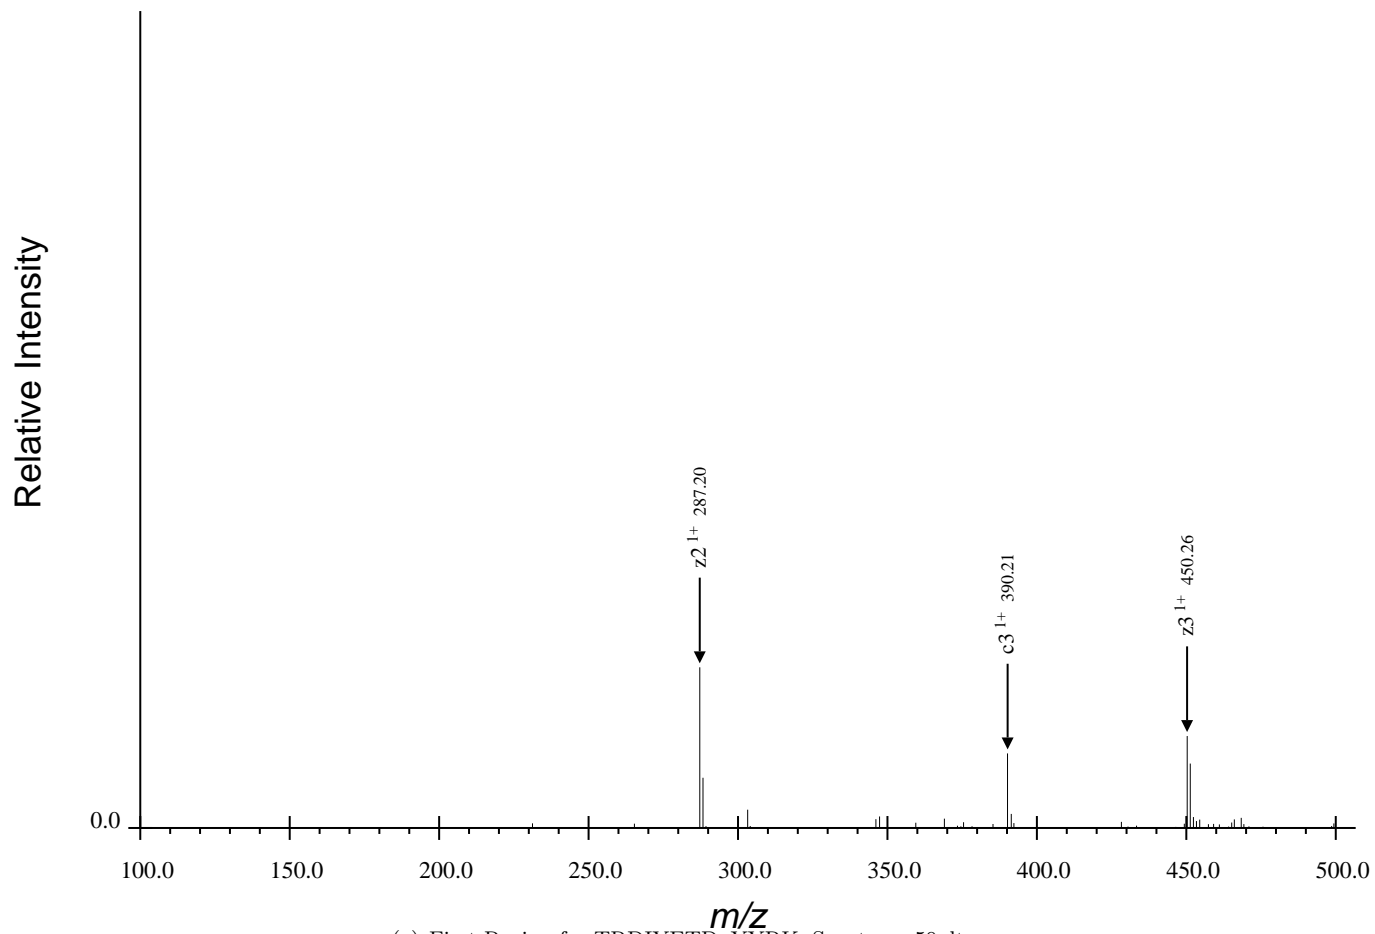

(a) First Region for TRDIYETDpYYRK, Spectrum 50.dta

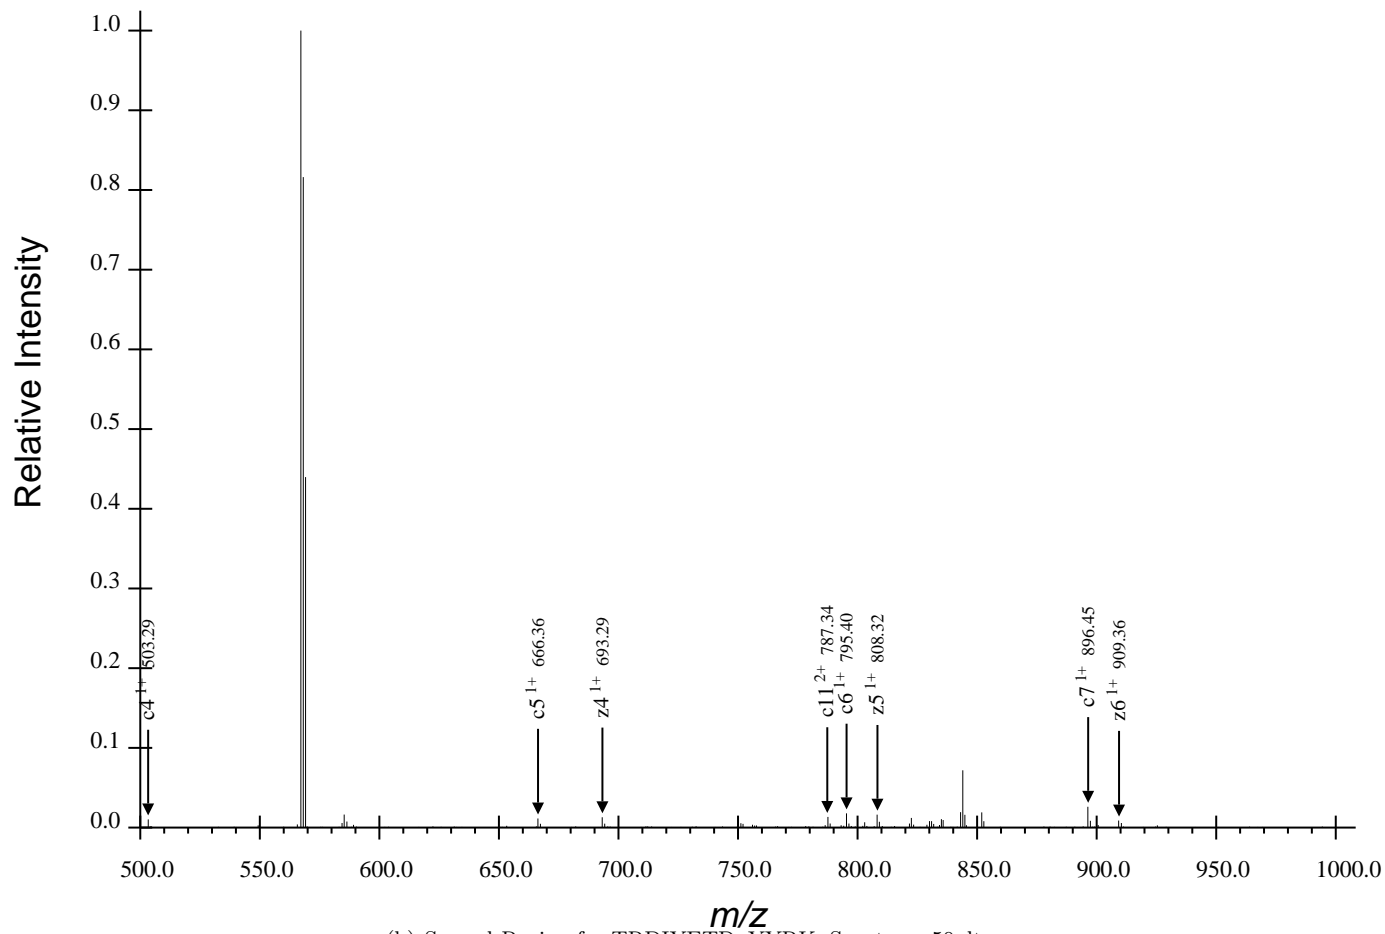

(b) Second Region for TRDIYETDpYYRK, Spectrum 50.dta

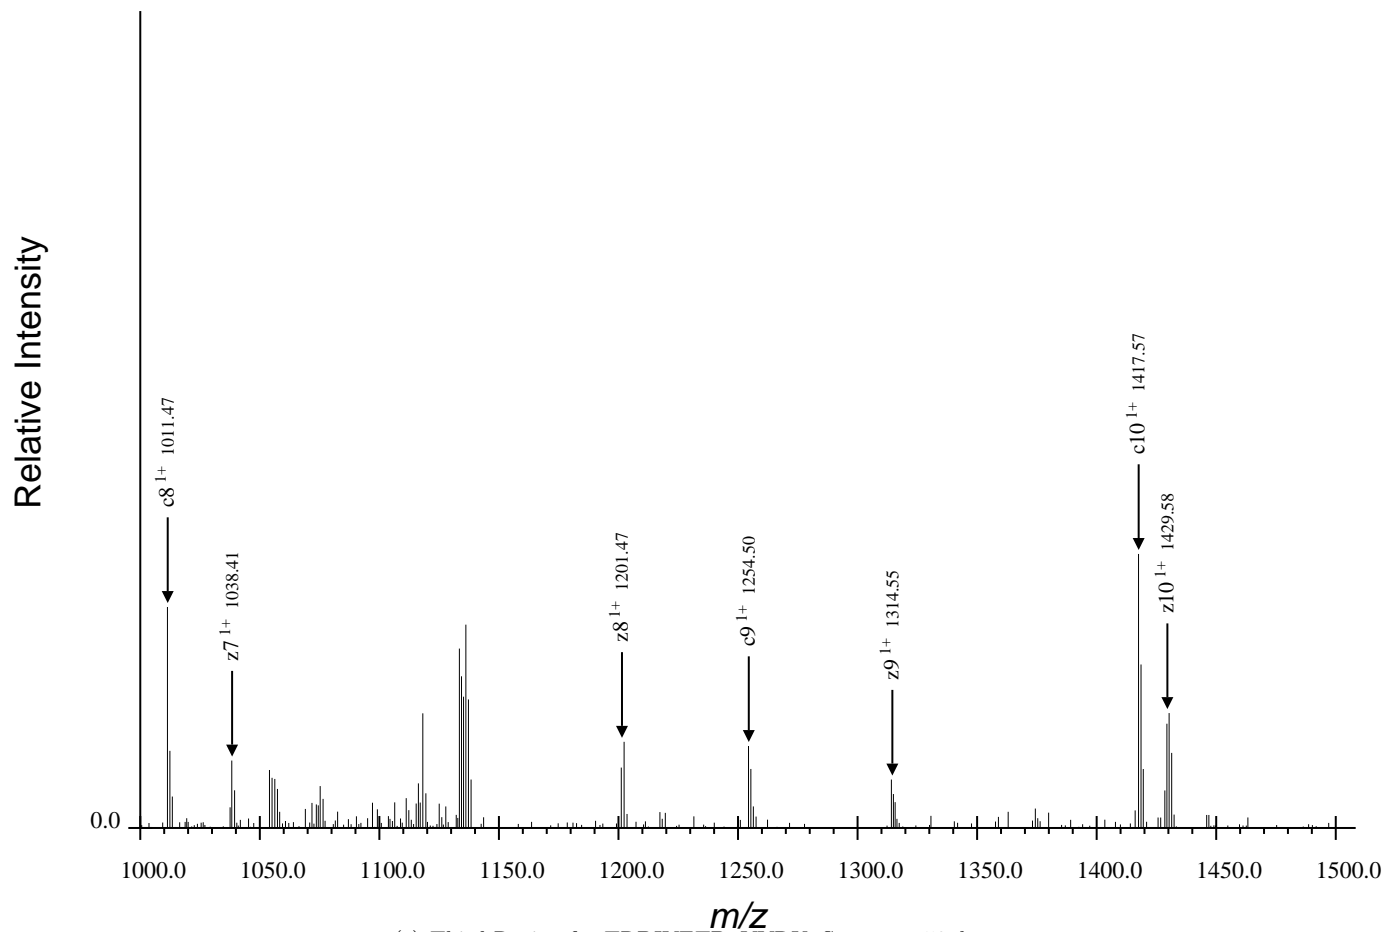

(c) Third Region for TRDIYETDpYYRK, Spectrum 50.dta

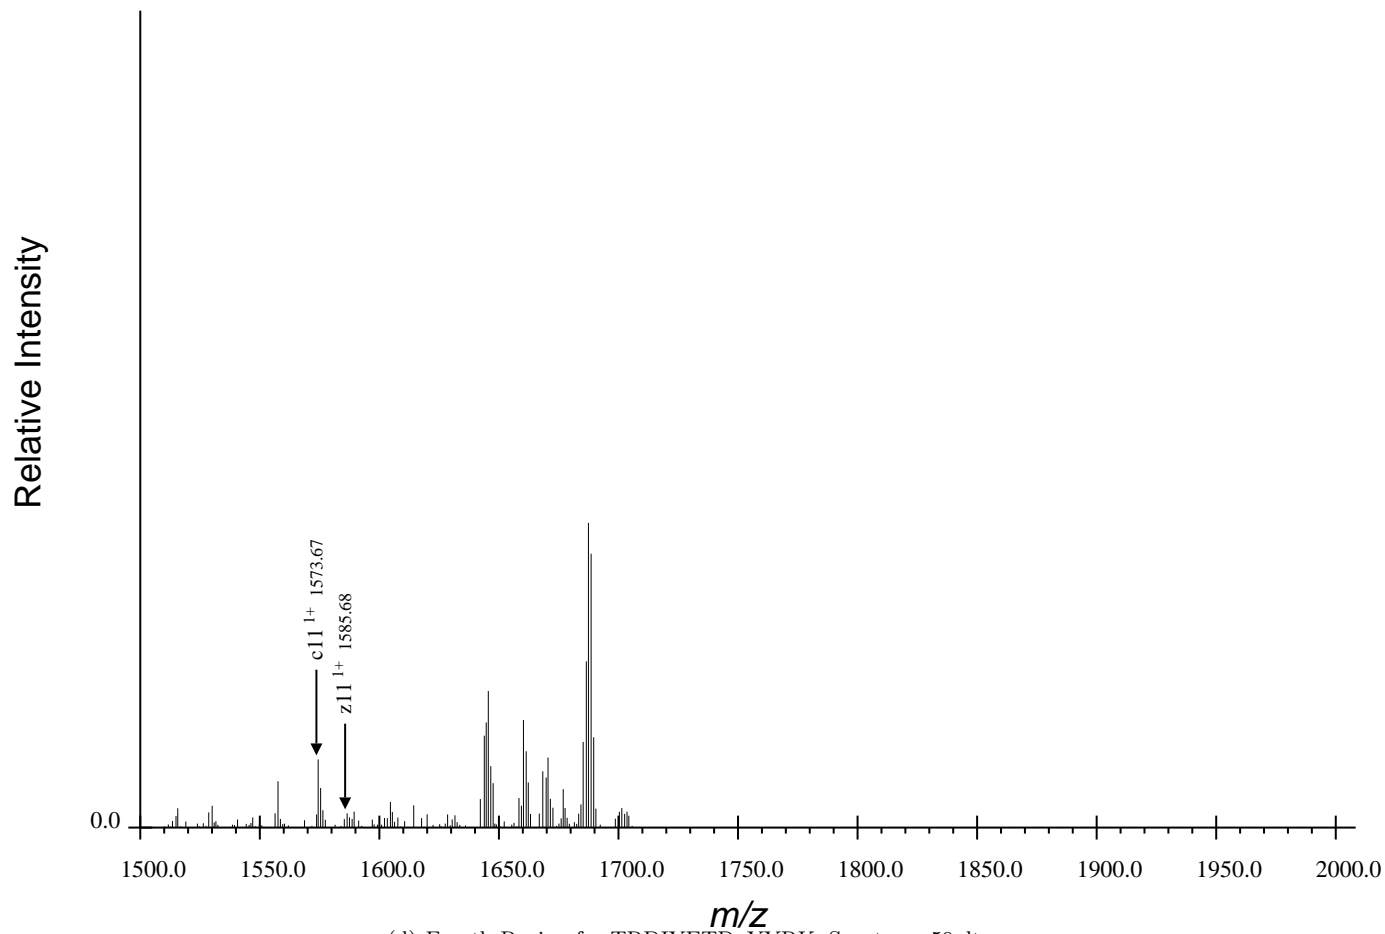

(d) Fourth Region for TRDIYETDpYYRK, Spectrum 50.dta

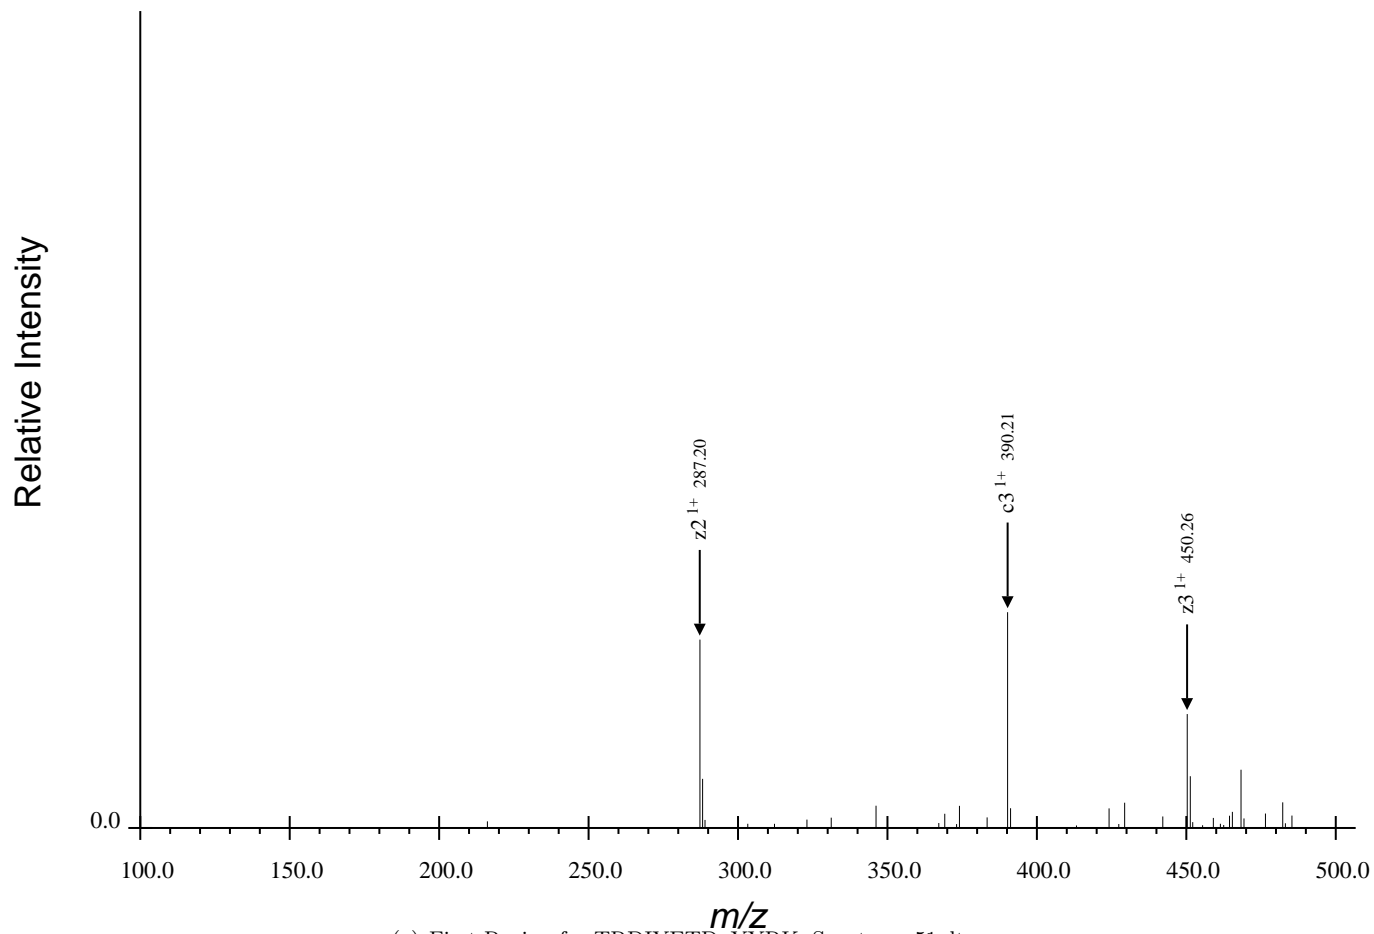

(a) First Region for TRDIYETDpYYRK, Spectrum 51.dta

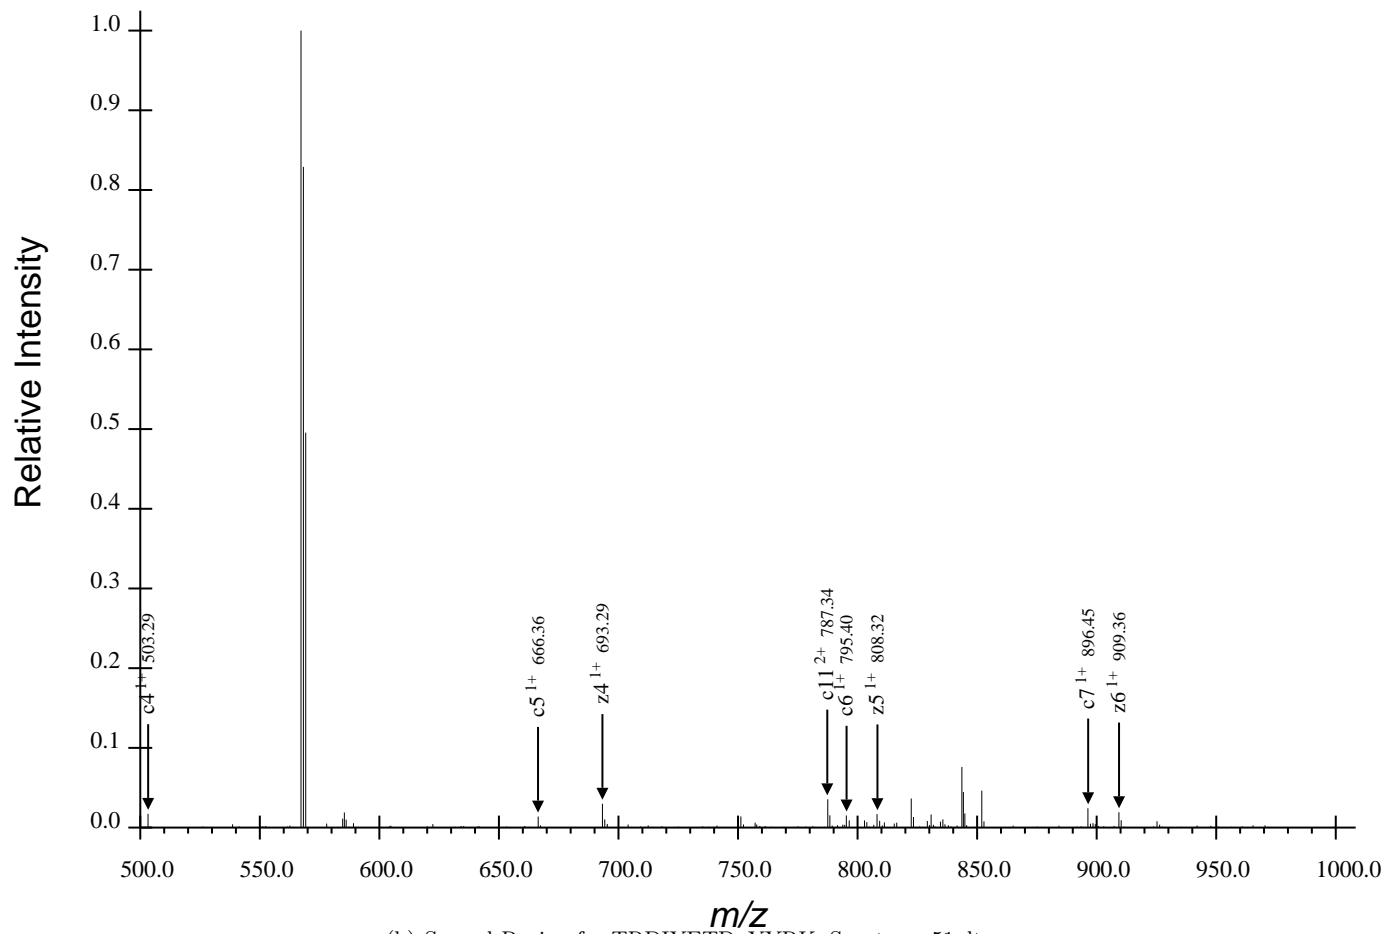

(b) Second Region for TRDIYETDpYYRK, Spectrum 51.dta

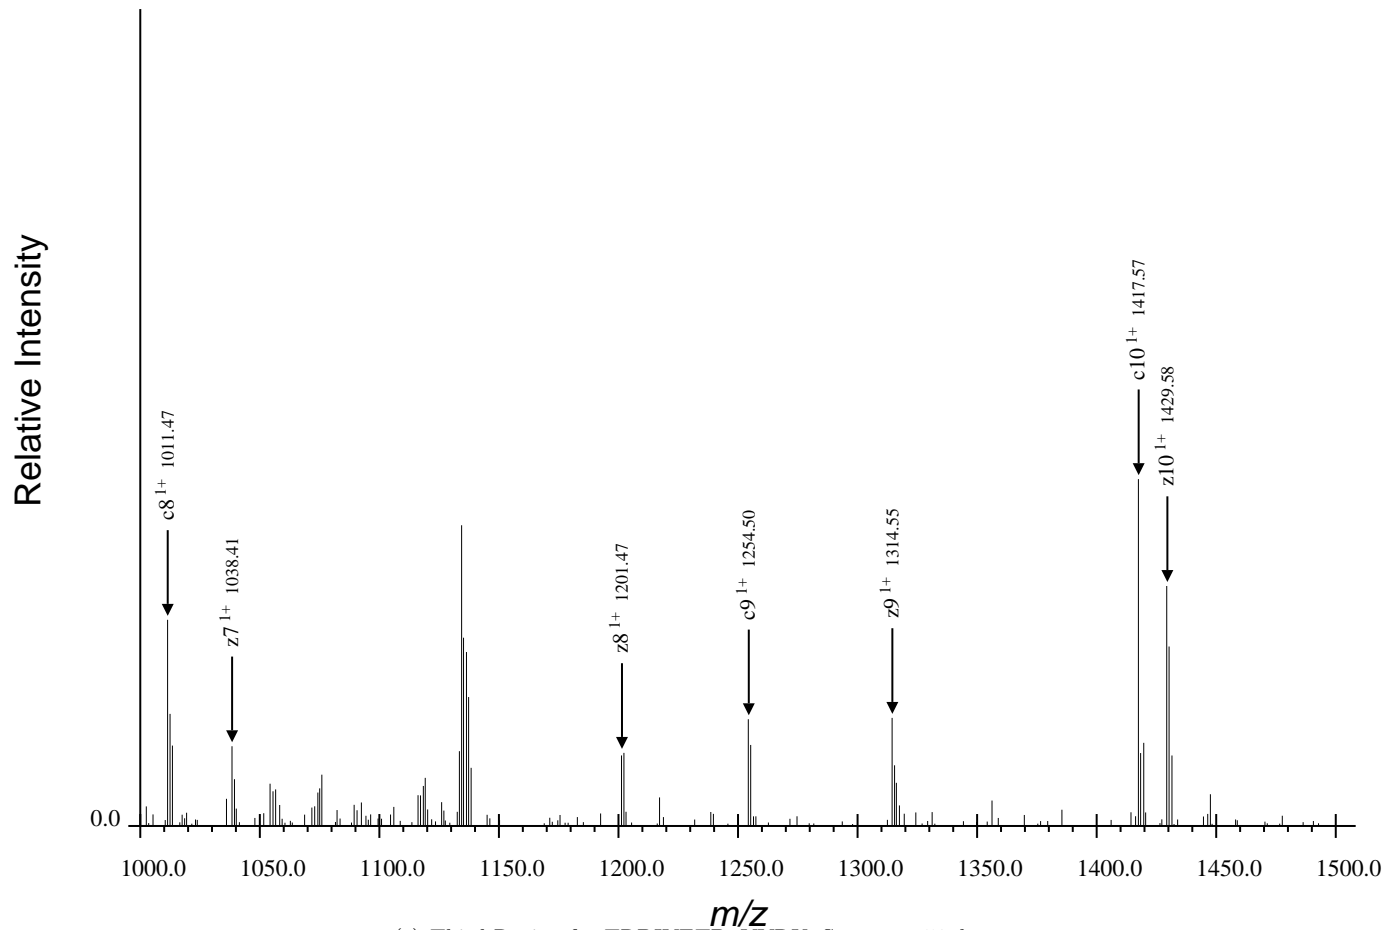

(c) Third Region for TRDIYETDpYYRK, Spectrum 51.dta

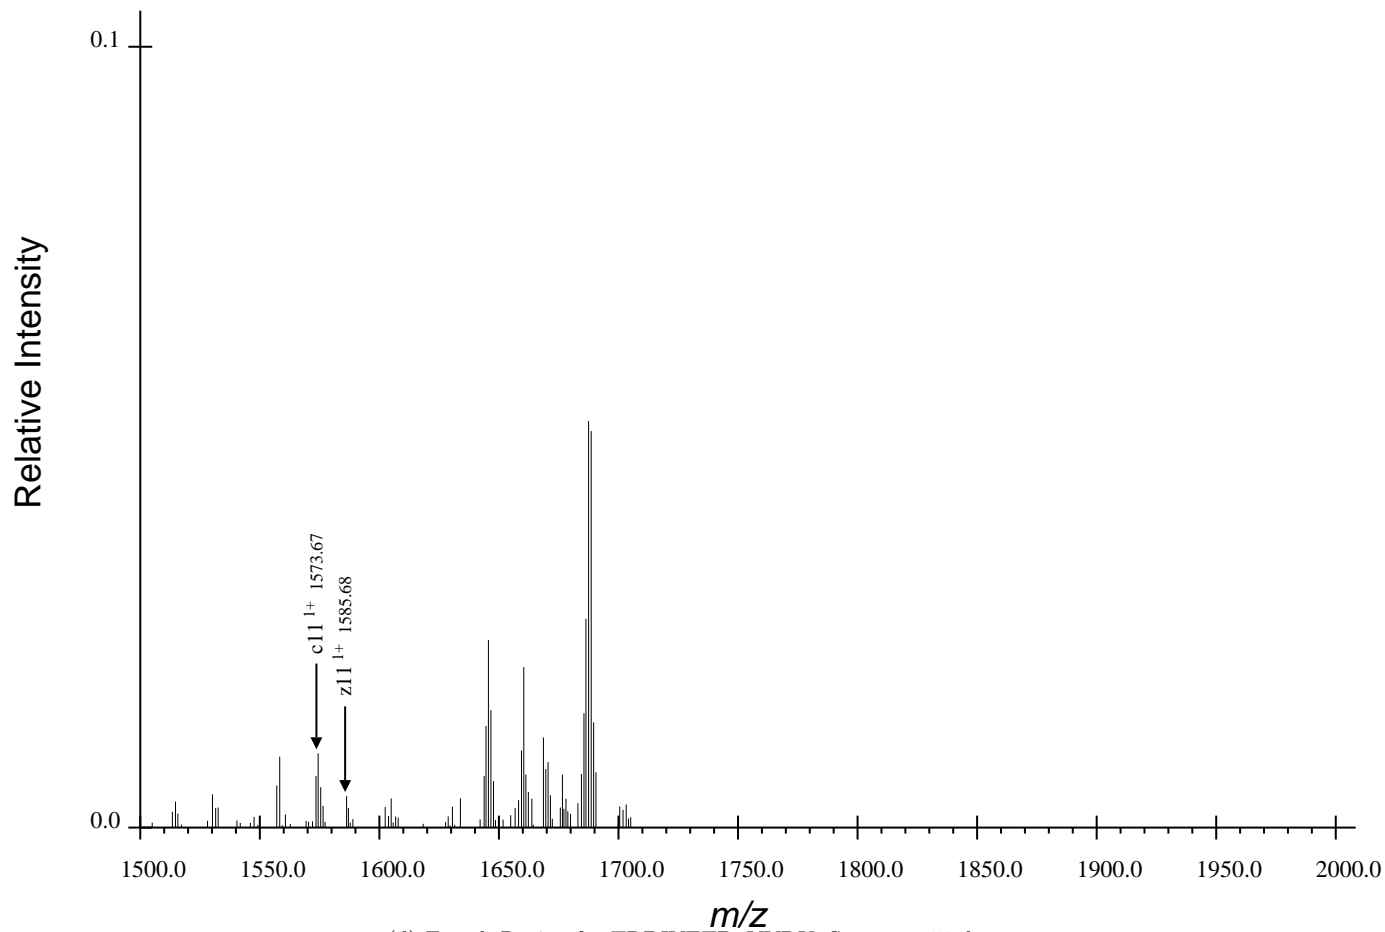

(d) Fourth Region for TRDIYETDpYYRK, Spectrum 51.dta

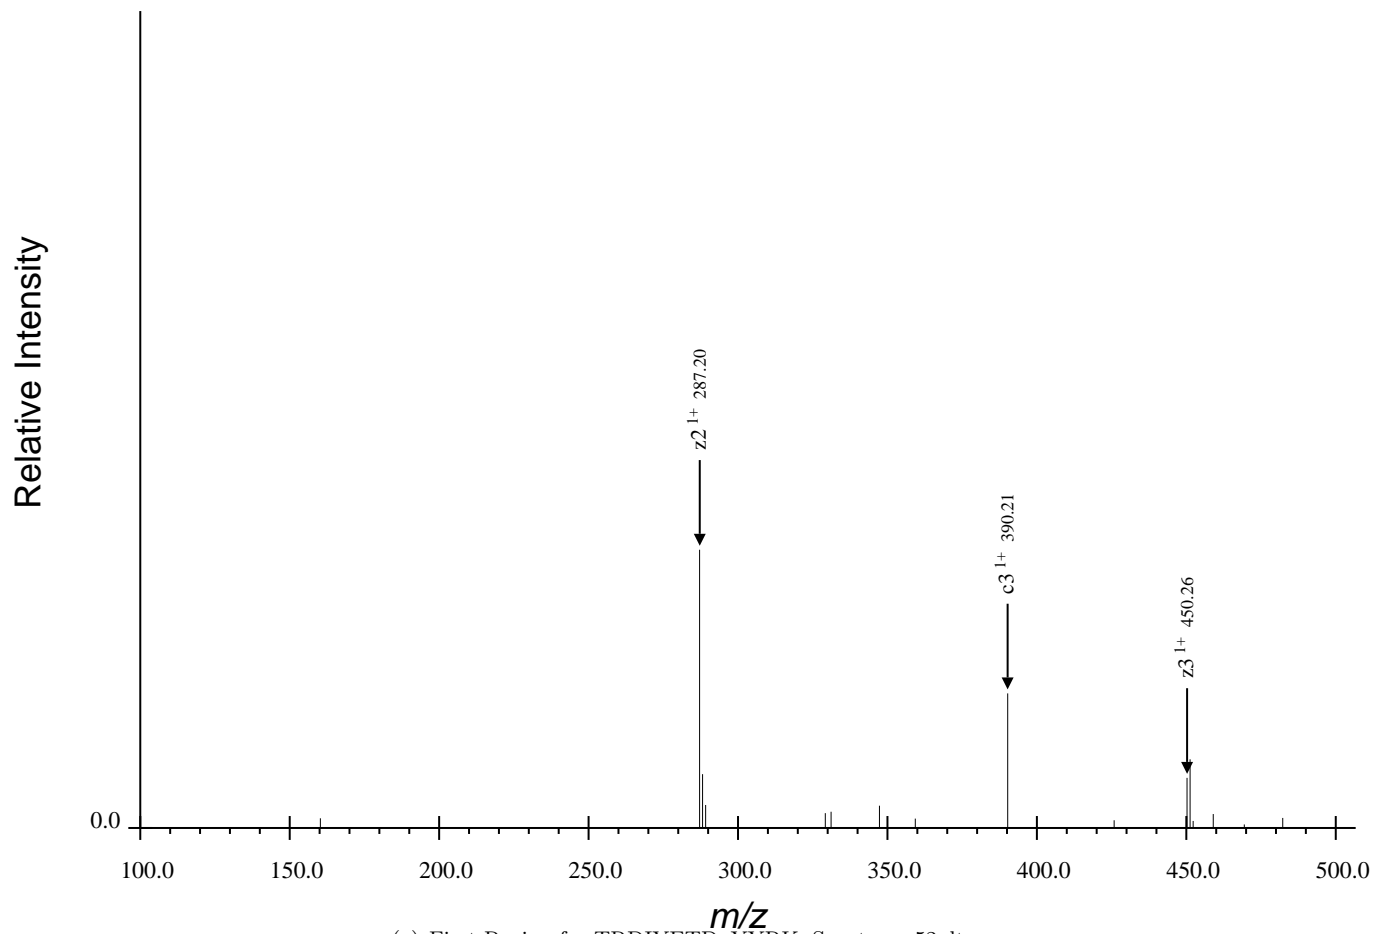

(a) First Region for TRDIYETDpYYRK, Spectrum 52.dta

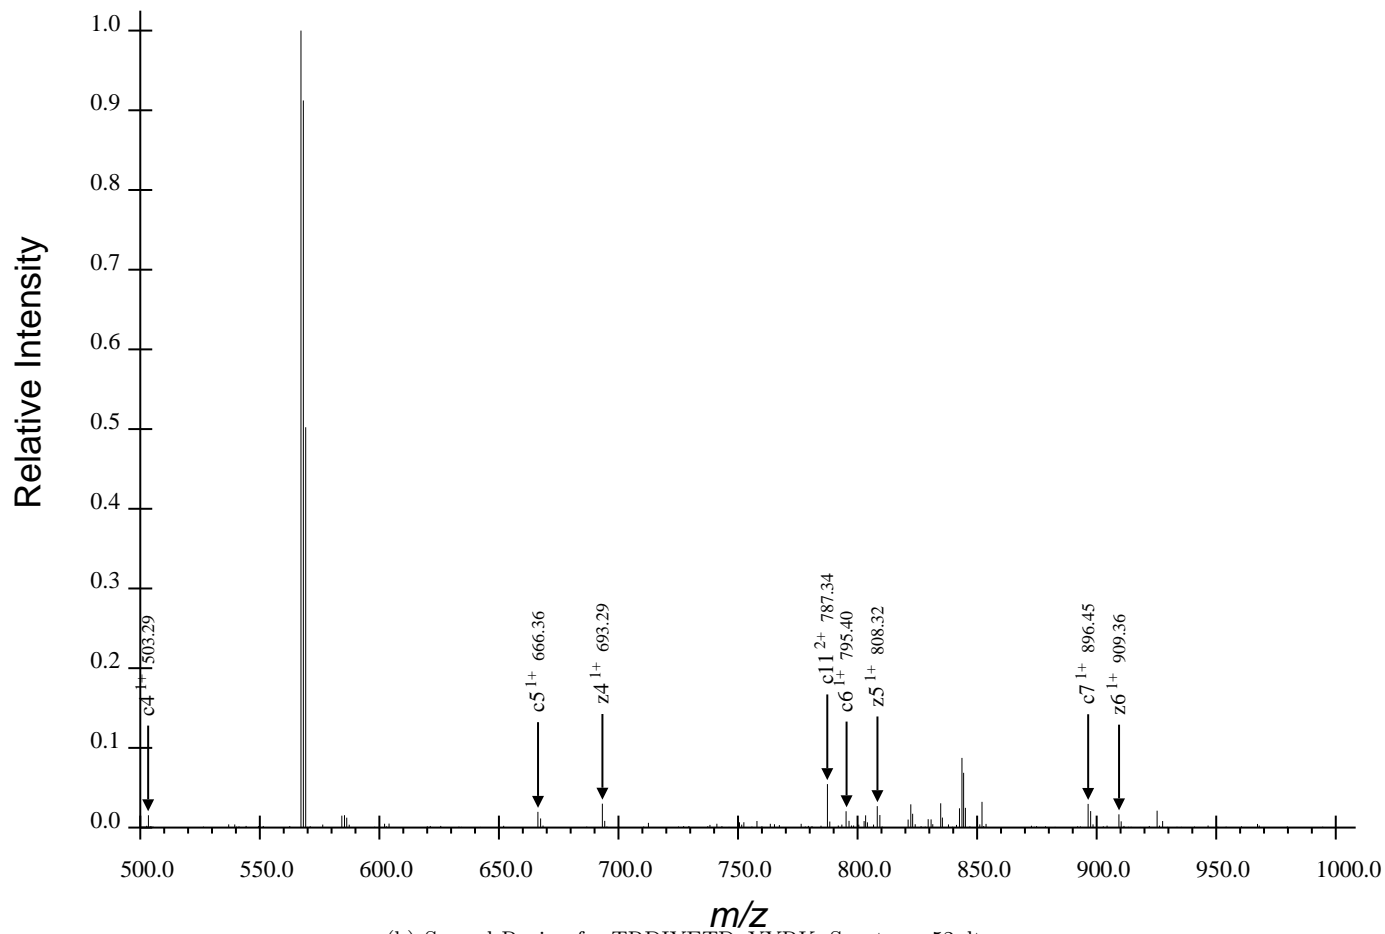

(b) Second Region for TRDIYETDpYYRK, Spectrum 52.dta

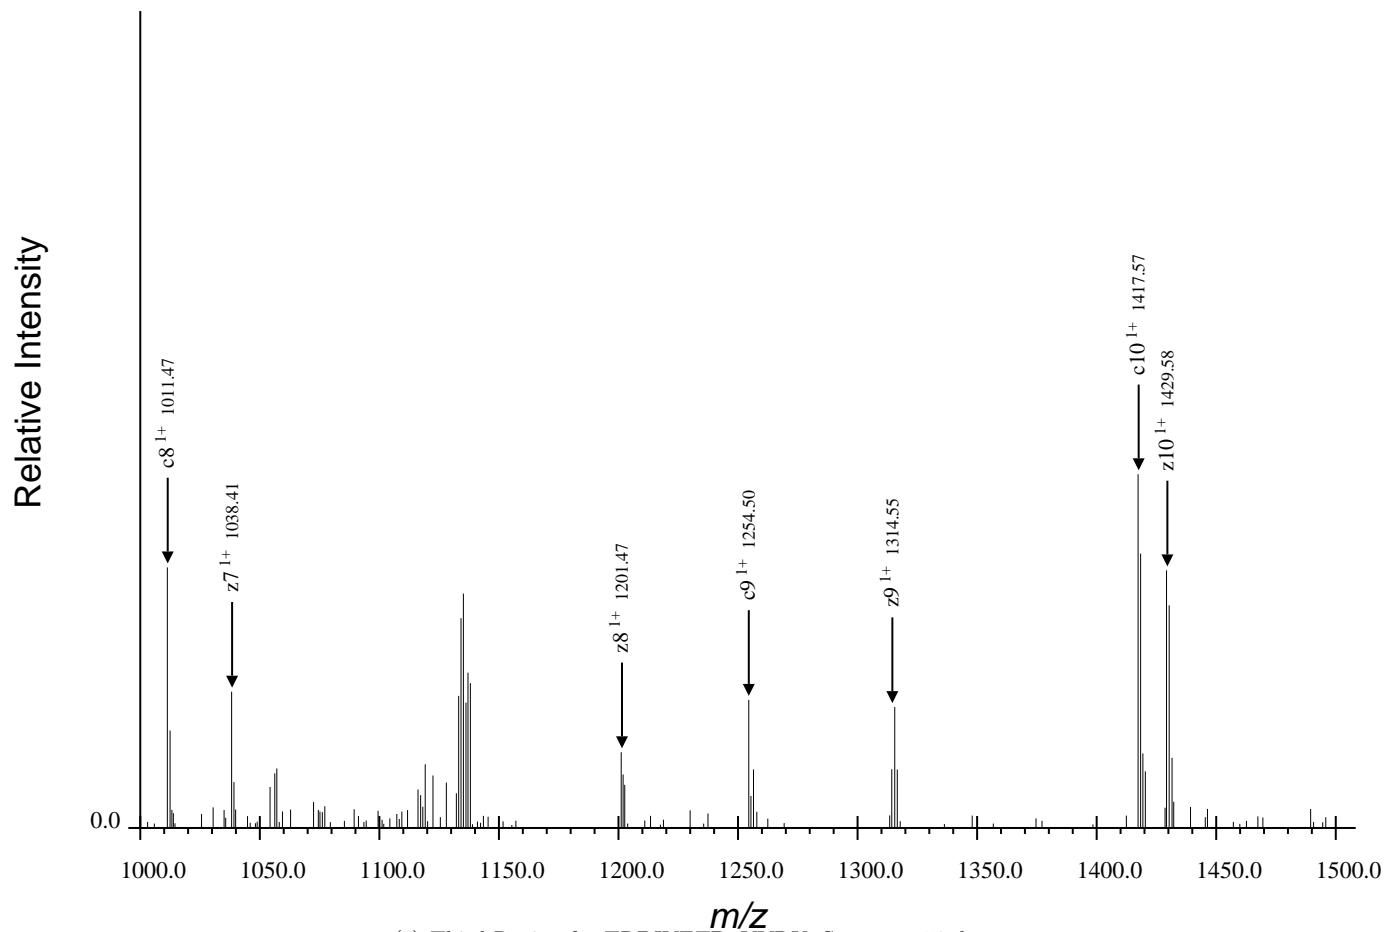

(c) Third Region for TRDIYETDpYYRK, Spectrum 52.dta

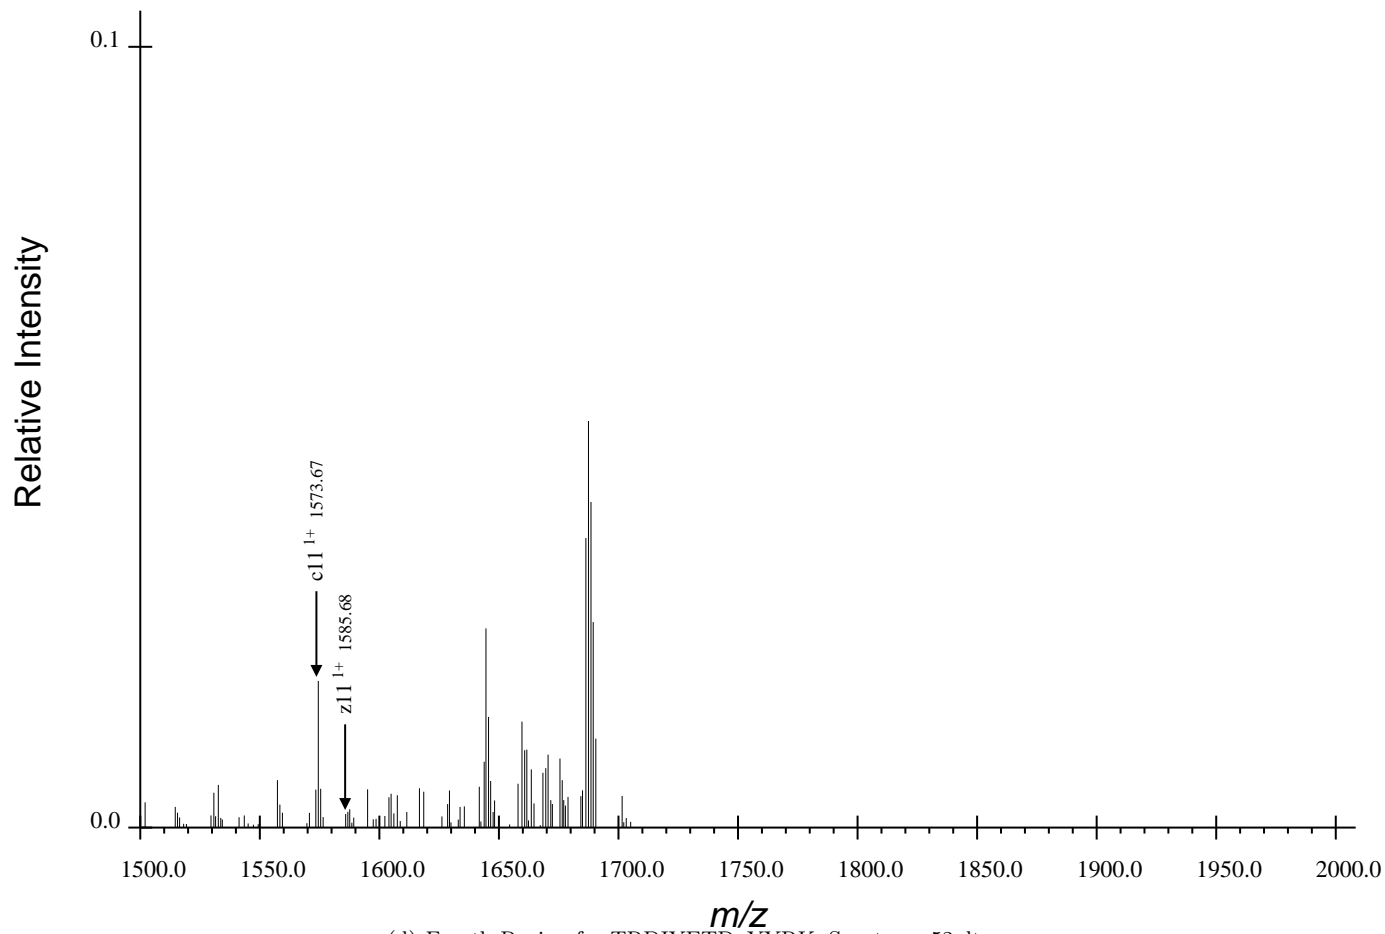

(d) Fourth Region for TRDIYETDpYYRK, Spectrum 52.dta



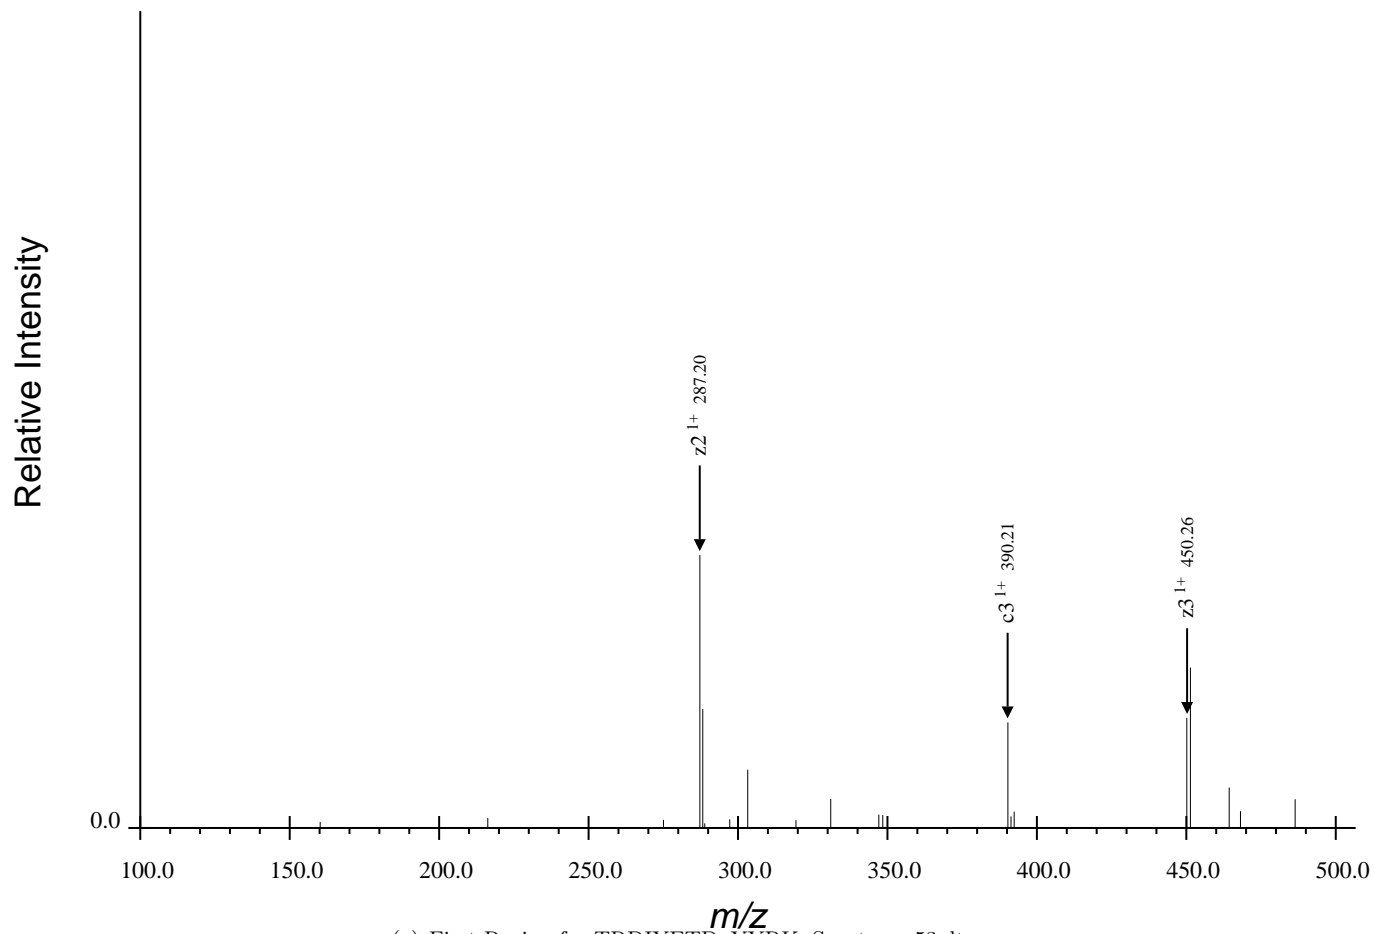

(a) First Region for TRDIYETDpYYRK, Spectrum 53.dta

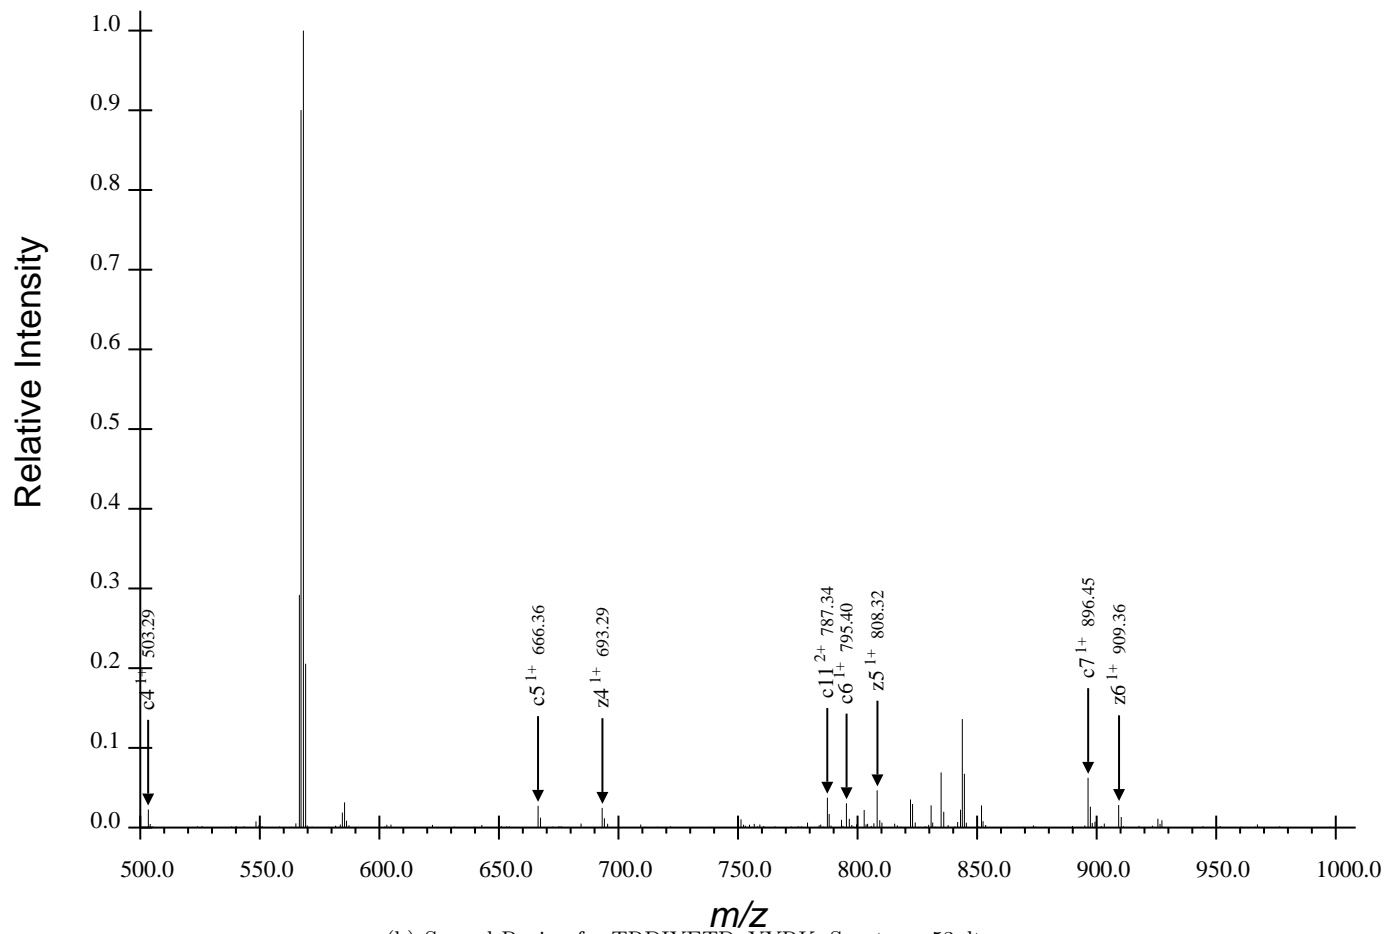

(b) Second Region for TRDIYETDpYYRK, Spectrum 53.dta

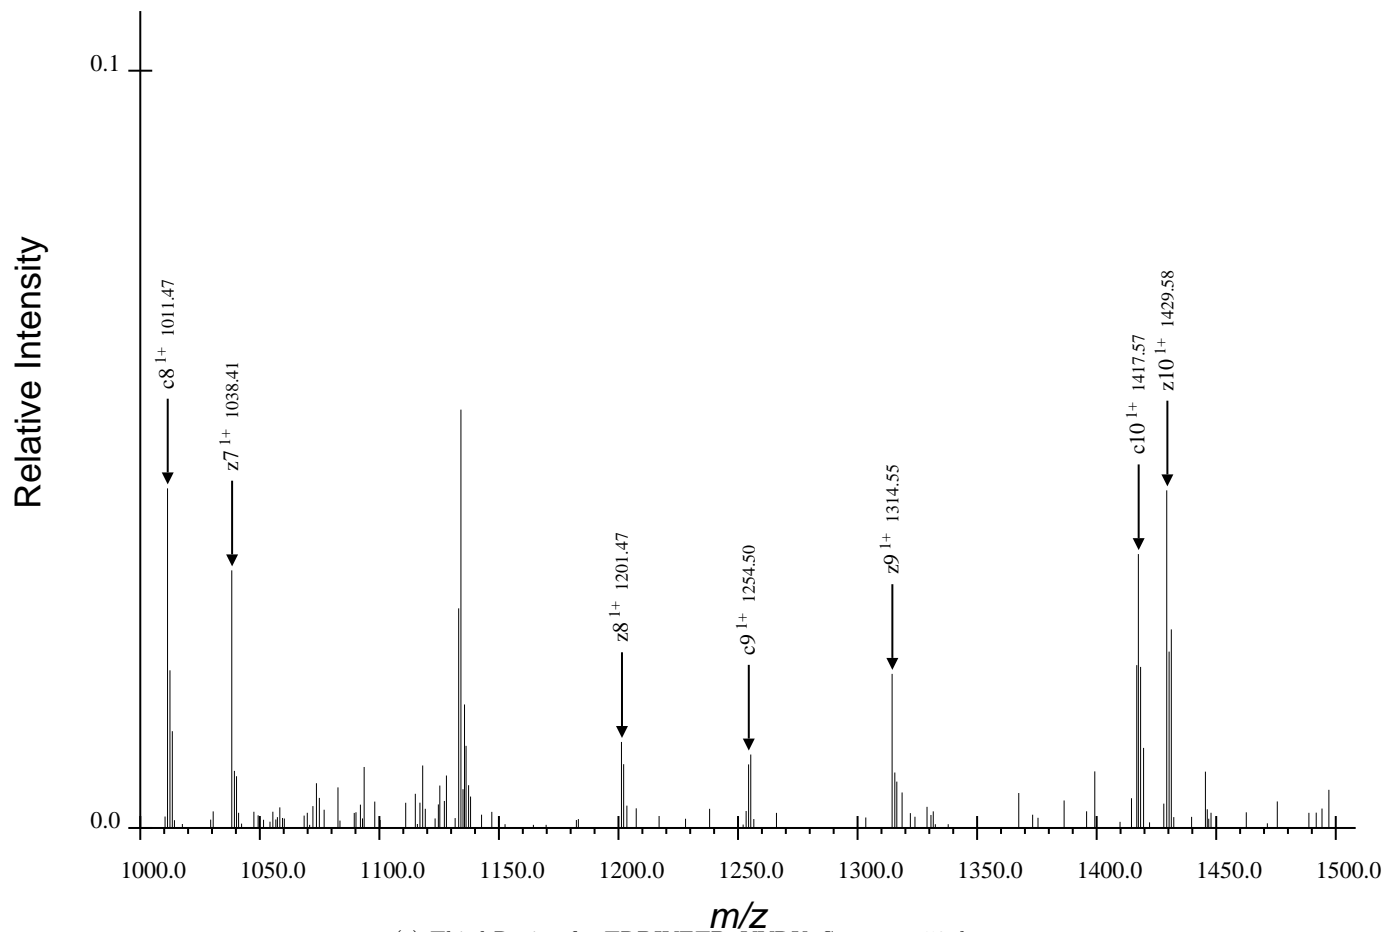

(c) Third Region for TRDIYETDpYYRK, Spectrum 53.dta

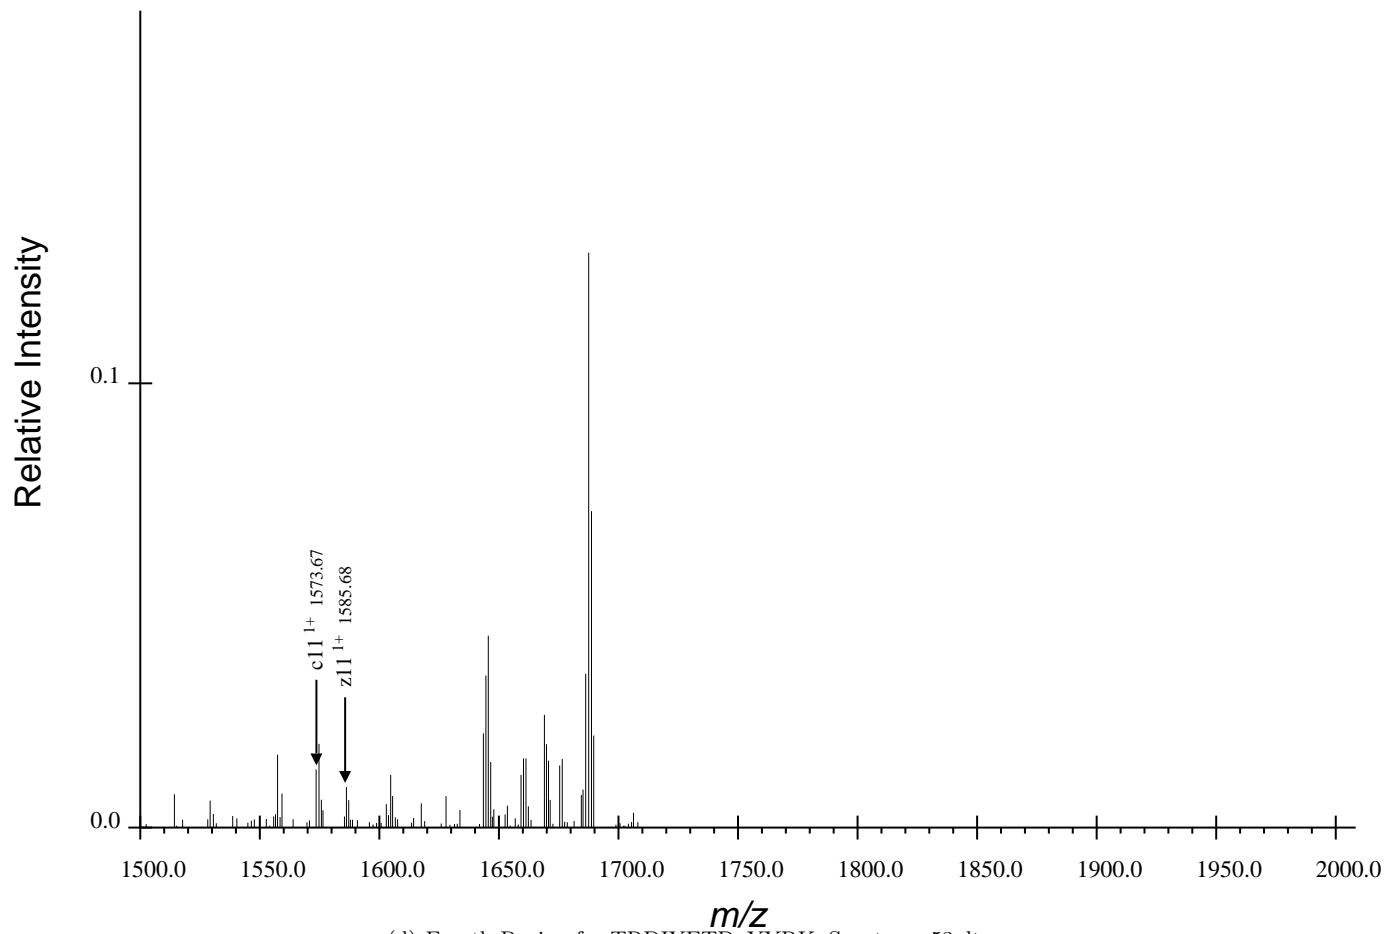

(d) Fourth Region for TRDIYETDpYYRK, Spectrum 53.dta

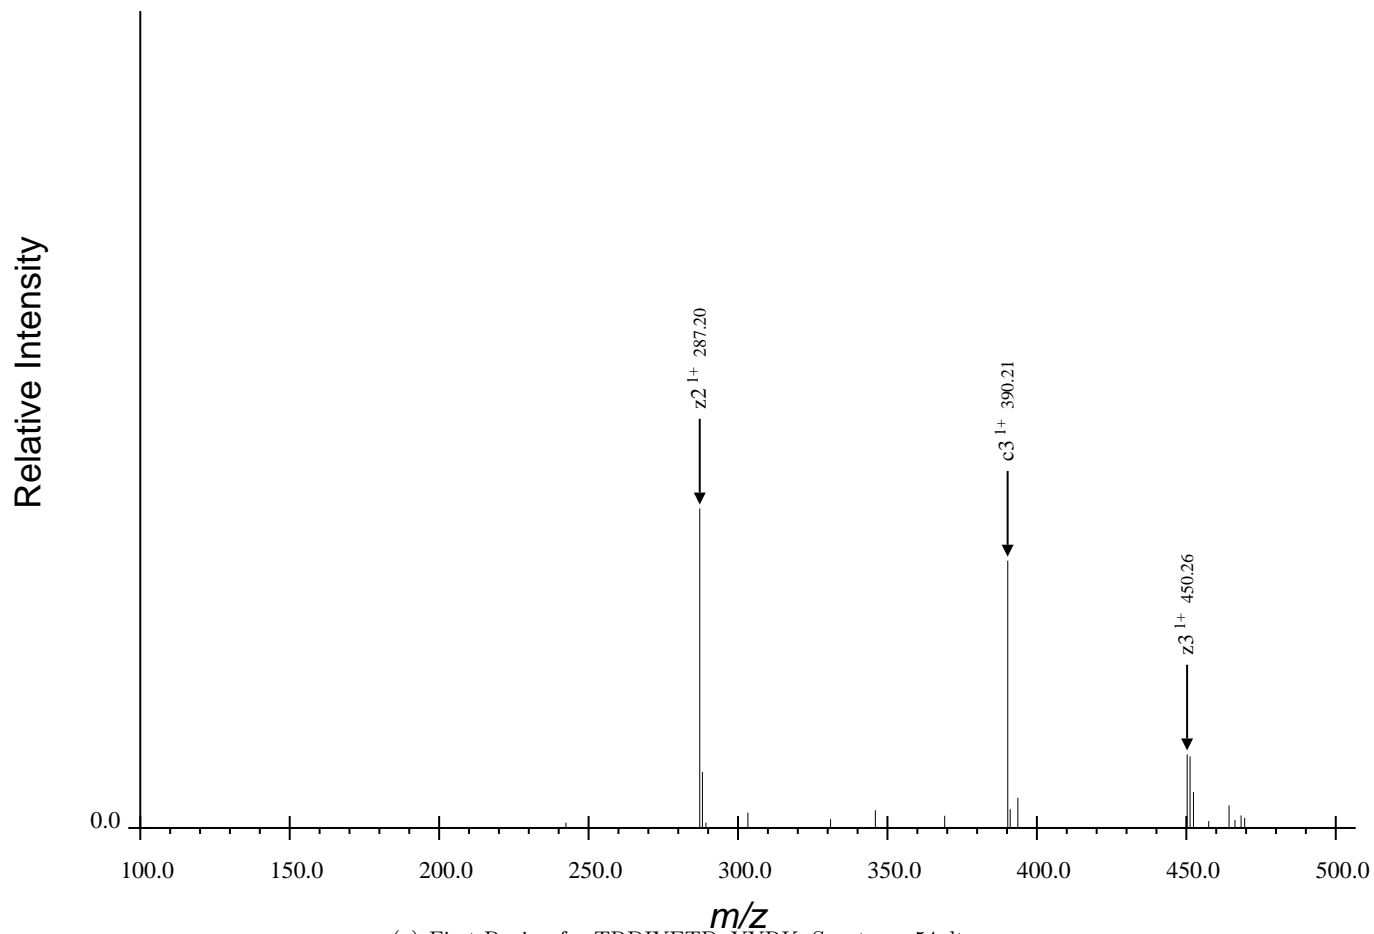

(a) First Region for TRDIYETDpYYRK, Spectrum 54.dta

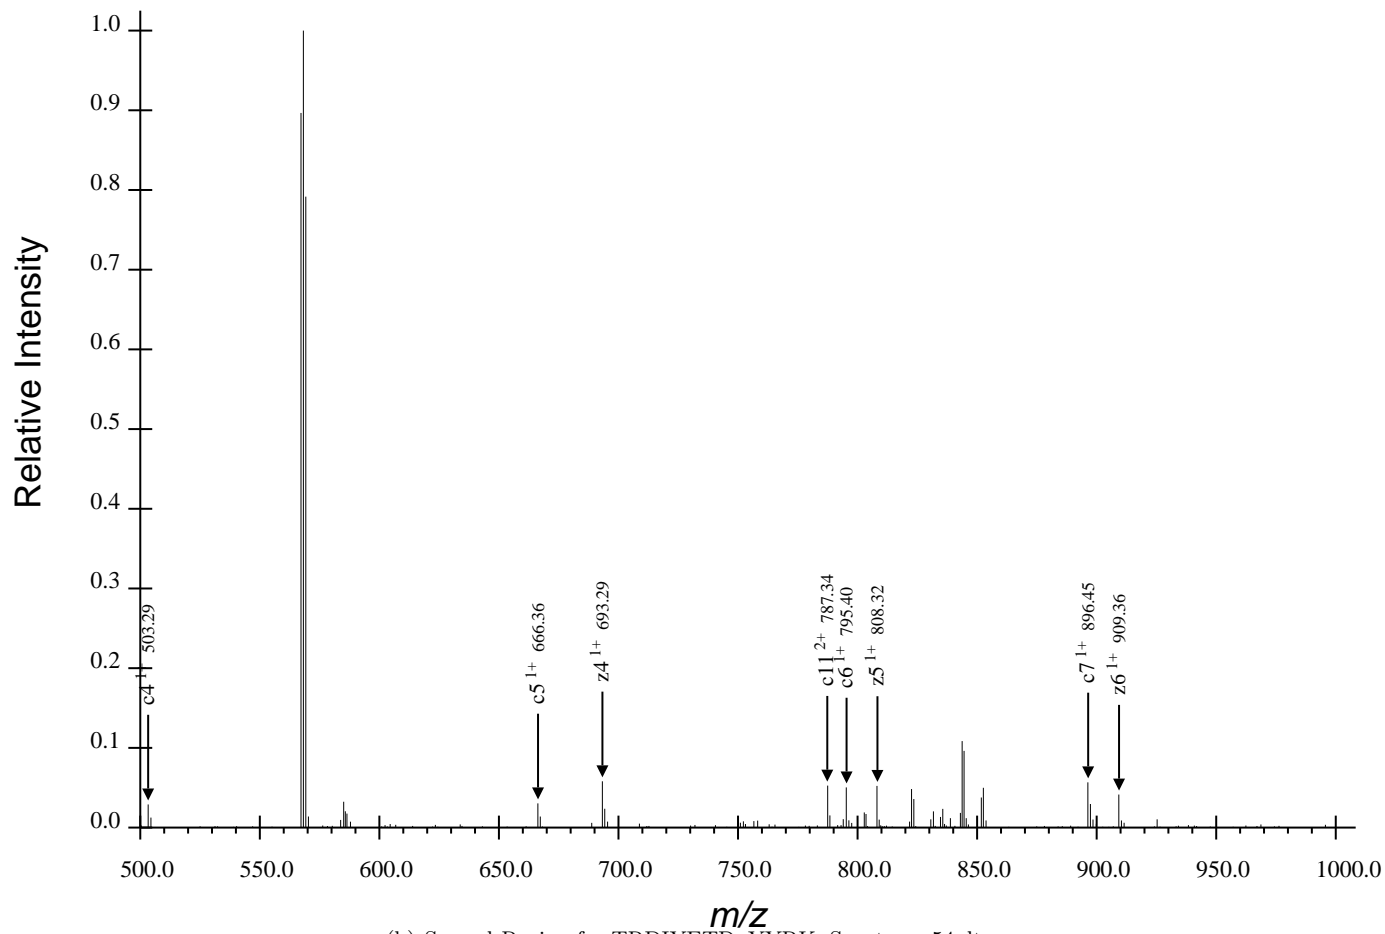

(b) Second Region for TRDIYETDpYYRK, Spectrum 54.dta

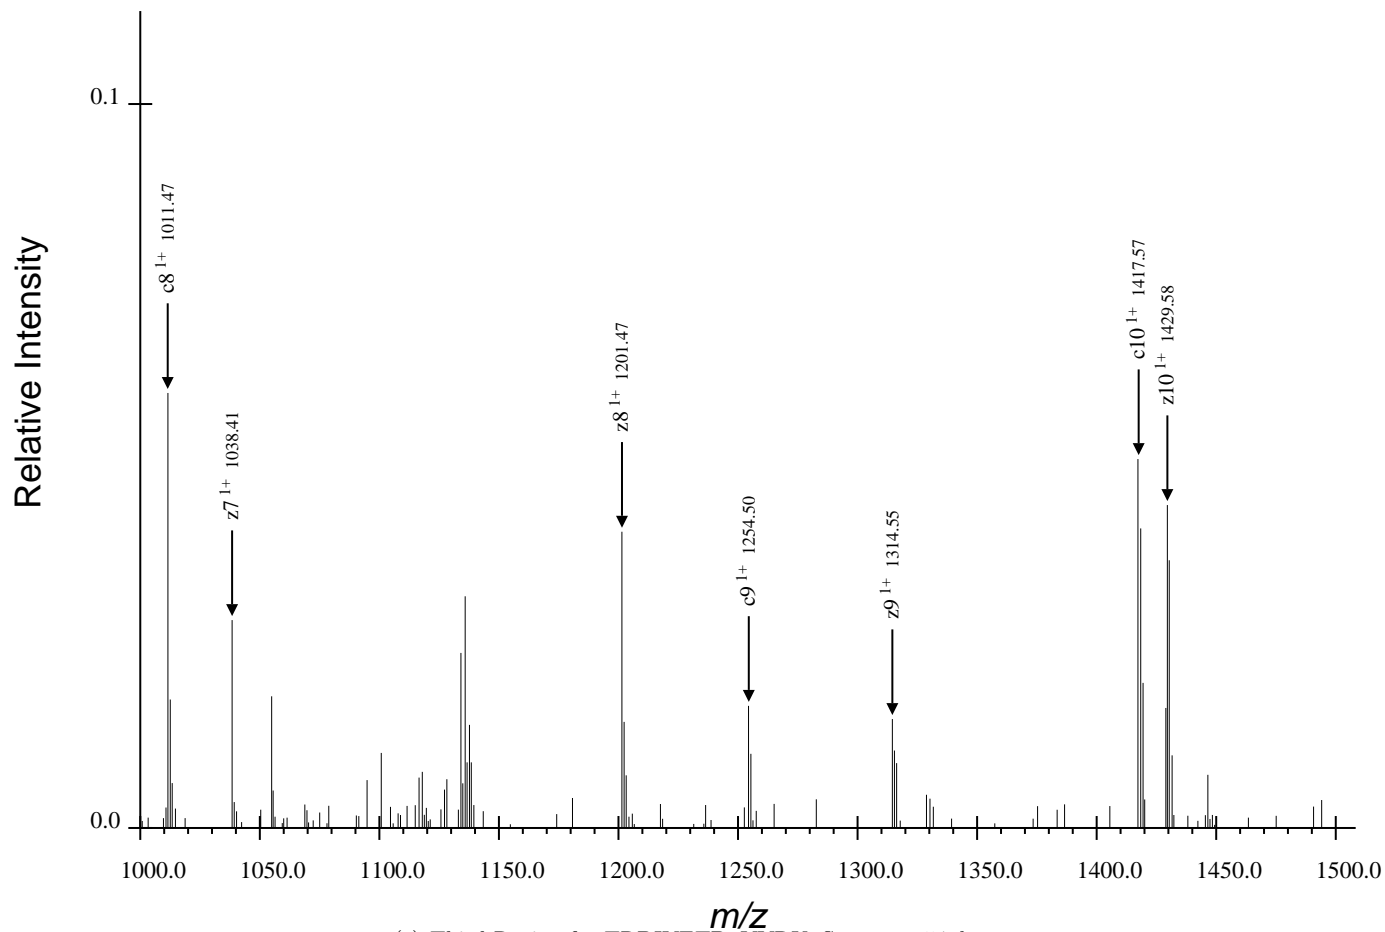

(c) Third Region for TRDIYETDpYYRK, Spectrum 54.dta

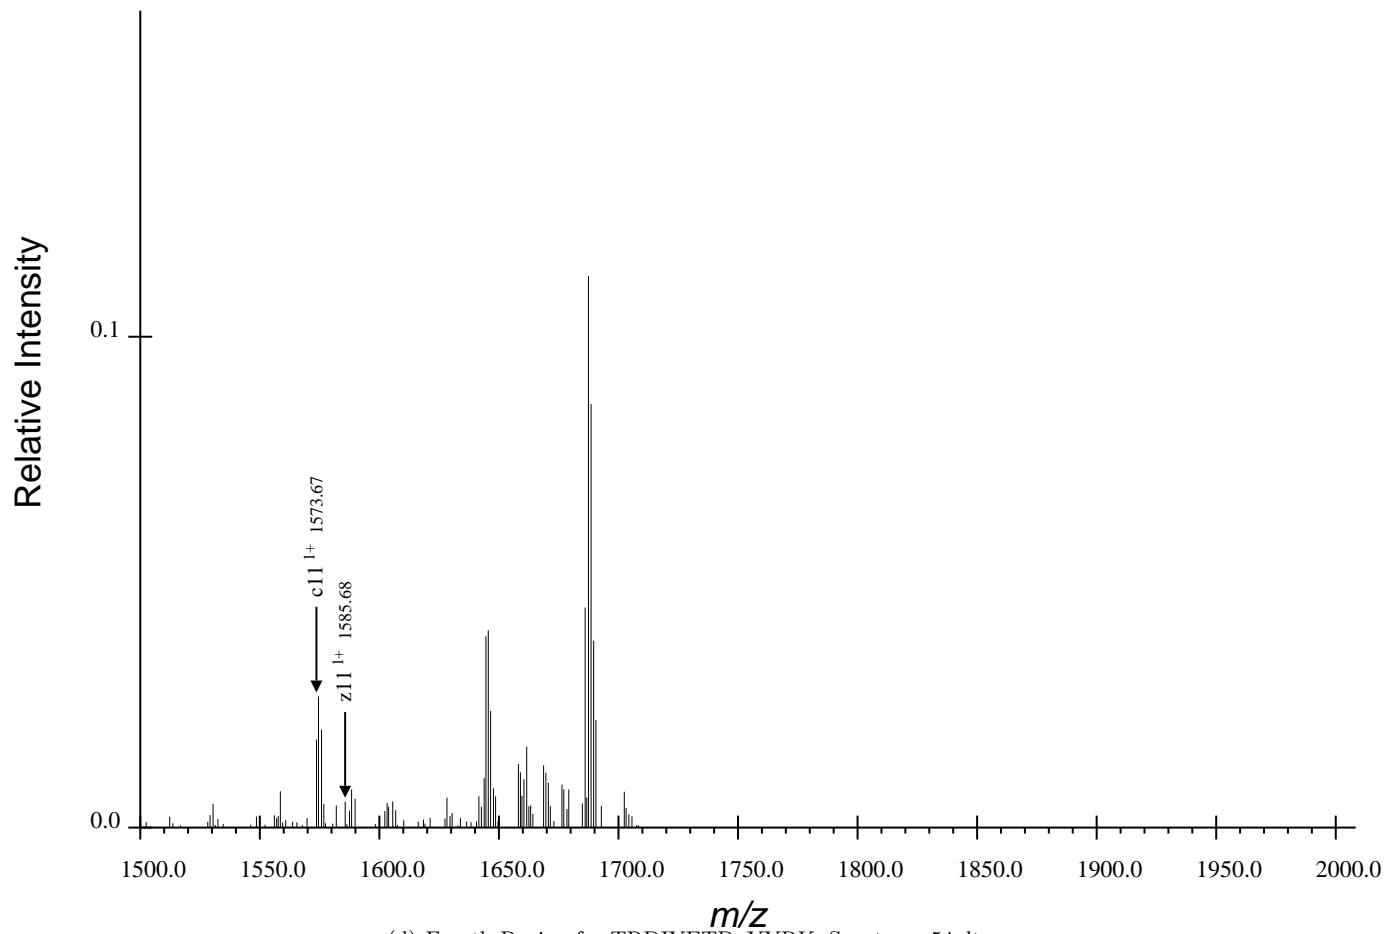

(d) Fourth Region for TRDIYETDpYYRK, Spectrum 54.dta

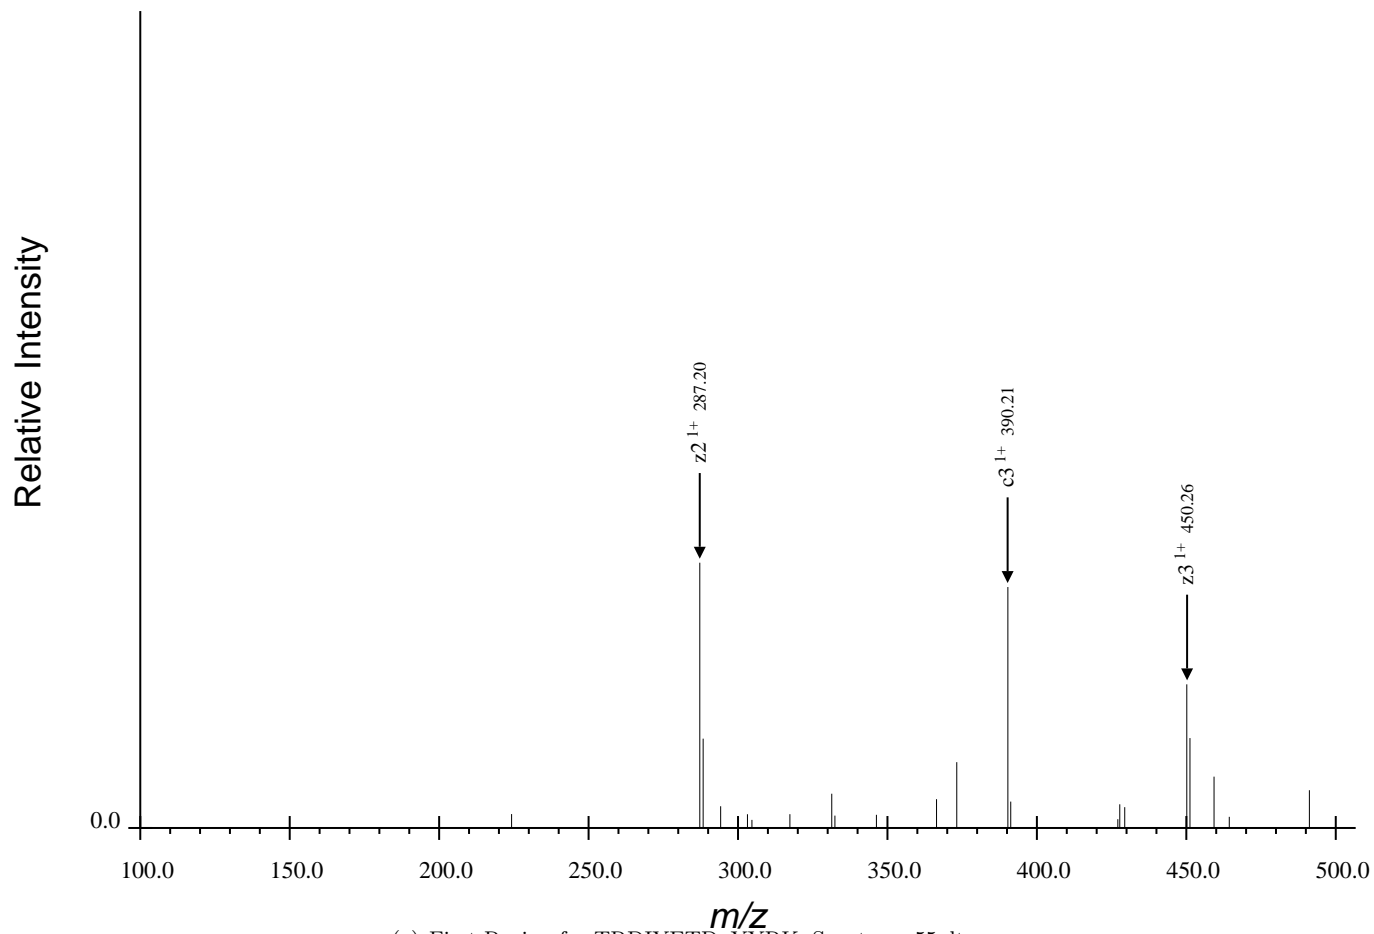

(a) First Region for TRDIYETDpYYRK, Spectrum 55.dta

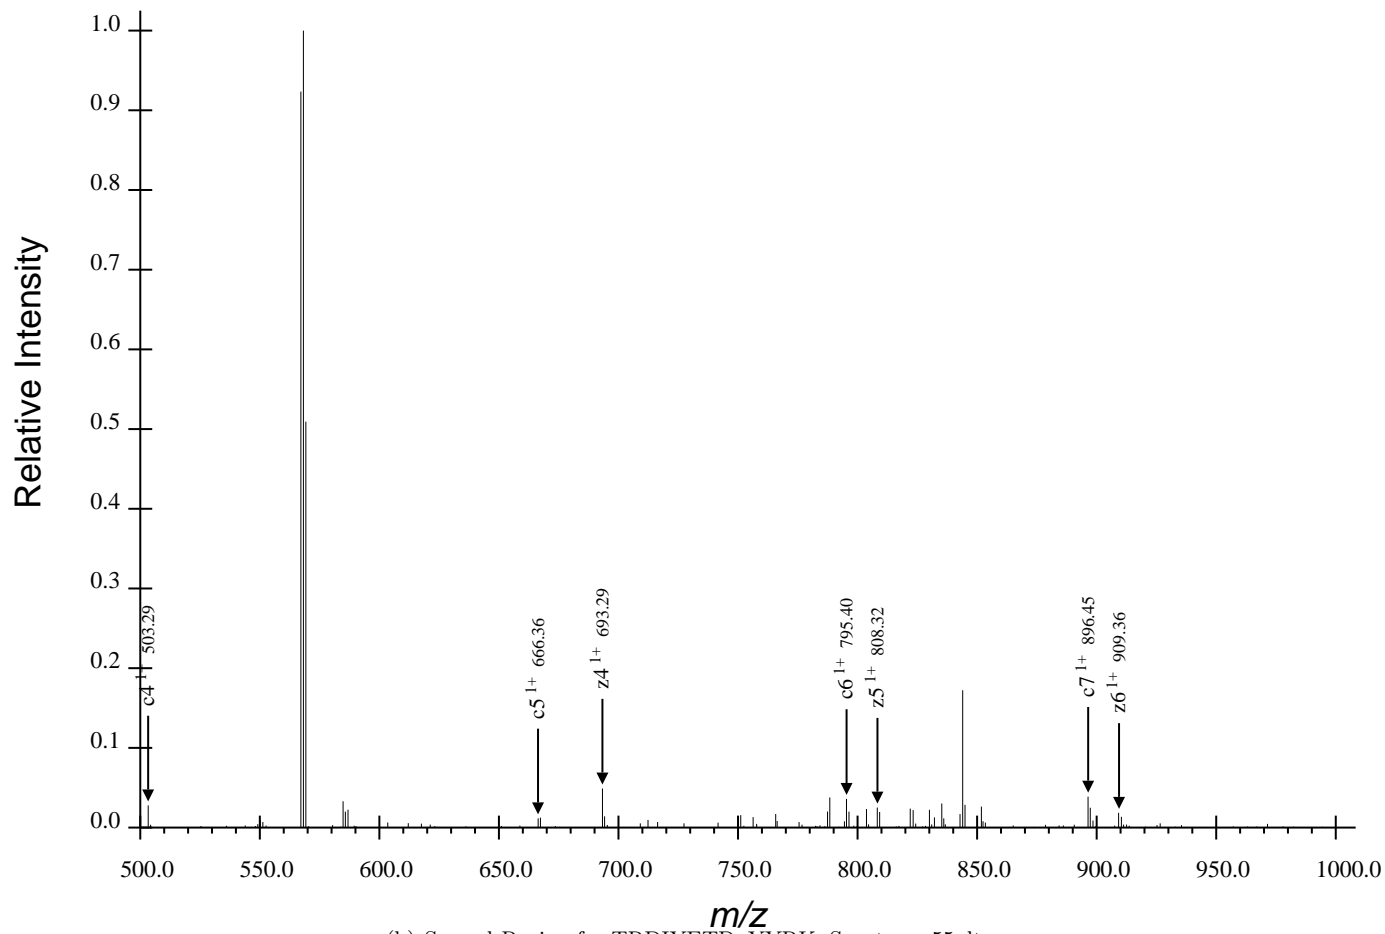

(b) Second Region for TRDIYETDpYYRK, Spectrum 55.dta

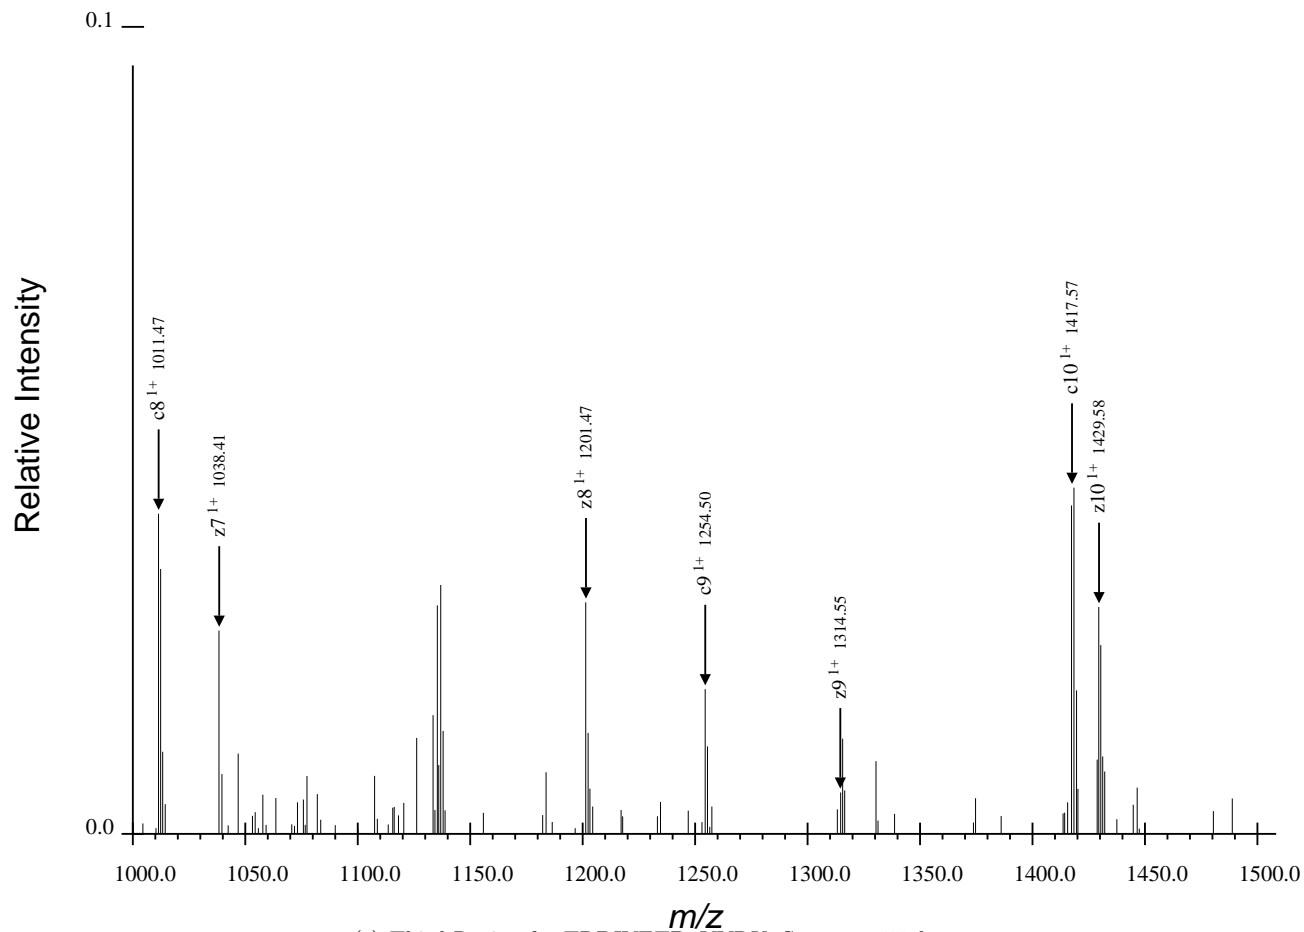

(c) Third Region for TRDIYETDpYYRK, Spectrum 55.dta

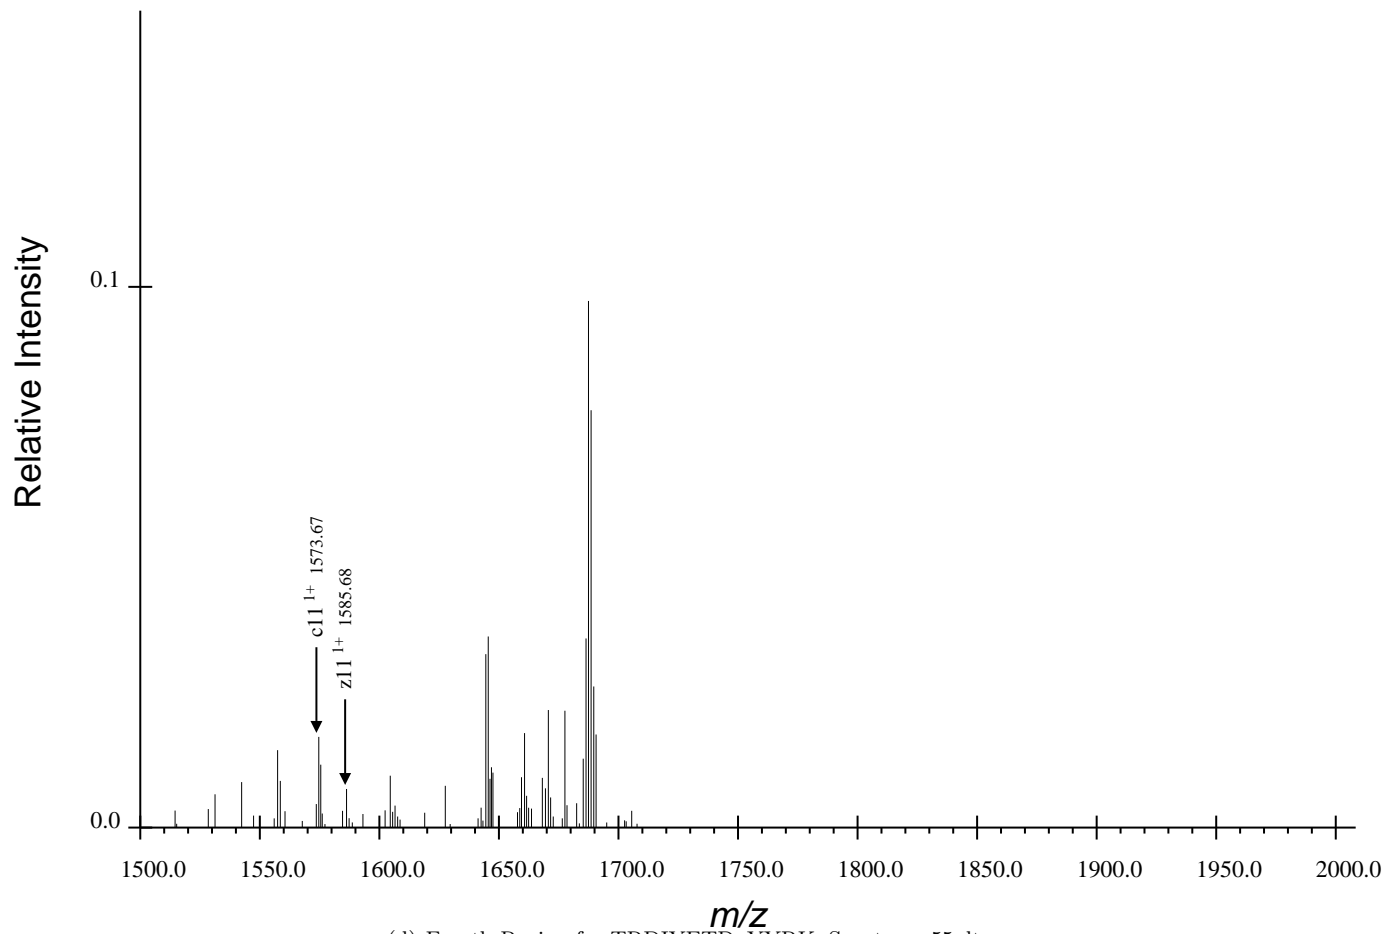

(d) Fourth Region for TRDIYETDpYYRK, Spectrum 55.dta

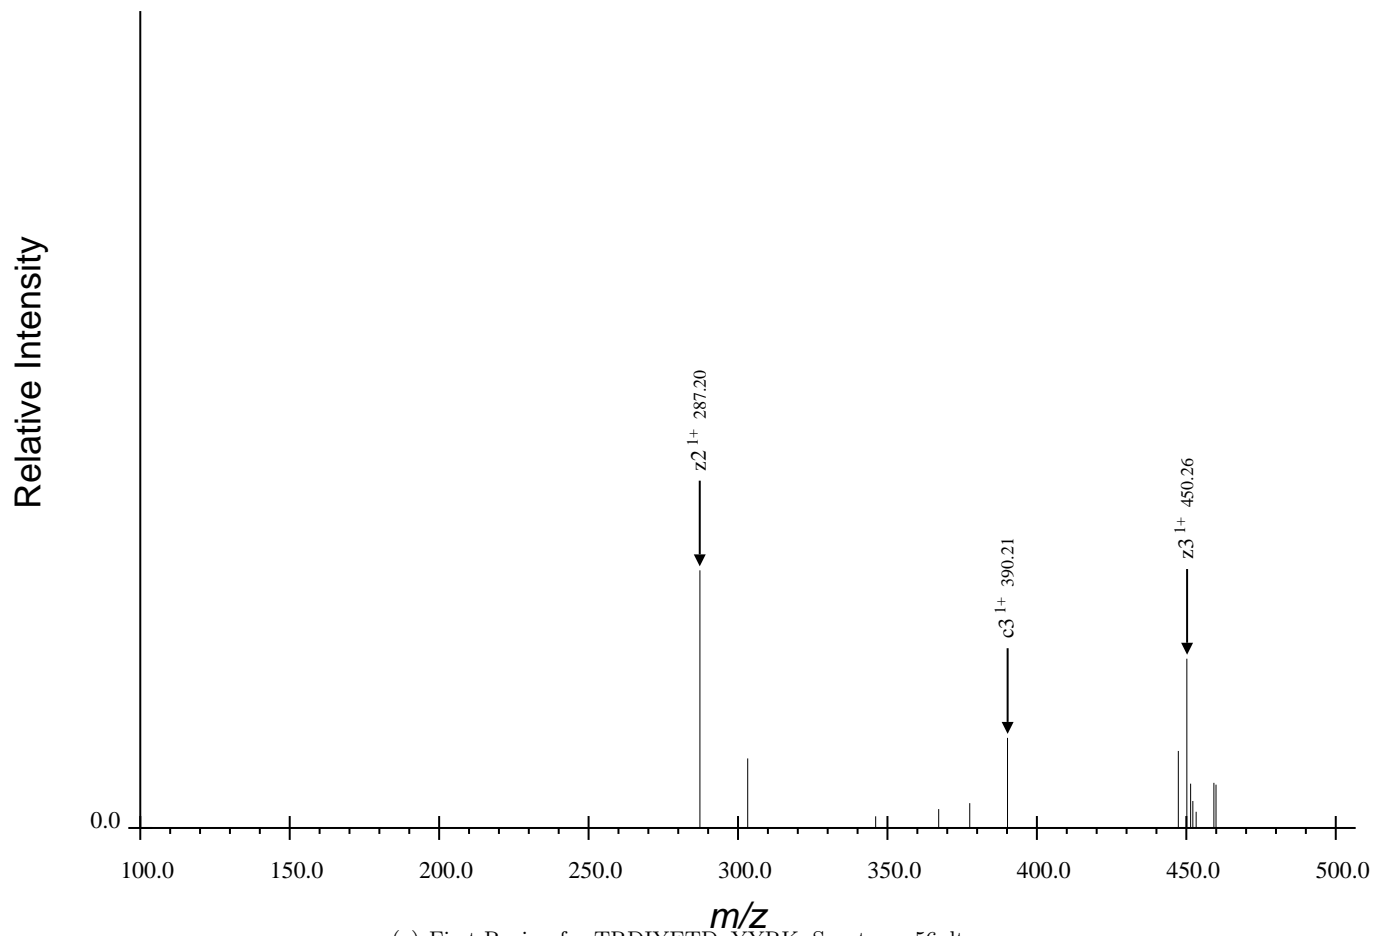

(a) First Region for TRDIYETDpYYRK, Spectrum 56.dta

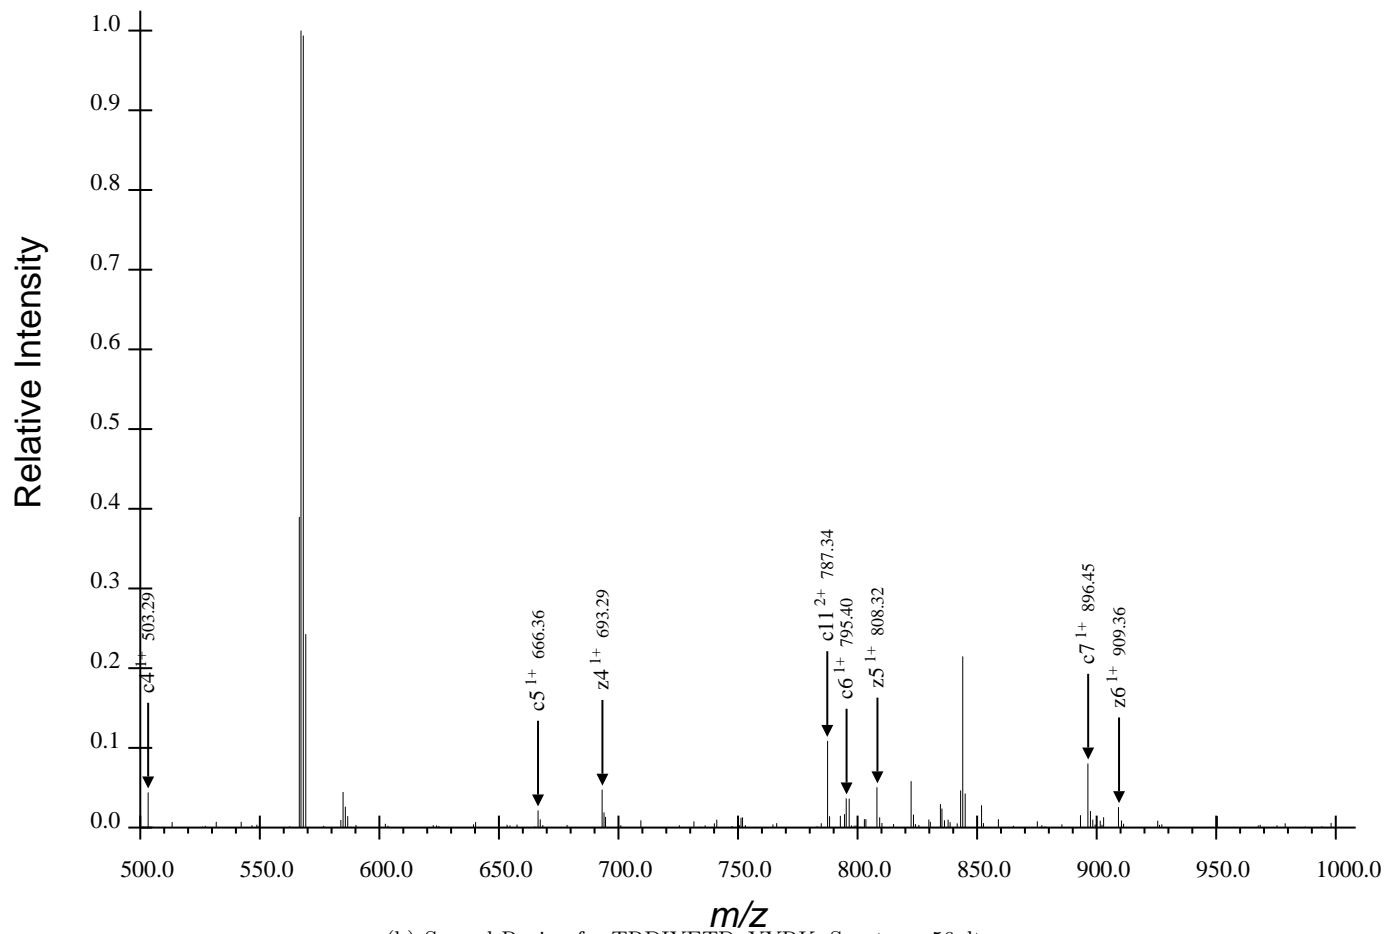

(b) Second Region for TRDIYETDpYYRK, Spectrum 56.dta

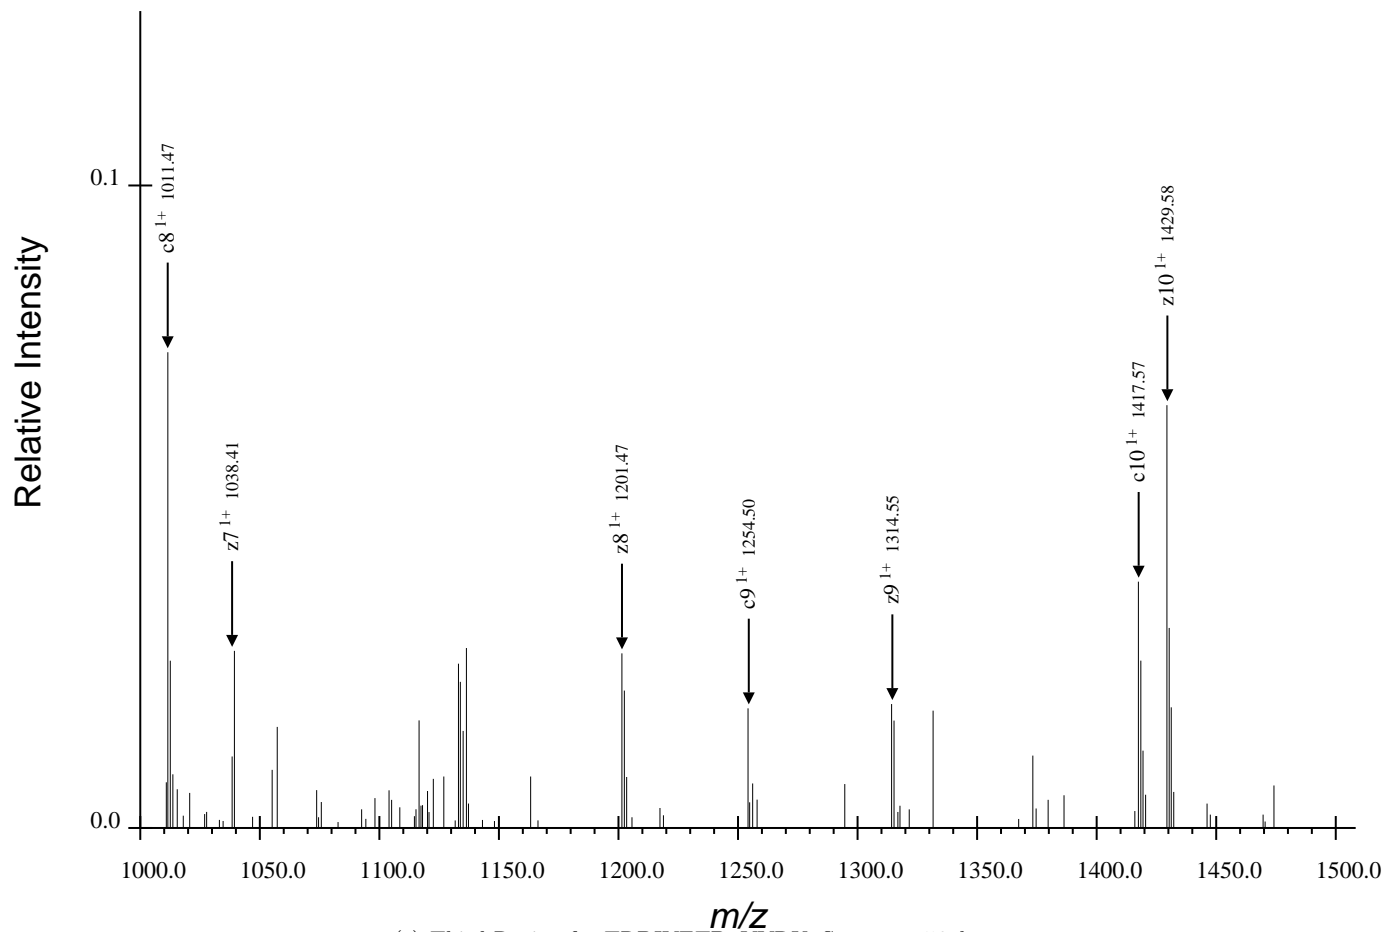

(c) Third Region for TRDIYETDpYYRK, Spectrum 56.dta

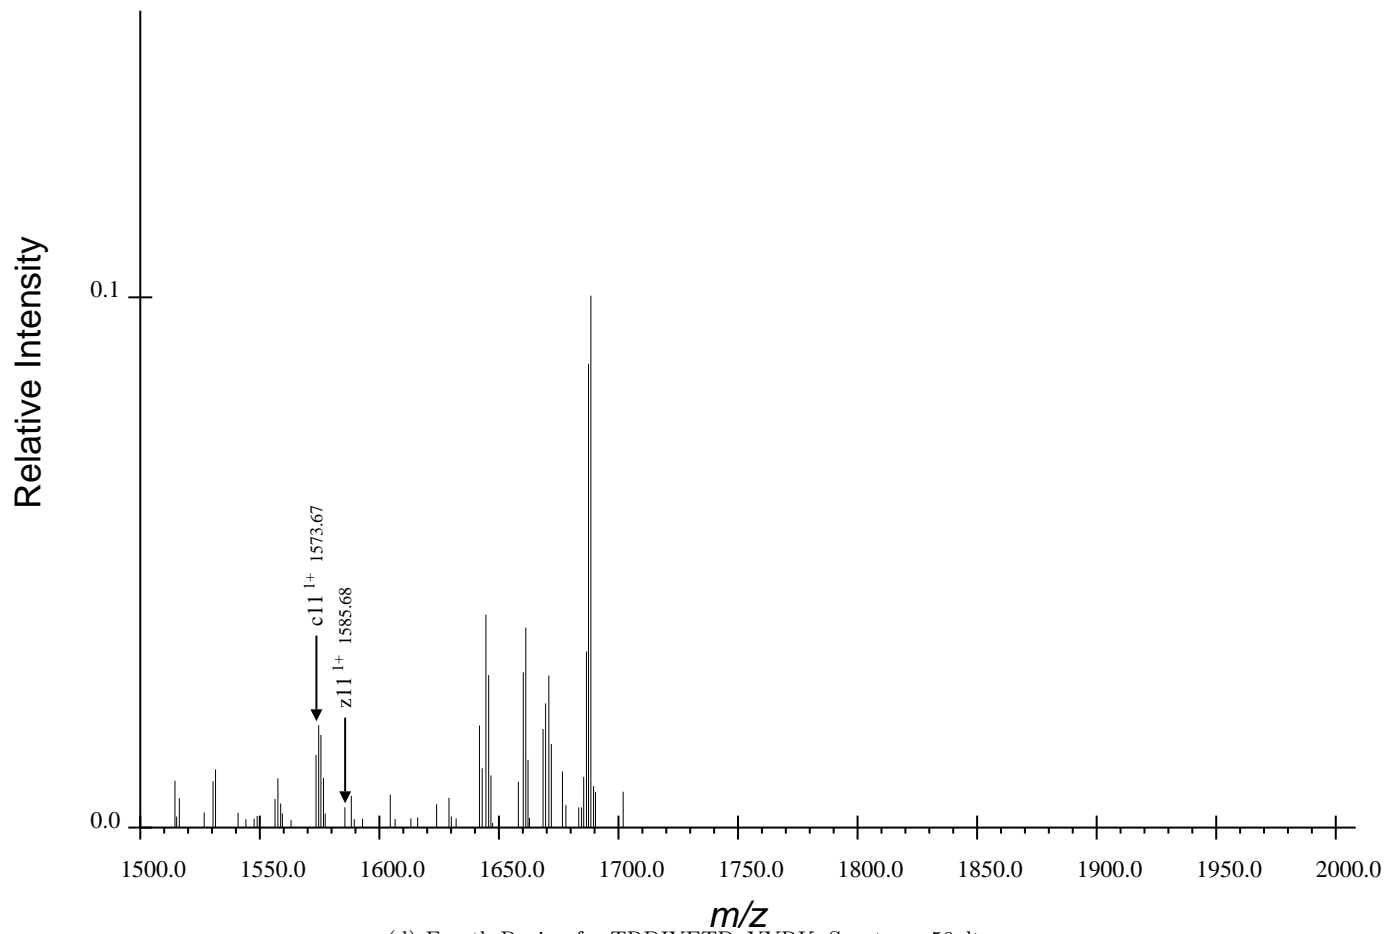

(d) Fourth Region for TRDIYETDpYYRK, Spectrum 56.dta



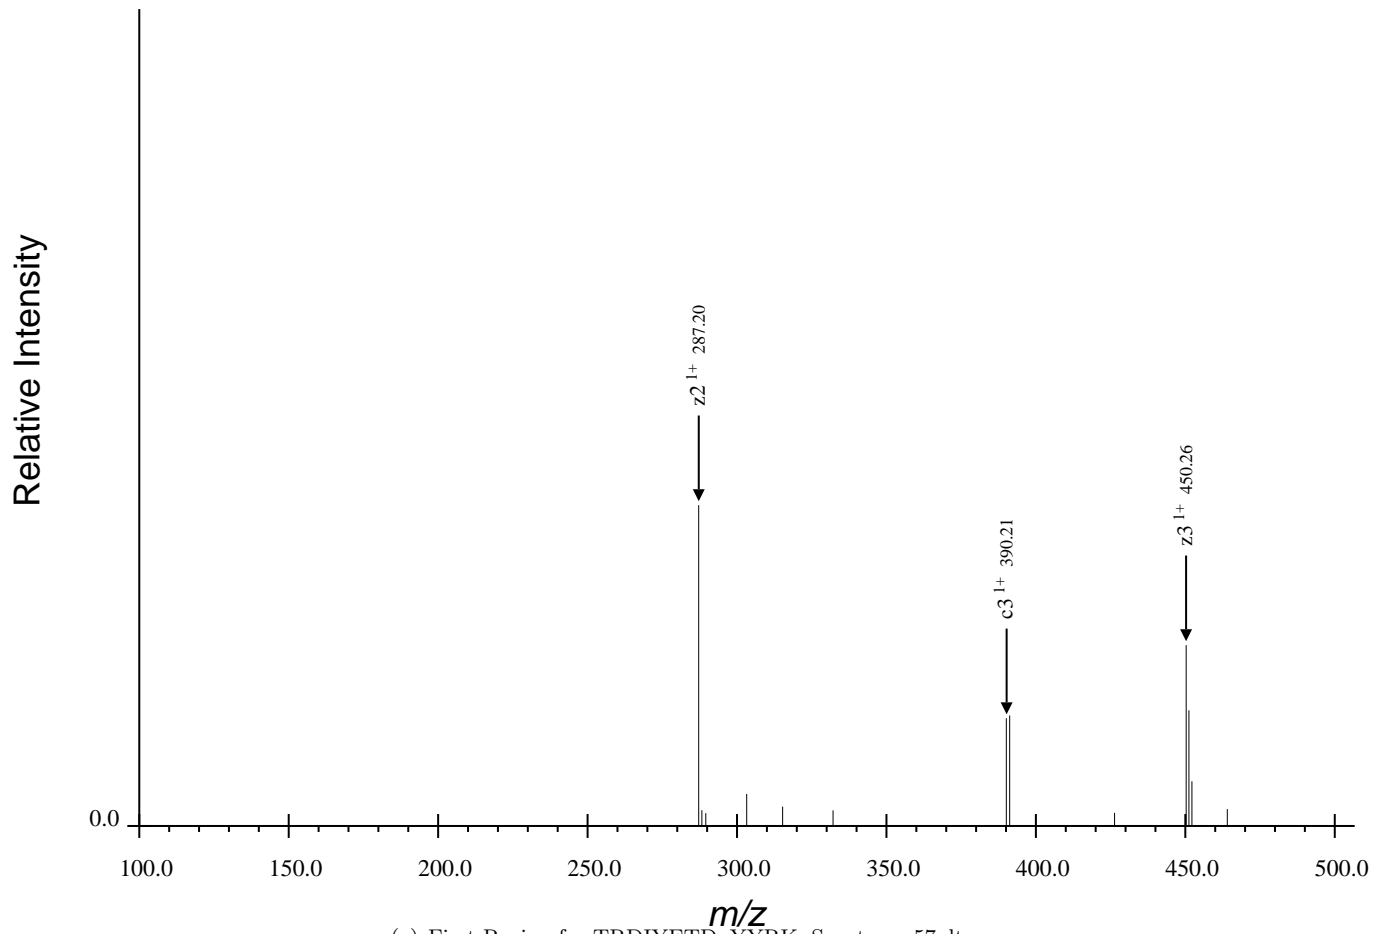

(a) First Region for TRDIYETDpYYRK, Spectrum 57.dta

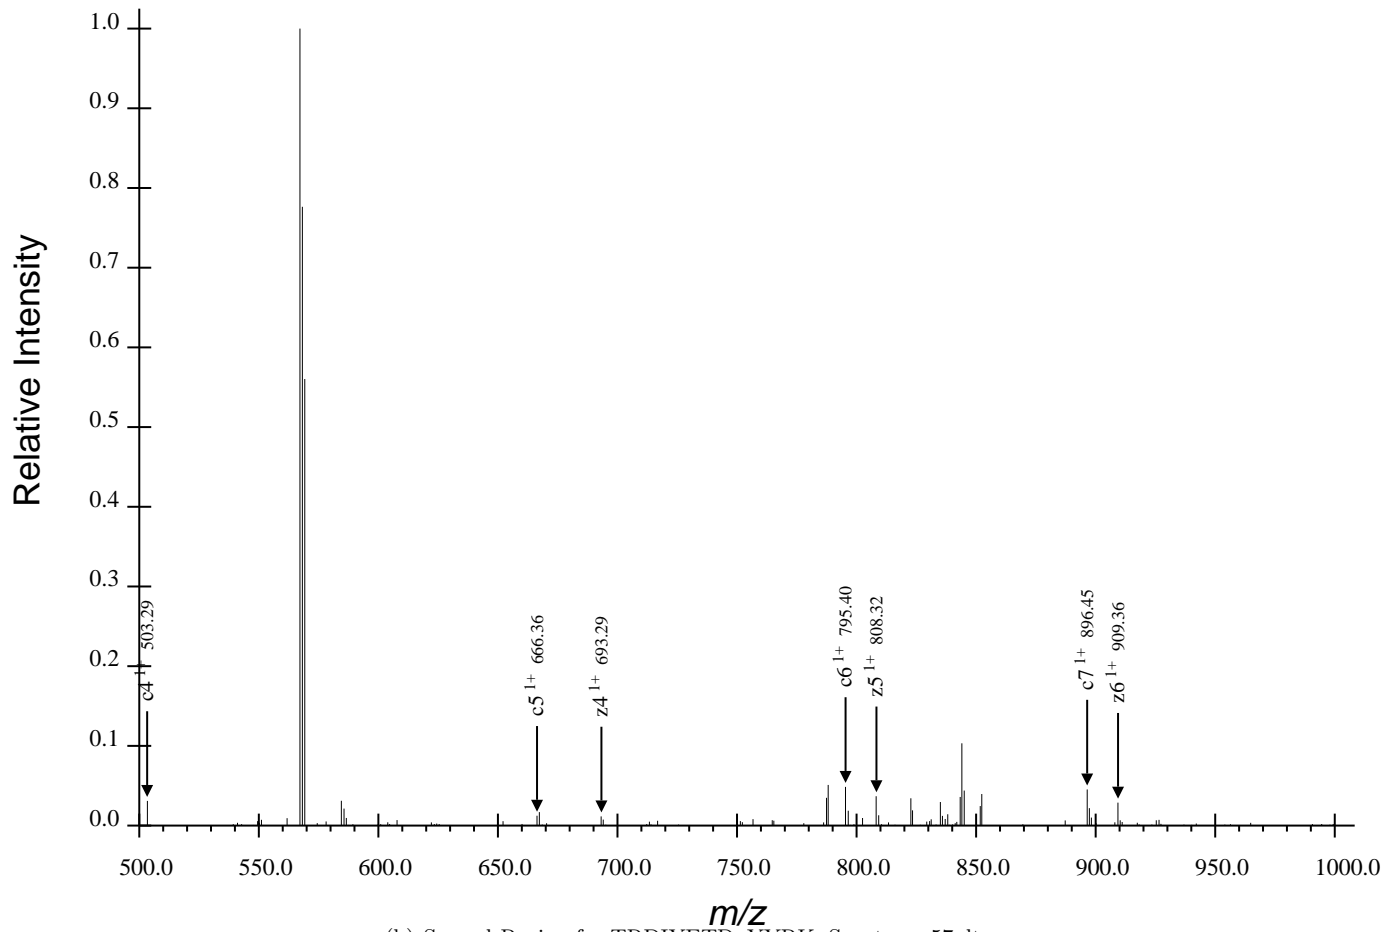

(b) Second Region for TRDIYETDpYYRK, Spectrum 57.dta

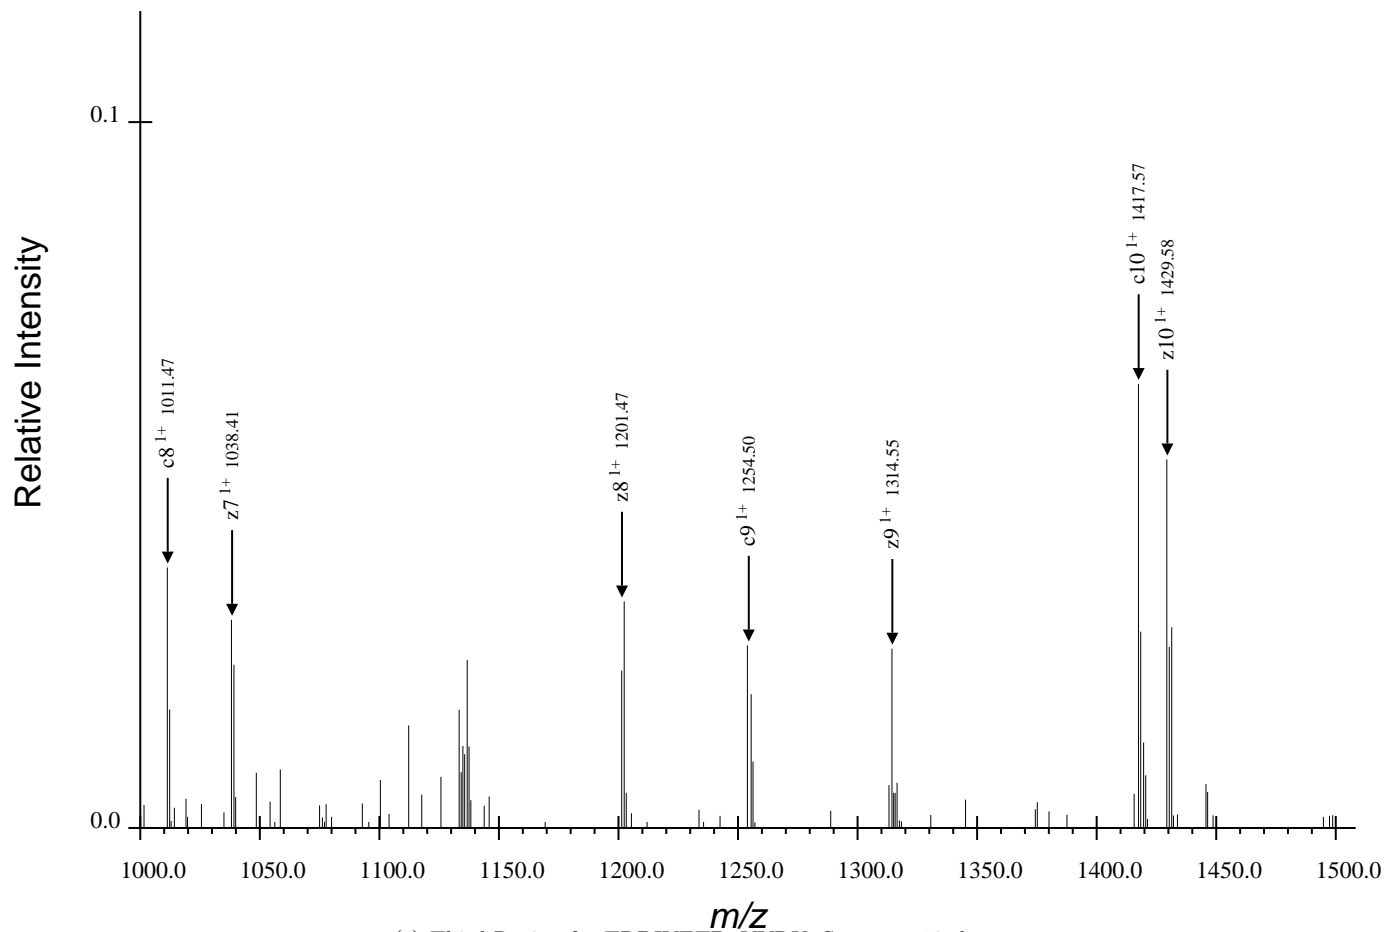

(c) Third Region for TRDIYETDpYYRK, Spectrum 57.dta

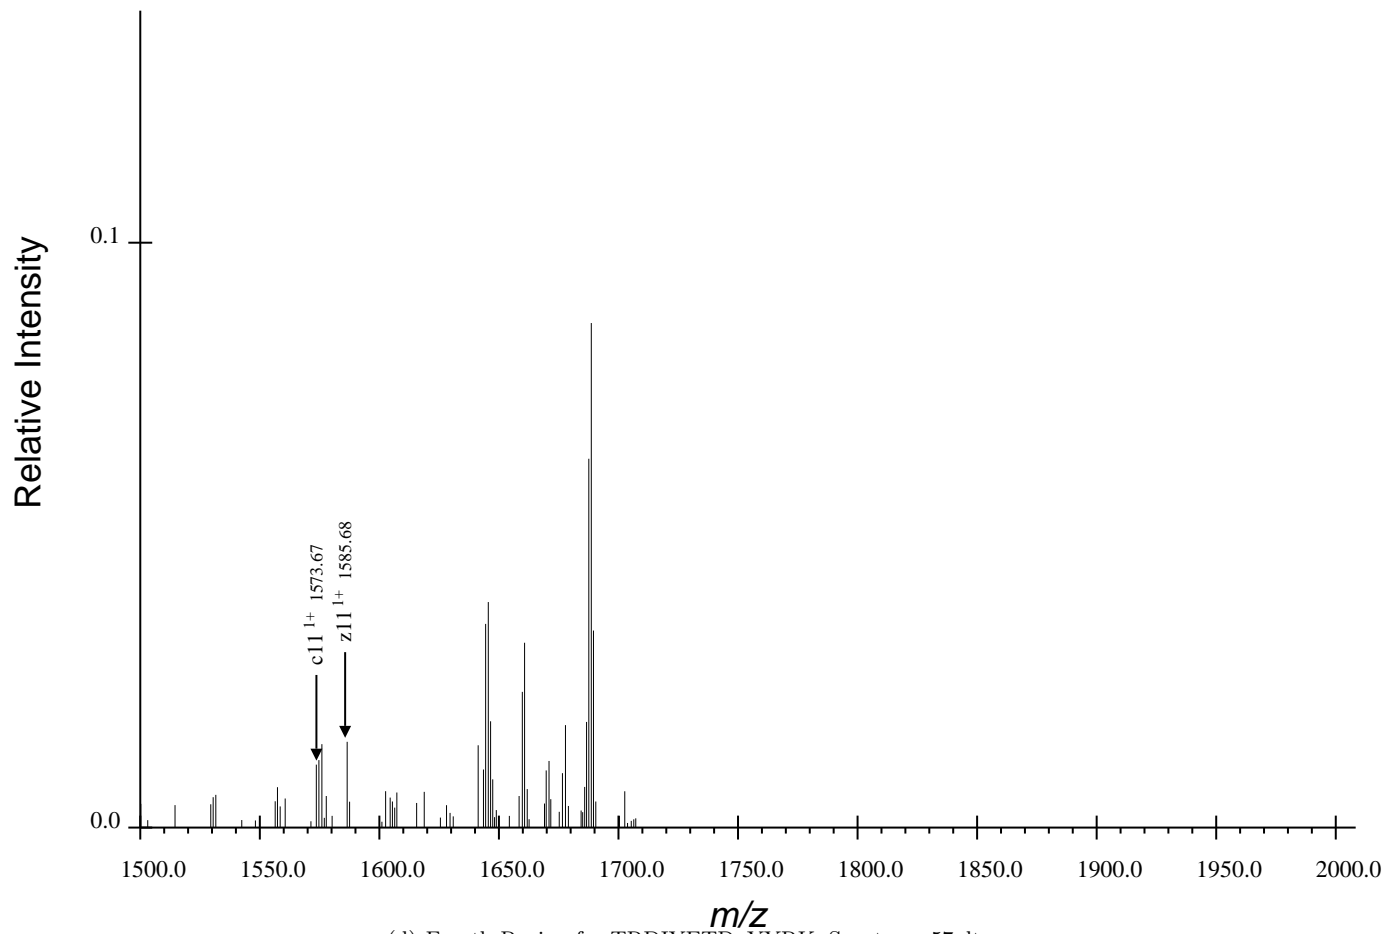

(d) Fourth Region for TRDIYETDpYYRK, Spectrum 57.dta

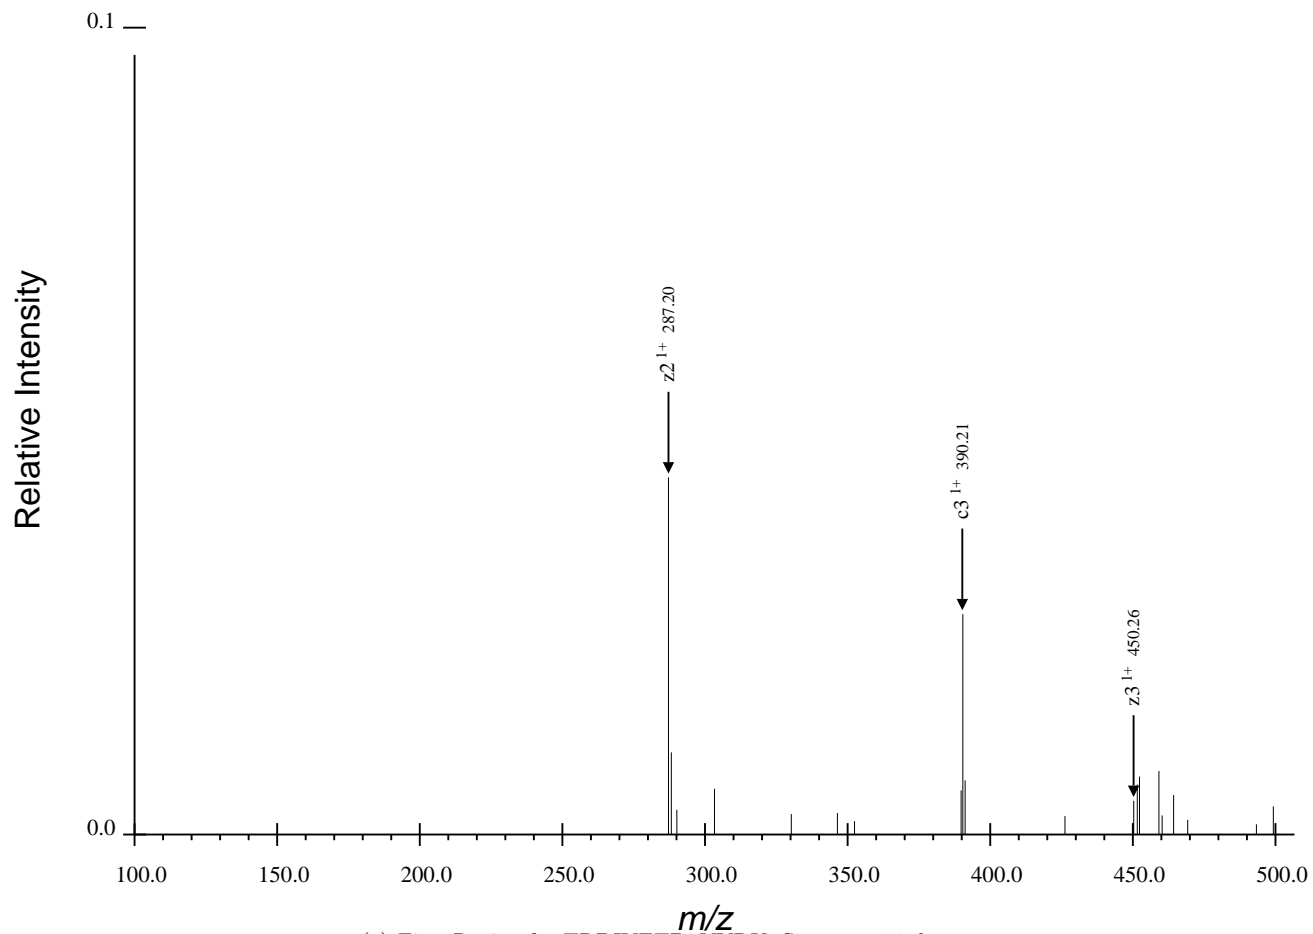

(a) First Region for TRDIYETDpYYRK, Spectrum 58.dta

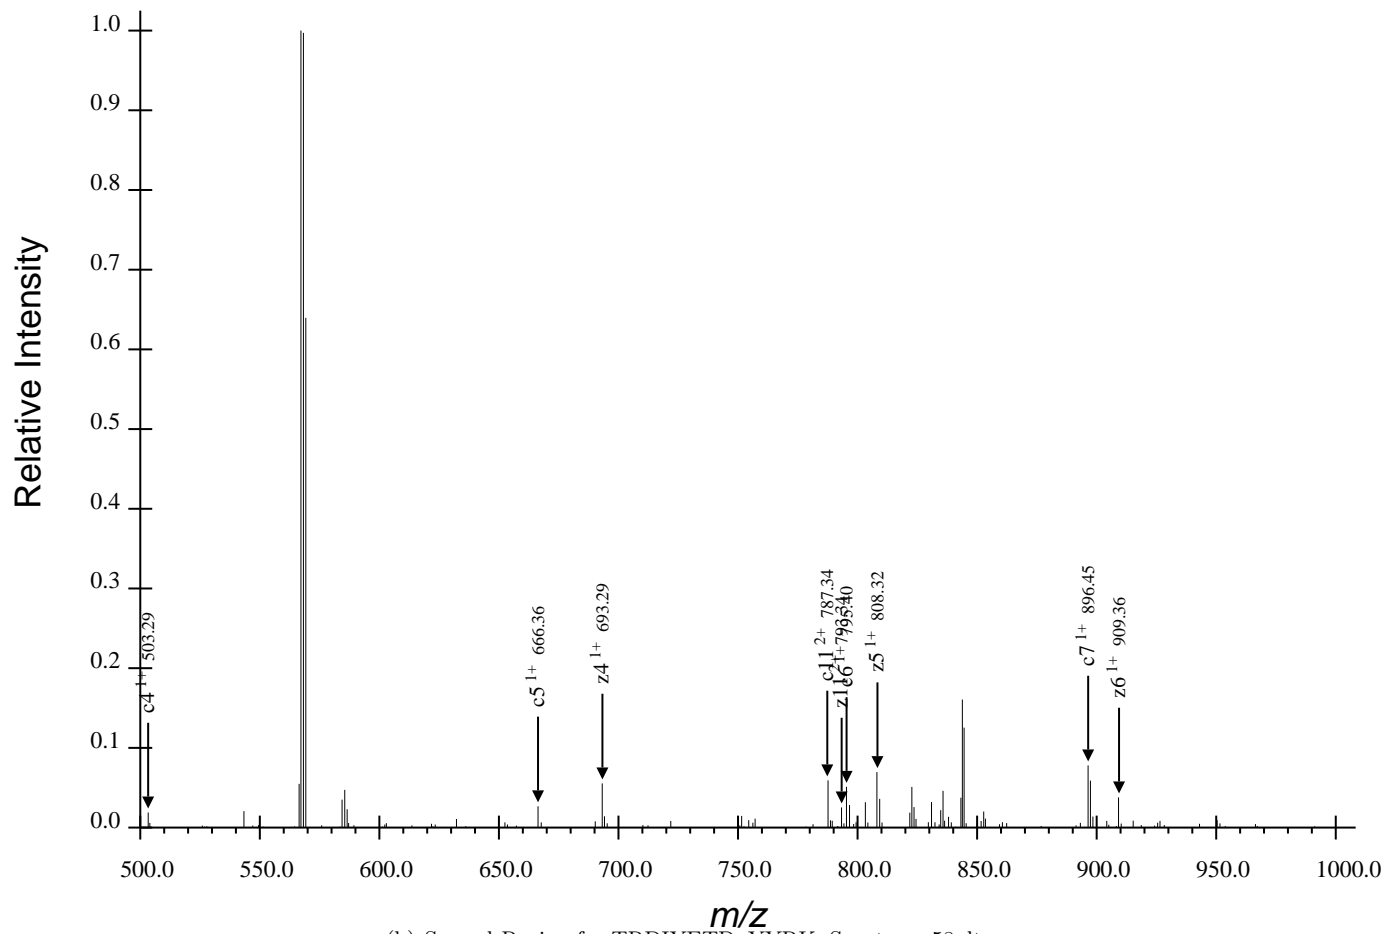

(b) Second Region for TRDIYETDpYYRK, Spectrum 58.dta

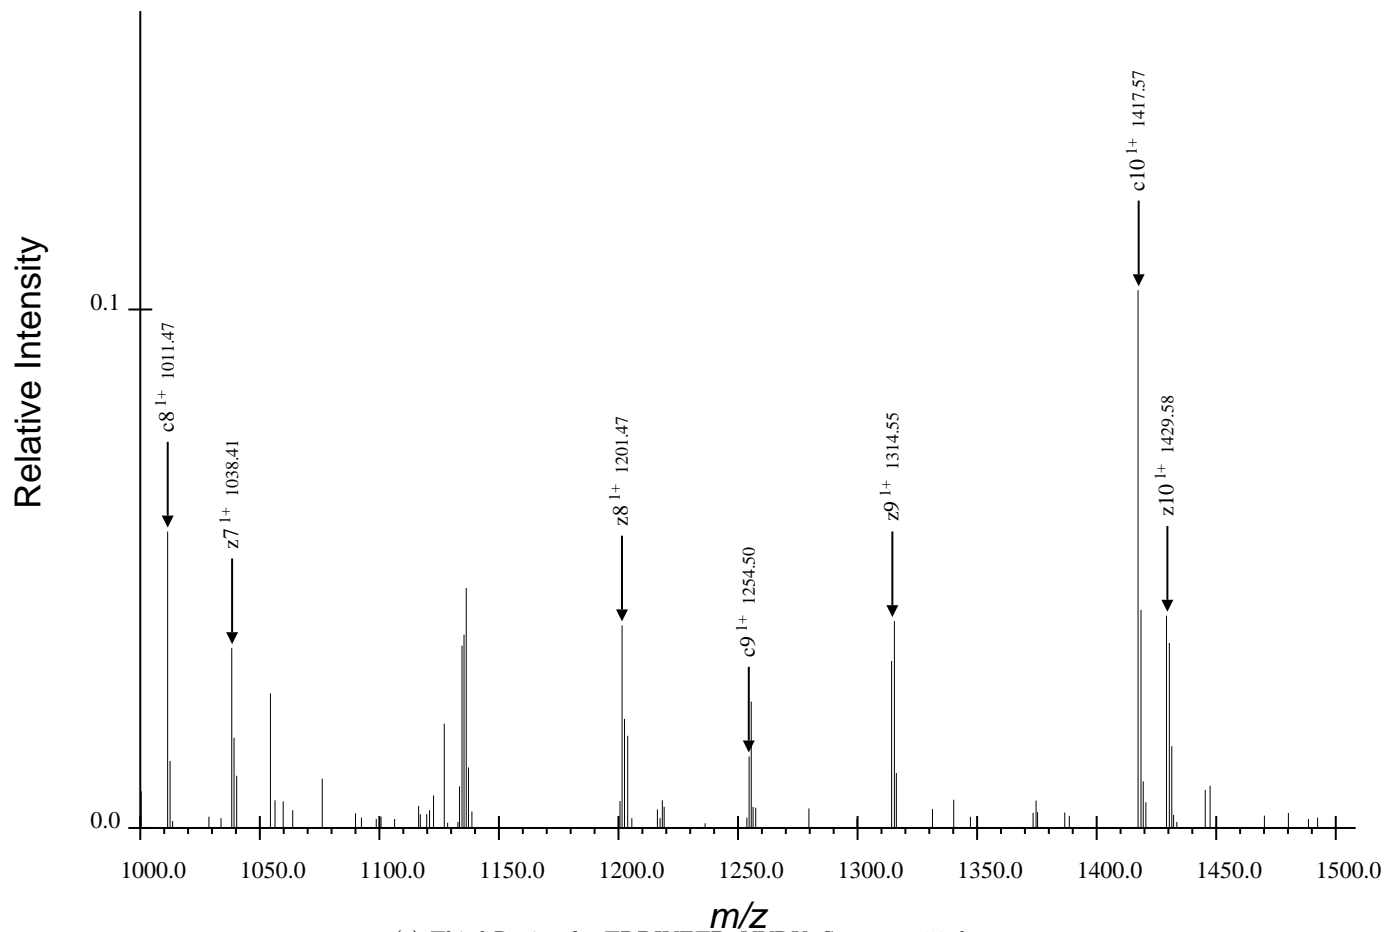

(c) Third Region for TRDIYETDpYYRK, Spectrum 58.dta

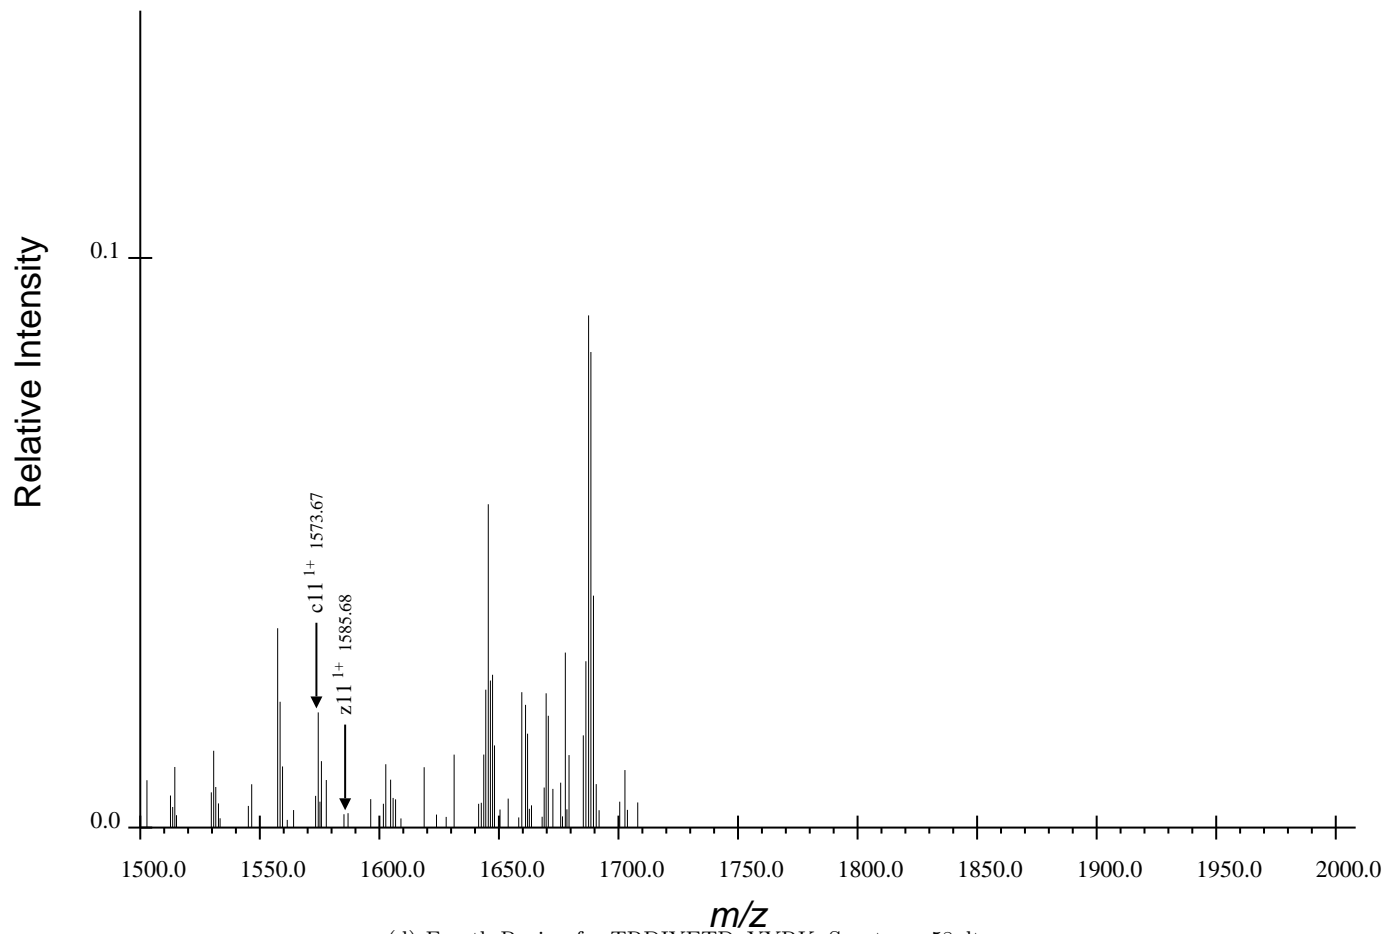

(d) Fourth Region for TRDIYETDpYYRK, Spectrum 58.dta

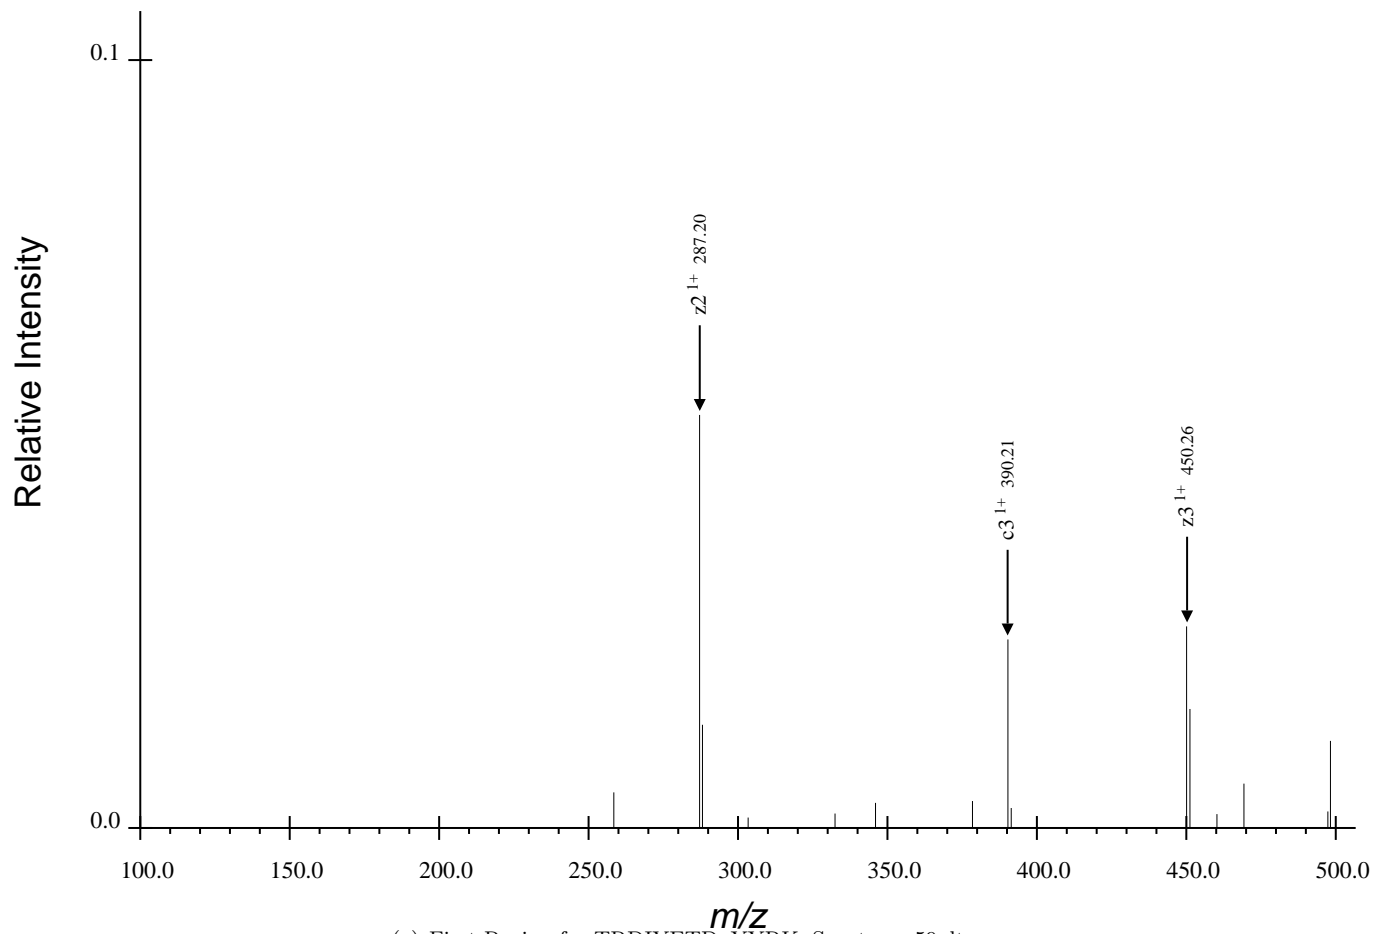

(a) First Region for TRDIYETDpYYRK, Spectrum 59.dta

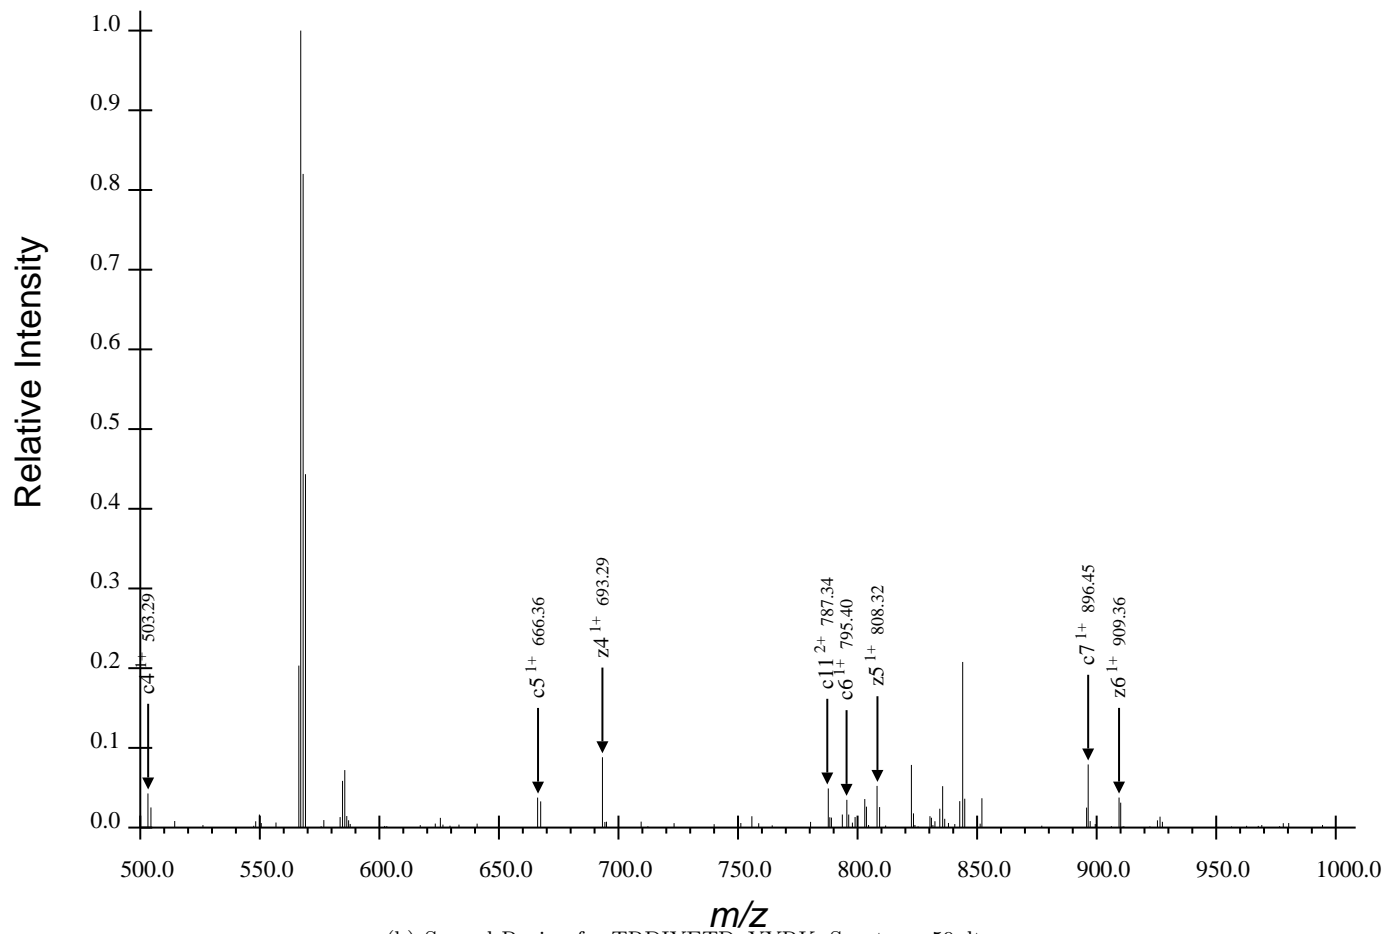

(b) Second Region for TRDIYETDpYYRK, Spectrum 59.dta

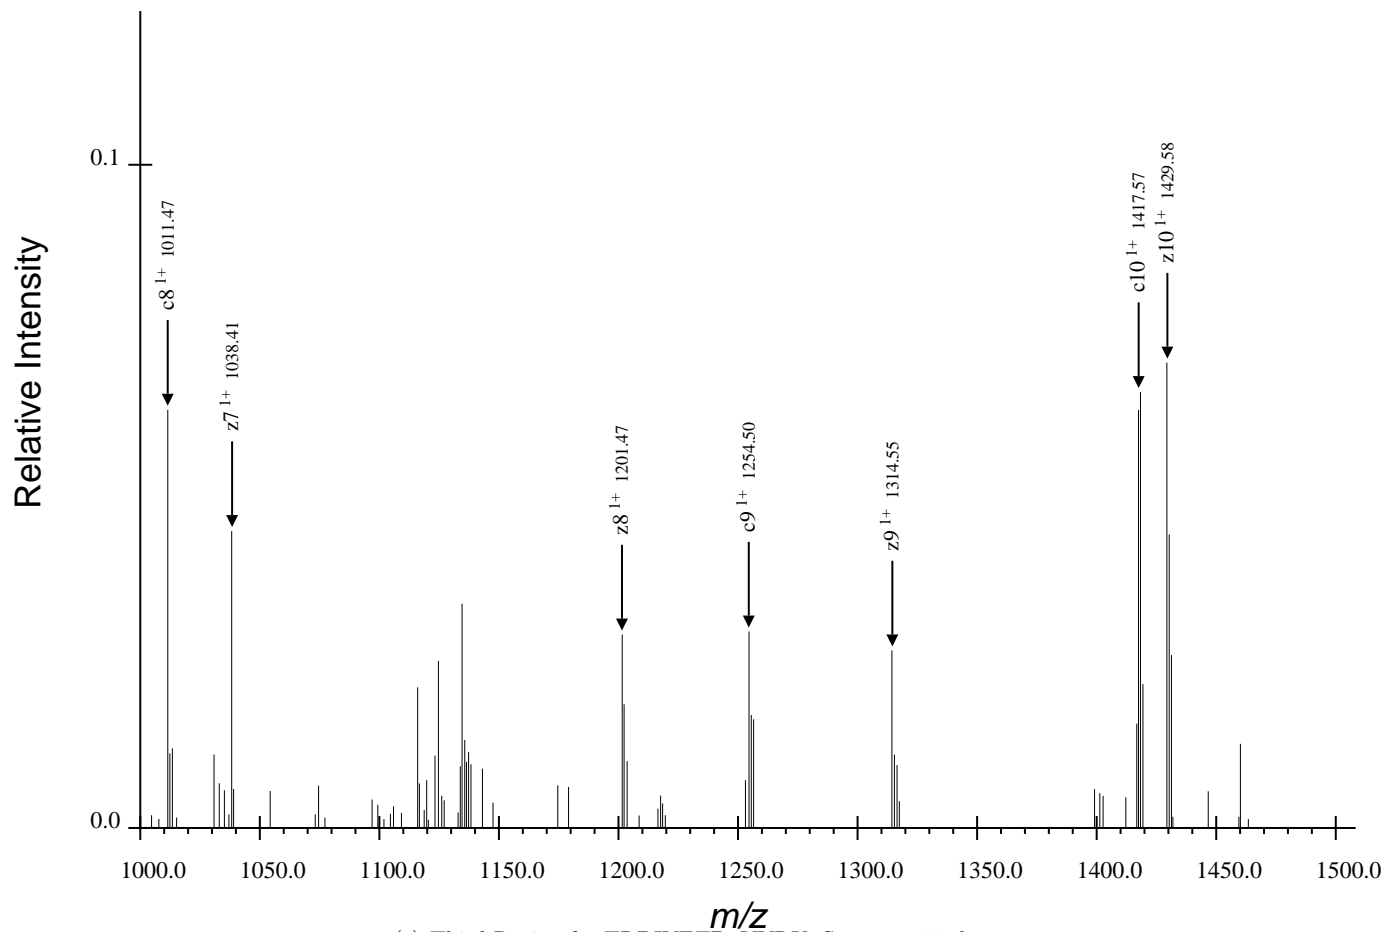

(c) Third Region for TRDIYETDpYYRK, Spectrum 59.dta

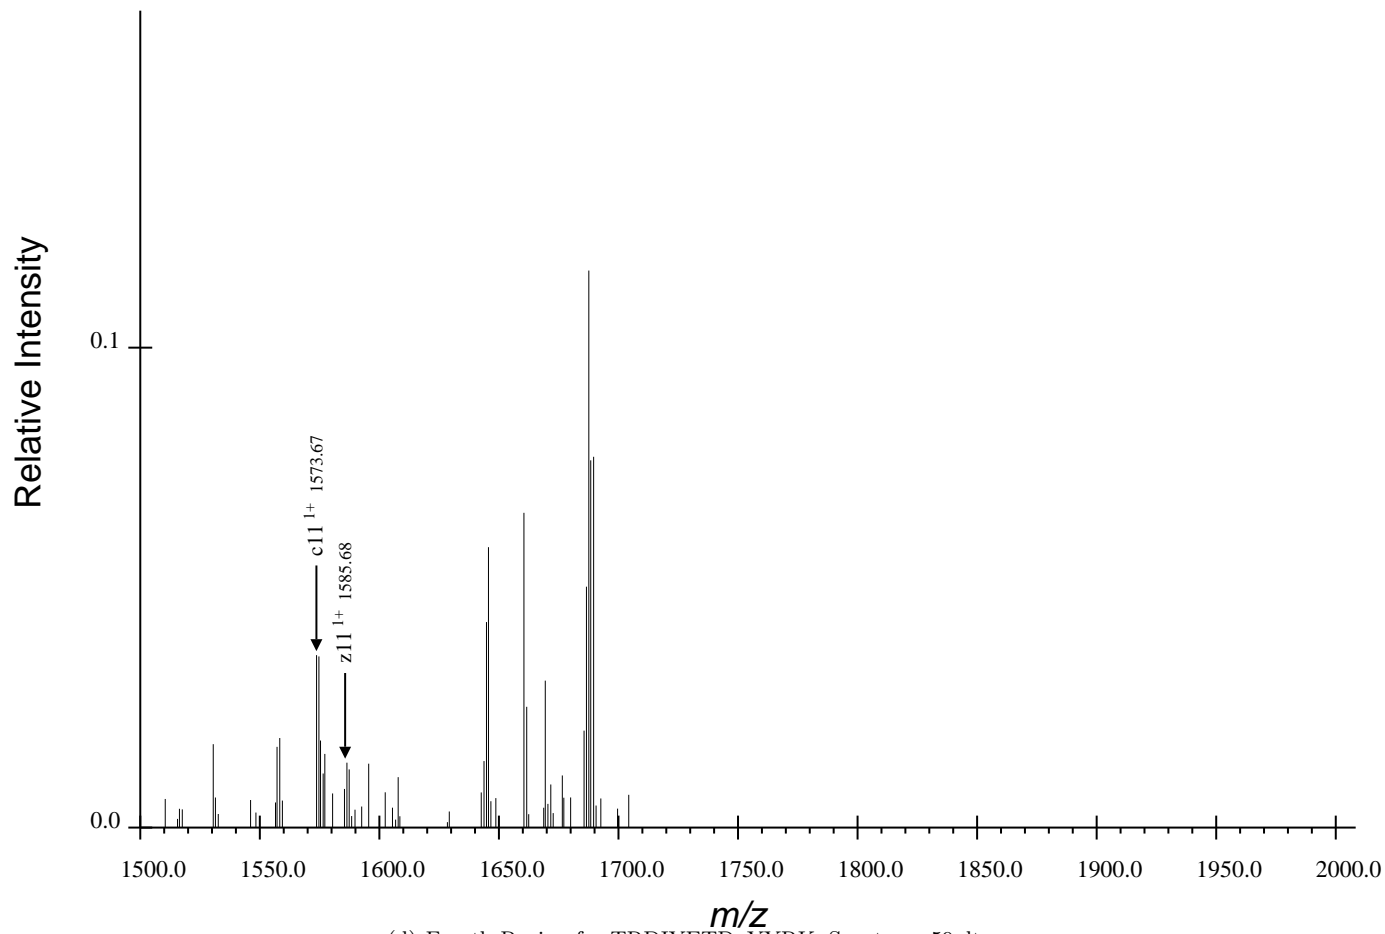

(d) Fourth Region for TRDIYETDpYYRK, Spectrum 59.dta

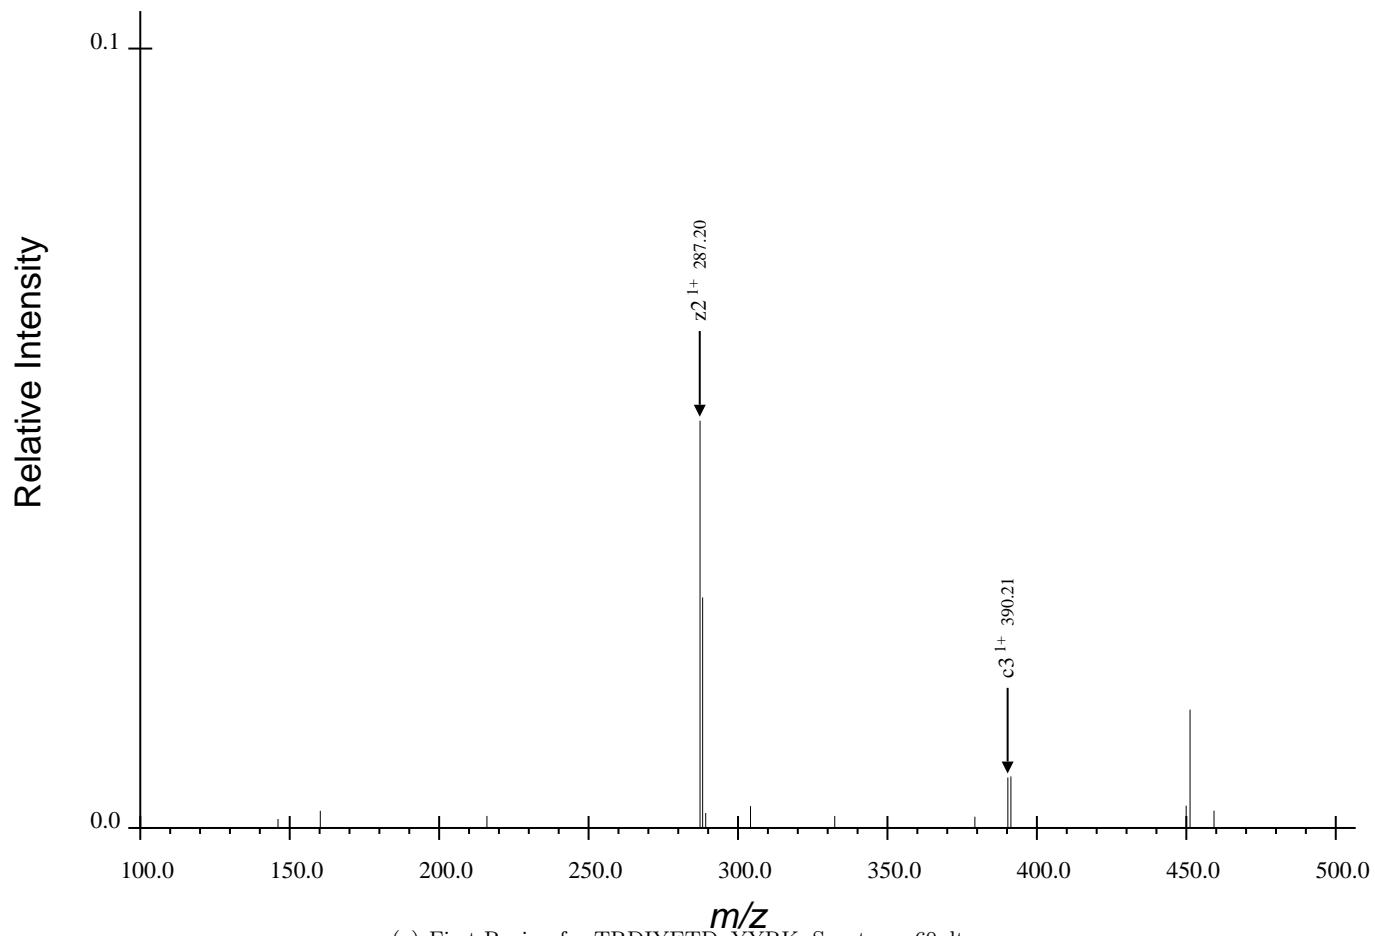

(a) First Region for TRDIYETDpYYRK, Spectrum 60.dta

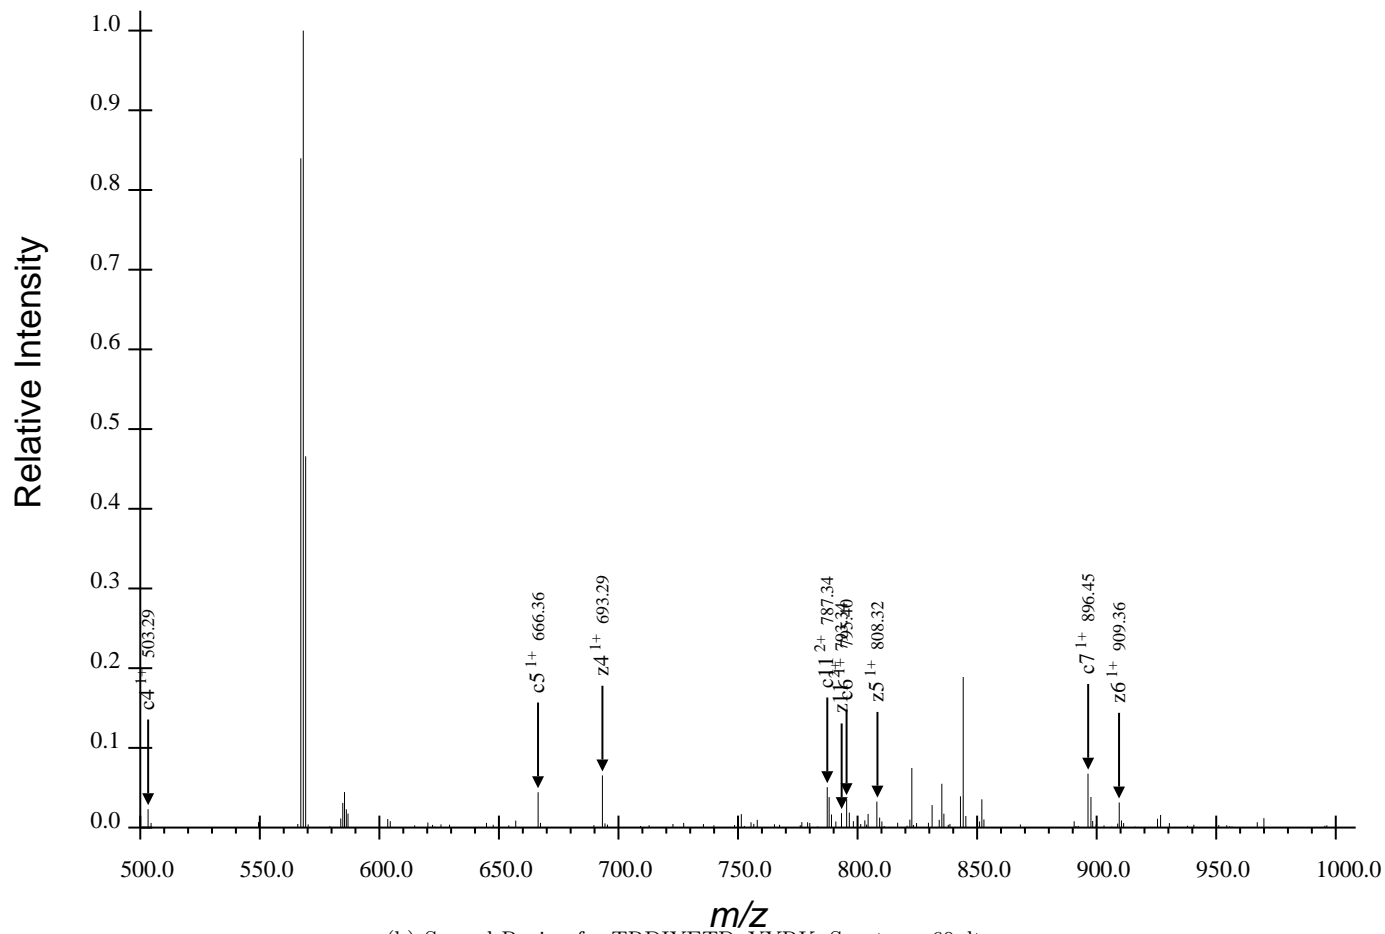

(b) Second Region for TRDIYETDpYYRK, Spectrum 60.dta

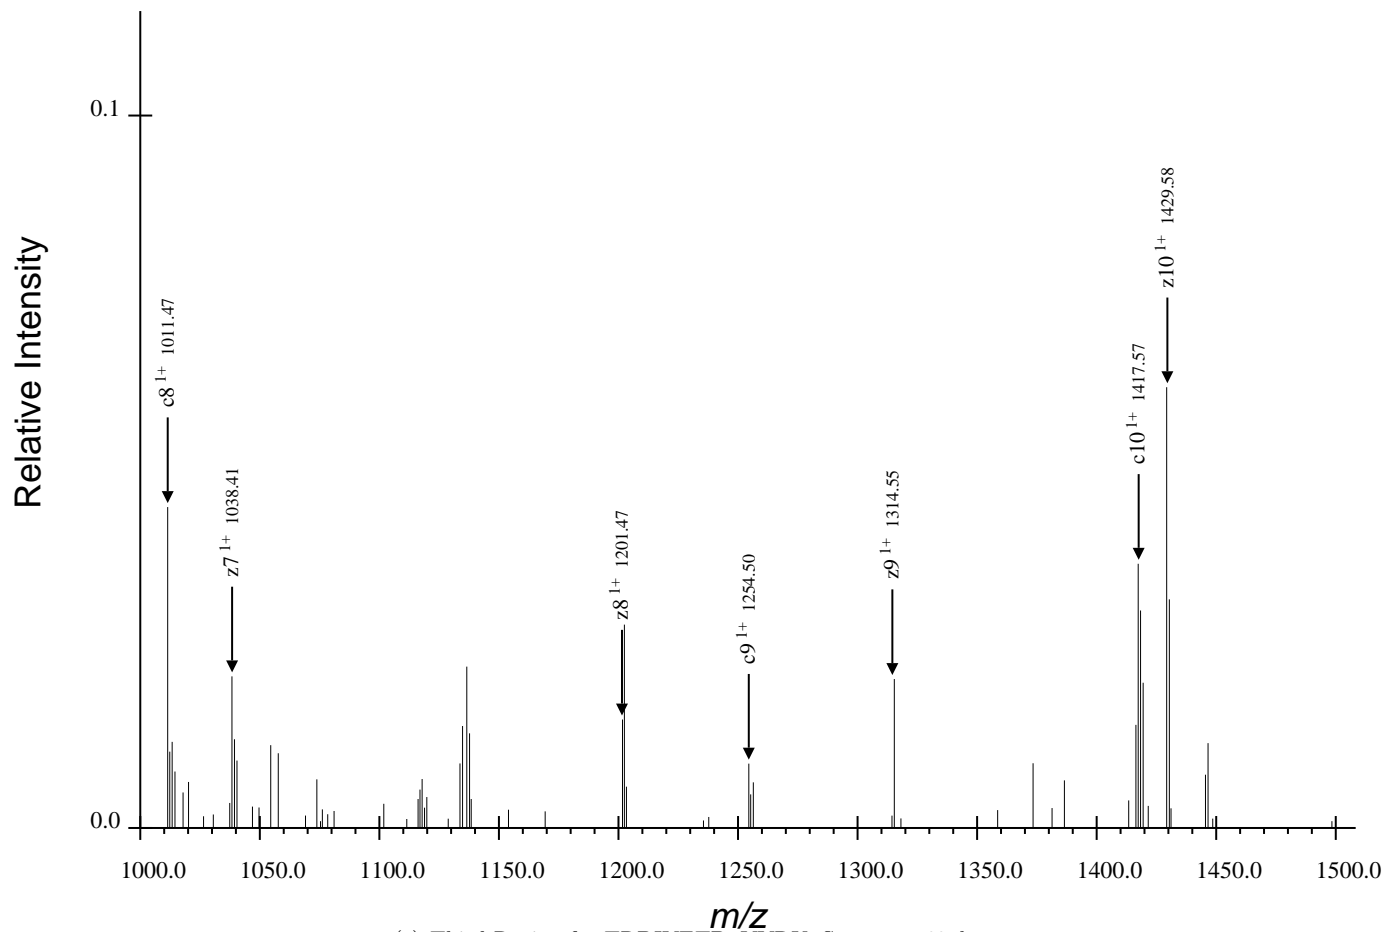

(c) Third Region for TRDIYETDpYYRK, Spectrum 60.dta

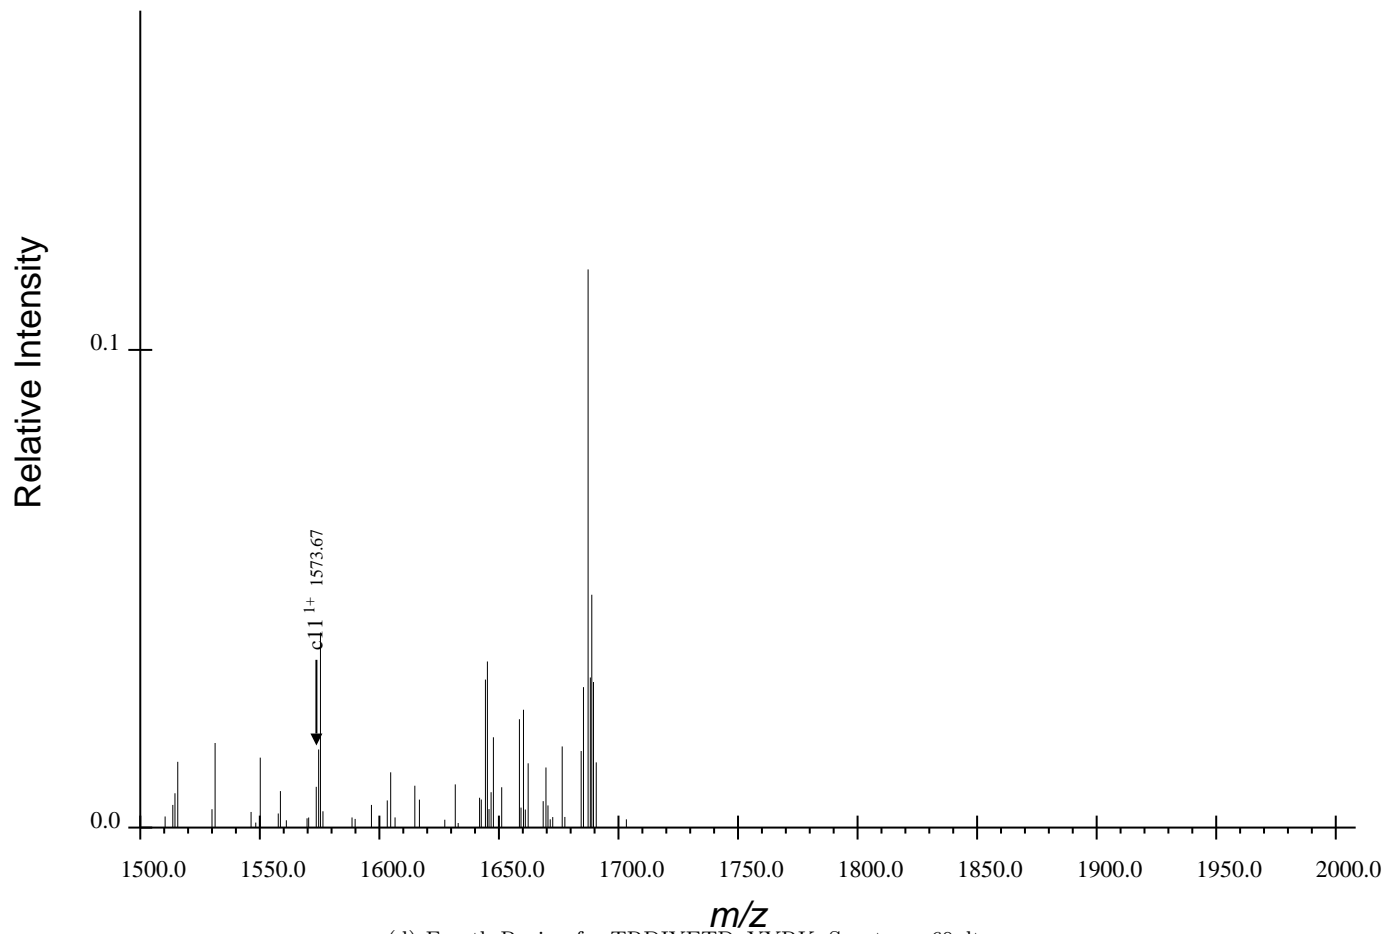

(d) Fourth Region for TRDIYETDpYYRK, Spectrum 60.dta



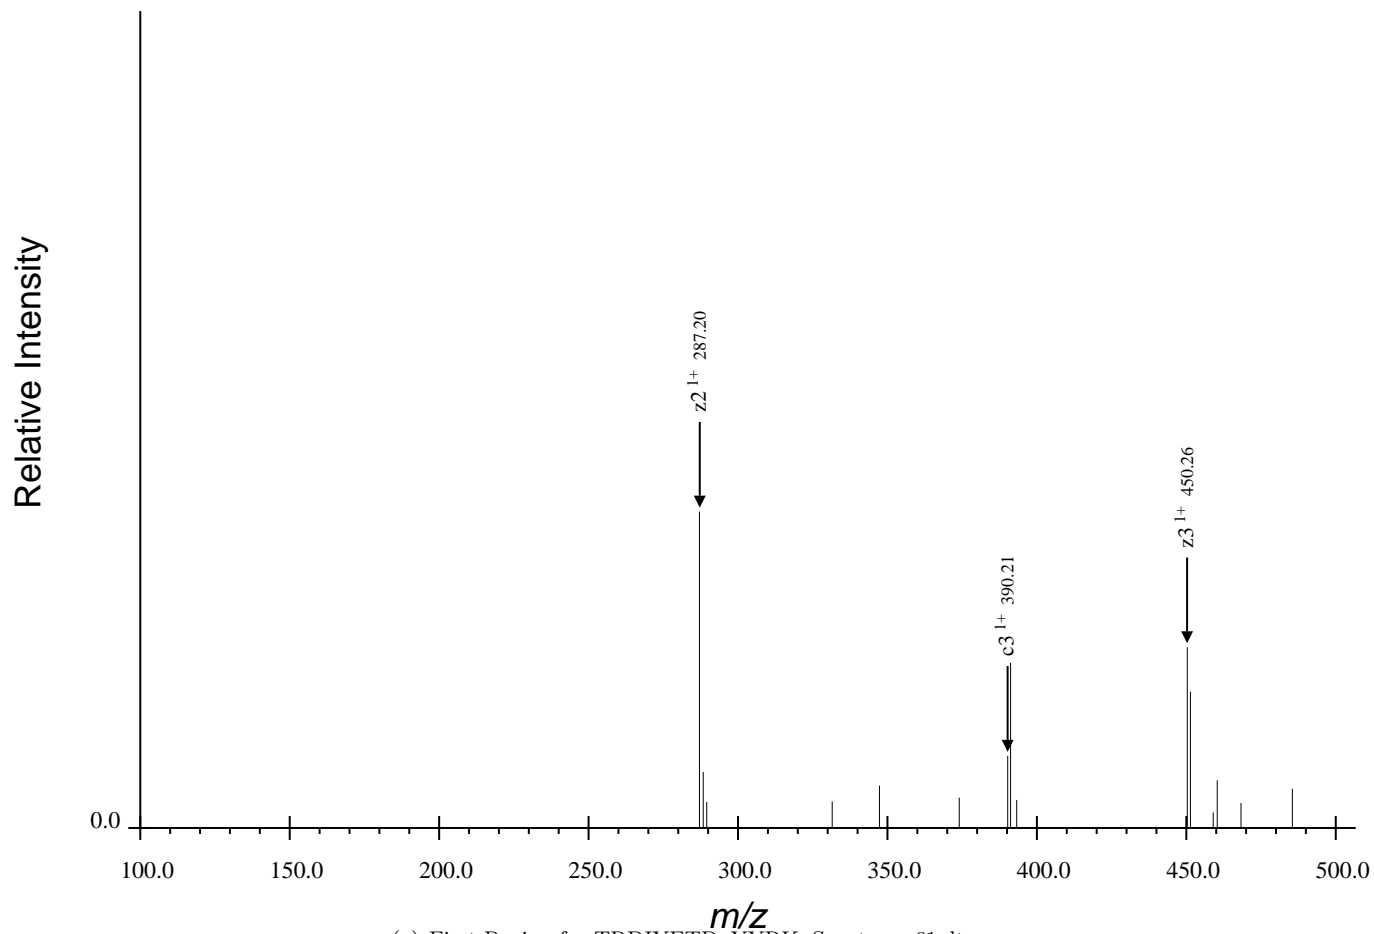

(a) First Region for TRDIYETDpYYRK, Spectrum 61.dta

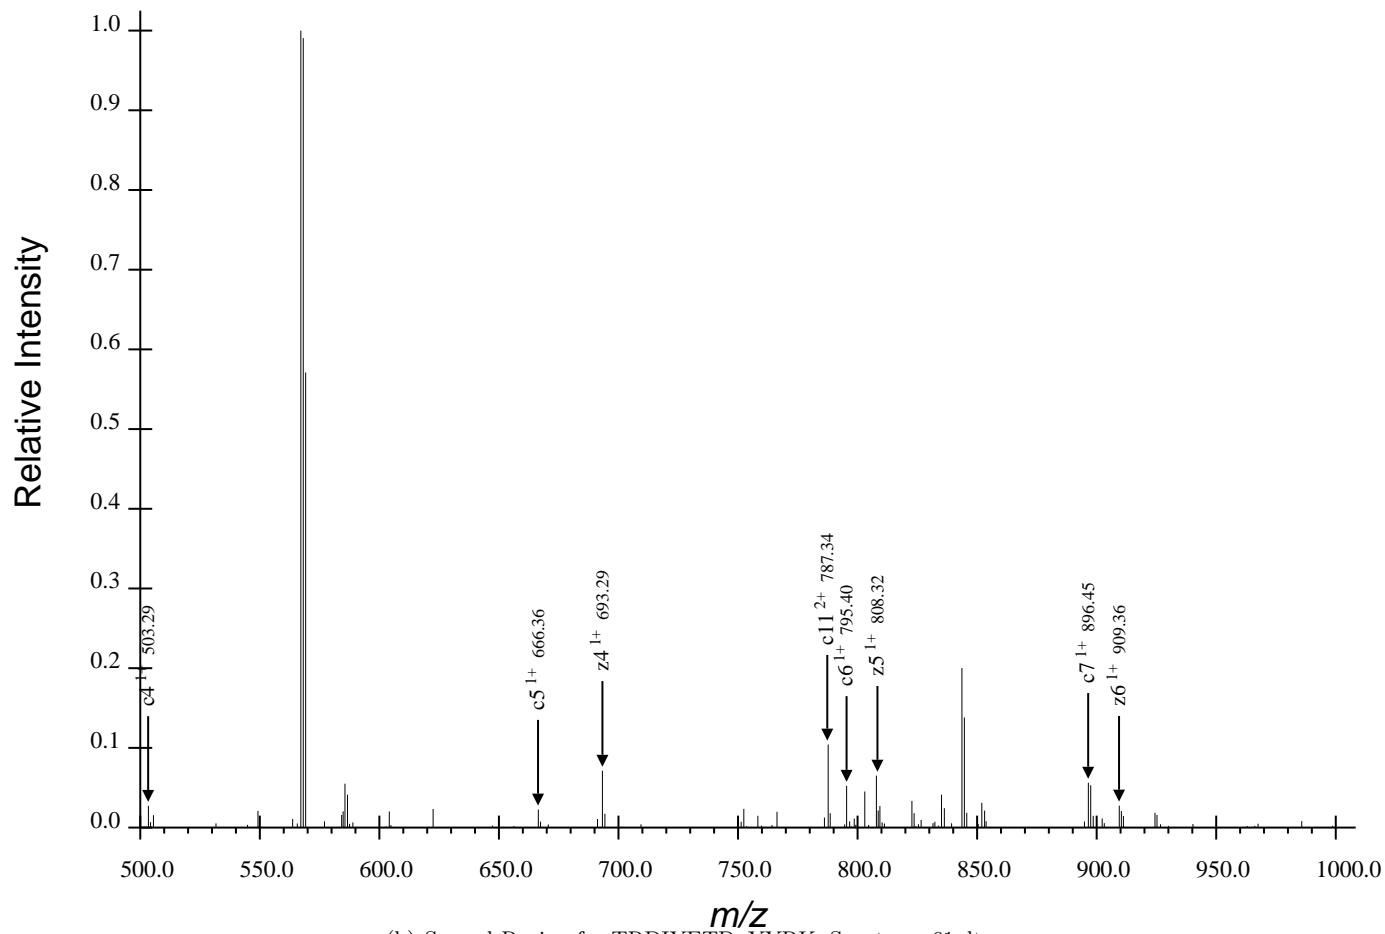

(b) Second Region for TRDIYETDpYYRK, Spectrum 61.dta

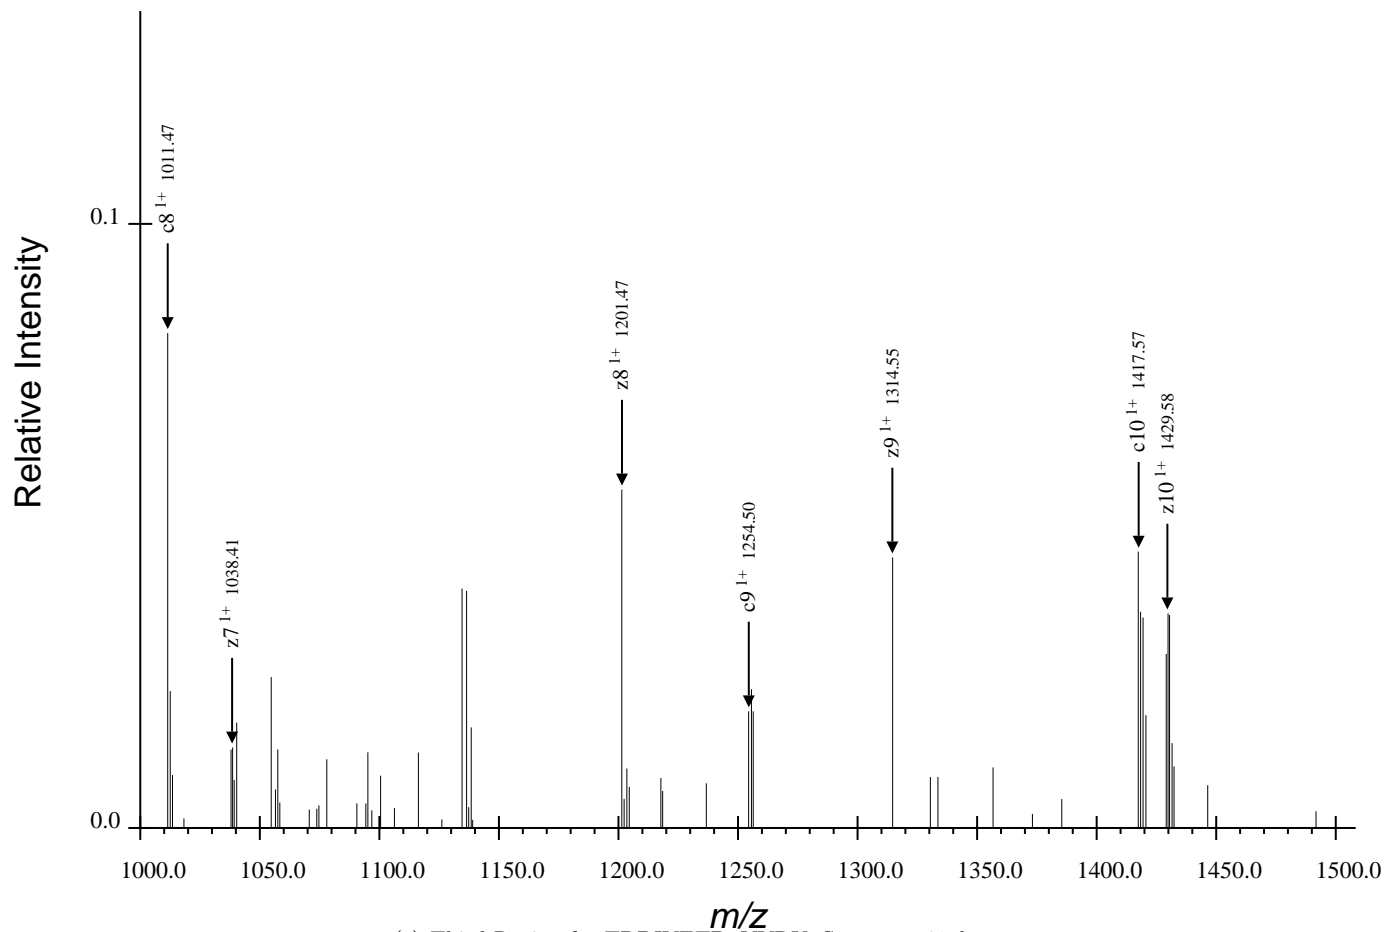

(c) Third Region for TRDIYETDpYYRK, Spectrum 61.dta

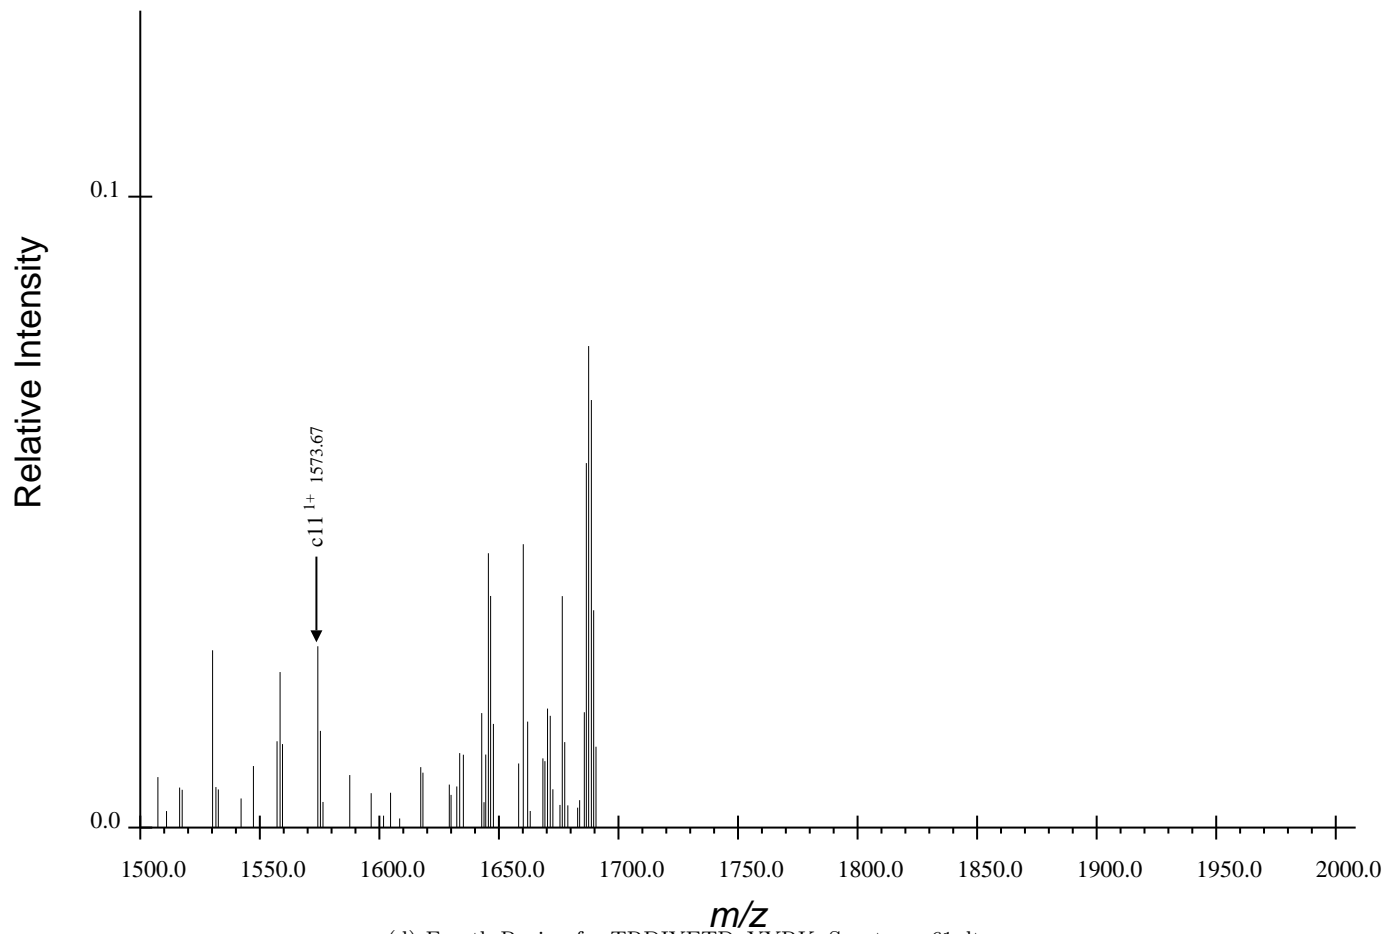

(d) Fourth Region for TRDIYETDpYYRK, Spectrum 61.dta

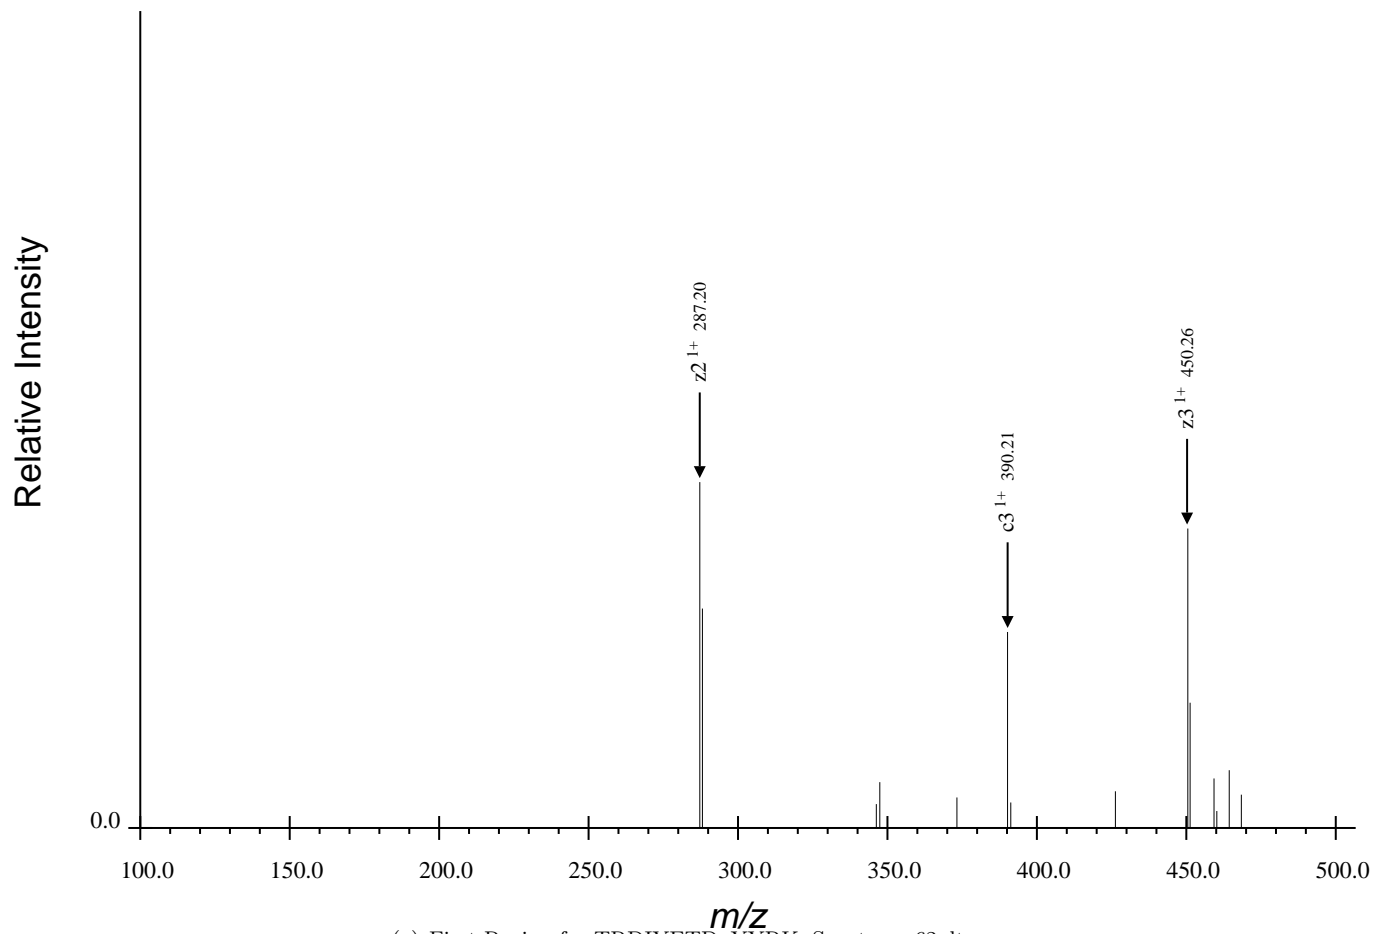

(a) First Region for TRDIYETDpYYRK, Spectrum 62.dta

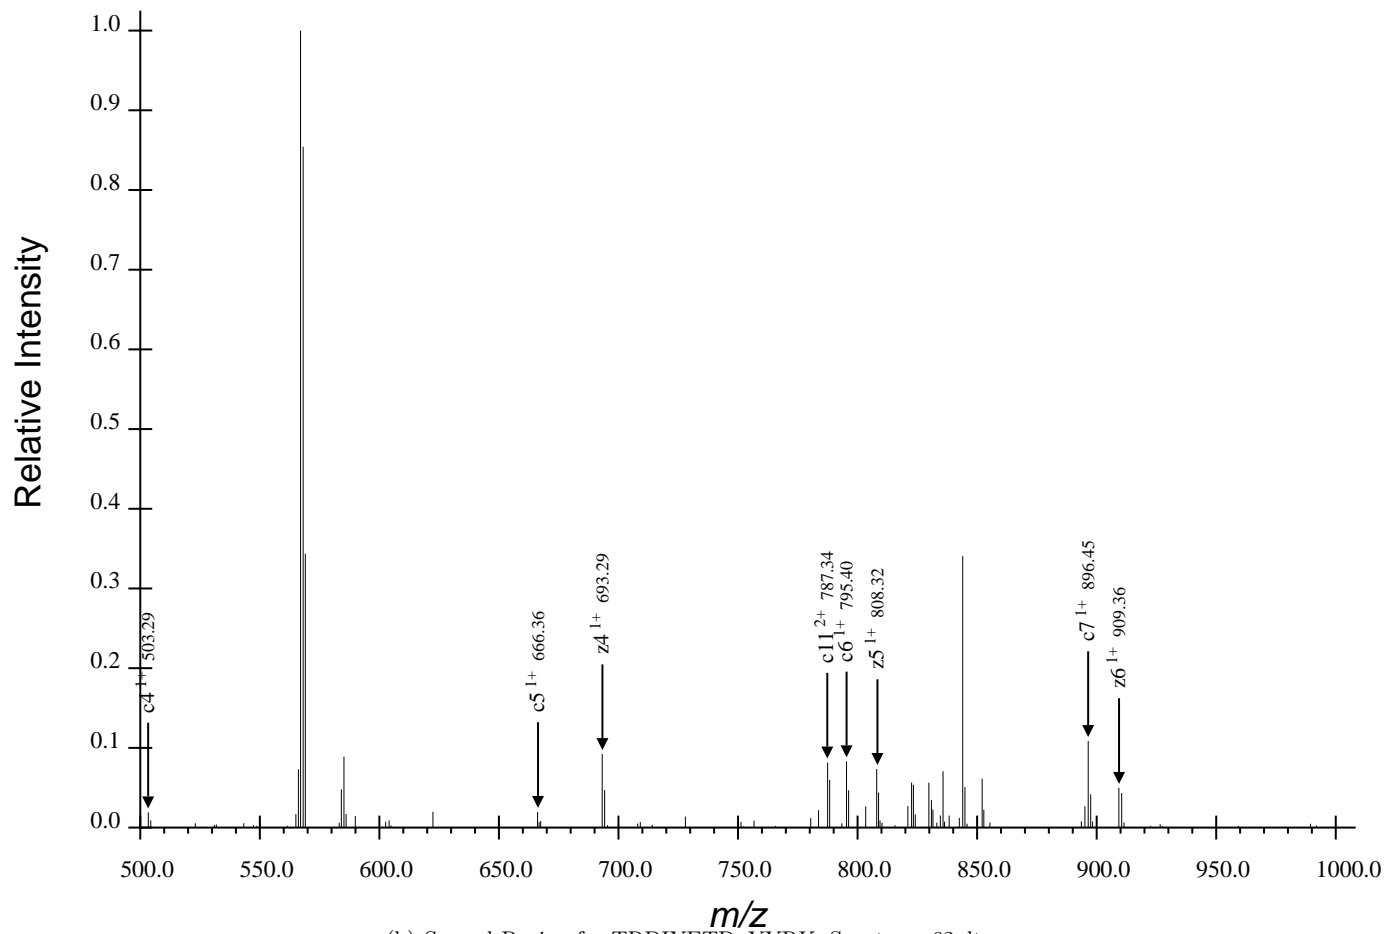

(b) Second Region for TRDIYETDpYYRK, Spectrum 62.dta

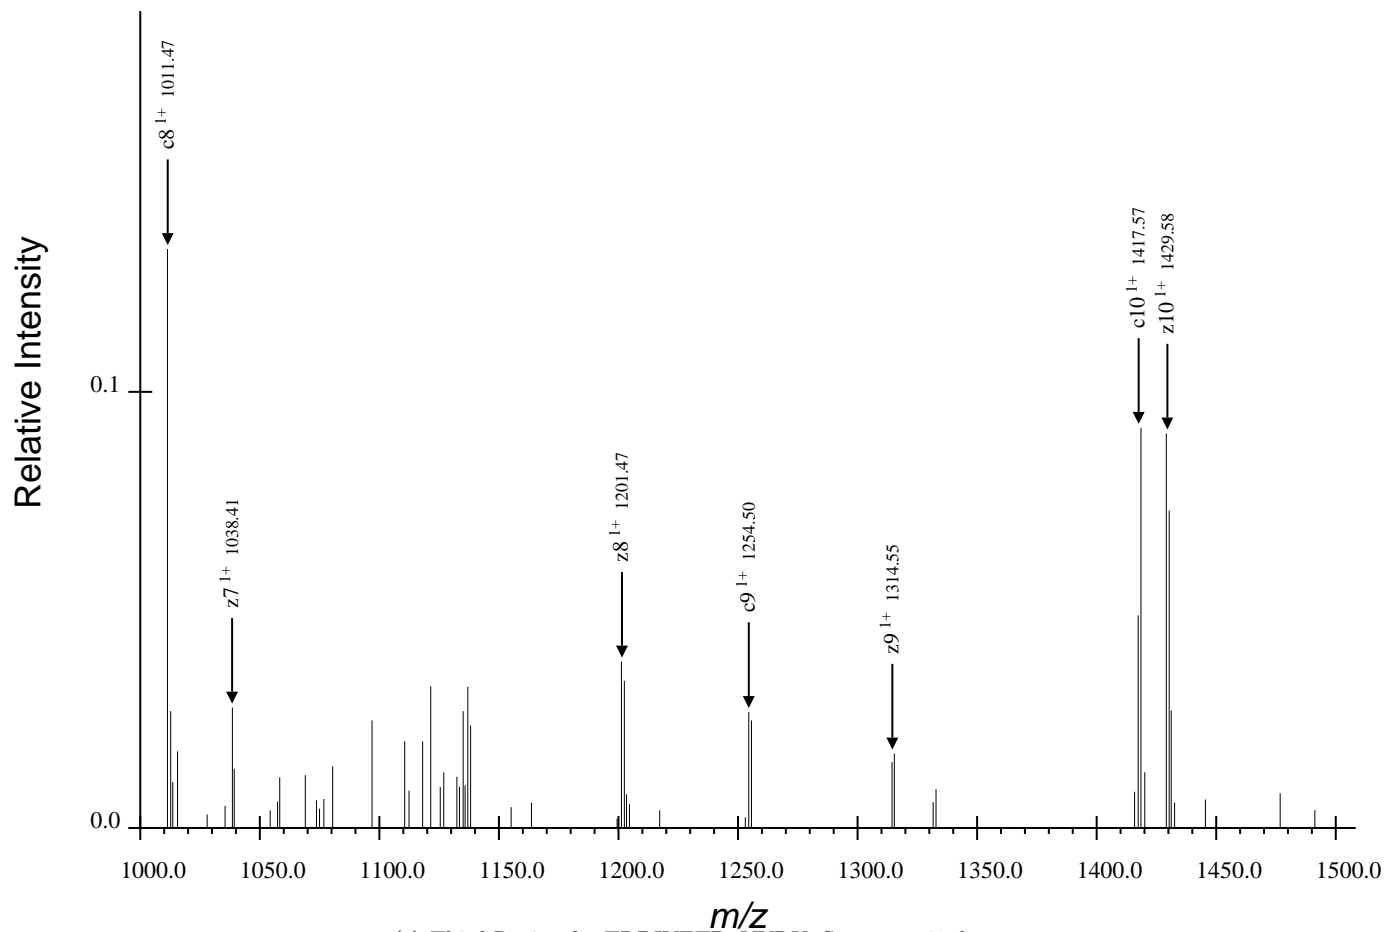

(c) Third Region for TRDIYETDpYYRK, Spectrum 62.dta

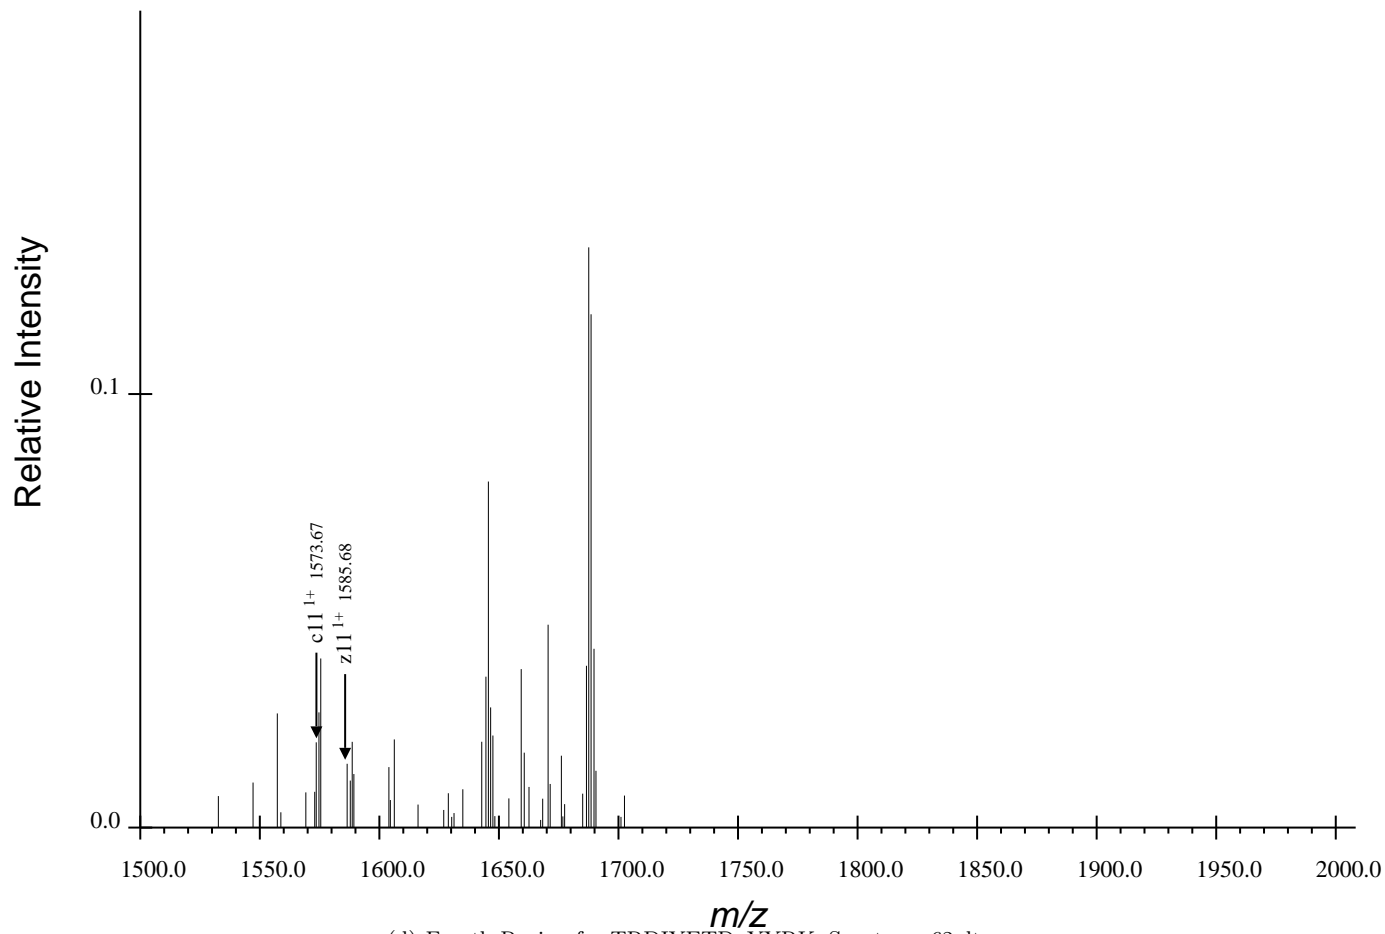

(d) Fourth Region for TRDIYETDpYYRK, Spectrum 62.dta

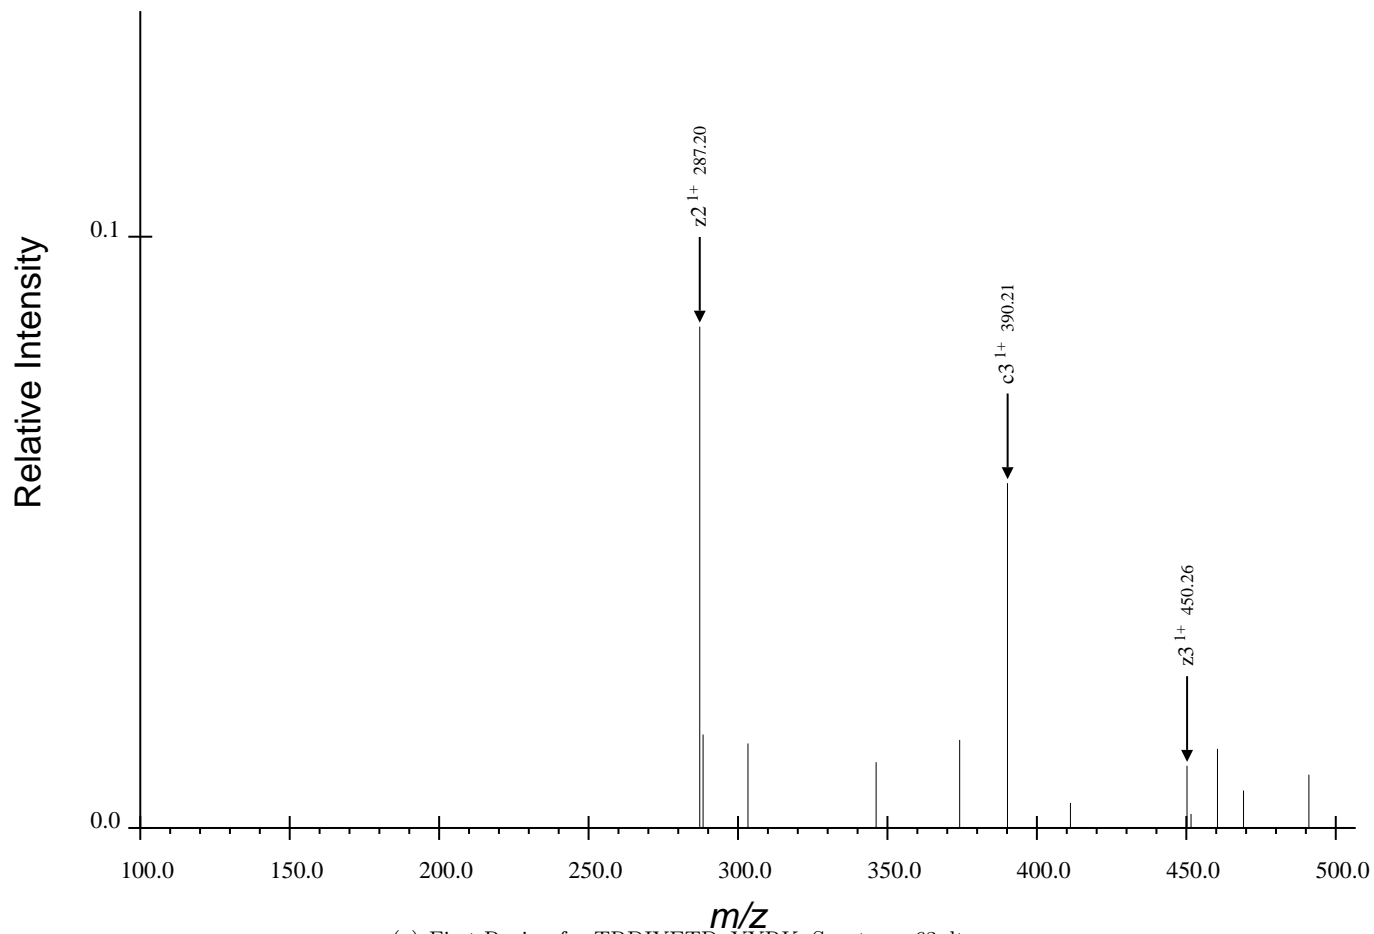

(a) First Region for TRDIYETDpYYRK, Spectrum 63.dta

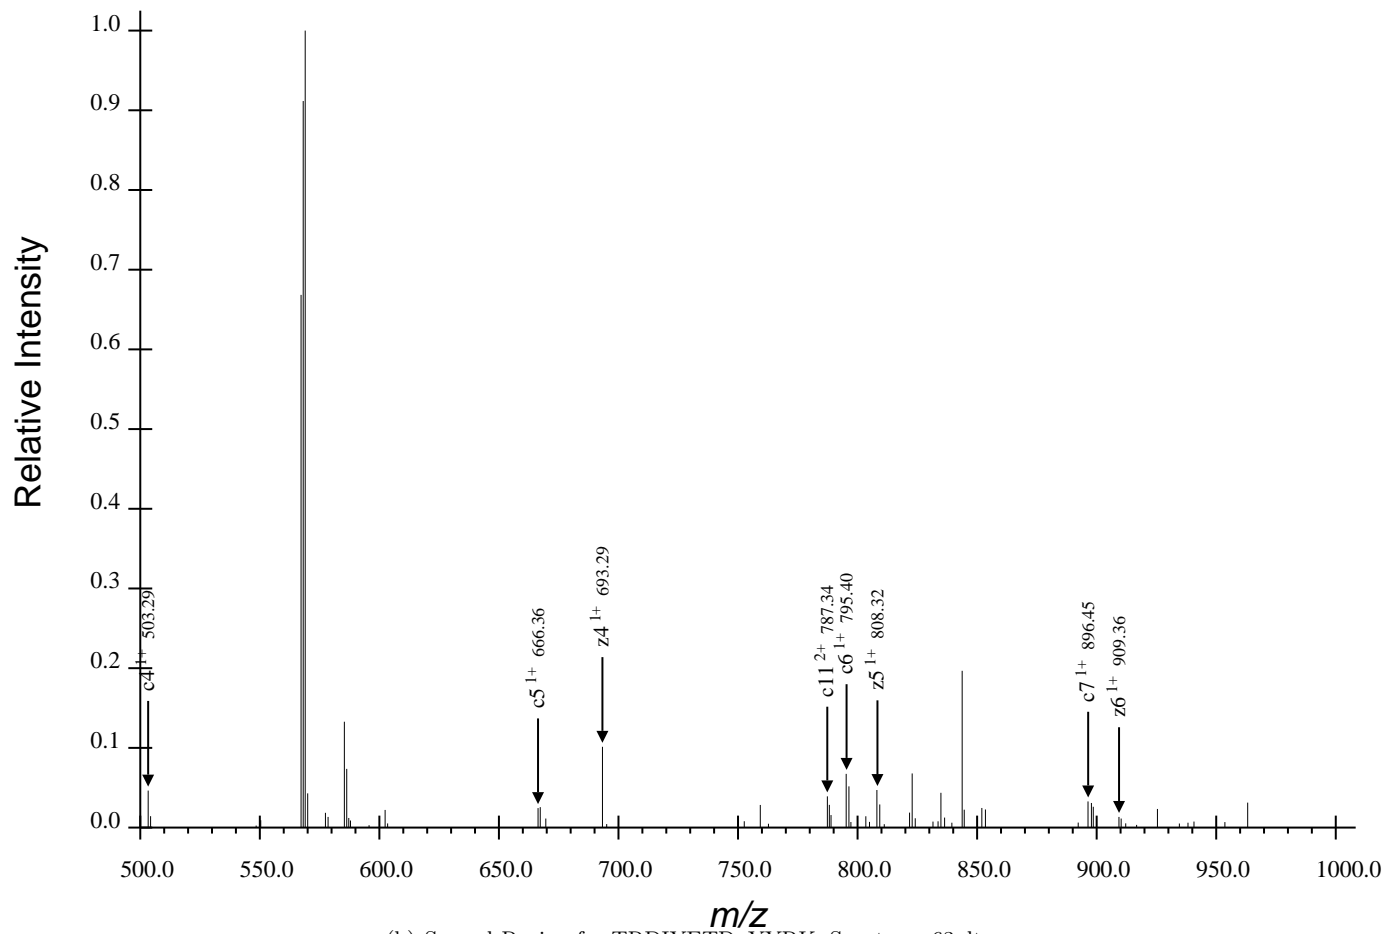

(b) Second Region for TRDIYETDpYYRK, Spectrum 63.dta

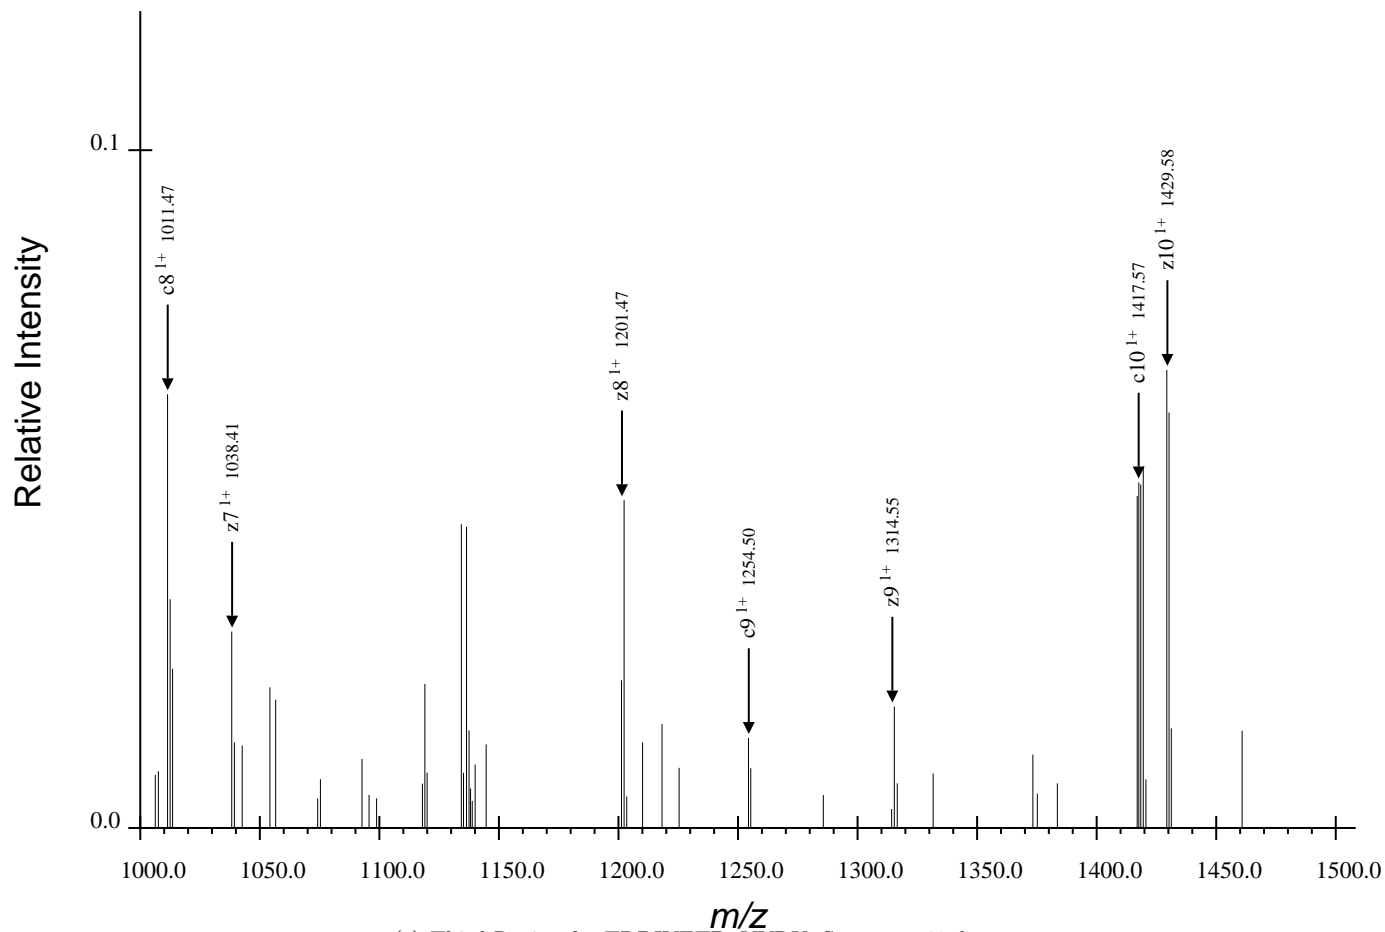

(c) Third Region for TRDIYETDpYYRK, Spectrum 63.dta

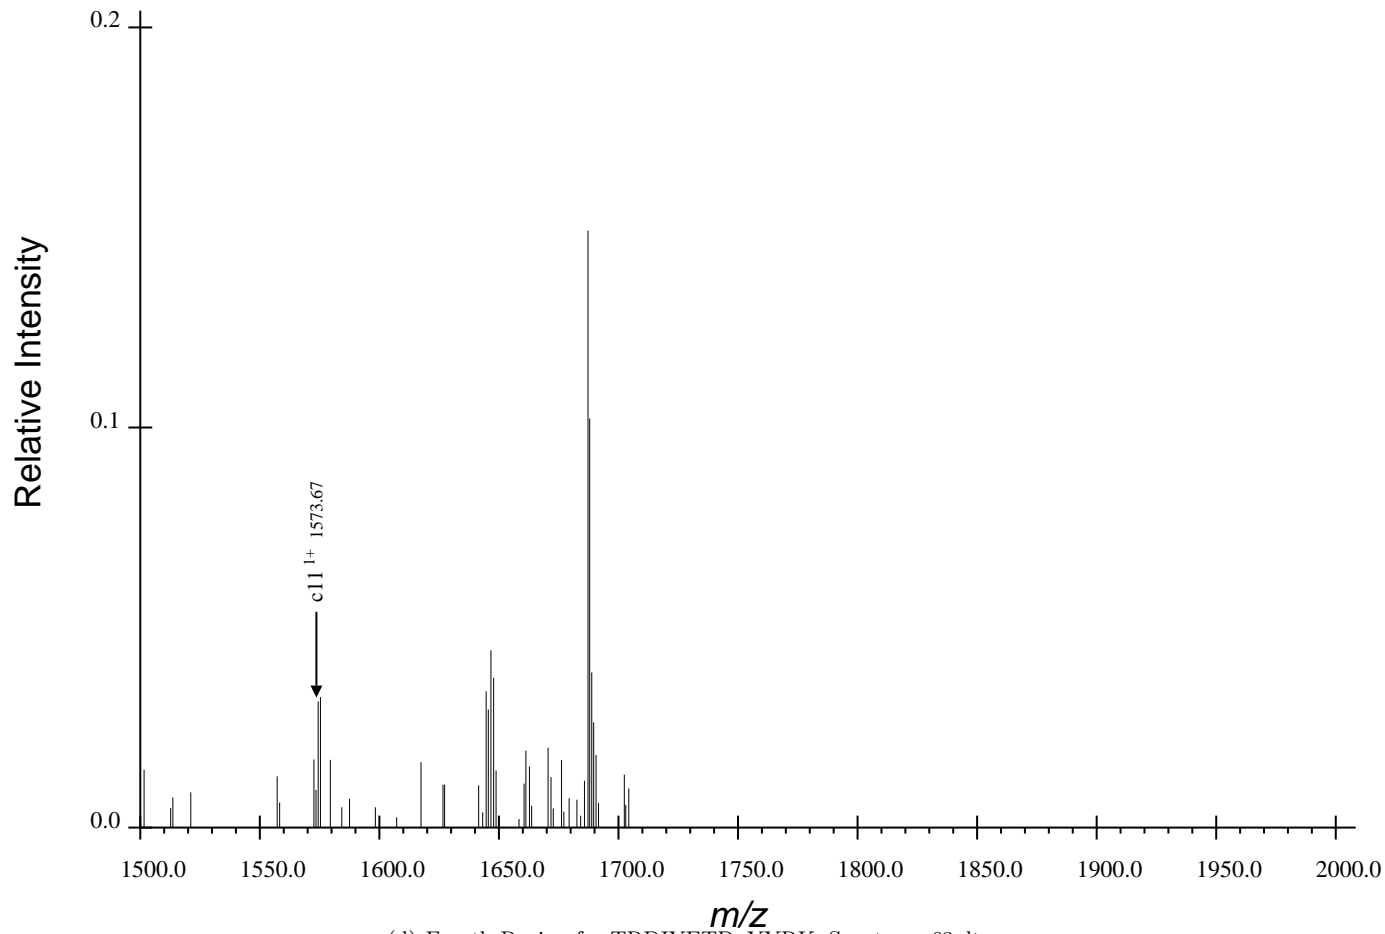

(d) Fourth Region for TRDIYETDpYYRK, Spectrum 63.dta

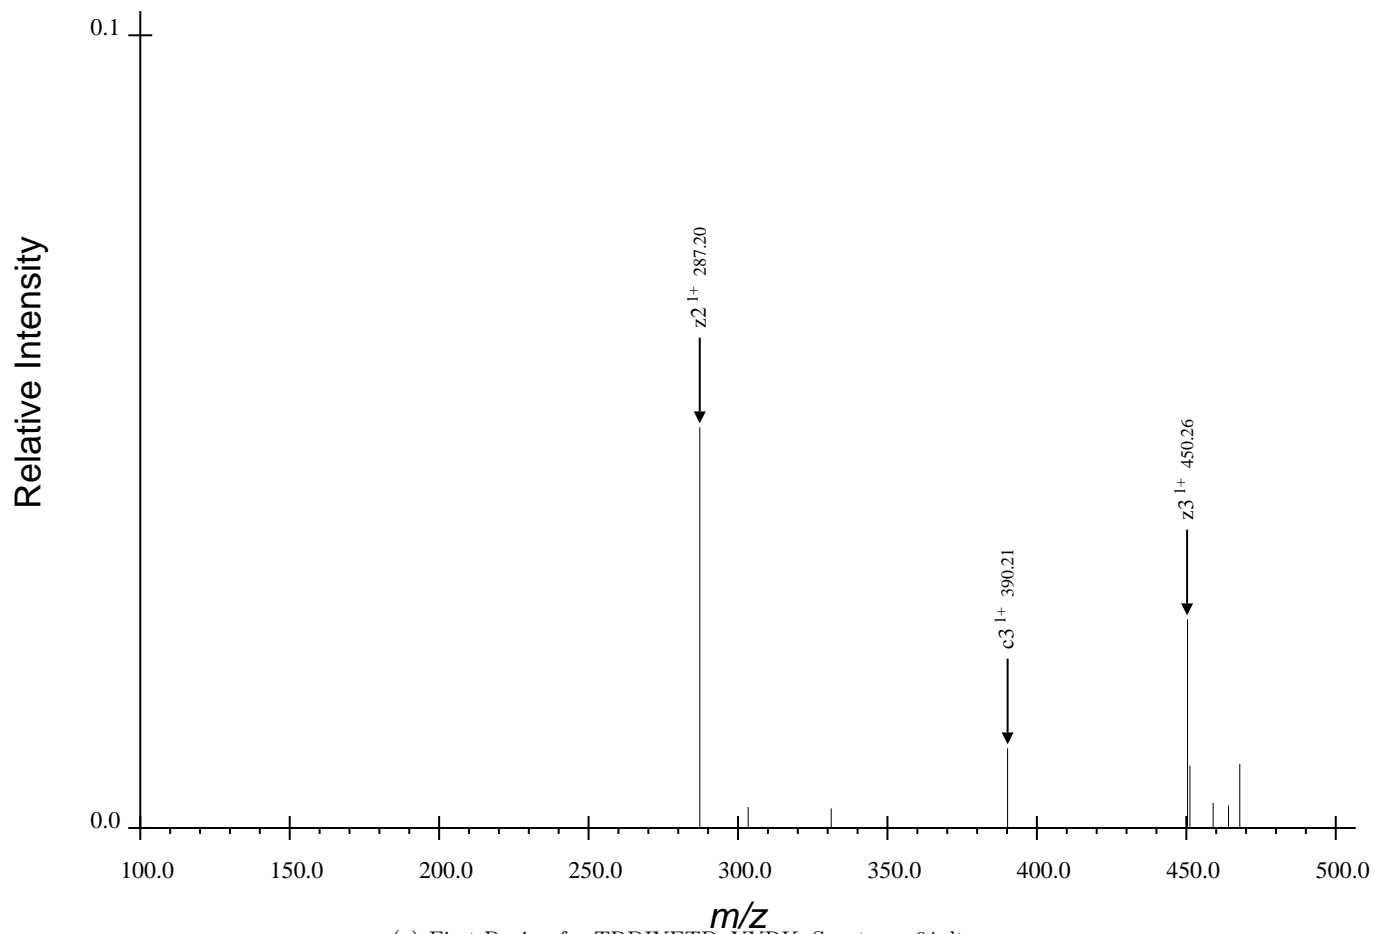

(a) First Region for TRDIYETDpYYRK, Spectrum 64.dta

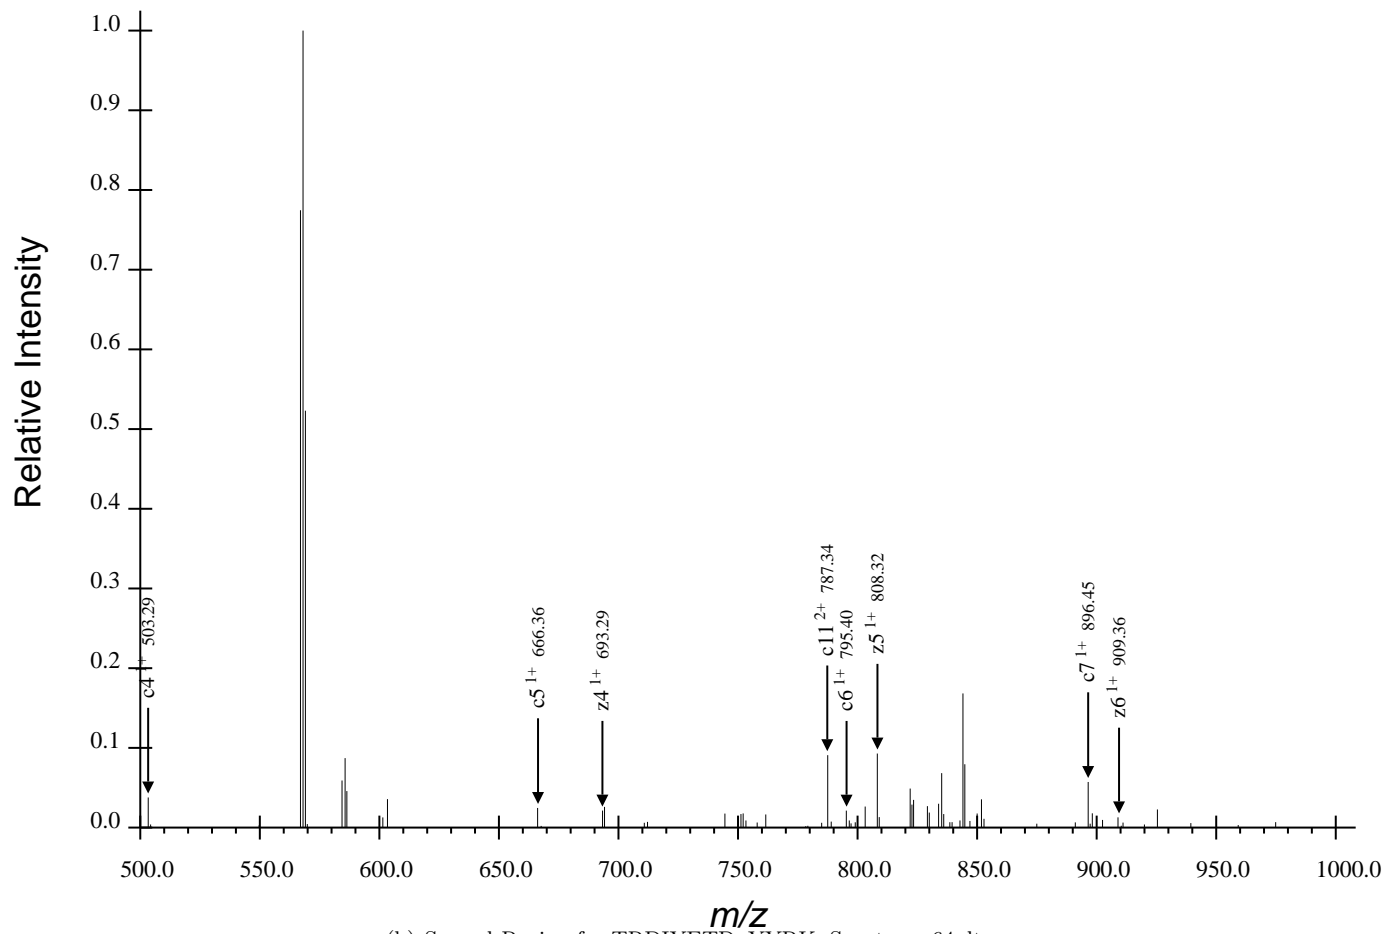

(b) Second Region for TRDIYETDpYYRK, Spectrum 64.dta

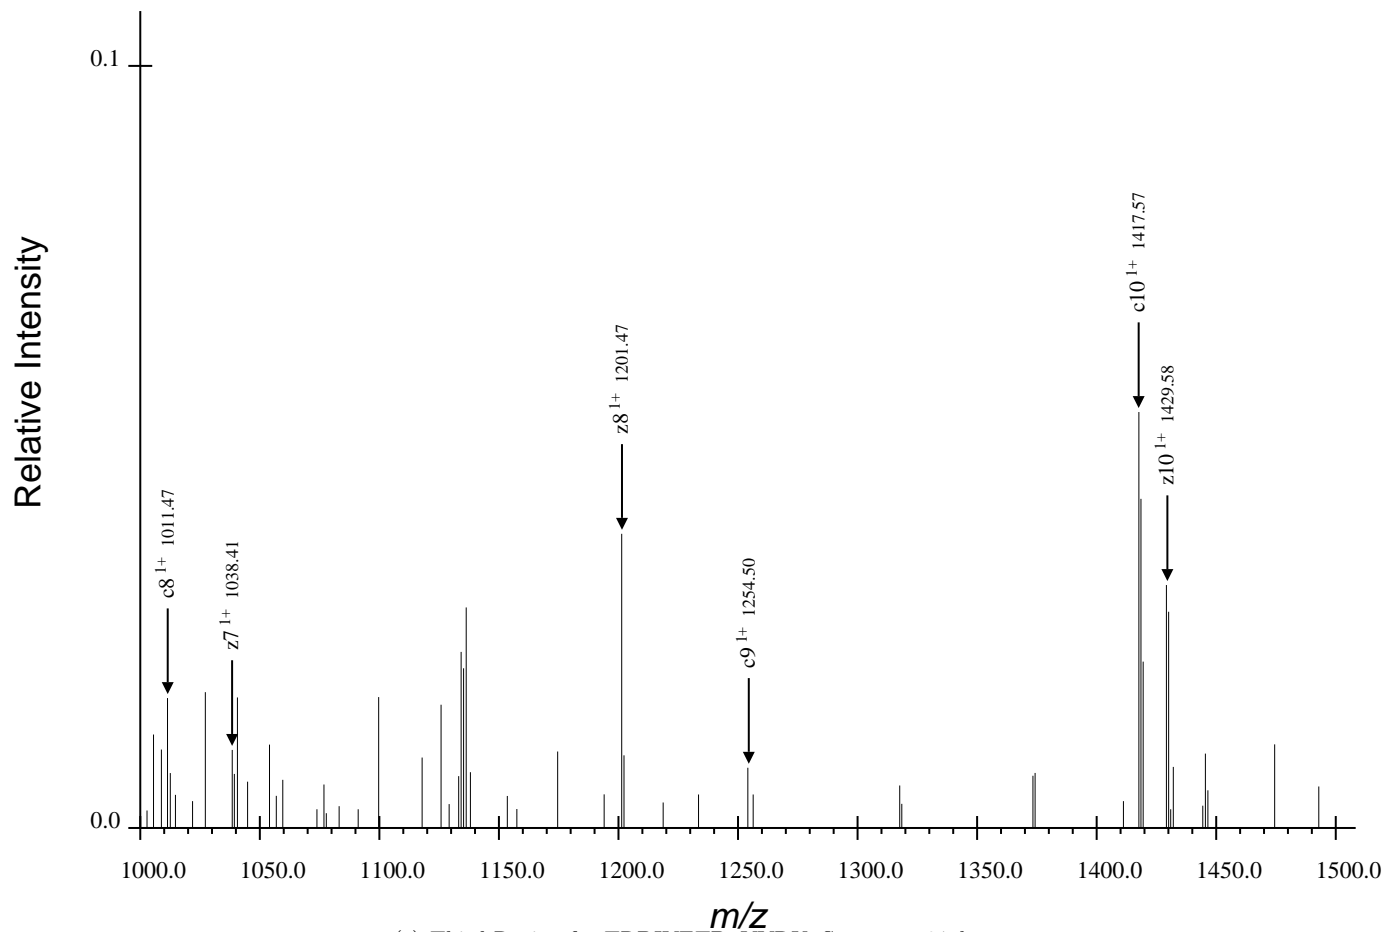

(c) Third Region for TRDIYETDpYYRK, Spectrum 64.dta

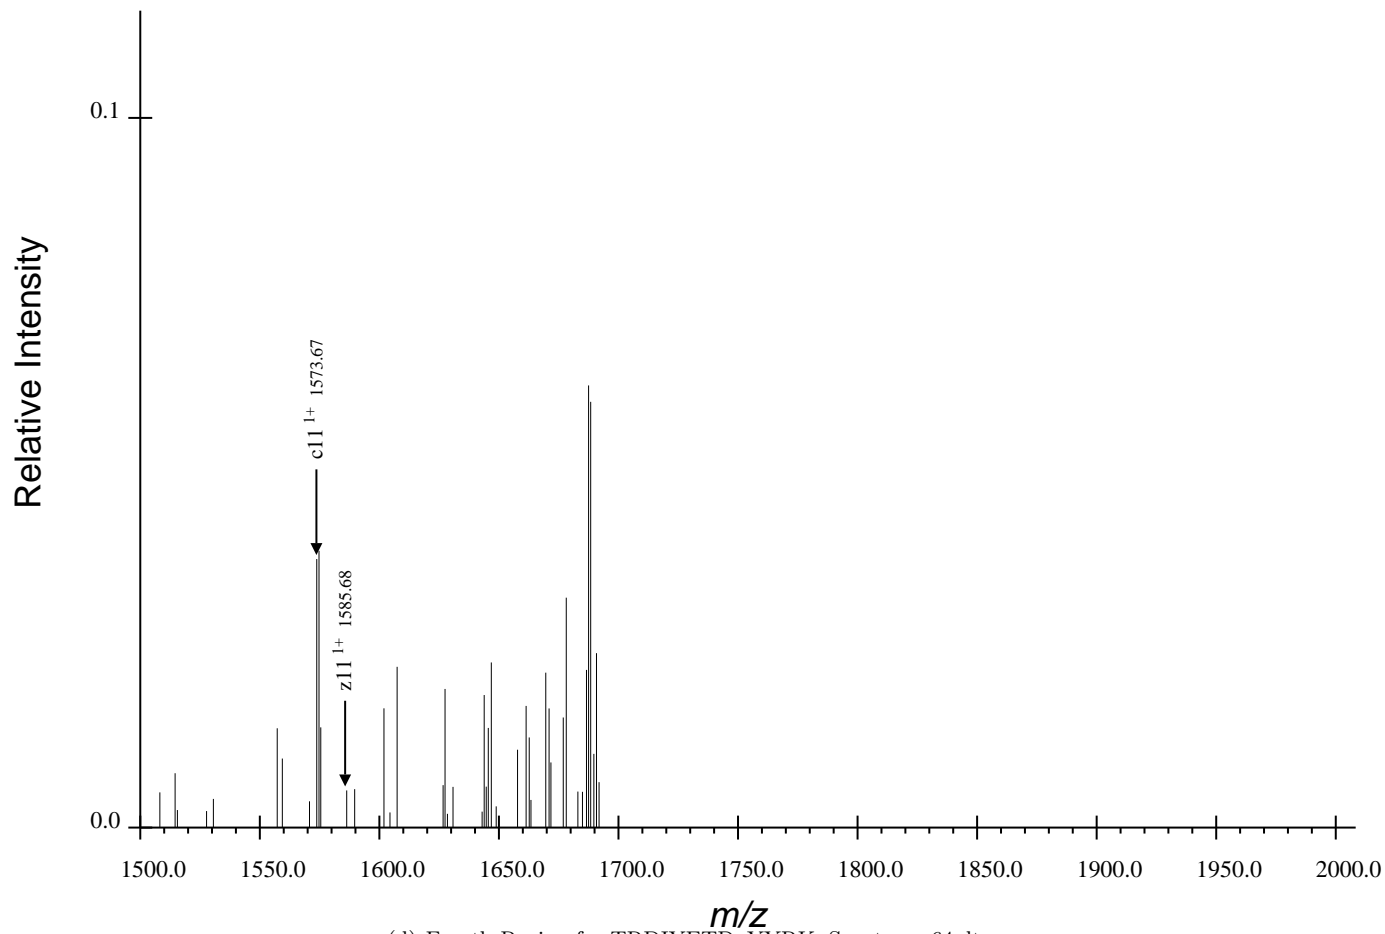

(d) Fourth Region for TRDIYETDpYYRK, Spectrum 64.dta



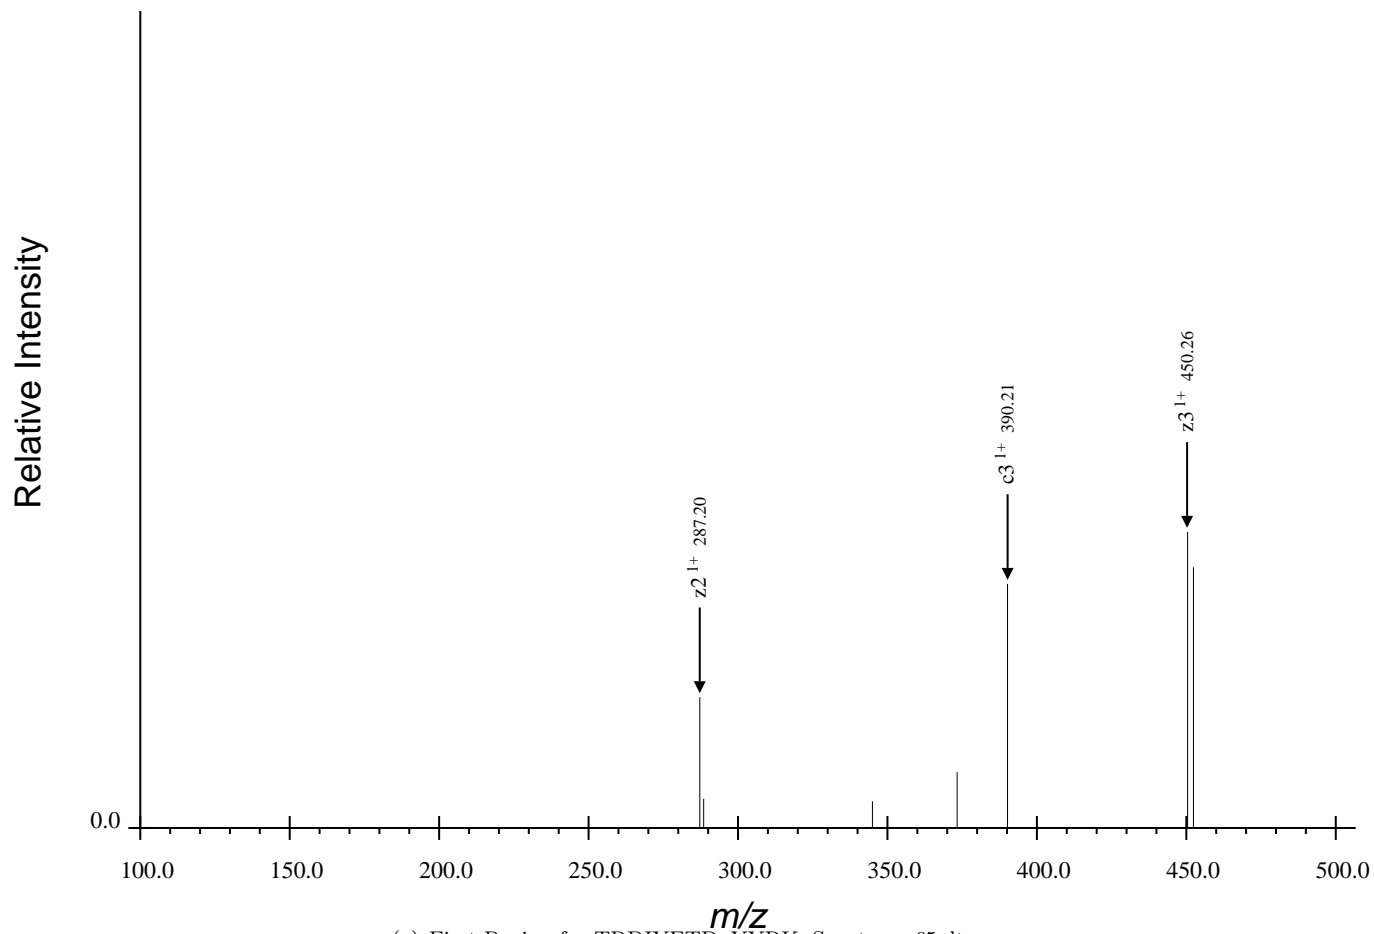

(a) First Region for TRDIYETDpYYRK, Spectrum 65.dta

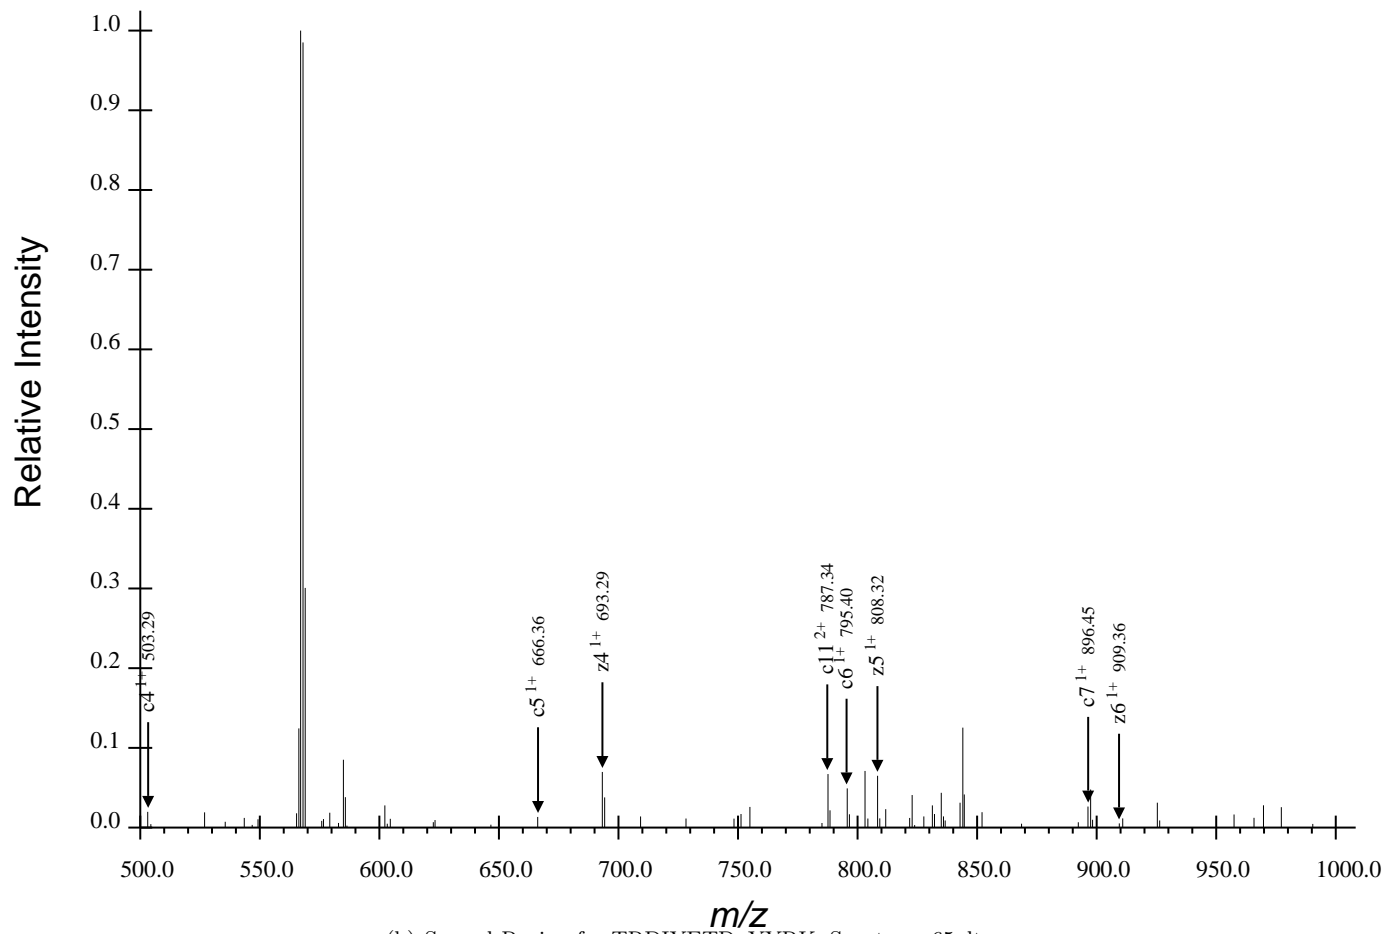

(b) Second Region for TRDIYETDpYYRK, Spectrum 65.dta

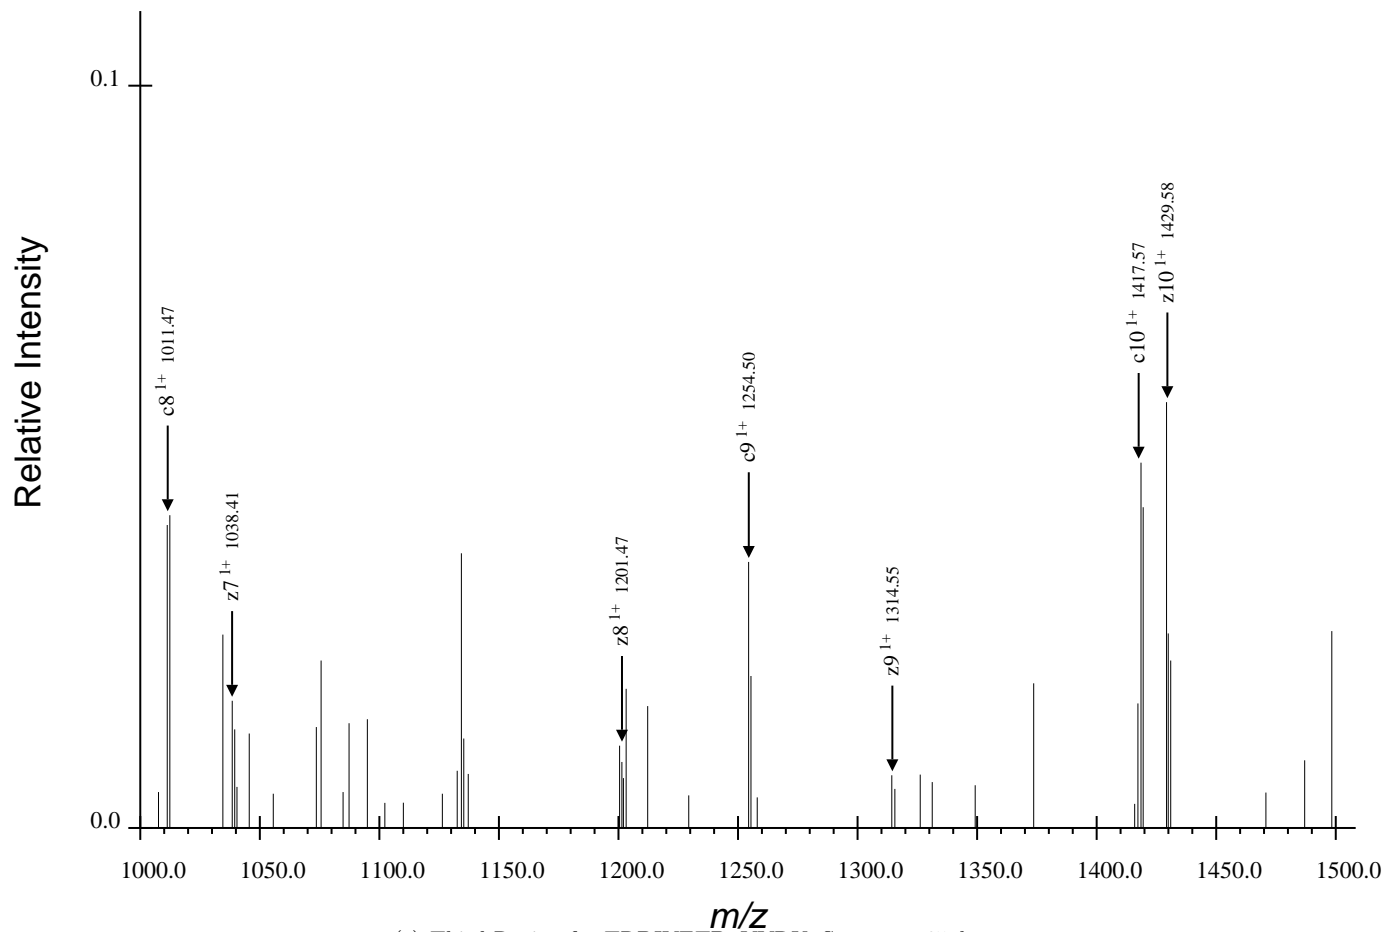

(c) Third Region for TRDIYETDpYYRK, Spectrum 65.dta

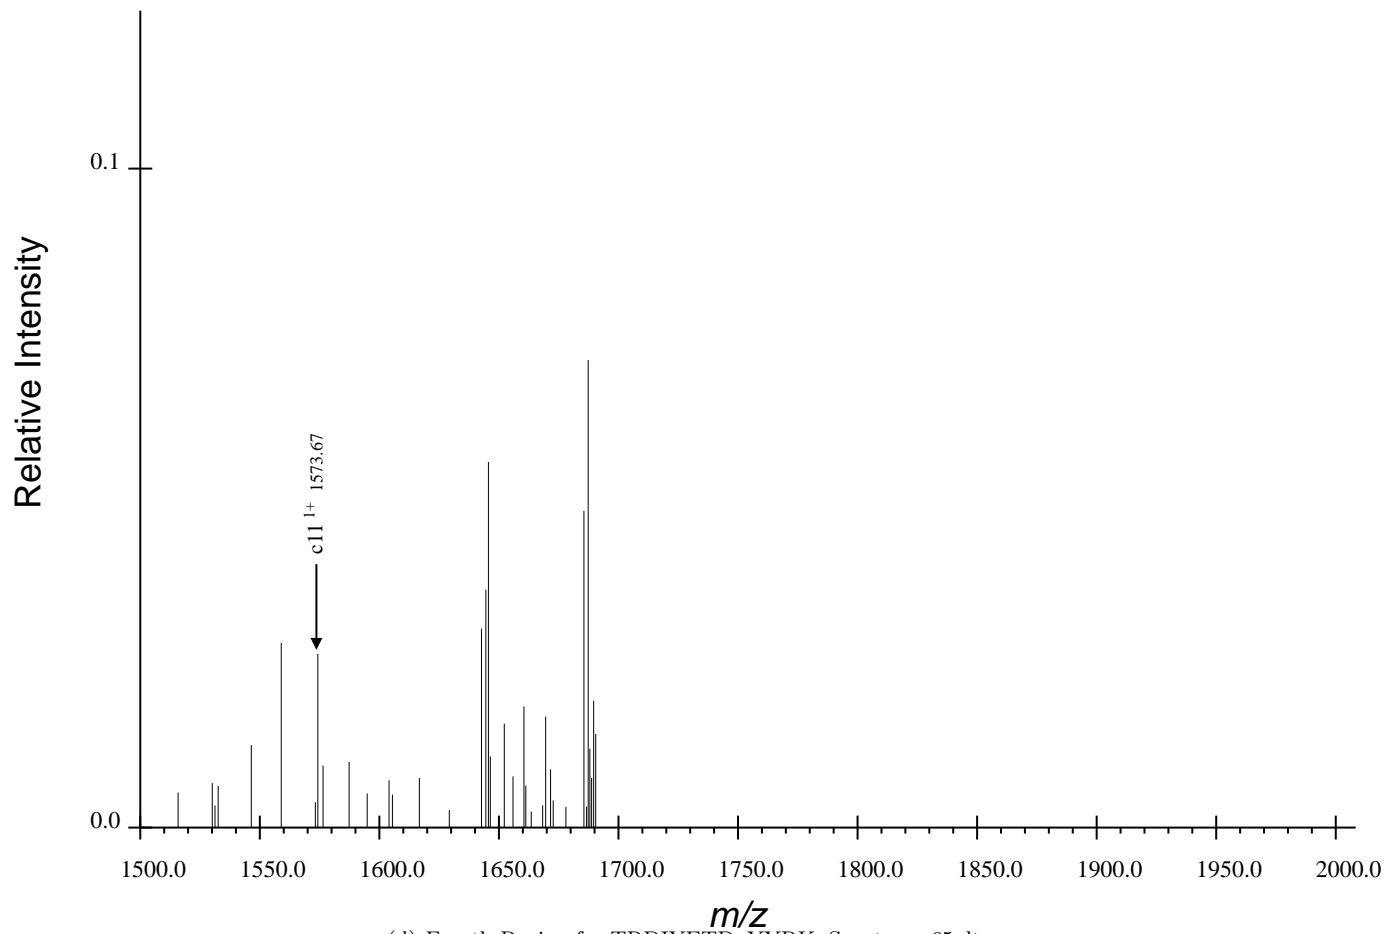

(d) Fourth Region for TRDIYETDpYYRK, Spectrum 65.dta

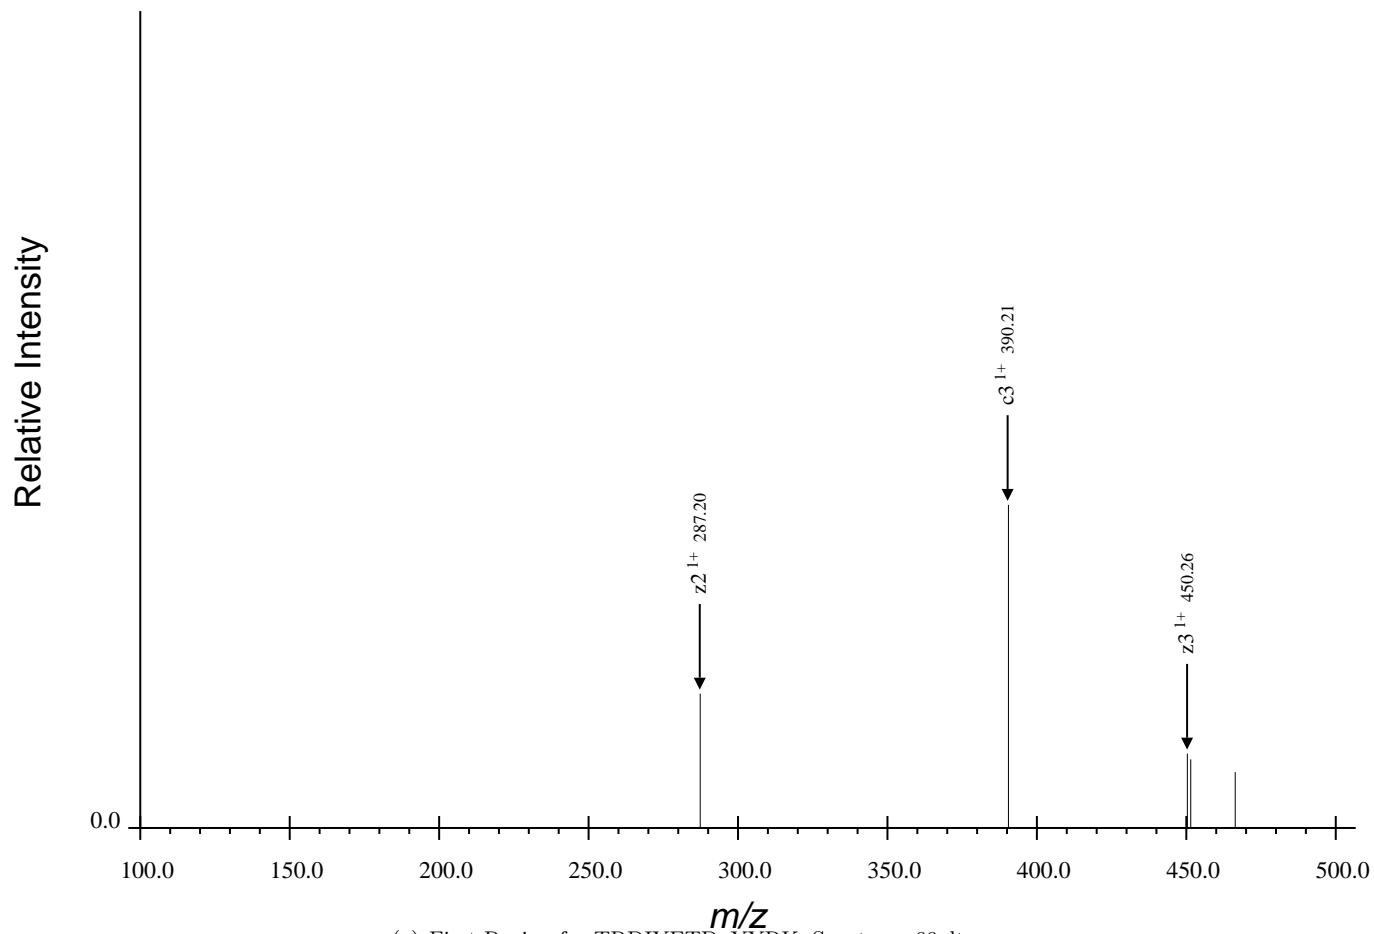

(a) First Region for TRDIYETDpYYRK, Spectrum 66.dta

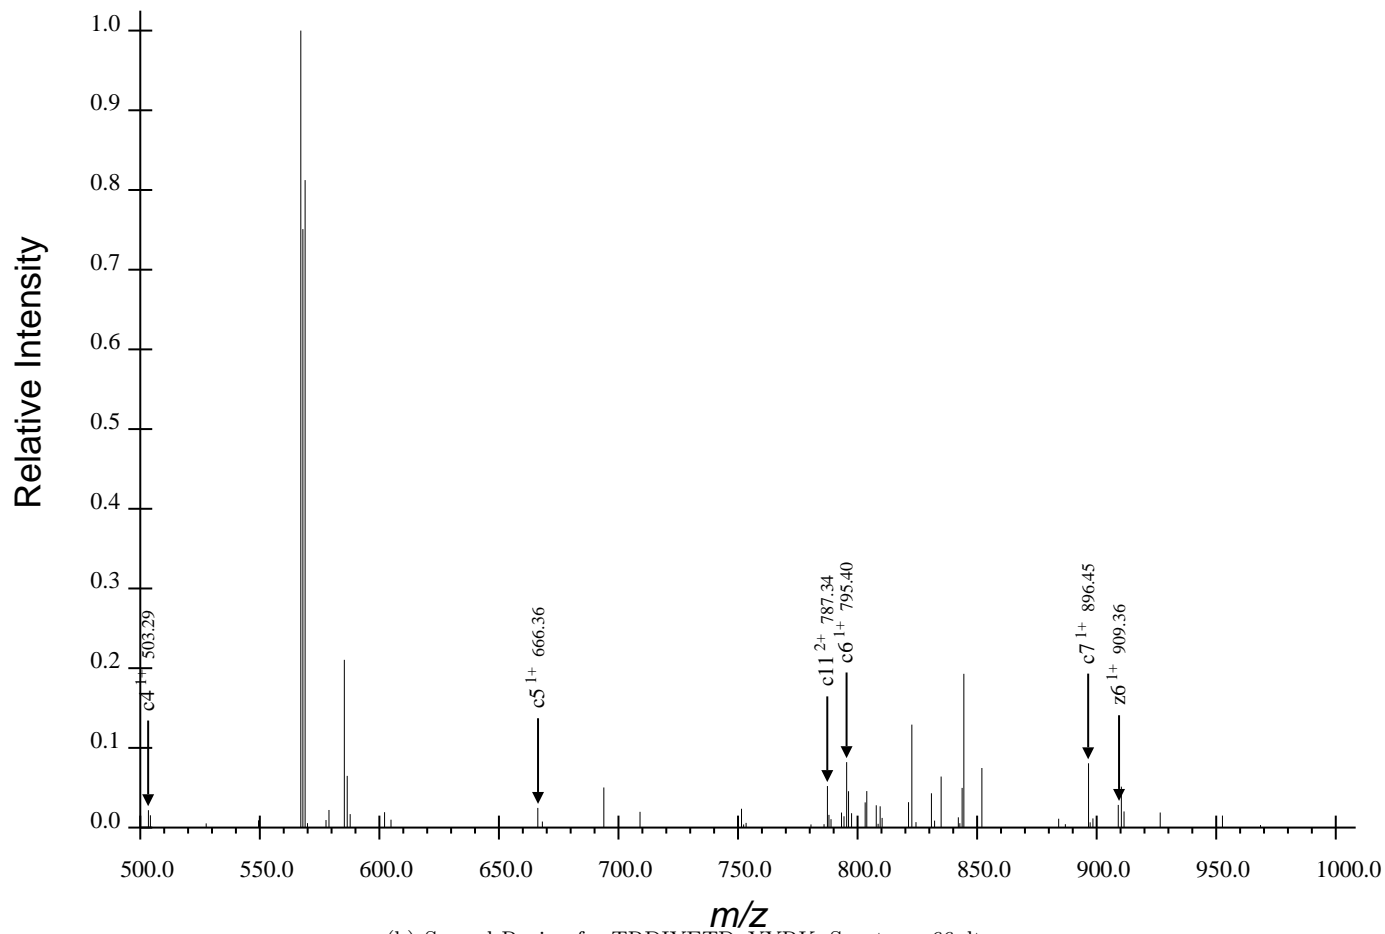

(b) Second Region for TRDIYETDpYYRK, Spectrum 66.dta

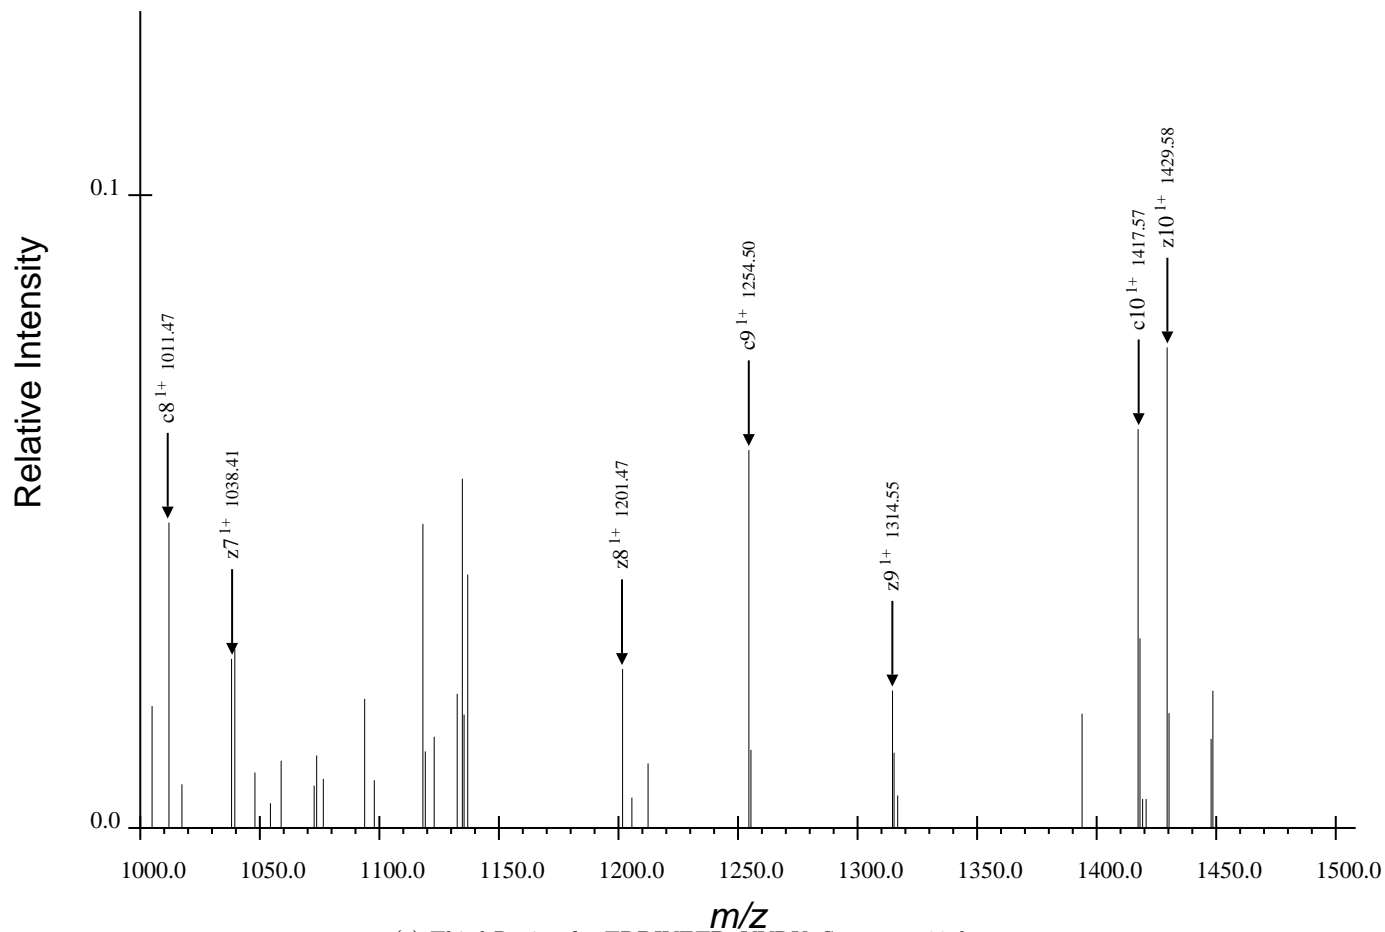

(c) Third Region for TRDIYETDpYYRK, Spectrum 66.dta

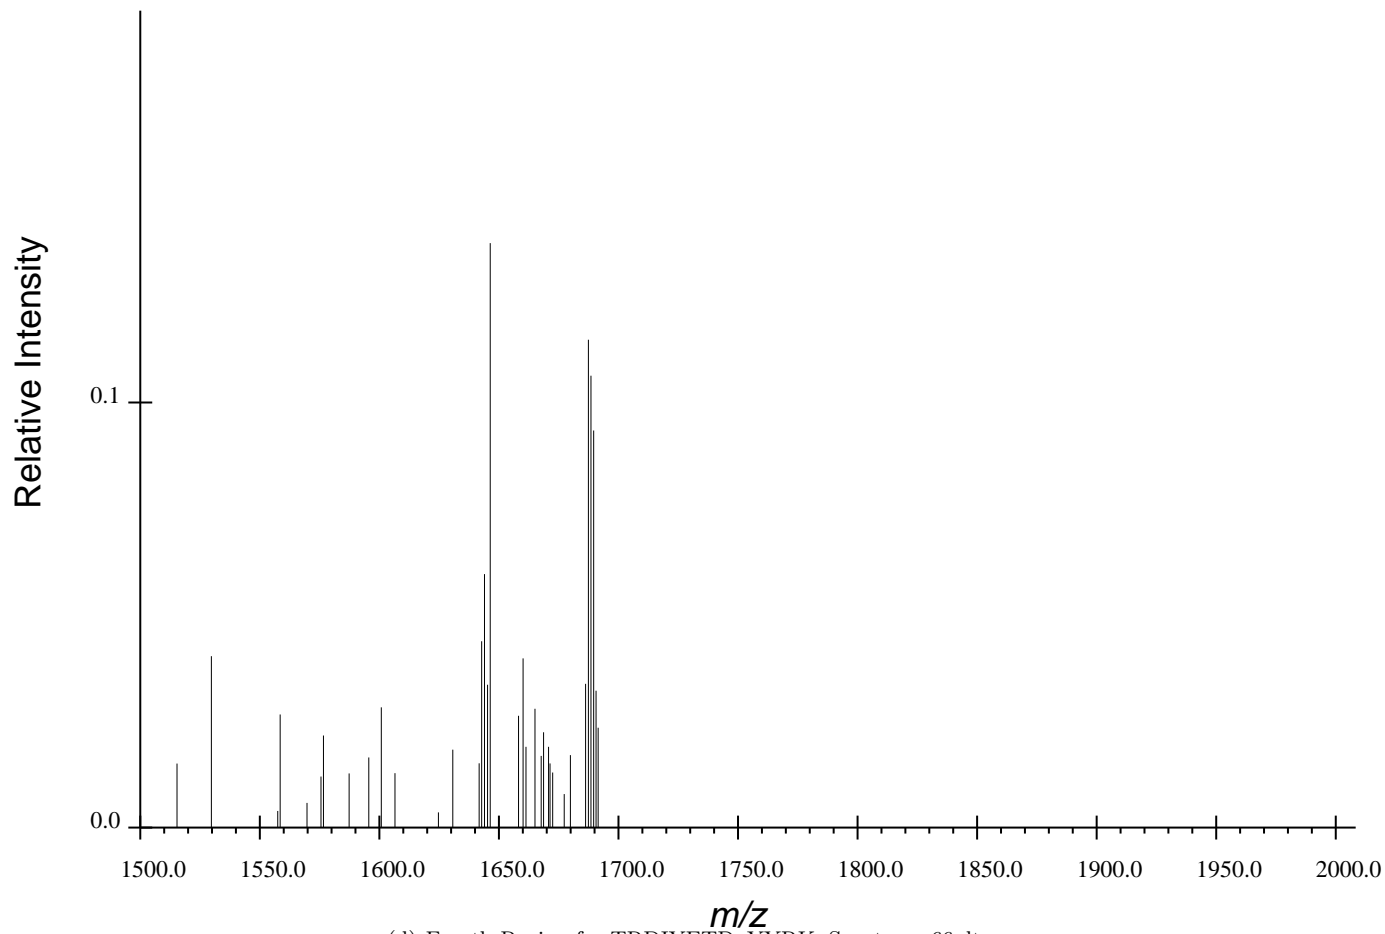

(d) Fourth Region for TRDIYETDpYYRK, Spectrum 66.dta

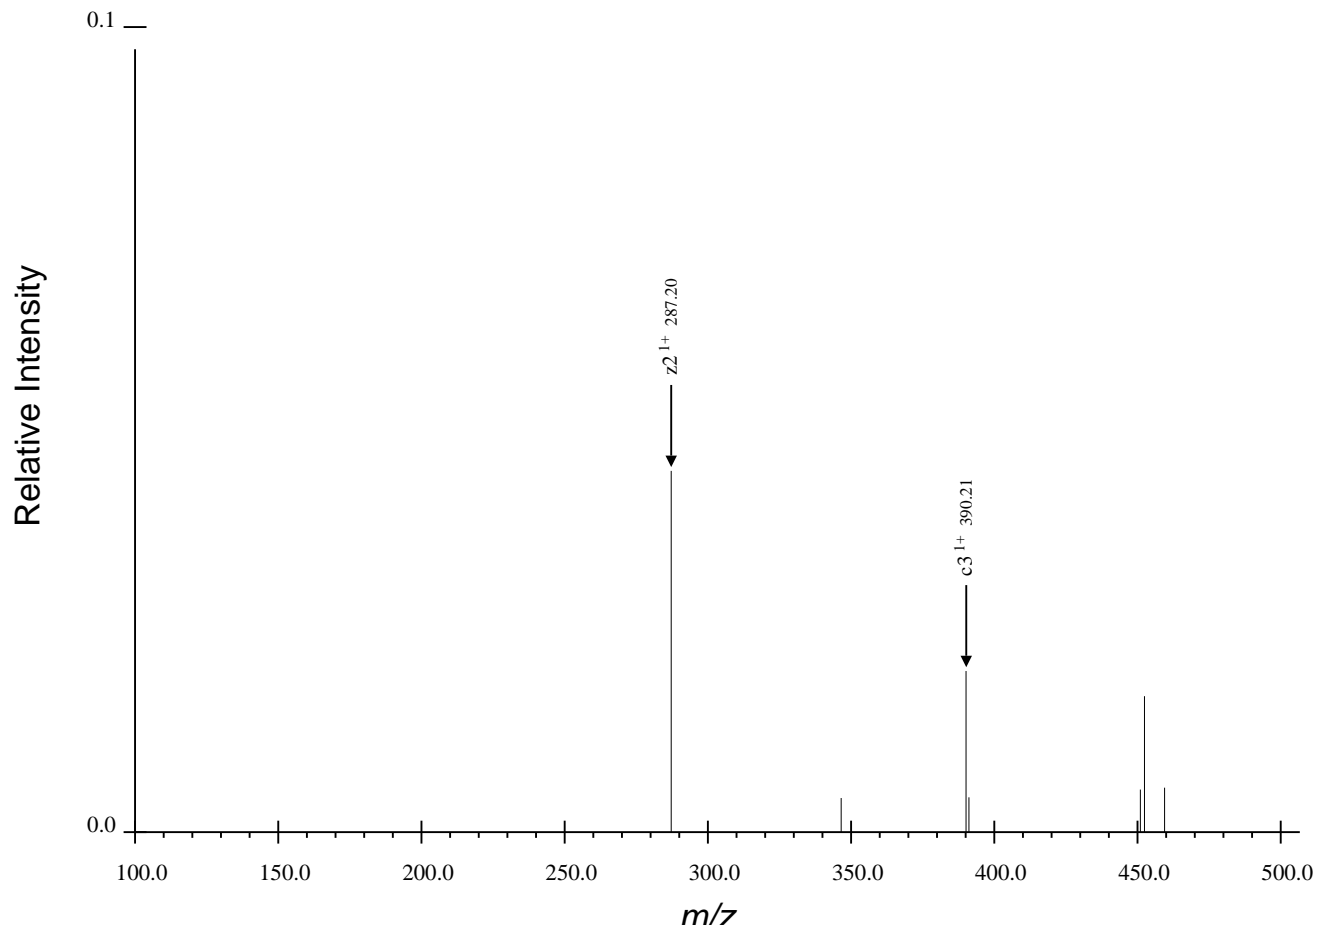

(a) First Region for TRDIYETDpYYRK, Spectrum 67.dta

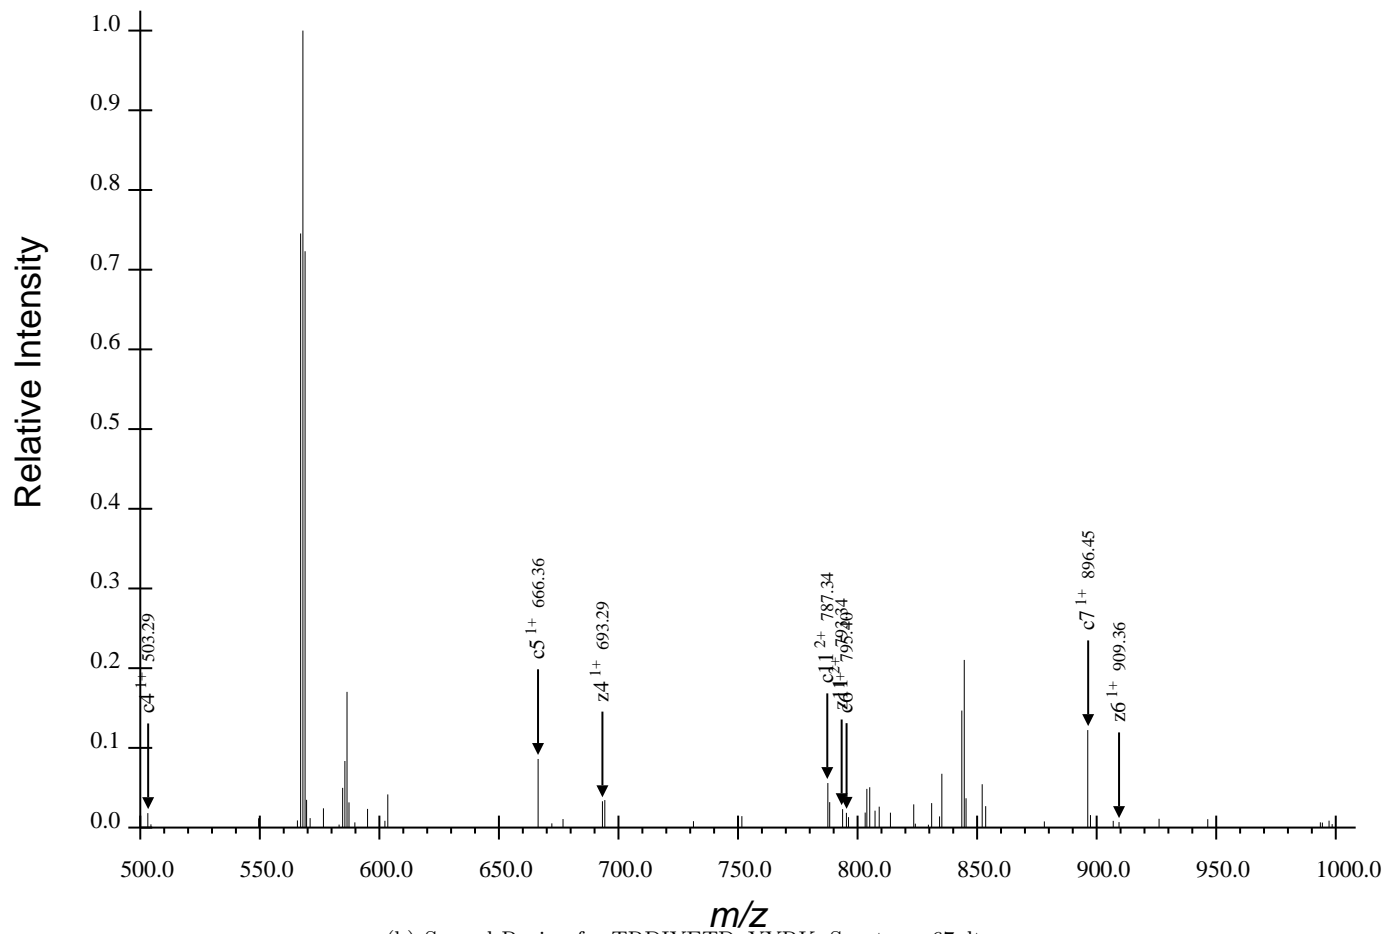

(b) Second Region for TRDIYETDpYYRK, Spectrum 67.dta

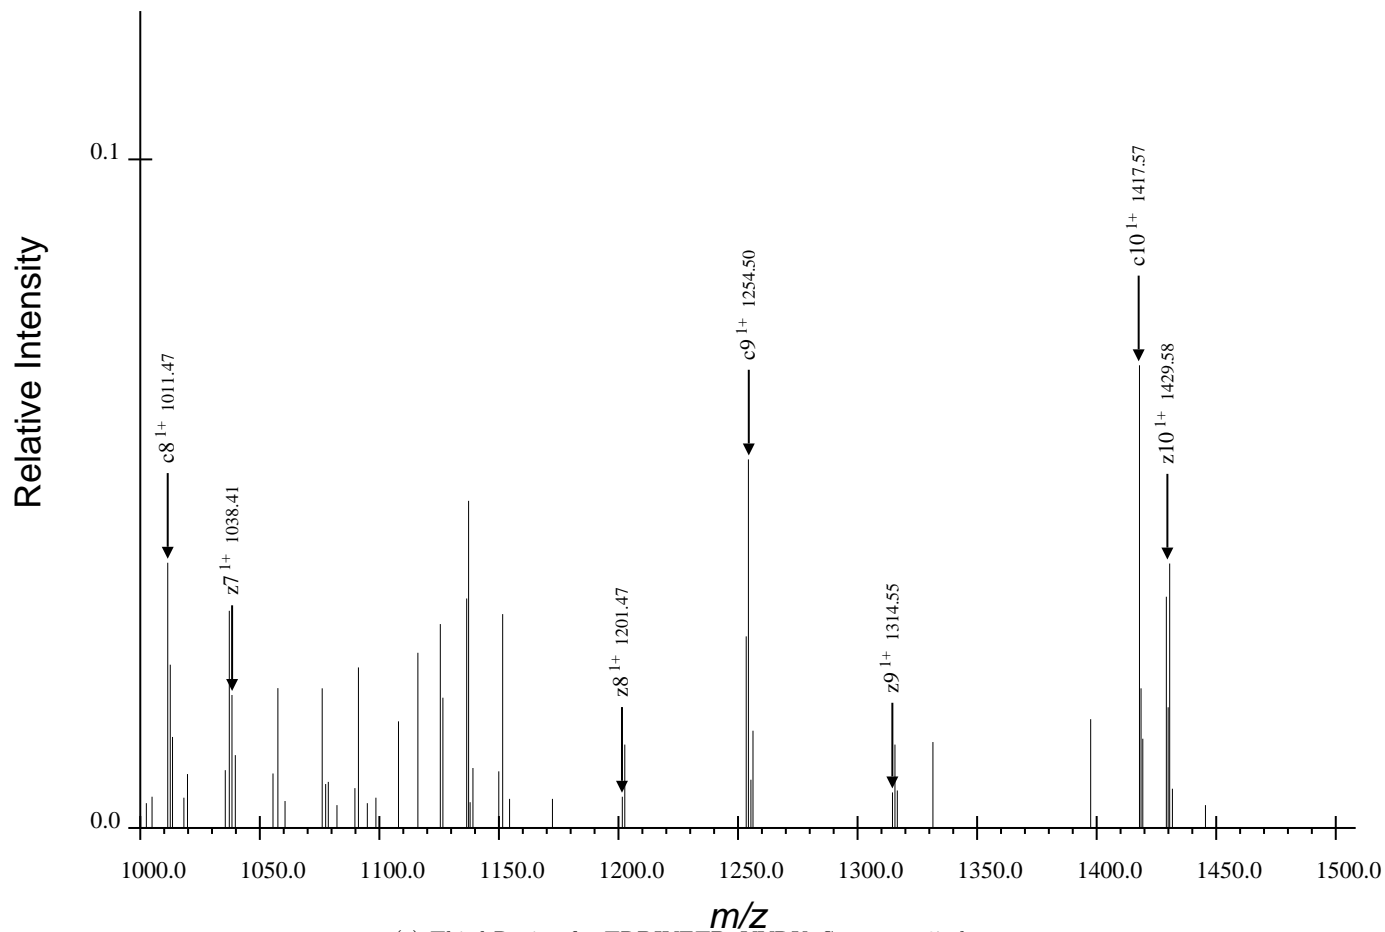

(c) Third Region for TRDIYETDpYYRK, Spectrum 67.dta

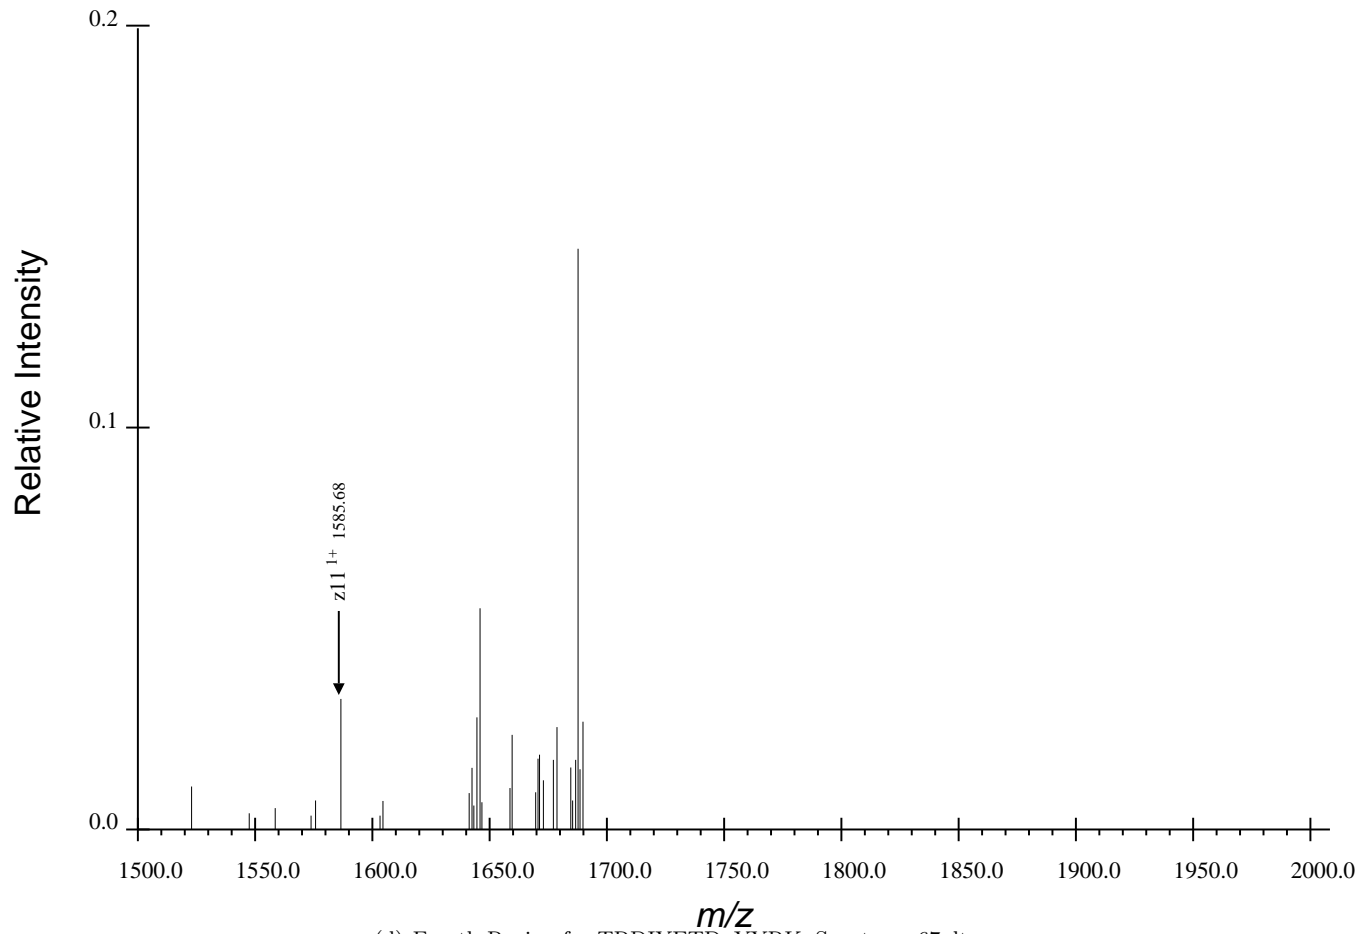

(d) Fourth Region for TRDIYETDpYYRK, Spectrum 67.dta

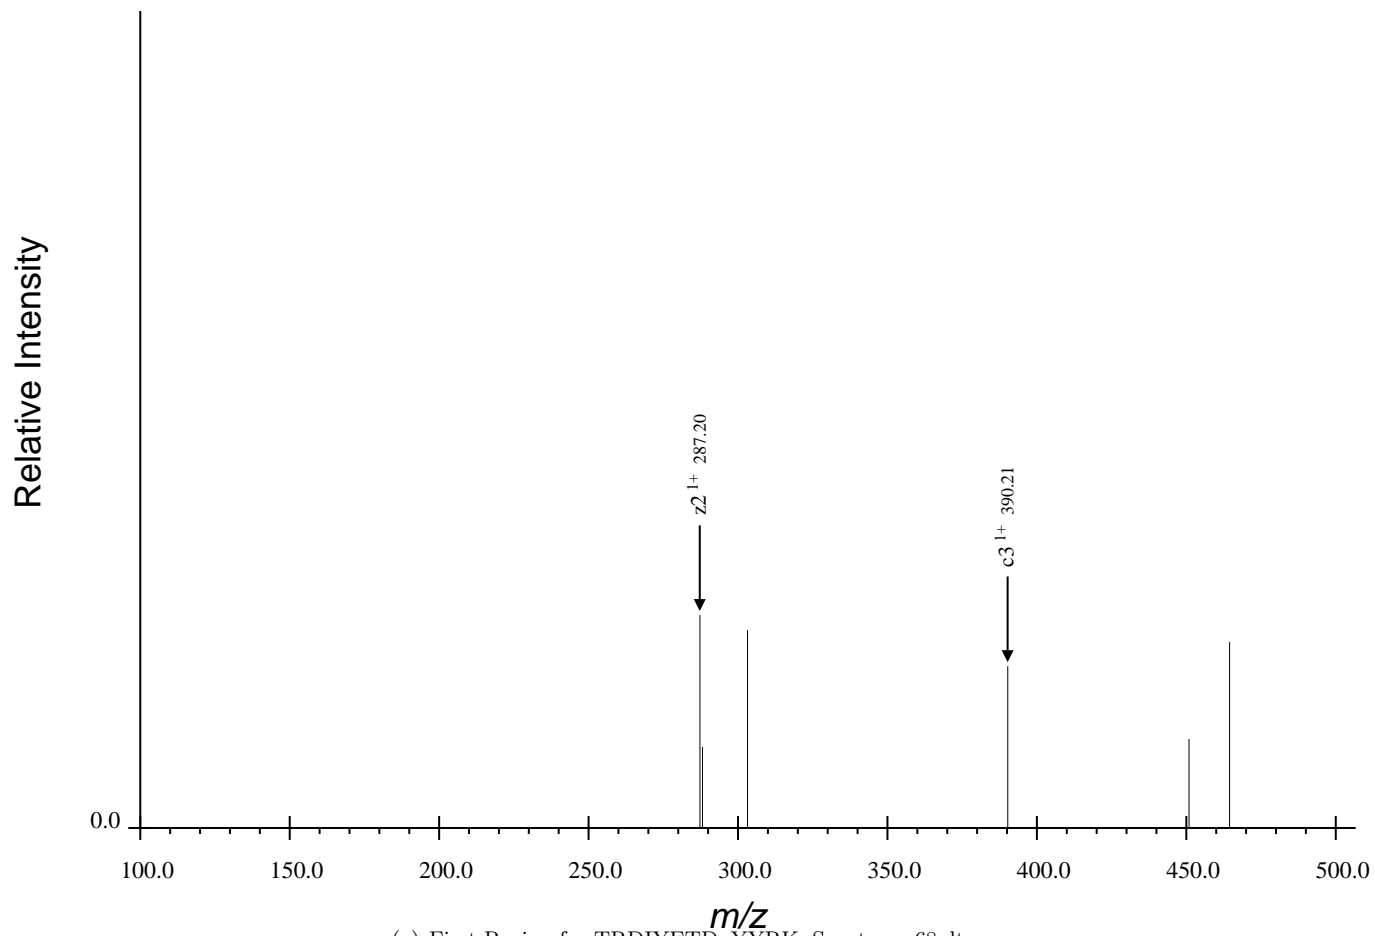

(a) First Region for TRDIYETDpYYRK, Spectrum 68.dta

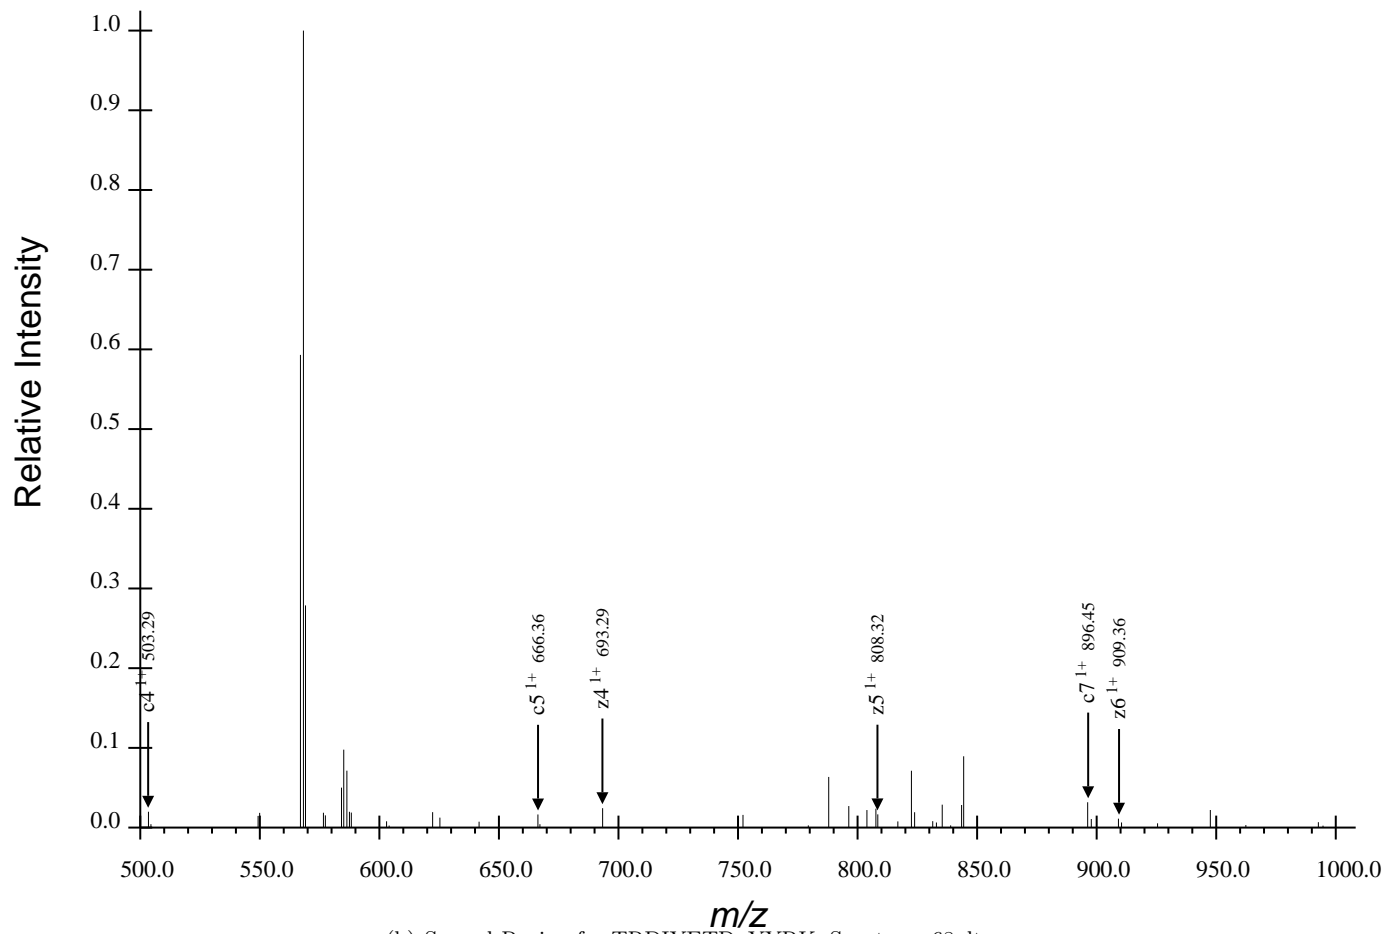

(b) Second Region for TRDIYETDpYYRK, Spectrum 68.dta

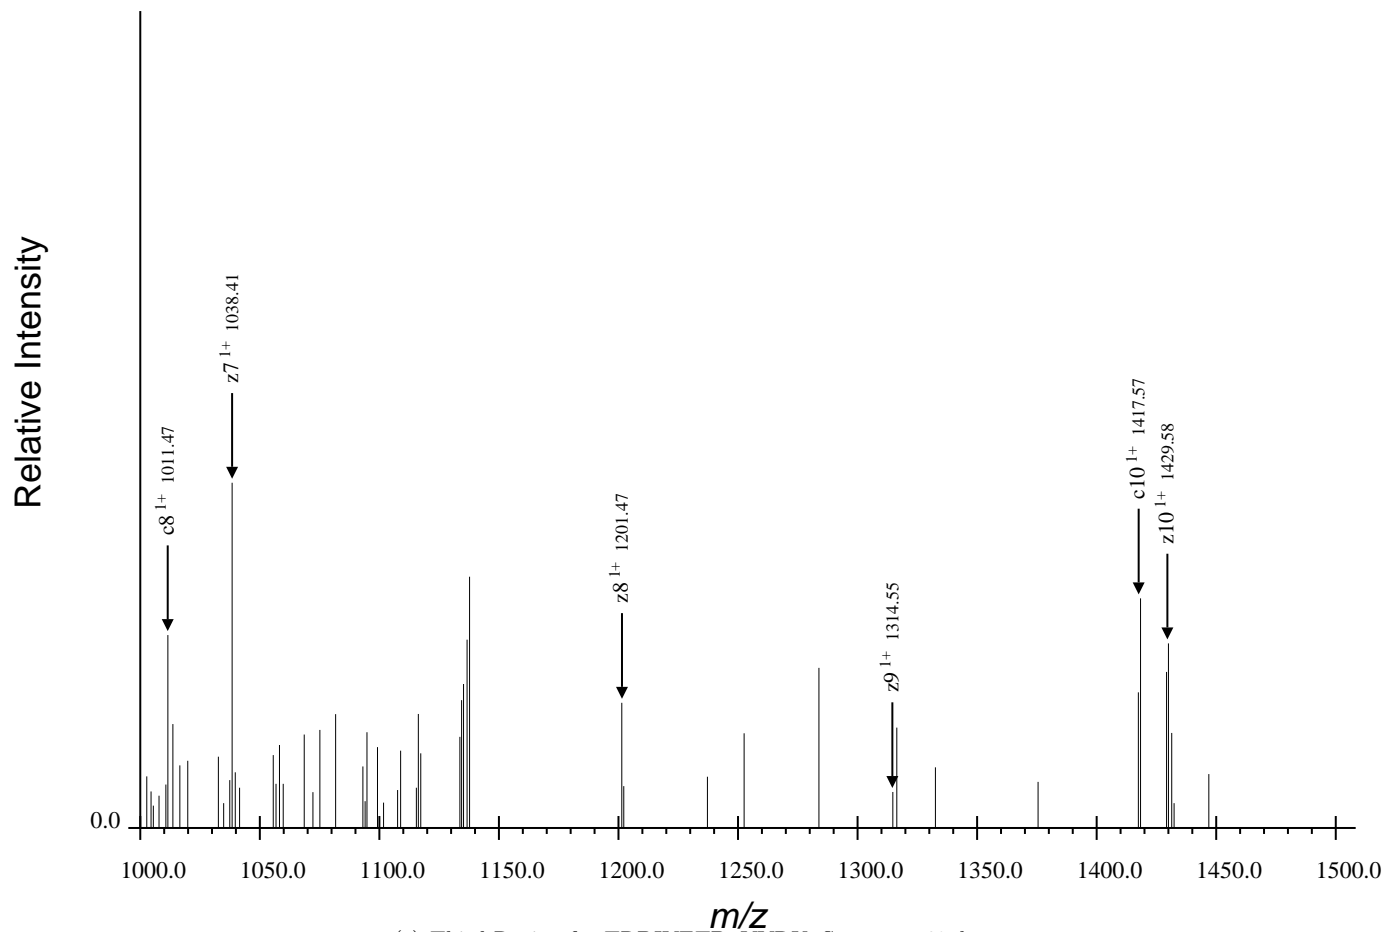

(c) Third Region for TRDIYETDpYYRK, Spectrum 68.dta

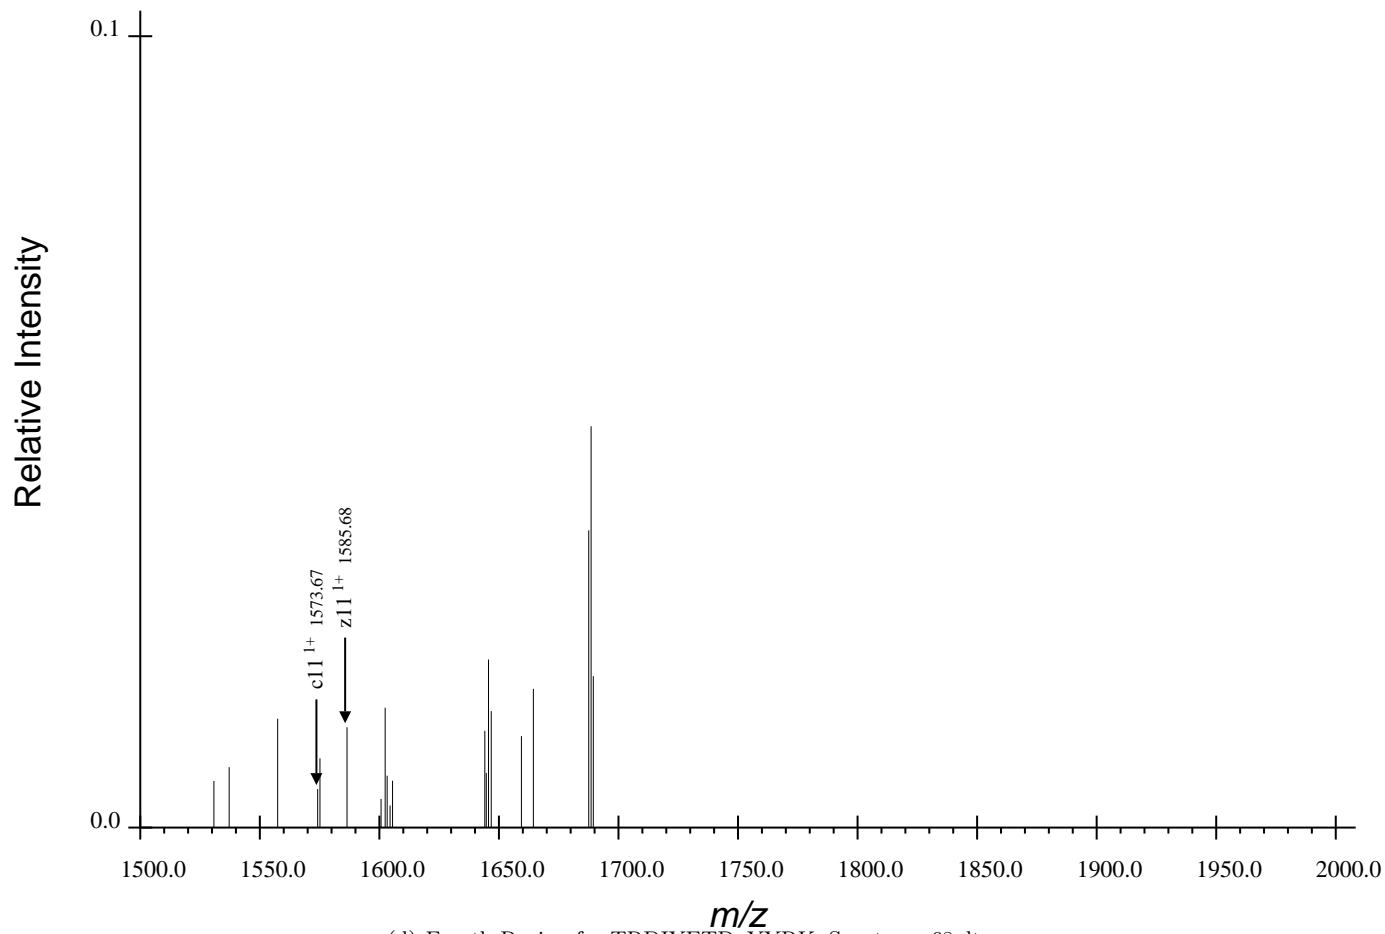

(d) Fourth Region for TRDIYETDpYYRK, Spectrum 68.dta
