# Supplementary material
Source: PubMed Central journal article supplement (PMC2871412)
Supplement: supp_M900487-MCP200_TestSetB_HistoneH3Polypeptides.pdf [file supp_M900487-MCP200_TestSetB_HistoneH3Polypeptides.pdf]

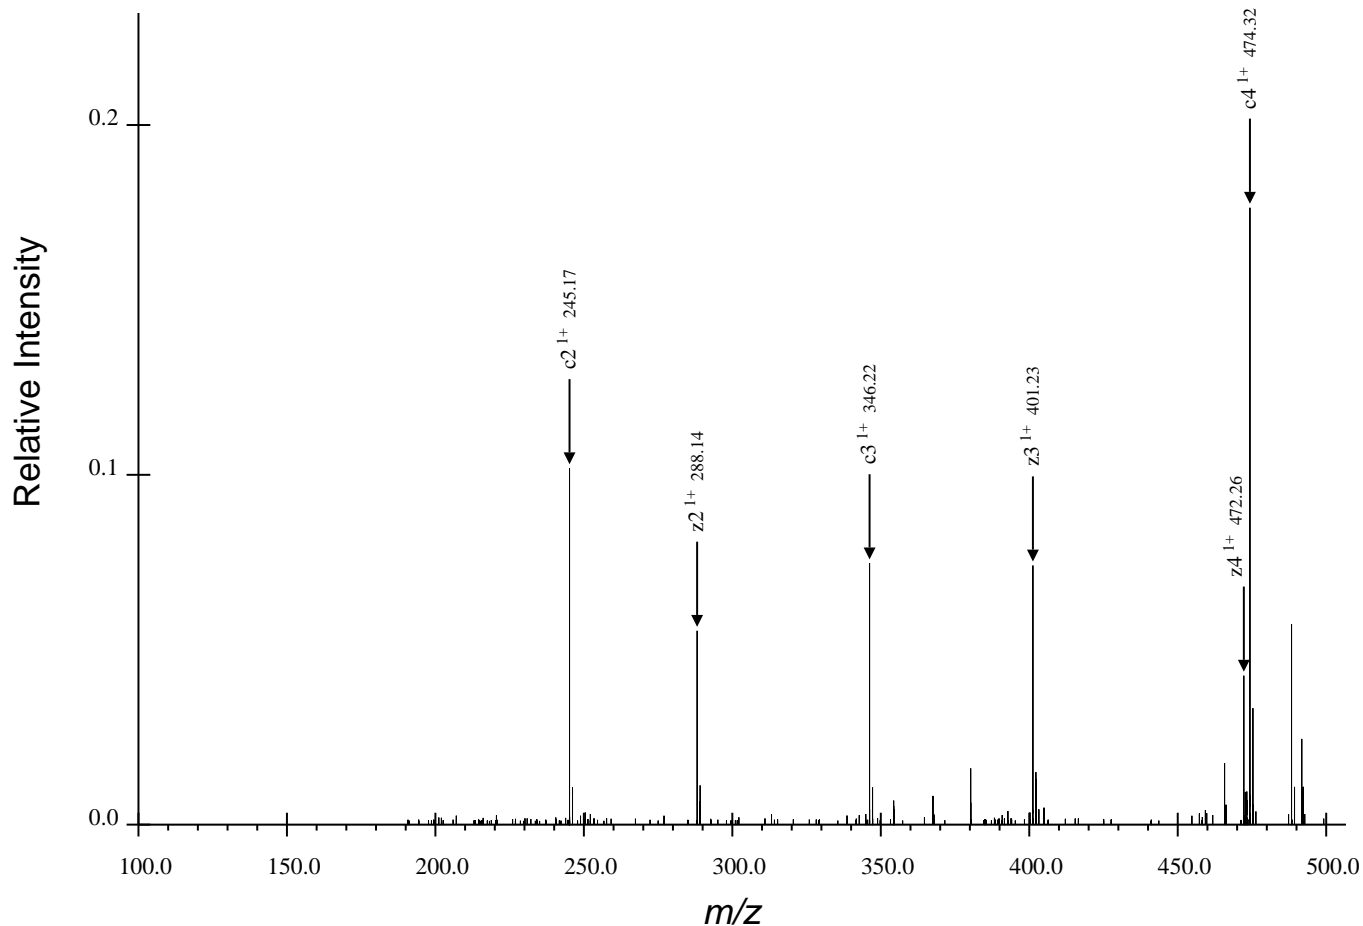

(a) First Region for ARTKQTARdKSTGGaKAPRKQLATaKAARdKSAPATGGVdKKPHRYRPGTVALRE, Spectrum 1.dta

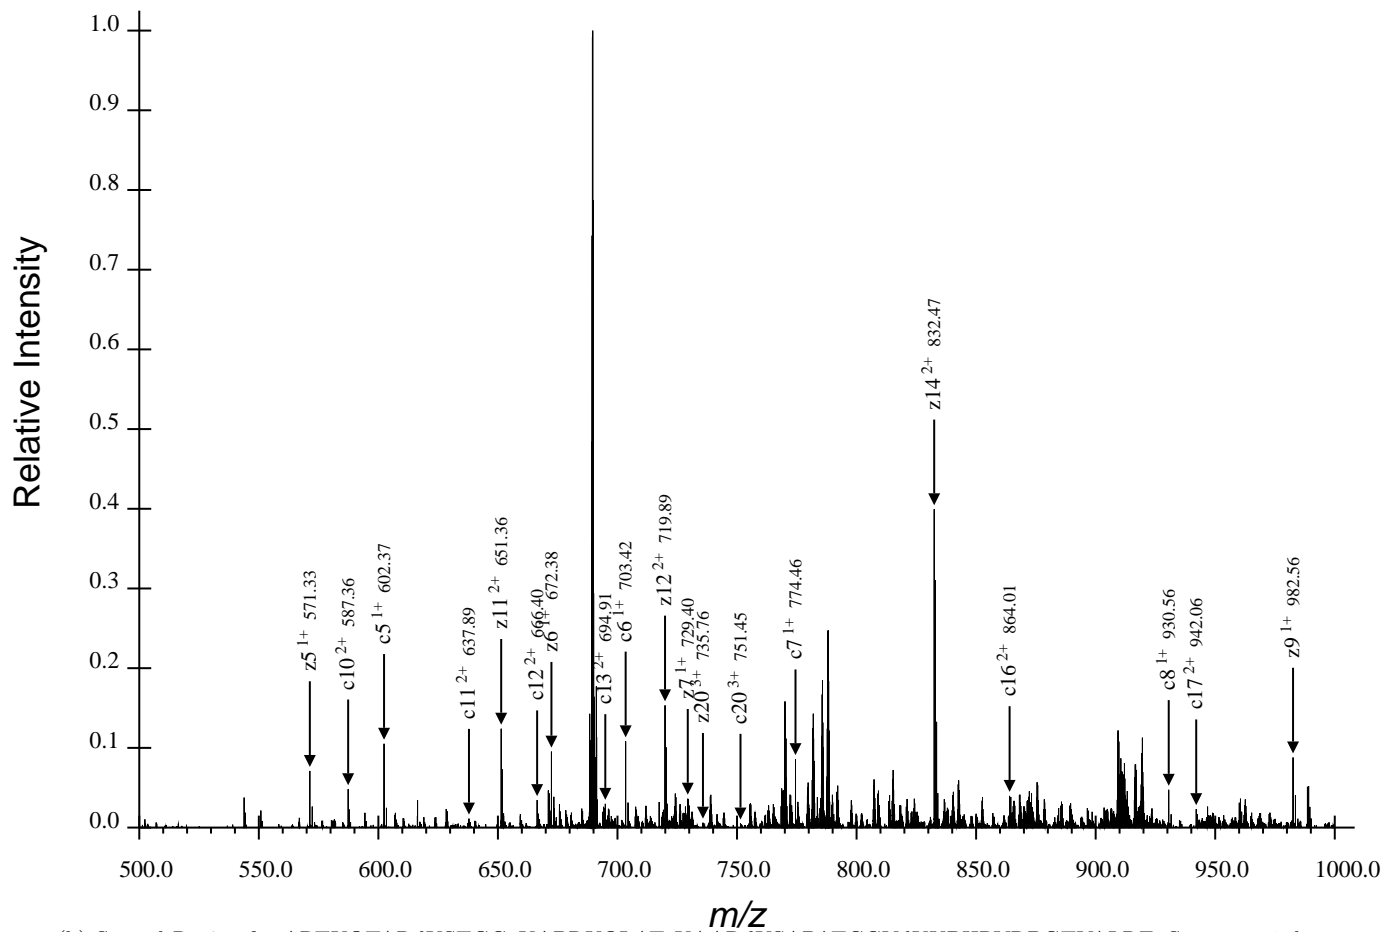

(b) Second Region for ARTKQTARdKSTGGaKAPRKQLATaKAARdKSAPATGGVdKKPHRYRPGTVALRE, Spectrum 1.dta

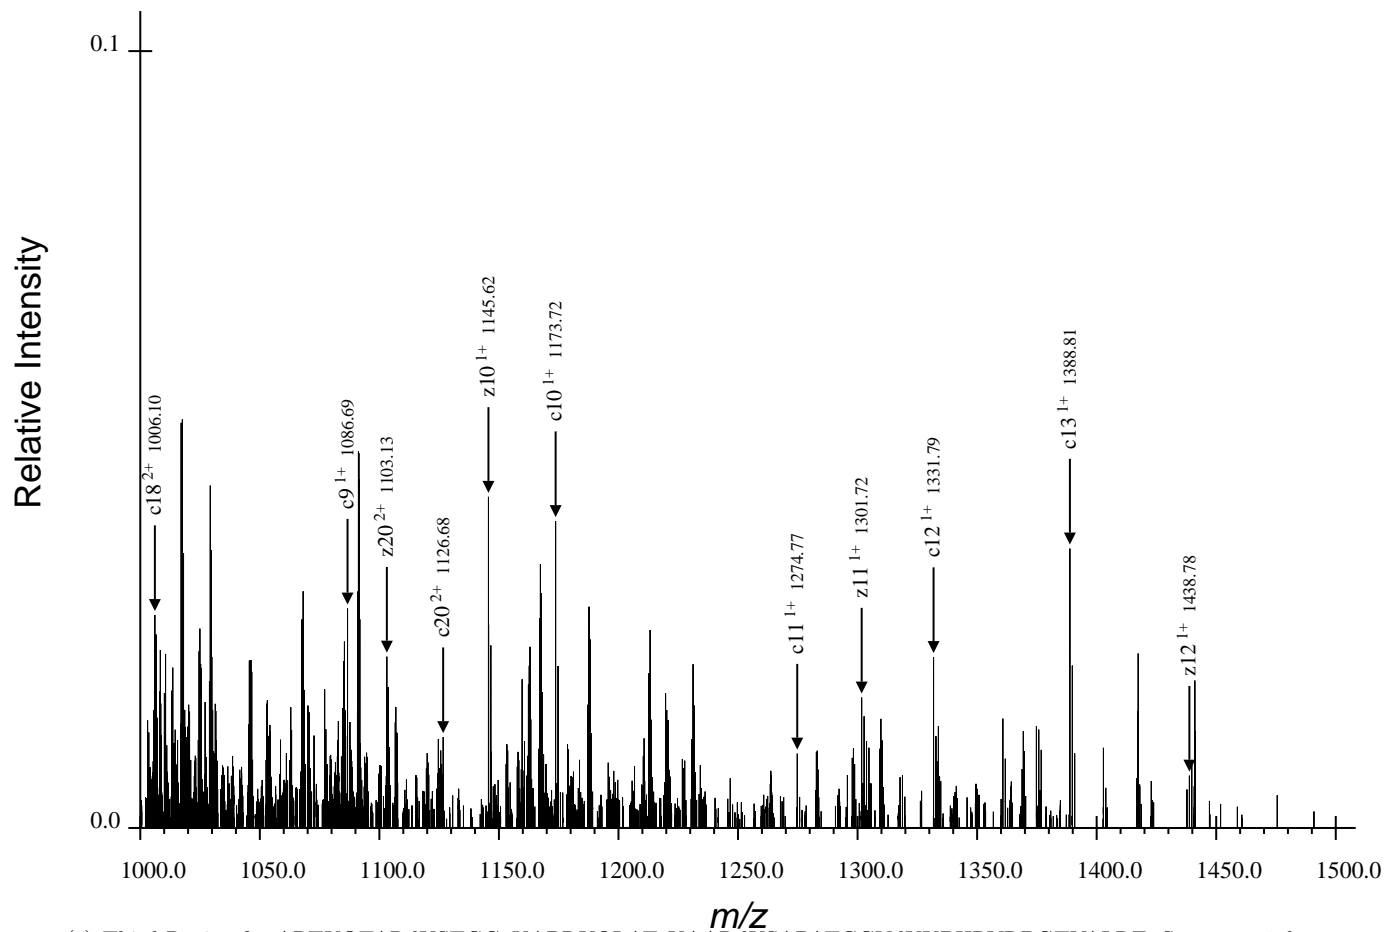

(c) Third Region for ARTKQTARdKSTGGaKAPRKQLATaKAARdKSAPATGGVdKKPHRYRPGTVALRE, Spectrum 1.dta

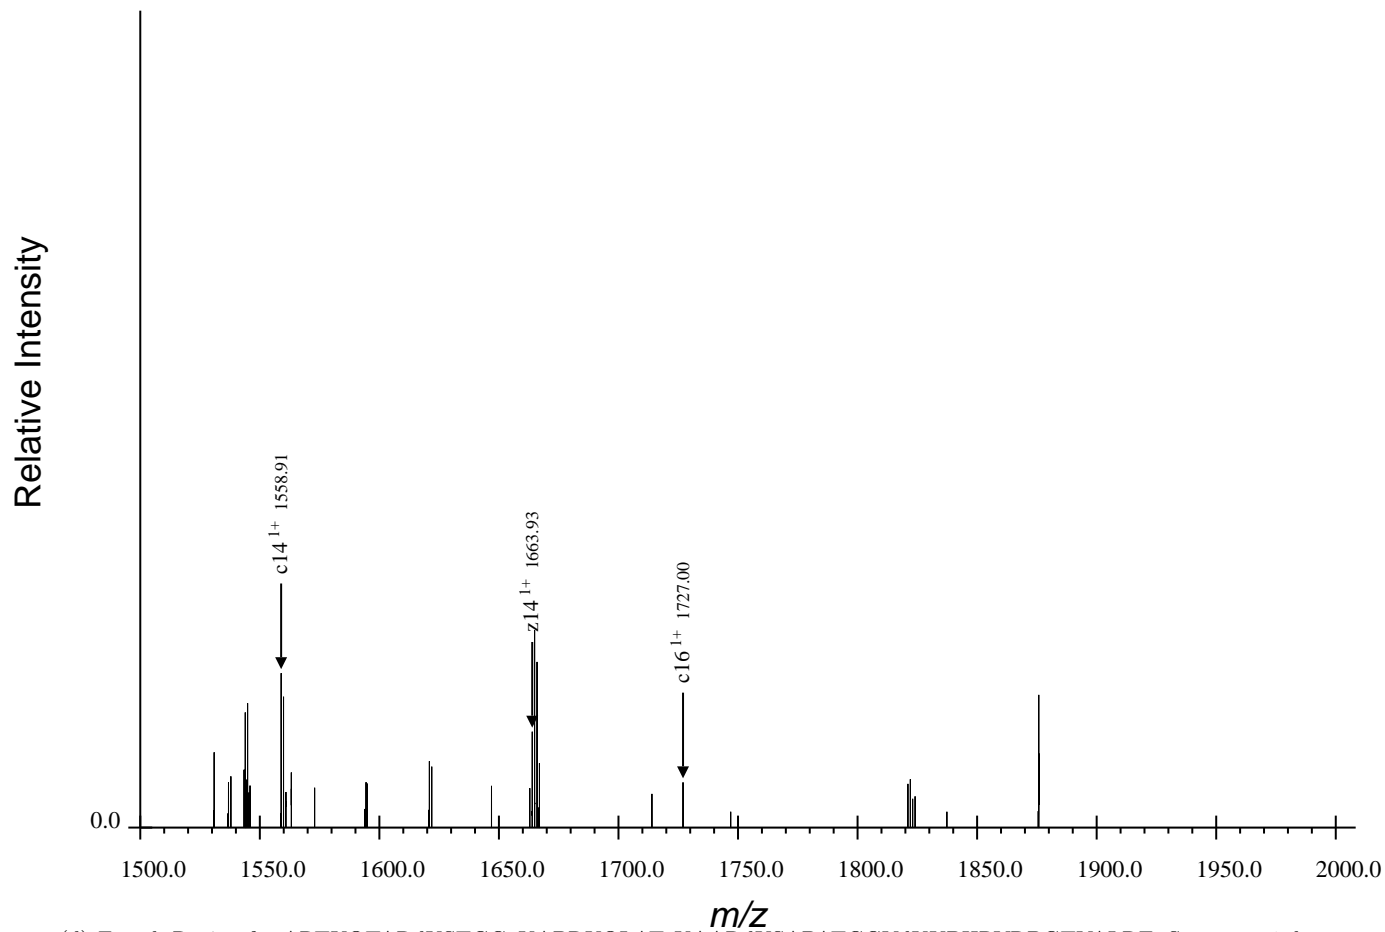

(d) Fourth Region for ARTKQTARdKSTGGaKAPRKQLATaKAARdKSAPATGGVdKKPHRYRPGTVALRE, Spectrum 1.dta

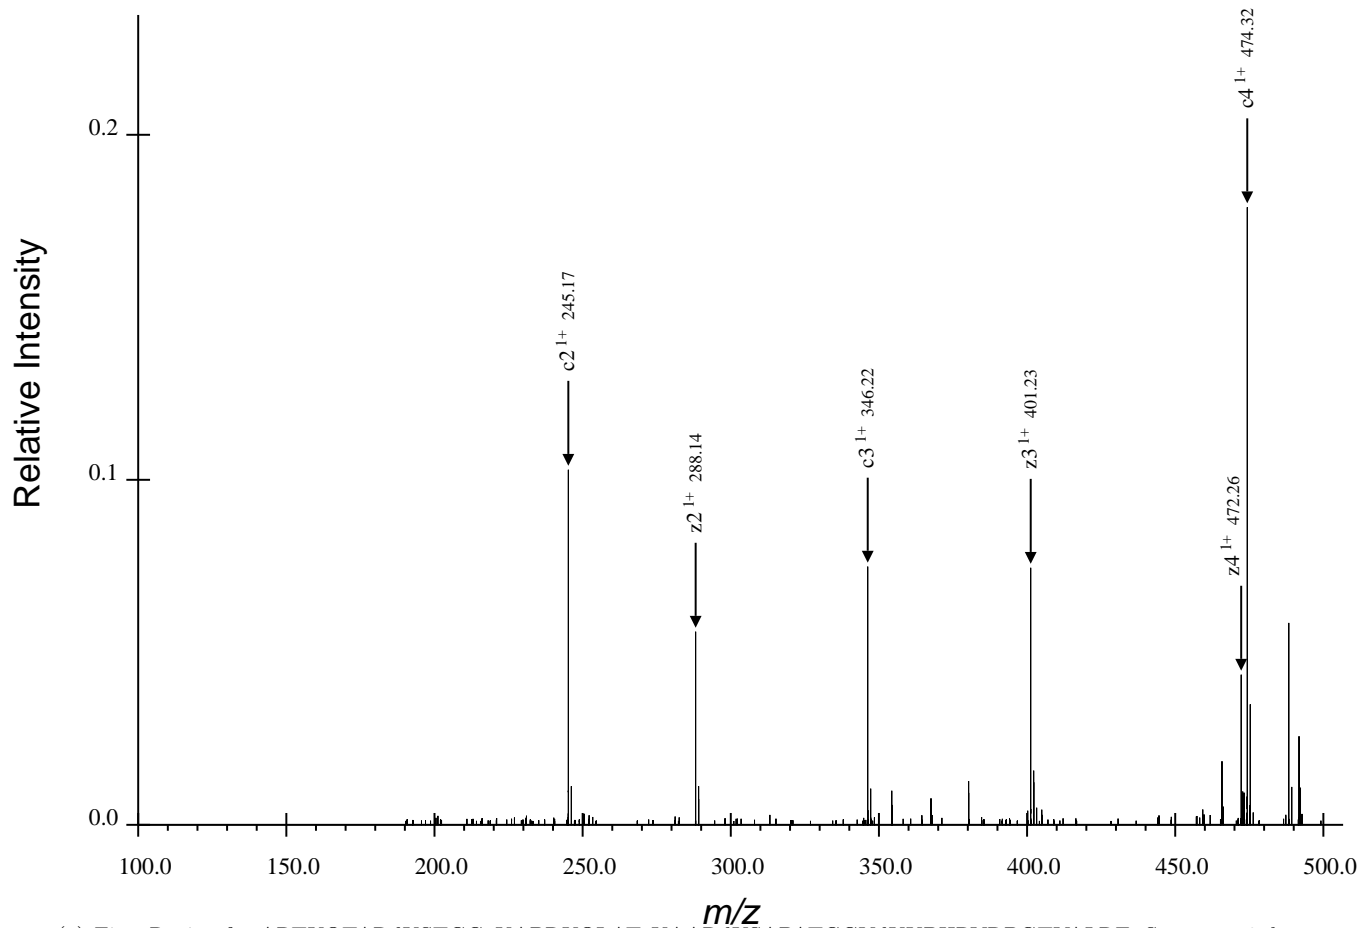

(a) First Region for ARTKQTARdKSTGGaKAPRKQLATaKAARdKSAPATGGVdKKPHRYRPGTVALRE, Spectrum 2.dta

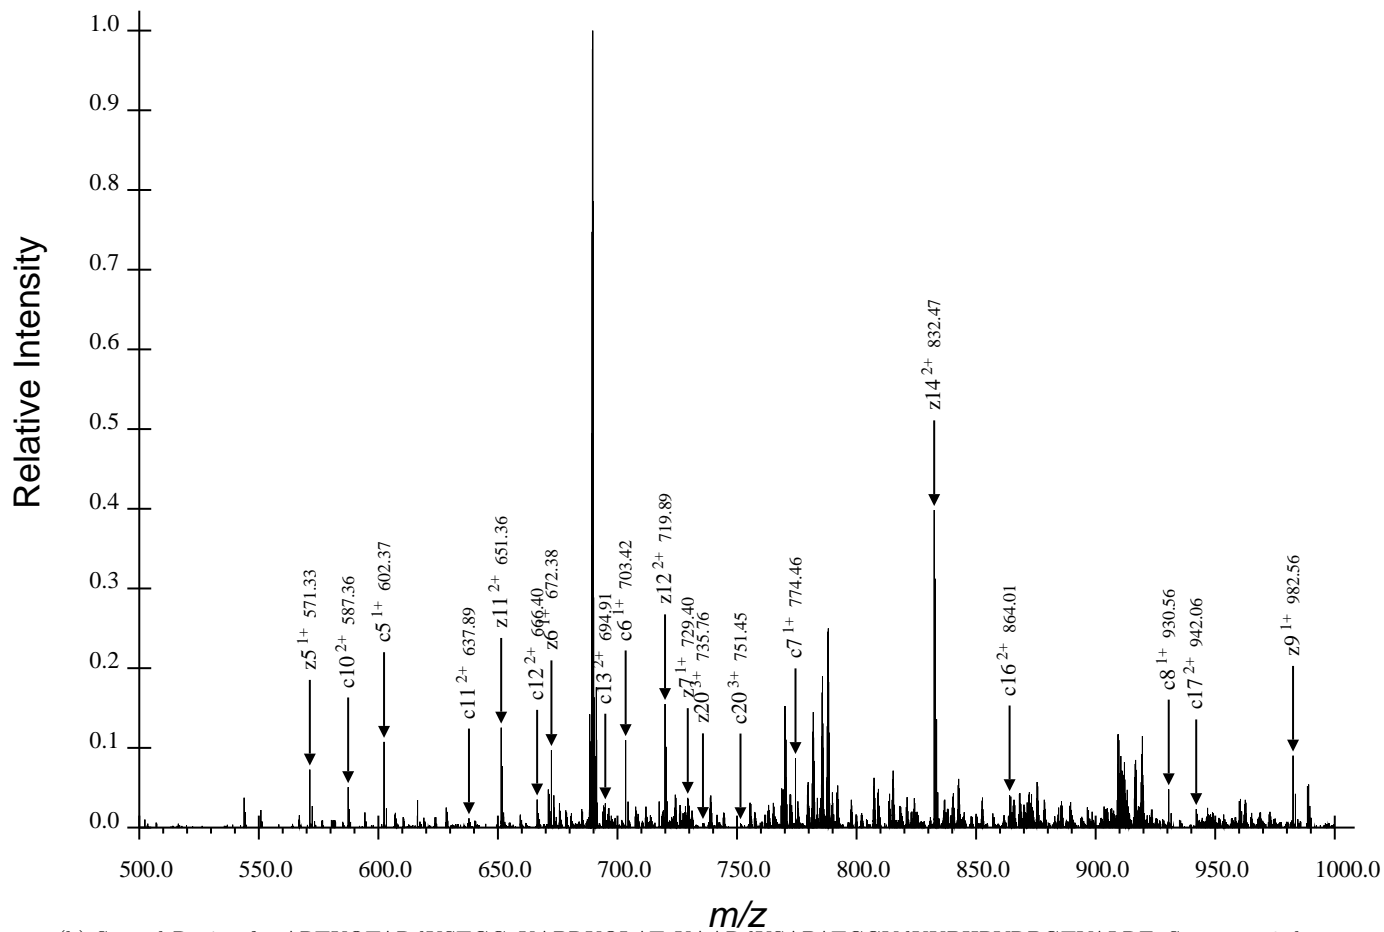

(b) Second Region for ARTKQTARdKSTGGaKAPRKQLATaKAARdKSAPATGGVdKKPHRYRPGTVALRE, Spectrum 2.dta

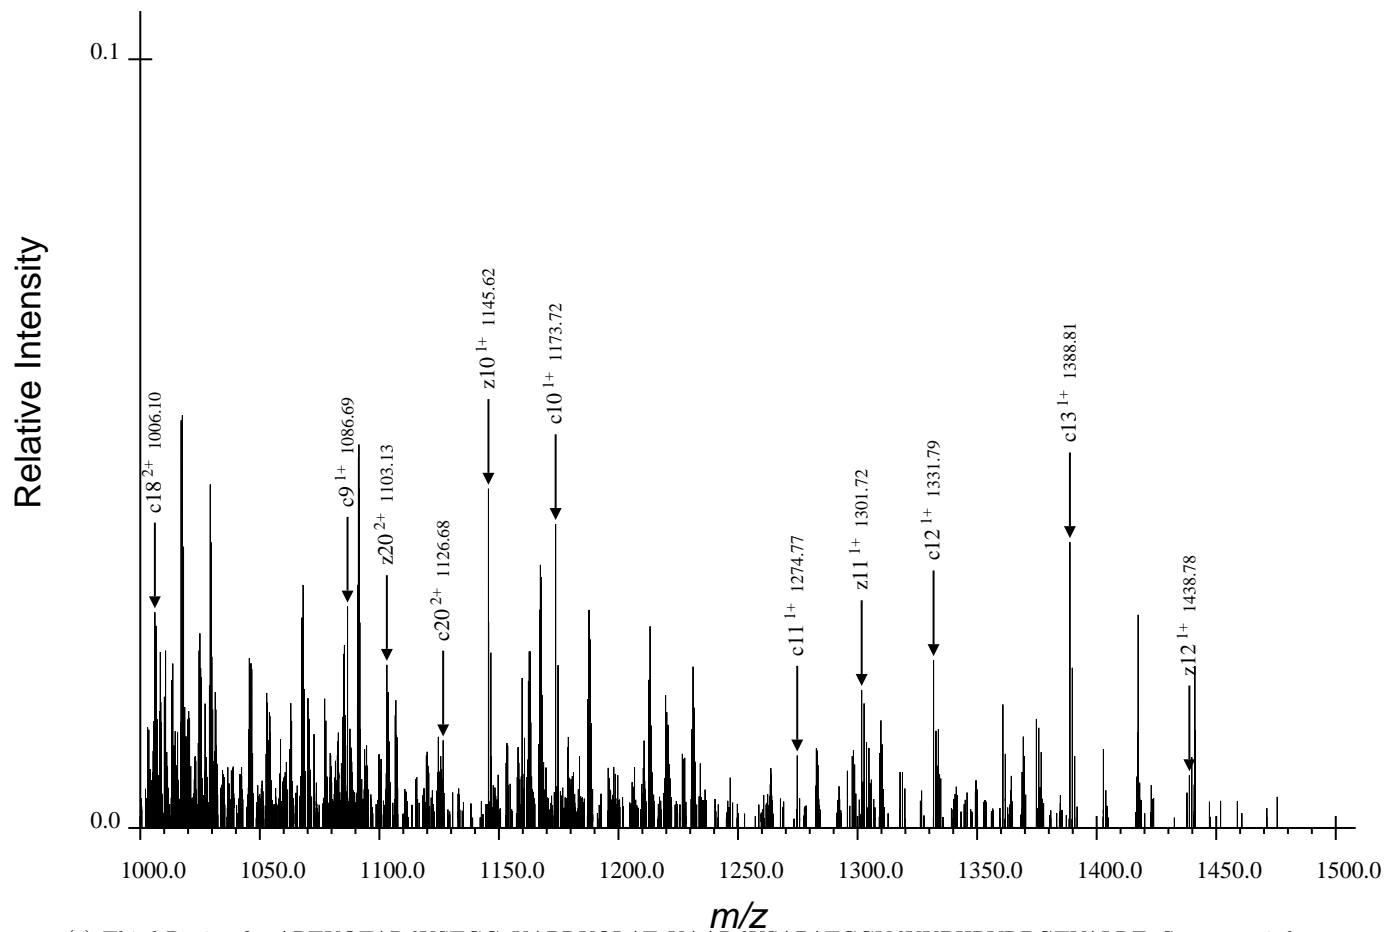

(c) Third Region for ARTKQTARdKSTGGaKAPRKQLATaKAARdKSAPATGGVdKKPHRYRPGTVALRE, Spectrum 2.dta

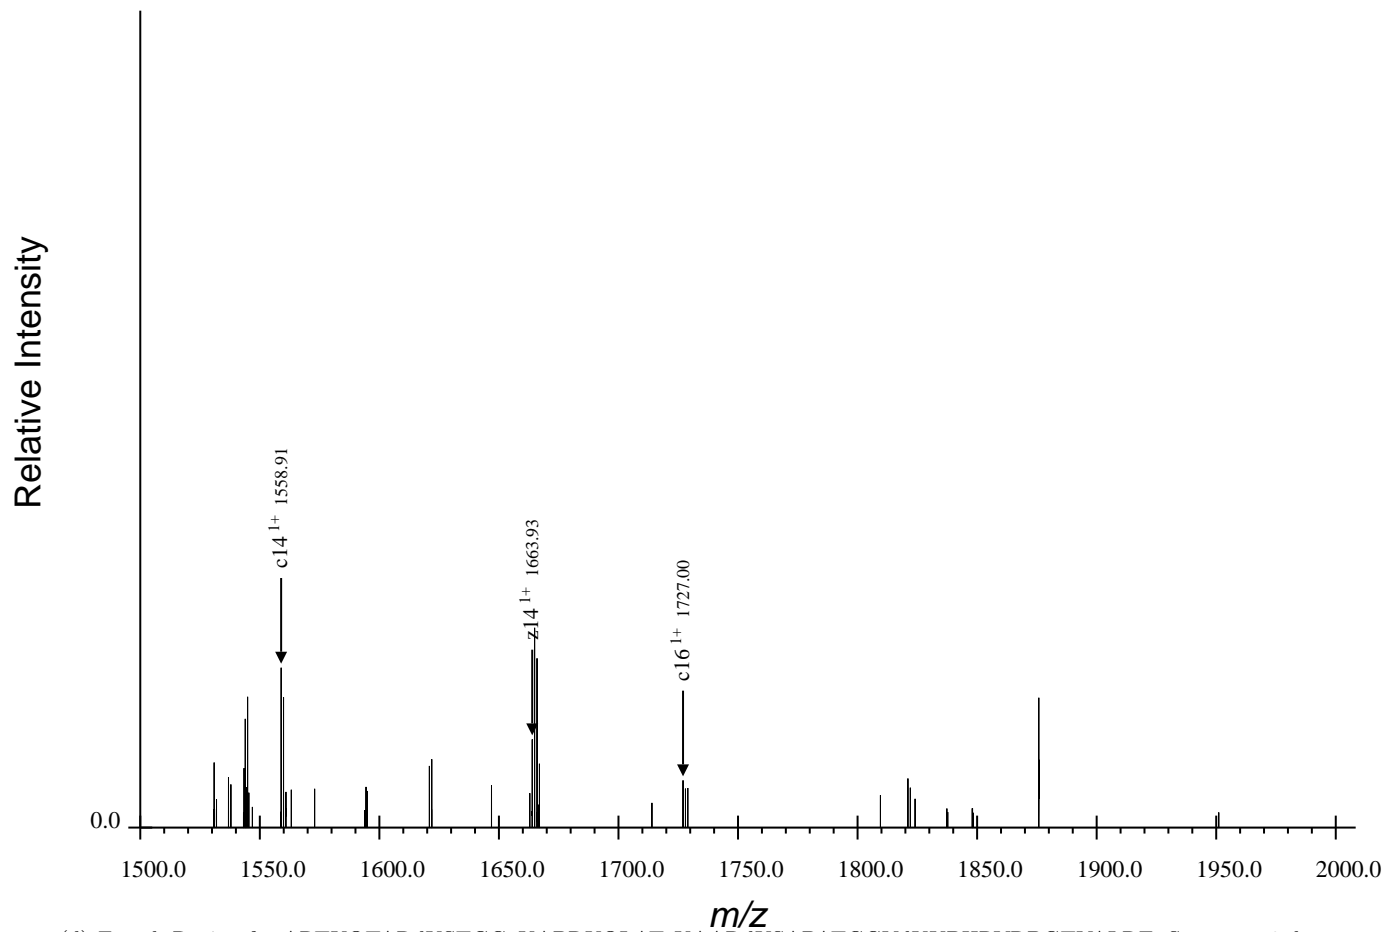

(d) Fourth Region for ARTKQTARdKSTGGaKAPRKQLATaKAARdKSAPATGGVdKKPHRYRPGTVALRE, Spectrum 2.dta

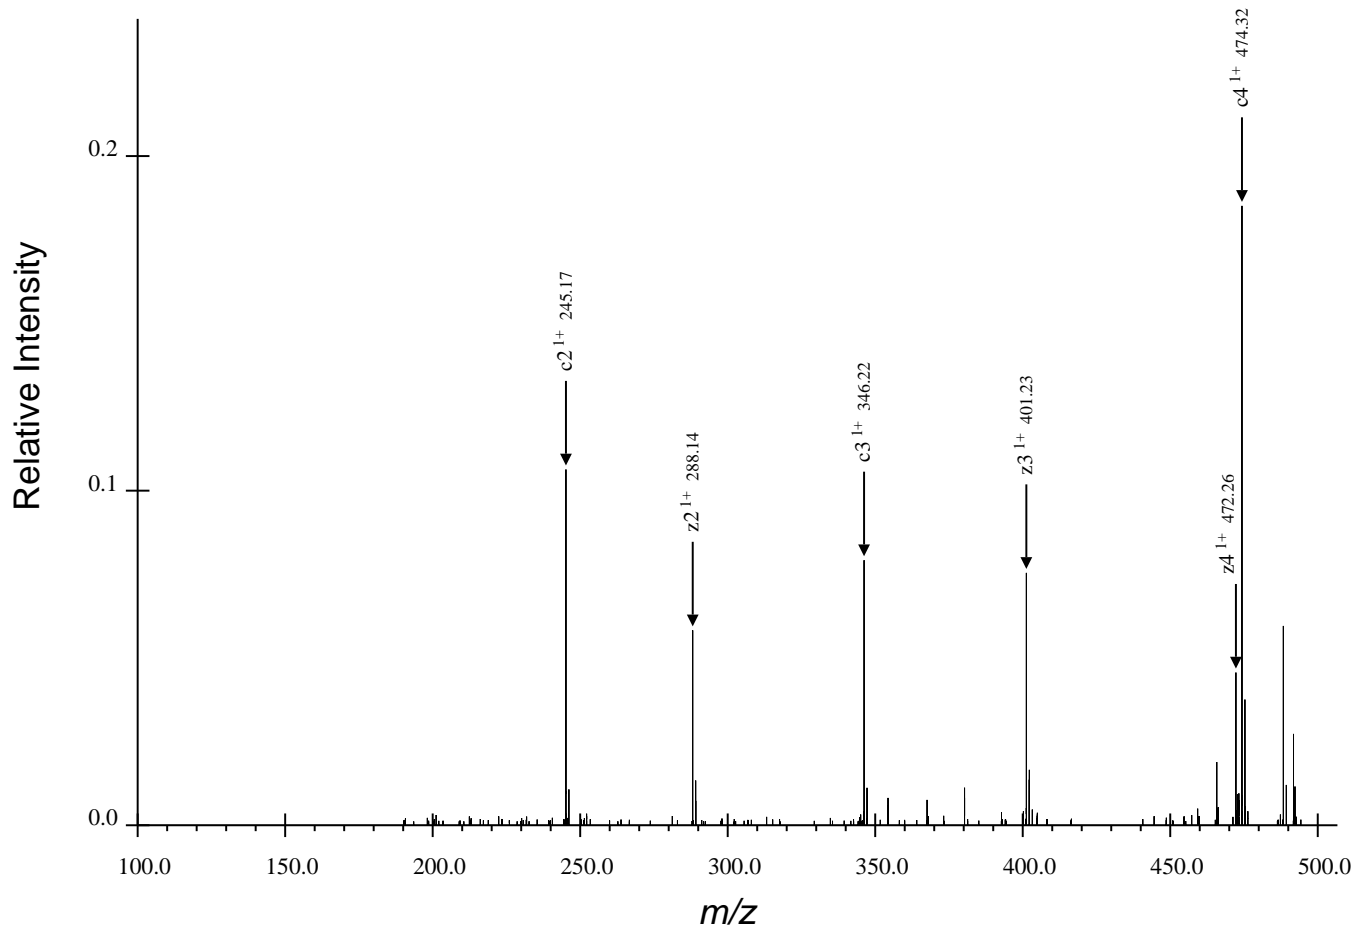

(a) First Region for ARTKQTARdKSTGGaKAPRKQLATaKAARdKSAPATGGVdKKPHRYRPGTVALRE, Spectrum 3.dta

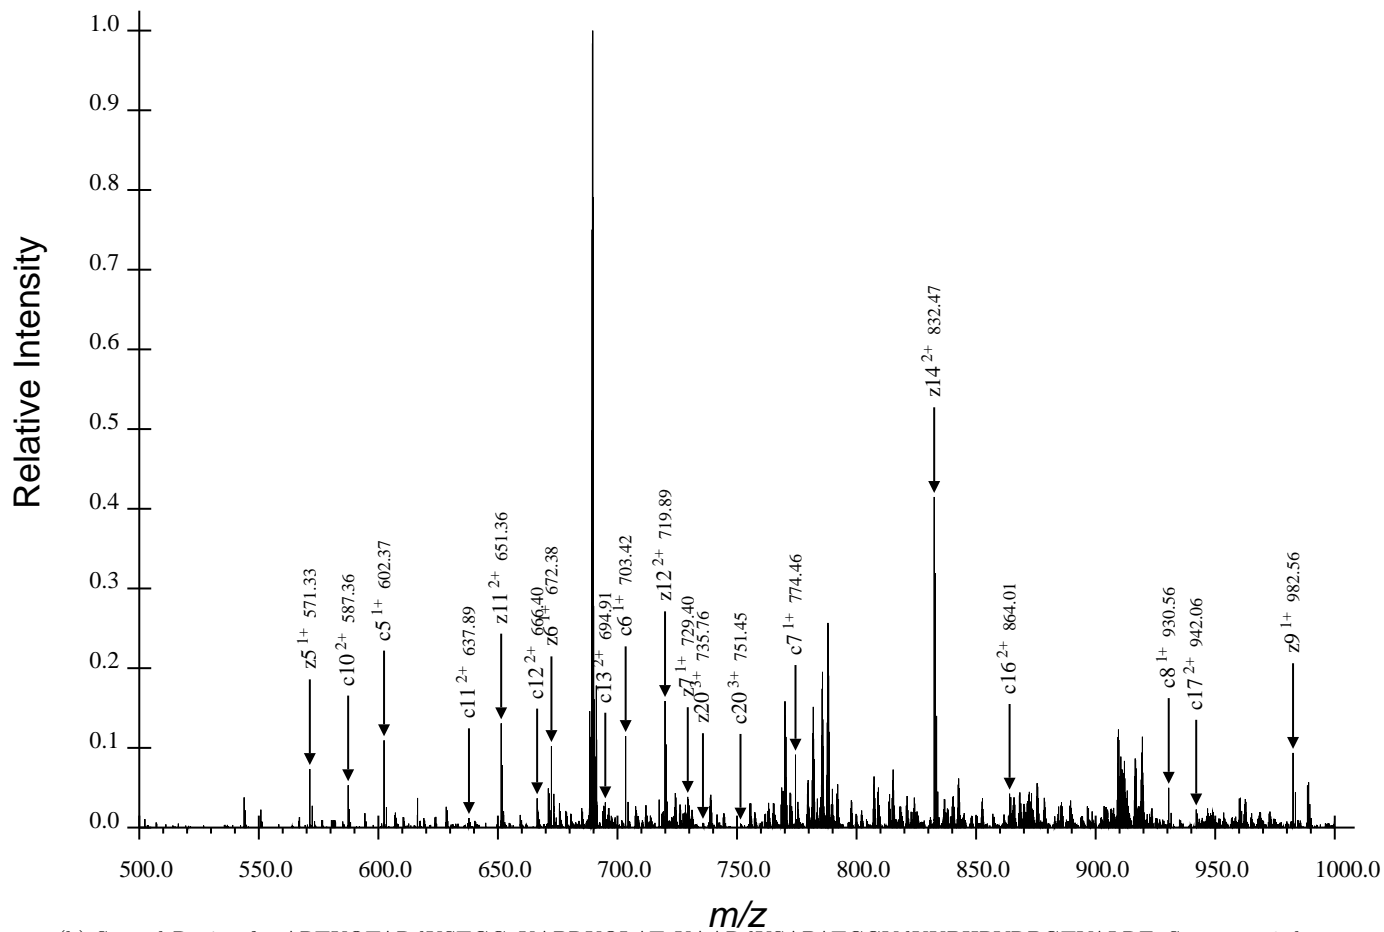

(b) Second Region for ARTKQTARdKSTGGaKAPRKQLATaKAARdKSAPATGGVdKKPHRYRPGTVALRE, Spectrum 3.dta

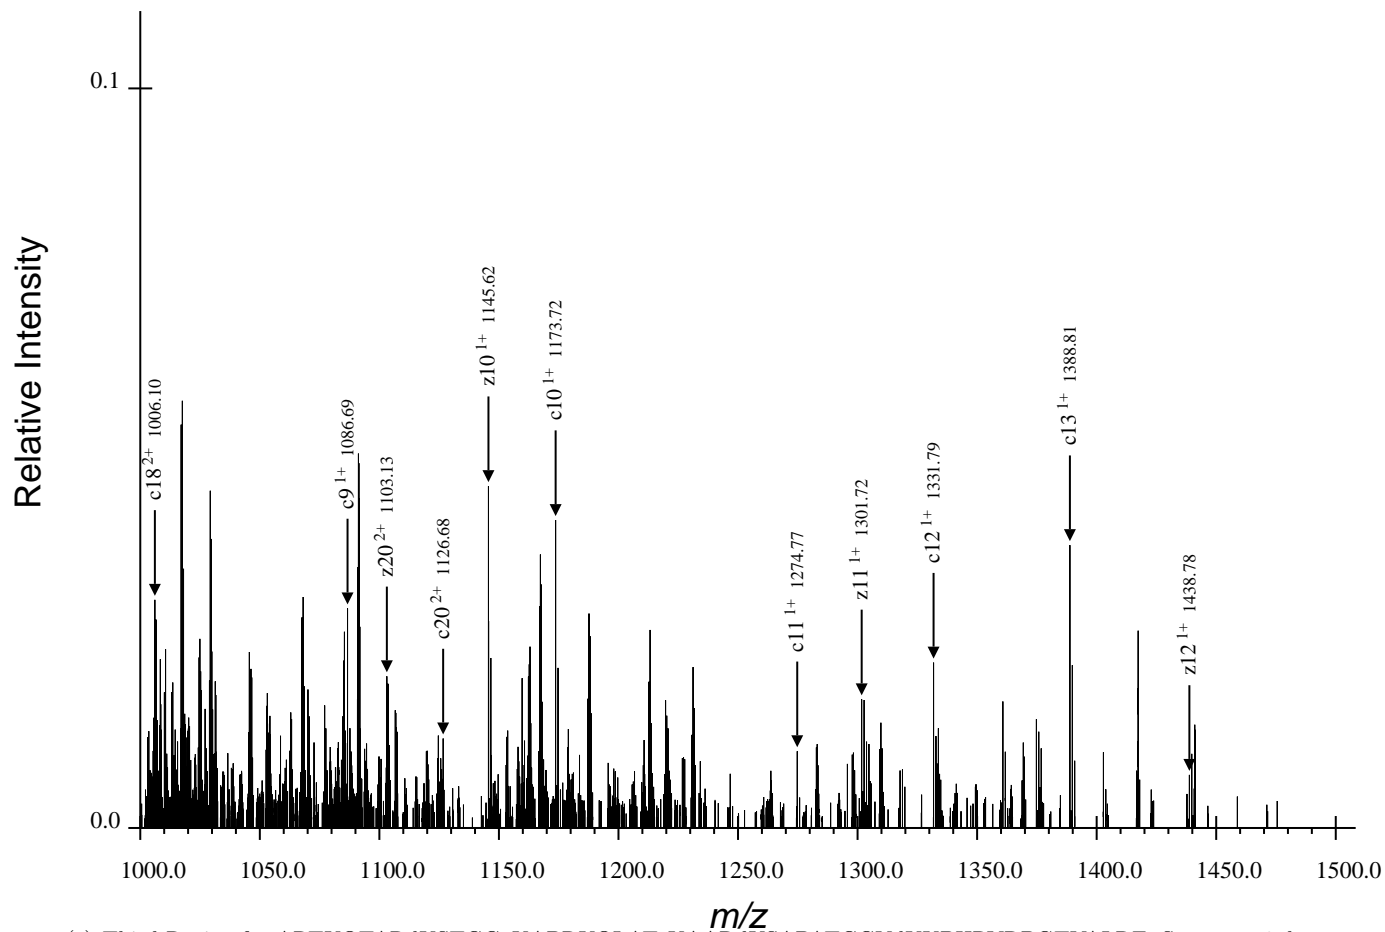

(c) Third Region for ARTKQTARdKSTGGaKAPRKQLATaKAARdKSAPATGGVdKKPHRYRPGTVALRE, Spectrum 3.dta

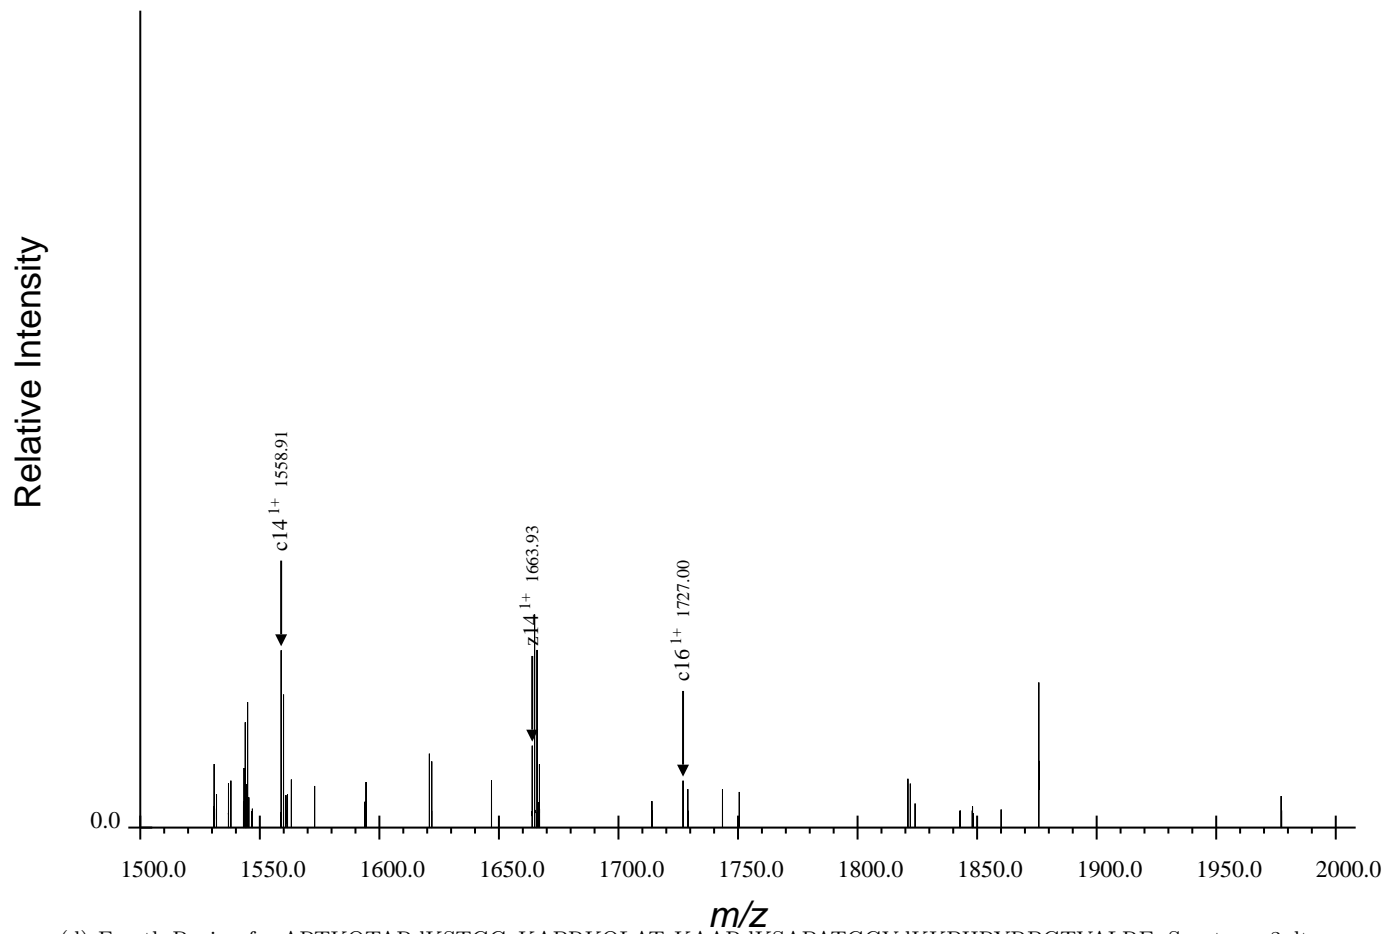

(d) Fourth Region for ARTKQTARdKSTGGaKAPRKQLATaKAARdKSAPATGGVdKKPHRYRPGTVALRE, Spectrum 3.dta

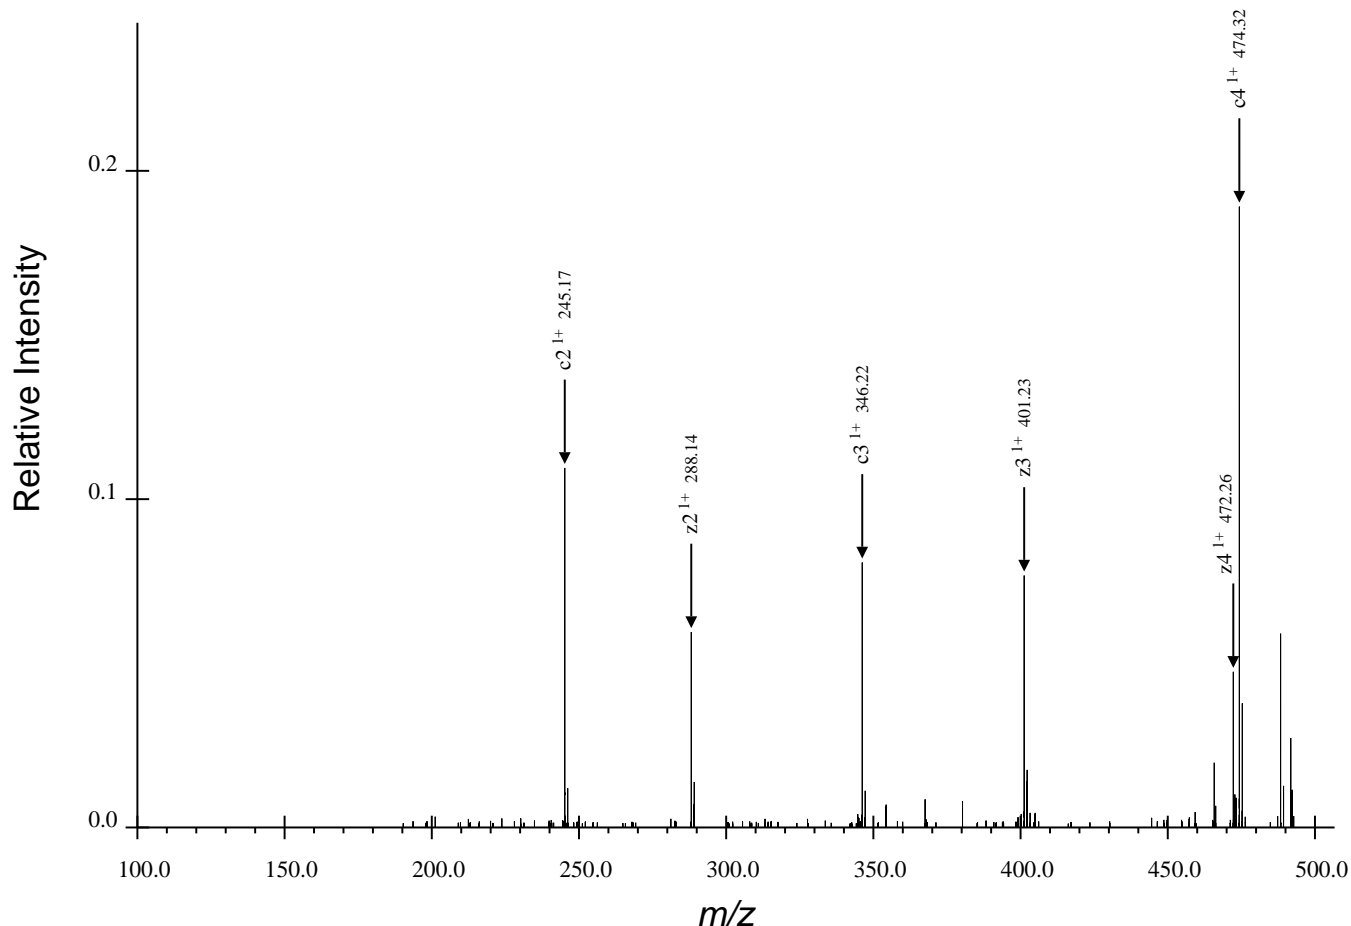

(a) First Region for ARTKQTARdKSTGGaKAPRKQLATAKaARdKSAPATGGVdKKPHRYRPGTVALRE, Spectrum 4.dta

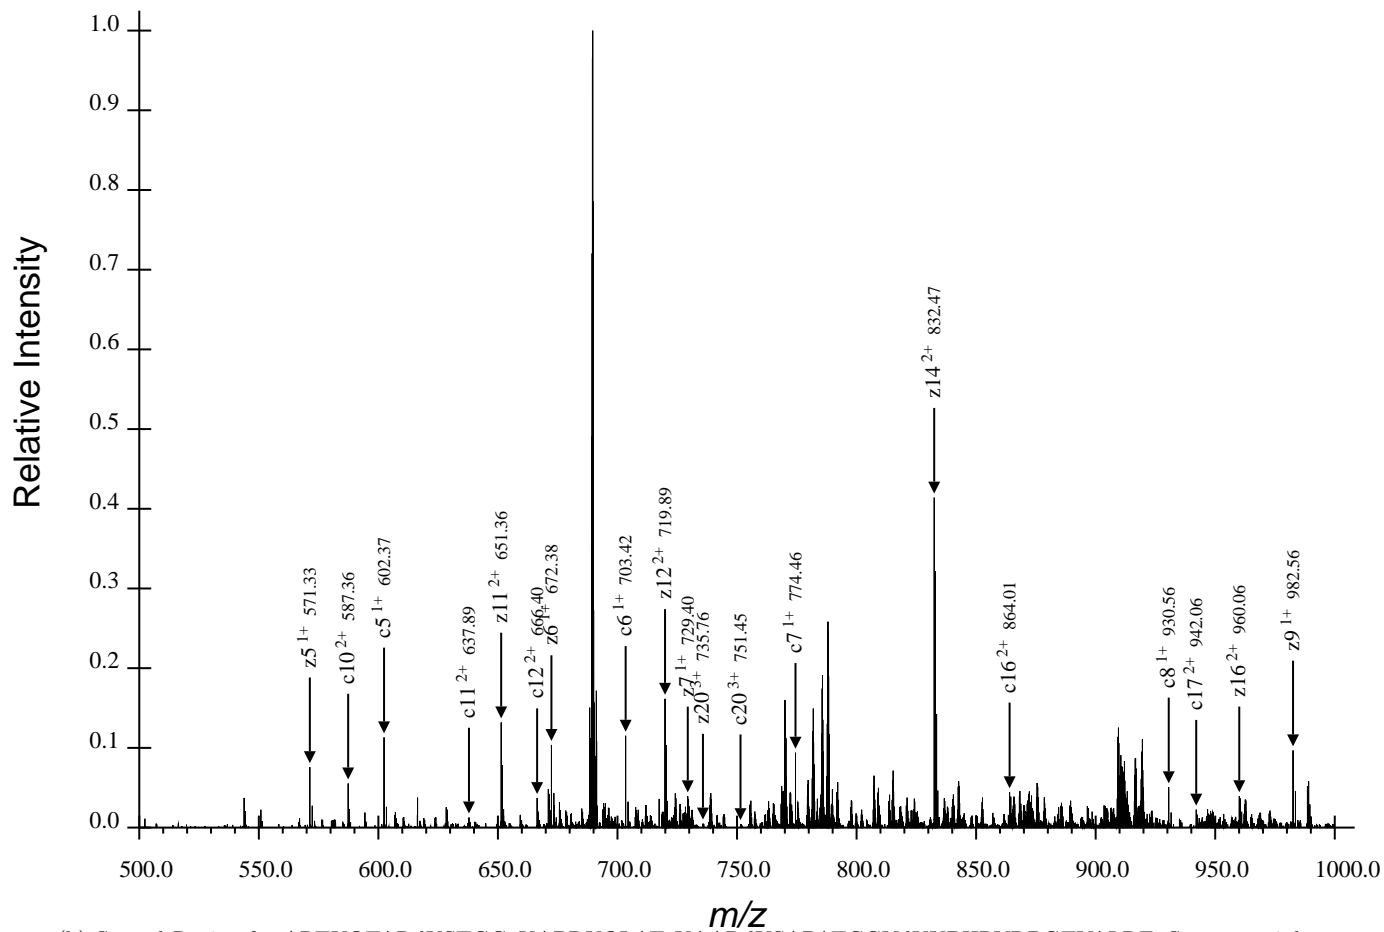

(b) Second Region for ARTKQTARdKSTGGaKAPRKQLATAKaARdKSAPATGGVdKKPHRYRPGTVALRE, Spectrum 4.dta

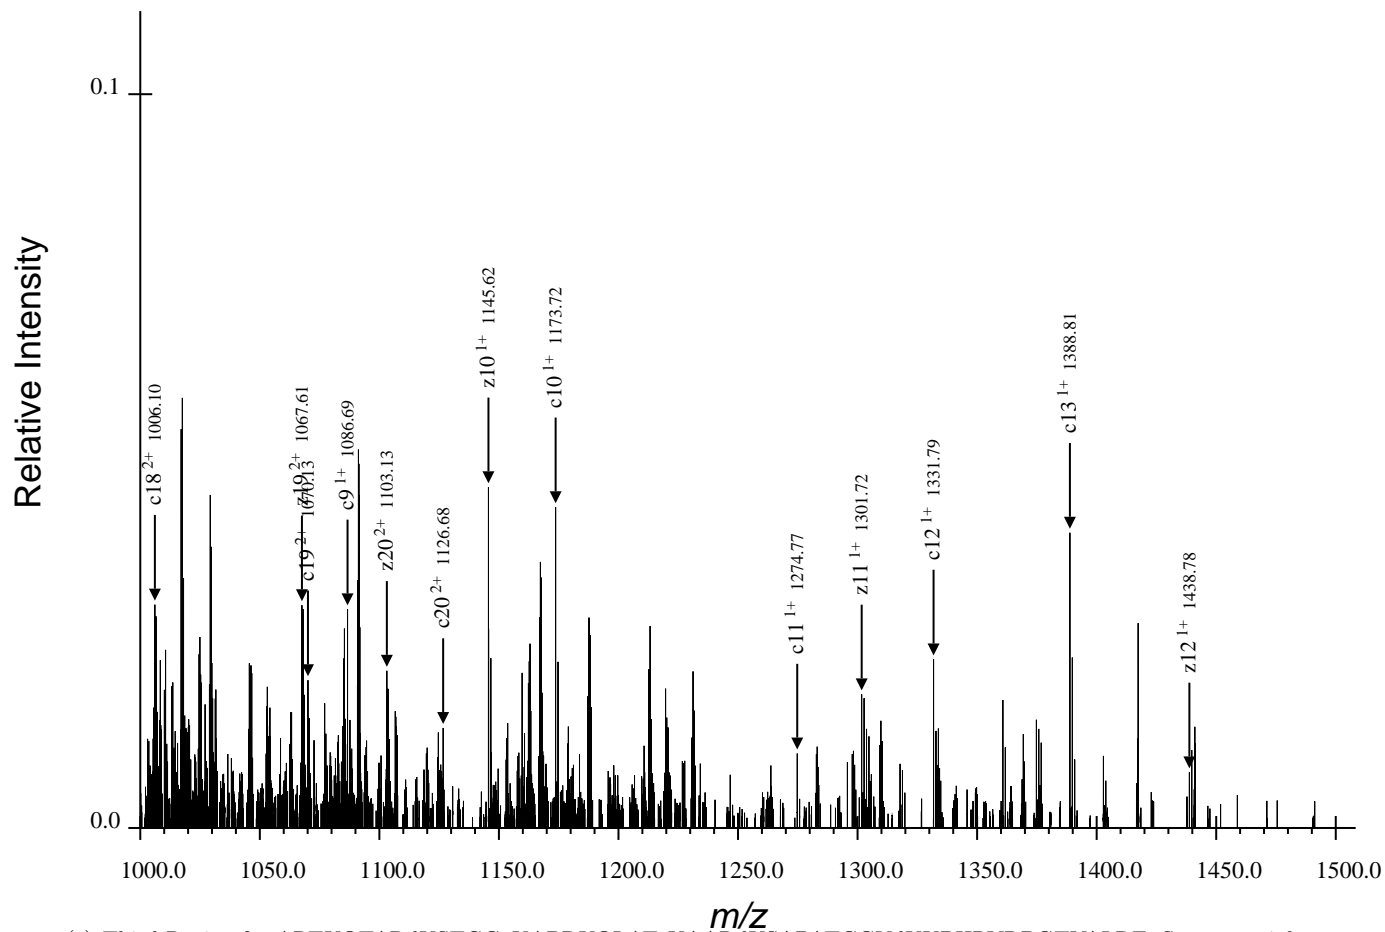

(c) Third Region for ARTKQTARdKSTGGaKAPRKQLATaKAARdKSAPATGGVdKKPHRYRPGTVALRE, Spectrum 4.dta

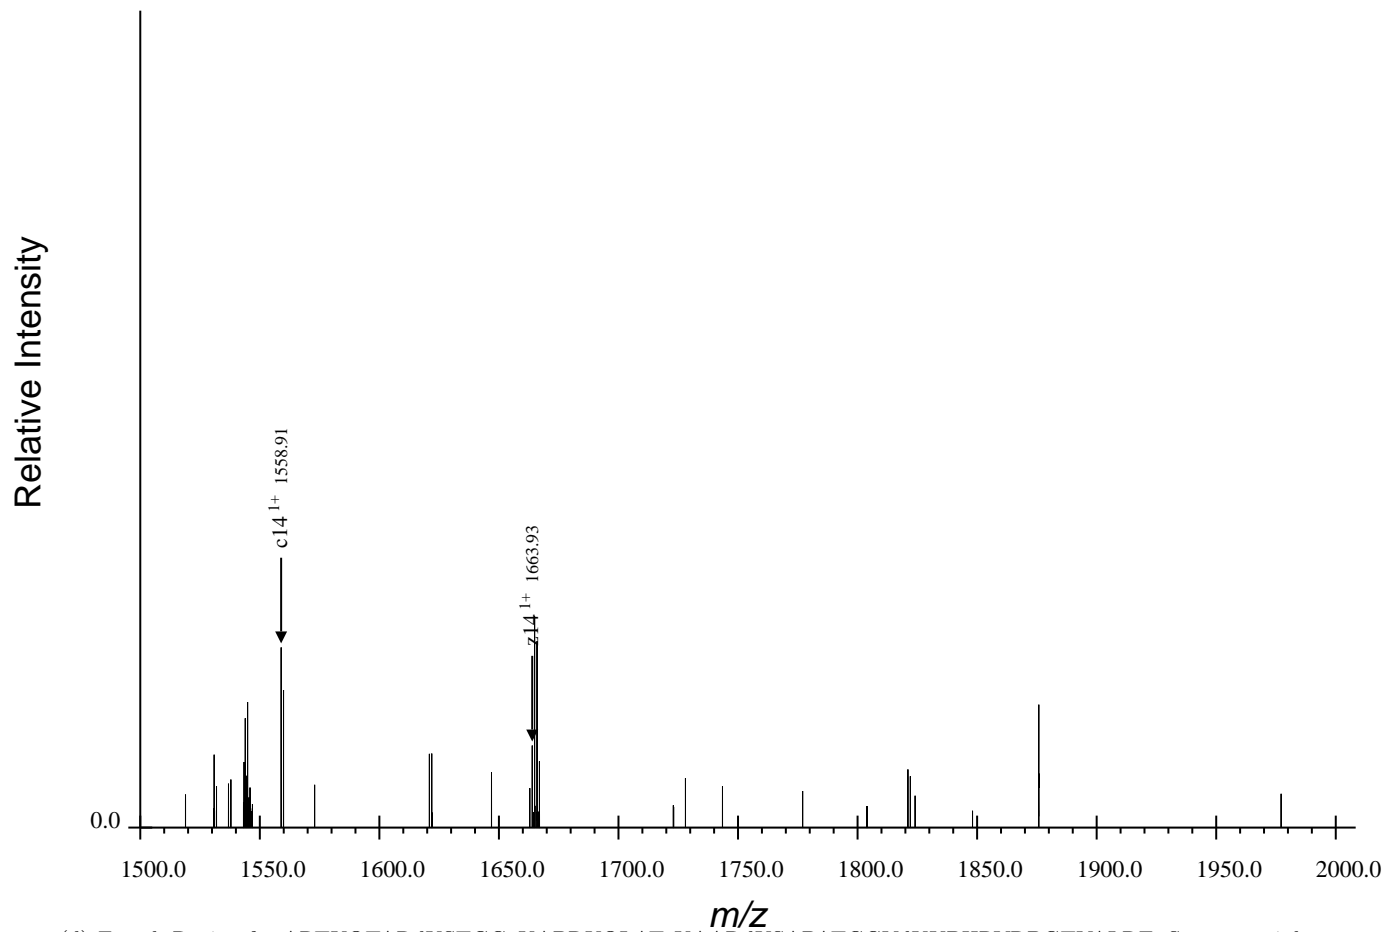

(d) Fourth Region for ARTKQTARdKSTGGaKAPRKQLATaKAARdKSAPATGGVdKKPHRYRPGTVALRE, Spectrum 4.dta



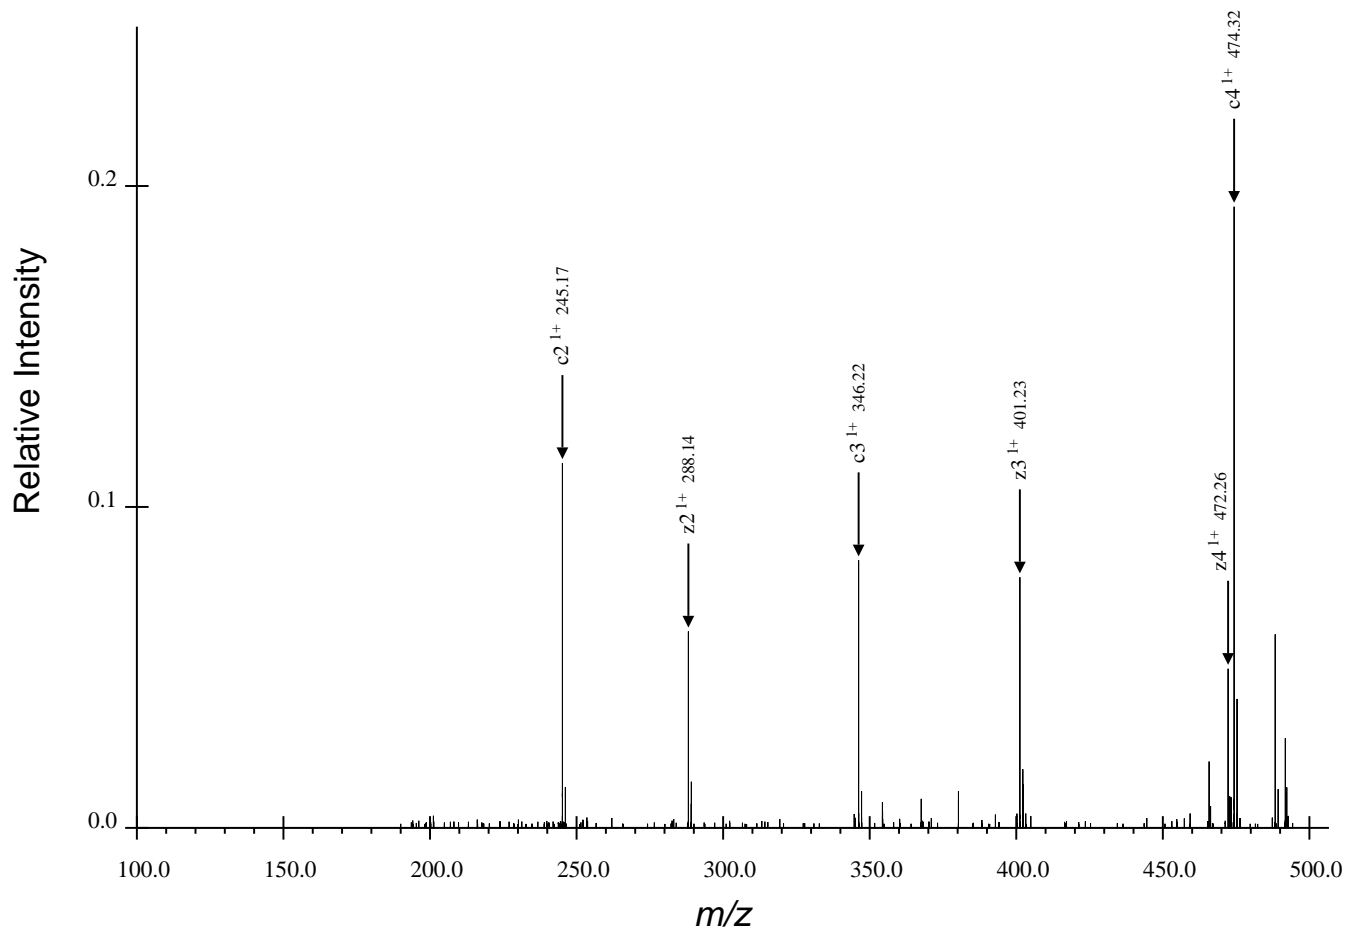

(a) First Region for ARTKQTARdKSTGGaKAPRKQLATAKaARdKSAPATGGVdKKPHRYRPGTVALRE, Spectrum 5.dta

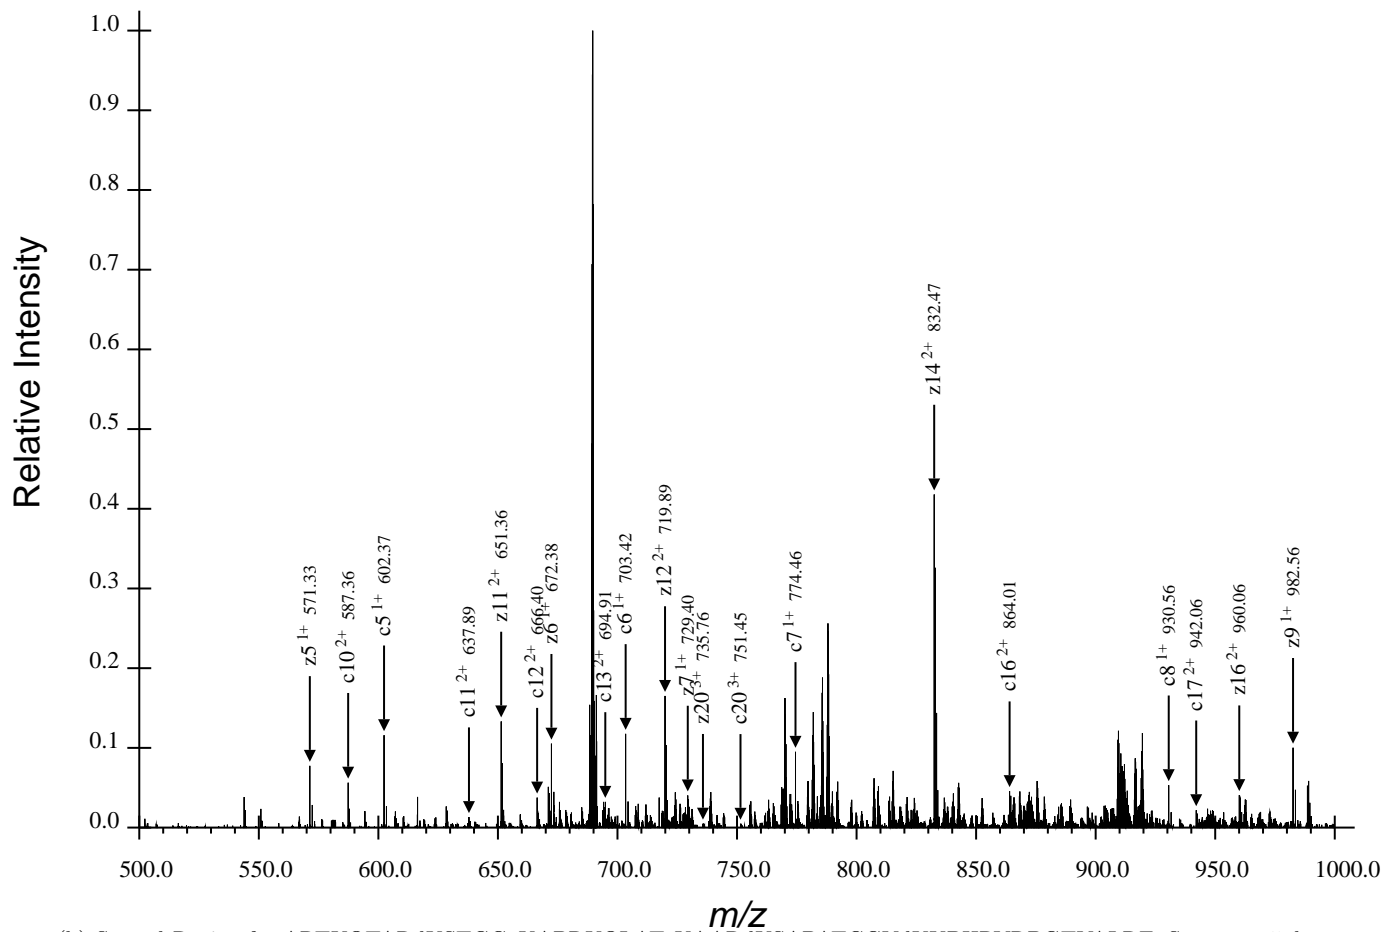

(b) Second Region for ARTKQTARdKSTGGaKAPRKQLATAKaARdKSAPATGGVdKKPHRYRPGTVALRE, Spectrum 5.dta

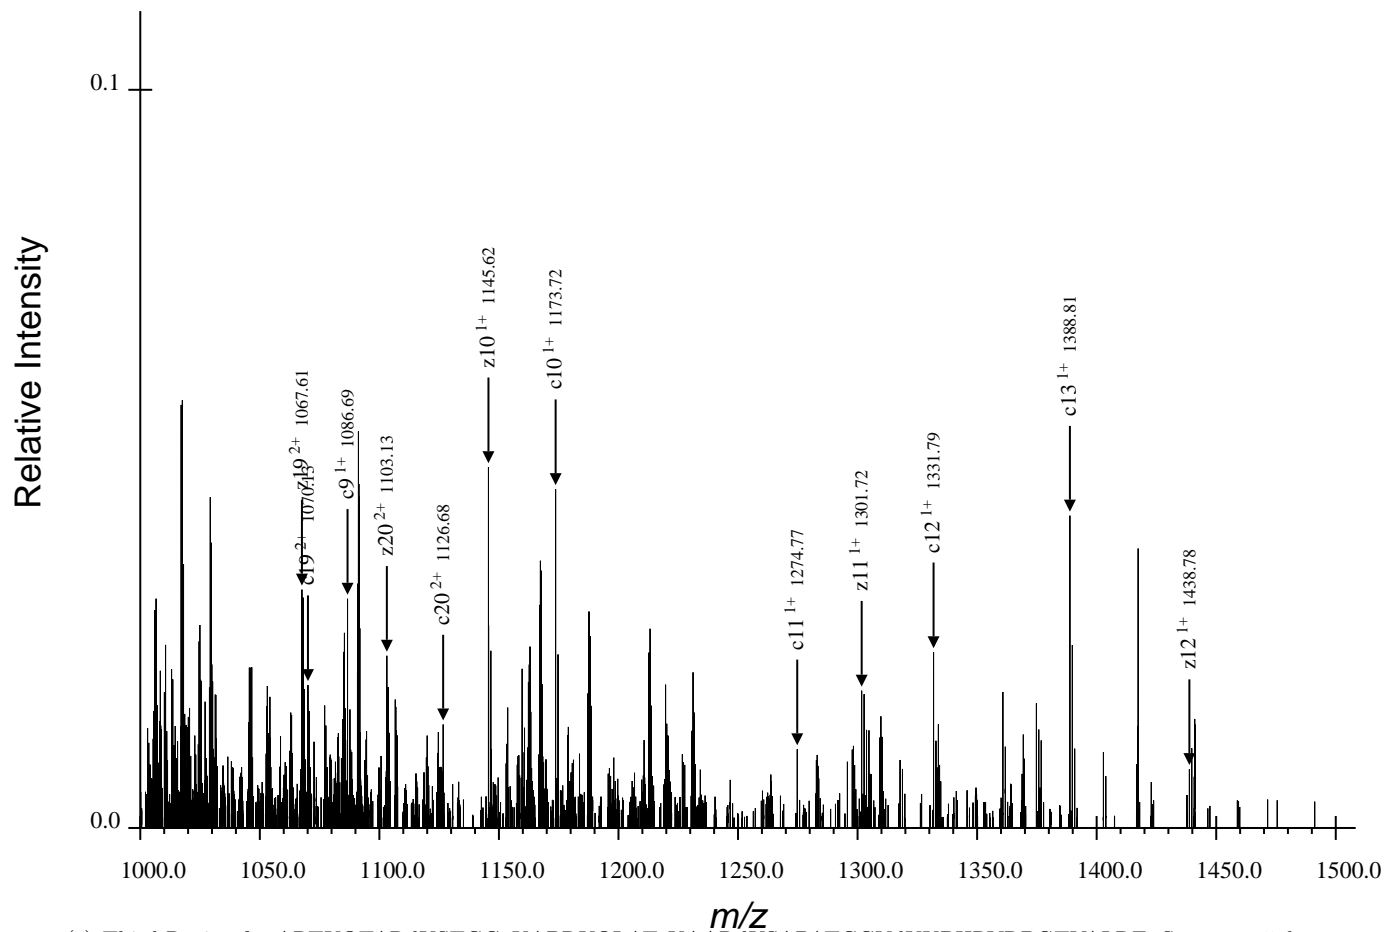

(c) Third Region for ARTKQTARdKSTGGaKAPRKQLATaKAARdKSAPATGGVdKKPHRYRPGTVALRE, Spectrum 5.dta

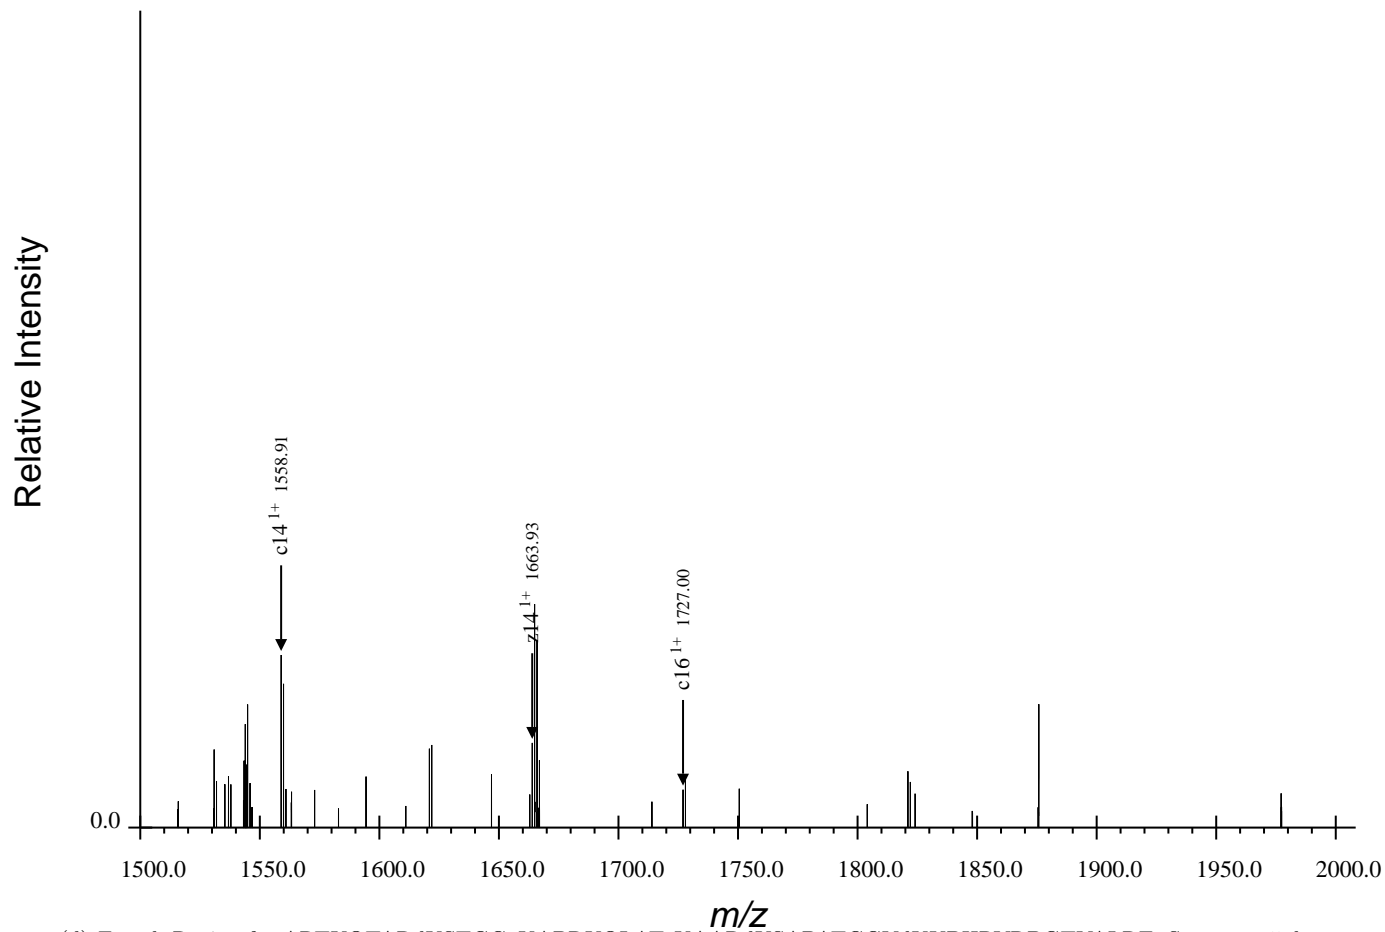

(d) Fourth Region for ARTKQTARdKSTGGaKAPRKQLATaKAARdKSAPATGGVdKKPHRYRPGTVALRE, Spectrum 5.dta

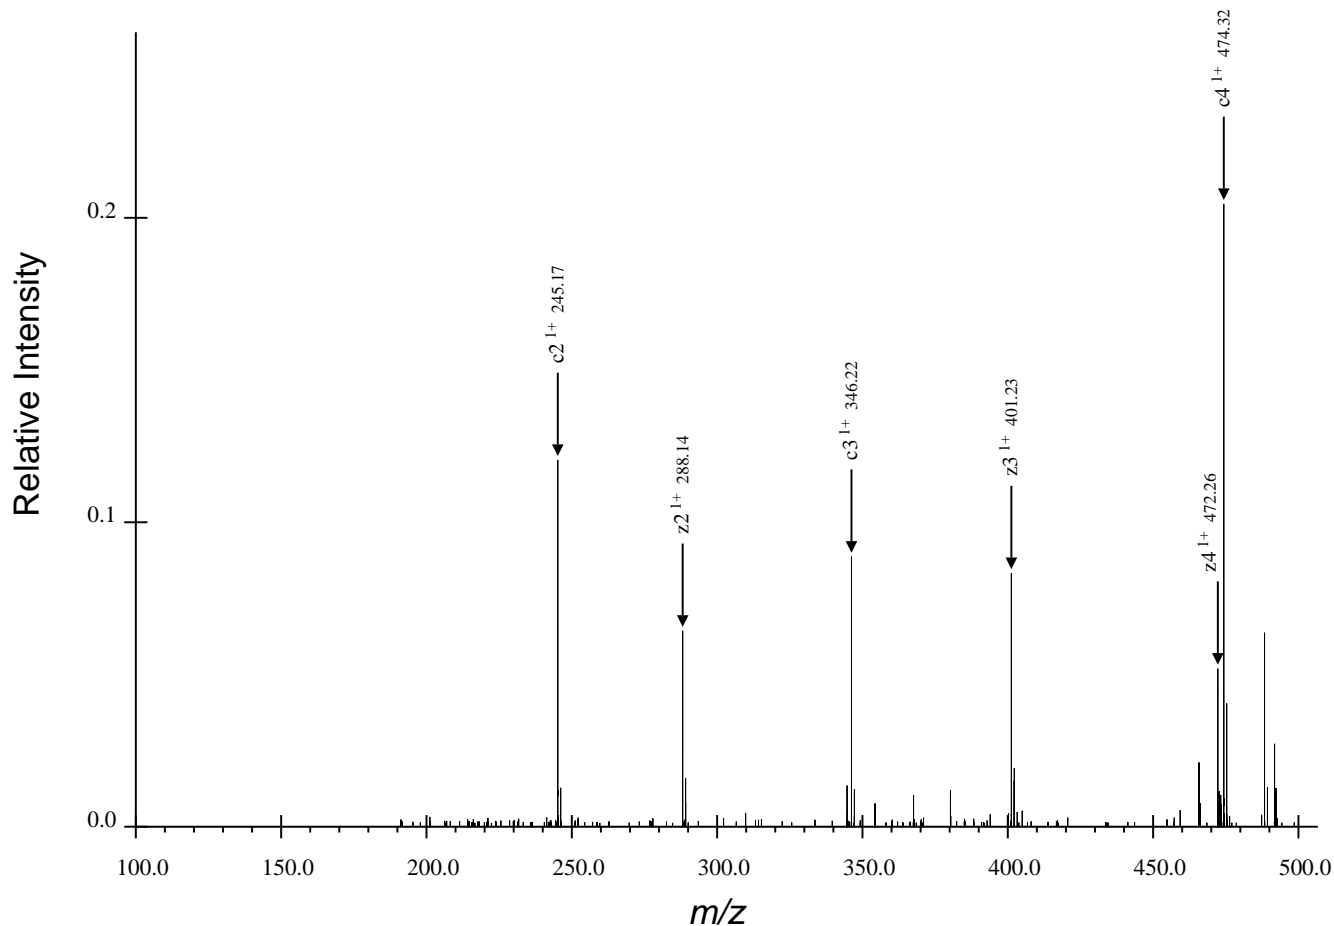

(a) First Region for ARTKQTARdKSTGGaKAPRKQLATaKAARdKSAPATGGVdKKPHRYRPGTVALRE, Spectrum 6.dta

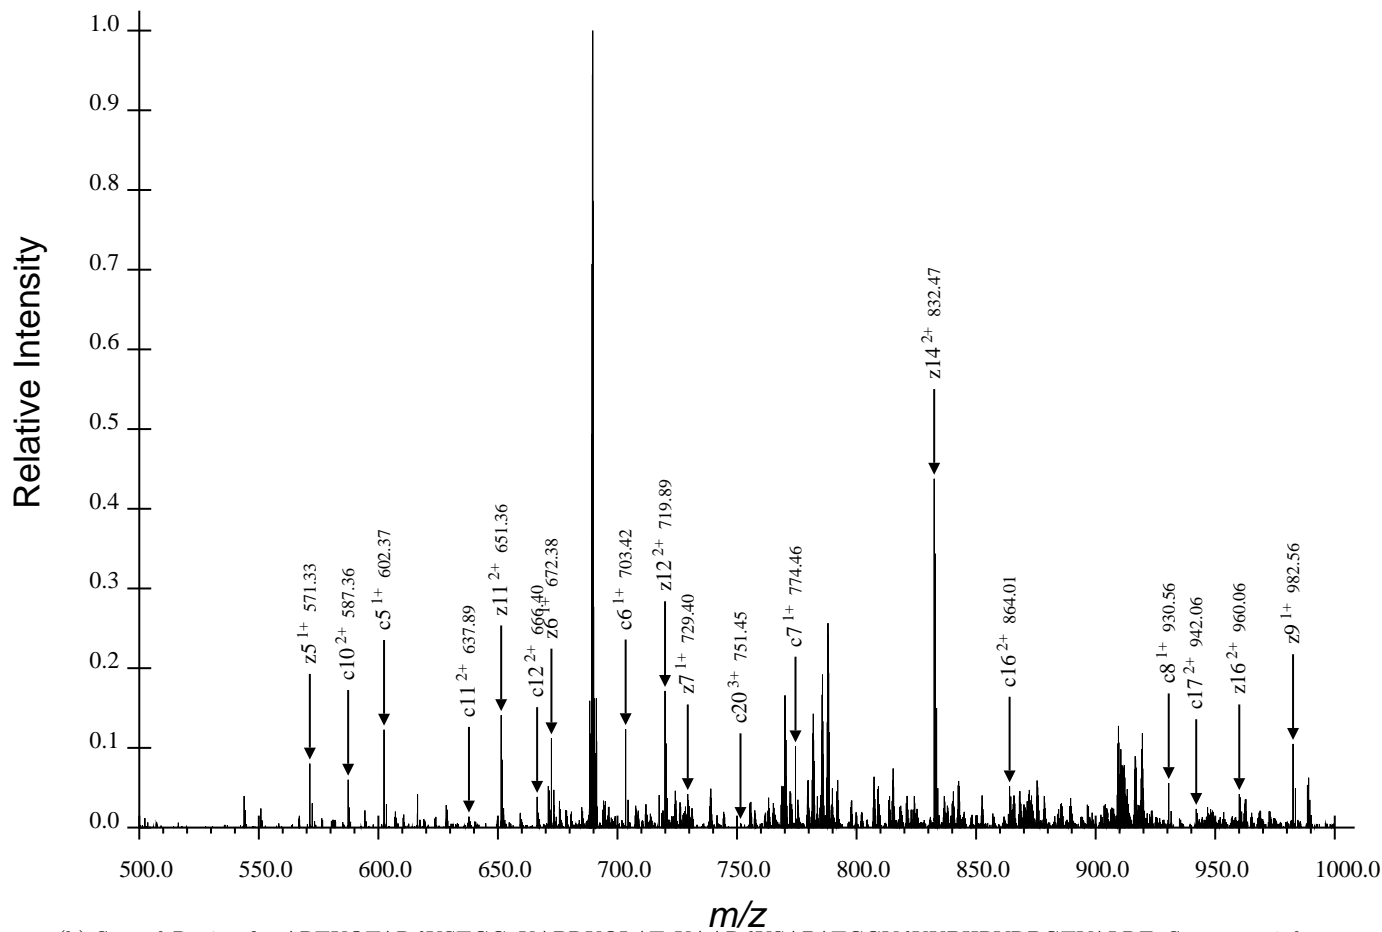

(b) Second Region for ARTKQTARdKSTGGaKAPRKQLATaKAARdKSAPATGGVdKKPHRYRPGTVALRE, Spectrum 6.dta

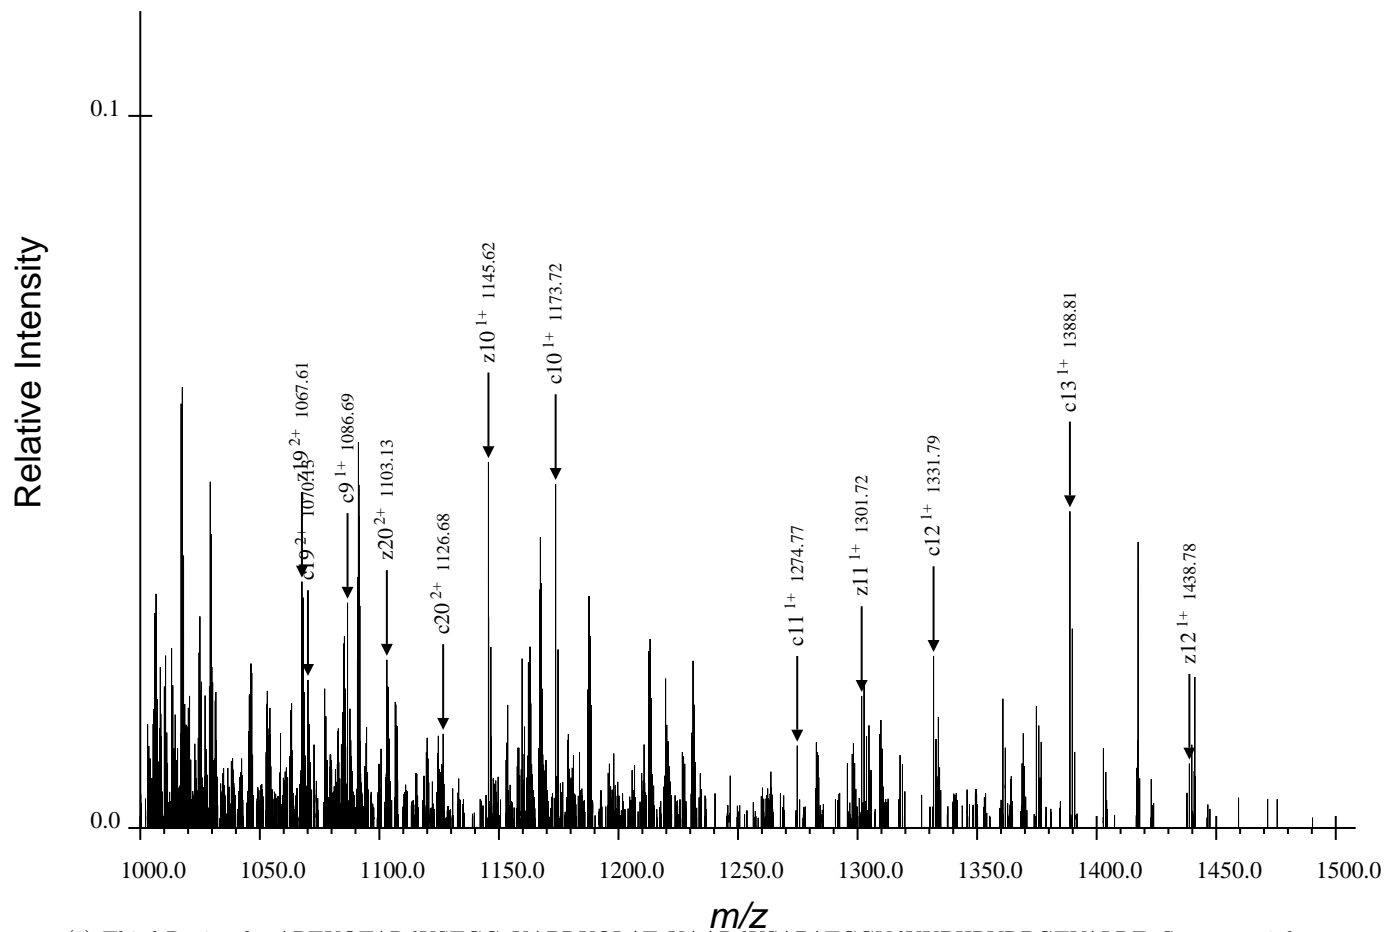

(c) Third Region for ARTKQTARdKSTGGaKAPRKQLATaKAARdKSAPATGGVdKKPHRYRPGTVALRE, Spectrum 6.dta

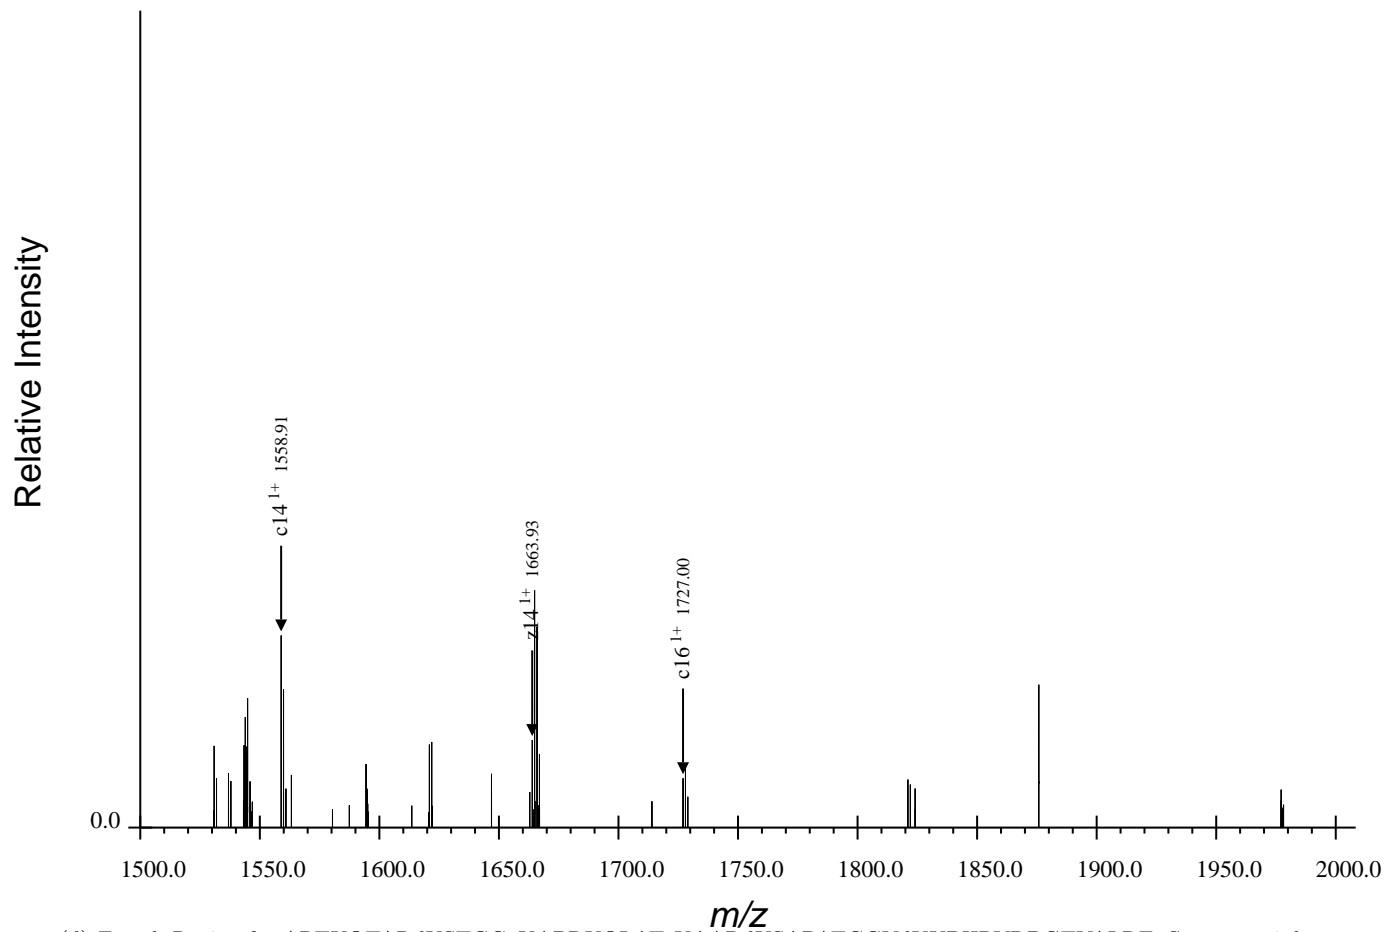

(d) Fourth Region for ARTKQTARdKSTGGaKAPRKQLATaKAARdKSAPATGGVdKKPHRYRPGTVALRE, Spectrum 6.dta

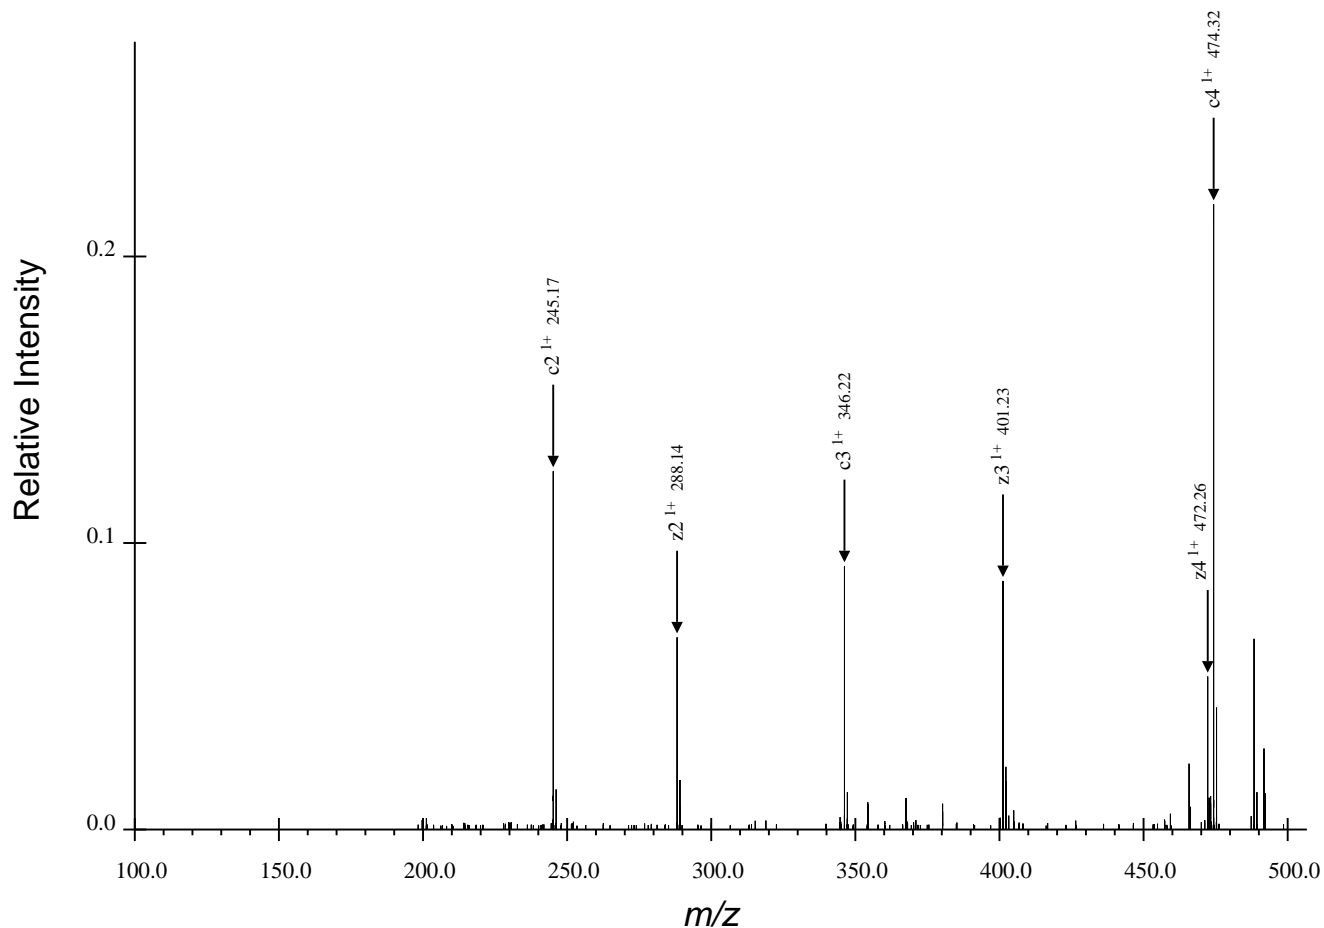

(a) First Region for ARTKQTARdKSTGGaKAPRKQLATaKAARdKSAPATGGVdKKPHRYRPGTVALRE, Spectrum 7.dta

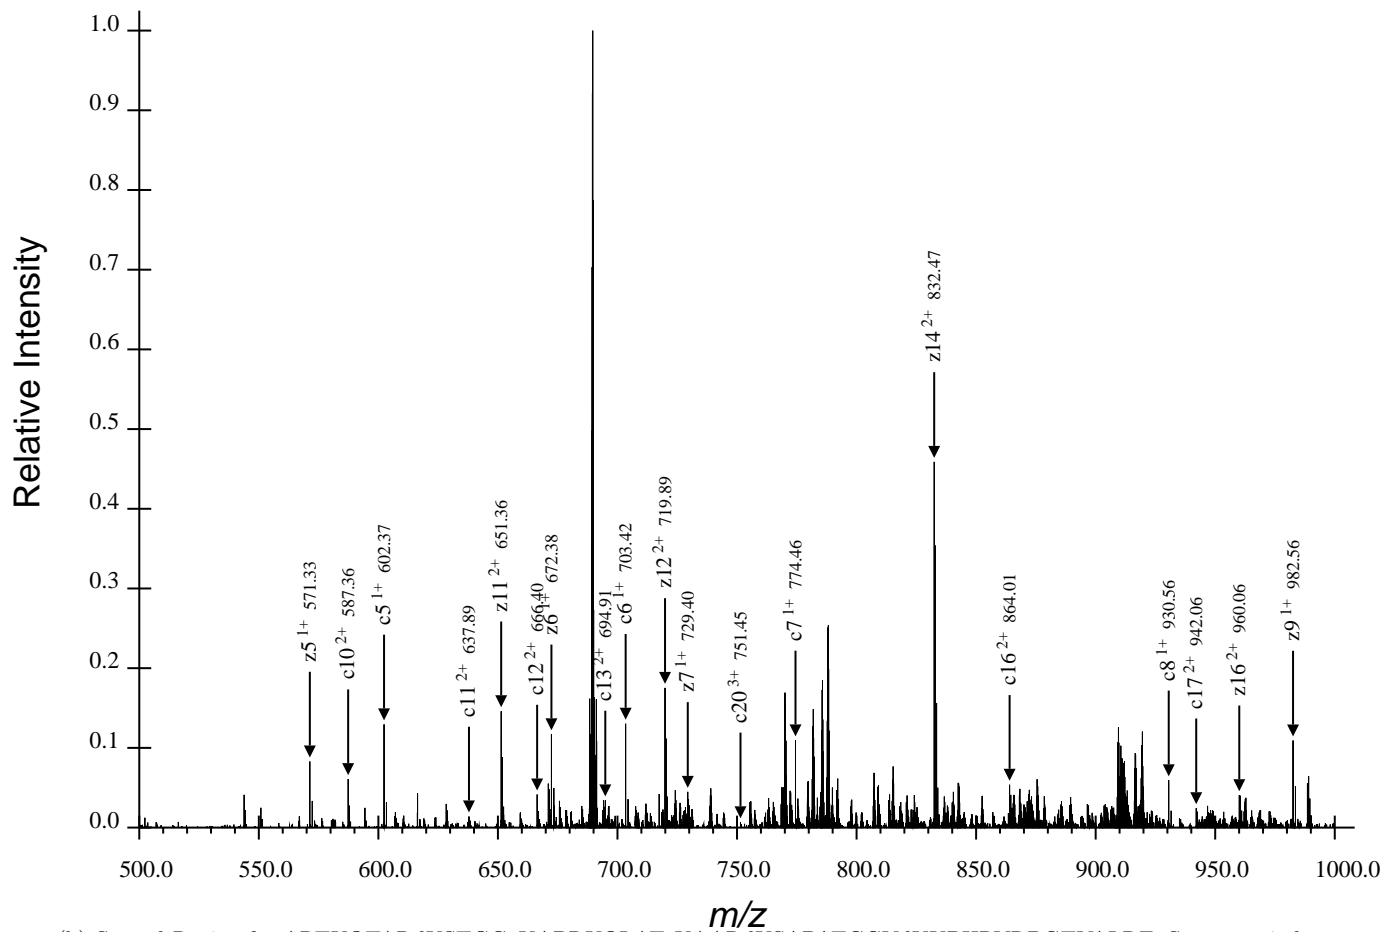

(b) Second Region for ARTKQTARdKSTGGaKAPRKQLATaKAARdKSAPATGGVdKKPHRYRPGTVALRE, Spectrum 7.dta

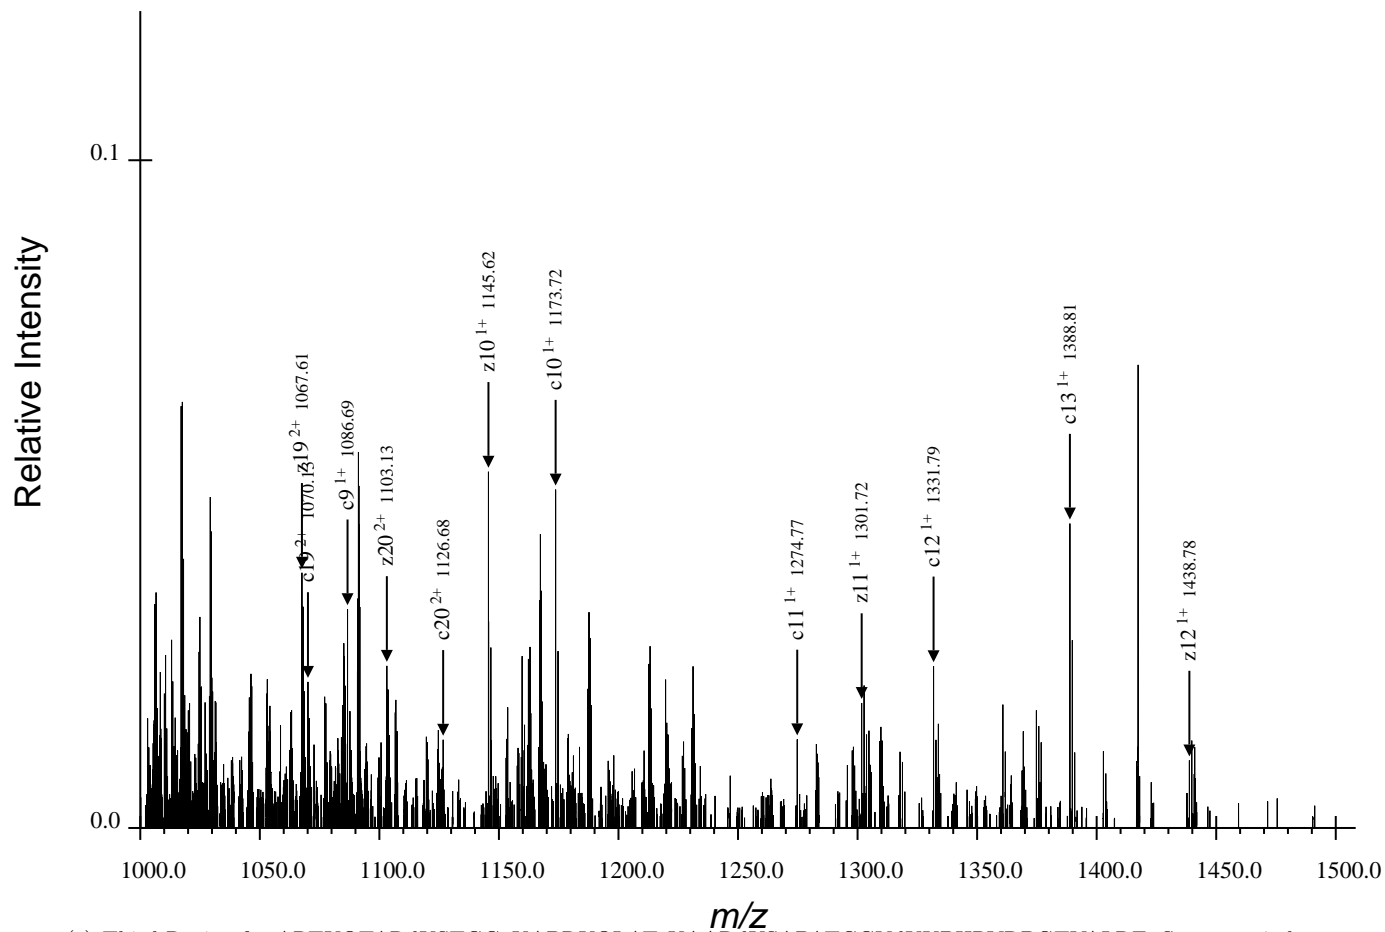

(c) Third Region for ARTKQTARdKSTGGaKAPRKQLATaKAARdKSAPATGGVdKKPHRYRPGTVALRE, Spectrum 7.dta

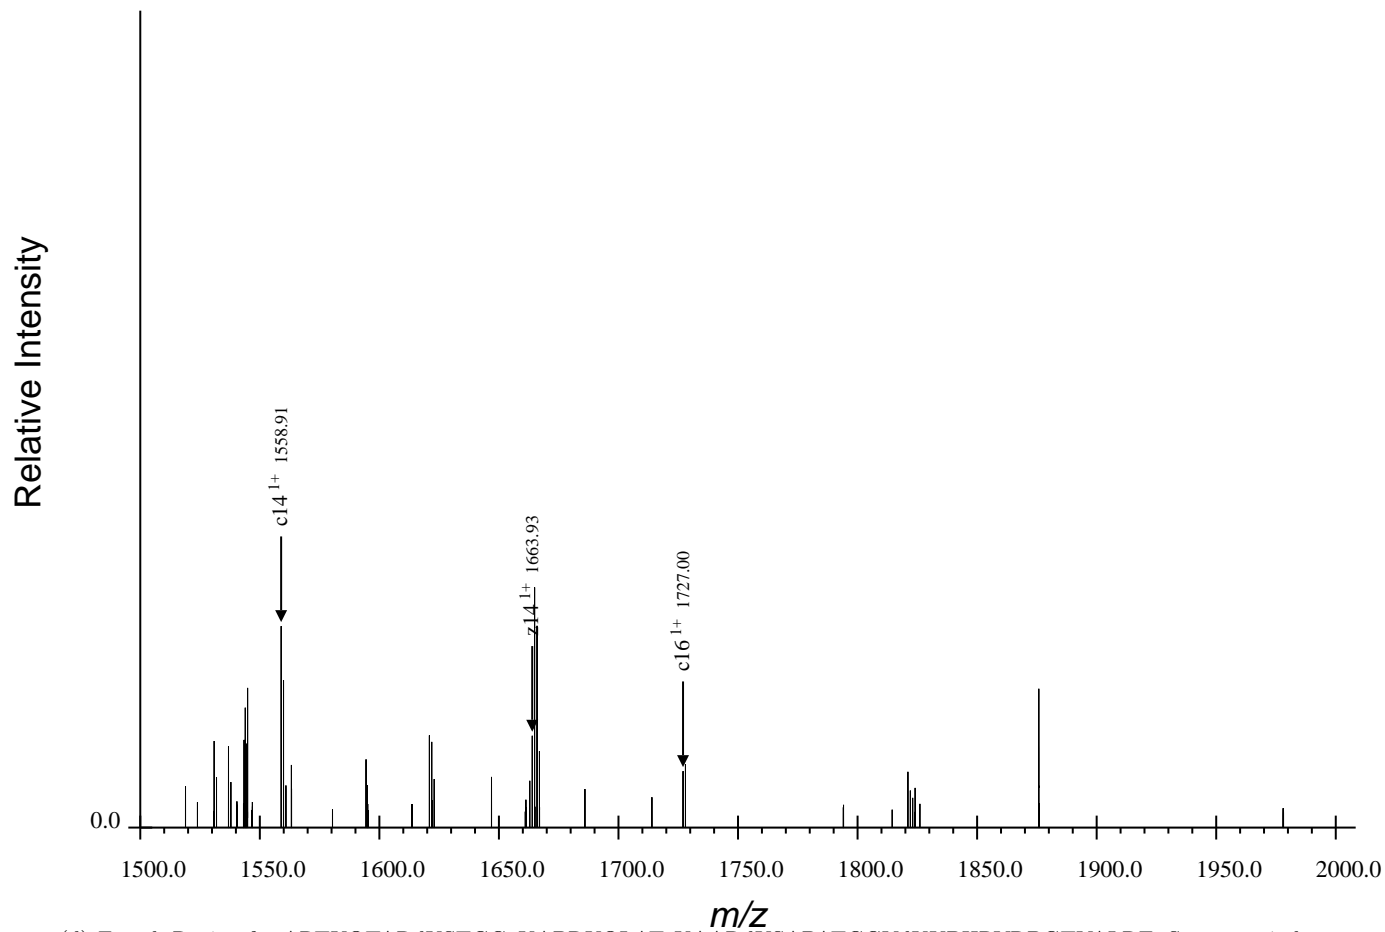

(d) Fourth Region for ARTKQTARdKSTGGaKAPRKQLATaKAARdKSAPATGGVdKKPHRYRPGTVALRE, Spectrum 7.dta

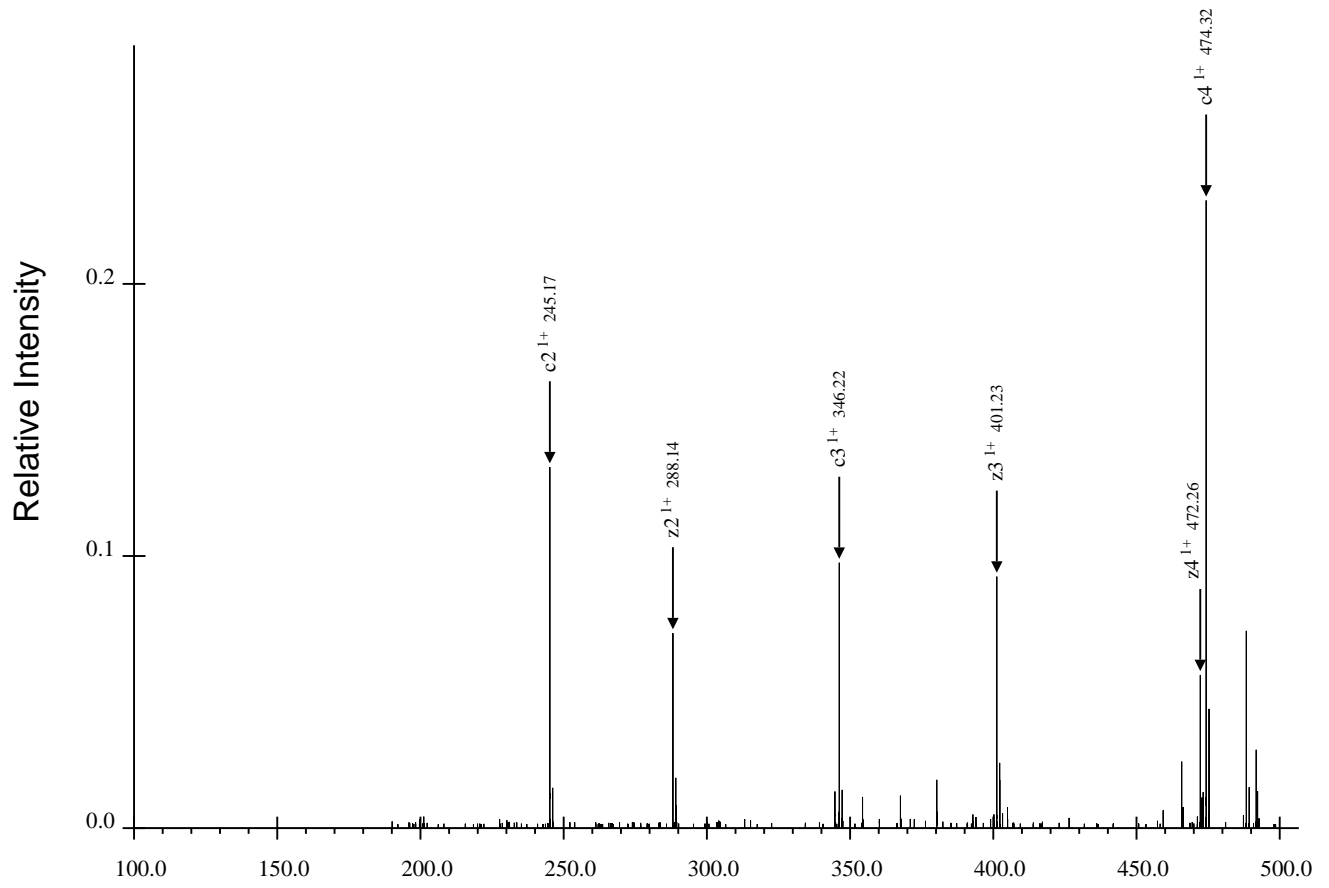

(a) First Region for ARTKQTARdKSTGGaKAPRKQLATaKAARdKSAPATGGVdKKPHRYRPGTVALRE, Spectrum 8.dta

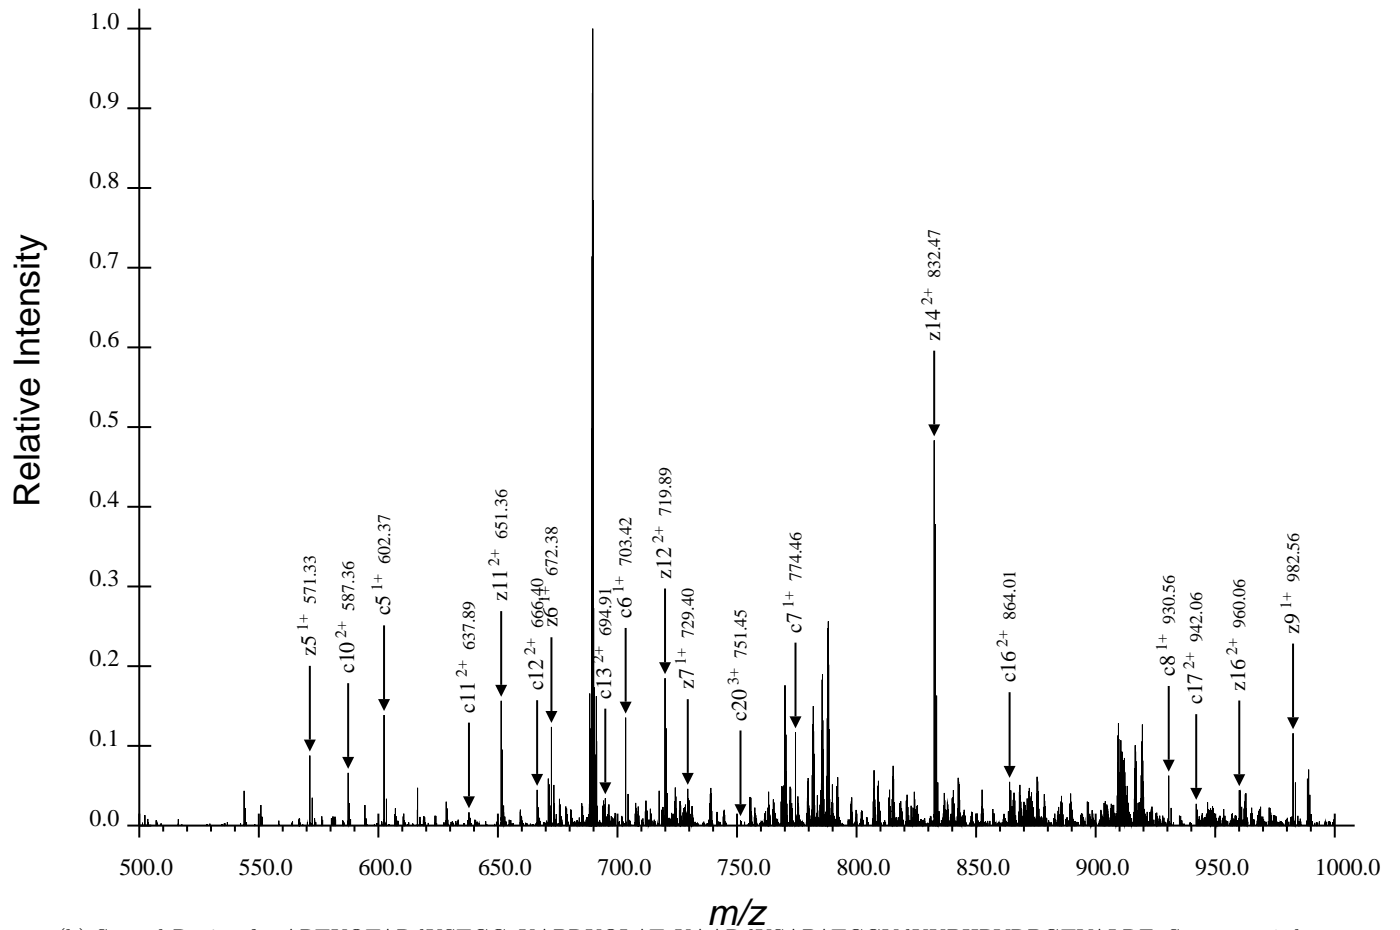

(b) Second Region for ARTKQTARdKSTGGaKAPRKQLATaKAARdKSAPATGGVdKKPHRYRPGTVALRE, Spectrum 8.dta

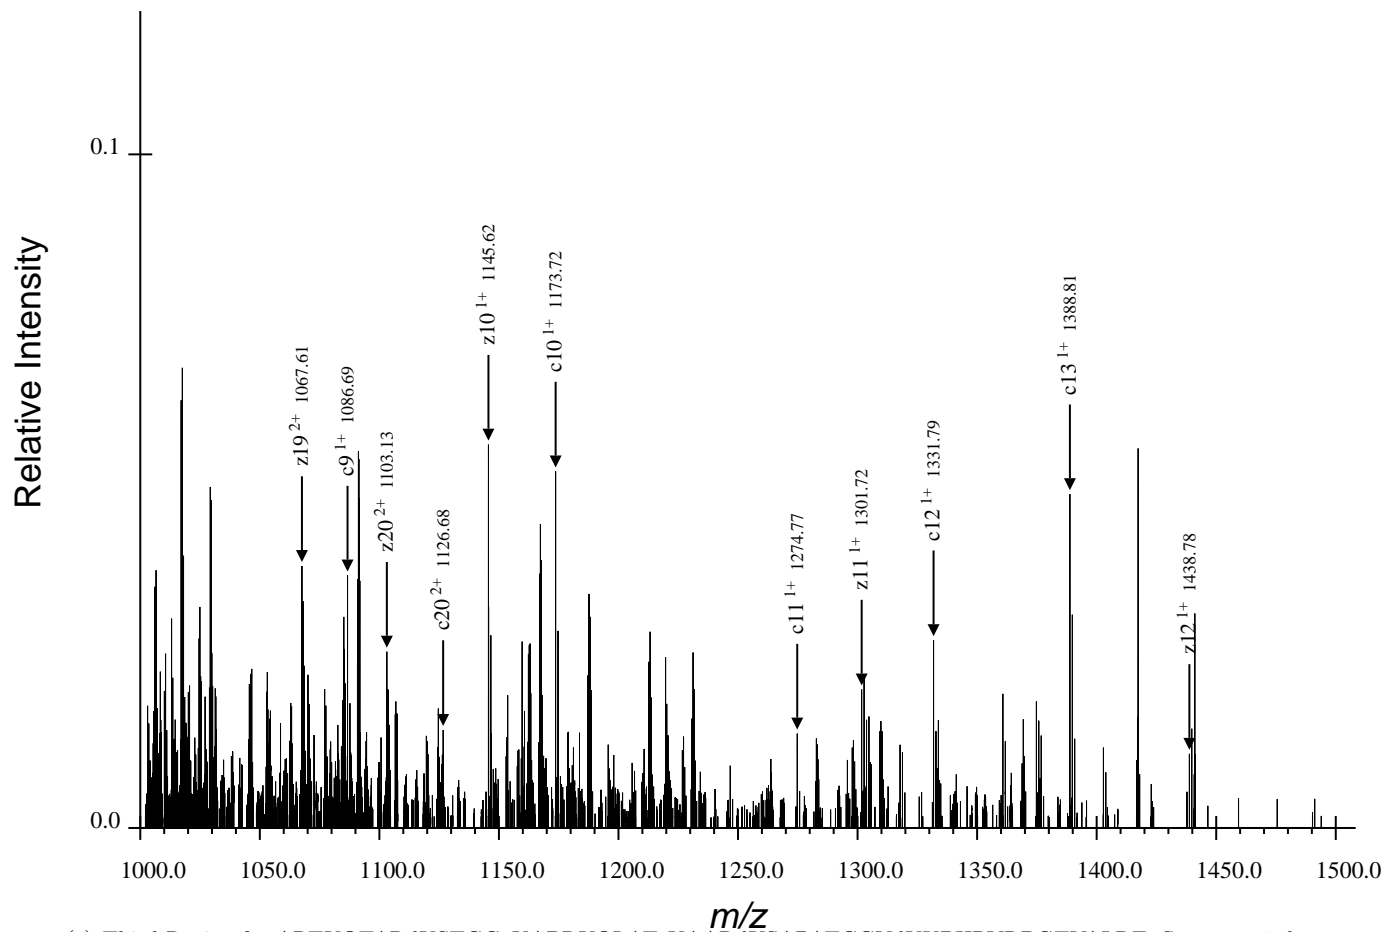

(c) Third Region for ARTKQTARdKSTGGaKAPRKQLATaKAARdKSAPATGGVdKKPHRYRPGTVALRE, Spectrum 8.dta

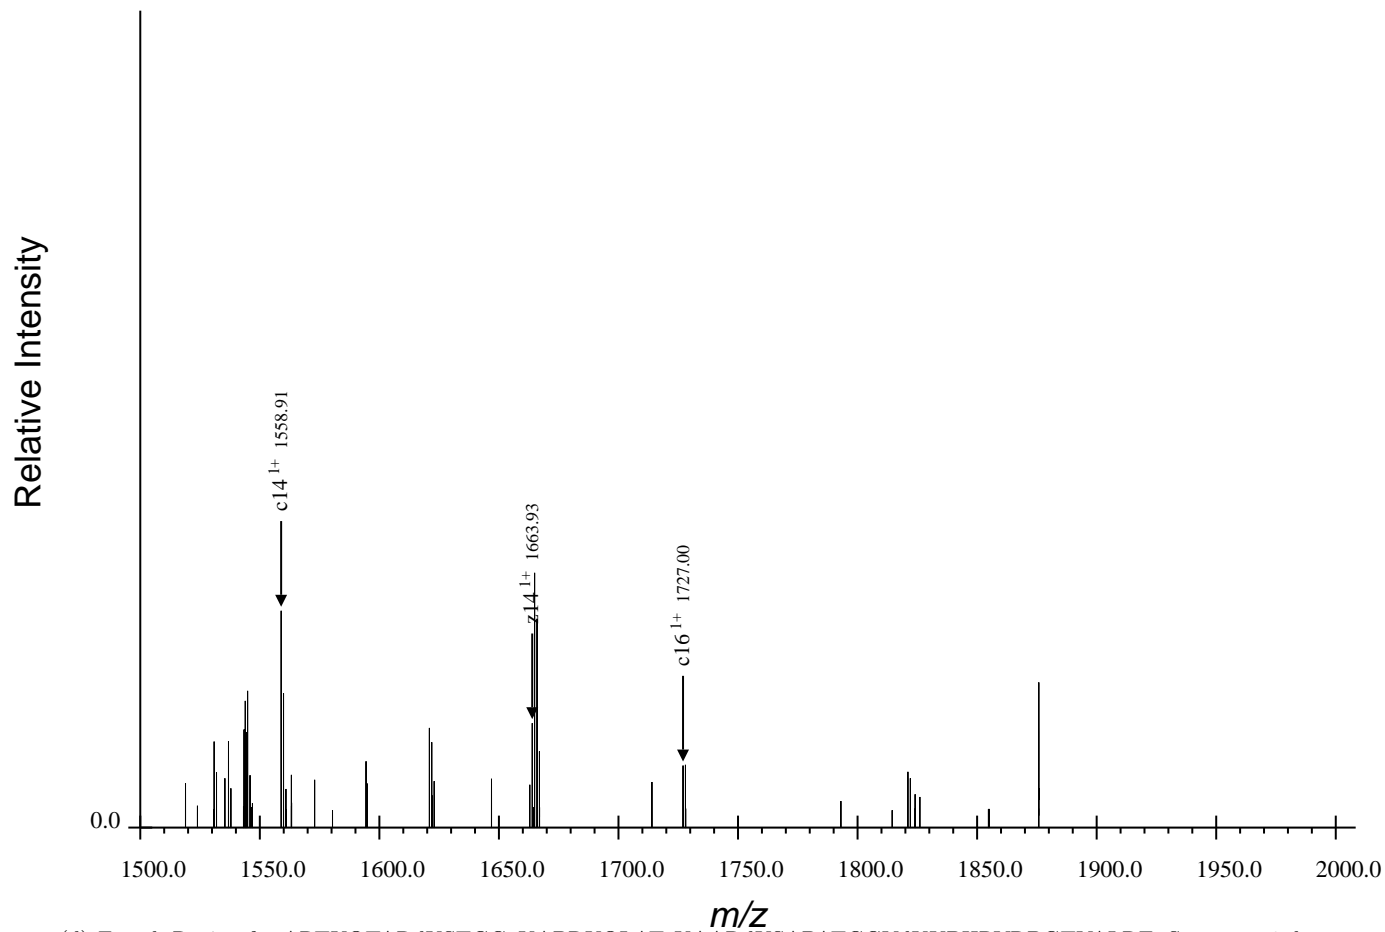

(d) Fourth Region for ARTKQTARdKSTGGaKAPRKQLATaKAARdKSAPATGGVdKKPHRYRPGTVALRE, Spectrum 8.dta



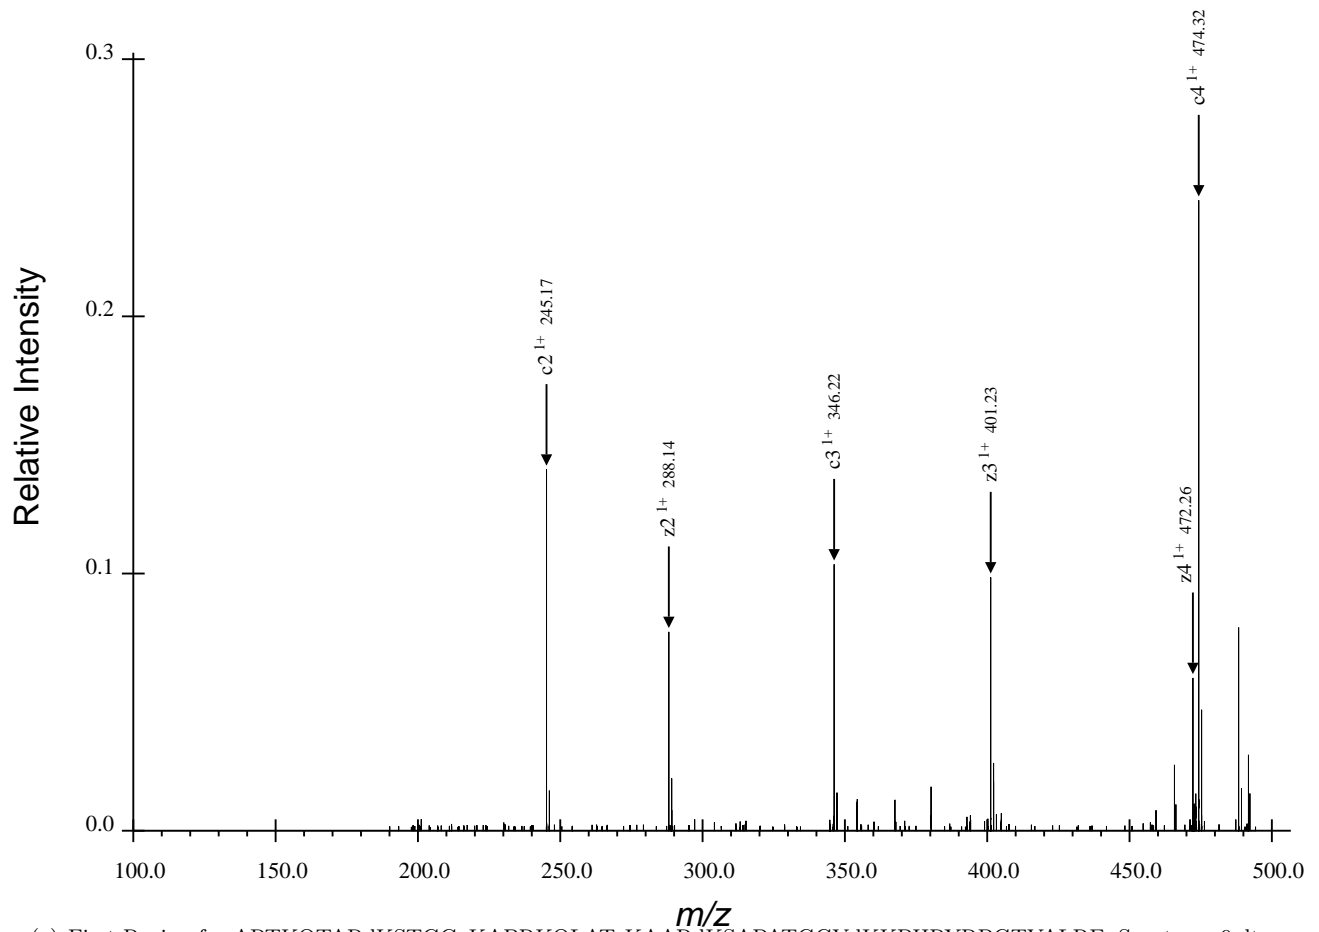

(a) First Region for ARTKQTARdKSTGGaKAPRKQLATaKAARdKSAPATGGVdKKPHRYRPGTVALRE, Spectrum 9.dta

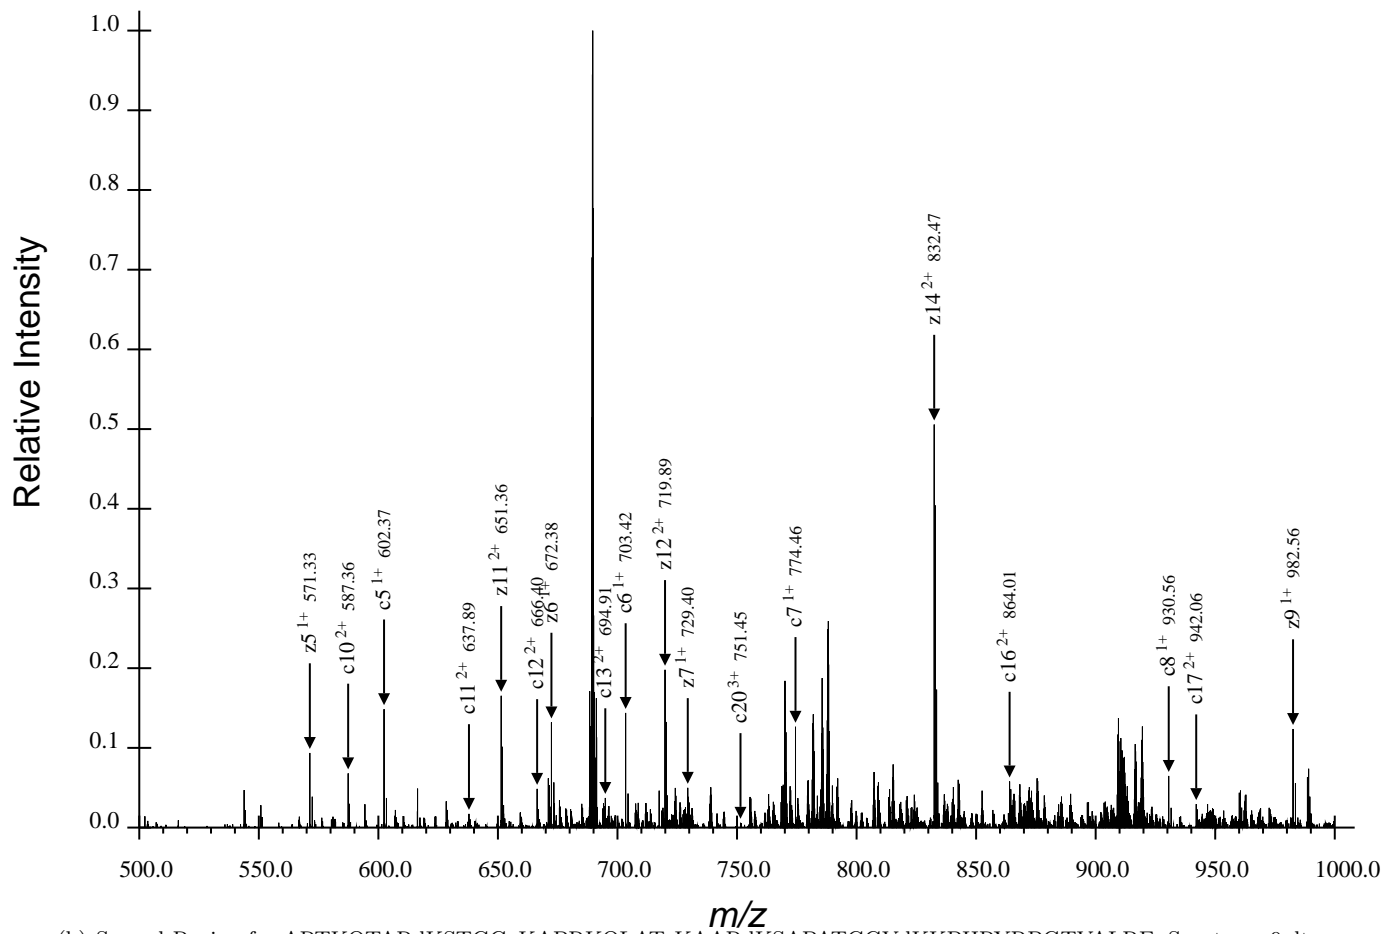

(b) Second Region for ARTKQTARdKSTGGaKAPRKQLATaKAARdKSAPATGGVdKKPHRYRPGTVALRE, Spectrum 9.dta

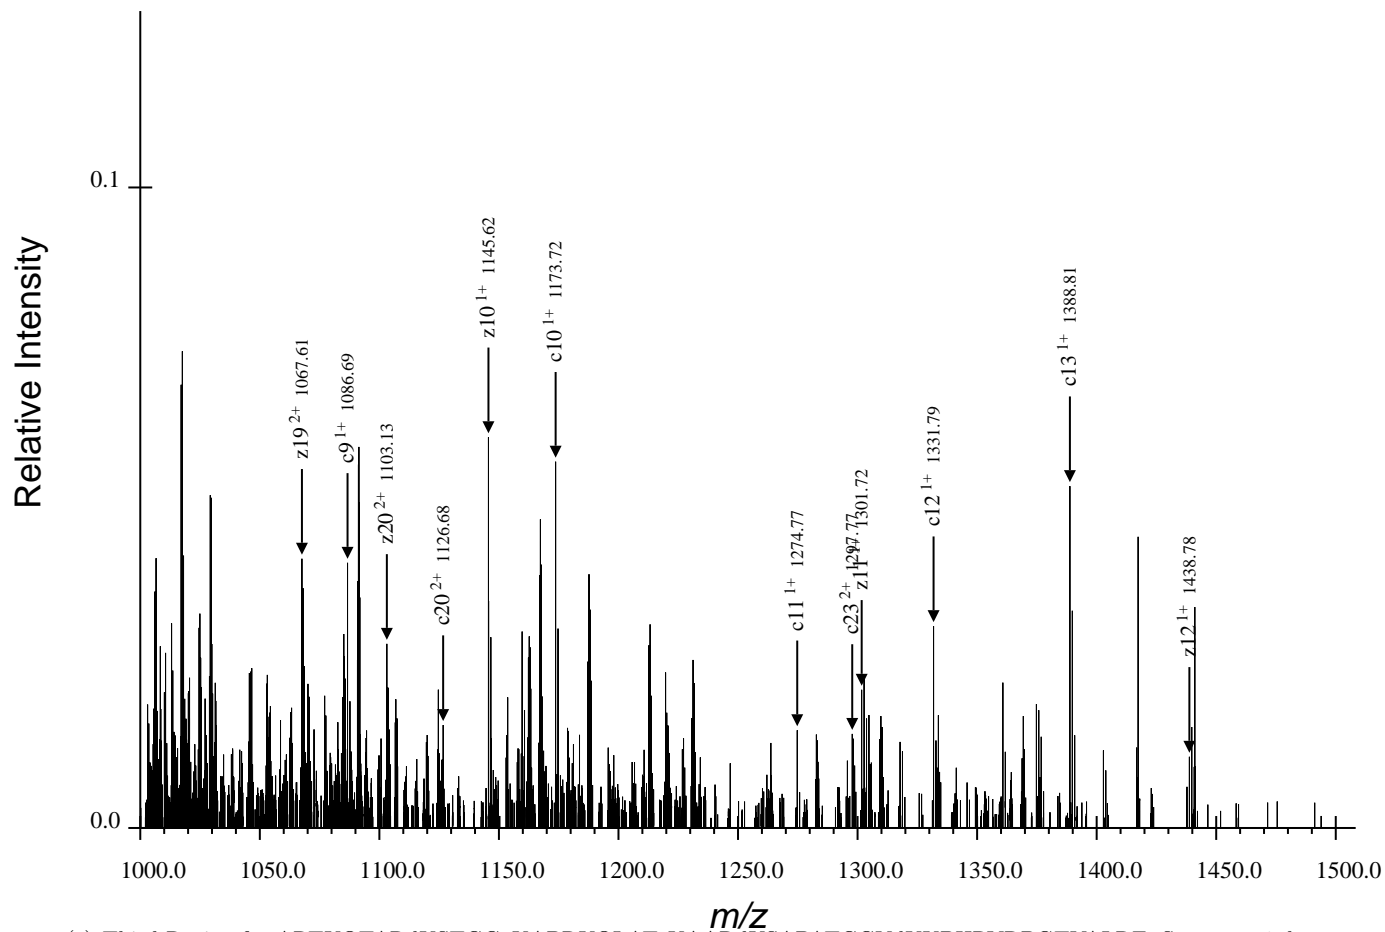

(c) Third Region for ARTKQTARdKSTGGaKAPRKQLATaKAARdKSAPATGGVdKKPHRYRPGTVALRE, Spectrum 9.dta

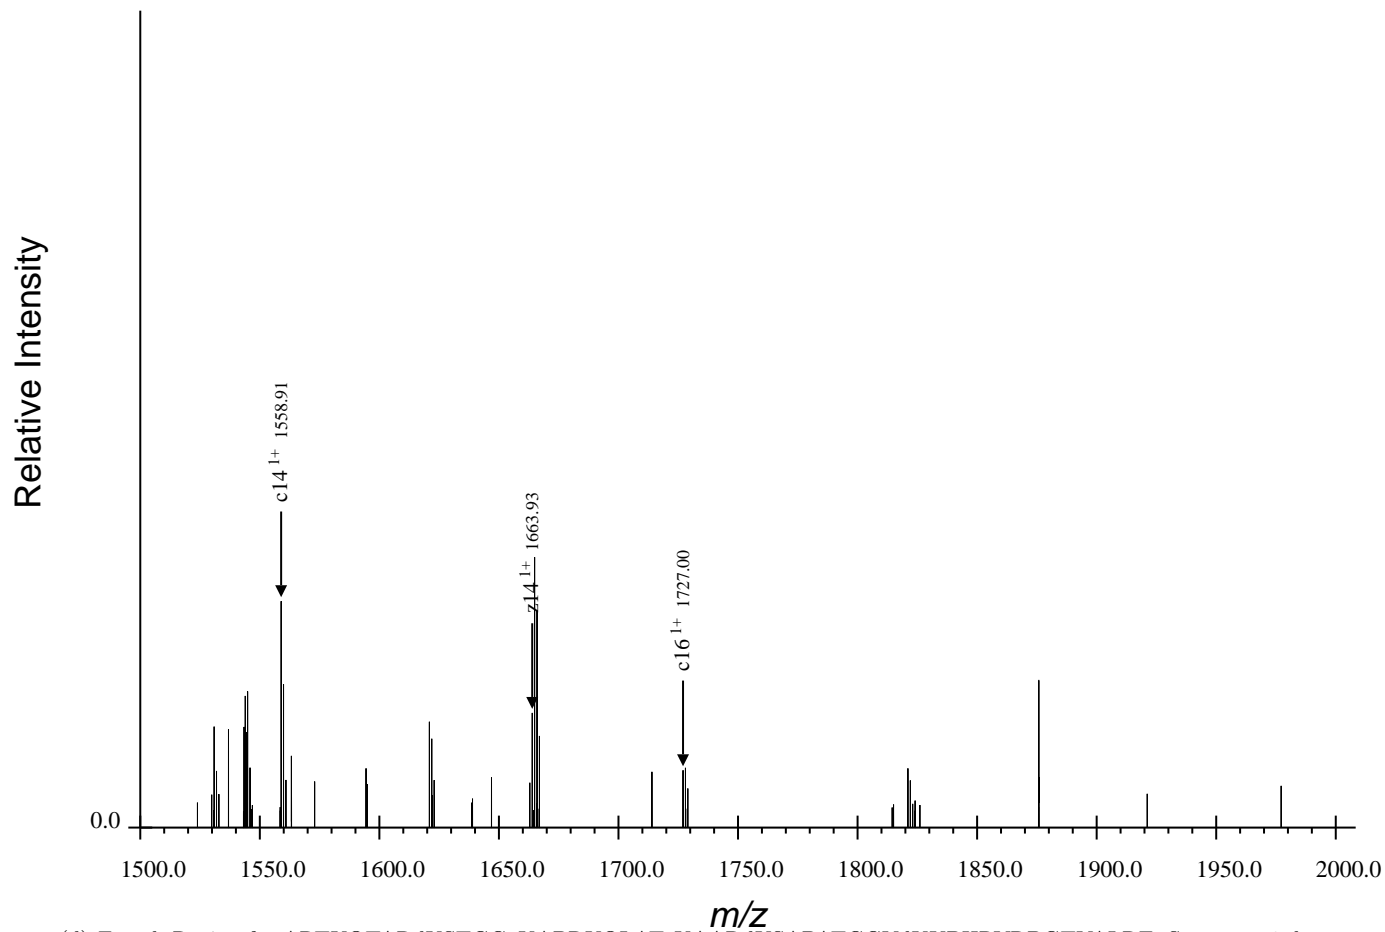

(d) Fourth Region for ARTKQTARdKSTGGaKAPRKQLATaKAARdKSAPATGGVdKKPHRYRPGTVALRE, Spectrum 9.dta

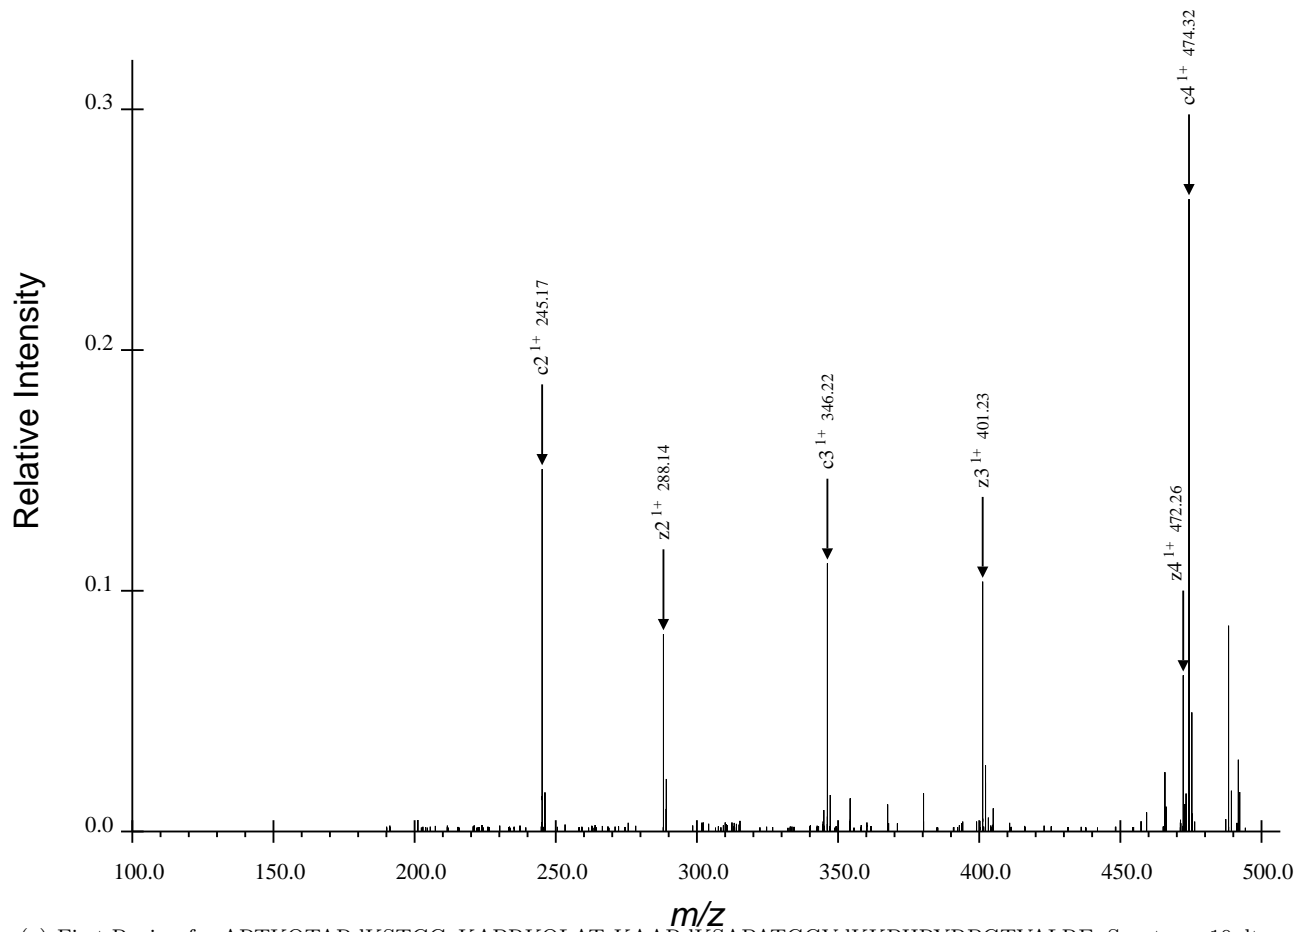

(a) First Region for ARTKQTARdKSTGGaKAPRKQLATaKAARdKSAPATGGVdKKPHRYRPGTVALRE, Spectrum 10.dta

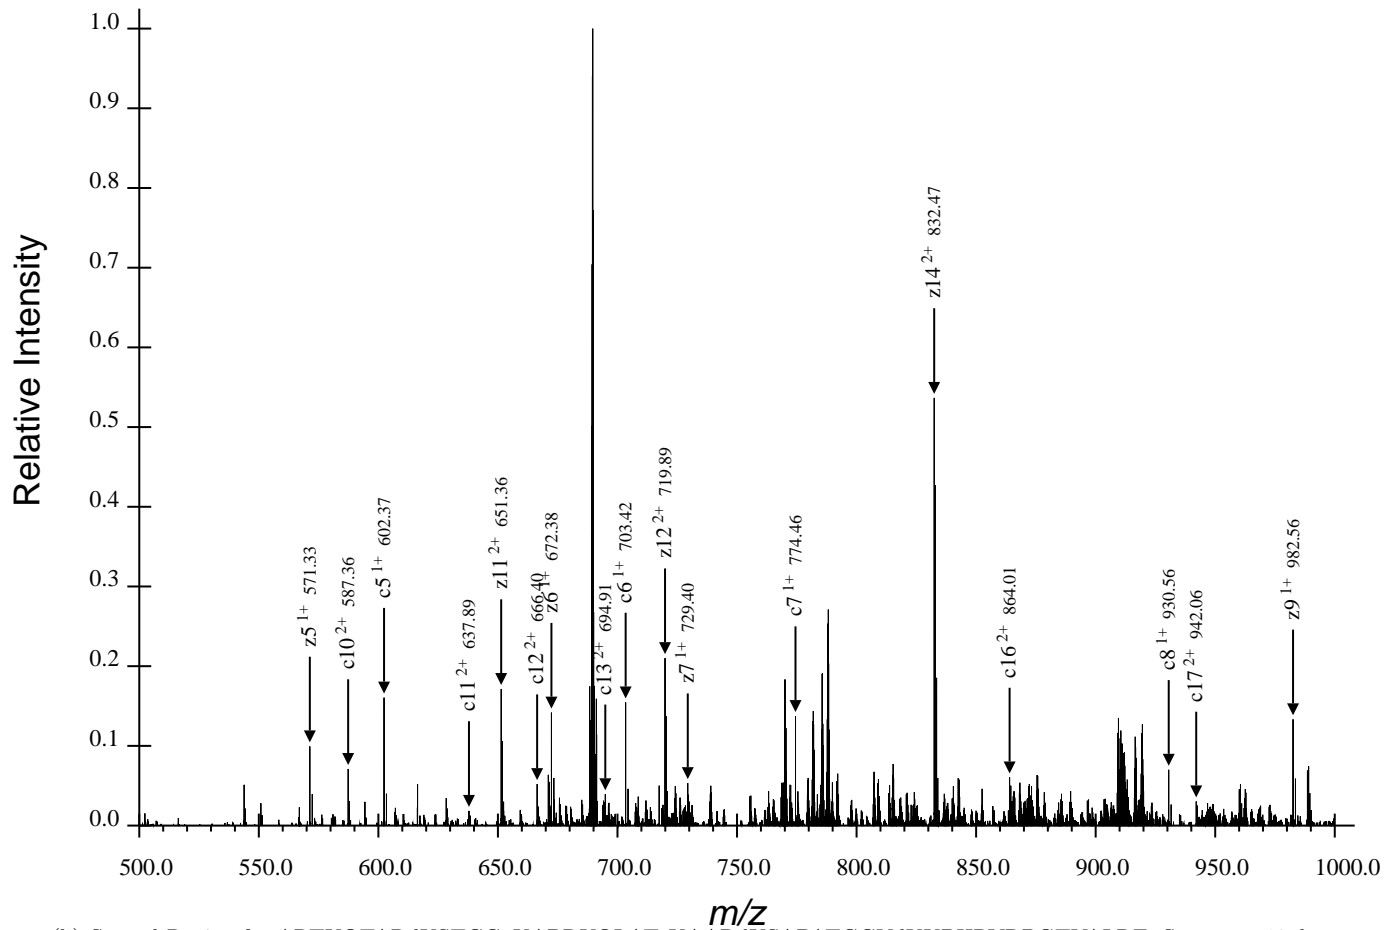

(b) Second Region for ARTKQTARdKSTGGaKAPRKQLATaKAARdKSAPATGGVdKKPHRYRPGTVALRE, Spectrum 10.dta

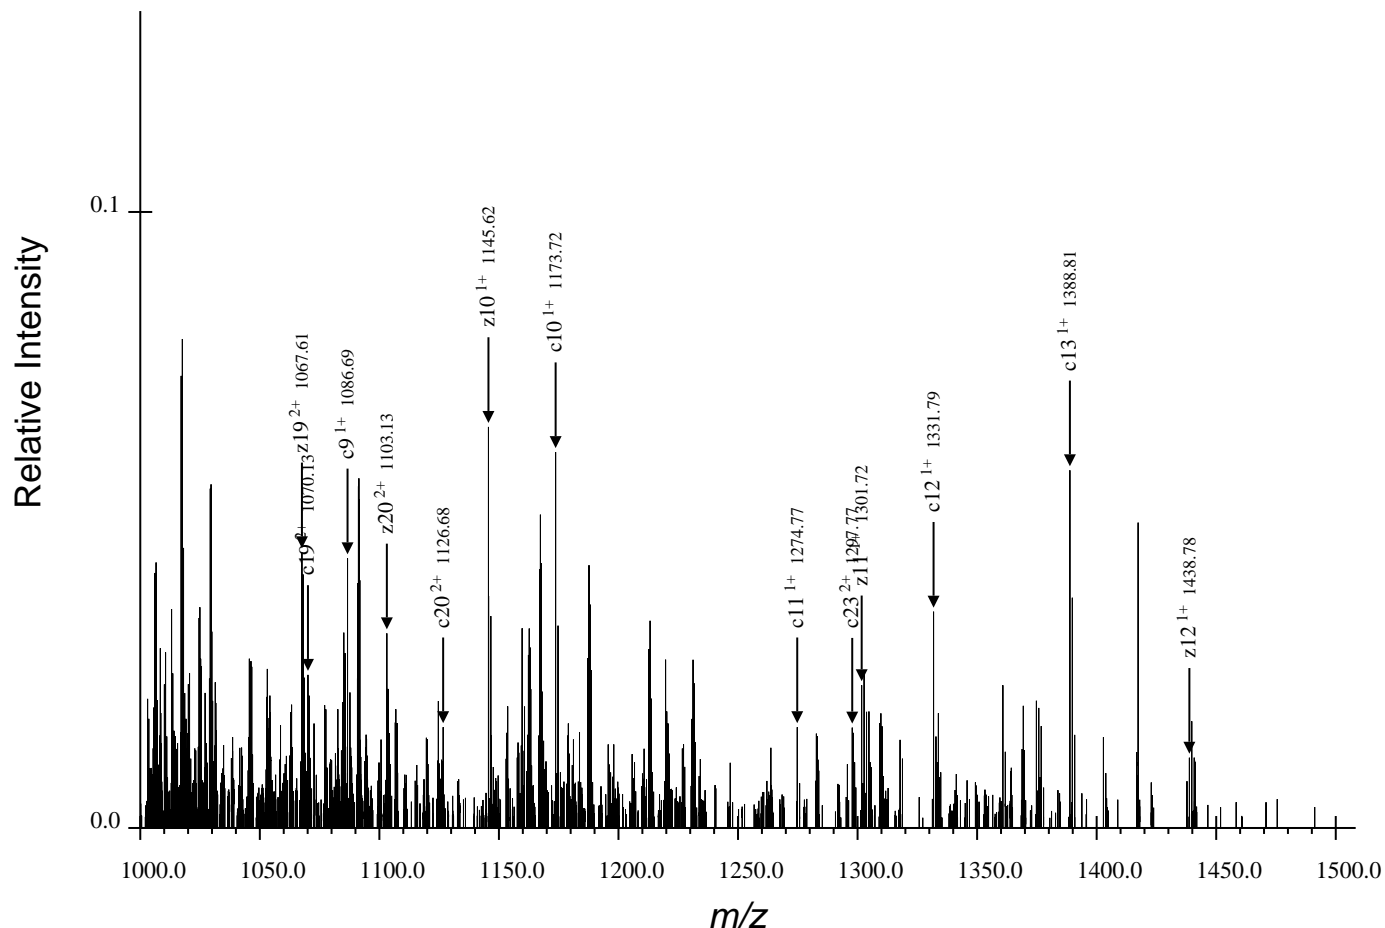

(c) Third Region for ARTKQTARdKSTGGaKAPRKQLATaKAARdKSAPATGGVdKKPHRYRPGTVALRE, Spectrum 10.dta

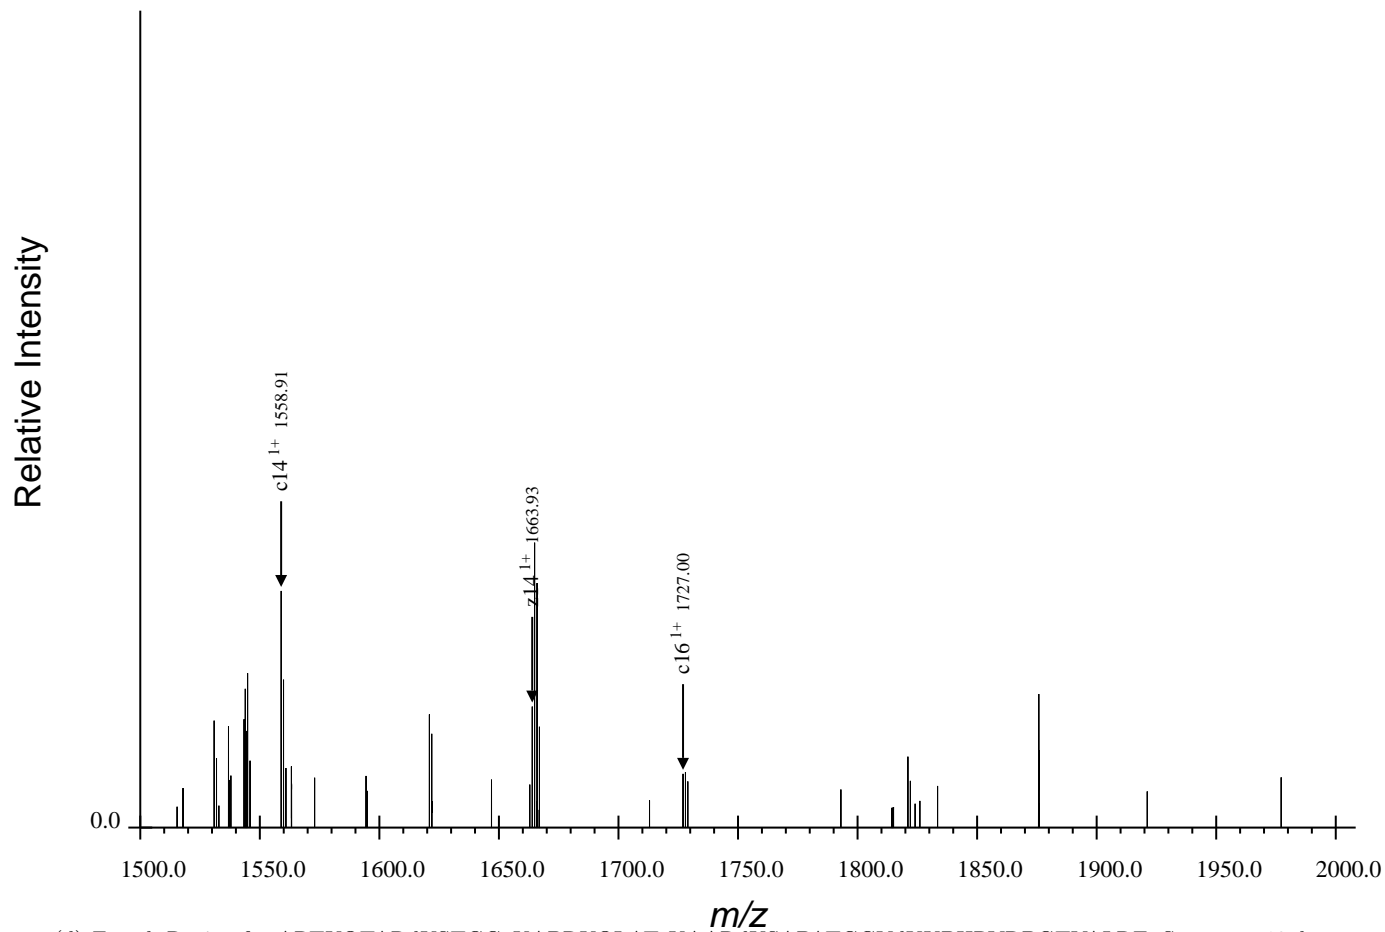

(d) Fourth Region for ARTKQTARdKSTGGaKAPRKQLATaKAARdKSAPATGGVdKKPHRYRPGTVALRE, Spectrum 10.dta

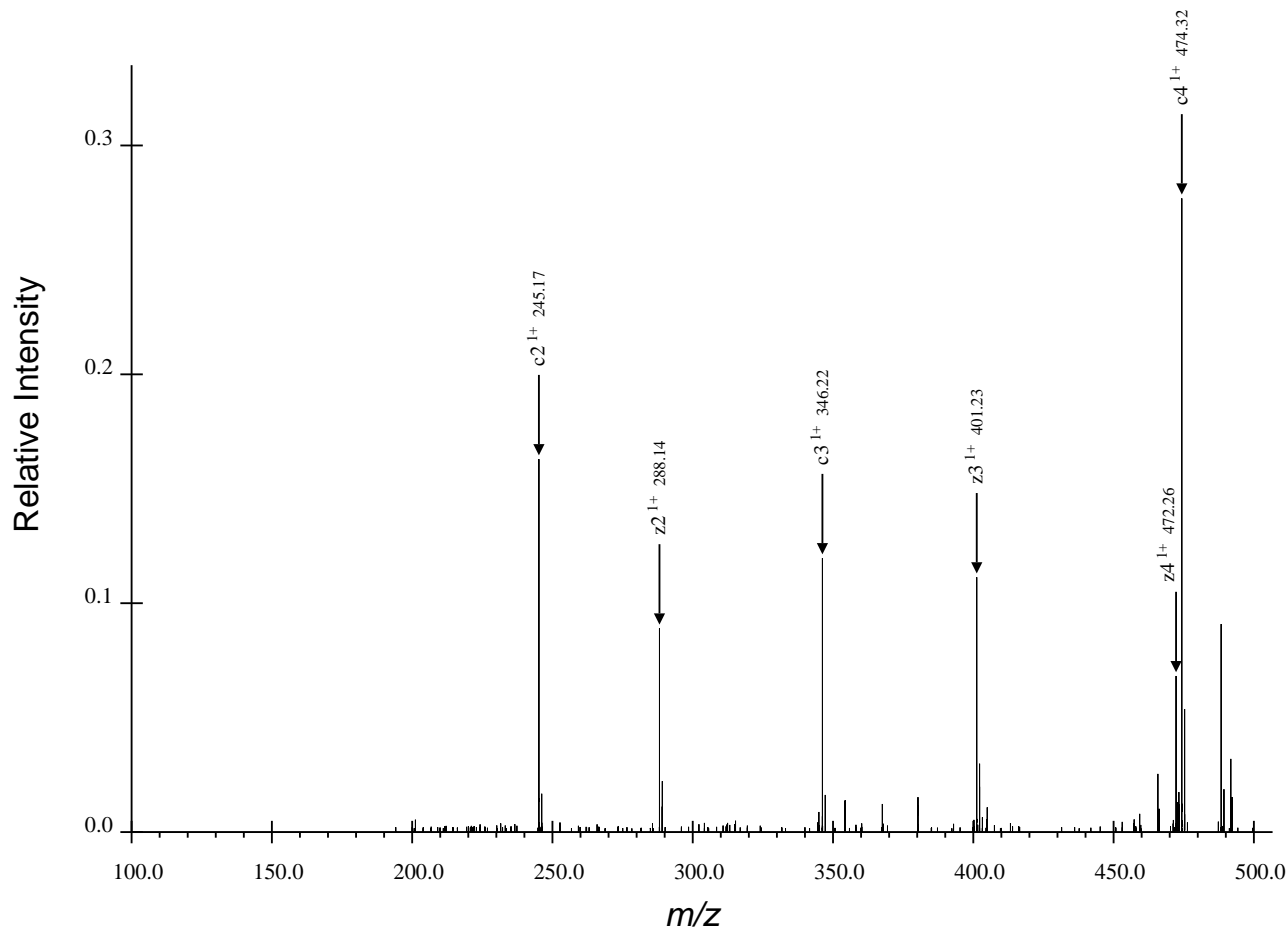

(a) First Region for ARTKQTARdKSTGGaKAPRKQLATaKAARdKSAPATGGVdKKPHRYRPGTVALRE, Spectrum 11.dta

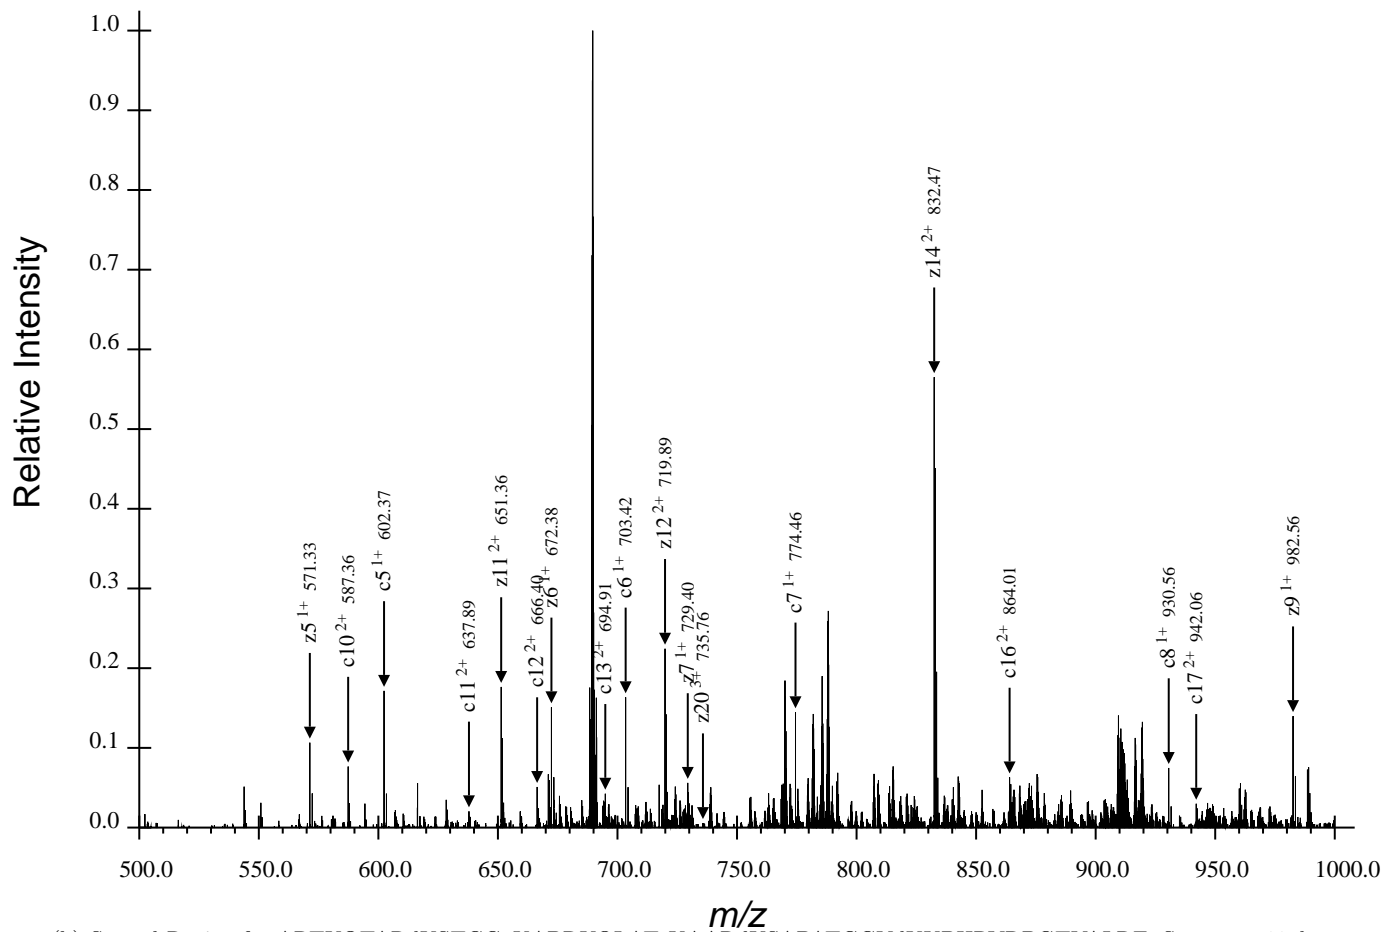

(b) Second Region for ARTKQTARdKSTGGaKAPRKQLATaKAARdKSAPATGGVdKKPHRYRPGTVALRE, Spectrum 11.dta



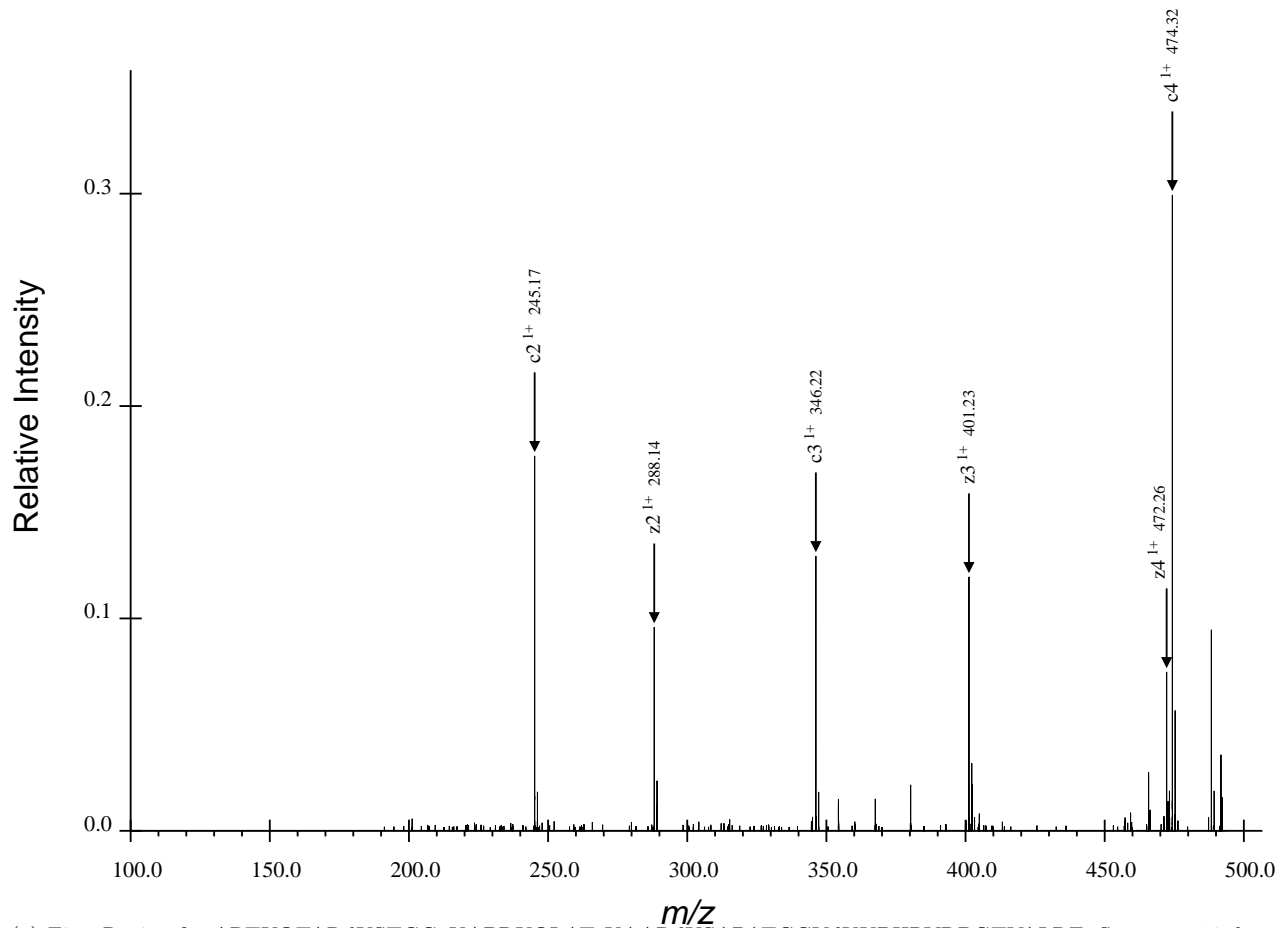

(a) First Region for ARTKQTARdKSTGGaKAPRKQLATaKAARdKSAPATGGVdKKPHRYRPGTVALRE, Spectrum 12.dta

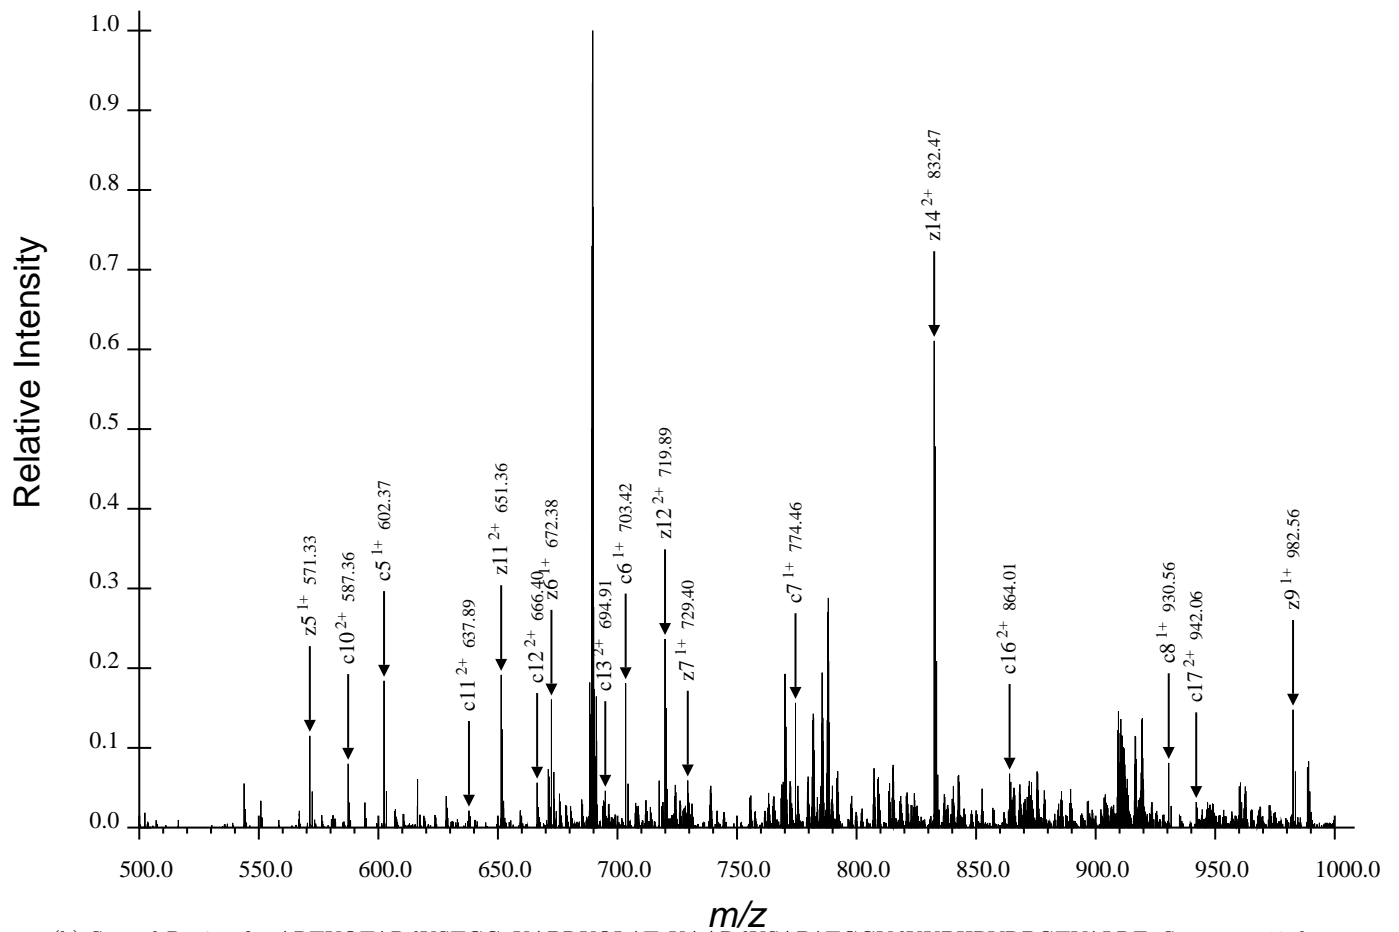

(b) Second Region for ARTKQTARdKSTGGaKAPRKQLATaKAARdKSAPATGGVdKKPHRYRPGTVALRE, Spectrum 12.dta

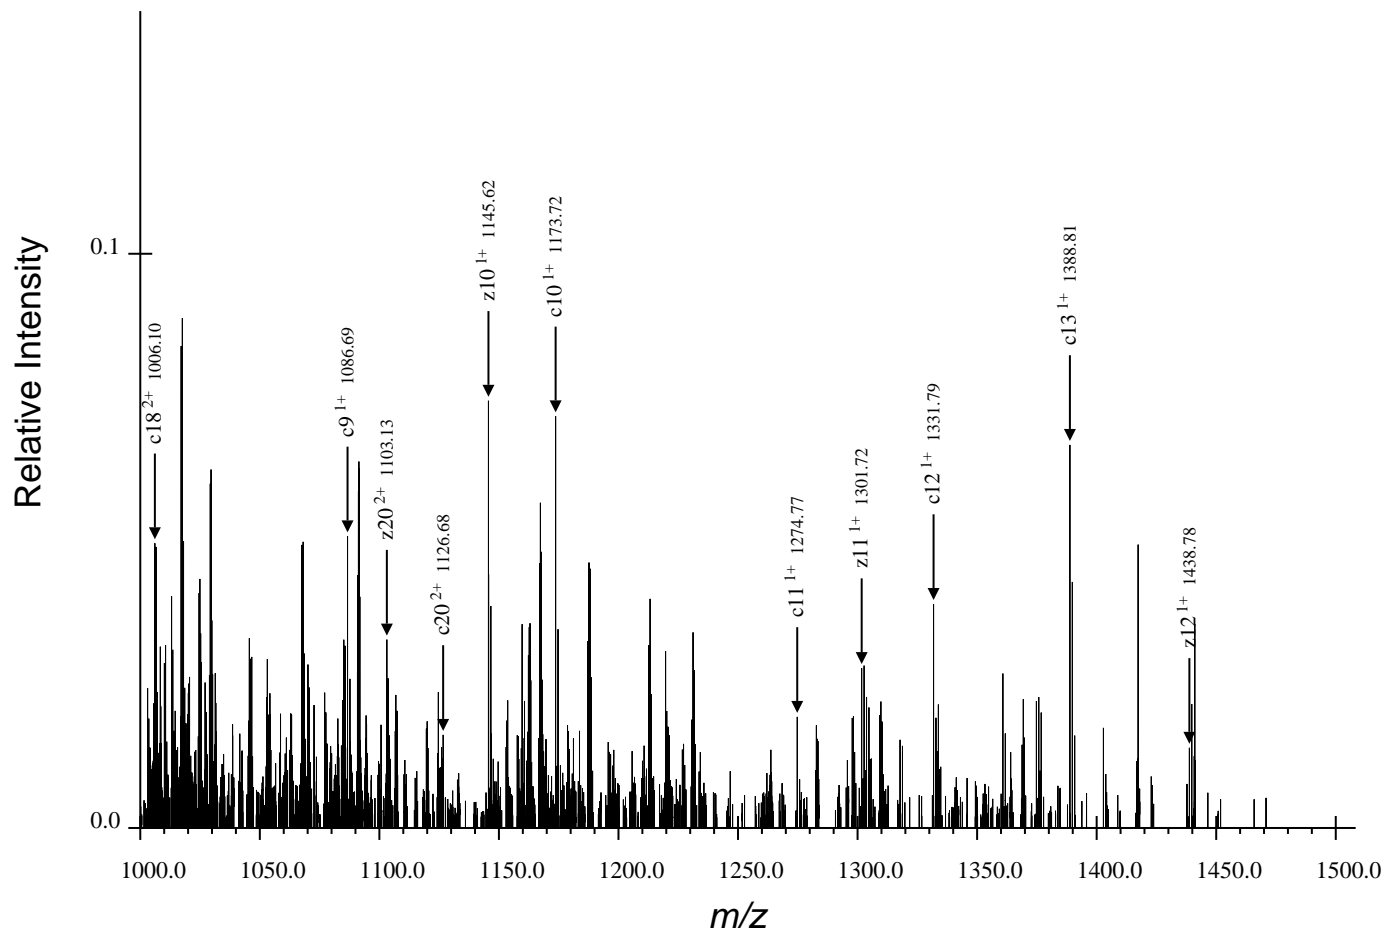

(c) Third Region for ARTKQTARdKSTGGaKAPRKQLATaKAARdKSAPATGGVdKKPHRYRPGTVALRE, Spectrum 12.dta

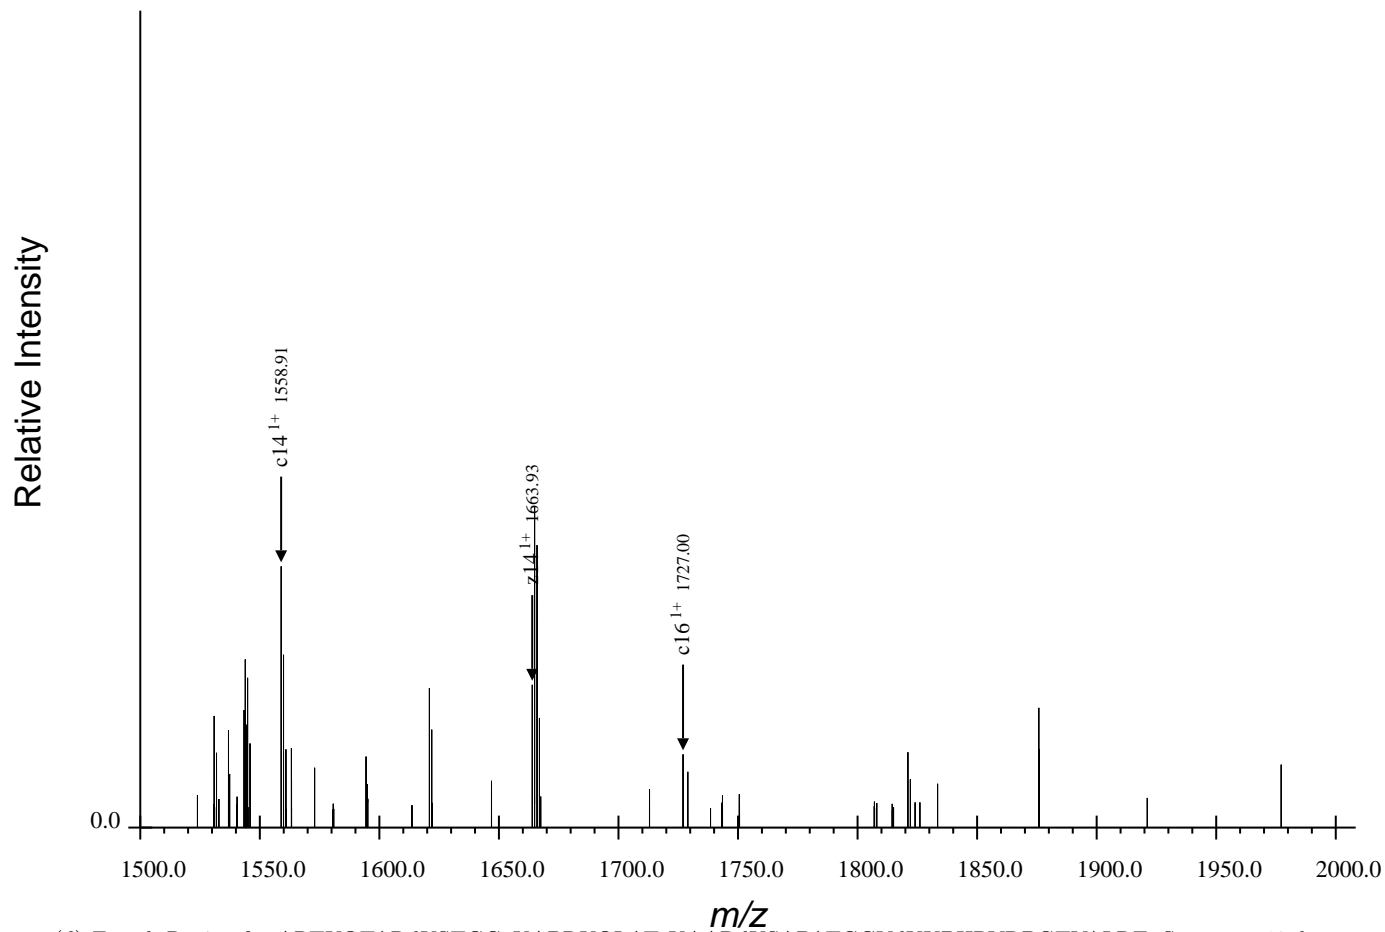

(d) Fourth Region for ARTKQTARdKSTGGaKAPRKQLATaKAARdKSAPATGGVdKKPHRYRPGTVALRE, Spectrum 12.dta



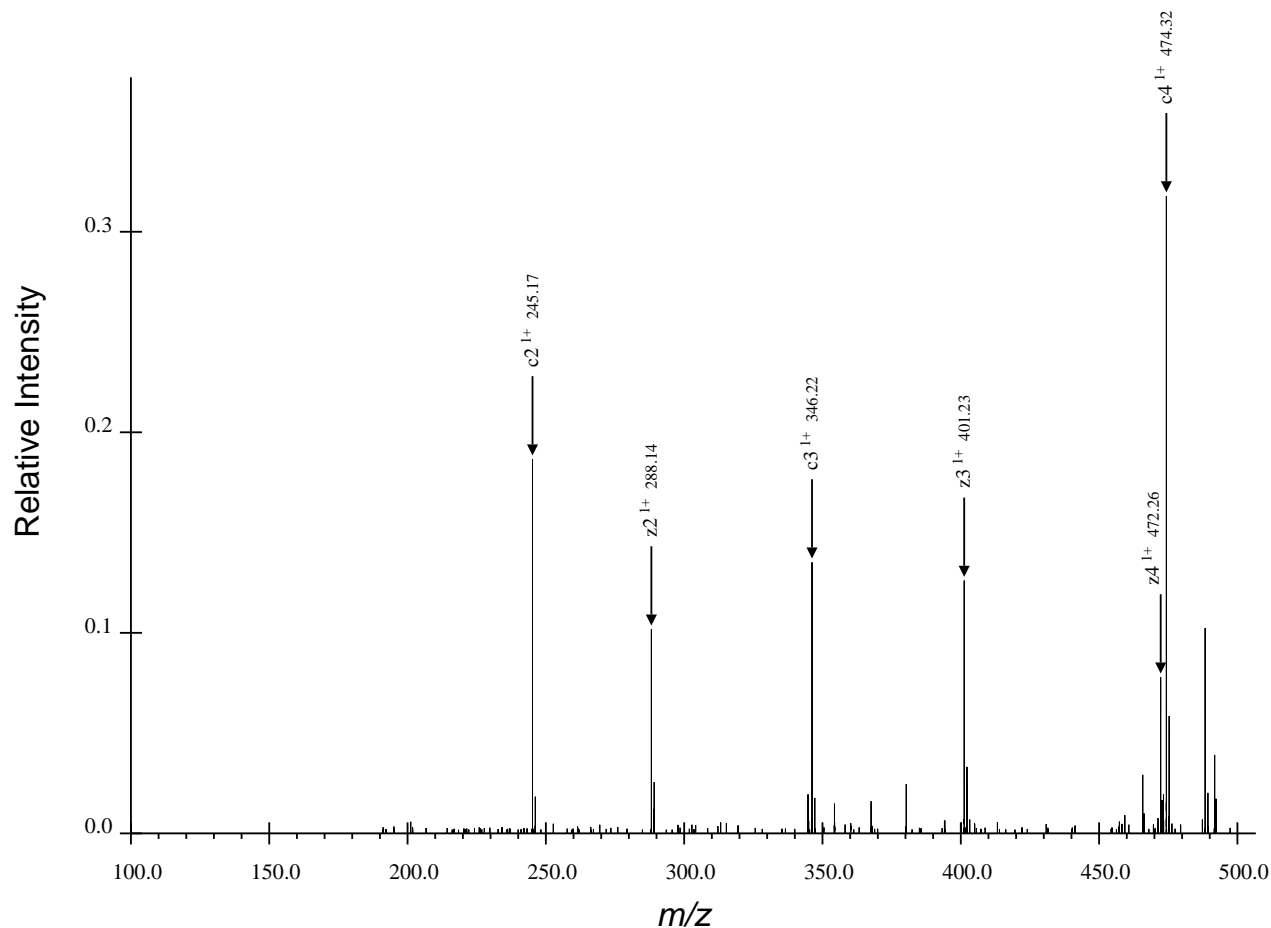

(a) First Region for ARTKQTARdKSTGGaKAPRKQLATaKAARdKSAPATGGVdKKPHRYRPGTVALRE, Spectrum 13.dta

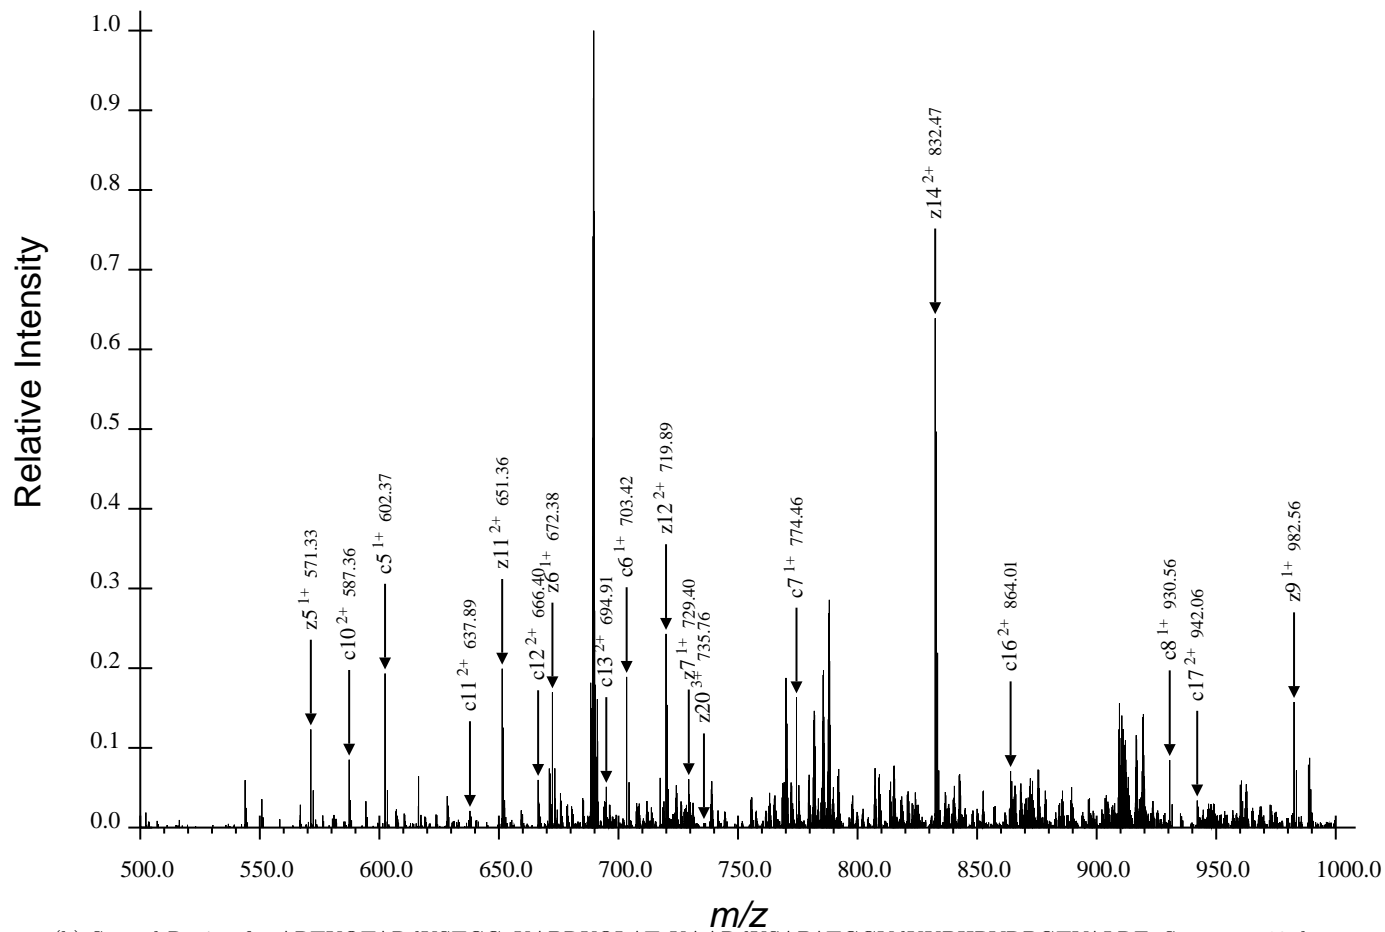

(b) Second Region for ARTKQTARdKSTGGaKAPRKQLATaKAARdKSAPATGGVdKKPHRYRPGTVALRE, Spectrum 13.dta

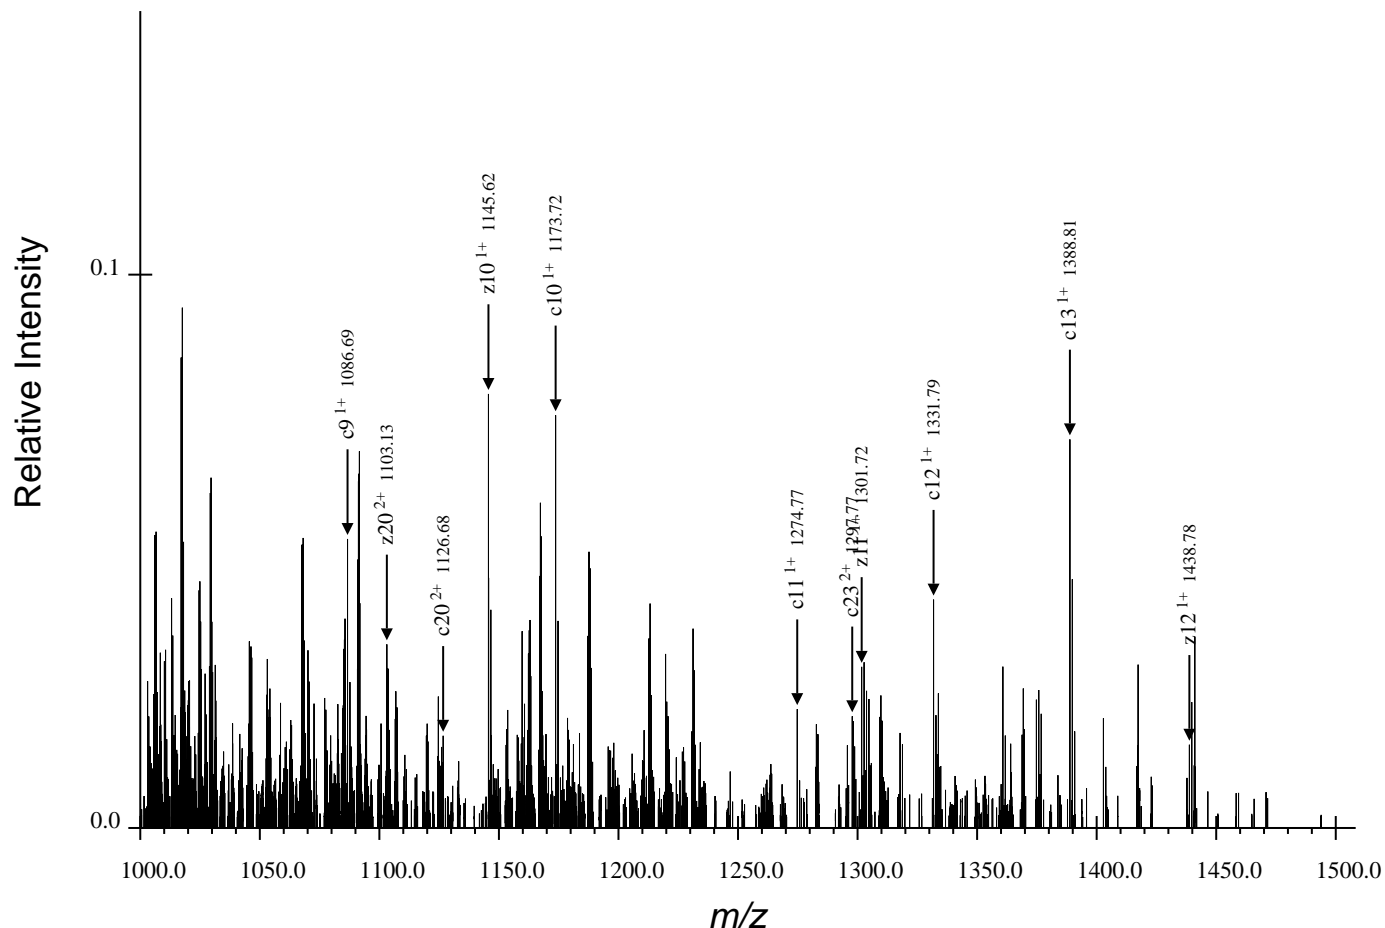

(c) Third Region for ARTKQTARdKSTGGaKAPRKQLATaKAARdKSAPATGGVdKKPHRYRPGTVALRE, Spectrum 13.dta

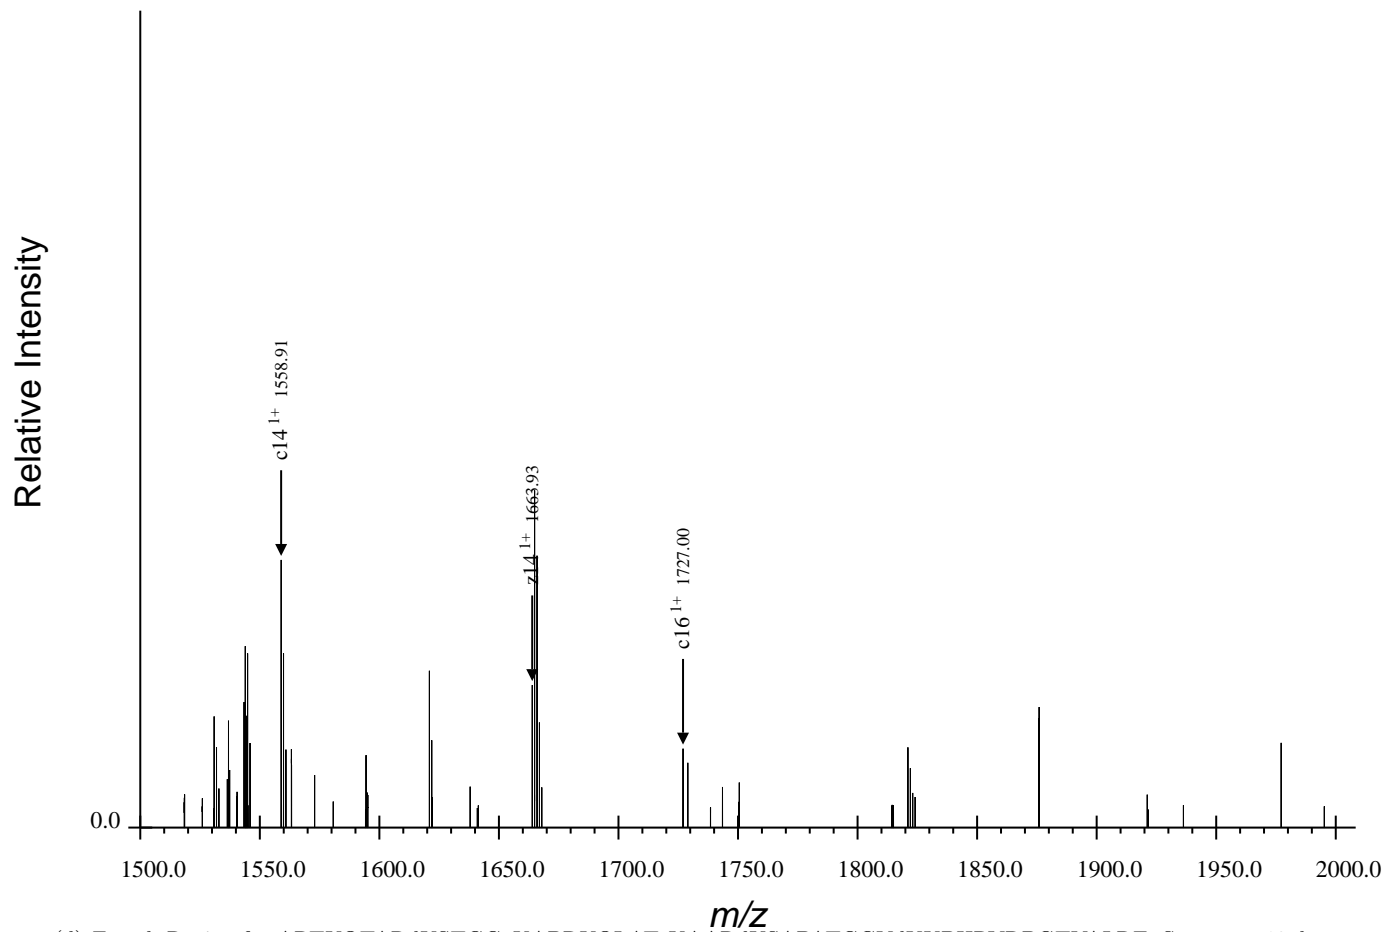

(d) Fourth Region for ARTKQTARdKSTGGaKAPRKQLATaKAARdKSAPATGGVdKKPHRYRPGTVALRE, Spectrum 13.dta

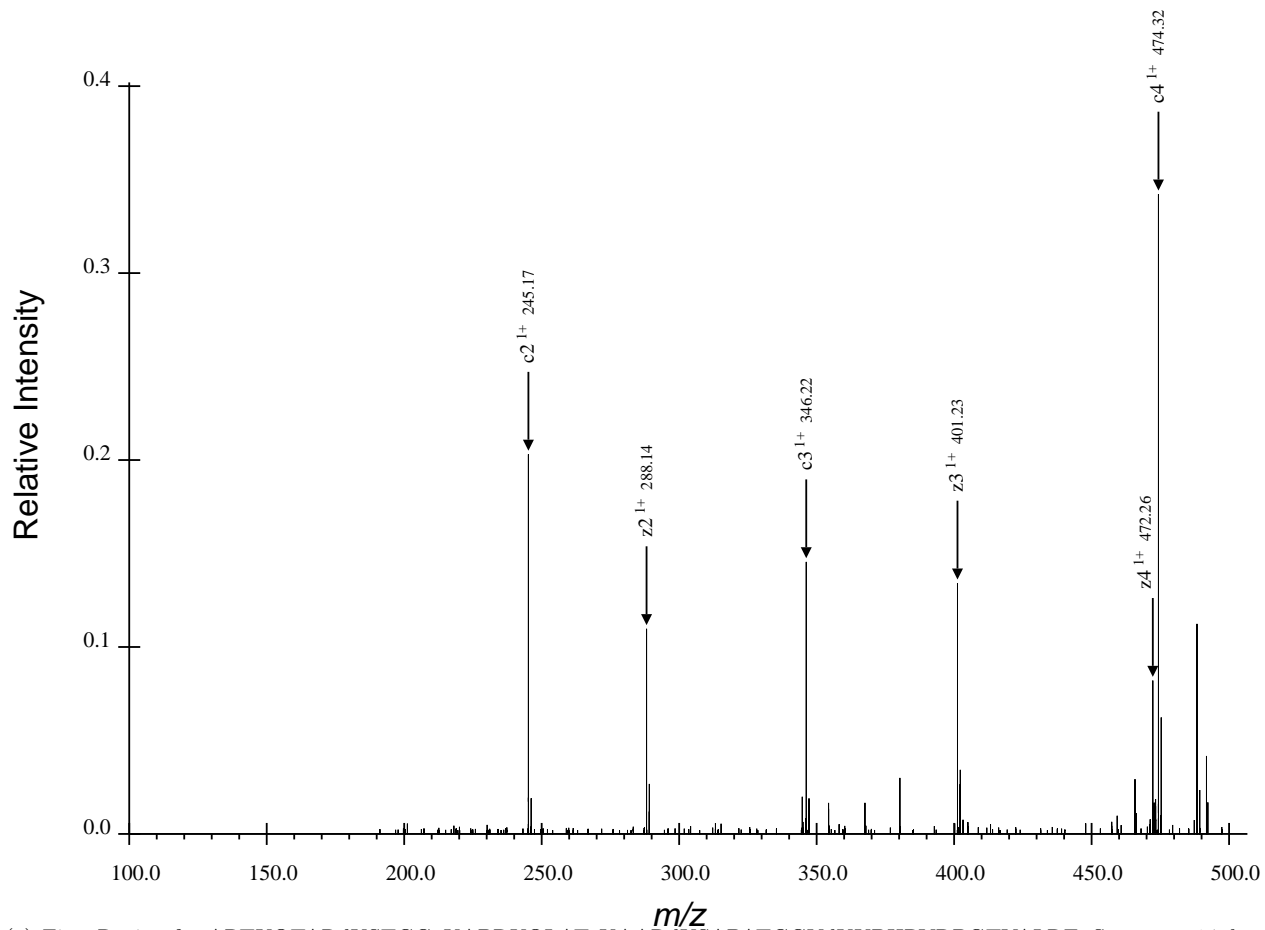

(a) First Region for ARTKQTARdKSTGGaKAPRKQLATaKAARdKSAPATGGVdKKPHRYRPGTVALRE, Spectrum 14.dta

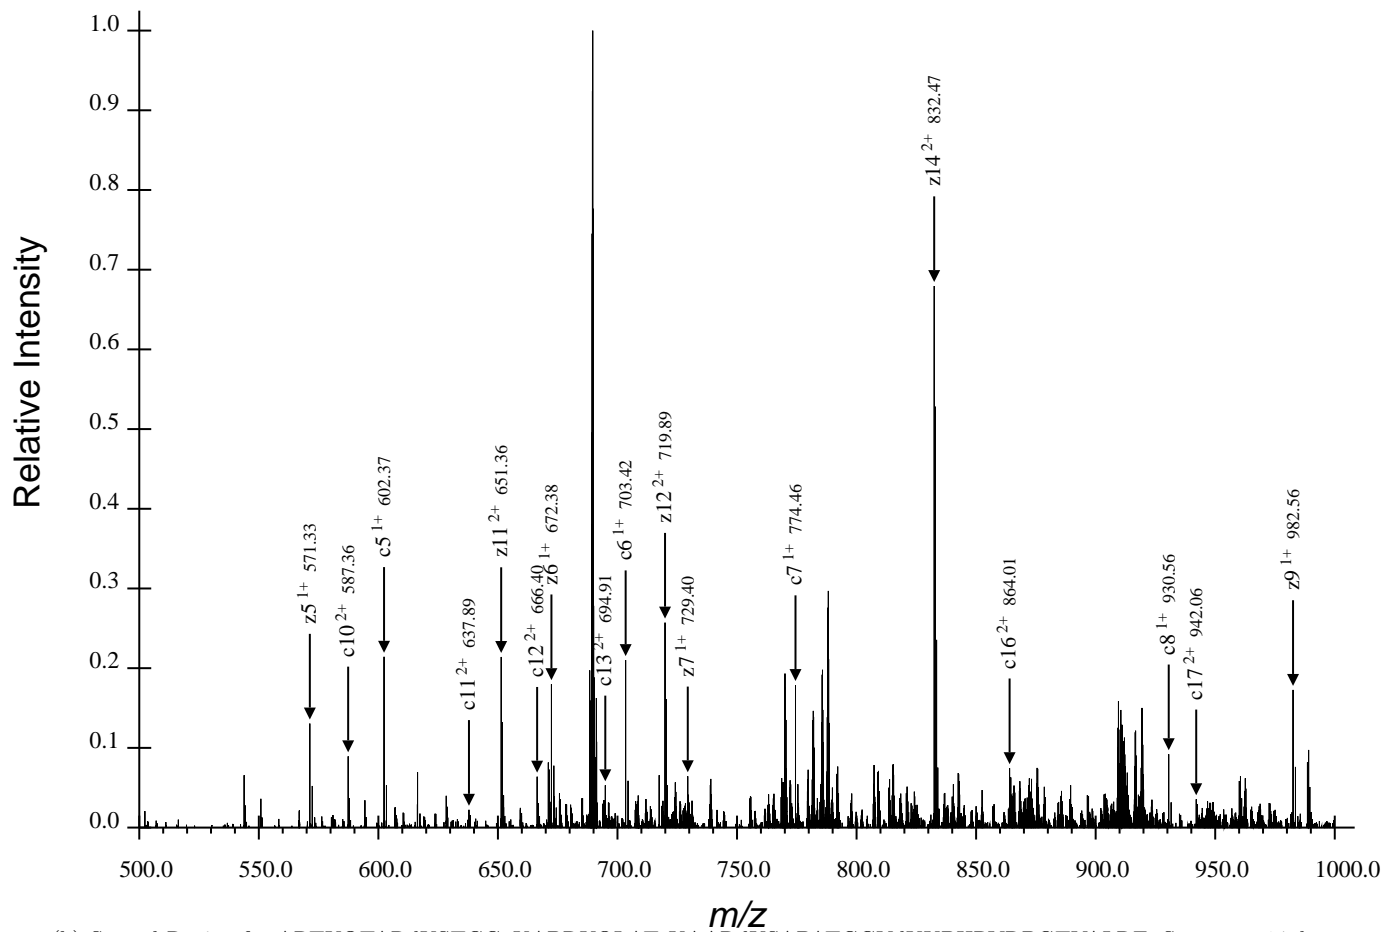

(b) Second Region for ARTKQTARdKSTGGaKAPRKQLATaKAARdKSAPATGGVdKKPHRYRPGTVALRE, Spectrum 14.dta

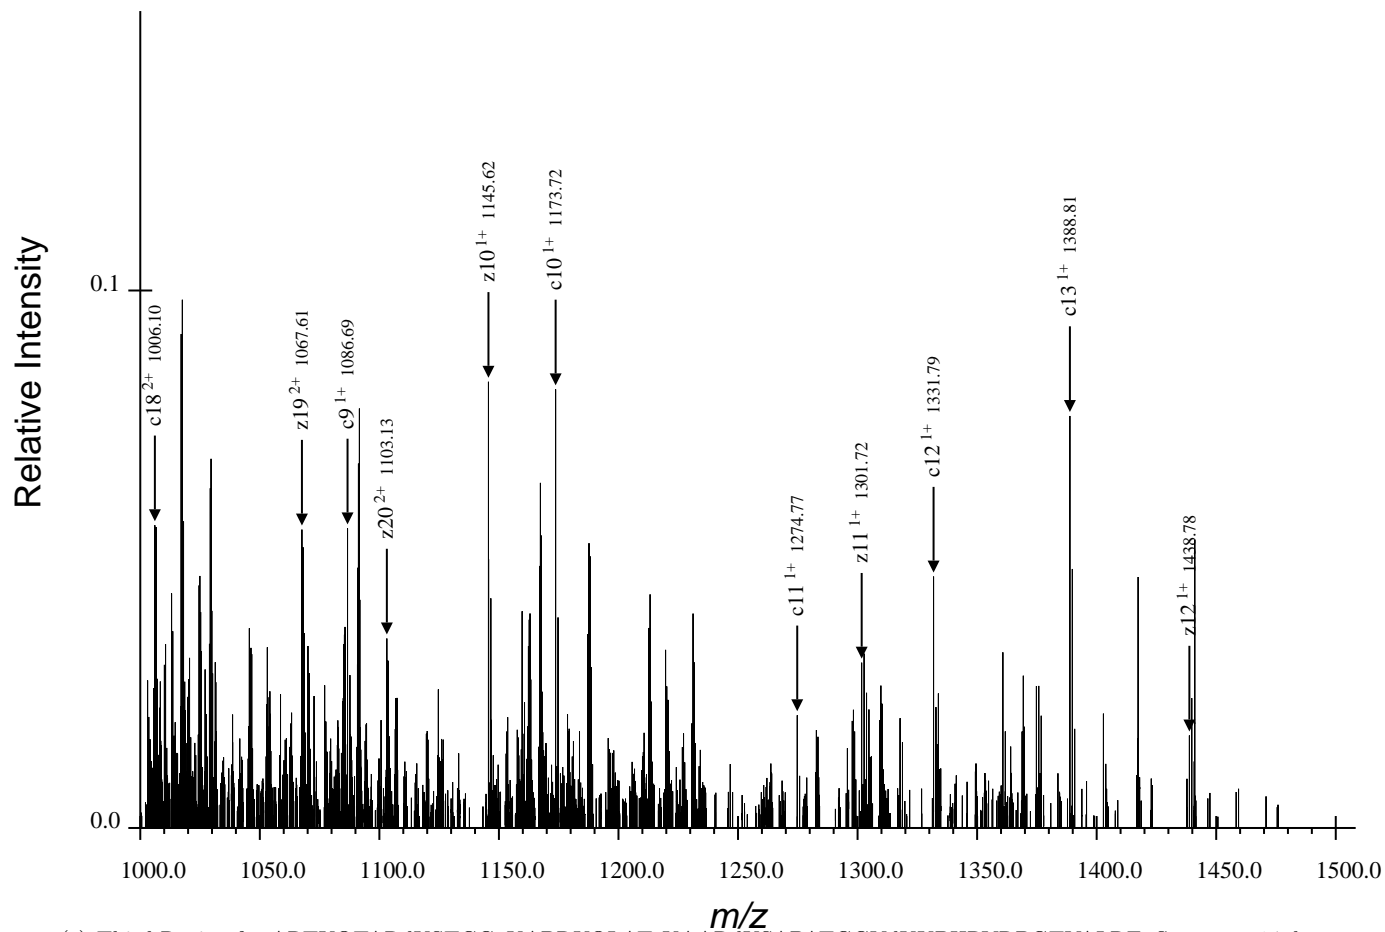

(c) Third Region for ARTKQTARdKSTGGaKAPRQLATaKAARdKSAPATGGVdKKPHRYRPGTVALRE, Spectrum 14.dta

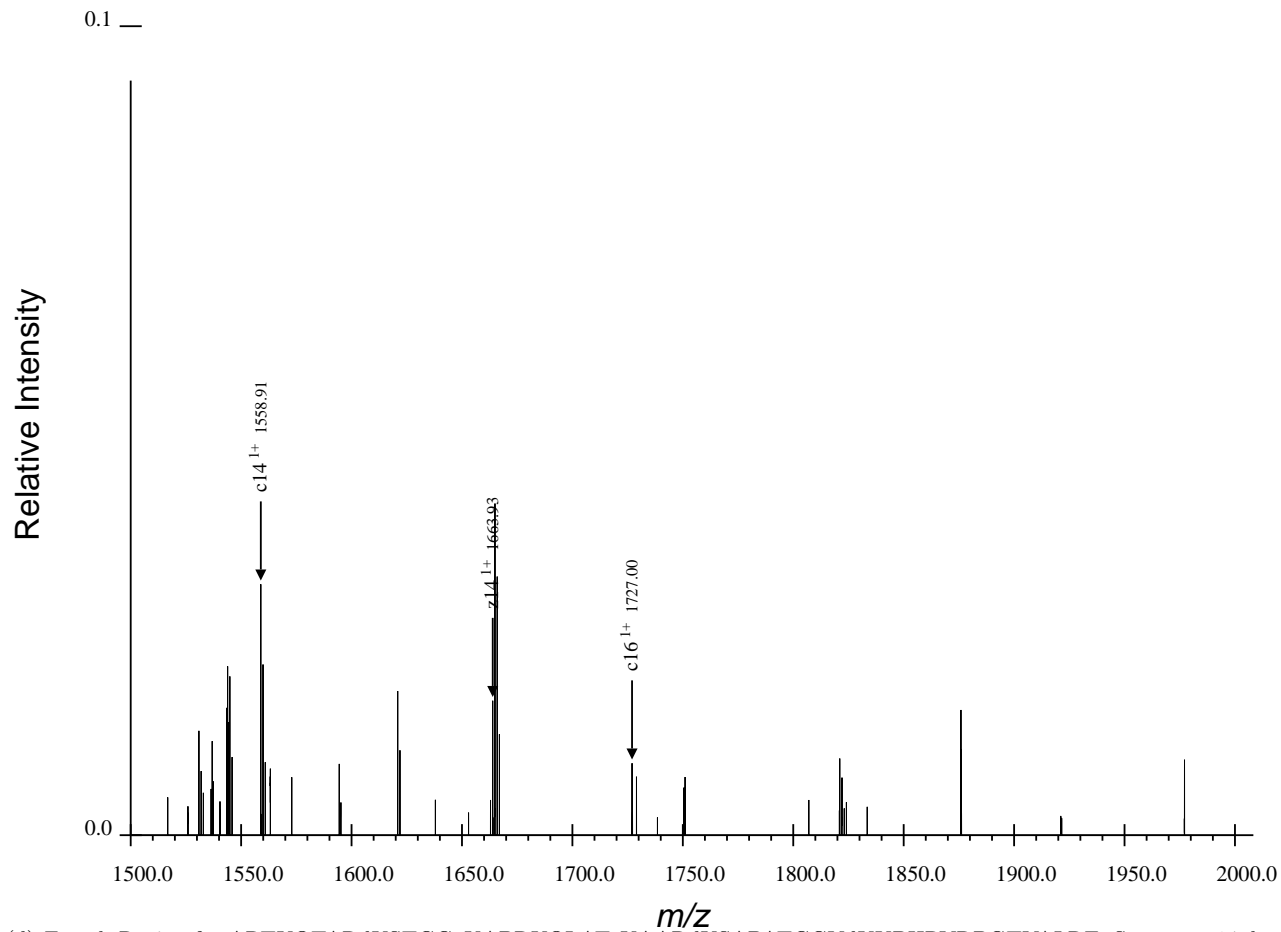

(d) Fourth Region for ARTKQTARdKSTGGaKAPRQLATaKAARdKSAPATGGVdKKPHRYRPGTVALRE, Spectrum 14.dta

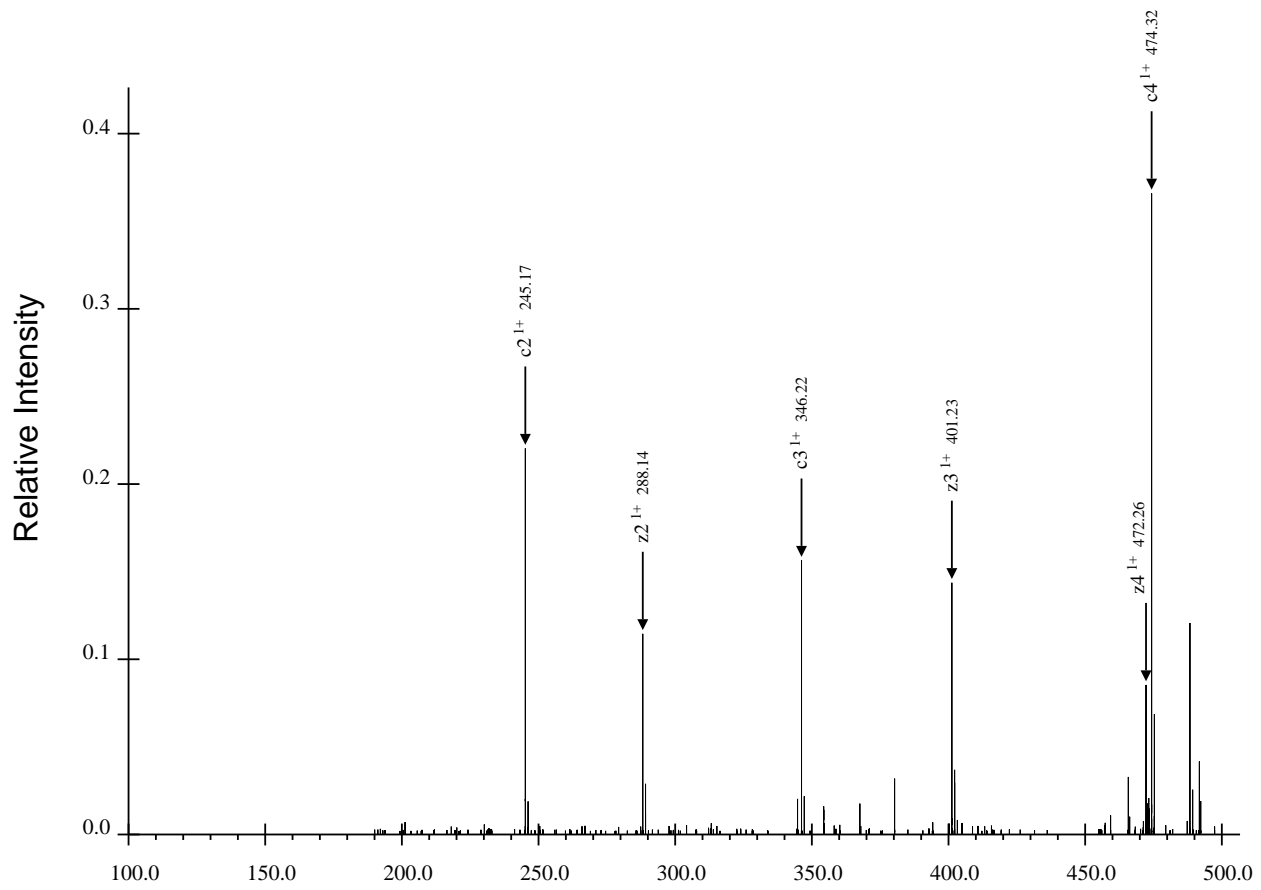

(a) First Region for ARTKQTARdKSTGGaKAPRKQLATaKAARdKSAPATGGVdKKPHRYRPGTVALRE, Spectrum 15.dta

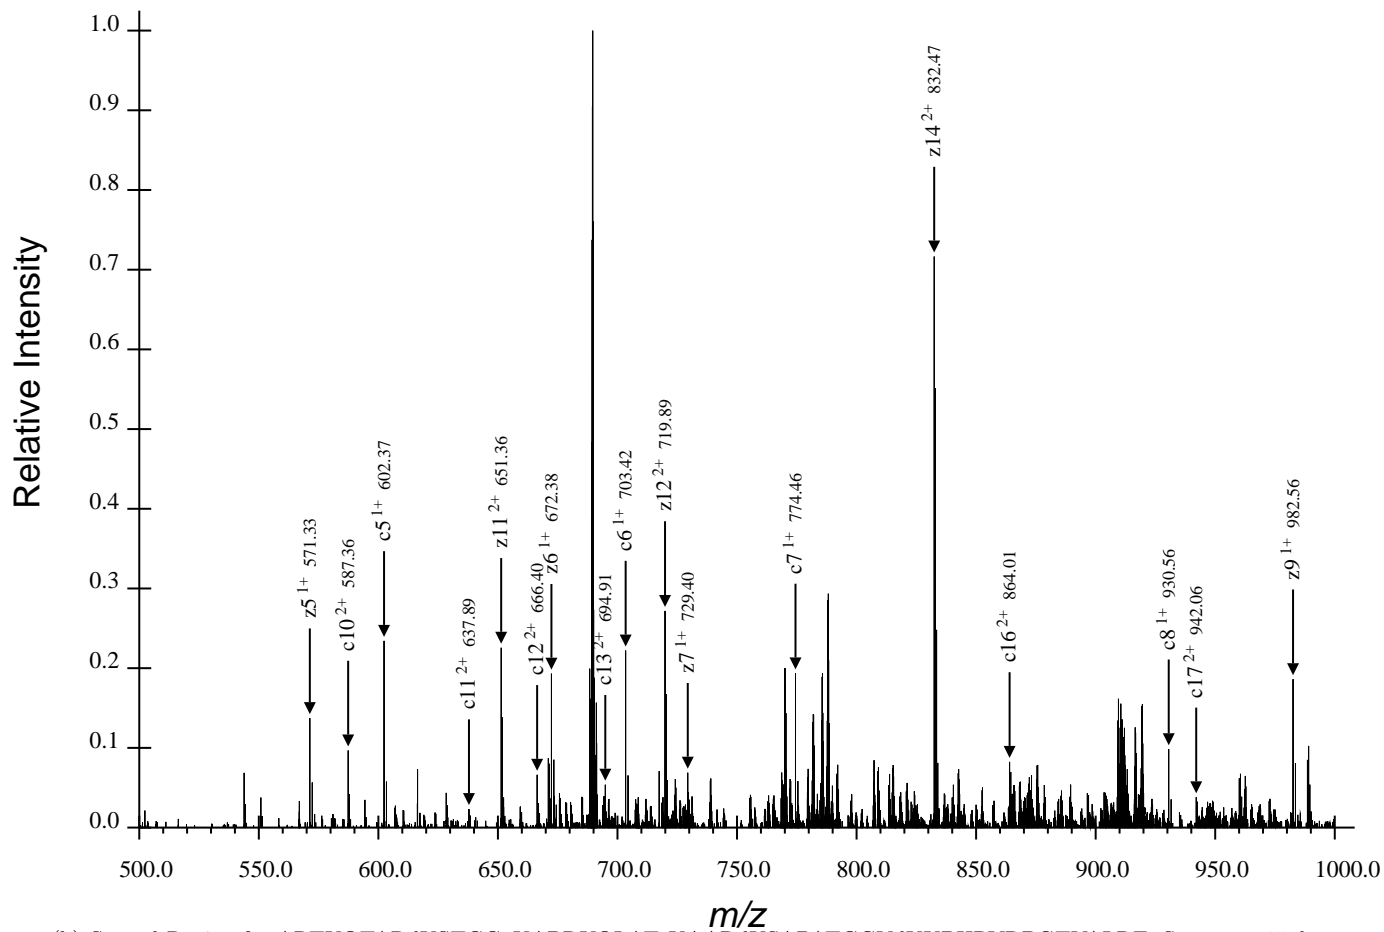

(b) Second Region for ARTKQTARdKSTGGaKAPRKQLATaKAARdKSAPATGGVdKKPHRYRPGTVALRE, Spectrum 15.dta

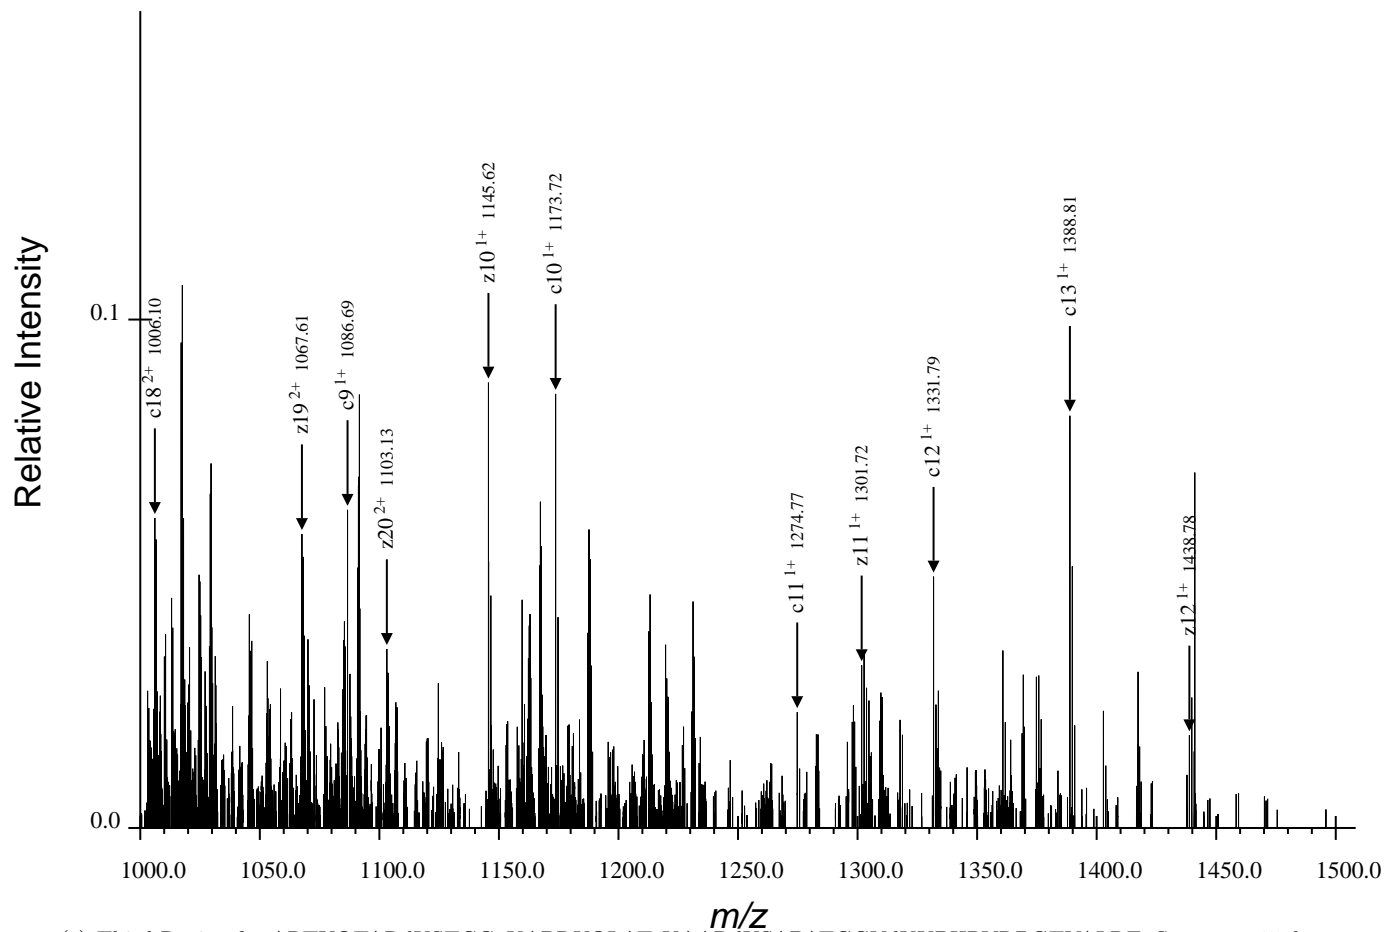

(c) Third Region for ARTKQTARdKSTGGaKAPRKQLATaKAARdKSAPATGGVdKKPHRYRPGTVALRE, Spectrum 15.dta

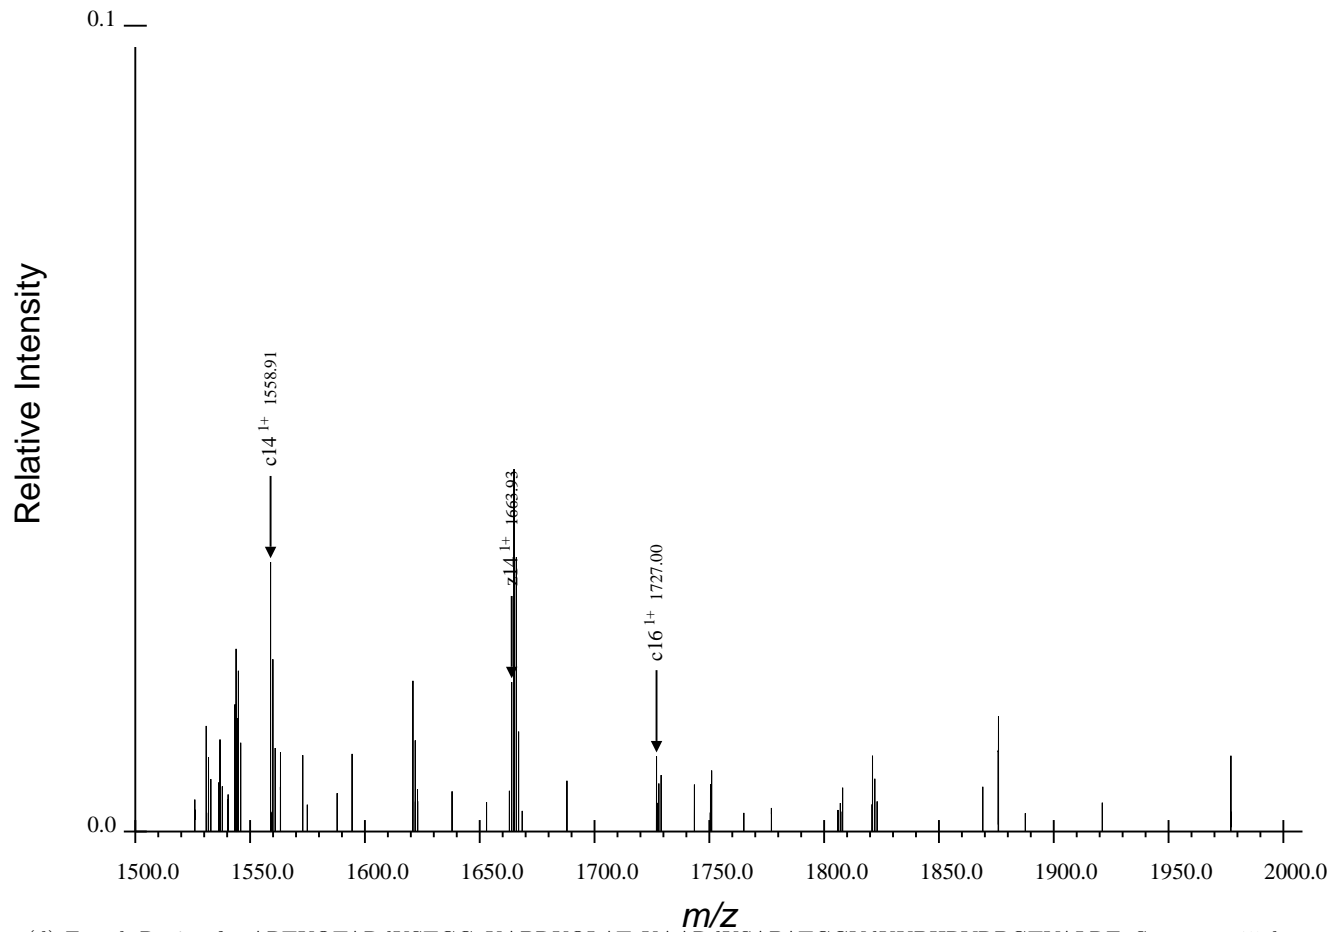

(d) Fourth Region for ARTKQTARdKSTGGaKAPRKQLATaKAARdKSAPATGGVdKKPHRYRPGTVALRE, Spectrum 15.dta

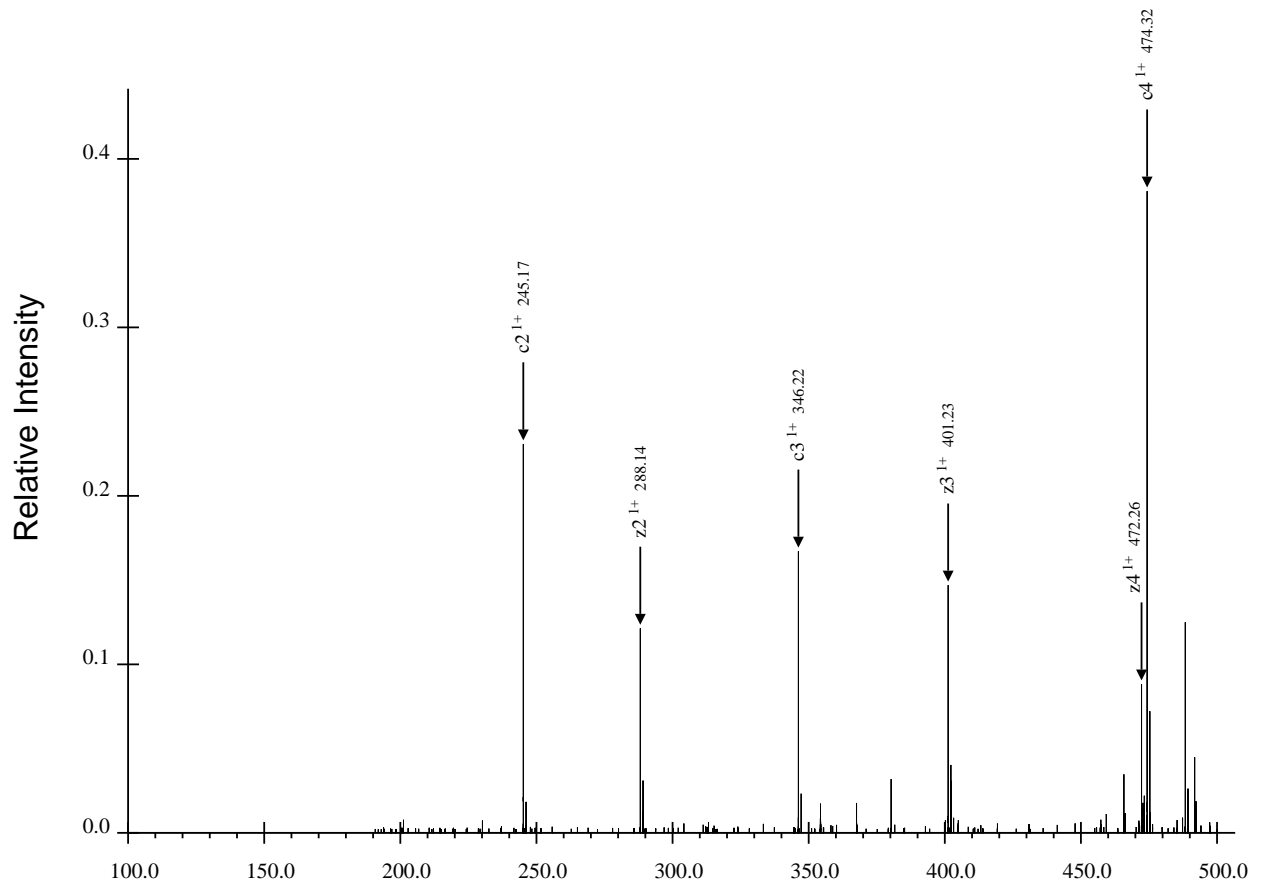

(a) First Region for ARTKQTARdKSTGGaKAPRKQLATaKAARdKSAPATGGVdKKPHRYRPGTVALRE, Spectrum 16.dta

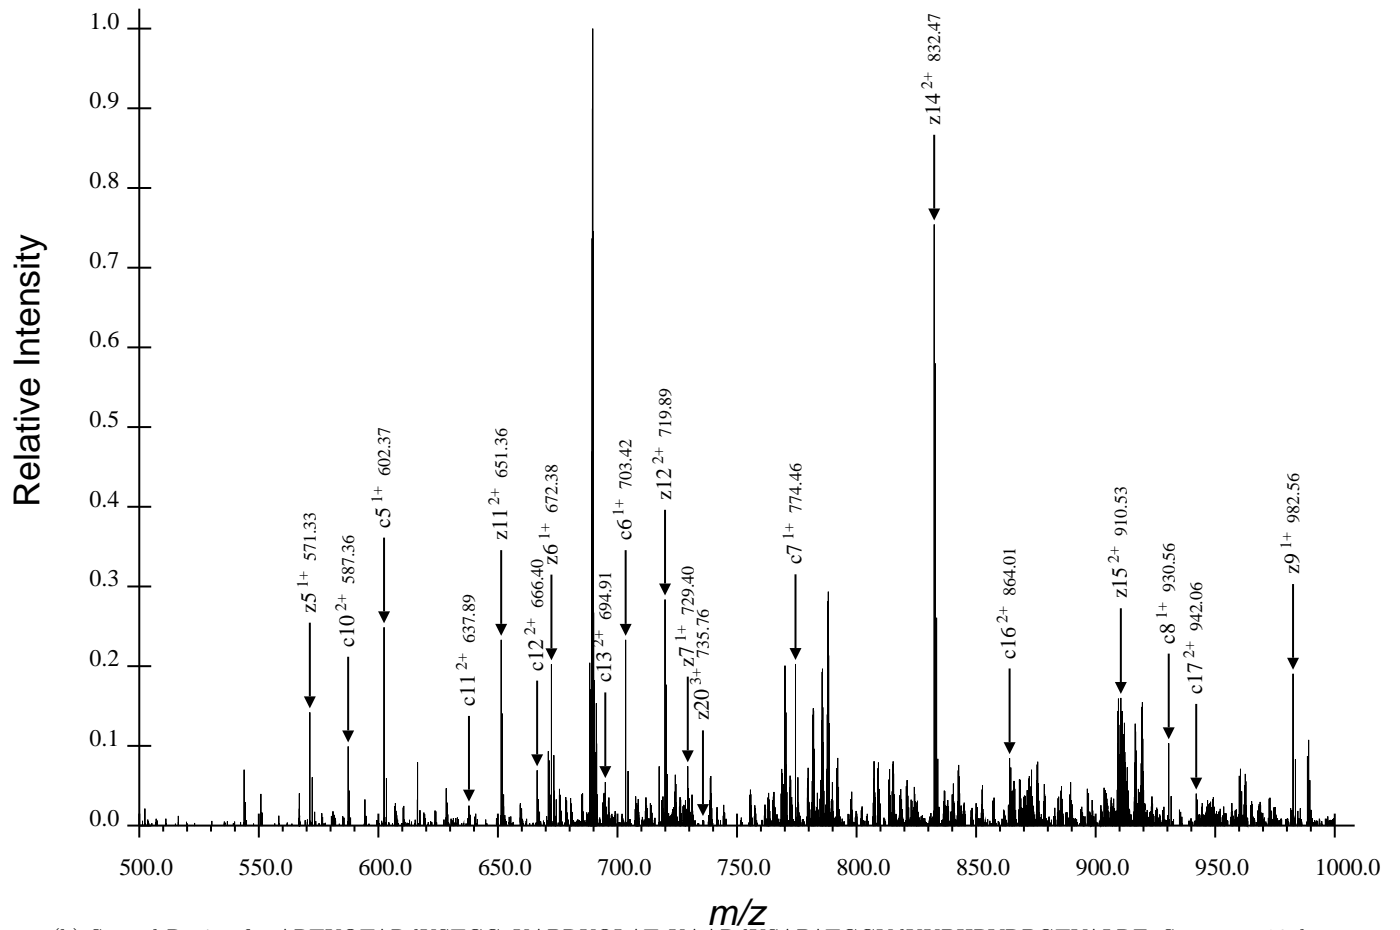

(b) Second Region for ARTKQTARdKSTGGaKAPRKQLATaKAARdKSAPATGGVdKKPHRYRPGTVALRE, Spectrum 16.dta

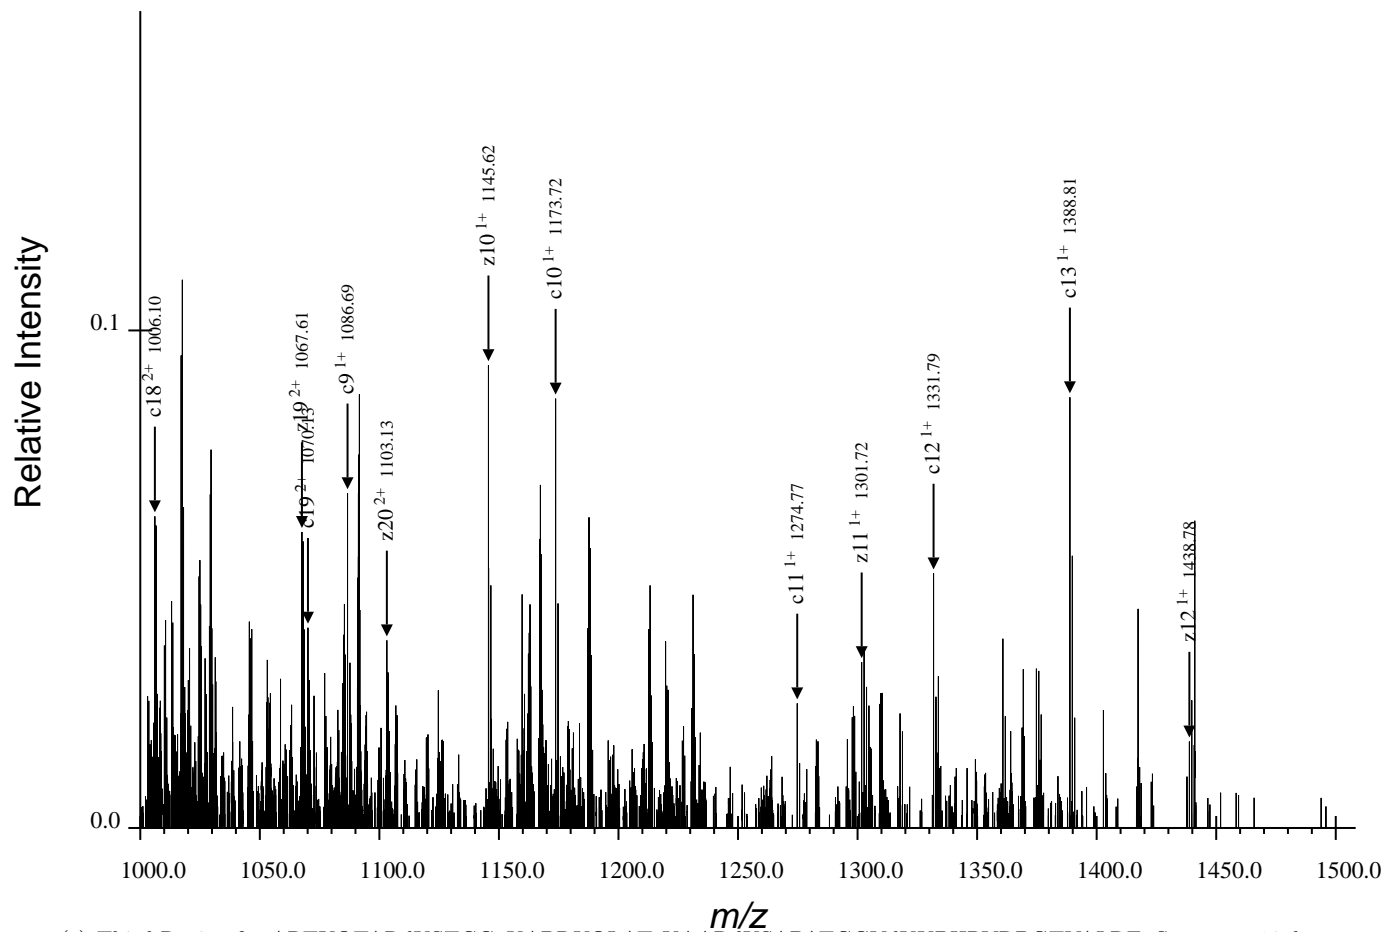

(c) Third Region for ARTKQTARdKSTGGaKAPRQLATaKAARdKSAPATGGVdKKPHRYRPGTVALRE, Spectrum 16.dta

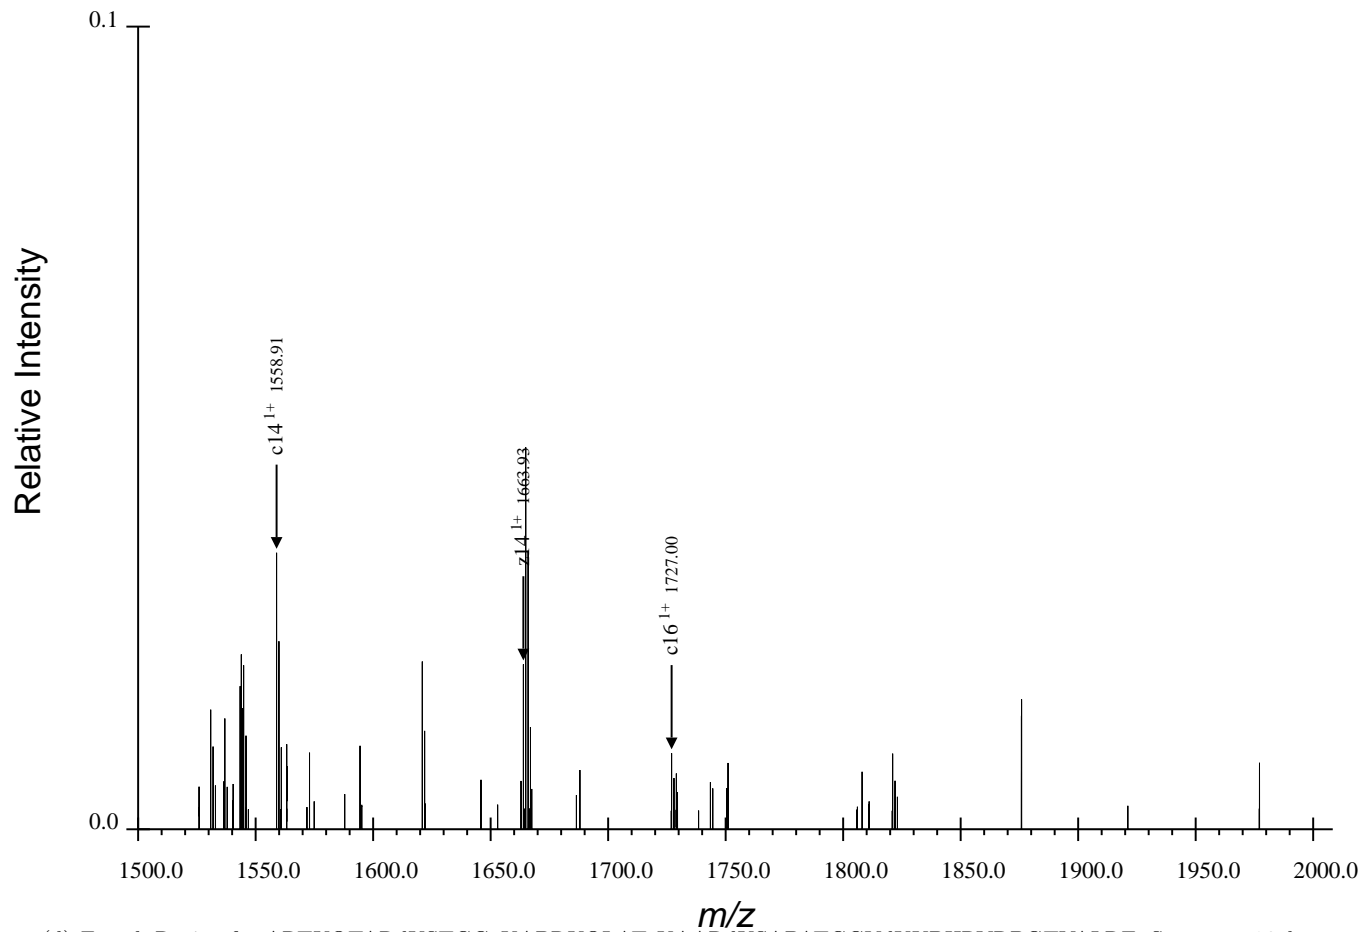

(d) Fourth Region for ARTKQTARdKSTGGaKAPRQLATaKAARdKSAPATGGVdKKPHRYRPGTVALRE, Spectrum 16.dta



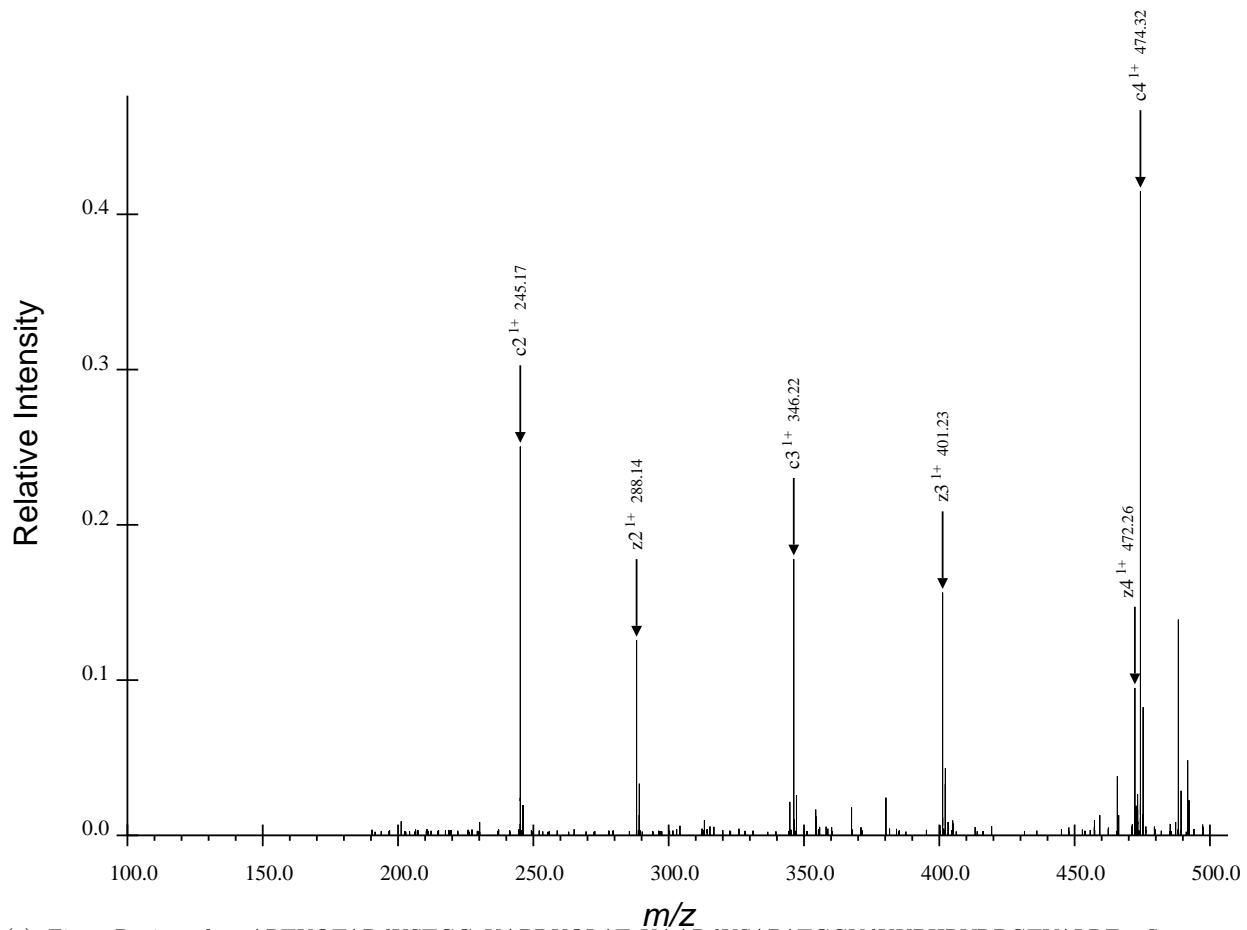

(a) First Region for ARTKQTARdKSTGGaKAPRKQLATaKAARdKSAPATGGVdKKPHRYRPGTVALRE, Spectrum 17.dta

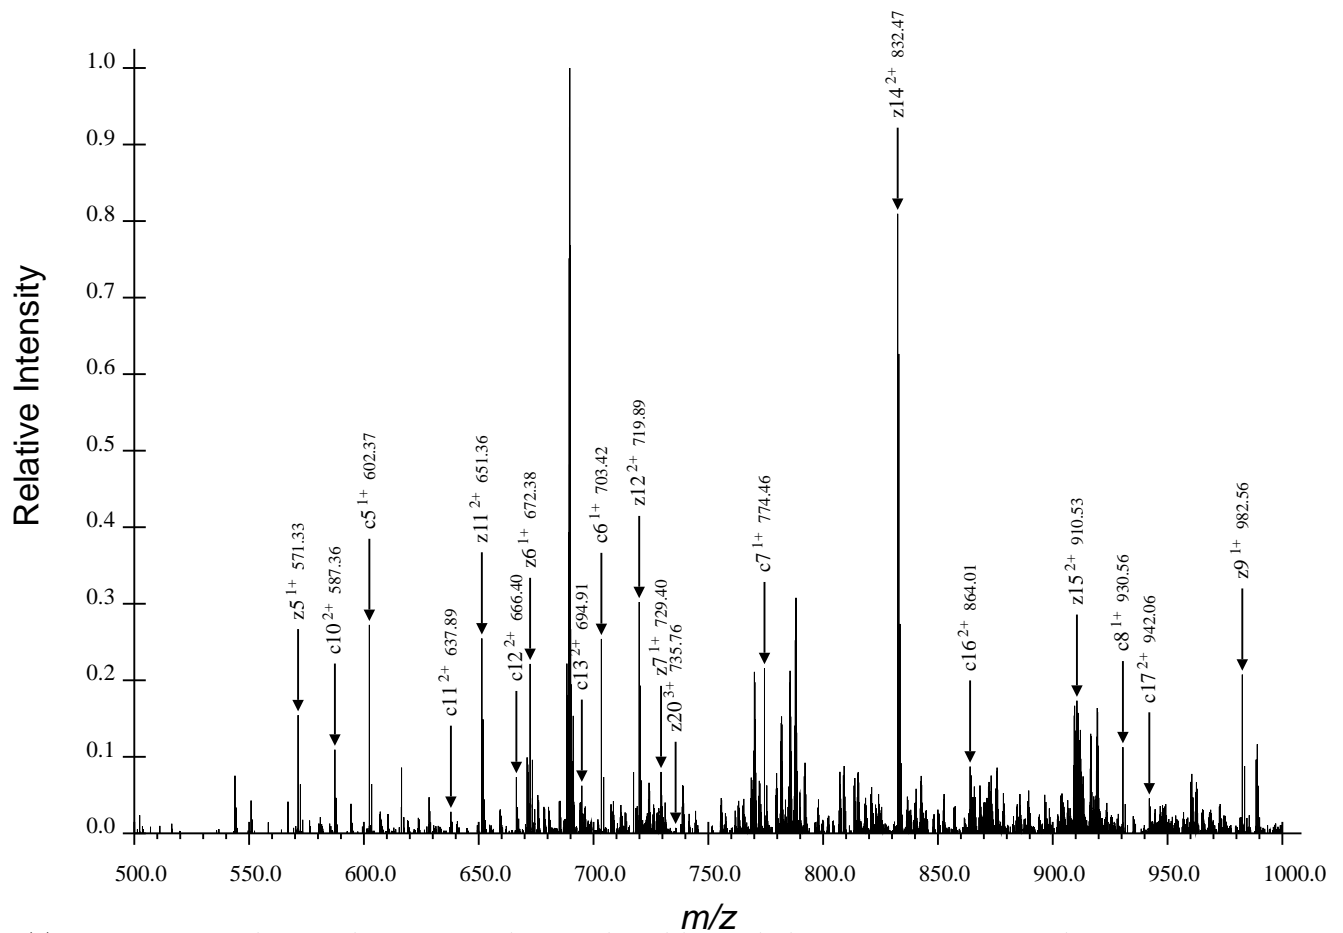

(b) Second Region for ARTKQTARdKSTGGaKAPRKQLATaKAARdKSAPATGGVdKKPHRYRPGTVALRE, Spectrum 17.dta

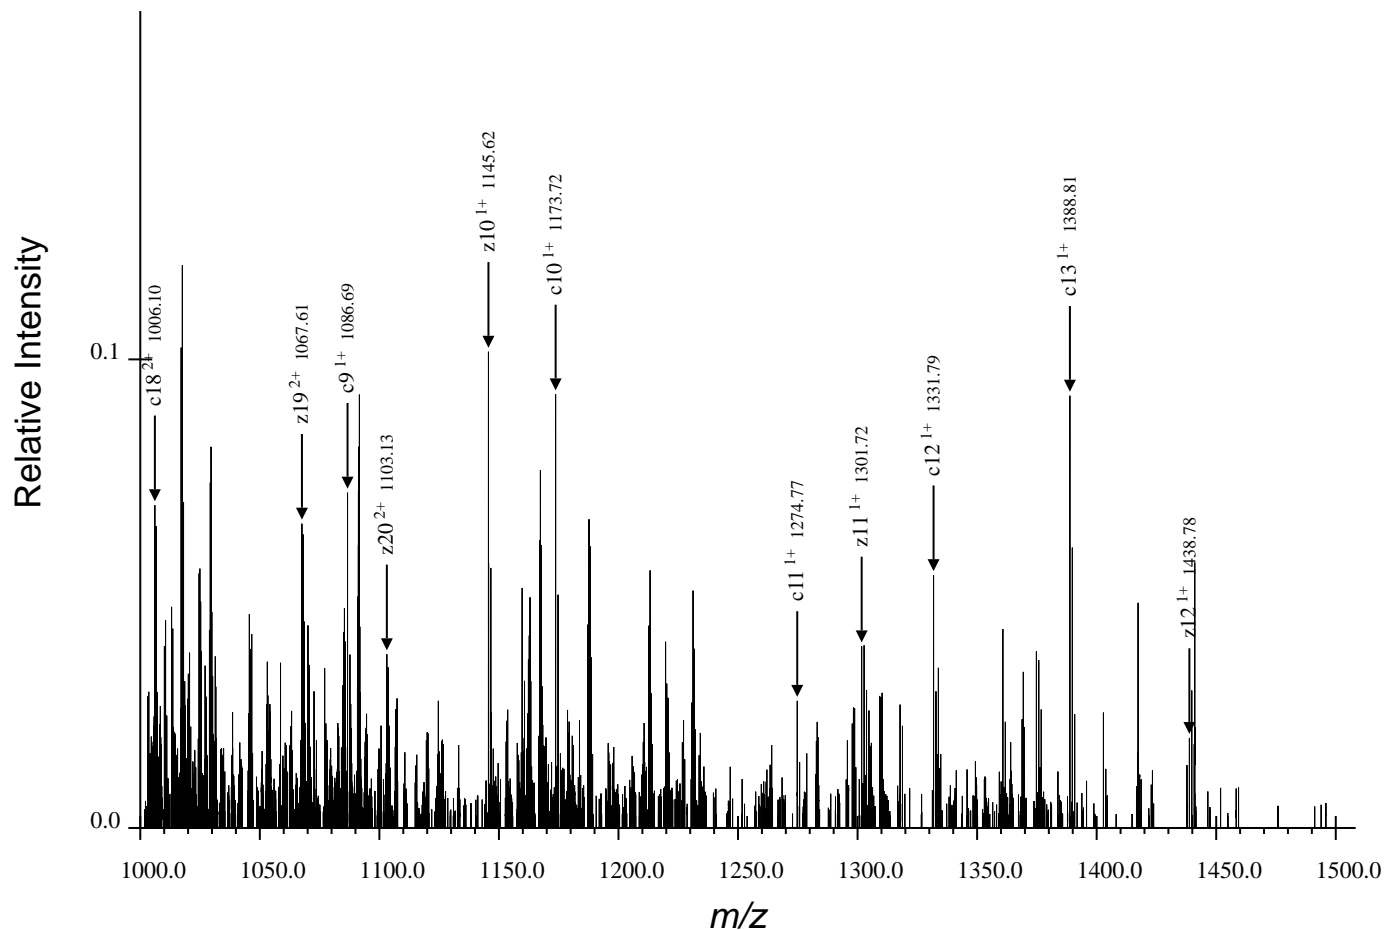

(c) Third Region for ARTKQTARdKSTGGaKAPRKQLATaKAARdKSAPATGGVdKKPHRYRPGTVALRE, Spectrum 17.dta

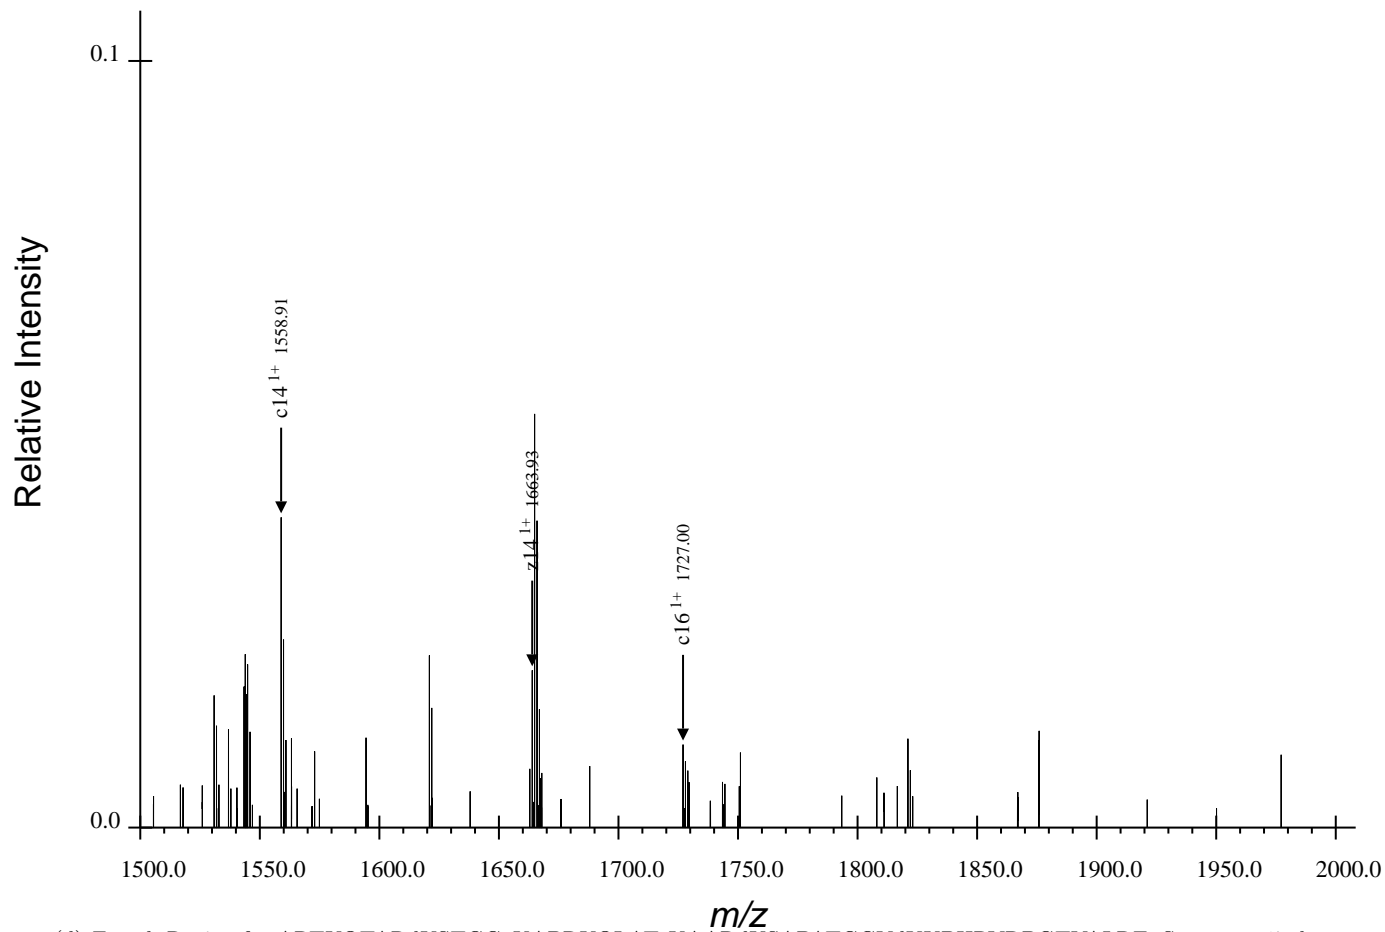

(d) Fourth Region for ARTKQTARdKSTGGaKAPRKQLATaKAARdKSAPATGGVdKKPHRYRPGTVALRE, Spectrum 17.dta

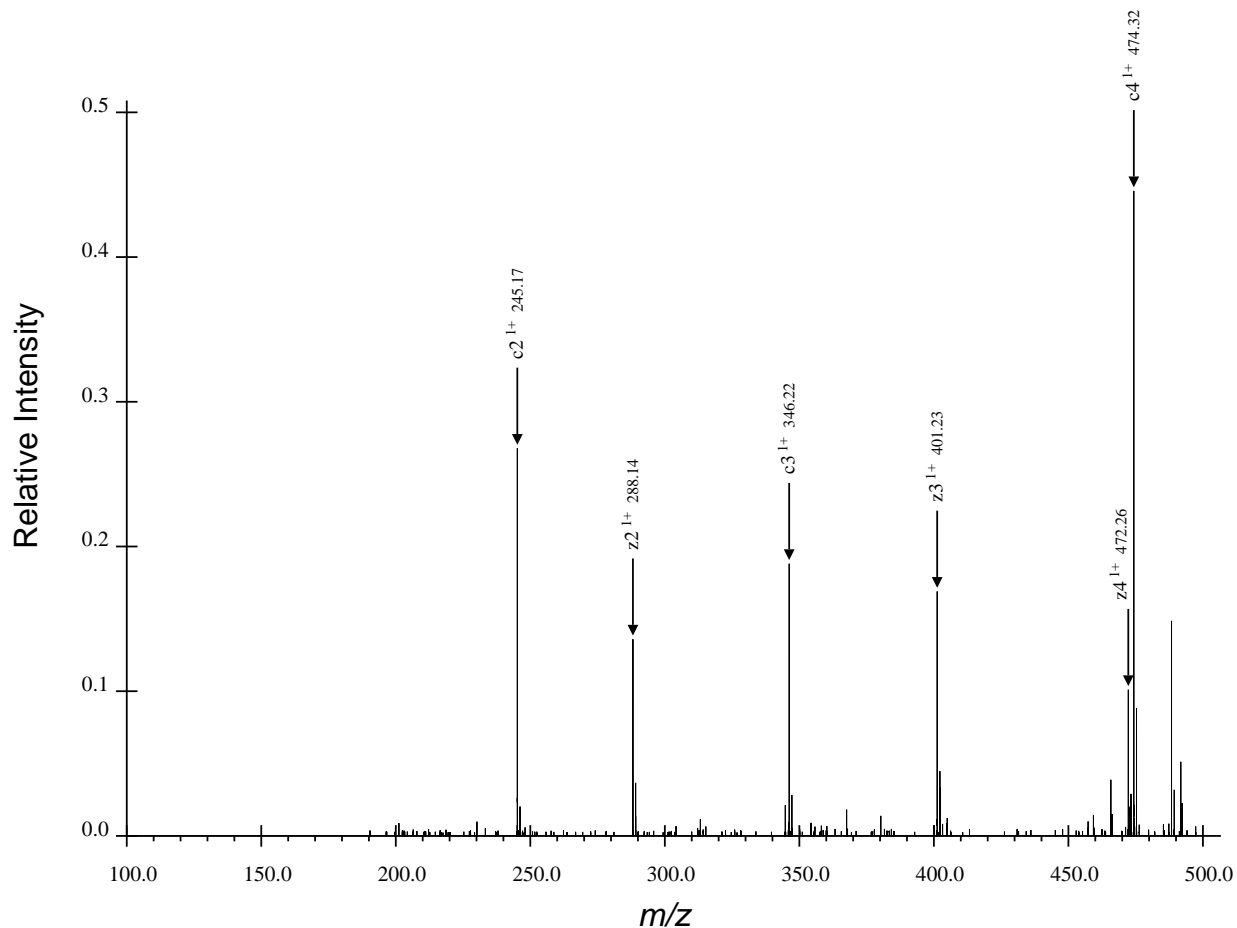

(a) First Region for ARTKQTARdKSTGGaKAPRKQLATaKAARdKSAPATGGVdKKPHRYRPGTVALRE, Spectrum 18.dta

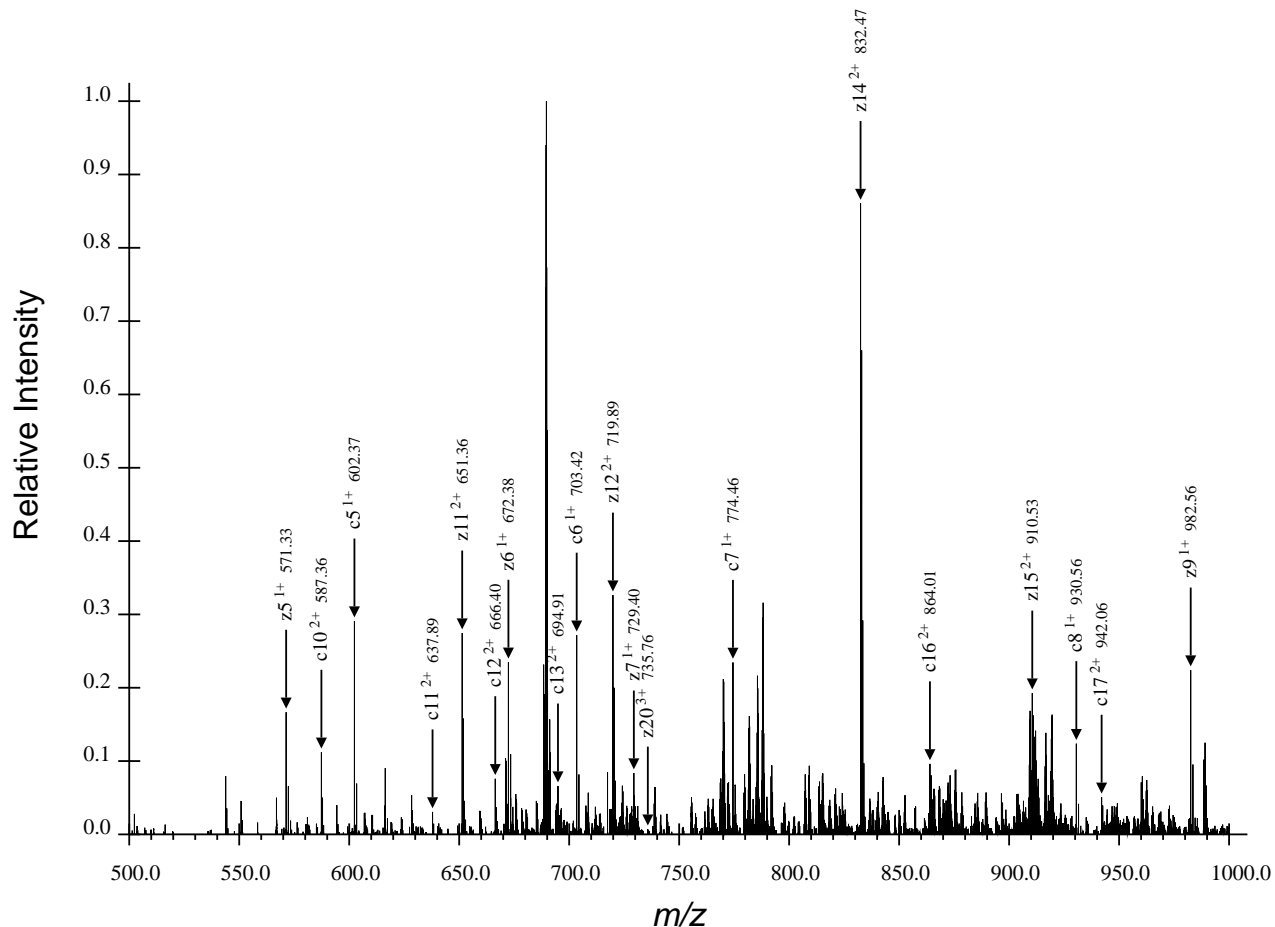

(b) Second Region for ARTKQTARdKSTGGaKAPRKQLATaKAARdKSAPATGGVdKKPHRYRPGTVALRE, Spectrum 18.dta

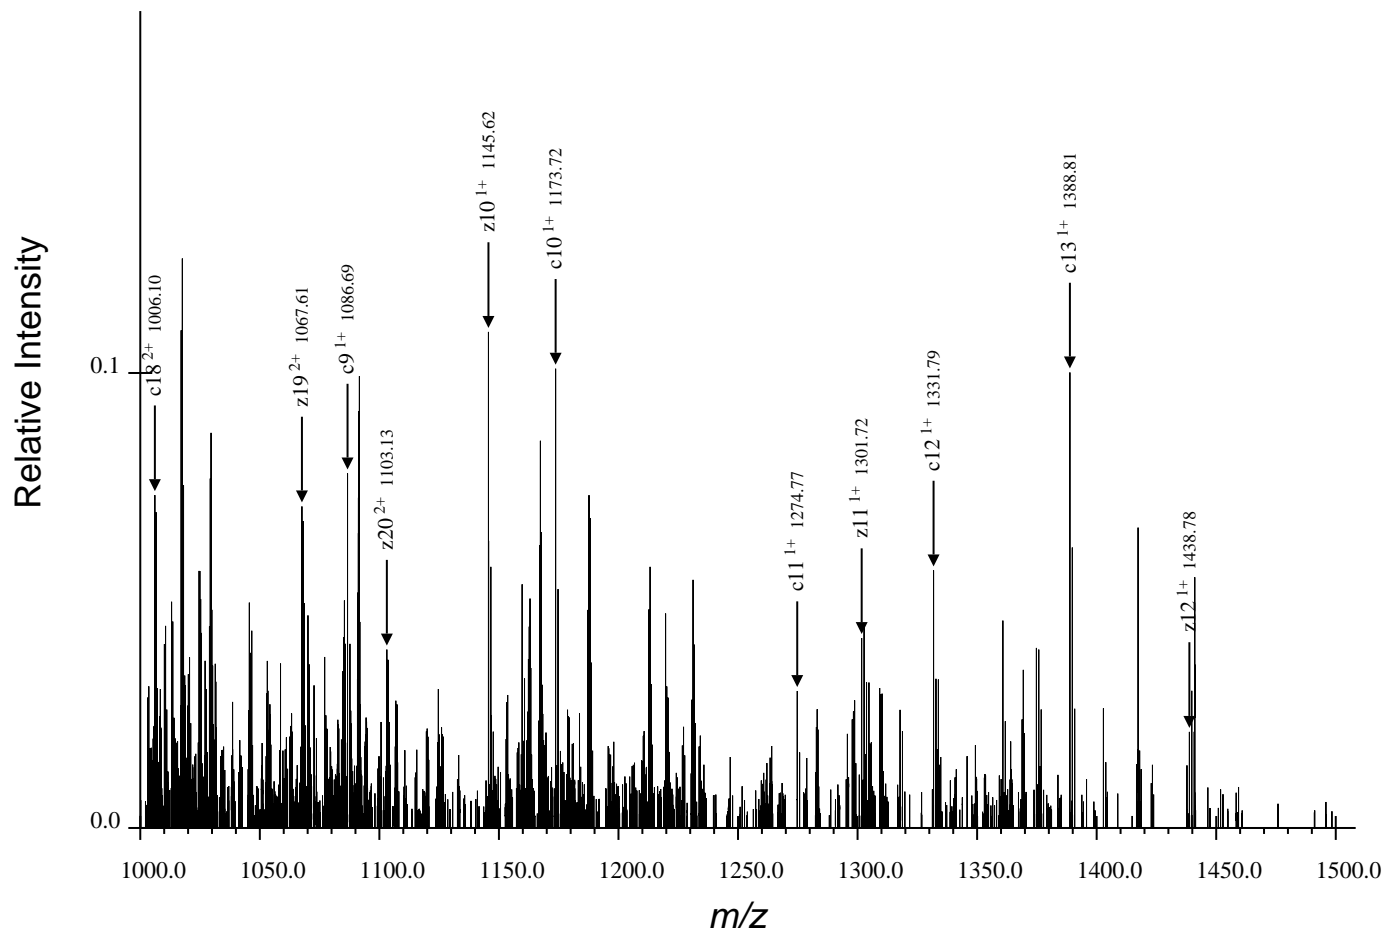

(c) Third Region for ARTKQTARdKSTGGaKAPRKQLATaKAARdKSAPATGGVdKKPHRYRPGTVALRE, Spectrum 18.dta

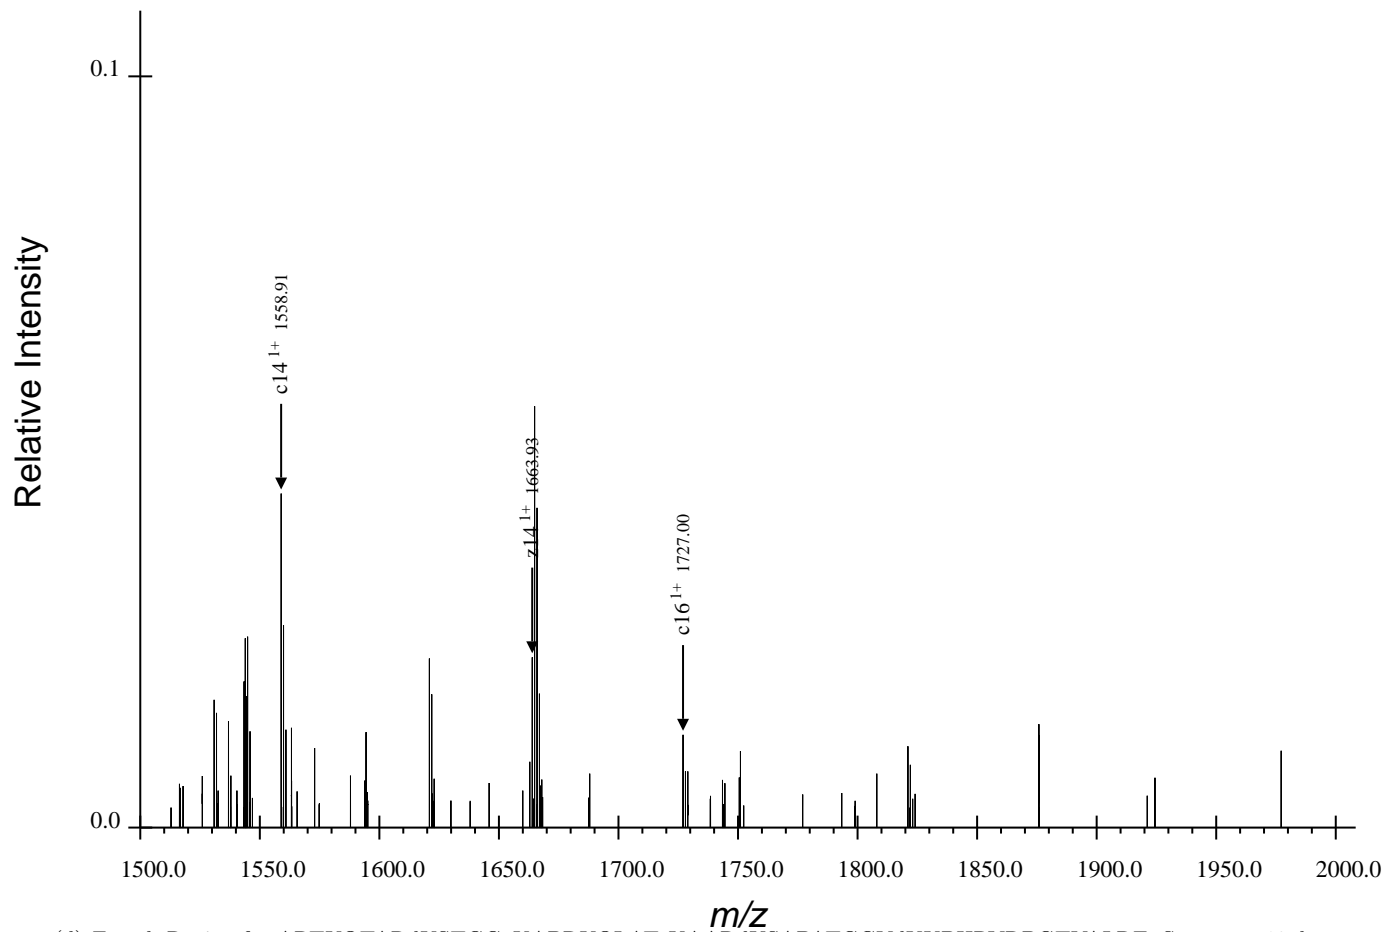

(d) Fourth Region for ARTKQTARdKSTGGaKAPRKQLATaKAARdKSAPATGGVdKKPHRYRPGTVALRE, Spectrum 18.dta

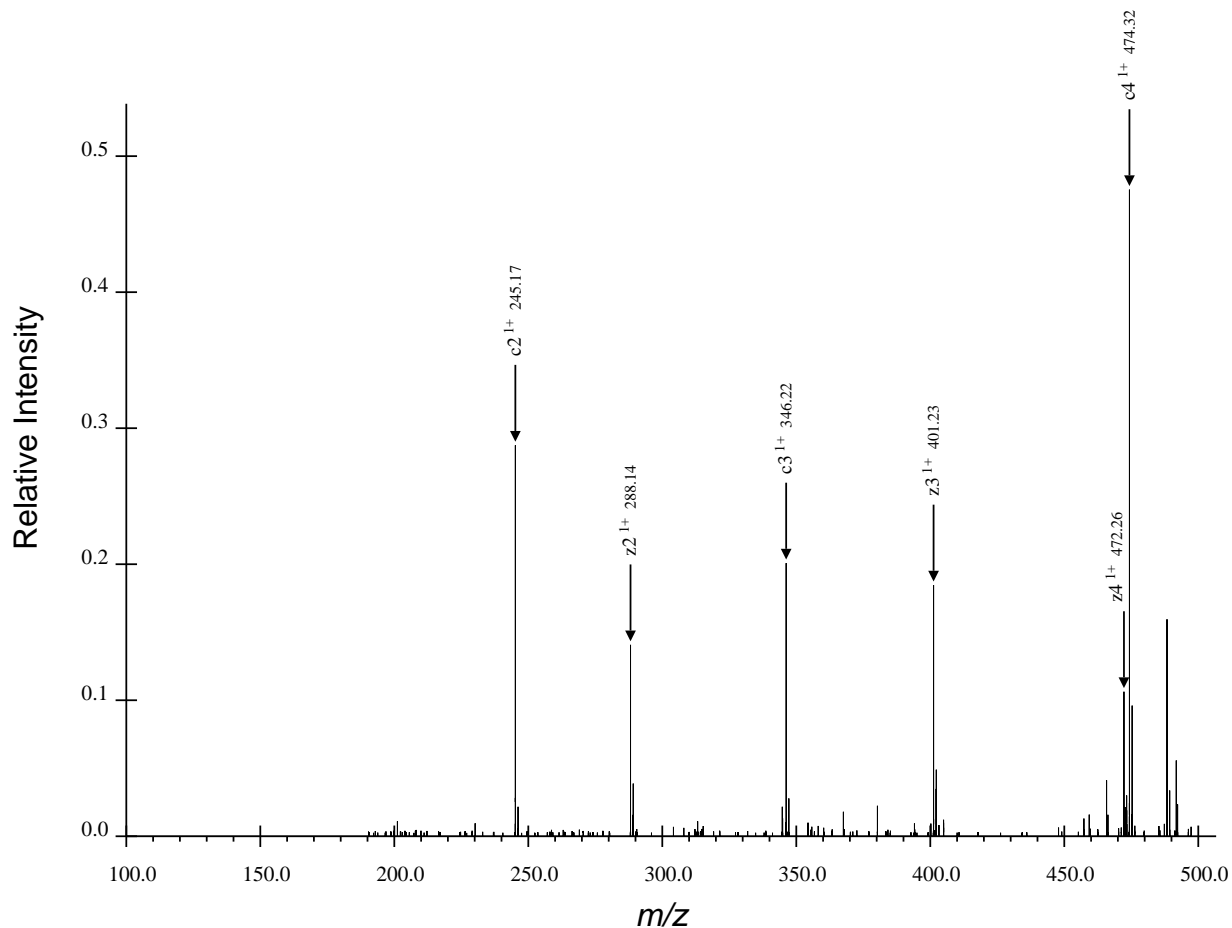

(a) First Region for ARTKQTARdKSTGGaKAPRKQLATaKAARdKSAPATGGVdKKPHRYRPGTVALRE, Spectrum 19.dta

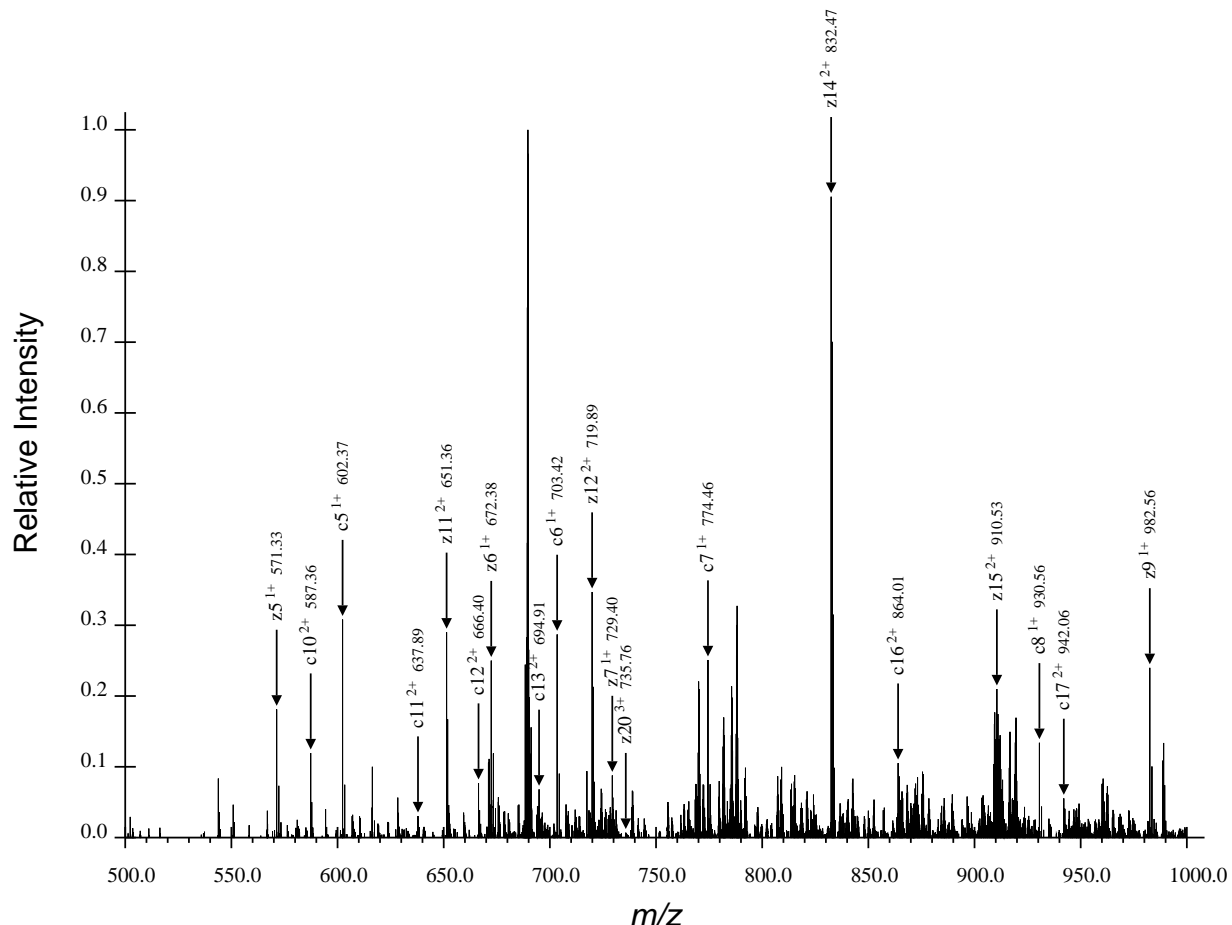

(b) Second Region for ARTKQTARdKSTGGaKAPRKQLATaKAARdKSAPATGGVdKKPHRYRPGTVALRE, Spectrum 19.dta

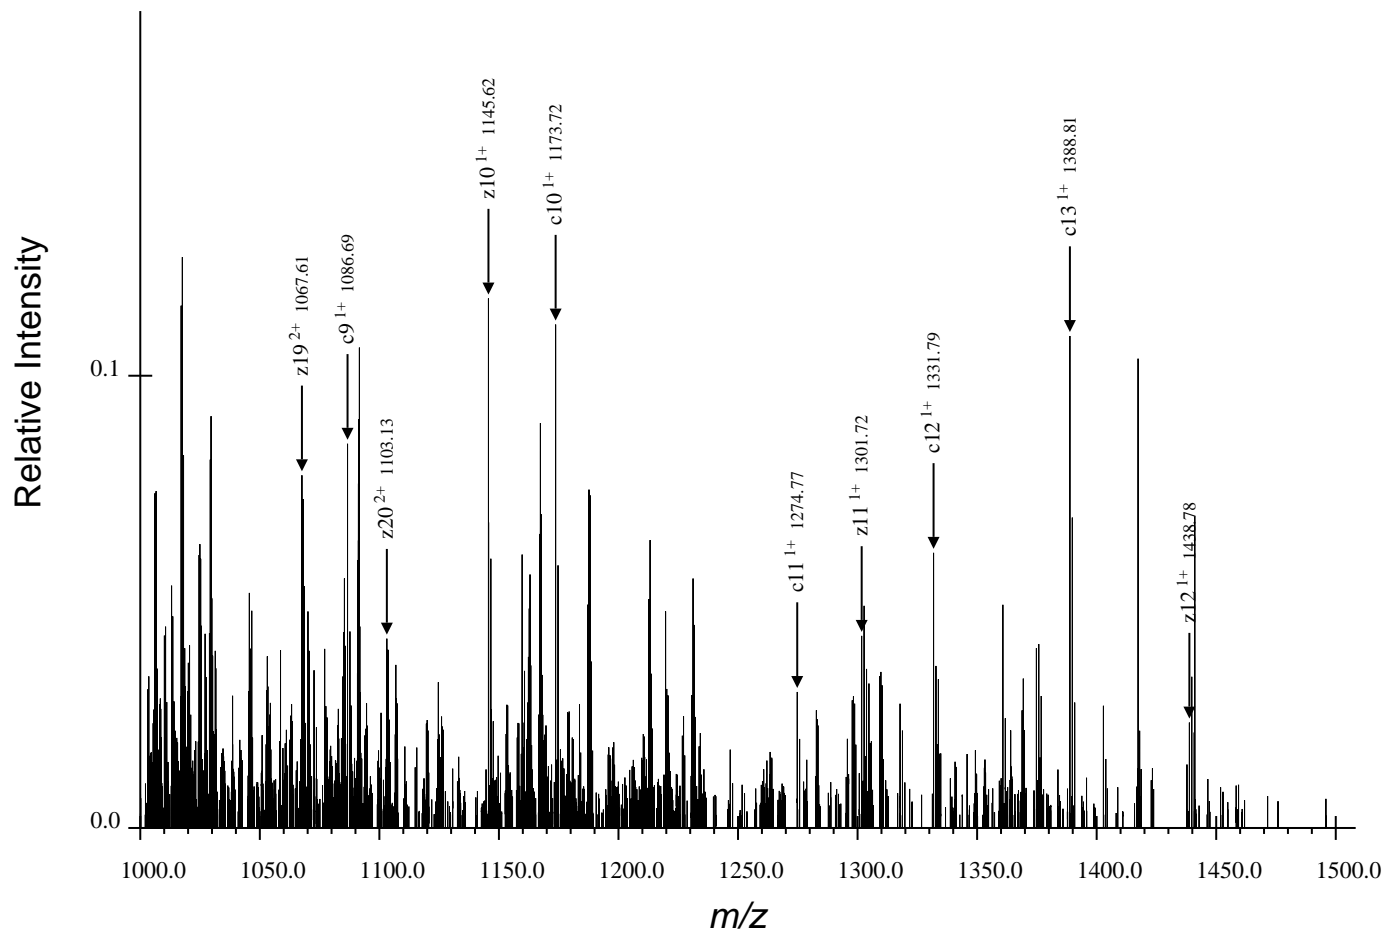

(c) Third Region for ARTKQTARdKSTGGaKAPRKQLATaKAARdKSAPATGGVdKKPHRYRPGTVALRE, Spectrum 19.dta

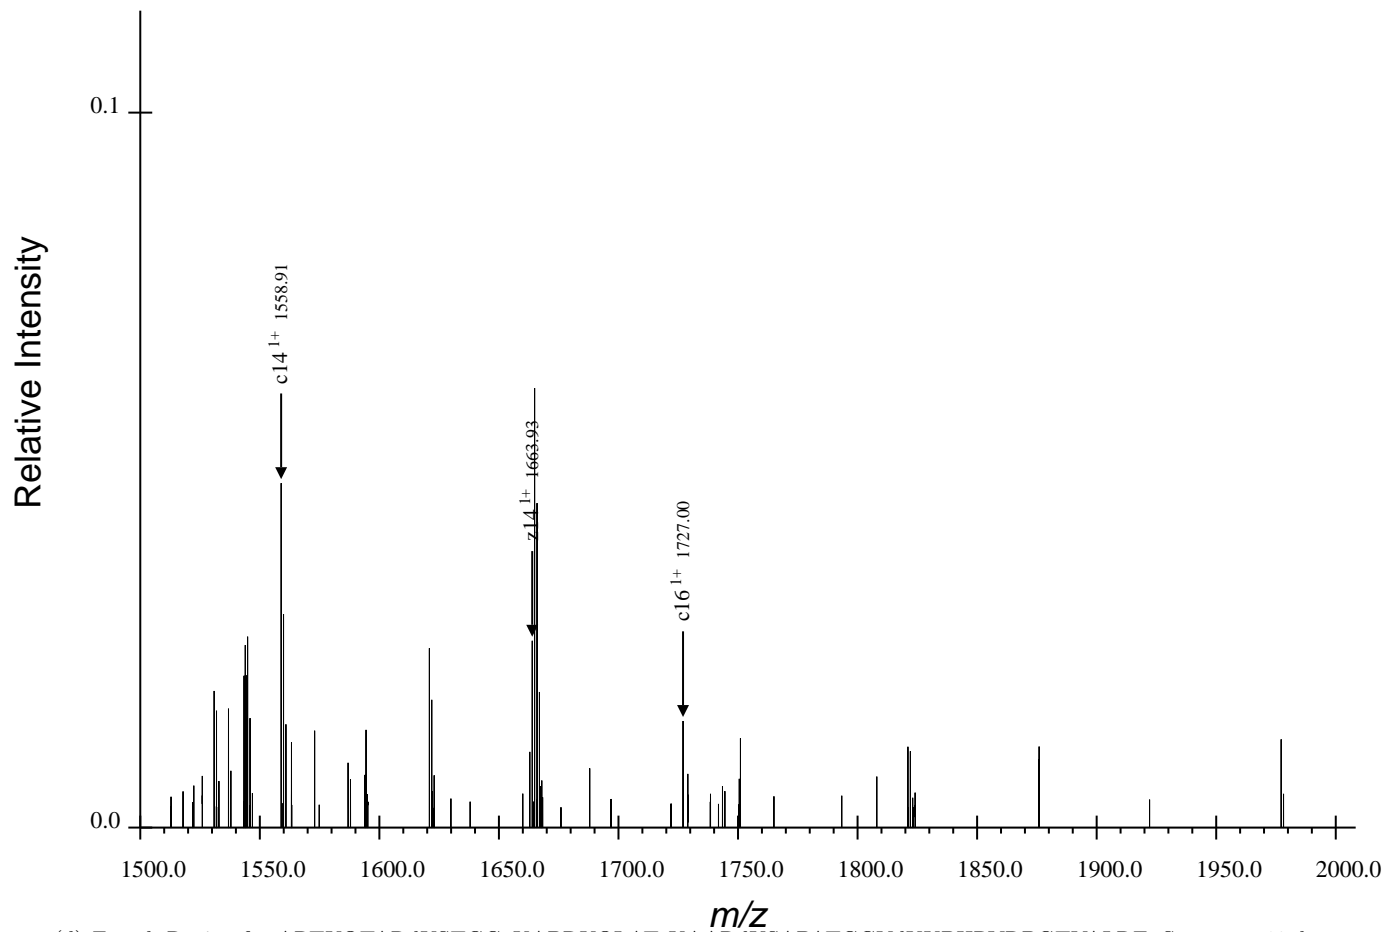

(d) Fourth Region for ARTKQTARdKSTGGaKAPRKQLATaKAARdKSAPATGGVdKKPHRYRPGTVALRE, Spectrum 19.dta

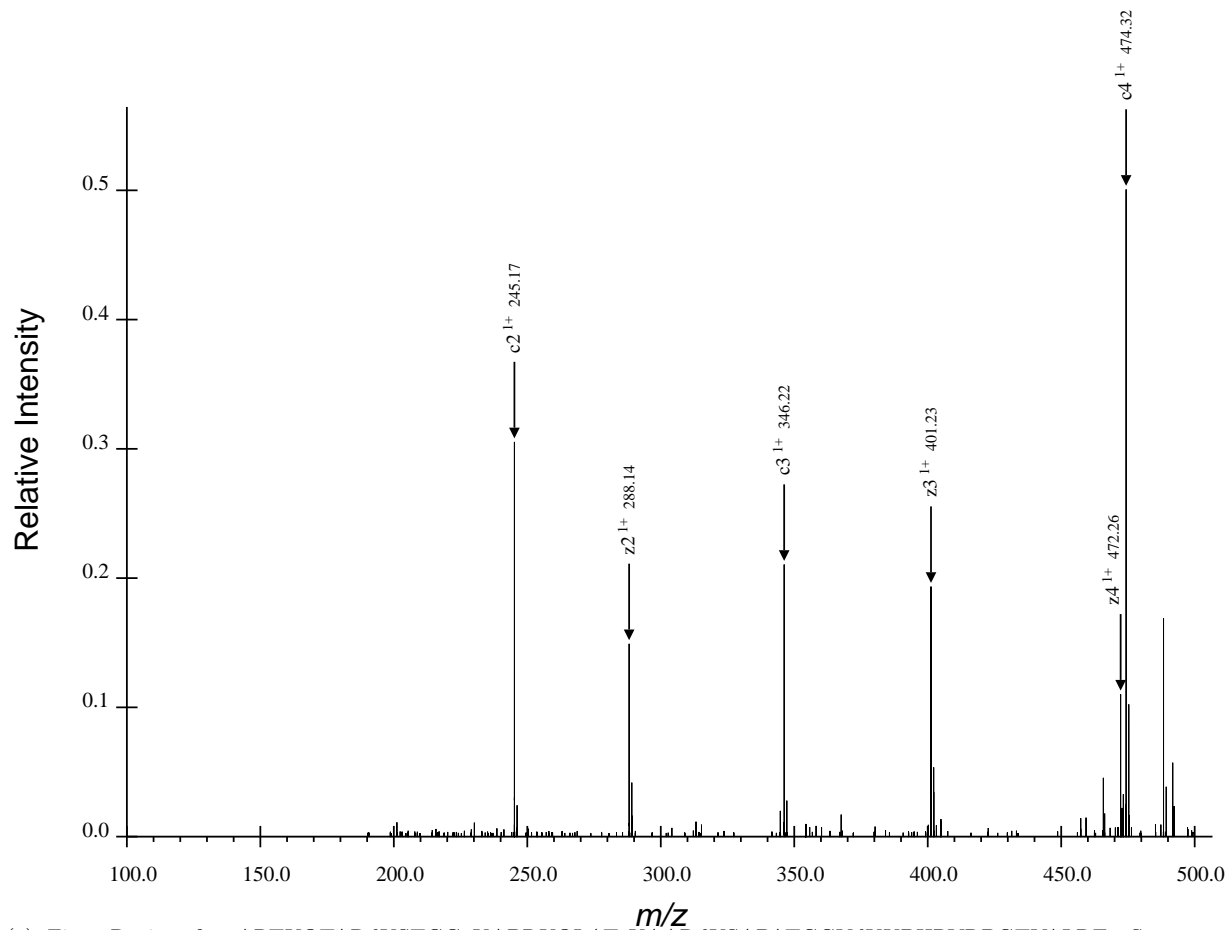

(a) First Region for ARTKQTARdKSTGGaKAPRKQLATaKAARdKSAPATGGVdKKPHRYRPGTVALRE, Spectrum 20.dta

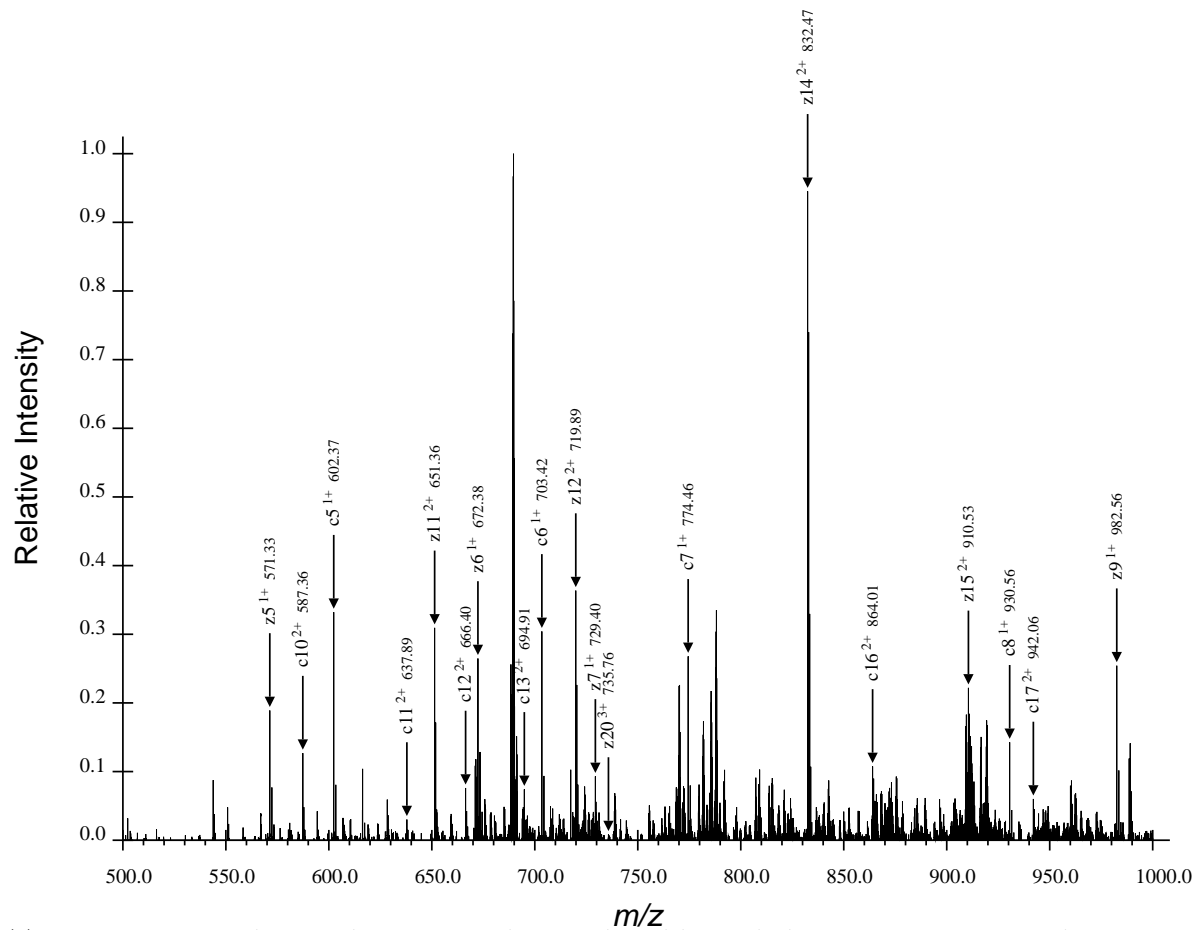

(b) Second Region for ARTKQTARdKSTGGaKAPRKQLATaKAARdKSAPATGGVdKKPHRYRPGTVALRE, Spectrum 20.dta

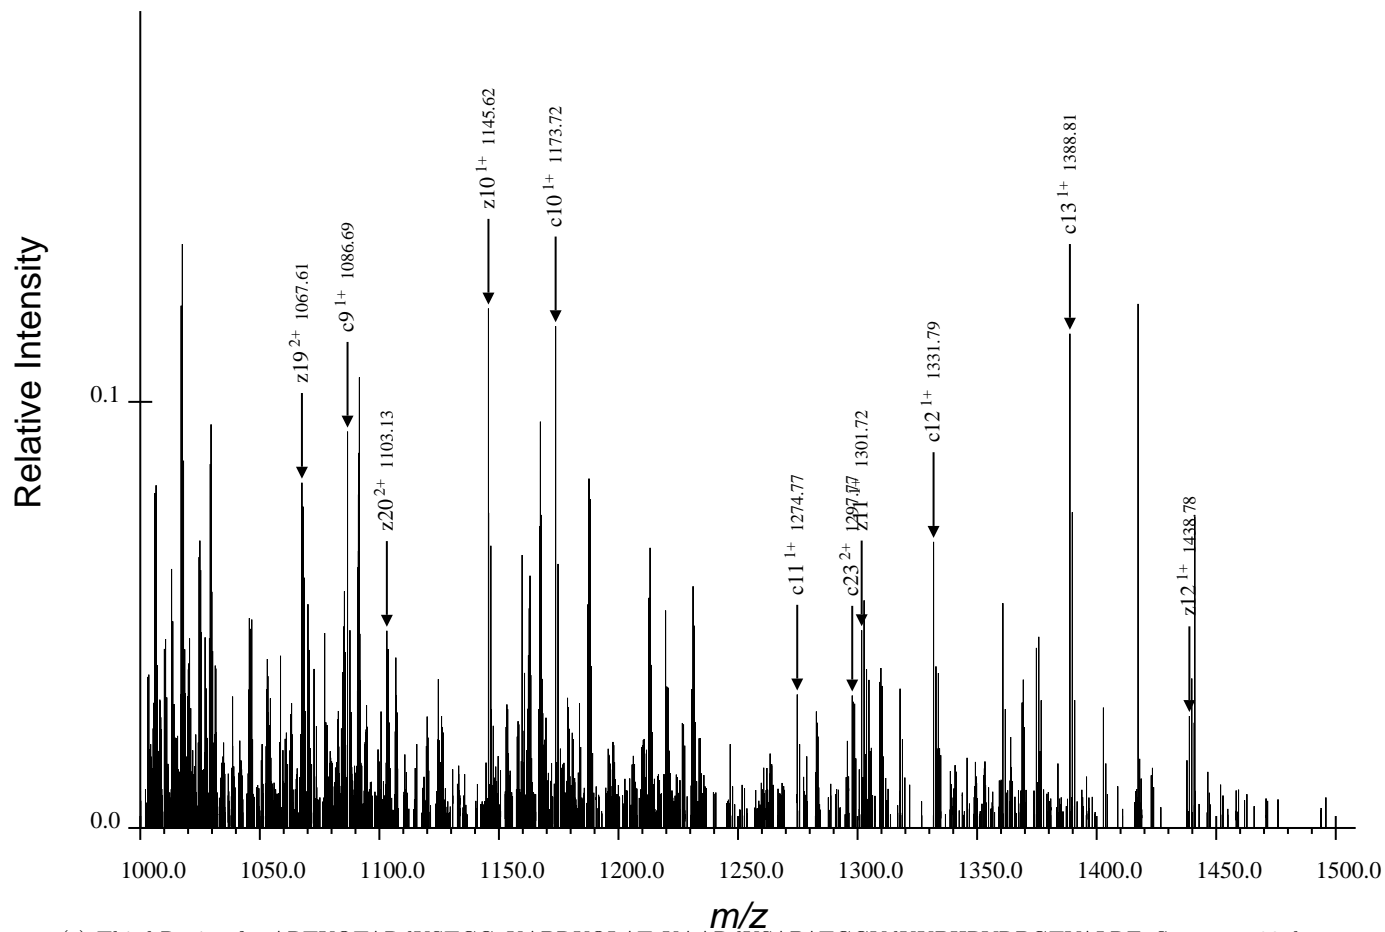

(c) Third Region for ARTKQTARdKSTGGaKAPRKQLATaKAARdKSAPATGGVdKKPHRYRPGTVALRE, Spectrum 20.dta

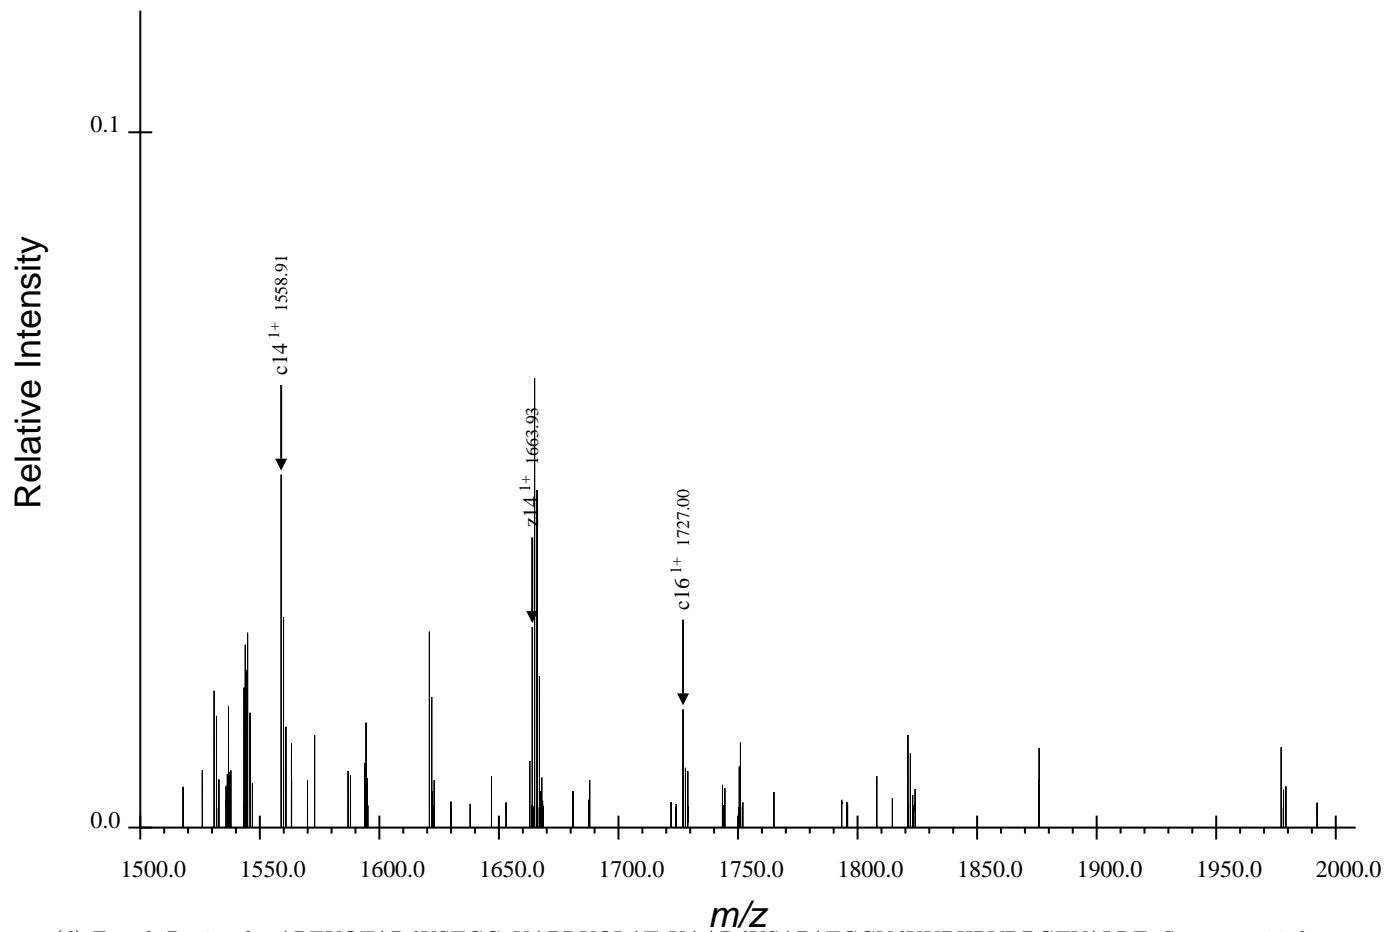

(d) Fourth Region for ARTKQTARdKSTGGaKAPRKQLATaKAARdKSAPATGGVdKKPHRYRPGTVALRE, Spectrum 20.dta



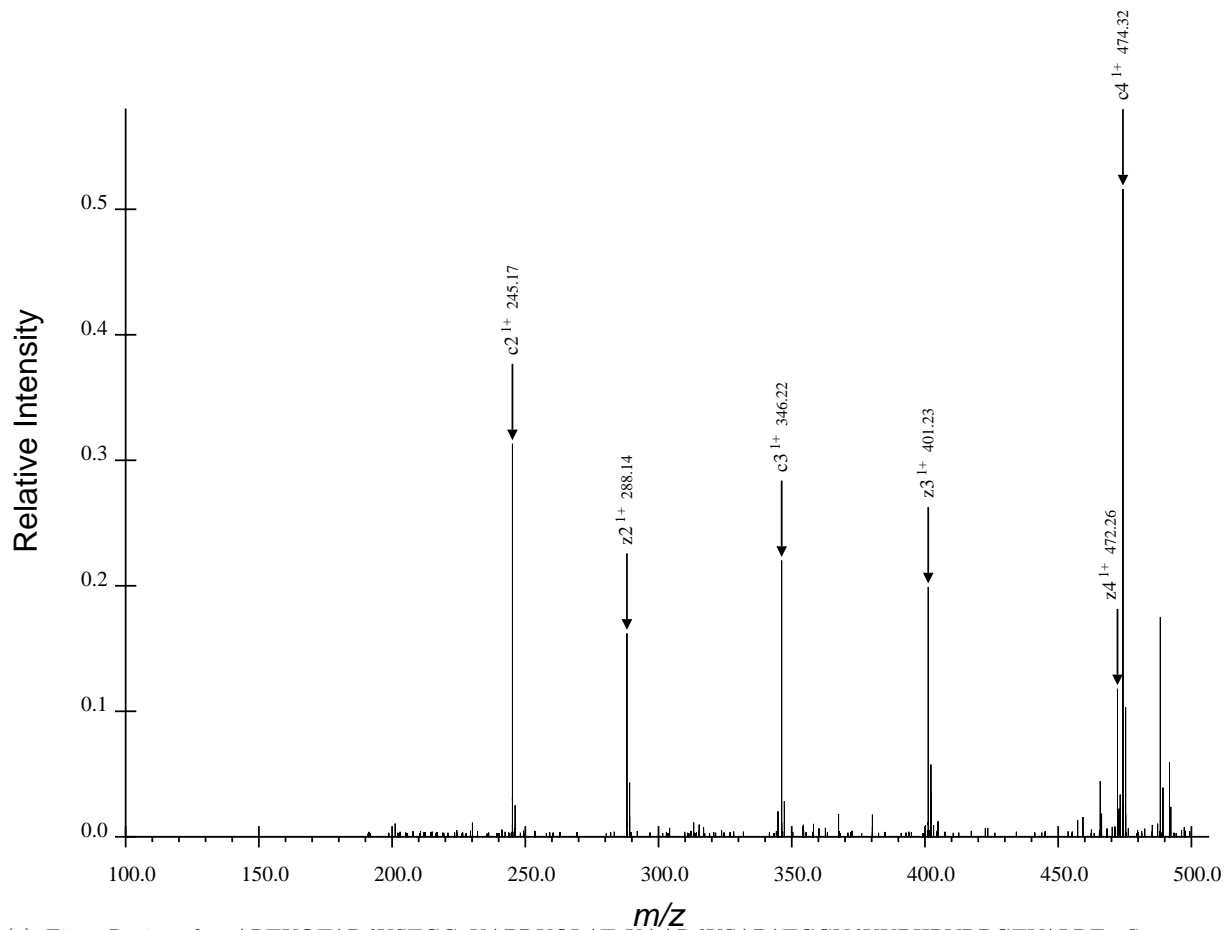

(a) First Region for ARTKQTARdKSTGGaKAPRKQLATaKAARdKSAPATGGVdKKPHRYRPGTVALRE, Spectrum 21.dta

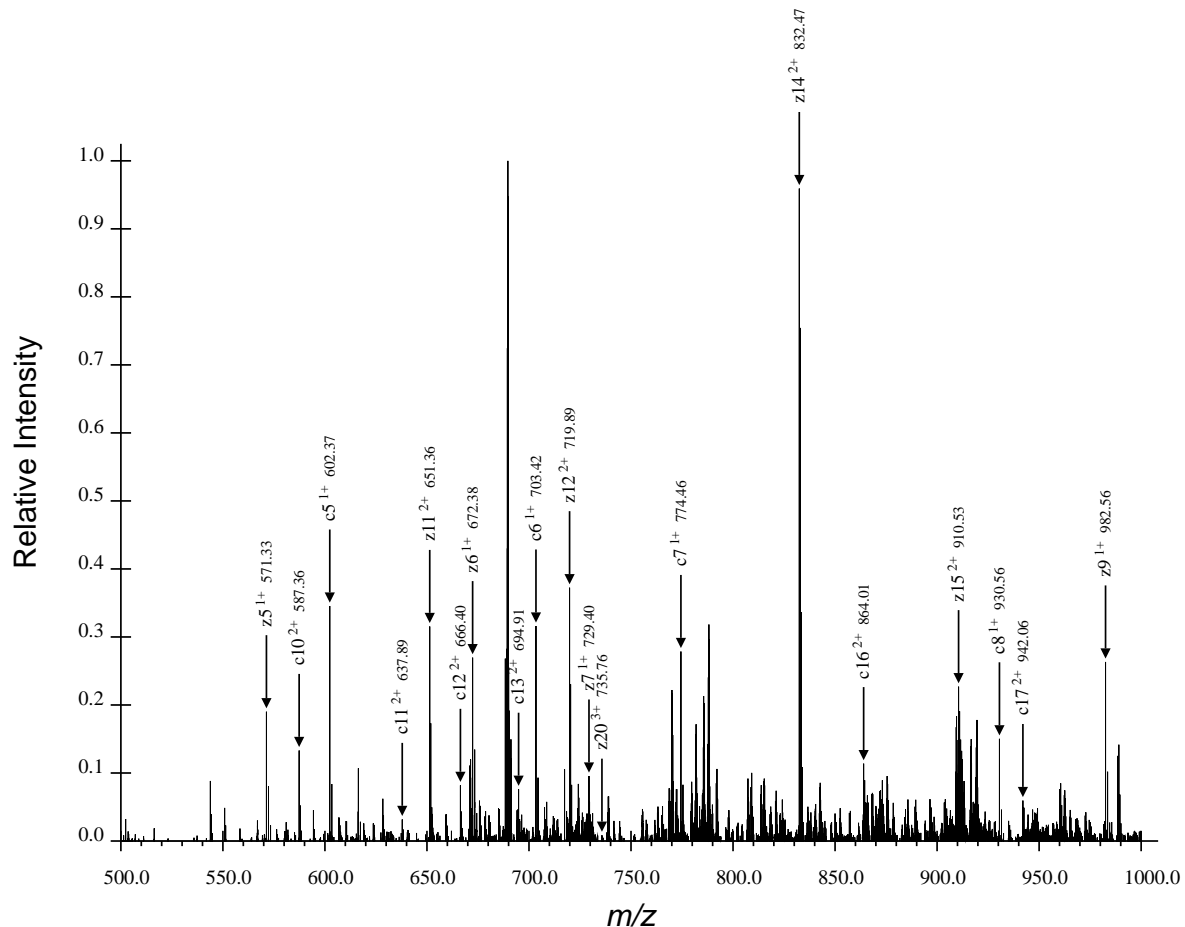

(b) Second Region for ARTKQTARdKSTGGaKAPRKQLATaKAARdKSAPATGGVdKKPHRYRPGTVALRE, Spectrum 21.dta

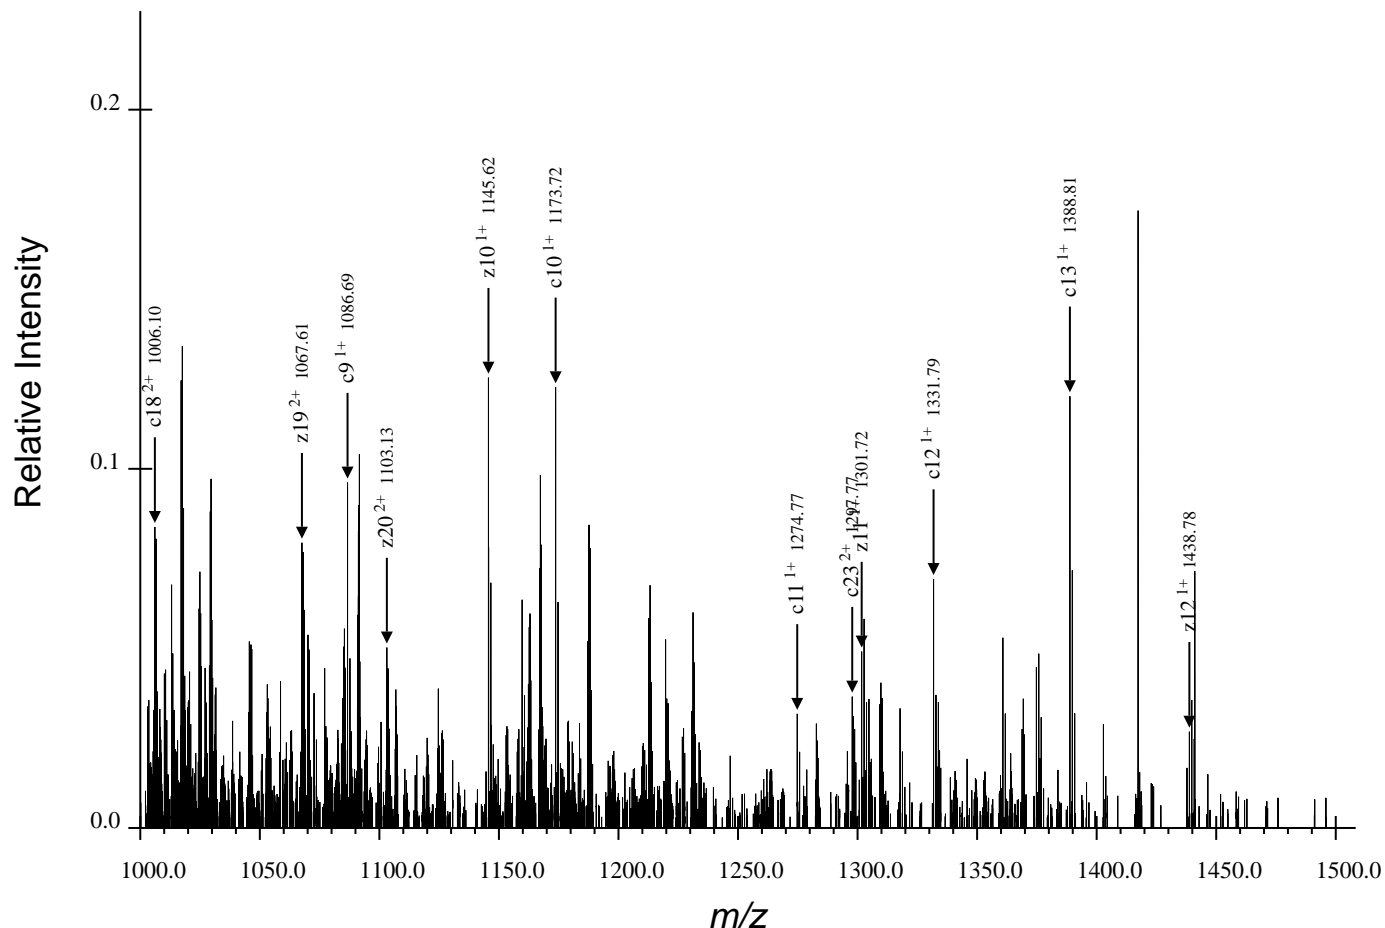

(c) Third Region for ARTKQTARdKSTGGaKAPRKQLATaKAARdKSAPATGGVdKKPHRYRPGTVALRE, Spectrum 21.dta

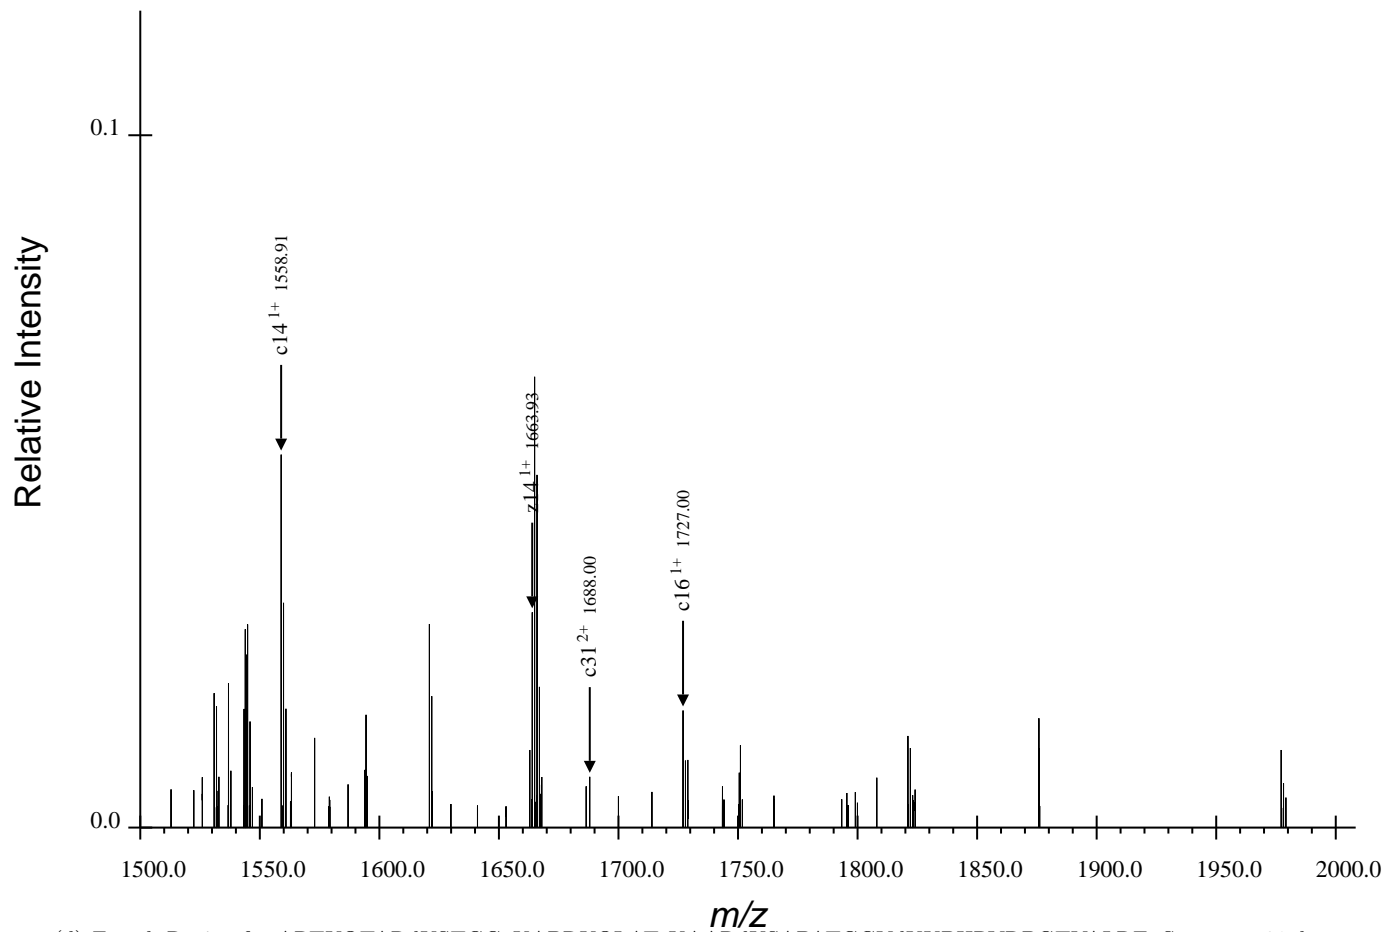

(d) Fourth Region for ARTKQTARdKSTGGaKAPRKQLATaKAARdKSAPATGGVdKKPHRYRPGTVALRE, Spectrum 21.dta

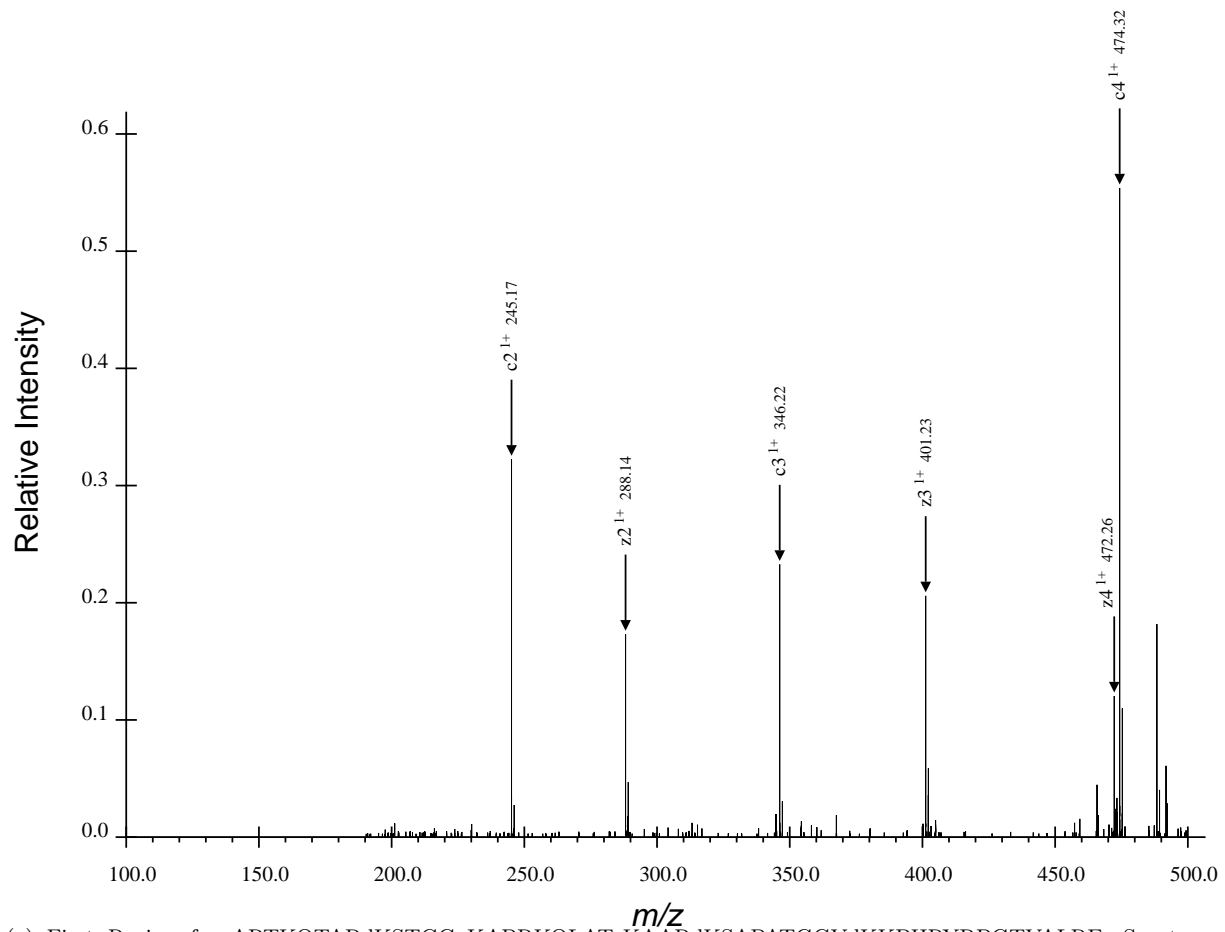

(a) First Region for ARTKQTARdKSTGGaKAPRKQLATaKAARdKSAPATGGVdKKPHRYRPGTVALRE, Spectrum 22.dta

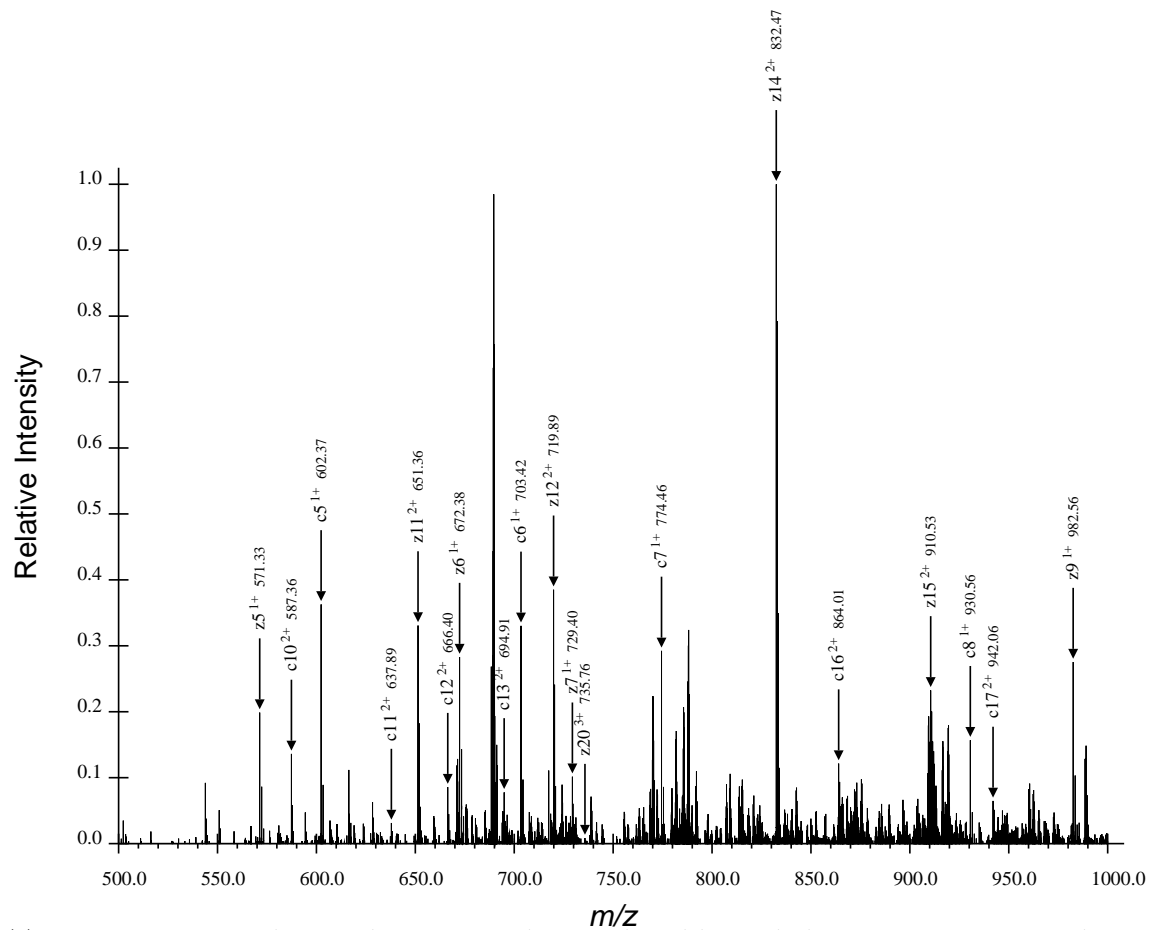

(b) Second Region for ARTKQTARdKSTGGaKAPRKQLATaKAARdKSAPATGGVdKKPHRYRPGTVALRE, Spectrum 22.dta

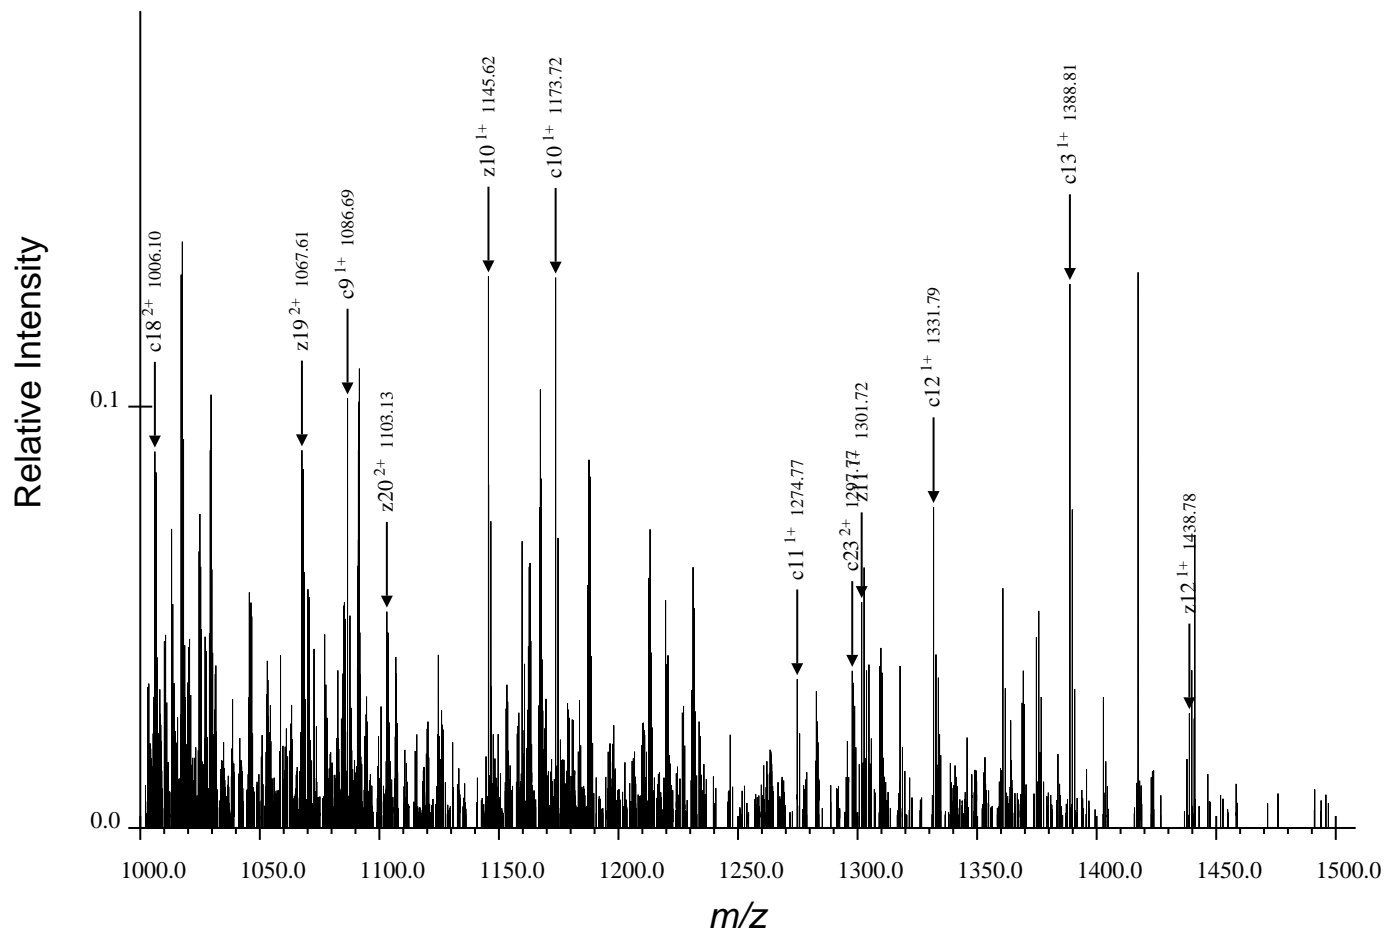

(c) Third Region for ARTKQTARdKSTGGaKAPRKQLATaKAARdKSAPATGGVdKKPHRYRPGTVALRE, Spectrum 22.dta

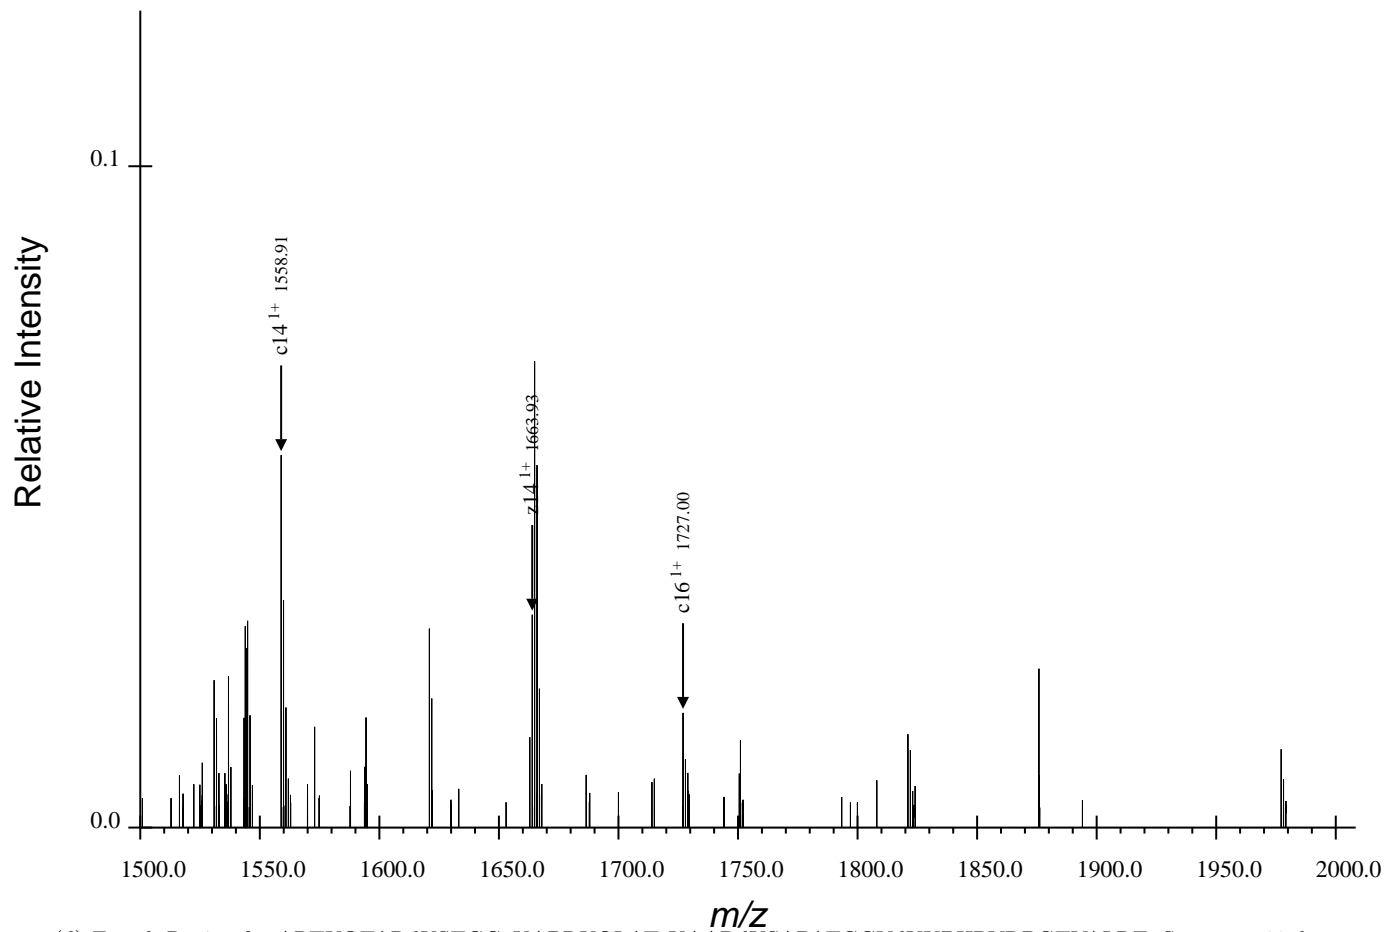

(d) Fourth Region for ARTKQTARdKSTGGaKAPRKQLATaKAARdKSAPATGGVdKKPHRYRPGTVALRE, Spectrum 22.dta

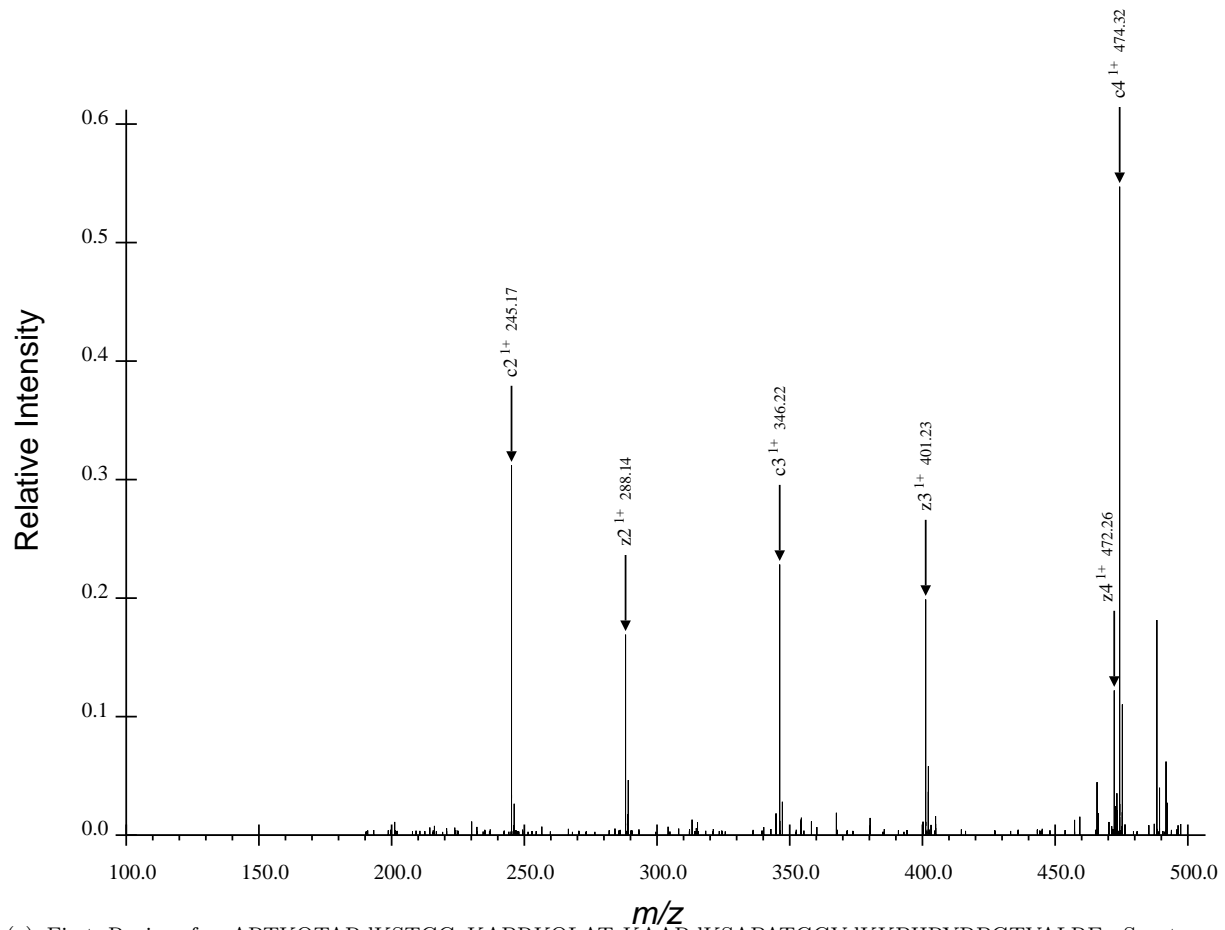

(a) First Region for ARTKQTARdKSTGGaKAPRKQLATaKAARdKSAPATGGVdKKPHRYRPGTVALRE, Spectrum 23.dta

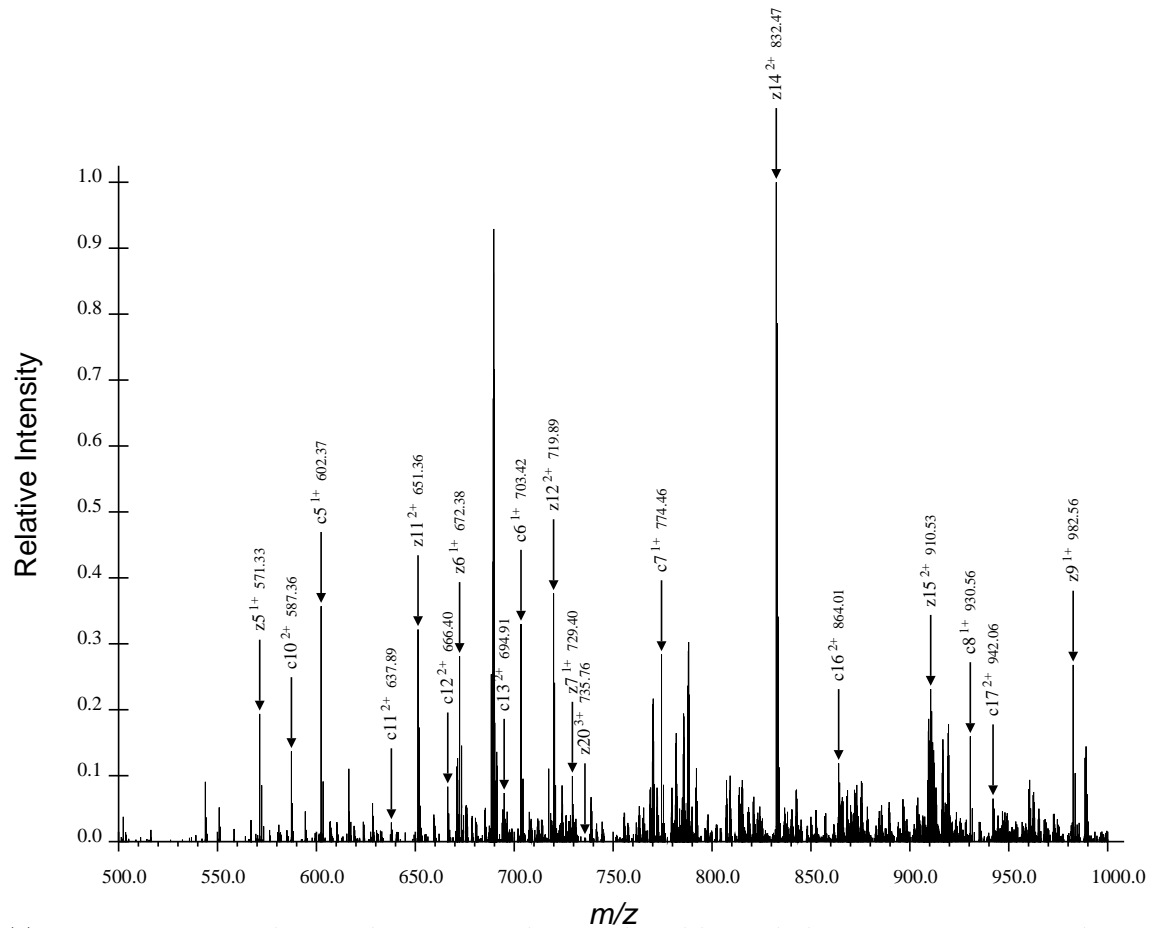

(b) Second Region for ARTKQTARdKSTGGaKAPRKQLATaKAARdKSAPATGGVdKKPHRYRPGTVALRE, Spectrum 23.dta

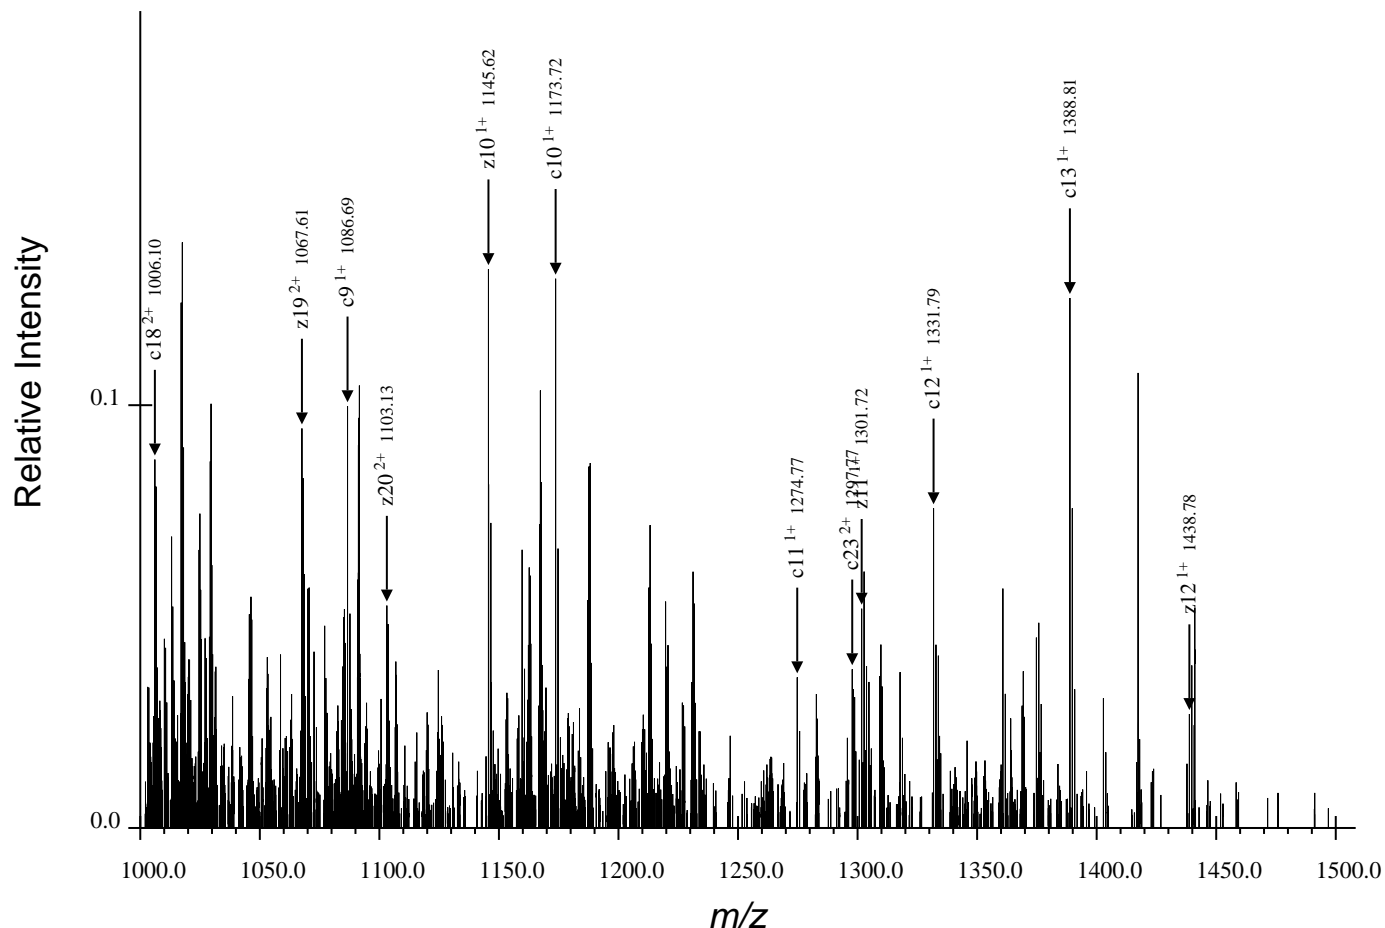

(c) Third Region for ARTKQTARdKSTGGaKAPRKQLATaKAARdKSAPATGGVdKKPHRYRPGTVALRE, Spectrum 23.dta

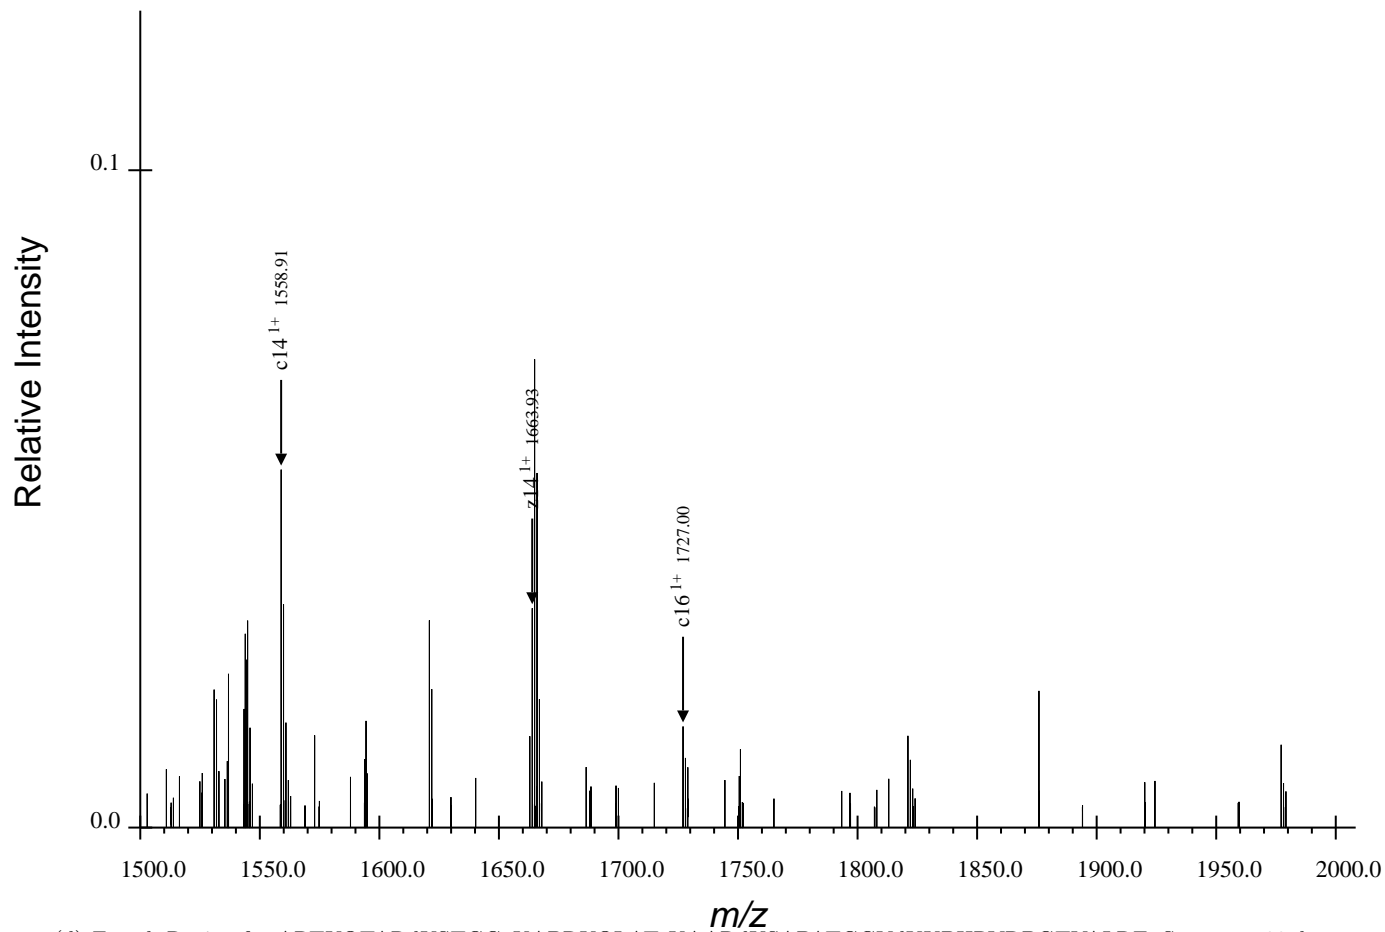

(d) Fourth Region for ARTKQTARdKSTGGaKAPRKQLATaKAARdKSAPATGGVdKKPHRYRPGTVALRE, Spectrum 23.dta

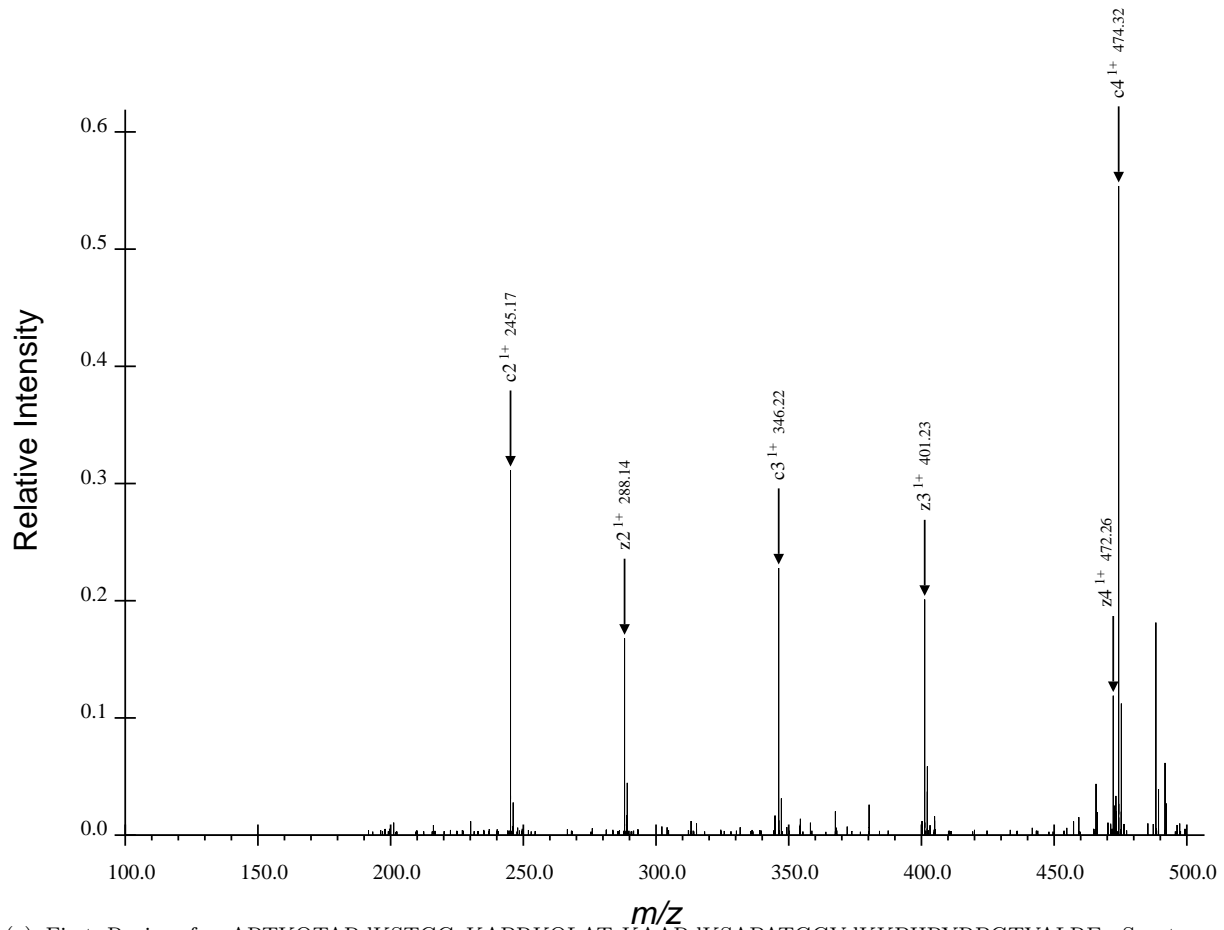

(a) First Region for ARTKQTARdKSTGGaKAPRKQLATaKAARdKSAPATGGVdKKPHRYRPGTVALRE, Spectrum 24.dta

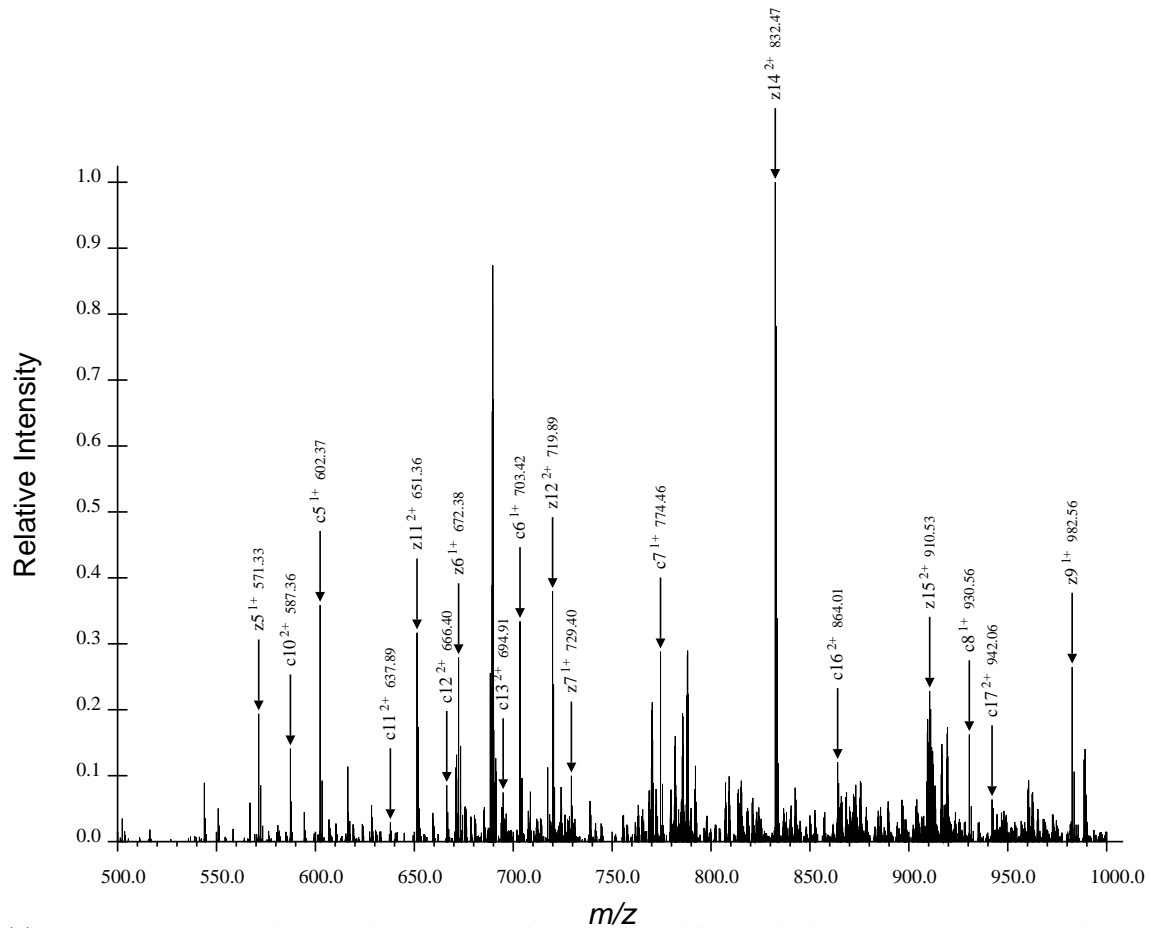

(b) Second Region for ARTKQTARdKSTGGaKAPRKQLATaKAARdKSAPATGGVdKKPHRYRPGTVALRE, Spectrum 24.dta

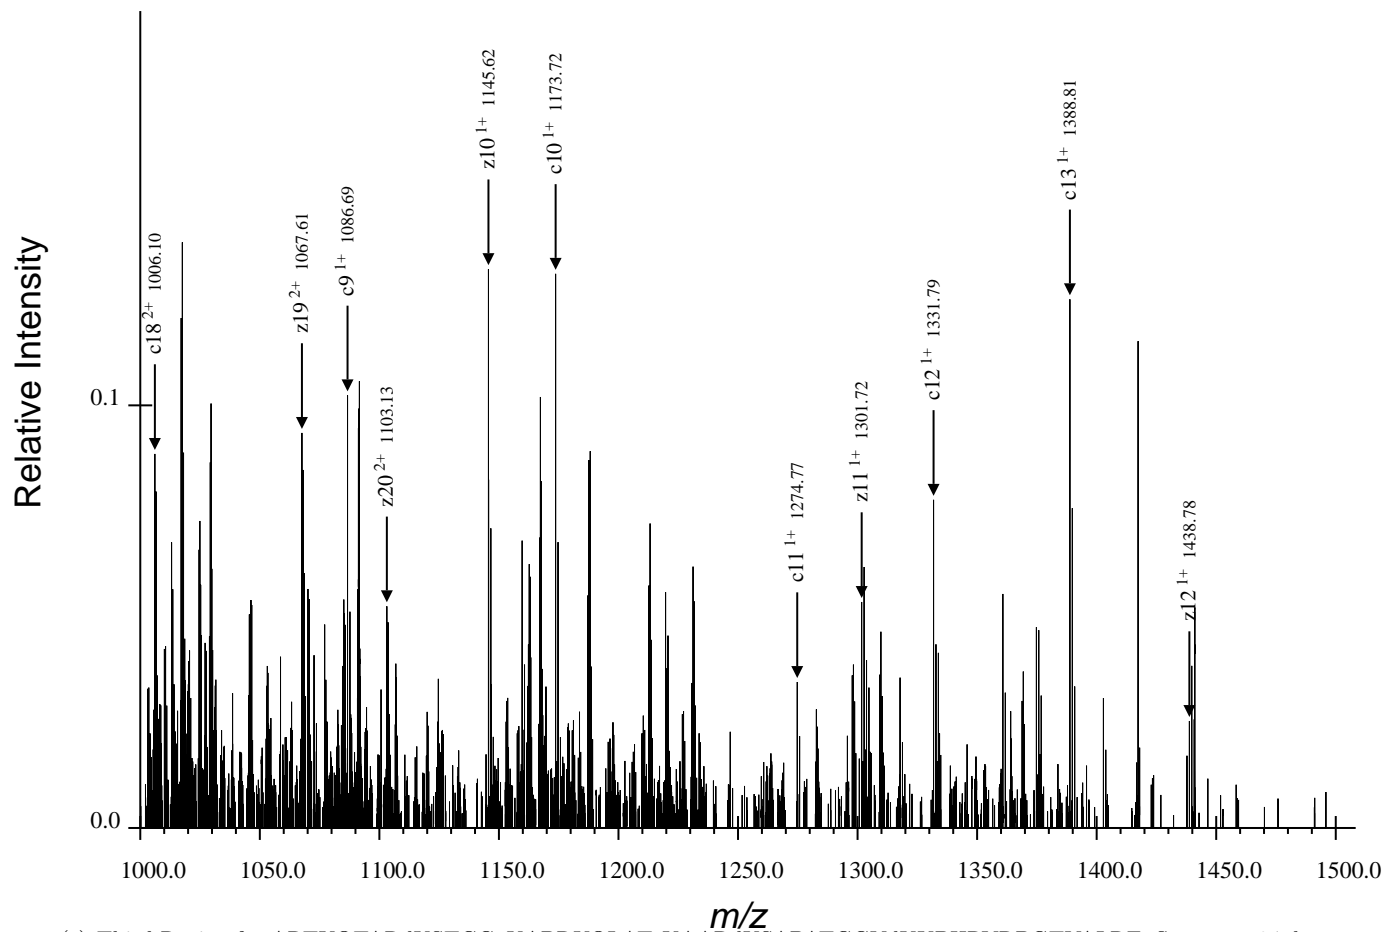

(c) Third Region for ARTKQTARdKSTGGaKAPRKQLATaKAARdKSAPATGGVdKKPHRYRPGTVALRE, Spectrum 24.dta

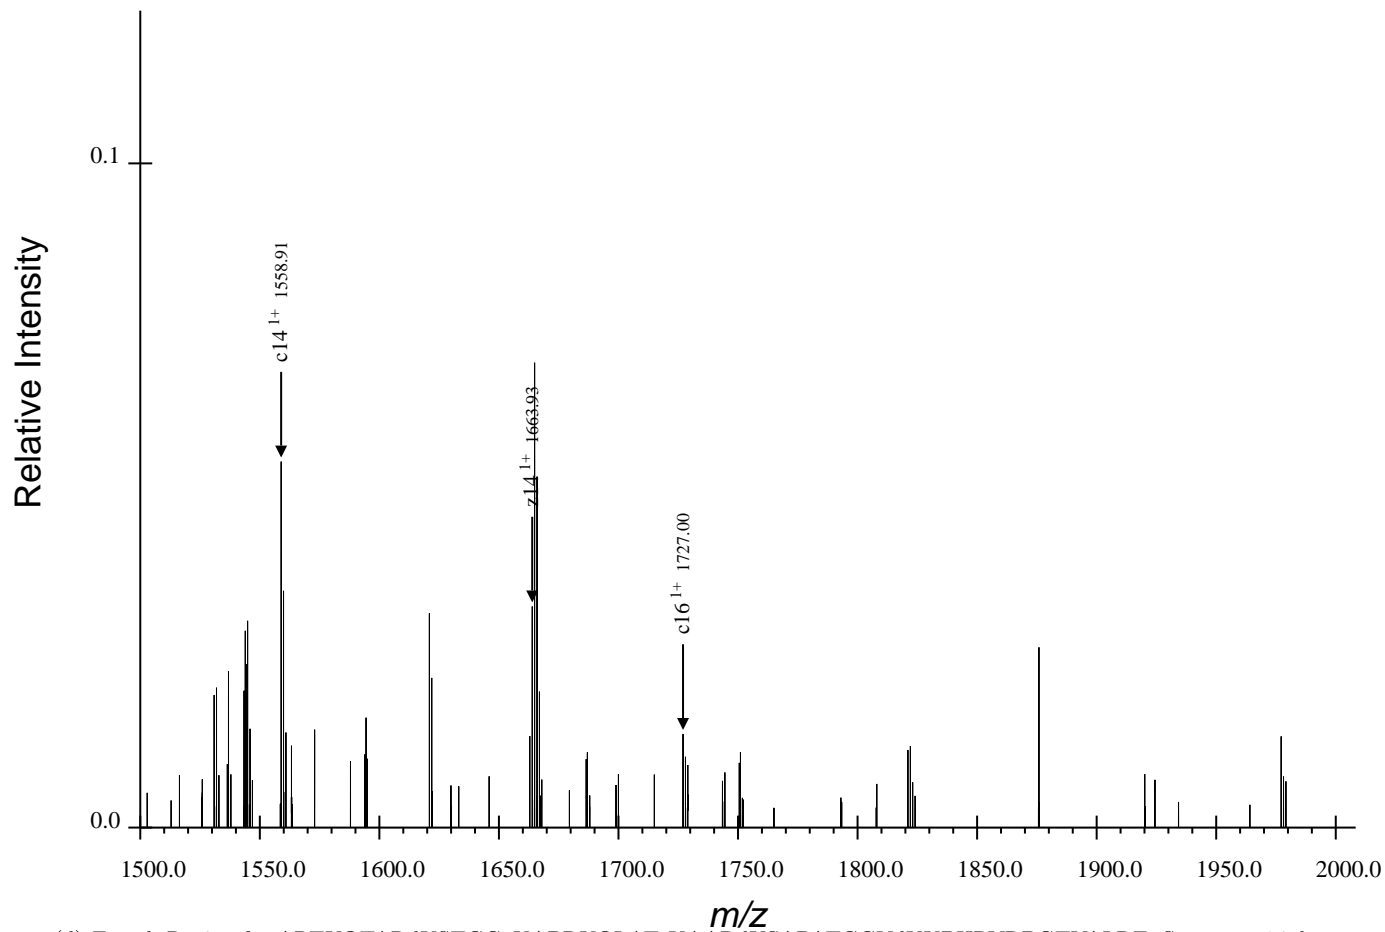

(d) Fourth Region for ARTKQTARdKSTGGaKAPRKQLATaKAARdKSAPATGGVdKKPHRYRPGTVALRE, Spectrum 24.dta



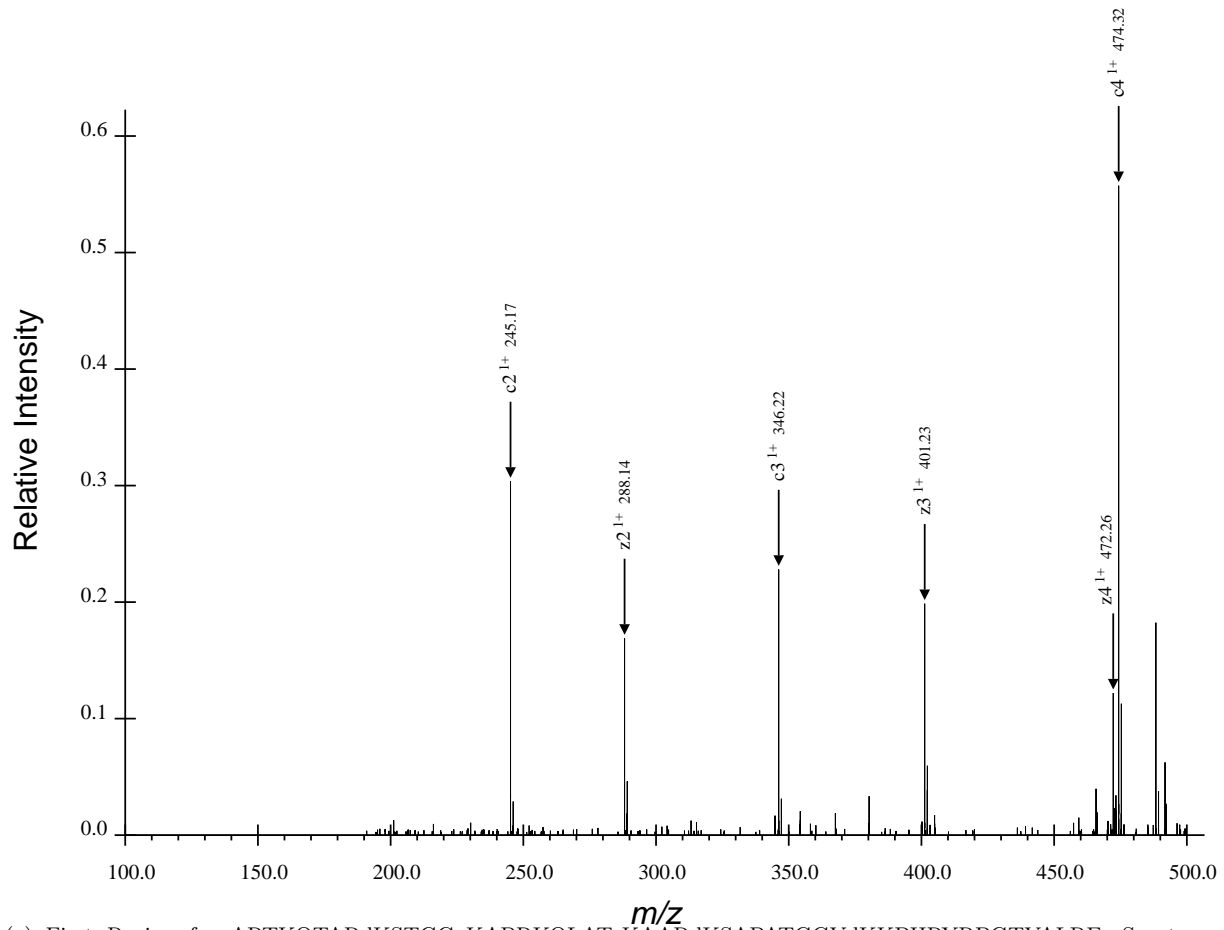

(a) First Region for ARTKQTARdKSTGGaKAPRKQLATaKAARdKSAPATGGVdKKPHRYRPGTVALRE, Spectrum 25.dta

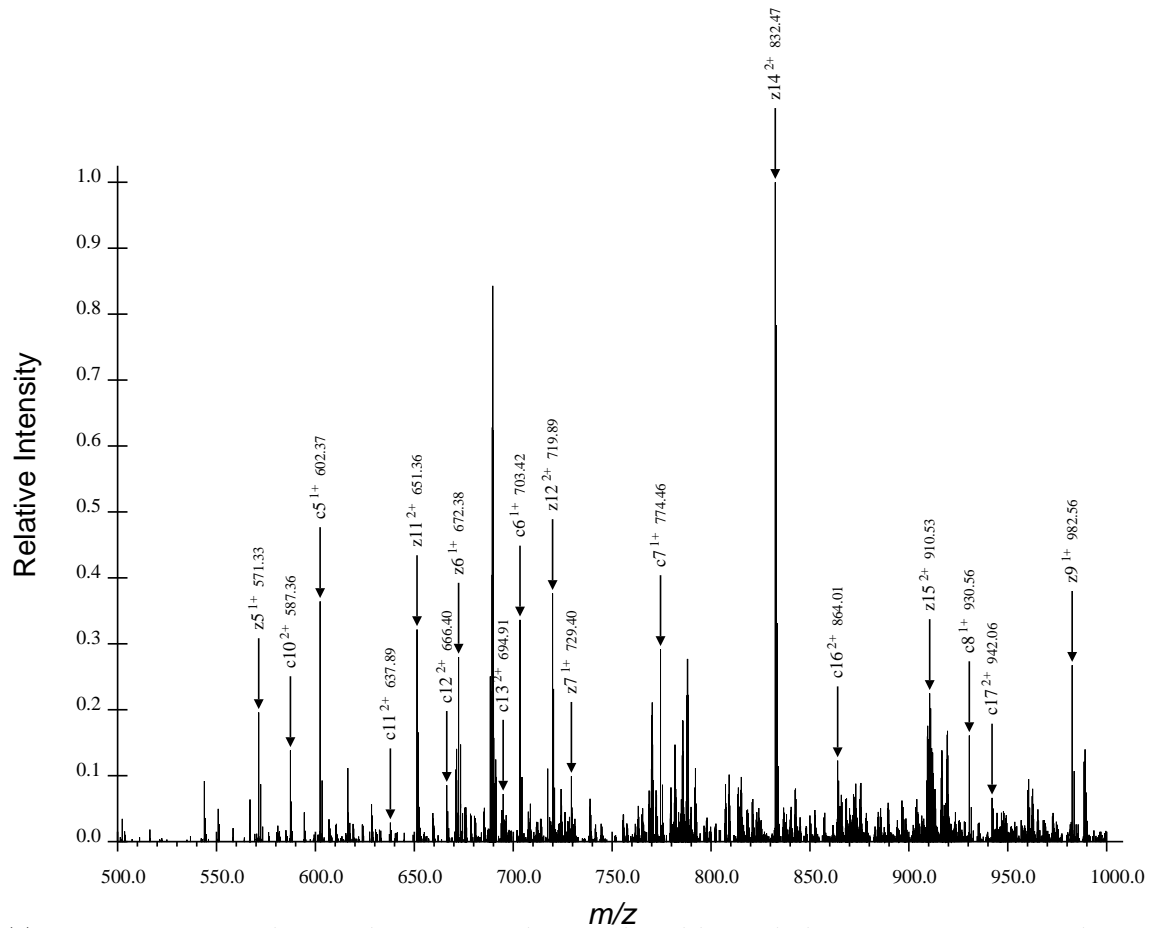

(b) Second Region for ARTKQTARdKSTGGaKAPRKQLATaKAARdKSAPATGGVdKKPHRYRPGTVALRE, Spectrum 25.dta

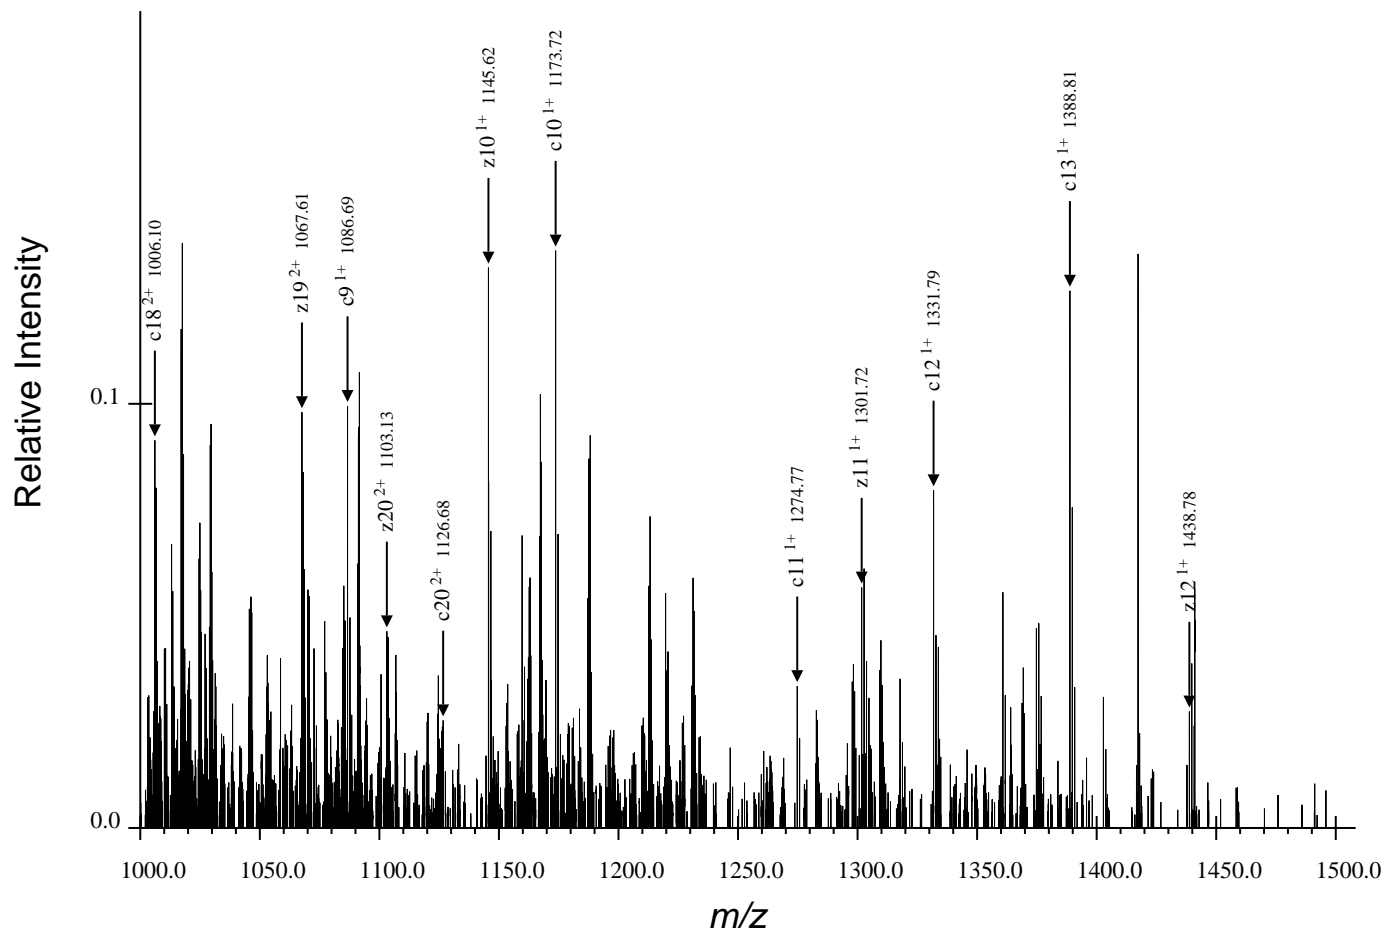

(c) Third Region for ARTKQTARdKSTGGaKAPRKQLATaKAARdKSAPATGGVdKKPHRYRPGTVALRE, Spectrum 25.dta

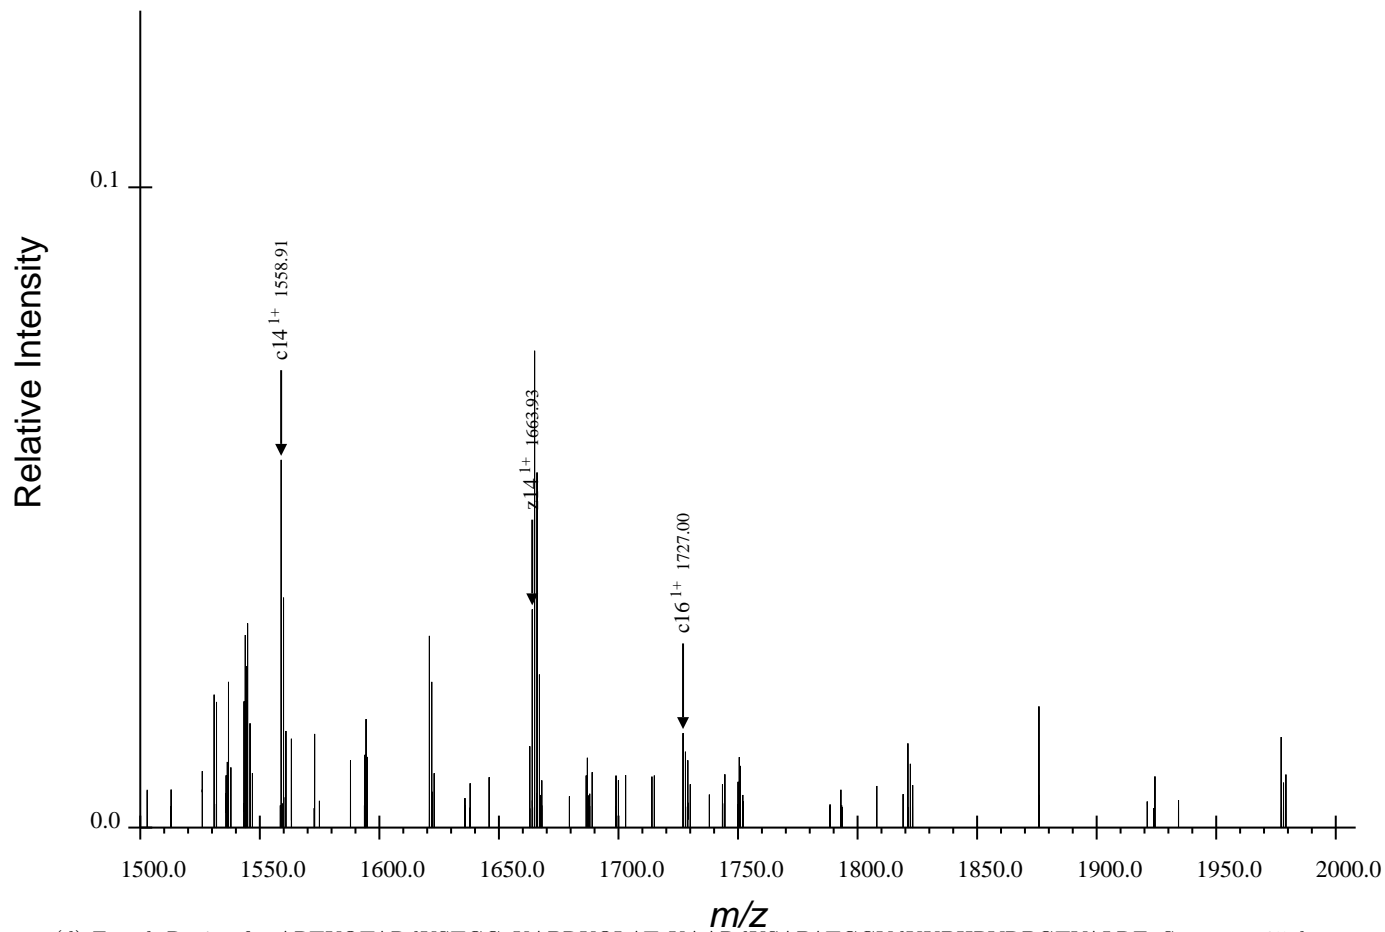

(d) Fourth Region for ARTKQTARdKSTGGaKAPRKQLATaKAARdKSAPATGGVdKKPHRYRPGTVALRE, Spectrum 25.dta

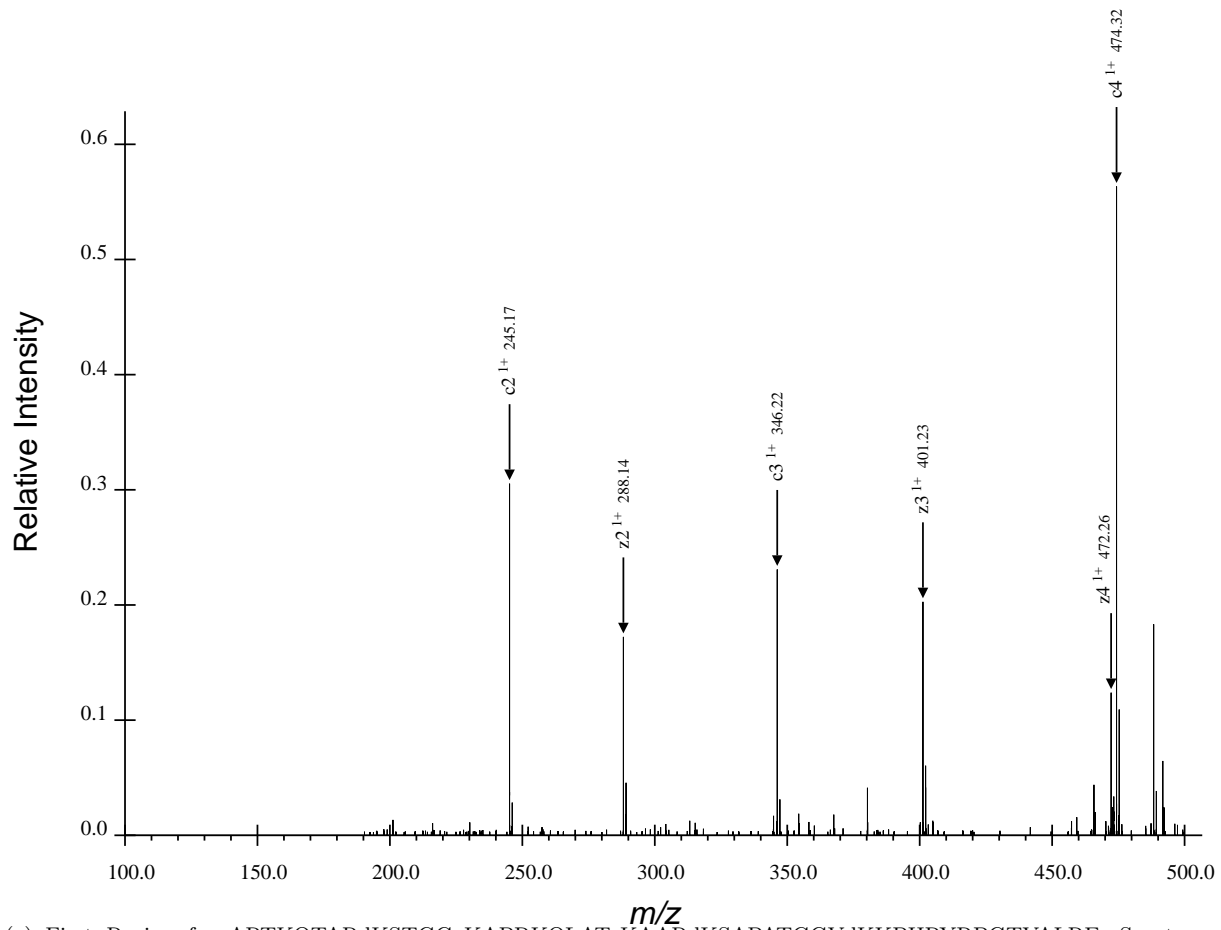

(a) First Region for ARTKQTARdKSTGGaKAPRKQLATaKAARdKSAPATGGVdKKPHRYRPGTVALRE, Spectrum 26.dta

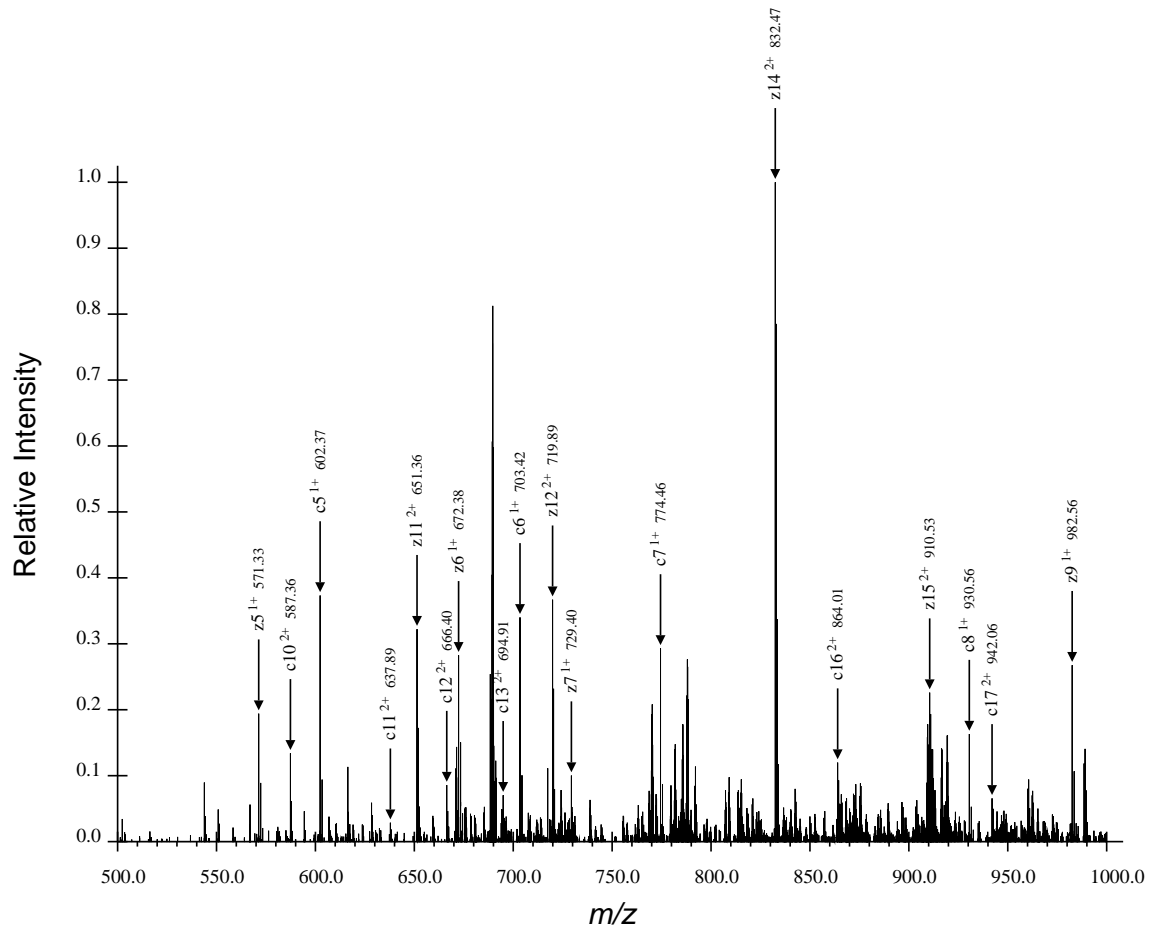

(b) Second Region for ARTKQTARdKSTGGaKAPRKQLATaKAARdKSAPATGGVdKKPHRYRPGTVALRE, Spectrum 26.dta

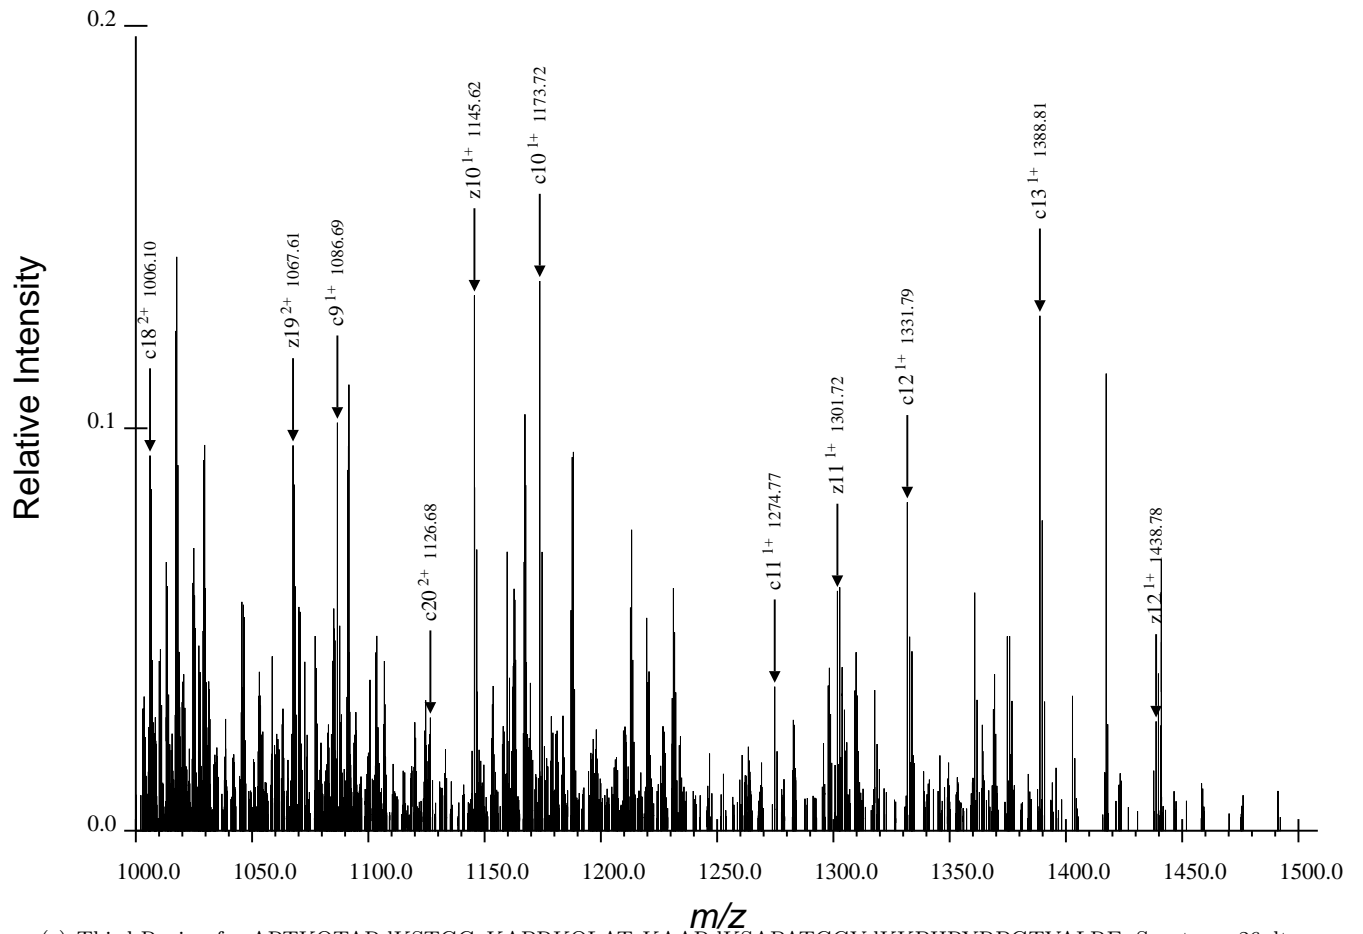

(c) Third Region for ARTKQTARdKSTGGaKAPRKQLATaKAARdKSAPATGGVdKKPHRYRPGTVALRE, Spectrum 26.dta

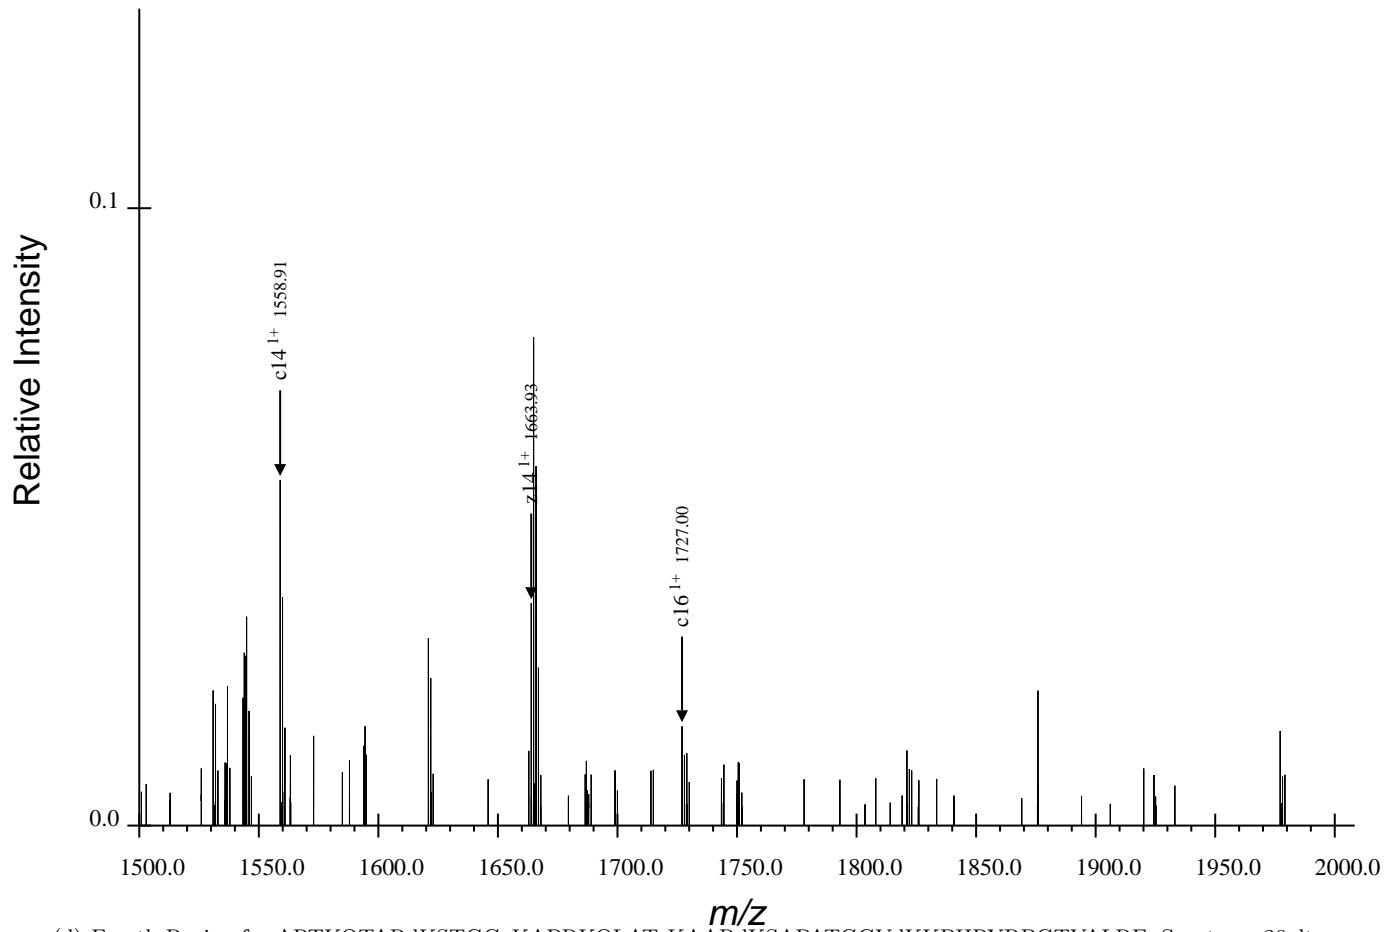

(d) Fourth Region for ARTKQTARdKSTGGaKAPRKQLATaKAARdKSAPATGGVdKKPHRYRPGTVALRE, Spectrum 26.dta

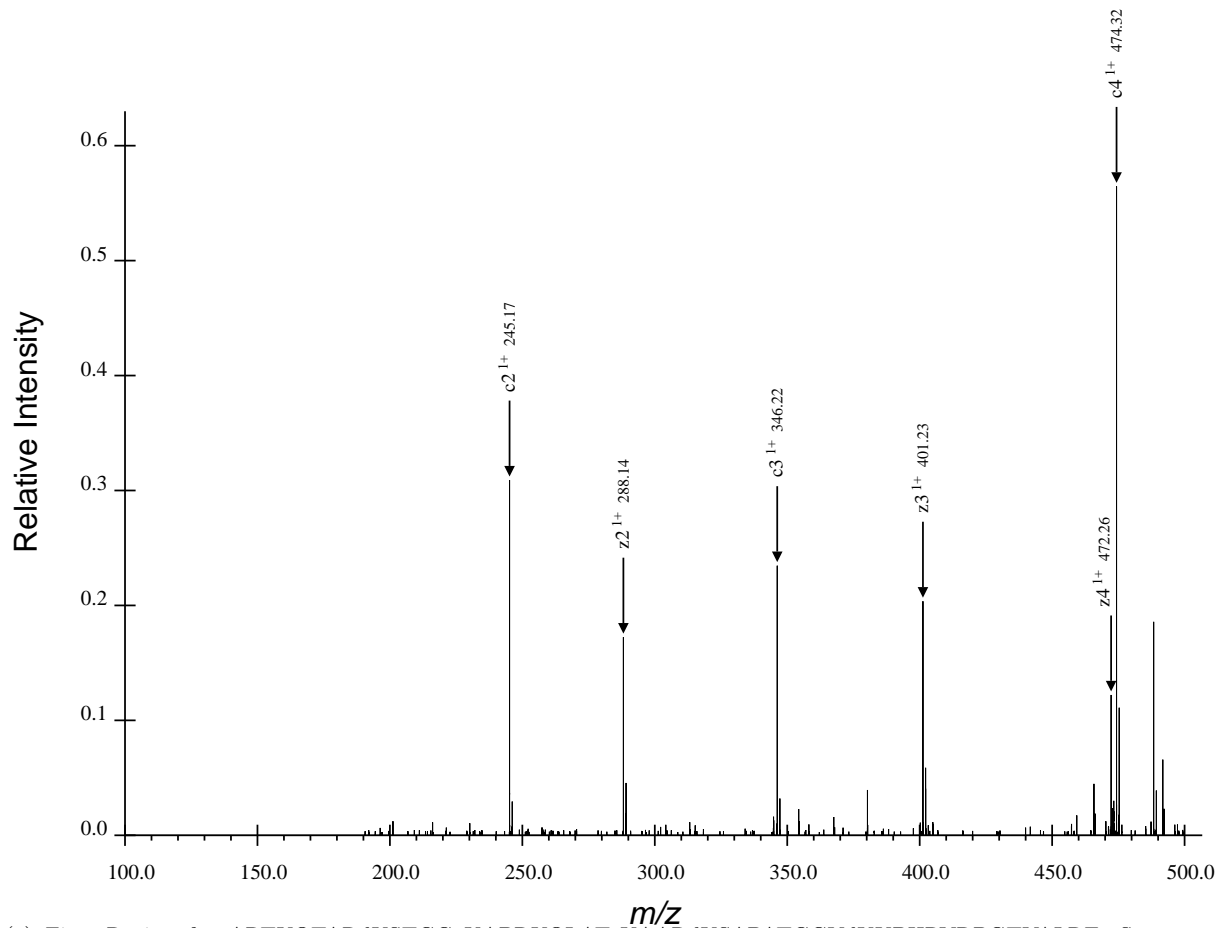

(a) First Region for ARTKQTARdKSTGGaKAPRKQLATaKAARdKSAPATGGVdKKPHRYRPGTVALRE, Spectrum 27.dta

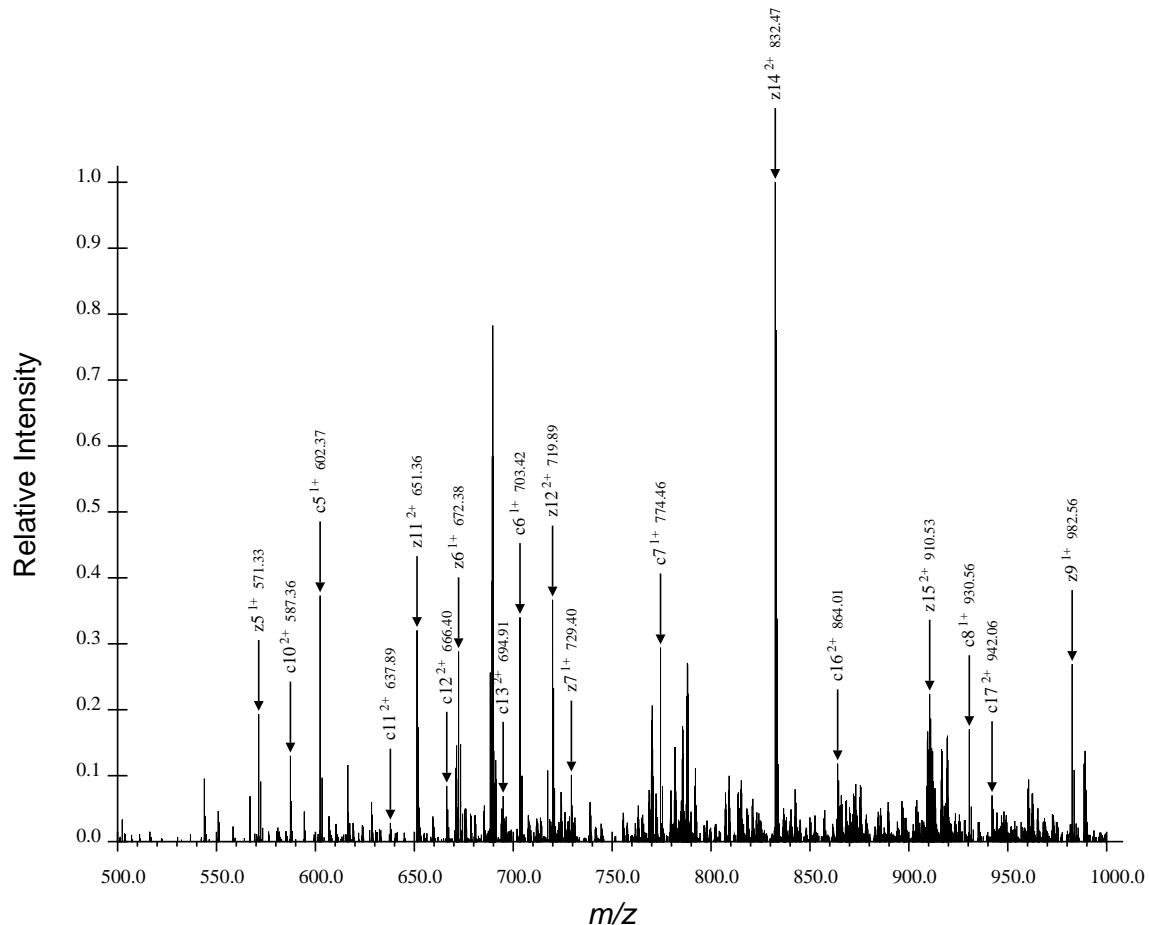

(b) Second Region for ARTKQTARdKSTGGaKAPRKQLATaKAARdKSAPATGGVdKKPHRYRPGTVALRE, Spectrum 27.dta

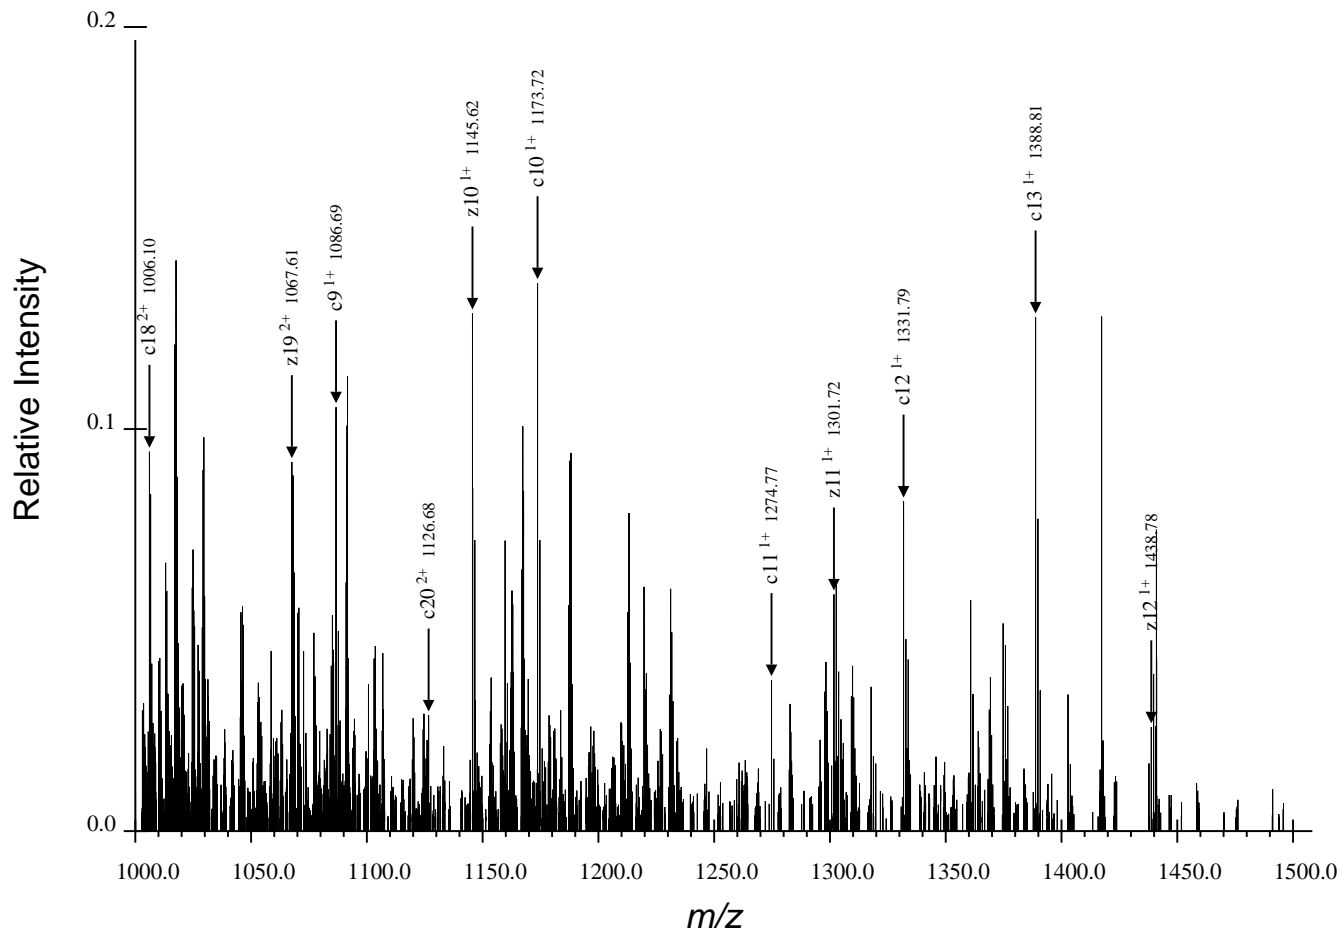

(c) Third Region for ARTKQTARdKSTGGaKAPRKQLATaKAARdKSAPATGGVdKKPHRYRPGTVALRE, Spectrum 27.dta

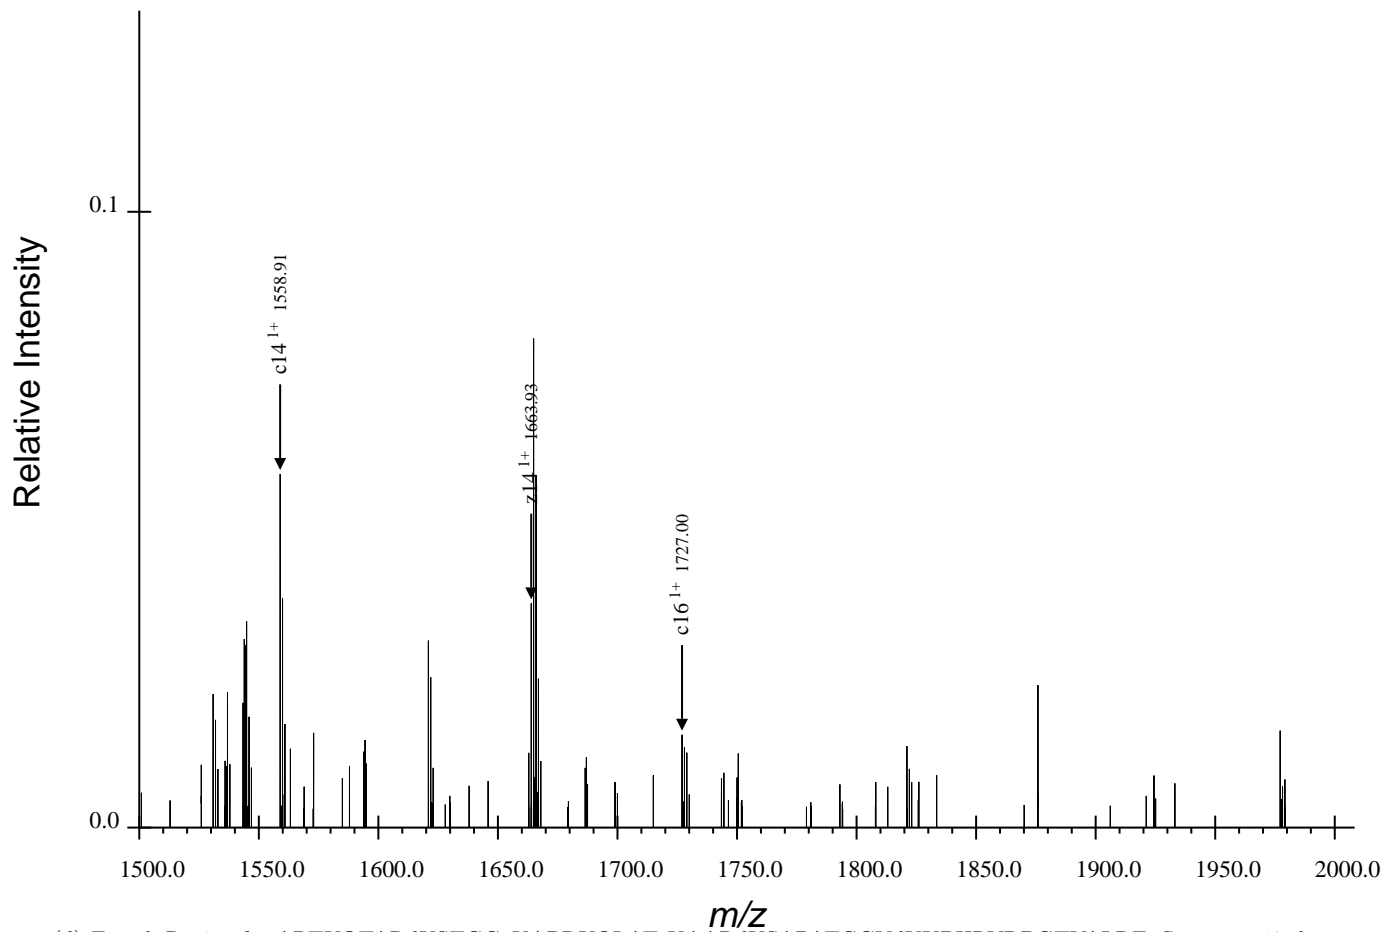

(d) Fourth Region for ARTKQTARdKSTGGaKAPRKQLATaKAARdKSAPATGGVdKKPHRYRPGTVALRE, Spectrum 27.dta

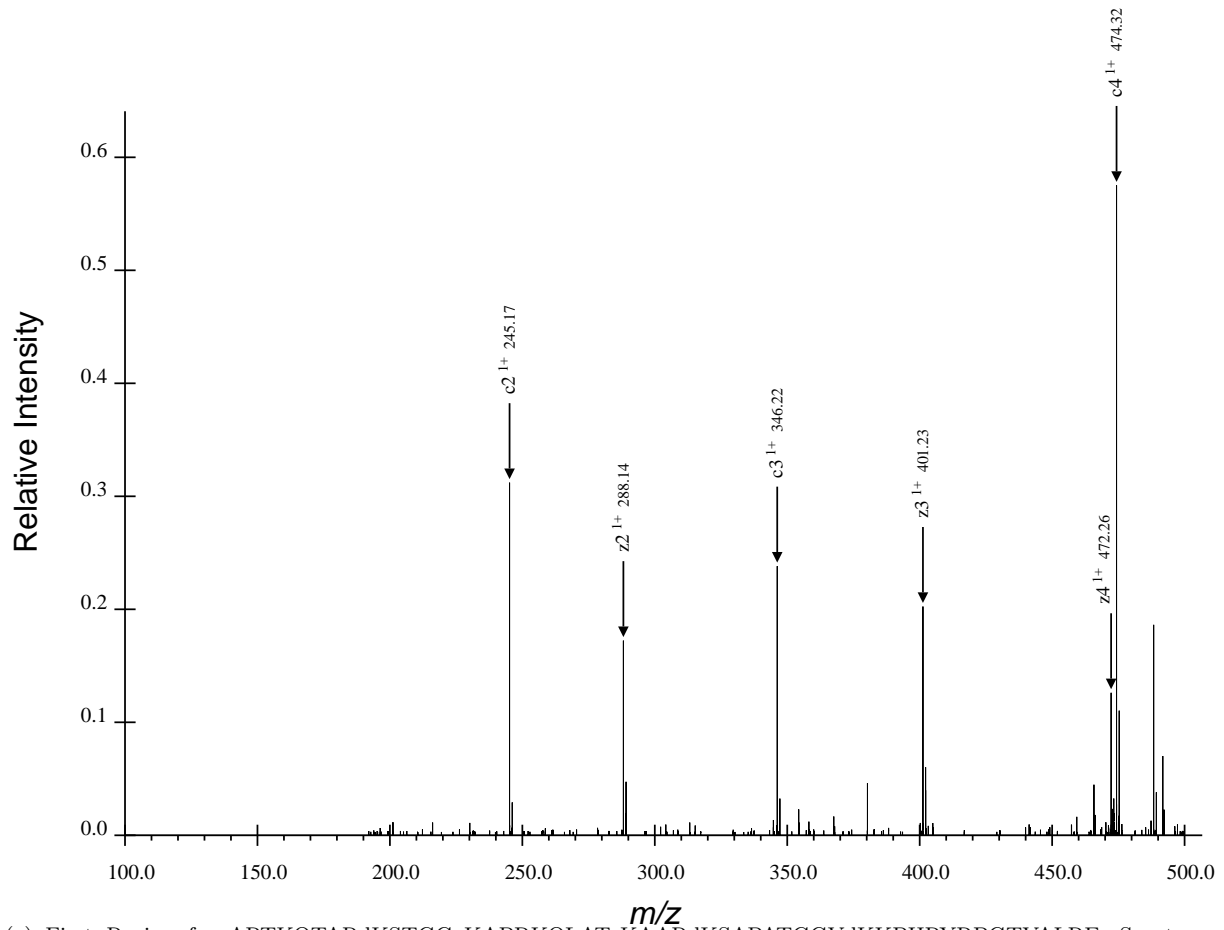

(a) First Region for ARTKQTARdKSTGGaKAPRKQLATaKAARdKSAPATGGVdKKPHRYRPGTVALRE, Spectrum 28.dta

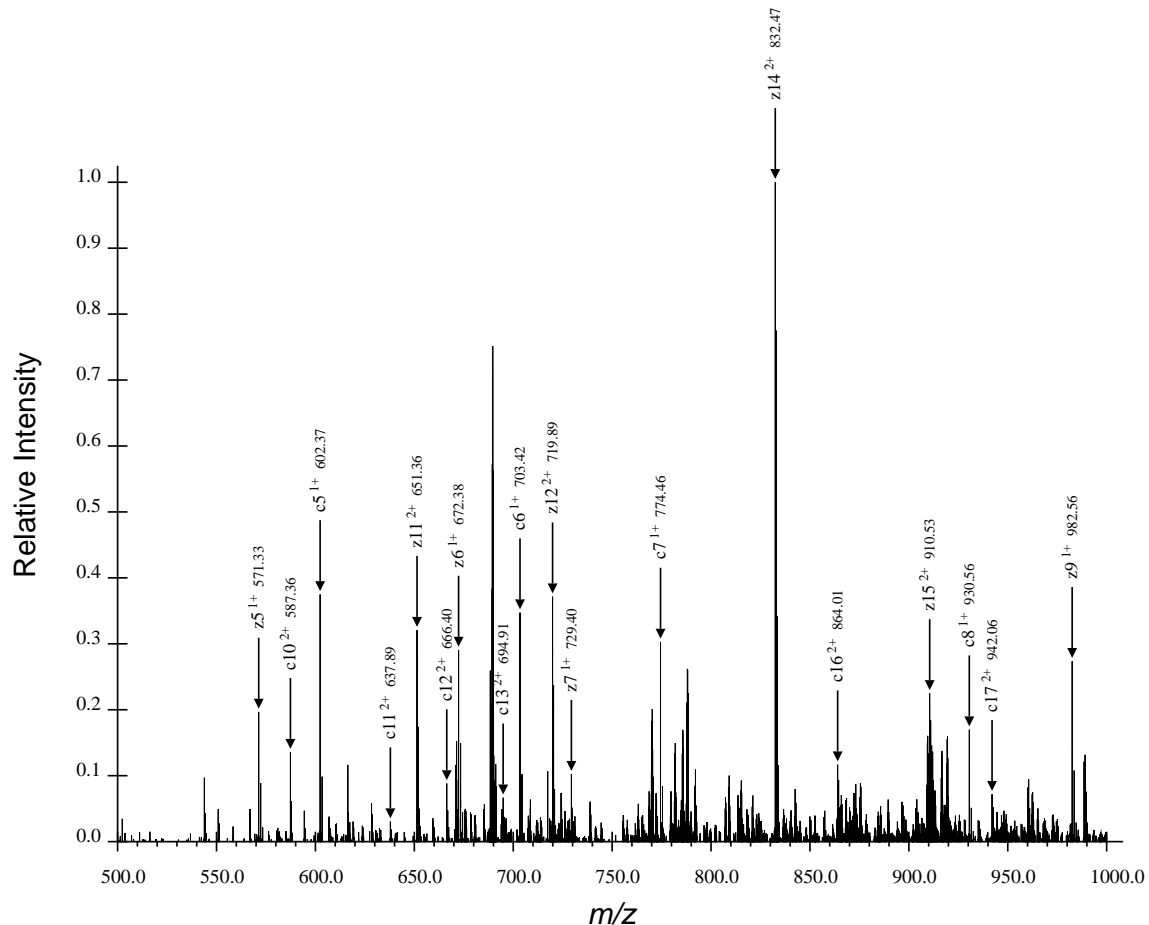

(b) Second Region for ARTKQTARdKSTGGaKAPRKQLATaKAARdKSAPATGGVdKKPHRYRPGTVALRE, Spectrum 28.dta

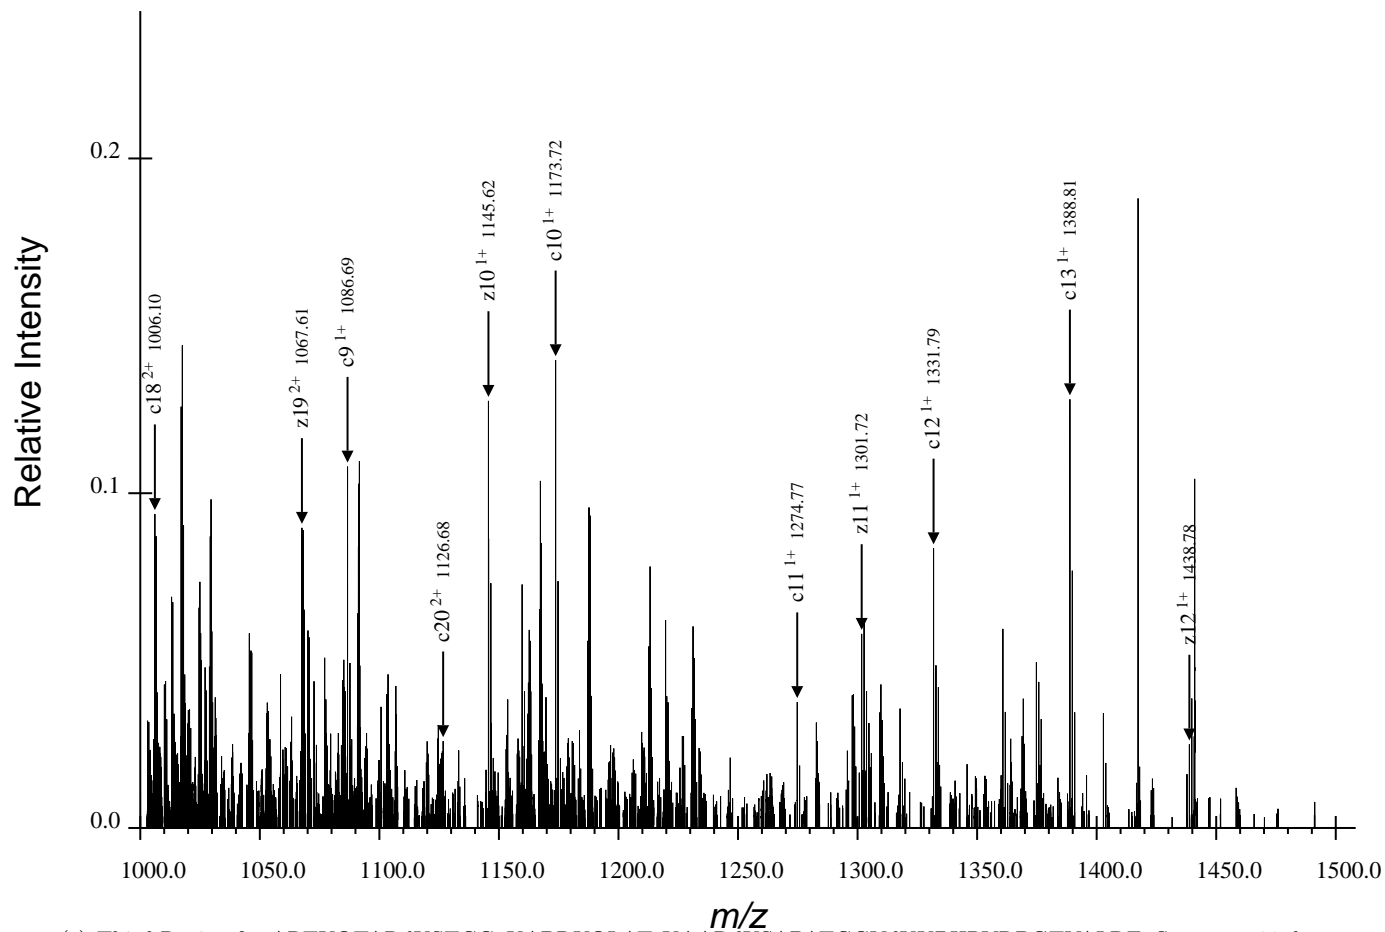

(c) Third Region for ARTKQTARdKSTGGaKAPRKQLATaKAARdKSAPATGGVdKKPHRYRPGTVALRE, Spectrum 28.dta

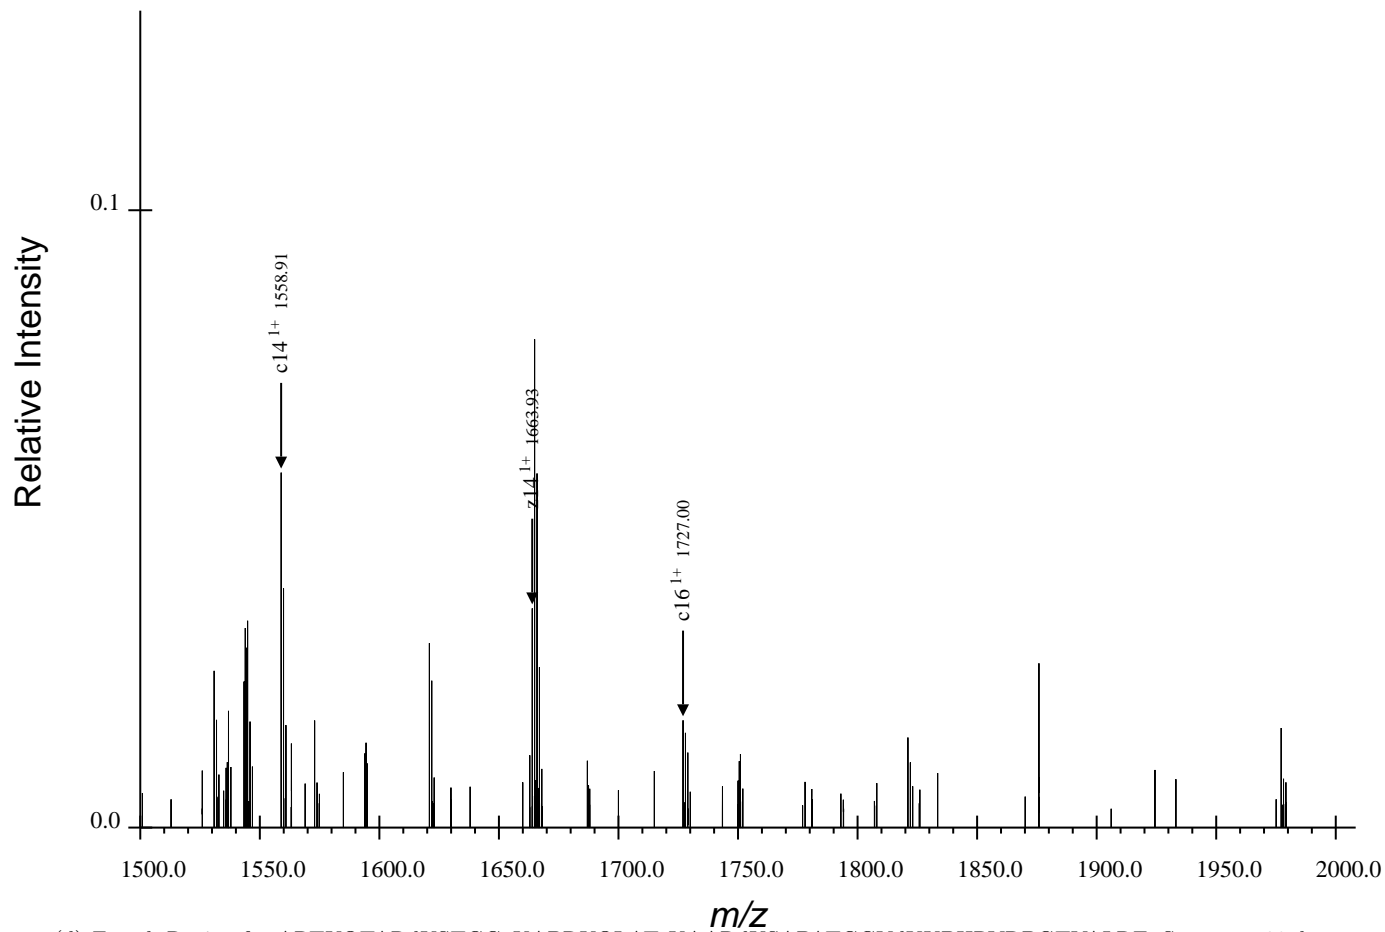

(d) Fourth Region for ARTKQTARdKSTGGaKAPRKQLATaKAARdKSAPATGGVdKKPHRYRPGTVALRE, Spectrum 28.dta



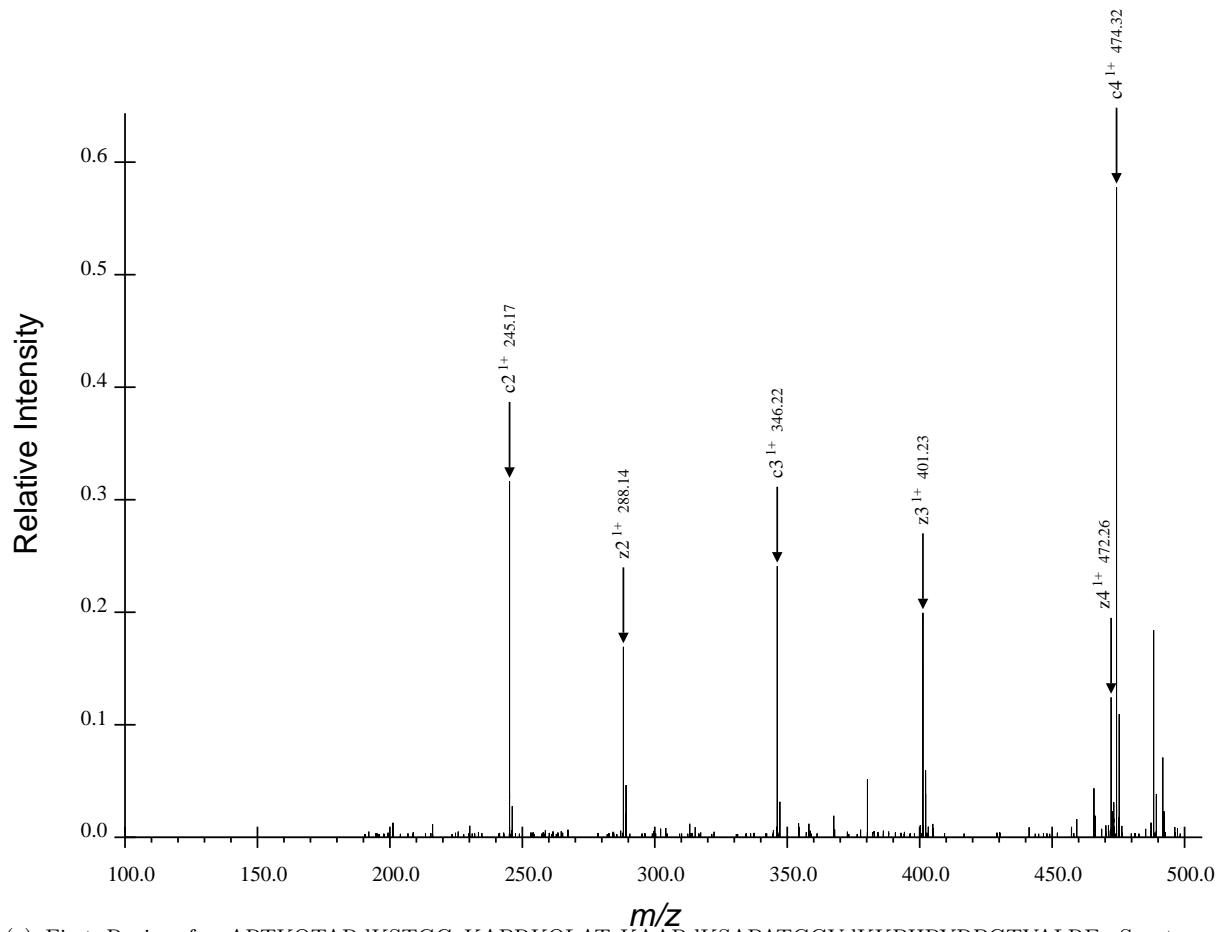

(a) First Region for ARTKQTARdKSTGGaKAPRKQLATaKAARdKSAPATGGVdKKPHRYRPGTVALRE, Spectrum 29.dta

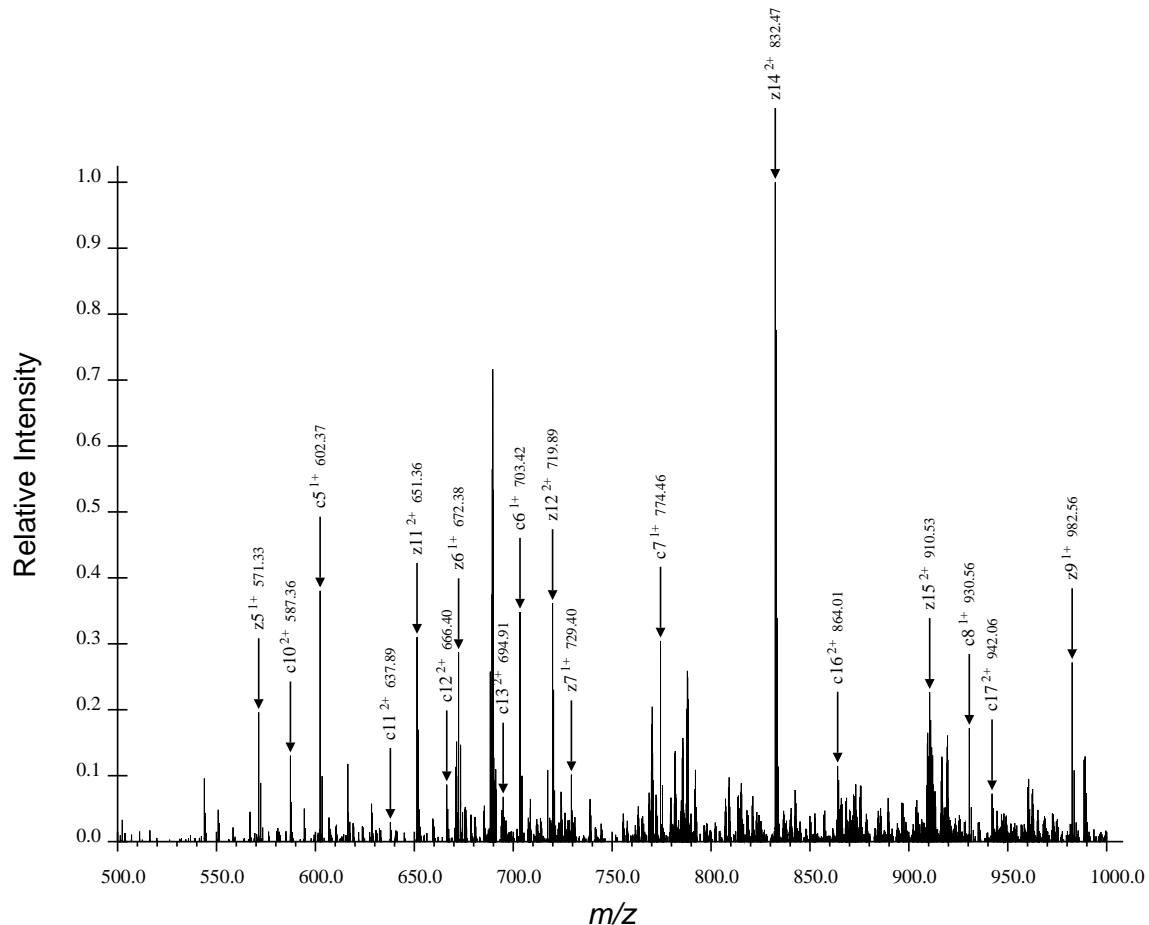

(b) Second Region for ARTKQTARdKSTGGaKAPRKQLATaKAARdKSAPATGGVdKKPHRYRPGTVALRE, Spectrum 29.dta

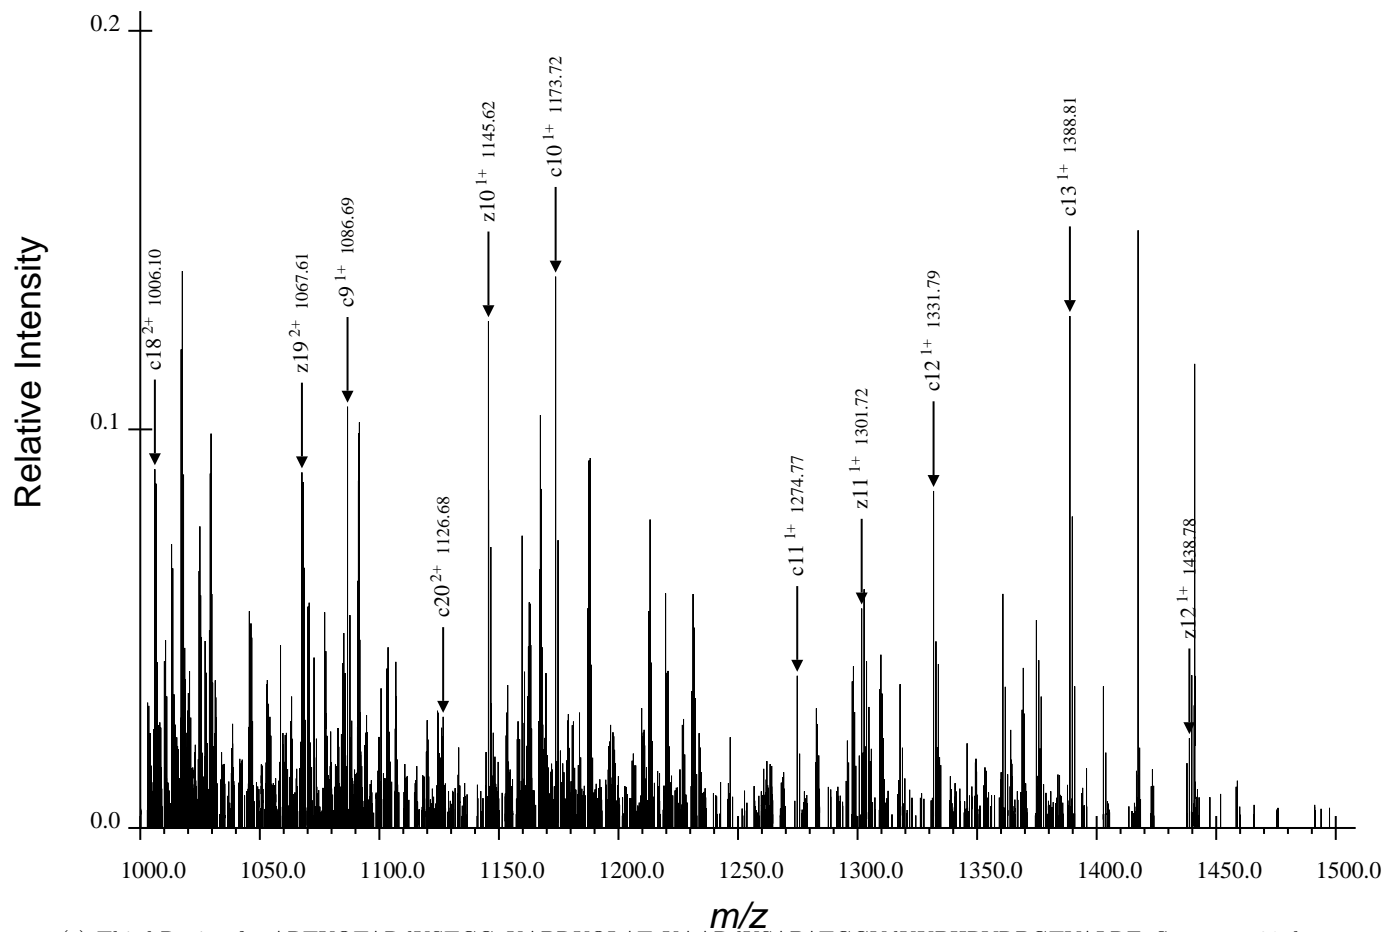

(c) Third Region for ARTKQTARdKSTGGaKAPRKQLATaKAARdKSAPATGGVdKKPHRYRPGTVALRE, Spectrum 29.dta

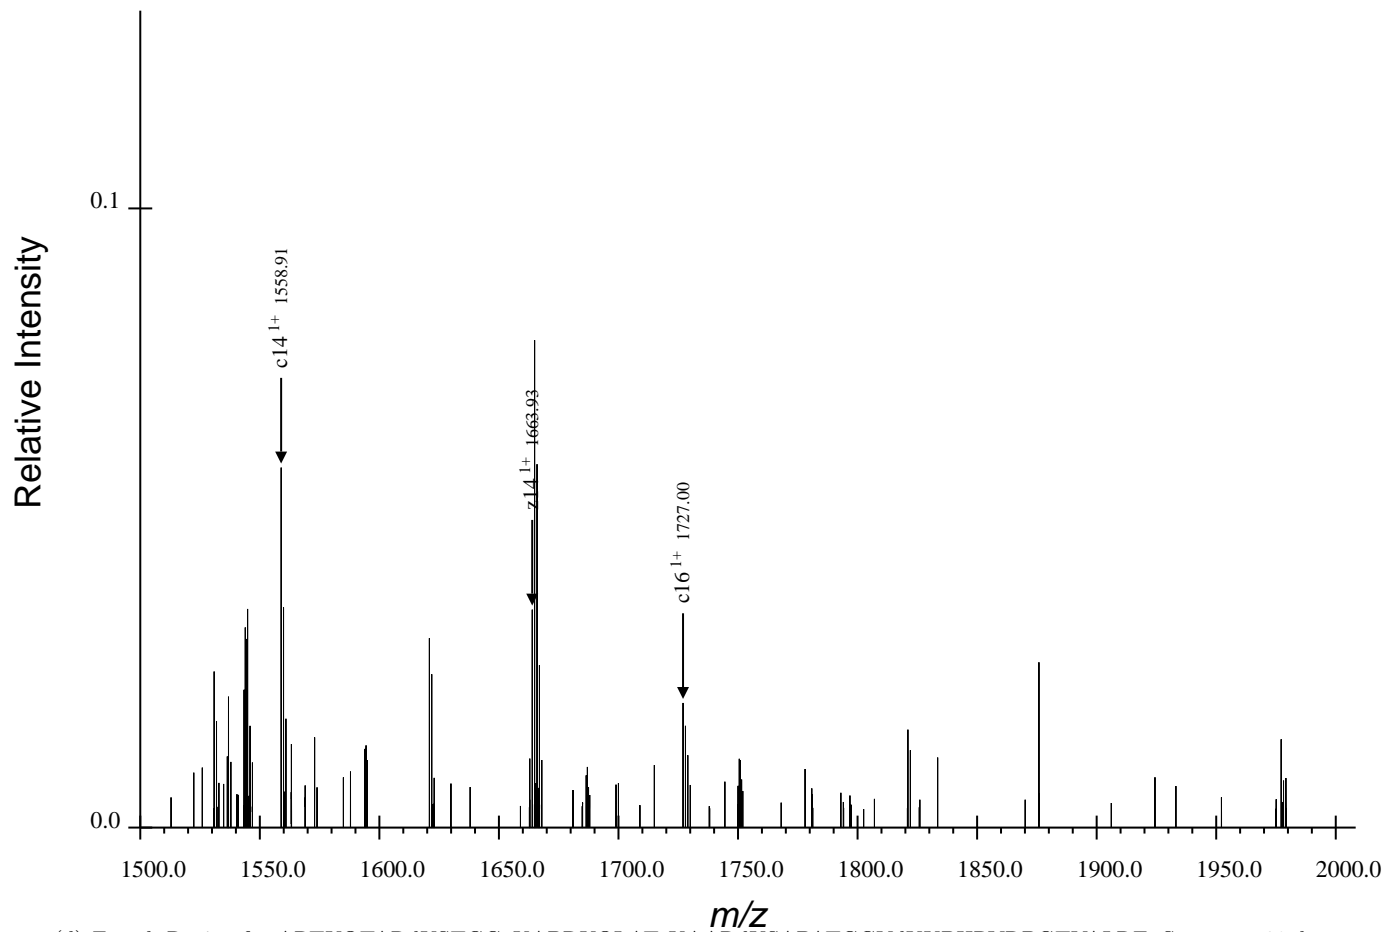

(d) Fourth Region for ARTKQTARdKSTGGaKAPRKQLATaKAARdKSAPATGGVdKKPHRYRPGTVALRE, Spectrum 29.dta

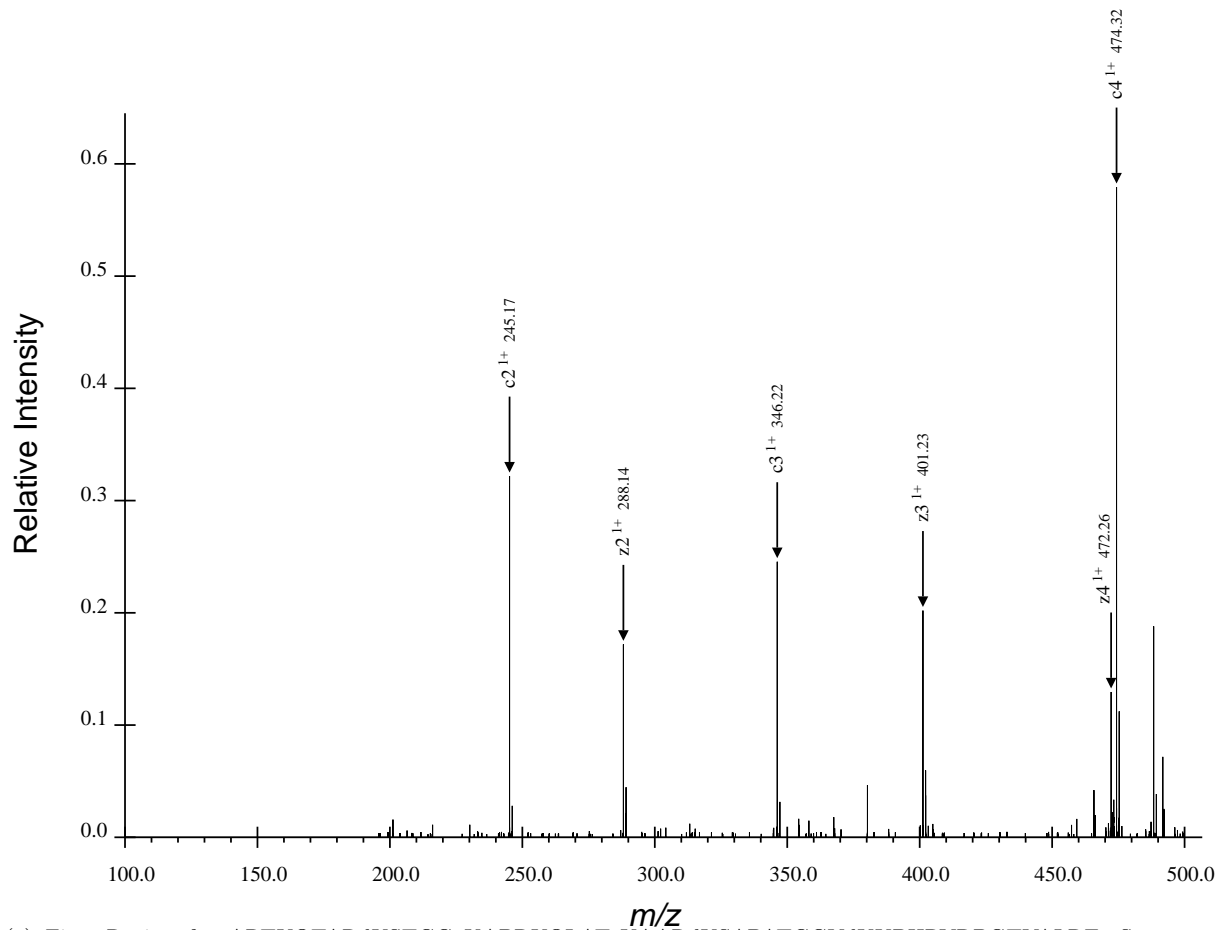

(a) First Region for ARTKQTARdKSTGGaKAPRKQLATaKAARdKSAPATGGVdKKPHRYRPGTVALRE, Spectrum 30.dta

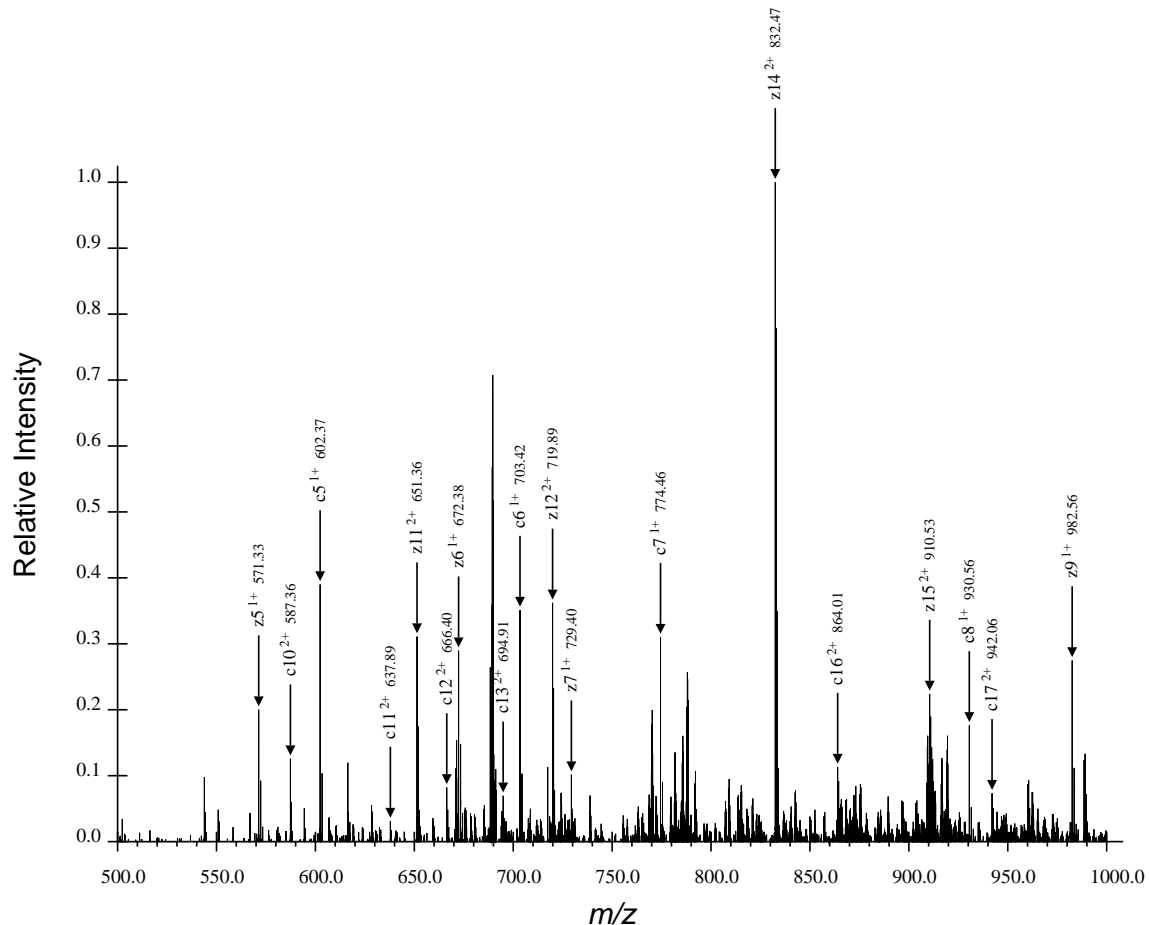

(b) Second Region for ARTKQTARdKSTGGaKAPRKQLATaKAARdKSAPATGGVdKKPHRYRPGTVALRE, Spectrum 30.dta

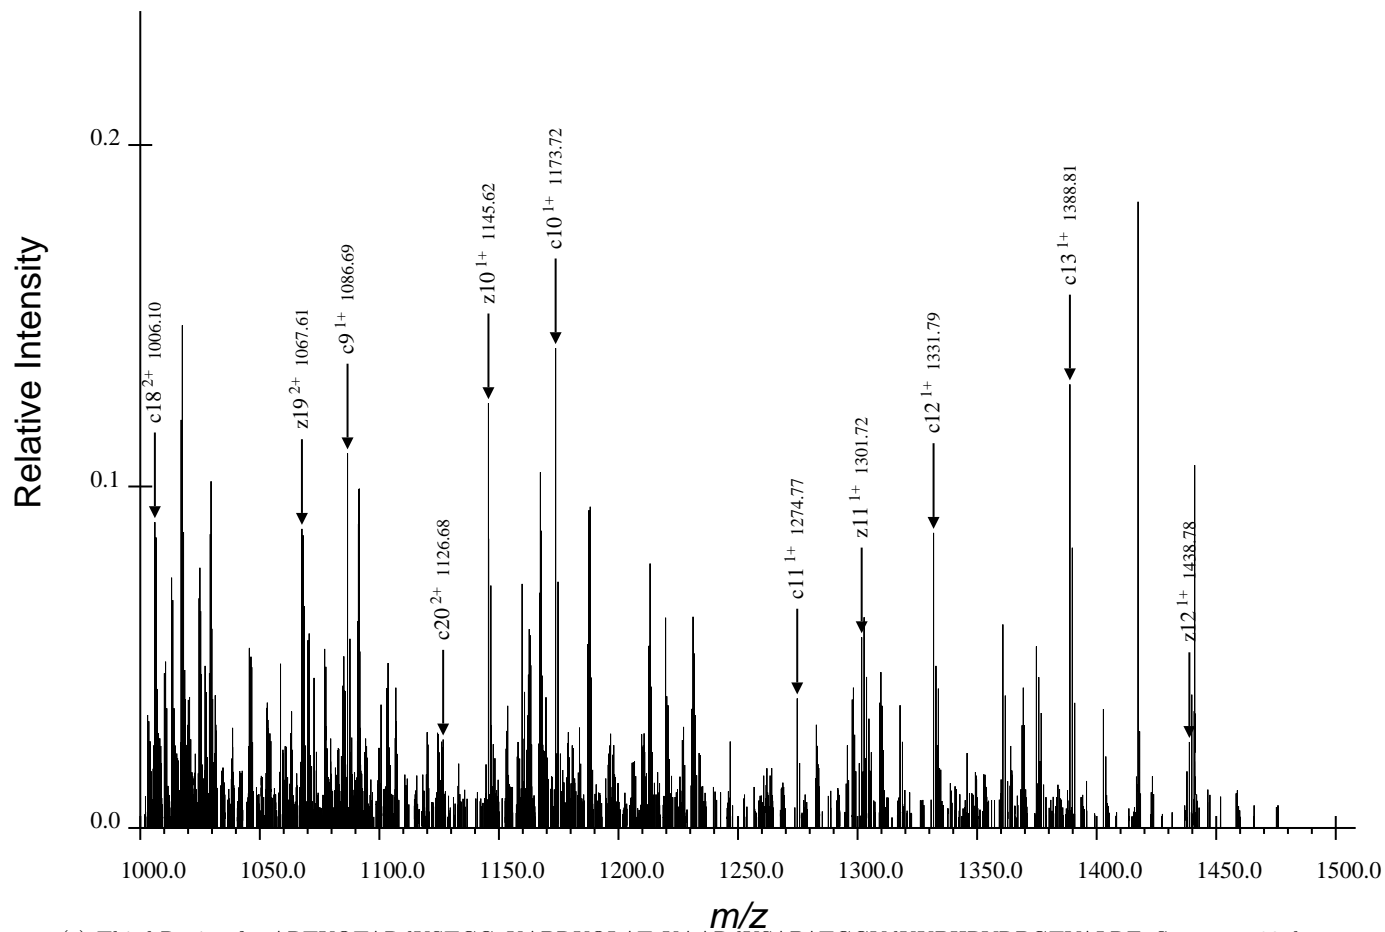

(c) Third Region for ARTKQTARdKSTGGaKAPRKQLATaKAARdKSAPATGGVdKKPHRYRPGTVALRE, Spectrum 30.dta

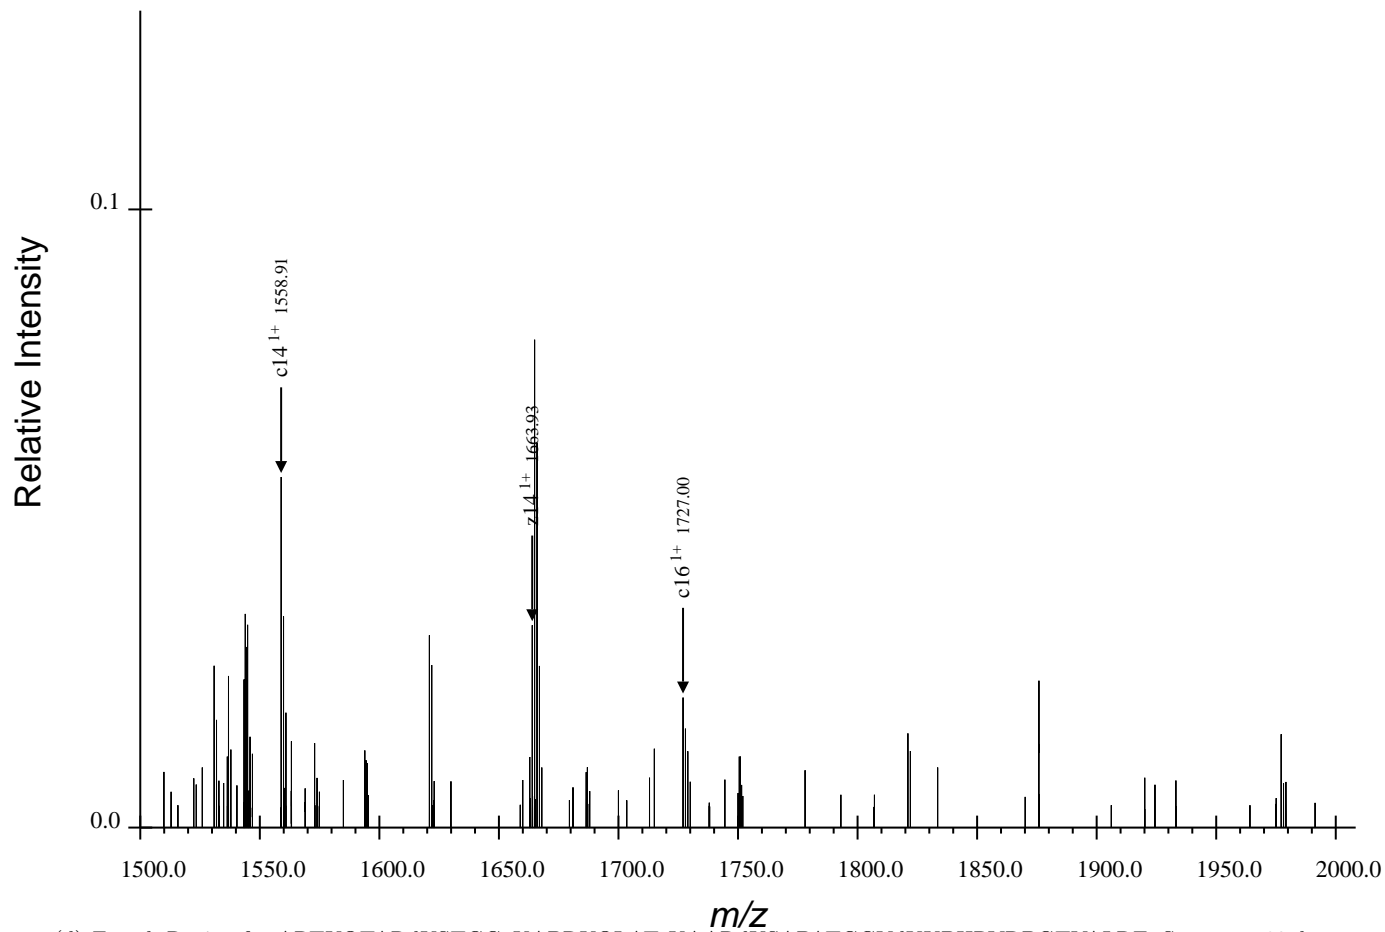

(d) Fourth Region for ARTKQTARdKSTGGaKAPRKQLATaKAARdKSAPATGGVdKKPHRYRPGTVALRE, Spectrum 30.dta

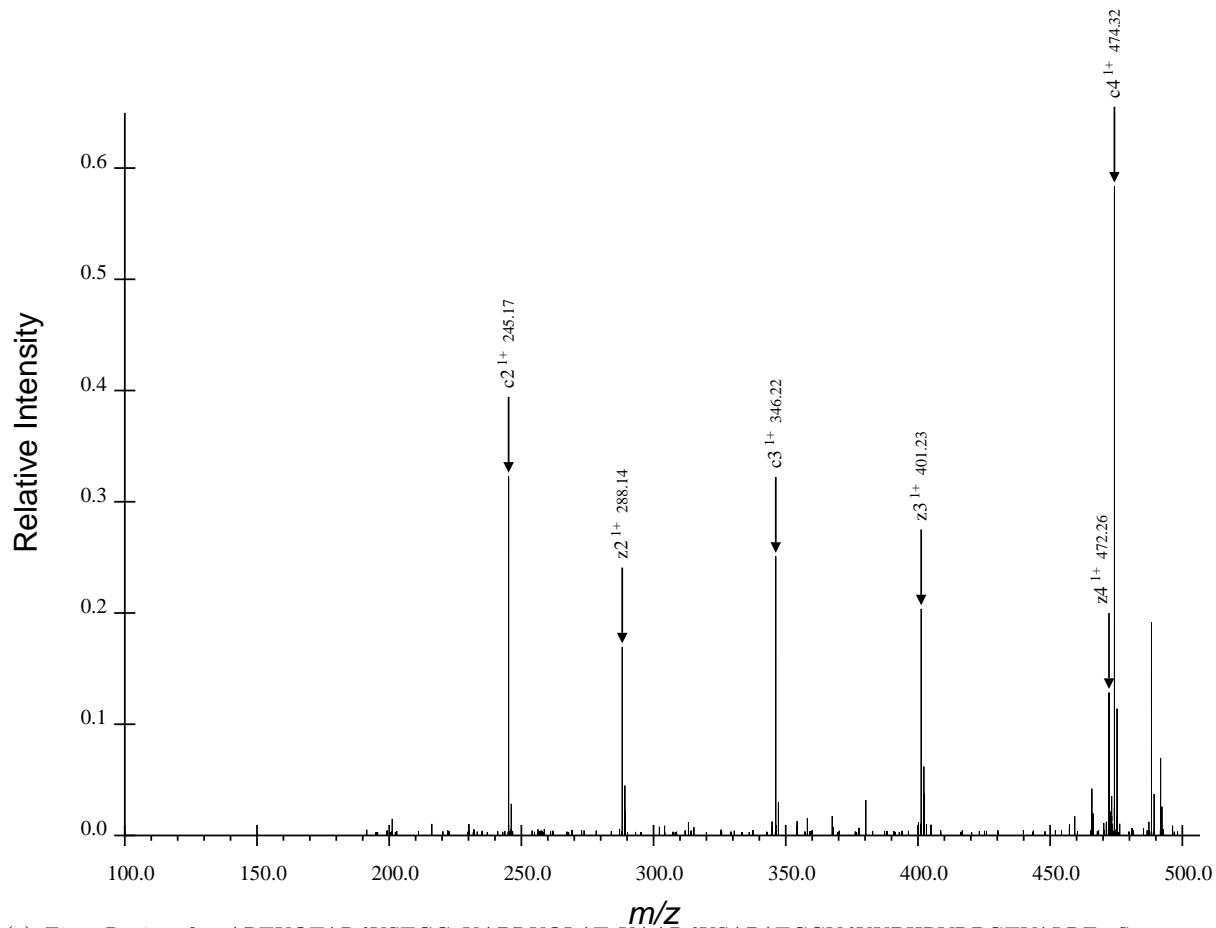

(a) First Region for ARTKQTARdKSTGGaKAPRKQLATaKAARdKSAPATGGVdKKPHRYRPGTVALRE, Spectrum 31.dta

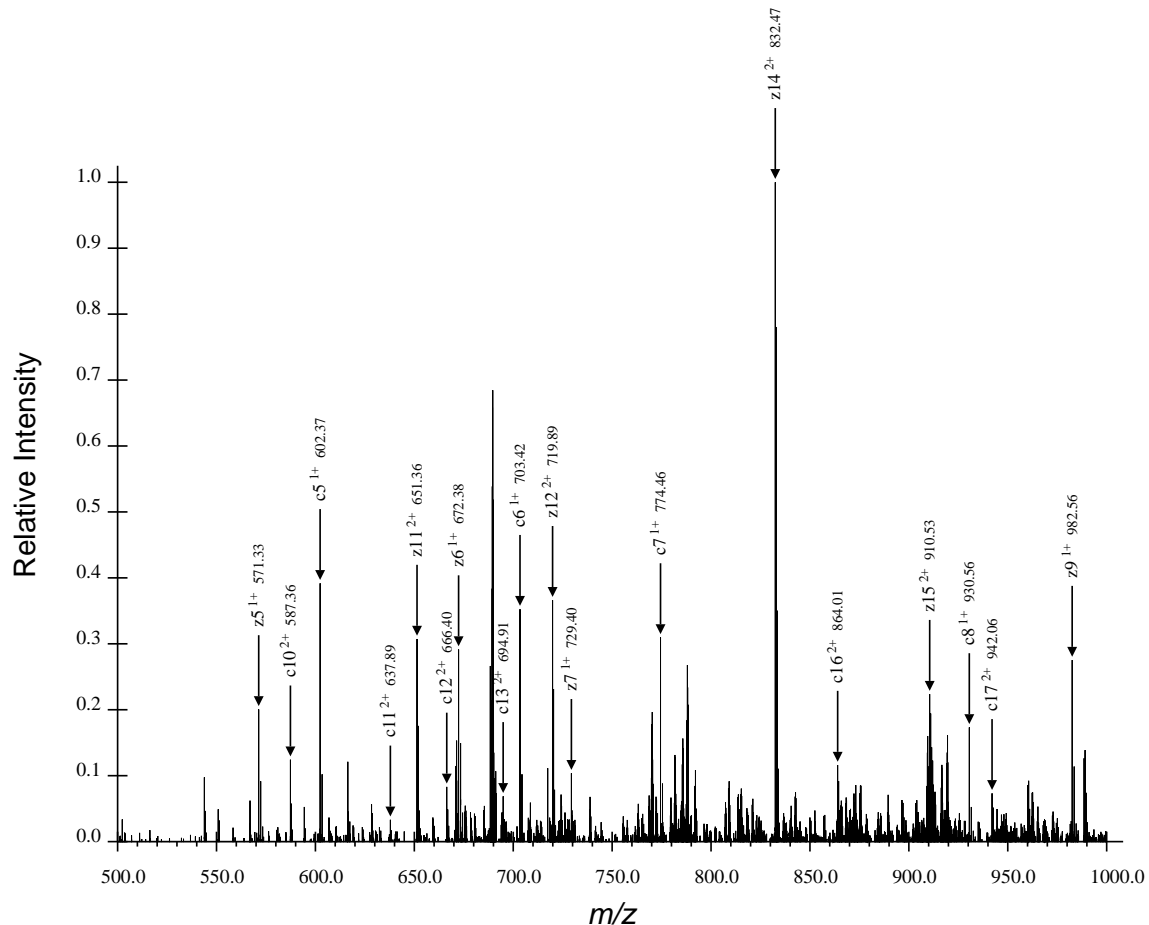

(b) Second Region for ARTKQTARdKSTGGaKAPRKQLATaKAARdKSAPATGGVdKKPHRYRPGTVALRE, Spectrum 31.dta

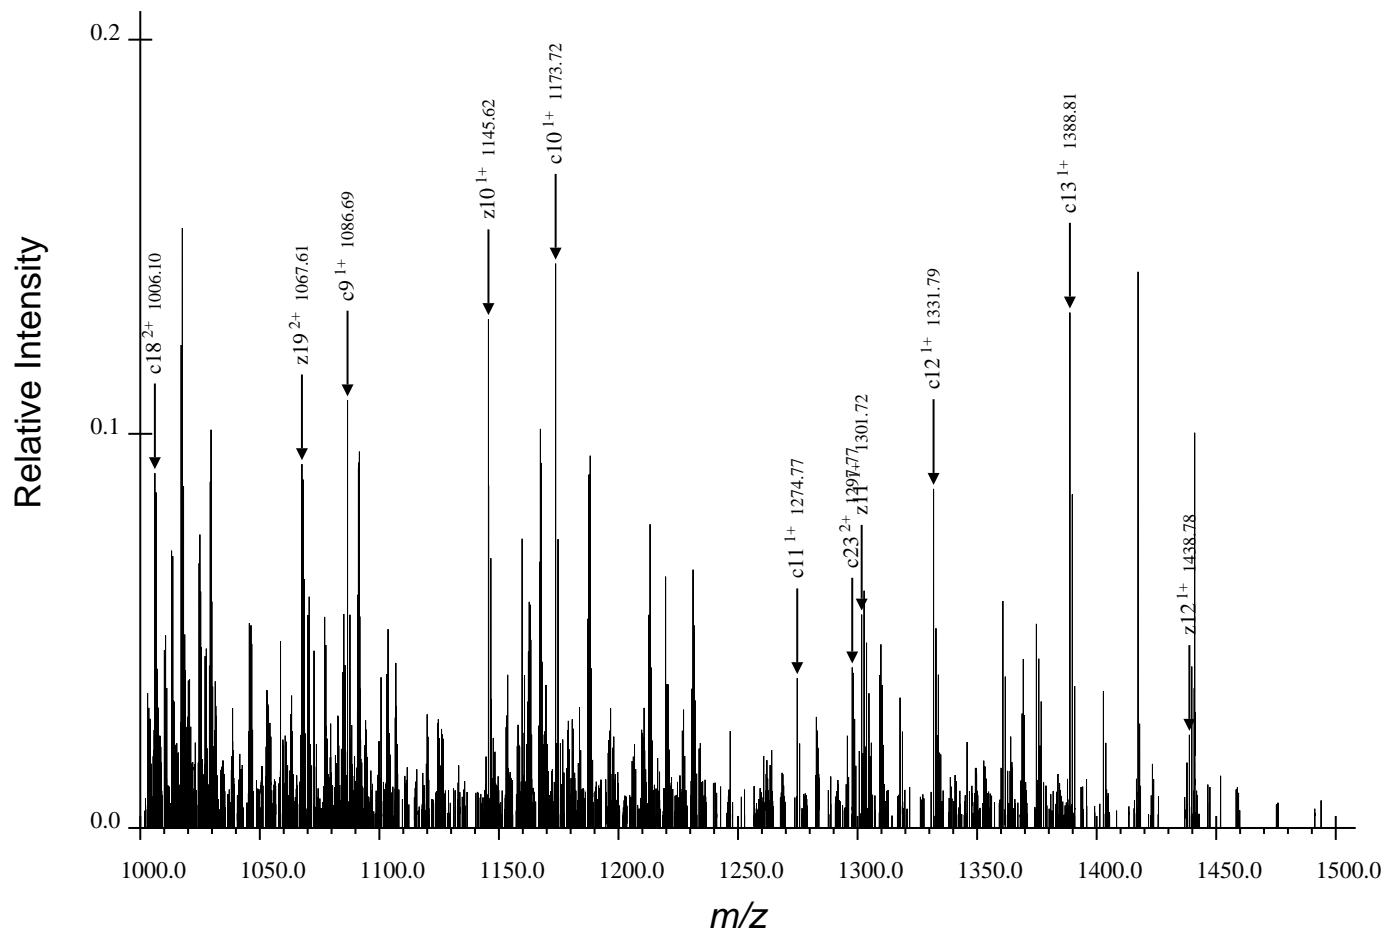

(c) Third Region for ARTKQTARdKSTGGaKAPRKQLATaKAARdKSAPATGGVdKKPHRYRPGTVALRE, Spectrum 31.dta

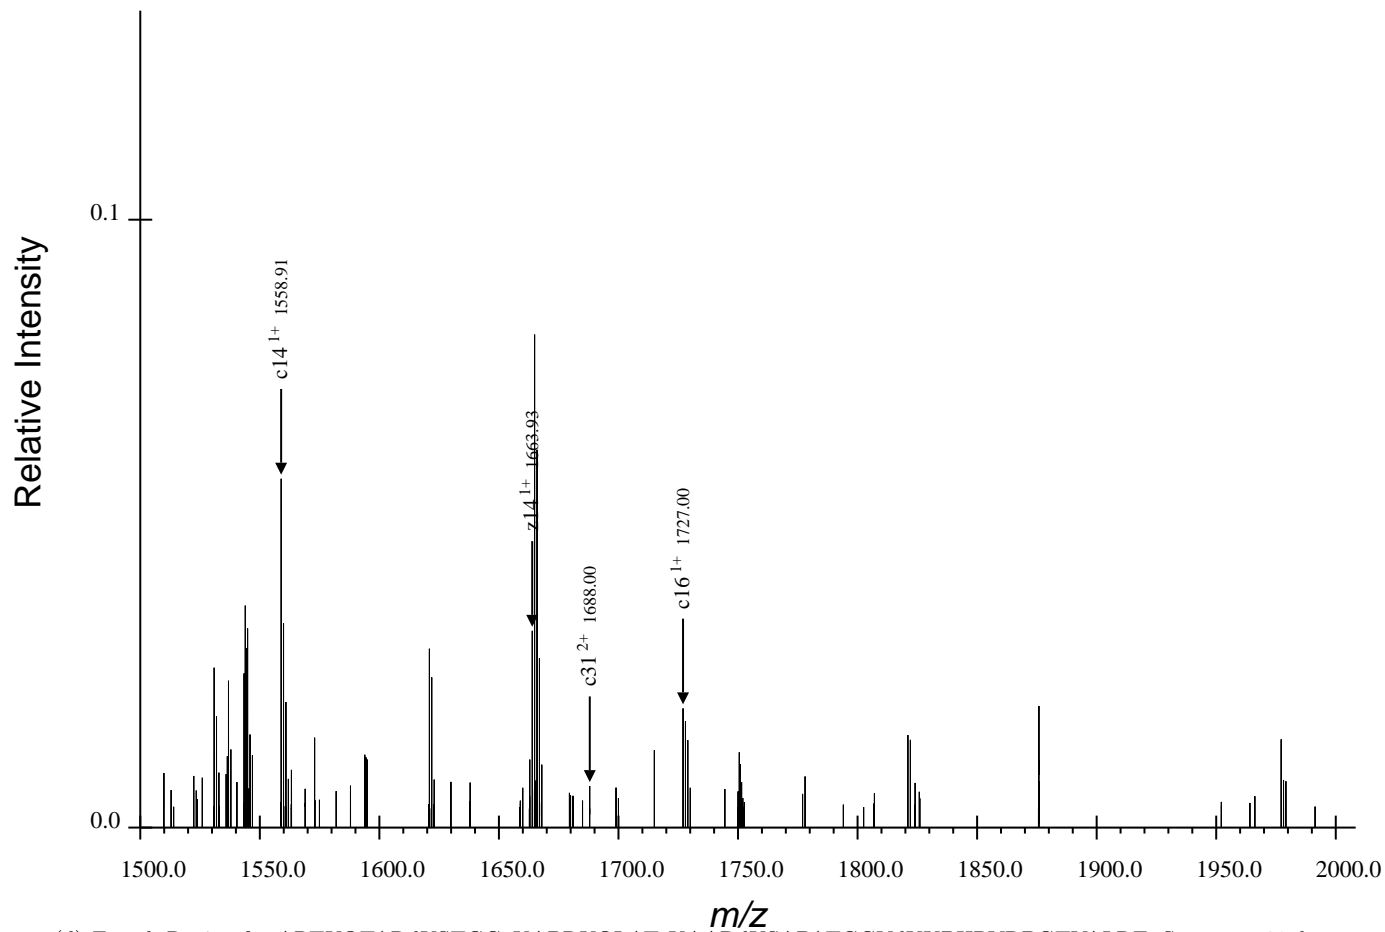

(d) Fourth Region for ARTKQTARdKSTGGaKAPRKQLATaKAARdKSAPATGGVdKKPHRYRPGTVALRE, Spectrum 31.dta

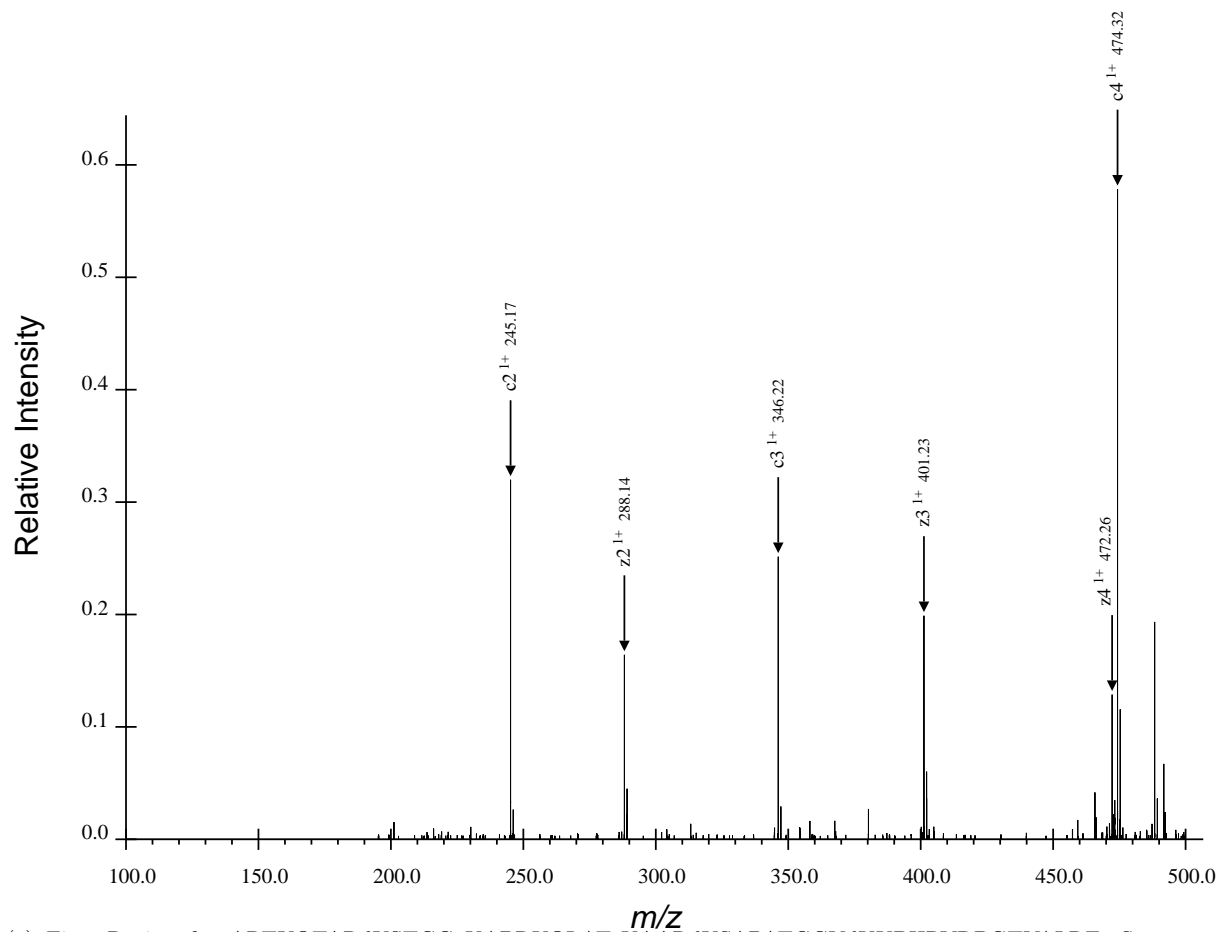

(a) First Region for ARTKQTARdKSTGGaKAPRKQLATaKAARdKSAPATGGVdKKPHRYRPGTVALRE, Spectrum 32.dta

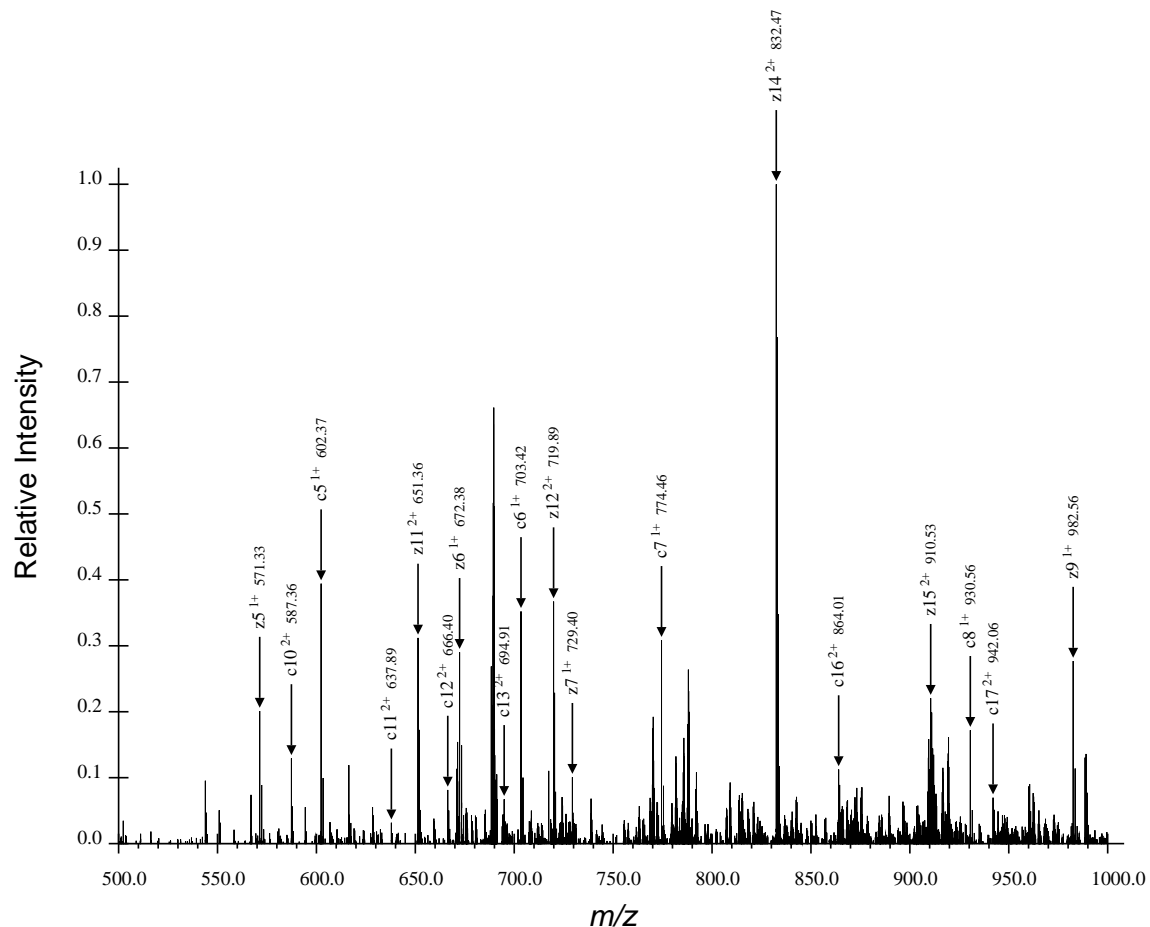

(b) Second Region for ARTKQTARdKSTGGaKAPRKQLATaKAARdKSAPATGGVdKKPHRYRPGTVALRE, Spectrum 32.dta

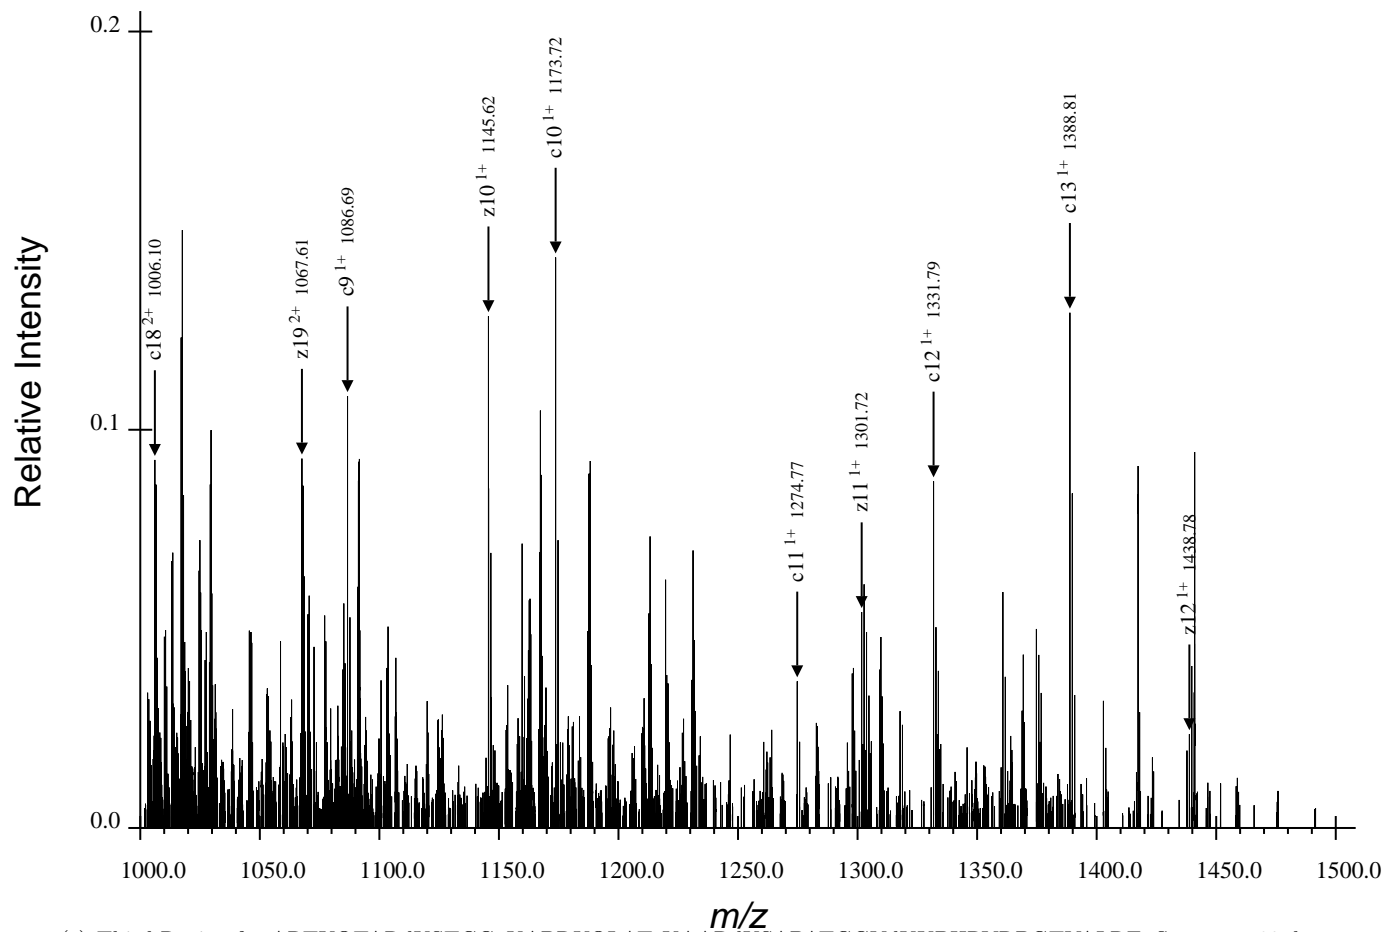

(c) Third Region for ARTKQTARdKSTGGaKAPRKQLATaKAARdKSAPATGGVdKKPHRYRPGTVALRE, Spectrum 32.dta

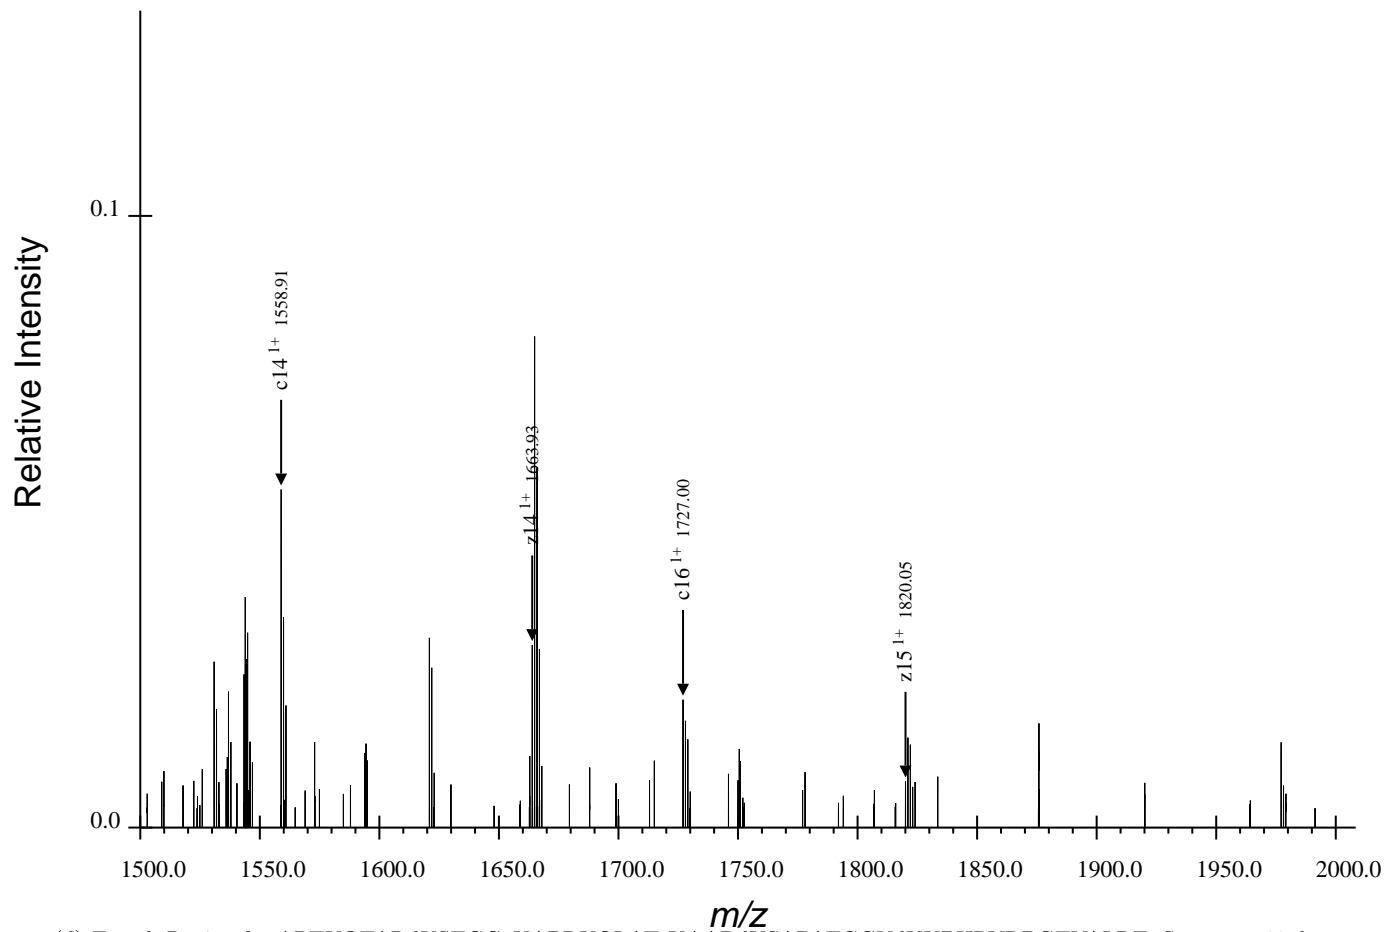

(d) Fourth Region for ARTKQTARdKSTGGaKAPRKQLATaKAARdKSAPATGGVdKKPHRYRPGTVALRE, Spectrum 32.dta



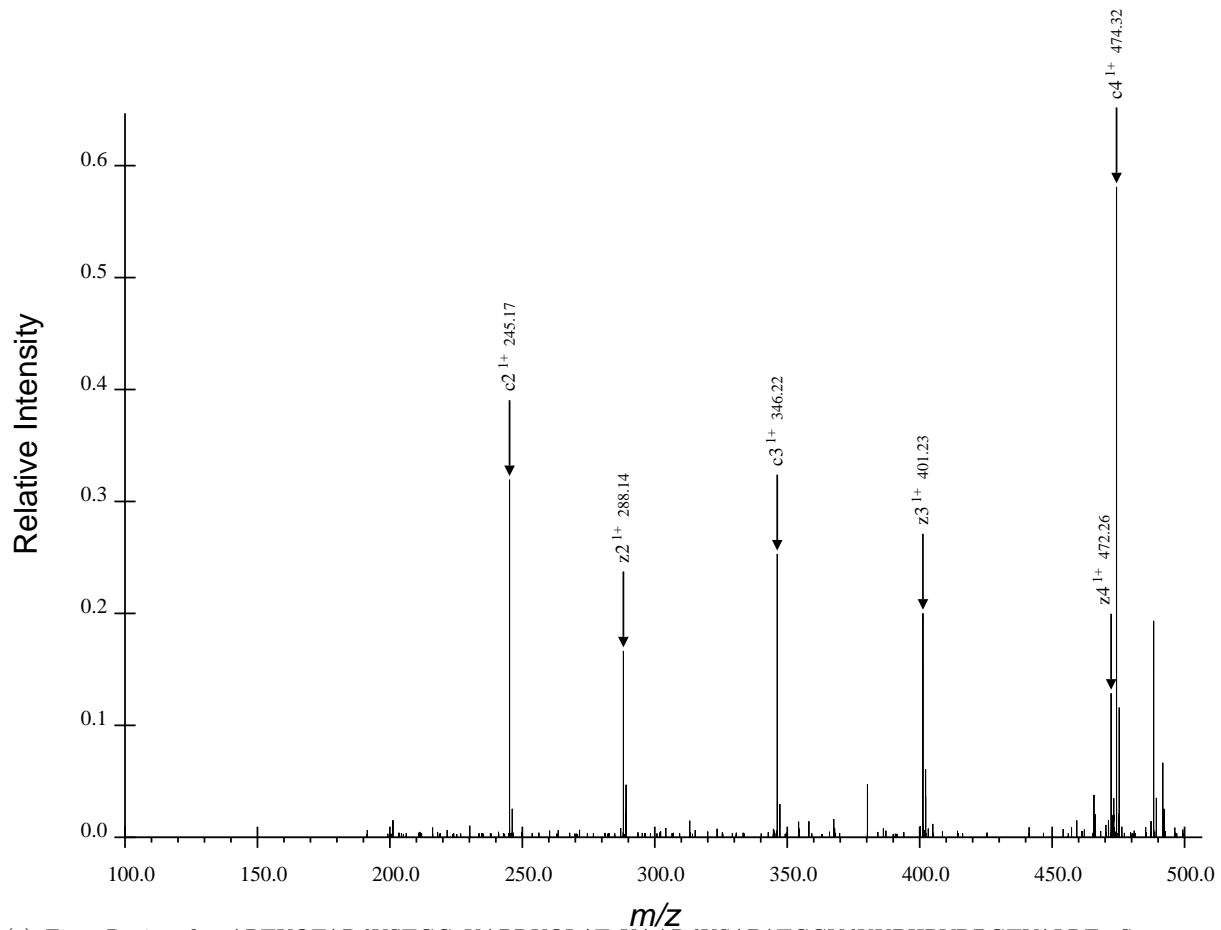

(a) First Region for ARTKQTARdKSTGGaKAPRKQLATaKAARdKSAPATGGVdKKPHRYRPGTVALRE, Spectrum 33.dta

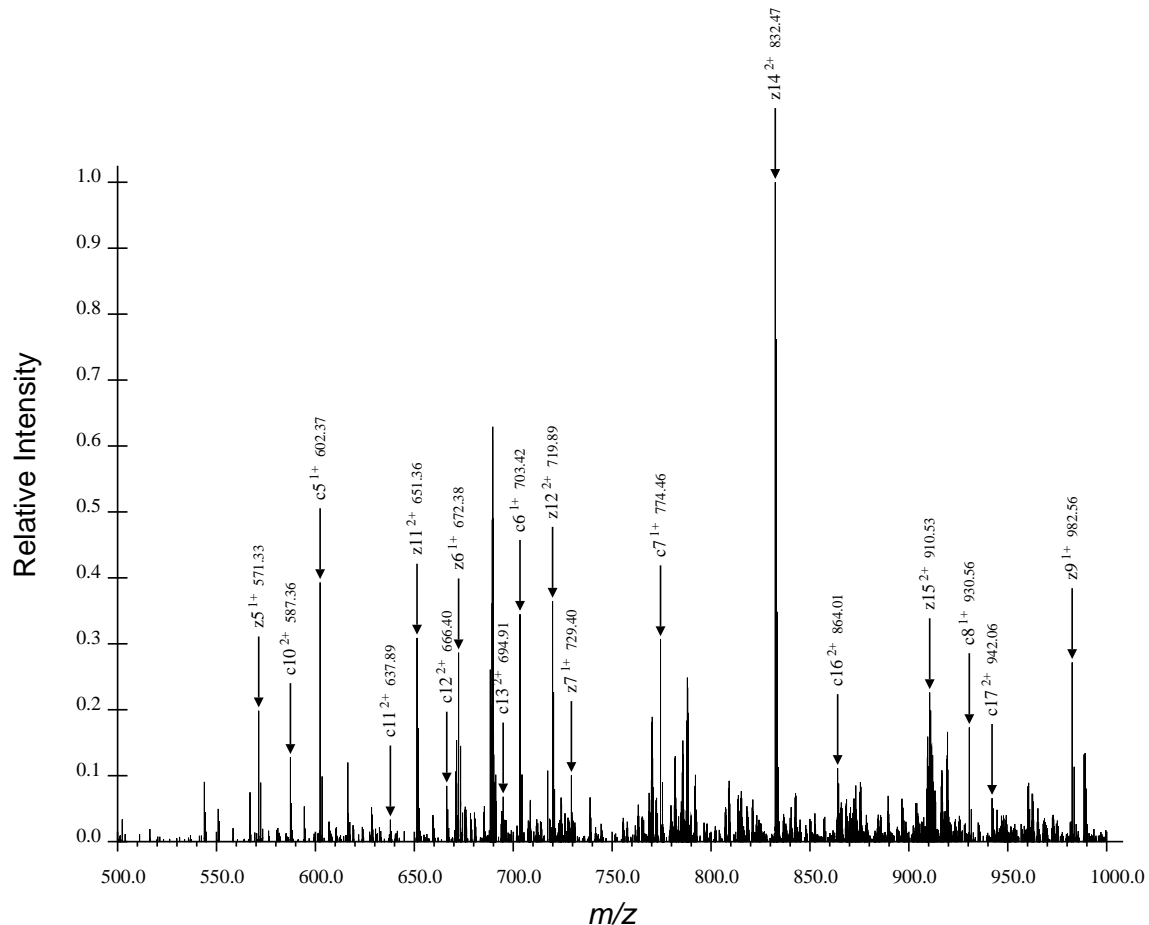

(b) Second Region for ARTKQTARdKSTGGaKAPRKQLATaKAARdKSAPATGGVdKKPHRYRPGTVALRE, Spectrum 33.dta

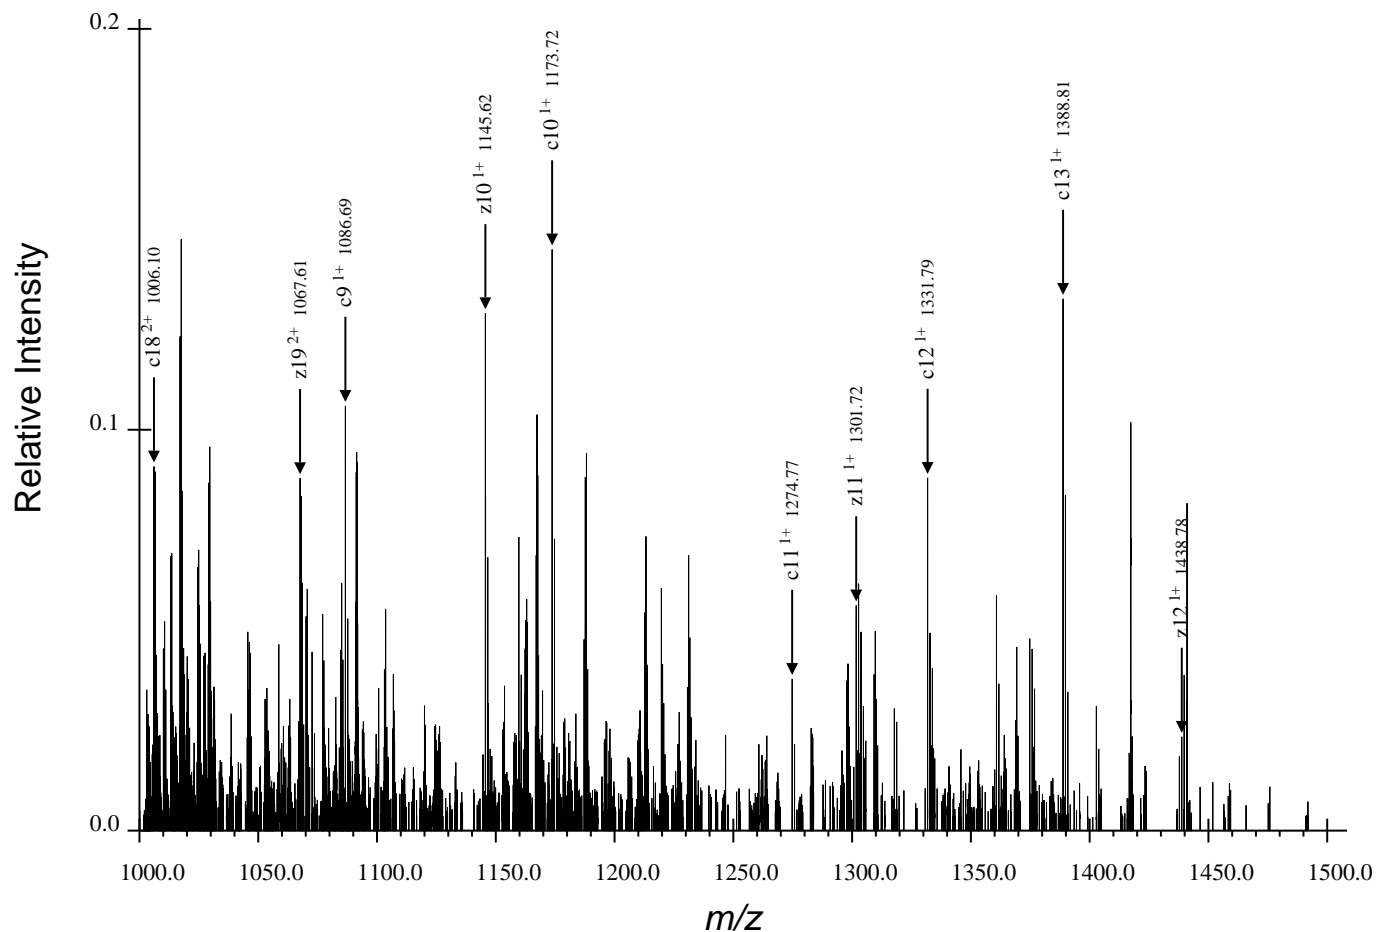

(c) Third Region for ARTKQTARdKSTGGaKAPRKQLATaKAARdKSAPATGGVdKKPHRYRPGTVALRE, Spectrum 33.dta

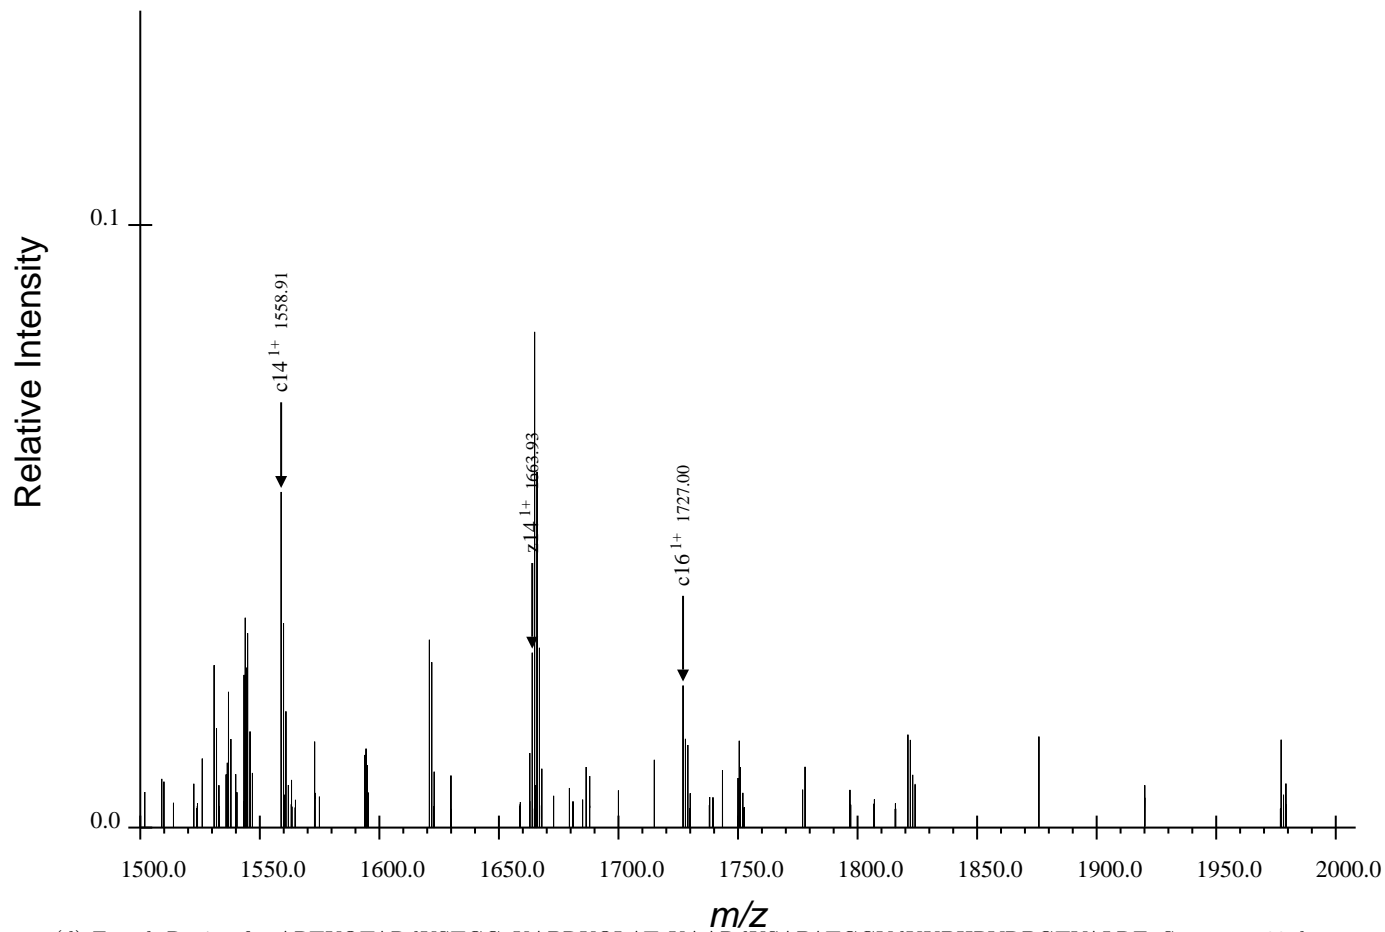

(d) Fourth Region for ARTKQTARdKSTGGaKAPRKQLATaKAARdKSAPATGGVdKKPHRYRPGTVALRE, Spectrum 33.dta

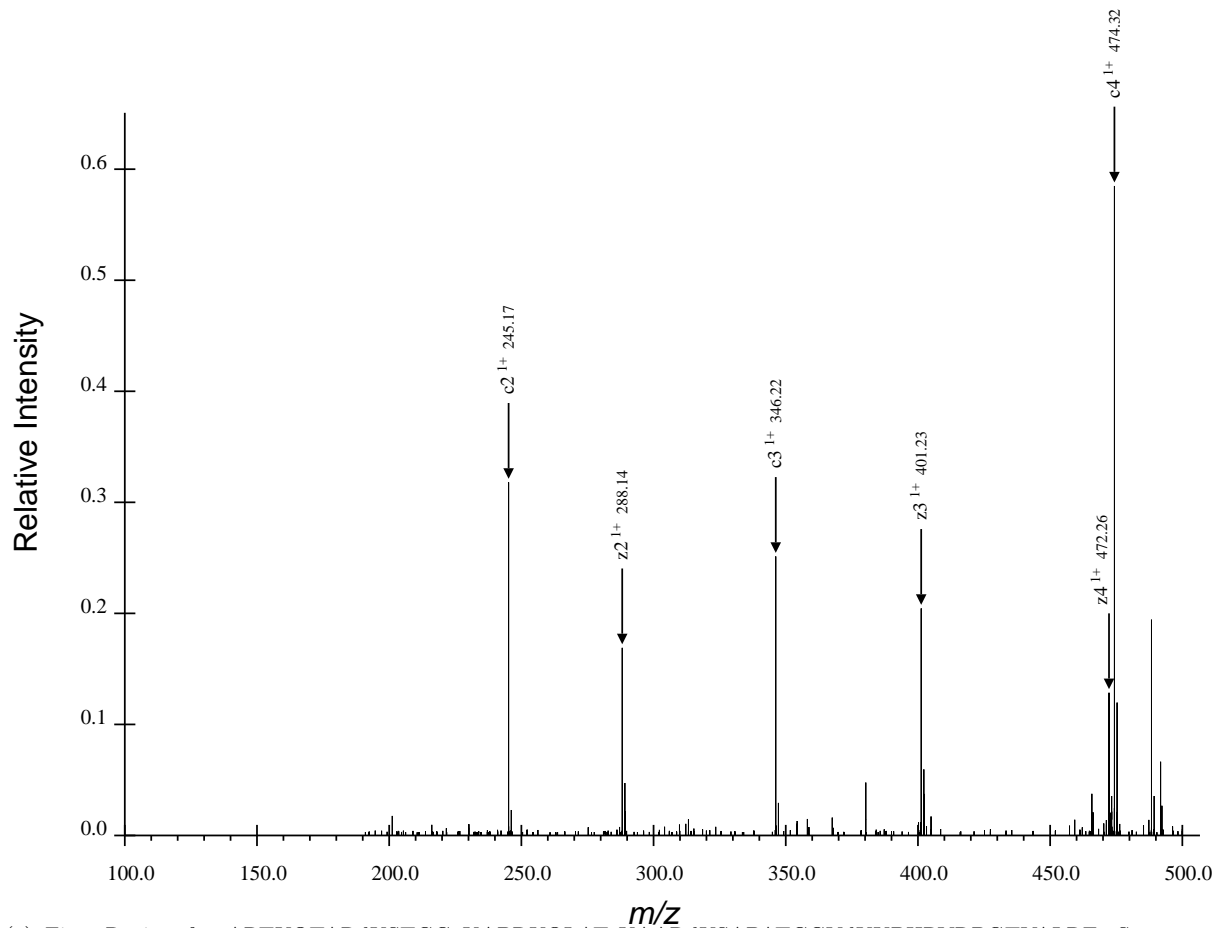

(a) First Region for ARTKQTARdKSTGGaKAPRKQLATaKAARdKSAPATGGVdKKPHRYRPGTVALRE, Spectrum 34.dta

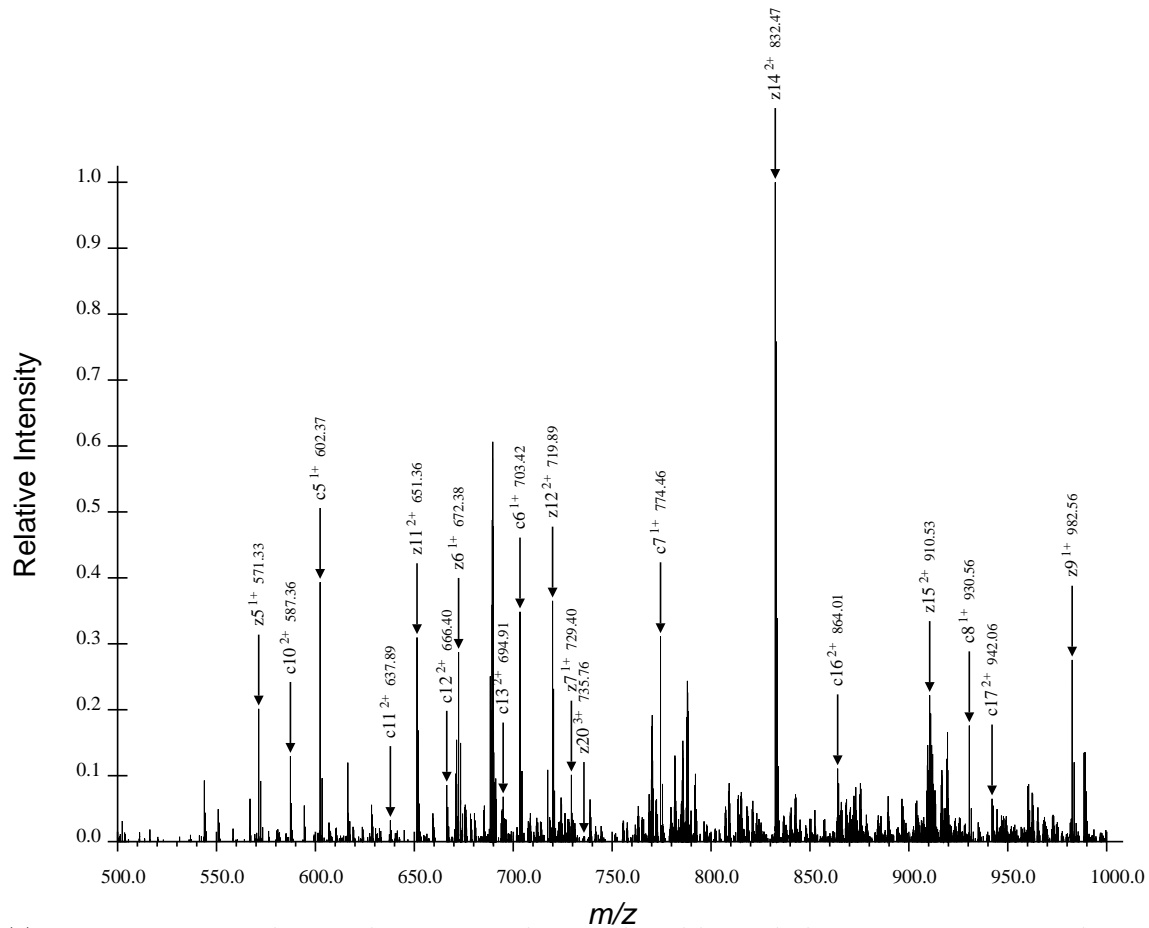

(b) Second Region for ARTKQTARdKSTGGaKAPRKQLATaKAARdKSAPATGGVdKKPHRYRPGTVALRE, Spectrum 34.dta

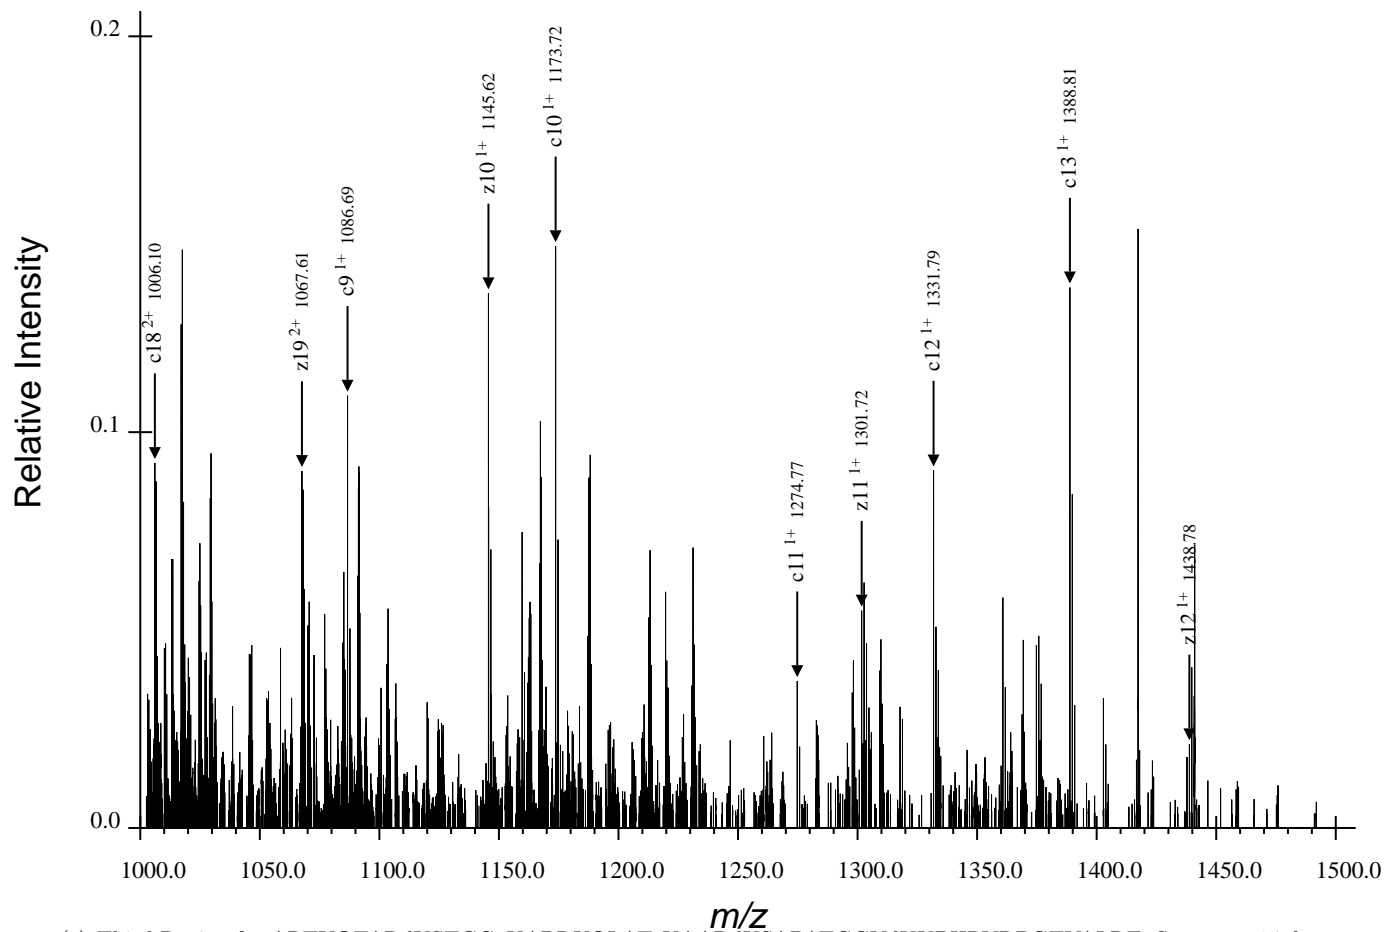

(c) Third Region for ARTKQTARdKSTGGaKAPRKQLATaKAARdKSAPATGGVdKKPHRYRPGTVALRE, Spectrum 34.dta

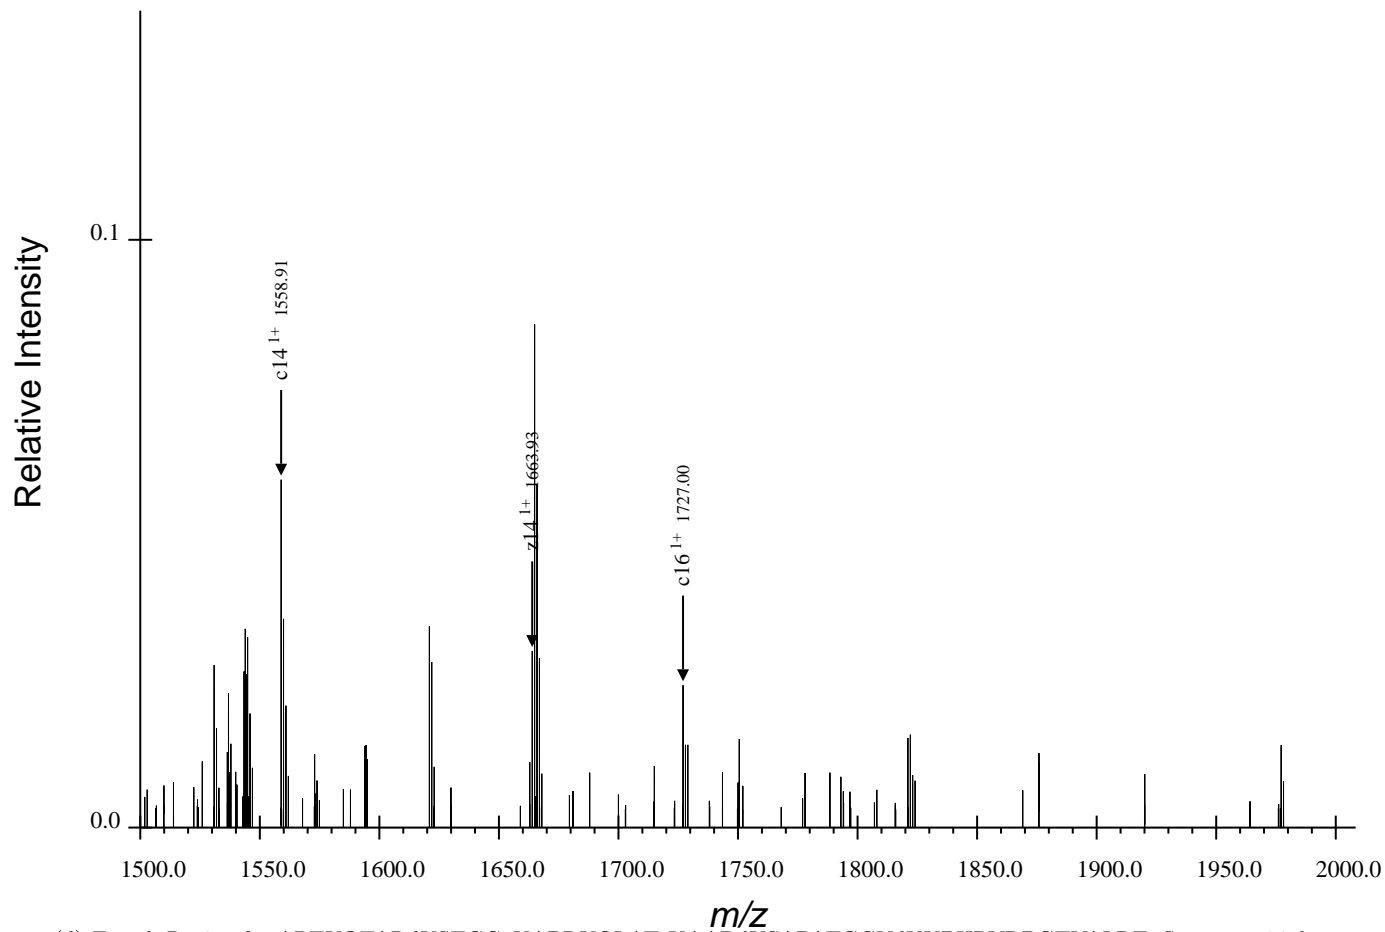

(d) Fourth Region for ARTKQTARdKSTGGaKAPRKQLATaKAARdKSAPATGGVdKKPHRYRPGTVALRE, Spectrum 34.dta

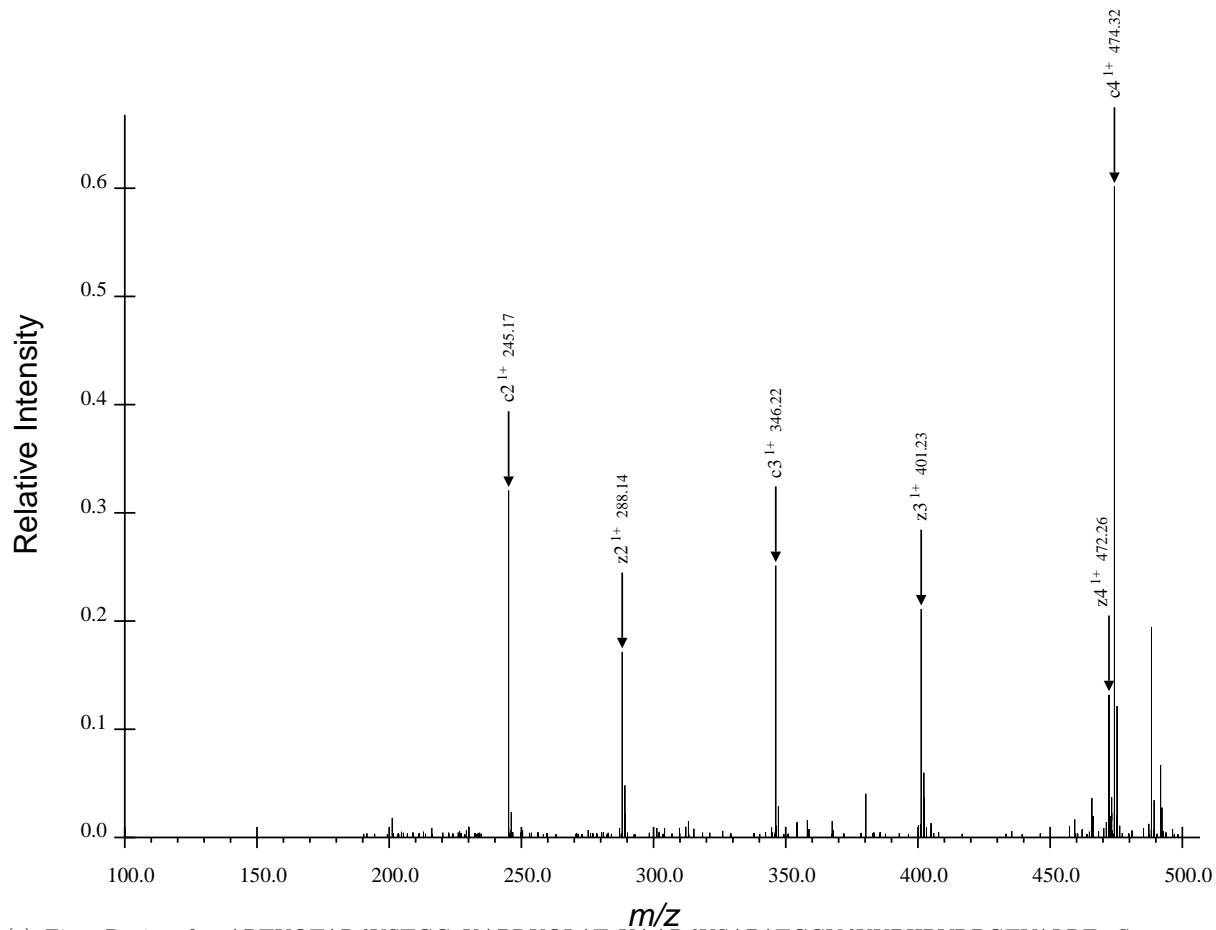

(a) First Region for ARTKQTARdKSTGGaKAPRKQLATaKAARdKSAPATGGVdKKPHRYRPGTVALRE, Spectrum 35.dta

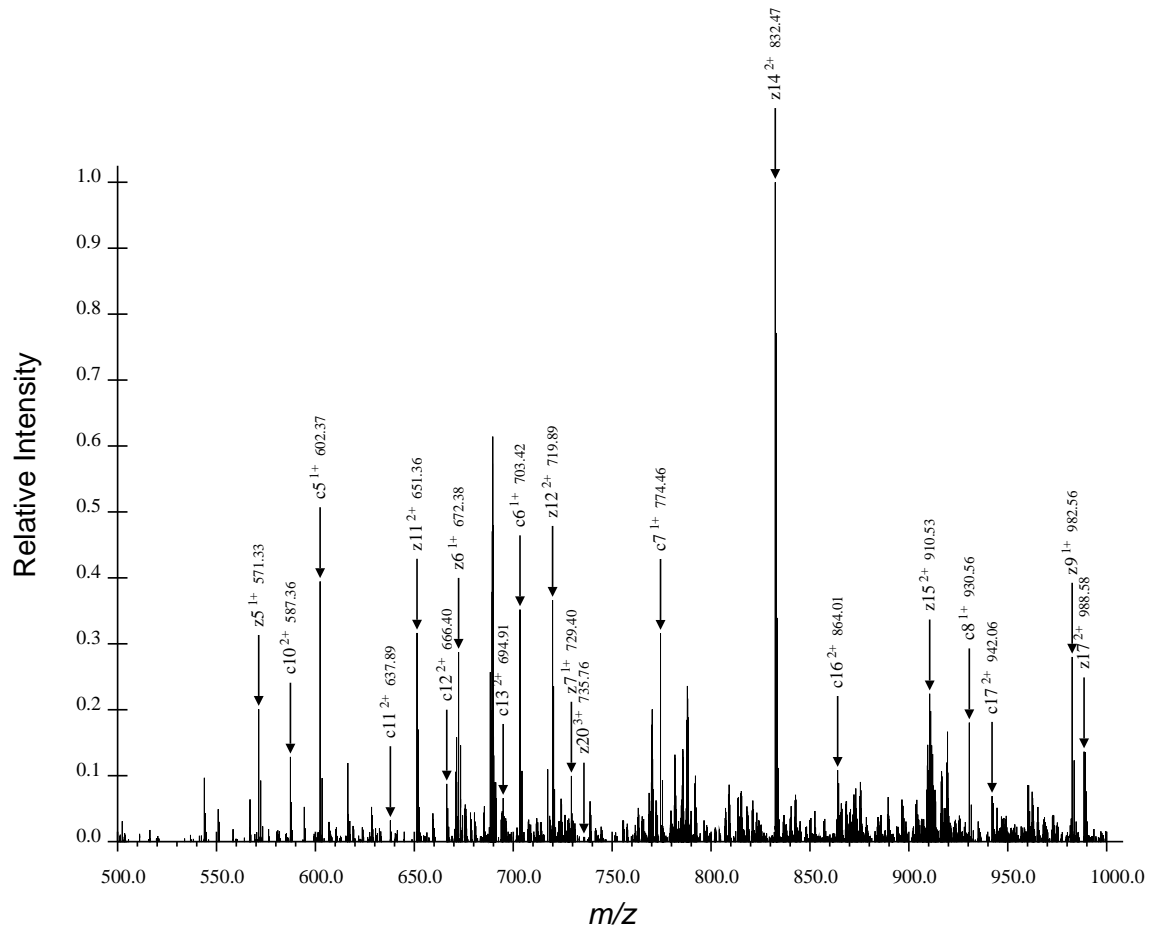

(b) Second Region for ARTKQTARdKSTGGaKAPRKQLATaKAARdKSAPATGGVdKKPHRYRPGTVALRE, Spectrum 35.dta

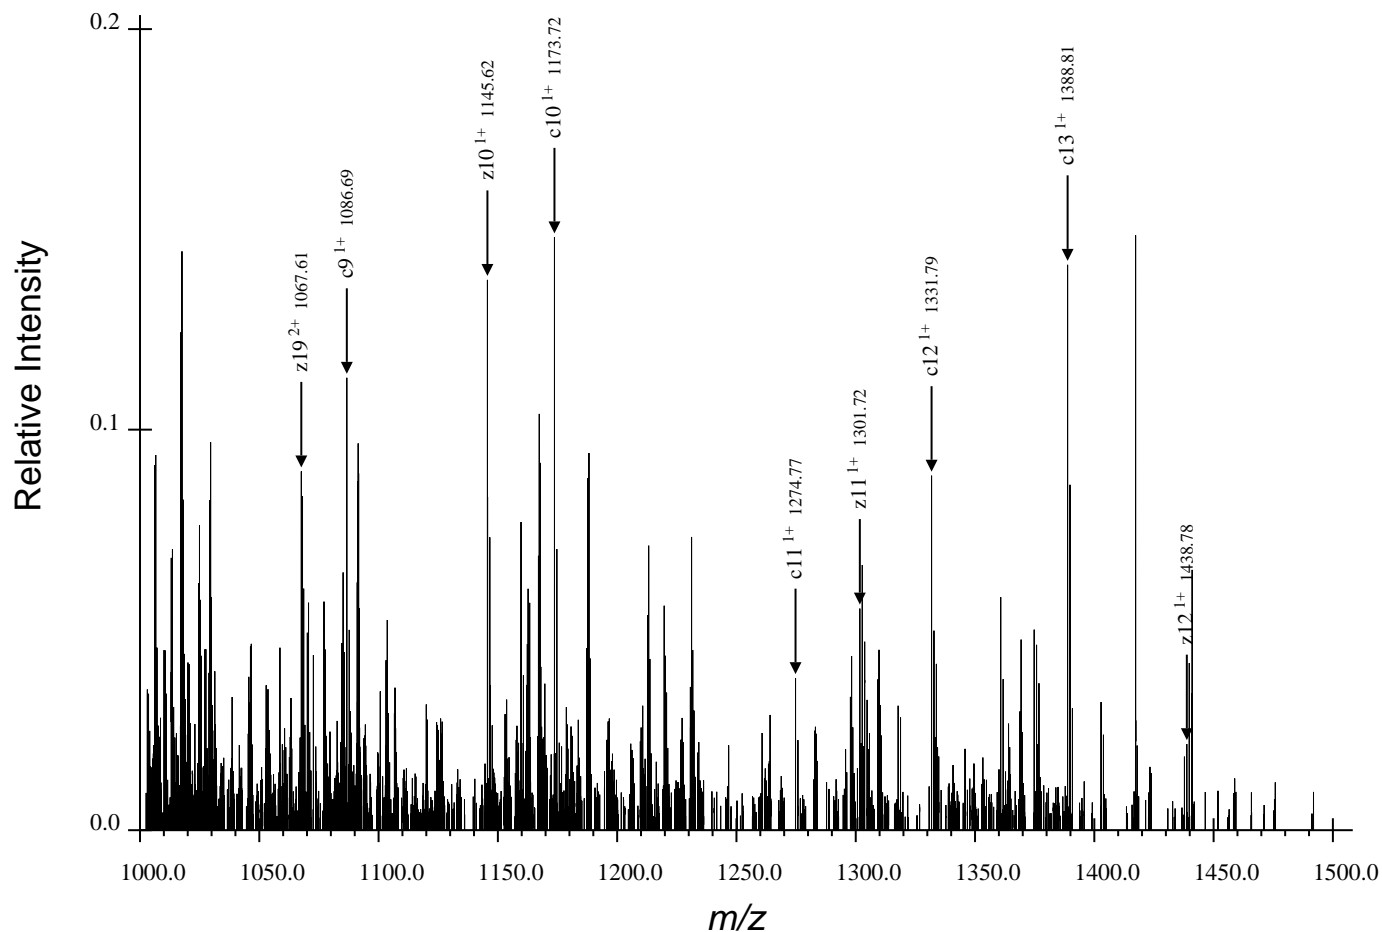

(c) Third Region for ARTKQTARdKSTGGaKAPRKQLATaKAARdKSAPATGGVdKKPHRYRPGTVALRE, Spectrum 35.dta

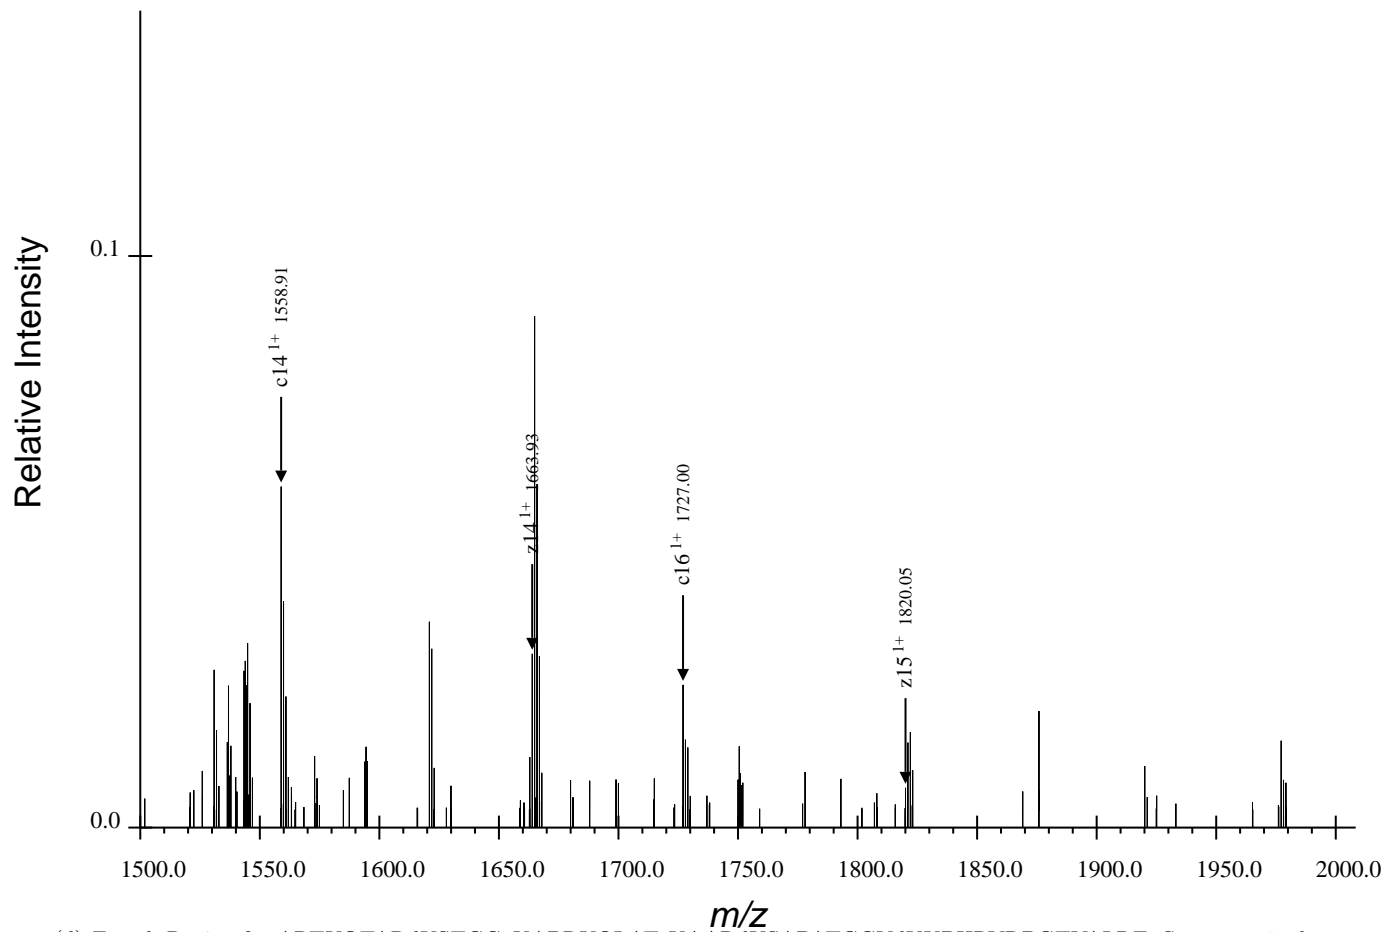

(d) Fourth Region for ARTKQTARdKSTGGaKAPRKQLATaKAARdKSAPATGGVdKKPHRYRPGTVALRE, Spectrum 35.dta

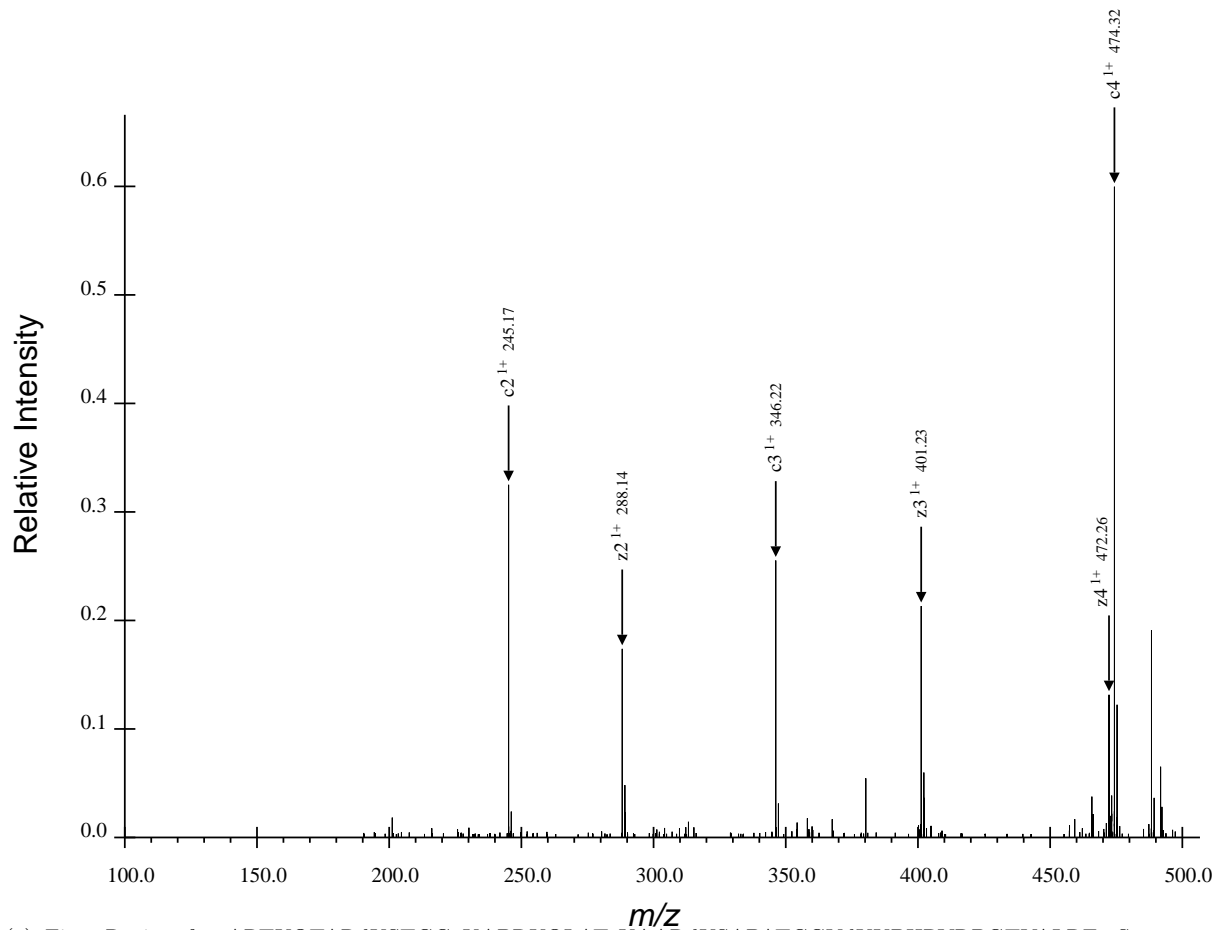

(a) First Region for ARTKQTARdKSTGGaKAPRKQLATaKAARdKSAPATGGVdKKPHRYRPGTVALRE, Spectrum 36.dta

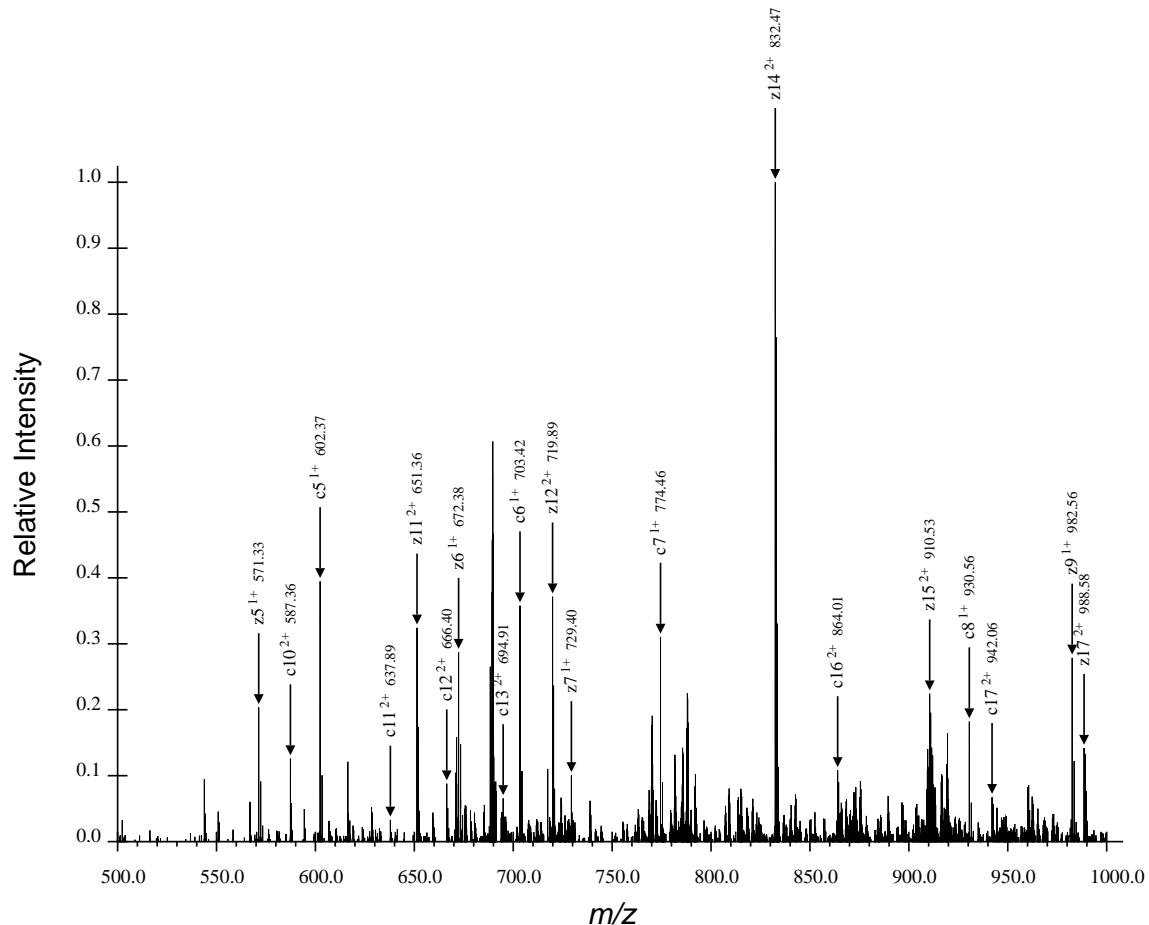

(b) Second Region for ARTKQTARdKSTGGaKAPRKQLATaKAARdKSAPATGGVdKKPHRYRPGTVALRE, Spectrum 36.dta

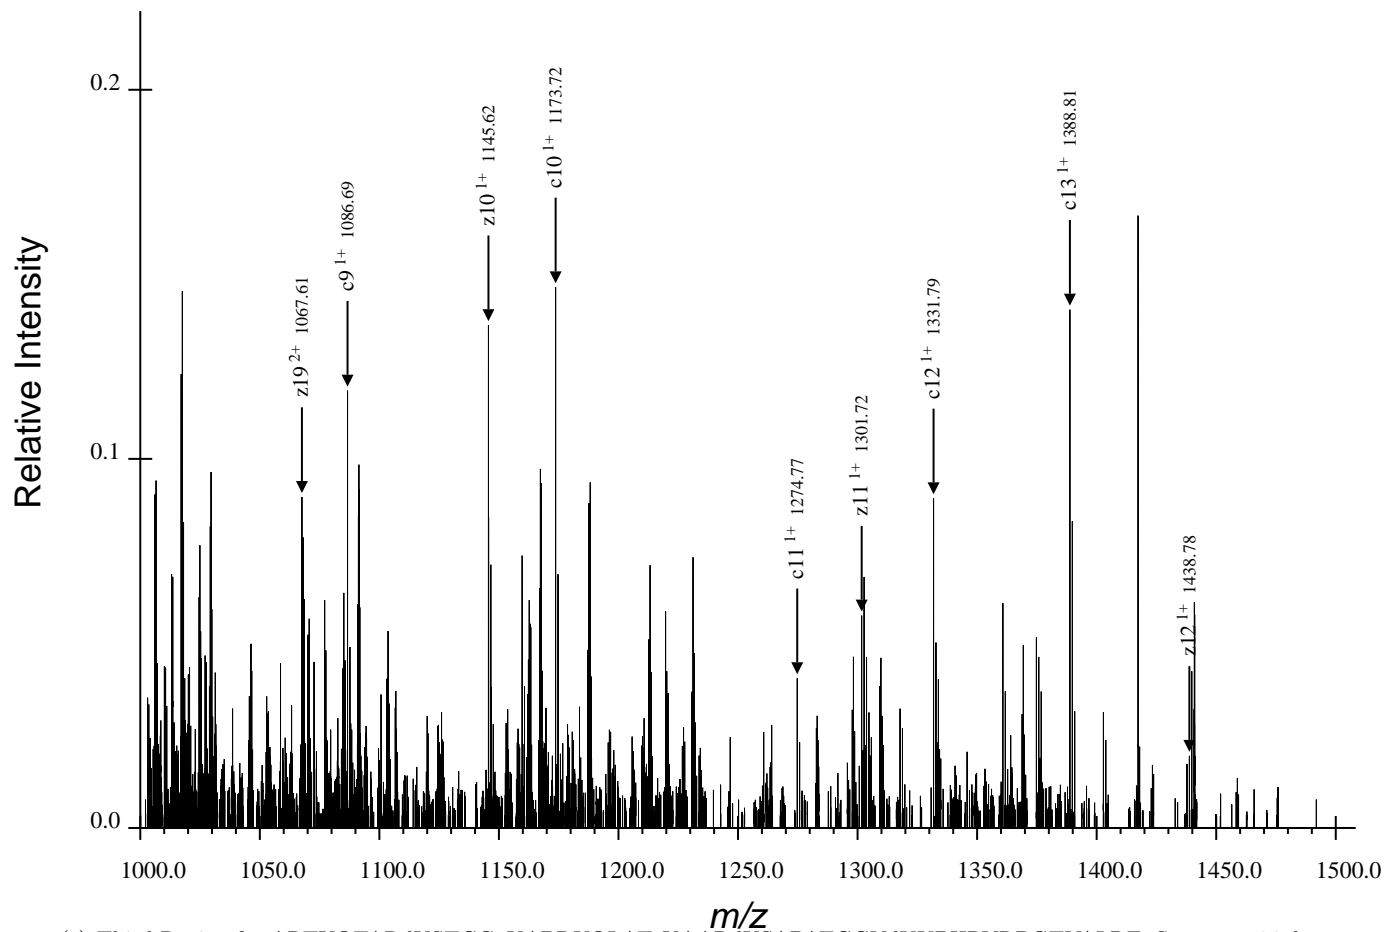

(c) Third Region for ARTKQTARdKSTGGaKAPRKQLATaKAARdKSAPATGGVdKKPHRYRPGTVALRE, Spectrum 36.dta

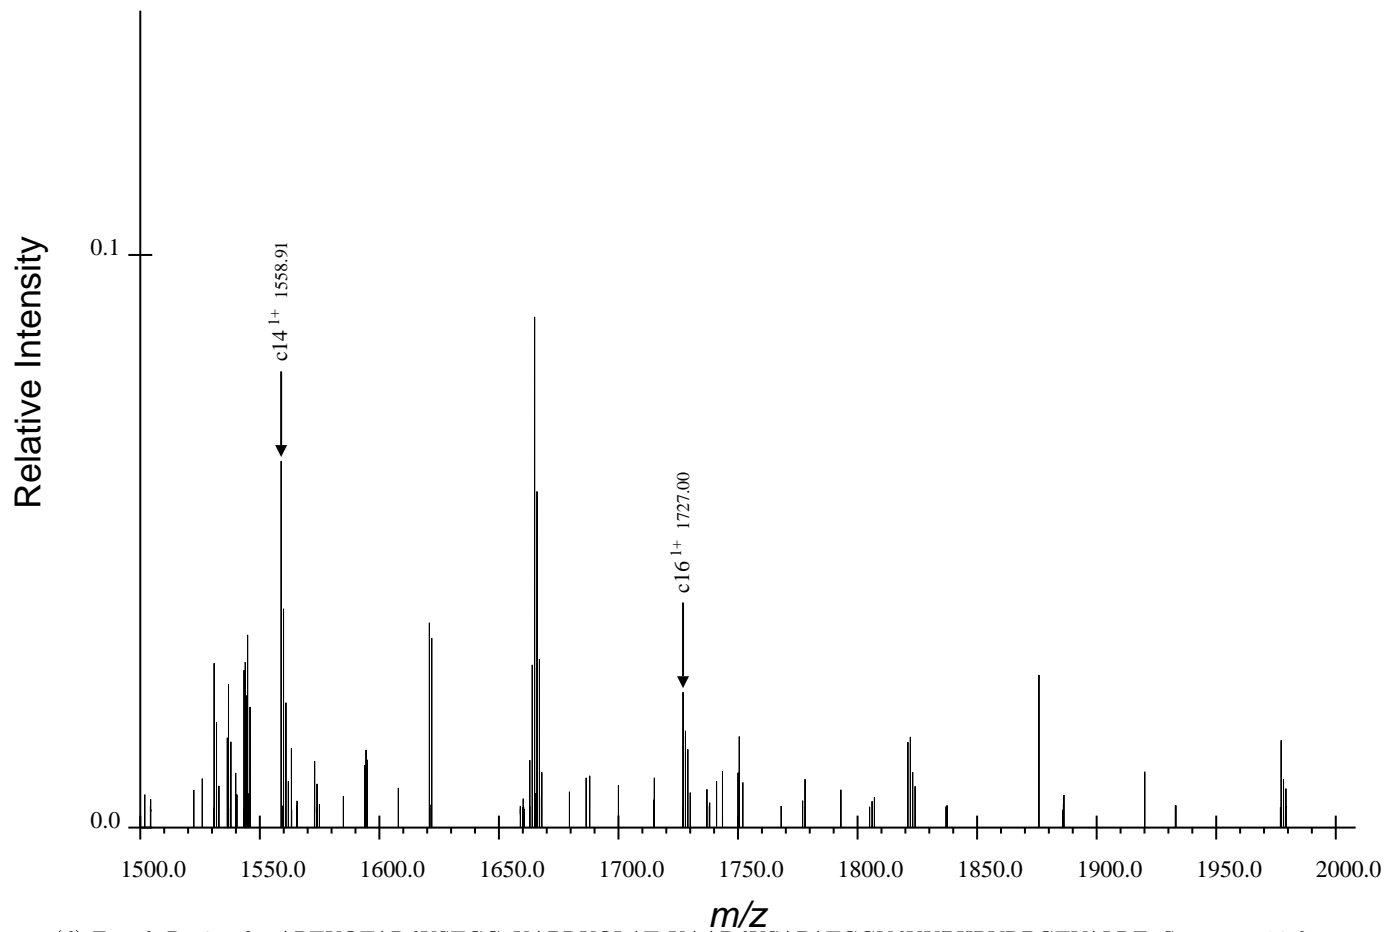

(d) Fourth Region for ARTKQTARdKSTGGaKAPRKQLATaKAARdKSAPATGGVdKKPHRYRPGTVALRE, Spectrum 36.dta



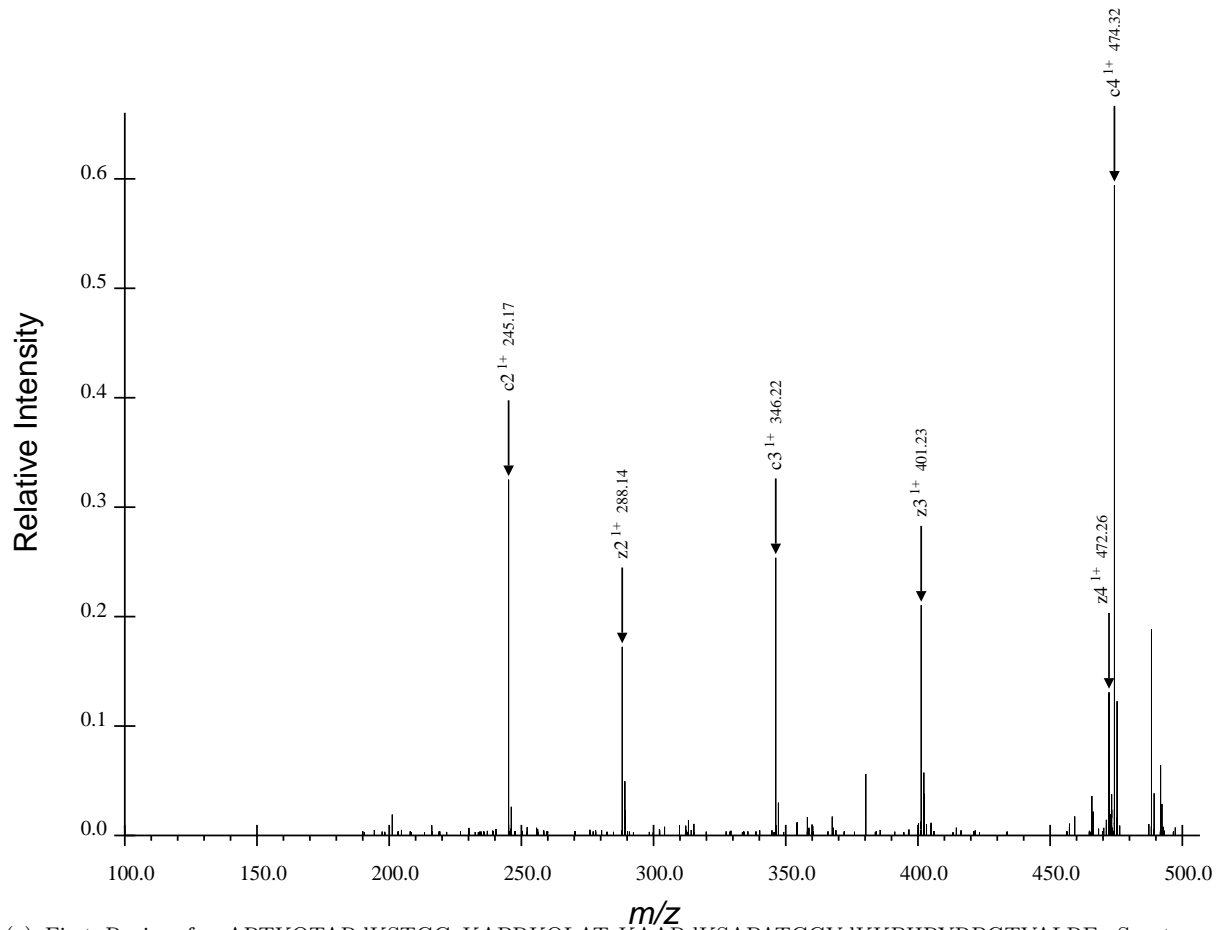

(a) First Region for ARTKQTARdKSTGGaKAPRKQLATaKAARdKSAPATGGVdKKPHRYRPGTVALRE, Spectrum 37.dta

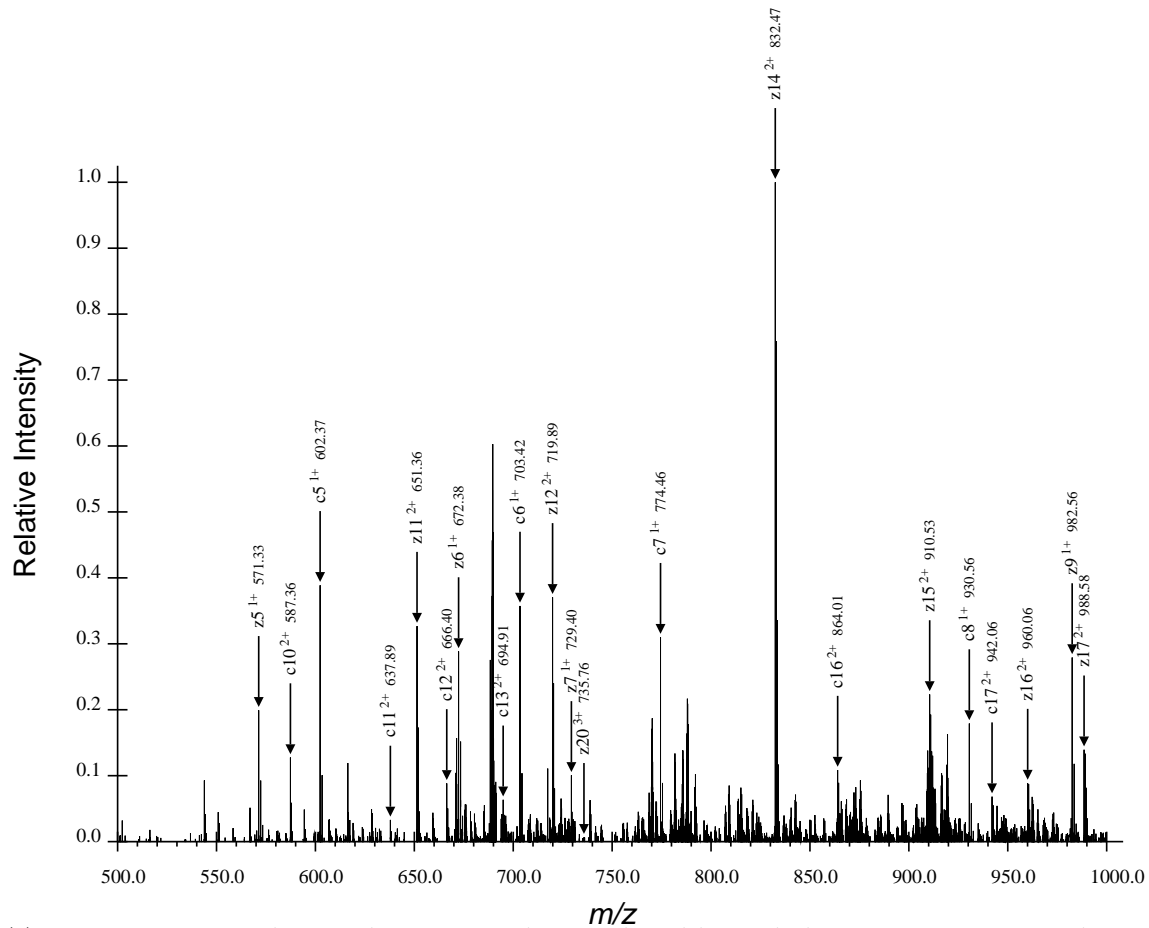

(b) Second Region for ARTKQTARdKSTGGaKAPRKQLATaKAARdKSAPATGGVdKKPHRYRPGTVALRE, Spectrum 37.dta

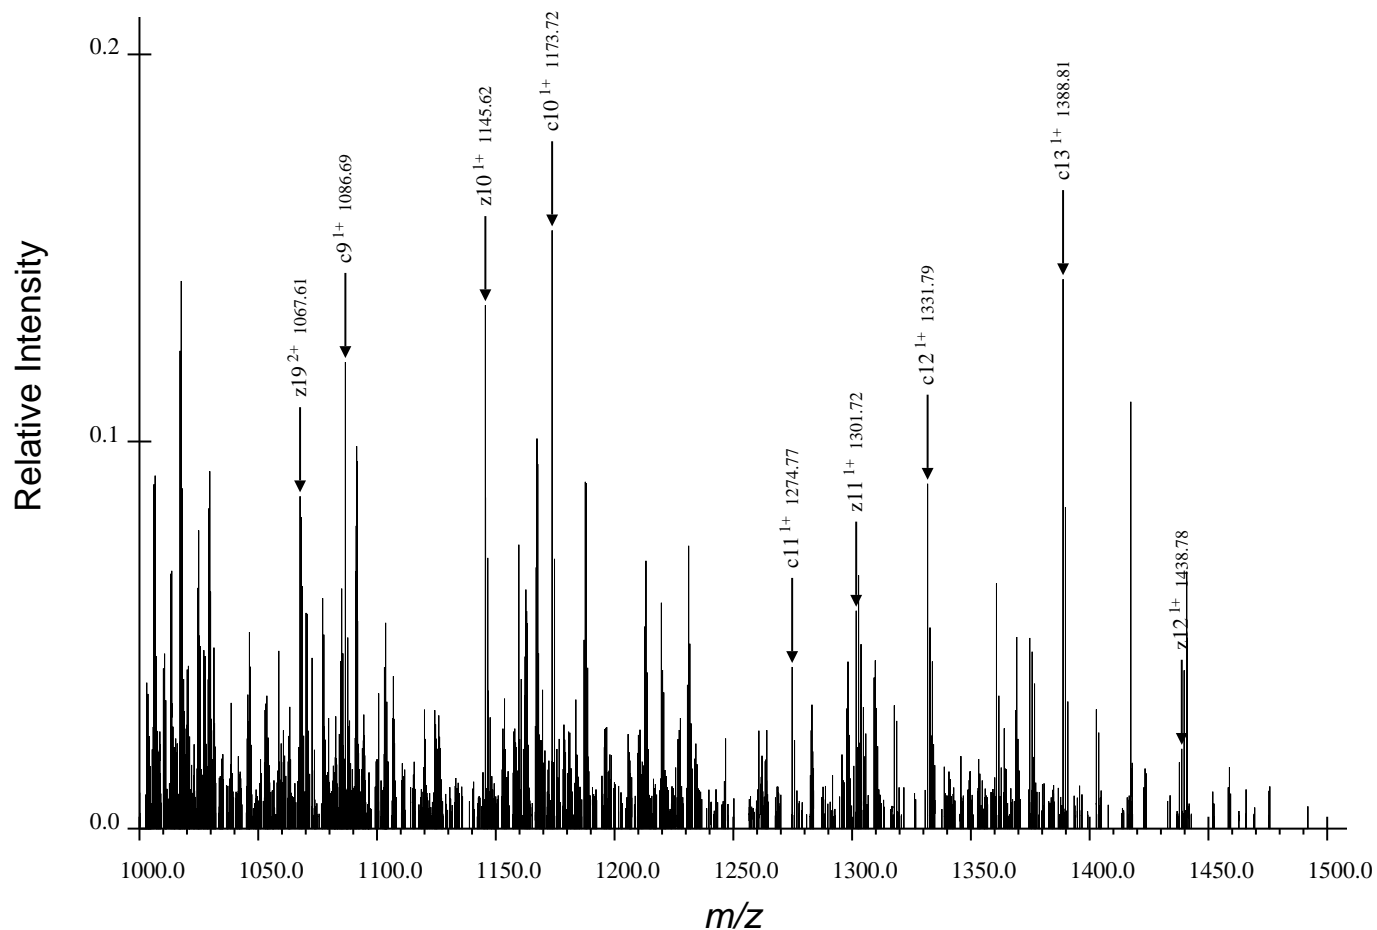

(c) Third Region for ARTKQTARdKSTGGaKAPRKQLATaKAARdKSAPATGGVdKKPHRYRPGTVALRE, Spectrum 37.dta

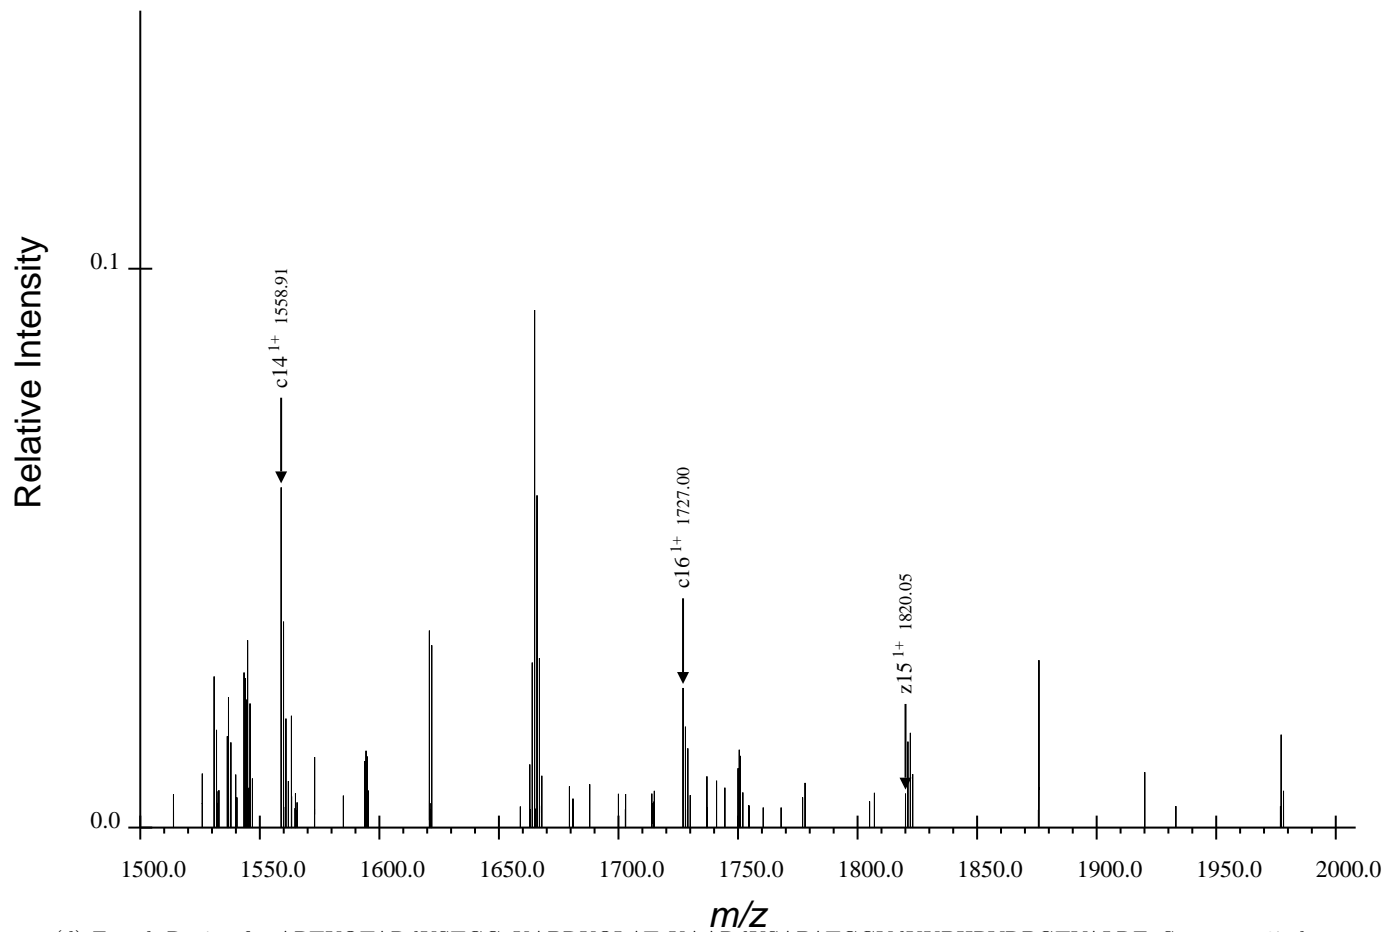

(d) Fourth Region for ARTKQTARdKSTGGaKAPRKQLATaKAARdKSAPATGGVdKKPHRYRPGTVALRE, Spectrum 37.dta

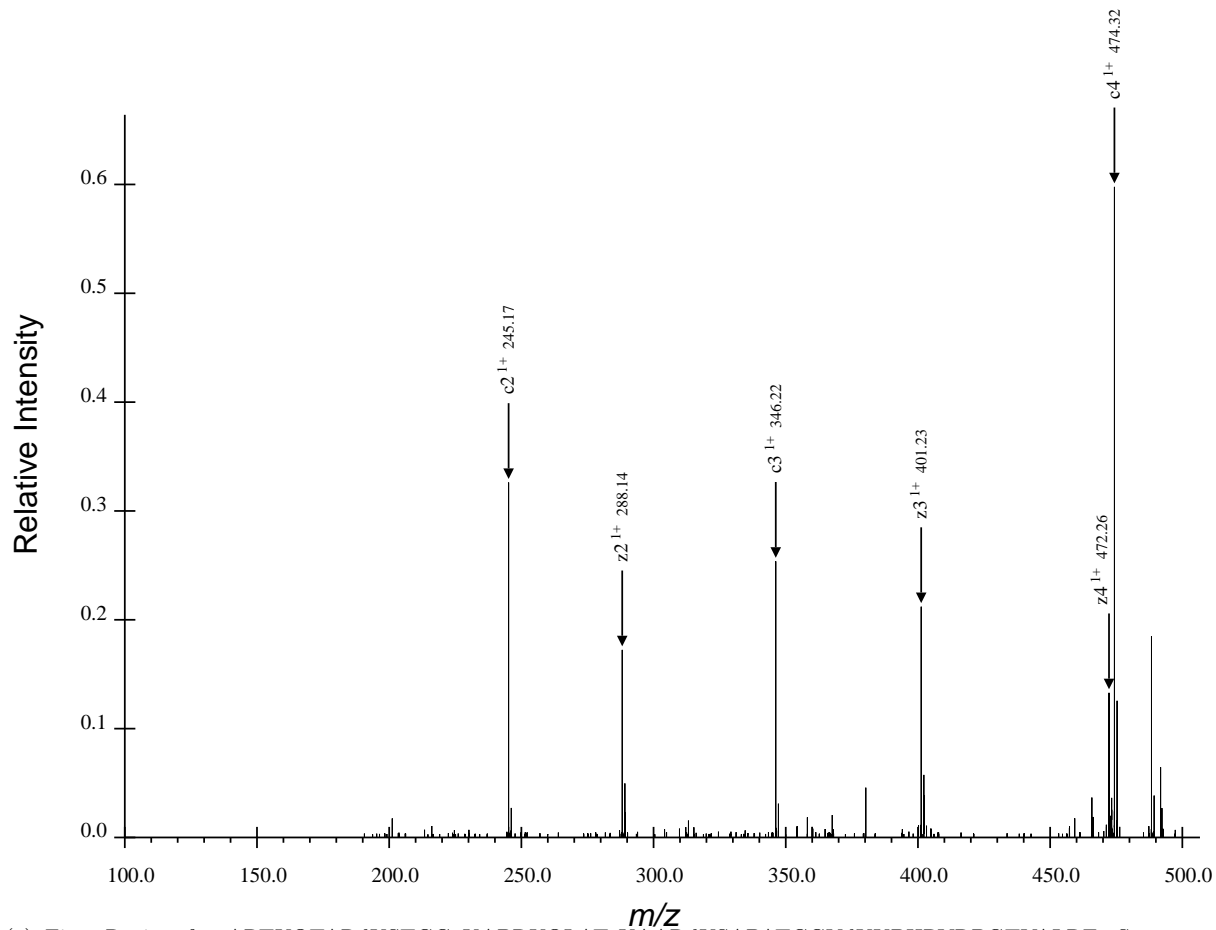

(a) First Region for ARTKQTARdKSTGGaKAPRKQLATaKAARdKSAPATGGVdKKPHRYRPGTVALRE, Spectrum 38.dta

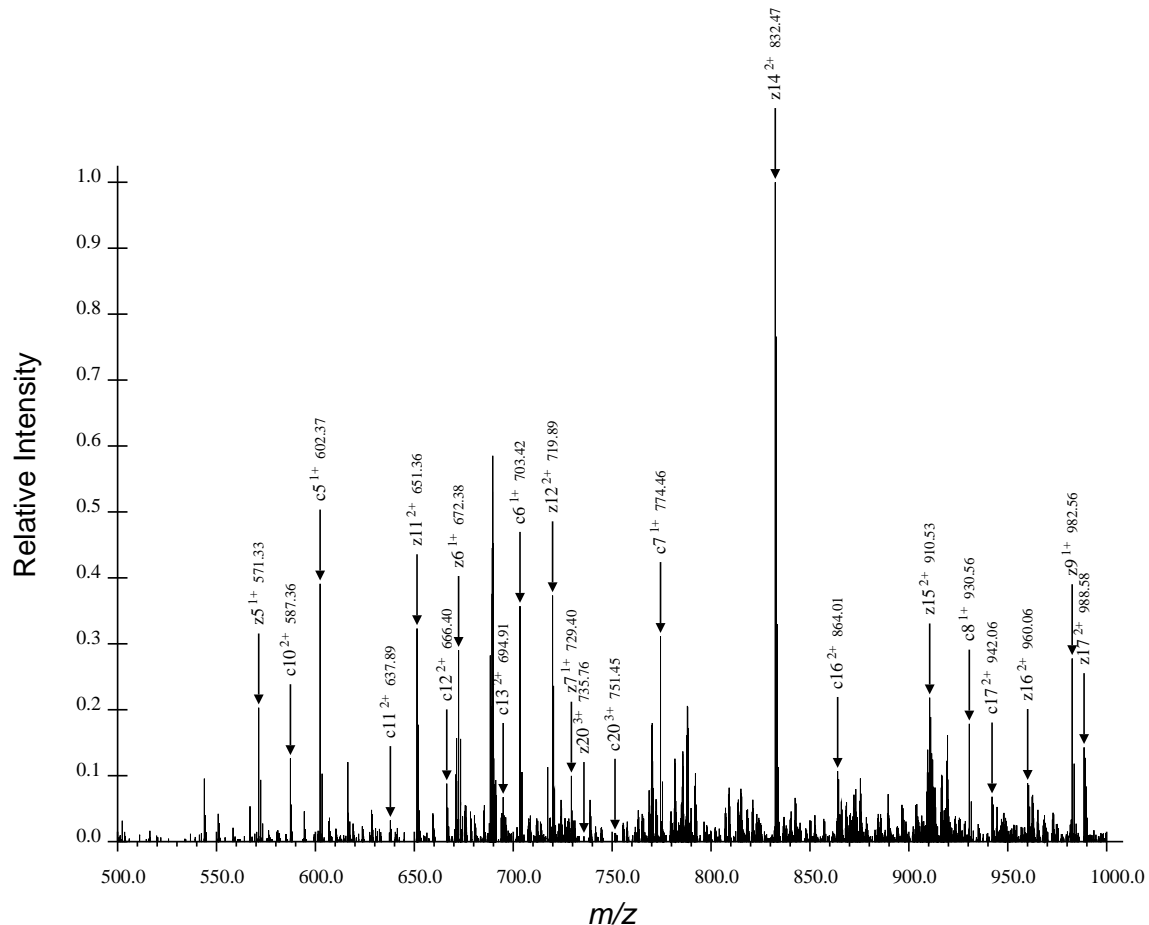

(b) Second Region for ARTKQTARdKSTGGaKAPRKQLATaKAARdKSAPATGGVdKKPHRYRPGTVALRE, Spectrum 38.dta

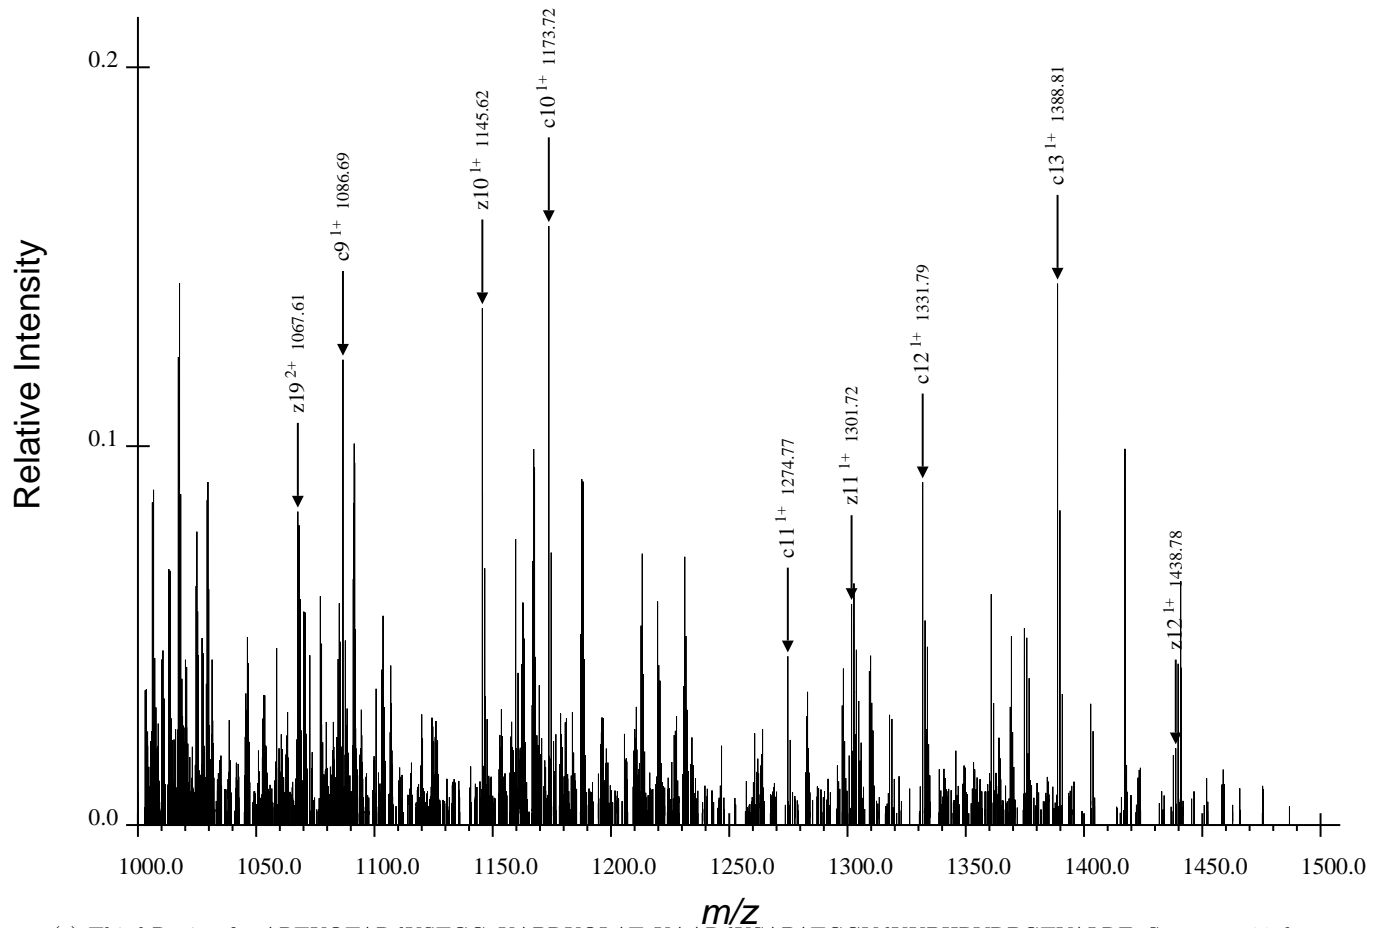

(c) Third Region for ARTKQTARdKSTGGaKAPRKQLATaKAARdKSAPATGGVdKKPHRYRPGTVALRE, Spectrum 38.dta

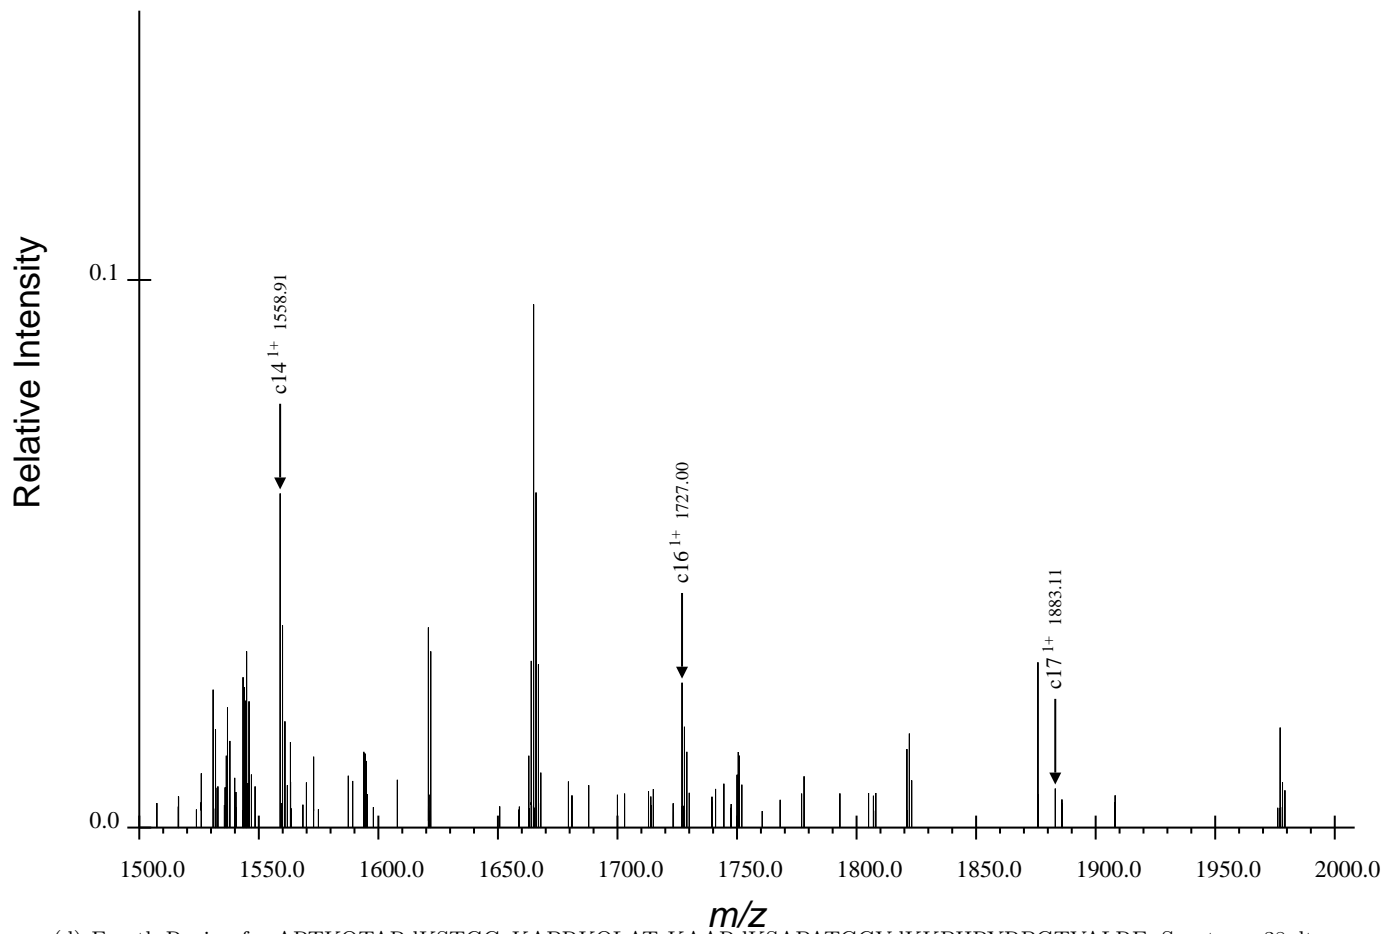

(d) Fourth Region for ARTKQTARdKSTGGaKAPRKQLATaKAARdKSAPATGGVdKKPHRYRPGTVALRE, Spectrum 38.dta

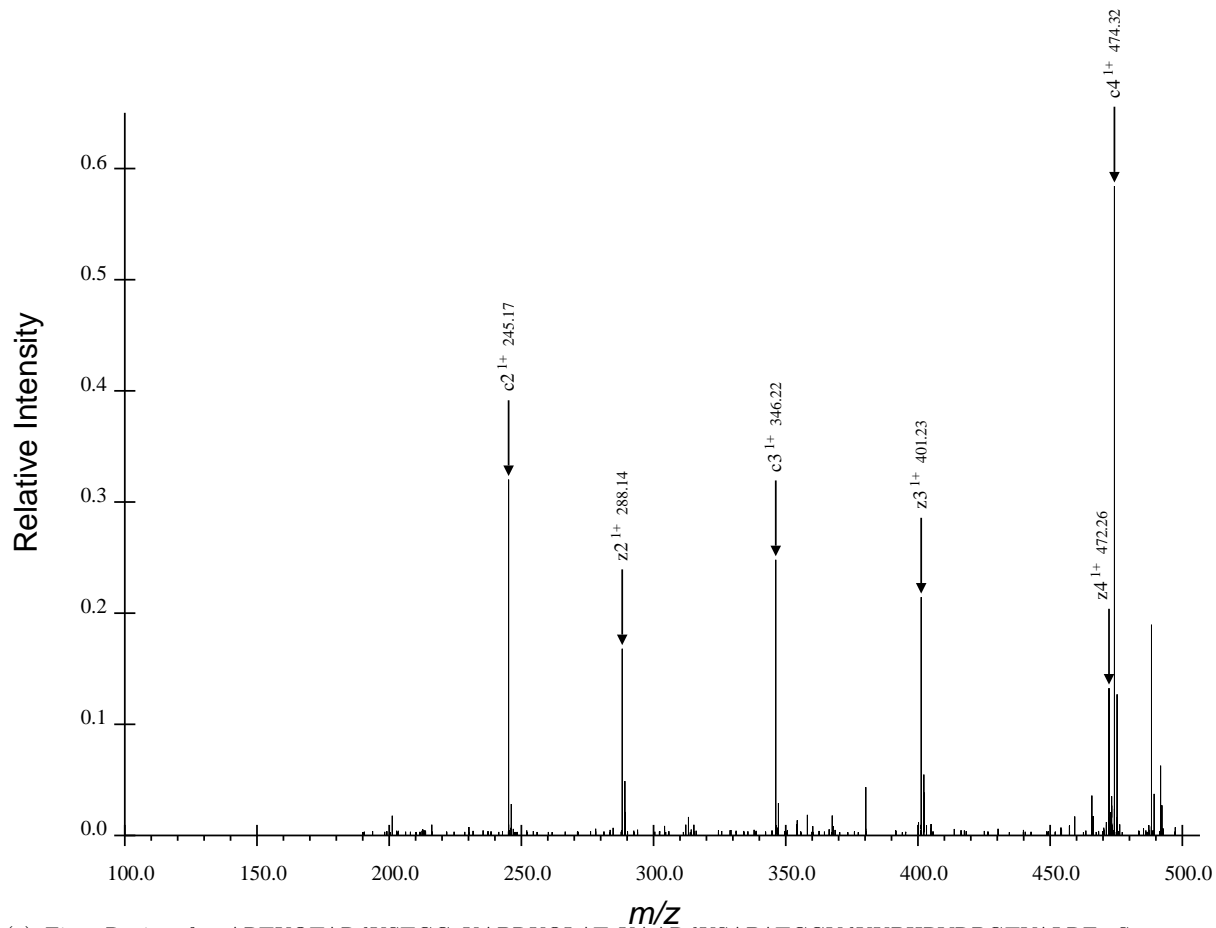

(a) First Region for ARTKQTARdKSTGGaKAPRKQLATaKAARdKSAPATGGVdKKPHRYRPGTVALRE, Spectrum 39.dta

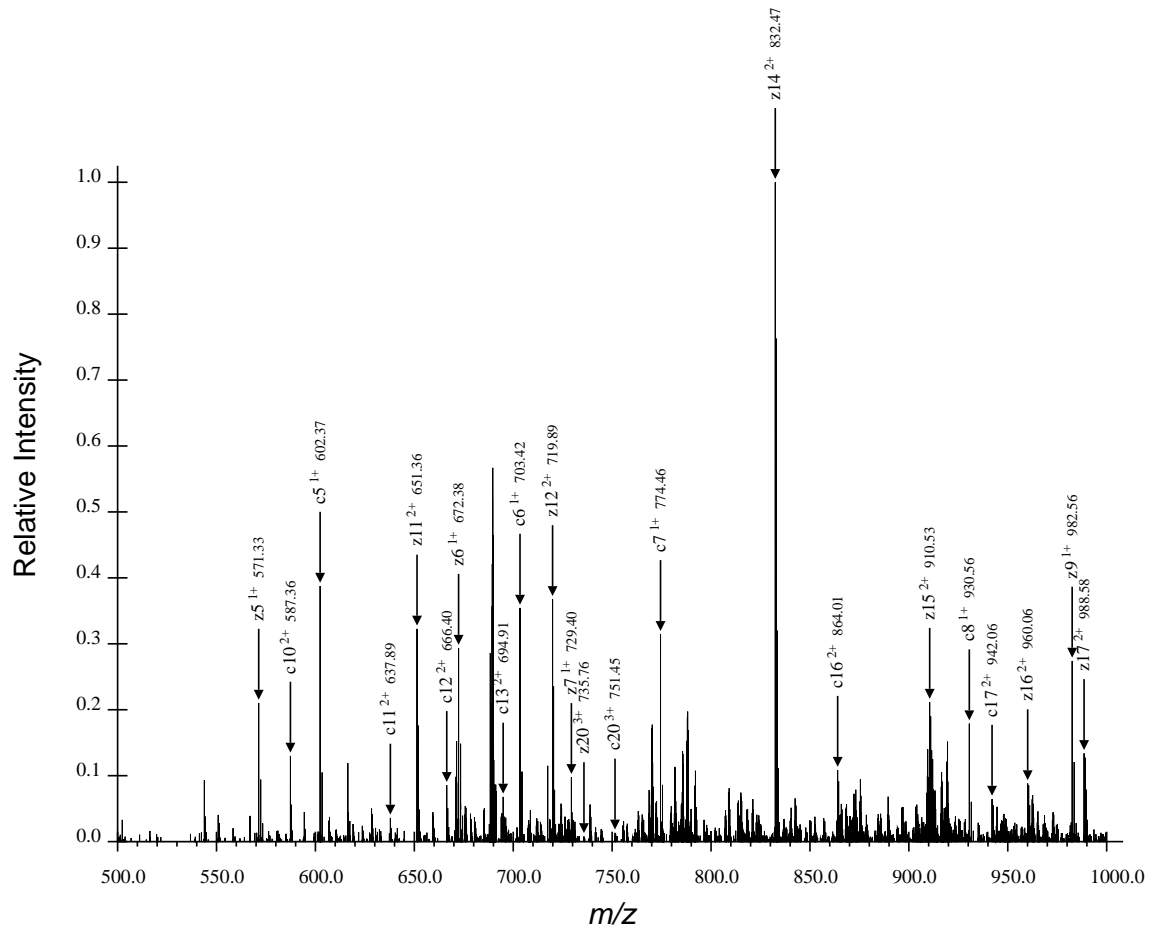

(b) Second Region for ARTKQTARdKSTGGaKAPRKQLATaKAARdKSAPATGGVdKKPHRYRPGTVALRE, Spectrum 39.dta

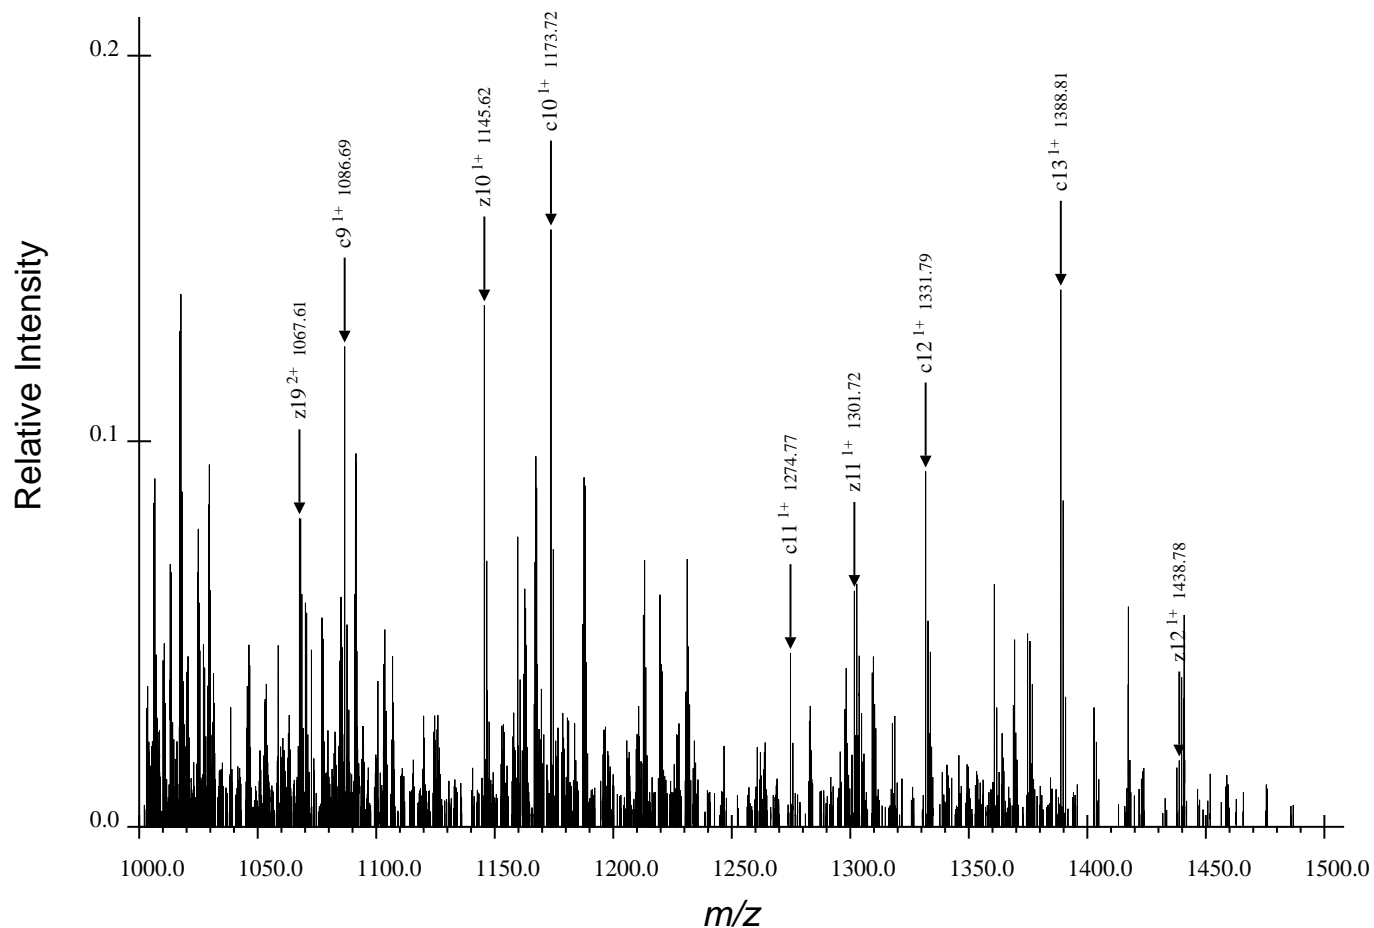

(c) Third Region for ARTKQTARdKSTGGaKAPRKQLATaKAARdKSAPATGGVdKKPHRYRPGTVALRE, Spectrum 39.dta

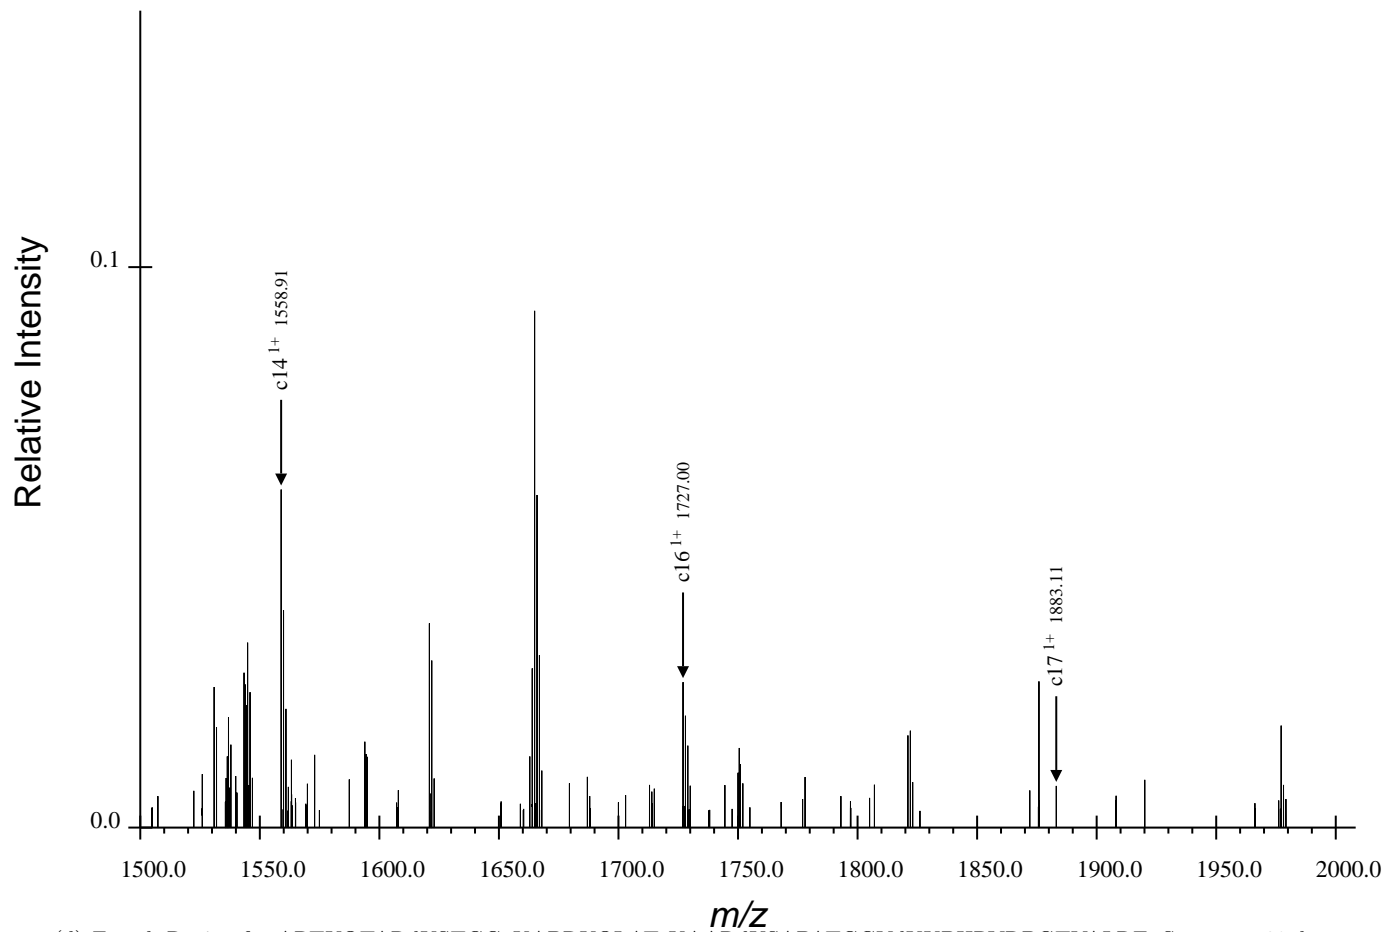

(d) Fourth Region for ARTKQTARdKSTGGaKAPRKQLATaKAARdKSAPATGGVdKKPHRYRPGTVALRE, Spectrum 39.dta

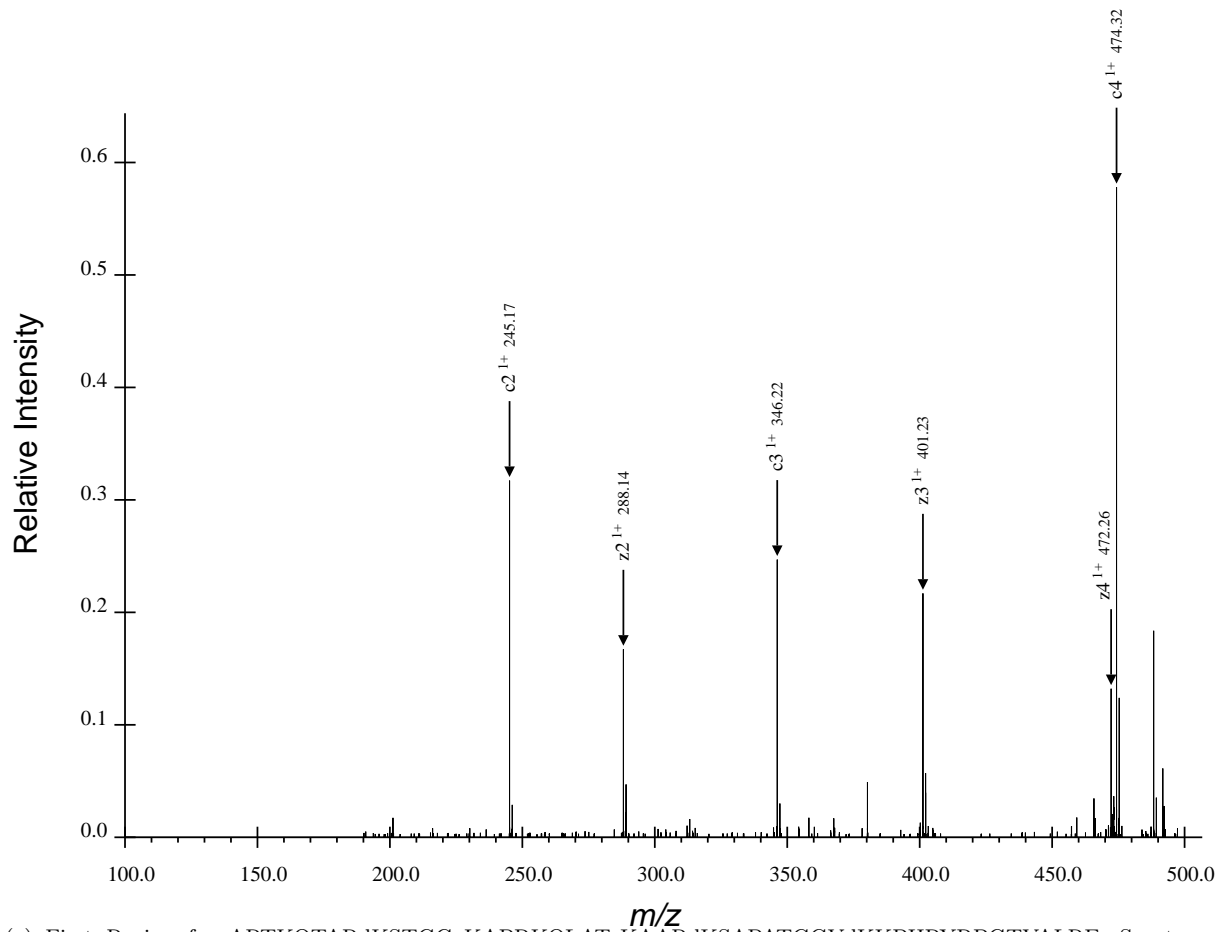

(a) First Region for ARTKQTARdKSTGGaKAPRKQLATaKAARdKSAPATGGVdKKPHRYRPGTVALRE, Spectrum 40.dta

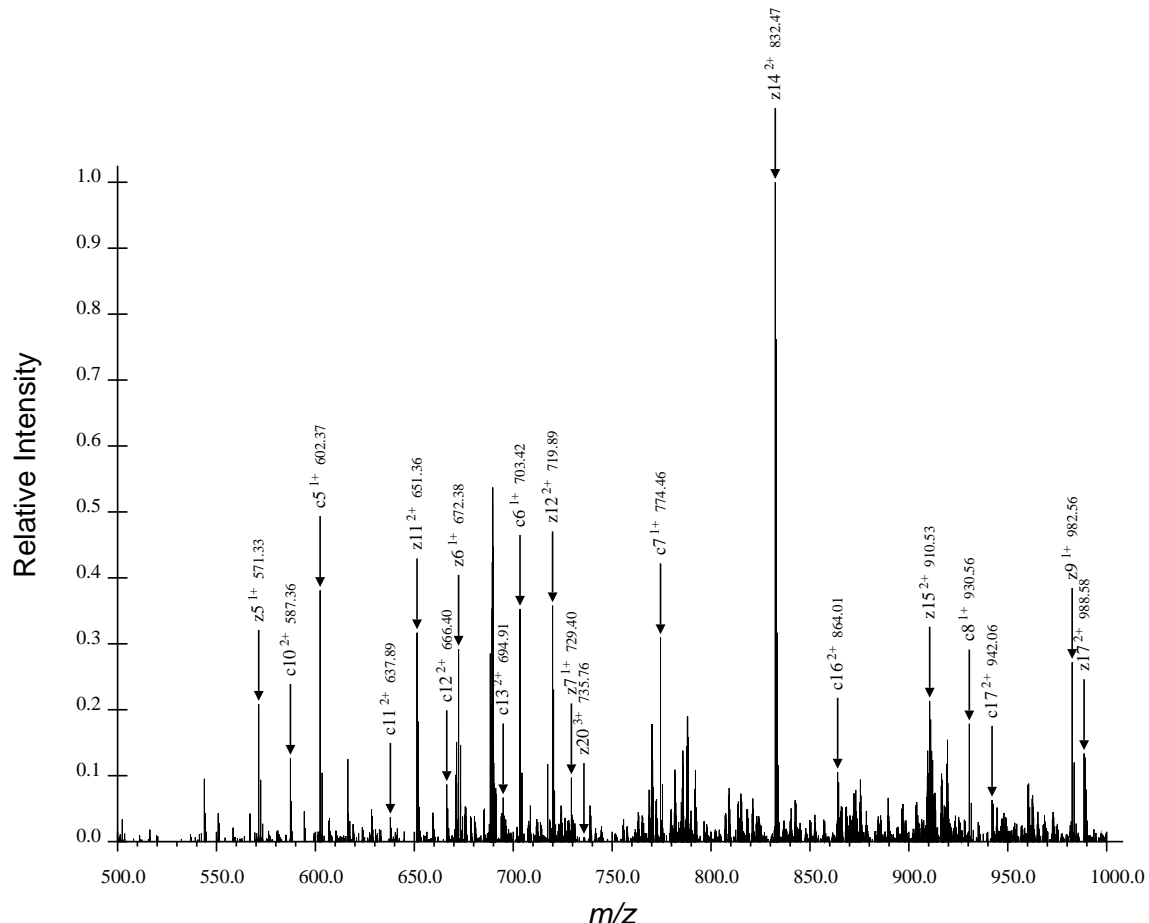

(b) Second Region for ARTKQTARdKSTGGaKAPRKQLATaKAARdKSAPATGGVdKKPHRYRPGTVALRE, Spectrum 40.dta

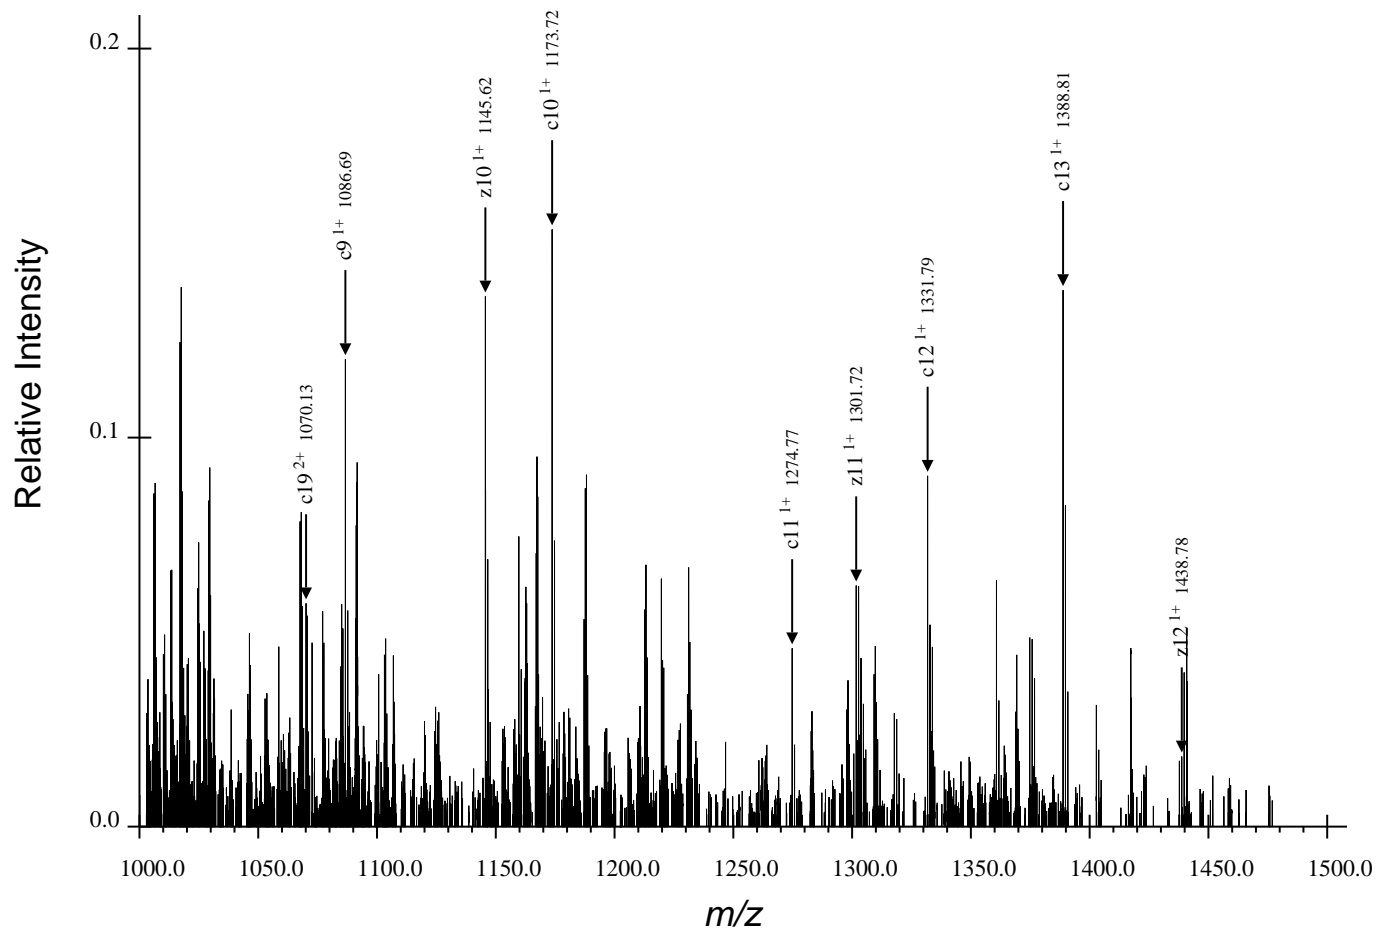

(c) Third Region for ARTKQTARdKSTGGaKAPRKQLATaKAARdKSAPATGGVdKKPHRYRPGTVALRE, Spectrum 40.dta

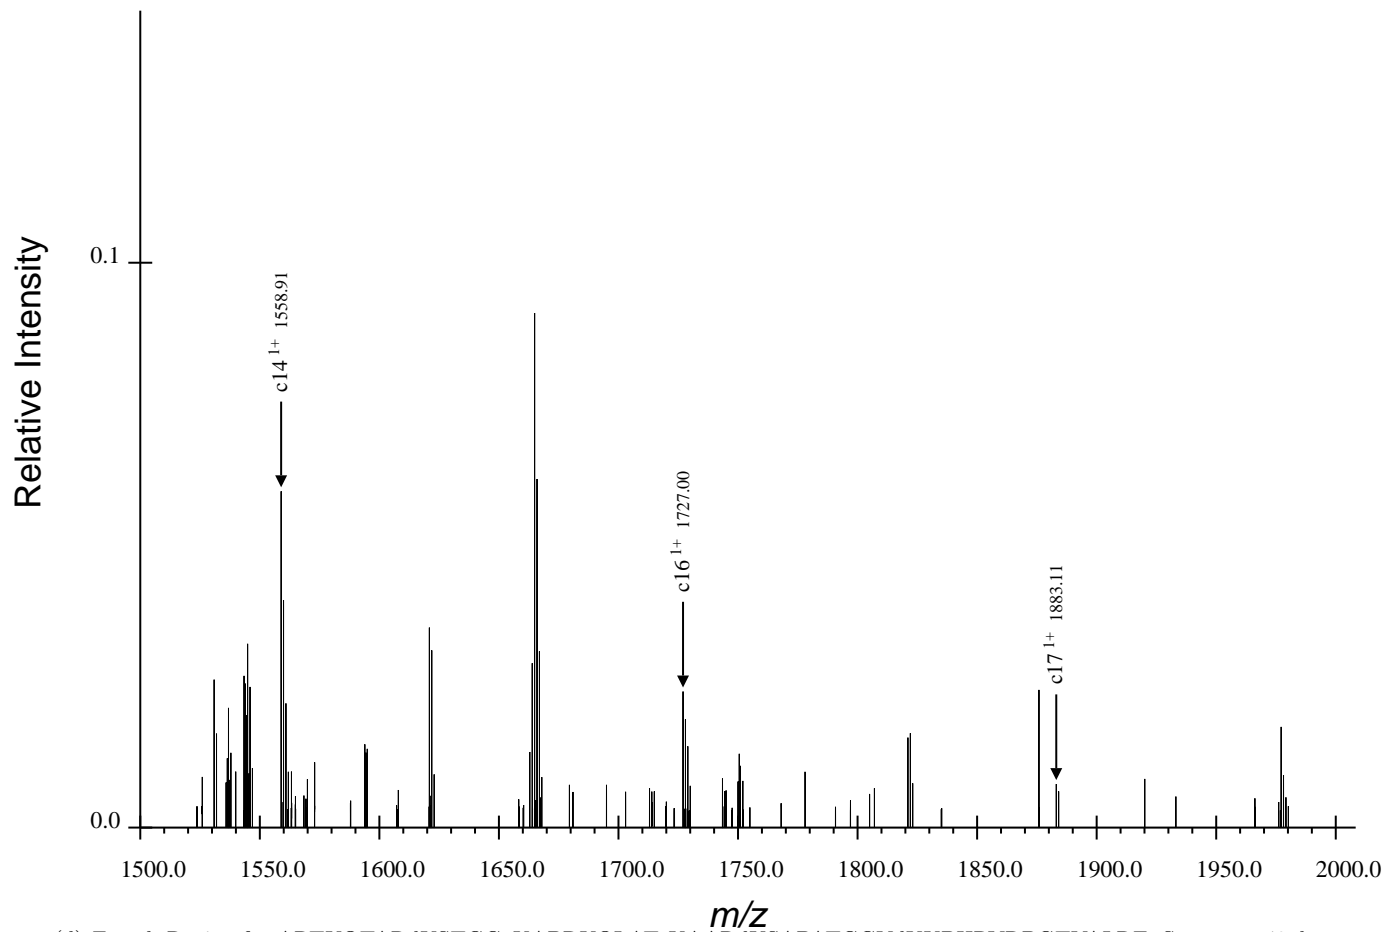

(d) Fourth Region for ARTKQTARdKSTGGaKAPRKQLATaKAARdKSAPATGGVdKKPHRYRPGTVALRE, Spectrum 40.dta



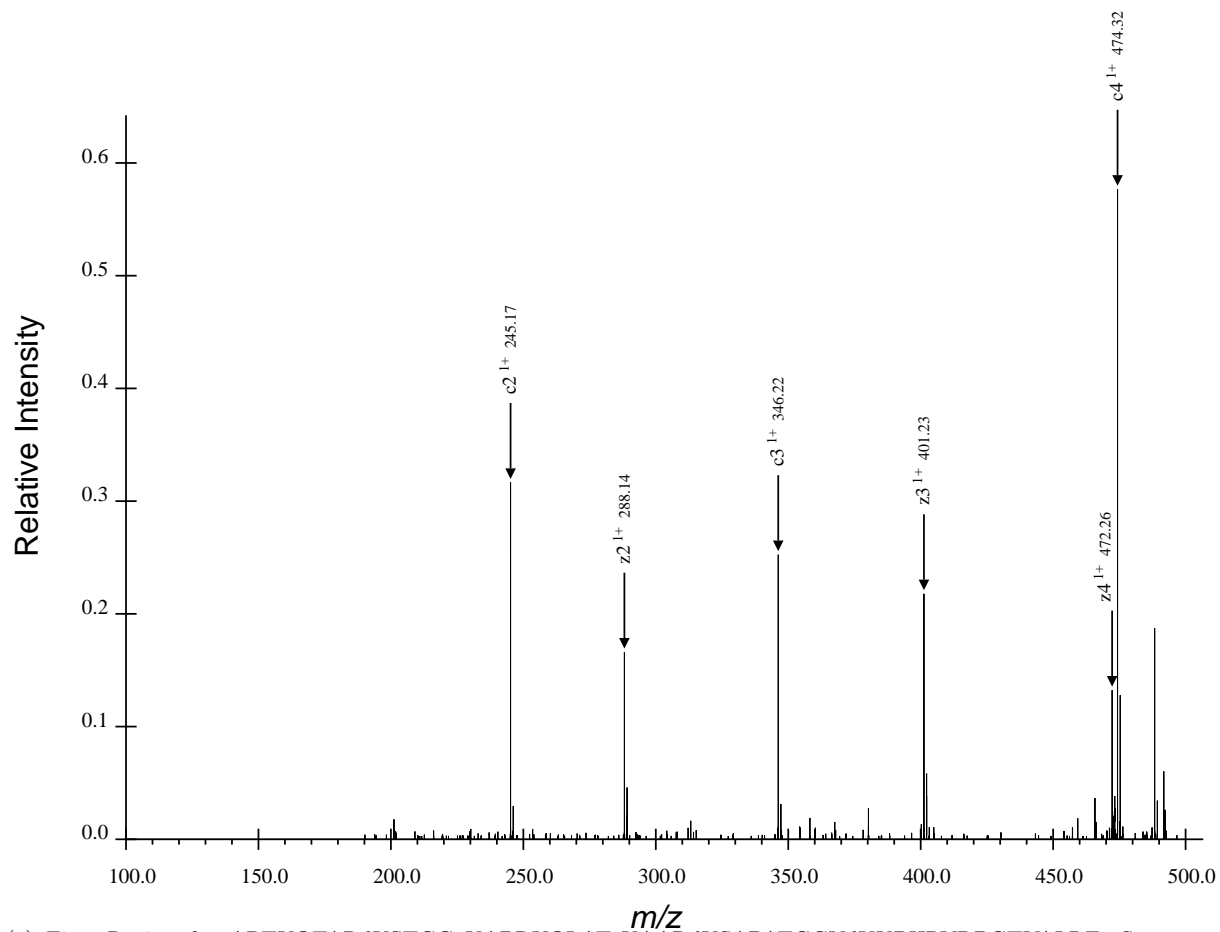

(a) First Region for ARTKQTARdKSTGGaKAPRKQLATaKAARdKSAPATGGVdKKPHRYRPGTVALRE, Spectrum 41.dta

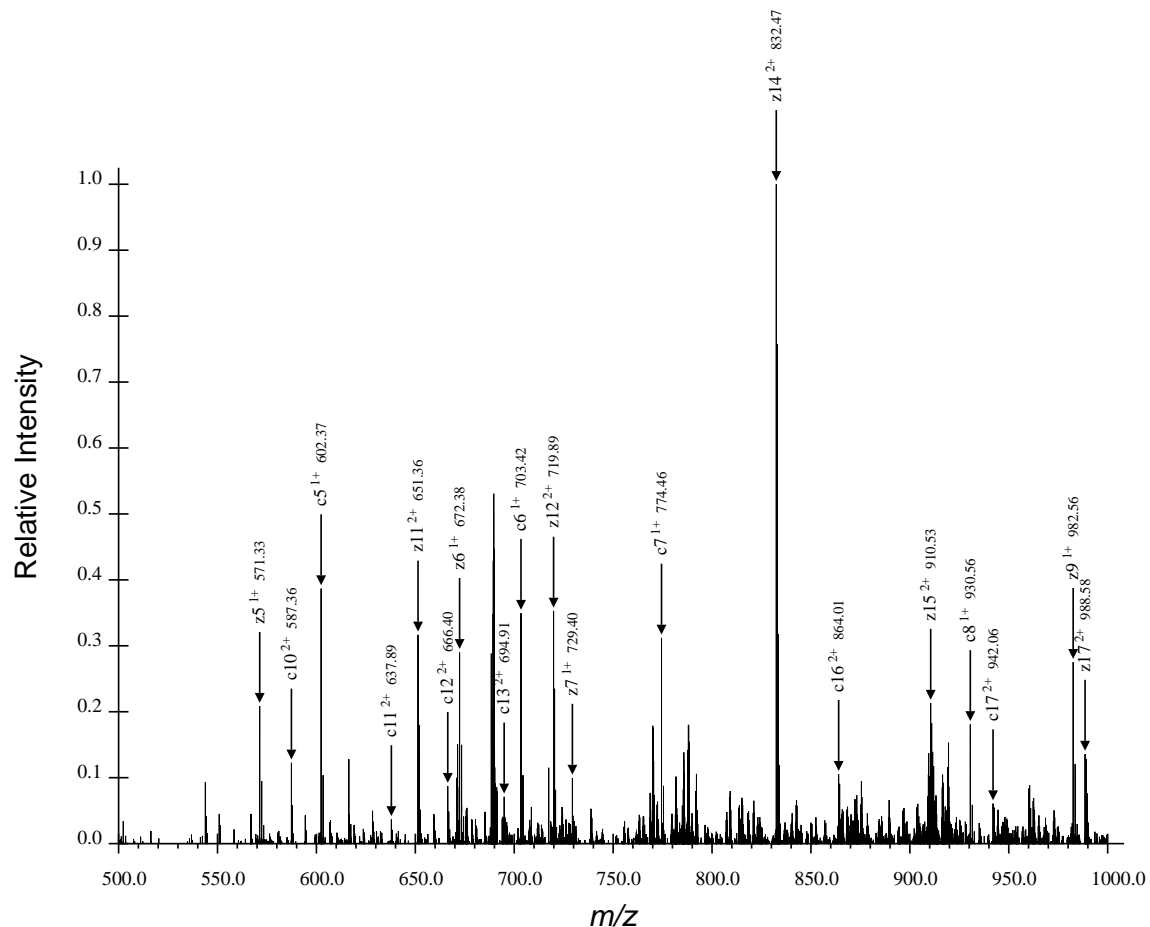

(b) Second Region for ARTKQTARdKSTGGaKAPRKQLATaKAARdKSAPATGGVdKKPHRYRPGTVALRE, Spectrum 41.dta

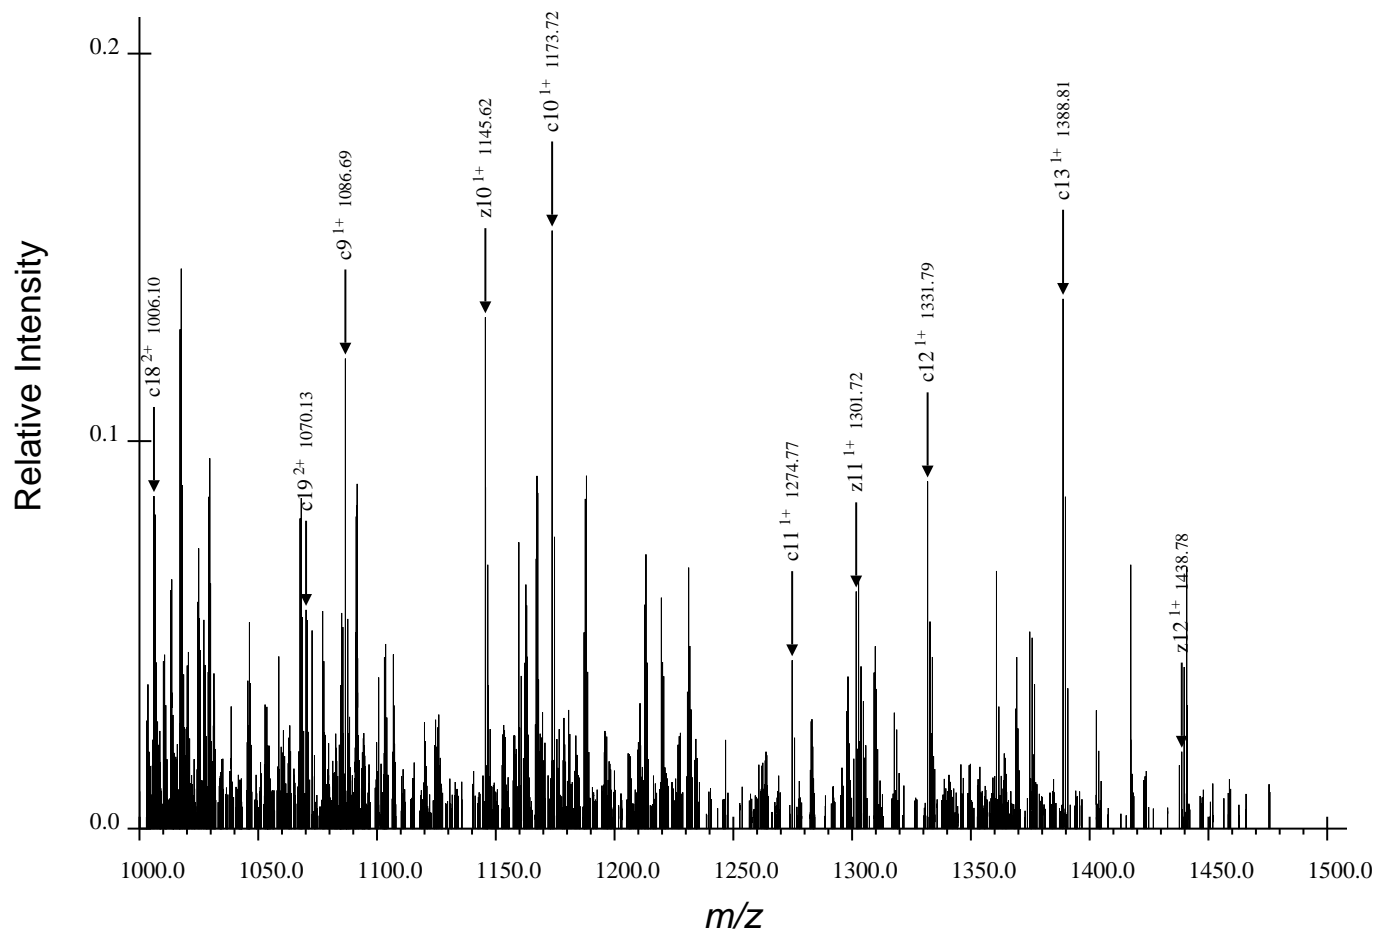

(c) Third Region for ARTKQTARdKSTGGaKAPRKQLATaKAARdKSAPATGGVdKKPHRYRPGTVALRE, Spectrum 41.dta

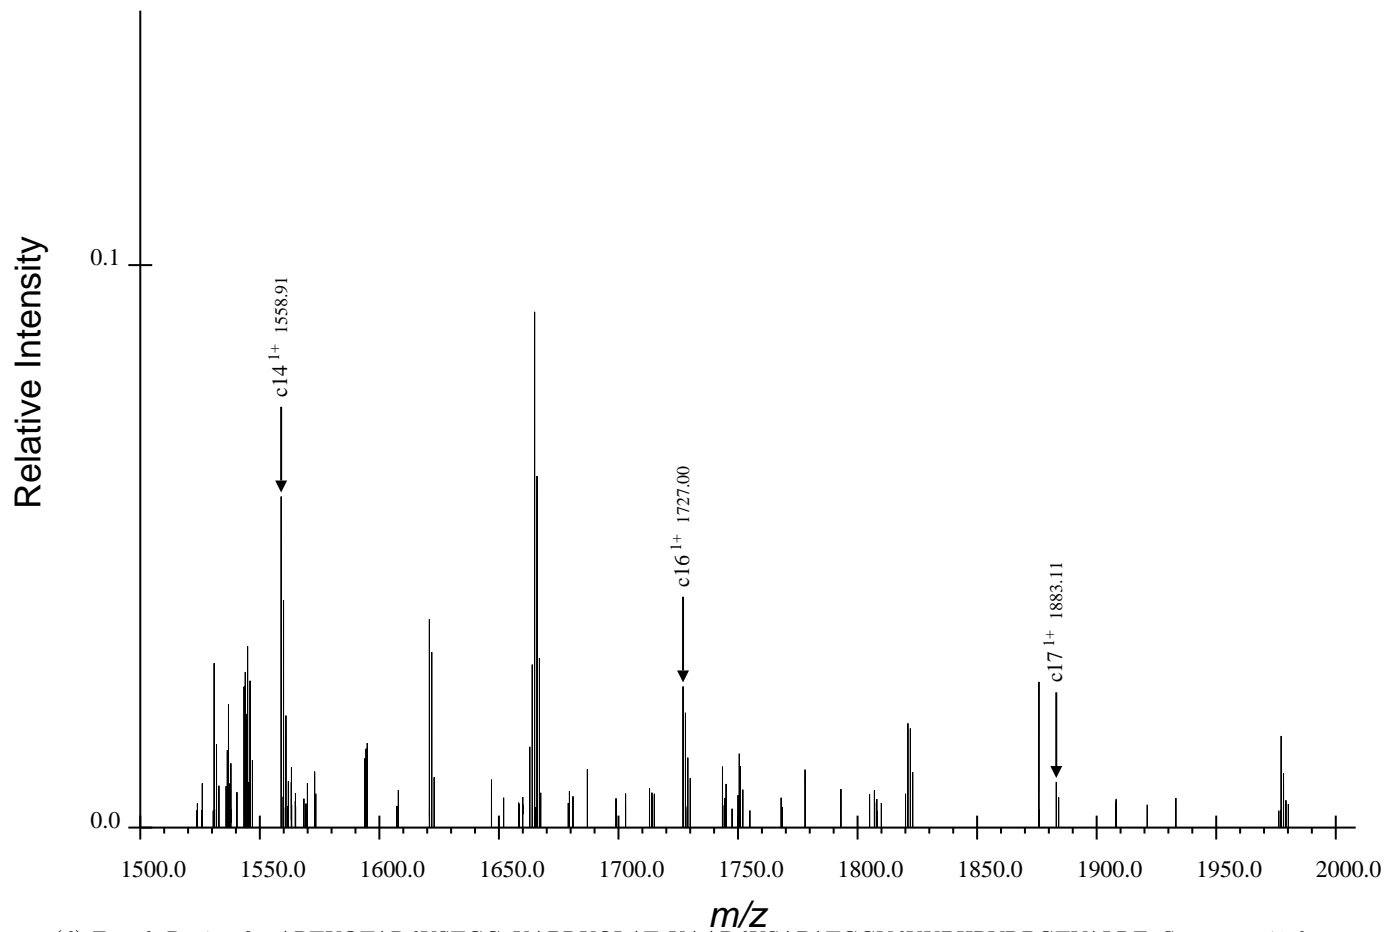

(d) Fourth Region for ARTKQTARdKSTGGaKAPRKQLATaKAARdKSAPATGGVdKKPHRYRPGTVALRE, Spectrum 41.dta

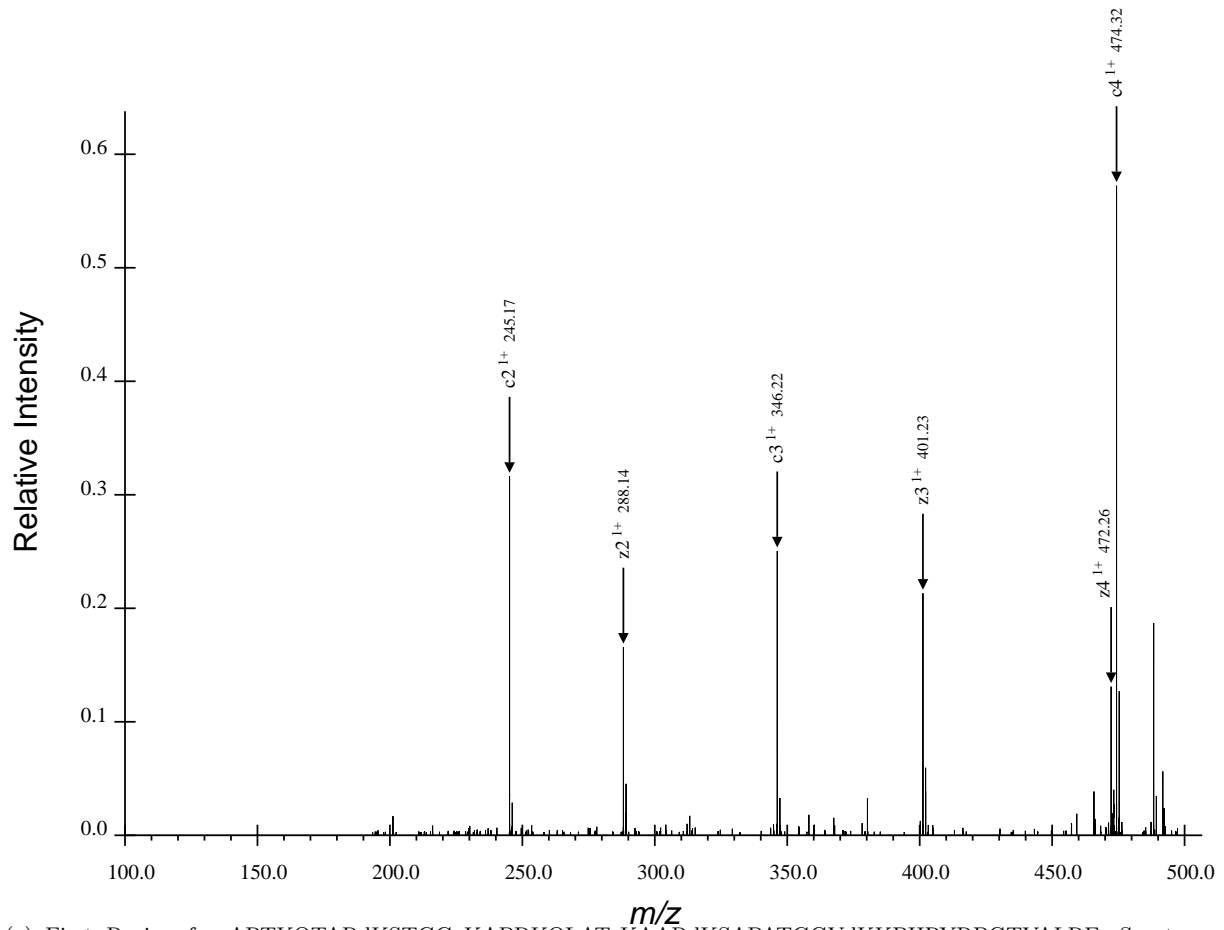

(a) First Region for ARTKQTARdKSTGGaKAPRKQLATaKAARdKSAPATGGVdKKPHRYRPGTVALRE, Spectrum 42.dta

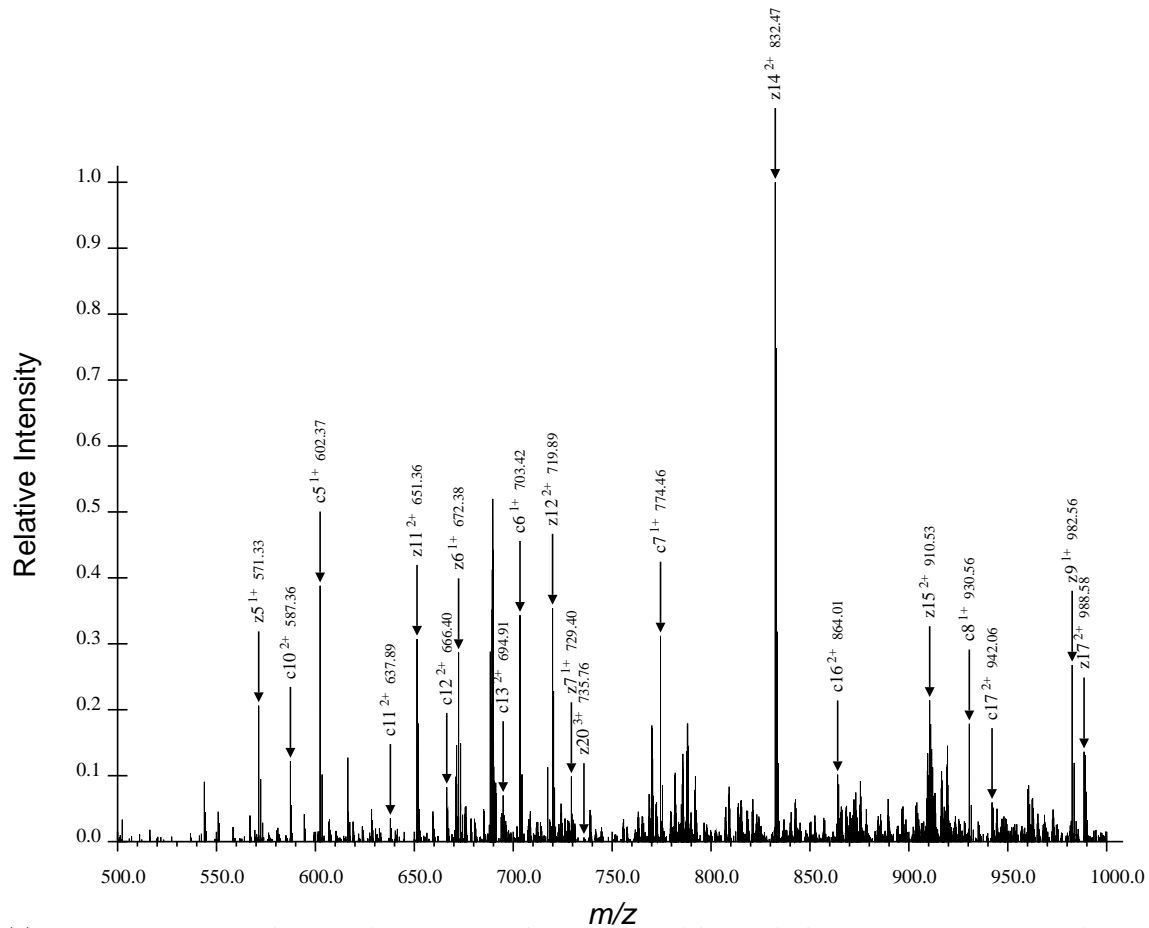

(b) Second Region for ARTKQTARdKSTGGaKAPRKQLATaKAARdKSAPATGGVdKKPHRYRPGTVALRE, Spectrum 42.dta

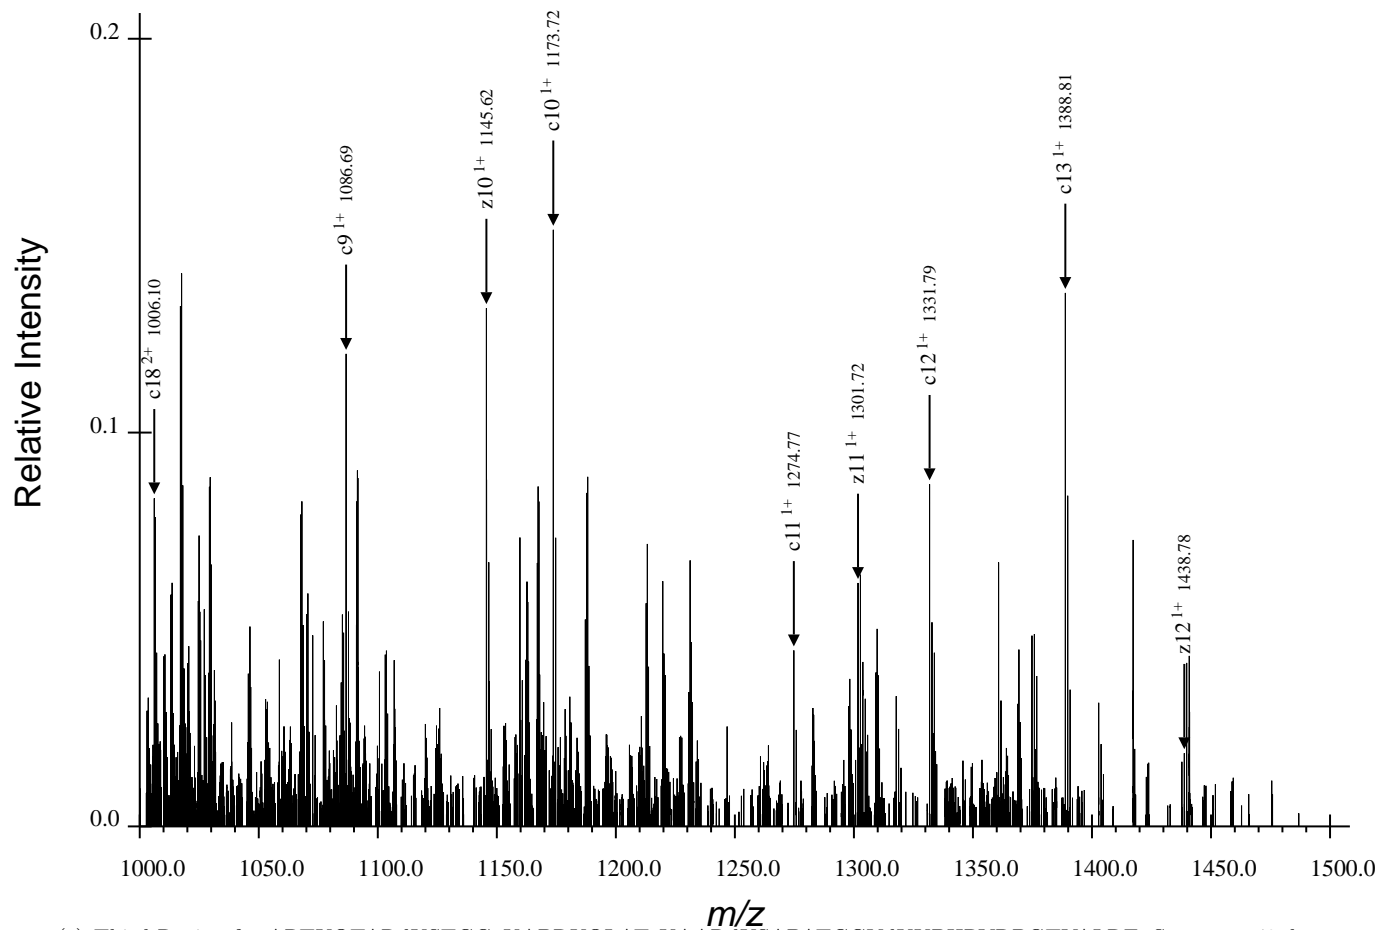

(c) Third Region for ARTKQTARdKSTGGaKAPRKQLATaKAARdKSAPATGGVdKKPHRYRPGTVALRE, Spectrum 42.dta

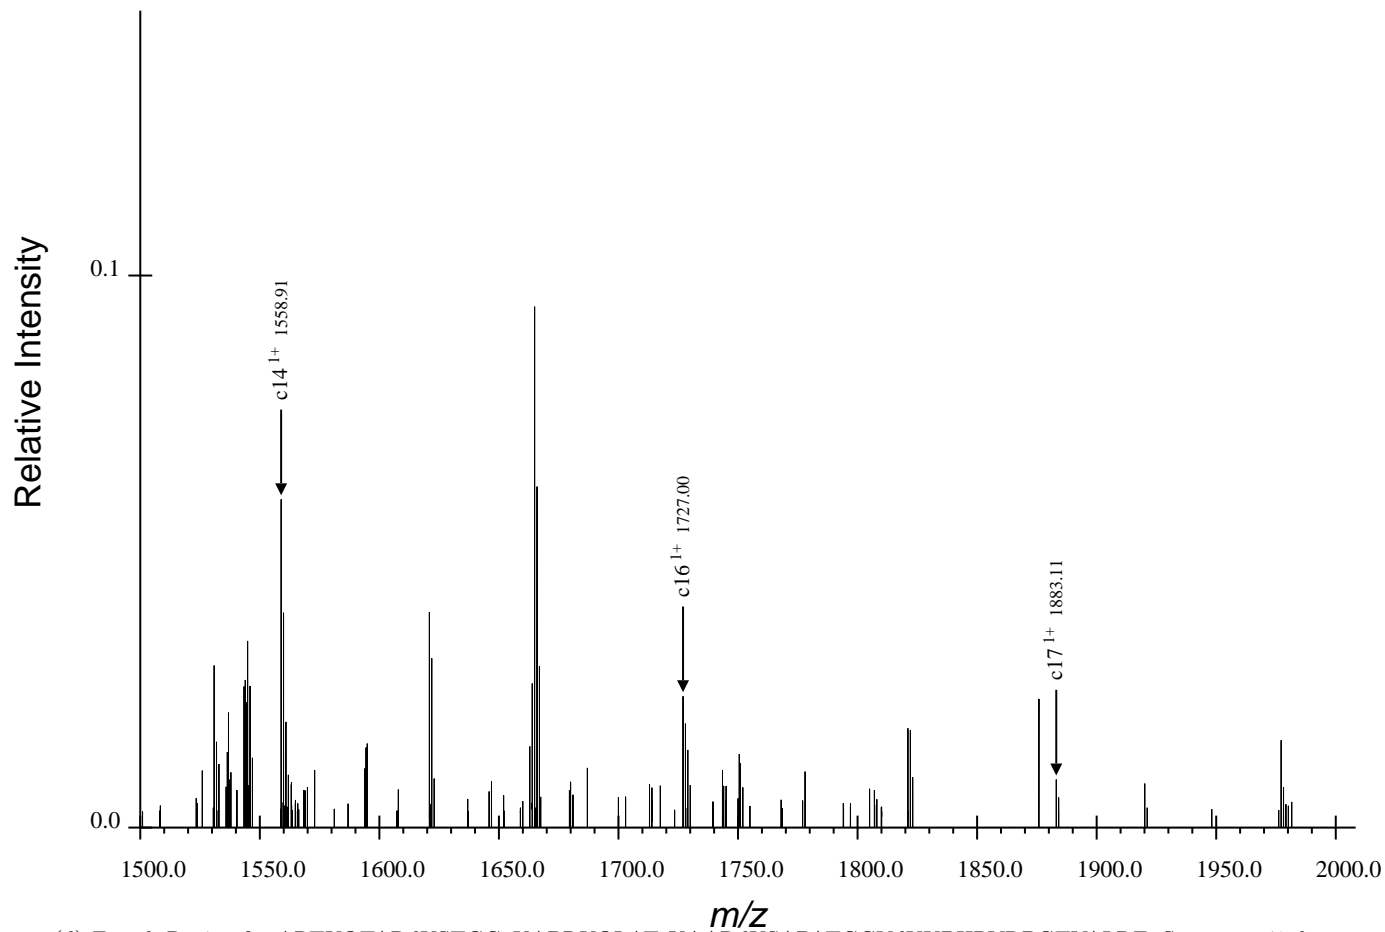

(d) Fourth Region for ARTKQTARdKSTGGaKAPRKQLATaKAARdKSAPATGGVdKKPHRYRPGTVALRE, Spectrum 42.dta

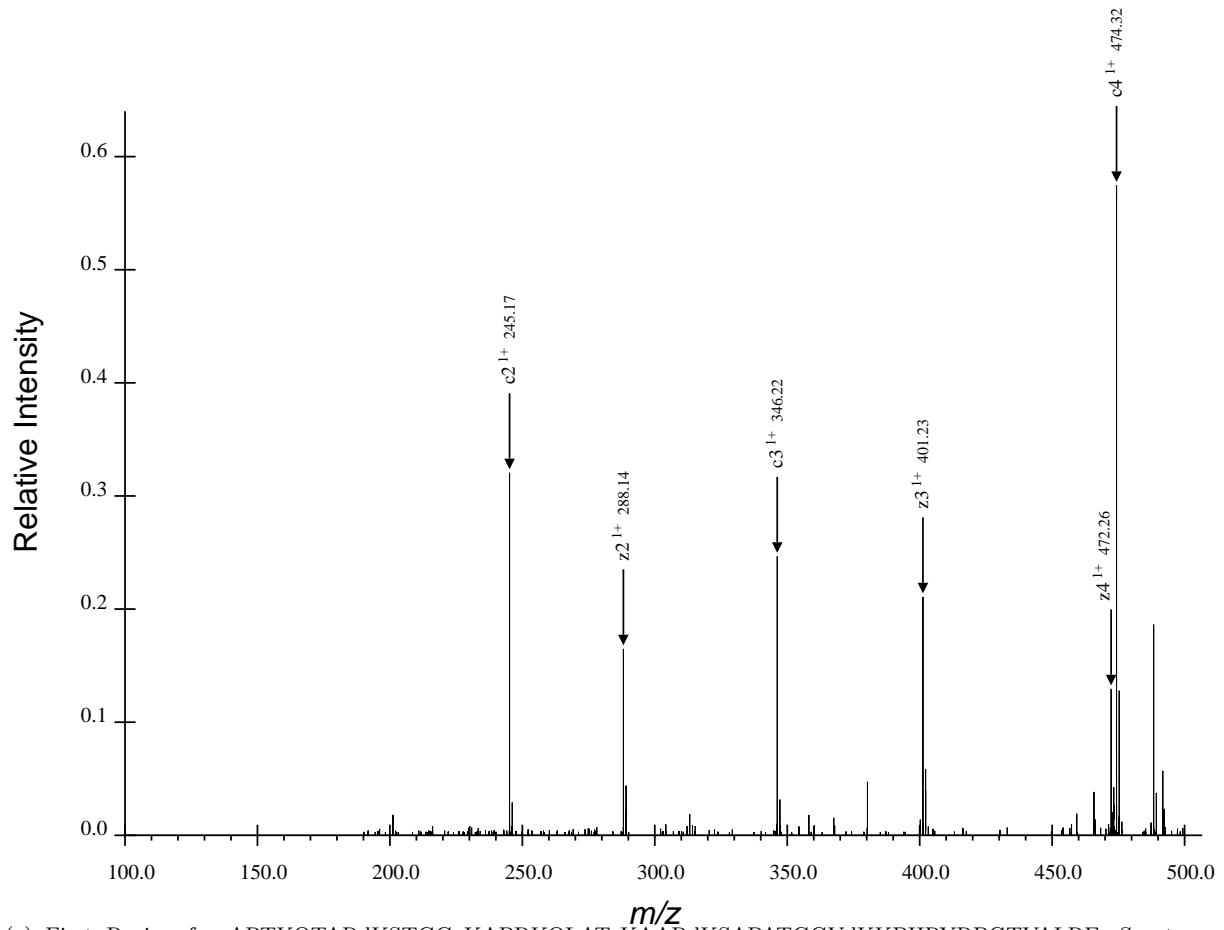

(a) First Region for ARTKQTARdKSTGGaKAPRKQLATaKAARdKSAPATGGVdKKPHRYRPGTVALRE, Spectrum 43.dta

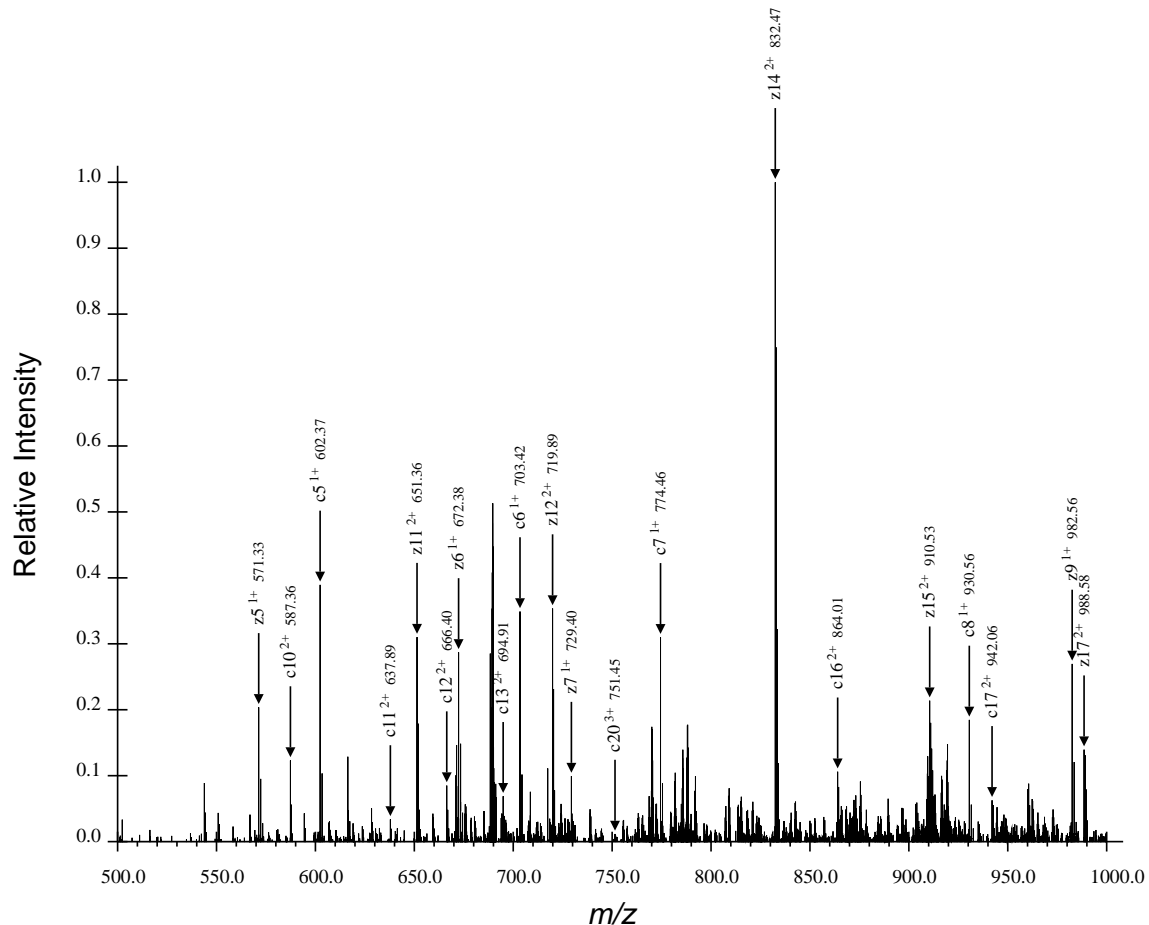

(b) Second Region for ARTKQTARdKSTGGaKAPRKQLATaKAARdKSAPATGGVdKKPHRYRPGTVALRE, Spectrum 43.dta

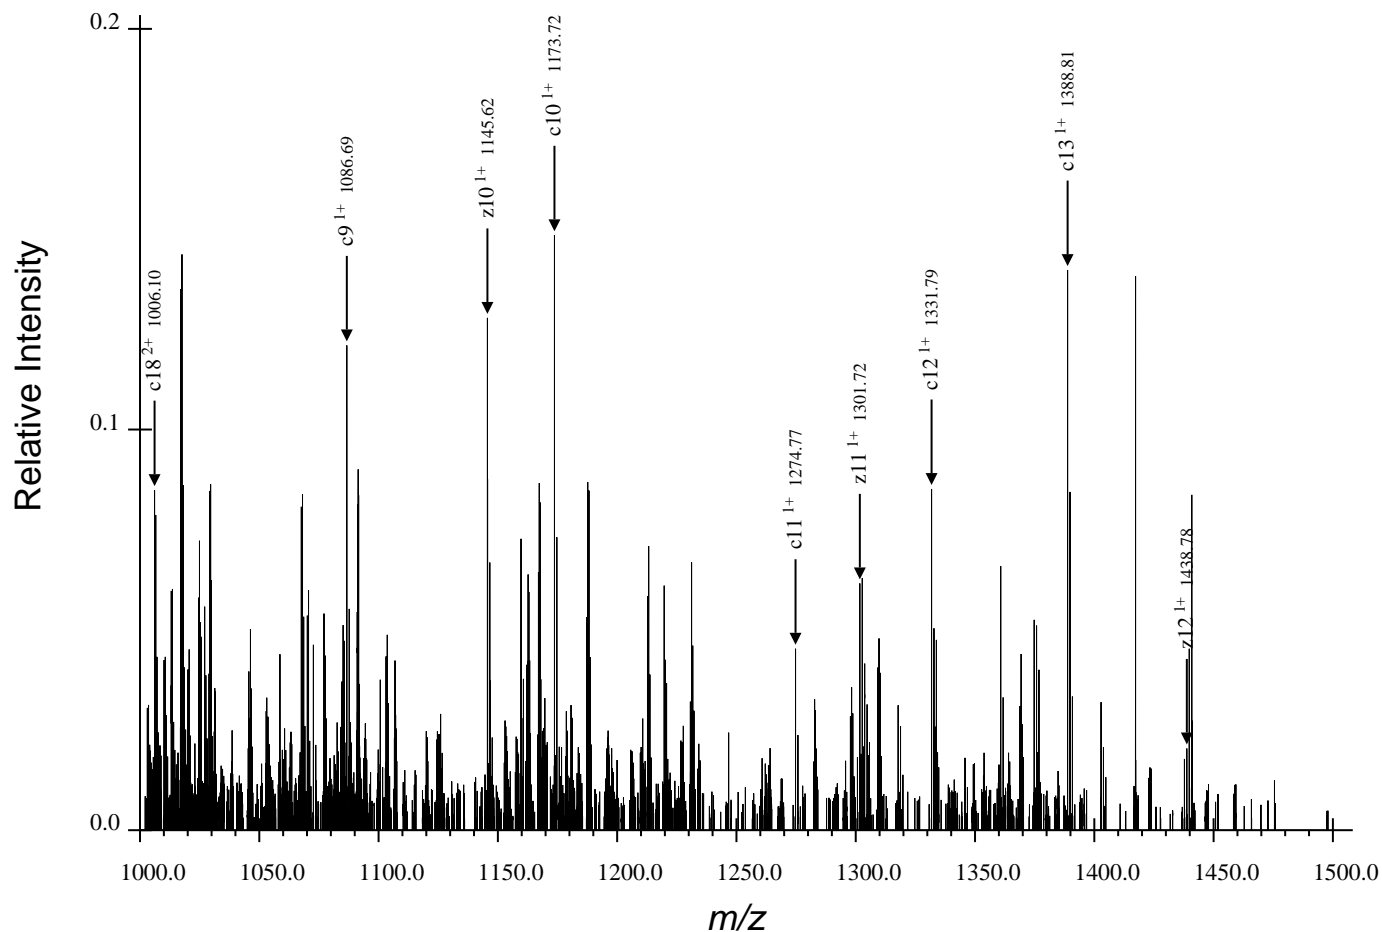

(c) Third Region for ARTKQTARdKSTGGaKAPRKQLATaKAARdKSAPATGGVdKKPHRYRPGTVALRE, Spectrum 43.dta

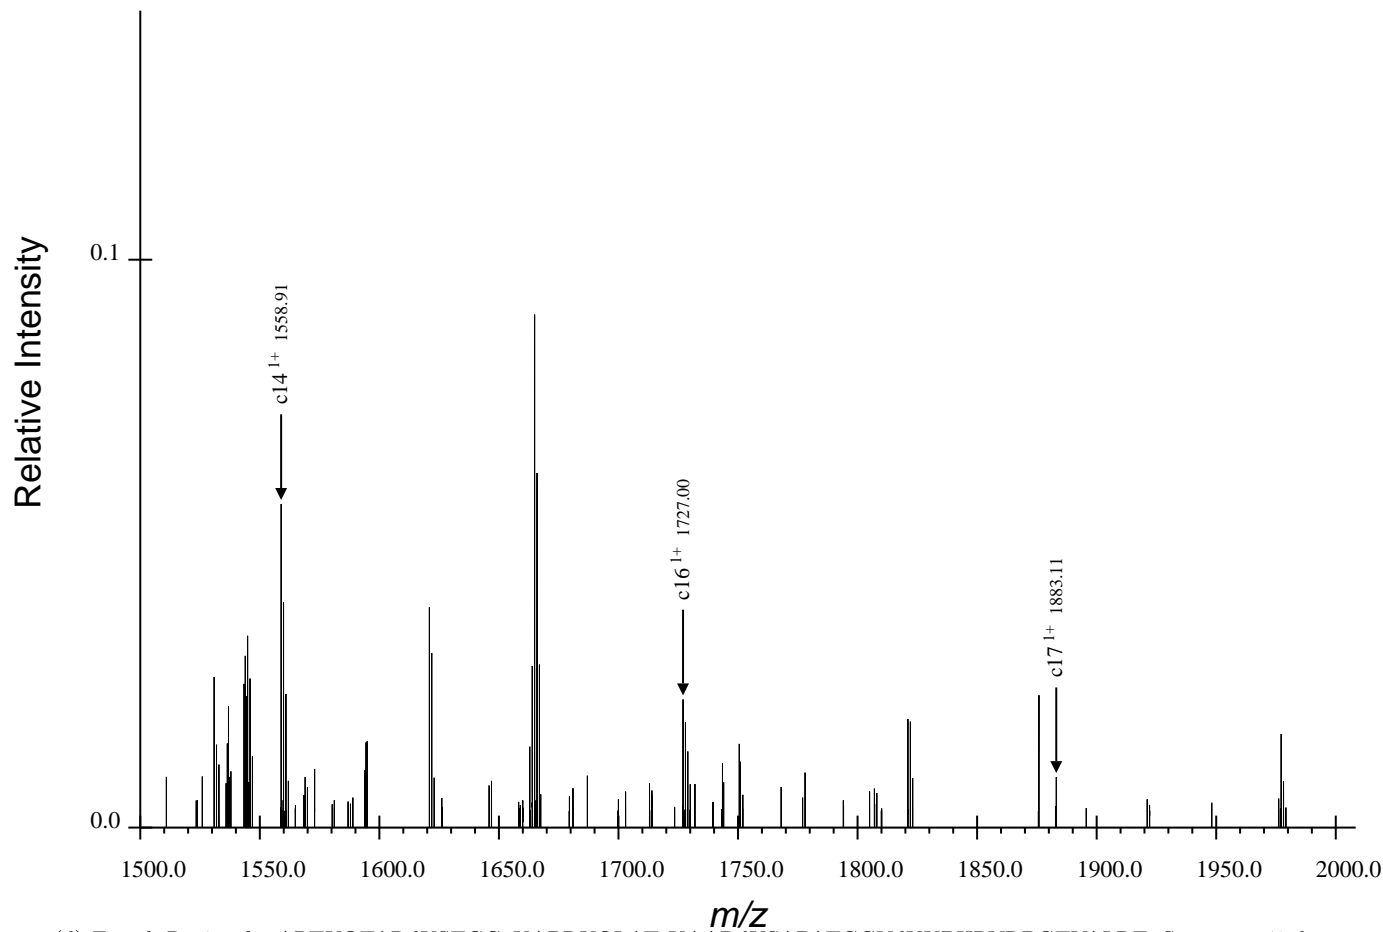

(d) Fourth Region for ARTKQTARdKSTGGaKAPRKQLATaKAARdKSAPATGGVdKKPHRYRPGTVALRE, Spectrum 43.dta

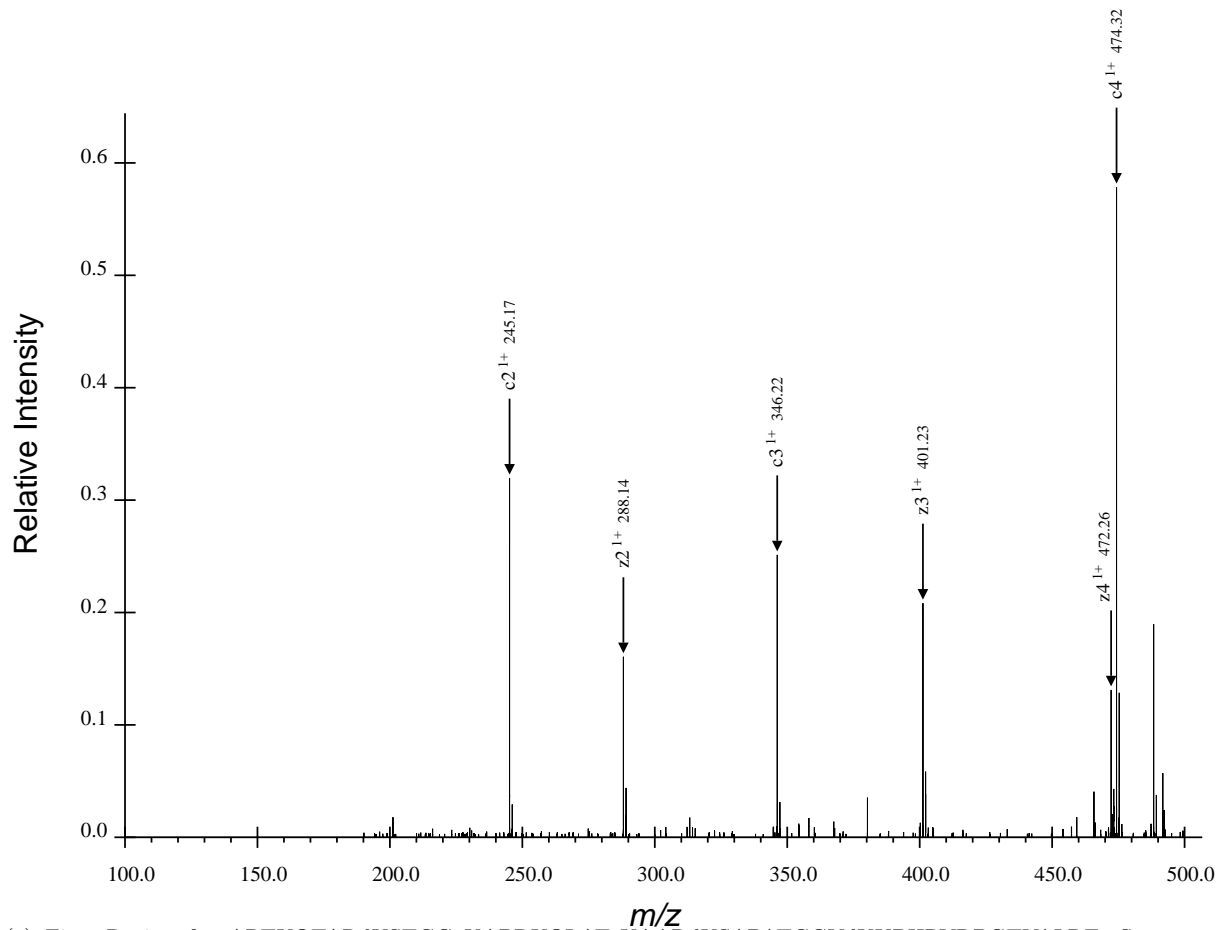

(a) First Region for ARTKQTARdKSTGGaKAPRKQLATaKAARdKSAPATGGVdKKPHRYRPGTVALRE, Spectrum 44.dta

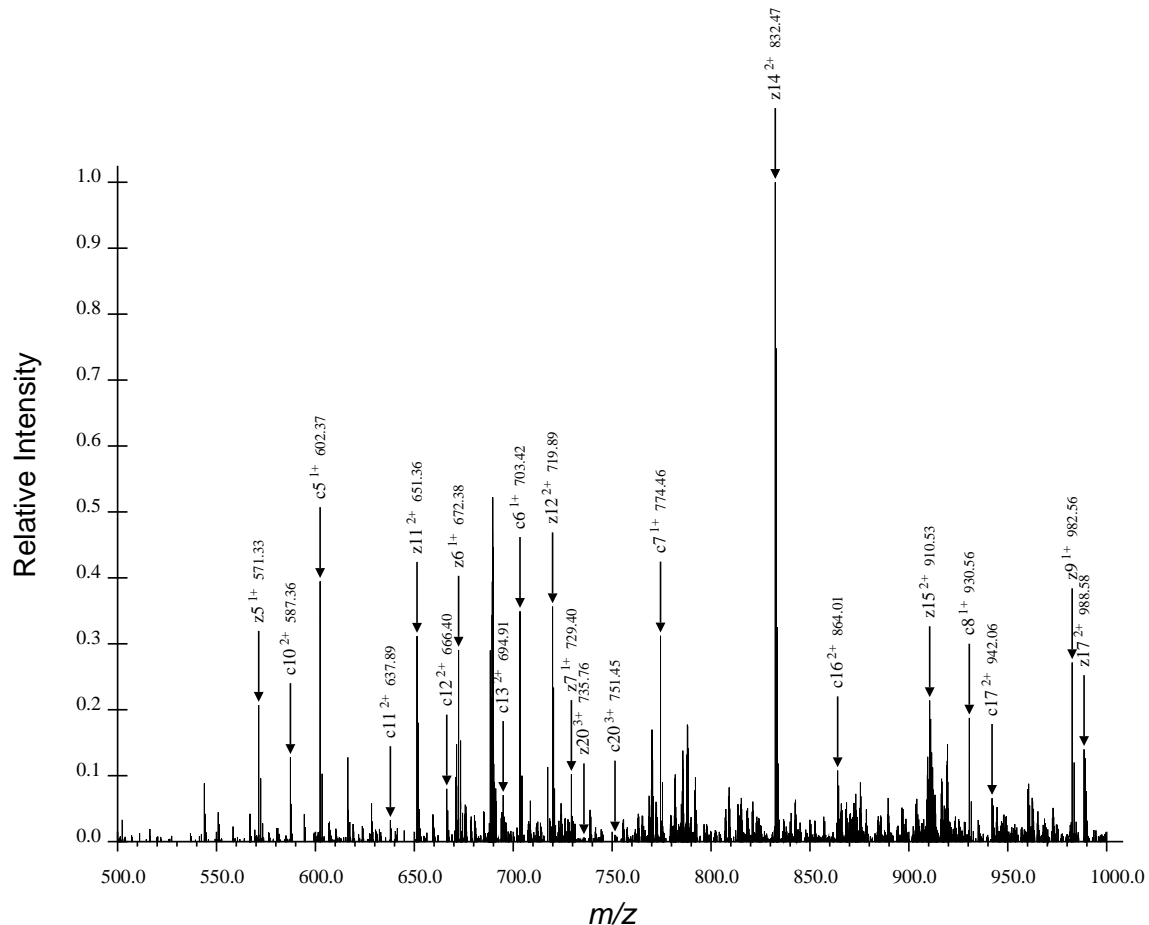

(b) Second Region for ARTKQTARdKSTGGaKAPRKQLATaKAARdKSAPATGGVdKKPHRYRPGTVALRE, Spectrum 44.dta

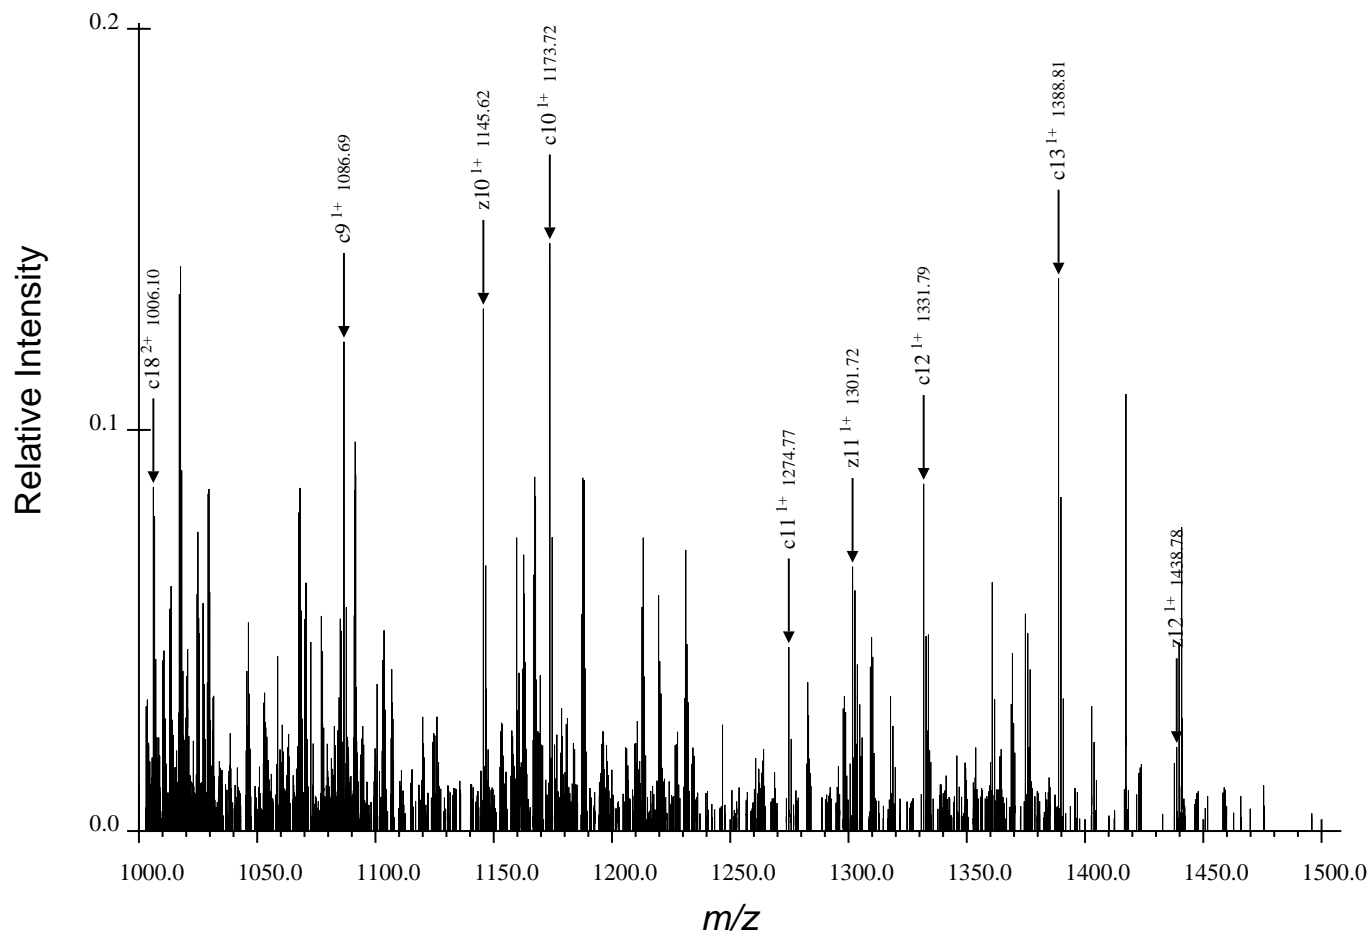

(c) Third Region for ARTKQTARdKSTGGaKAPRKQLATaKAARdKSAPATGGVdKKPHRYRPGTVALRE, Spectrum 44.dta

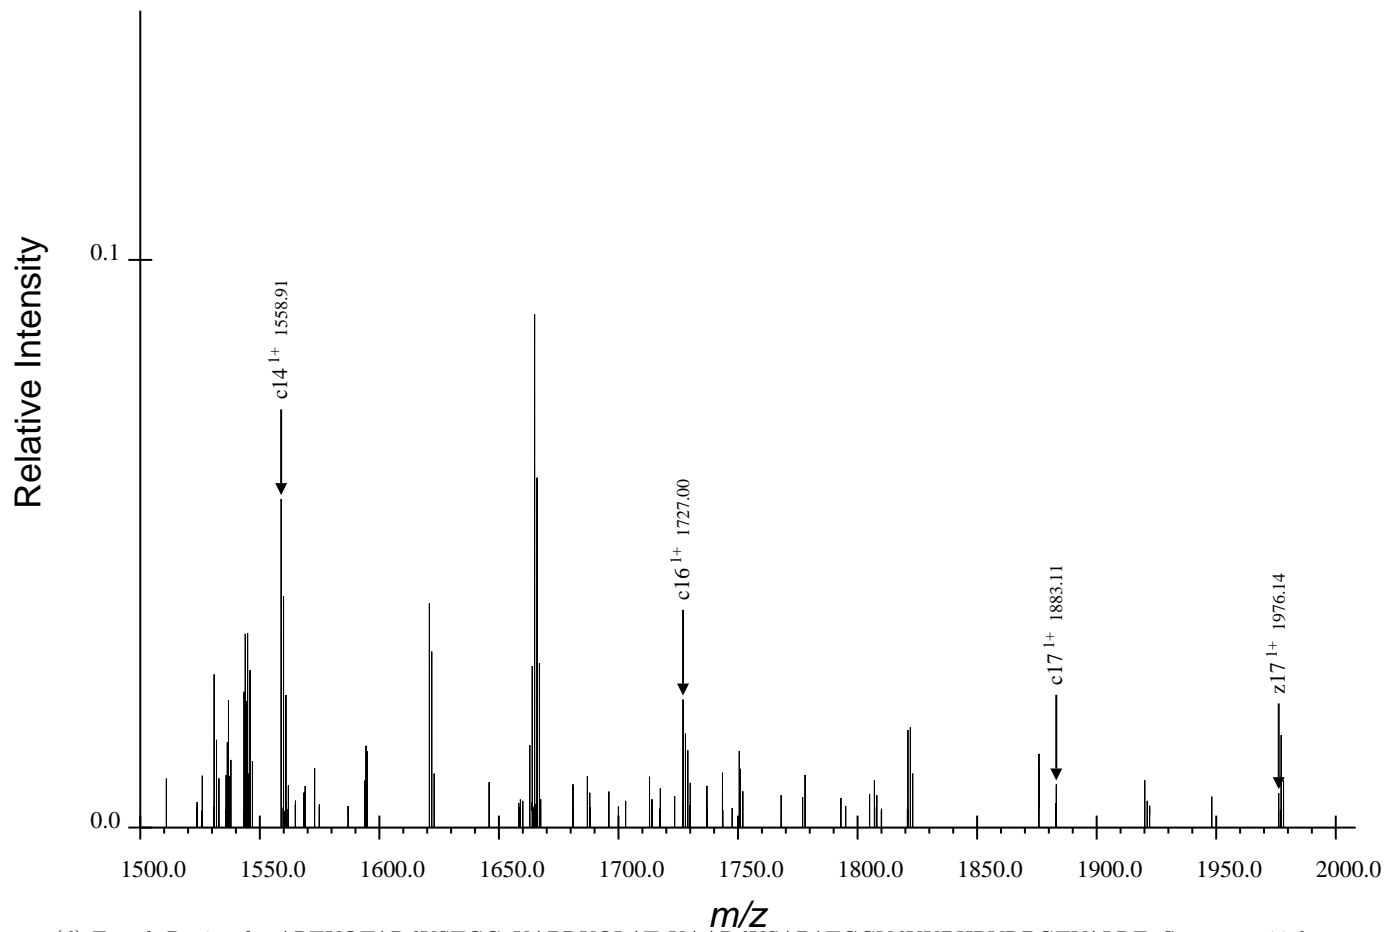

(d) Fourth Region for ARTKQTARdKSTGGaKAPRKQLATaKAARdKSAPATGGVdKKPHRYRPGTVALRE, Spectrum 44.dta



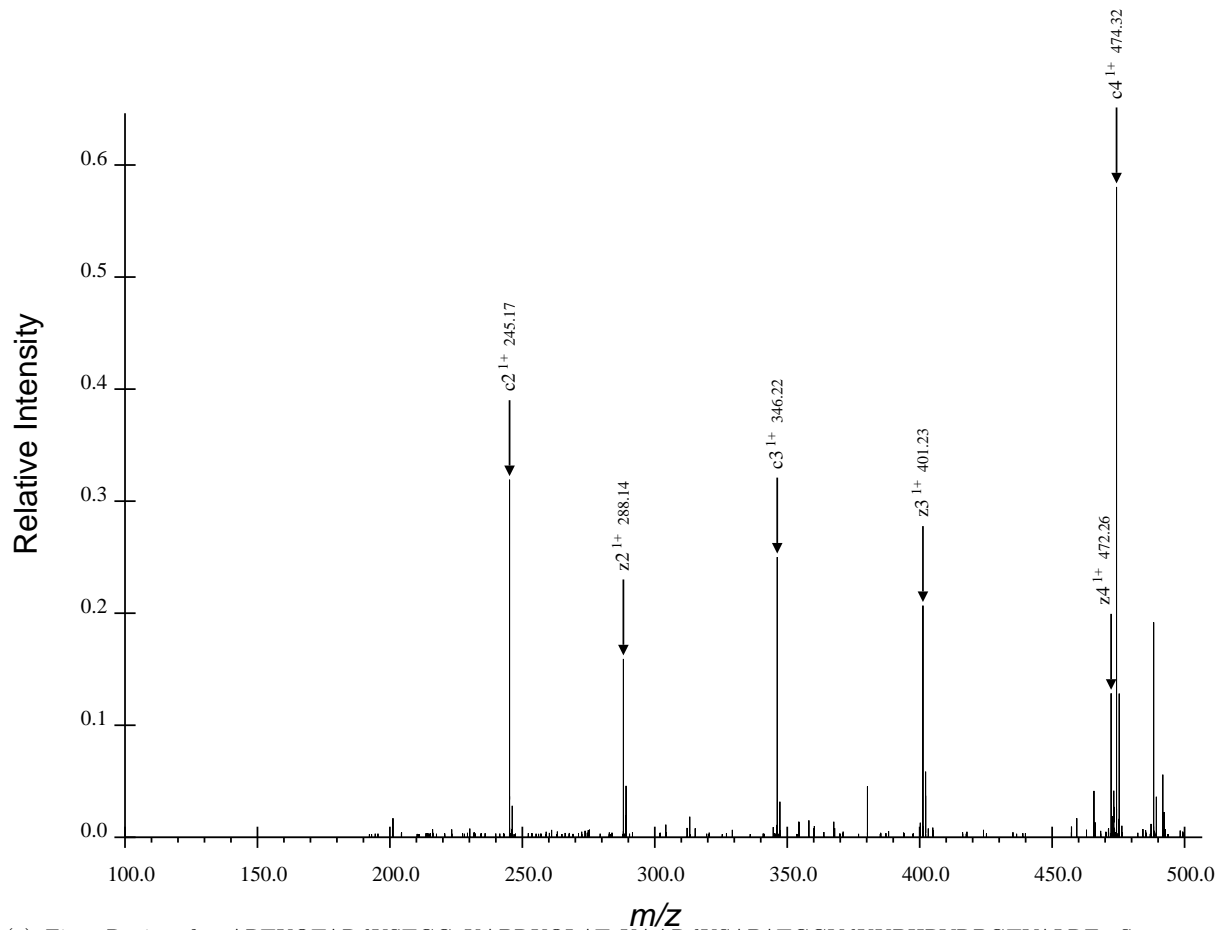

(a) First Region for ARTKQTARdKSTGGaKAPRKQLATaKAARdKSAPATGGVdKKPHRYRPGTVALRE, Spectrum 45.dta

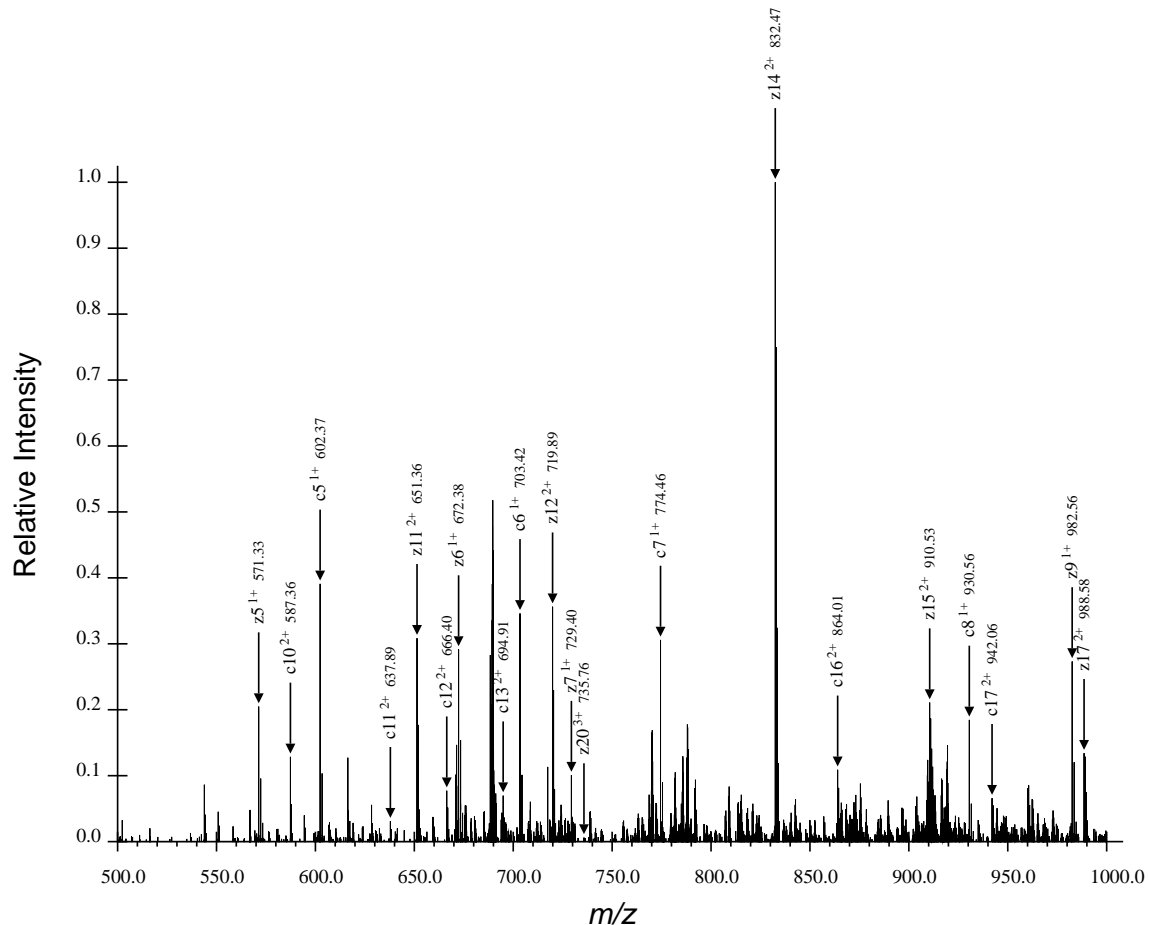

(b) Second Region for ARTKQTARdKSTGGaKAPRKQLATaKAARdKSAPATGGVdKKPHRYRPGTVALRE, Spectrum 45.dta

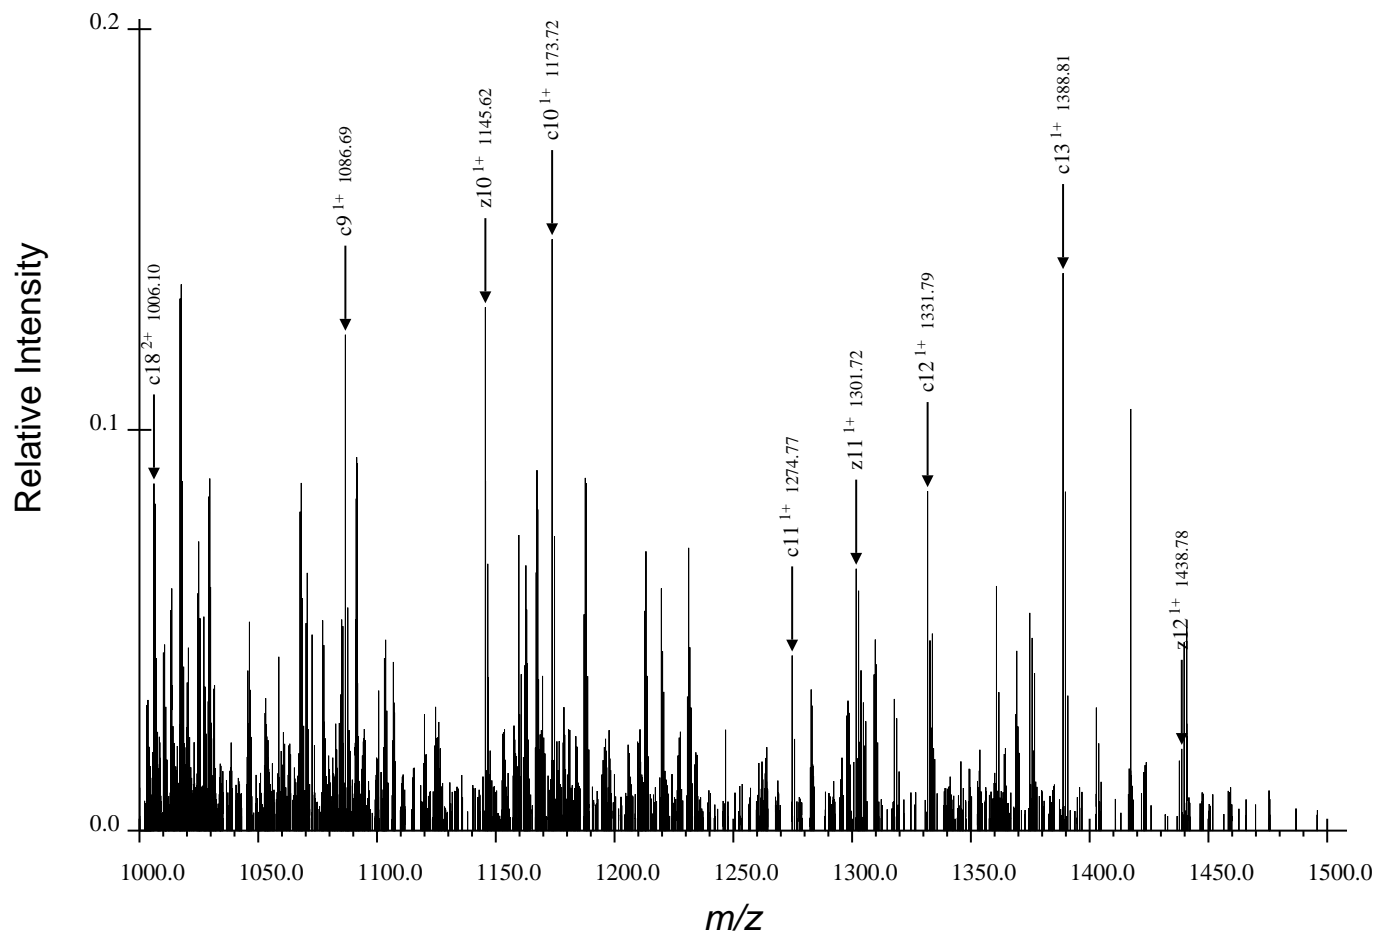

(c) Third Region for ARTKQTARdKSTGGaKAPRKQLATaKAARdKSAPATGGVdKKPHRYRPGTVALRE, Spectrum 45.dta

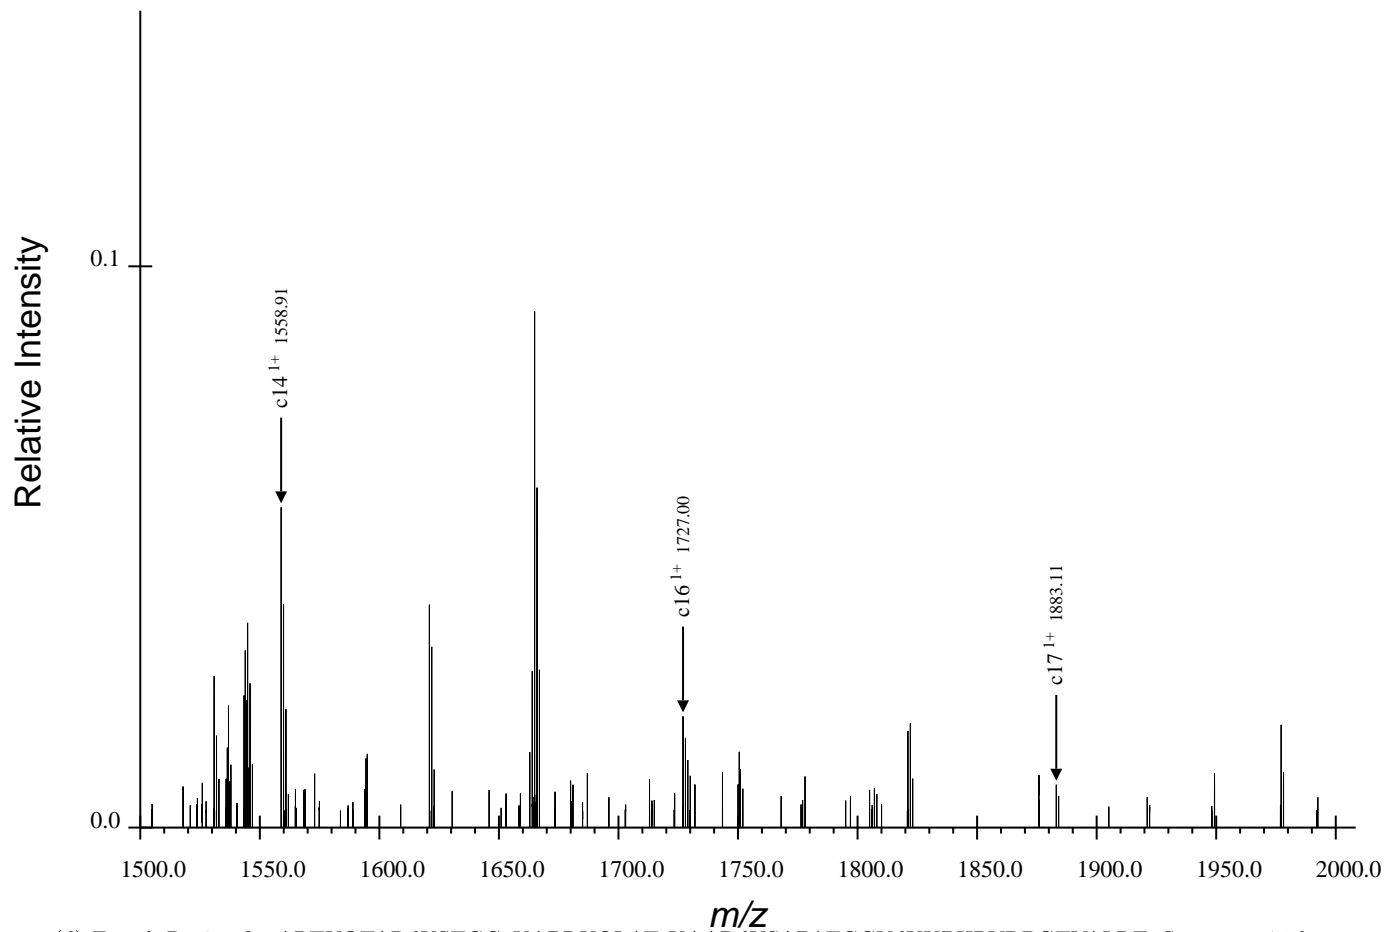

(d) Fourth Region for ARTKQTARdKSTGGaKAPRKQLATaKAARdKSAPATGGVdKKPHRYRPGTVALRE, Spectrum 45.dta

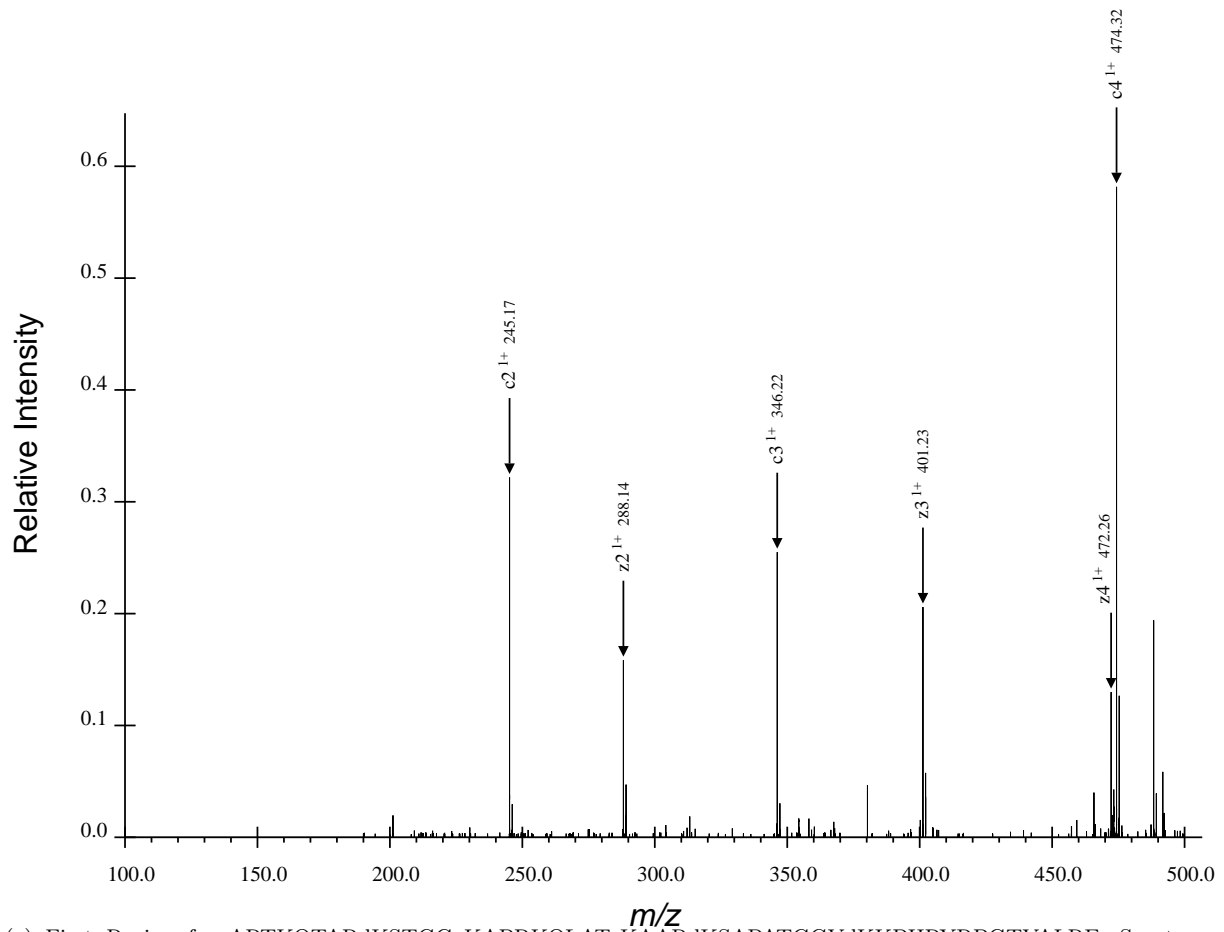

(a) First Region for ARTKQTARdKSTGGaKAPRKQLATaKAARdKSAPATGGVdKKPHRYRPGTVALRE, Spectrum 46.dta

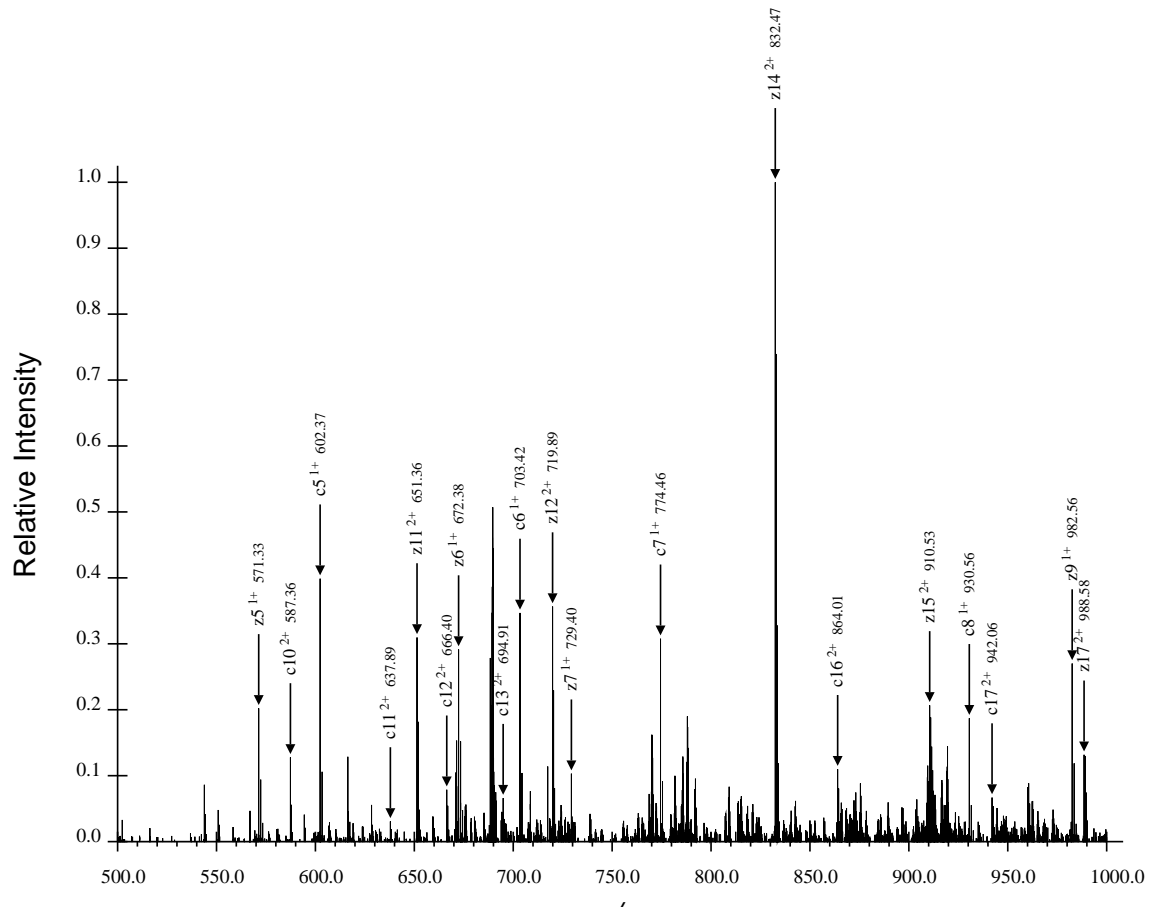

(b) Second Region for ARTKQTARdKSTGGaKAPRKQLATaKAARdKSAPATGGVdKKPHRYRPGTVALRE, Spectrum 46.dta

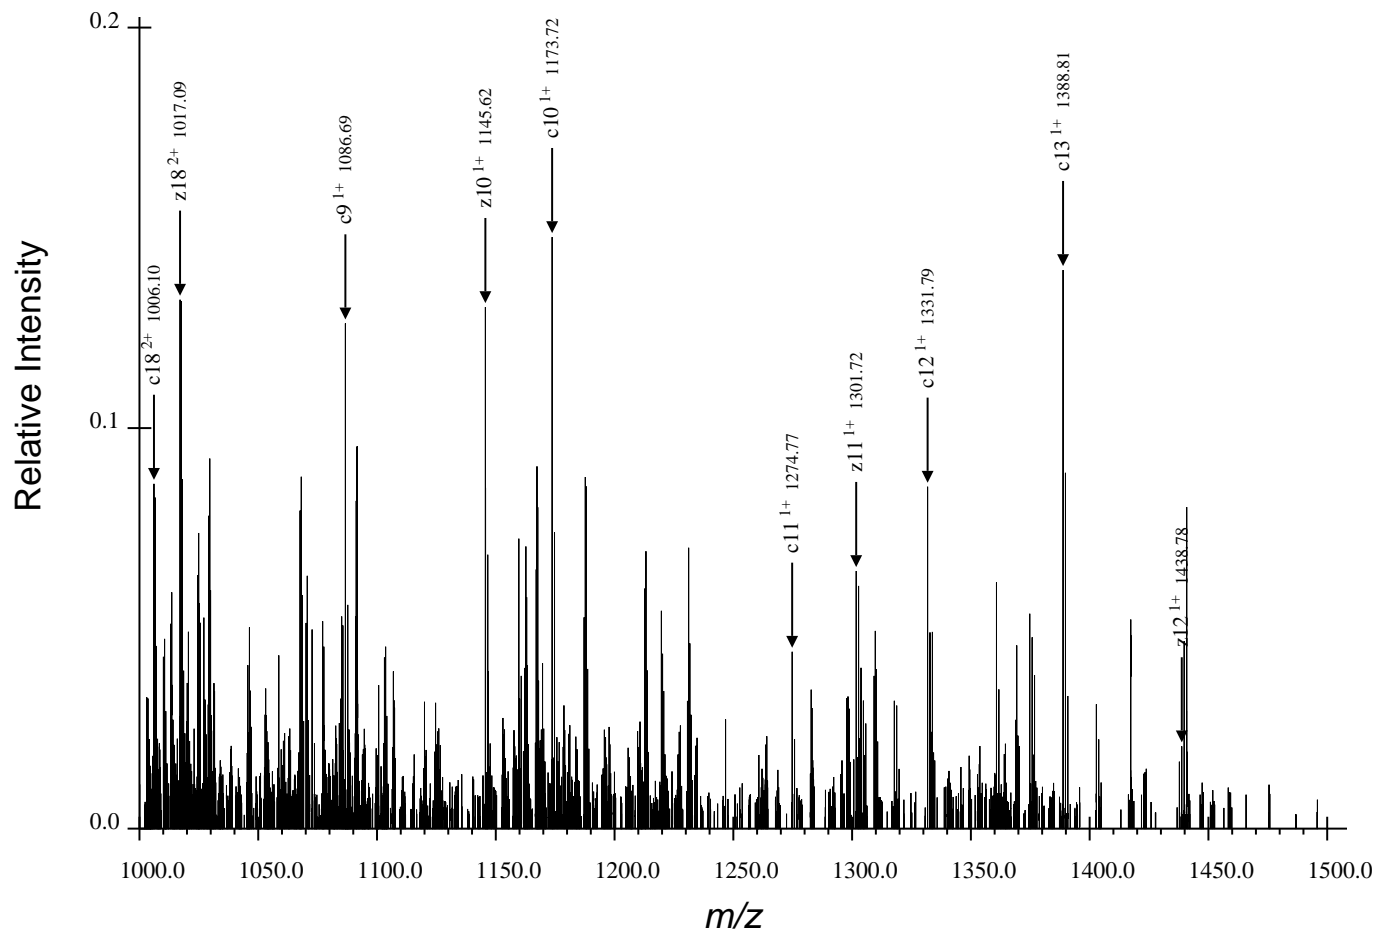

(c) Third Region for ARTKQTARdKSTGGaKAPRKQLATaKAARdKSAPATGGVdKKPHRYRPGTVALRE, Spectrum 46.dta

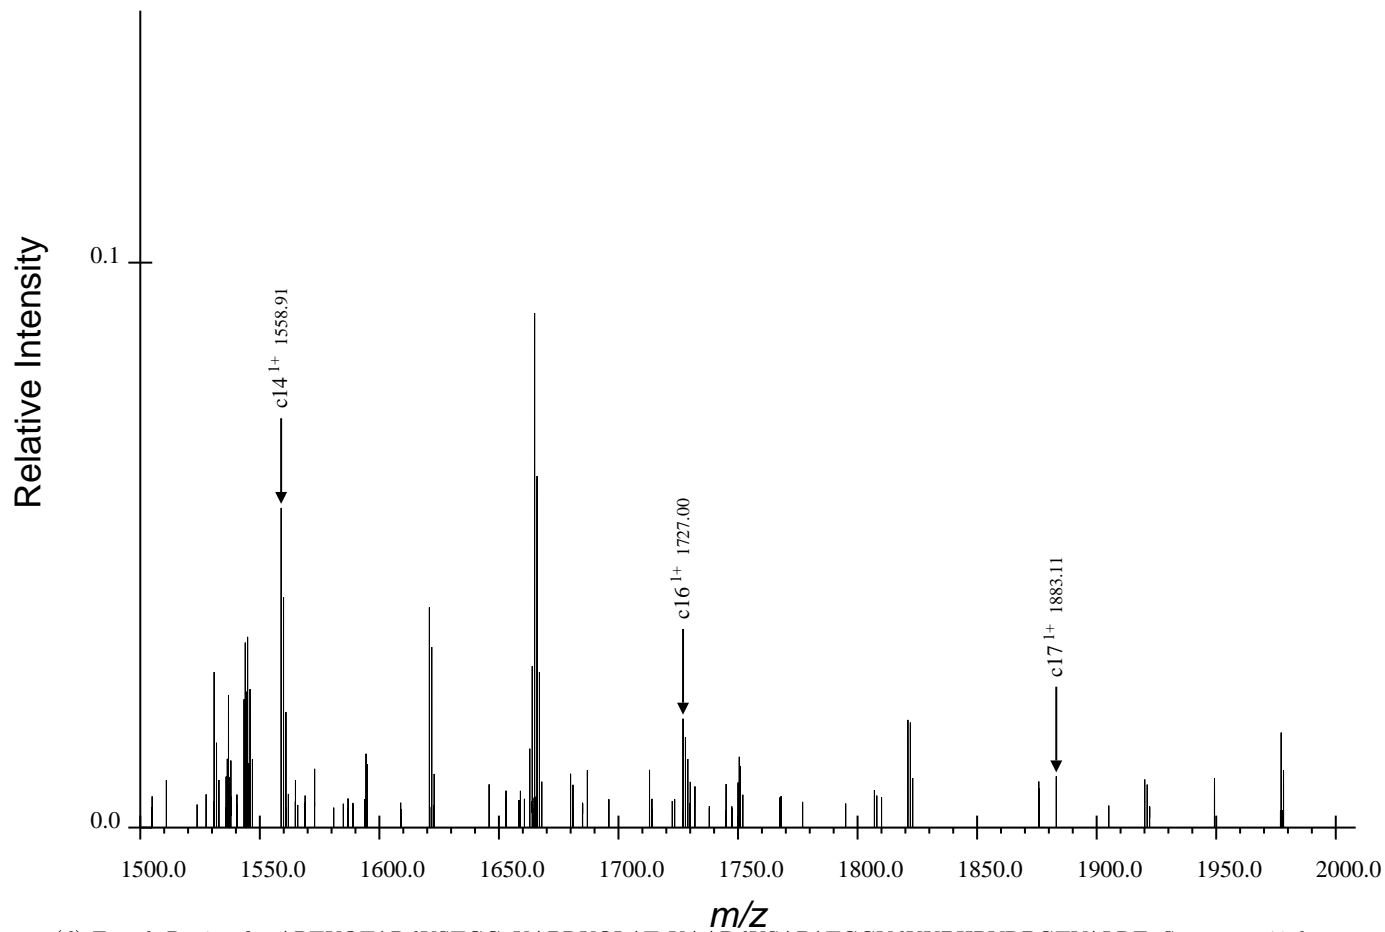

(d) Fourth Region for ARTKQTARdKSTGGaKAPRKQLATaKAARdKSAPATGGVdKKPHRYRPGTVALRE, Spectrum 46.dta

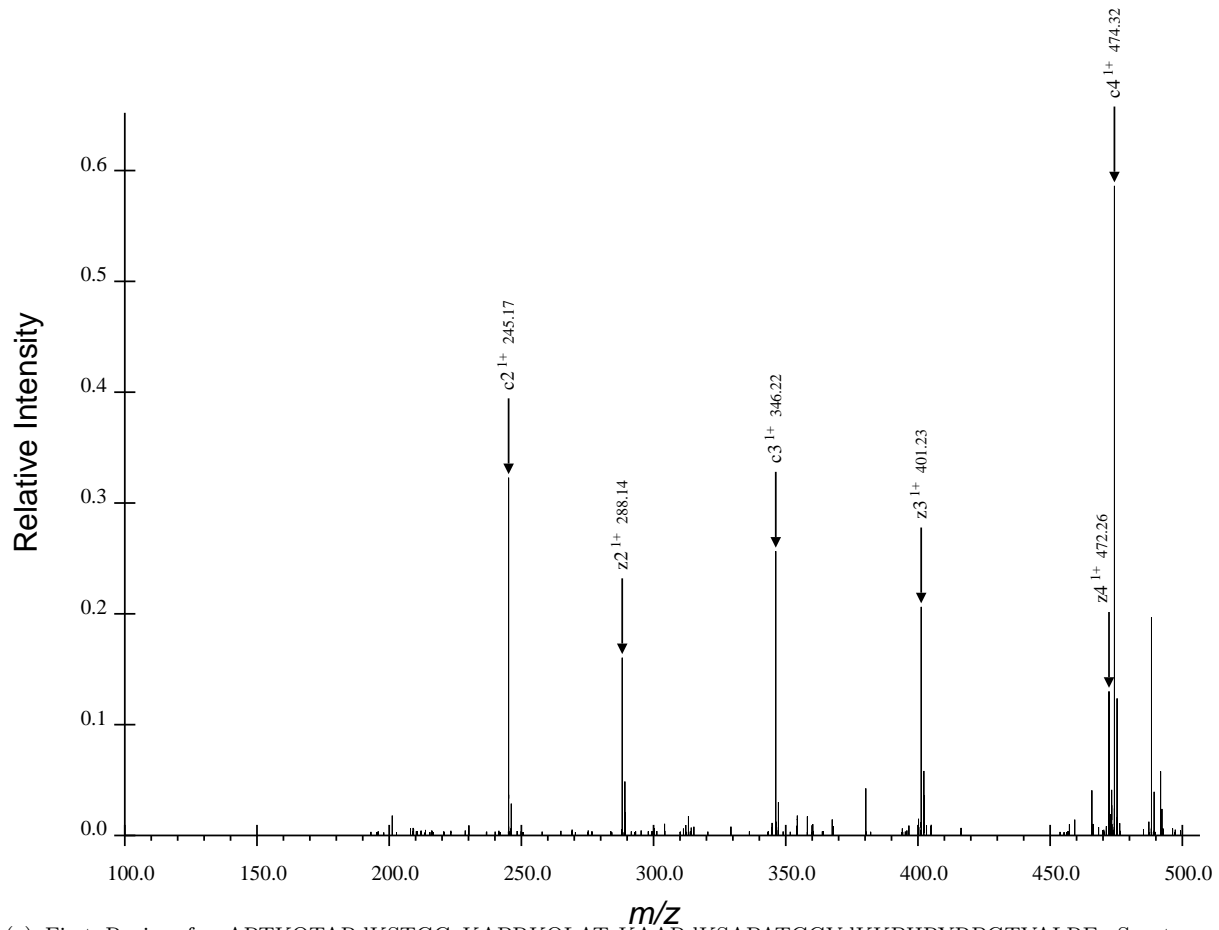

(a) First Region for ARTKQTARdKSTGGaKAPRKQLATaKAARdKSAPATGGVdKKPHRYRPGTVALRE, Spectrum 47.dta

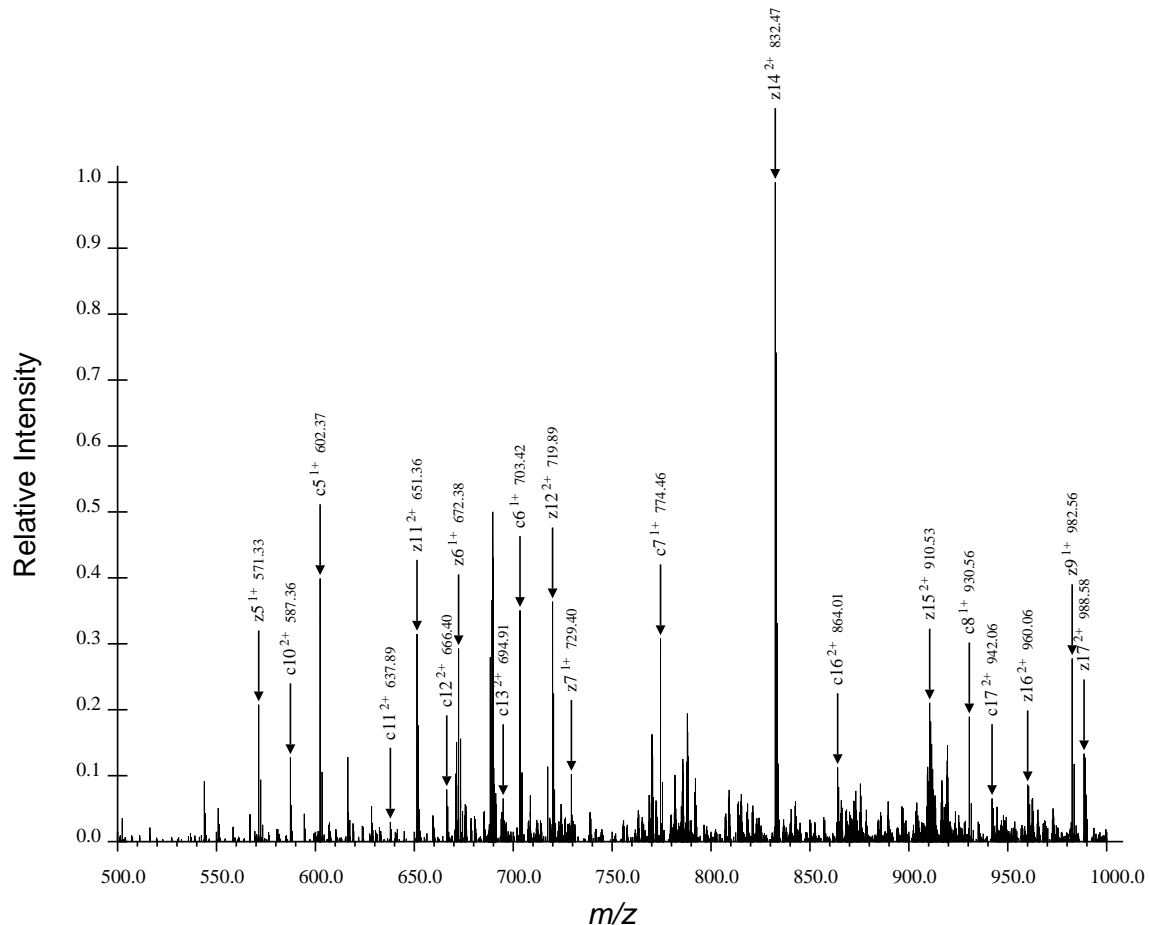

(b) Second Region for ARTKQTARdKSTGGaKAPRKQLATaKAARdKSAPATGGVdKKPHRYRPGTVALRE, Spectrum 47.dta

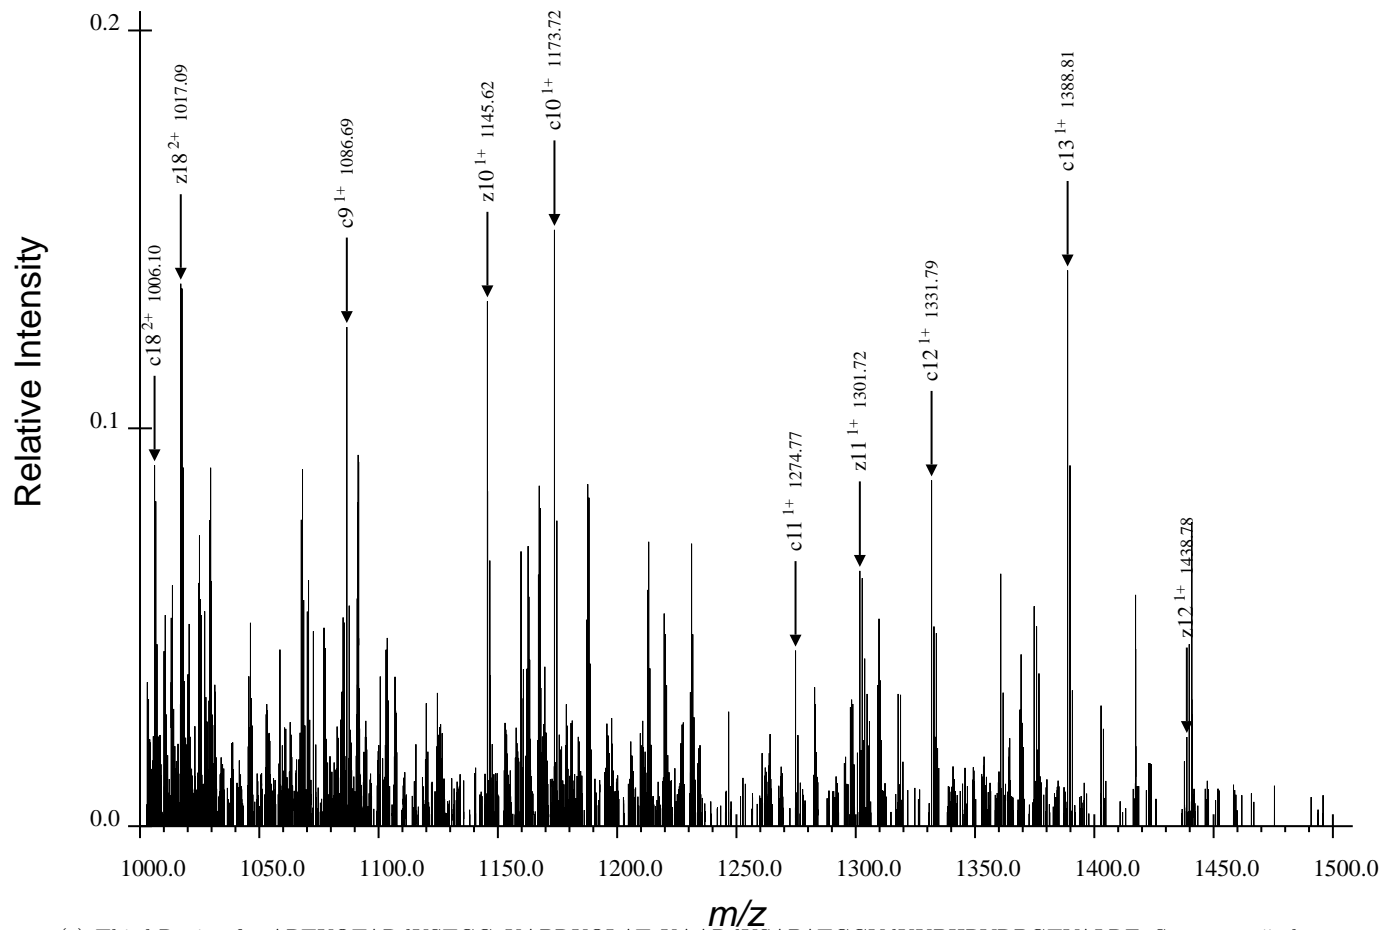

(c) Third Region for ARTKQTARdKSTGGaKAPRKQLATaKAARdKSAPATGGVdKKPHRYRPGTVALRE, Spectrum 47.dta

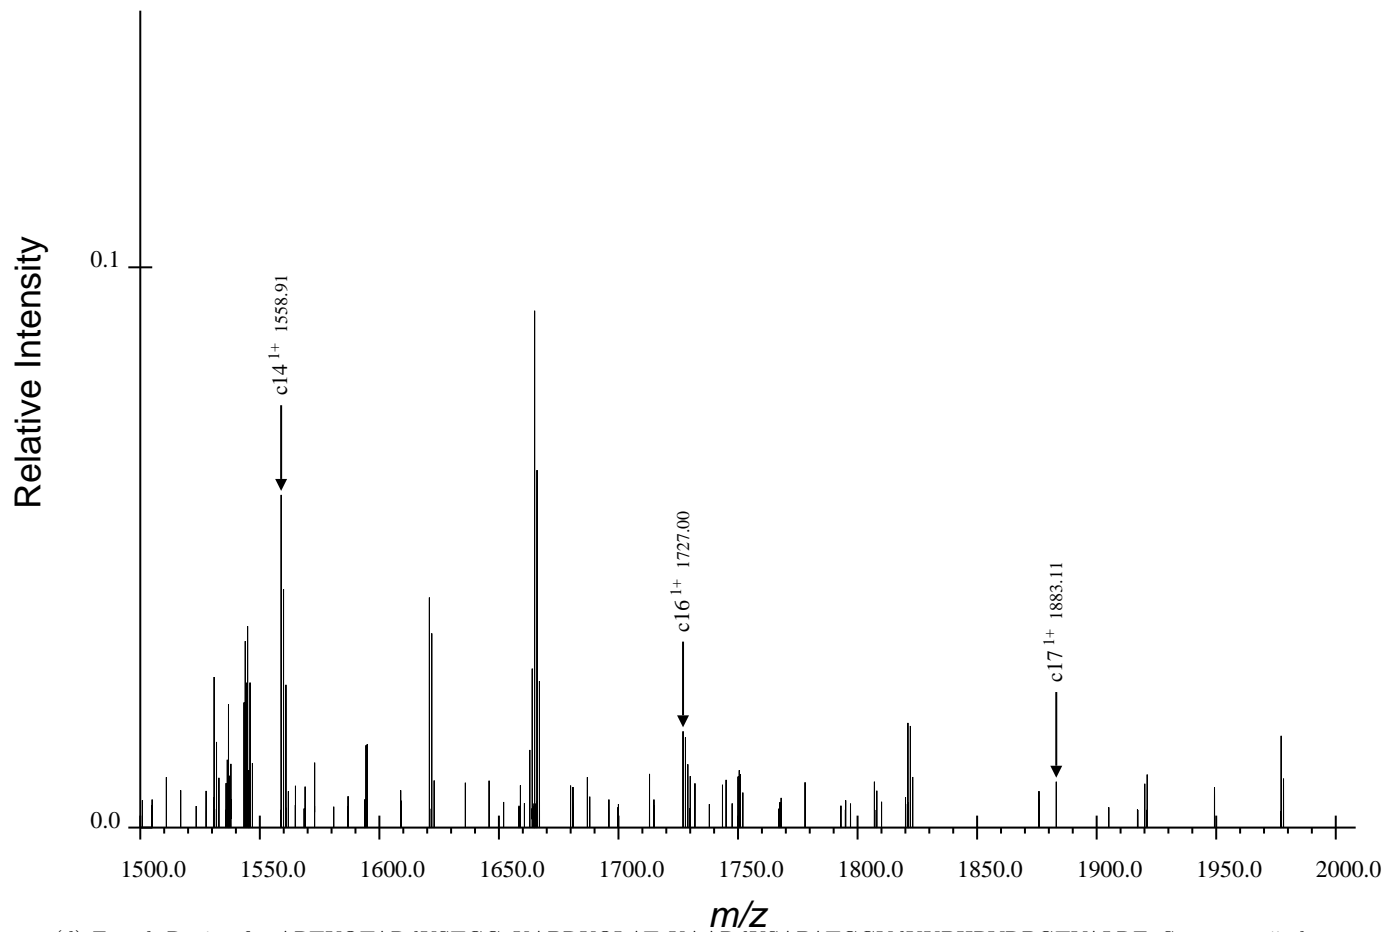

(d) Fourth Region for ARTKQTARdKSTGGaKAPRKQLATaKAARdKSAPATGGVdKKPHRYRPGTVALRE, Spectrum 47.dta

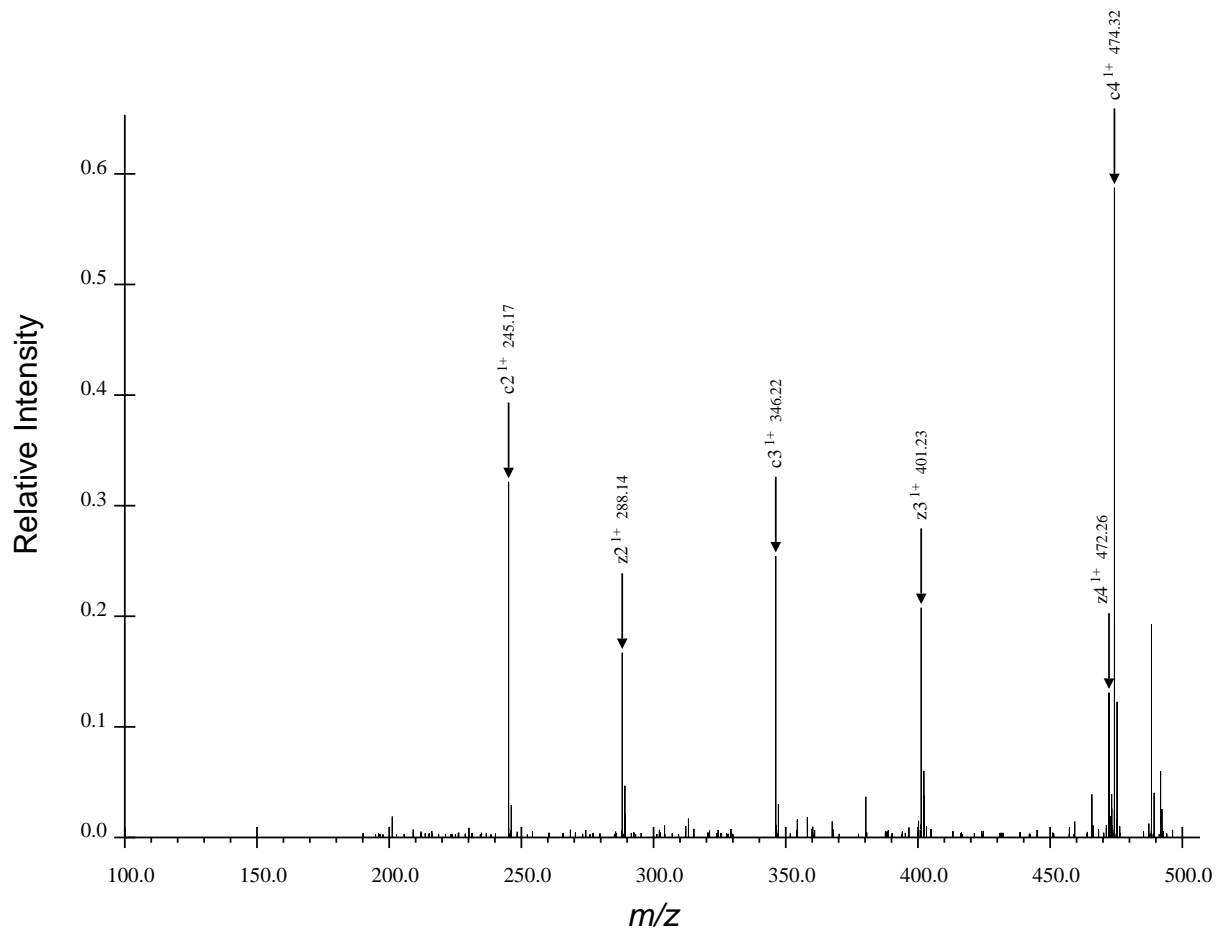

(a) First Region for ARTKQTARdKSTGGaKAPRKQLATaKAARdKSAPATGGVdKKPHRYRPGTVALRE, Spectrum 48.dta

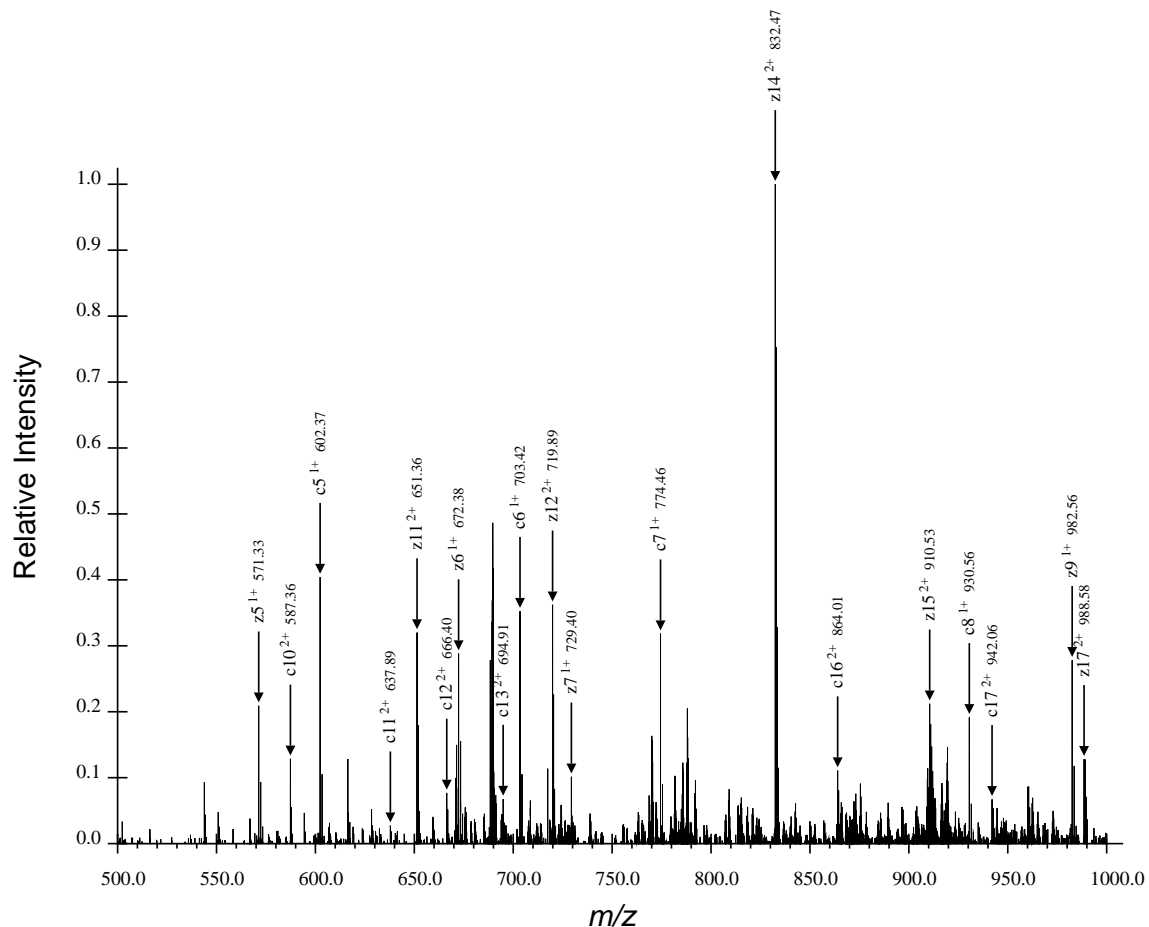

(b) Second Region for ARTKQTARdKSTGGaKAPRKQLATaKAARdKSAPATGGVdKKPHRYRPGTVALRE, Spectrum 48.dta

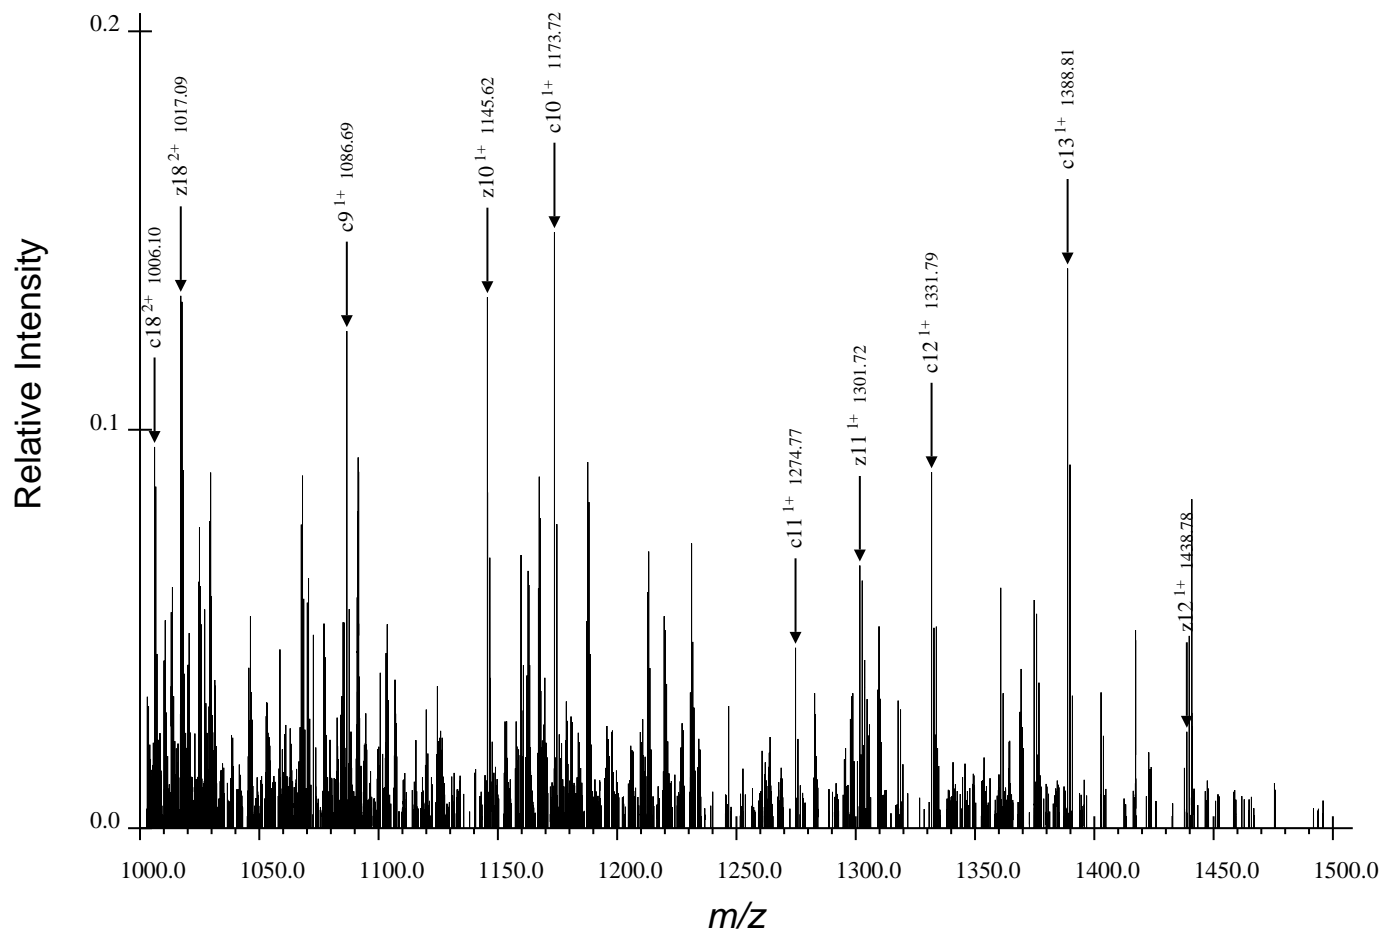

(c) Third Region for ARTKQTARdKSTGGaKAPRKQLATaKAARdKSAPATGGVdKKPHRYRPGTVALRE, Spectrum 48.dta

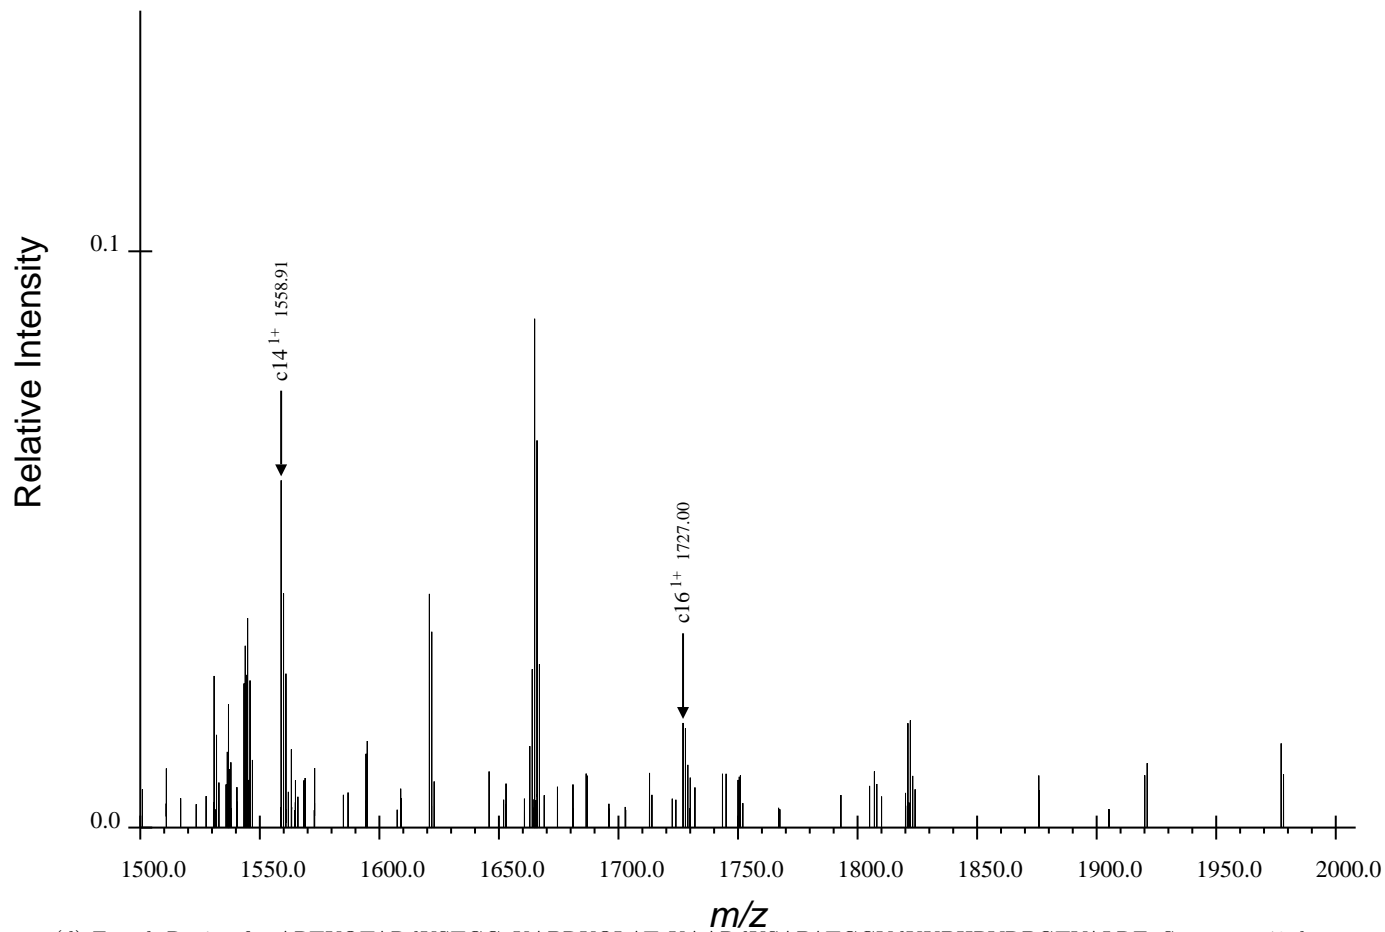

(d) Fourth Region for ARTKQTARdKSTGGaKAPRKQLATaKAARdKSAPATGGVdKKPHRYRPGTVALRE, Spectrum 48.dta



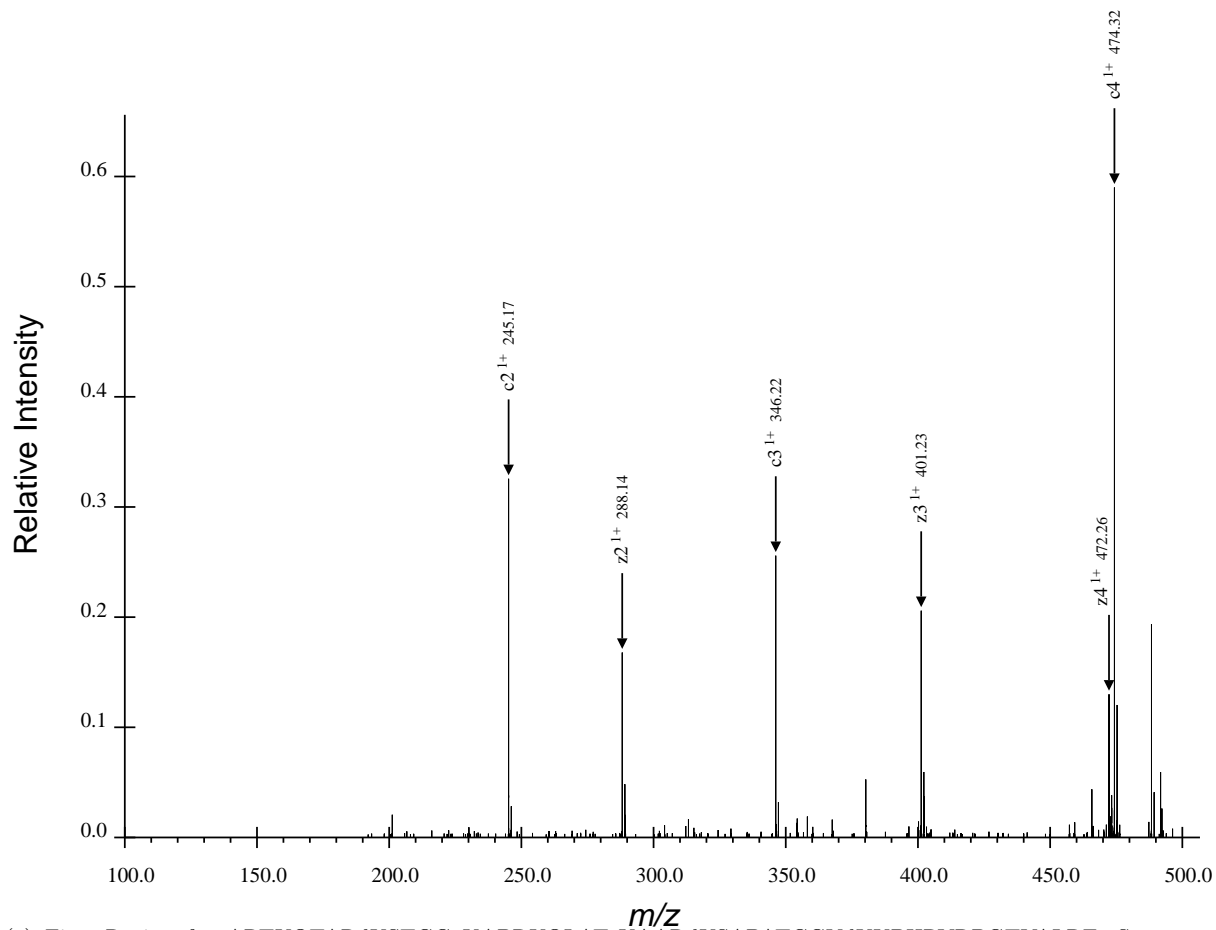

(a) First Region for ARTKQTARdKSTGGaKAPRKQLATaKAARdKSAPATGGVdKKPHRYRPGTVALRE, Spectrum 49.dta

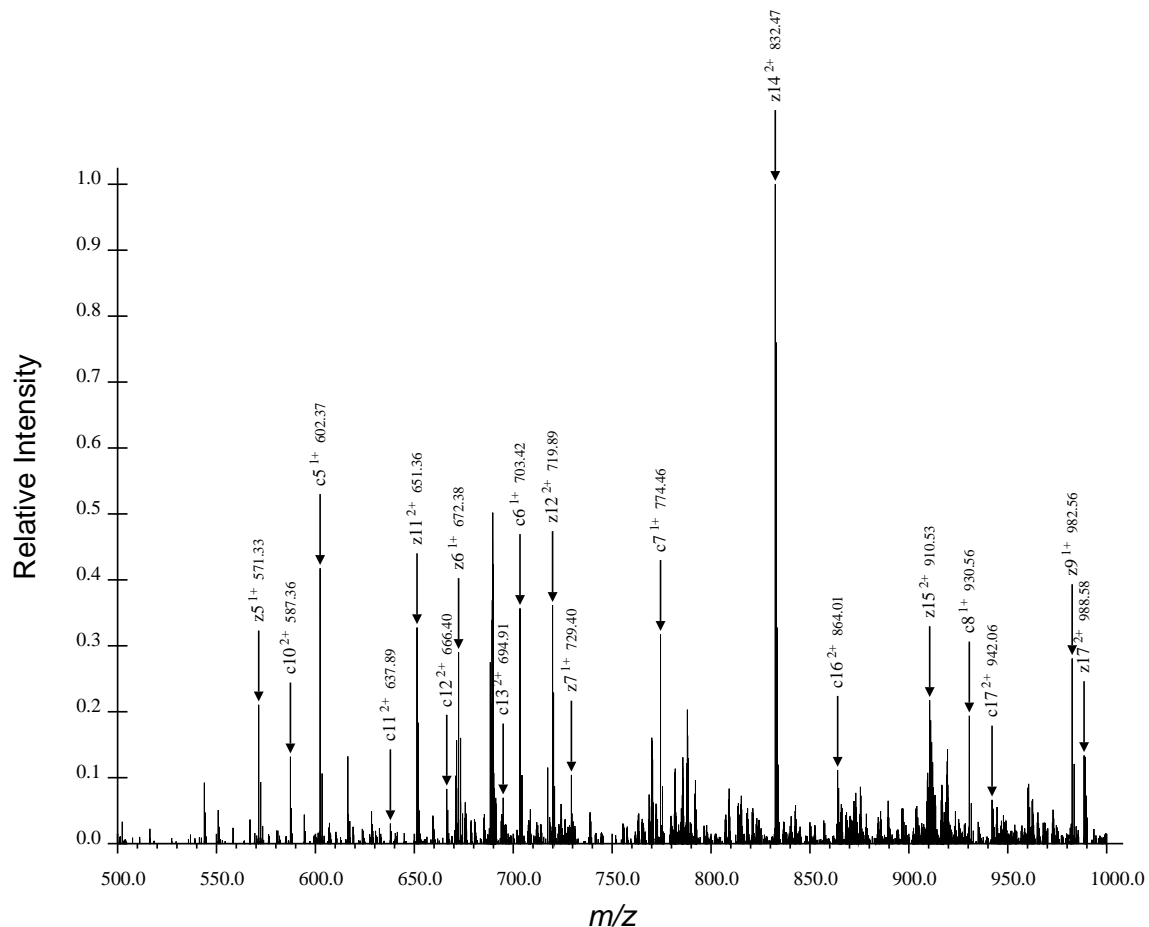

(b) Second Region for ARTKQTARdKSTGGaKAPRKQLATaKAARdKSAPATGGVdKKPHRYRPGTVALRE, Spectrum 49.dta

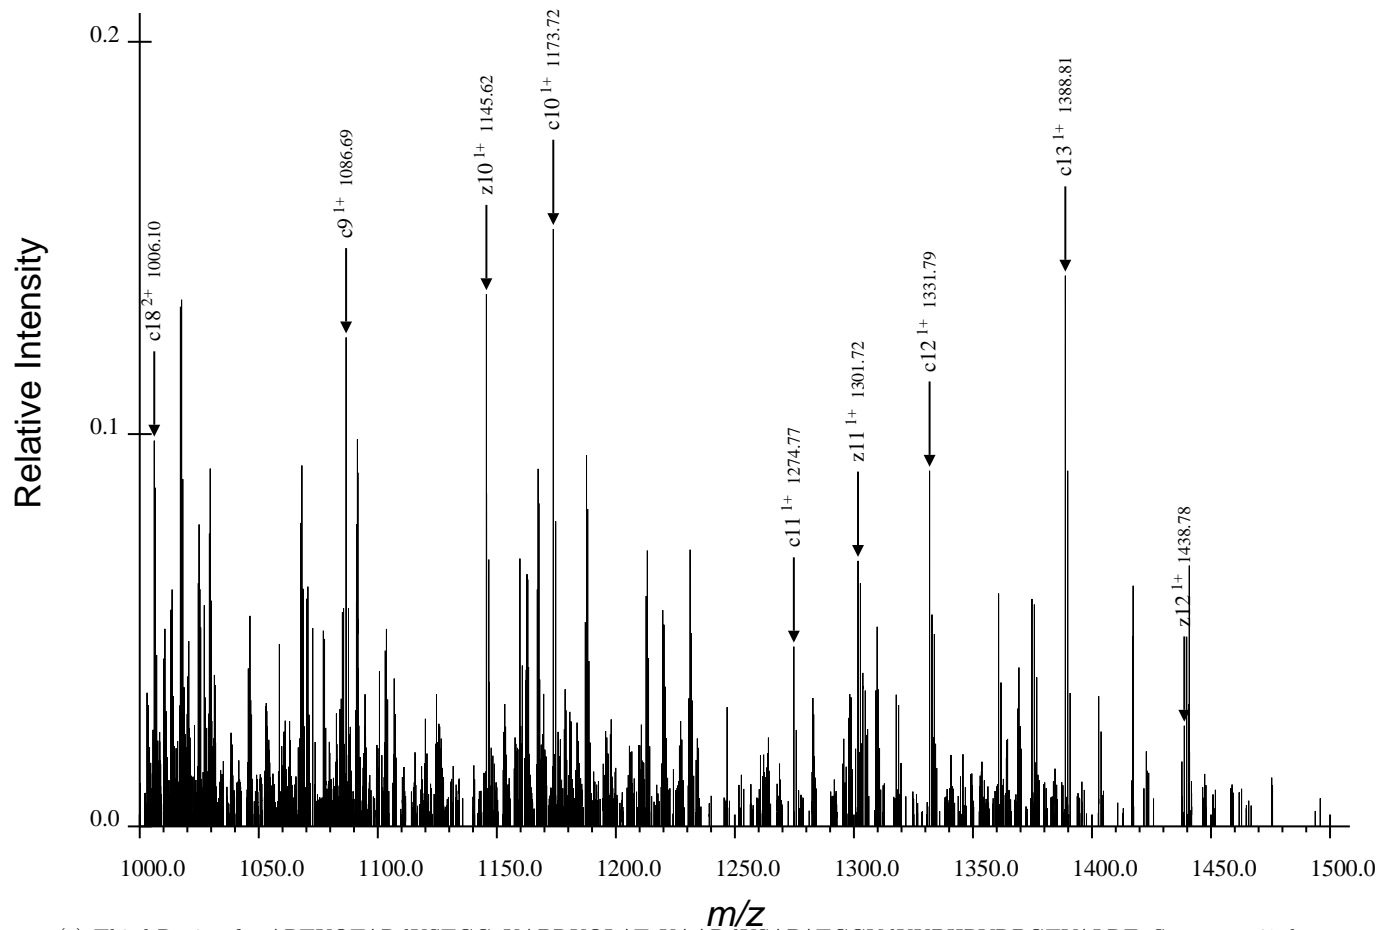

(c) Third Region for ARTKQTARdKSTGGaKAPRKQLATaKAARdKSAPATGGVdKKPHRYRPGTVALRE, Spectrum 49.dta

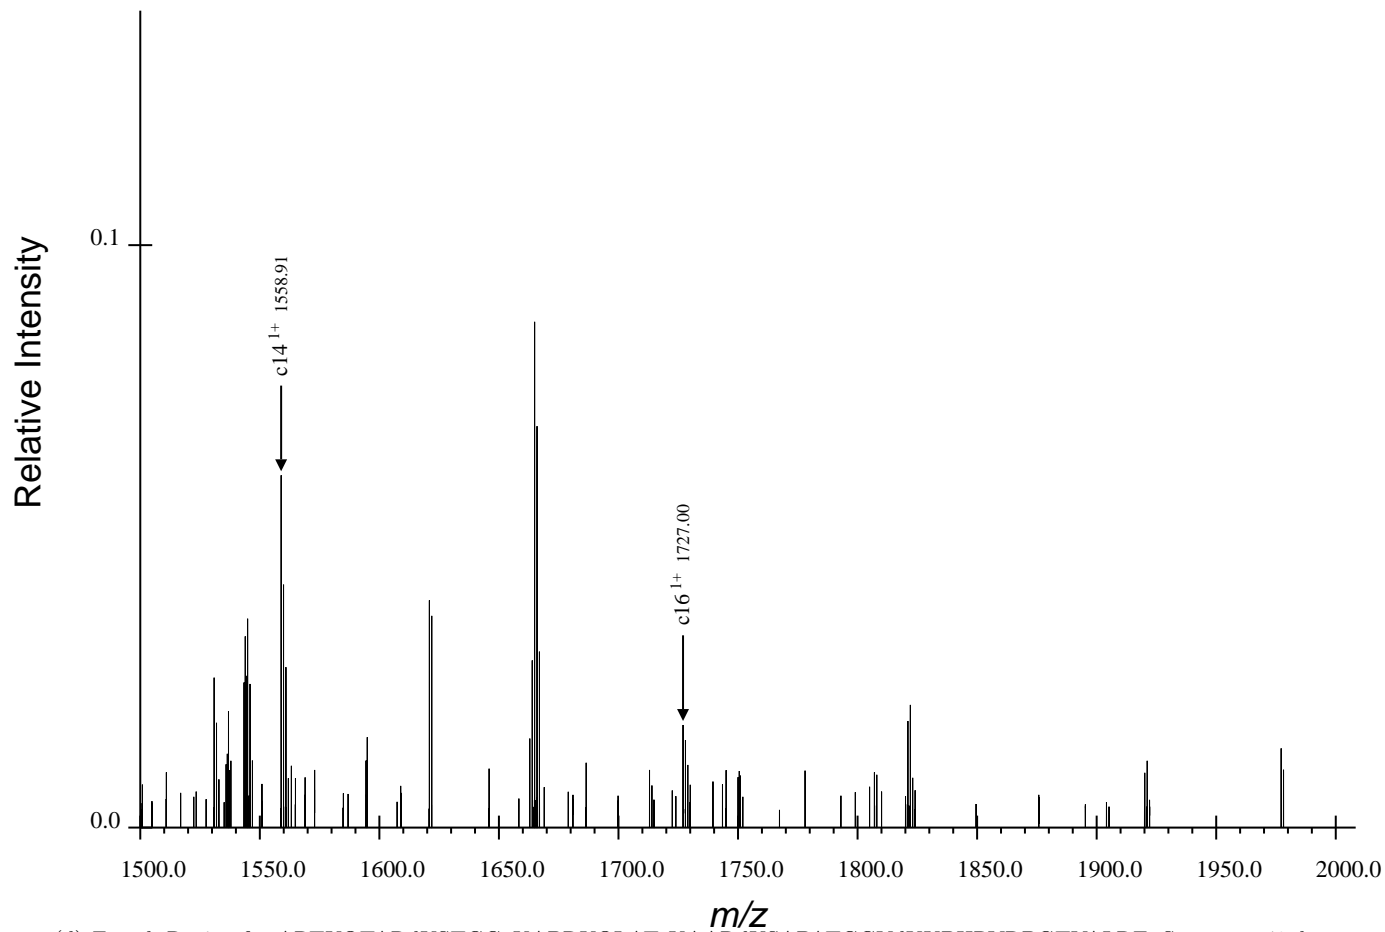

(d) Fourth Region for ARTKQTARdKSTGGaKAPRKQLATaKAARdKSAPATGGVdKKPHRYRPGTVALRE, Spectrum 49.dta

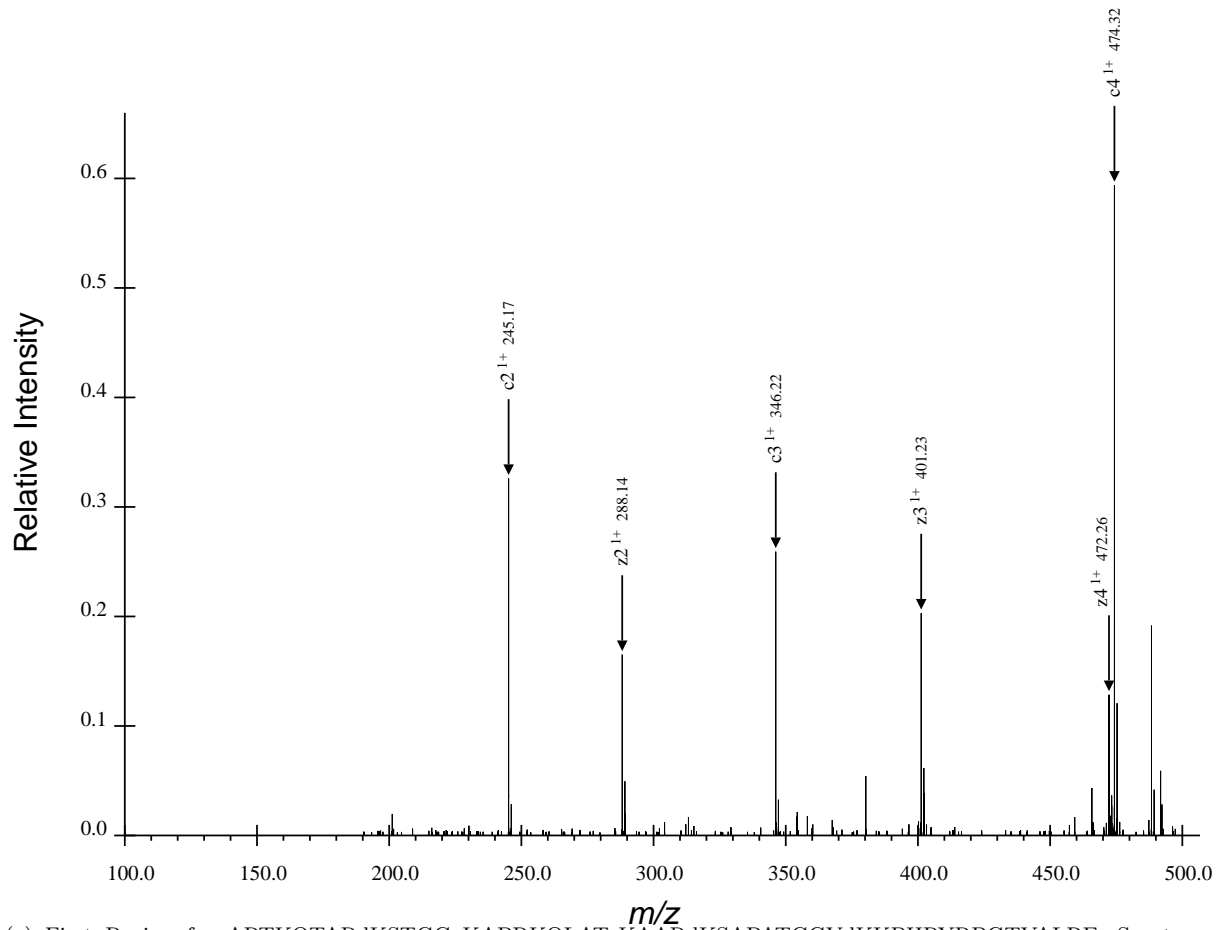

(a) First Region for ARTKQTARdKSTGGaKAPRKQLATaKAARdKSAPATGGVdKKPHRYRPGTVALRE, Spectrum 50.dta

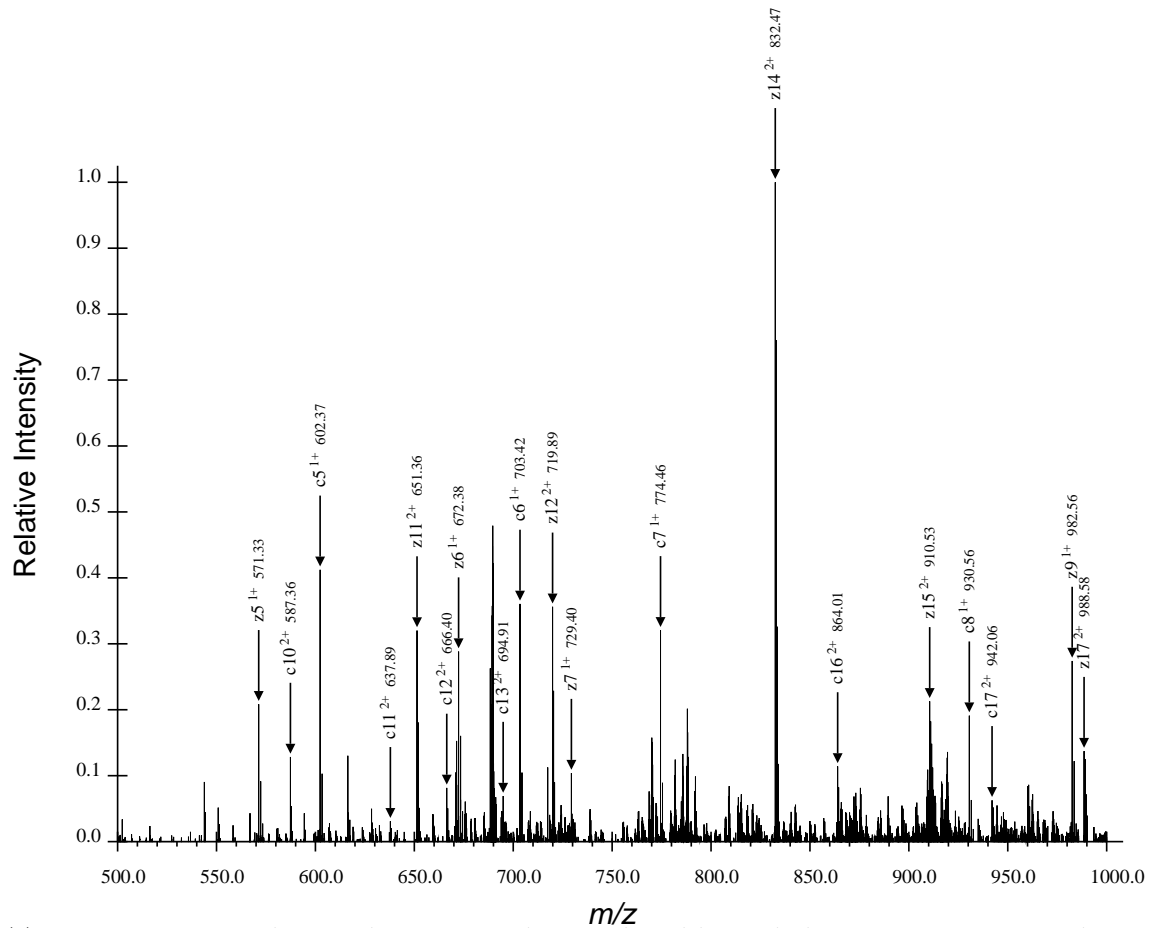

(b) Second Region for ARTKQTARdKSTGGaKAPRKQLATaKAARdKSAPATGGVdKKPHRYRPGTVALRE, Spectrum 50.dta

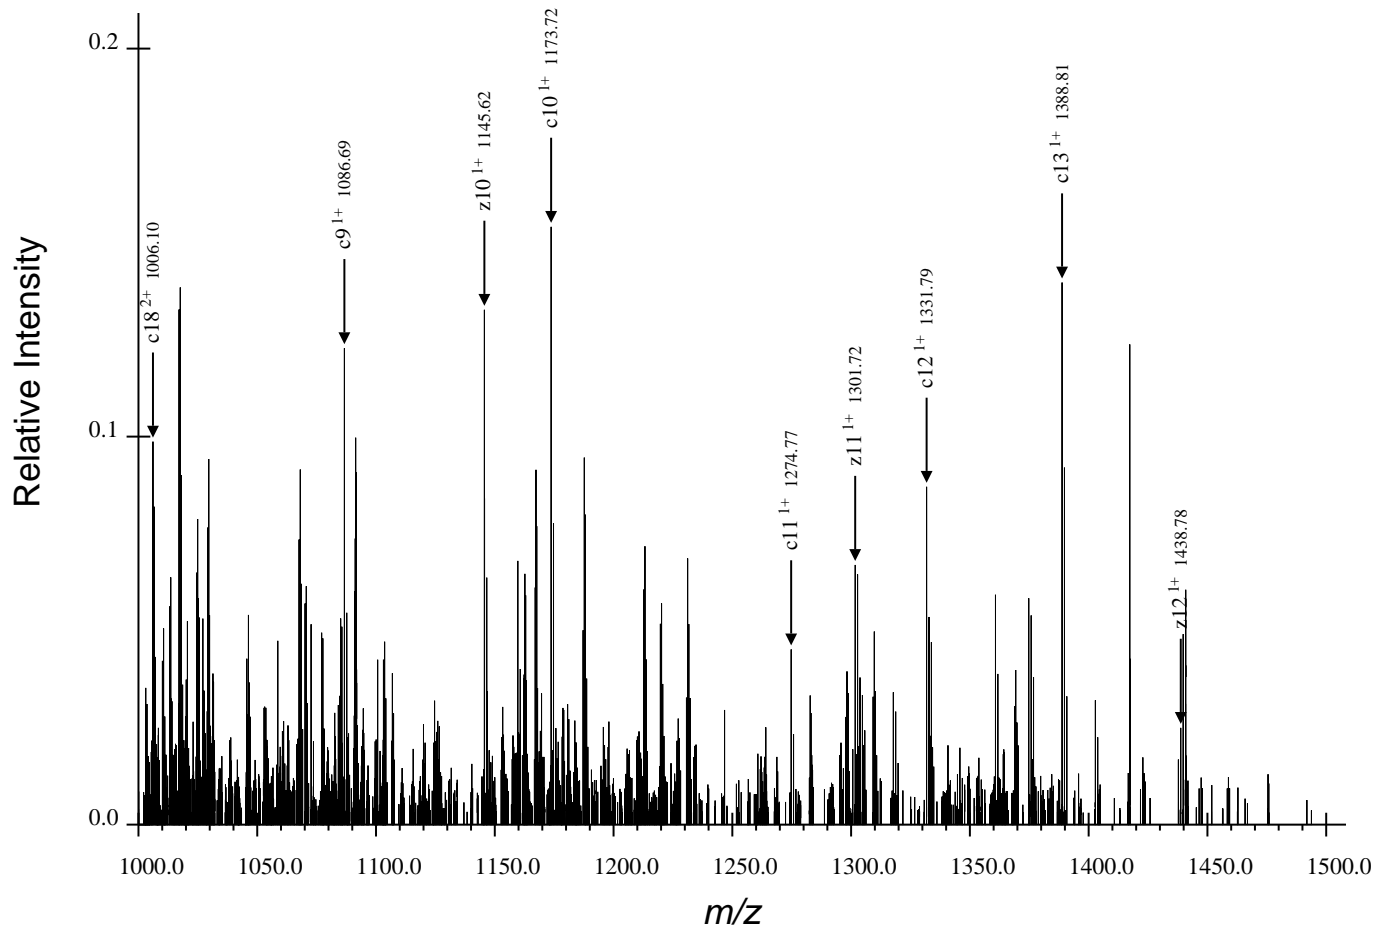

(c) Third Region for ARTKQTARdKSTGGaKAPRKQLATaKAARdKSAPATGGVdKKPHRYRPGTVALRE, Spectrum 50.dta

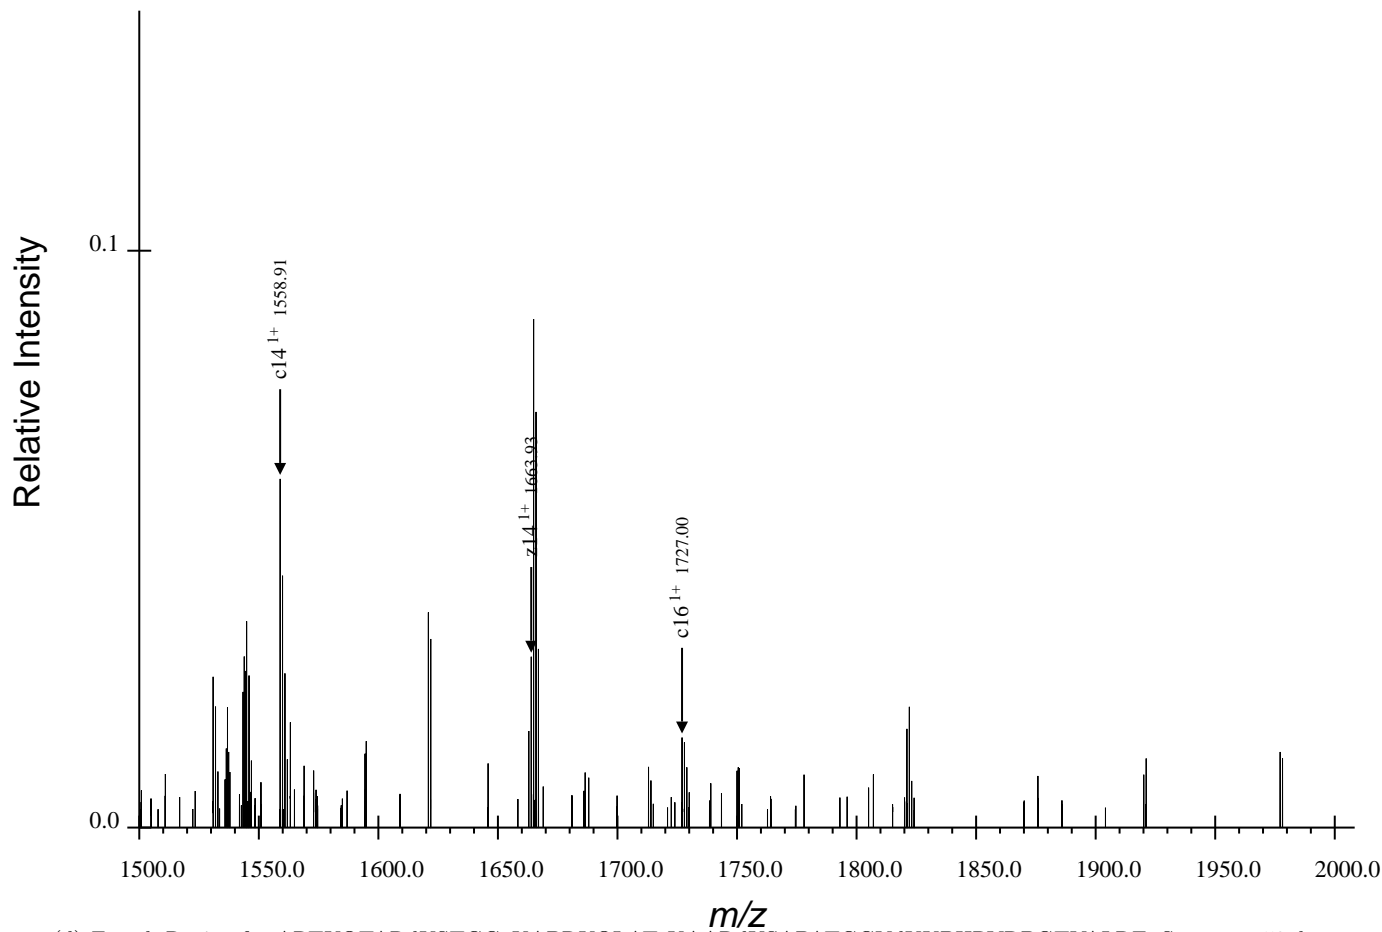

(d) Fourth Region for ARTKQTARdKSTGGaKAPRKQLATaKAARdKSAPATGGVdKKPHRYRPGTVALRE, Spectrum 50.dta

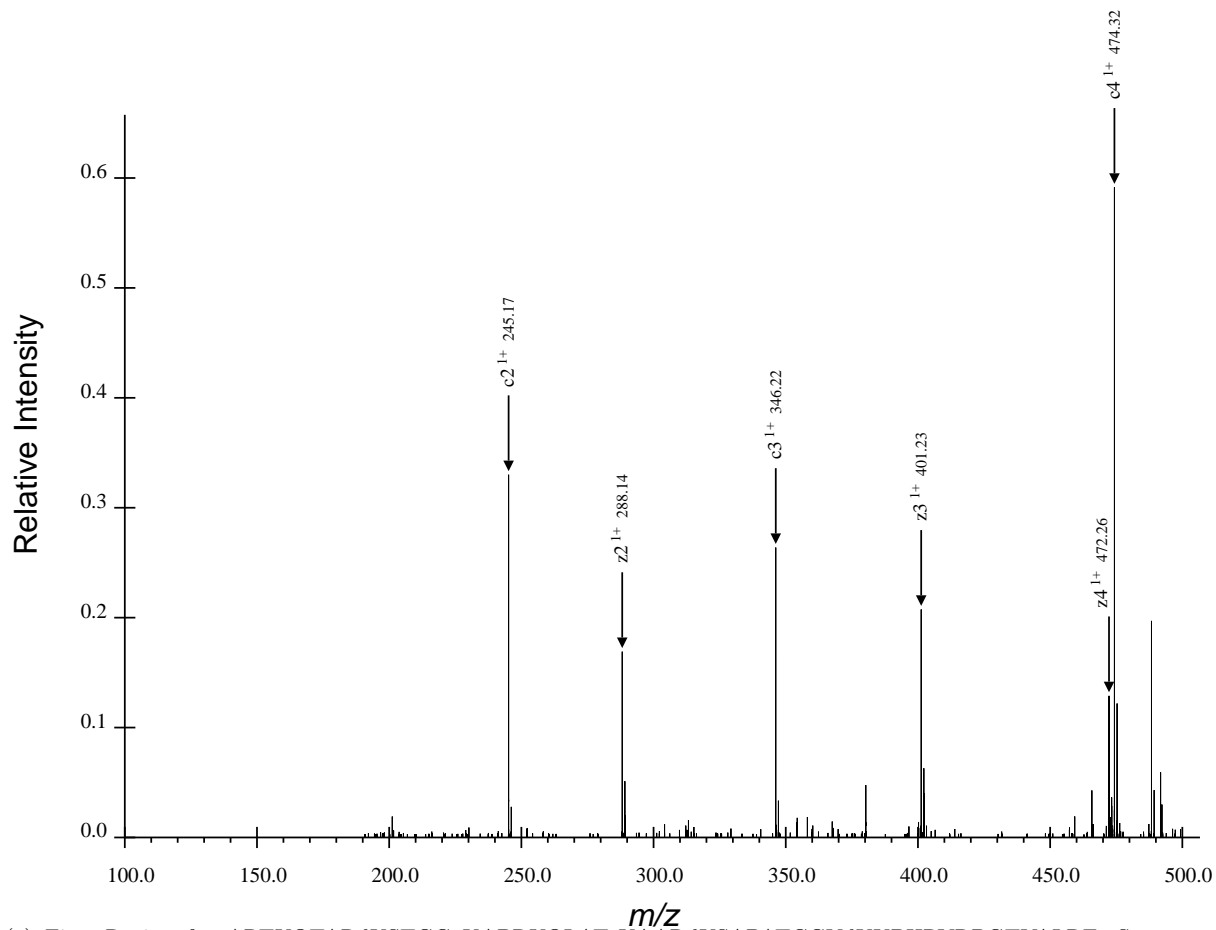

(a) First Region for ARTKQTARdKSTGGaKAPRKQLATaKAARdKSAPATGGVdKKPHRYRPGTVALRE, Spectrum 51.dta

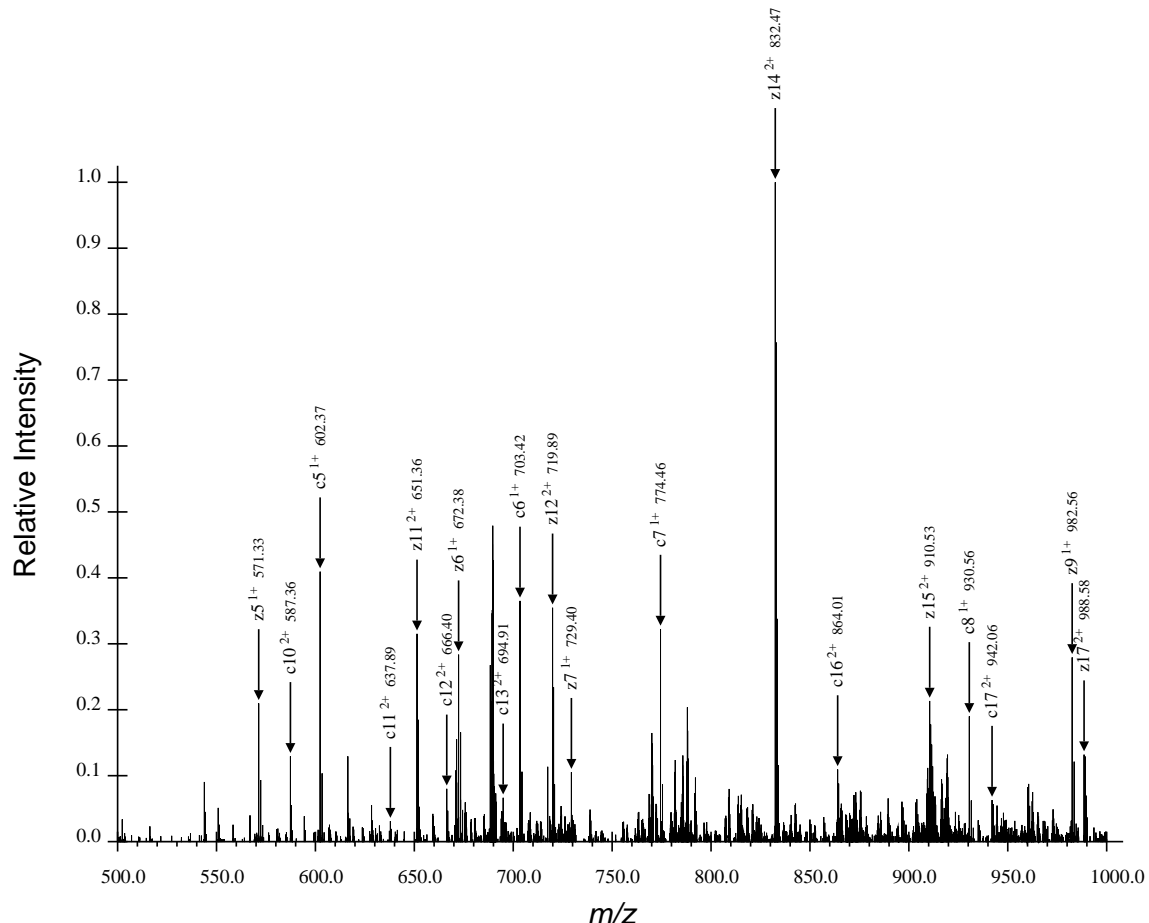

(b) Second Region for ARTKQTARdKSTGGaKAPRKQLATaKAARdKSAPATGGVdKKPHRYRPGTVALRE, Spectrum 51.dta

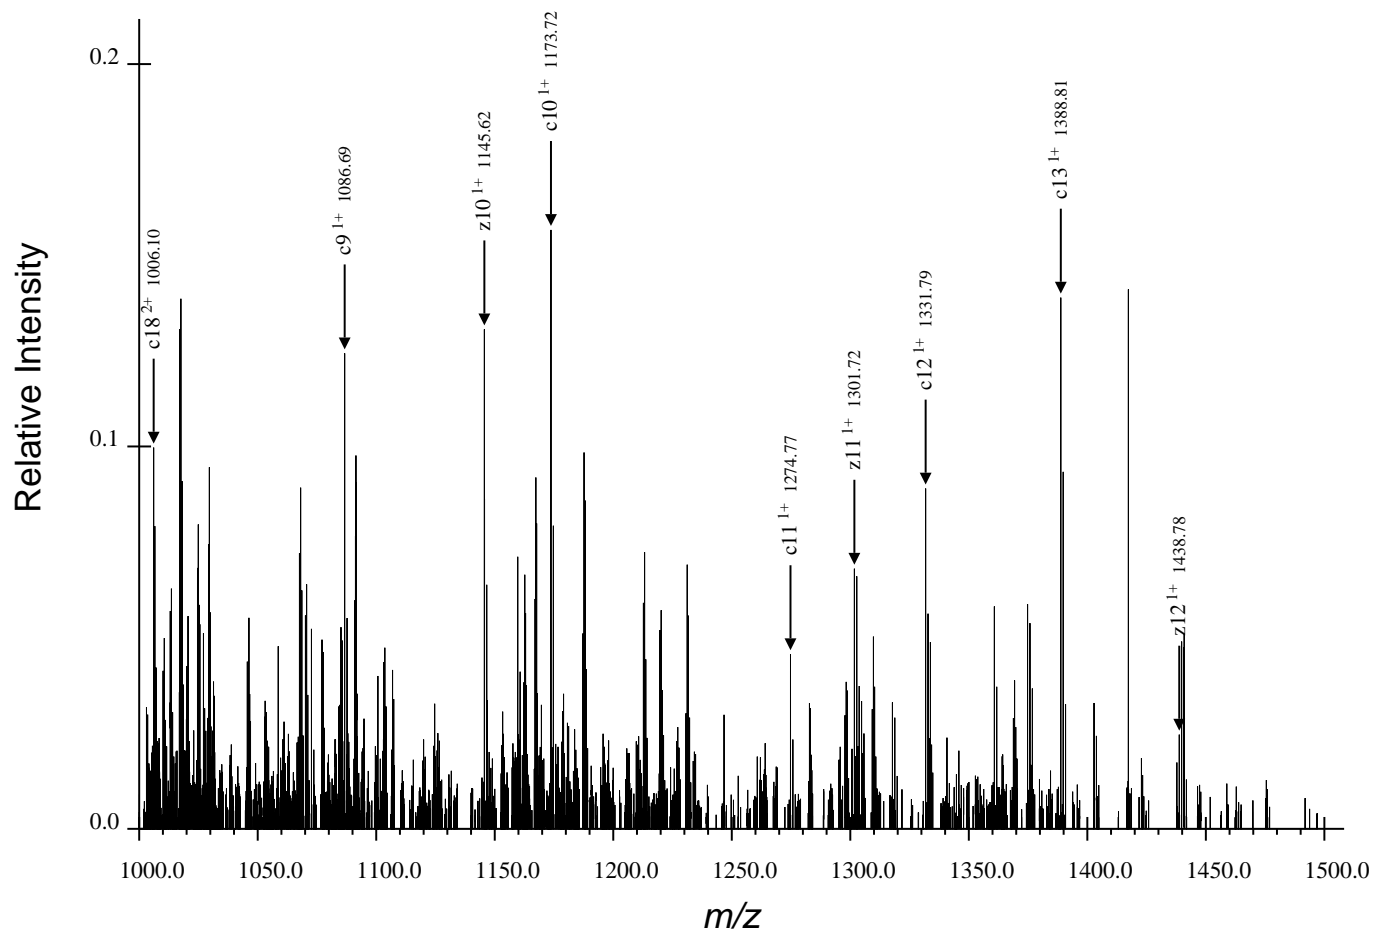

(c) Third Region for ARTKQTARdKSTGGaKAPRKQLATaKAARdKSAPATGGVdKKPHRYRPGTVALRE, Spectrum 51.dta

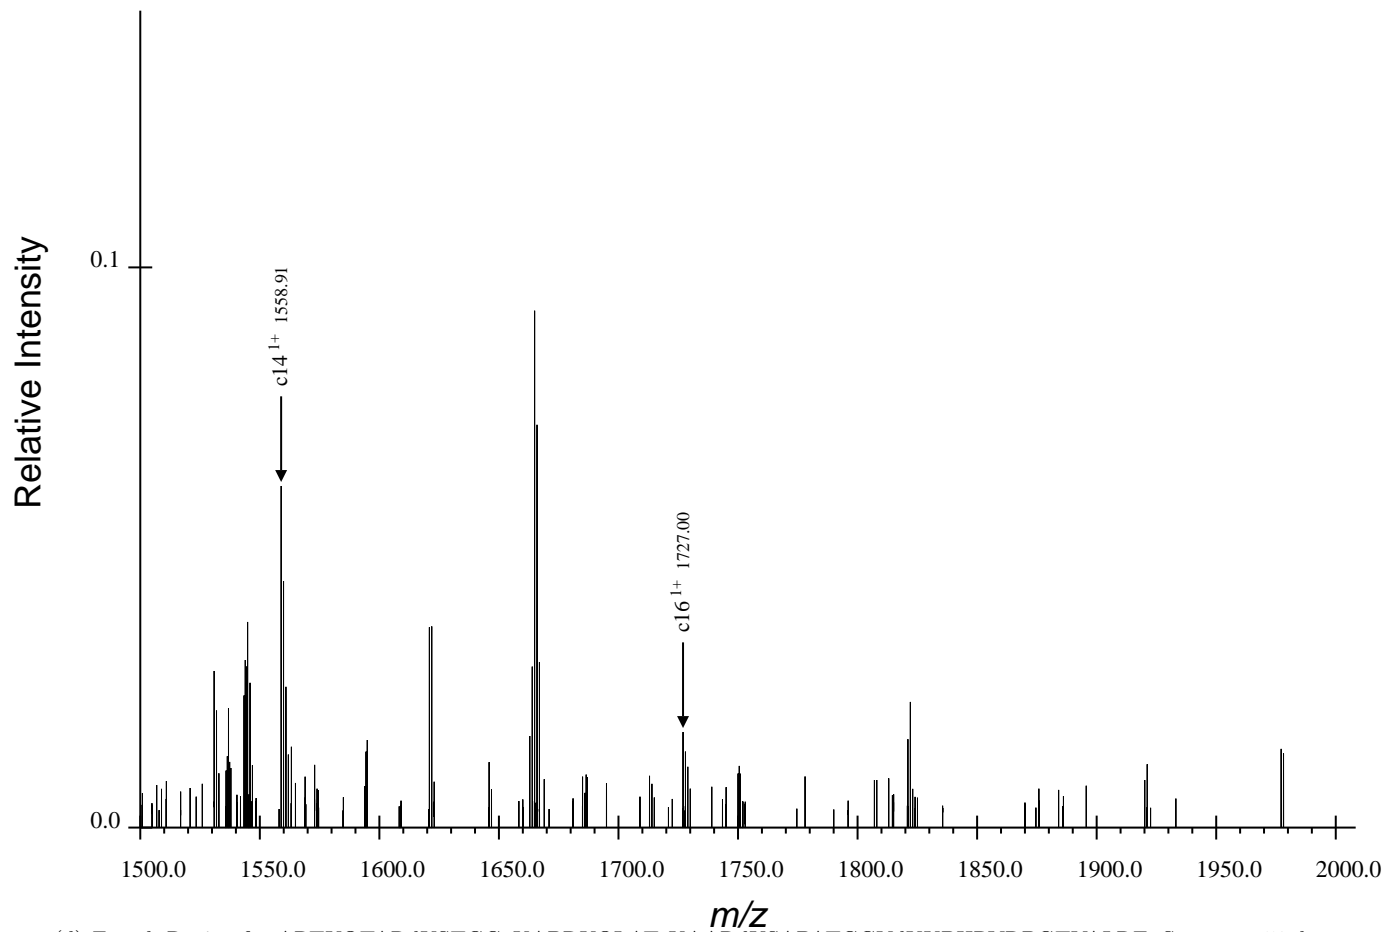

(d) Fourth Region for ARTKQTARdKSTGGaKAPRKQLATaKAARdKSAPATGGVdKKPHRYRPGTVALRE, Spectrum 51.dta

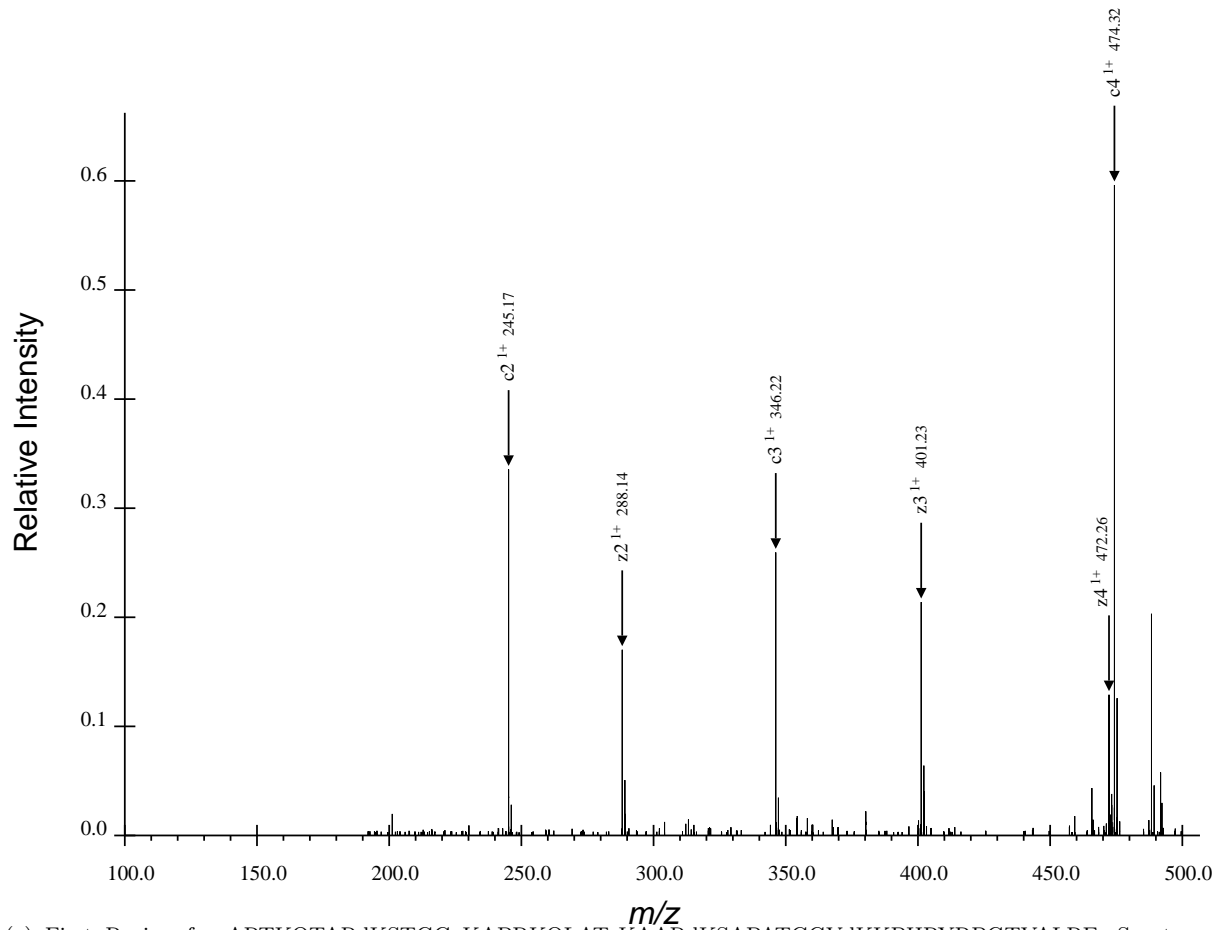

(a) First Region for ARTKQTARdKSTGGaKAPRKQLATaKAARdKSAPATGGVdKKPHRYRPGTVALRE, Spectrum 52.dta

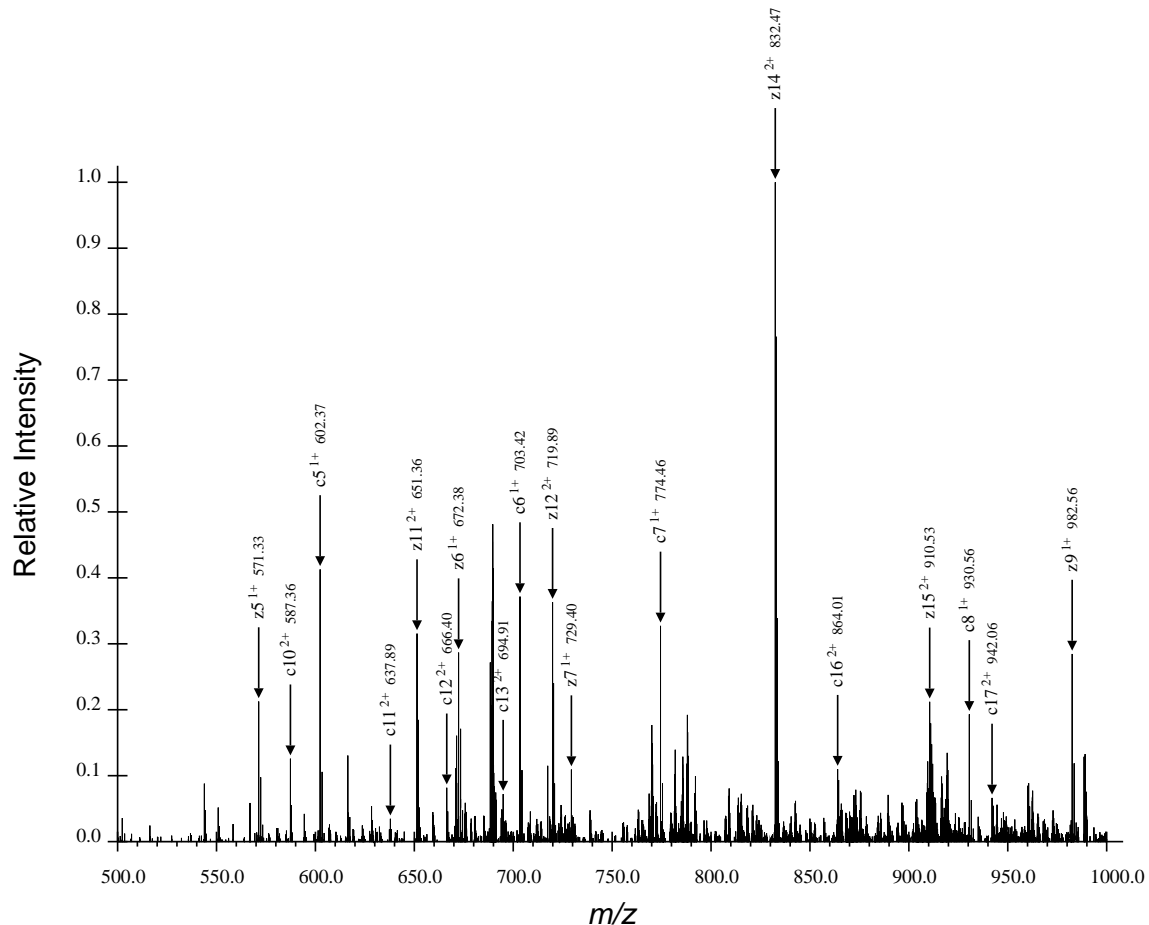

(b) Second Region for ARTKQTARdKSTGGaKAPRKQLATaKAARdKSAPATGGVdKKPHRYRPGTVALRE, Spectrum 52.dta

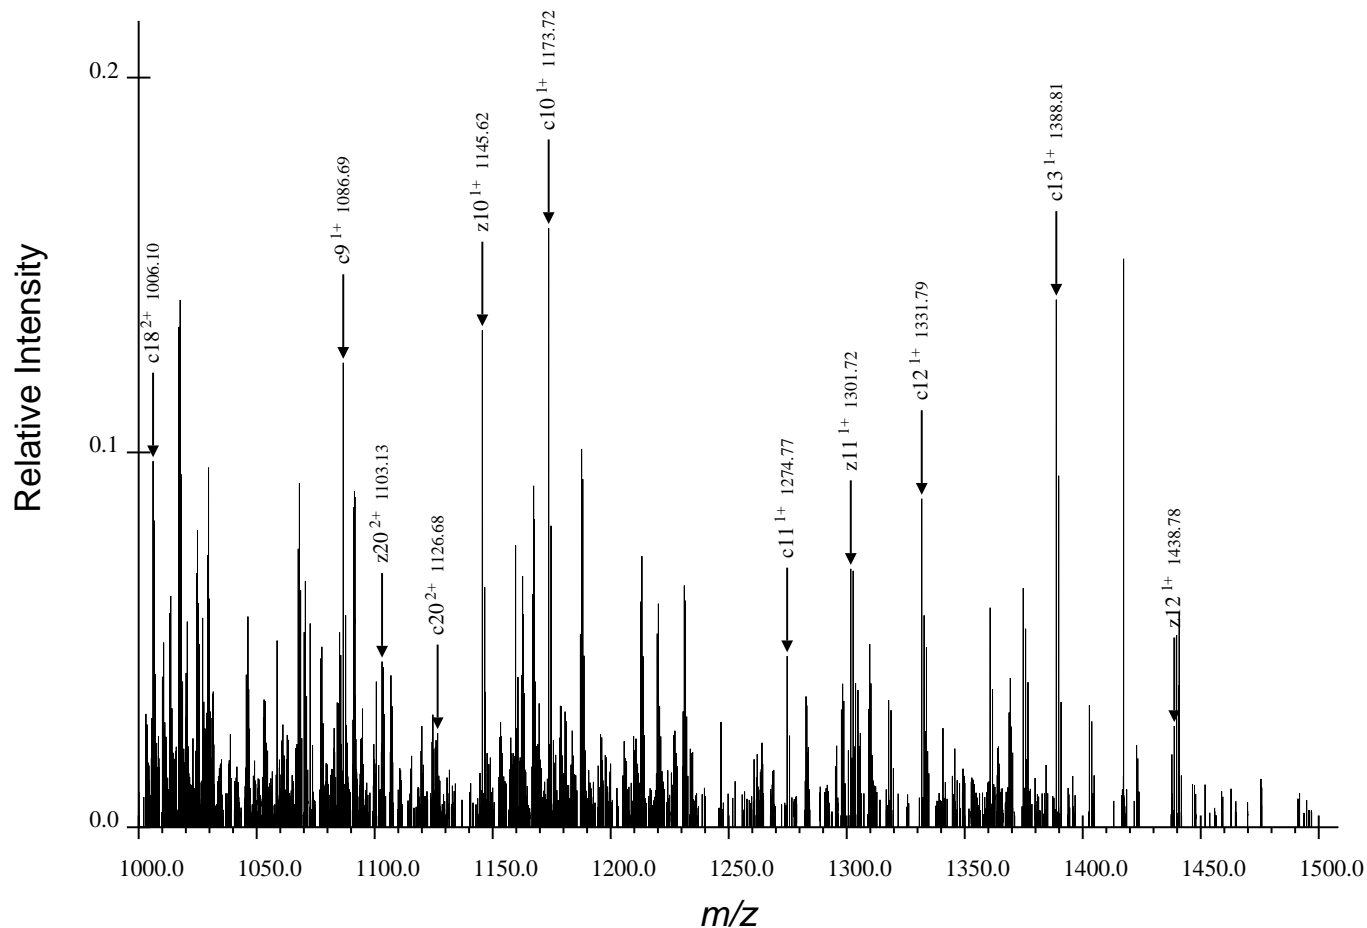

(c) Third Region for ARTKQTARdKSTGGaKAPRKQLATaKAARdKSAPATGGVdKKPHRYRPGTVALRE, Spectrum 52.dta

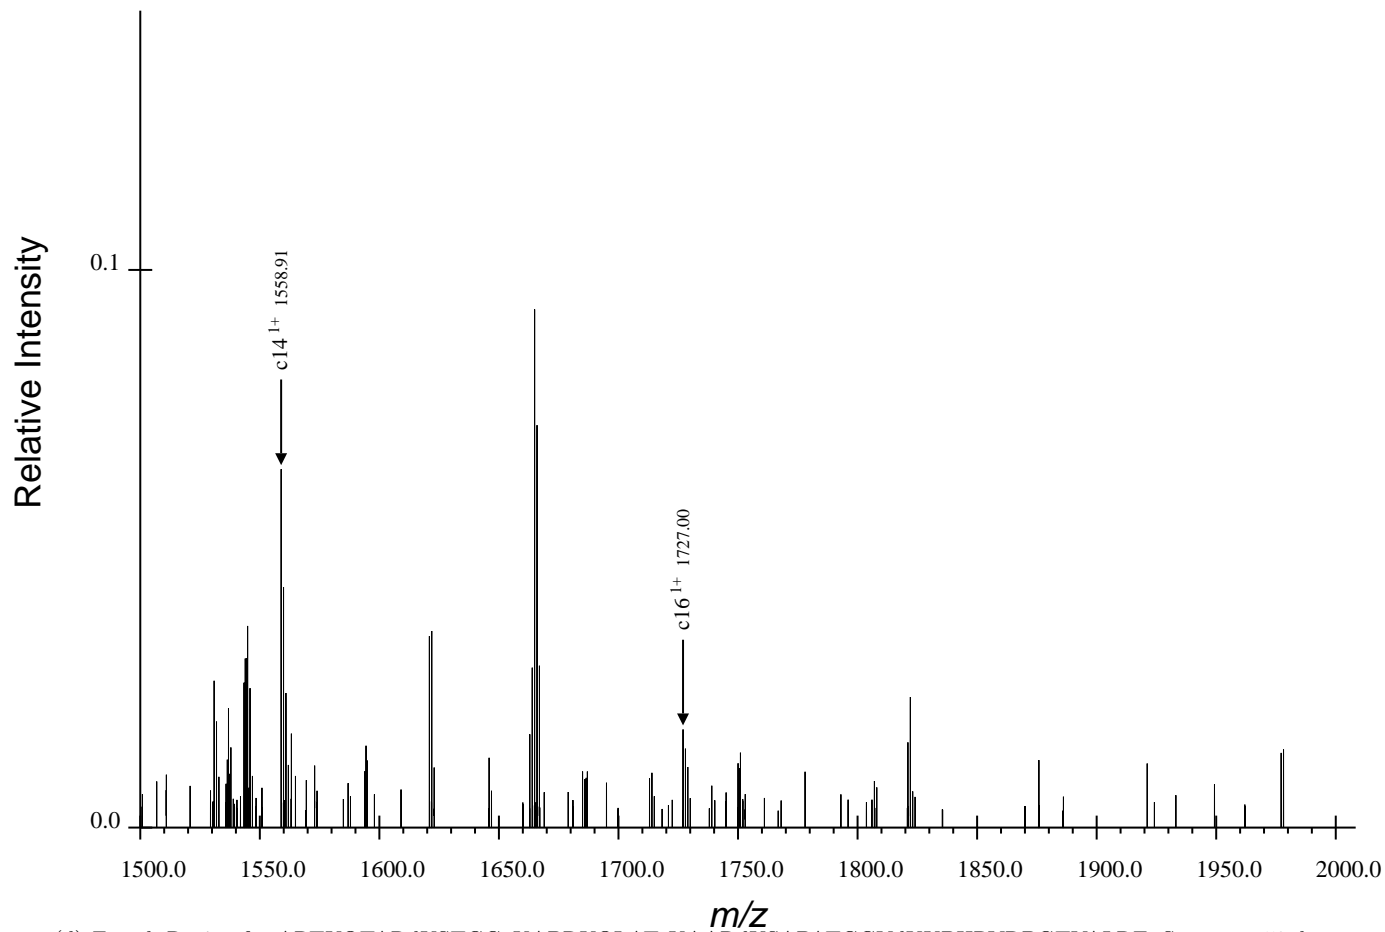

(d) Fourth Region for ARTKQTARdKSTGGaKAPRKQLATaKAARdKSAPATGGVdKKPHRYRPGTVALRE, Spectrum 52.dta



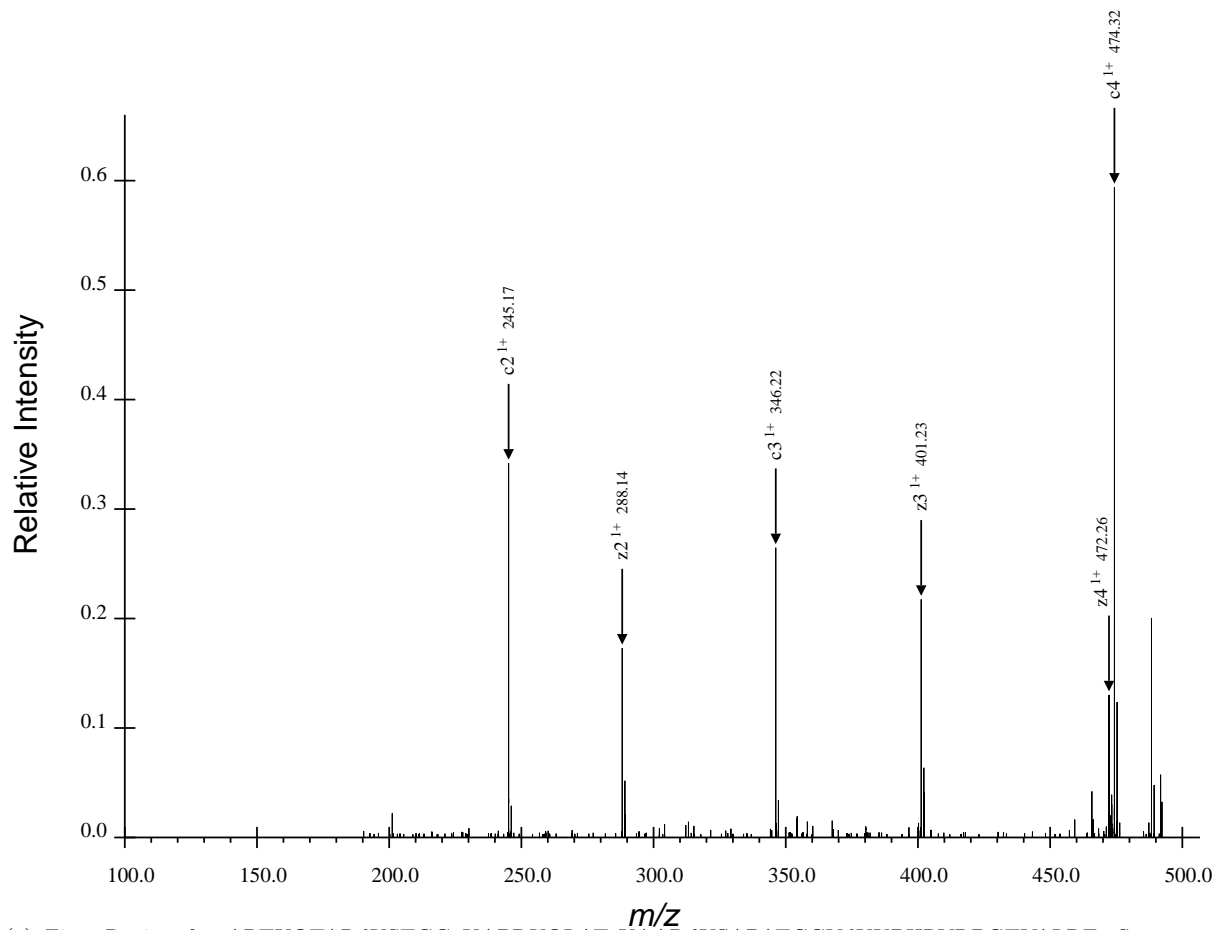

(a) First Region for ARTKQTARdKSTGGaKAPRKQLATaKAARdKSAPATGGVdKKPHRYRPGTVALRE, Spectrum 53.dta

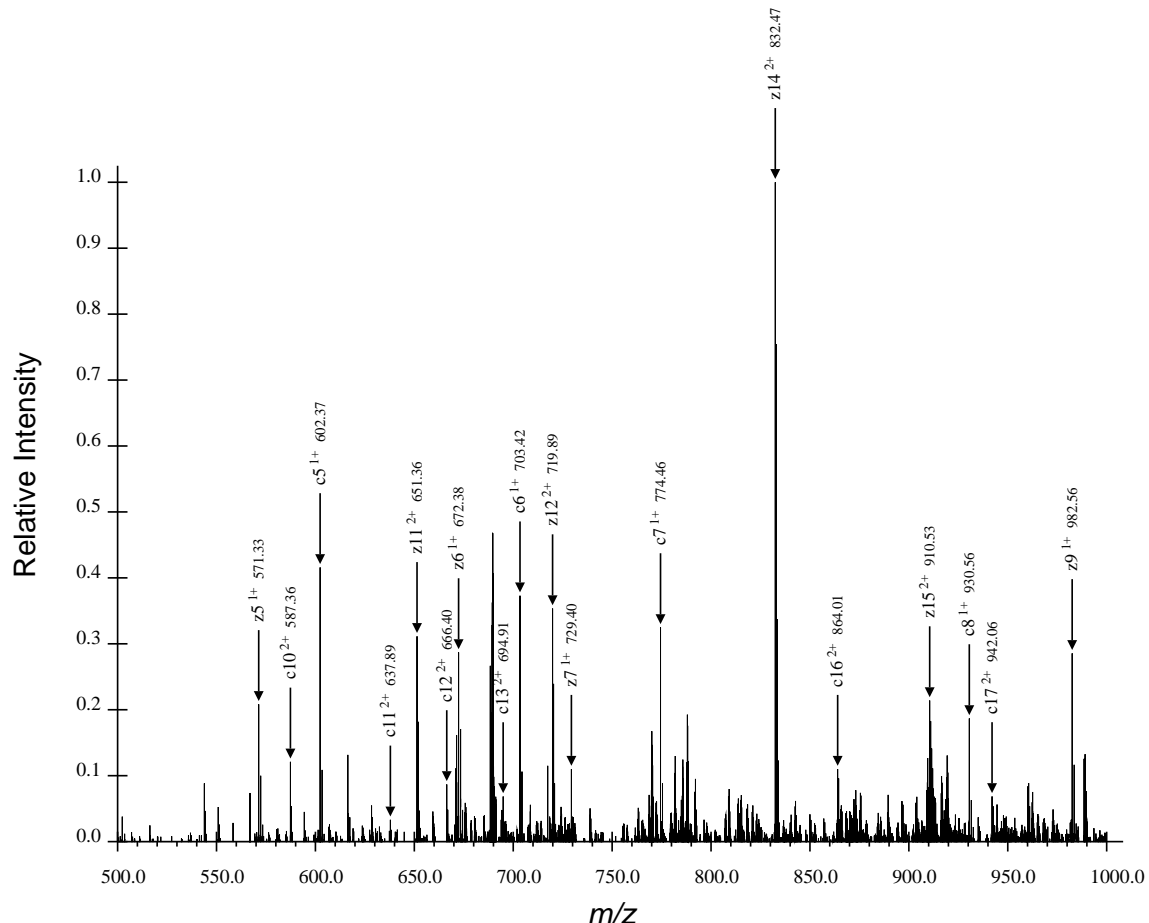

(b) Second Region for ARTKQTARdKSTGGaKAPRKQLATaKAARdKSAPATGGVdKKPHRYRPGTVALRE, Spectrum 53.dta

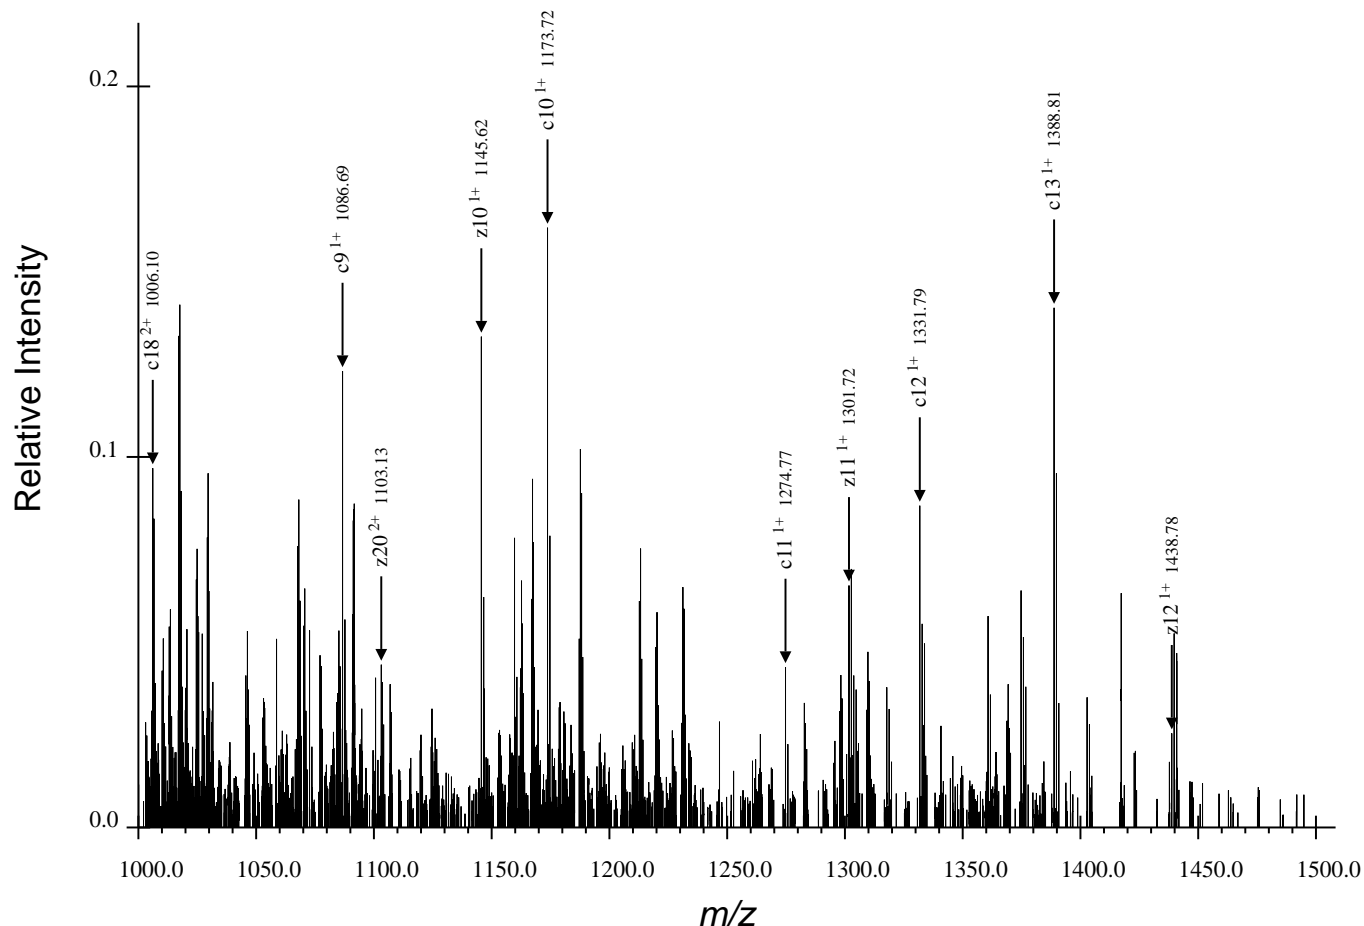

(c) Third Region for ARTKQTARdKSTGGaKAPRKQLATaKAARdKSAPATGGVdKKPHRYRPGTVALRE, Spectrum 53.dta

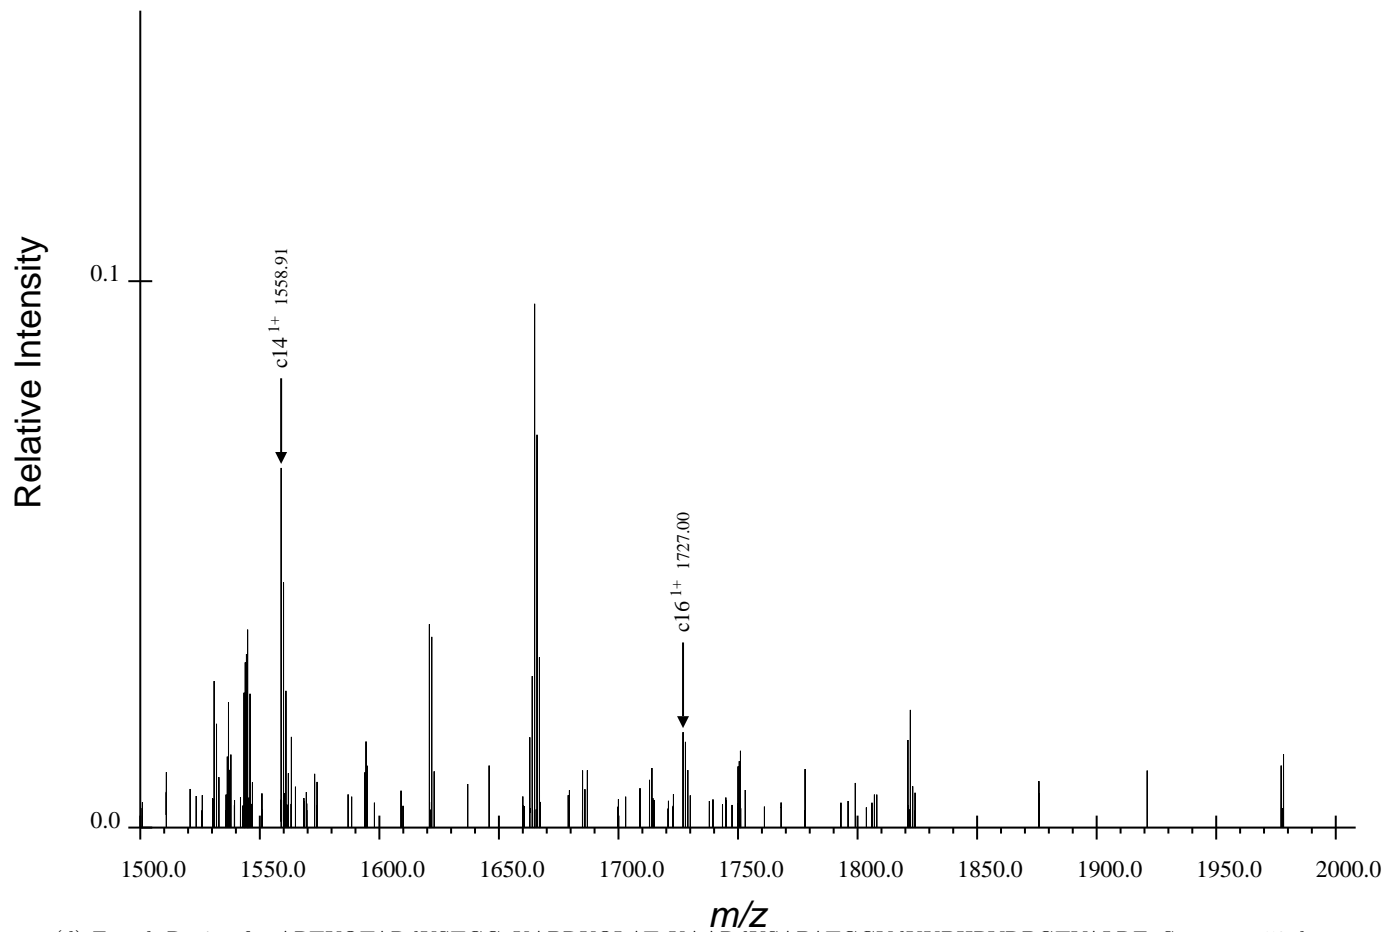

(d) Fourth Region for ARTKQTARdKSTGGaKAPRKQLATaKAARdKSAPATGGVdKKPHRYRPGTVALRE, Spectrum 53.dta

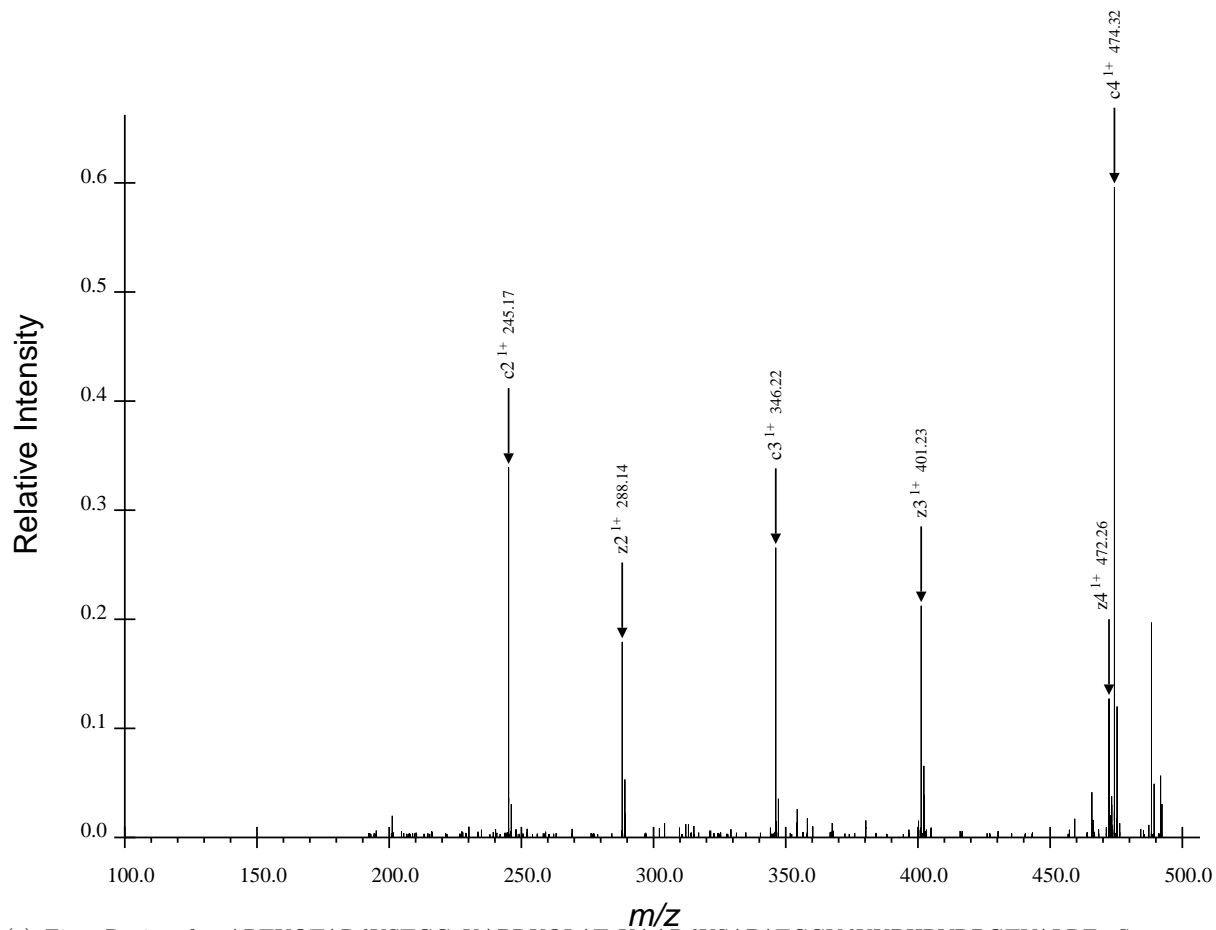

(a) First Region for ARTKQTARdKSTGGaKAPRKQLATaKAARdKSAPATGGVdKKPHRYRPGTVALRE, Spectrum 54.dta

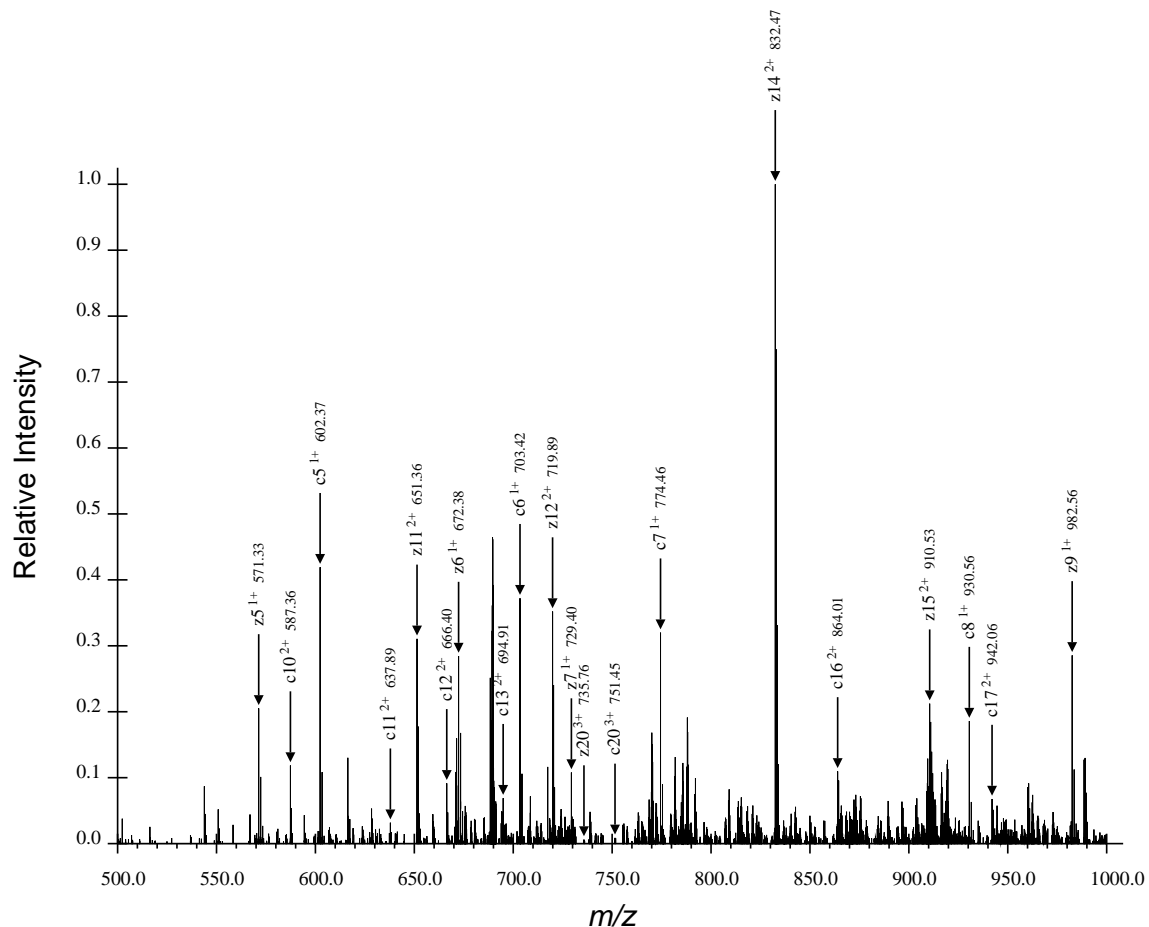

(b) Second Region for ARTKQTARdKSTGGaKAPRKQLATaKAARdKSAPATGGVdKKPHRYRPGTVALRE, Spectrum 54.dta

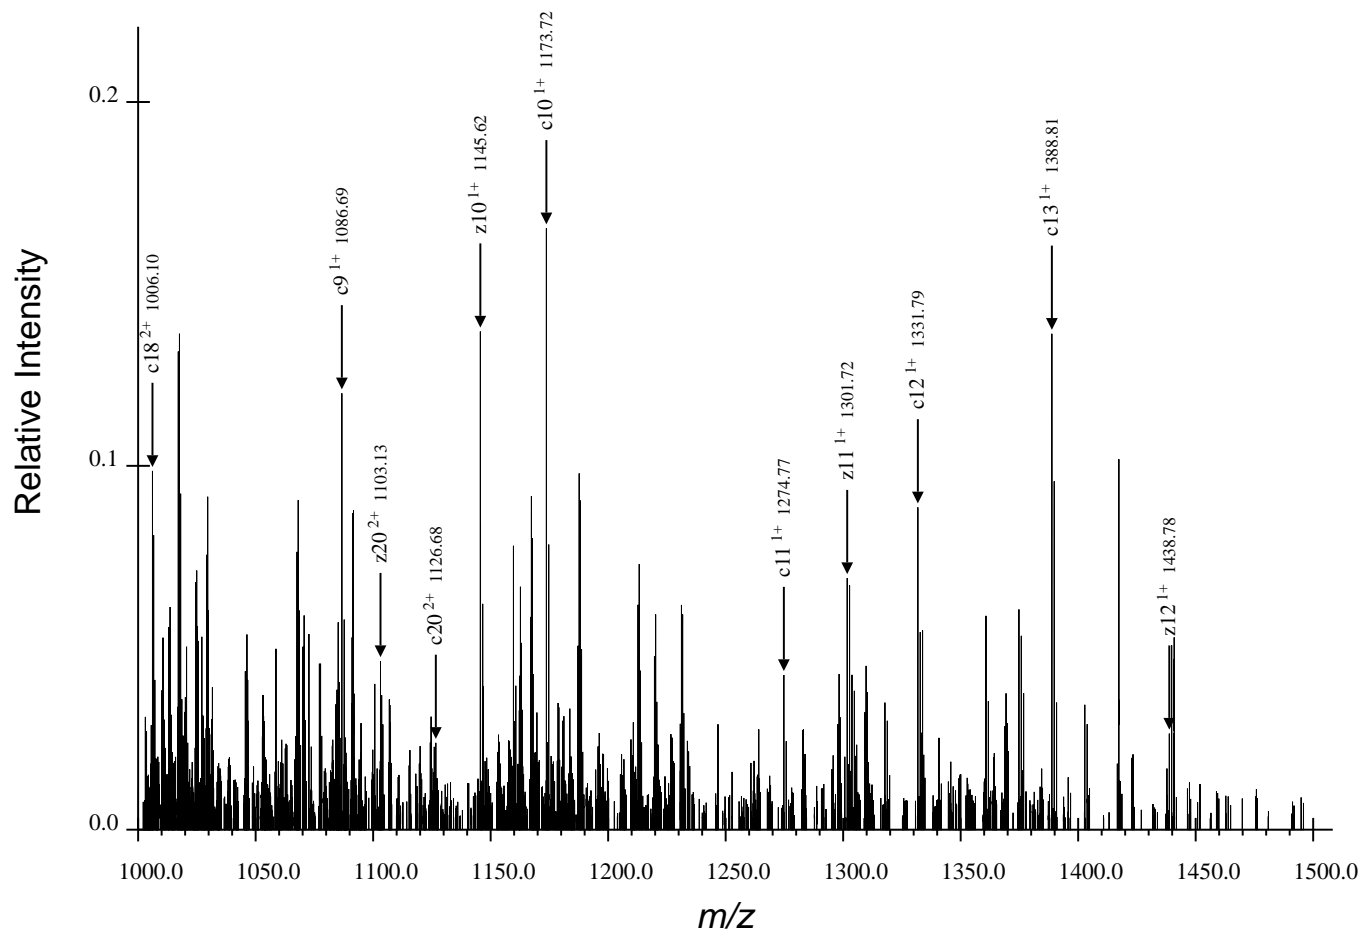

(c) Third Region for ARTKQTARdKSTGGaKAPRKQLATaKAARdKSAPATGGVdKKPHRYRPGTVALRE, Spectrum 54.dta

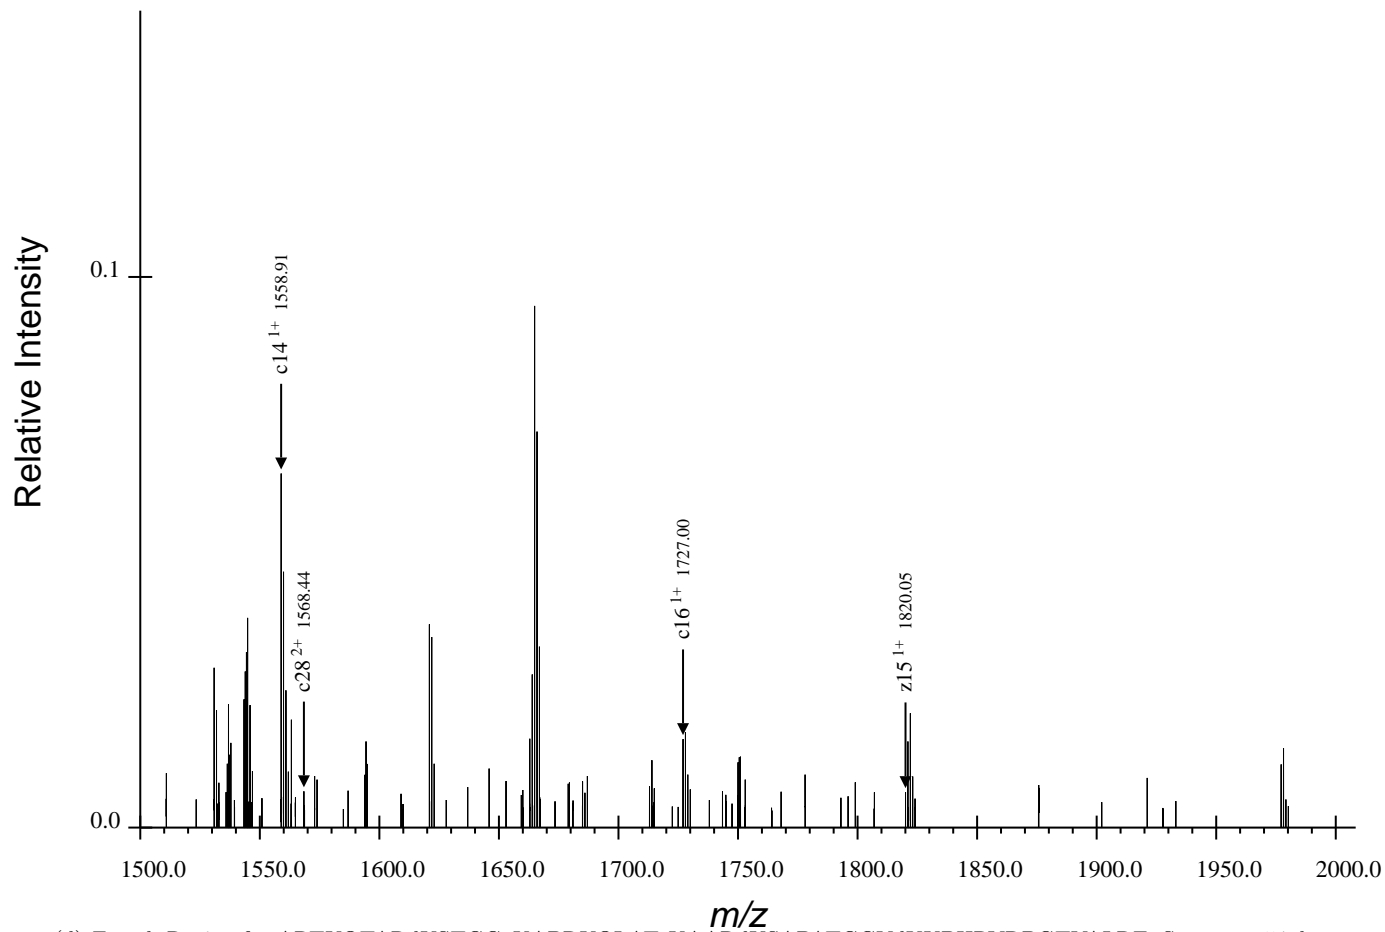

(d) Fourth Region for ARTKQTARdKSTGGaKAPRKQLATaKAARdKSAPATGGVdKKPHRYRPGTVALRE, Spectrum 54.dta

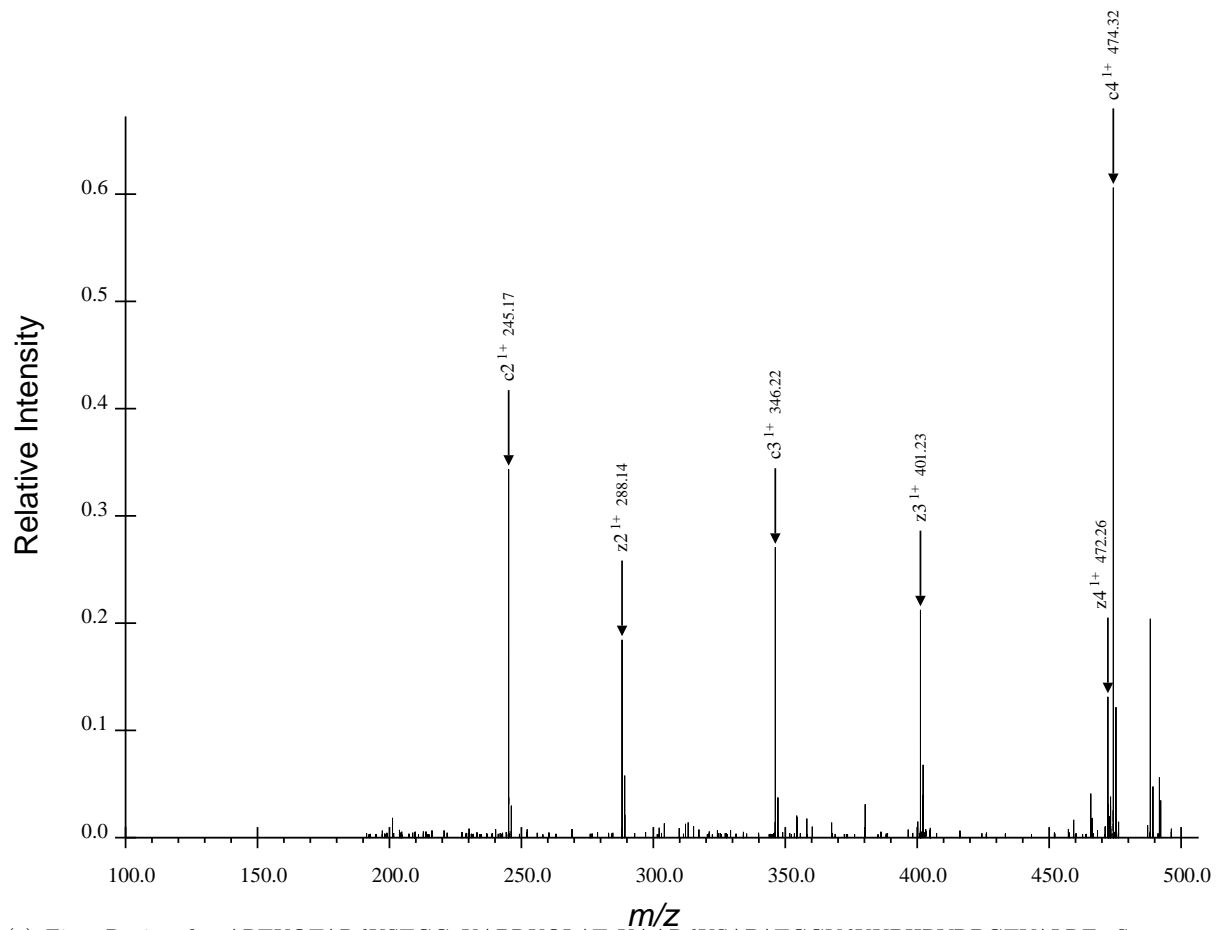

(a) First Region for ARTKQTARdKSTGGaKAPRKQLATaKAARdKSAPATGGVdKKPHRYRPGTVALRE, Spectrum 55.dta

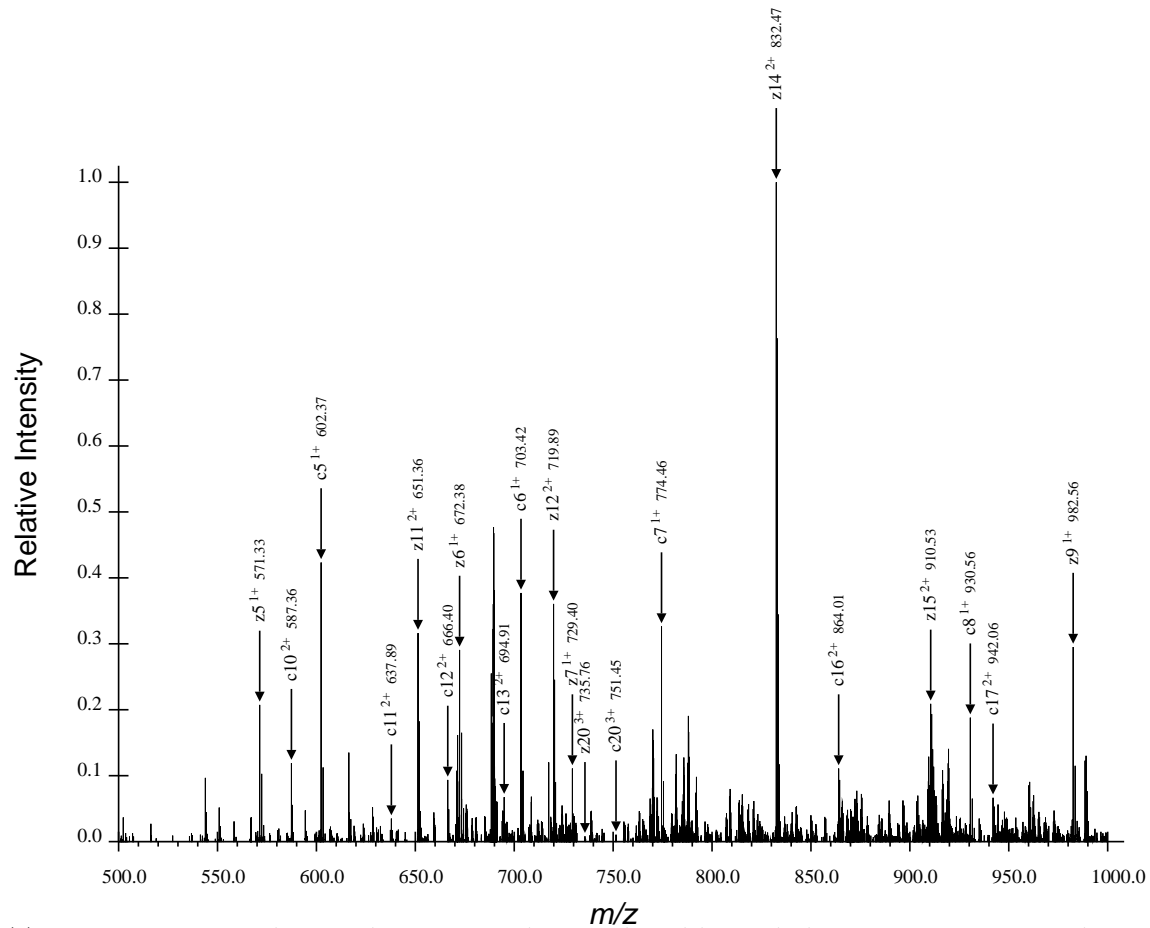

(b) Second Region for ARTKQTARdKSTGGaKAPRKQLATaKAARdKSAPATGGVdKKPHRYRPGTVALRE, Spectrum 55.dta

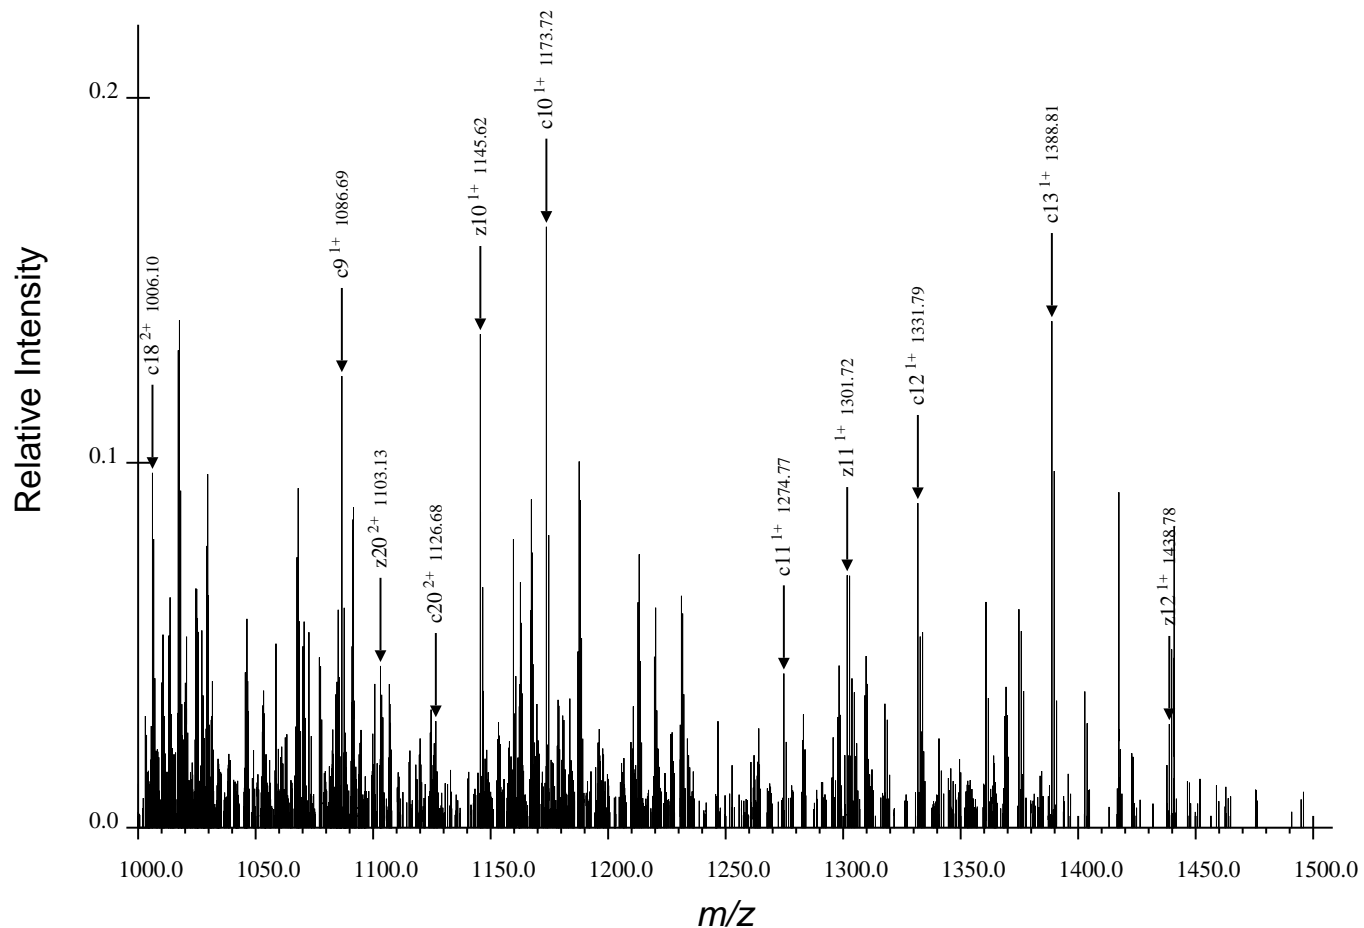

(c) Third Region for ARTKQTARdKSTGGaKAPRKQLATaKAARdKSAPATGGVdKKPHRYRPGTVALRE, Spectrum 55.dta

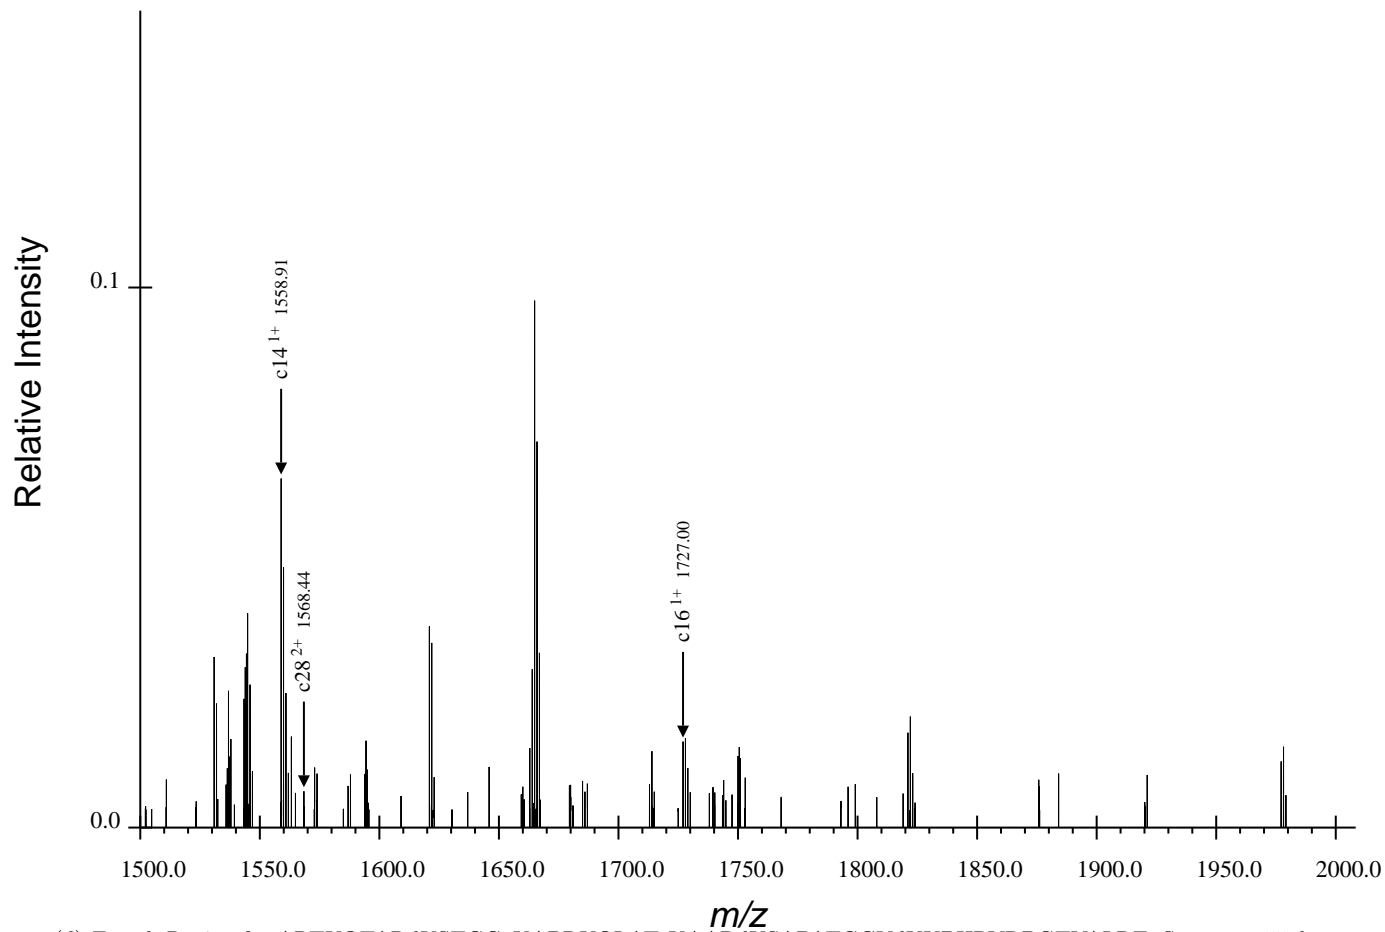

(d) Fourth Region for ARTKQTARdKSTGGaKAPRKQLATaKAARdKSAPATGGVdKKPHRYRPGTVALRE, Spectrum 55.dta

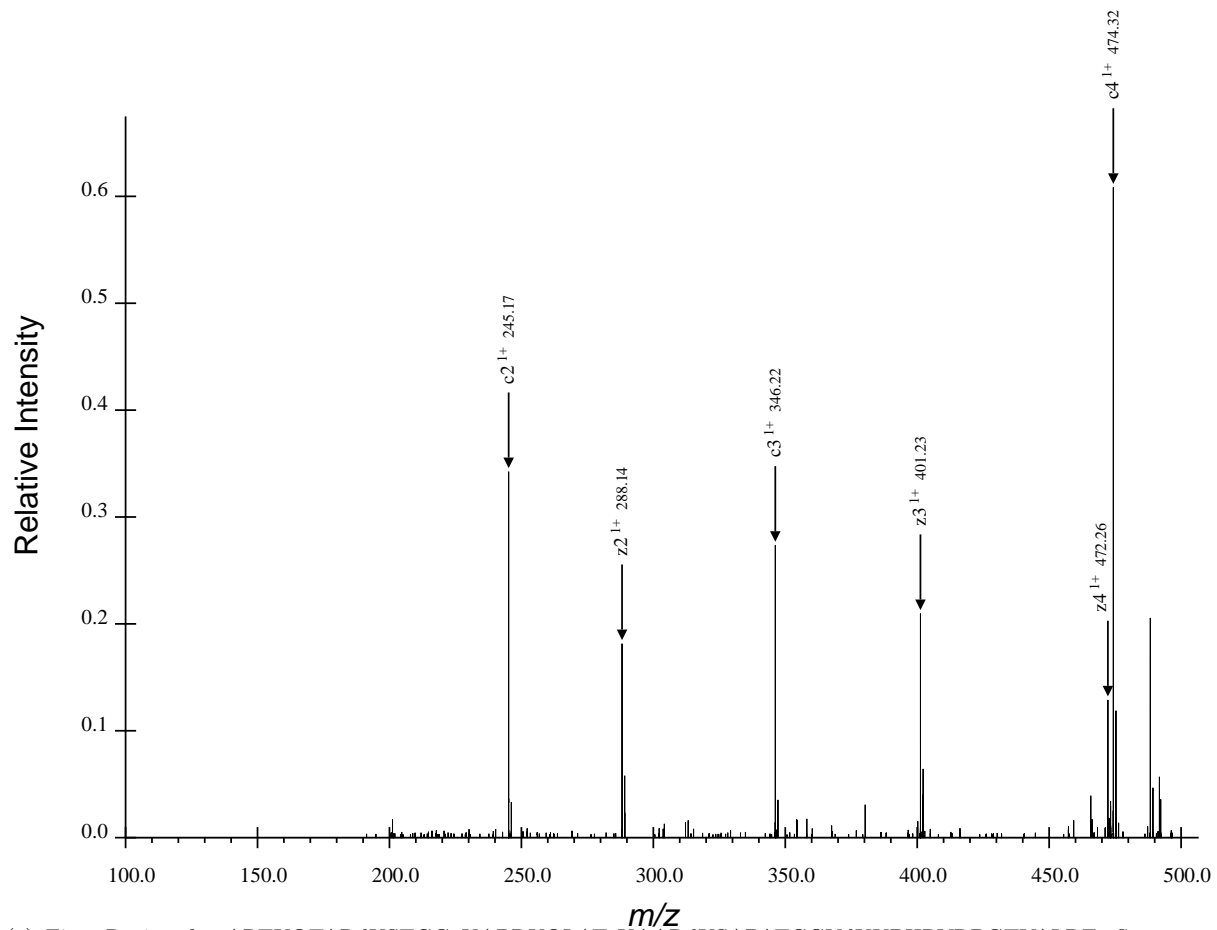

(a) First Region for ARTKQTARdKSTGGaKAPRKQLATaKAARdKSAPATGGVdKKPHRYRPGTVALRE, Spectrum 56.dta

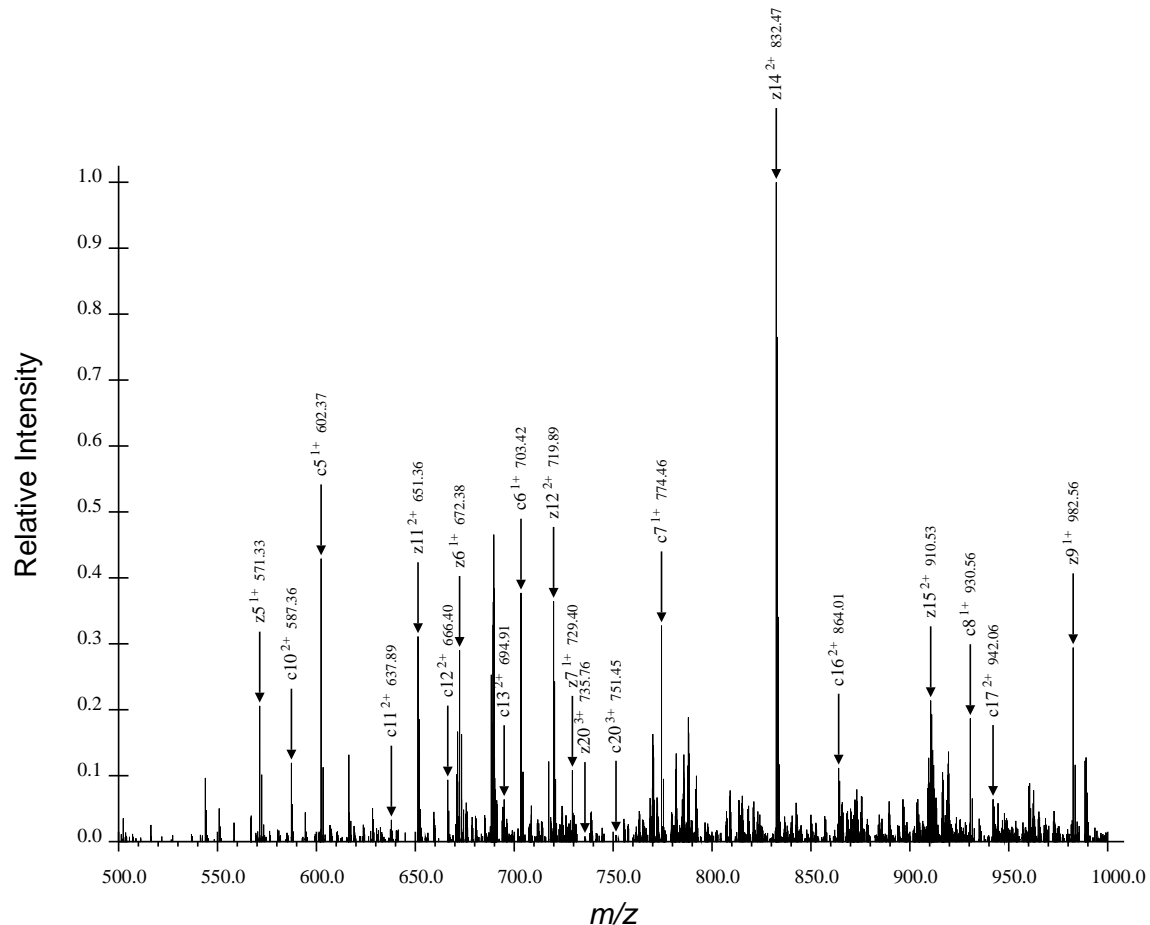

(b) Second Region for ARTKQTARdKSTGGaKAPRKQLATaKAARdKSAPATGGVdKKPHRYRPGTVALRE, Spectrum 56.dta

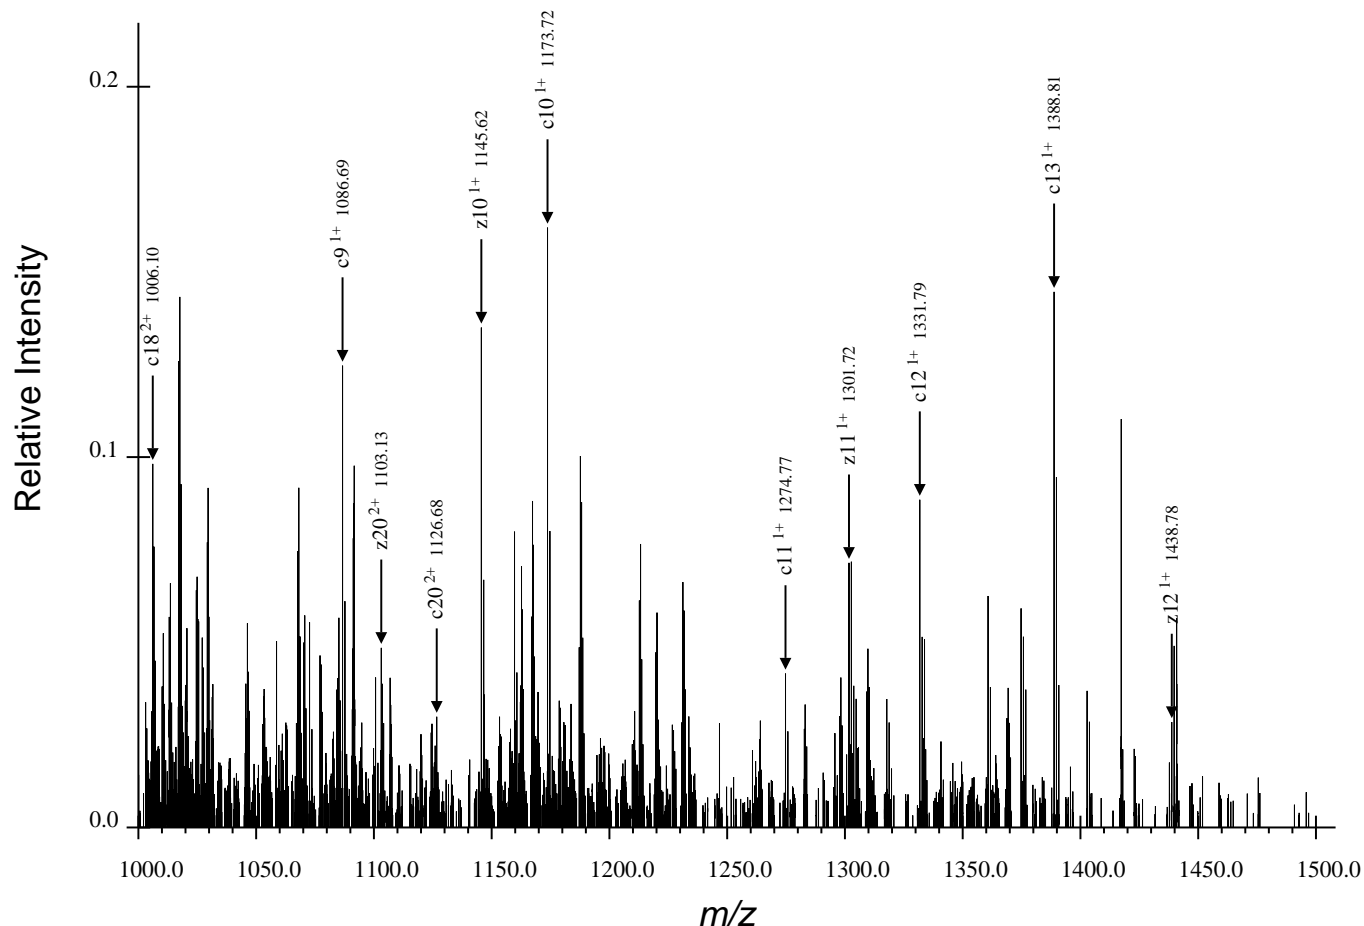

(c) Third Region for ARTKQTARdKSTGGaKAPRKQLATaKAARdKSAPATGGVdKKPHRYRPGTVALRE, Spectrum 56.dta

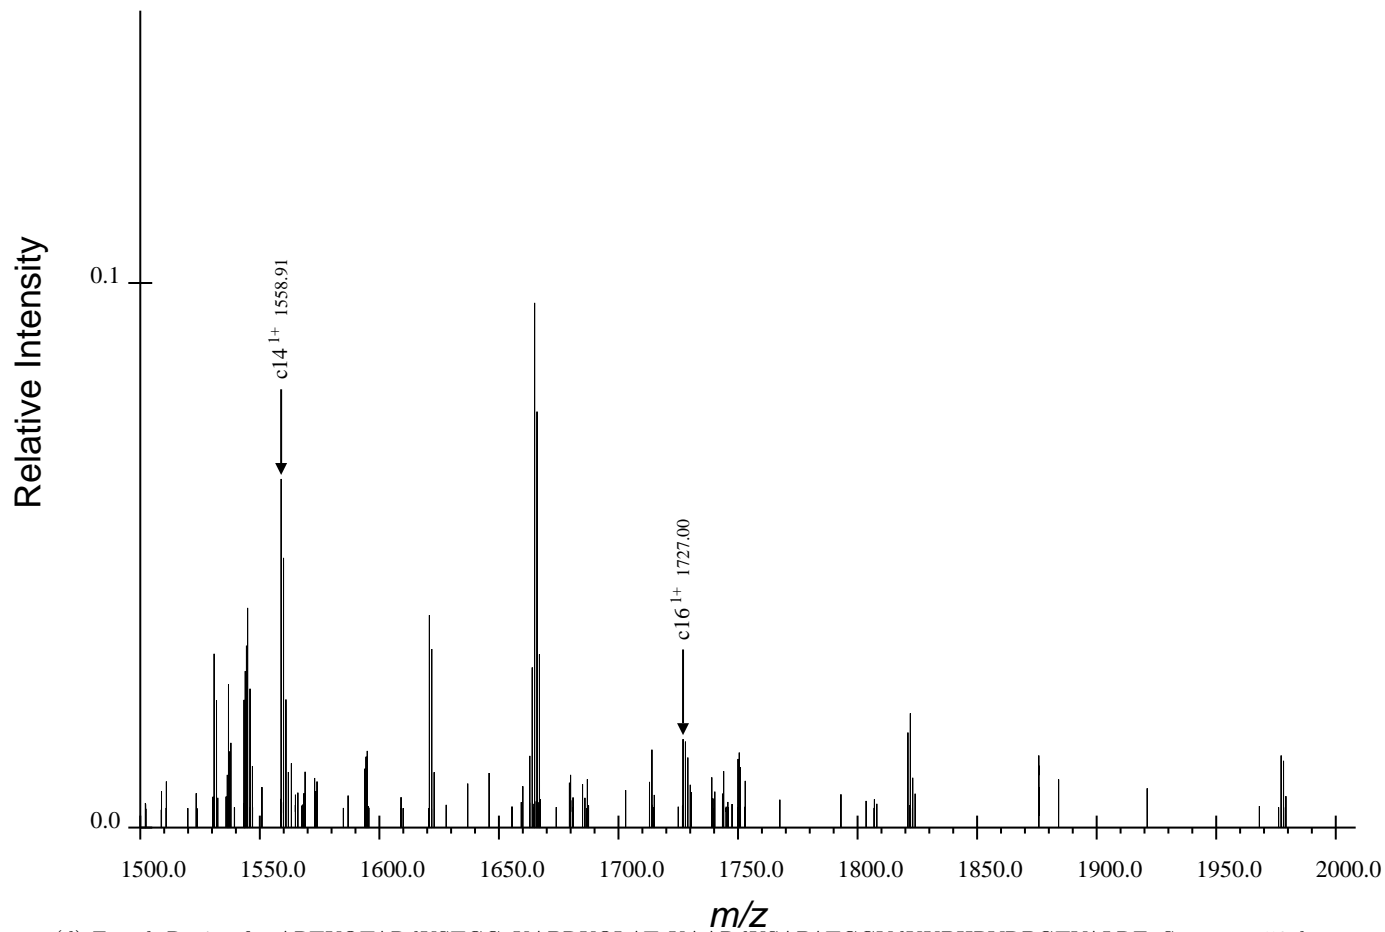

(d) Fourth Region for ARTKQTARdKSTGGaKAPRKQLATaKAARdKSAPATGGVdKKPHRYRPGTVALRE, Spectrum 56.dta



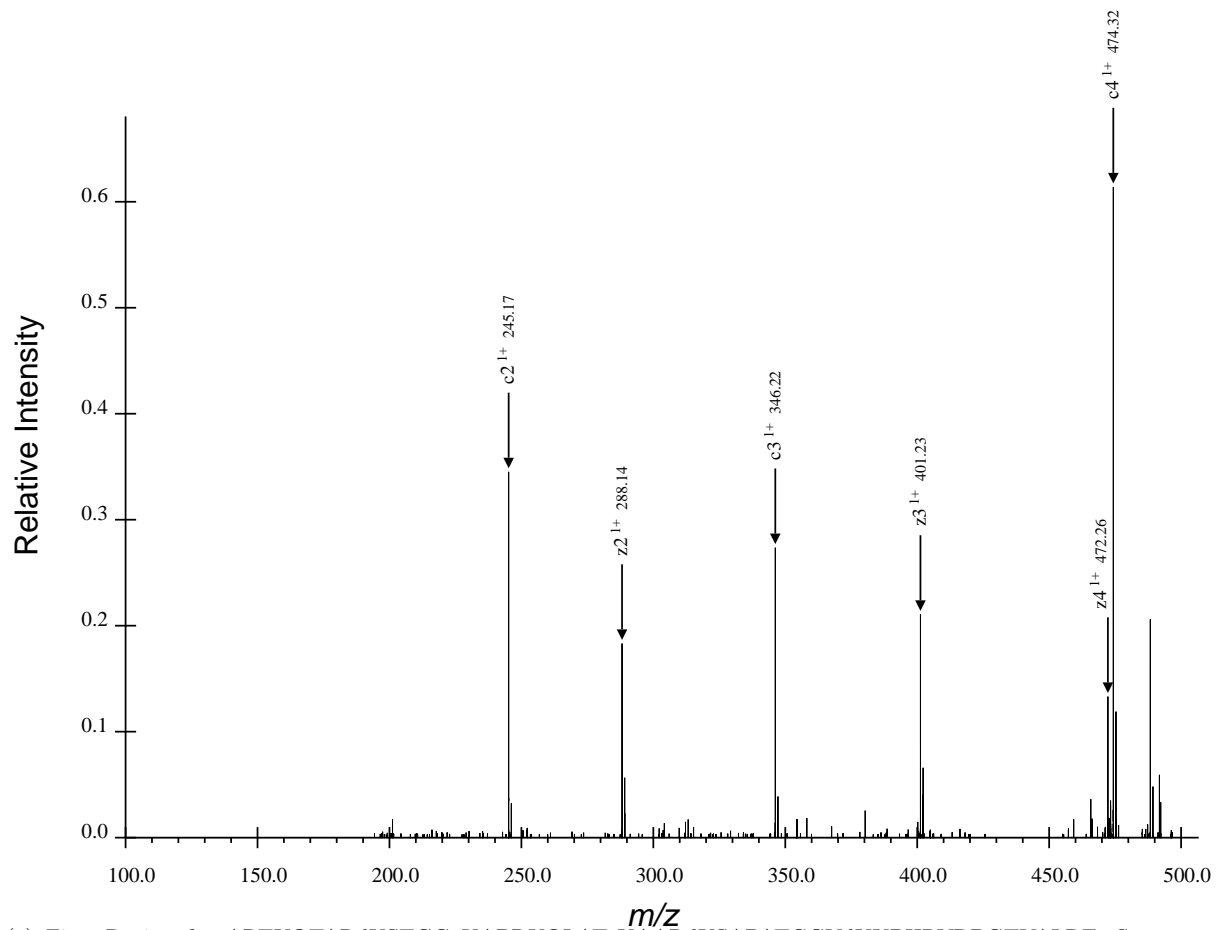

(a) First Region for ARTKQTARdKSTGGaKAPRKQLATaKAARdKSAPATGGVdKKPHRYRPGTVALRE, Spectrum 57.dta

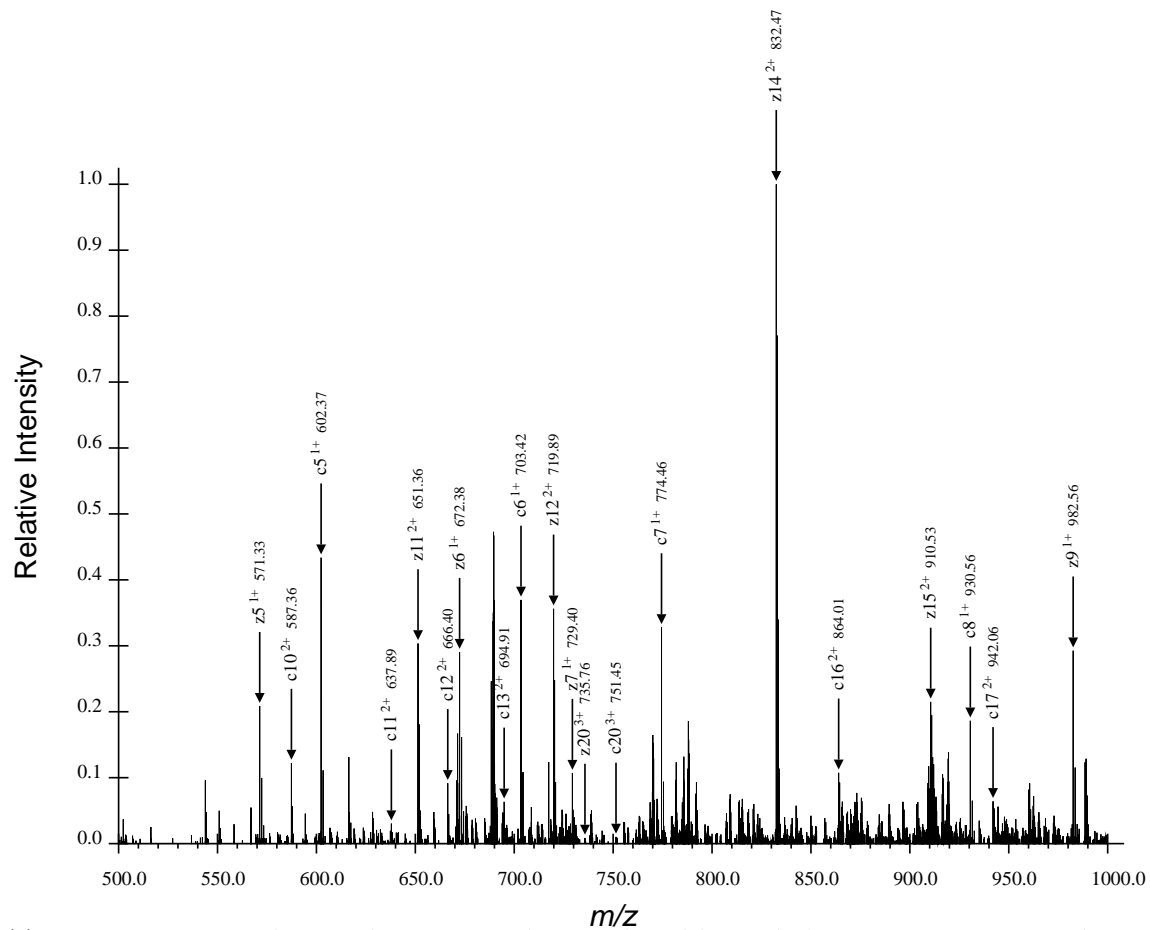

(b) Second Region for ARTKQTARdKSTGGaKAPRKQLATaKAARdKSAPATGGVdKKPHRYRPGTVALRE, Spectrum 57.dta

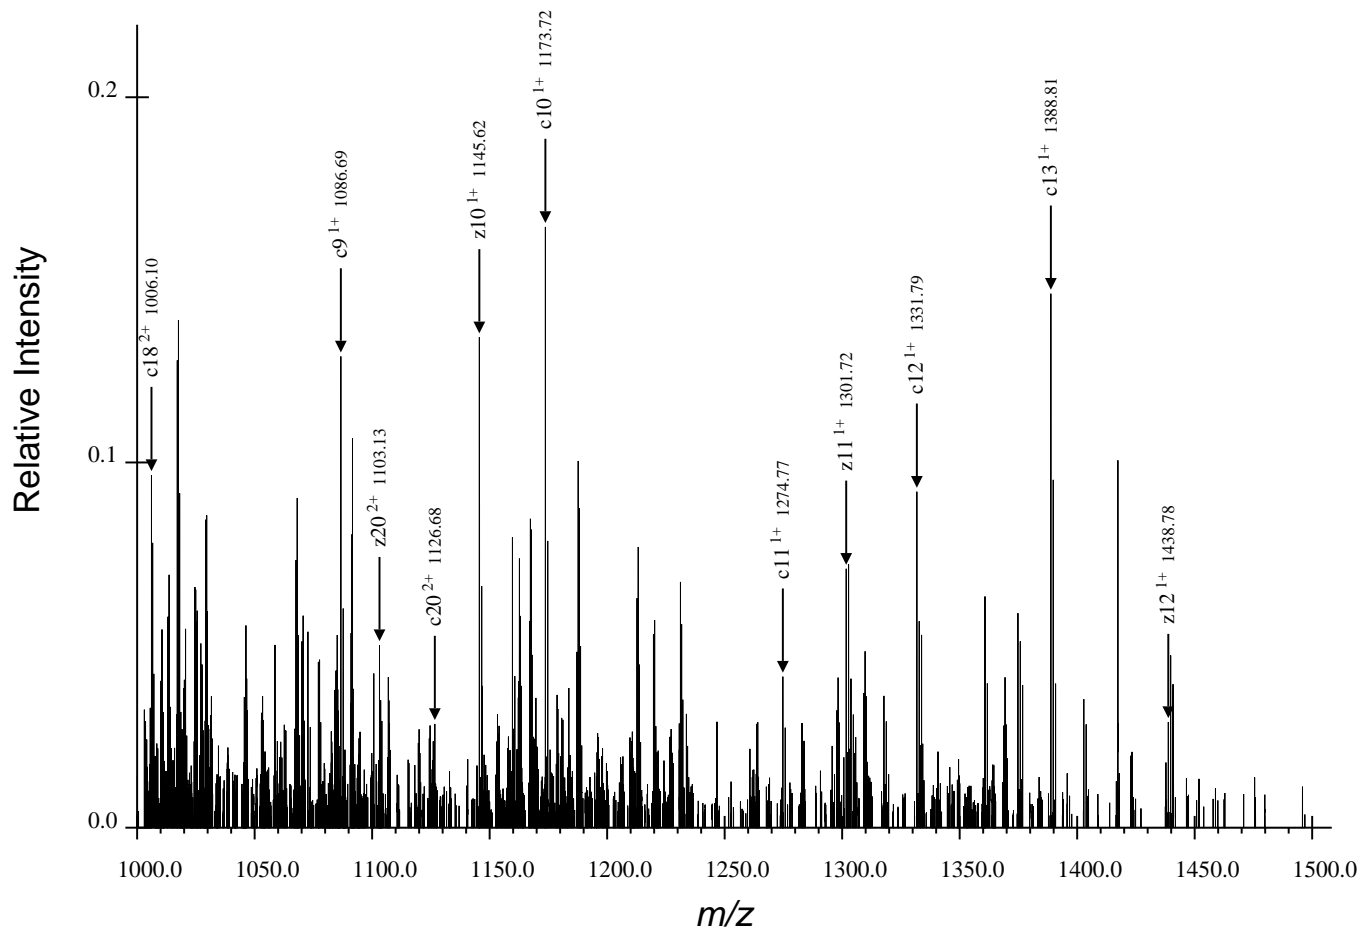

(c) Third Region for ARTKQTARdKSTGGaKAPRKQLATaKAARdKSAPATGGVdKKPHRYRPGTVALRE, Spectrum 57.dta

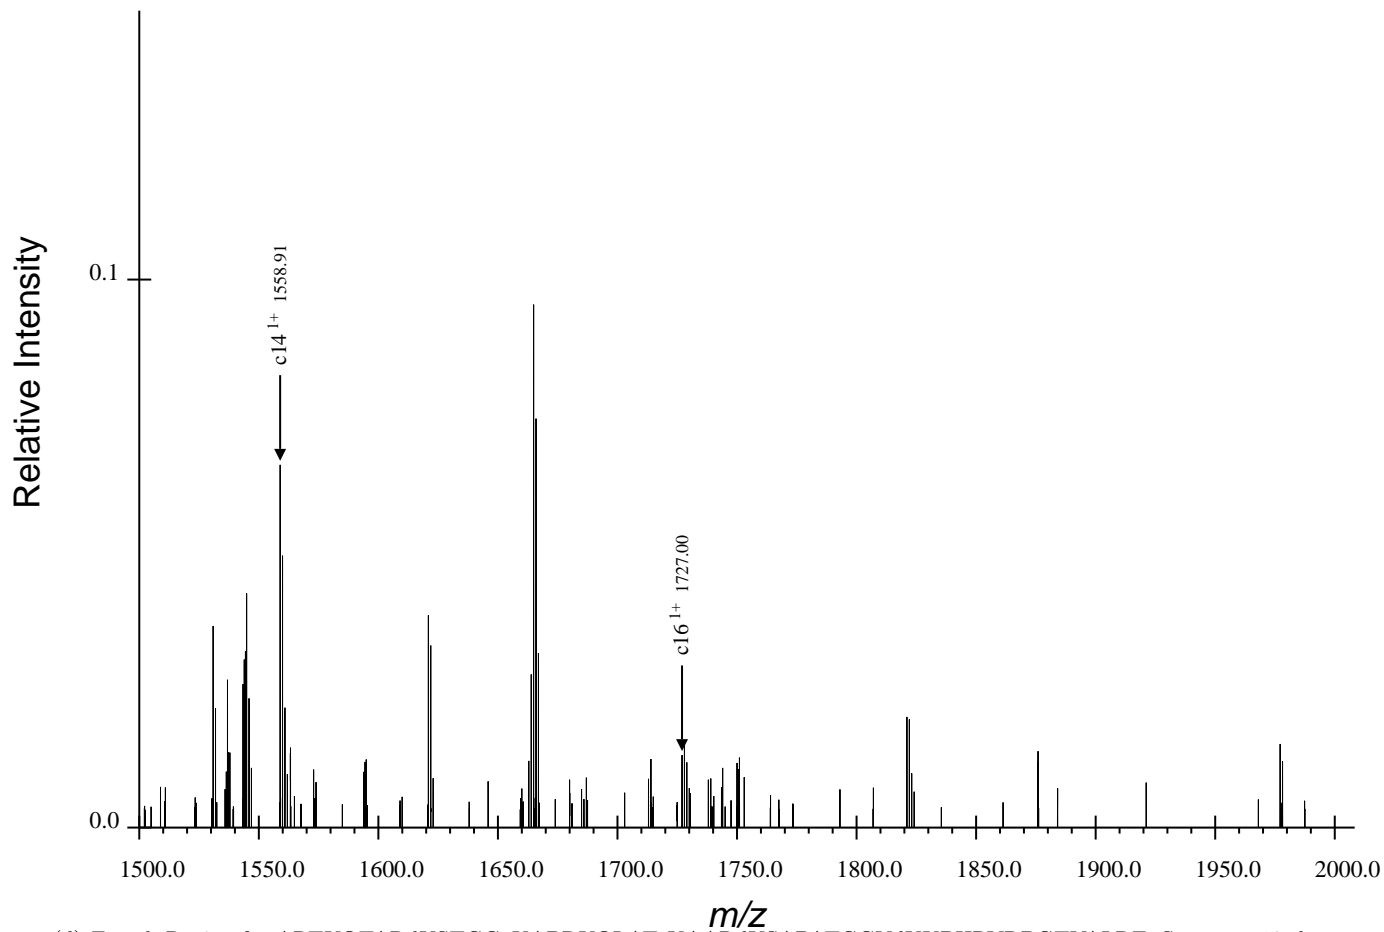

(d) Fourth Region for ARTKQTARdKSTGGaKAPRKQLATaKAARdKSAPATGGVdKKPHRYRPGTVALRE, Spectrum 57.dta

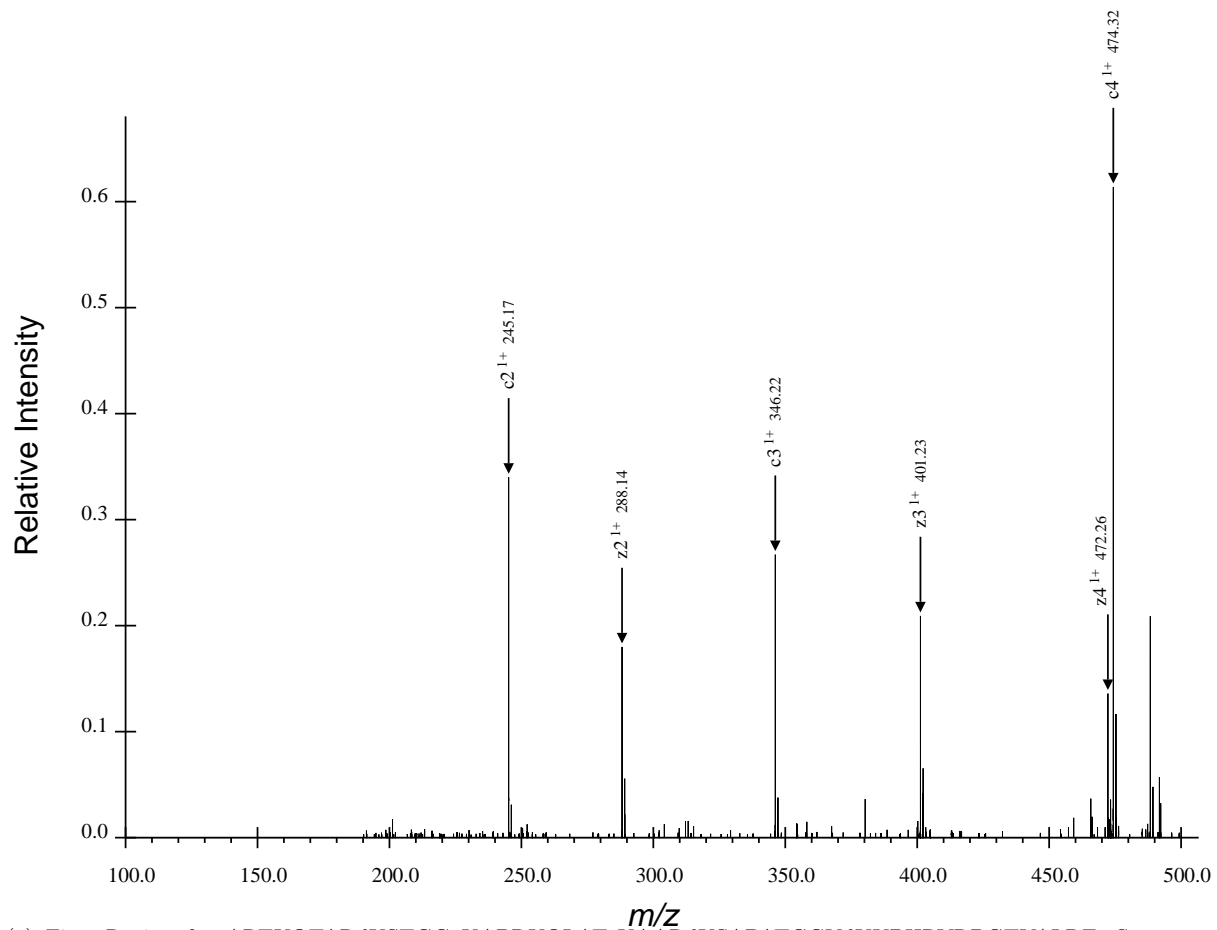

(a) First Region for ARTKQTARdKSTGGaKAPRKQLATaKAARdKSAPATGGVdKKPHRYRPGTVALRE, Spectrum 58.dta

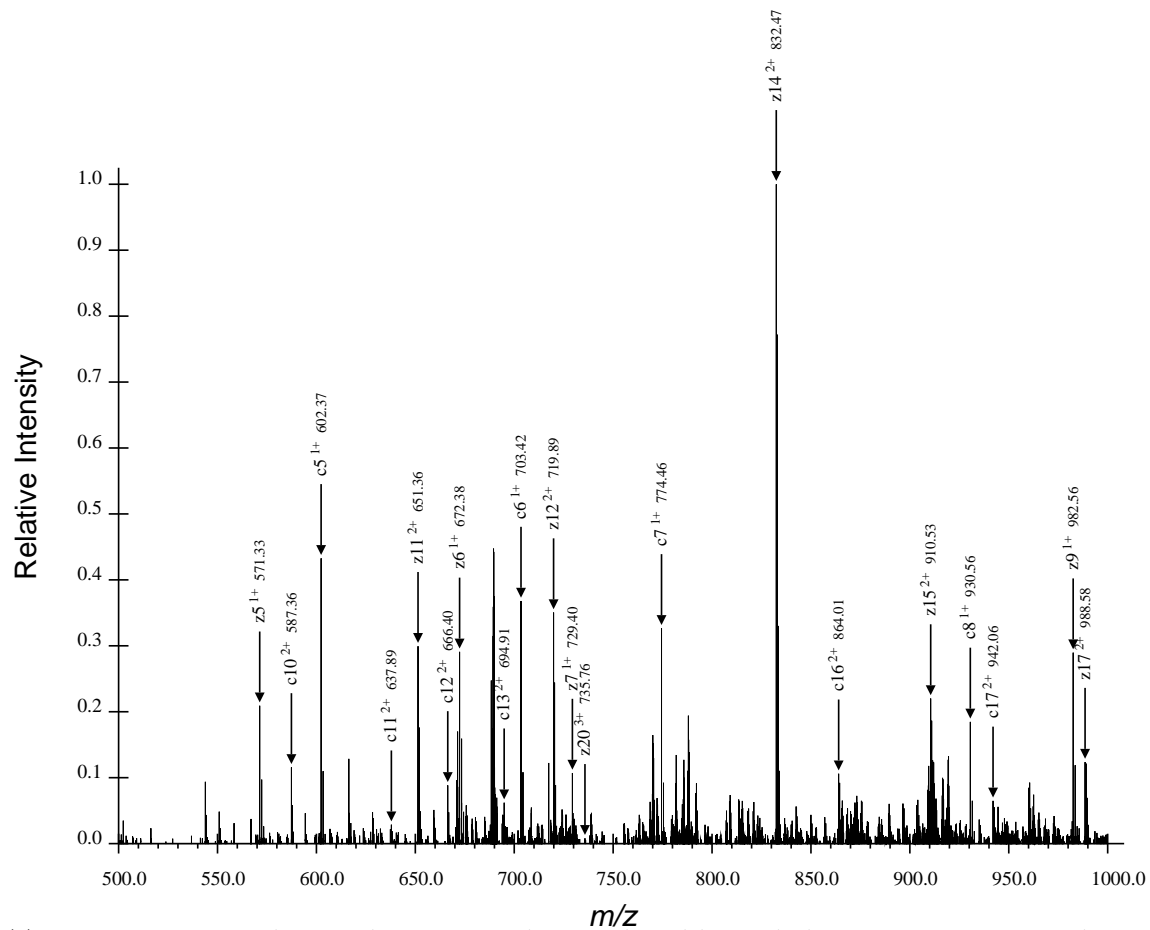

(b) Second Region for ARTKQTARdKSTGGaKAPRKQLATaKAARdKSAPATGGVdKKPHRYRPGTVALRE, Spectrum 58.dta

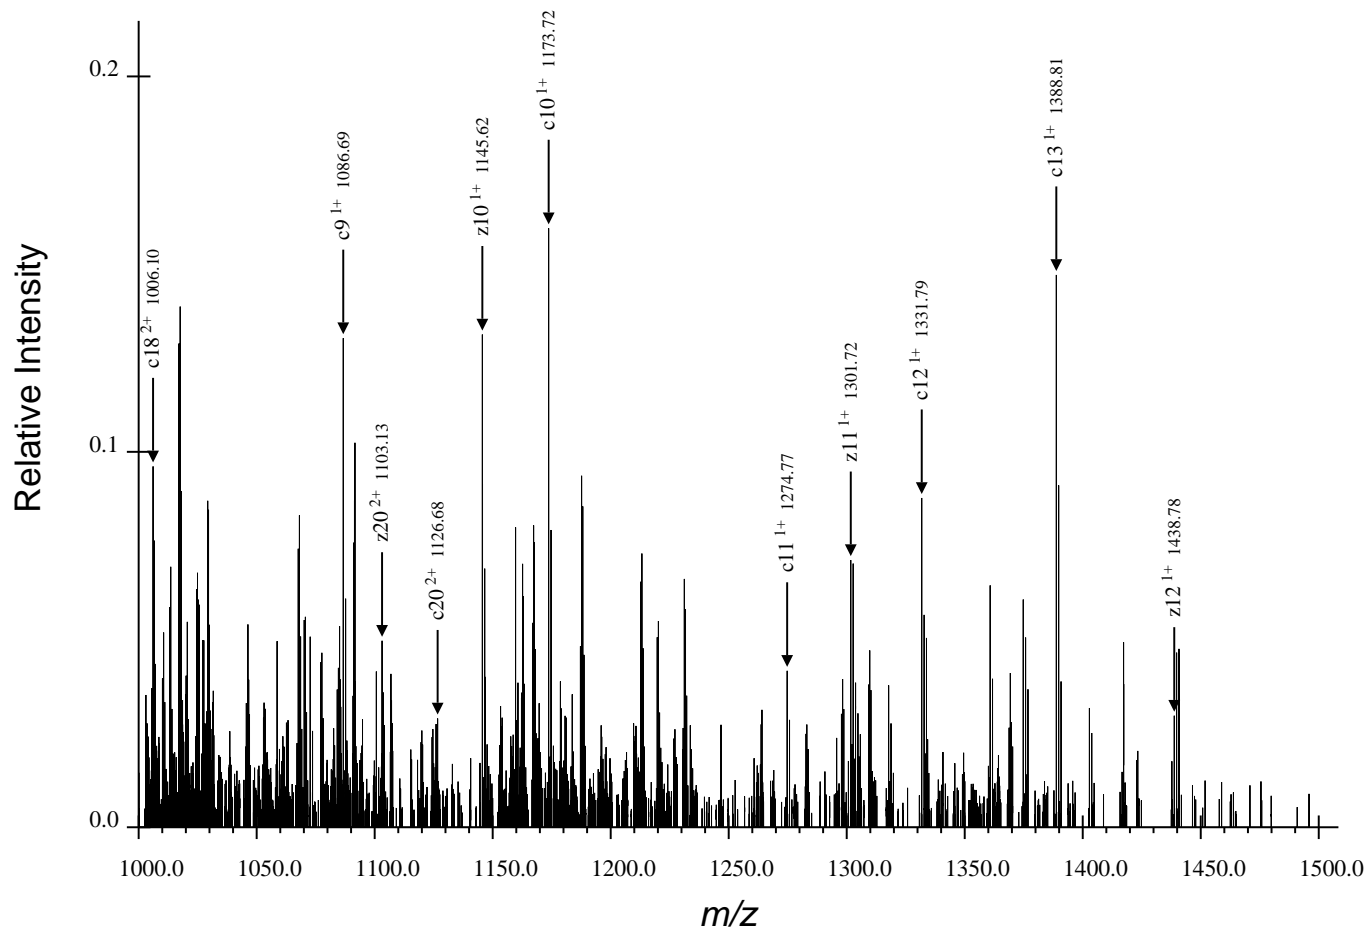

(c) Third Region for ARTKQTARdKSTGGaKAPRKQLATaKAARdKSAPATGGVdKKPHRYRPGTVALRE, Spectrum 58.dta

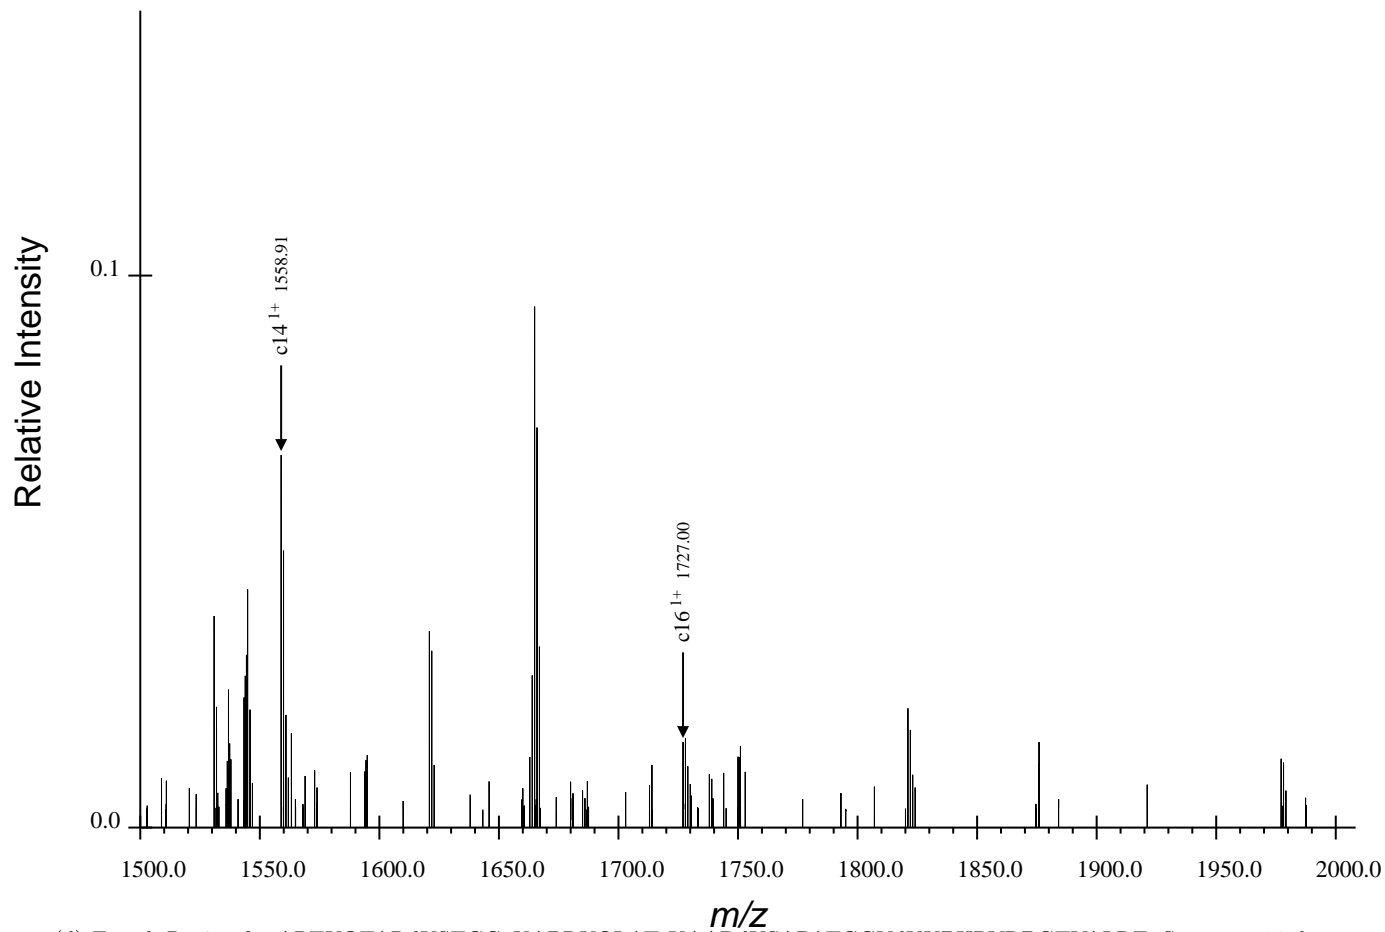

(d) Fourth Region for ARTKQTARdKSTGGaKAPRKQLATaKAARdKSAPATGGVdKKPHRYRPGTVALRE, Spectrum 58.dta
