# Supplementary material
Source: PubMed Central journal article supplement (PMC2871412)
Supplement: supp_M900487-MCP200_TestSetC_TrypticHistones.pdf [file supp_M900487-MCP200_TestSetC_TrypticHistones.pdf]

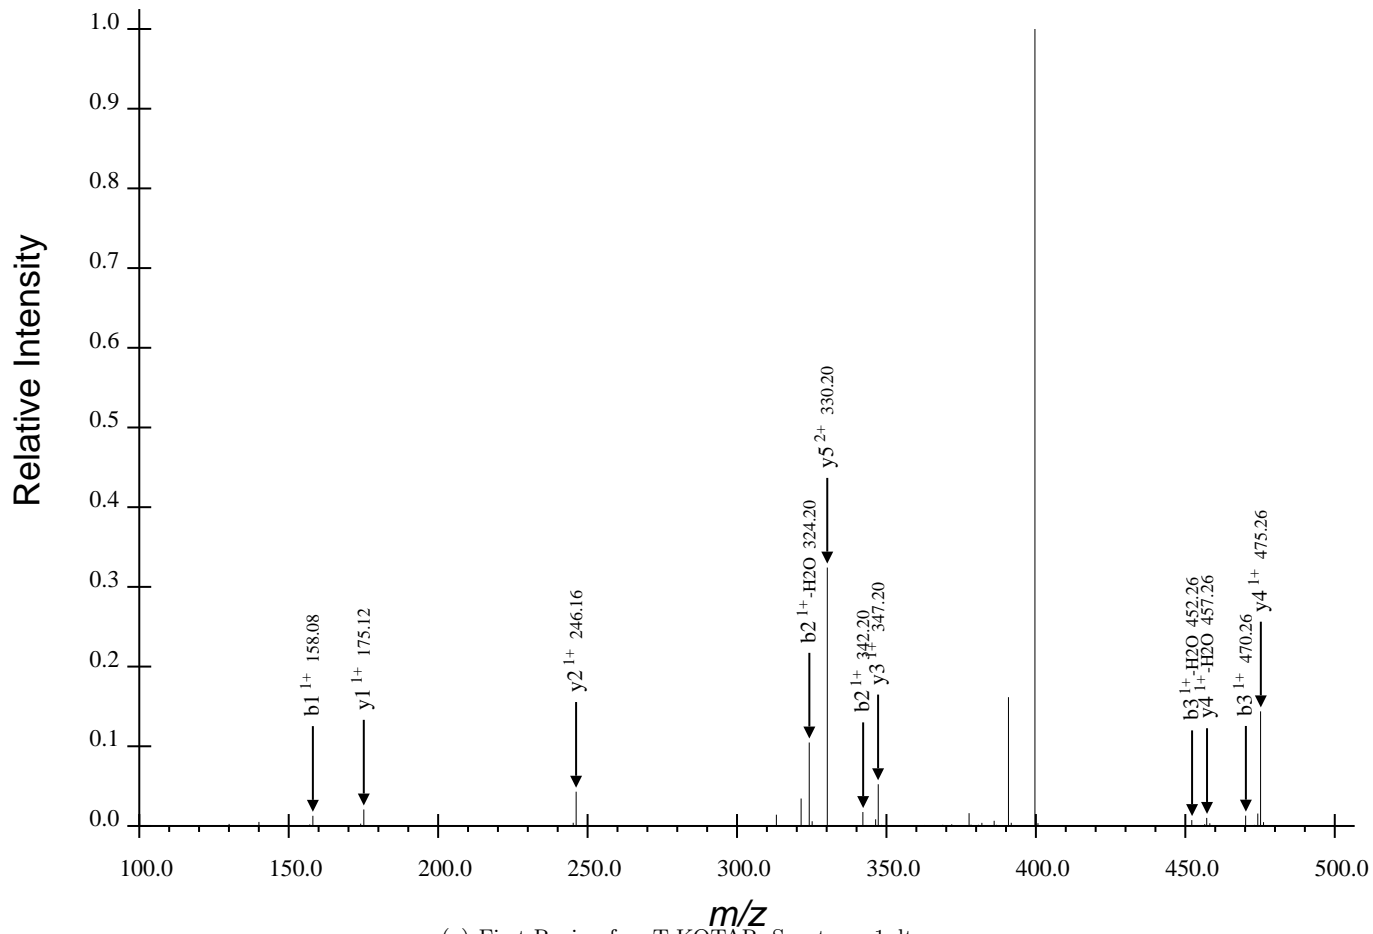

(a) First Region for rTrKQTAR, Spectrum 1.dta

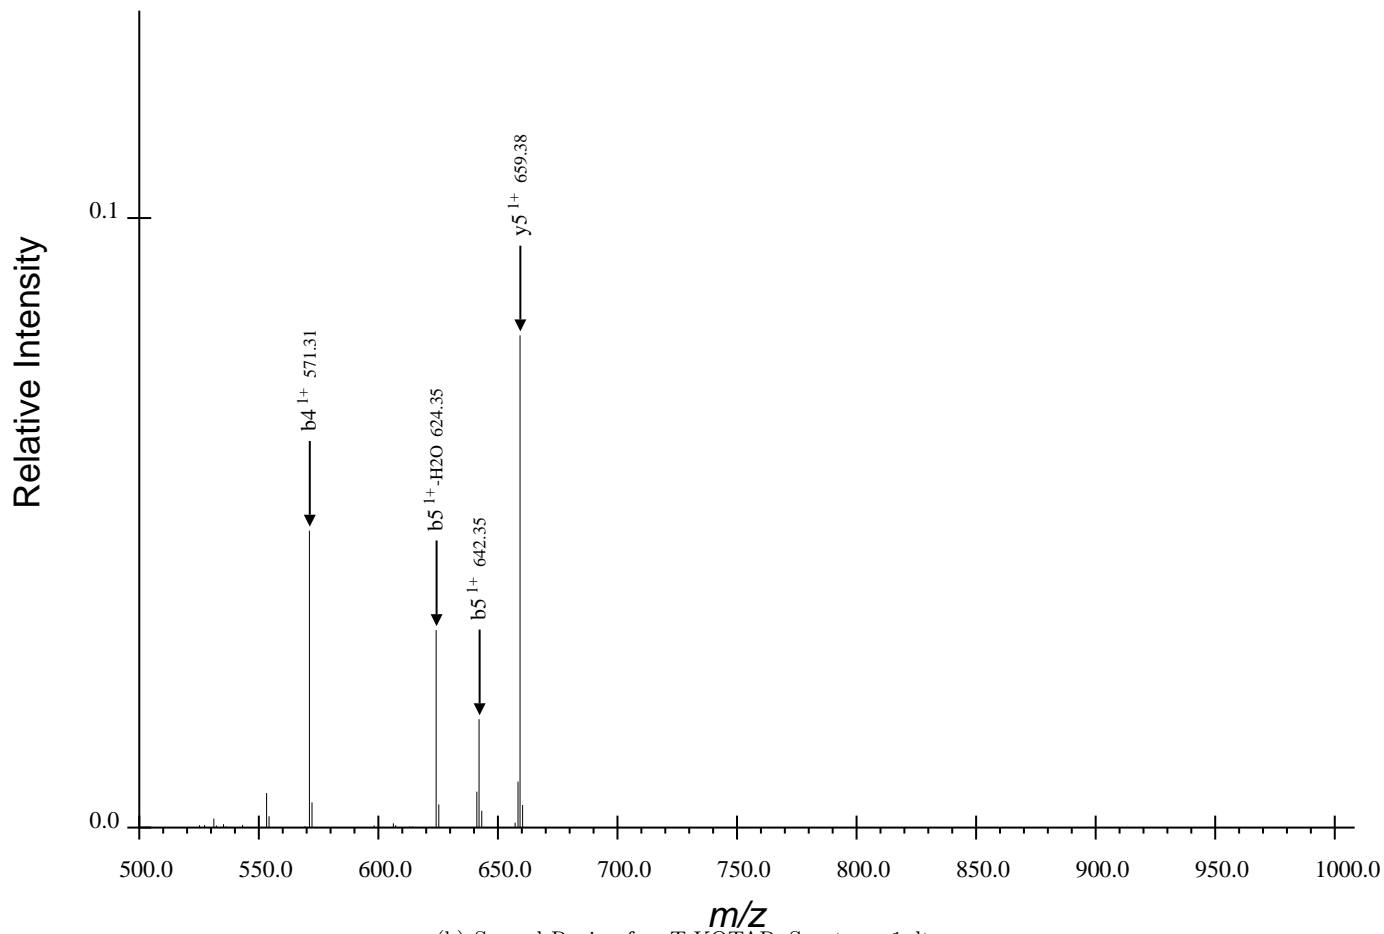

(b) Second Region for rTrKQTAR, Spectrum 1.dta

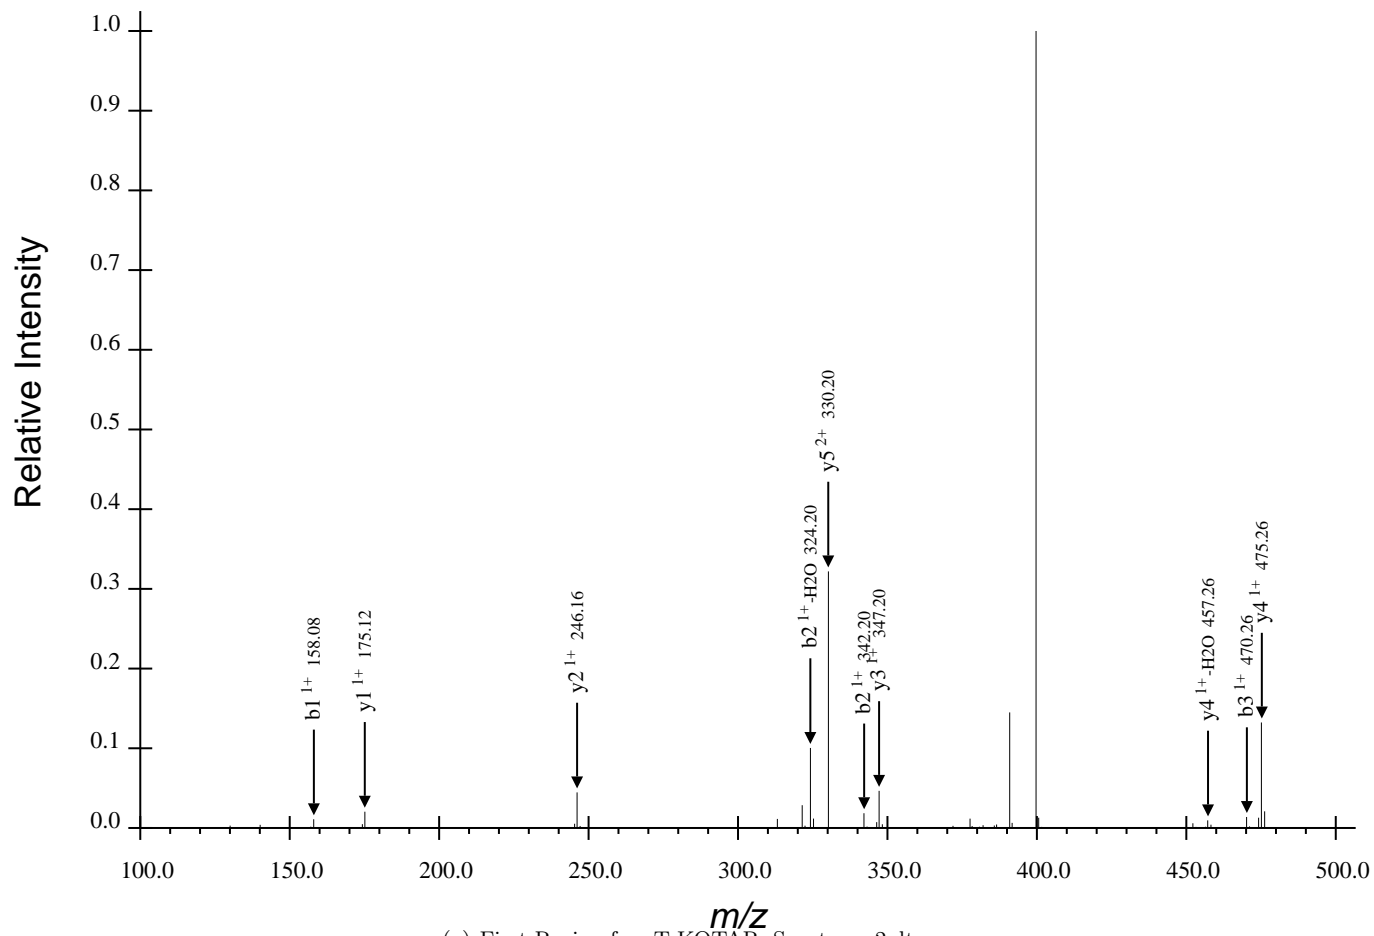

(a) First Region for rTrKQTAR, Spectrum 2.dta

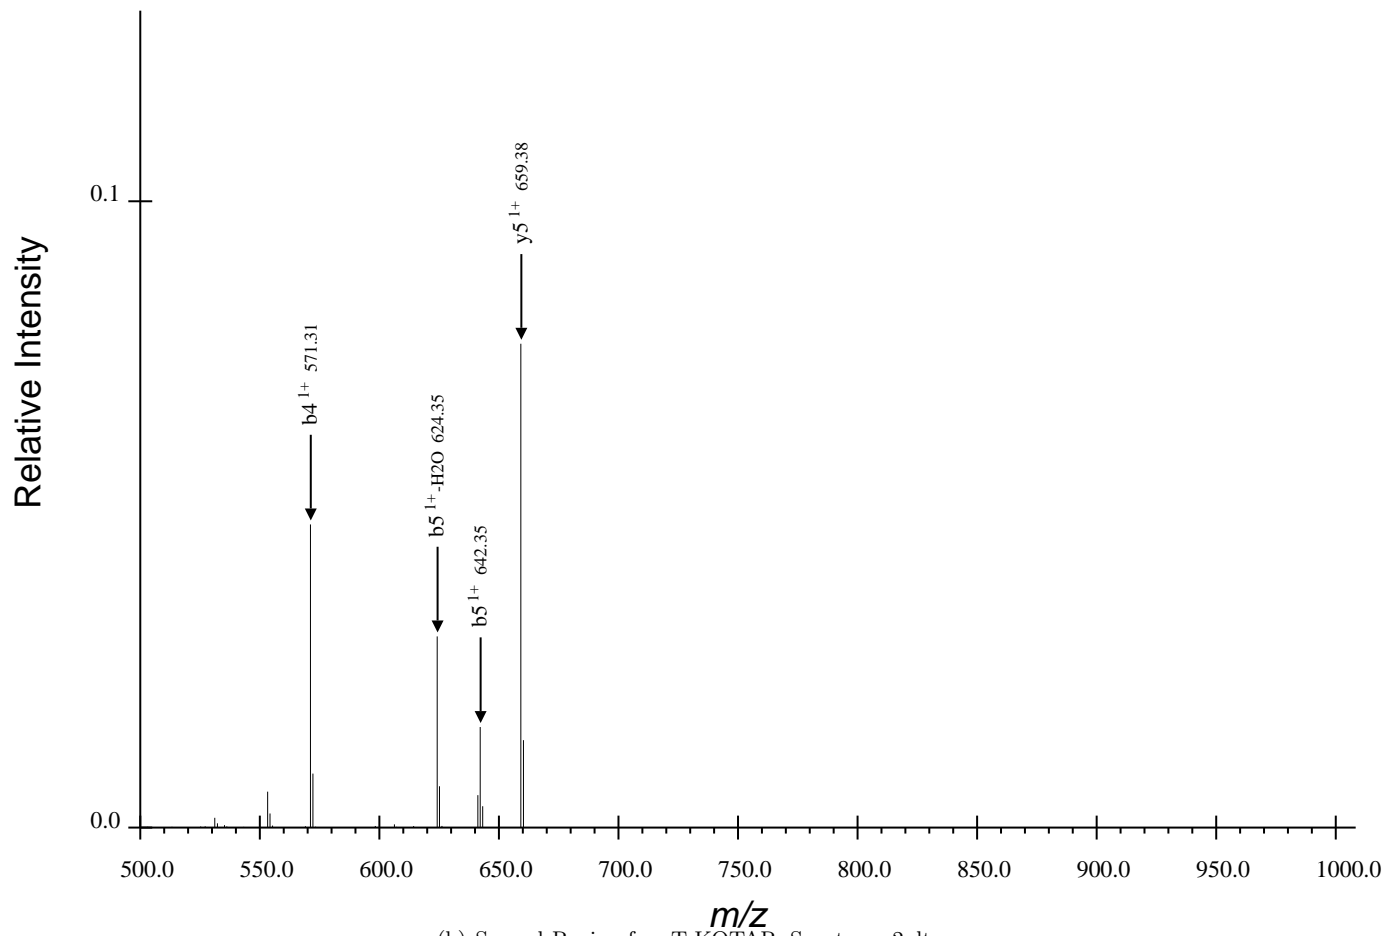

(b) Second Region for rTrKQTAR, Spectrum 2.dta

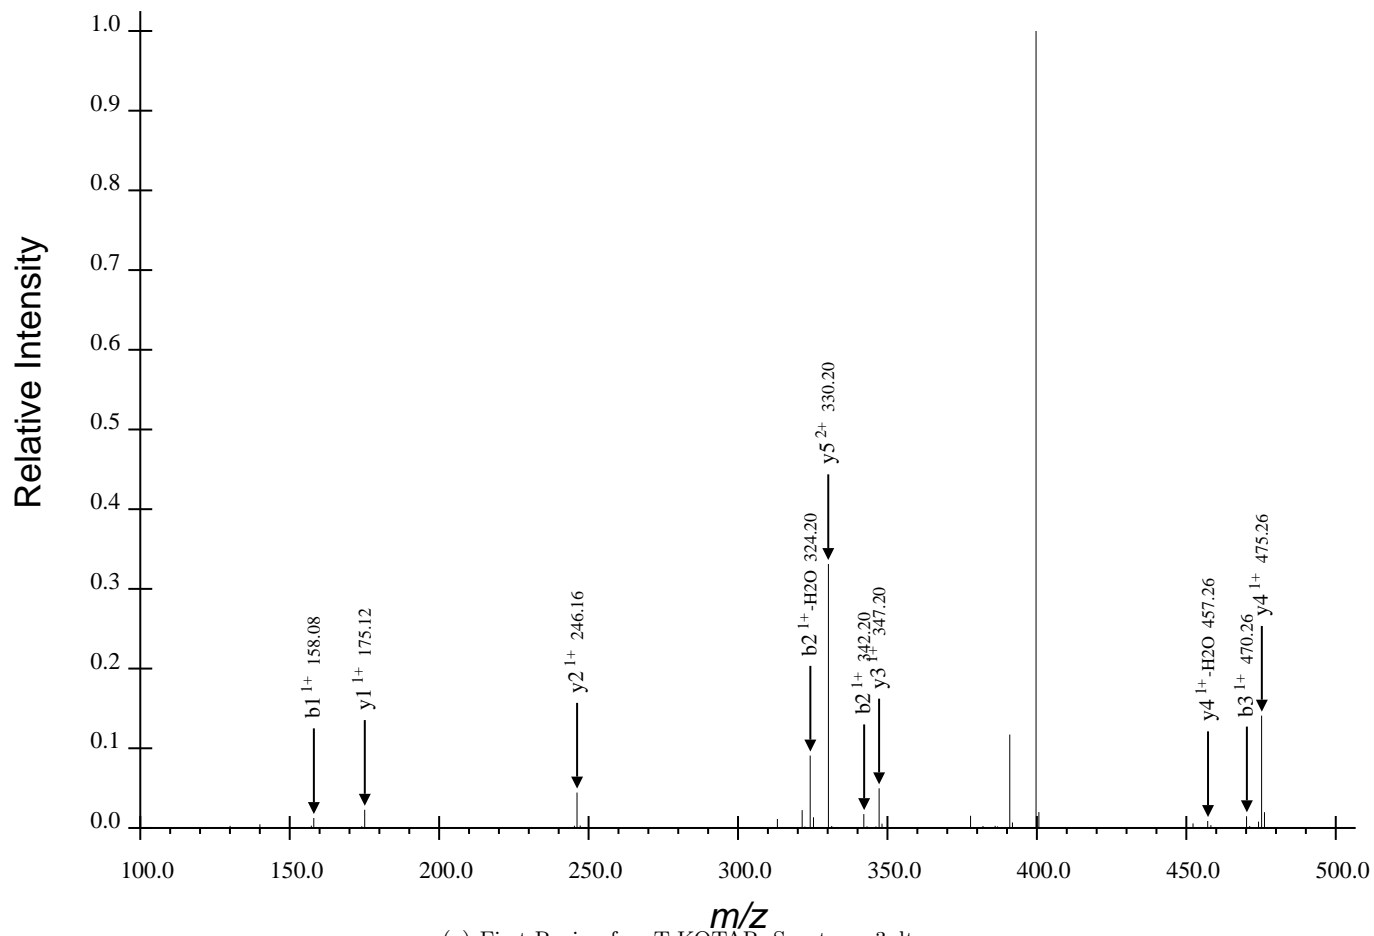

(a) First Region for rTrKQTAR, Spectrum 3.dta

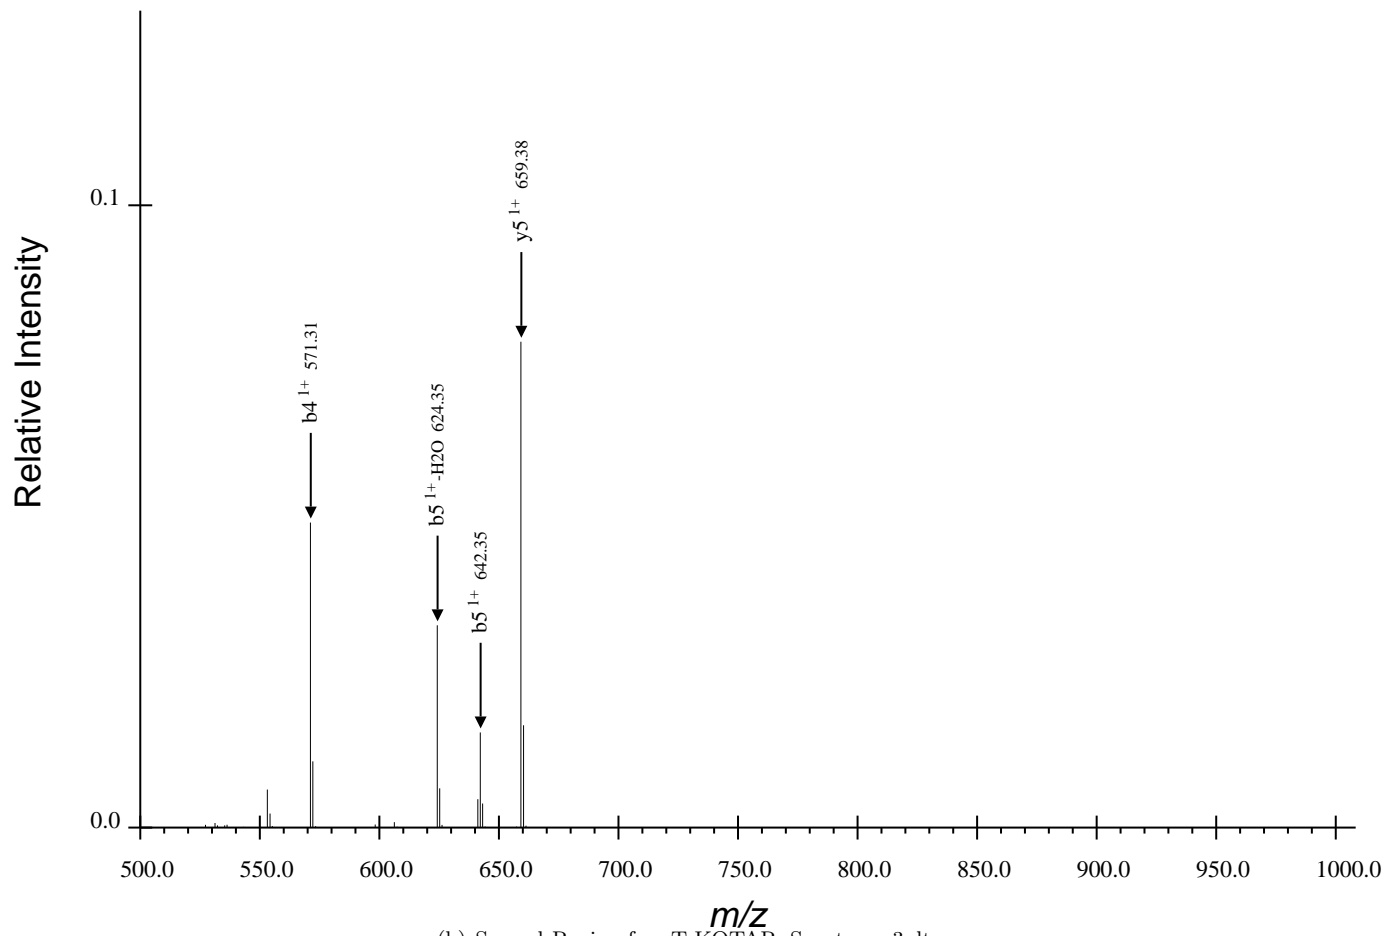

(b) Second Region for rTrKQTAR, Spectrum 3.dta

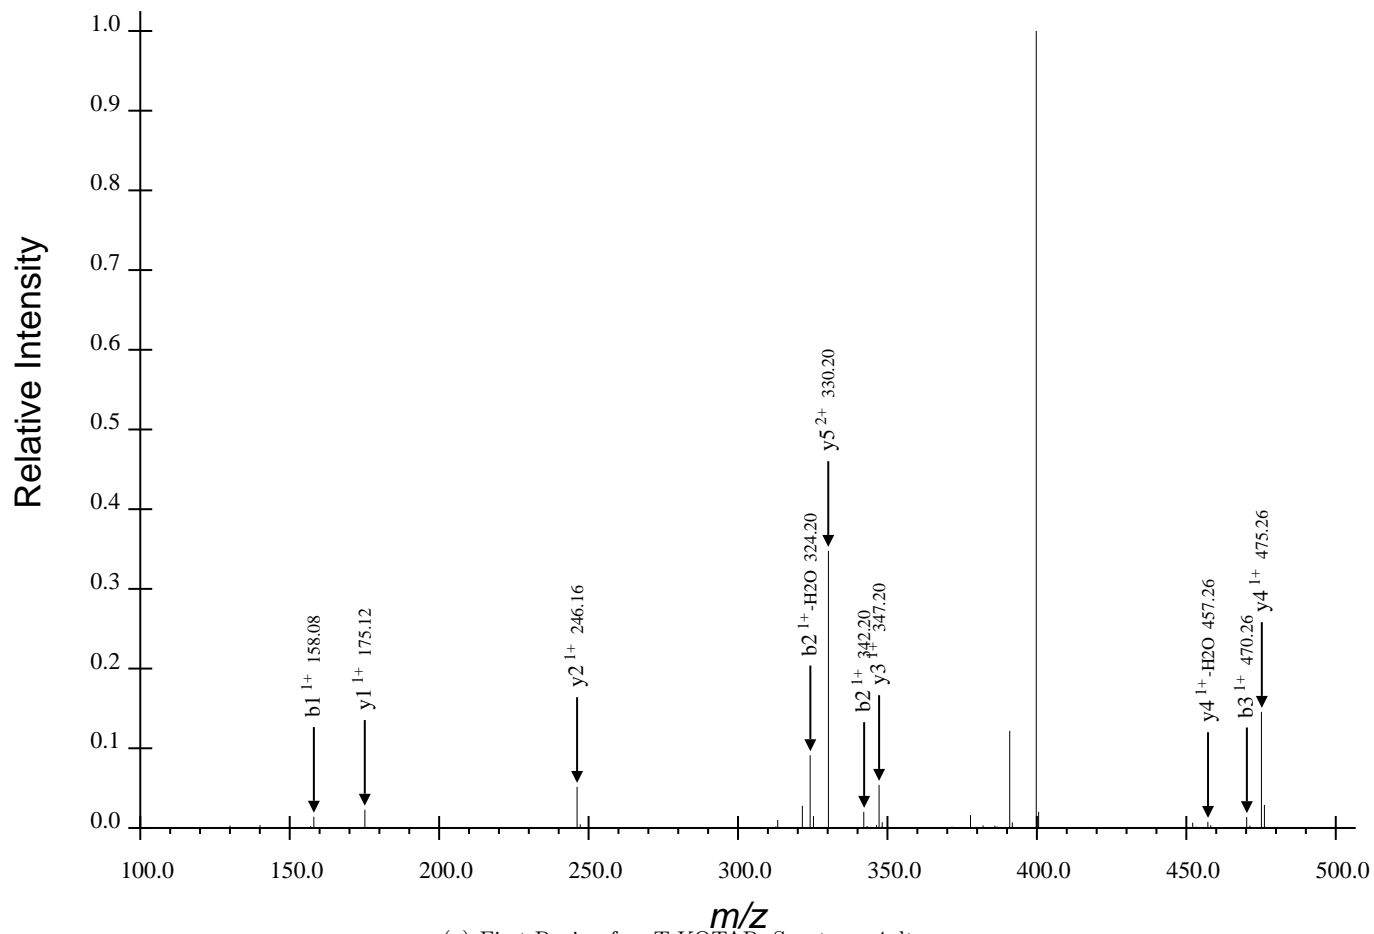

(a) First Region for rTrKQTAR, Spectrum 4.dta

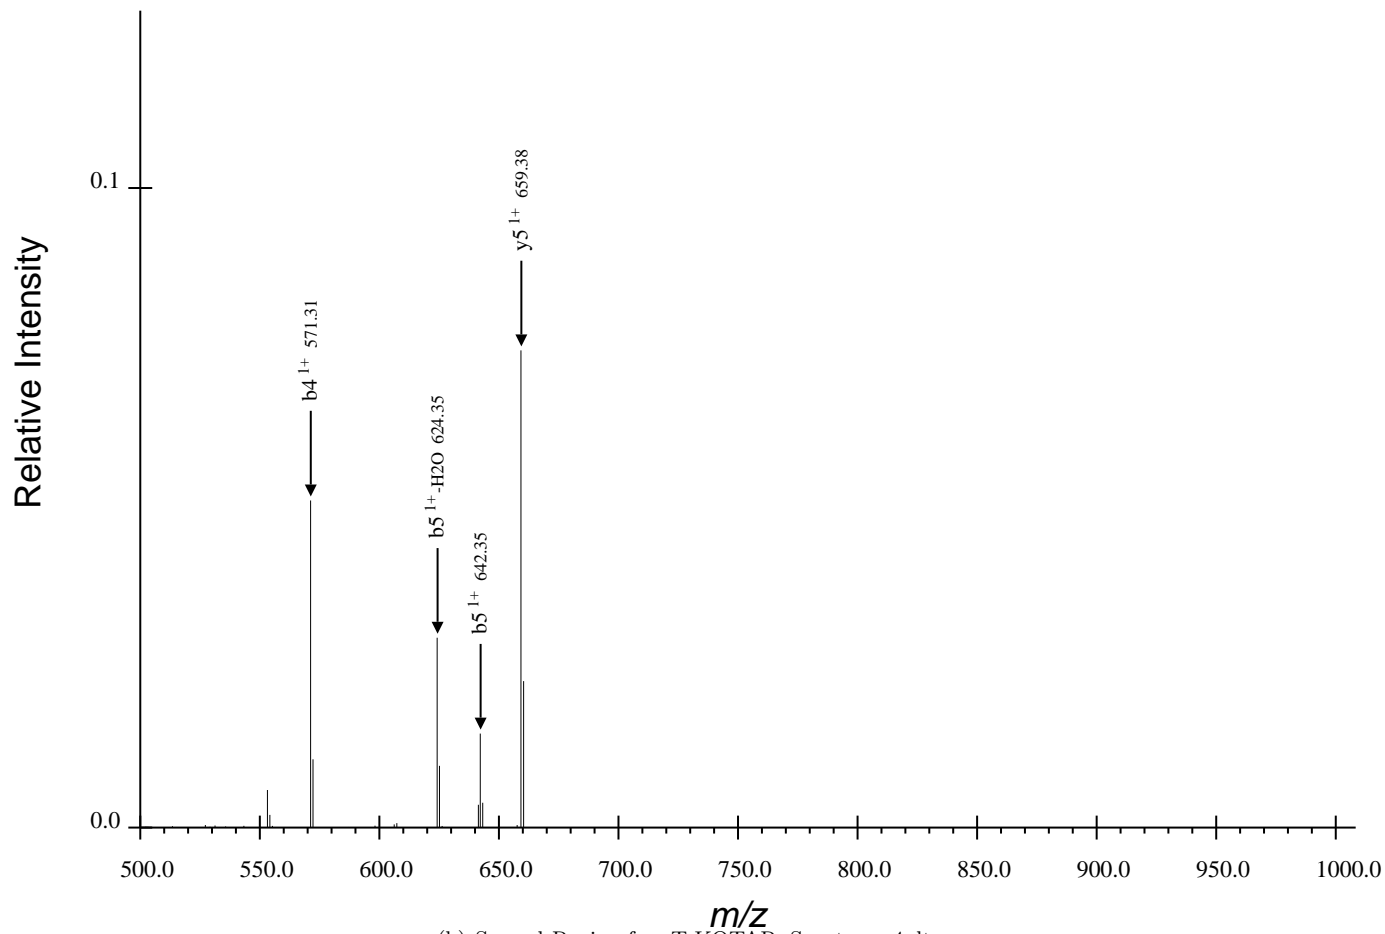

(b) Second Region for rTrKQTAR, Spectrum 4.dta

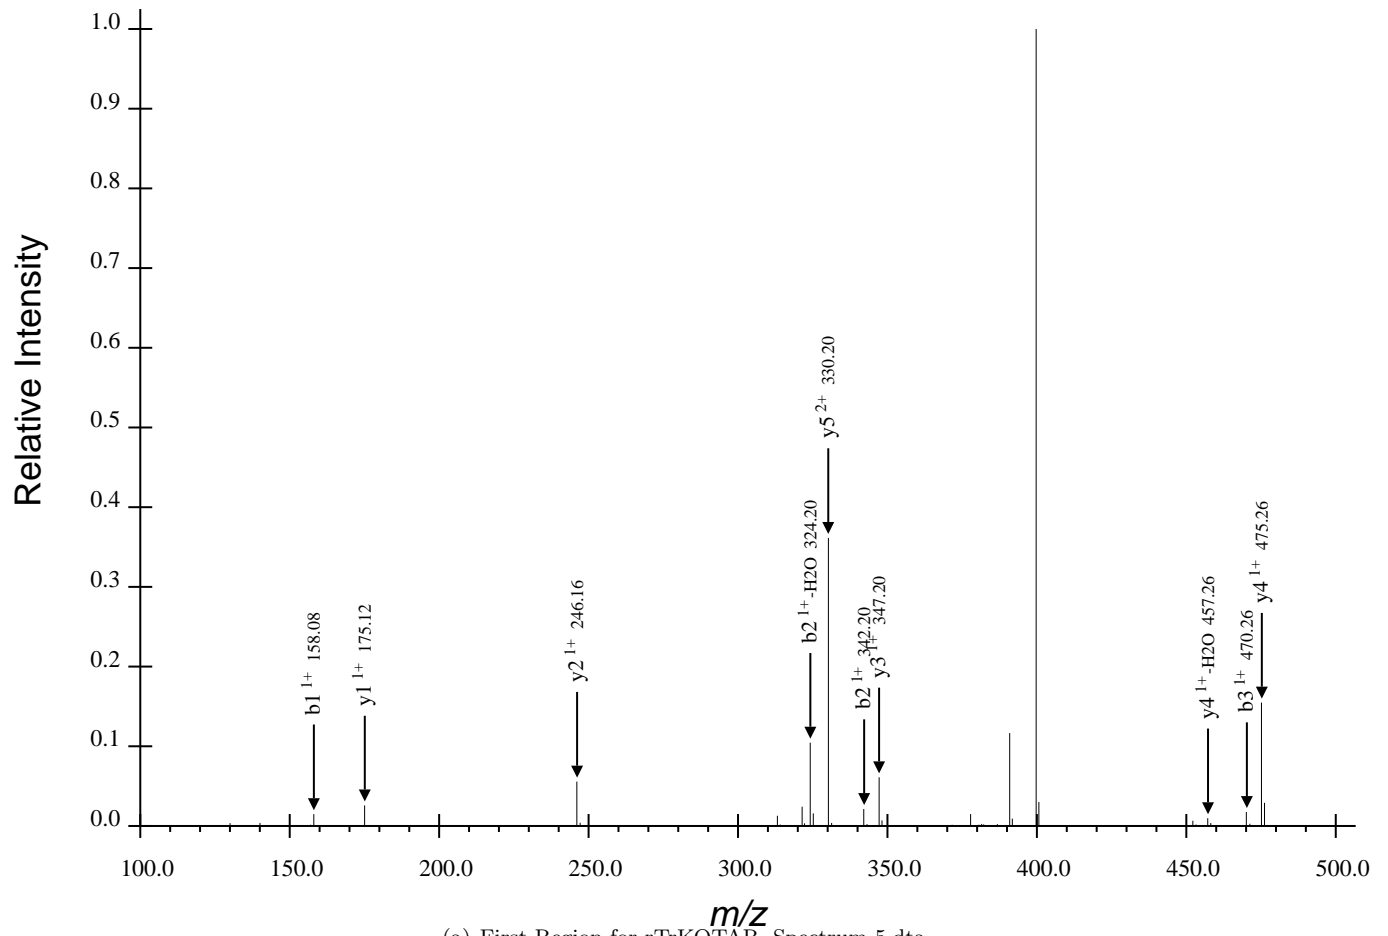

(a) First Region for rTrKQTAR, Spectrum 5.dta

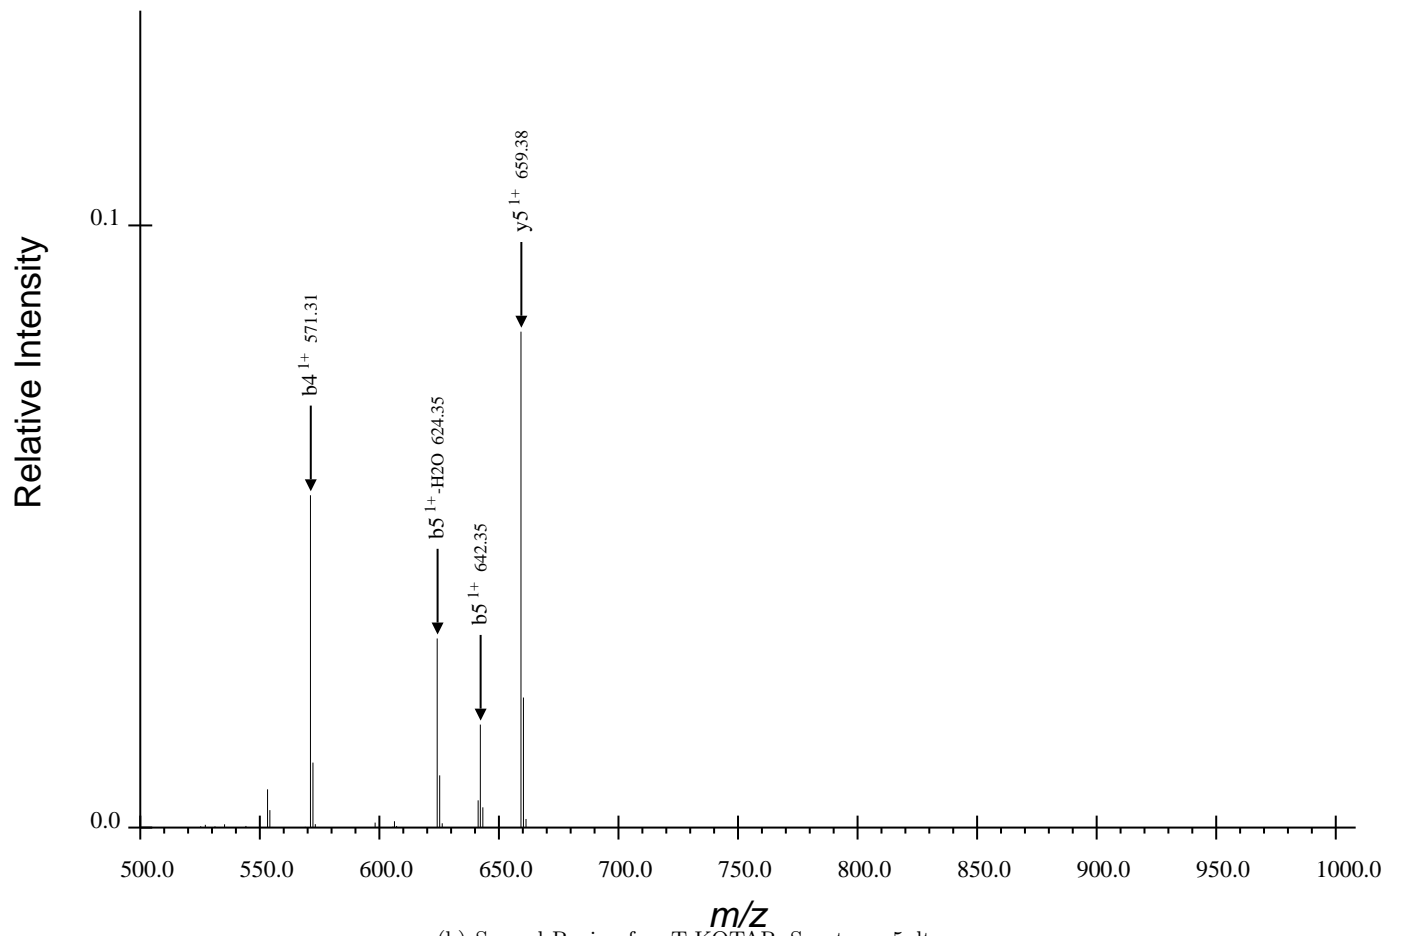

(b) Second Region for rTrKQTAR, Spectrum 5.dta

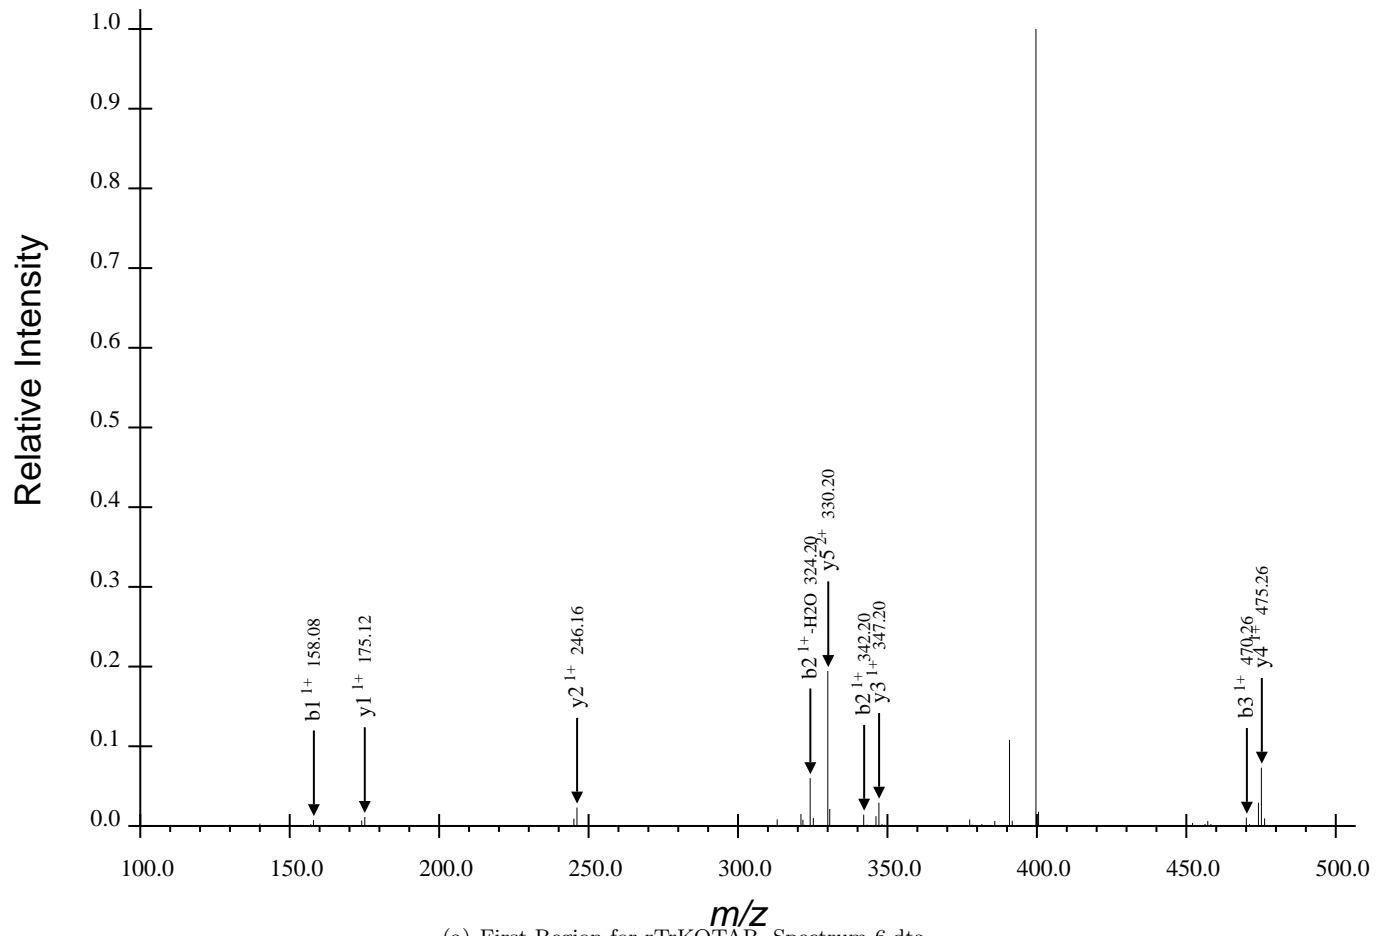

(a) First Region for rTrKQTAR, Spectrum 6.dta

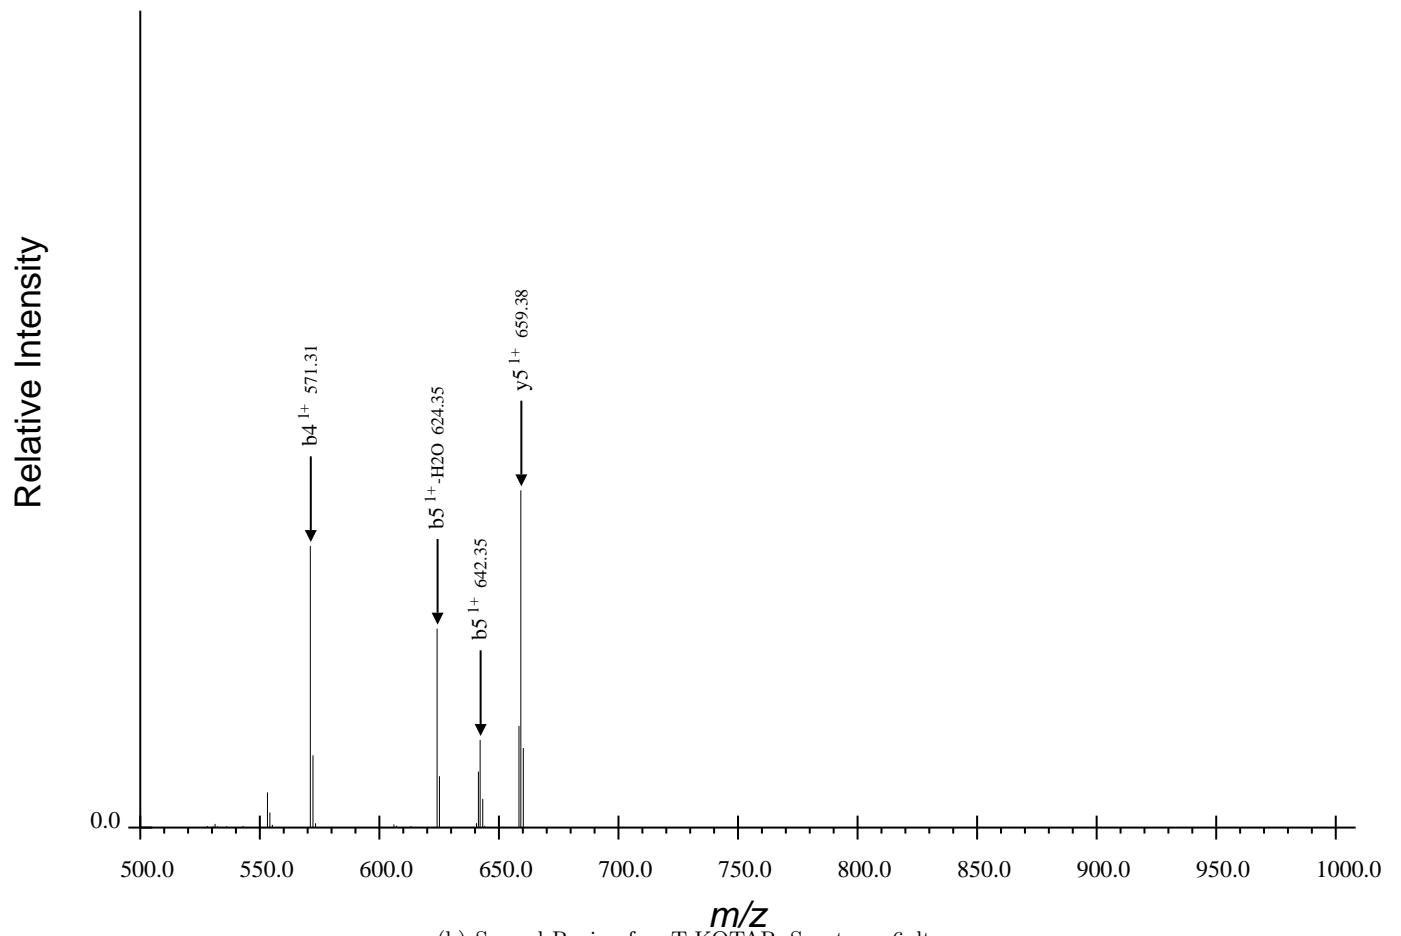

(b) Second Region for rTrKQTAR, Spectrum 6.dta

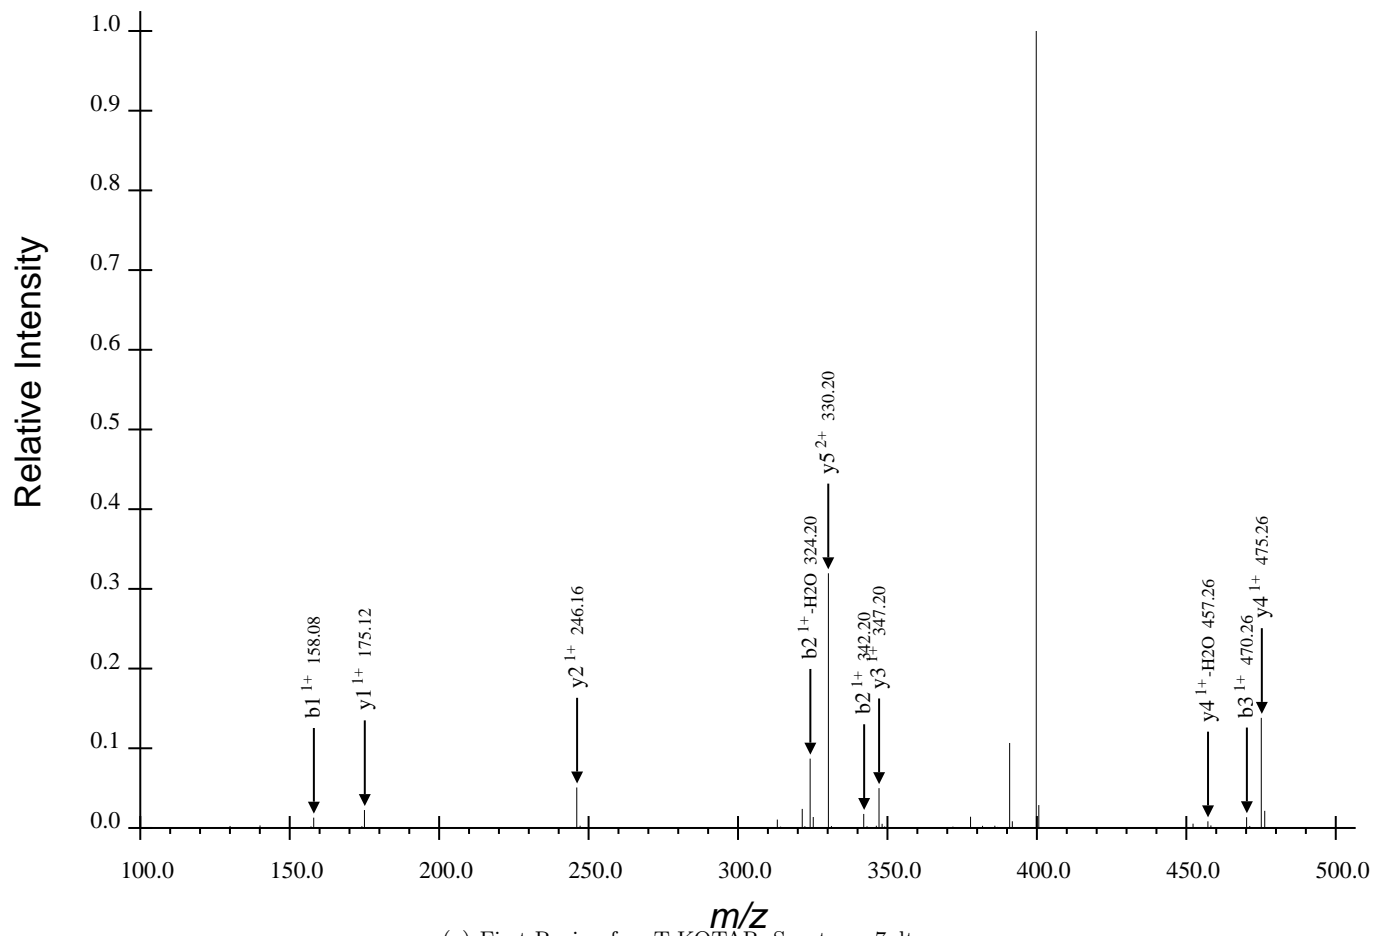

(a) First Region for rTrKQTAR, Spectrum 7.dta

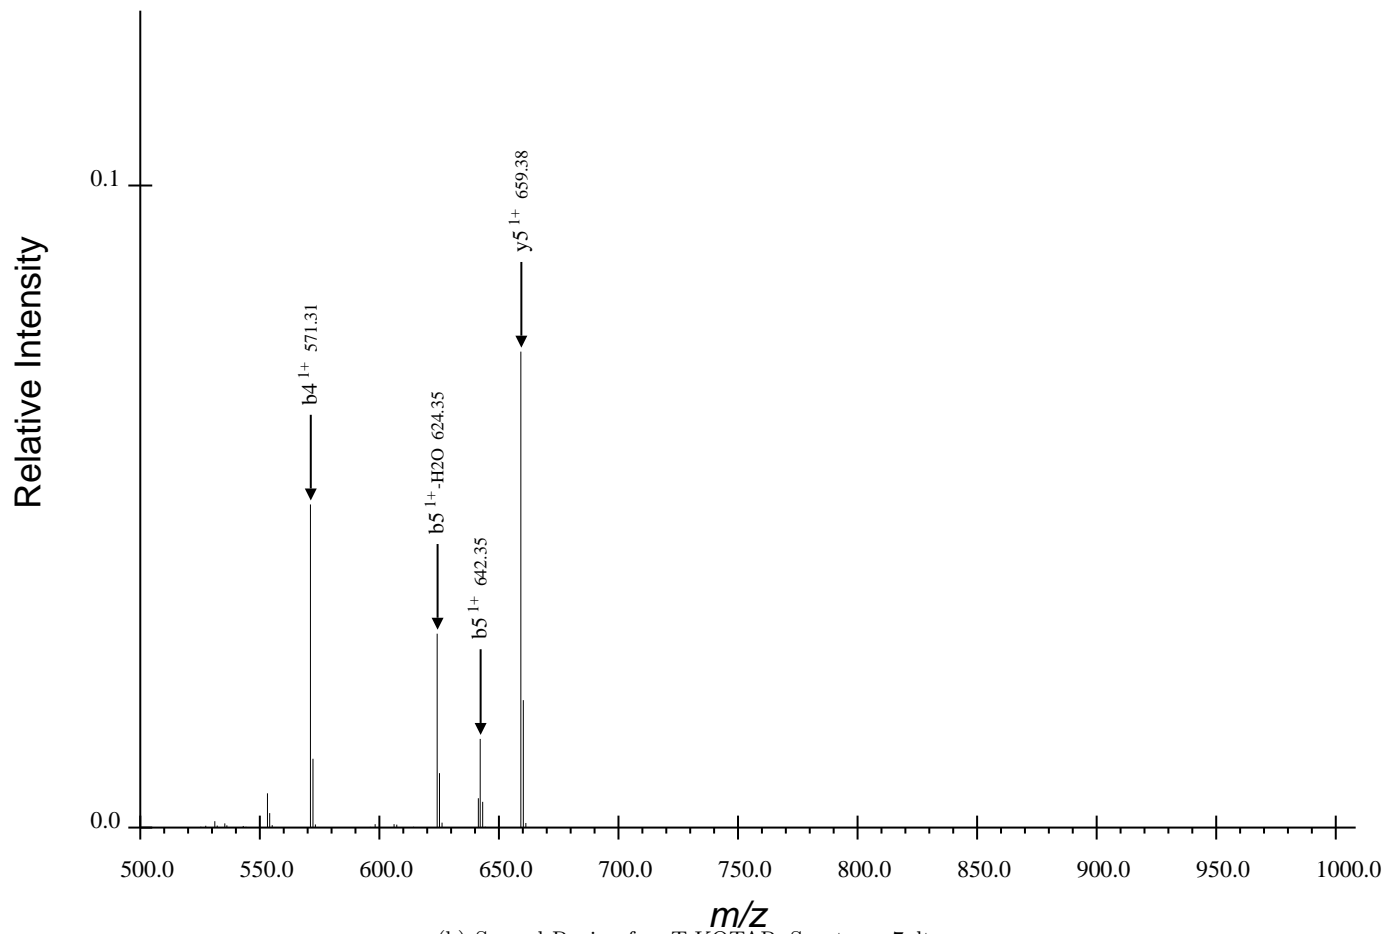

(b) Second Region for rTrKQTAR, Spectrum 7.dta

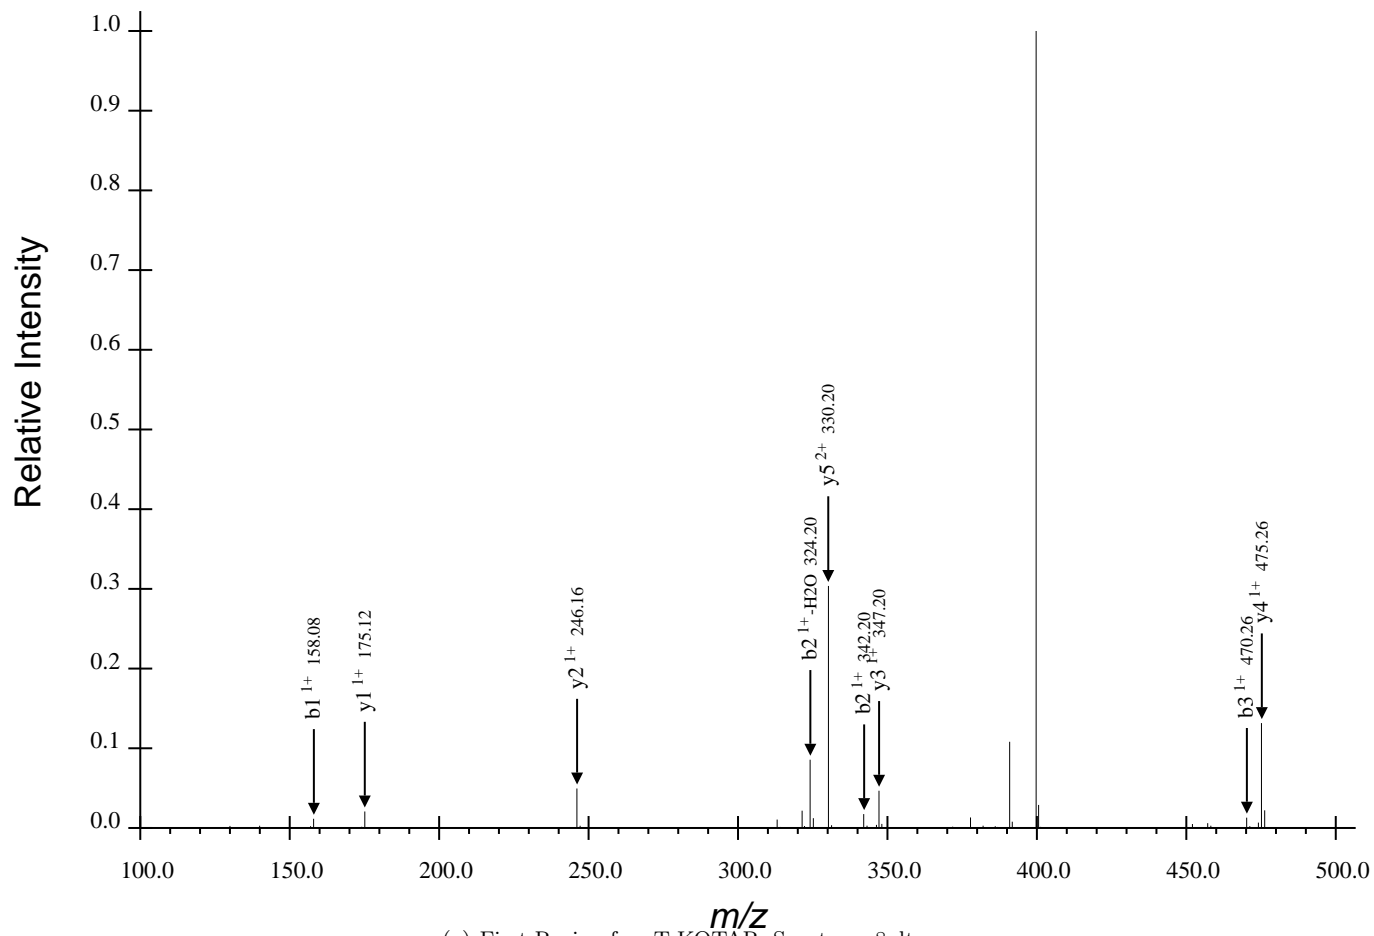

(a) First Region for rTrKQTAR, Spectrum 8.dta

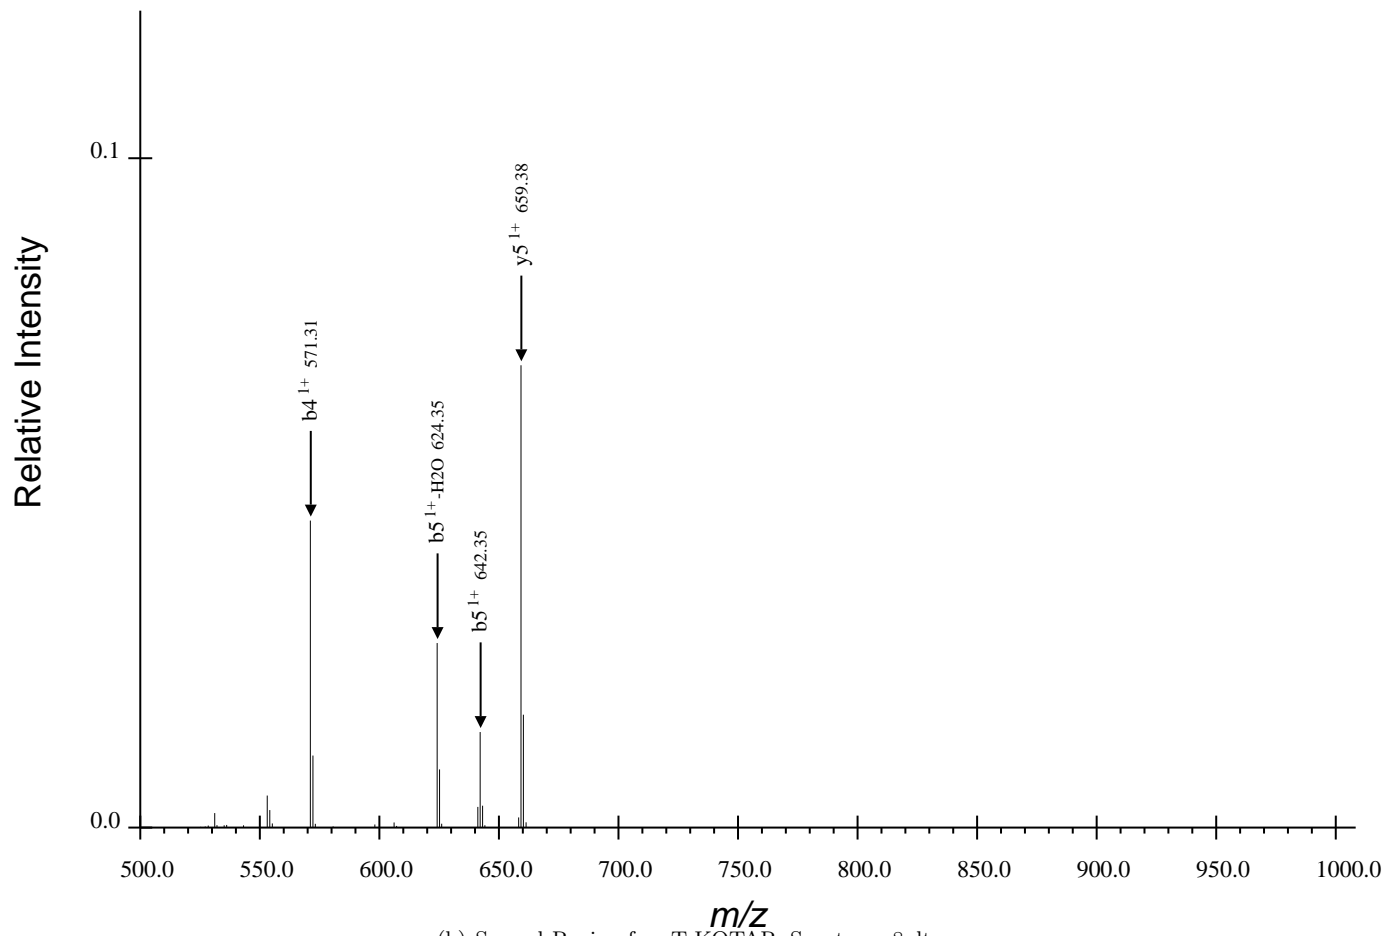

(b) Second Region for rTrKQTAR, Spectrum 8.dta



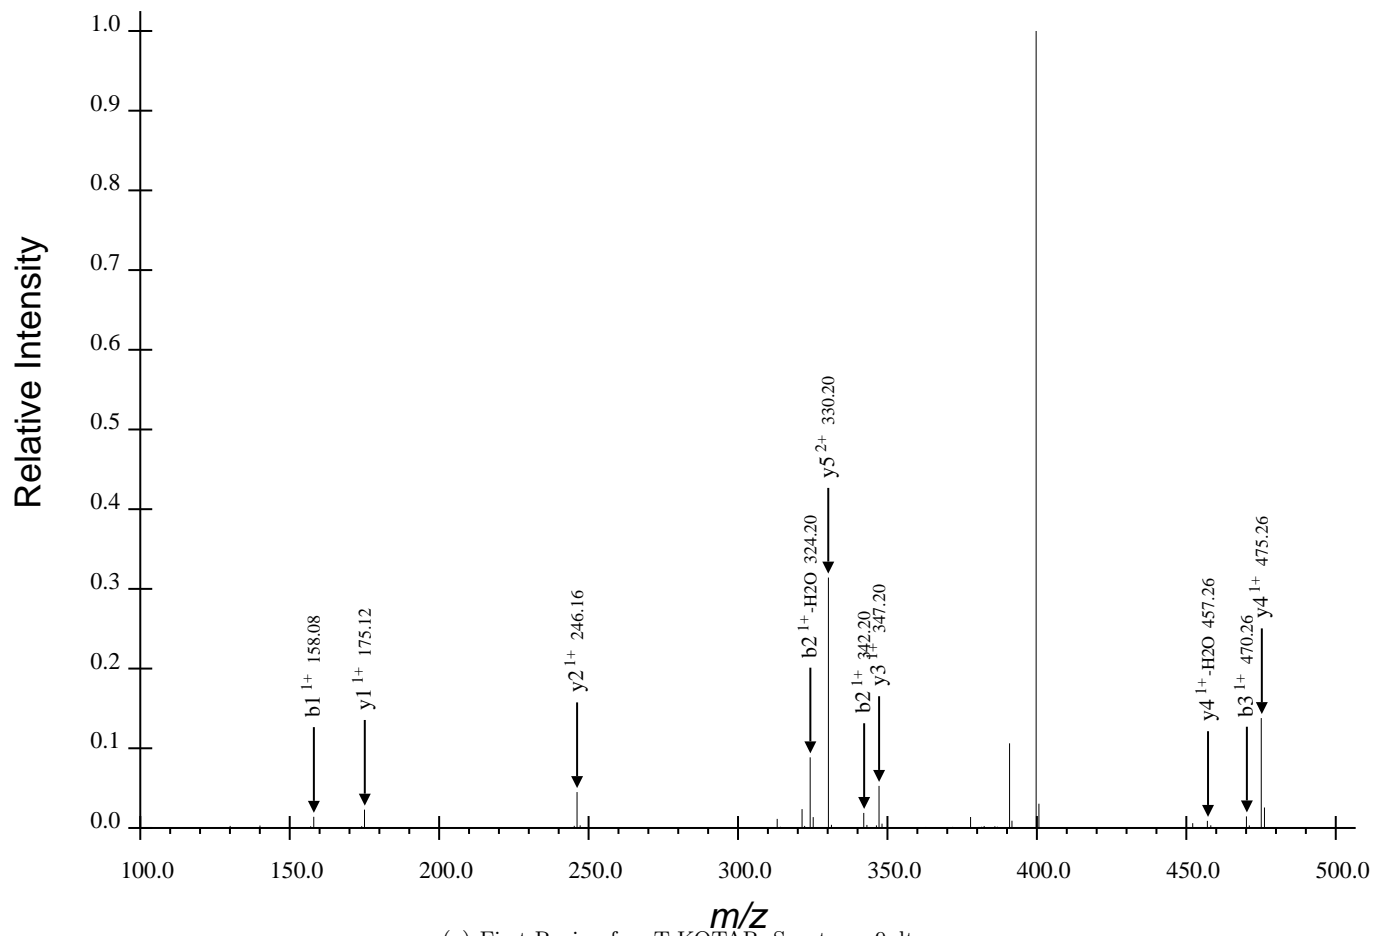

(a) First Region for rTrKQTAR, Spectrum 9.dta

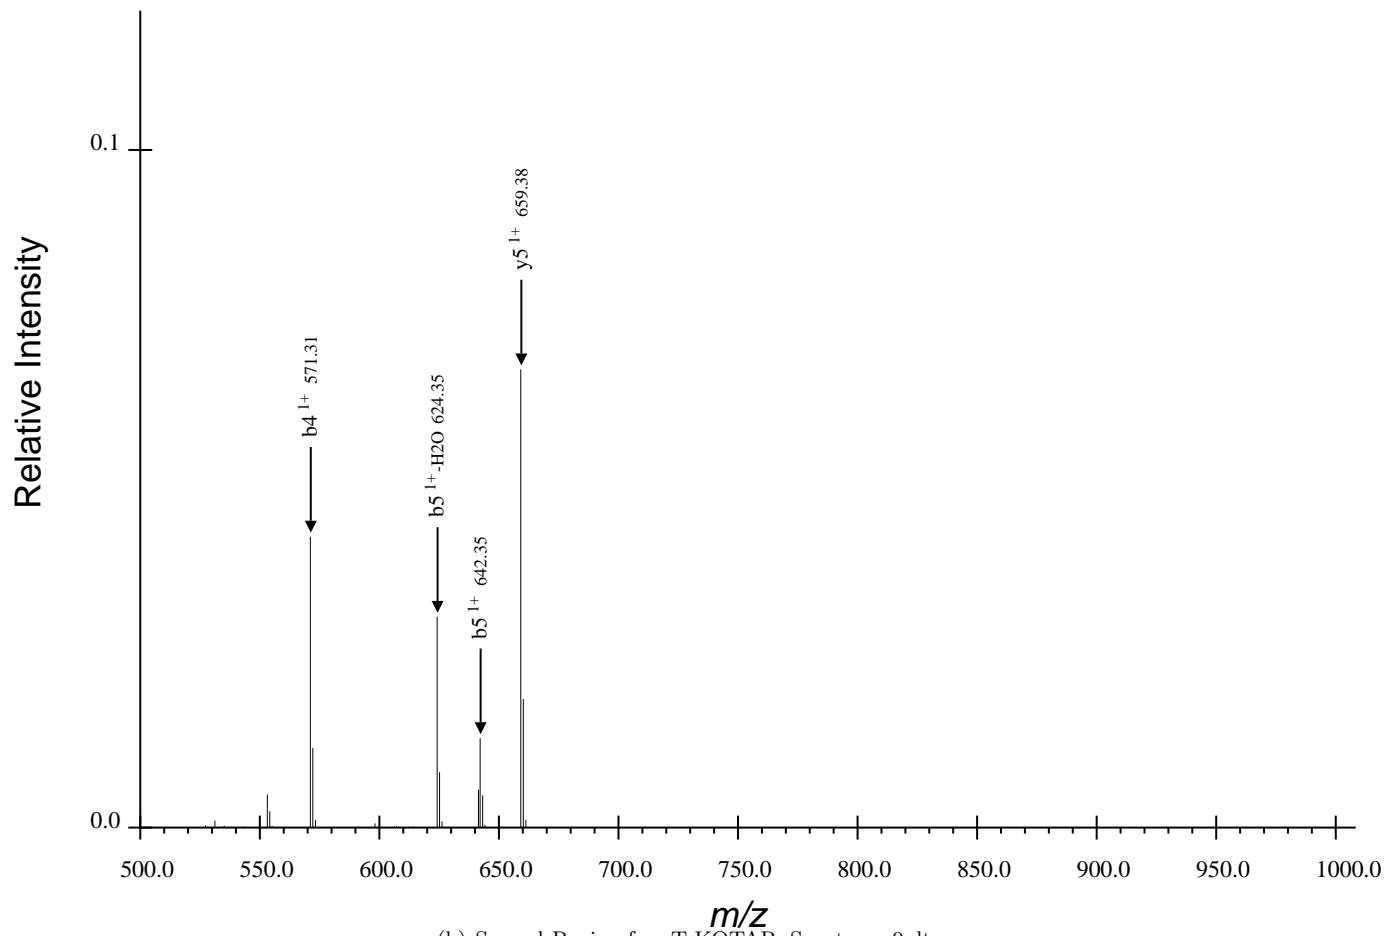

(b) Second Region for rTrKQTAR, Spectrum 9.dta

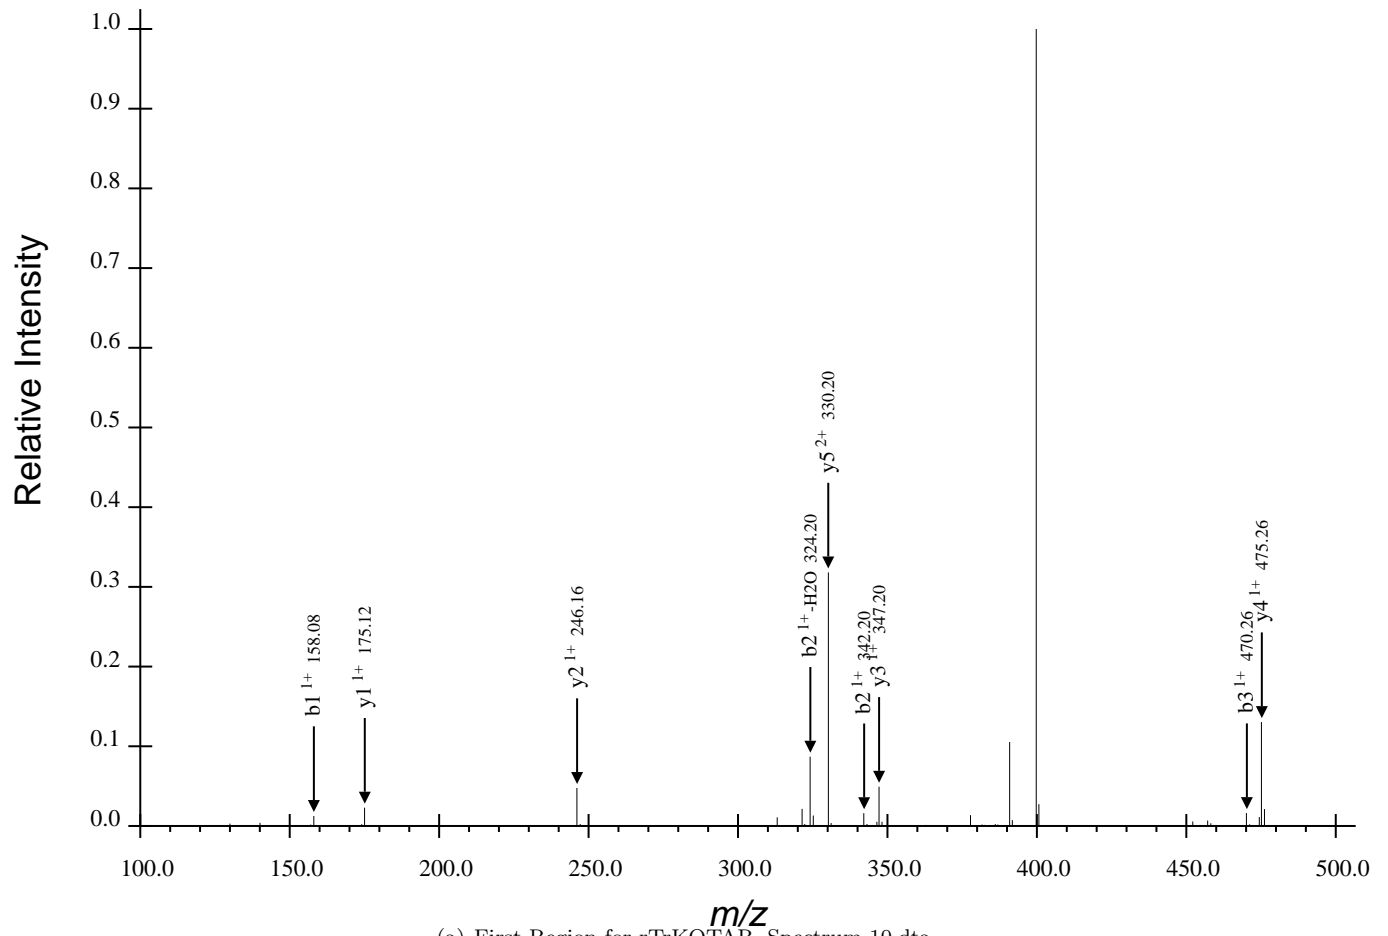

(a) First Region for rTrKQTAR, Spectrum 10.dta

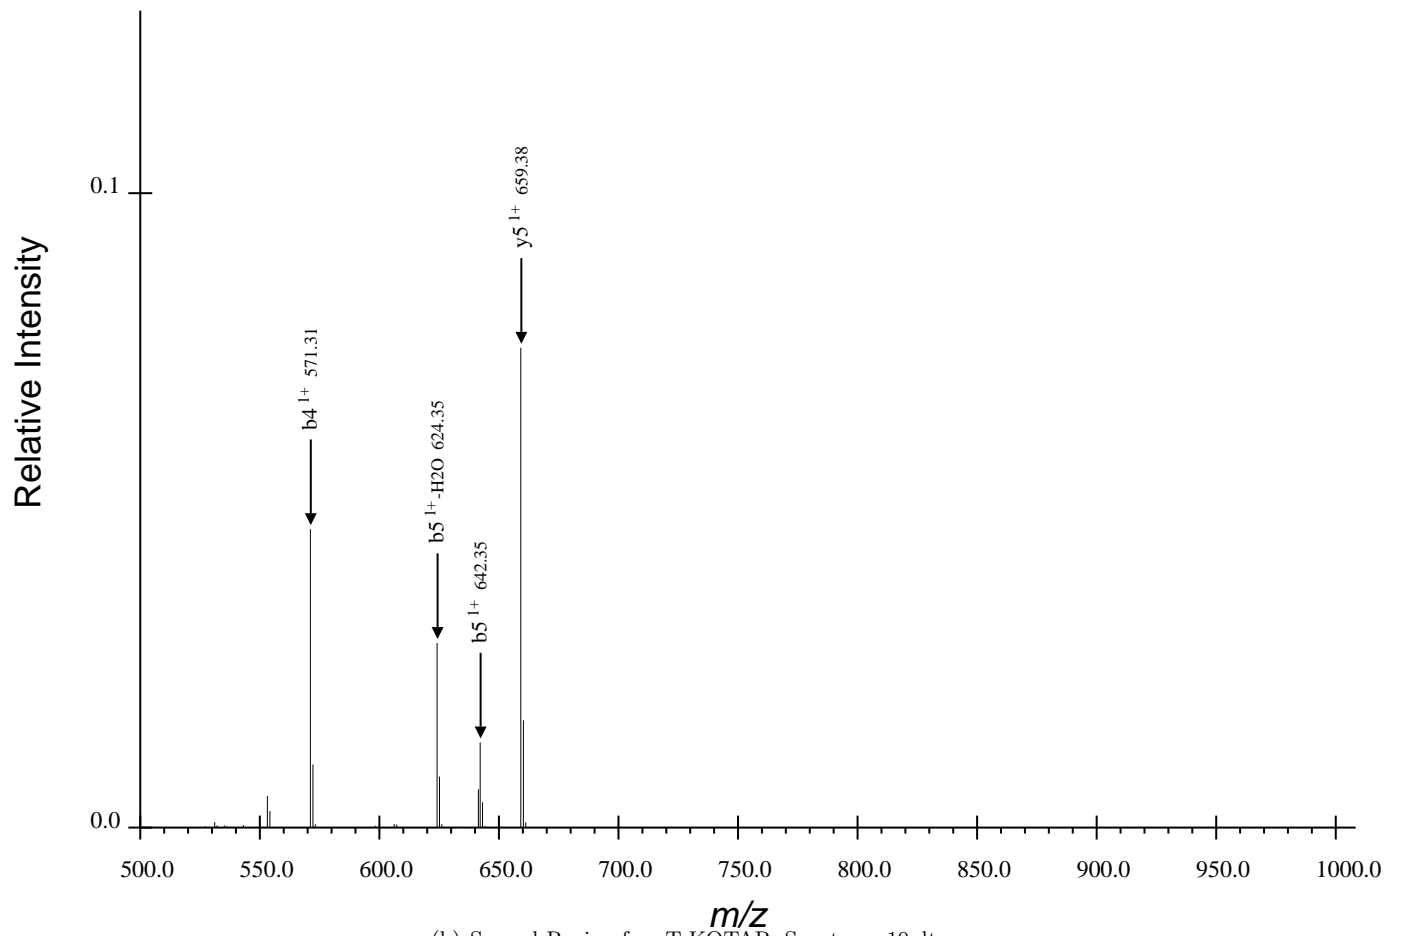

(b) Second Region for rTrKQTAR, Spectrum 10.dta

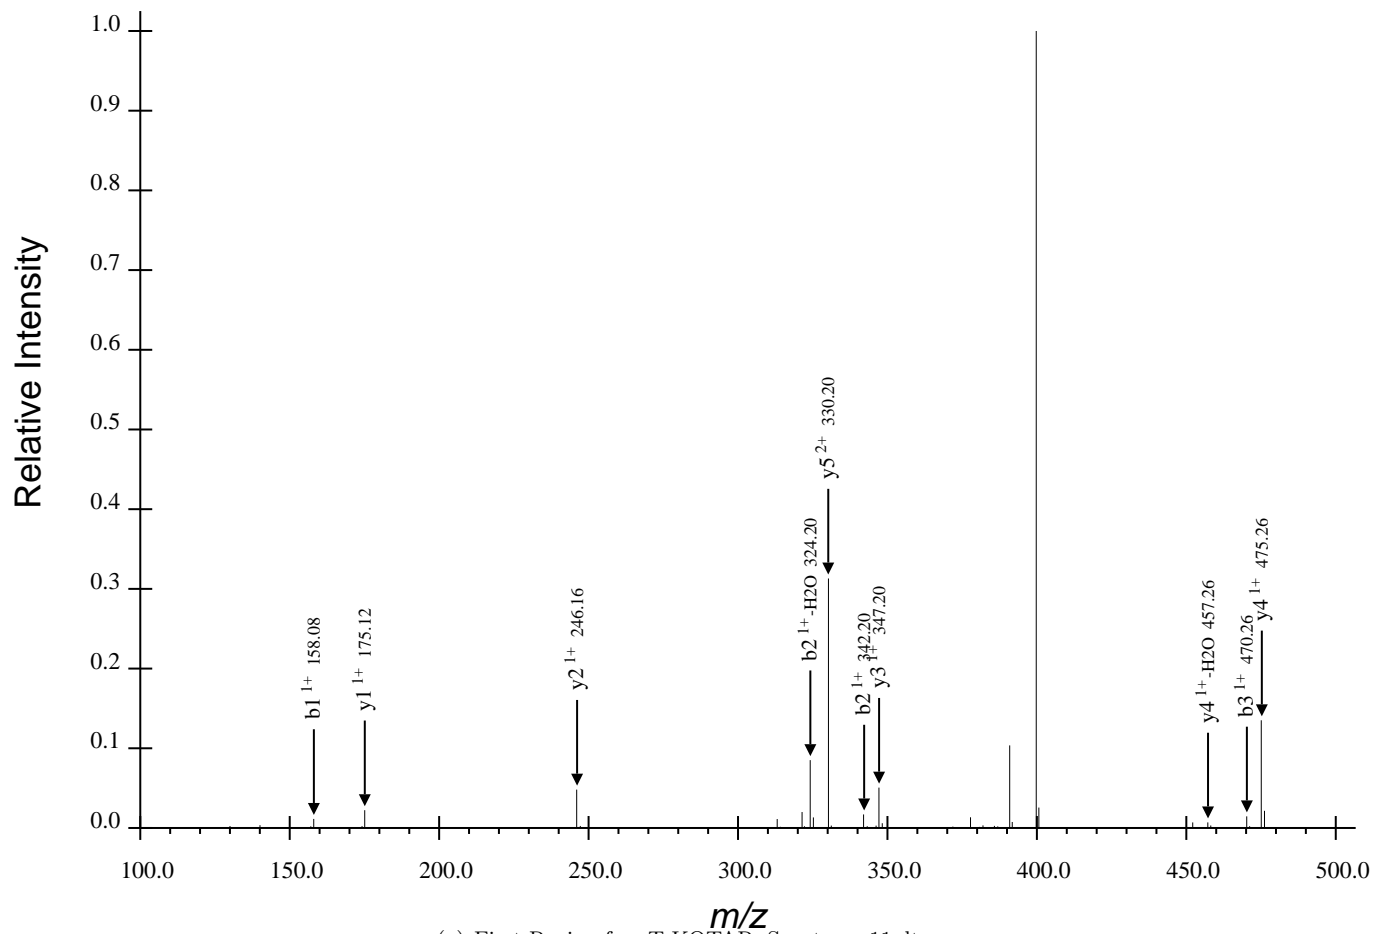

(a) First Region for rTrKQTAR, Spectrum 11.dta

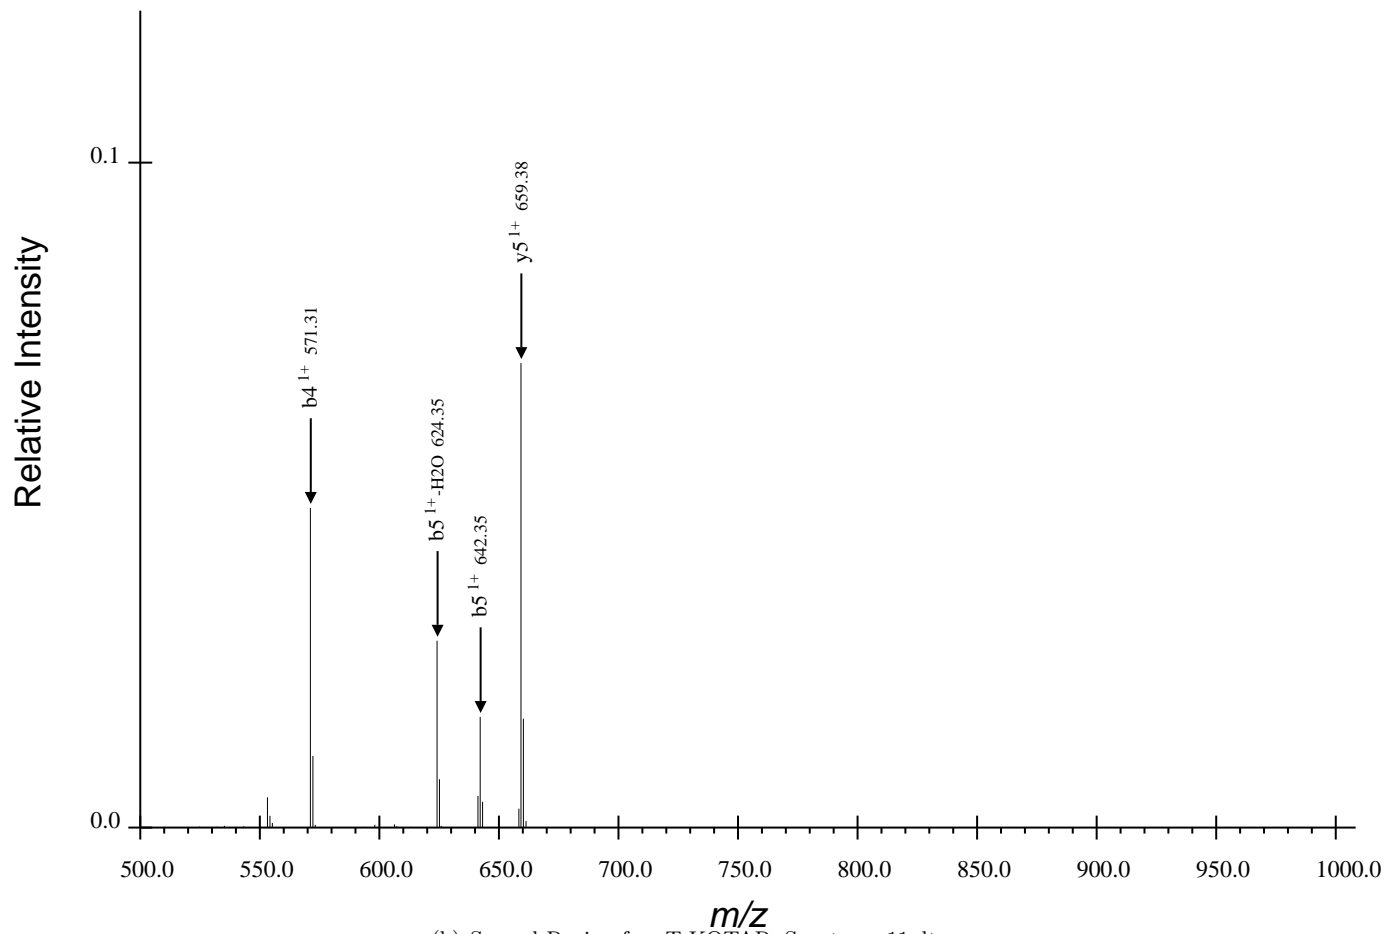

(b) Second Region for rTrKQTAR, Spectrum 11.dta

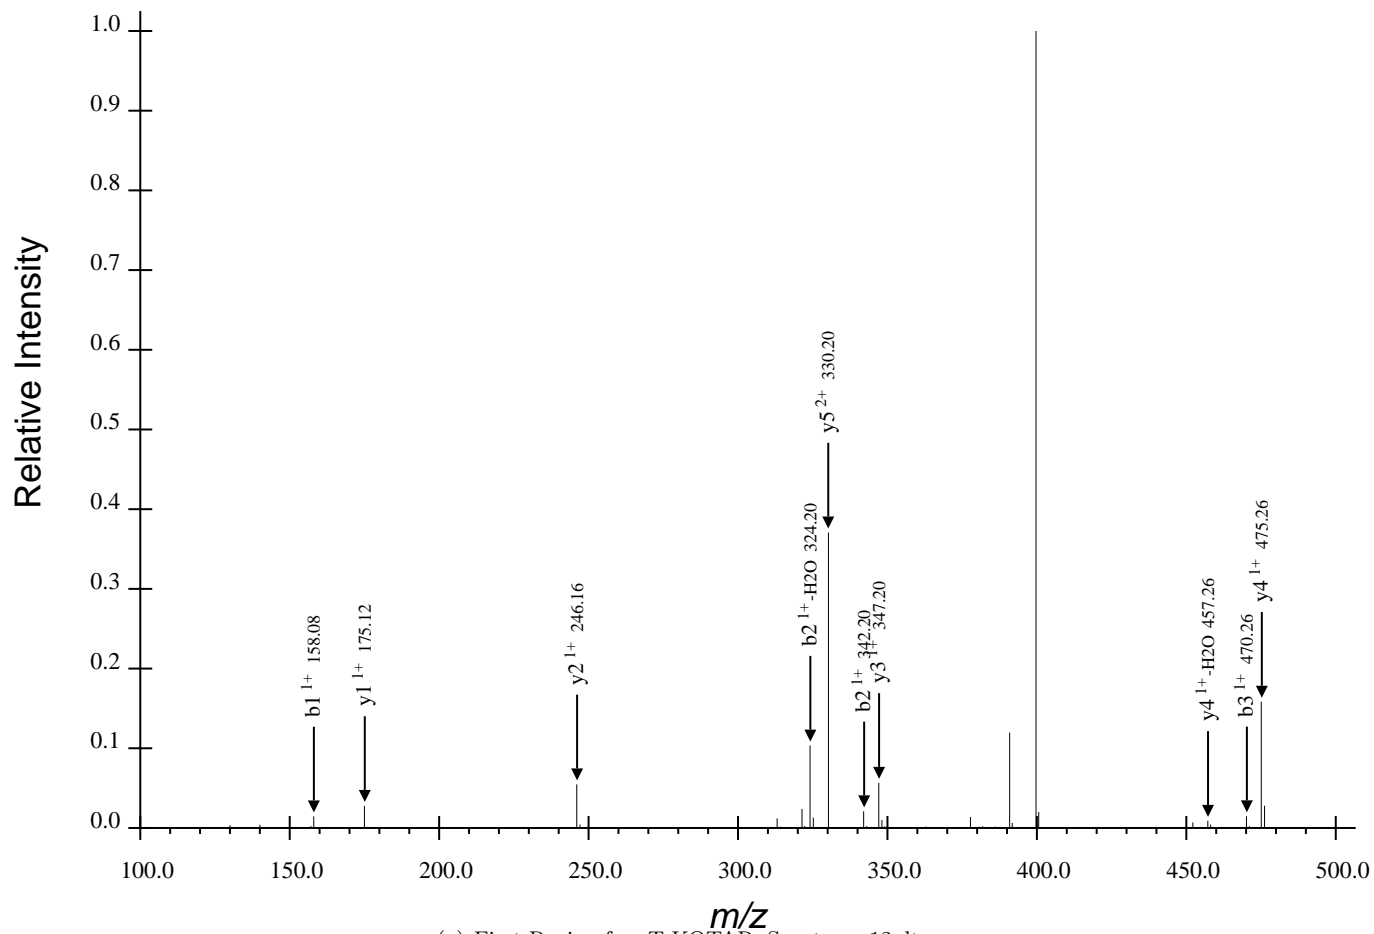

(a) First Region for rTrKQTAR, Spectrum 12.dta

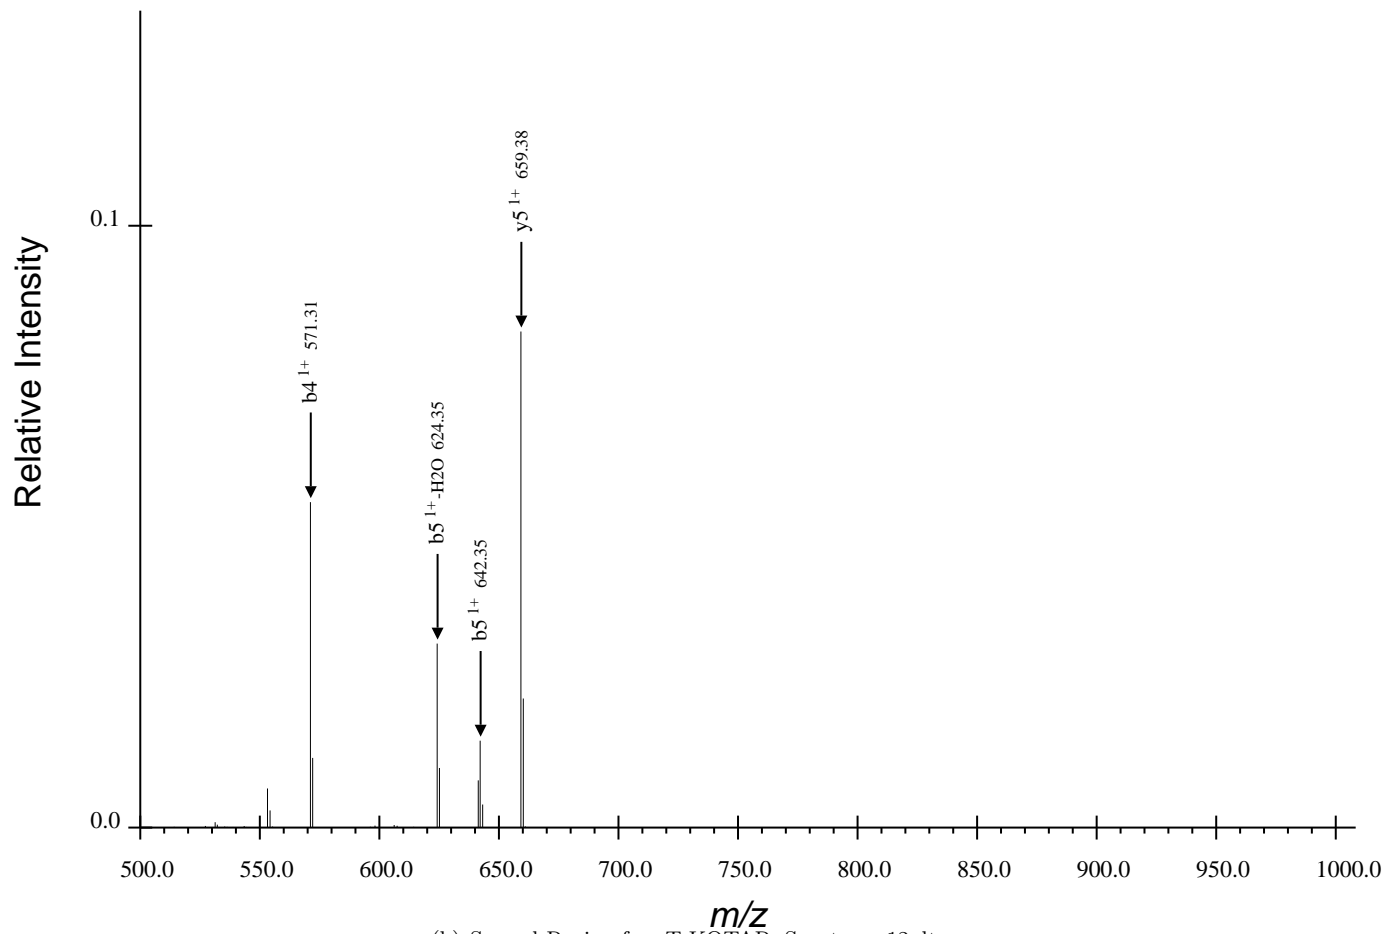

(b) Second Region for rTrKQTAR, Spectrum 12.dta

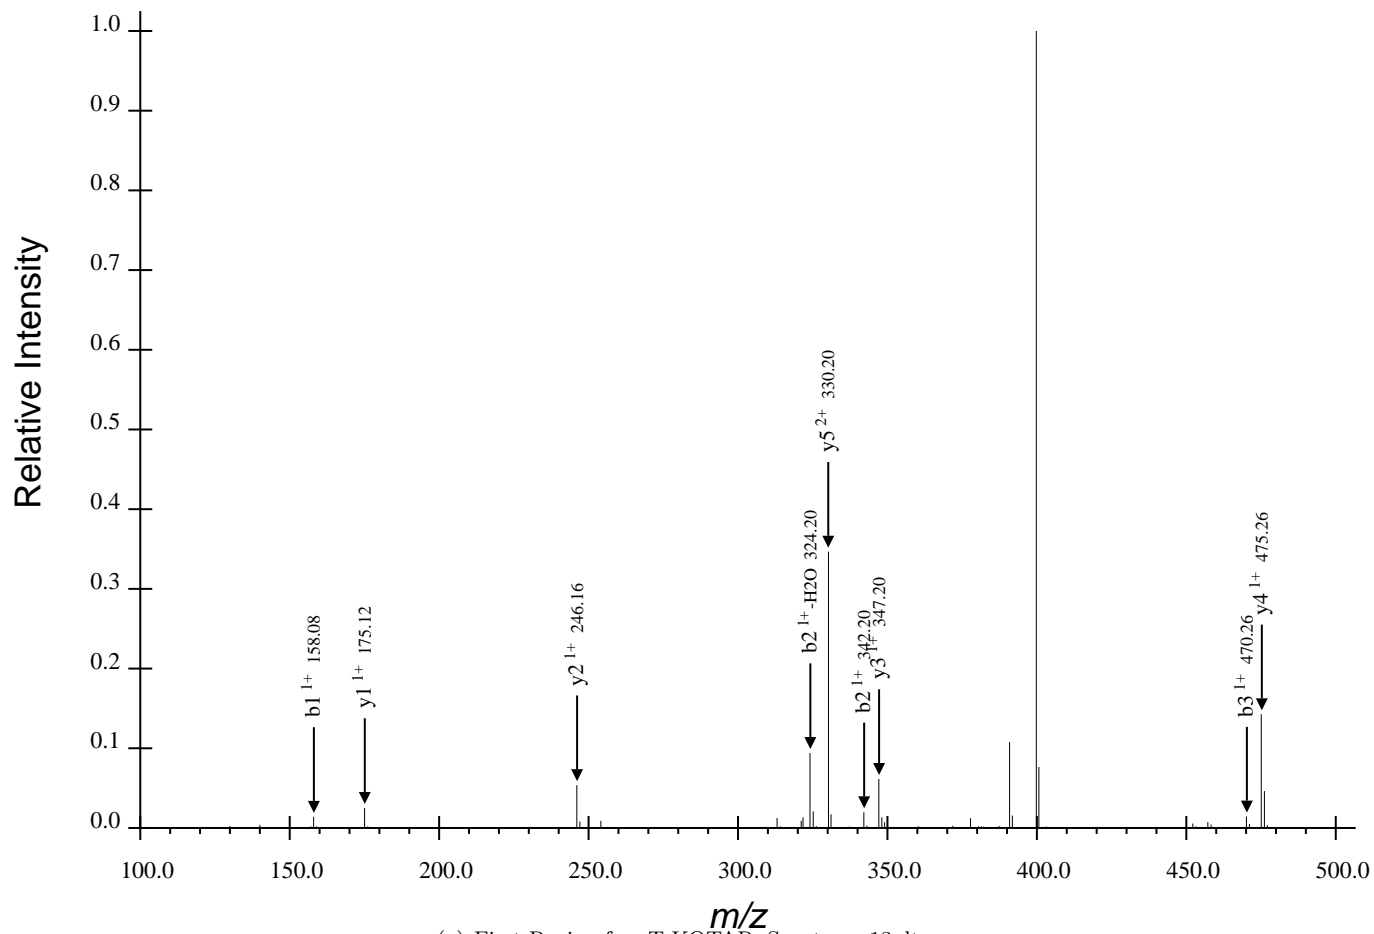

(a) First Region for rTrKQTAR, Spectrum 13.dta

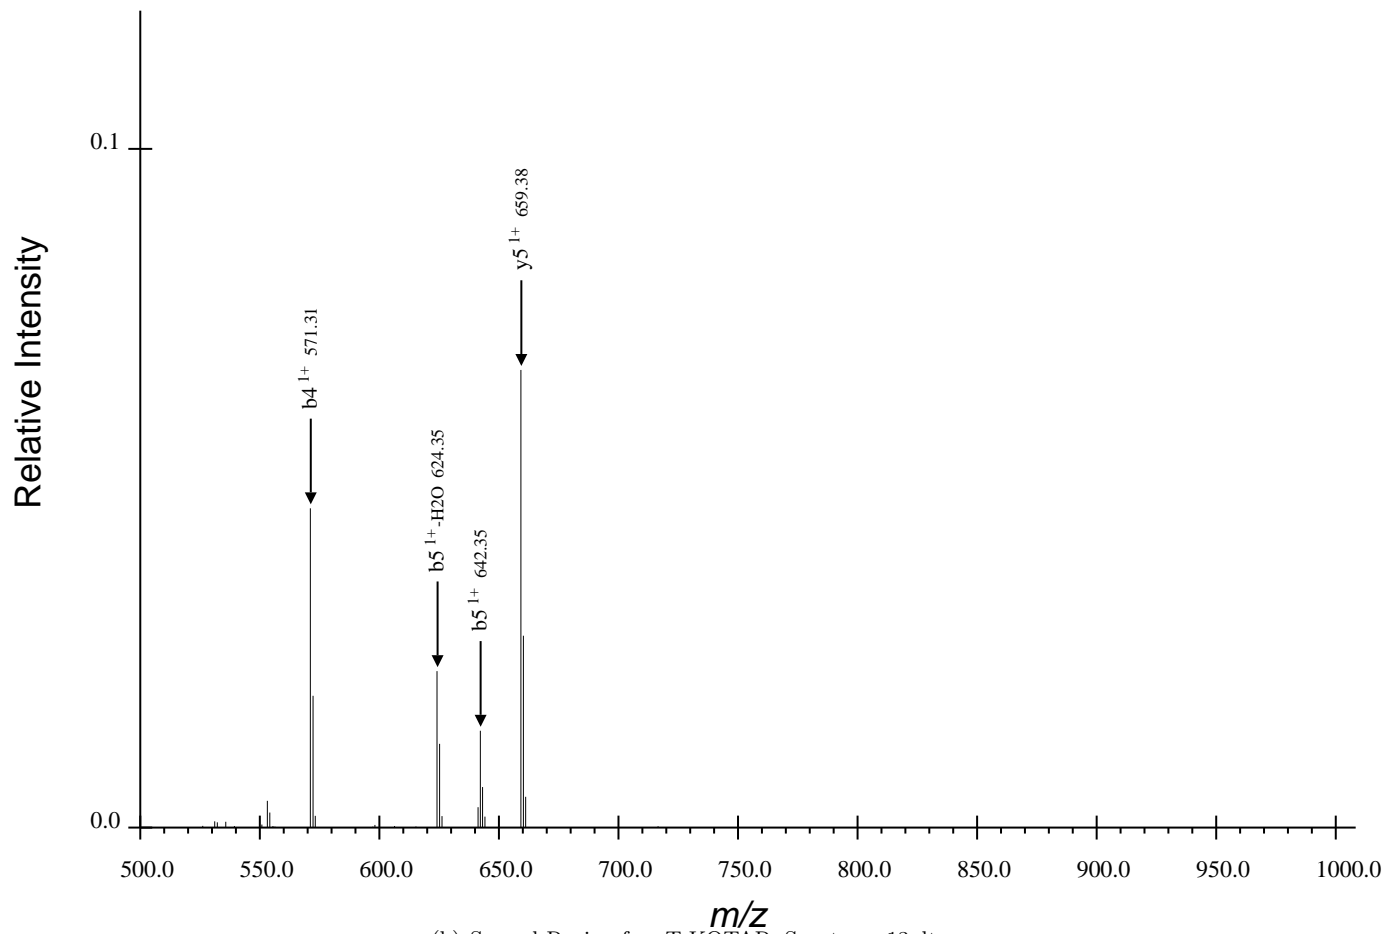

(b) Second Region for rTrKQTAR, Spectrum 13.dta

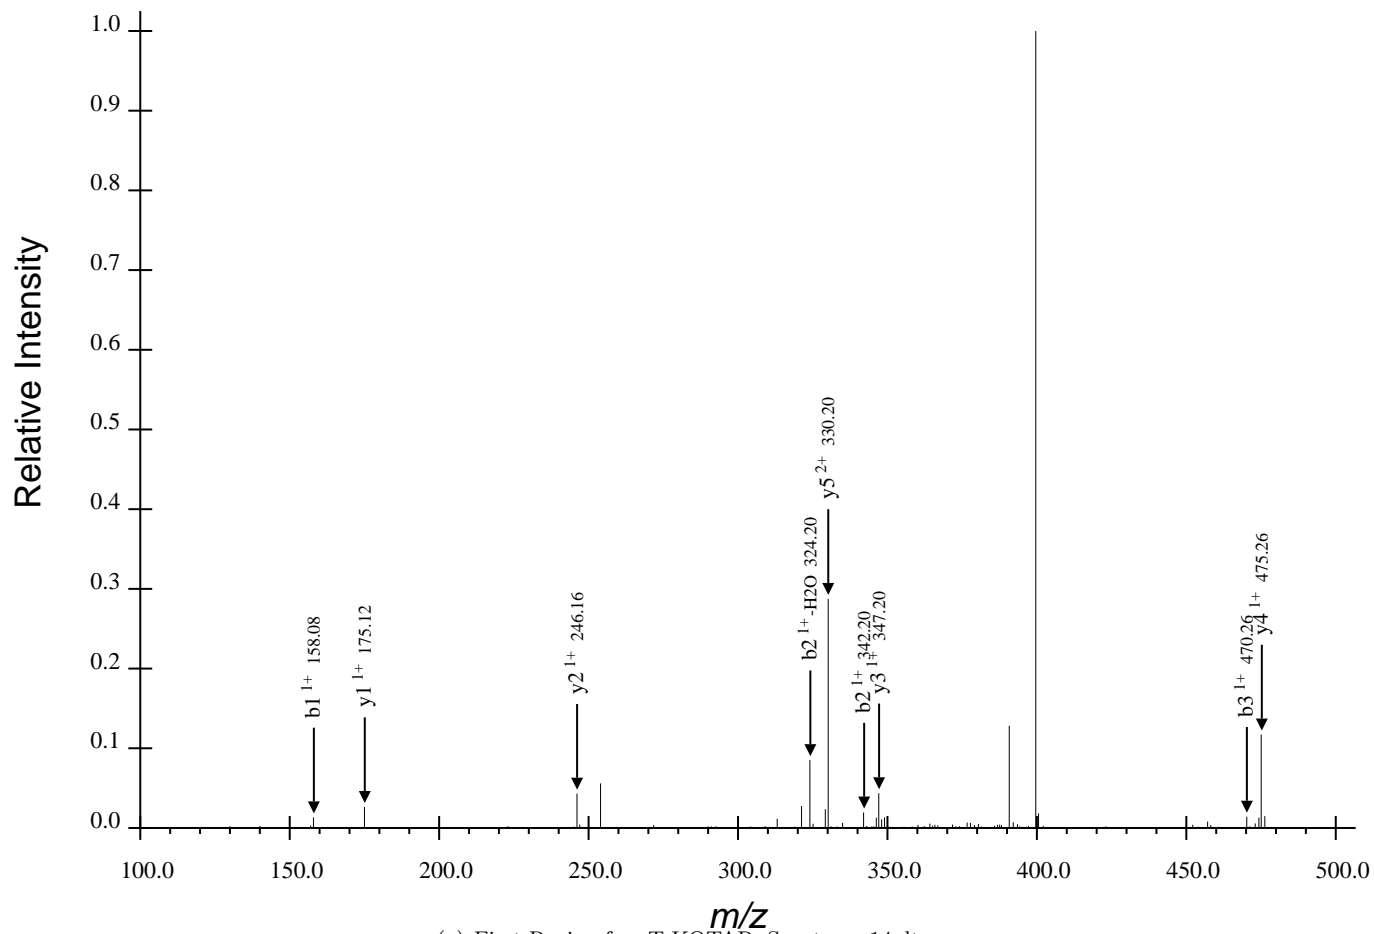

(a) First Region for rTrKQTAR, Spectrum 14.dta

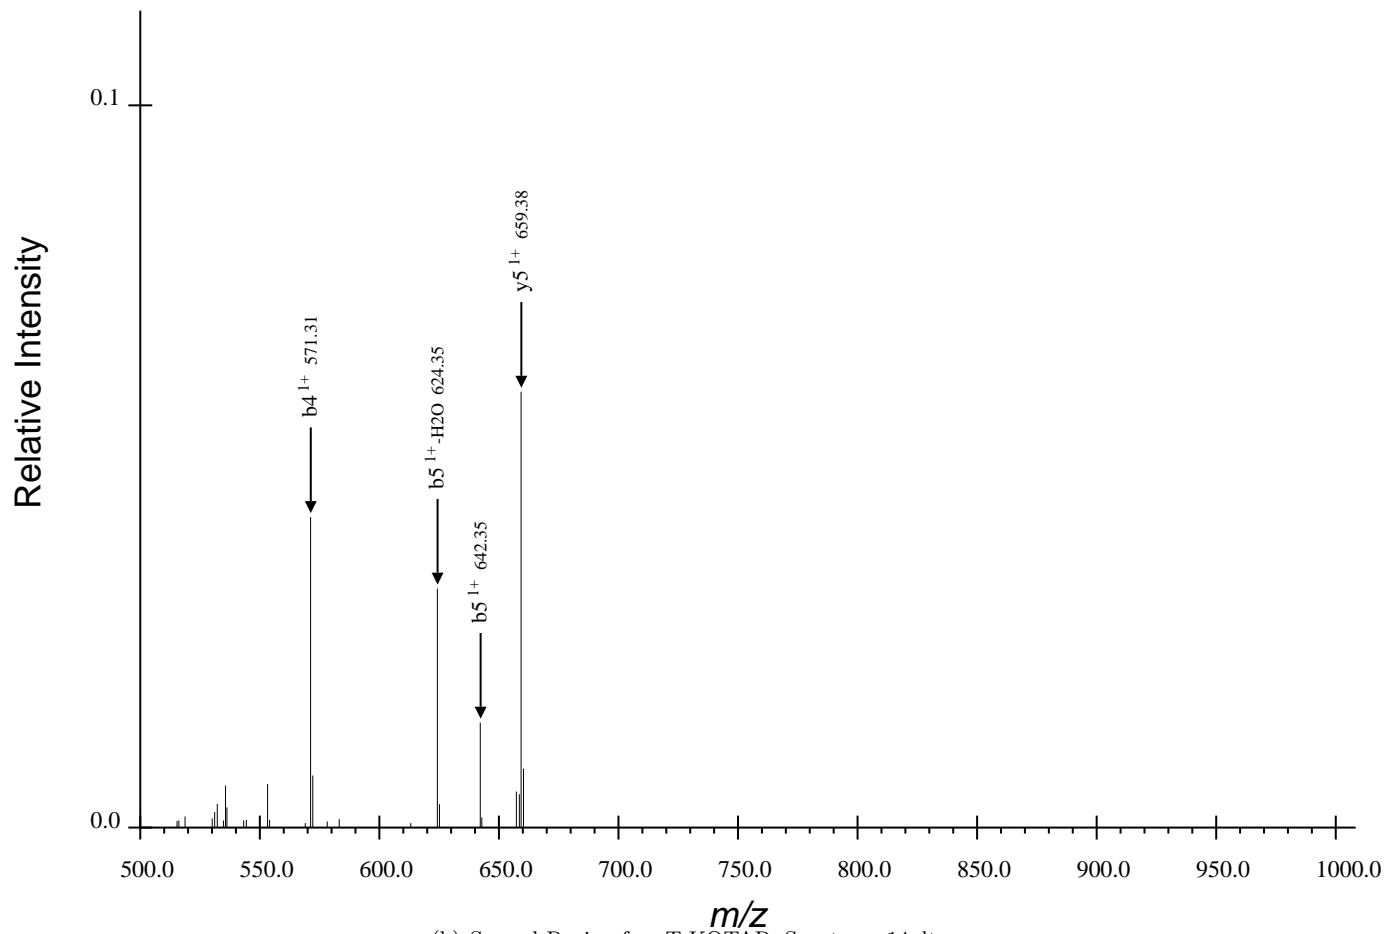

(b) Second Region for rTrKQTAR, Spectrum 14.dta

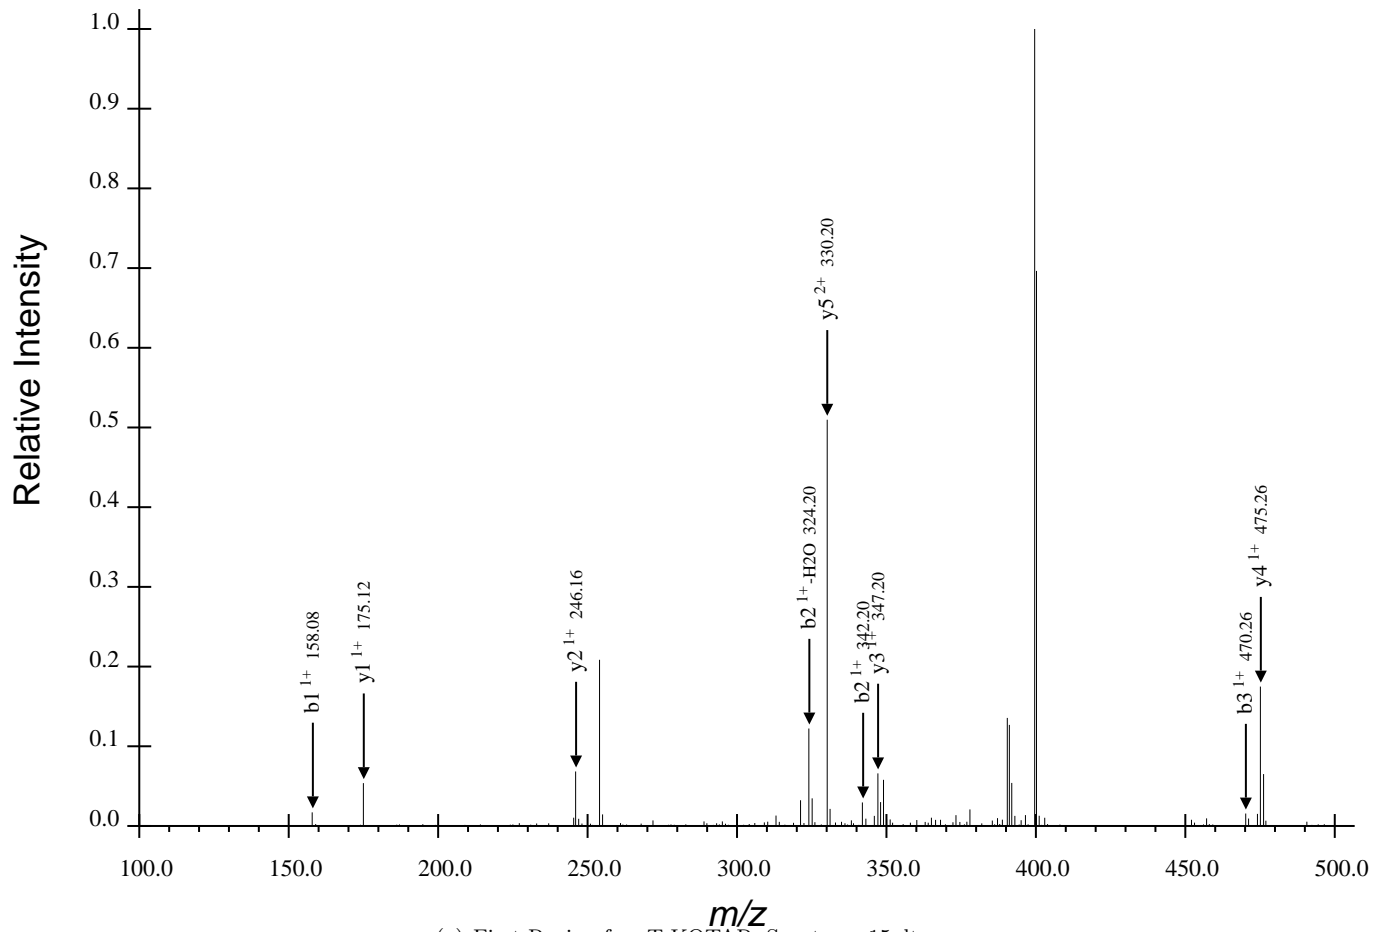

(a) First Region for rTrKQTAR, Spectrum 15.dta

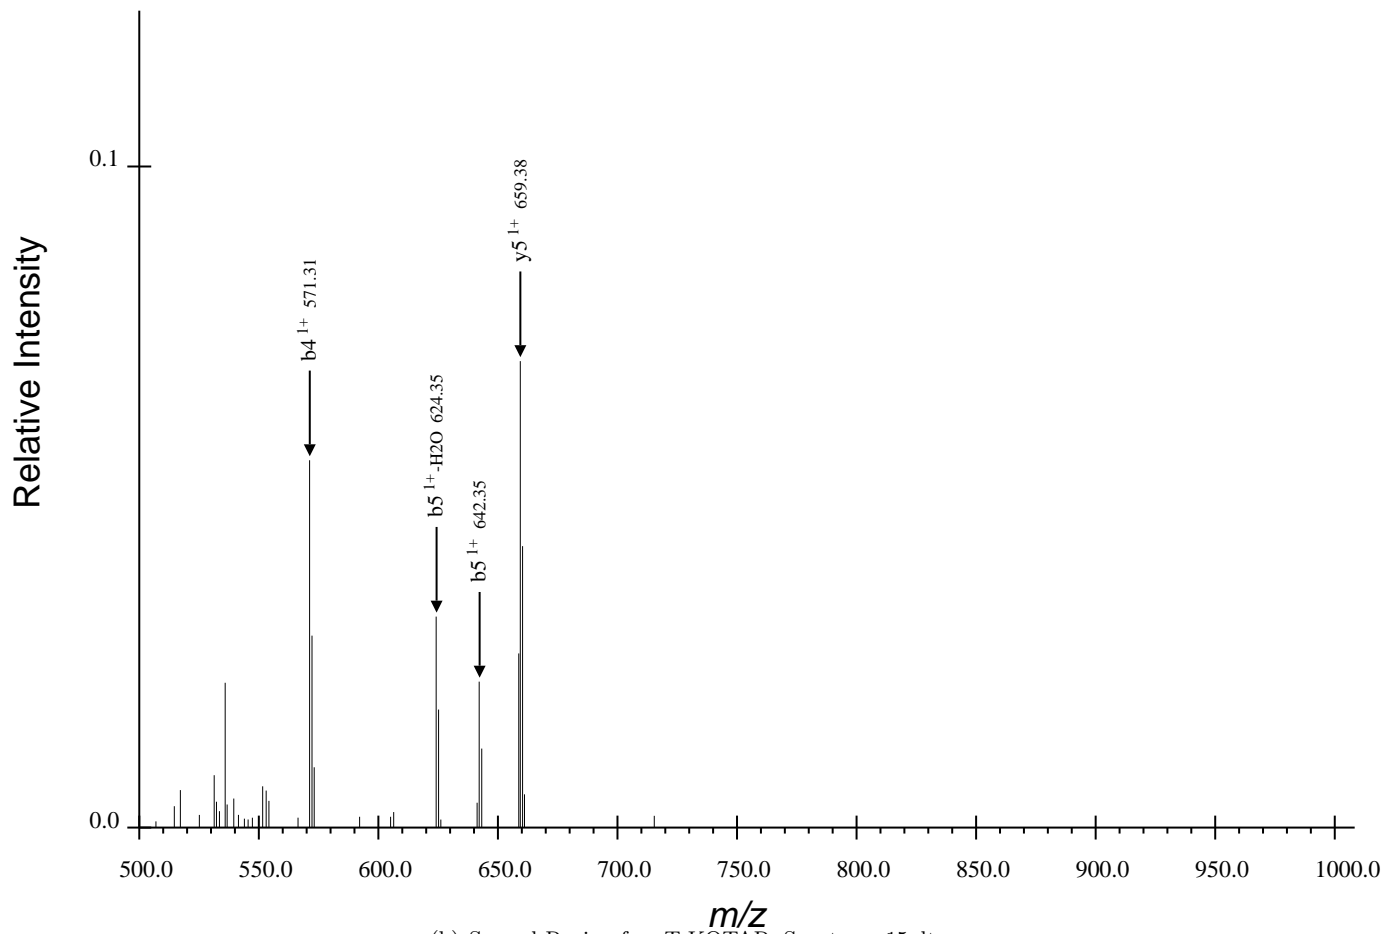

(b) Second Region for rTrKQTAR, Spectrum 15.dta

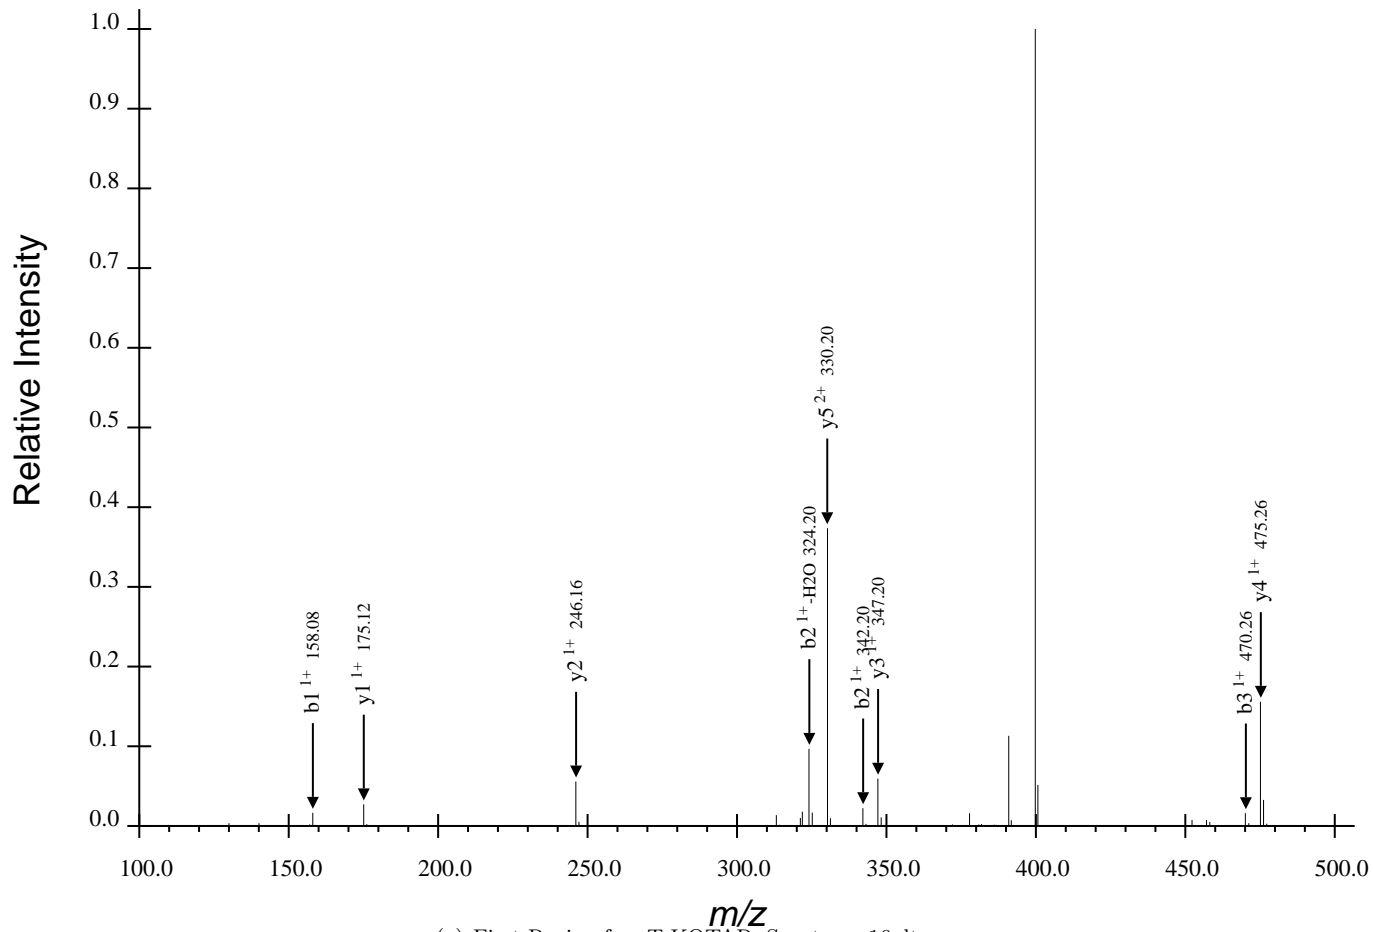

(a) First Region for rTrKQTAR, Spectrum 16.dta

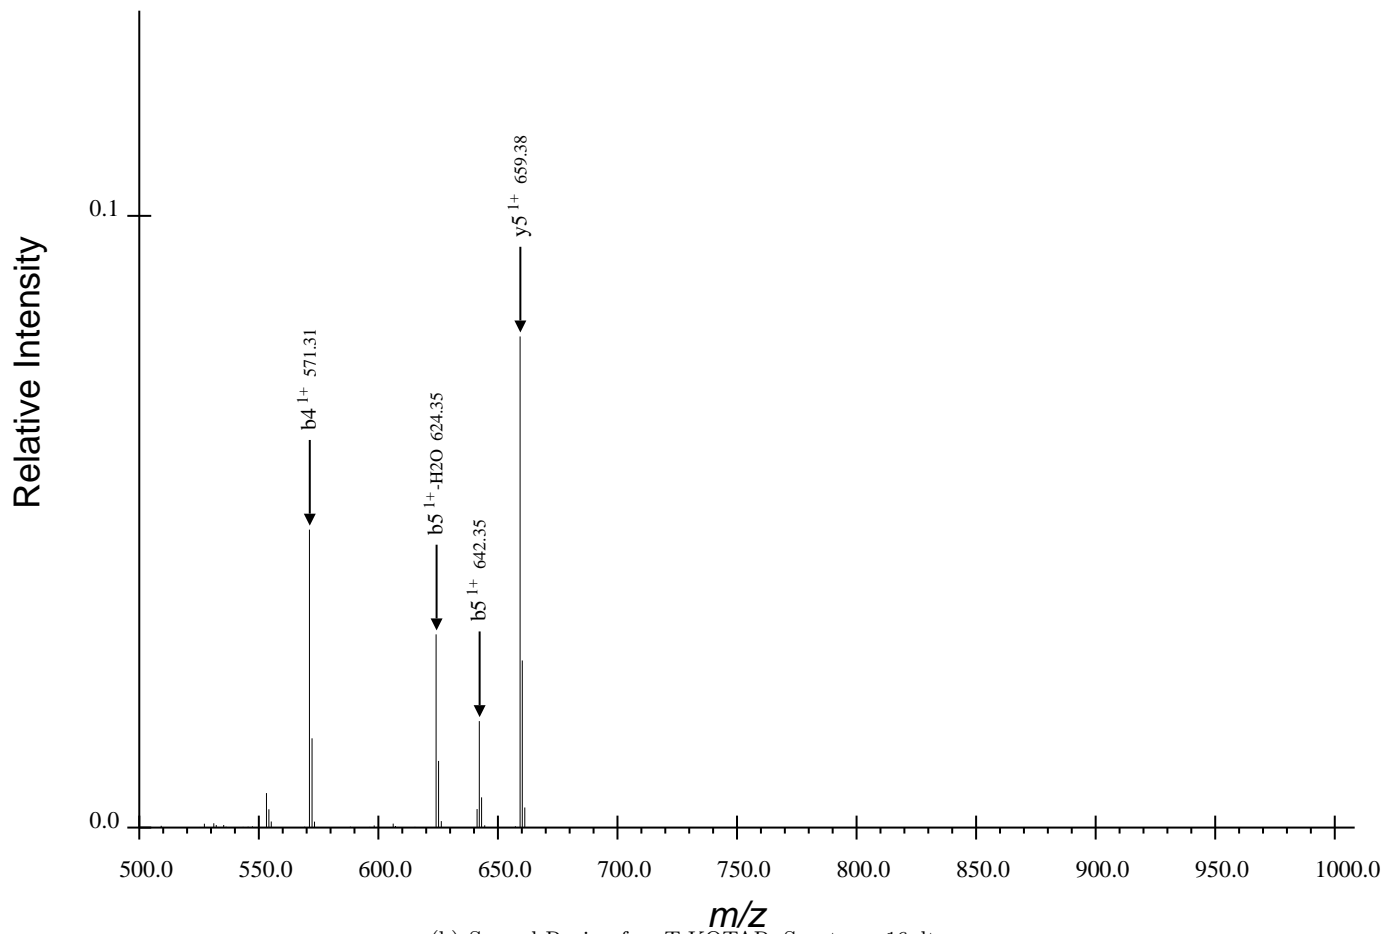

(b) Second Region for rTrKQTAR, Spectrum 16.dta



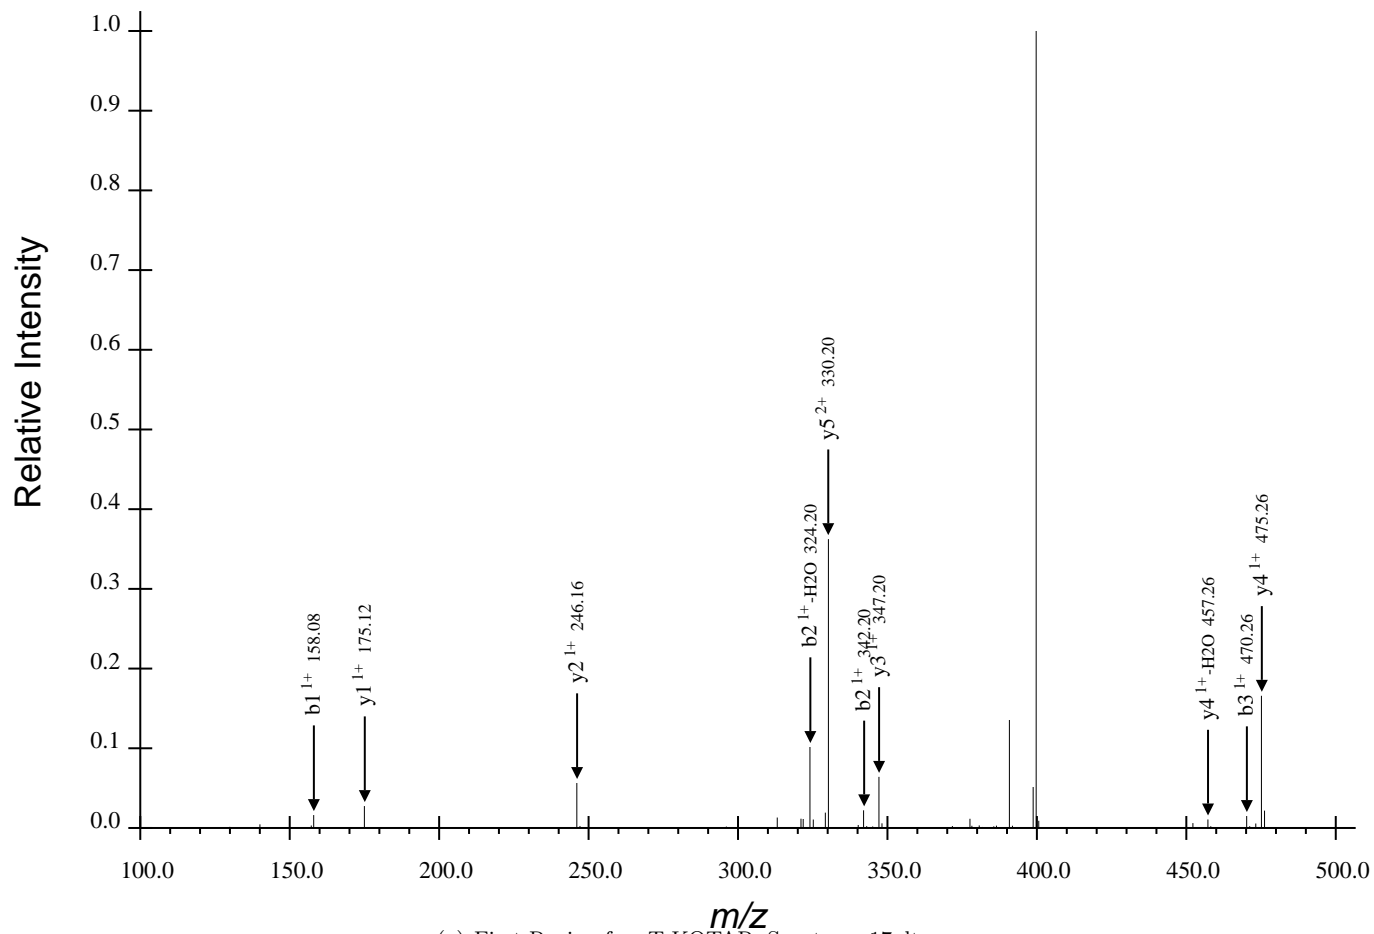

(a) First Region for rTrKQTAR, Spectrum 17.dta

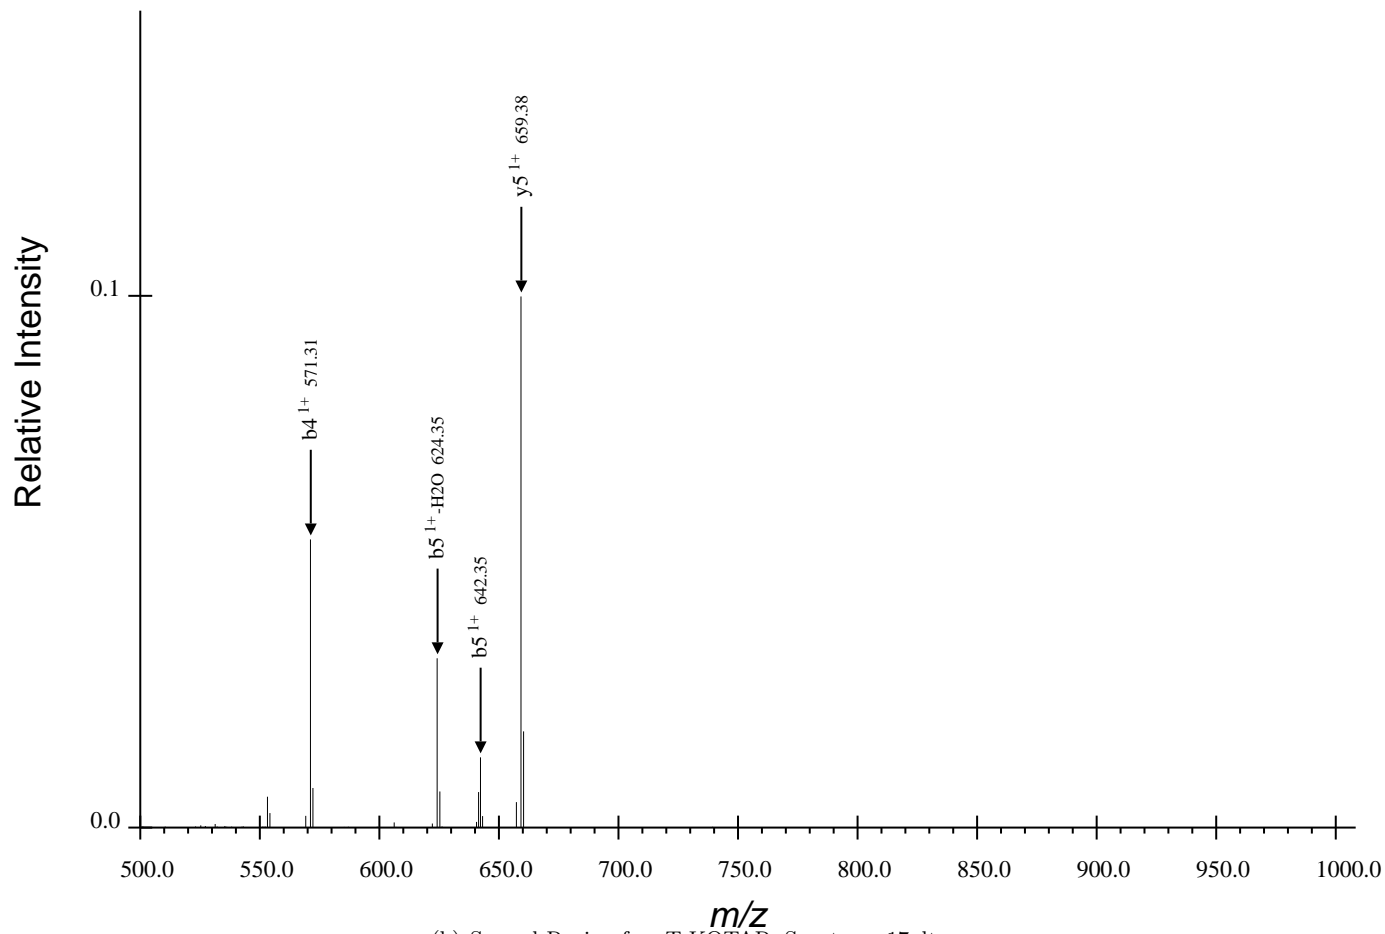

(b) Second Region for rTrKQTAR, Spectrum 17.dta

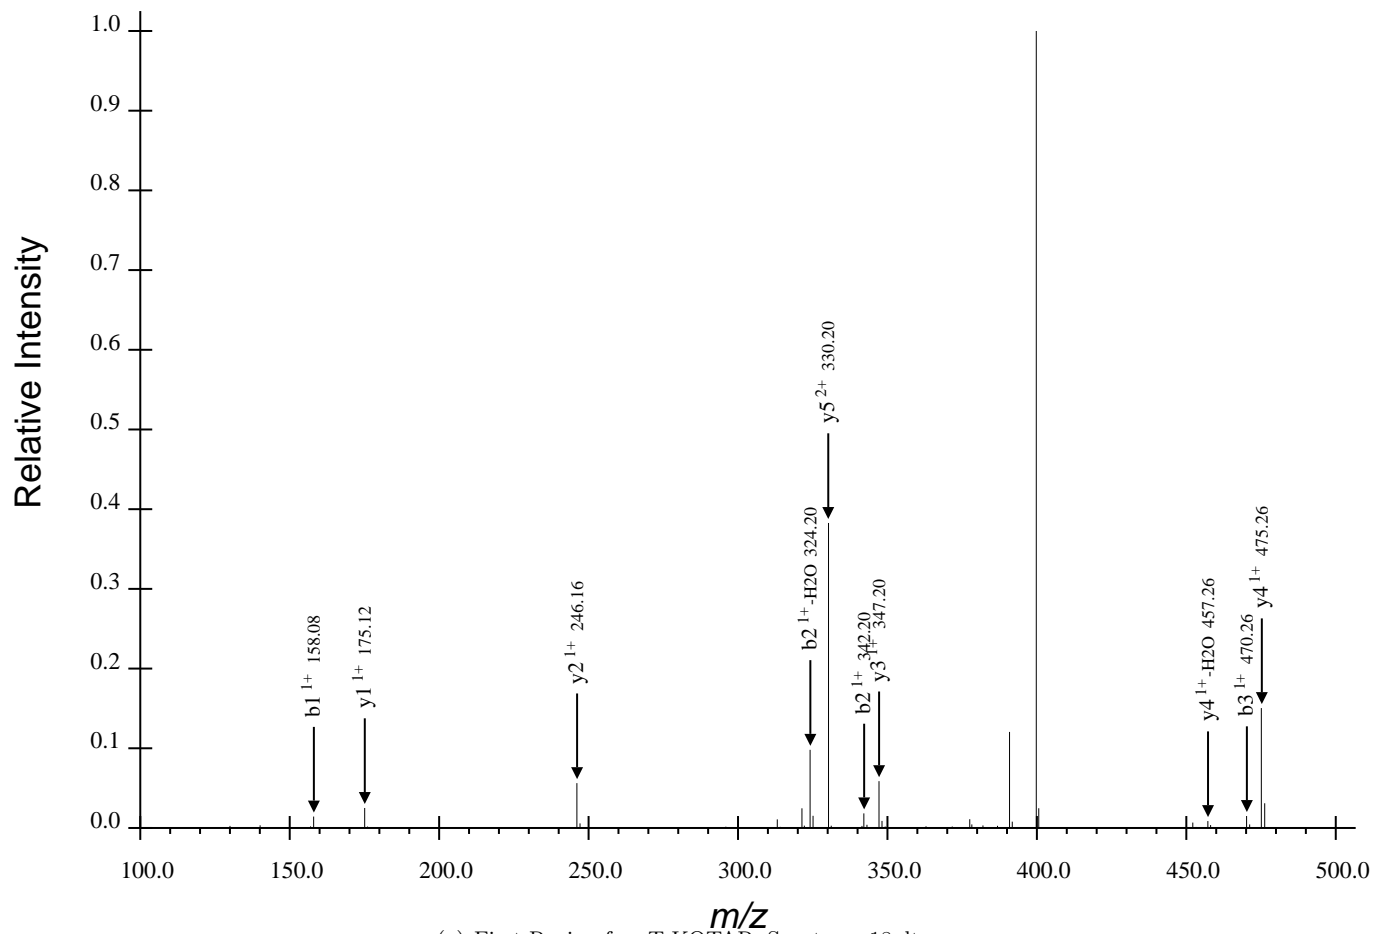

(a) First Region for rTrKQTAR, Spectrum 18.dta

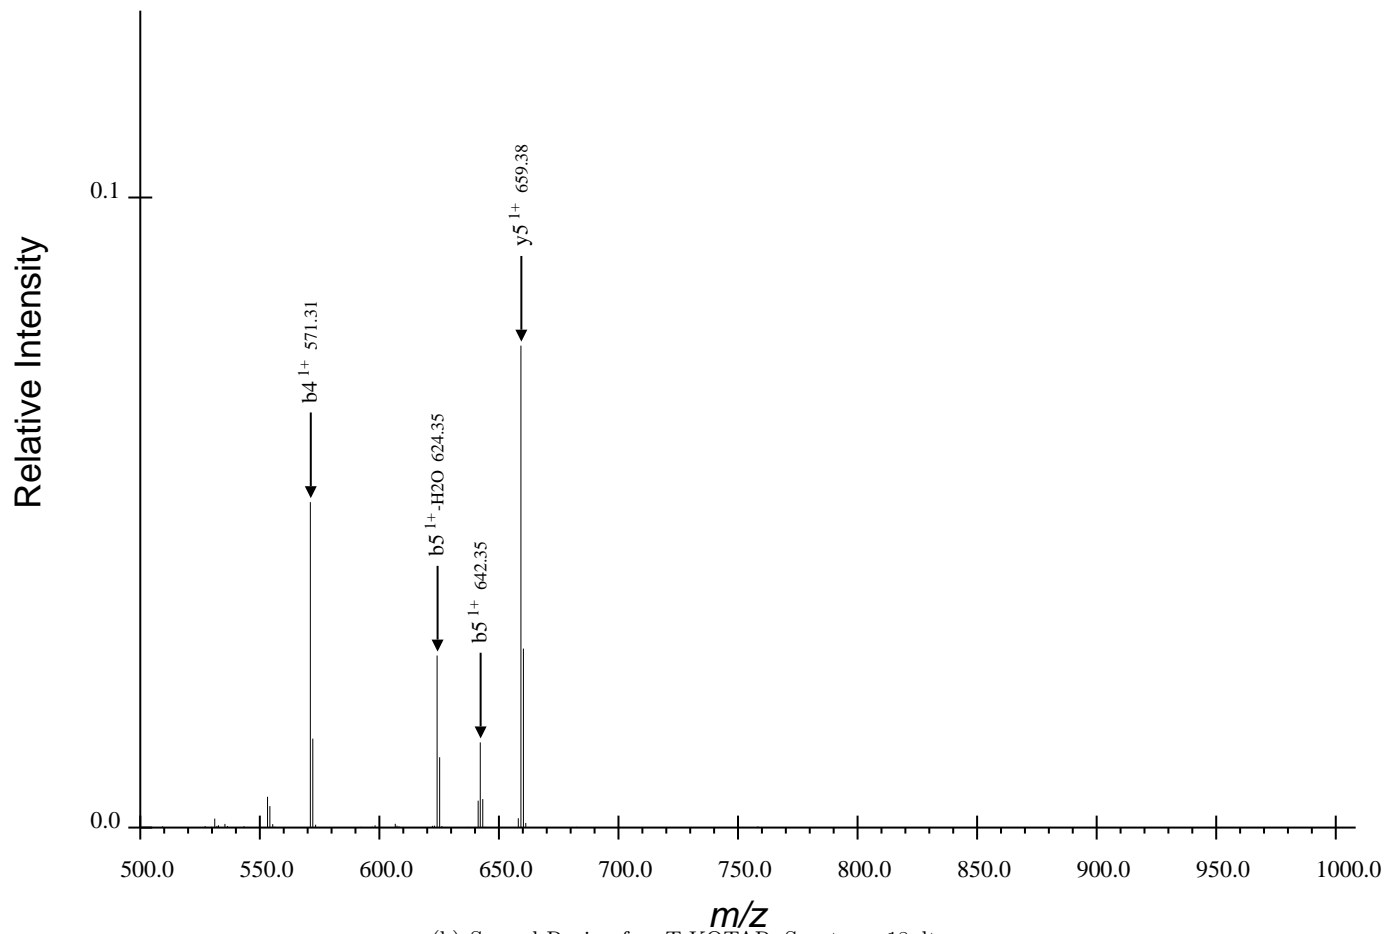

(b) Second Region for rTrKQTAR, Spectrum 18.dta

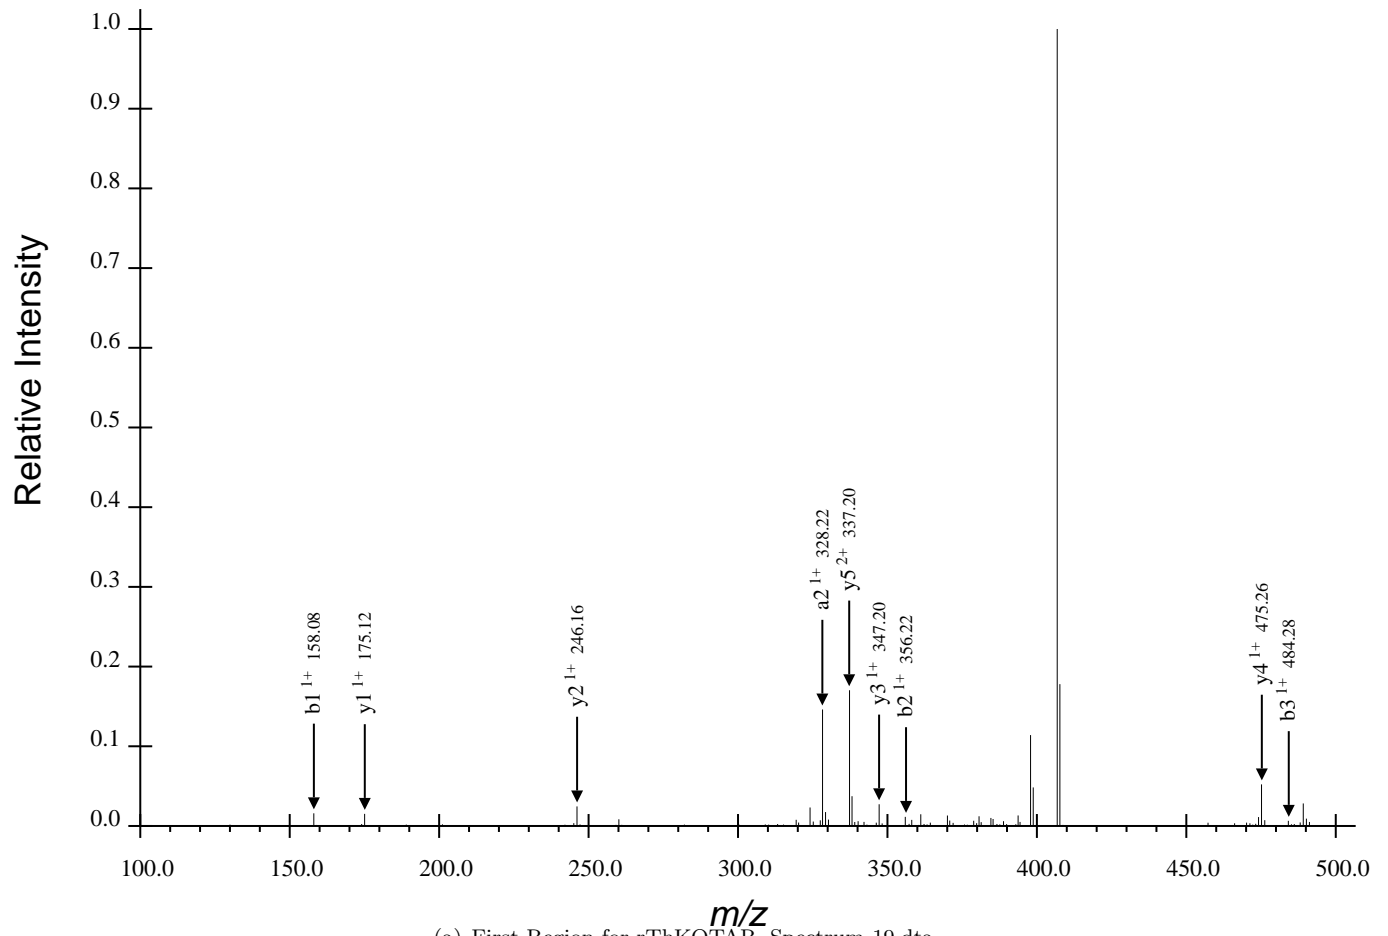

(a) First Region for rThKQTAR, Spectrum 19.dta

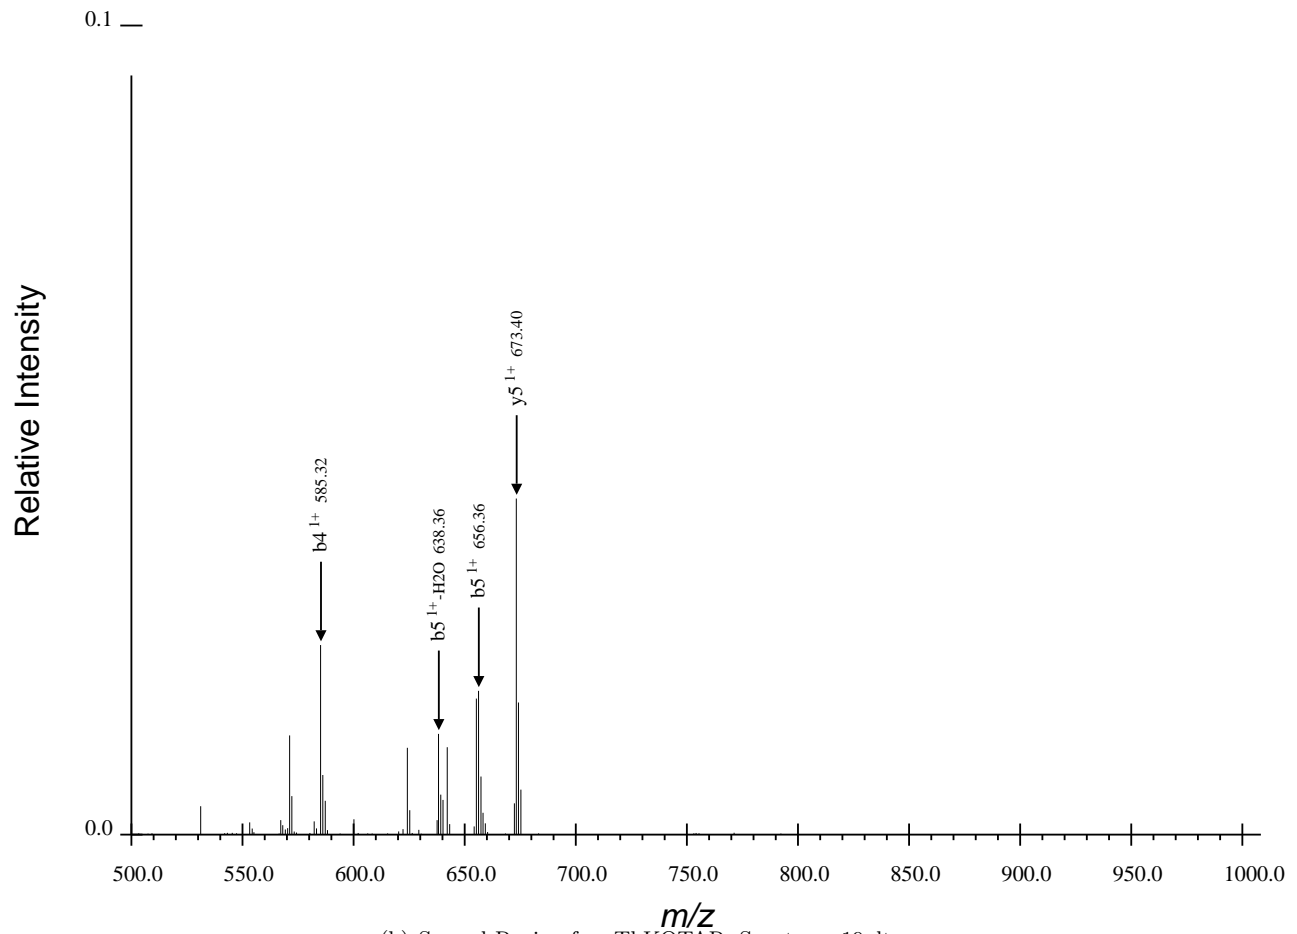

(b) Second Region for rThKQTAR, Spectrum 19.dta

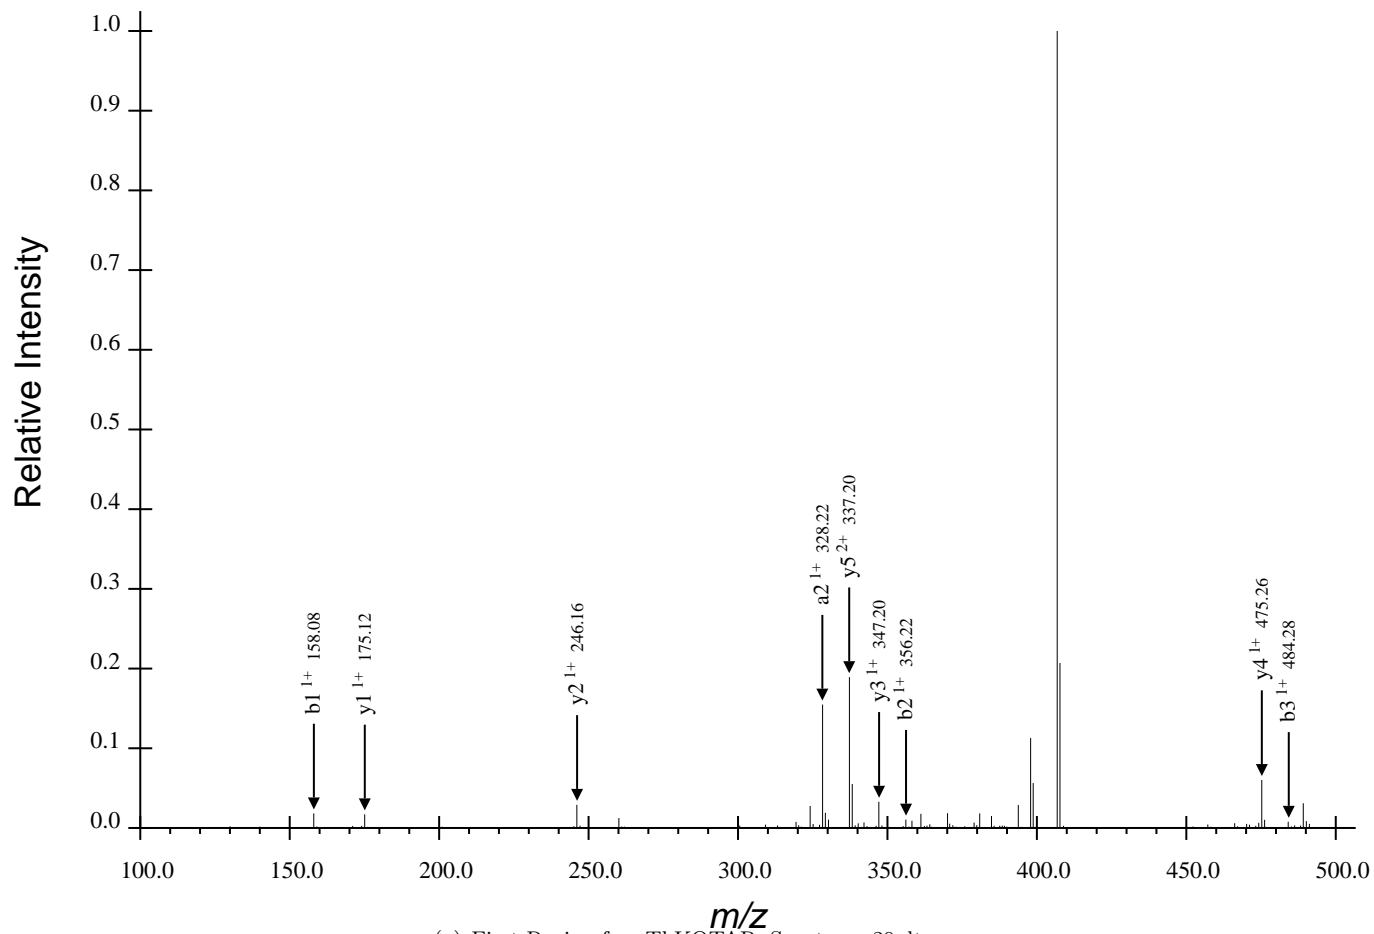

(a) First Region for rThKQTAR, Spectrum 20.dta

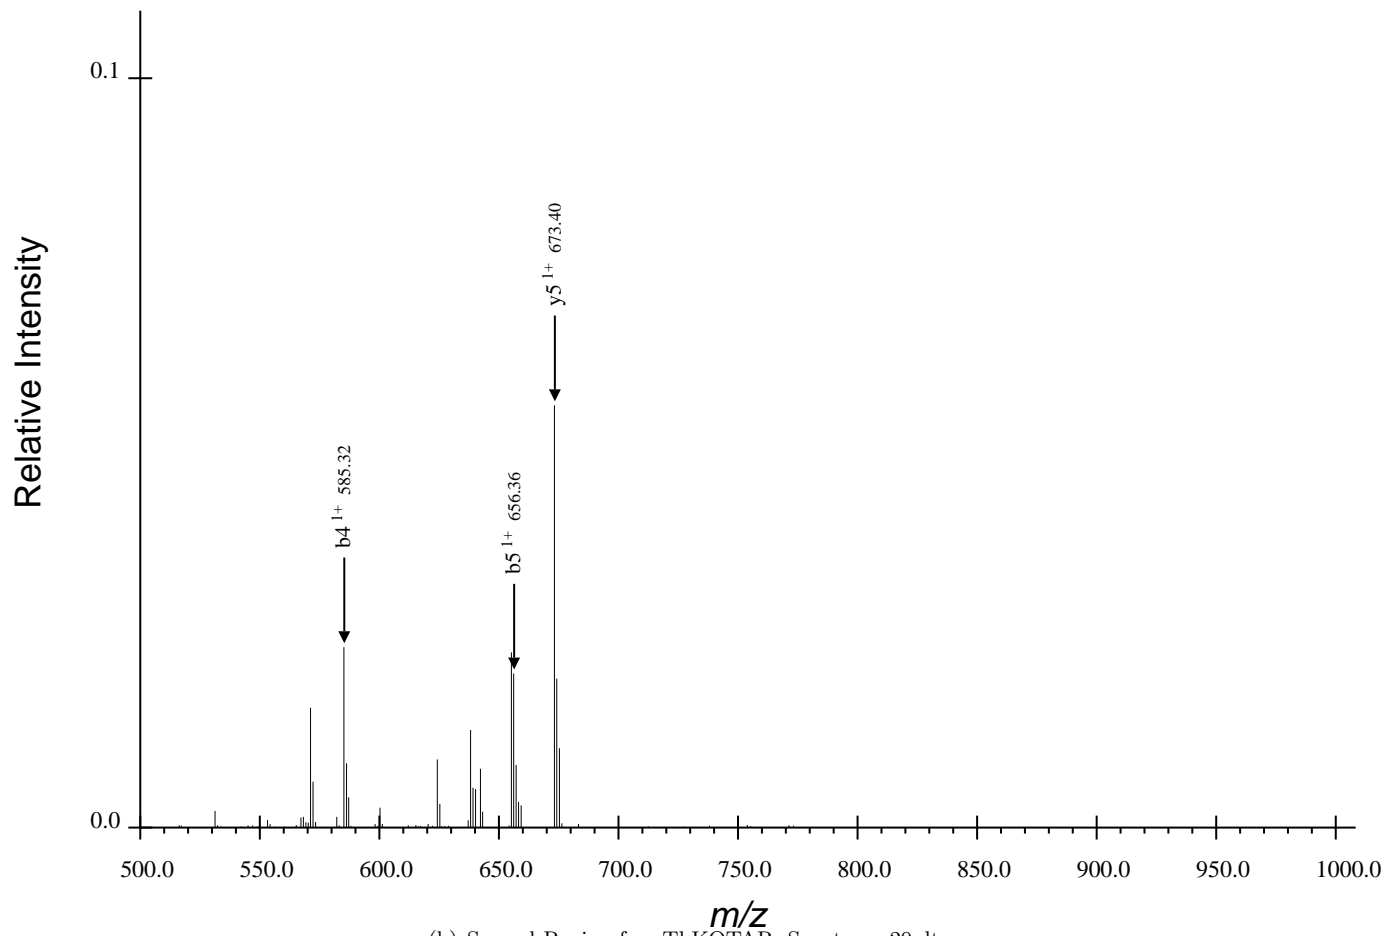

(b) Second Region for rThKQTAR, Spectrum 20.dta

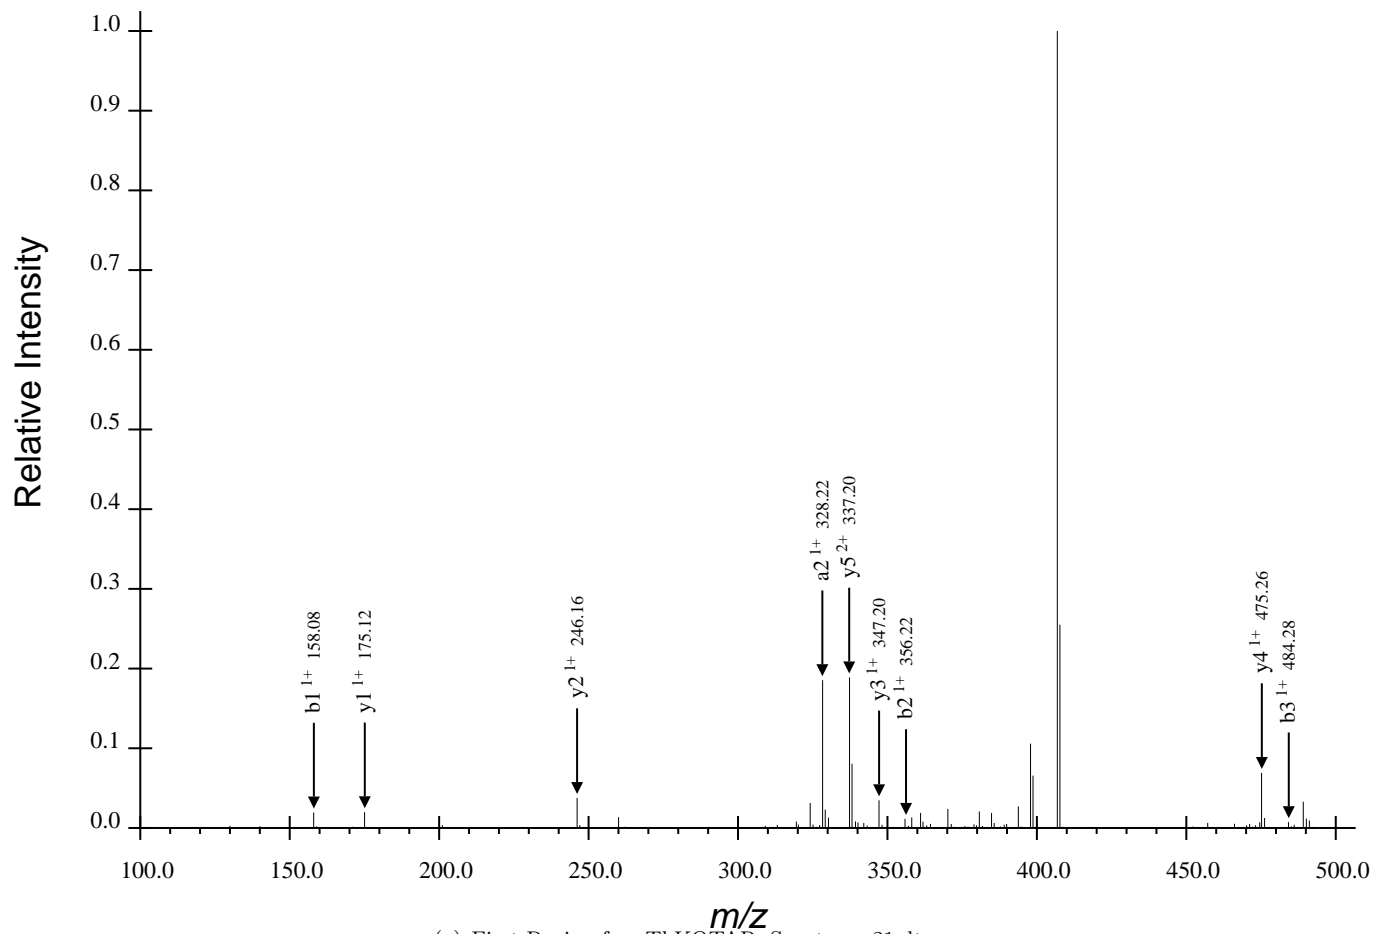

(a) First Region for rThKQTAR, Spectrum 21.dta

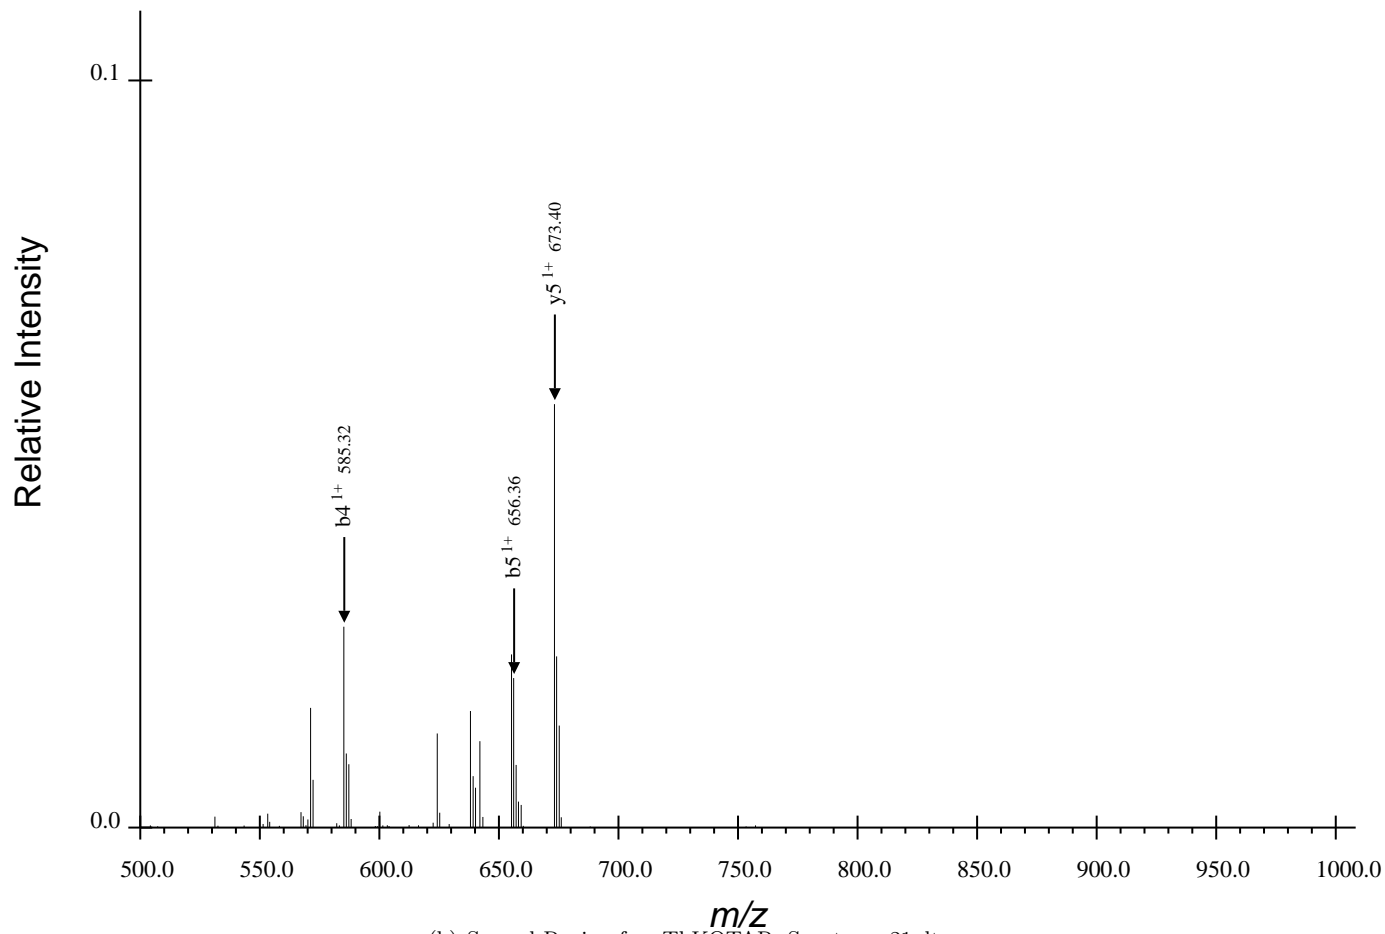

(b) Second Region for rThKQTAR, Spectrum 21.dta

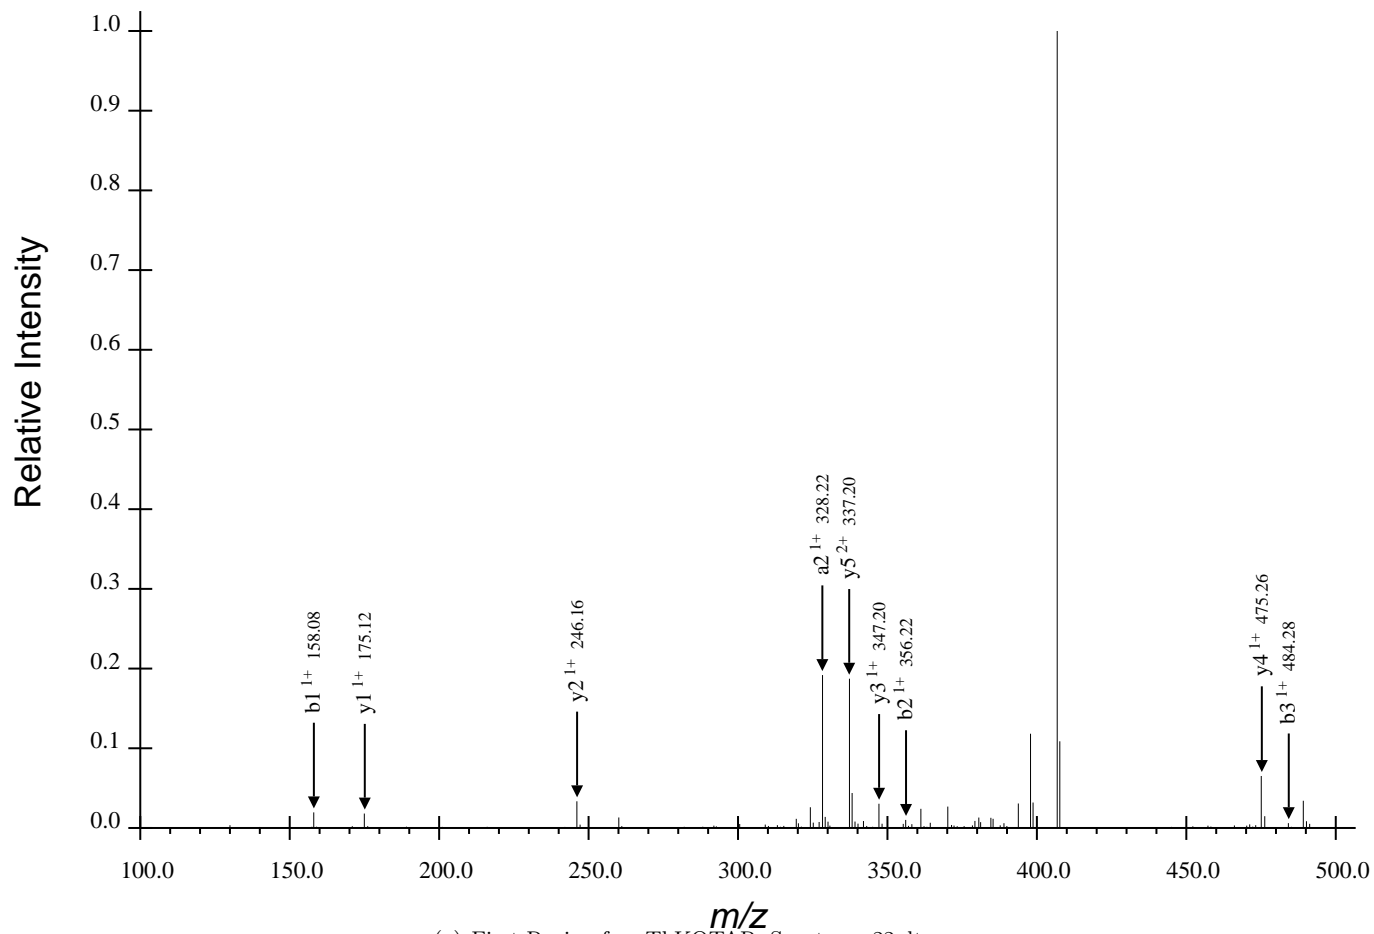

(a) First Region for rThKQTAR, Spectrum 22.dta

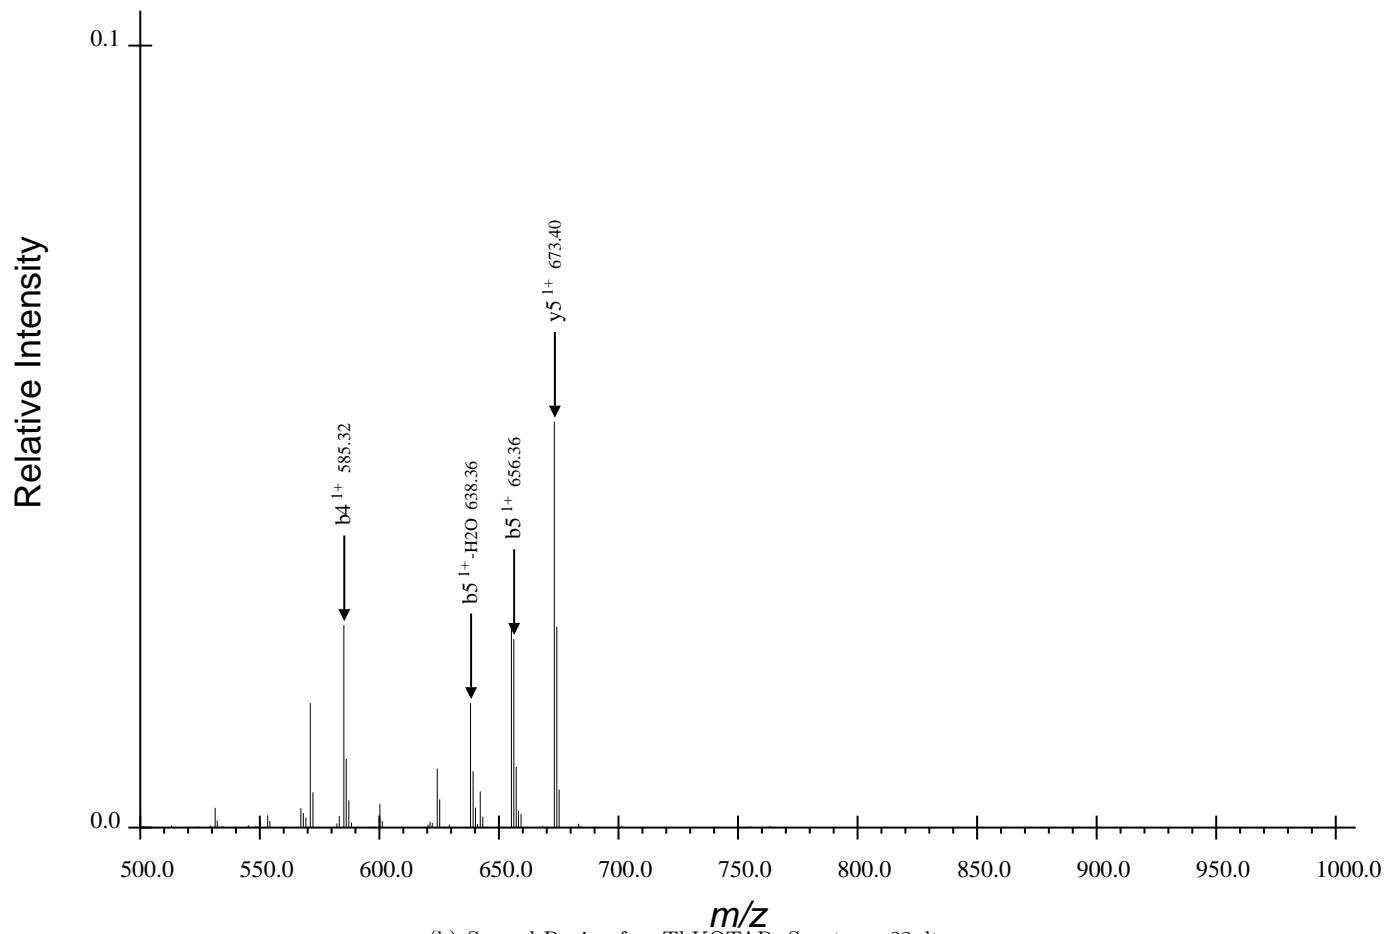

(b) Second Region for rThKQTAR, Spectrum 22.dta

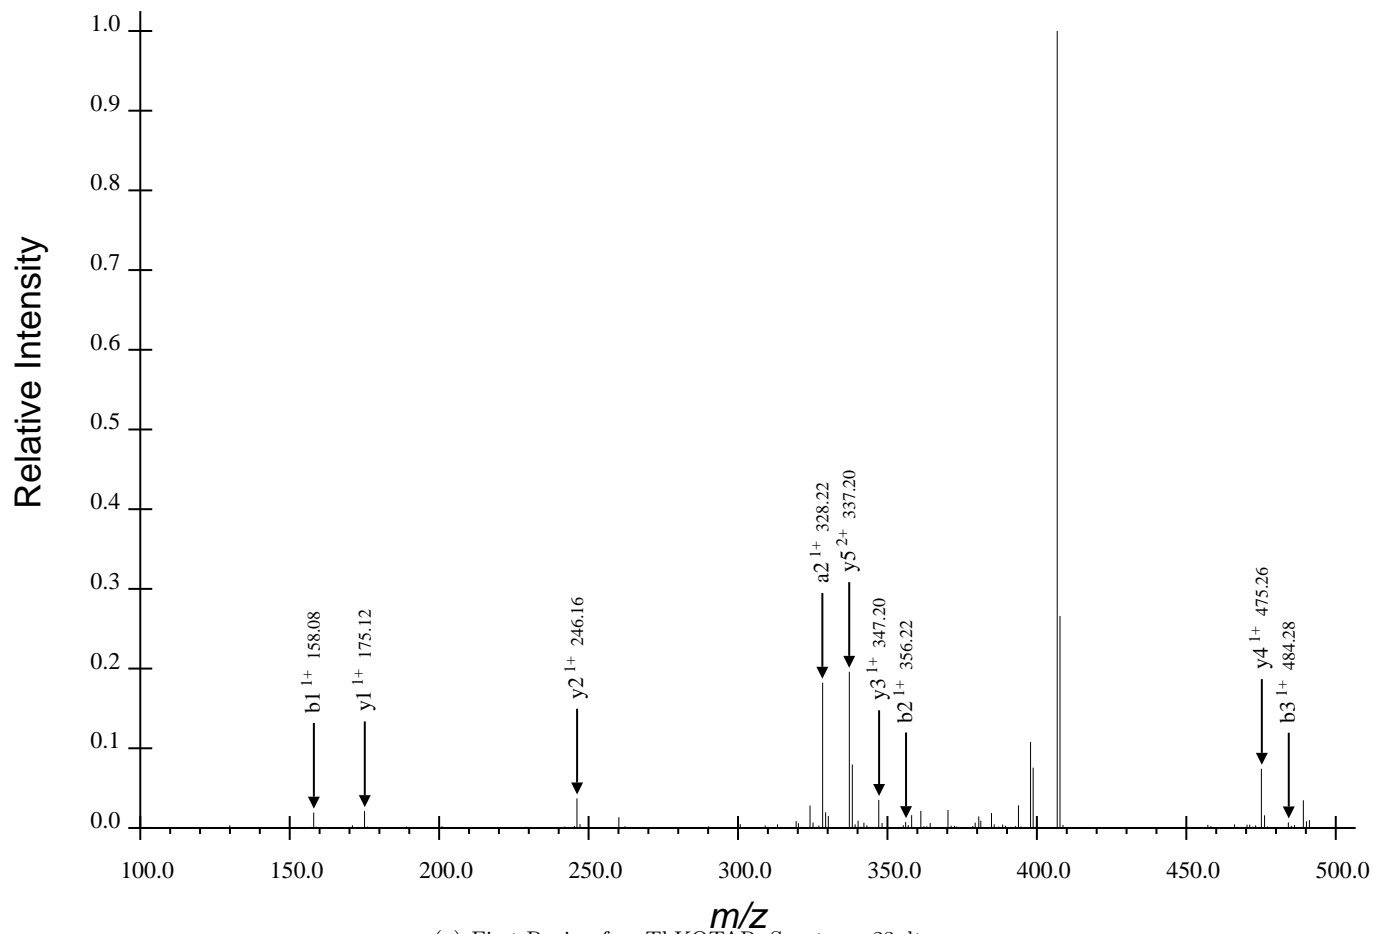

(a) First Region for rThKQTAR, Spectrum 23.dta

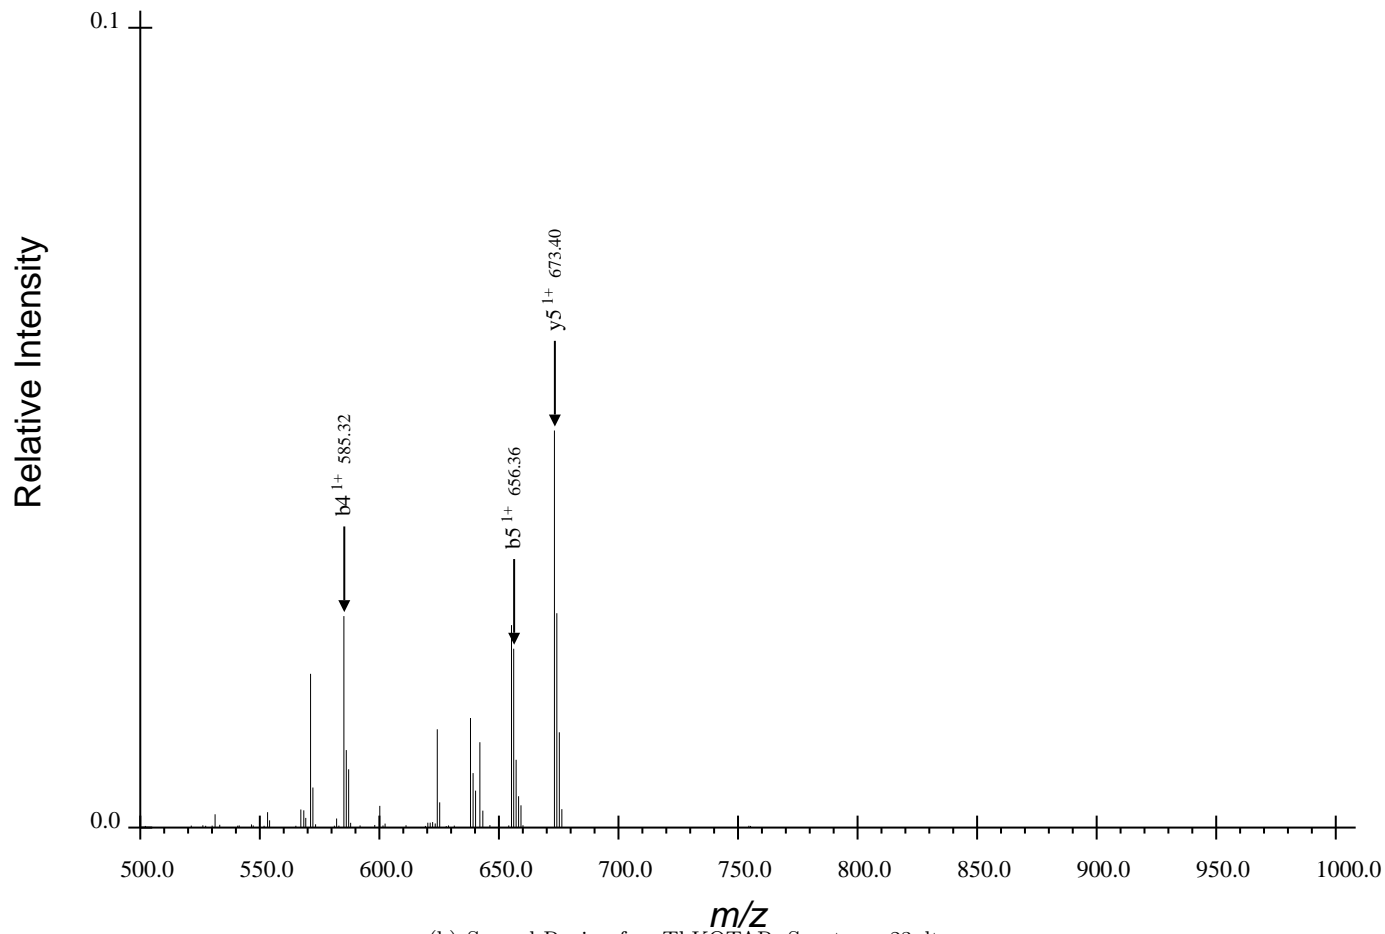

(b) Second Region for rThKQTAR, Spectrum 23.dta

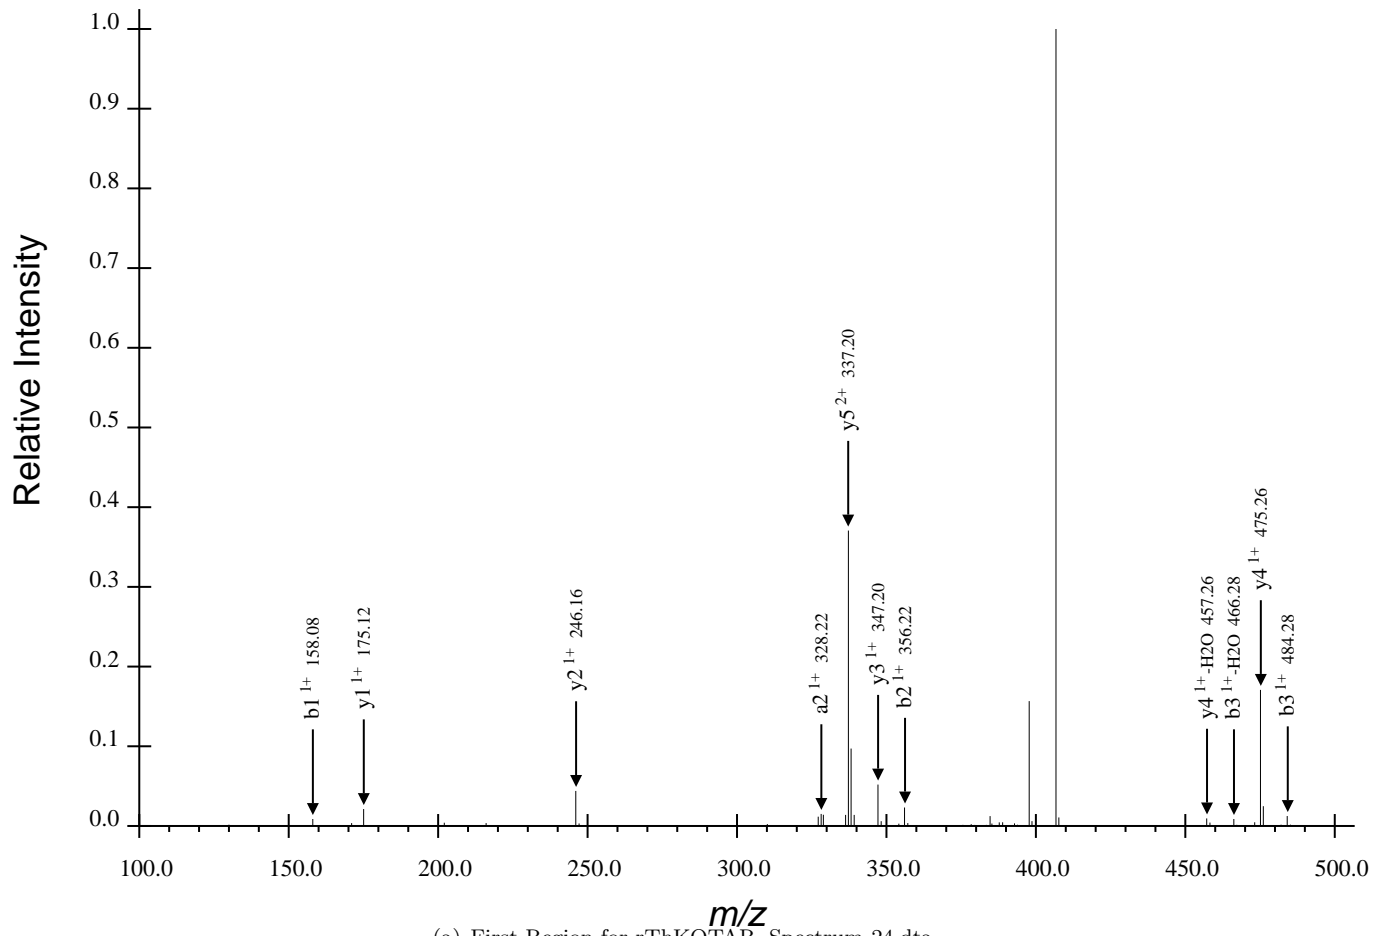

(a) First Region for rThKQTAR, Spectrum 24.dta

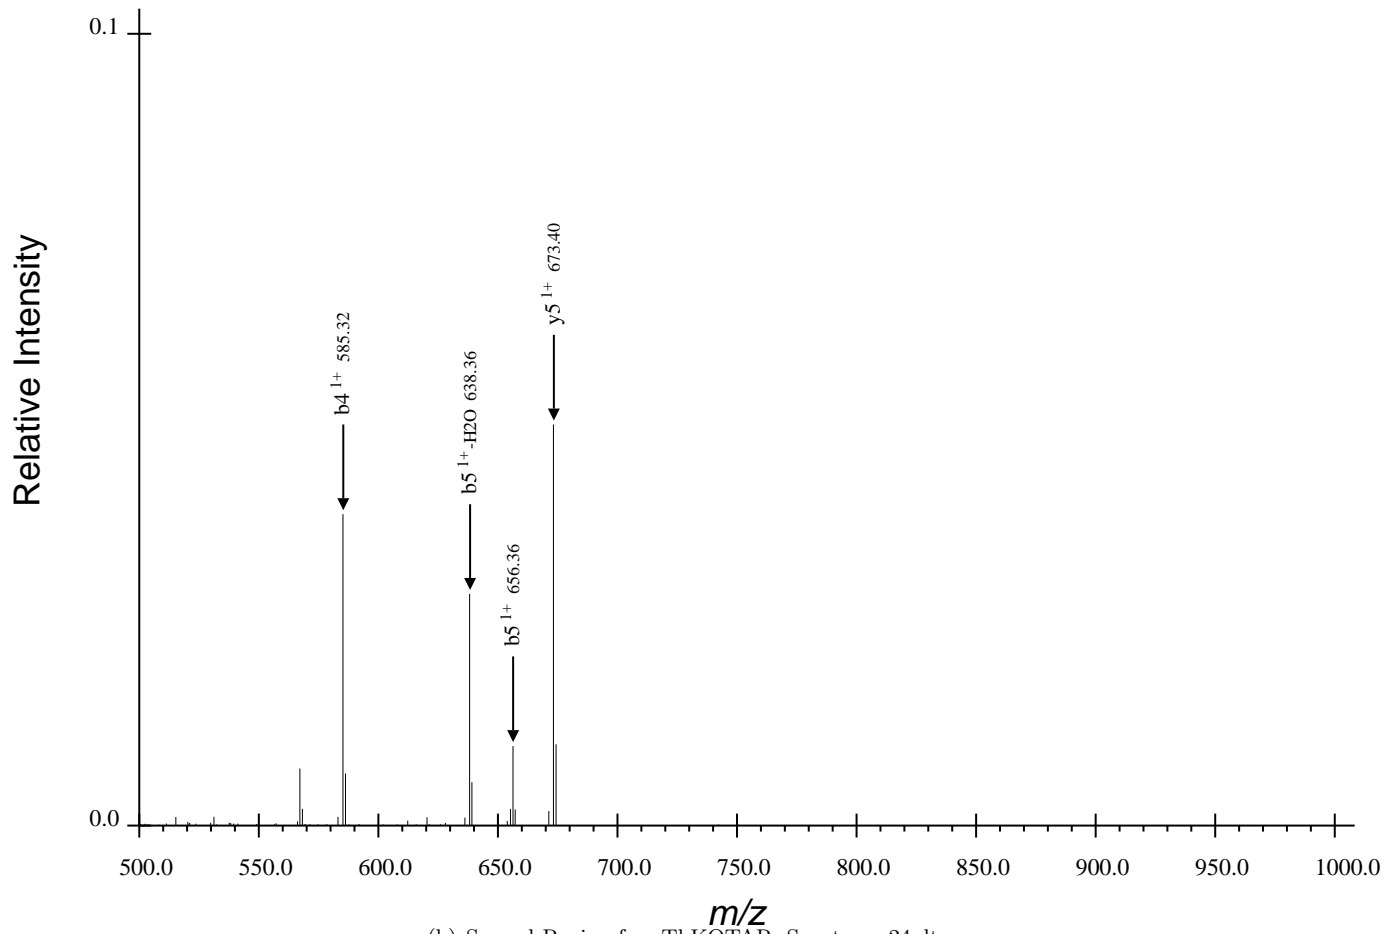

(b) Second Region for rThKQTAR, Spectrum 24.dta



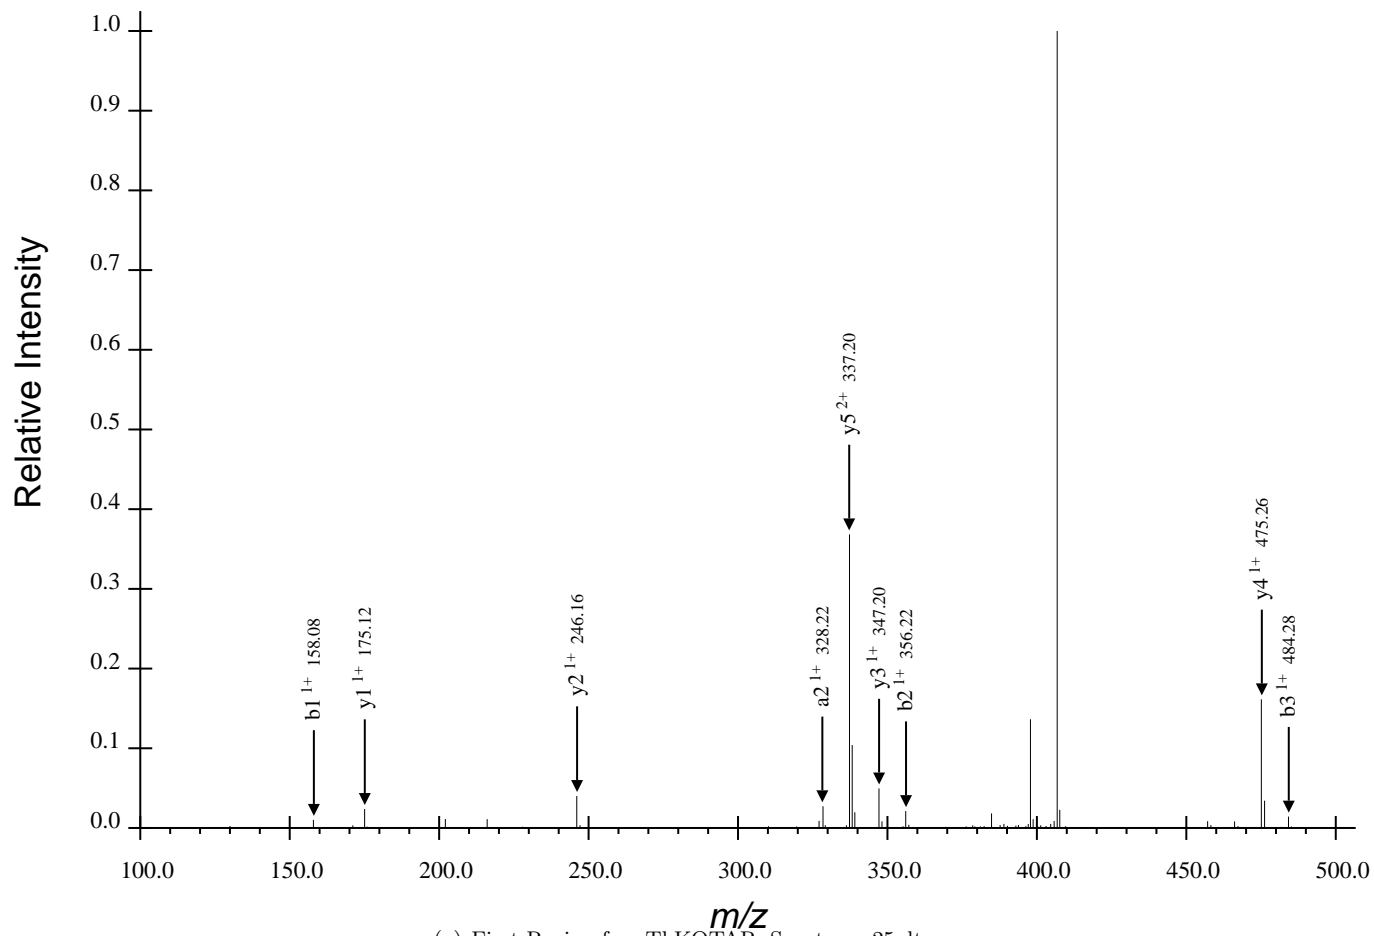

(a) First Region for rThKQTAR, Spectrum 25.dta

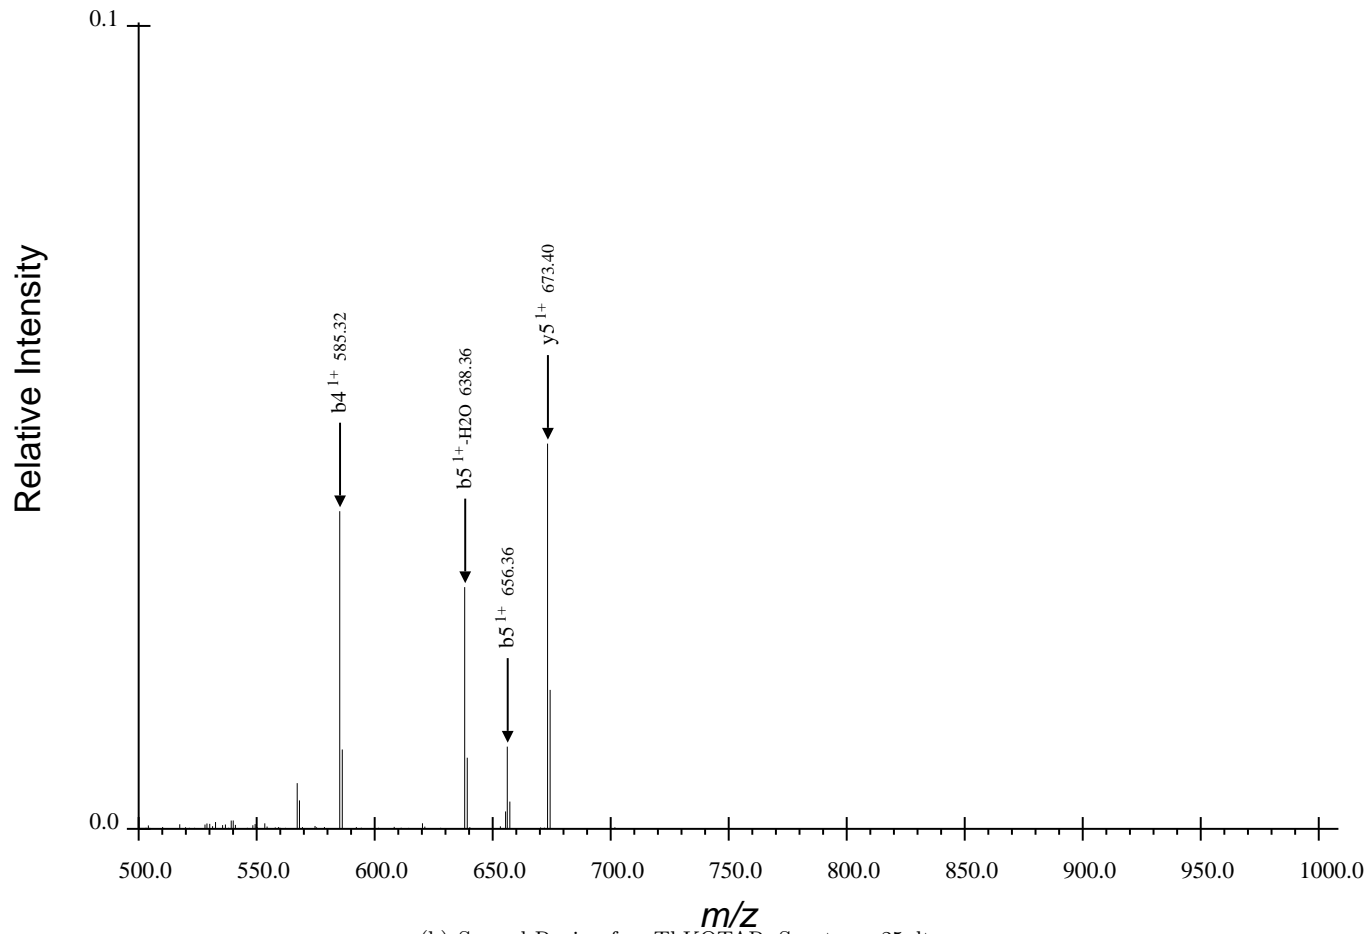

(b) Second Region for rThKQTAR, Spectrum 25.dta

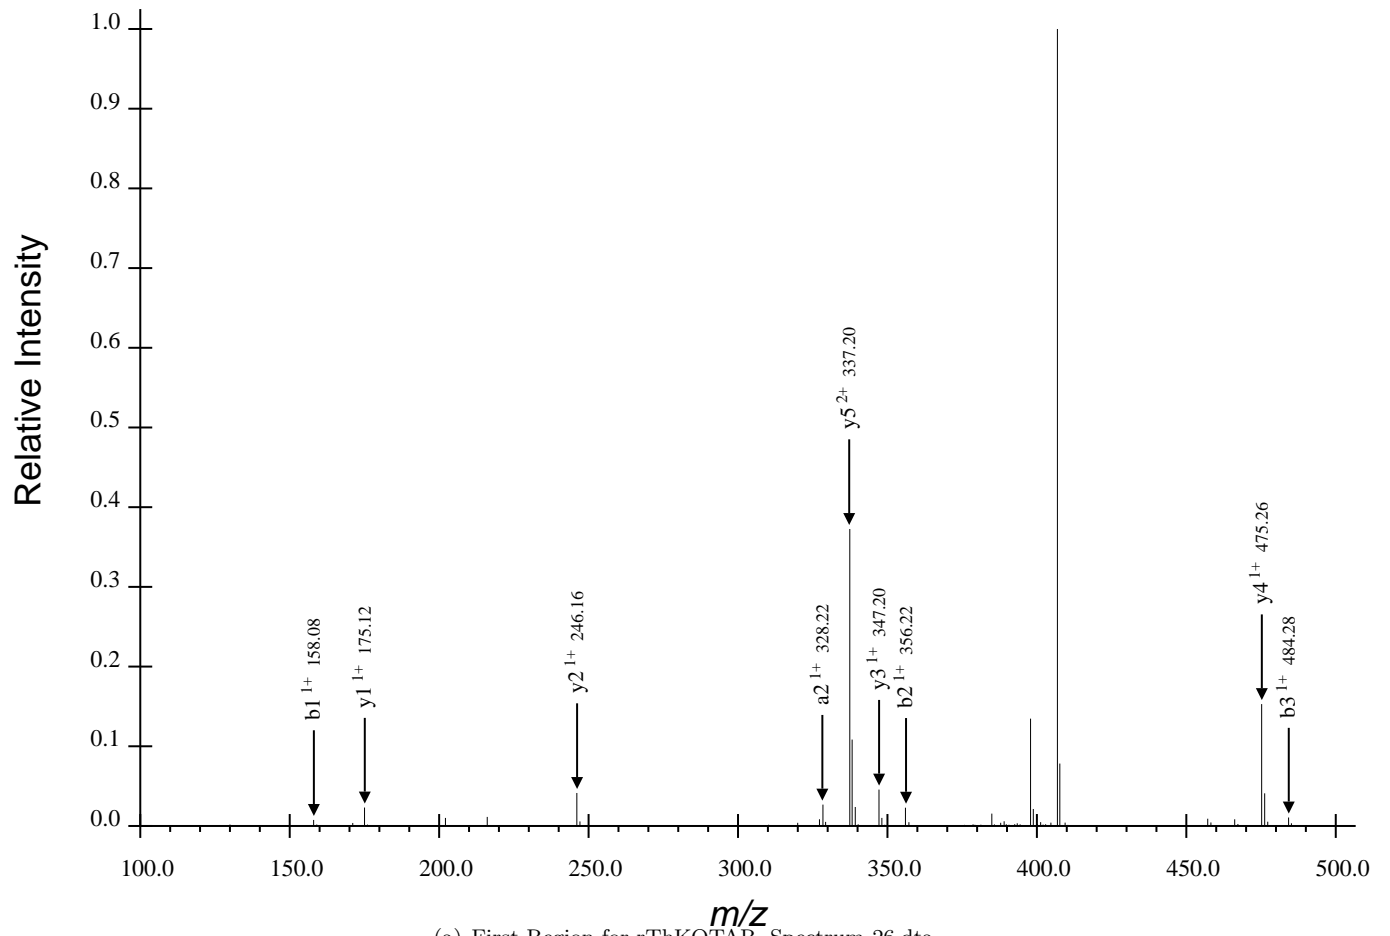

(a) First Region for rThKQTAR, Spectrum 26.dta

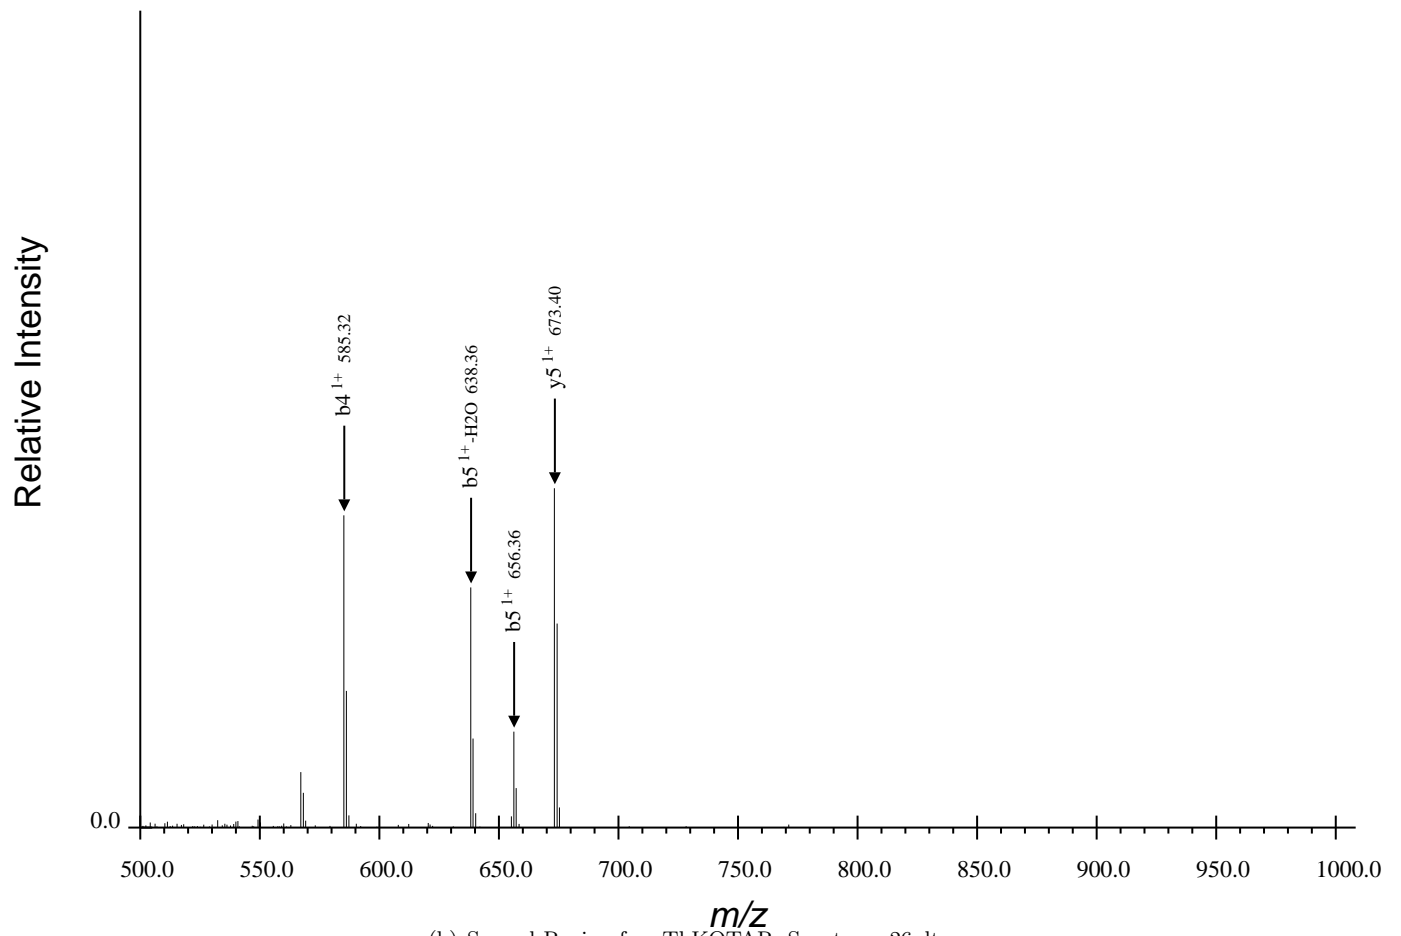

(b) Second Region for rThKQTAR, Spectrum 26.dta

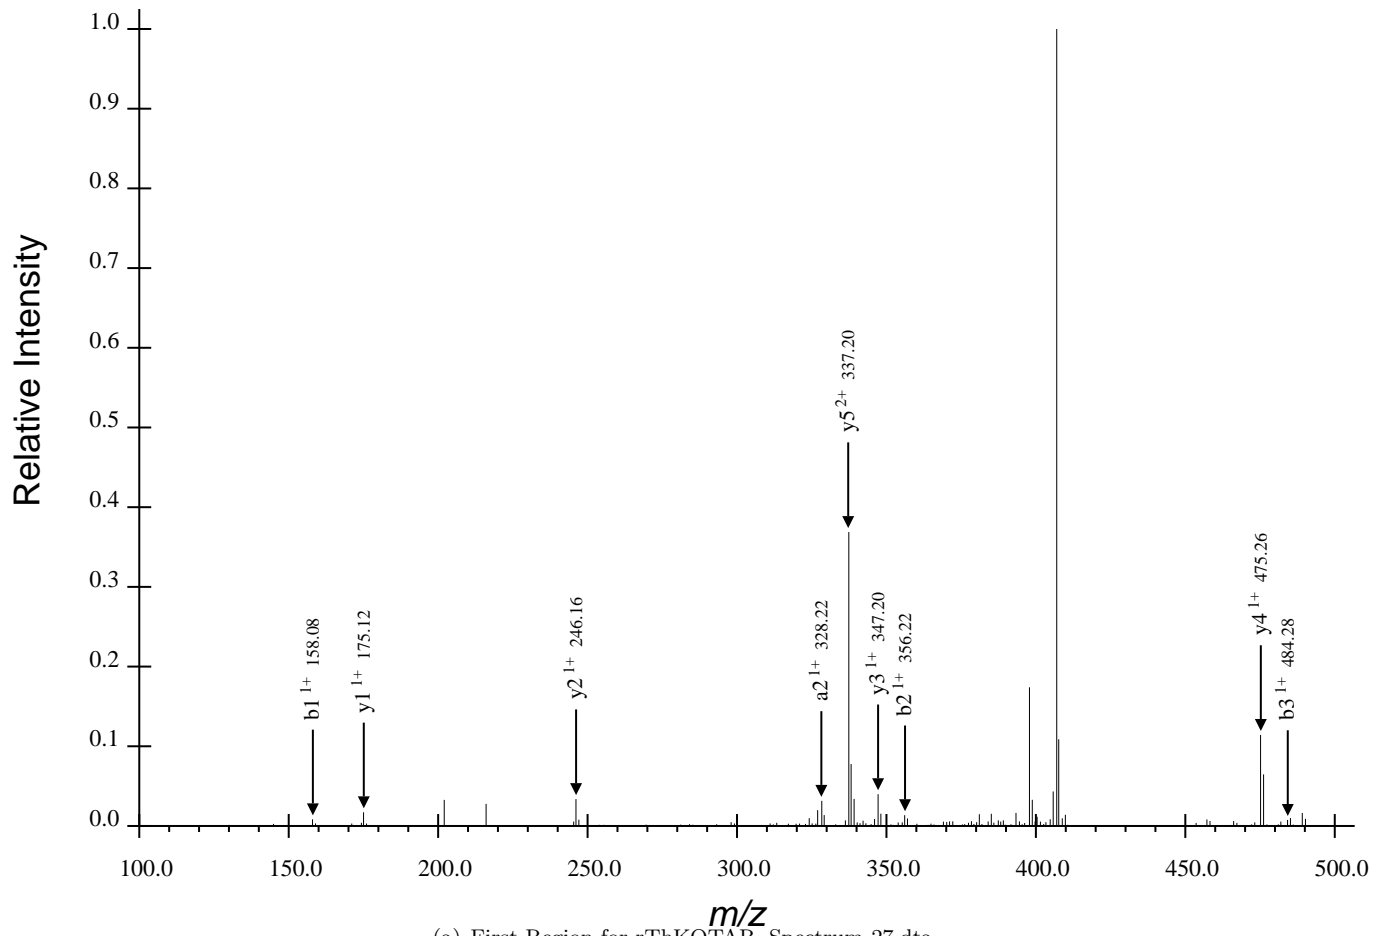

(a) First Region for rThKQTAR, Spectrum 27.dta

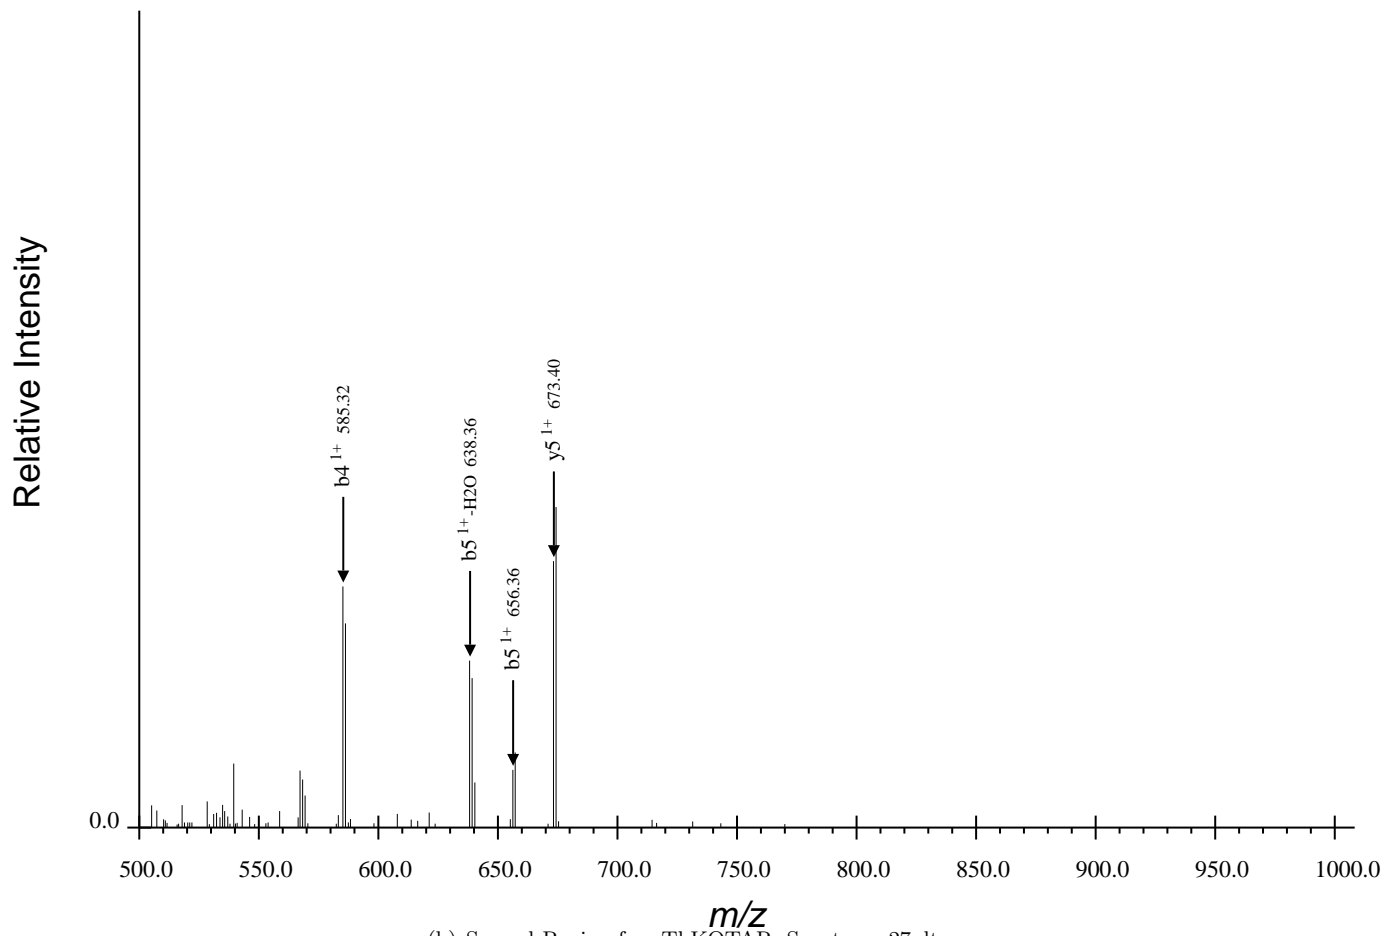

(b) Second Region for rThKQTAR, Spectrum 27.dta

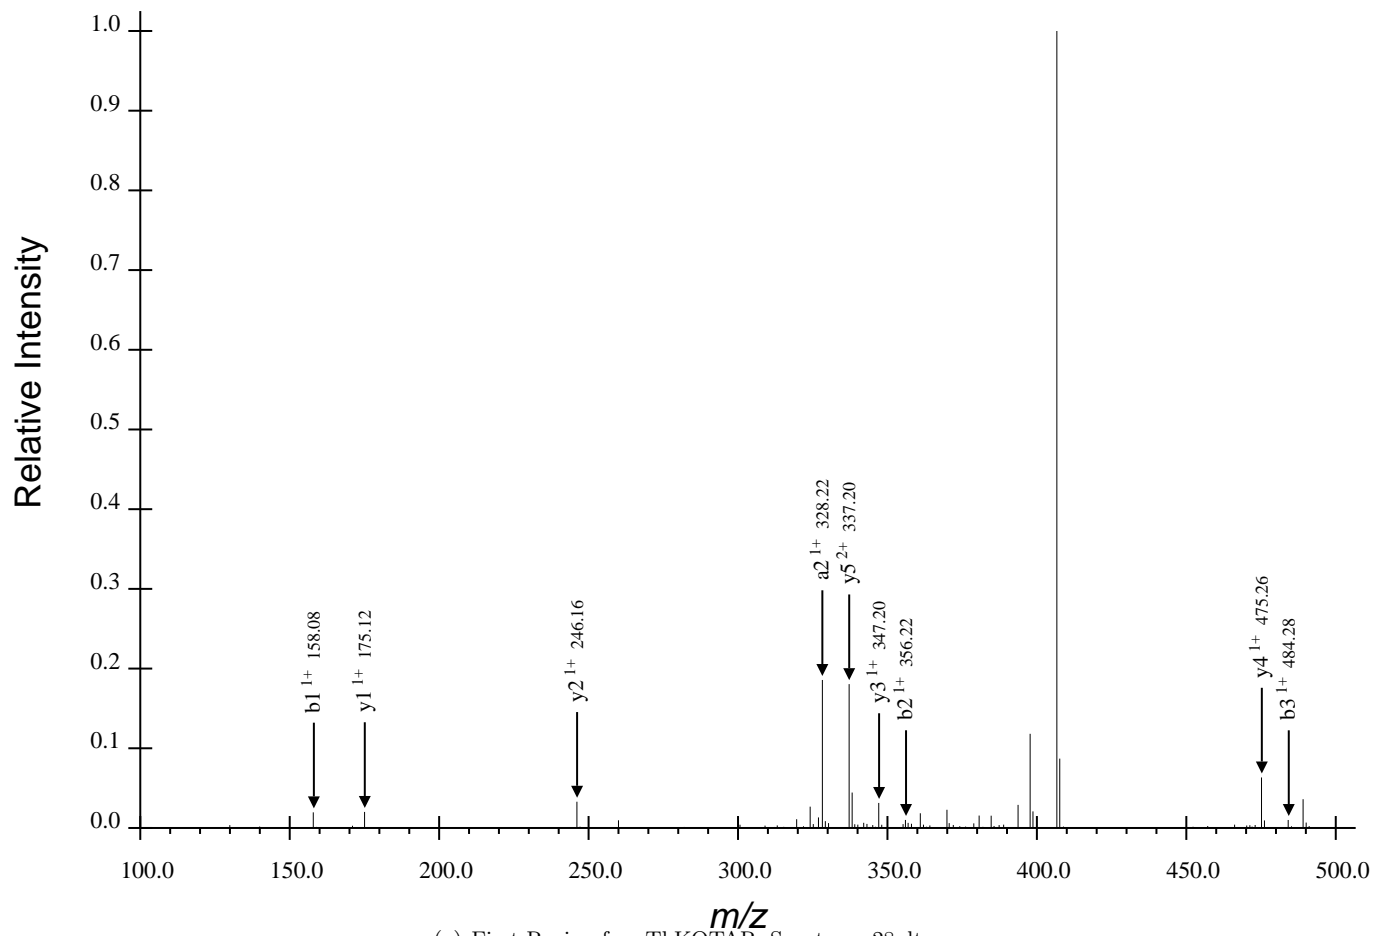

(a) First Region for rThKQTAR, Spectrum 28.dta

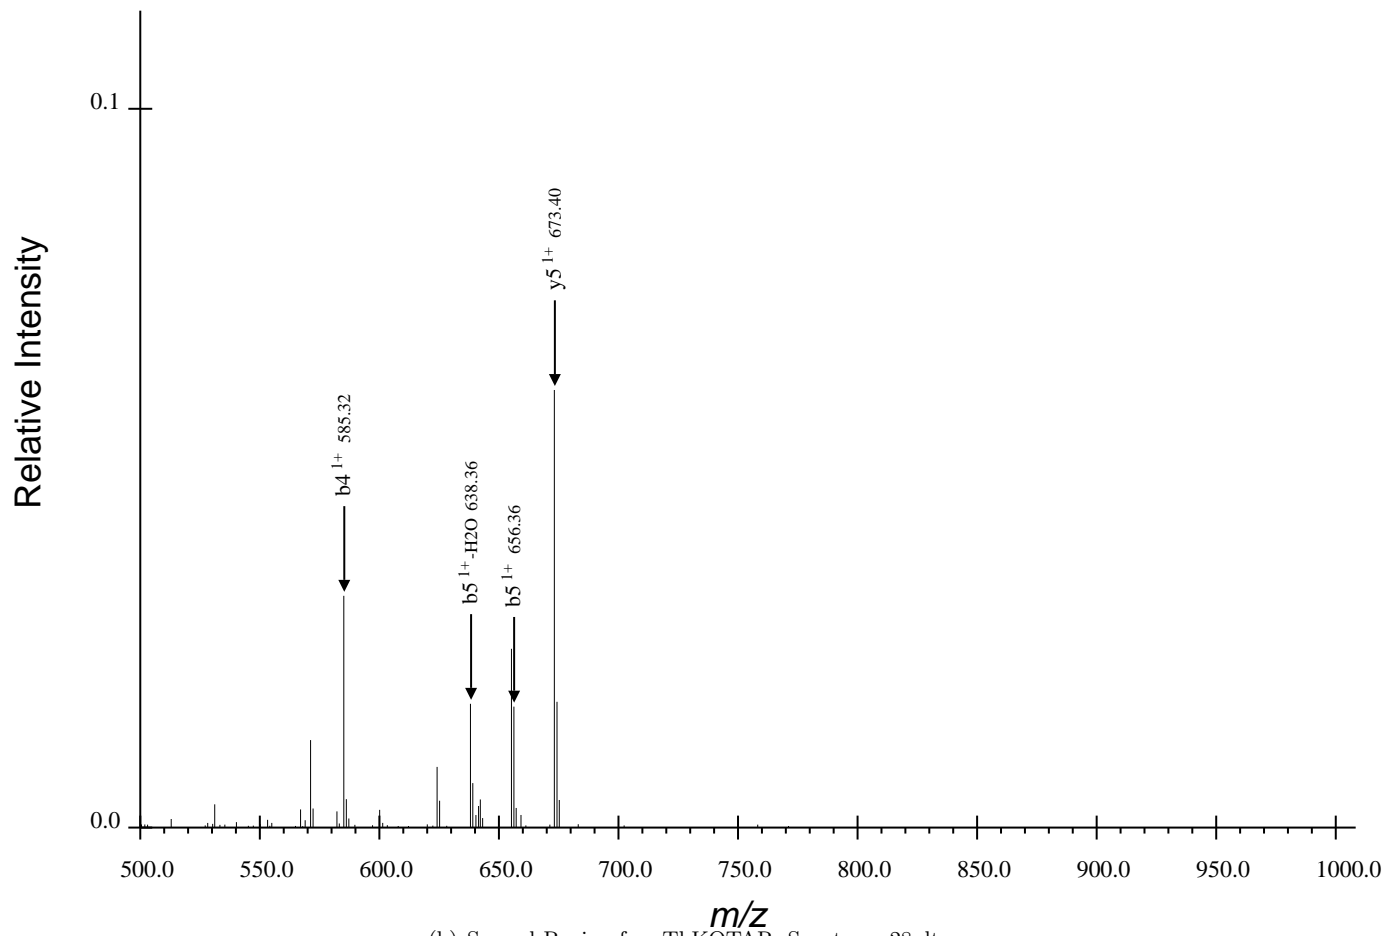

(b) Second Region for rThKQTAR, Spectrum 28.dta

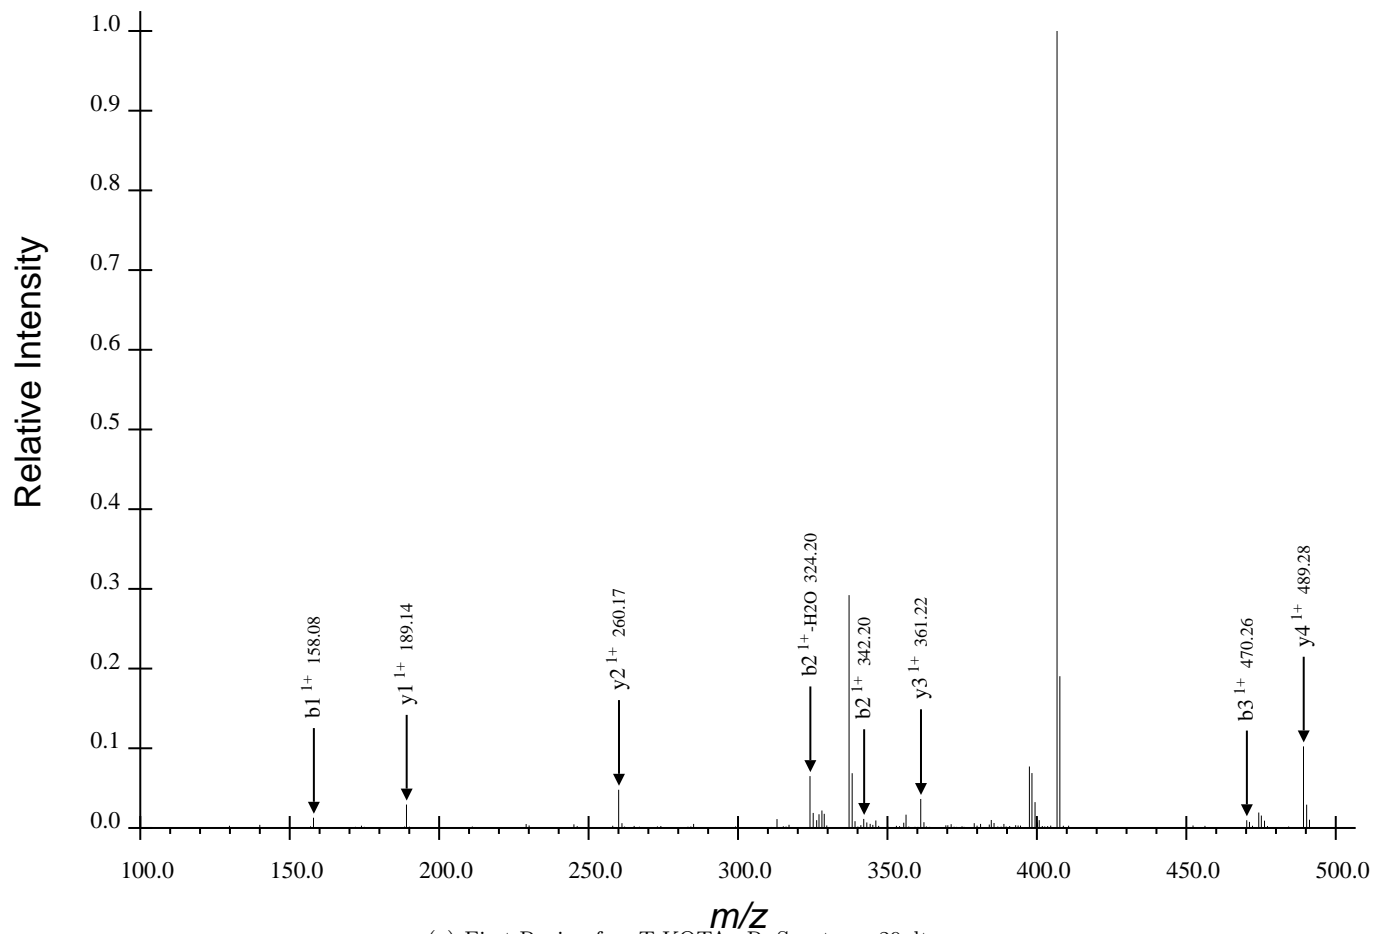

(a) First Region for rTrKQTAmR, Spectrum 29.dta

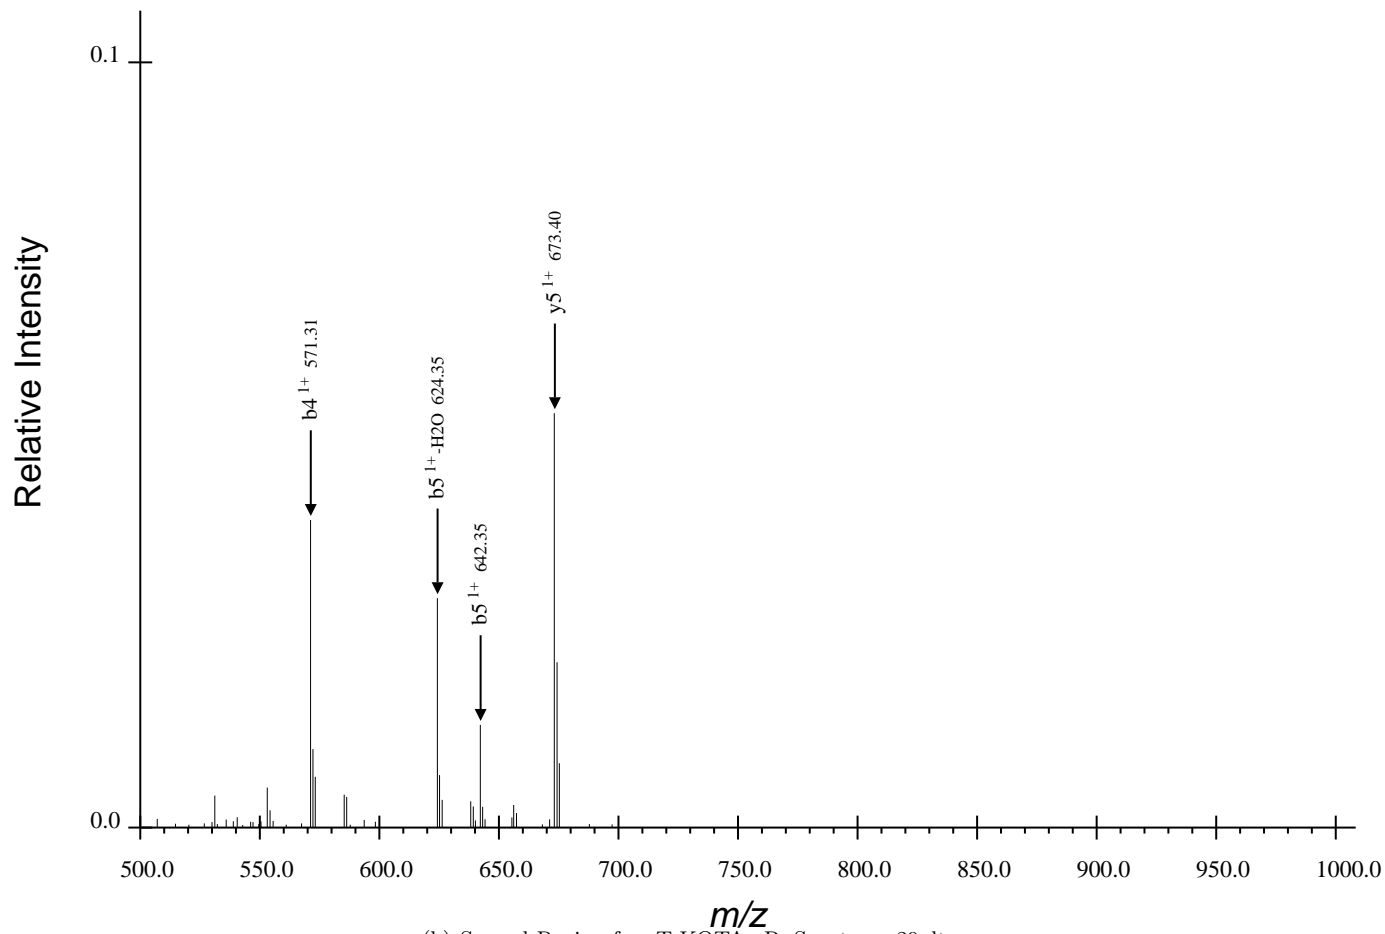

(b) Second Region for rTrKQTAmR, Spectrum 29.dta

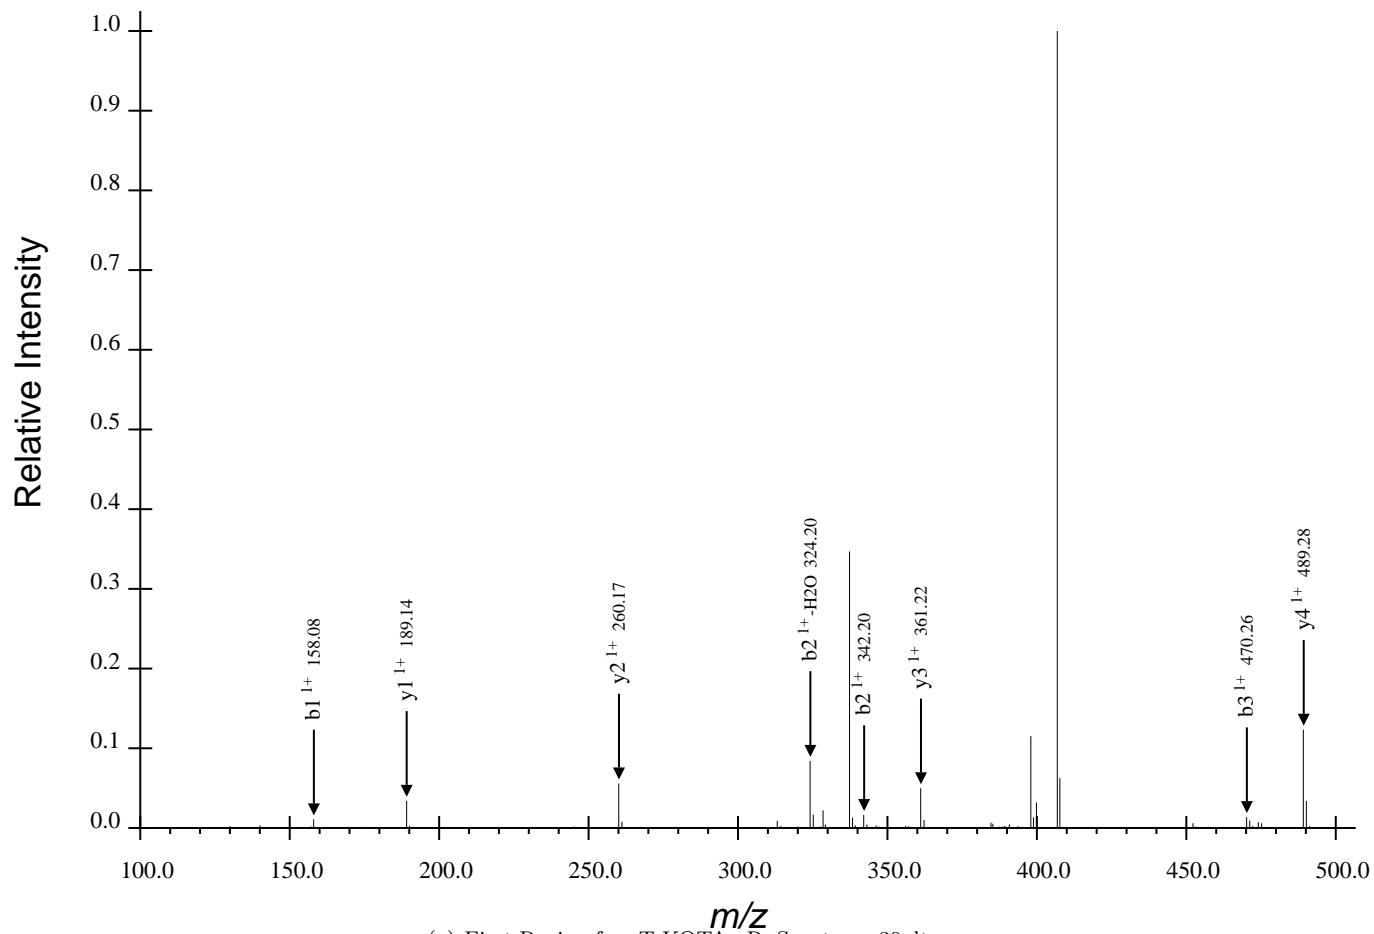

(a) First Region for rTrKQTAmR, Spectrum 30.dta

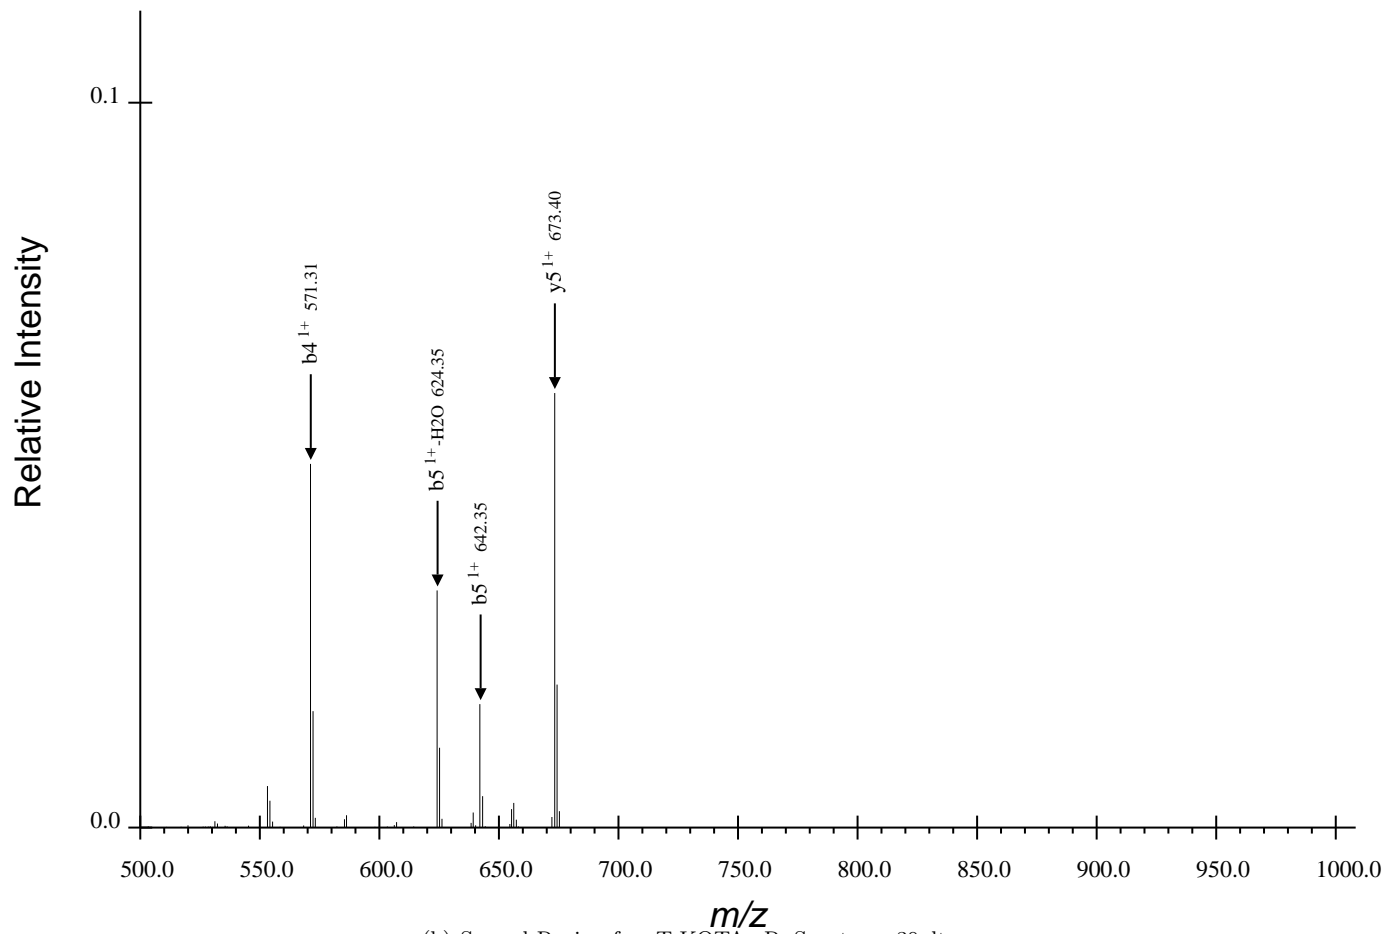

(b) Second Region for rTrKQTAmR, Spectrum 30.dta

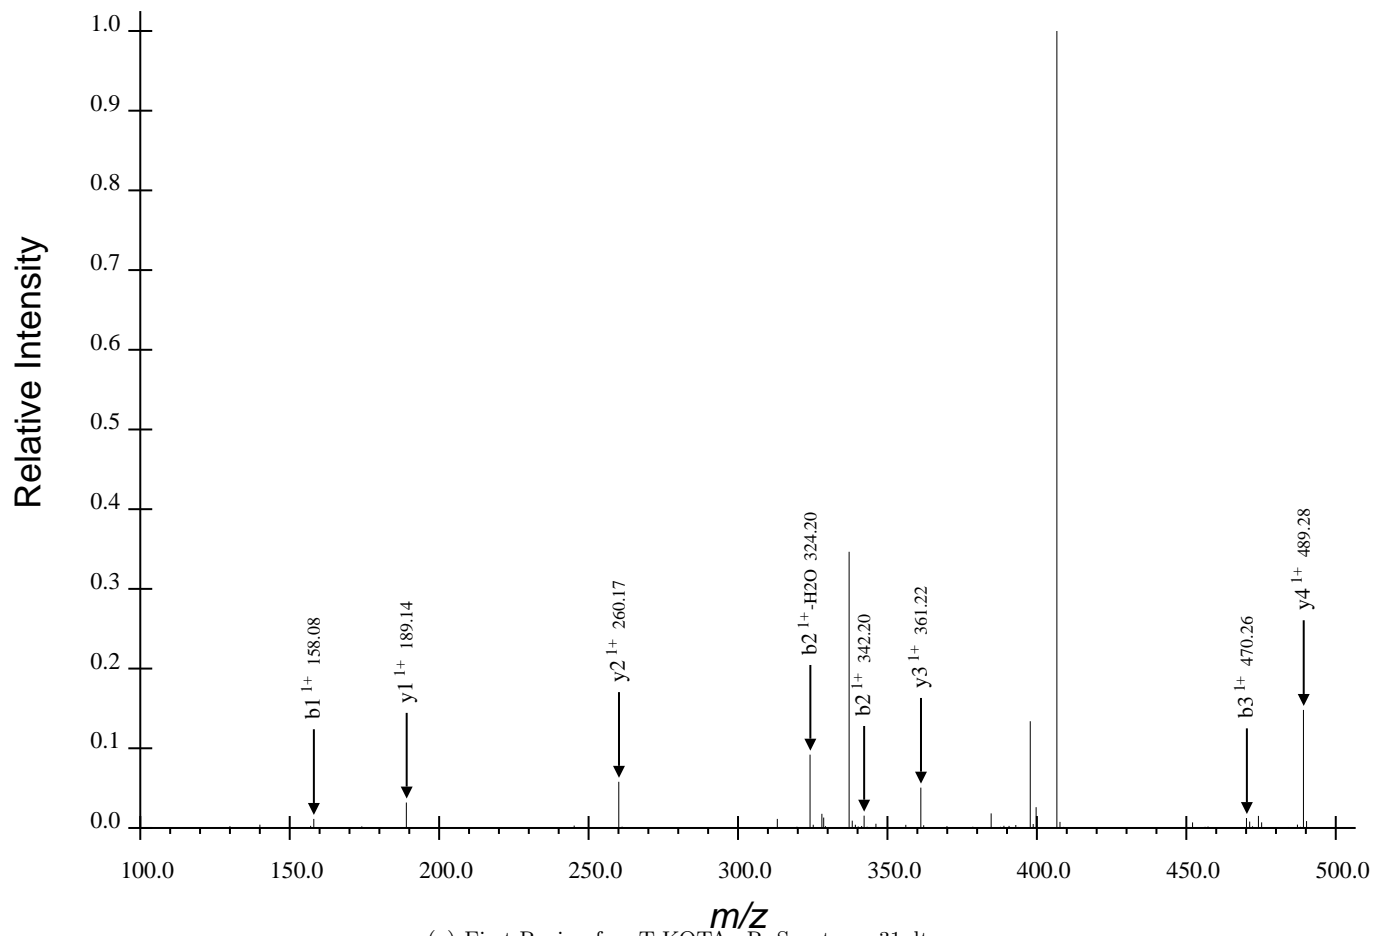

(a) First Region for rTrKQTAmR, Spectrum 31.dta

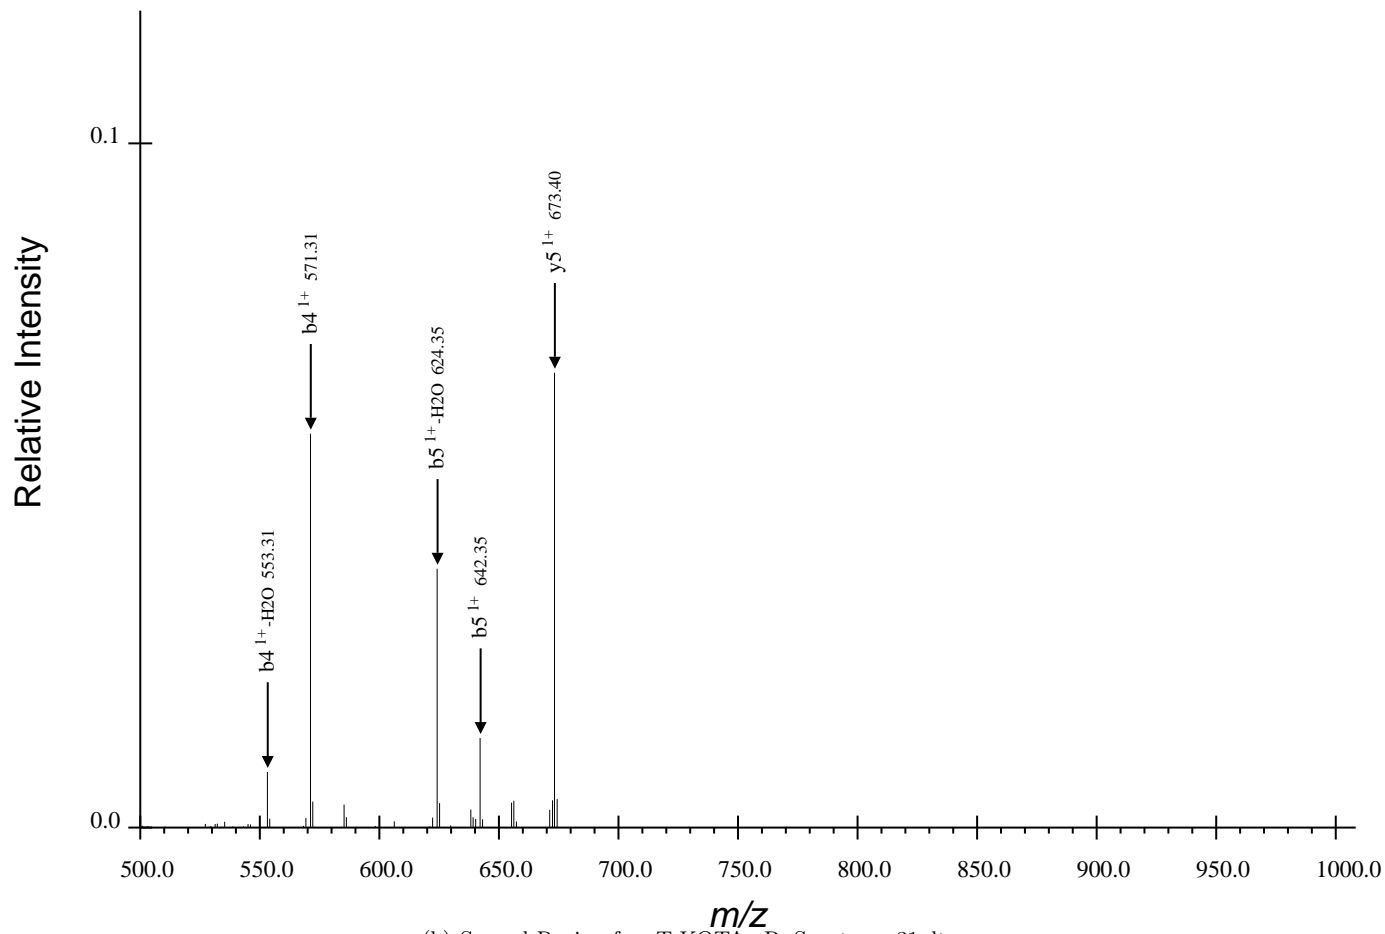

(b) Second Region for rTrKQTAmR, Spectrum 31.dta

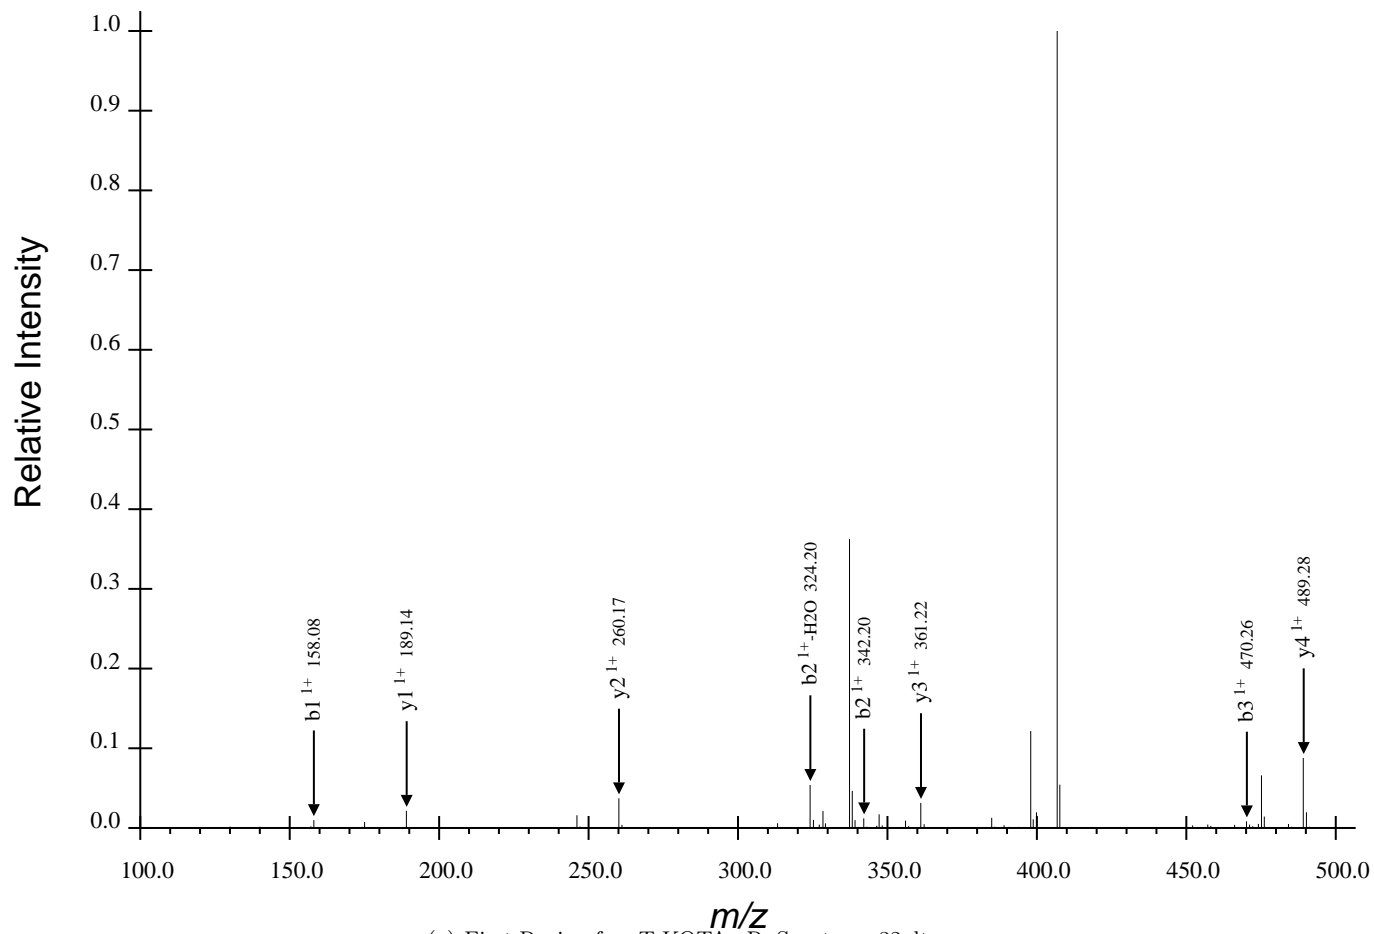

(a) First Region for rTrKQTAmR, Spectrum 32.dta

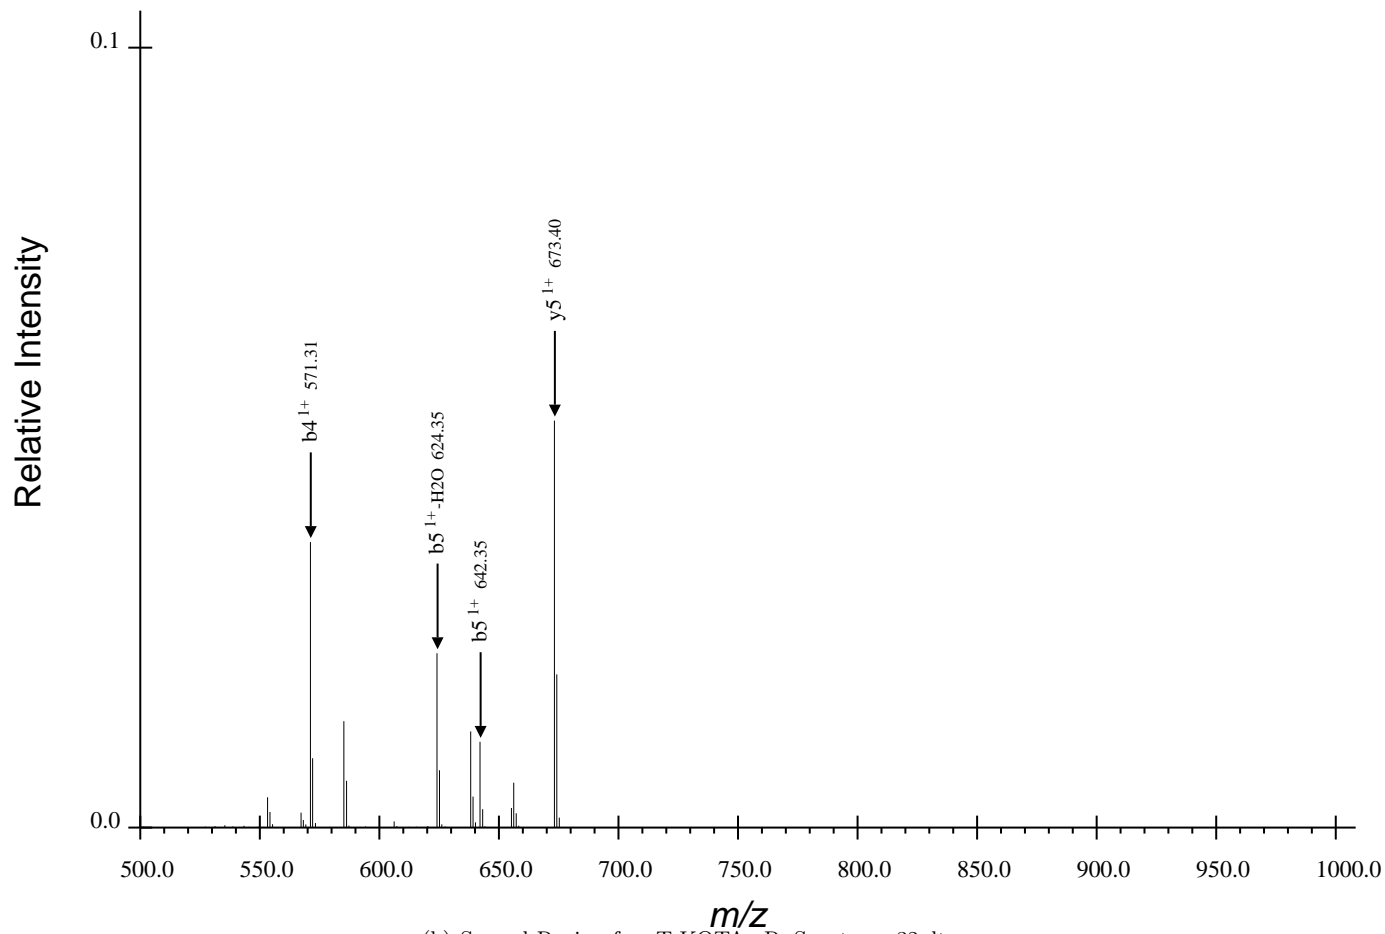

(b) Second Region for rTrKQTAmR, Spectrum 32.dta



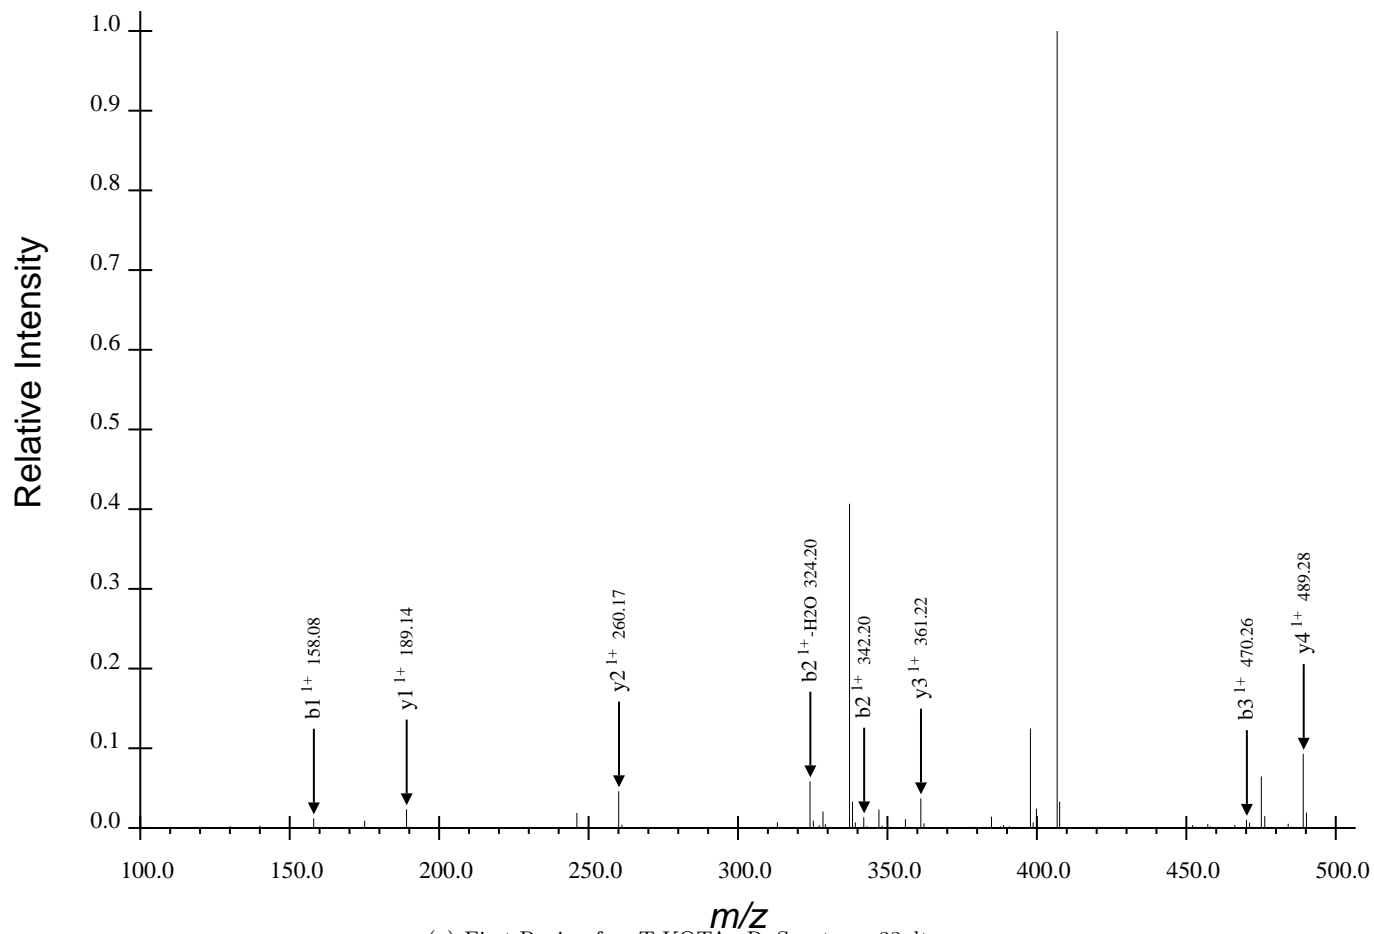

(a) First Region for rTrKQTAmR, Spectrum 33.dta

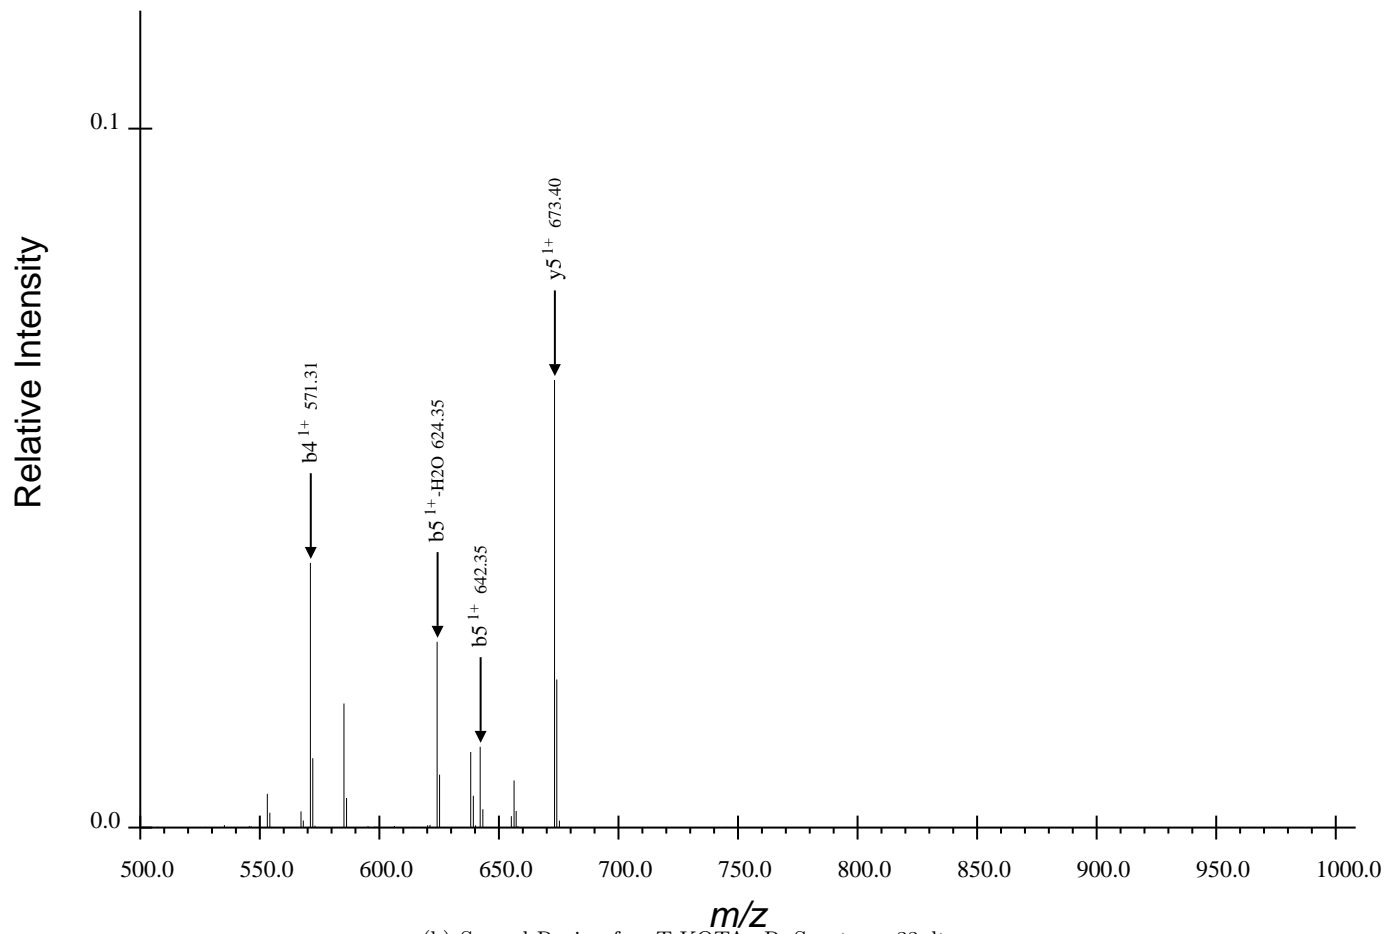

(b) Second Region for rTrKQTAmR, Spectrum 33.dta

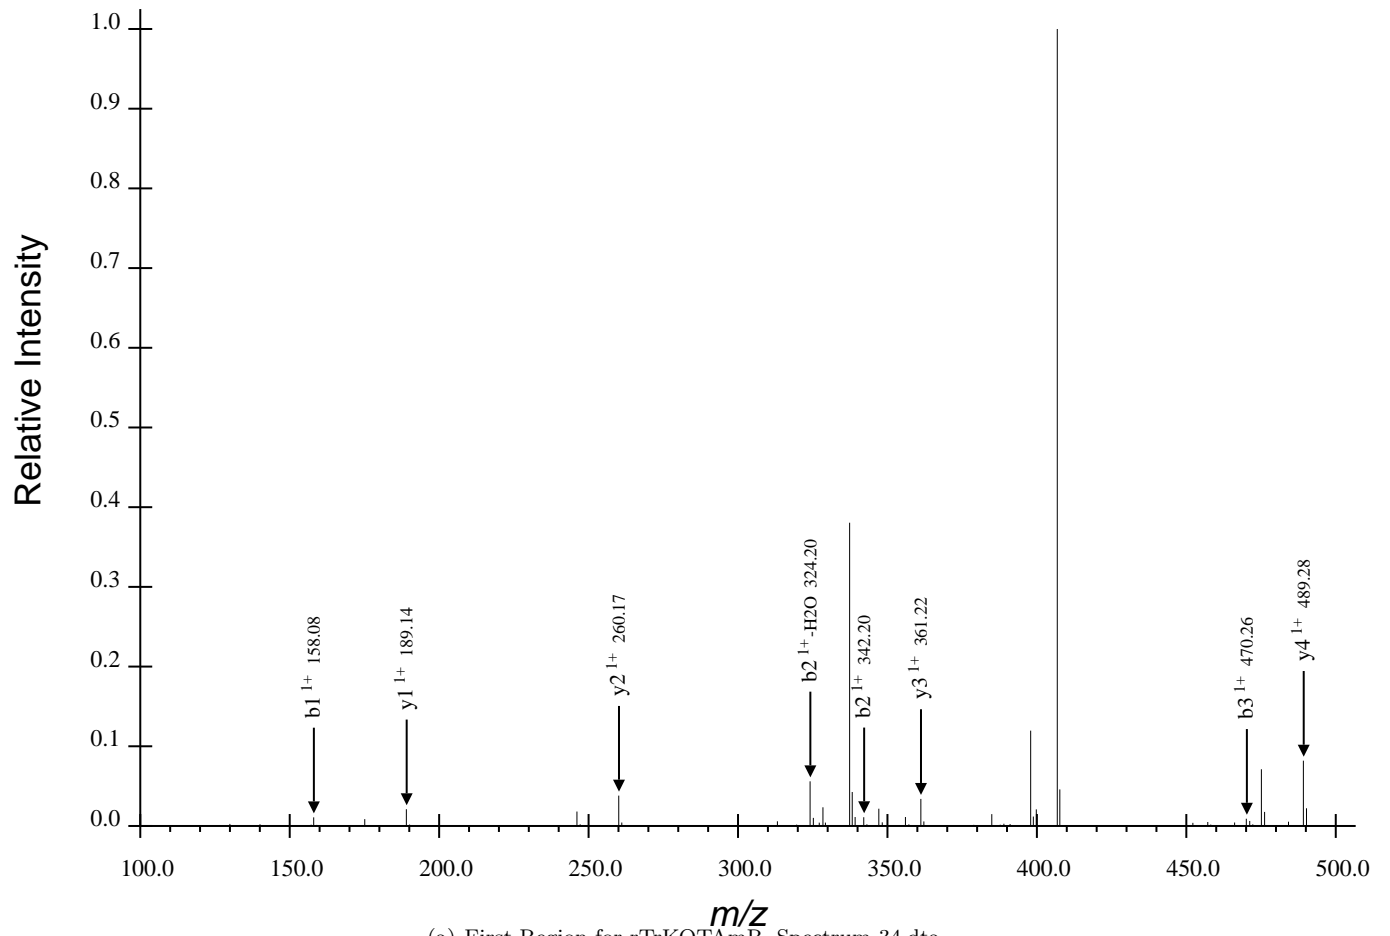

(a) First Region for rTrKQTAmR, Spectrum 34.dta

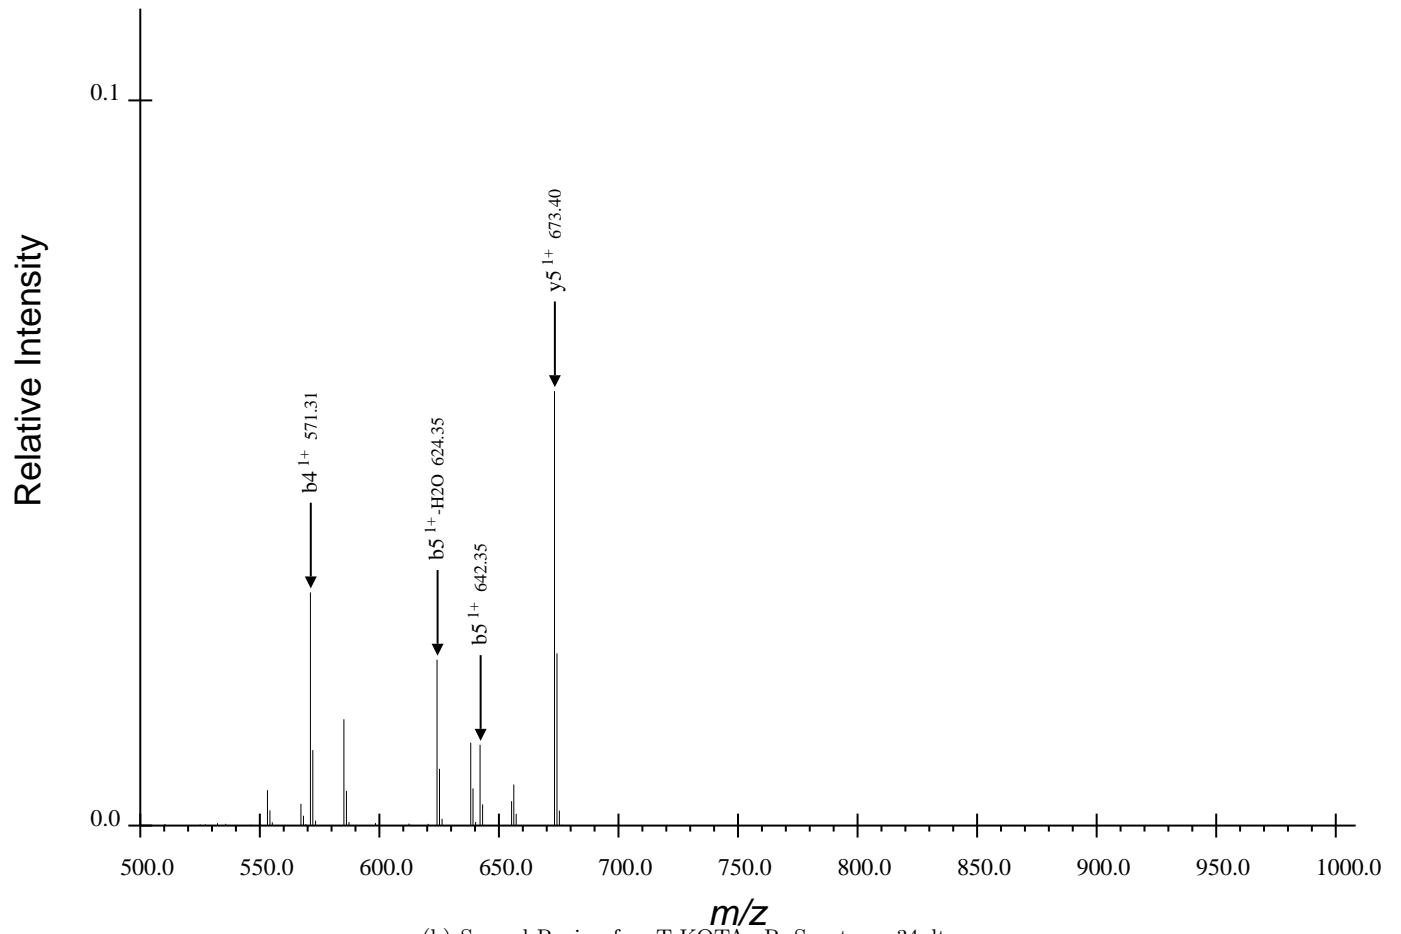

(b) Second Region for rTrKQTAmR, Spectrum 34.dta

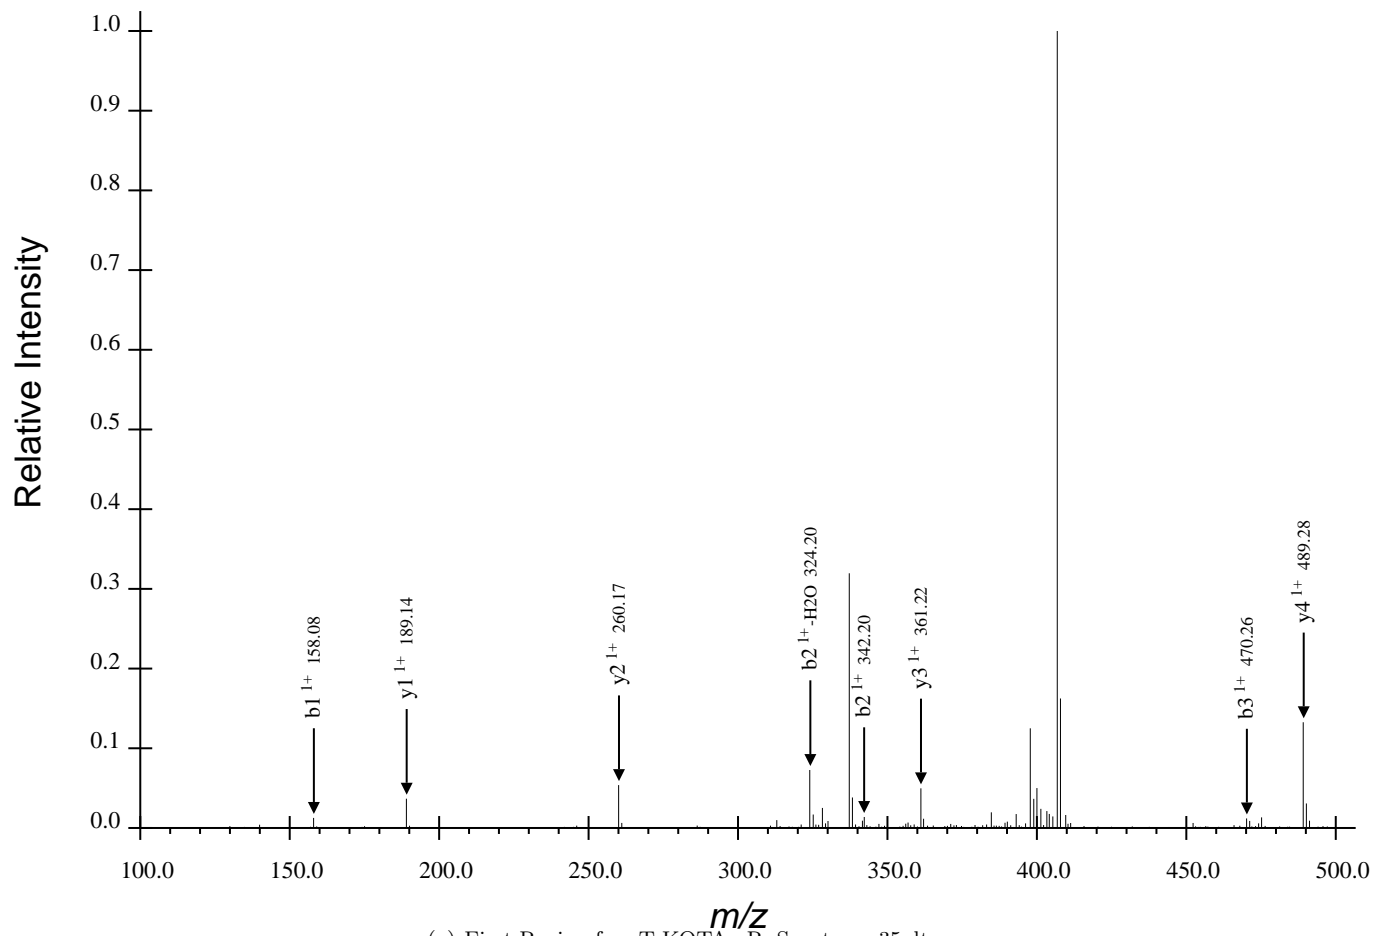

(a) First Region for rTrKQTAmR, Spectrum 35.dta

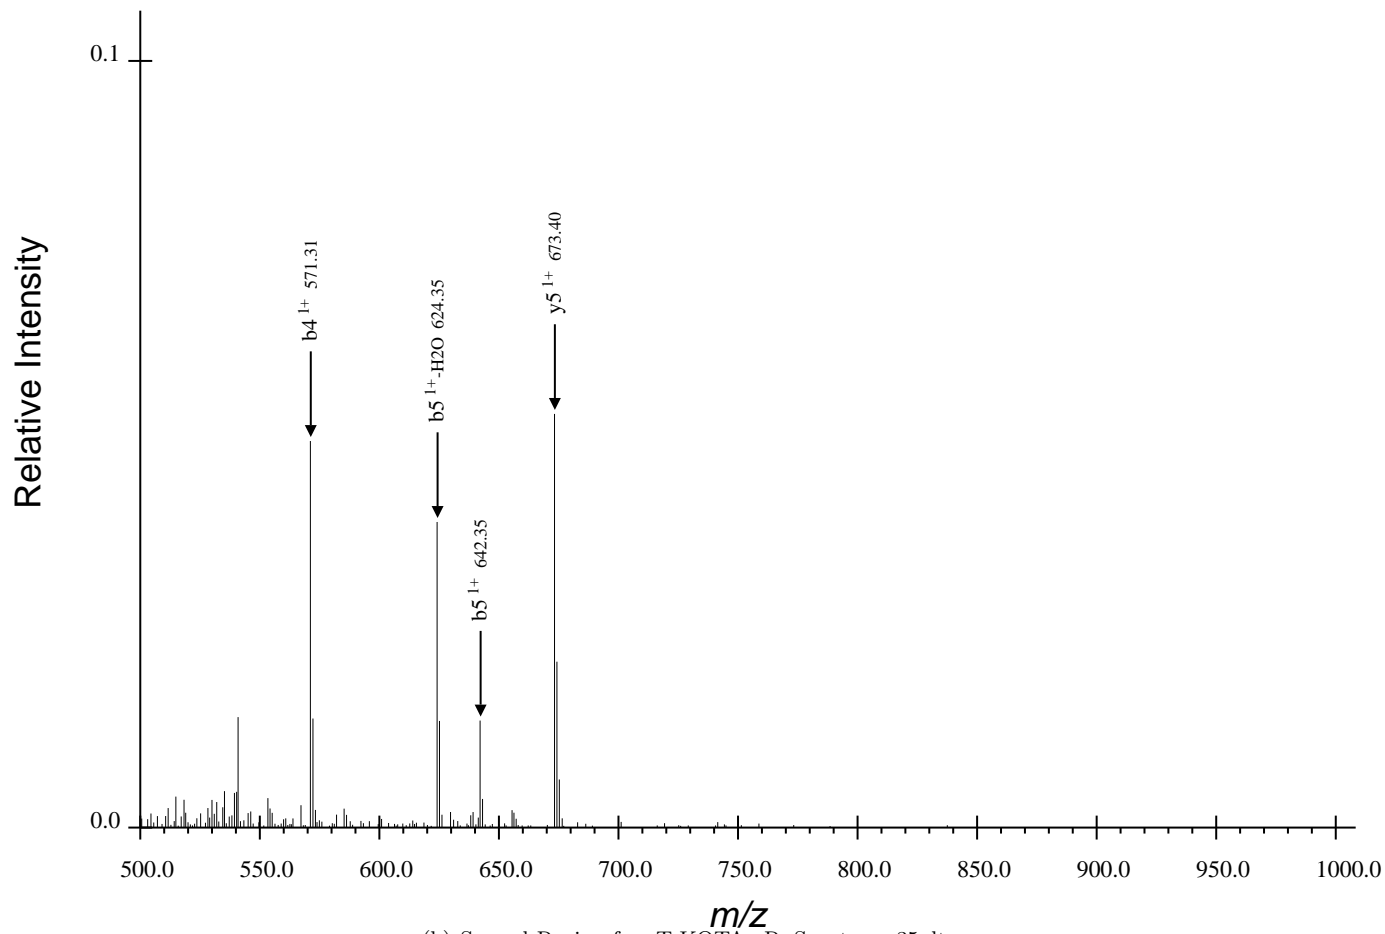

(b) Second Region for rTrKQTAmR, Spectrum 35.dta

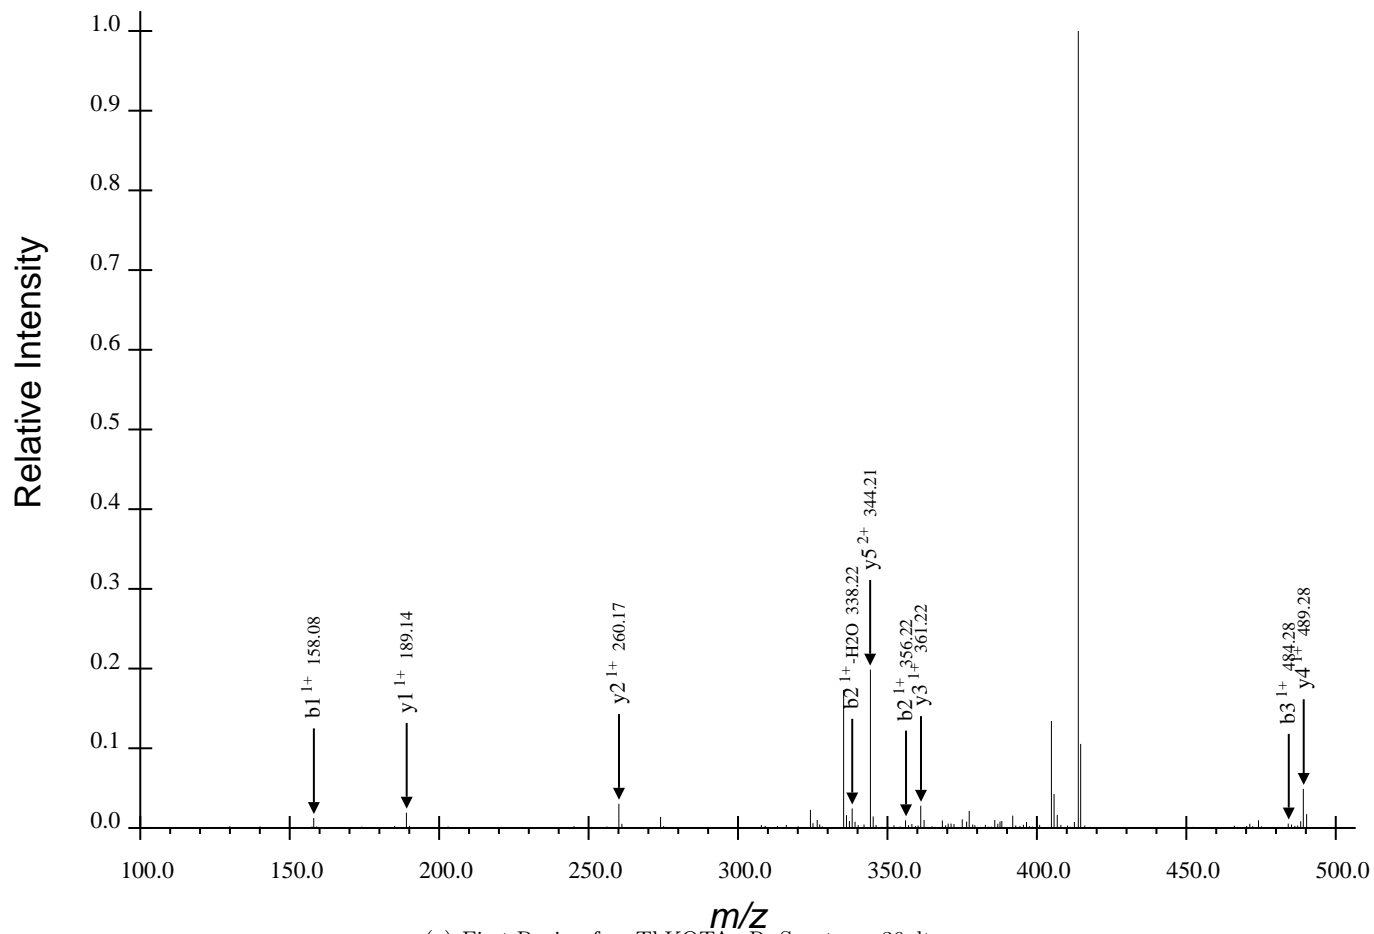

(a) First Region for rThKQTAmR, Spectrum 36.dta

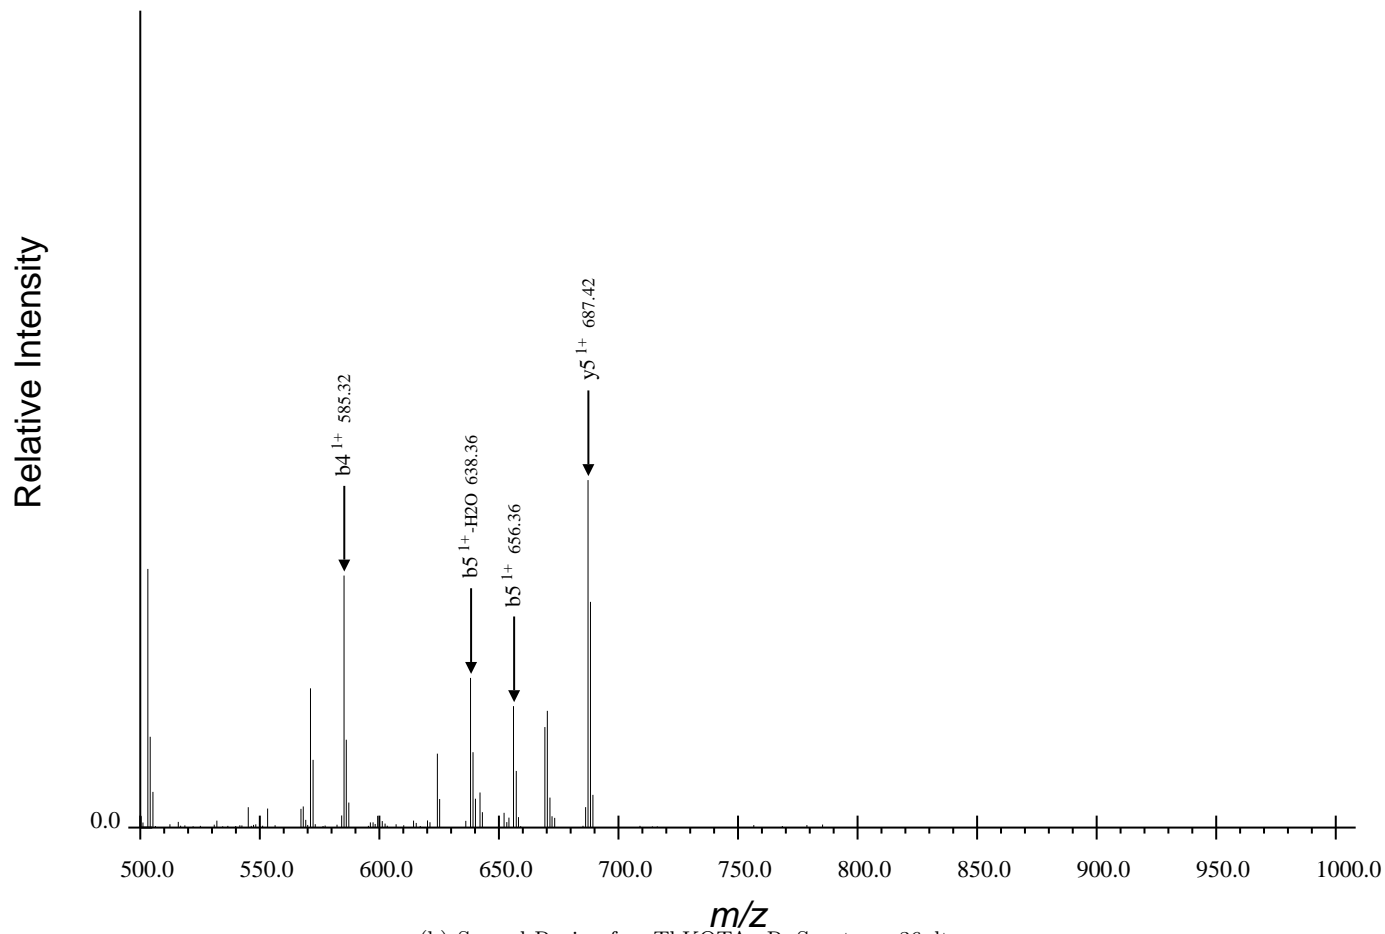

(b) Second Region for rThKQTAmR, Spectrum 36.dta

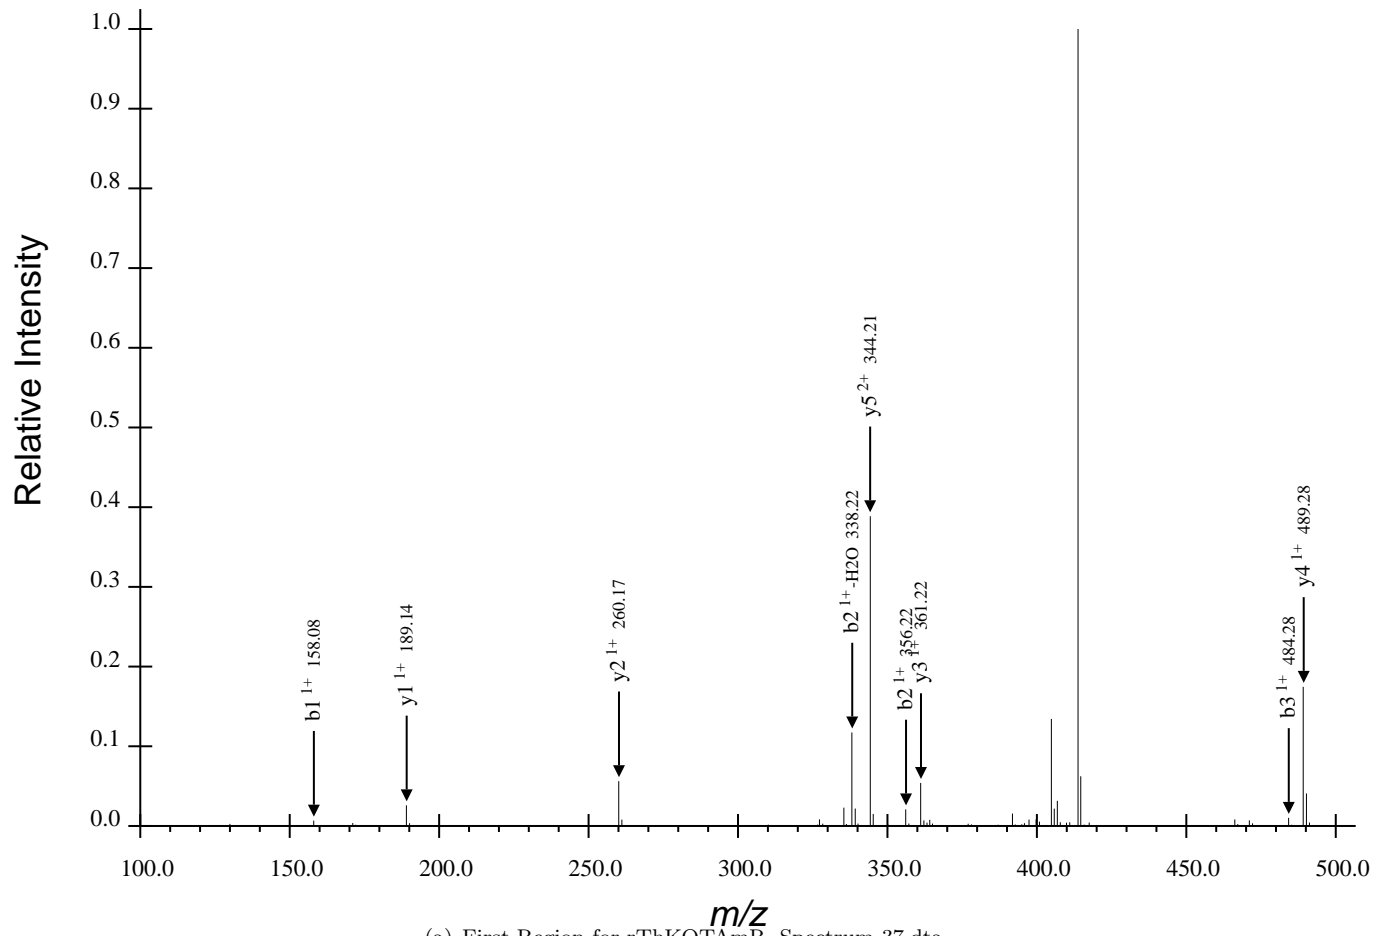

(a) First Region for rThKQTAmR, Spectrum 37.dta

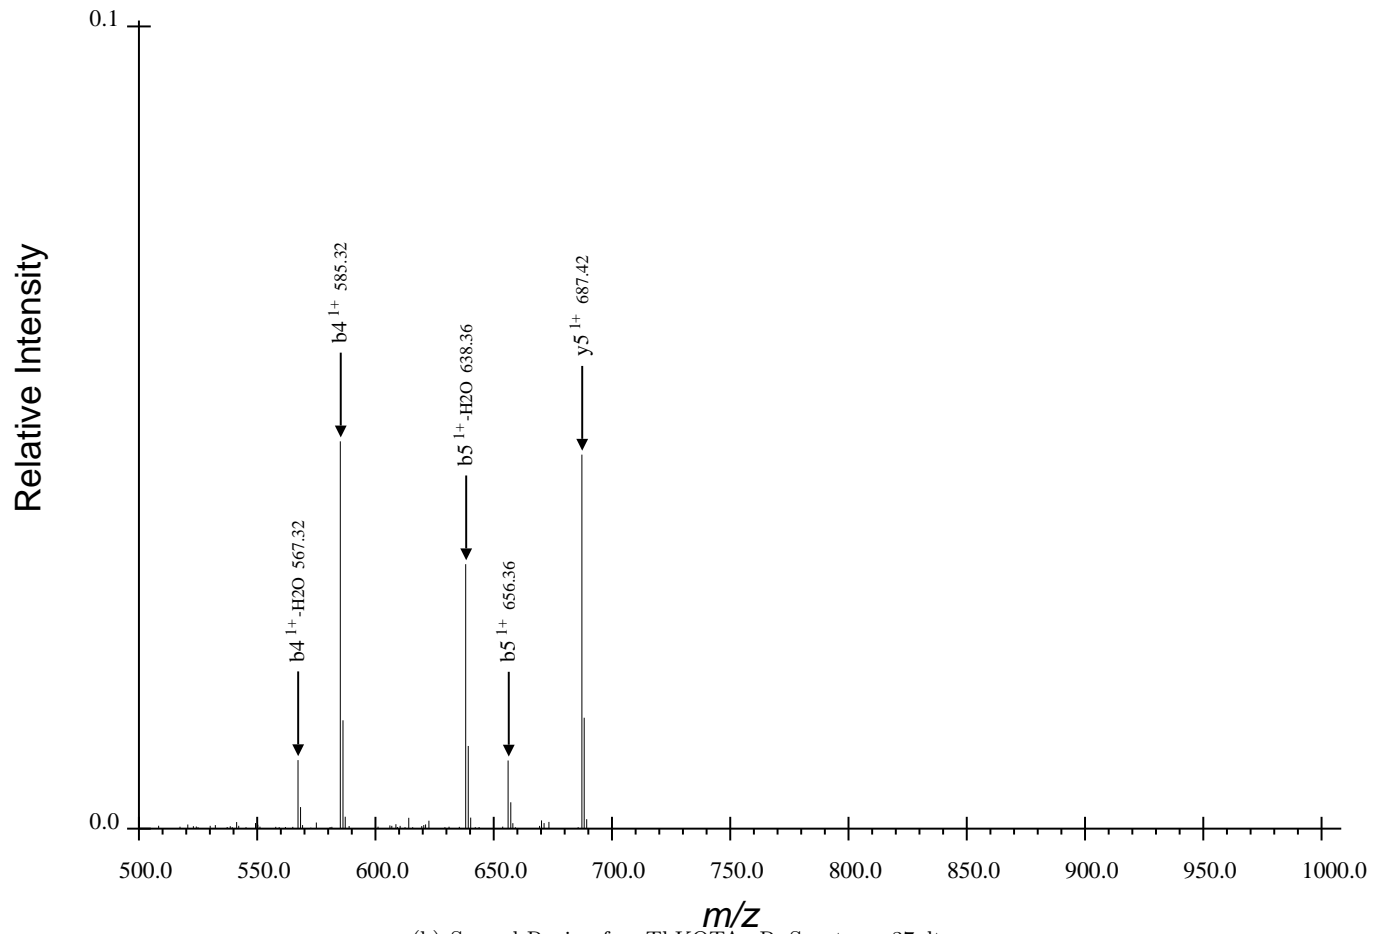

(b) Second Region for rThKQTAmR, Spectrum 37.dta

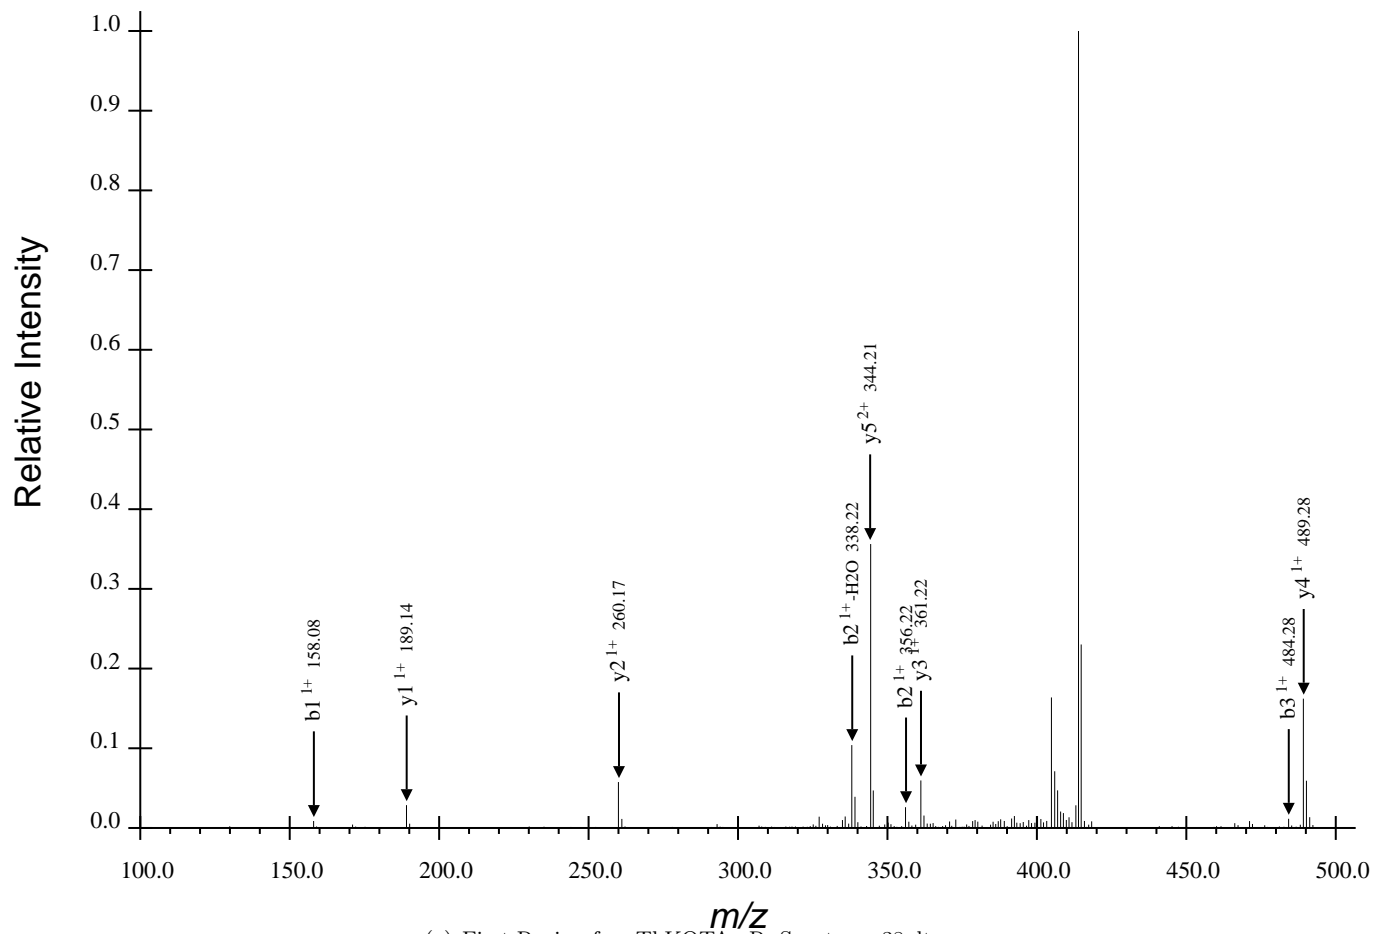

(a) First Region for rThKQTAmR, Spectrum 38.dta

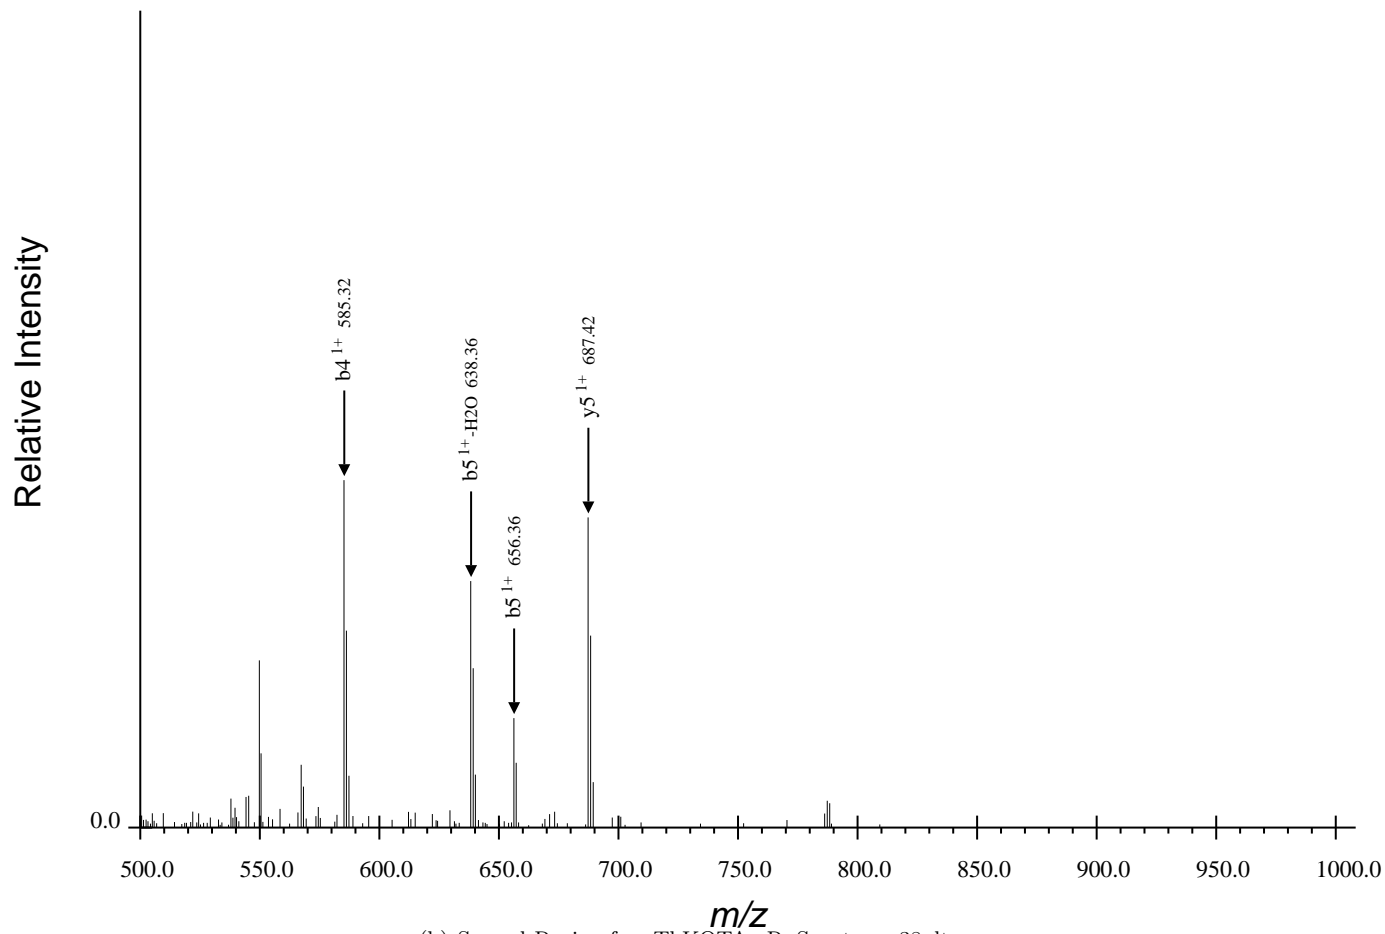

(b) Second Region for rThKQTAmR, Spectrum 38.dta

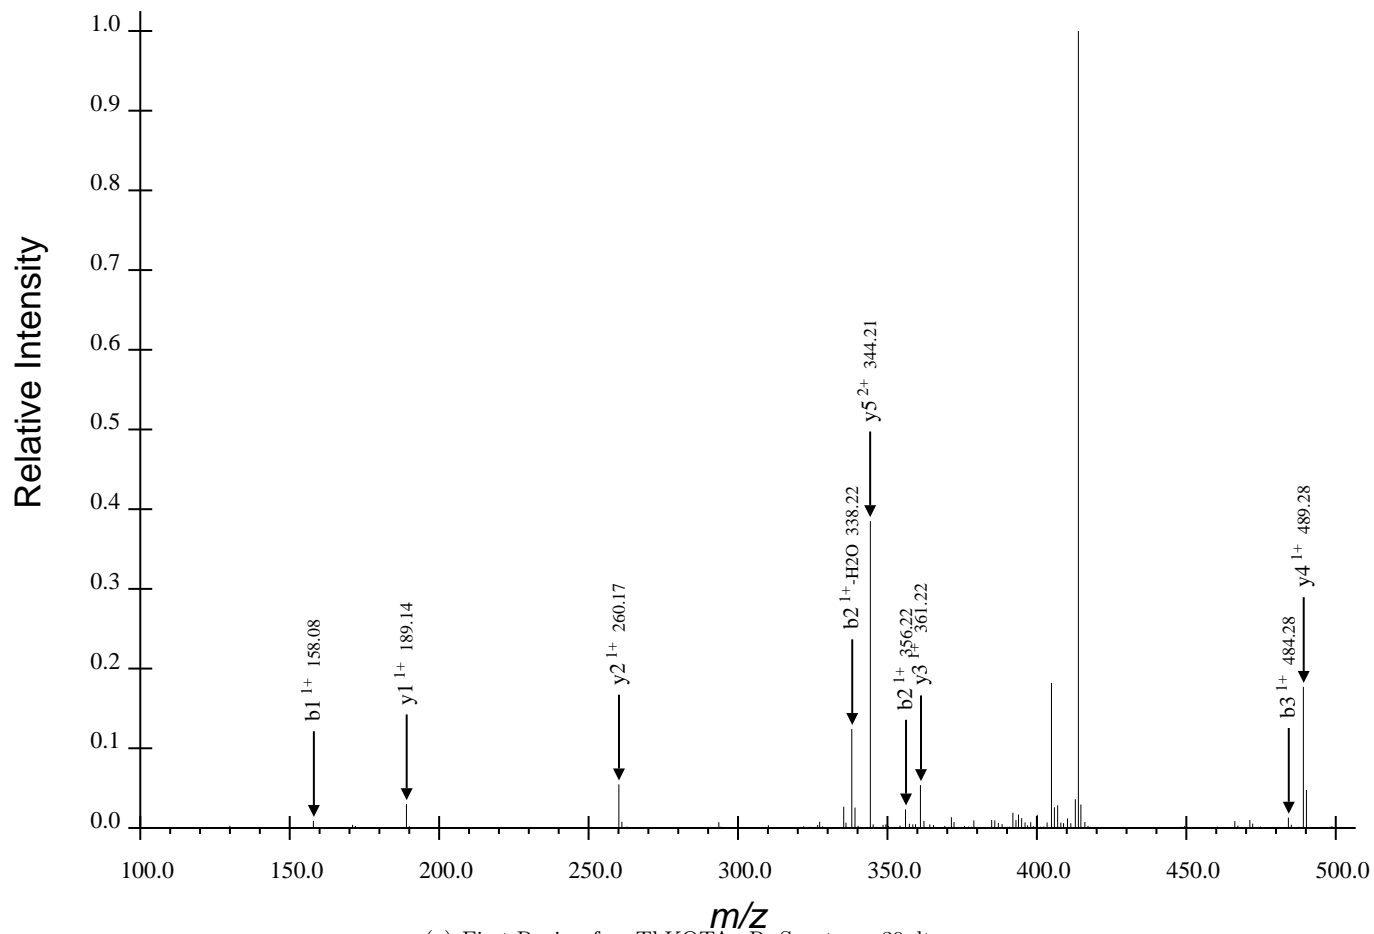

(a) First Region for rThKQTAmR, Spectrum 39.dta

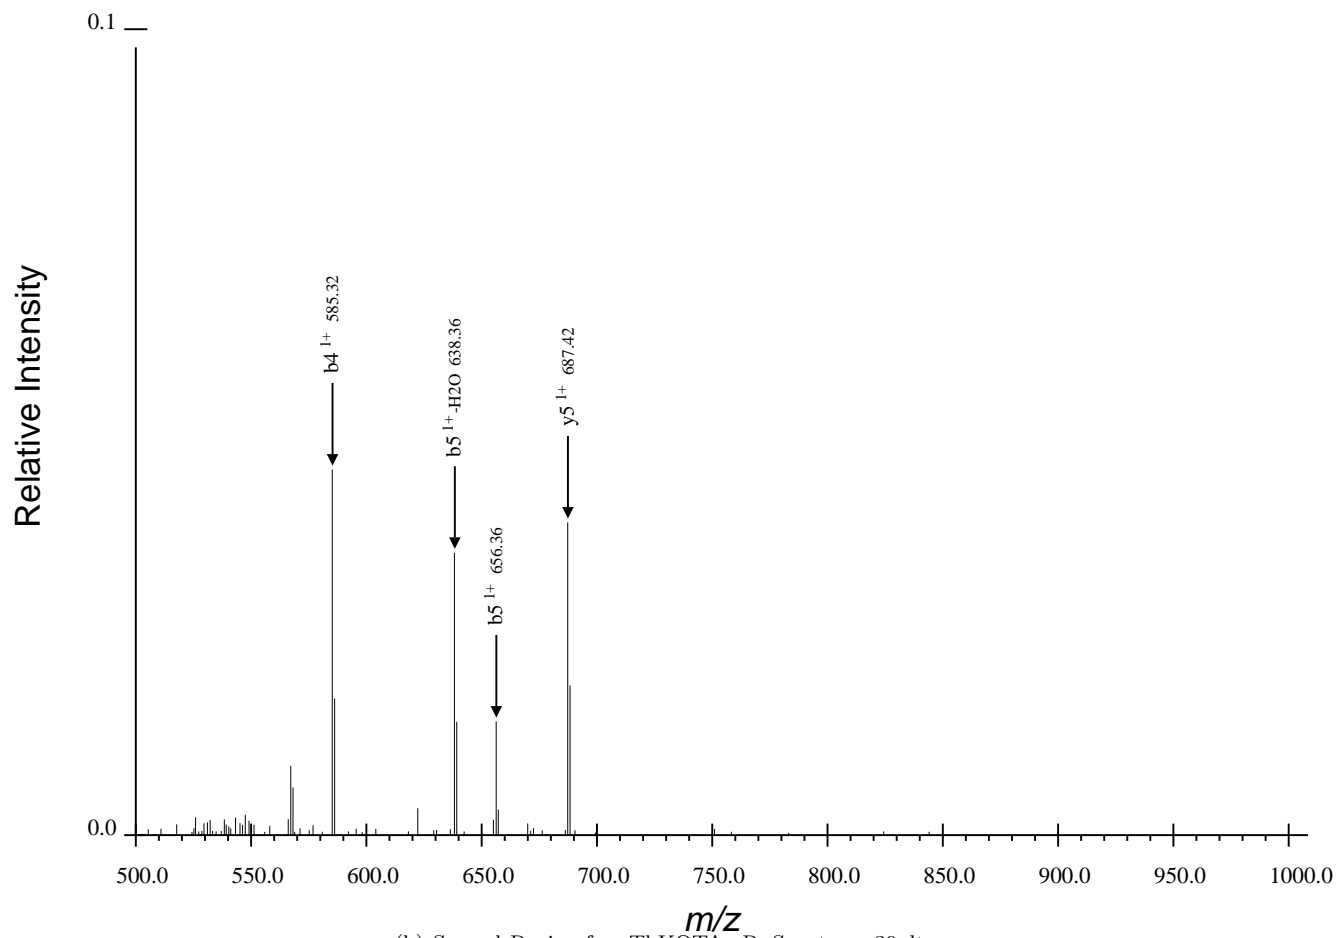

(b) Second Region for rThKQTAmR, Spectrum 39.dta

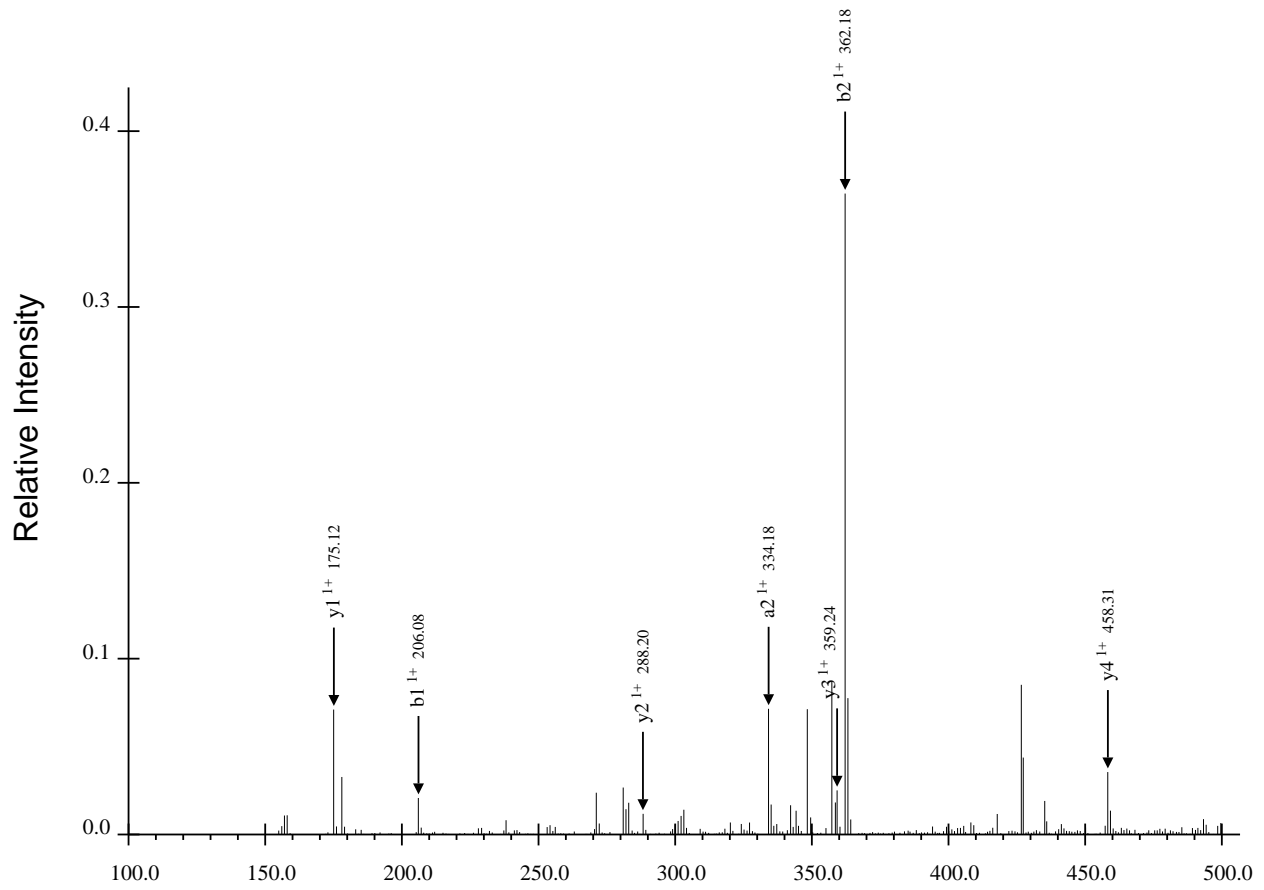

(a) First Region for aYRPGTVALR, Spectrum 40.dta

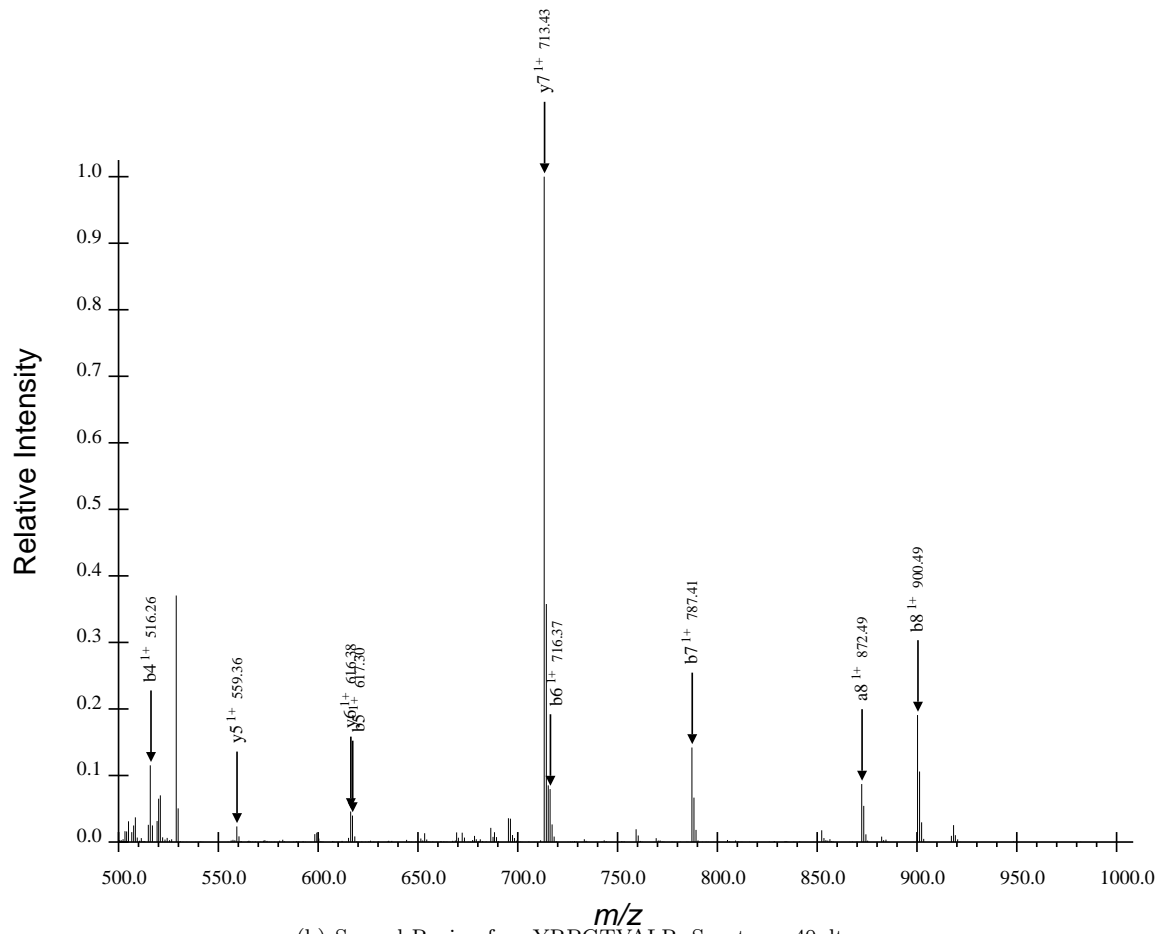

(b) Second Region for aYRPGTVALR, Spectrum 40.dta



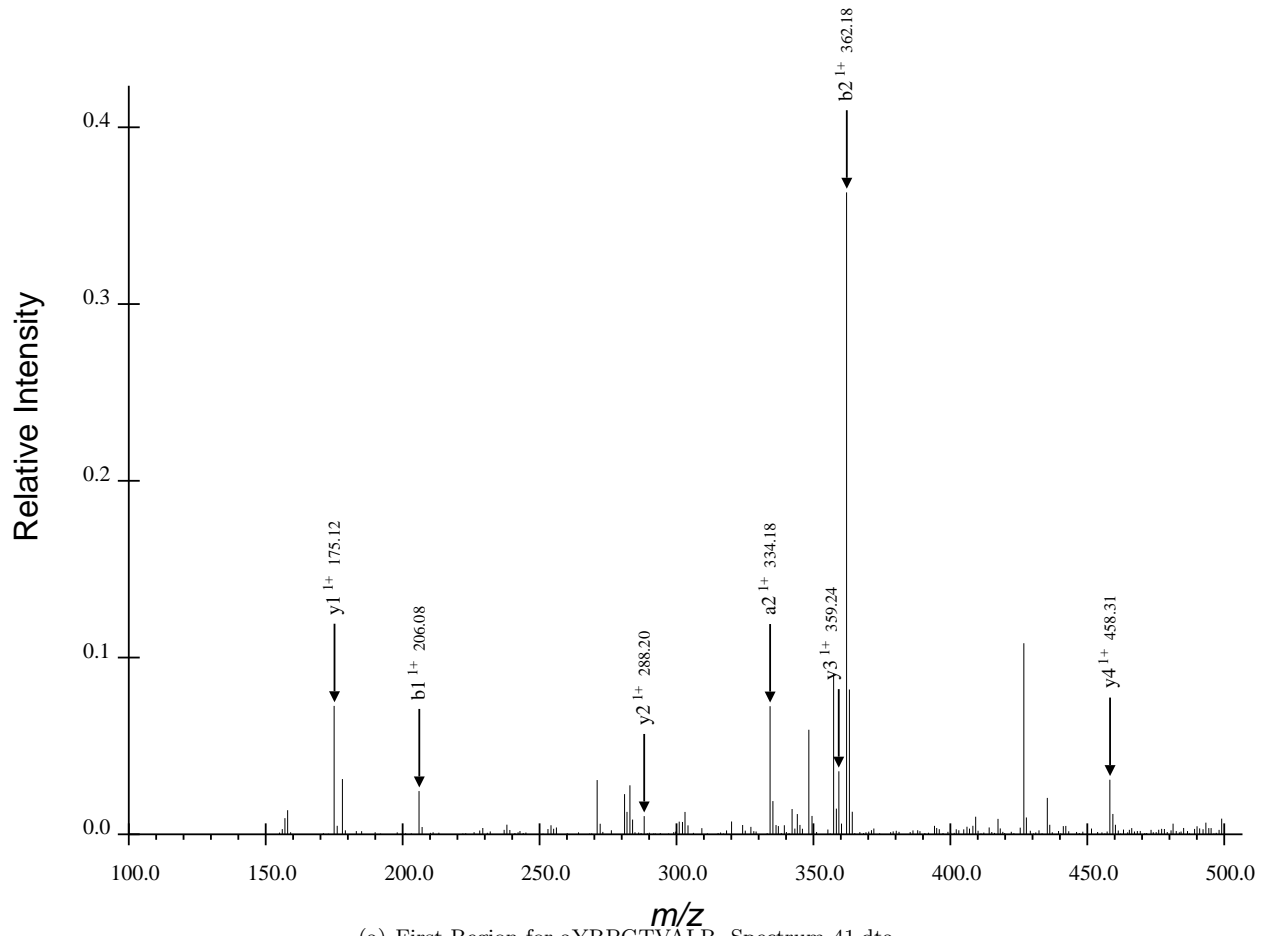

(a) First Region for aYRPGTVALR, Spectrum 41.dta

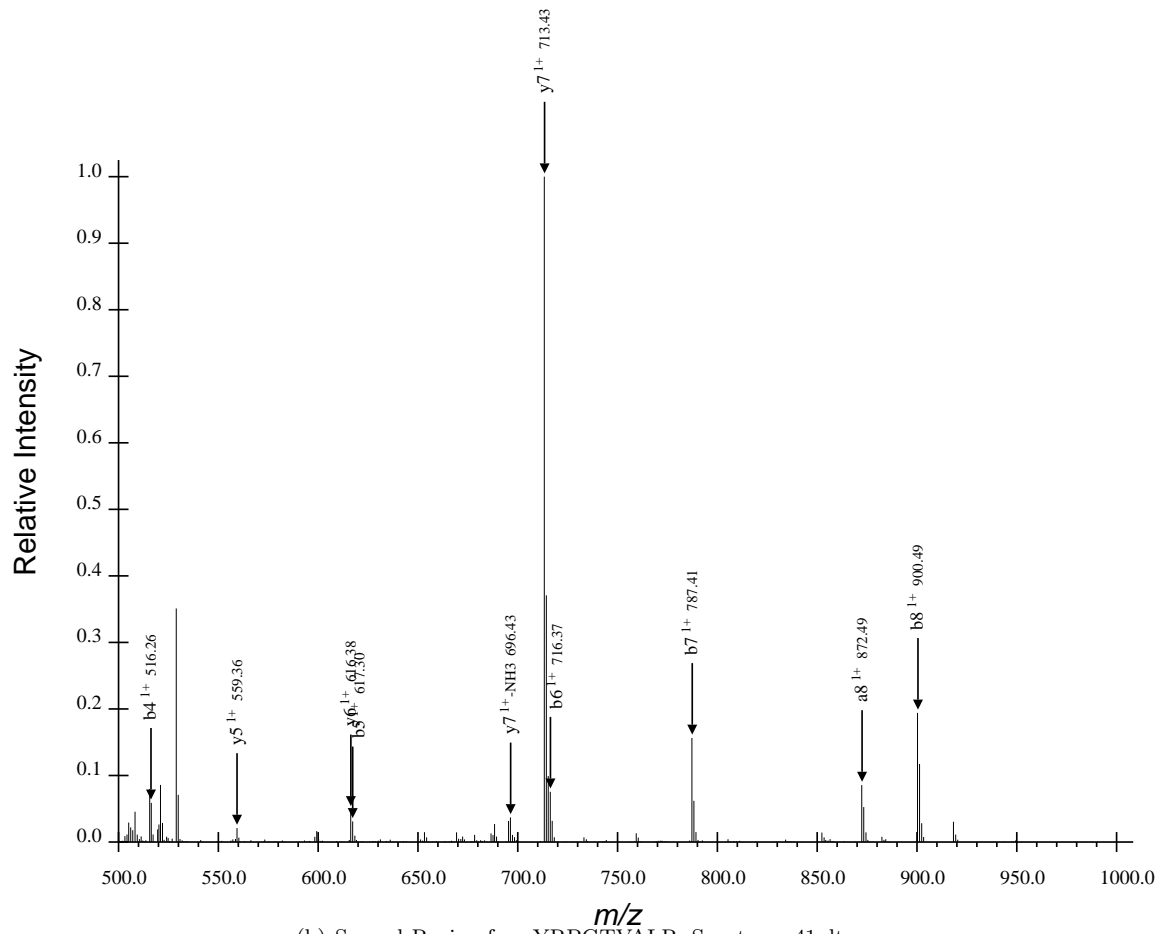

(b) Second Region for aYRPGTVALR, Spectrum 41.dta

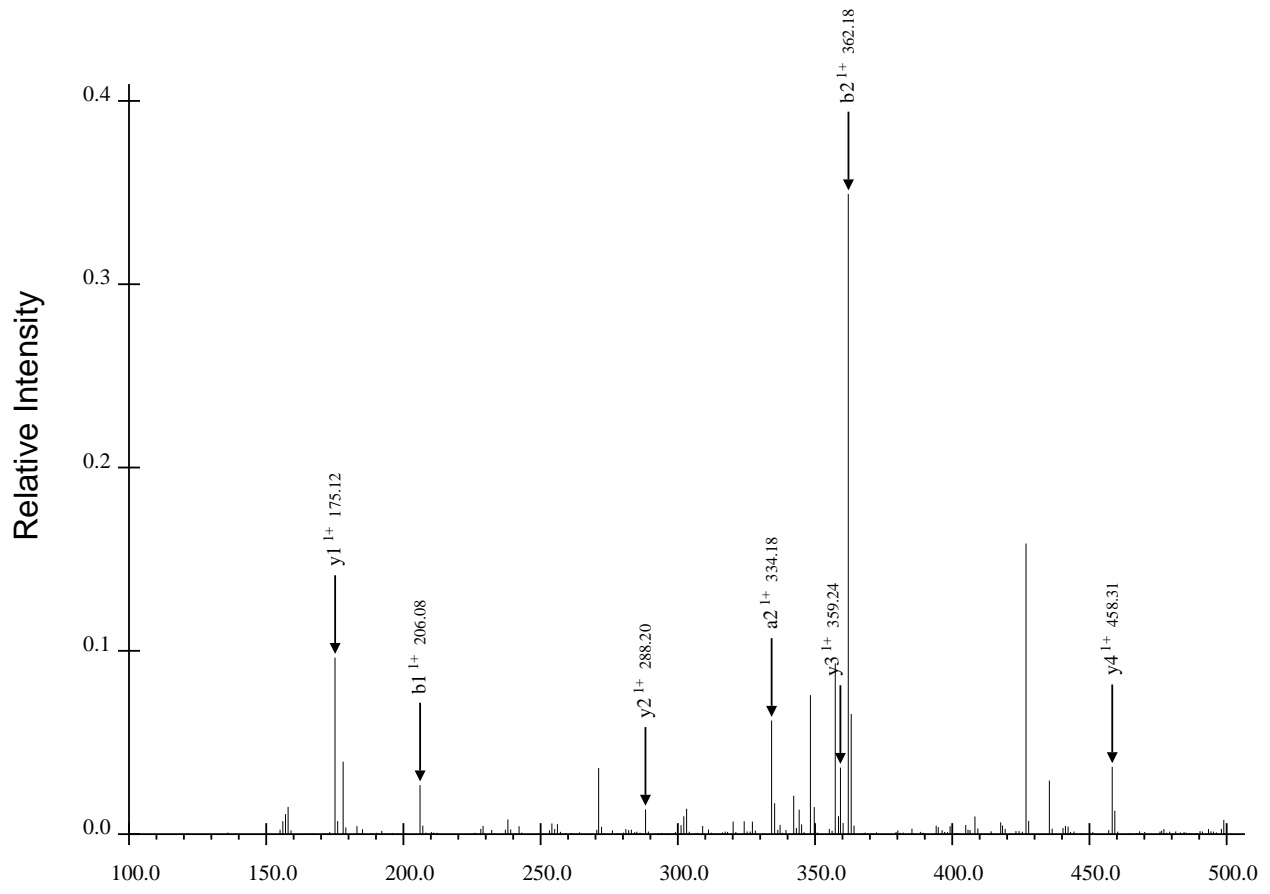

(a) First Region for aYRPGTVALR, Spectrum 42.dta

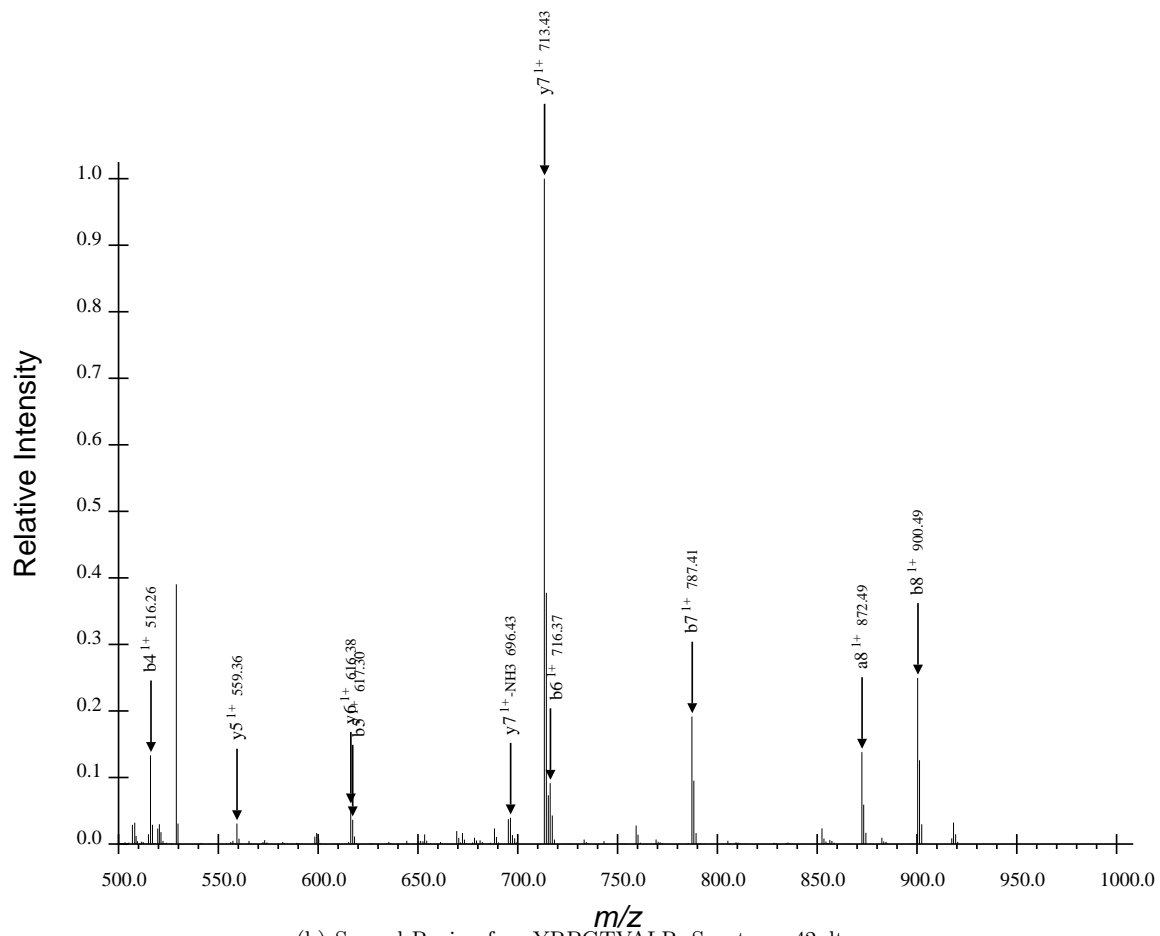

(b) Second Region for aYRPGTVALR, Spectrum 42.dta

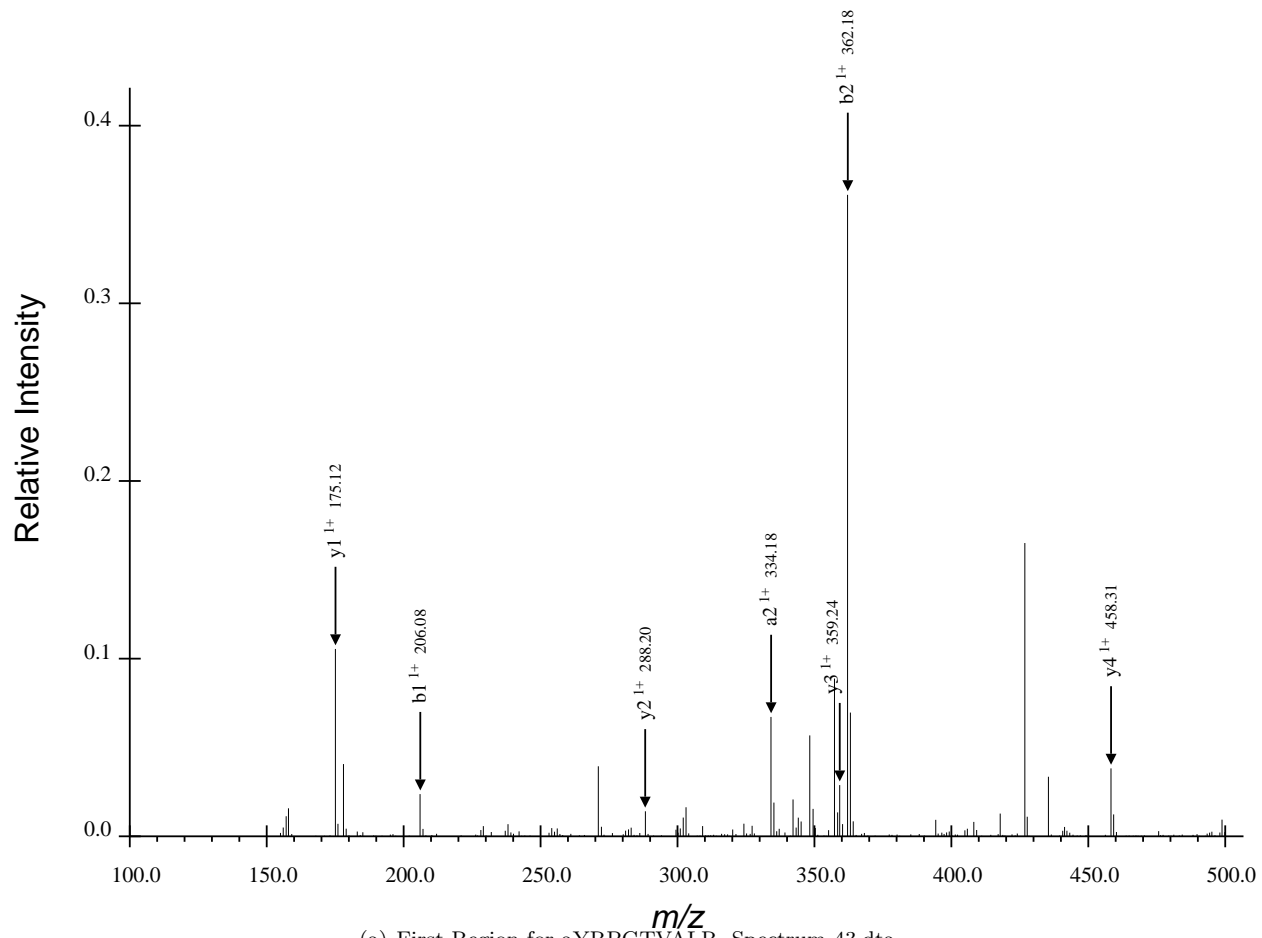

(a) First Region for aYRPGTVALR, Spectrum 43.dta

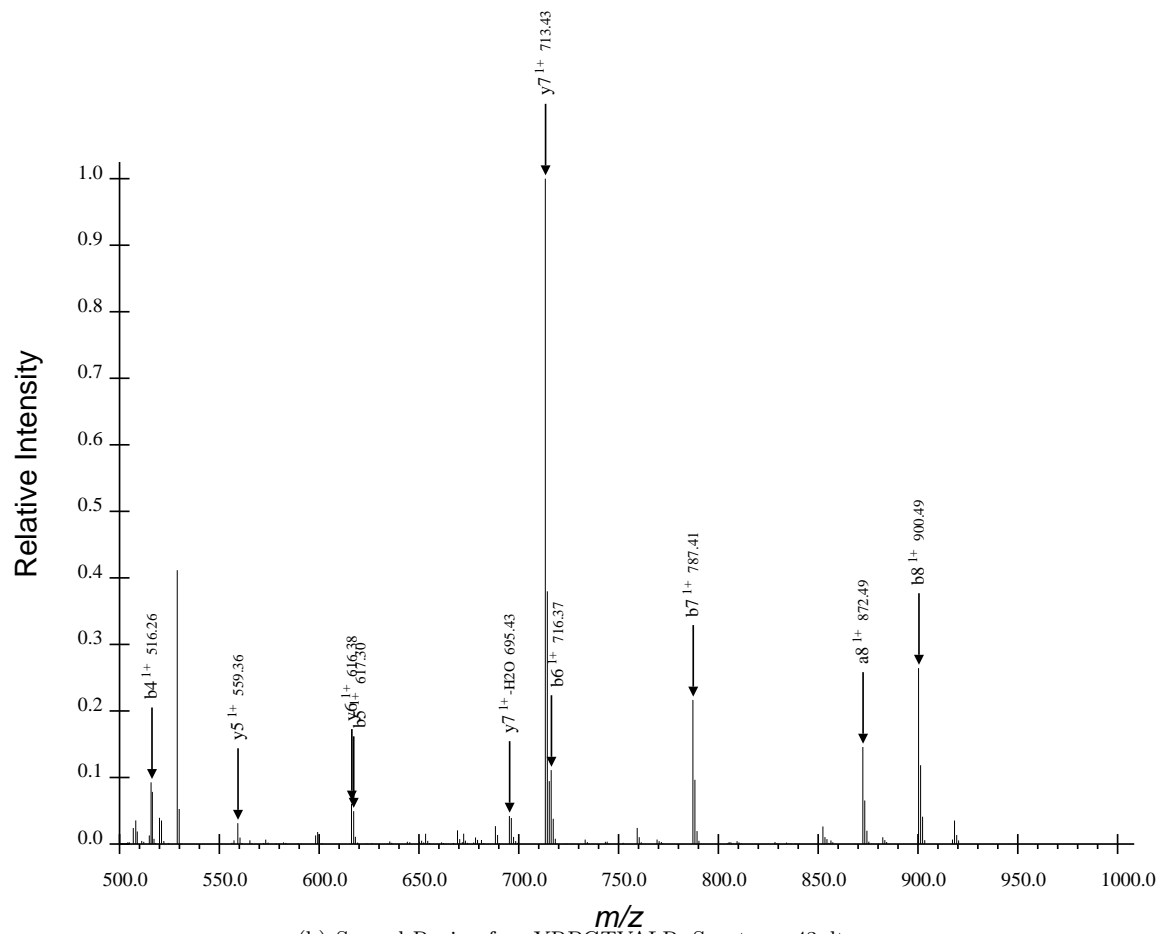

(b) Second Region for aYRPGTVALR, Spectrum 43.dta

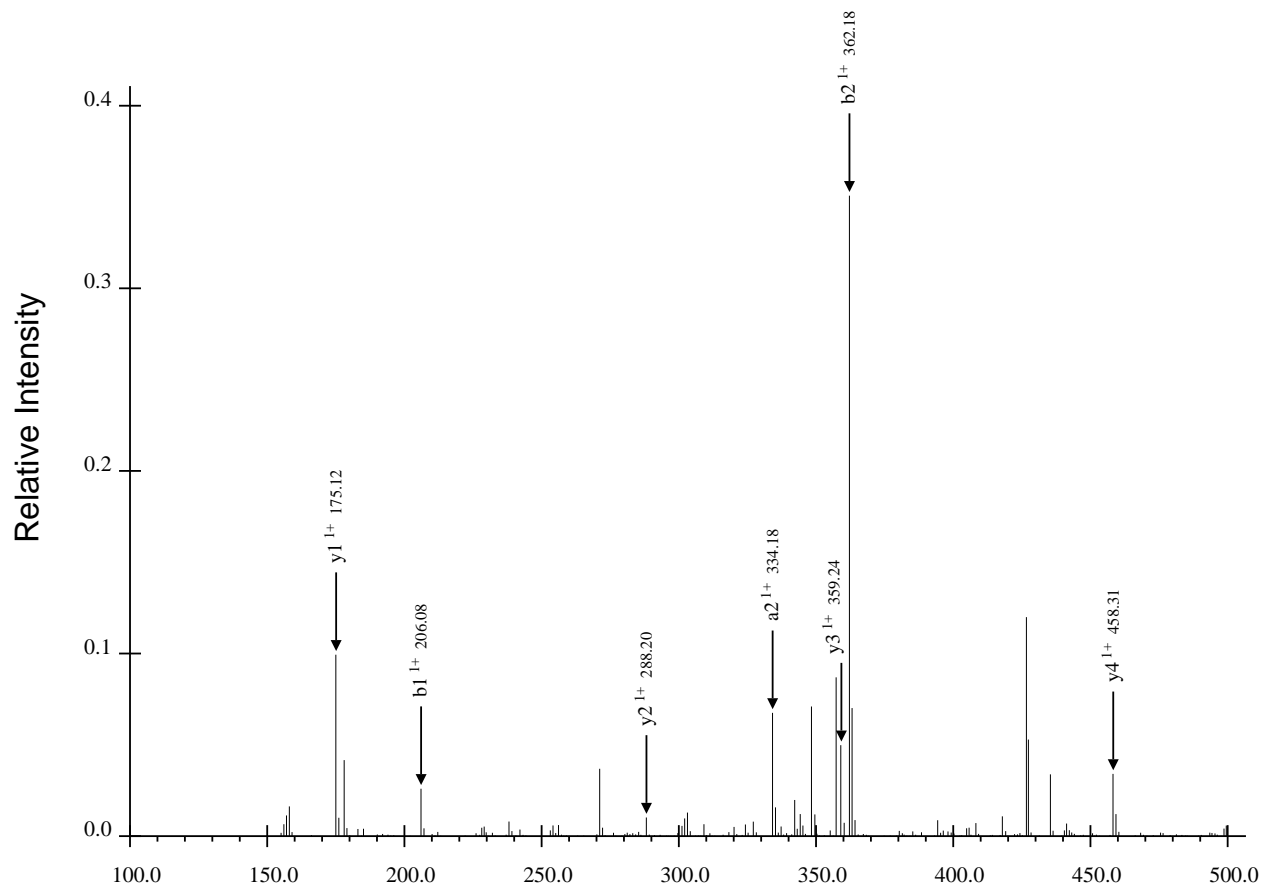

(a) First Region for aYRPGTVALR, Spectrum 44.dta

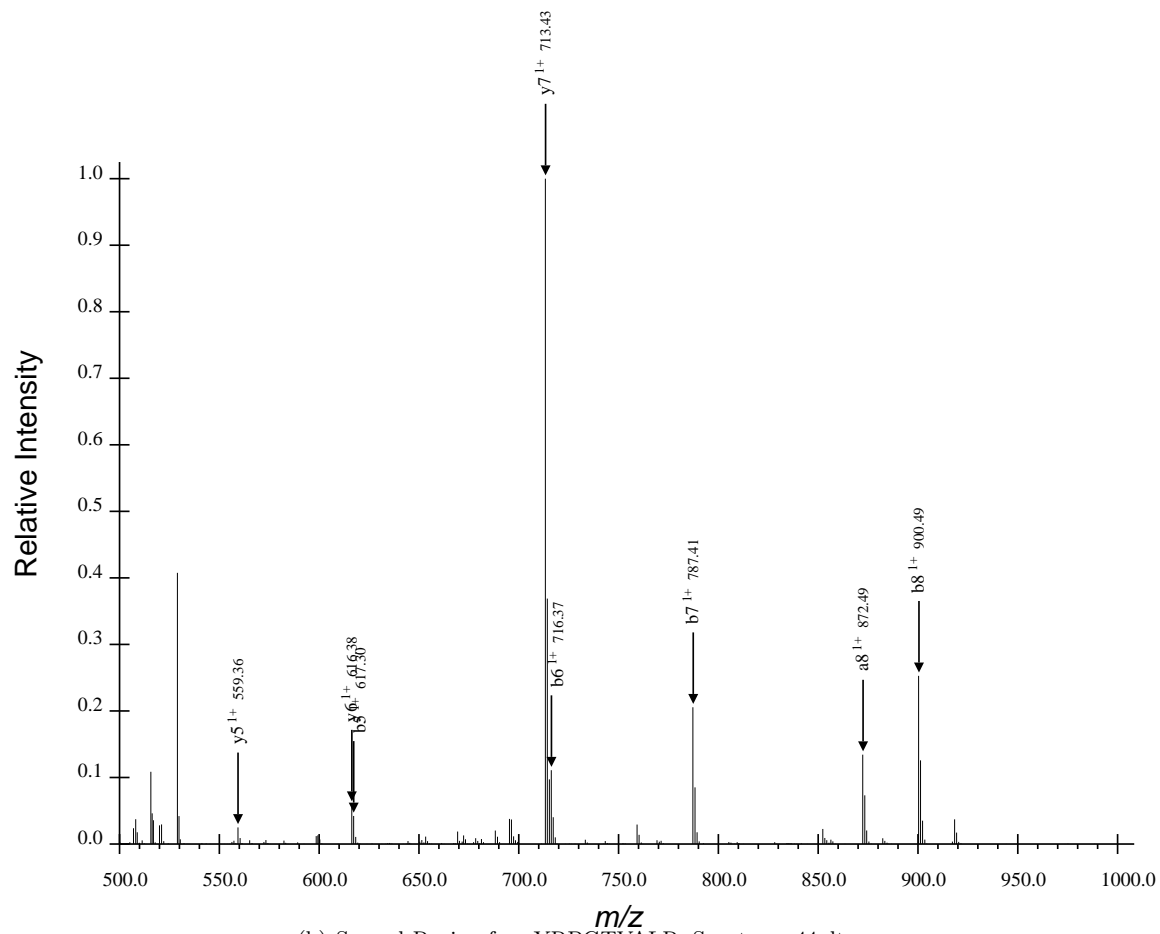

(b) Second Region for aYRPGTVALR, Spectrum 44.dta

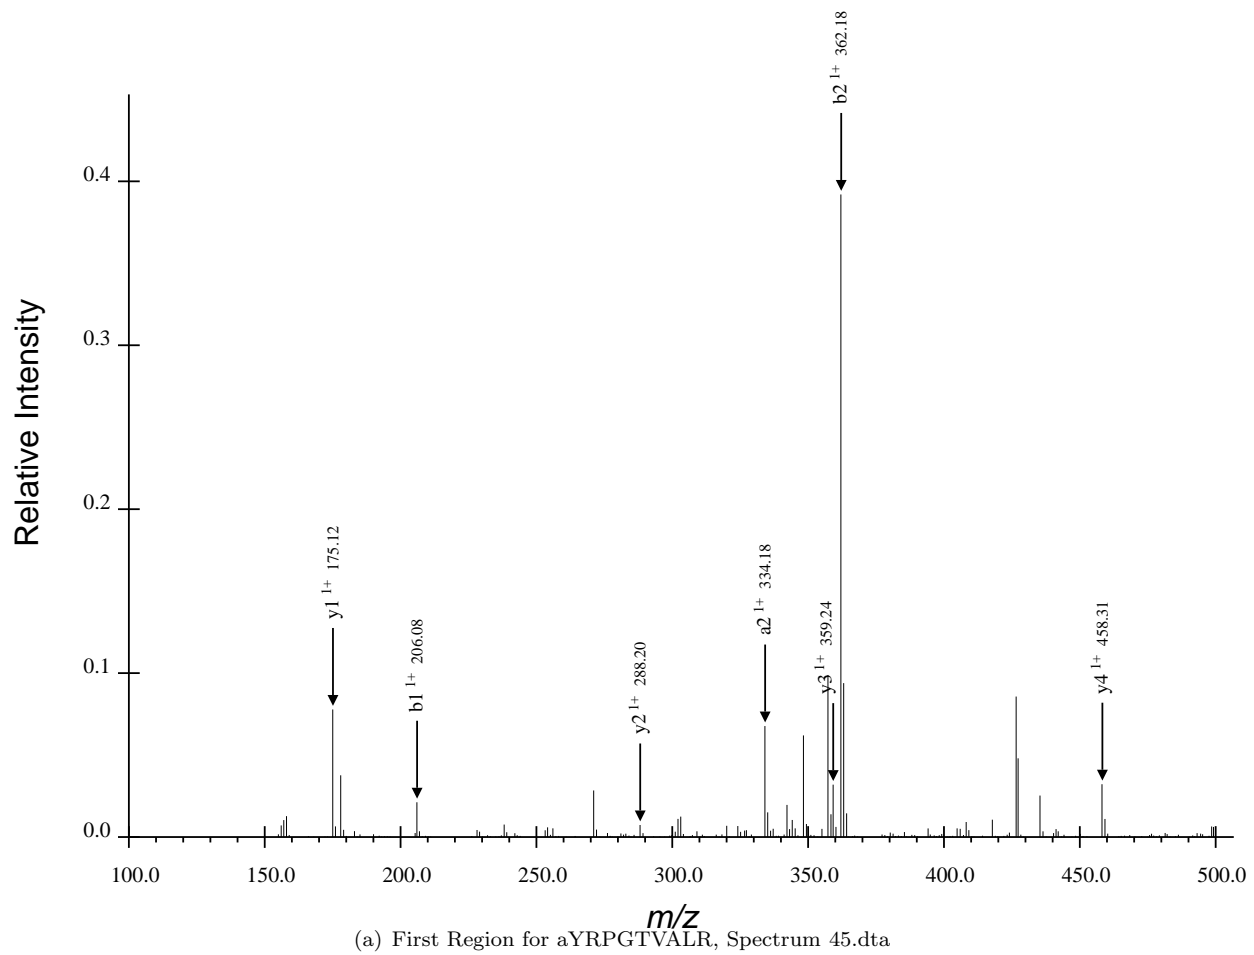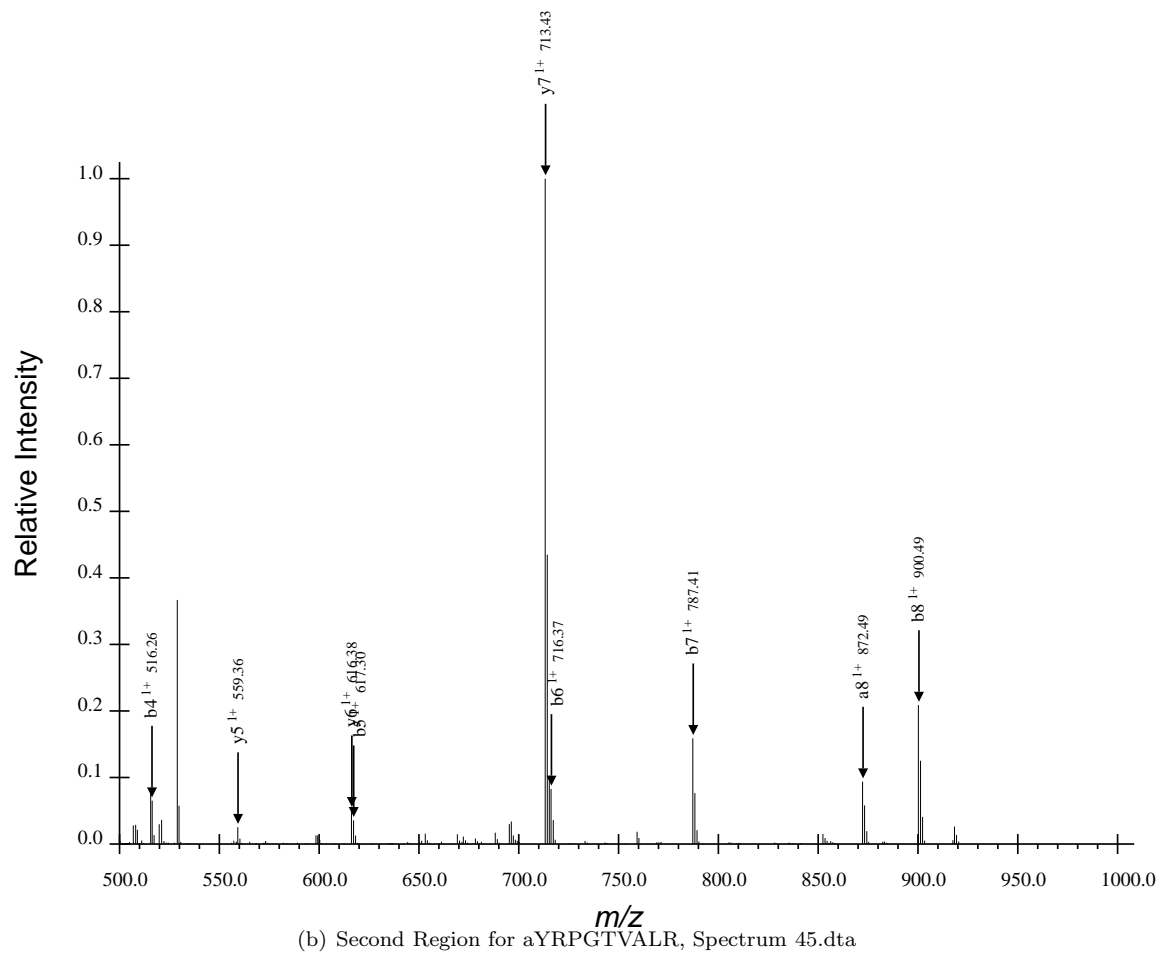

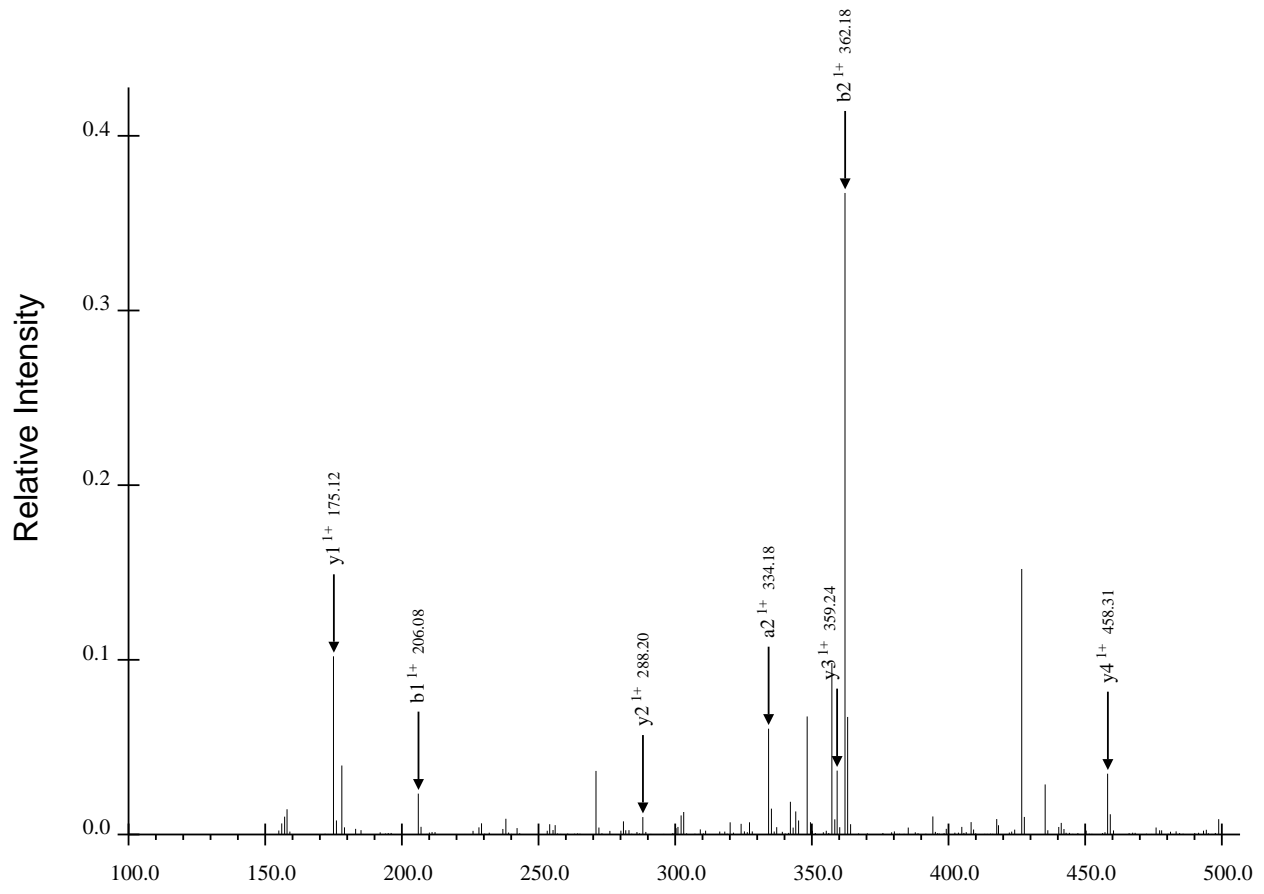

(a) First Region for aYRPGTVALR, Spectrum 46.dta

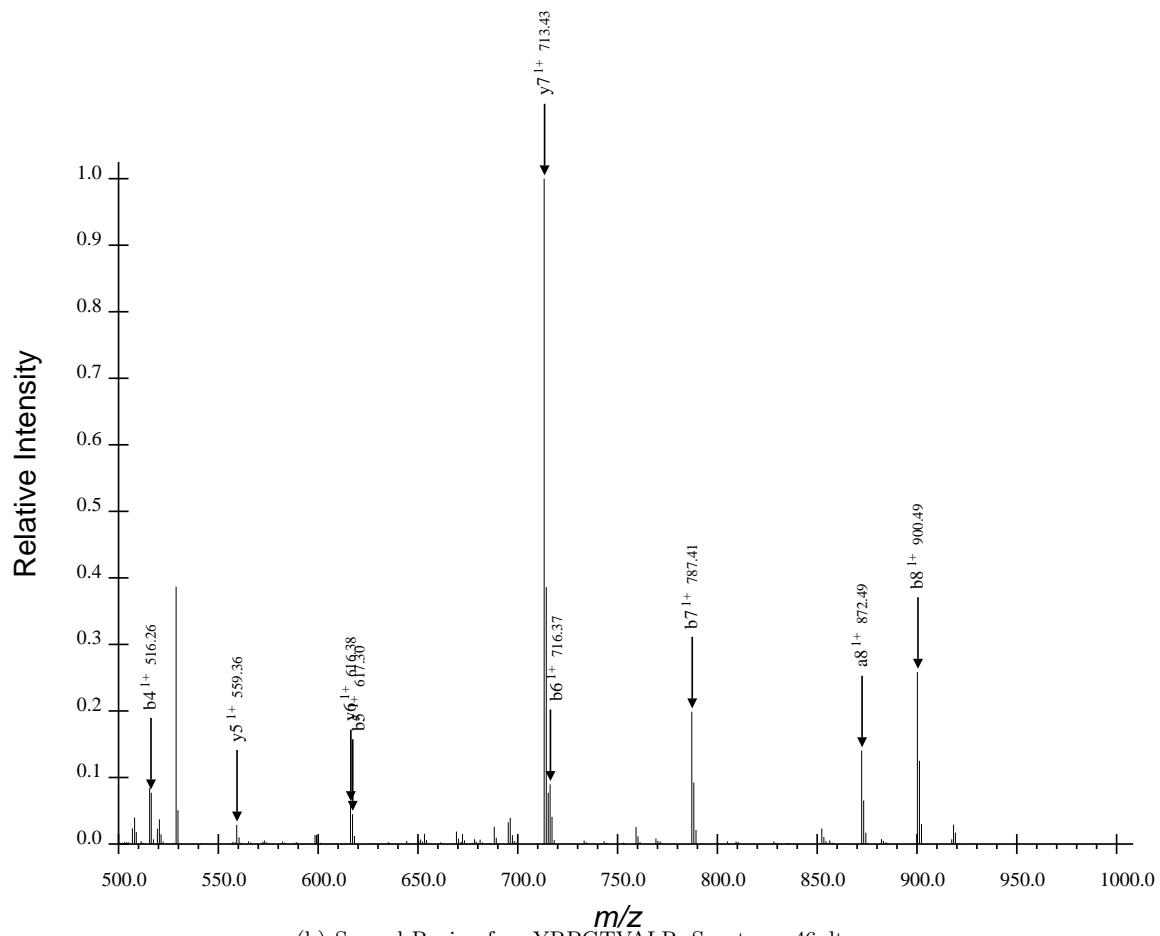

(b) Second Region for aYRPGTVALR, Spectrum 46.dta

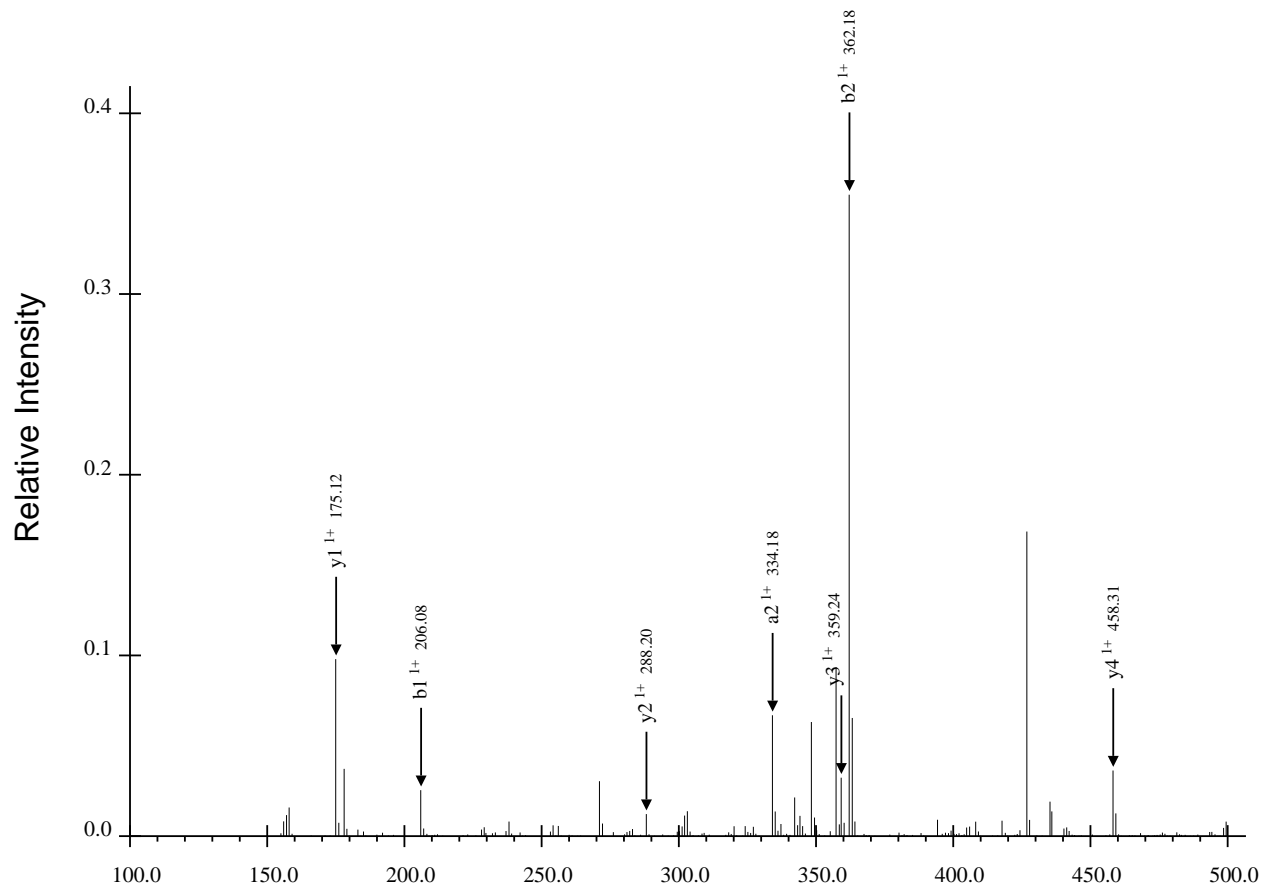

(a) First Region for aYRPGTVALR, Spectrum 47.dta

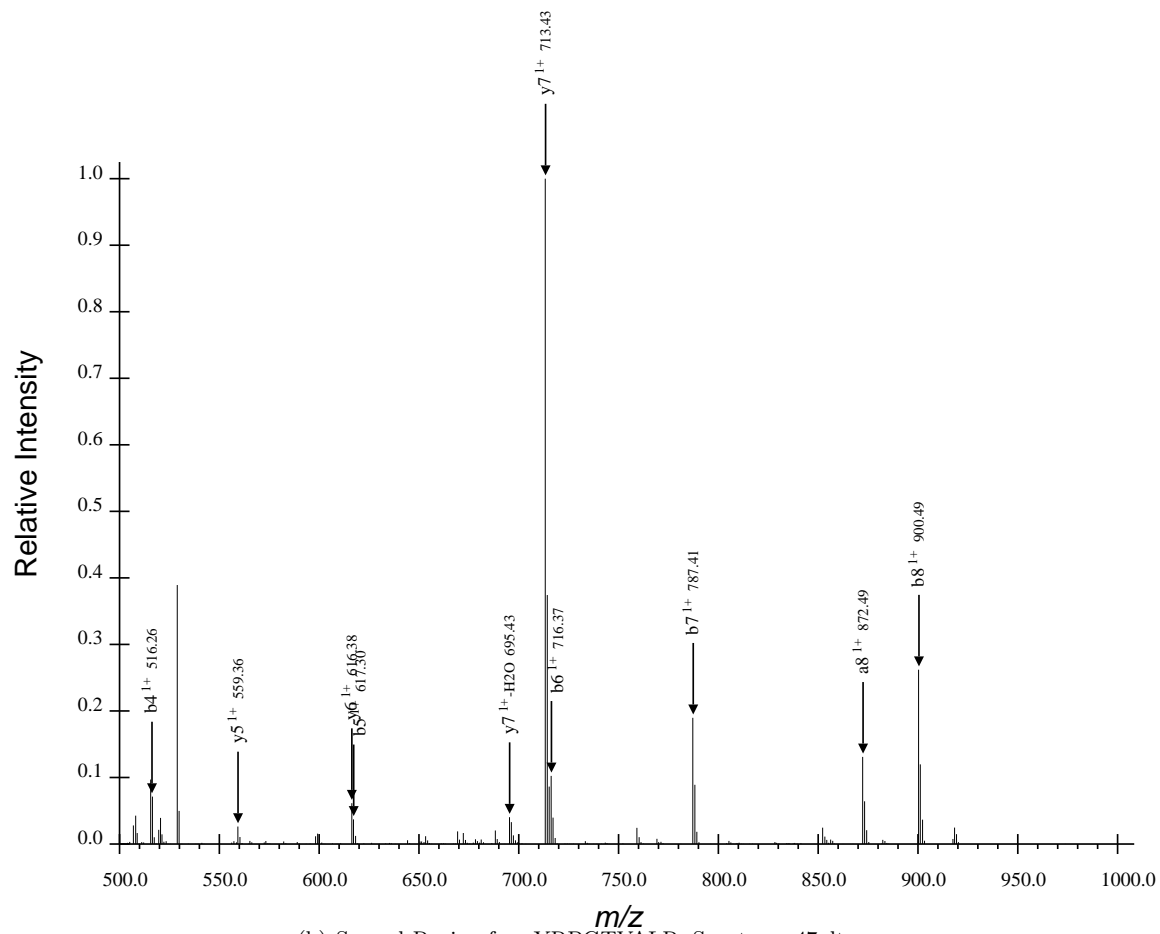

(b) Second Region for aYRPGTVALR, Spectrum 47.dta

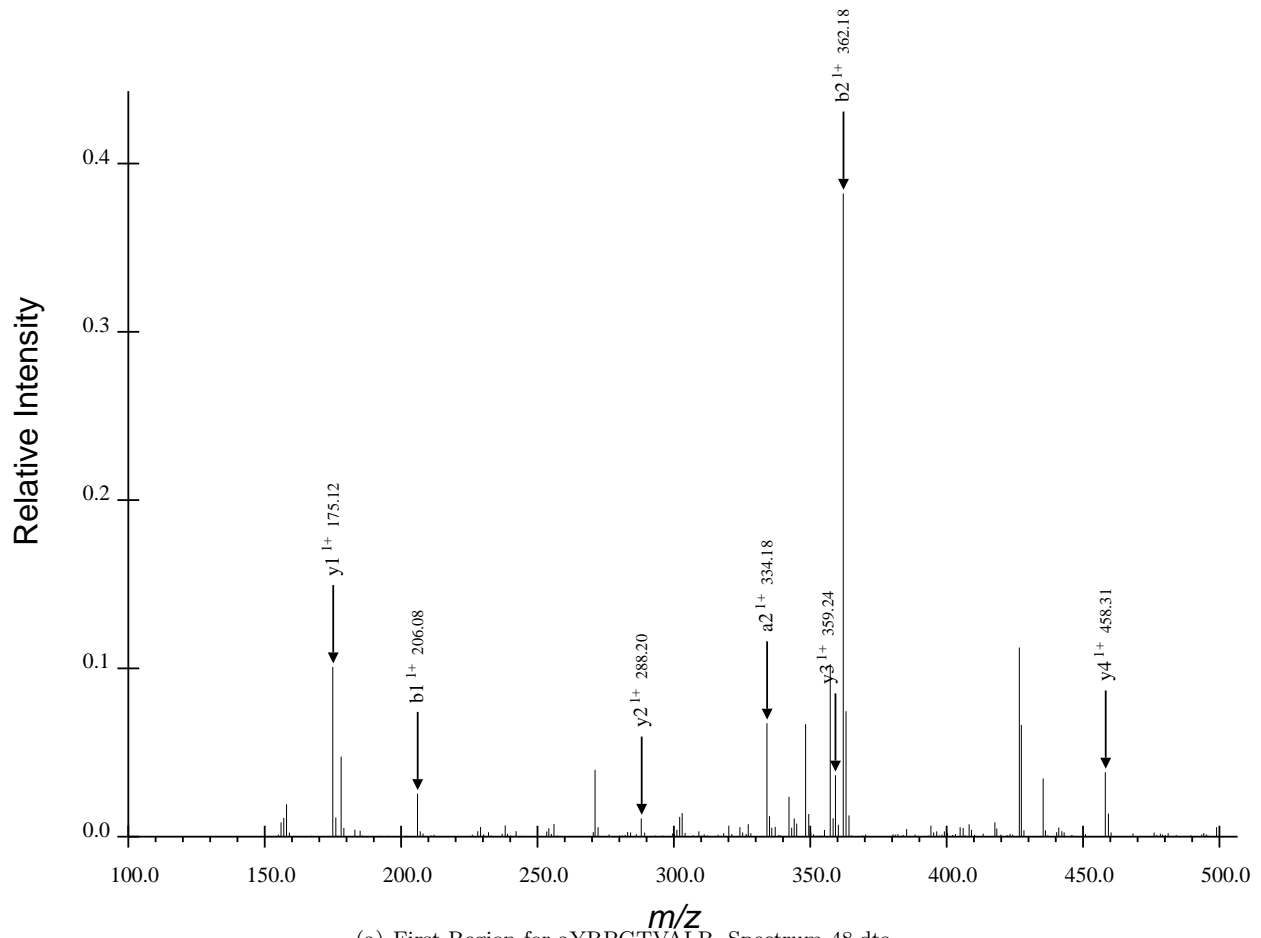

(a) First Region for aYRPGTVALR, Spectrum 48.dta

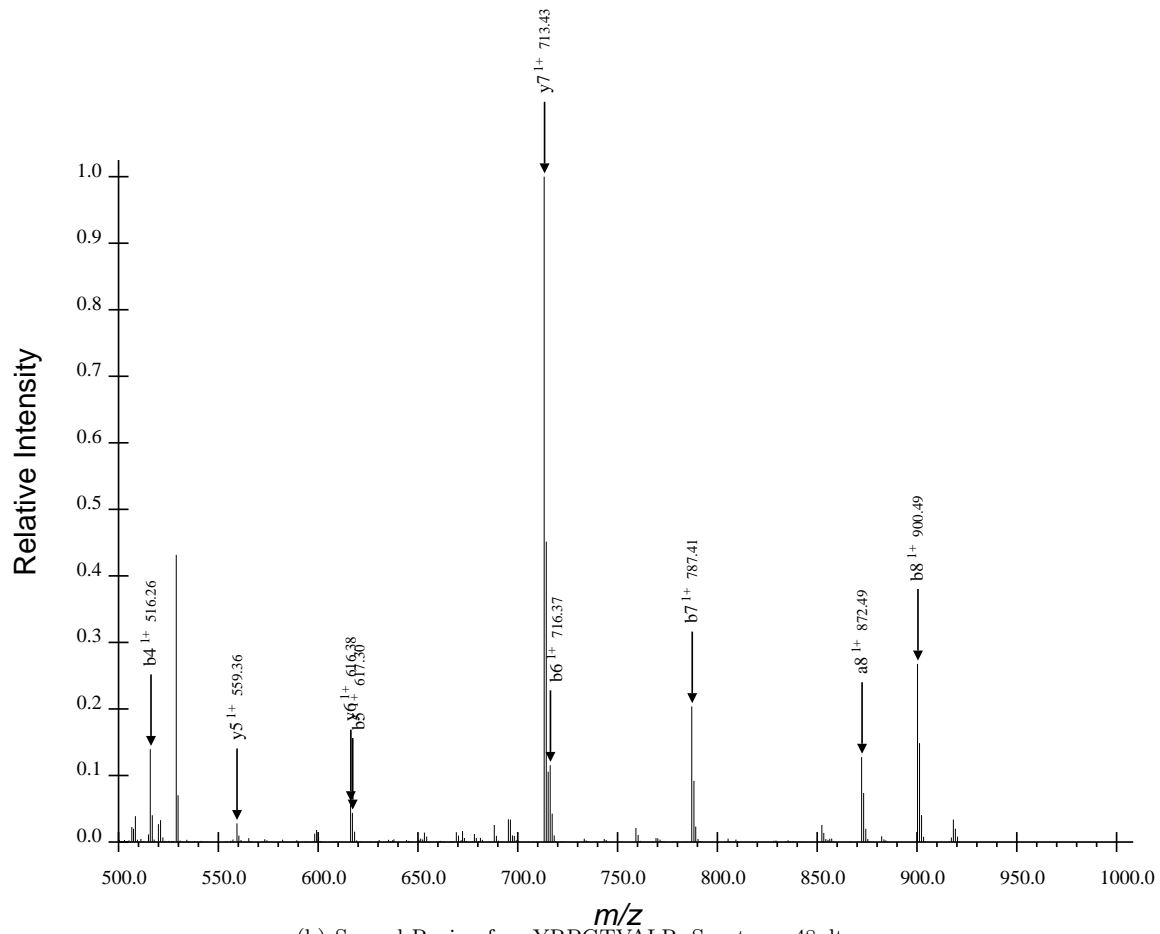

(b) Second Region for aYRPGTVALR, Spectrum 48.dta



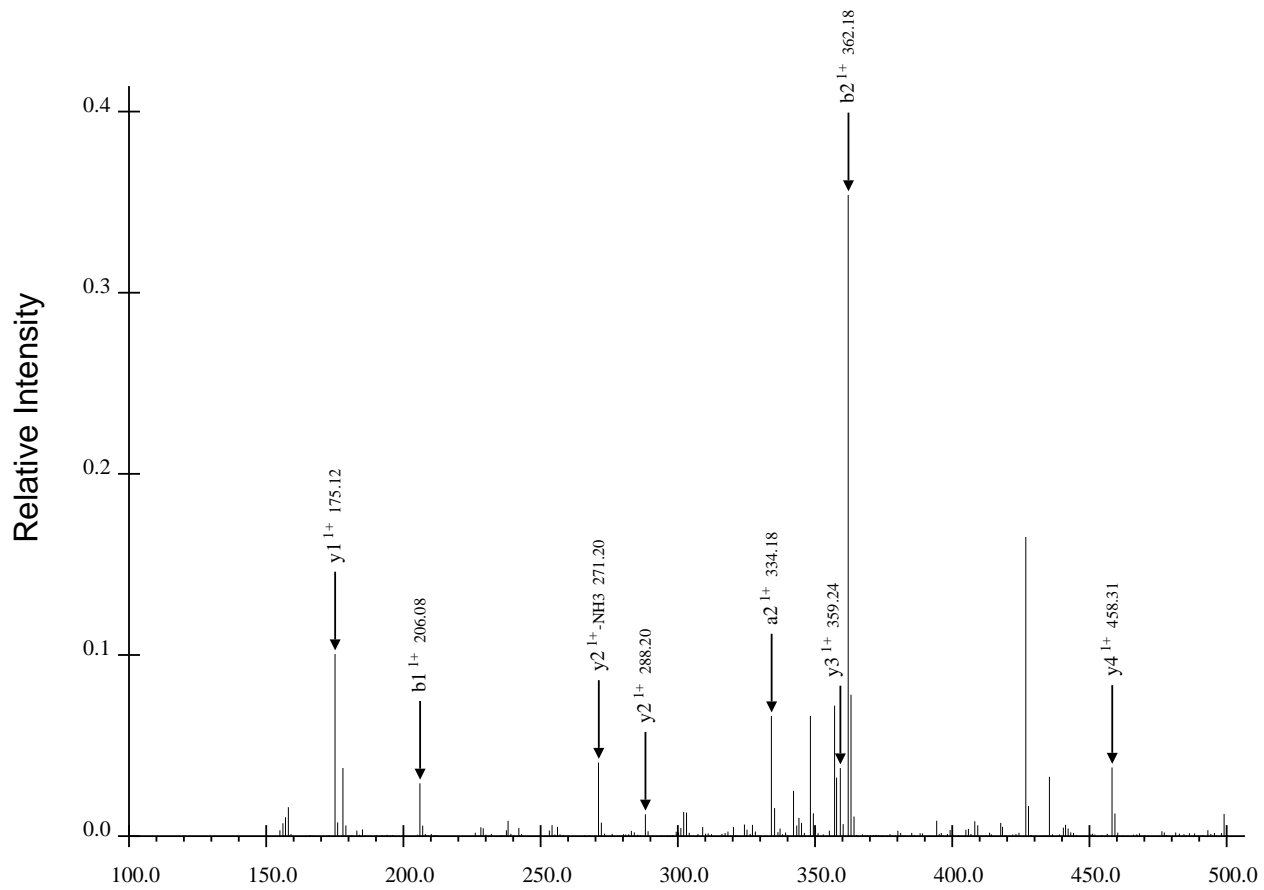

(a) First Region for aYRPGTVALR, Spectrum 49.dta

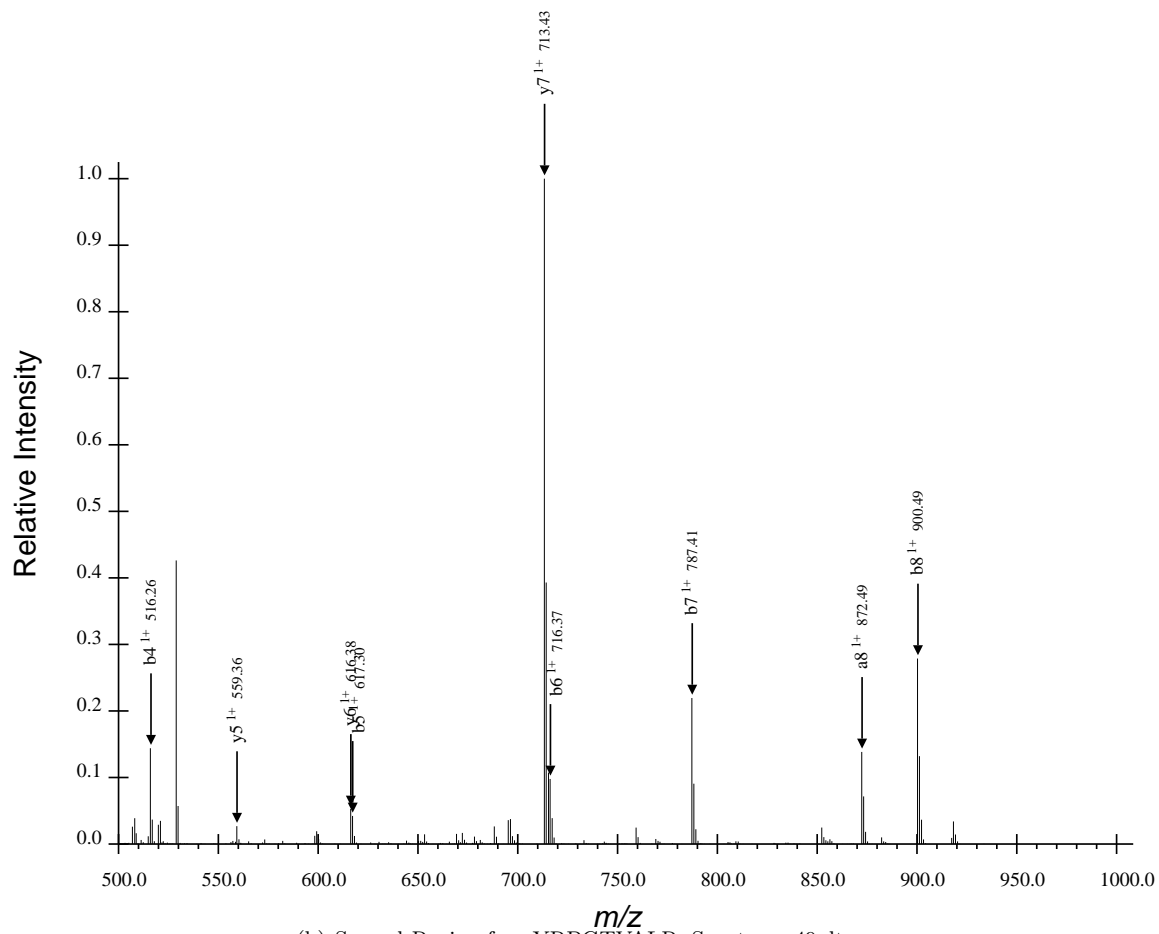

(b) Second Region for aYRPGTVALR, Spectrum 49.dta

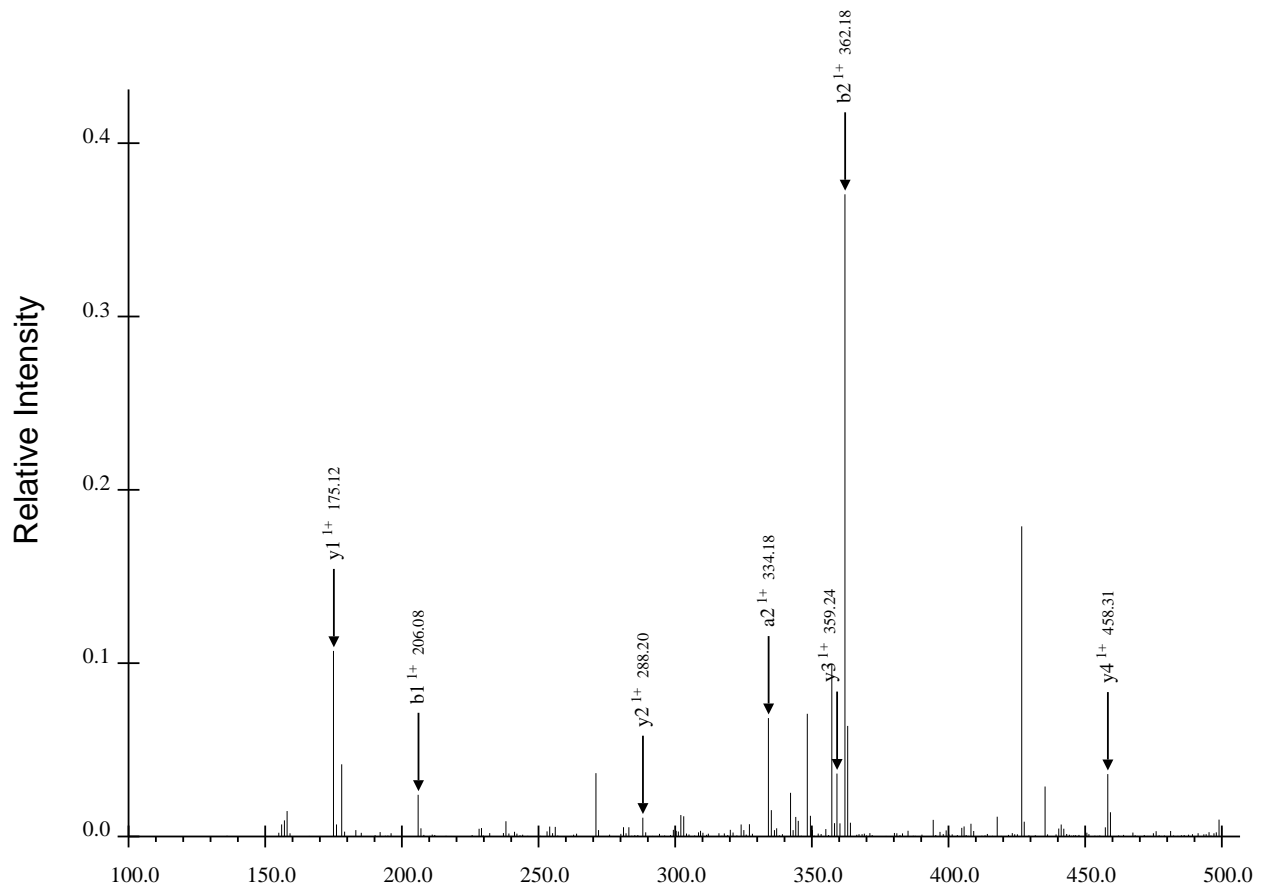

(a) First Region for aYRPGTVALR, Spectrum 50.dta

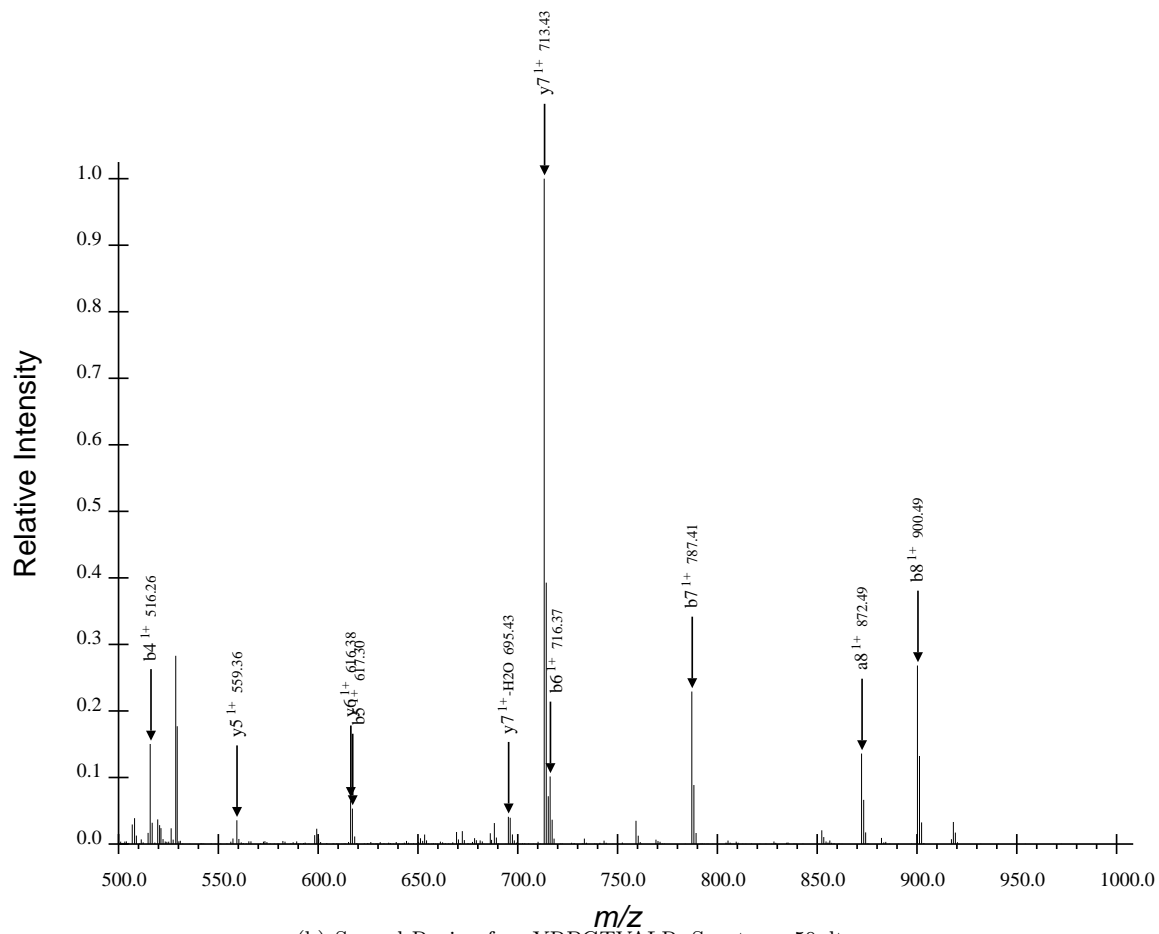

(b) Second Region for aYRPGTVALR, Spectrum 50.dta

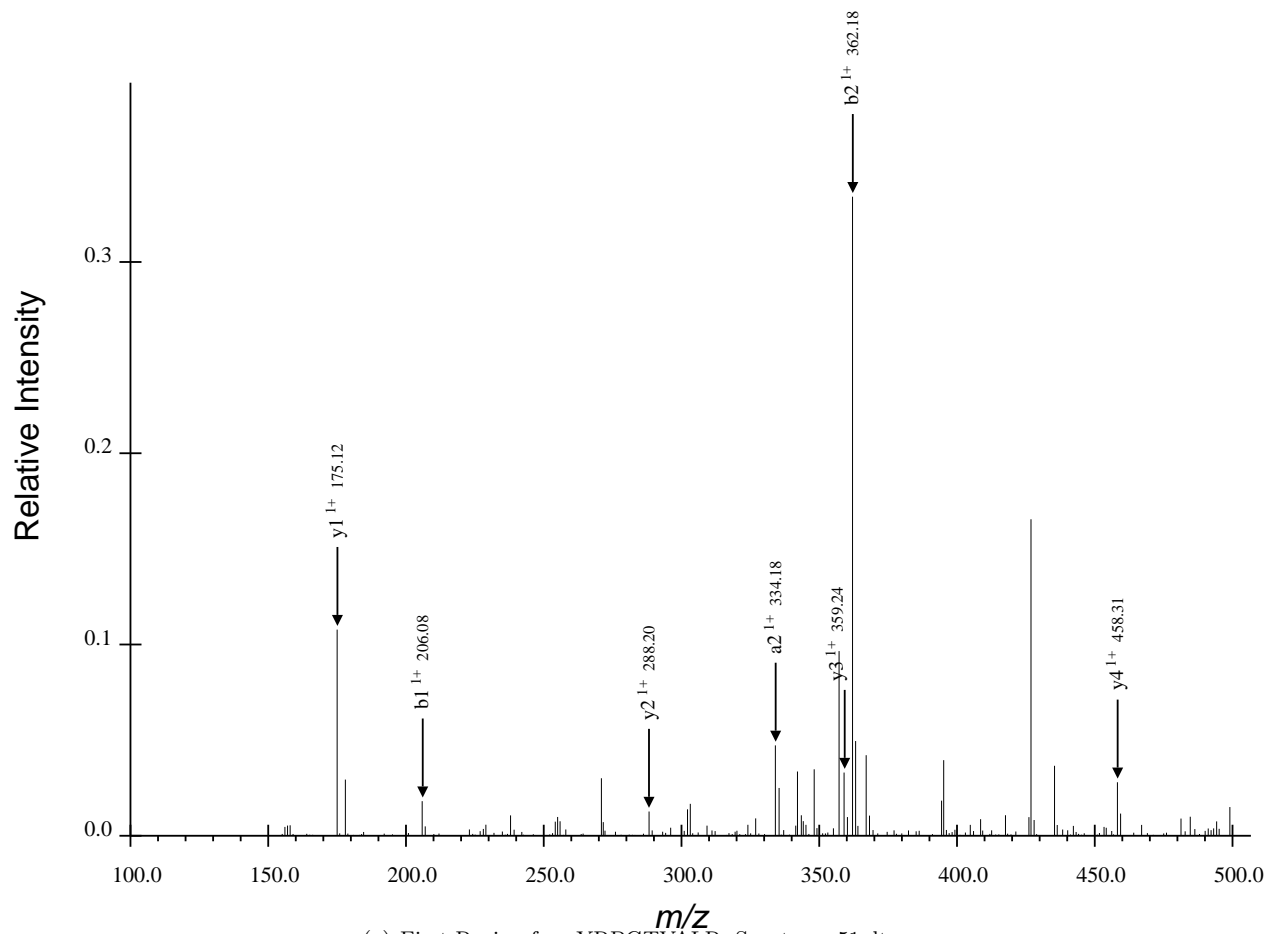

(a) First Region for aYRPGTVALR, Spectrum 51.dta

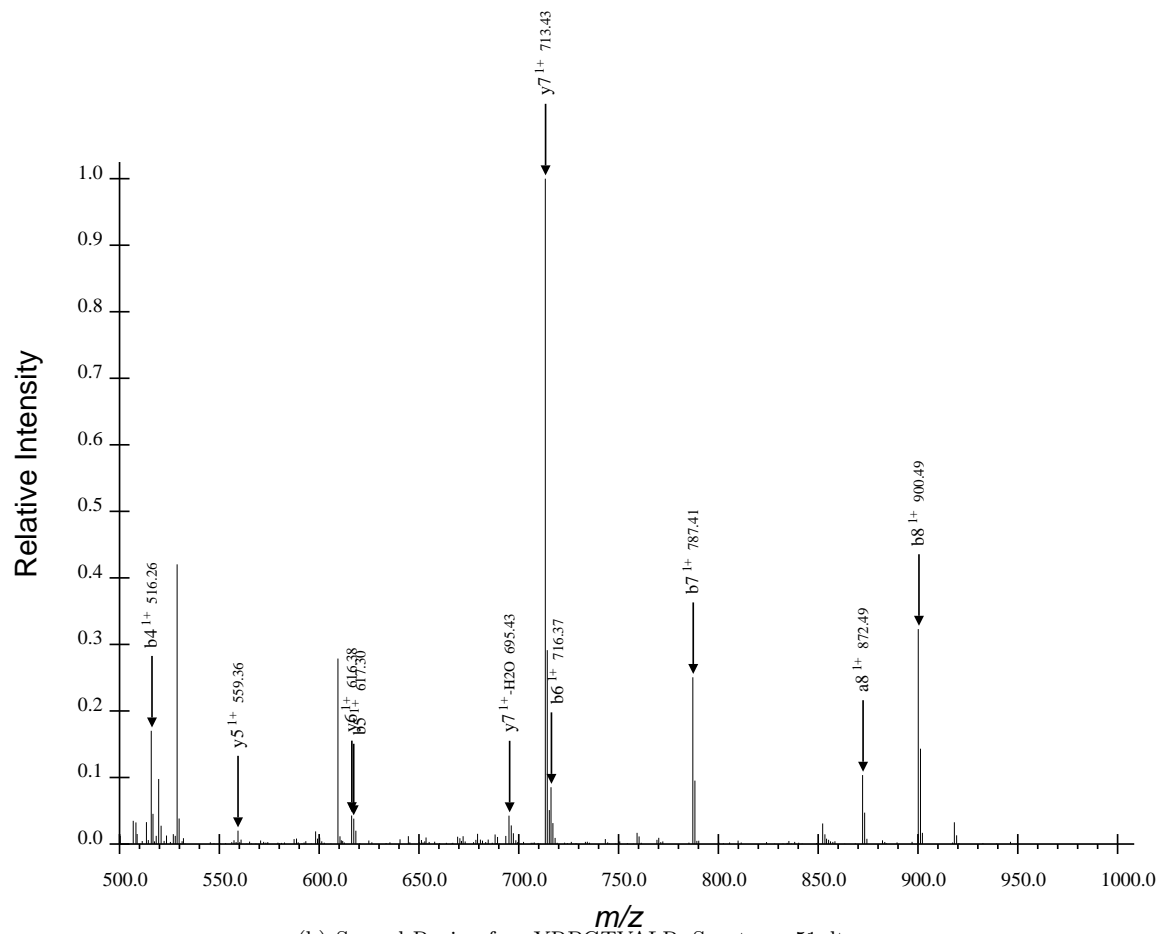

(b) Second Region for aYRPGTVALR, Spectrum 51.dta

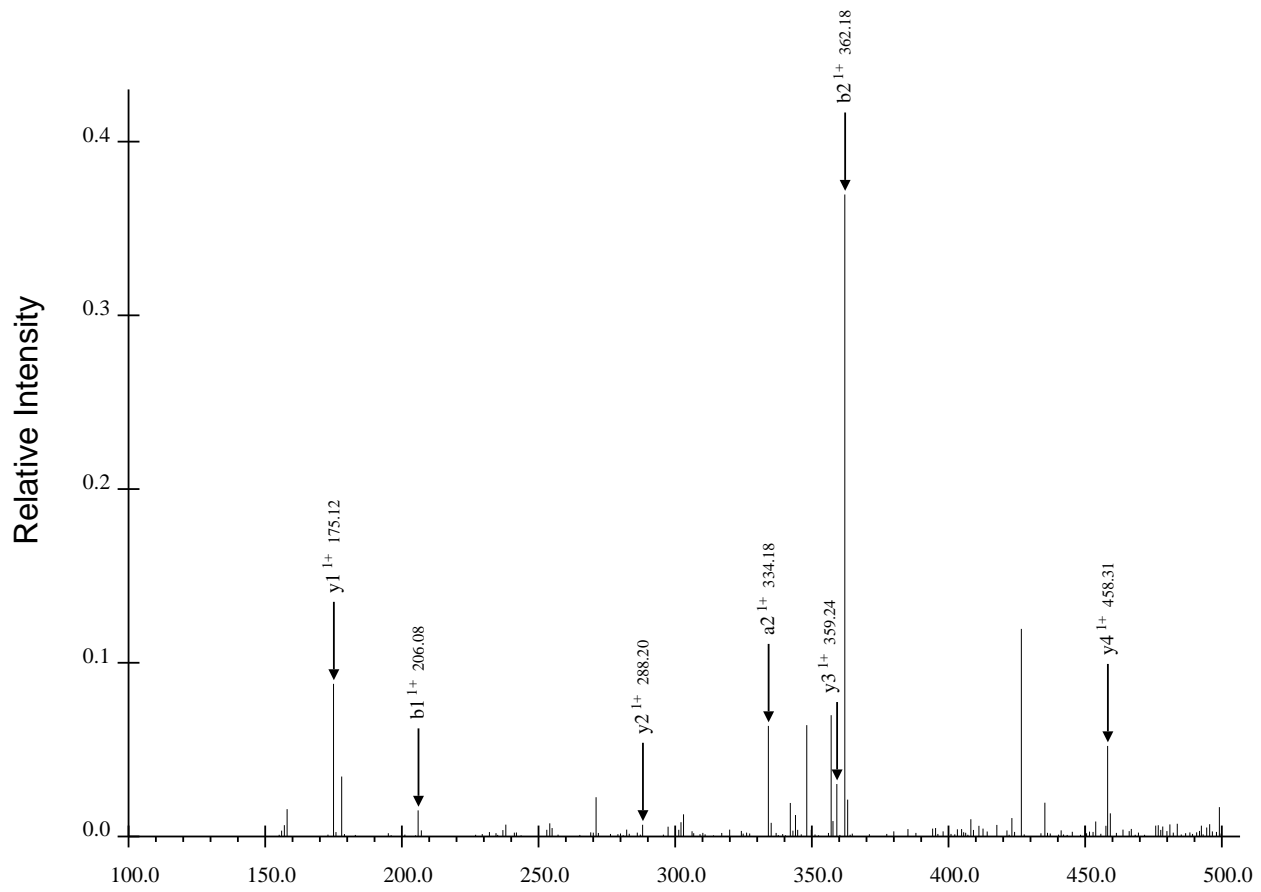

(a) First Region for aYRPGTVALR, Spectrum 52.dta

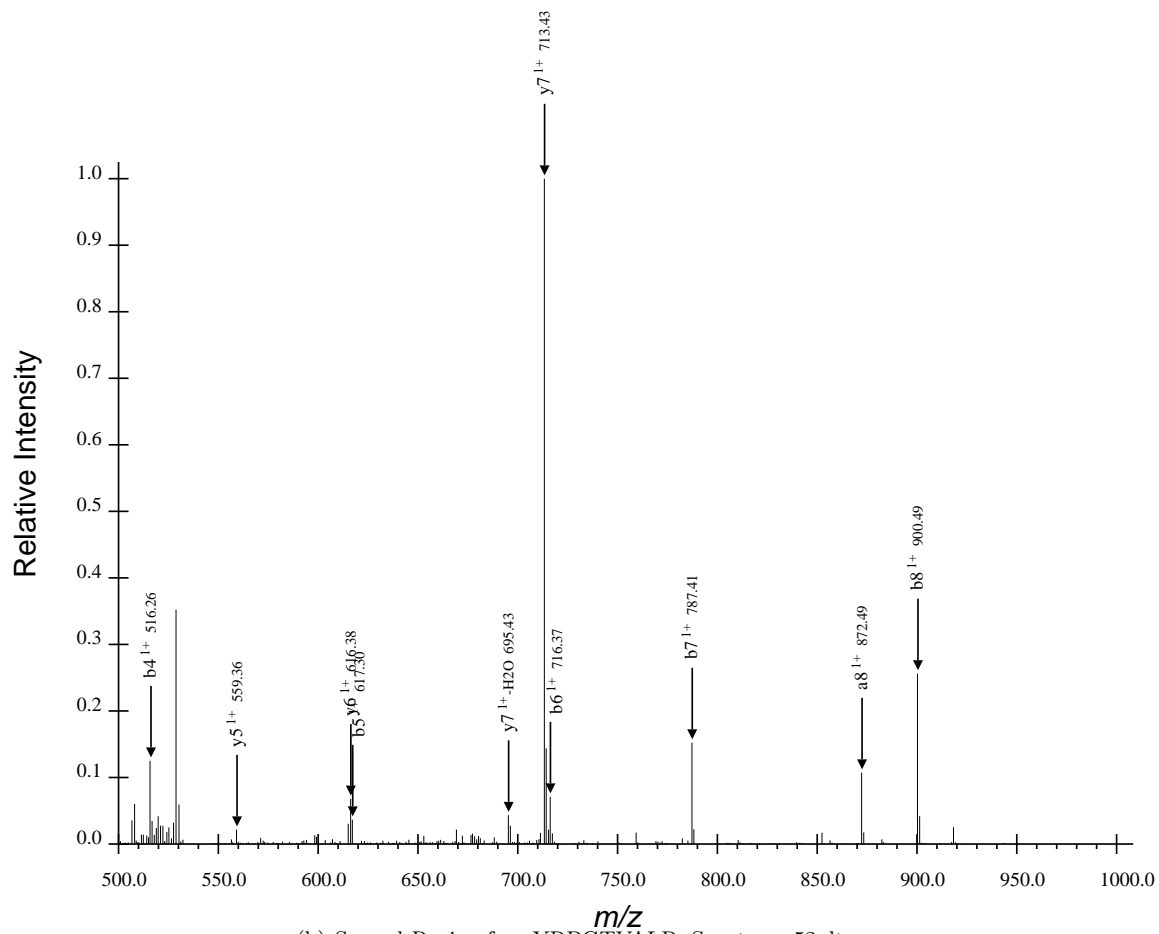

(b) Second Region for aYRPGTVALR, Spectrum 52.dta

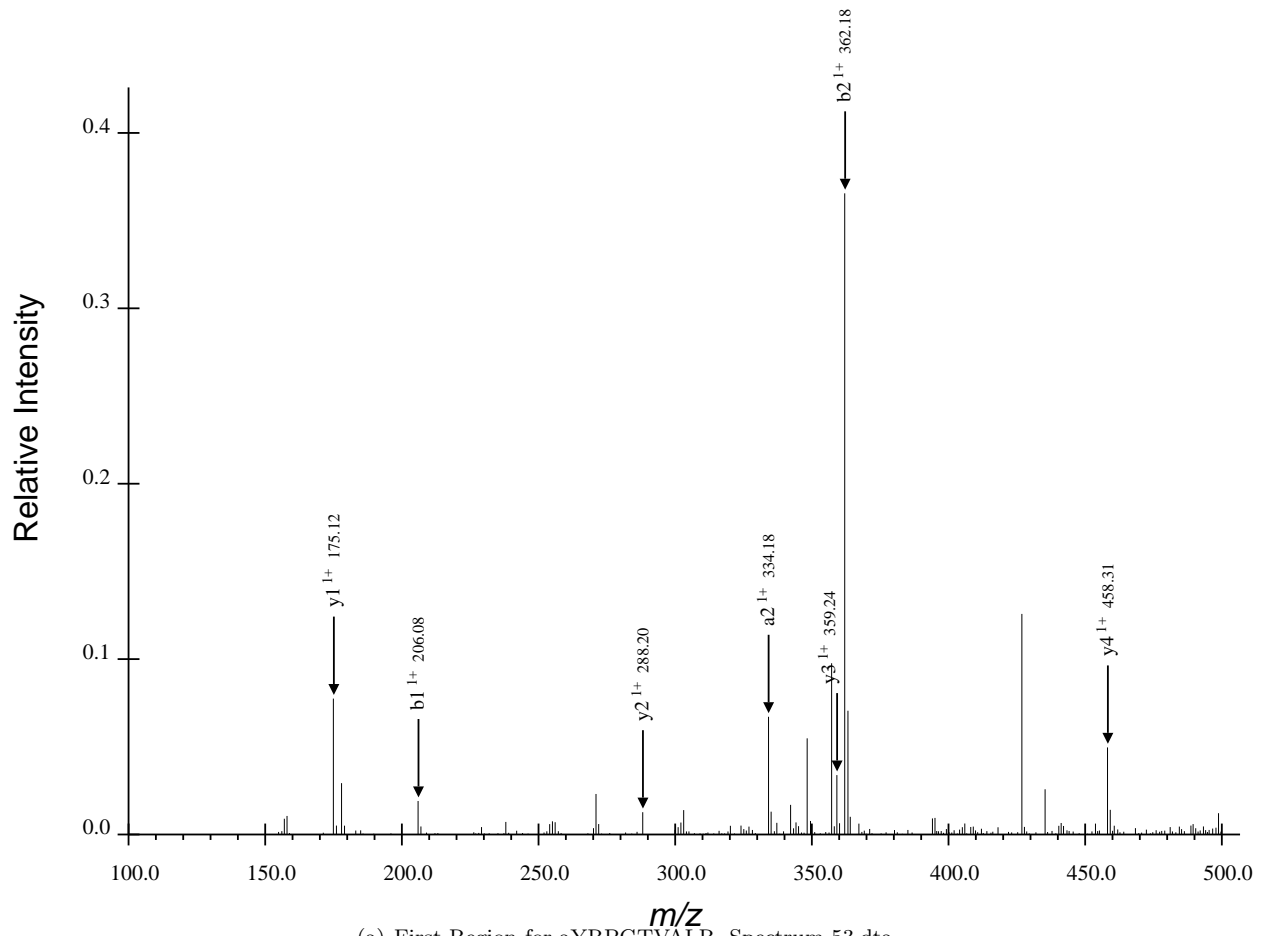

(a) First Region for aYRPGTVALR, Spectrum 53.dta

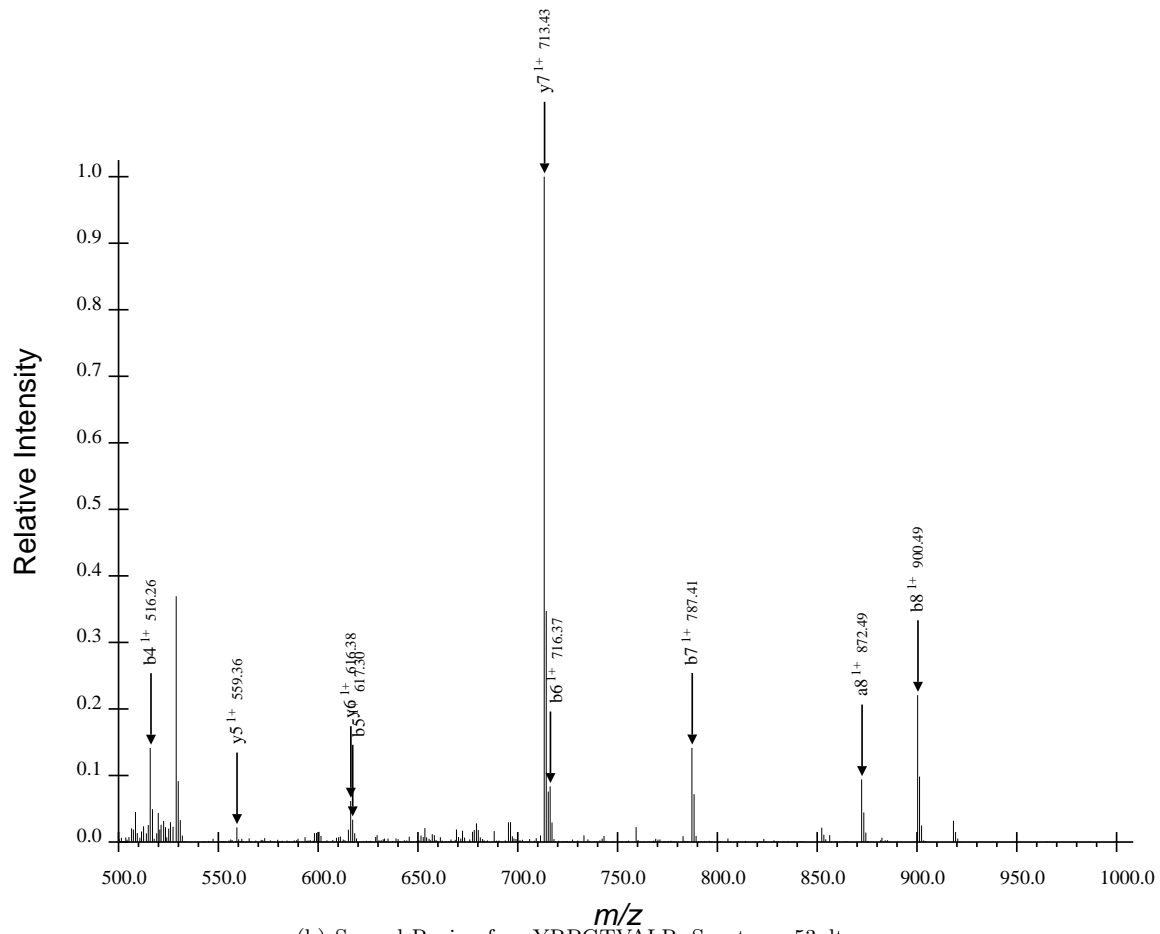

(b) Second Region for aYRPGTVALR, Spectrum 53.dta

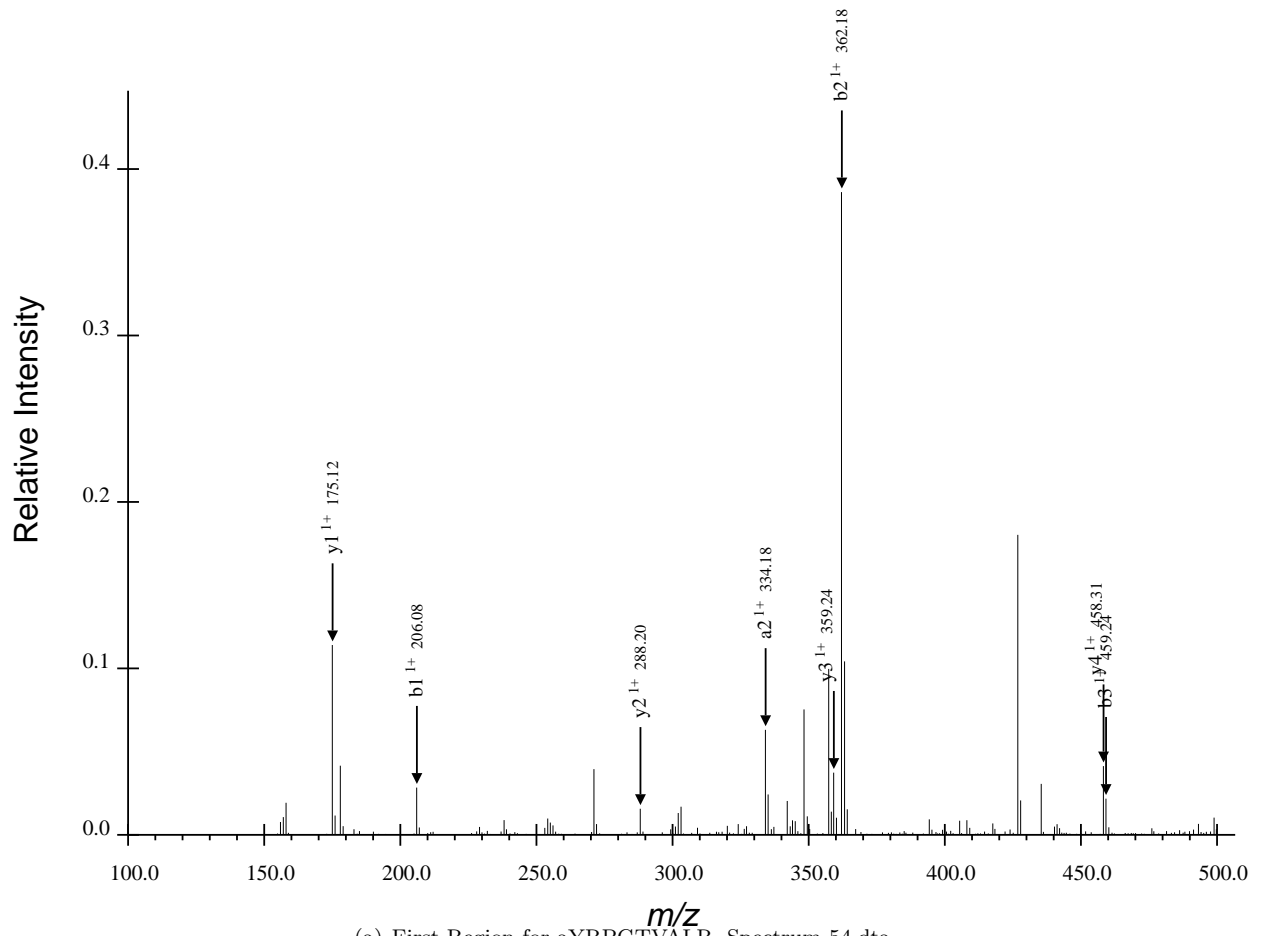

(a) First Region for aYRPGTVALR, Spectrum 54.dta

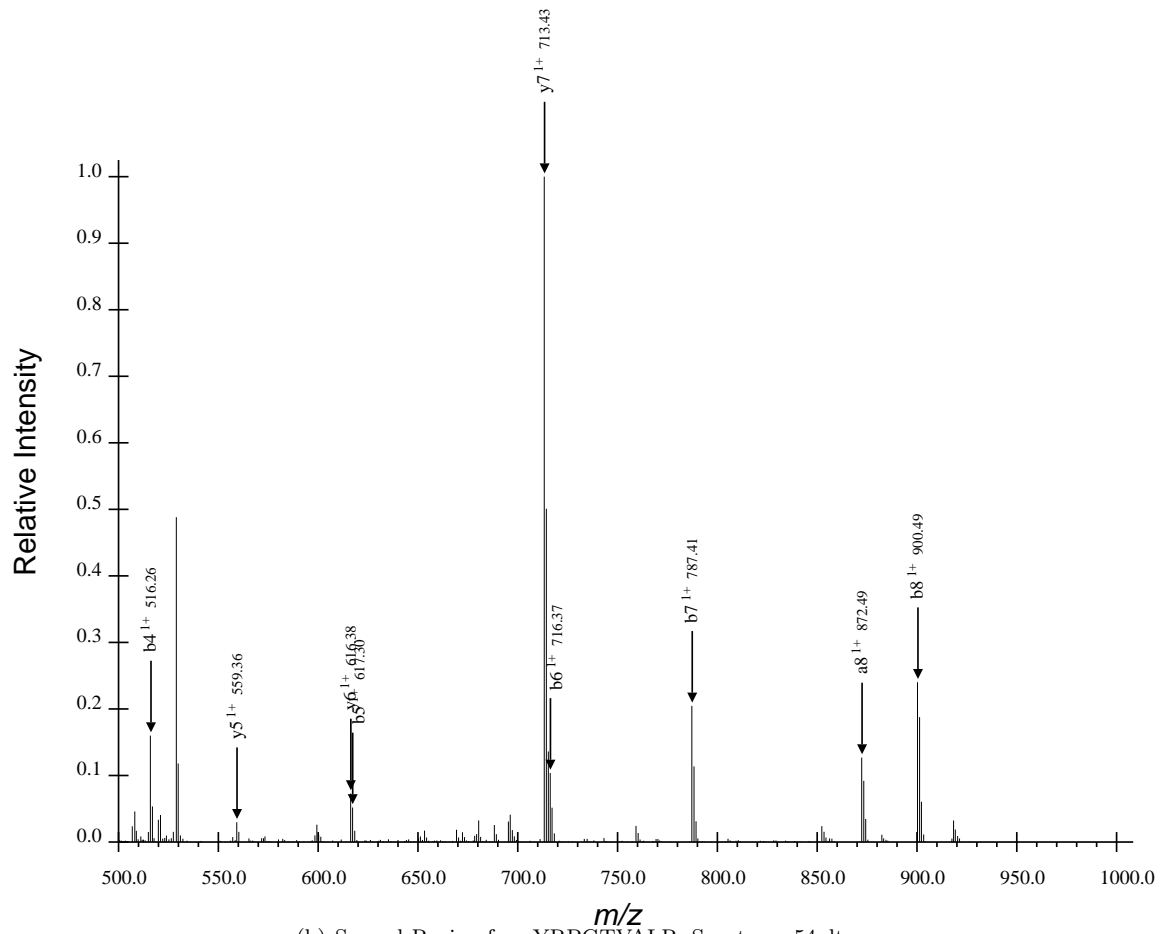

(b) Second Region for aYRPGTVALR, Spectrum 54.dta

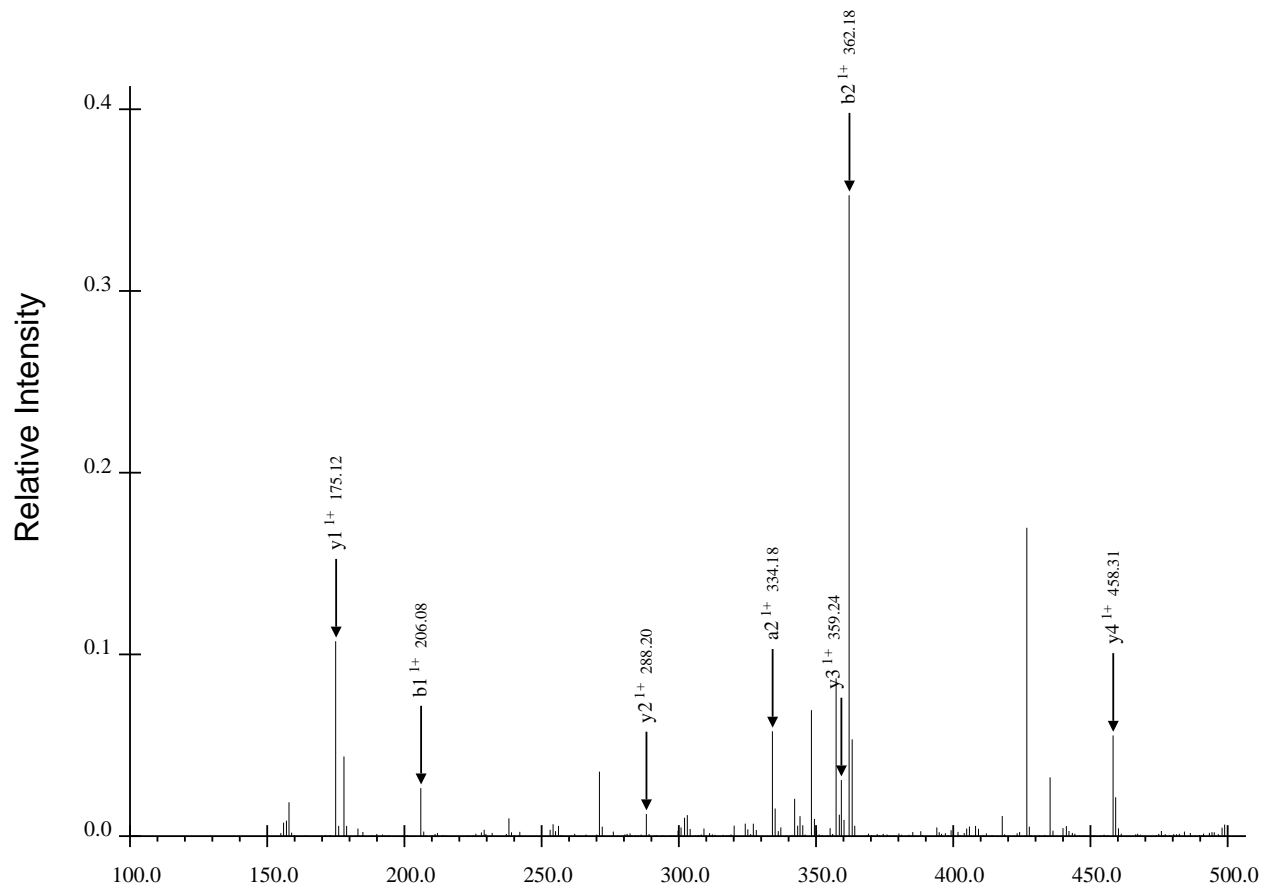

(a) First Region for aYRPGTVALR, Spectrum 55.dta

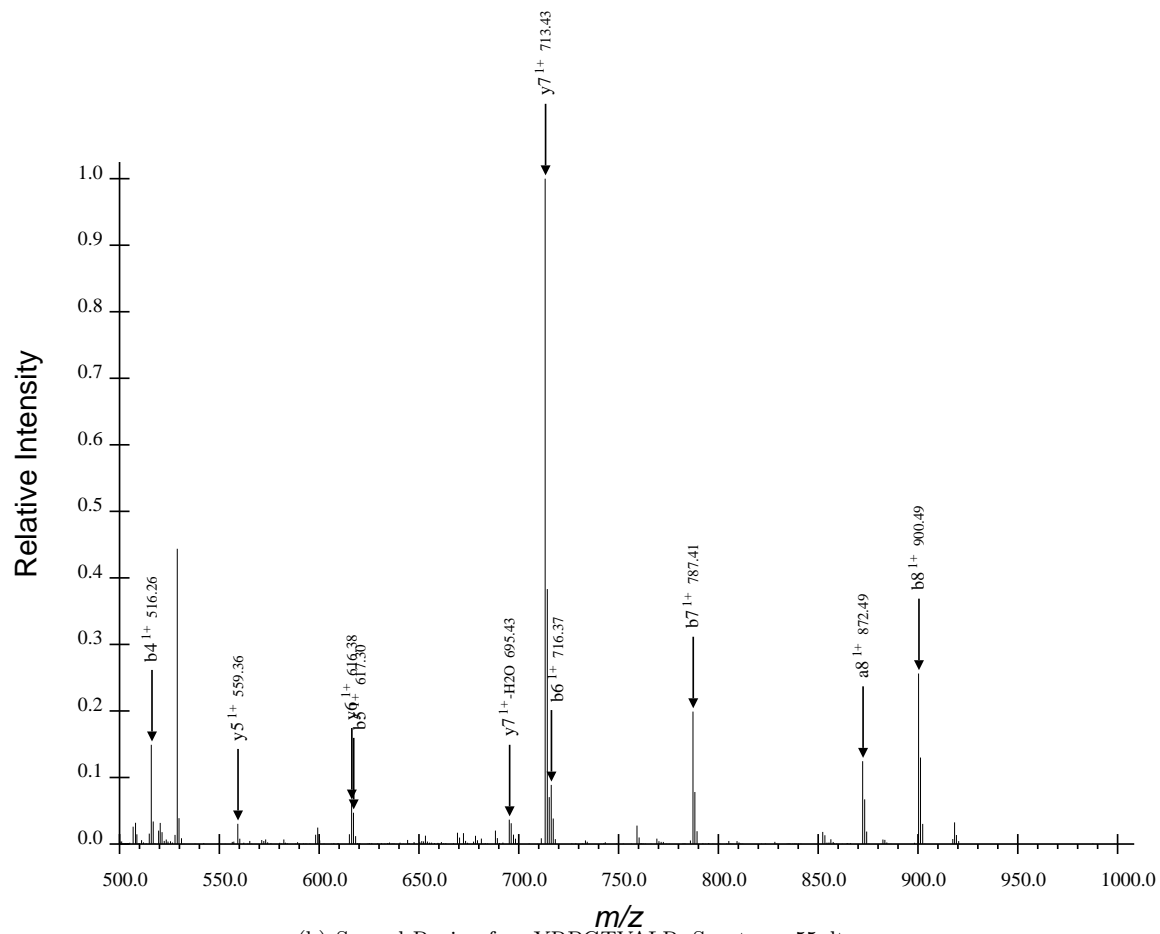

(b) Second Region for aYRPGTVALR, Spectrum 55.dta

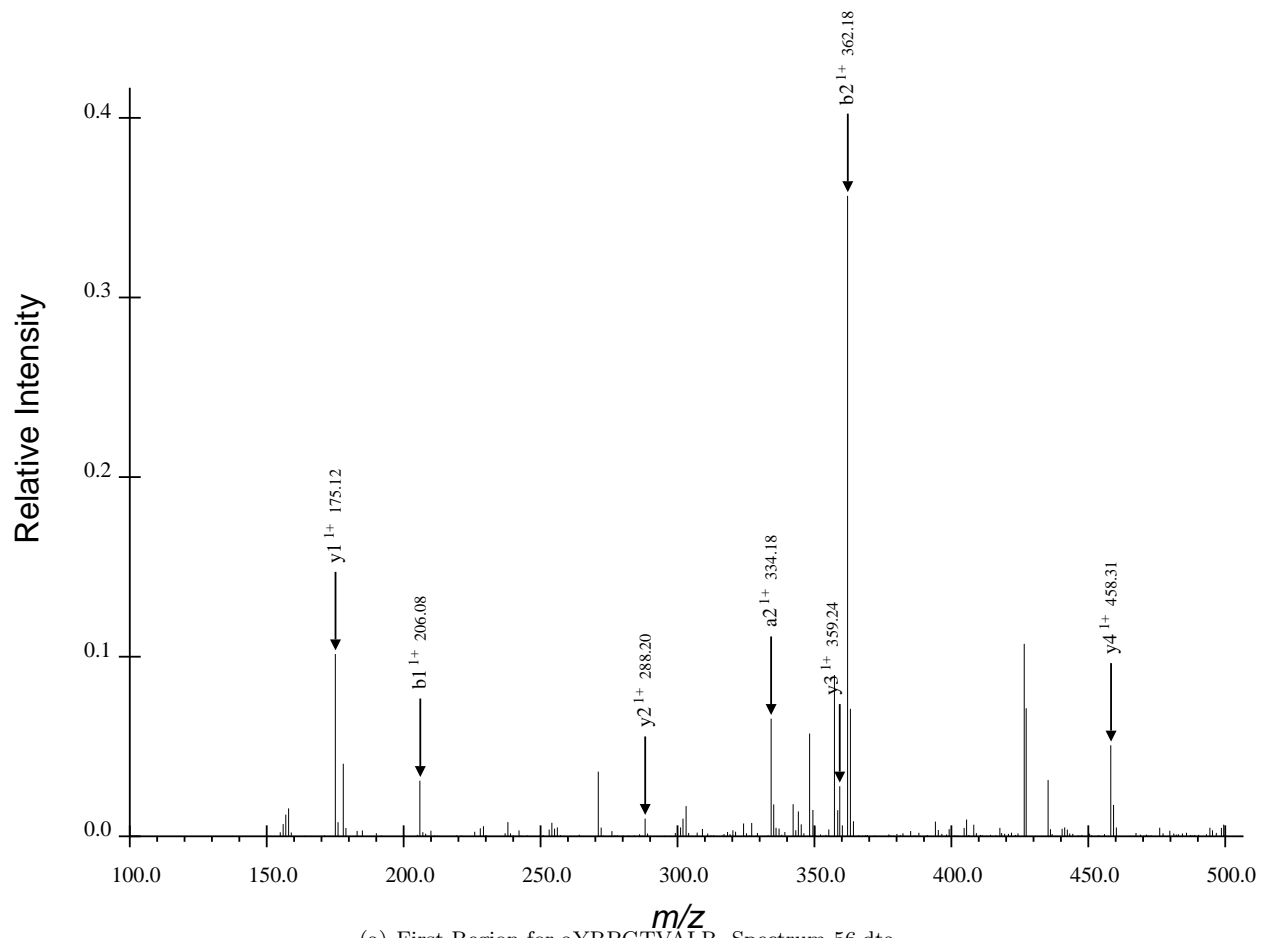

(a) First Region for aYRPGTVALR, Spectrum 56.dta

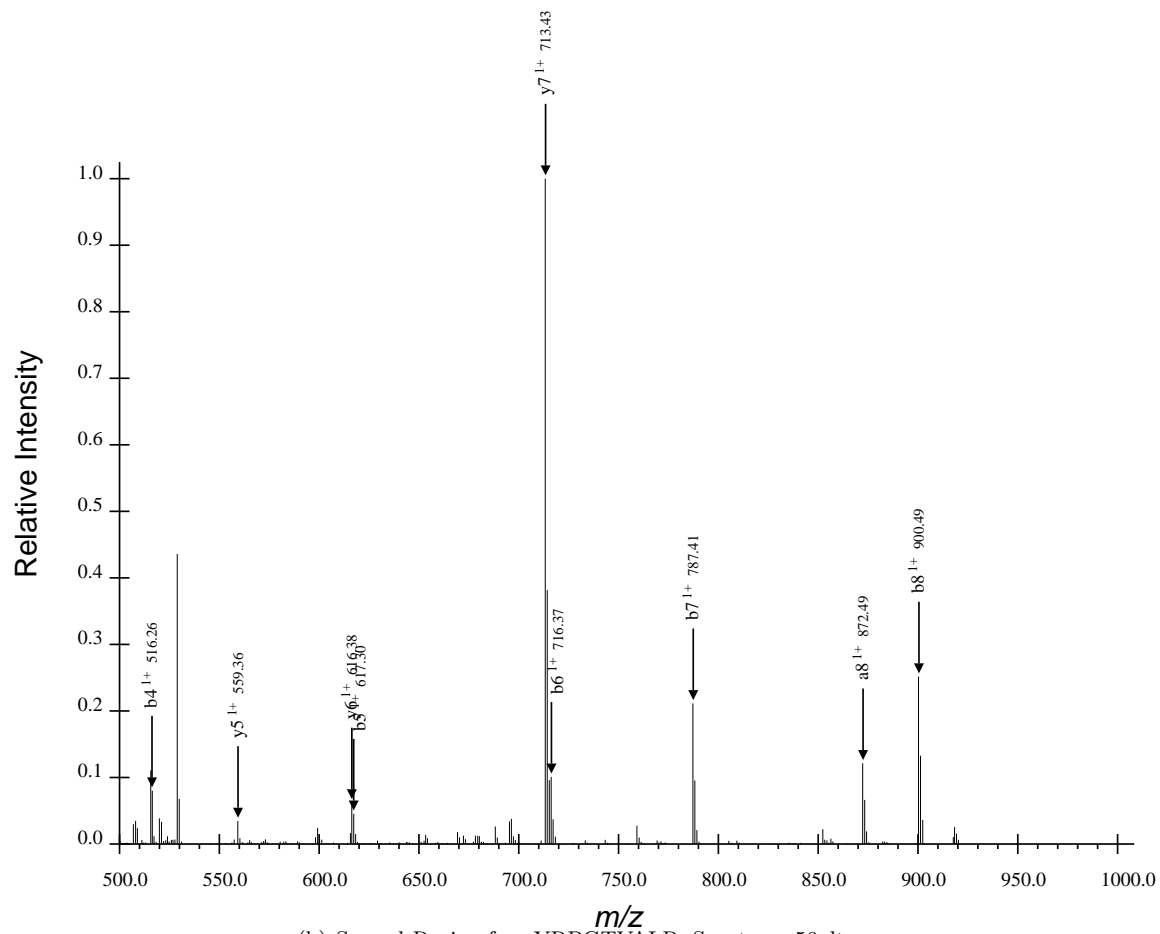

(b) Second Region for aYRPGTVALR, Spectrum 56.dta



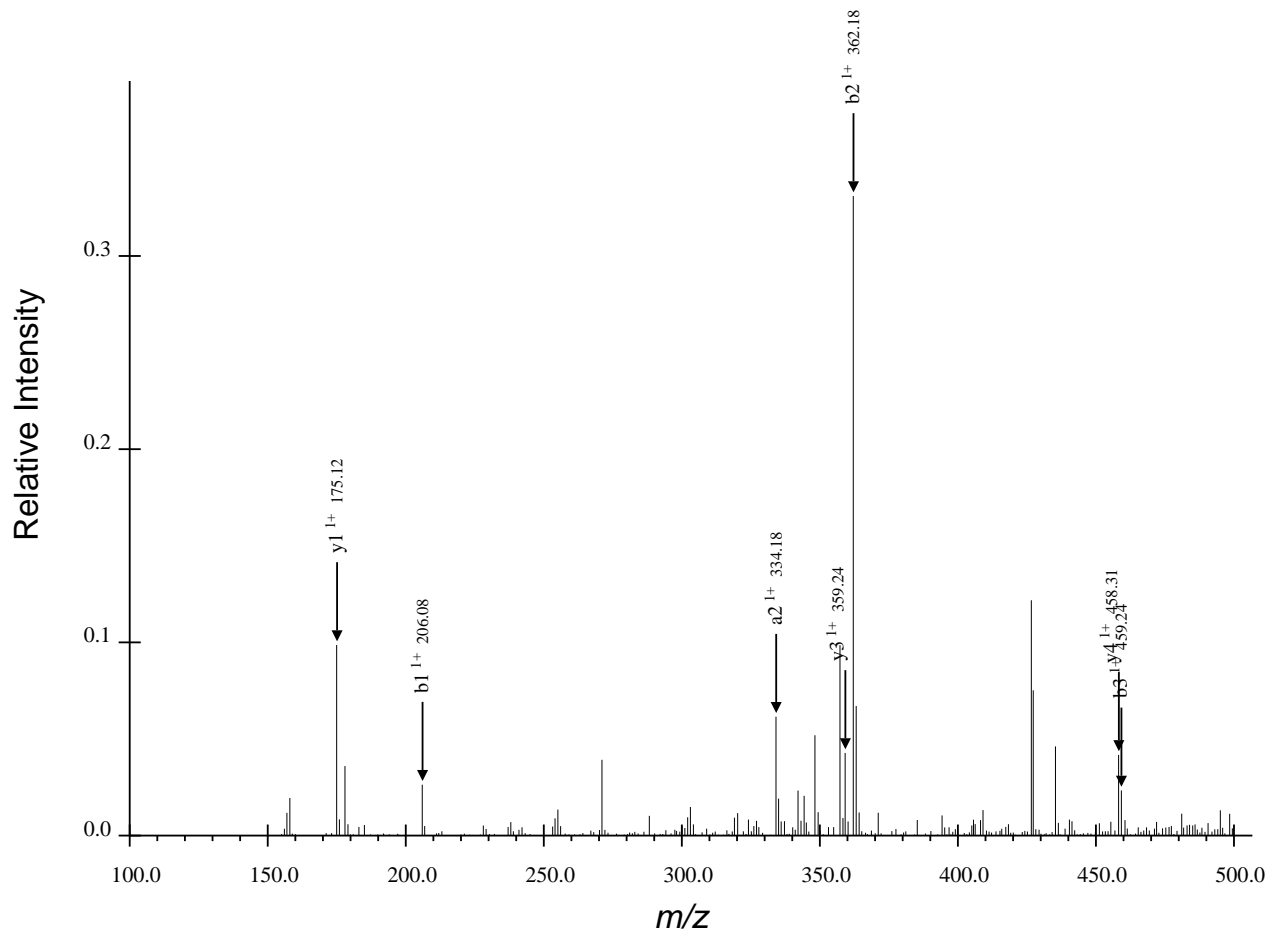

(a) First Region for aYRPGTVALR, Spectrum 57.dta

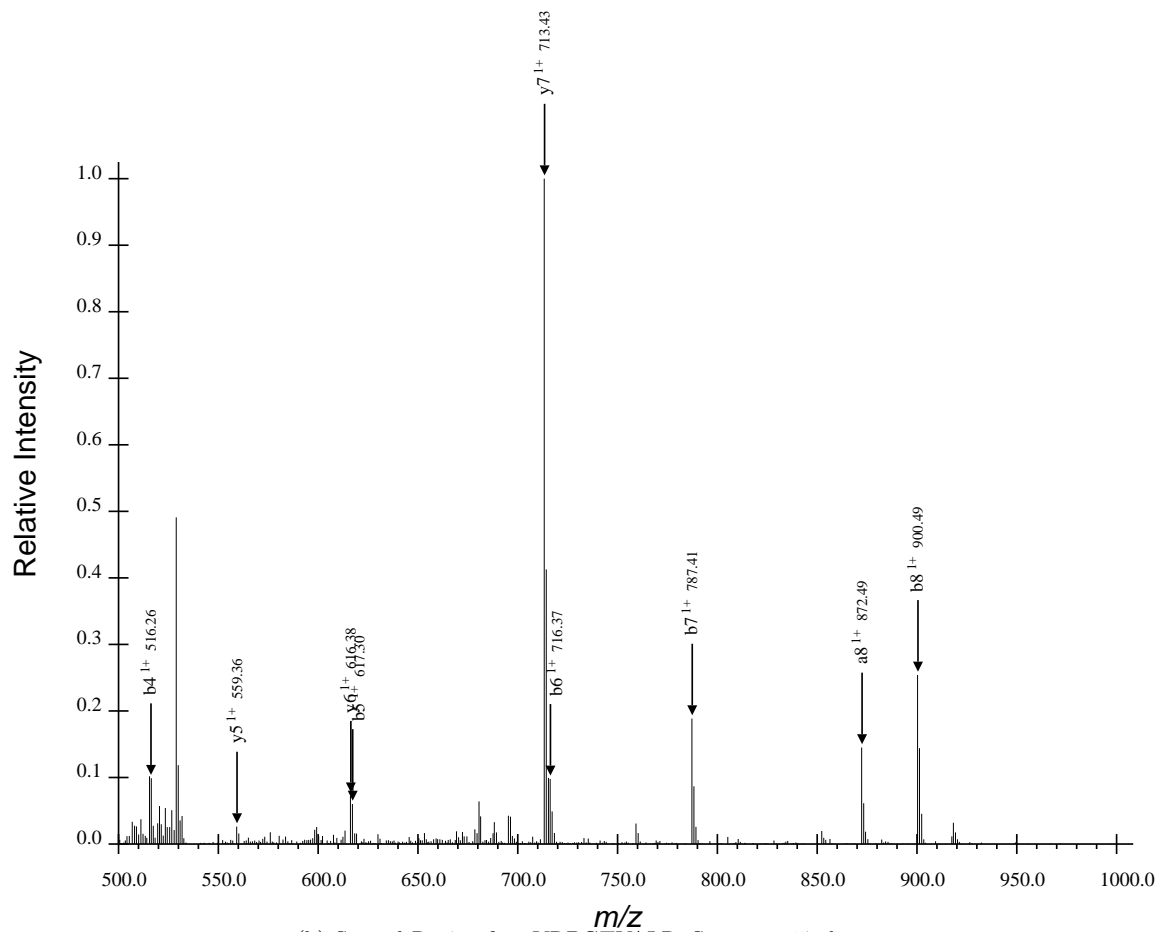

(b) Second Region for aYRPGTVALR, Spectrum 57.dta

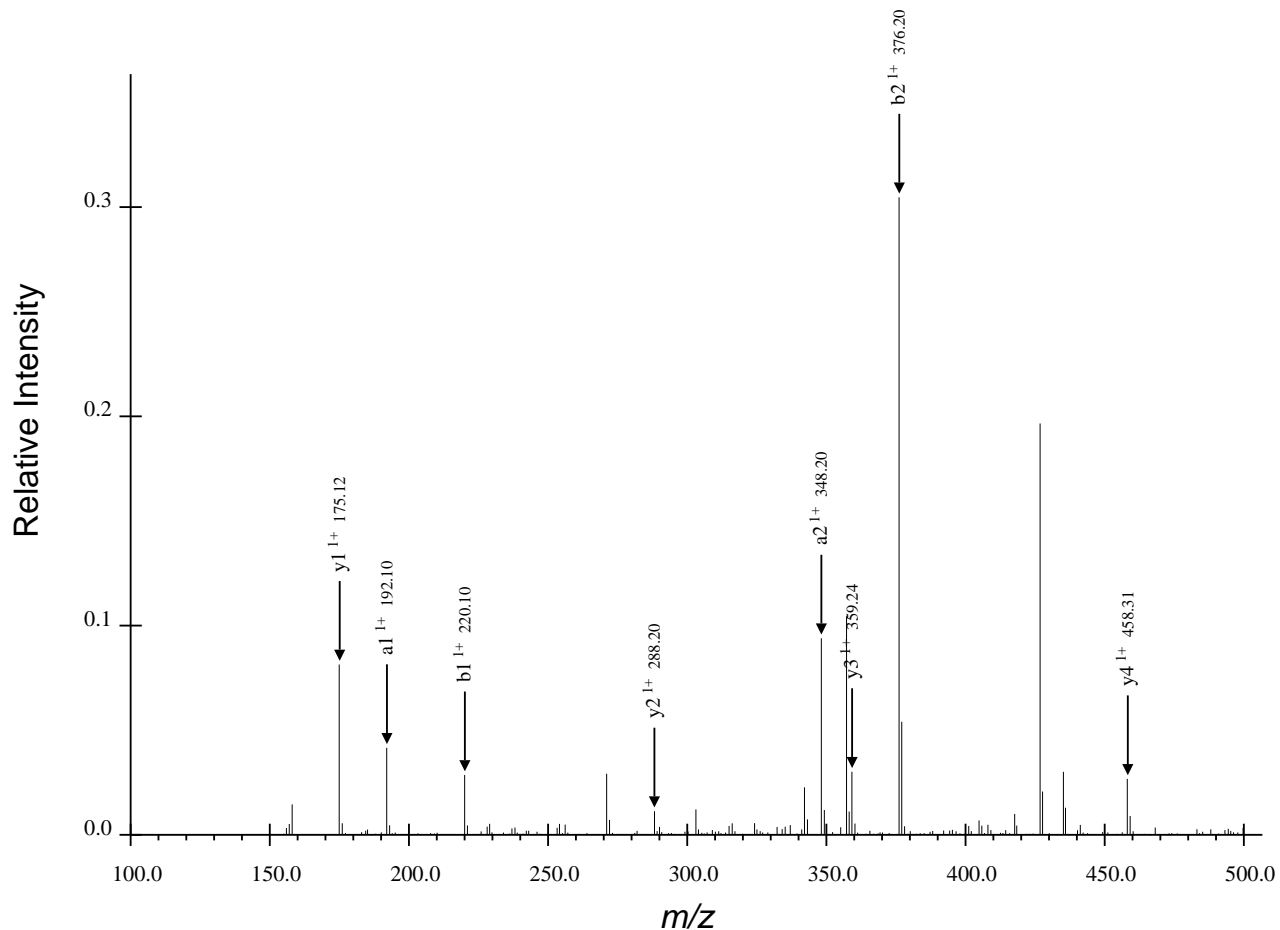

(a) First Region for rYRPGTVALR, Spectrum 58.dta

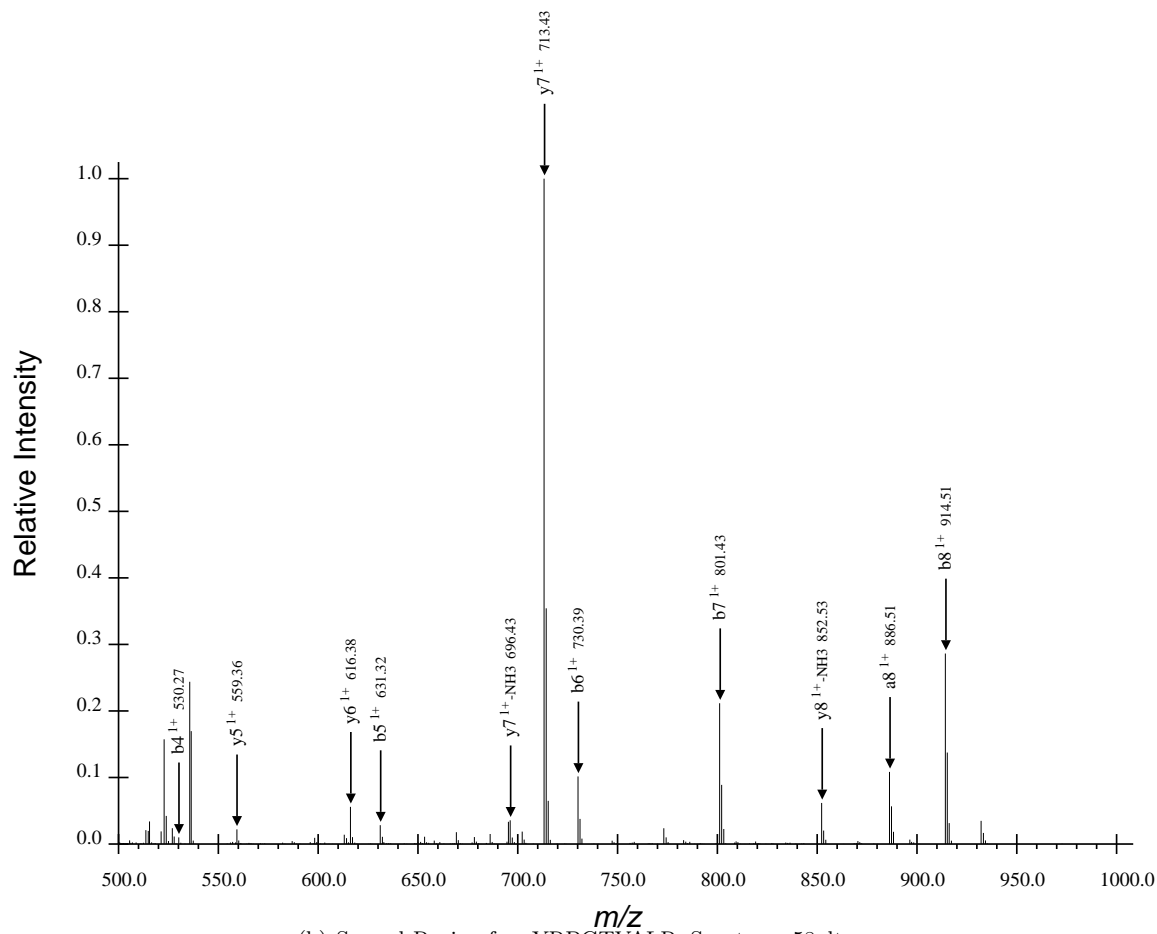

(b) Second Region for rYRPGTVALR, Spectrum 58.dta

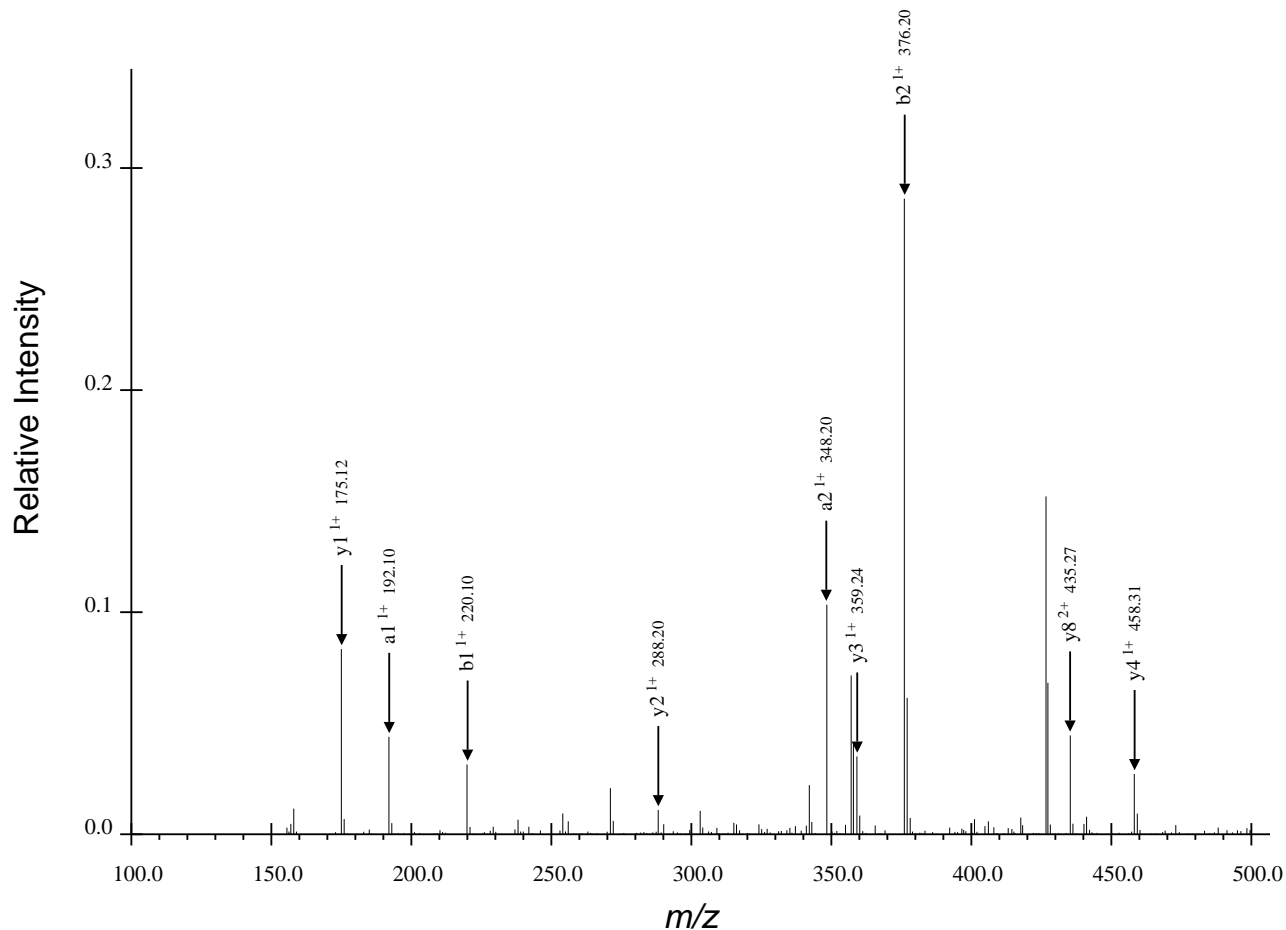

(a) First Region for rYRPGTVALR, Spectrum 59.dta

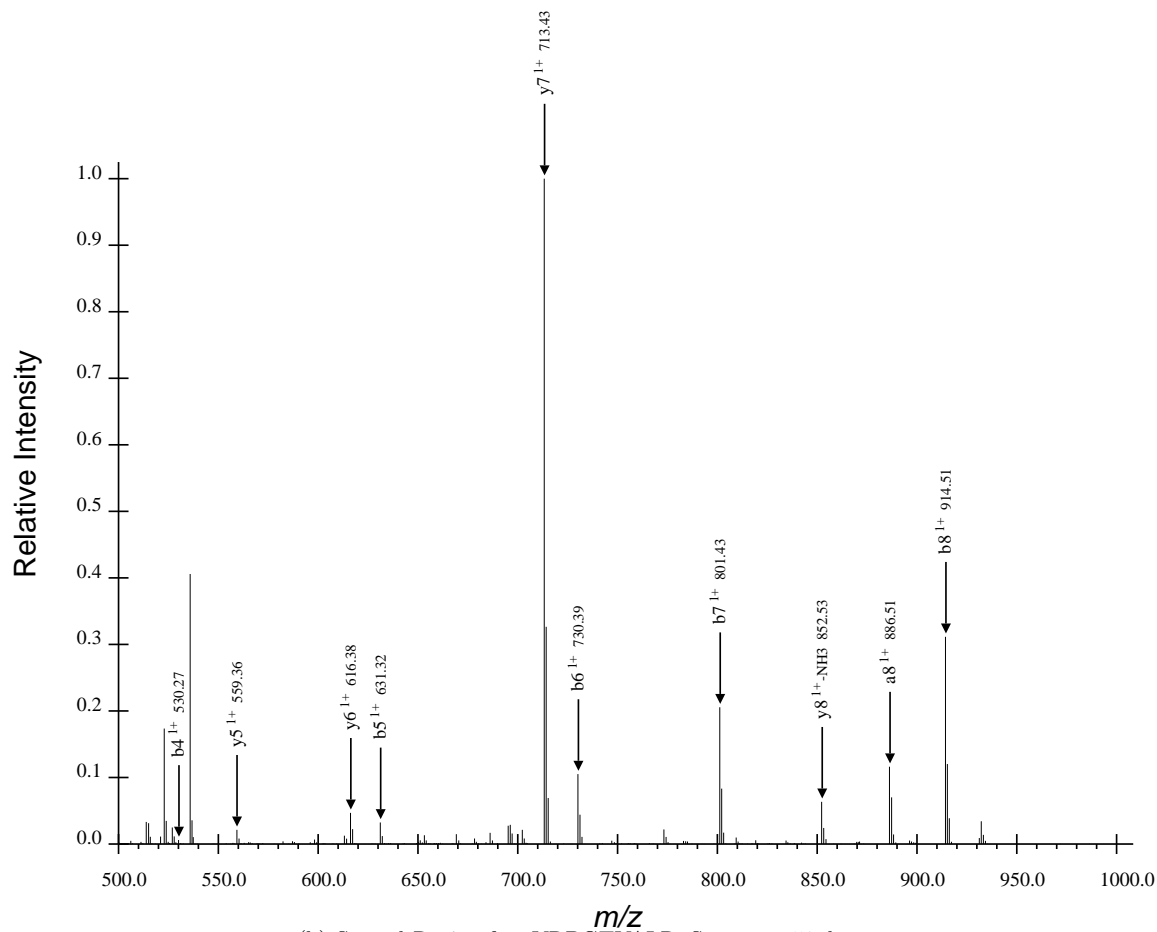

(b) Second Region for rYRPGTVALR, Spectrum 59.dta

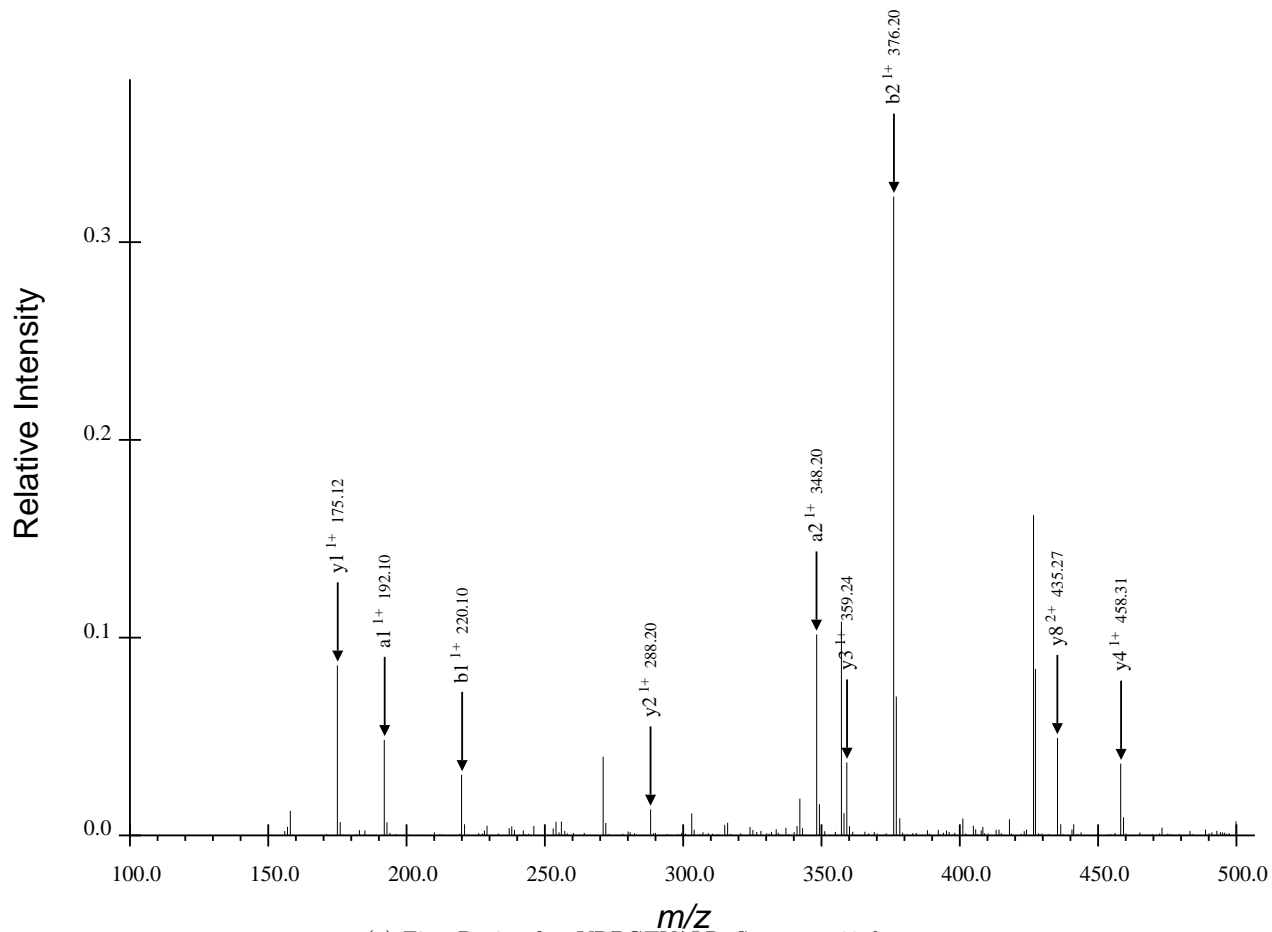

(a) First Region for rYRPGTVALR, Spectrum 60.dta

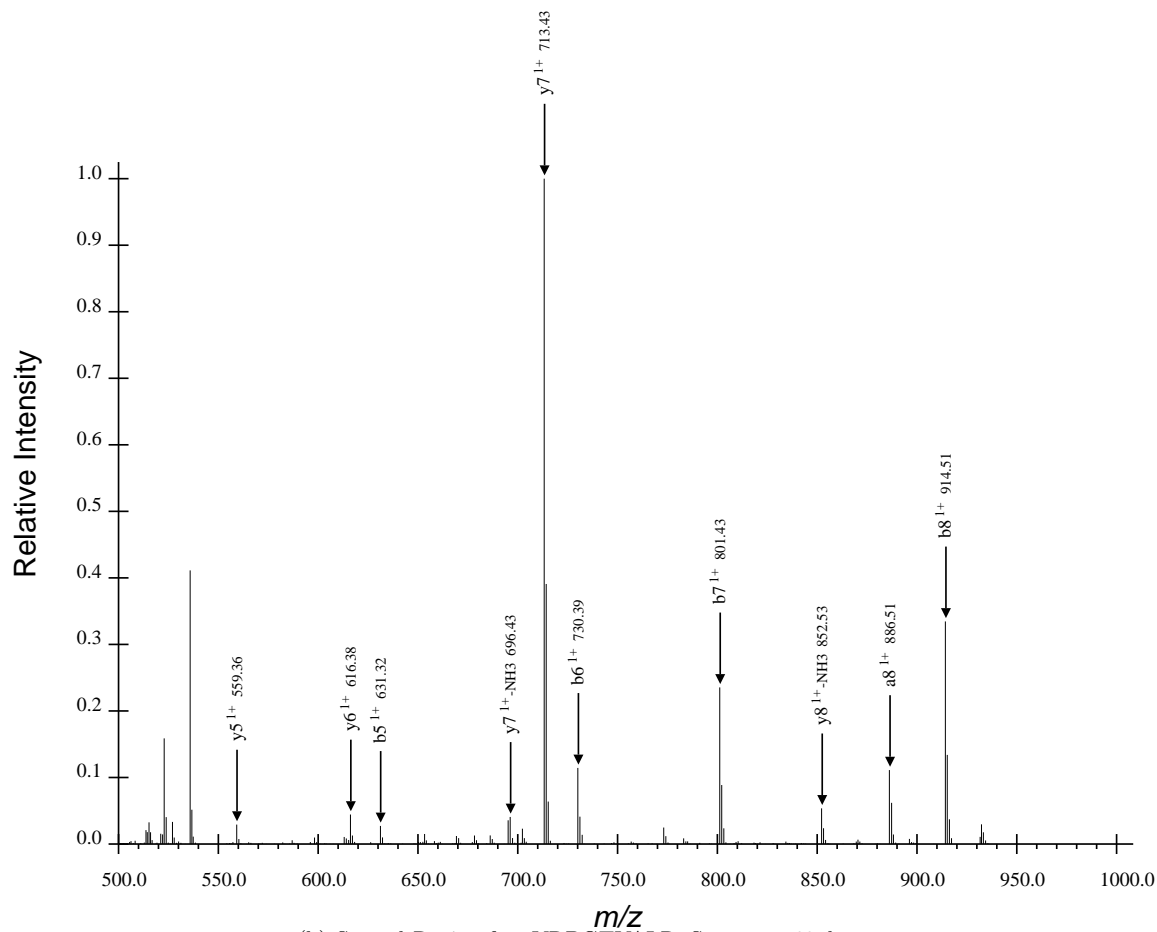

(b) Second Region for rYRPGTVALR, Spectrum 60.dta

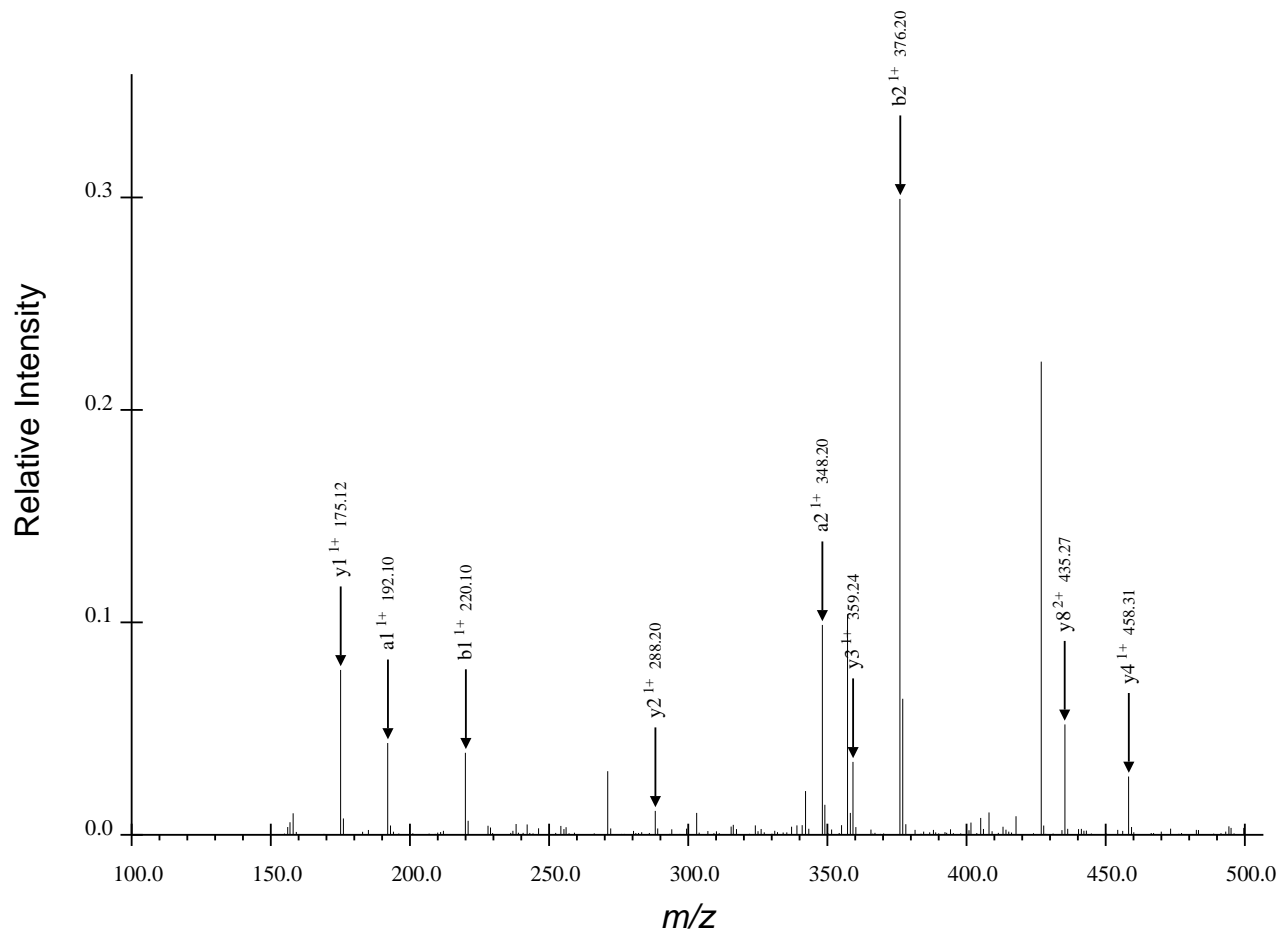

(a) First Region for rYRPGTVALR, Spectrum 61.dta

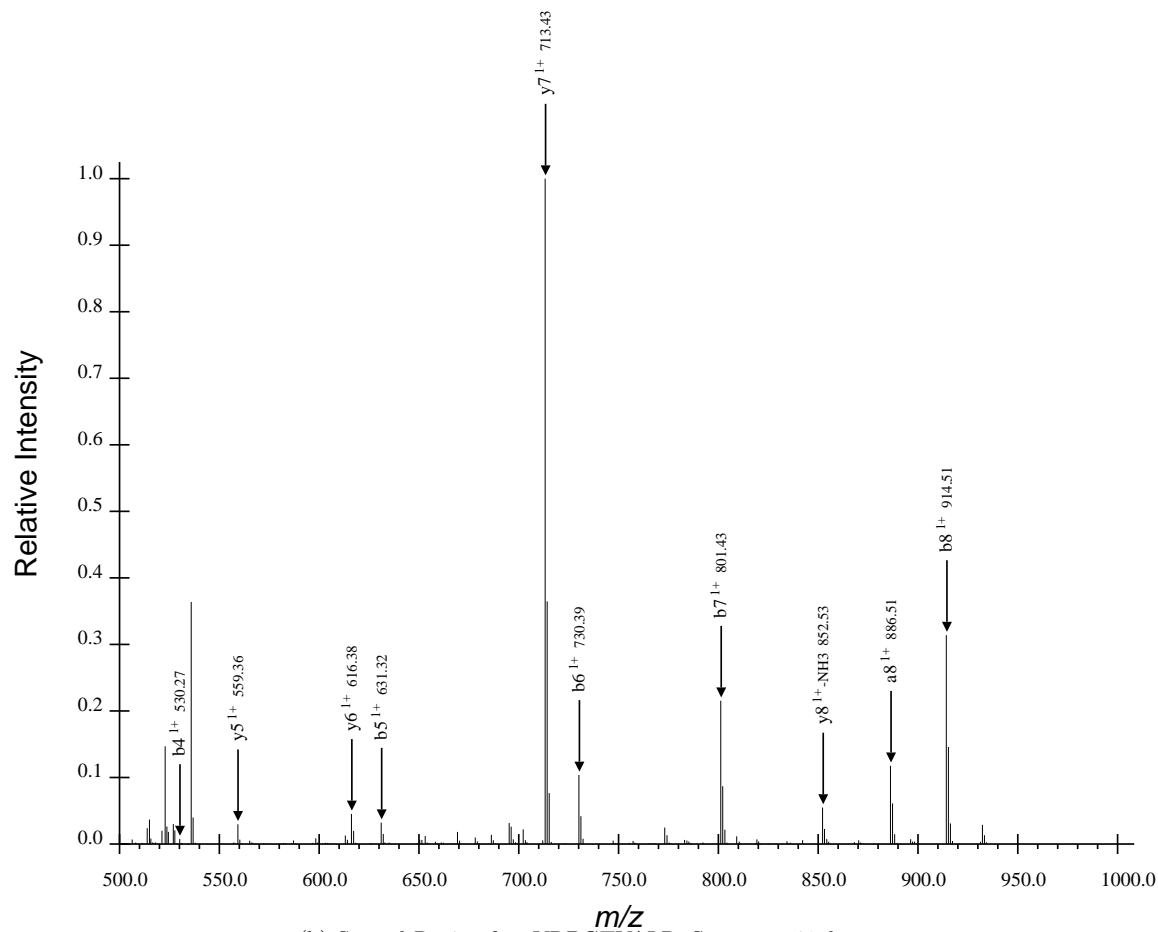

(b) Second Region for rYRPGTVALR, Spectrum 61.dta

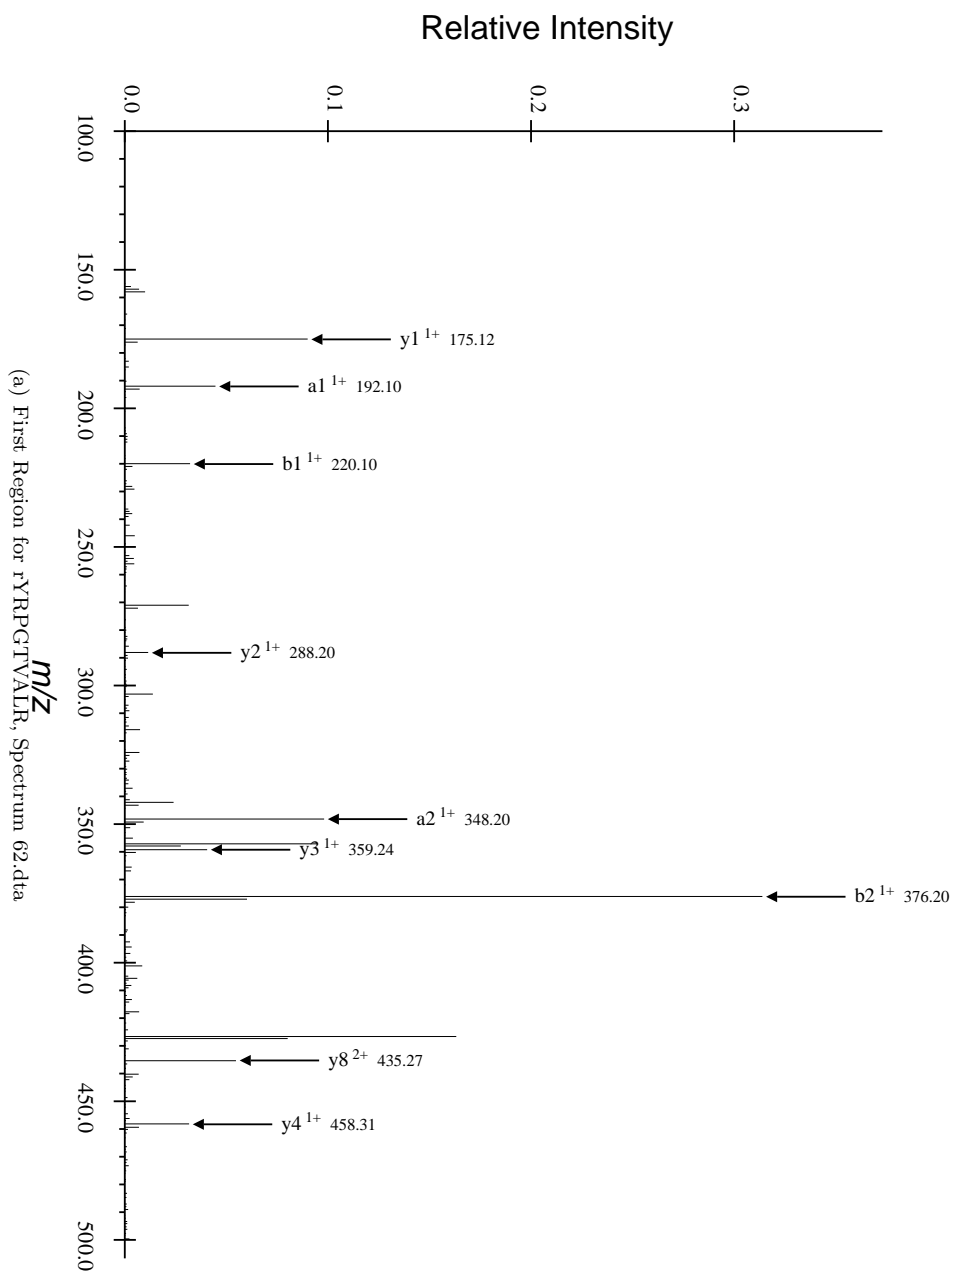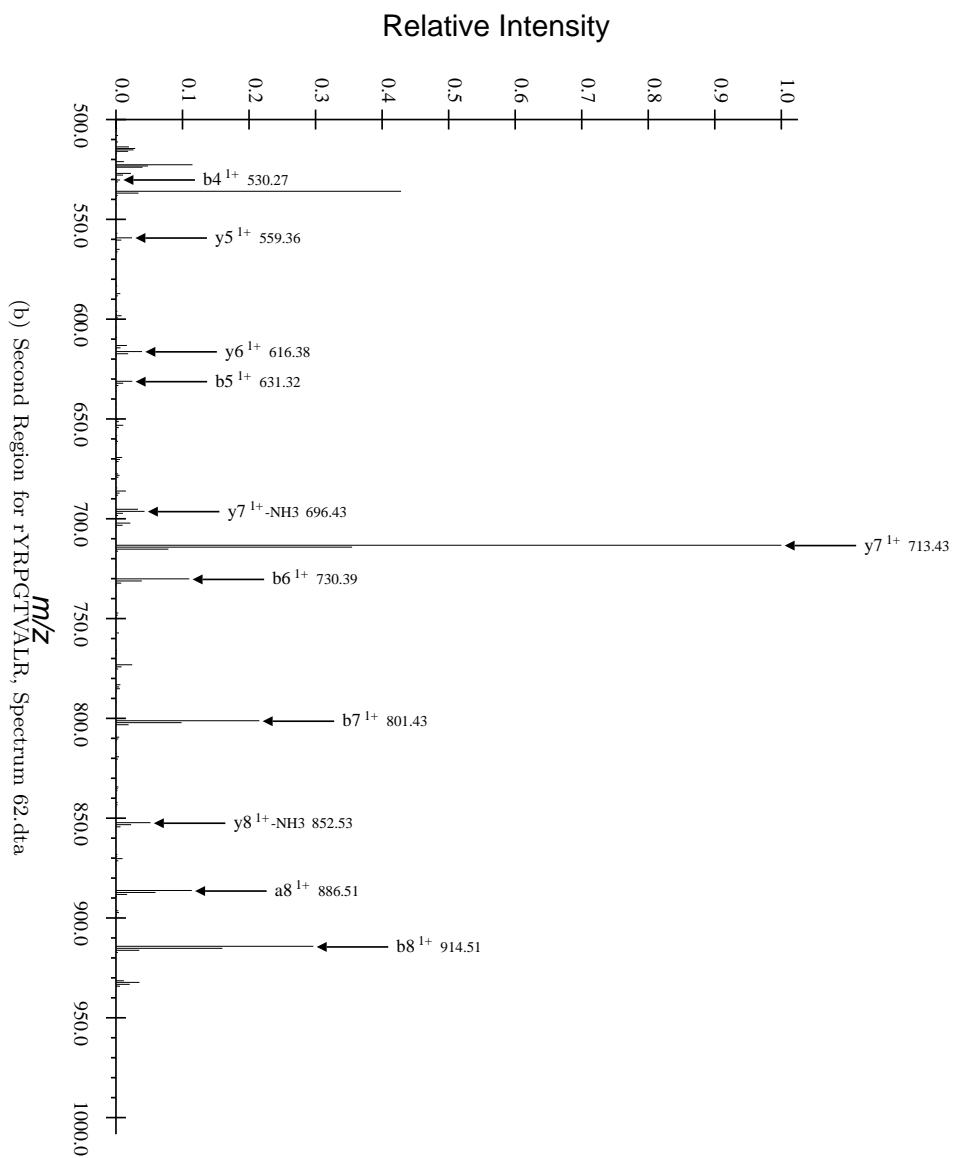

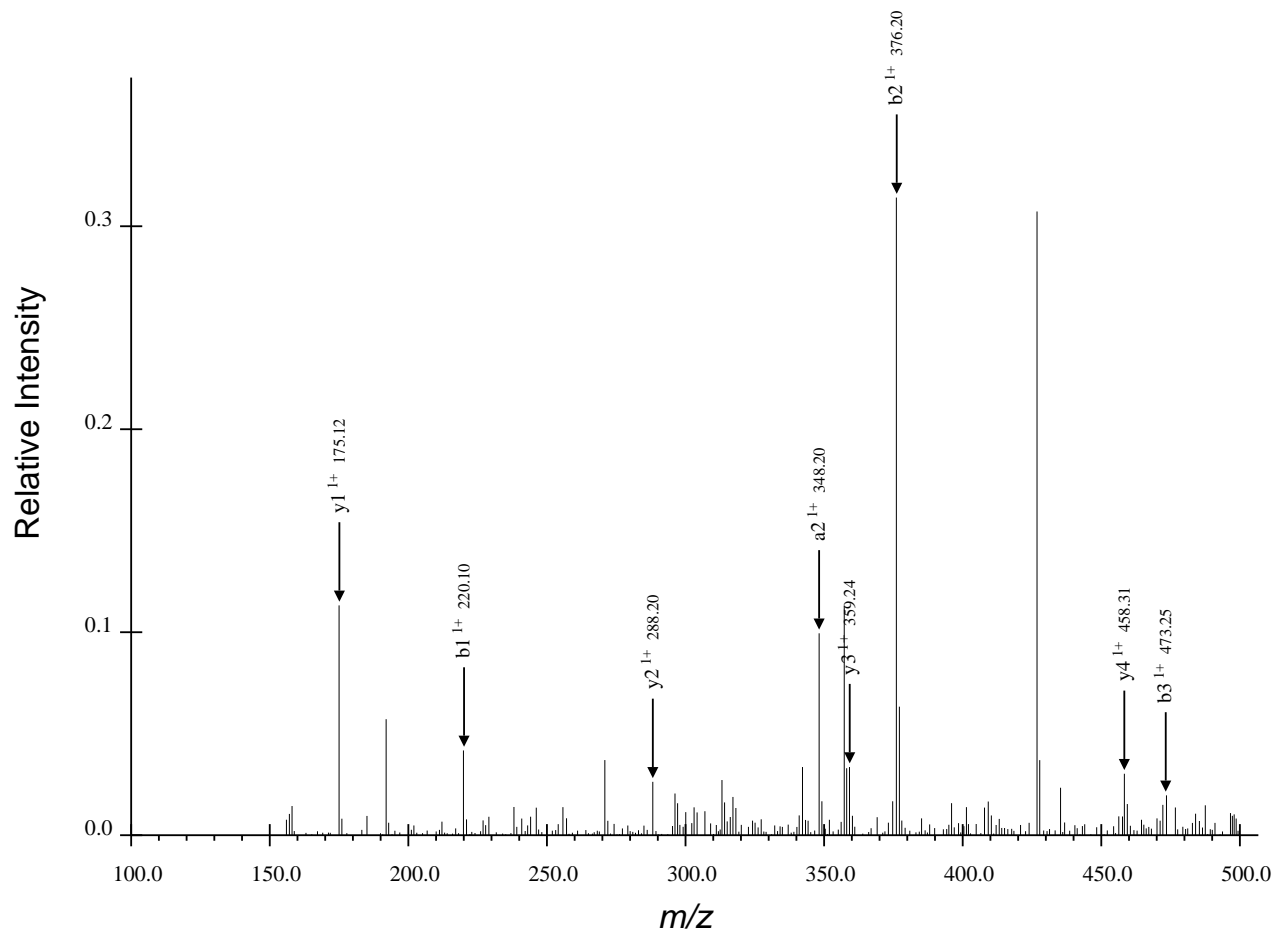

(a) First Region for rYRPGTVALR, Spectrum 63.dta

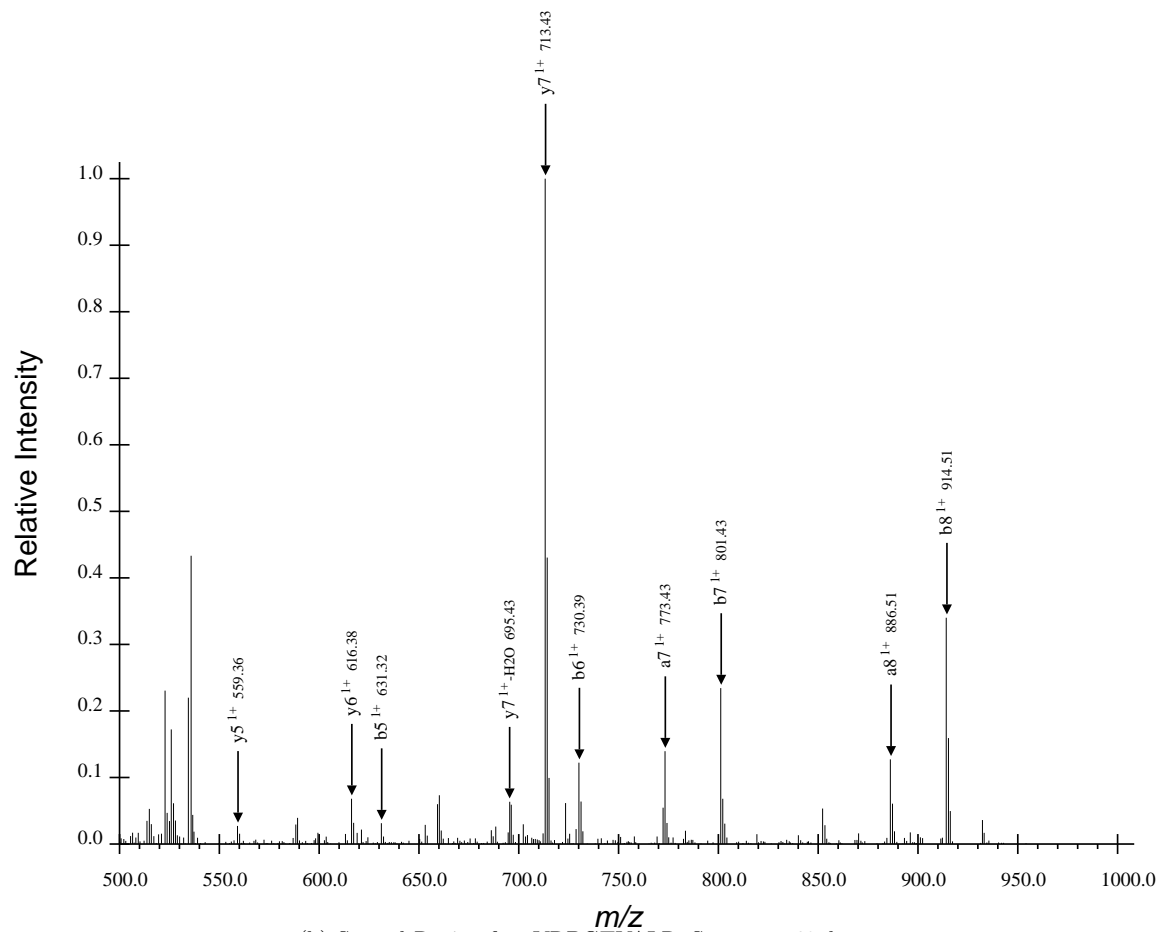

(b) Second Region for rYRPGTVALR, Spectrum 63.dta

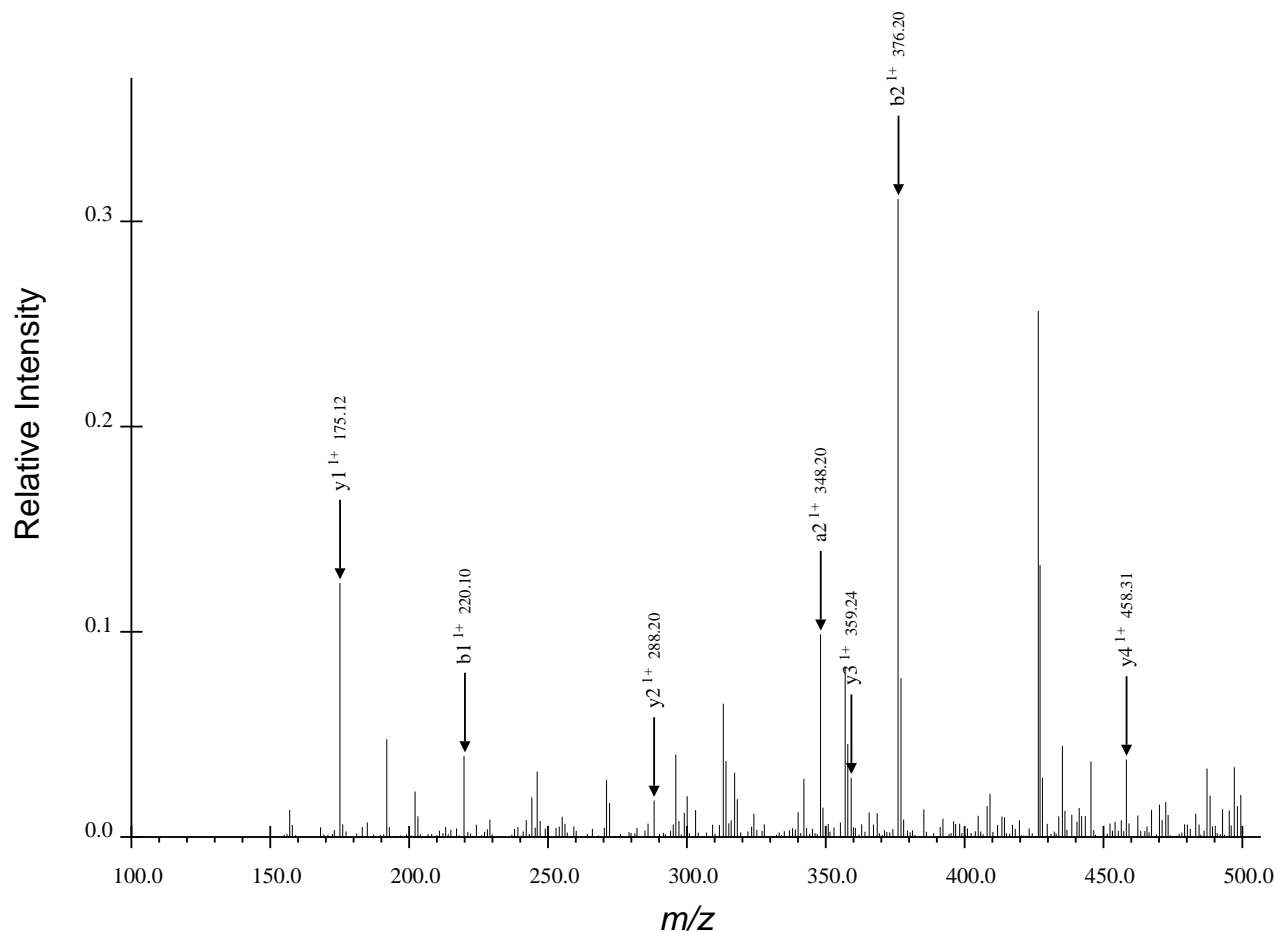

(a) First Region for rYRPGTVALR, Spectrum 64.dta

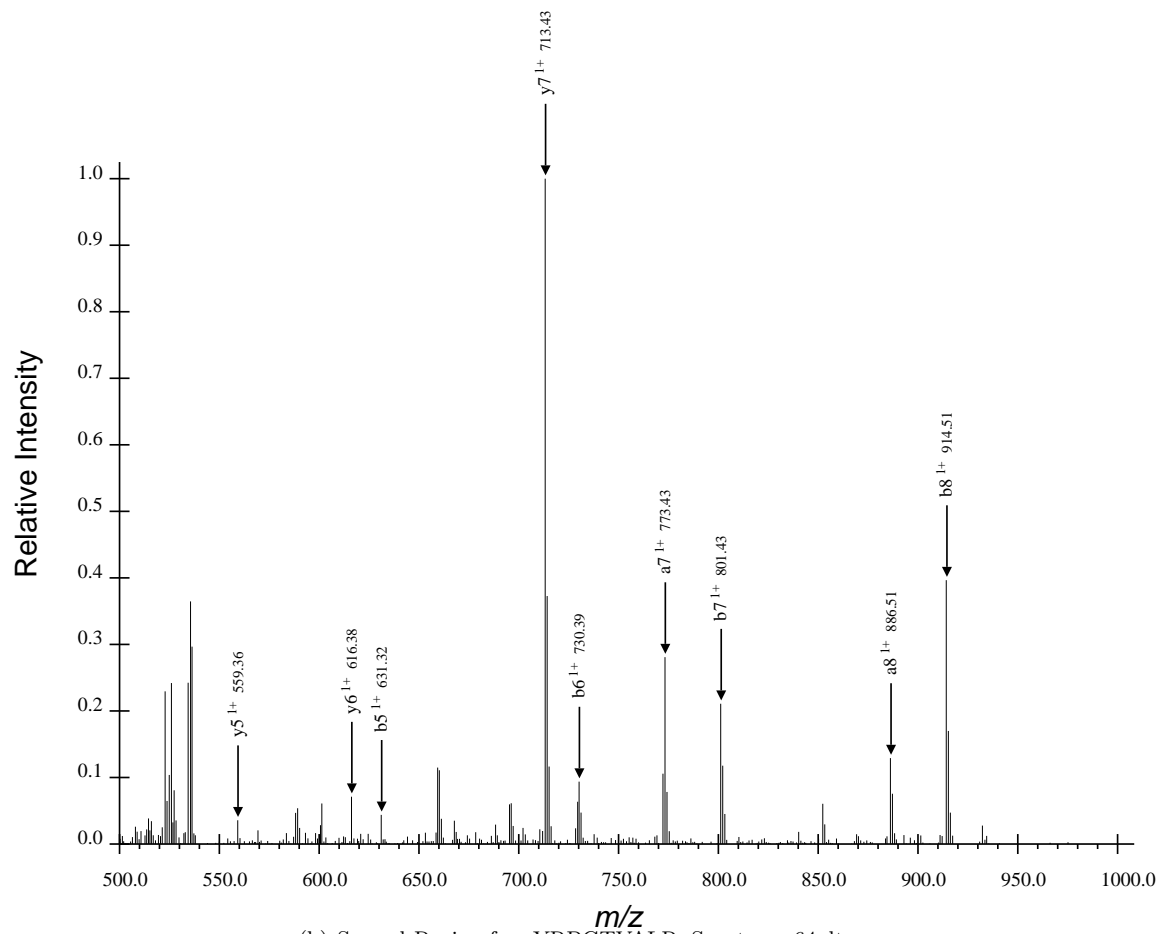

(b) Second Region for rYRPGTVALR, Spectrum 64.dta



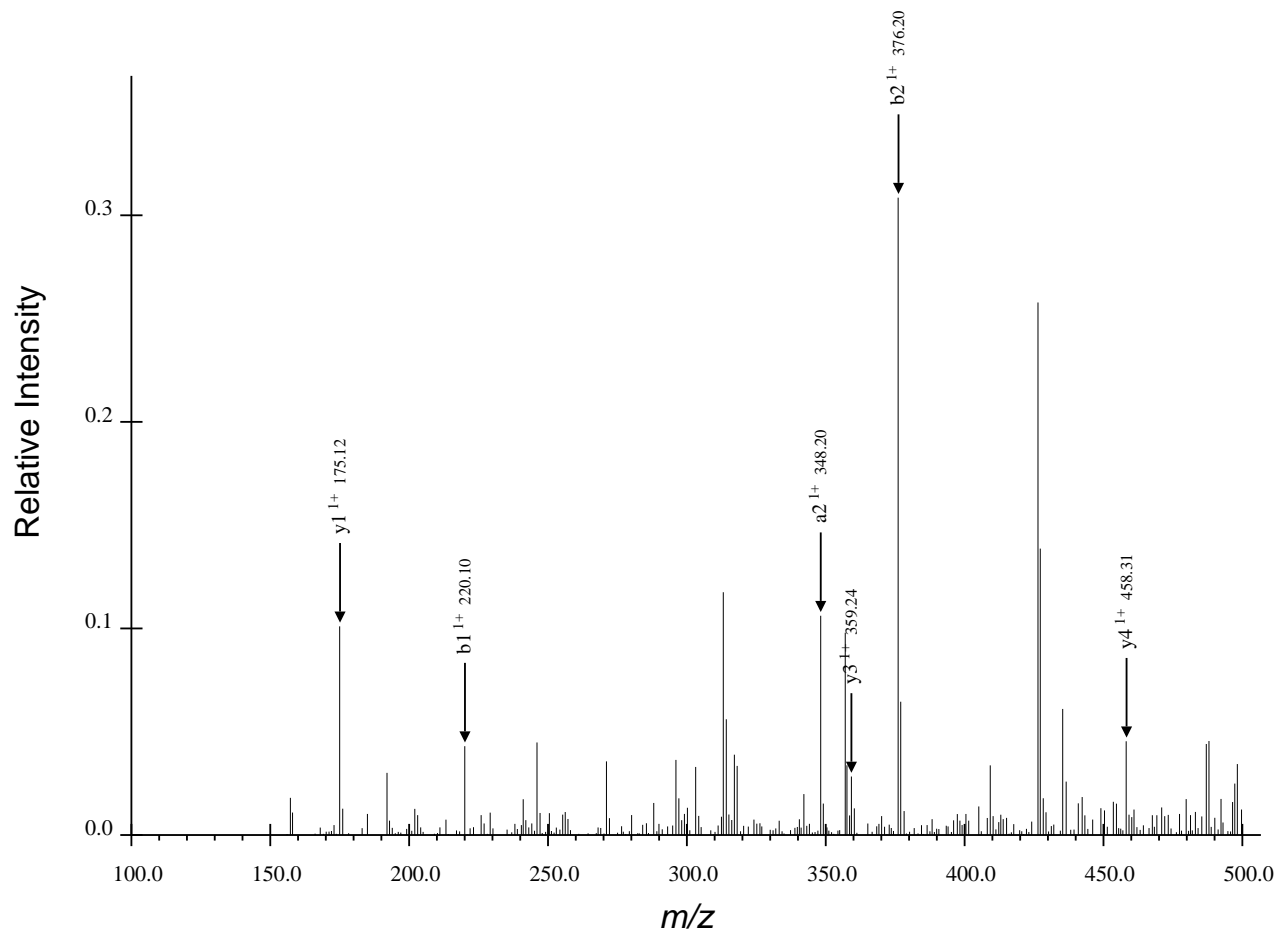

(a) First Region for rYRPGTVALR, Spectrum 65.dta

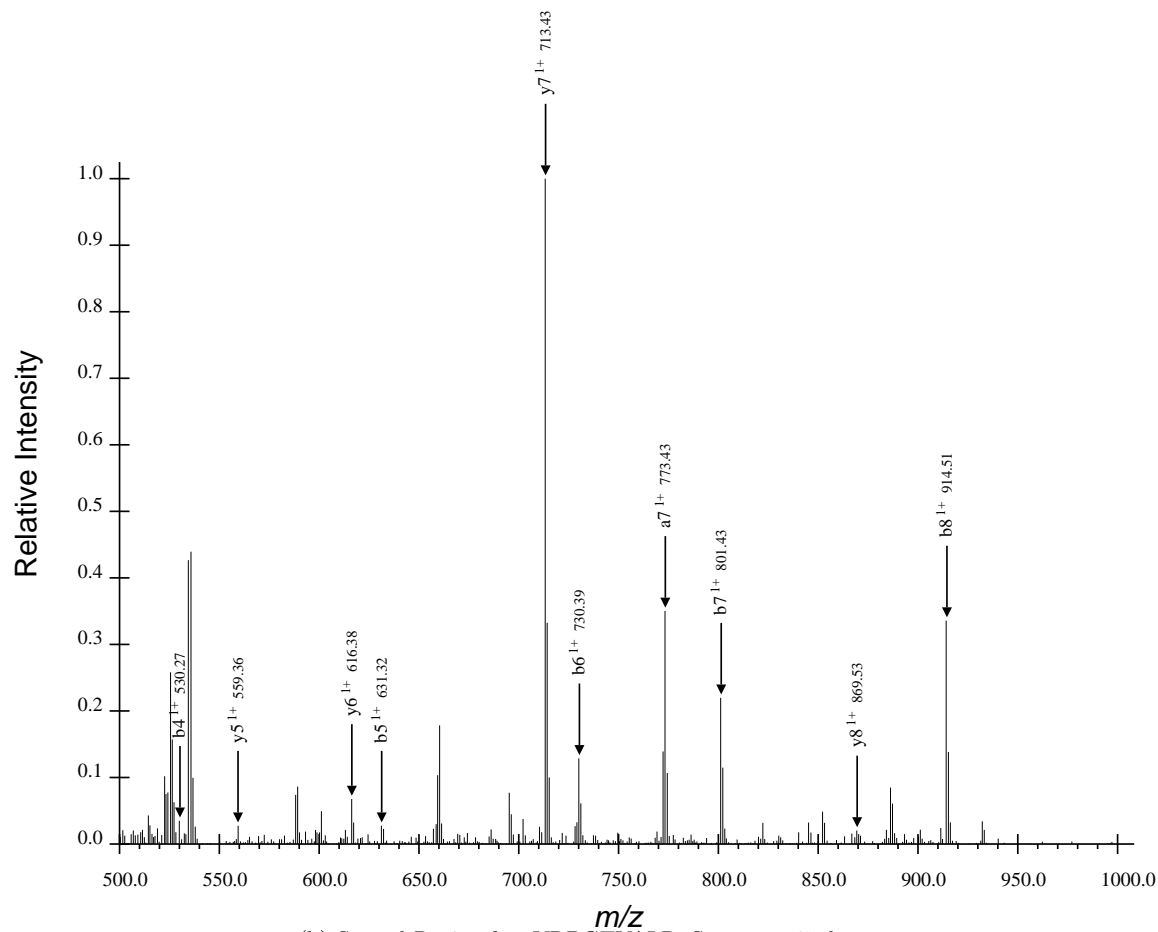

(b) Second Region for rYRPGTVALR, Spectrum 65.dta

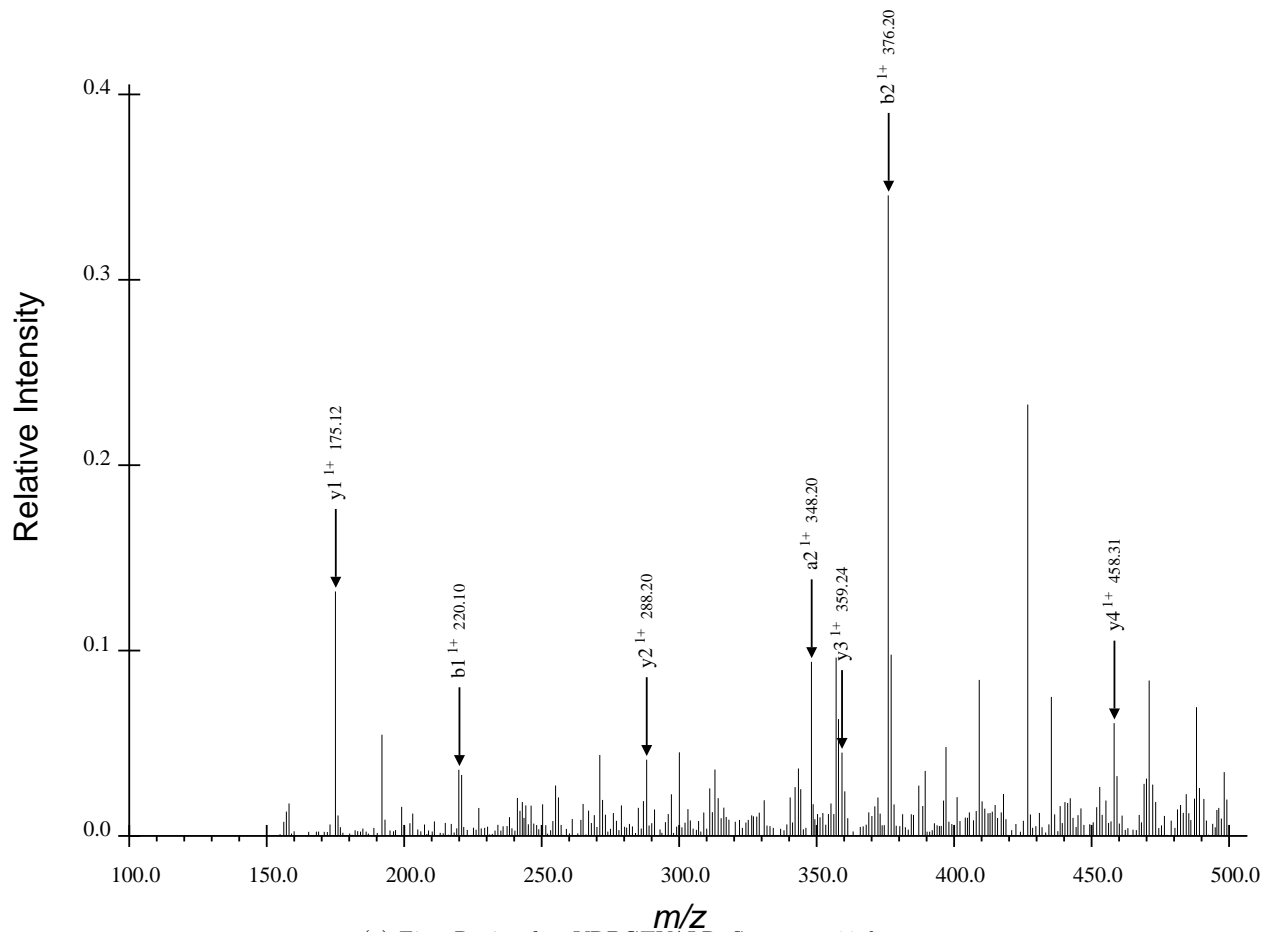

(a) First Region for rYRPGTVALR, Spectrum 66.dta

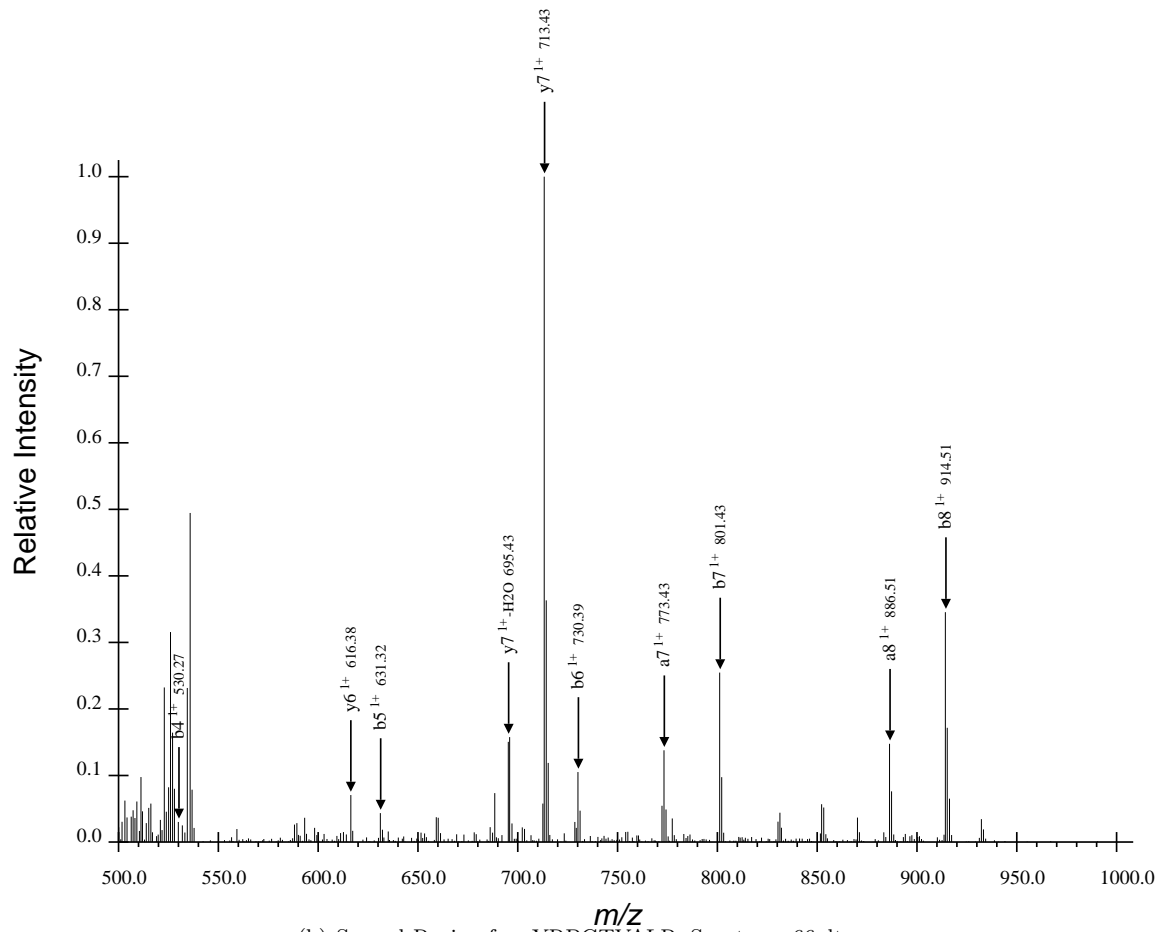

(b) Second Region for rYRPGTVALR, Spectrum 66.dta

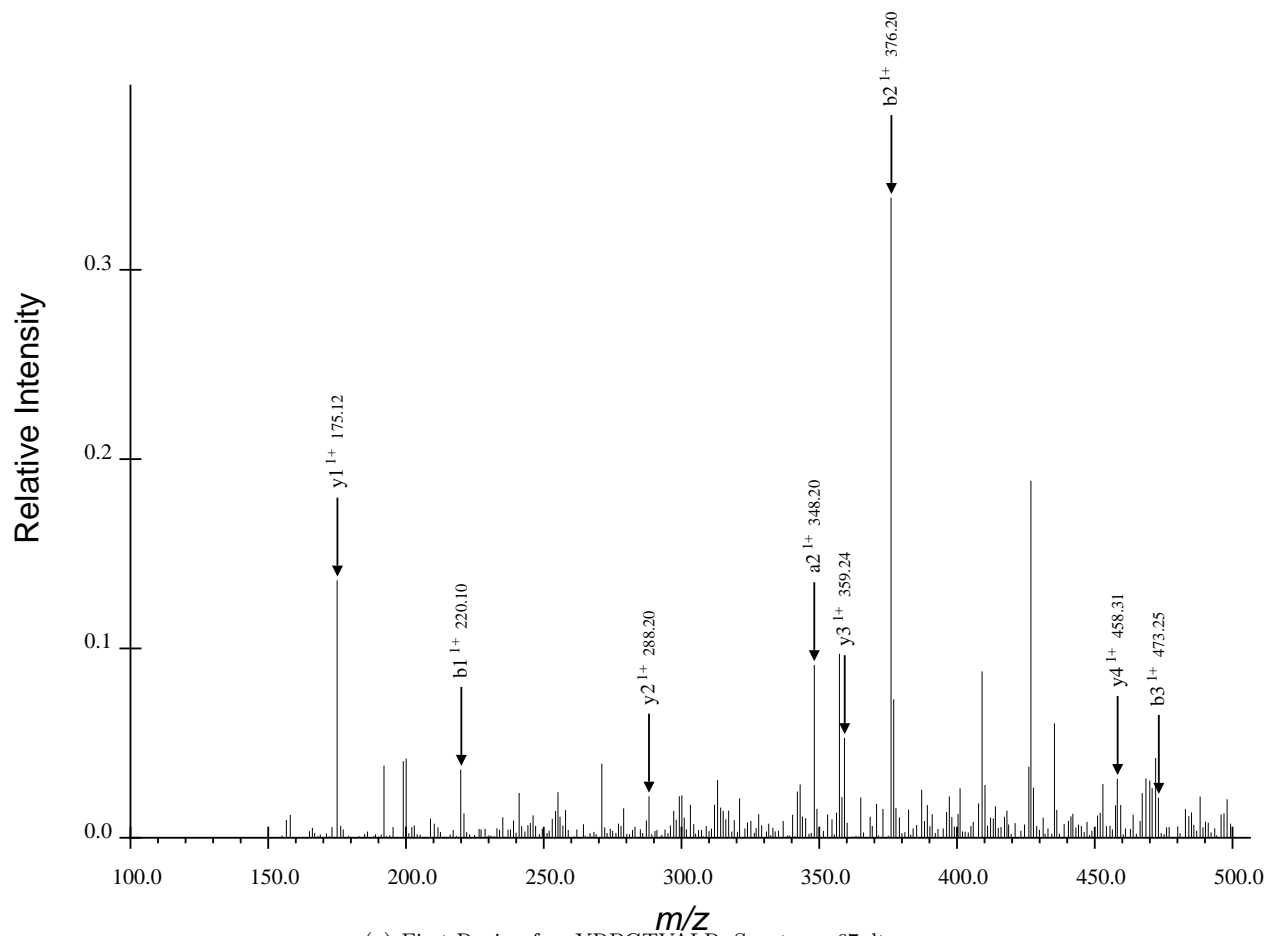

(a) First Region for rYRPGTVALR, Spectrum 67.dta

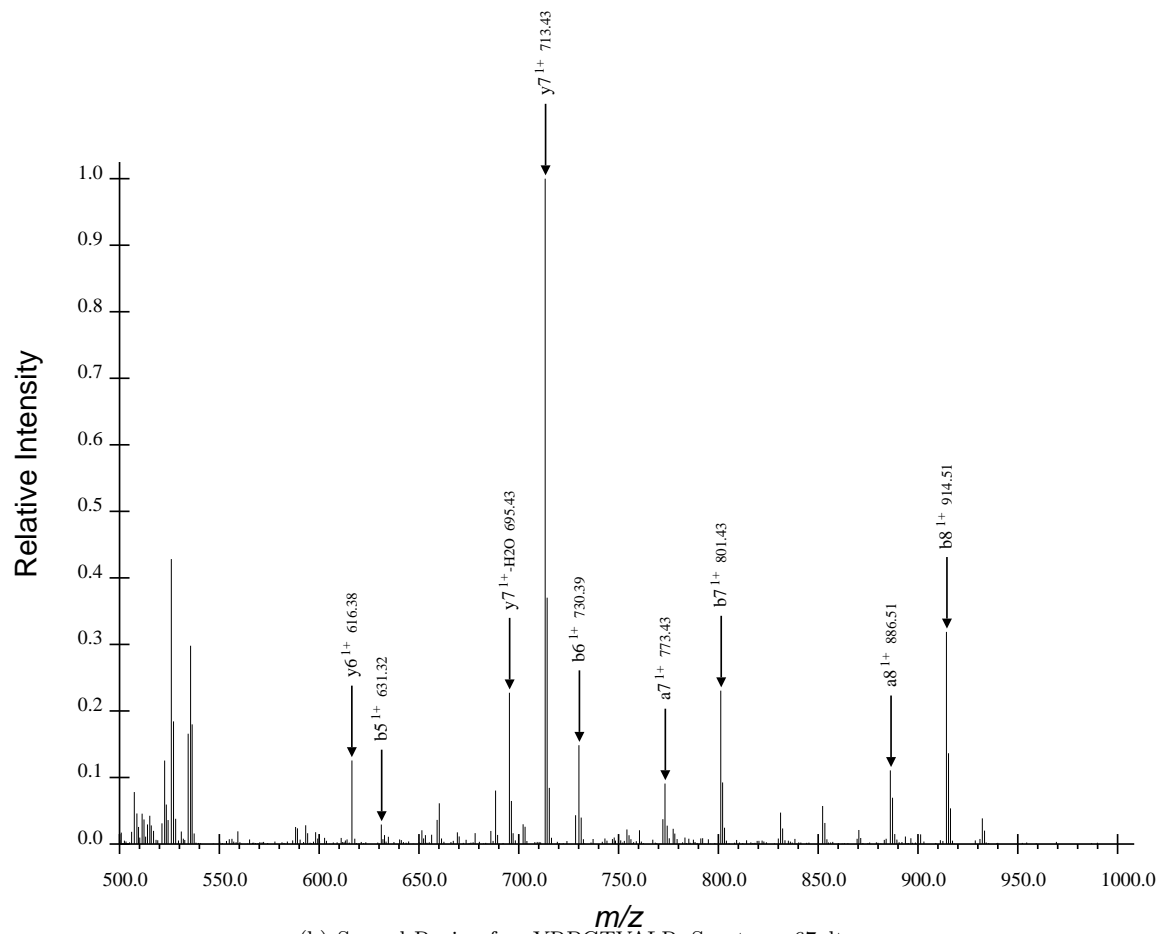

(b) Second Region for rYRPGTVALR, Spectrum 67.dta

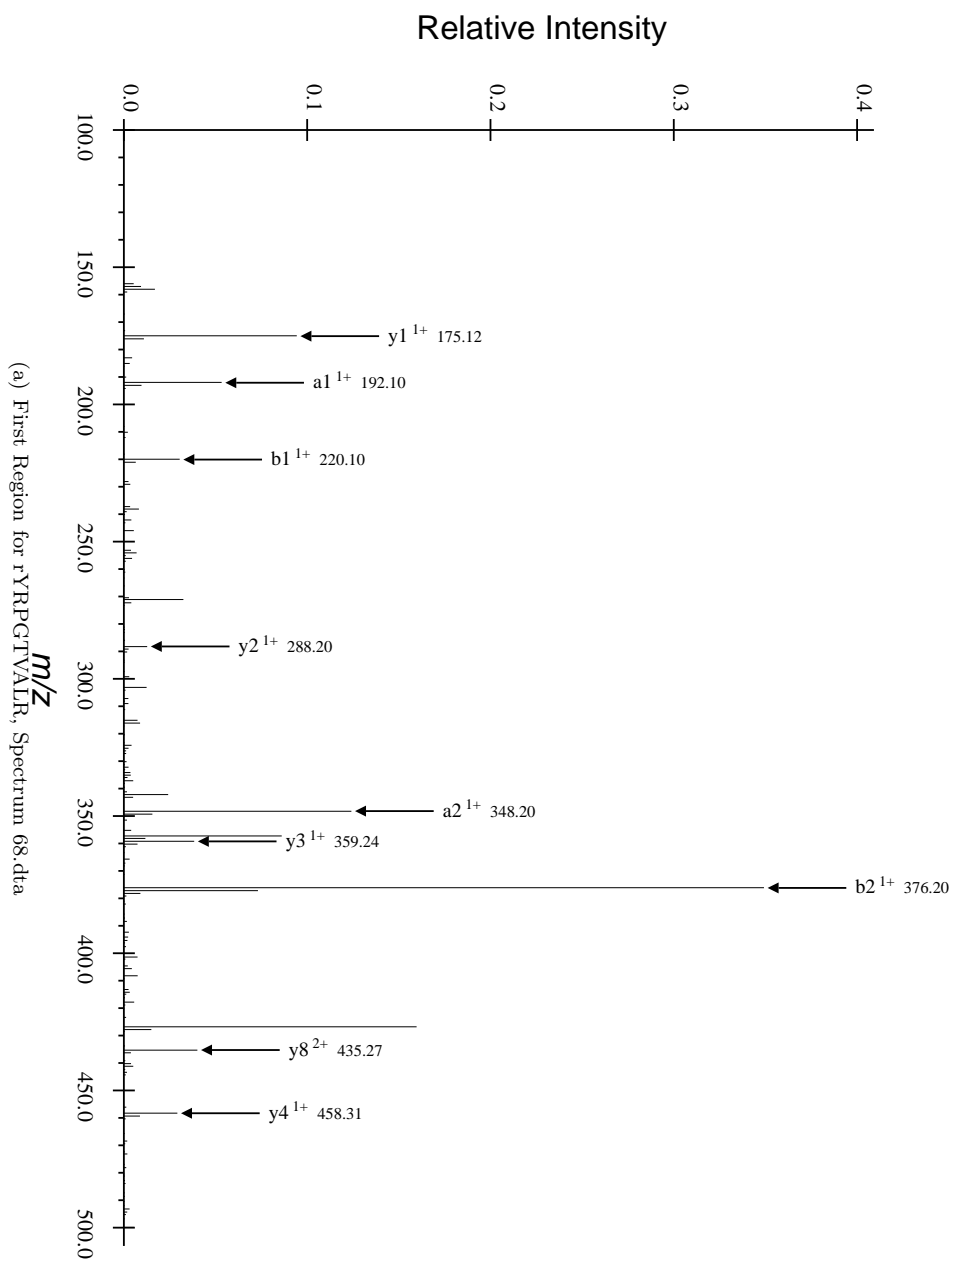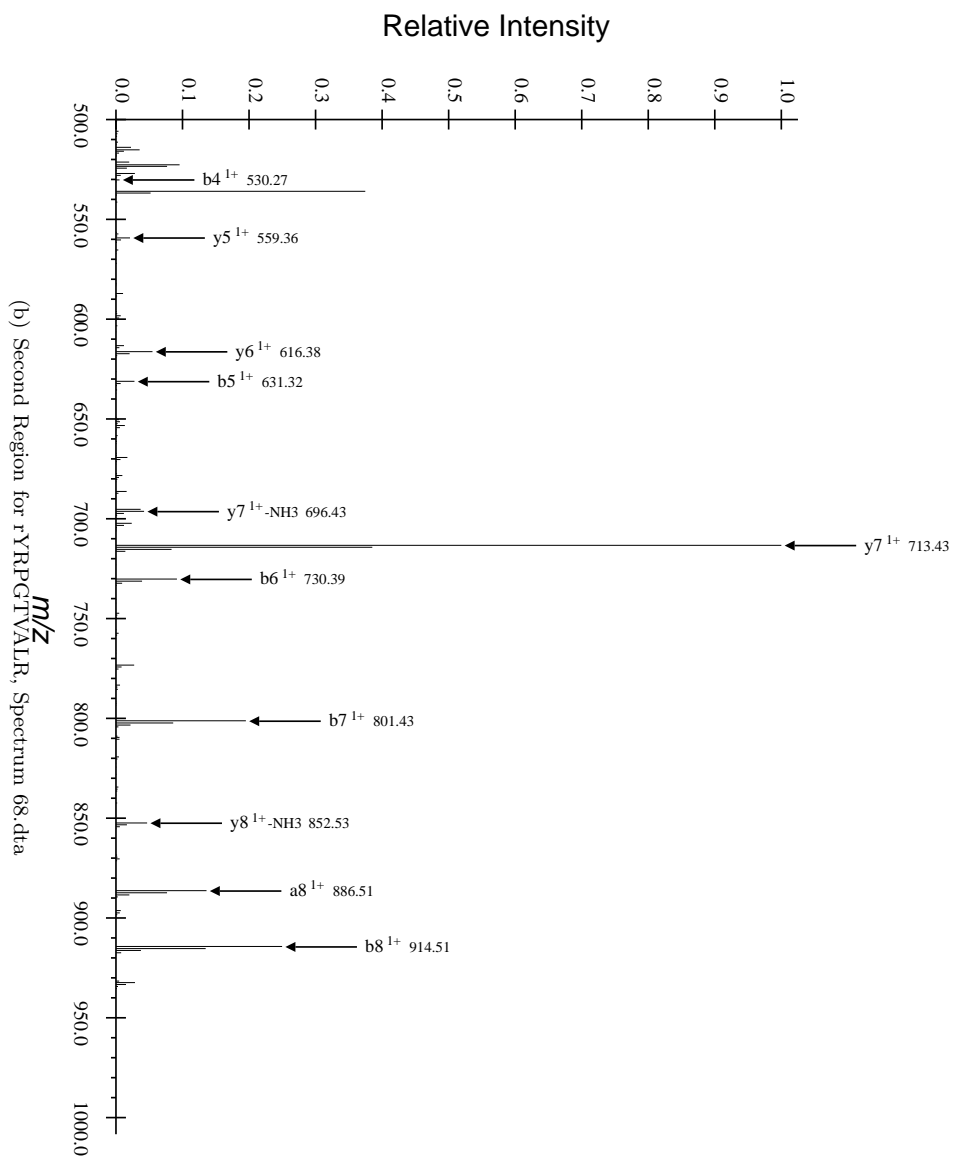

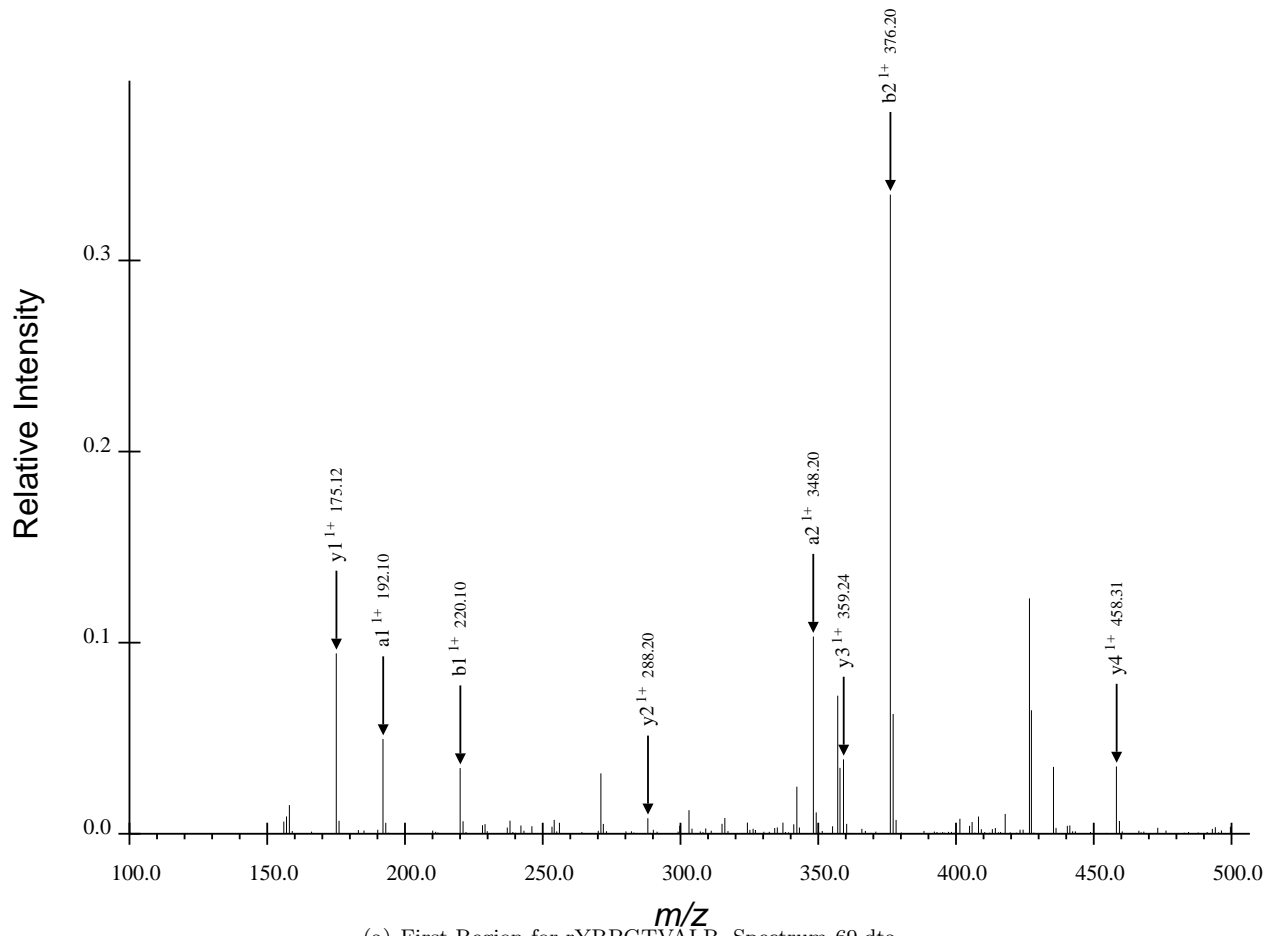

(a) First Region for rYRPGTVALR, Spectrum 69.dta

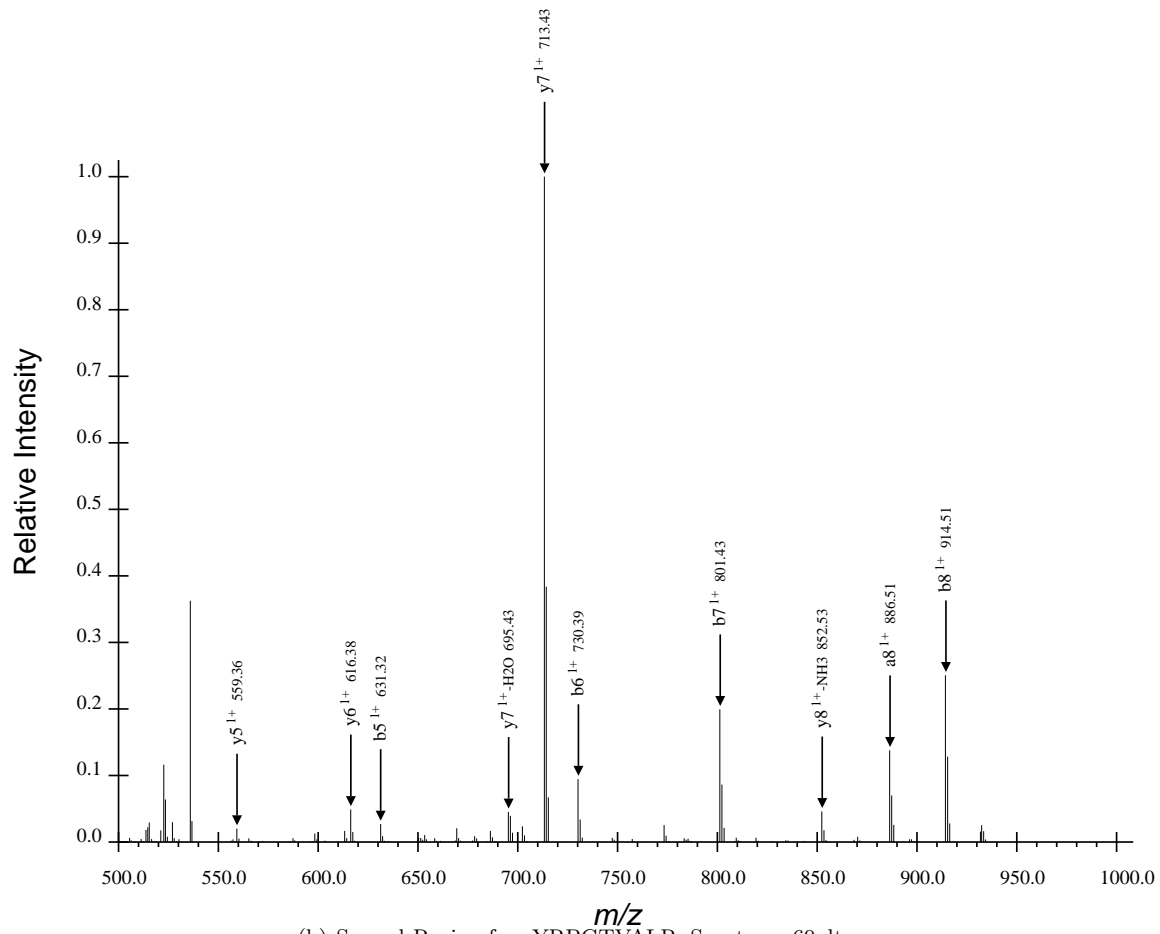

(b) Second Region for rYRPGTVALR, Spectrum 69.dta

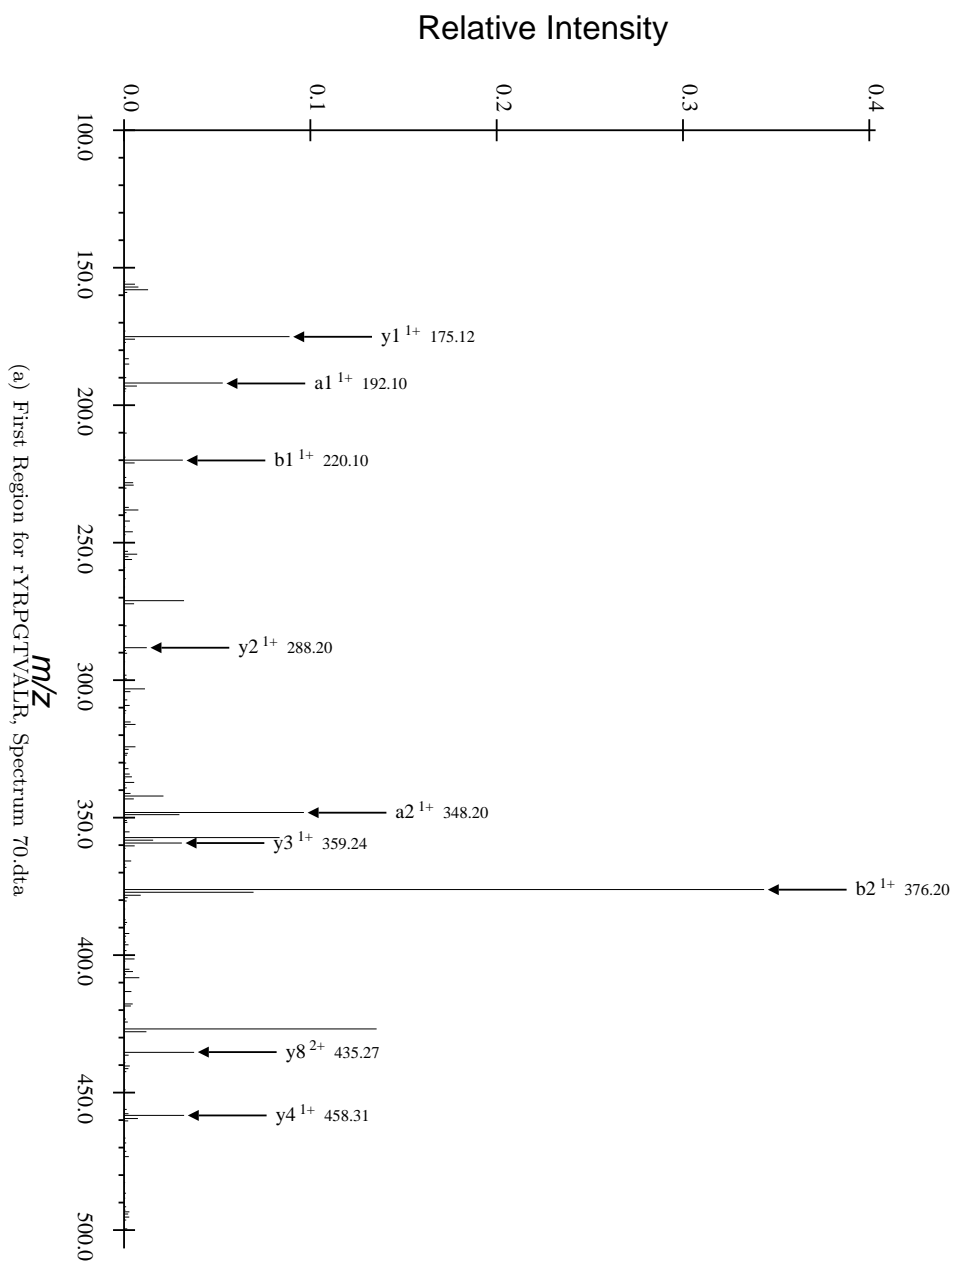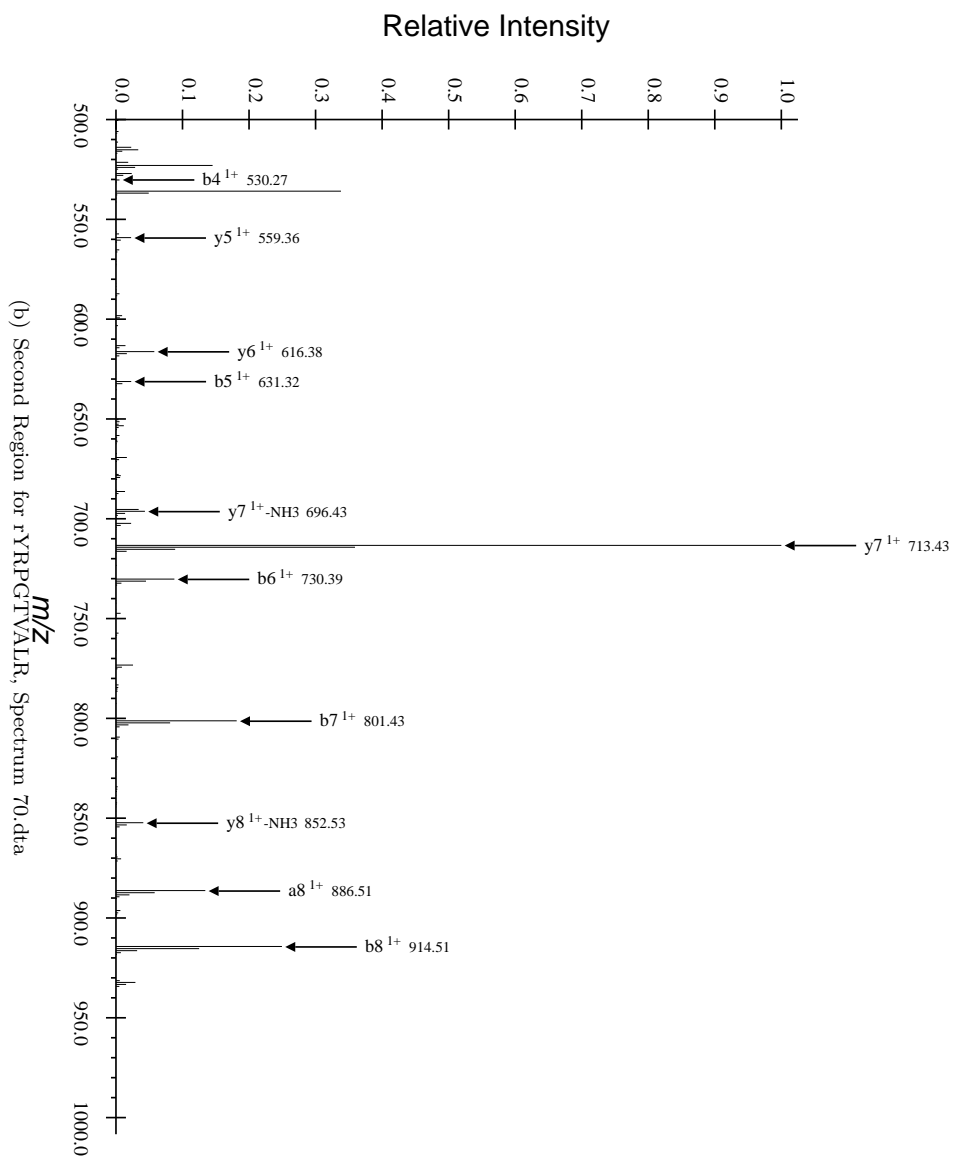

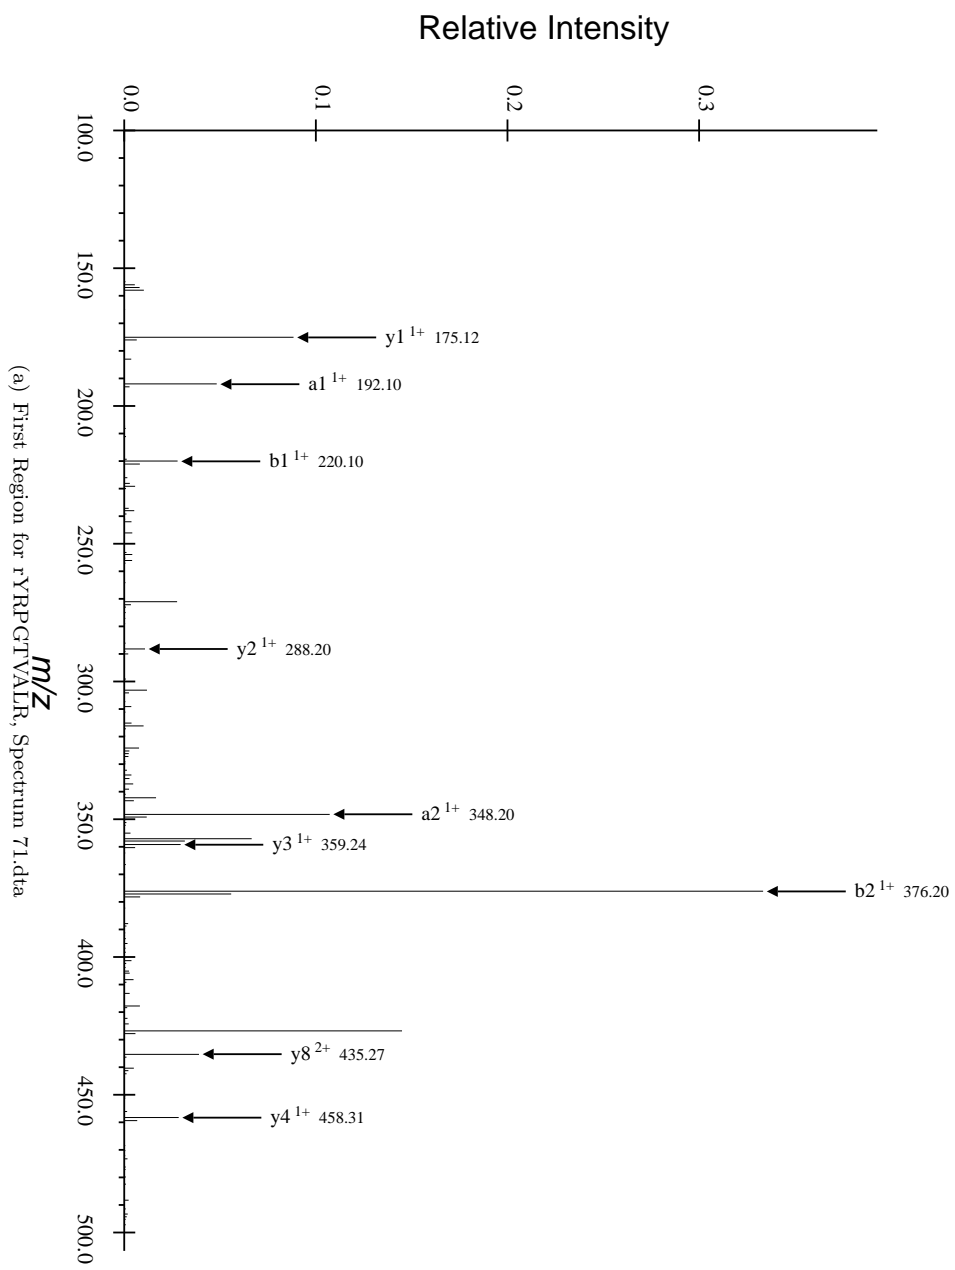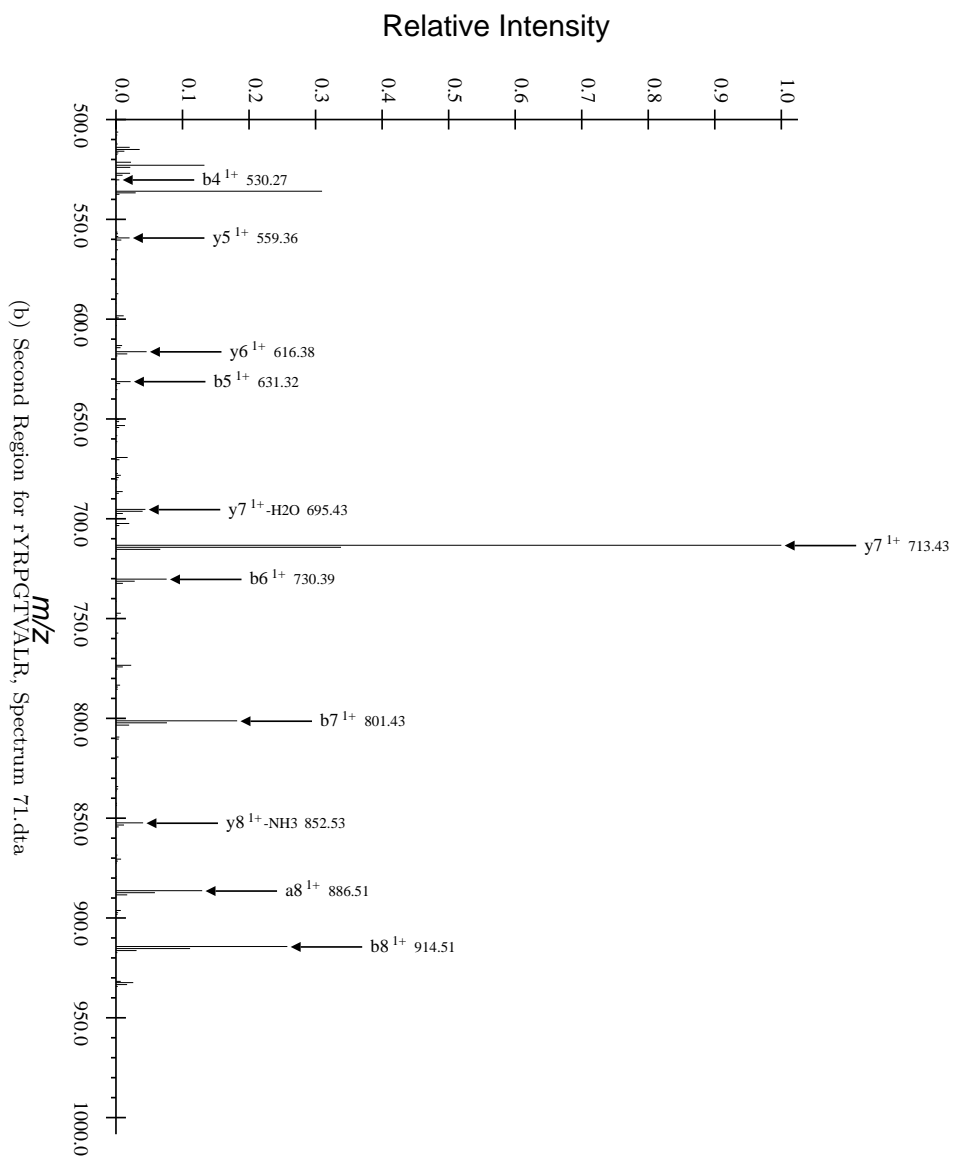

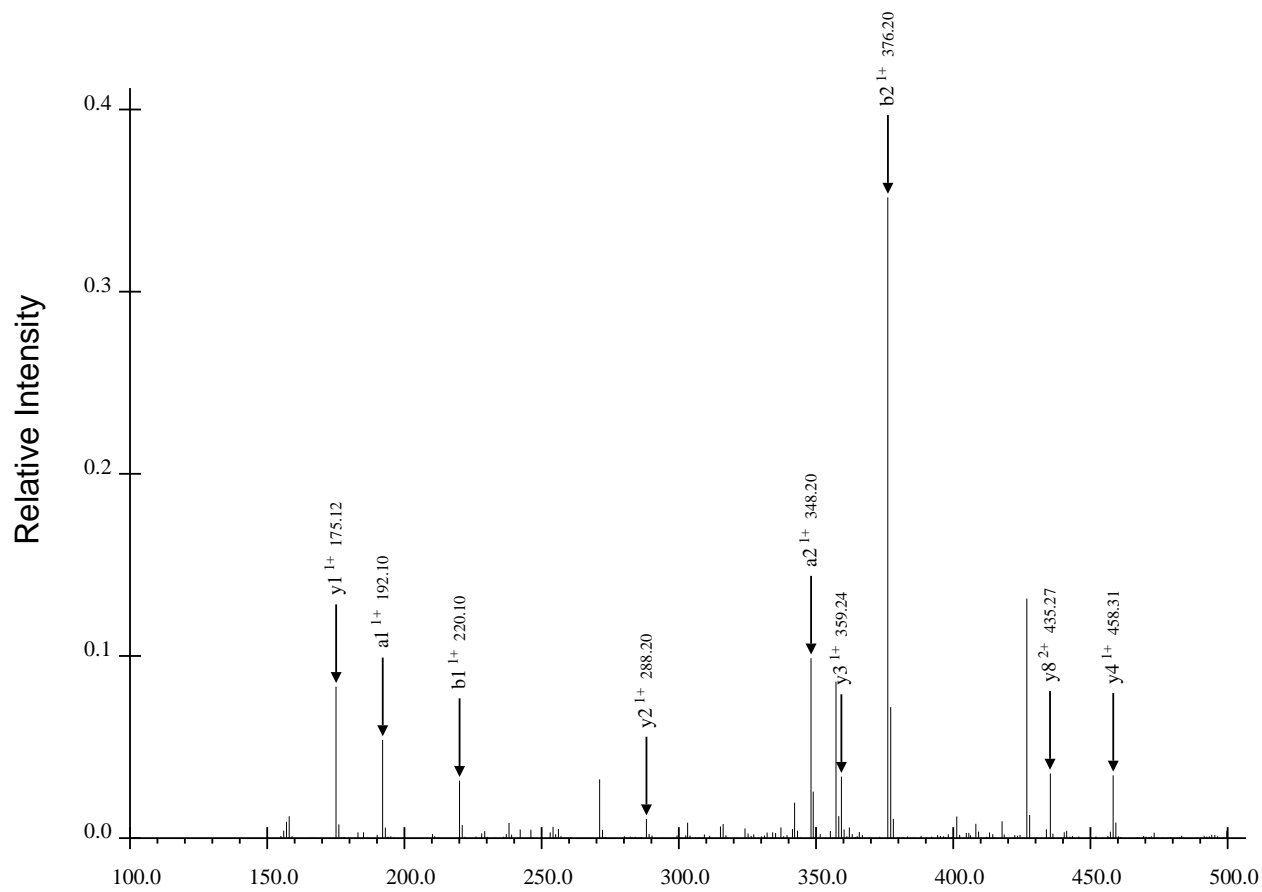

(a) First Region for rYRPGTVALR, Spectrum 72.dta

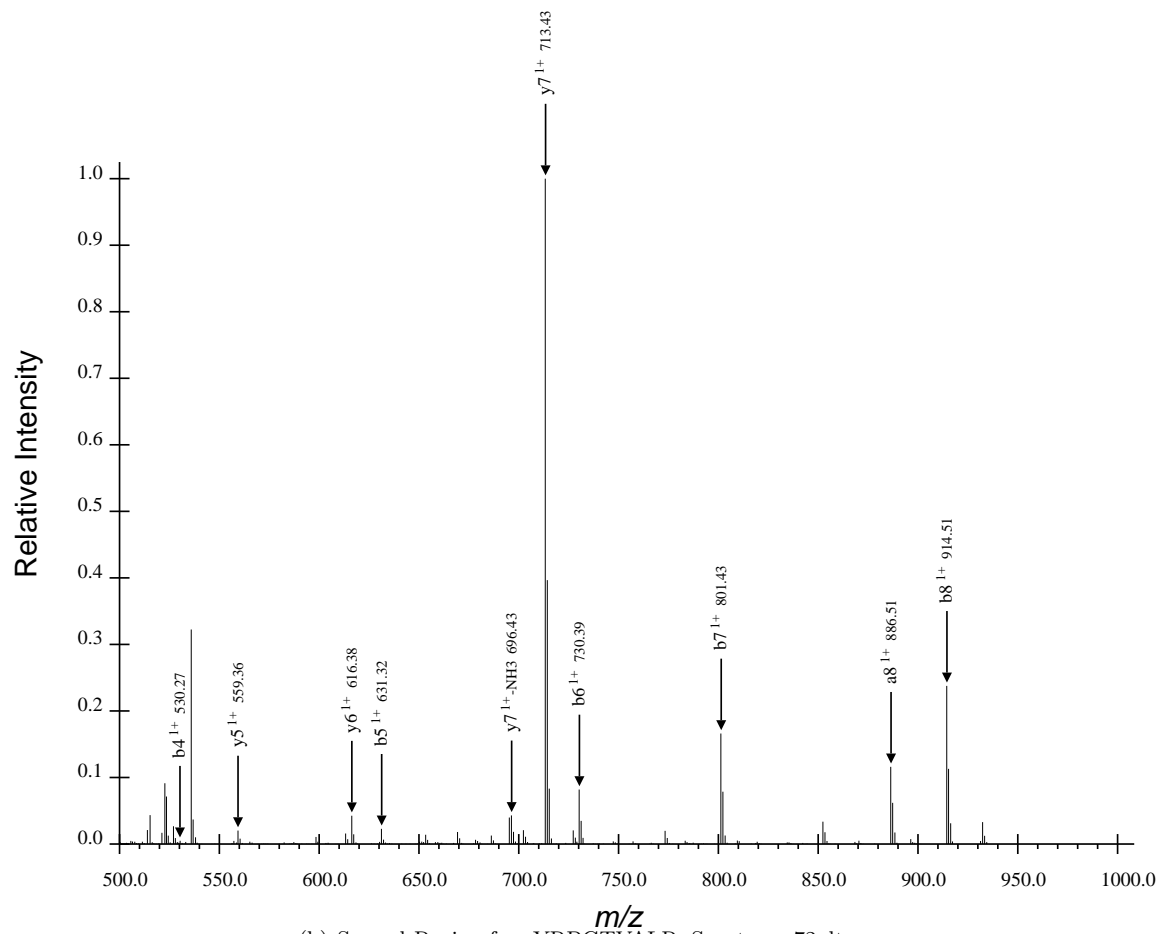

(b) Second Region for rYRPGTVALR, Spectrum 72.dta



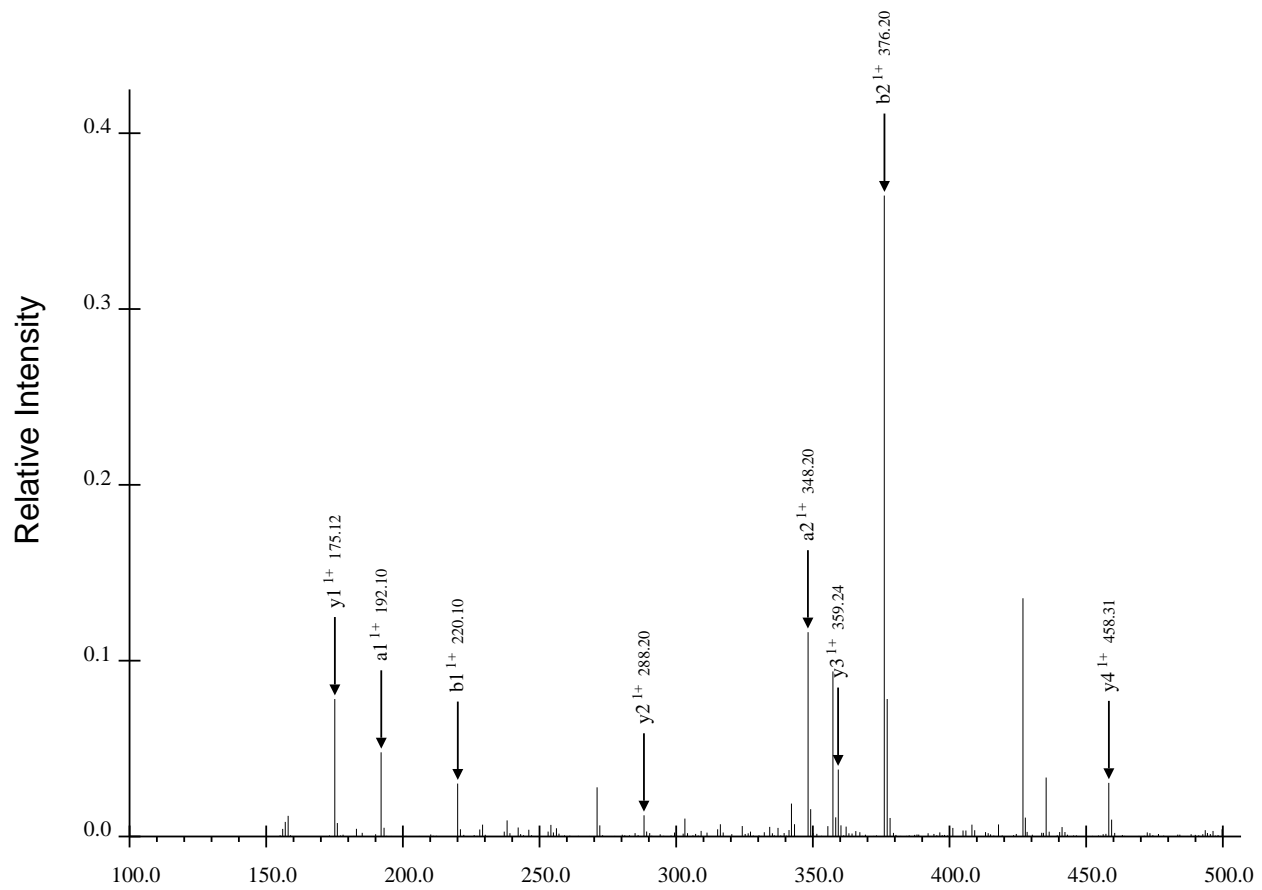

(a) First Region for rYRPGTVALR, Spectrum 73.dta

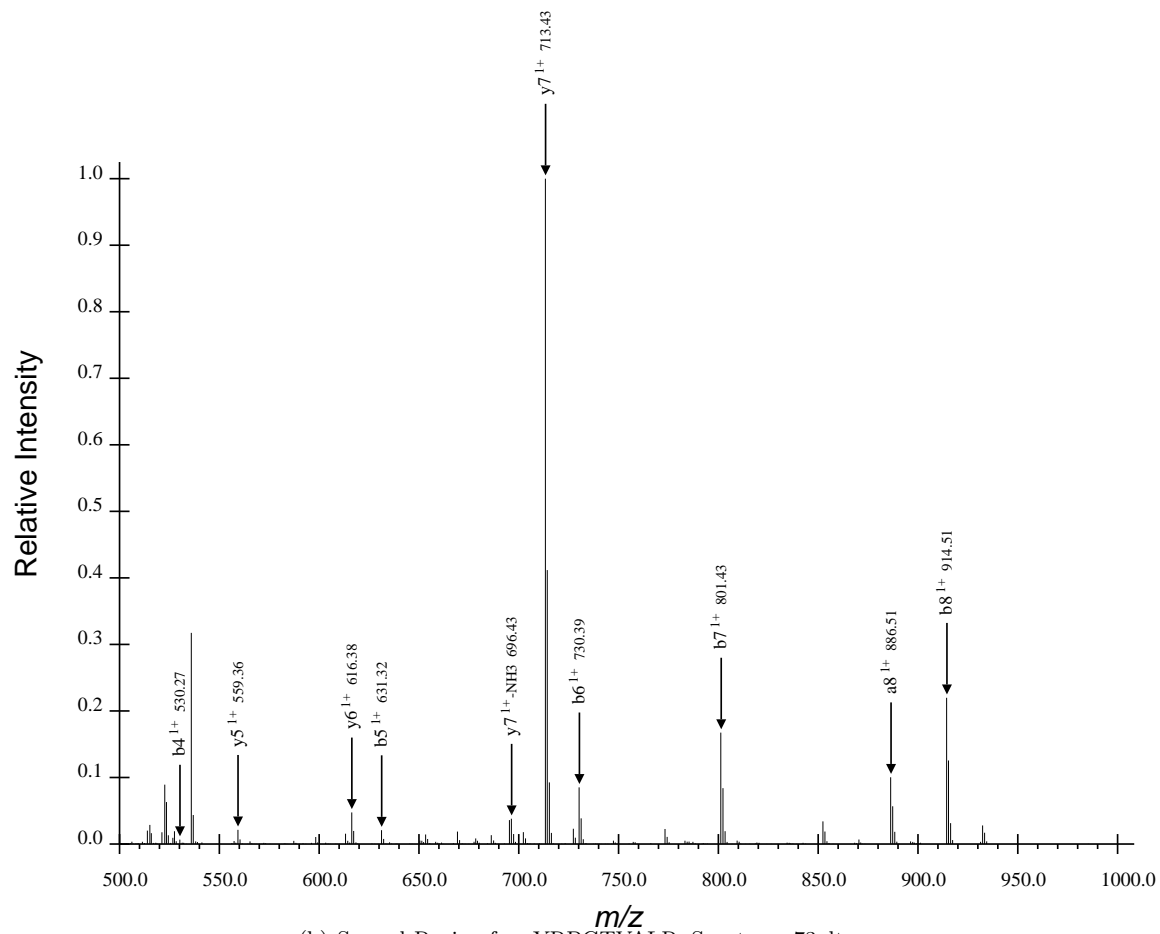

(b) Second Region for rYRPGTVALR, Spectrum 73.dta

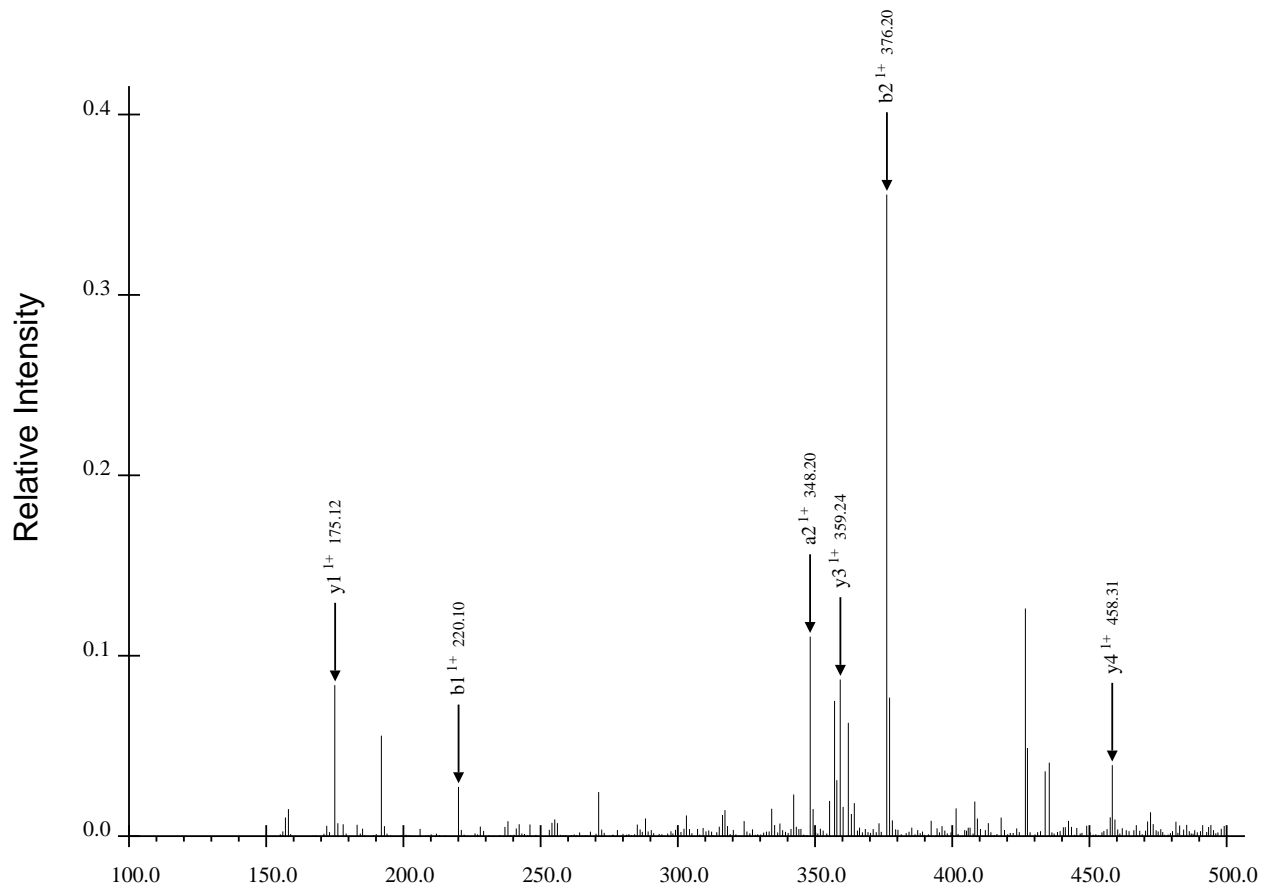

(a) First Region for rYRPGTVALR, Spectrum 74.dta

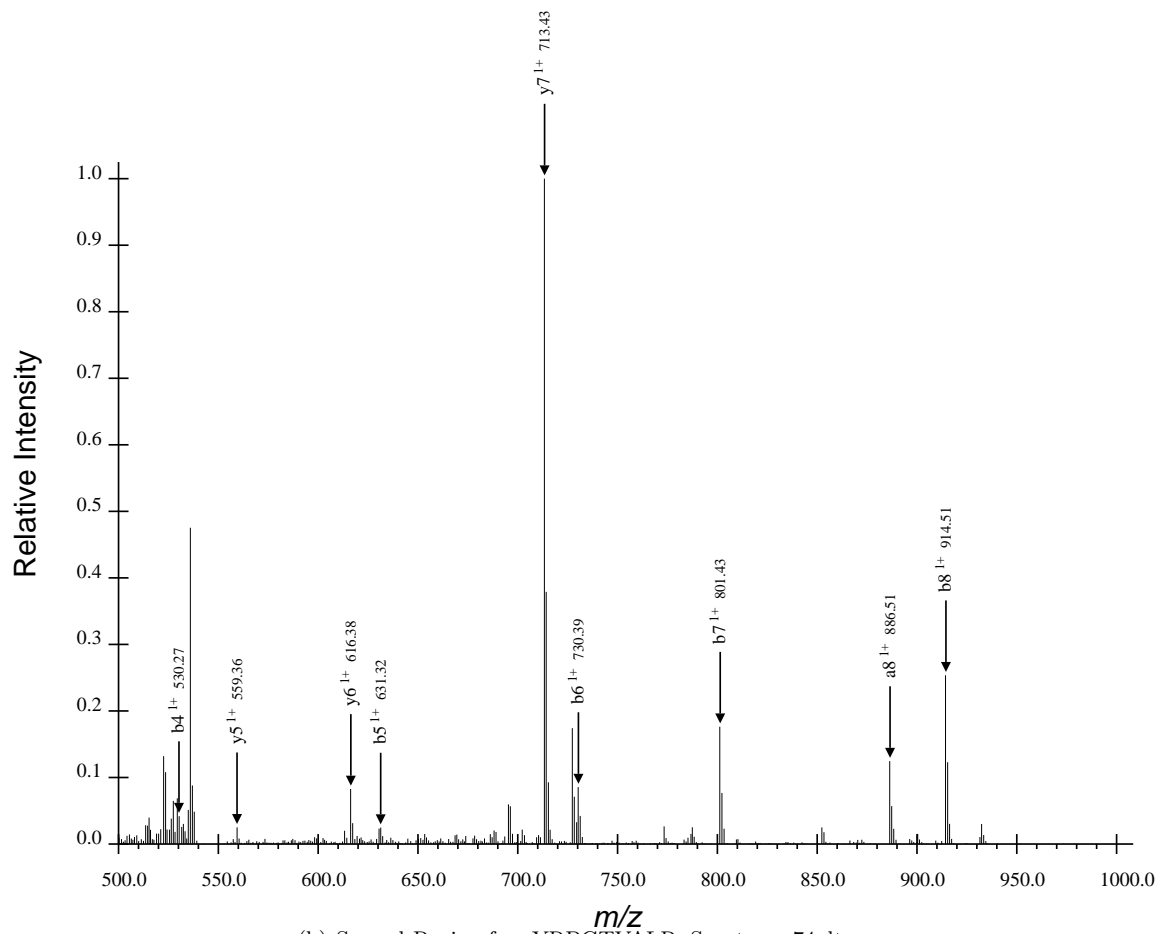

(b) Second Region for rYRPGTVALR, Spectrum 74.dta

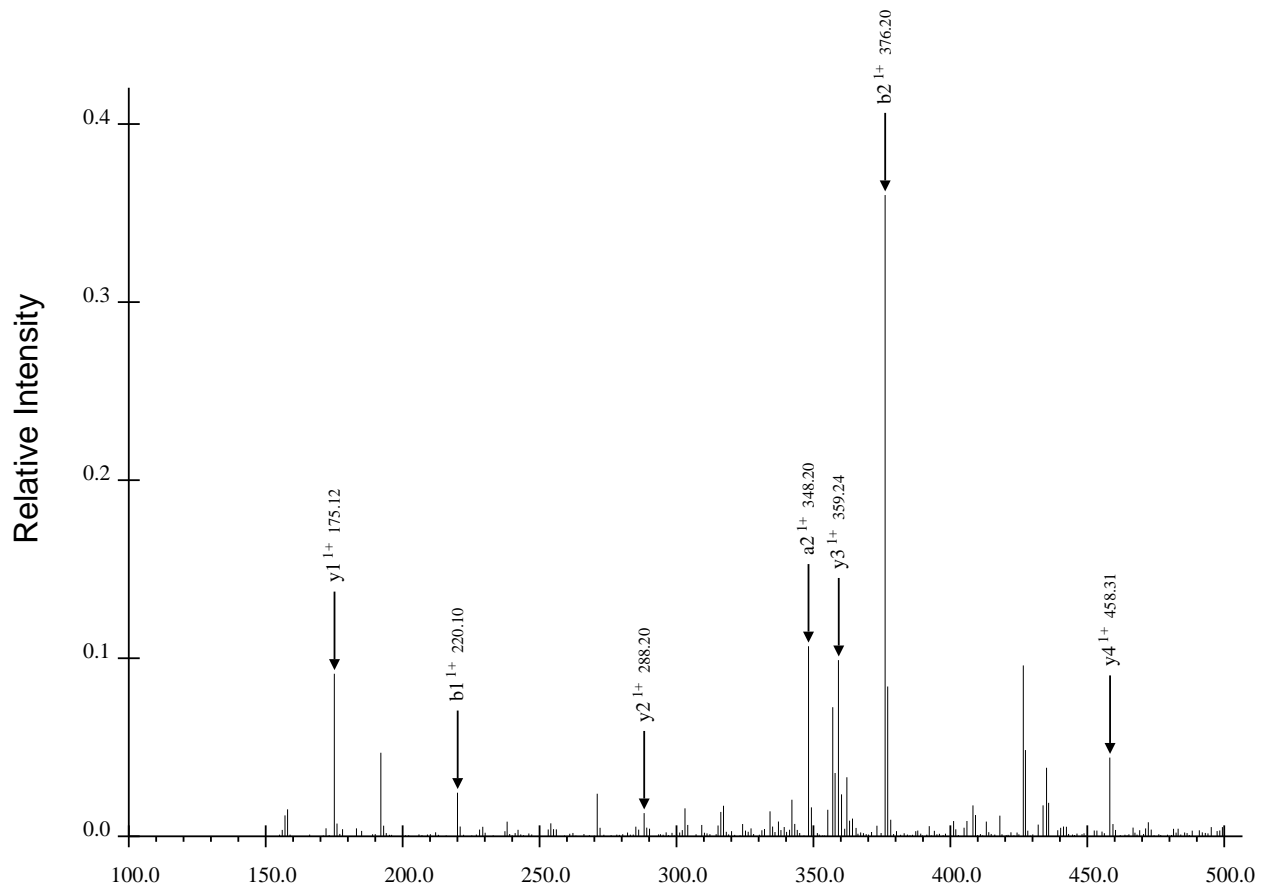

(a) First Region for rYRPGTVALR, Spectrum 75.dta

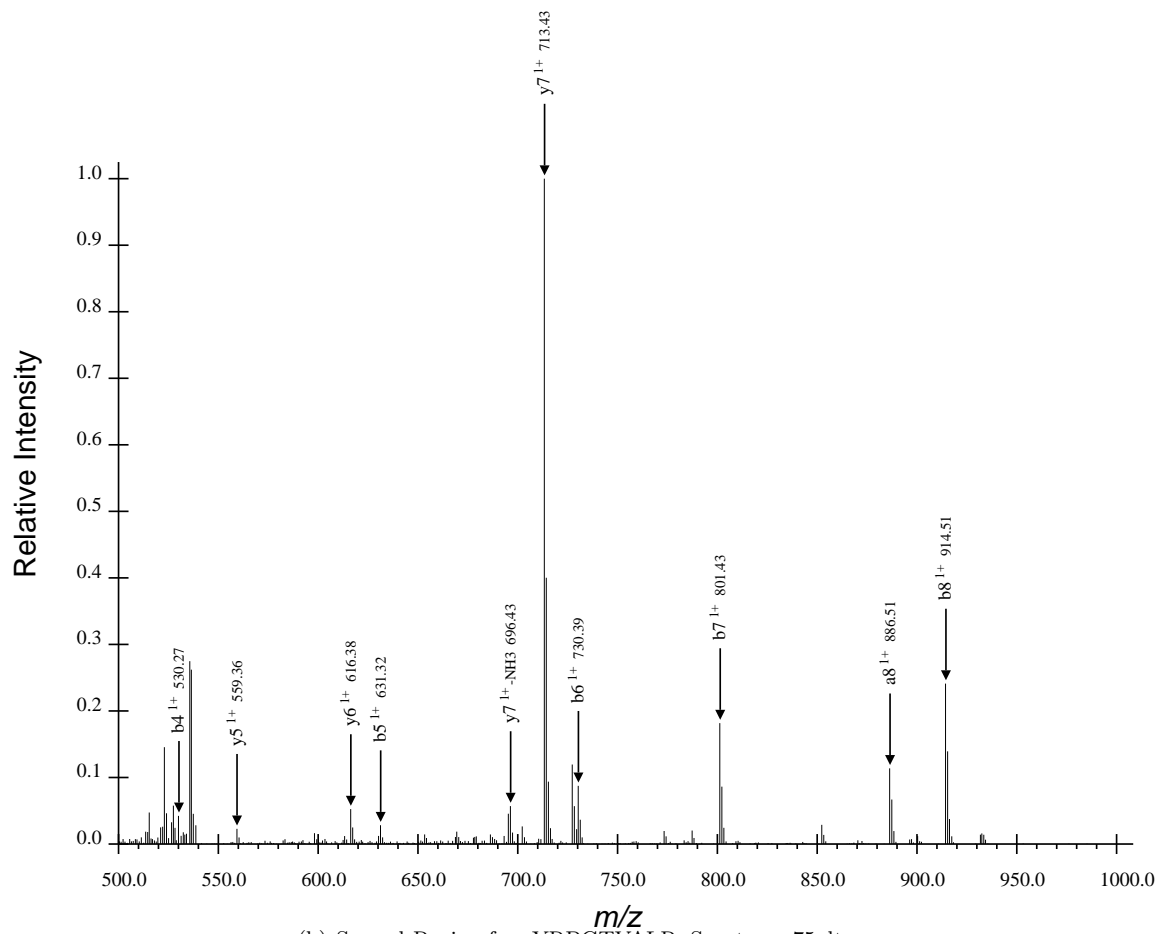

(b) Second Region for rYRPGTVALR, Spectrum 75.dta

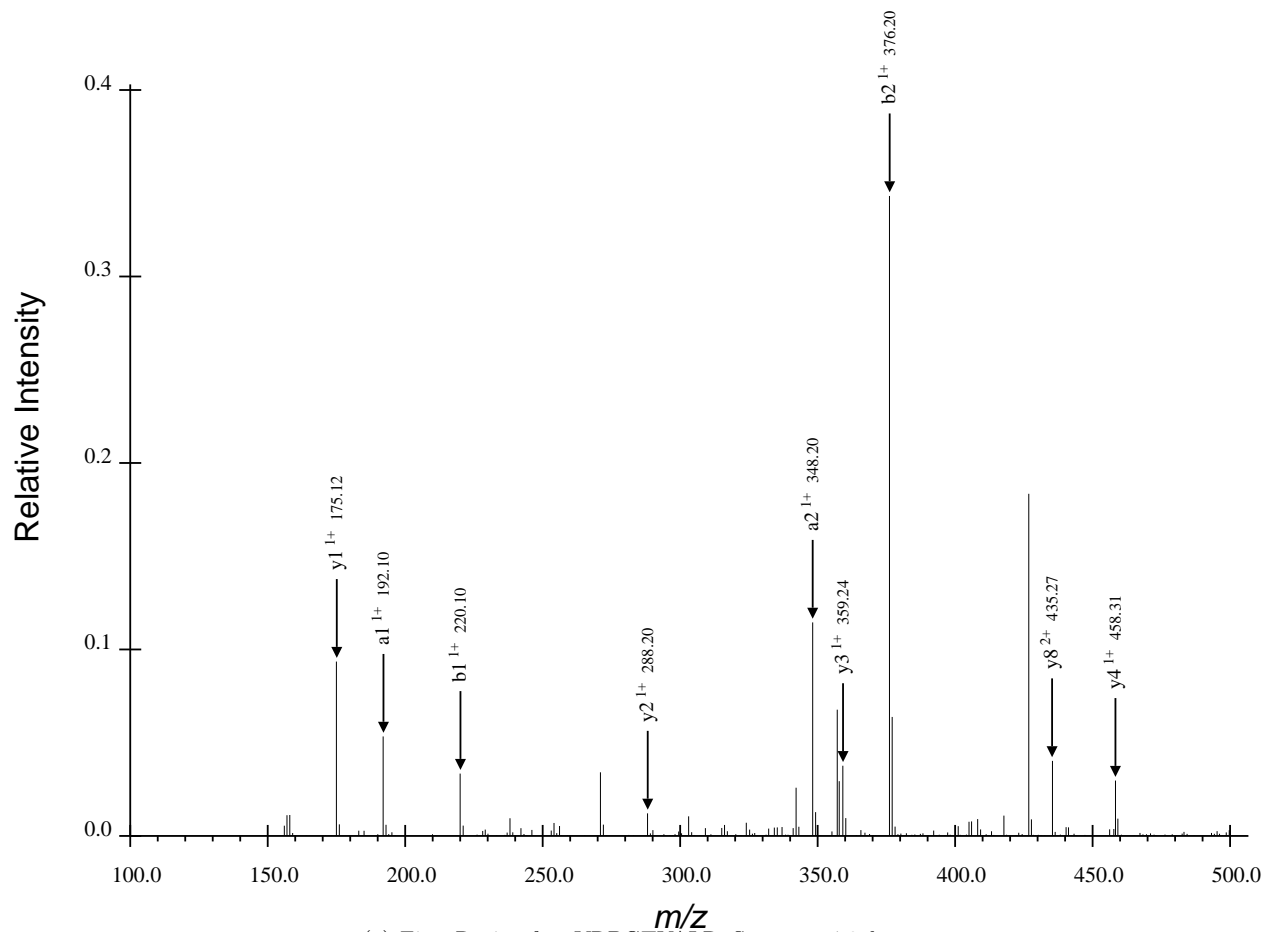

(a) First Region for rYRPGTVALR, Spectrum 76.dta

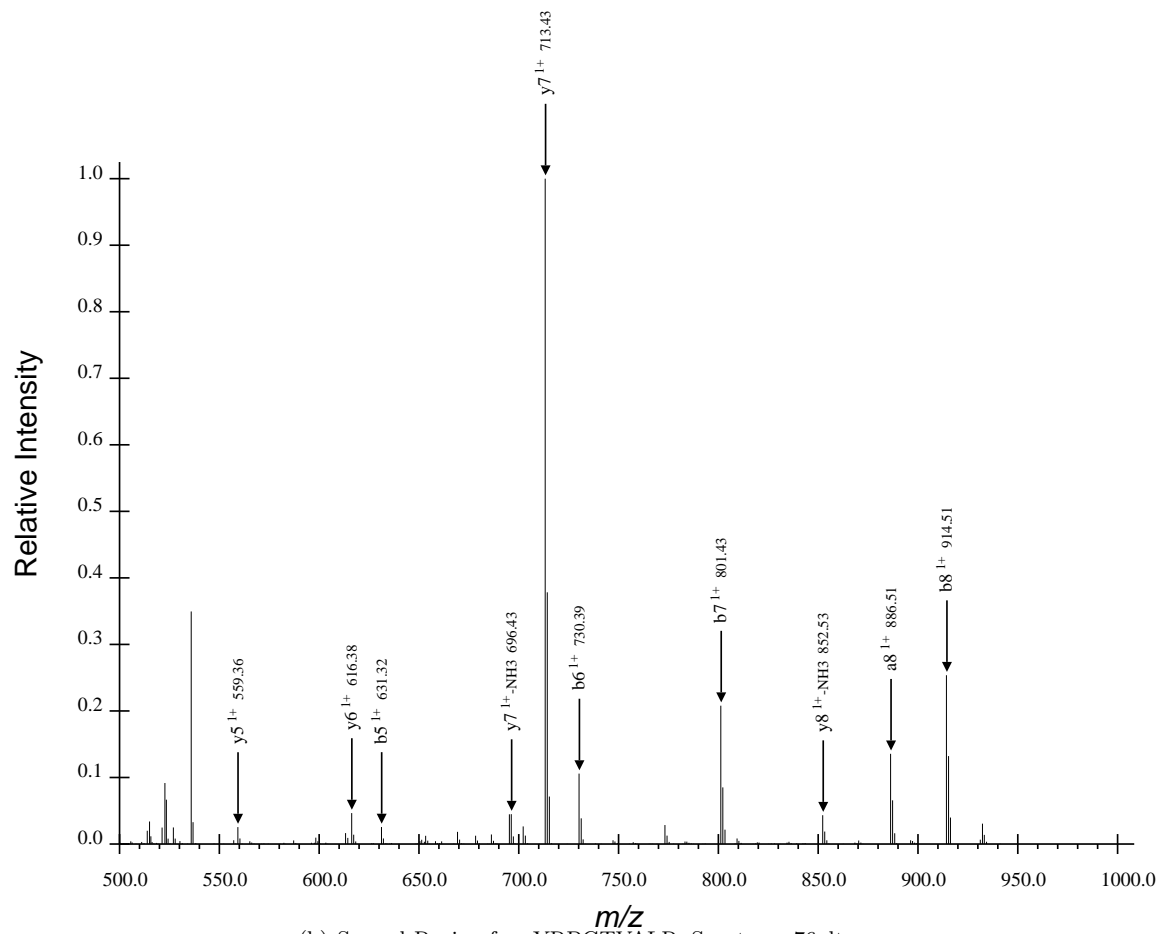

(b) Second Region for rYRPGTVALR, Spectrum 76.dta

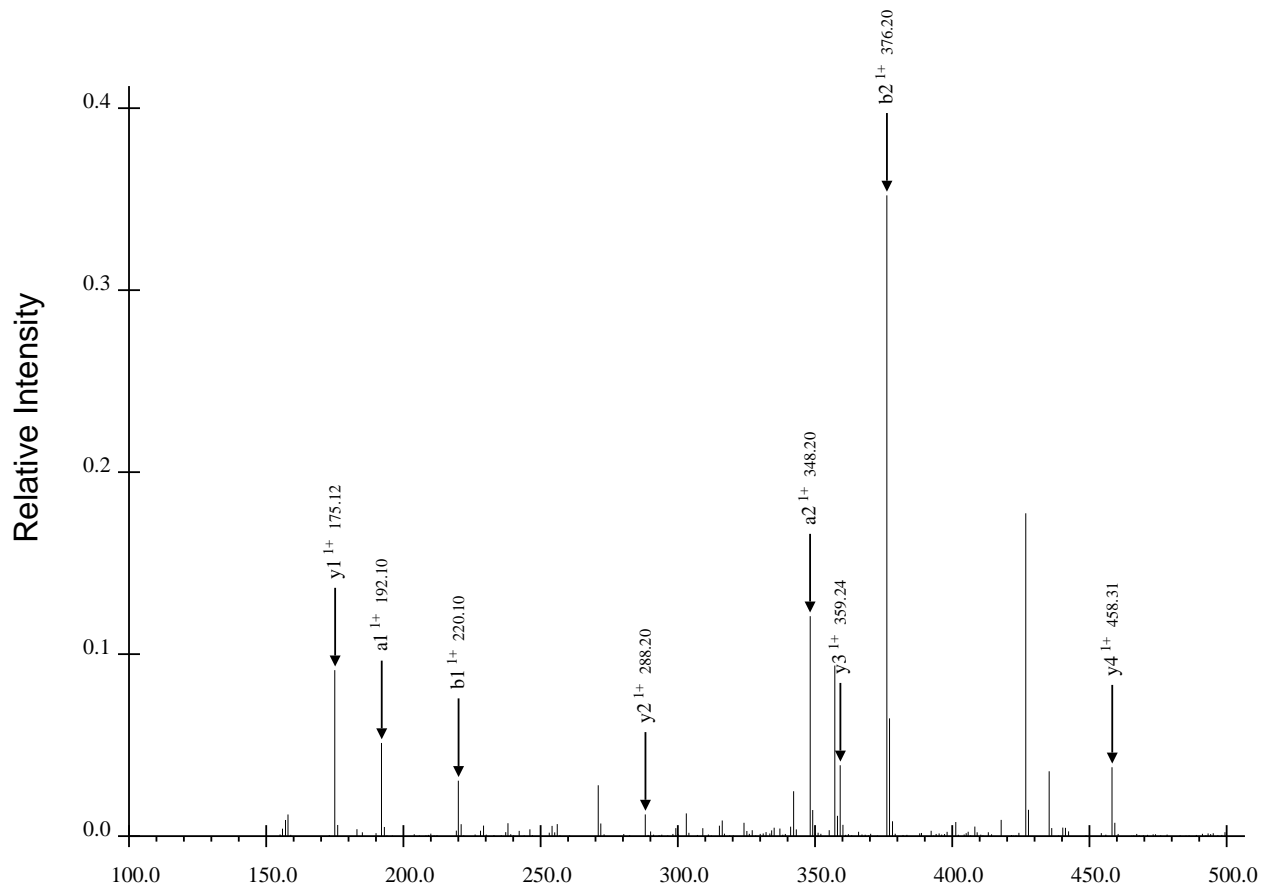

(a) First Region for rYRPGTVALR, Spectrum 77.dta

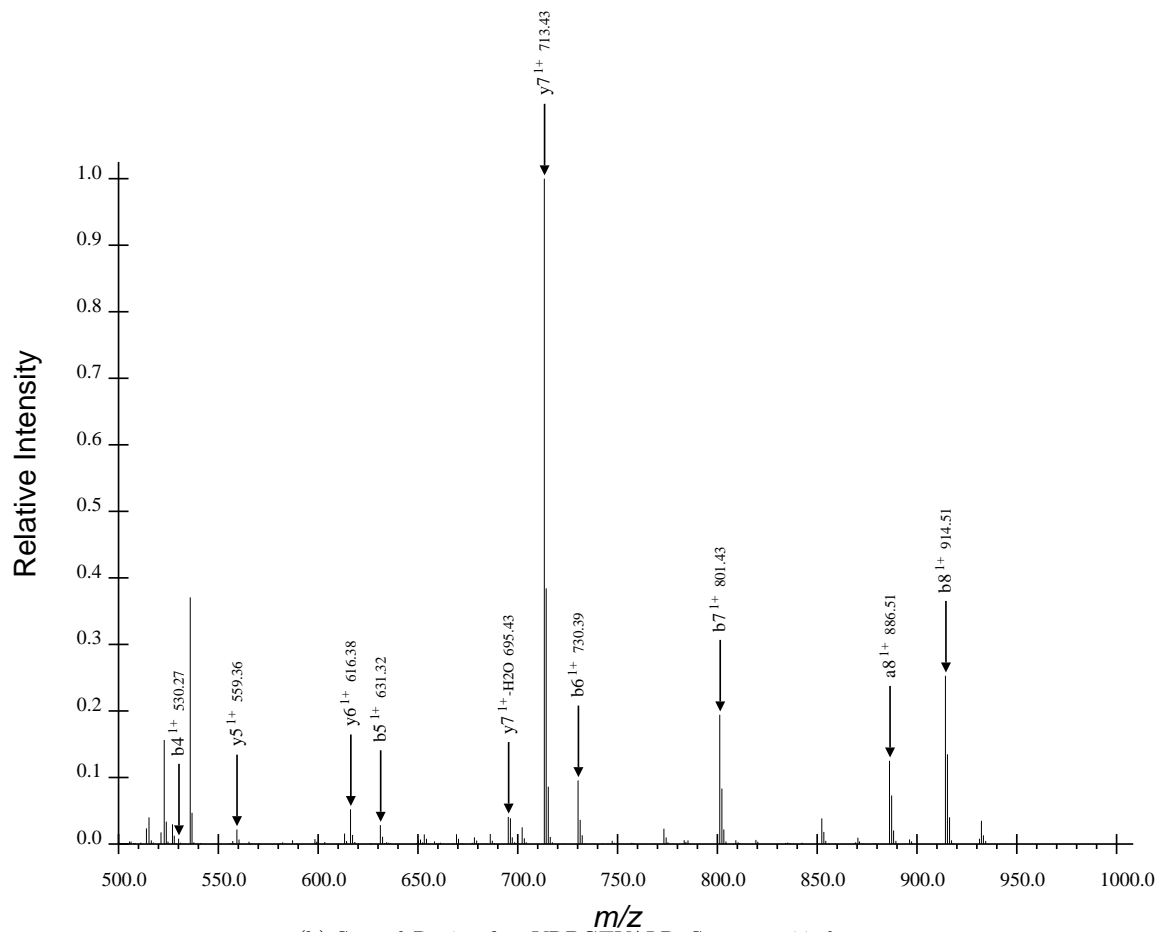

(b) Second Region for rYRPGTVALR, Spectrum 77.dta

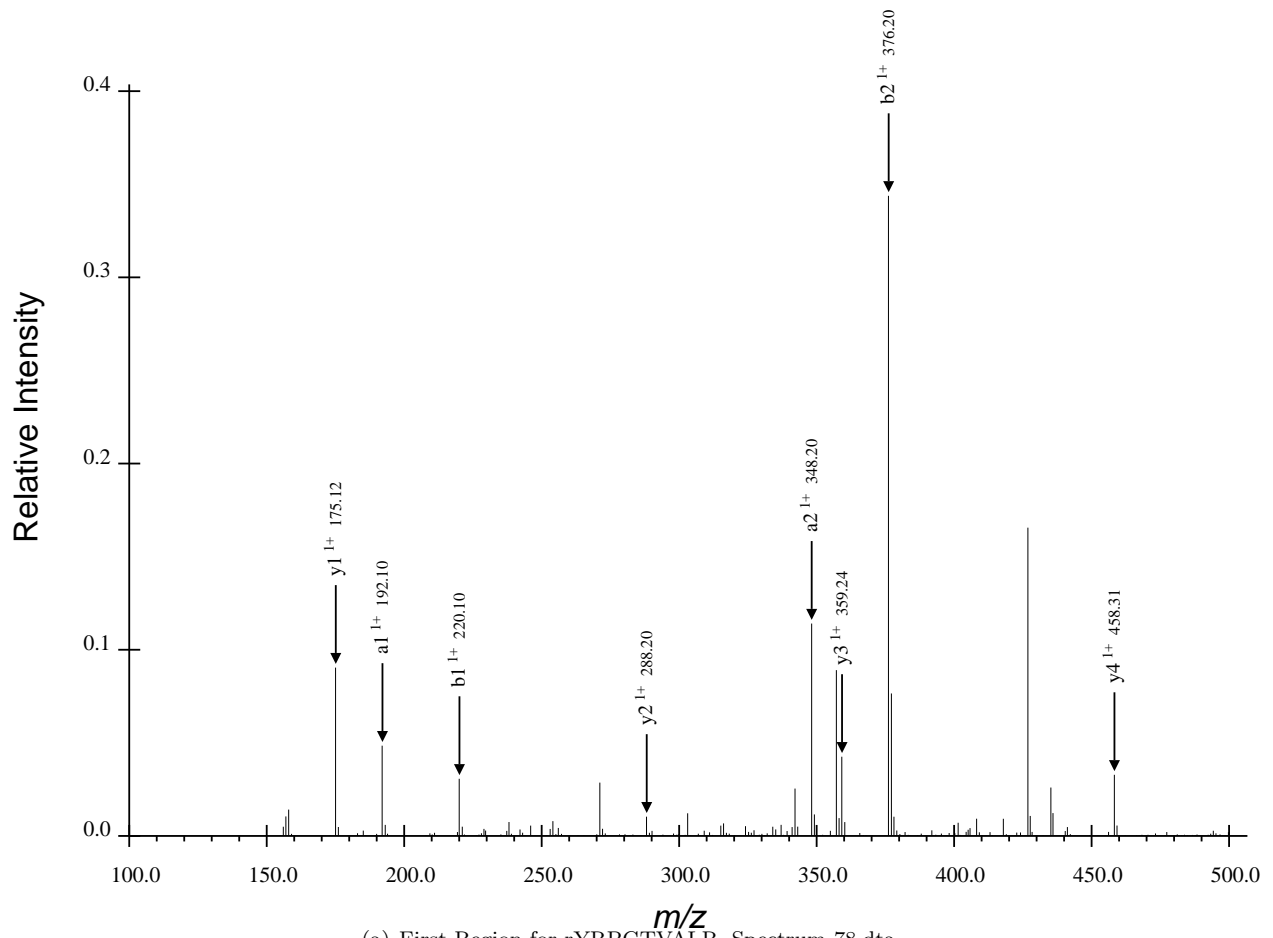

(a) First Region for rYRPGTVALR, Spectrum 78.dta

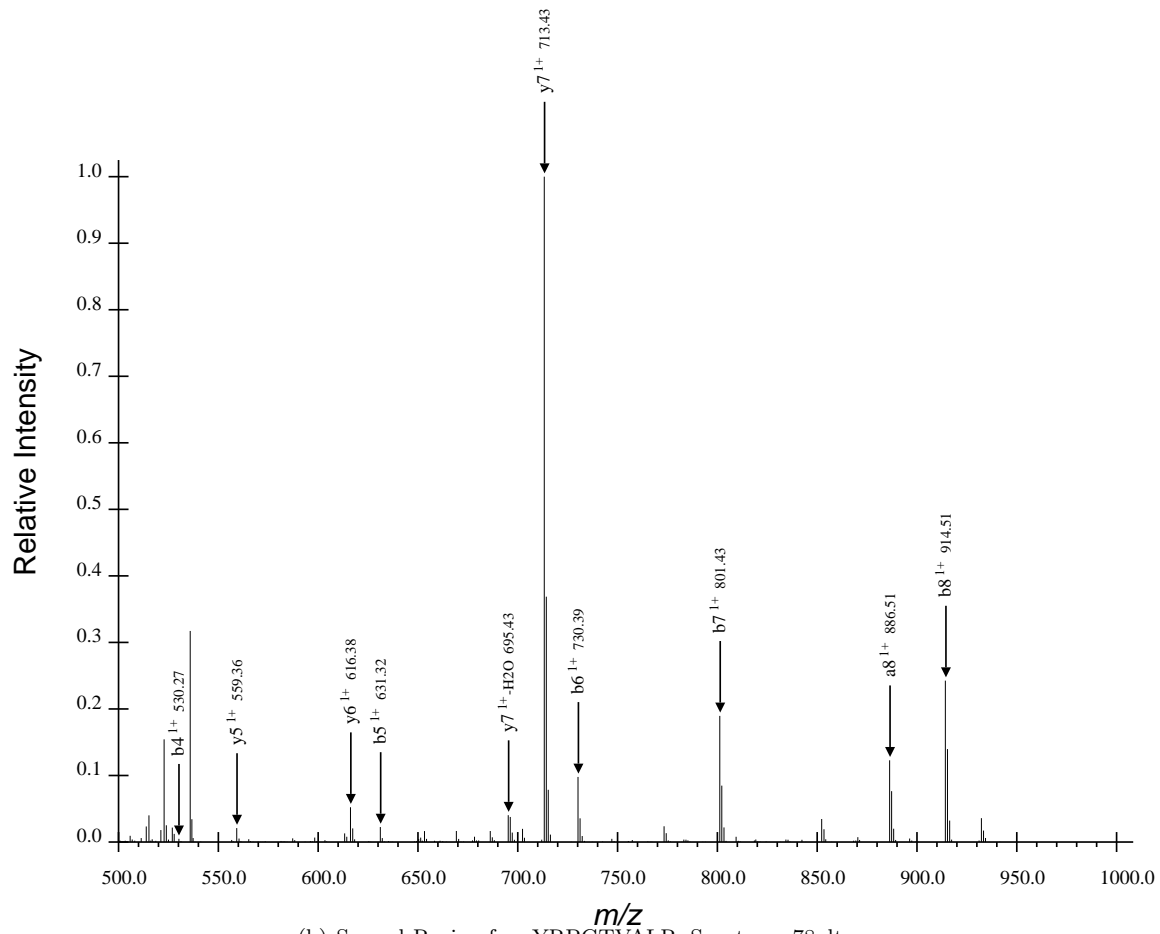

(b) Second Region for rYRPGTVALR, Spectrum 78.dta

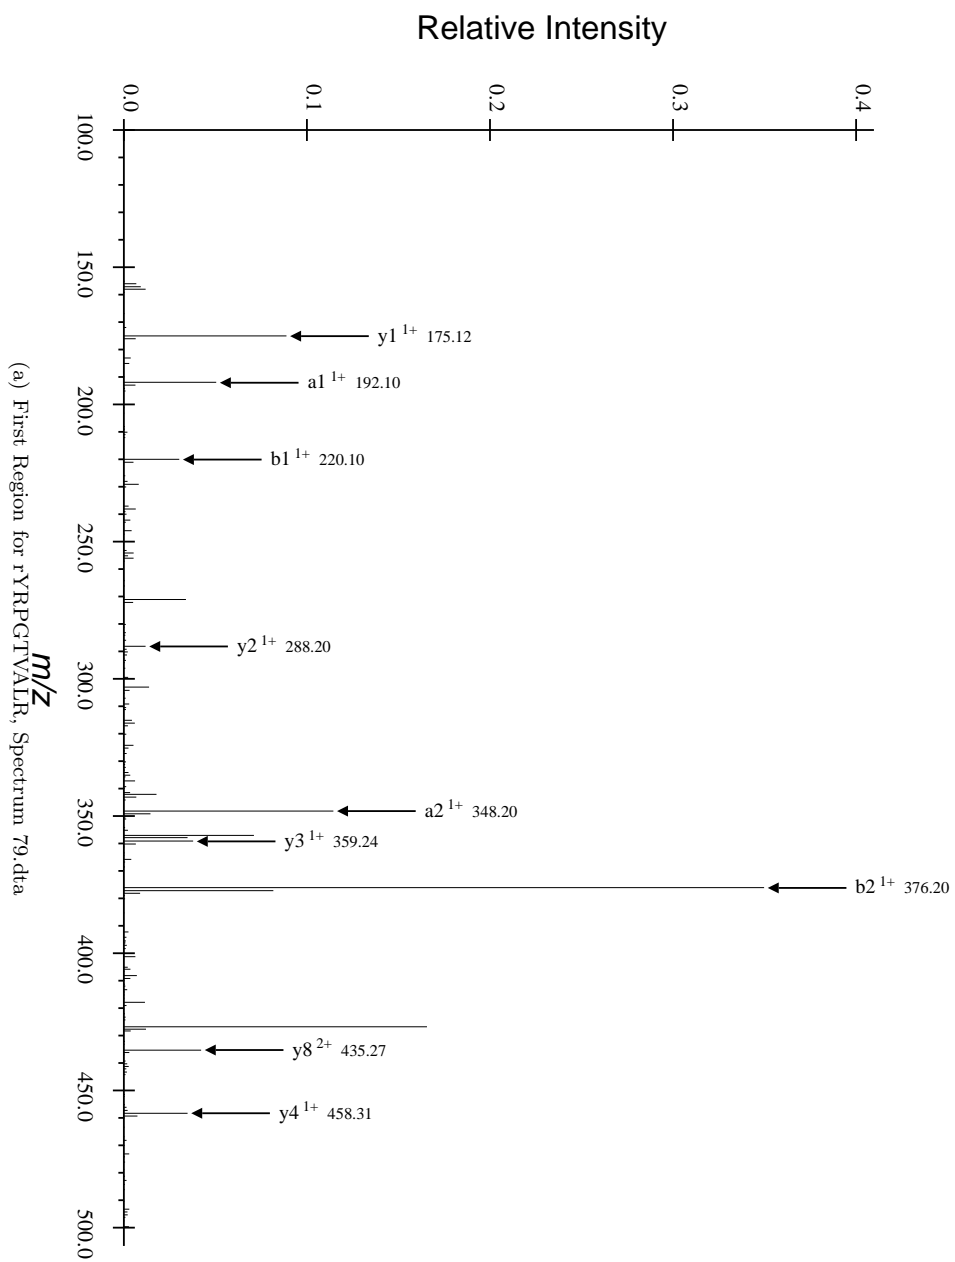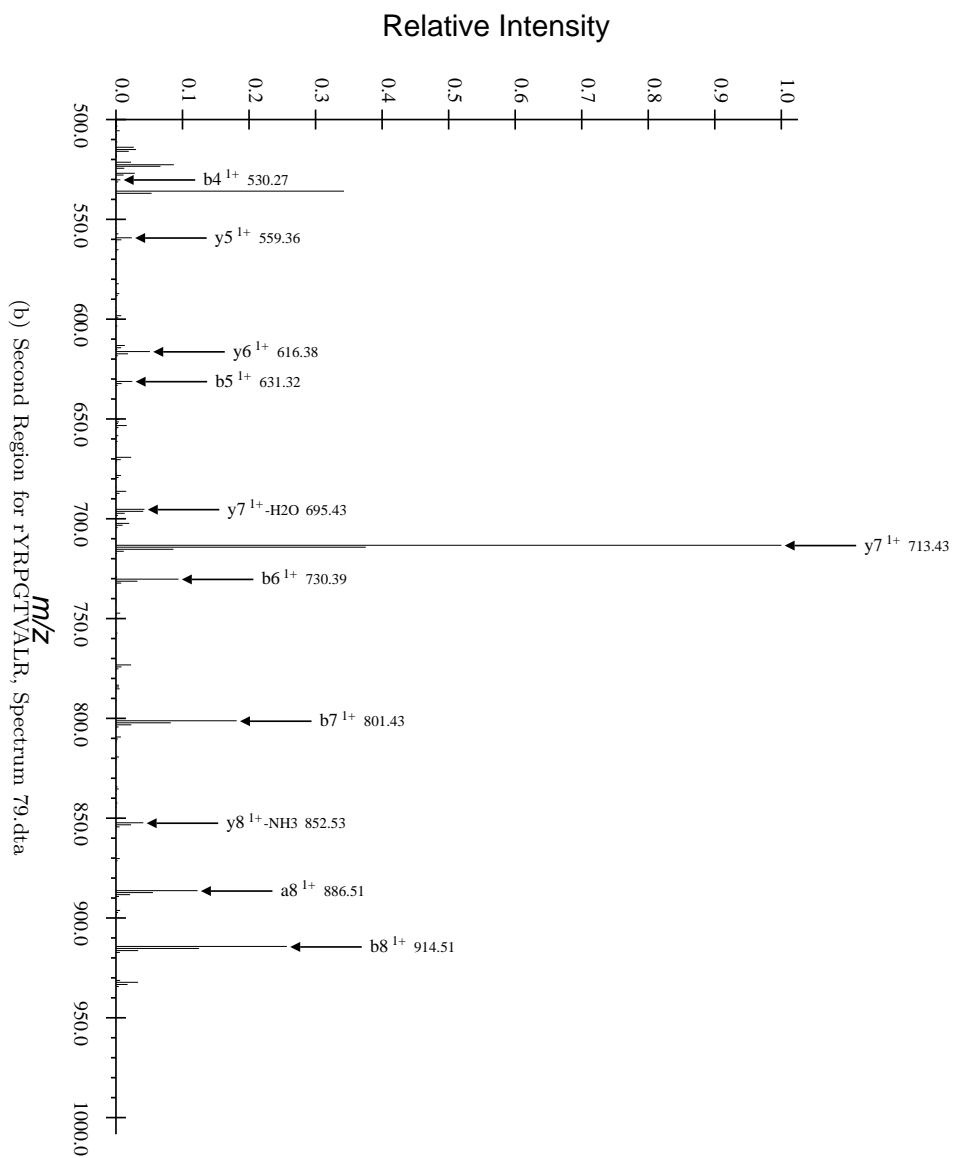

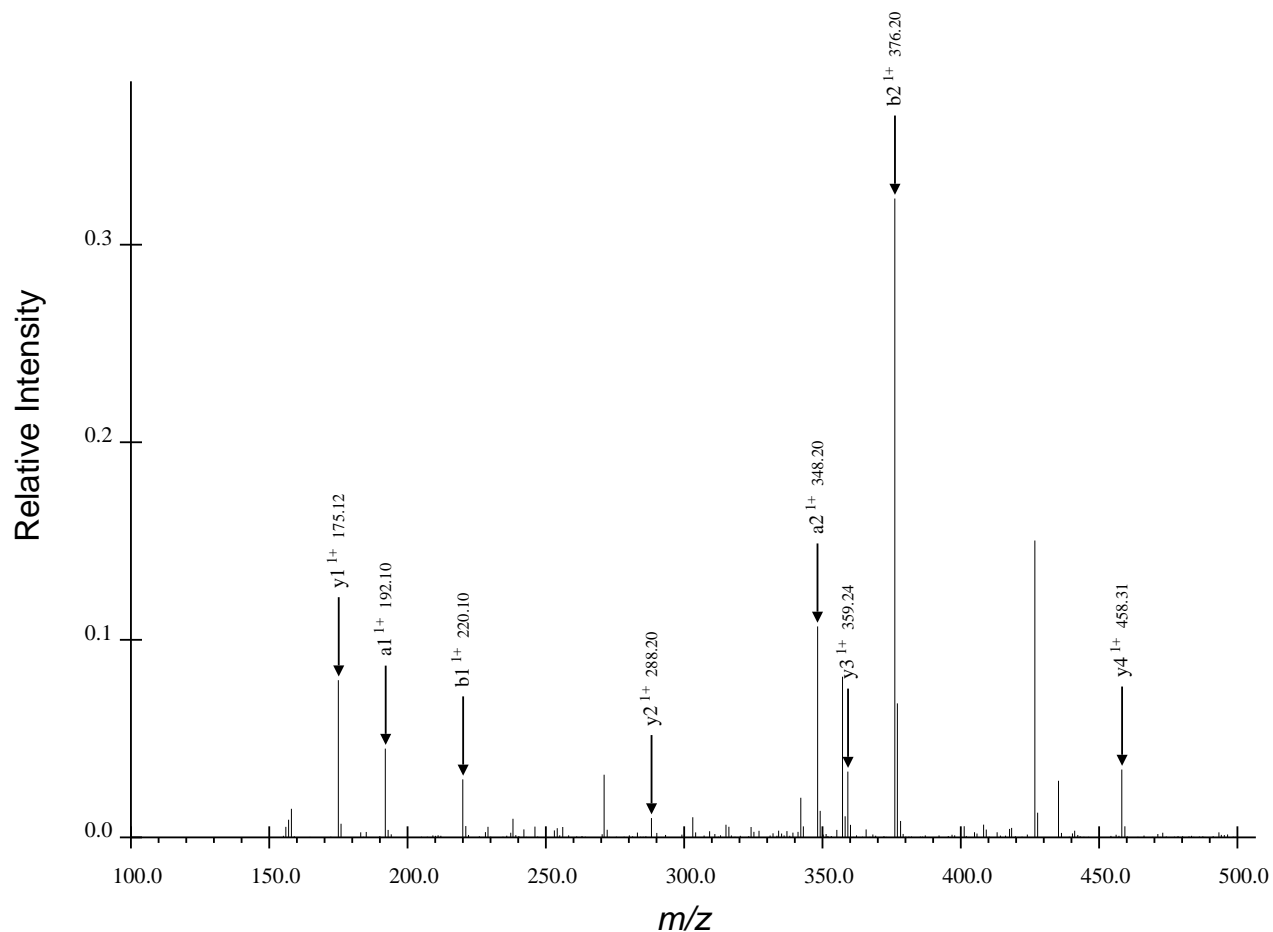

(a) First Region for rYRPGTVALR, Spectrum 80.dta

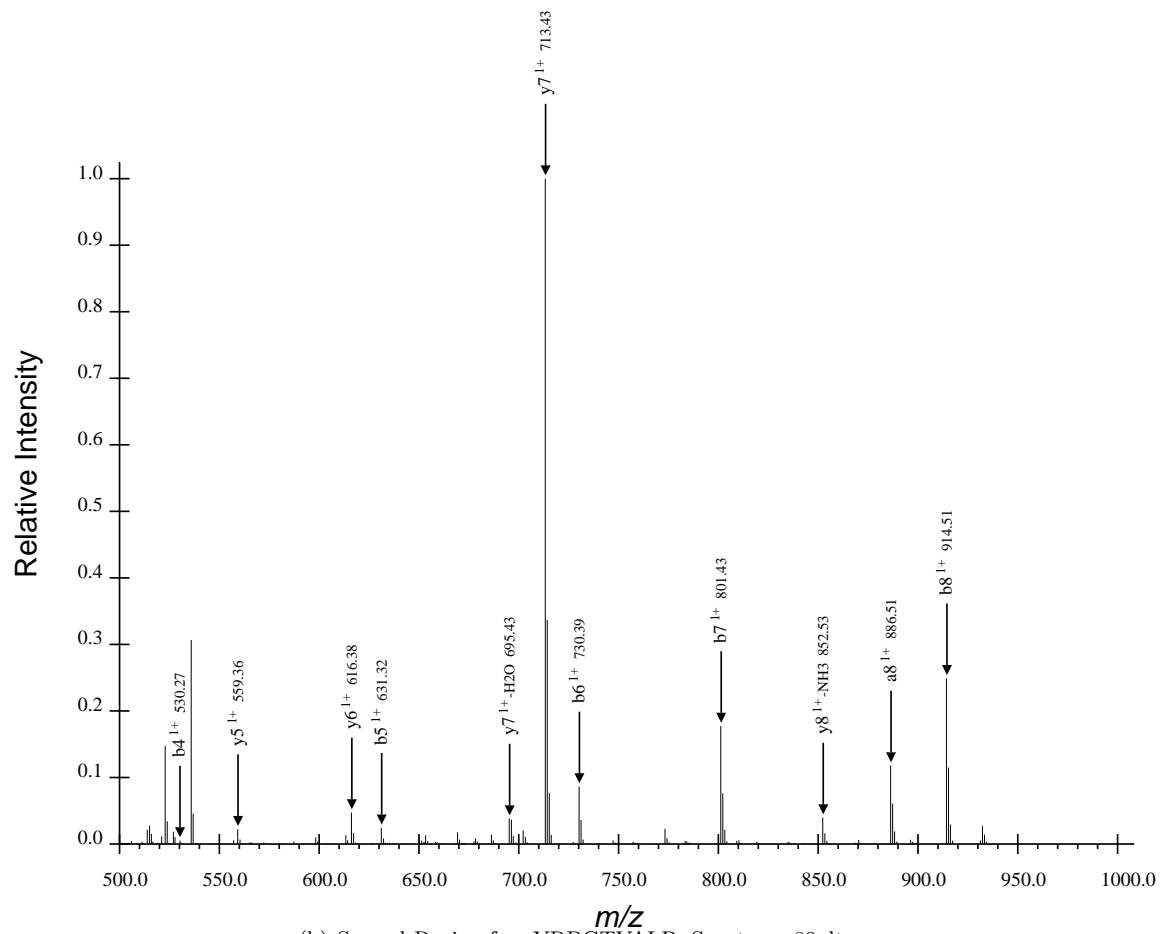

(b) Second Region for rYRPGTVALR, Spectrum 80.dta



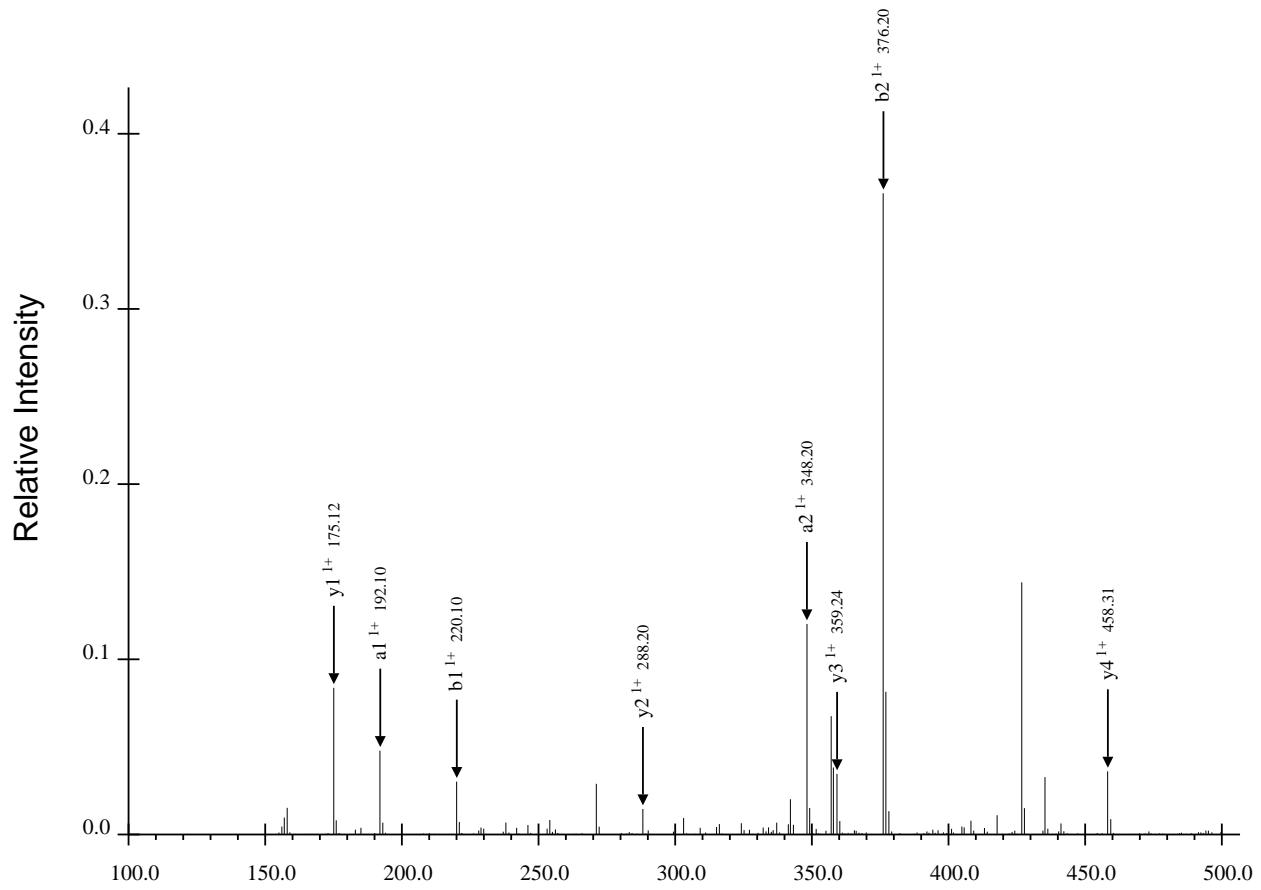

(a) First Region for rYRPGTVALR, Spectrum 81.dta

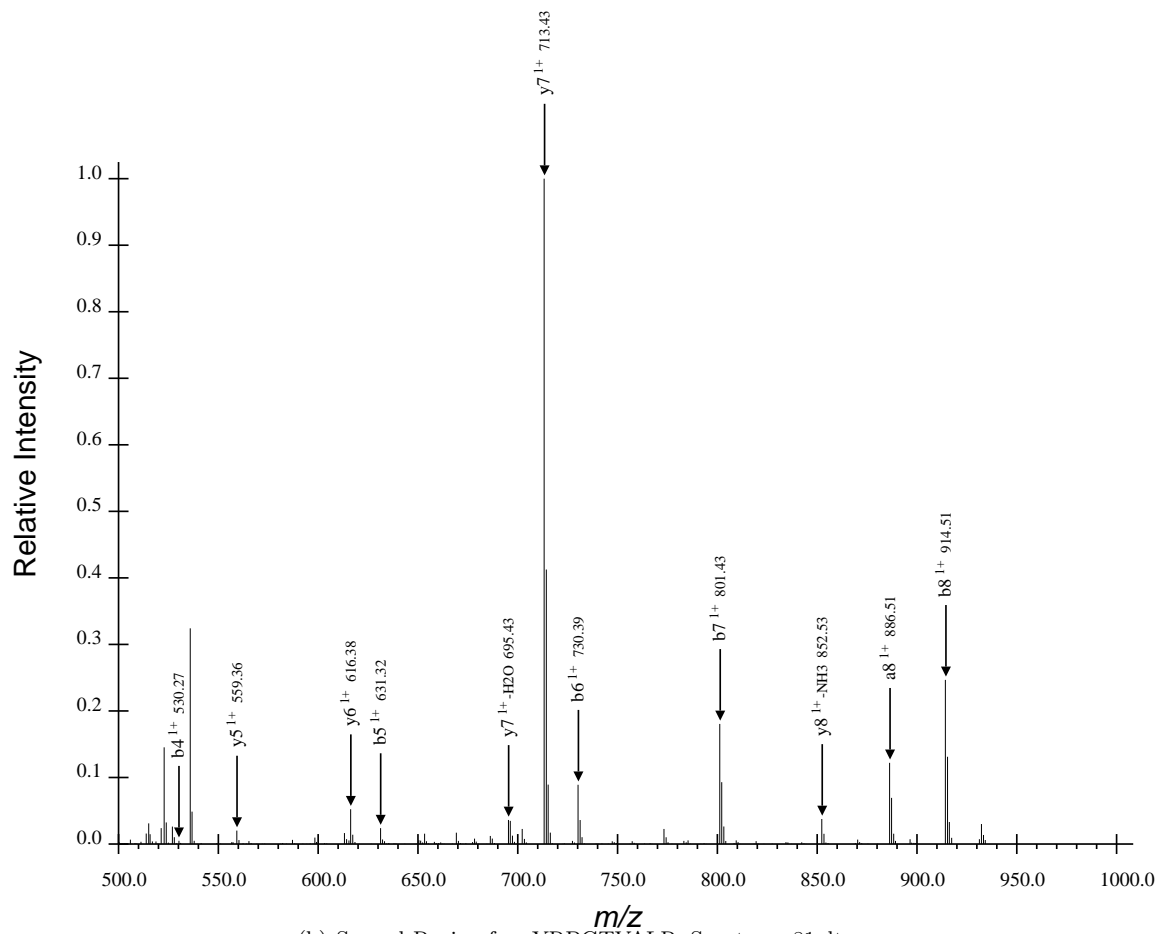

(b) Second Region for rYRPGTVALR, Spectrum 81.dta

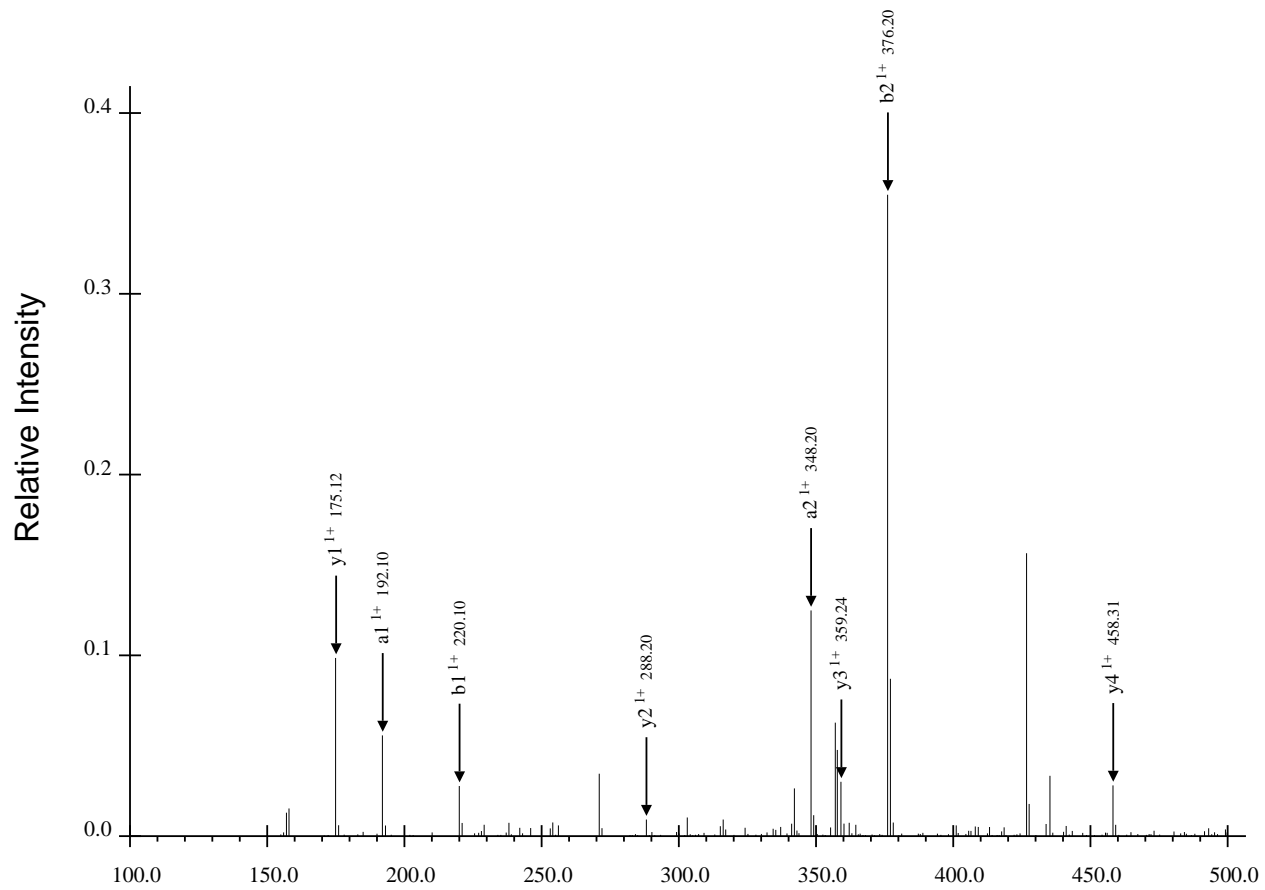

(a) First Region for rYRPGTVALR, Spectrum 82.dta

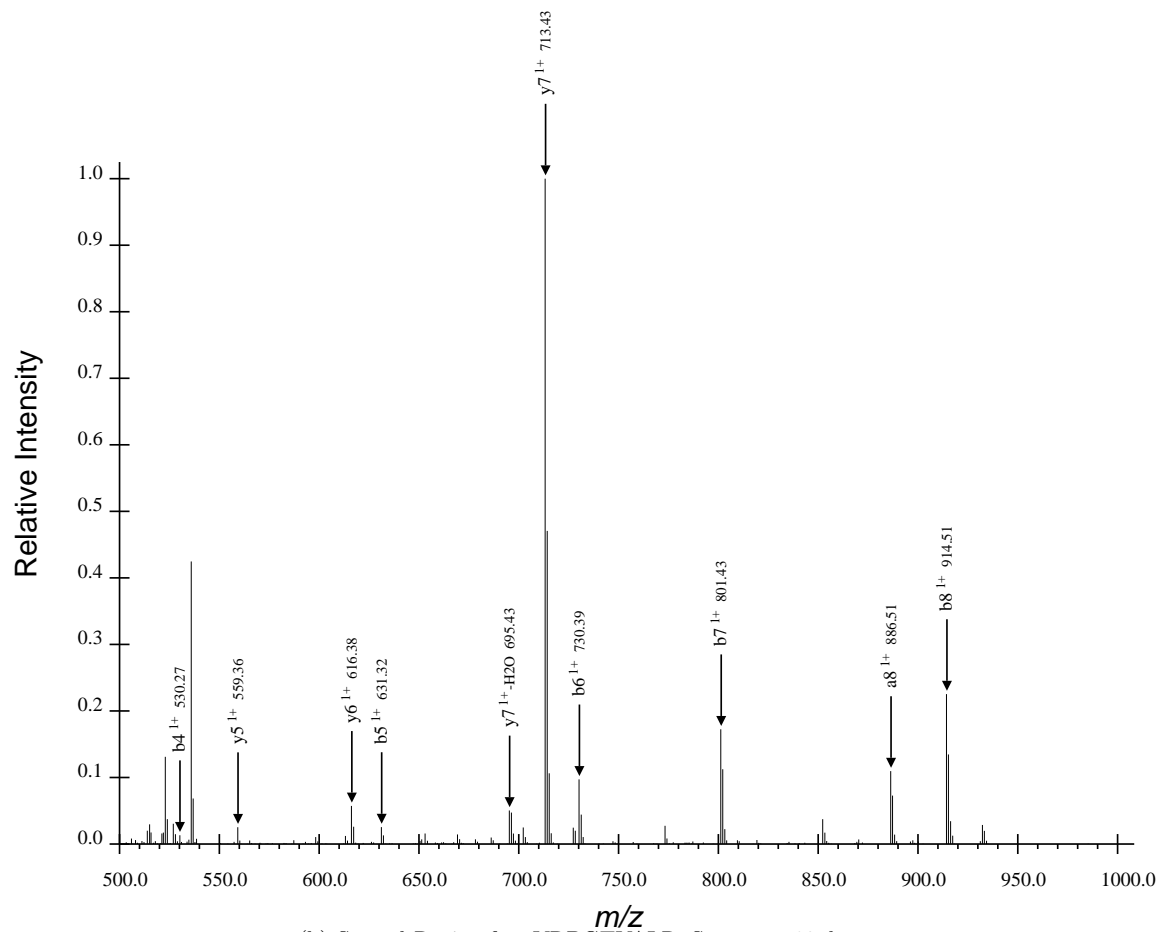

(b) Second Region for rYRPGTVALR, Spectrum 82.dta

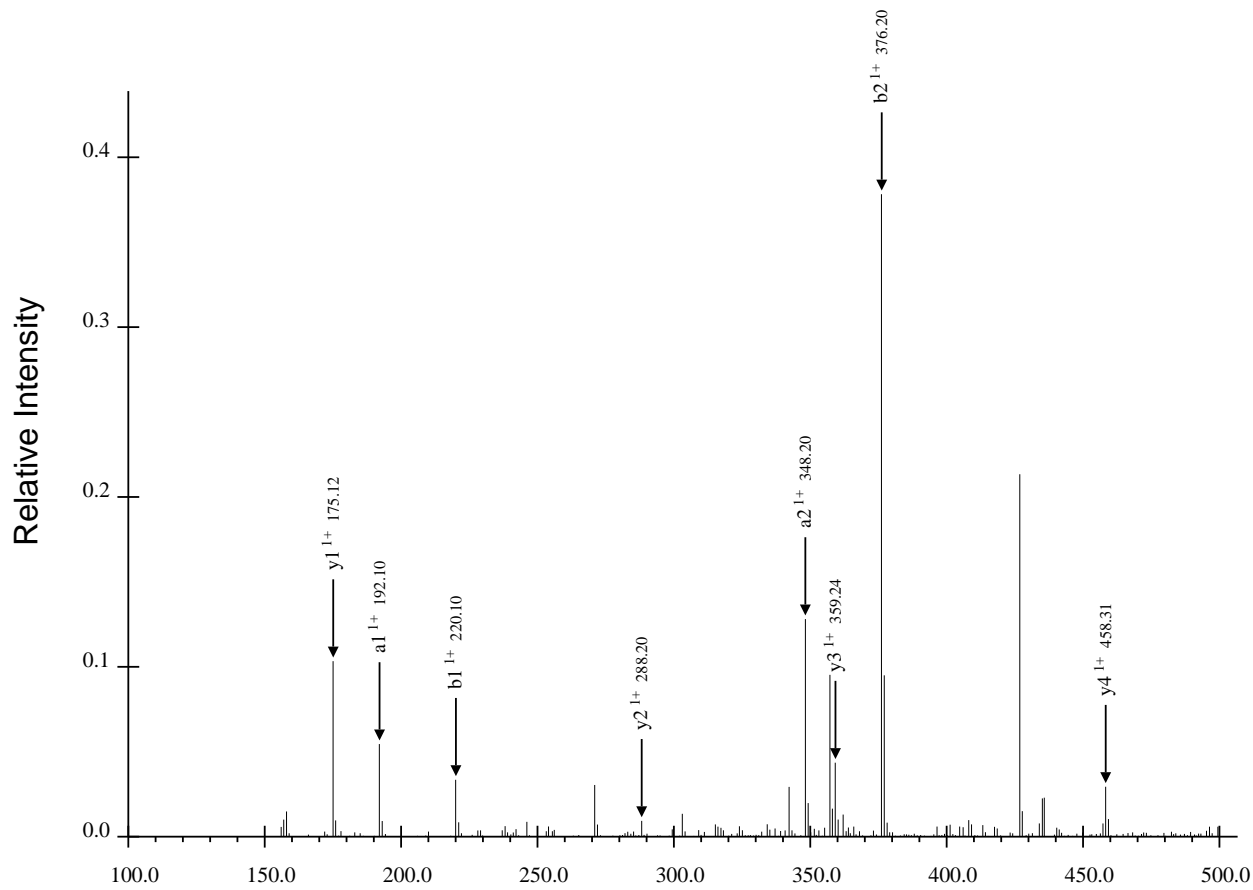

(a) First Region for rYRPGTVALR, Spectrum 83.dta

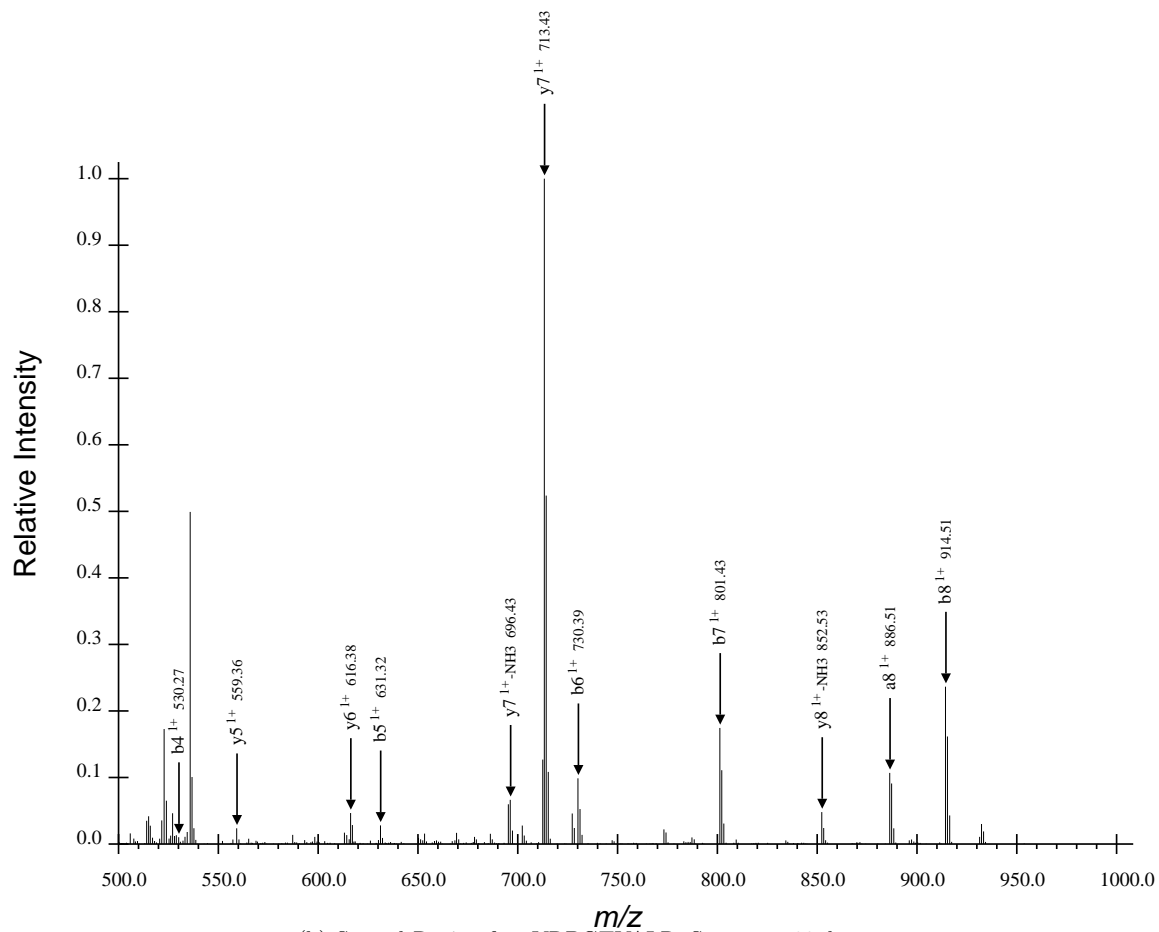

(b) Second Region for rYRPGTVALR, Spectrum 83.dta

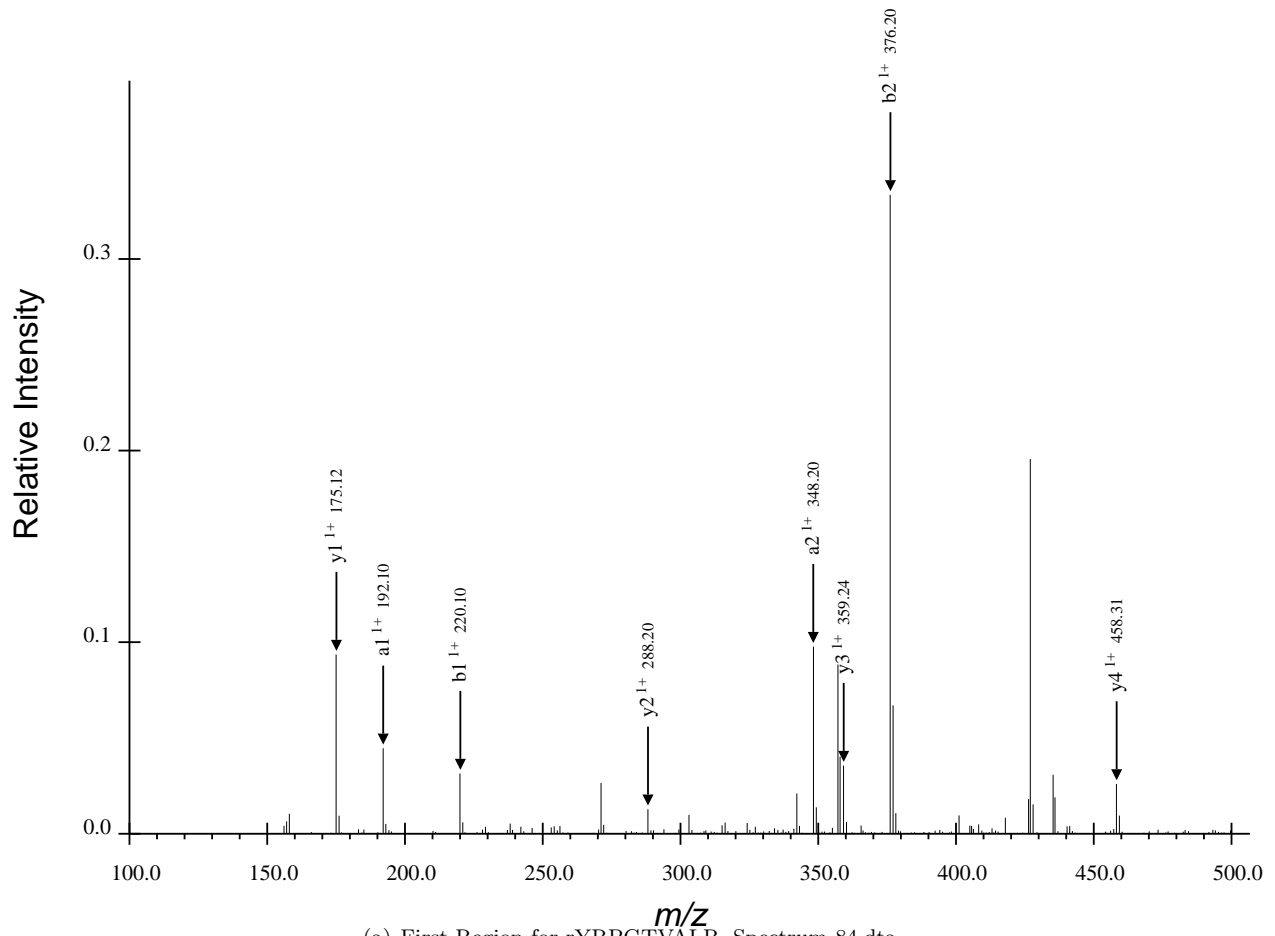

(a) First Region for rYRPGTVALR, Spectrum 84.dta

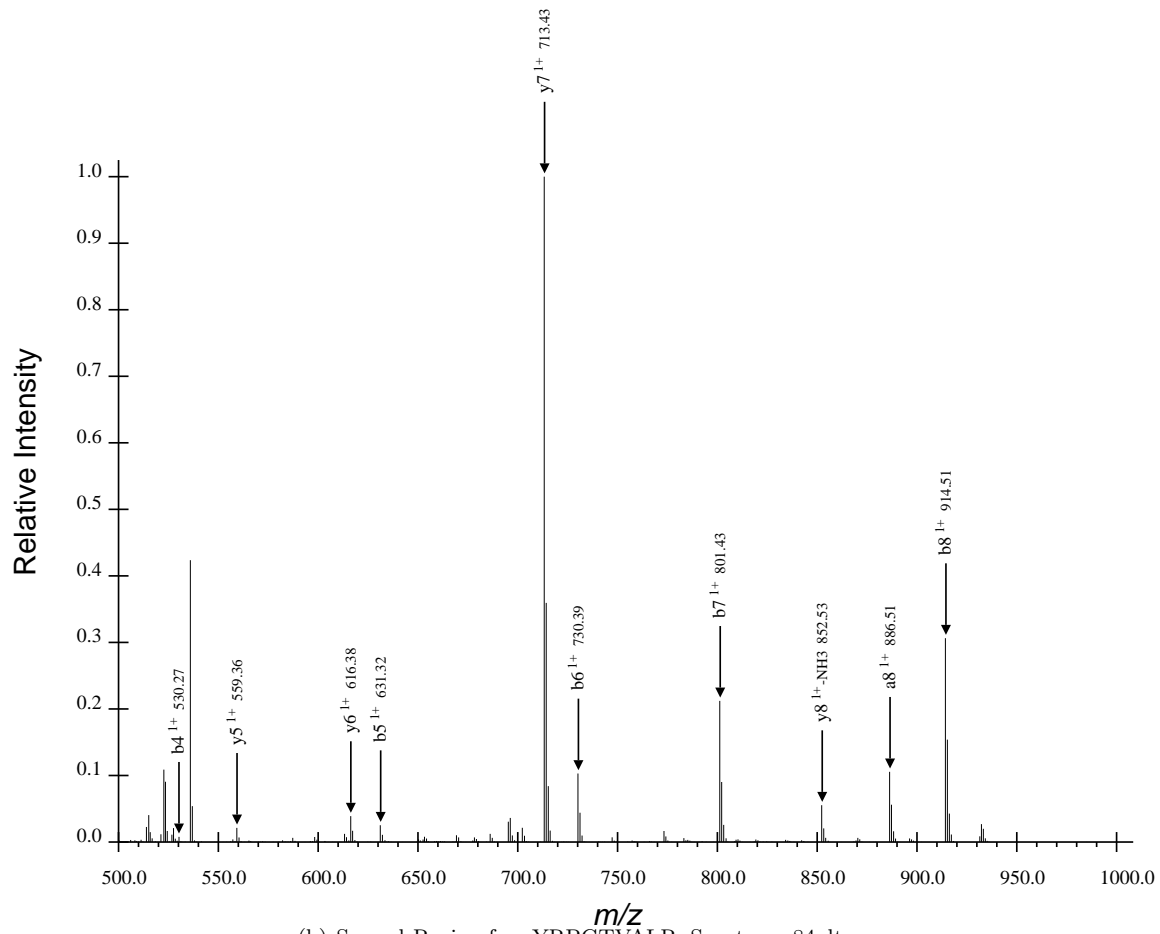

(b) Second Region for rYRPGTVALR, Spectrum 84.dta

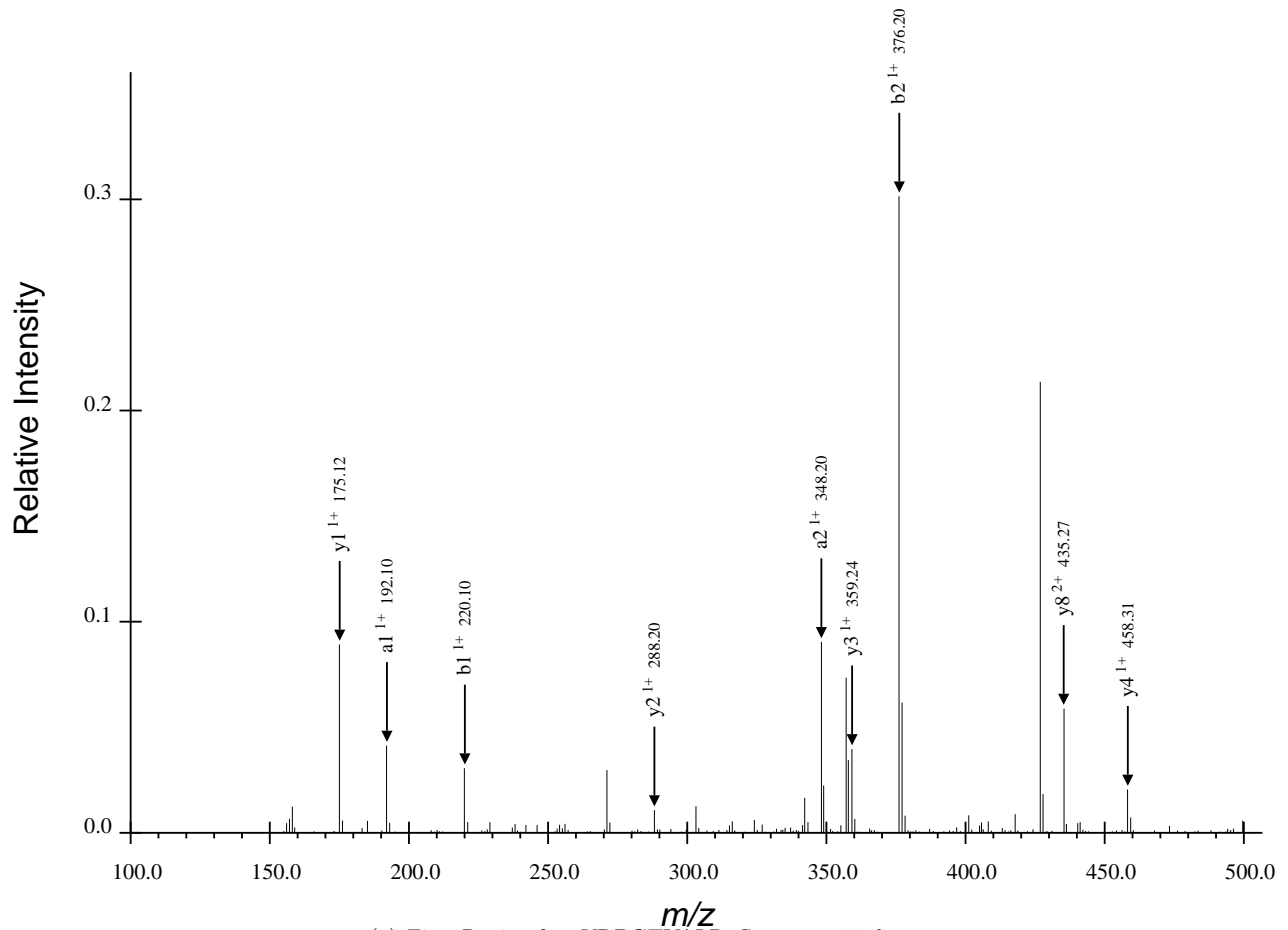

(a) First Region for rYRPGTVALR, Spectrum 85.dta

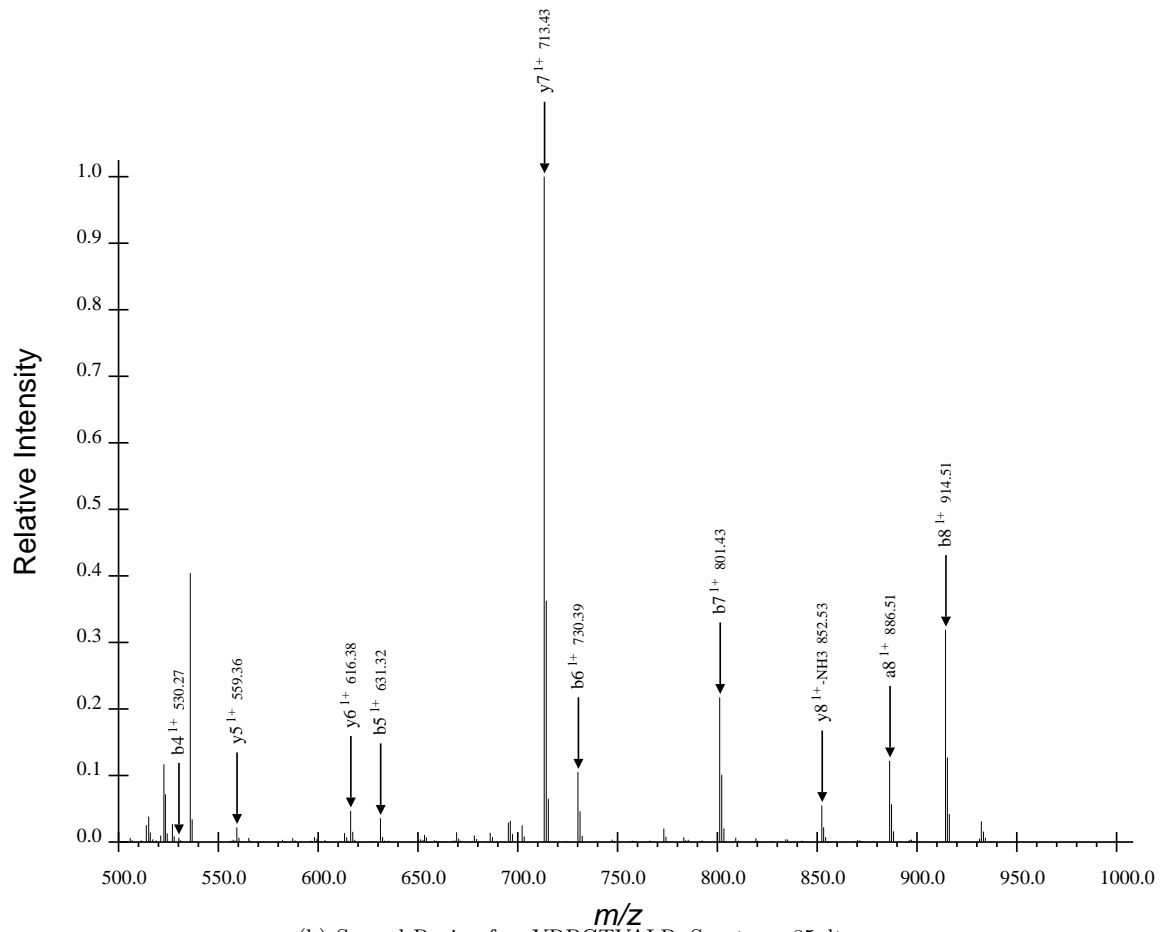

(b) Second Region for rYRPGTVALR, Spectrum 85.dta

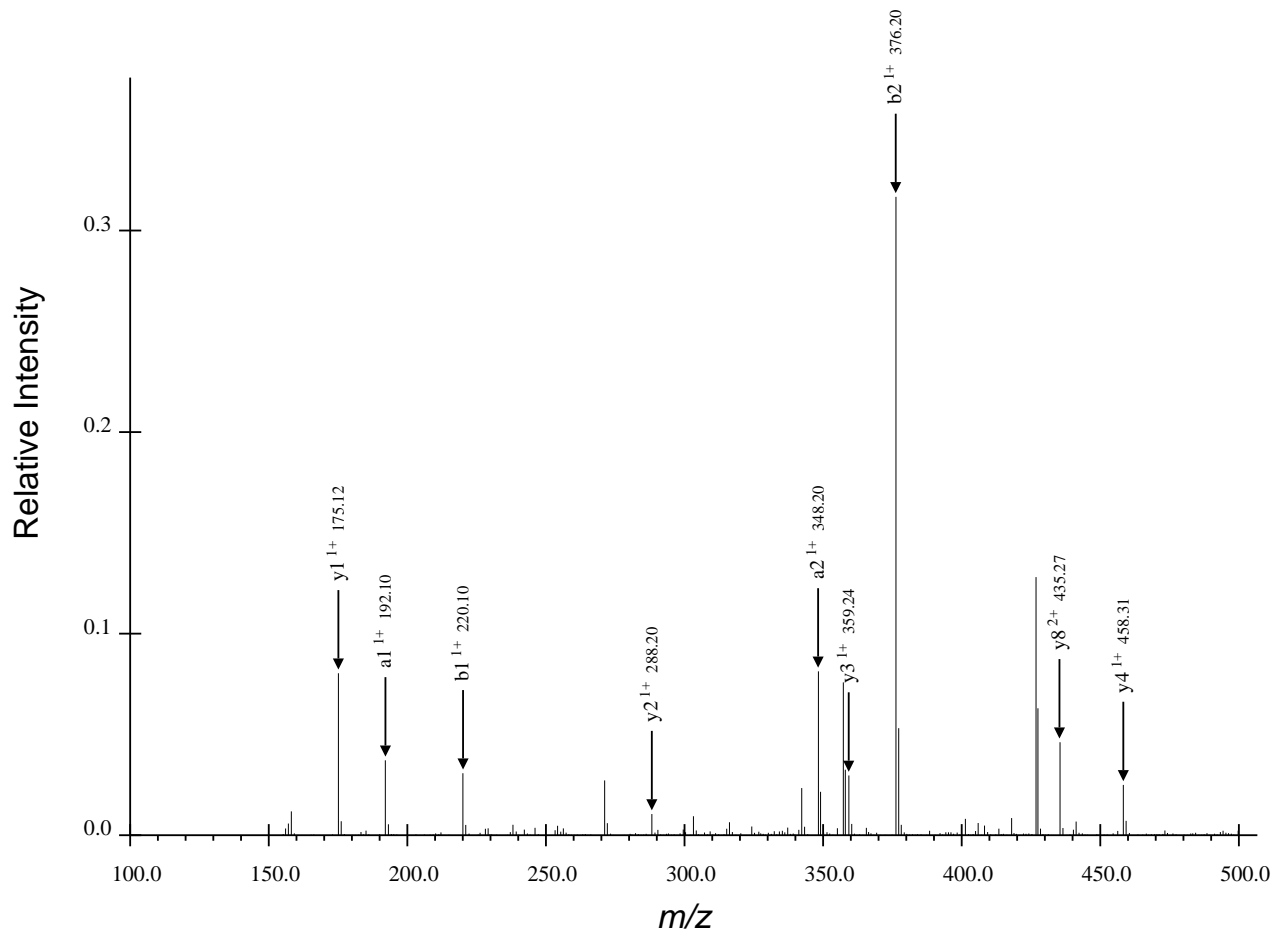

(a) First Region for rYRPGTVALR, Spectrum 86.dta

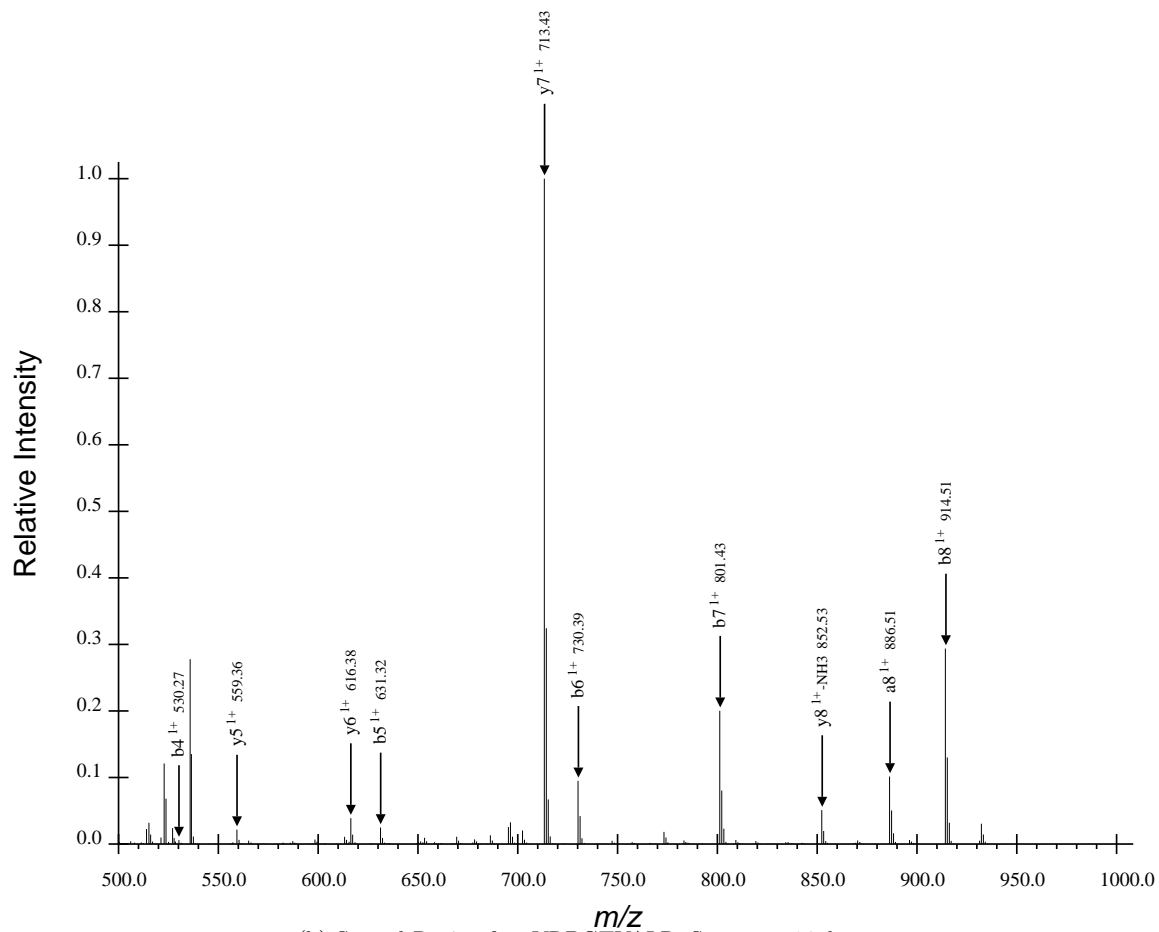

(b) Second Region for rYRPGTVALR, Spectrum 86.dta

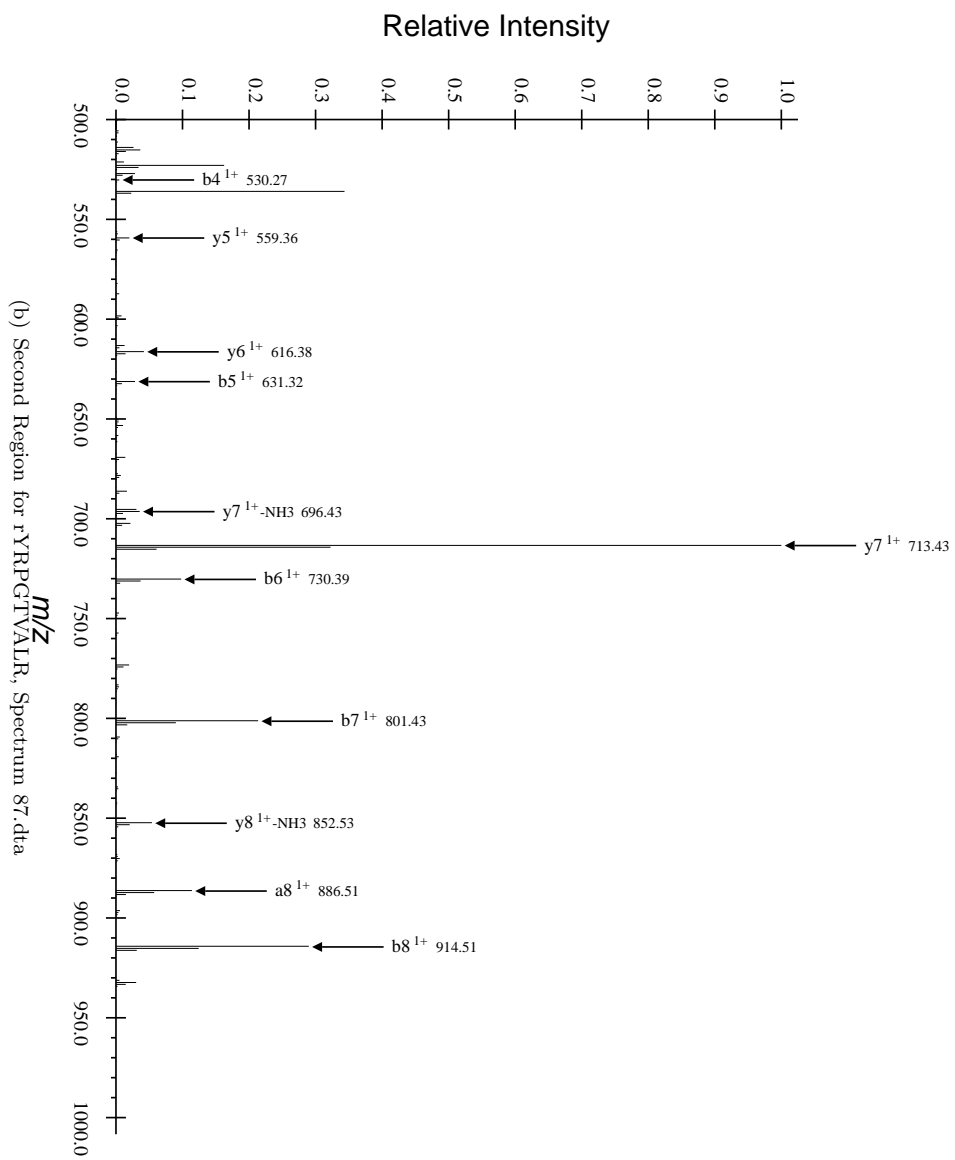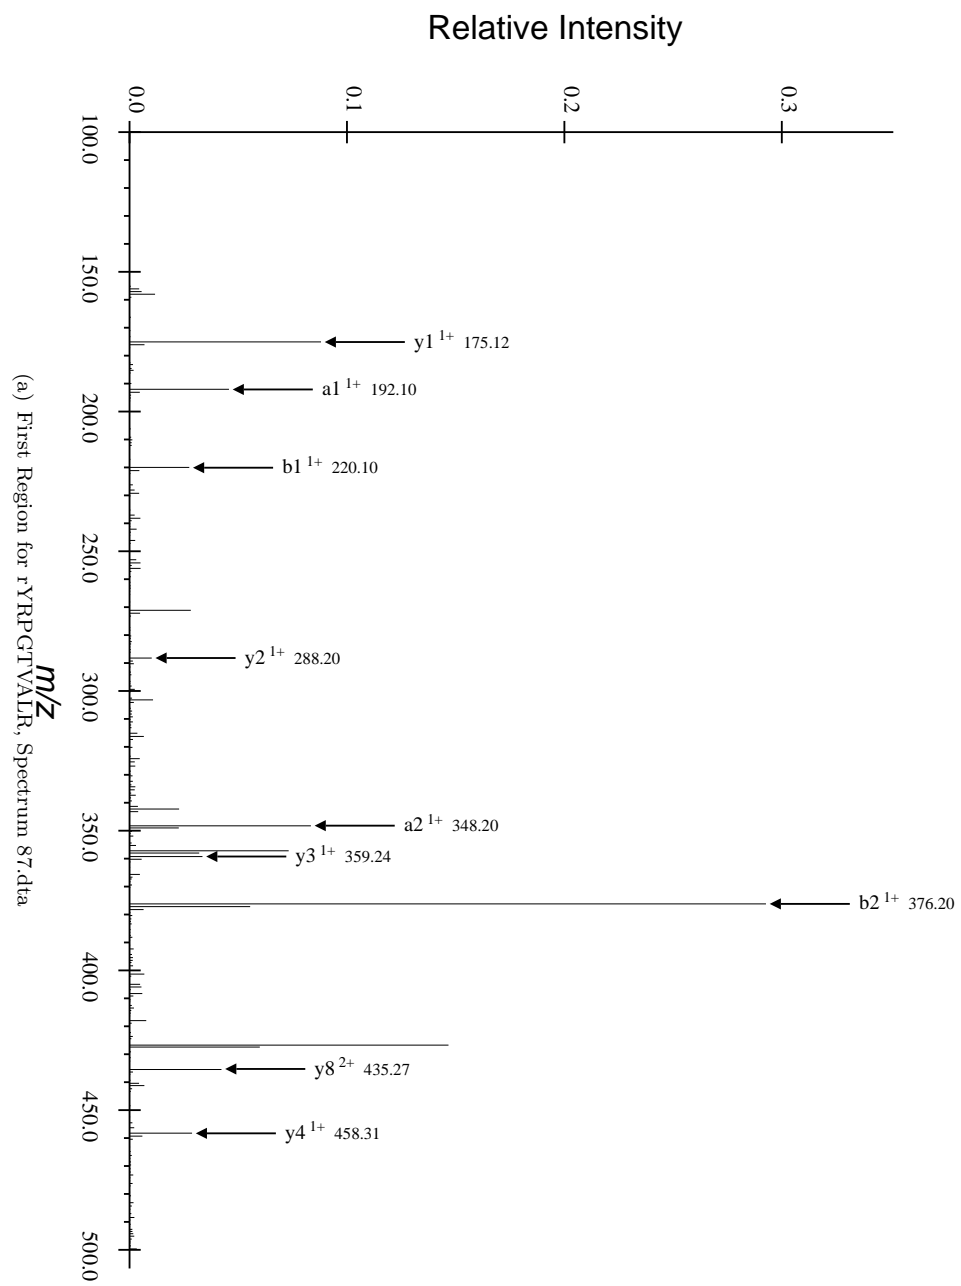

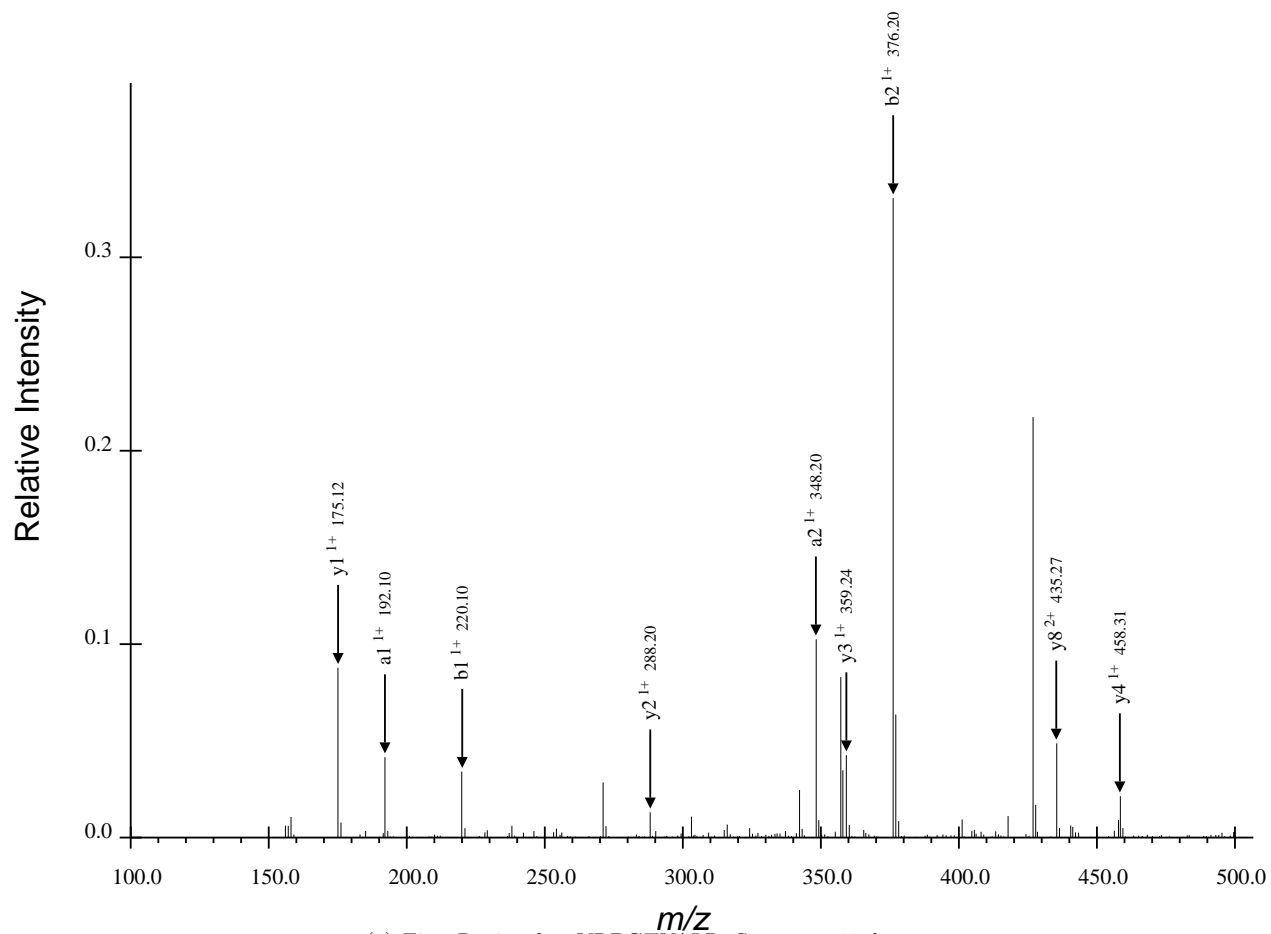

(a) First Region for rYRPGTVALR, Spectrum 88.dta

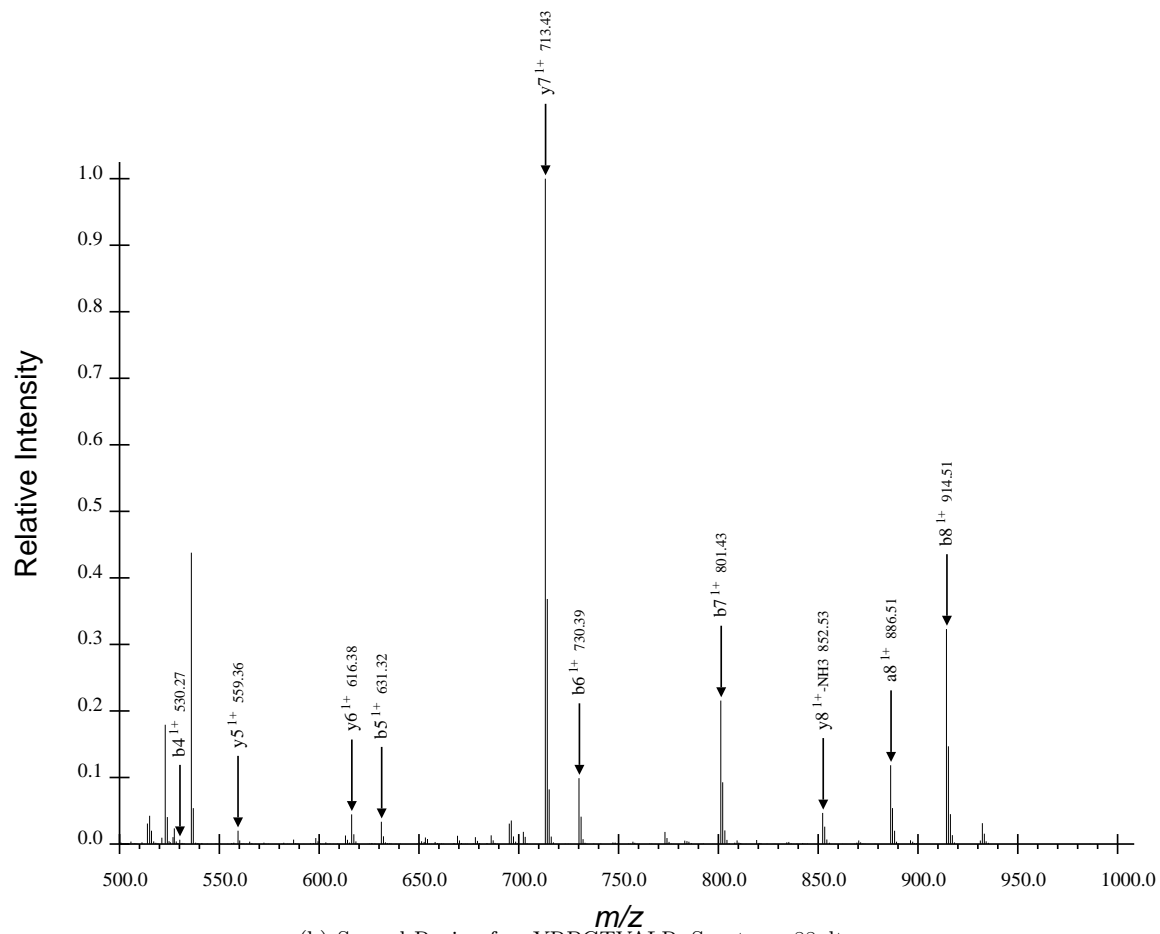

(b) Second Region for rYRPGTVALR, Spectrum 88.dta



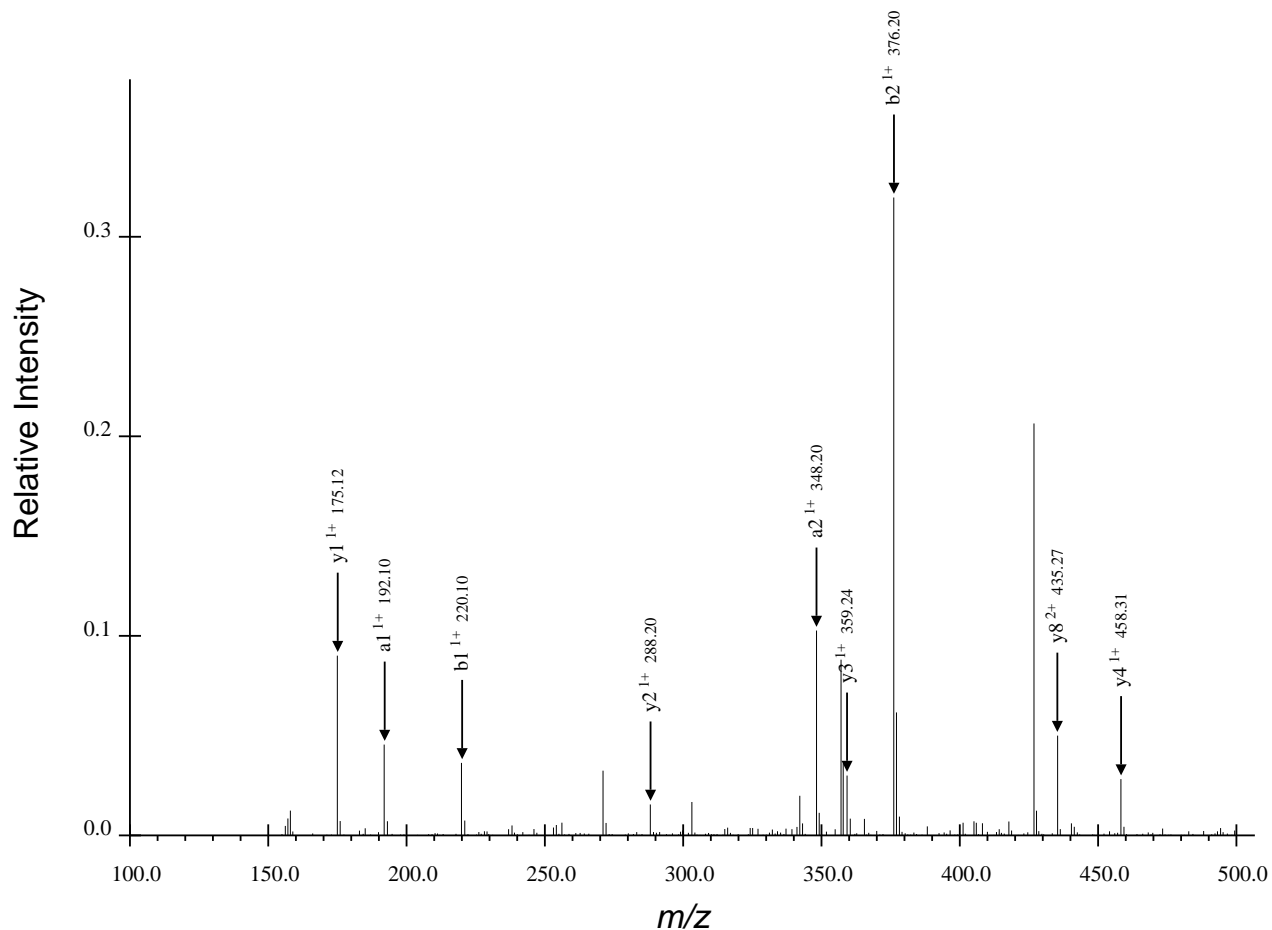

(a) First Region for rYRPGTVALR, Spectrum 89.dta

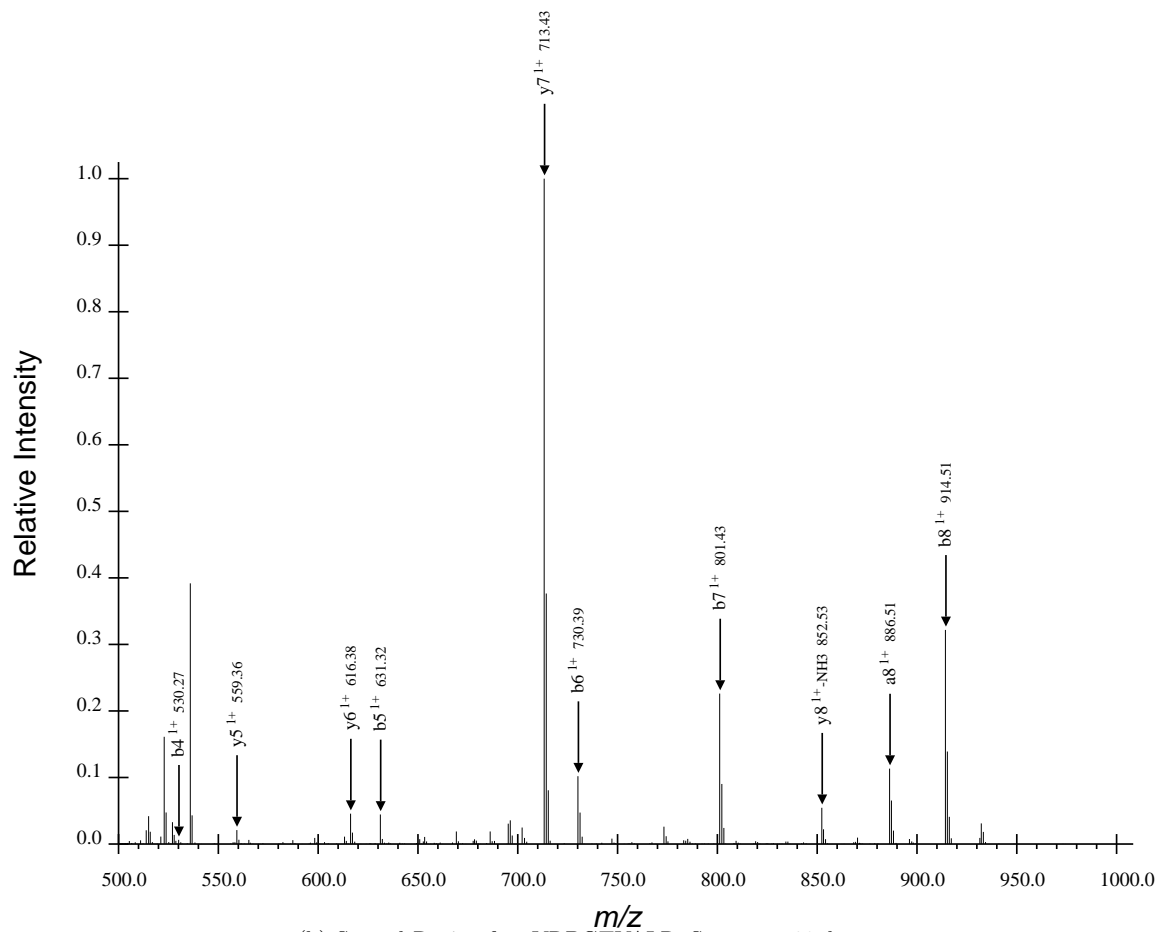

(b) Second Region for rYRPGTVALR, Spectrum 89.dta

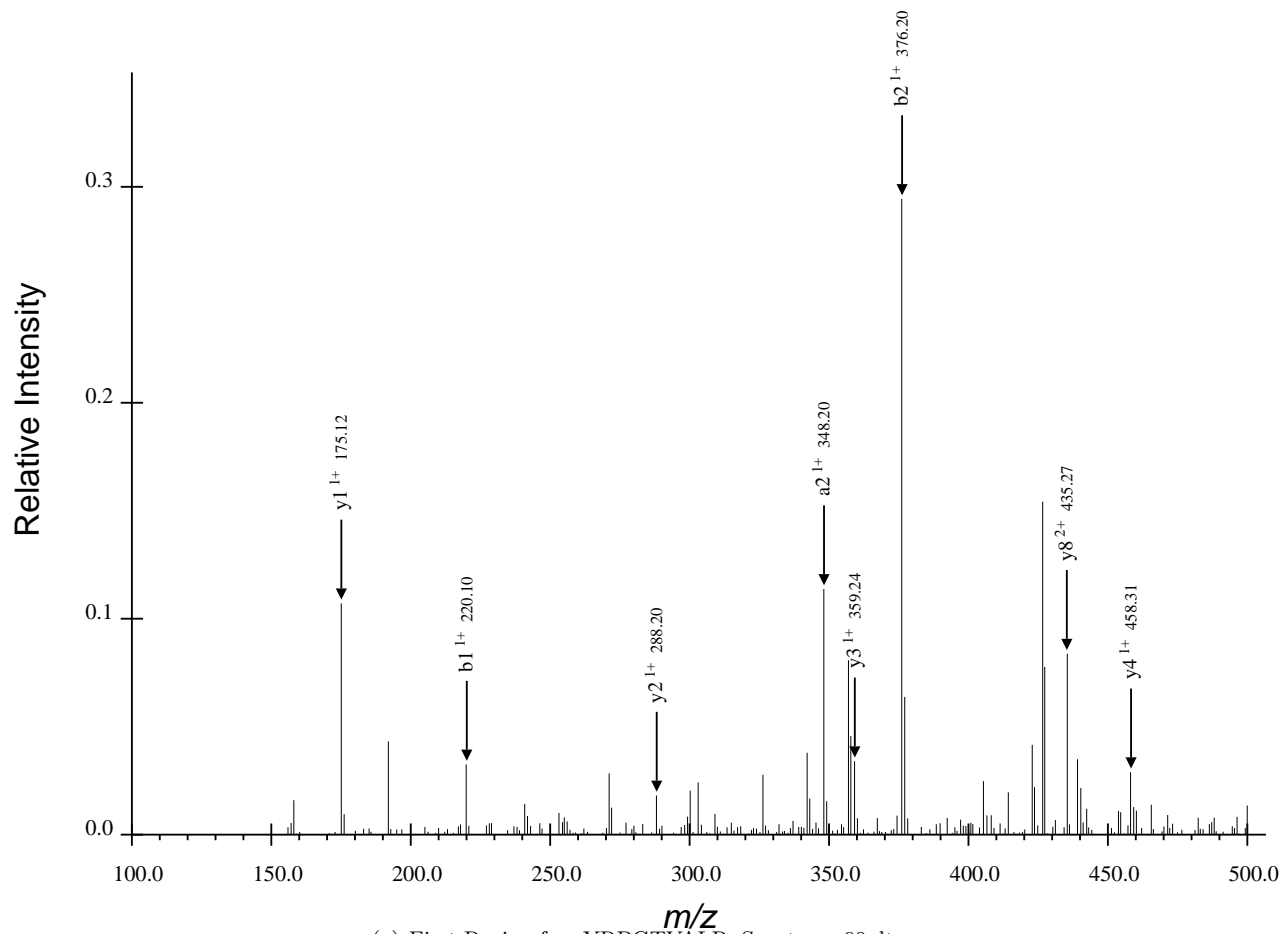

(a) First Region for rYRPGTVALR, Spectrum 90.dta

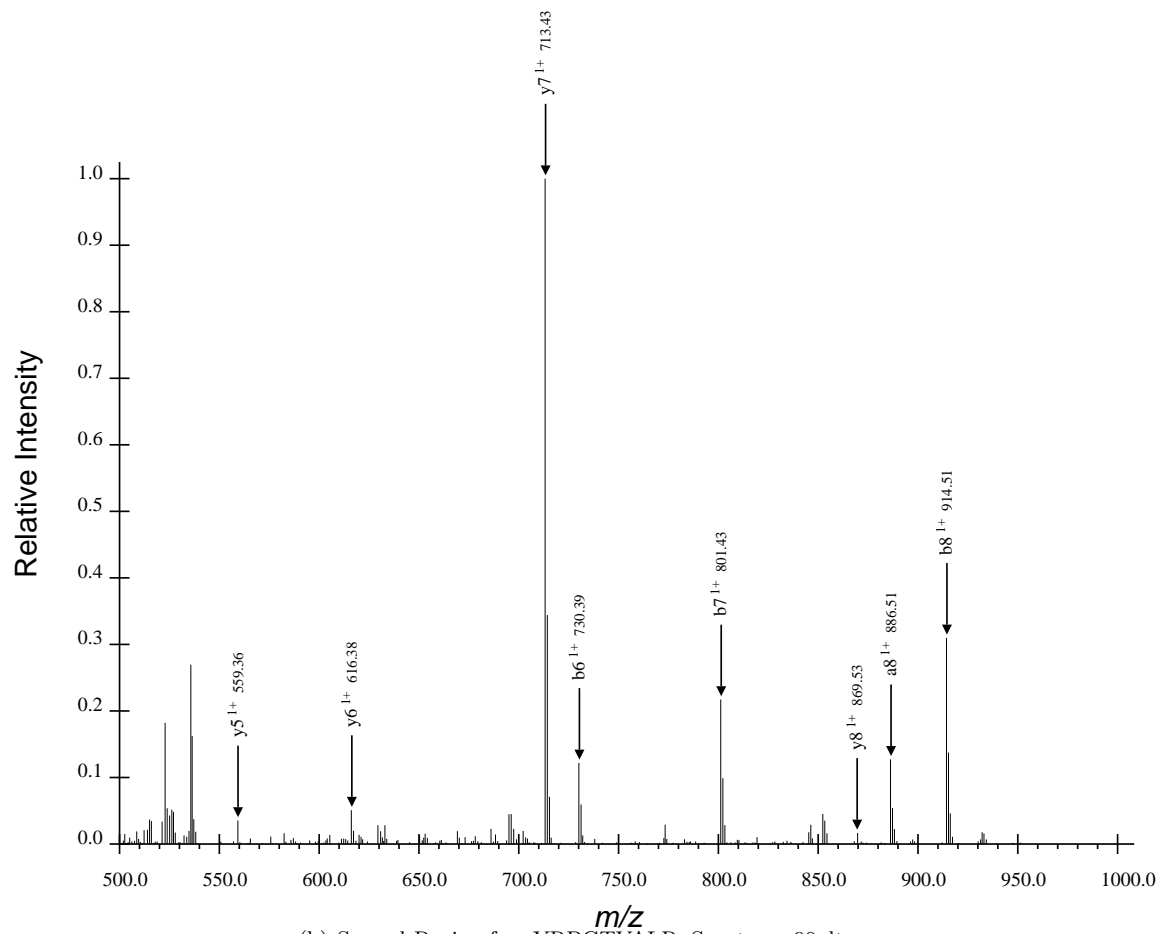

(b) Second Region for rYRPGTVALR, Spectrum 90.dta

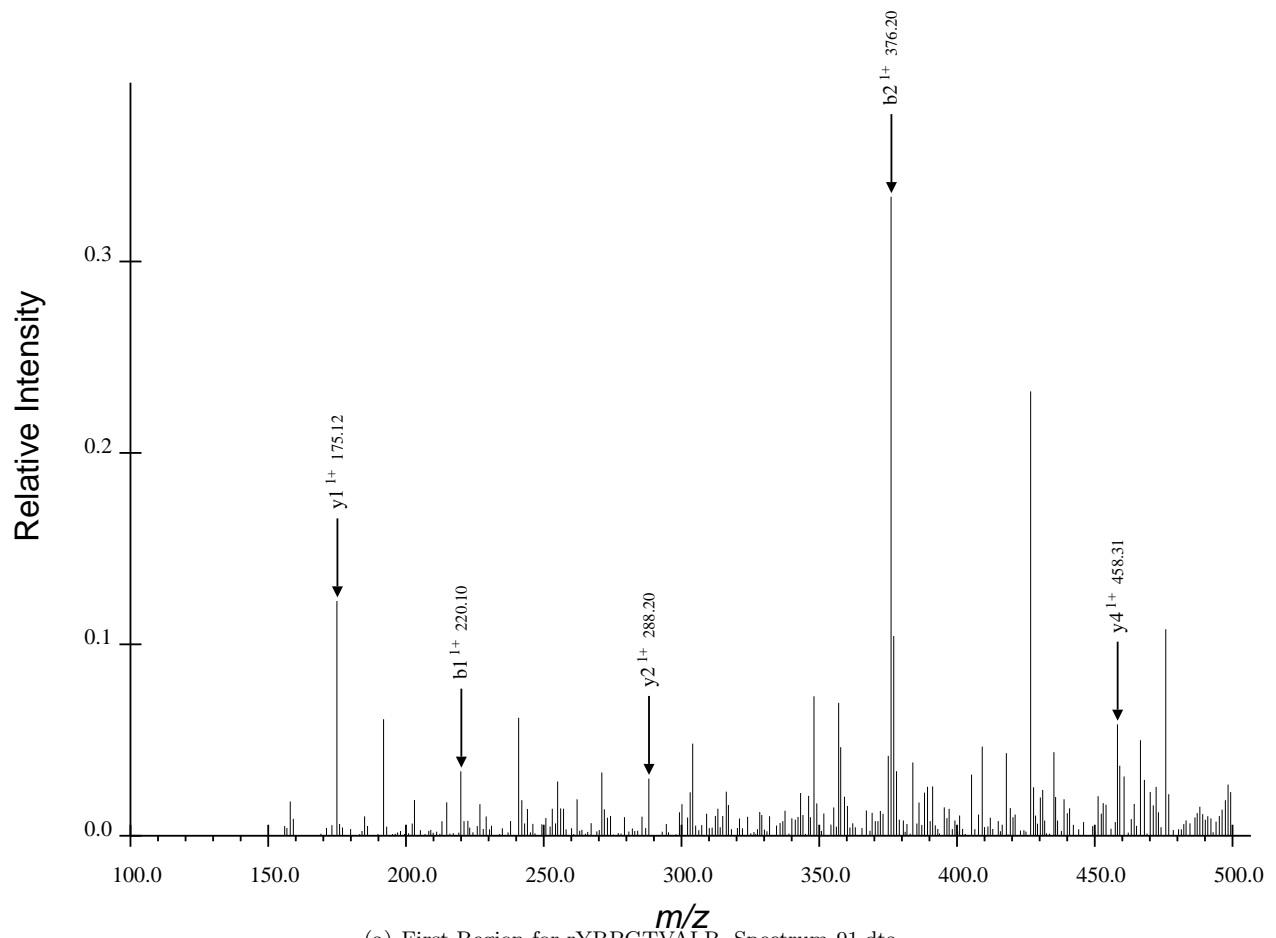

(a) First Region for rYRPGTVALR, Spectrum 91.dta

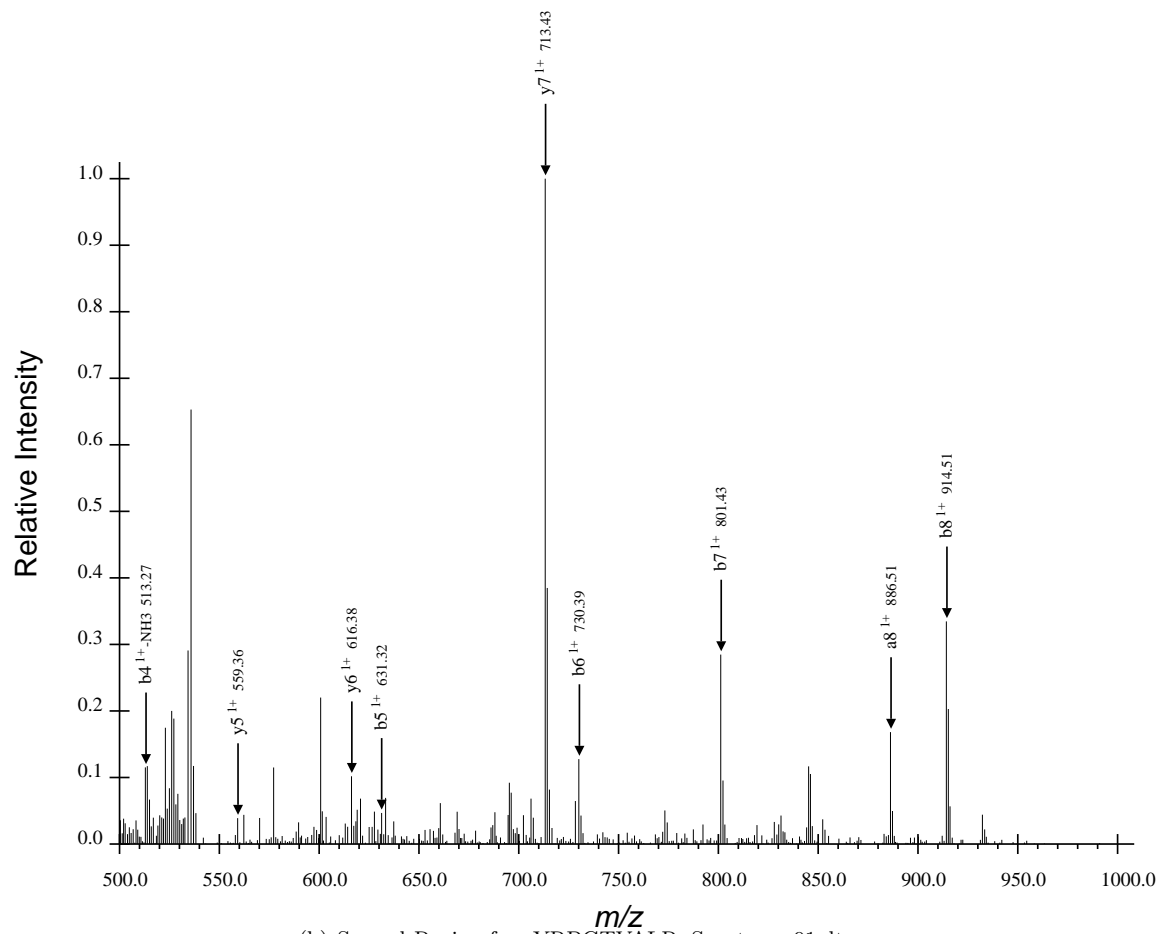

(b) Second Region for rYRPGTVALR, Spectrum 91.dta

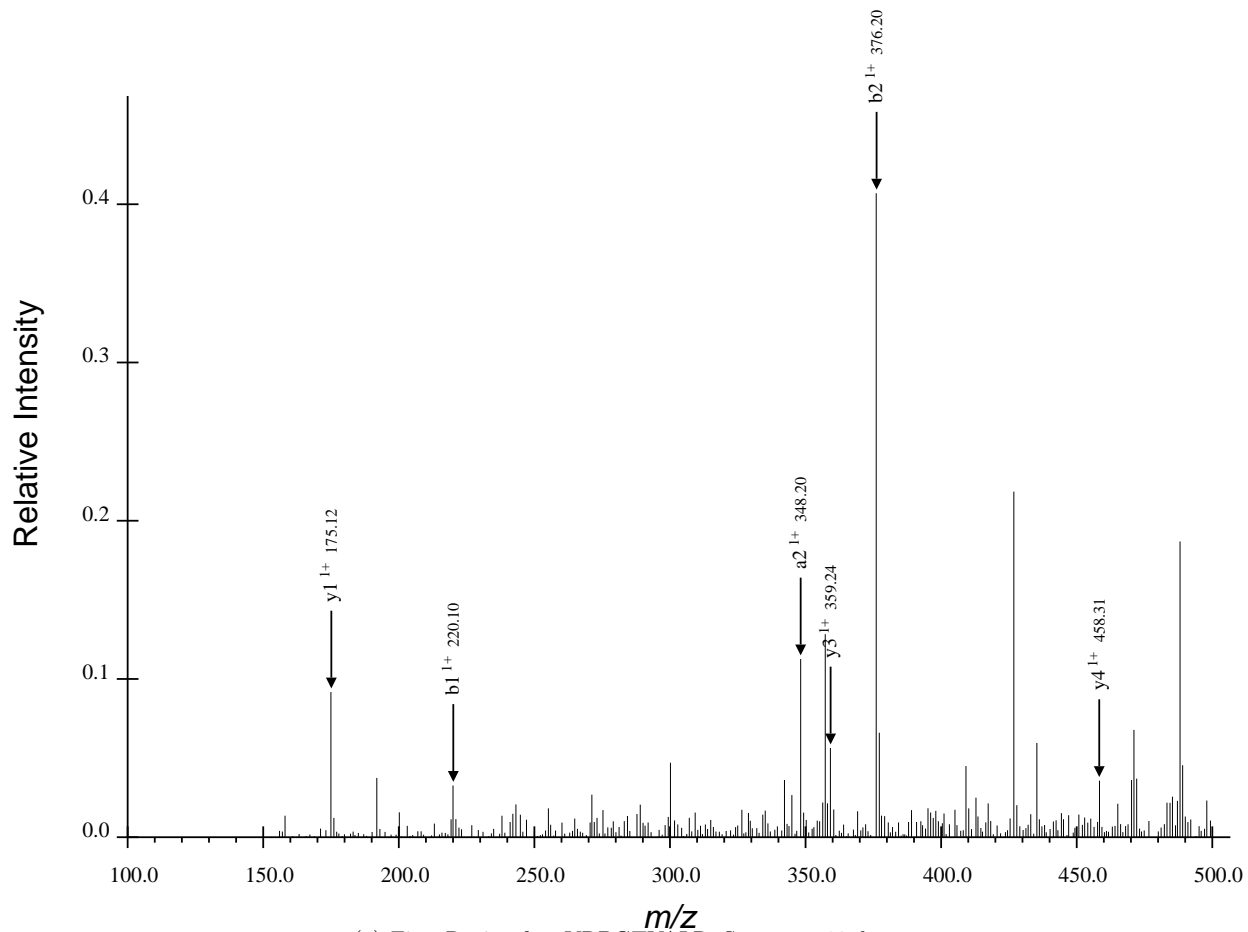

(a) First Region for rYRPGTVALR, Spectrum 92.dta

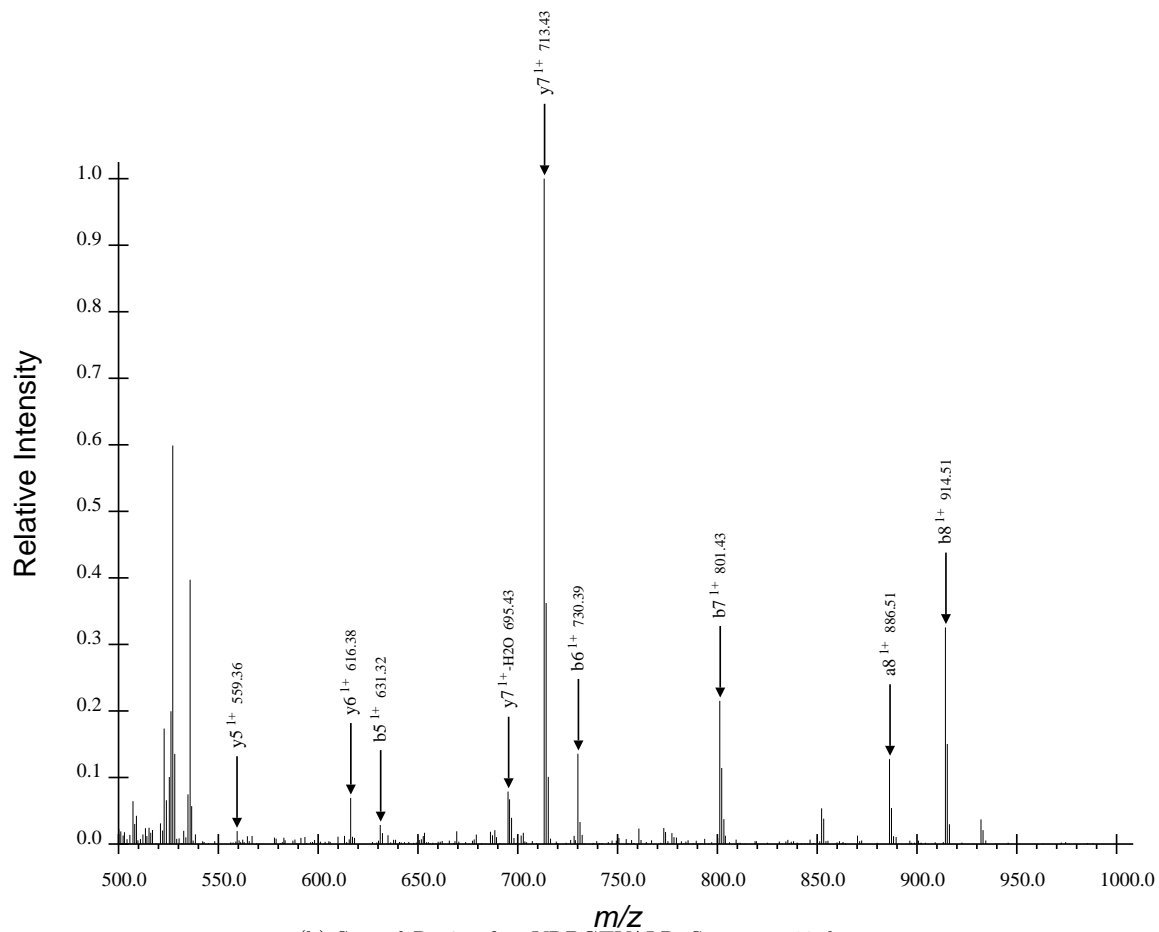

(b) Second Region for rYRPGTVALR, Spectrum 92.dta

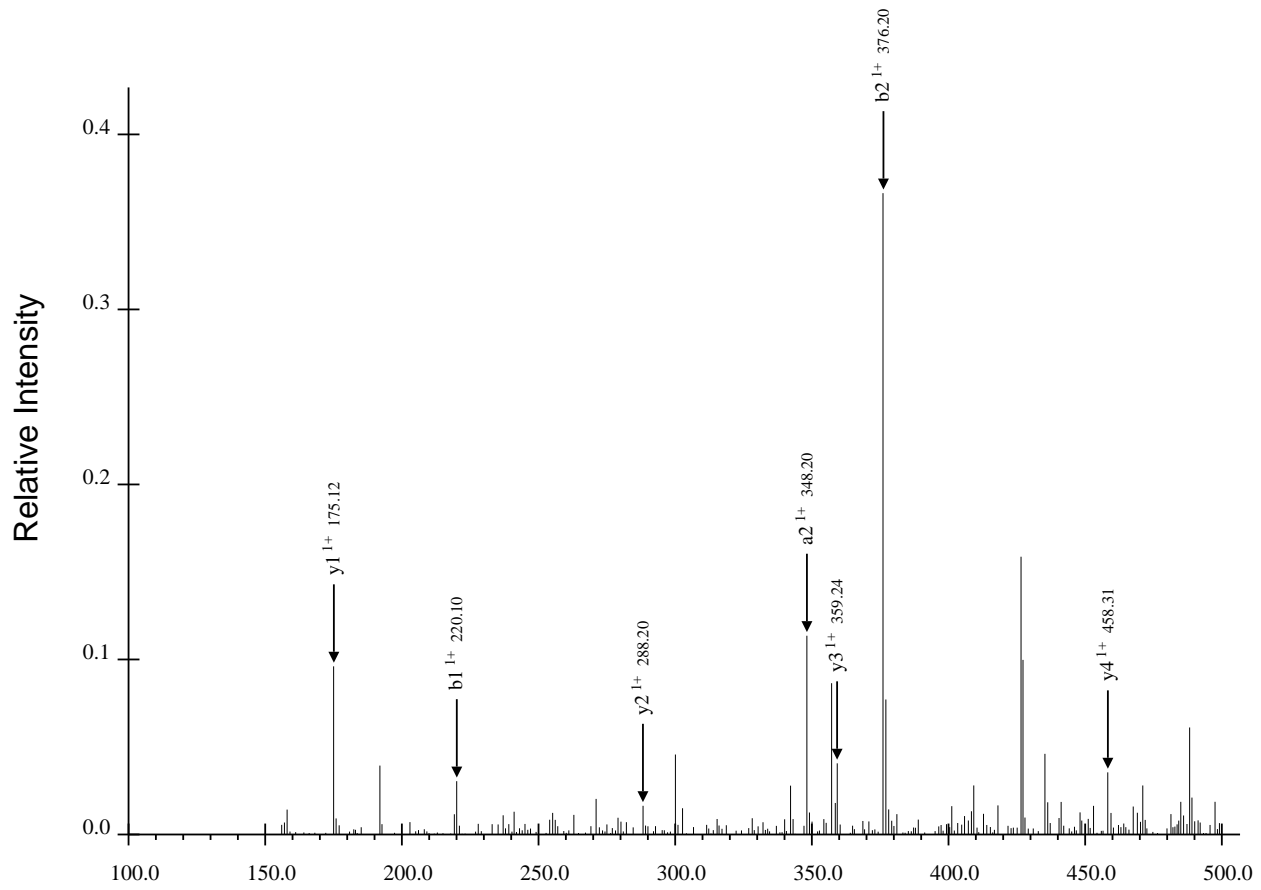

(a) First Region for rYRPGTVALR, Spectrum 93.dta

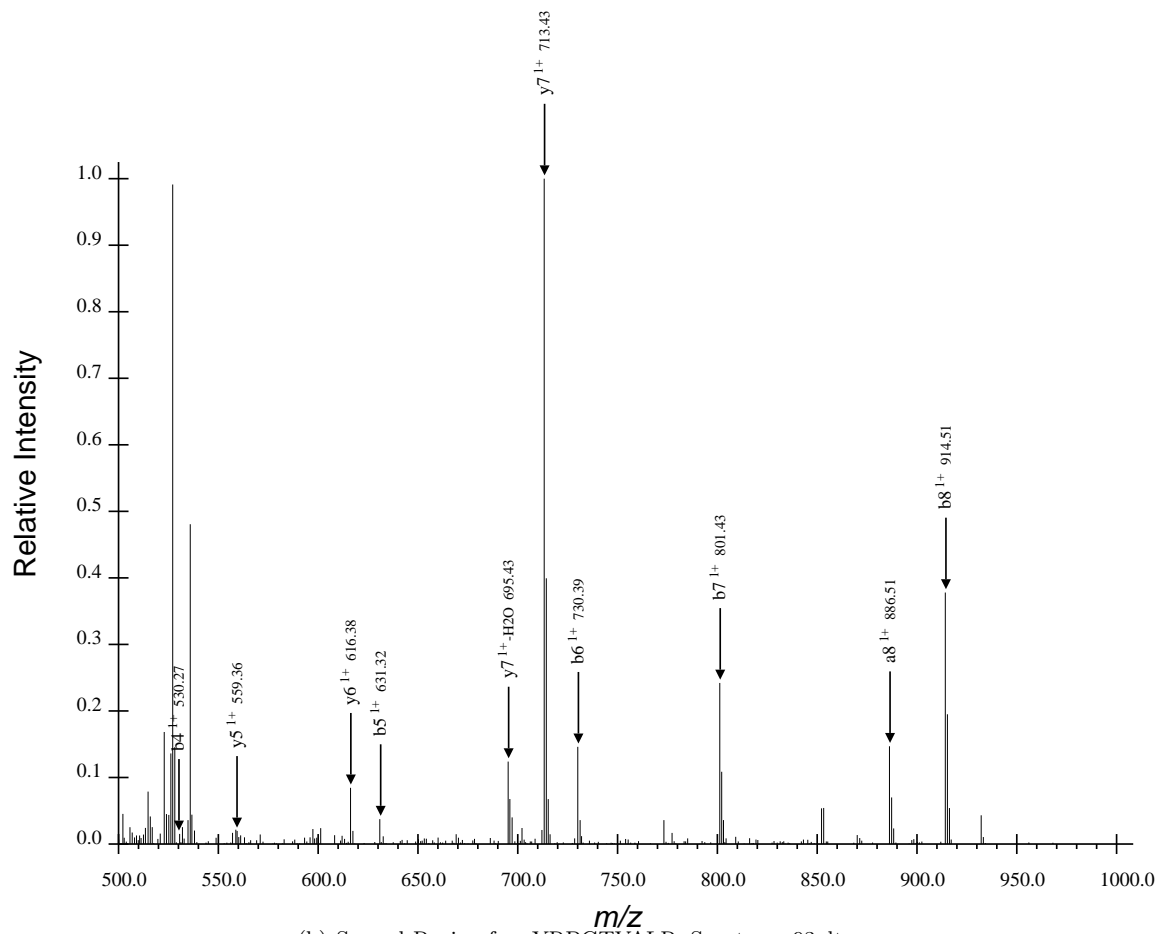

(b) Second Region for rYRPGTVALR, Spectrum 93.dta

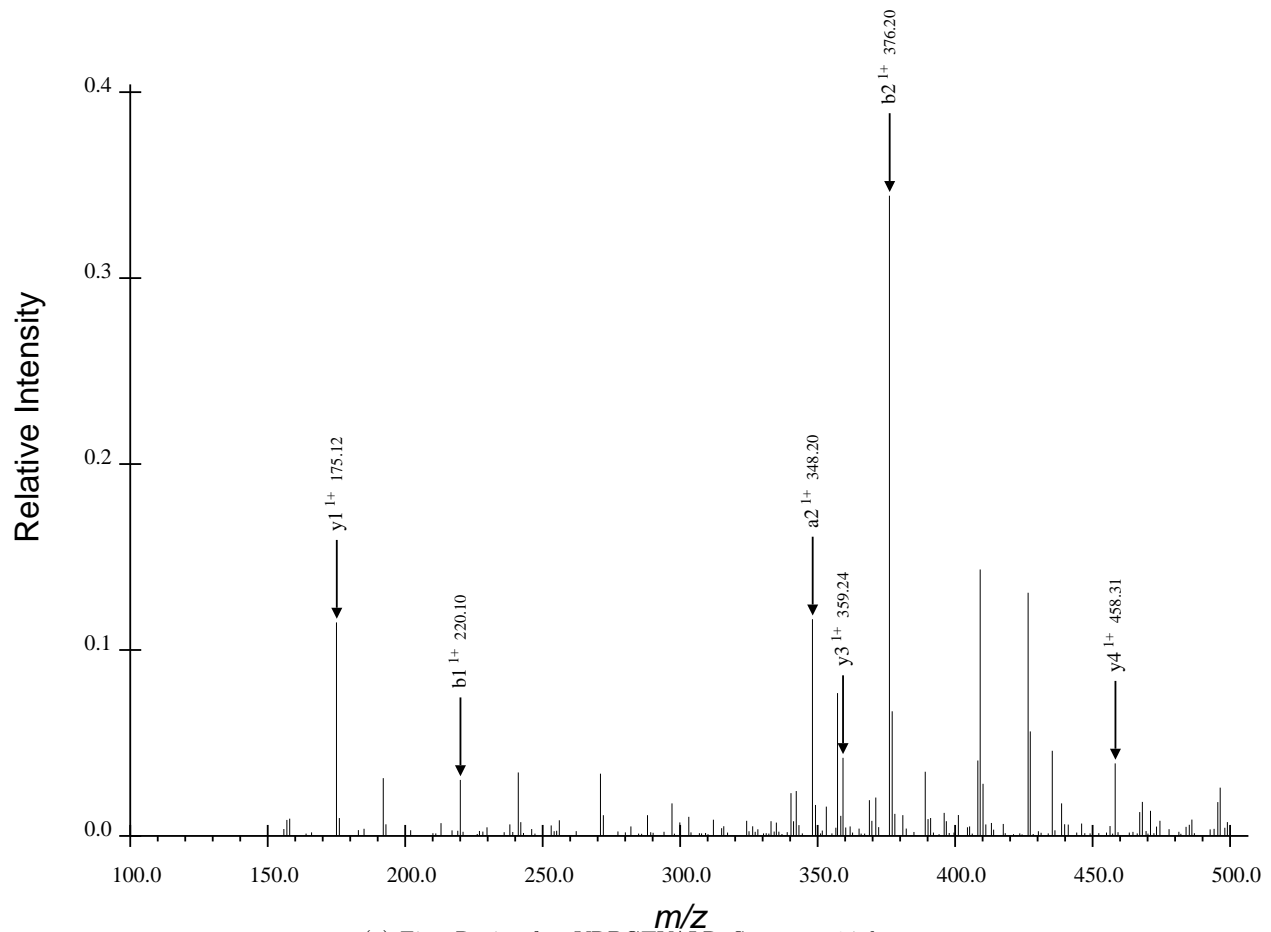

(a) First Region for rYRPGTVALR, Spectrum 94.dta

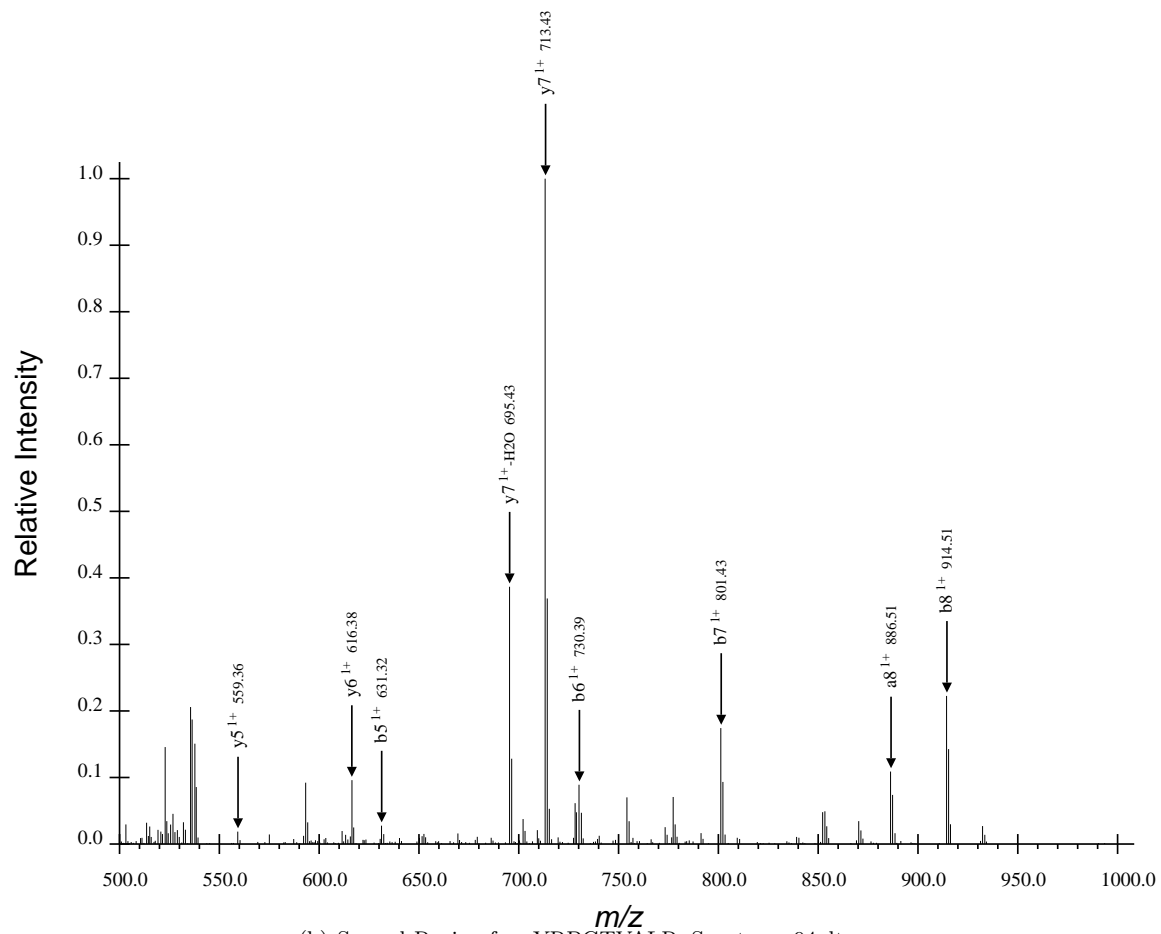

(b) Second Region for rYRPGTVALR, Spectrum 94.dta

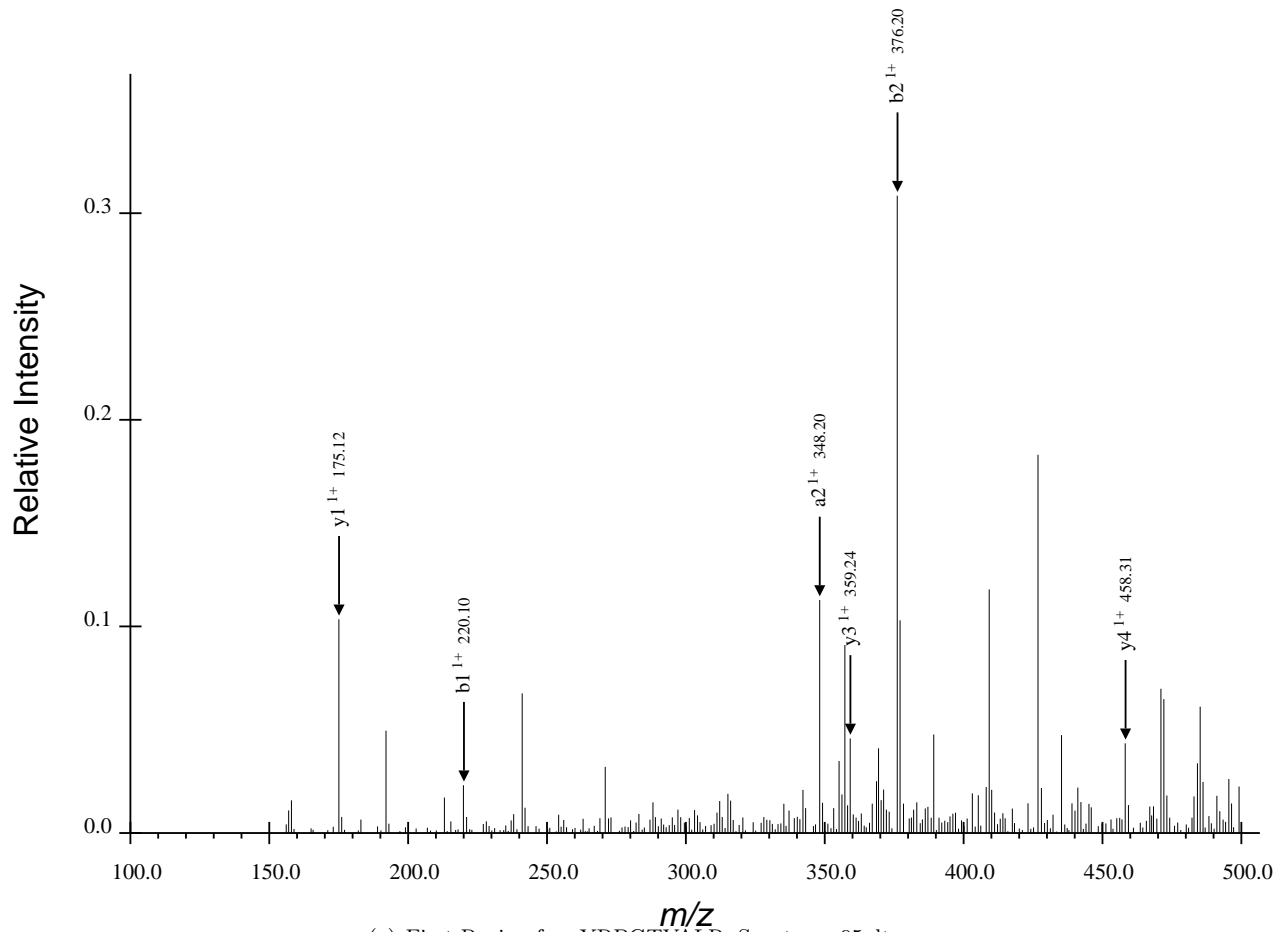

(a) First Region for rYRPGTVALR, Spectrum 95.dta

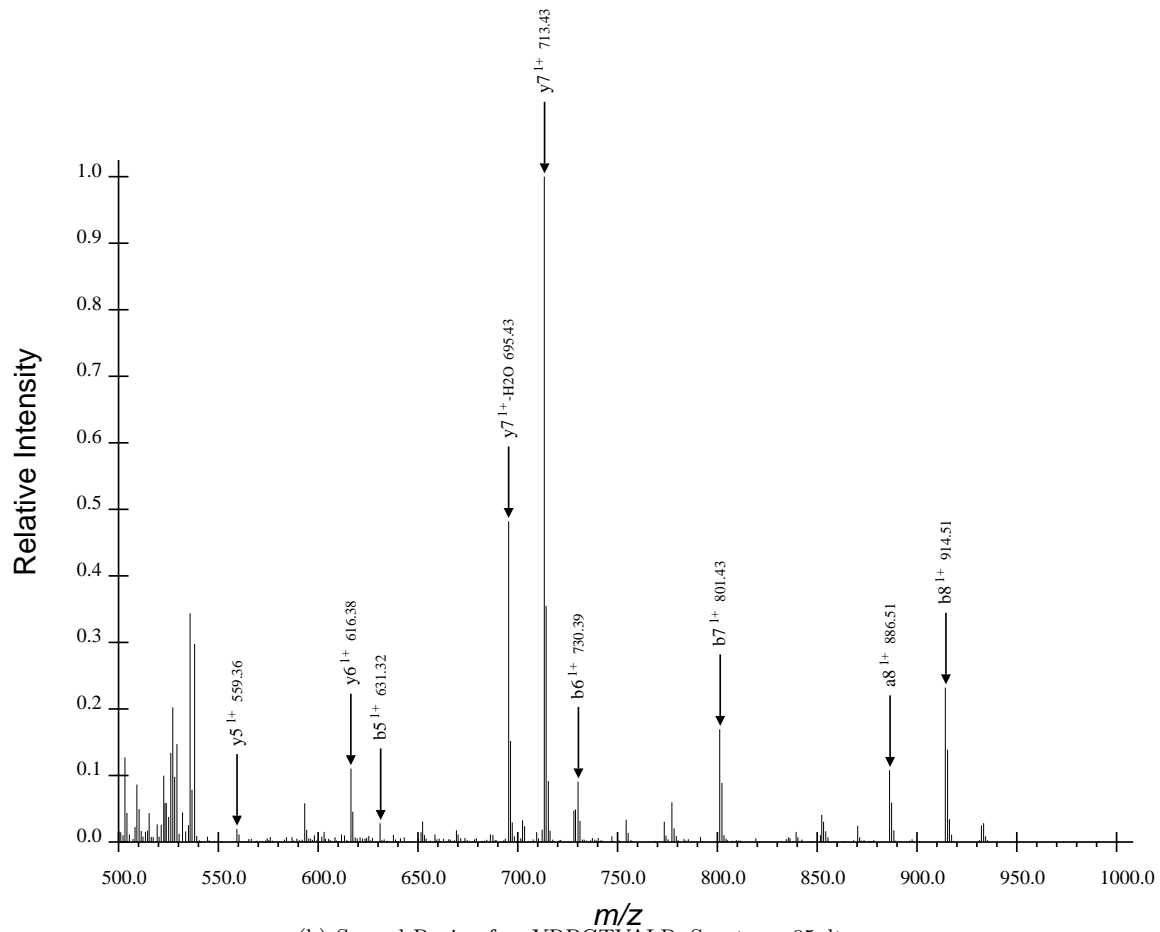

(b) Second Region for rYRPGTVALR, Spectrum 95.dta

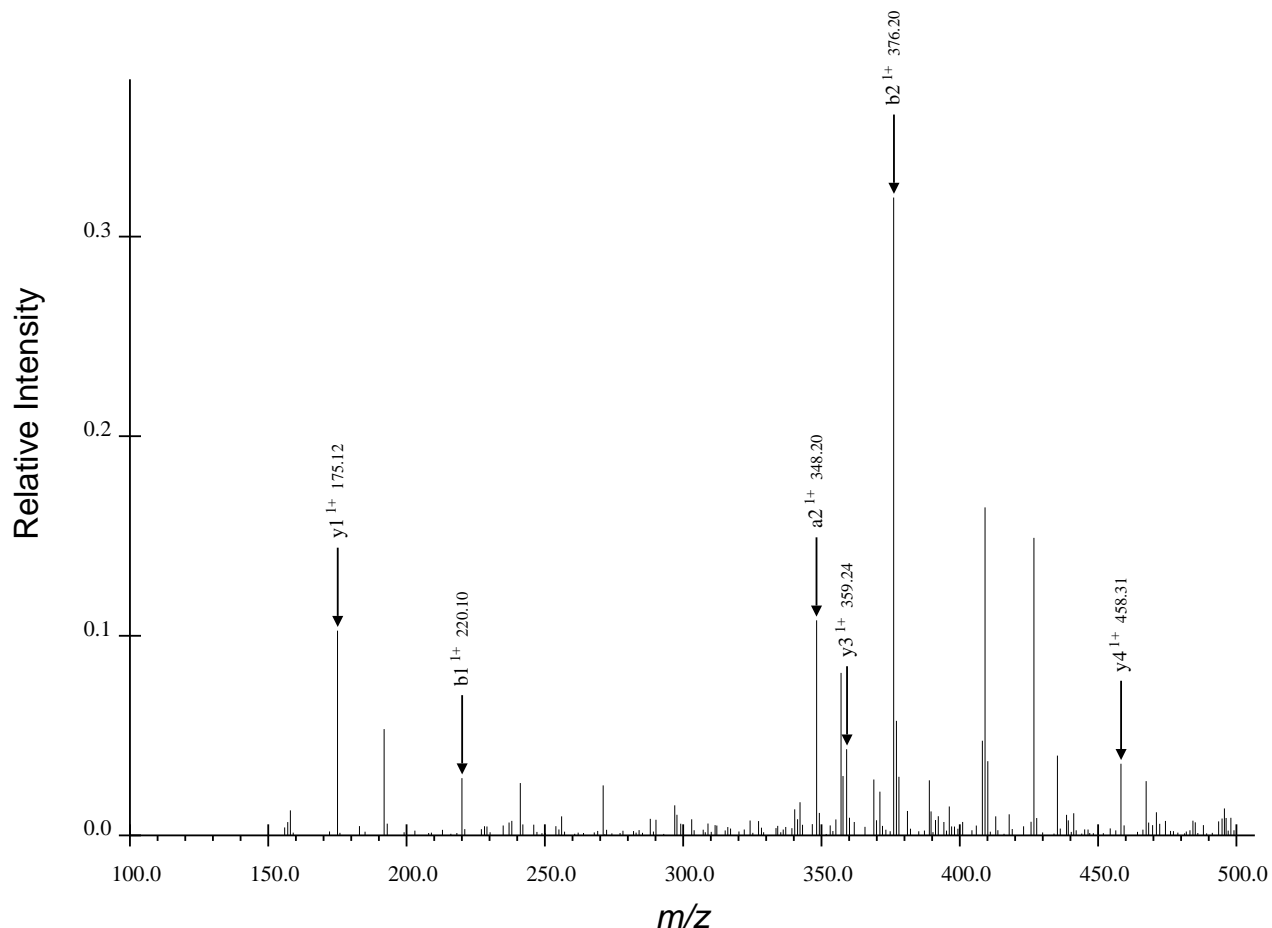

(a) First Region for rYRPGTVALR, Spectrum 96.dta

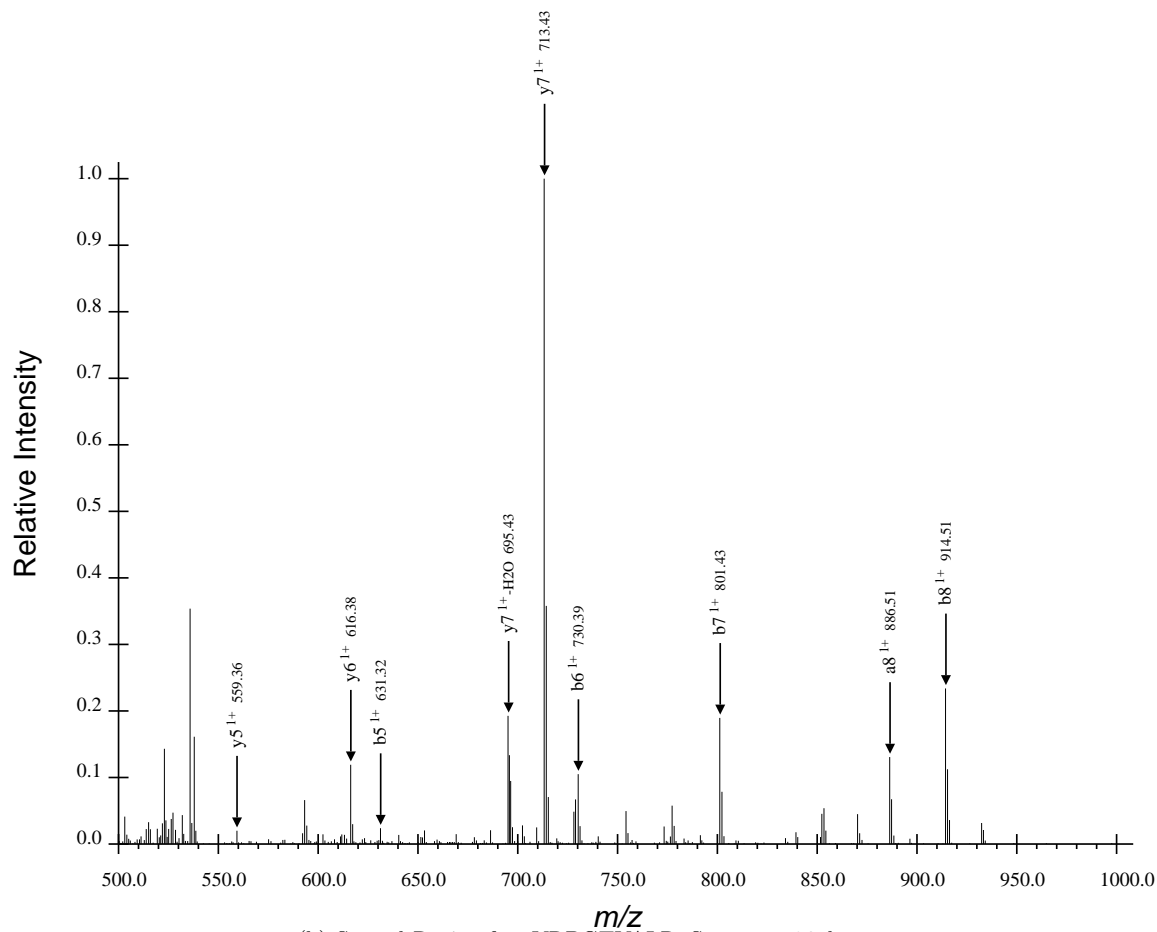

(b) Second Region for rYRPGTVALR, Spectrum 96.dta



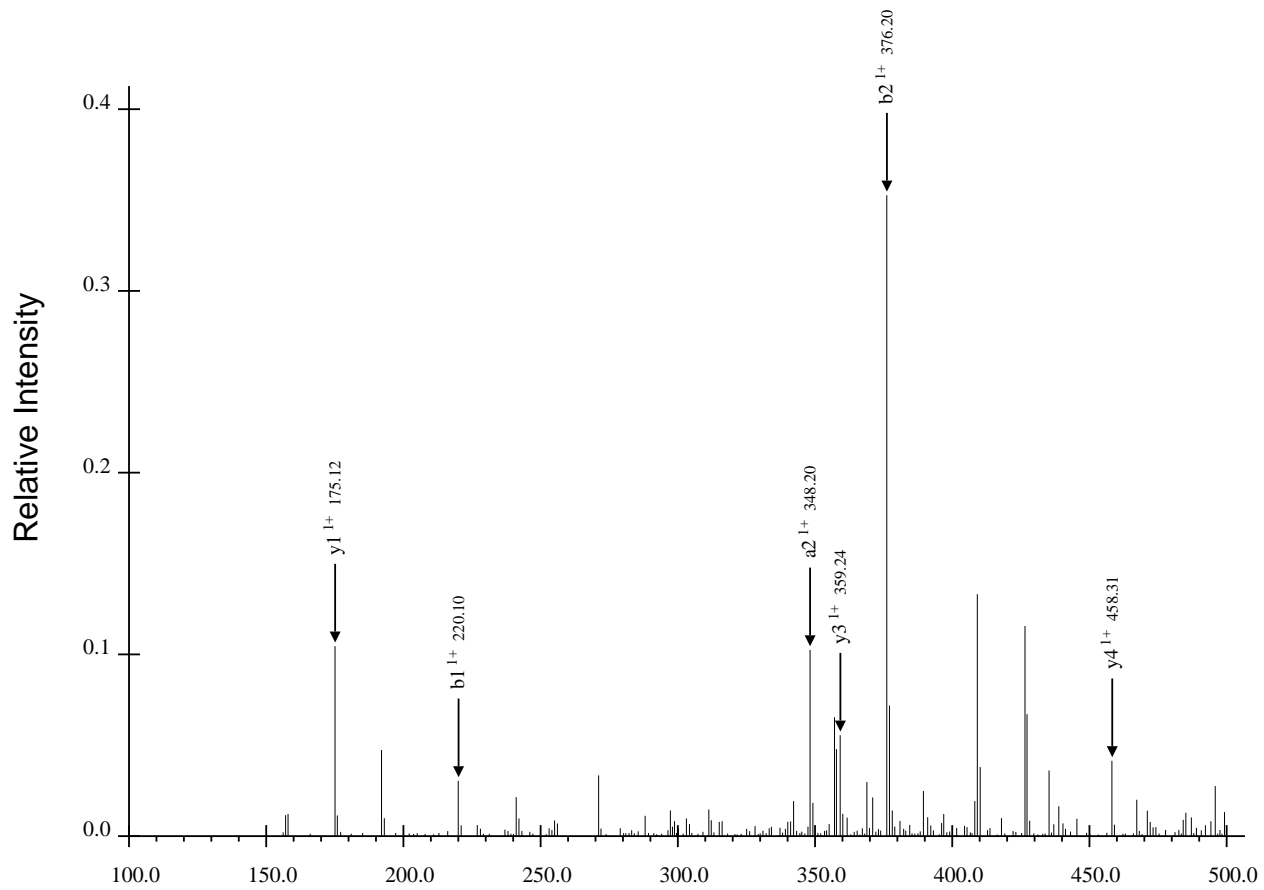

(a) First Region for rYRPGTVALR, Spectrum 97.dta

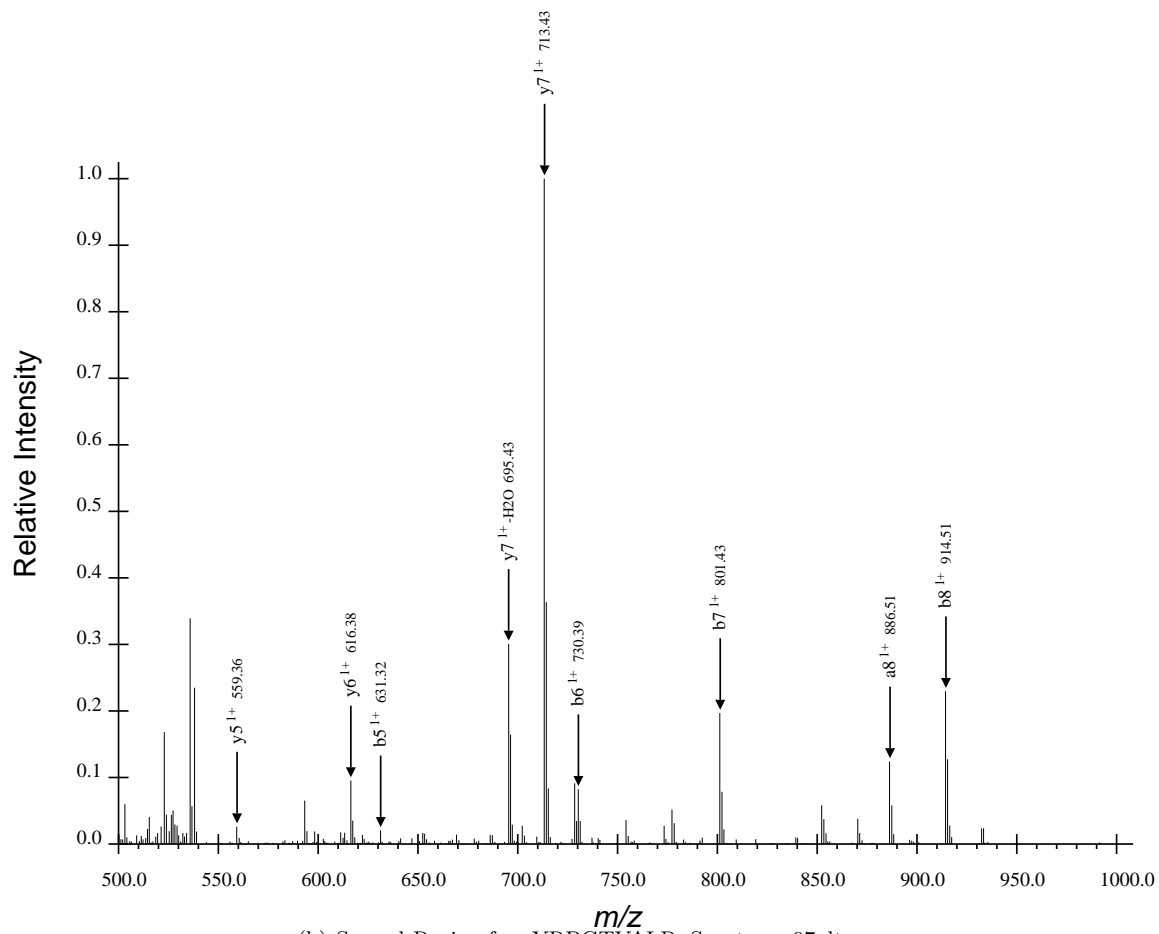

(b) Second Region for rYRPGTVALR, Spectrum 97.dta

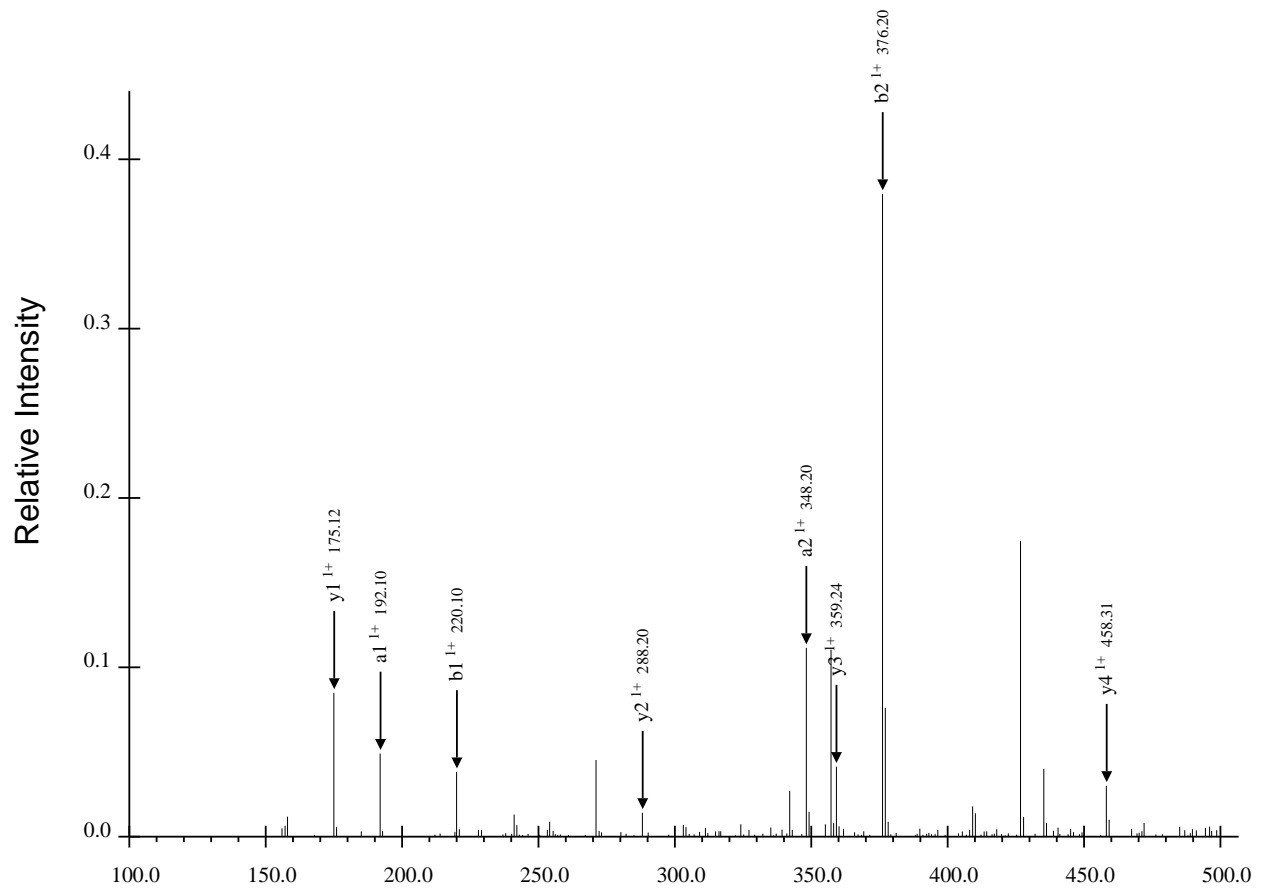

(a) First Region for rYRPGTVALR, Spectrum 98.dta

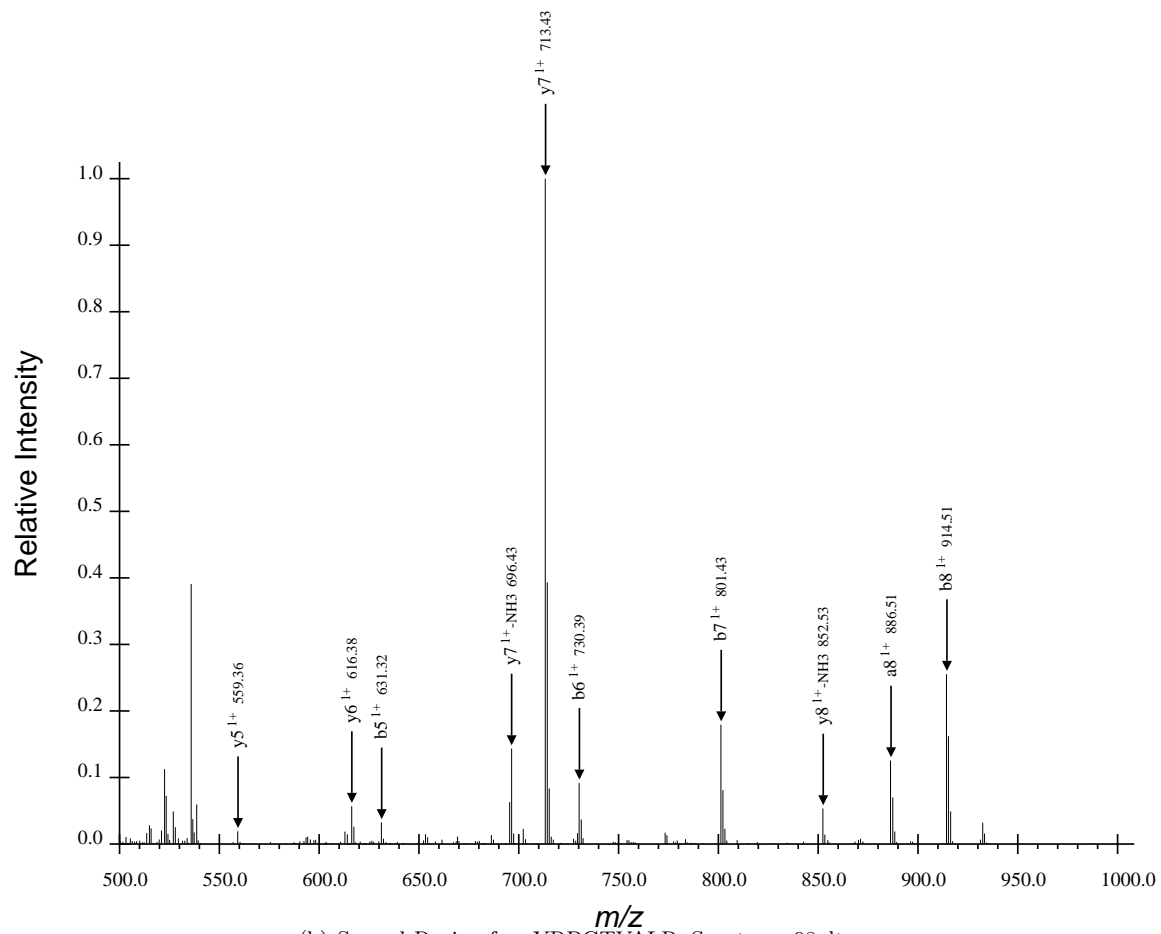

(b) Second Region for rYRPGTVALR, Spectrum 98.dta

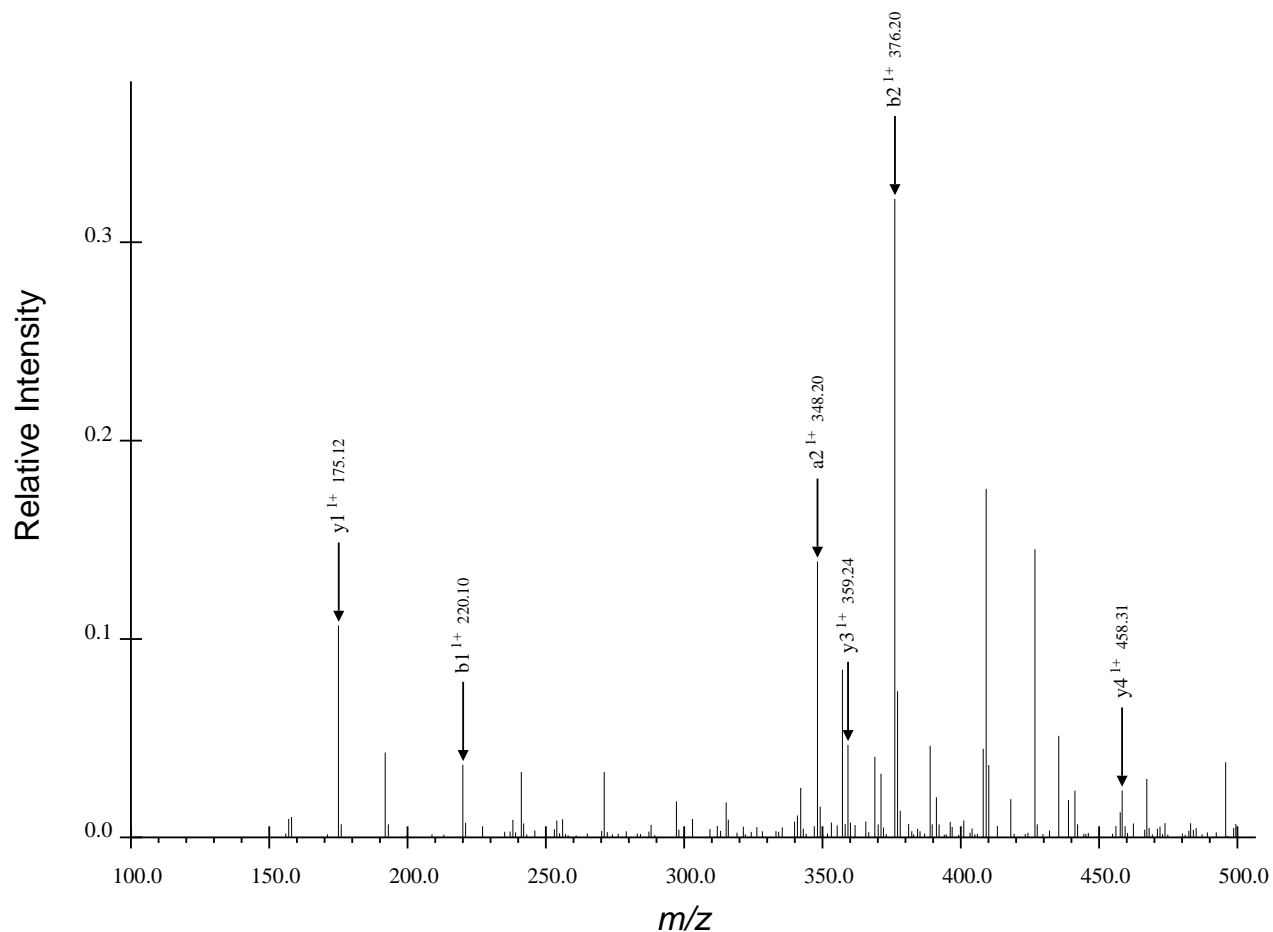

(a) First Region for rYRPGTVALR, Spectrum 99.dta

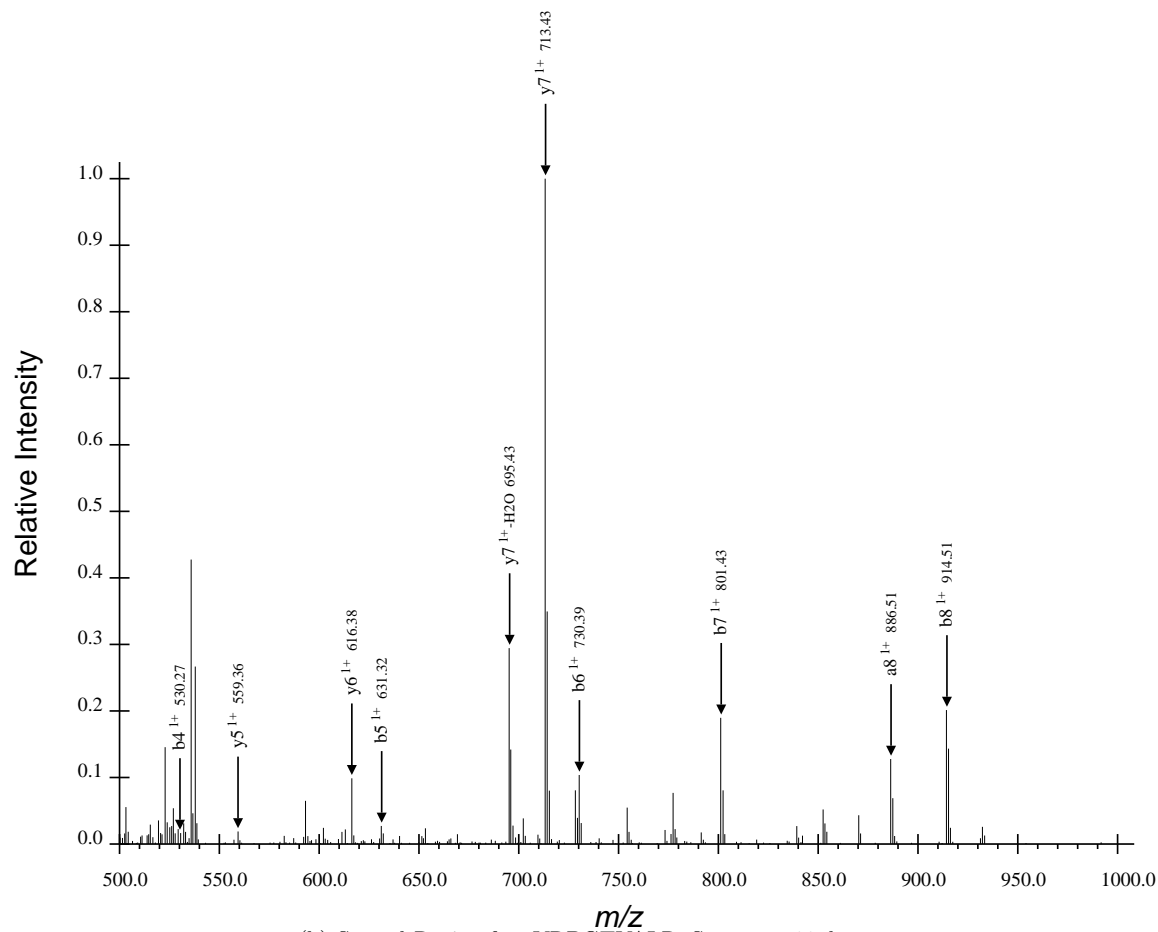

(b) Second Region for rYRPGTVALR, Spectrum 99.dta

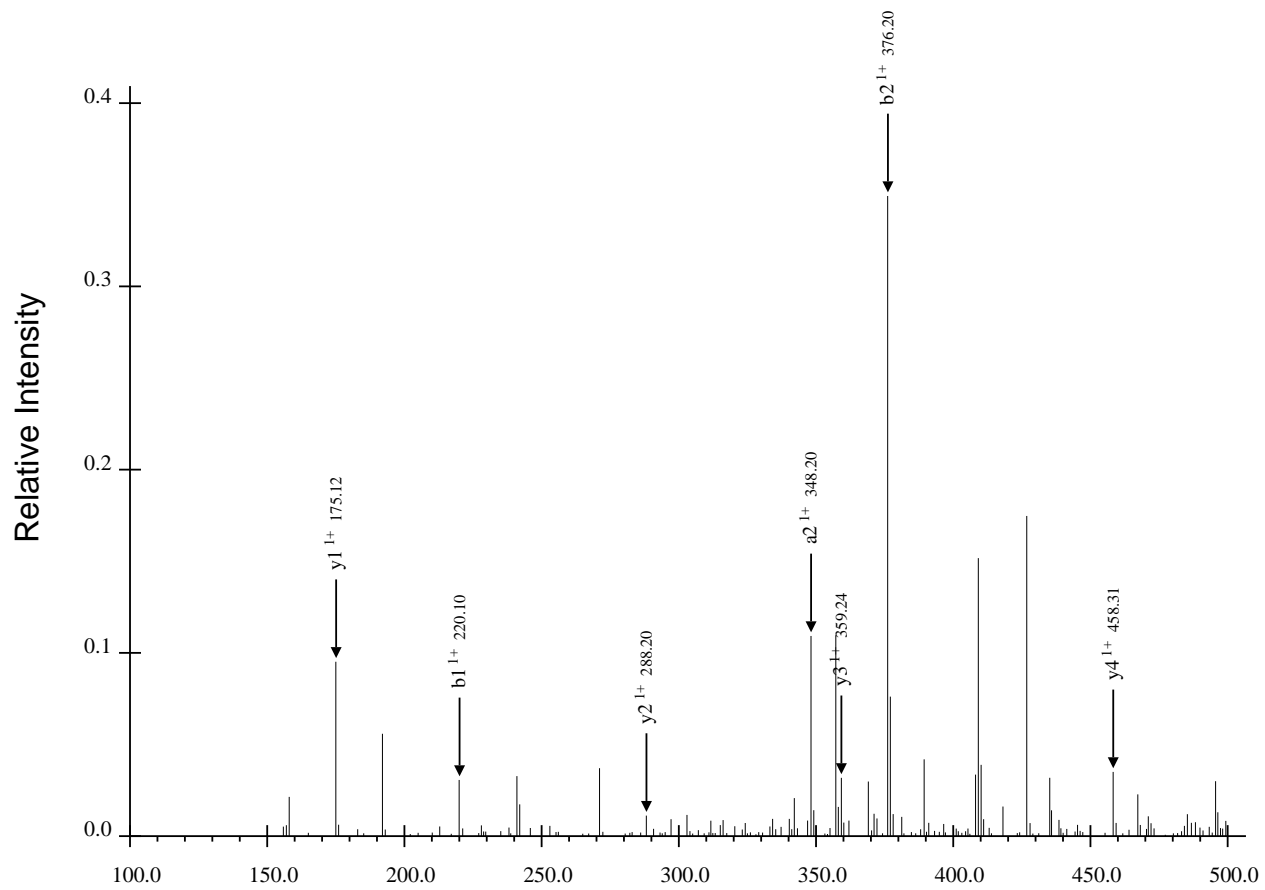

(a) First Region for rYRPGTVALR, Spectrum 100.dta

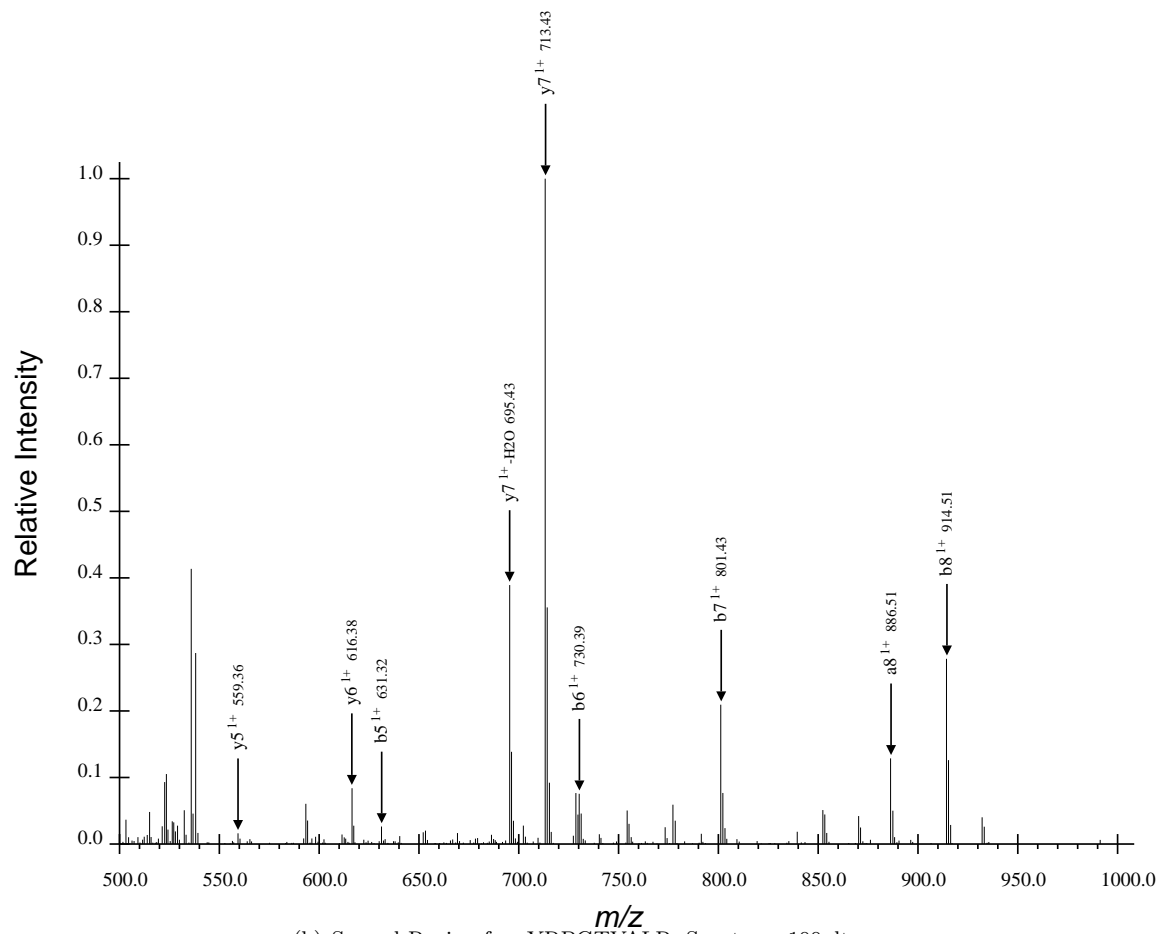

(b) Second Region for rYRPGTVALR, Spectrum 100.dta

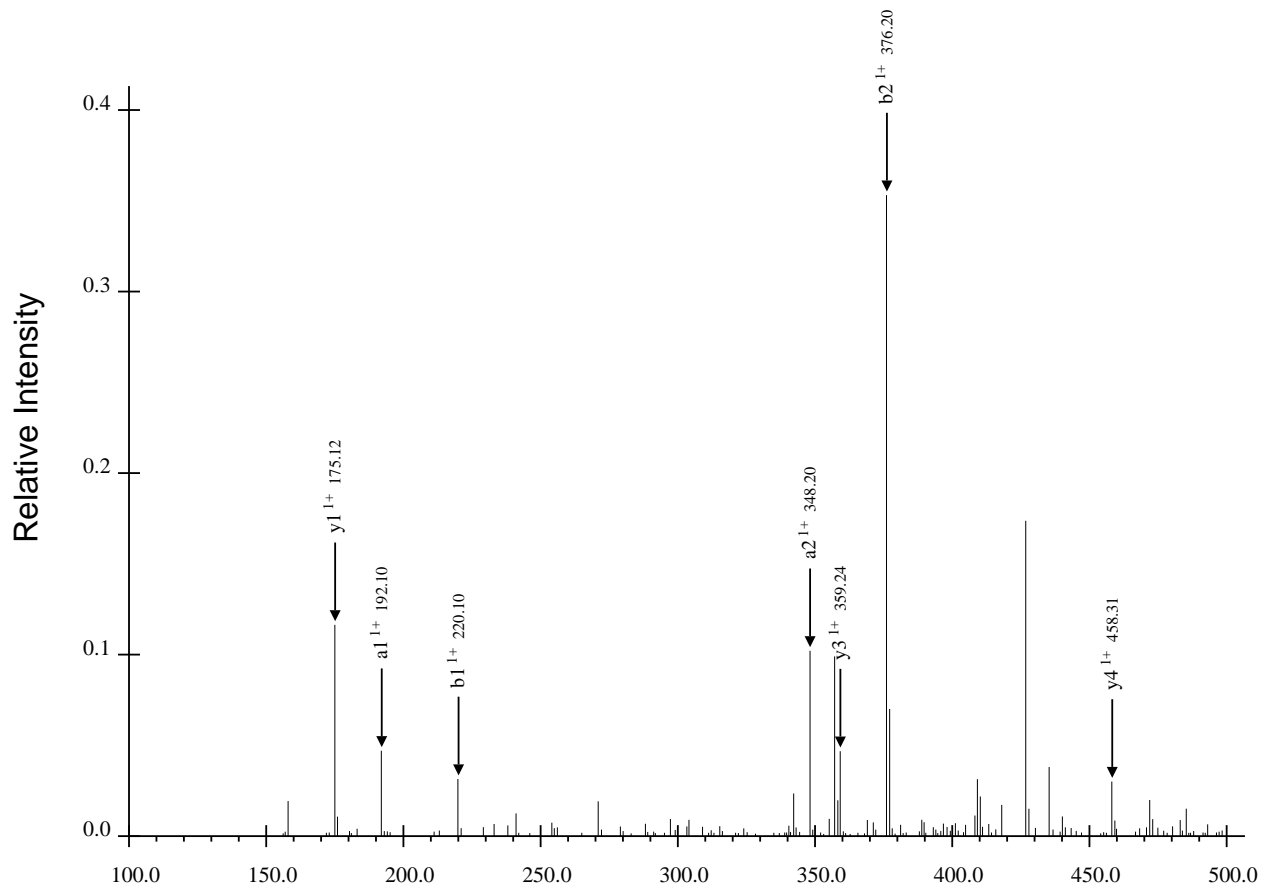

(a) First Region for rYRPGTVALR, Spectrum 101.dta

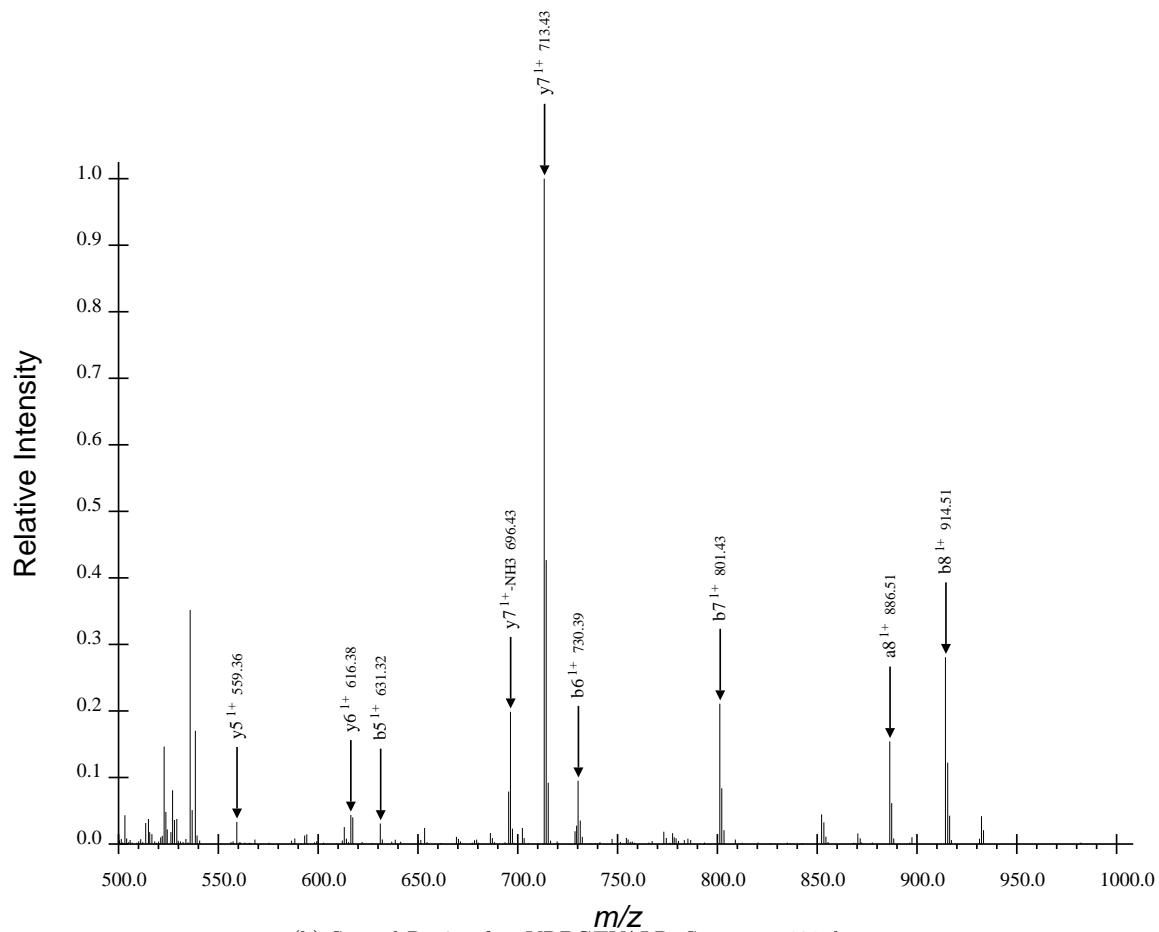

(b) Second Region for rYRPGTVALR, Spectrum 101.dta

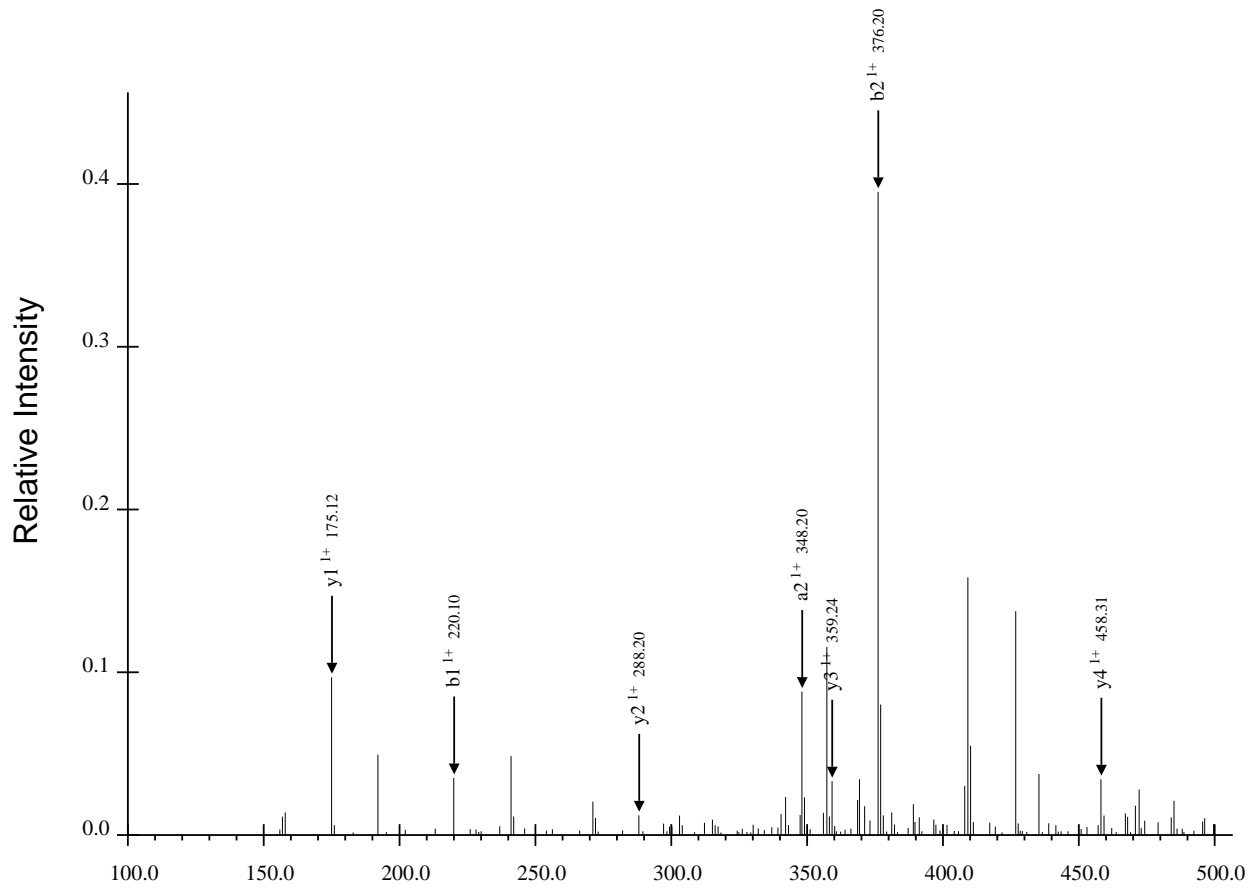

(a) First Region for rYRPGTVLR, Spectrum 102.dta

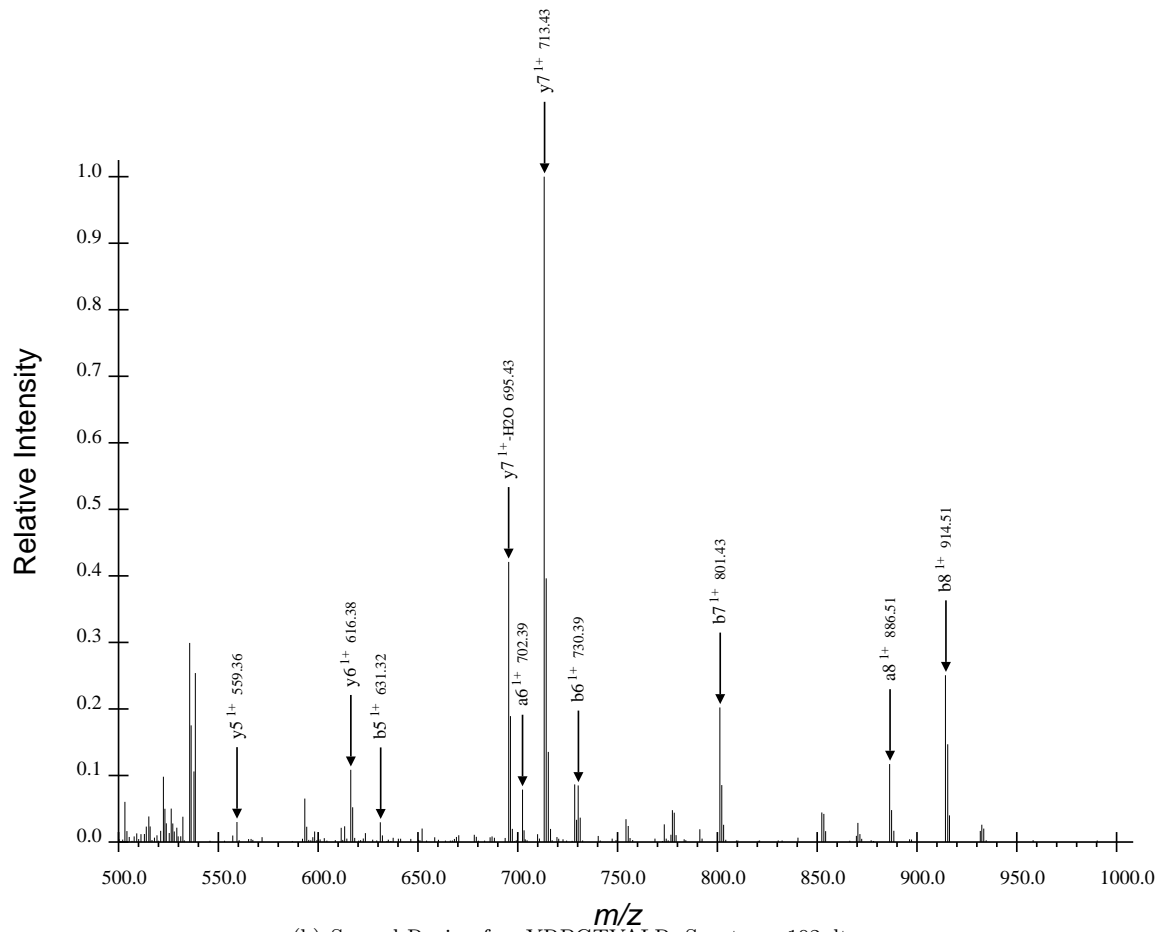

(b) Second Region for rYRPGTVLR, Spectrum 102.dta

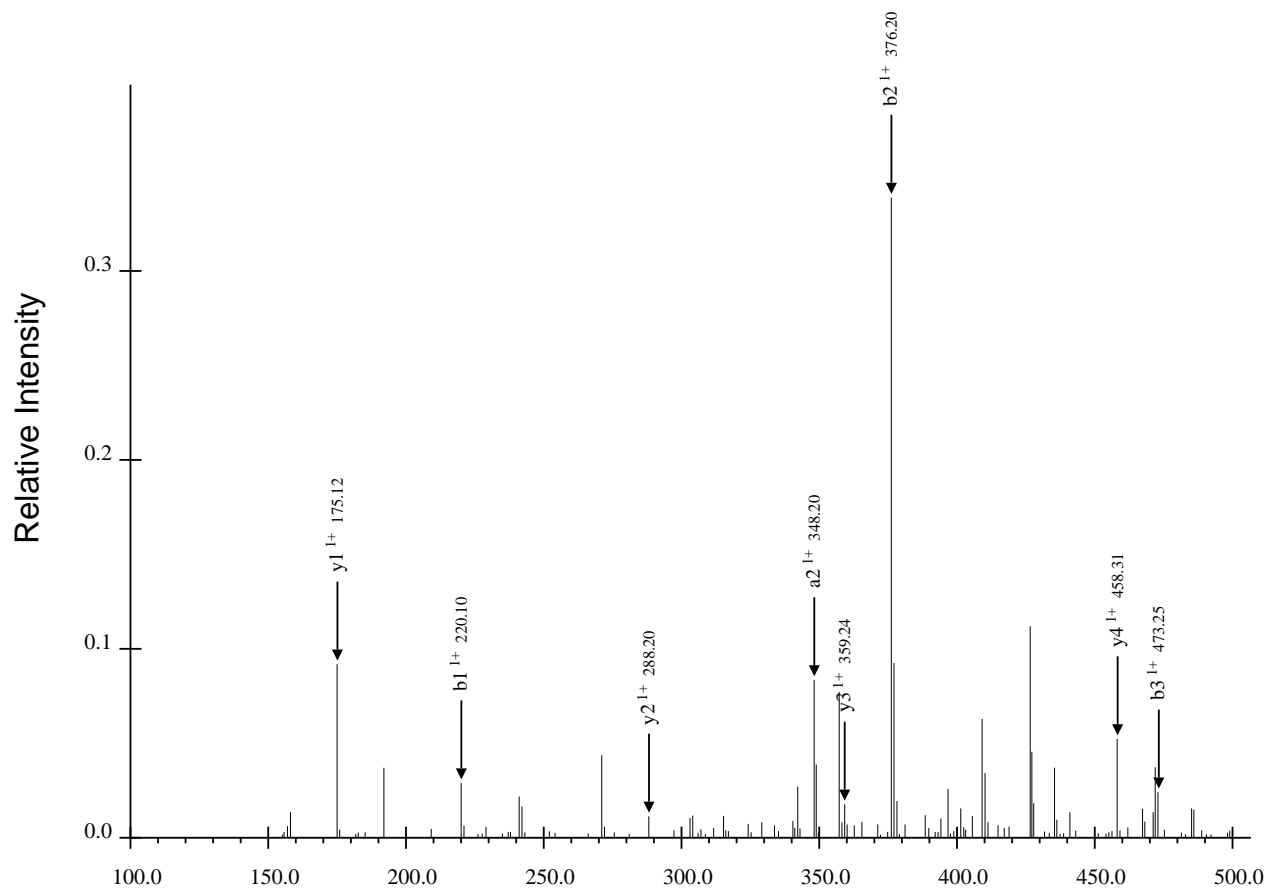

(a) First Region for rYRPGTVALR, Spectrum 103.dta

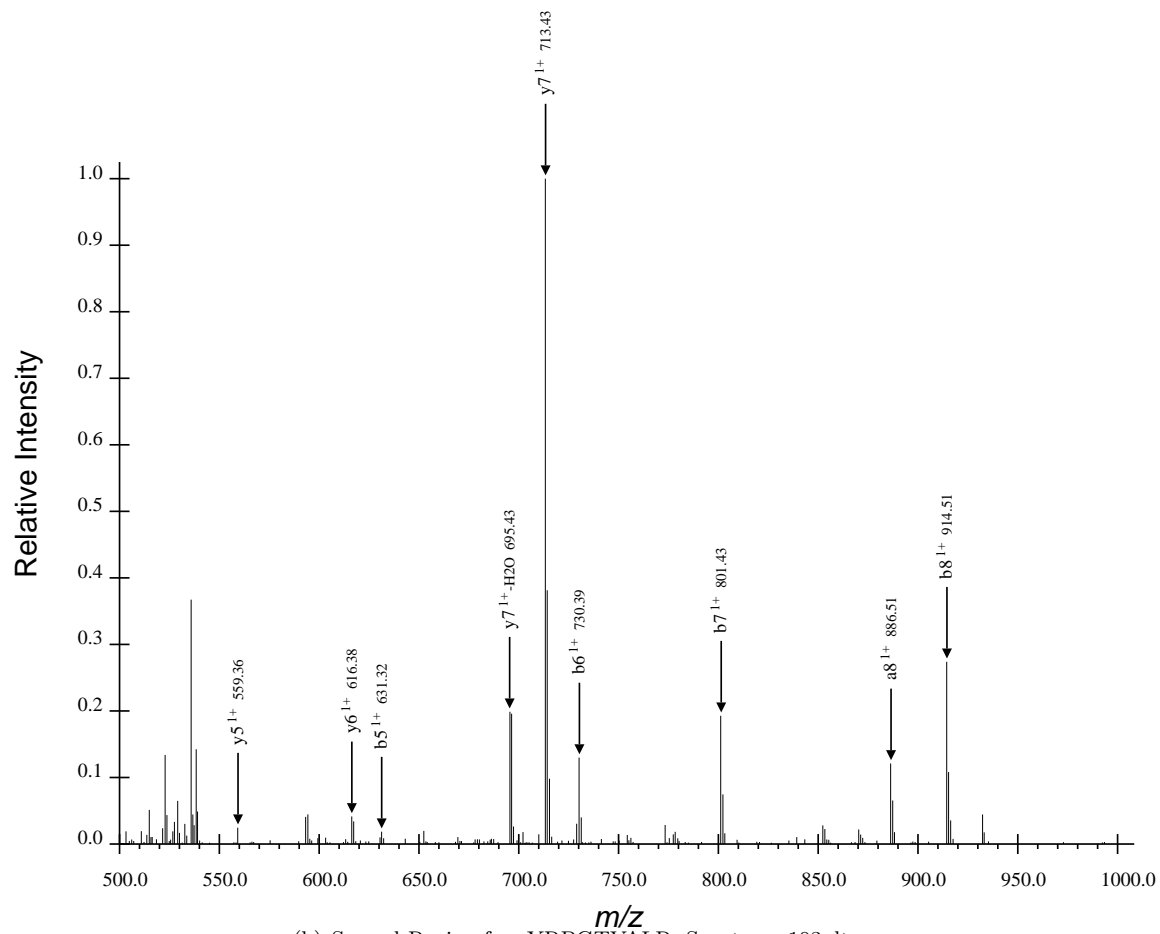

(b) Second Region for rYRPGTVALR, Spectrum 103.dta

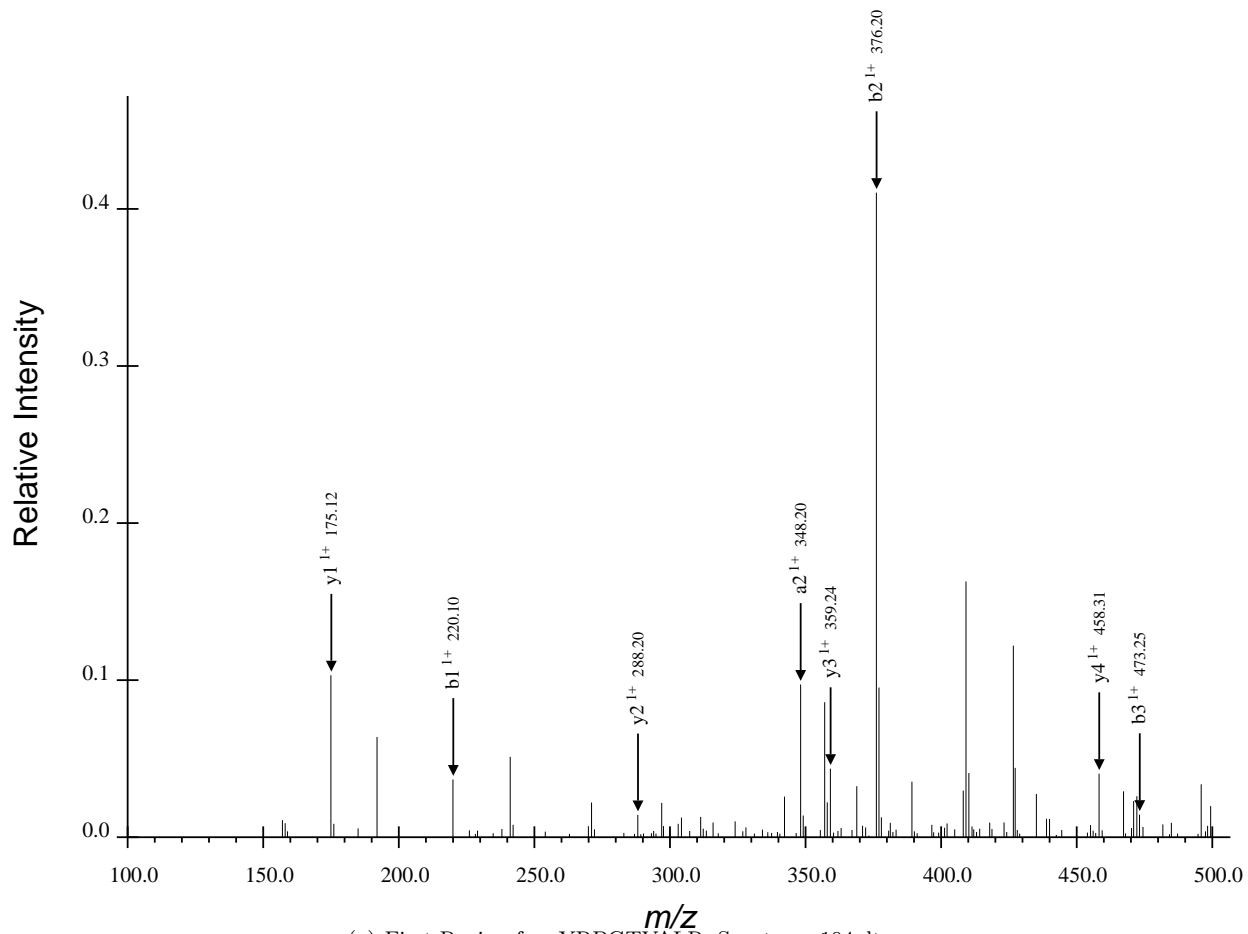

(a) First Region for rYRPGTVALR, Spectrum 104.dta

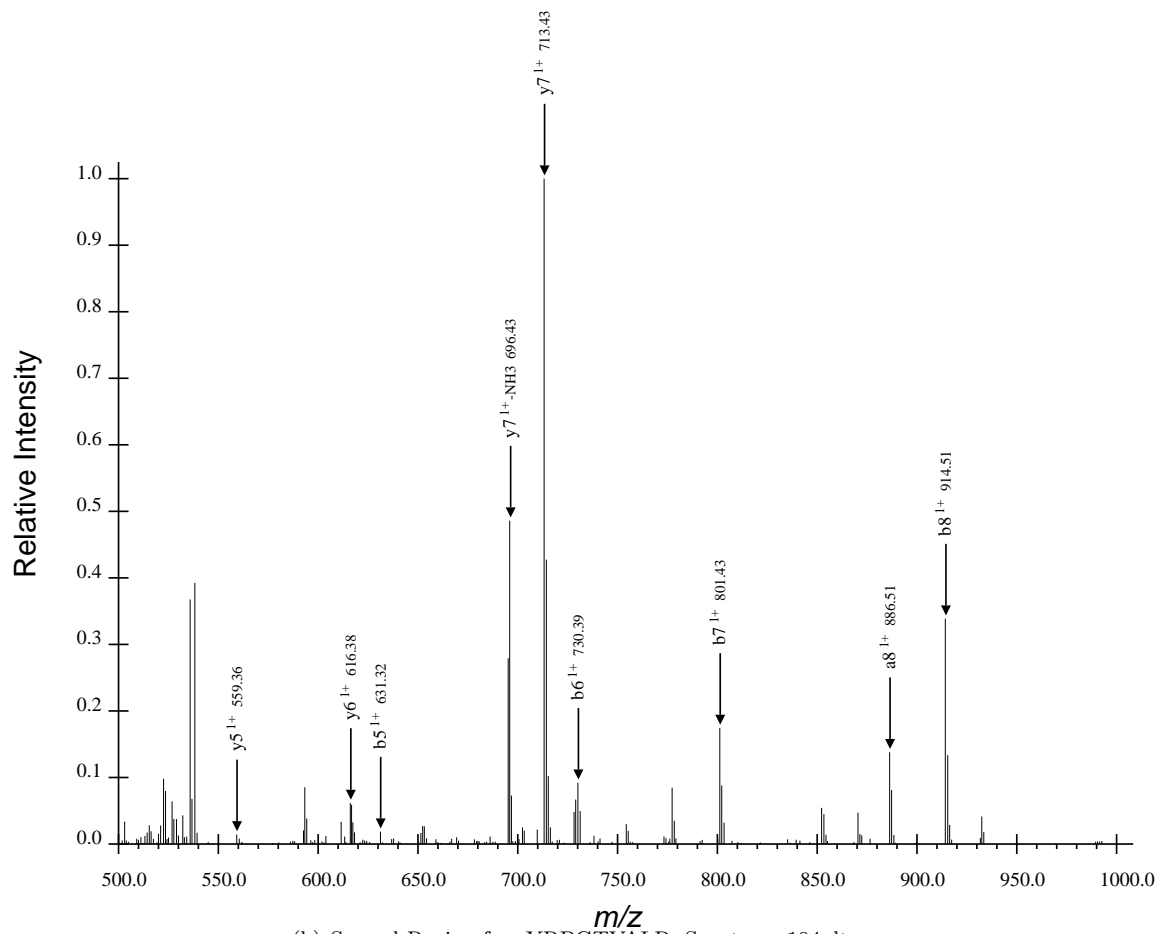

(b) Second Region for rYRPGTVALR, Spectrum 104.dta



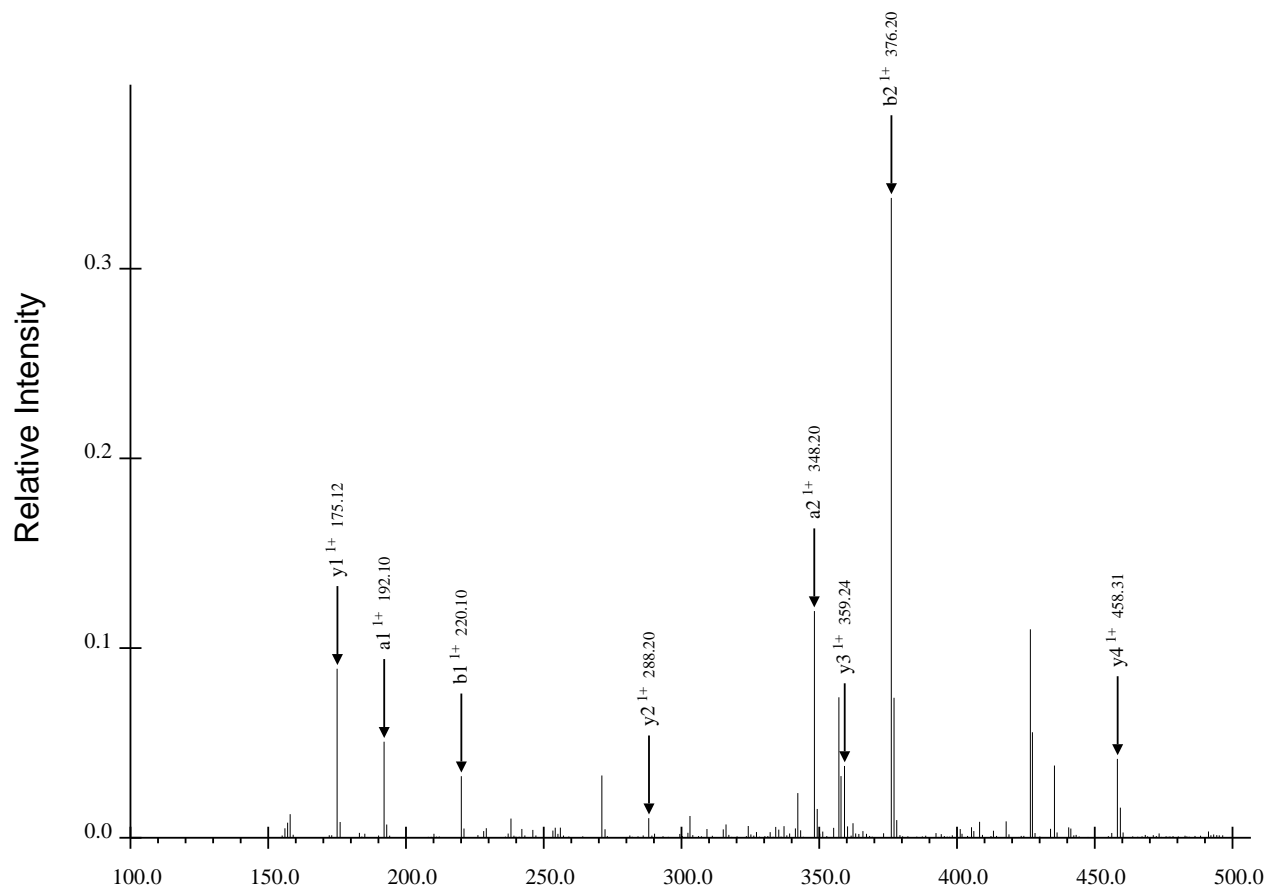

(a) First Region for rYRPGTVALR, Spectrum 105.dta

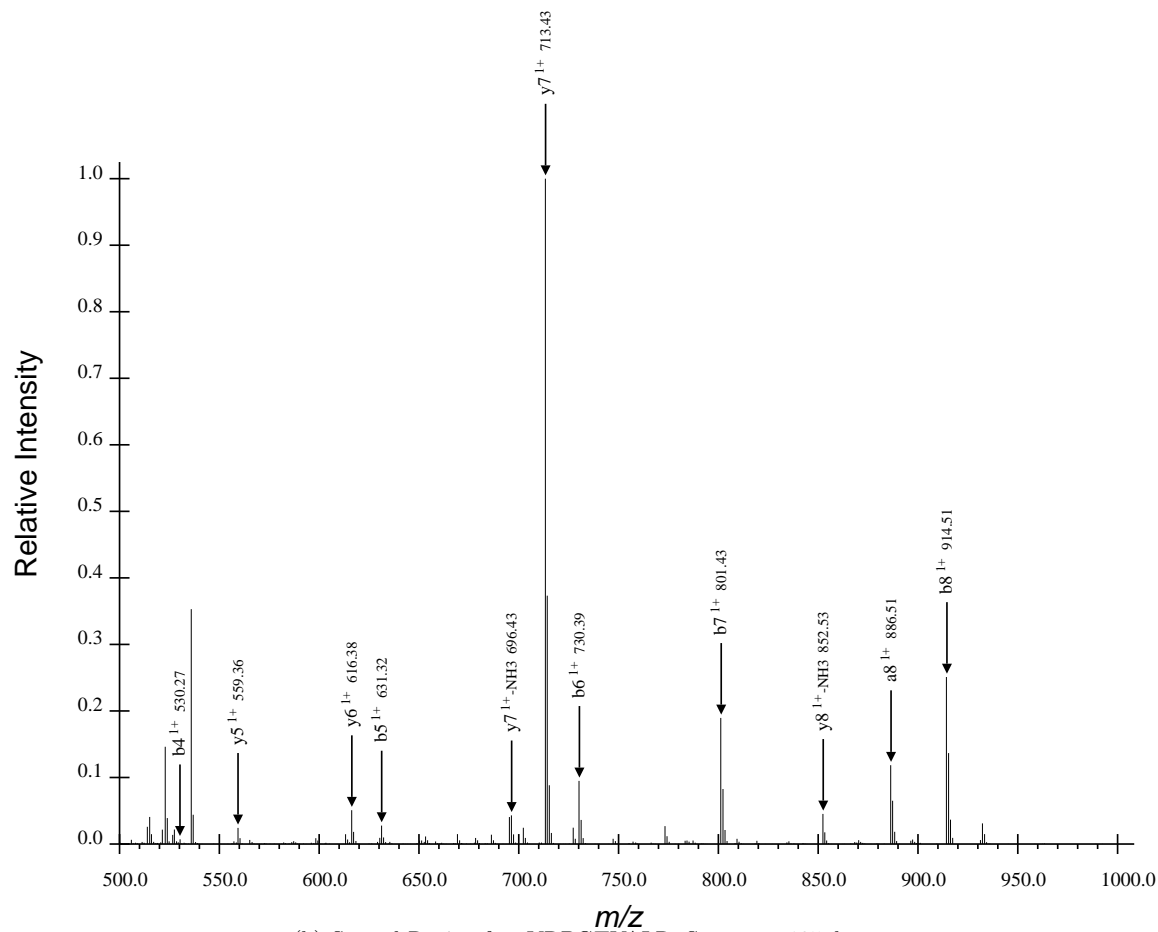

(b) Second Region for rYRPGTVALR, Spectrum 105.dta

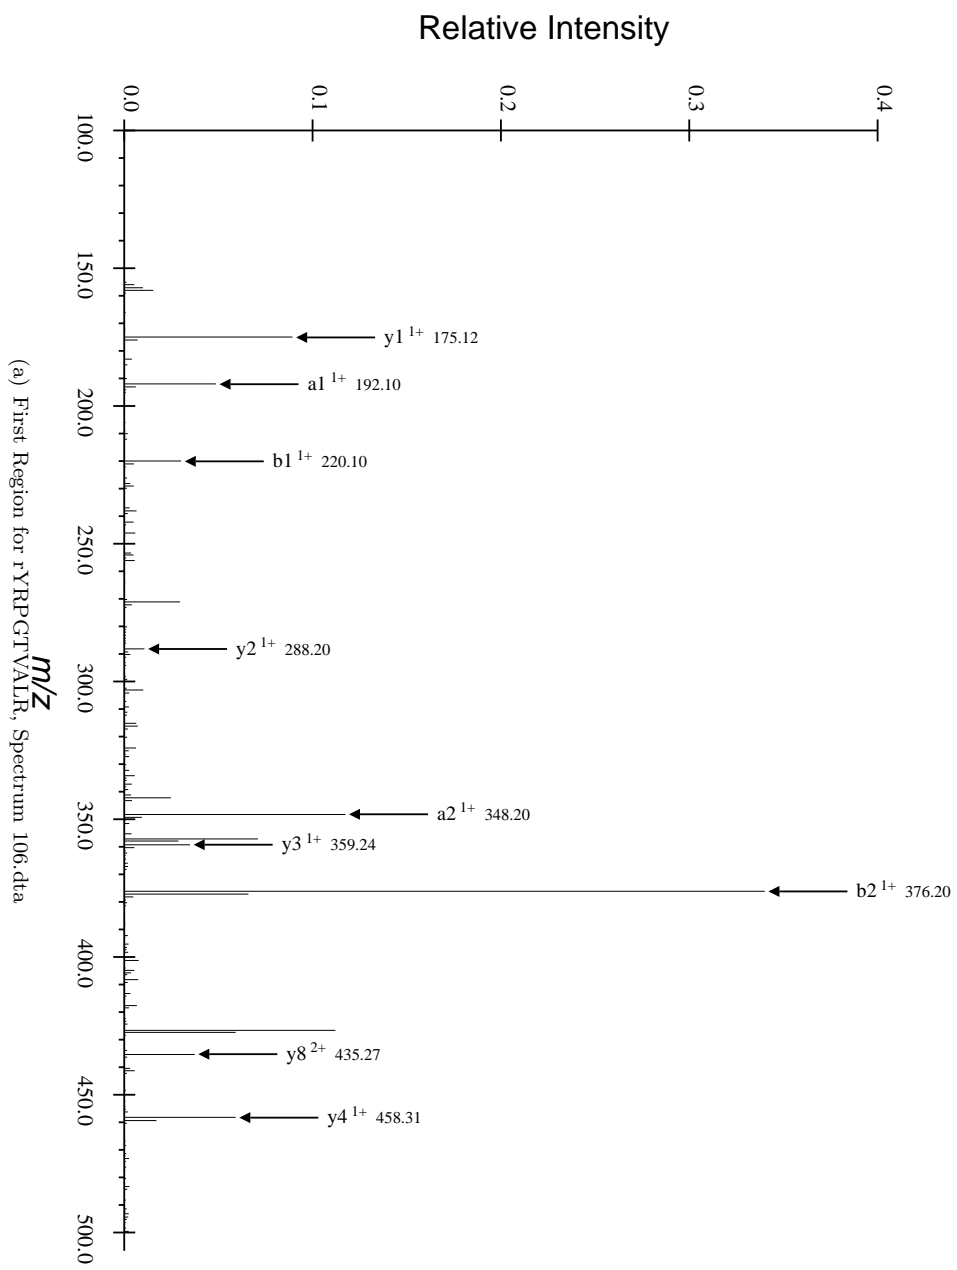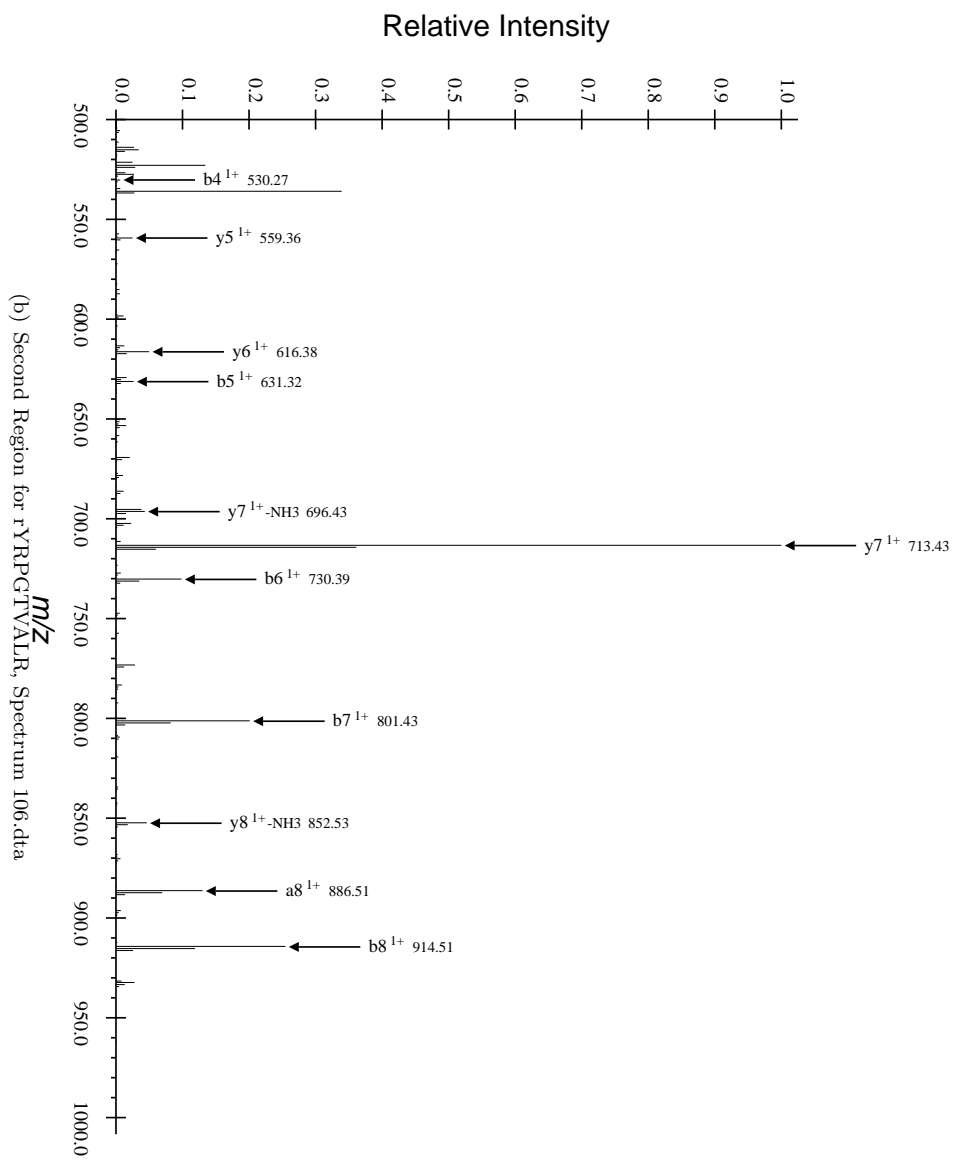

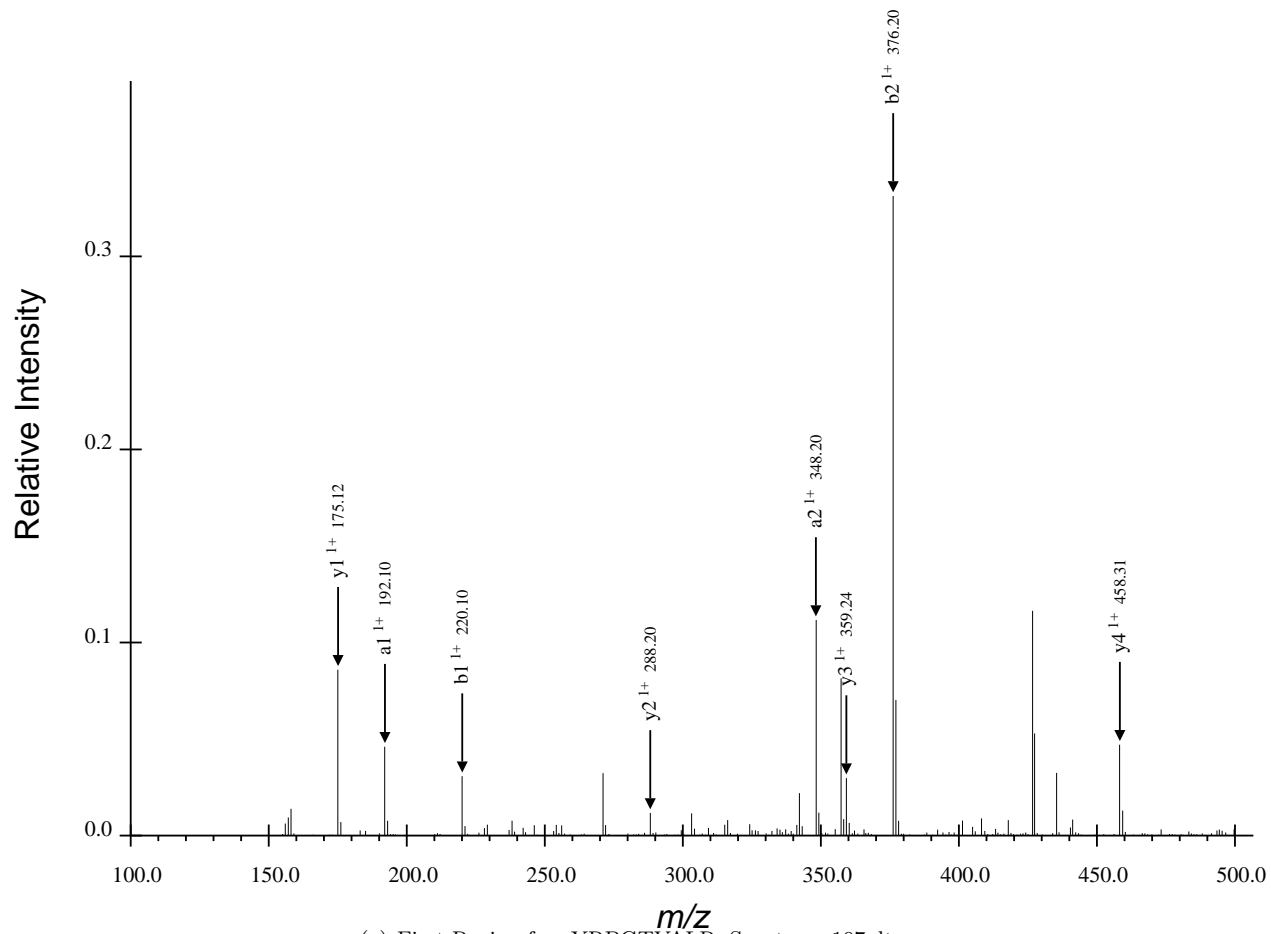

(a) First Region for rYRPGTVLR, Spectrum 107.dta

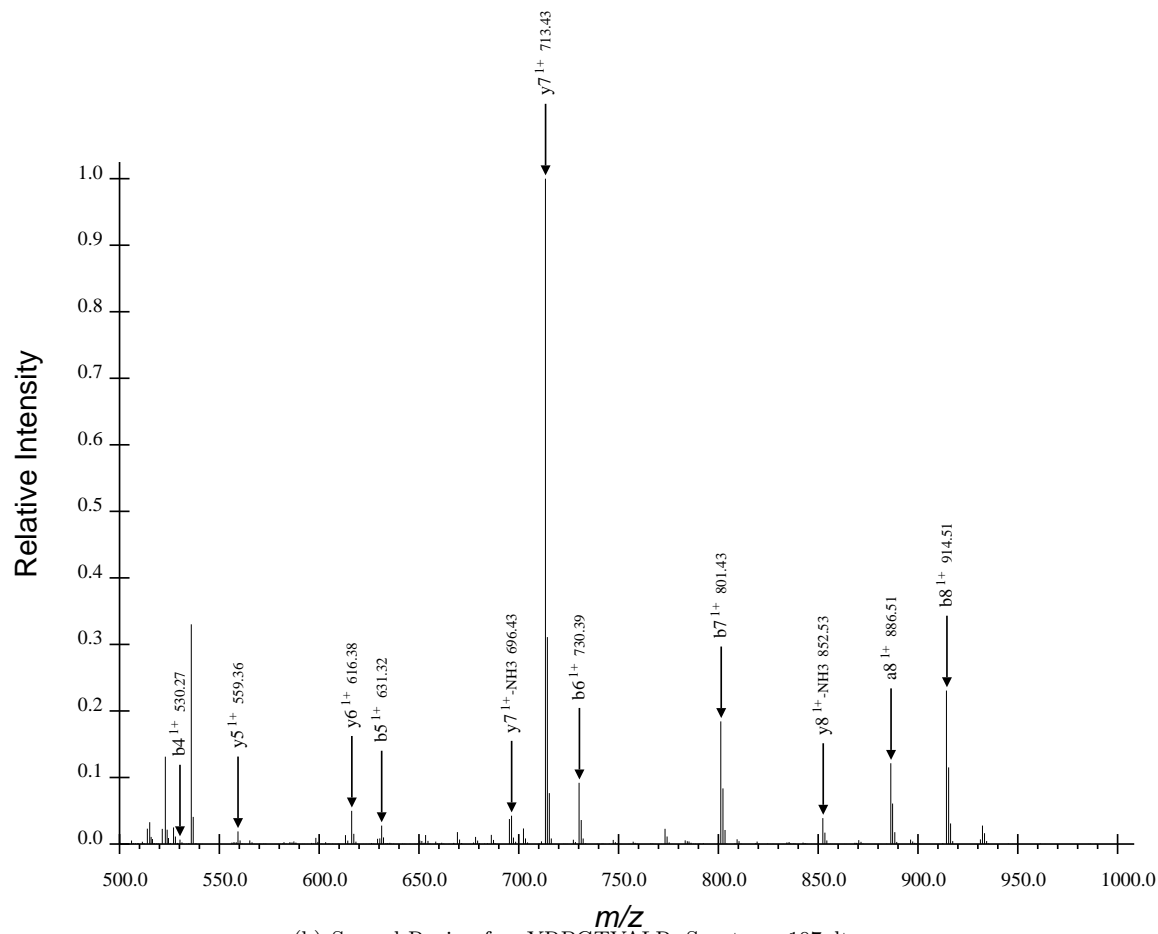

(b) Second Region for rYRPGTVLR, Spectrum 107.dta

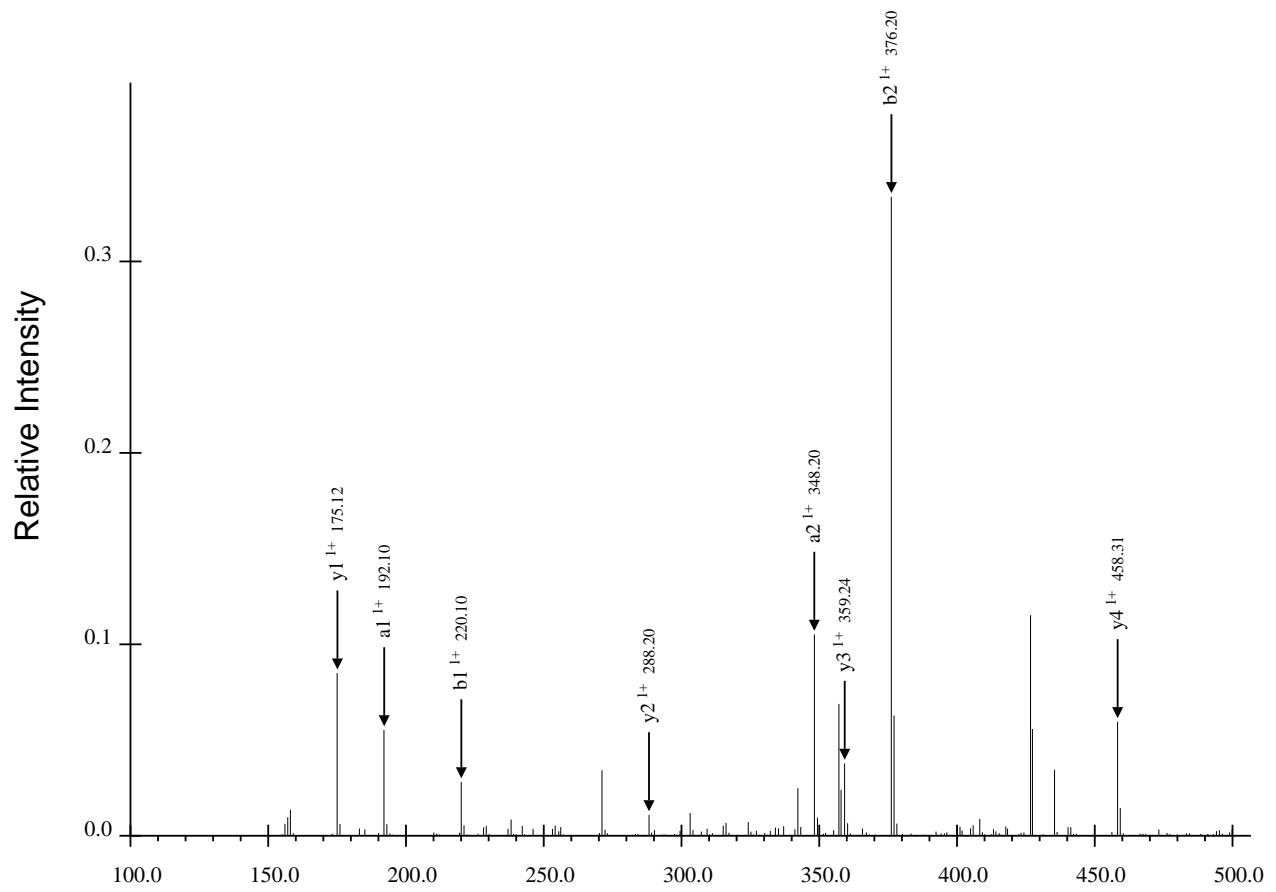

(a) First Region for rYRPGTVAlR, Spectrum 108.dta

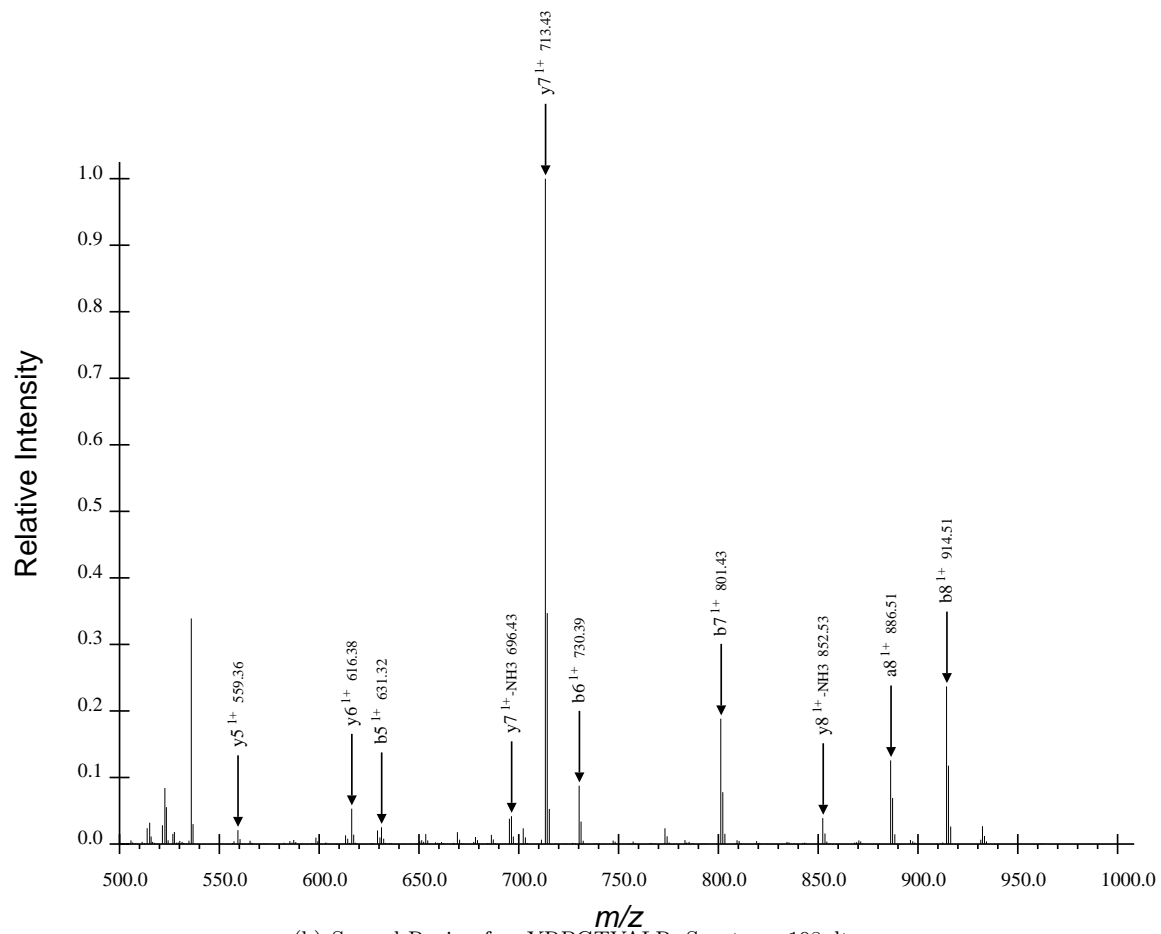

(b) Second Region for rYRPGTVAlR, Spectrum 108.dta

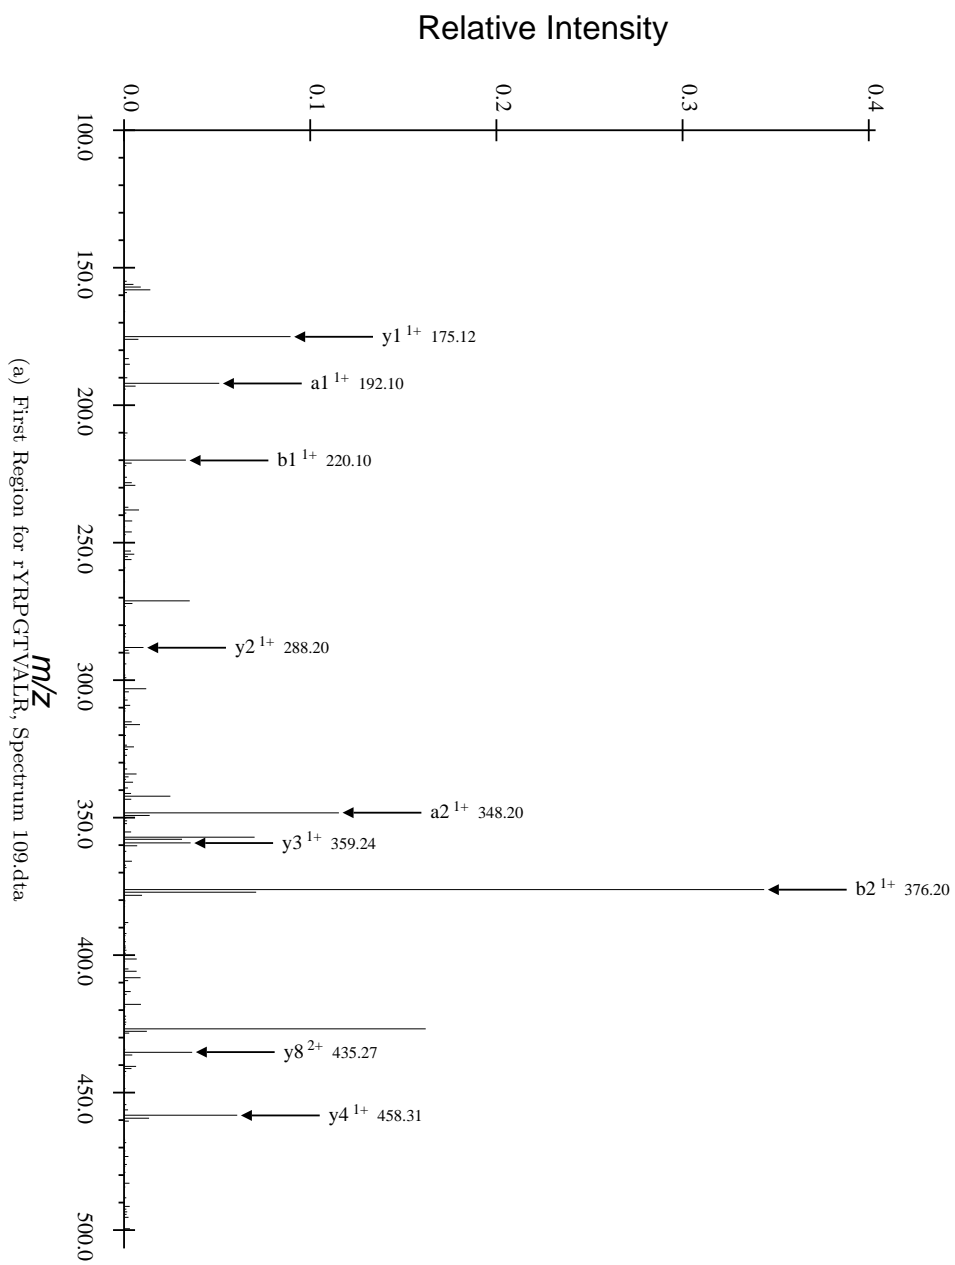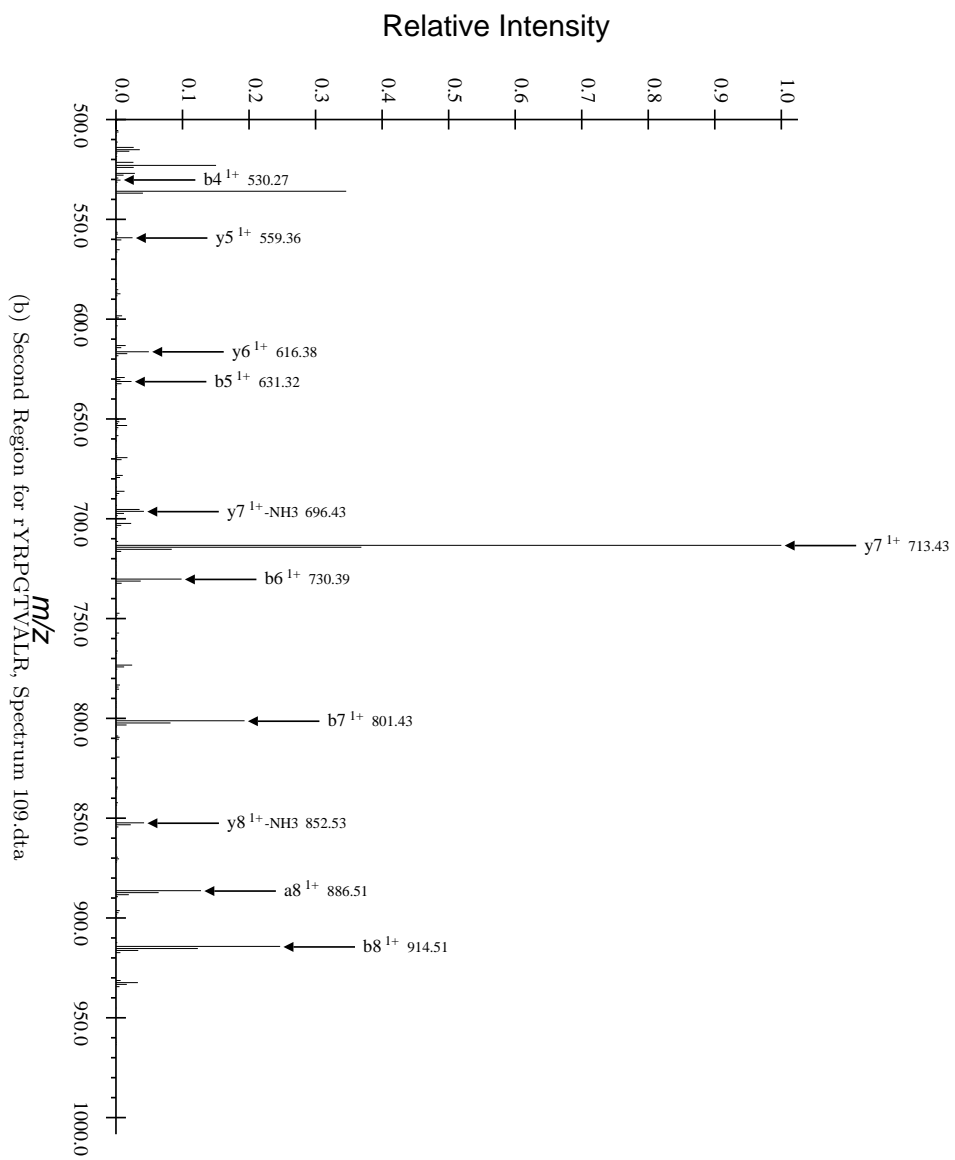

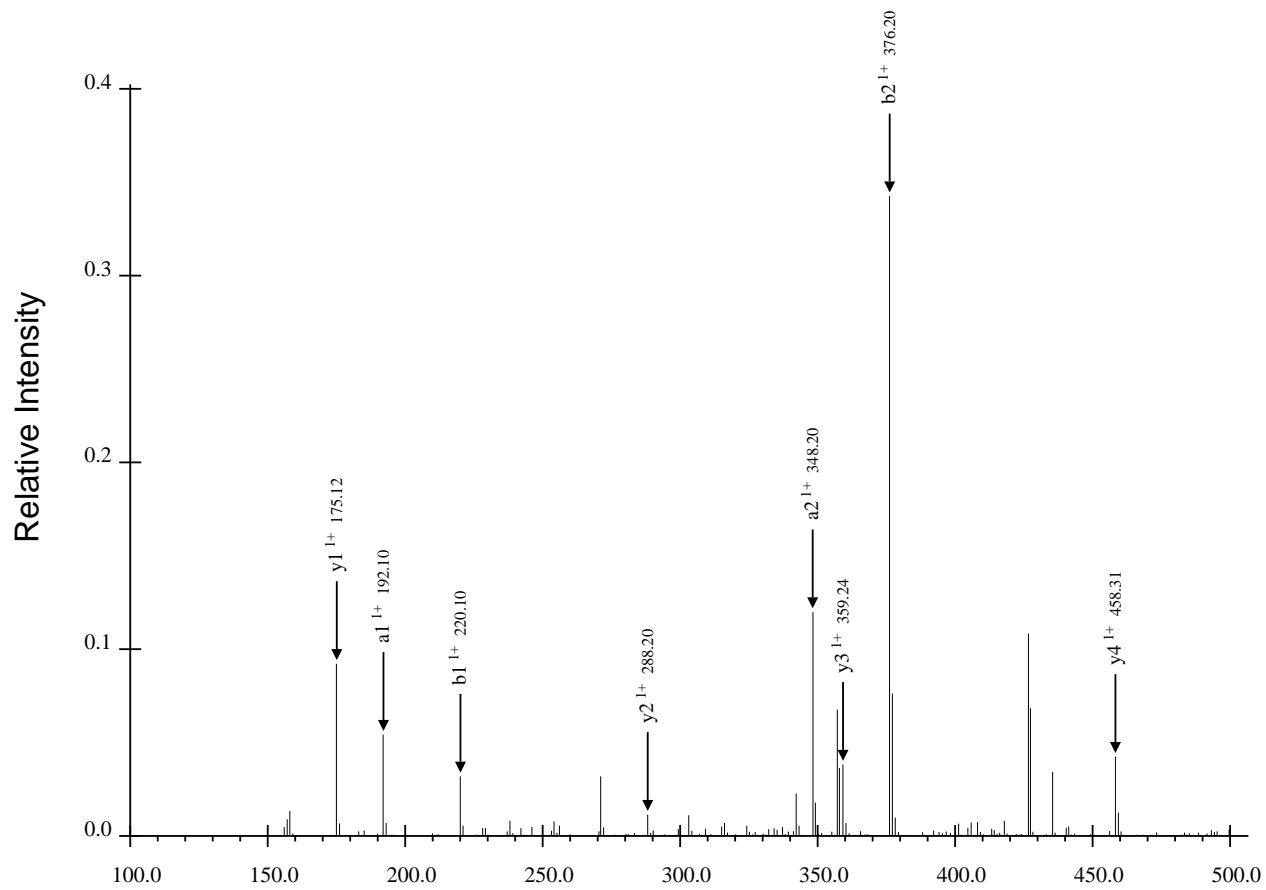

(a) First Region for rYRPGTVALR, Spectrum 110.dta

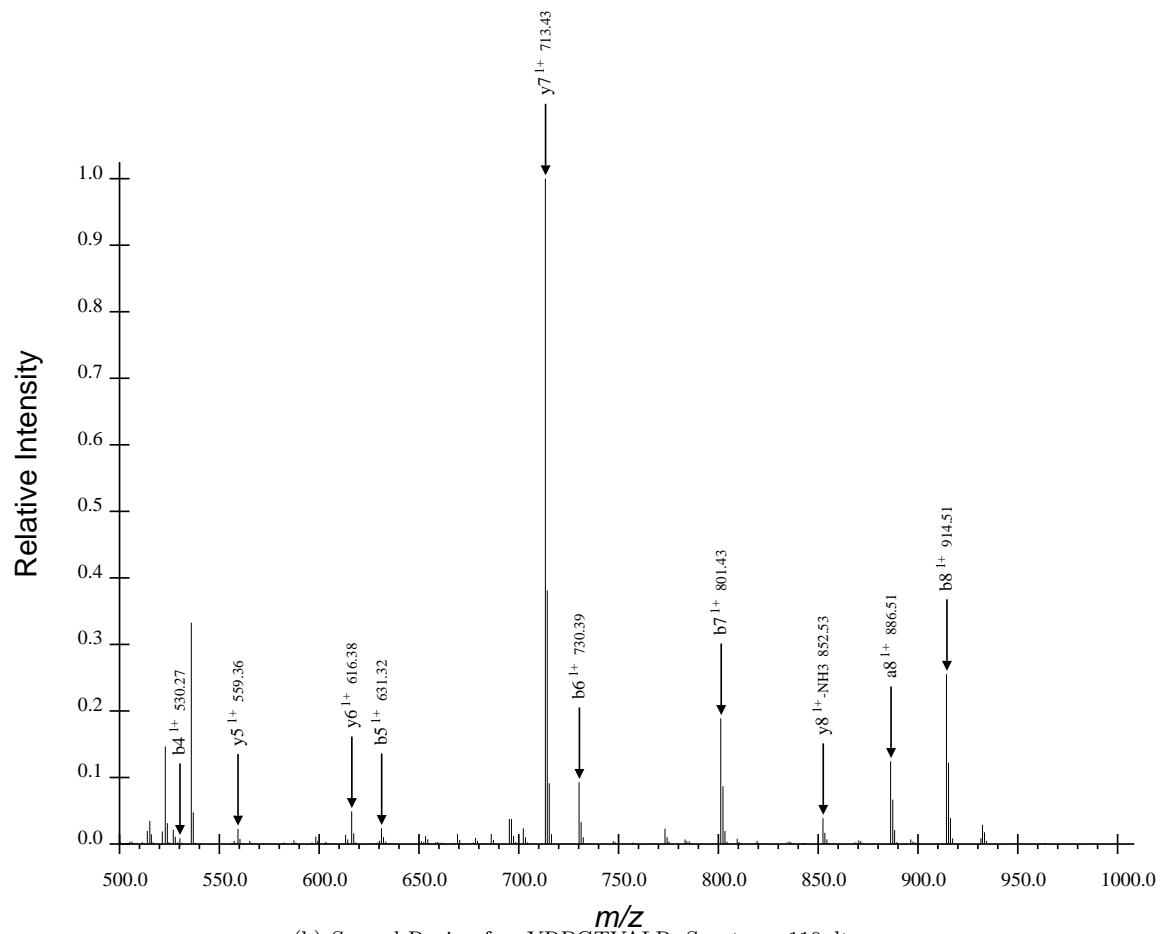

(b) Second Region for rYRPGTVALR, Spectrum 110.dta

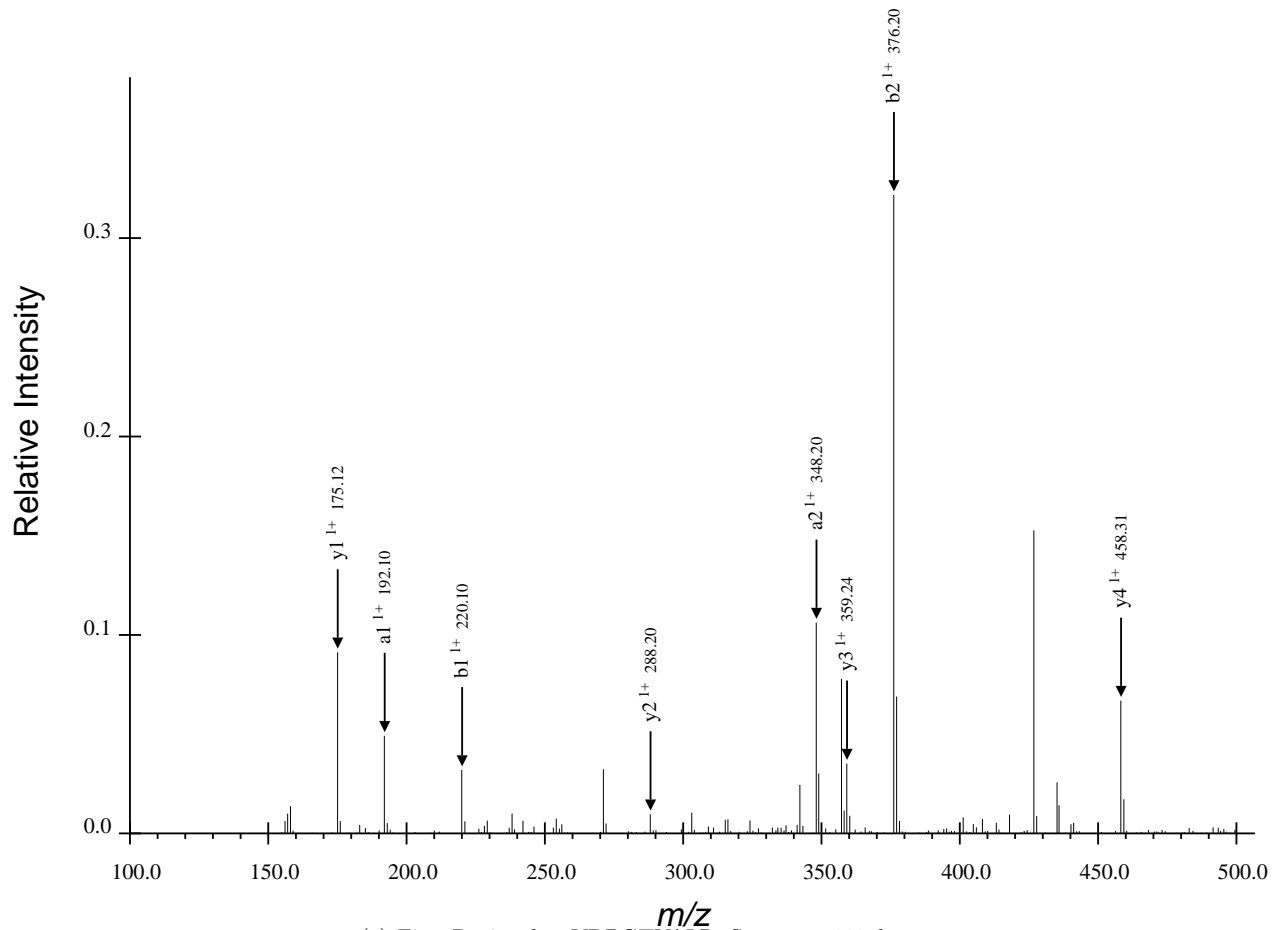

(a) First Region for rYRPGTVAlR, Spectrum 111.dta

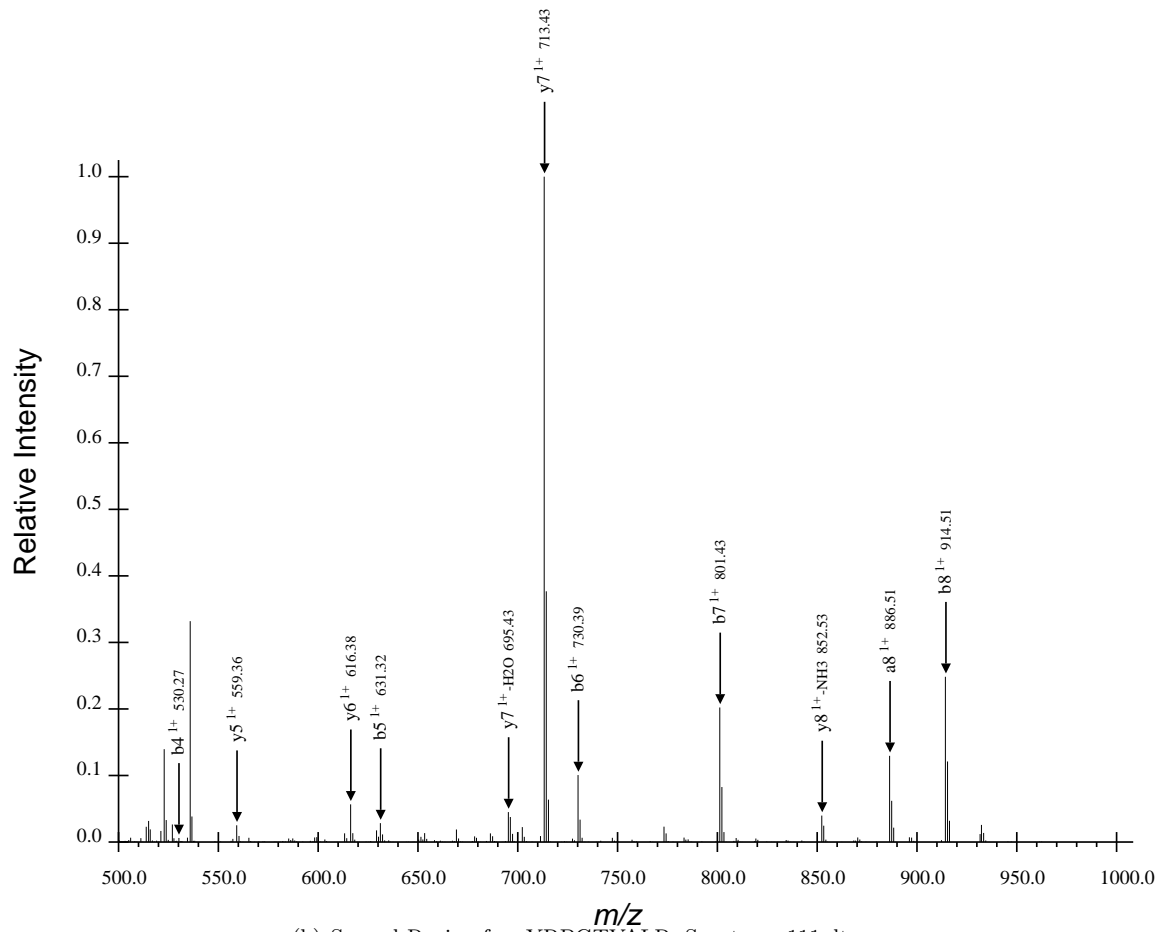

(b) Second Region for rYRPGTVAlR, Spectrum 111.dta

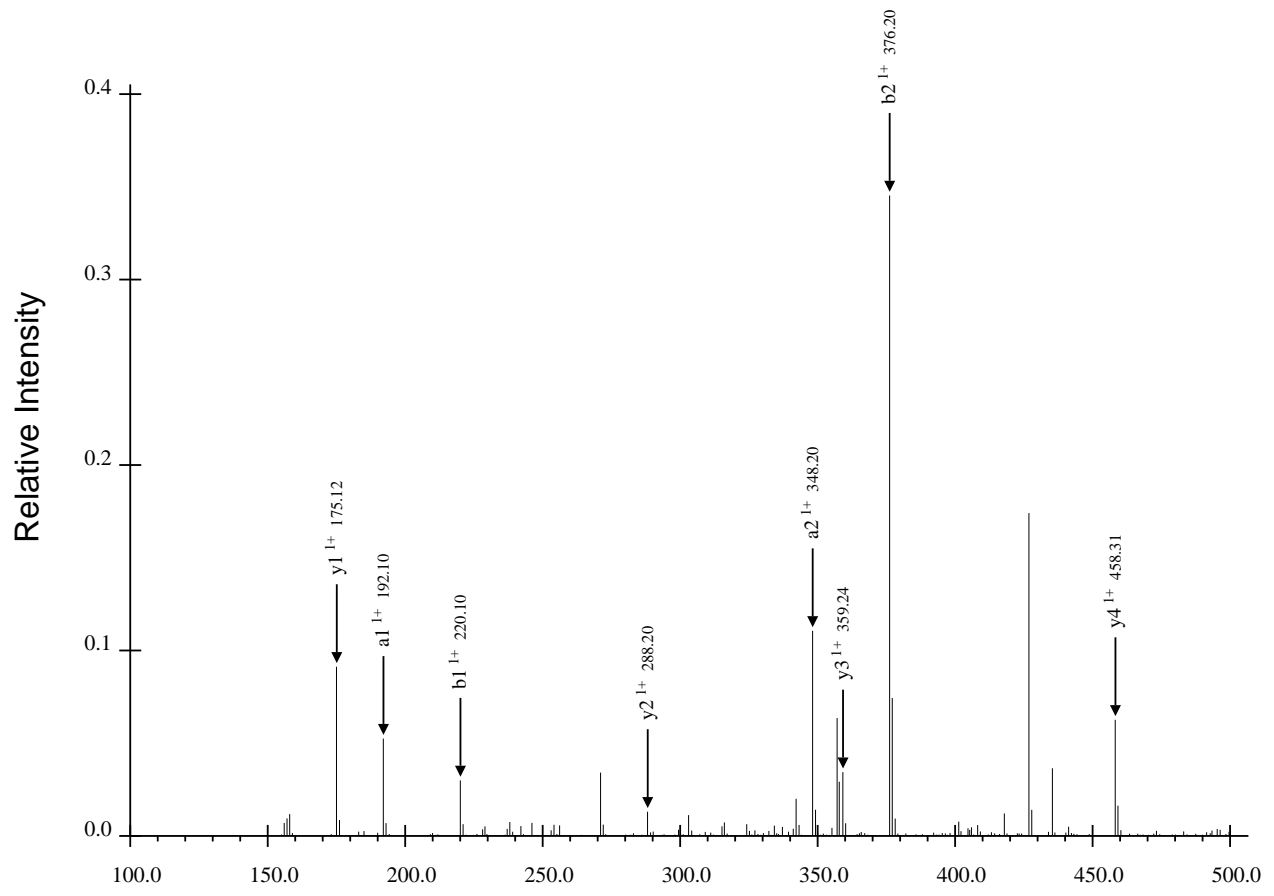

(a) First Region for rYRPGTVALR, Spectrum 112.dta

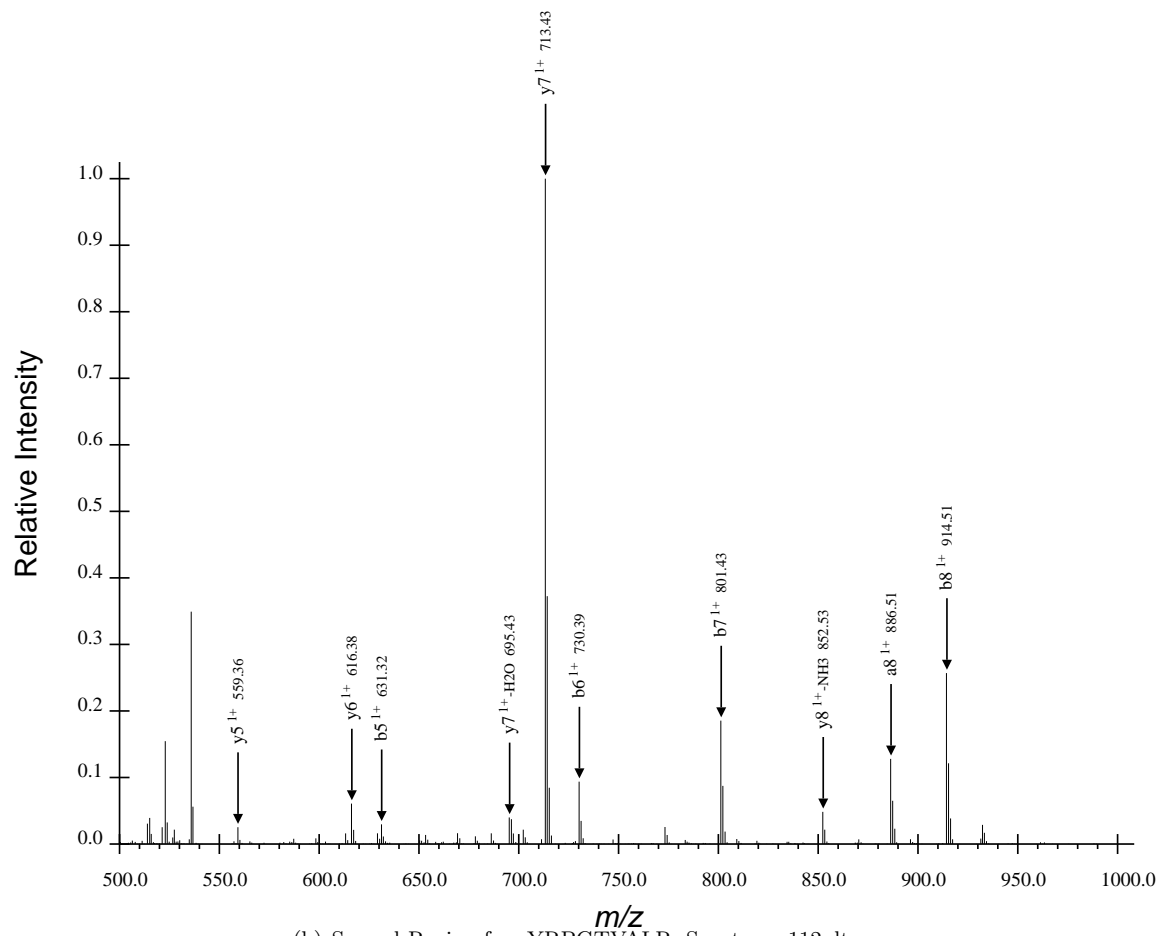

(b) Second Region for rYRPGTVALR, Spectrum 112.dta



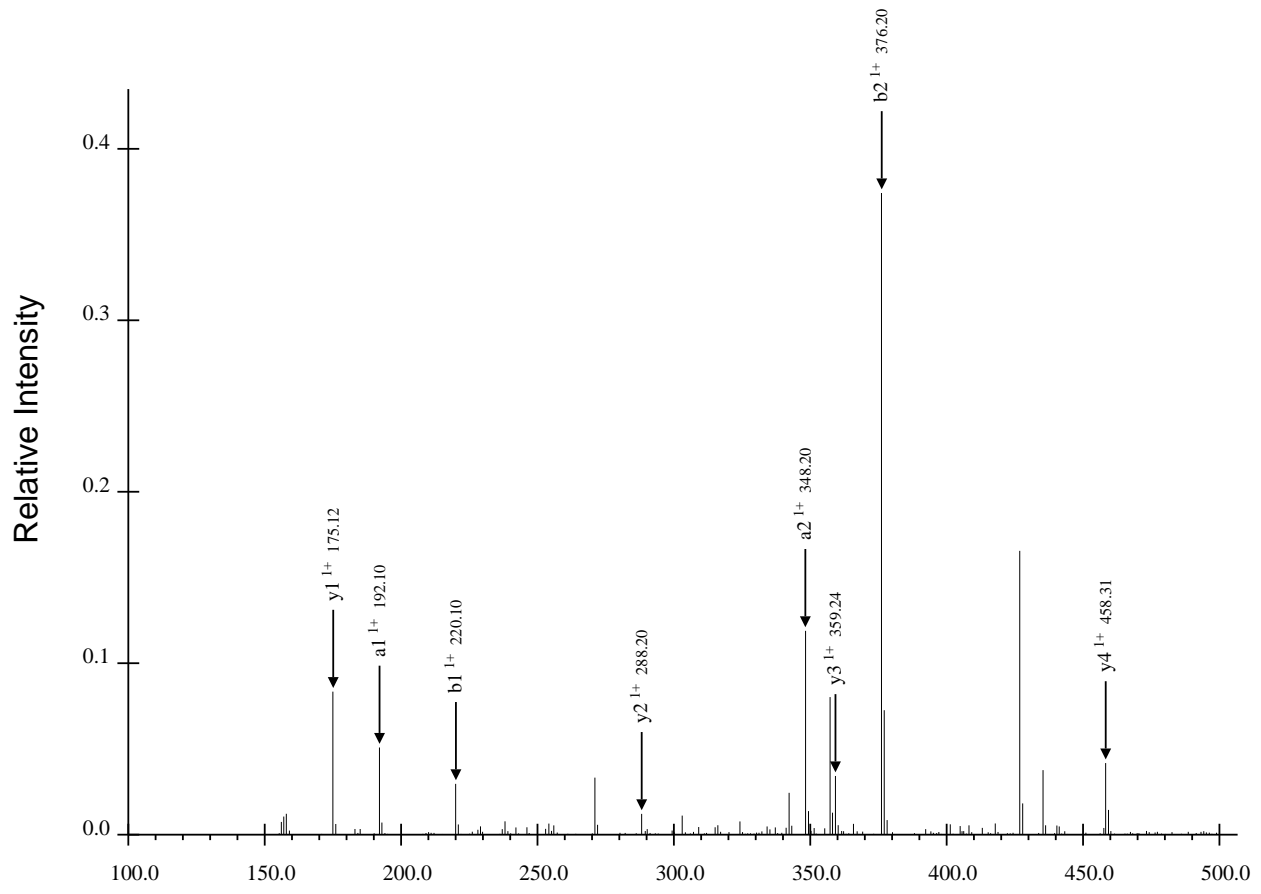

(a) First Region for rYRPGTVLR, Spectrum 113.dta

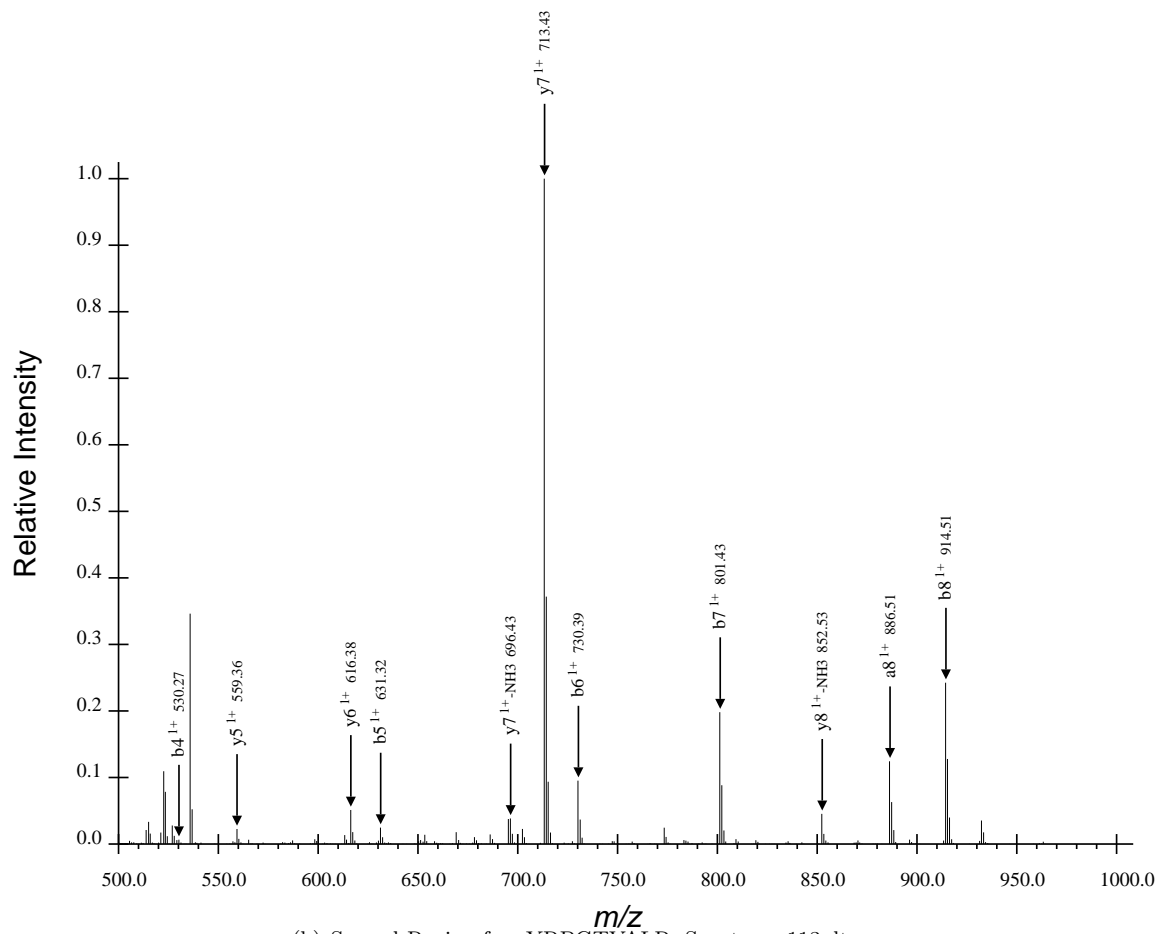

(b) Second Region for rYRPGTVLR, Spectrum 113.dta

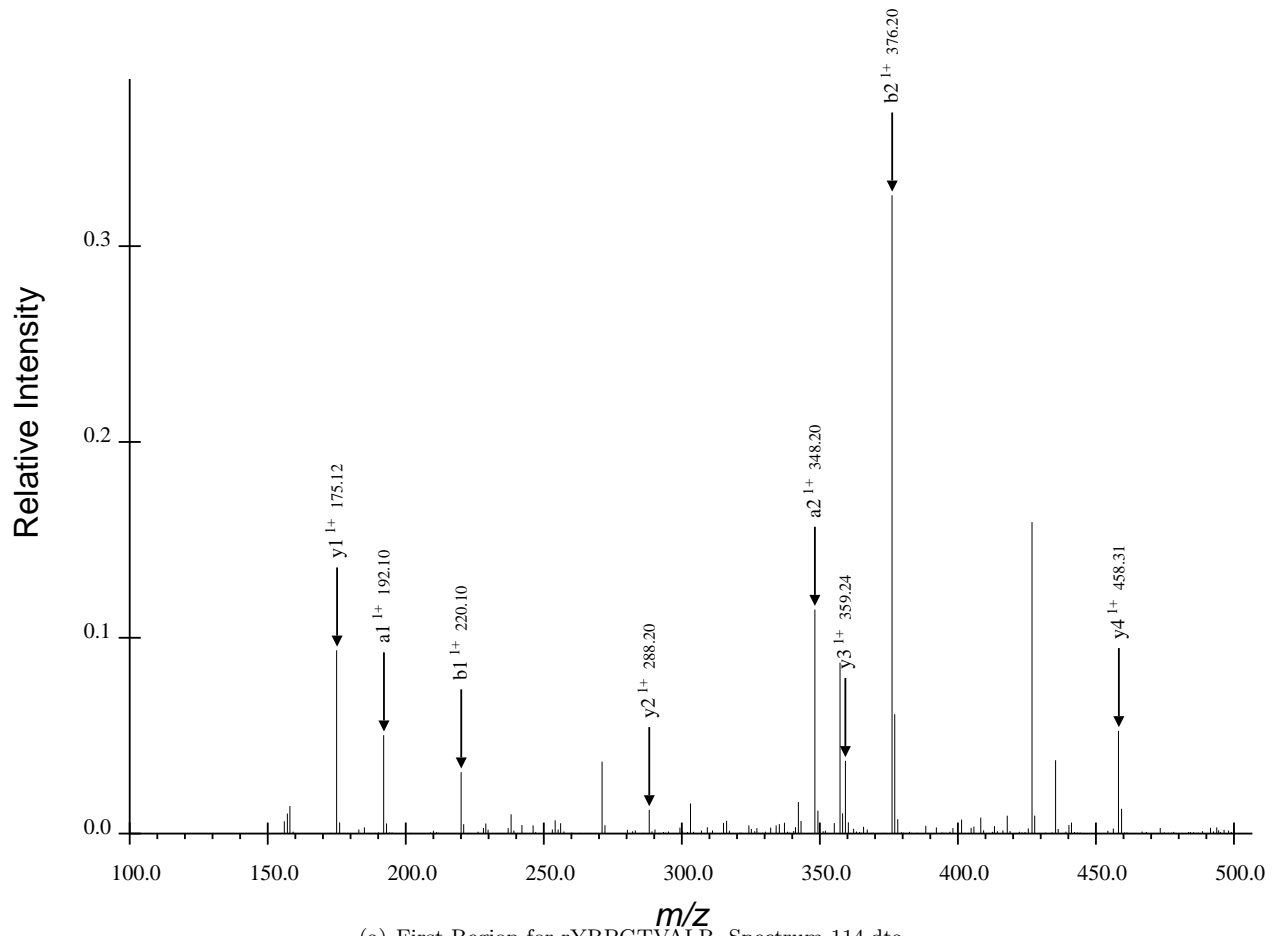

(a) First Region for rYRPGTVALR, Spectrum 114.dta

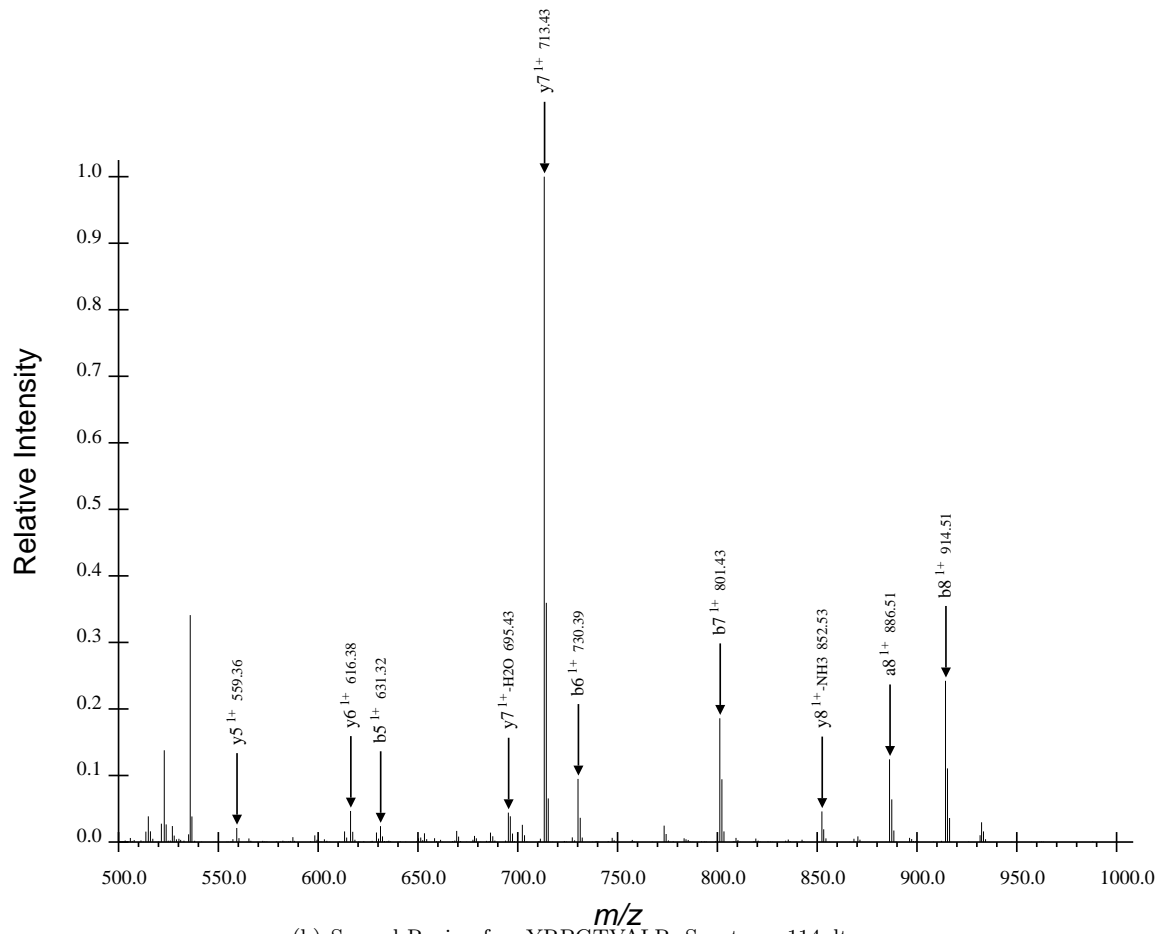

(b) Second Region for rYRPGTVALR, Spectrum 114.dta

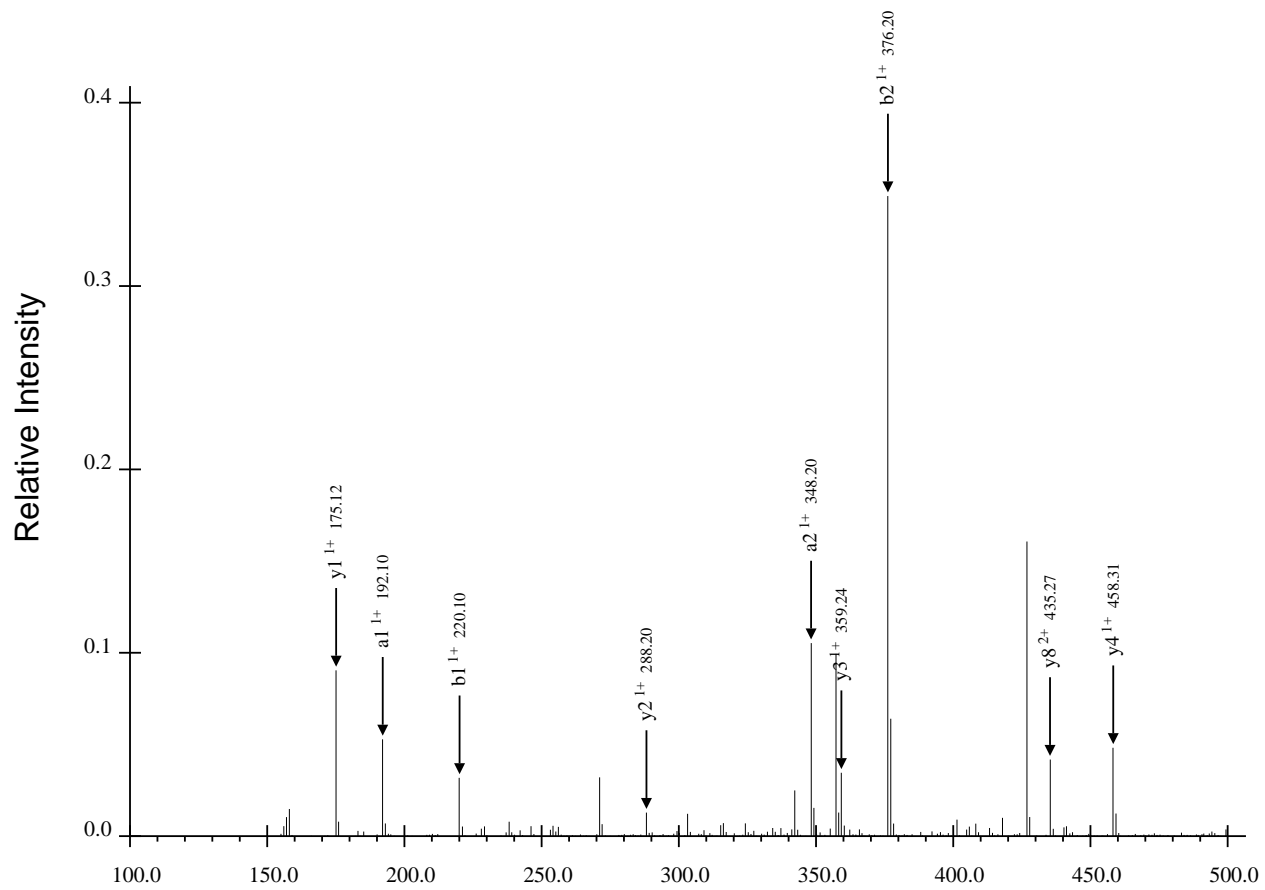

(a) First Region for rYRPGTVALR, Spectrum 115.dta

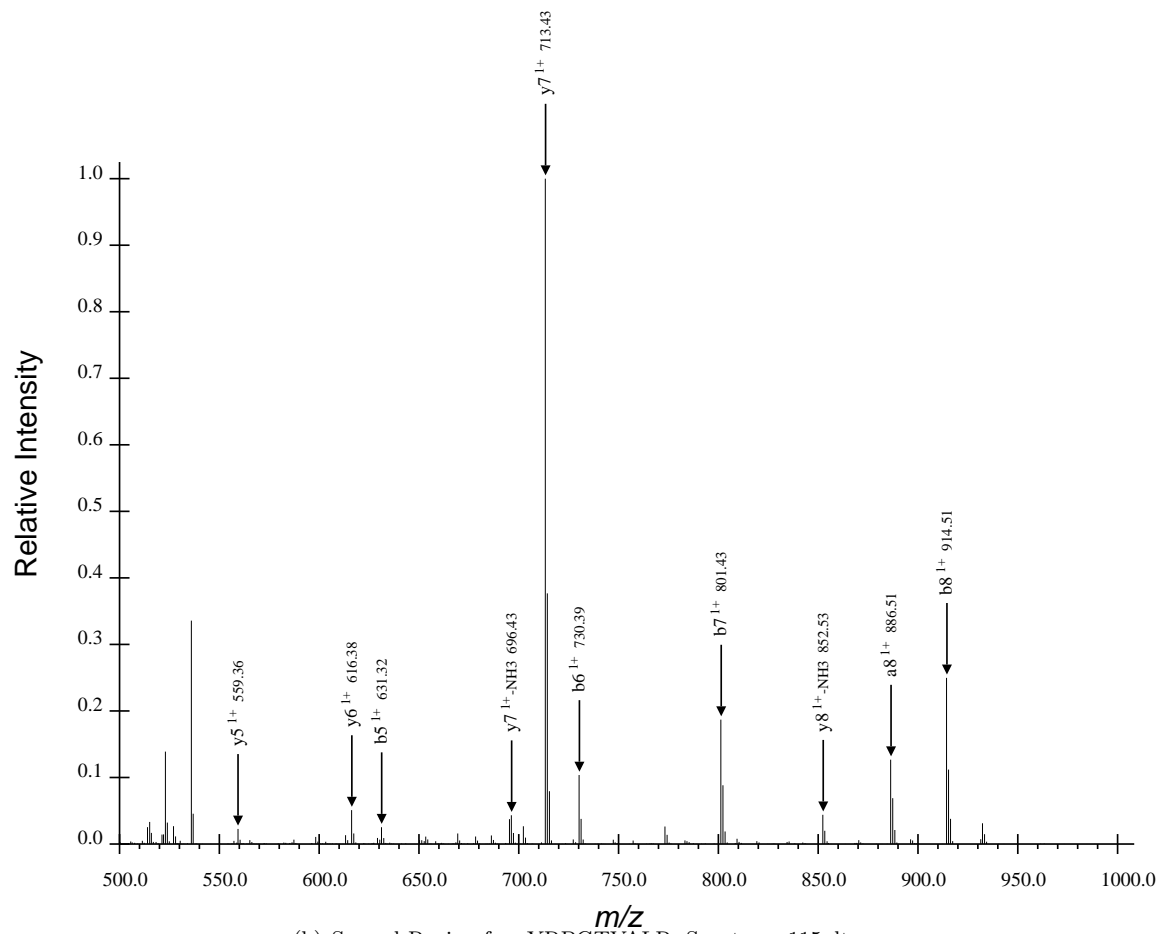

(b) Second Region for rYRPGTVALR, Spectrum 115.dta

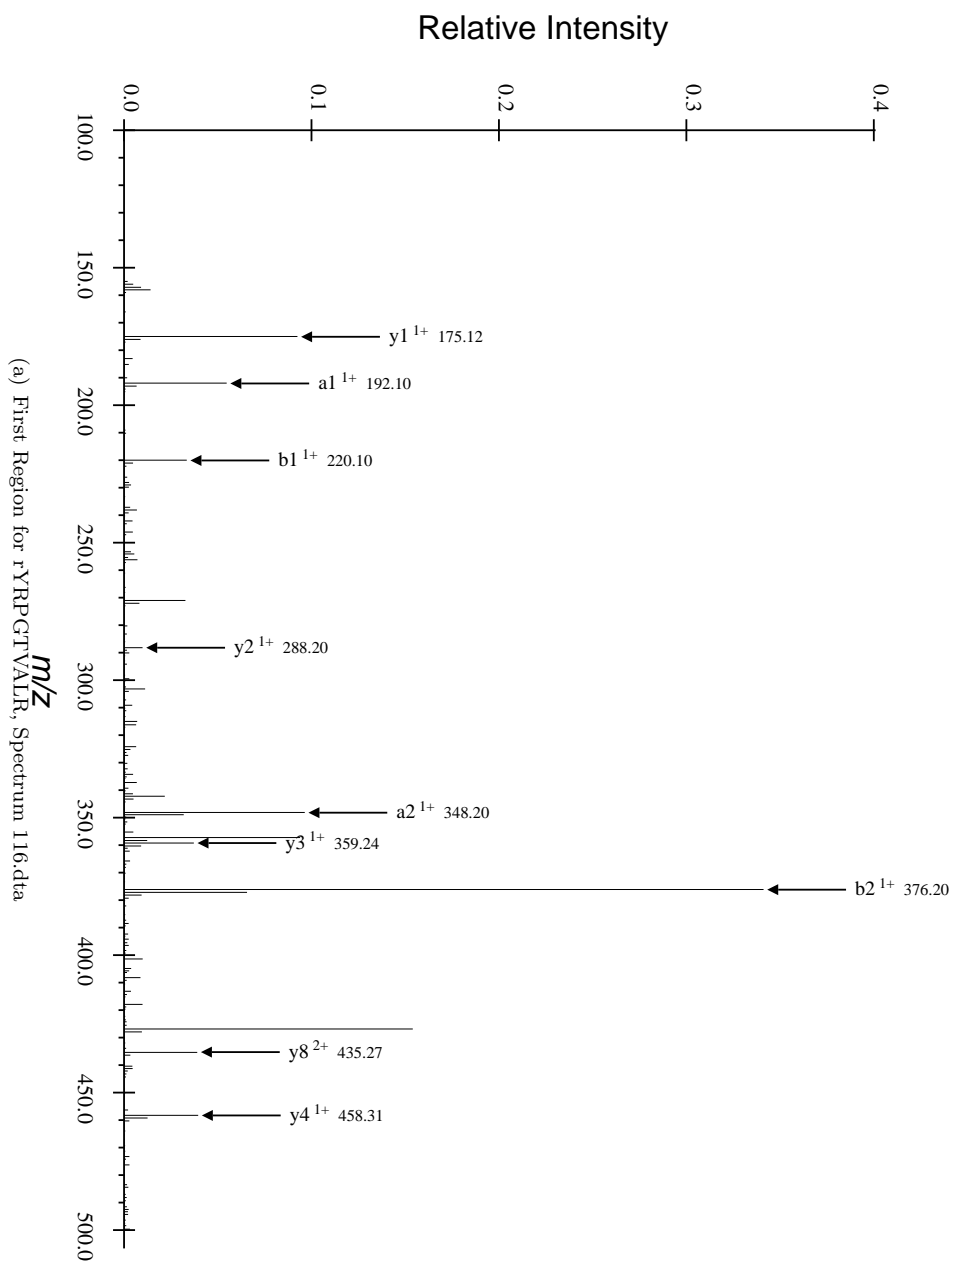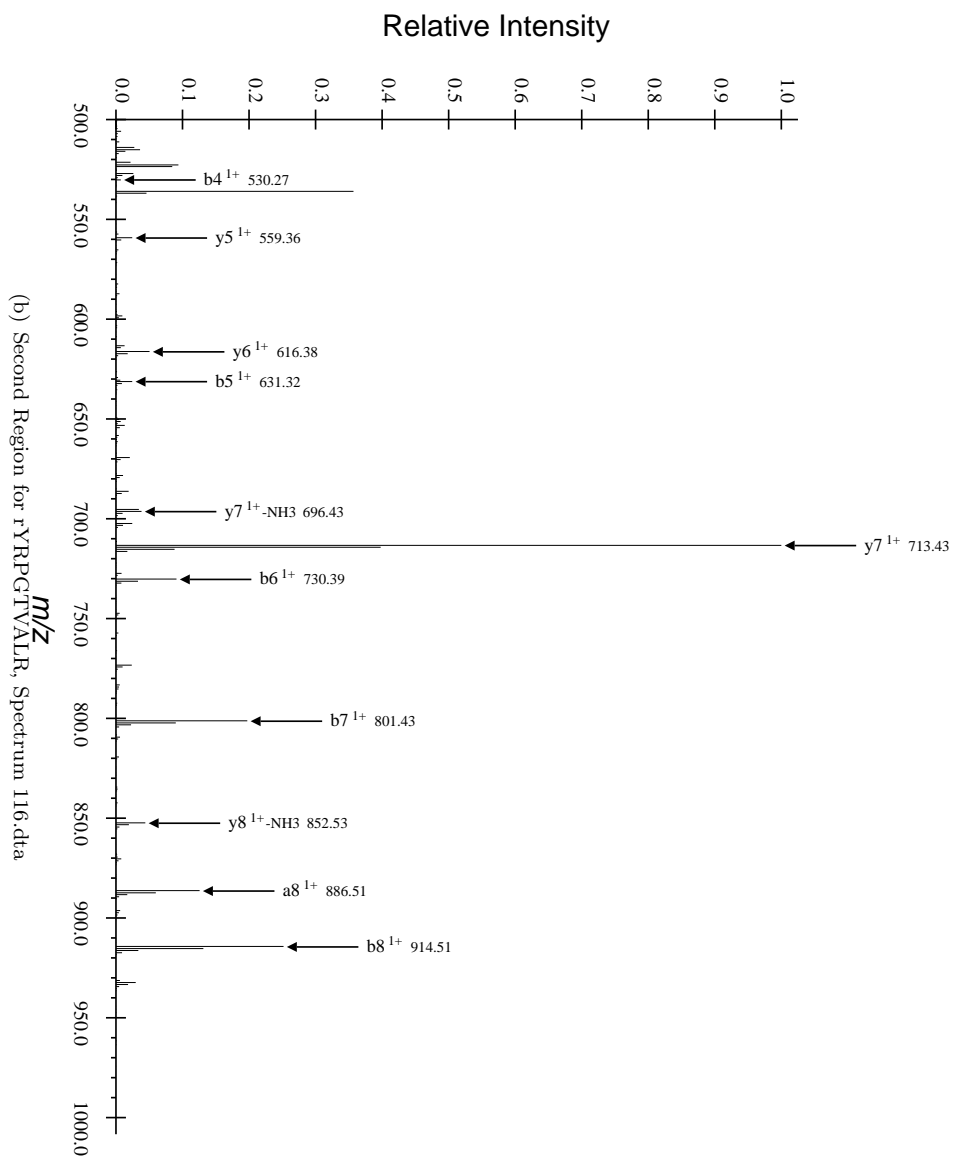

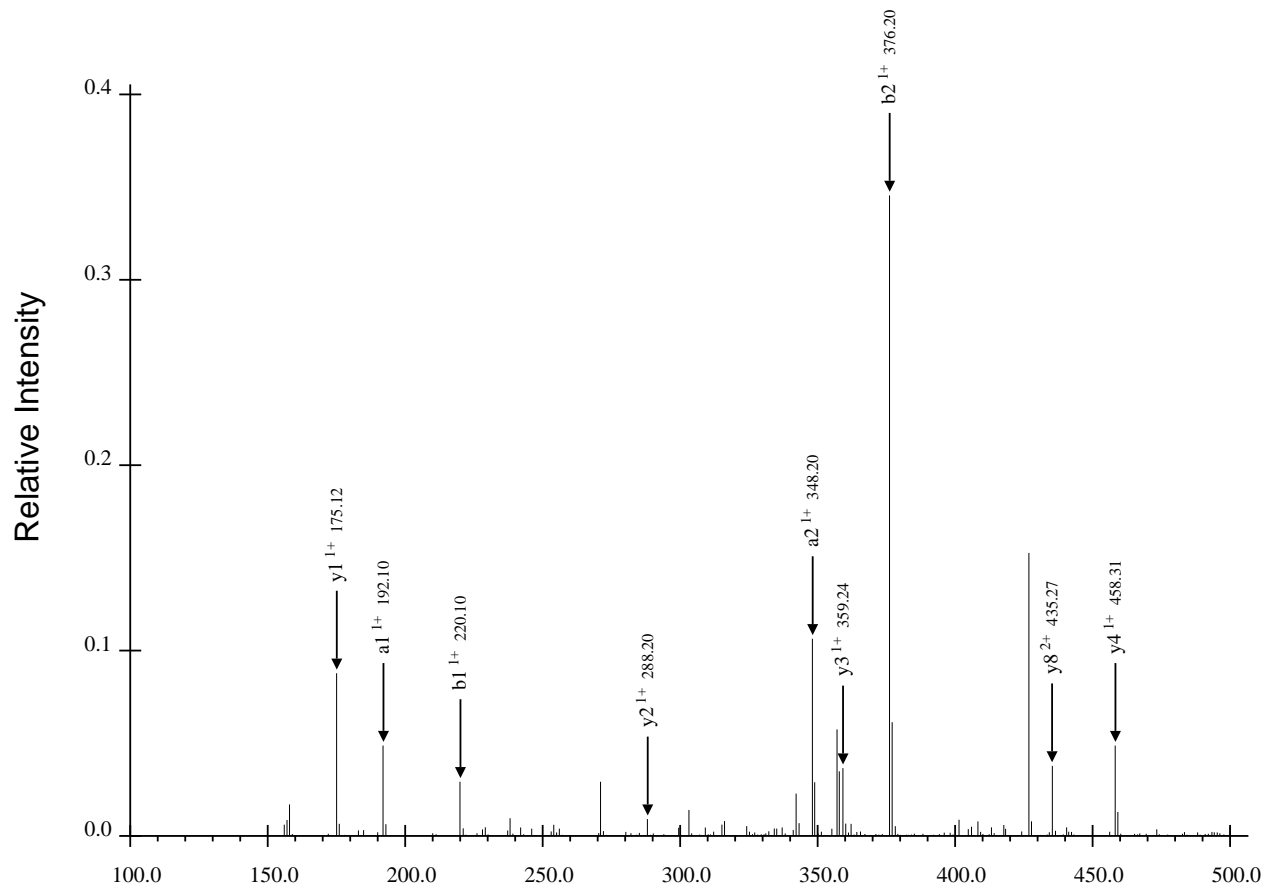

(a) First Region for rYRPGTVALR, Spectrum 117.dta

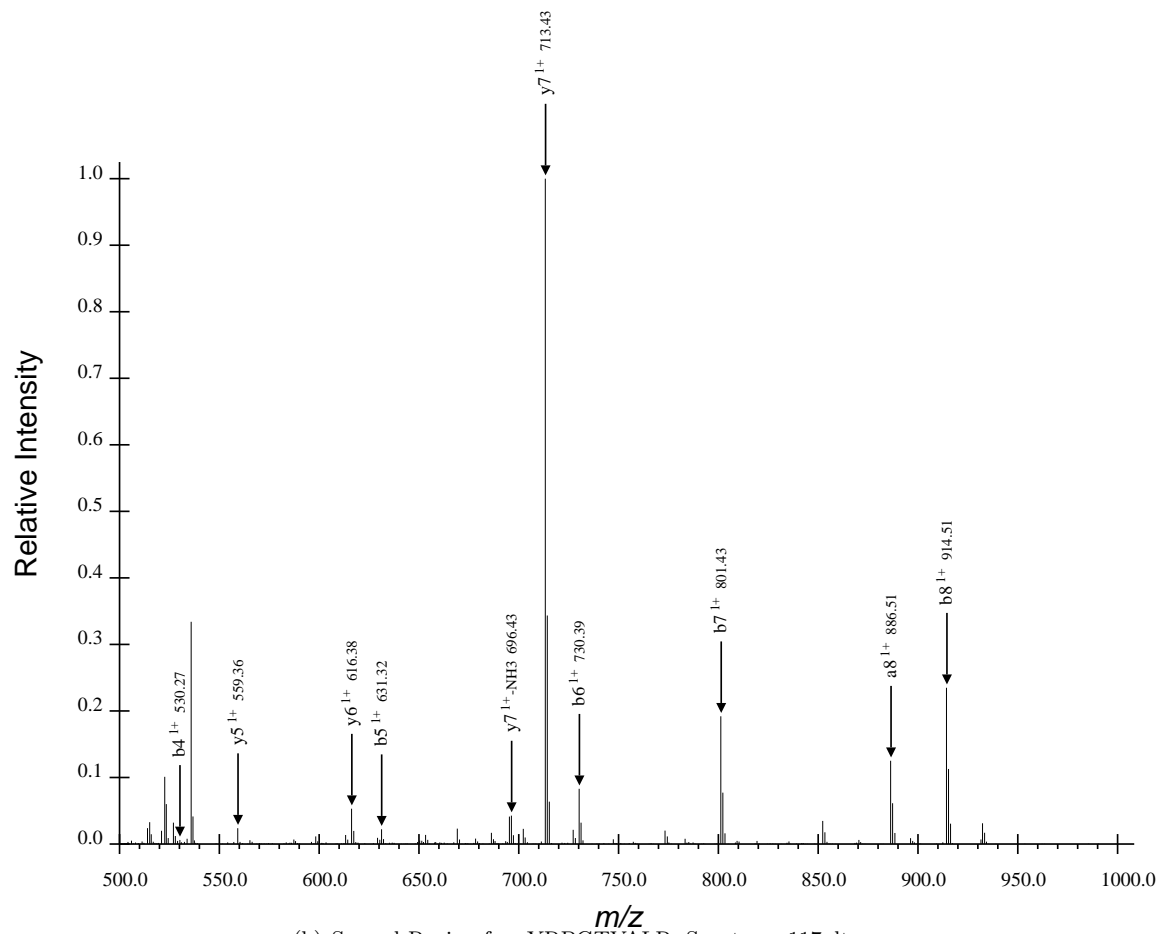

(b) Second Region for rYRPGTVALR, Spectrum 117.dta

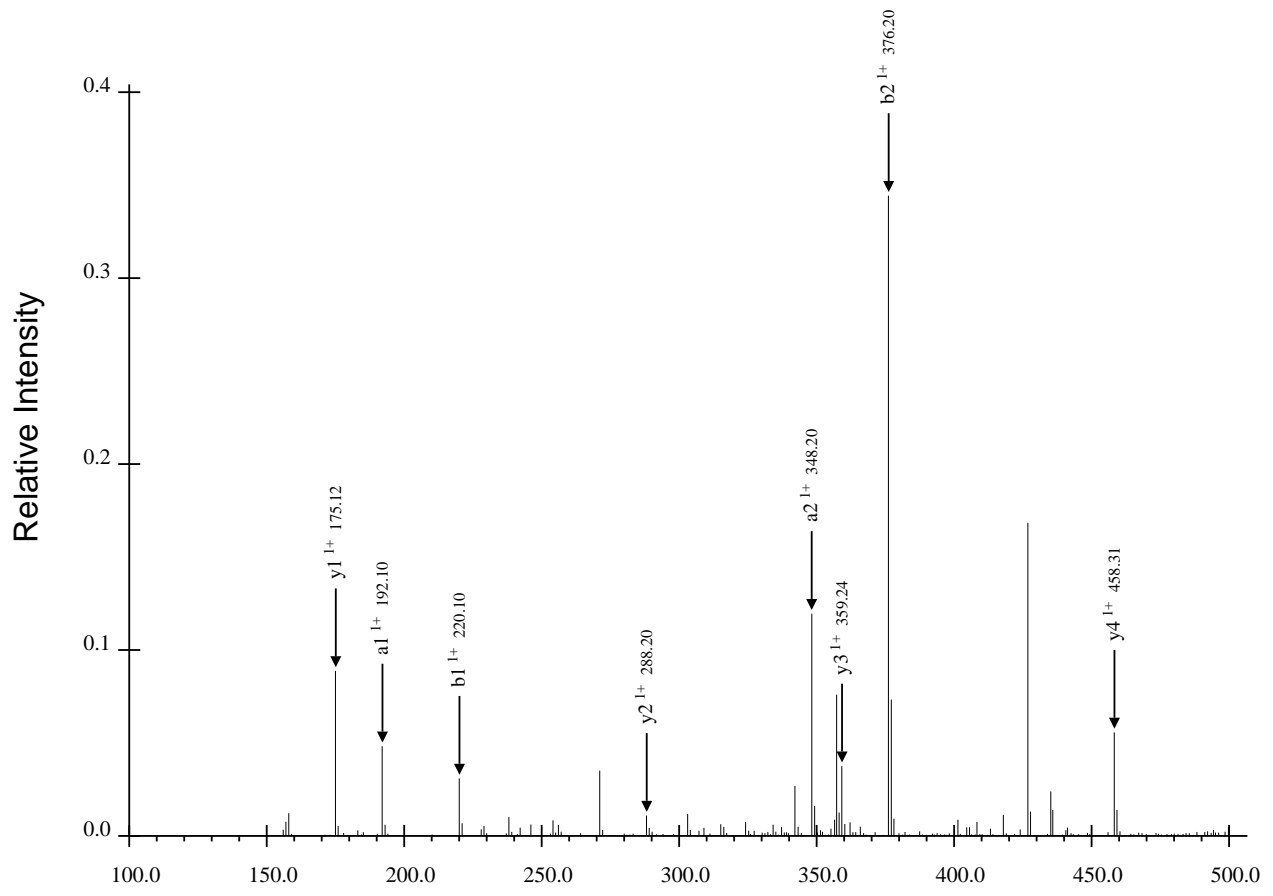

(a) First Region for rYRPGTVALR, Spectrum 118.dta

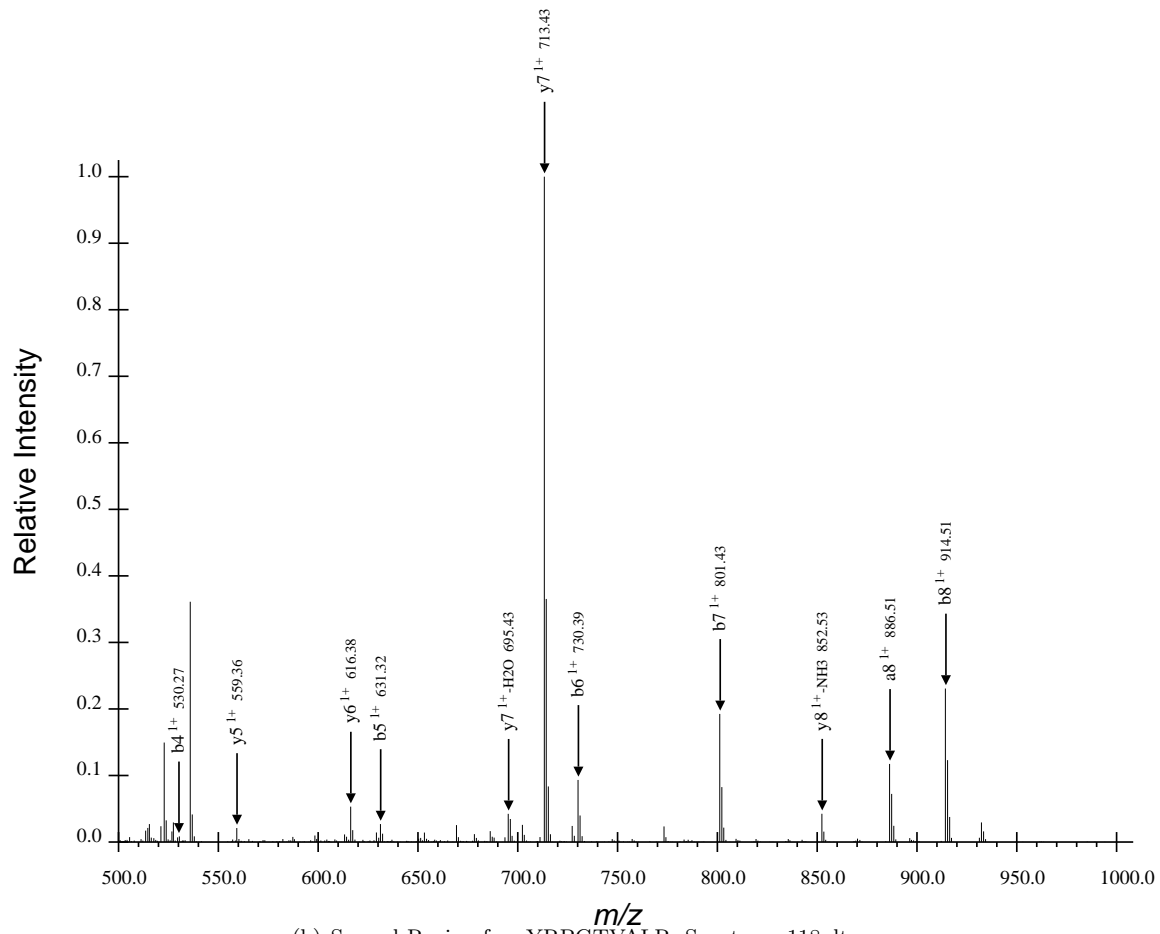

(b) Second Region for rYRPGTVALR, Spectrum 118.dta

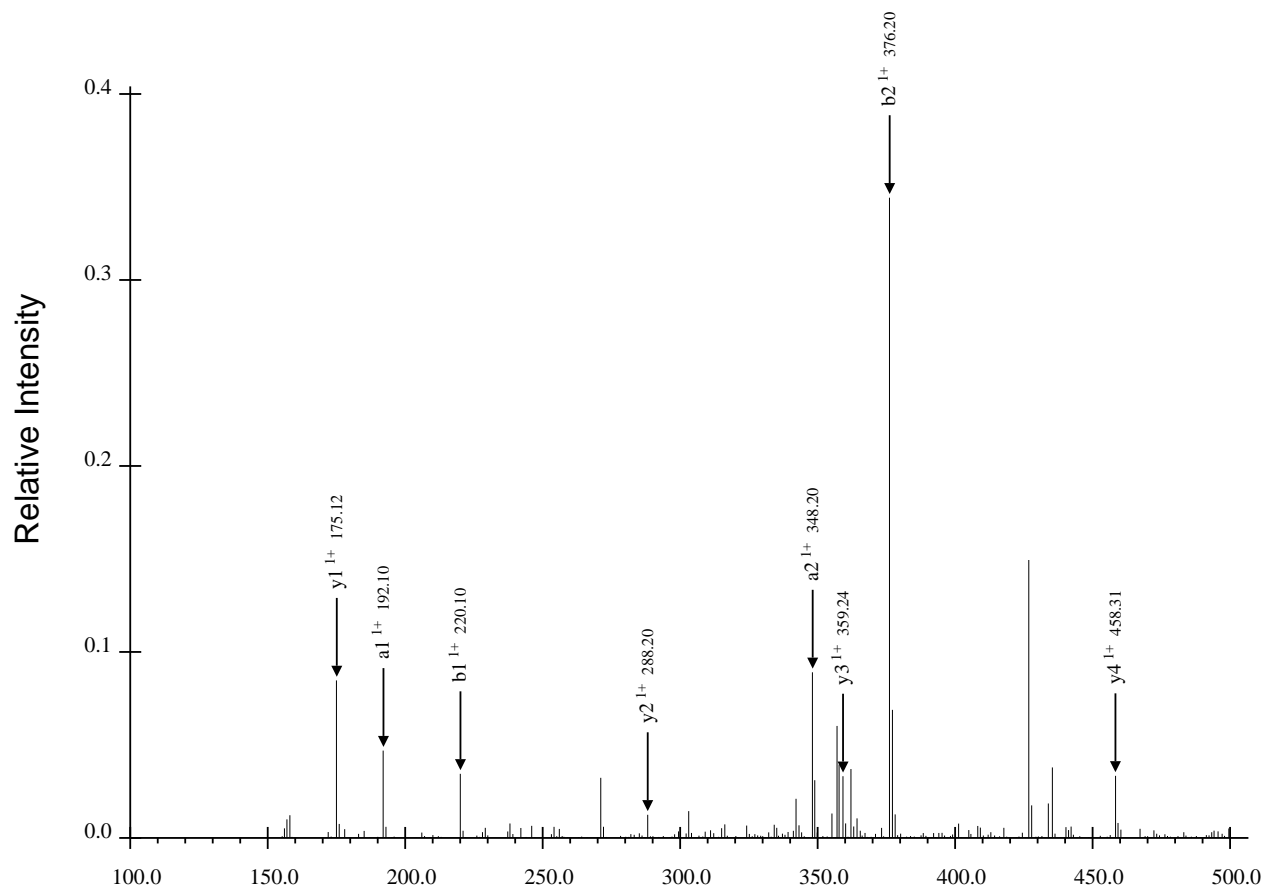

(a) First Region for rYRPGTVLR, Spectrum 119.dta

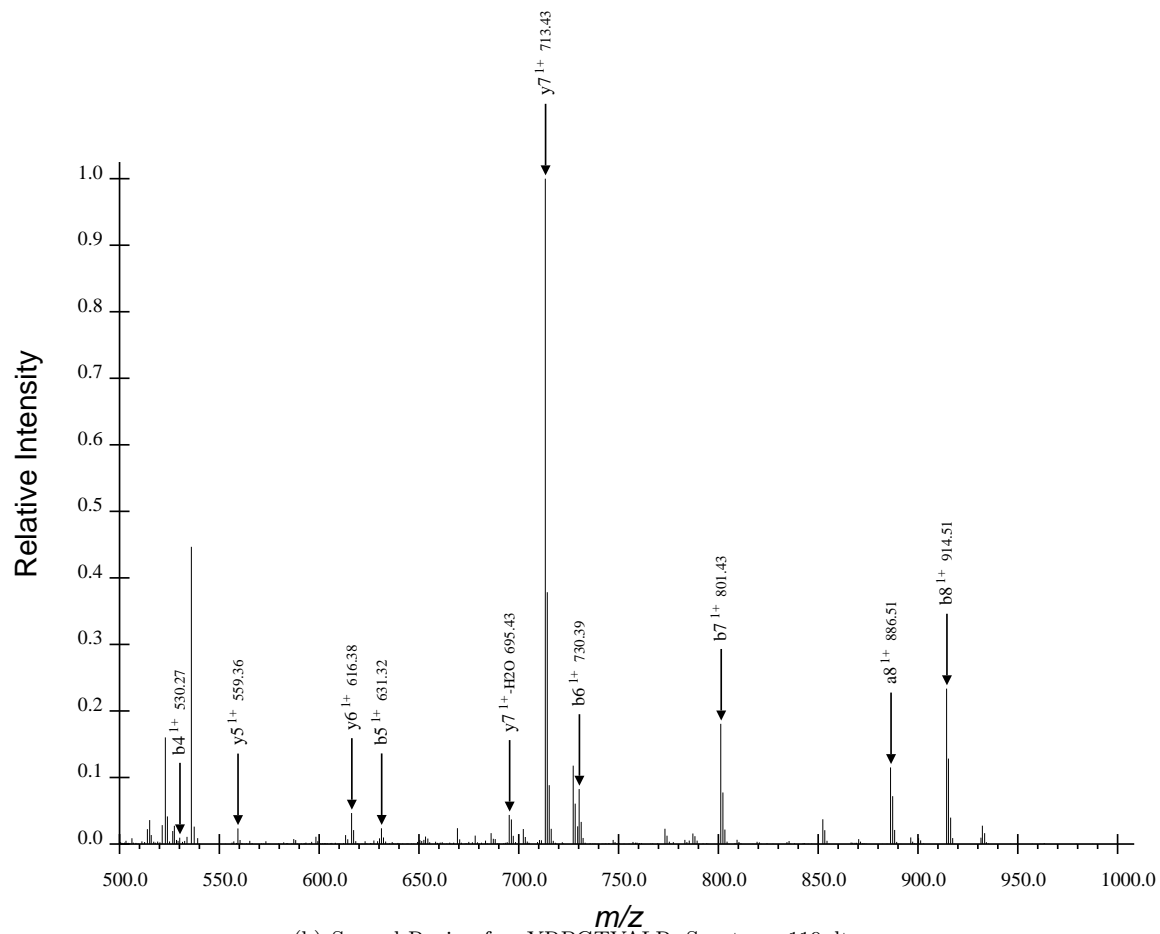

(b) Second Region for rYRPGTVLR, Spectrum 119.dta

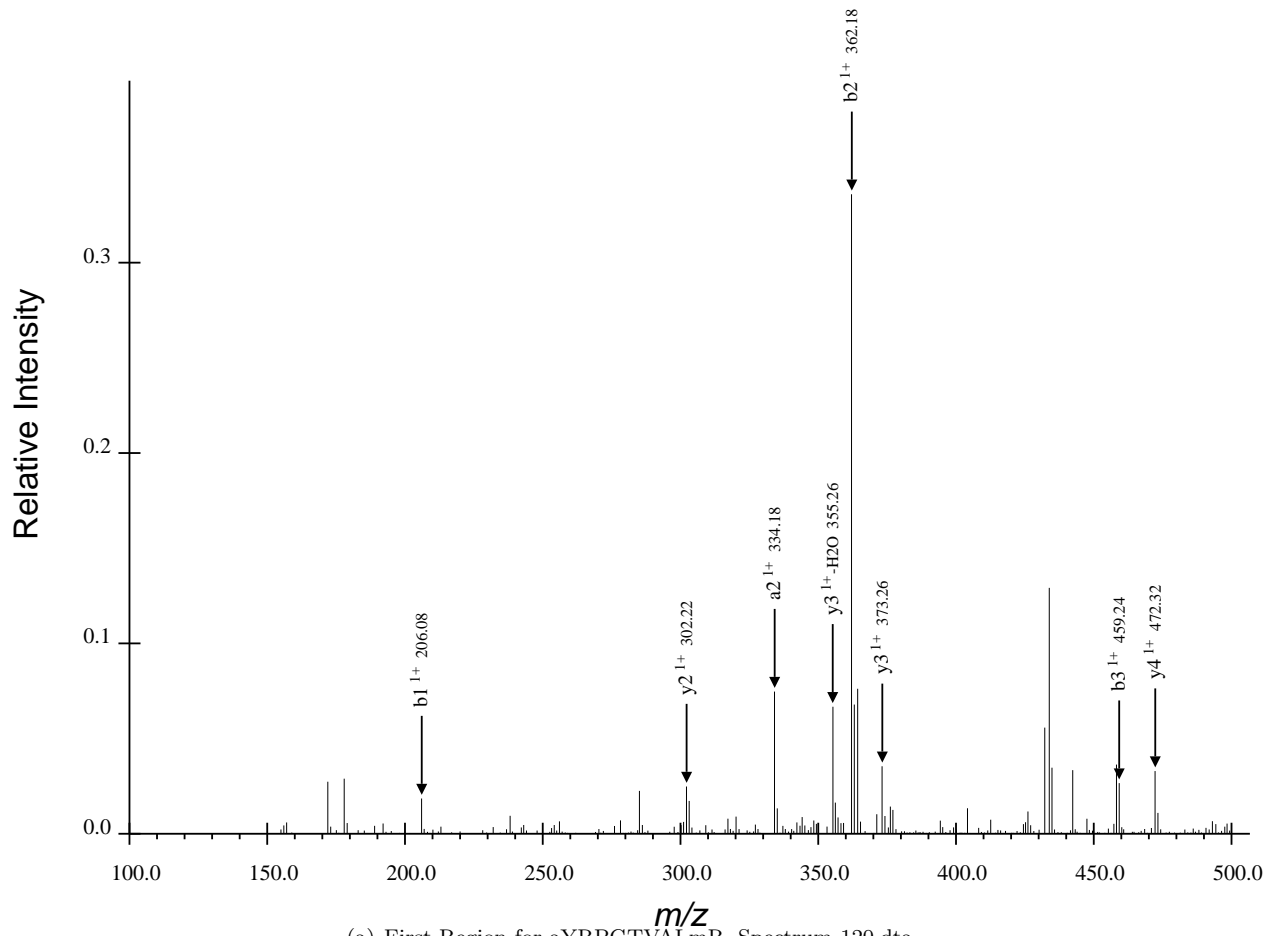

(a) First Region for aYRPGTVALmR, Spectrum 120.dta

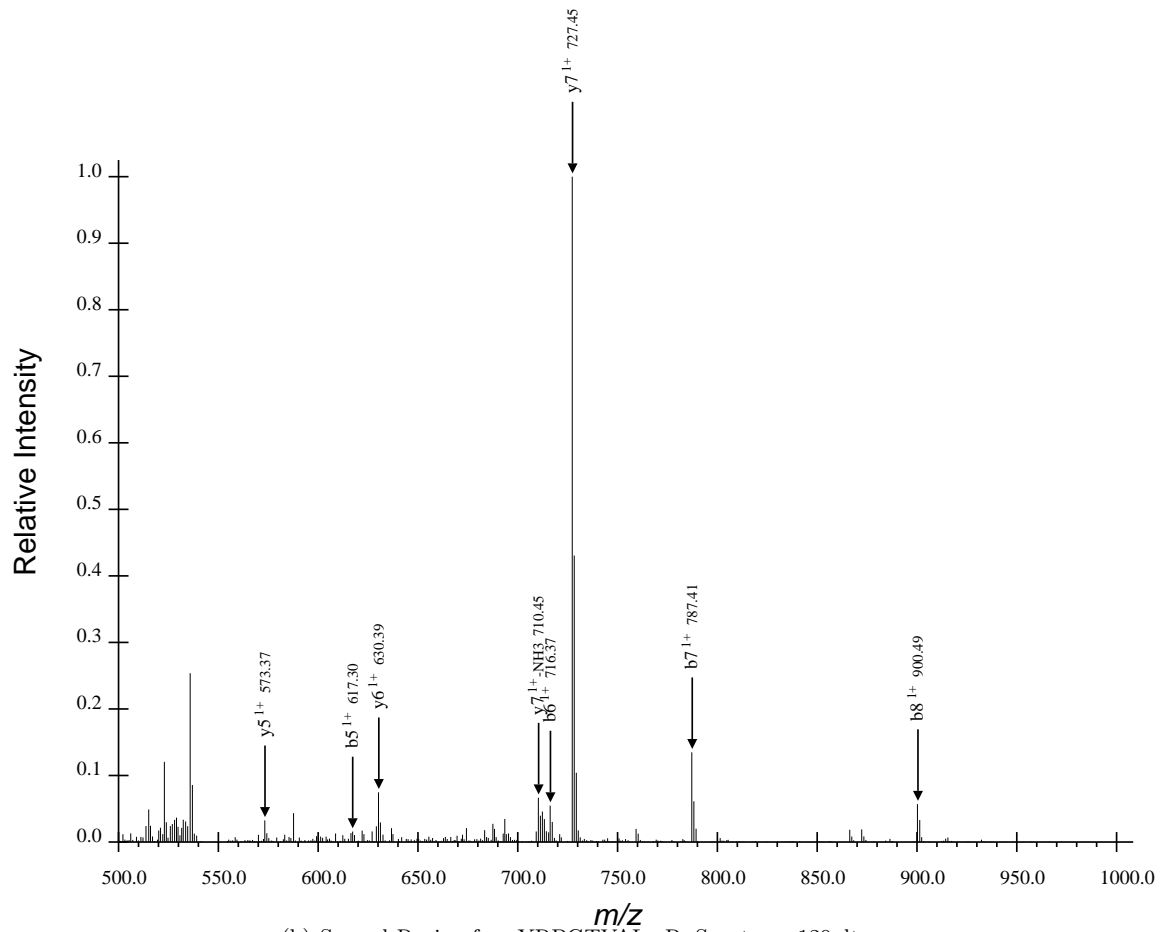

(b) Second Region for aYRPGTVALmR, Spectrum 120.dta



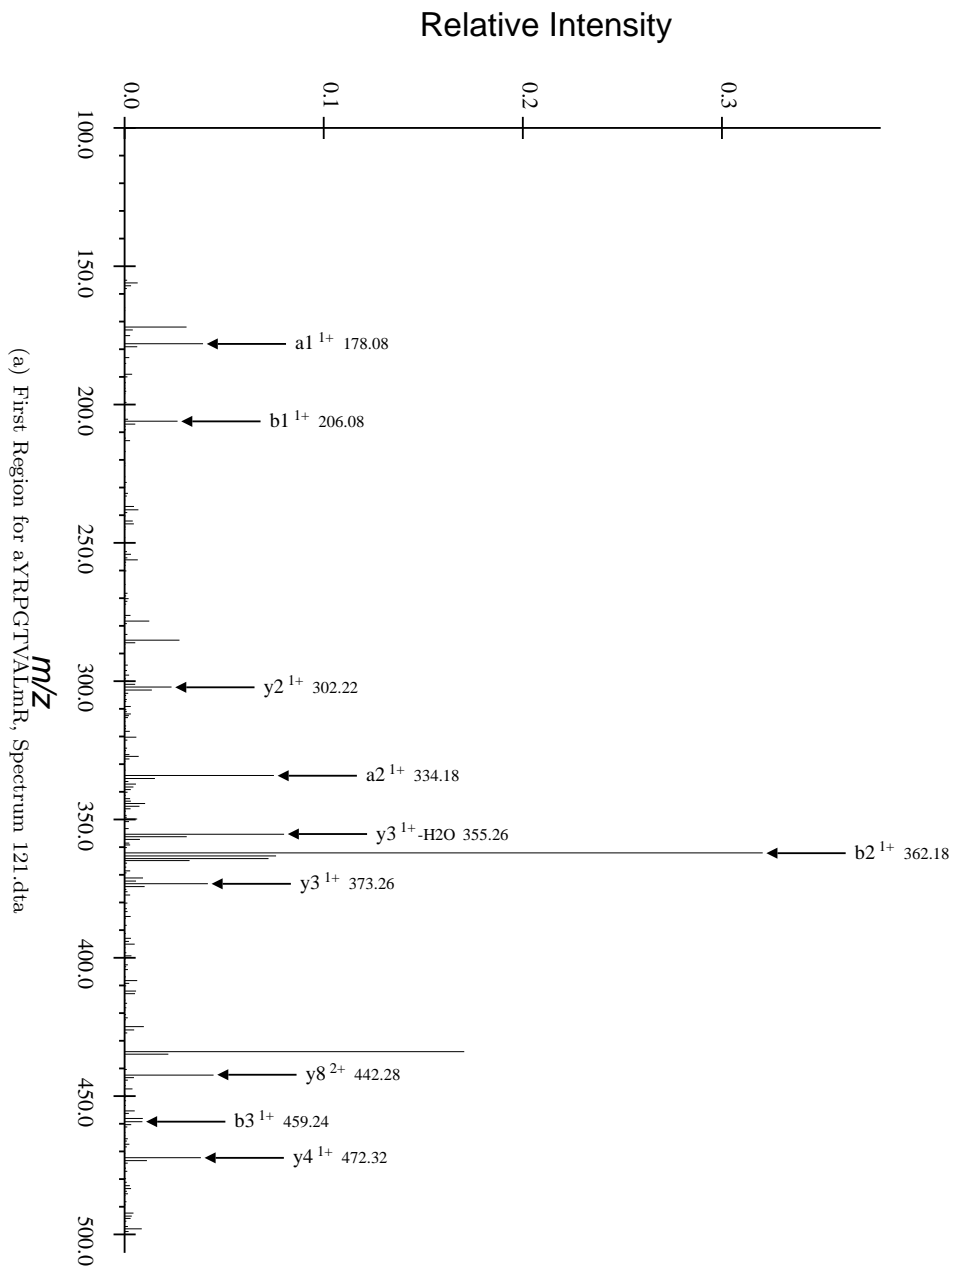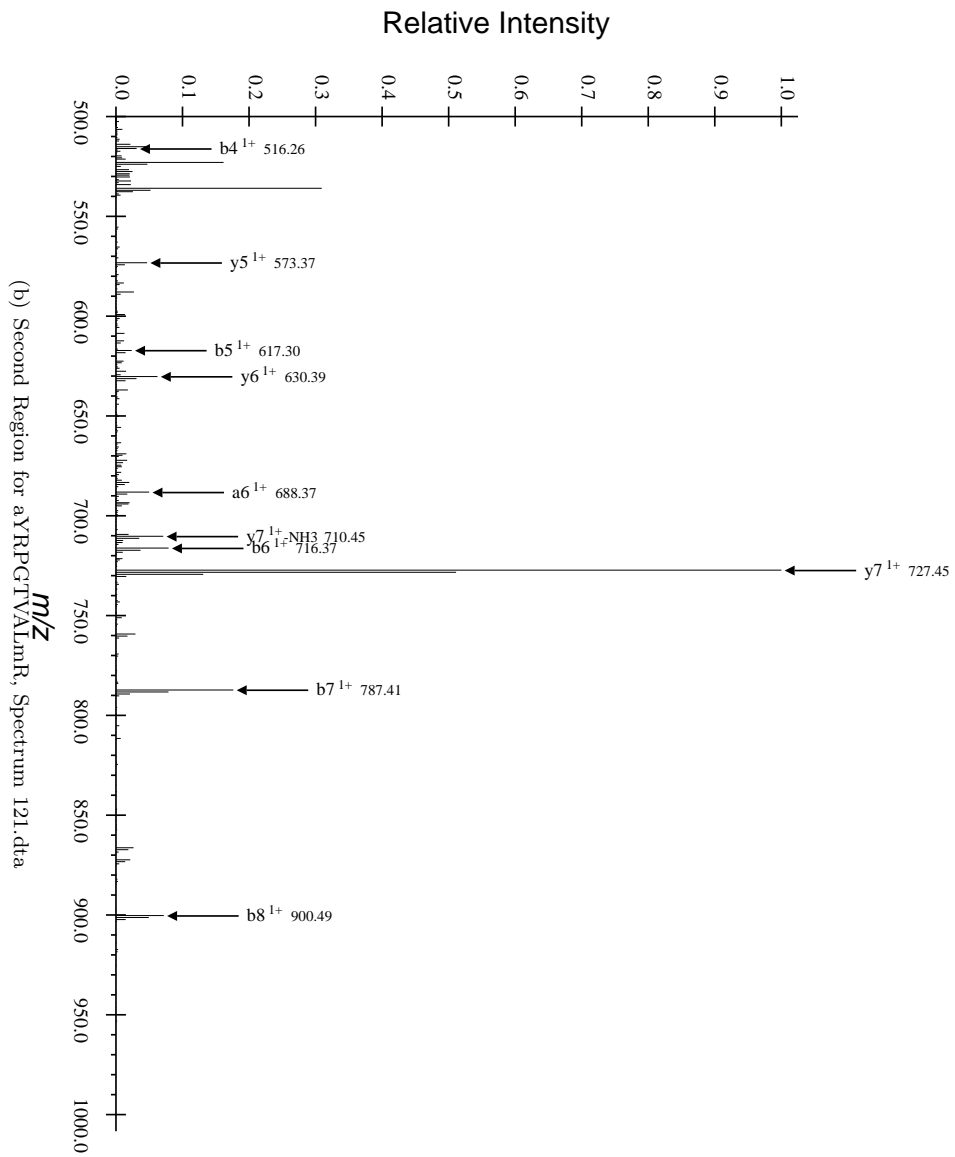

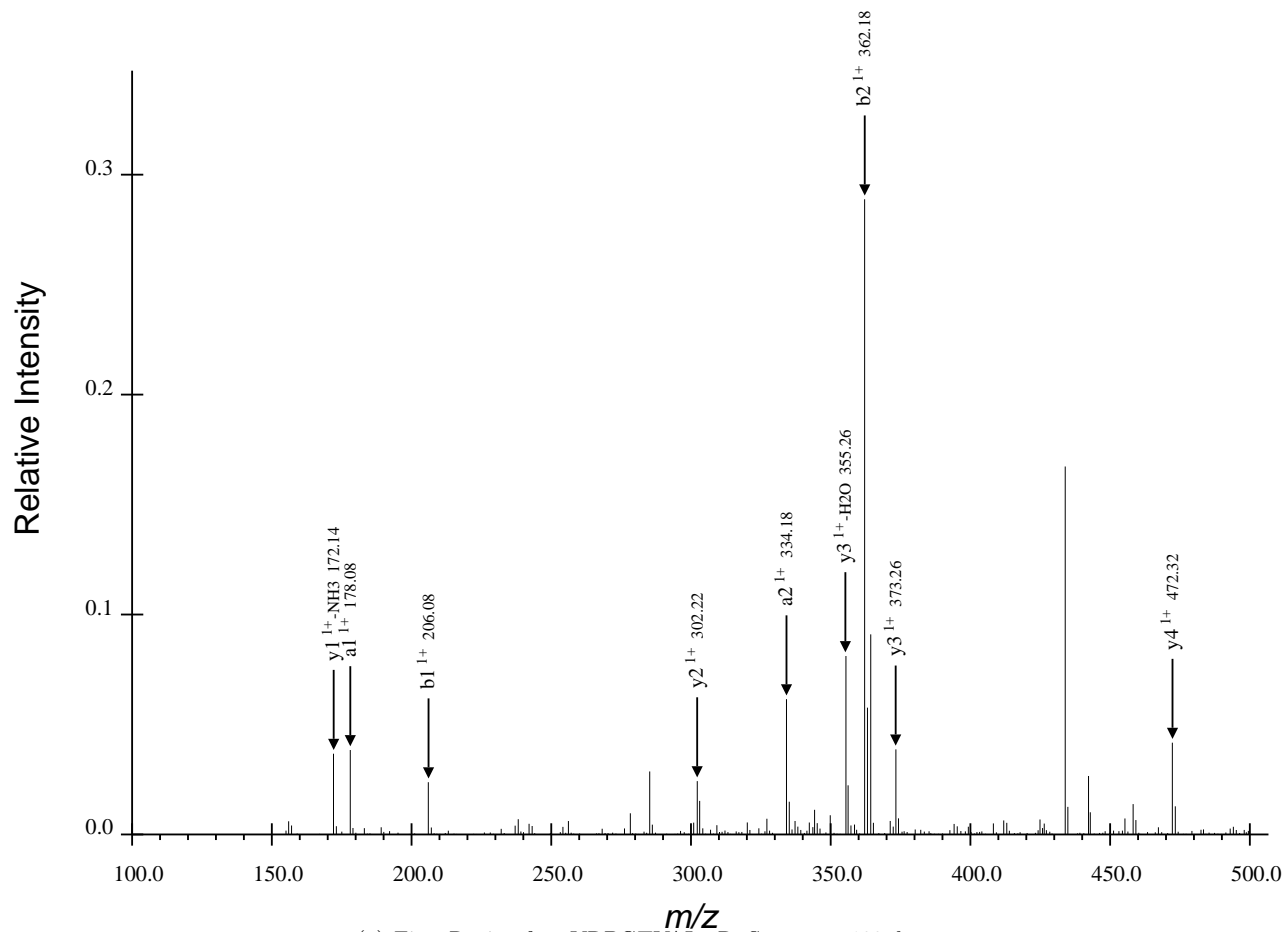

(a) First Region for aYRPGTVALmR, Spectrum 122.dta

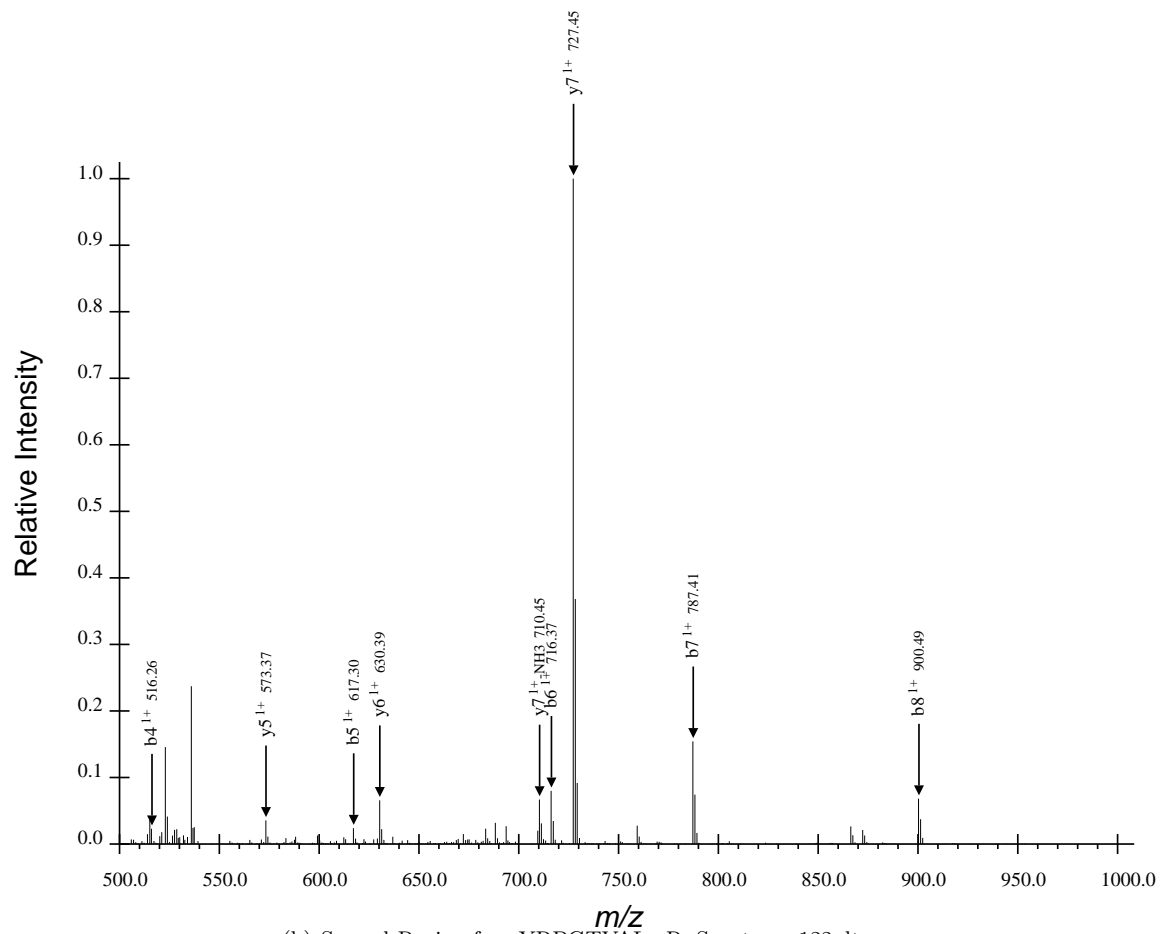

(b) Second Region for aYRPGTVALmR, Spectrum 122.dta

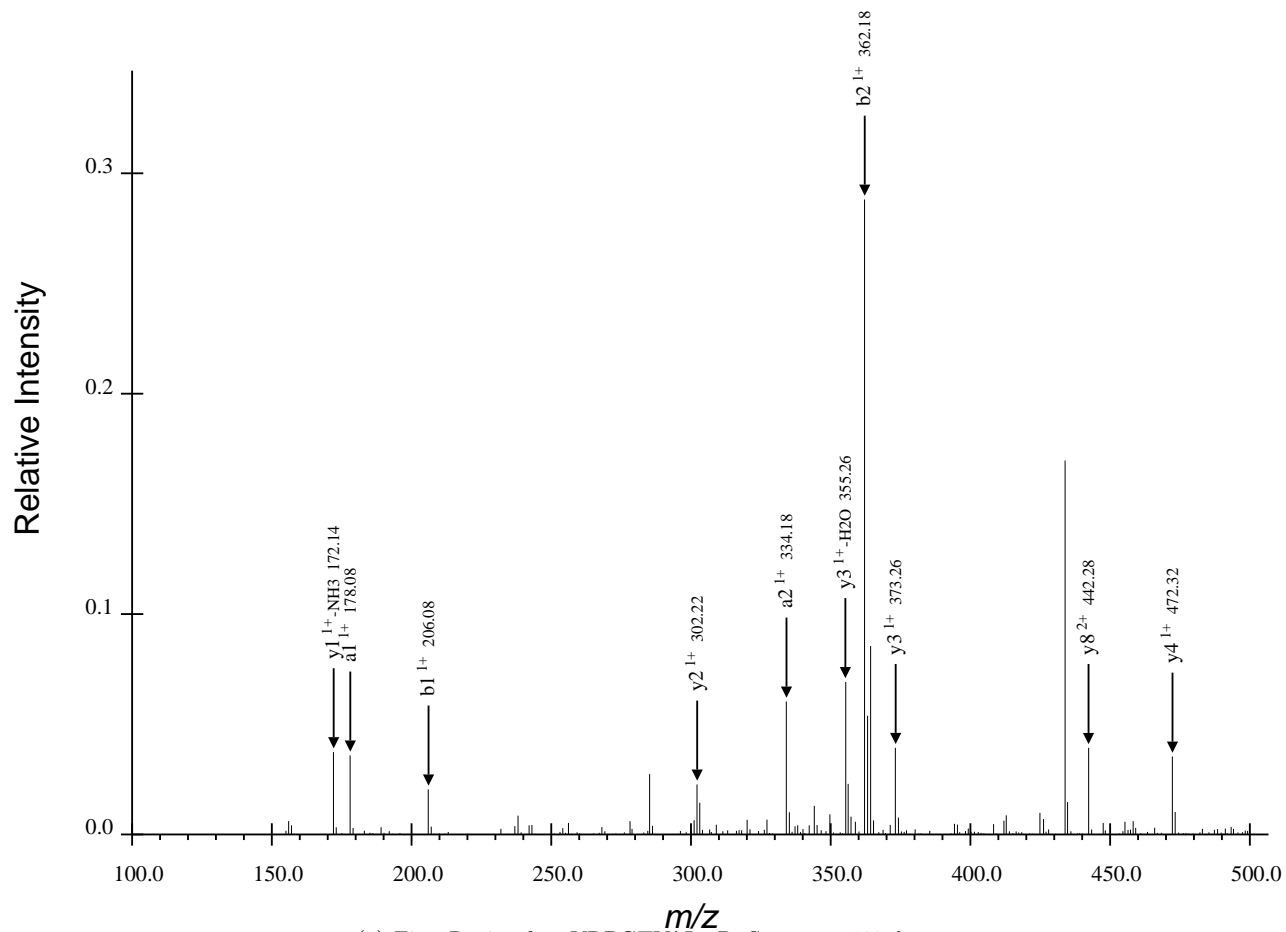

(a) First Region for aYRPGTVALmR, Spectrum 123.dta

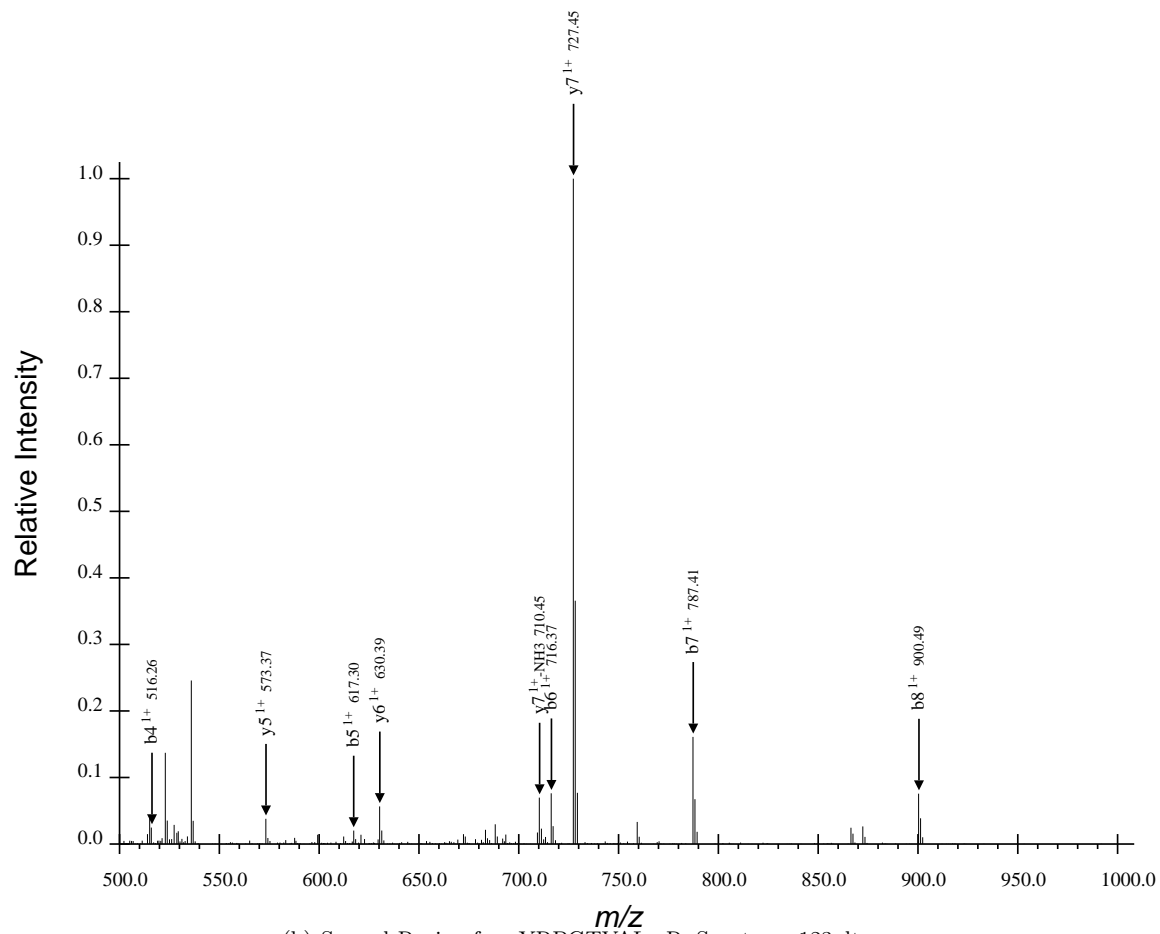

(b) Second Region for aYRPGTVALmR, Spectrum 123.dta

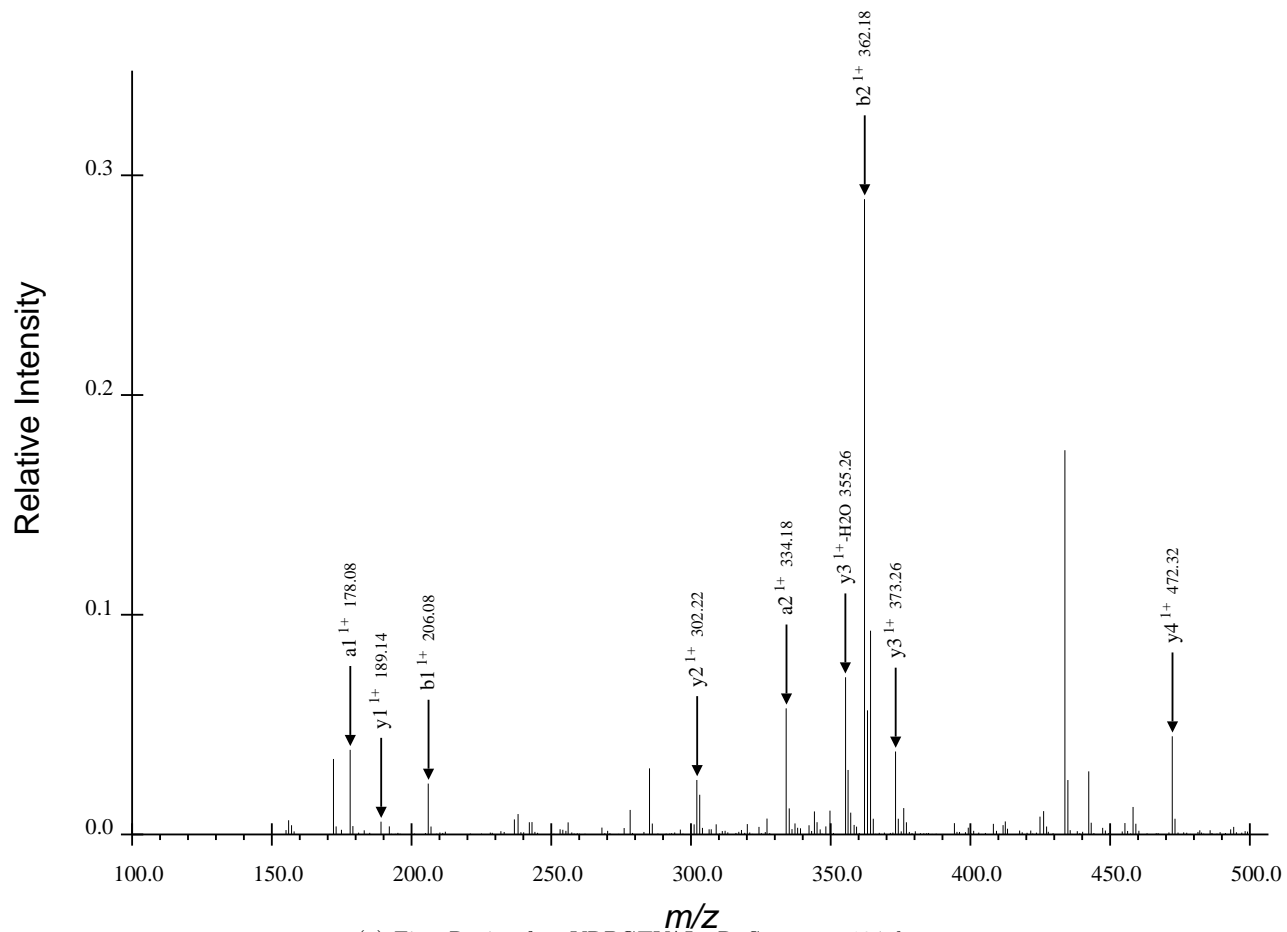

(a) First Region for aYRPGTVALmR, Spectrum 124.dta

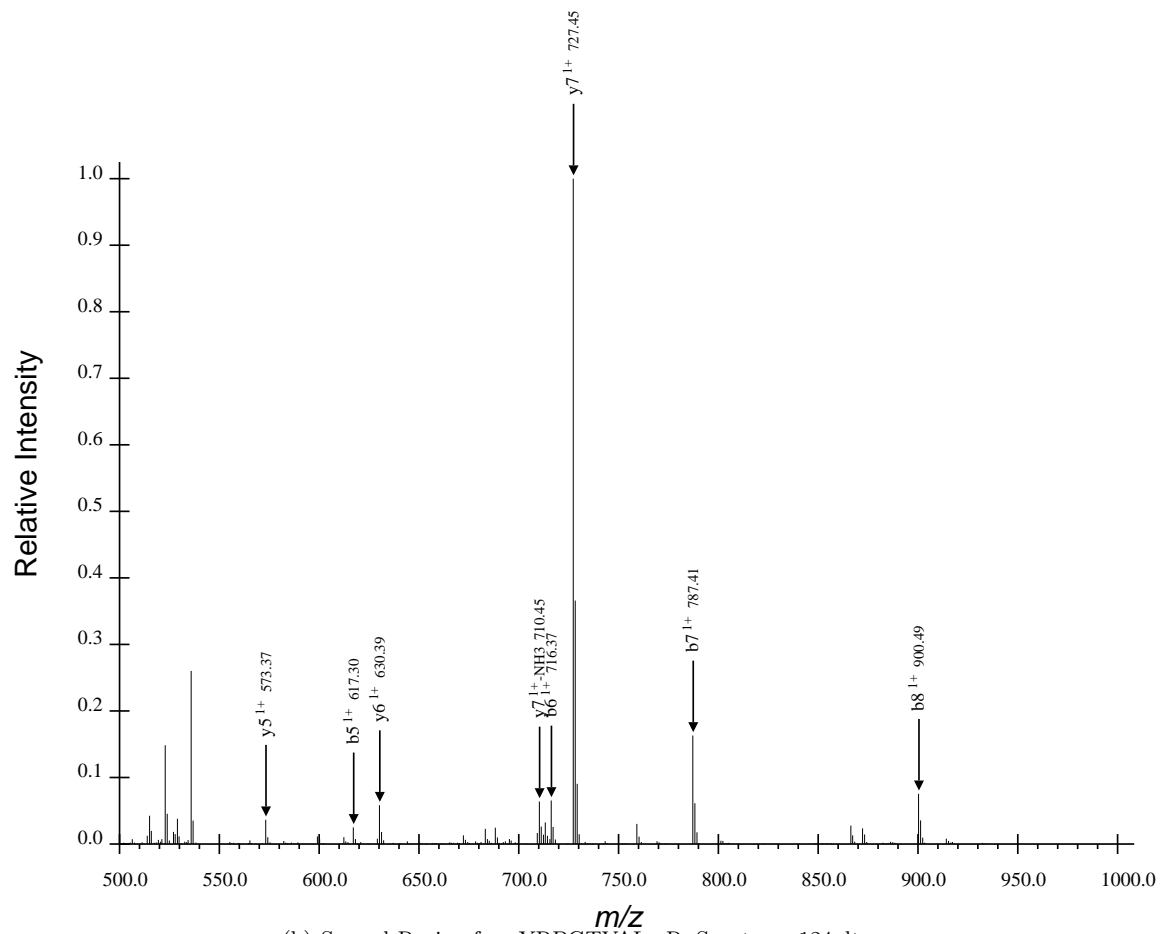

(b) Second Region for aYRPGTVALmR, Spectrum 124.dta

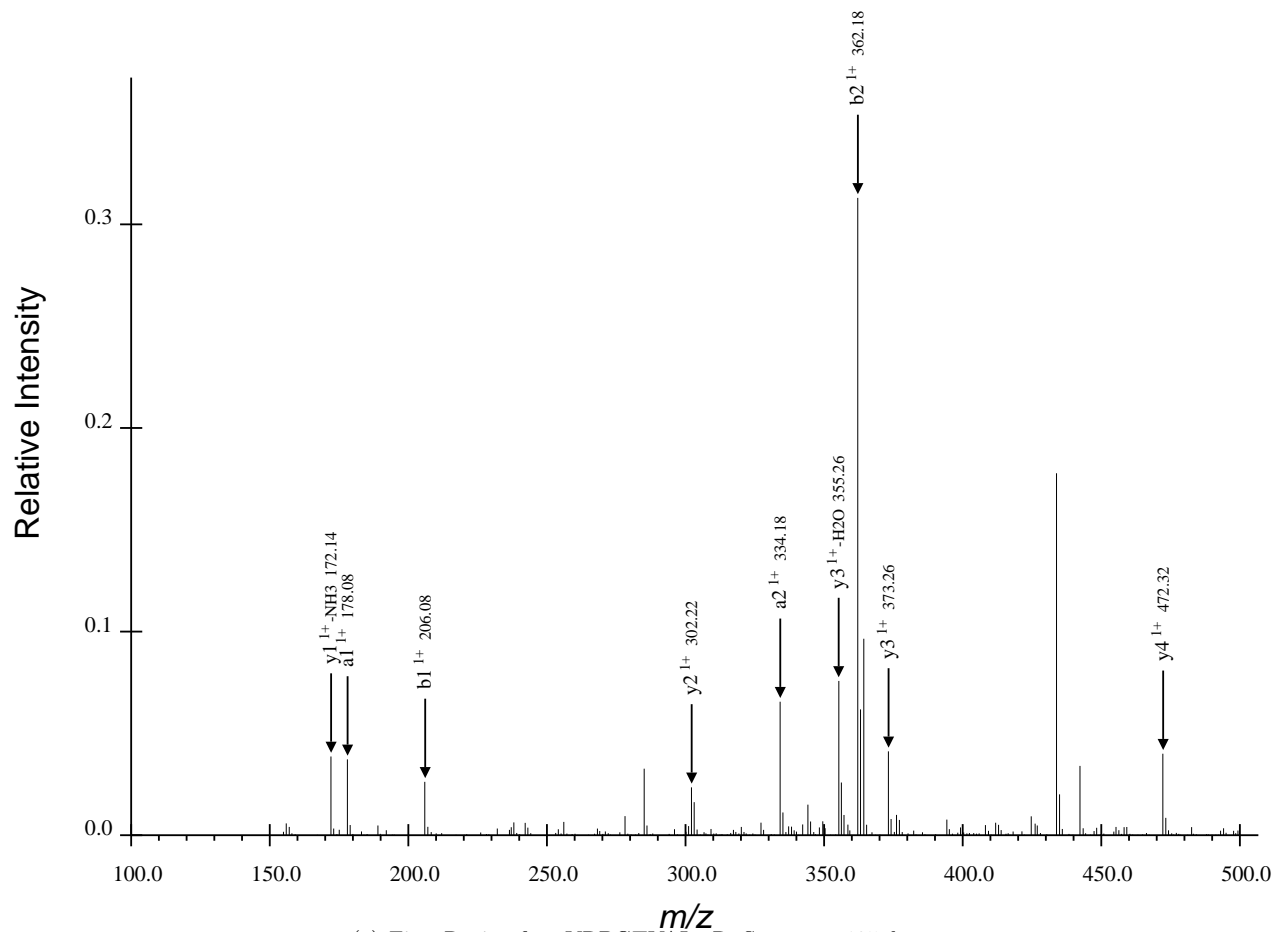

(a) First Region for aYRPGTVALmR, Spectrum 125.dta

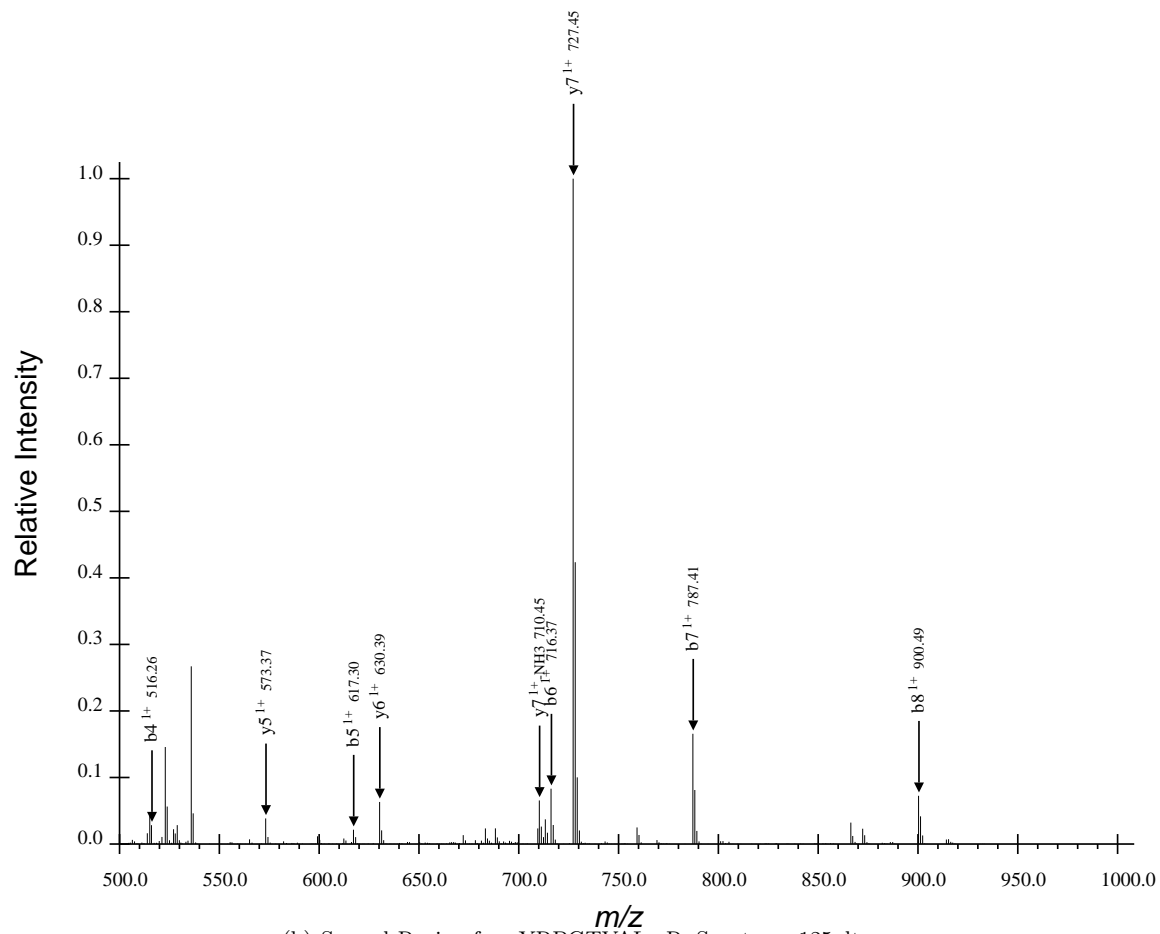

(b) Second Region for aYRPGTVALmR, Spectrum 125.dta

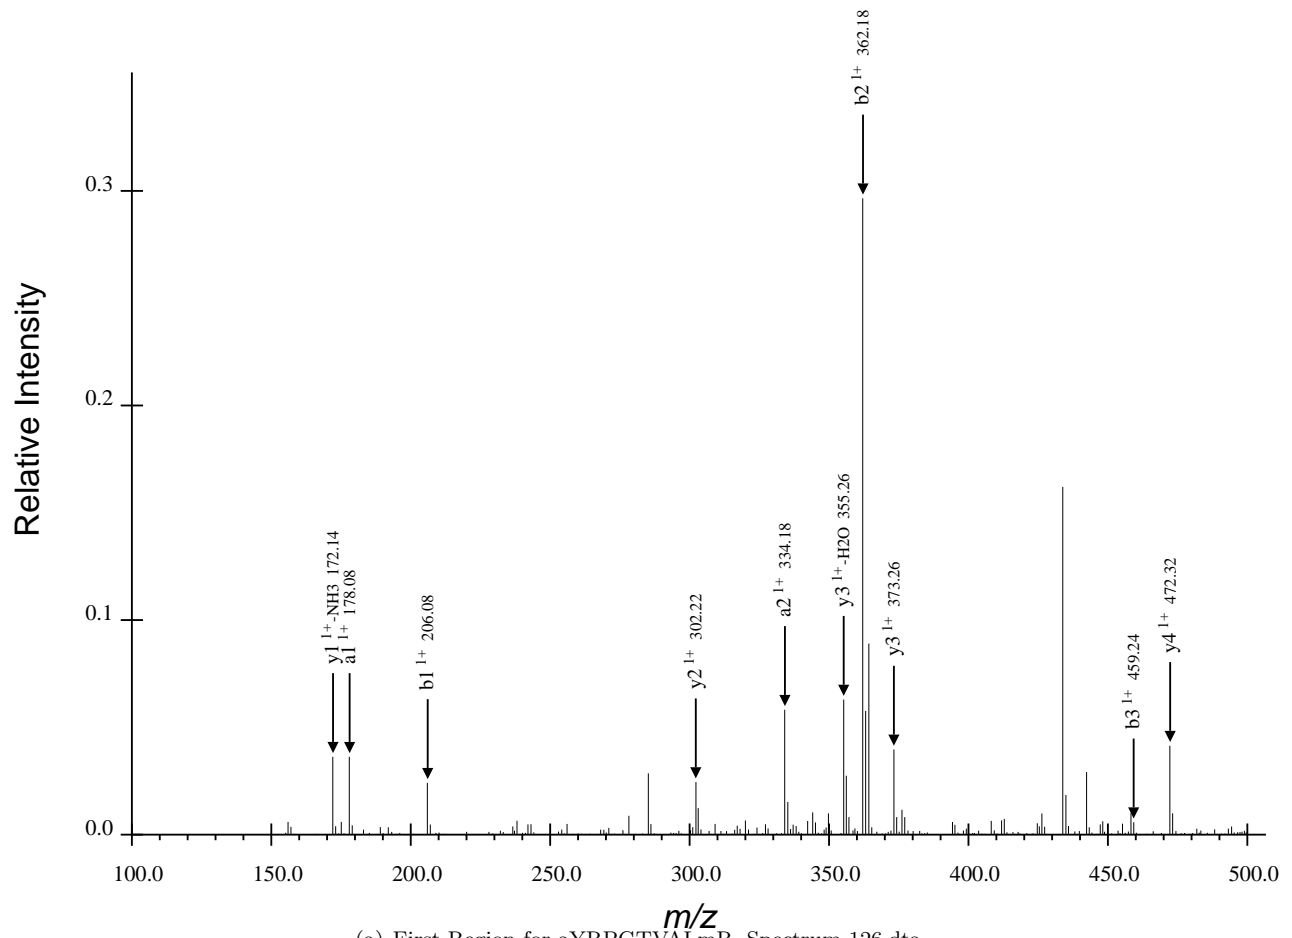

(a) First Region for aYRPGTVALmR, Spectrum 126.dta

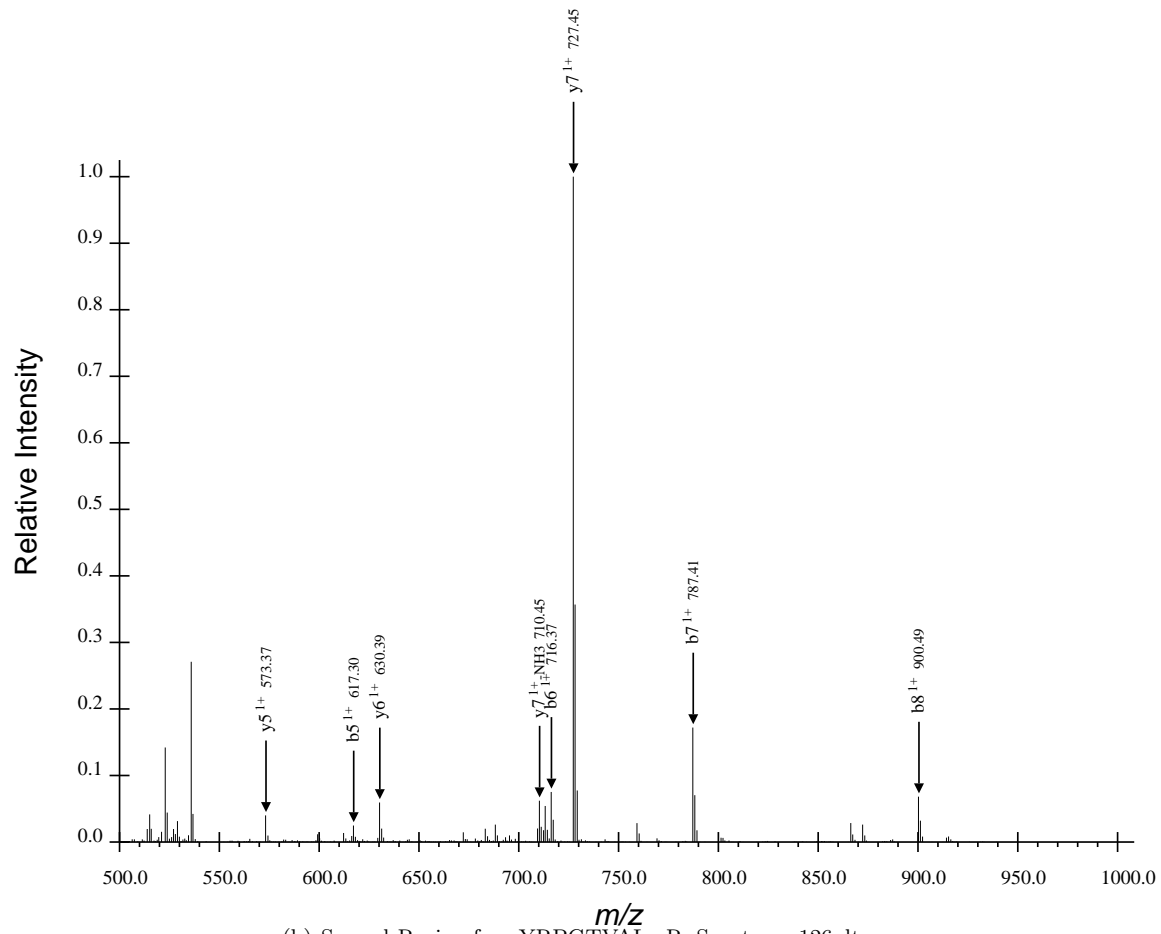

(b) Second Region for aYRPGTVALmR, Spectrum 126.dta

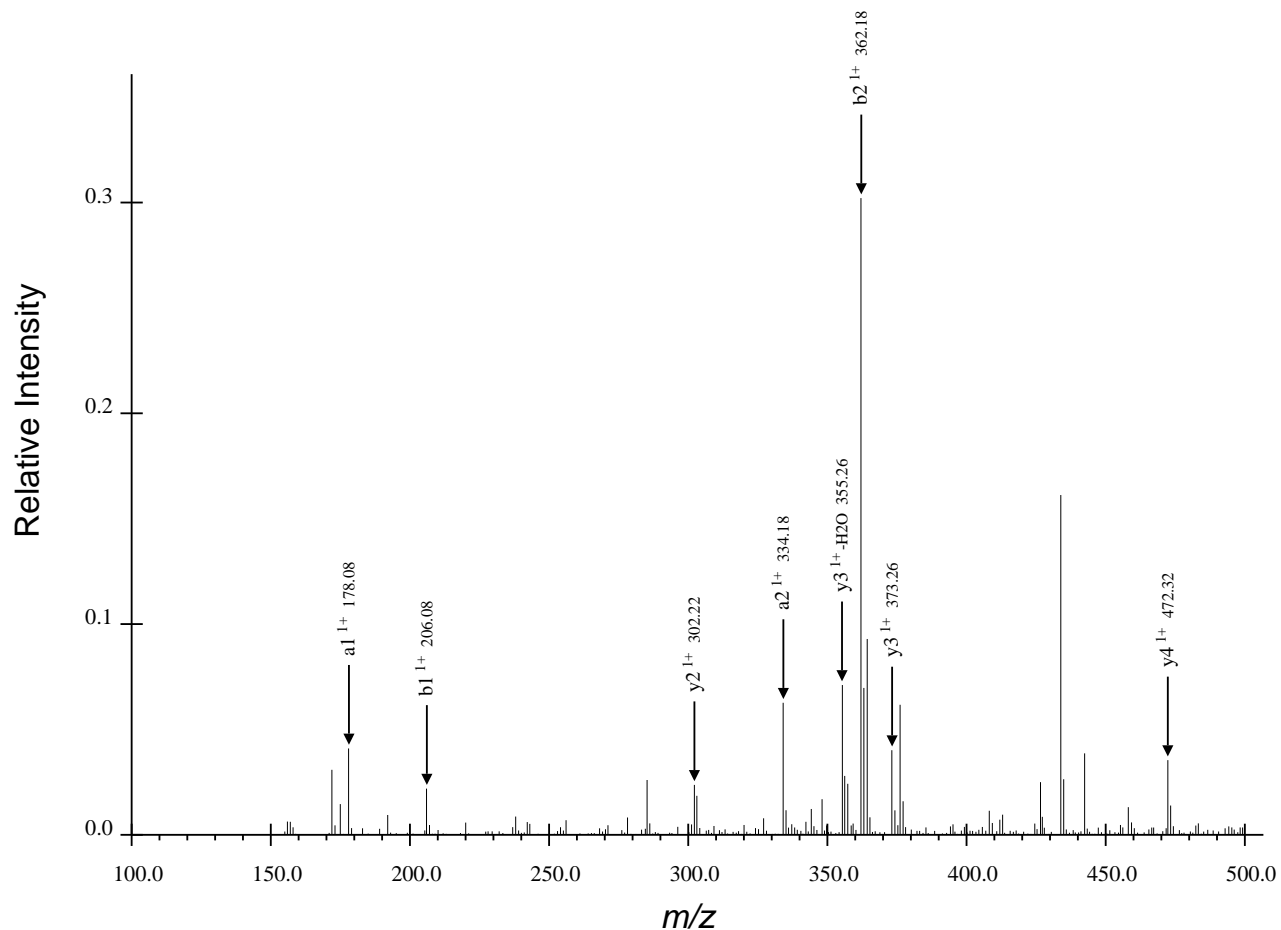

(a) First Region for aYRPGTVALmR, Spectrum 127.dta

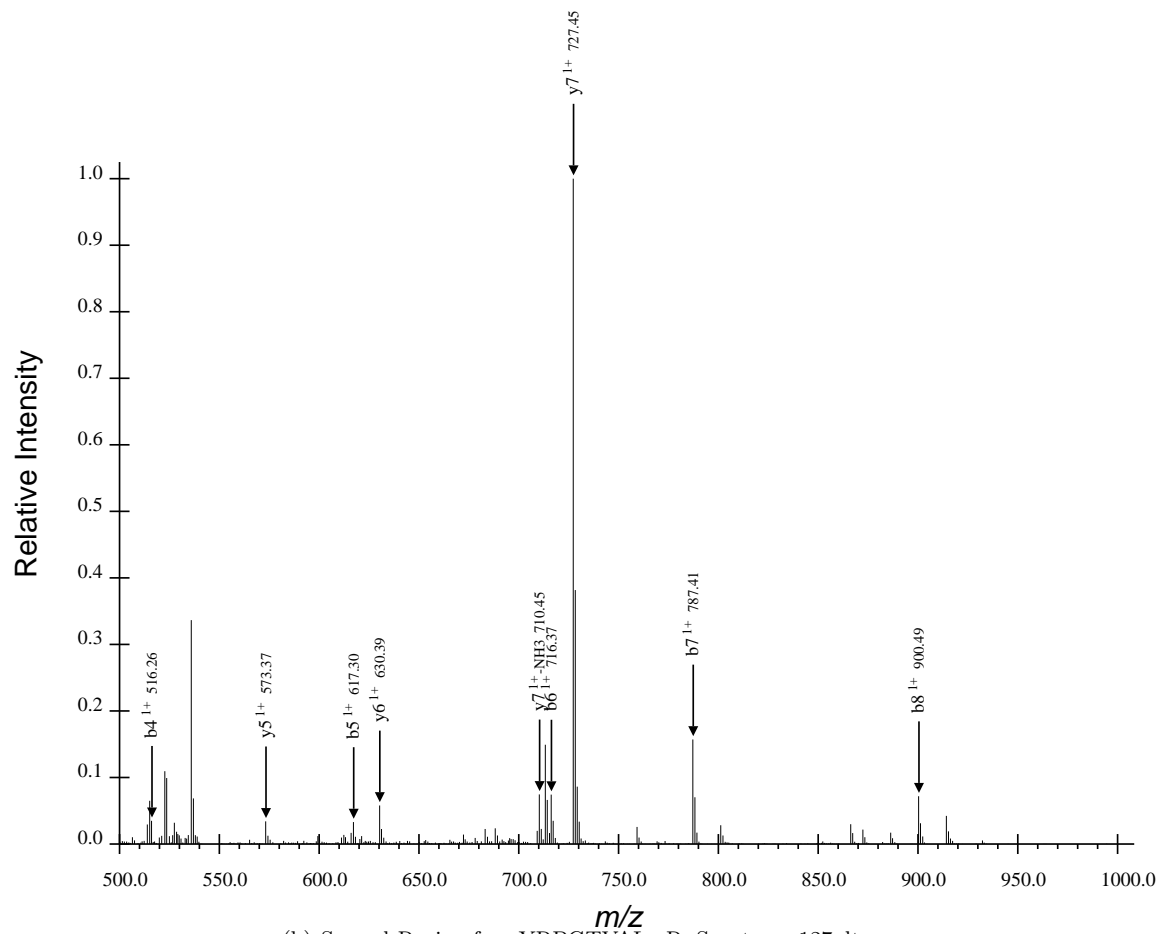

(b) Second Region for aYRPGTVALmR, Spectrum 127.dta

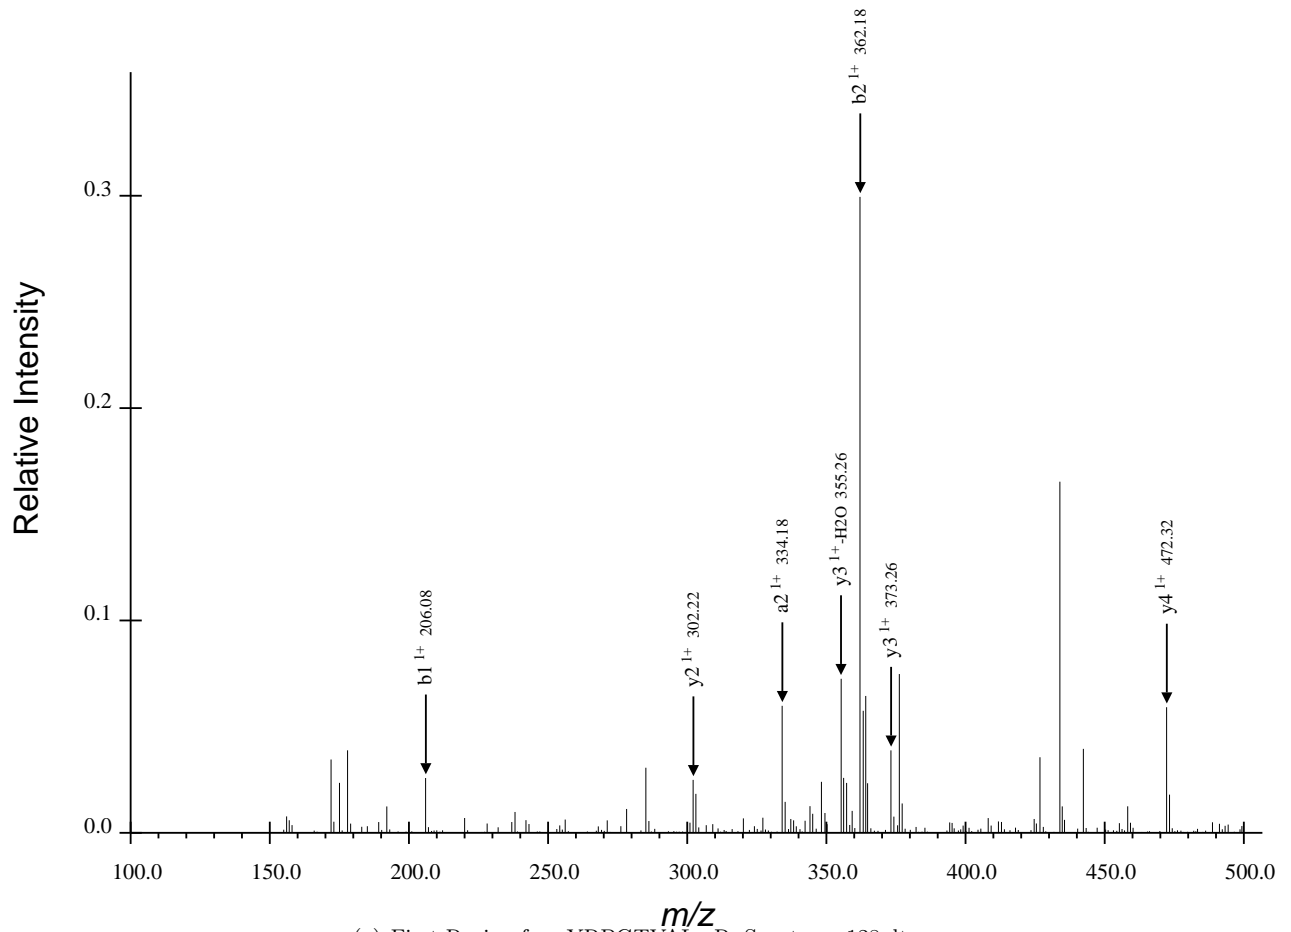

(a) First Region for aYRPGTVALmR, Spectrum 128.dta

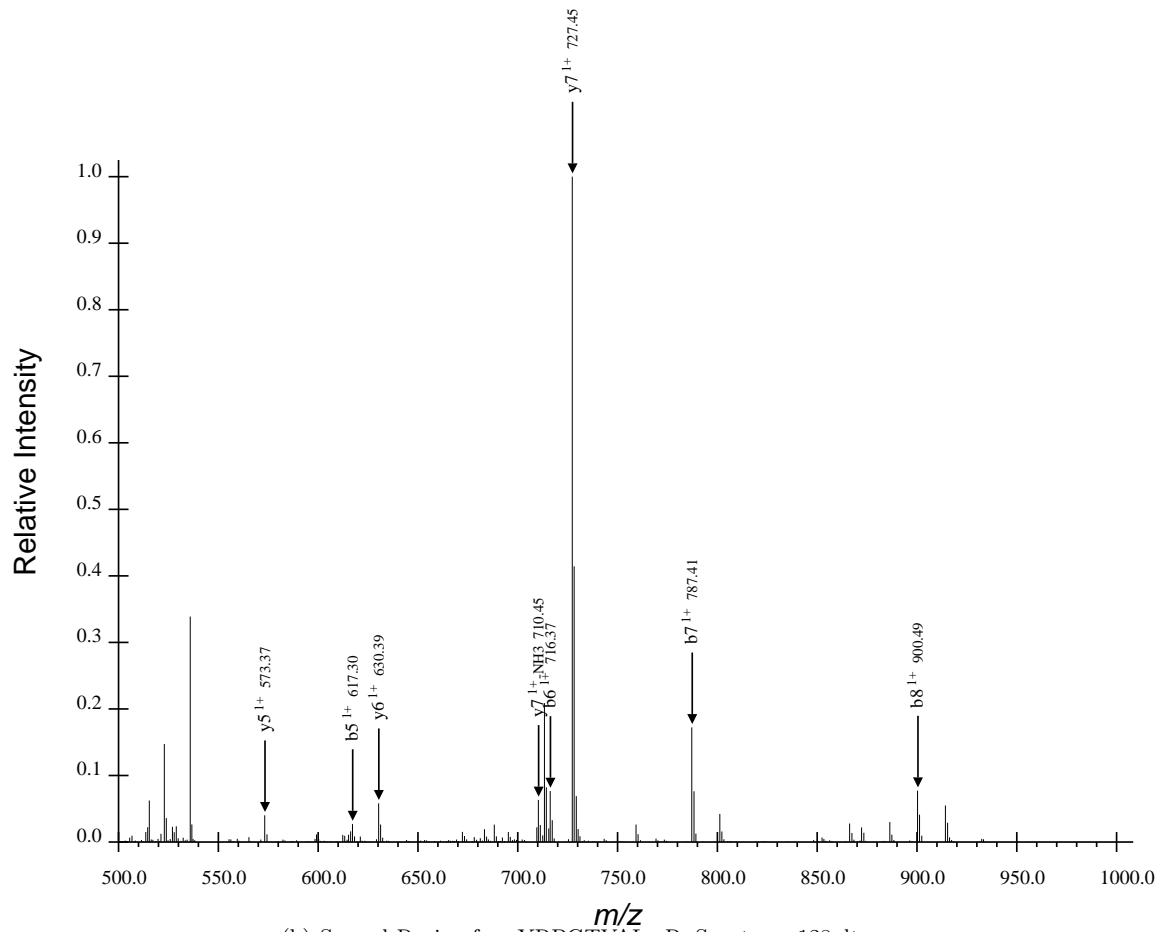

(b) Second Region for aYRPGTVALmR, Spectrum 128.dta



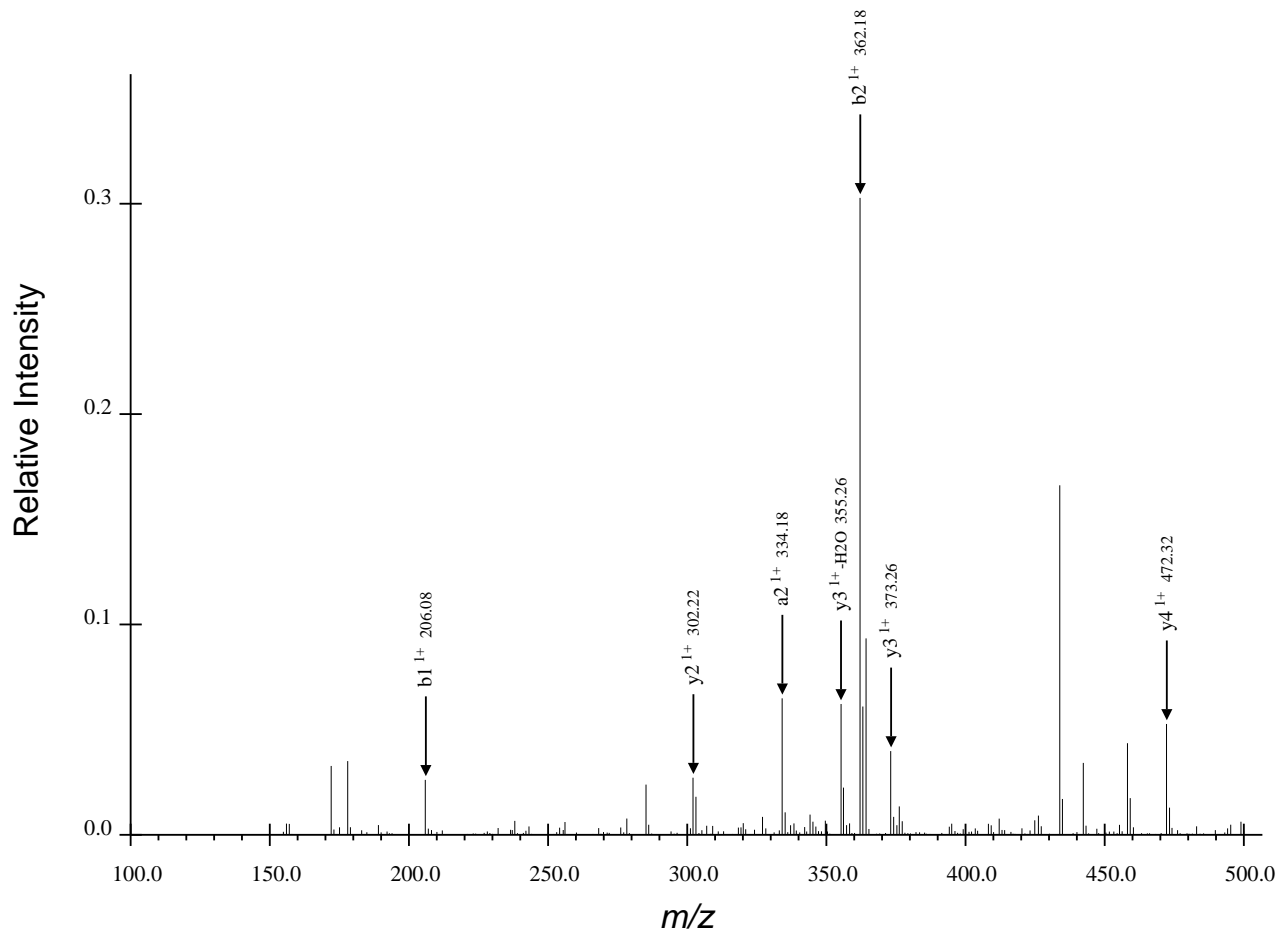

(a) First Region for aYRPGTVALmR, Spectrum 129.dta

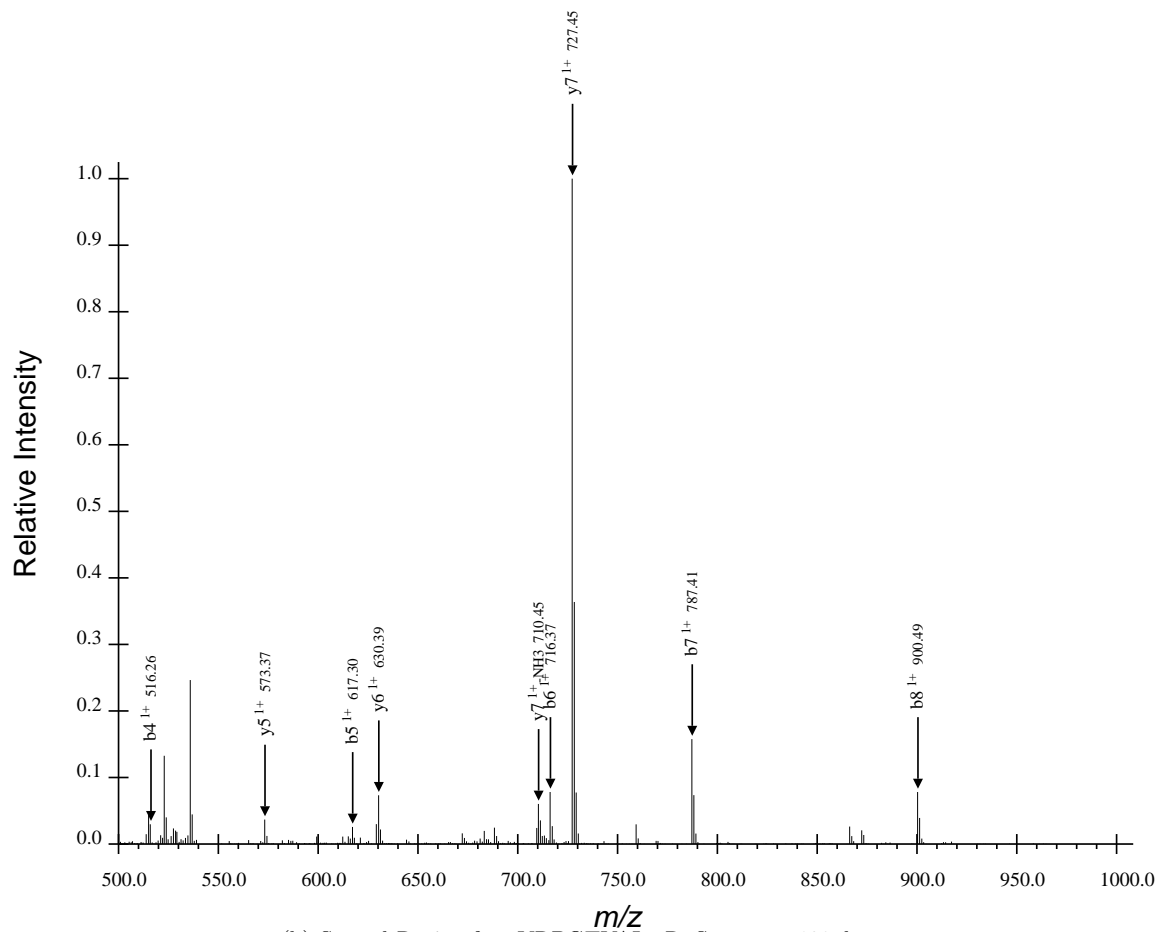

(b) Second Region for aYRPGTVALmR, Spectrum 129.dta

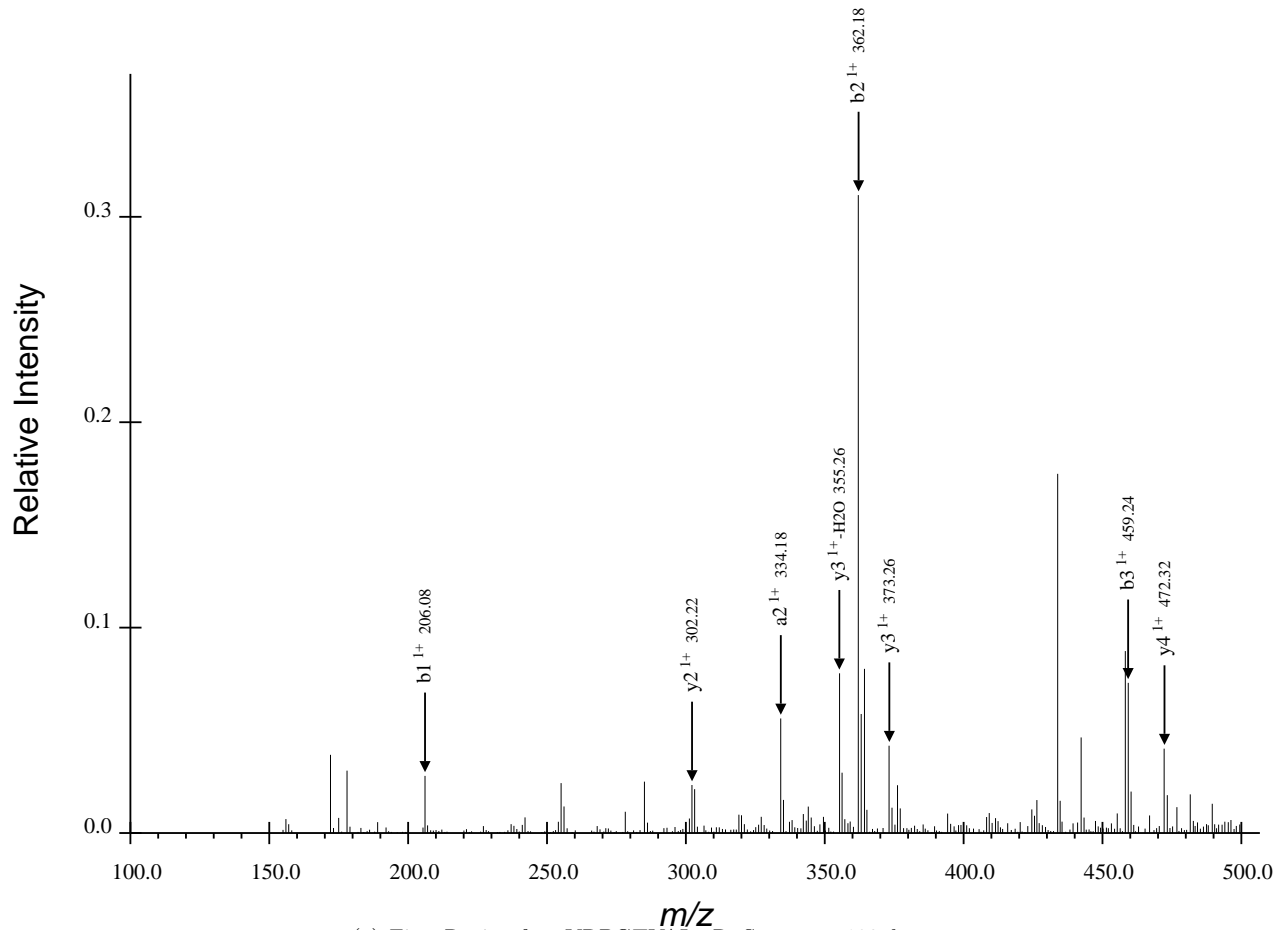

(a) First Region for aYRPGTVALmR, Spectrum 130.dta

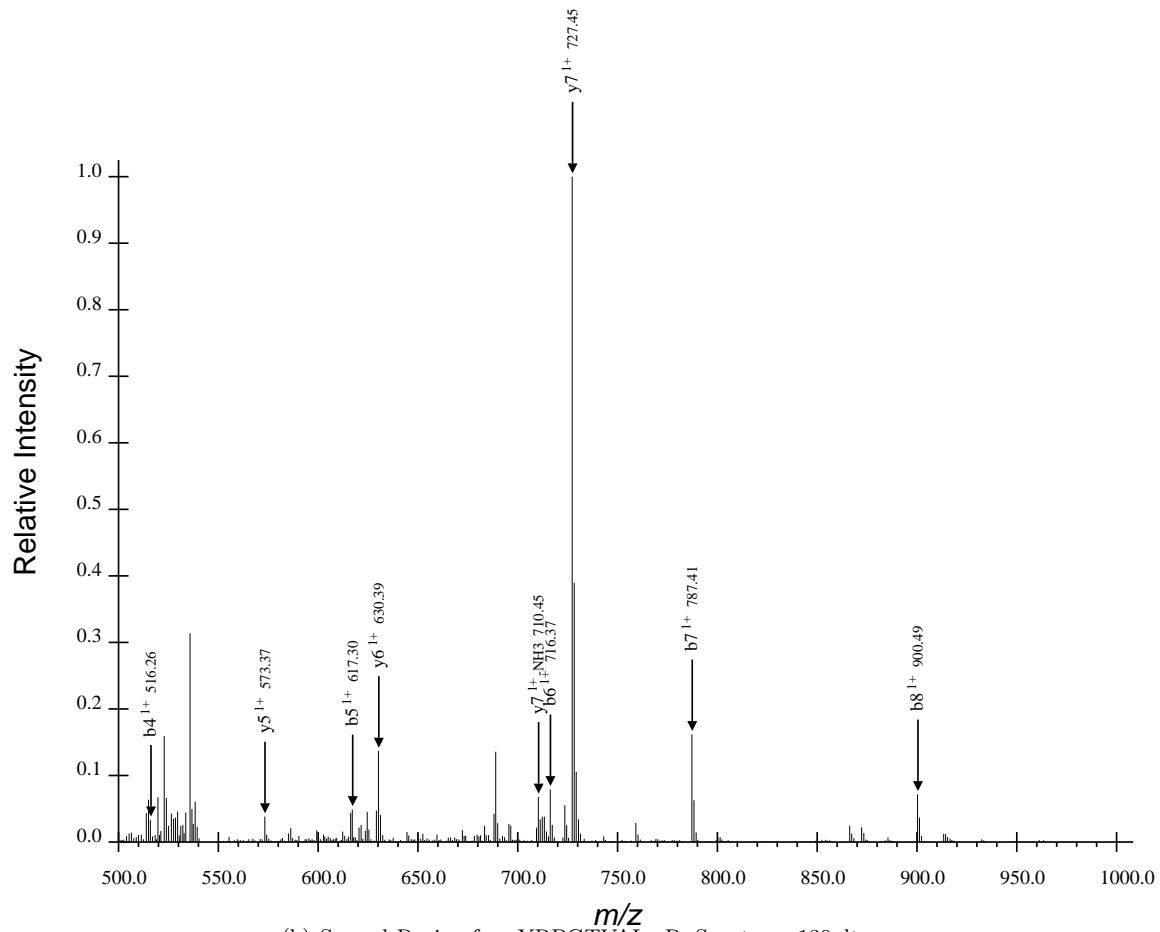

(b) Second Region for aYRPGTVALmR, Spectrum 130.dta

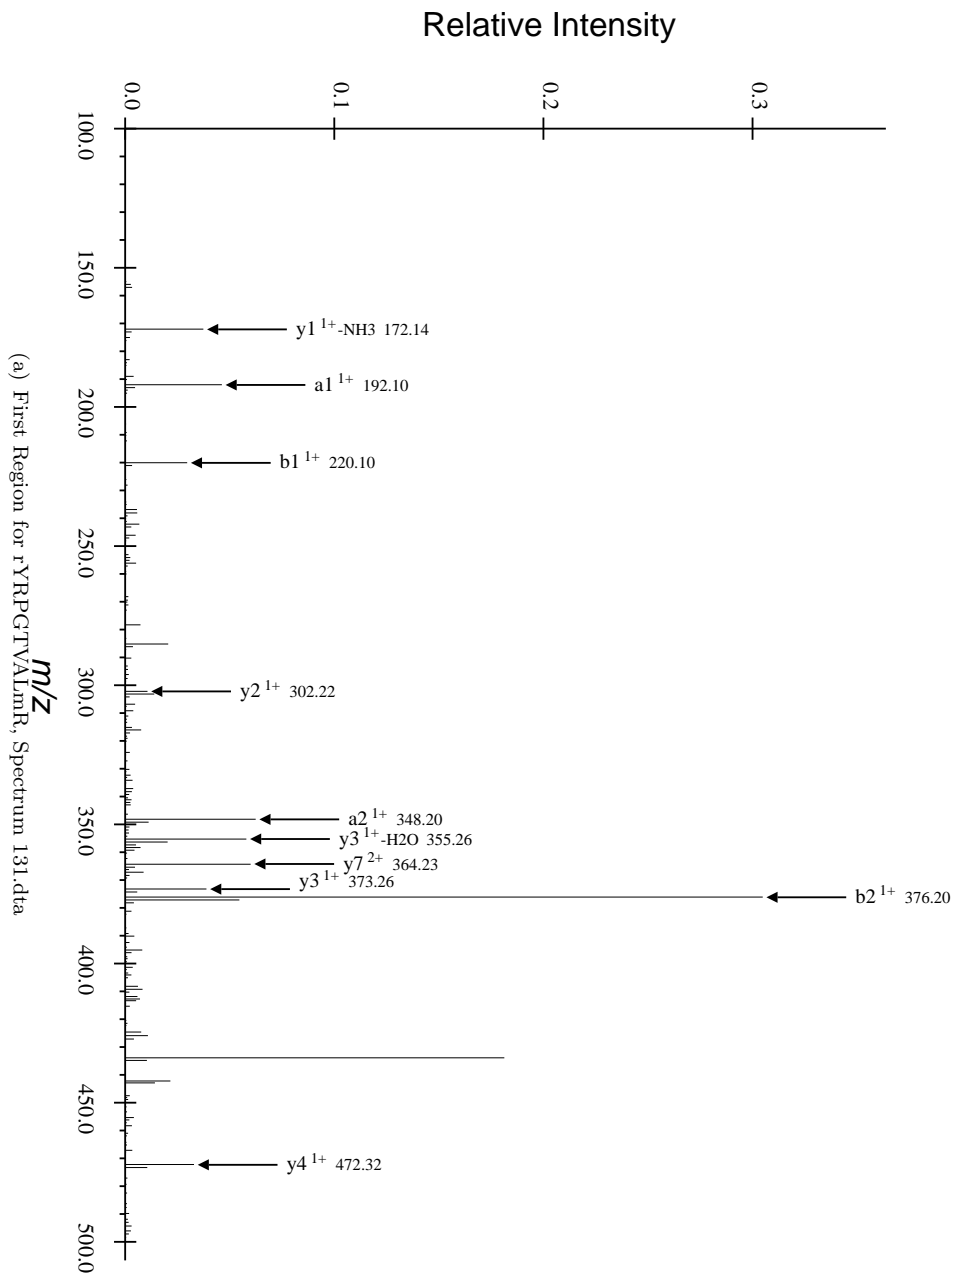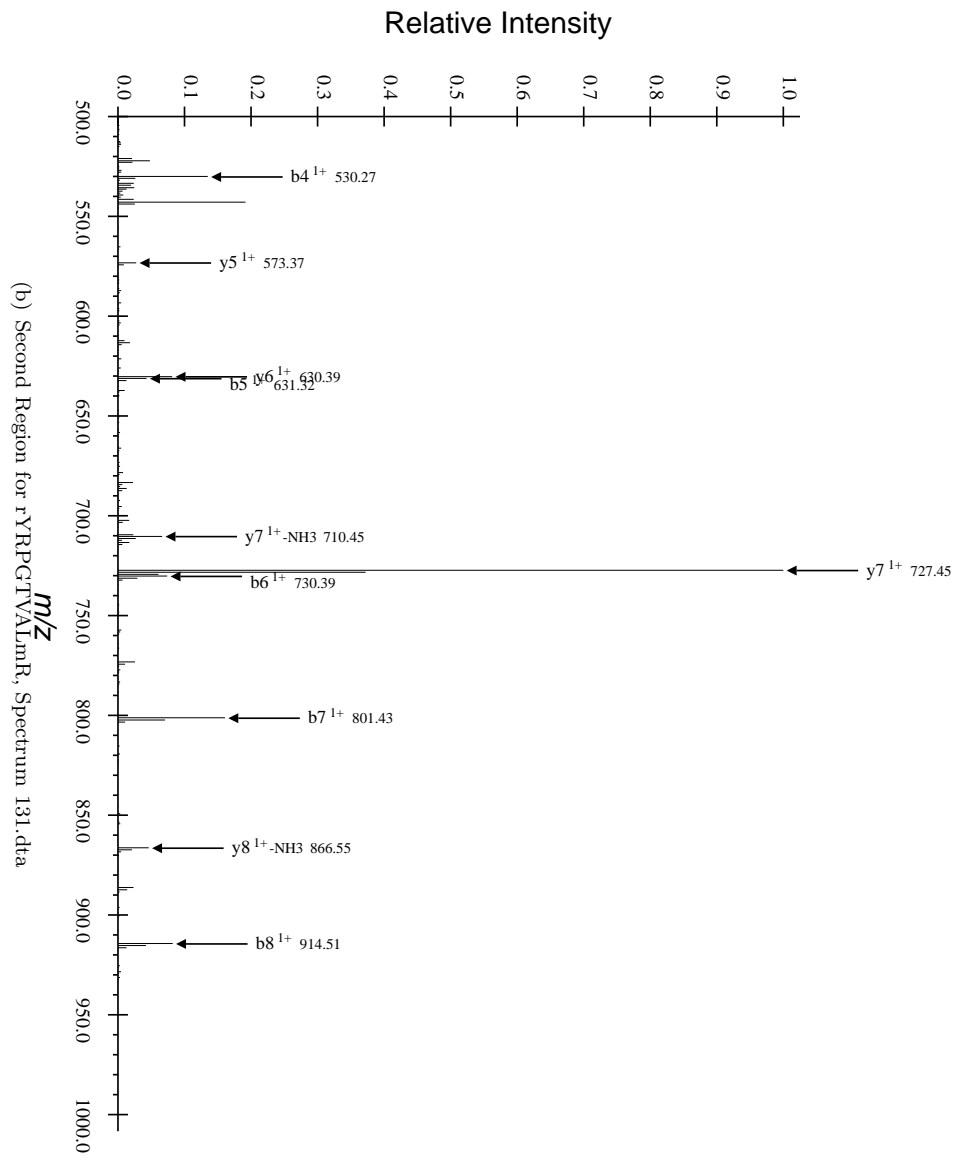

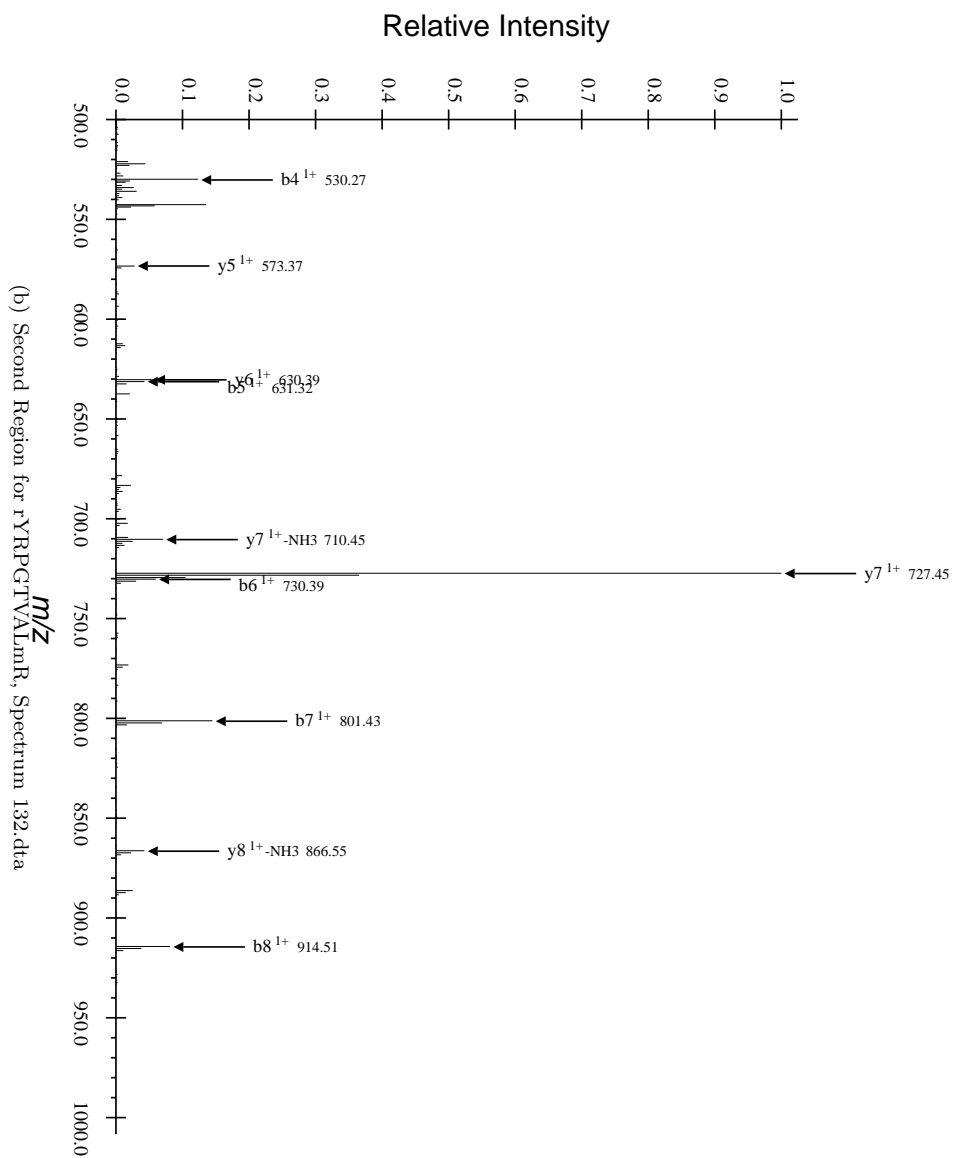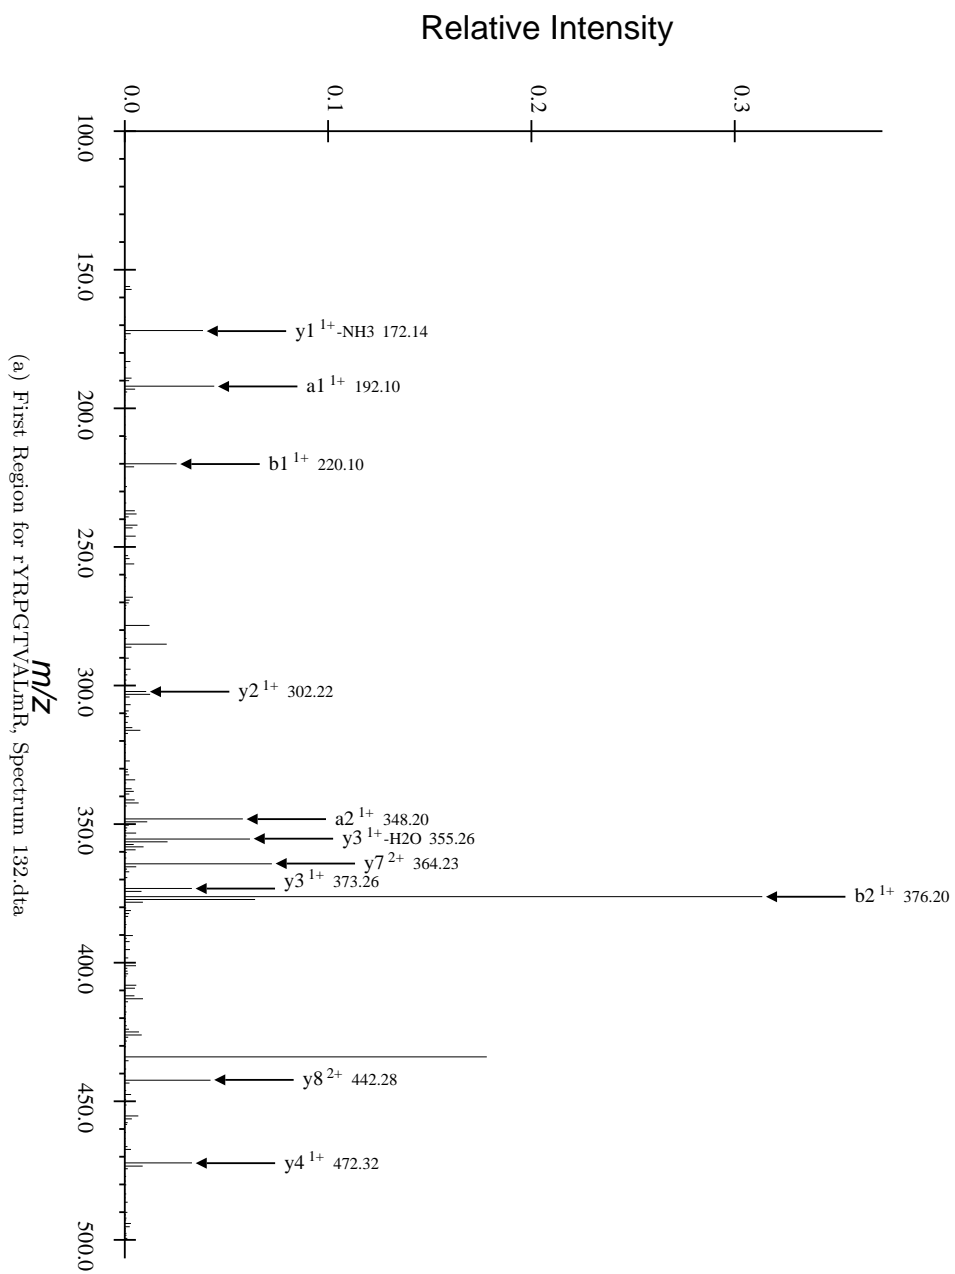

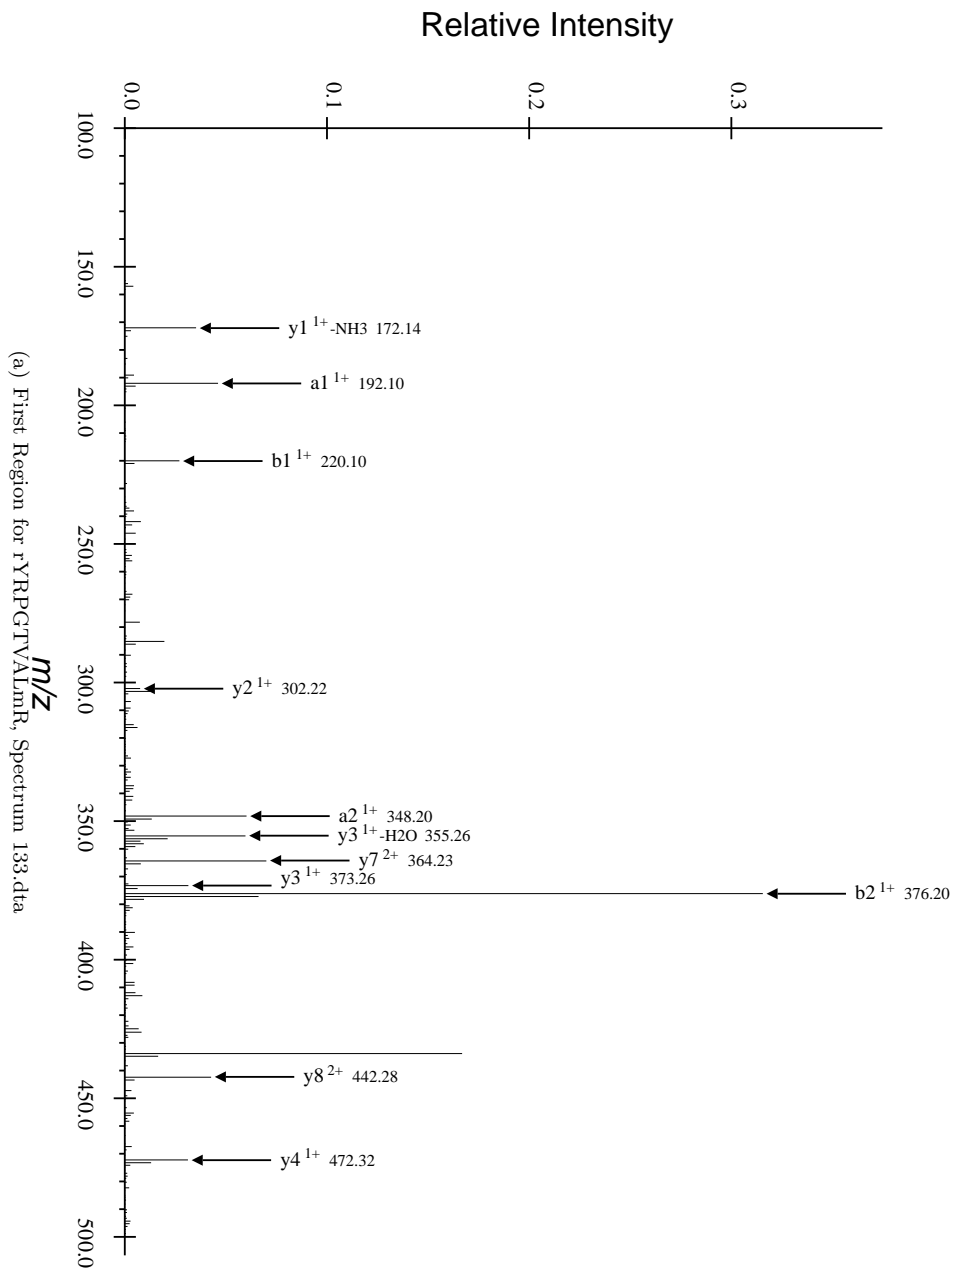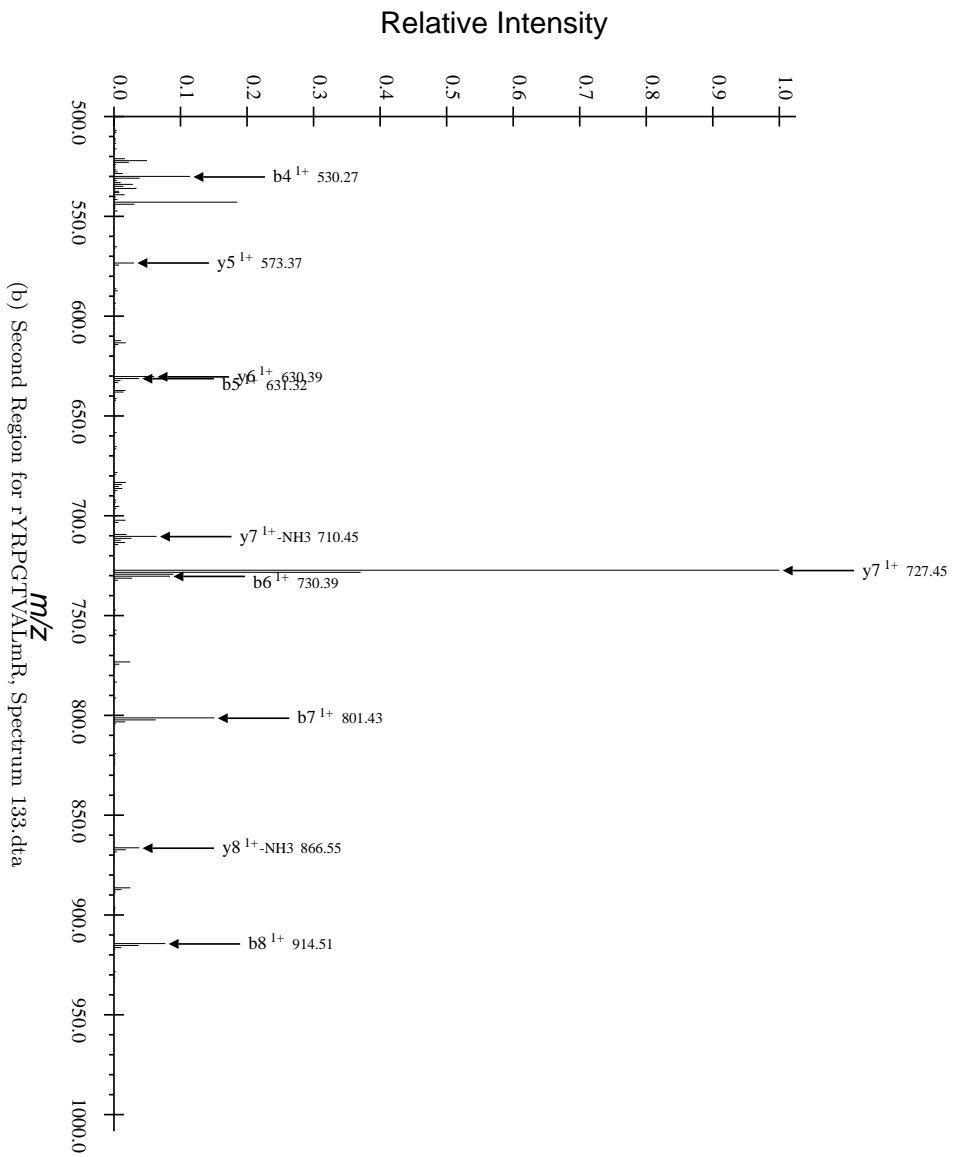

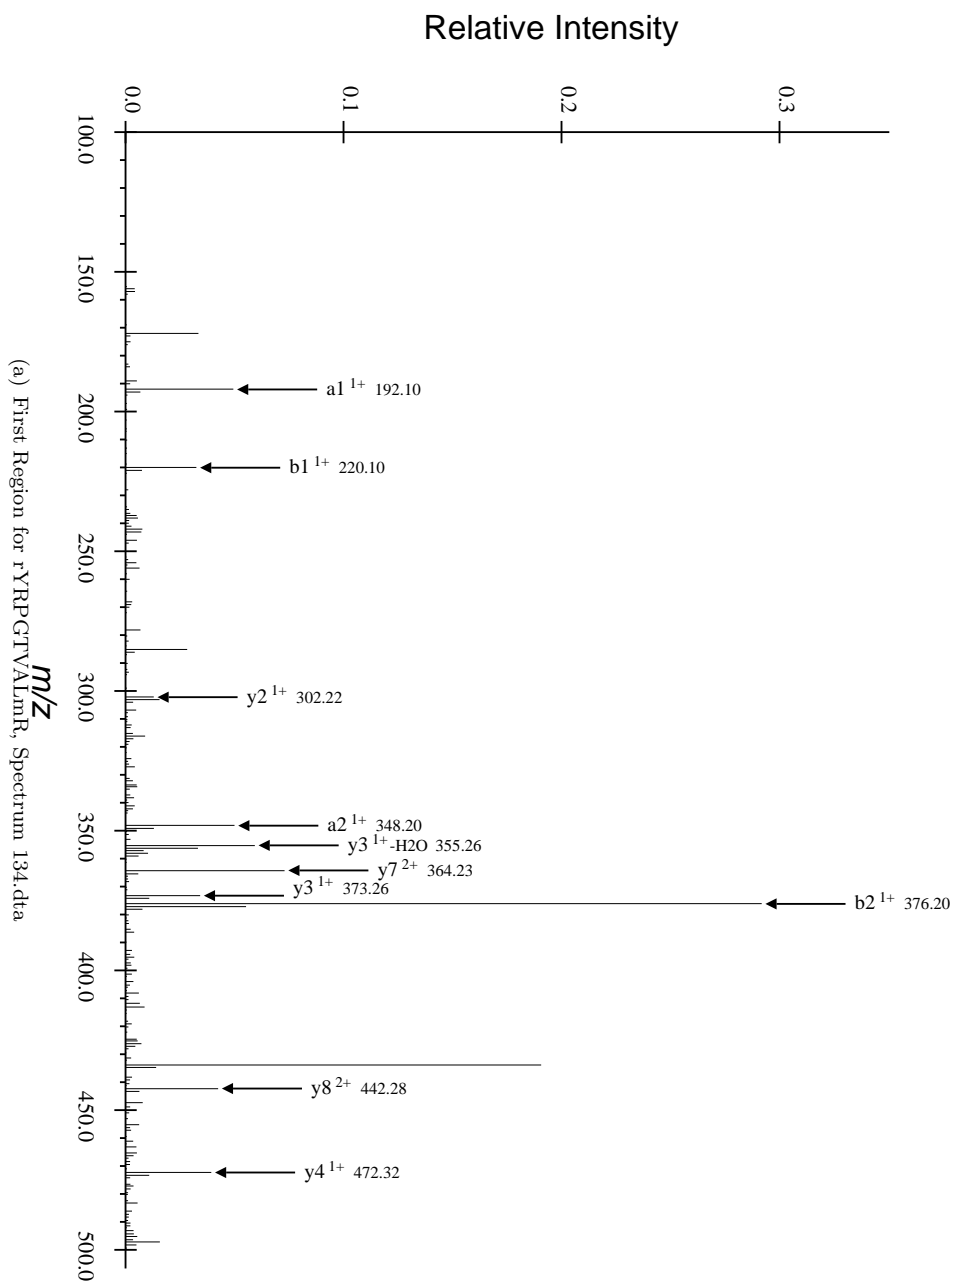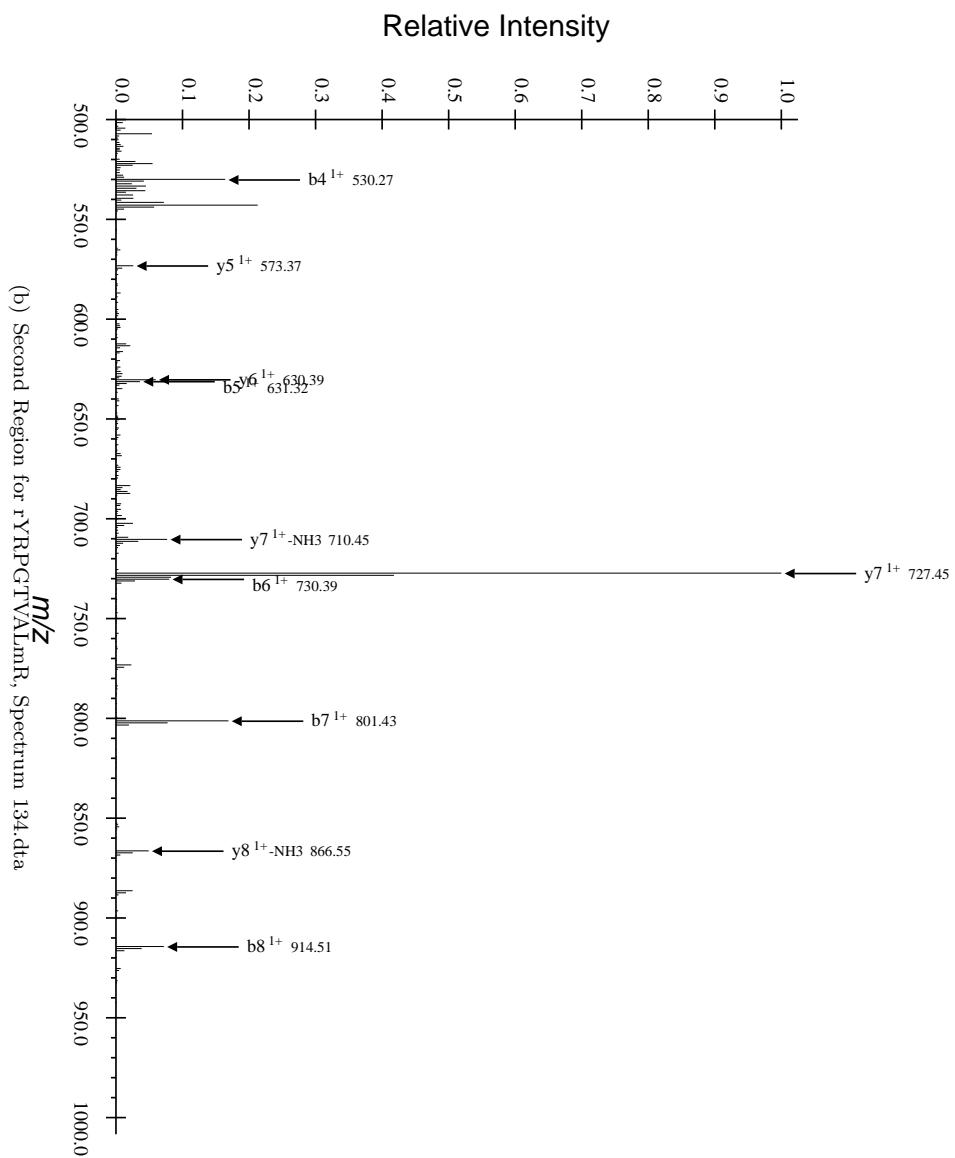

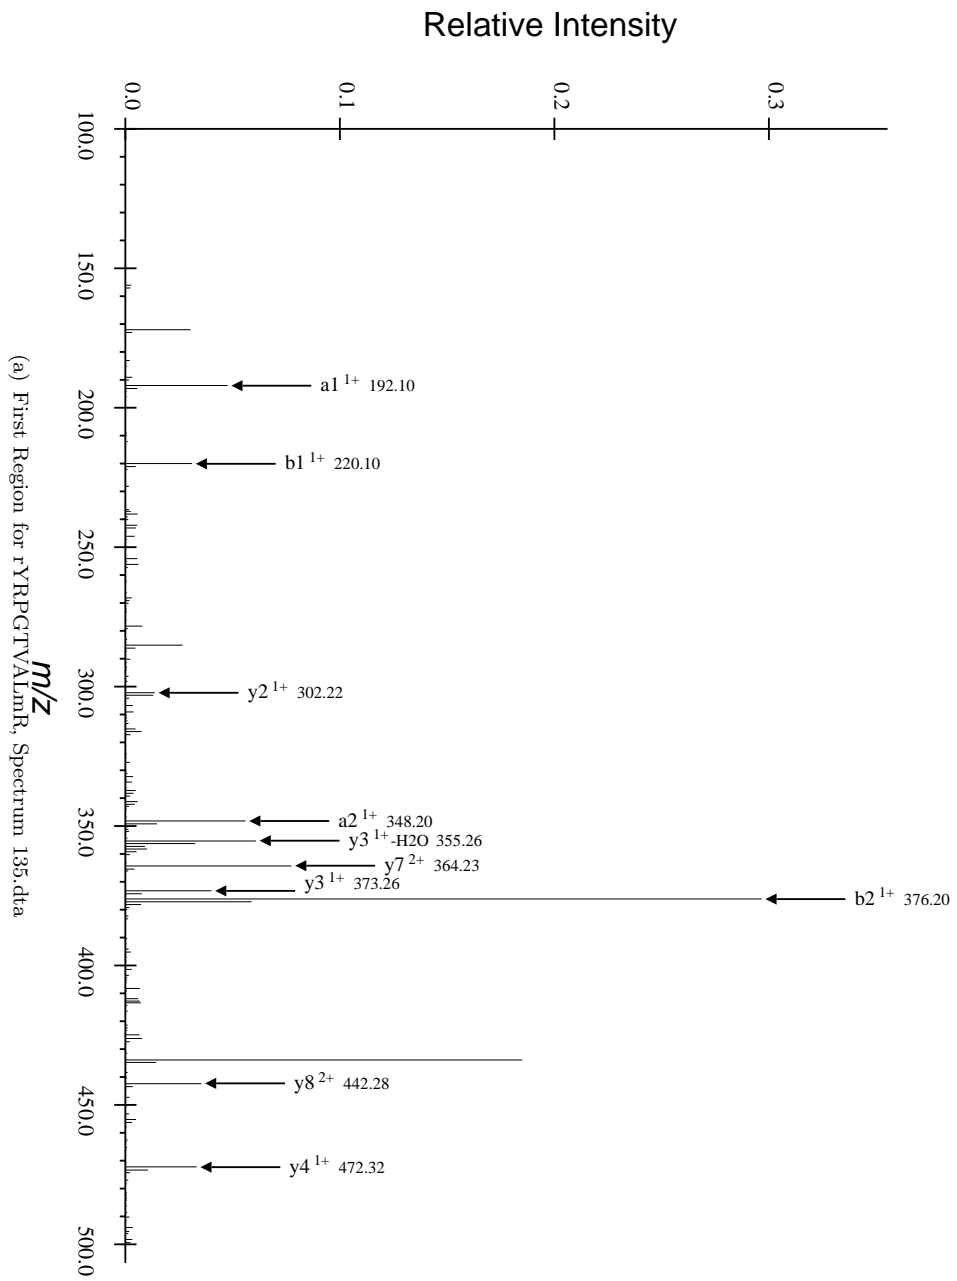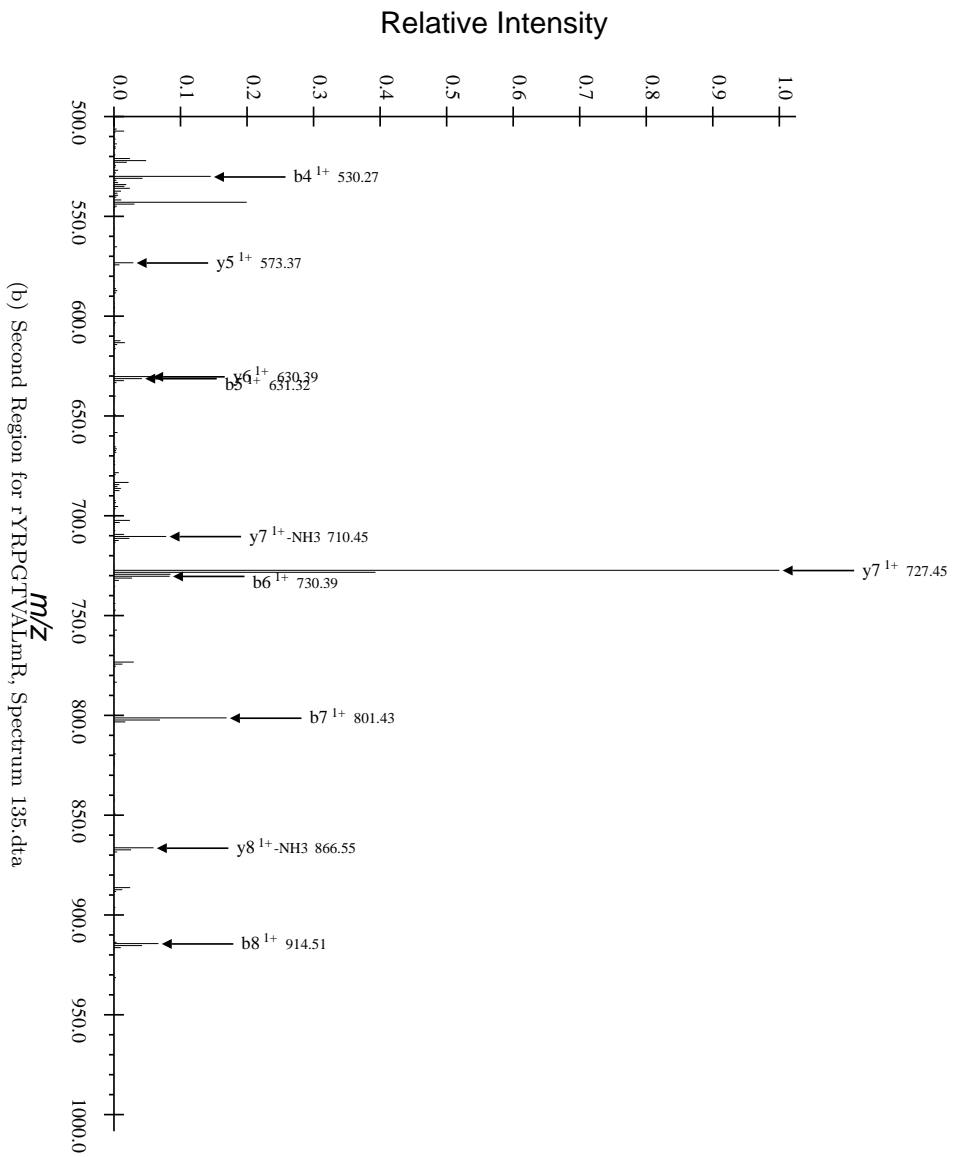

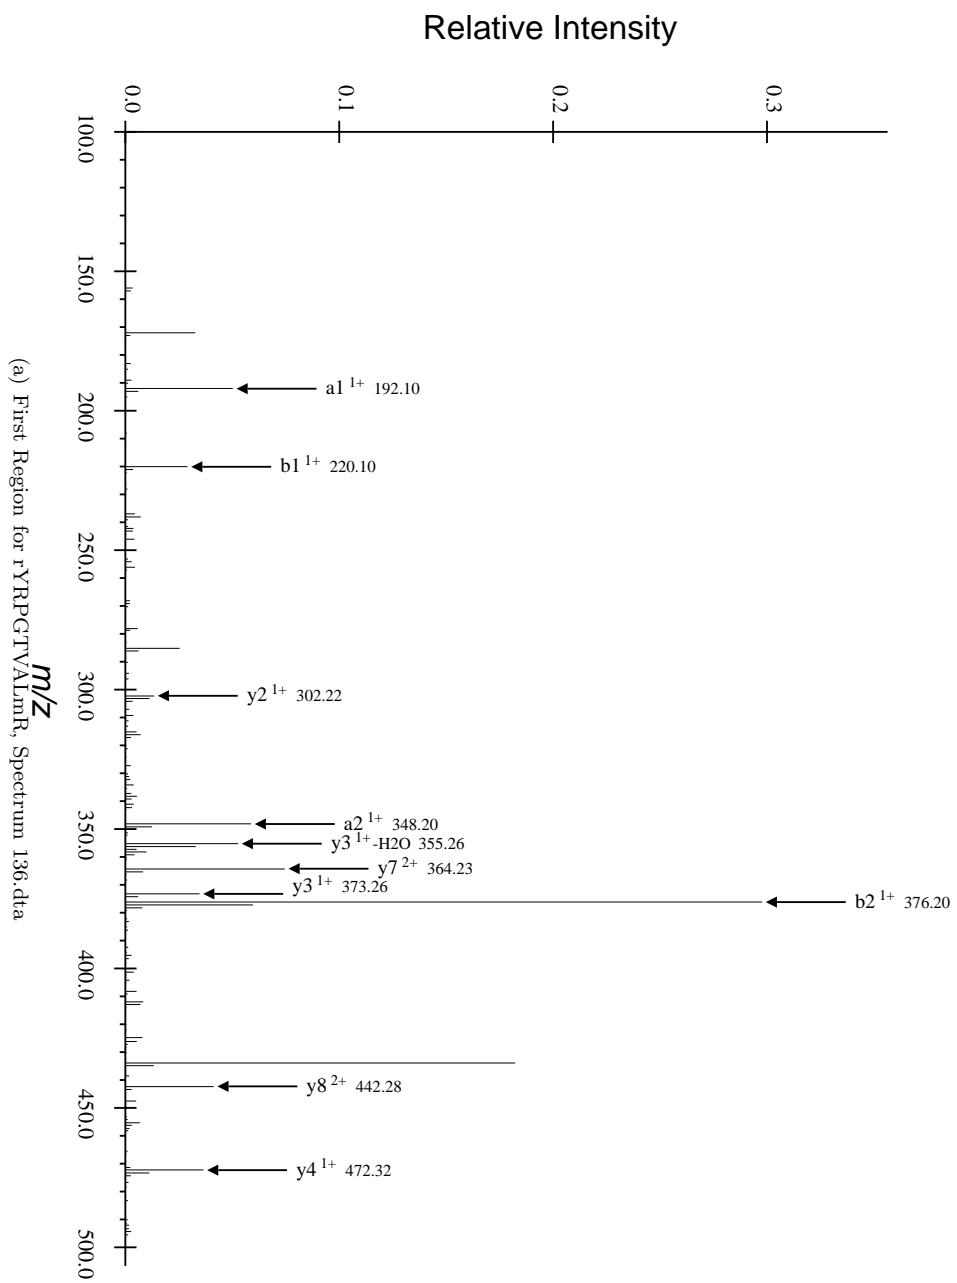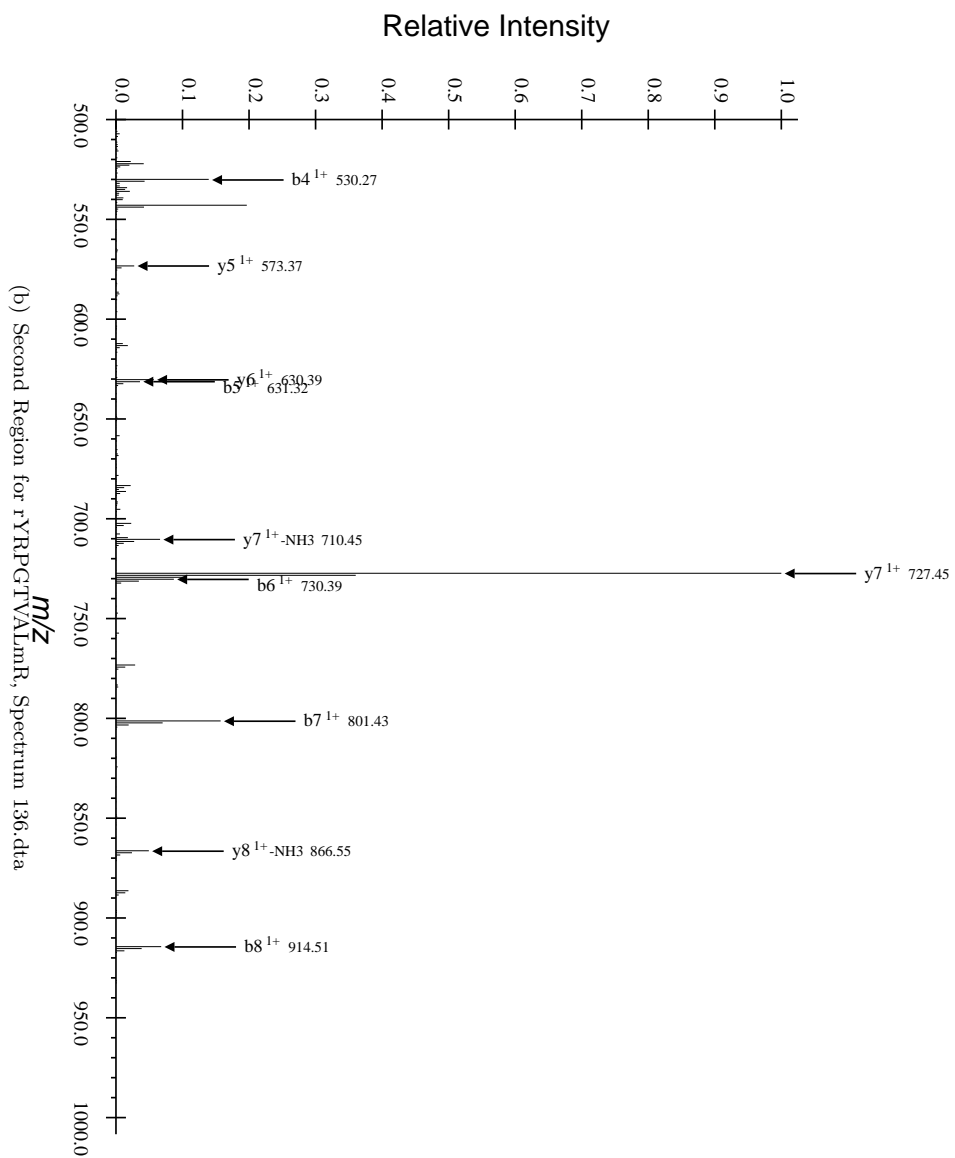



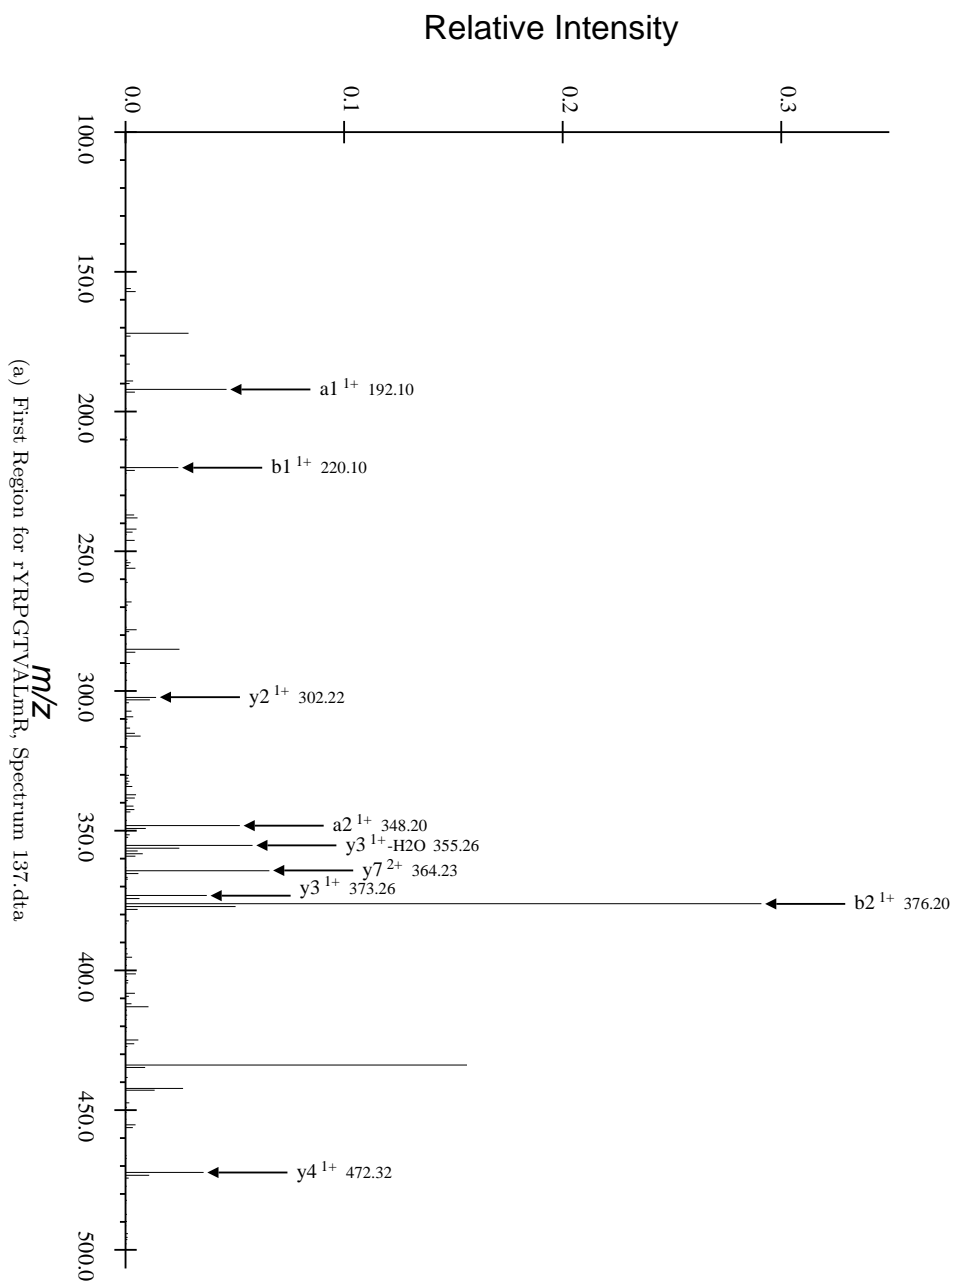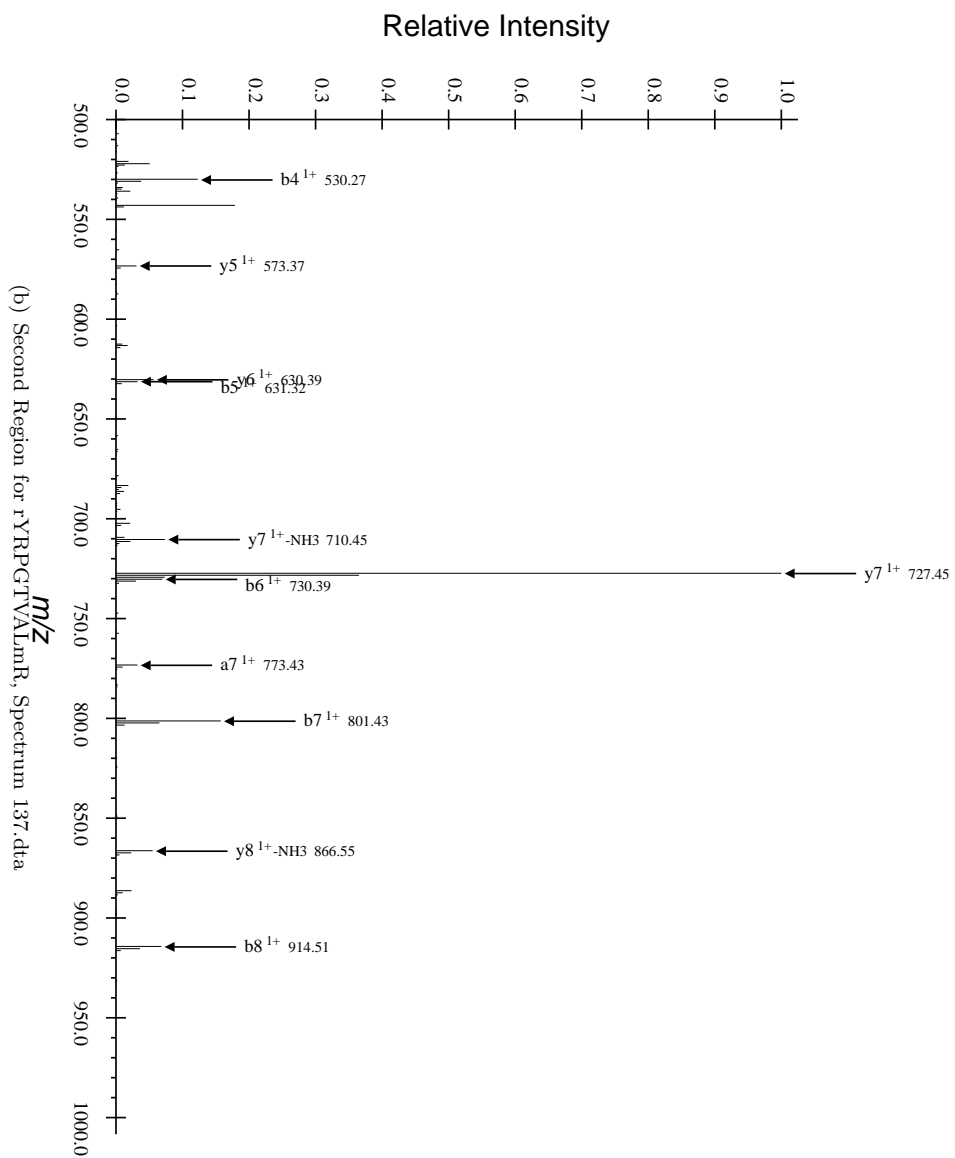

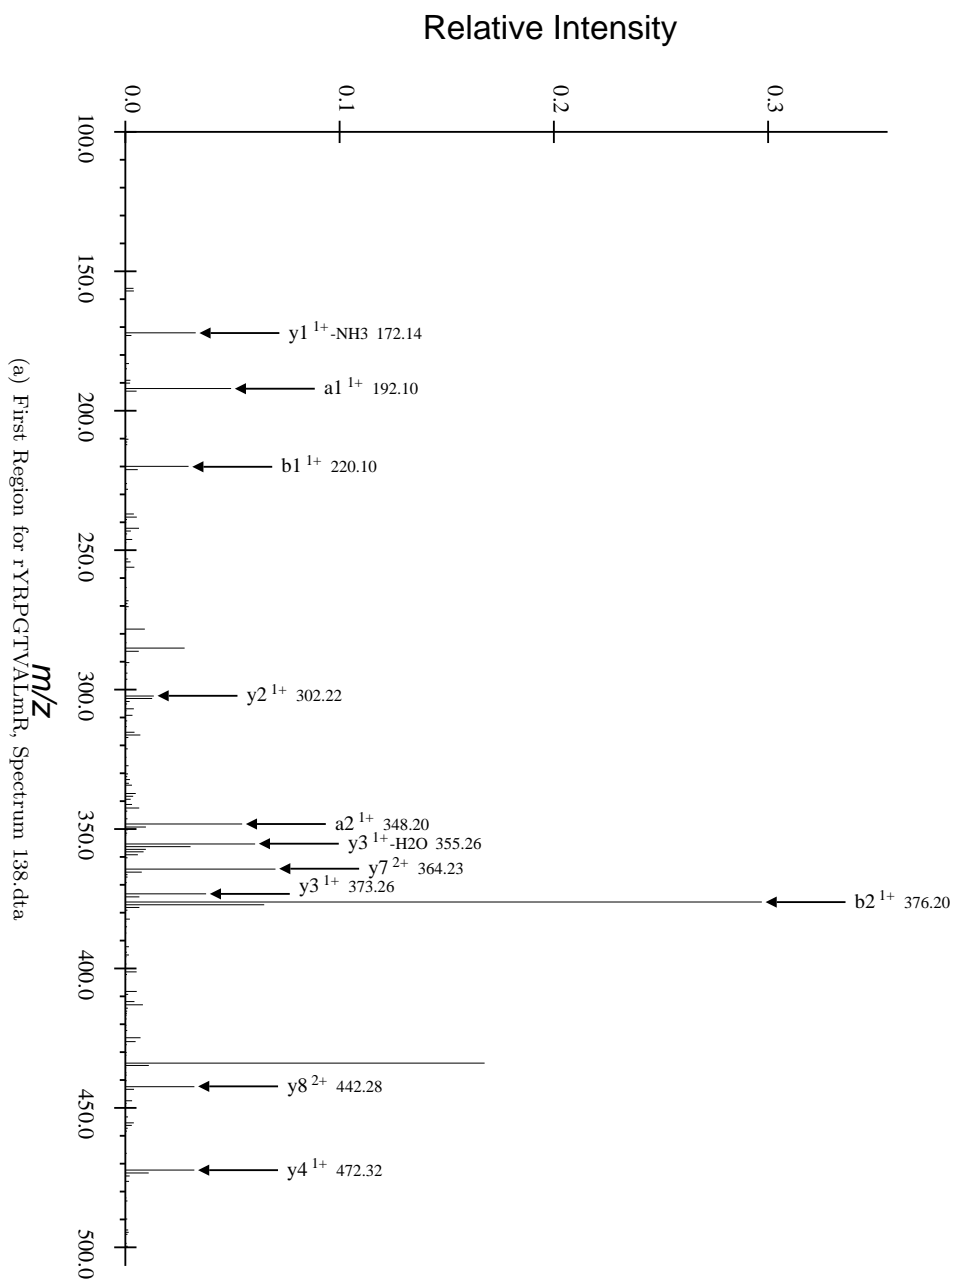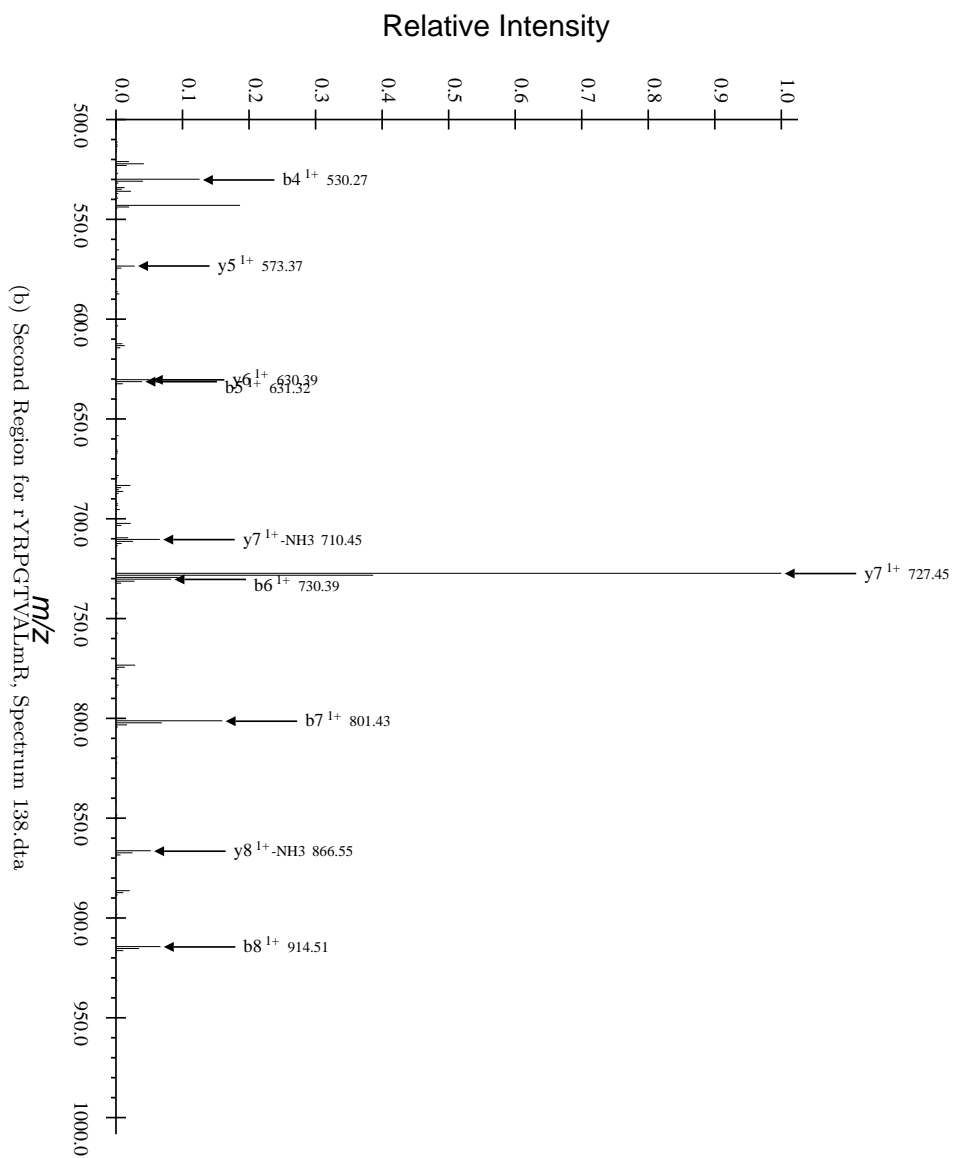

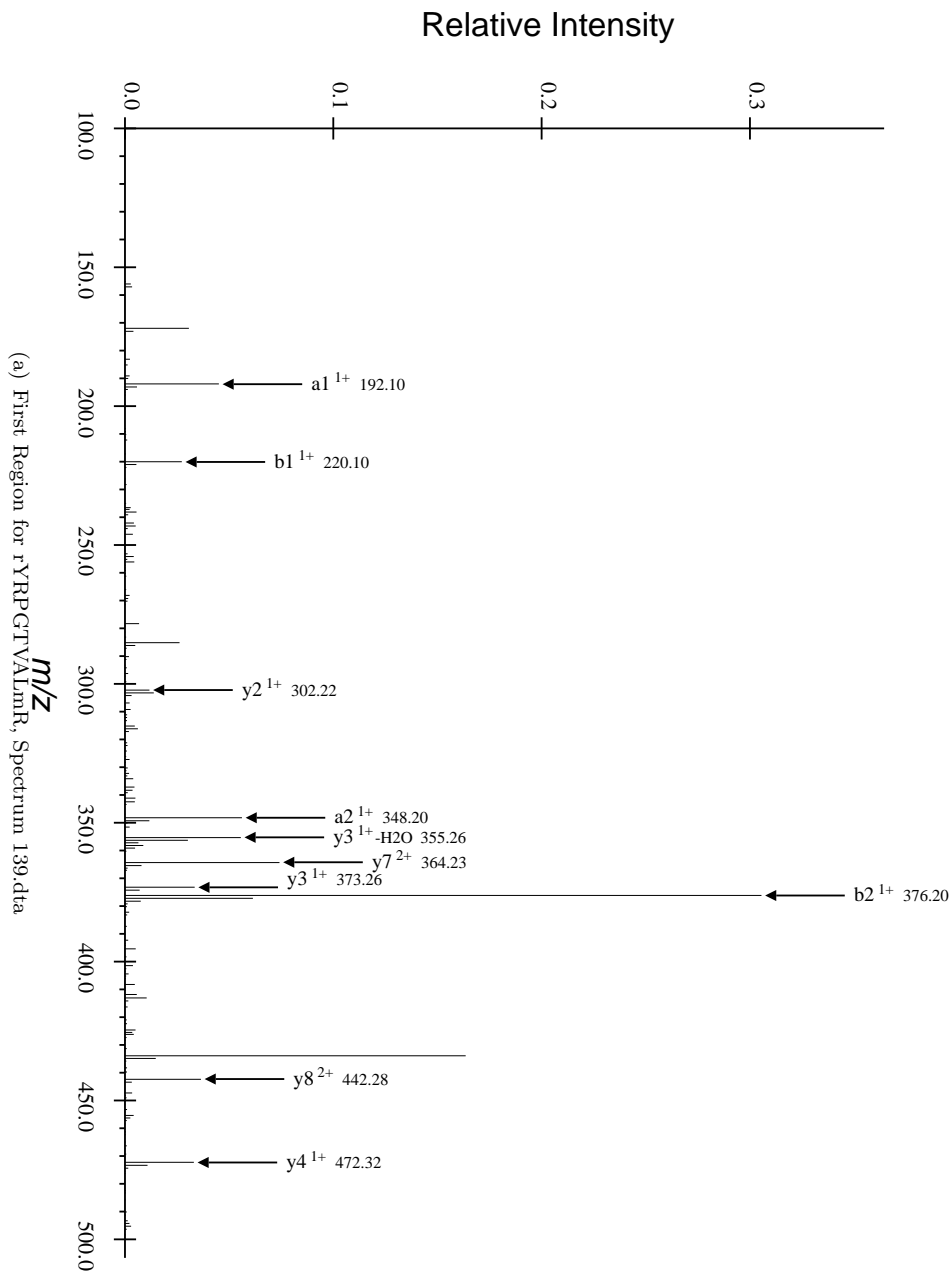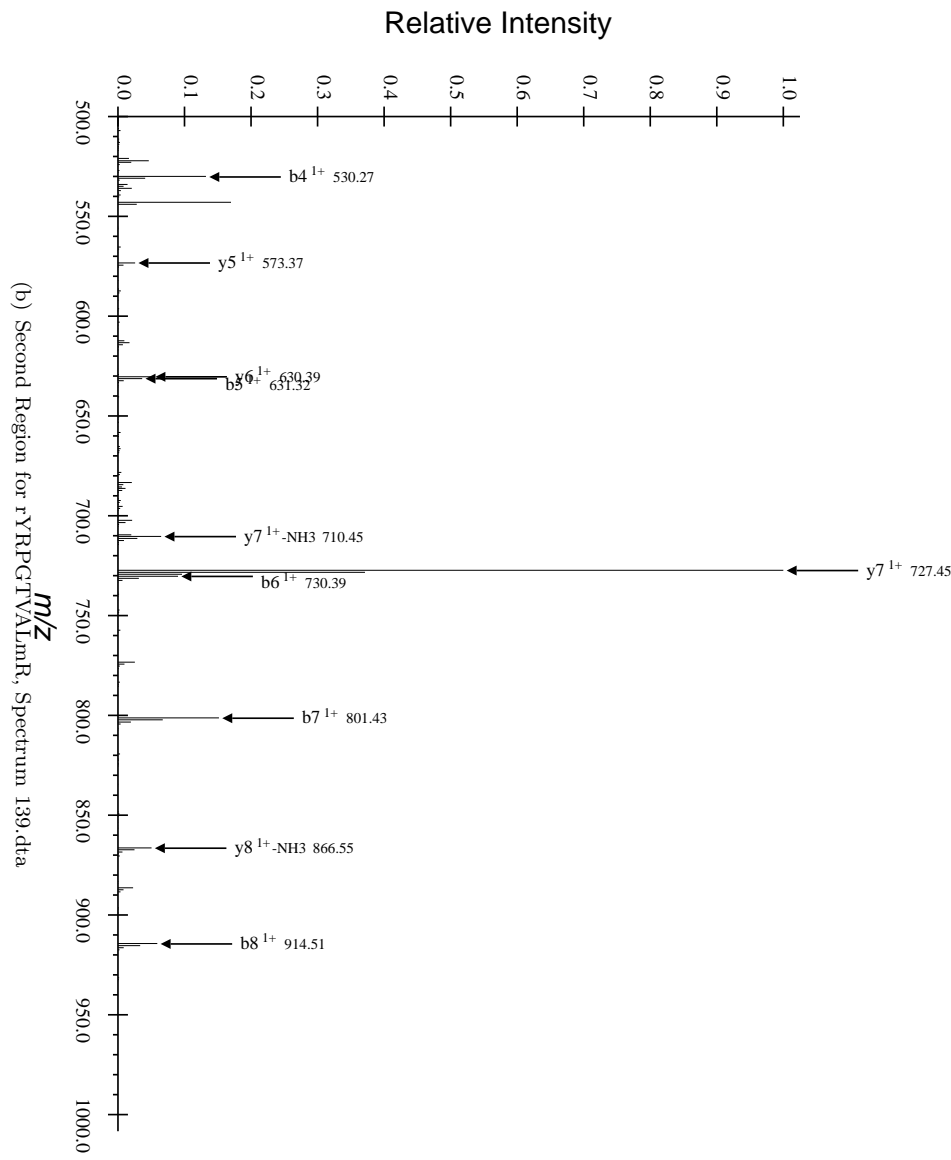

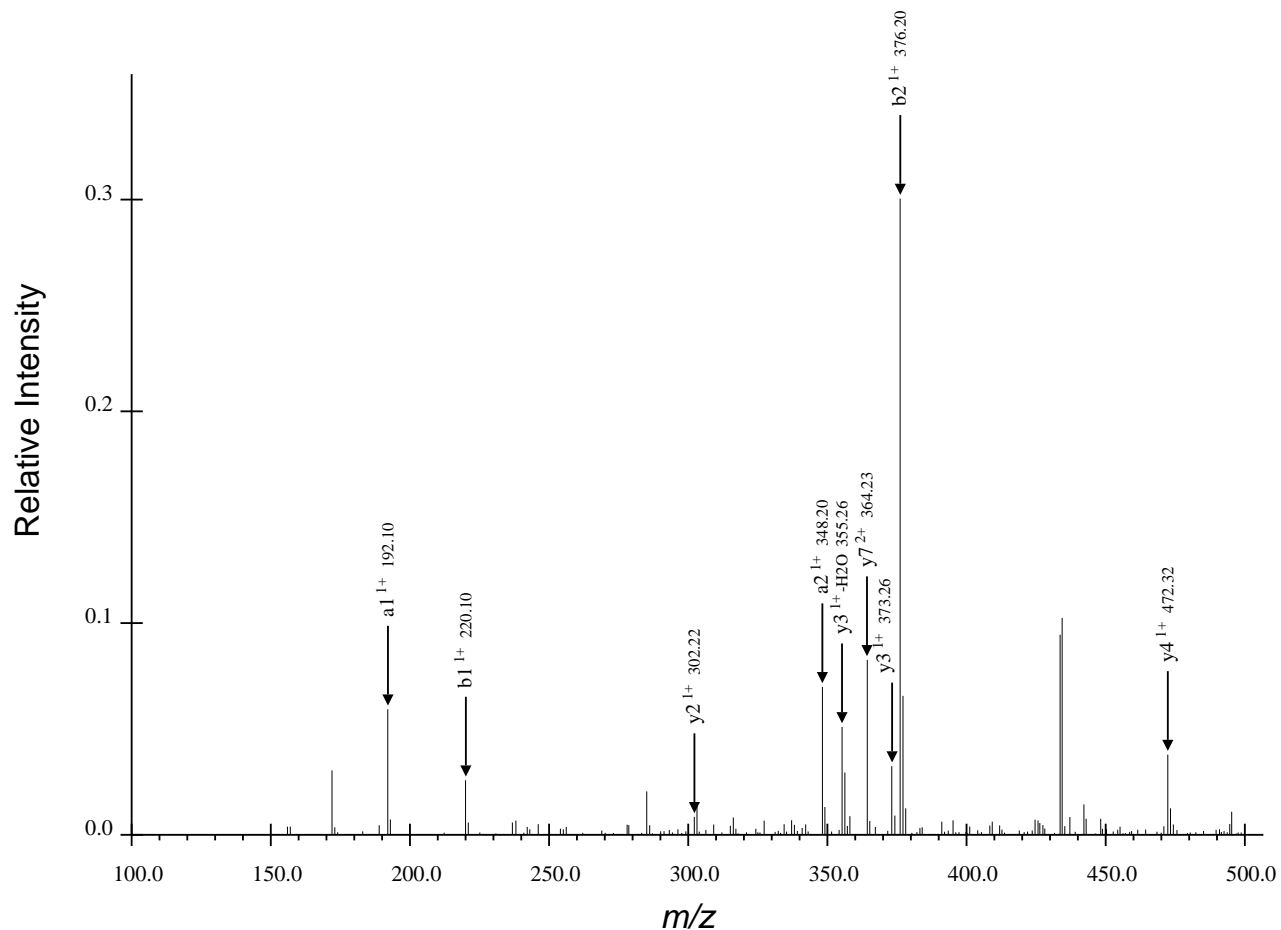

(a) First Region for rYRPGTVALmR, Spectrum 140.dta

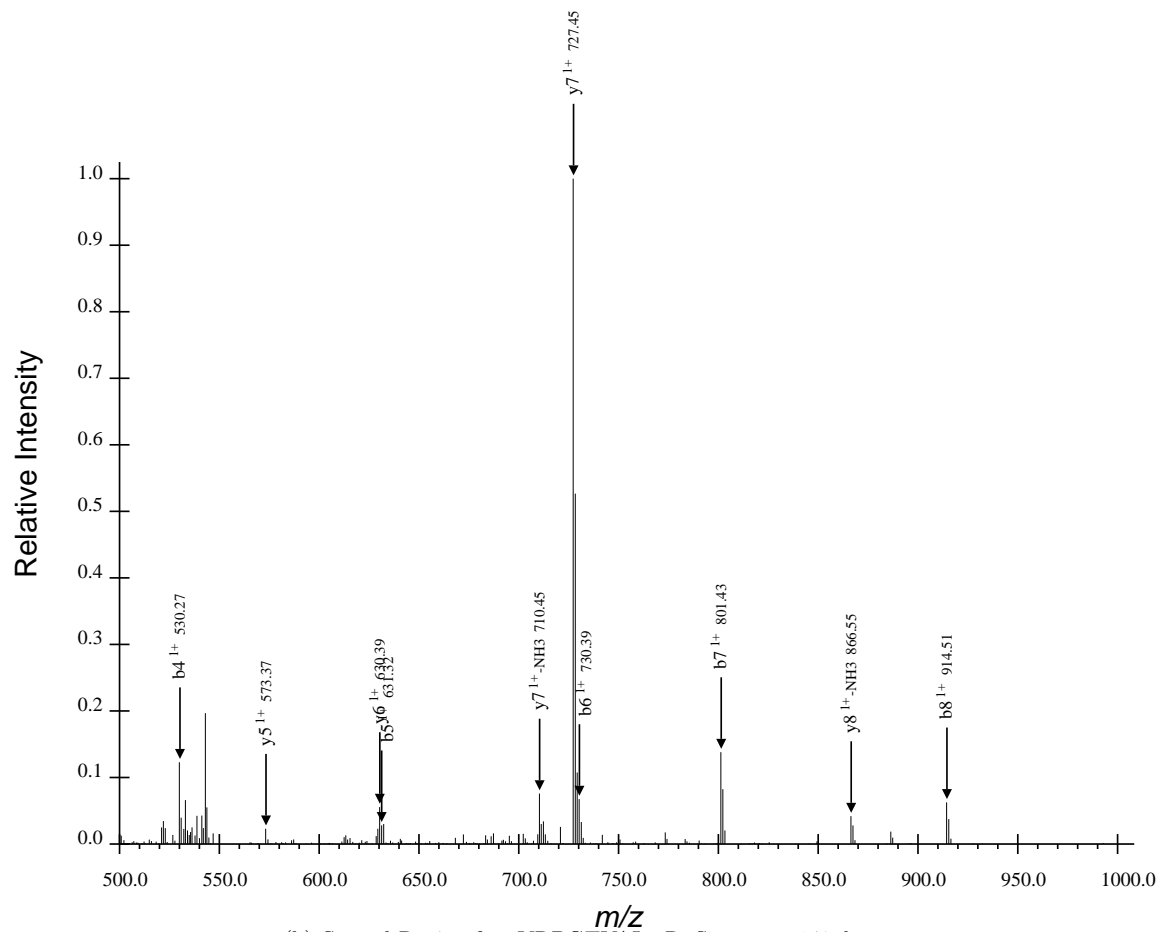

(b) Second Region for rYRPGTVALmR, Spectrum 140.dta

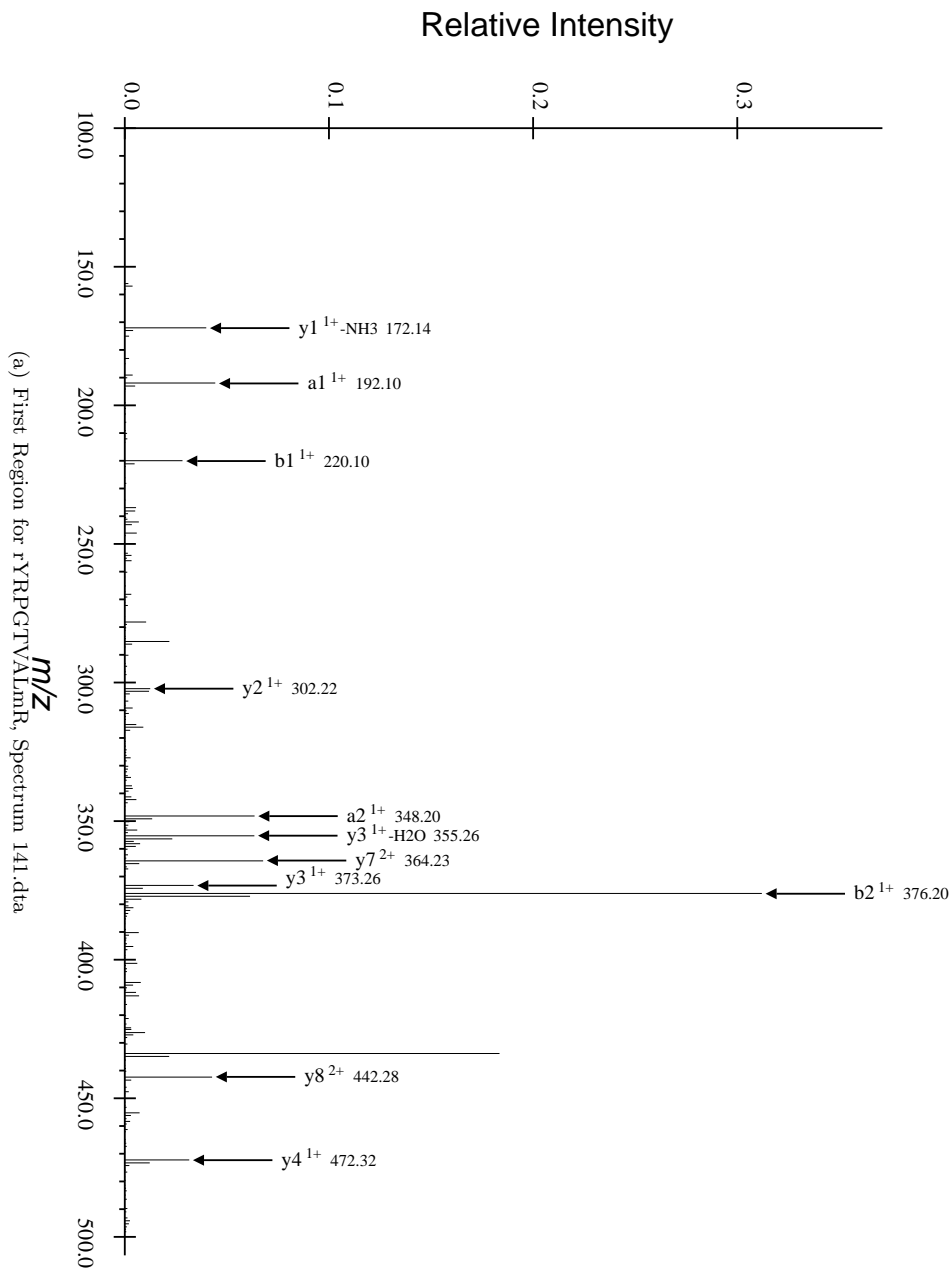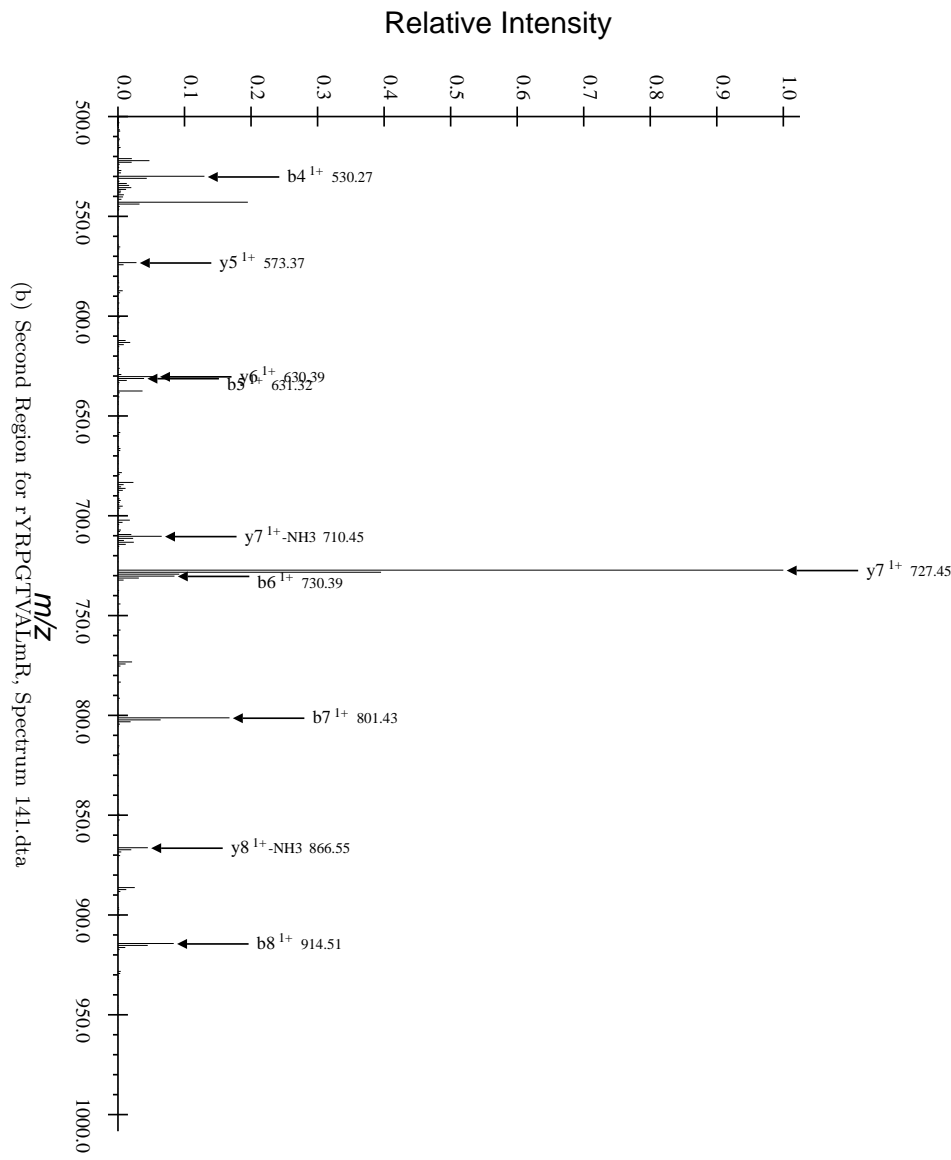

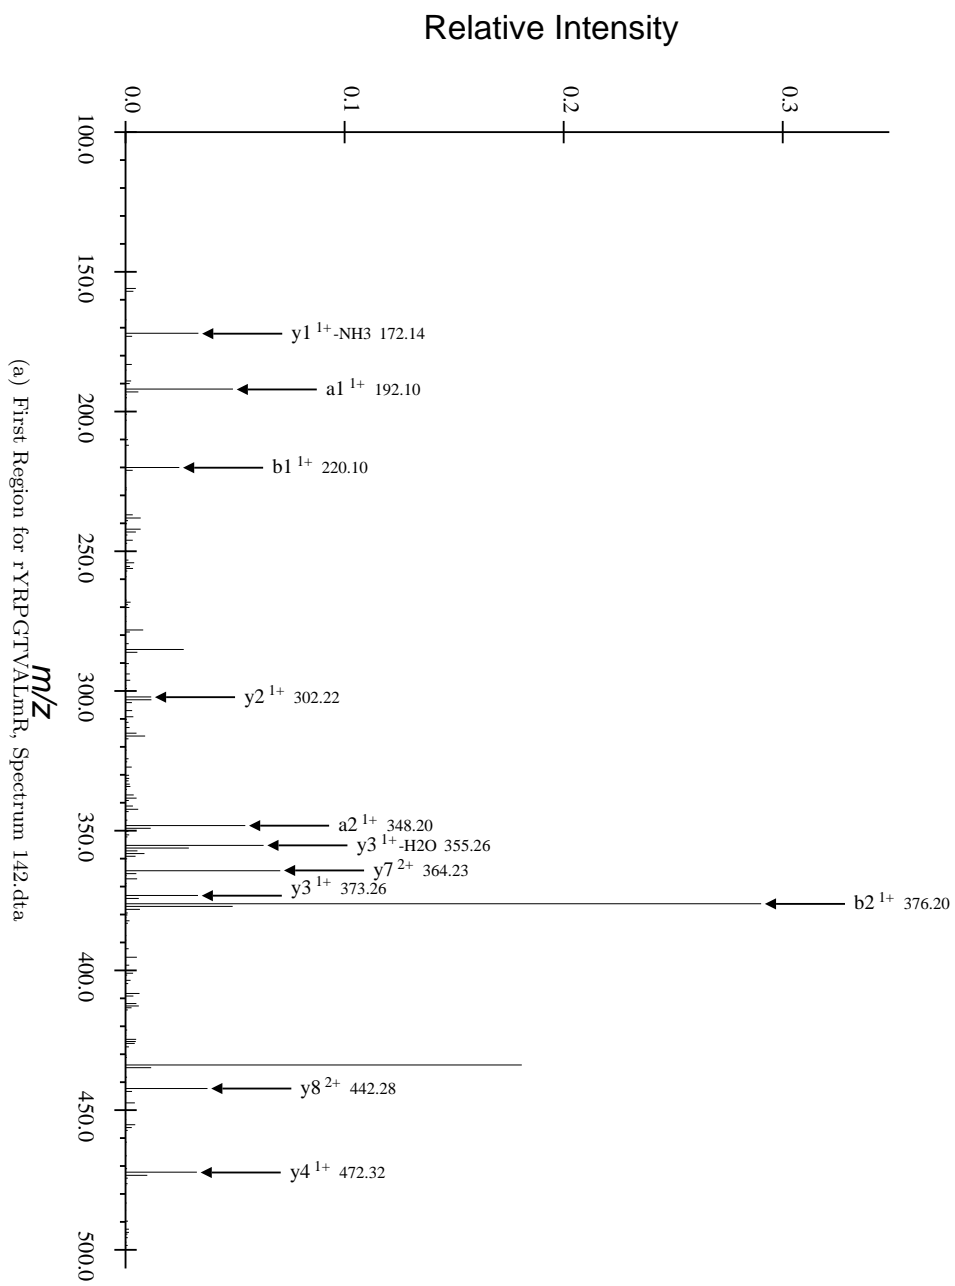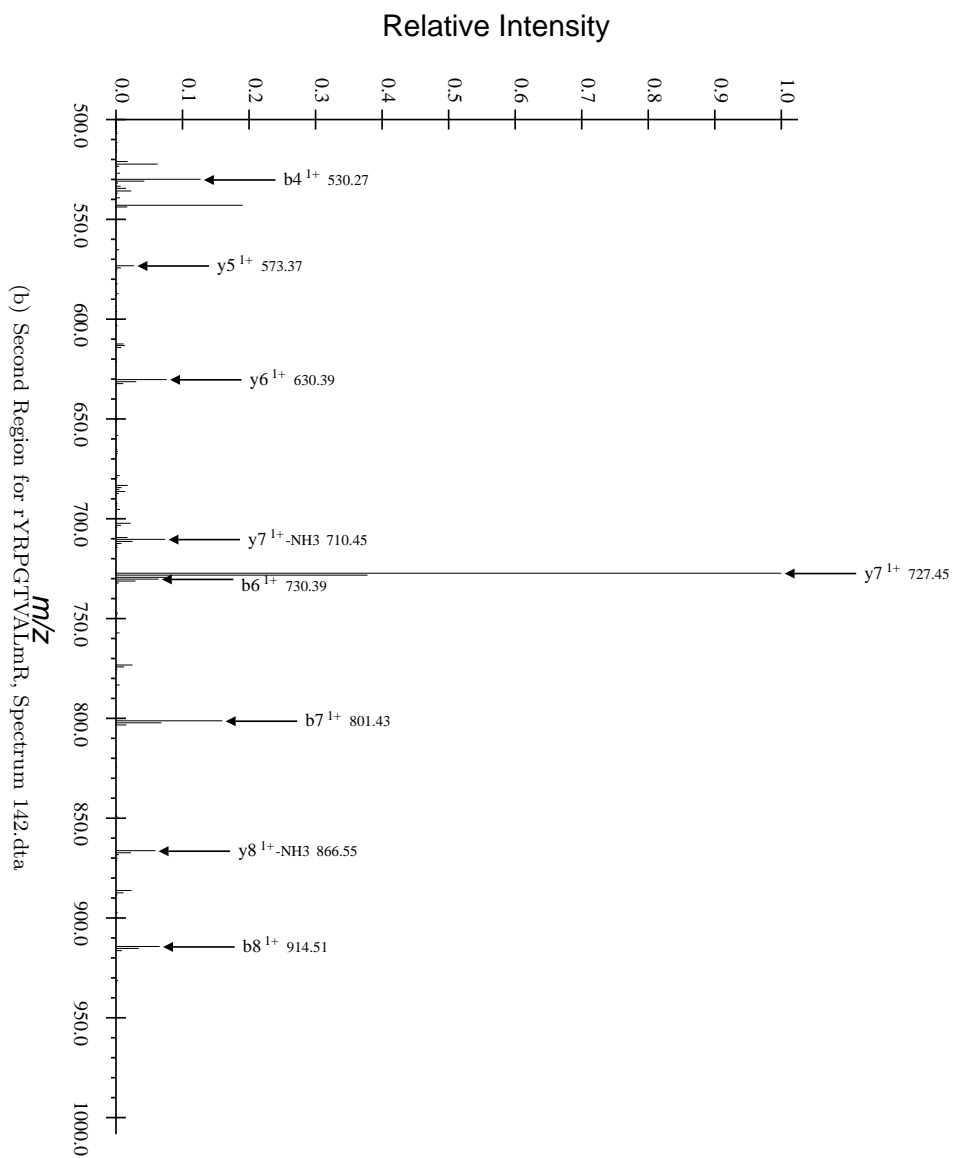

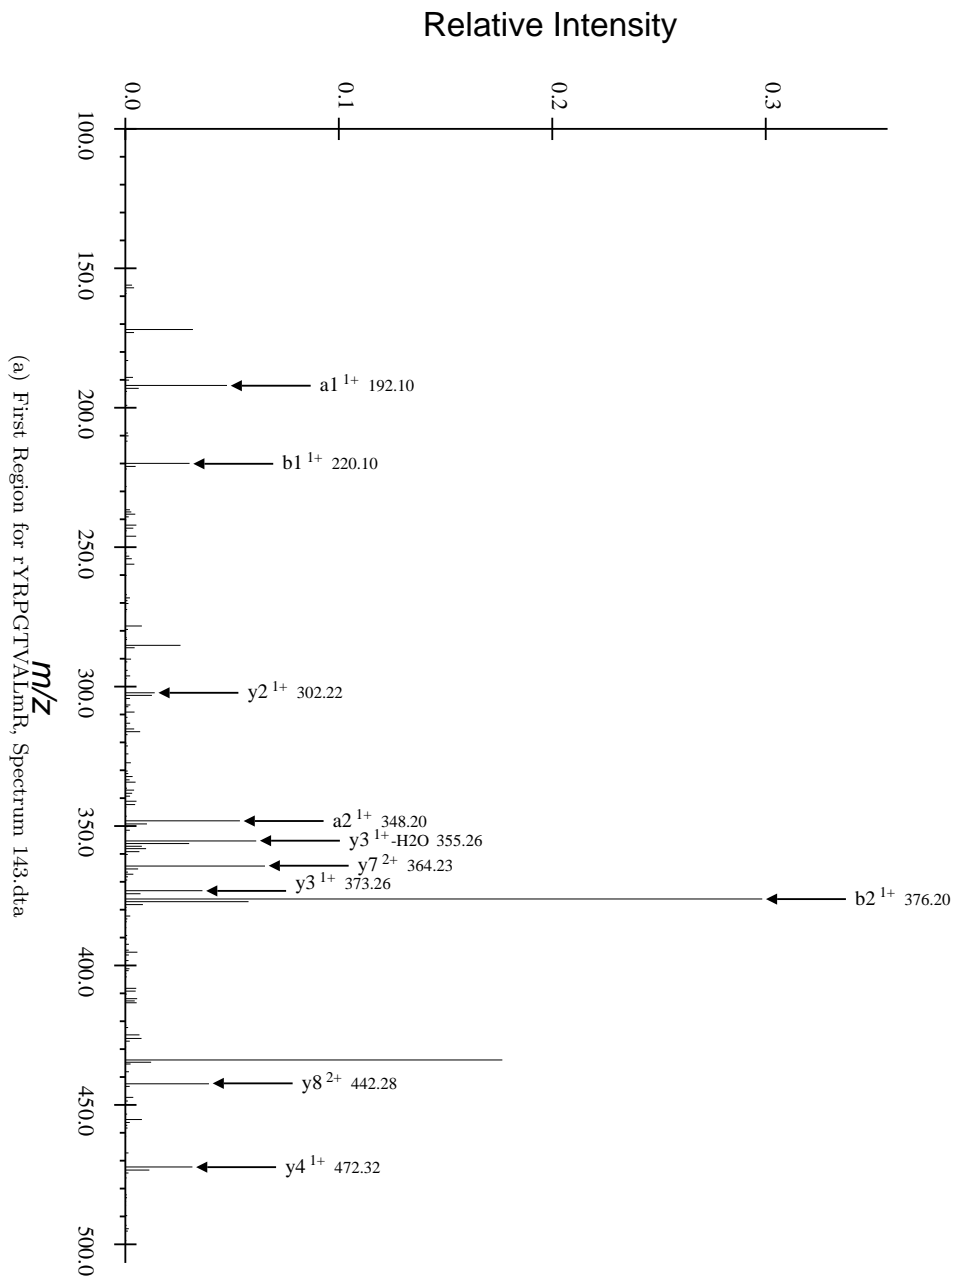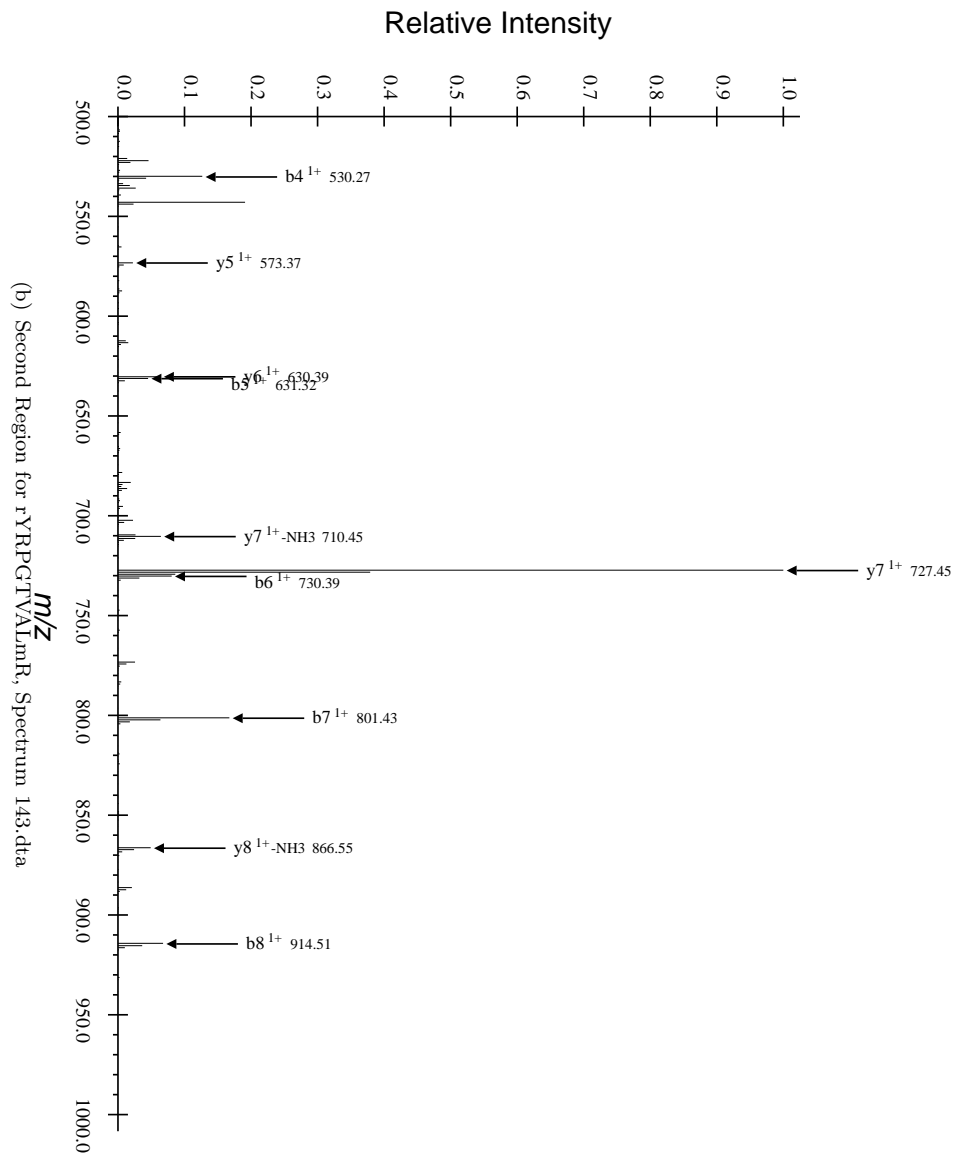

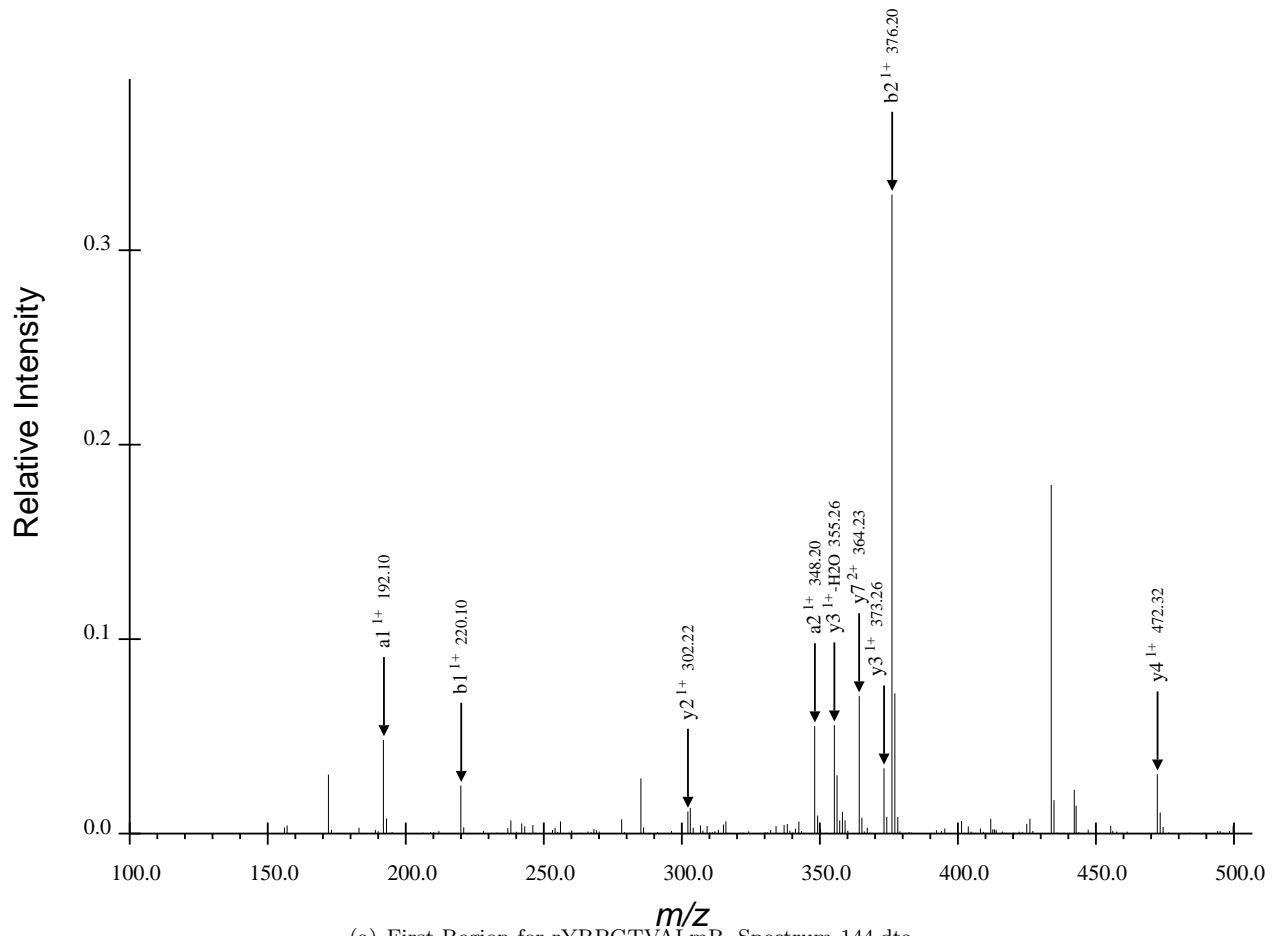

(a) First Region for rYRPGTVALmR, Spectrum 144.dta

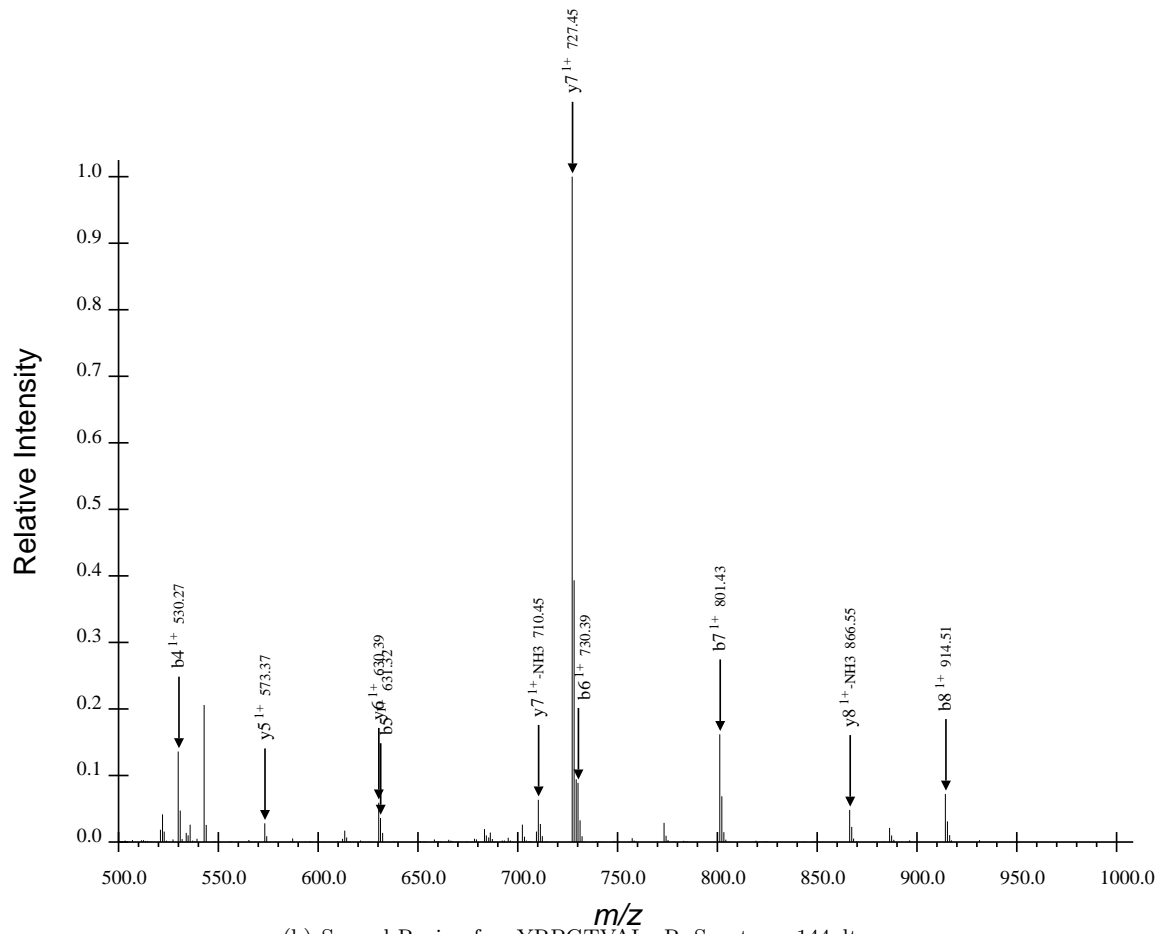

(b) Second Region for rYRPGTVALmR, Spectrum 144.dta



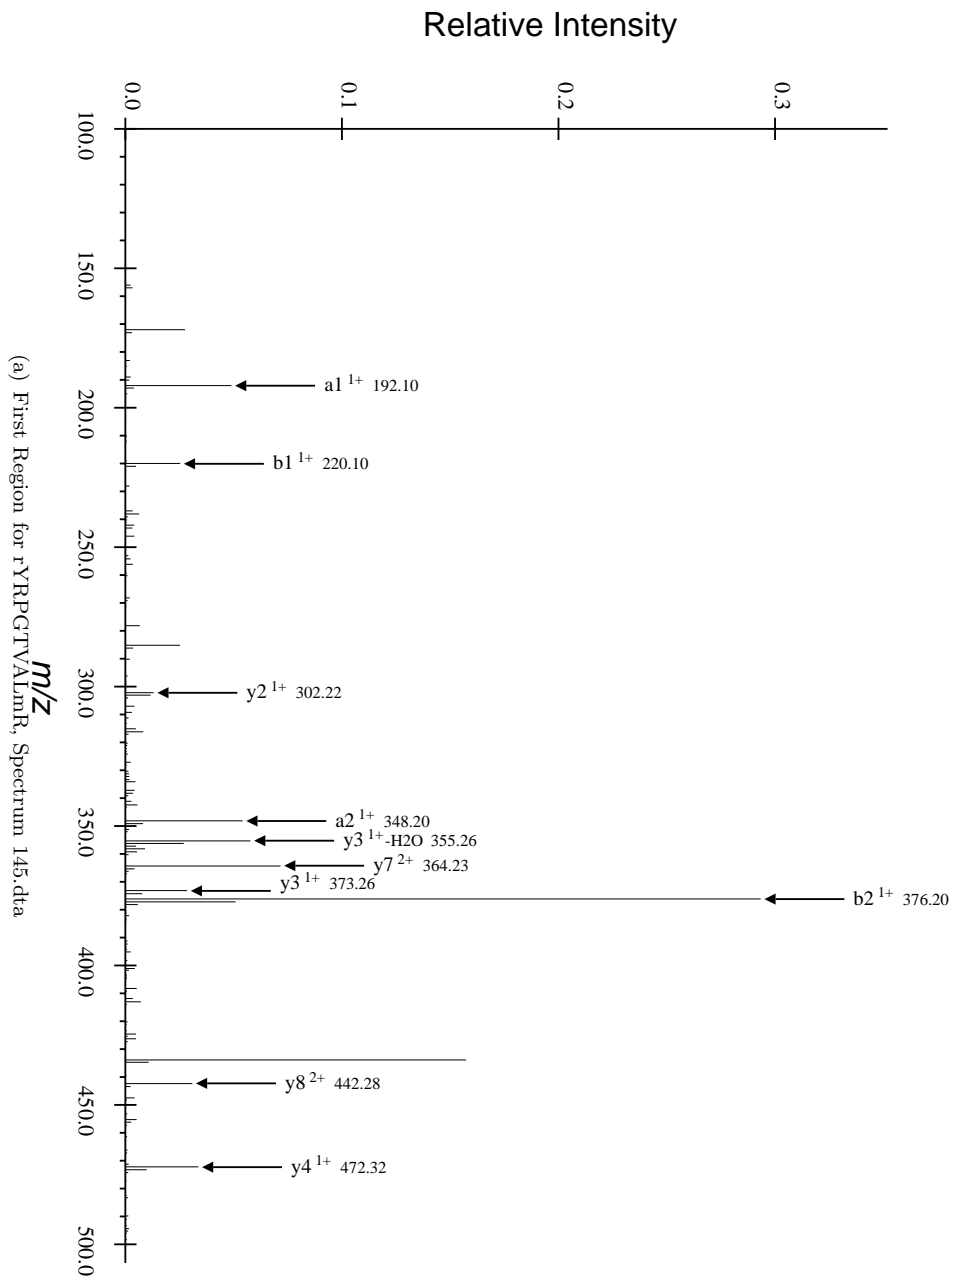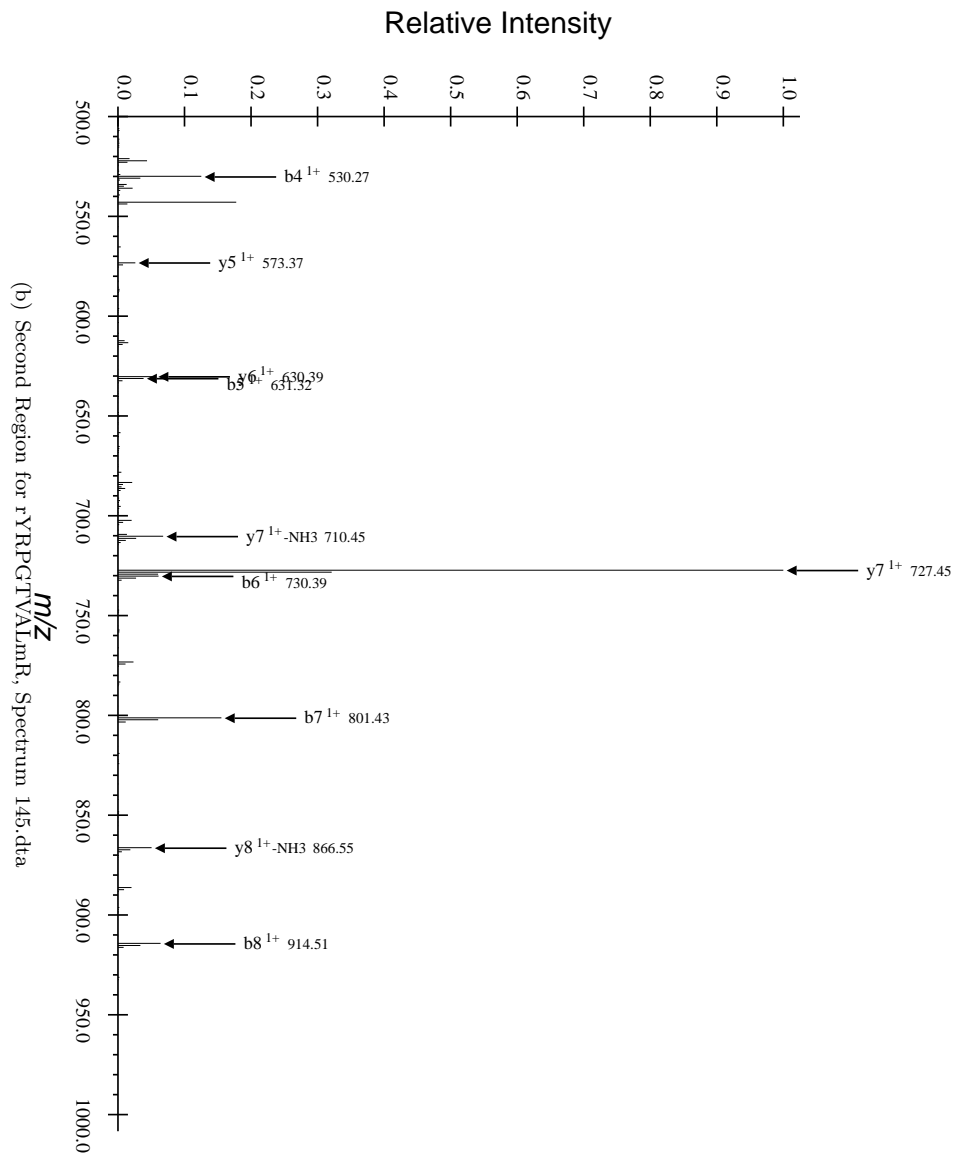

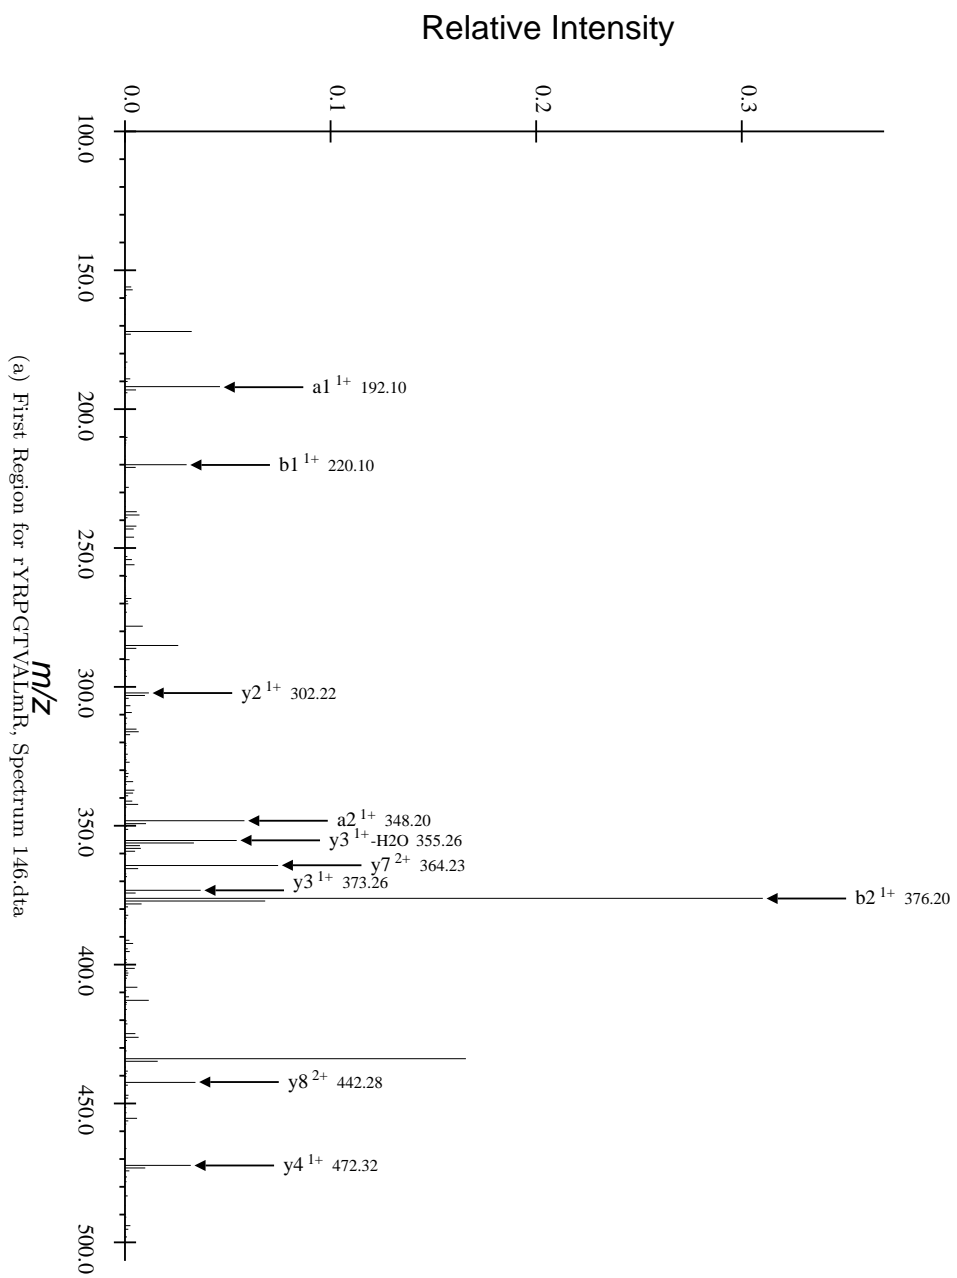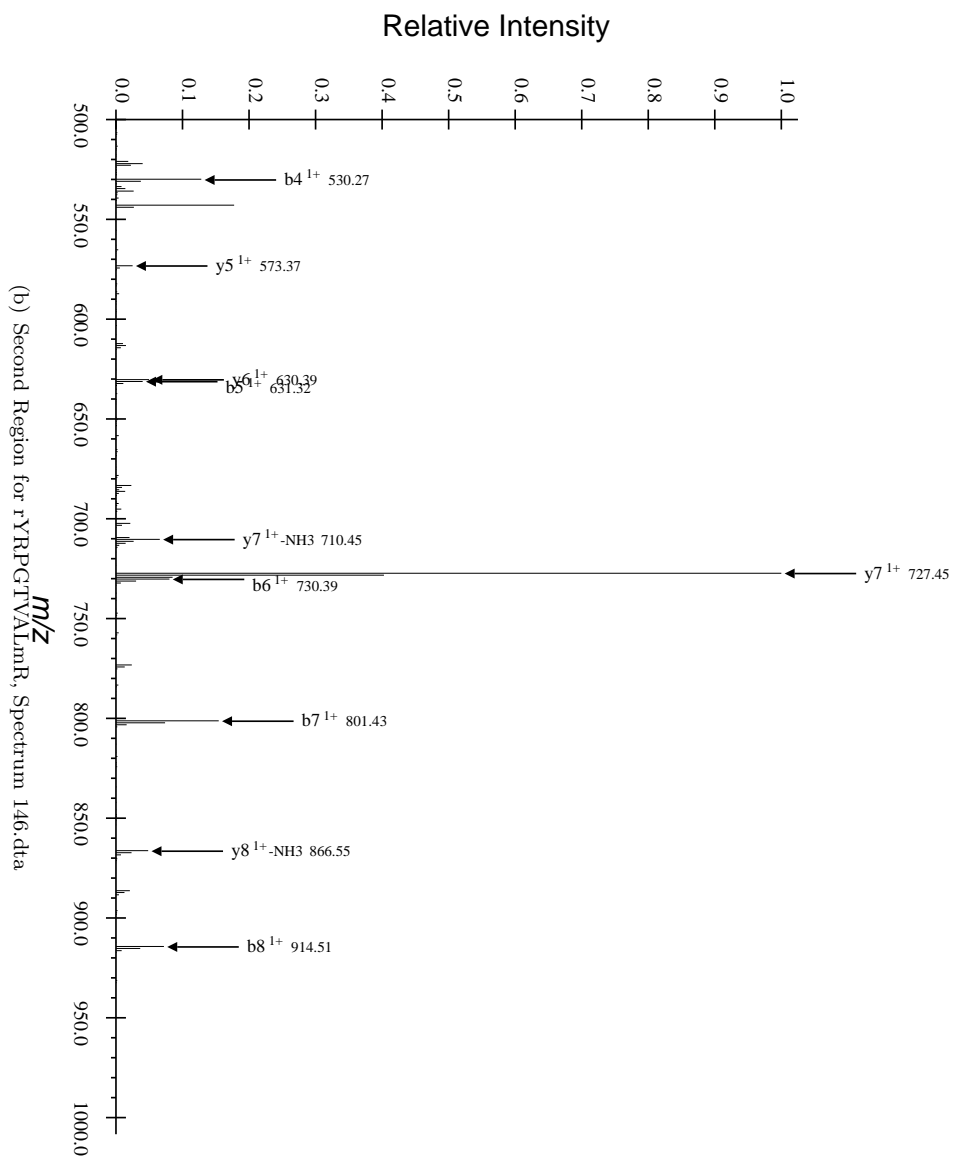

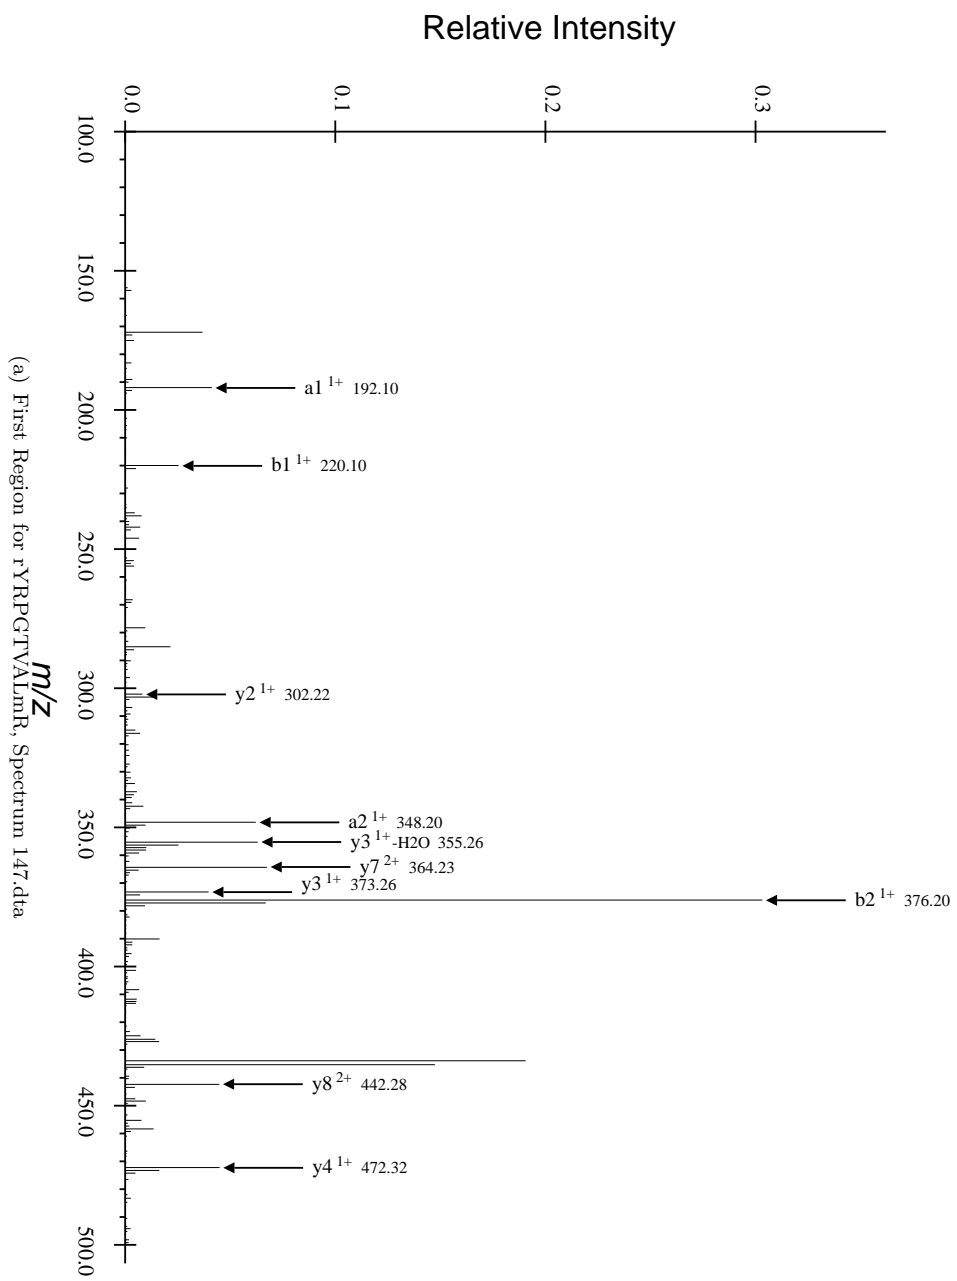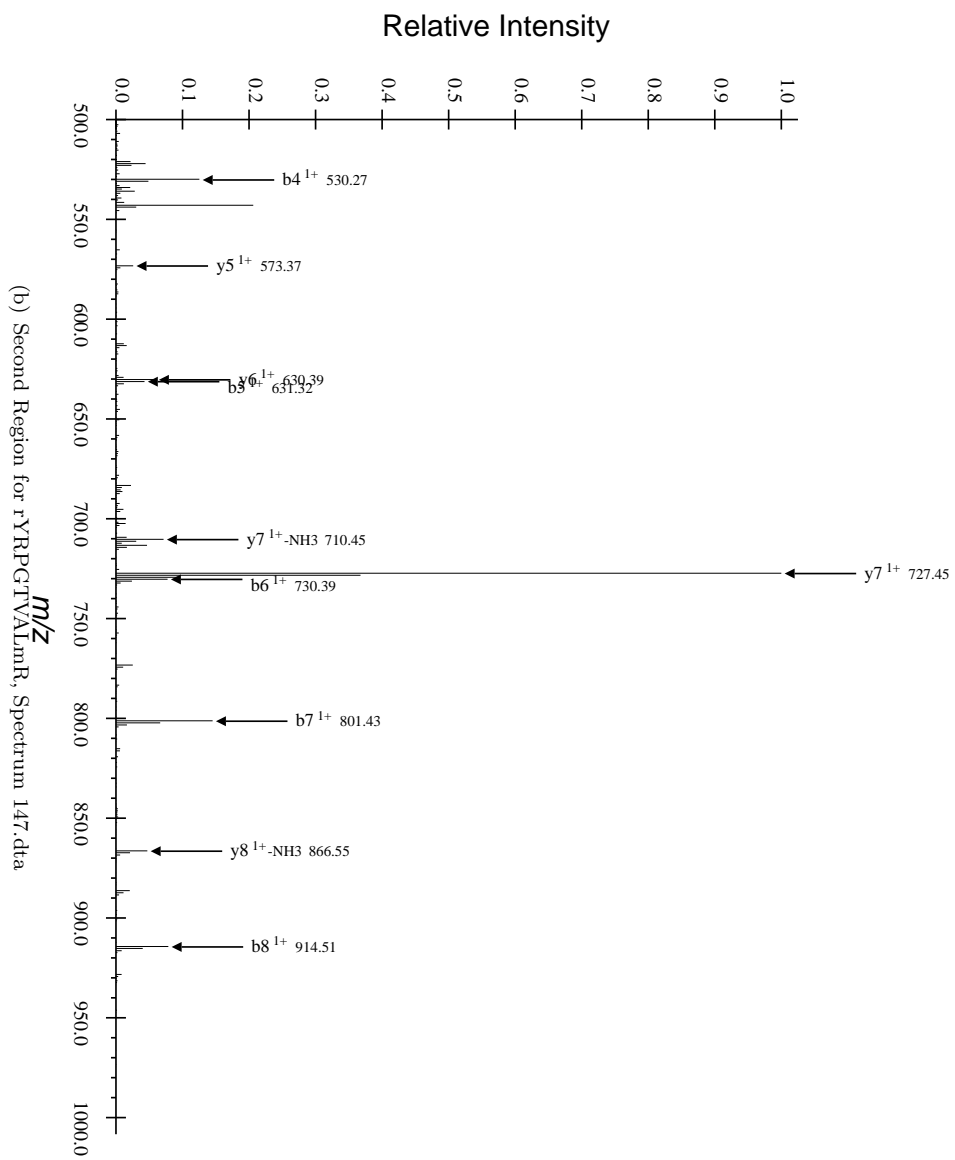

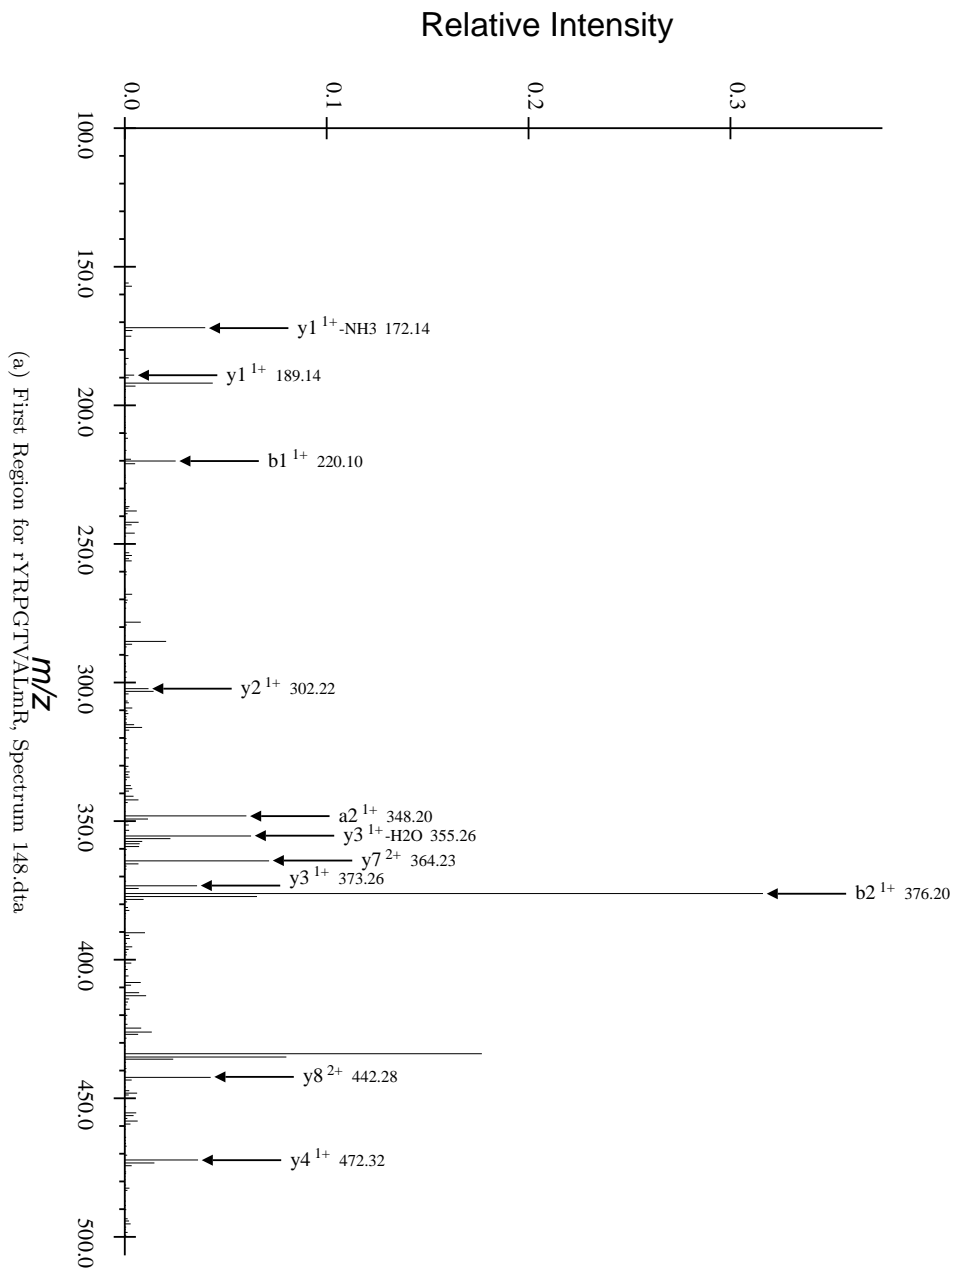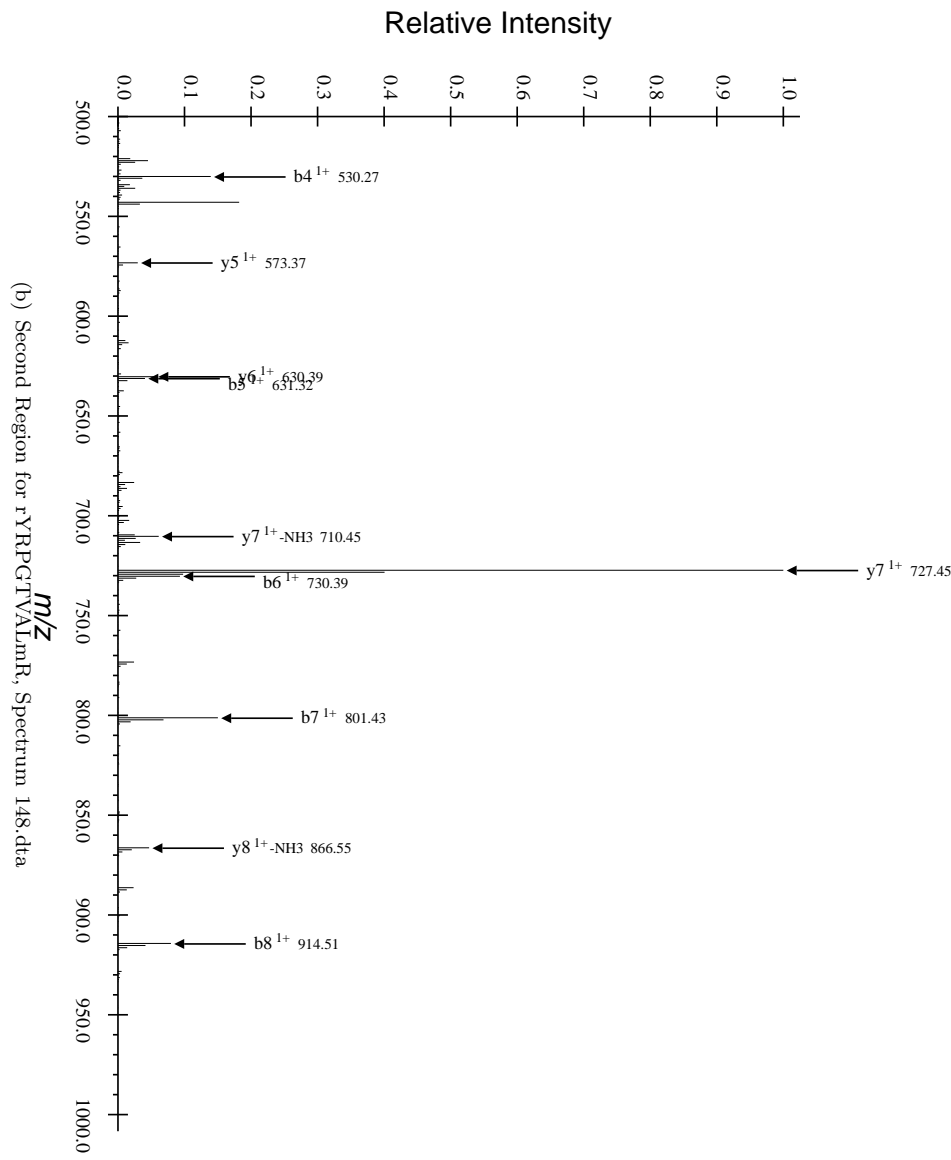

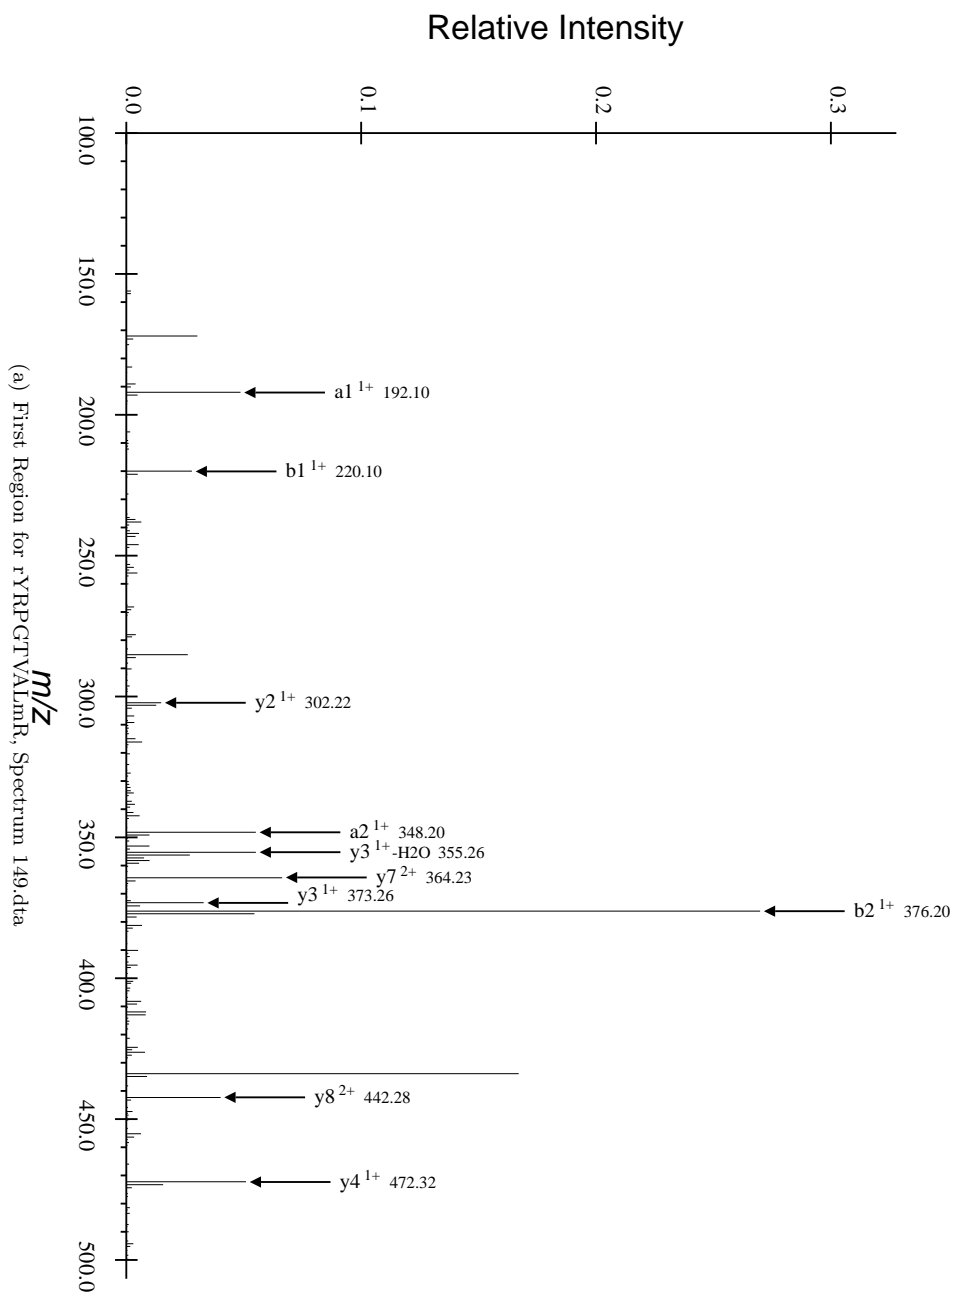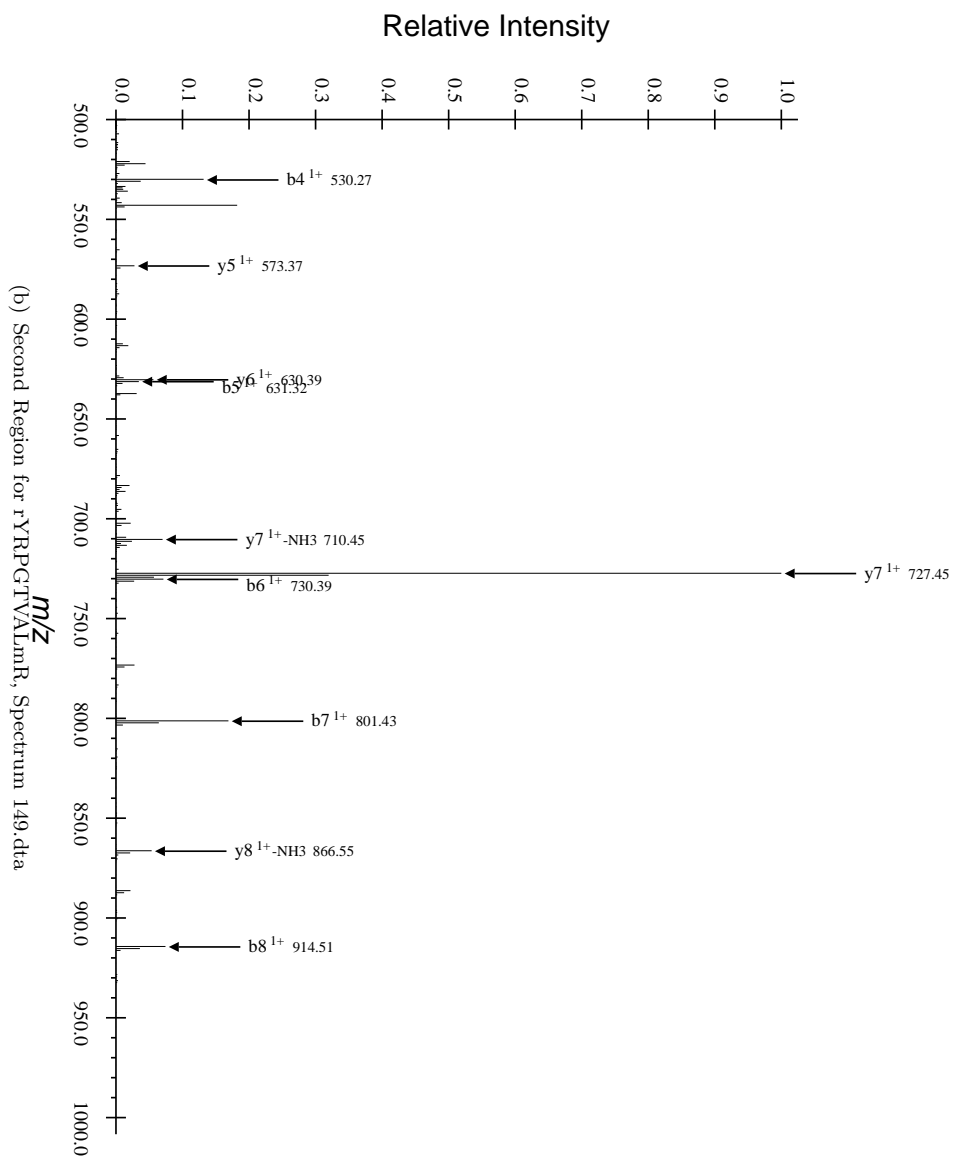

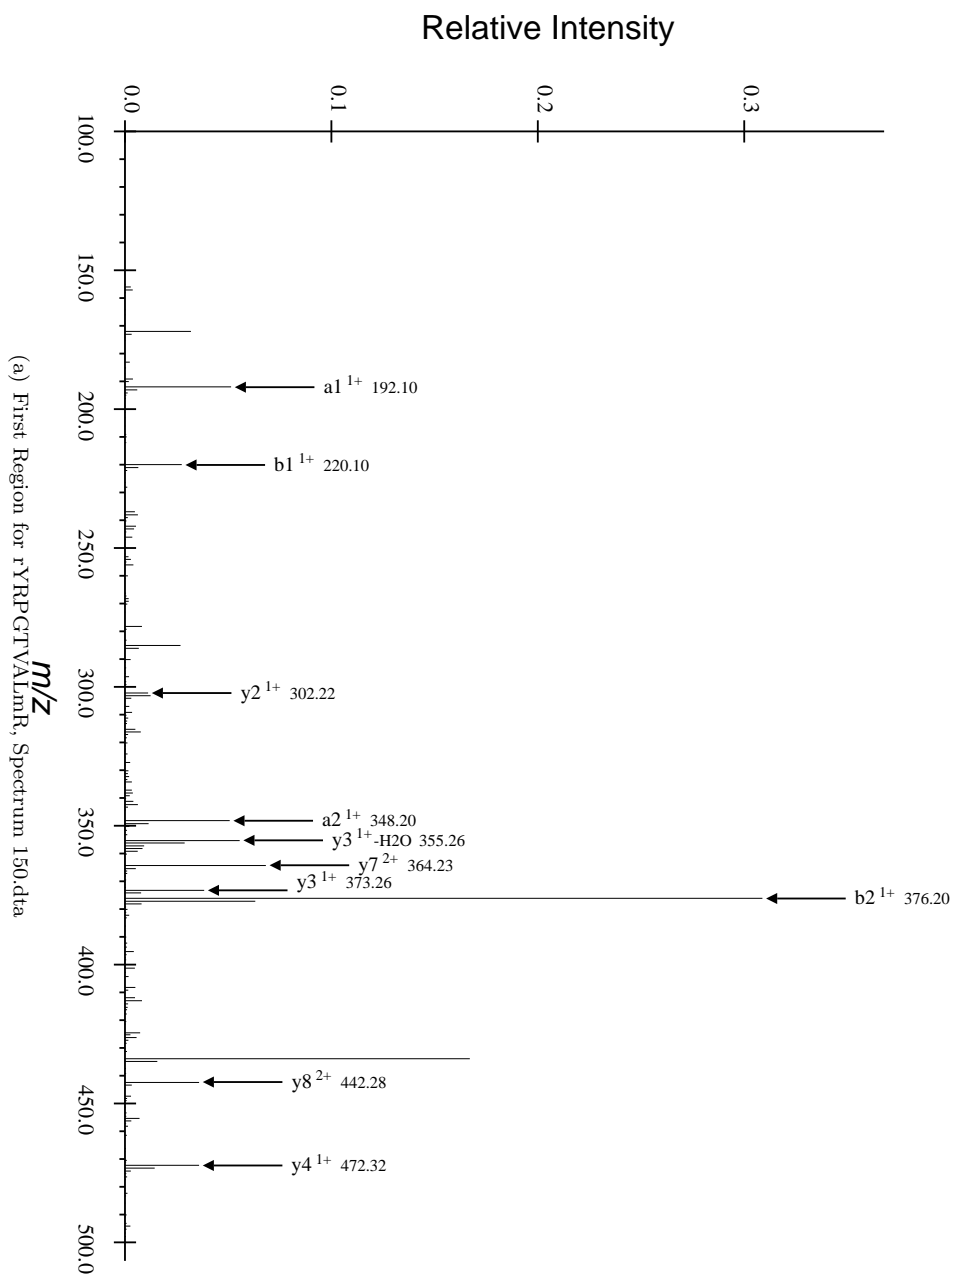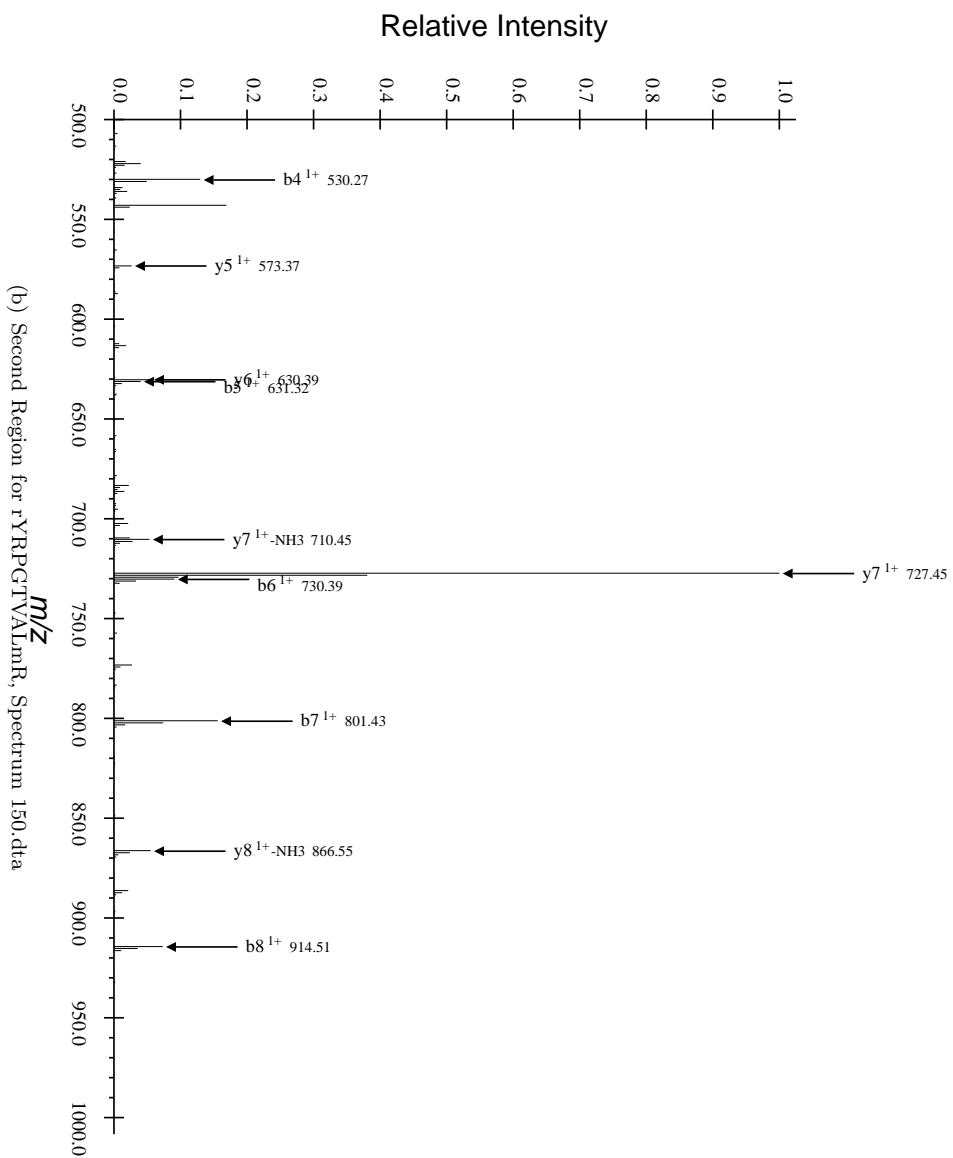

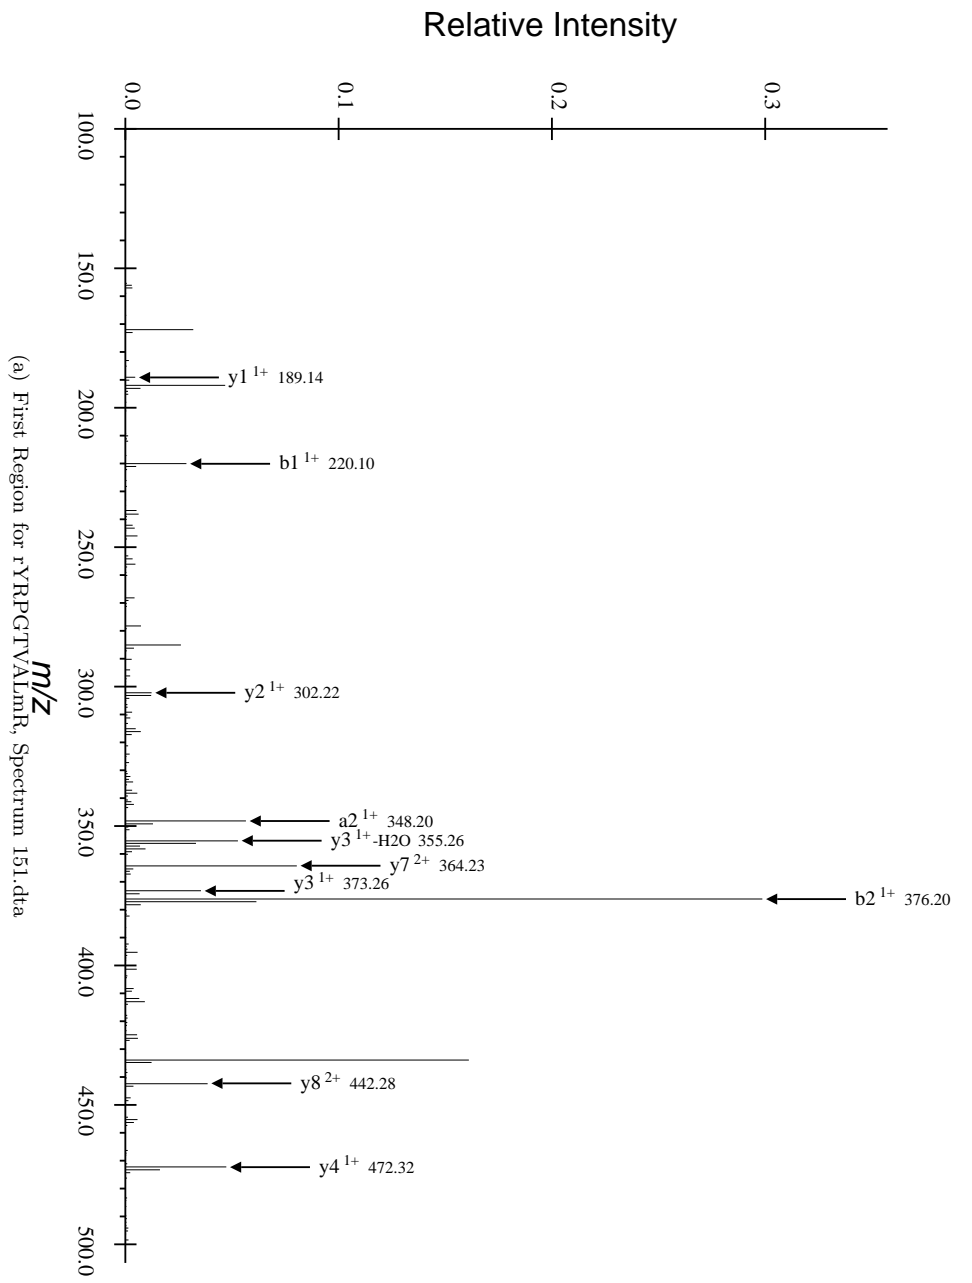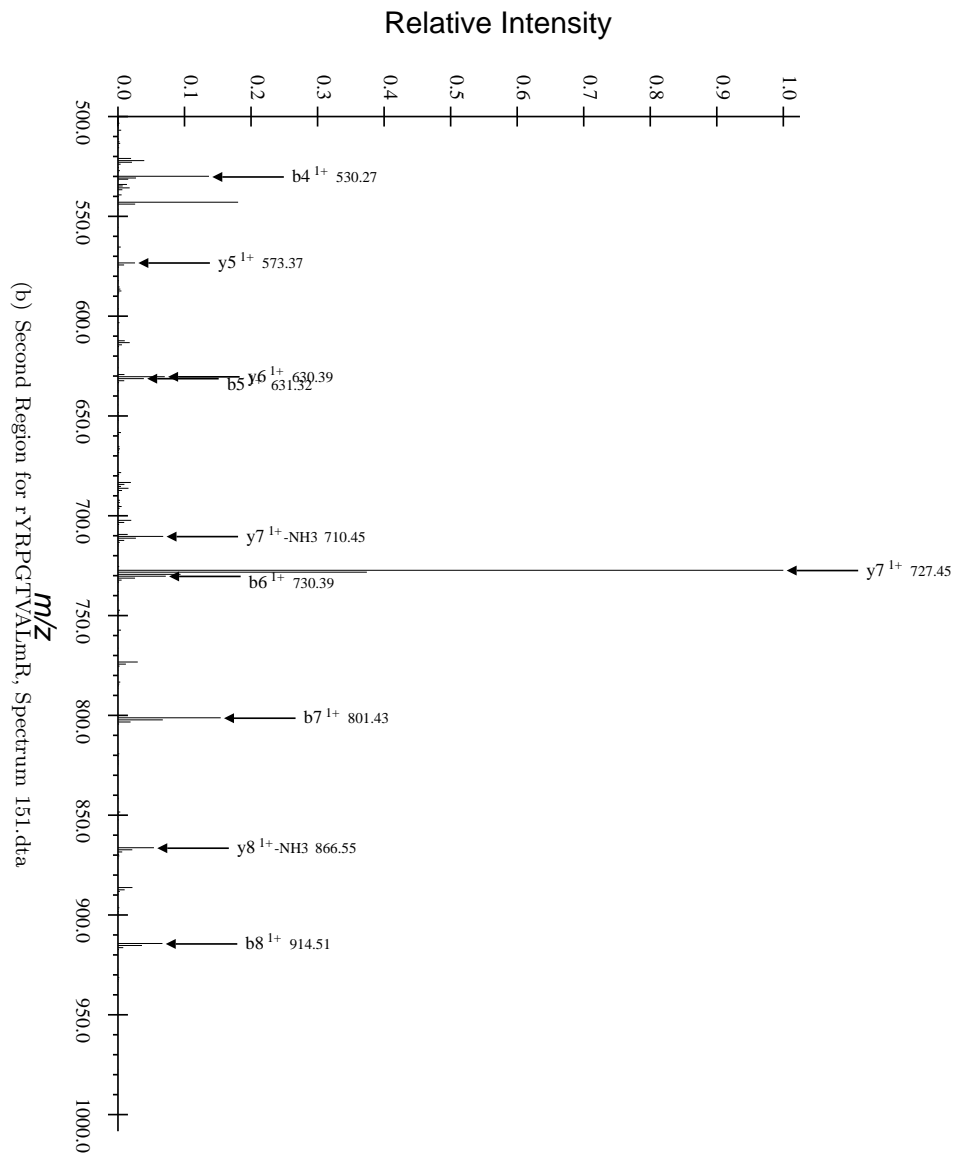

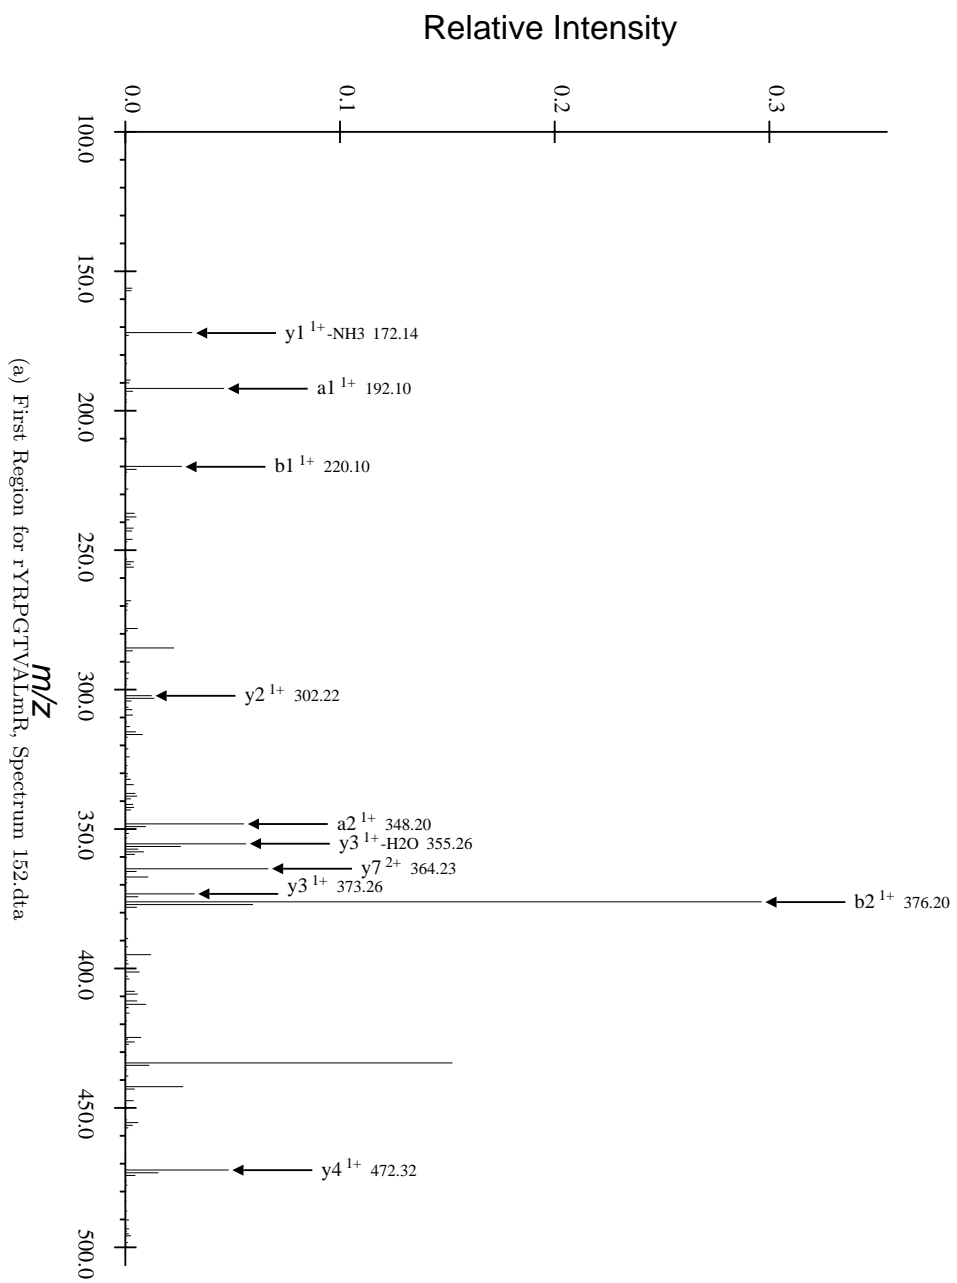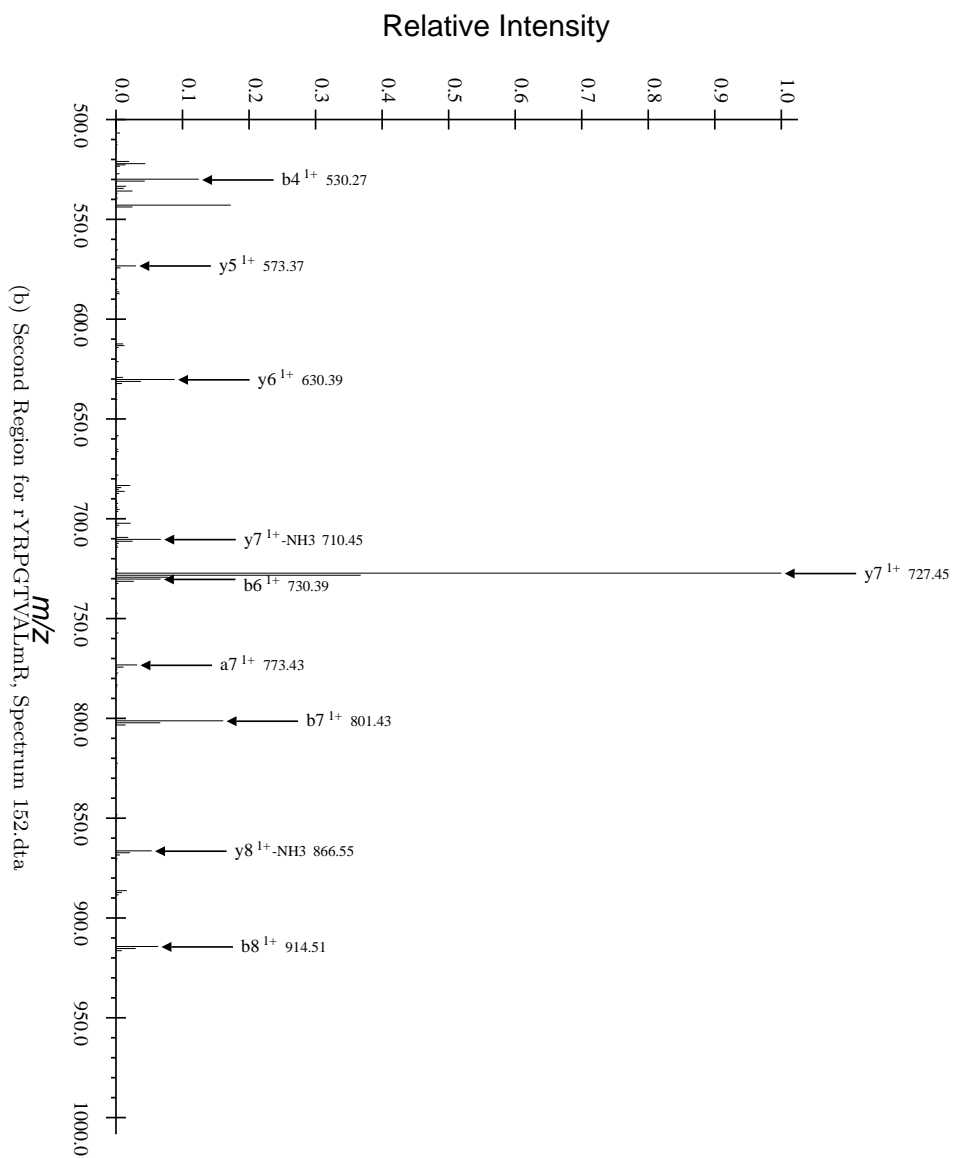



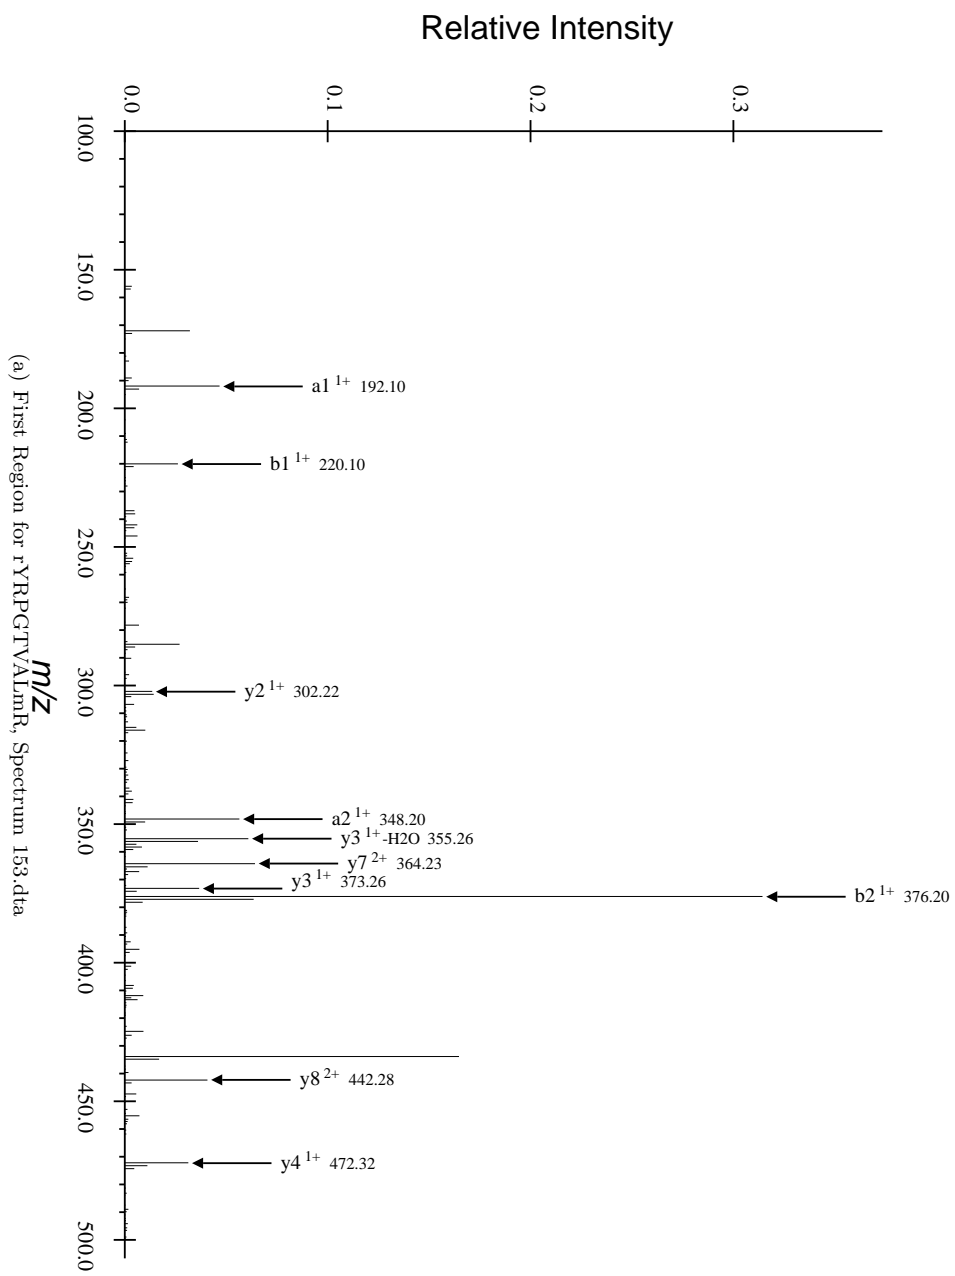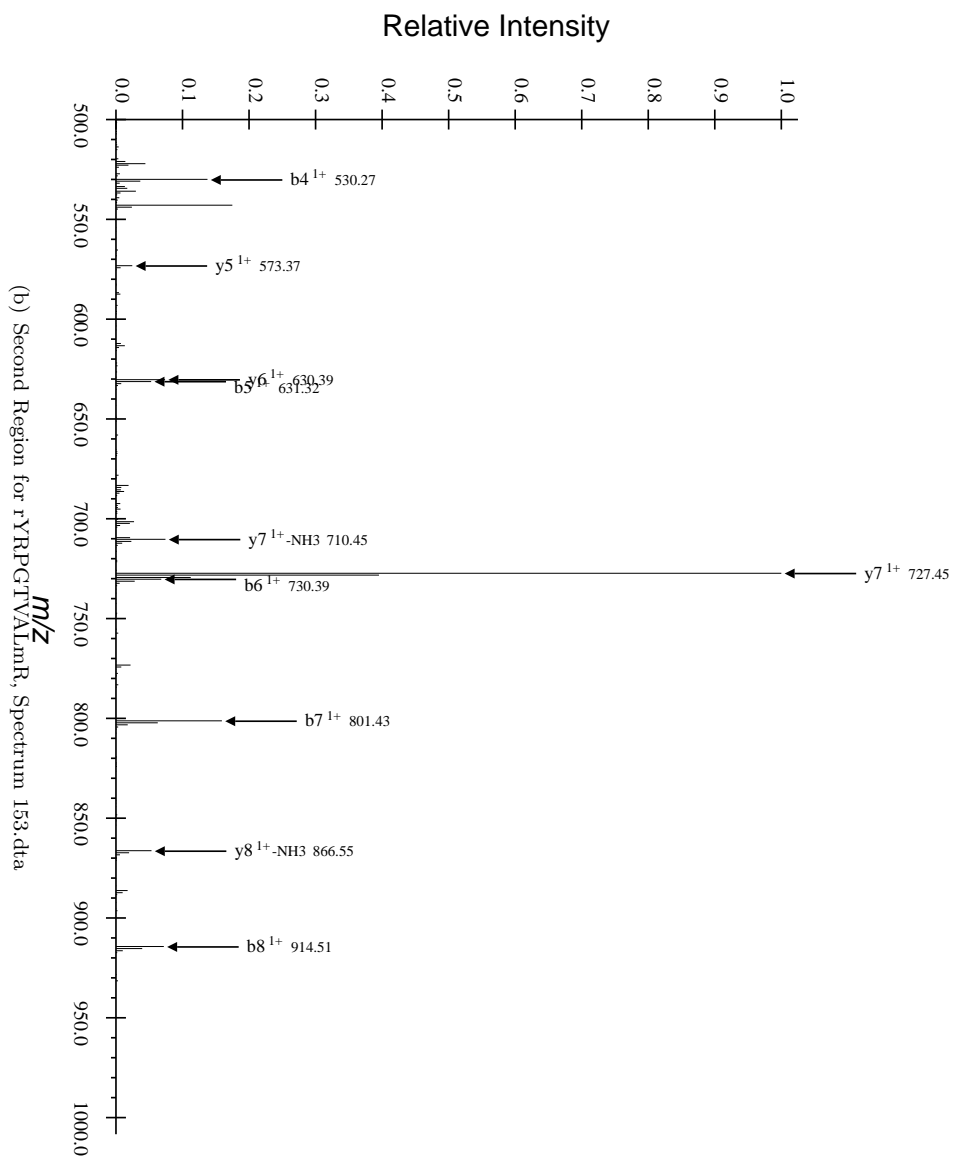

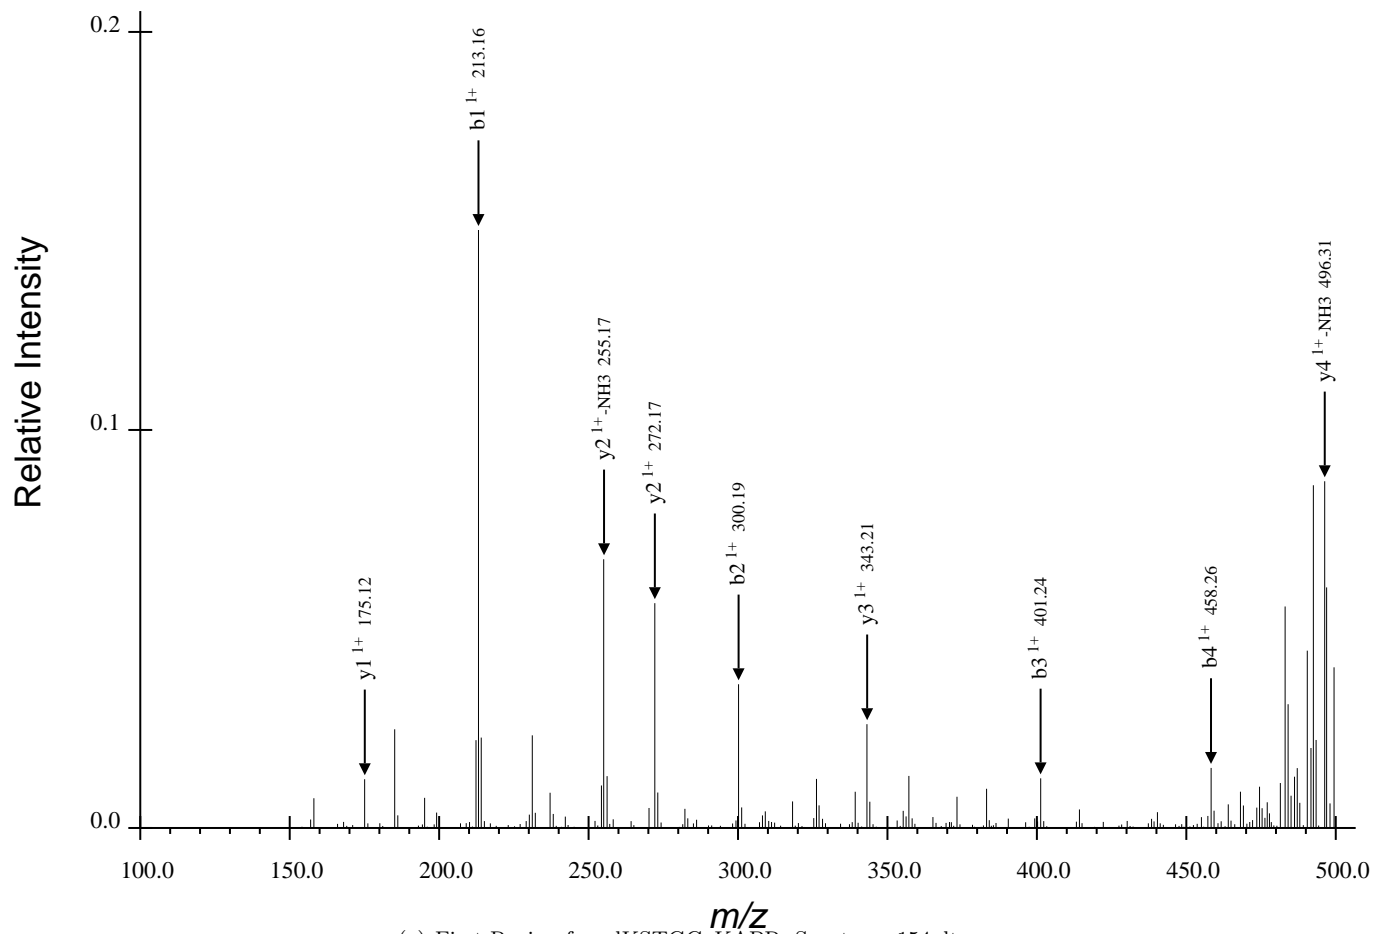

(a) First Region for rdKSTGGaKAPR, Spectrum 154.dta

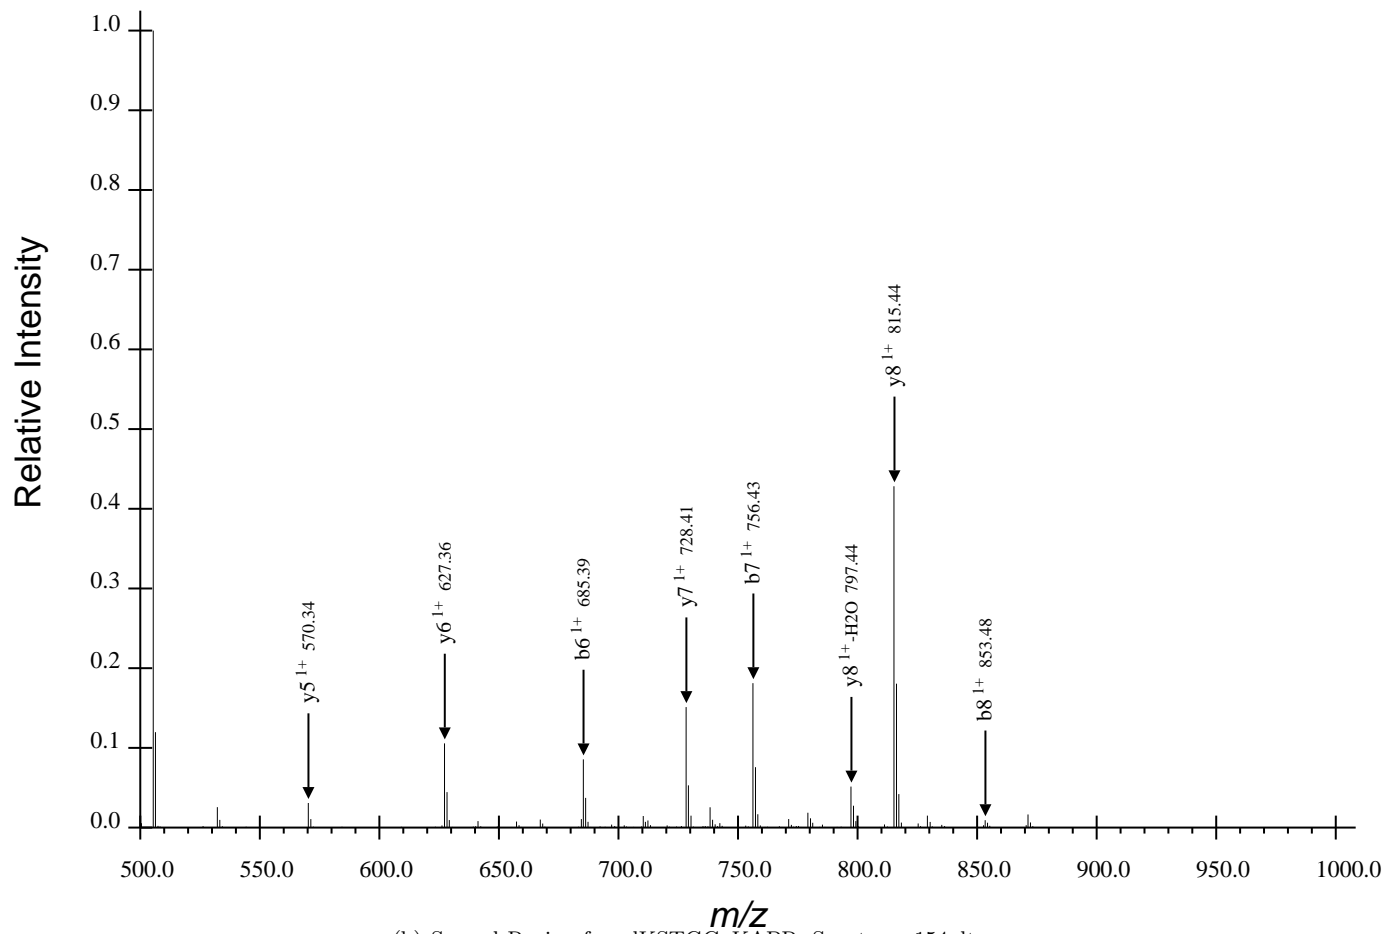

(b) Second Region for rdKSTGGaKAPR, Spectrum 154.dta

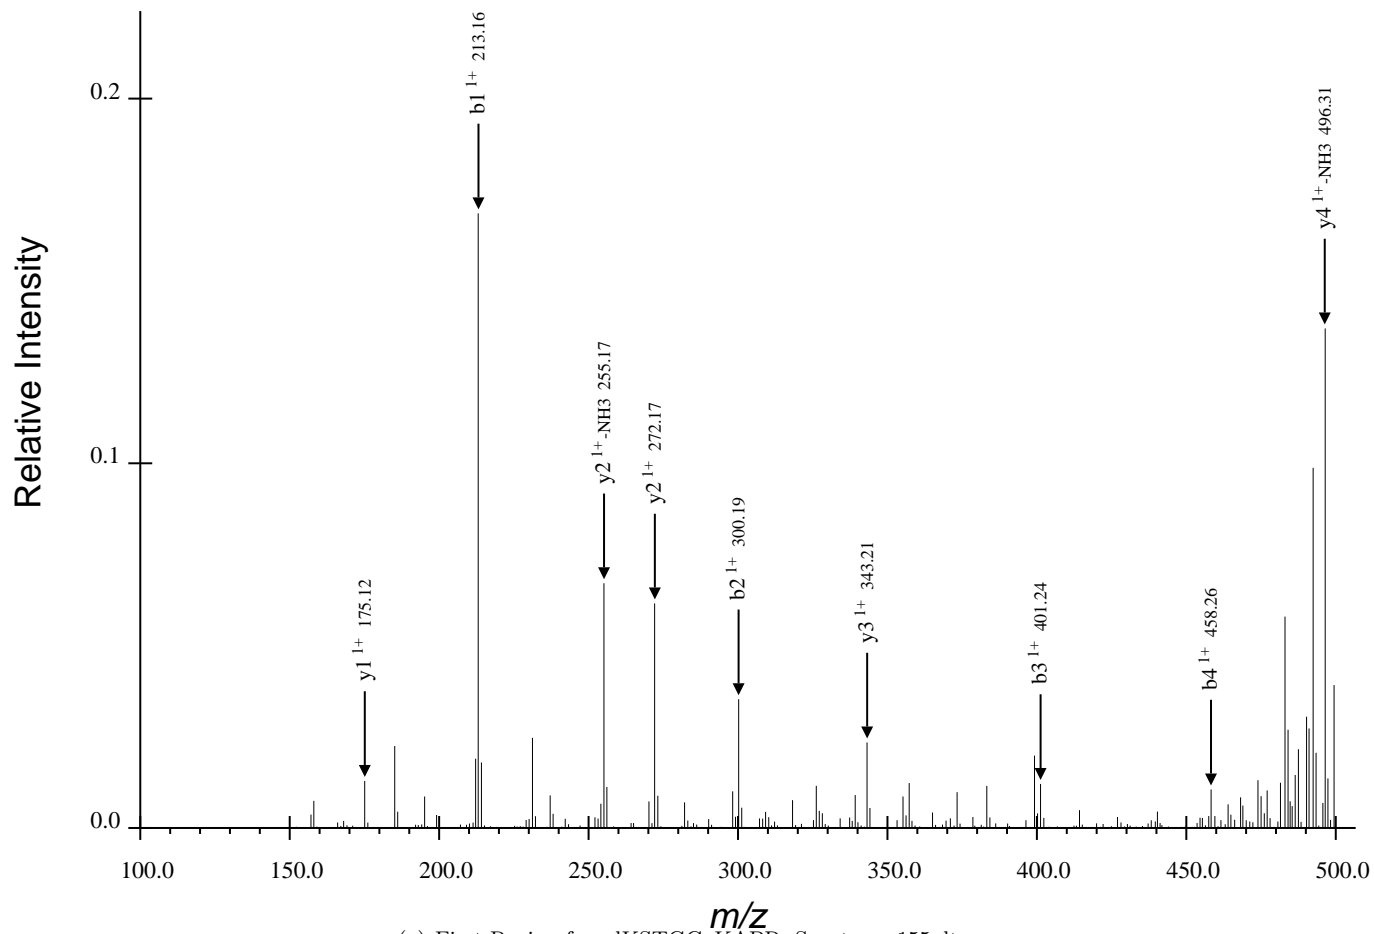

(a) First Region for rdKSTGGaKAPR, Spectrum 155.dta

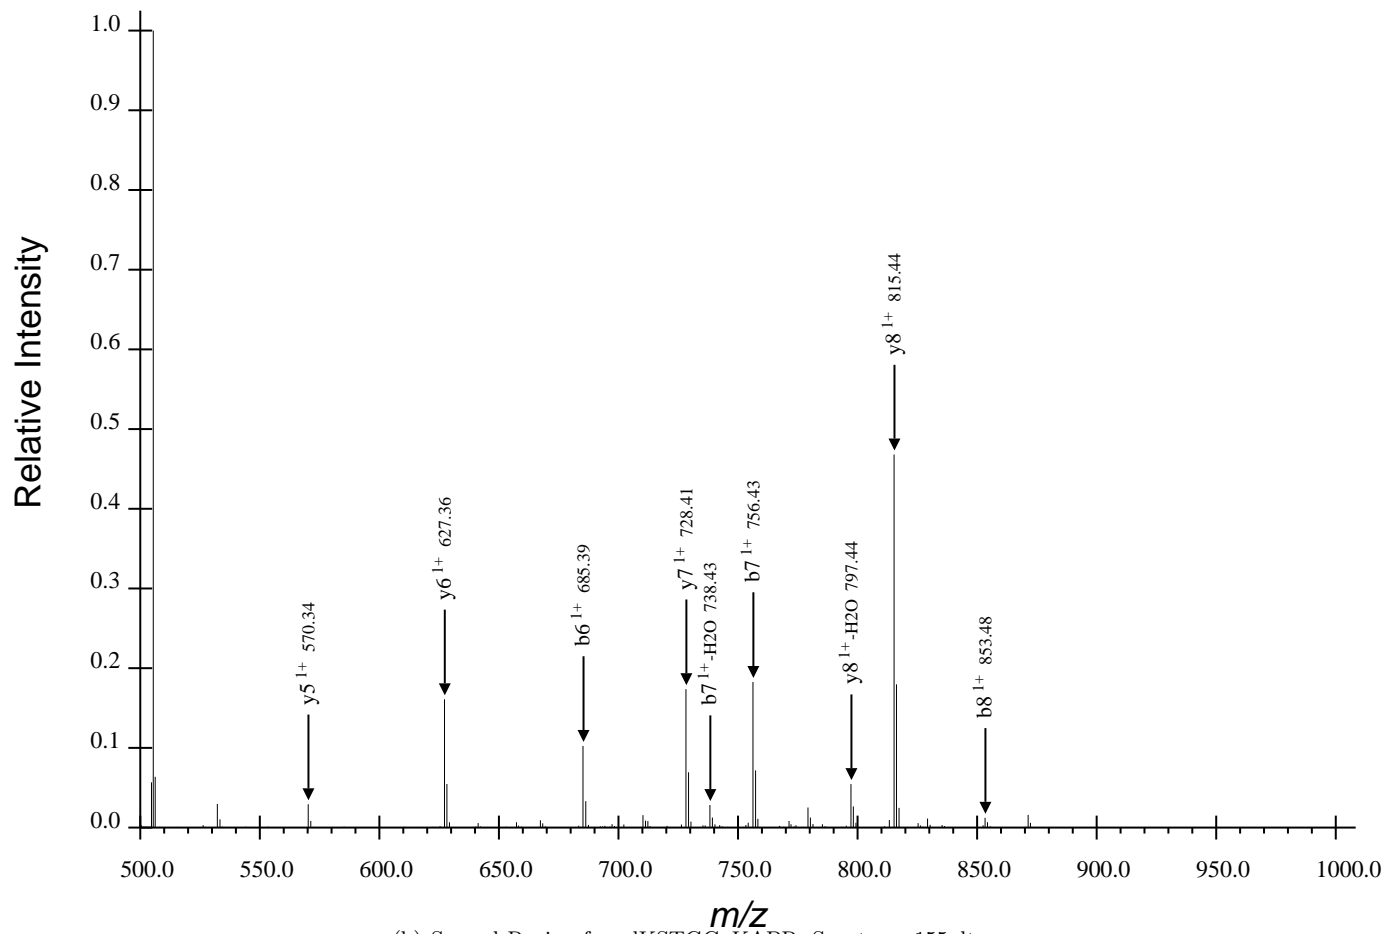

(b) Second Region for rdKSTGGaKAPR, Spectrum 155.dta

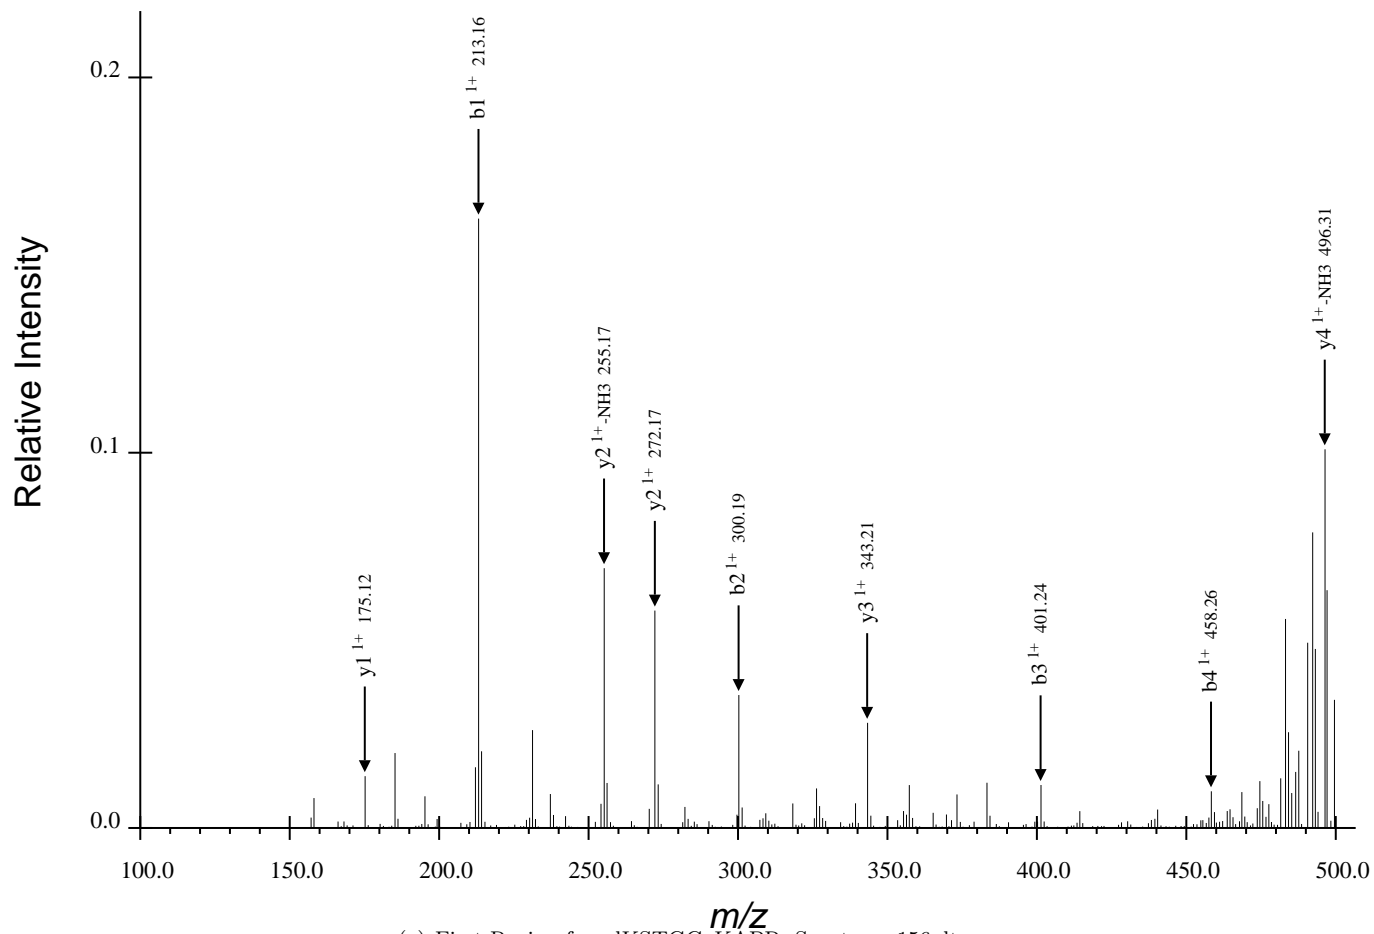

(a) First Region for rdKSTGGaKAPR, Spectrum 156.dta

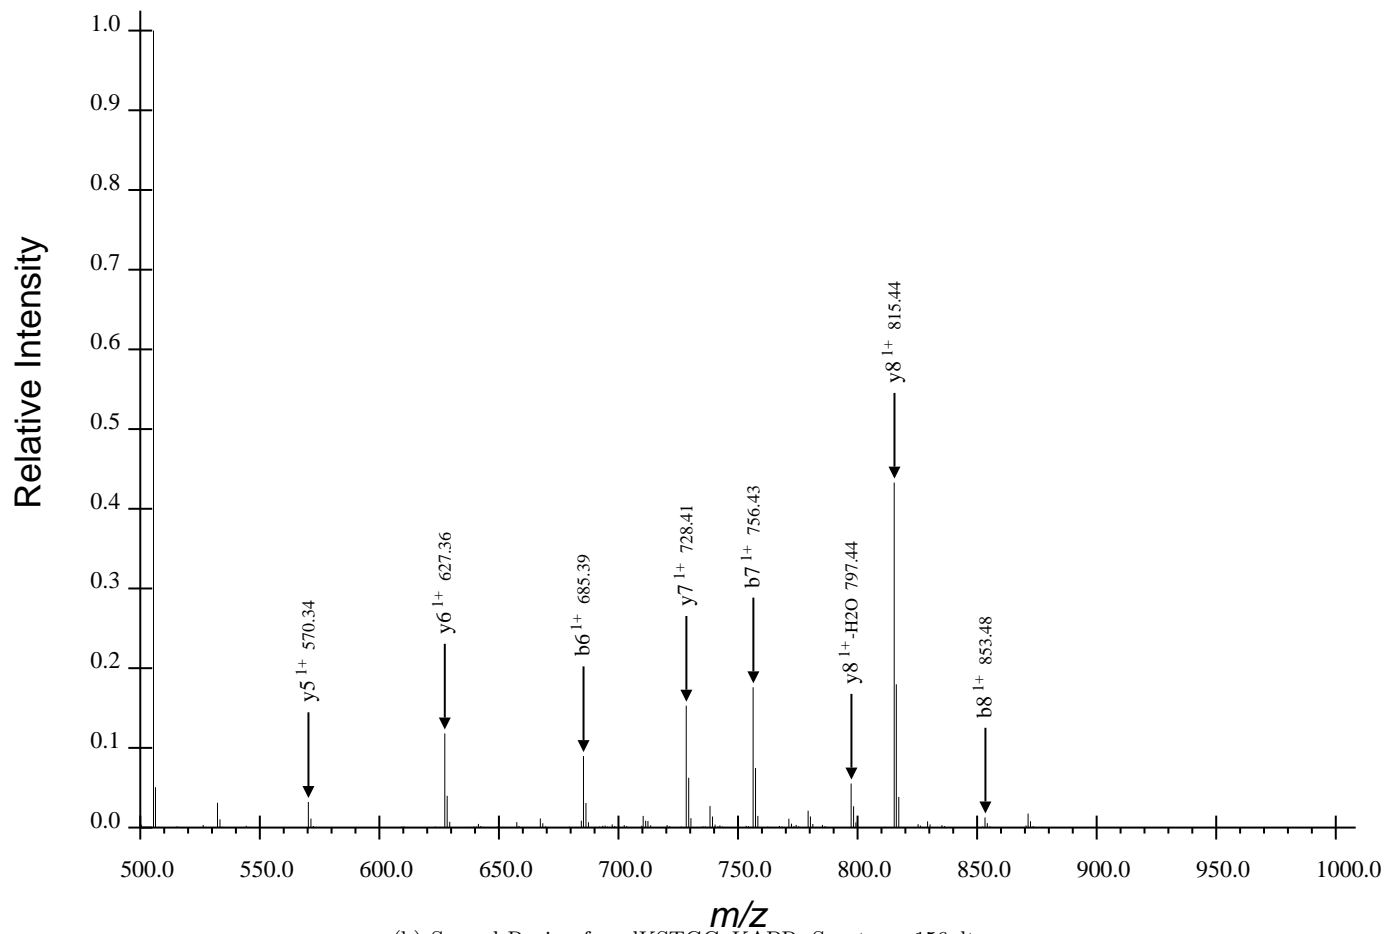

(b) Second Region for rdKSTGGaKAPR, Spectrum 156.dta

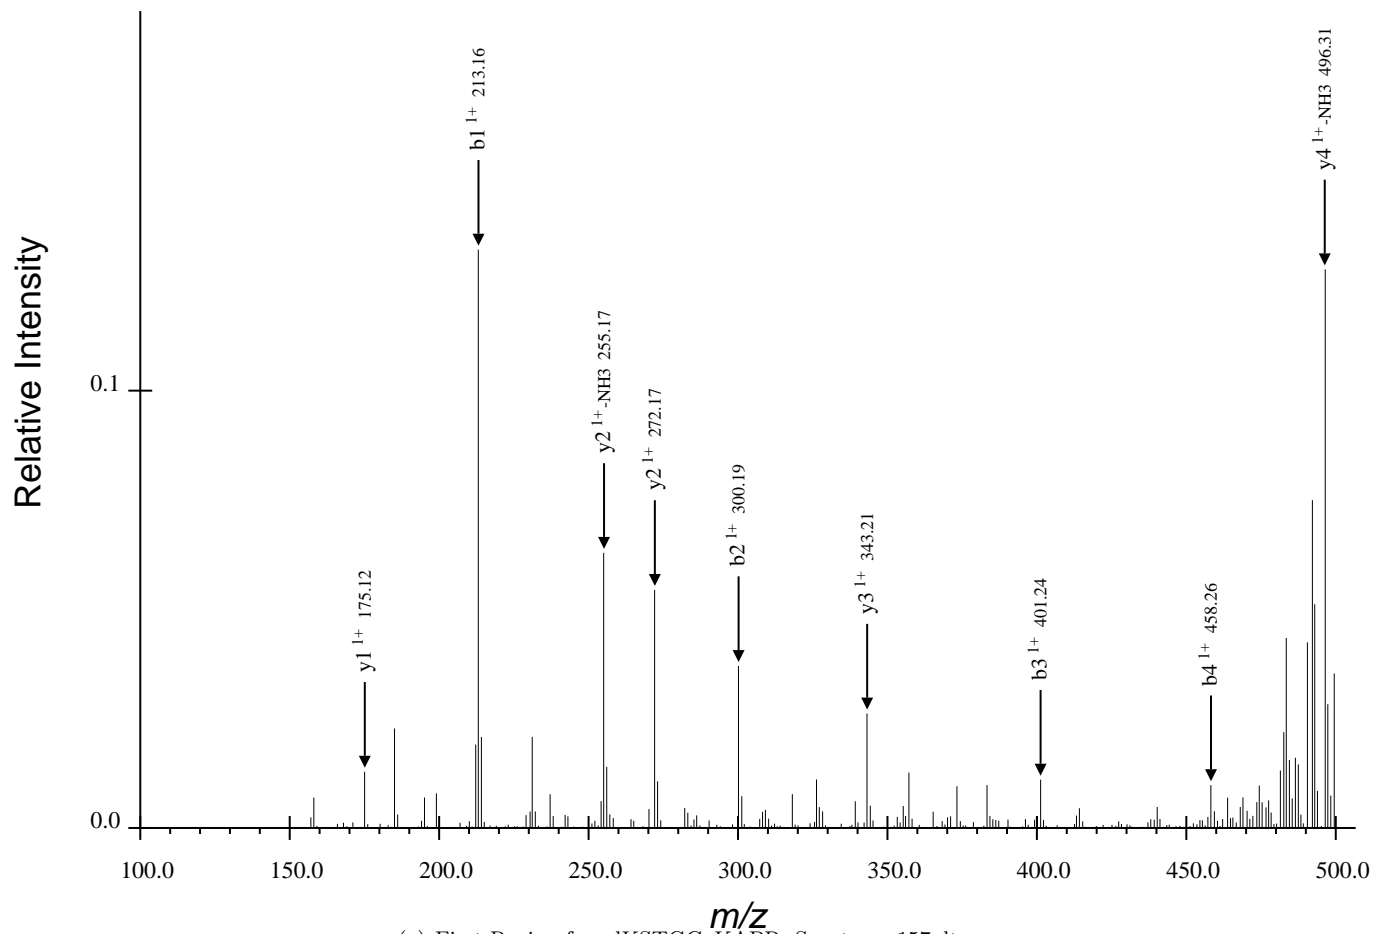

(a) First Region for rdKSTGGaKAPR, Spectrum 157.dta

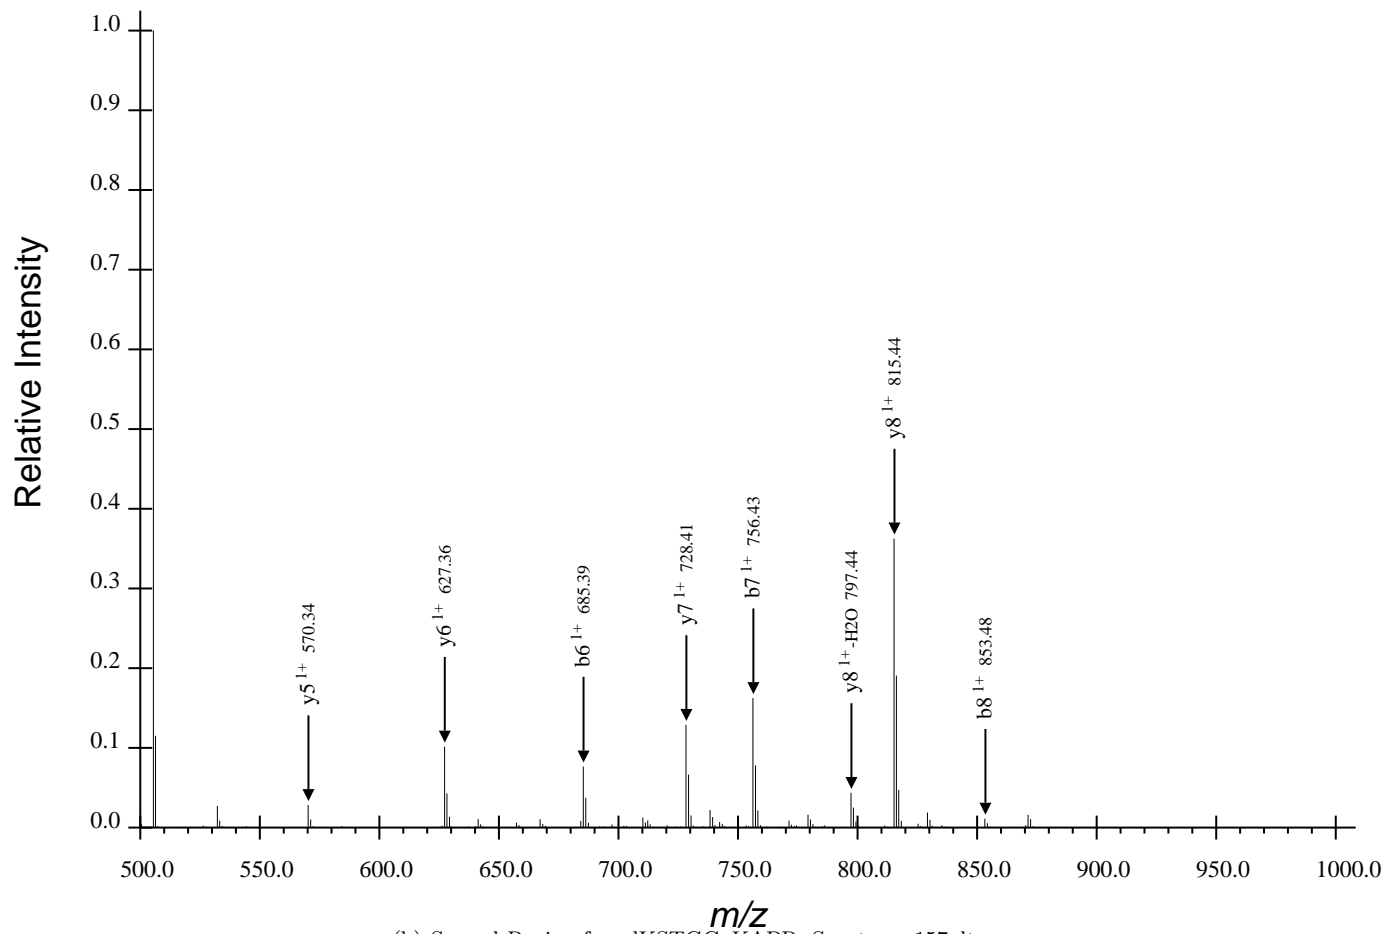

(b) Second Region for rdKSTGGaKAPR, Spectrum 157.dta

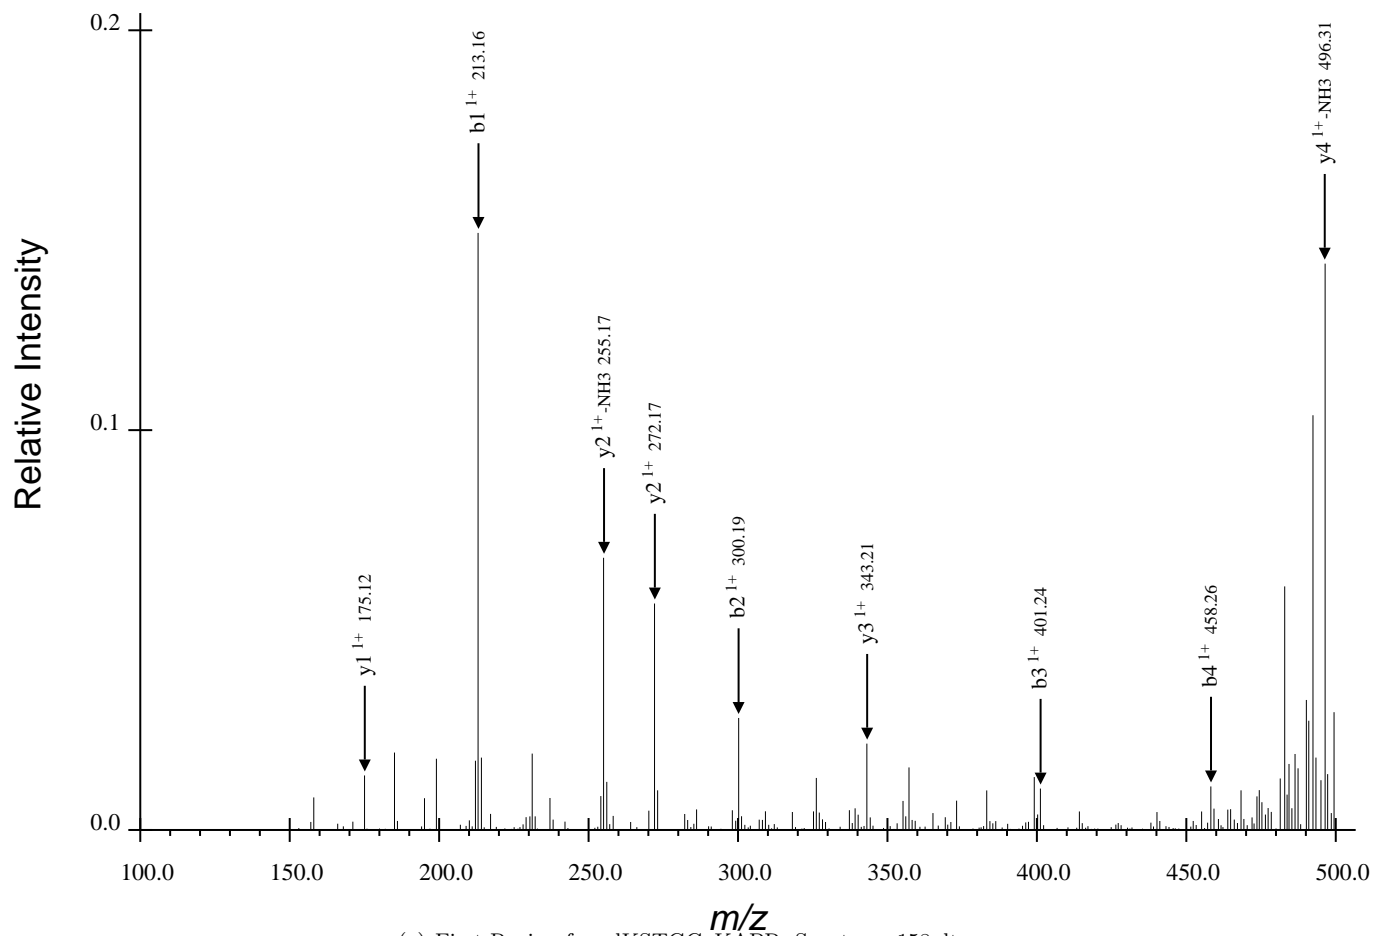

(a) First Region for rdKSTGGaKAPR, Spectrum 158.dta

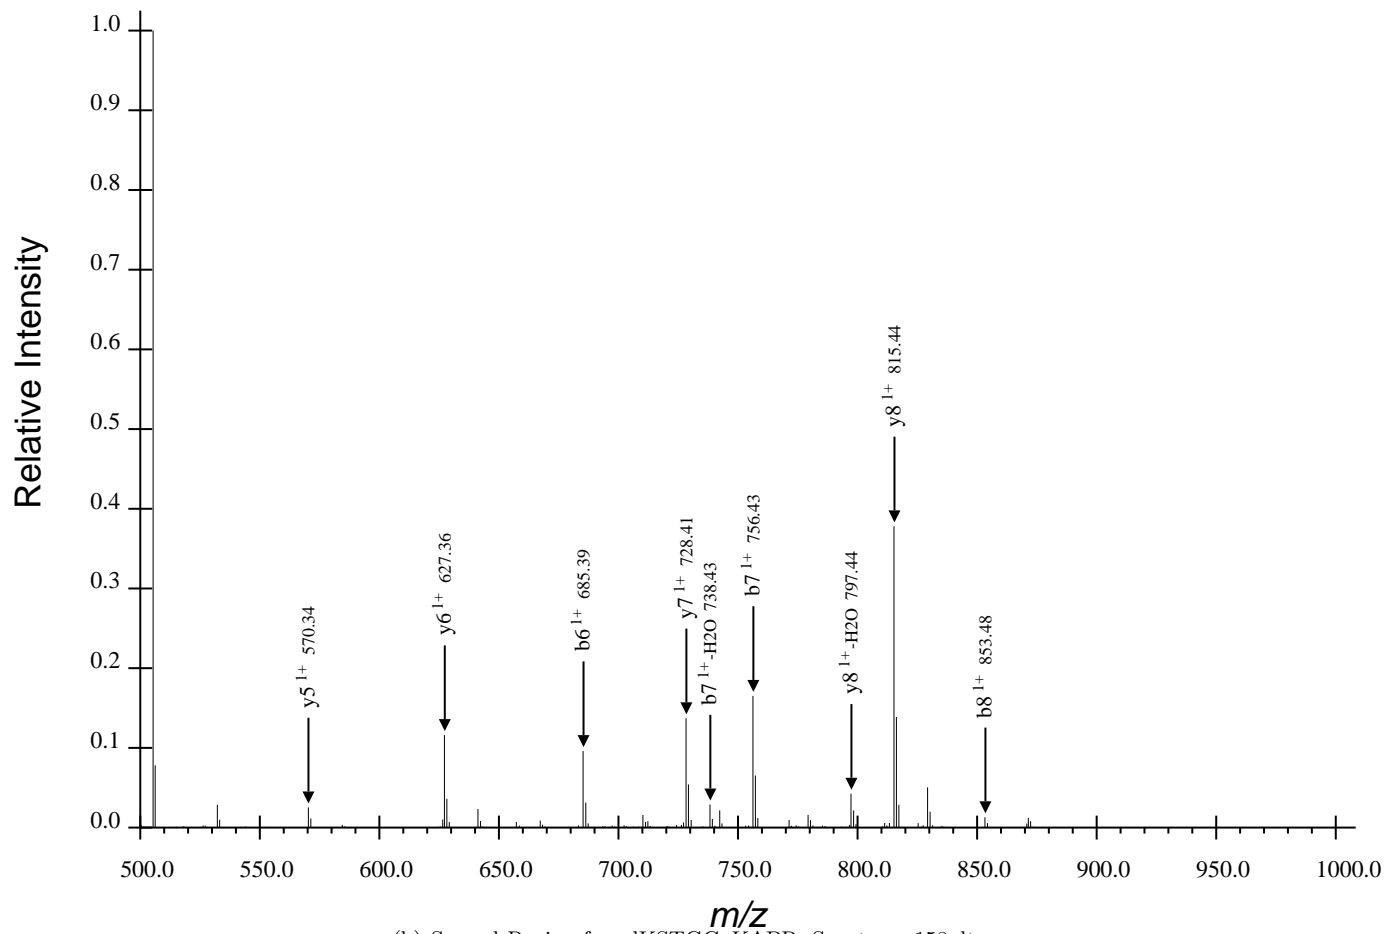

(b) Second Region for rdKSTGGaKAPR, Spectrum 158.dta

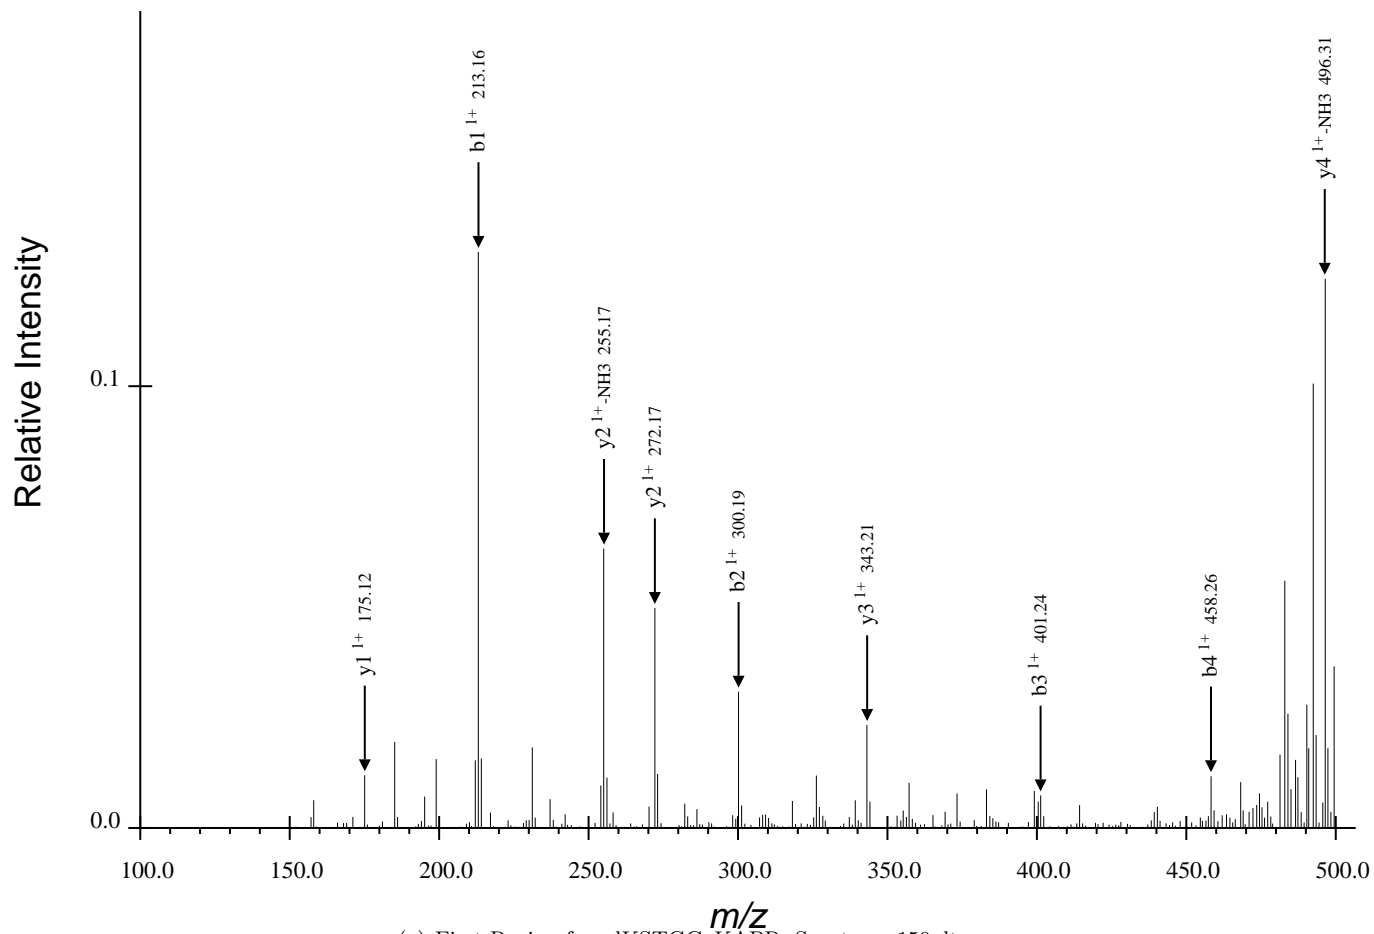

(a) First Region for rdKSTGGaKAPR, Spectrum 159.dta

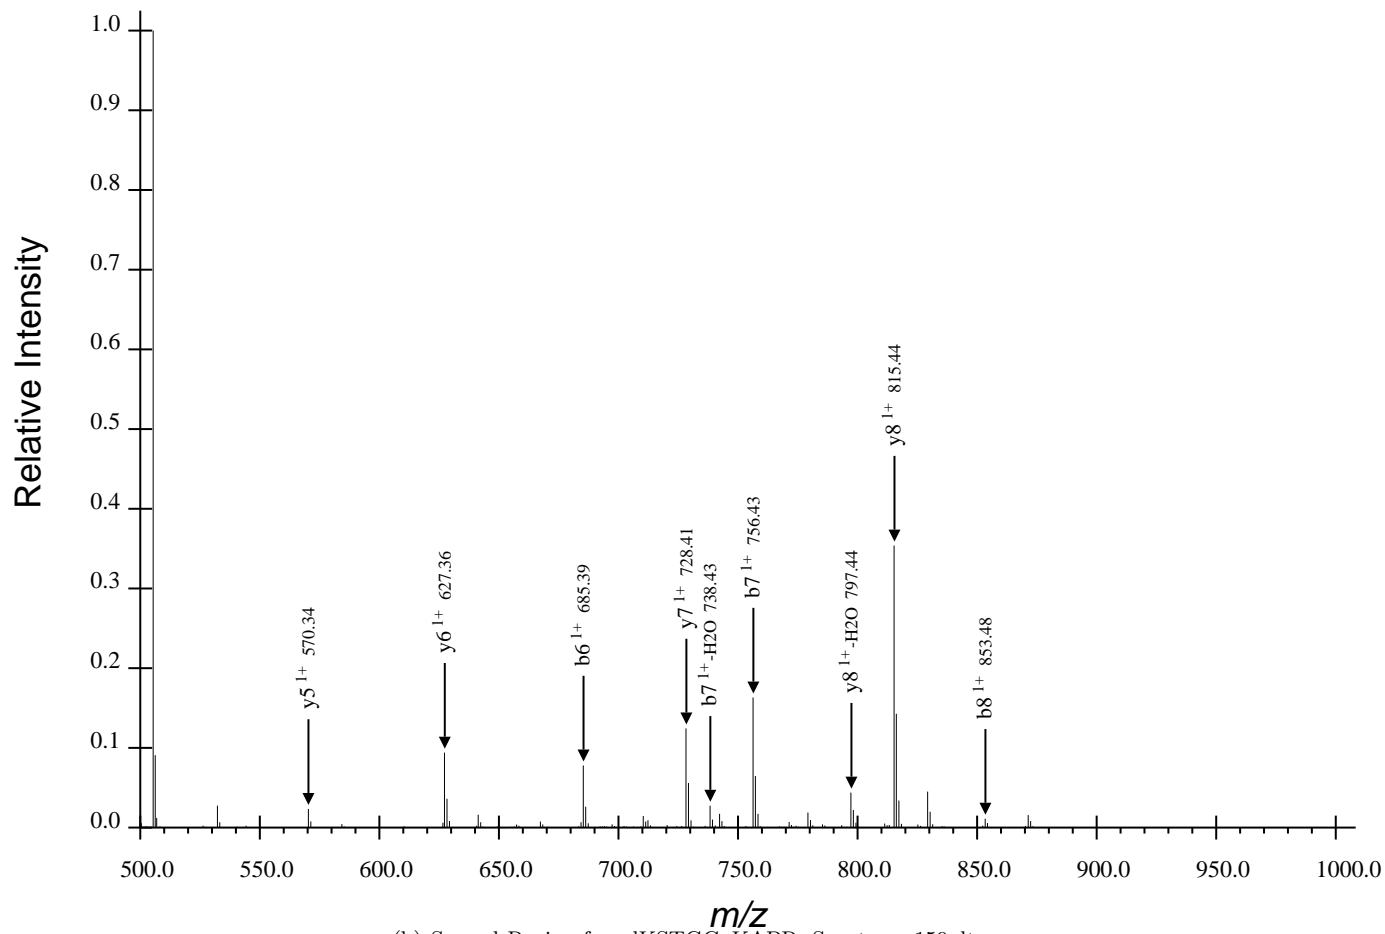

(b) Second Region for rdKSTGGaKAPR, Spectrum 159.dta

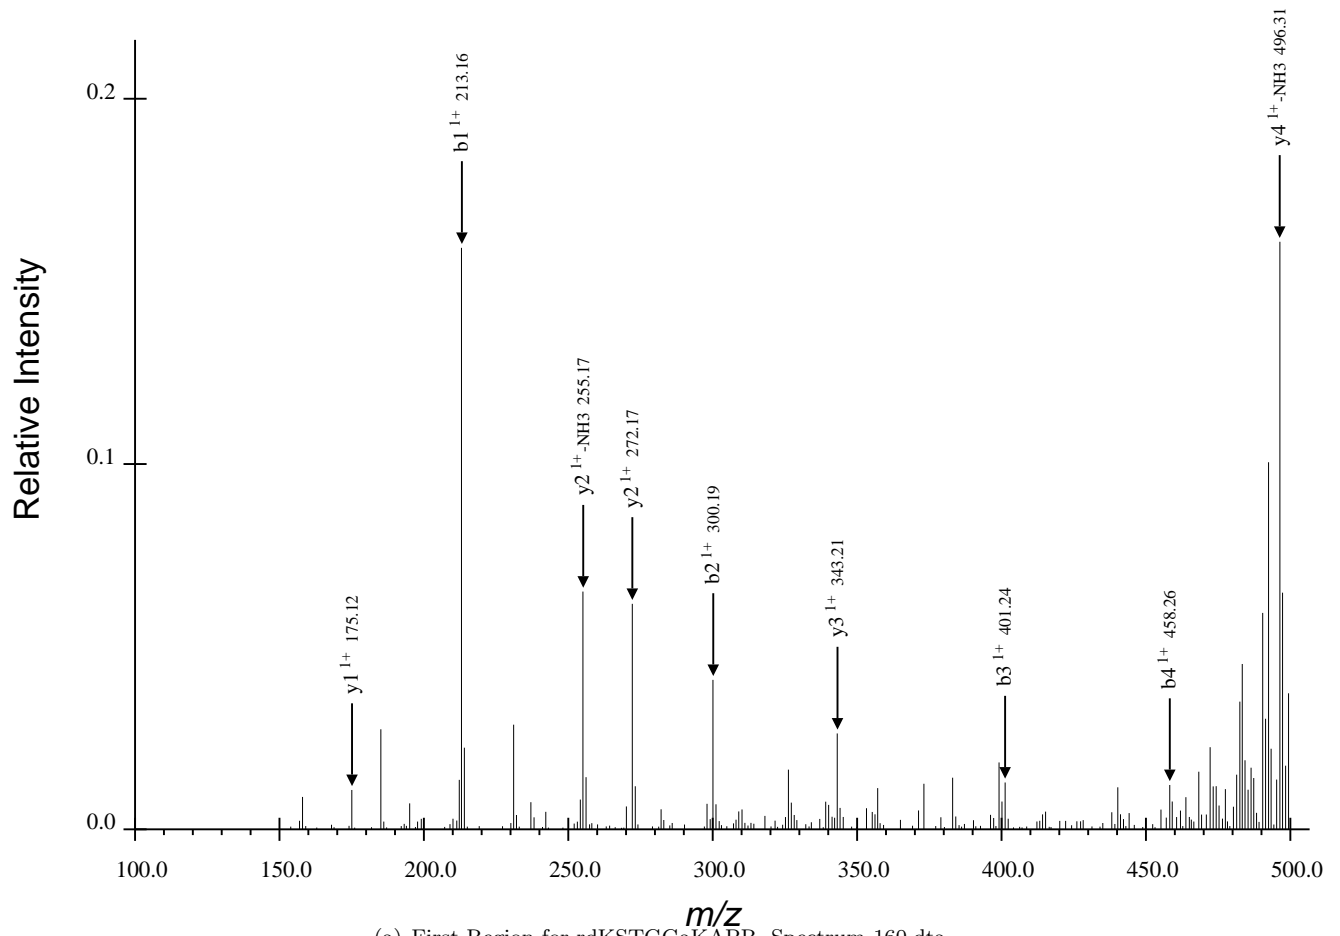

(a) First Region for rdKSTGGaKAPR, Spectrum 160.dta

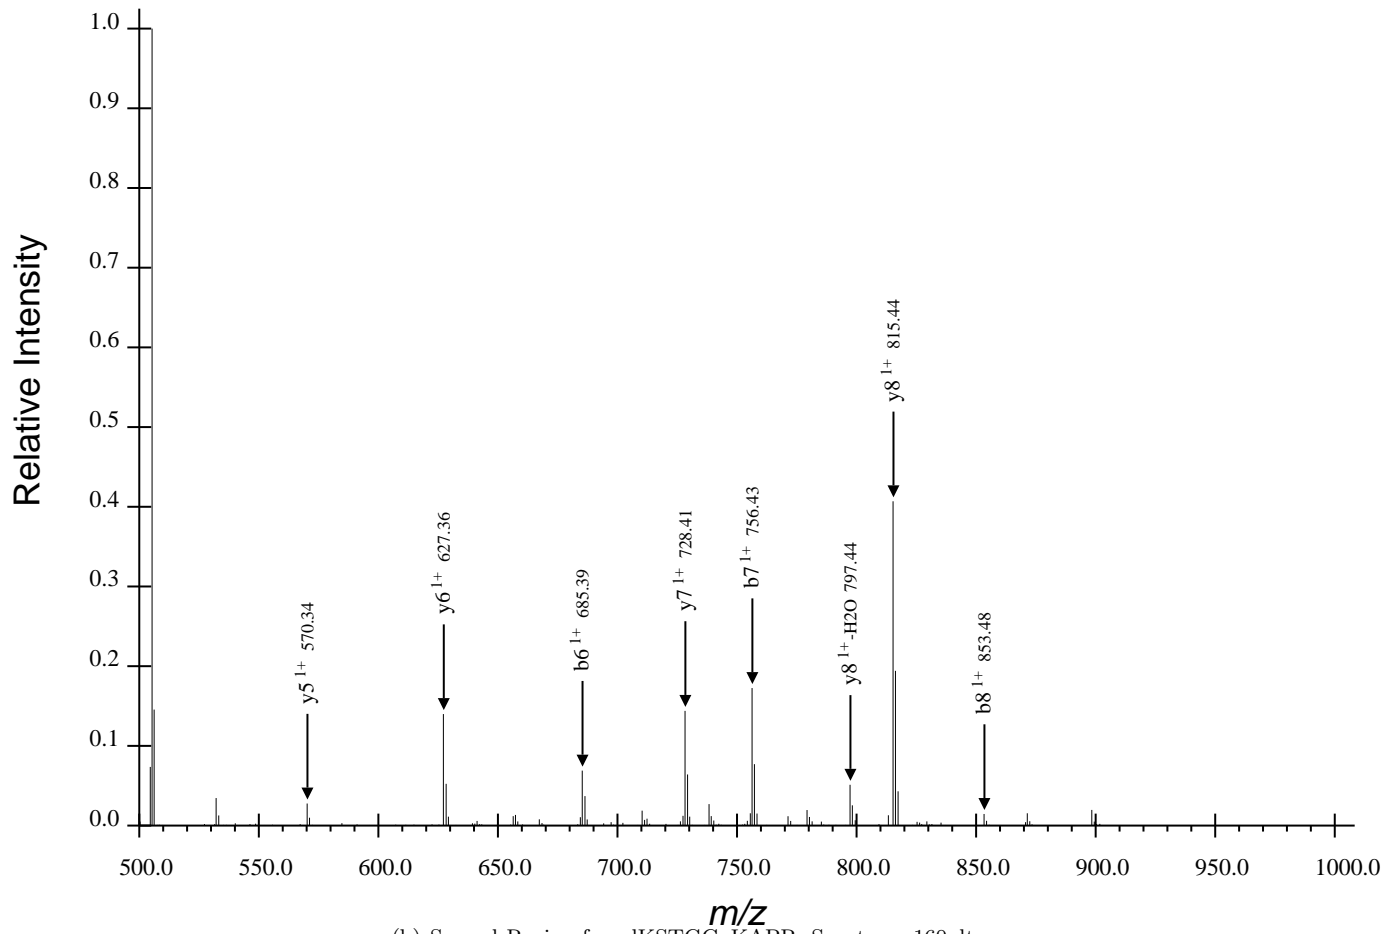

(b) Second Region for rdKSTGGaKAPR, Spectrum 160.dta



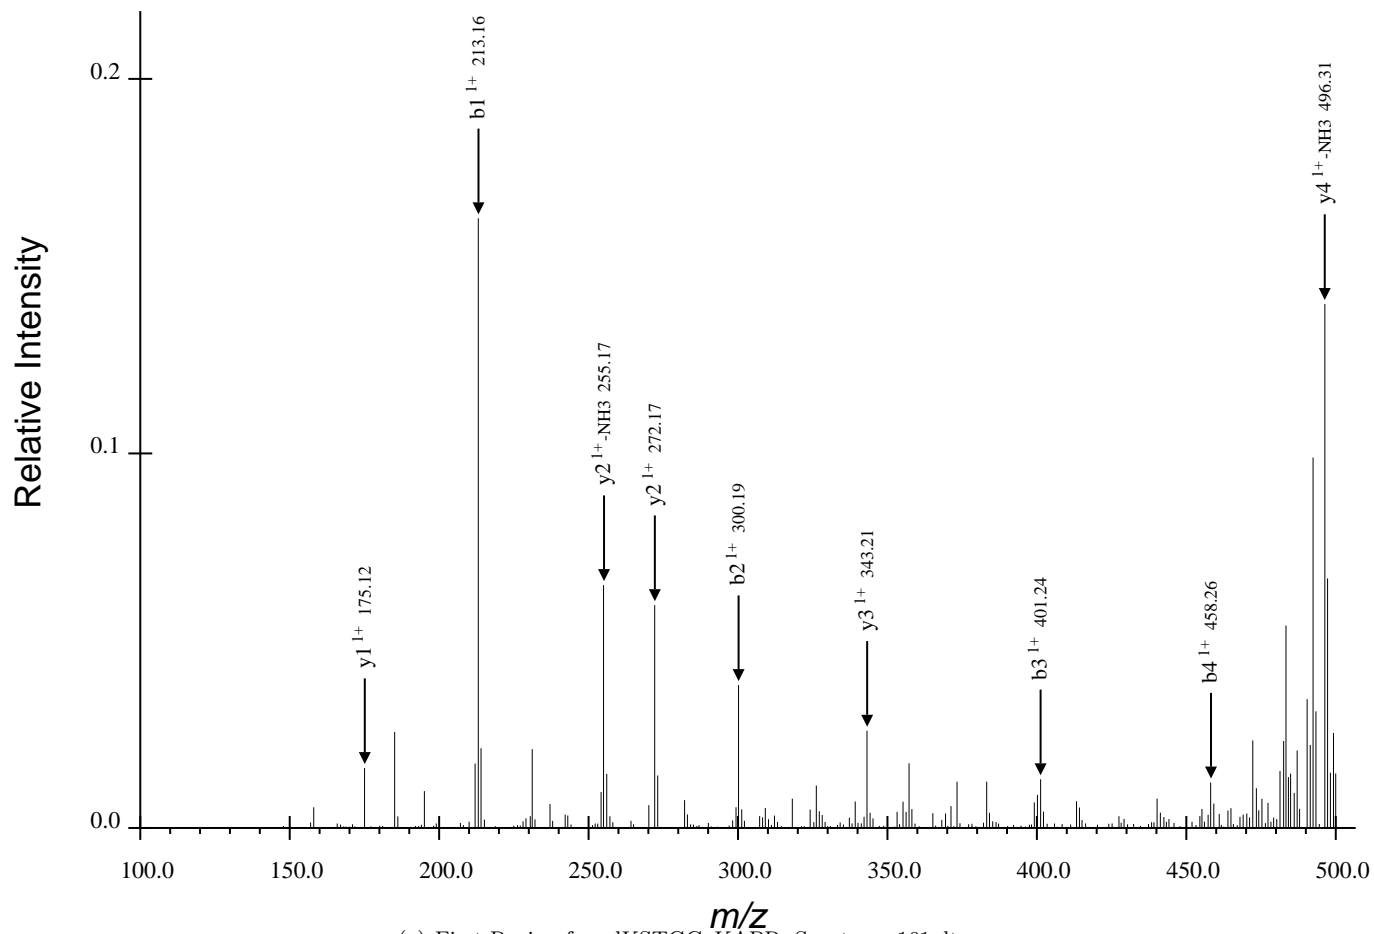

(a) First Region for rdKSTGGaKAPR, Spectrum 161.dta

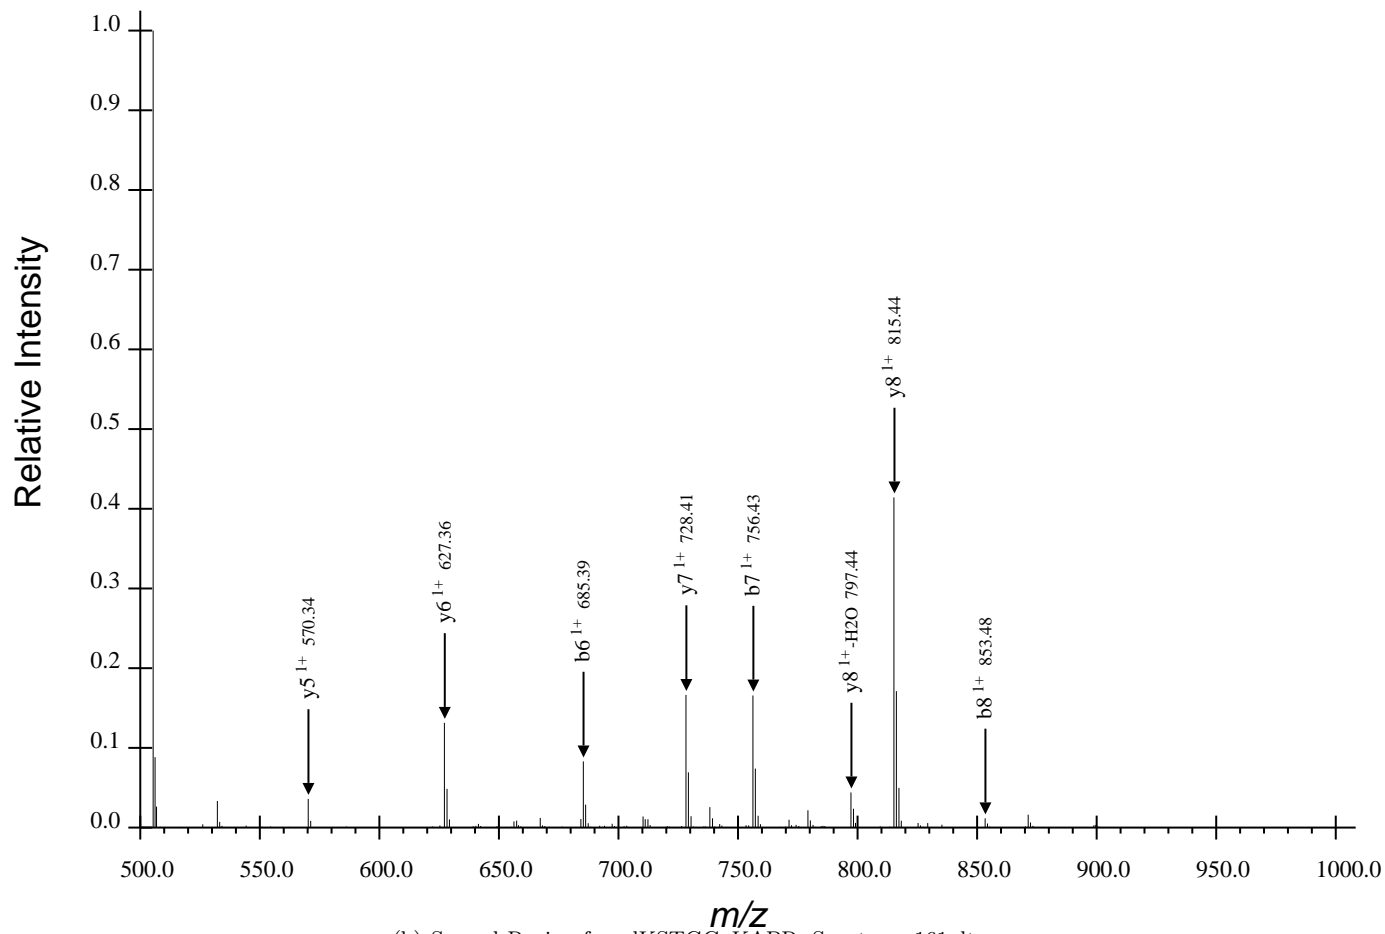

(b) Second Region for rdKSTGGaKAPR, Spectrum 161.dta

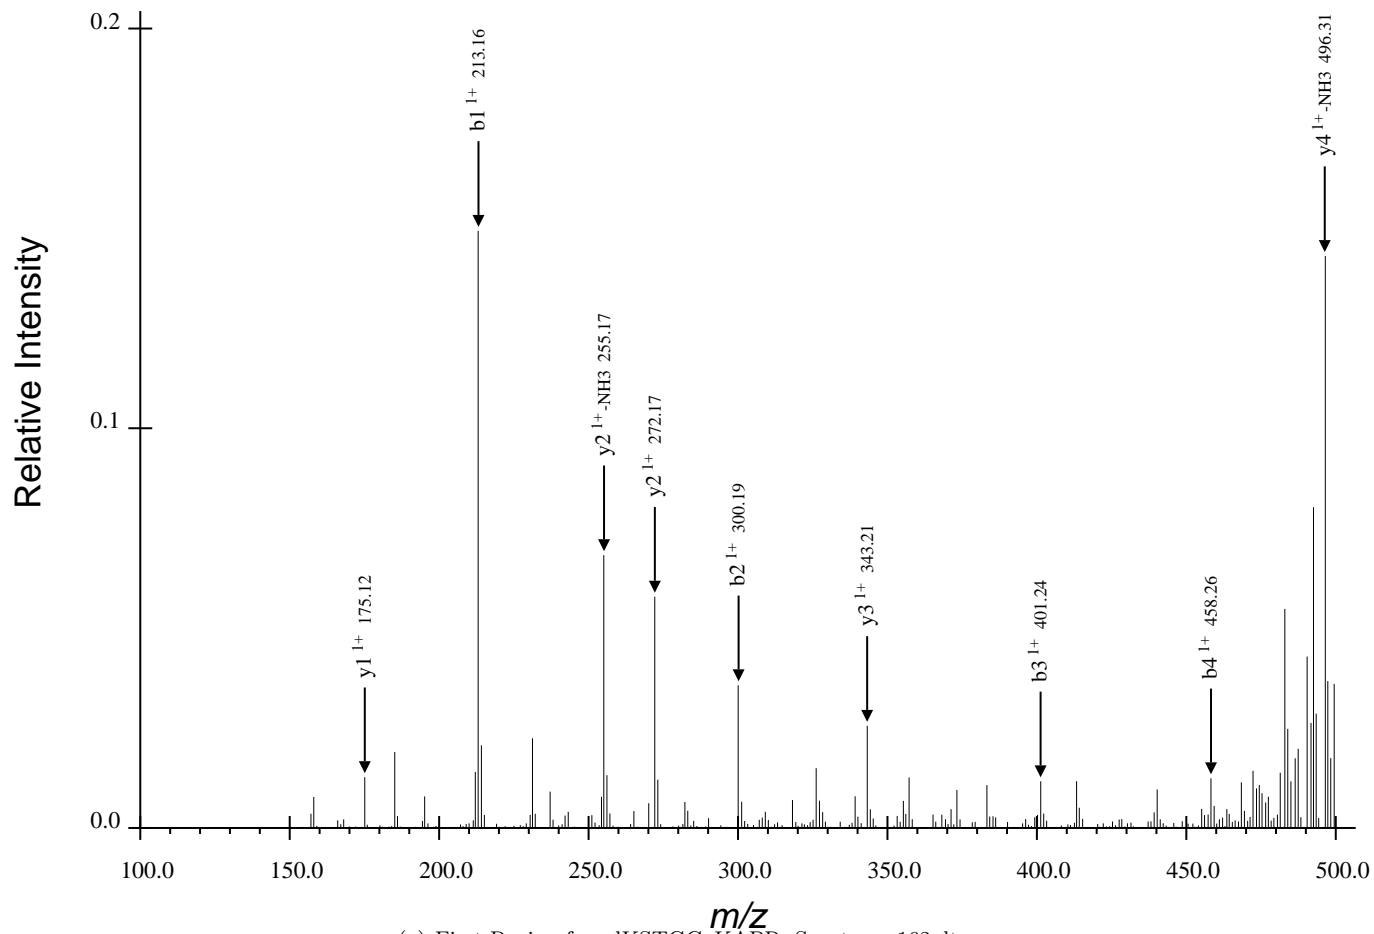

(a) First Region for rdKSTGGaKAPR, Spectrum 162.dta

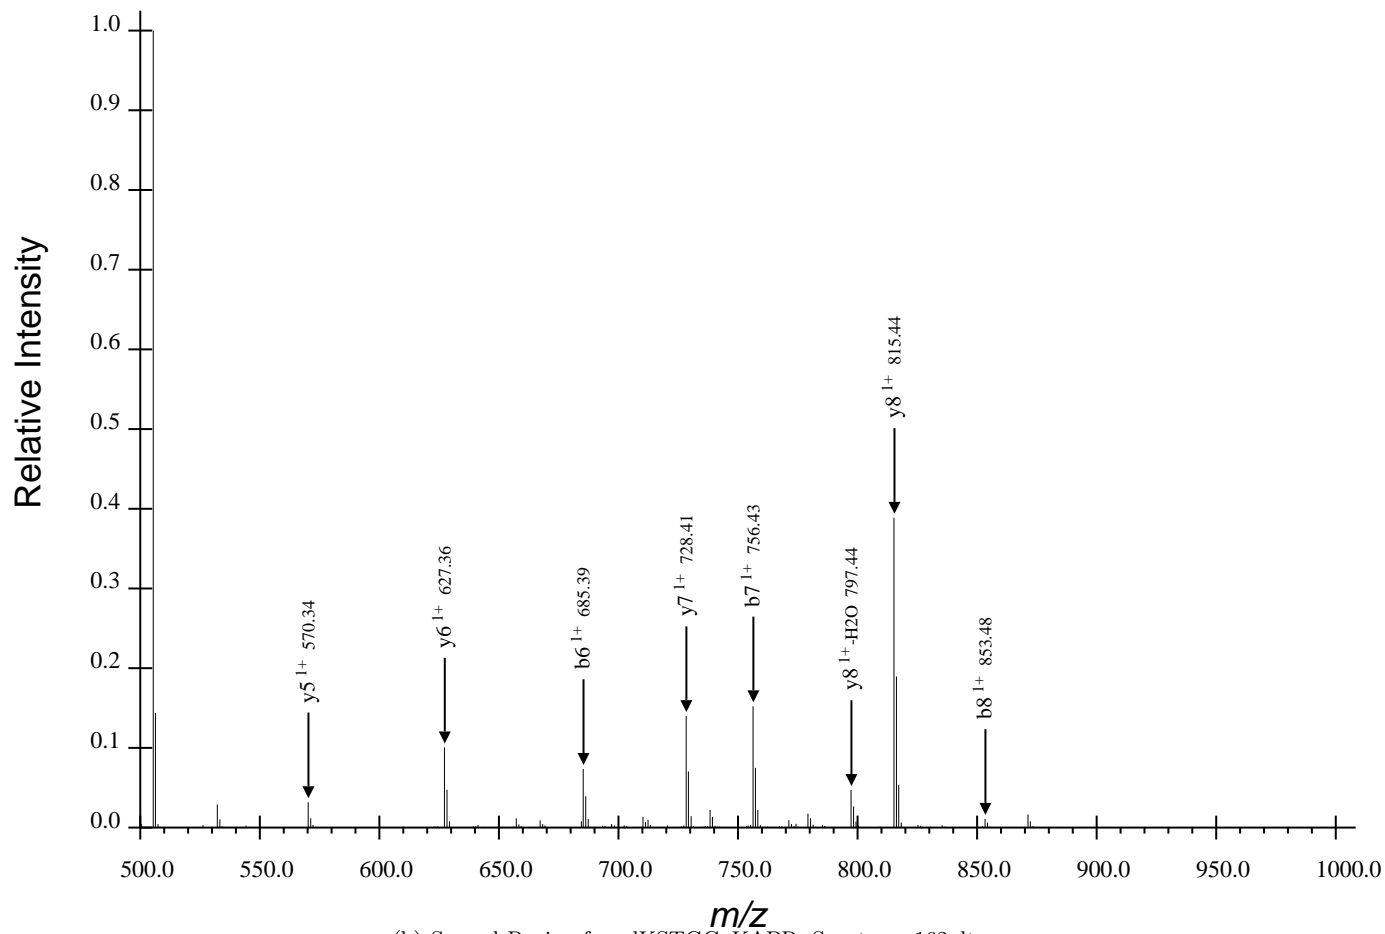

(b) Second Region for rdKSTGGaKAPR, Spectrum 162.dta

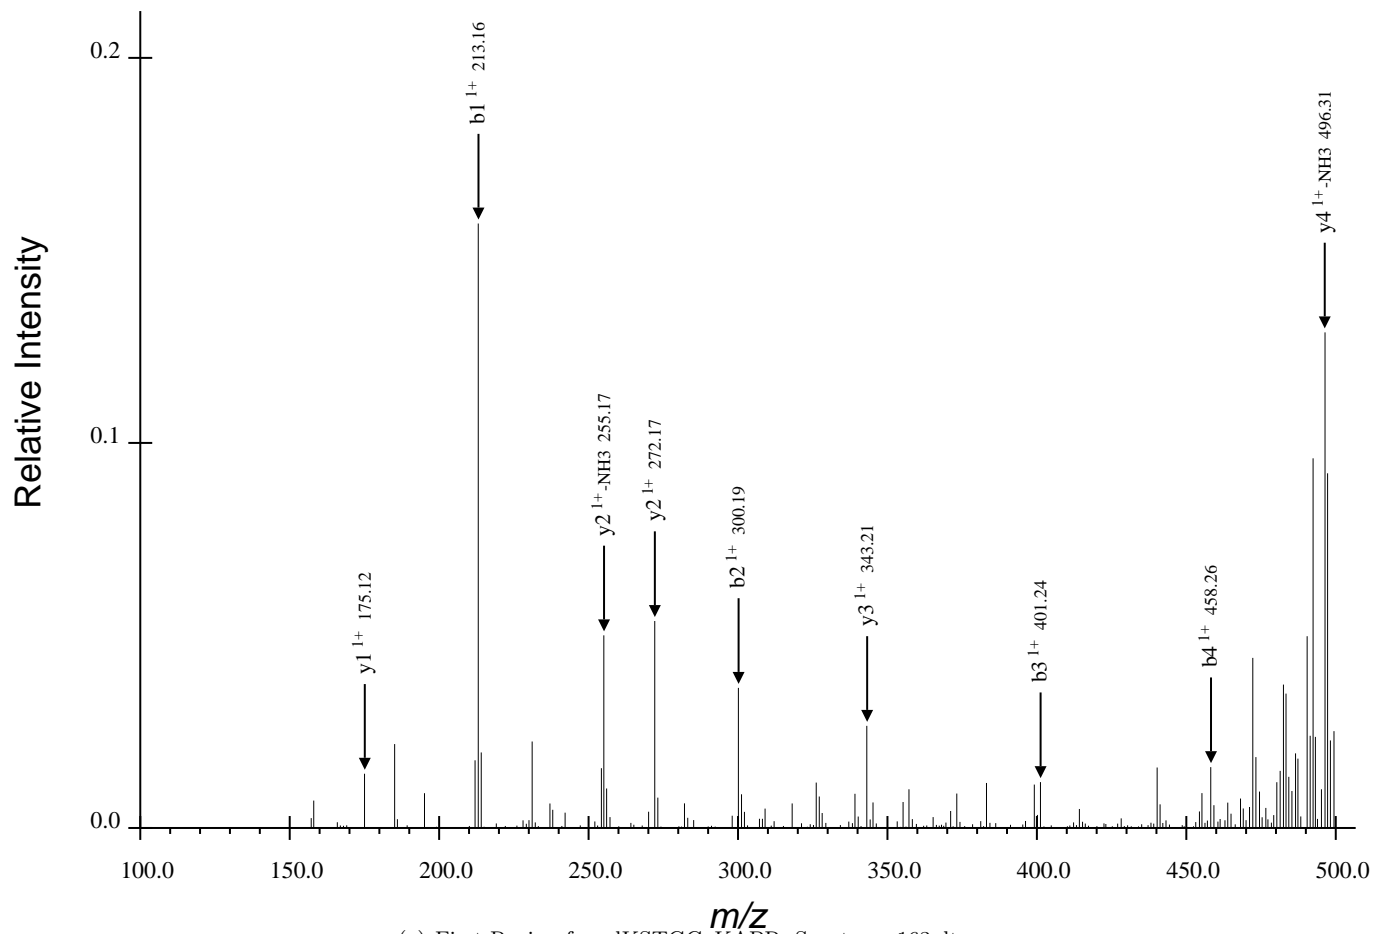

(a) First Region for rdKSTGGaKAPR, Spectrum 163.dta

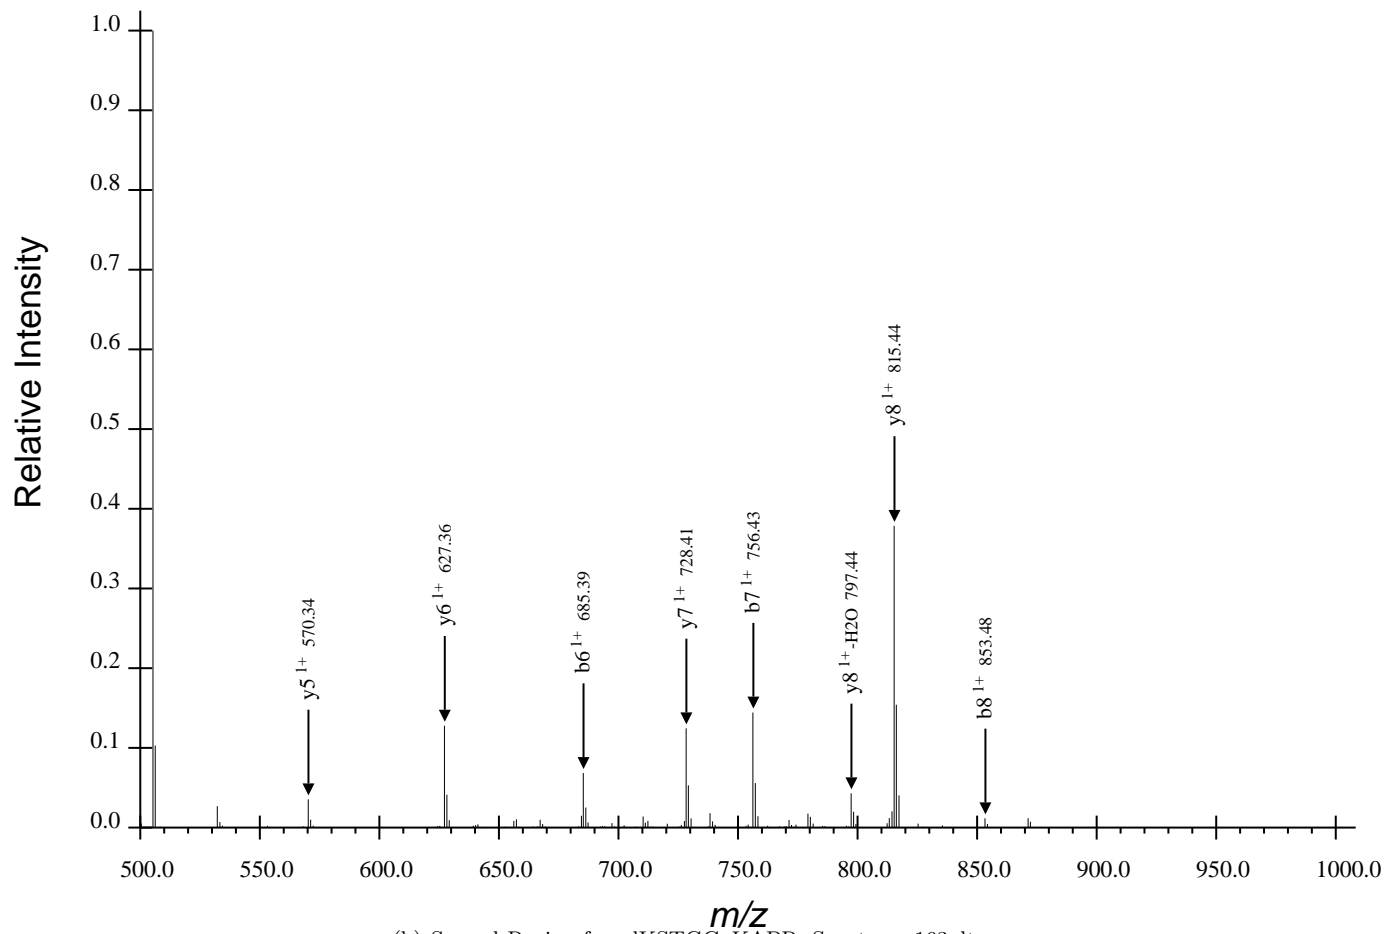

(b) Second Region for rdKSTGGaKAPR, Spectrum 163.dta

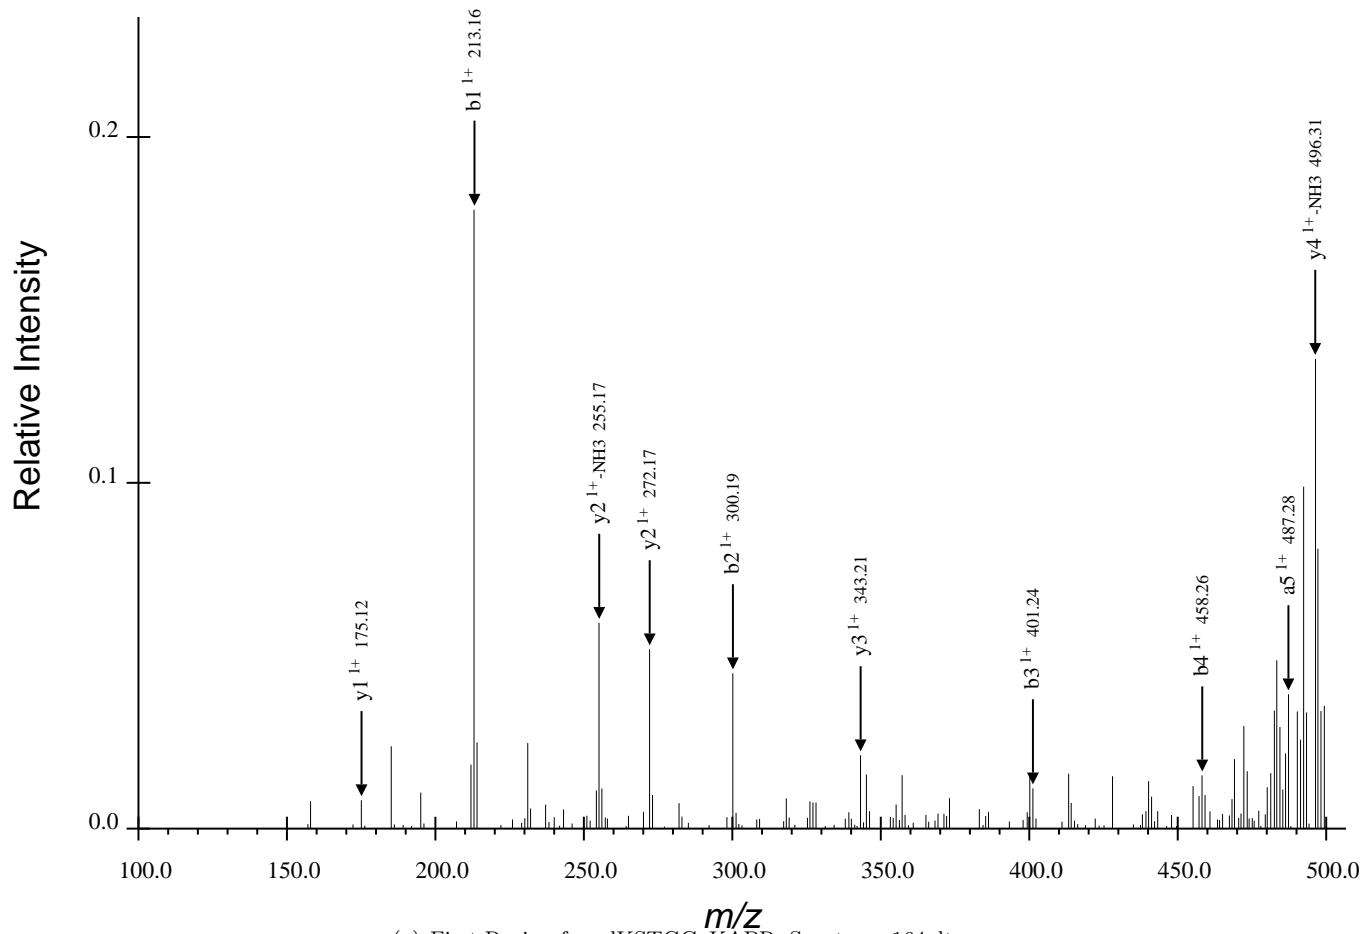

(a) First Region for rdKSTGGaKAPR, Spectrum 164.dta

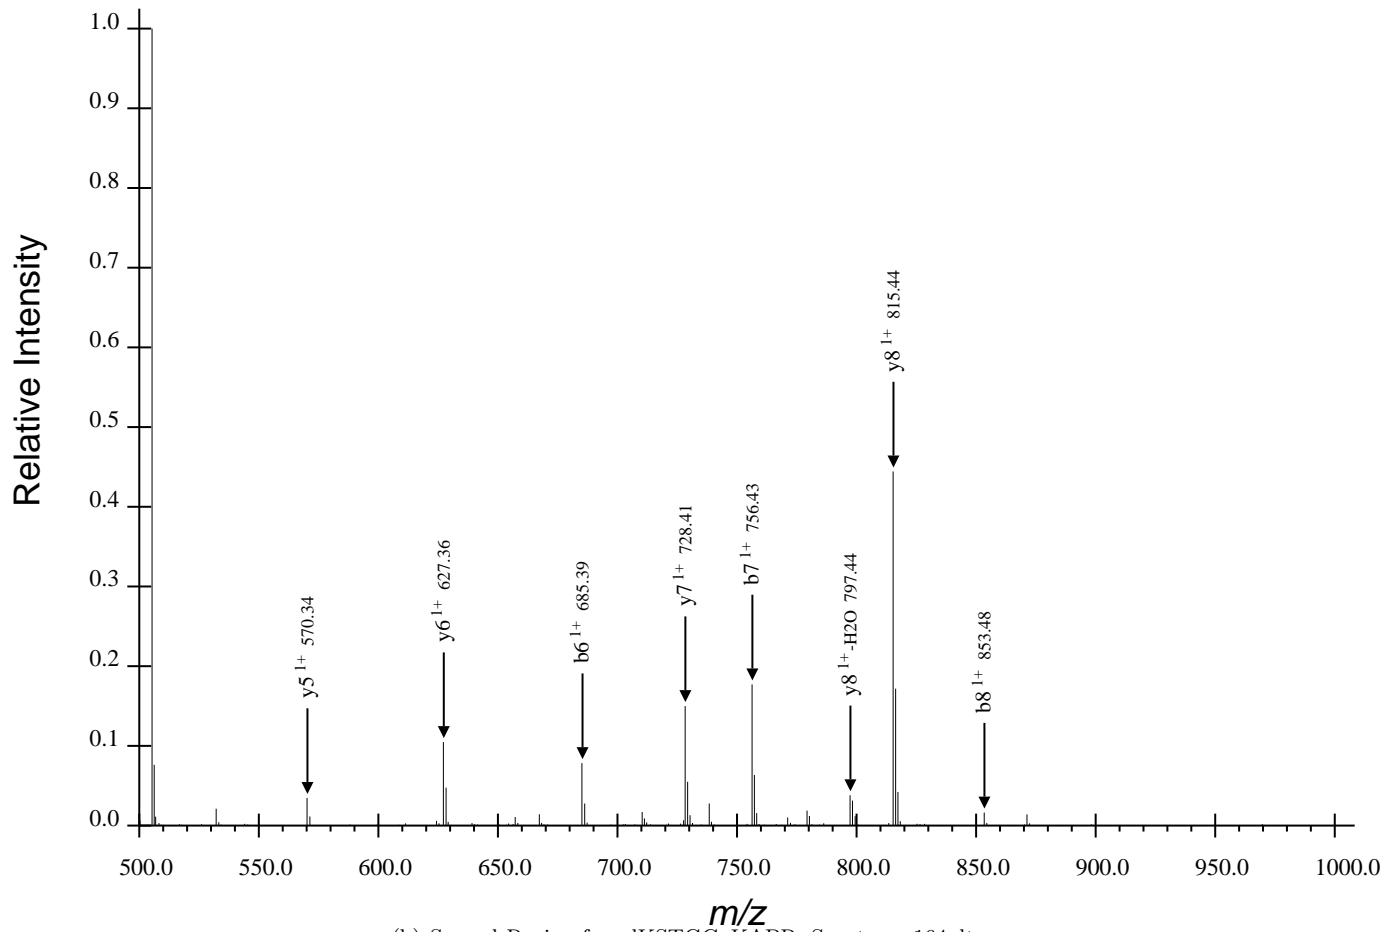

(b) Second Region for rdKSTGGaKAPR, Spectrum 164.dta

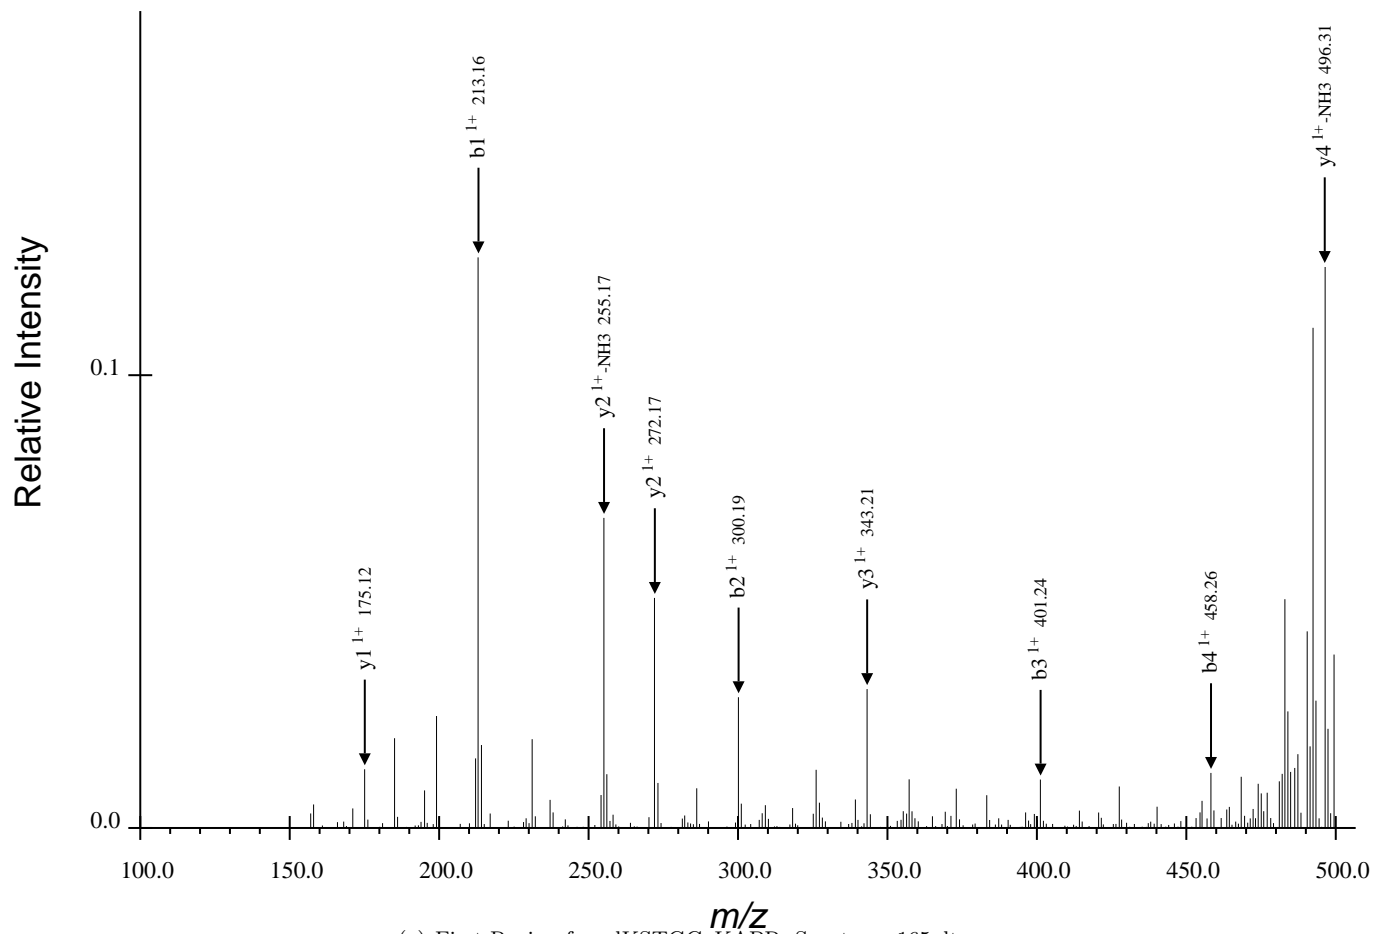

(a) First Region for rdKSTGGaKAPR, Spectrum 165.dta

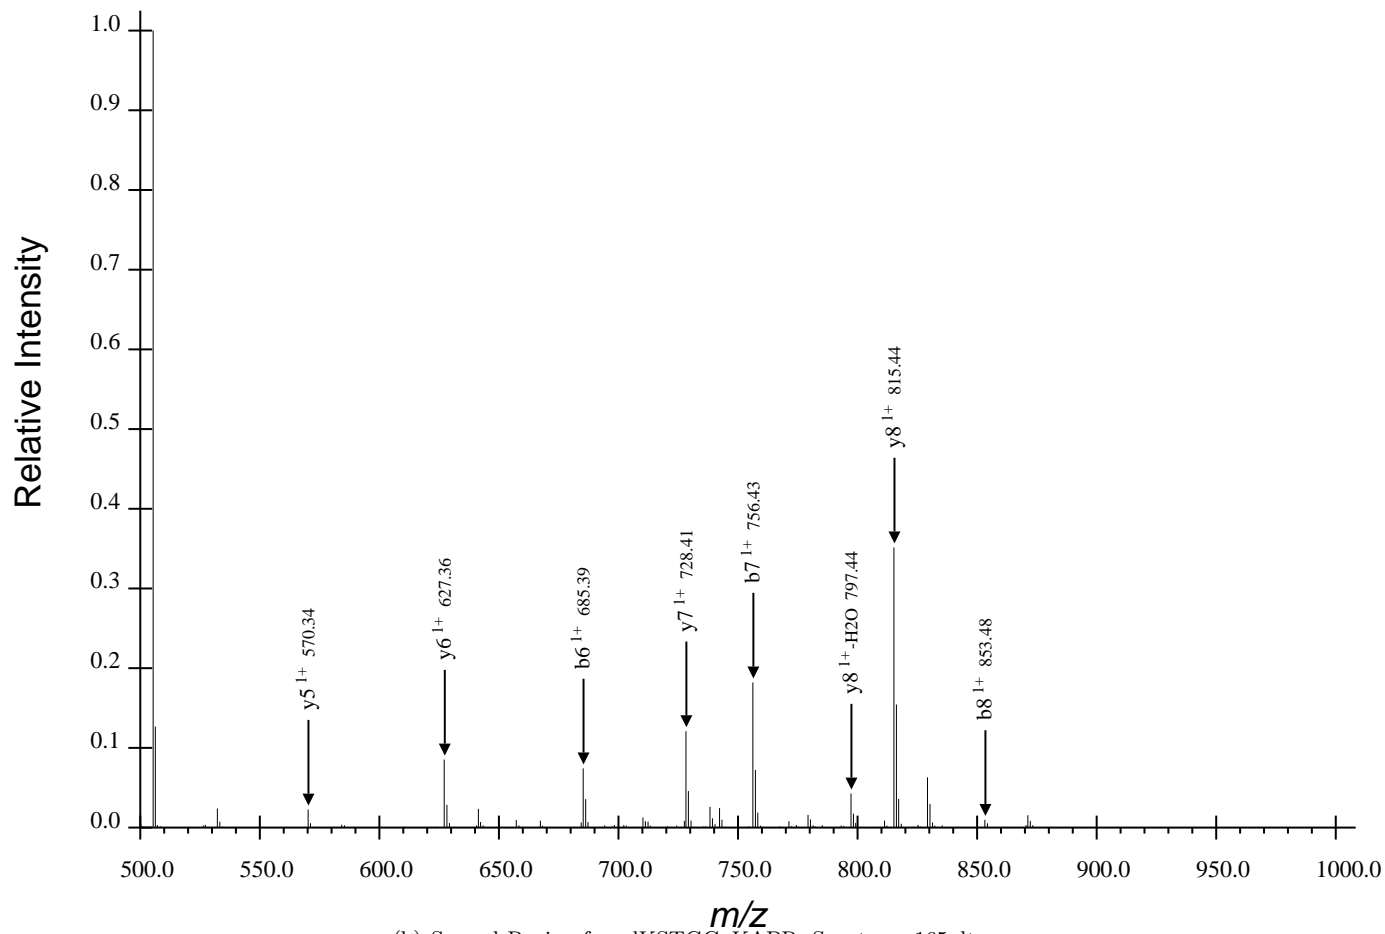

(b) Second Region for rdKSTGGaKAPR, Spectrum 165.dta

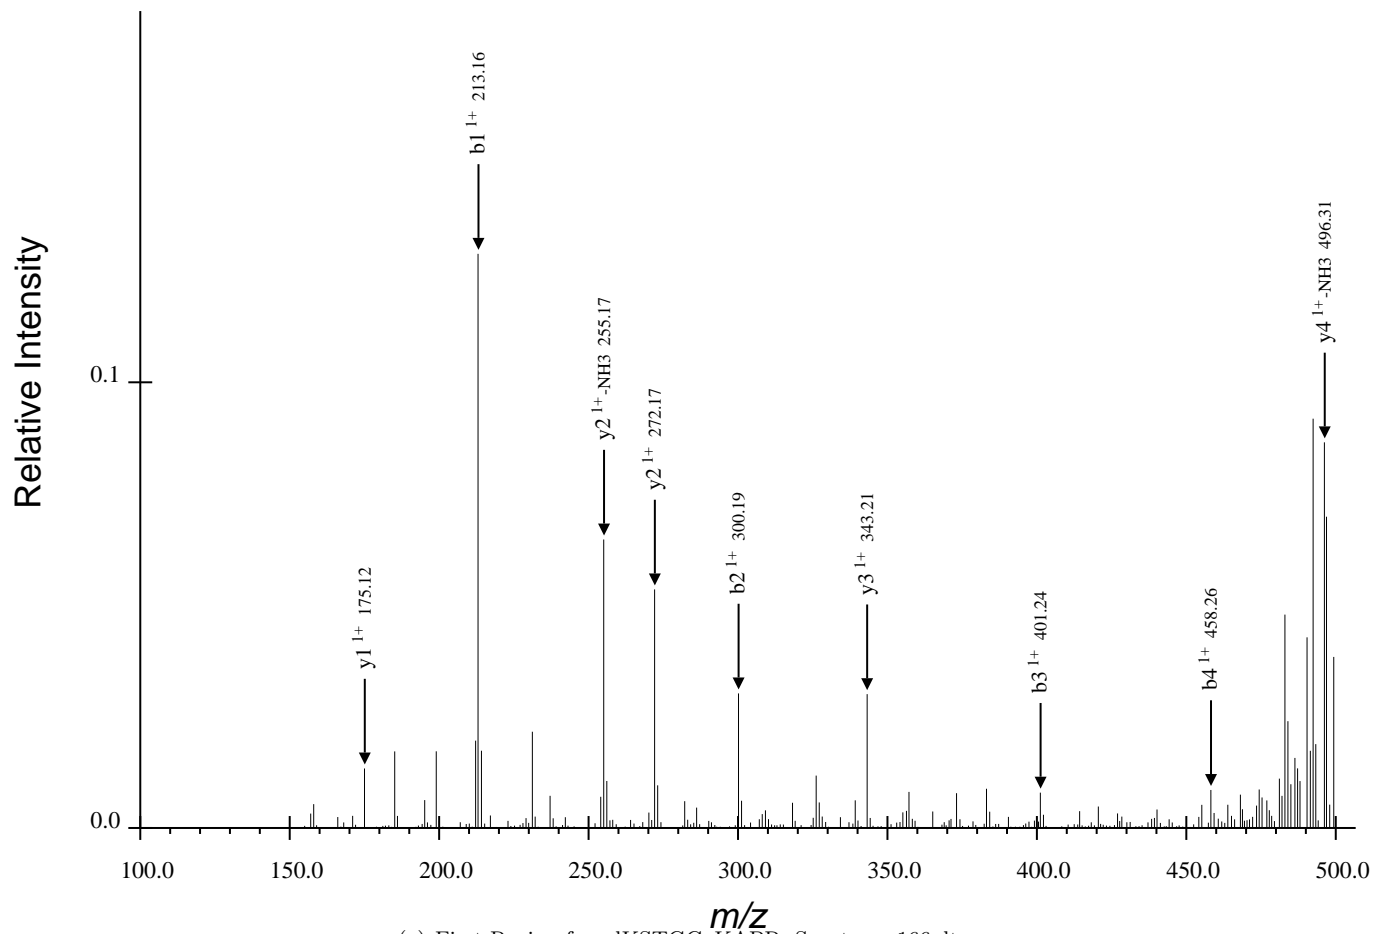

(a) First Region for rdKSTGGaKAPR, Spectrum 166.dta

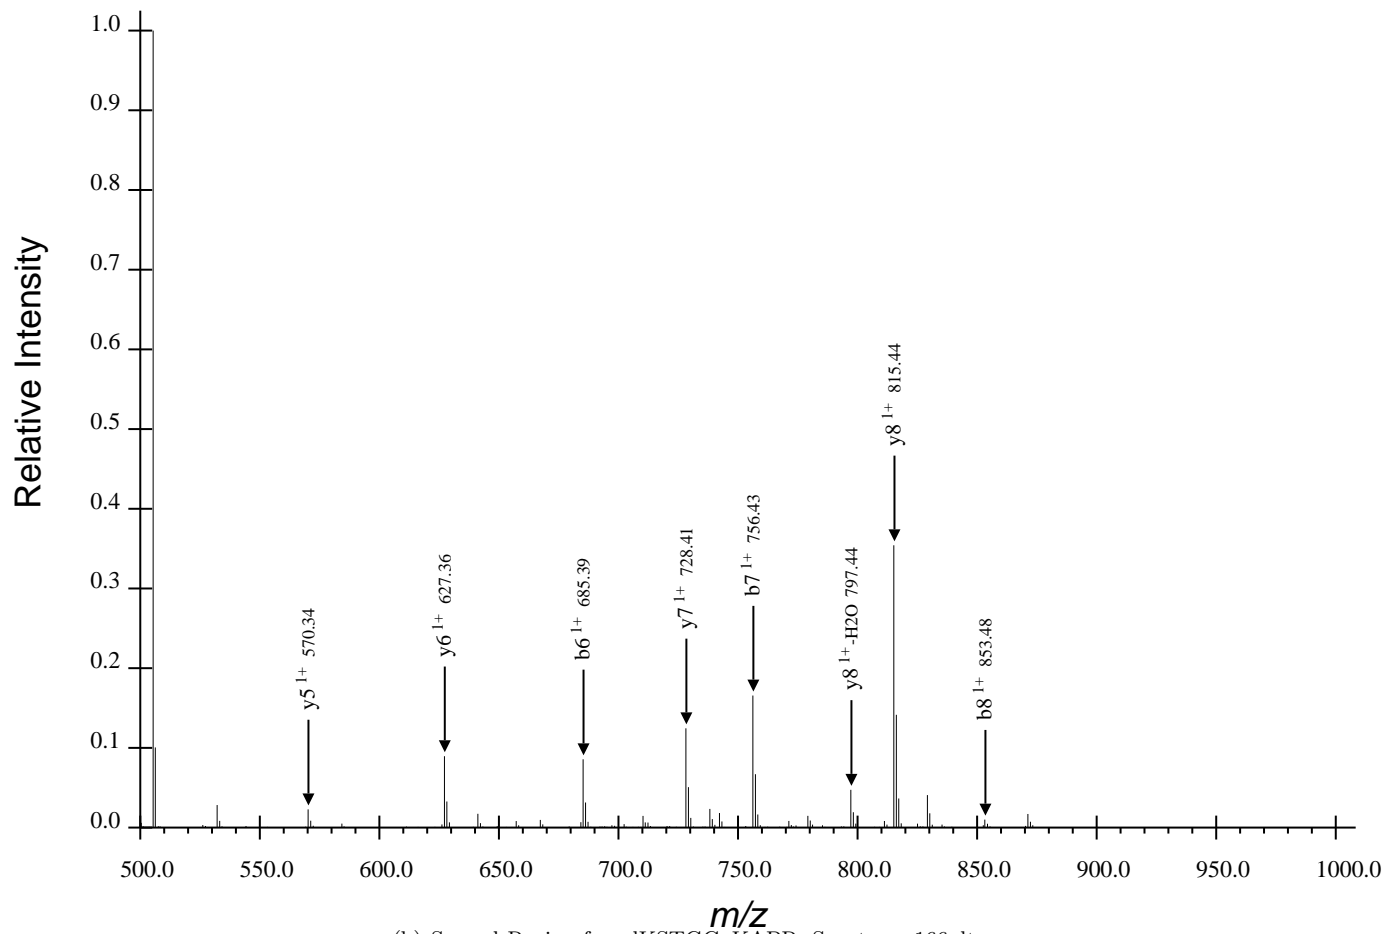

(b) Second Region for rdKSTGGaKAPR, Spectrum 166.dta

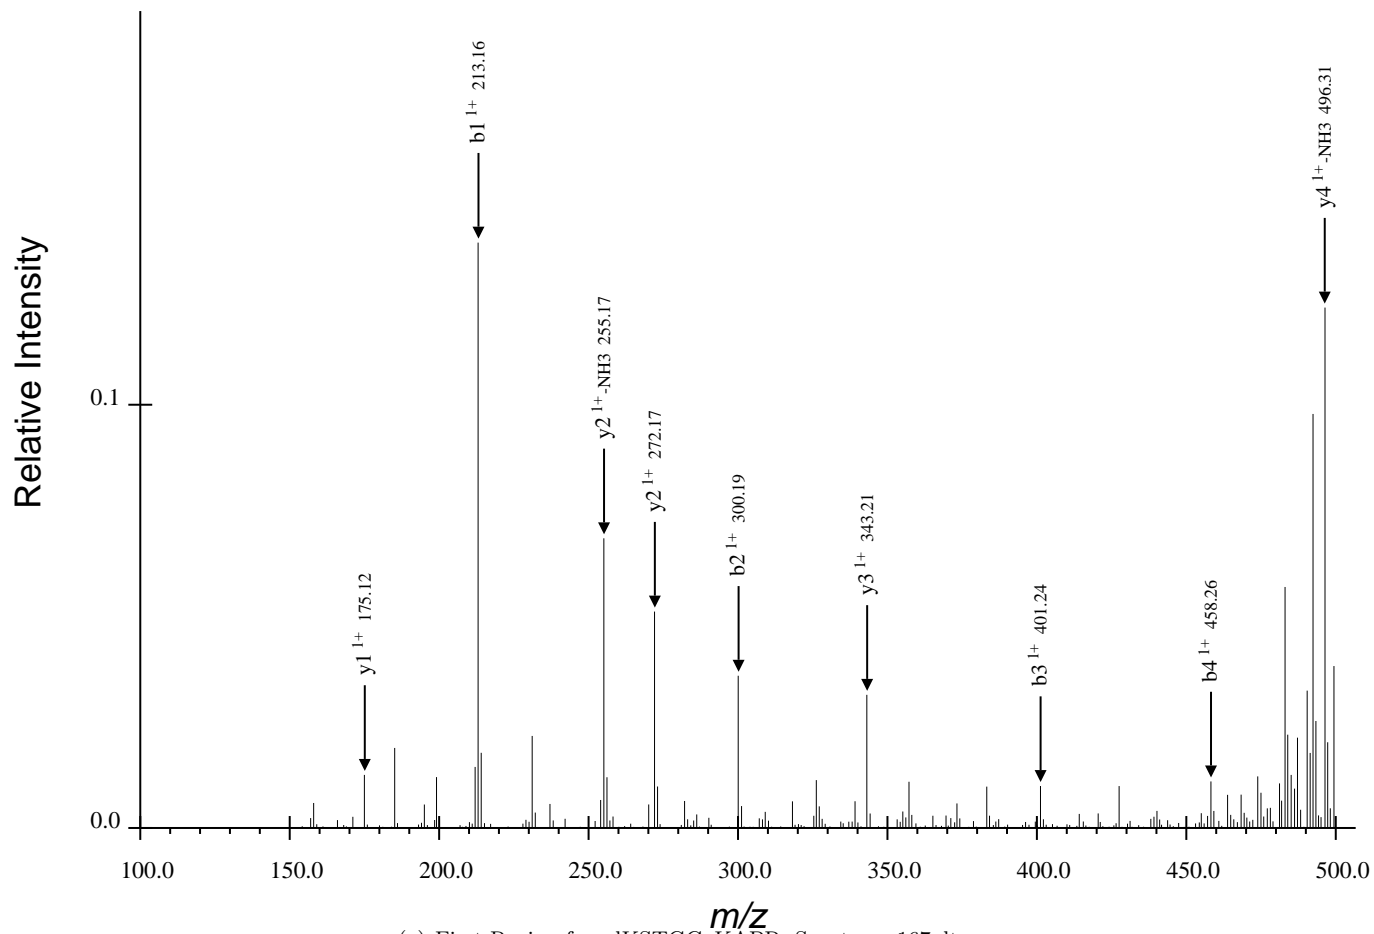

(a) First Region for rdKSTGGaKAPR, Spectrum 167.dta

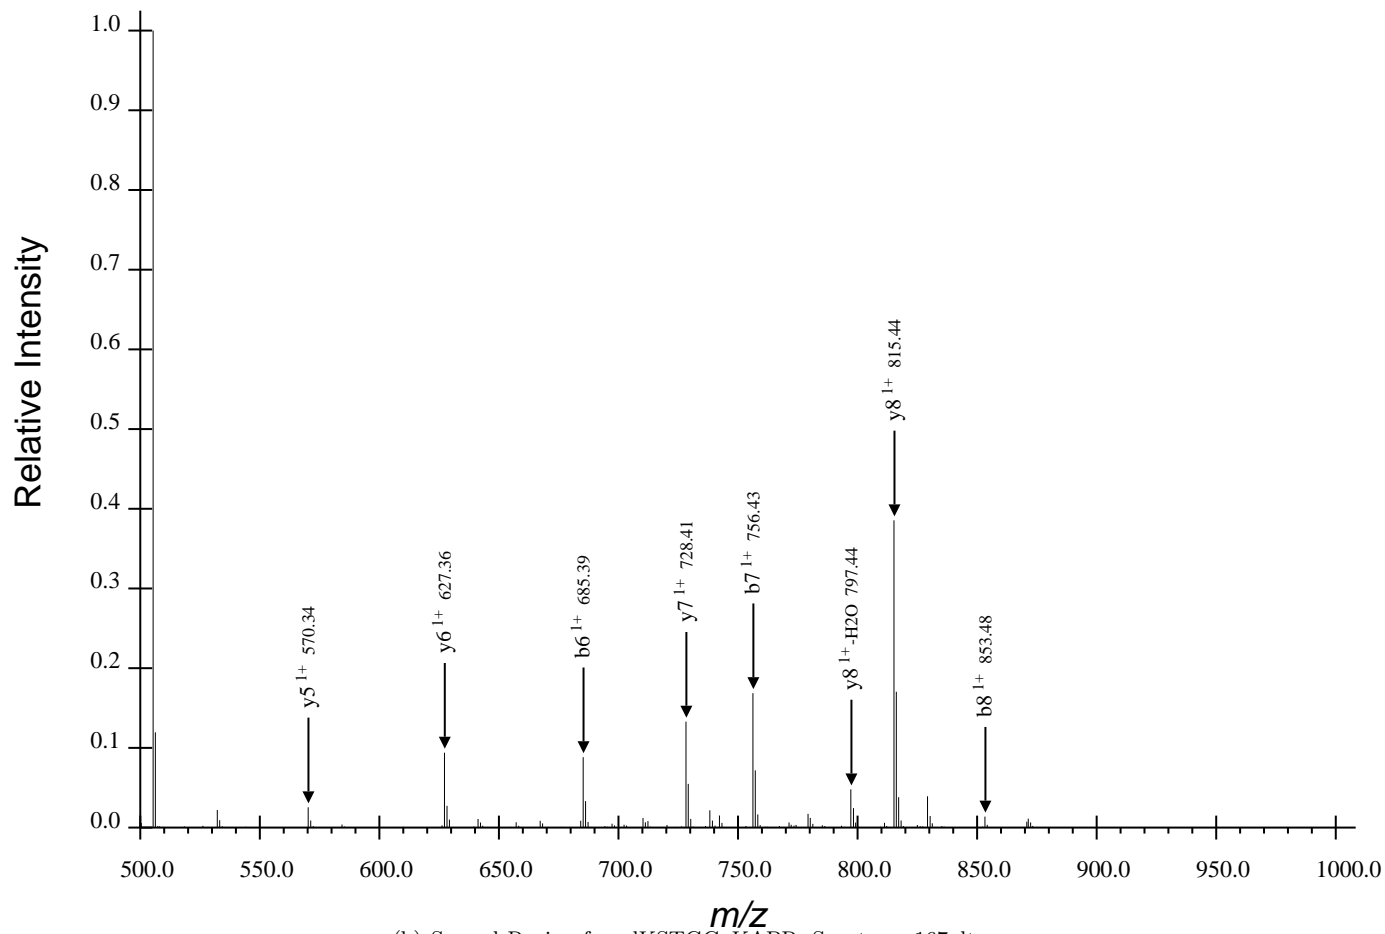

(b) Second Region for rdKSTGGaKAPR, Spectrum 167.dta

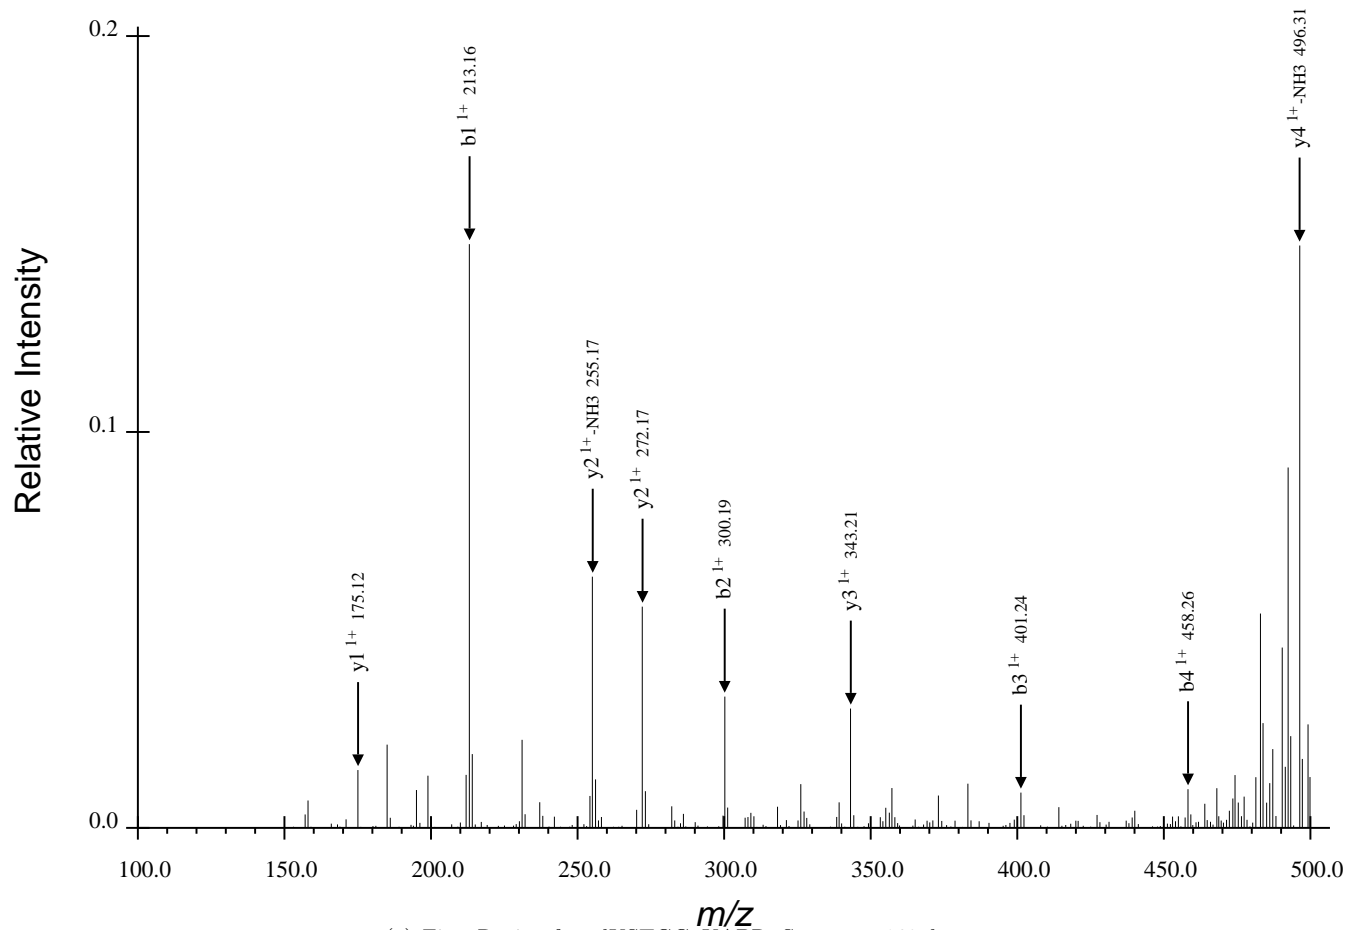

(a) First Region for rdKSTGGaKAPR, Spectrum 168.dta

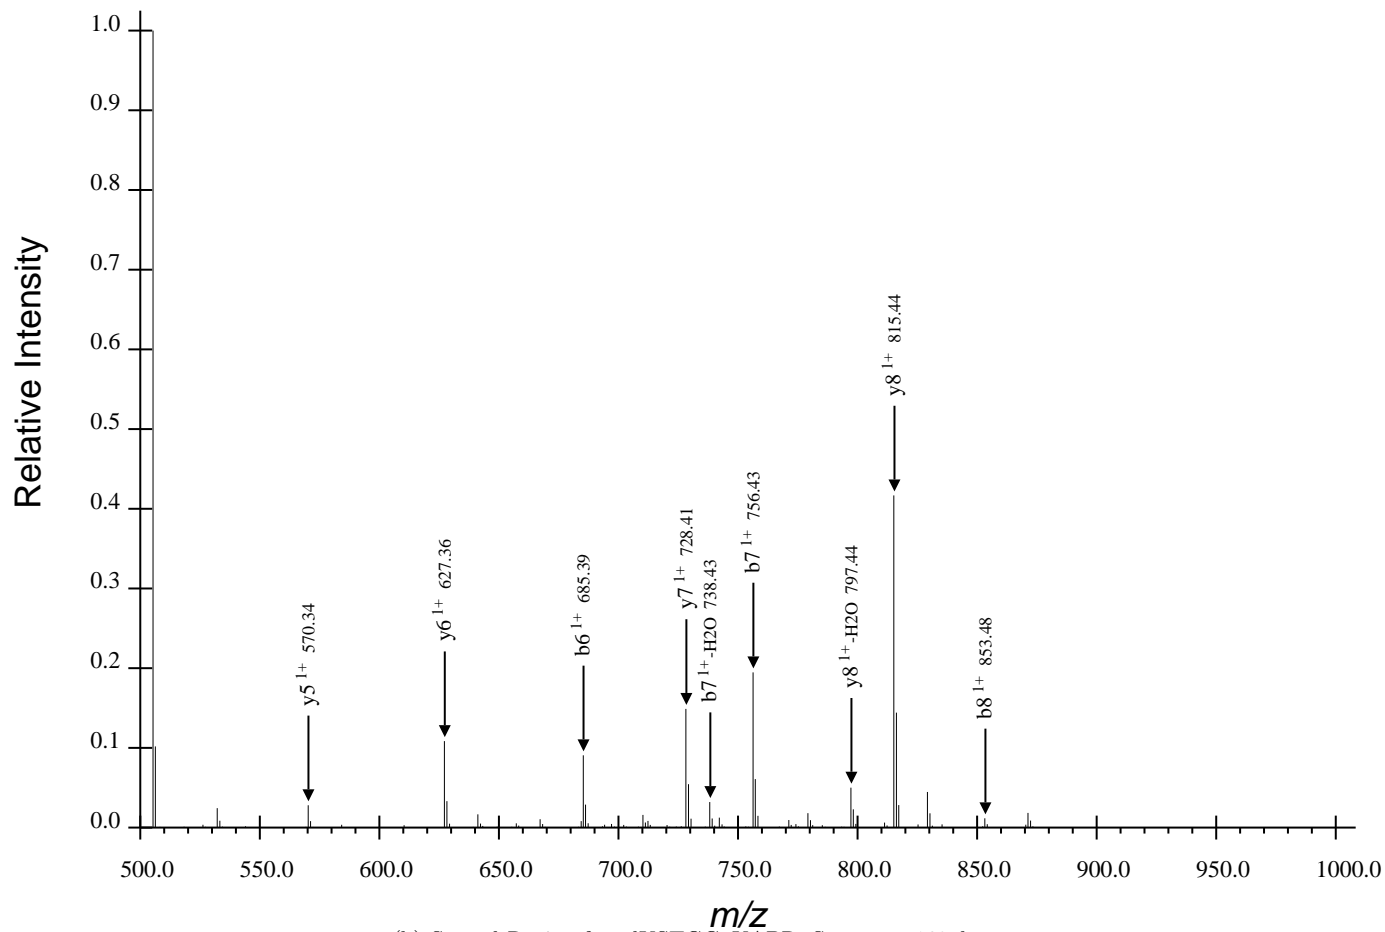

(b) Second Region for rdKSTGGaKAPR, Spectrum 168.dta



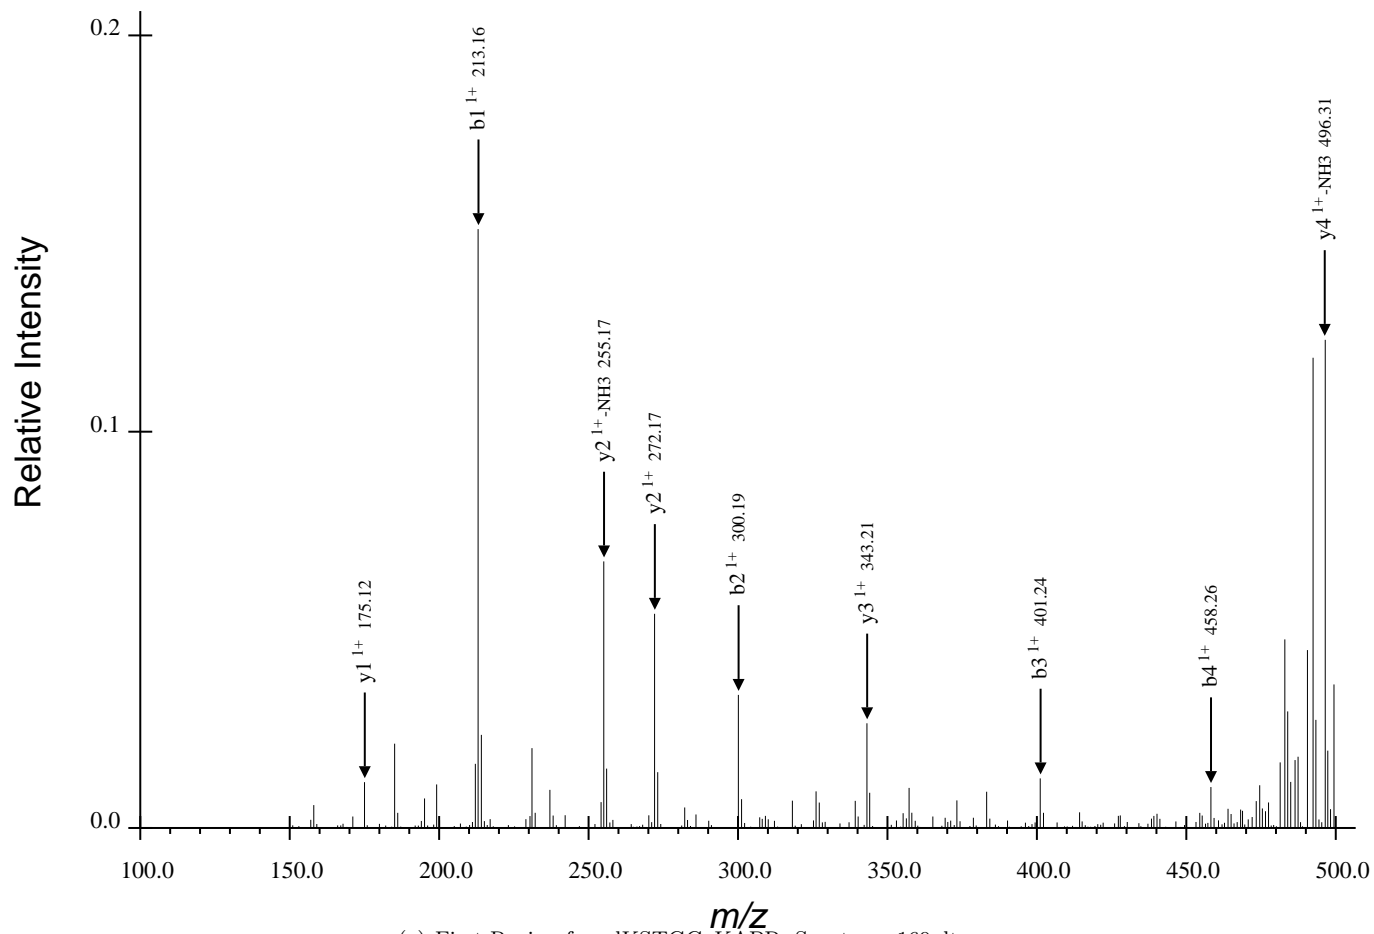

(a) First Region for rdKSTGGaKAPR, Spectrum 169.dta

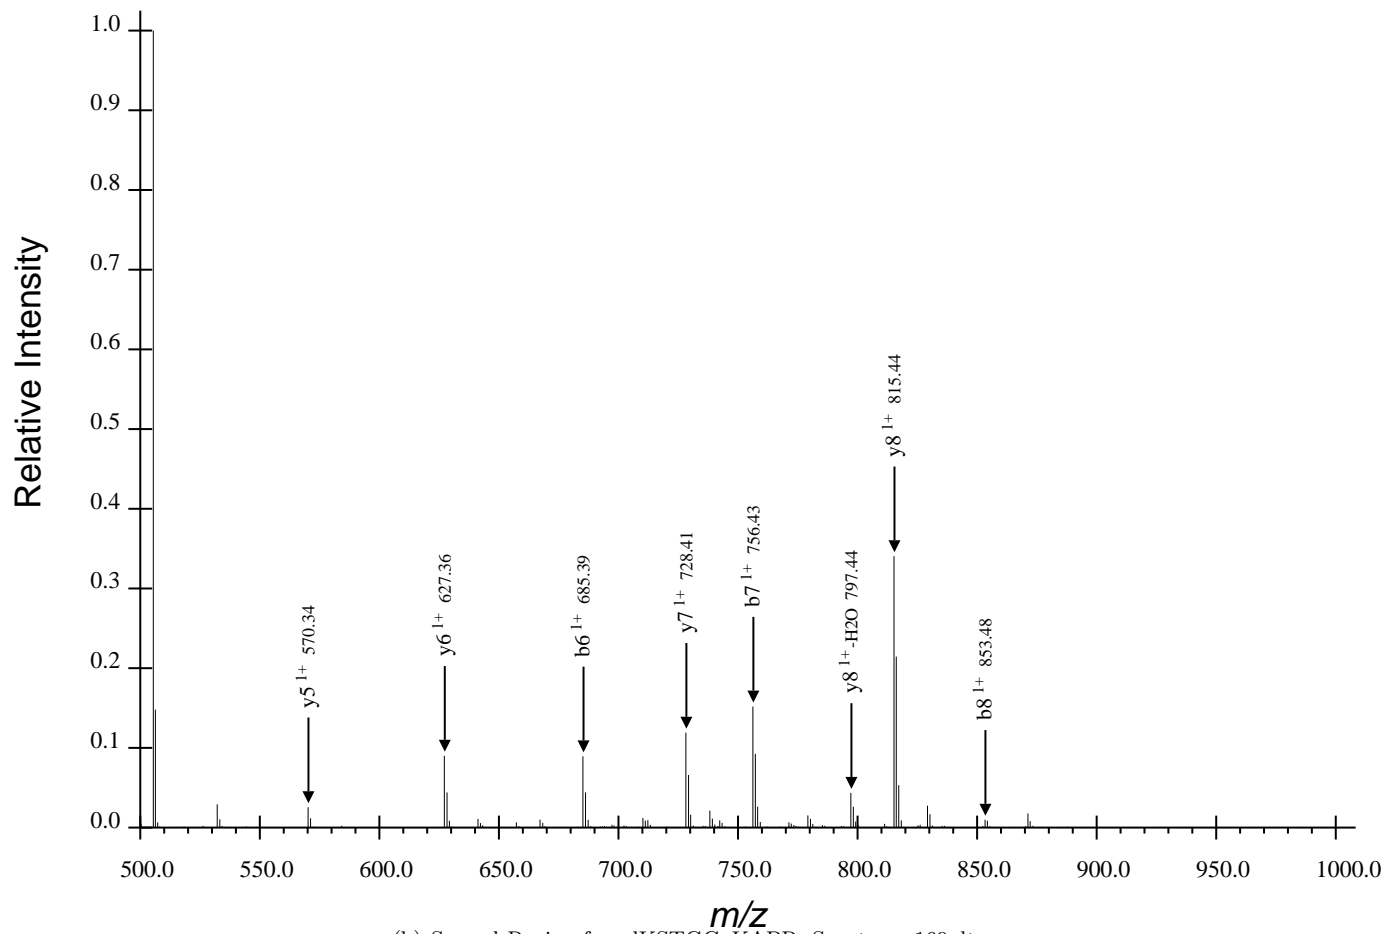

(b) Second Region for rdKSTGGaKAPR, Spectrum 169.dta

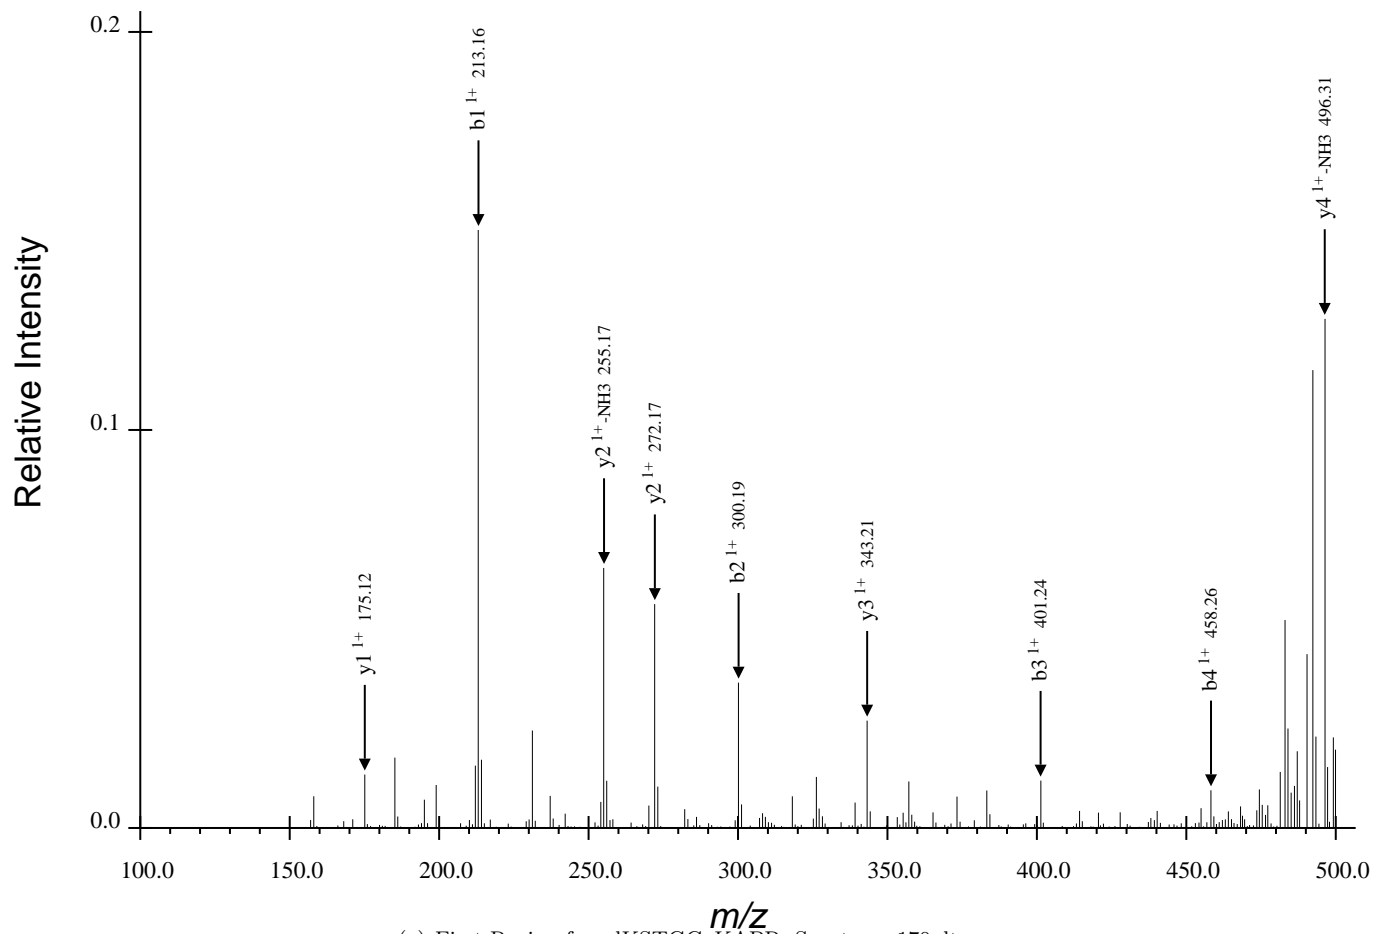

(a) First Region for rdKSTGGaKAPR, Spectrum 170.dta

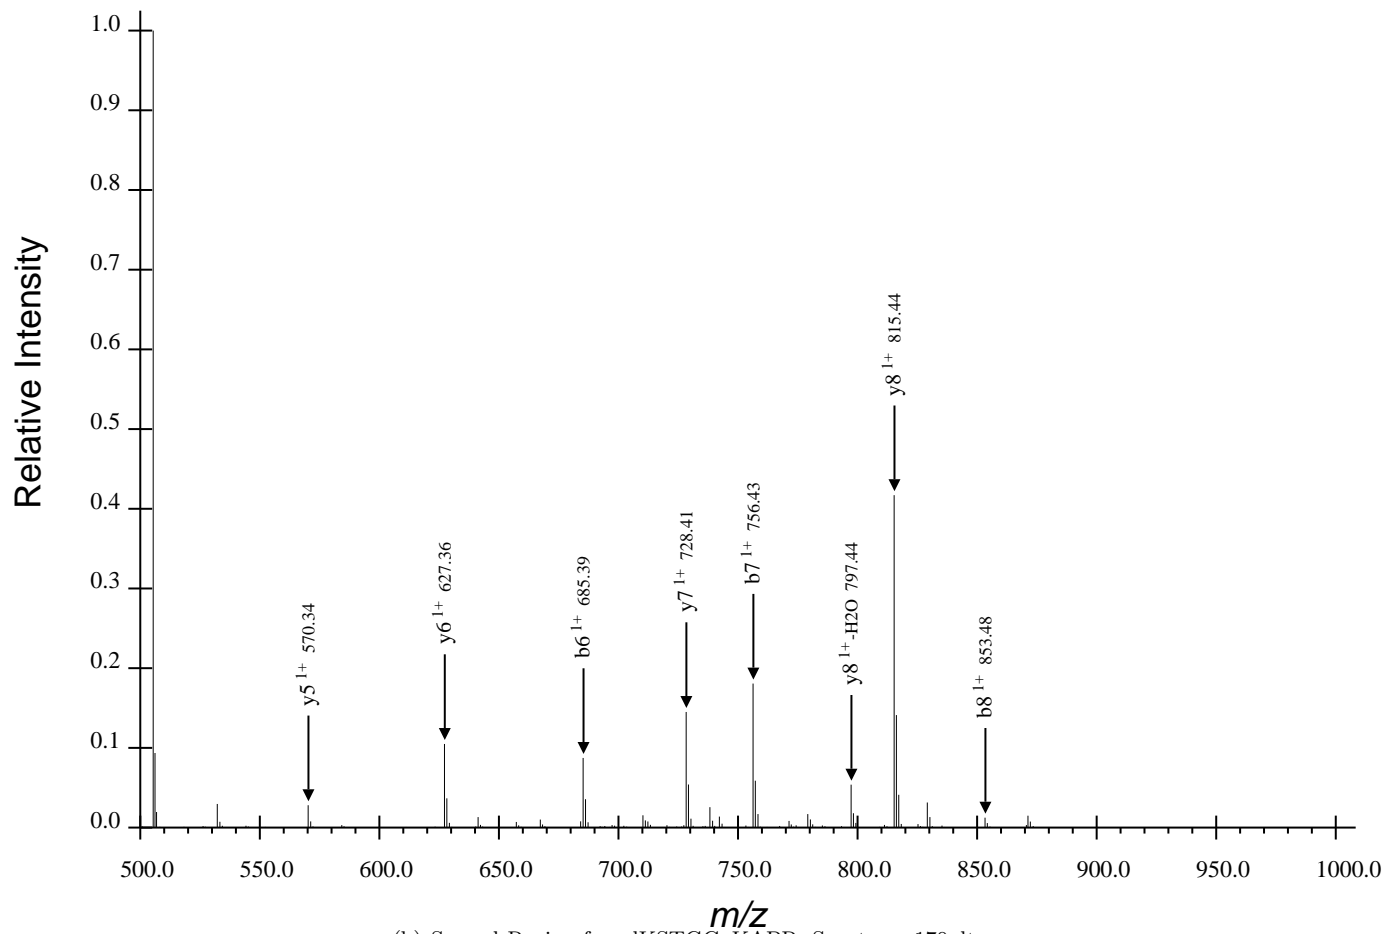

(b) Second Region for rdKSTGGaKAPR, Spectrum 170.dta

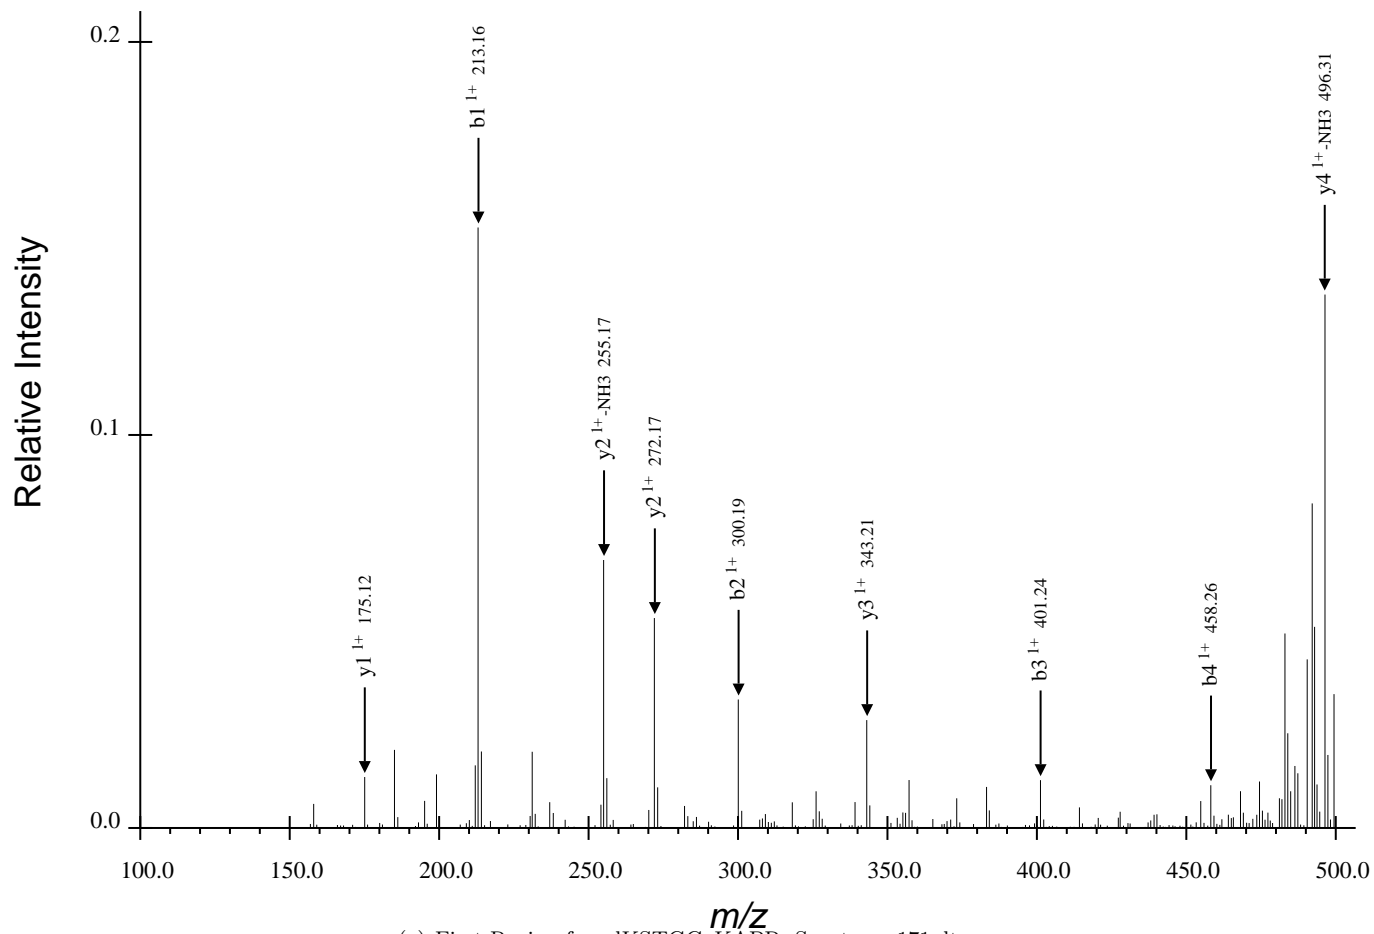

(a) First Region for rdKSTGGaKAPR, Spectrum 171.dta

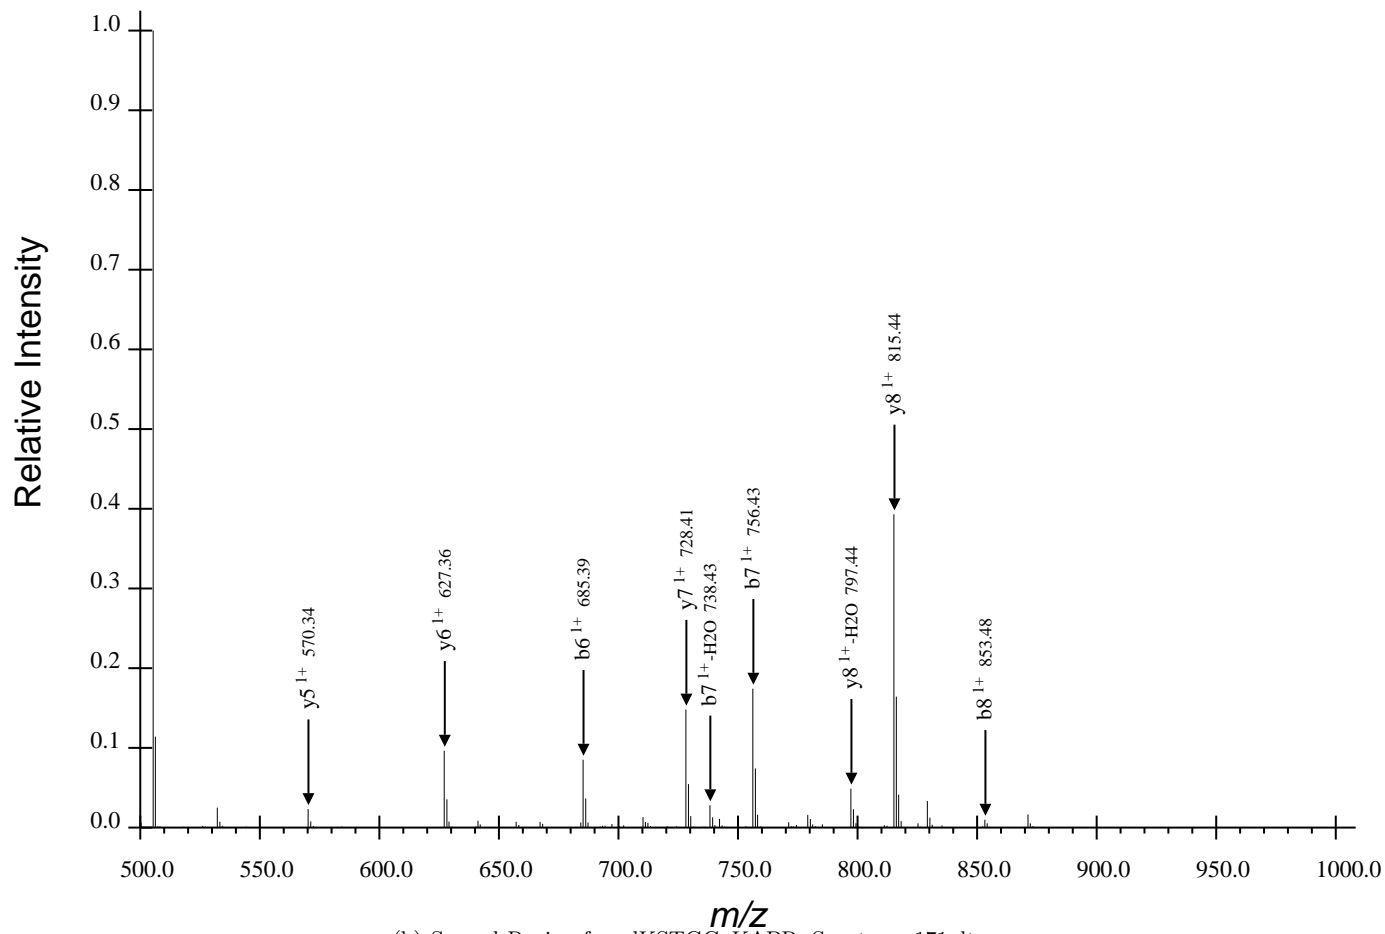

(b) Second Region for rdKSTGGaKAPR, Spectrum 171.dta

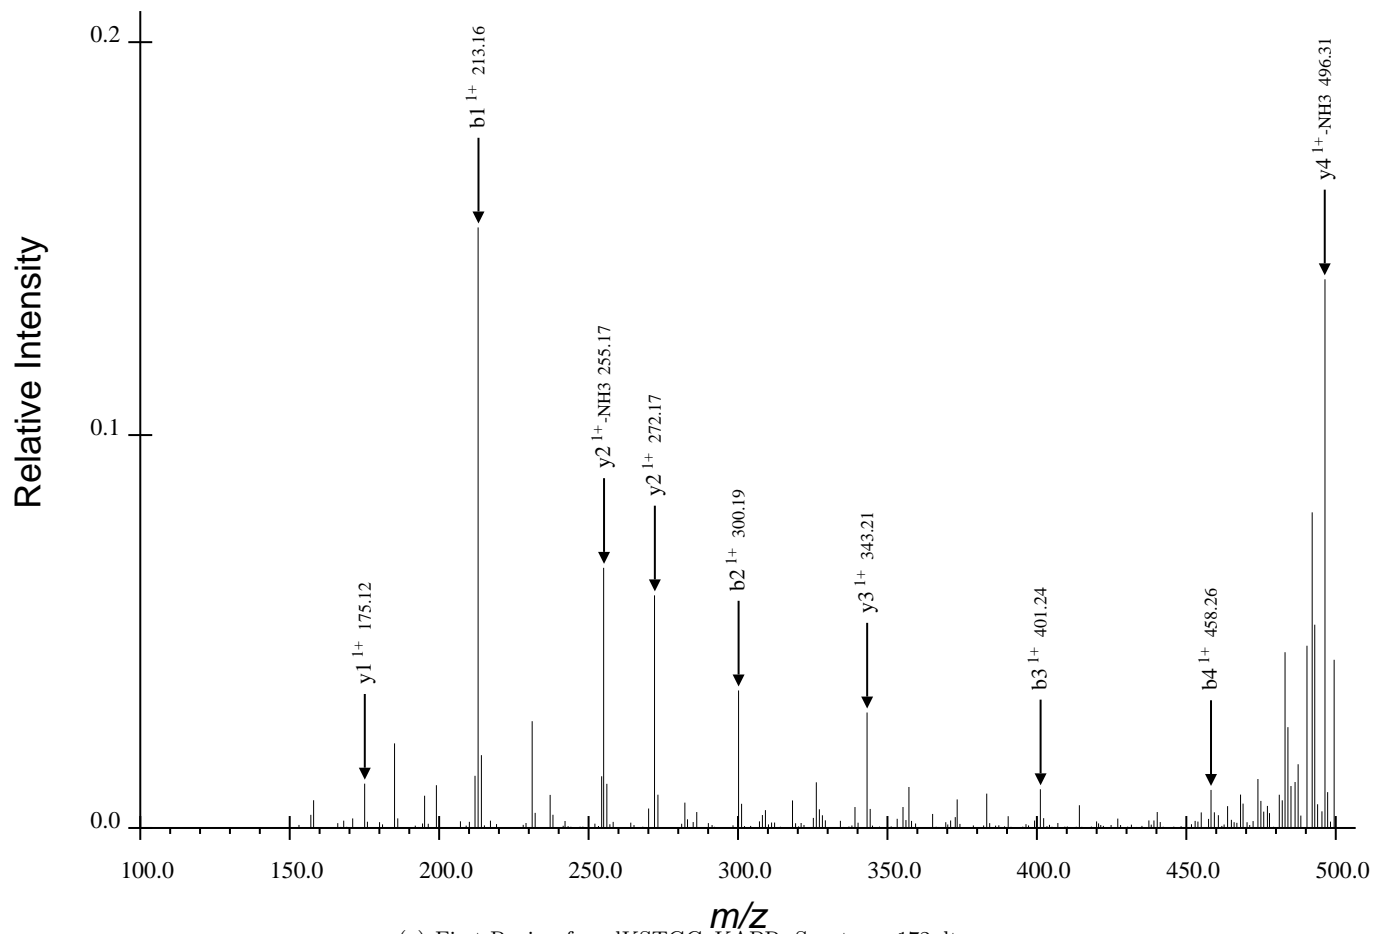

(a) First Region for rdKSTGGaKAPR, Spectrum 172.dta

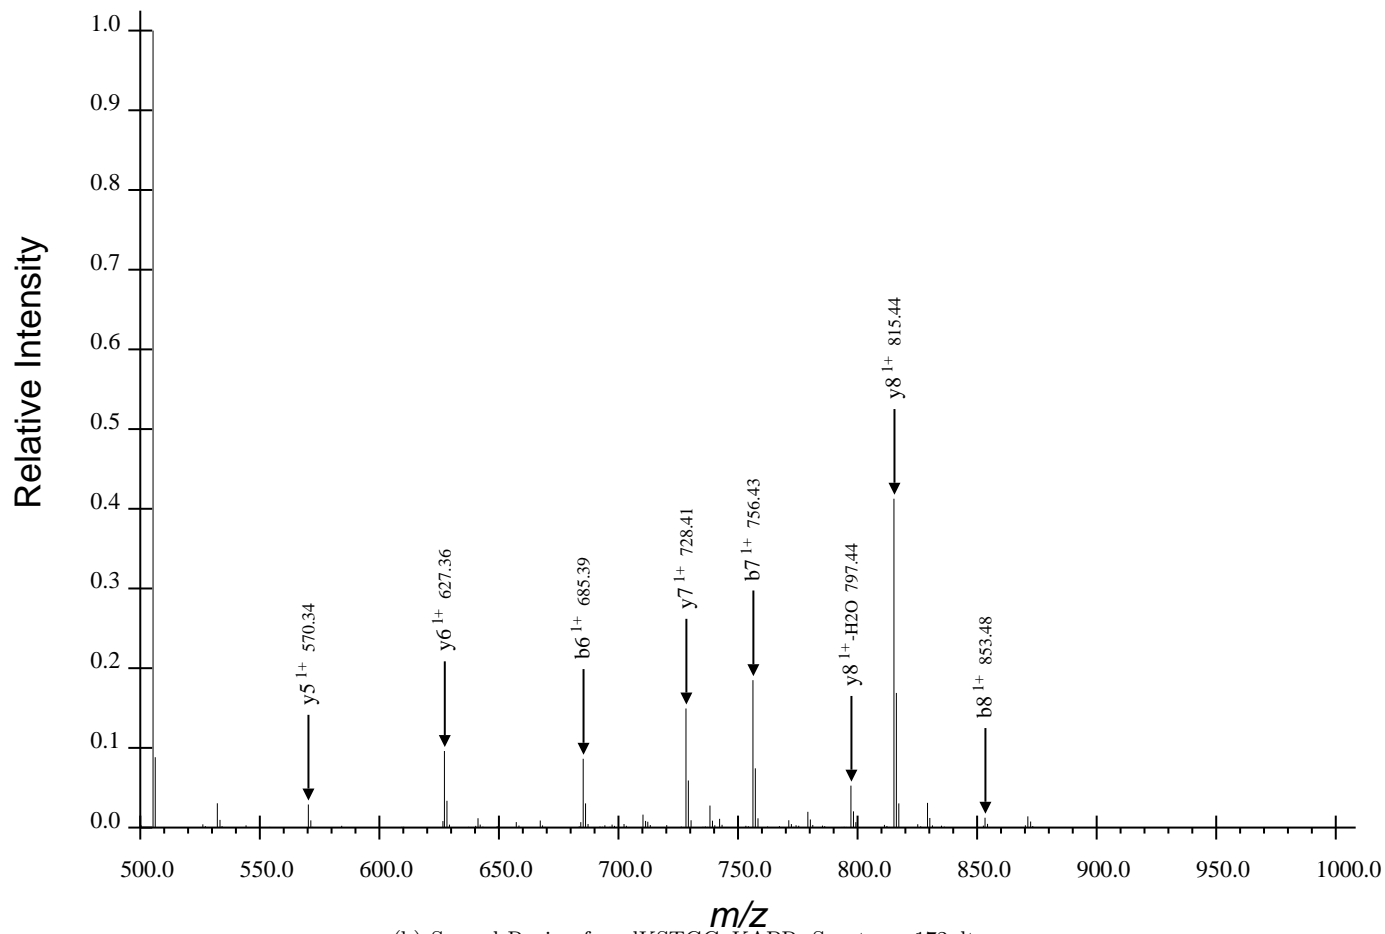

(b) Second Region for rdKSTGGaKAPR, Spectrum 172.dta

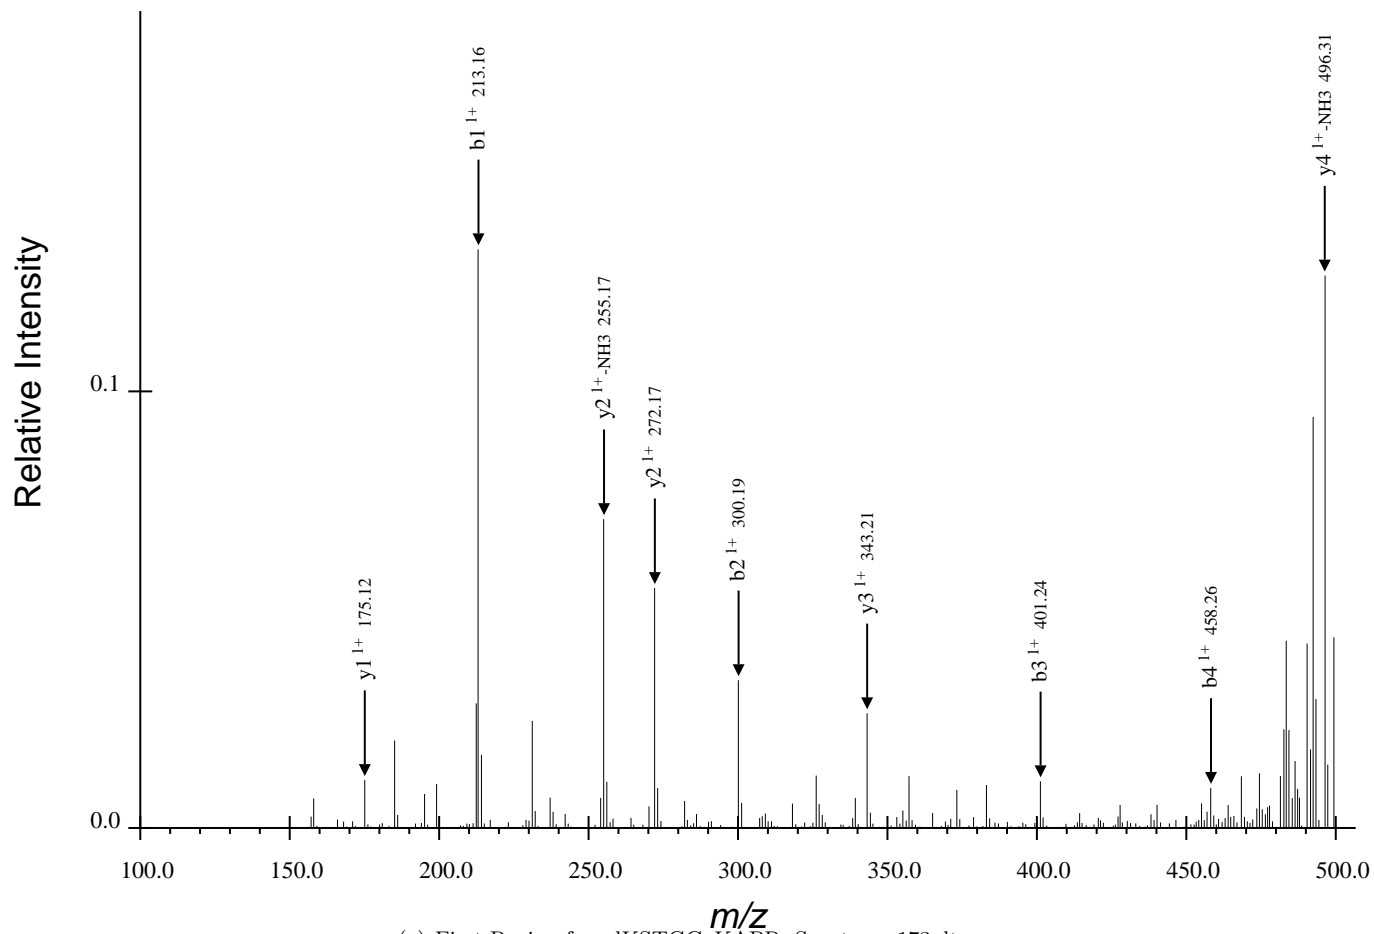

(a) First Region for rdKSTGGaKAPR, Spectrum 173.dta

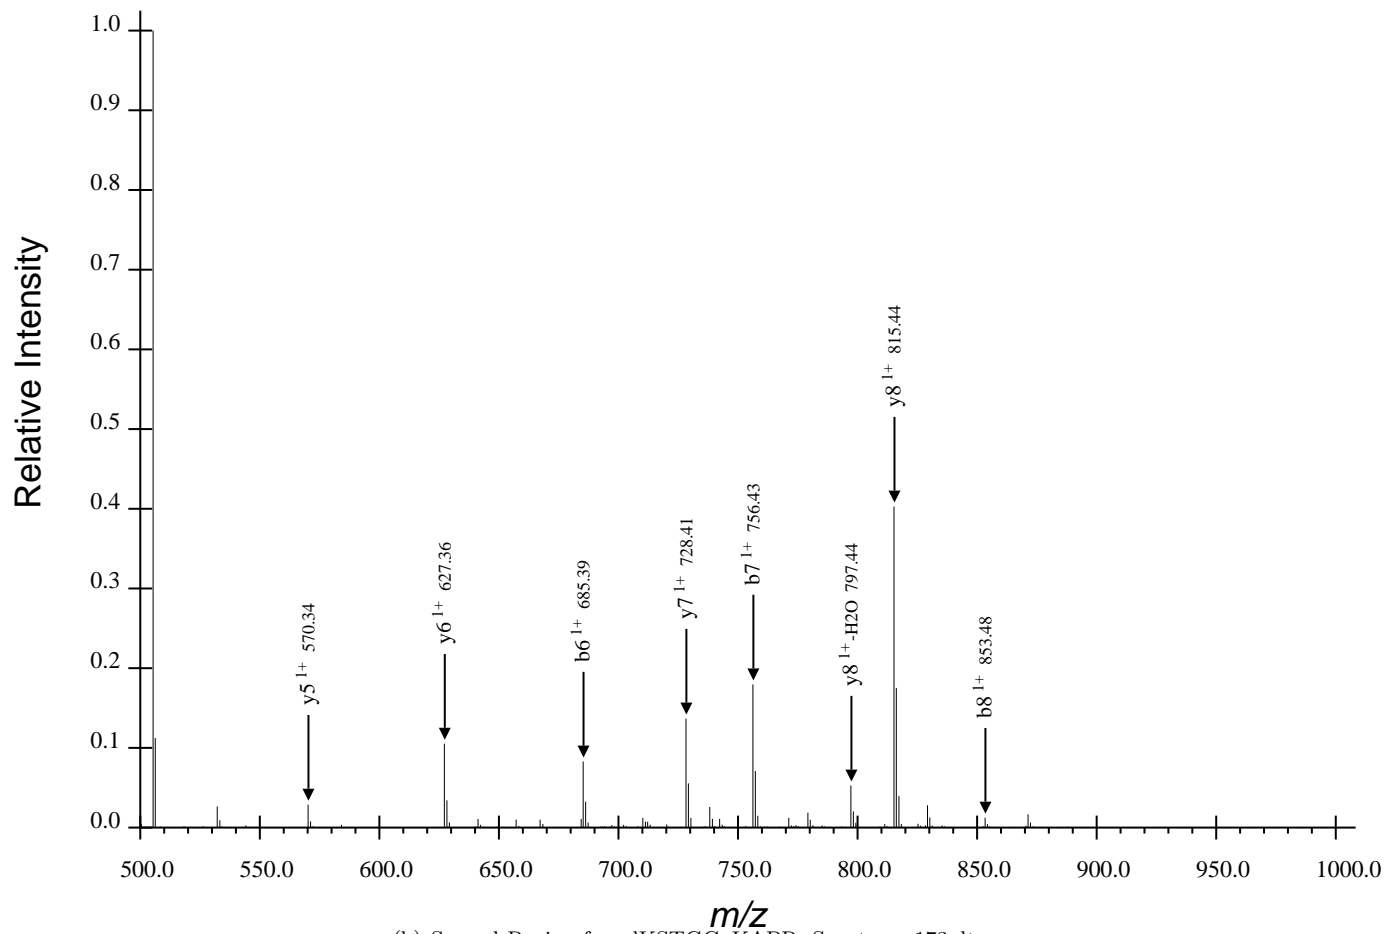

(b) Second Region for rdKSTGGaKAPR, Spectrum 173.dta

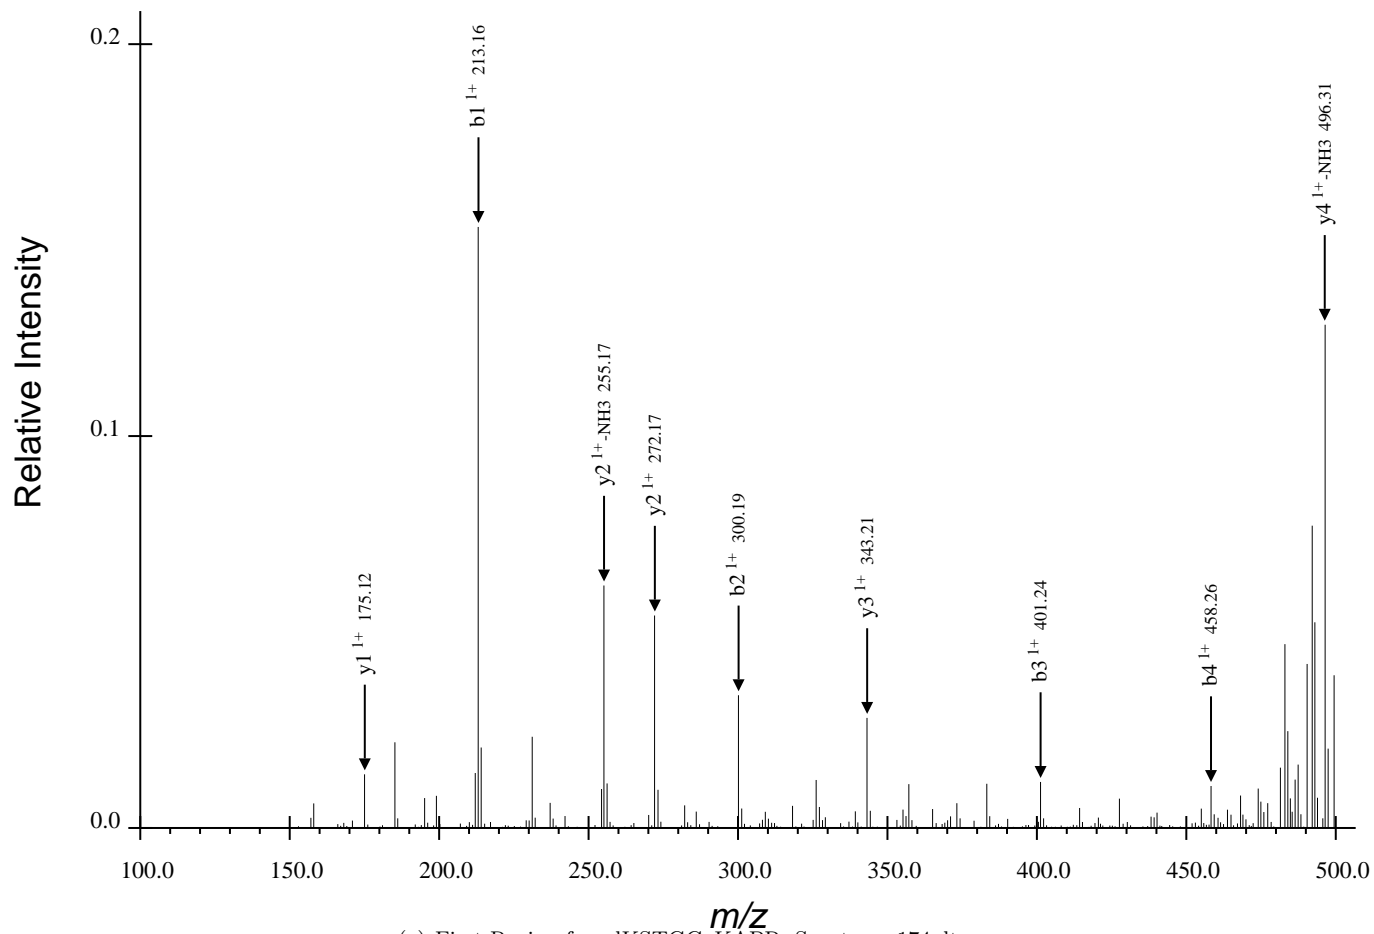

(a) First Region for rdKSTGGaKAPR, Spectrum 174.dta

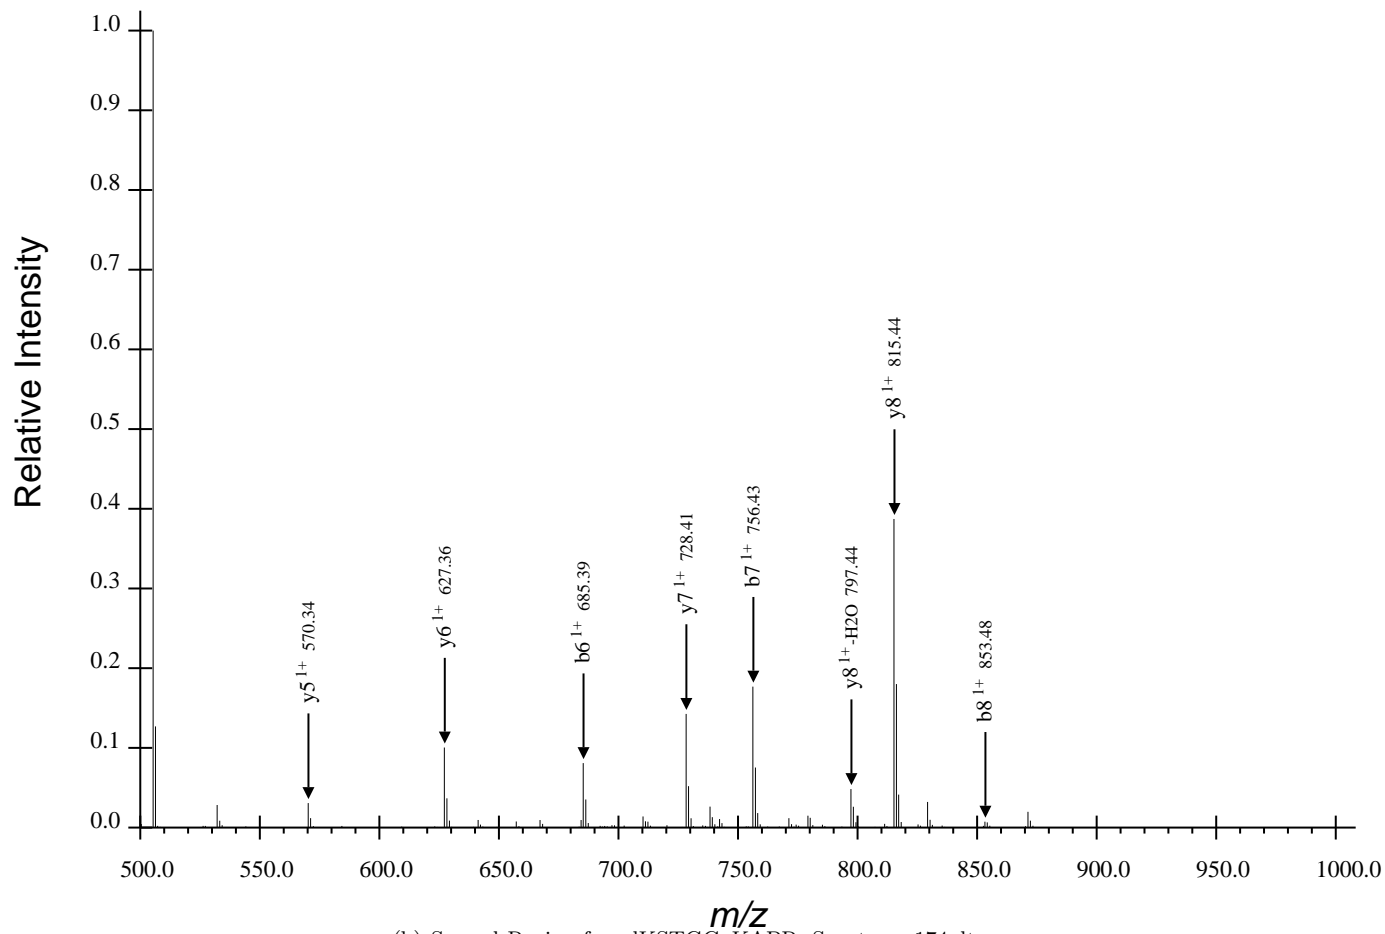

(b) Second Region for rdKSTGGaKAPR, Spectrum 174.dta

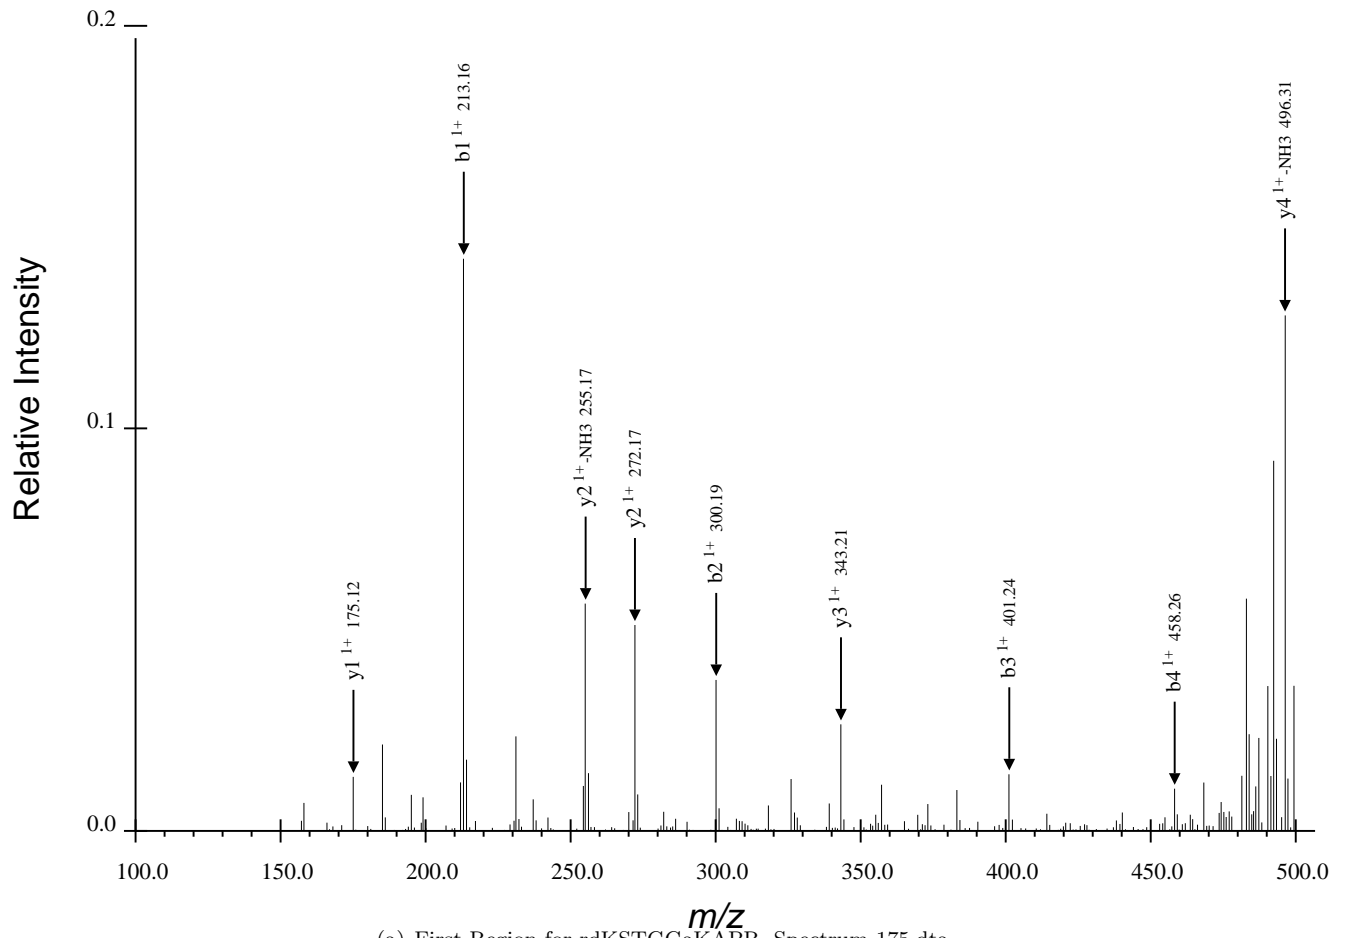

(a) First Region for rdKSTGGaKAPR, Spectrum 175.dta

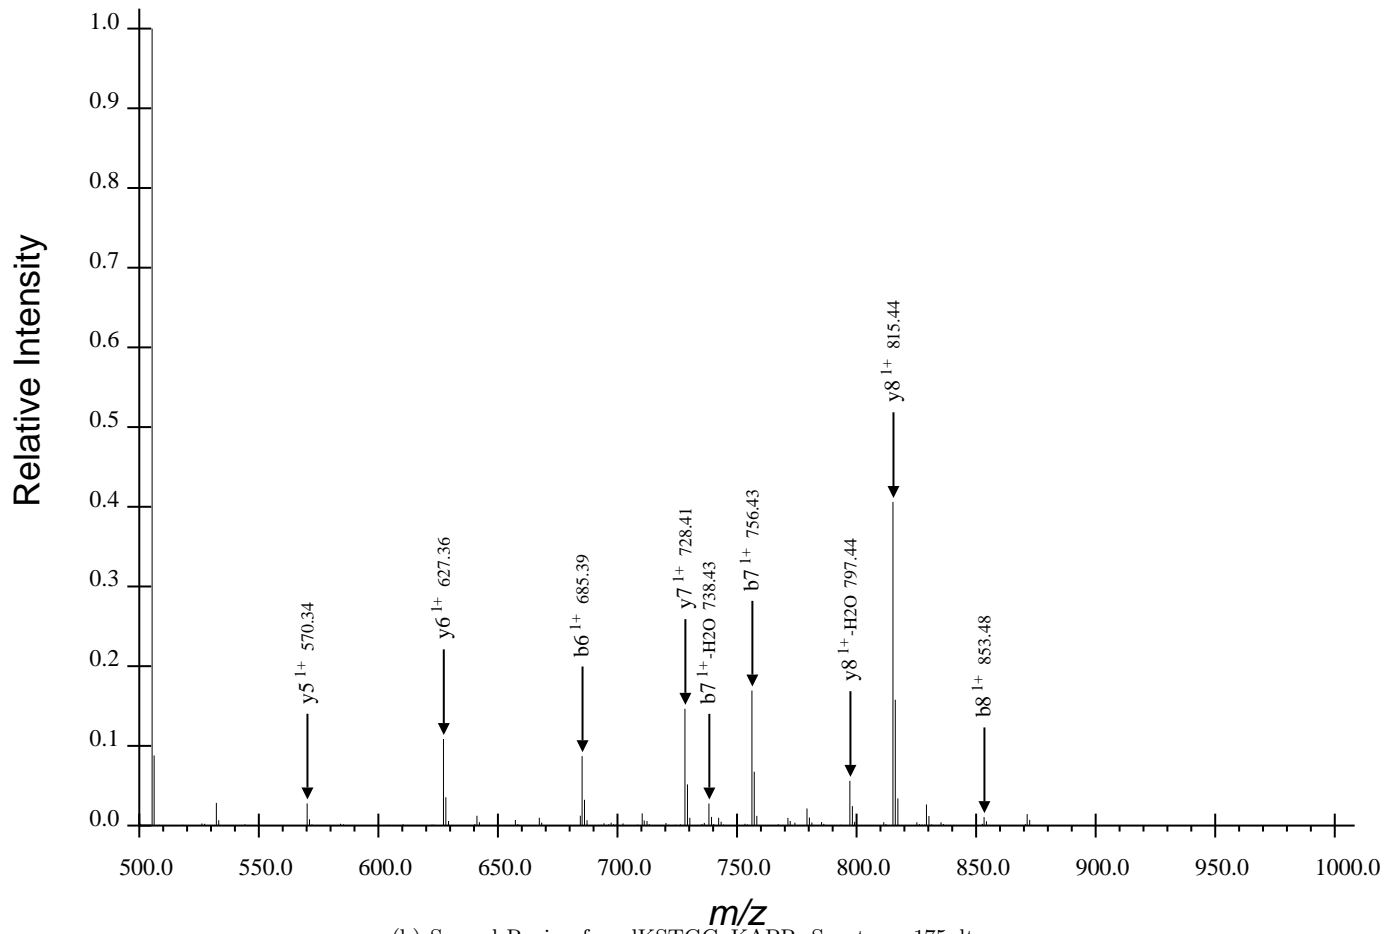

(b) Second Region for rdKSTGGaKAPR, Spectrum 175.dta

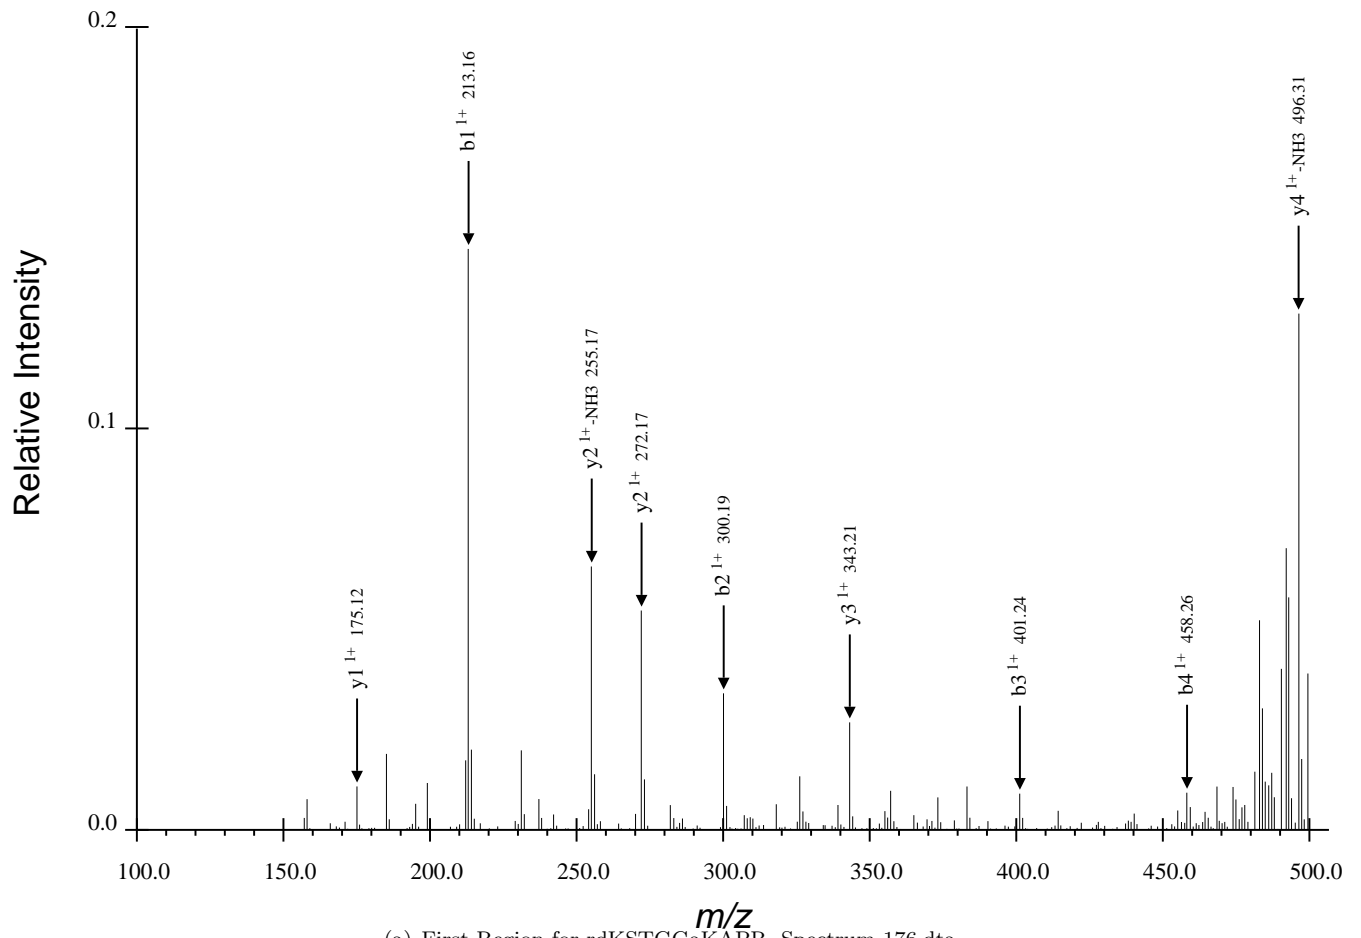

(a) First Region for rdKSTGGaKAPR, Spectrum 176.dta

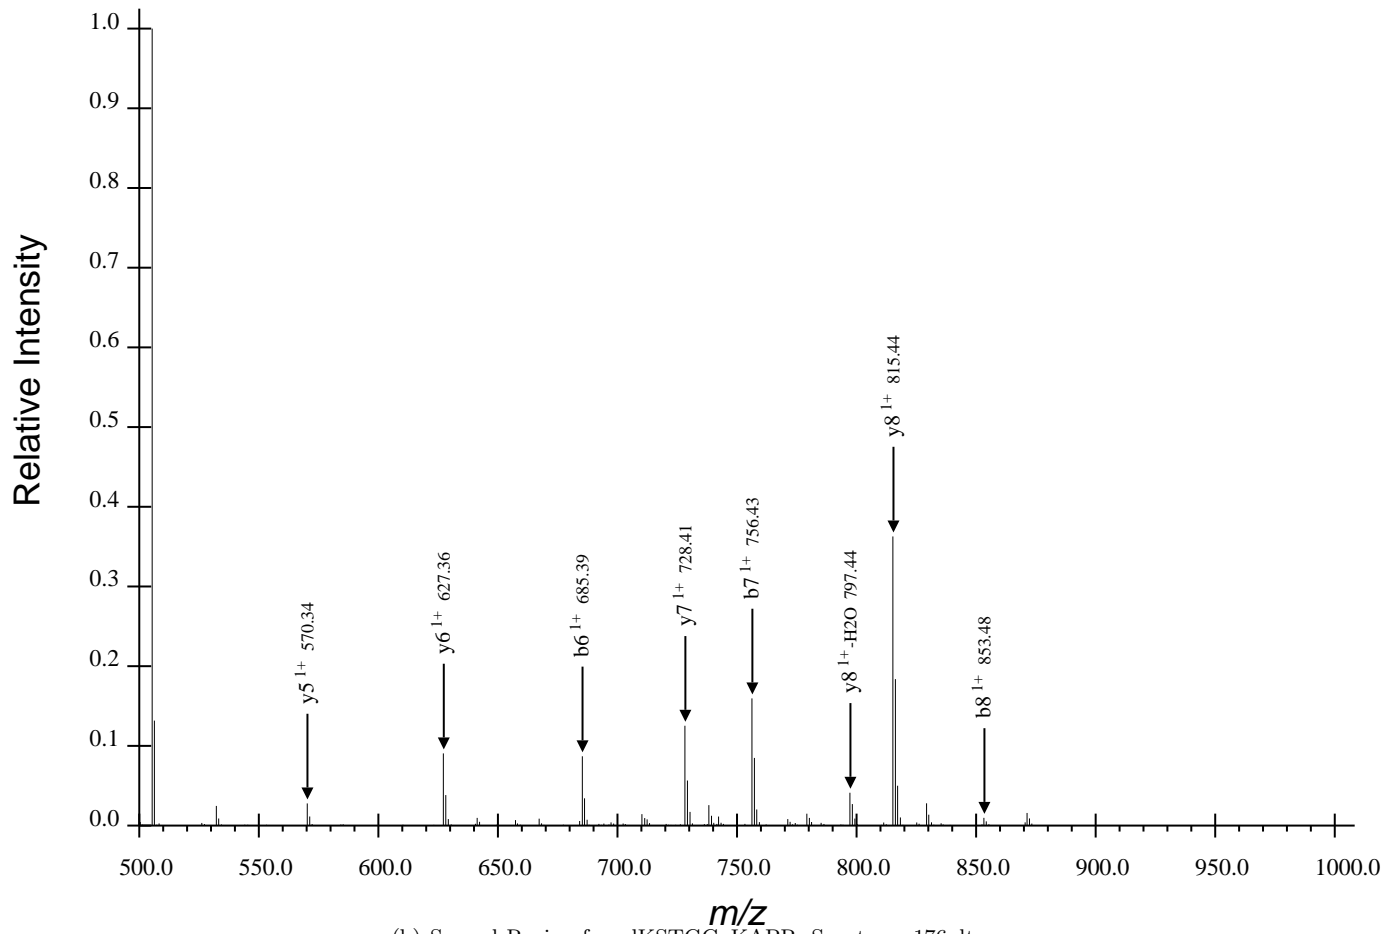

(b) Second Region for rdKSTGGaKAPR, Spectrum 176.dta



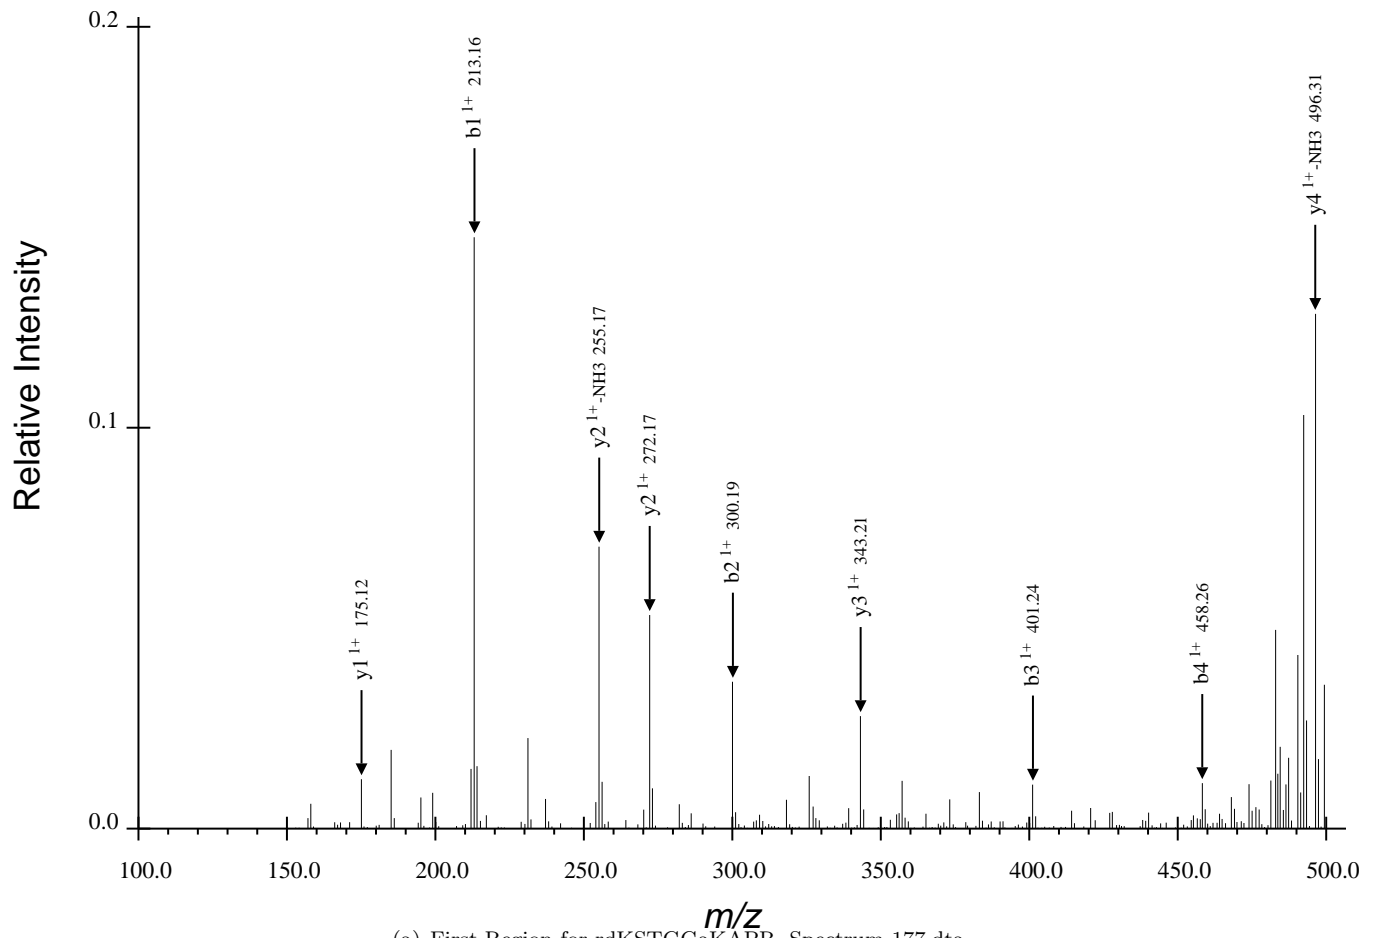

(a) First Region for rdKSTGGaKAPR, Spectrum 177.dta

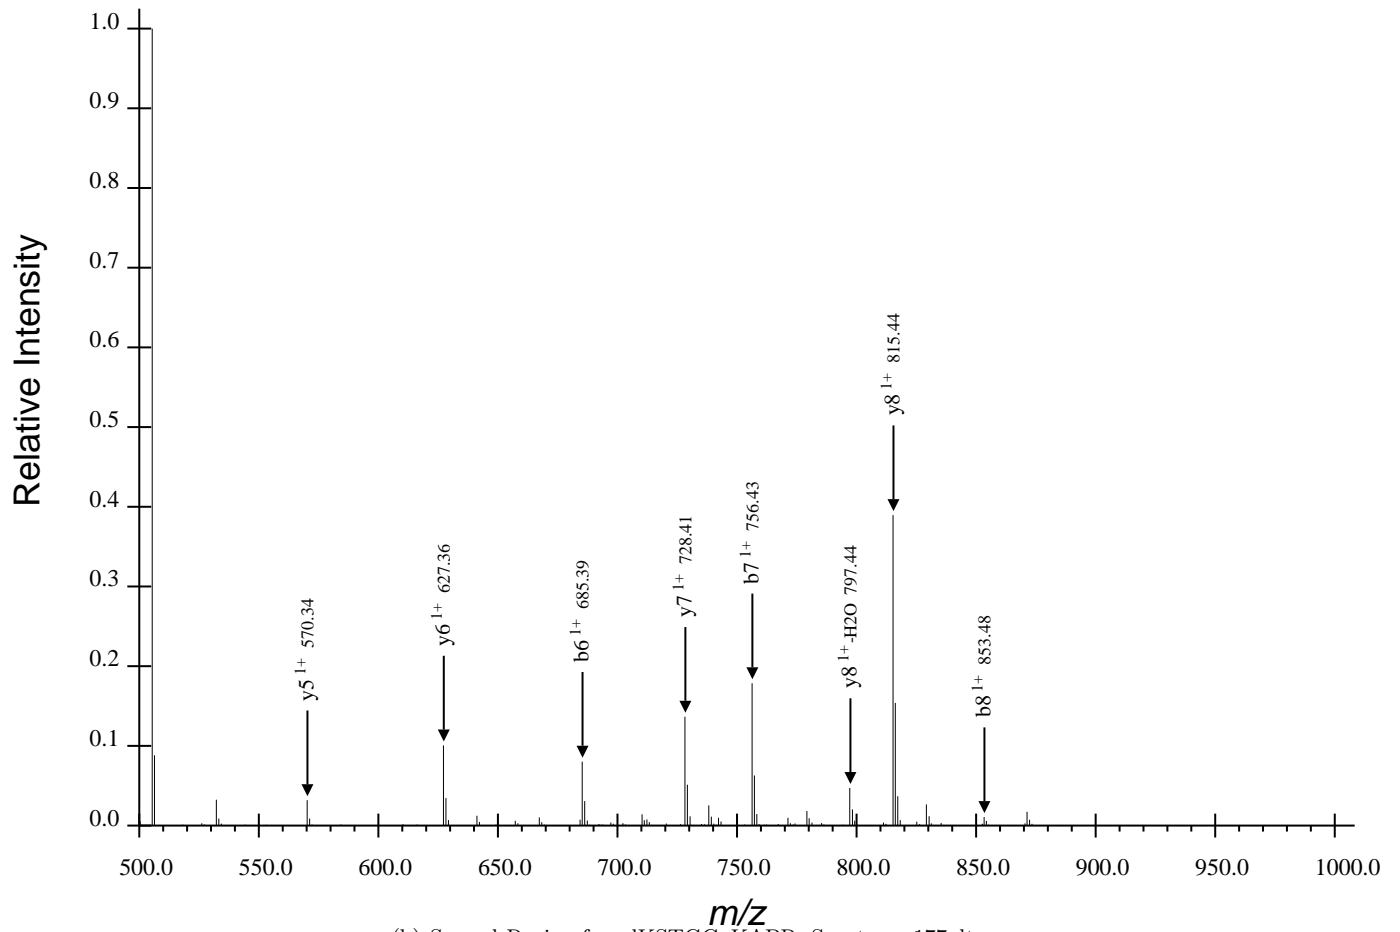

(b) Second Region for rdKSTGGaKAPR, Spectrum 177.dta

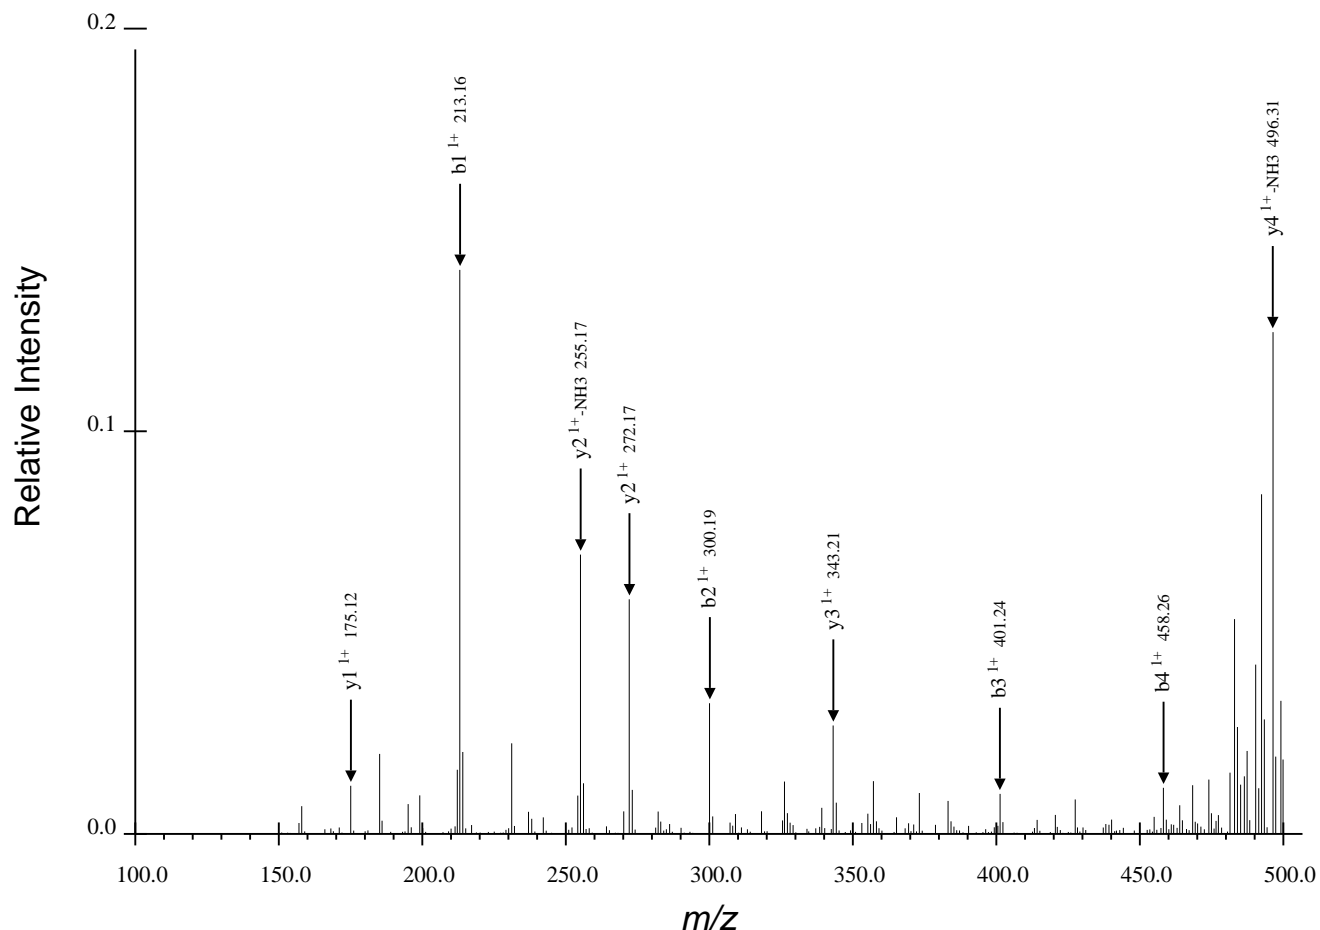

(a) First Region for rdKSTGGaKAPR, Spectrum 178.dta

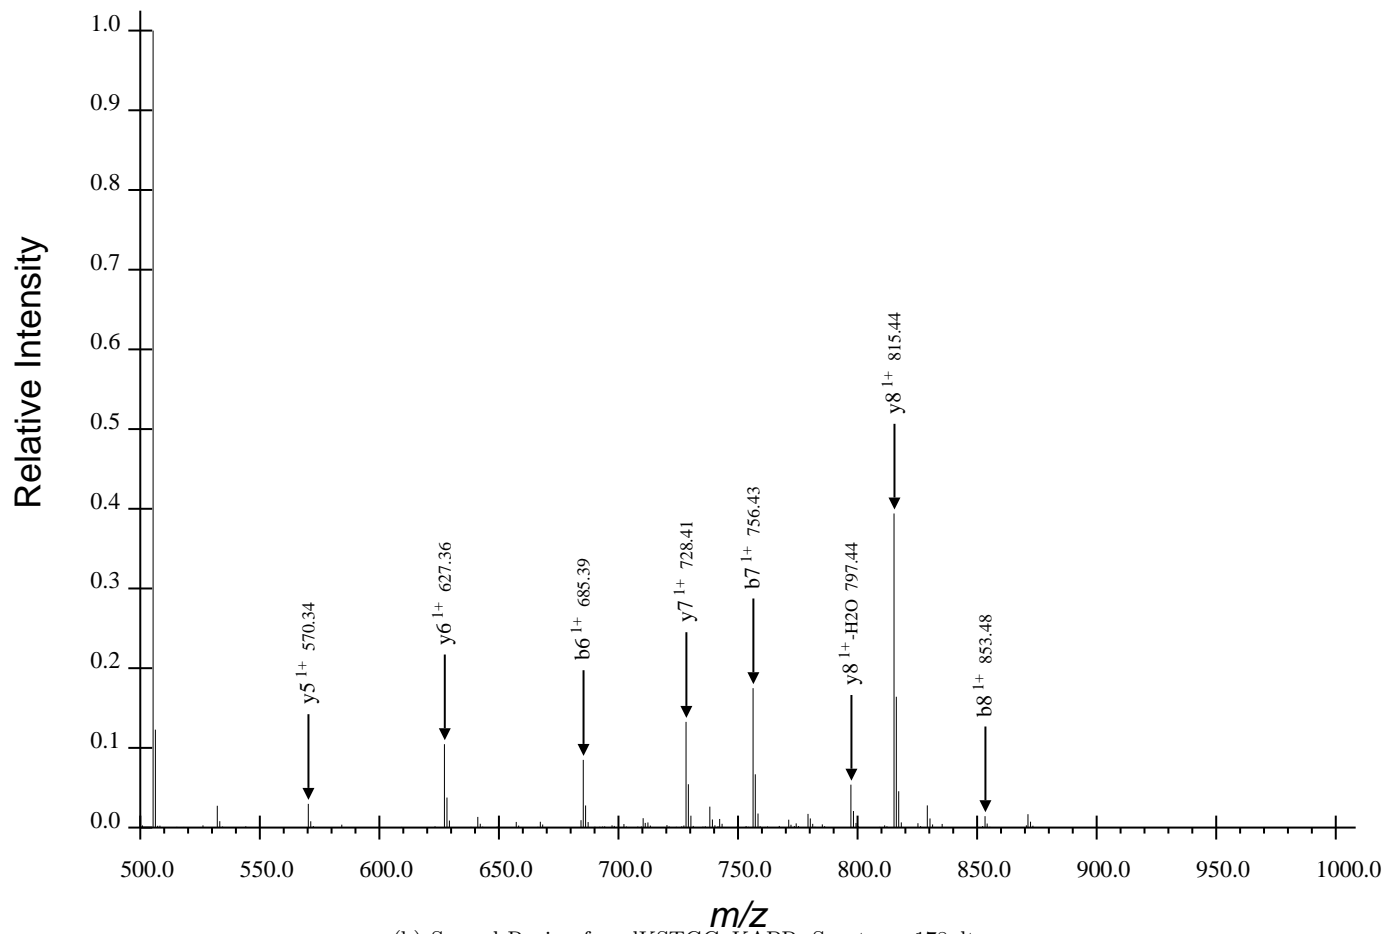

(b) Second Region for rdKSTGGaKAPR, Spectrum 178.dta

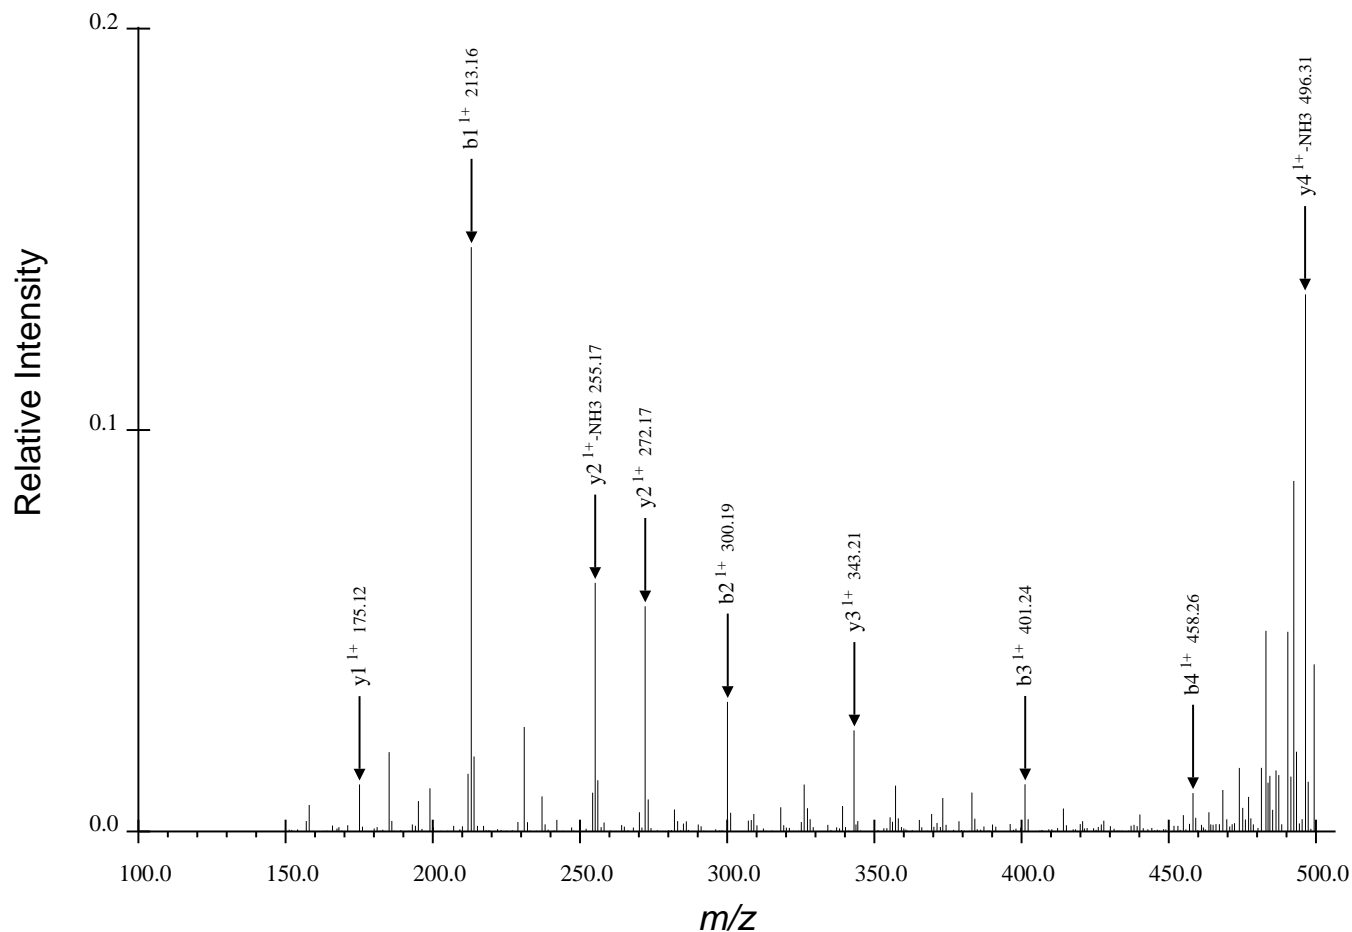

(a) First Region for rdKSTGGaKAPR, Spectrum 179.dta

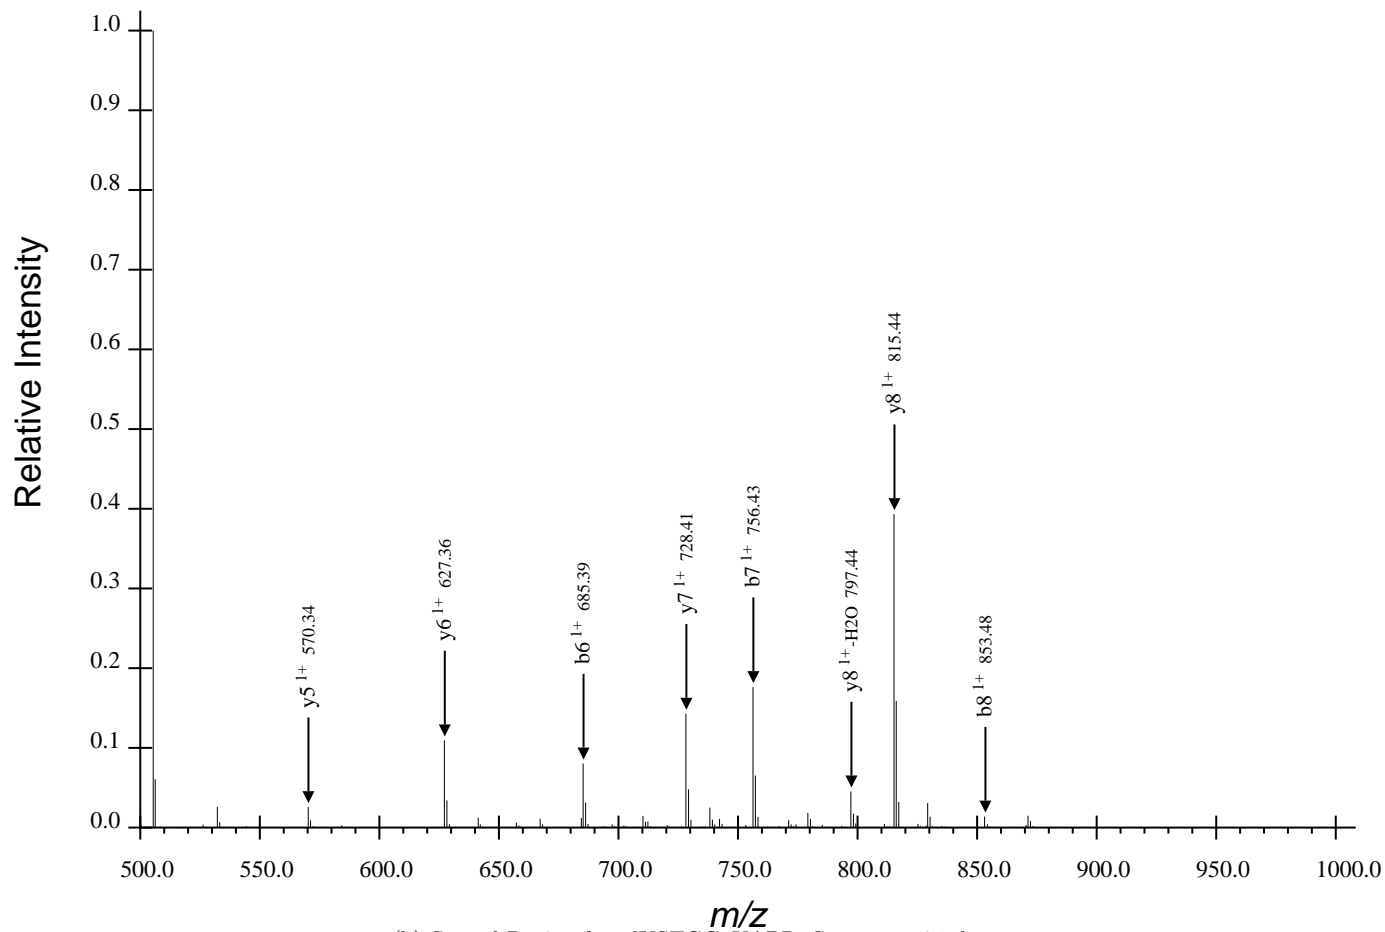

(b) Second Region for rdKSTGGaKAPR, Spectrum 179.dta

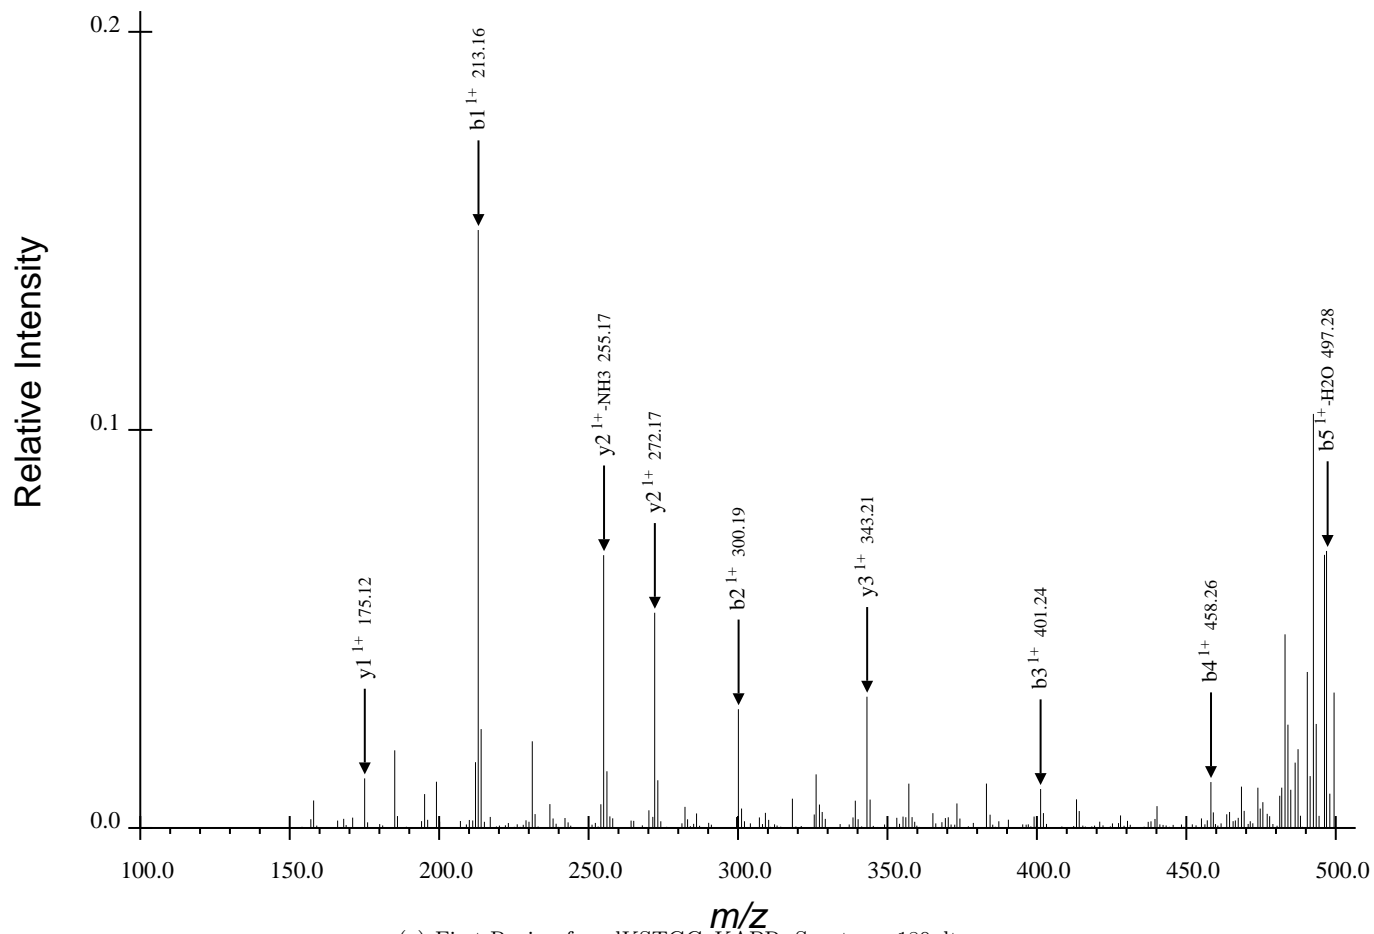

(a) First Region for rdKSTGGaKAPR, Spectrum 180.dta

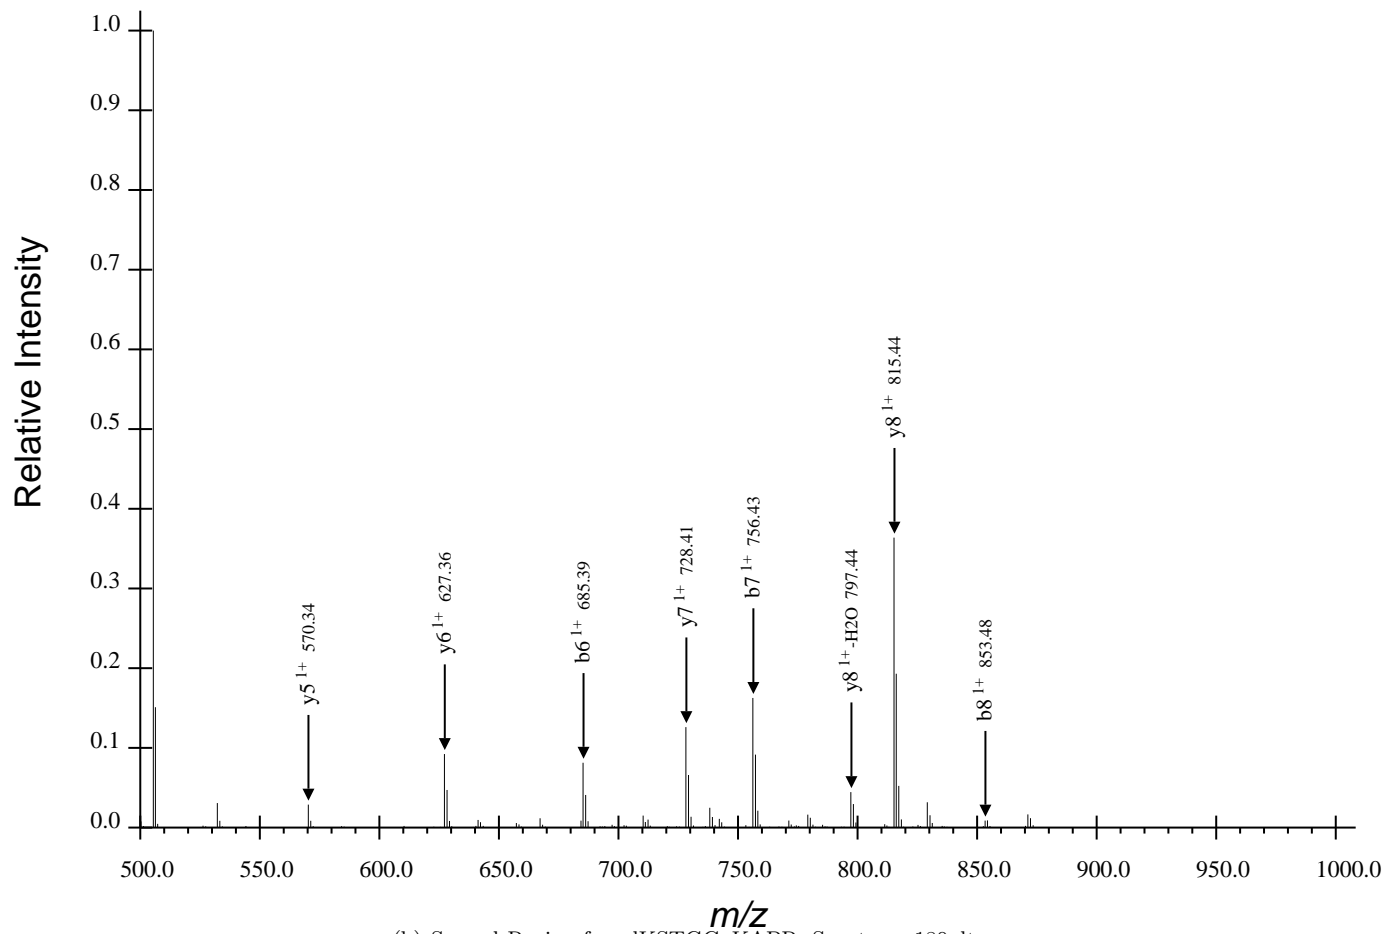

(b) Second Region for rdKSTGGaKAPR, Spectrum 180.dta

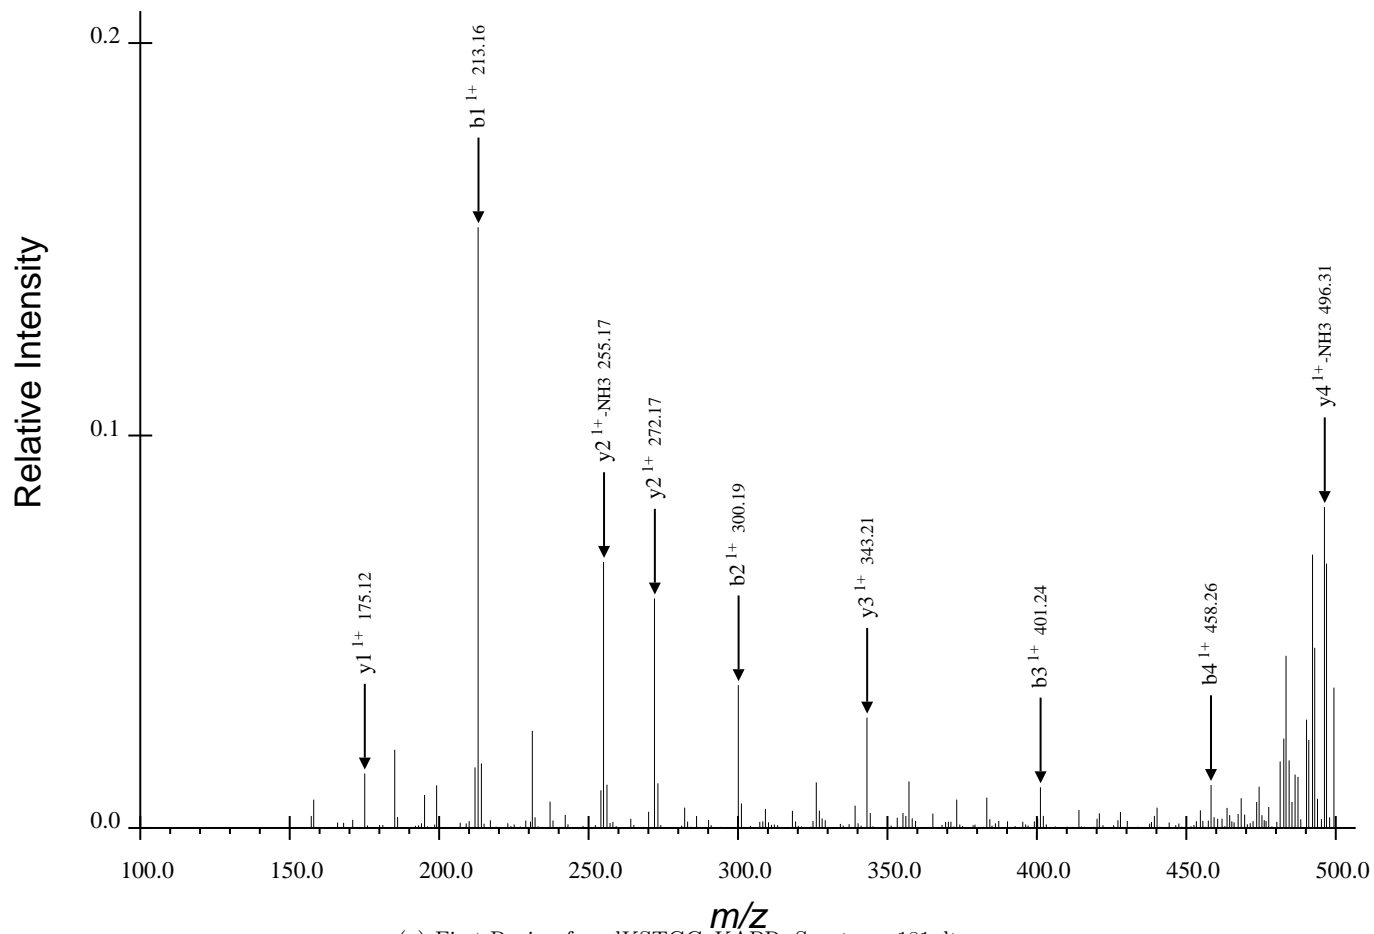

(a) First Region for rdKSTGGaKAPR, Spectrum 181.dta

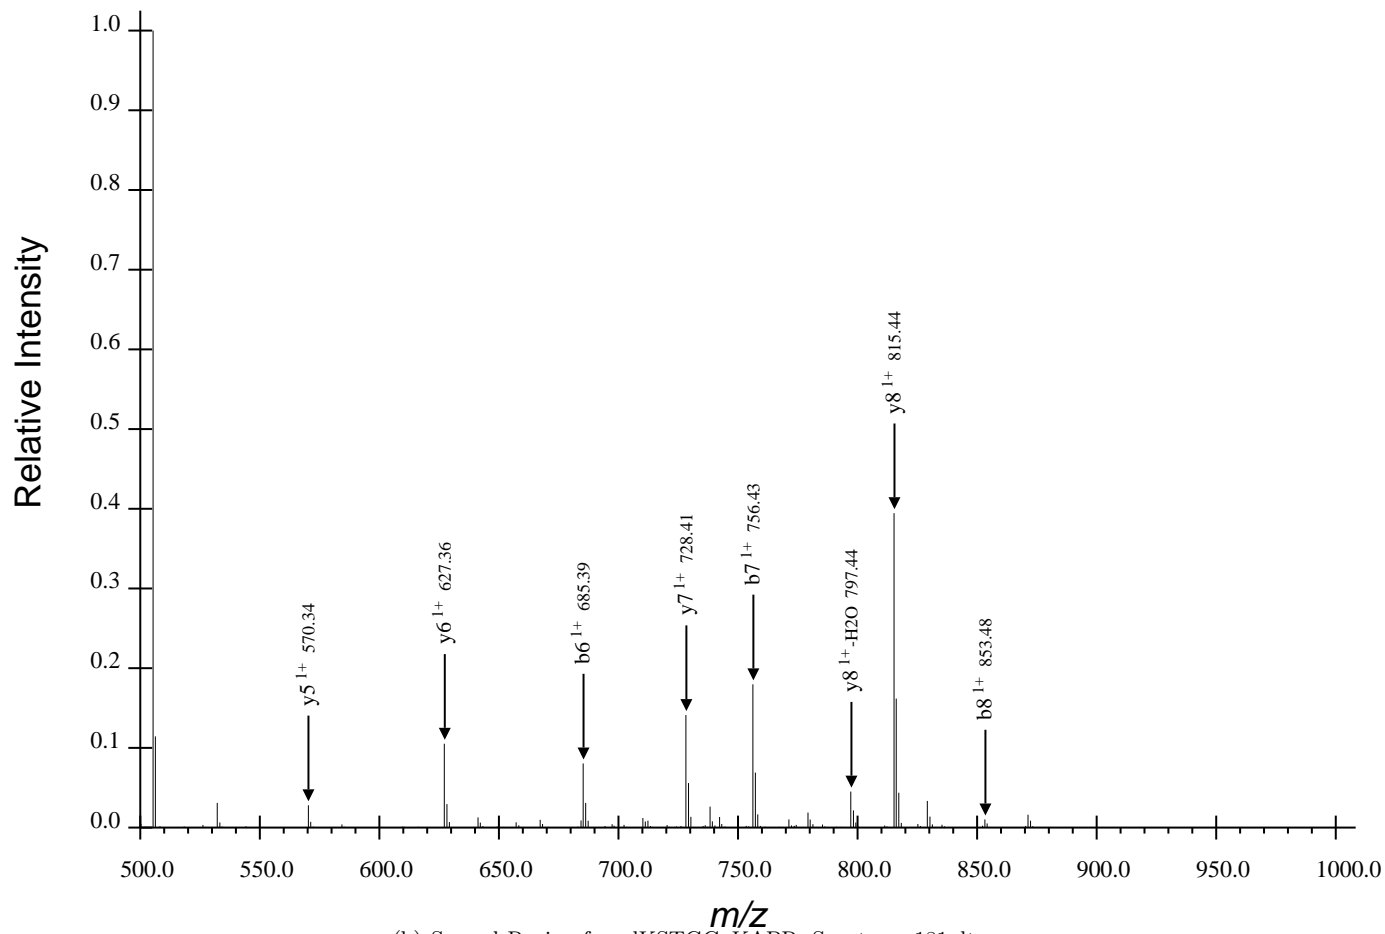

(b) Second Region for rdKSTGGaKAPR, Spectrum 181.dta

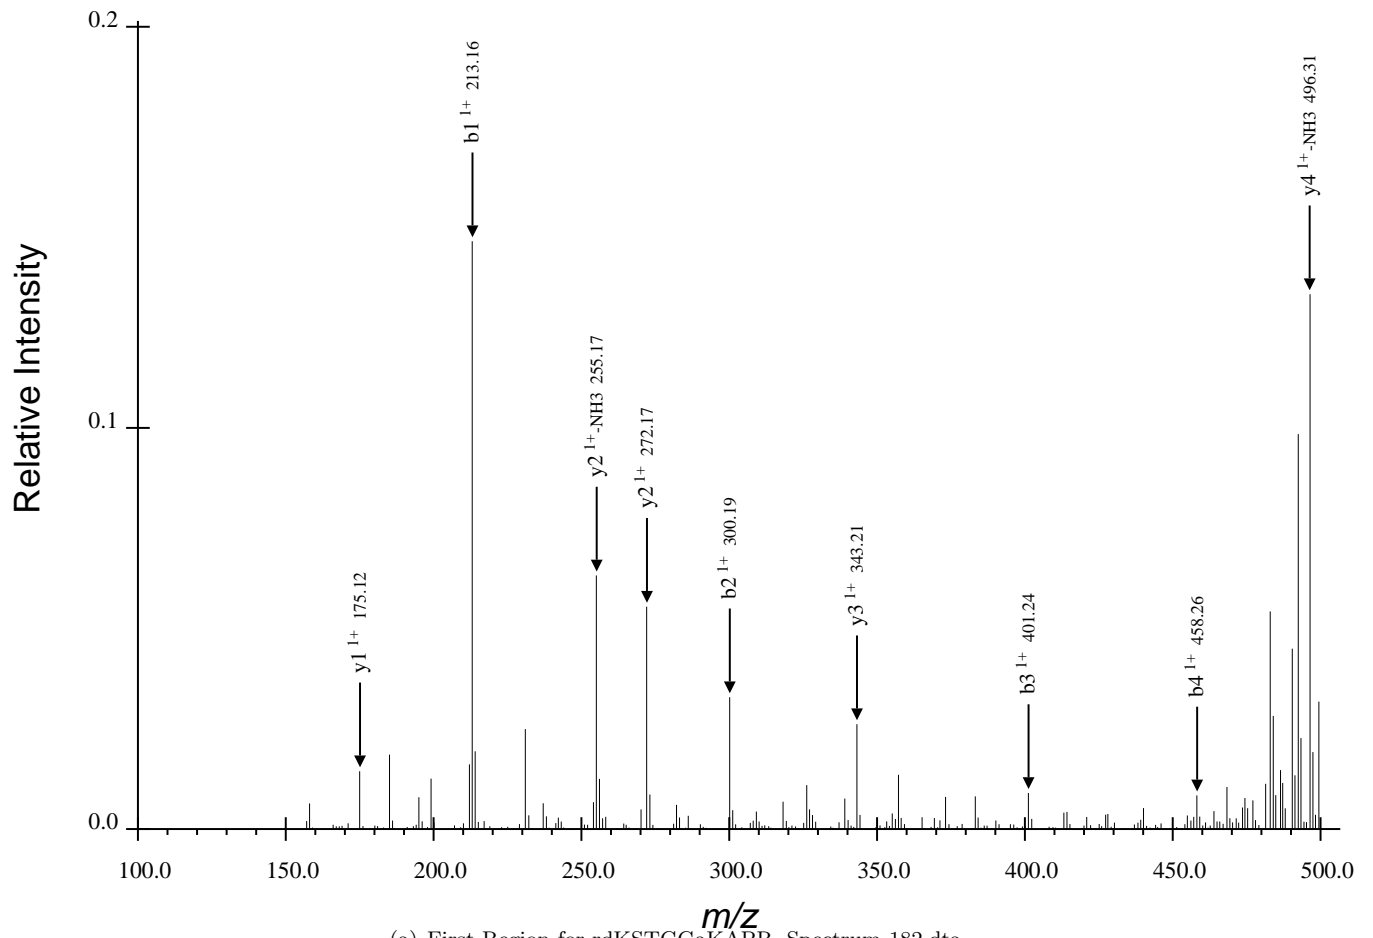

(a) First Region for rdKSTGGaKAPR, Spectrum 182.dta

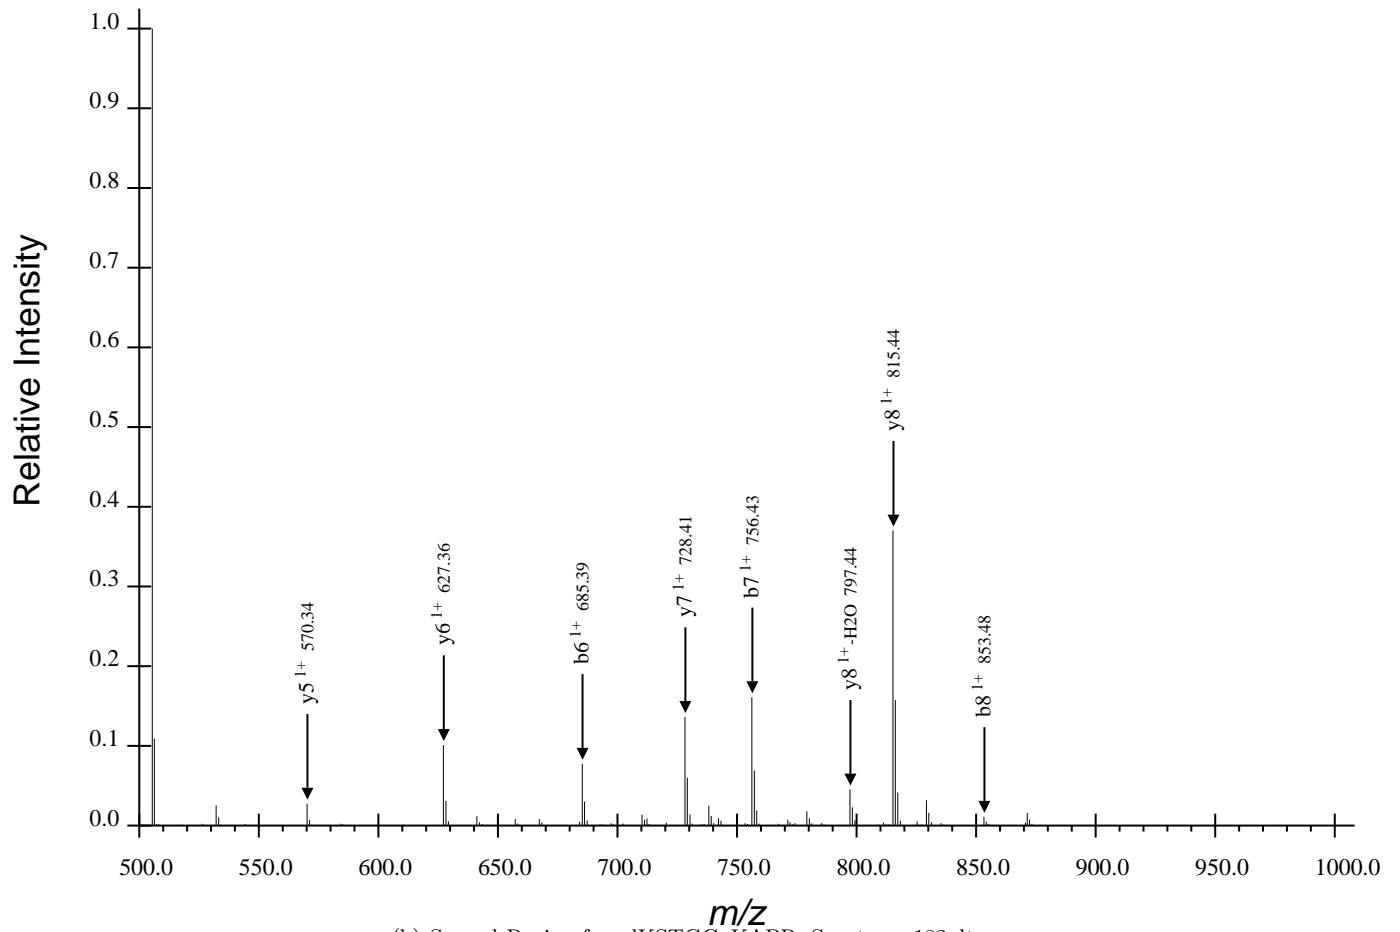

(b) Second Region for rdKSTGGaKAPR, Spectrum 182.dta

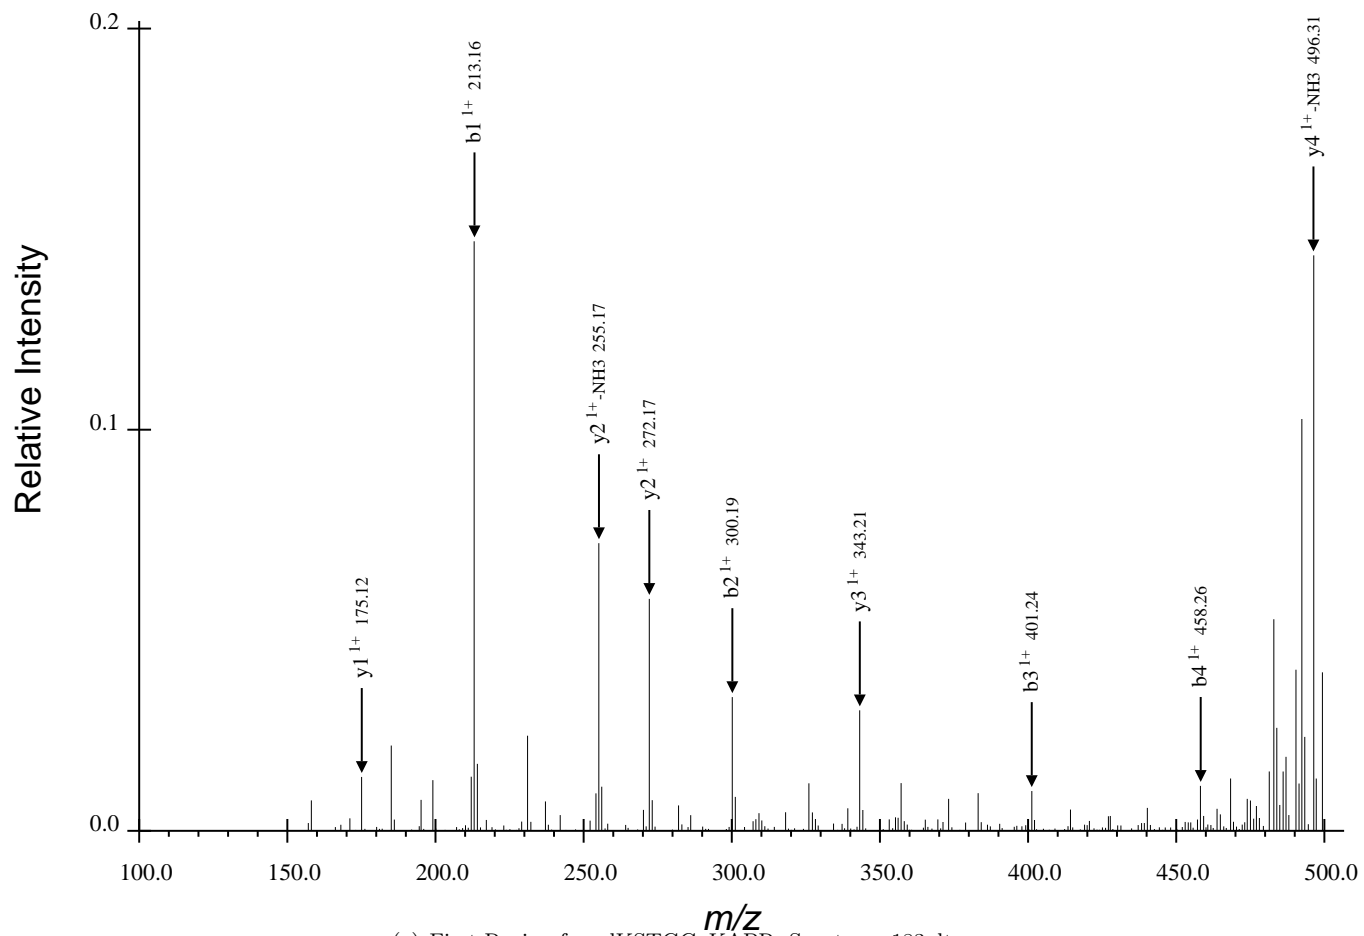

(a) First Region for rdKSTGGaKAPR, Spectrum 183.dta

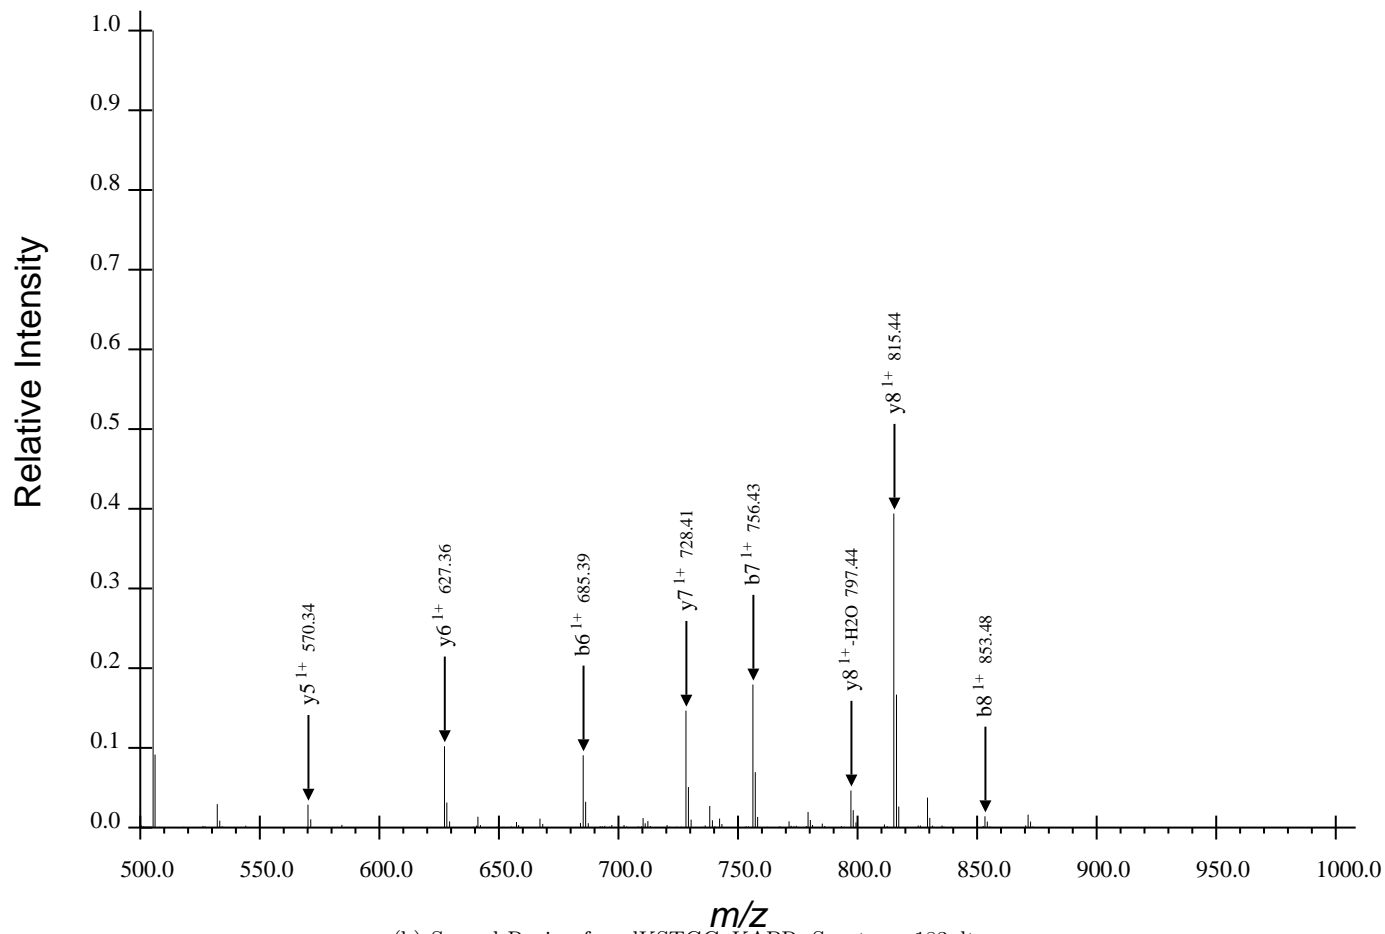

(b) Second Region for rdKSTGGaKAPR, Spectrum 183.dta

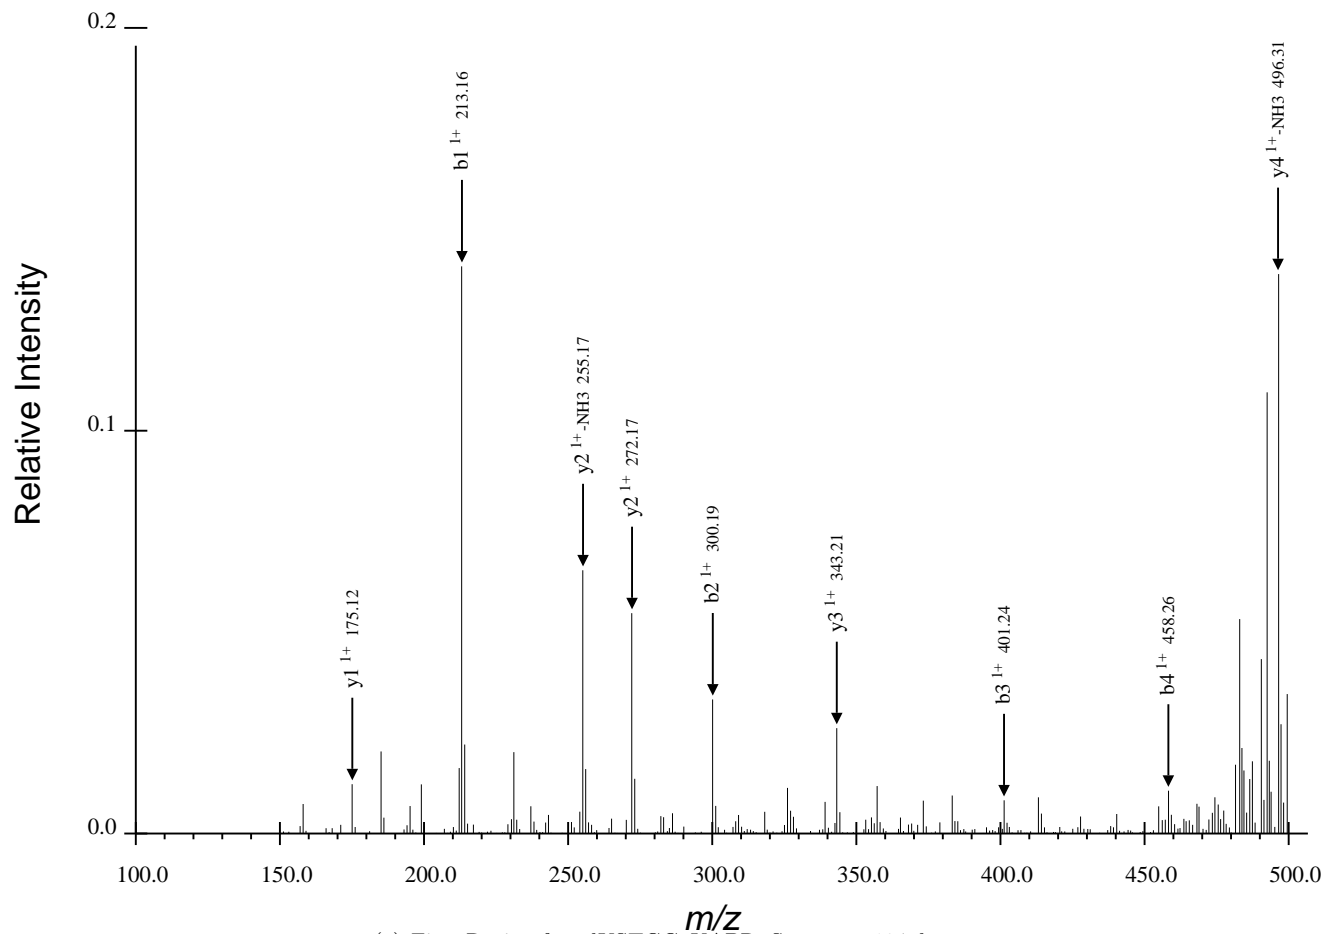

(a) First Region for rdKSTGGaKAPR, Spectrum 184.dta

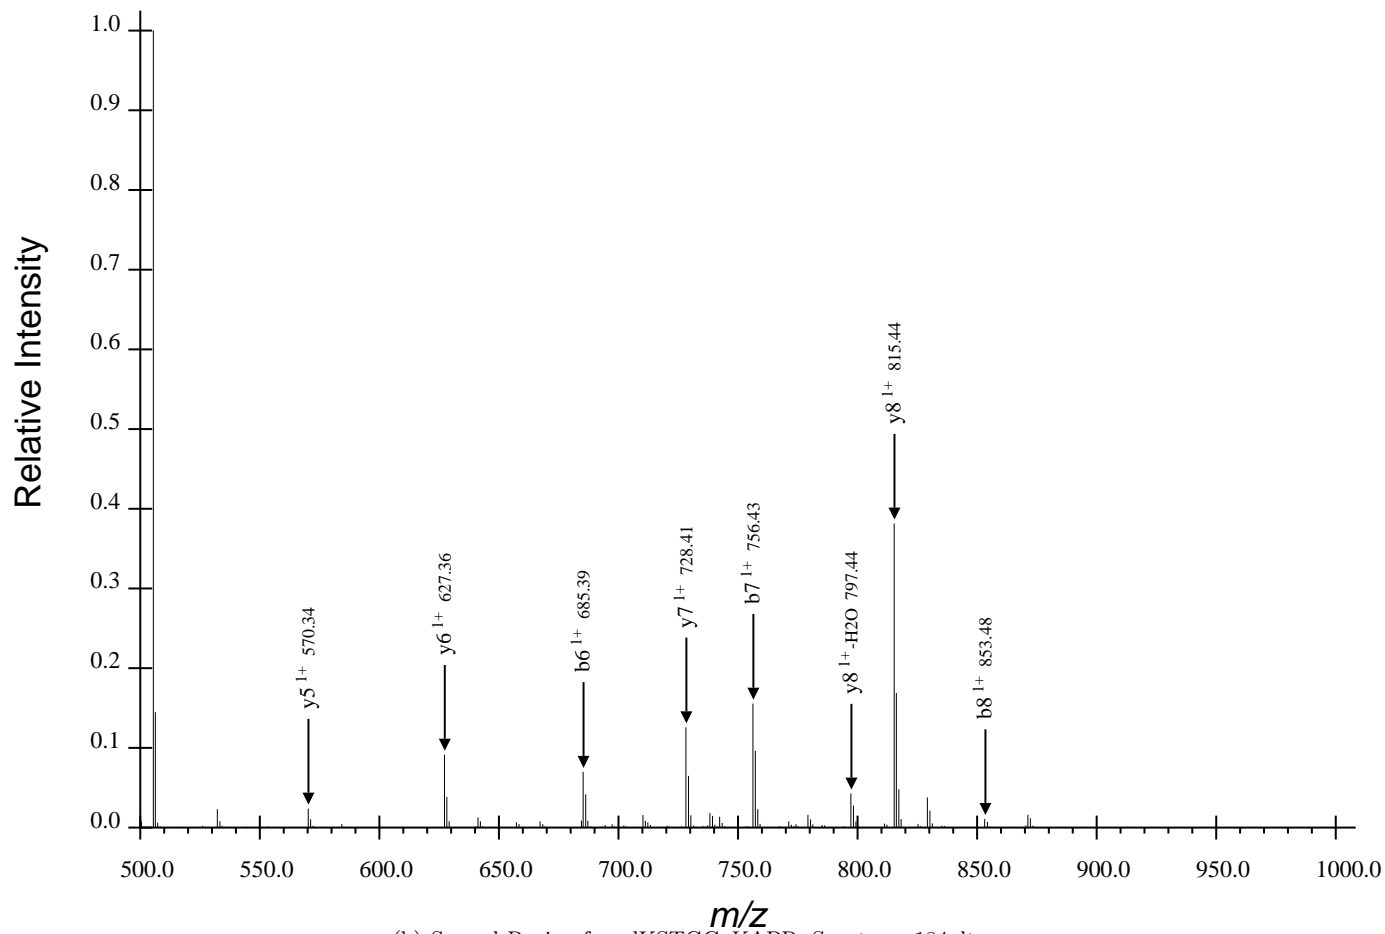

(b) Second Region for rdKSTGGaKAPR, Spectrum 184.dta



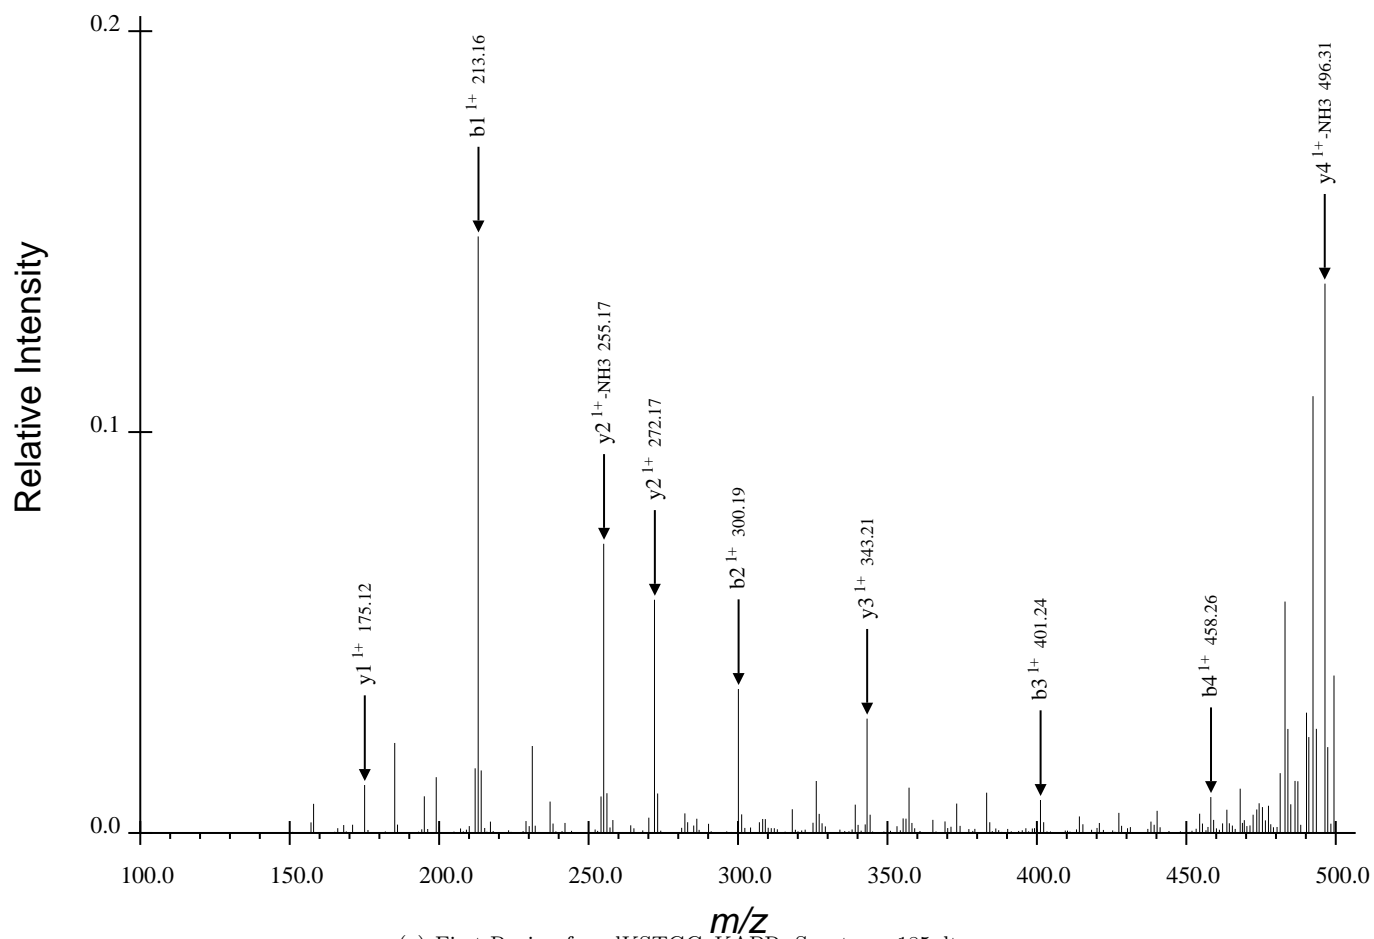

(a) First Region for rdKSTGGaKAPR, Spectrum 185.dta

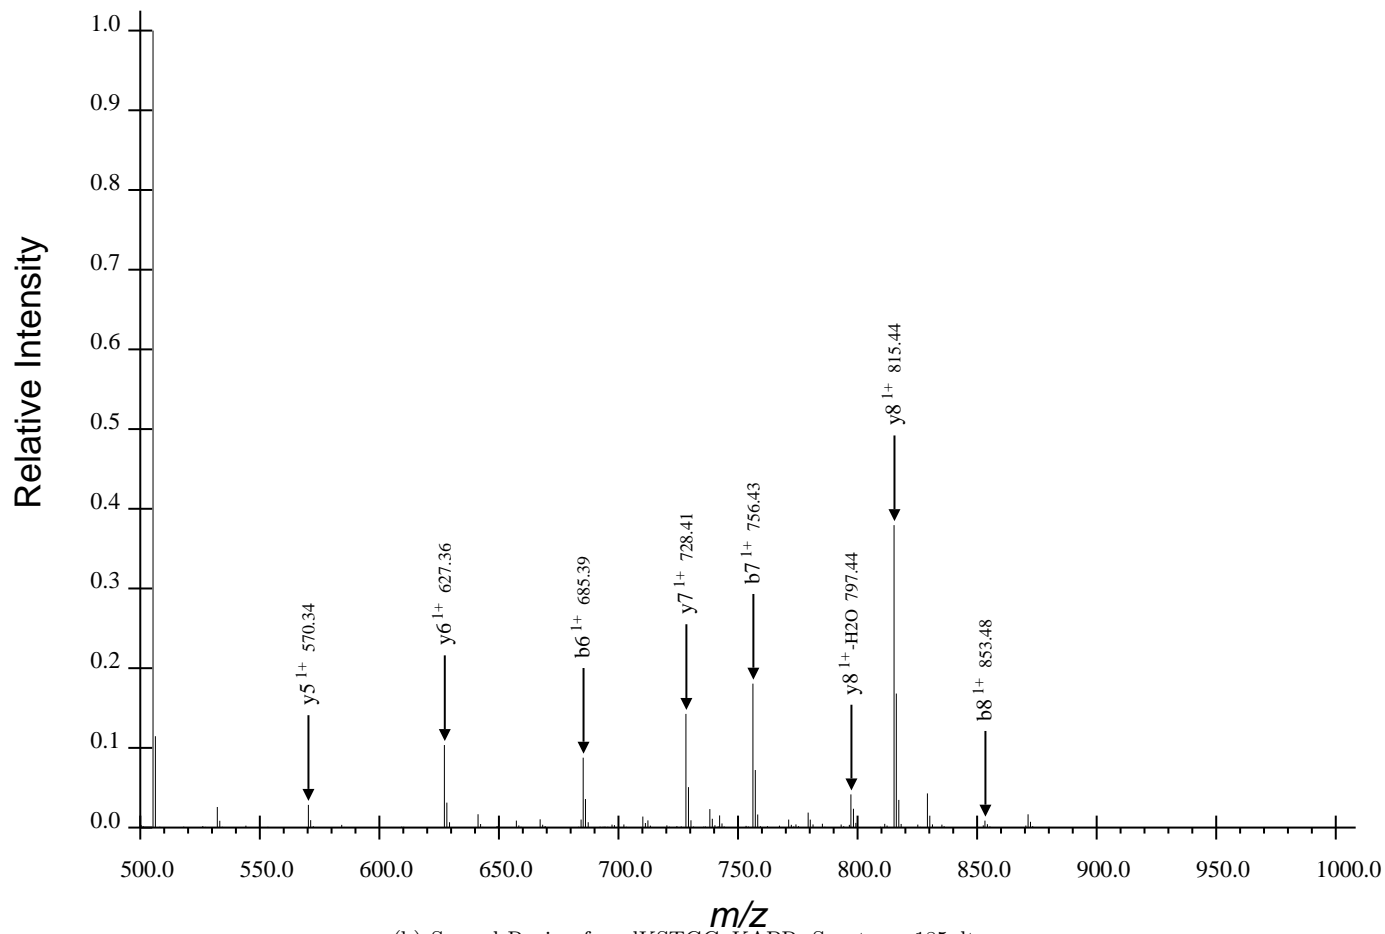

(b) Second Region for rdKSTGGaKAPR, Spectrum 185.dta

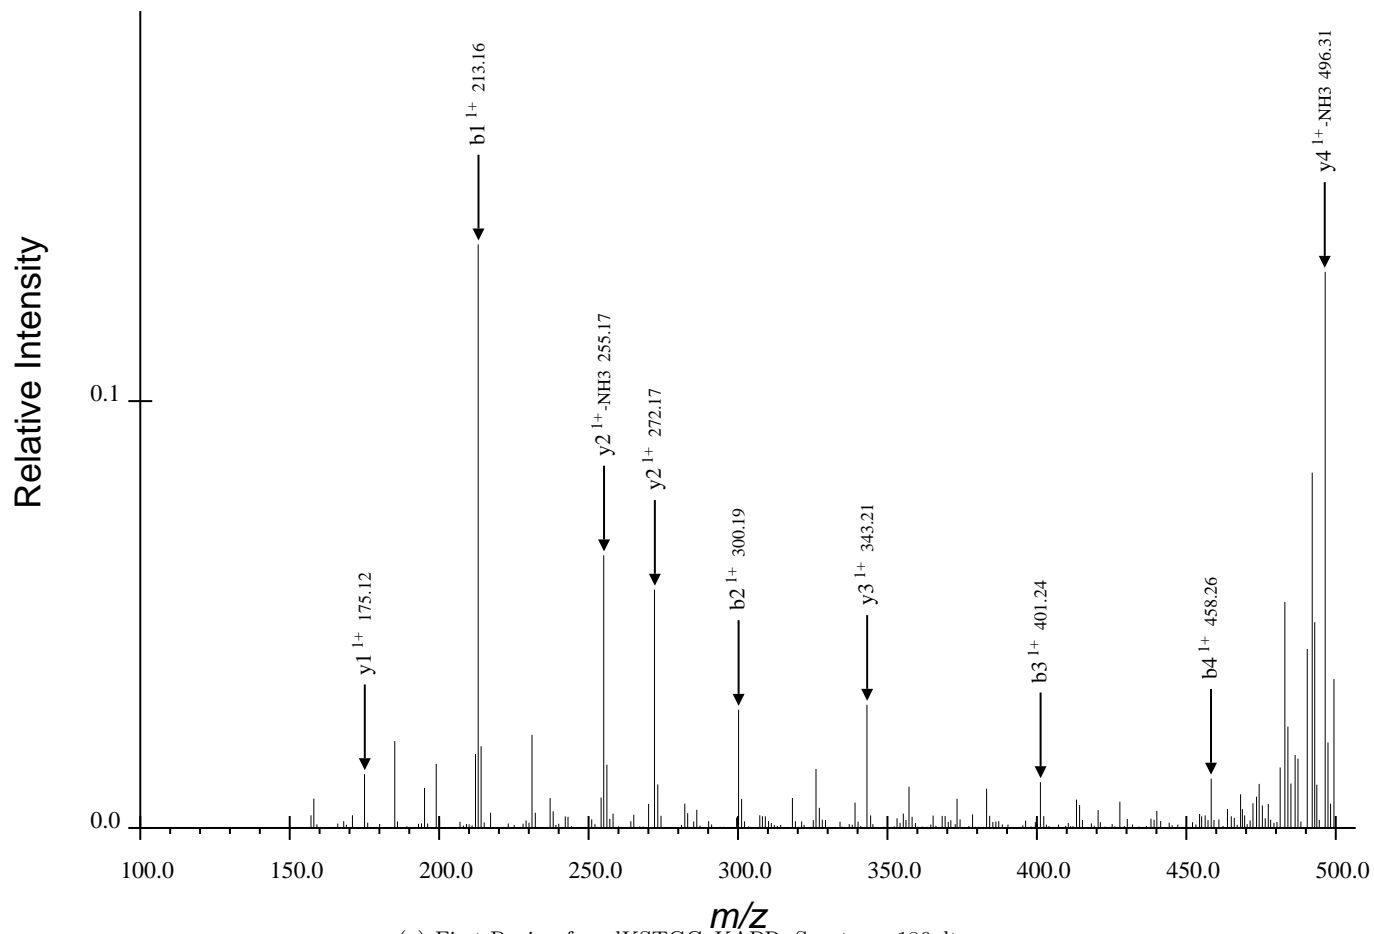

(a) First Region for rdKSTGGaKAPR, Spectrum 186.dta

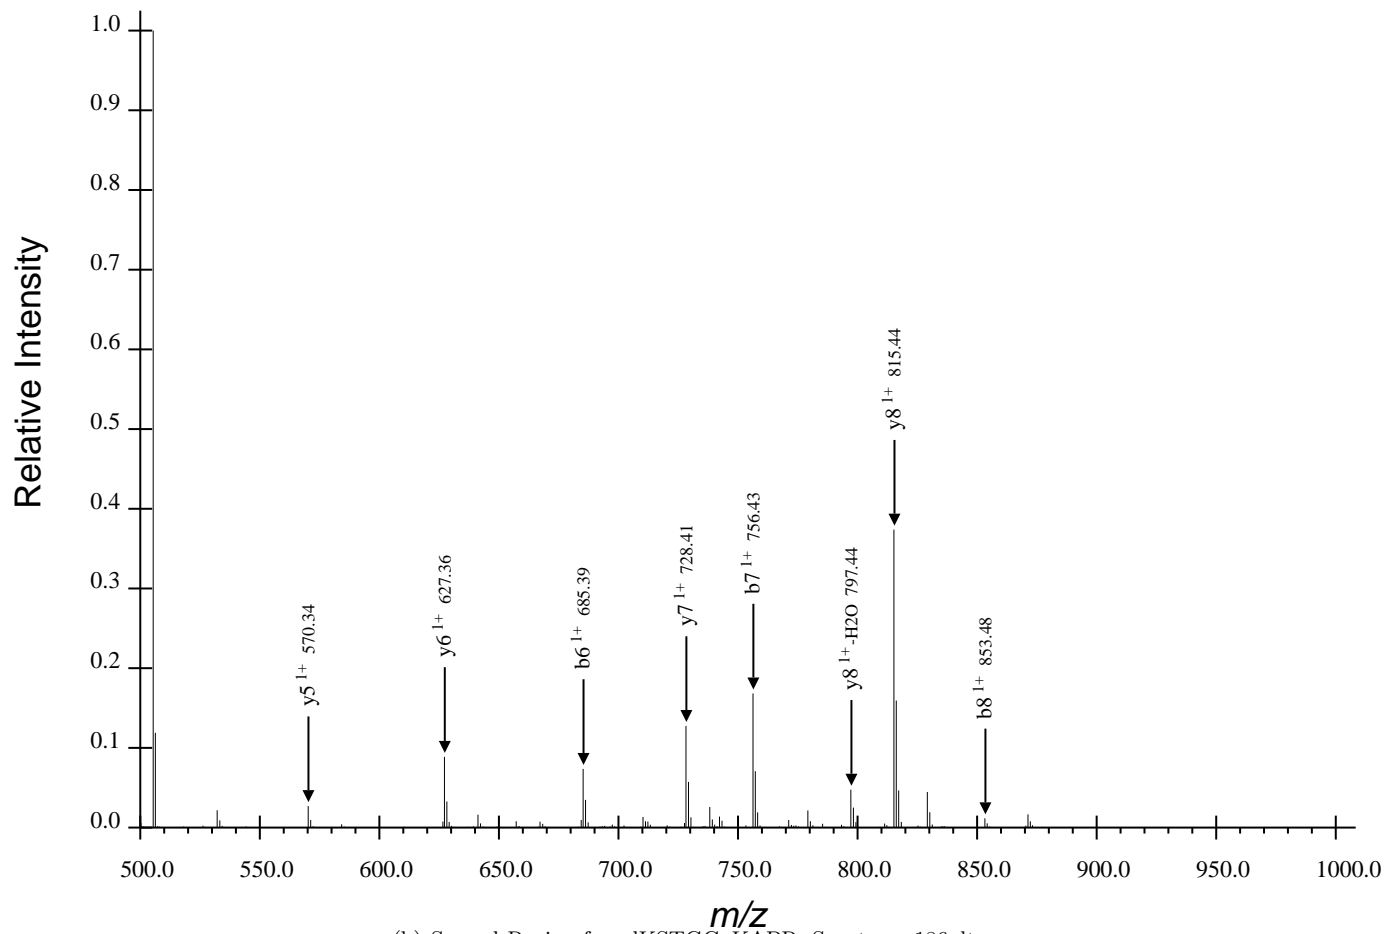

(b) Second Region for rdKSTGGaKAPR, Spectrum 186.dta

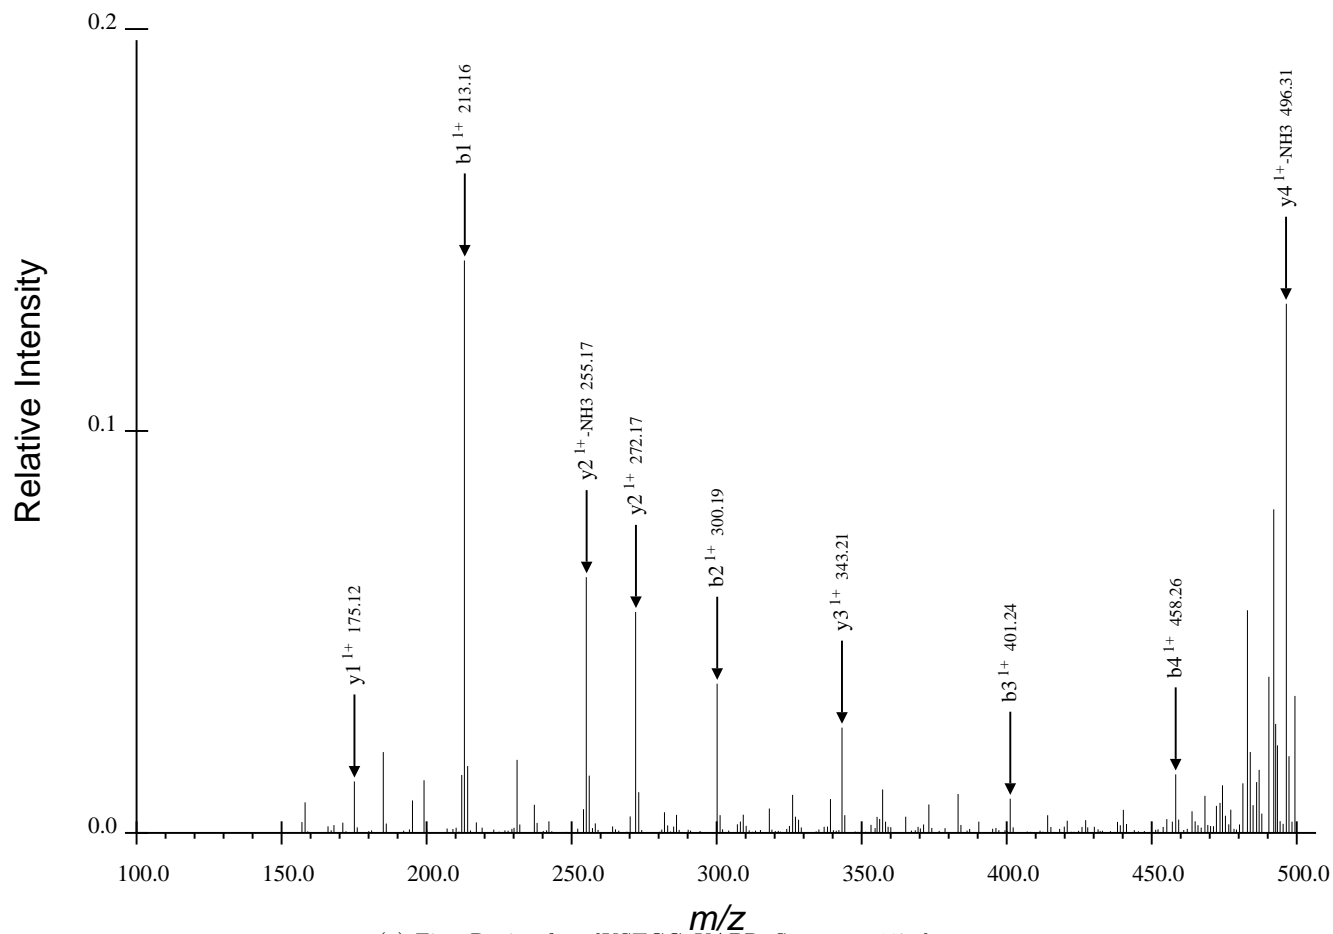

(a) First Region for rdKSTGGaKAPR, Spectrum 187.dta

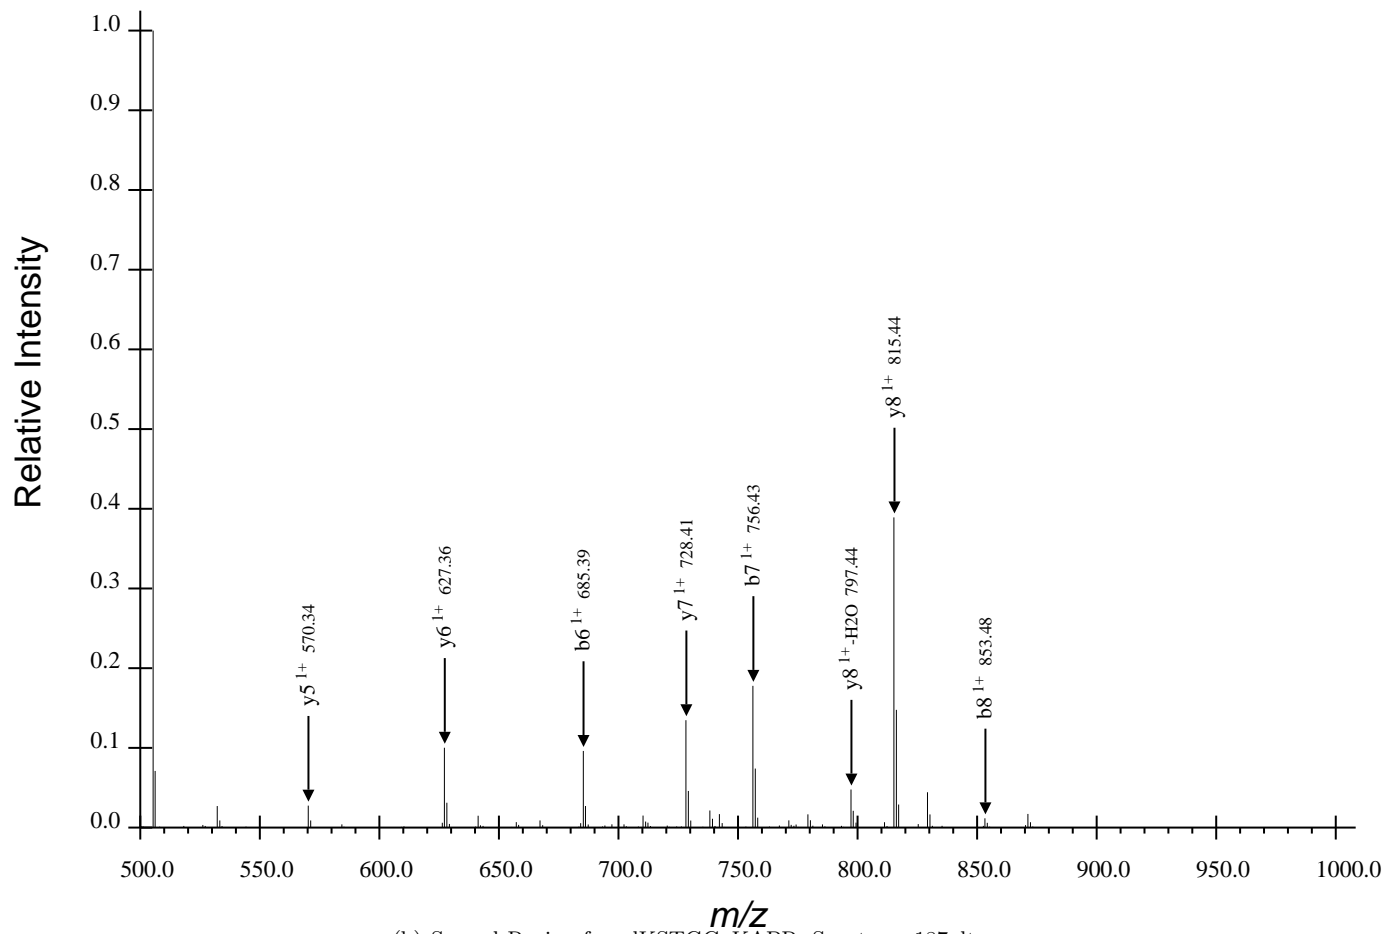

(b) Second Region for rdKSTGGaKAPR, Spectrum 187.dta

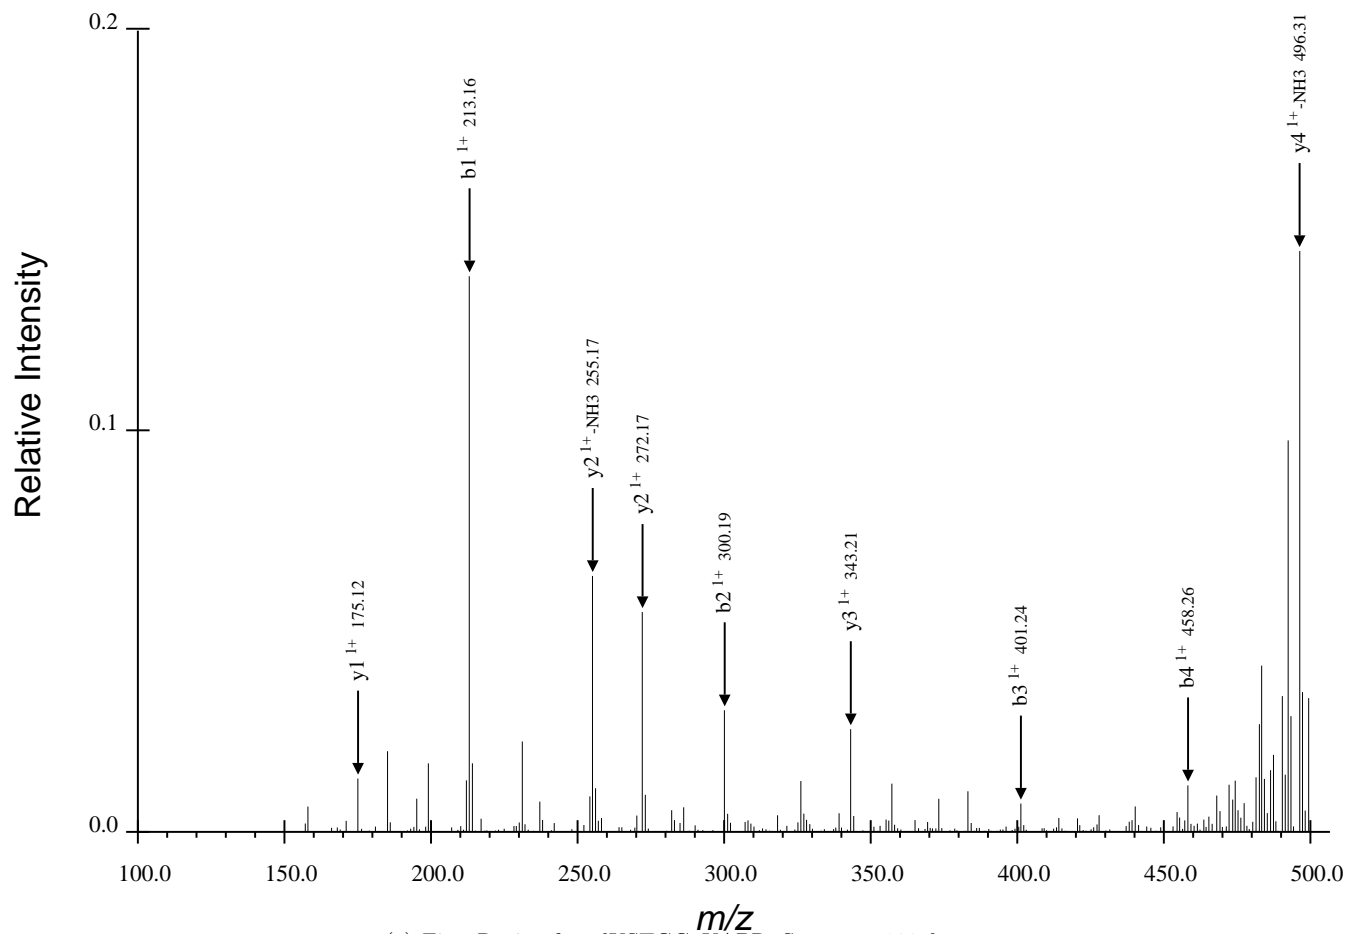

(a) First Region for rdKSTGGaKAPR, Spectrum 188.dta

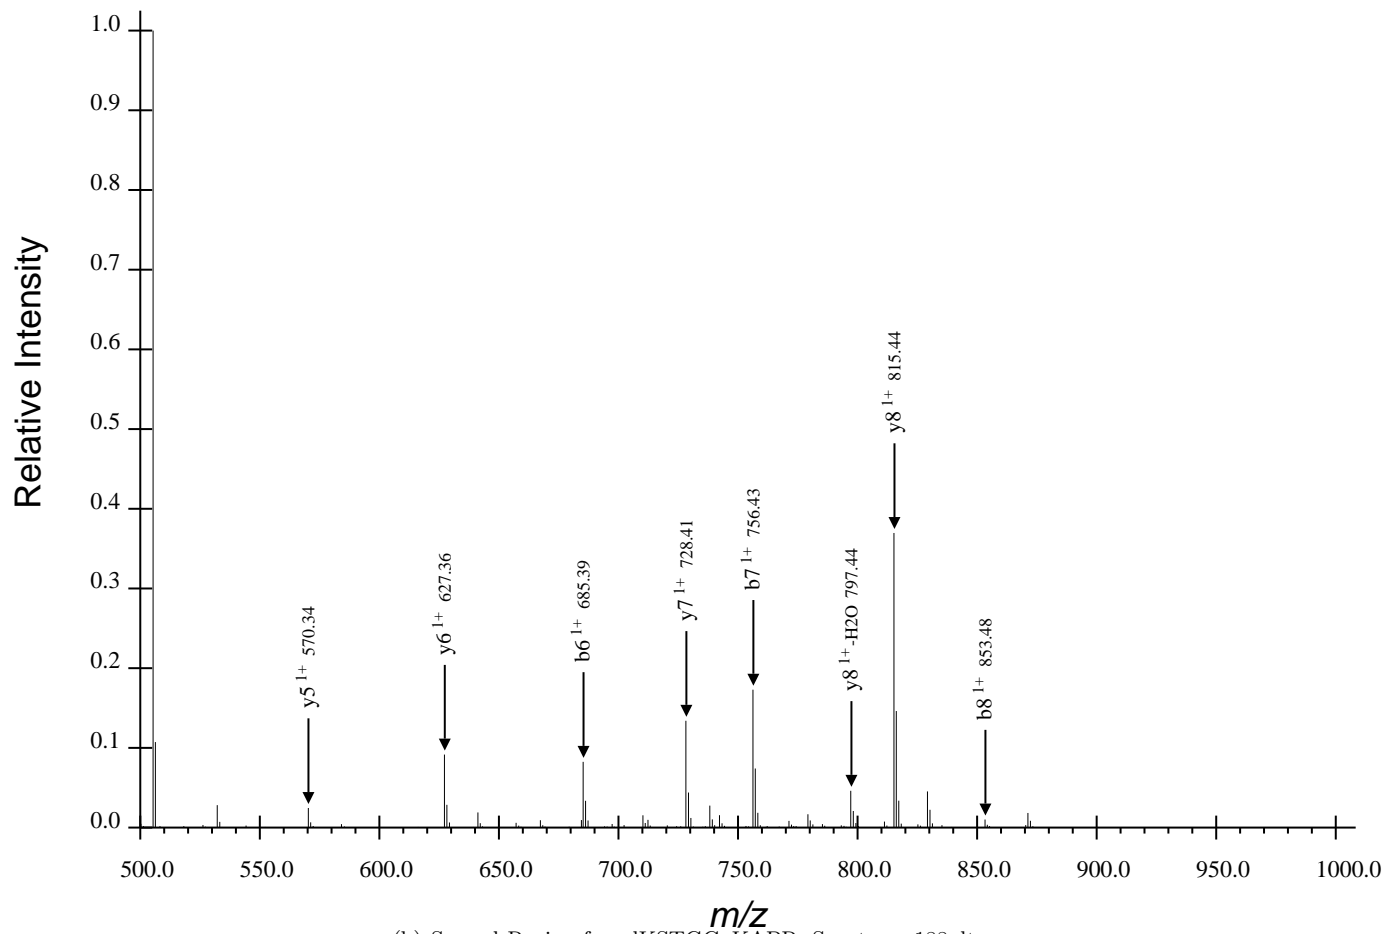

(b) Second Region for rdKSTGGaKAPR, Spectrum 188.dta

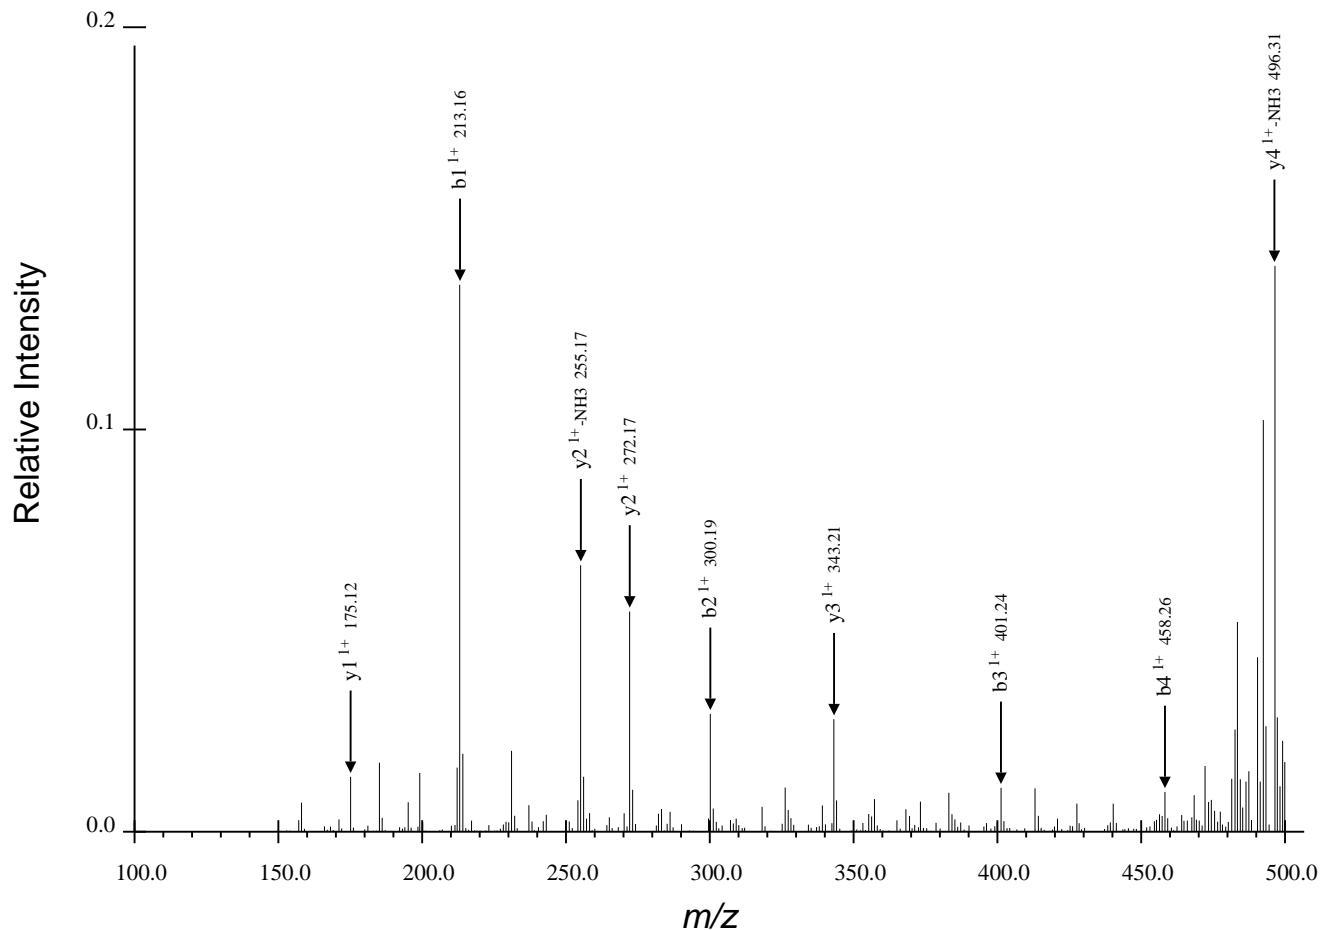

(a) First Region for rdKSTGGaKAPR, Spectrum 189.dta

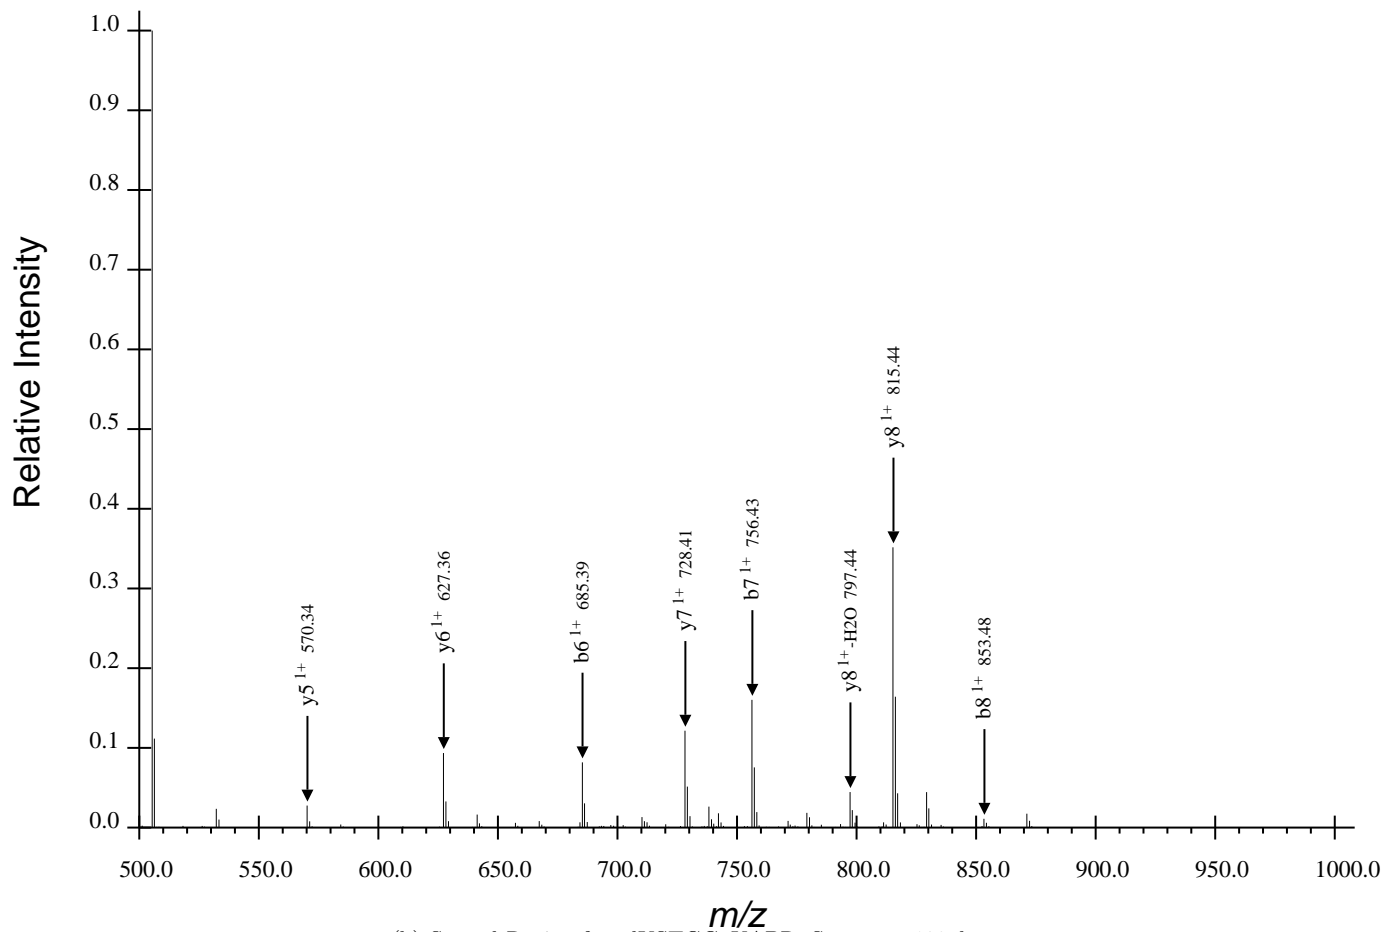

(b) Second Region for rdKSTGGaKAPR, Spectrum 189.dta

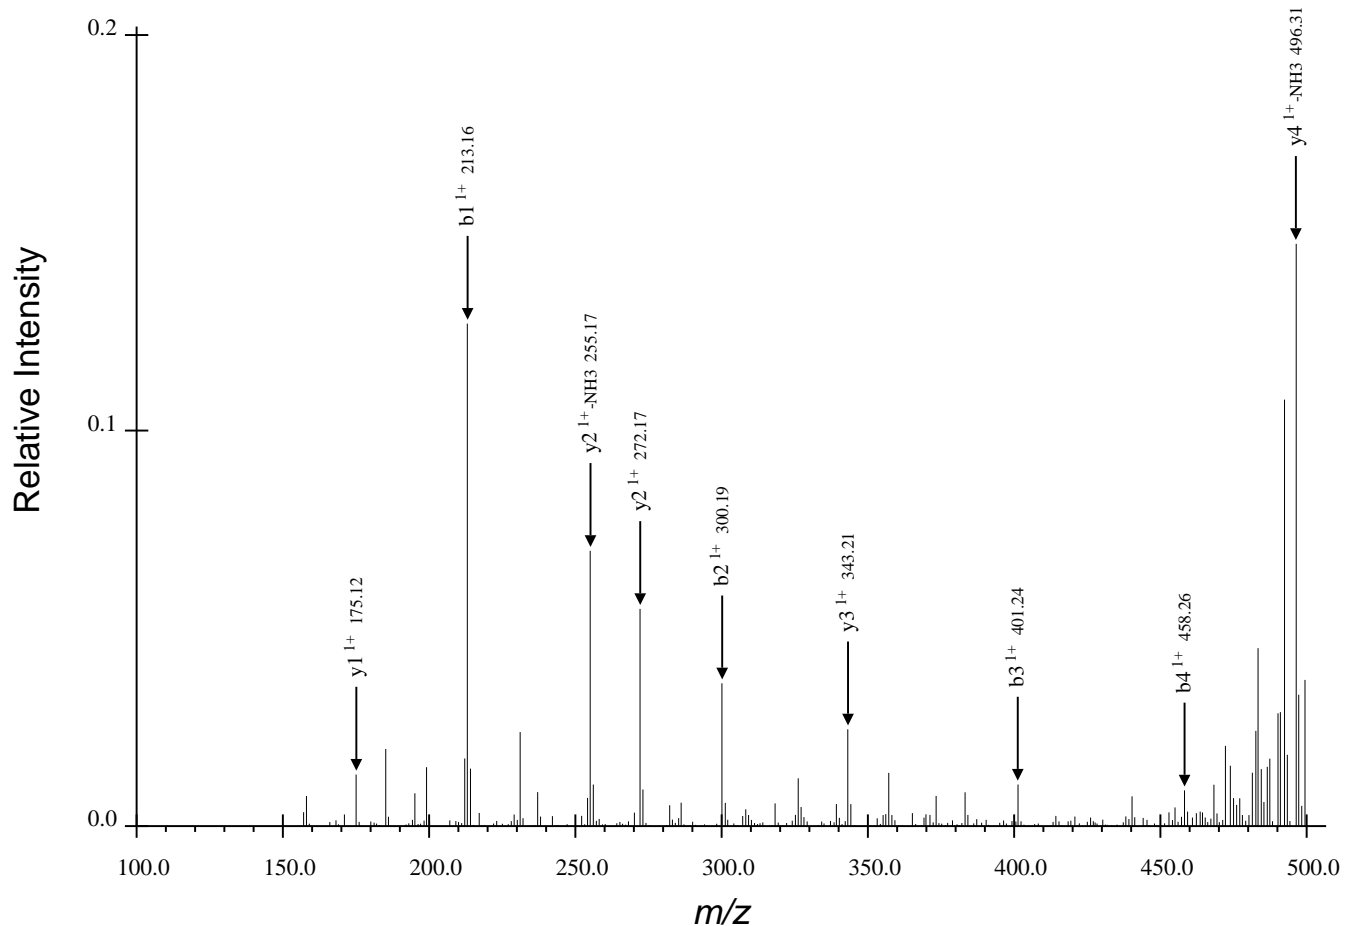

(a) First Region for rdKSTGGaKAPR, Spectrum 190.dta

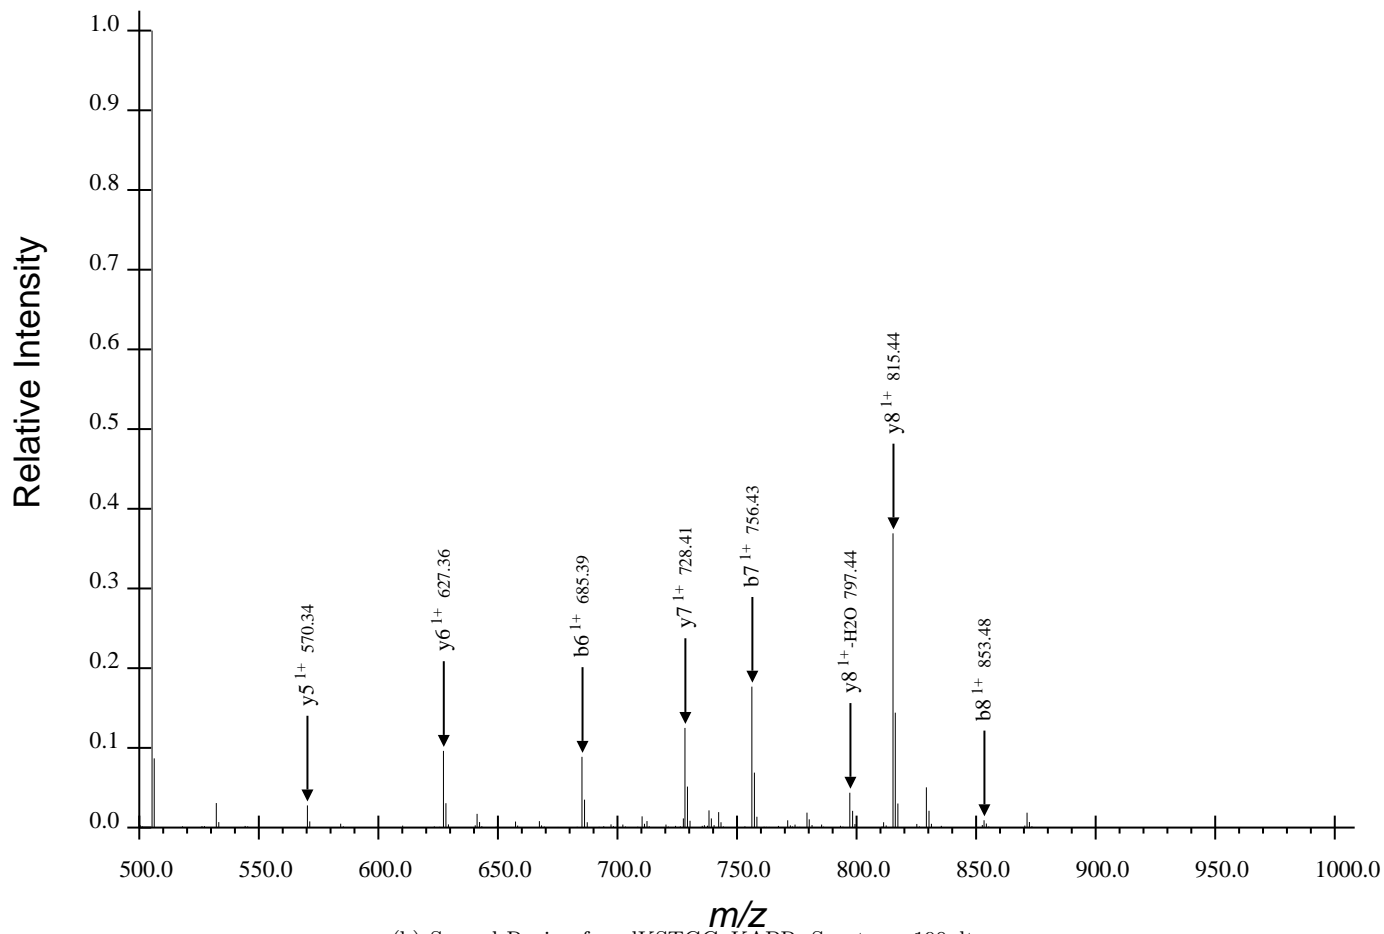

(b) Second Region for rdKSTGGaKAPR, Spectrum 190.dta

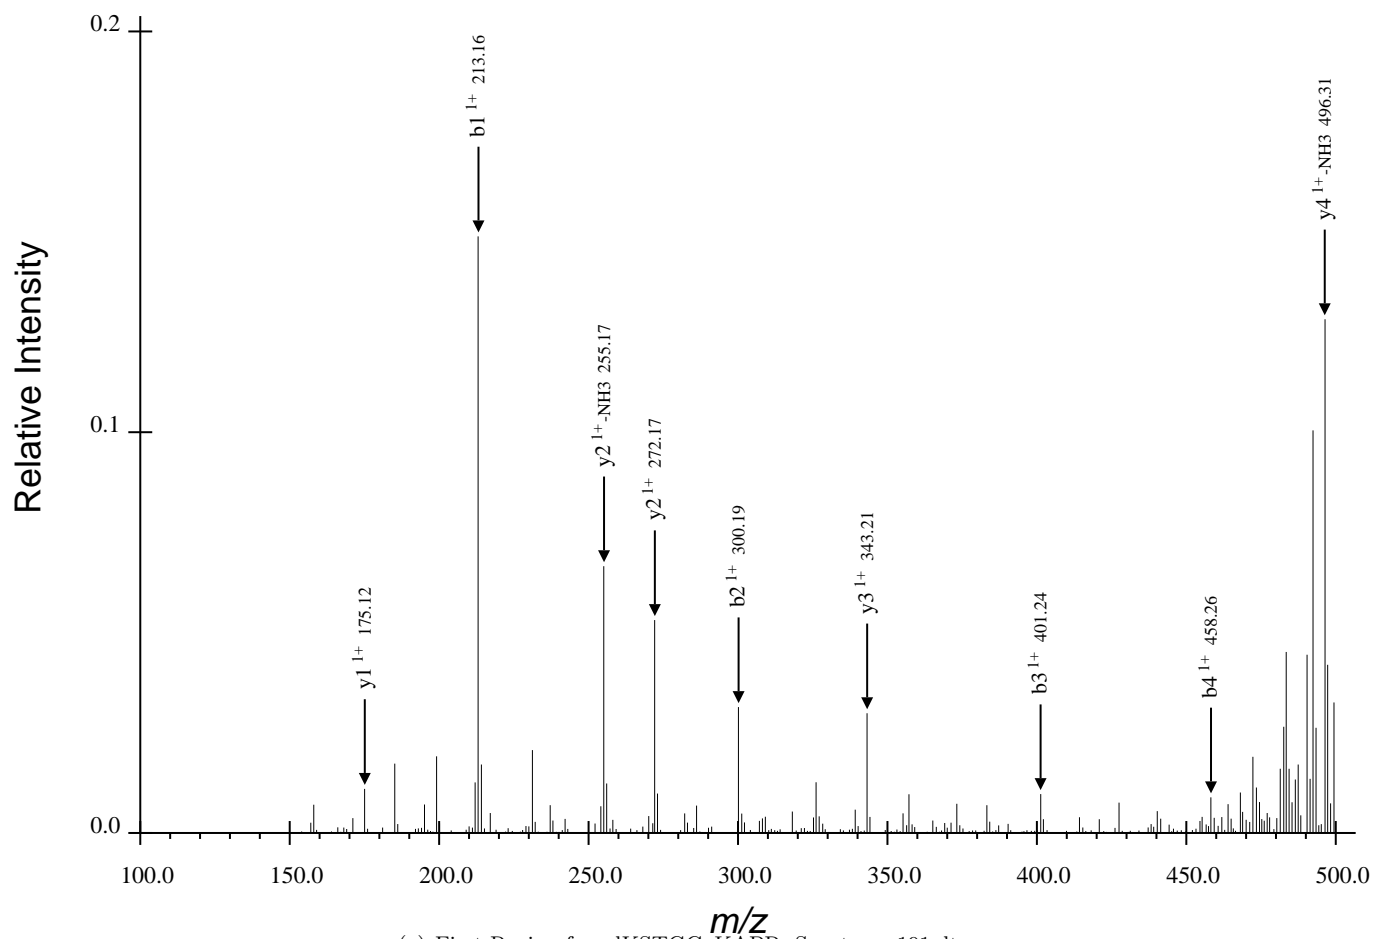

(a) First Region for rdKSTGGaKAPR, Spectrum 191.dta

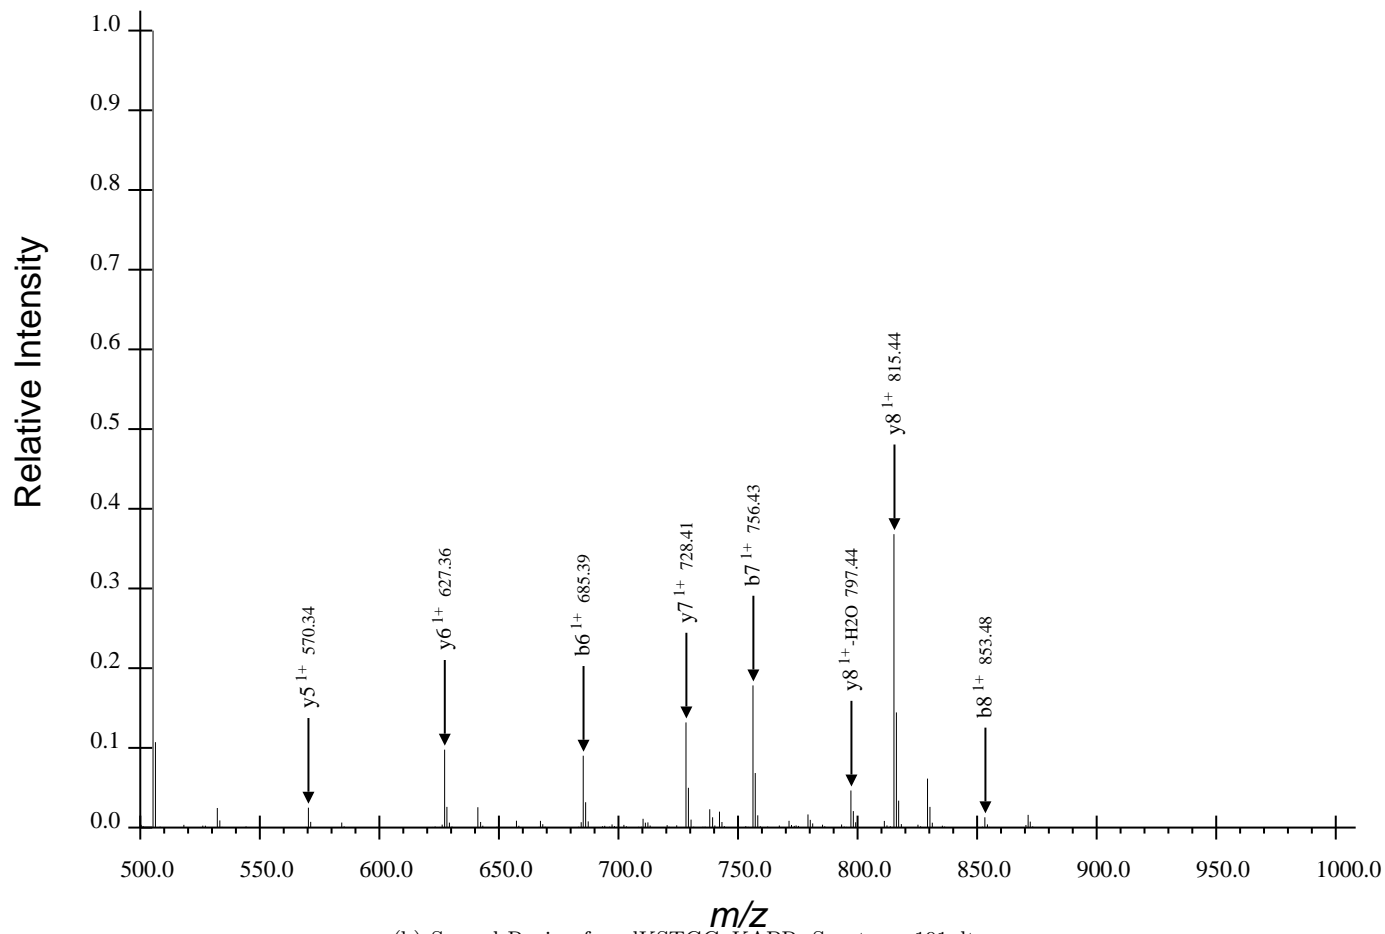

(b) Second Region for rdKSTGGaKAPR, Spectrum 191.dta

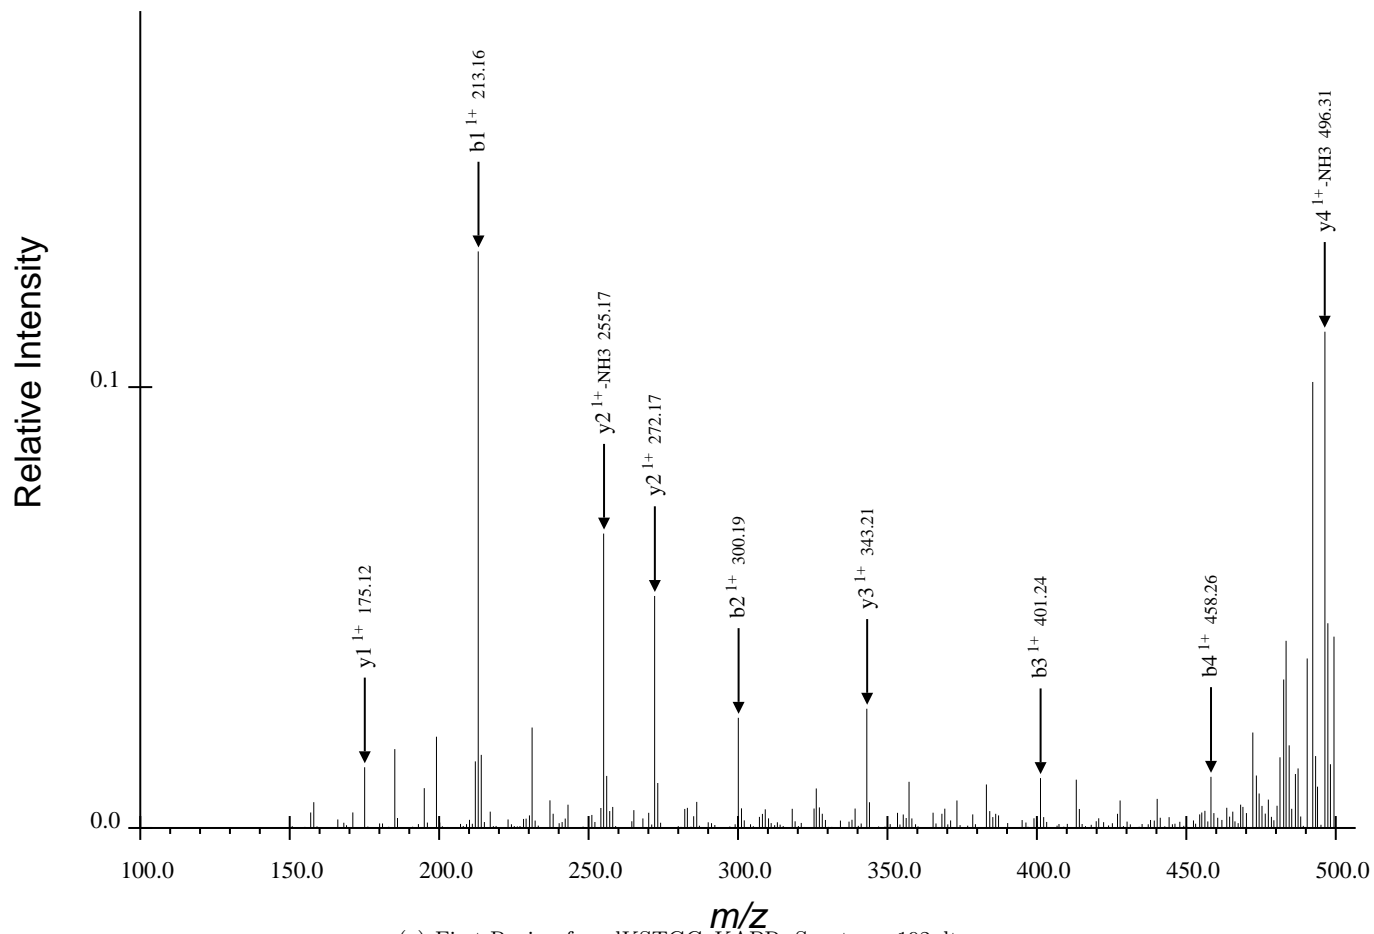

(a) First Region for rdKSTGGaKAPR, Spectrum 192.dta

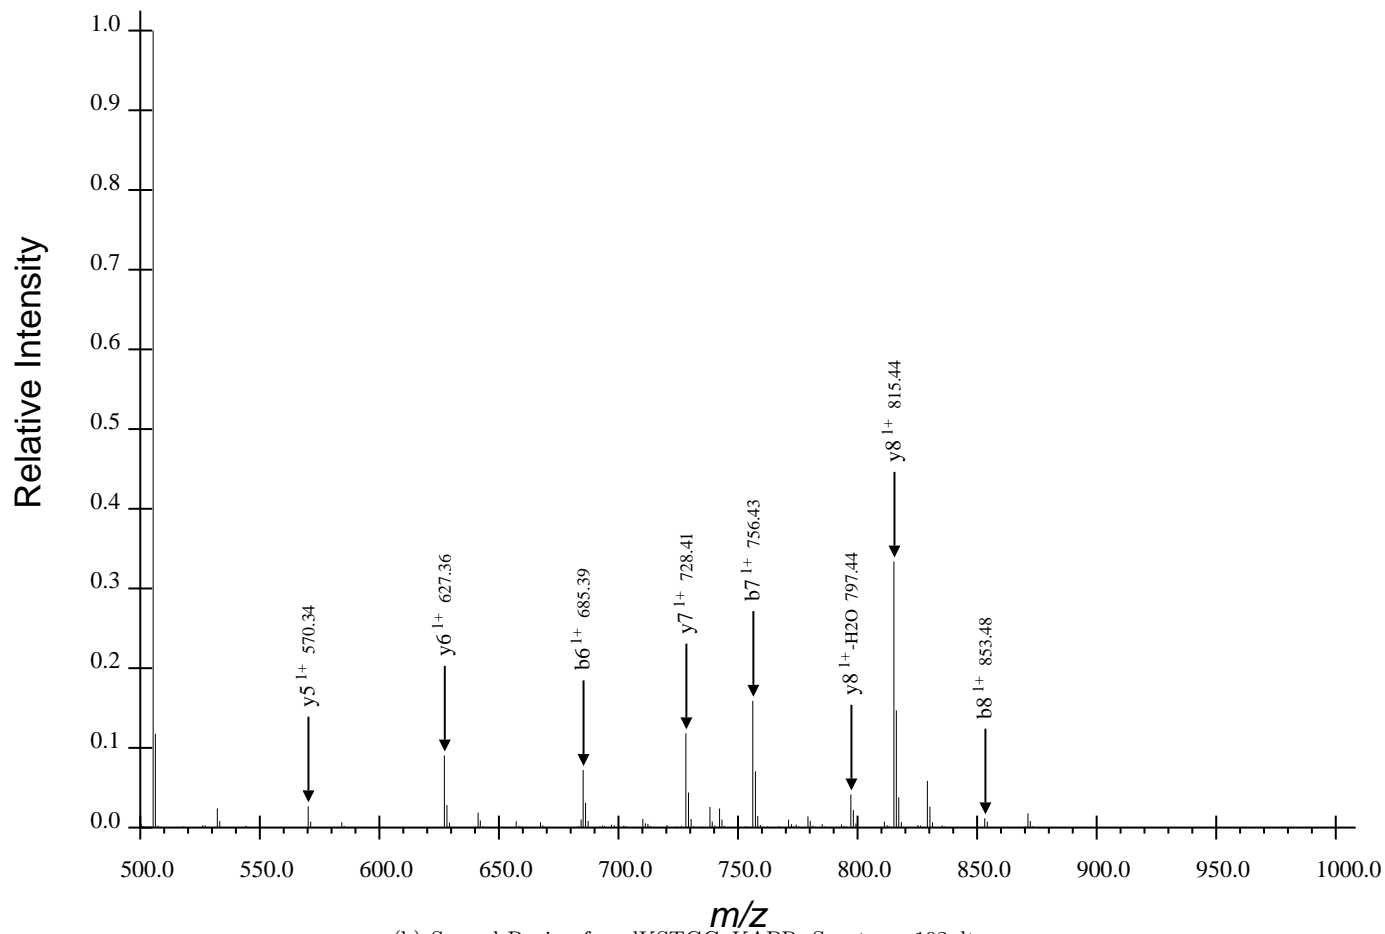

(b) Second Region for rdKSTGGaKAPR, Spectrum 192.dta



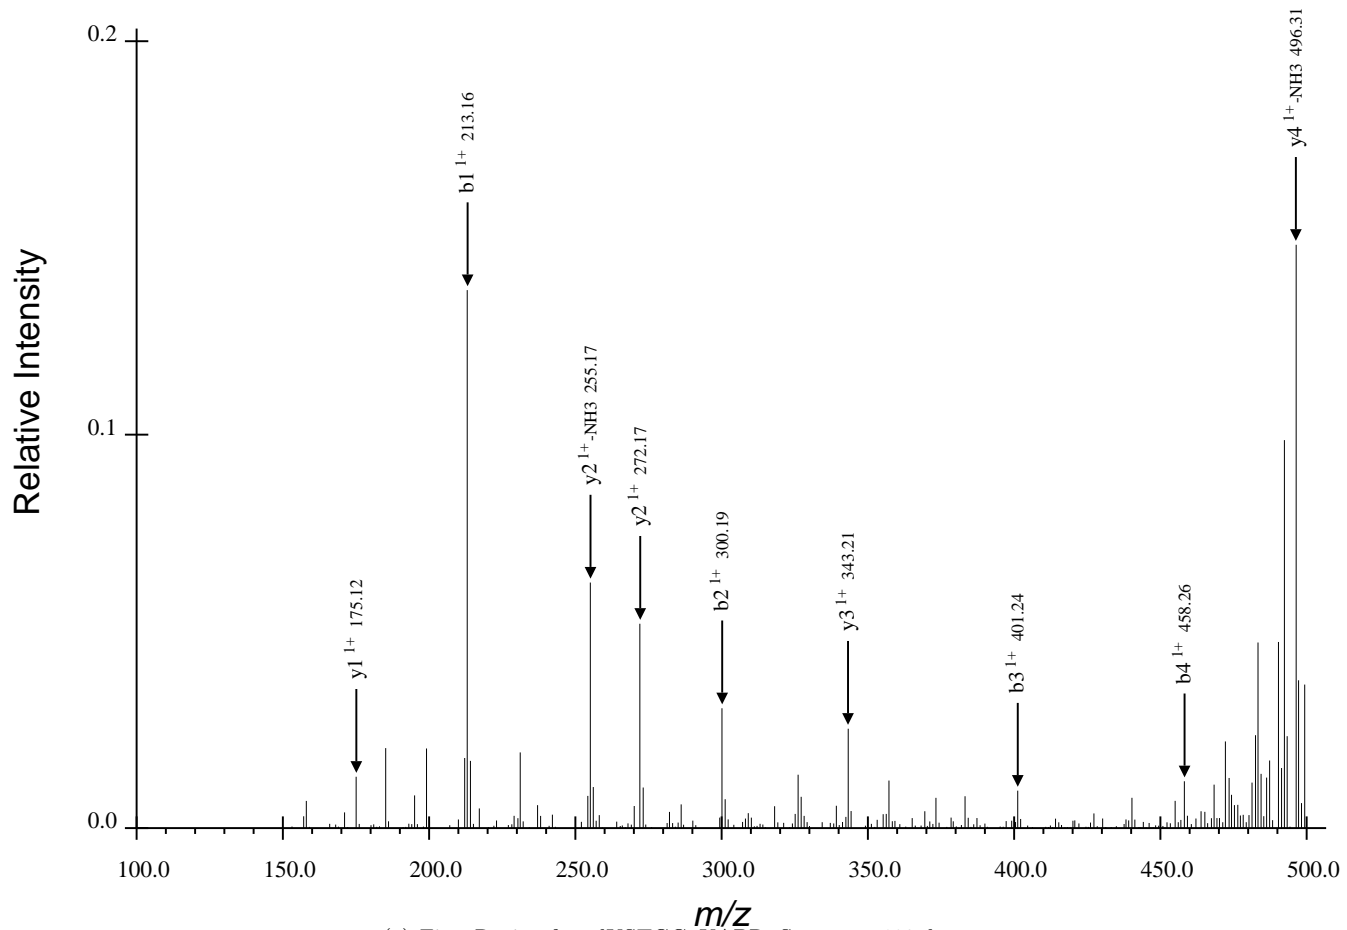

(a) First Region for rdKSTGGaKAPR, Spectrum 193.dta

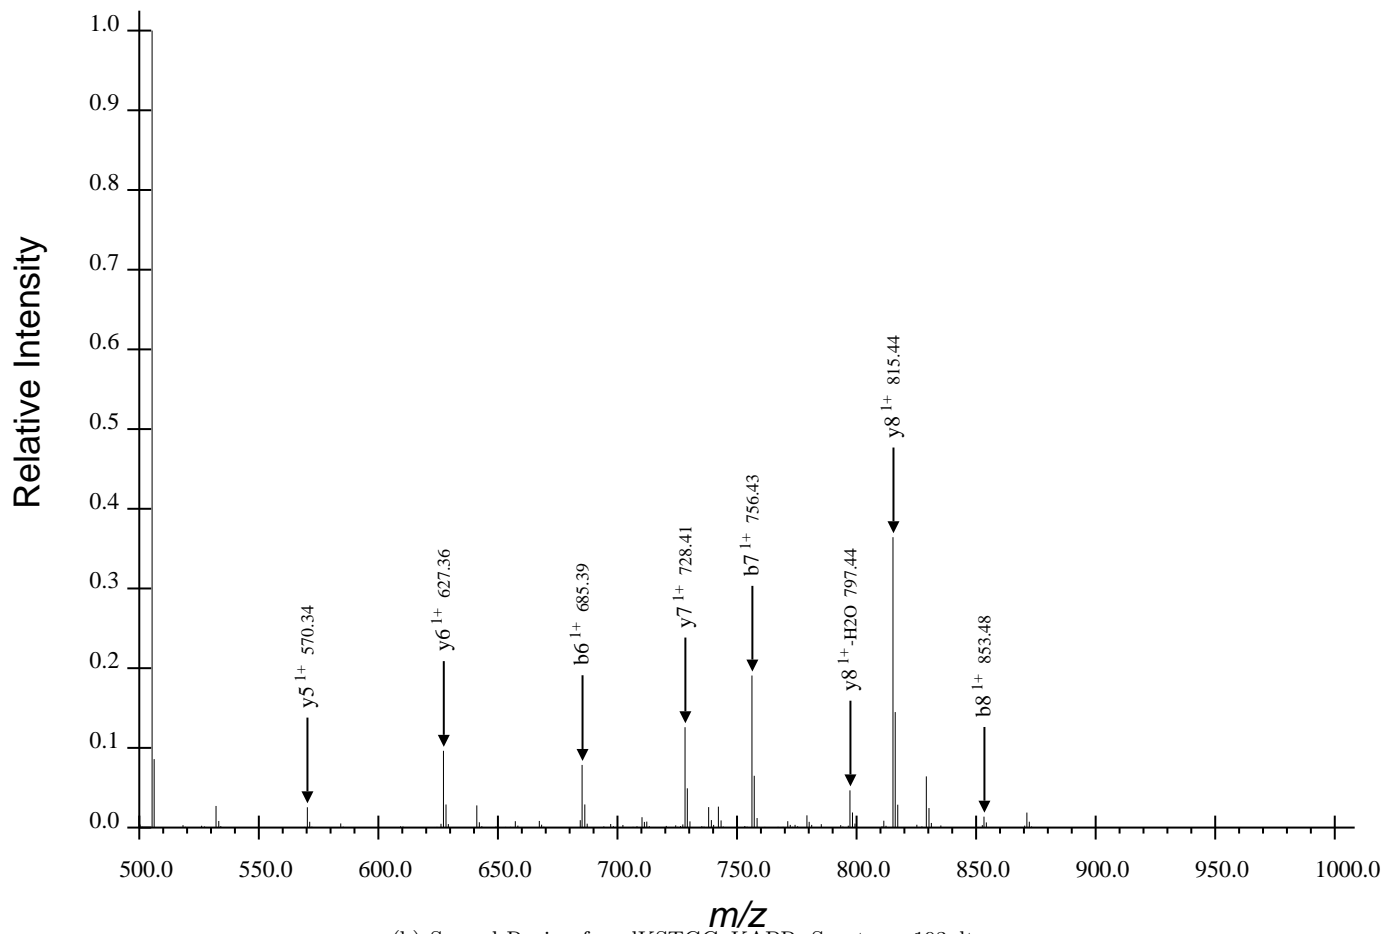

(b) Second Region for rdKSTGGaKAPR, Spectrum 193.dta

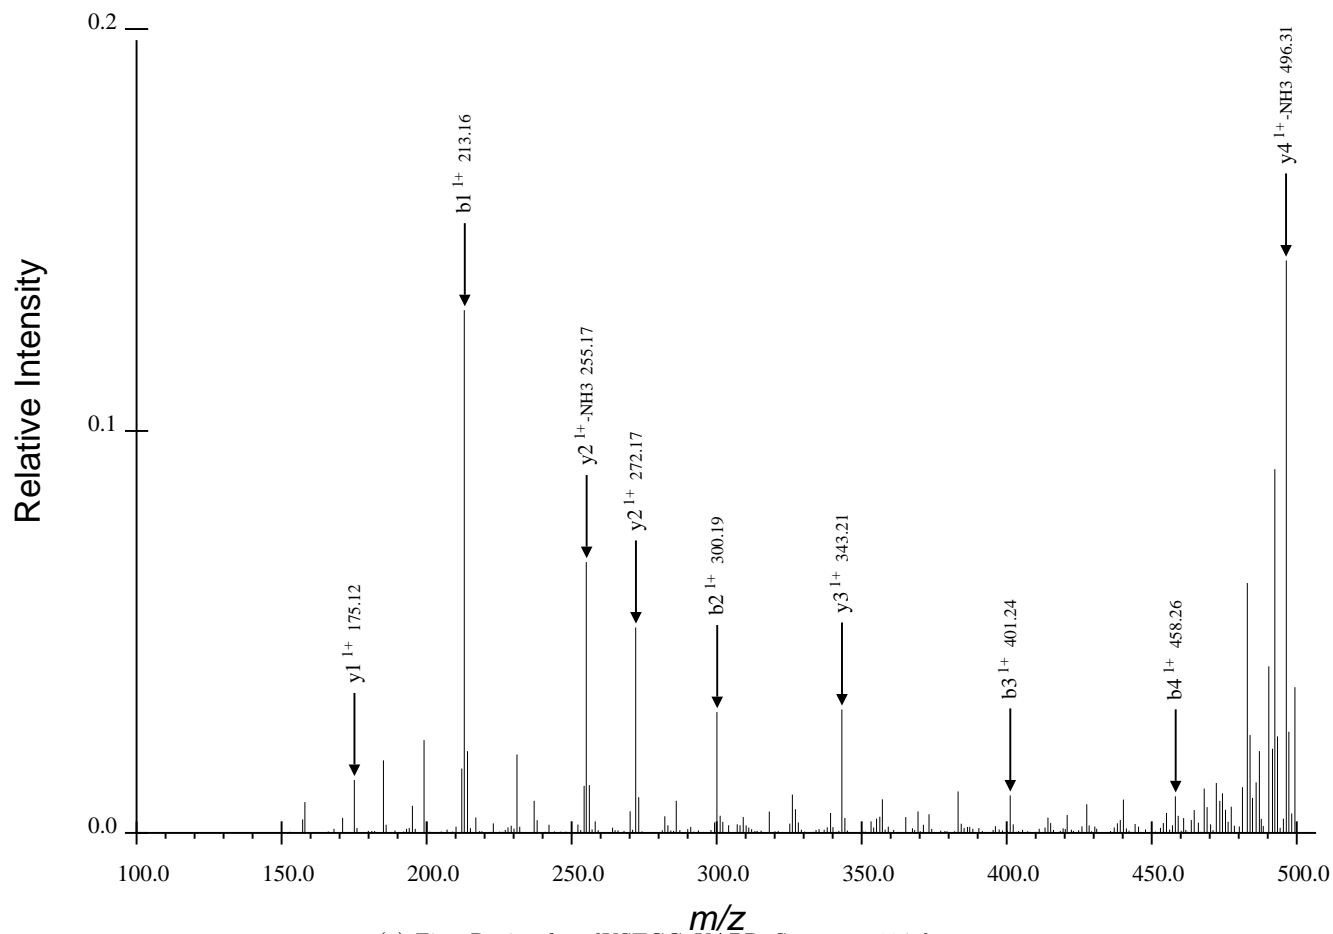

(a) First Region for rdKSTGGaKAPR, Spectrum 194.dta

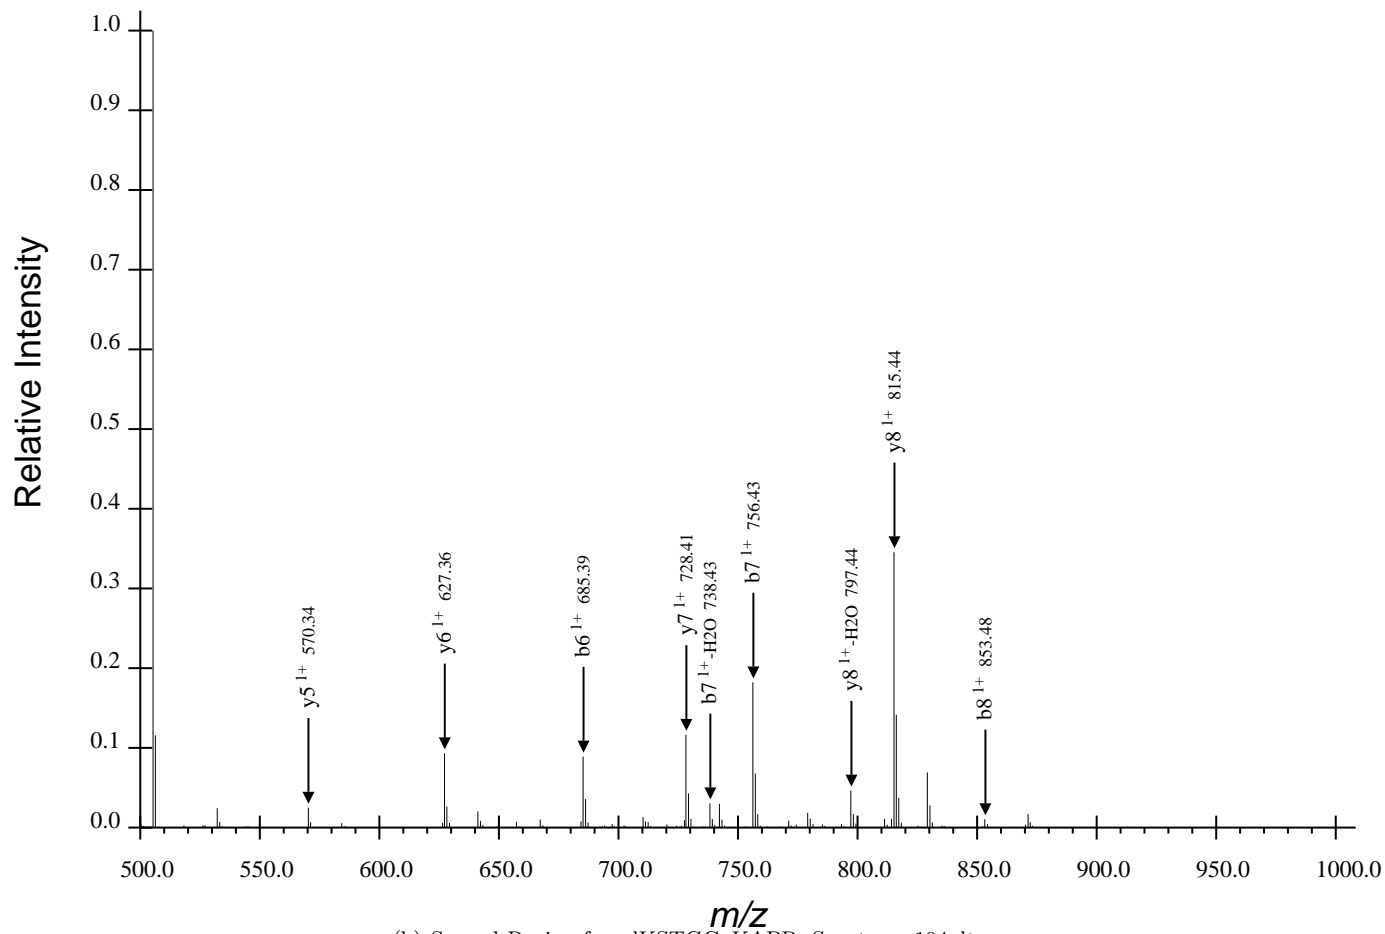

(b) Second Region for rdKSTGGaKAPR, Spectrum 194.dta

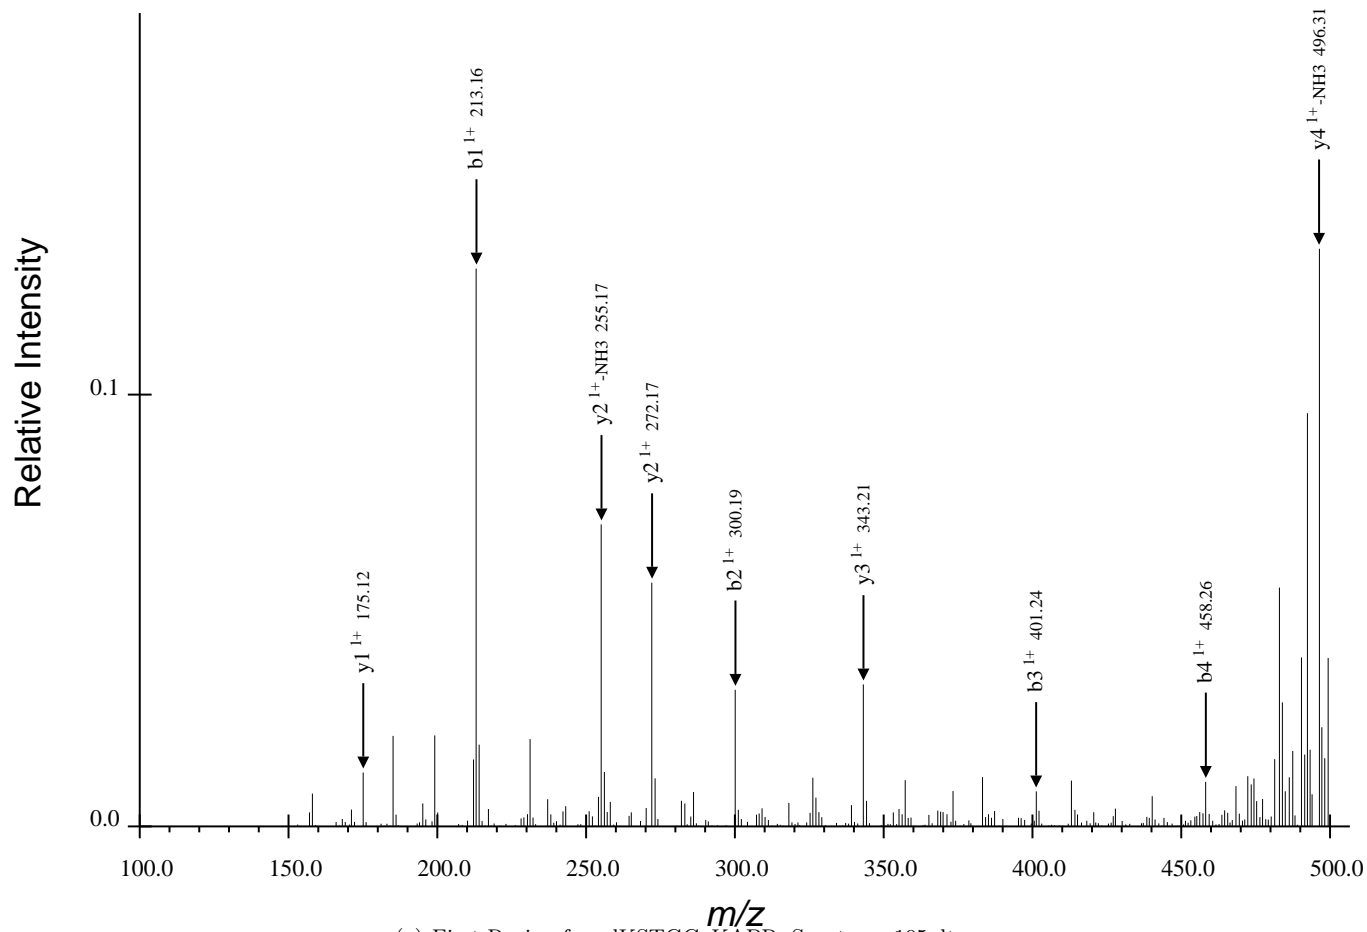

(a) First Region for rdKSTGGaKAPR, Spectrum 195.dta

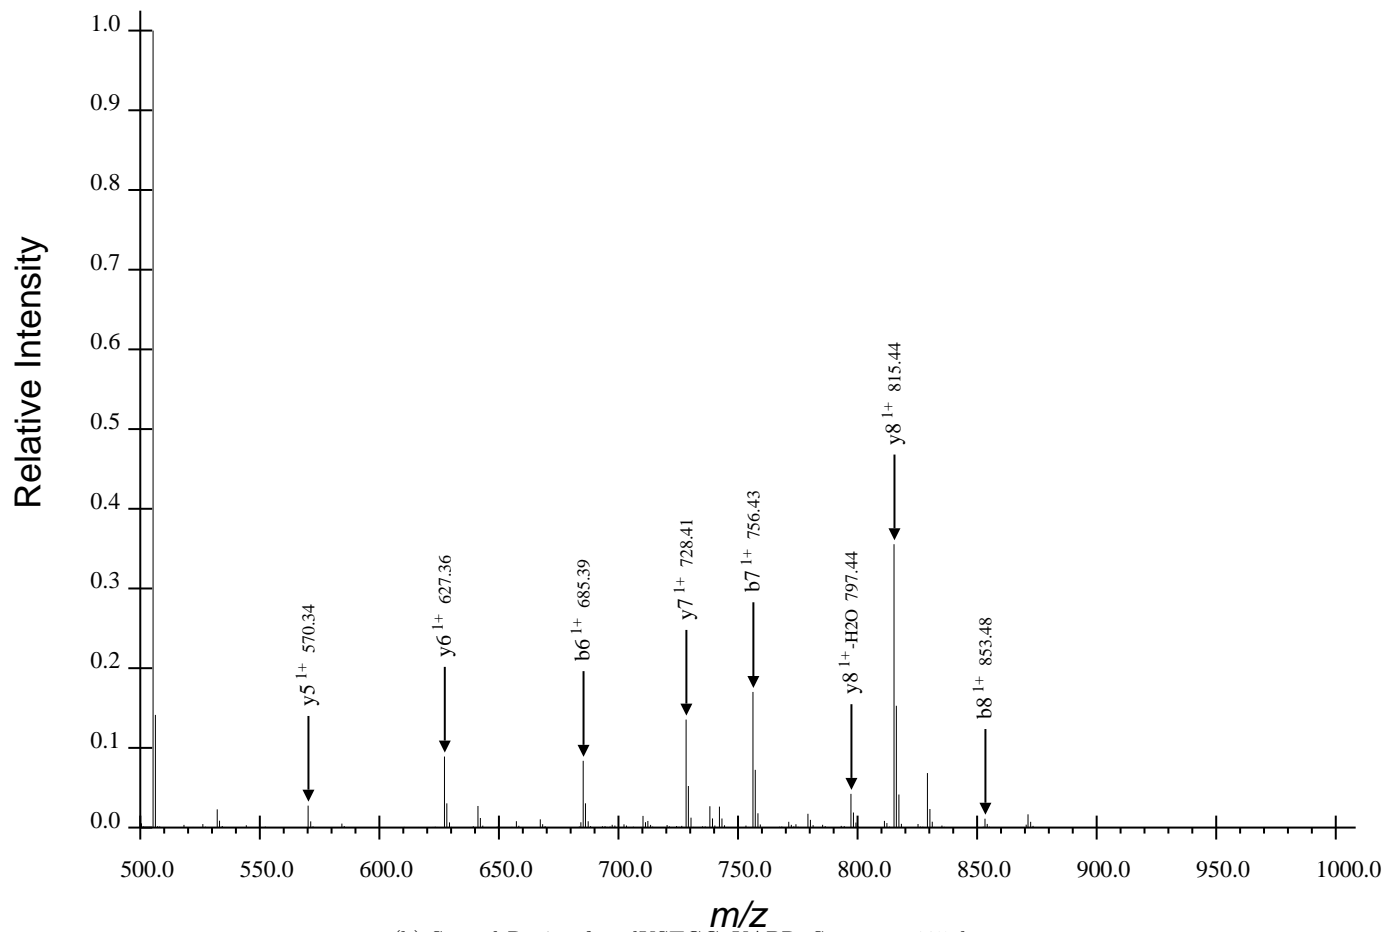

(b) Second Region for rdKSTGGaKAPR, Spectrum 195.dta

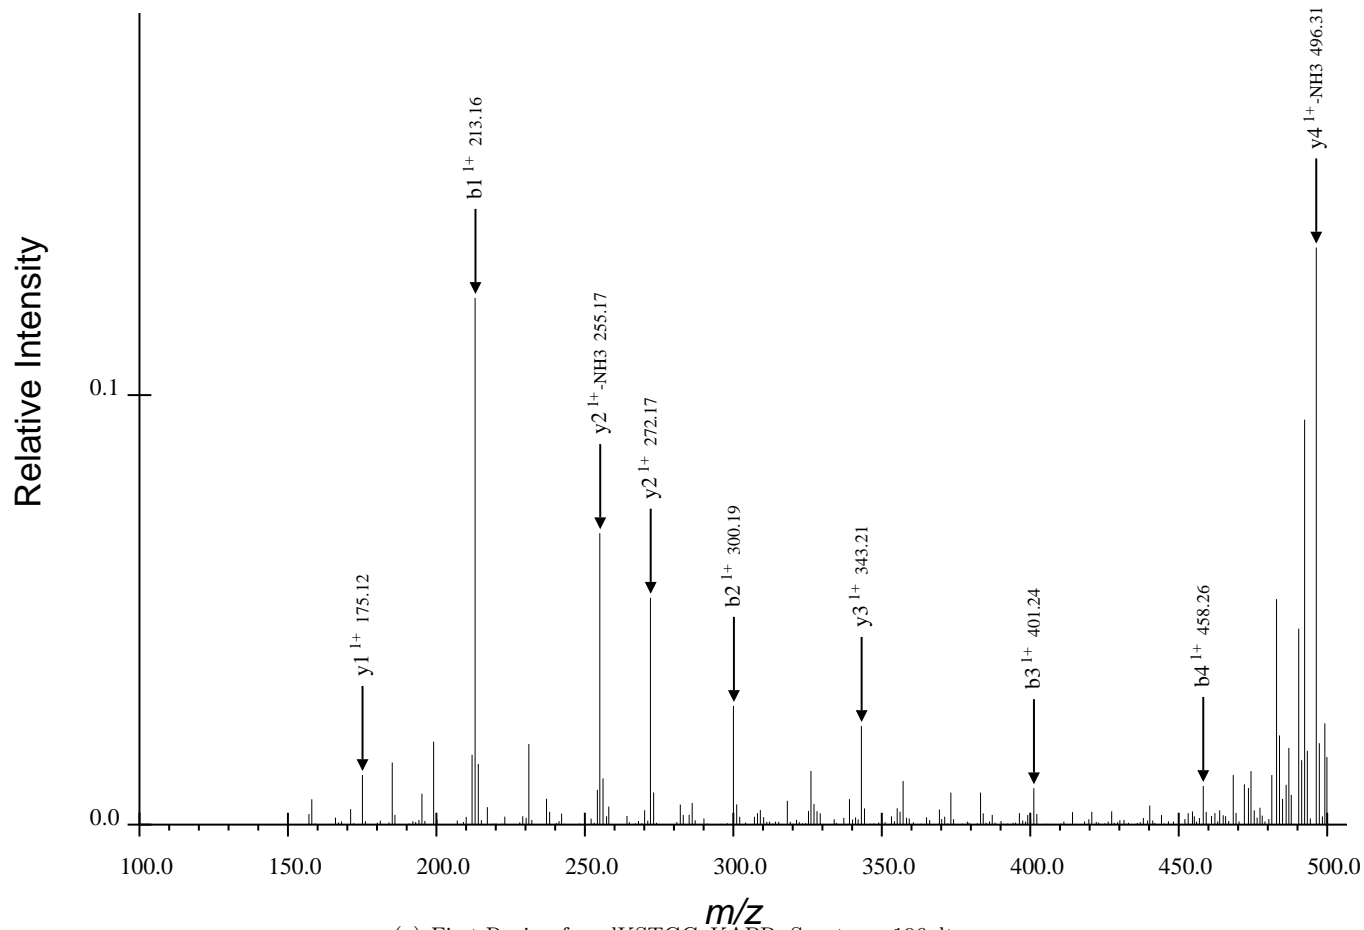

(a) First Region for rdKSTGGaKAPR, Spectrum 196.dta

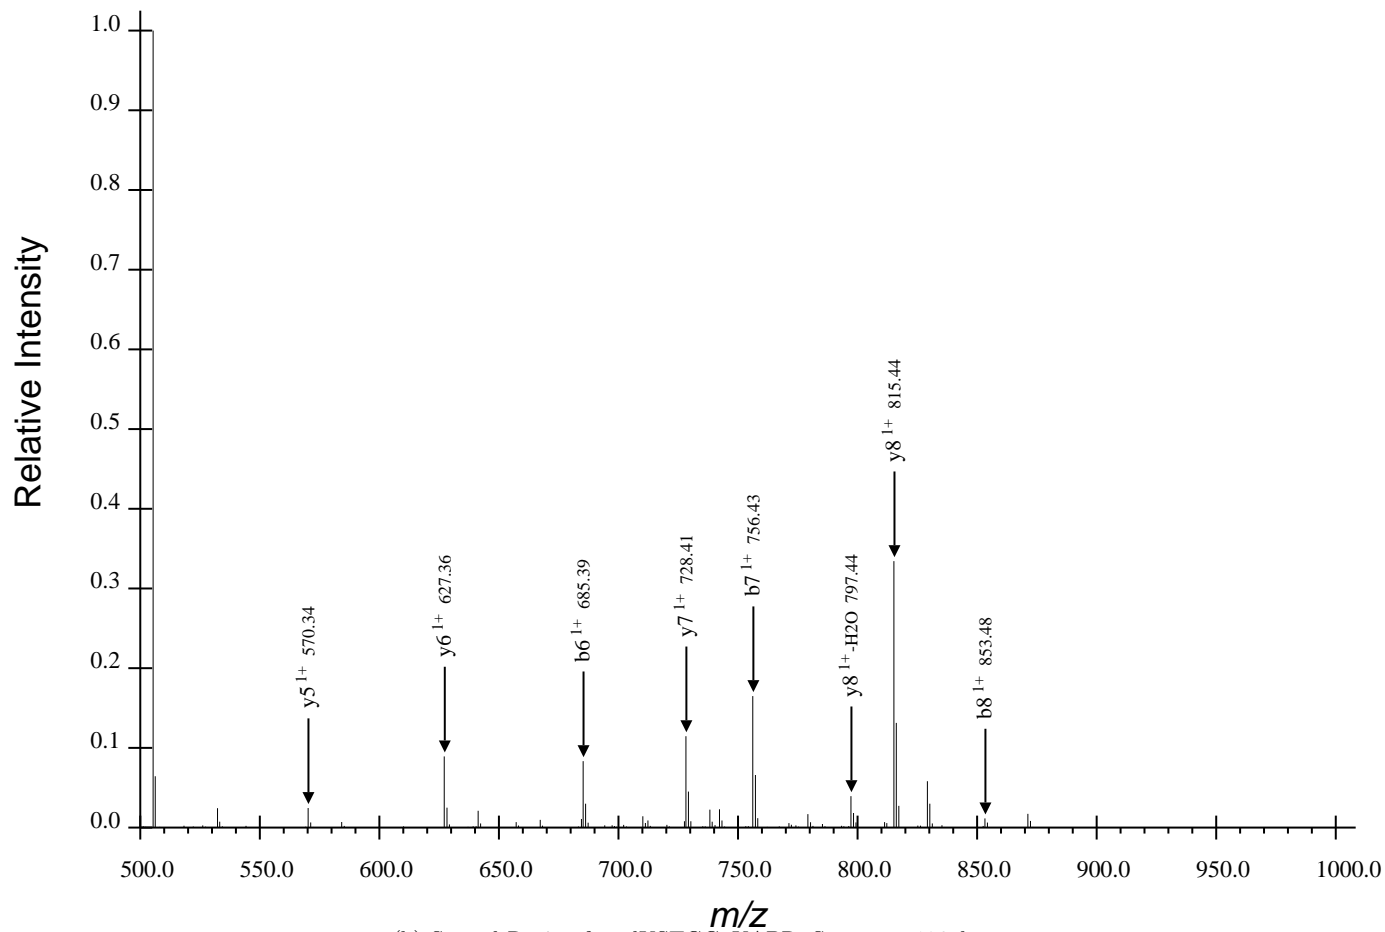

(b) Second Region for rdKSTGGaKAPR, Spectrum 196.dta

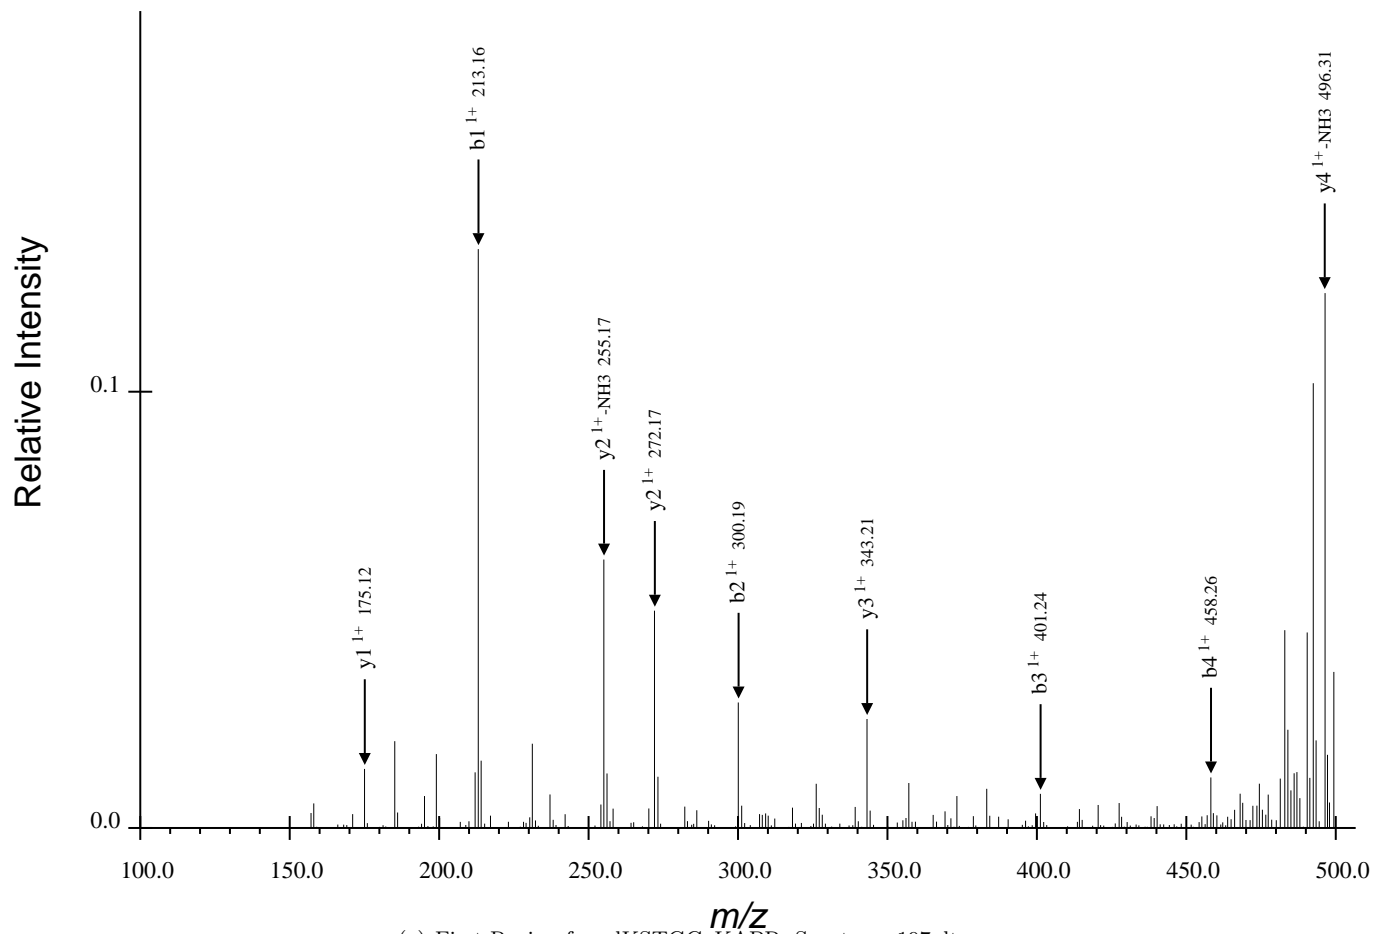

(a) First Region for rdKSTGGaKAPR, Spectrum 197.dta

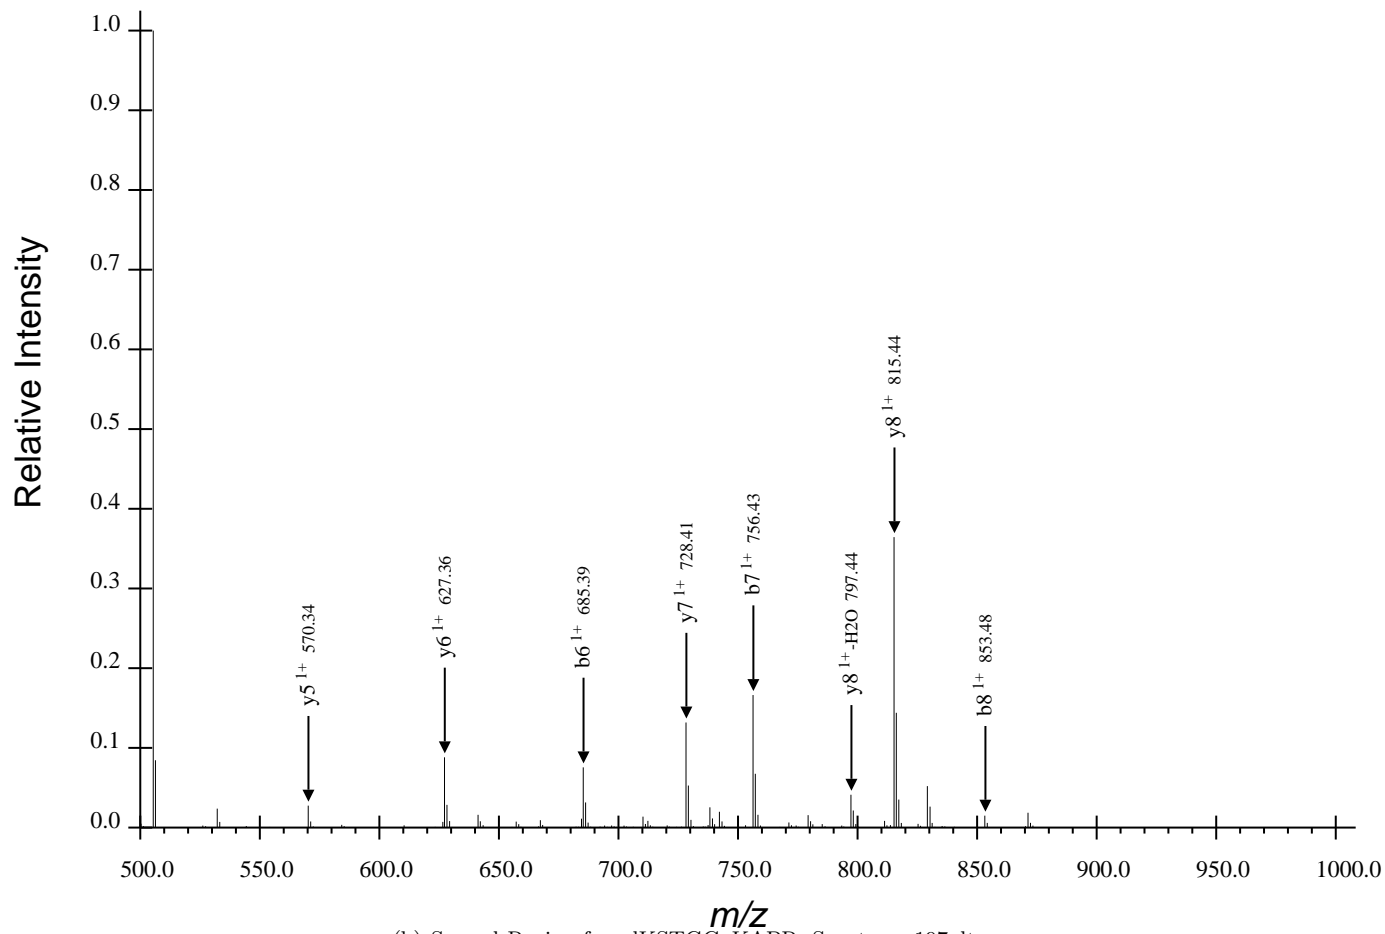

(b) Second Region for rdKSTGGaKAPR, Spectrum 197.dta

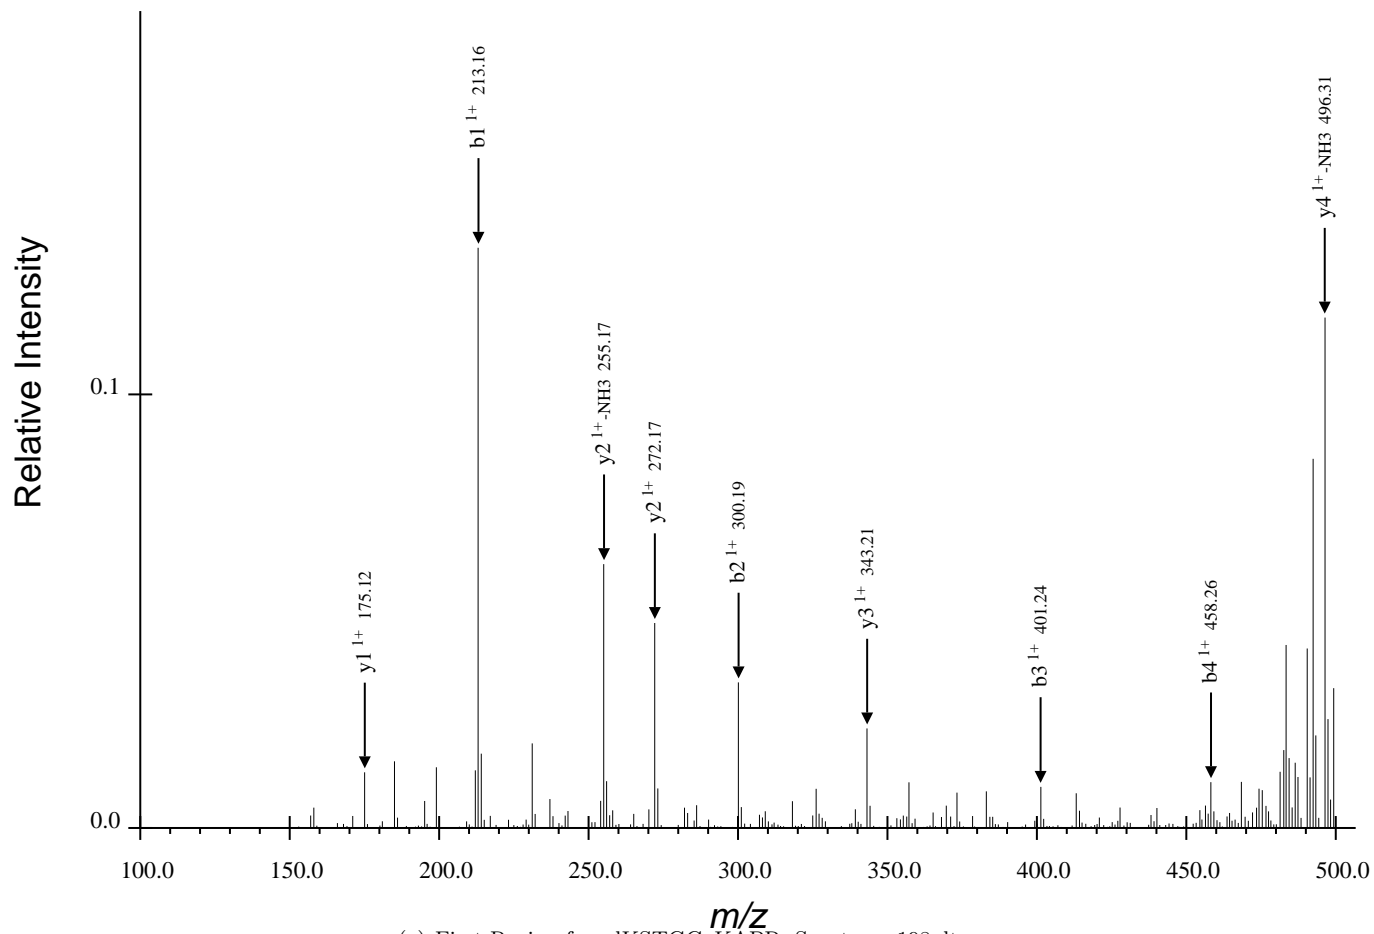

(a) First Region for rdKSTGGaKAPR, Spectrum 198.dta

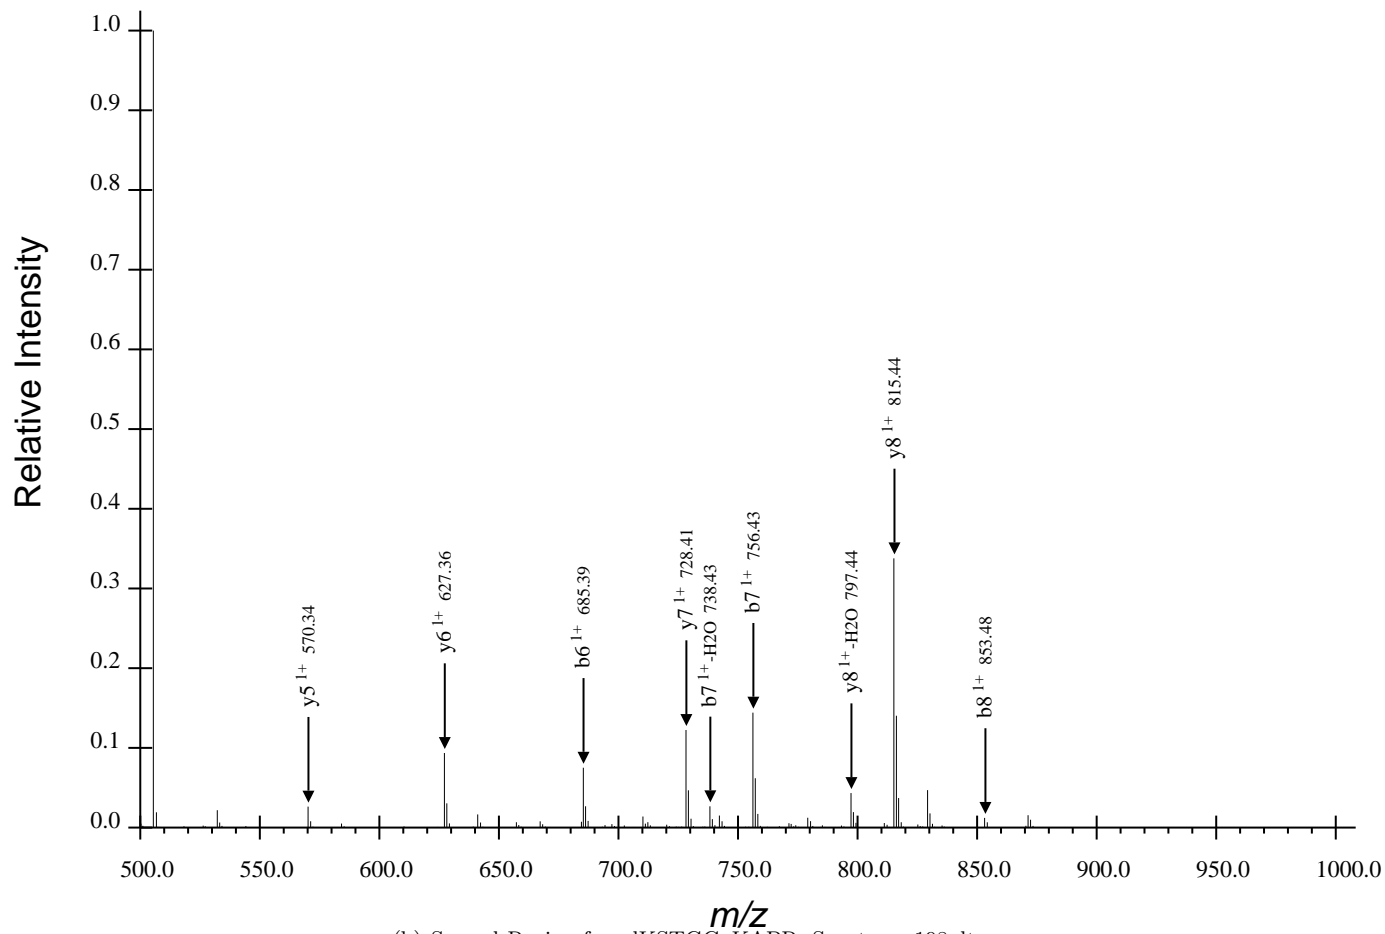

(b) Second Region for rdKSTGGaKAPR, Spectrum 198.dta

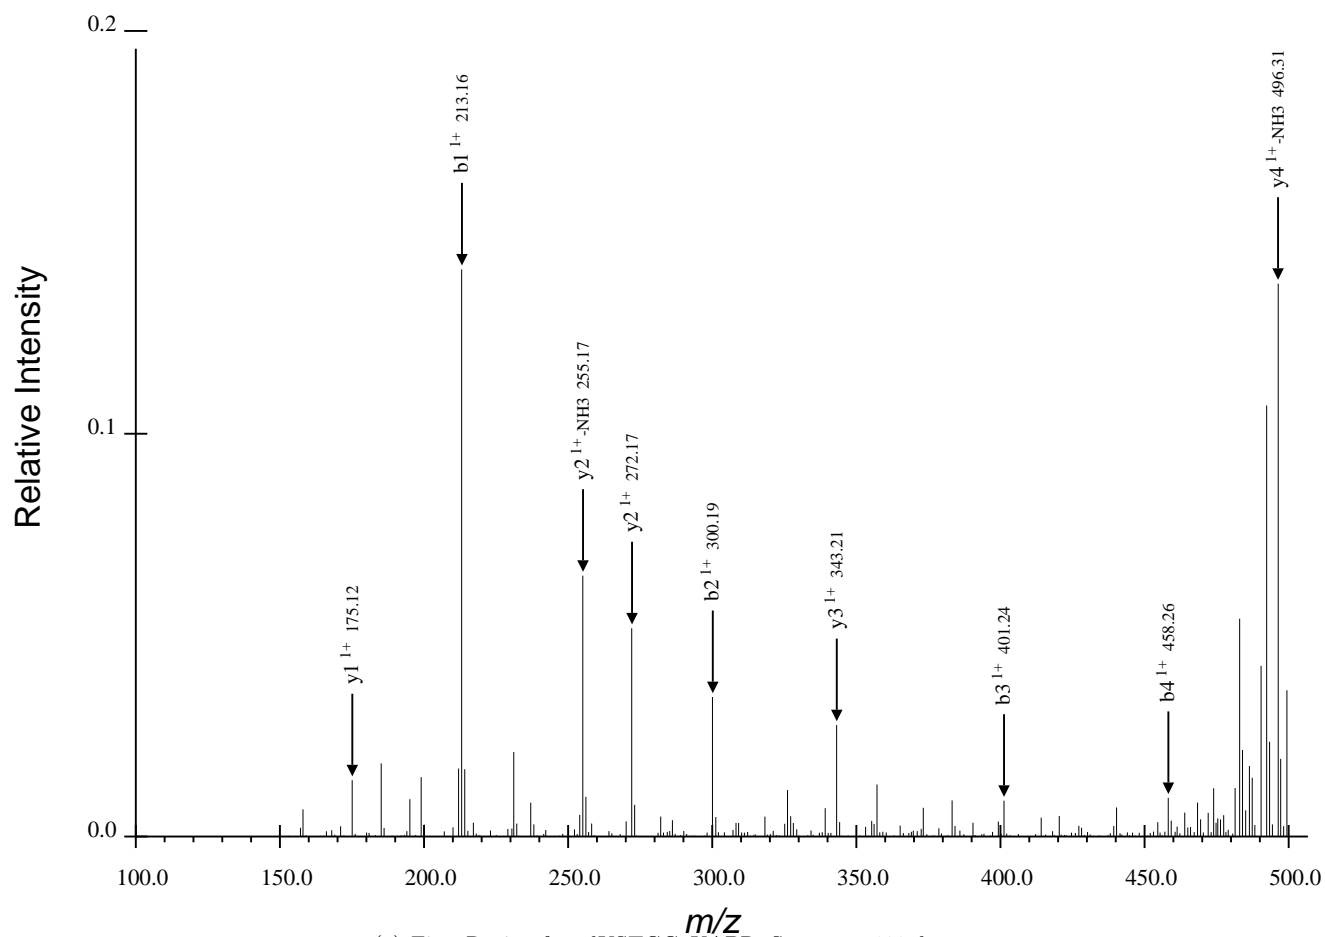

(a) First Region for rdKSTGGaKAPR, Spectrum 199.dta

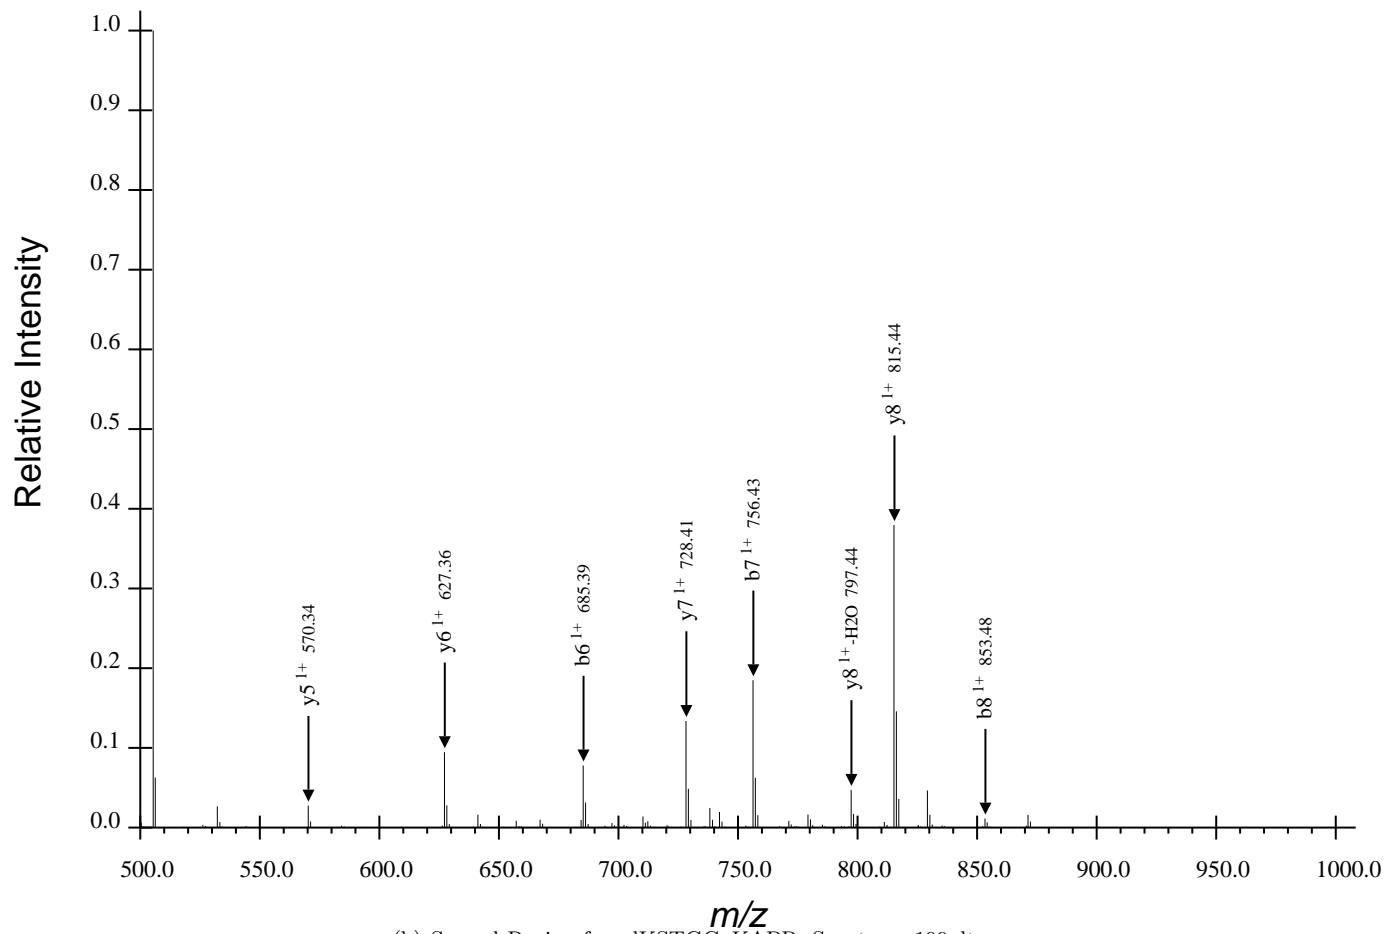

(b) Second Region for rdKSTGGaKAPR, Spectrum 199.dta

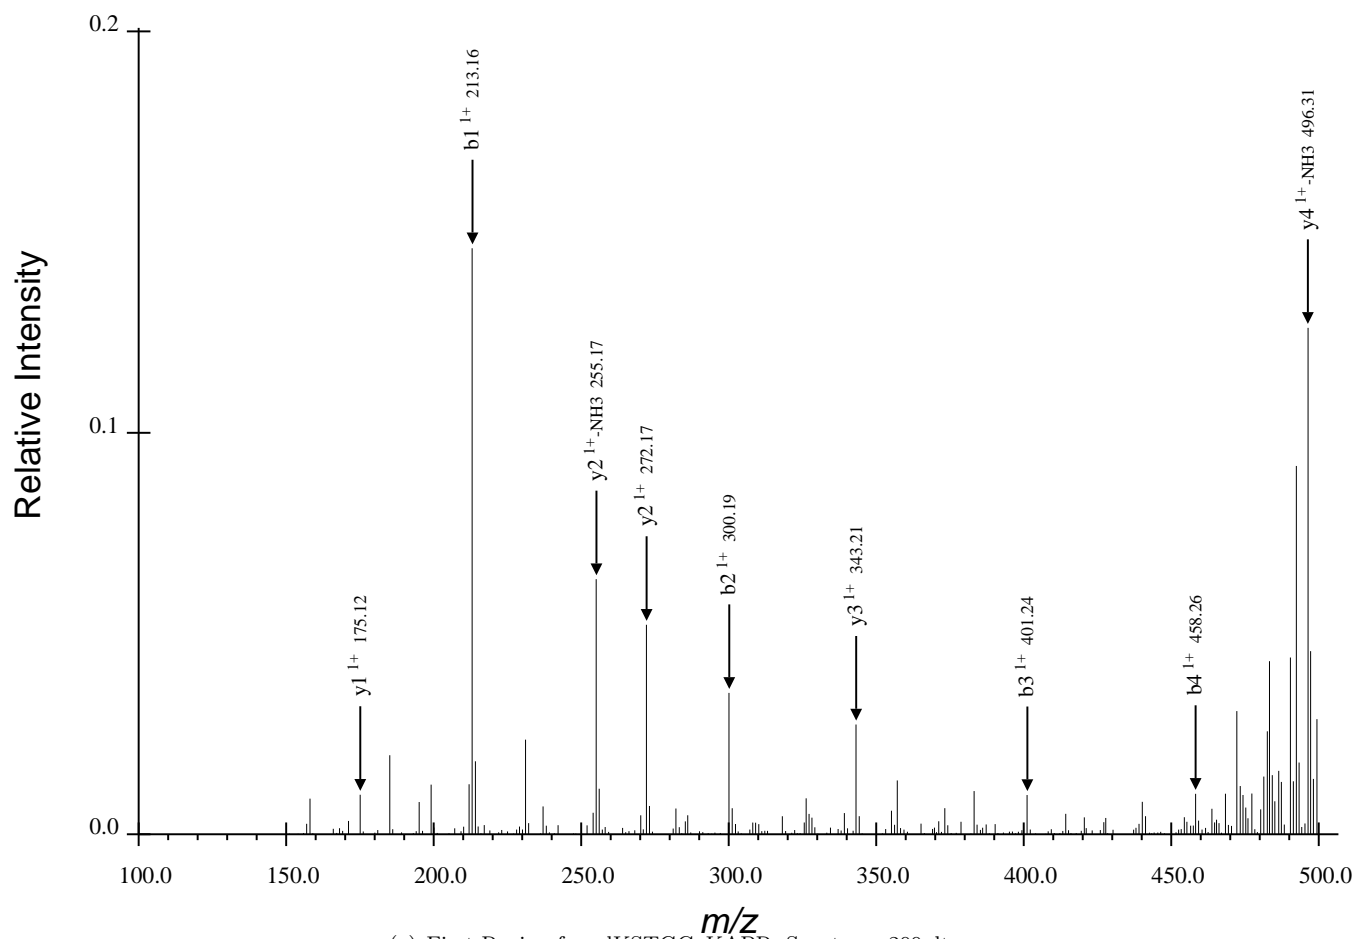

(a) First Region for rdKSTGGaKAPR, Spectrum 200.dta

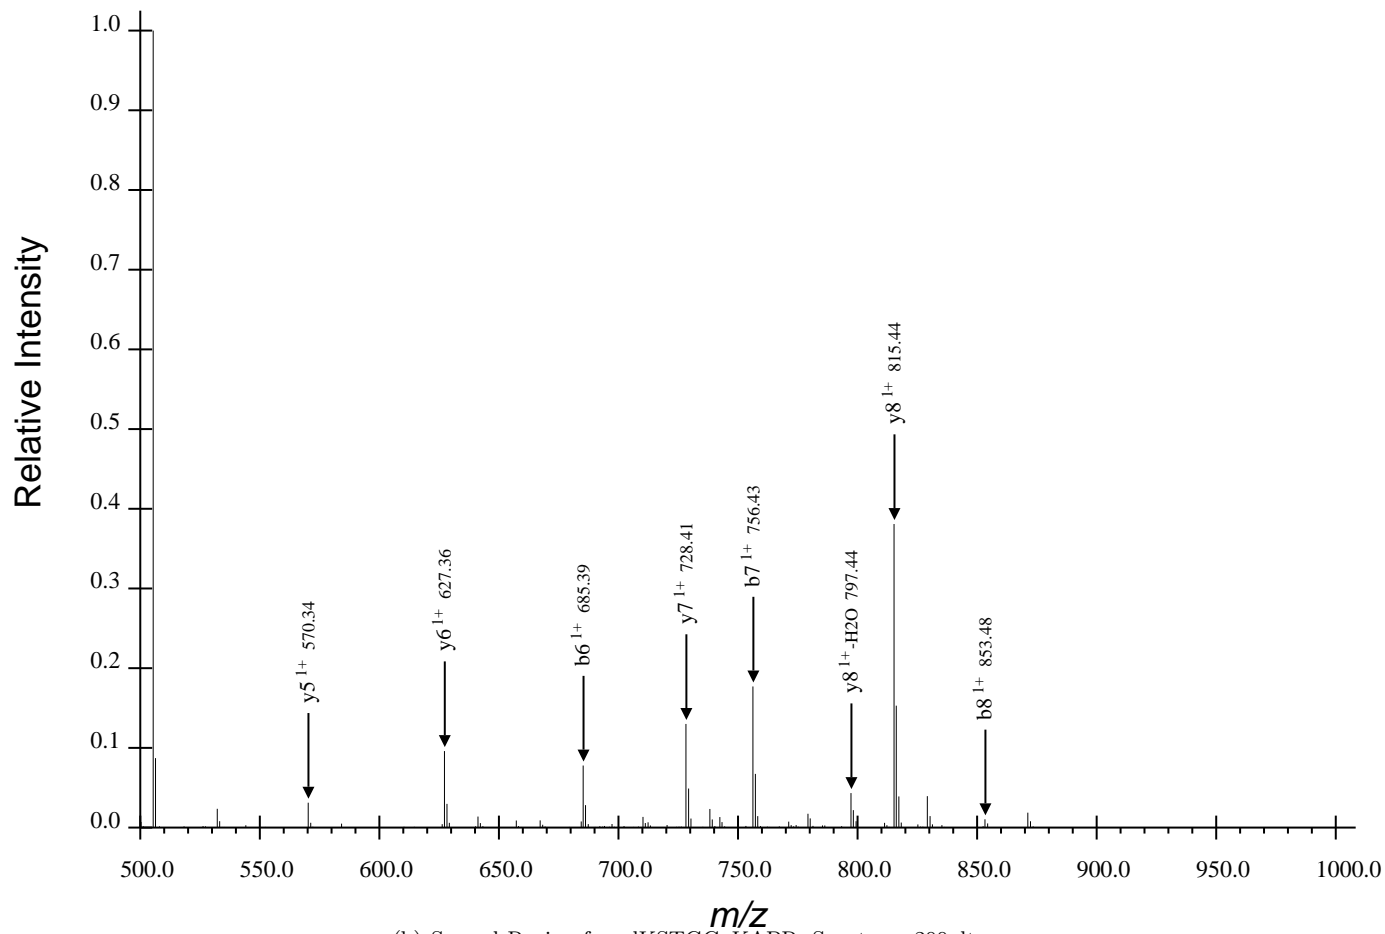

(b) Second Region for rdKSTGGaKAPR, Spectrum 200.dta



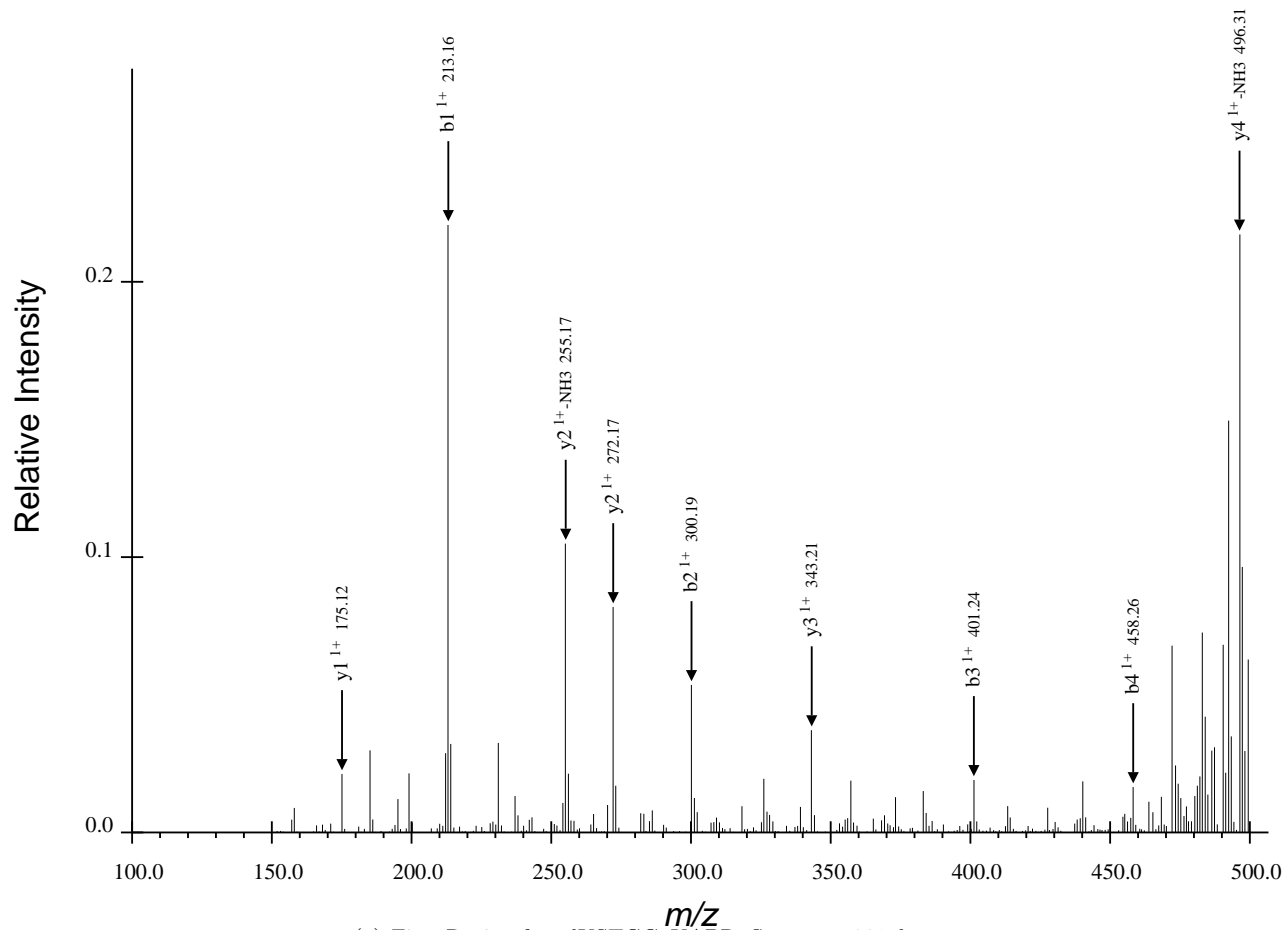

(a) First Region for rdKSTGGaKAPR, Spectrum 201.dta

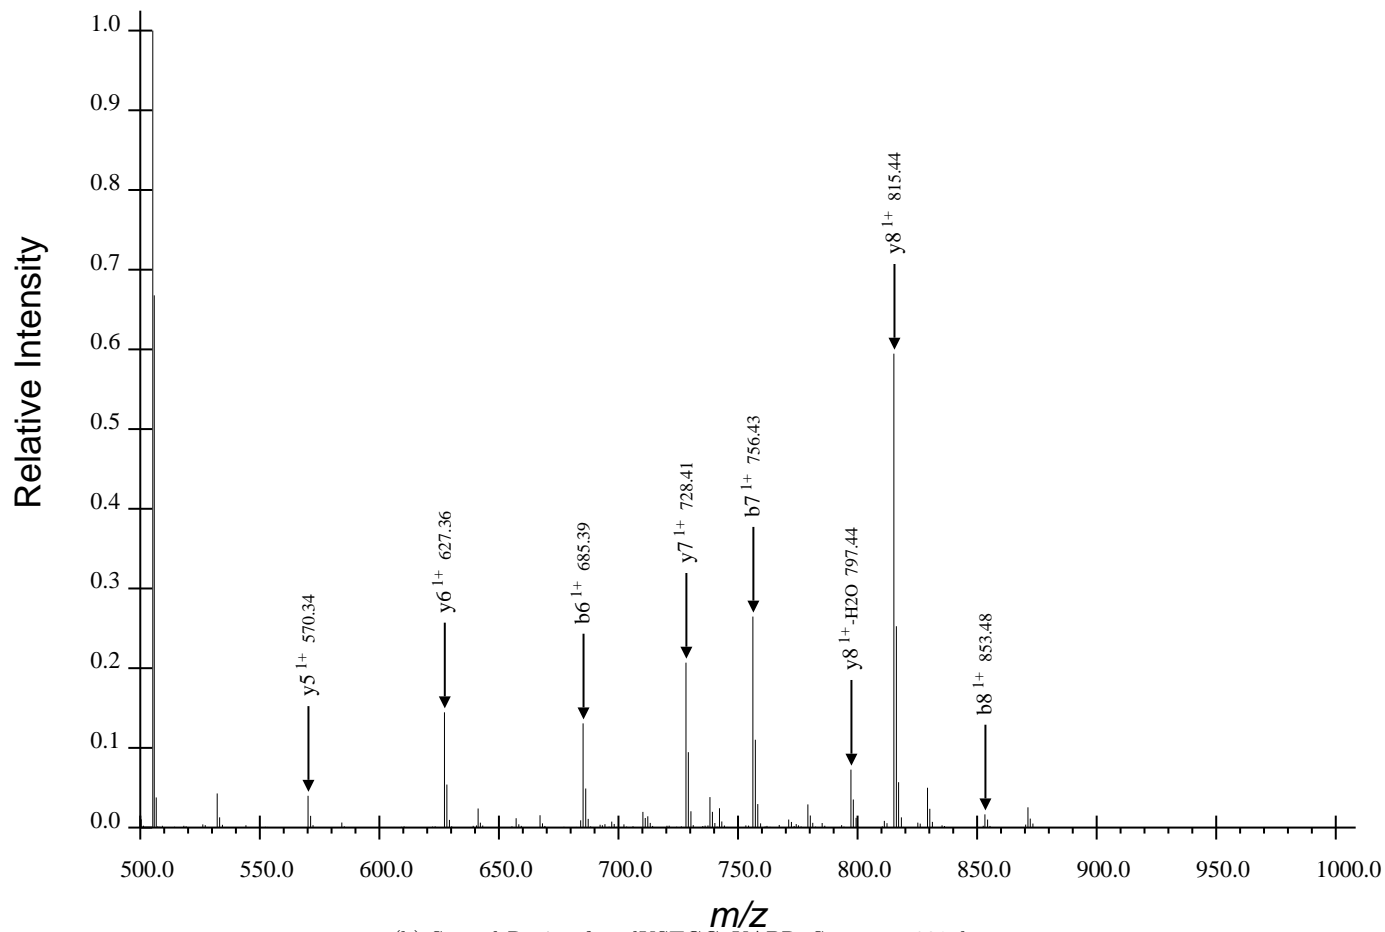

(b) Second Region for rdKSTGGaKAPR, Spectrum 201.dta

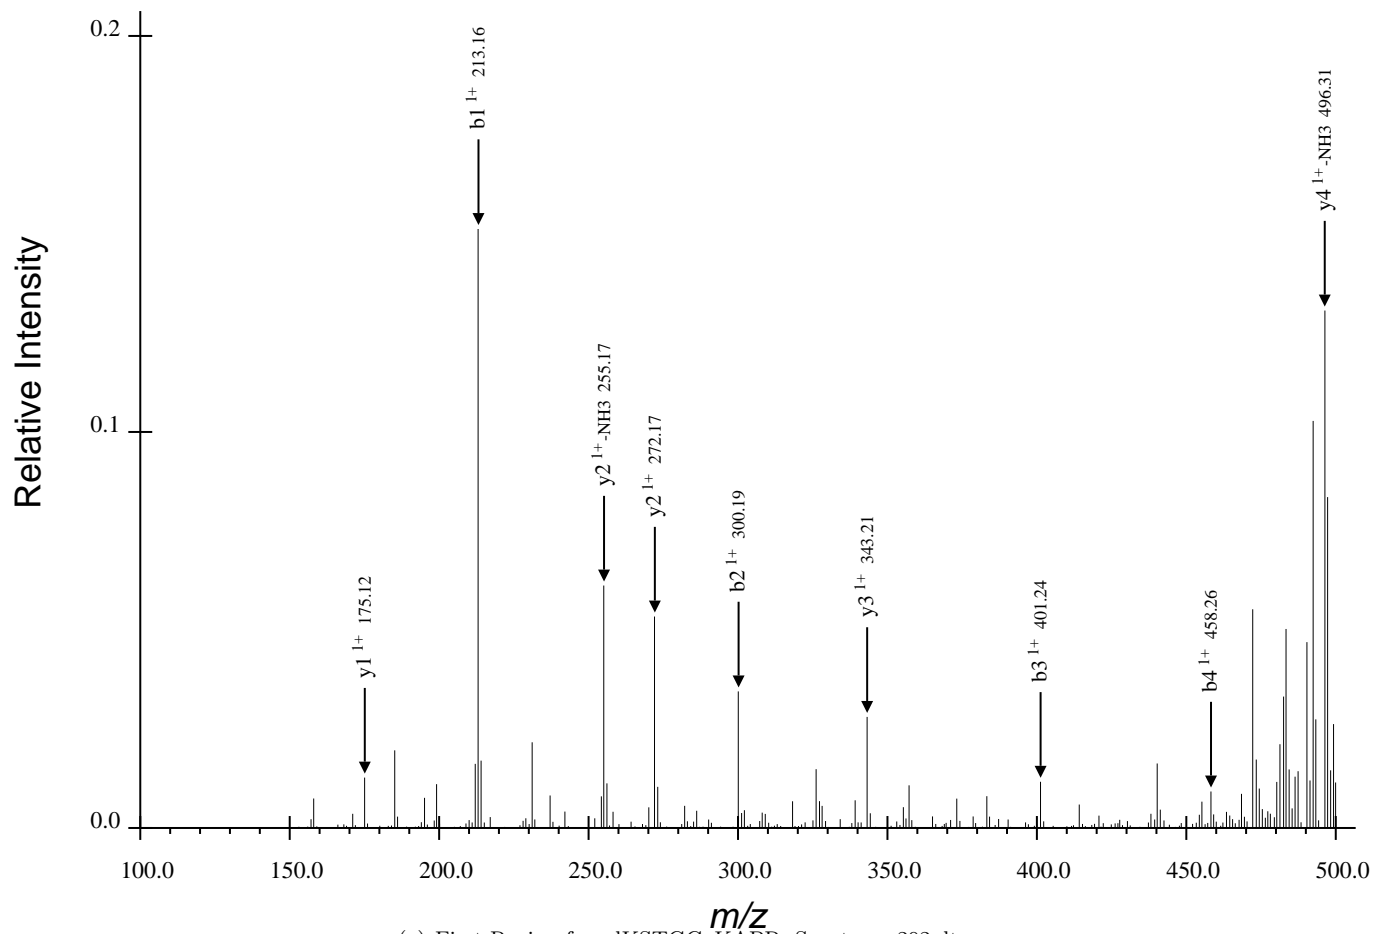

(a) First Region for rdKSTGGaKAPR, Spectrum 202.dta

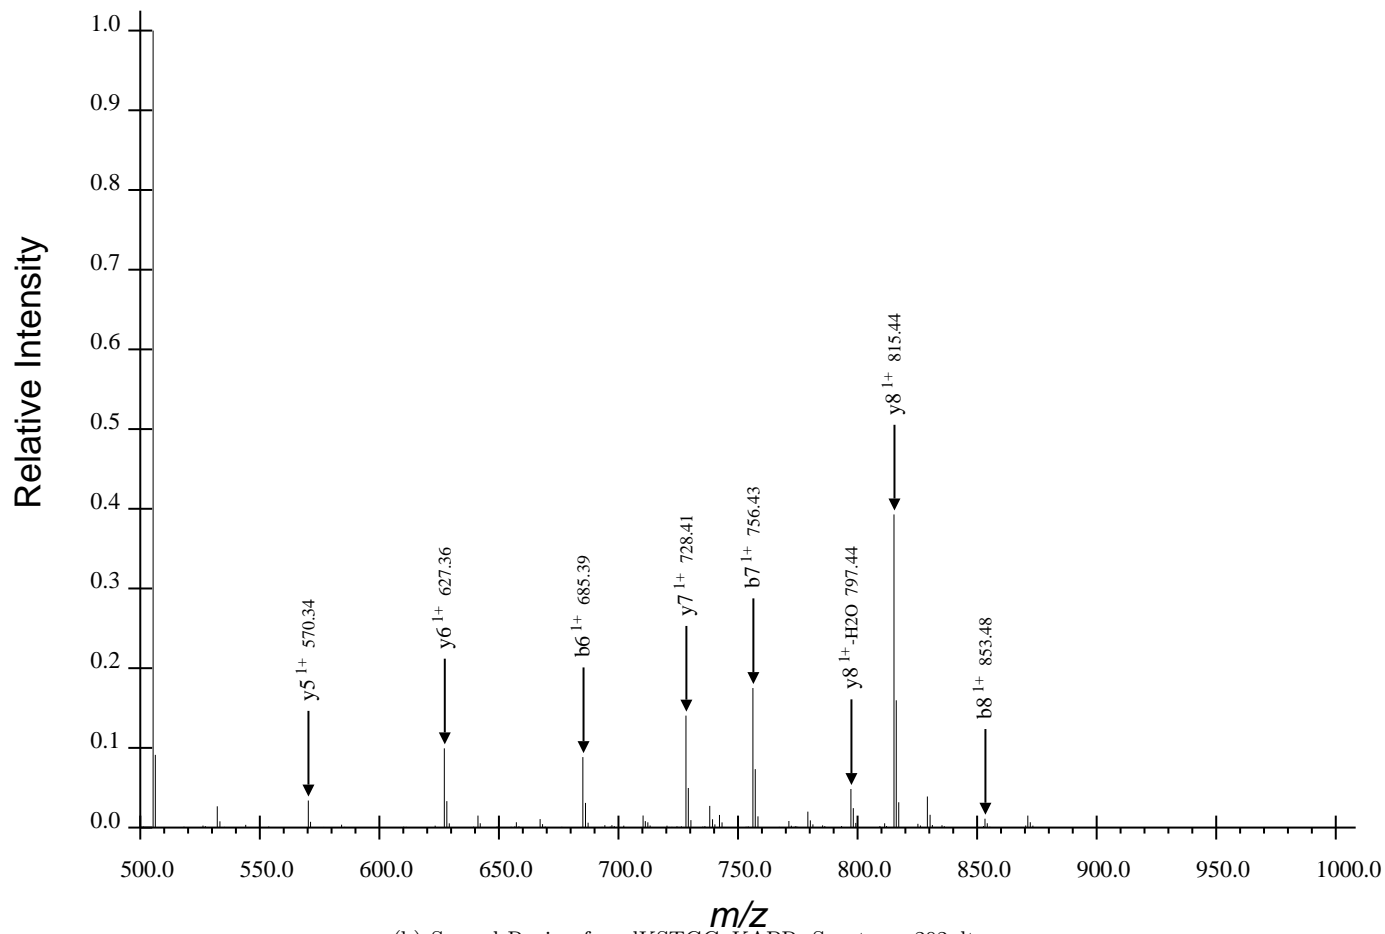

(b) Second Region for rdKSTGGaKAPR, Spectrum 202.dta

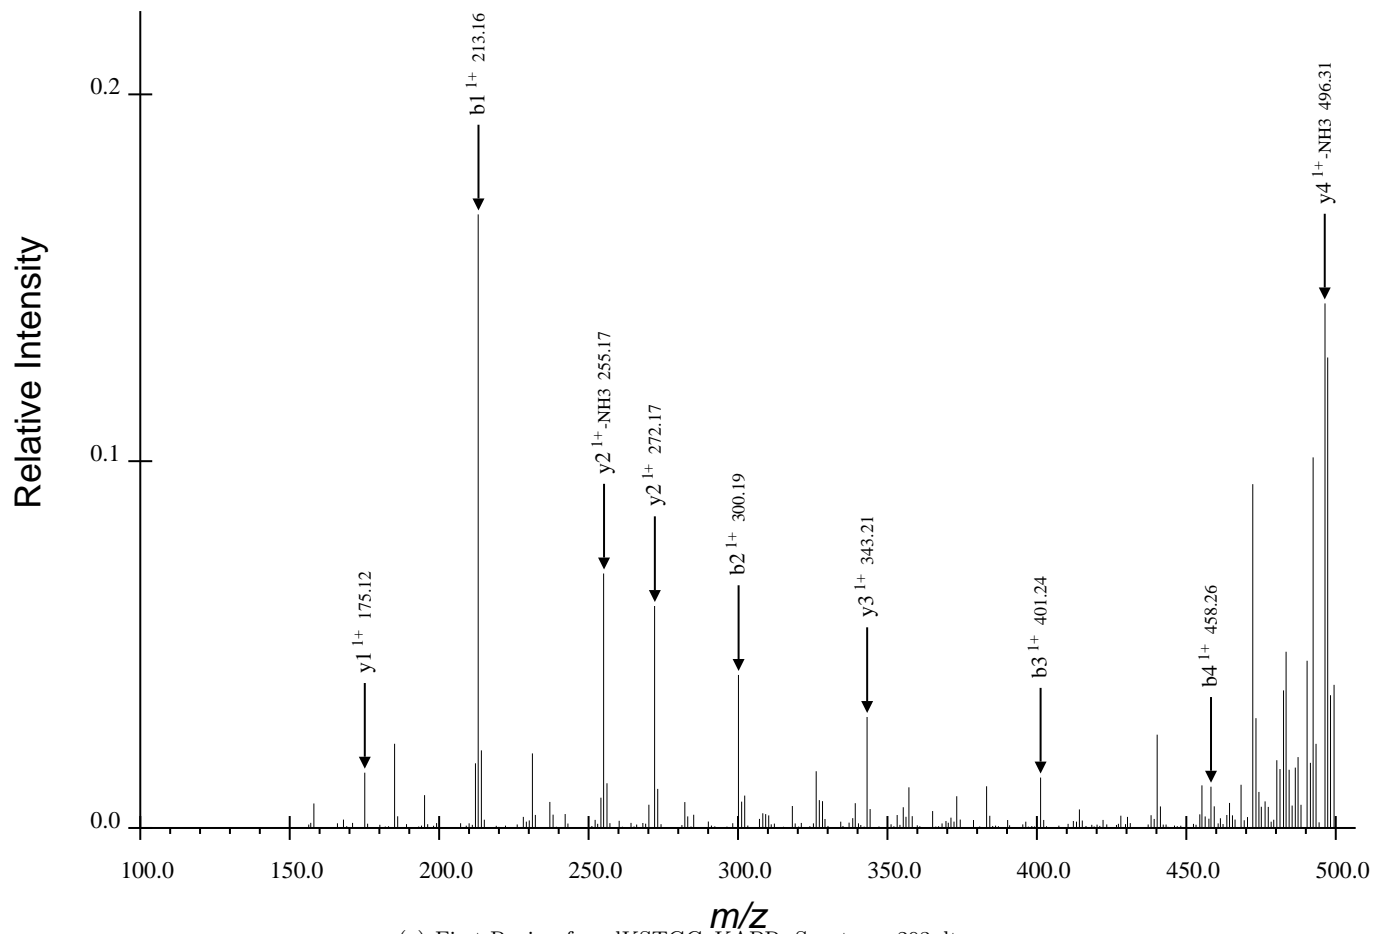

(a) First Region for rdKSTGGaKAPR, Spectrum 203.dta

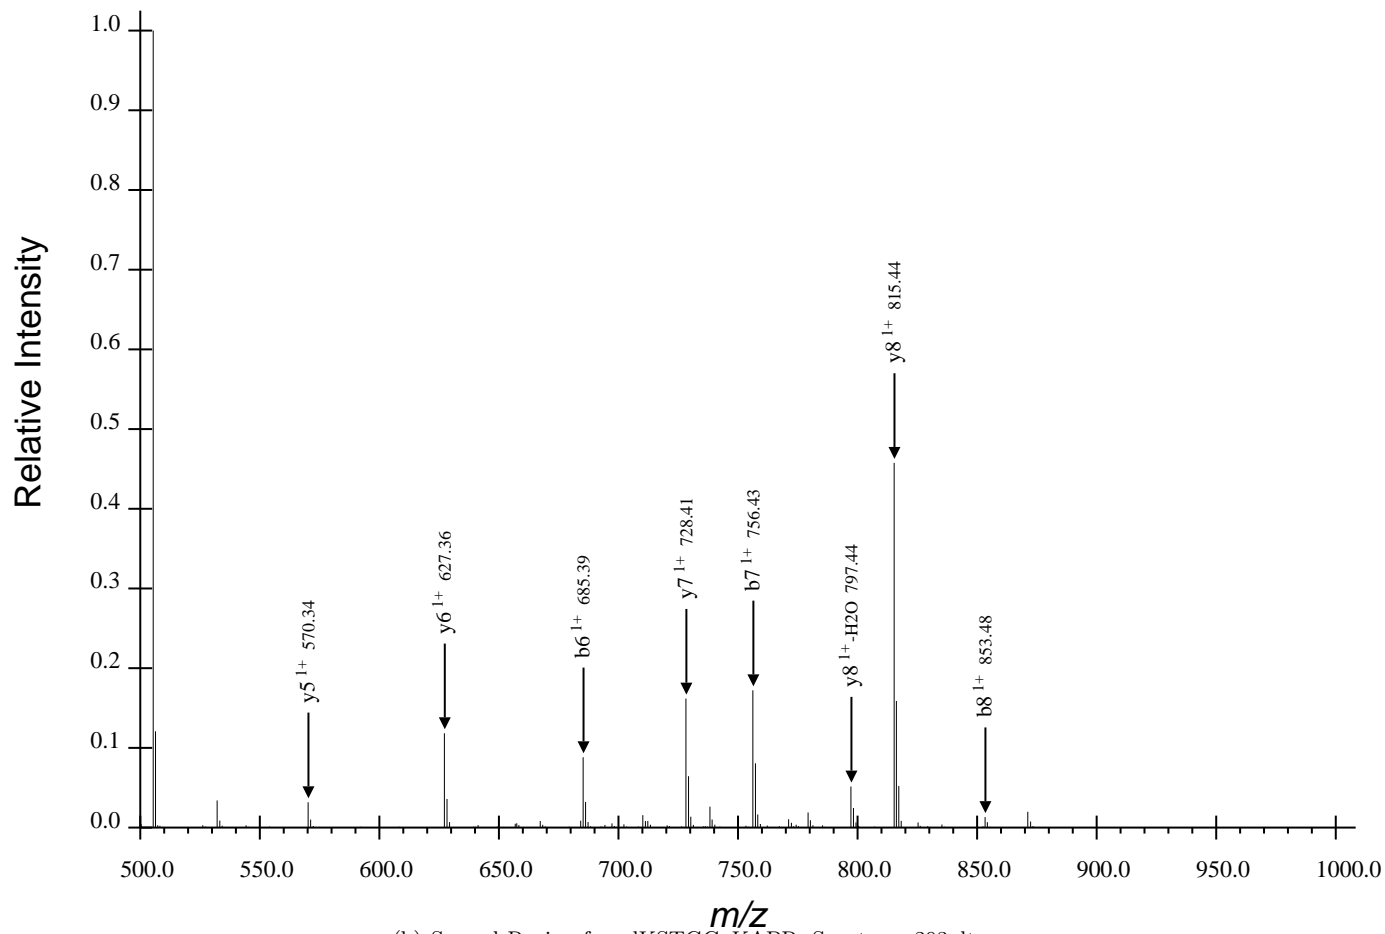

(b) Second Region for rdKSTGGaKAPR, Spectrum 203.dta

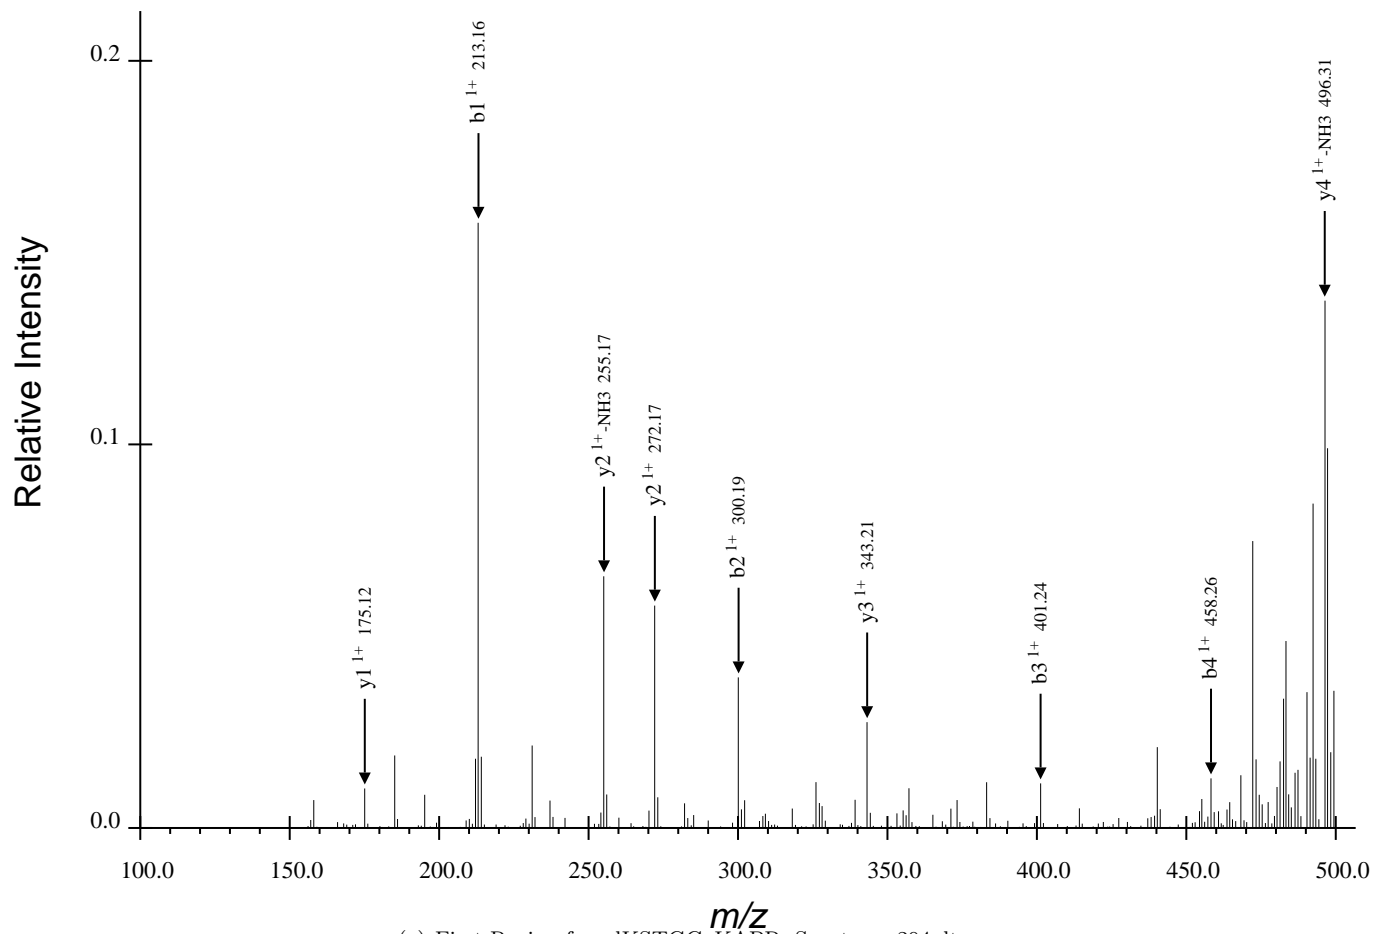

(a) First Region for rdKSTGGaKAPR, Spectrum 204.dta

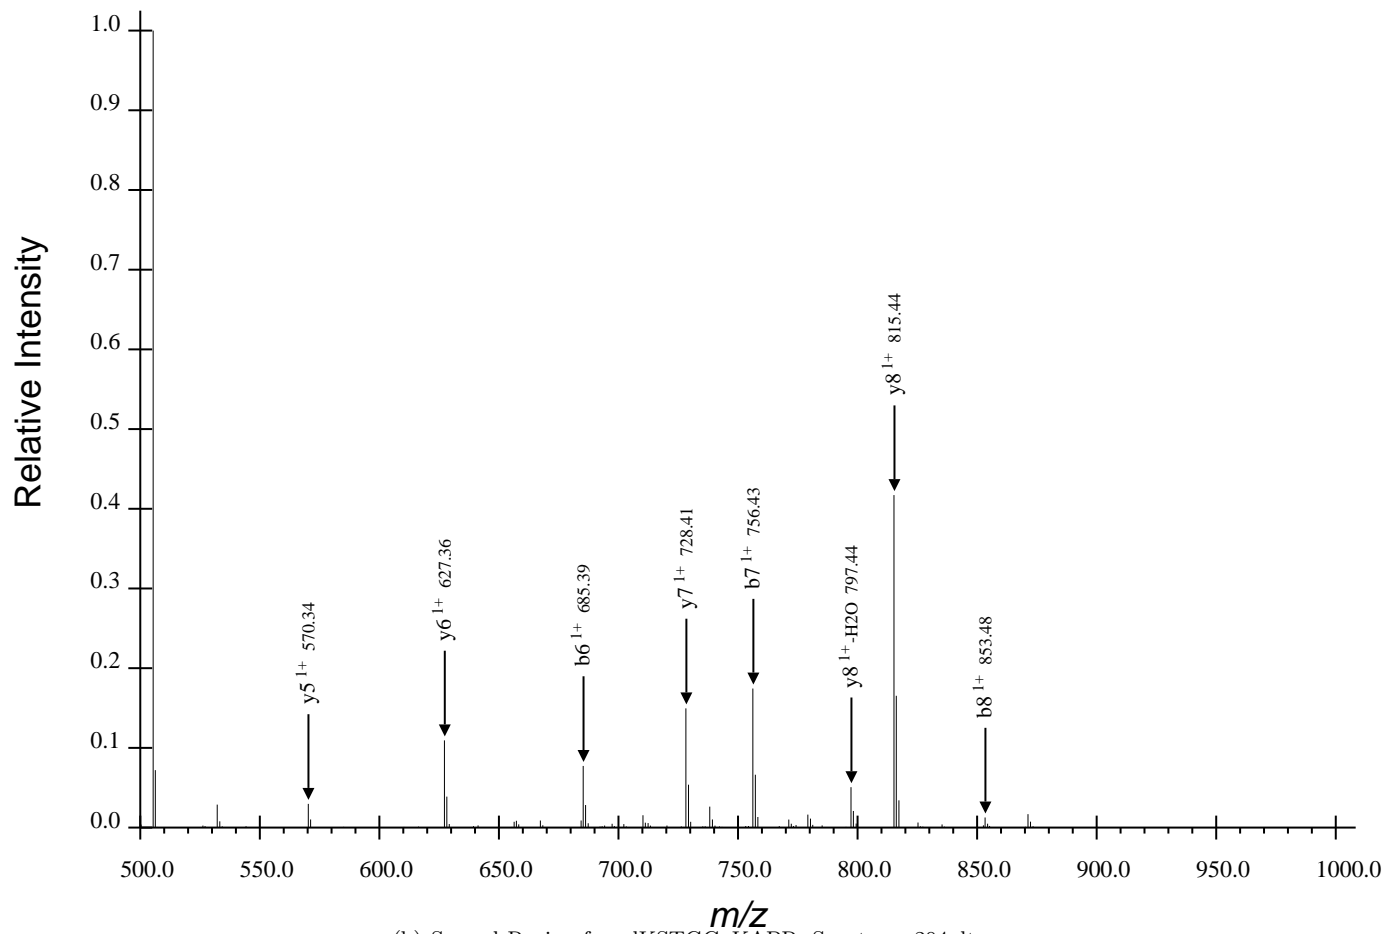

(b) Second Region for rdKSTGGaKAPR, Spectrum 204.dta

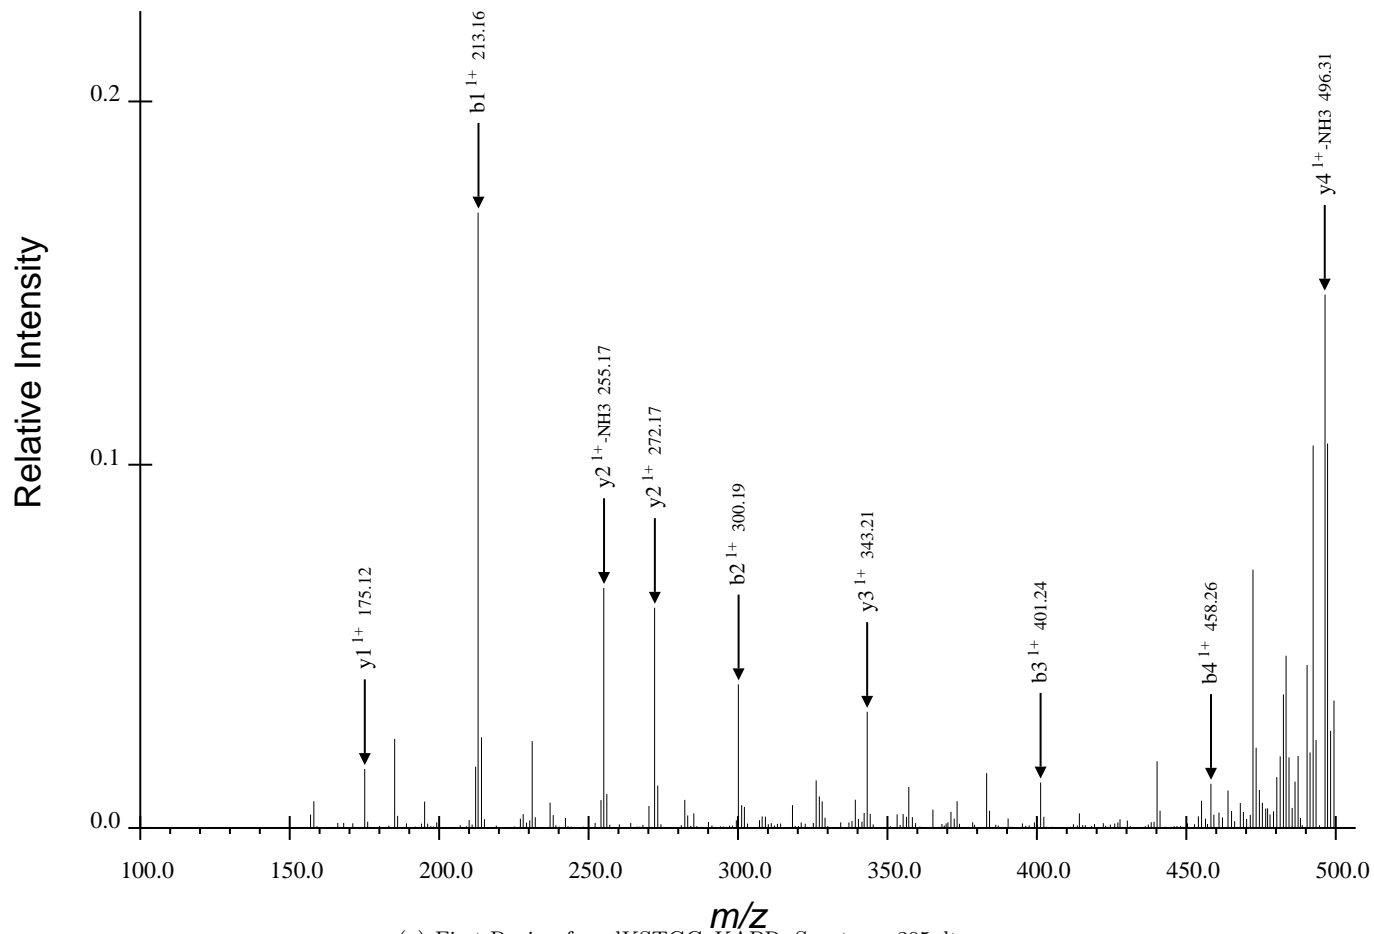

(a) First Region for rdKSTGGaKAPR, Spectrum 205.dta

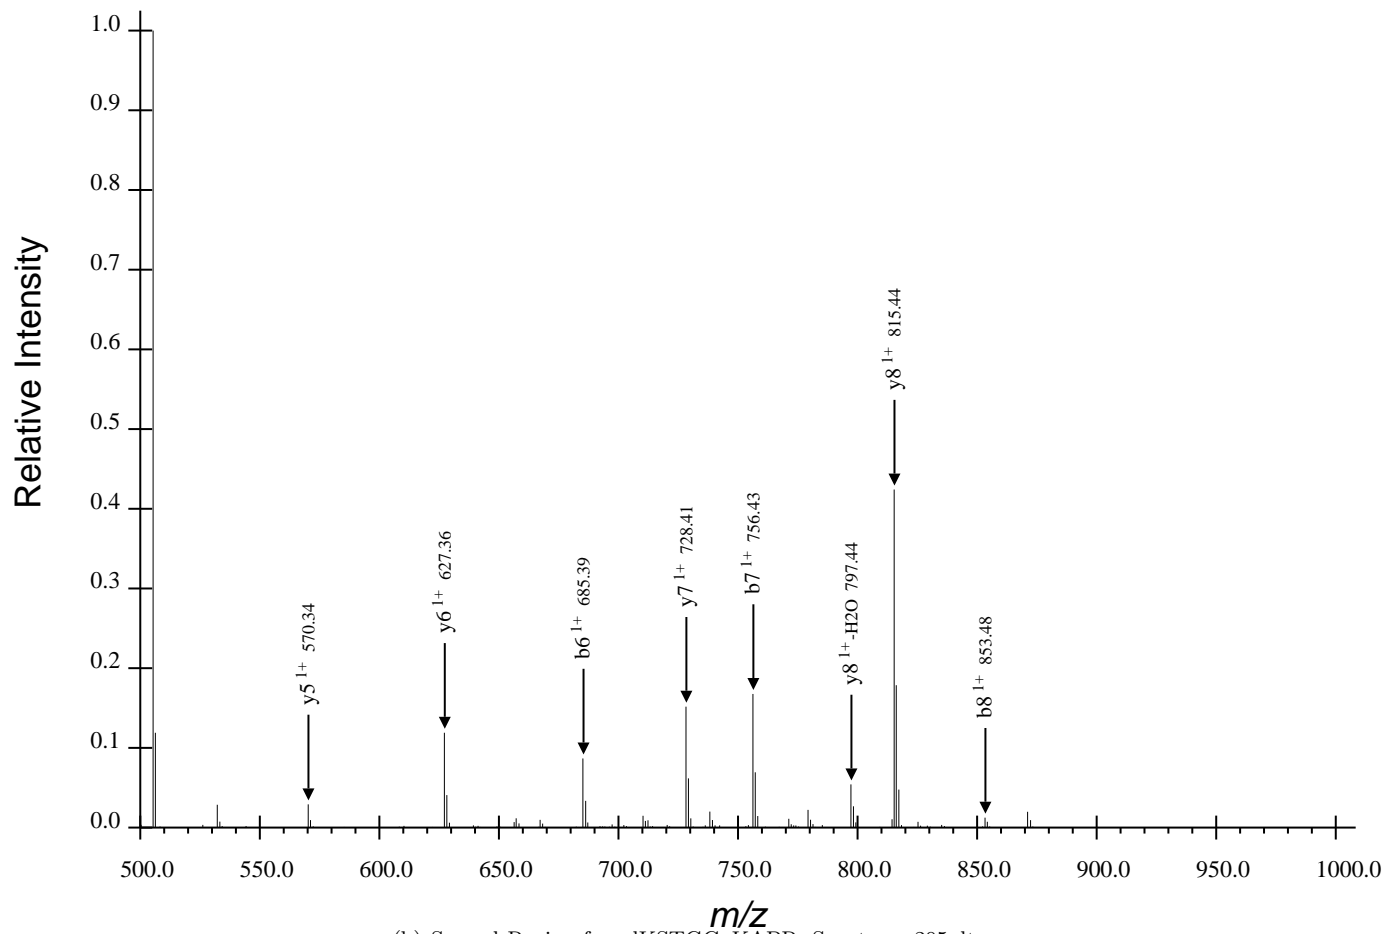

(b) Second Region for rdKSTGGaKAPR, Spectrum 205.dta

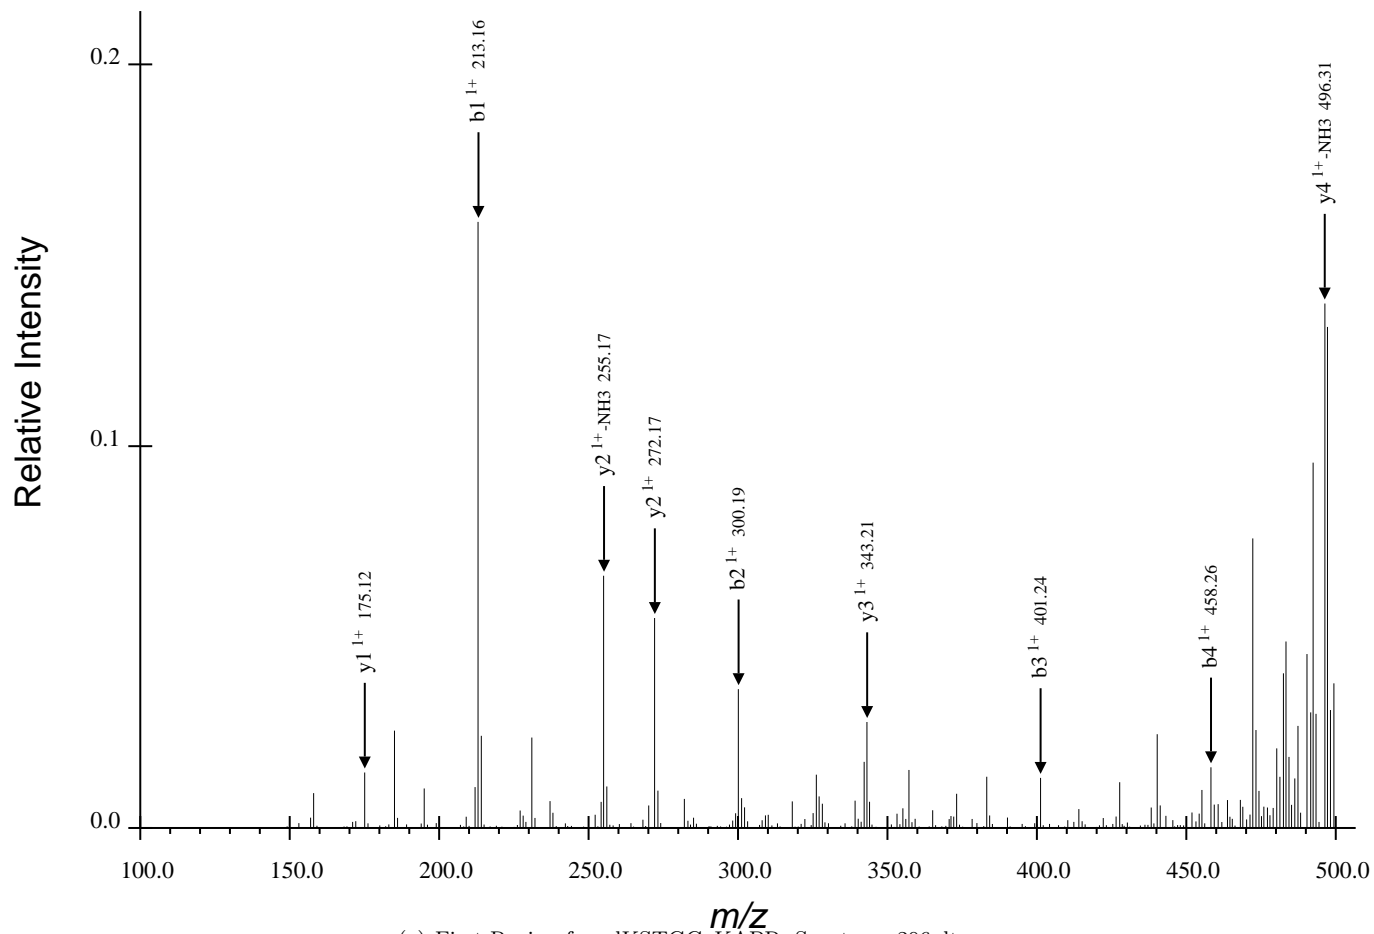

(a) First Region for rdKSTGGaKAPR, Spectrum 206.dta

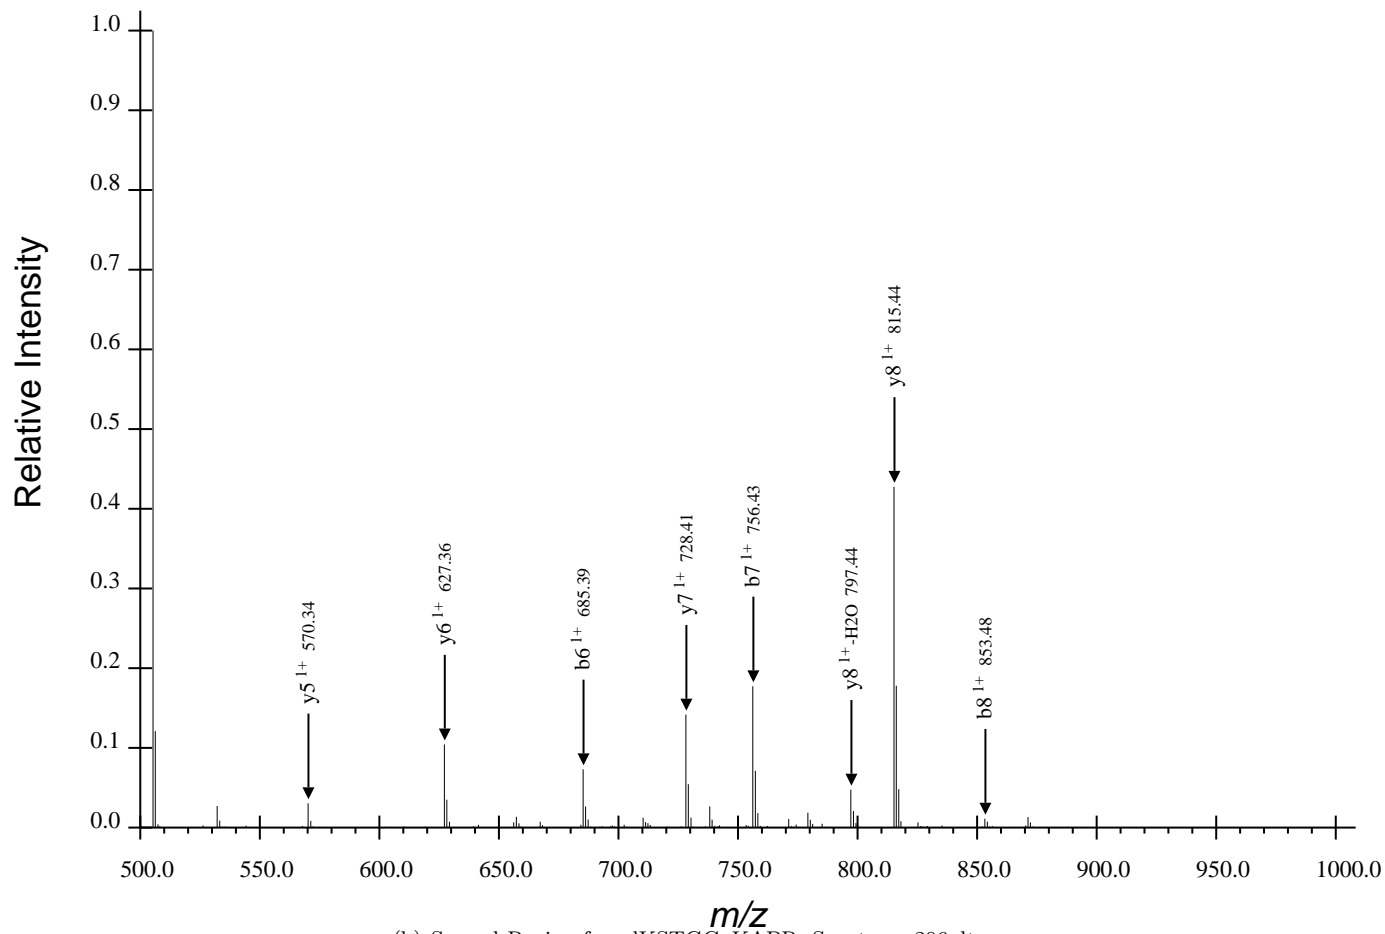

(b) Second Region for rdKSTGGaKAPR, Spectrum 206.dta

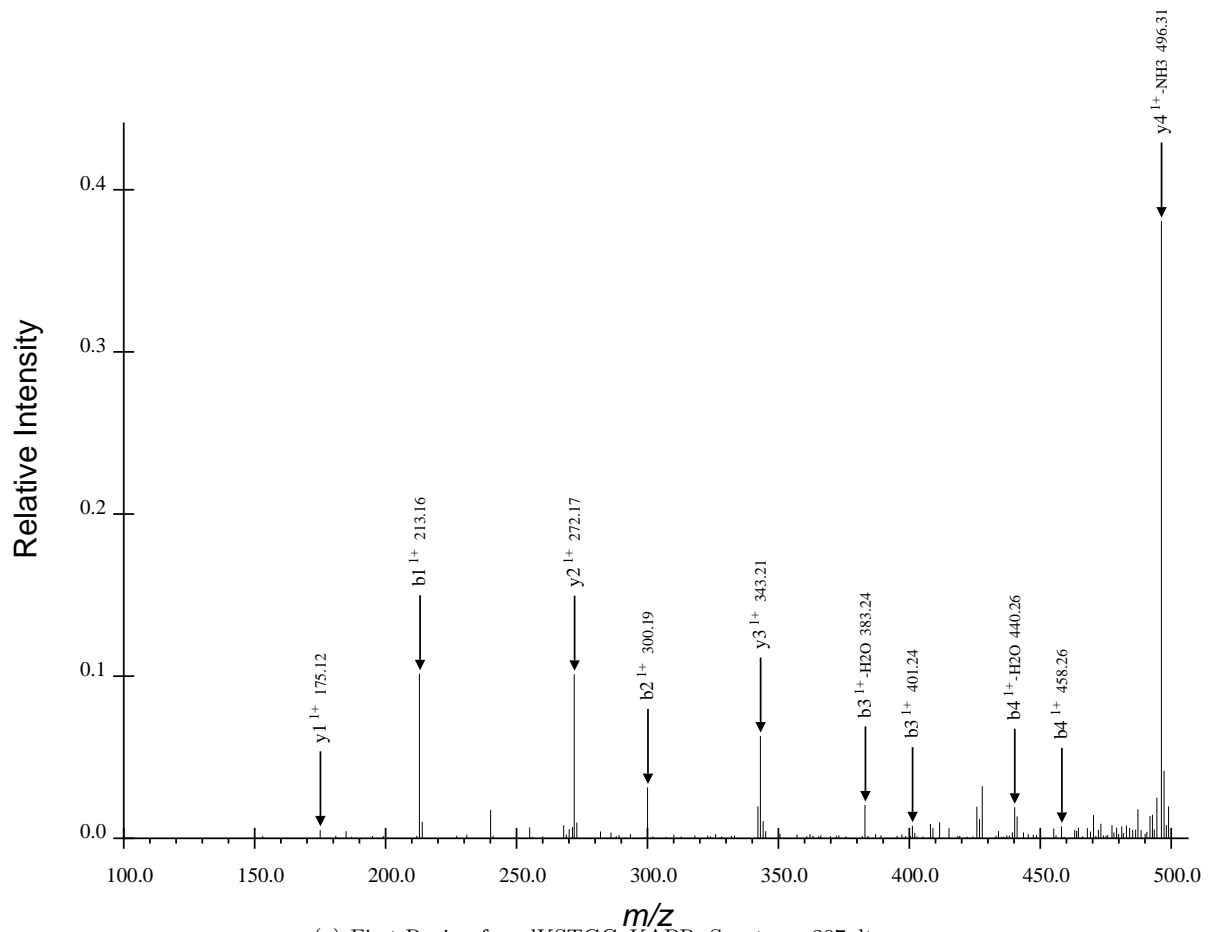

(a) First Region for rdKSTGGaKAPR, Spectrum 207.dta

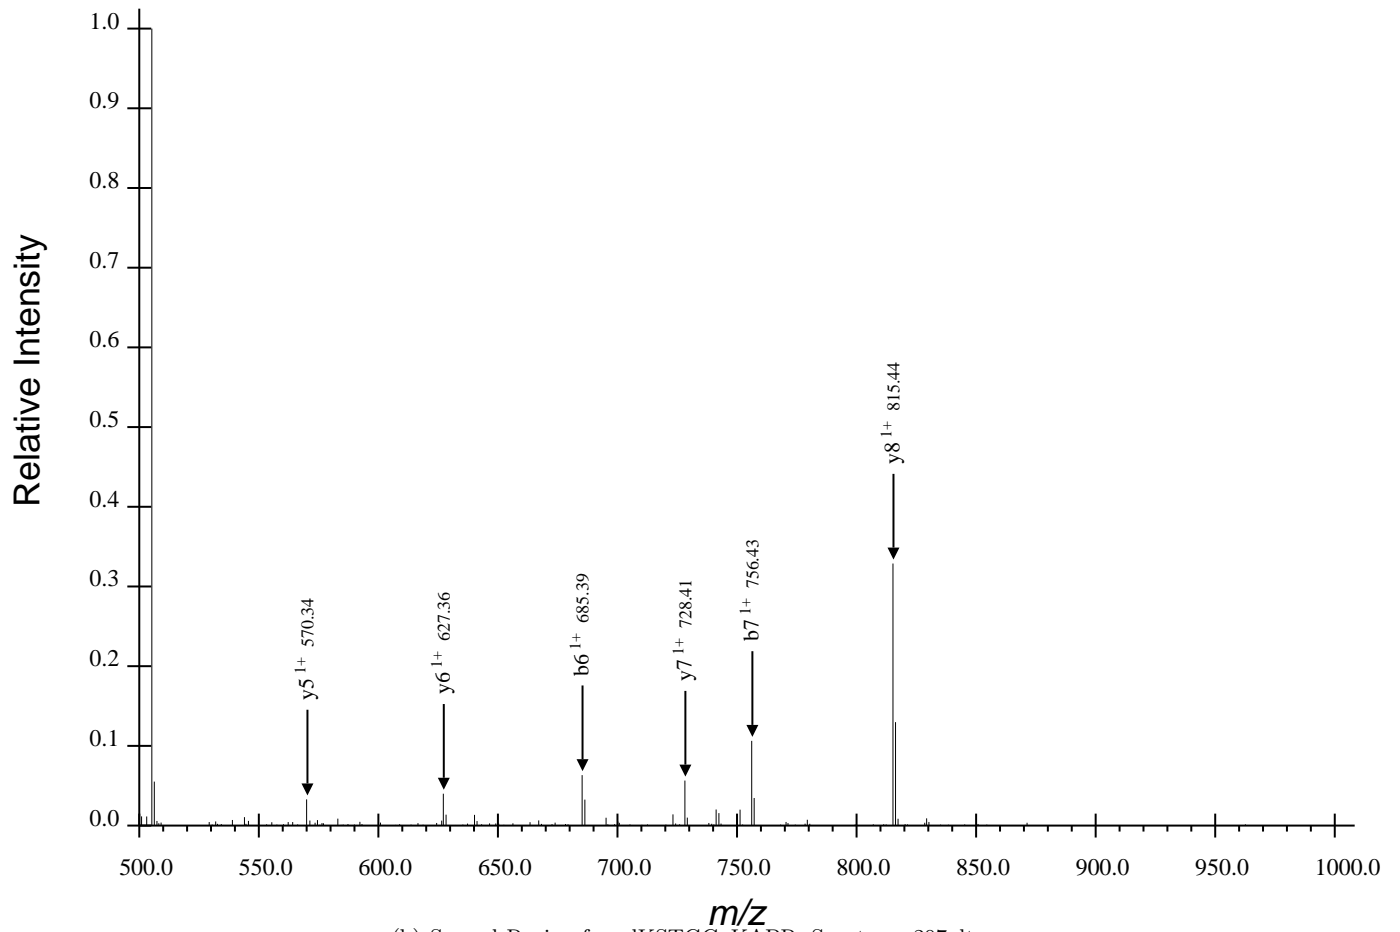

(b) Second Region for rdKSTGGaKAPR, Spectrum 207.dta

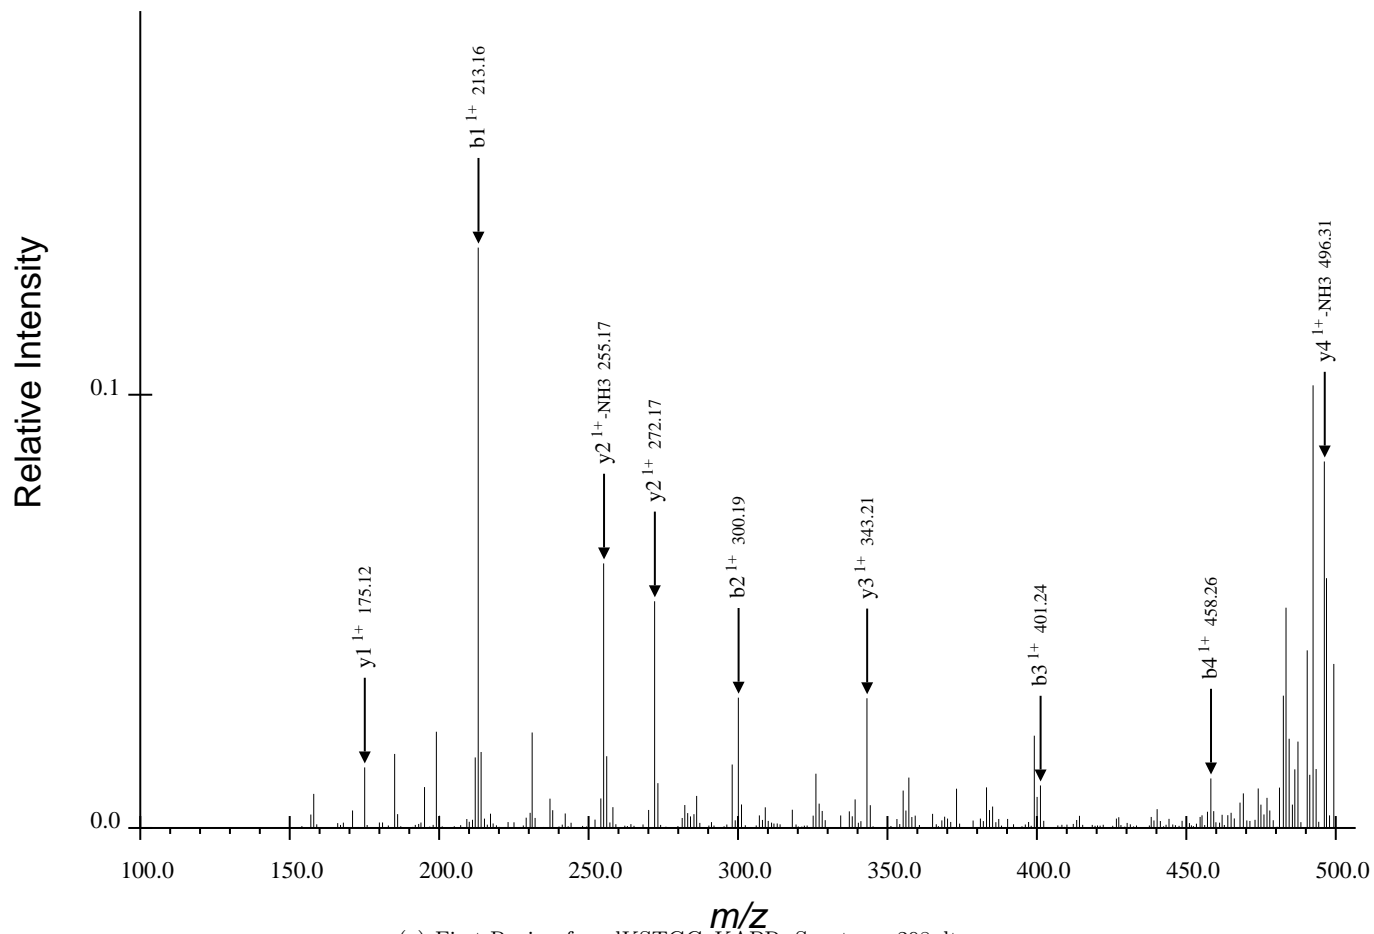

(a) First Region for rdKSTGGaKAPR, Spectrum 208.dta

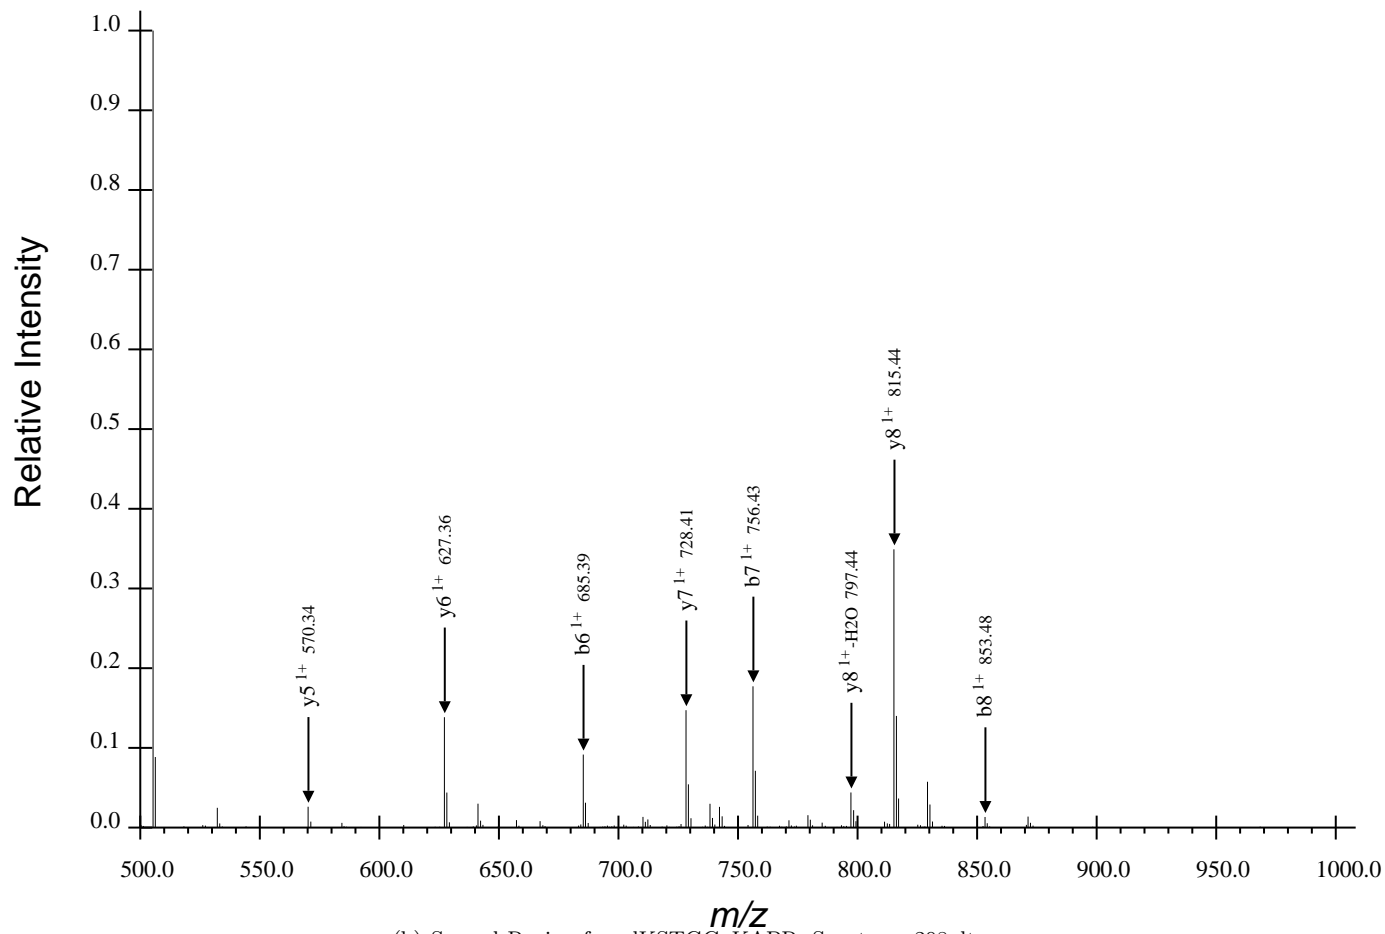

(b) Second Region for rdKSTGGaKAPR, Spectrum 208.dta



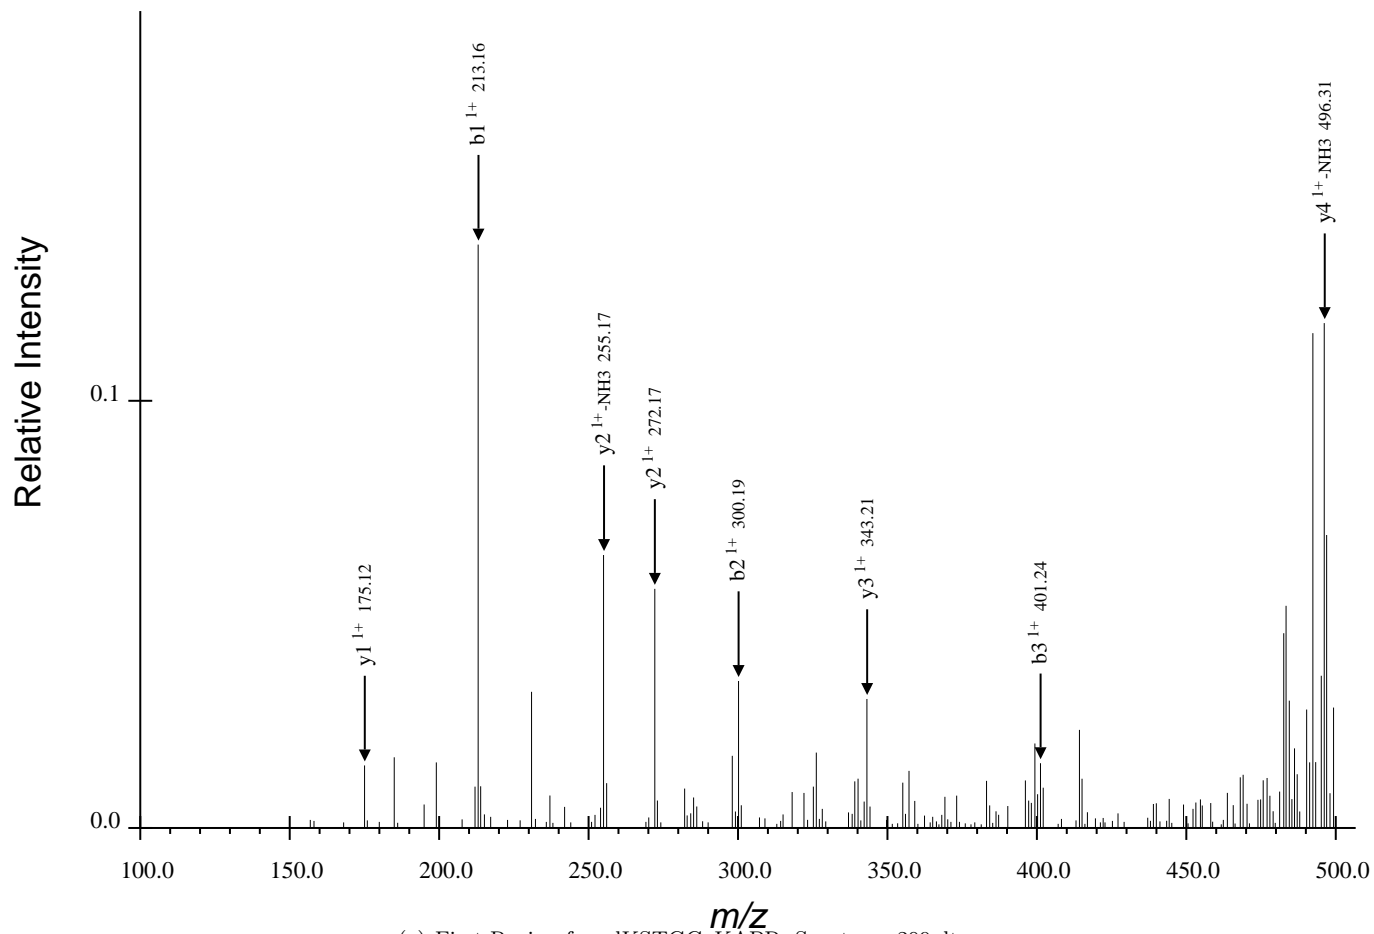

(a) First Region for rdKSTGGaKAPR, Spectrum 209.dta

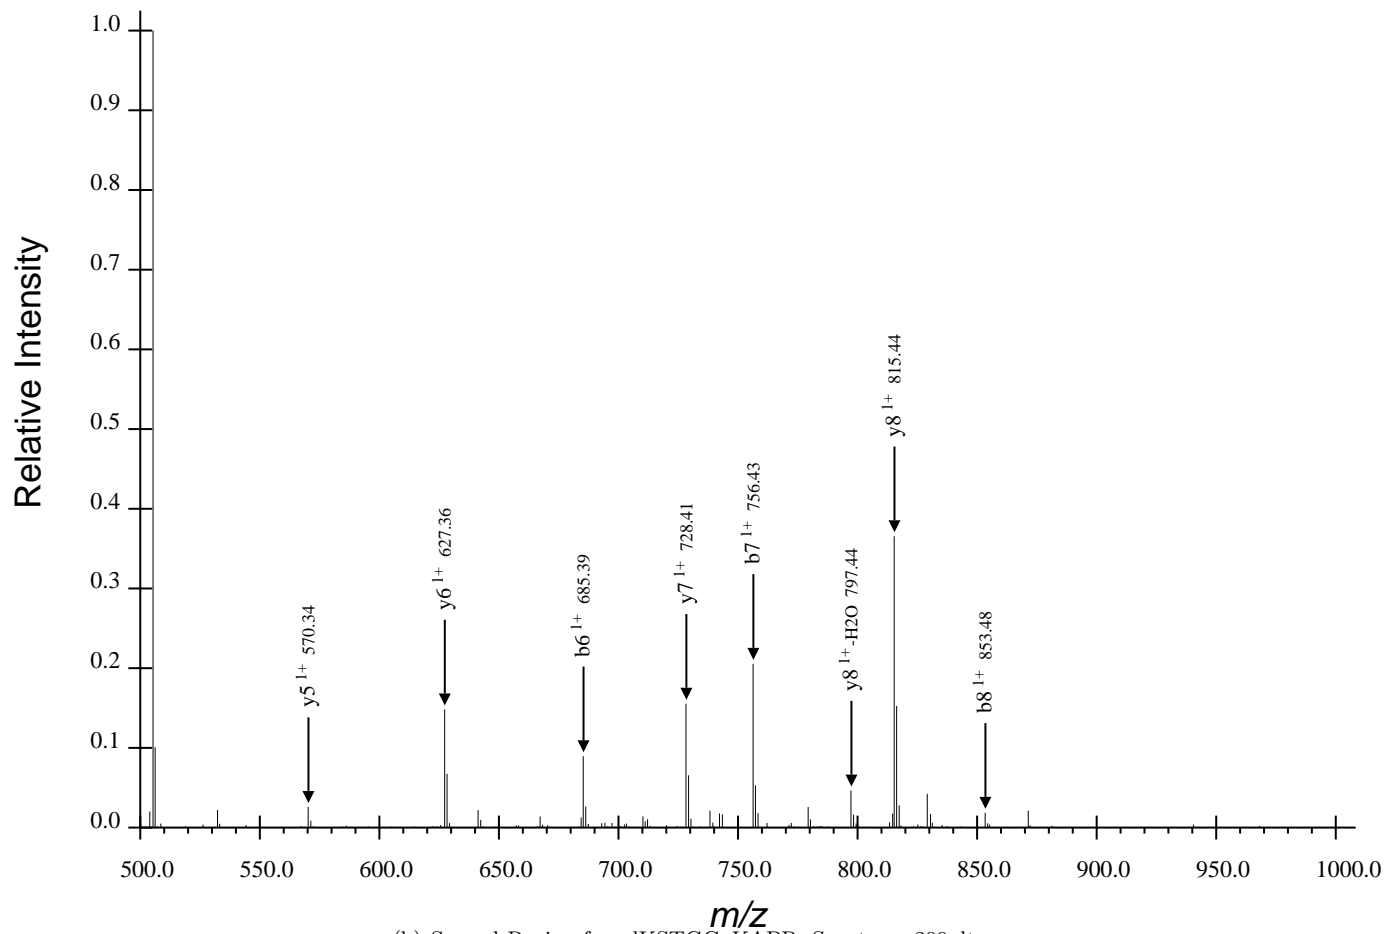

(b) Second Region for rdKSTGGaKAPR, Spectrum 209.dta

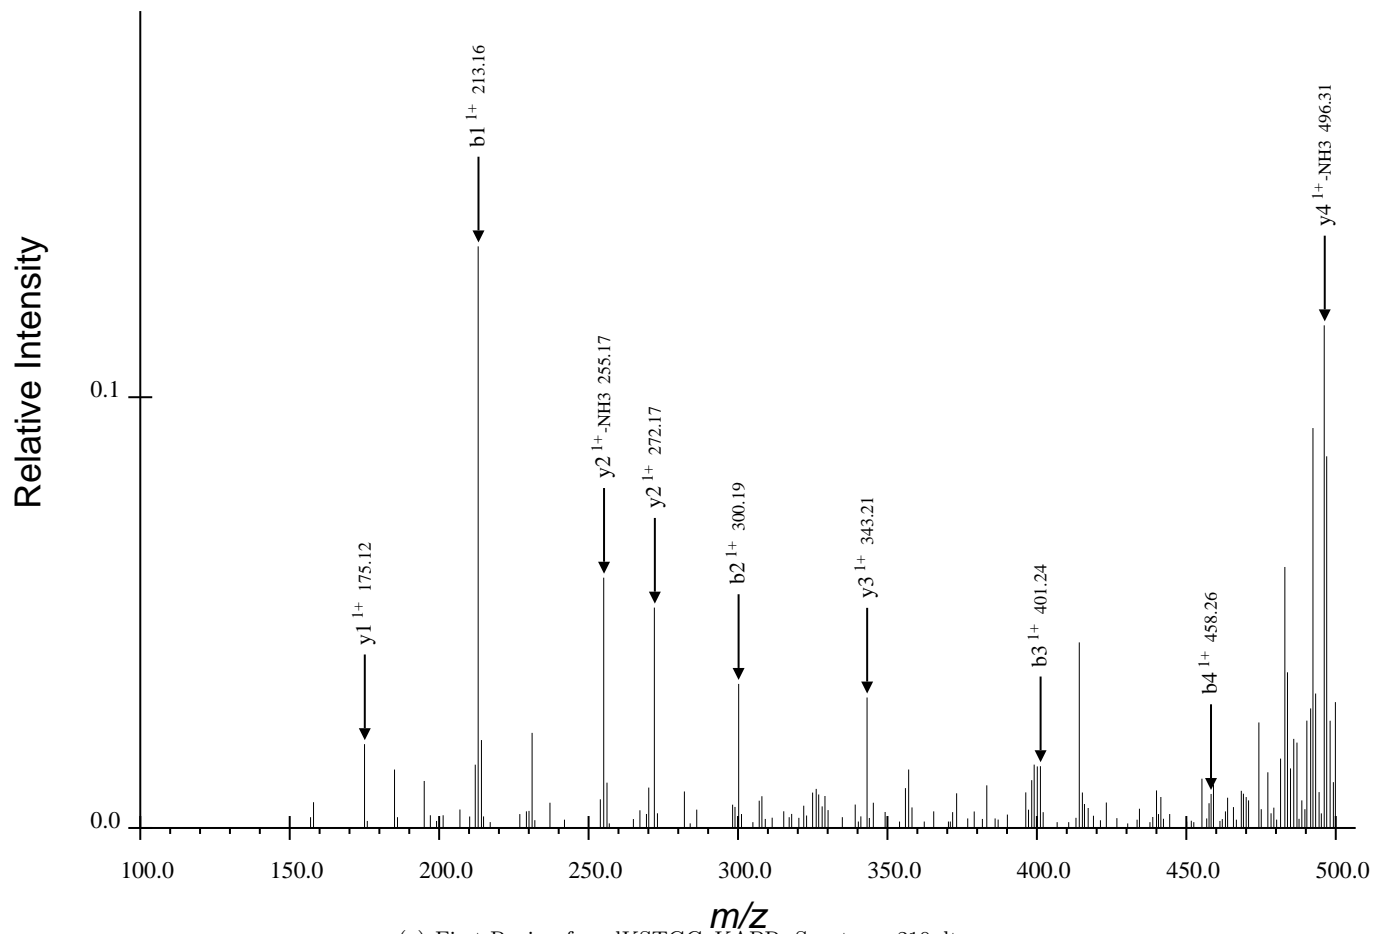

(a) First Region for rdKSTGGaKAPR, Spectrum 210.dta

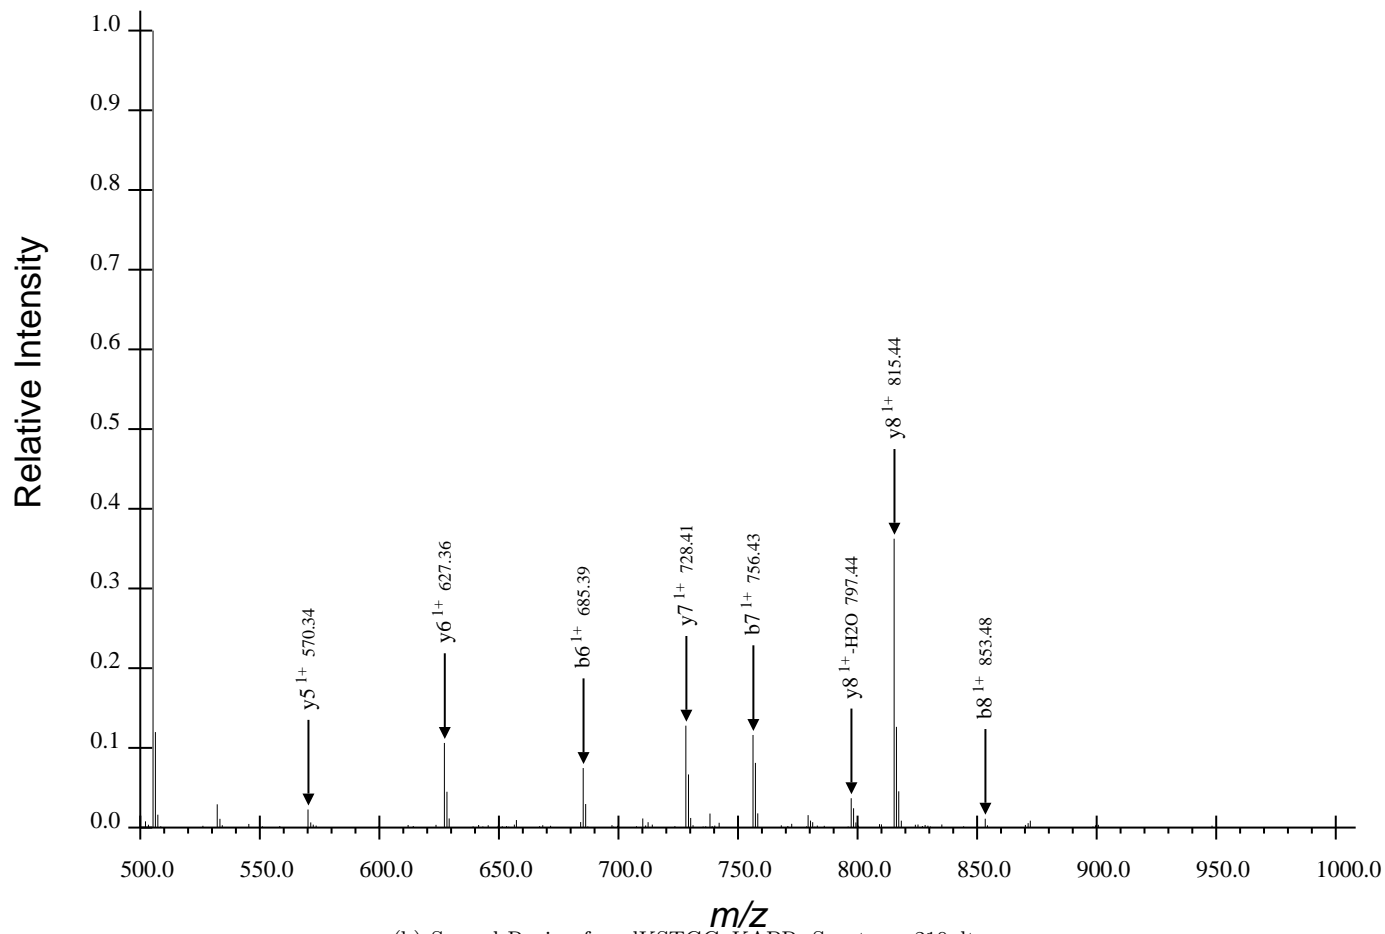

(b) Second Region for rdKSTGGaKAPR, Spectrum 210.dta

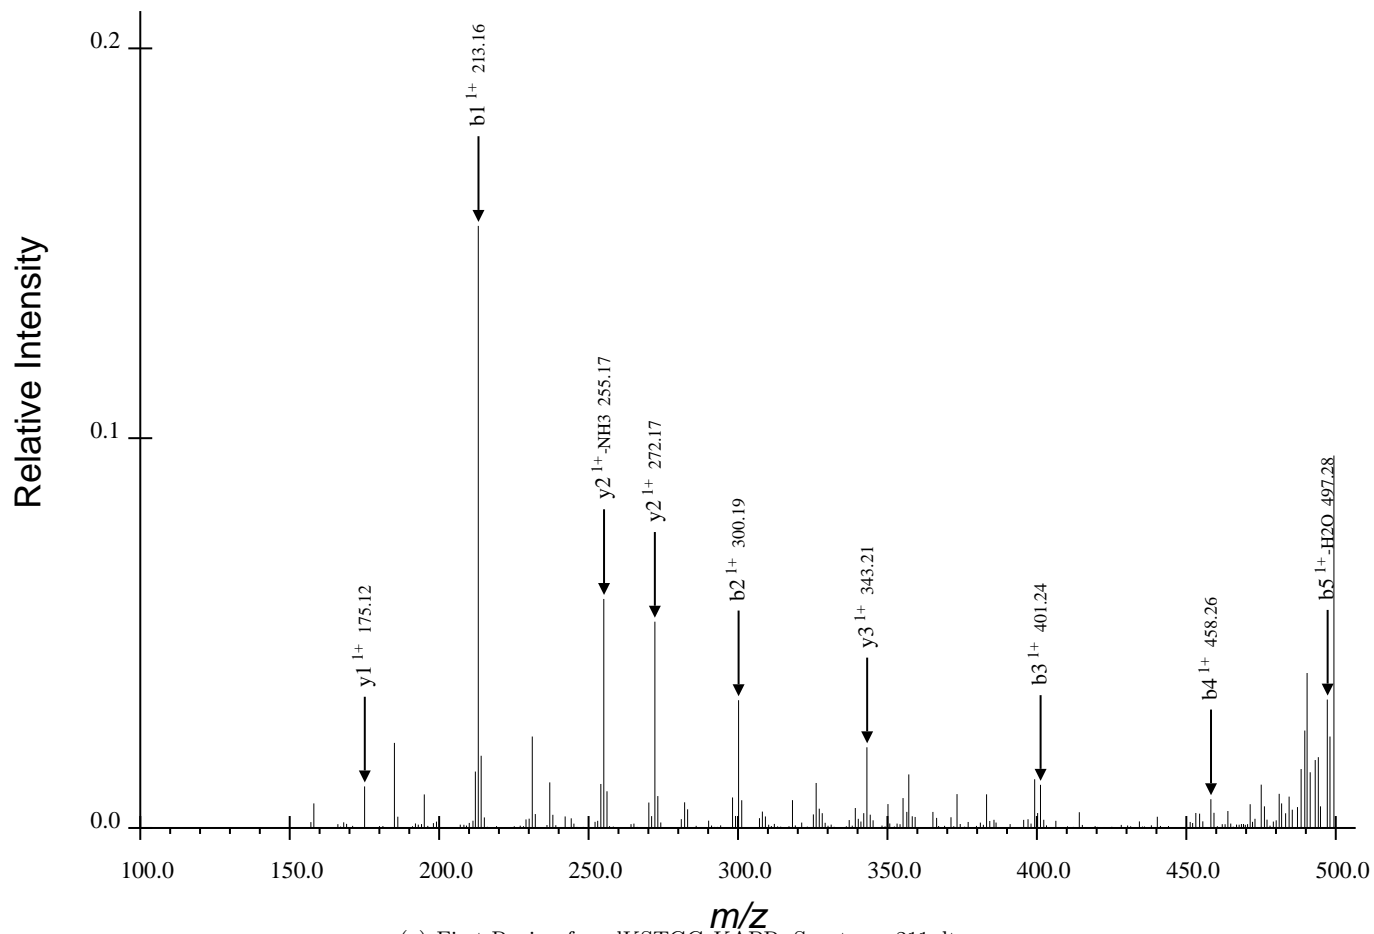

(a) First Region for rdKSTGGrKAPR, Spectrum 211.dta

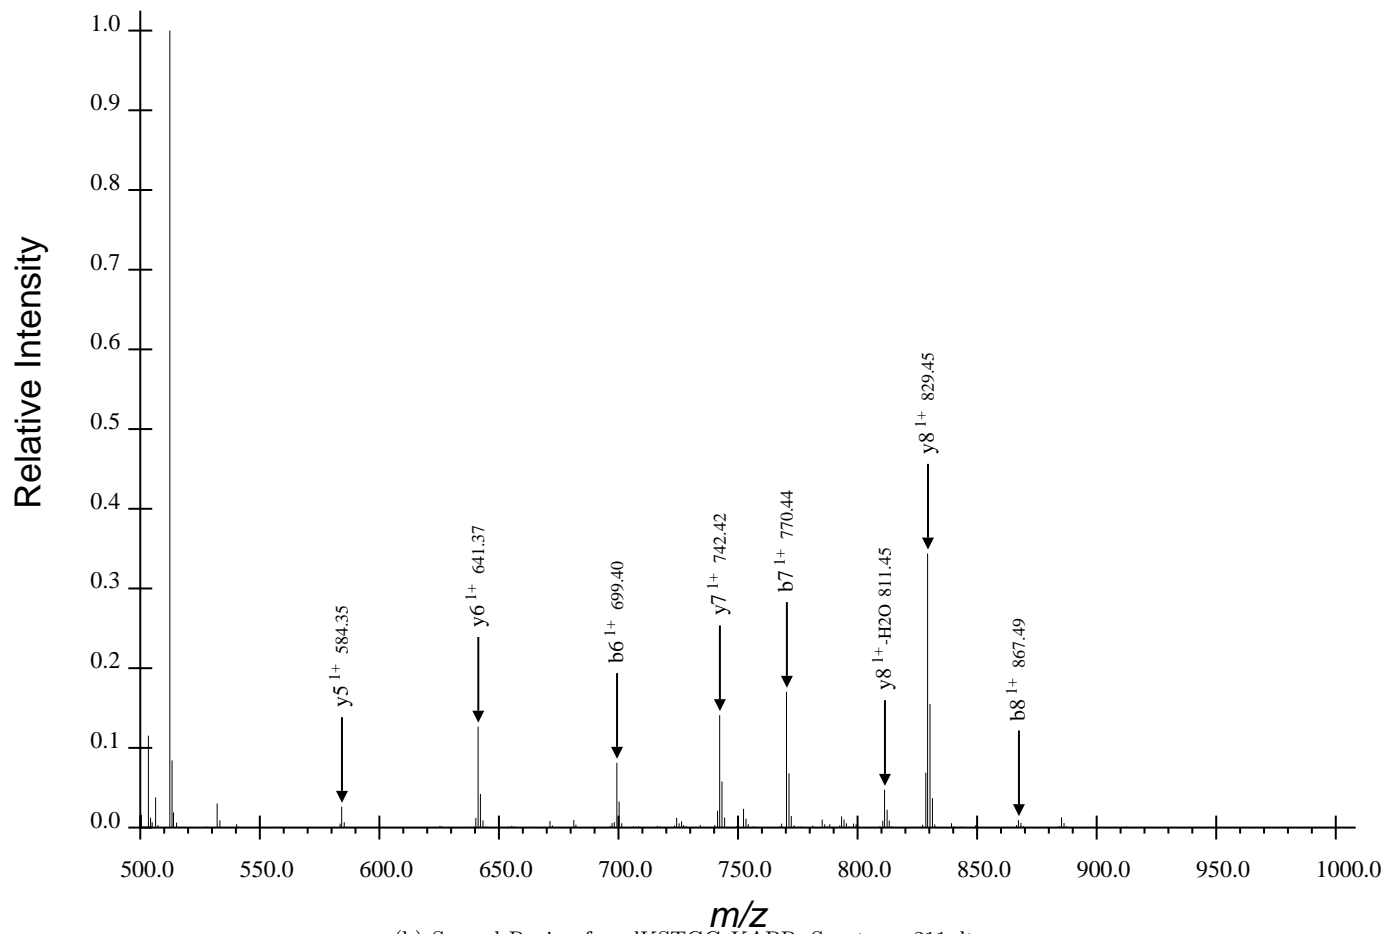

(b) Second Region for rdKSTGGrKAPR, Spectrum 211.dta

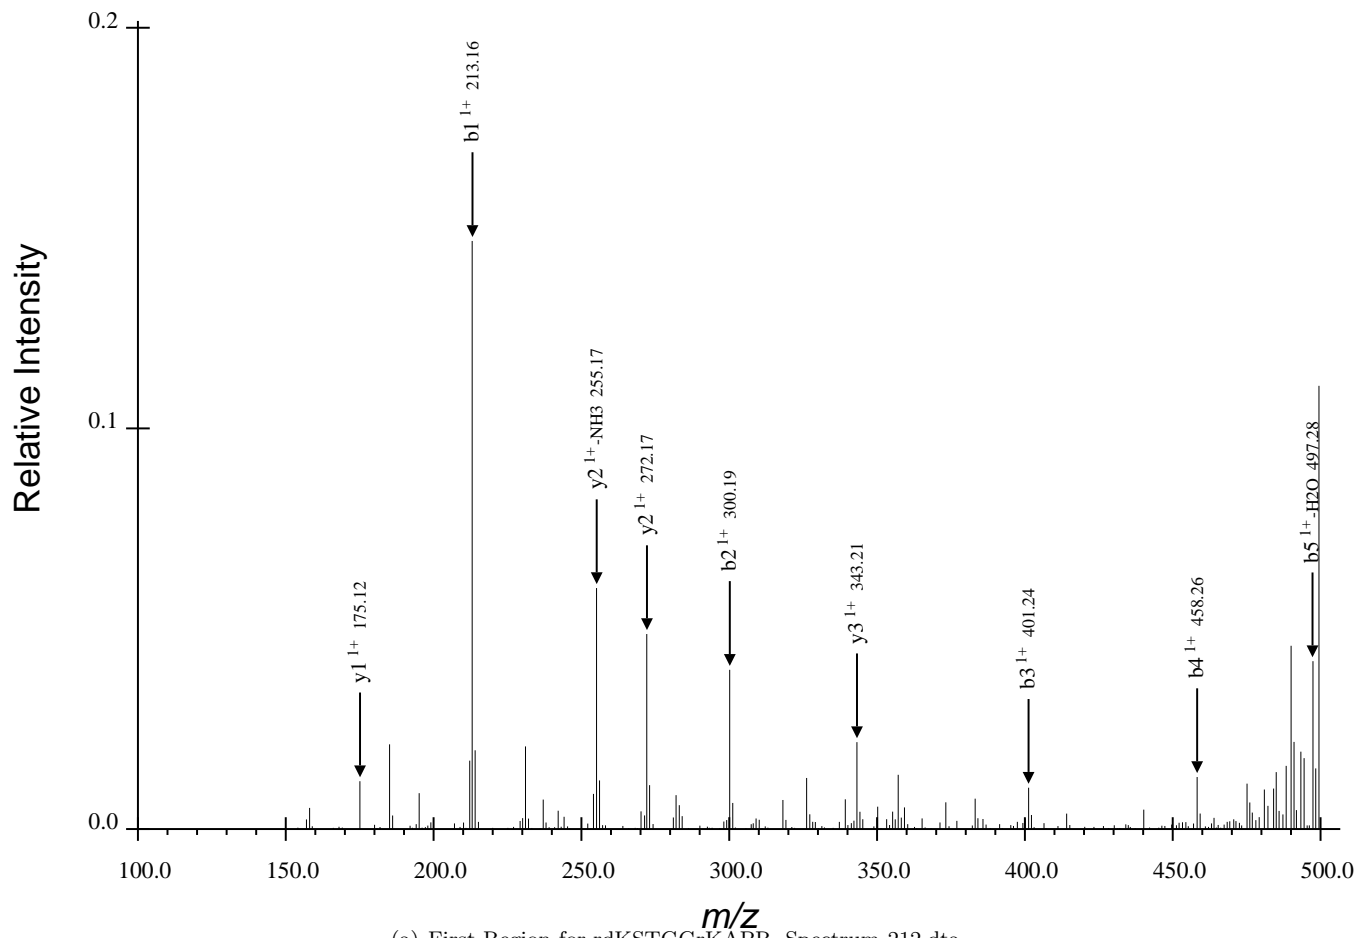

(a) First Region for rdKSTGGrKAPR, Spectrum 212.dta

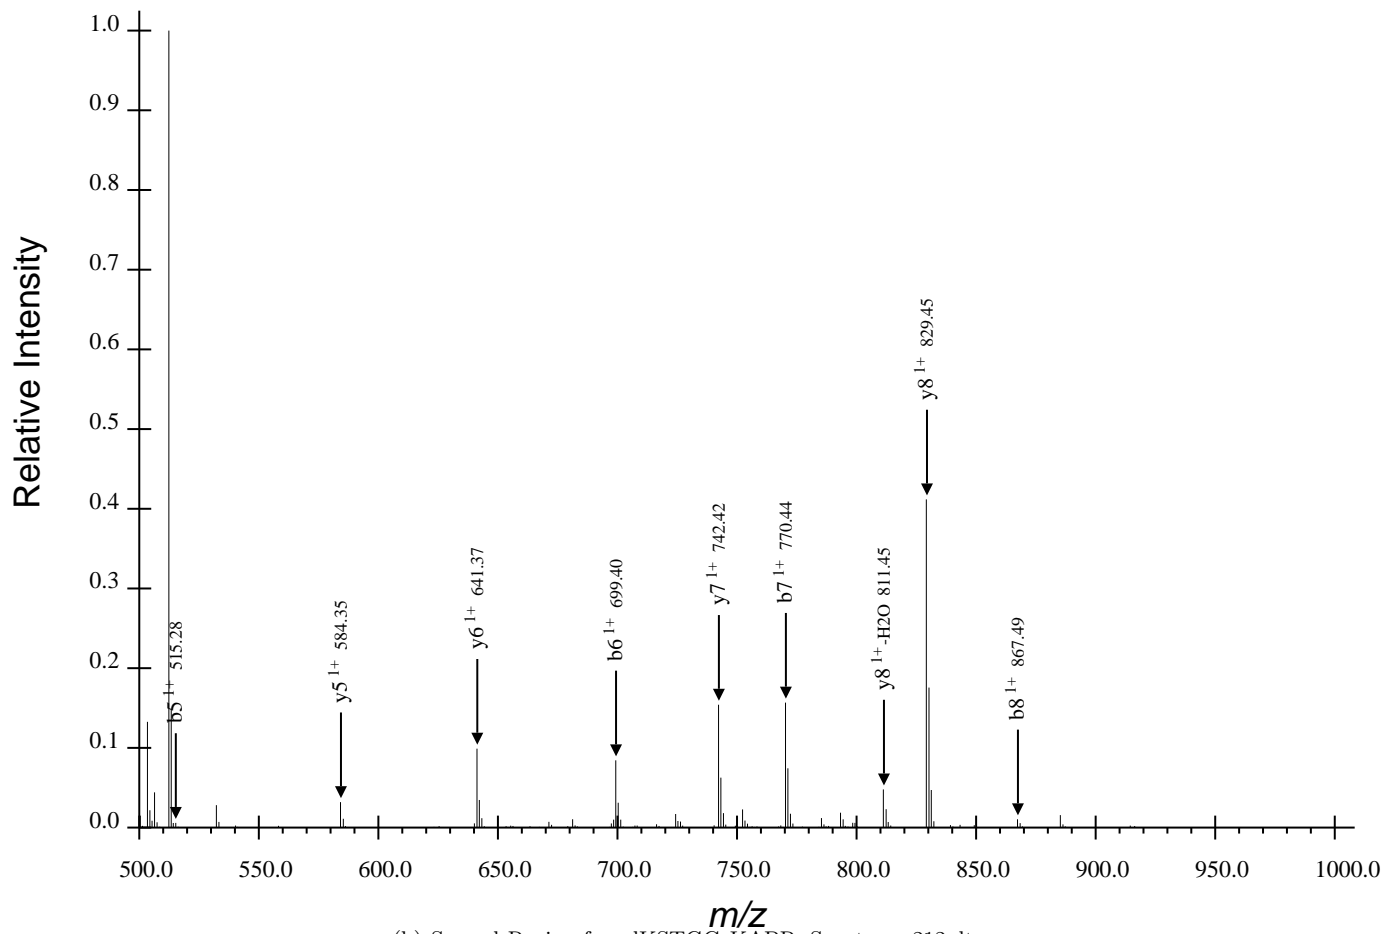

(b) Second Region for rdKSTGGrKAPR, Spectrum 212.dta

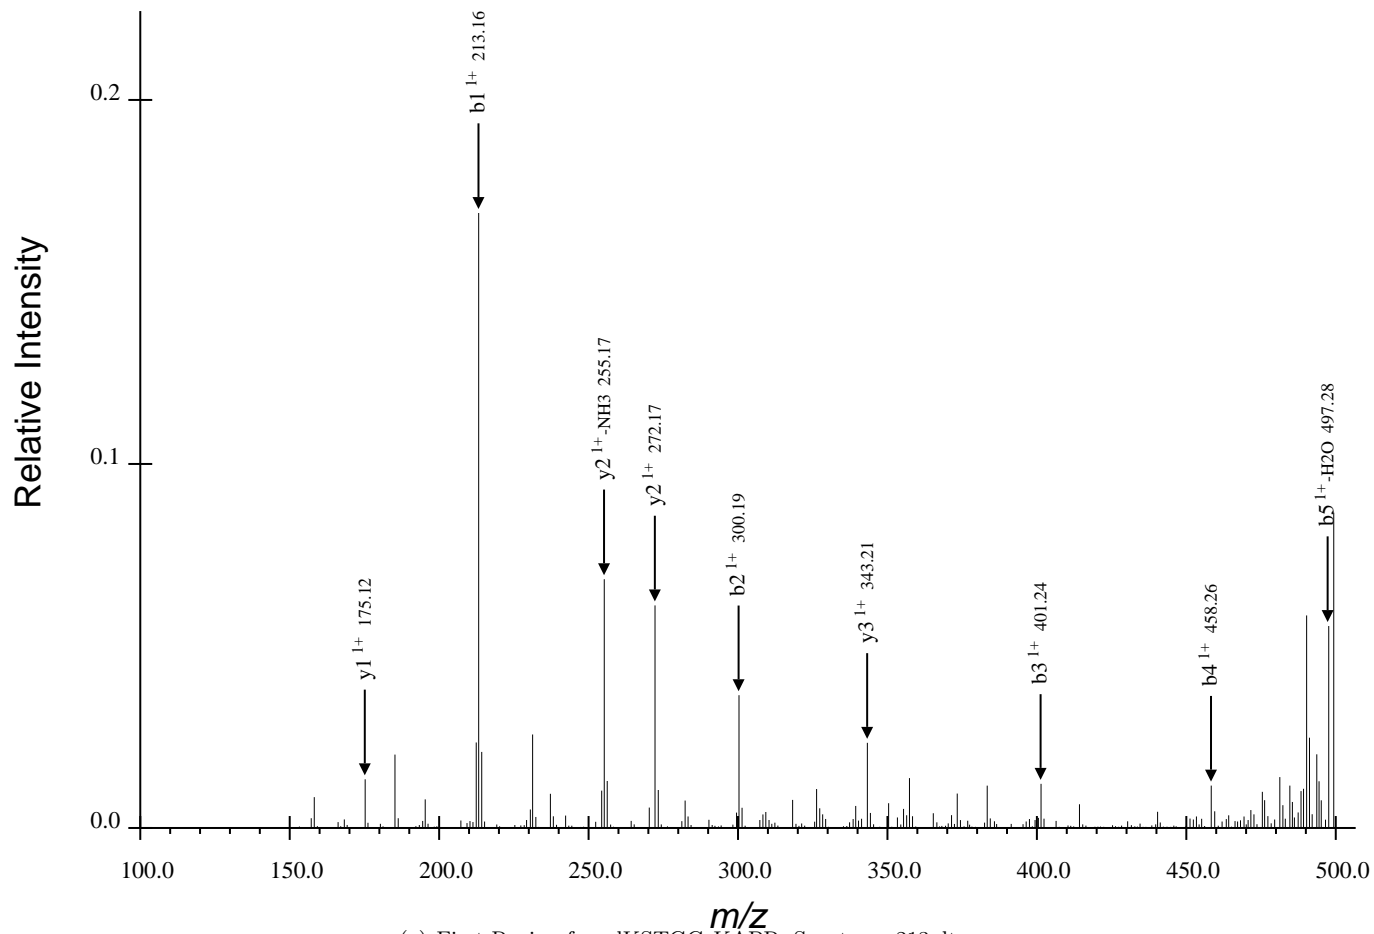

(a) First Region for rdKSTGGrKAPR, Spectrum 213.dta

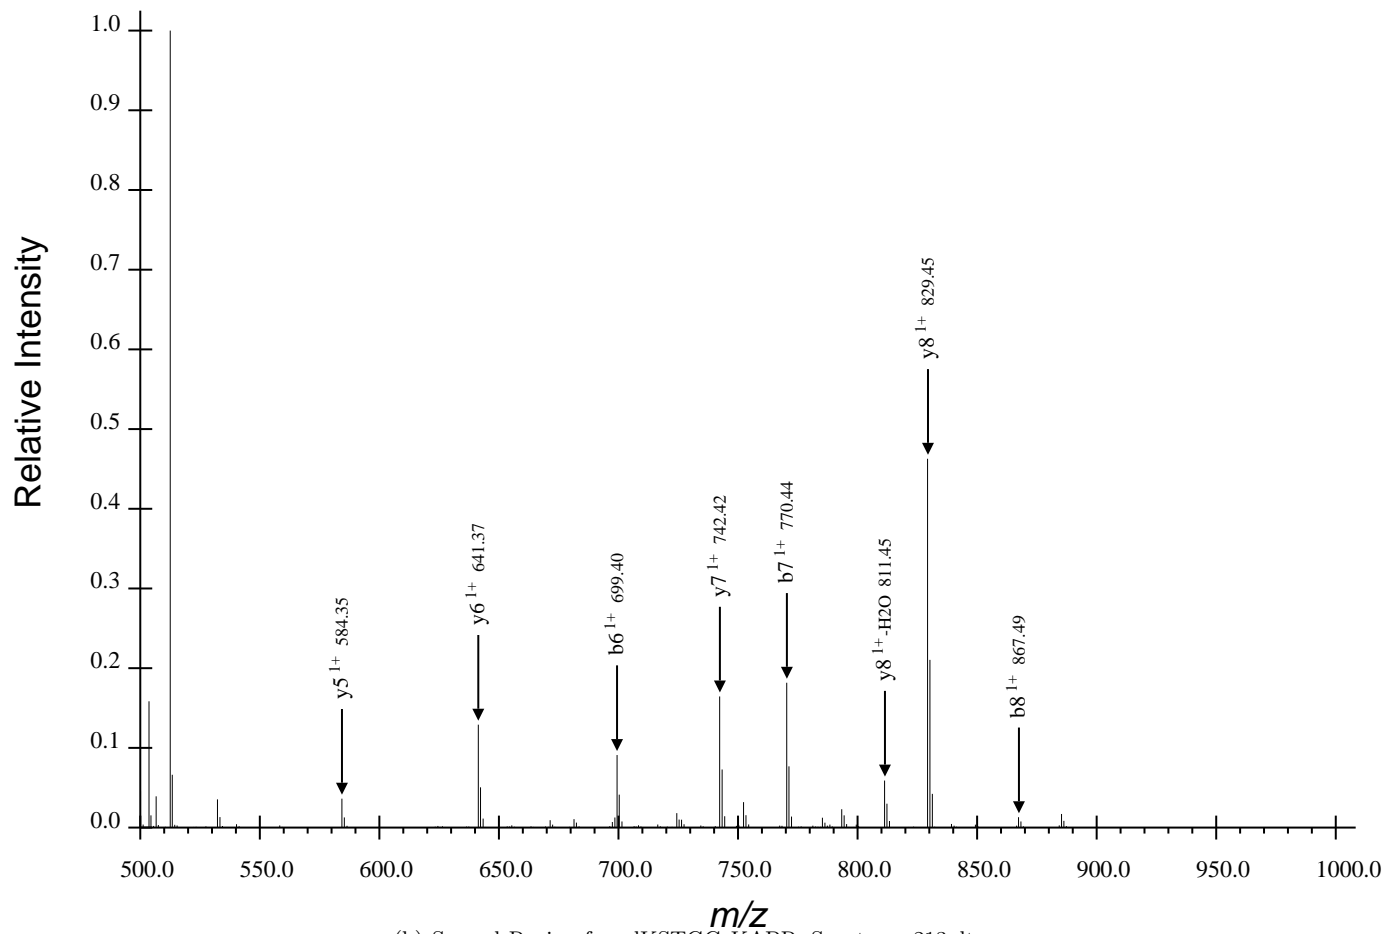

(b) Second Region for rdKSTGGrKAPR, Spectrum 213.dta

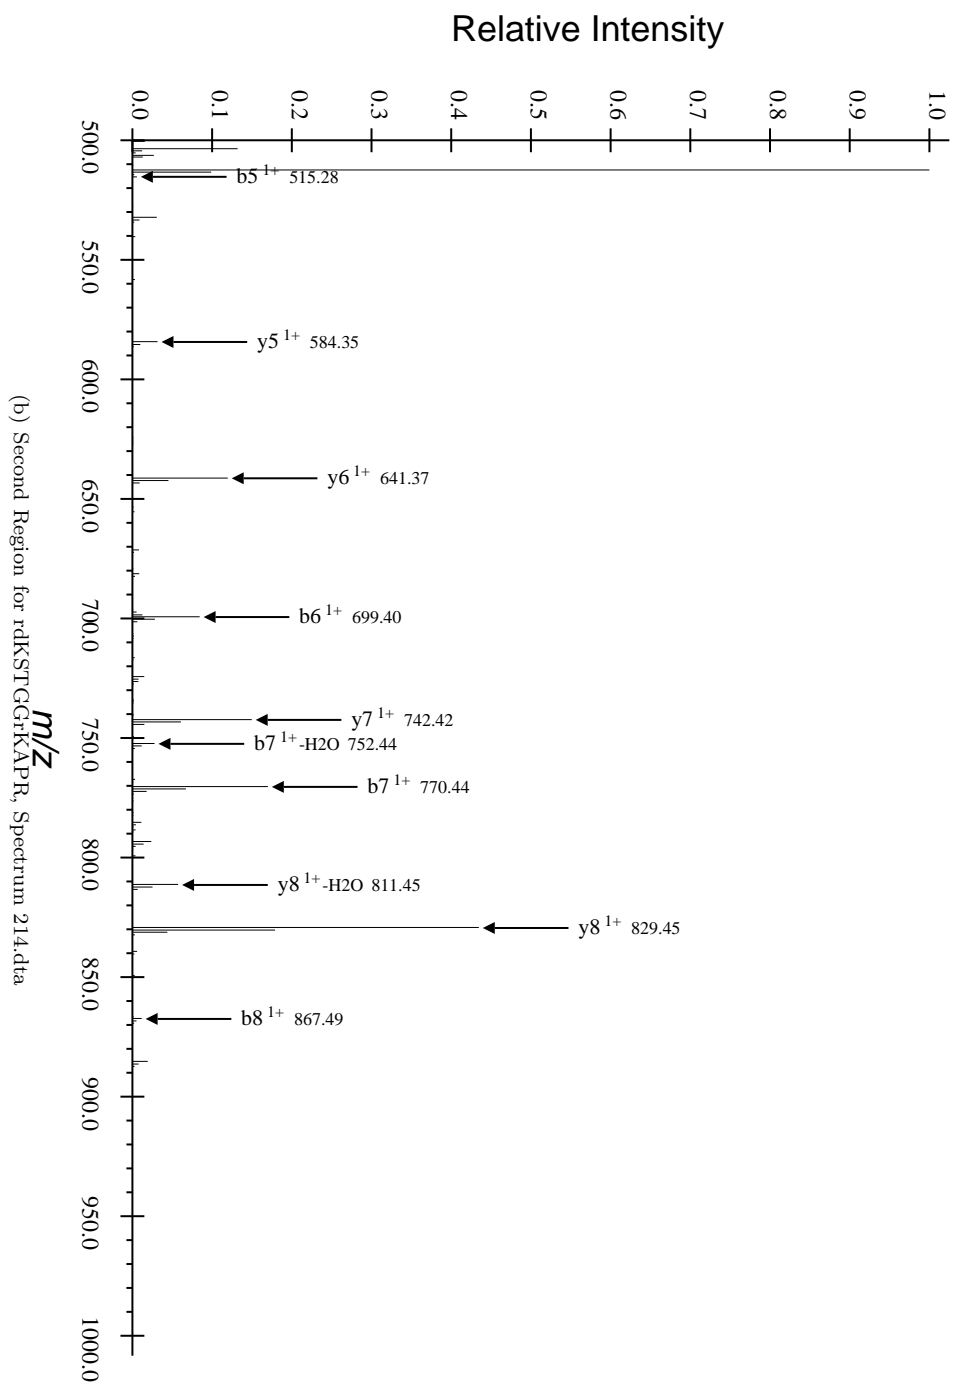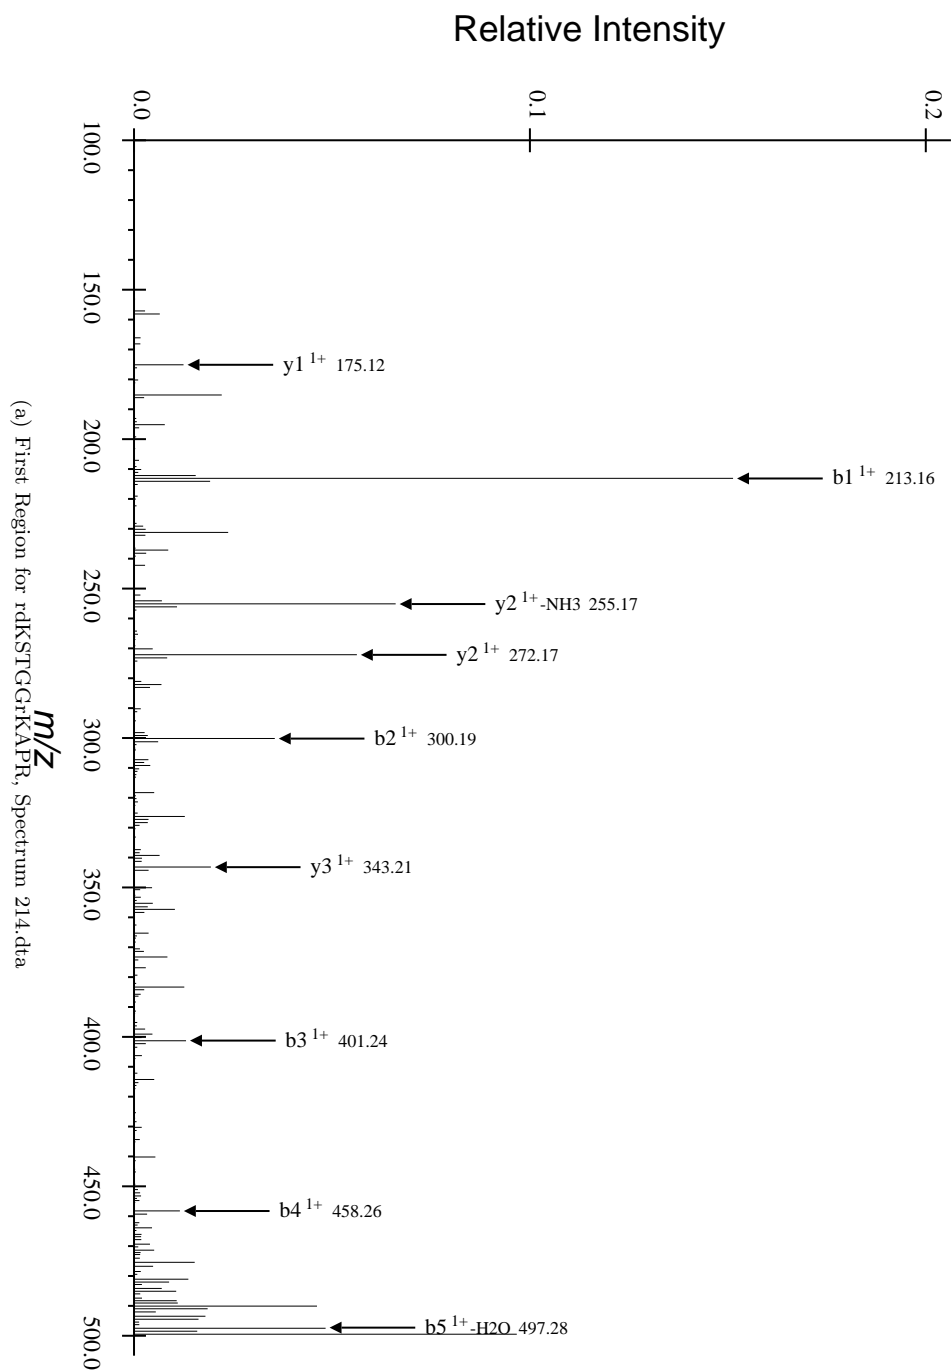

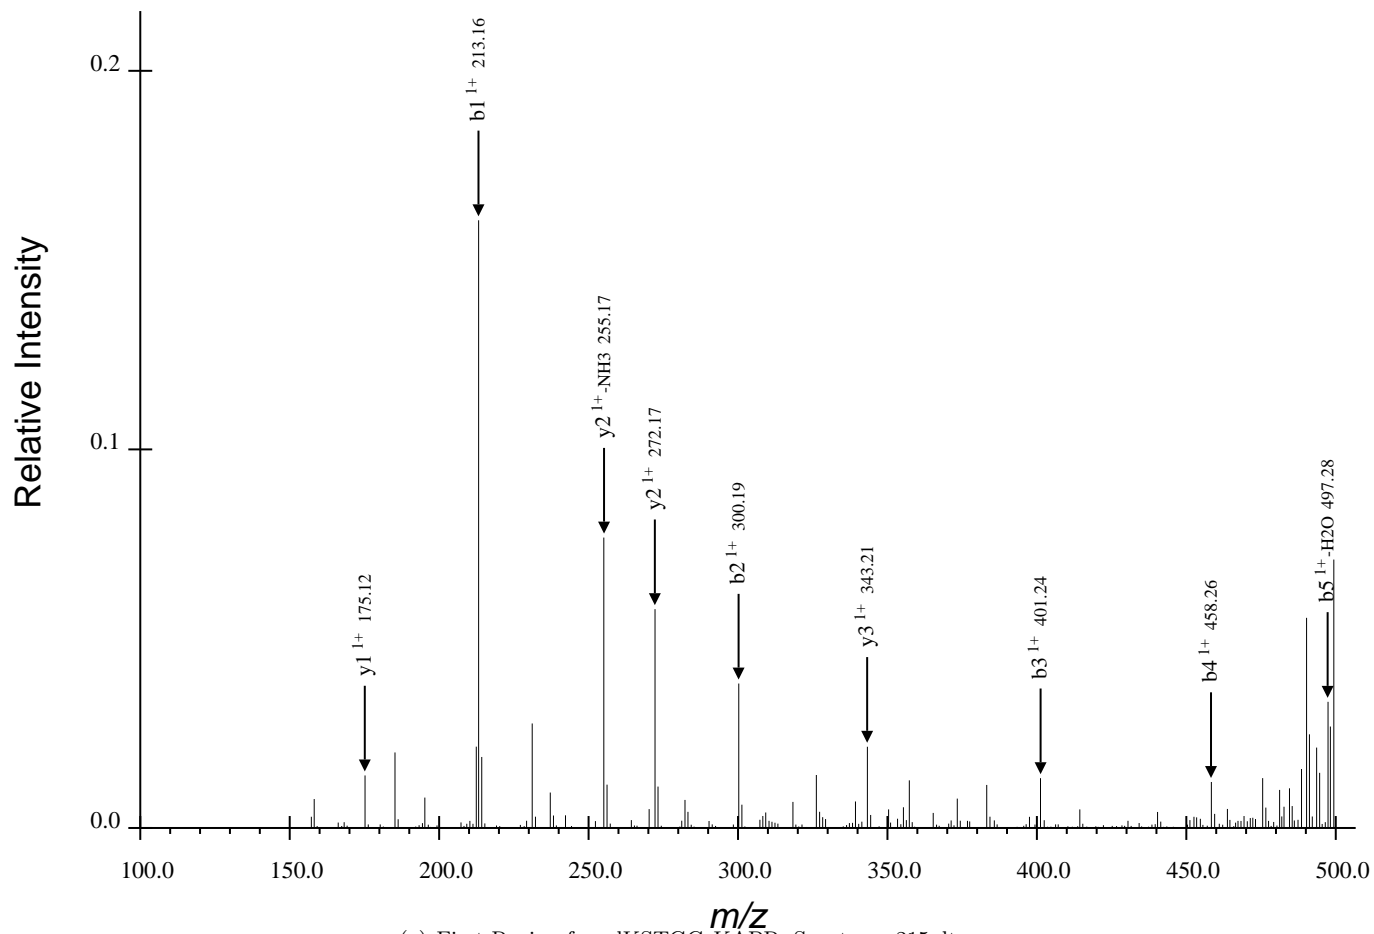

(a) First Region for rdKSTGGrKAPR, Spectrum 215.dta

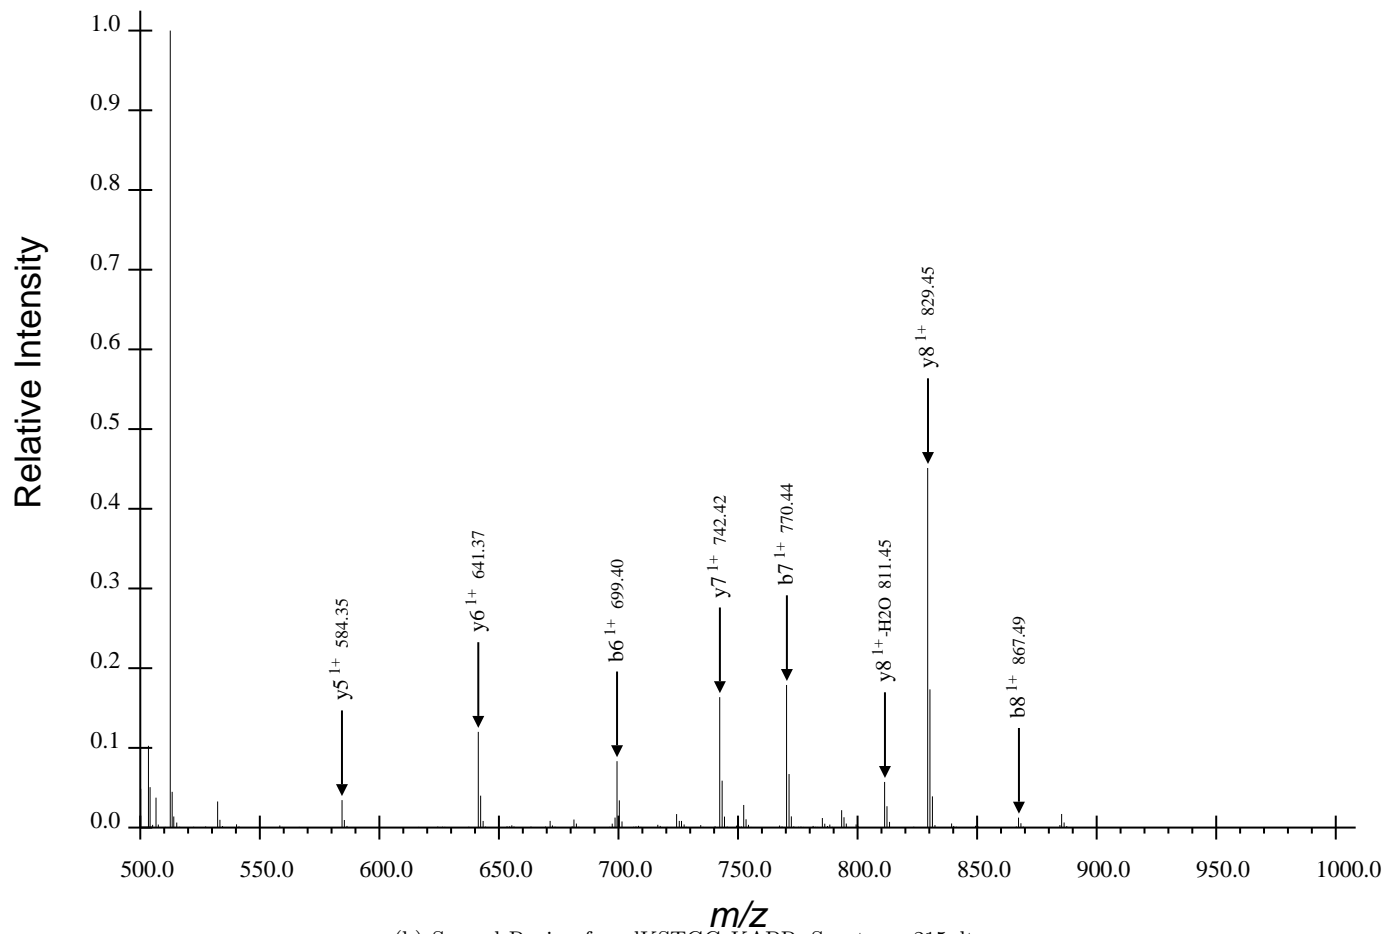

(b) Second Region for rdKSTGGrKAPR, Spectrum 215.dta

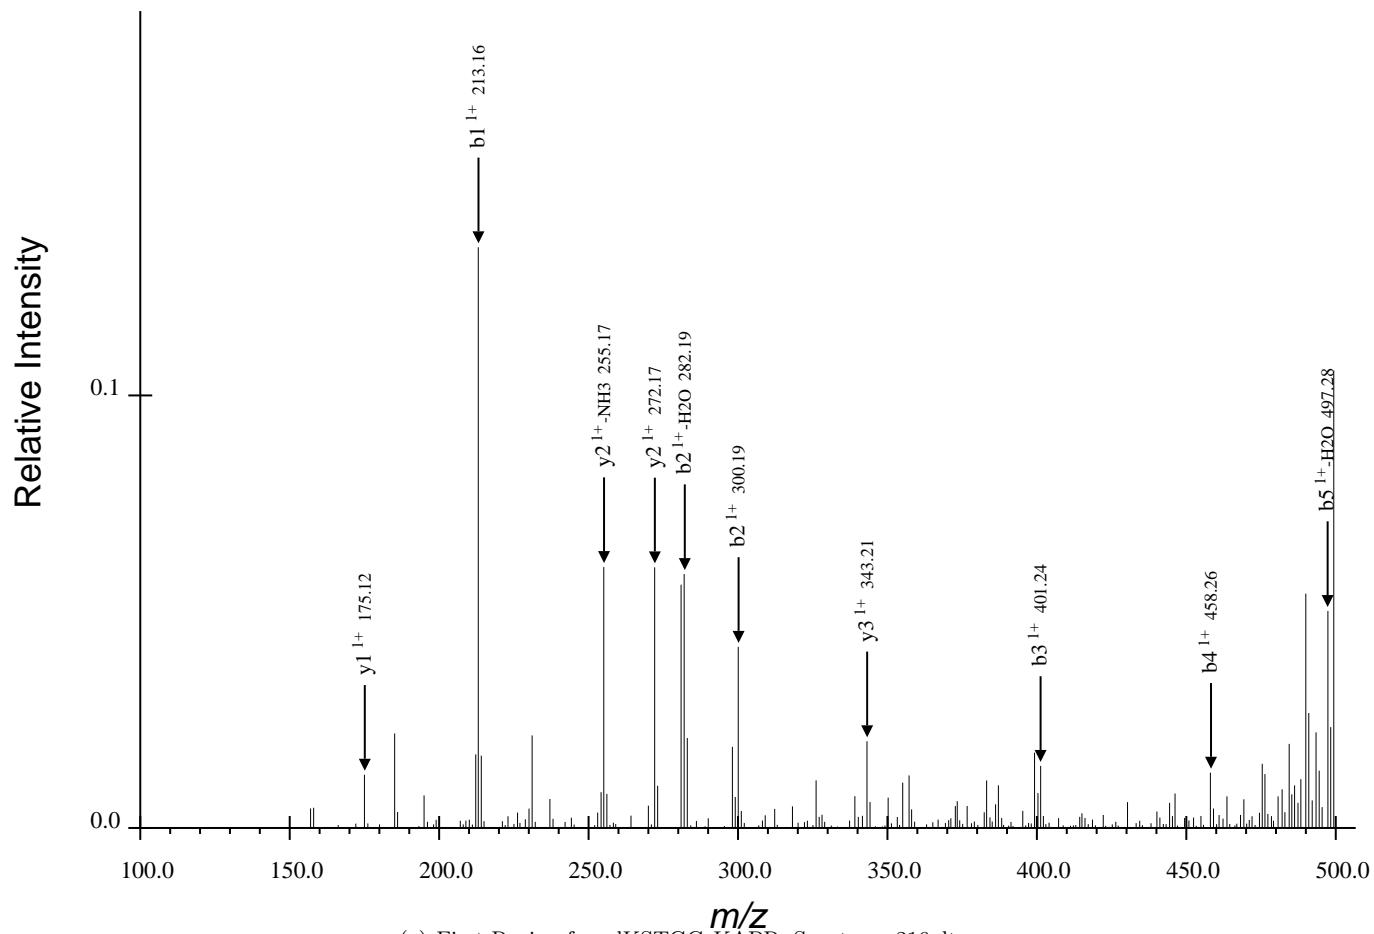

(a) First Region for rdKSTGGrKAPR, Spectrum 216.dta

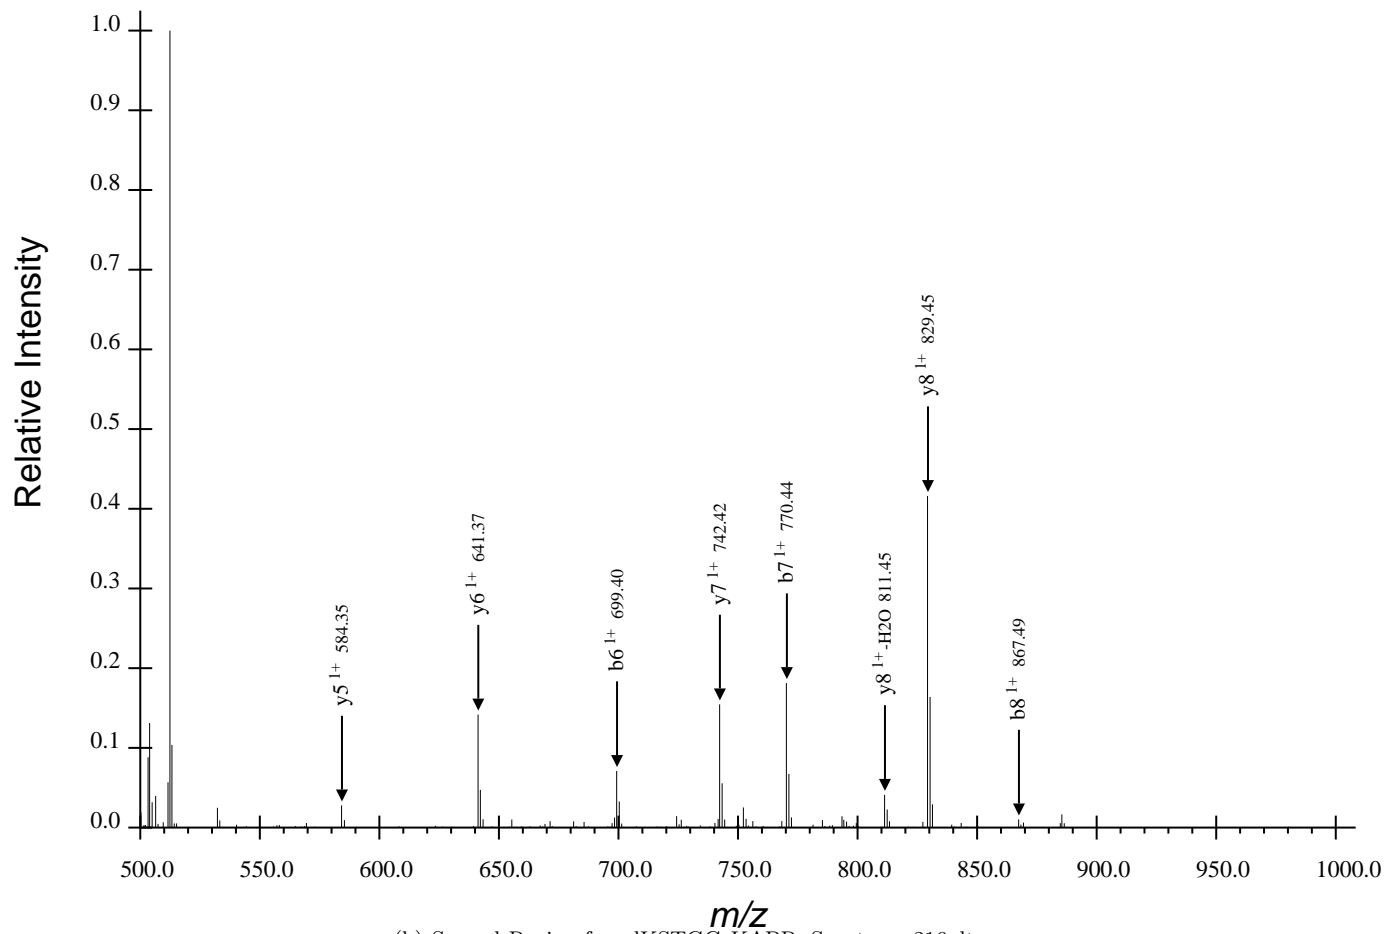

(b) Second Region for rdKSTGGrKAPR, Spectrum 216.dta



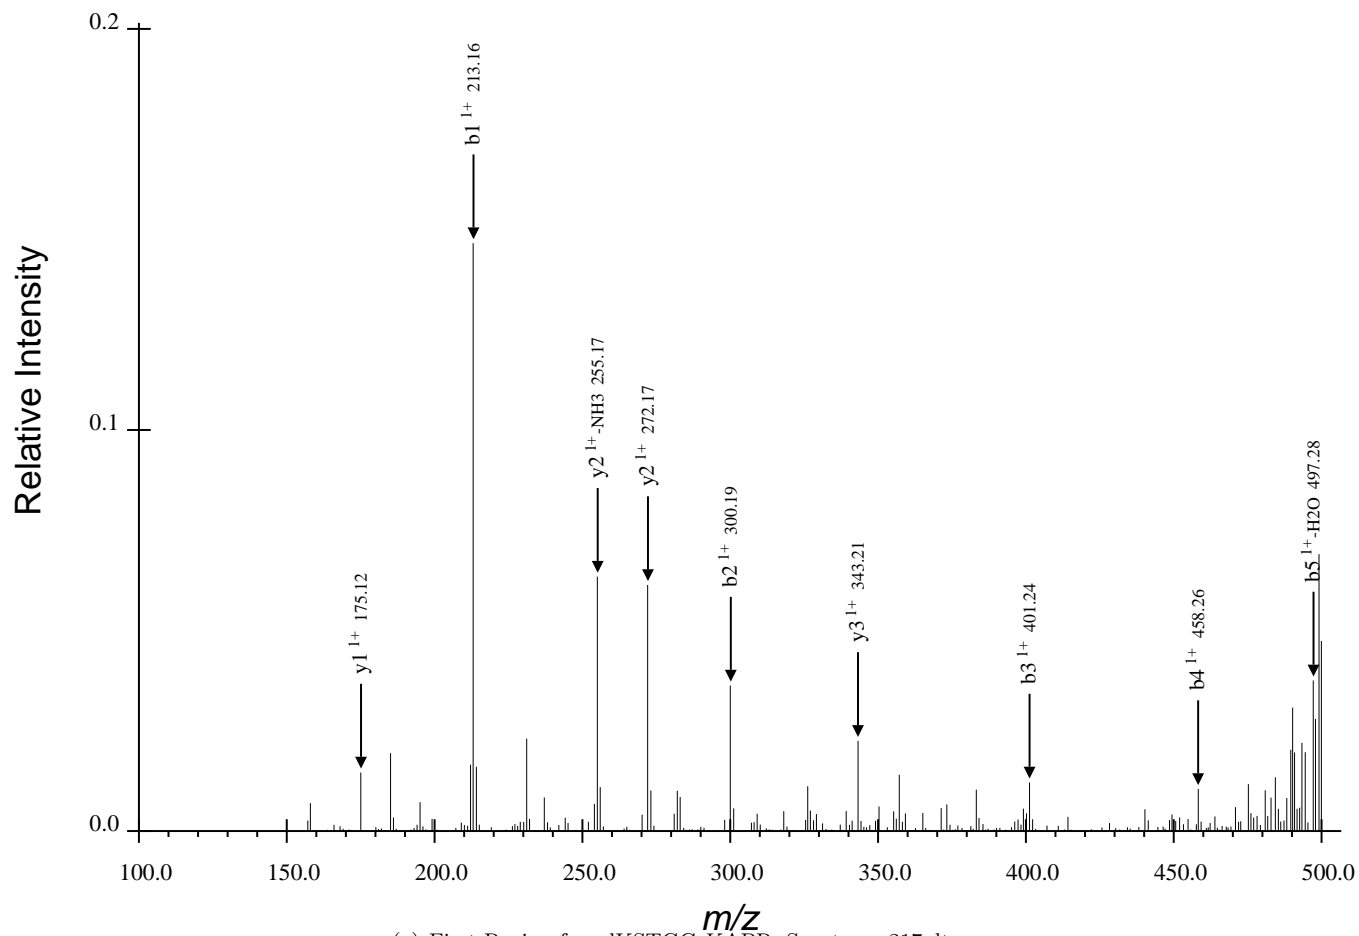

(a) First Region for rdKSTGGrKAPR, Spectrum 217.dta

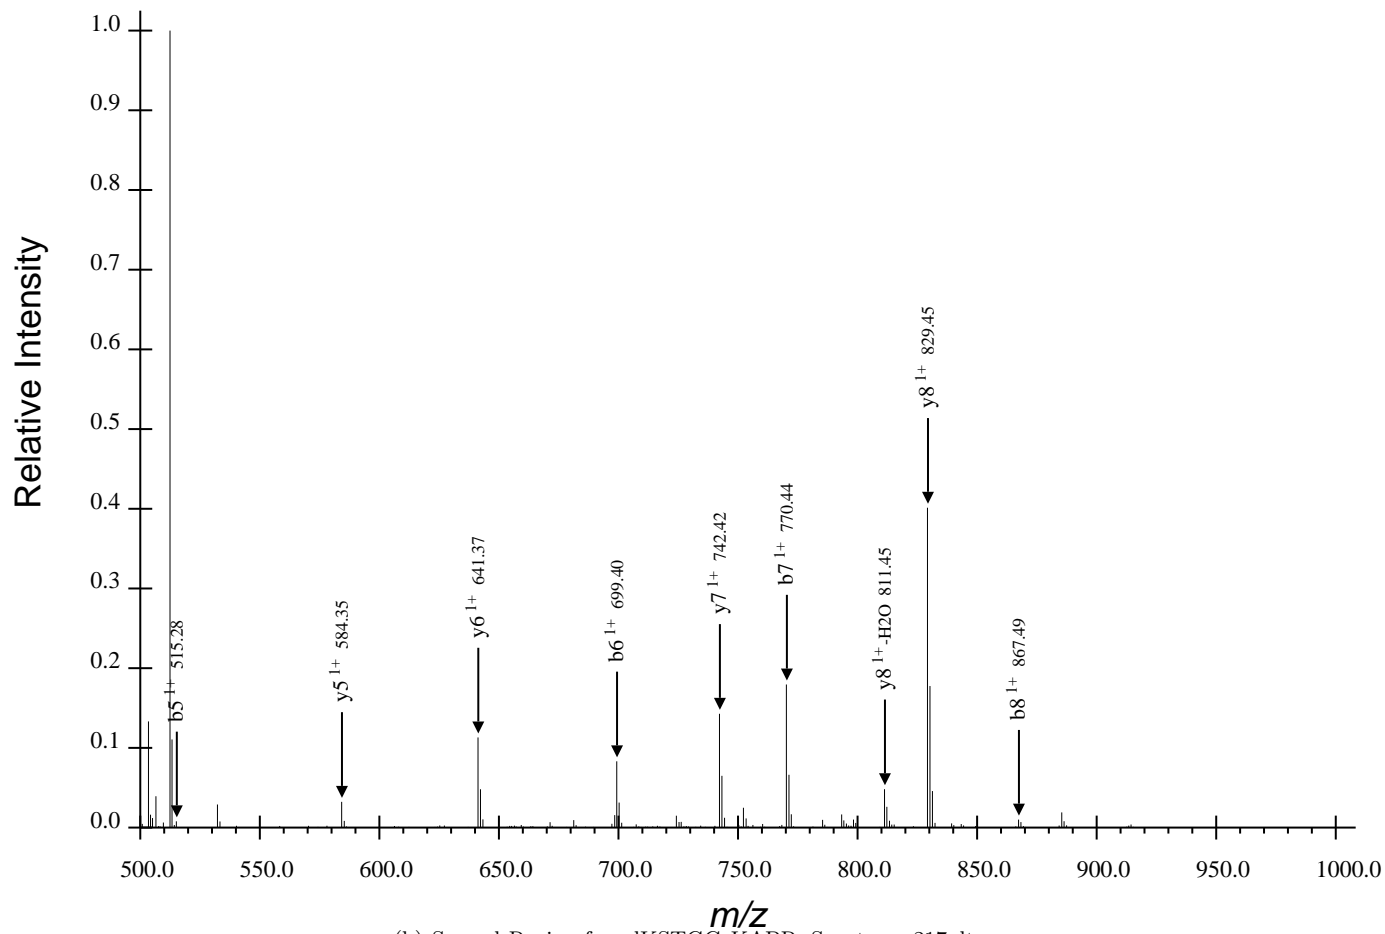

(b) Second Region for rdKSTGGrKAPR, Spectrum 217.dta

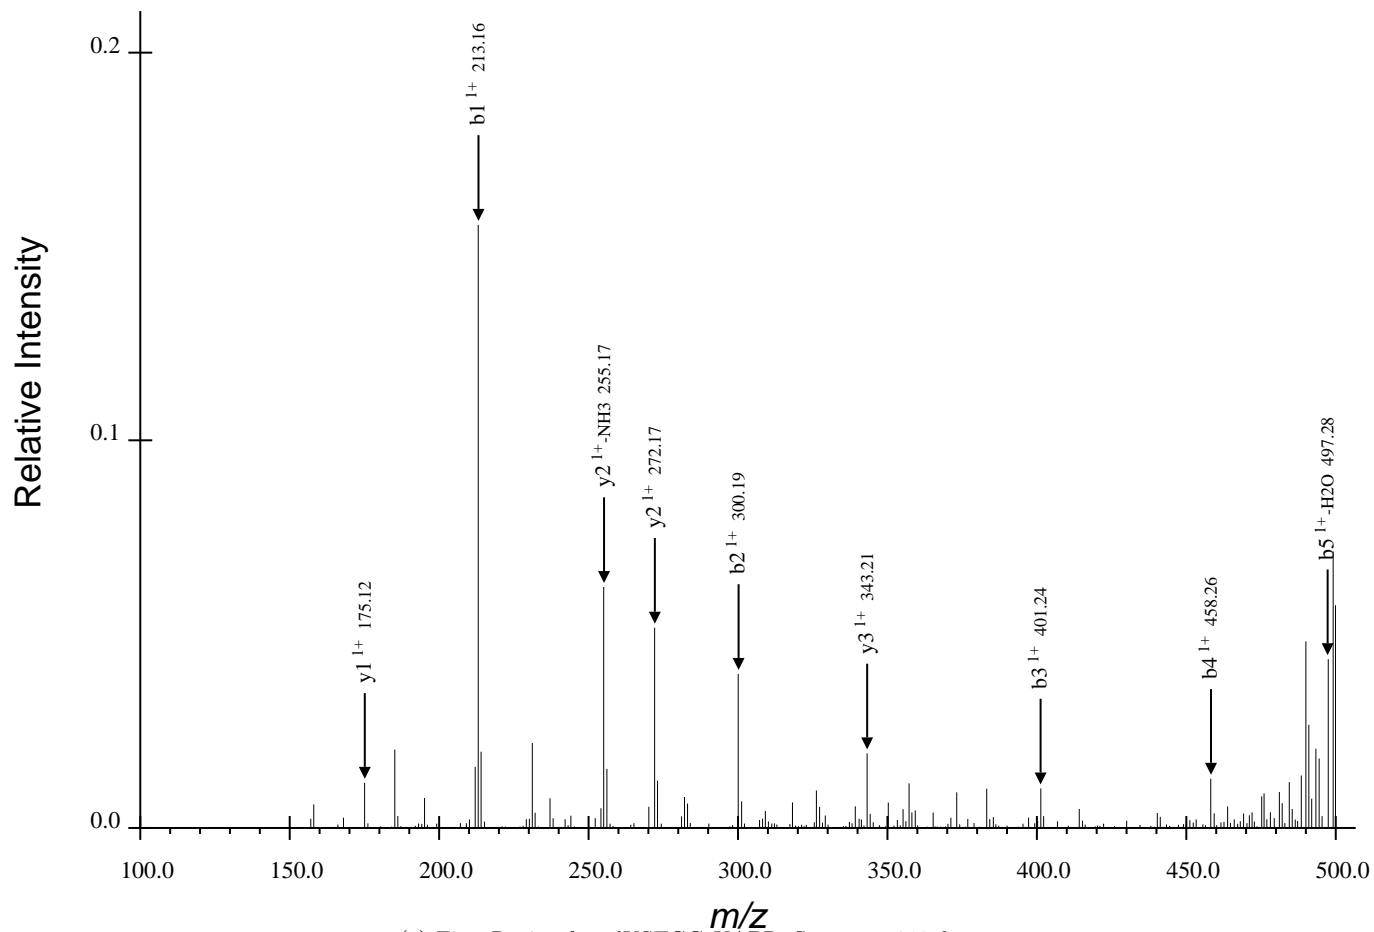

(a) First Region for rdKSTGGrKAPR, Spectrum 218.dta

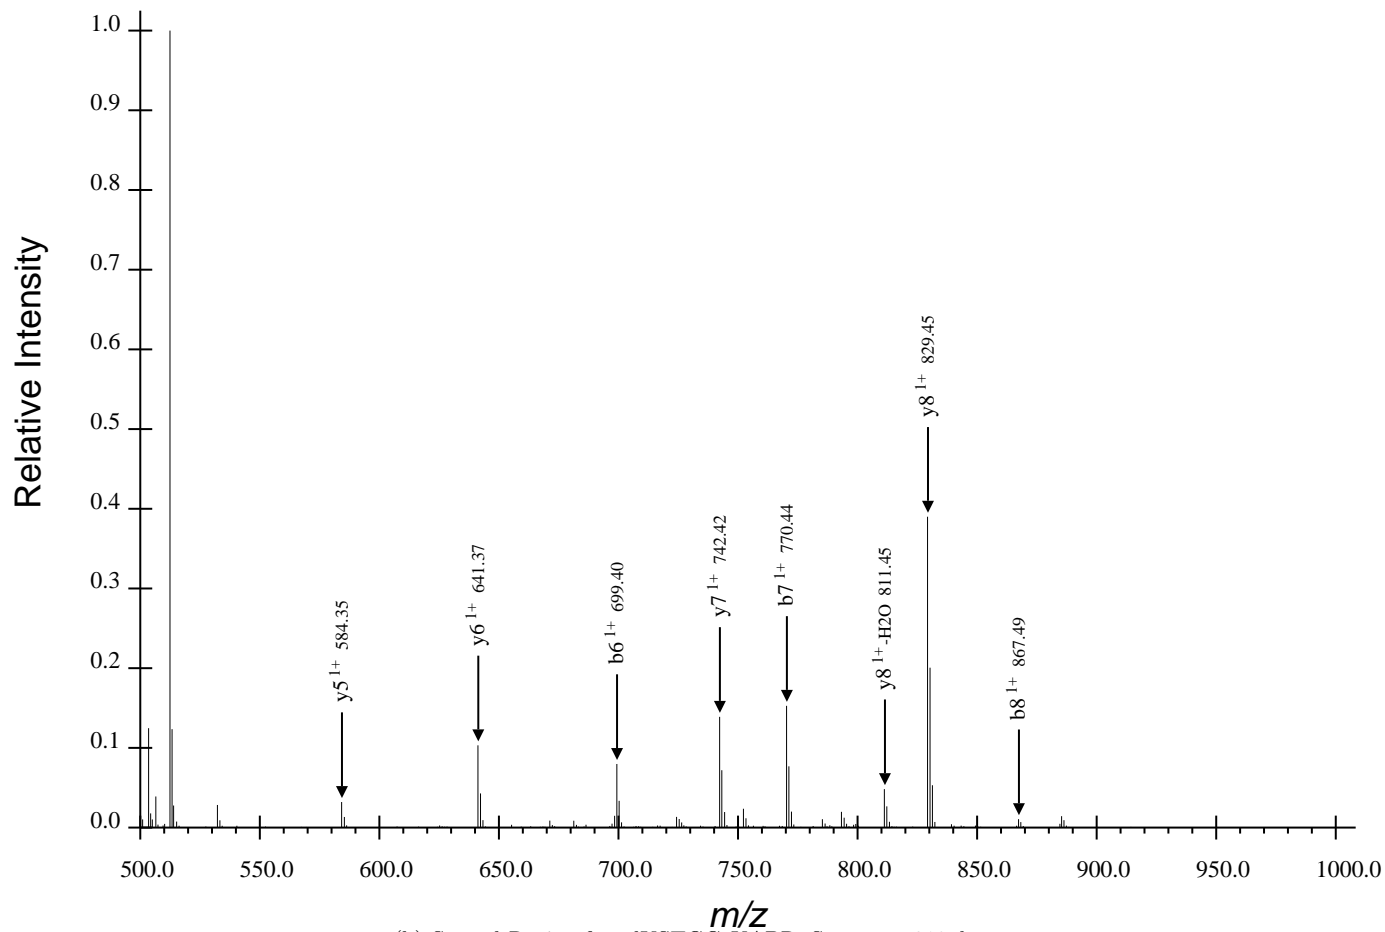

(b) Second Region for rdKSTGGrKAPR, Spectrum 218.dta

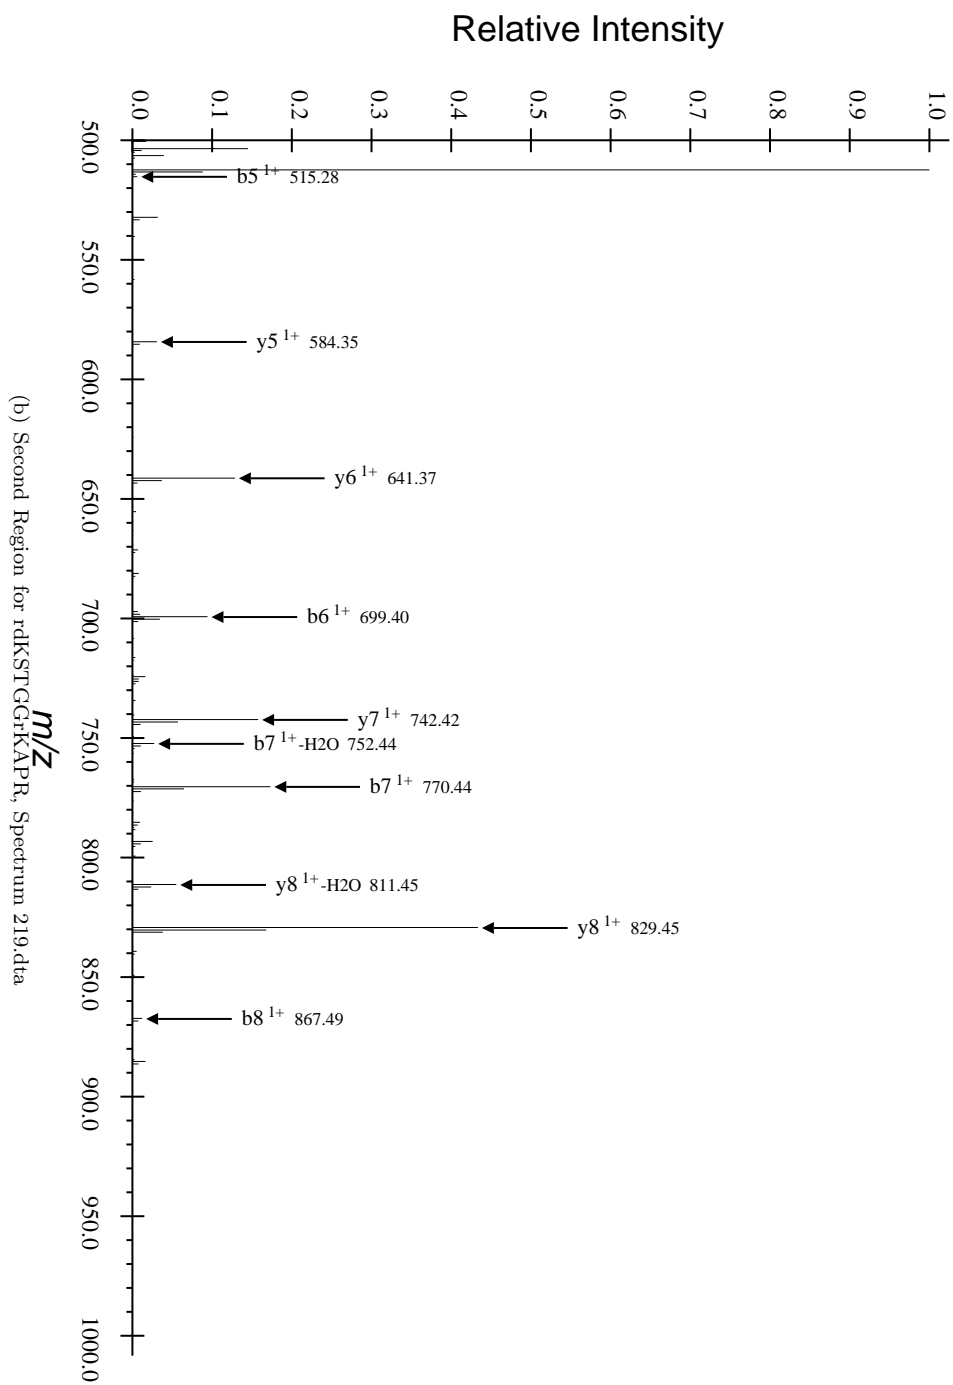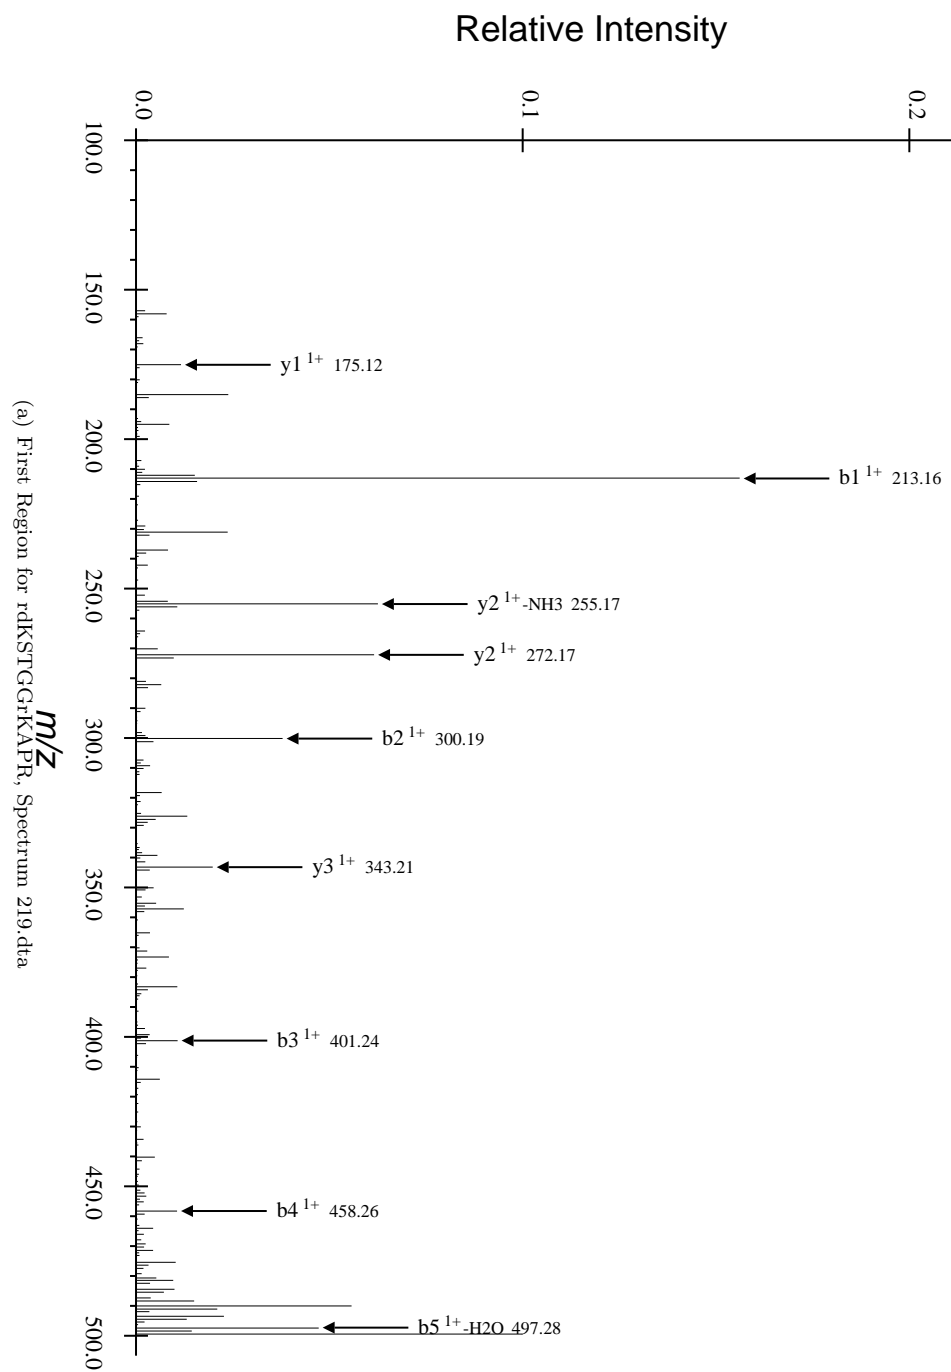

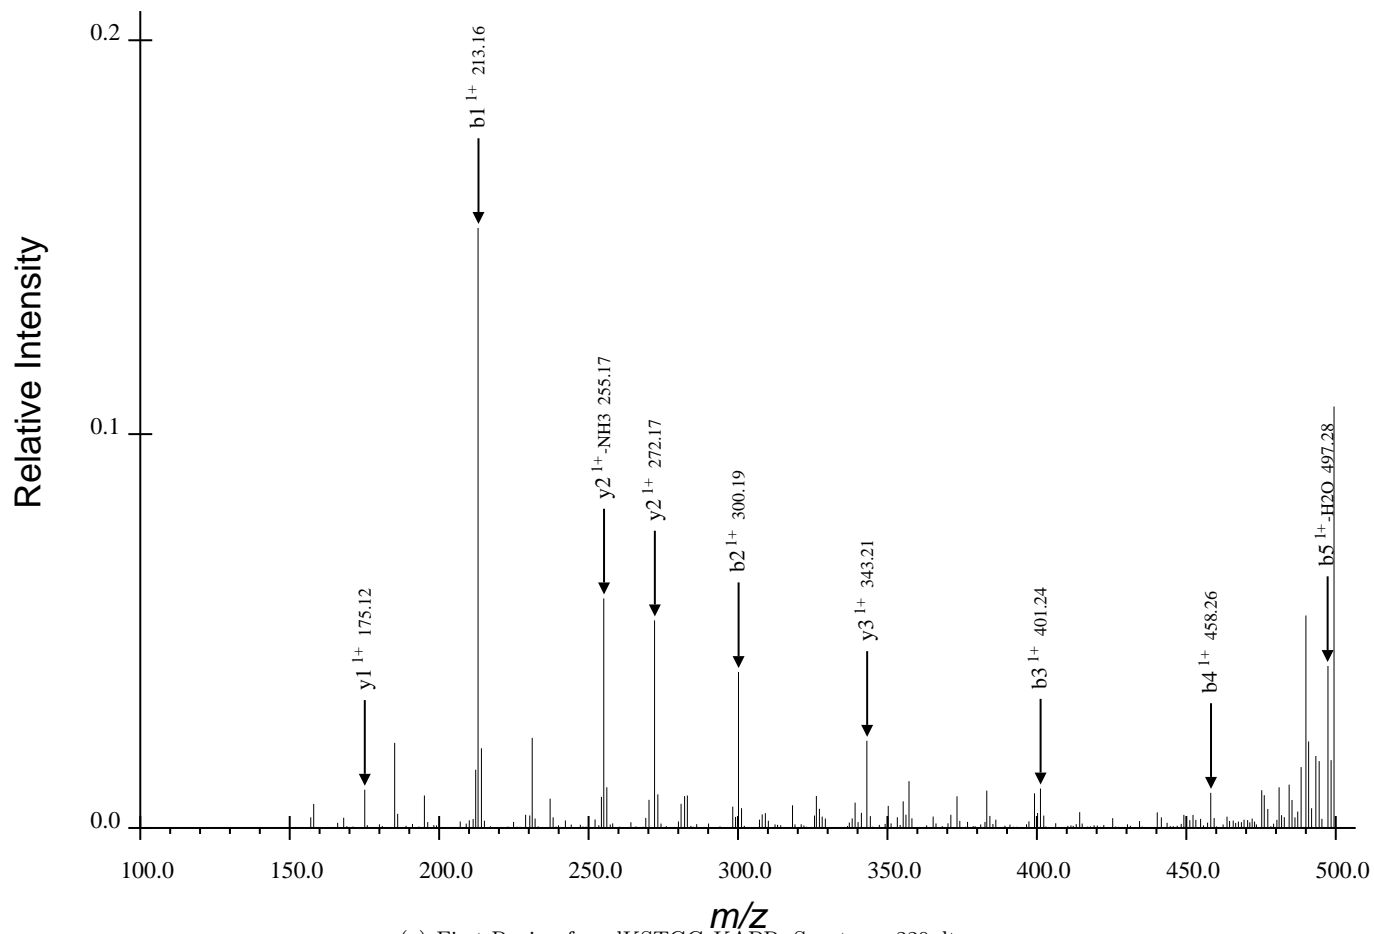

(a) First Region for rdKSTGGrKAPR, Spectrum 220.dta

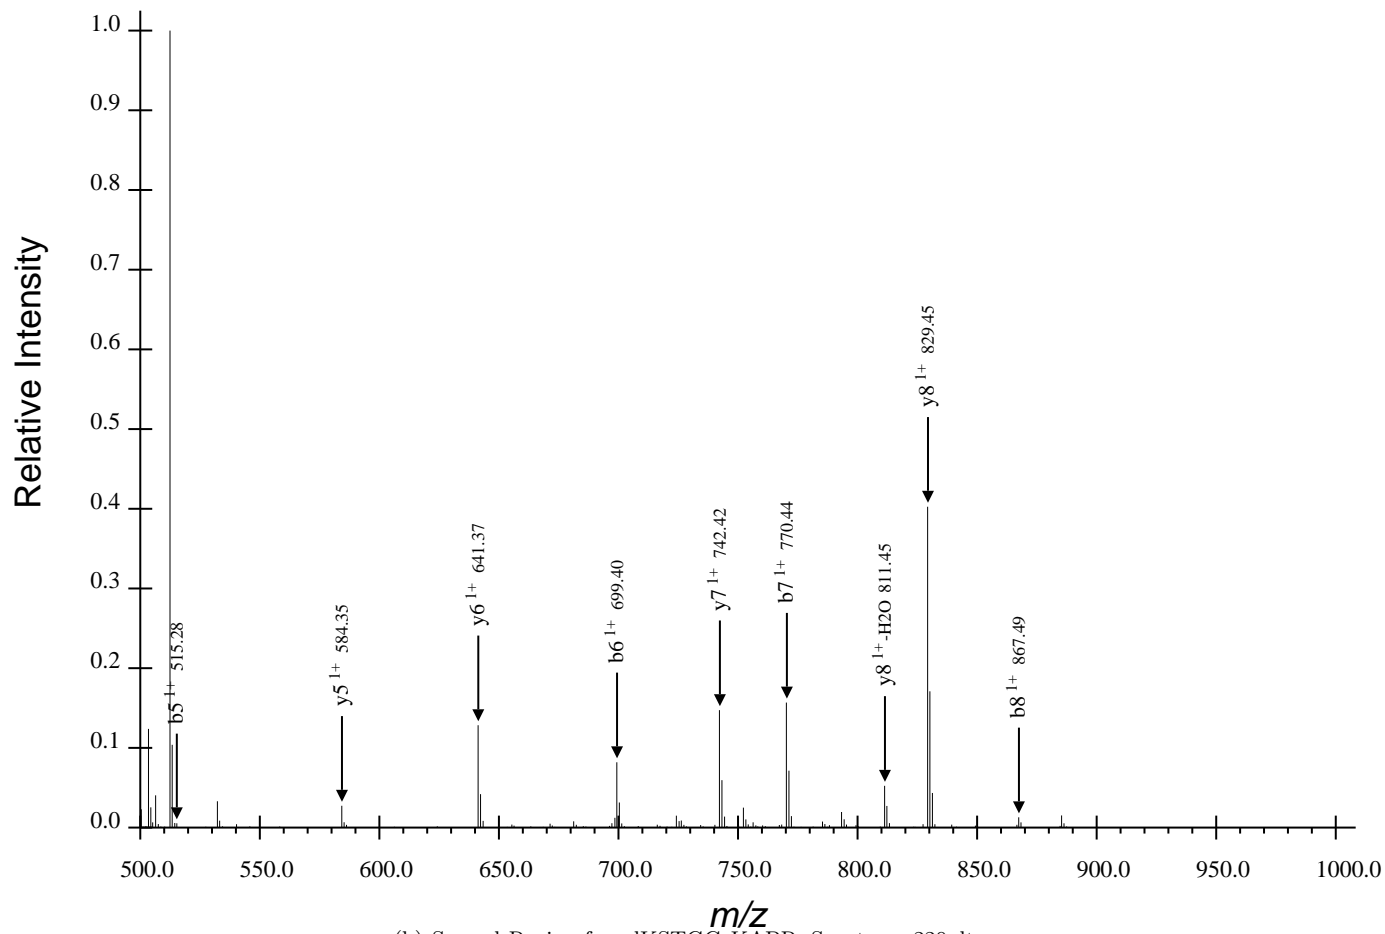

(b) Second Region for rdKSTGGrKAPR, Spectrum 220.dta

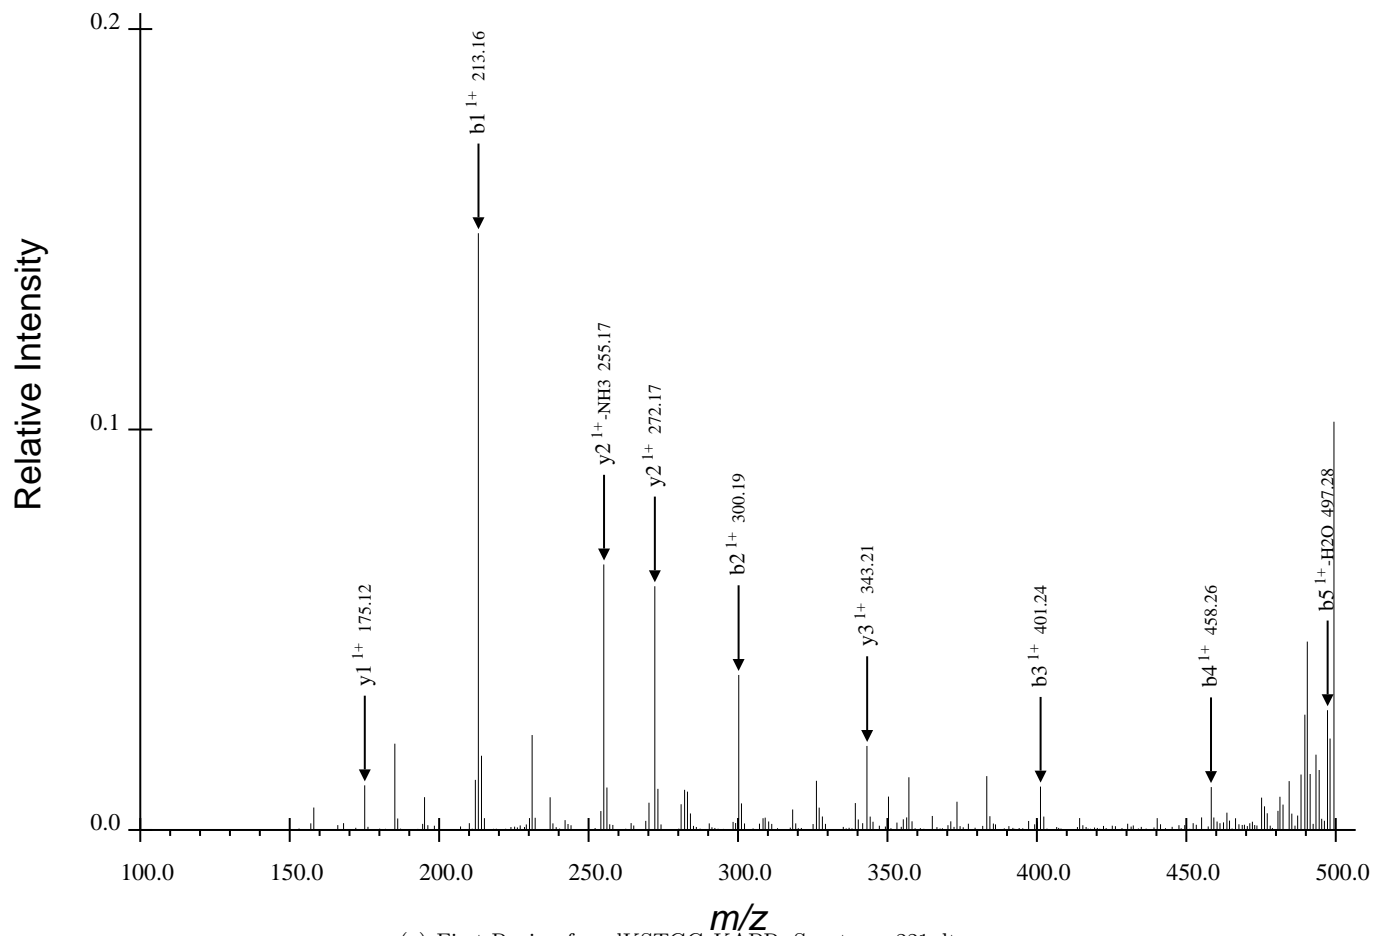

(a) First Region for rdKSTGGrKAPR, Spectrum 221.dta

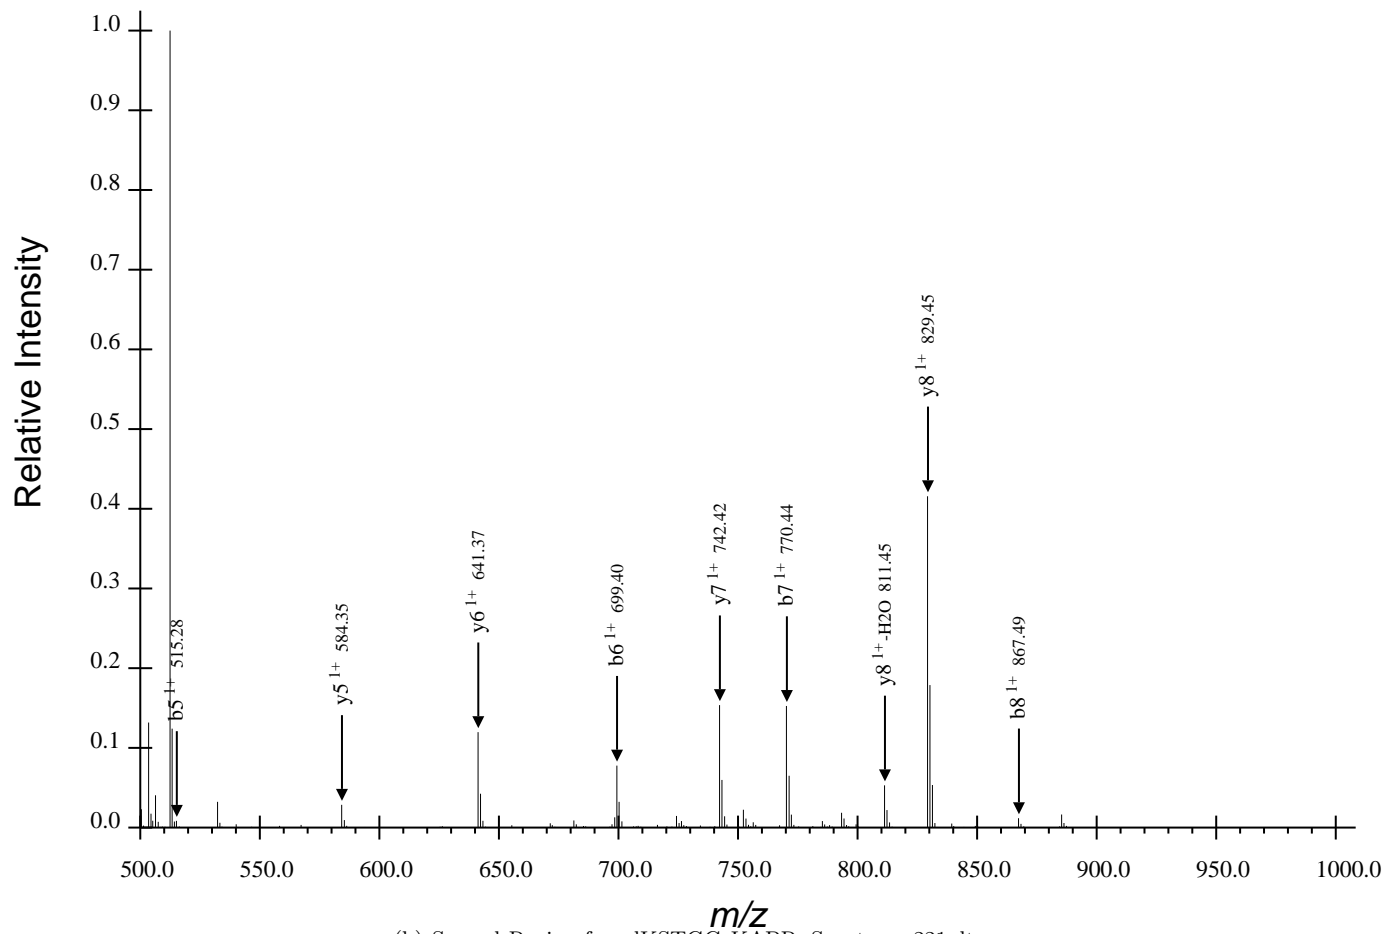

(b) Second Region for rdKSTGGrKAPR, Spectrum 221.dta

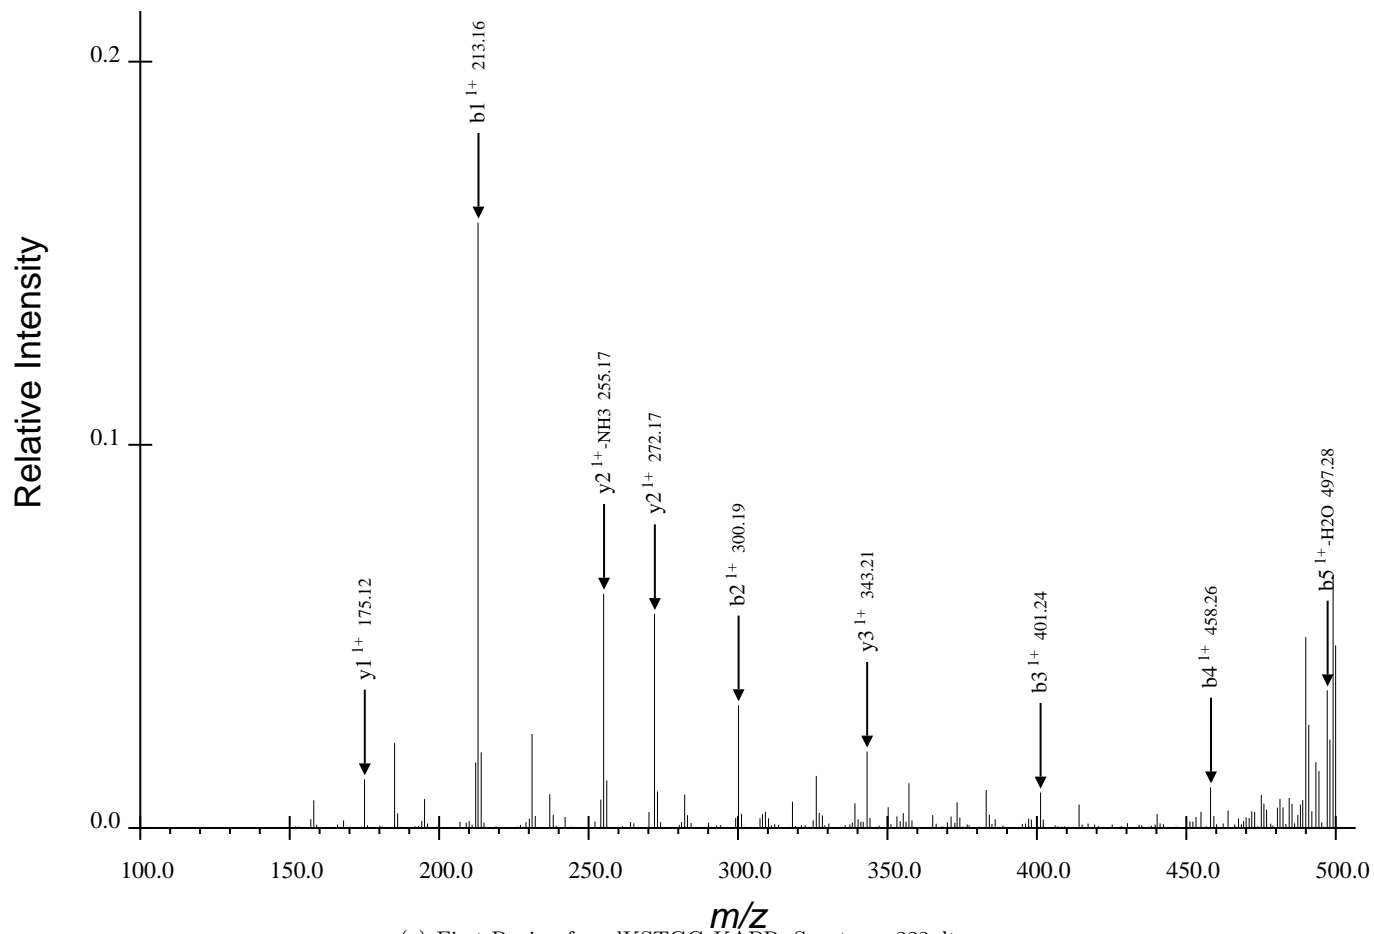

(a) First Region for rdKSTGGrKAPR, Spectrum 222.dta

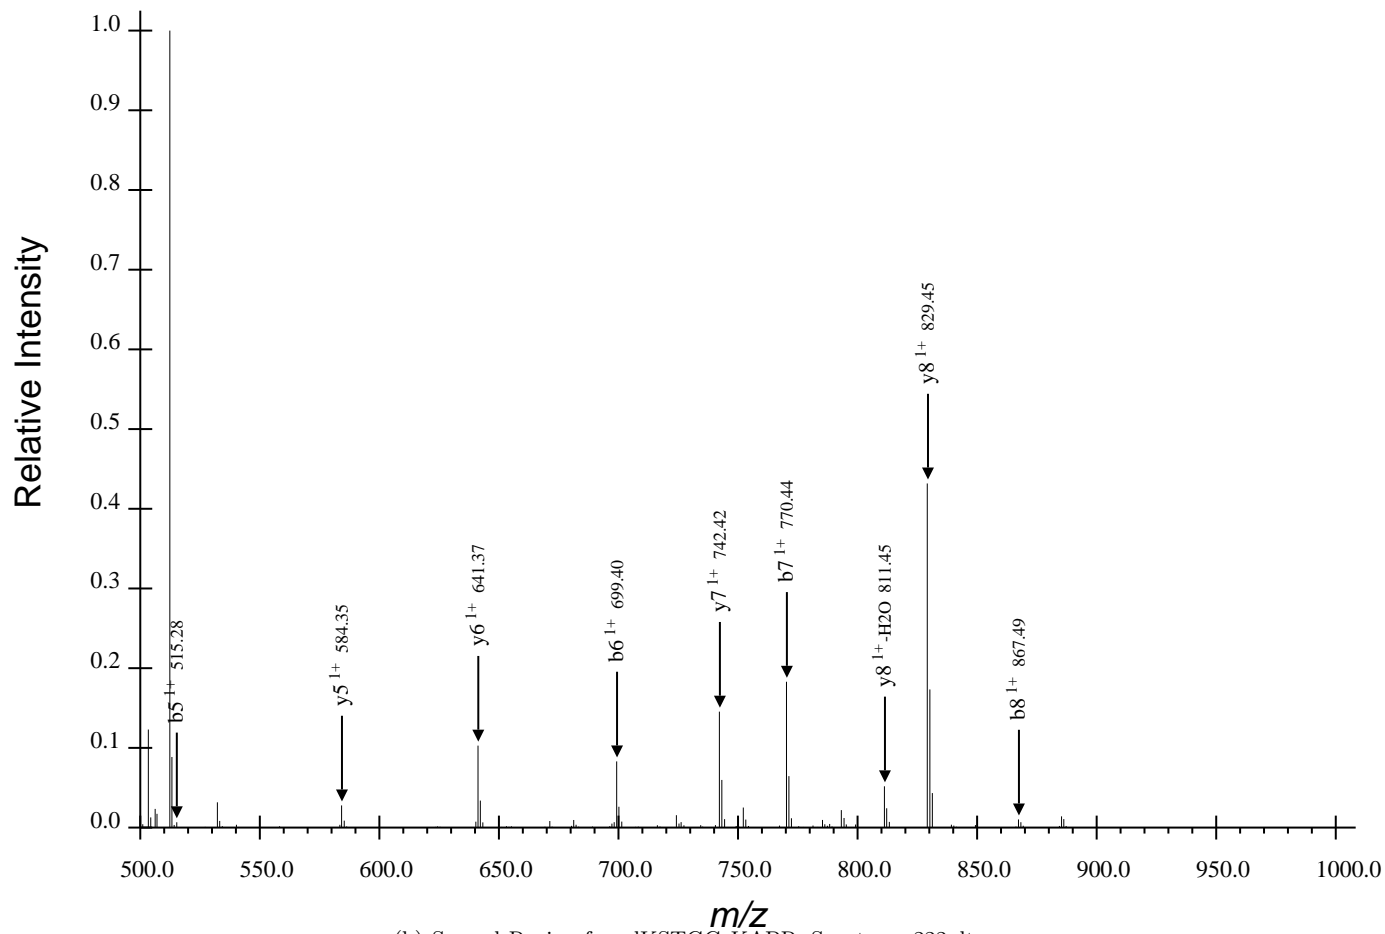

(b) Second Region for rdKSTGGrKAPR, Spectrum 222.dta

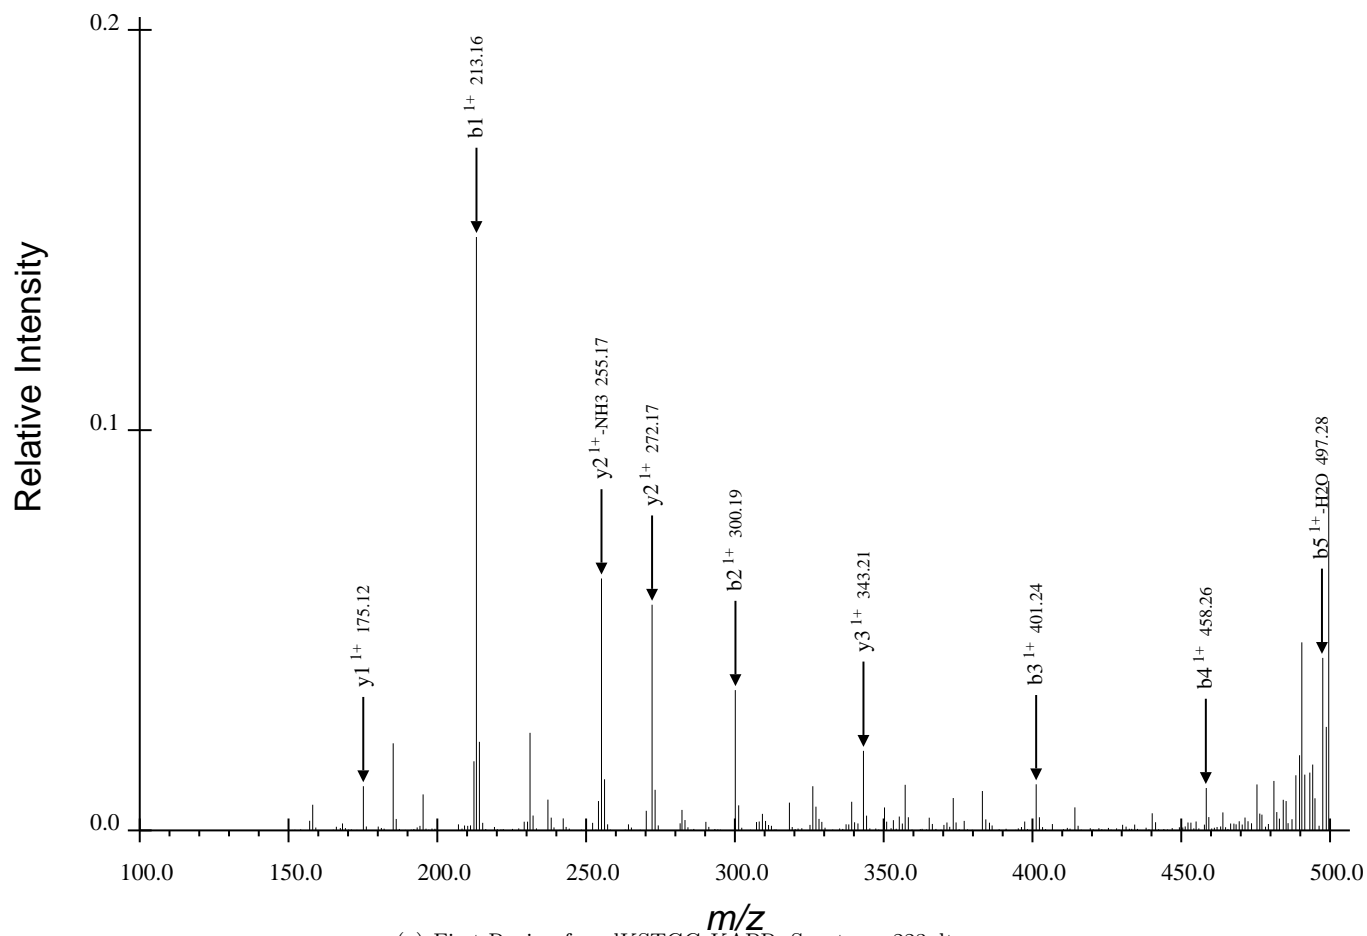

(a) First Region for rdKSTGGrKAPR, Spectrum 223.dta

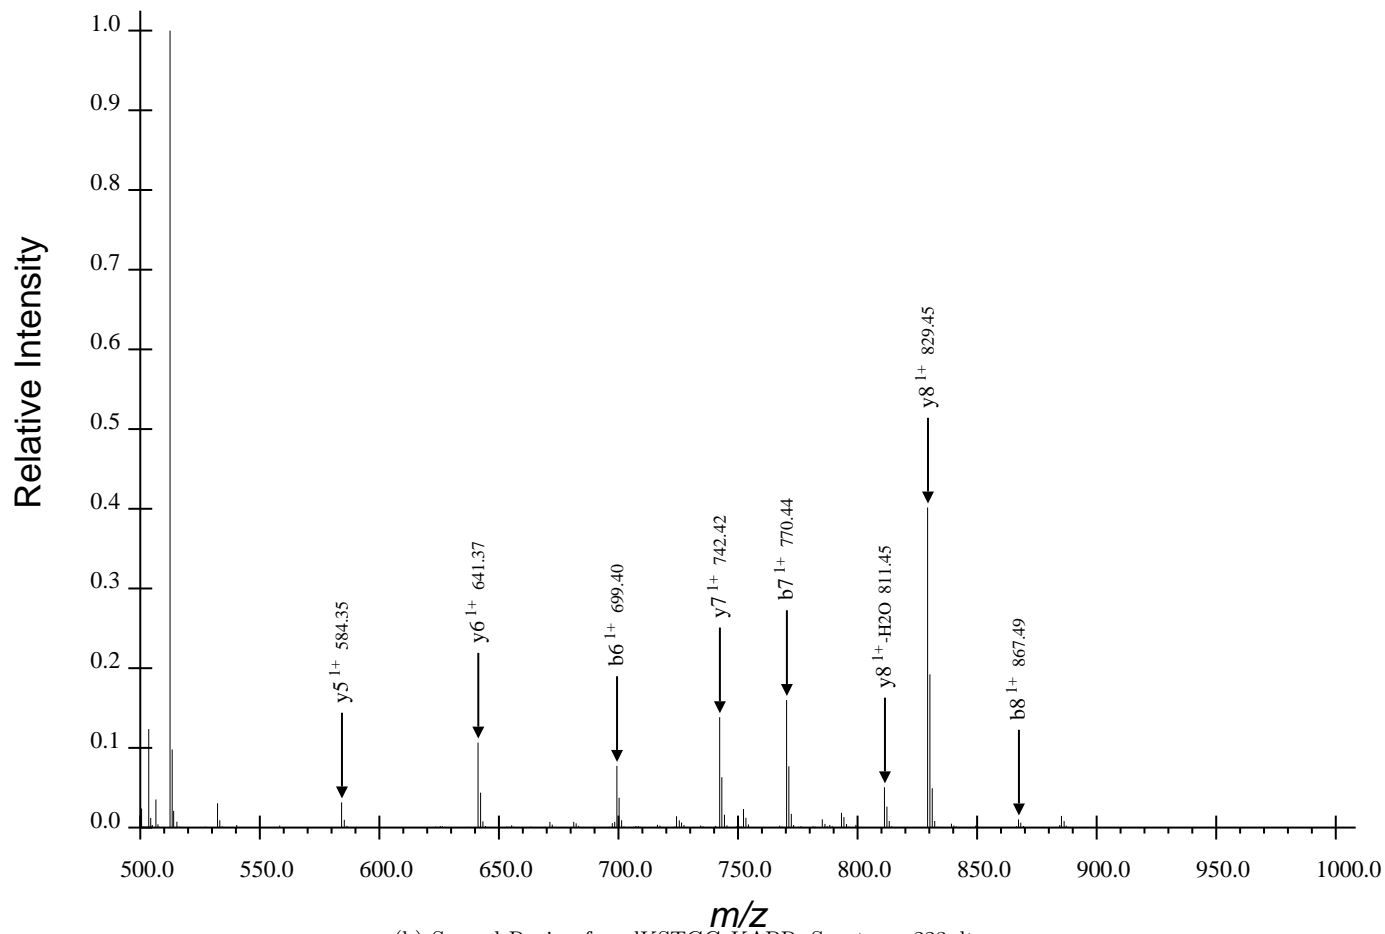

(b) Second Region for rdKSTGGrKAPR, Spectrum 223.dta

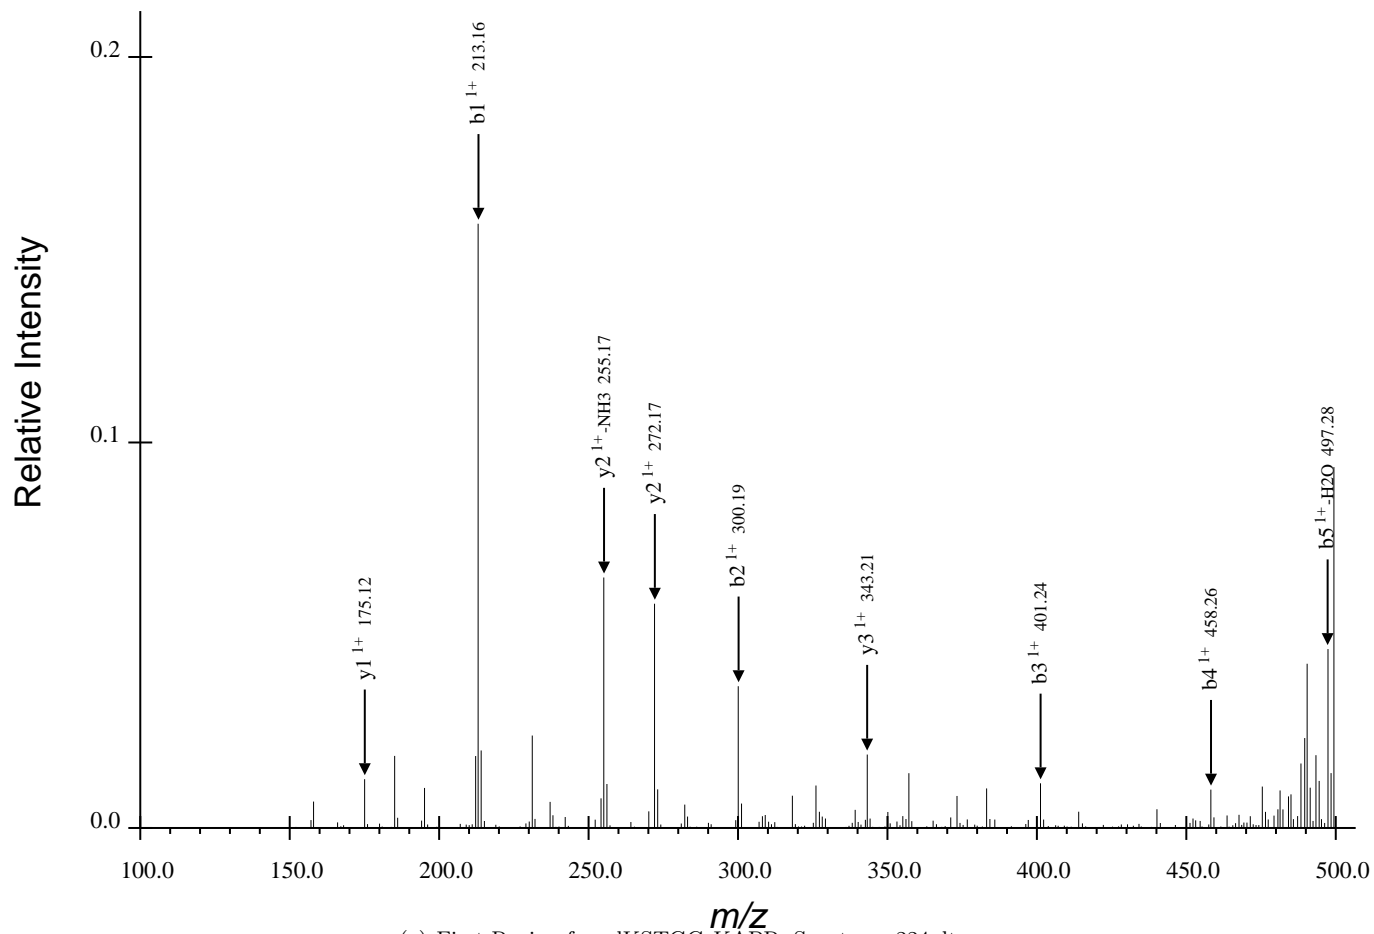

(a) First Region for rdKSTGGrKAPR, Spectrum 224.dta

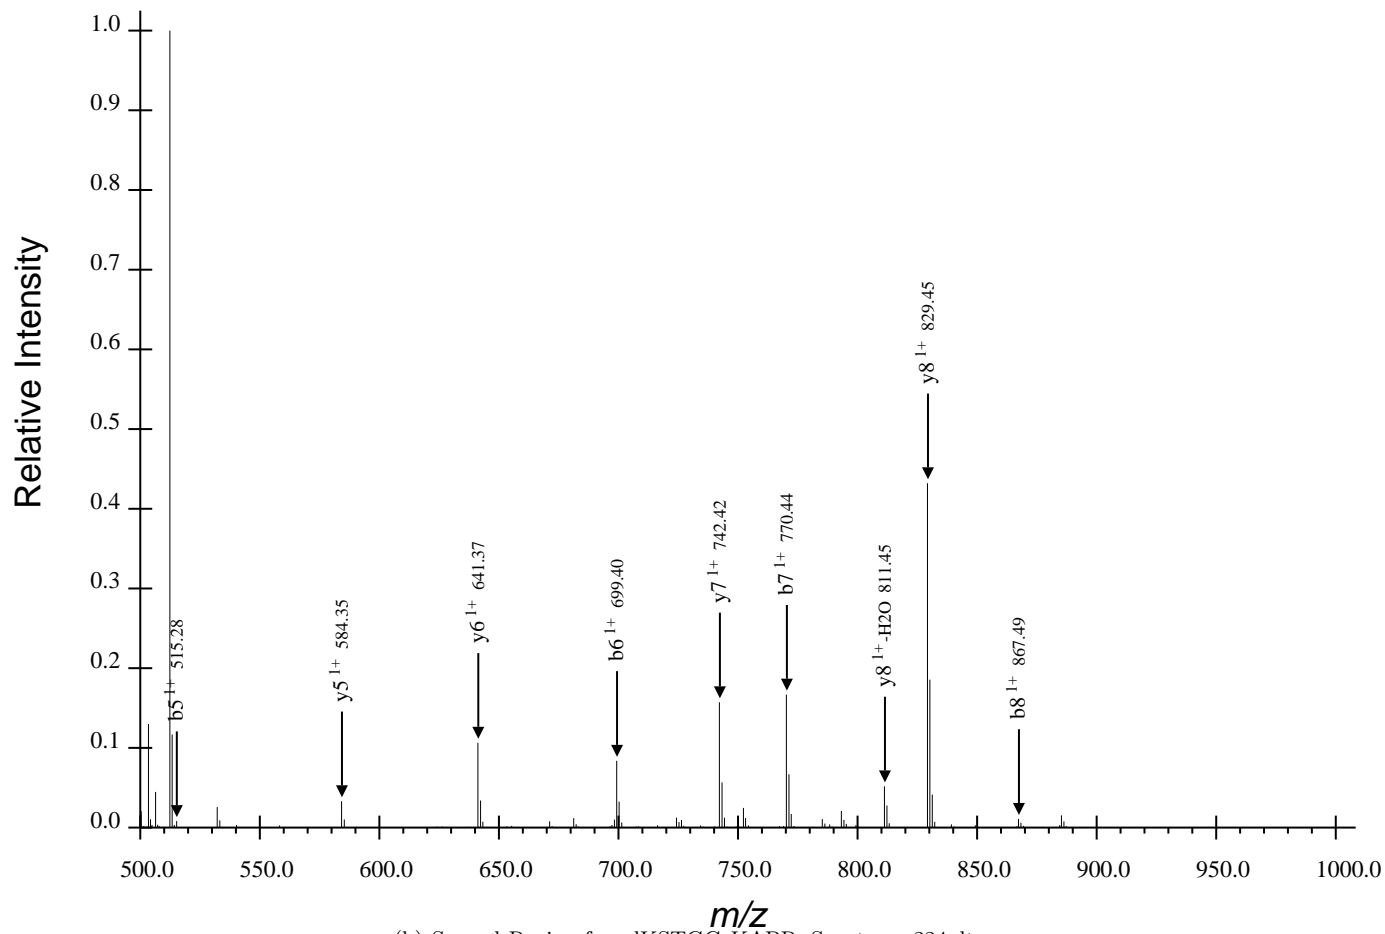

(b) Second Region for rdKSTGGrKAPR, Spectrum 224.dta



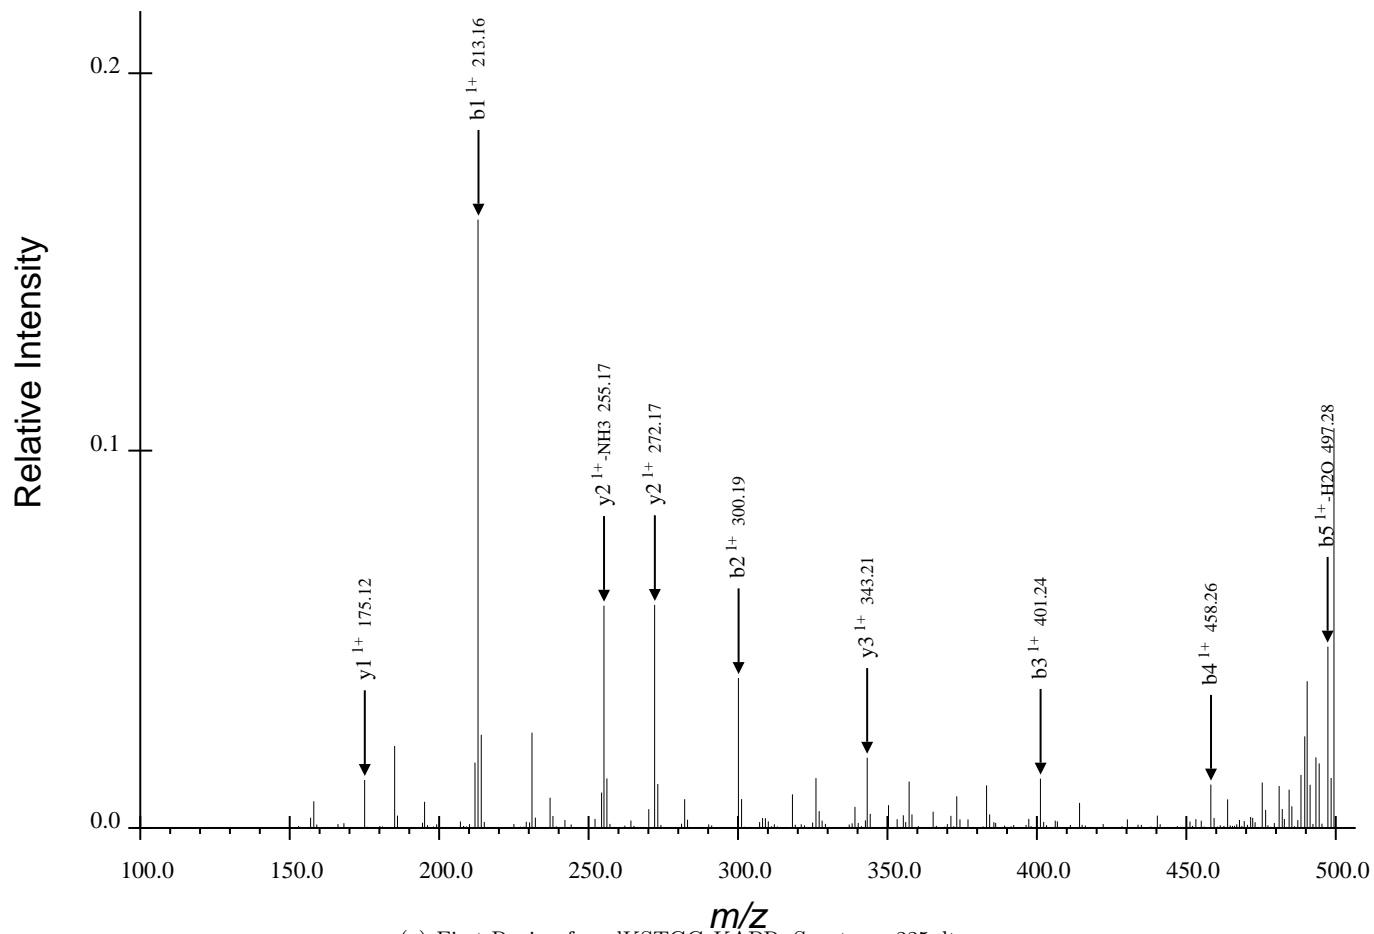

(a) First Region for rdKSTGGrKAPR, Spectrum 225.dta

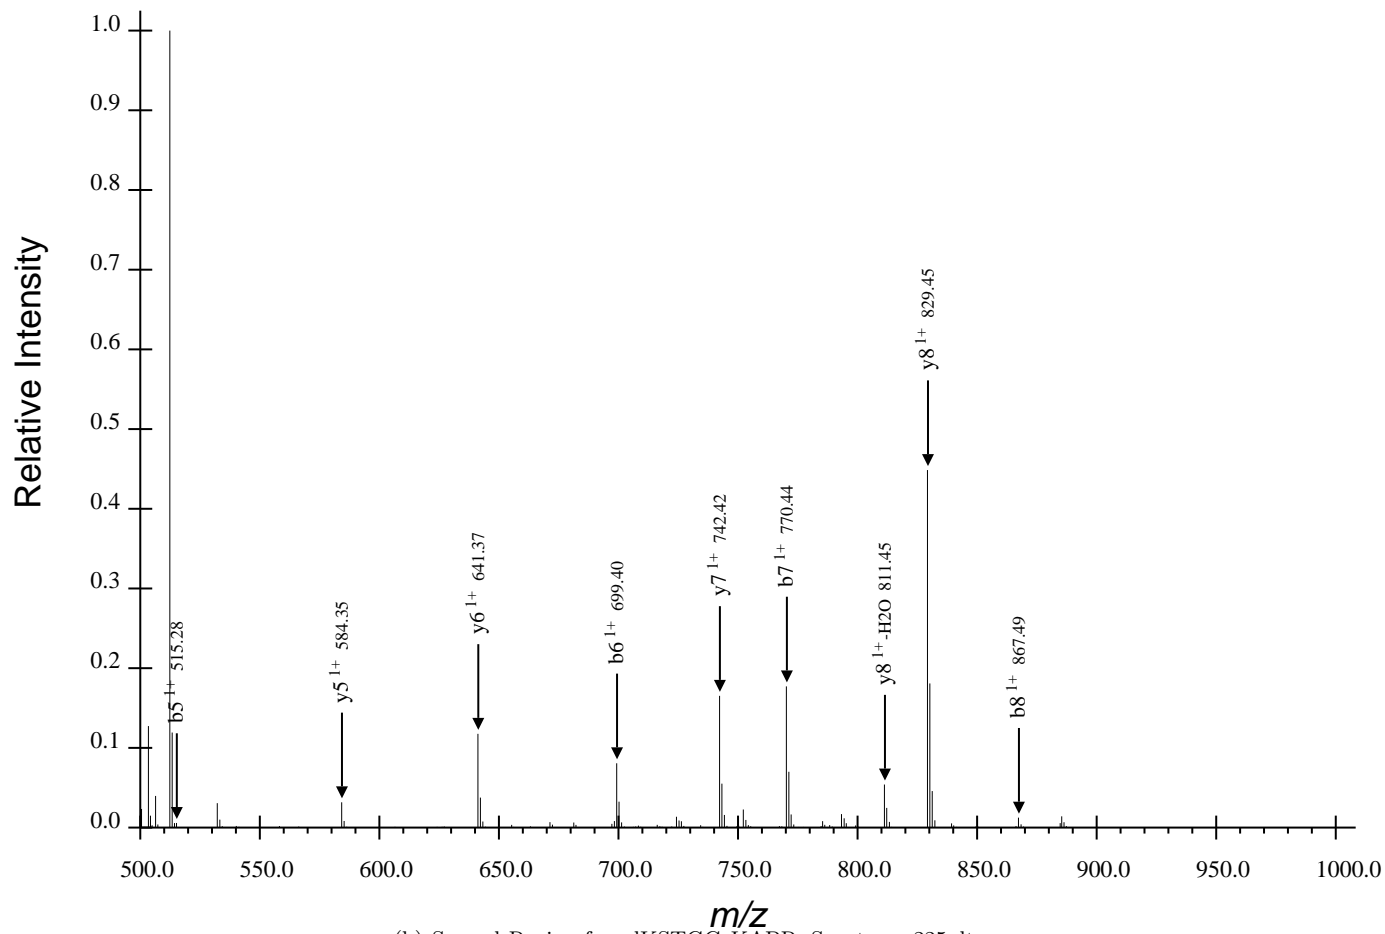

(b) Second Region for rdKSTGGrKAPR, Spectrum 225.dta

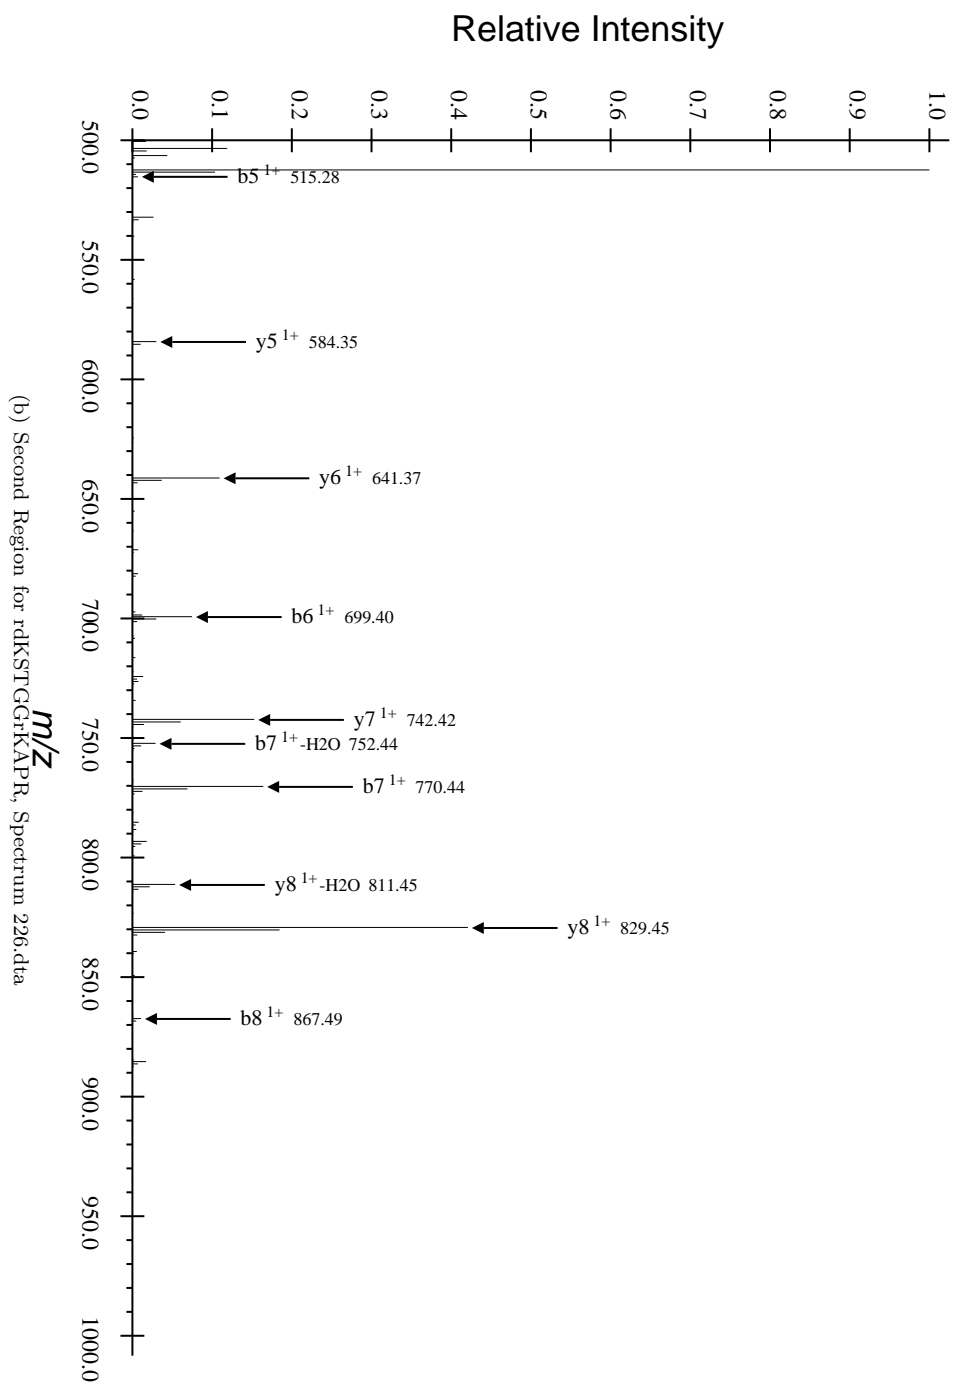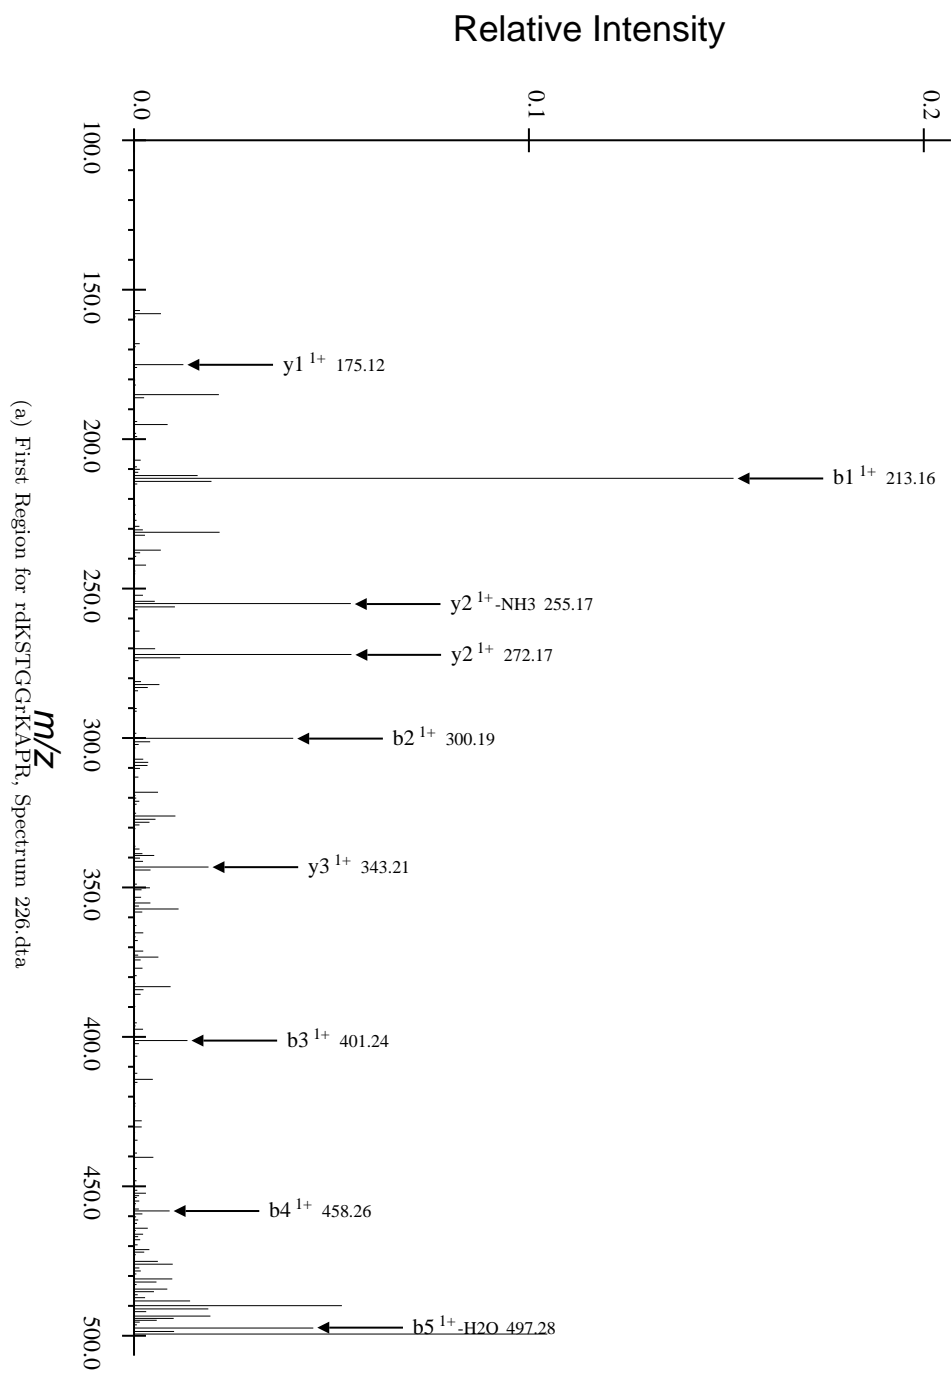

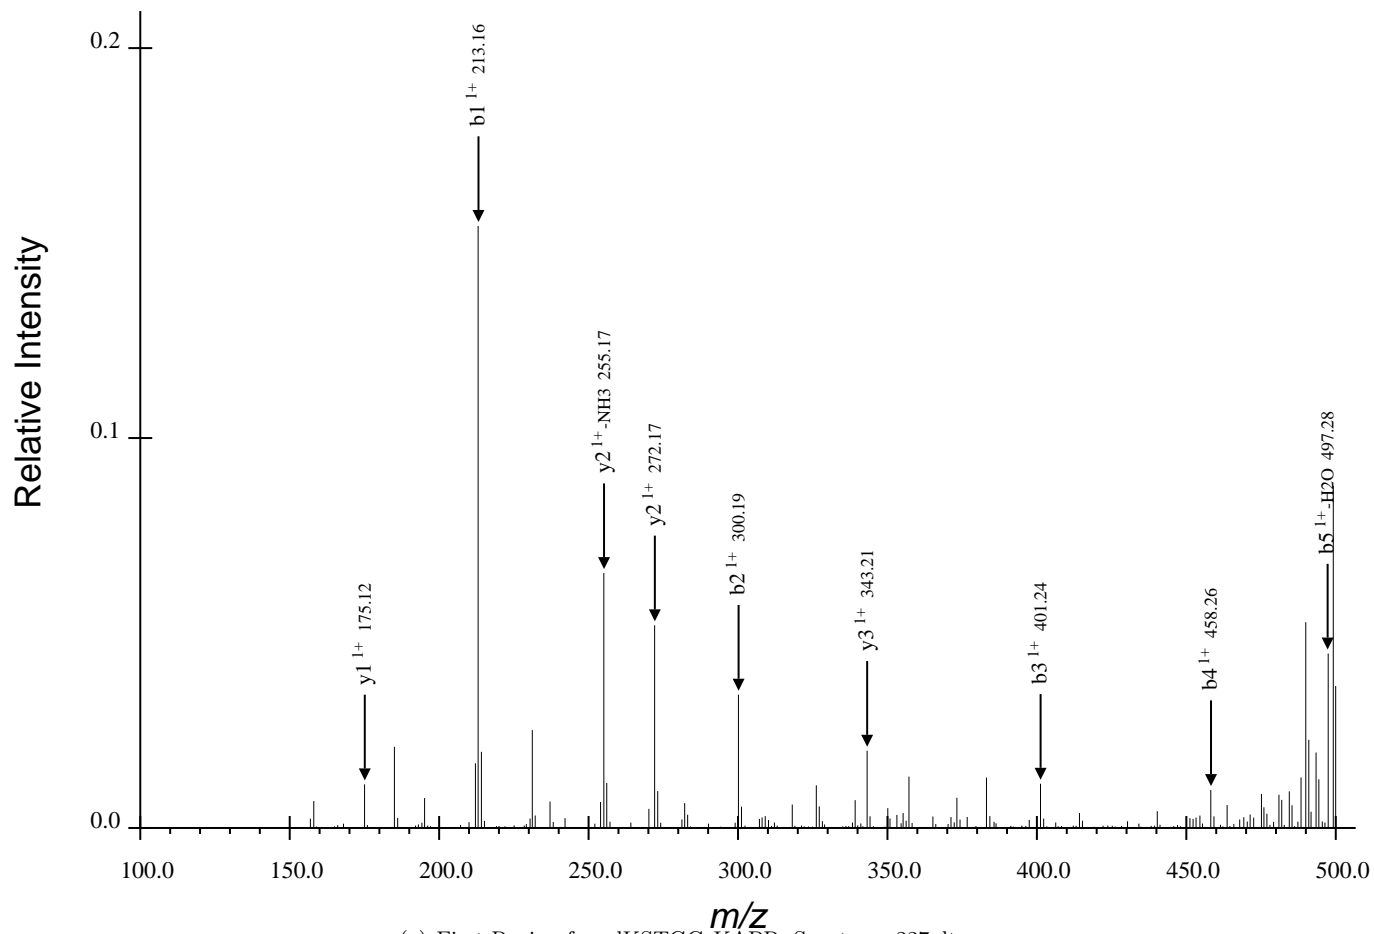

(a) First Region for rdKSTGGrKAPR, Spectrum 227.dta

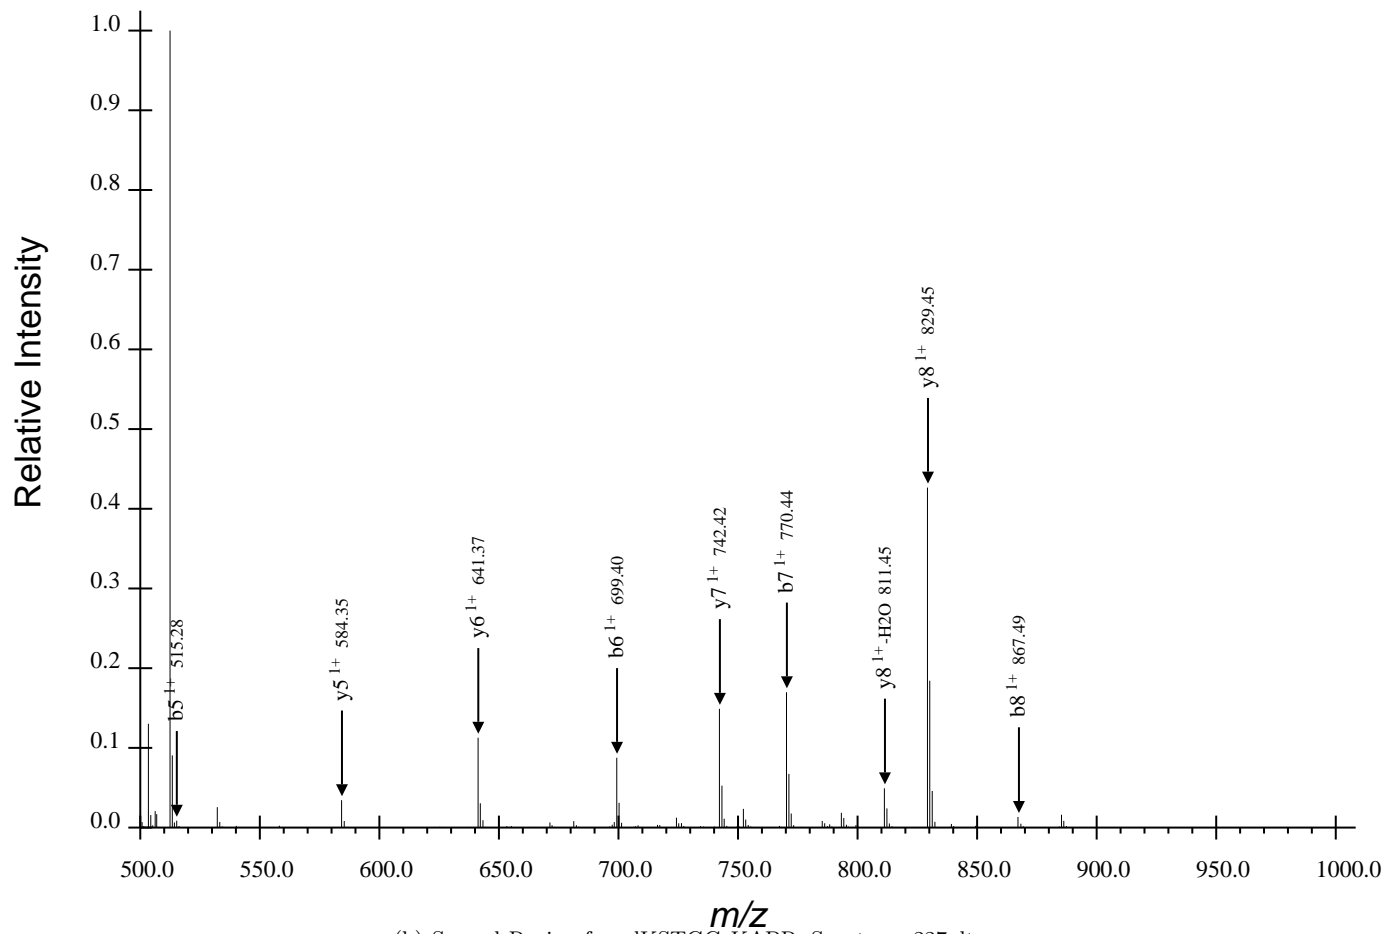

(b) Second Region for rdKSTGGrKAPR, Spectrum 227.dta

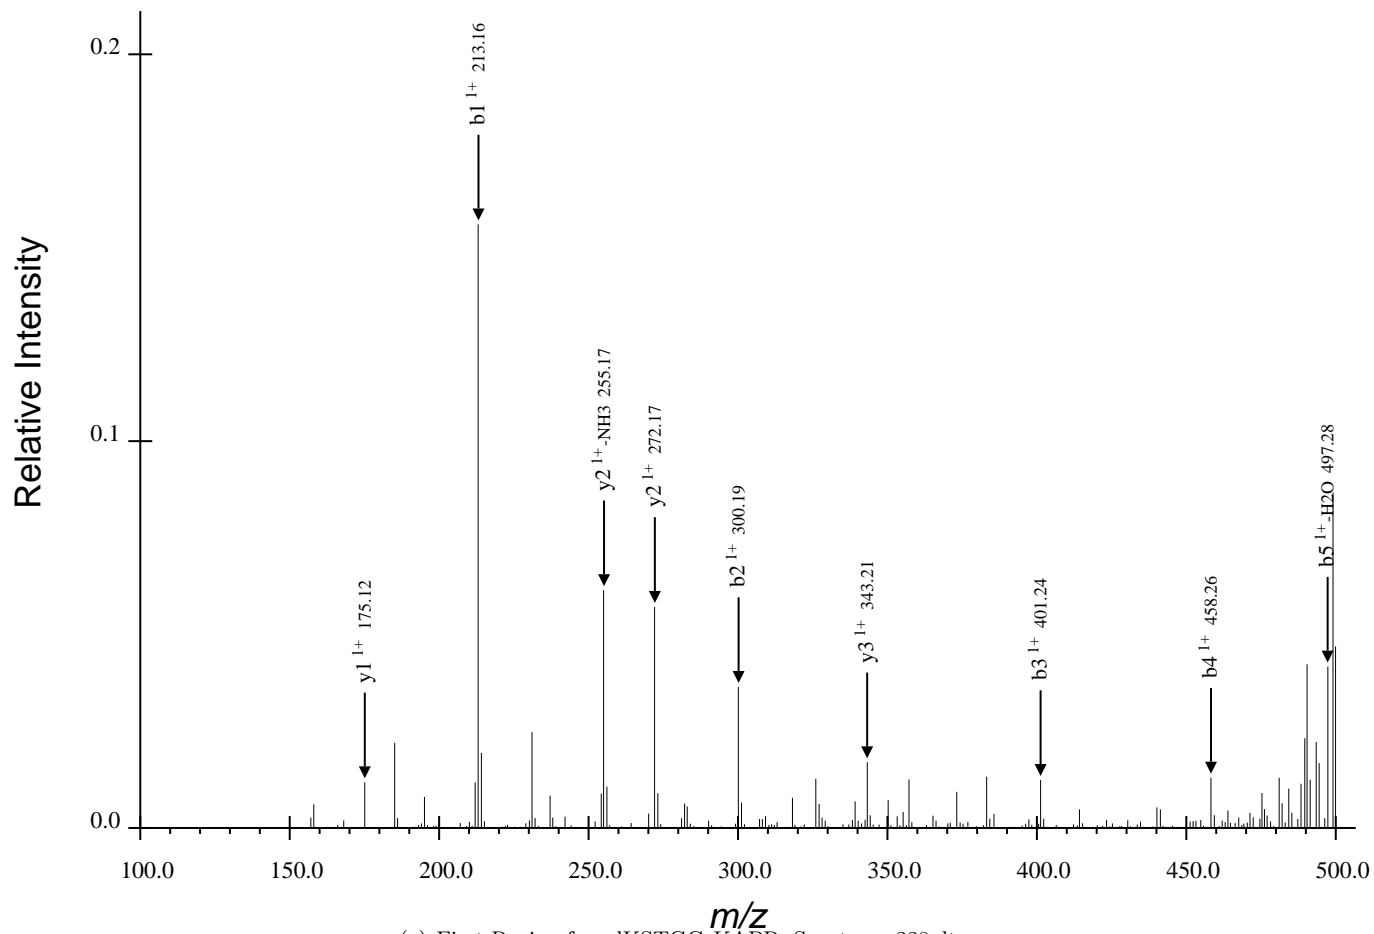

(a) First Region for rdKSTGGrKAPR, Spectrum 228.dta

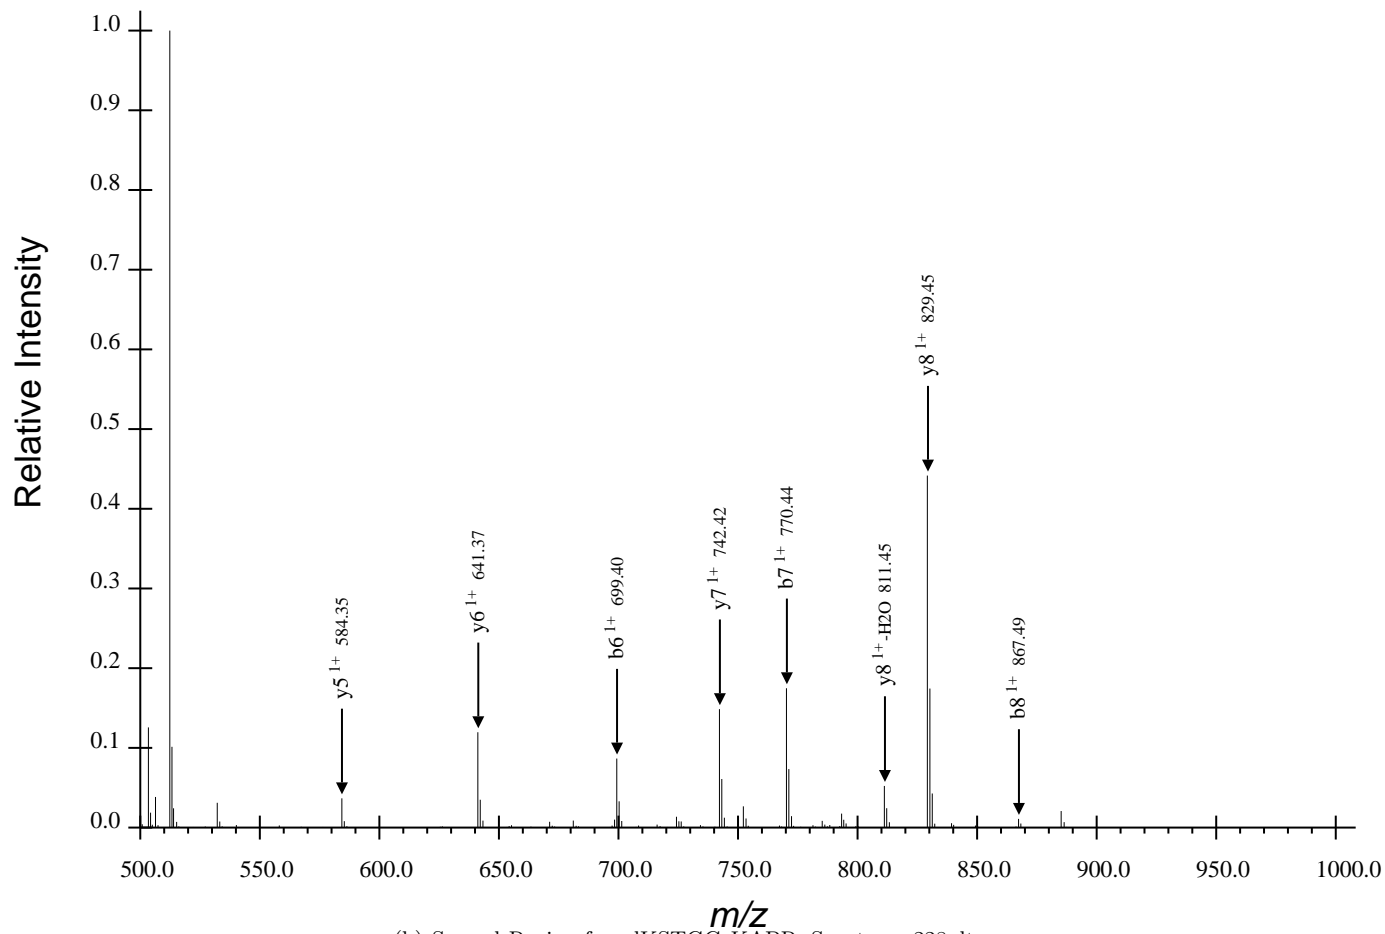

(b) Second Region for rdKSTGGrKAPR, Spectrum 228.dta

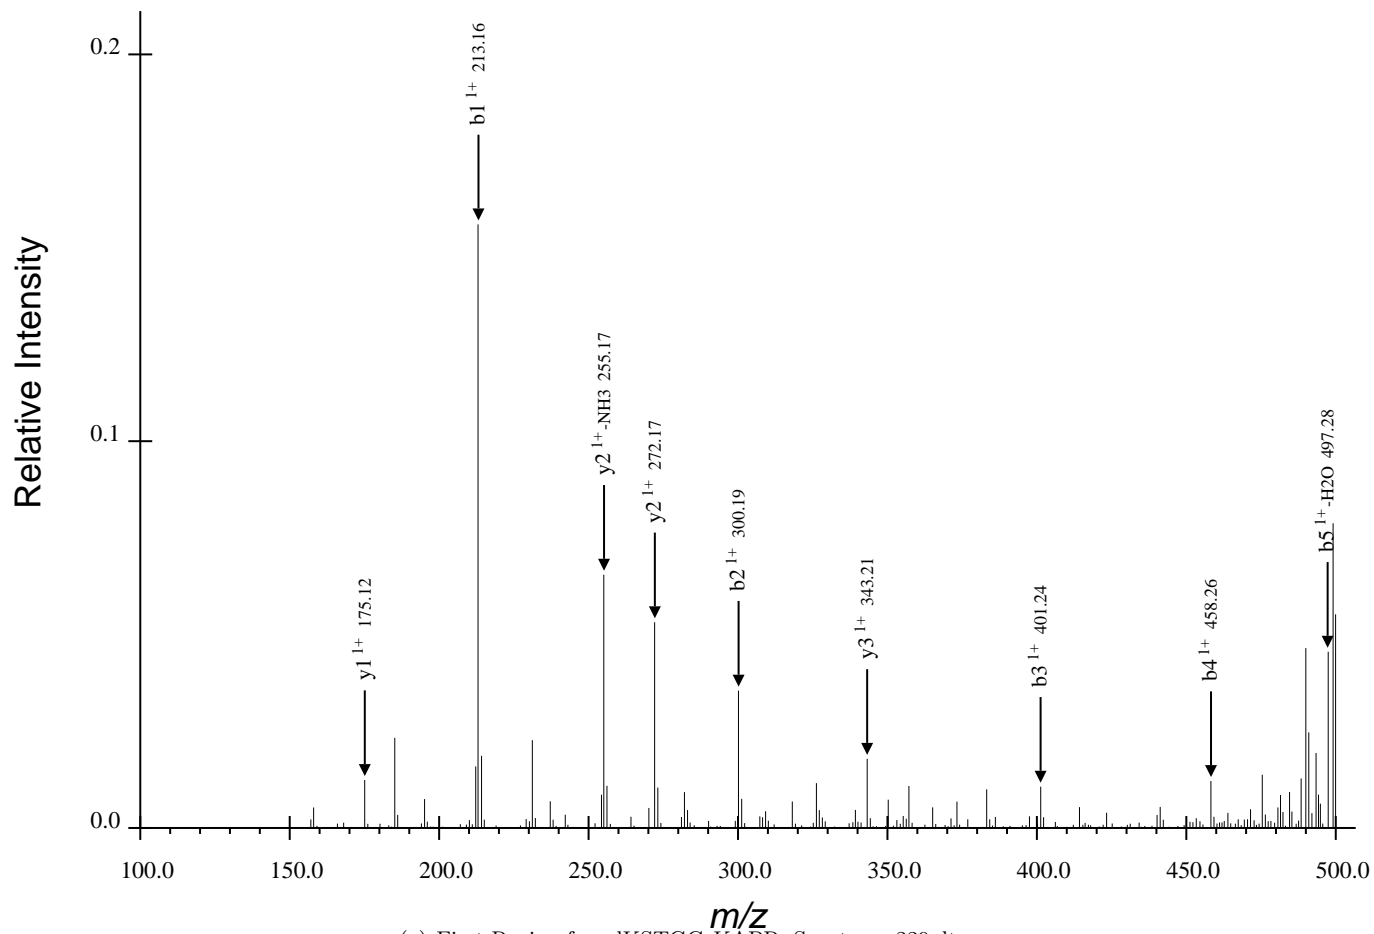

(a) First Region for rdKSTGGrKAPR, Spectrum 229.dta

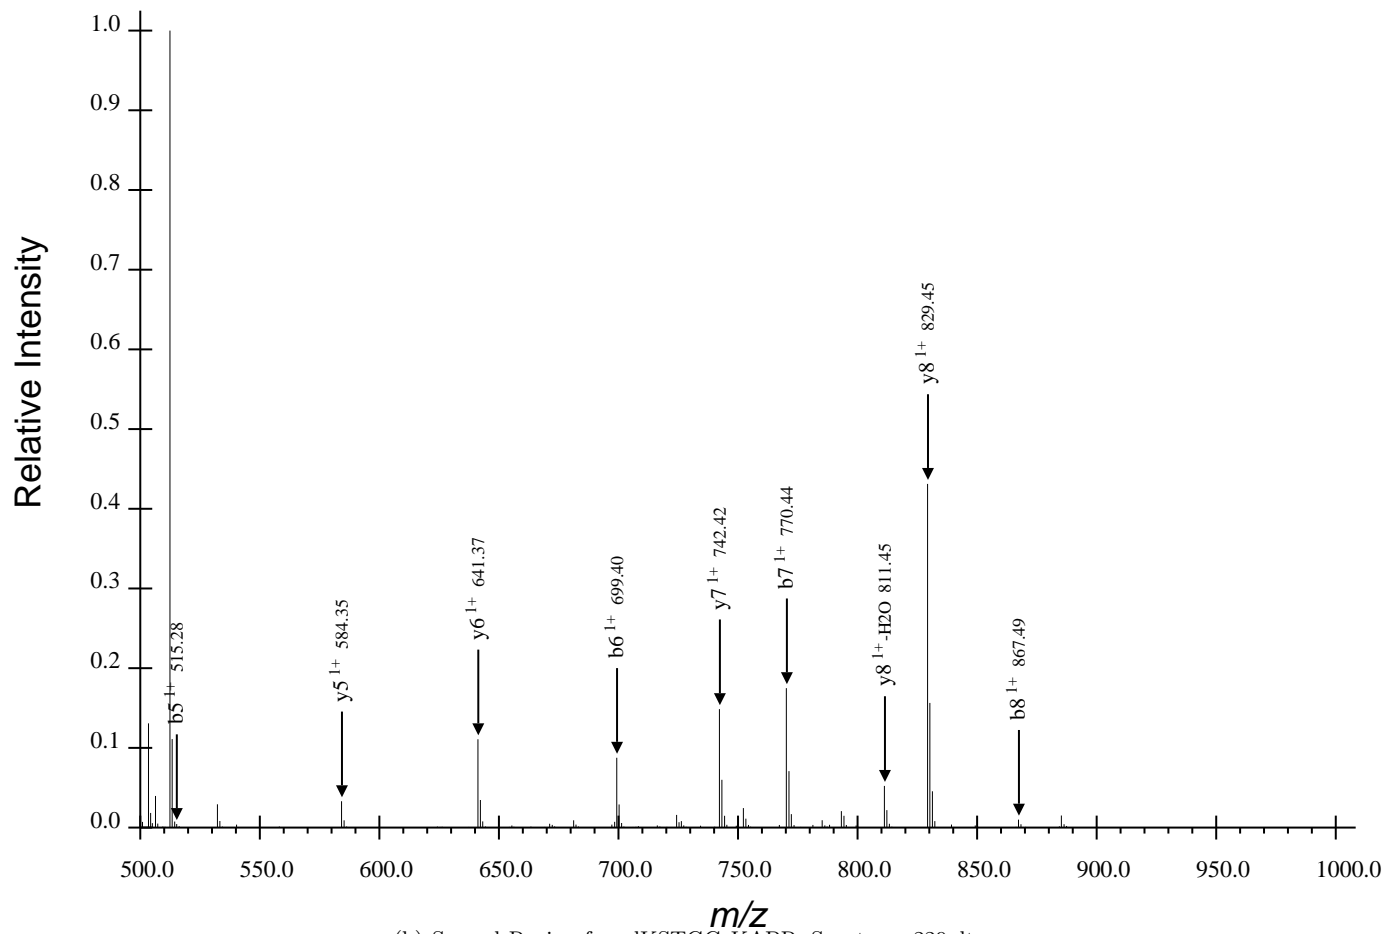

(b) Second Region for rdKSTGGrKAPR, Spectrum 229.dta

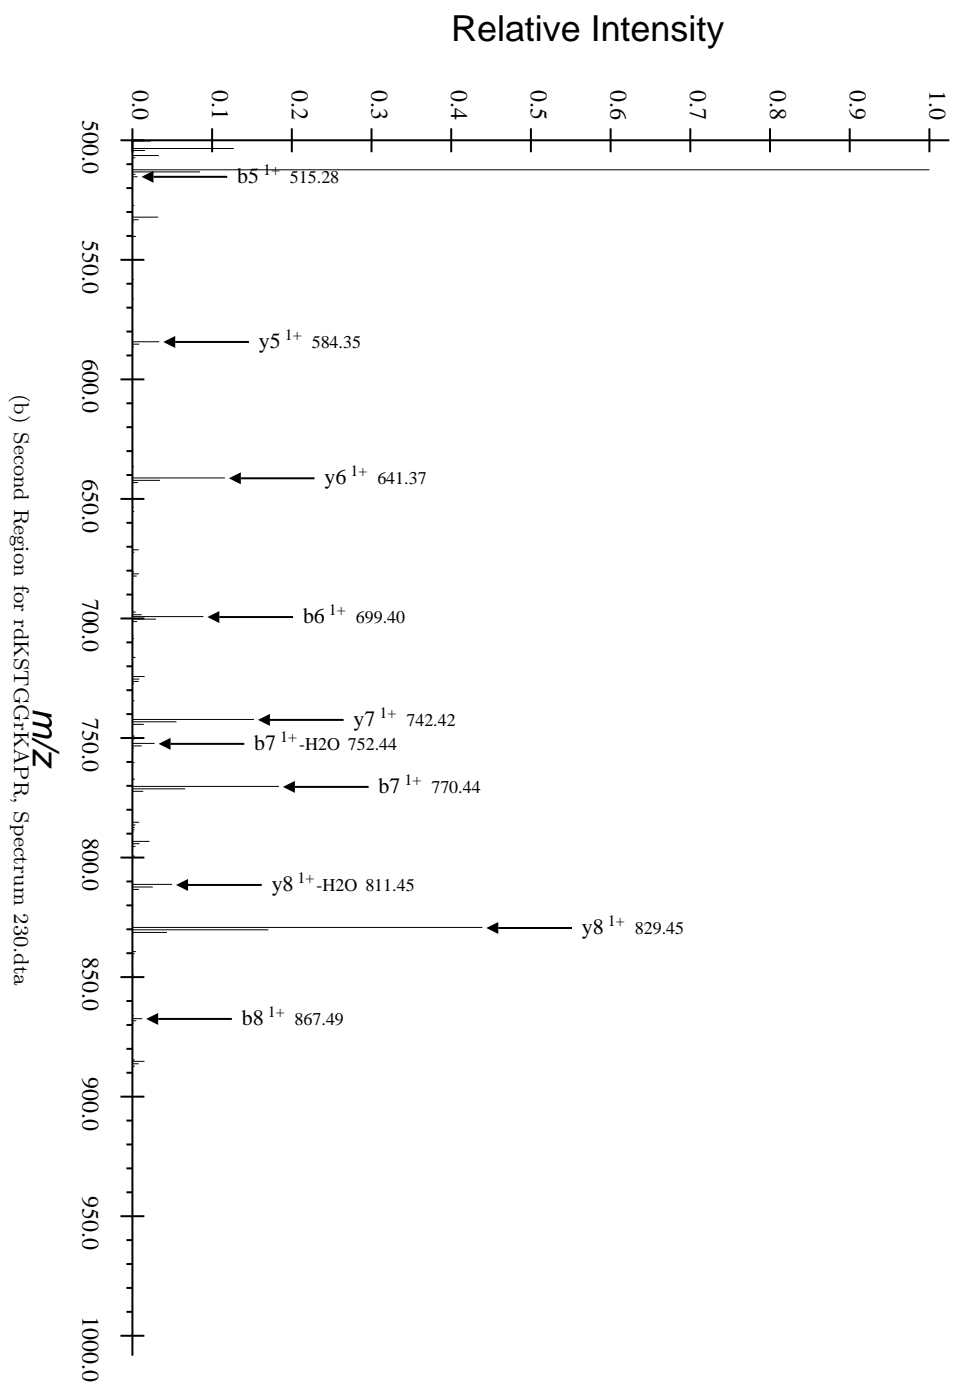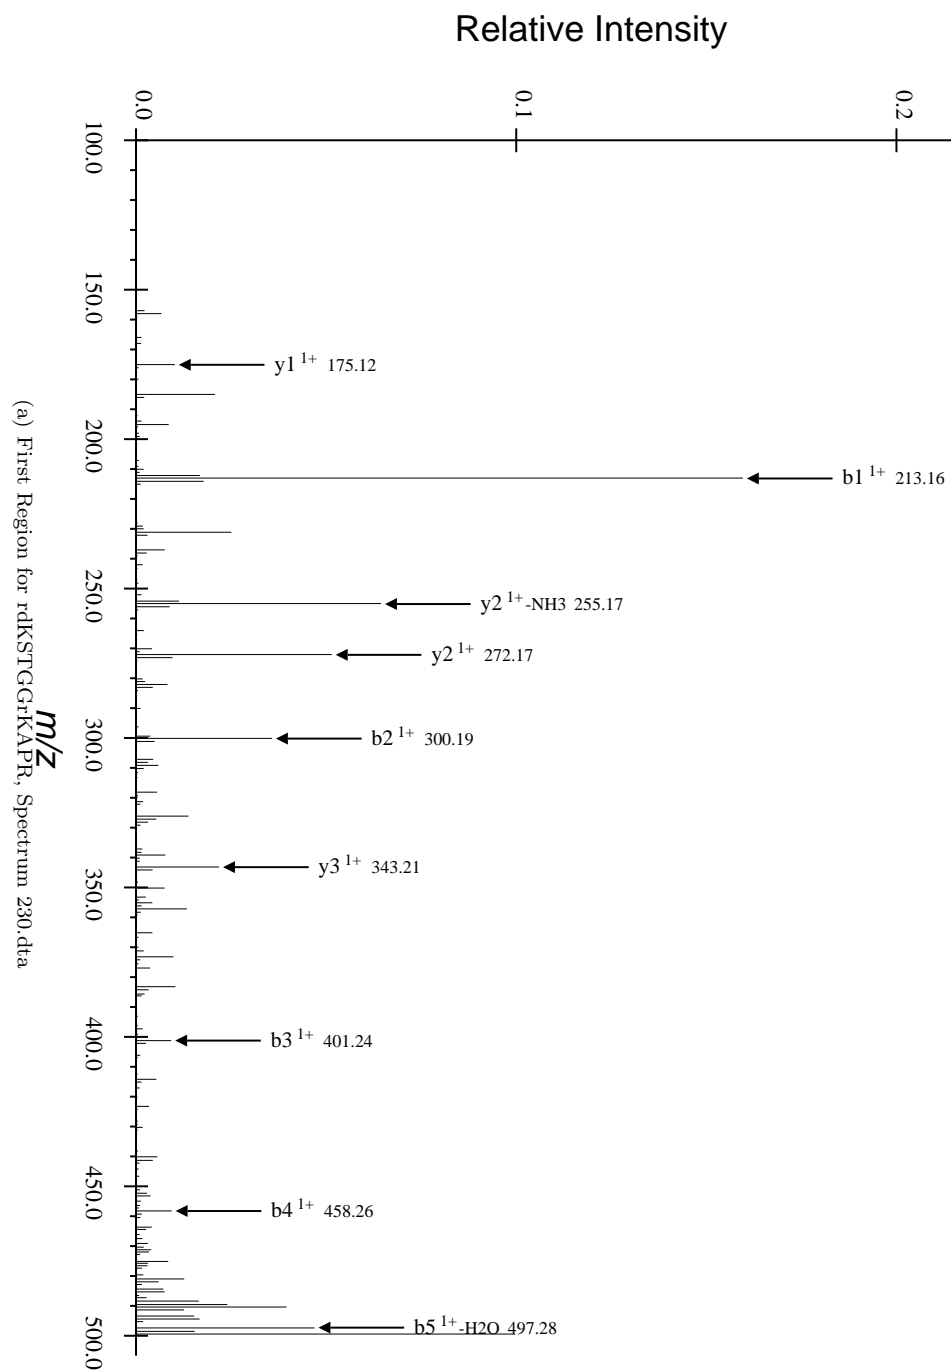

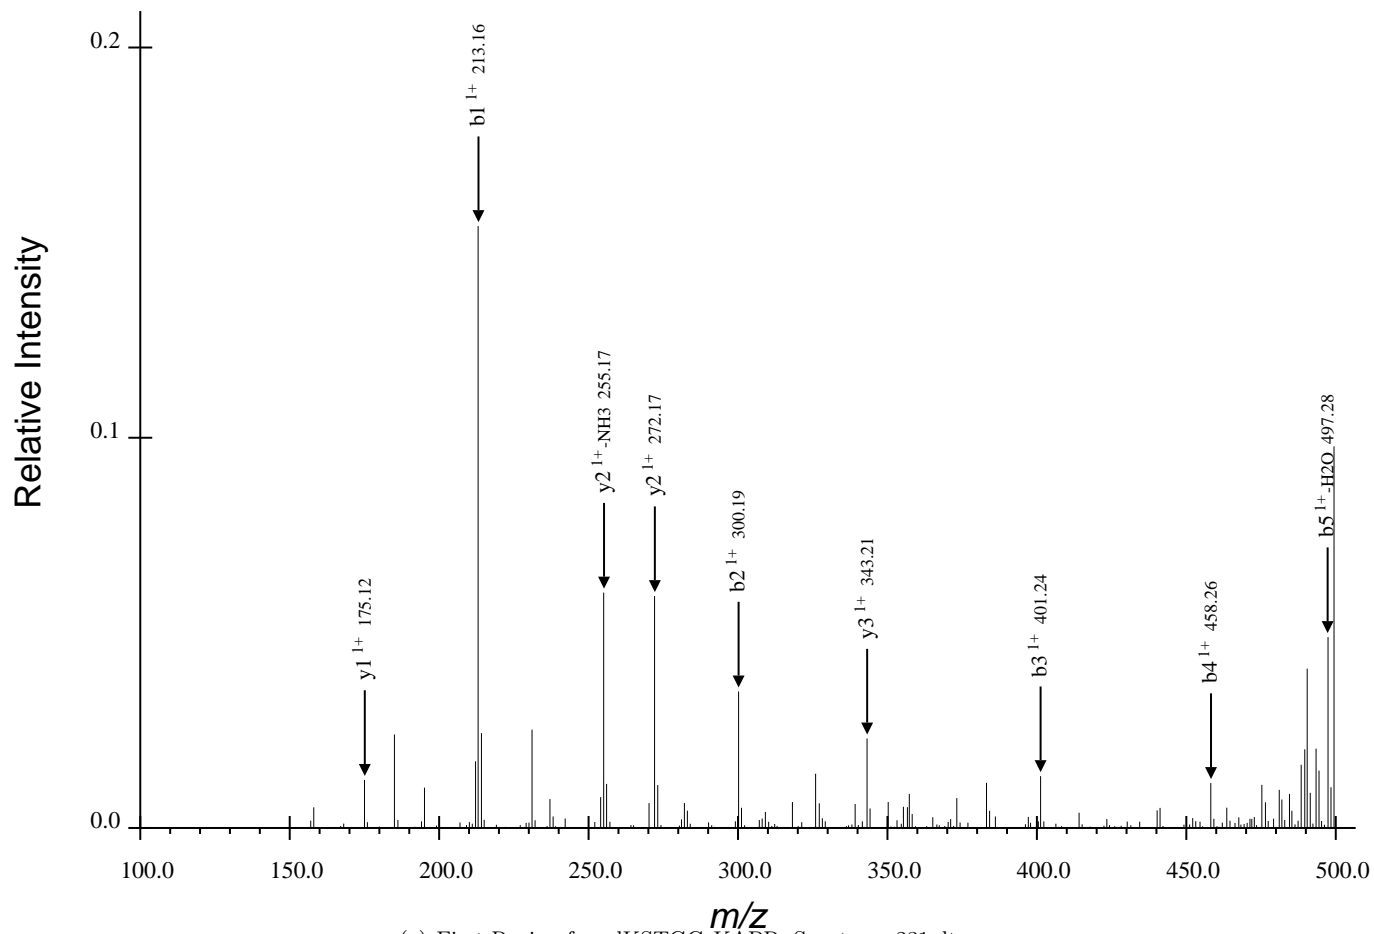

(a) First Region for rdKSTGGrKAPR, Spectrum 231.dta

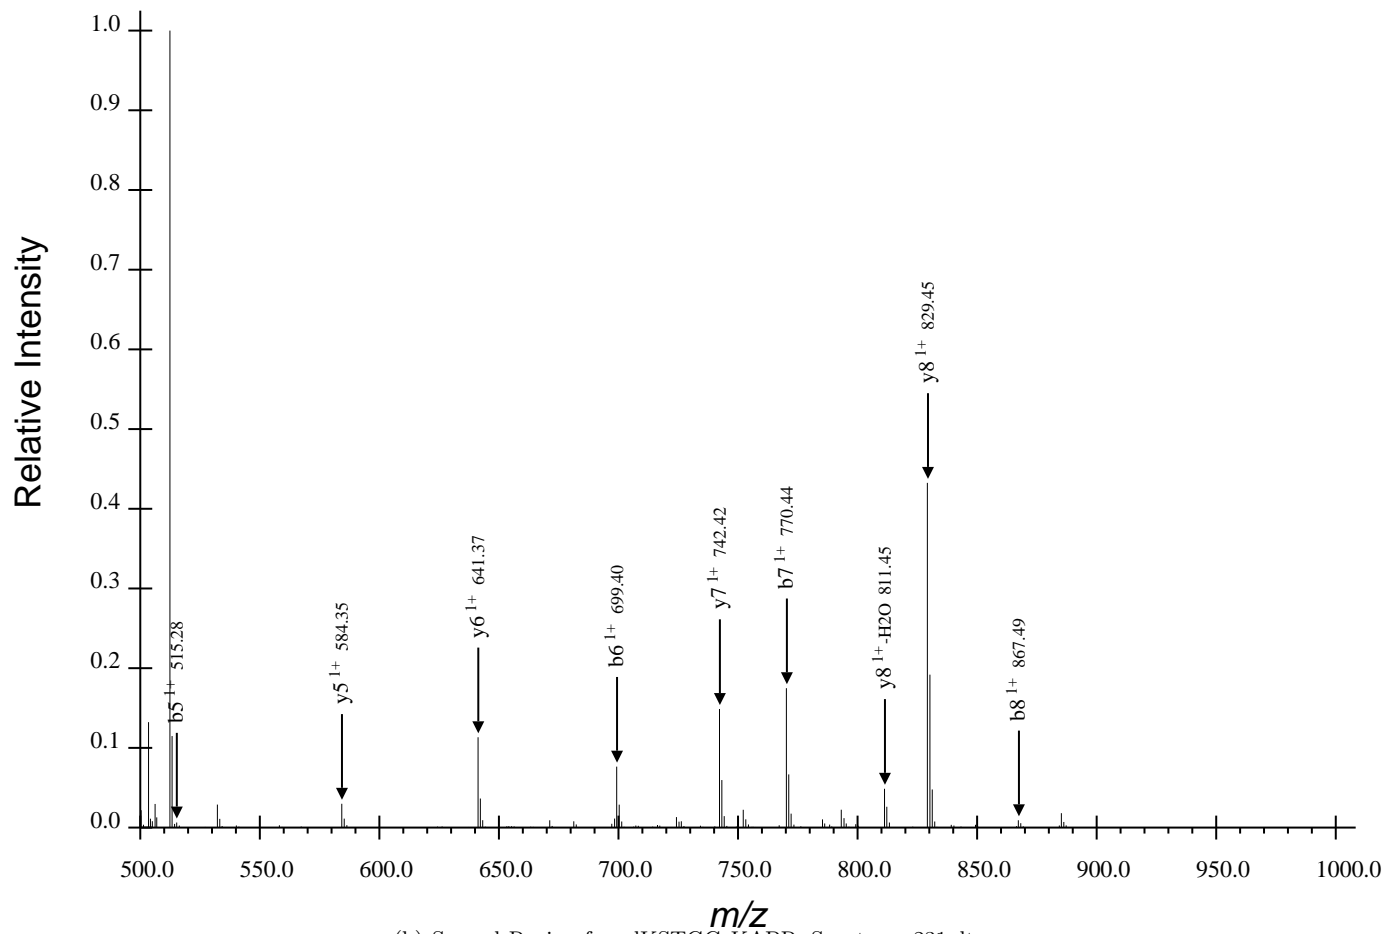

(b) Second Region for rdKSTGGrKAPR, Spectrum 231.dta

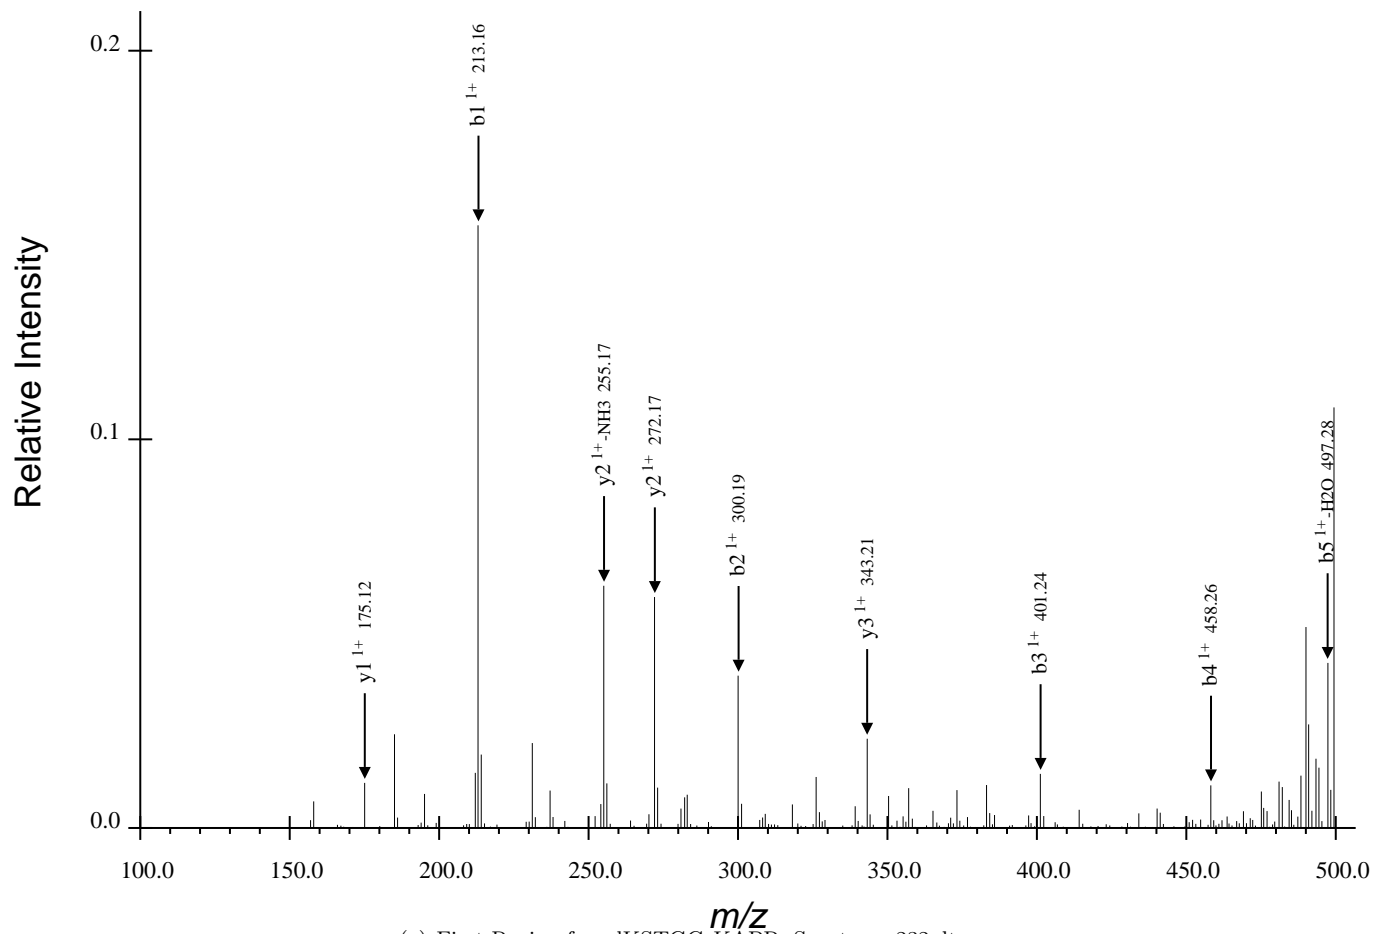

(a) First Region for rdKSTGGrKAPR, Spectrum 232.dta

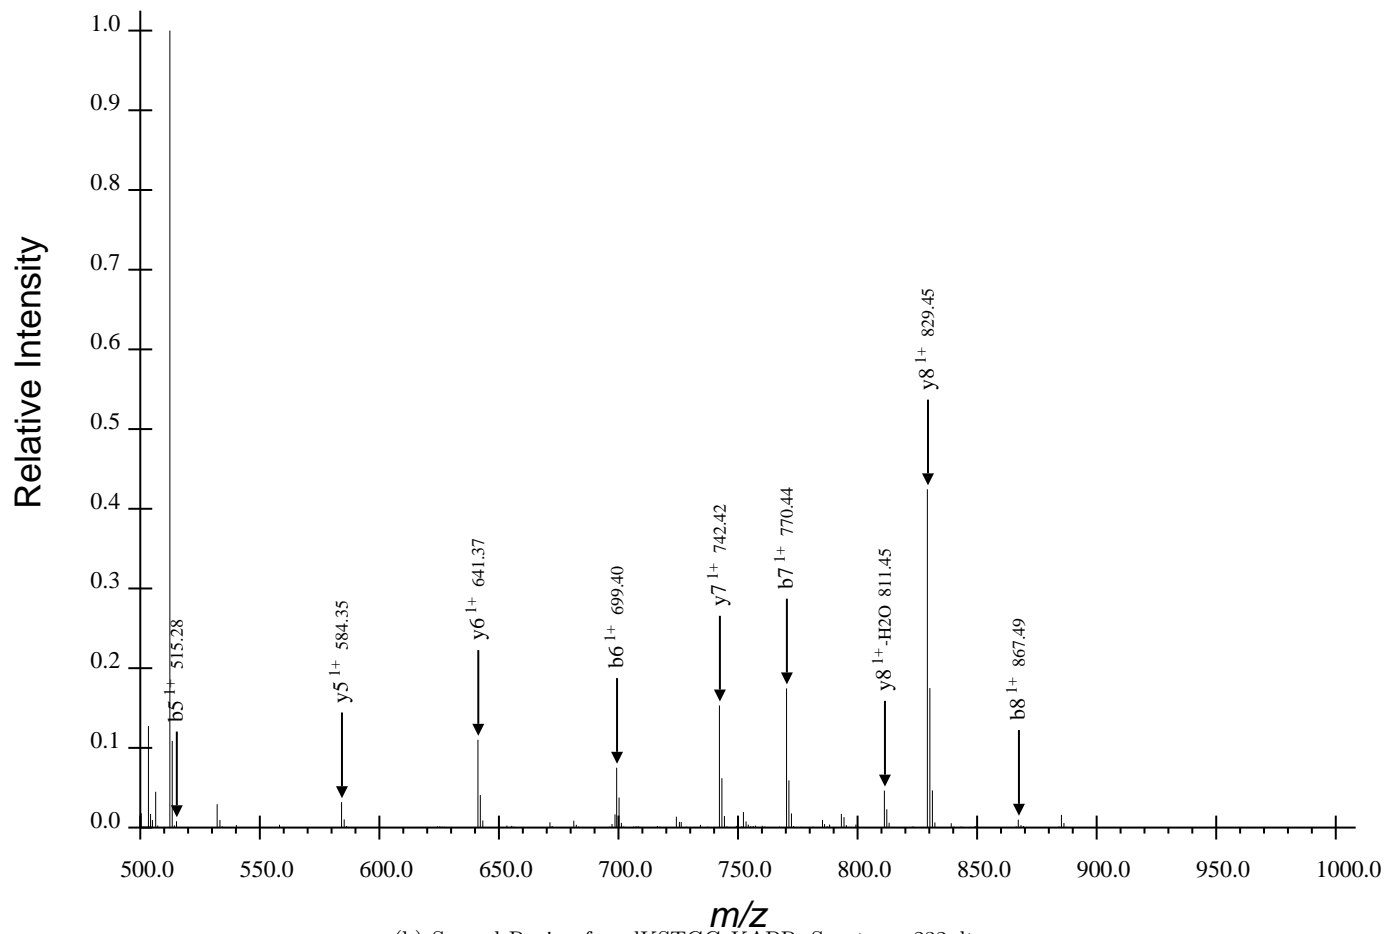

(b) Second Region for rdKSTGGrKAPR, Spectrum 232.dta



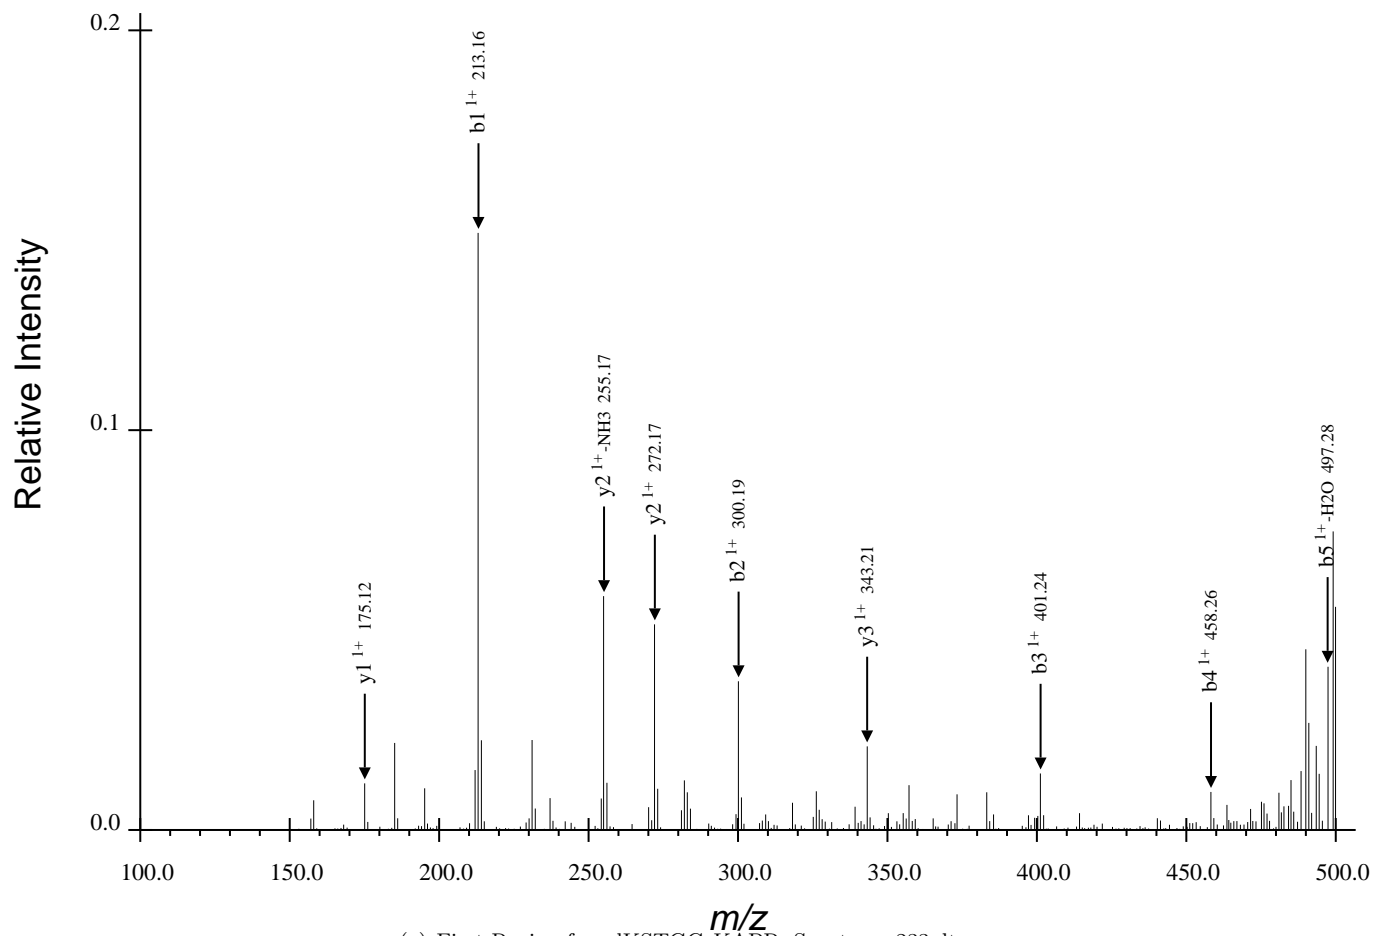

(a) First Region for rdKSTGGrKAPR, Spectrum 233.dta

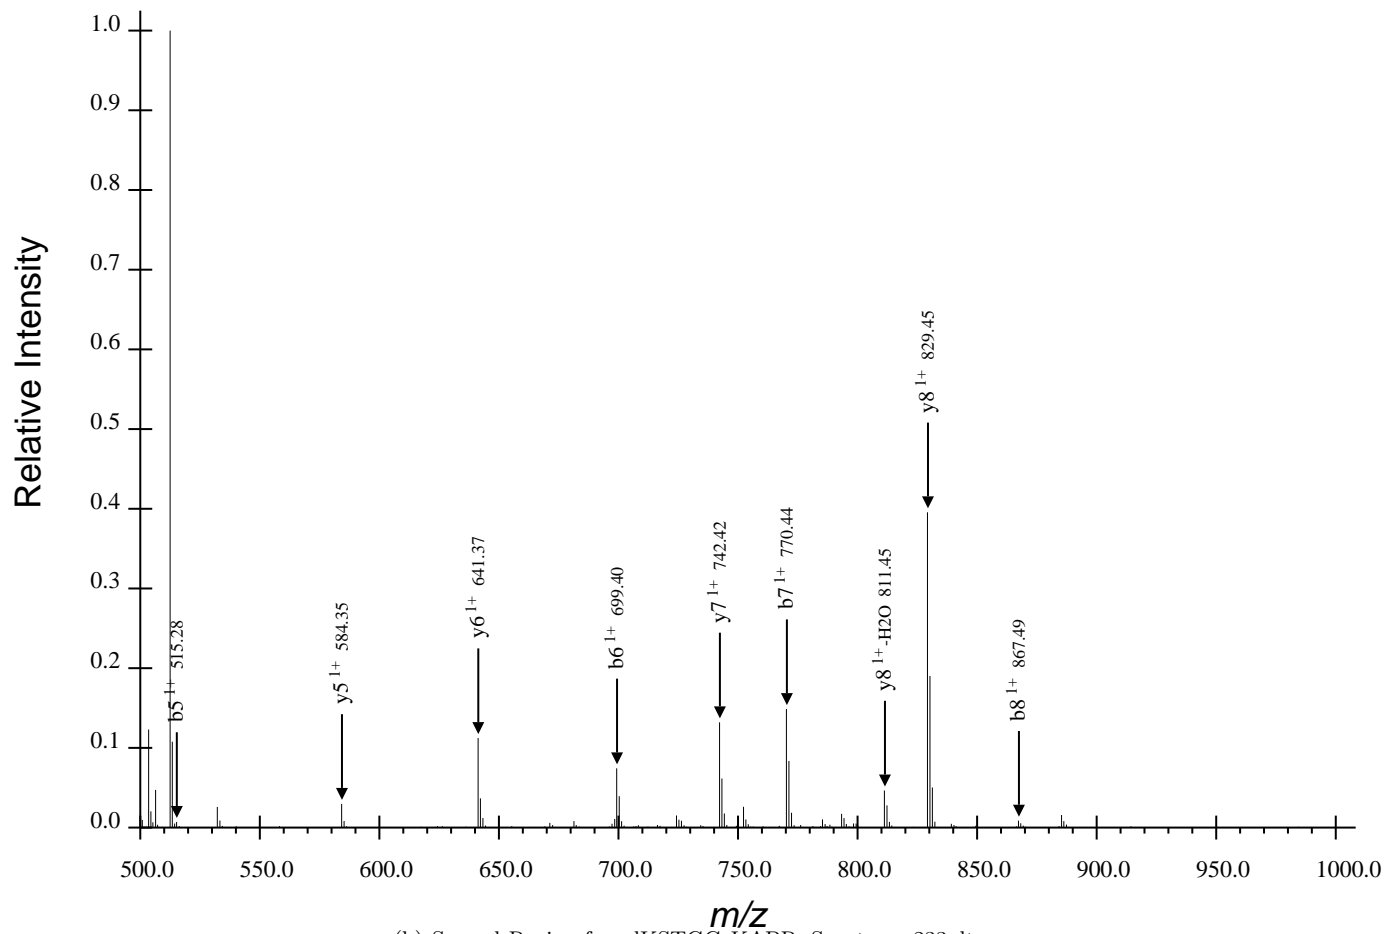

(b) Second Region for rdKSTGGrKAPR, Spectrum 233.dta

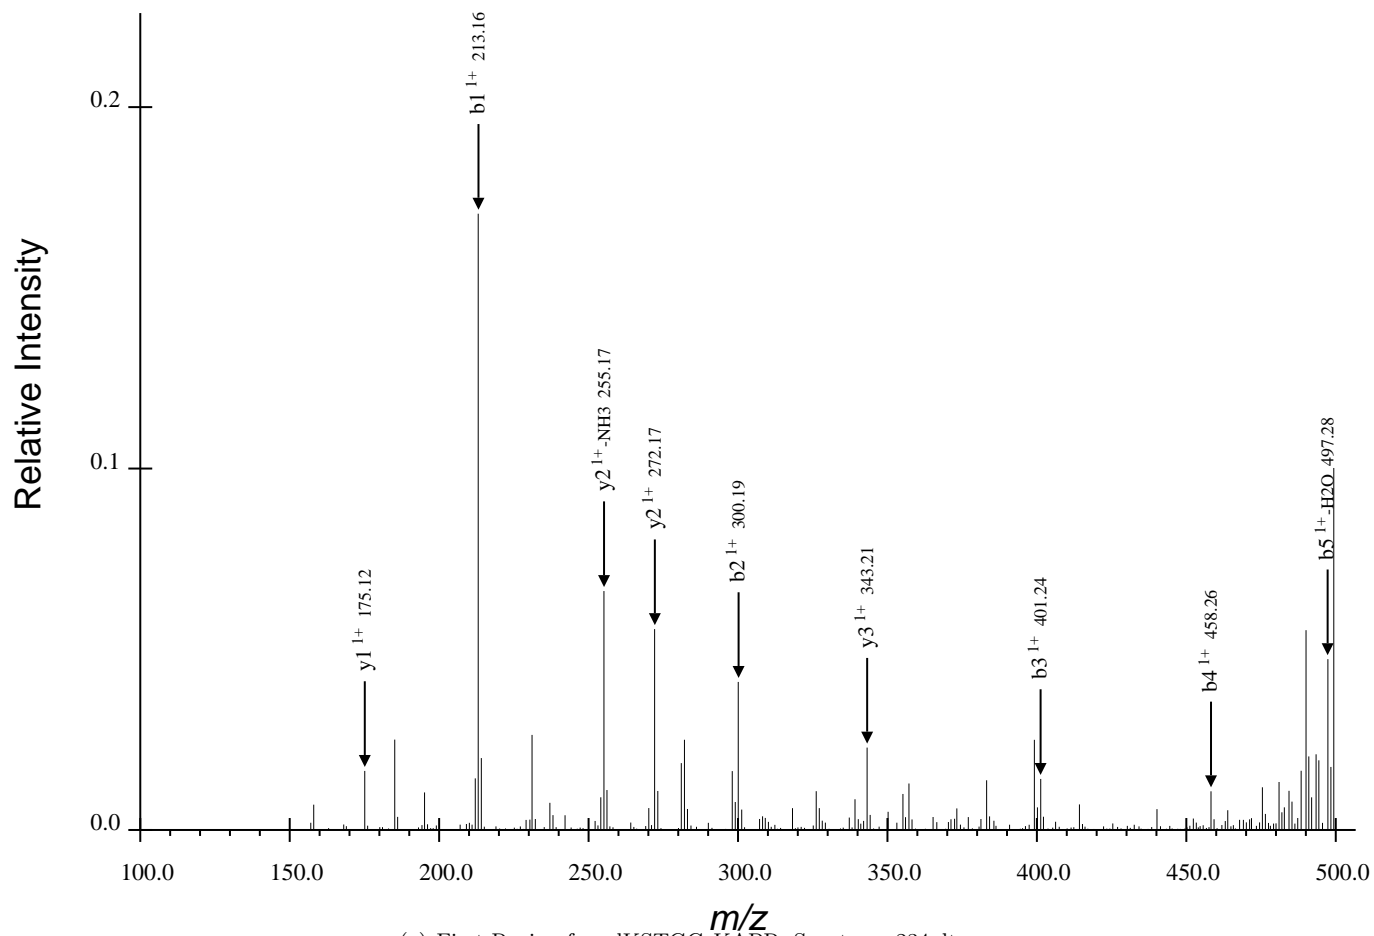

(a) First Region for rdKSTGGrKAPR, Spectrum 234.dta

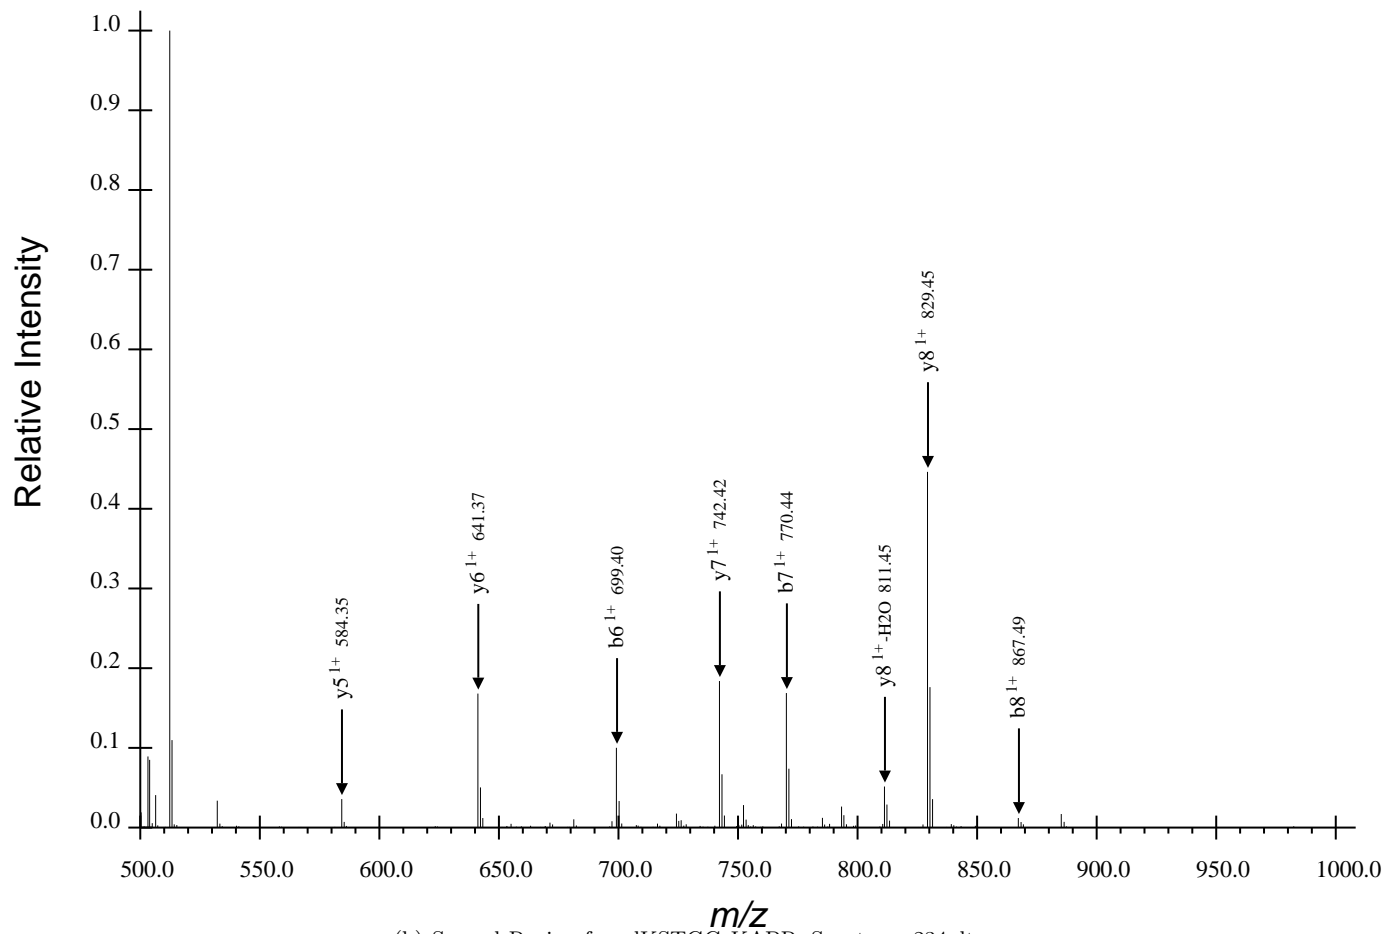

(b) Second Region for rdKSTGGrKAPR, Spectrum 234.dta

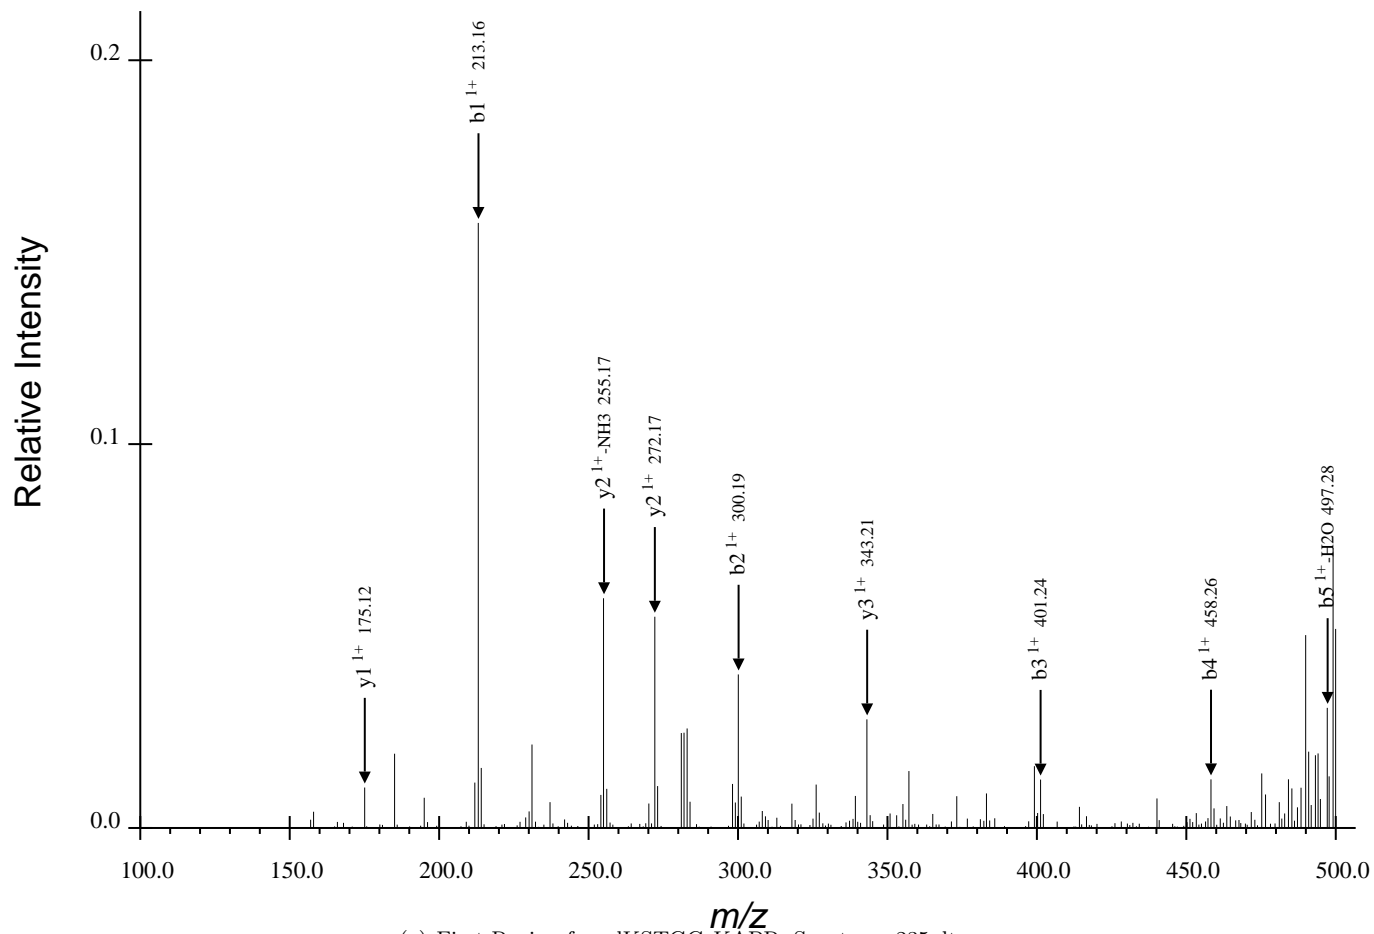

(a) First Region for rdKSTGGrKAPR, Spectrum 235.dta

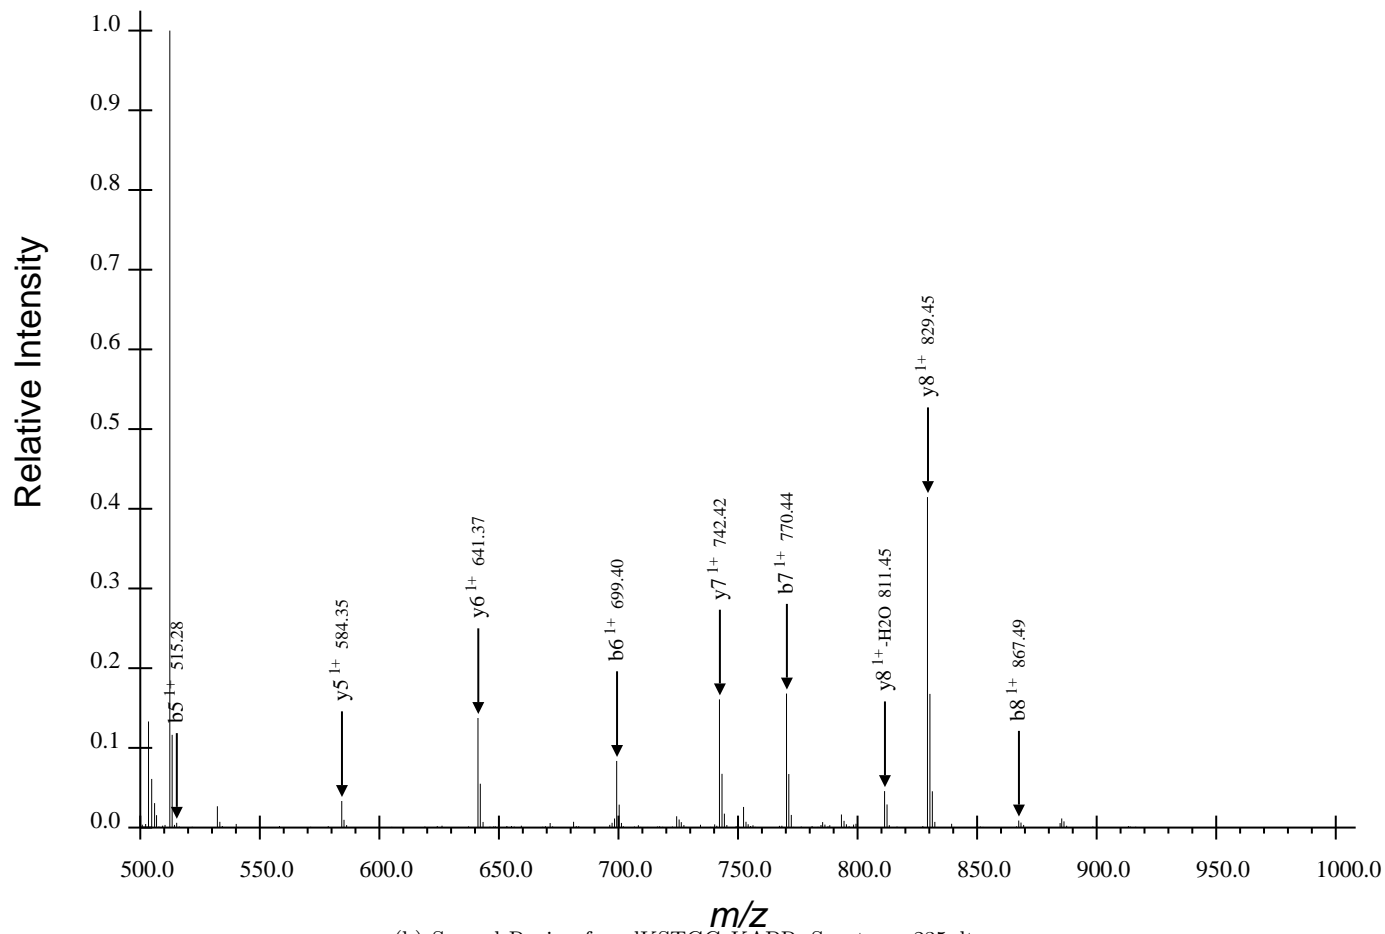

(b) Second Region for rdKSTGGrKAPR, Spectrum 235.dta

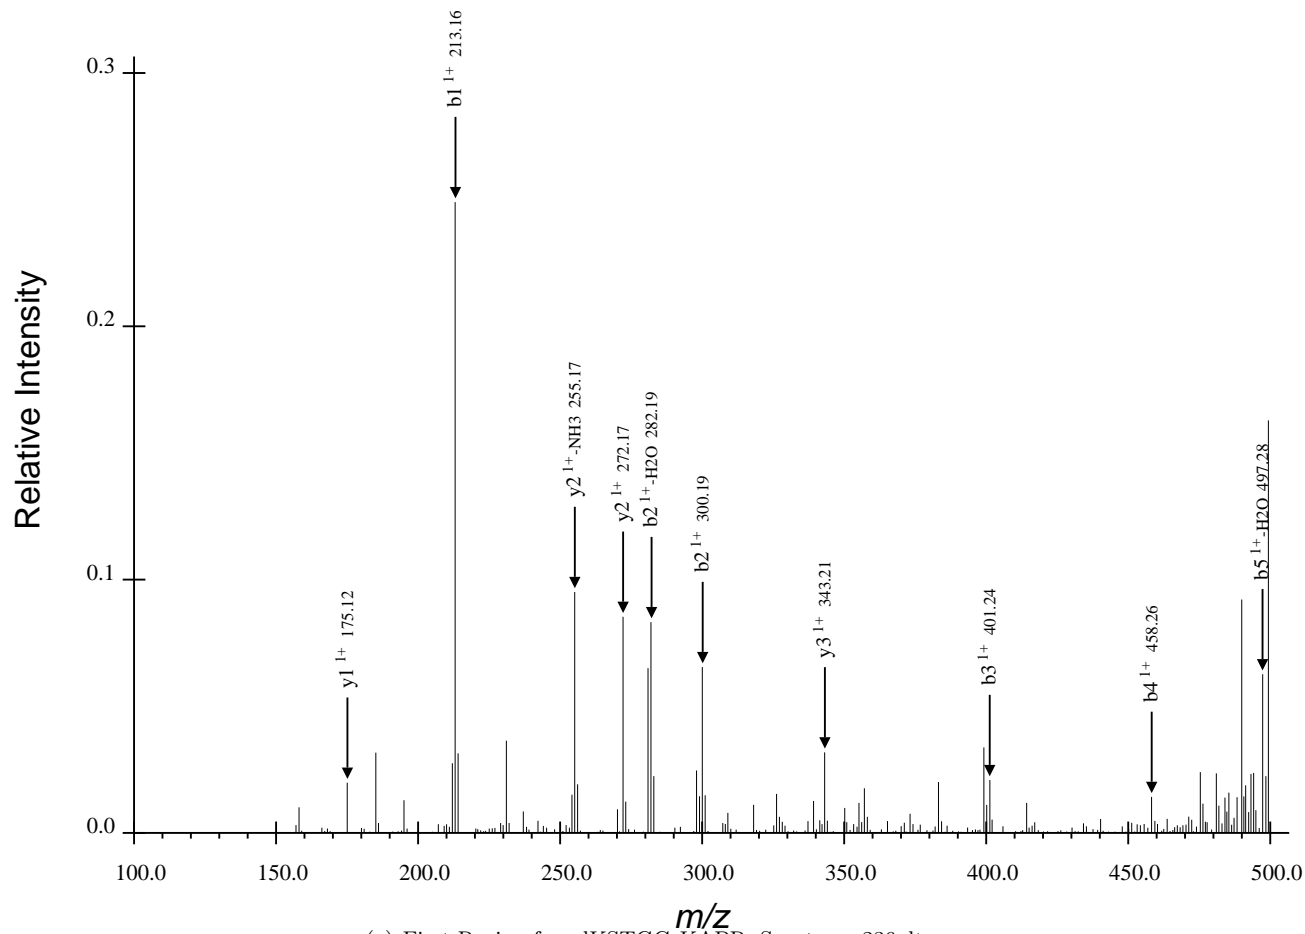

(a) First Region for rdKSTGGrKAPR, Spectrum 236.dta

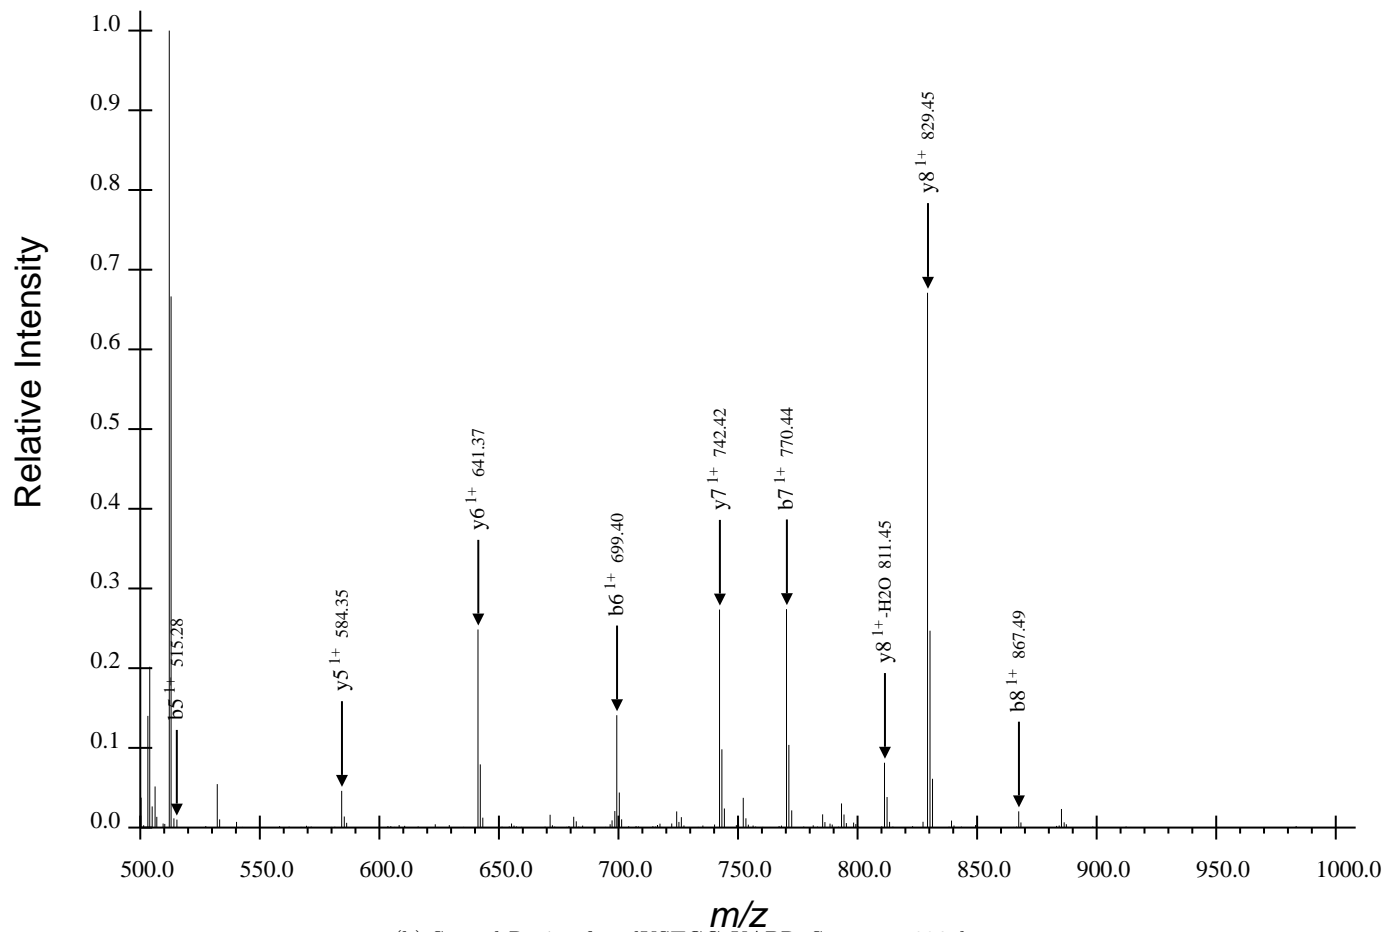

(b) Second Region for rdKSTGGrKAPR, Spectrum 236.dta

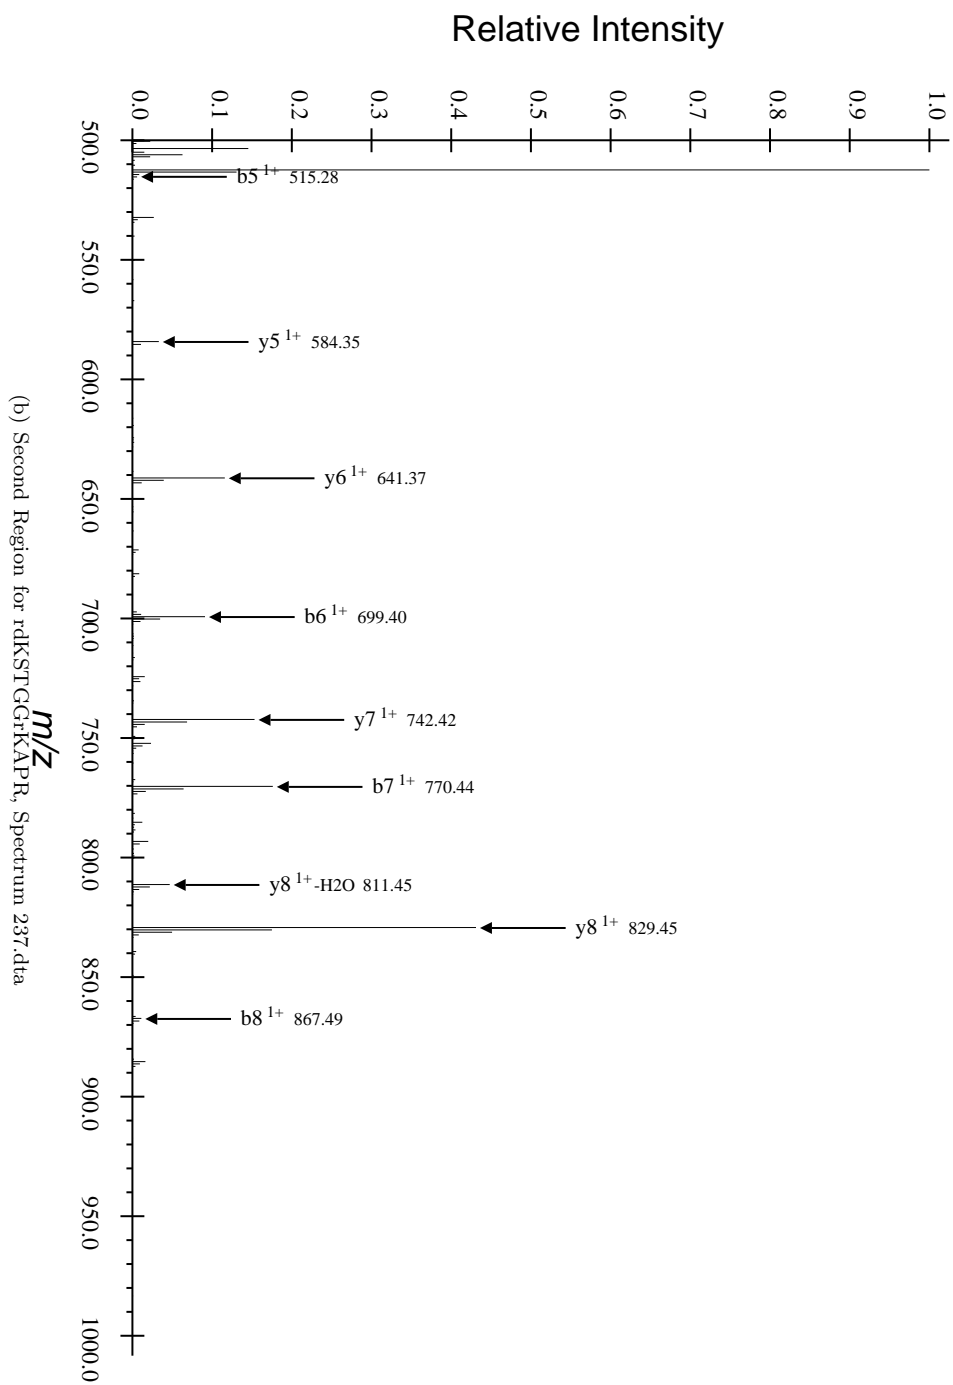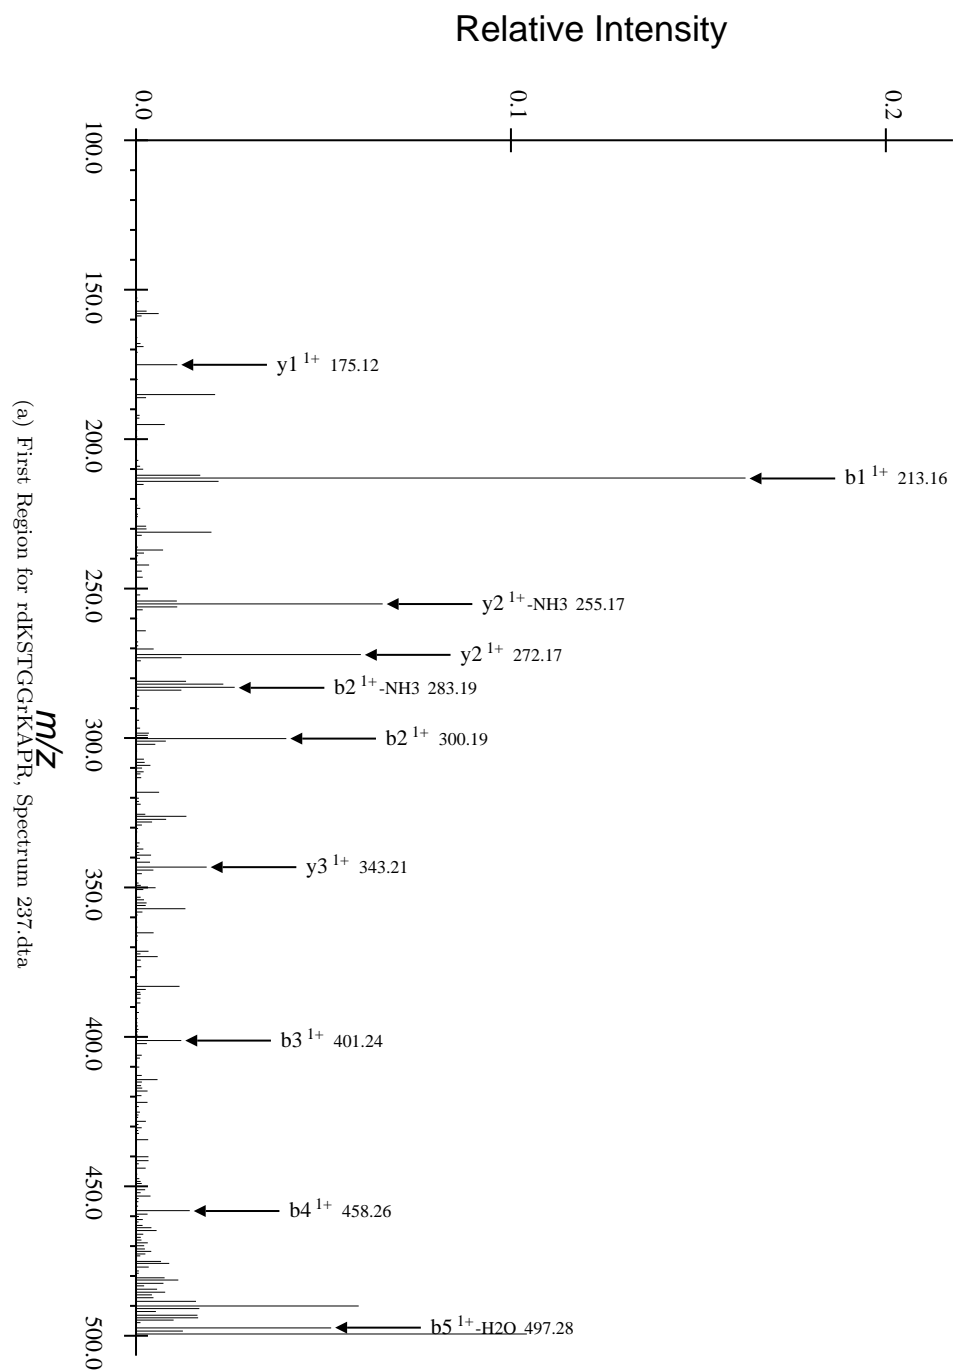

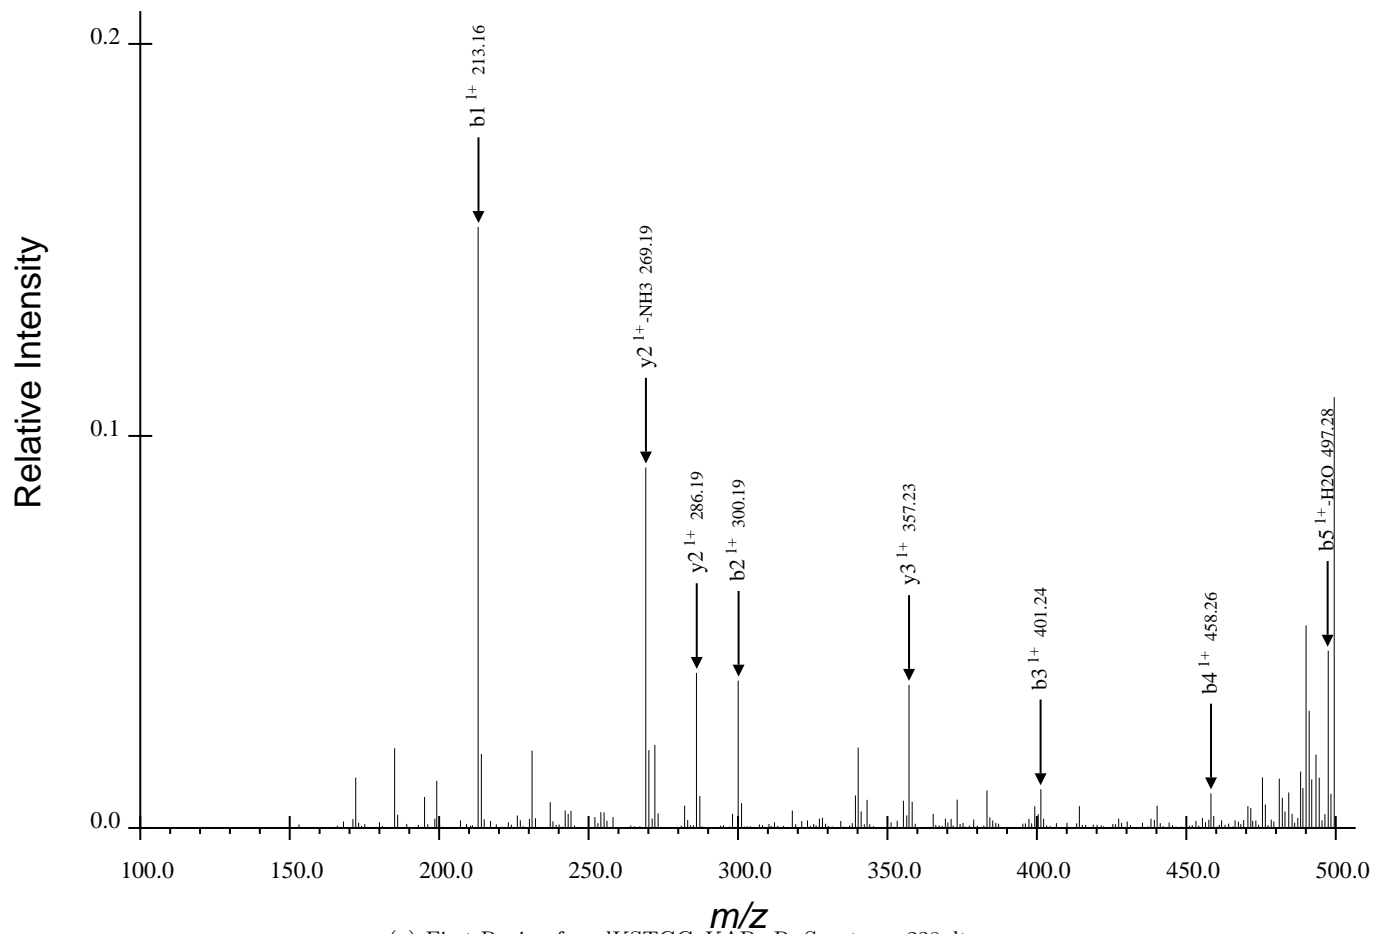

(a) First Region for rdKSTGGaKAPmR, Spectrum 238.dta

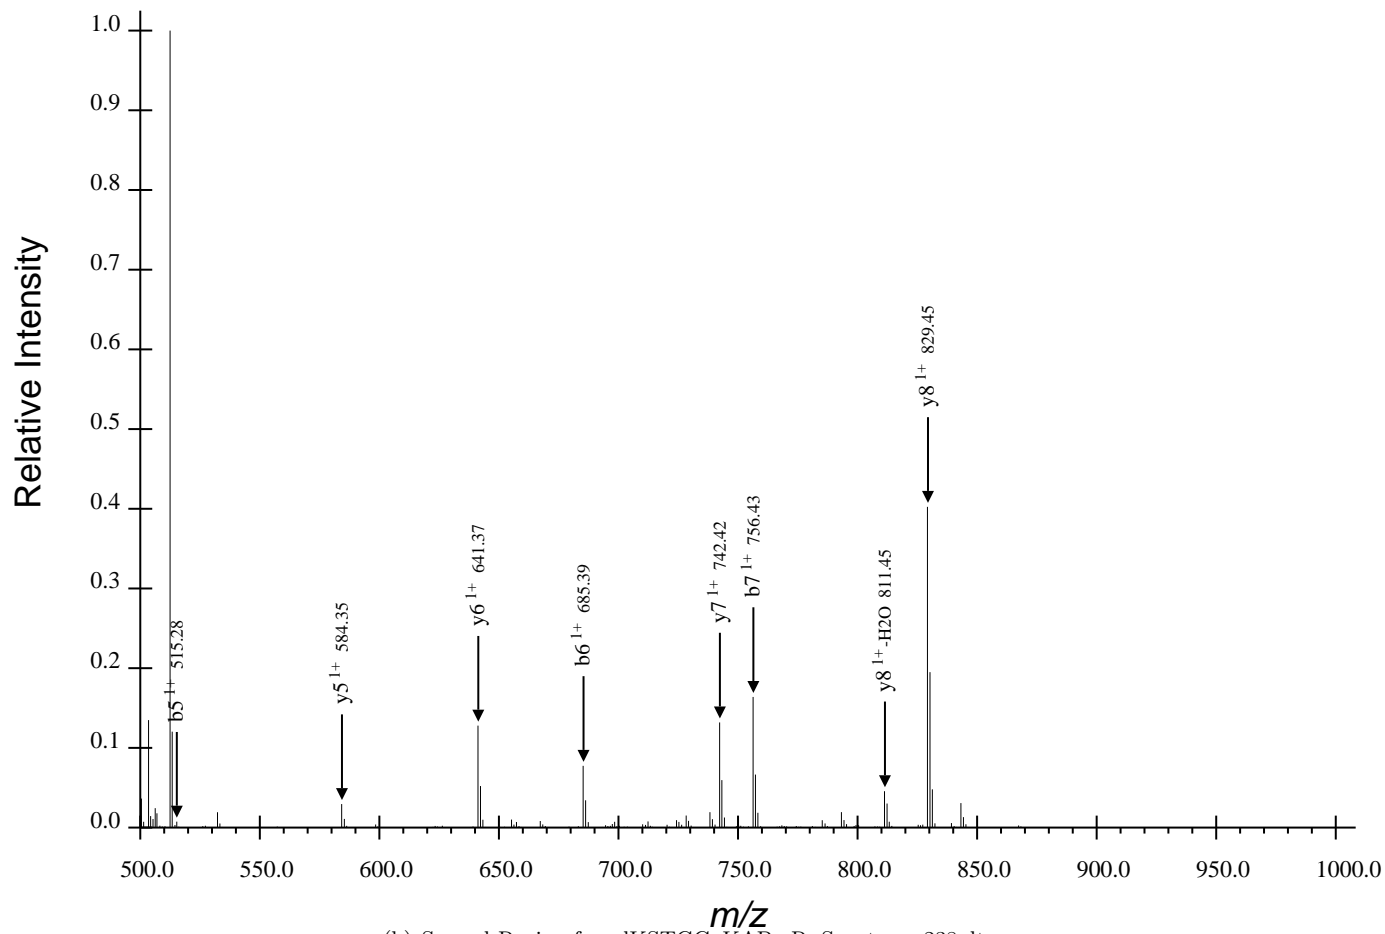

(b) Second Region for rdKSTGGaKAPmR, Spectrum 238.dta

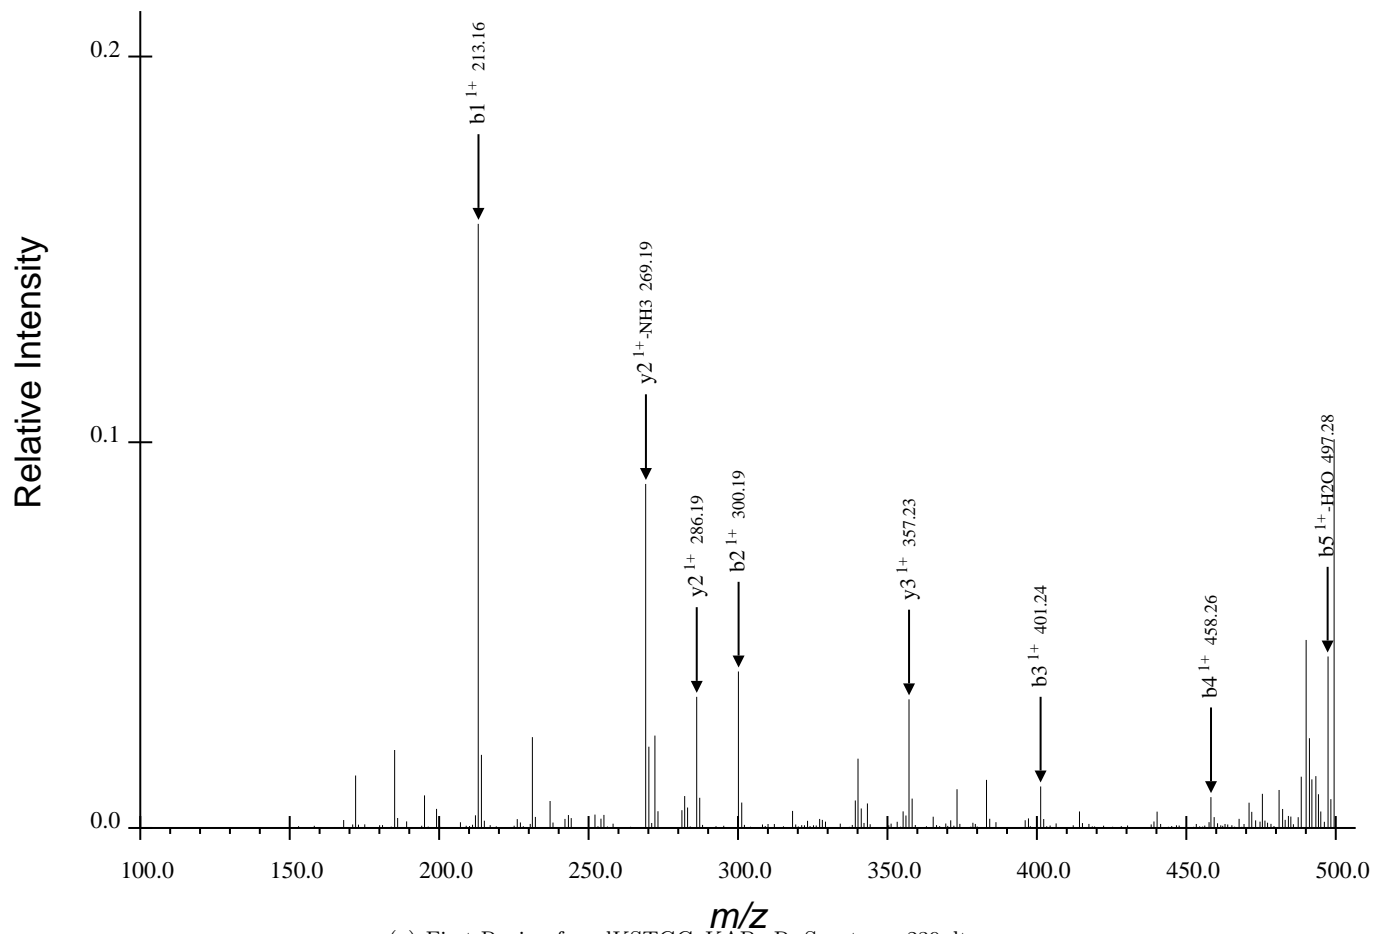

(a) First Region for rdKSTGGaKAPmR, Spectrum 239.dta

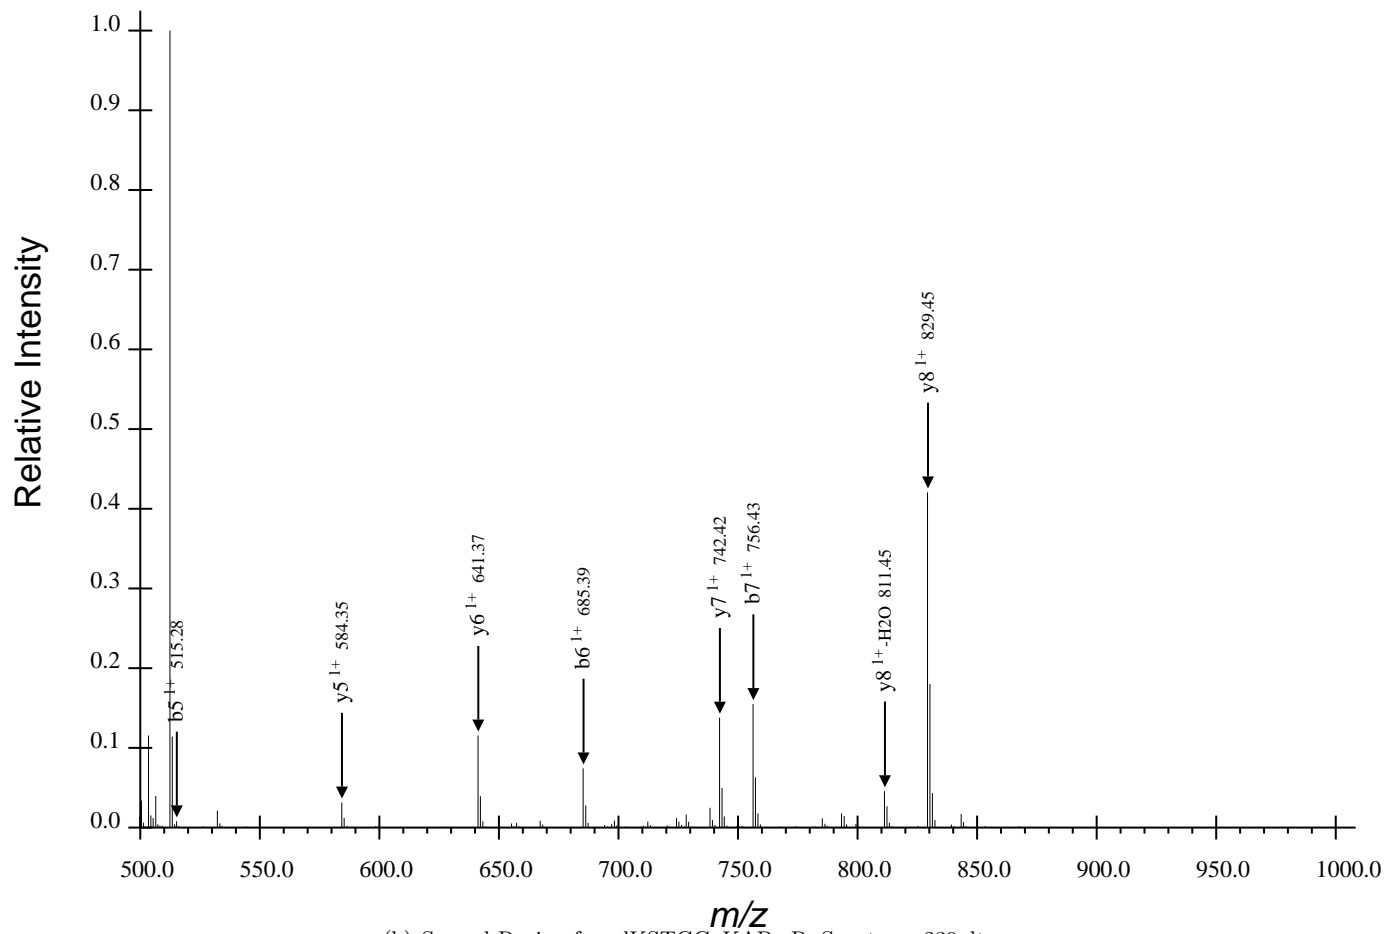

(b) Second Region for rdKSTGGaKAPmR, Spectrum 239.dta

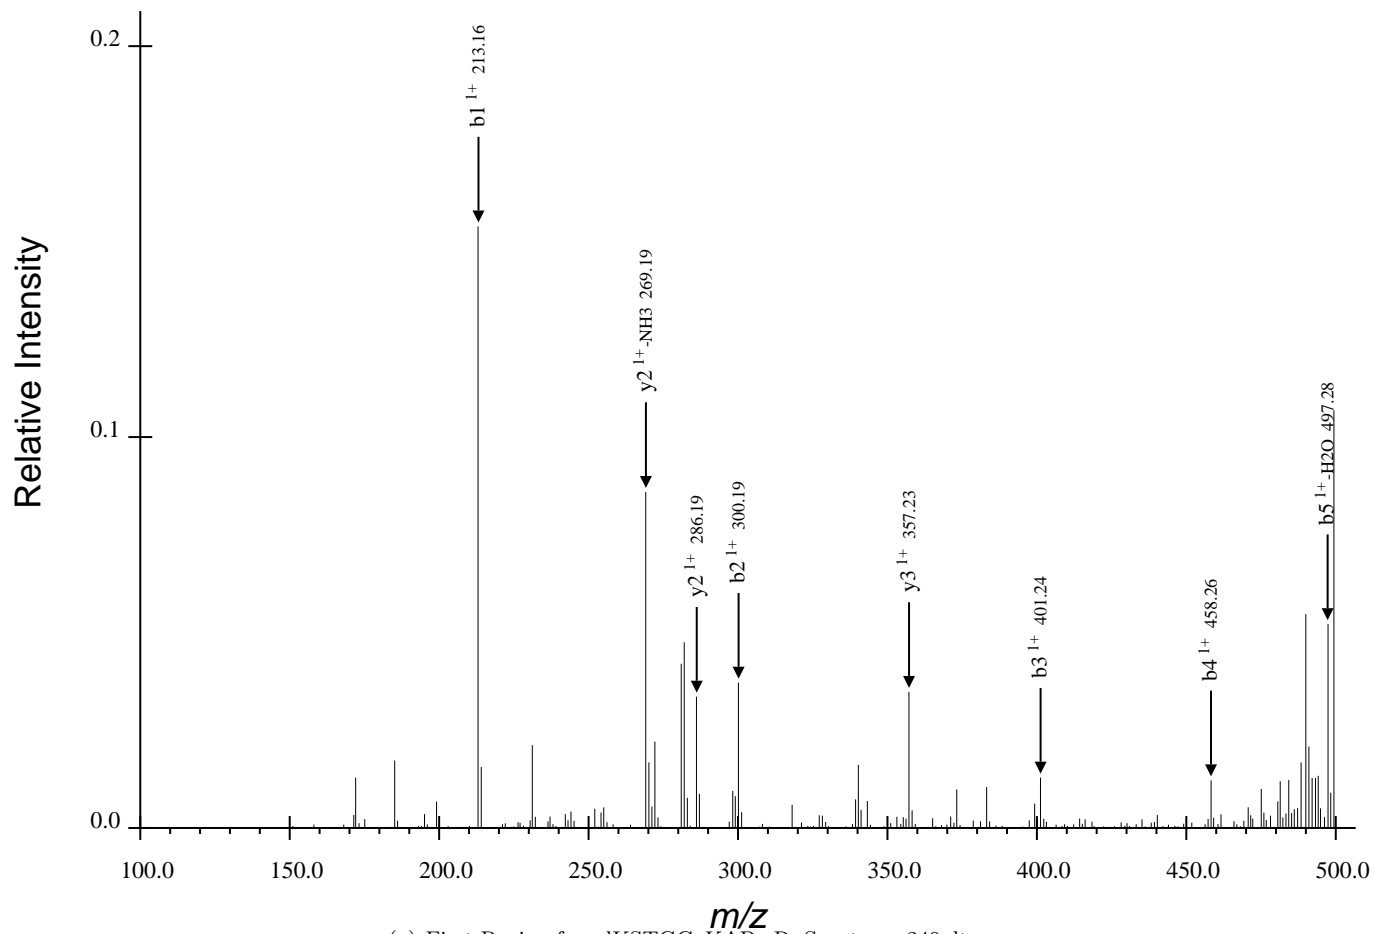

(a) First Region for rdKSTGGaKAPmR, Spectrum 240.dta

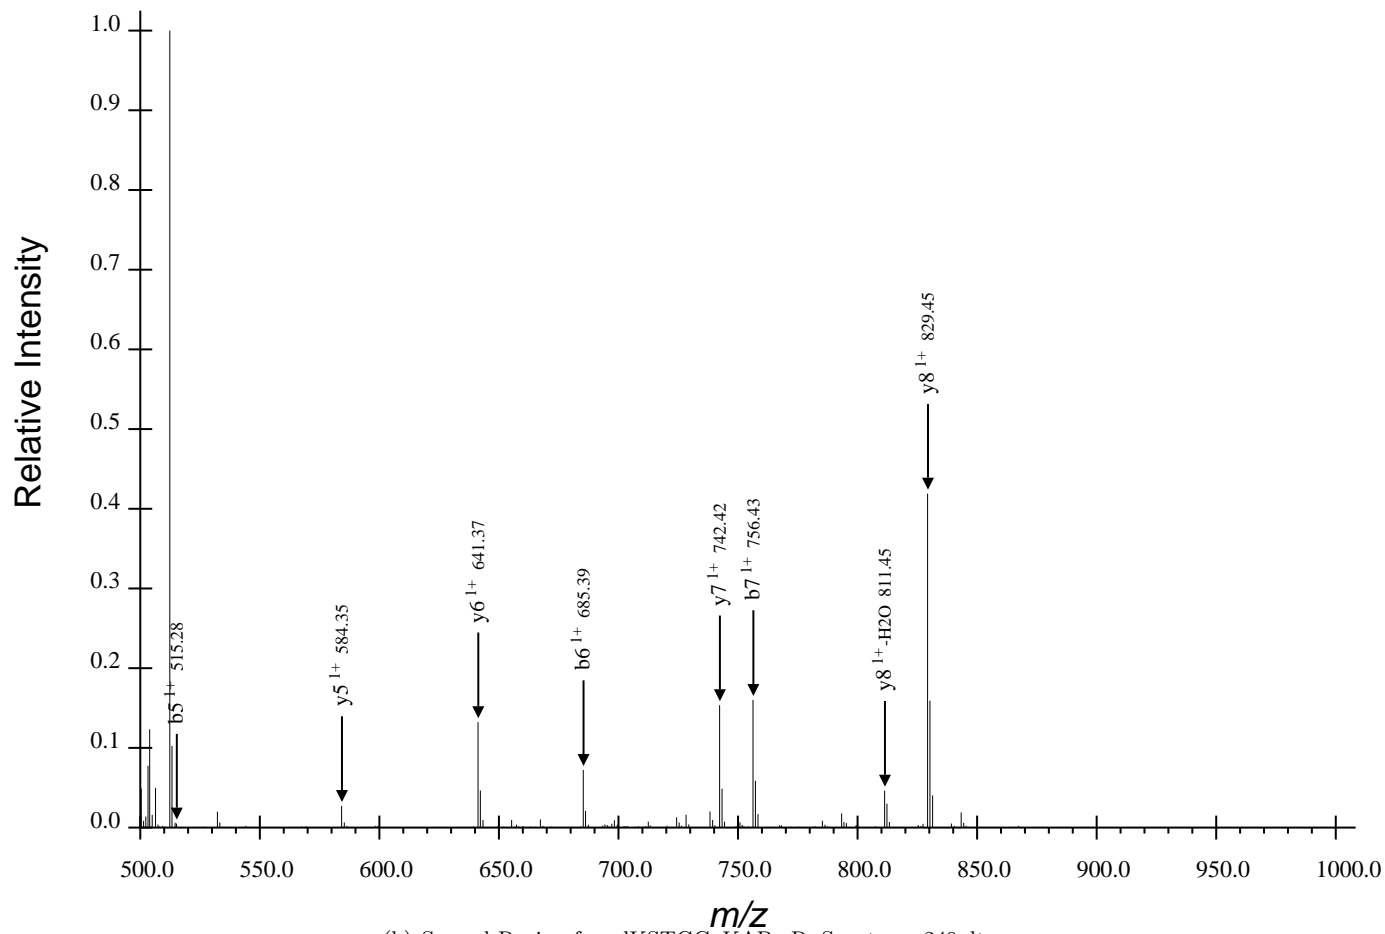

(b) Second Region for rdKSTGGaKAPmR, Spectrum 240.dta



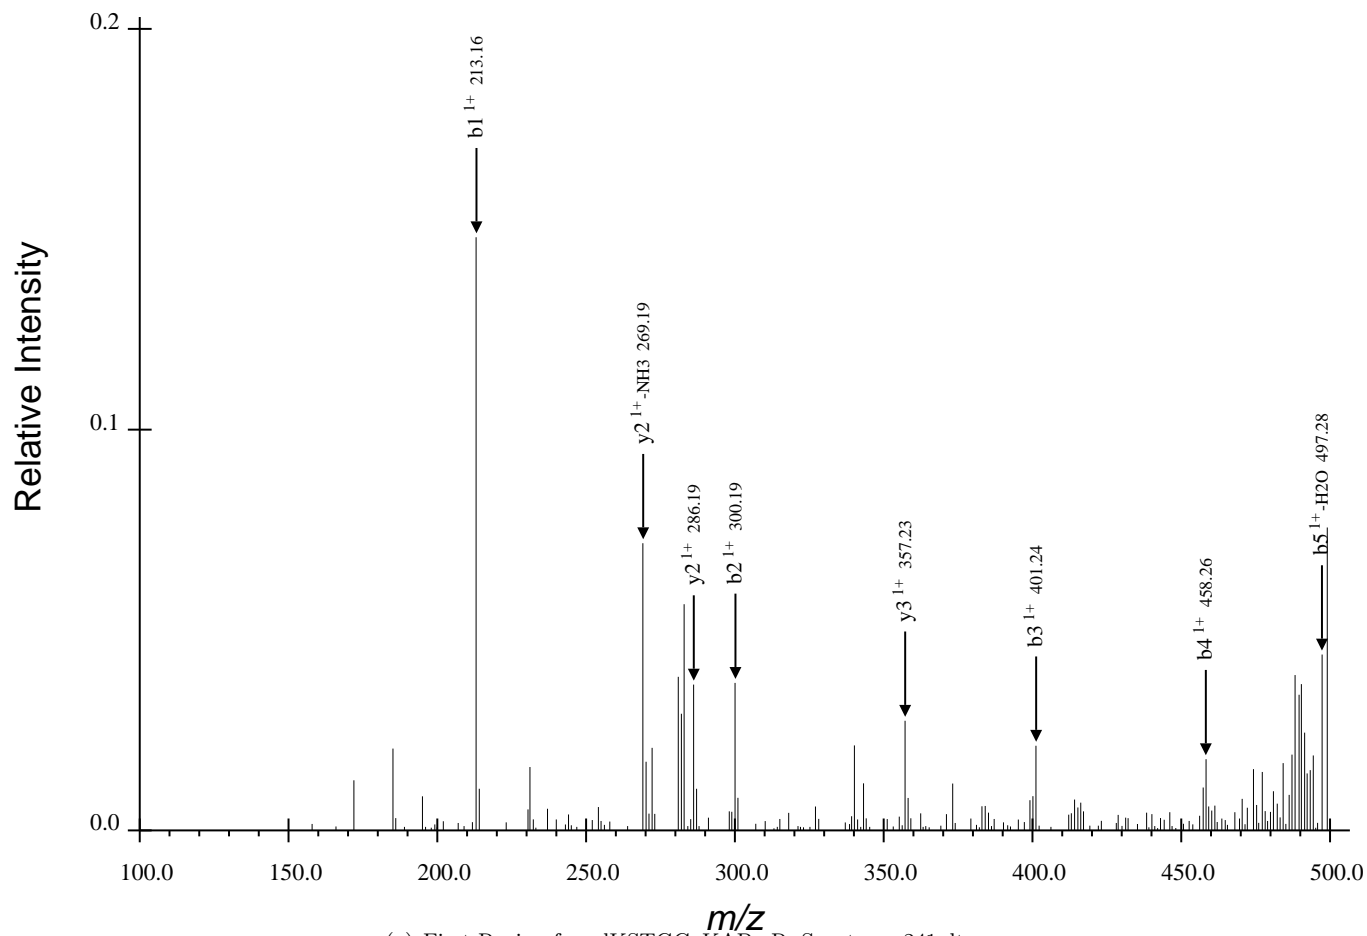

(a) First Region for rdKSTGGaKAPmR, Spectrum 241.dta

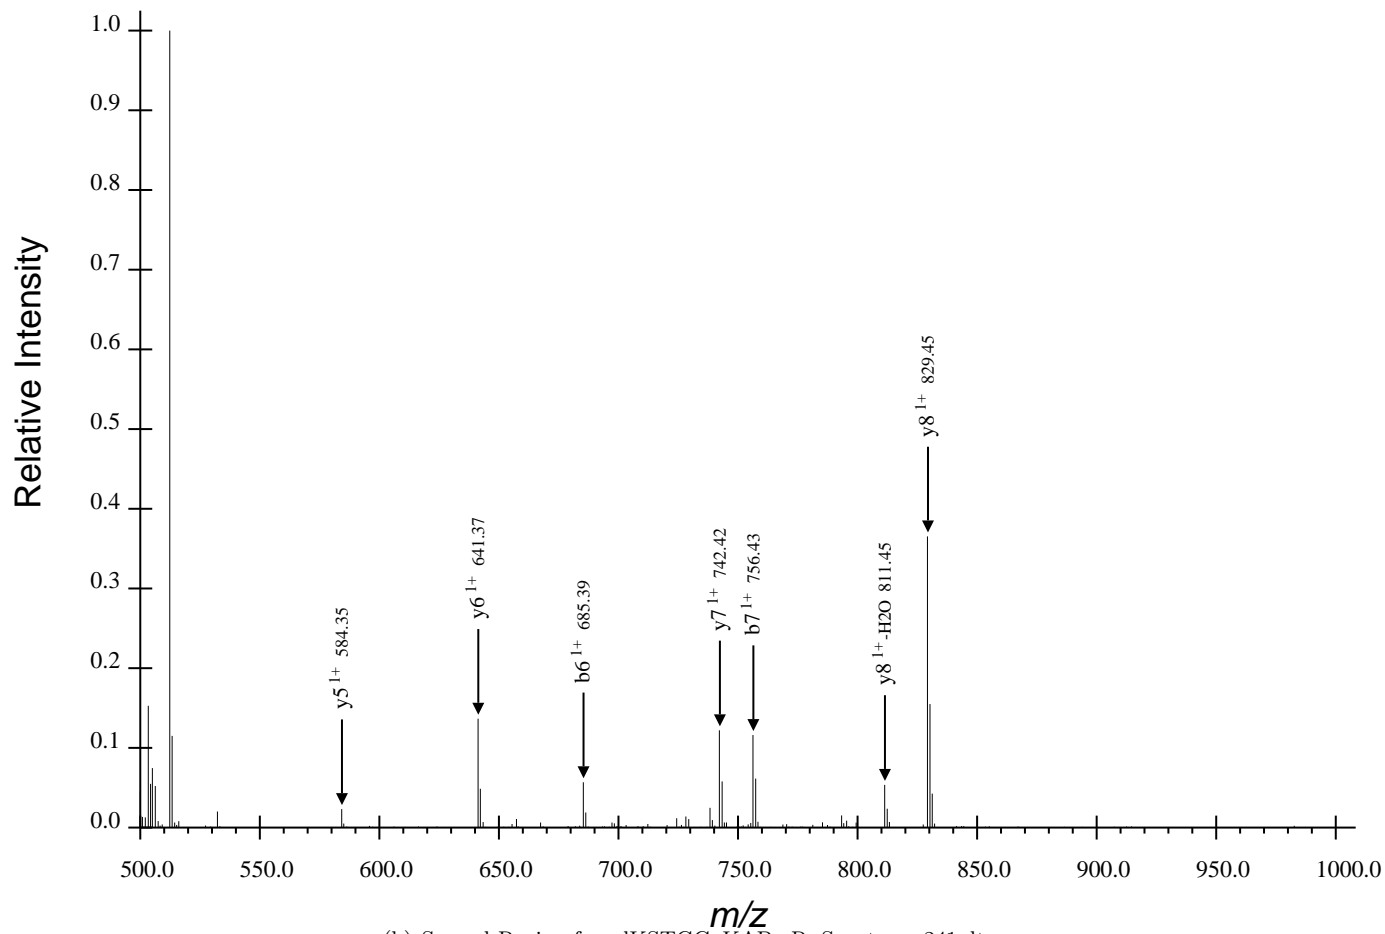

(b) Second Region for rdKSTGGaKAPmR, Spectrum 241.dta

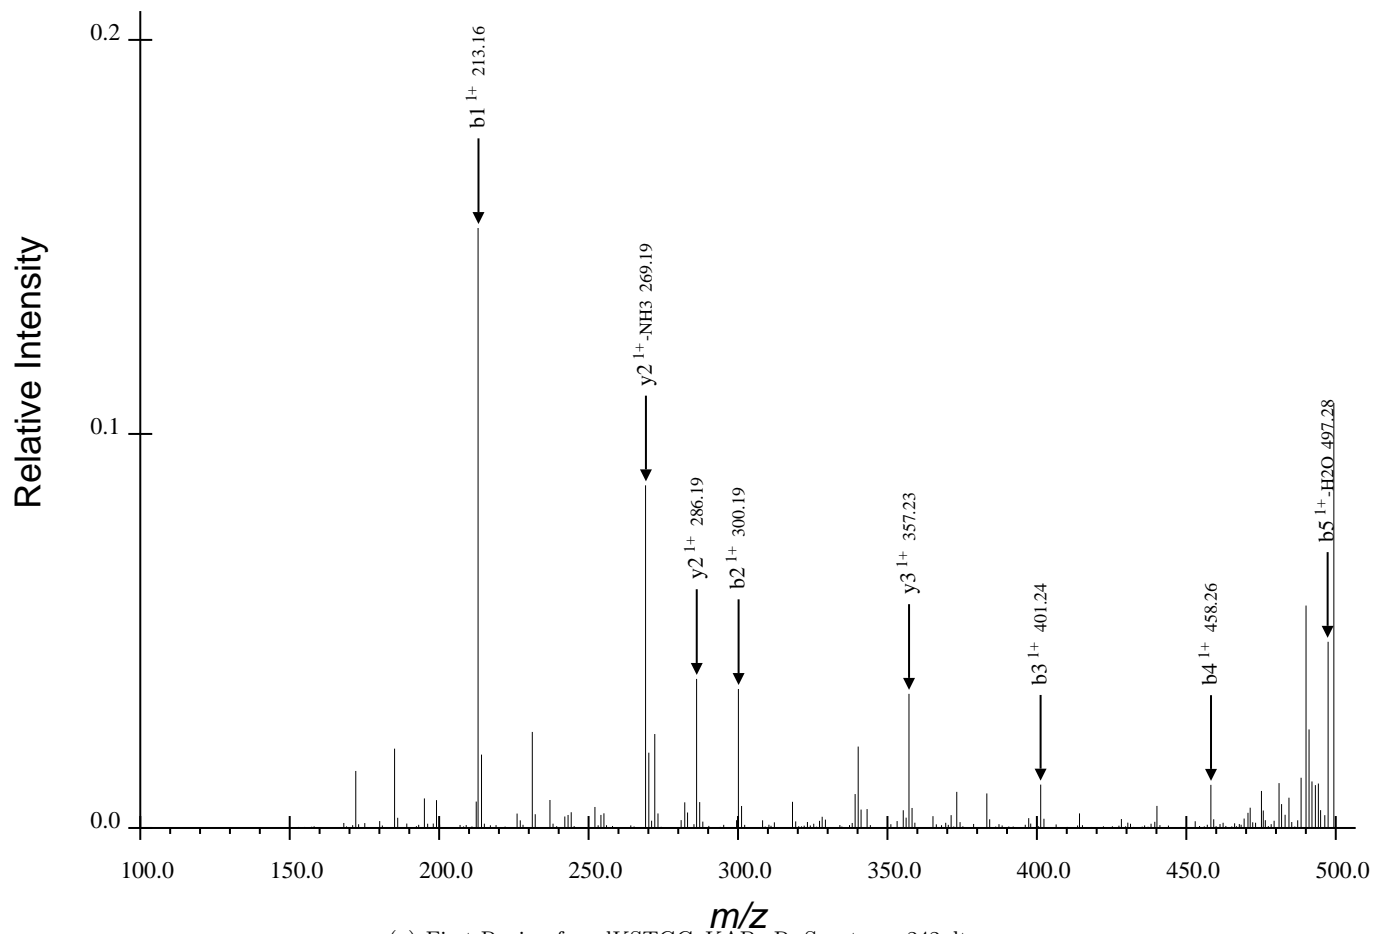

(a) First Region for rdKSTGGaKAPmR, Spectrum 242.dta

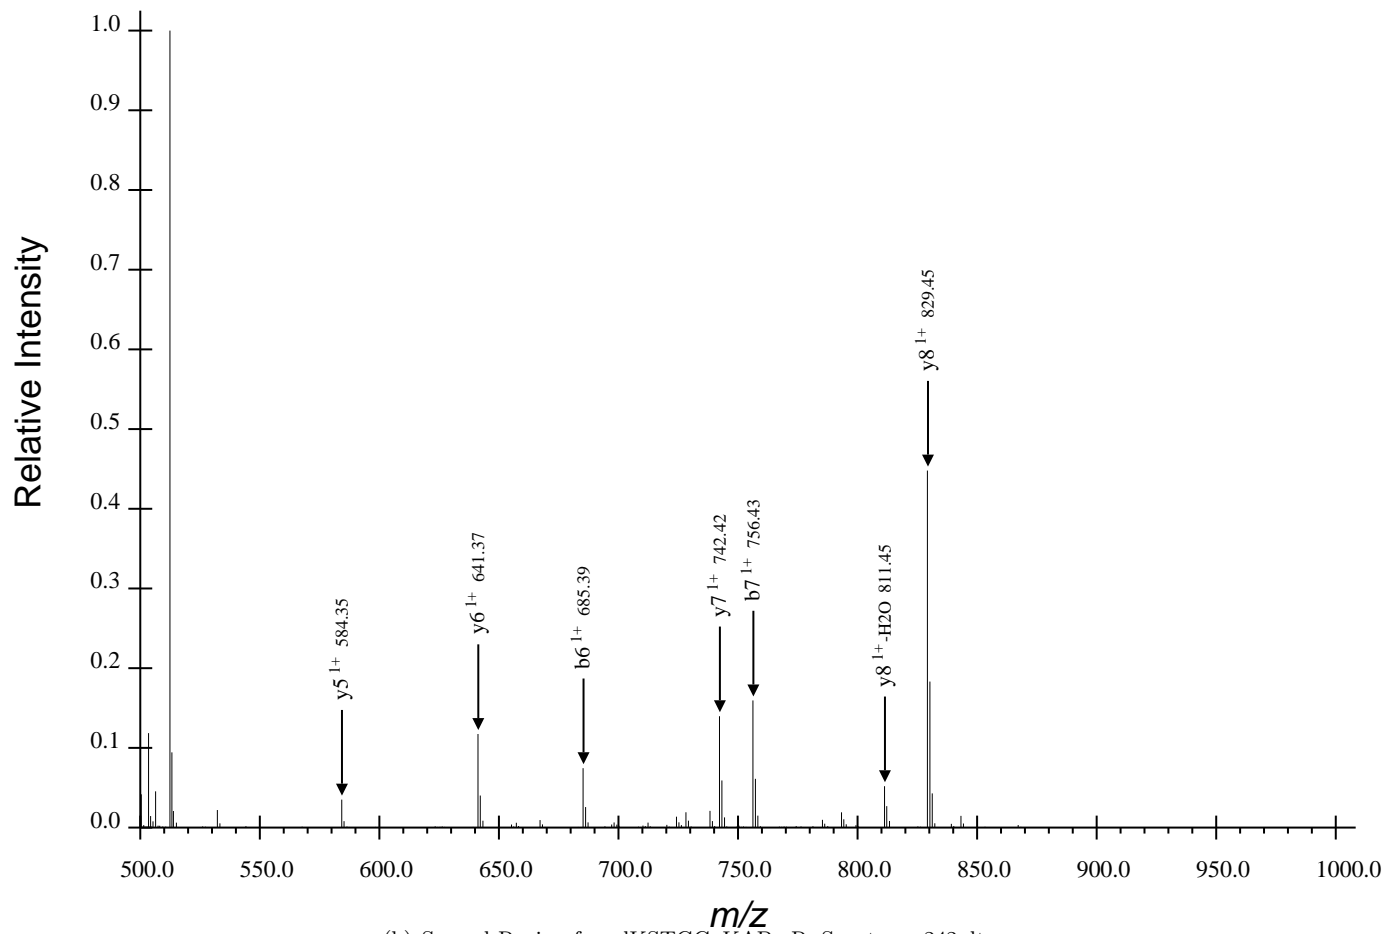

(b) Second Region for rdKSTGGaKAPmR, Spectrum 242.dta

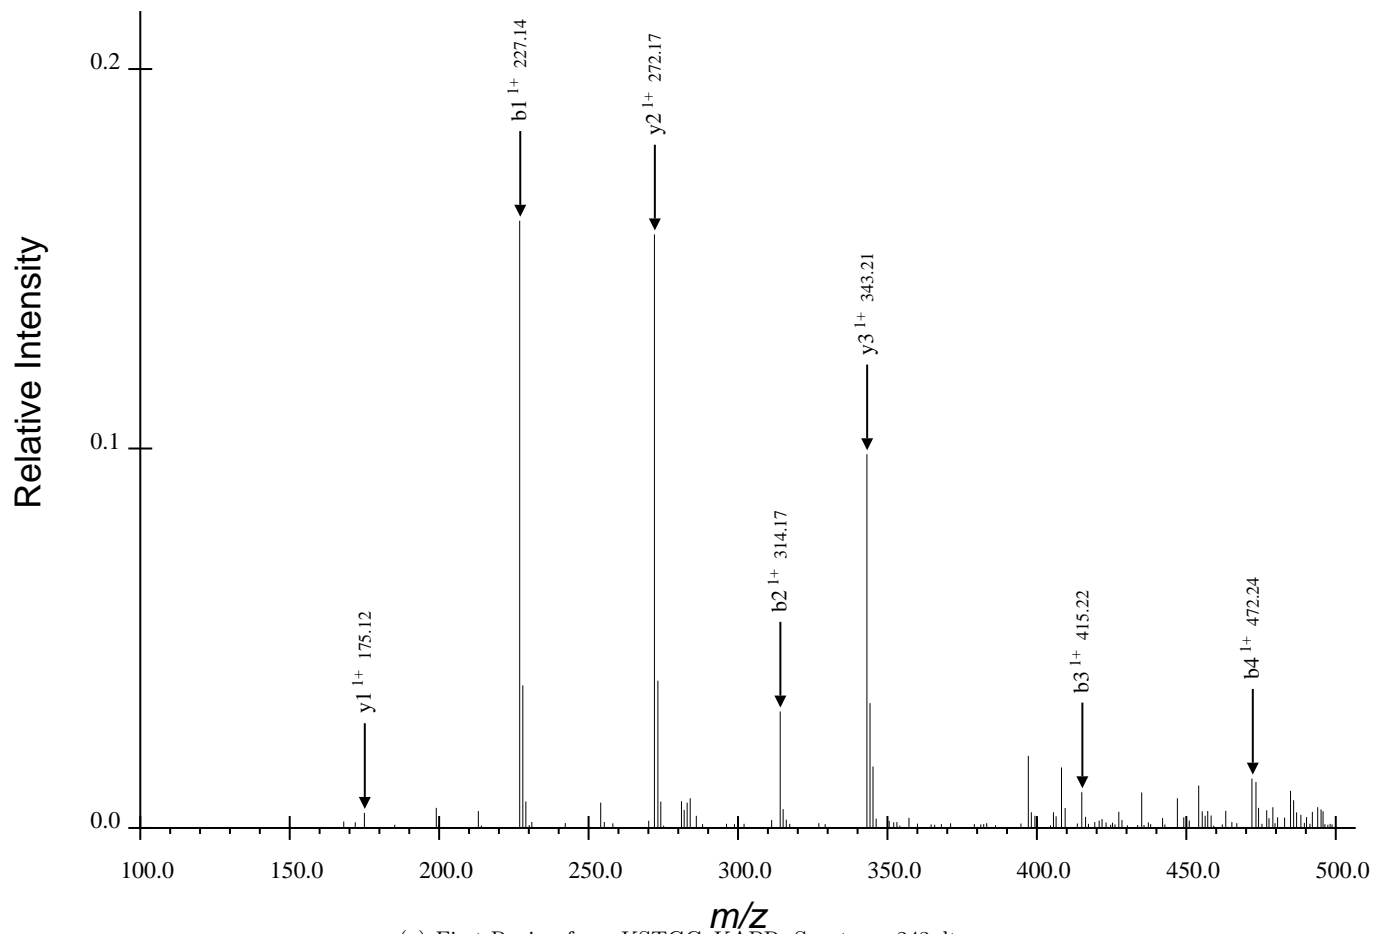

(a) First Region for raKSTGGaKAPR, Spectrum 243.dta

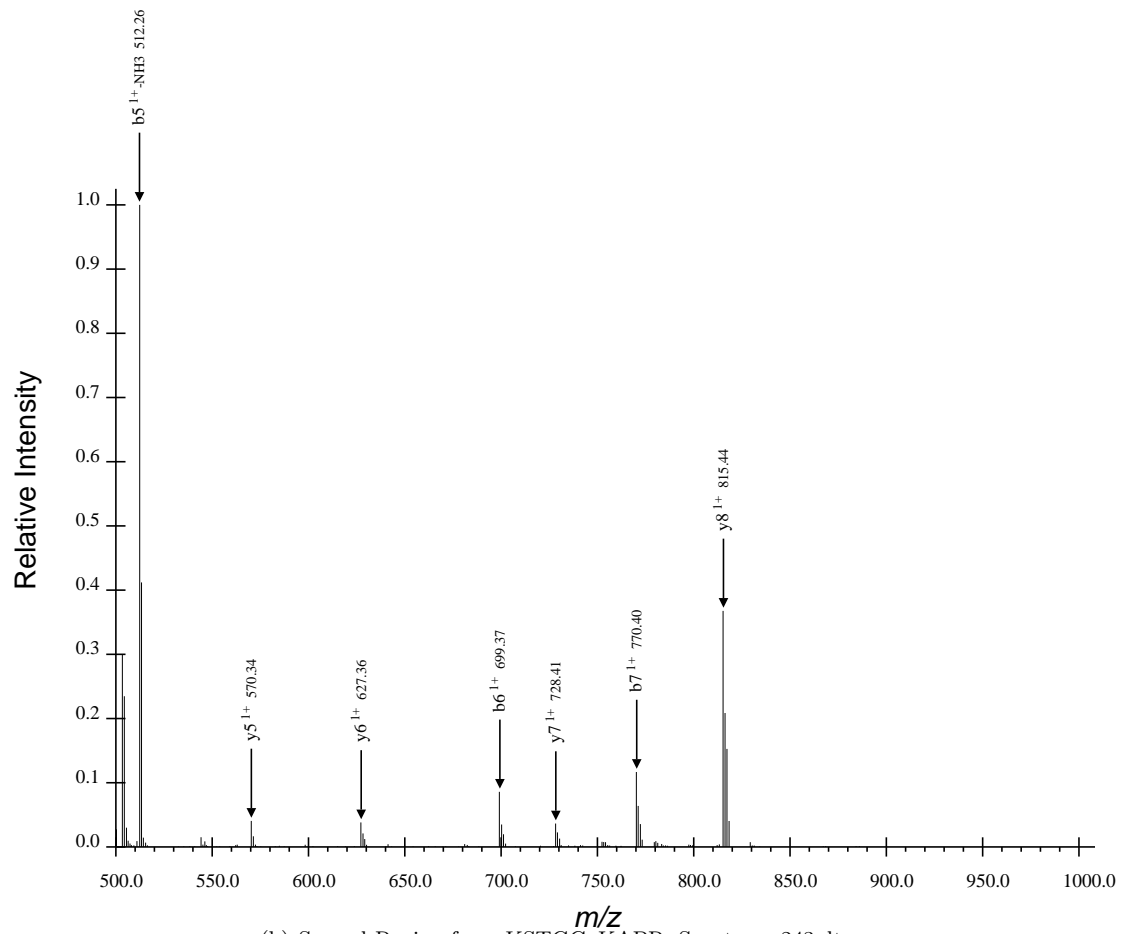

(b) Second Region for raKSTGGaKAPR, Spectrum 243.dta

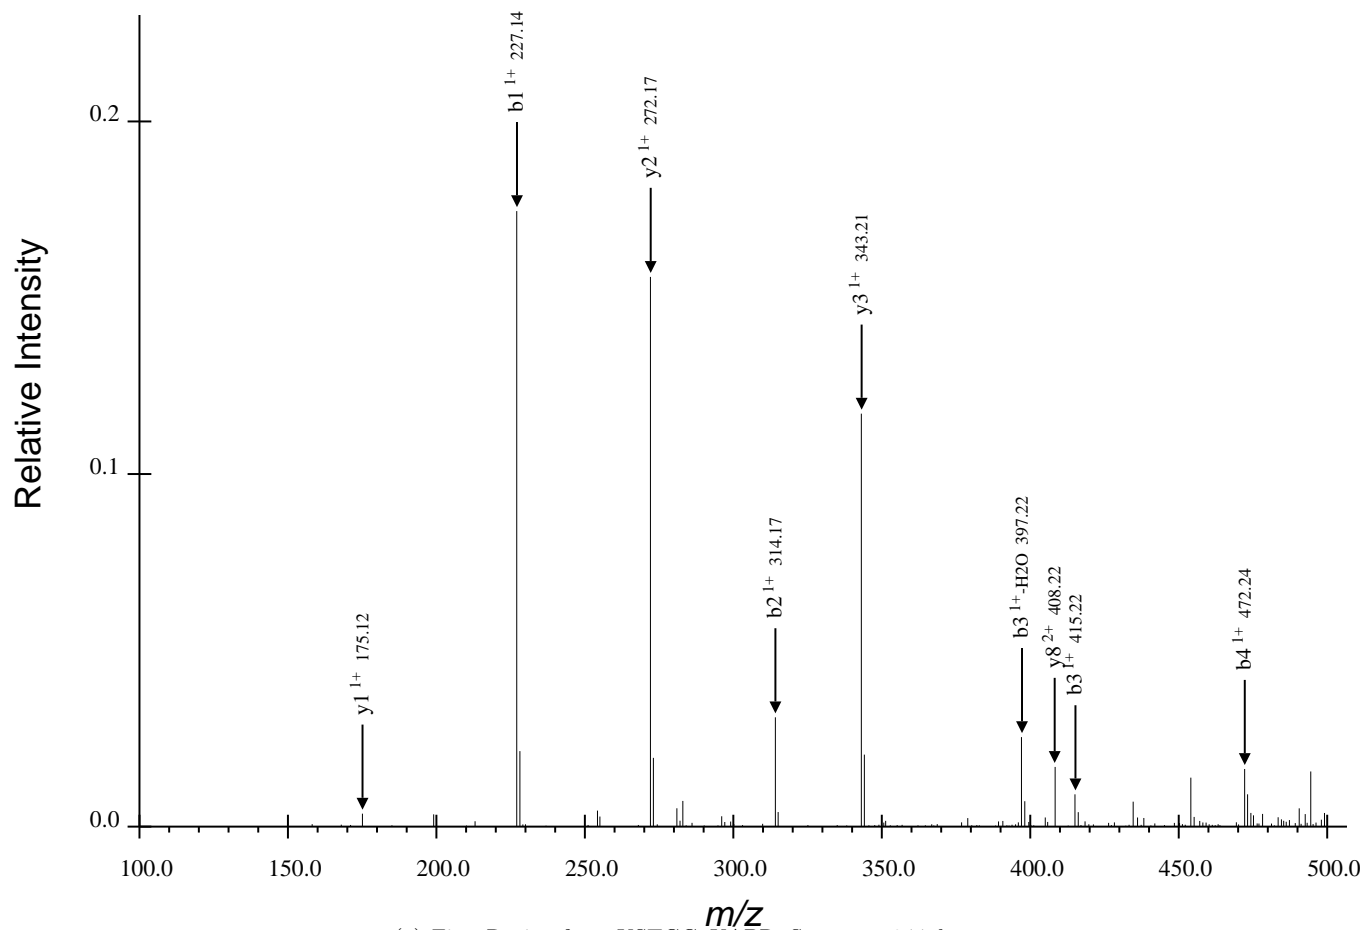

(a) First Region for raKSTGGaKAPR, Spectrum 244.dta

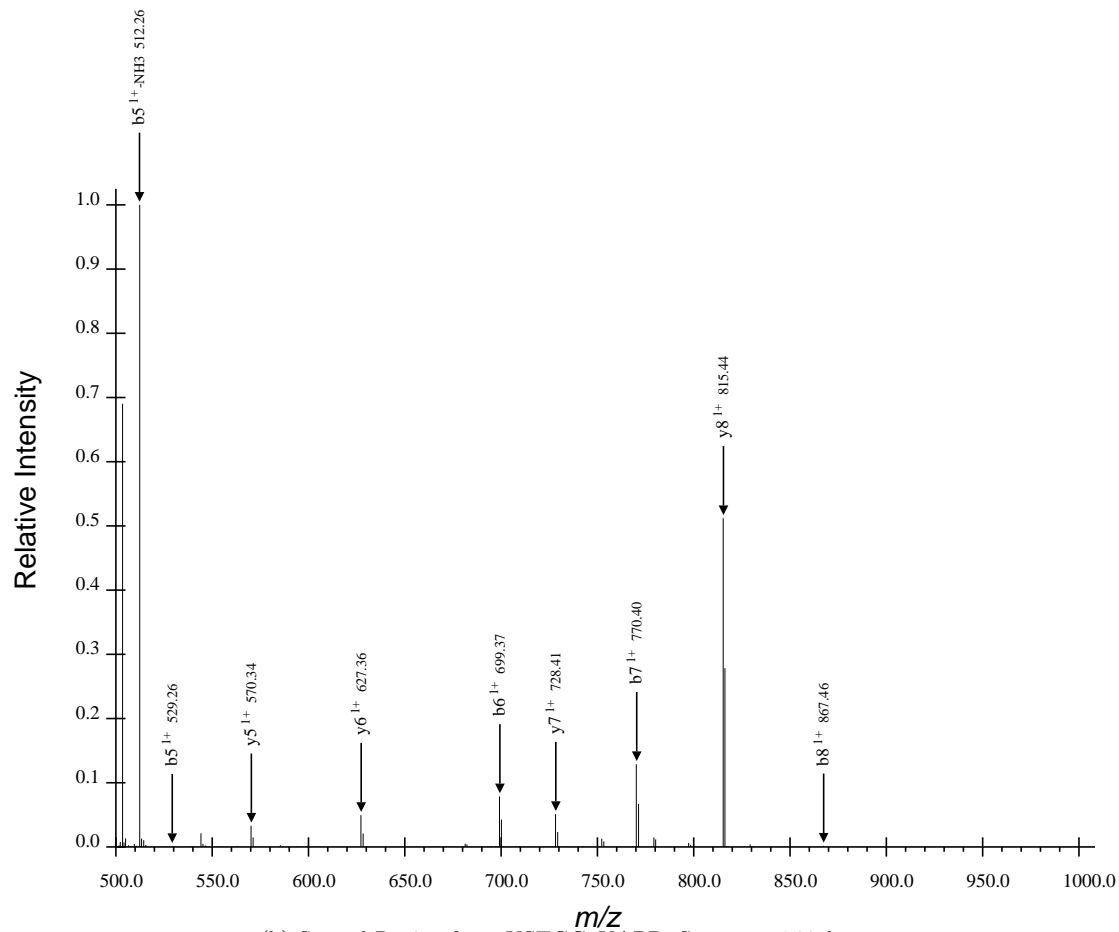

(b) Second Region for raKSTGGaKAPR, Spectrum 244.dta

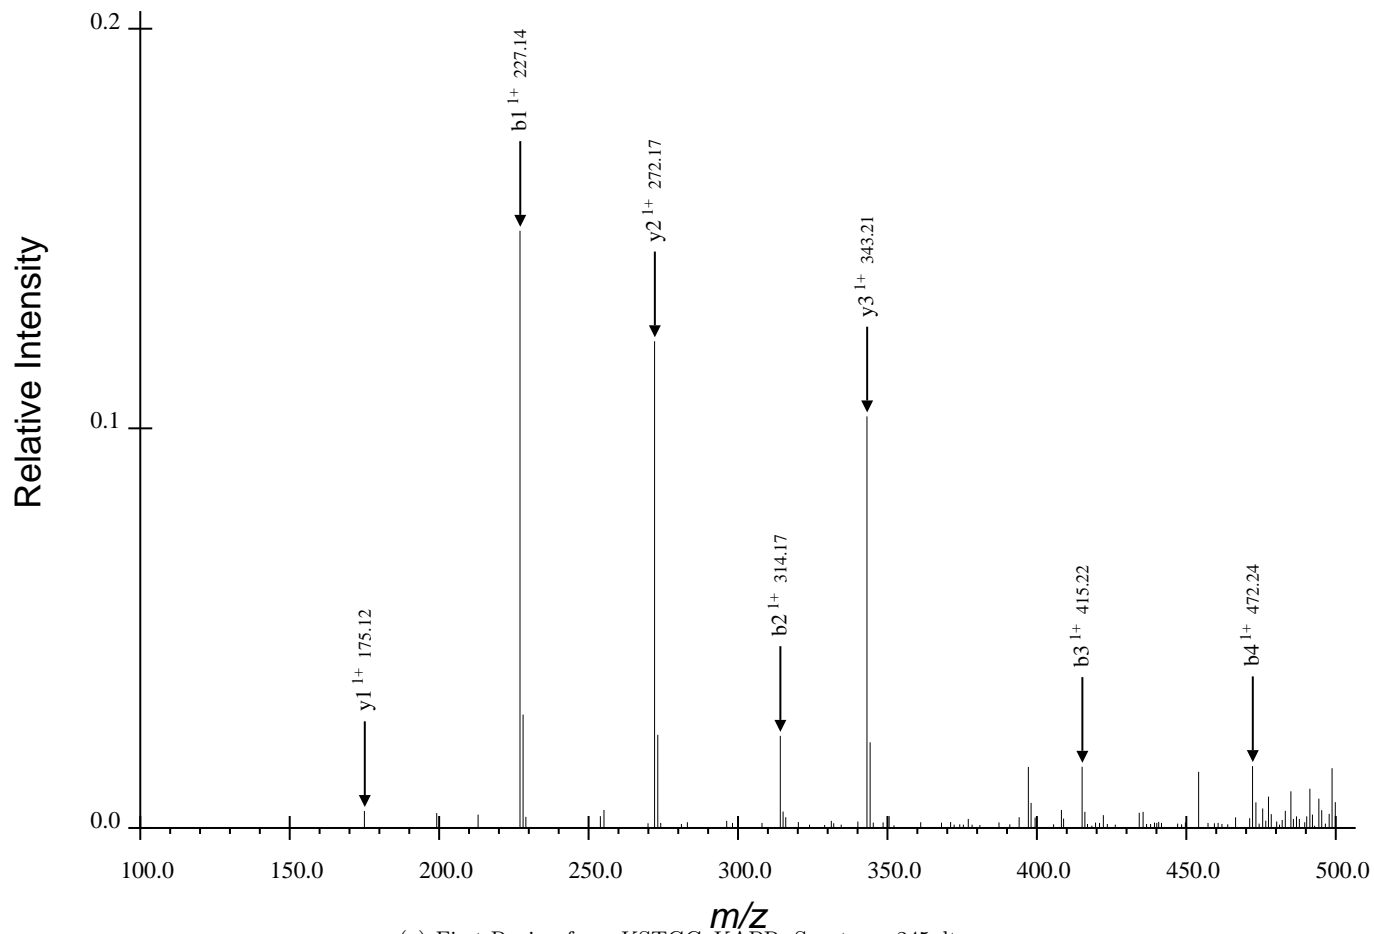

(a) First Region for raKSTGGaKAPR, Spectrum 245.dta

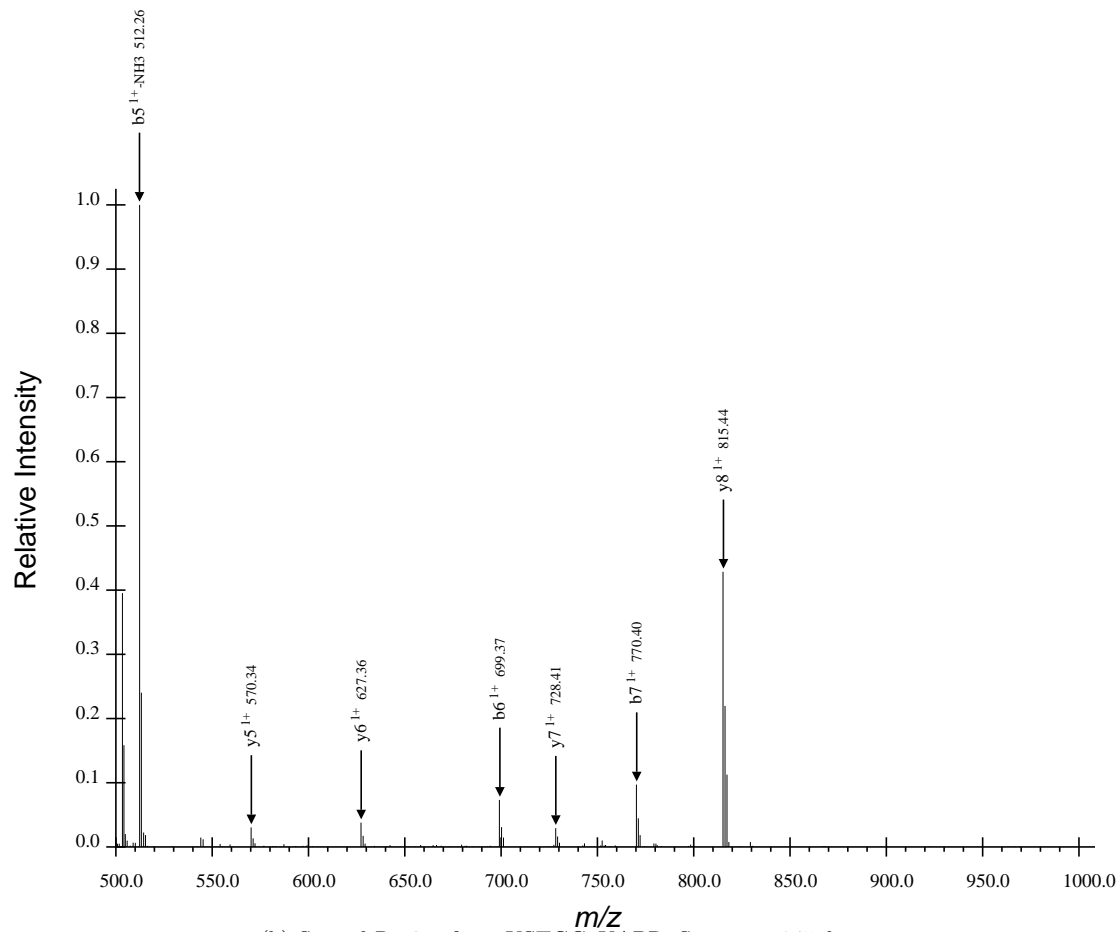

(b) Second Region for raKSTGGaKAPR, Spectrum 245.dta

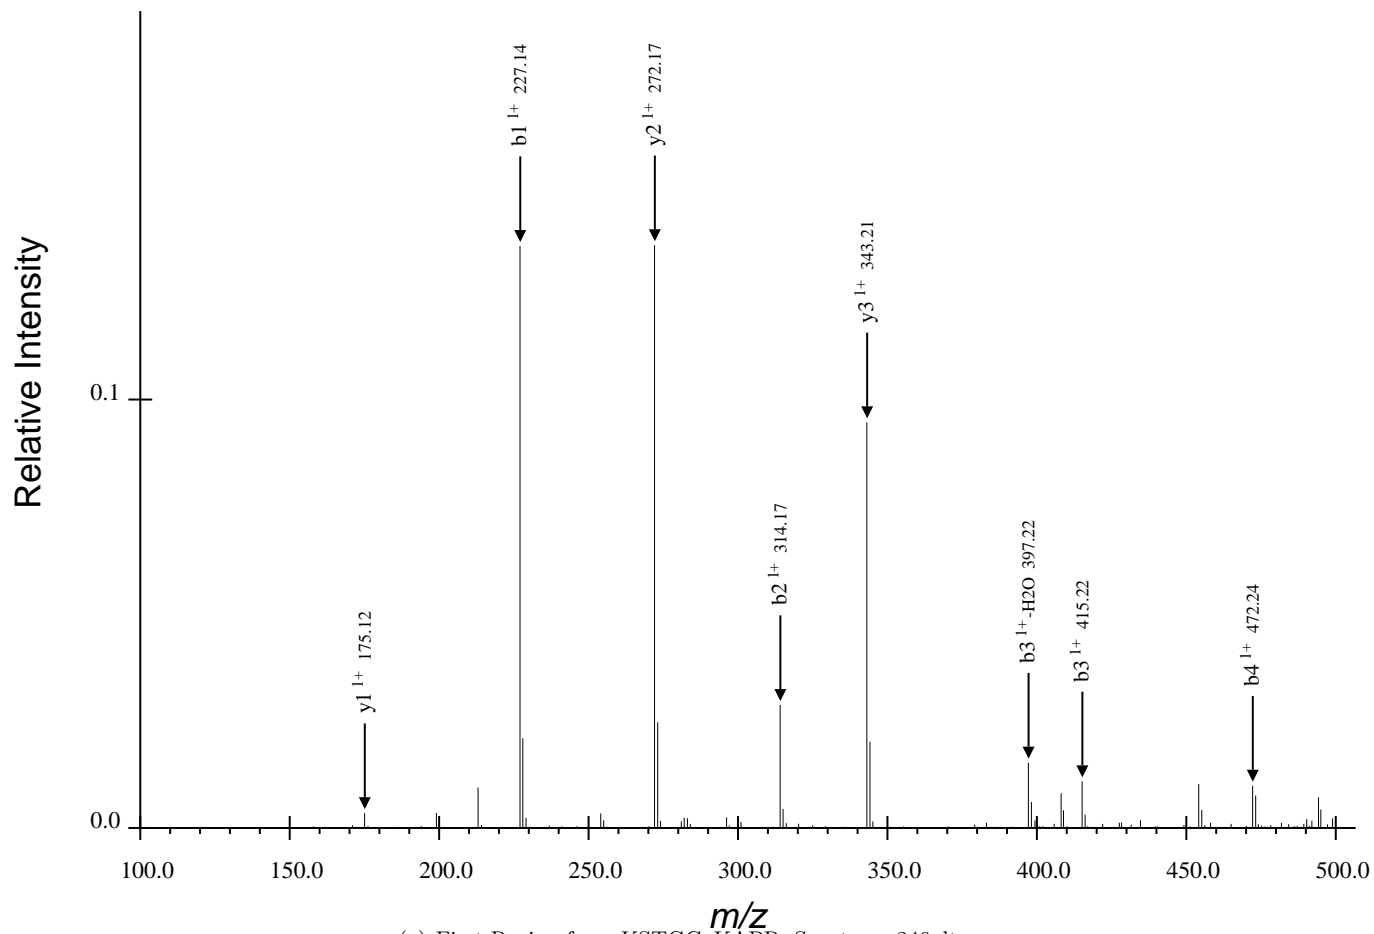

(a) First Region for raKSTGGaKAPR, Spectrum 246.dta

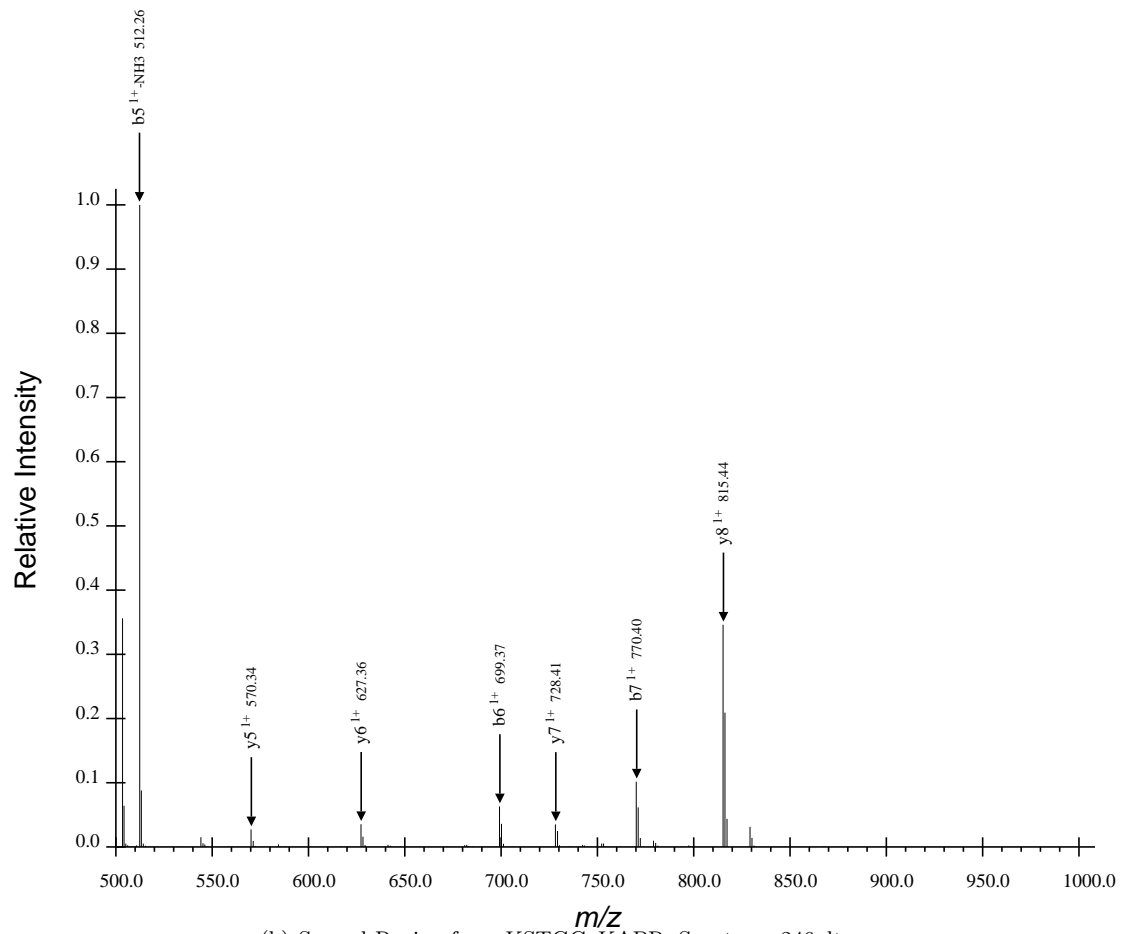

(b) Second Region for raKSTGGaKAPR, Spectrum 246.dta

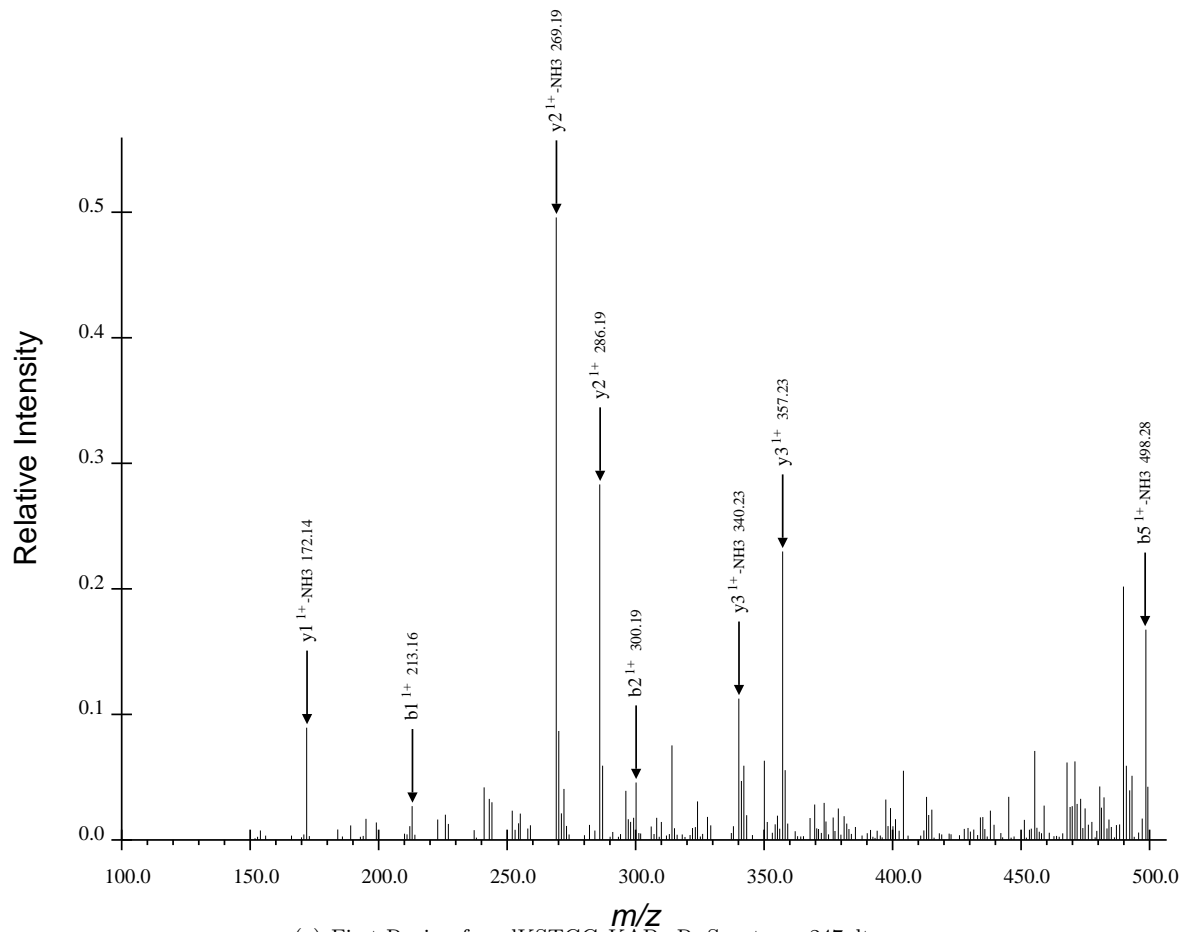

(a) First Region for rdKSTGGGrKAPmR, Spectrum 247.dta

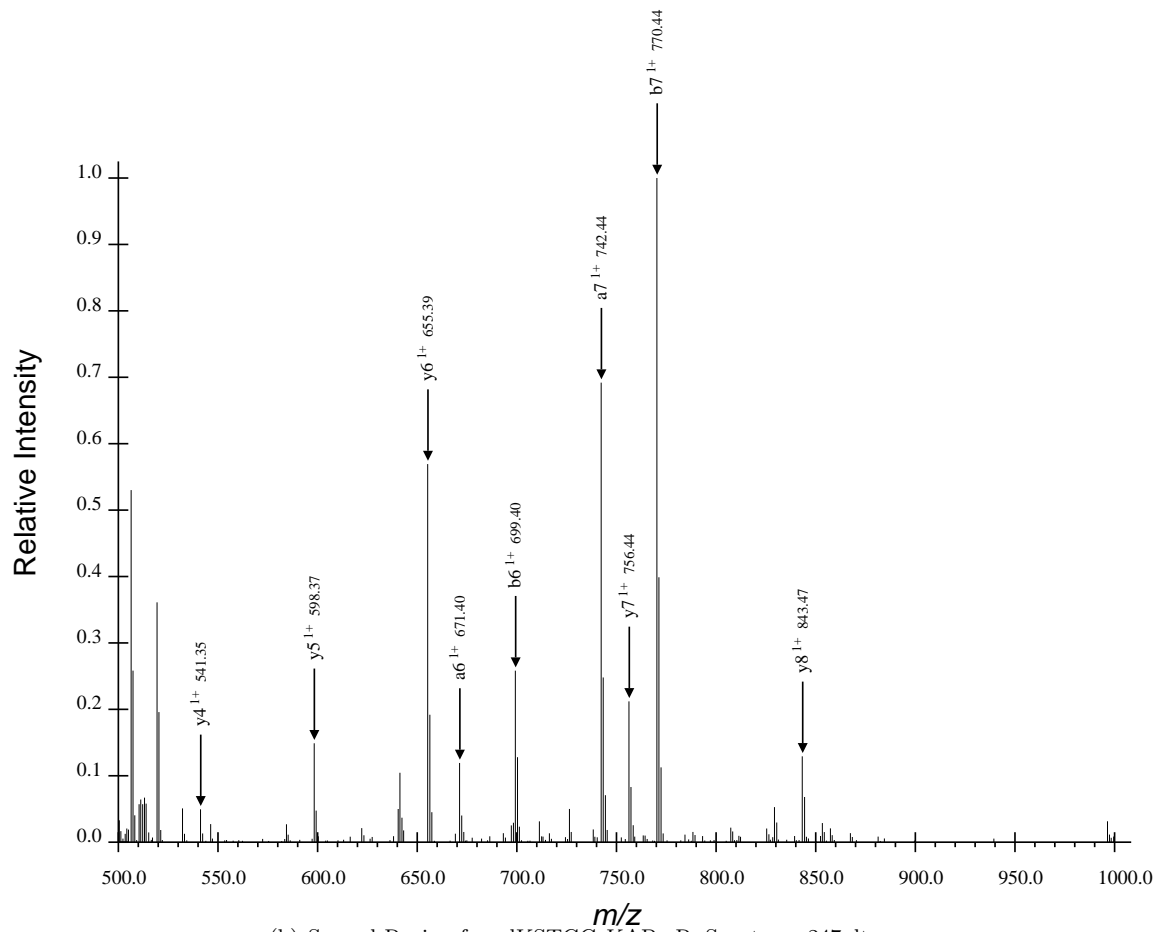

(b) Second Region for rdKSTGGGrKAPmR, Spectrum 247.dta

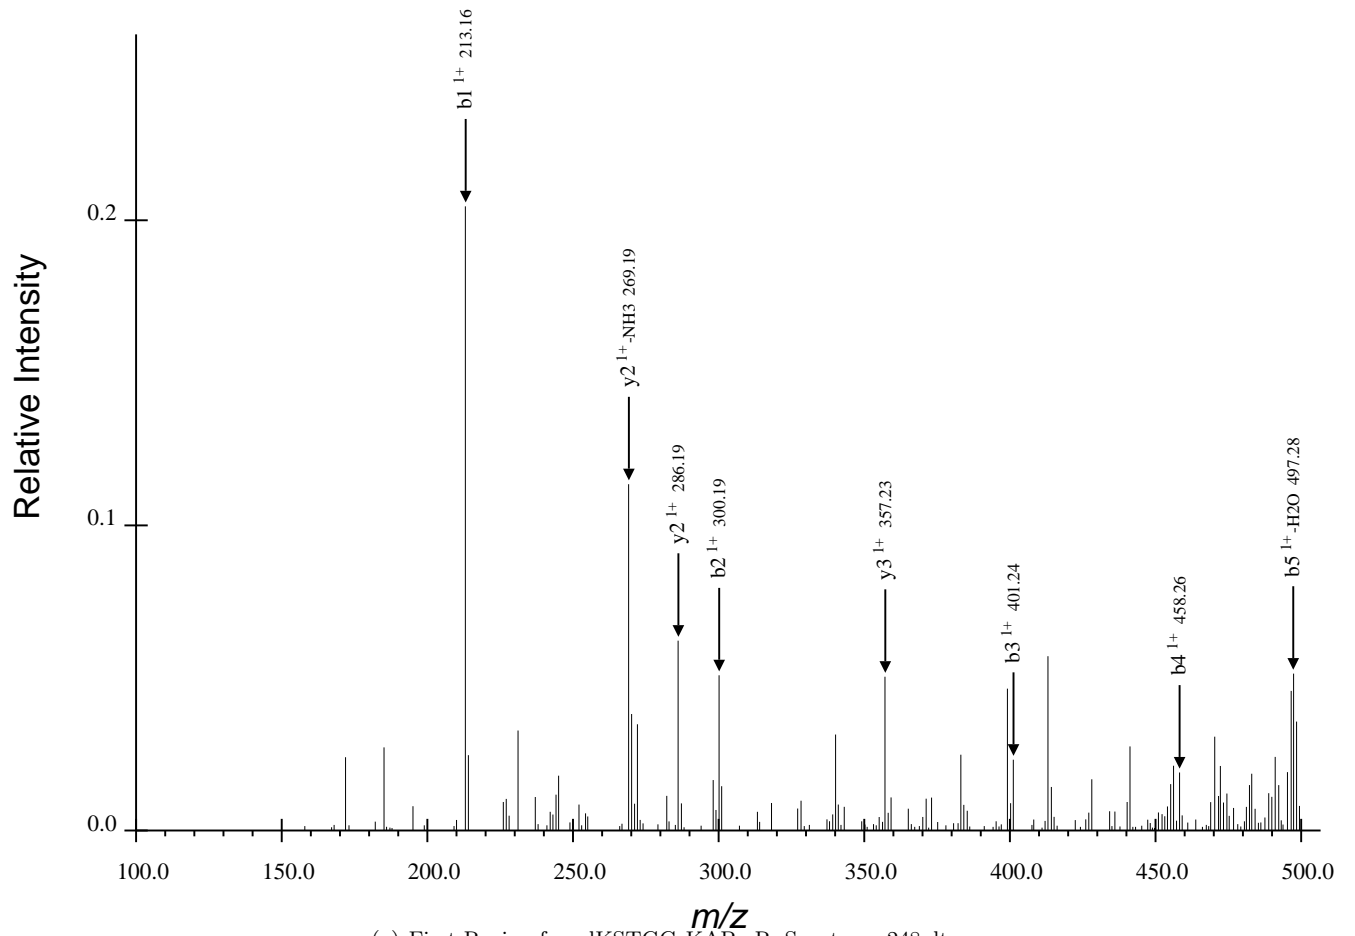

(a) First Region for rdKSTGGrKAPmR, Spectrum 248.dta

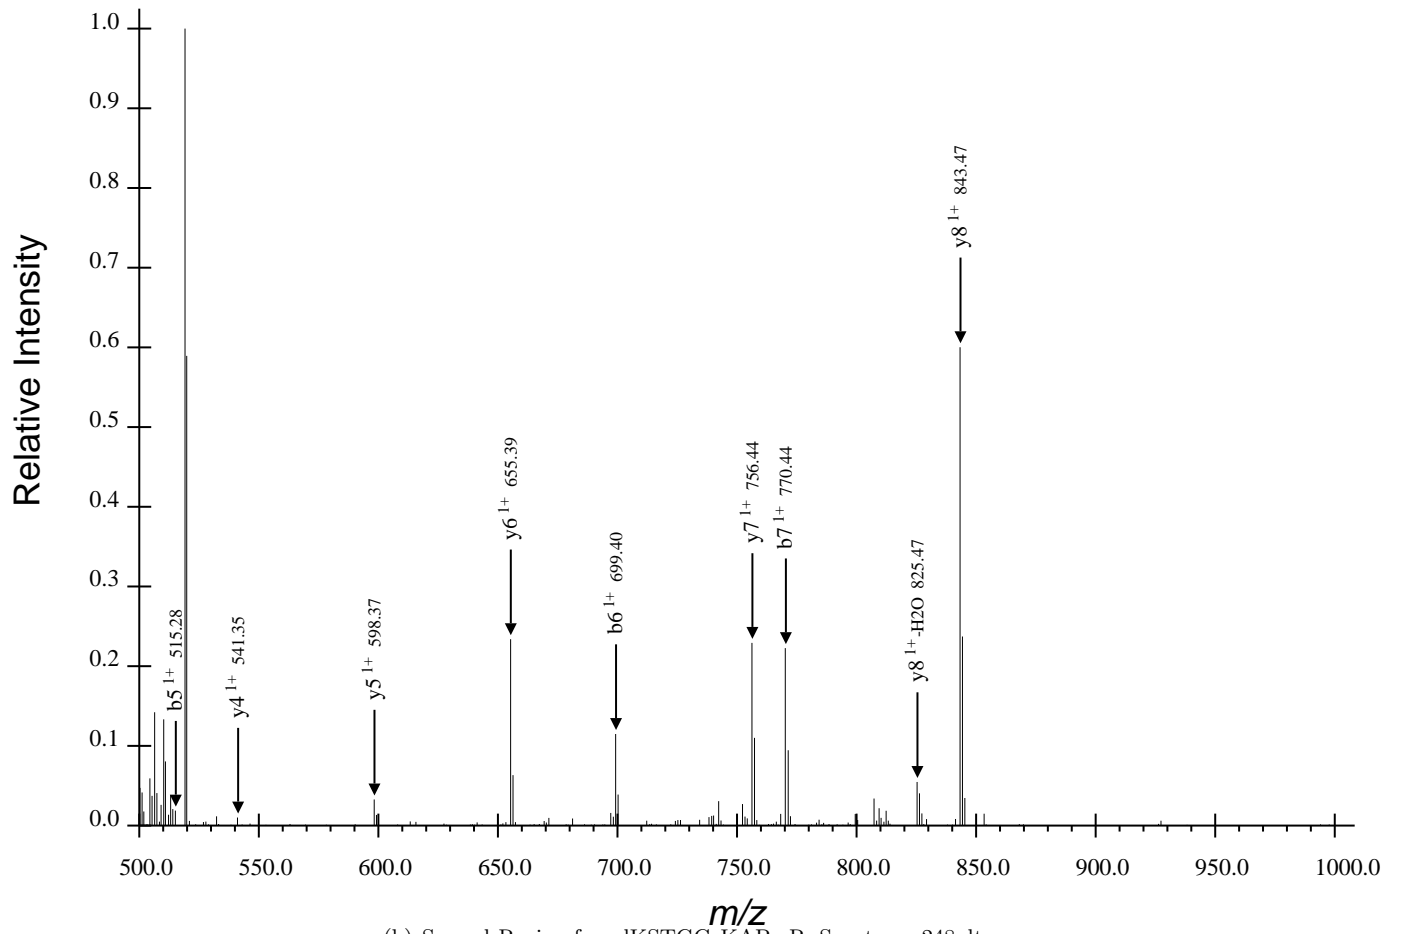

(b) Second Region for rdKSTGGrKAPmR, Spectrum 248.dta



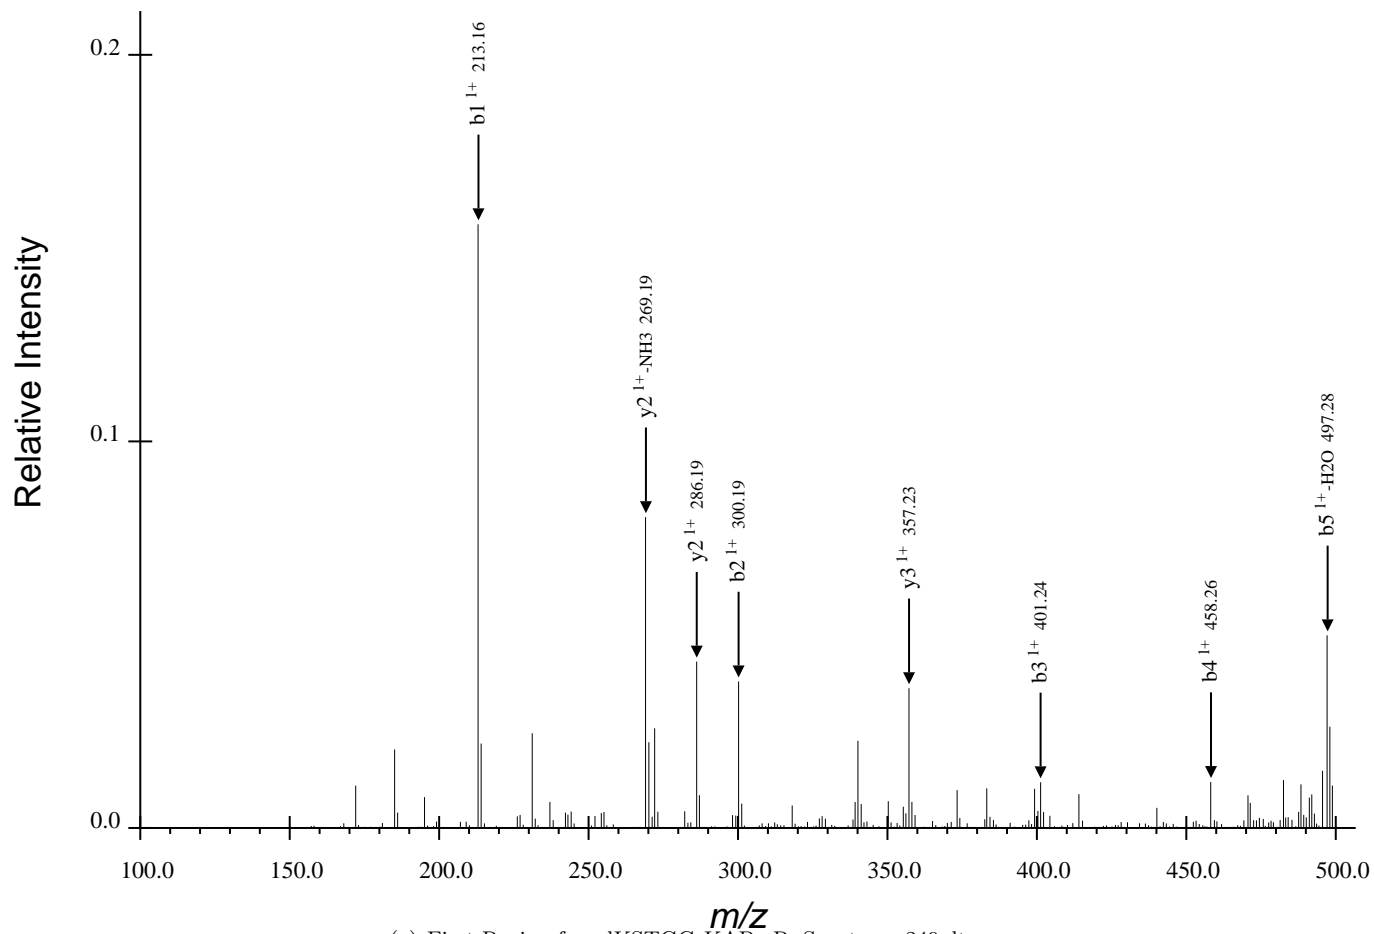

(a) First Region for rdKSTGGGrKAPmR, Spectrum 249.dta

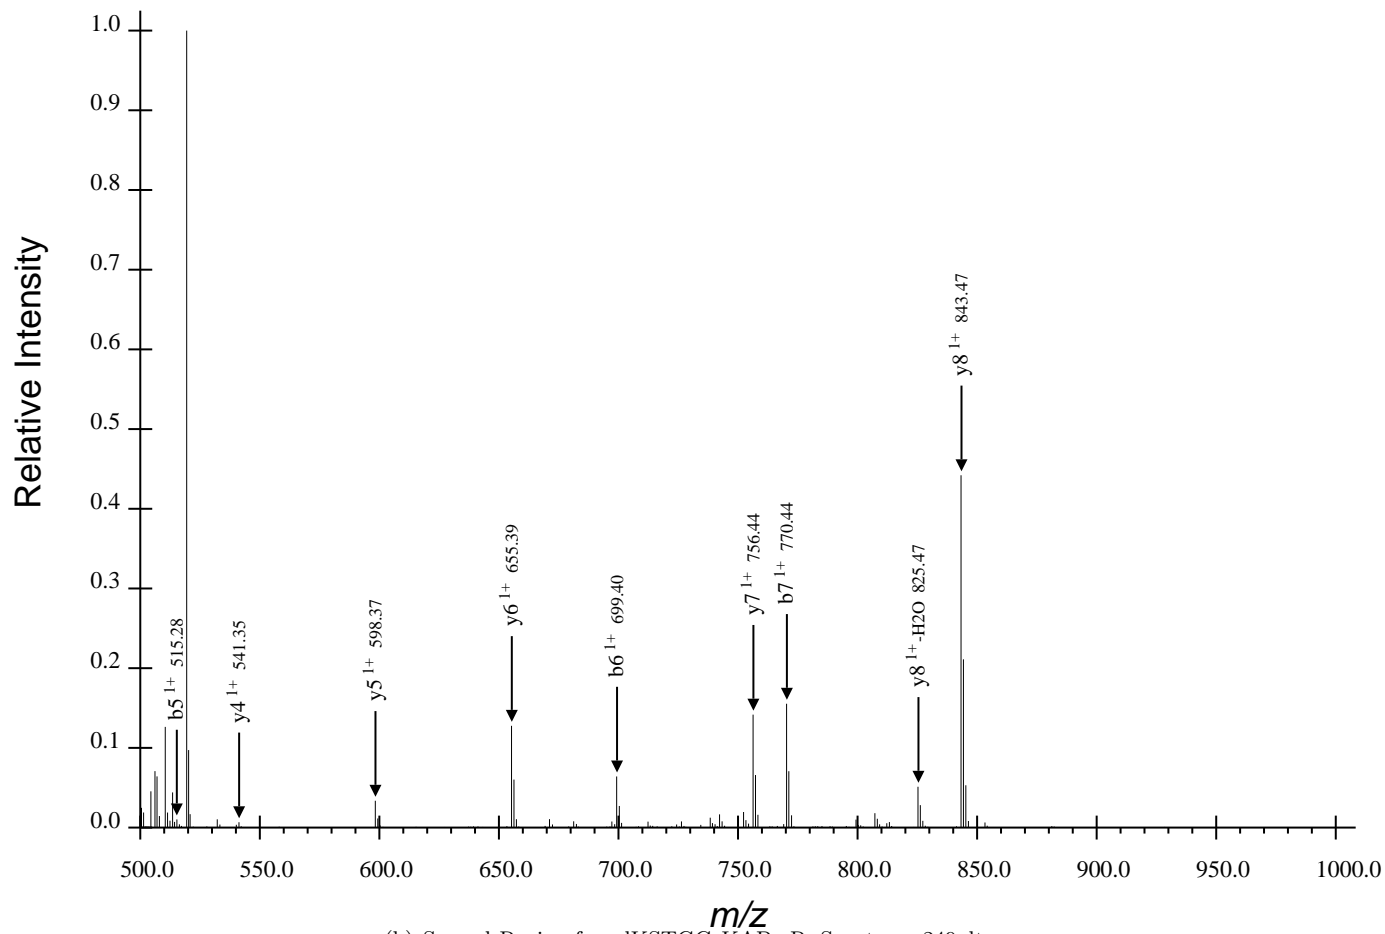

(b) Second Region for rdKSTGGGrKAPmR, Spectrum 249.dta

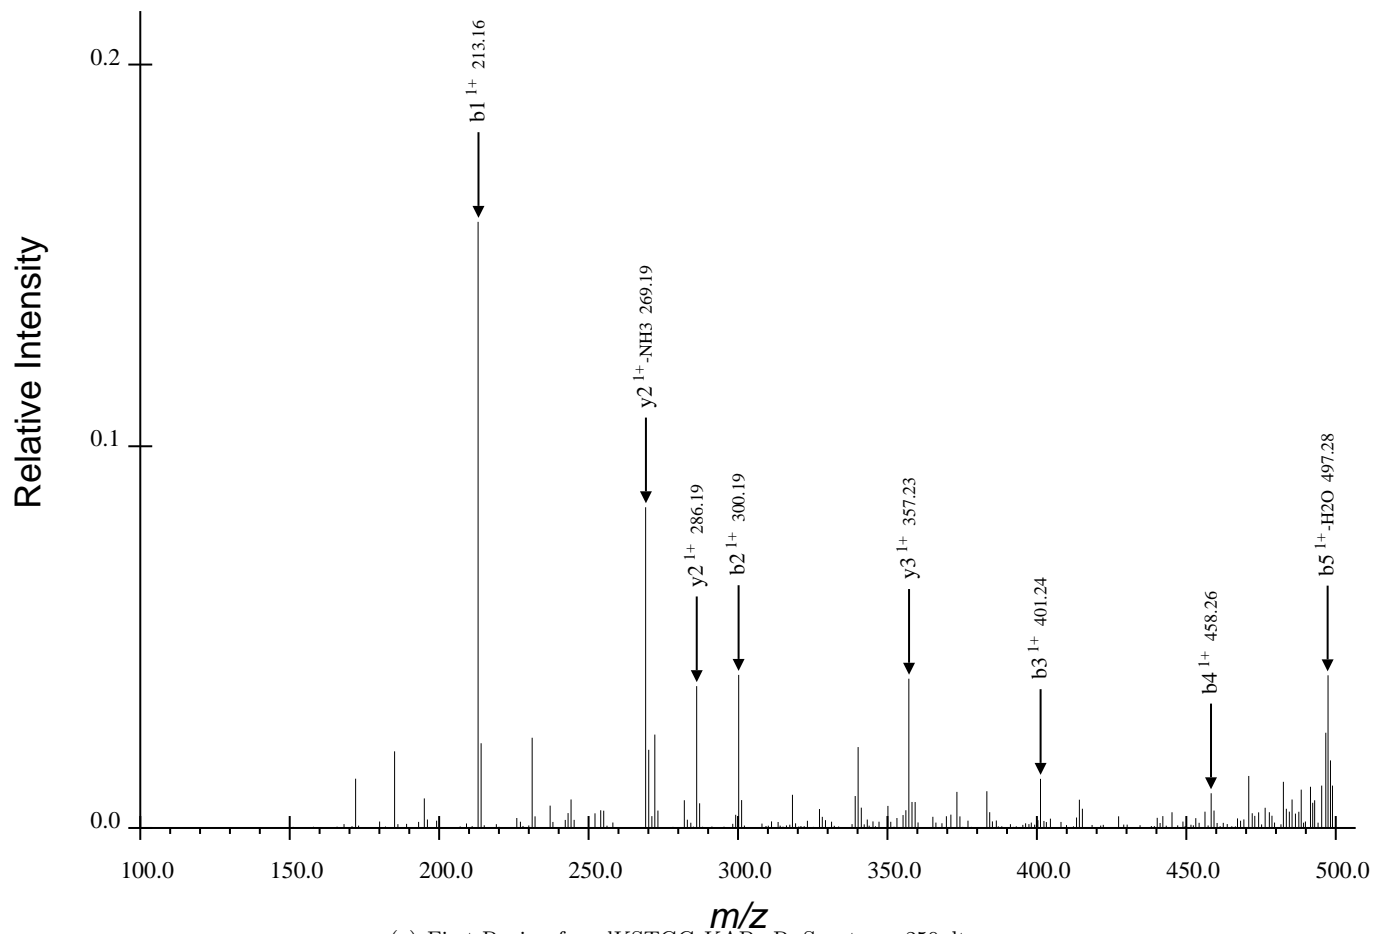

(a) First Region for rdKSTGGGrKAPmR, Spectrum 250.dta

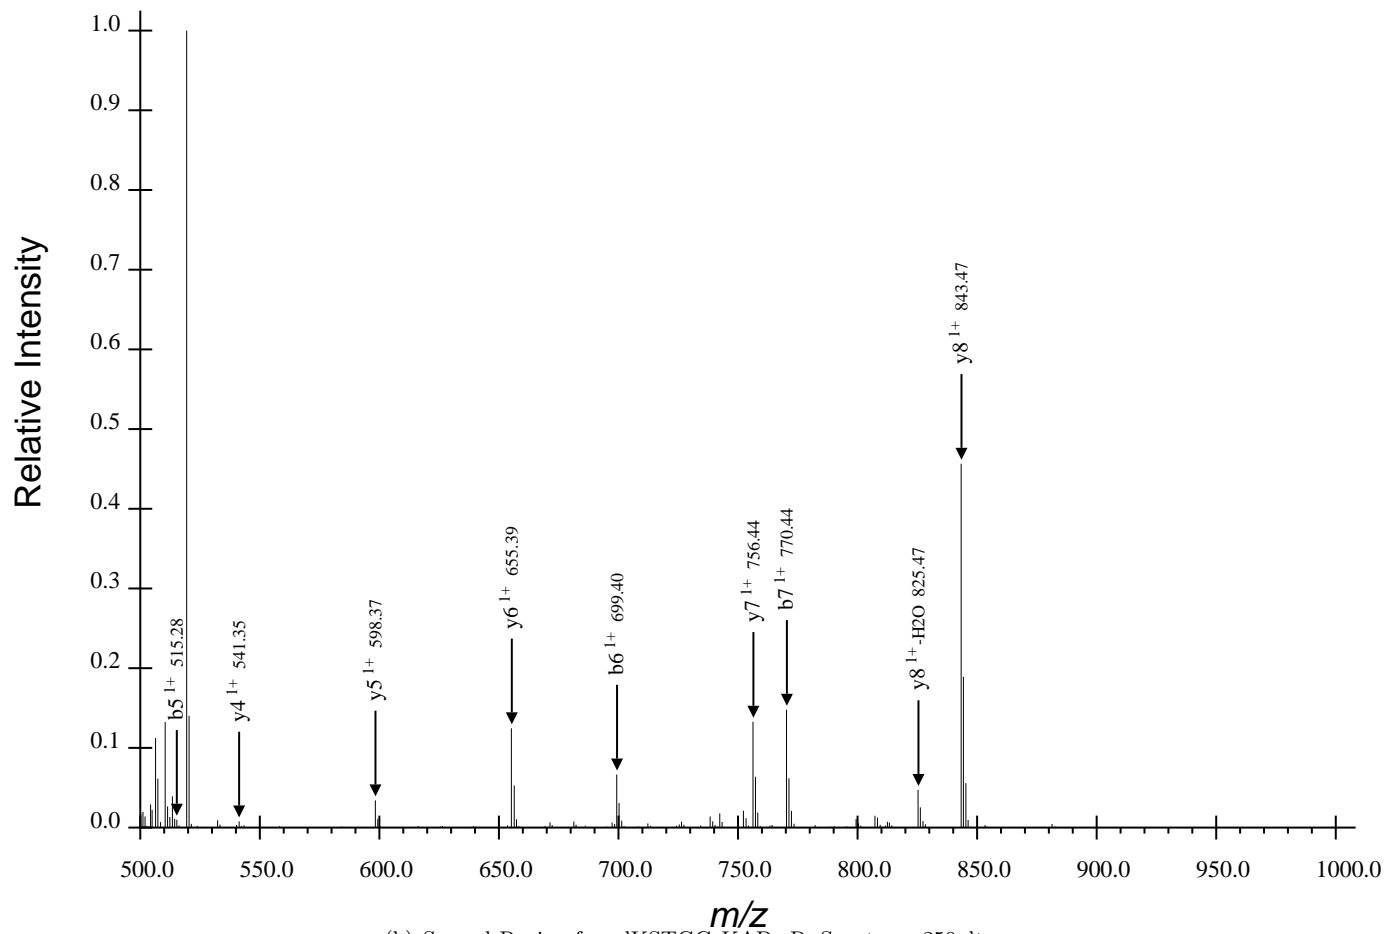

(b) Second Region for rdKSTGGGrKAPmR, Spectrum 250.dta

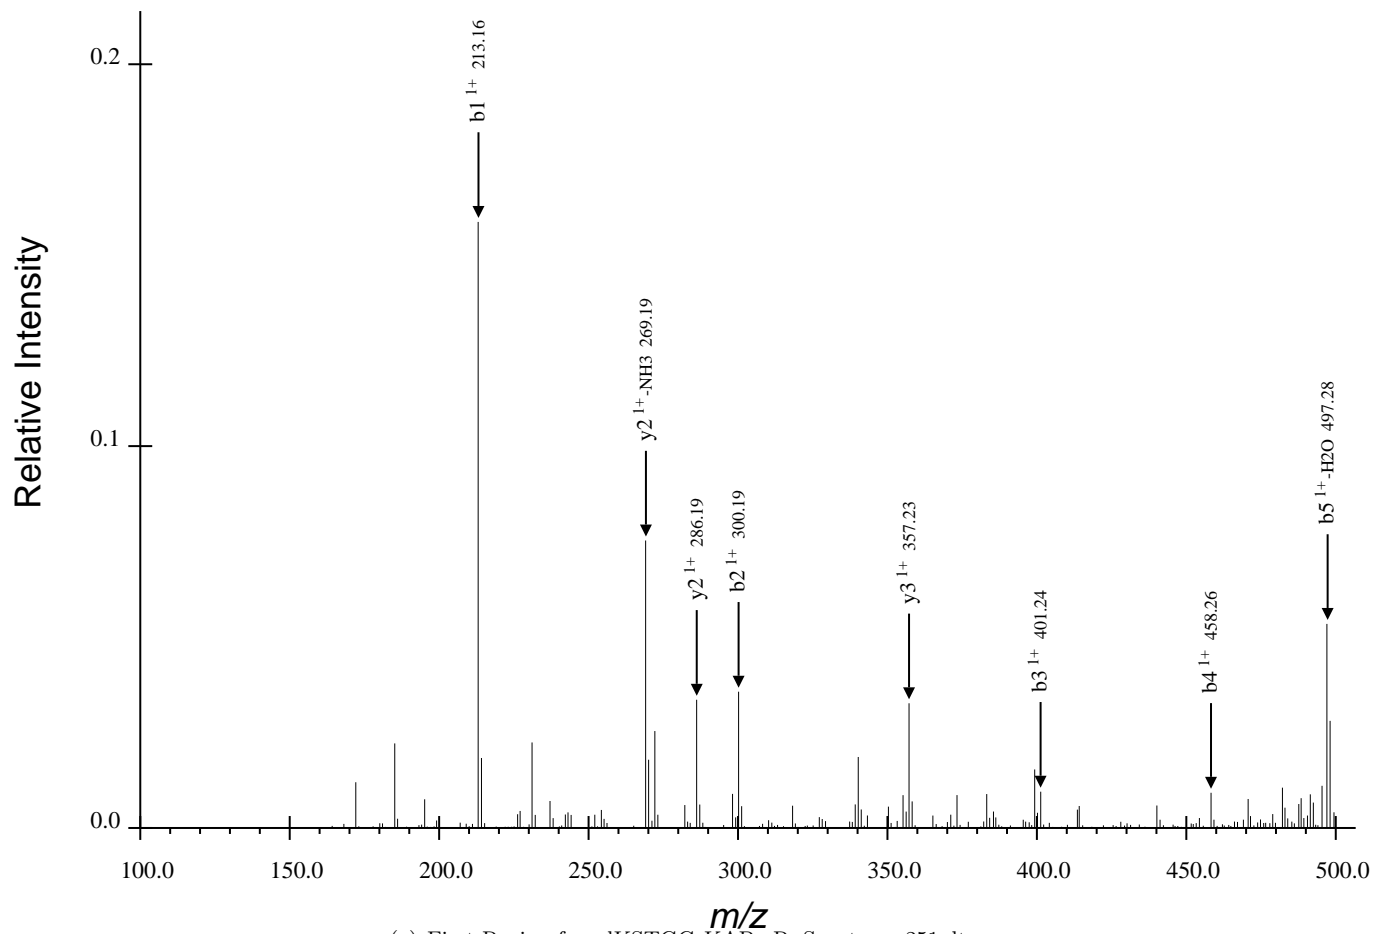

(a) First Region for rdKSTGGGrKAPmR, Spectrum 251.dta

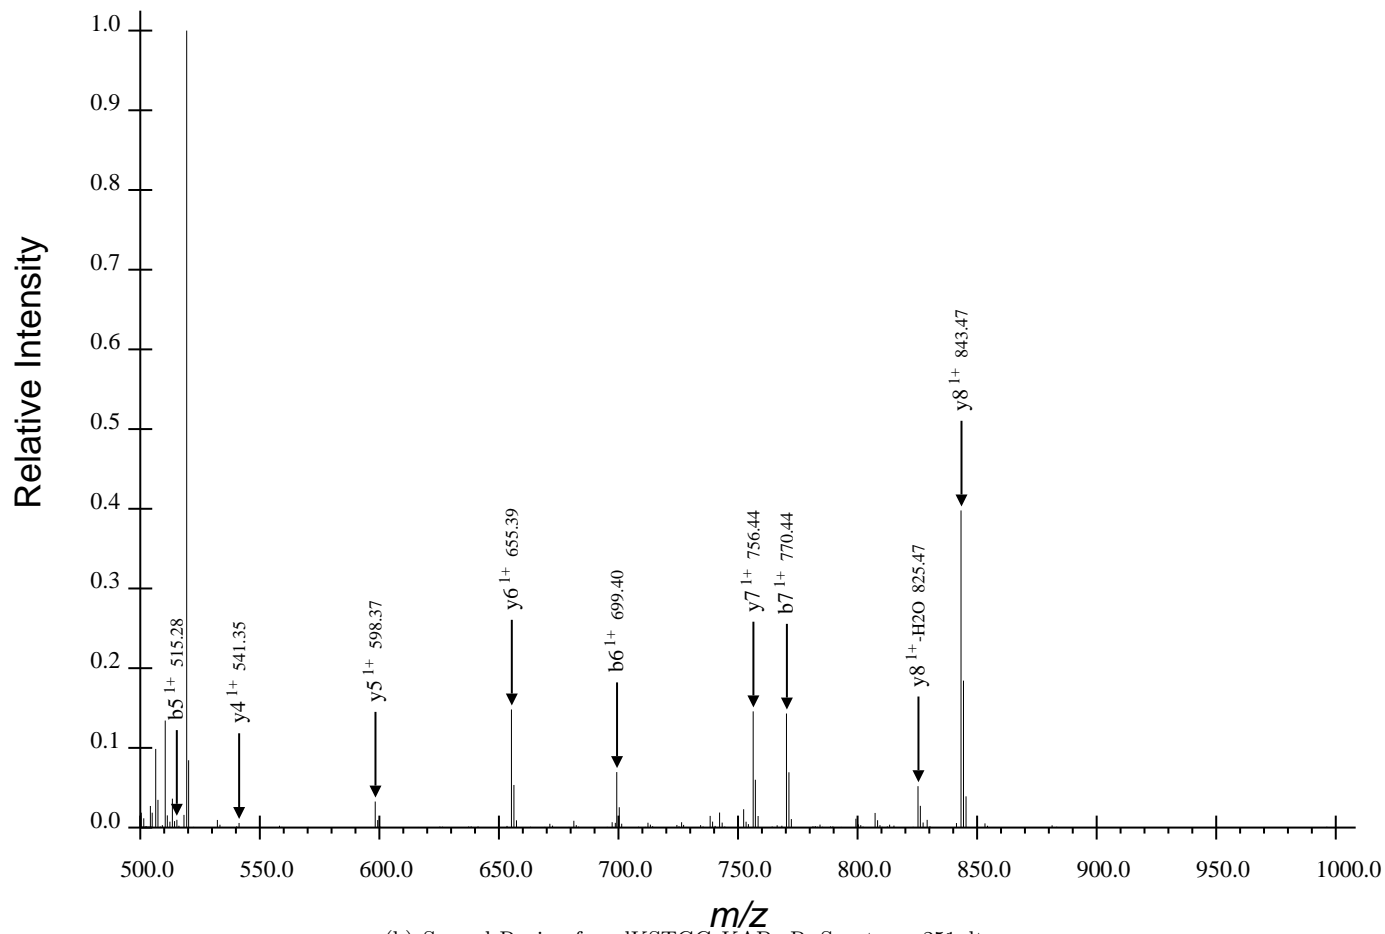

(b) Second Region for rdKSTGGGrKAPmR, Spectrum 251.dta

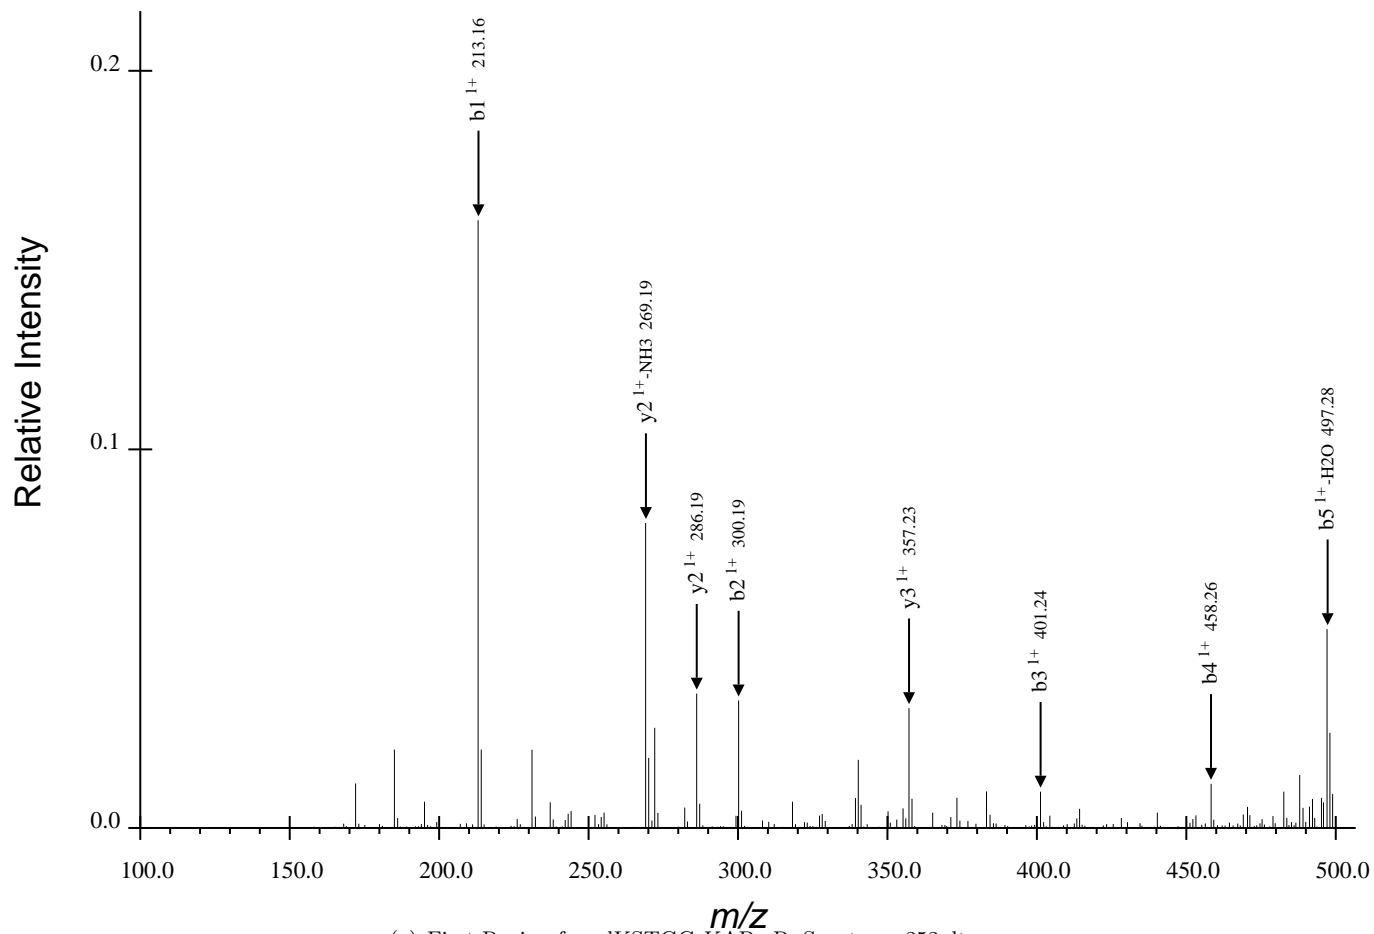

(a) First Region for rdKSTGGGrKAPmR, Spectrum 252.dta

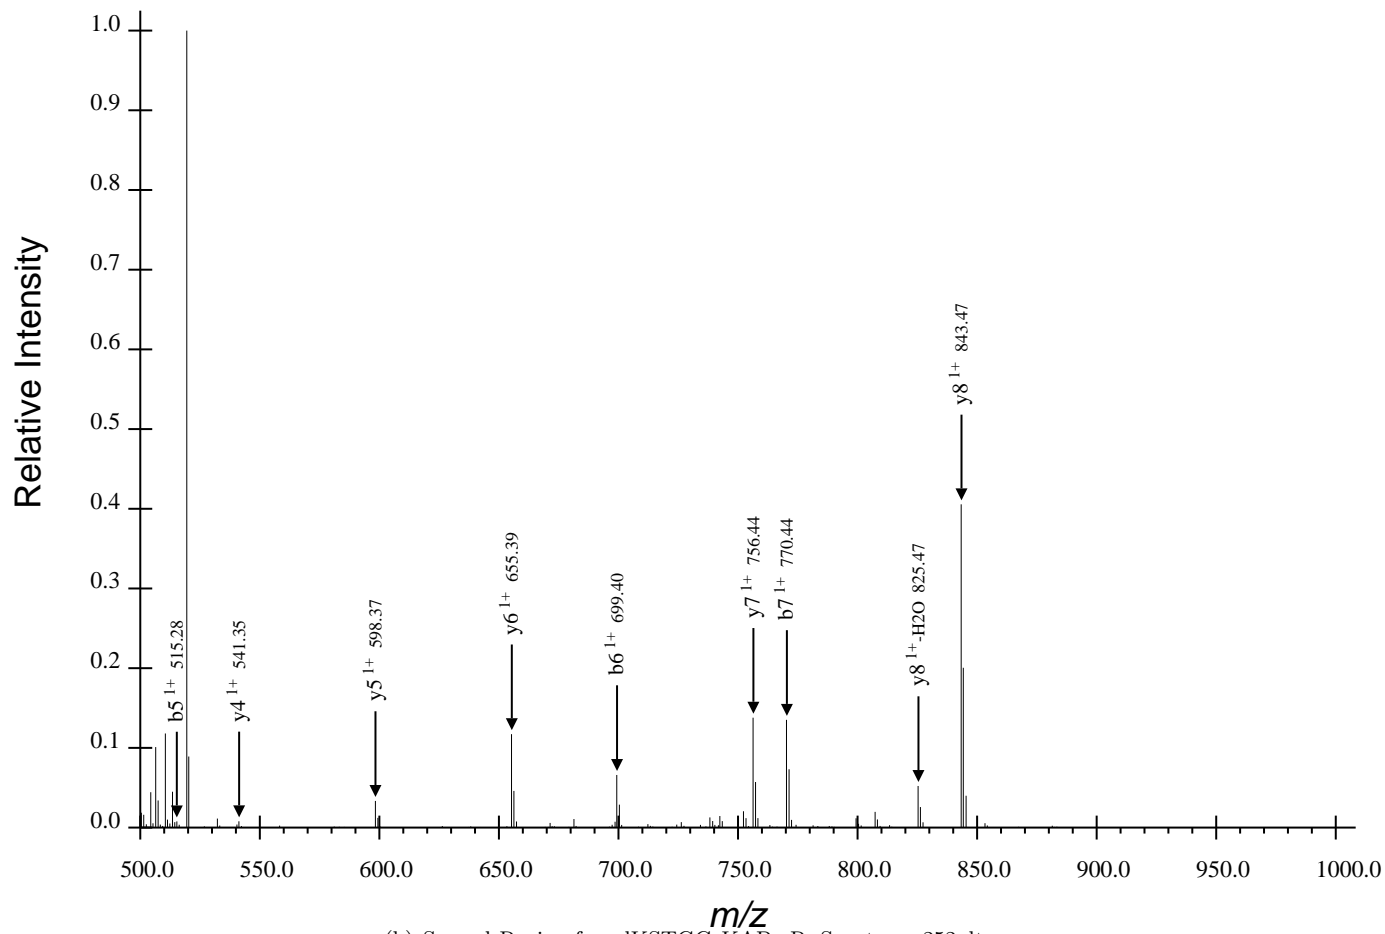

(b) Second Region for rdKSTGGGrKAPmR, Spectrum 252.dta

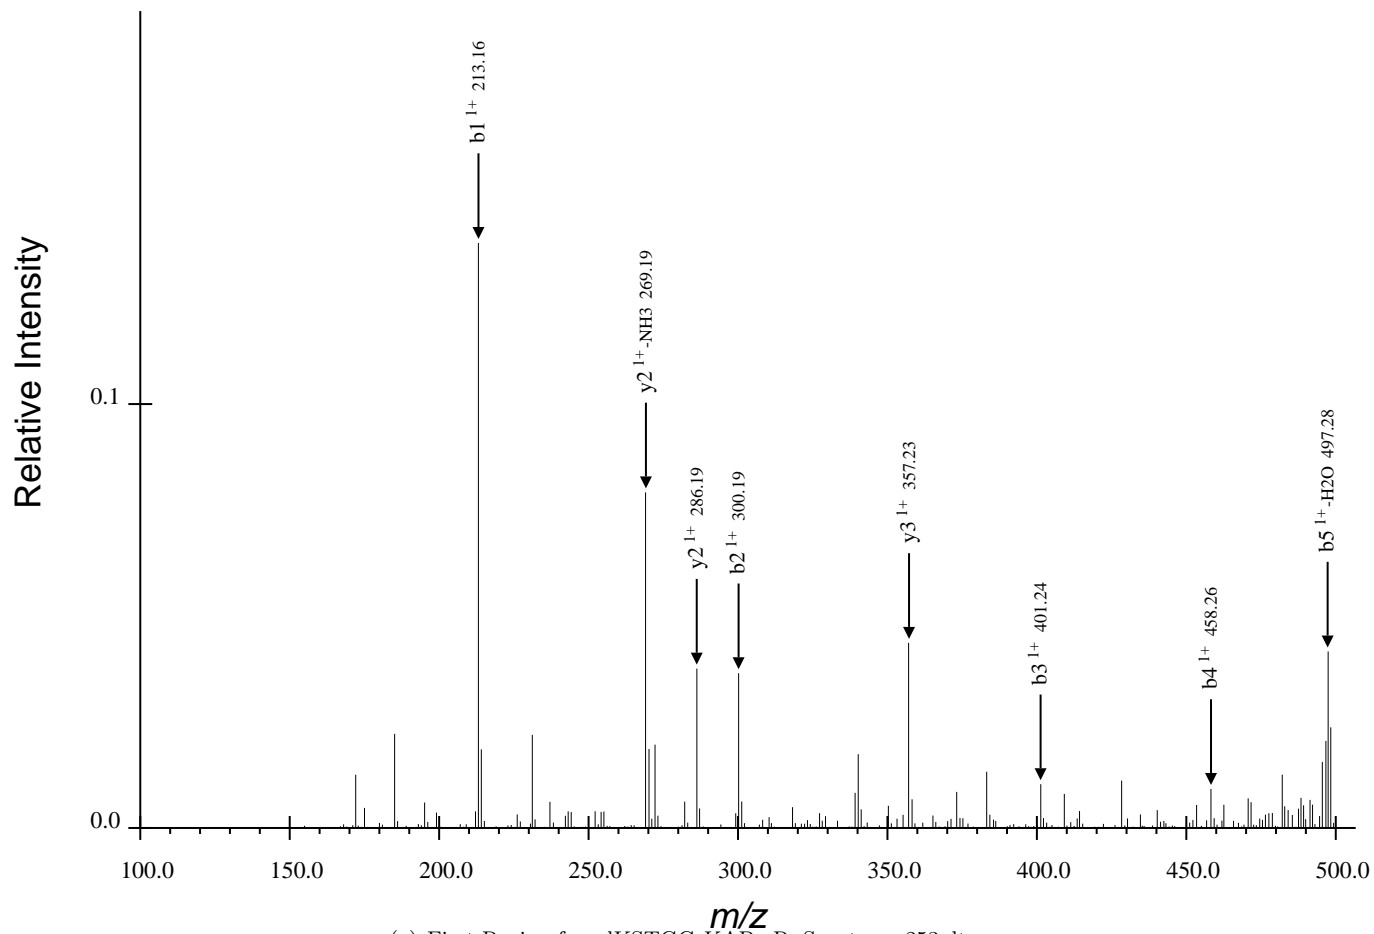

(a) First Region for rdKSTGGGrKAPmR, Spectrum 253.dta

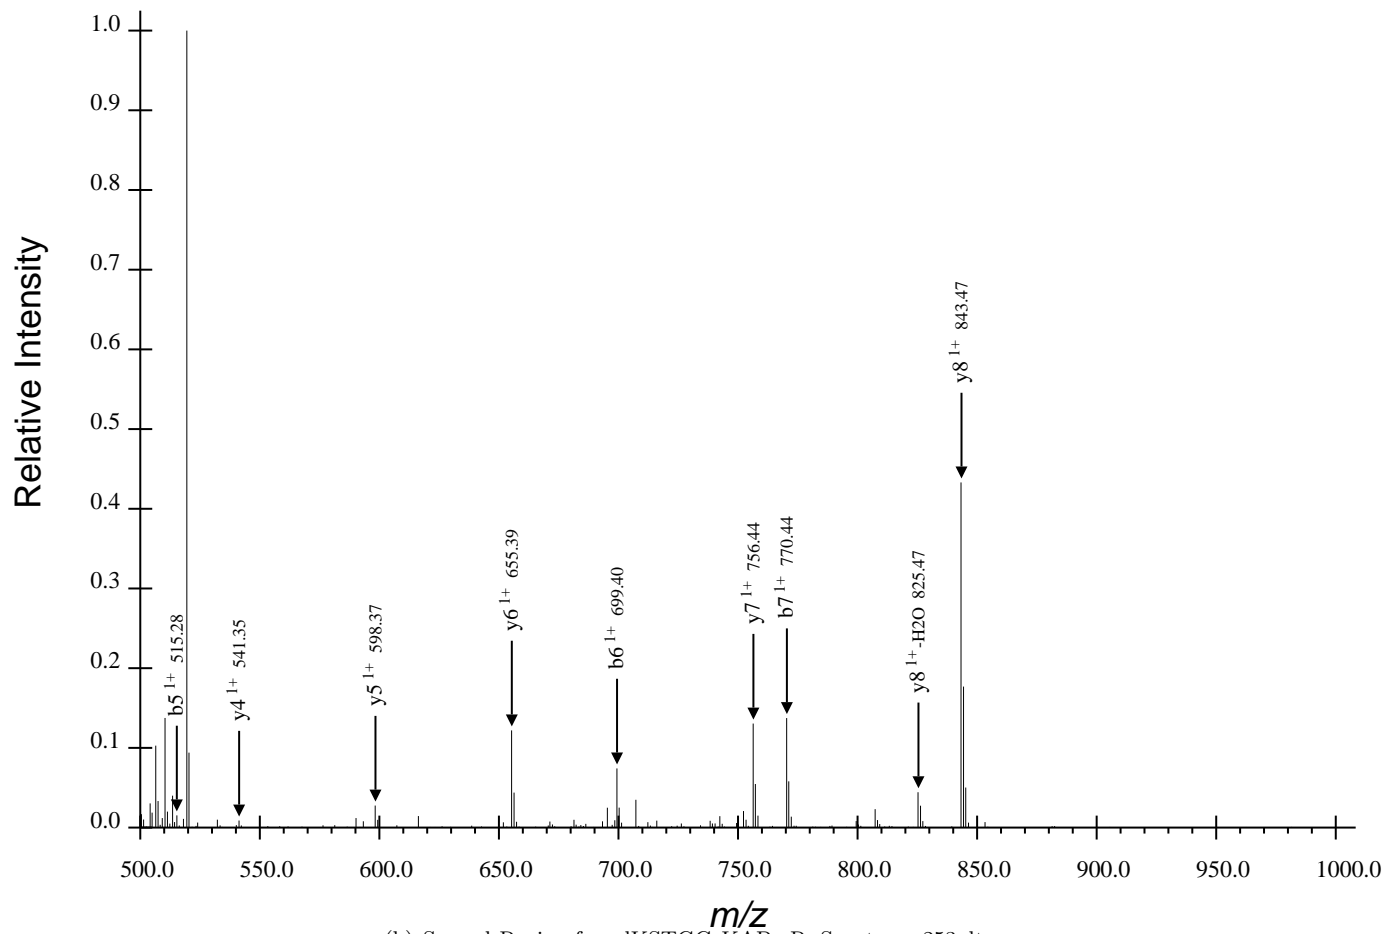

(b) Second Region for rdKSTGGGrKAPmR, Spectrum 253.dta

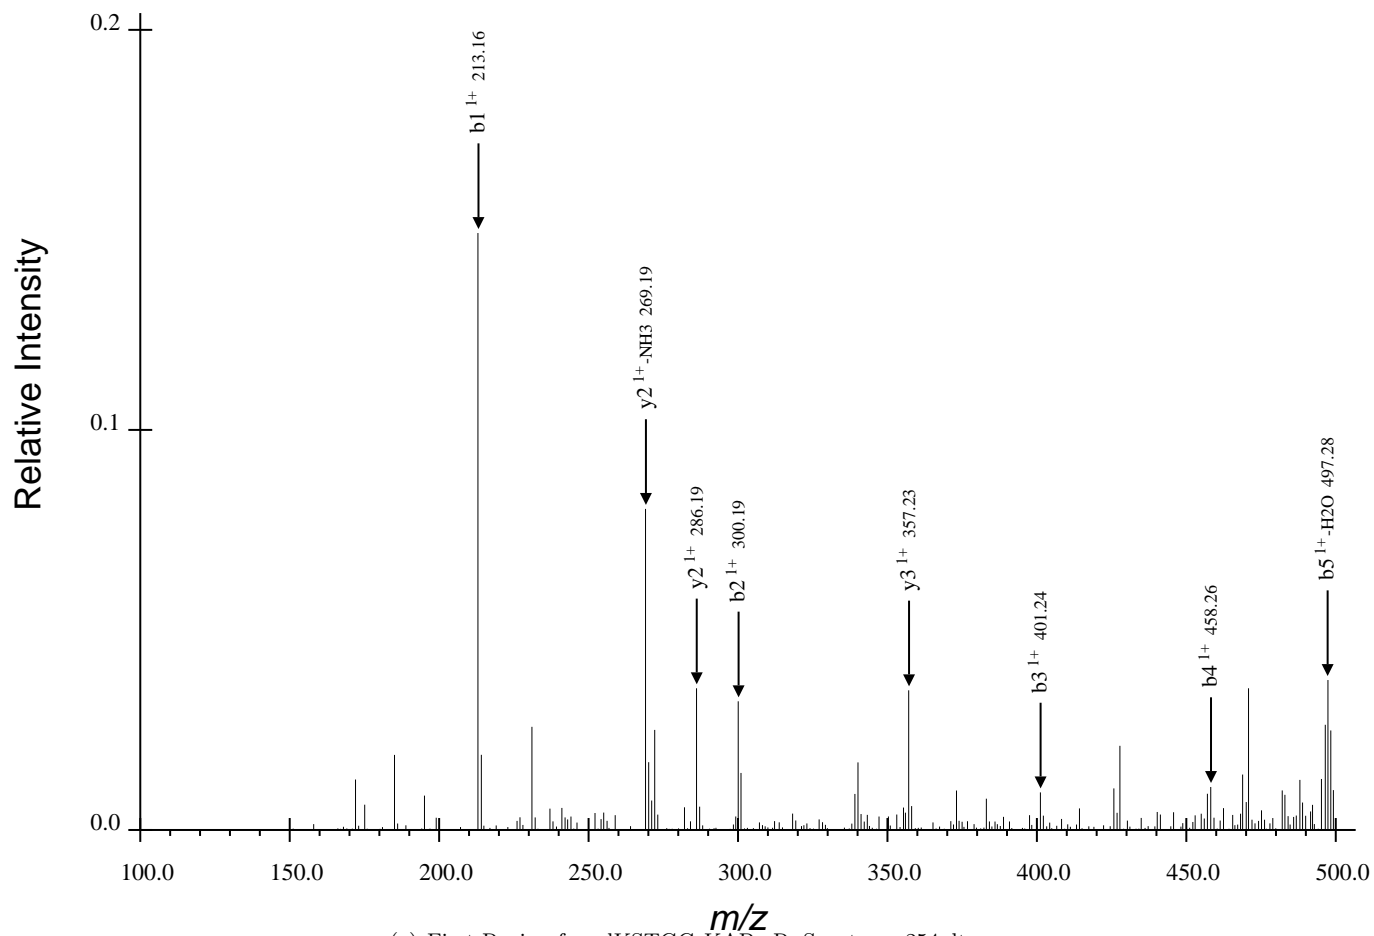

(a) First Region for rdKSTGGGrKAPmR, Spectrum 254.dta

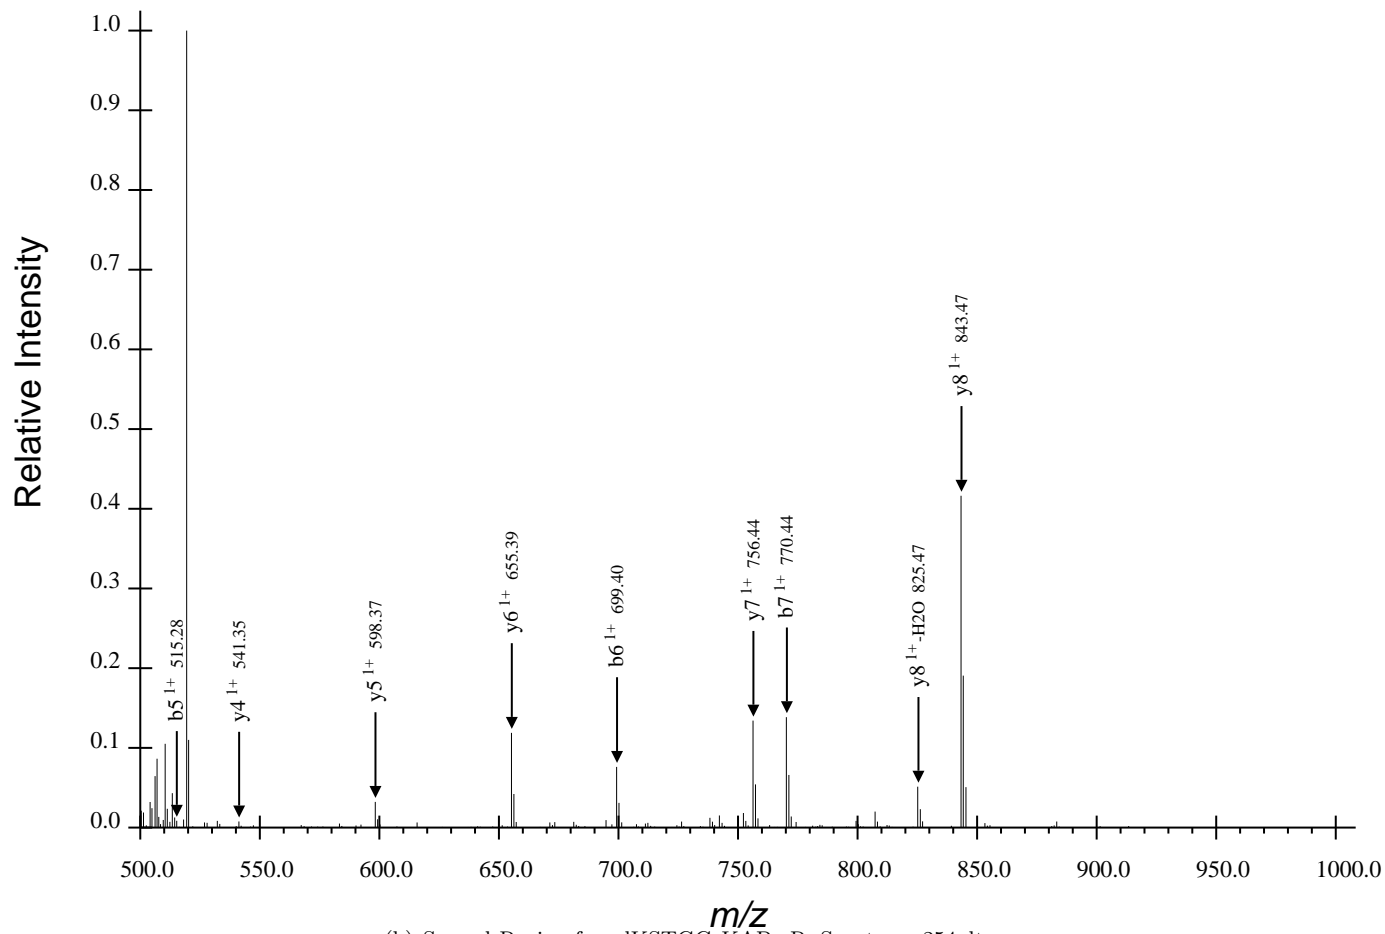

(b) Second Region for rdKSTGGGrKAPmR, Spectrum 254.dta

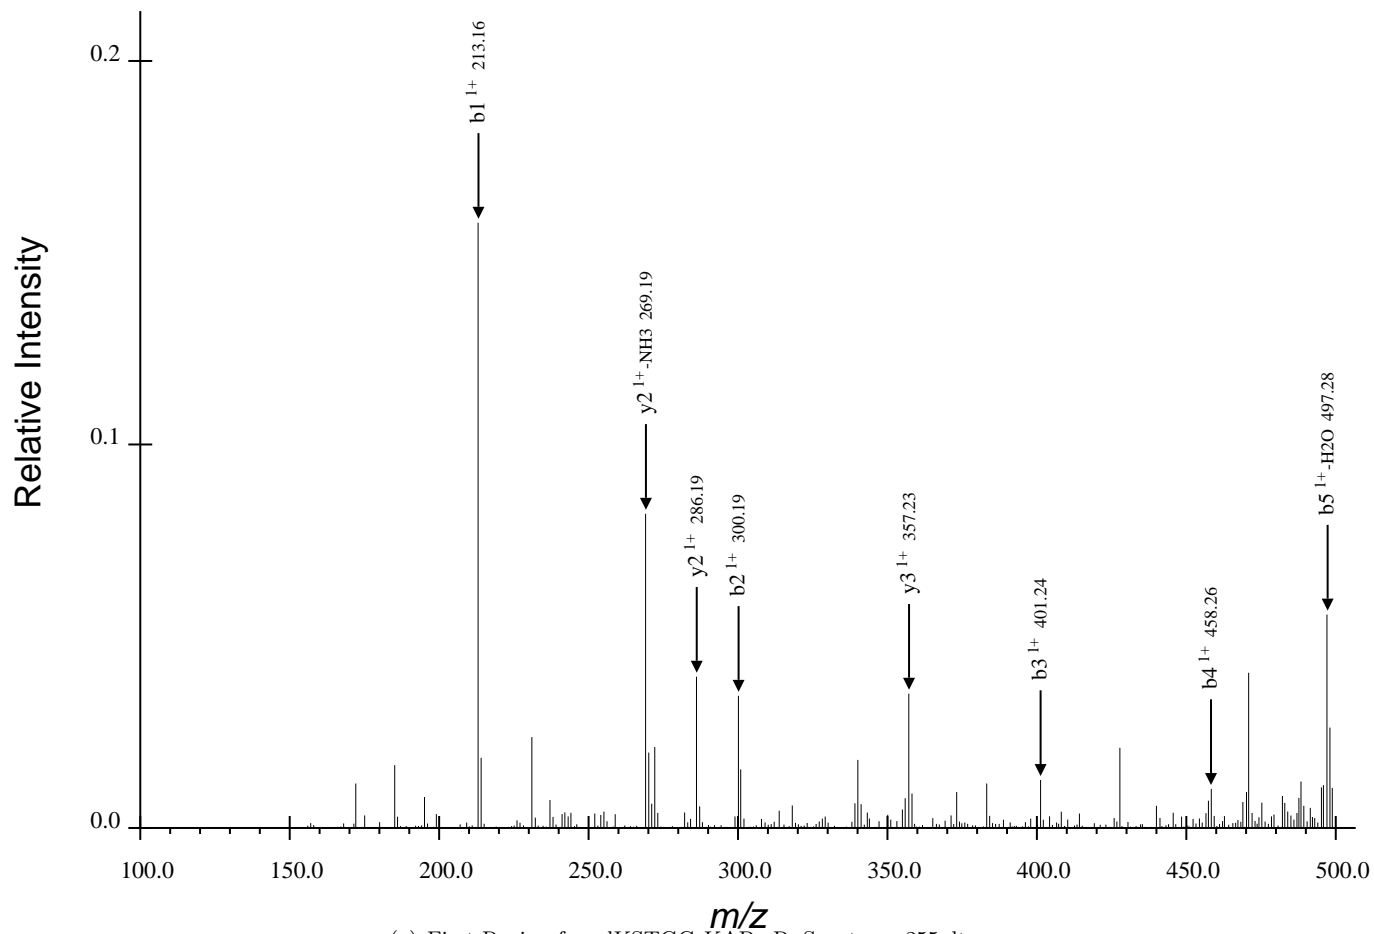

(a) First Region for rdKSTGGGrKAPmR, Spectrum 255.dta

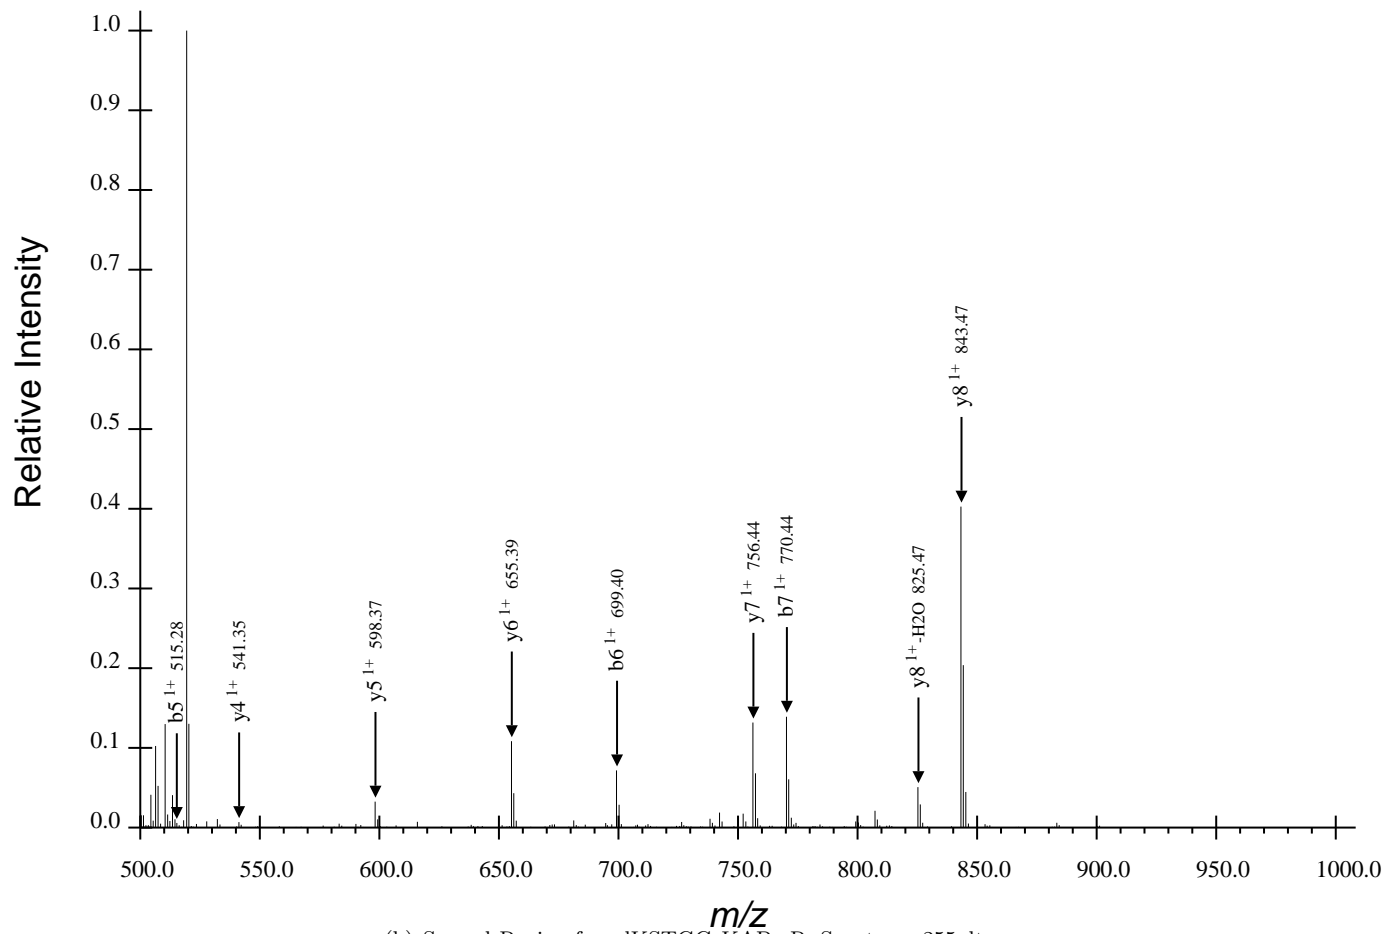

(b) Second Region for rdKSTGGGrKAPmR, Spectrum 255.dta

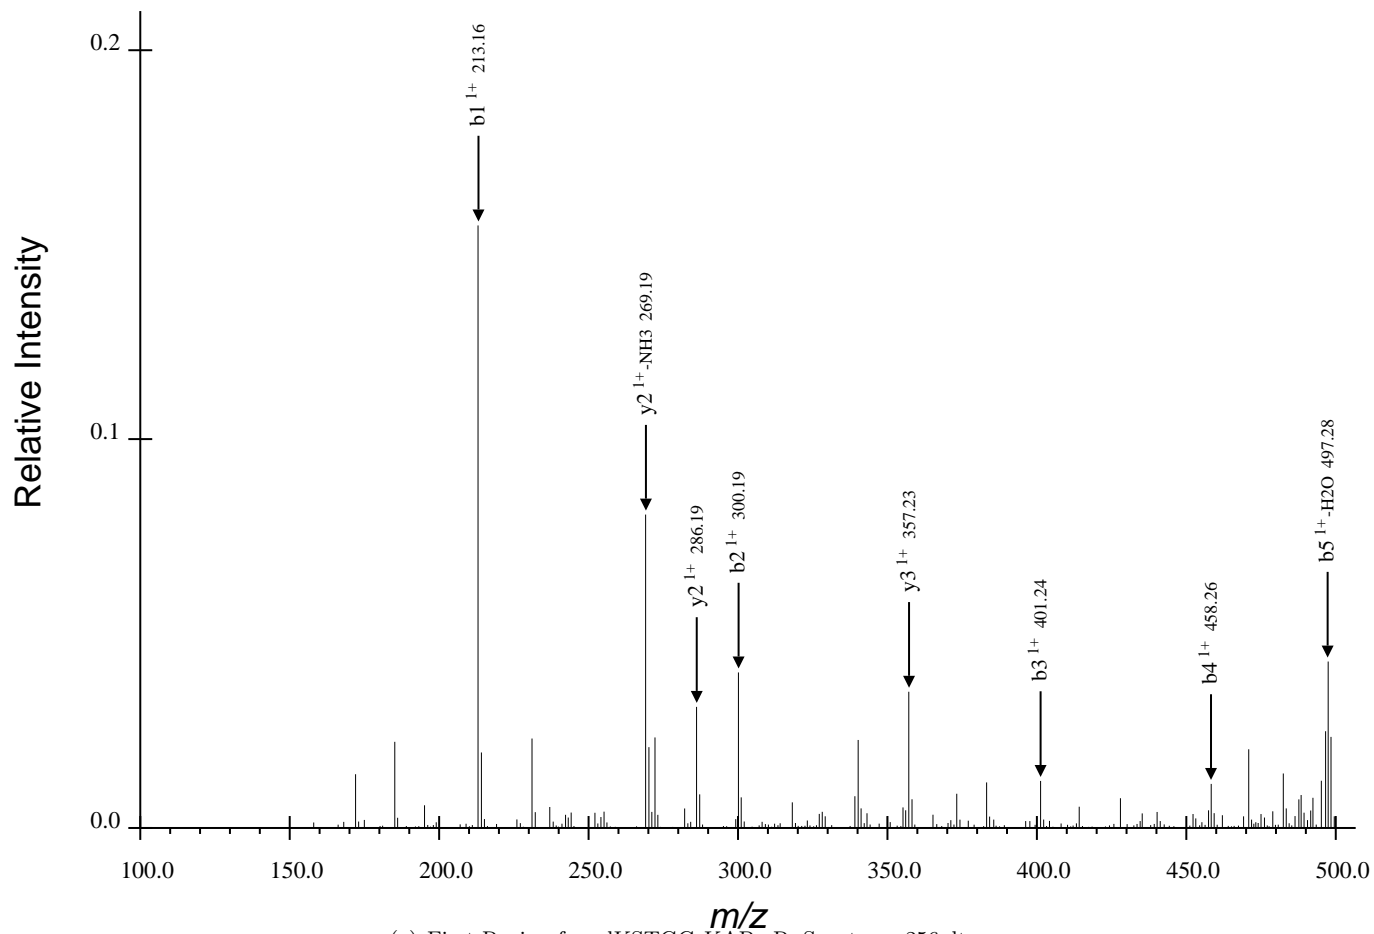

(a) First Region for rdKSTGGGrKAPmR, Spectrum 256.dta

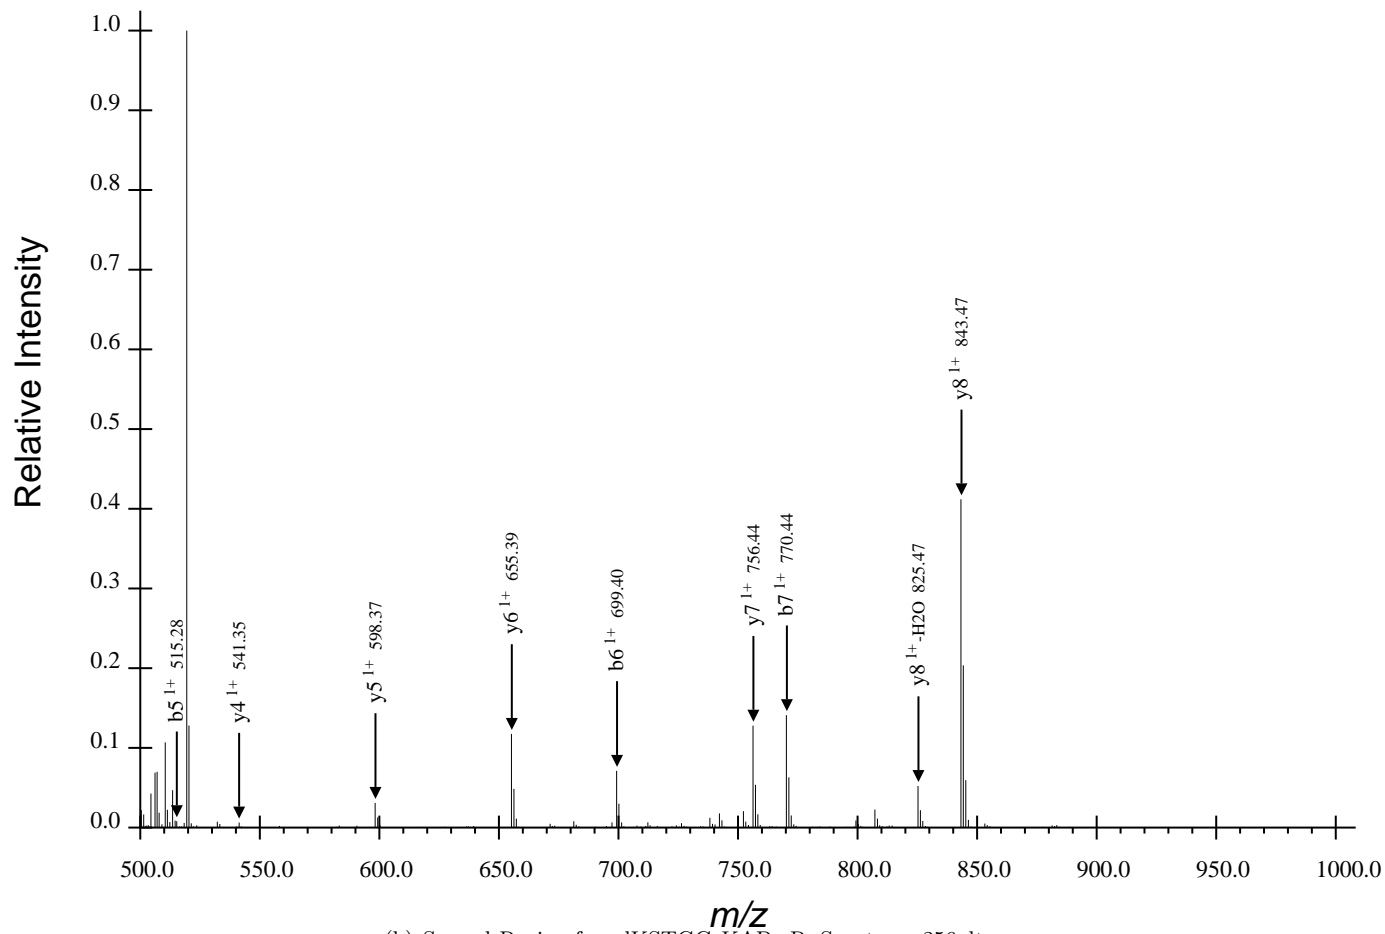

(b) Second Region for rdKSTGGGrKAPmR, Spectrum 256.dta



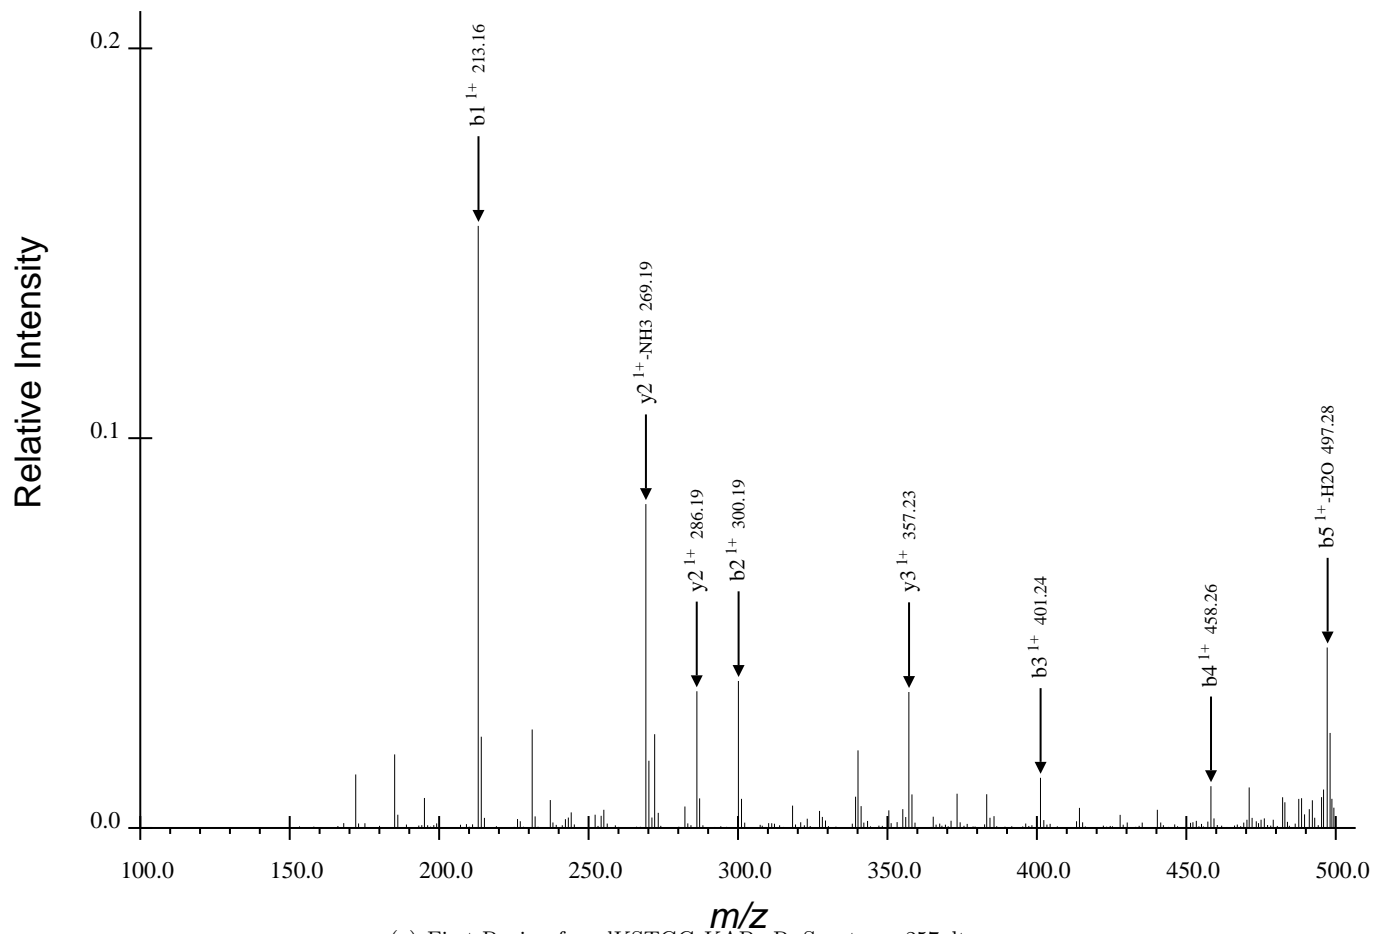

(a) First Region for rdKSTGGGrKAPmR, Spectrum 257.dta

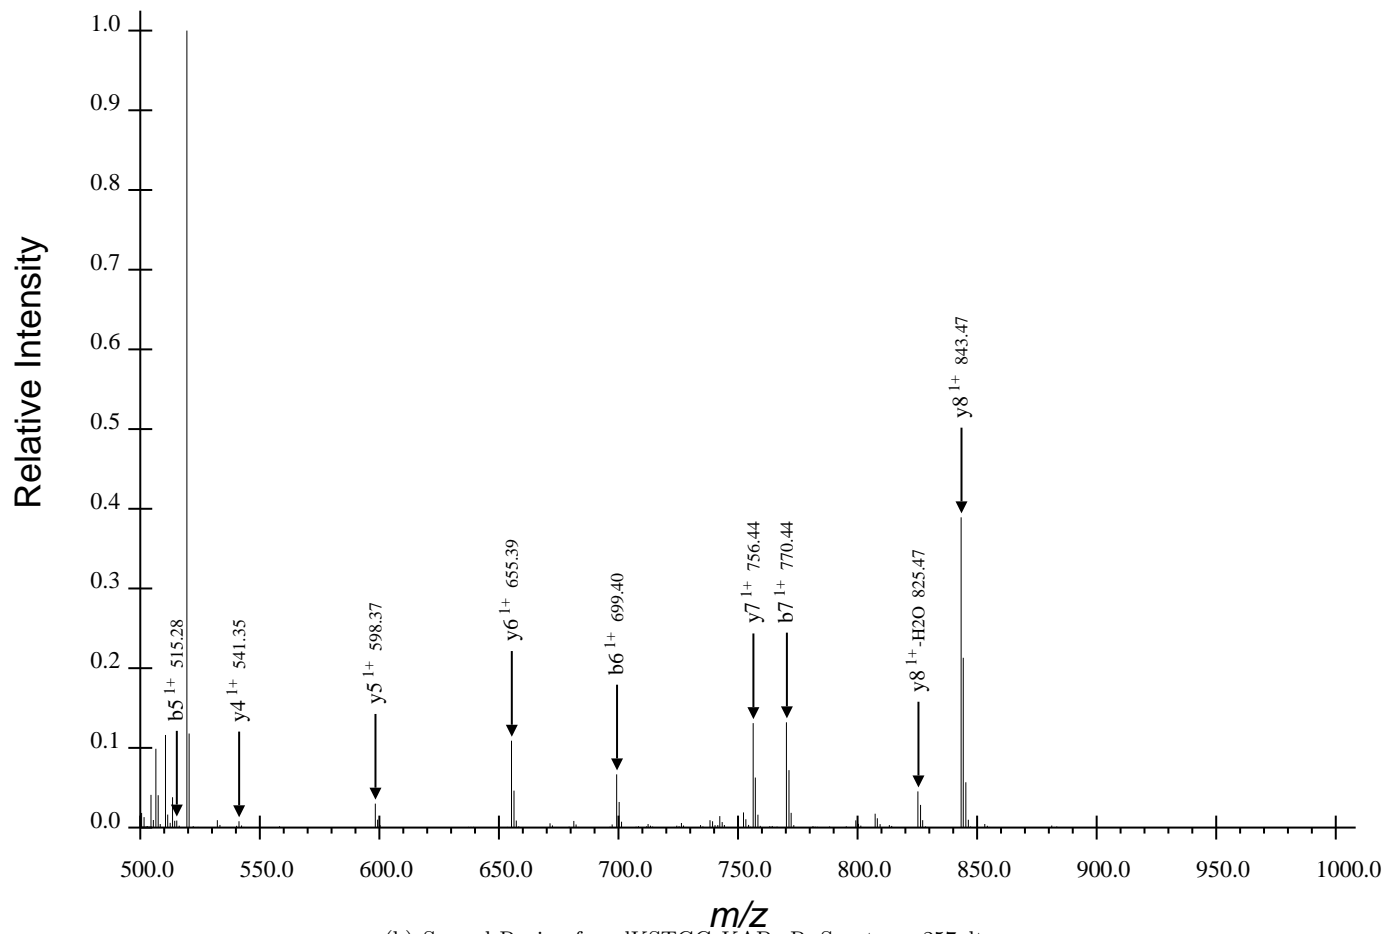

(b) Second Region for rdKSTGGGrKAPmR, Spectrum 257.dta

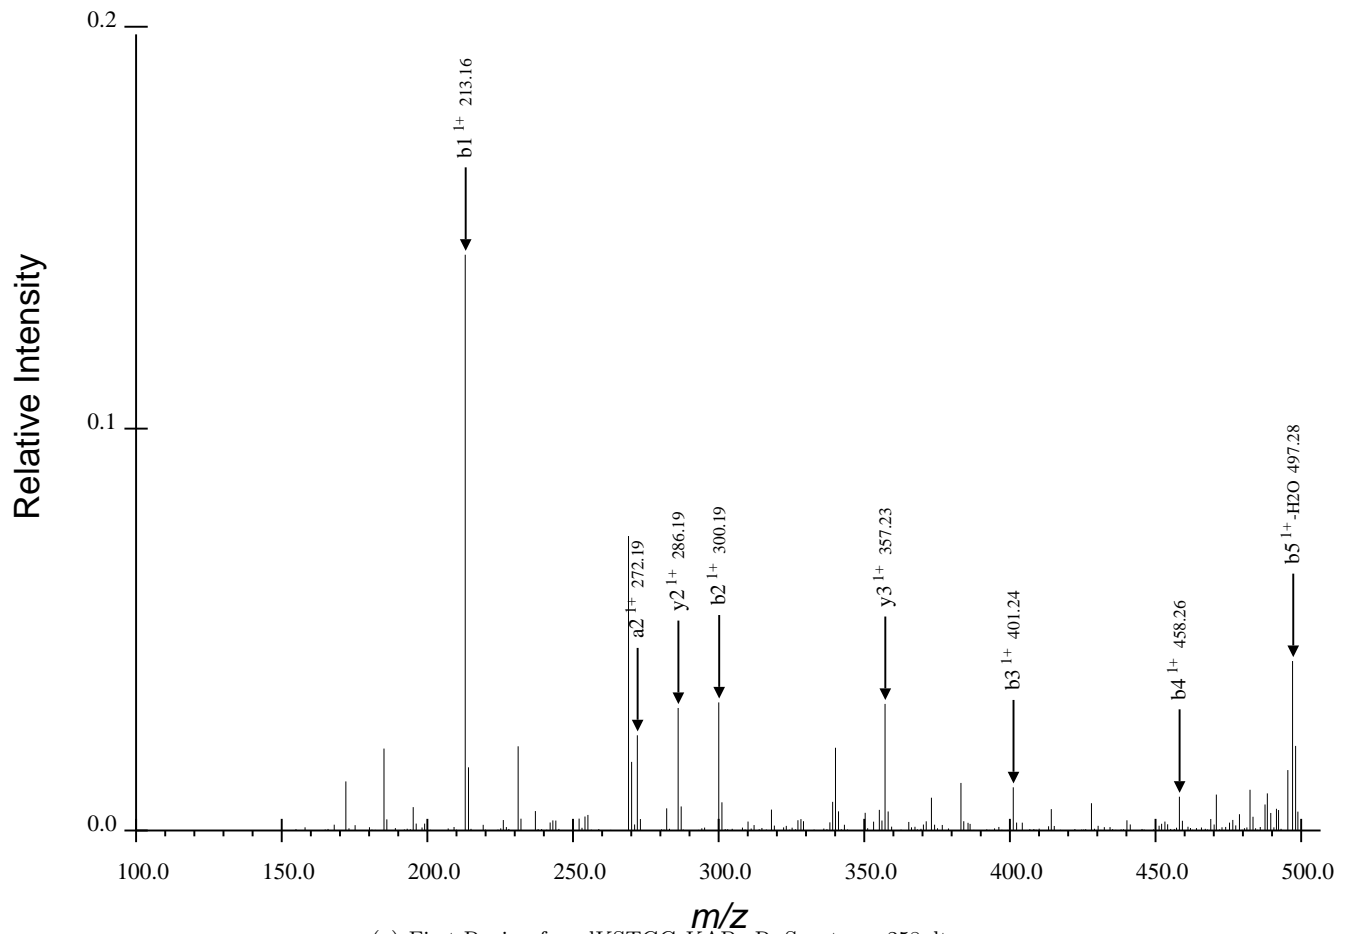

(a) First Region for rdKSTGGGrKAPmR, Spectrum 258.dta

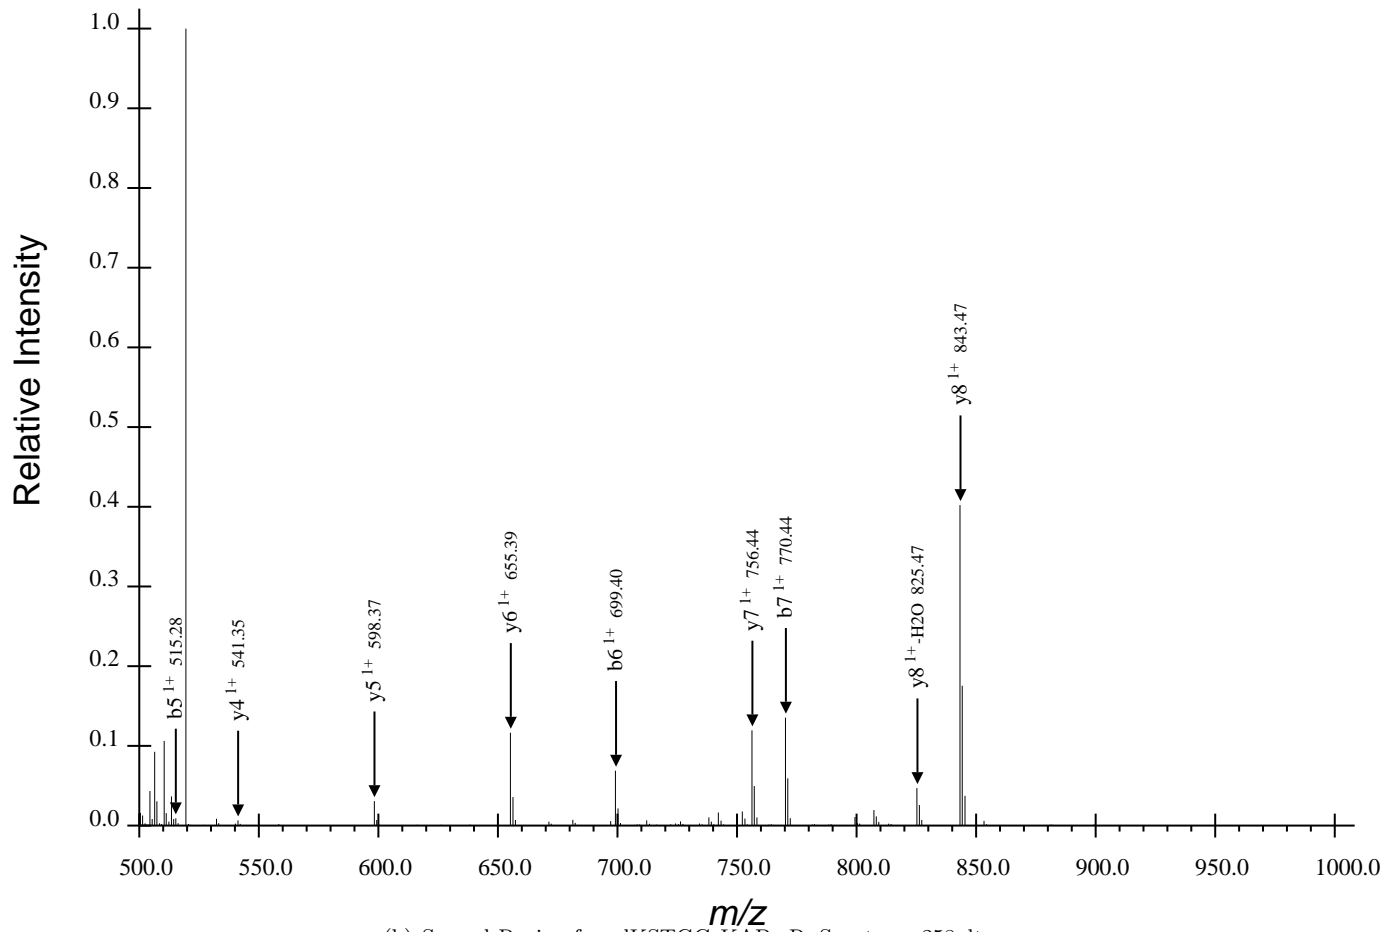

(b) Second Region for rdKSTGGGrKAPmR, Spectrum 258.dta

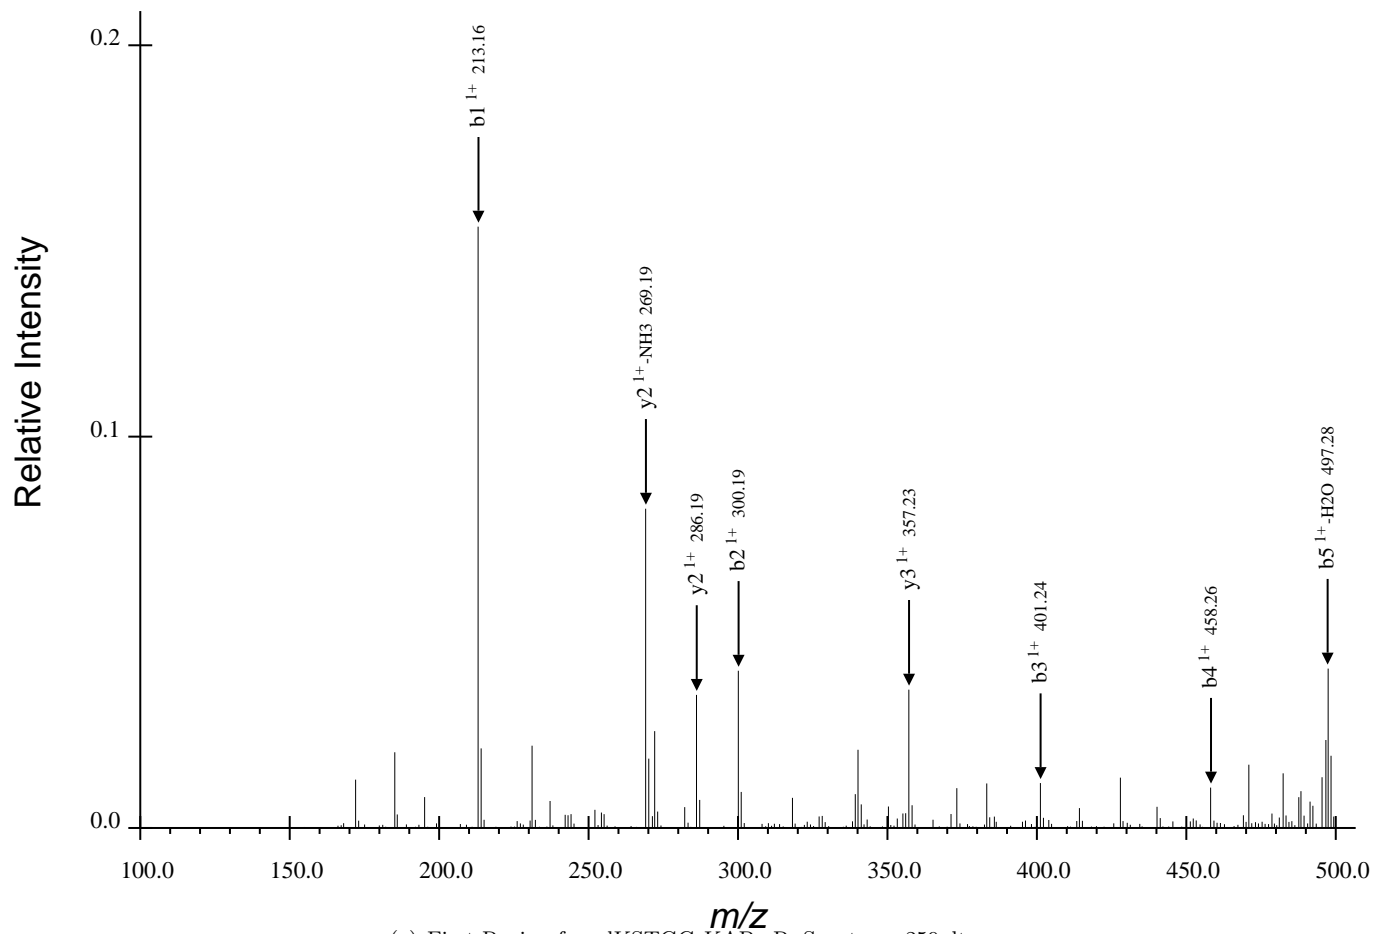

(a) First Region for rdKSTGGGrKAPmR, Spectrum 259.dta

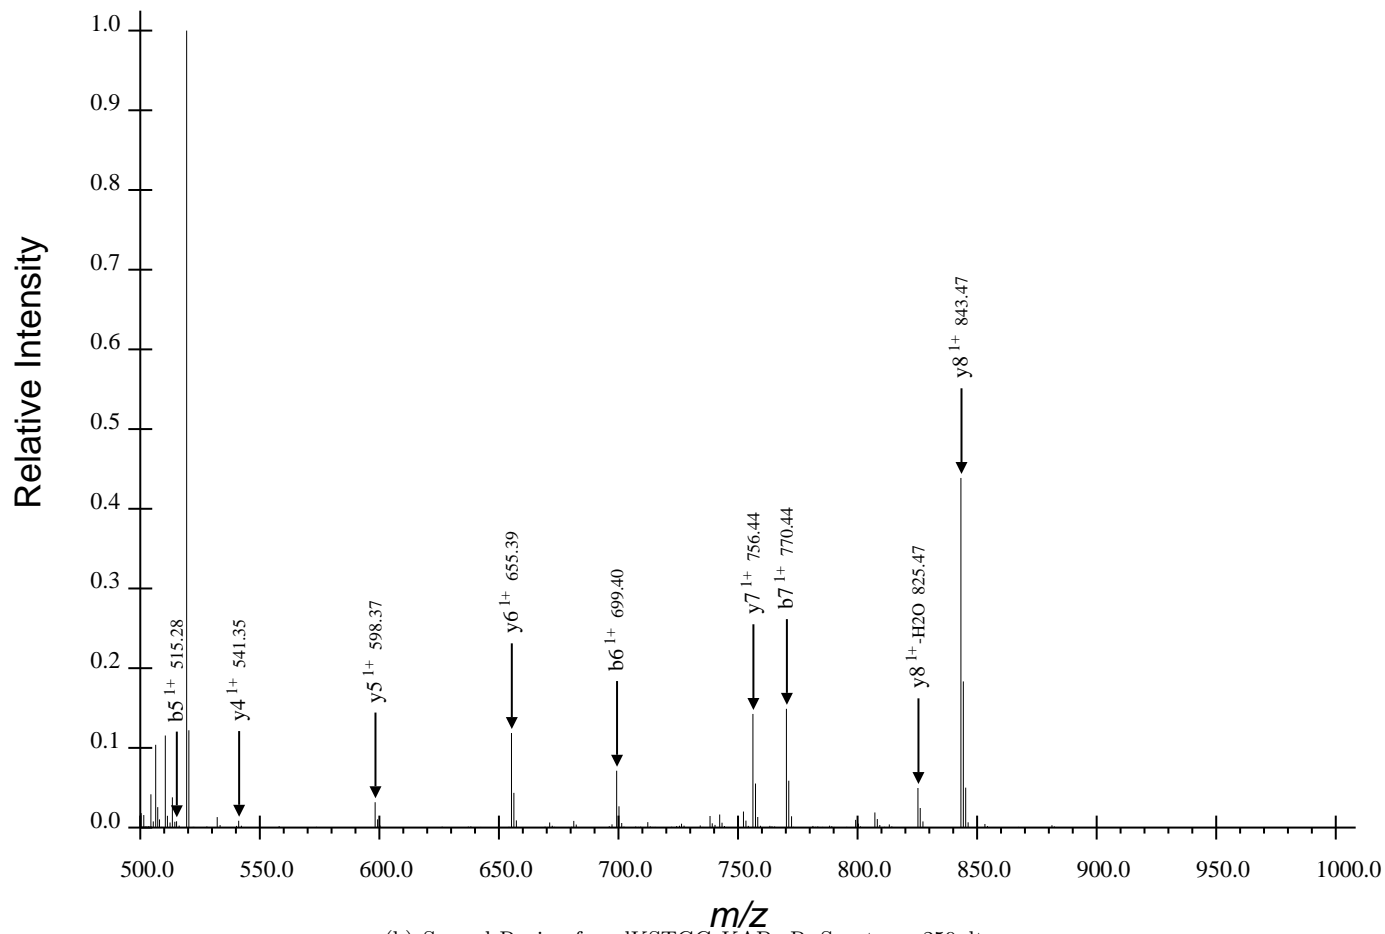

(b) Second Region for rdKSTGGGrKAPmR, Spectrum 259.dta

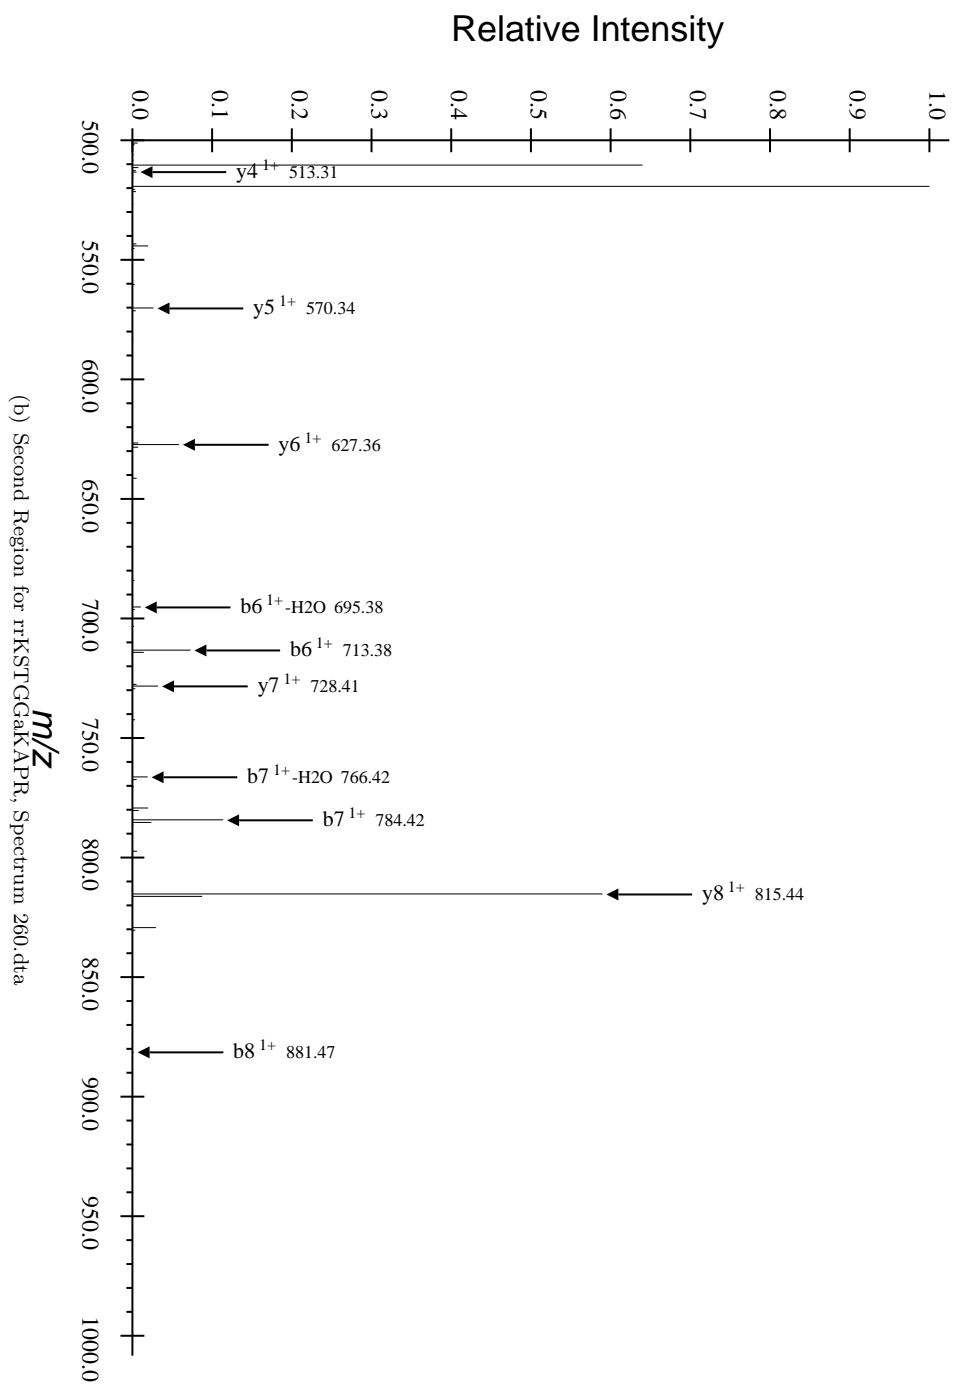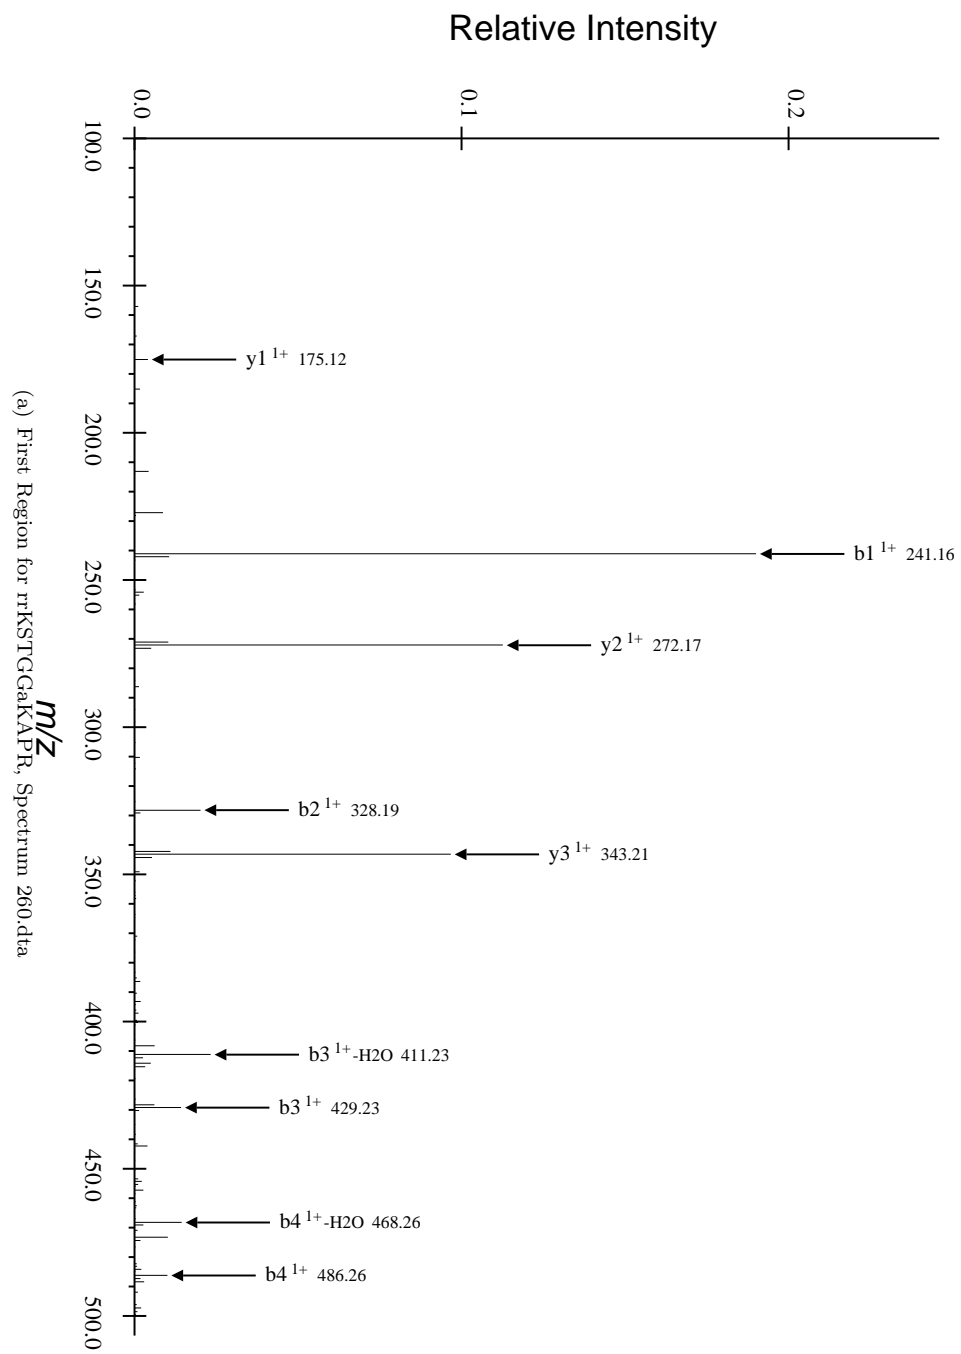

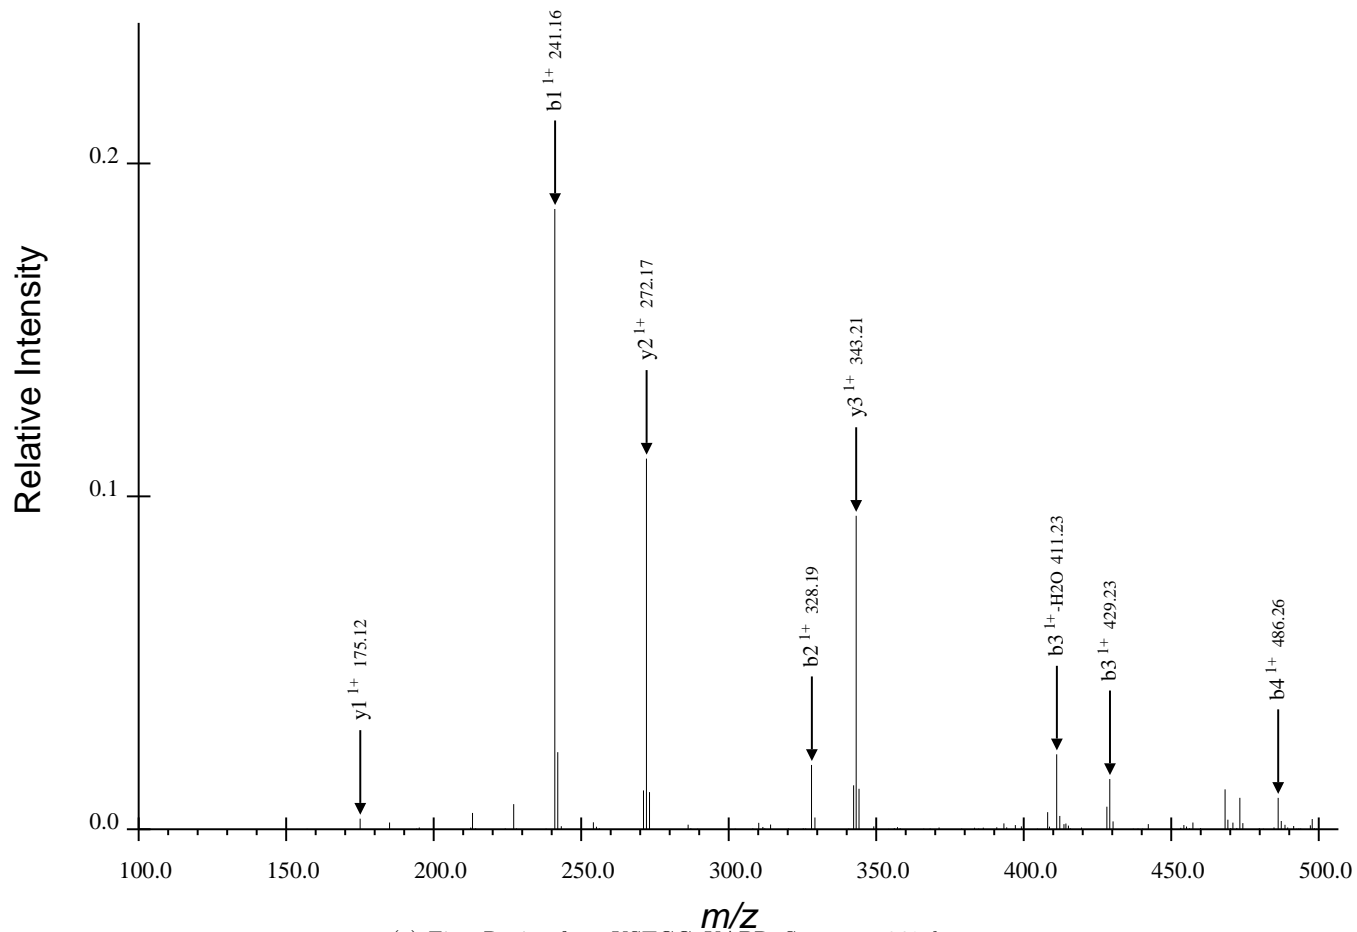

(a) First Region for rrKSTGGaKAPR, Spectrum 261.dta

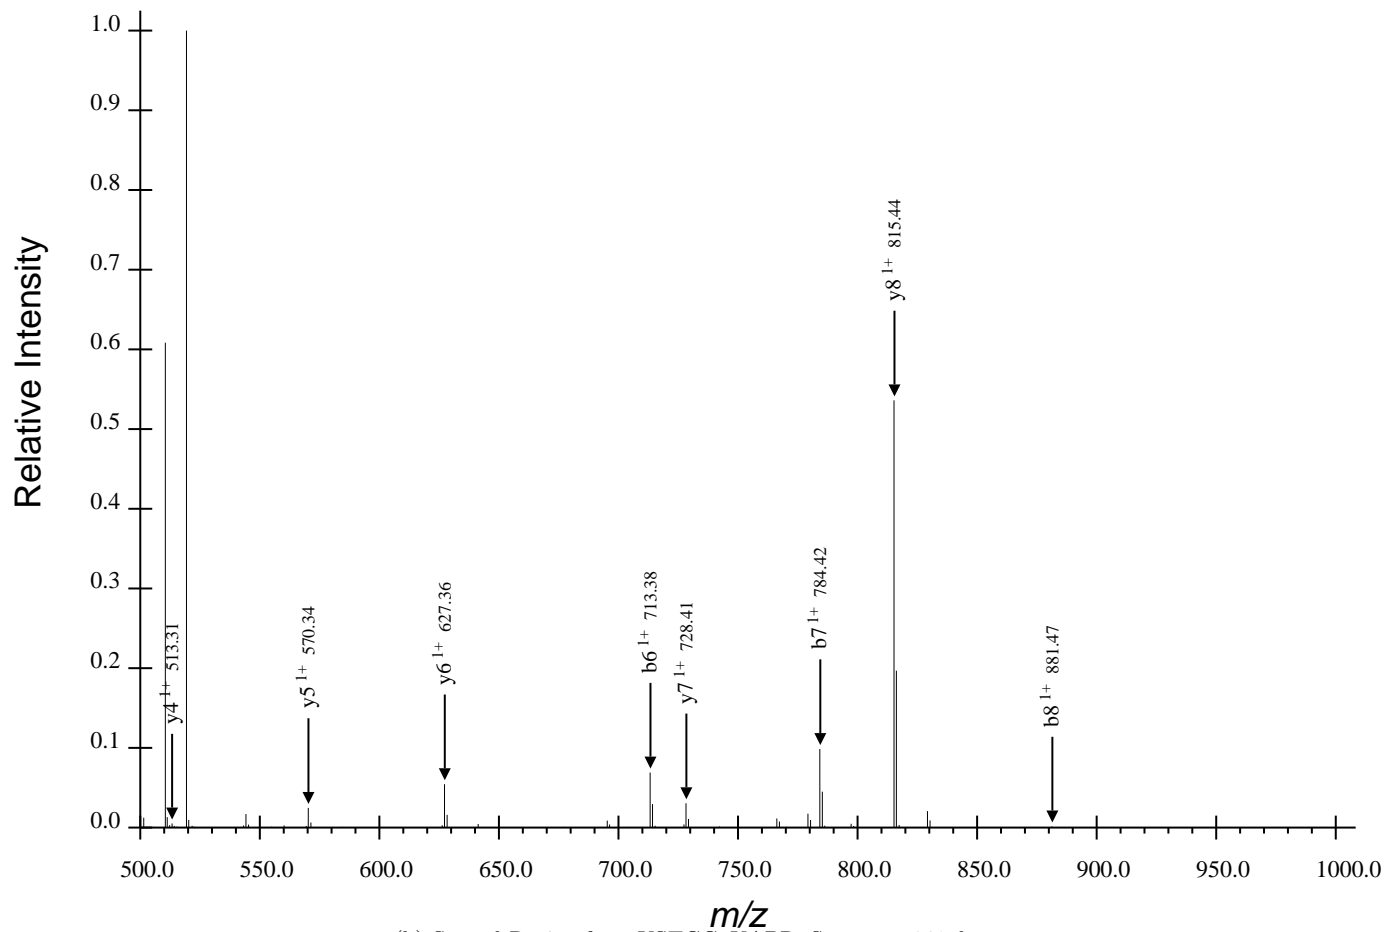

(b) Second Region for rrKSTGGaKAPR, Spectrum 261.dta

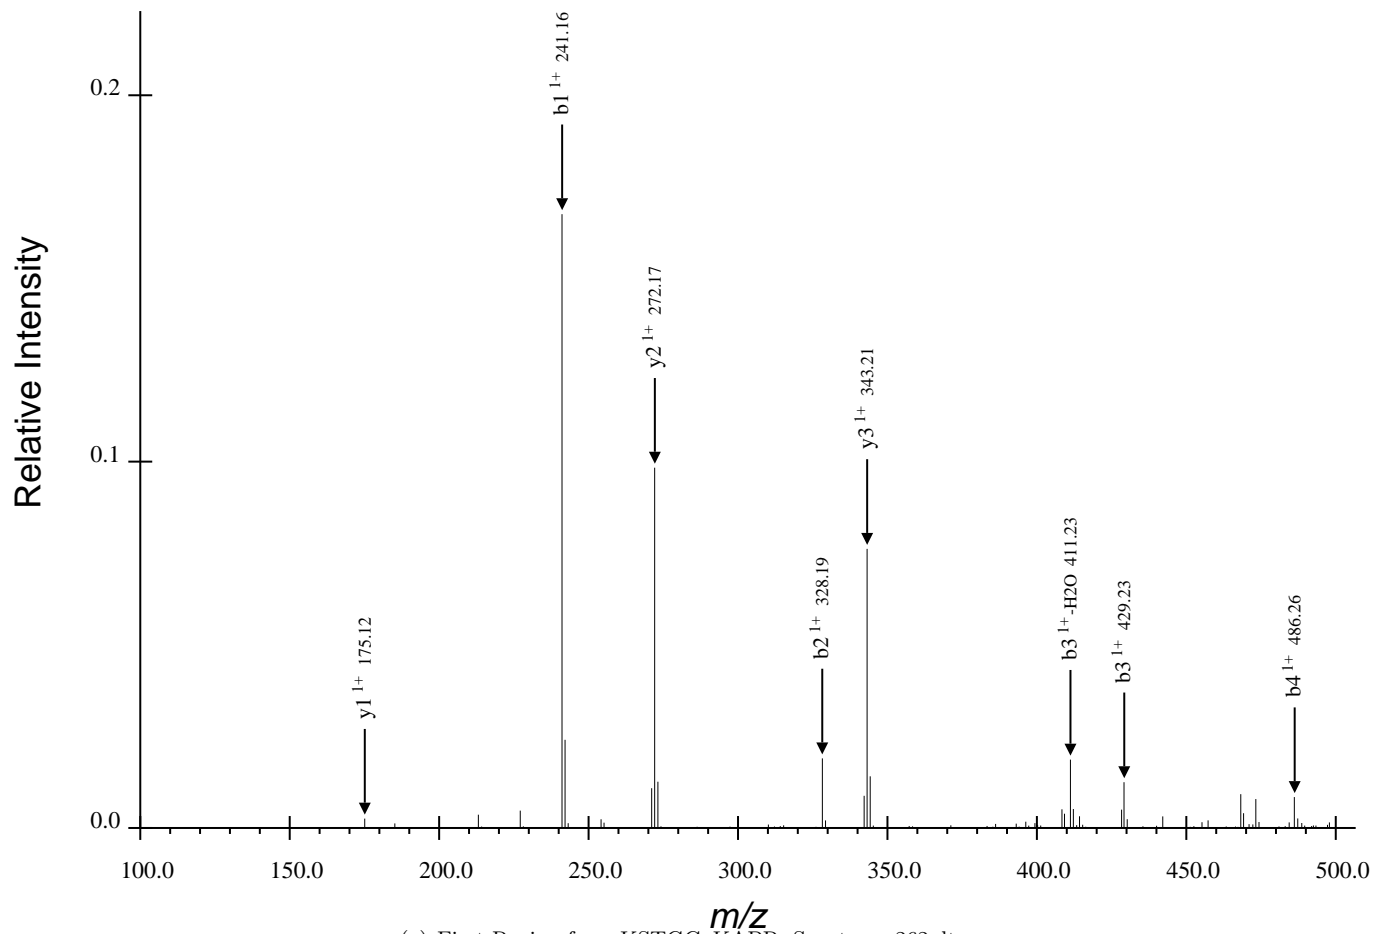

(a) First Region for rrKSTGGaKAPR, Spectrum 262.dta

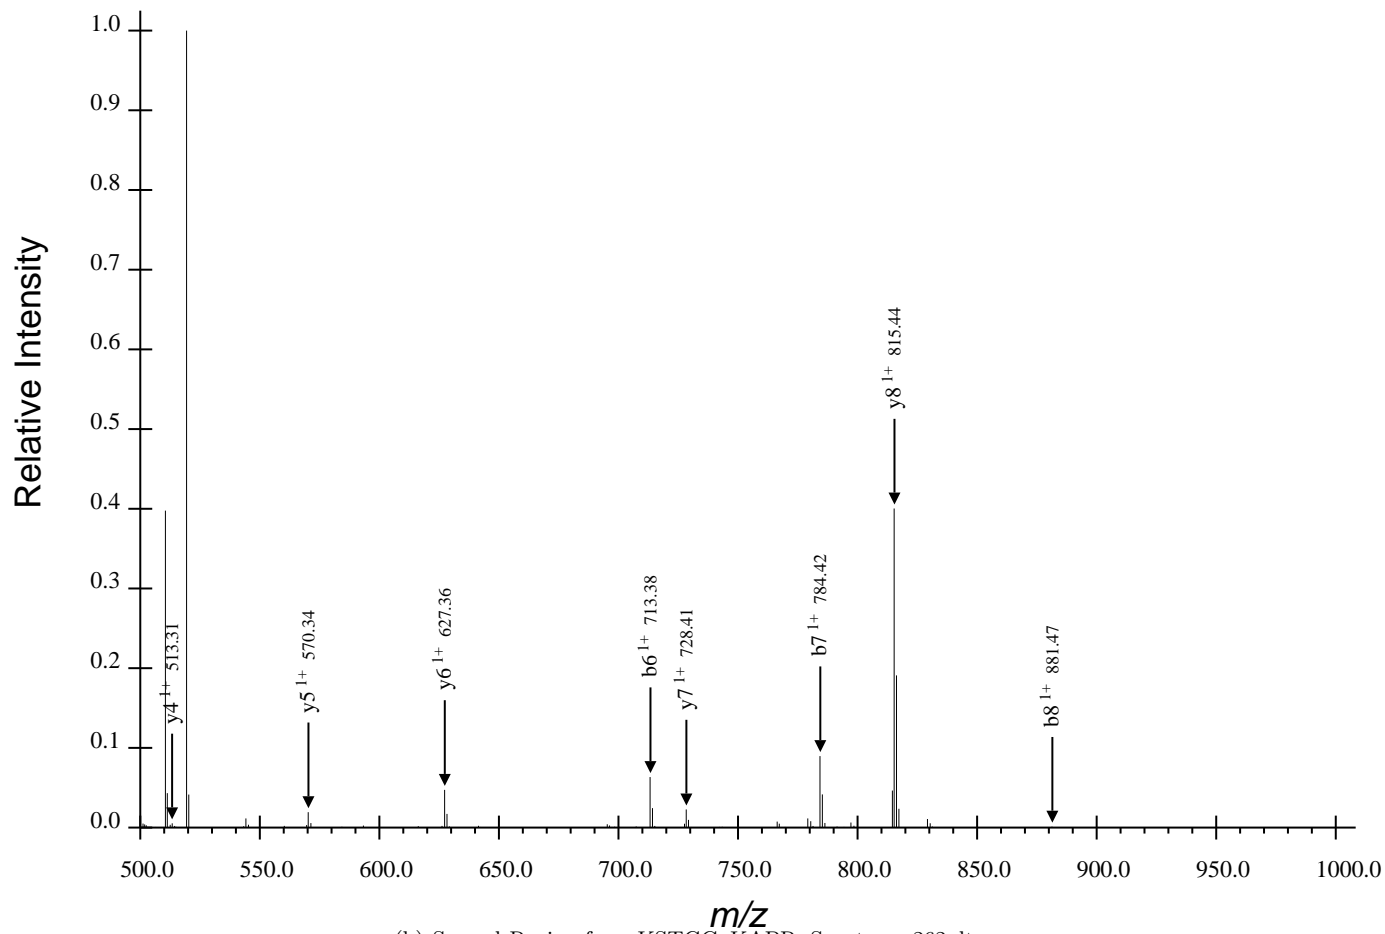

(b) Second Region for rrKSTGGaKAPR, Spectrum 262.dta

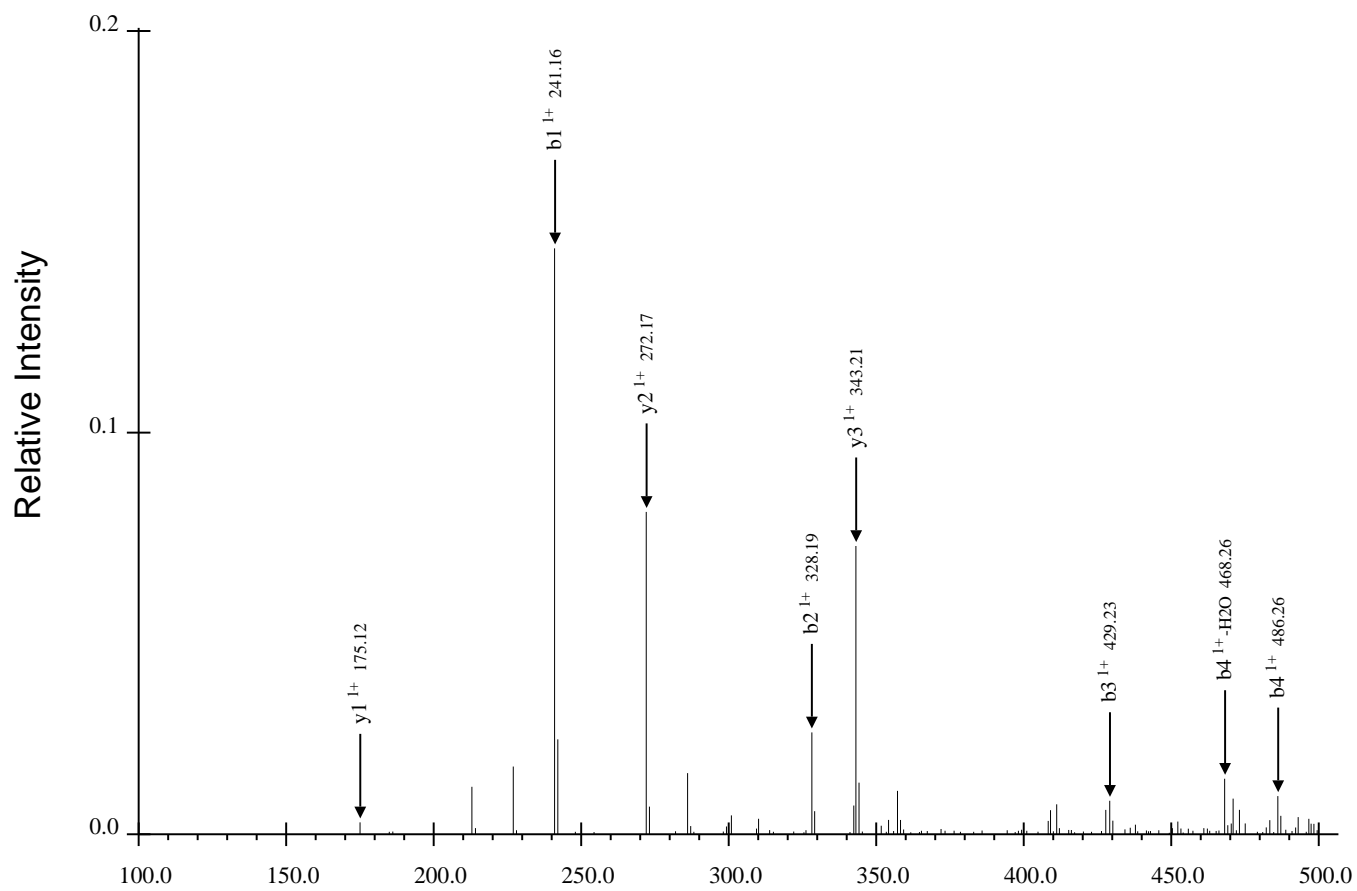

(a) First Region for rrKSTGGaKAPR, Spectrum 263.dta

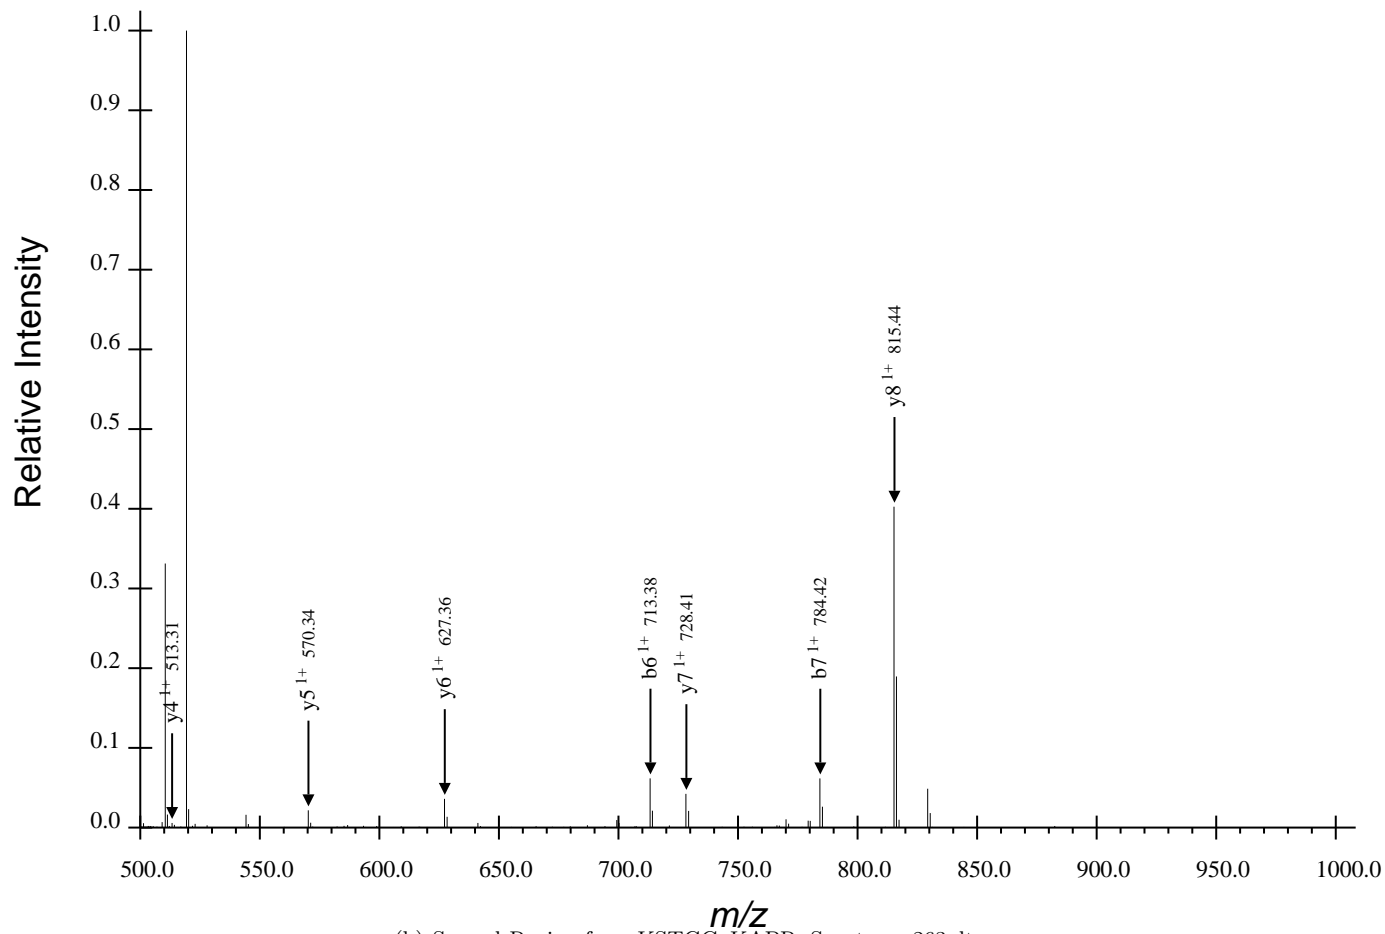

(b) Second Region for rrKSTGGaKAPR, Spectrum 263.dta

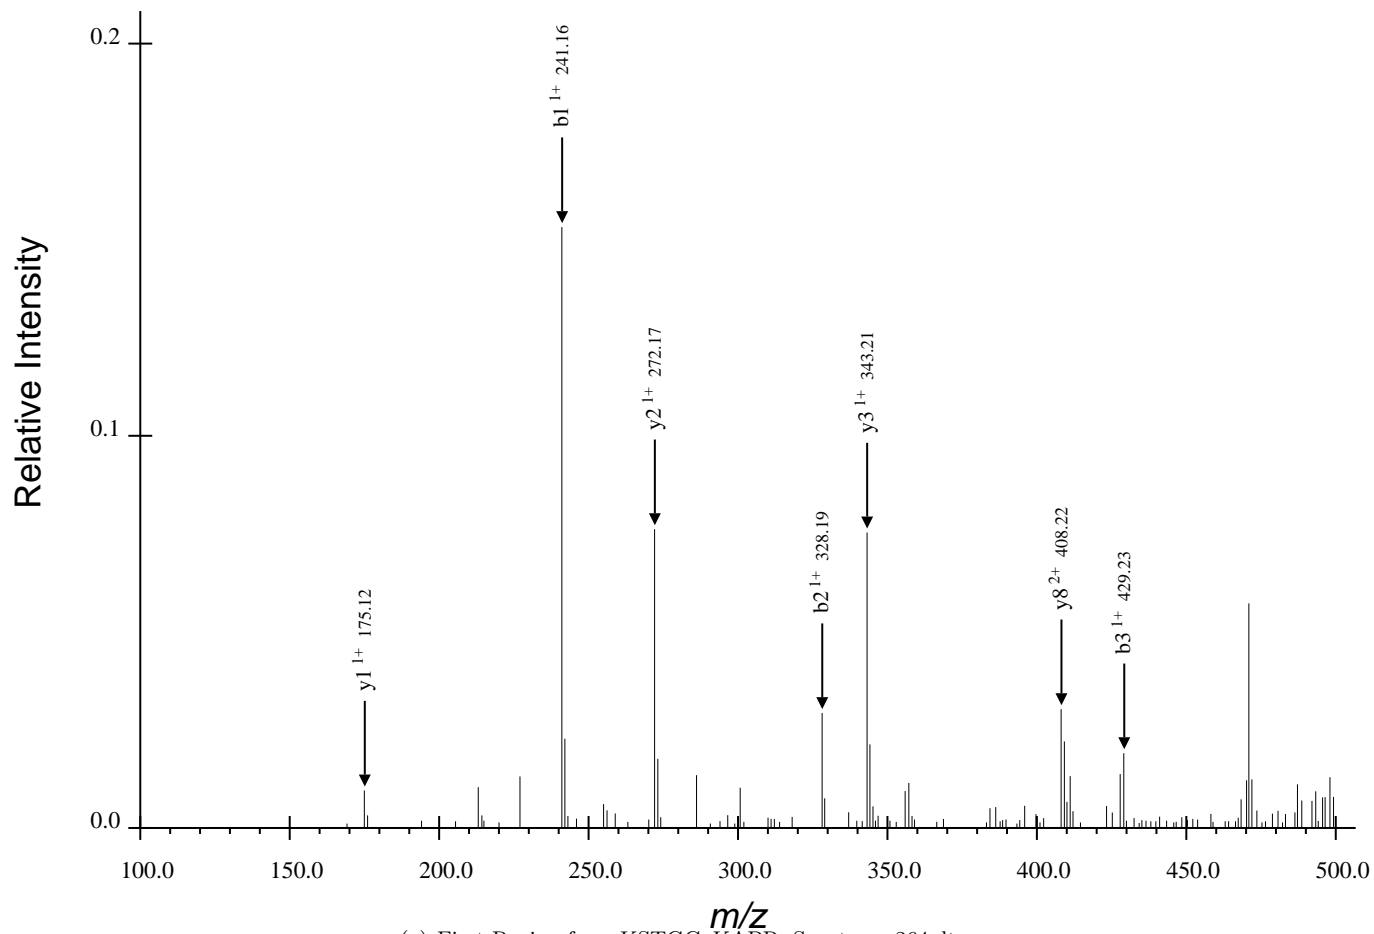

(a) First Region for rrKSTGGaKAPR, Spectrum 264.dta

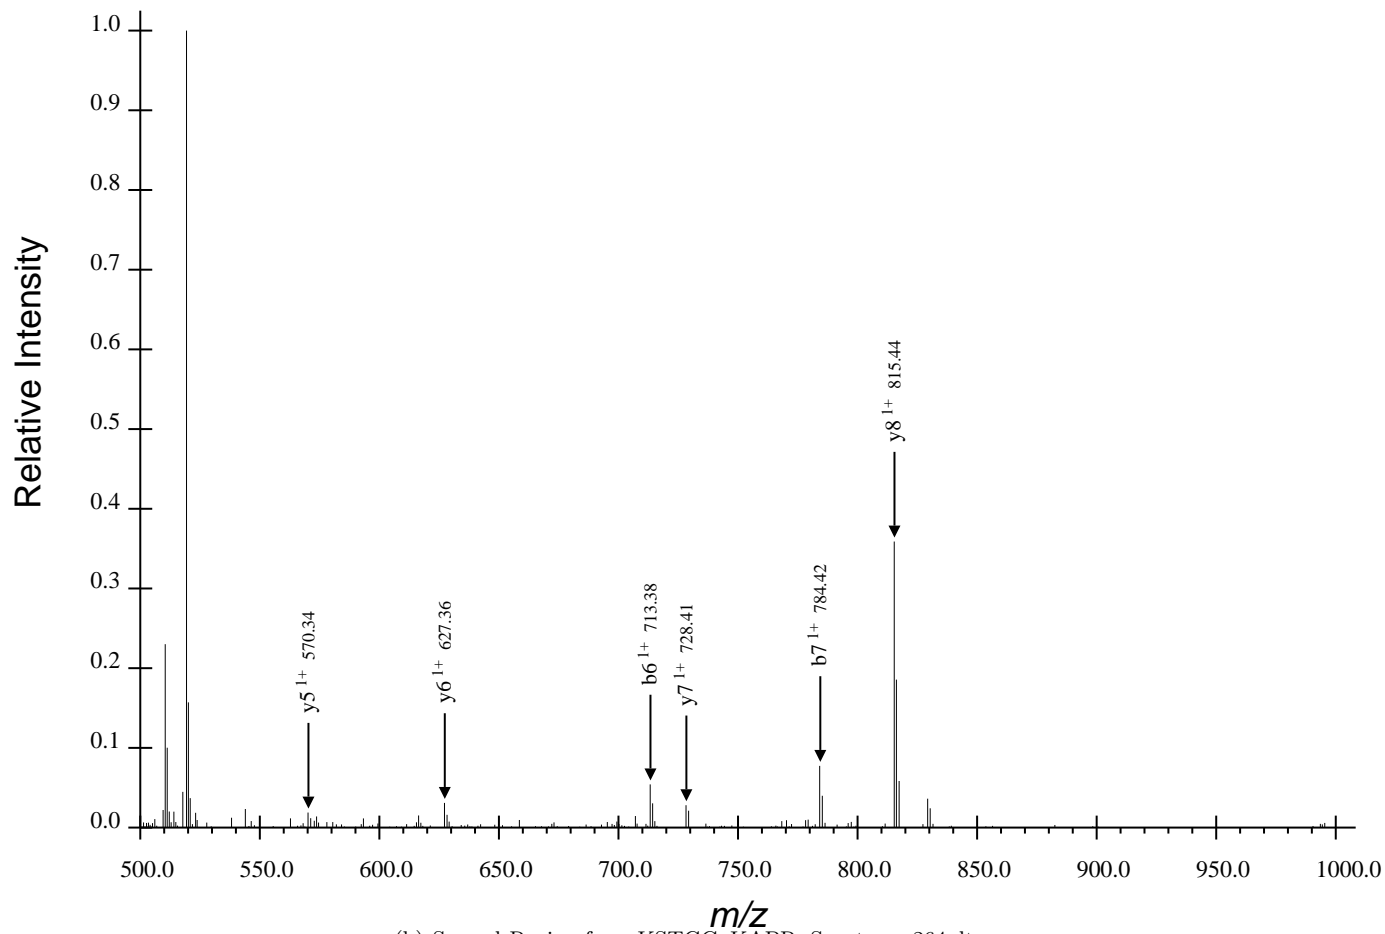

(b) Second Region for rrKSTGGaKAPR, Spectrum 264.dta



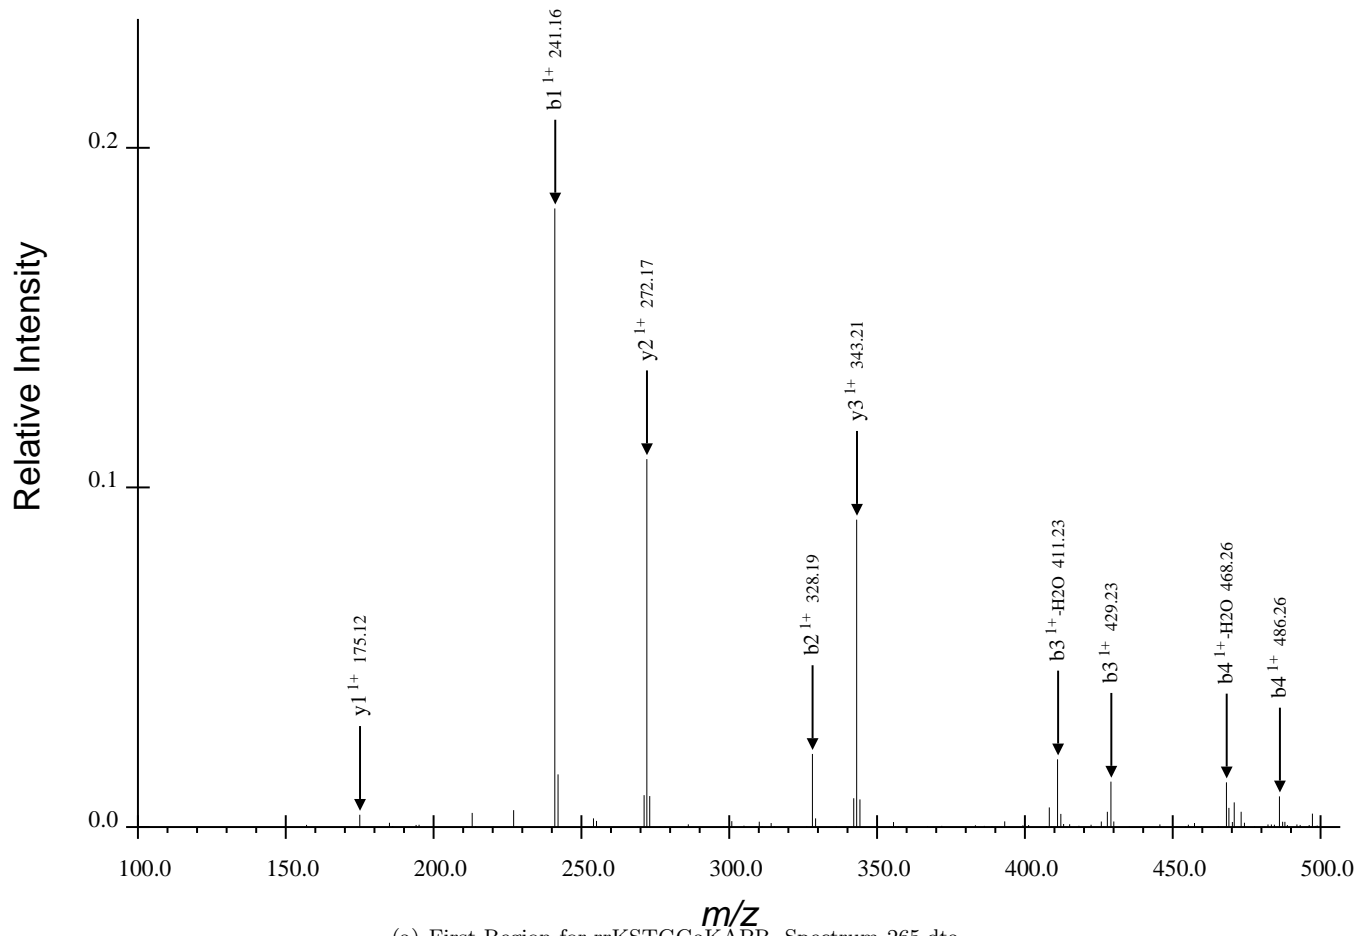

(a) First Region for rrKSTGGaKAPR, Spectrum 265.dta

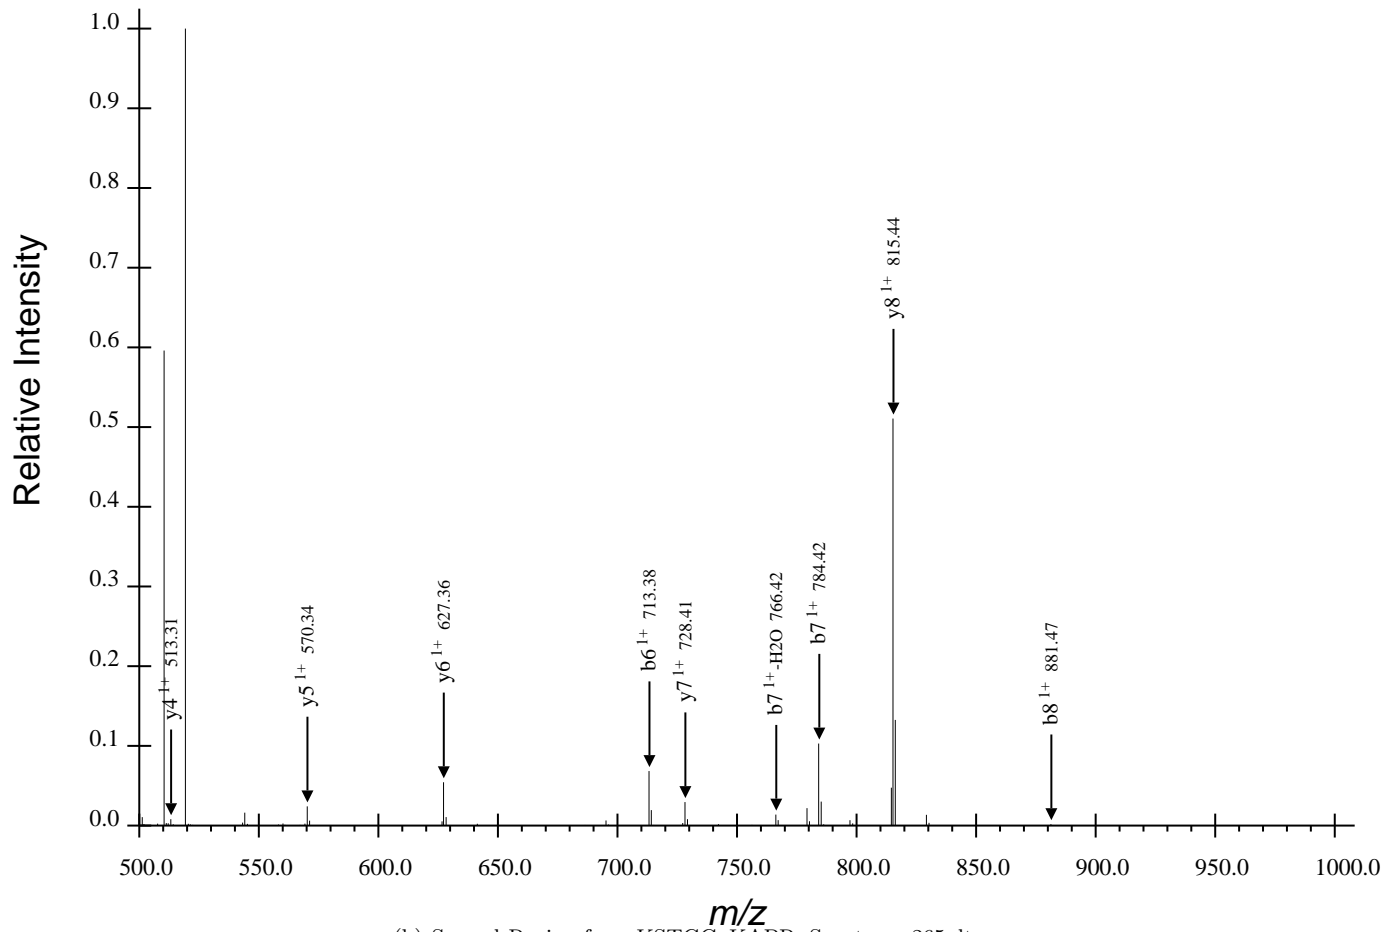

(b) Second Region for rrKSTGGaKAPR, Spectrum 265.dta

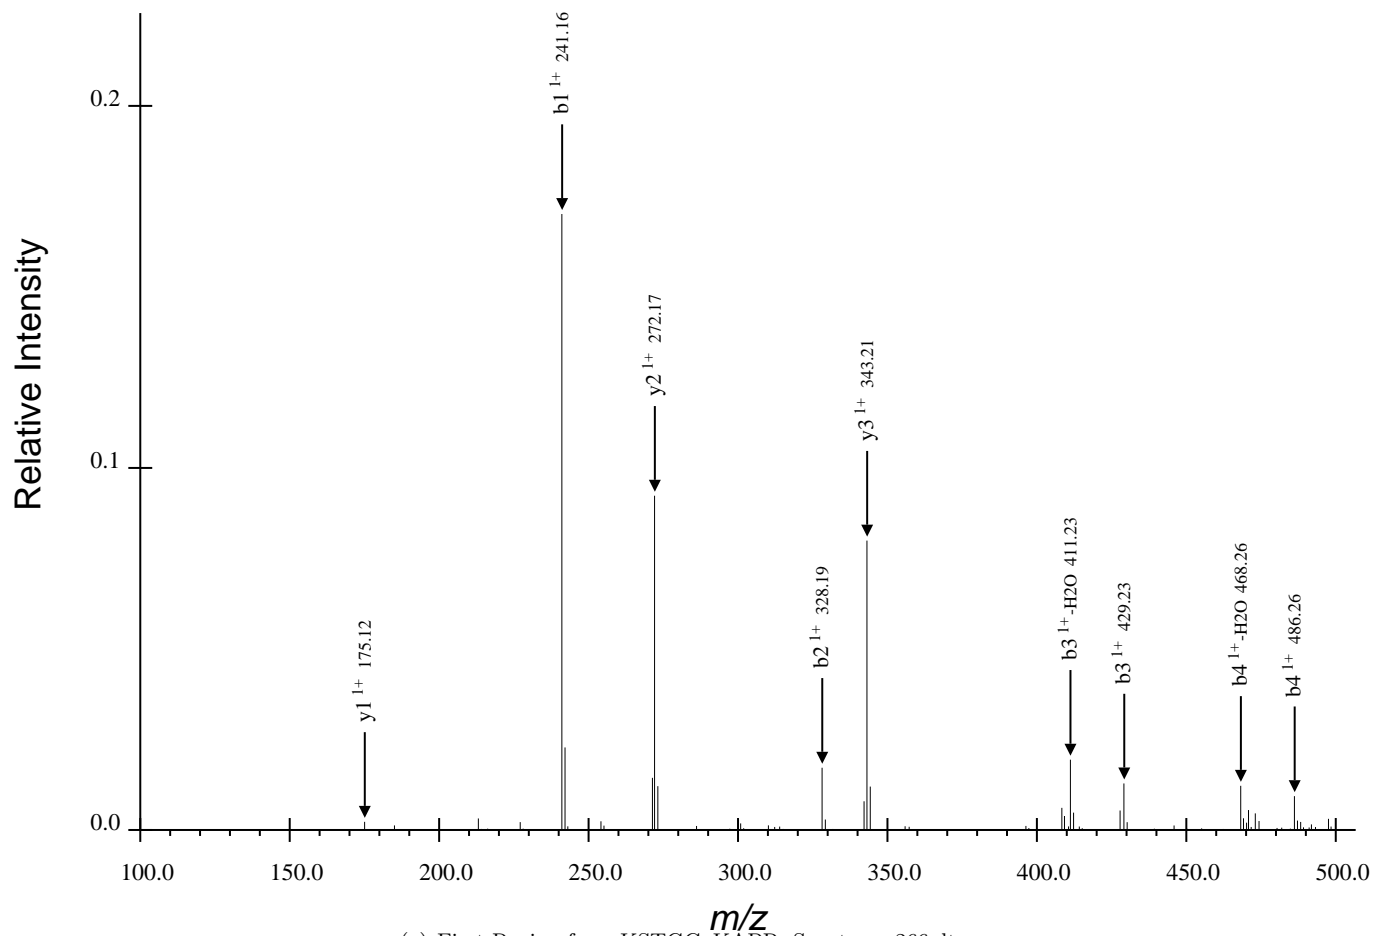

(a) First Region for rrKSTGGaKAPR, Spectrum 266.dta

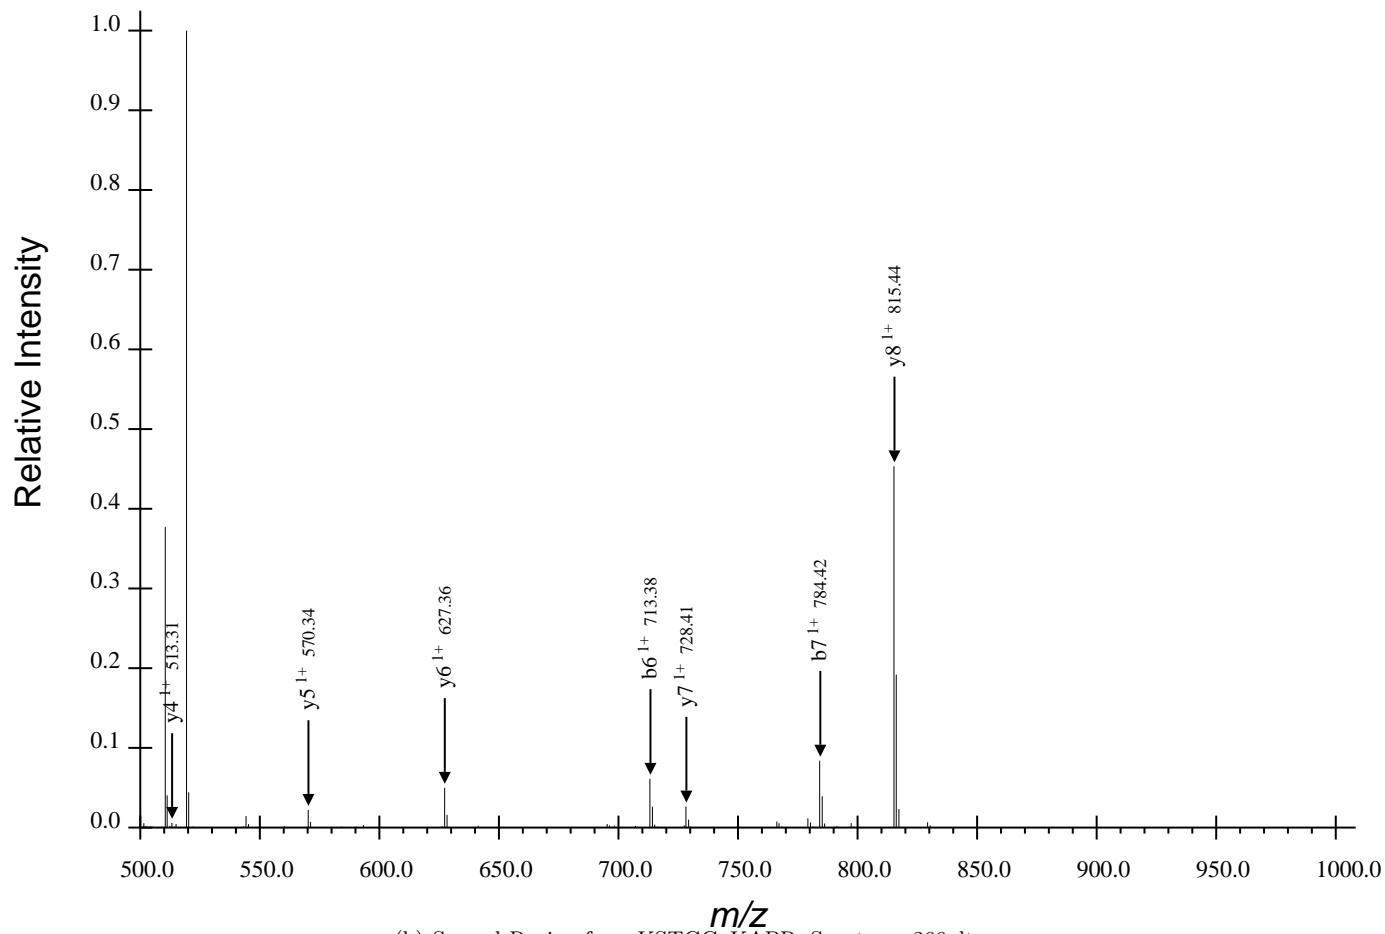

(b) Second Region for rrKSTGGaKAPR, Spectrum 266.dta

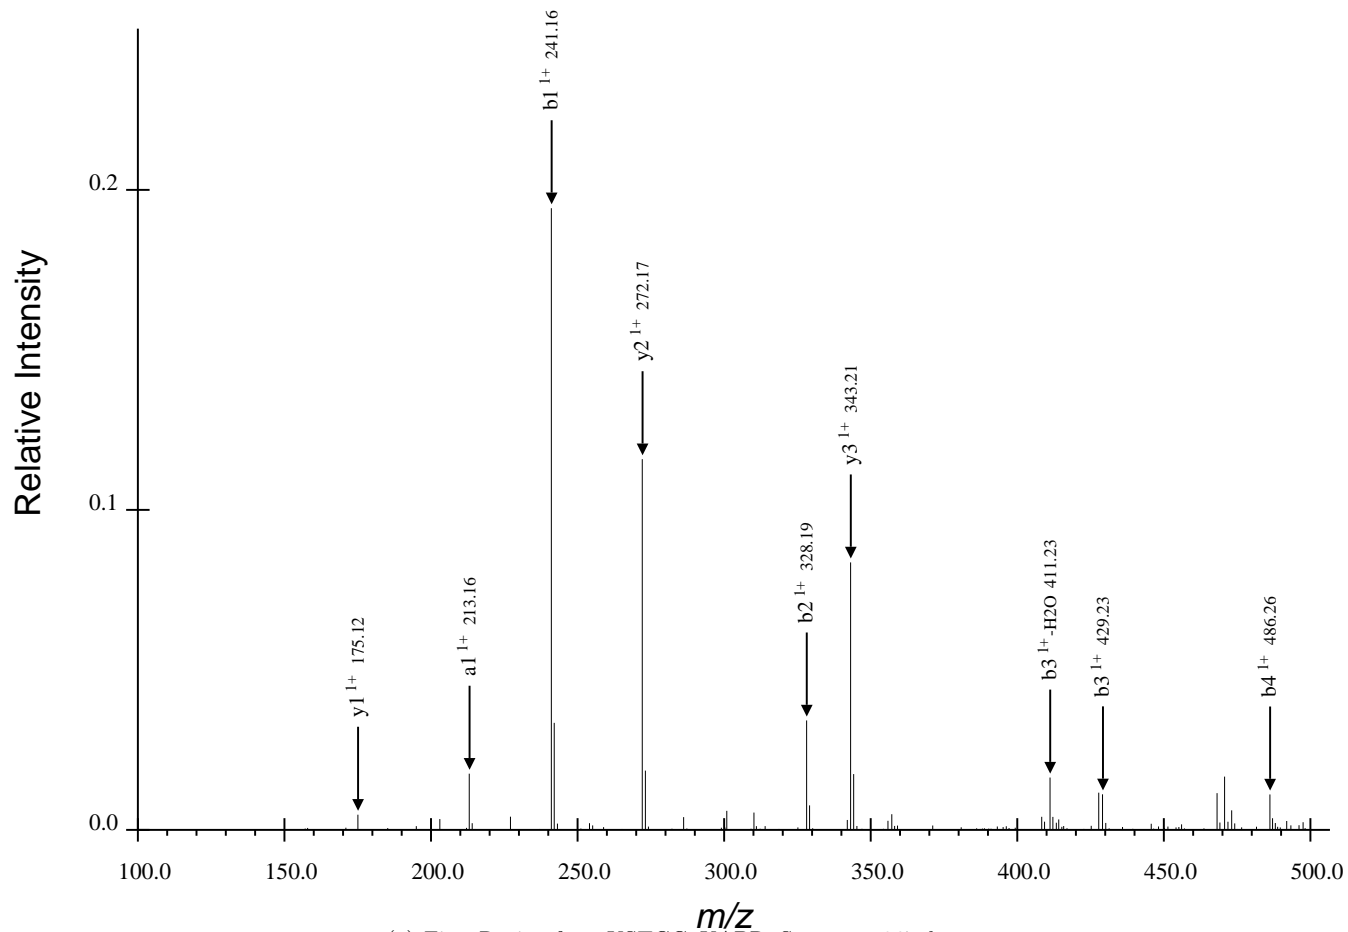

(a) First Region for rrKSTGGaKAPR, Spectrum 267.dta

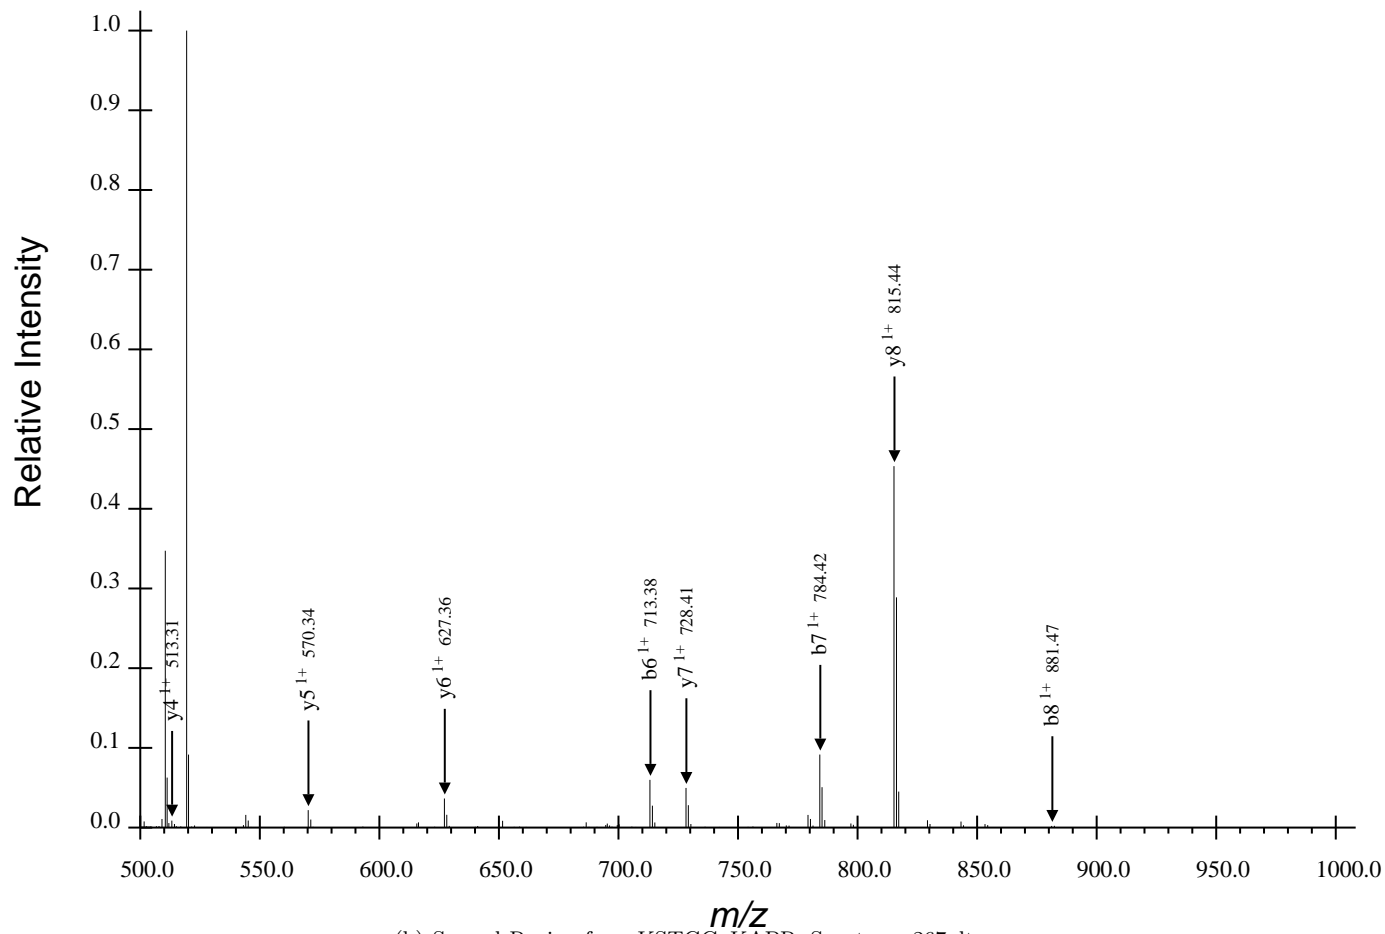

(b) Second Region for rrKSTGGaKAPR, Spectrum 267.dta

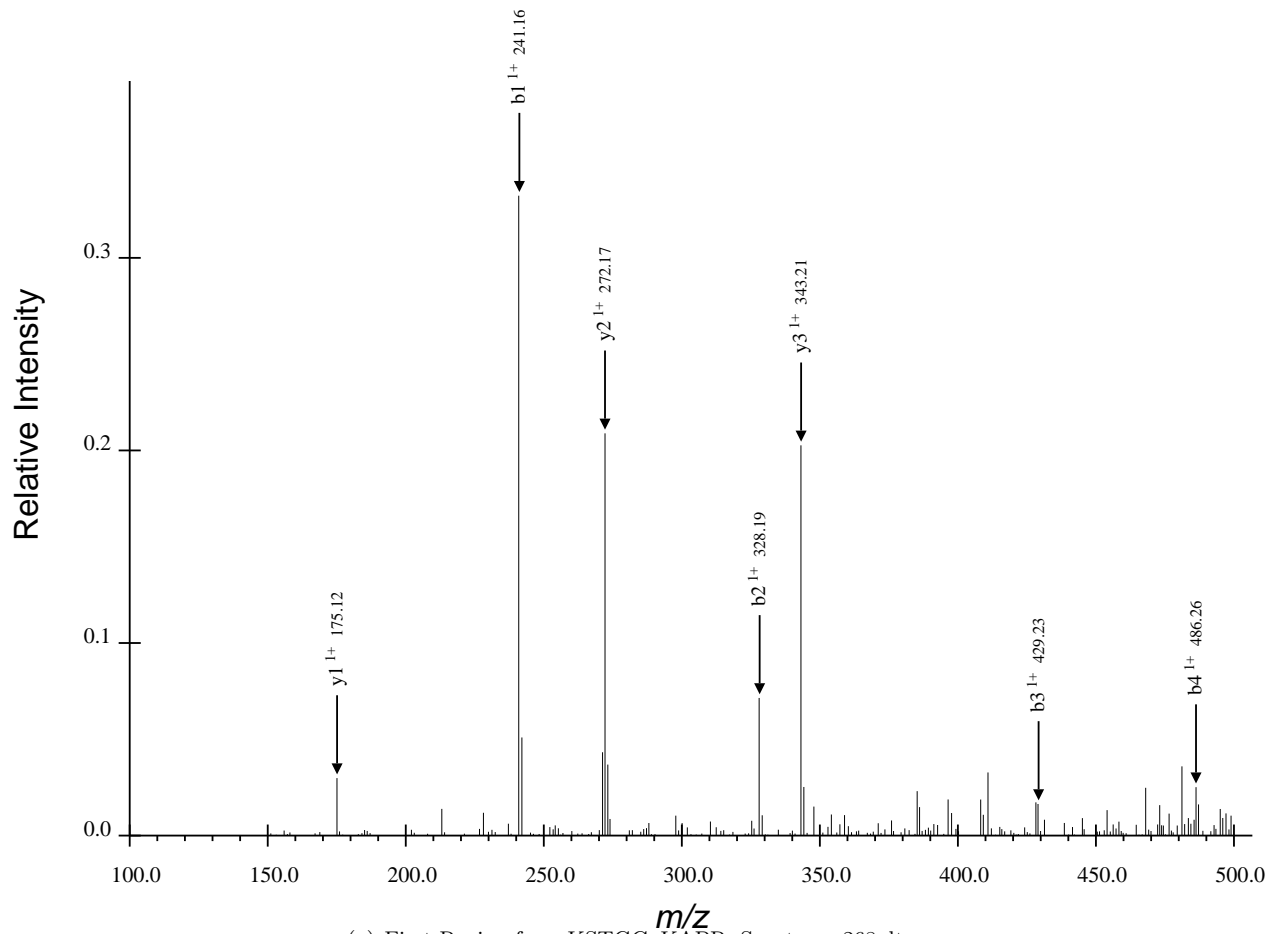

(a) First Region for rrKSTGGaKAPR, Spectrum 268.dta

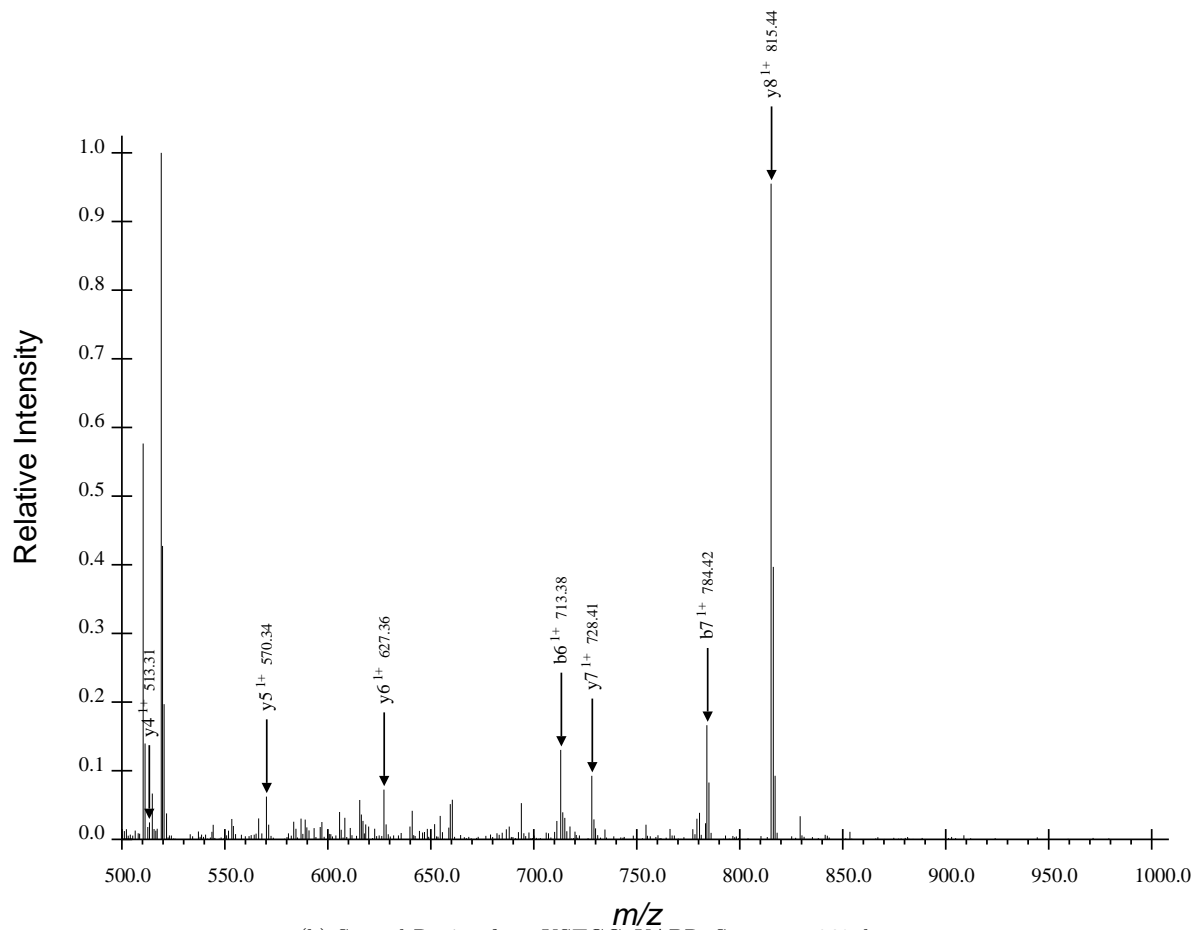

(b) Second Region for rrKSTGGaKAPR, Spectrum 268.dta

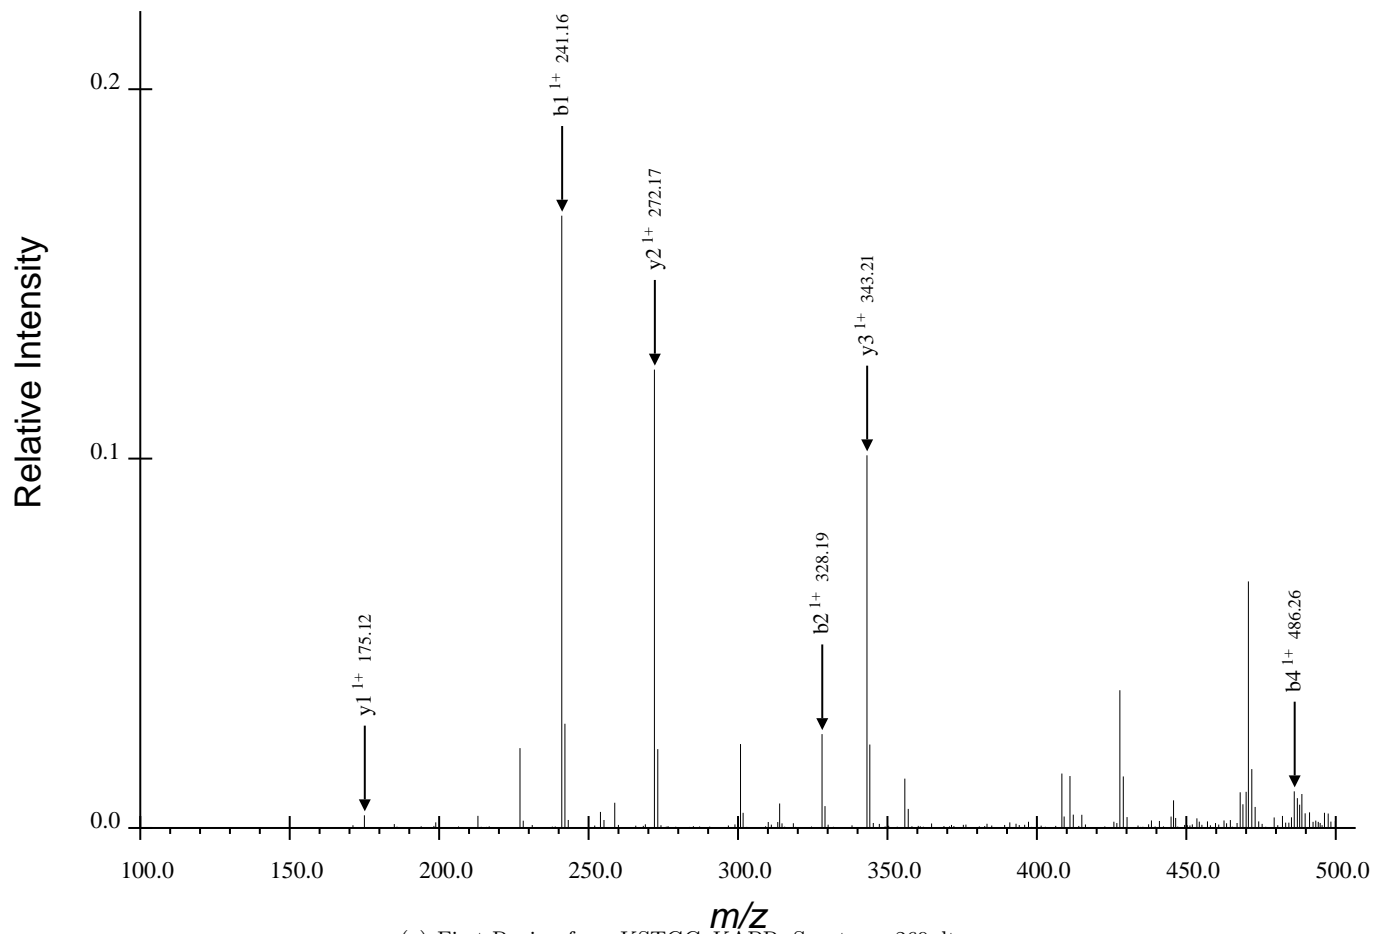

(a) First Region for rrKSTGGaKAPR, Spectrum 269.dta

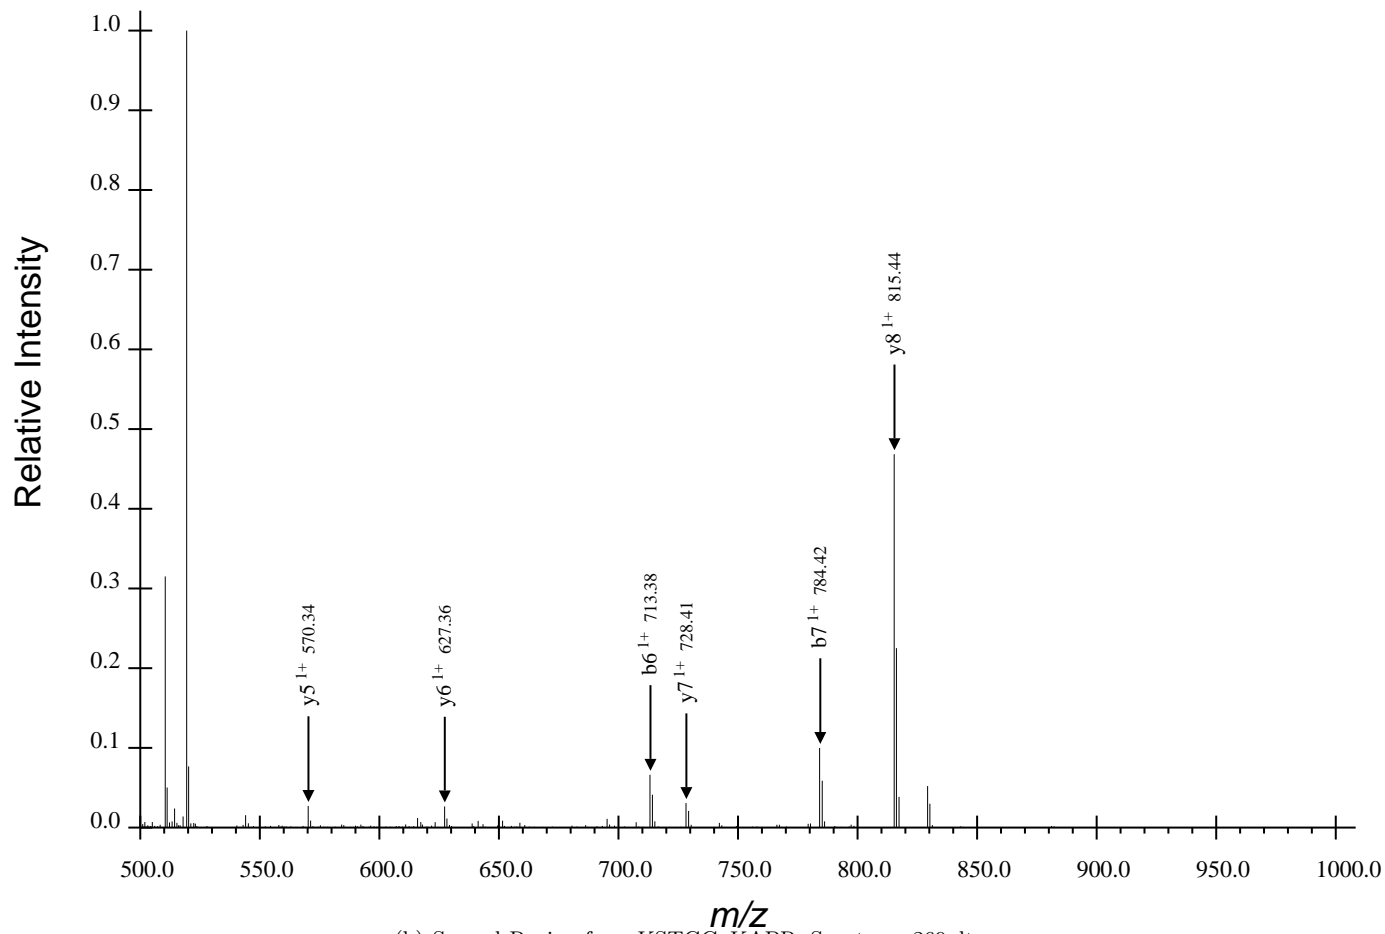

(b) Second Region for rrKSTGGaKAPR, Spectrum 269.dta

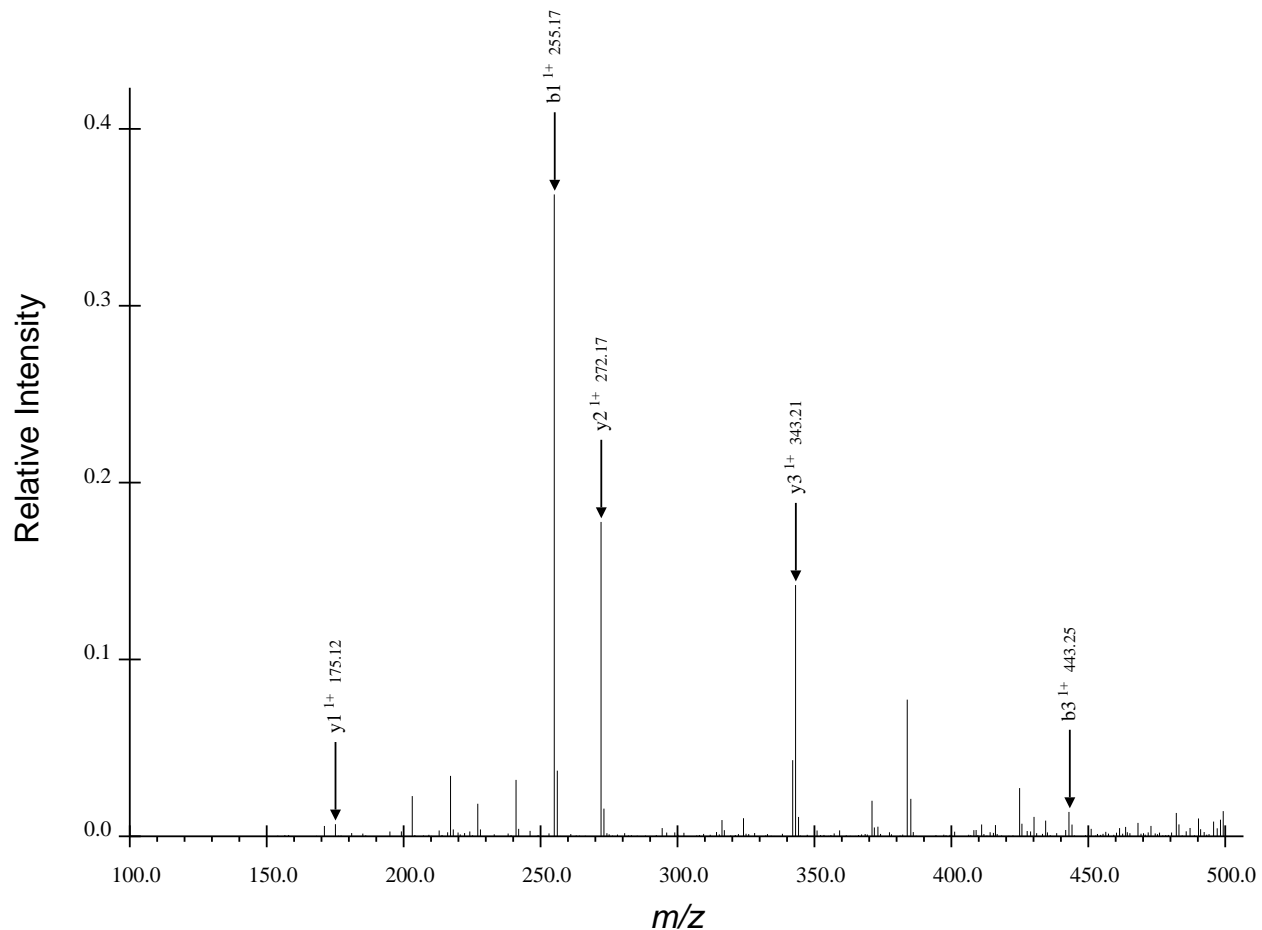

(a) First Region for rhKSTGGaKAPR, Spectrum 270.dta

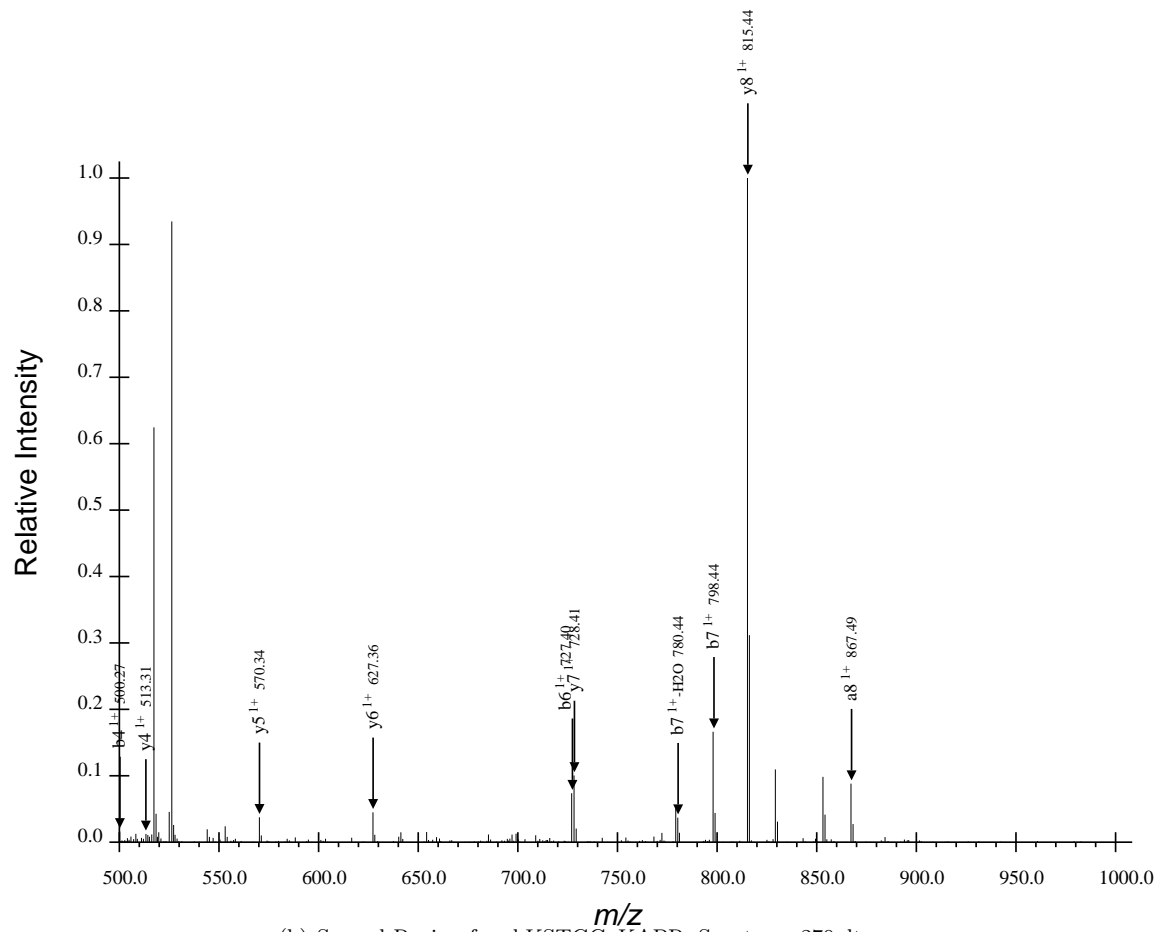

(b) Second Region for rhKSTGGaKAPR, Spectrum 270.dta

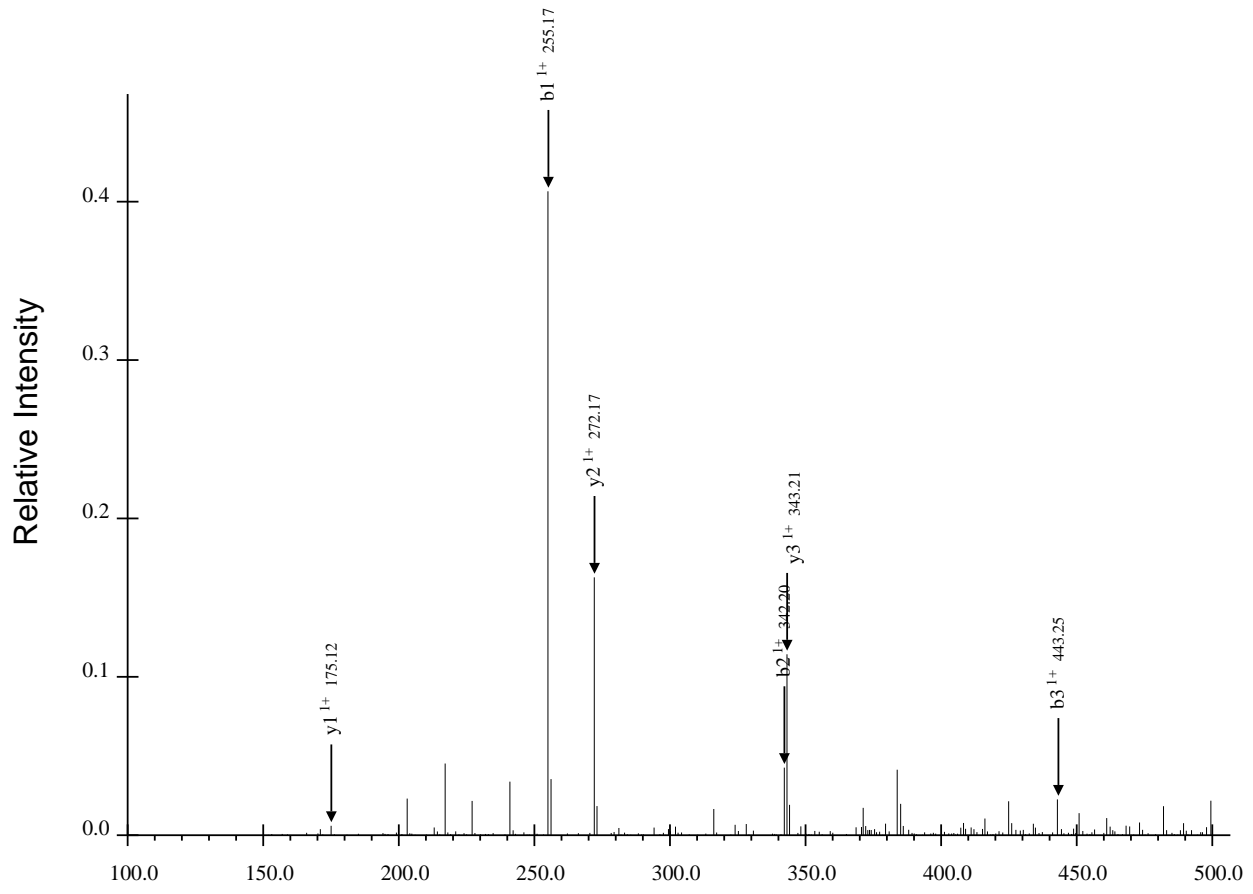

(a) First Region for rhKSTGGaKAPR, Spectrum 271.dta

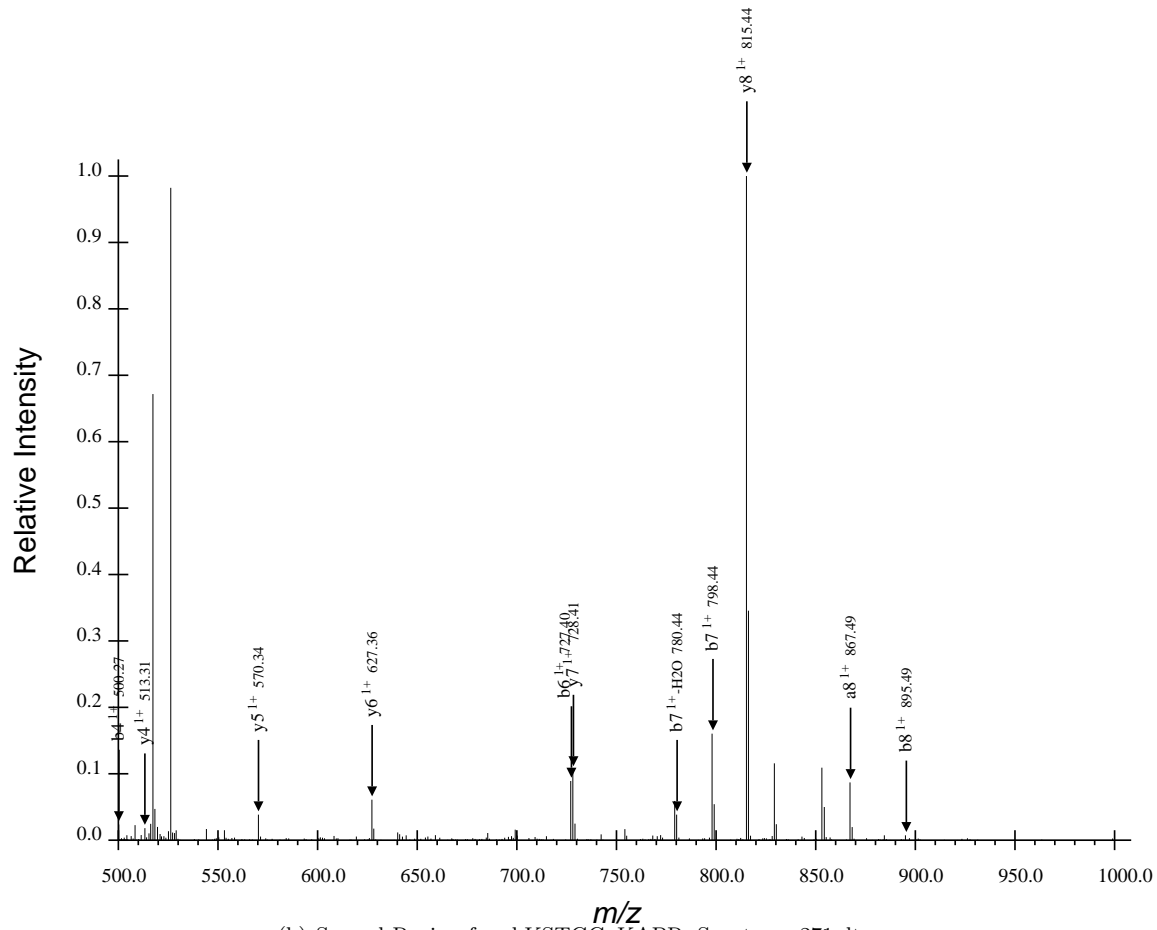

(b) Second Region for rhKSTGGaKAPR, Spectrum 271.dta

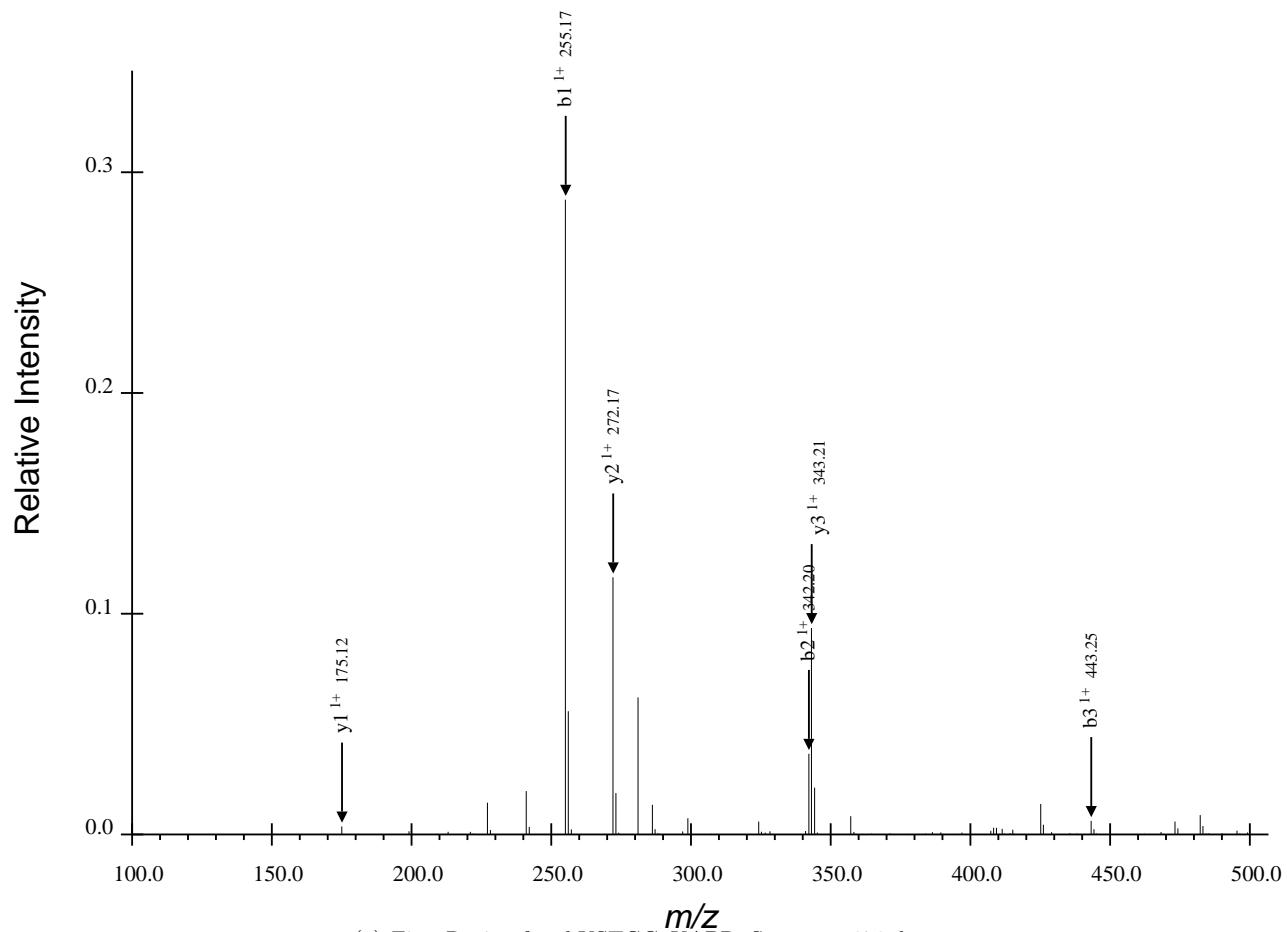

(a) First Region for rhKSTGGaKAPR, Spectrum 272.dta

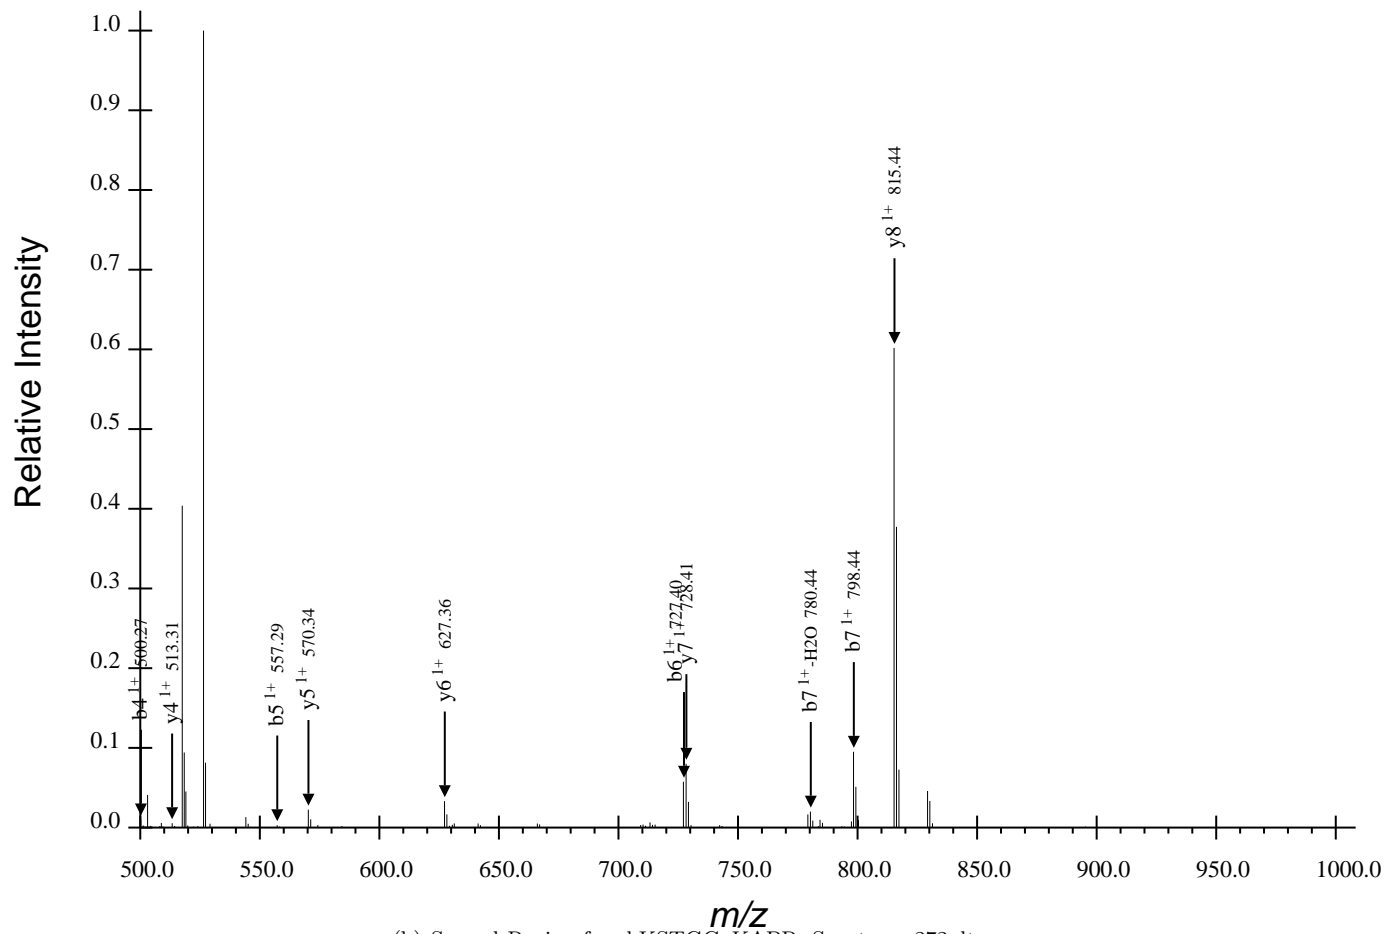

(b) Second Region for rhKSTGGaKAPR, Spectrum 272.dta



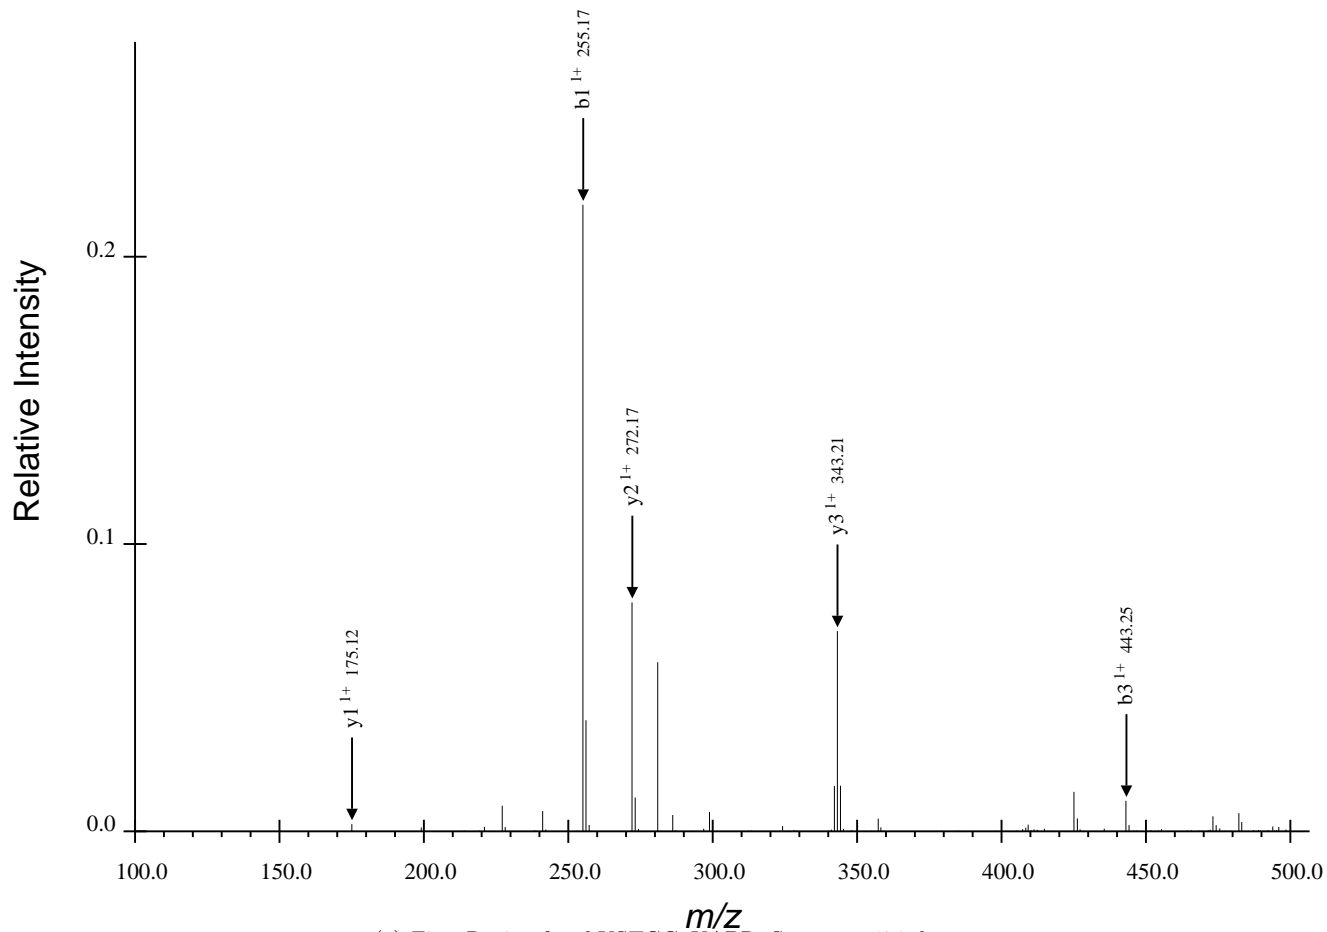

(a) First Region for rhKSTGGaKAPR, Spectrum 273.dta

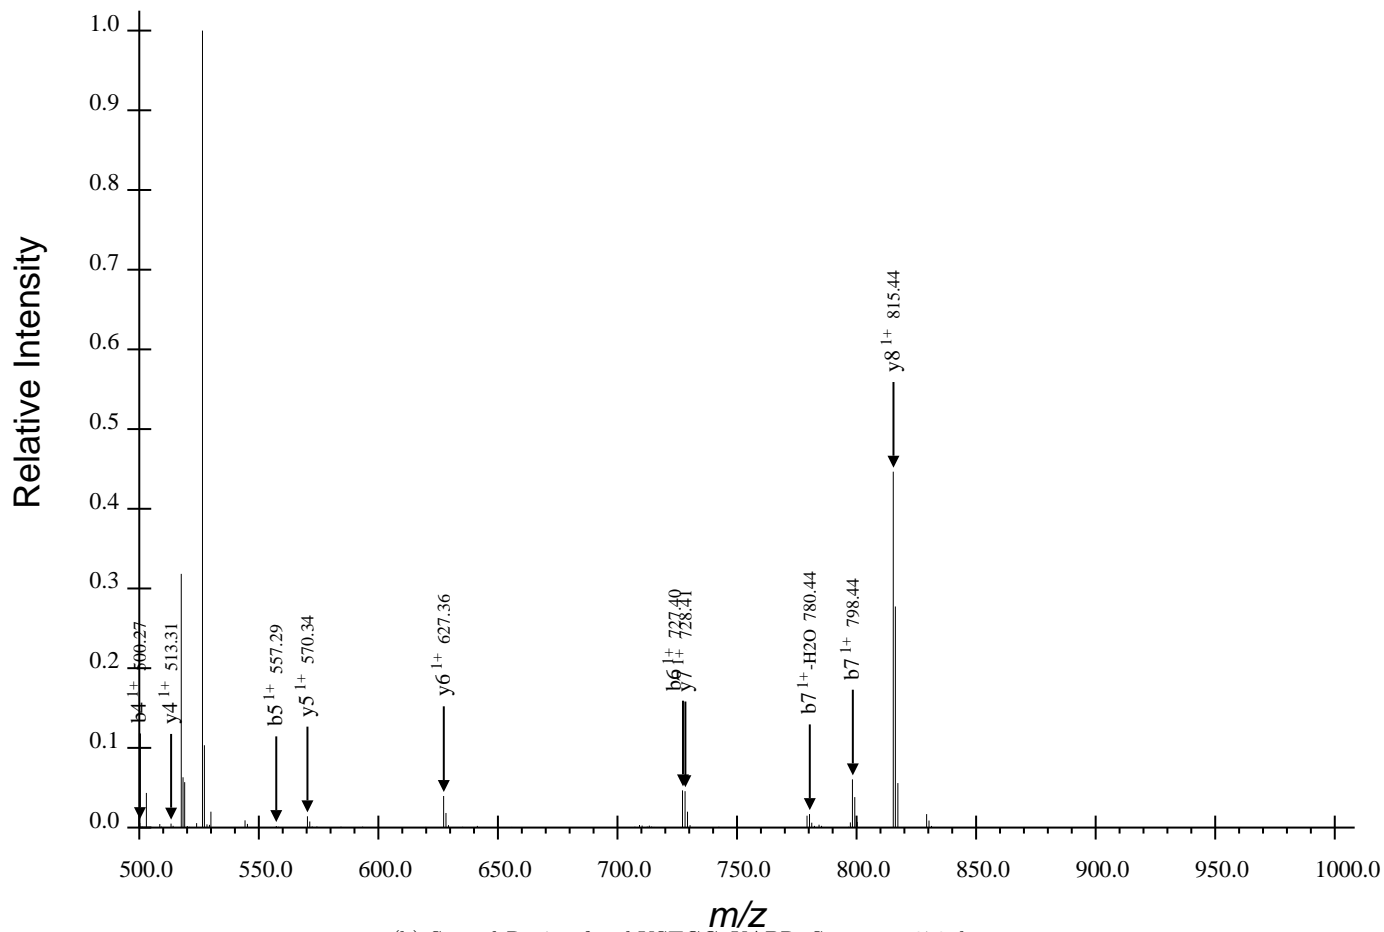

(b) Second Region for rhKSTGGaKAPR, Spectrum 273.dta

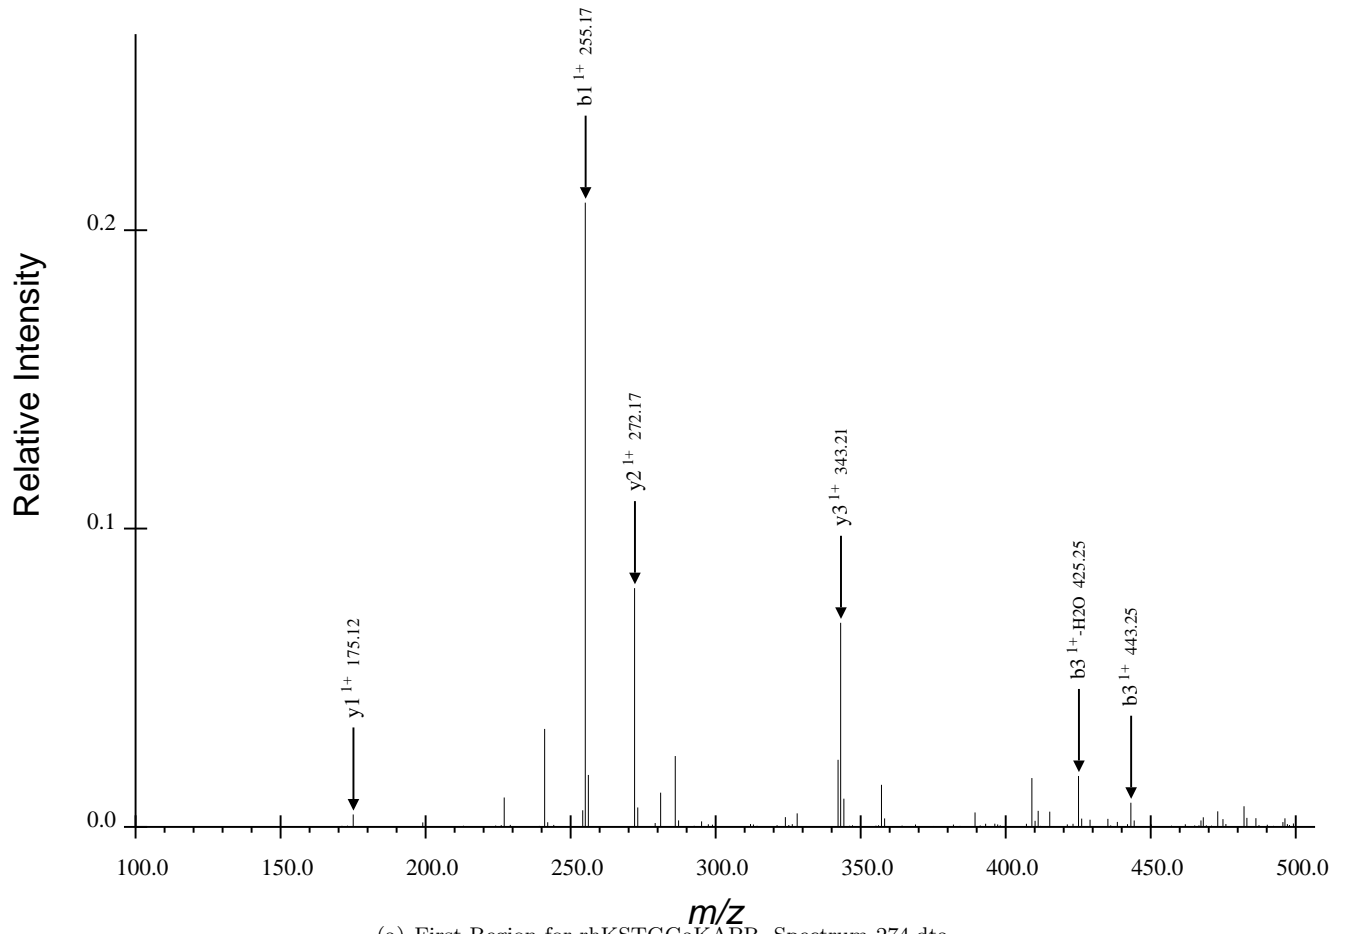

(a) First Region for rhKSTGGaKAPR, Spectrum 274.dta

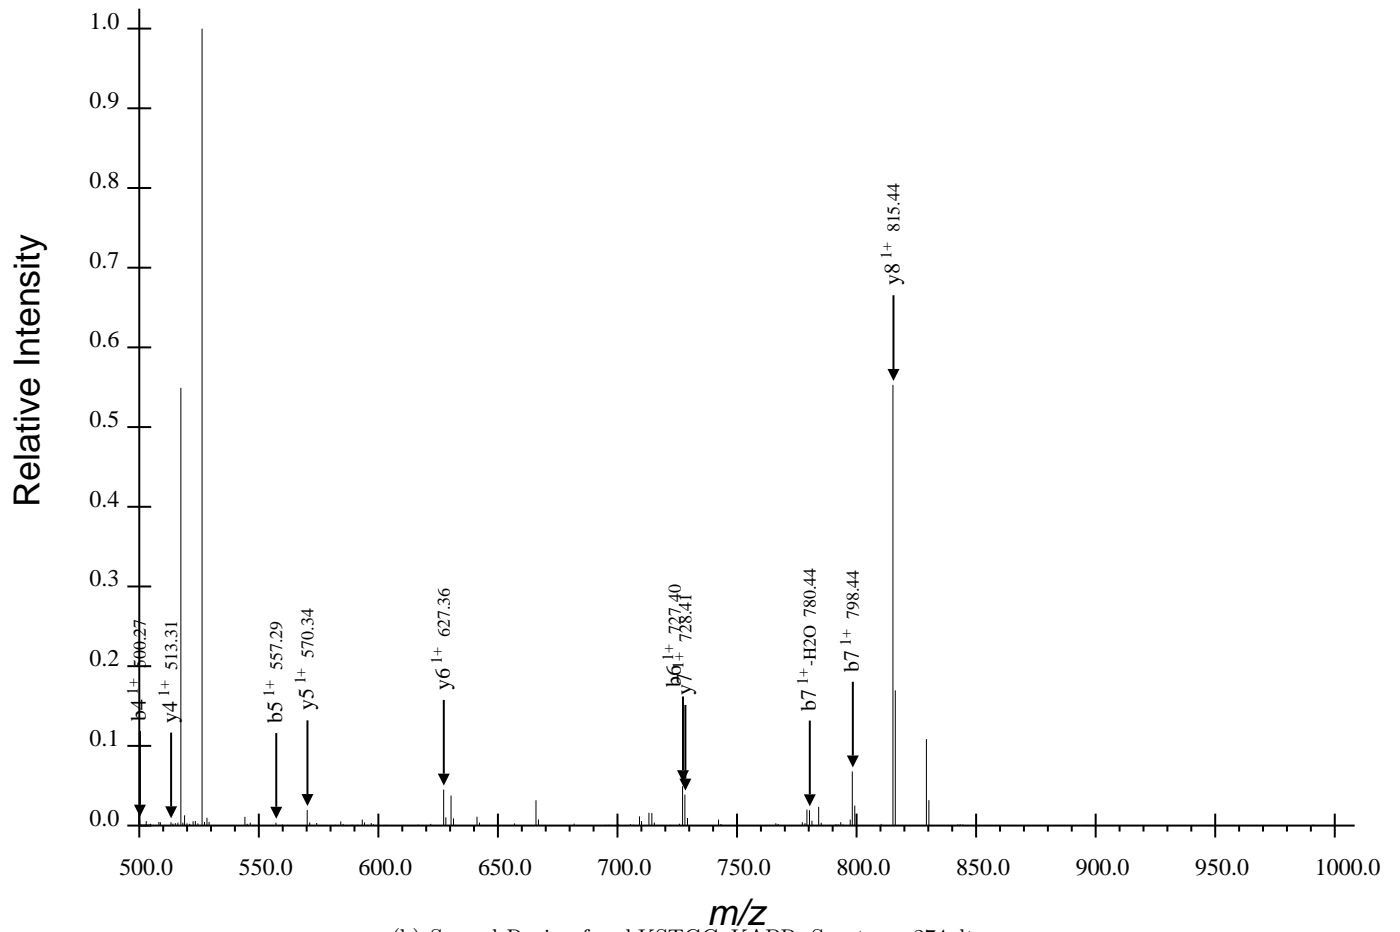

(b) Second Region for rhKSTGGaKAPR, Spectrum 274.dta

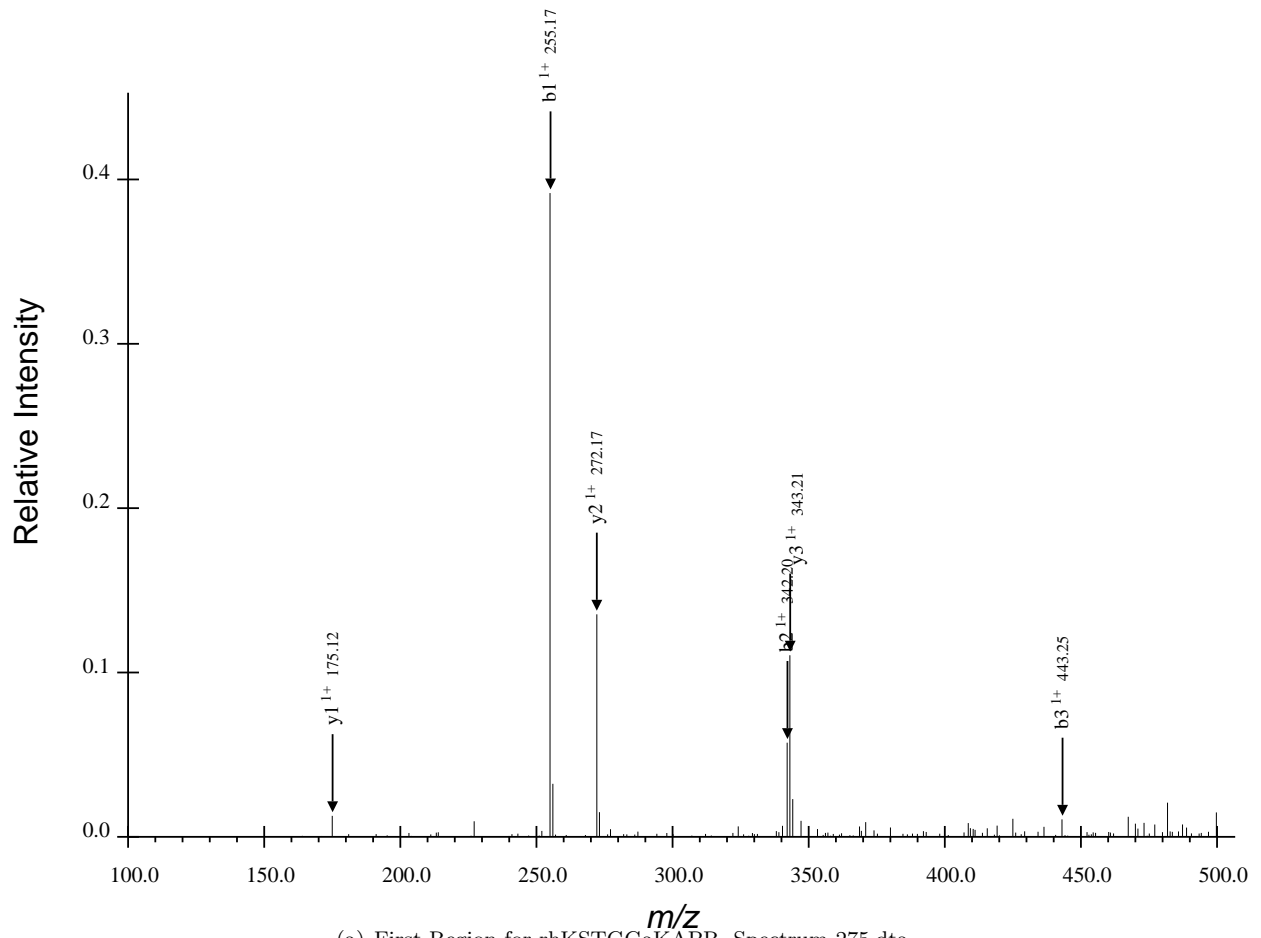

(a) First Region for rhKSTGGaKAPR, Spectrum 275.dta

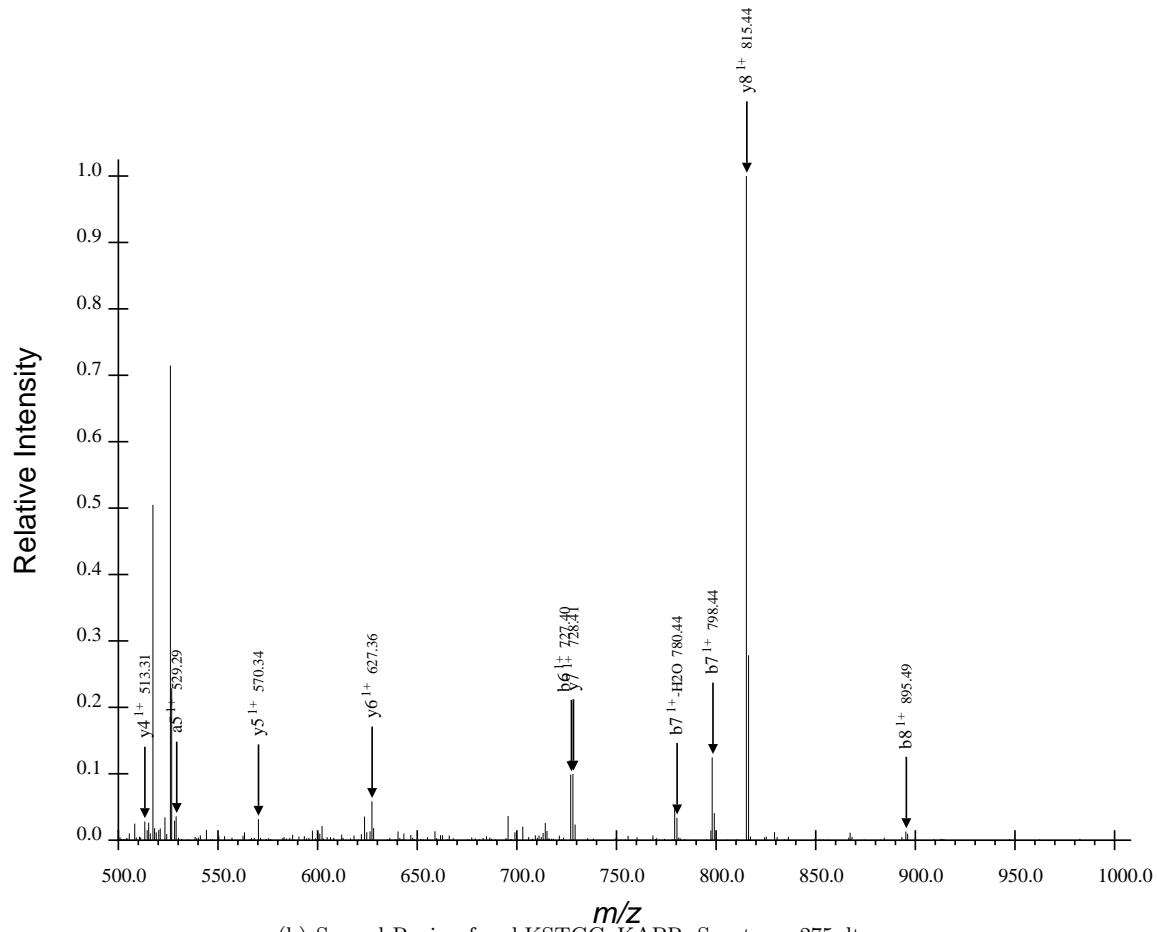

(b) Second Region for rhKSTGGaKAPR, Spectrum 275.dta

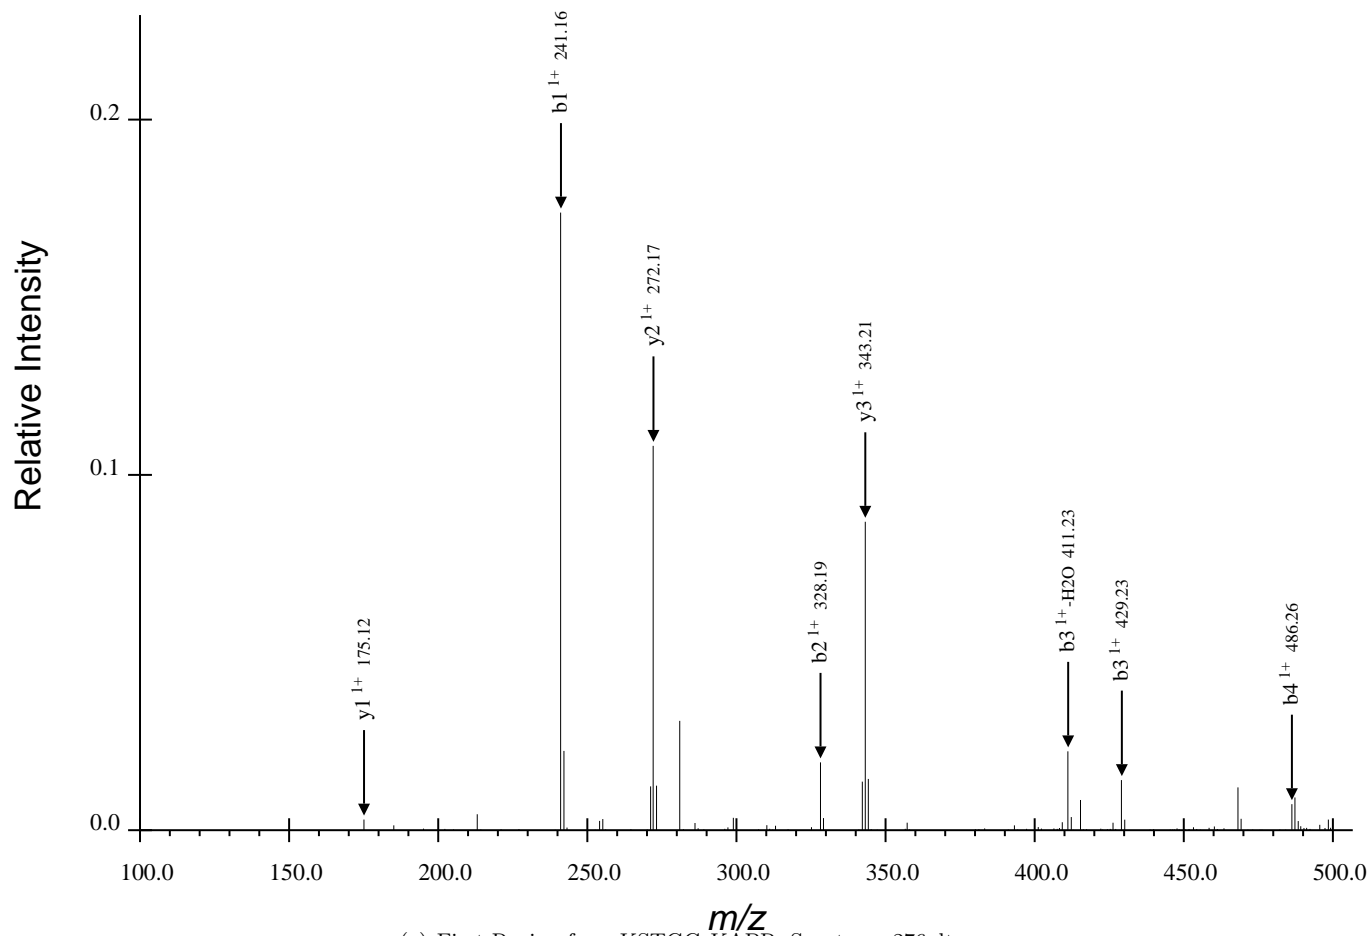

(a) First Region for rrKSTGGGrKAPR, Spectrum 276.dta

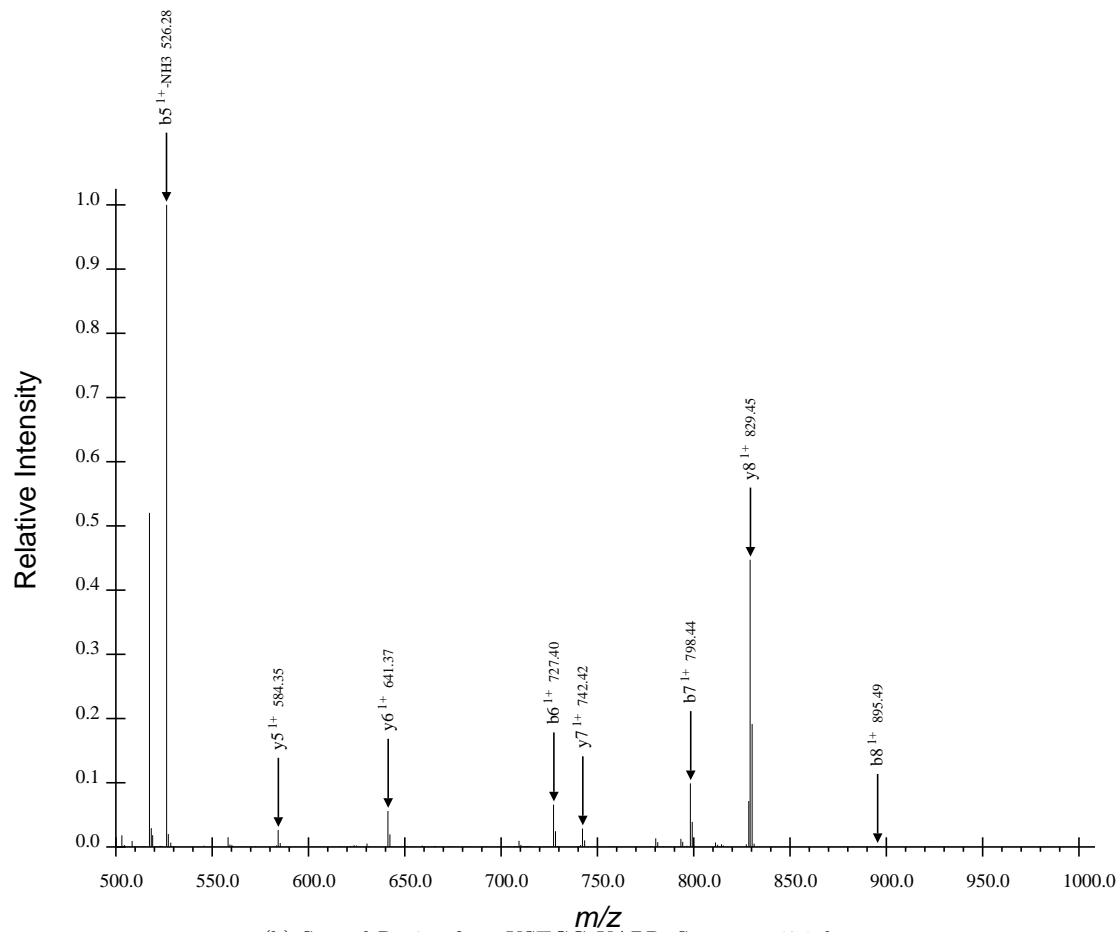

(b) Second Region for rrKSTGGGrKAPR, Spectrum 276.dta

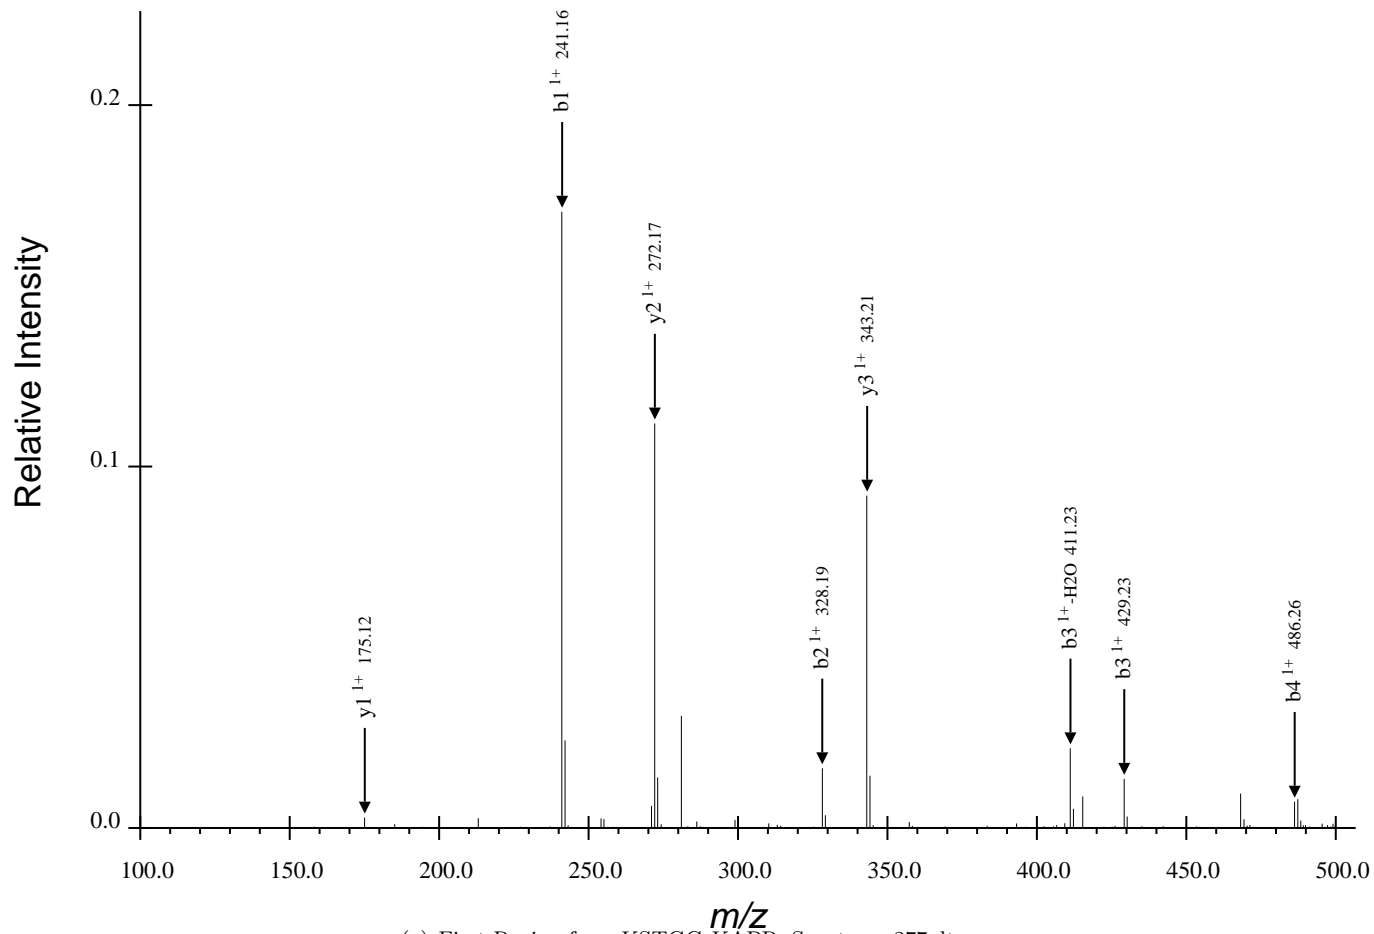

(a) First Region for rrKSTGGrKAPR, Spectrum 277.dta

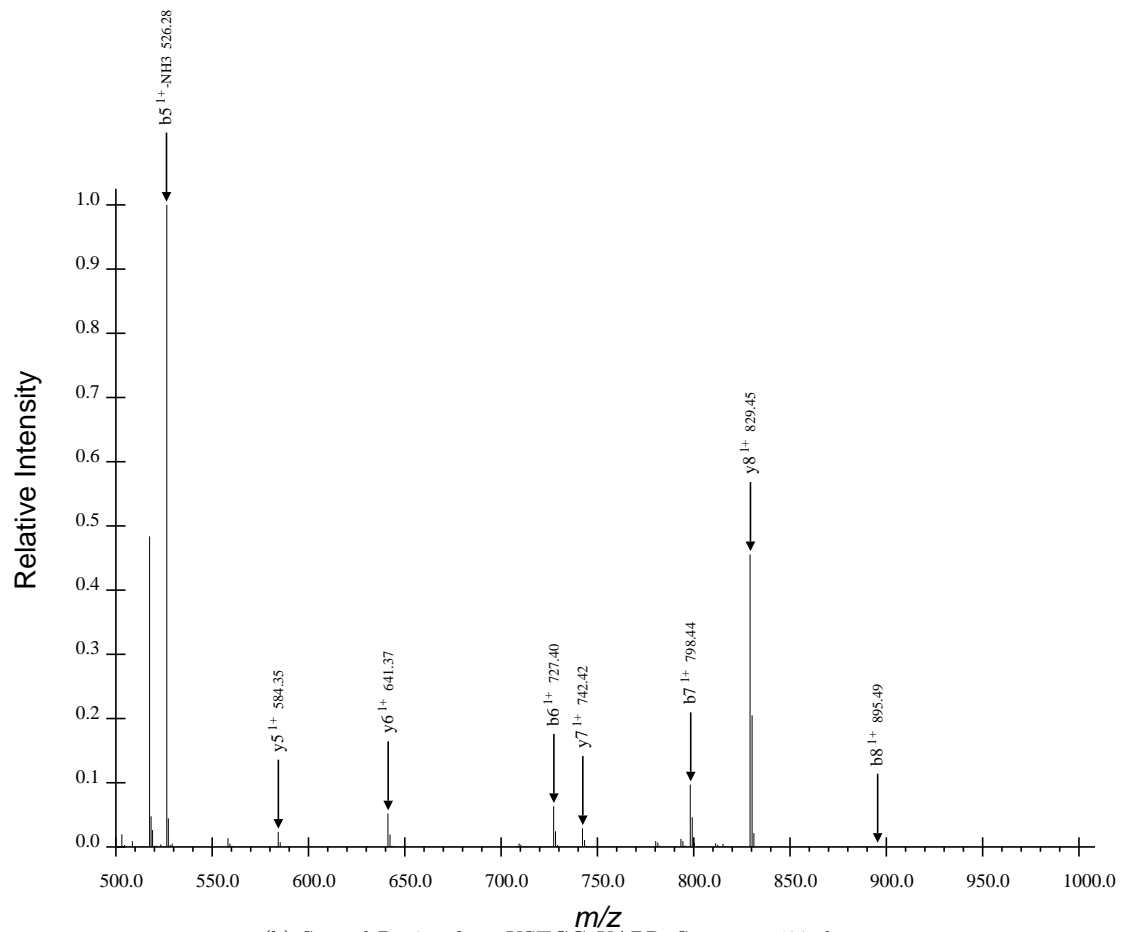

(b) Second Region for rrKSTGGrKAPR, Spectrum 277.dta

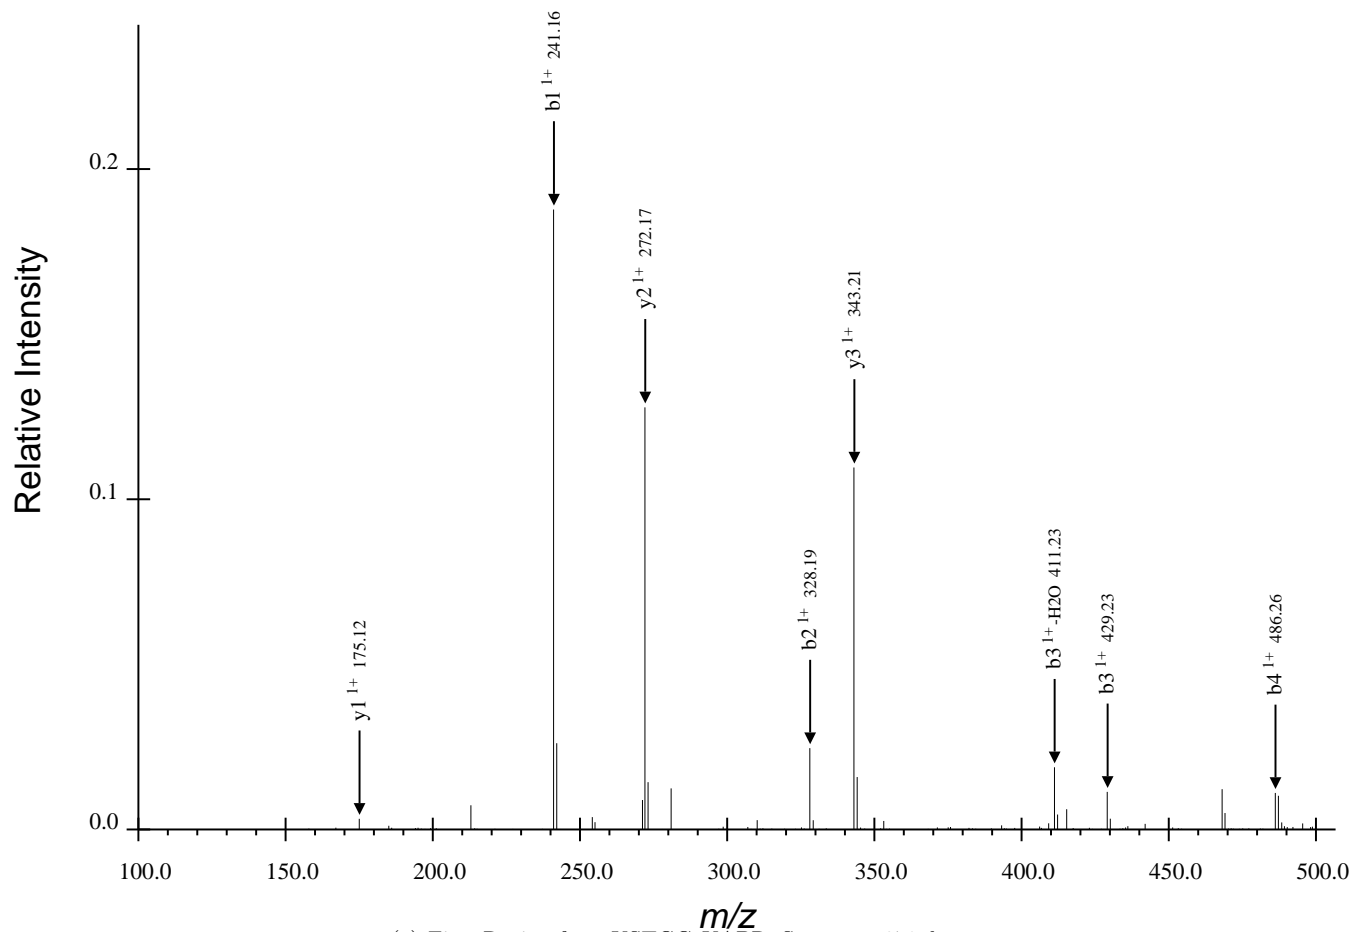

(a) First Region for rrKSTGGrKAPR, Spectrum 278.dta

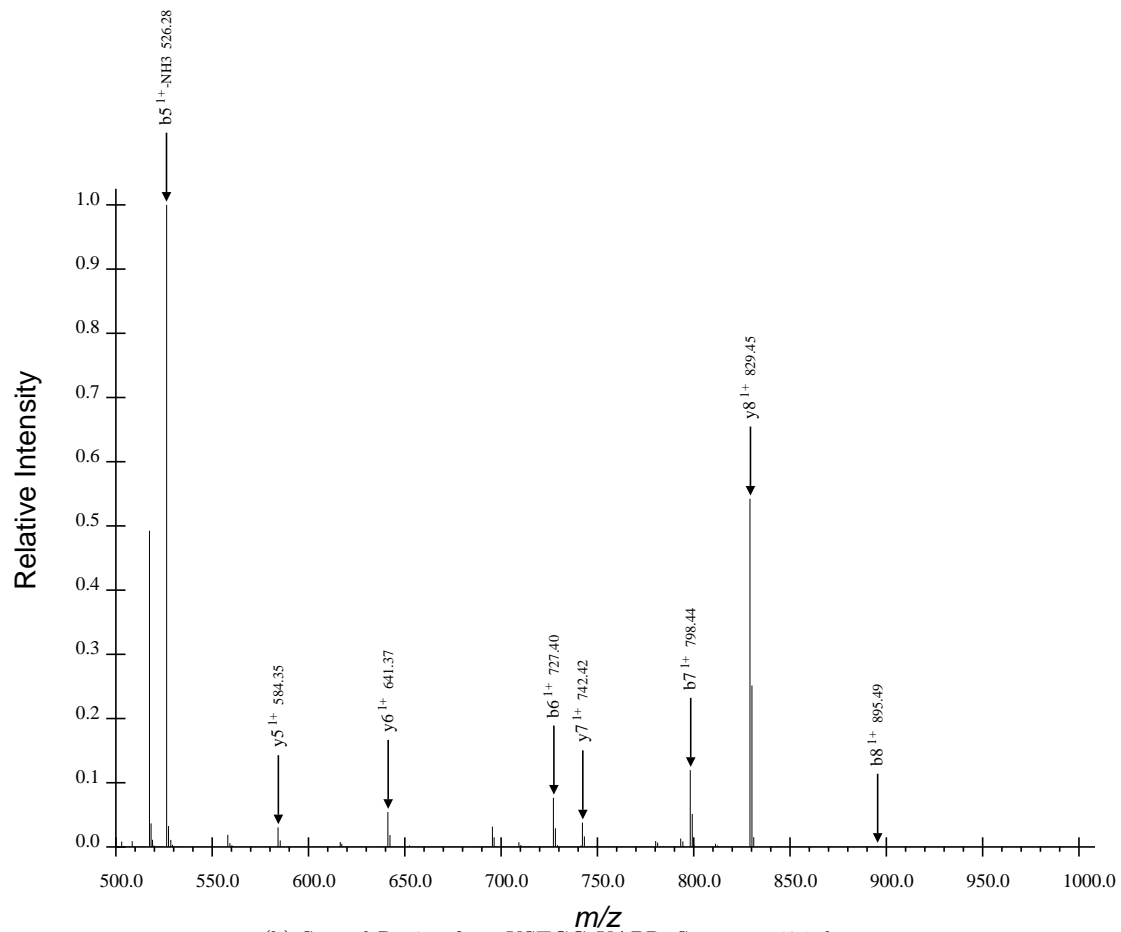

(b) Second Region for rrKSTGGrKAPR, Spectrum 278.dta

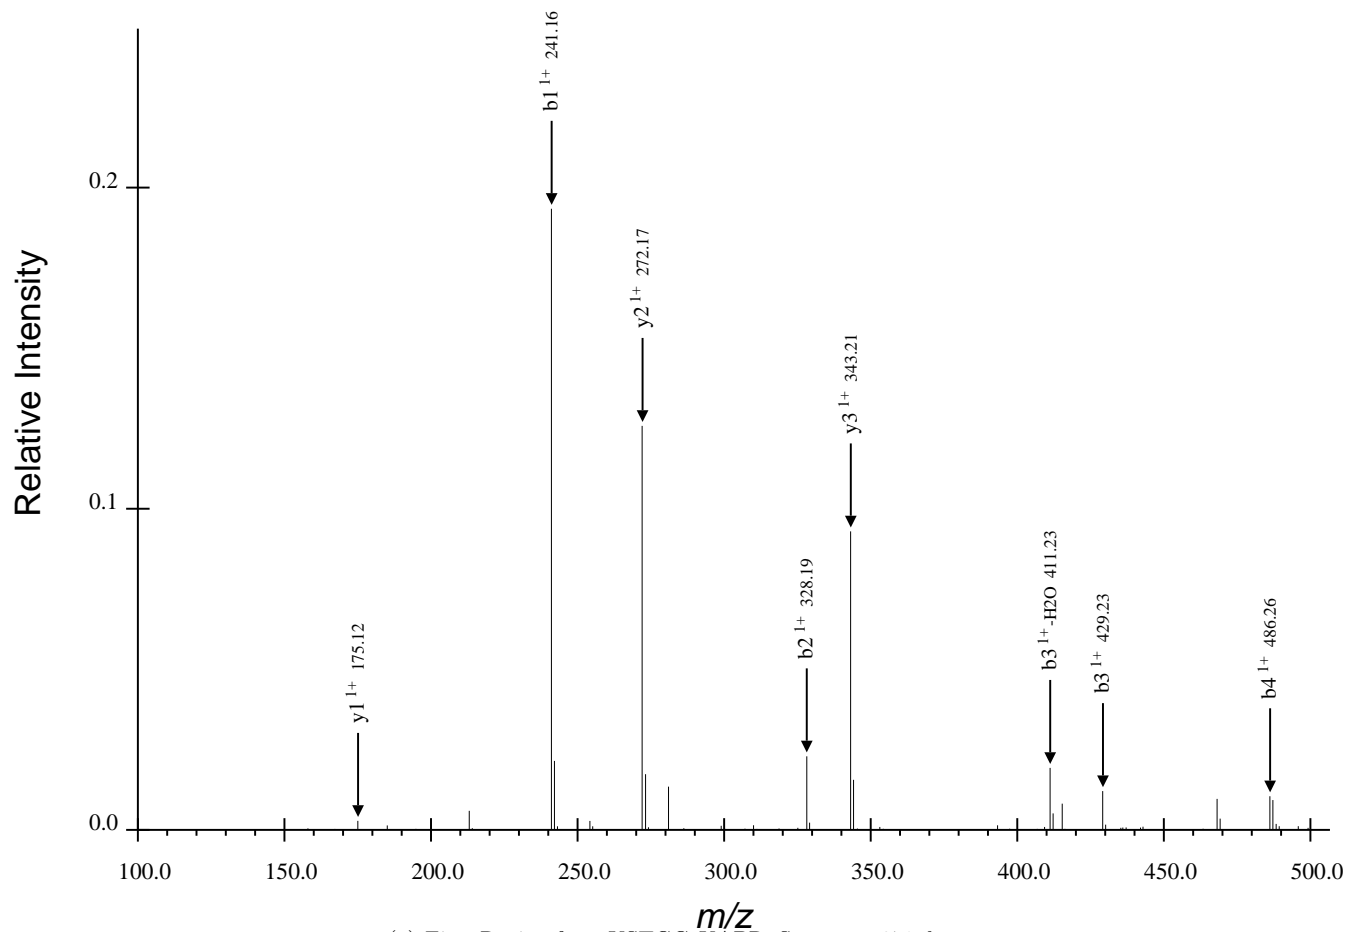

(a) First Region for rrKSTGGrKAPR, Spectrum 279.dta

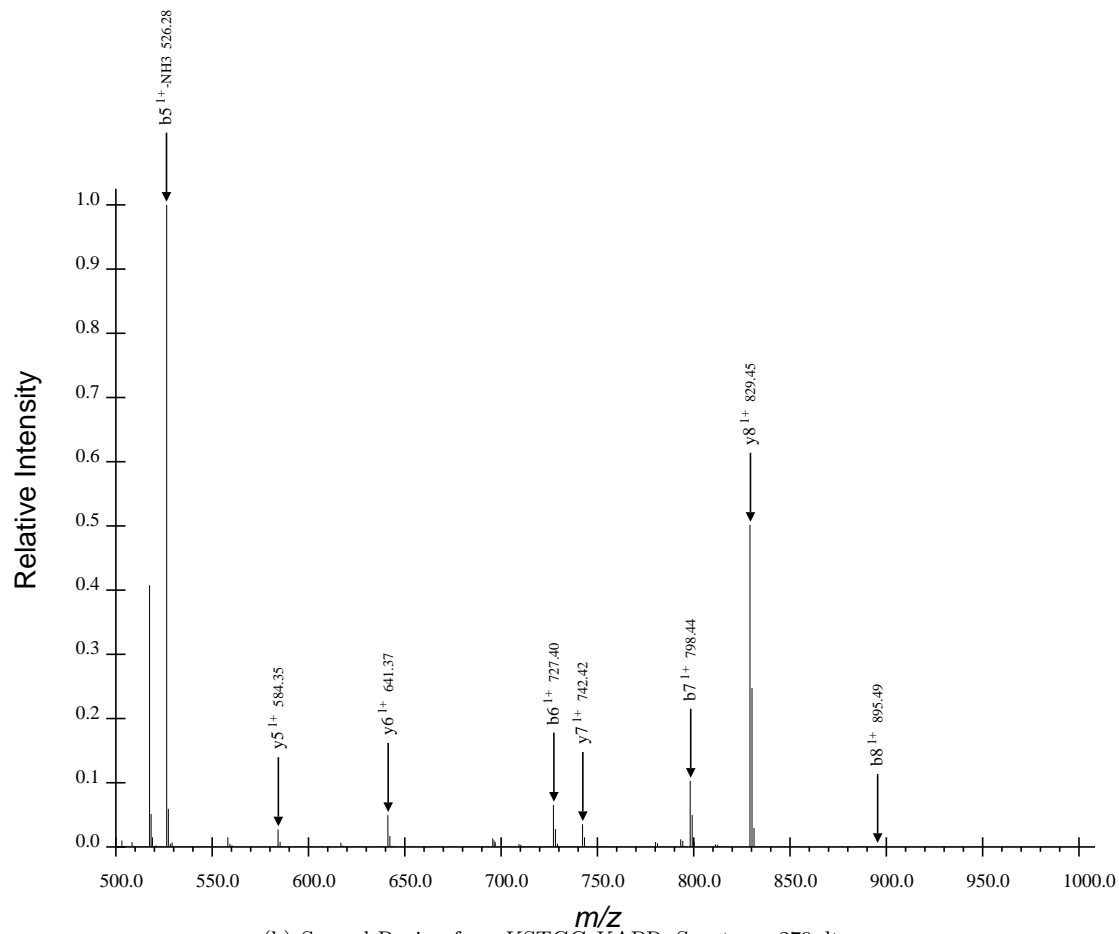

(b) Second Region for rrKSTGGrKAPR, Spectrum 279.dta

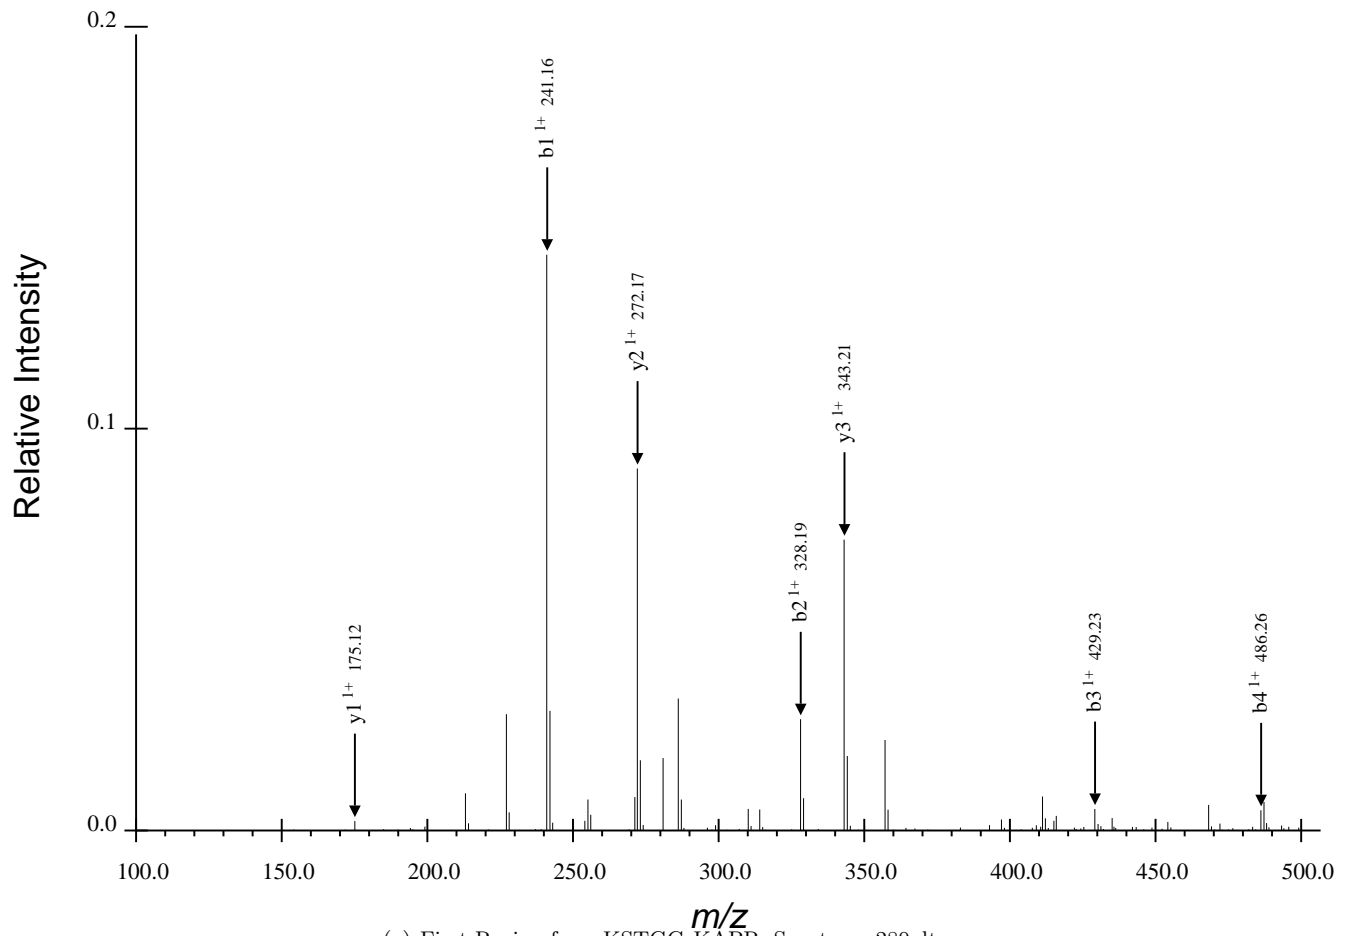

(a) First Region for rrKSTGGrKAPR, Spectrum 280.dta

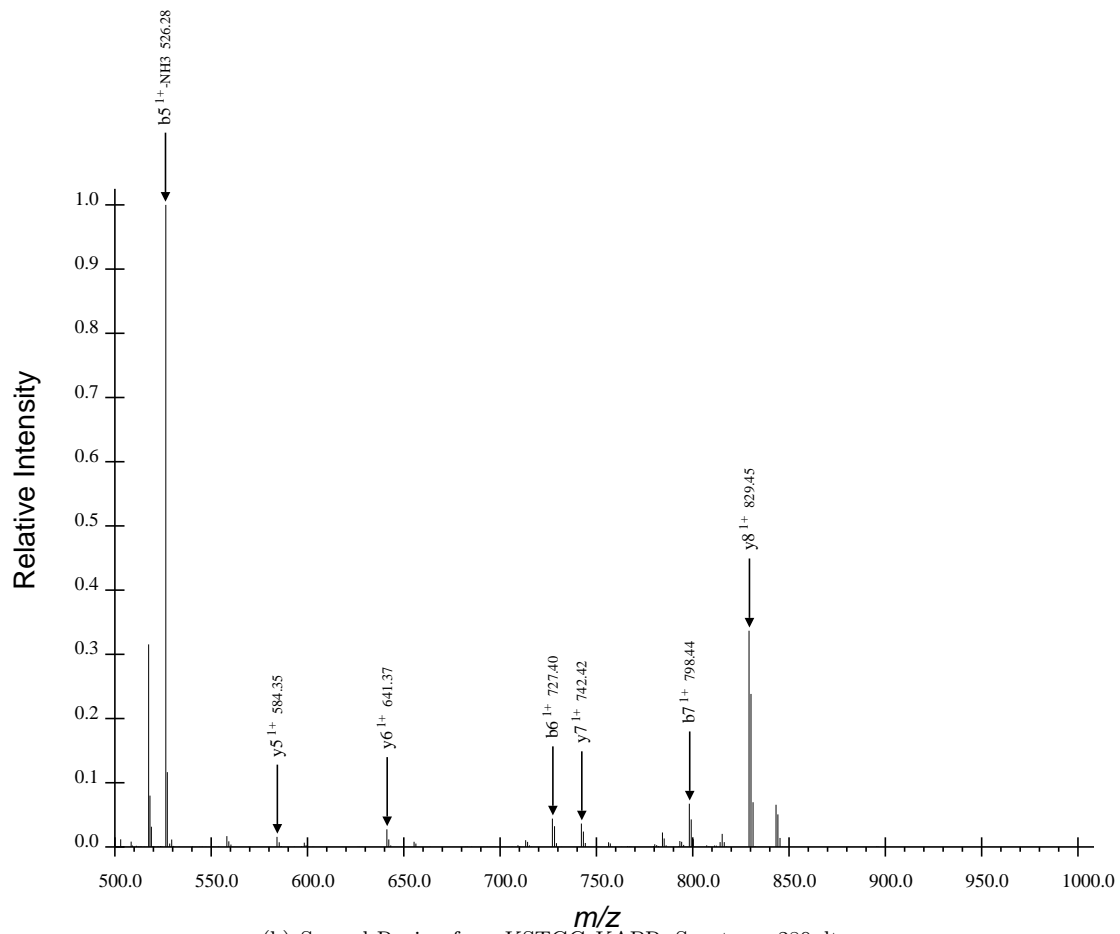

(b) Second Region for rrKSTGGrKAPR, Spectrum 280.dta



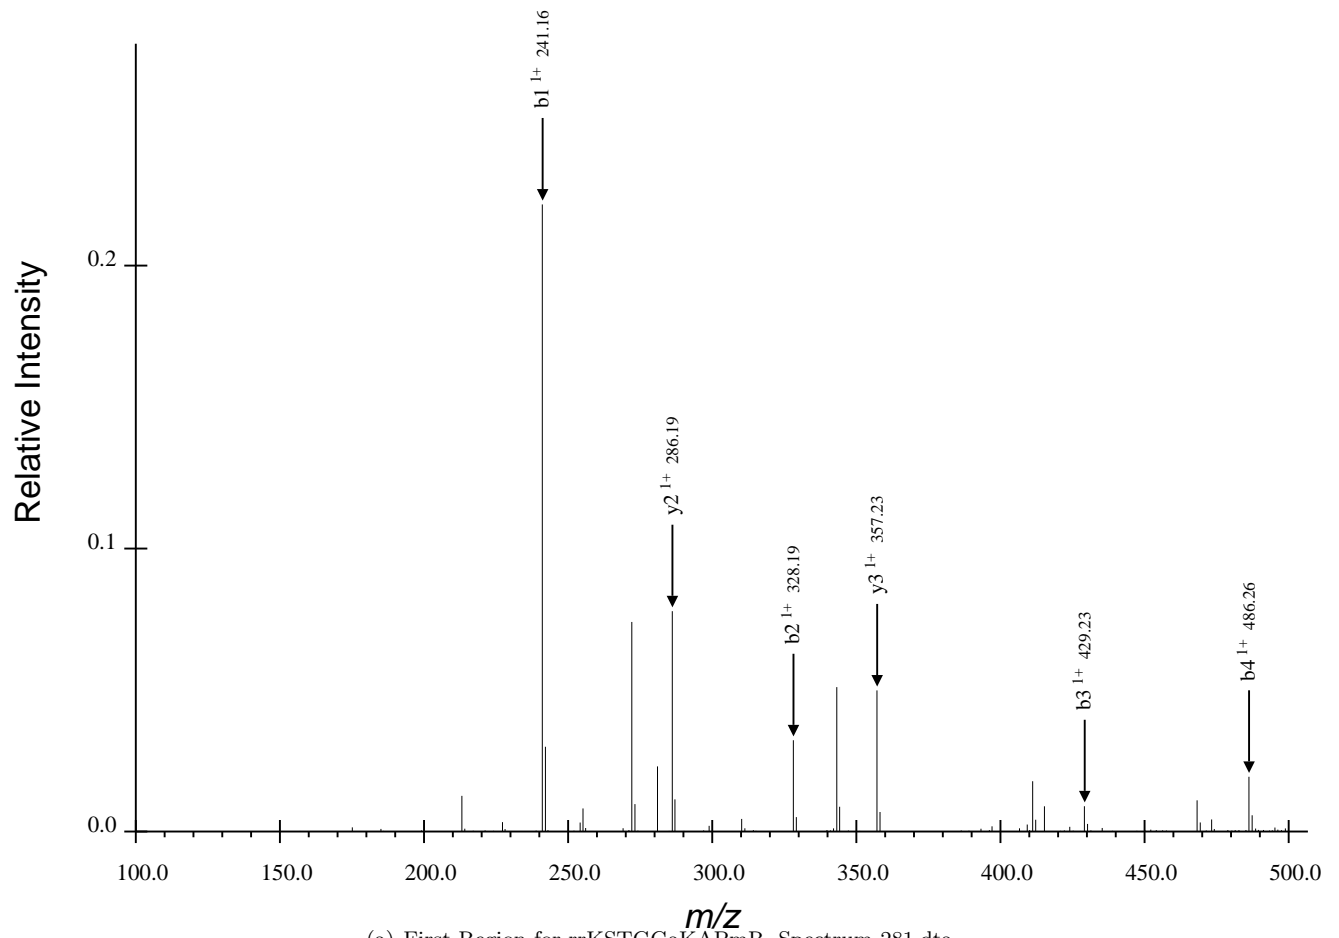

(a) First Region for rrKSTGGaKAPmR, Spectrum 281.dta

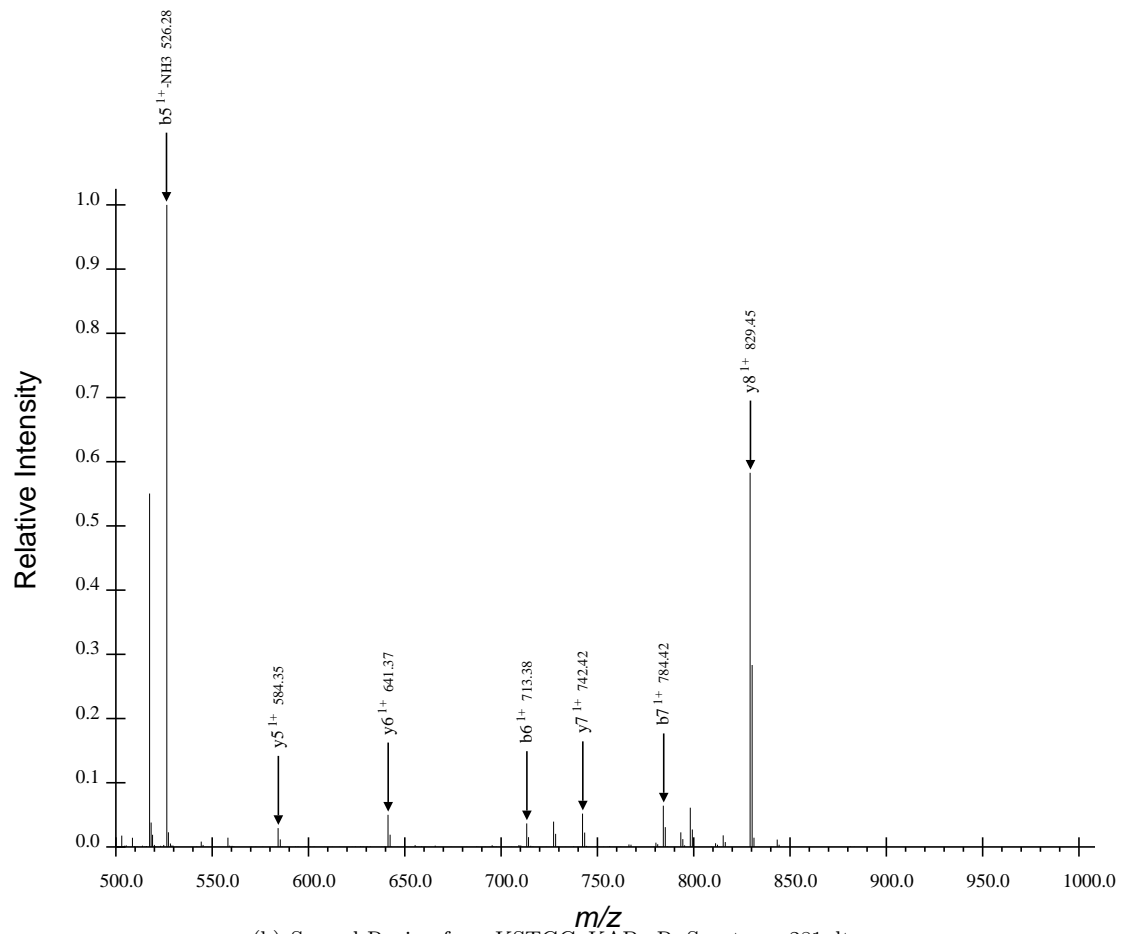

(b) Second Region for rrKSTGGaKAPmR, Spectrum 281.dta

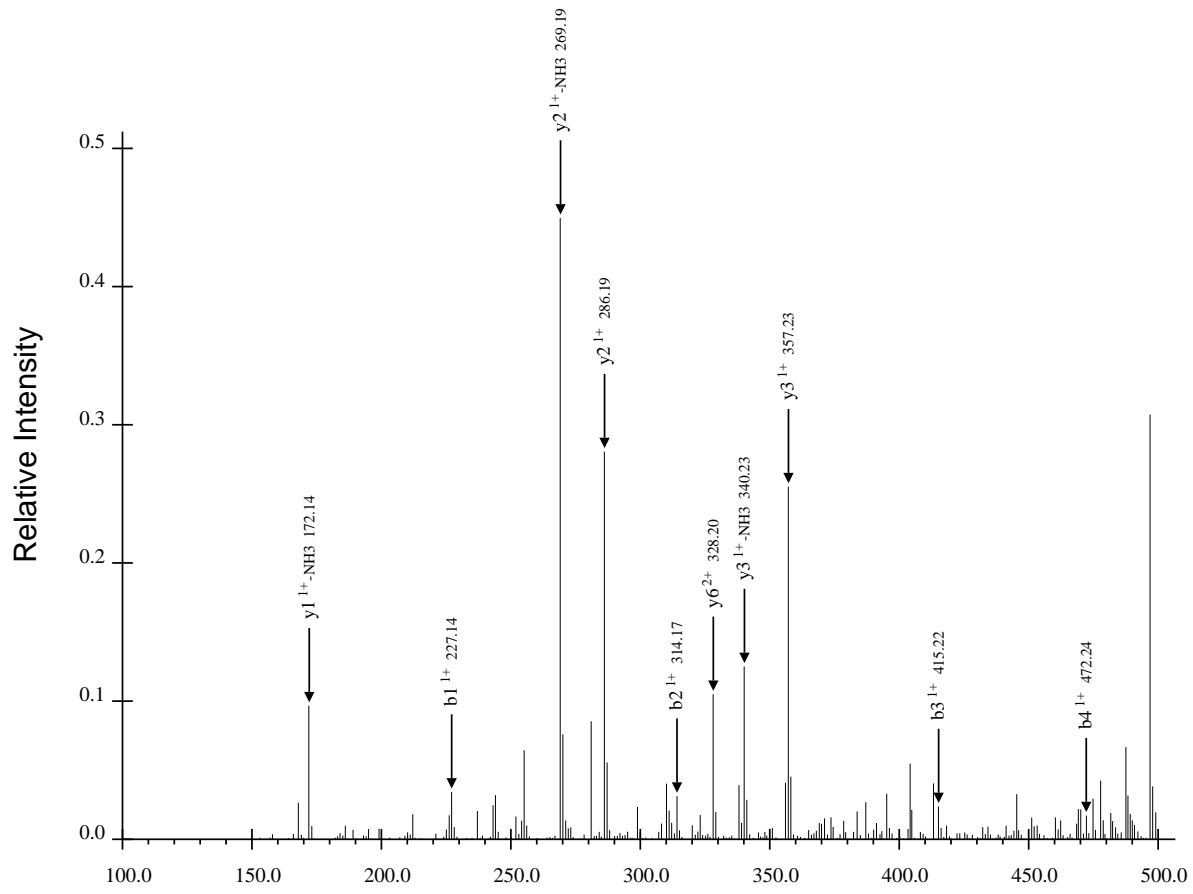

(a) First Region for raKSTGGGrKAPmR, Spectrum 282.dta

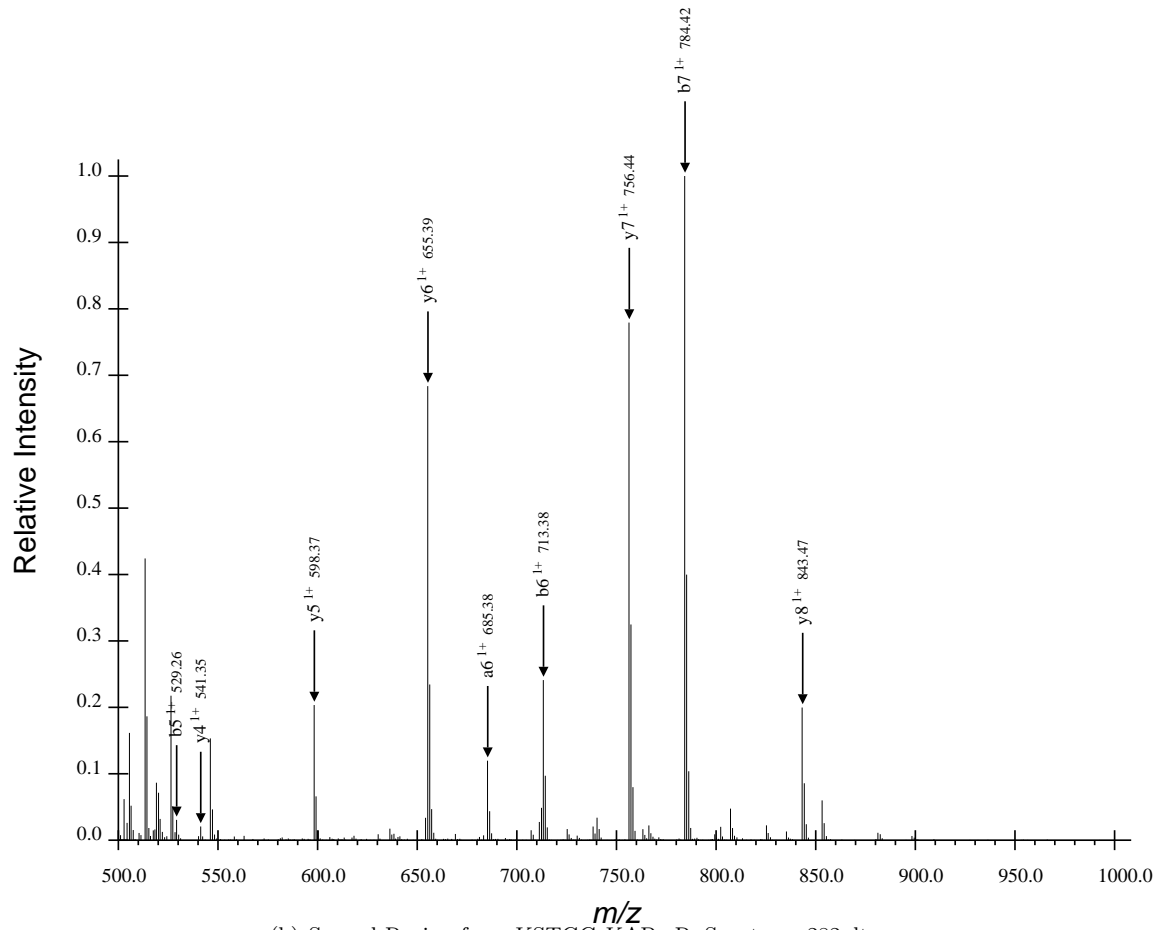

(b) Second Region for raKSTGGGrKAPmR, Spectrum 282.dta

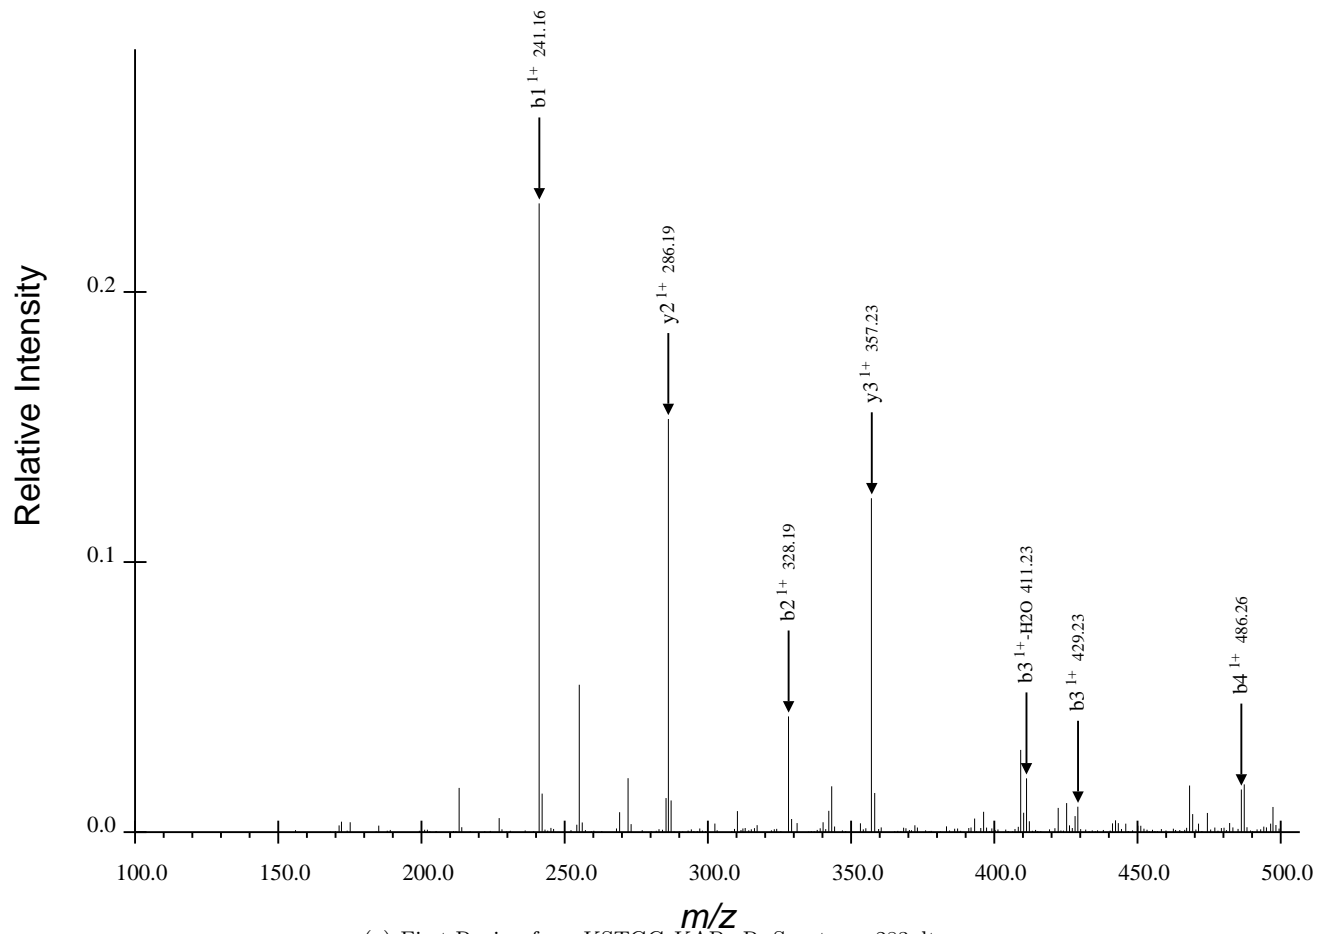

(a) First Region for rrKSTGGrKAPmR, Spectrum 283.dta

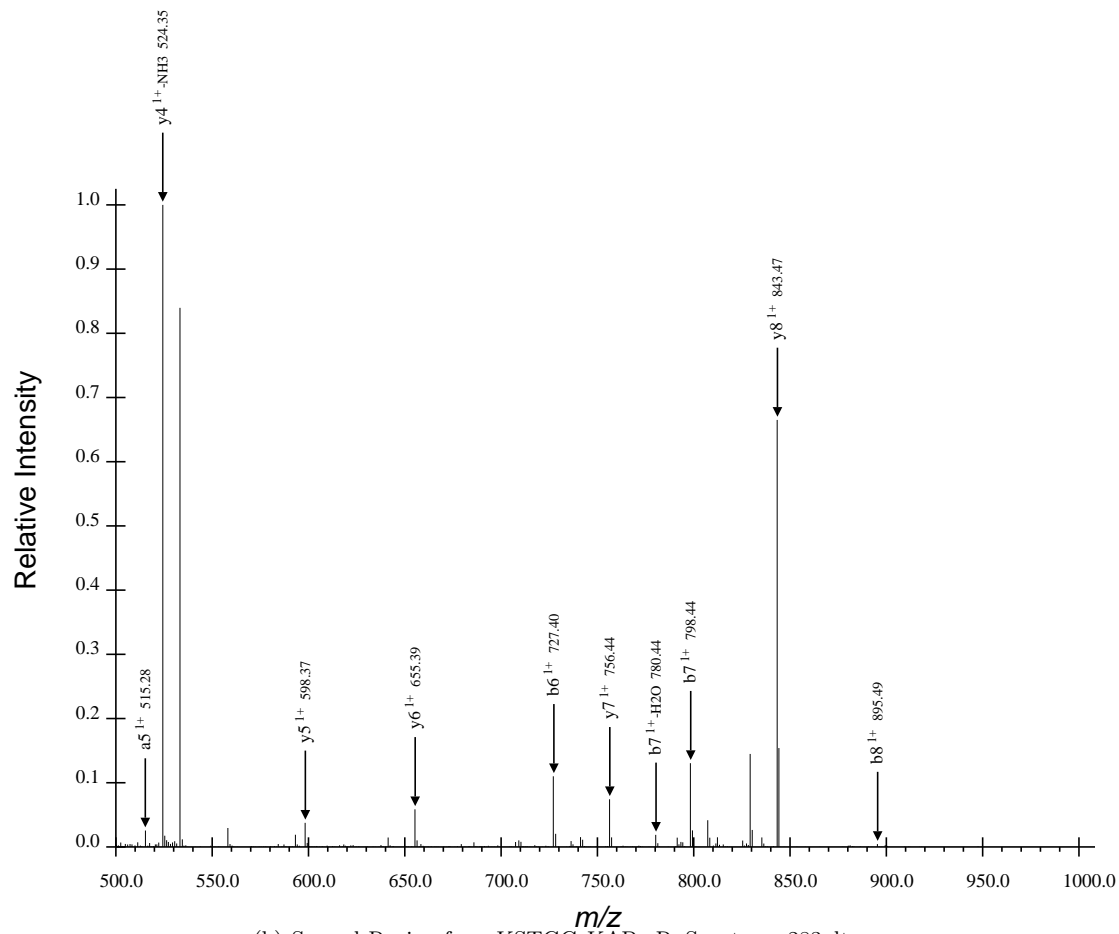

(b) Second Region for rrKSTGGrKAPmR, Spectrum 283.dta

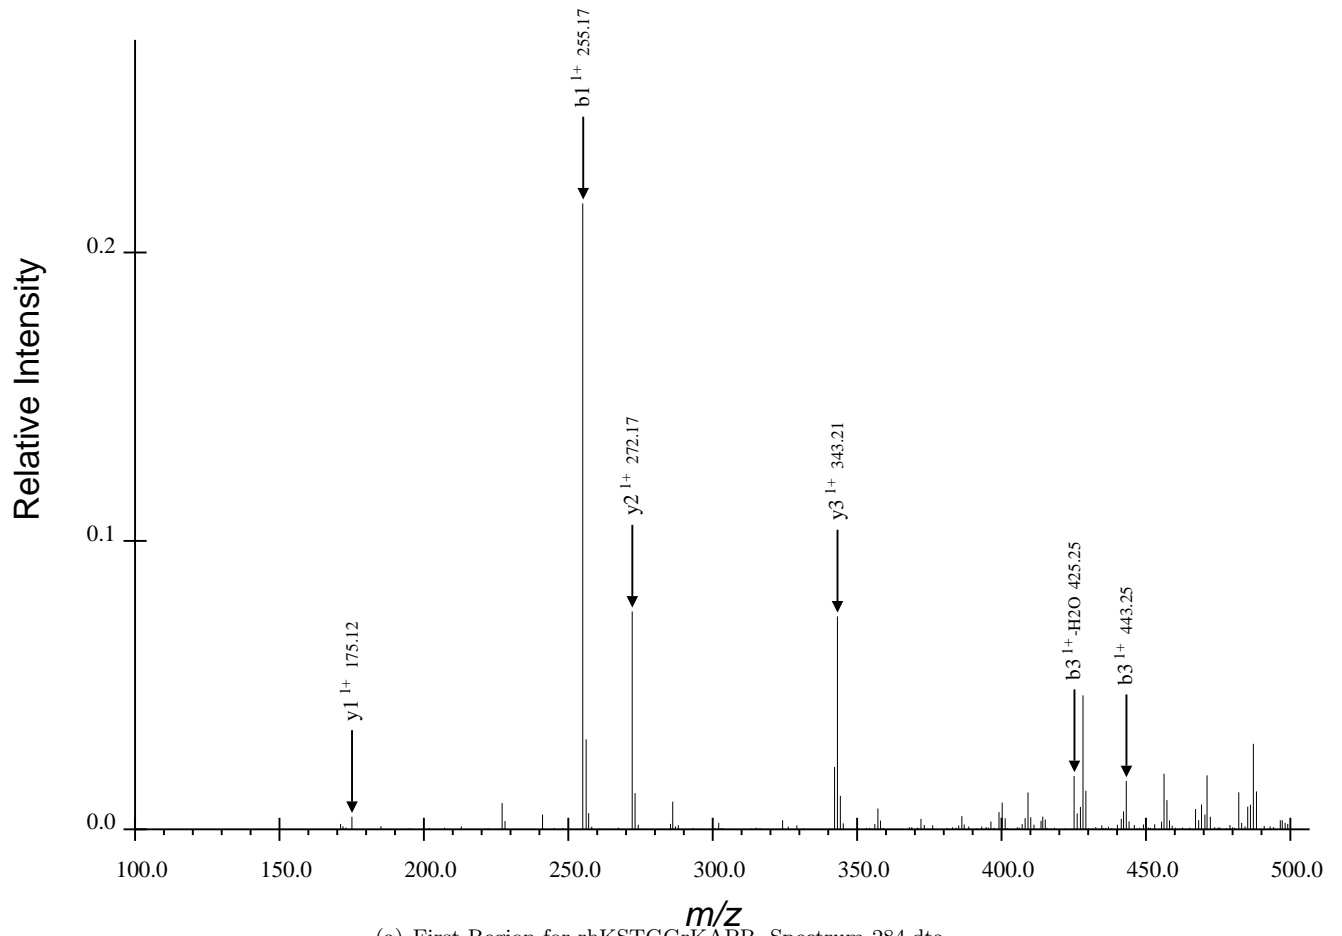

(a) First Region for rhKSTGGrKAPR, Spectrum 284.dta

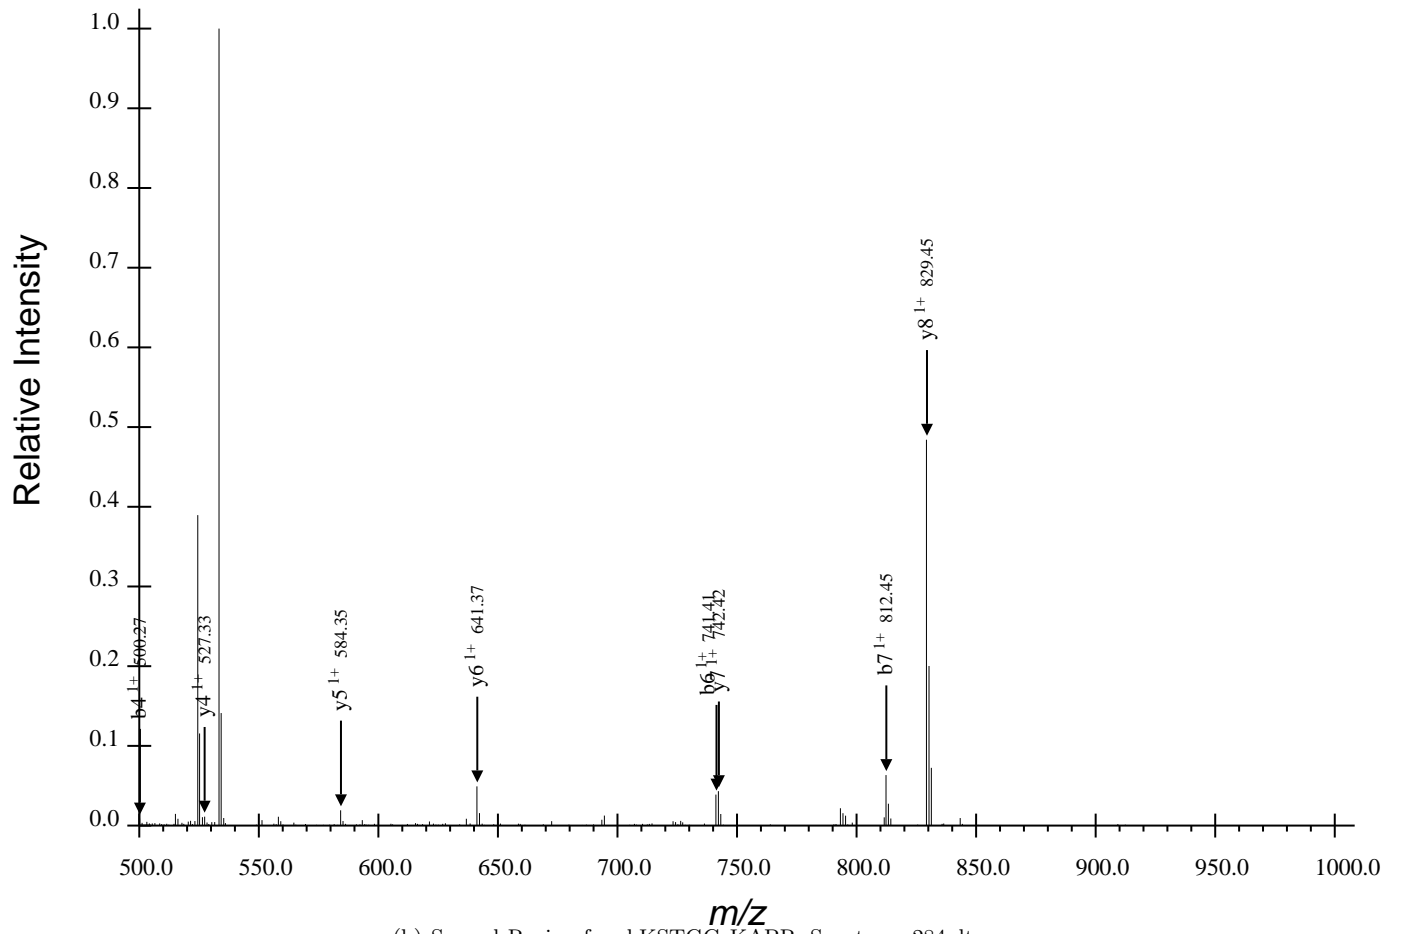

(b) Second Region for rhKSTGGrKAPR, Spectrum 284.dta

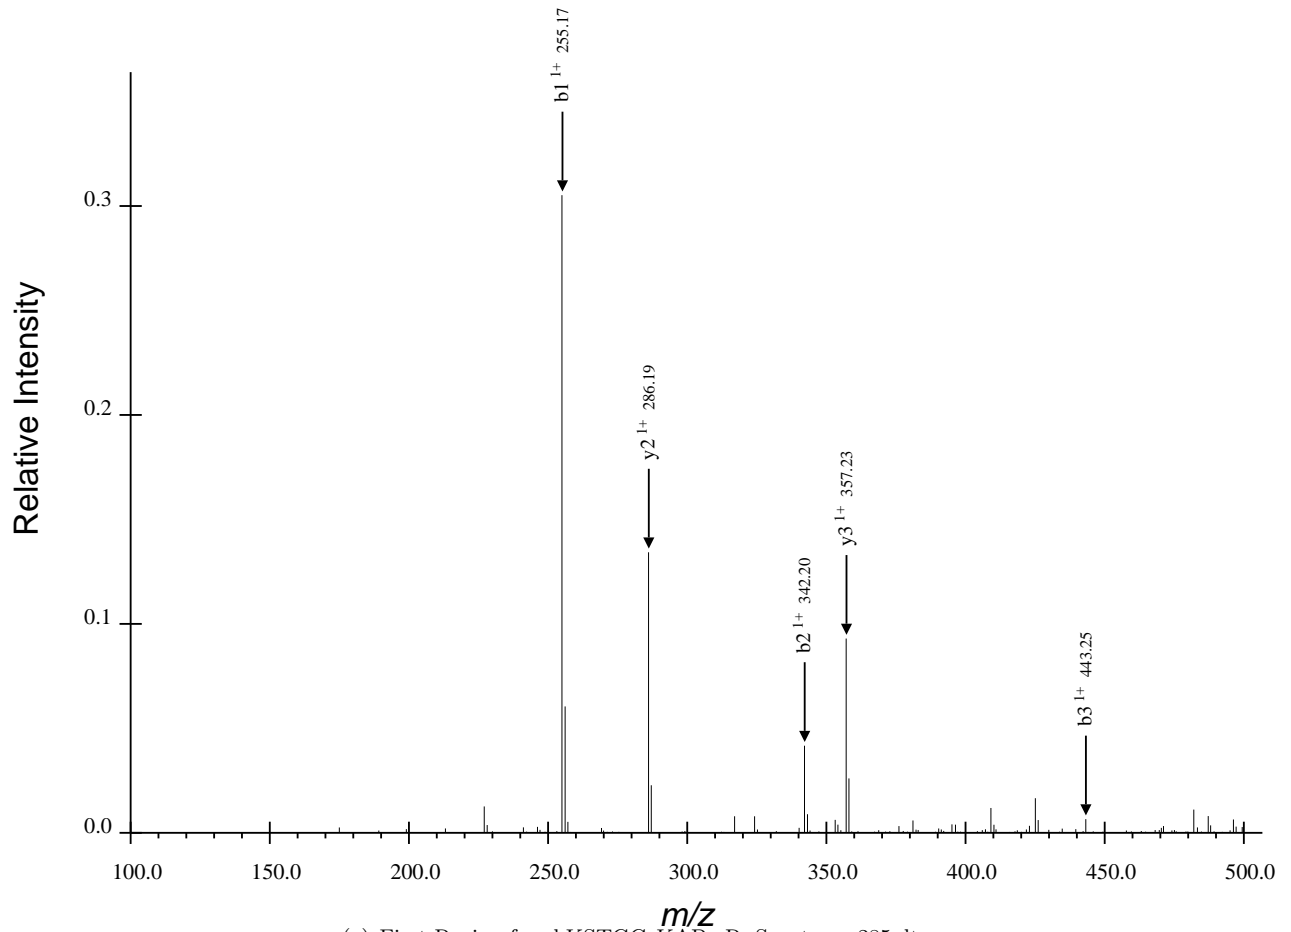

(a) First Region for rhKSTGGrKAPmR, Spectrum 285.dta

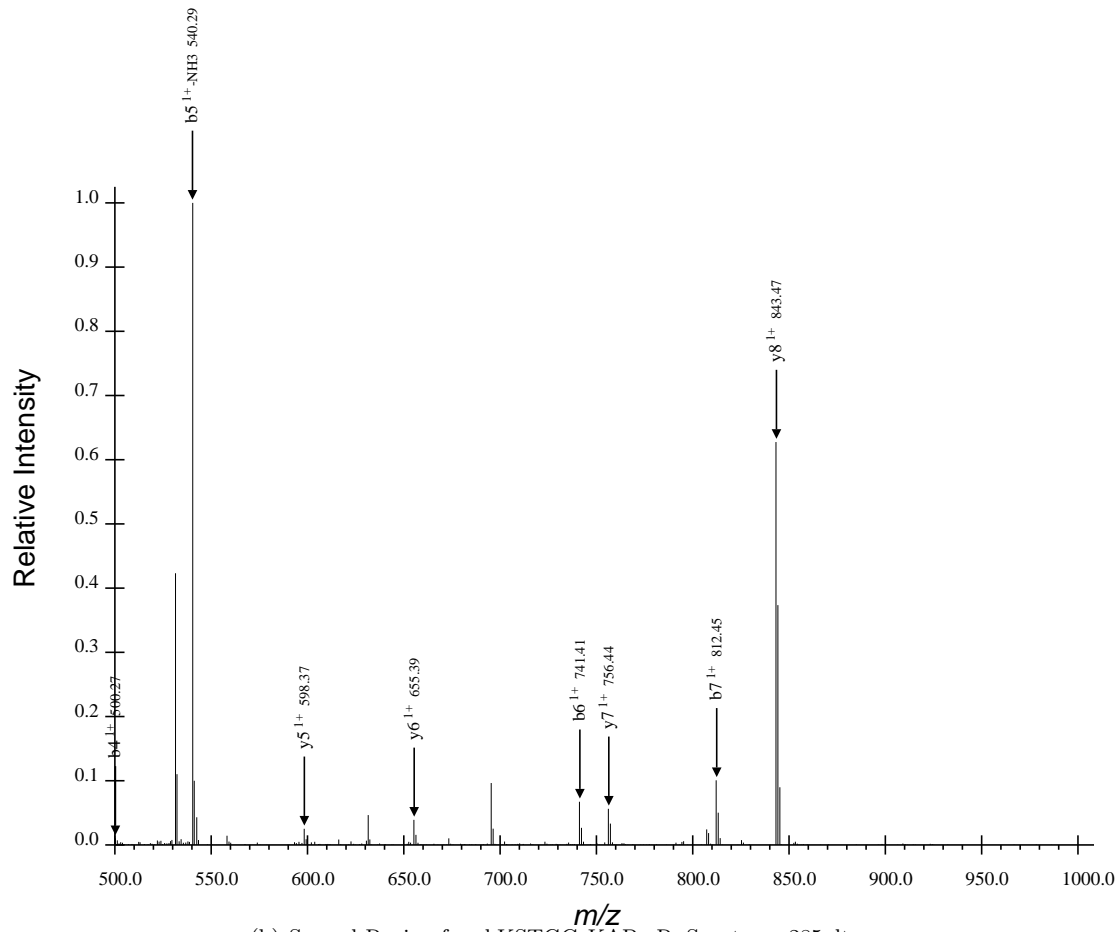

(b) Second Region for rhKSTGGrKAPmR, Spectrum 285.dta

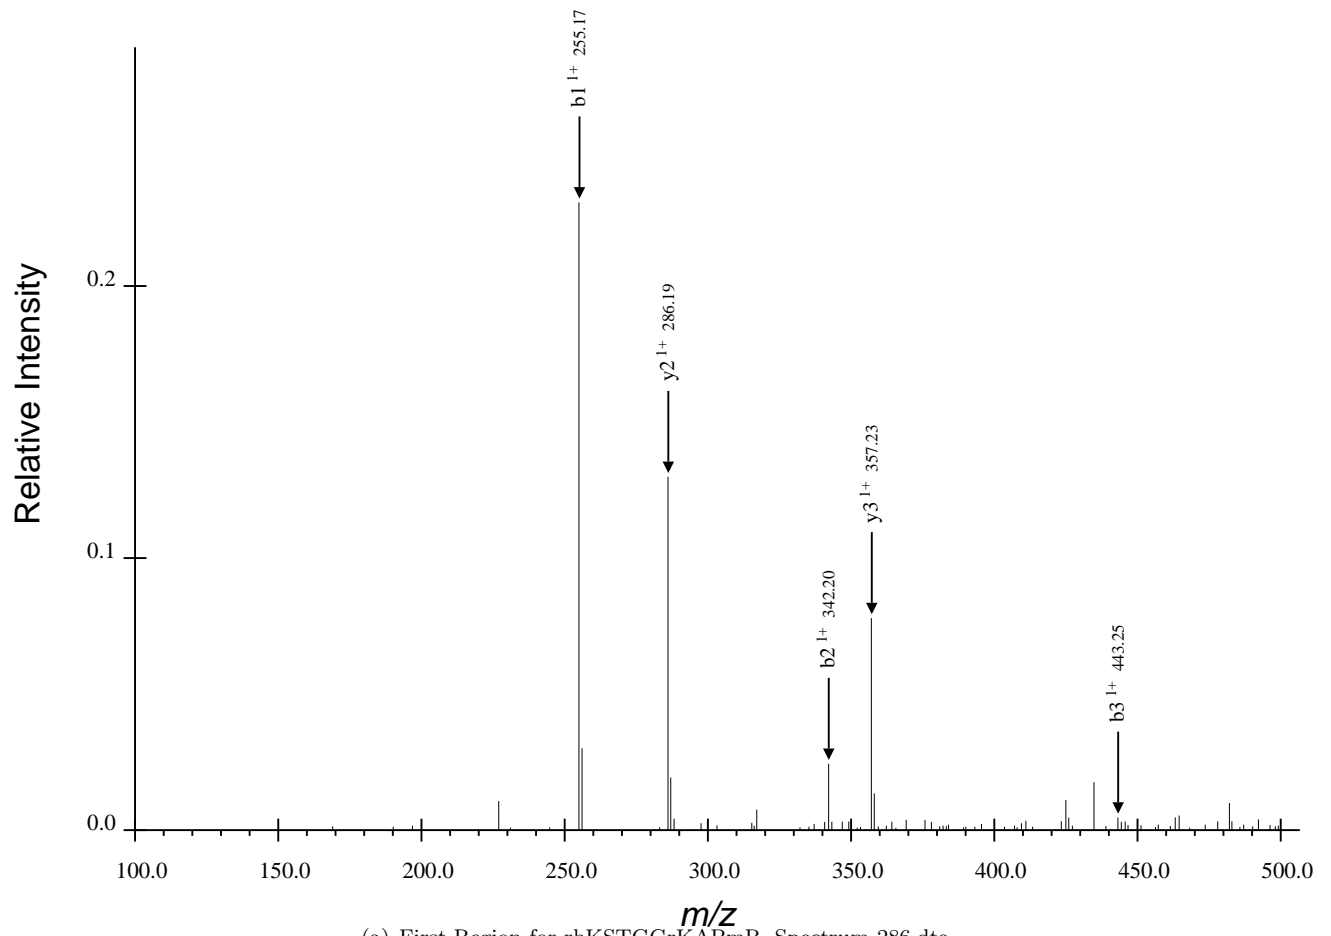

(a) First Region for rhKSTGGrKAPmR, Spectrum 286.dta

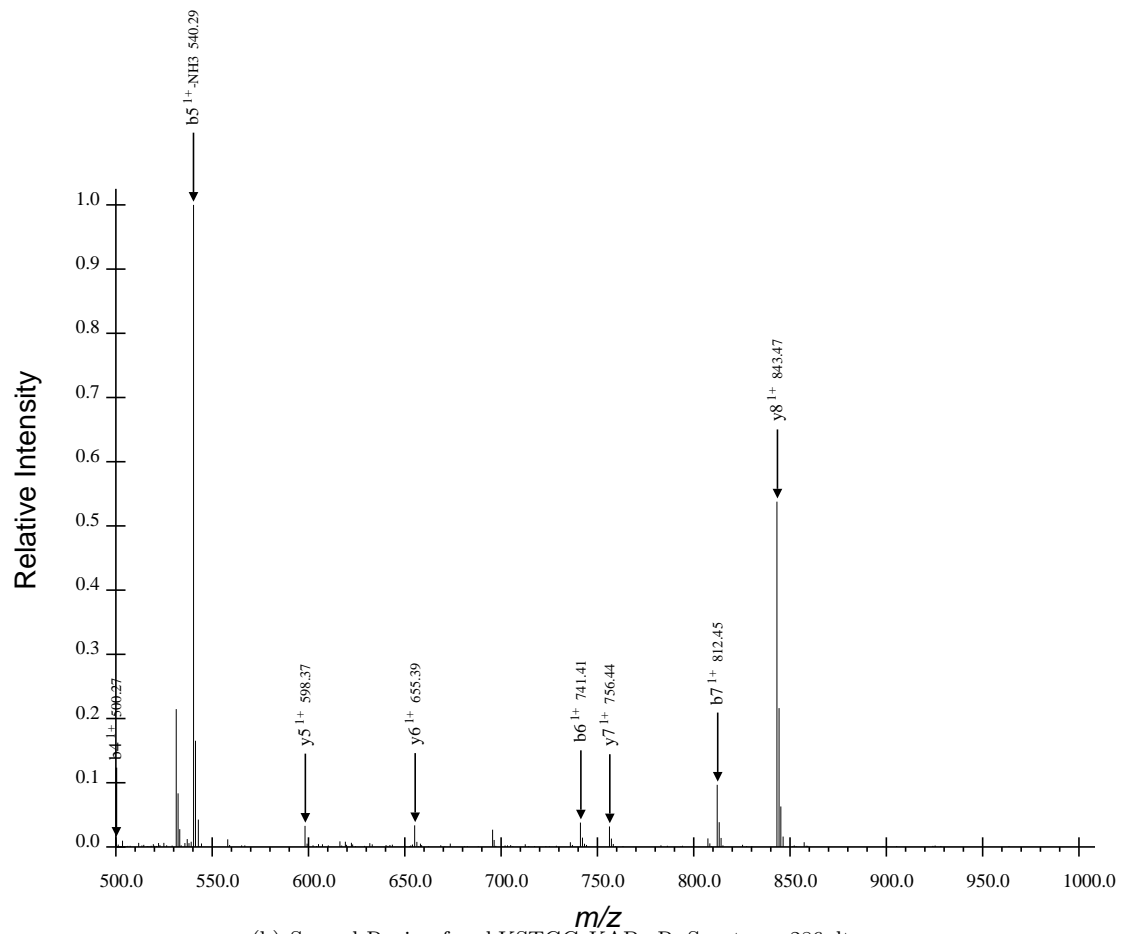

(b) Second Region for rhKSTGGrKAPmR, Spectrum 286.dta

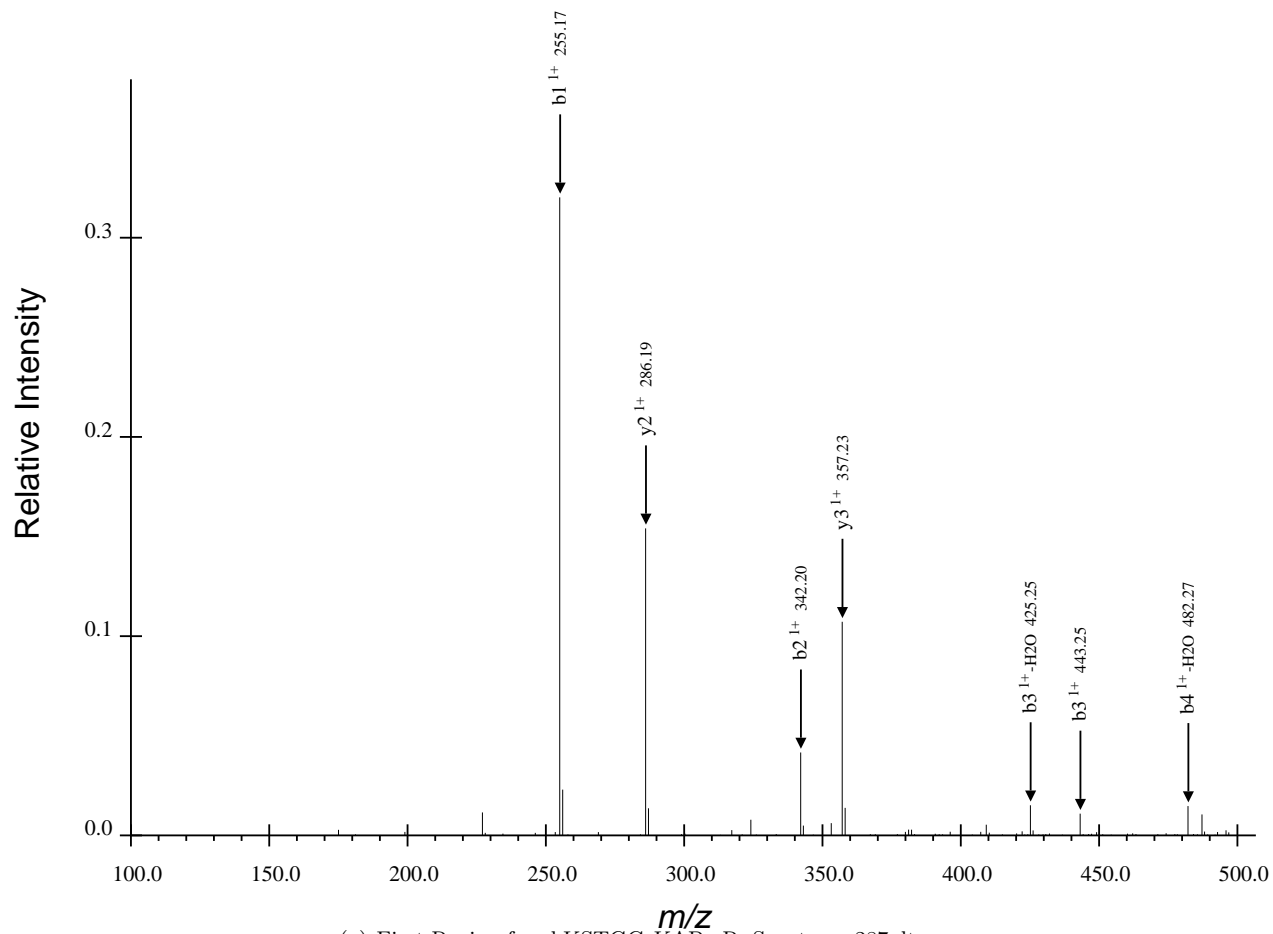

(a) First Region for rhKSTGGrKAPmR, Spectrum 287.dta

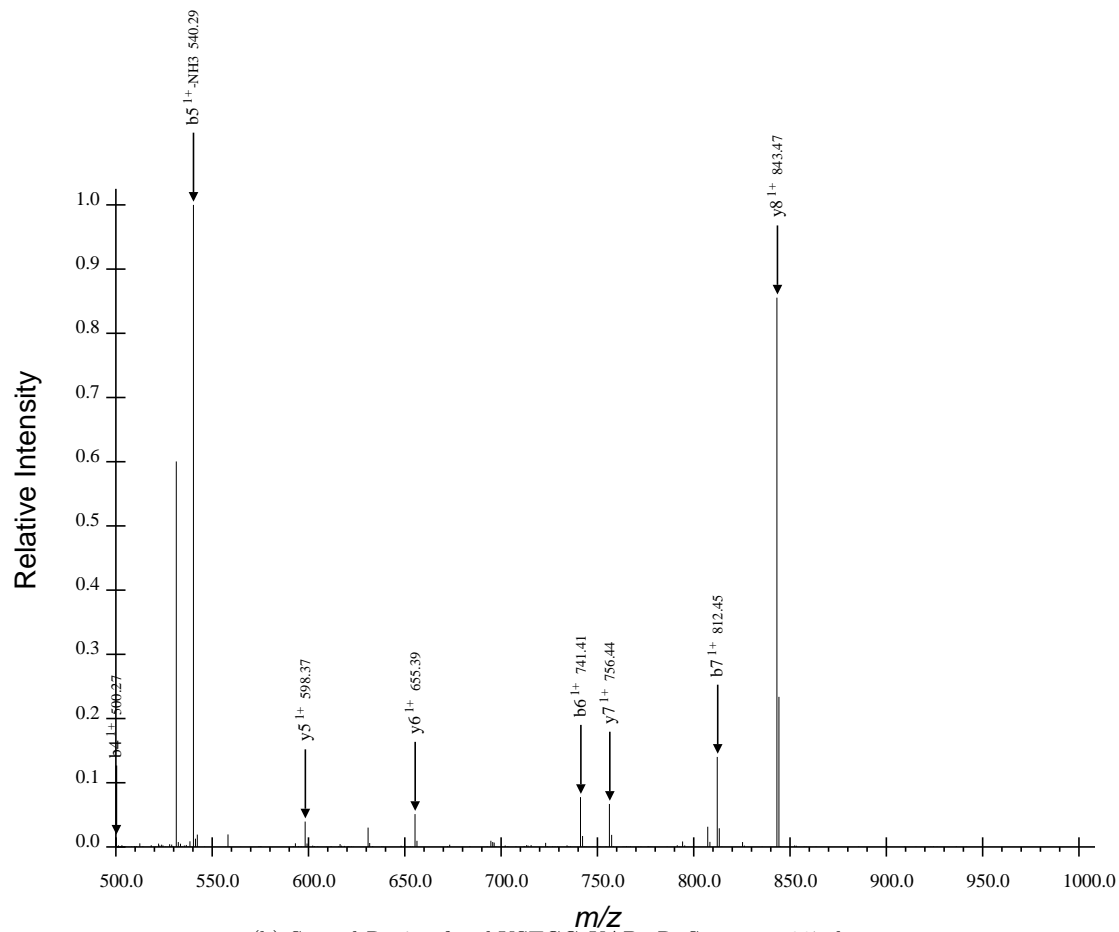

(b) Second Region for rhKSTGGrKAPmR, Spectrum 287.dta

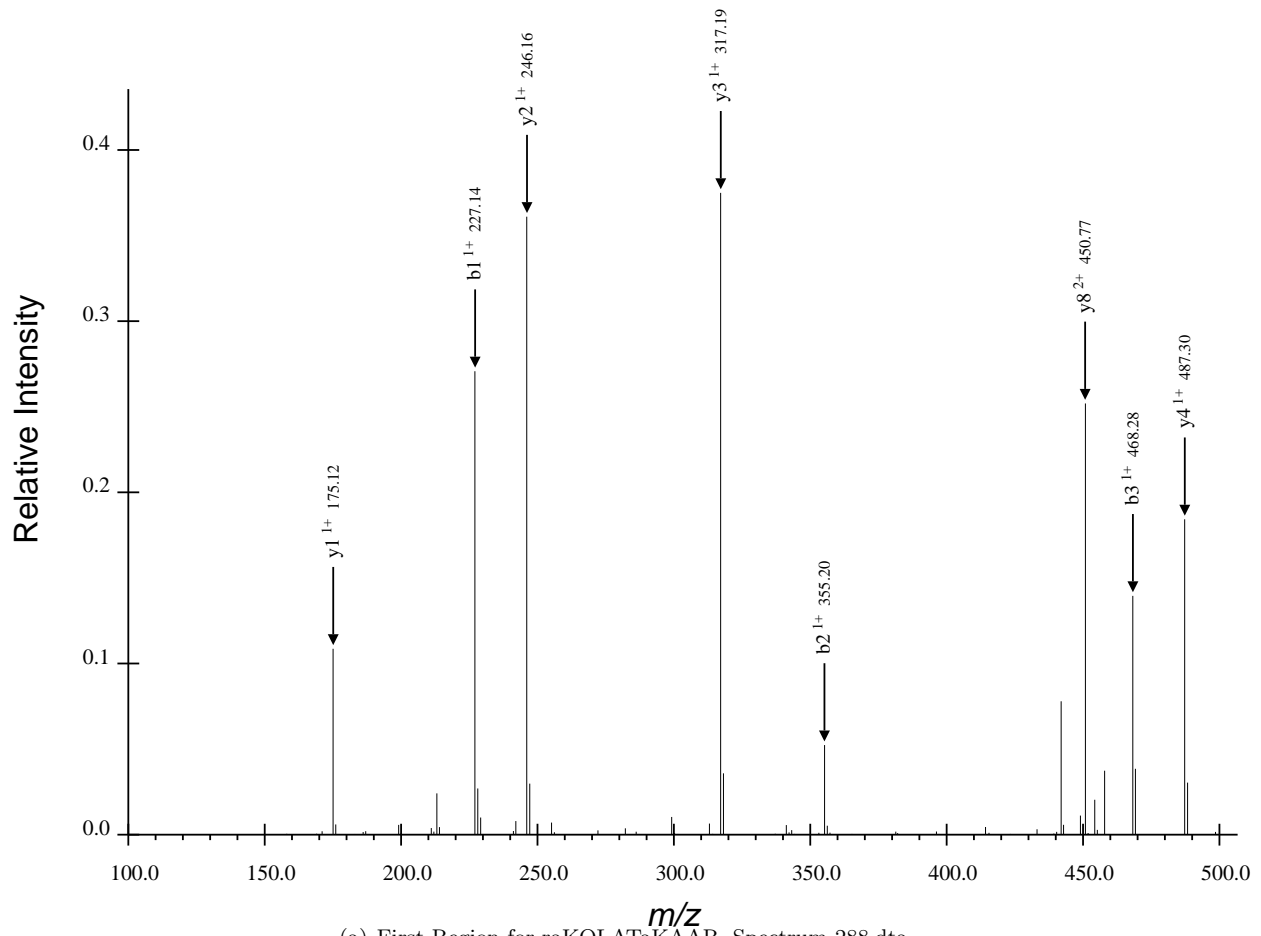

(a) First Region for raKQLATaKAAR, Spectrum 288.dta

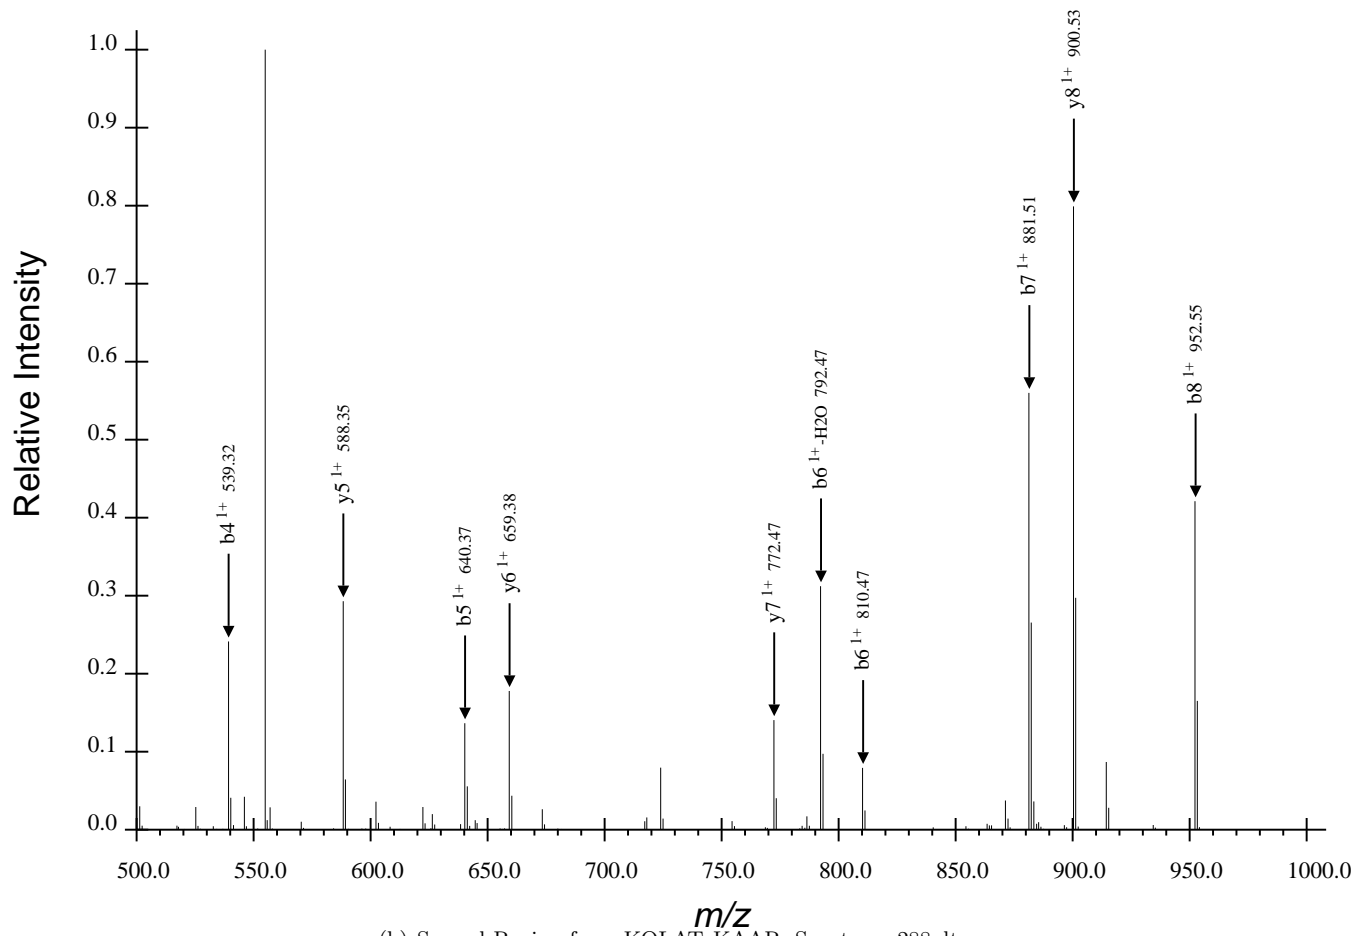

(b) Second Region for raKQLATaKAAR, Spectrum 288.dta



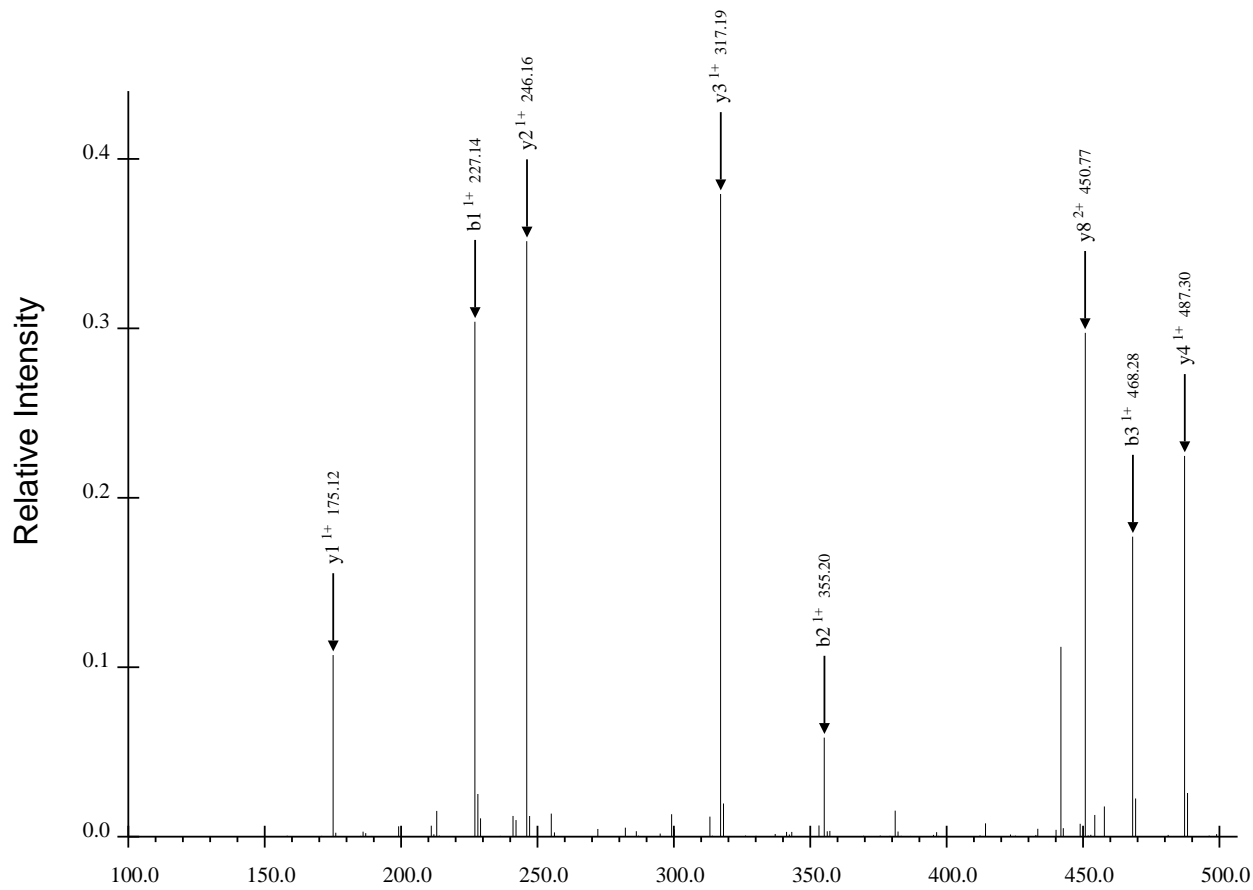

(a) First Region for raKQLATaKAAR, Spectrum 289.dta

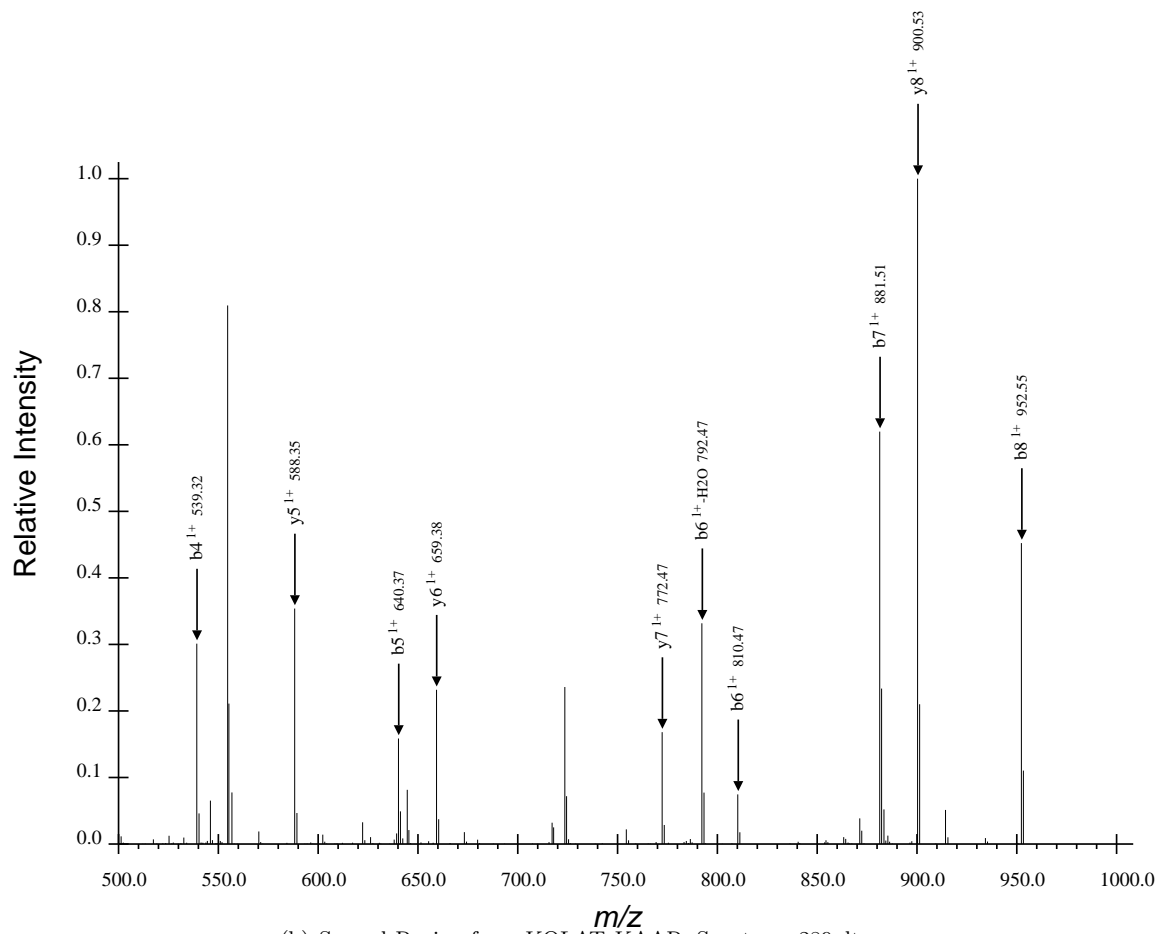

(b) Second Region for raKQLATaKAAR, Spectrum 289.dta

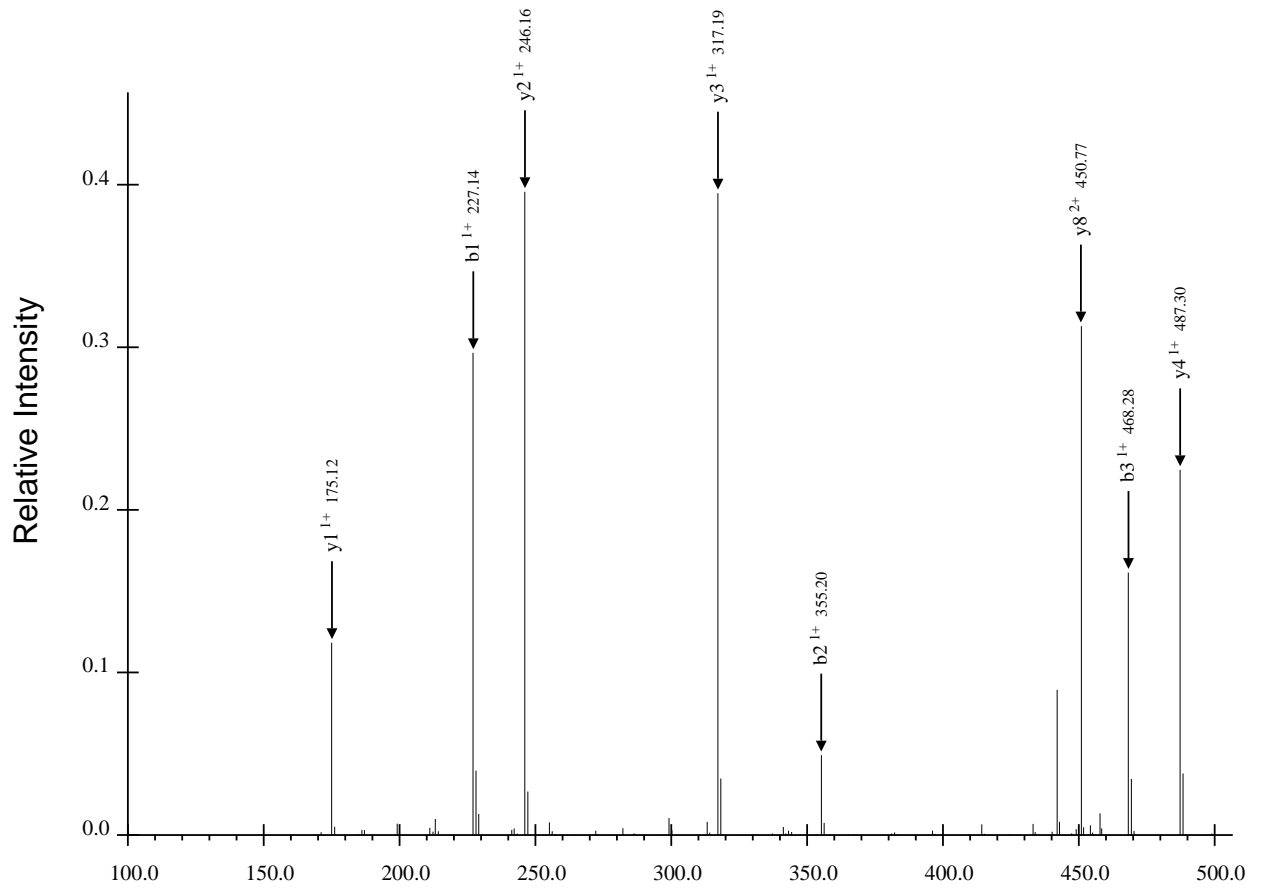

(a) First Region for raKQLATaKAAR, Spectrum 290.dta

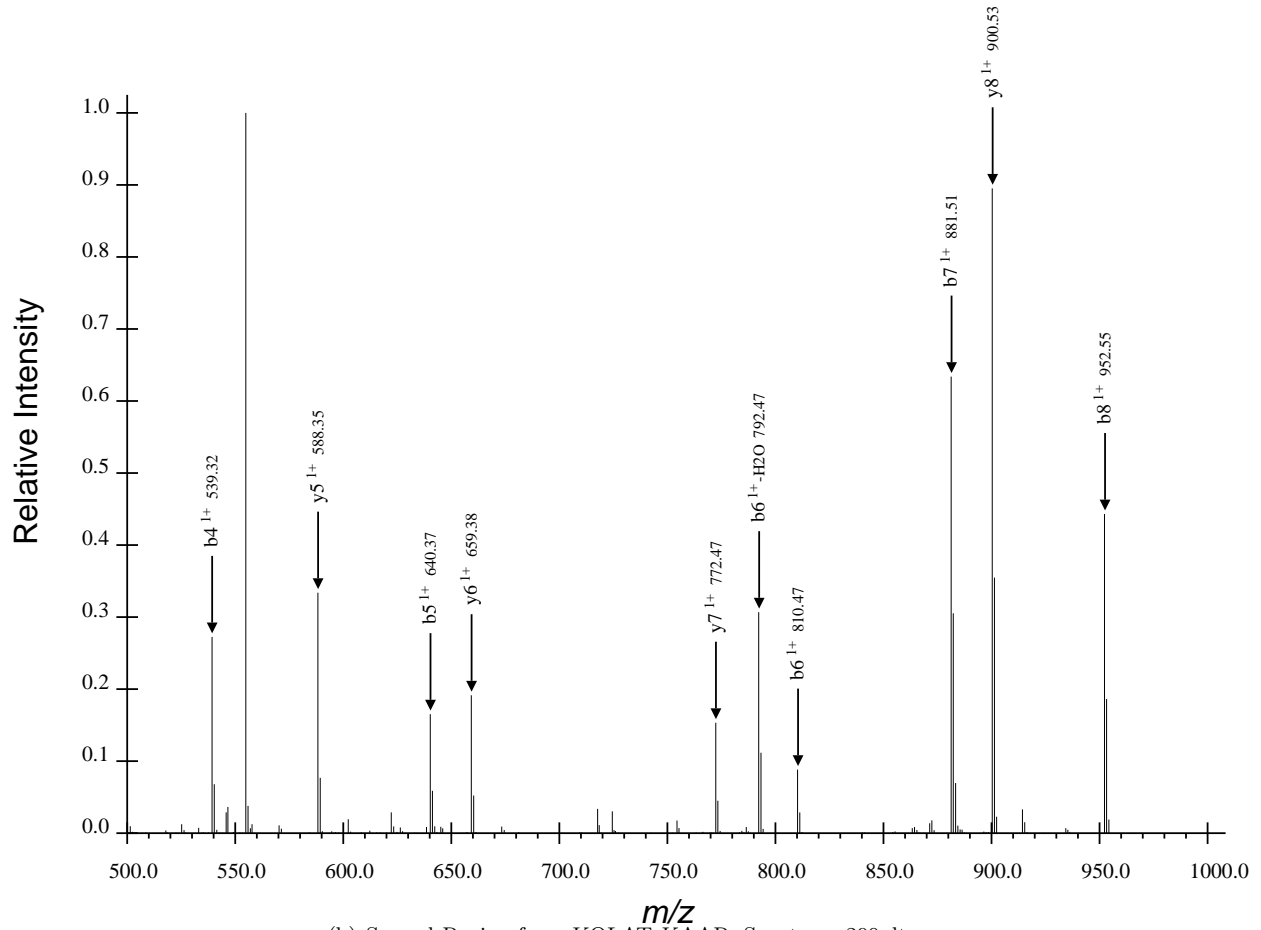

(b) Second Region for raKQLATaKAAR, Spectrum 290.dta

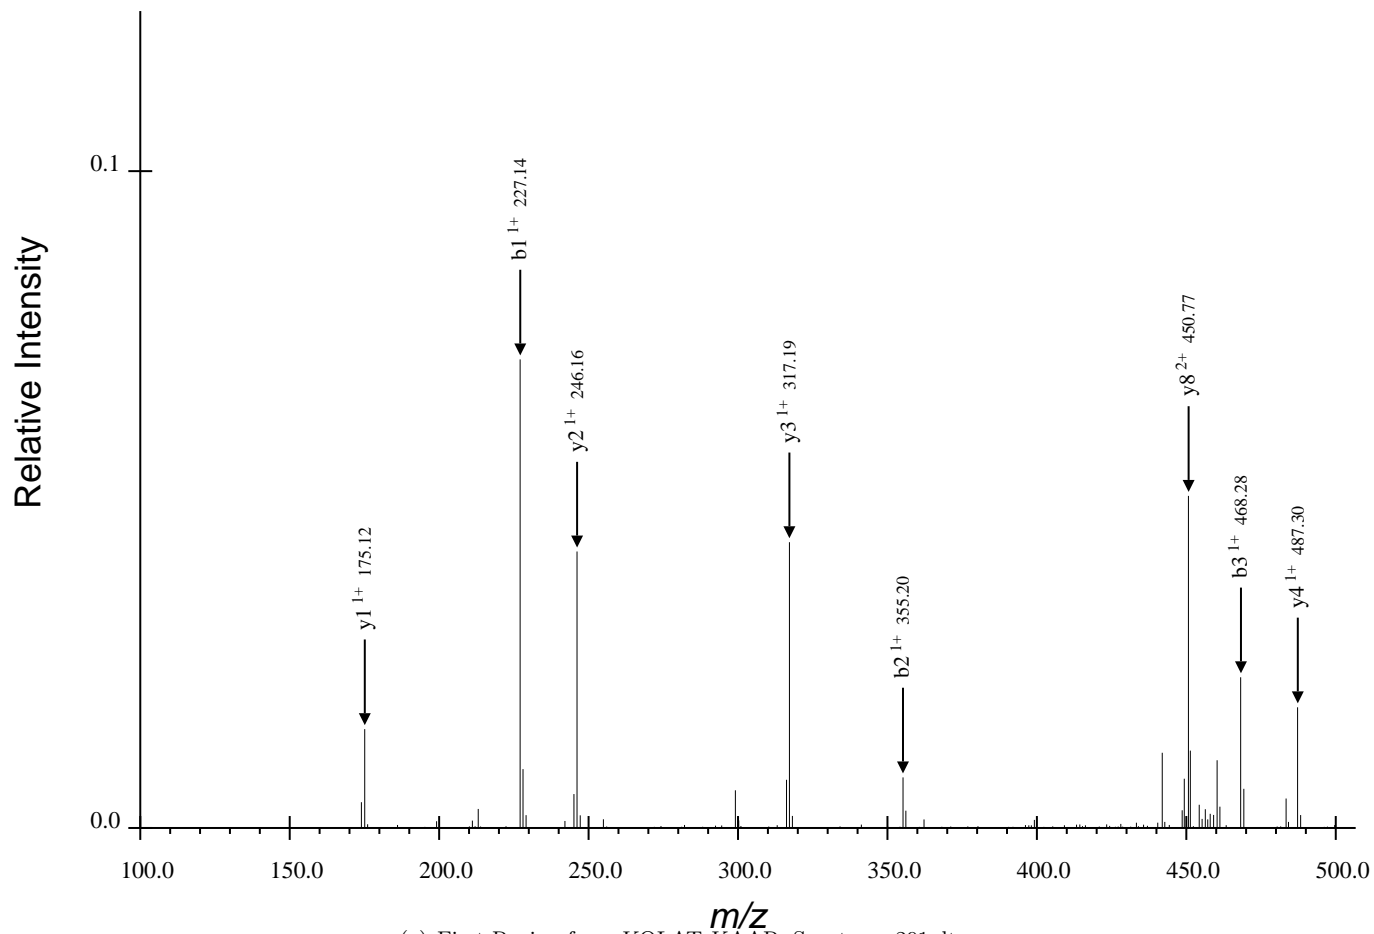

(a) First Region for raKQLATaKAAR, Spectrum 291.dta

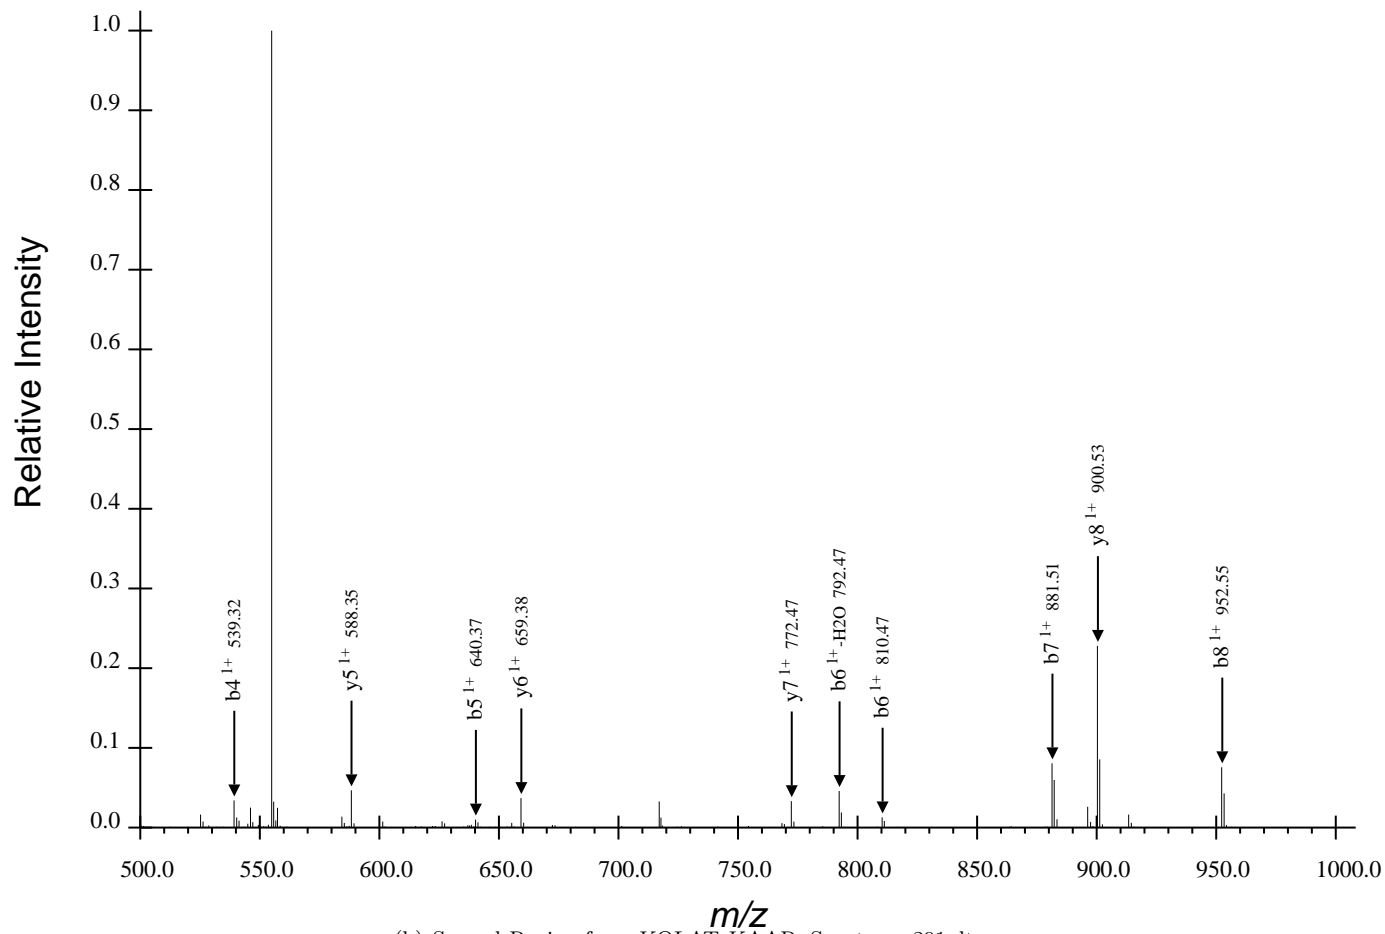

(b) Second Region for raKQLATaKAAR, Spectrum 291.dta

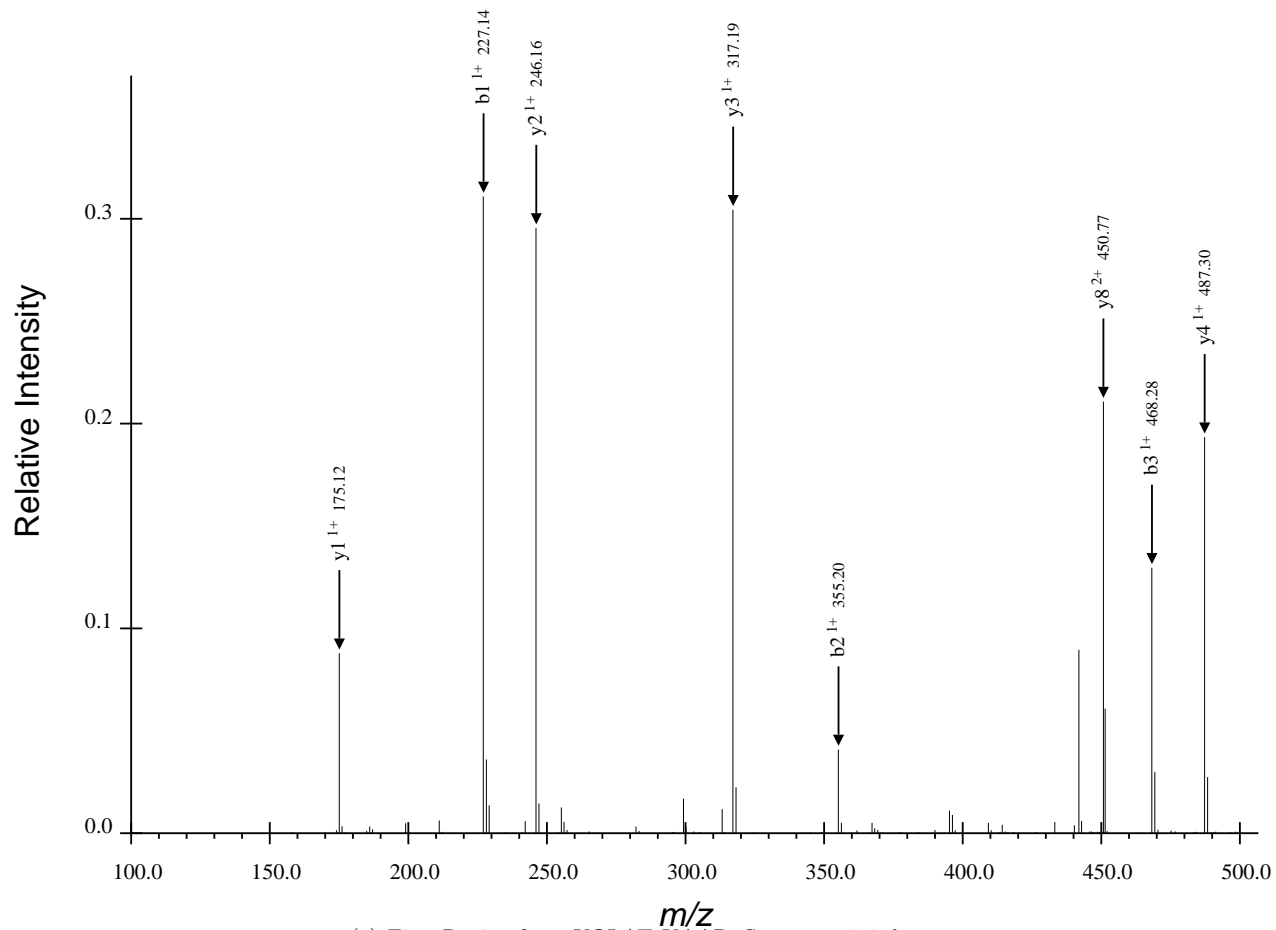

(a) First Region for raKQLATaKAAR, Spectrum 292.dta

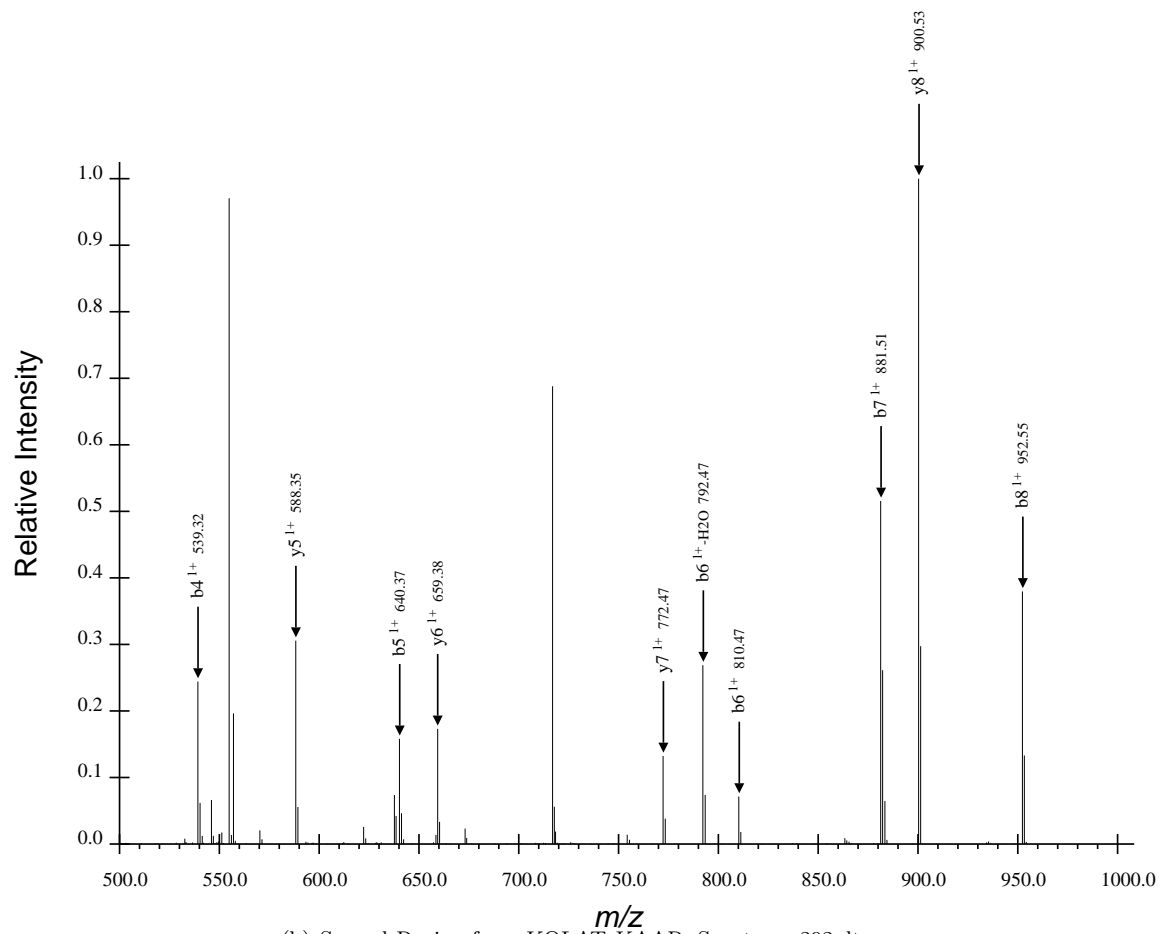

(b) Second Region for raKQLATaKAAR, Spectrum 292.dta

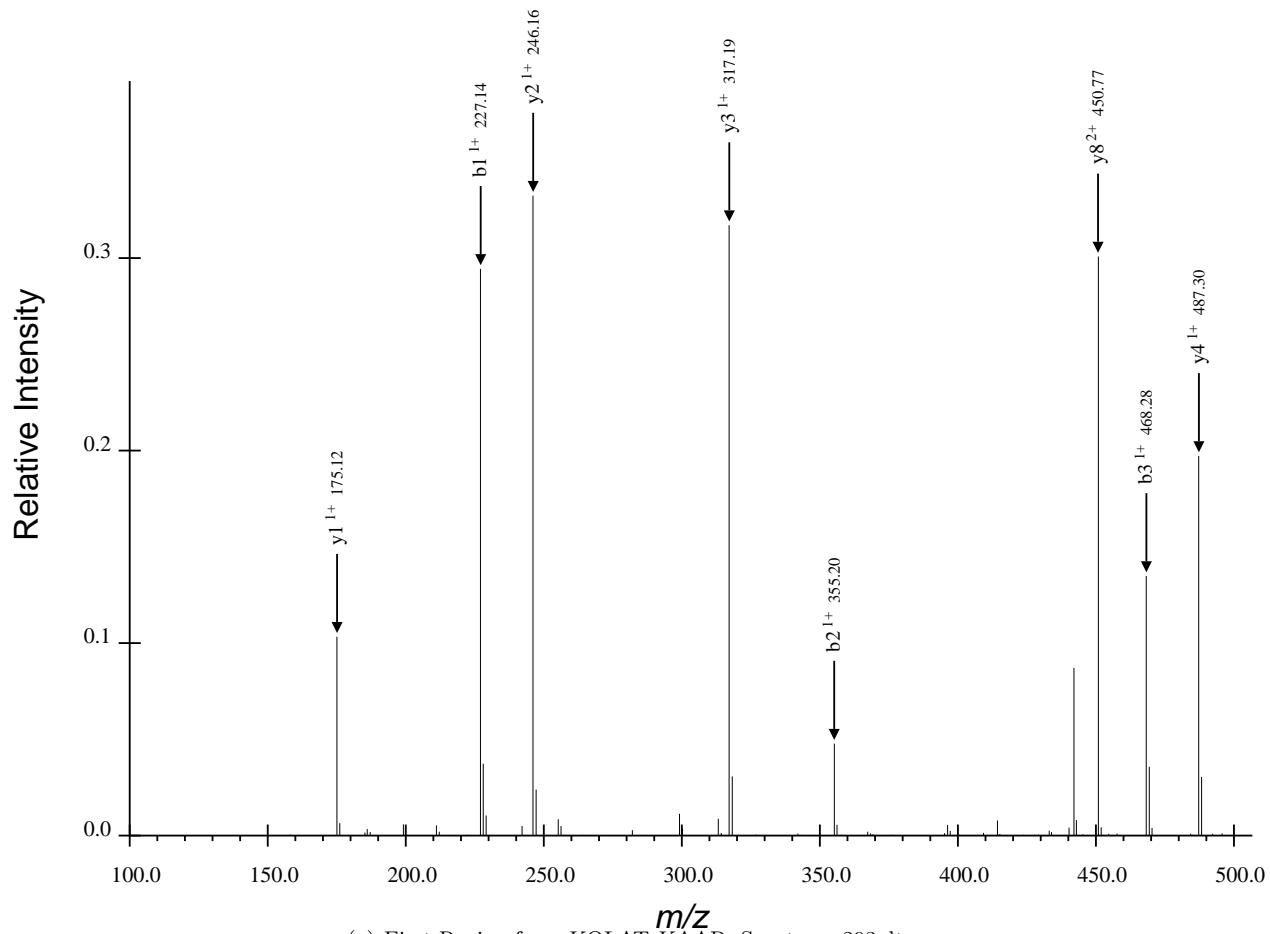

(a) First Region for raKQLATaKAAR, Spectrum 293.dta

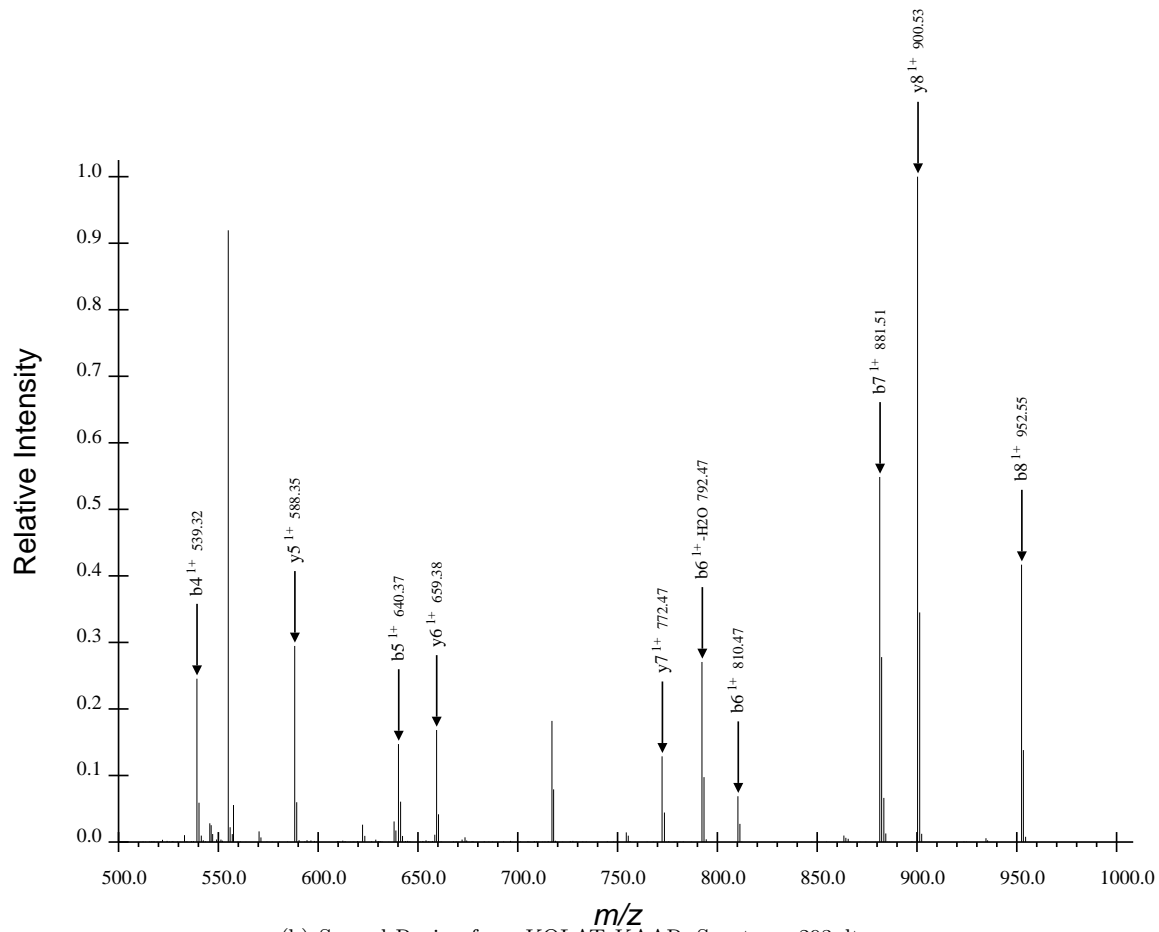

(b) Second Region for raKQLATaKAAR, Spectrum 293.dta

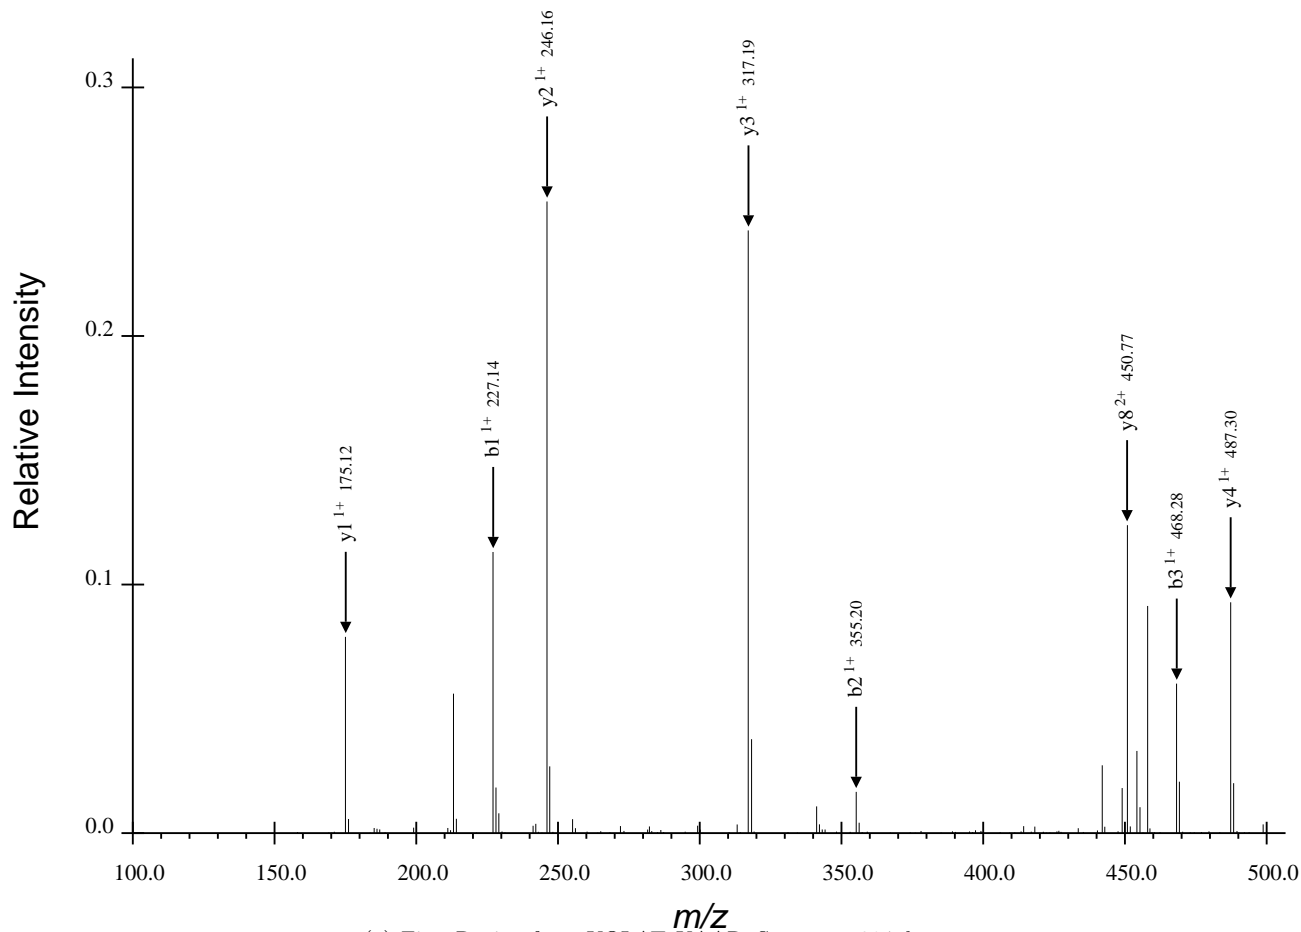

(a) First Region for raKQLATaKAAR, Spectrum 294.dta

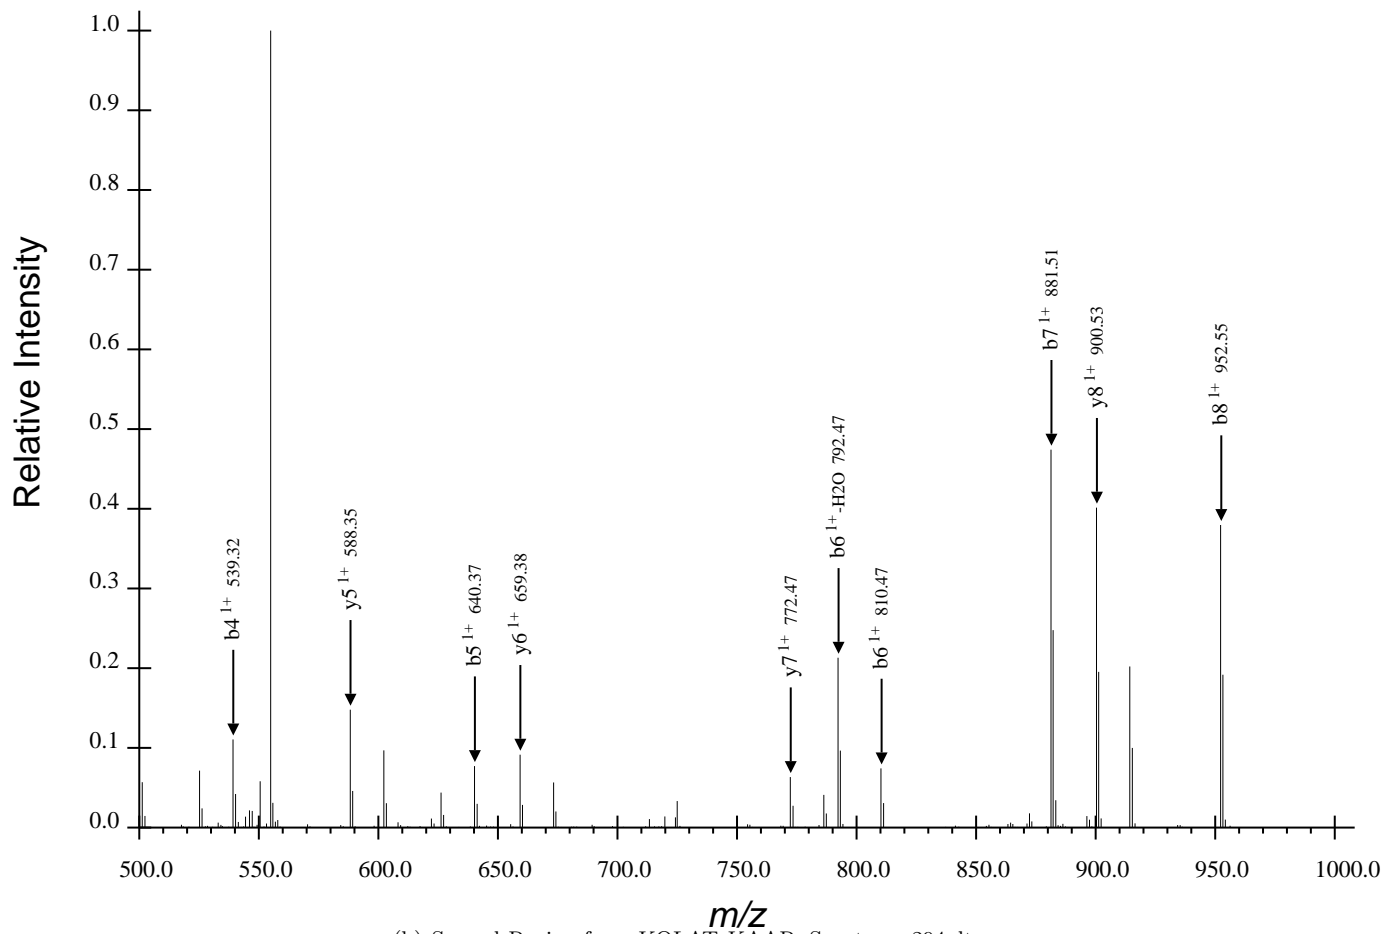

(b) Second Region for raKQLATaKAAR, Spectrum 294.dta

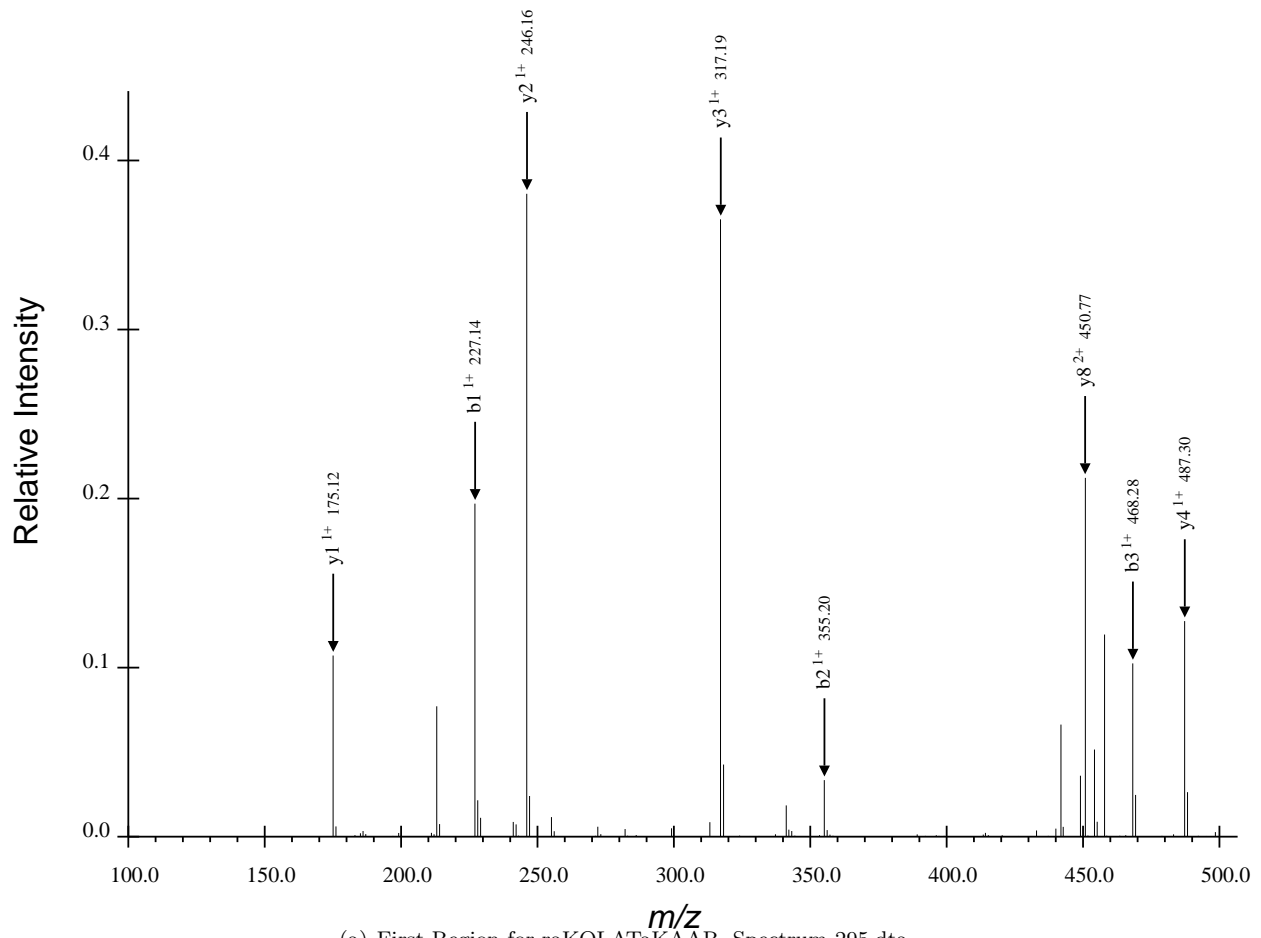

(a) First Region for raKQLATaKAAR, Spectrum 295.dta

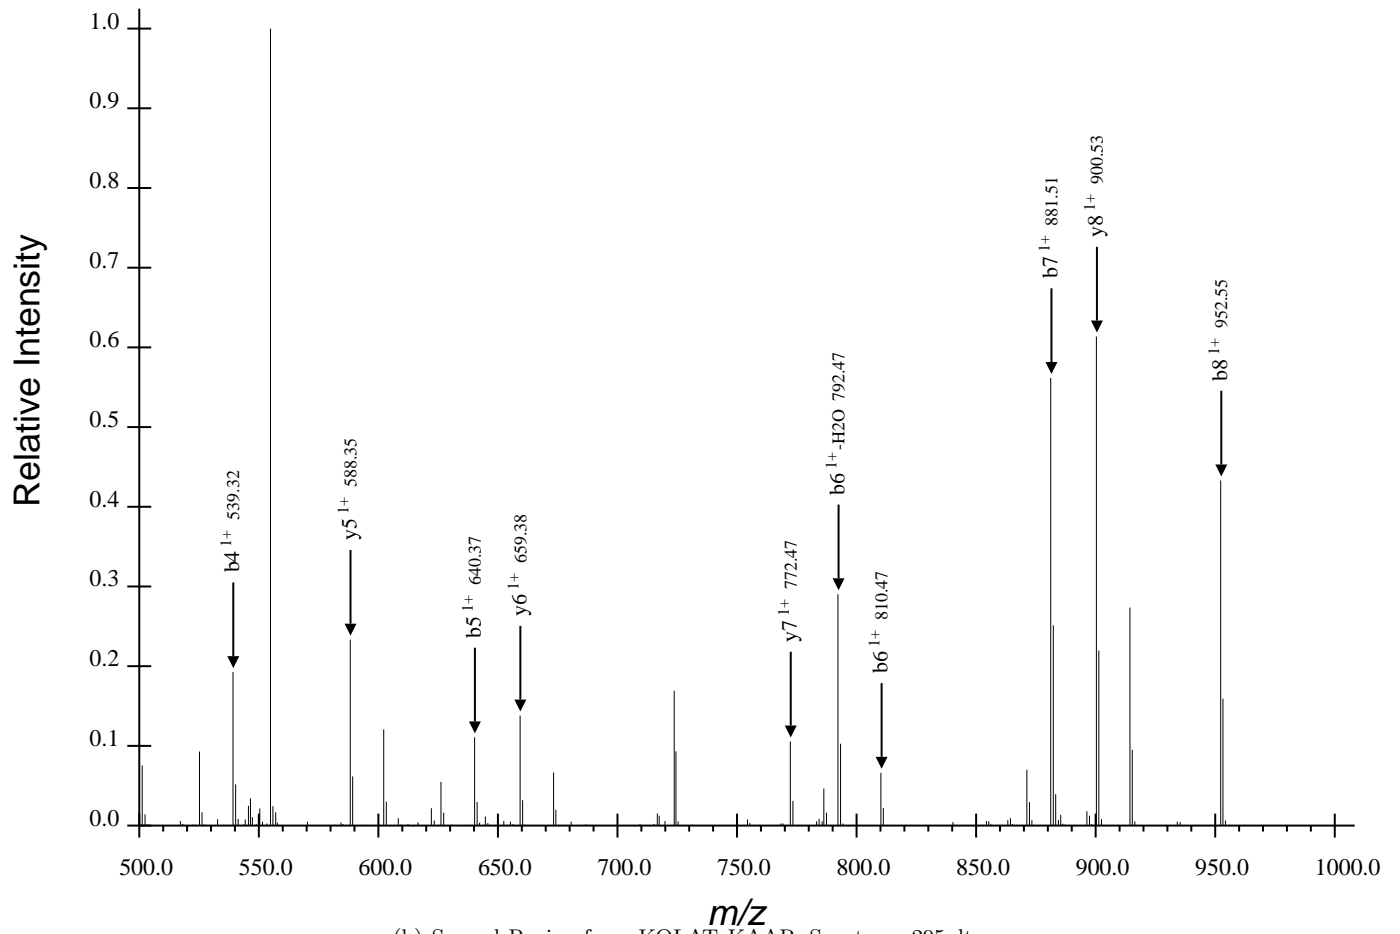

(b) Second Region for raKQLATaKAAR, Spectrum 295.dta

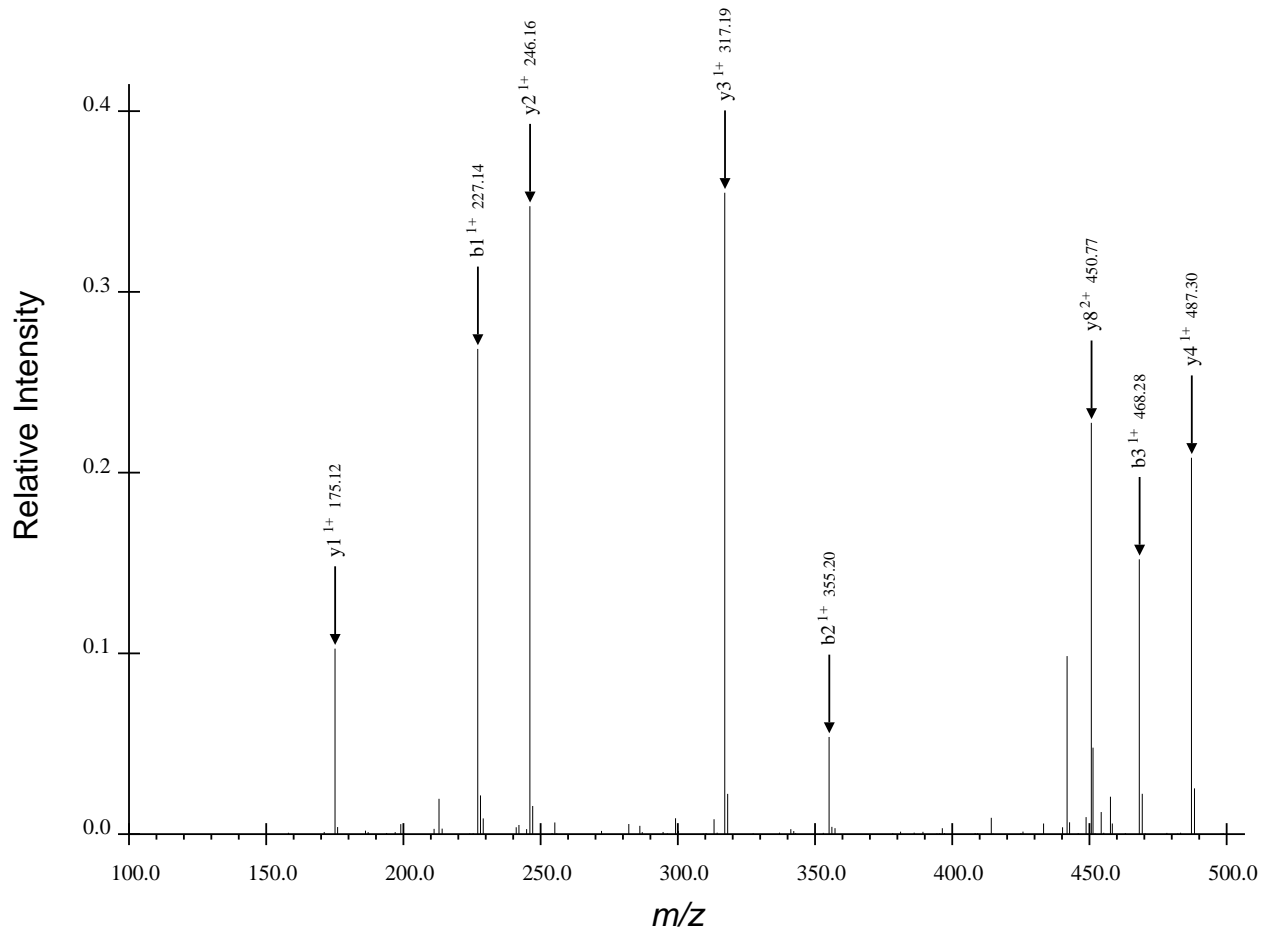

(a) First Region for raKQLATaKAAR, Spectrum 296.dta

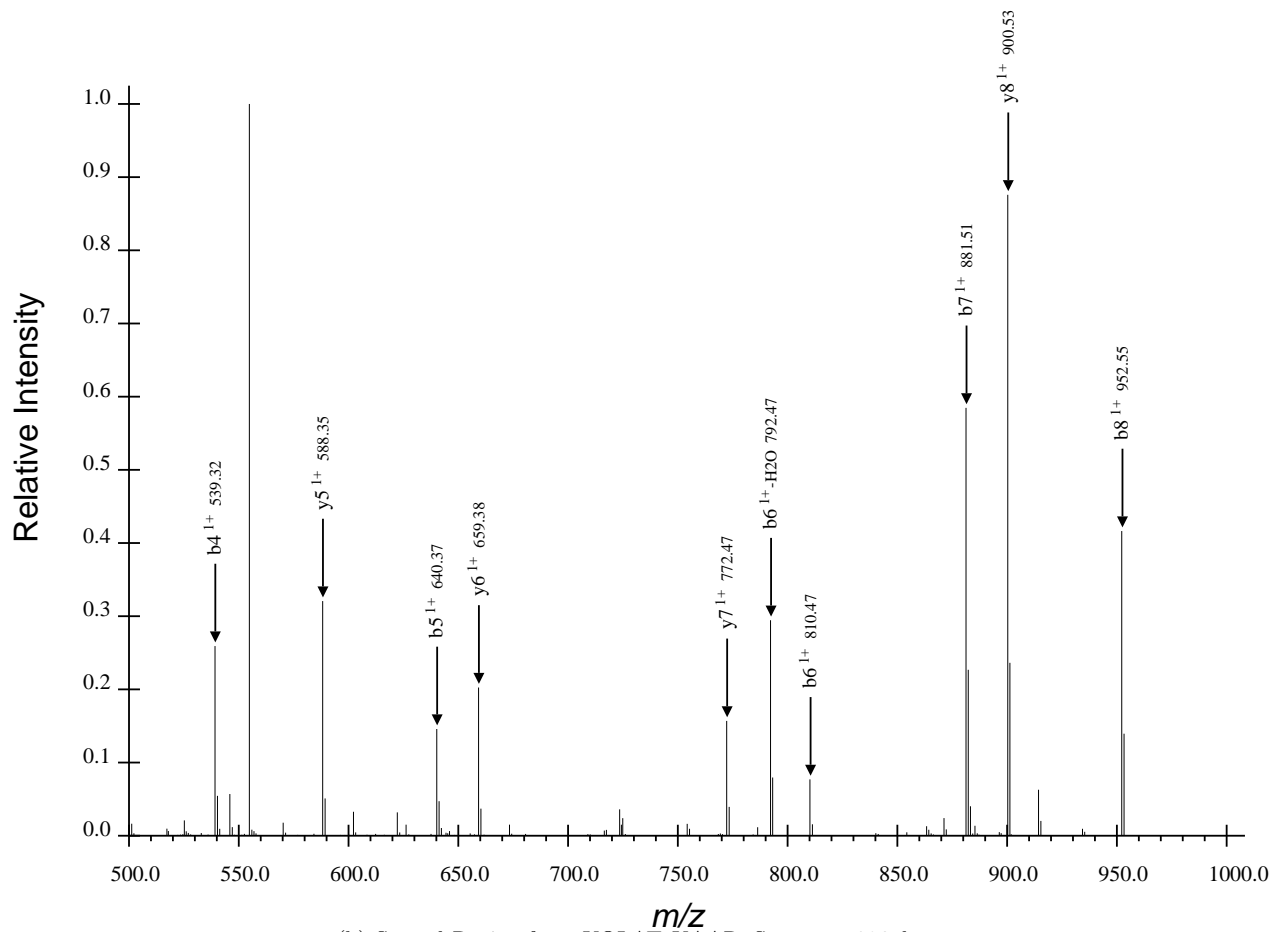

(b) Second Region for raKQLATaKAAR, Spectrum 296.dta



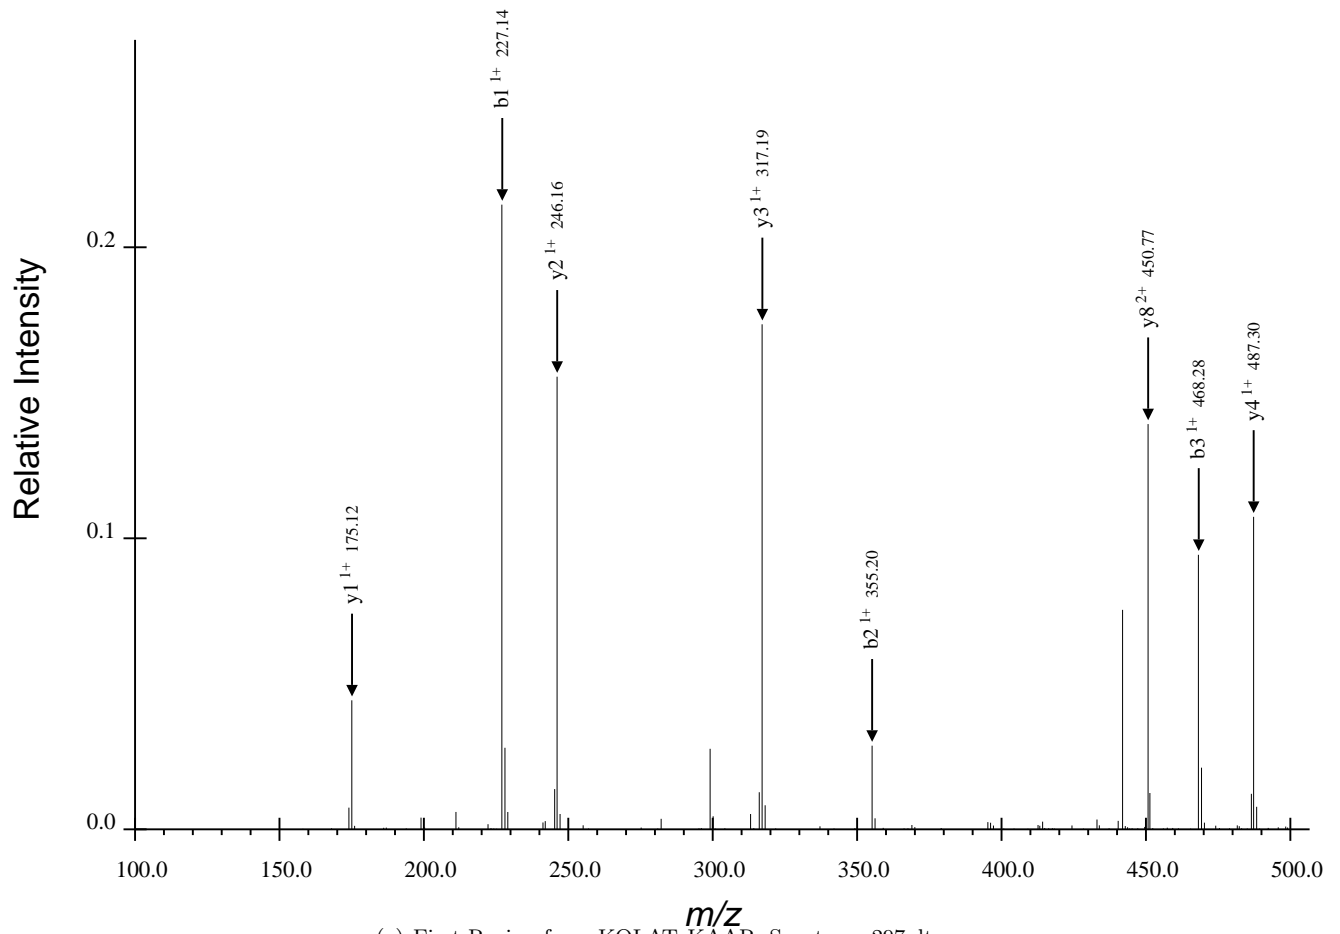

(a) First Region for raKQLATaKAAR, Spectrum 297.dta

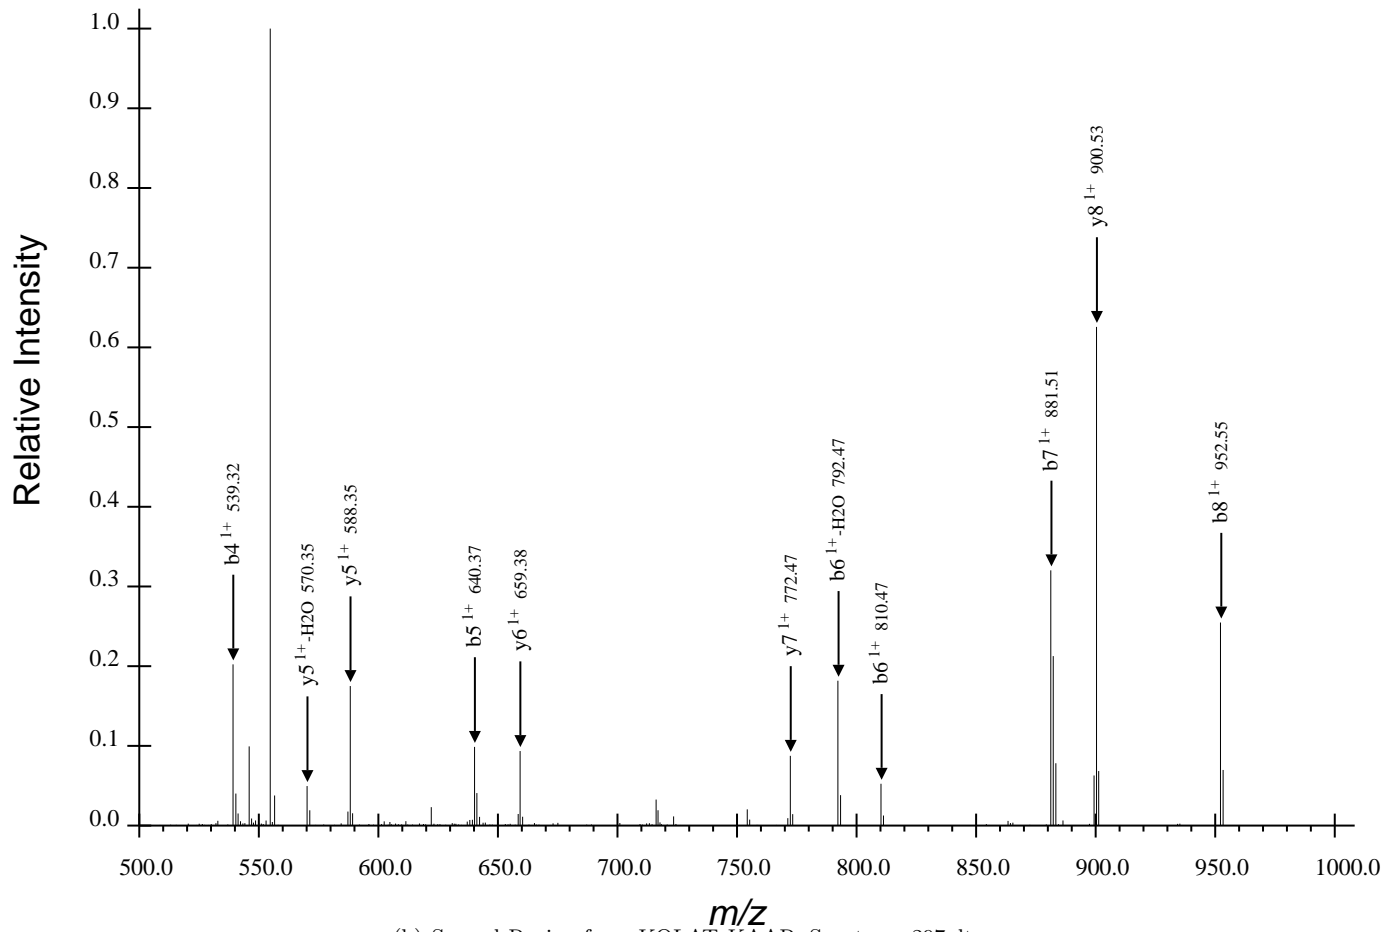

(b) Second Region for raKQLATaKAAR, Spectrum 297.dta

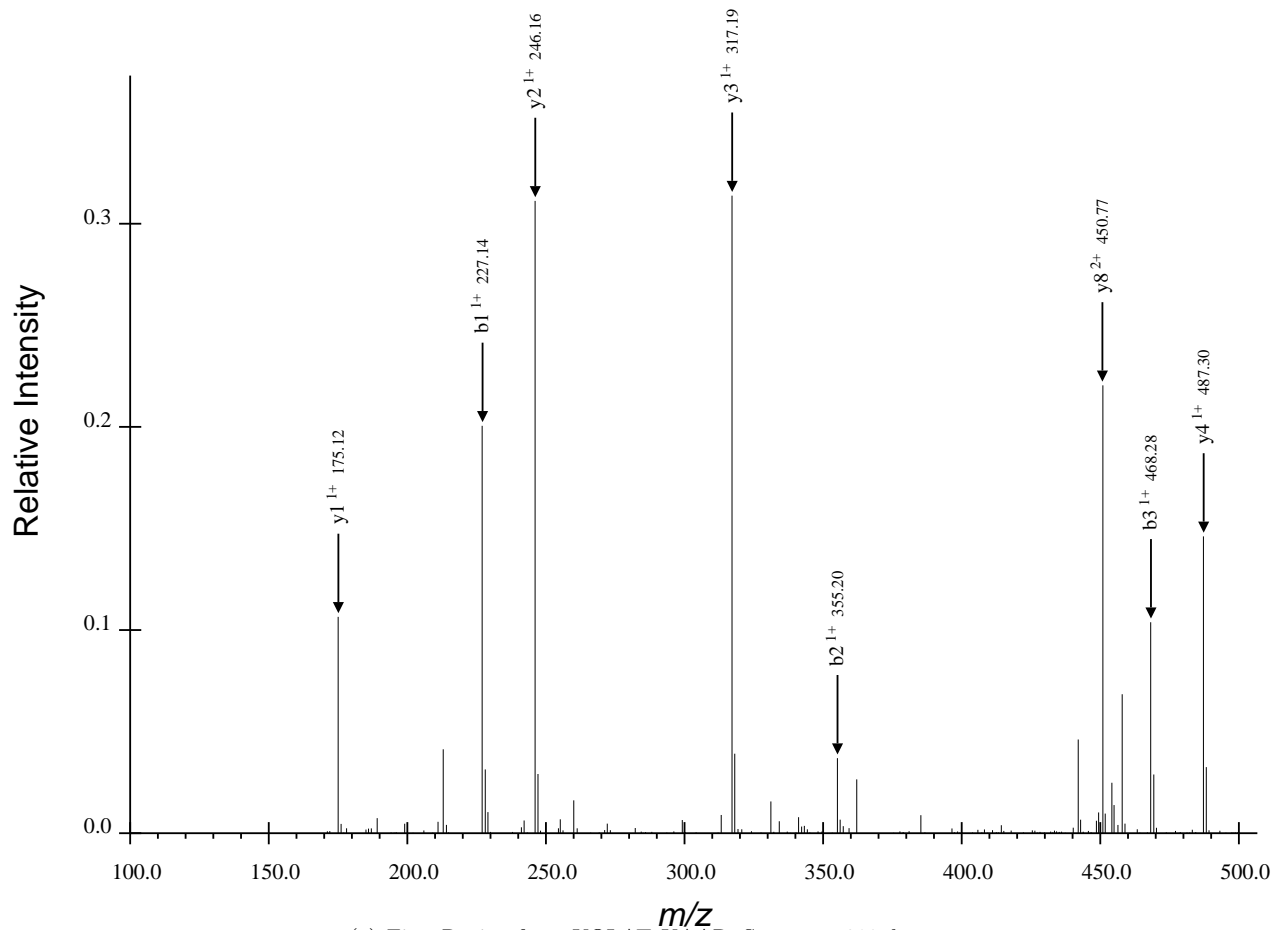

(a) First Region for raKQLATaKAAR, Spectrum 298.dta

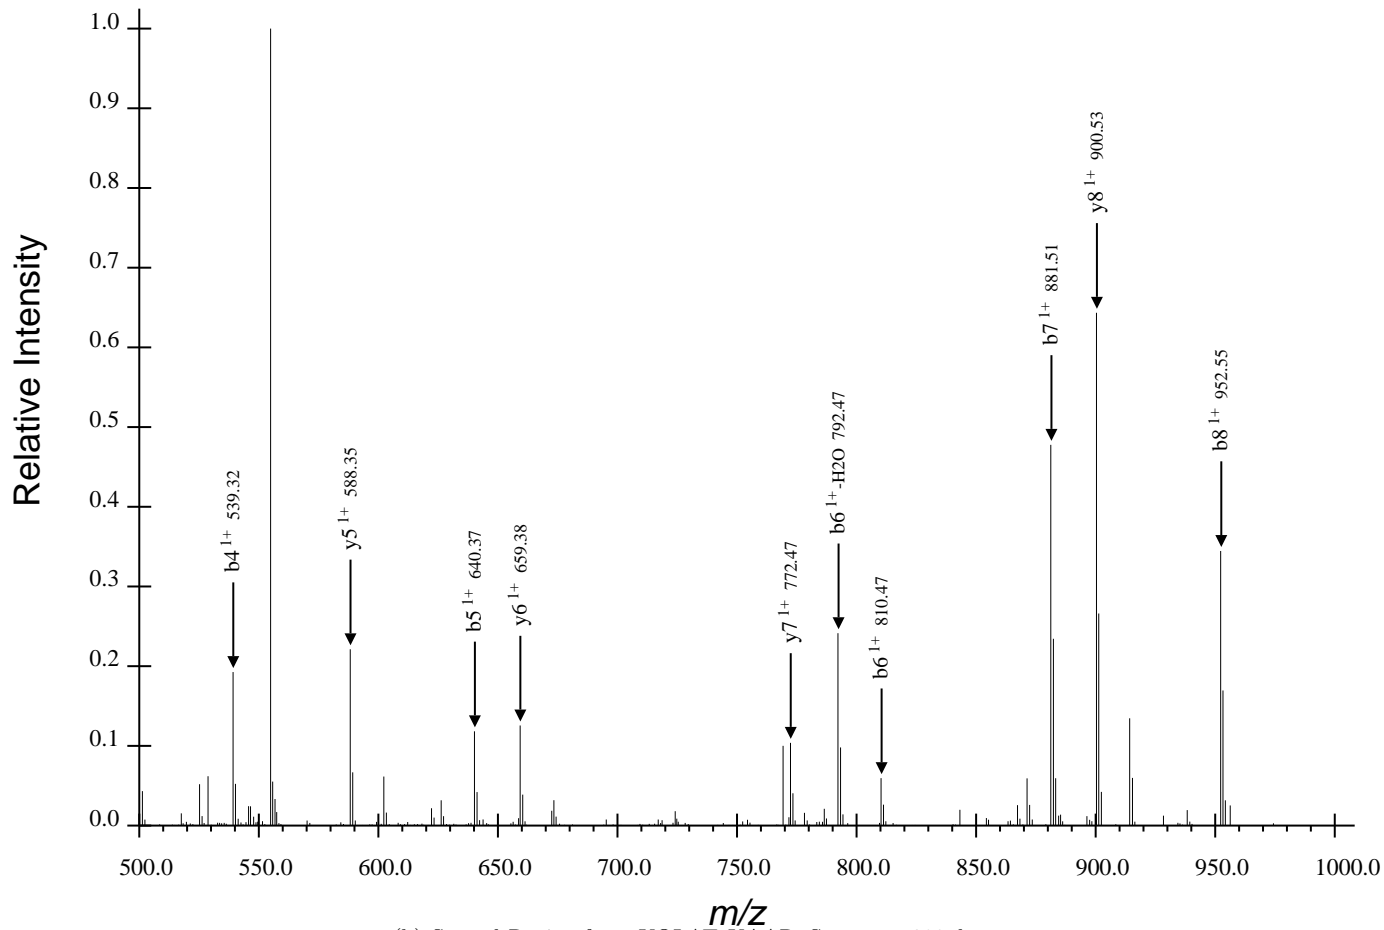

(b) Second Region for raKQLATaKAAR, Spectrum 298.dta

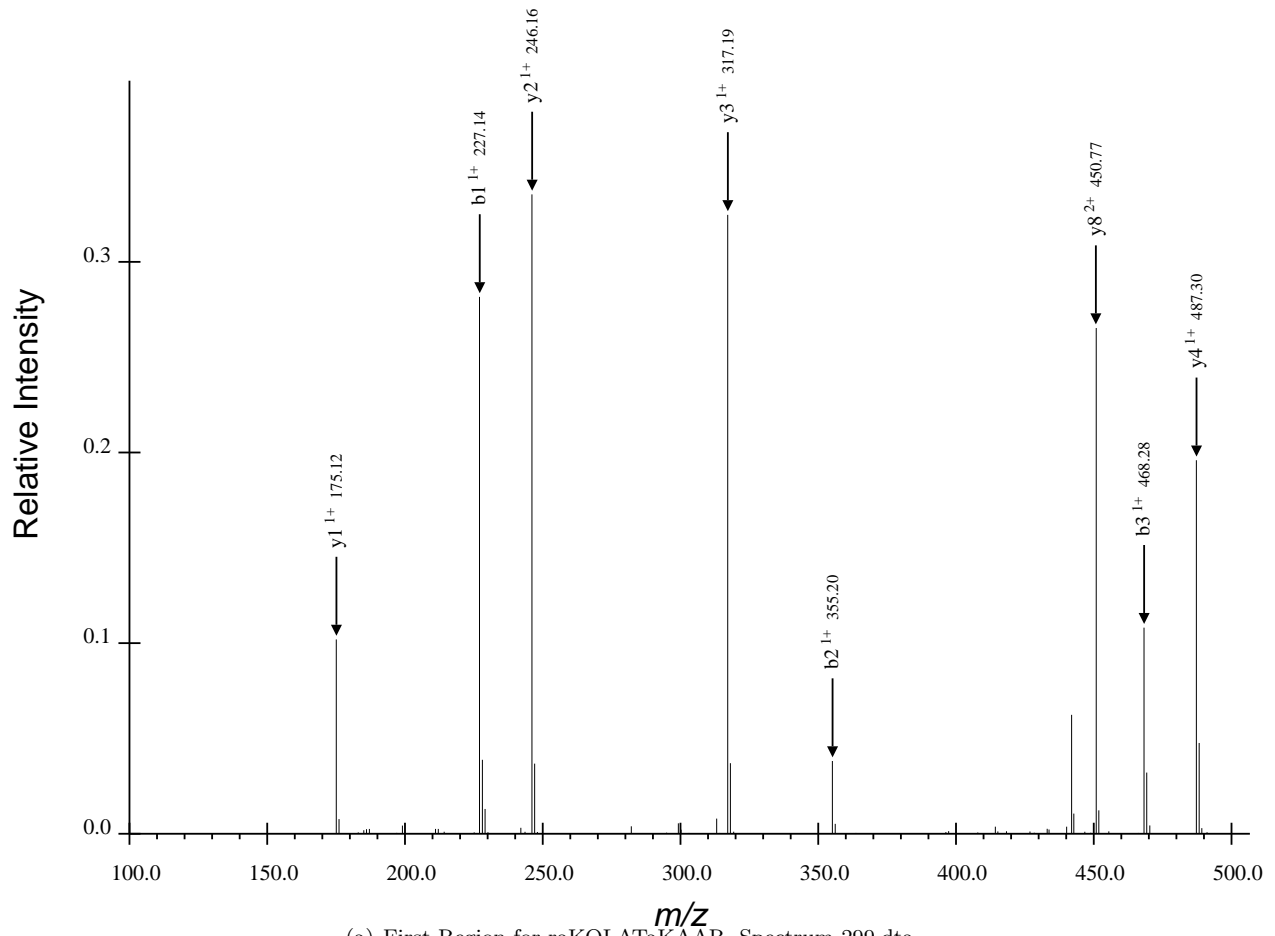

(a) First Region for raQQLATaKAAR, Spectrum 299.dta

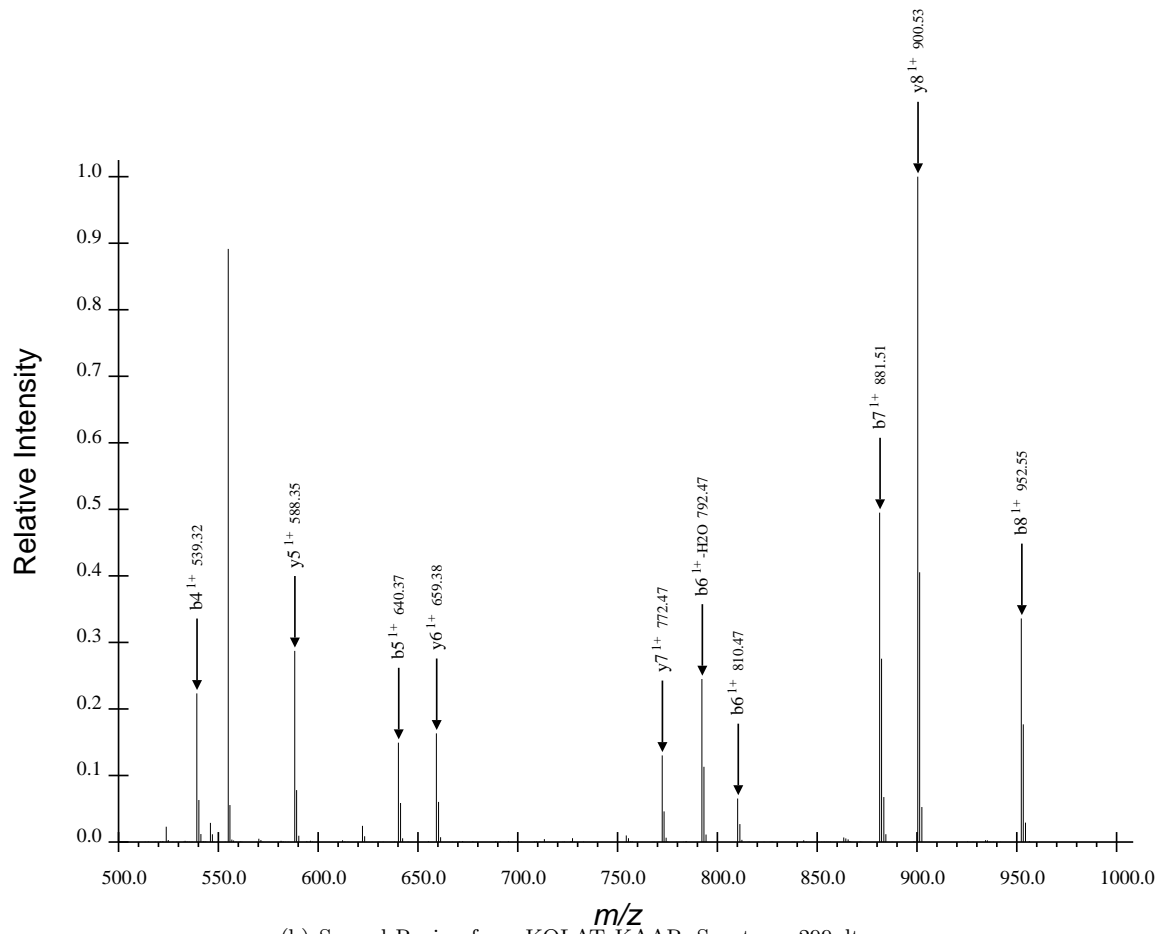

(b) Second Region for raQQLATaKAAR, Spectrum 299.dta

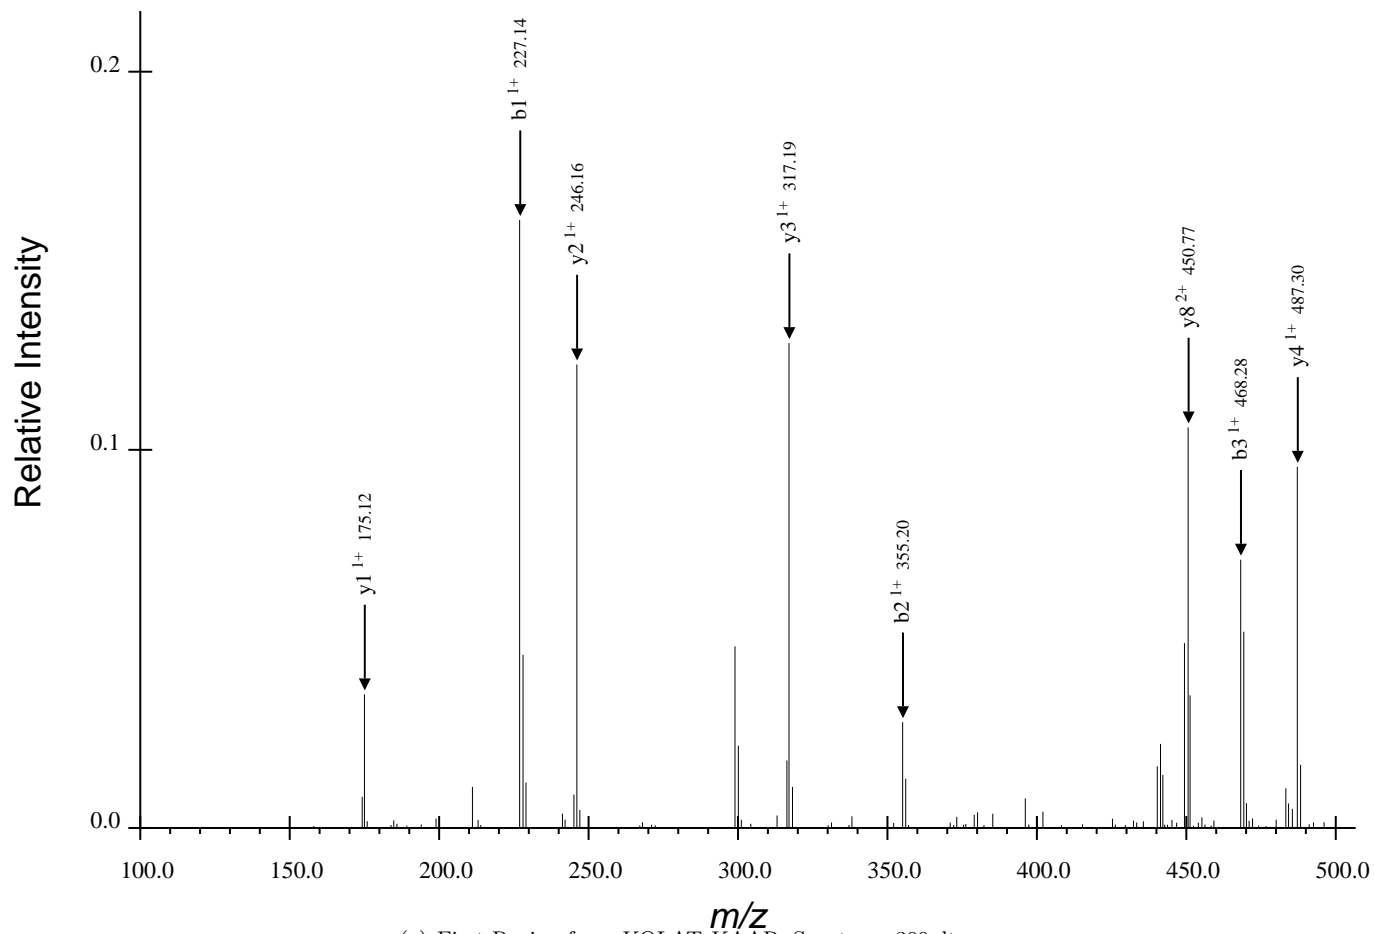

(a) First Region for raKQLATaKAAR, Spectrum 300.dta

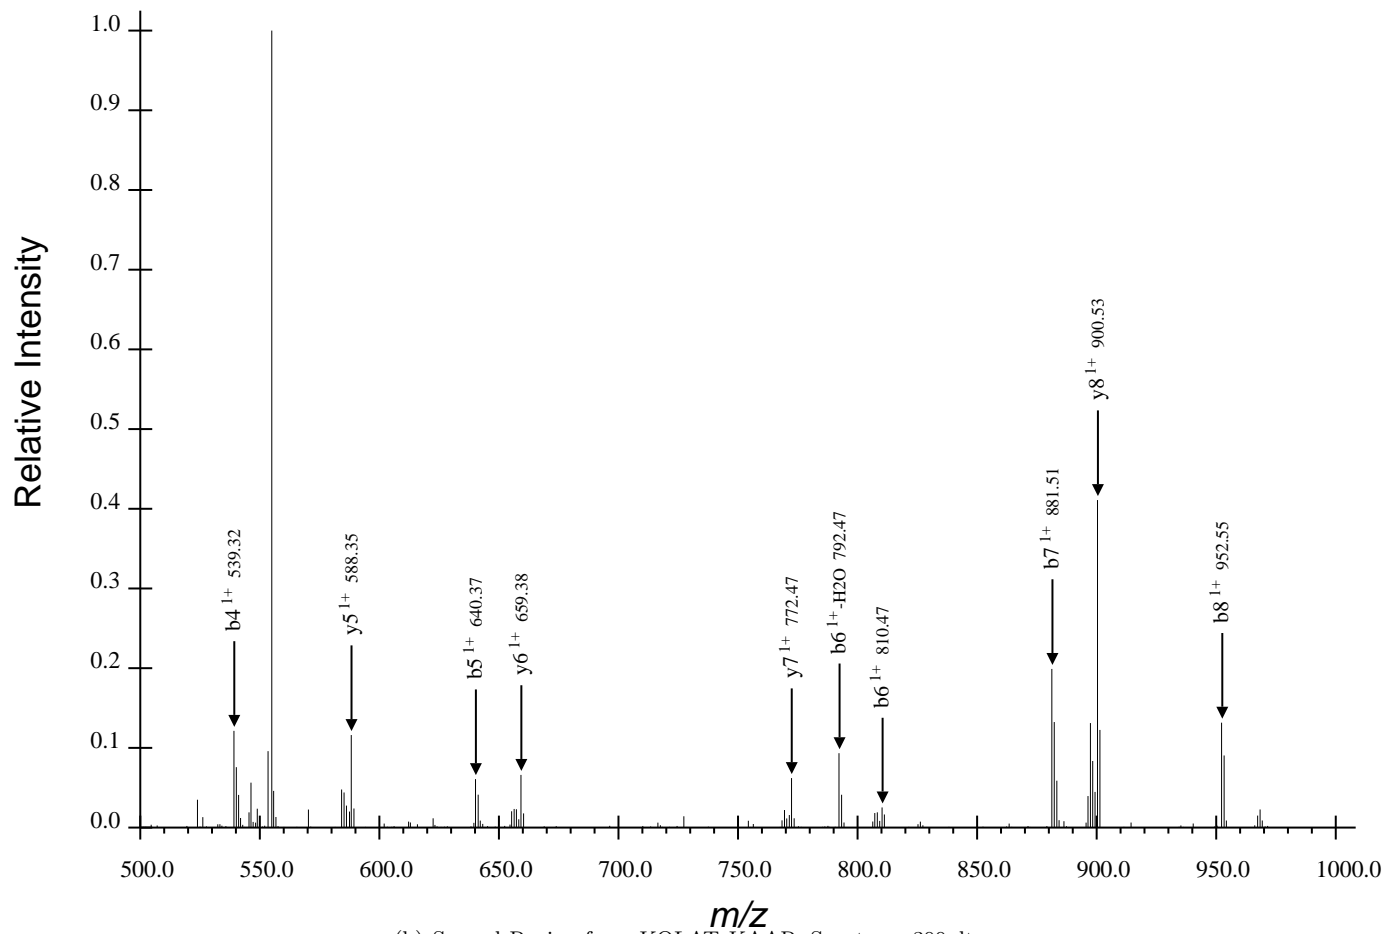

(b) Second Region for raKQLATaKAAR, Spectrum 300.dta

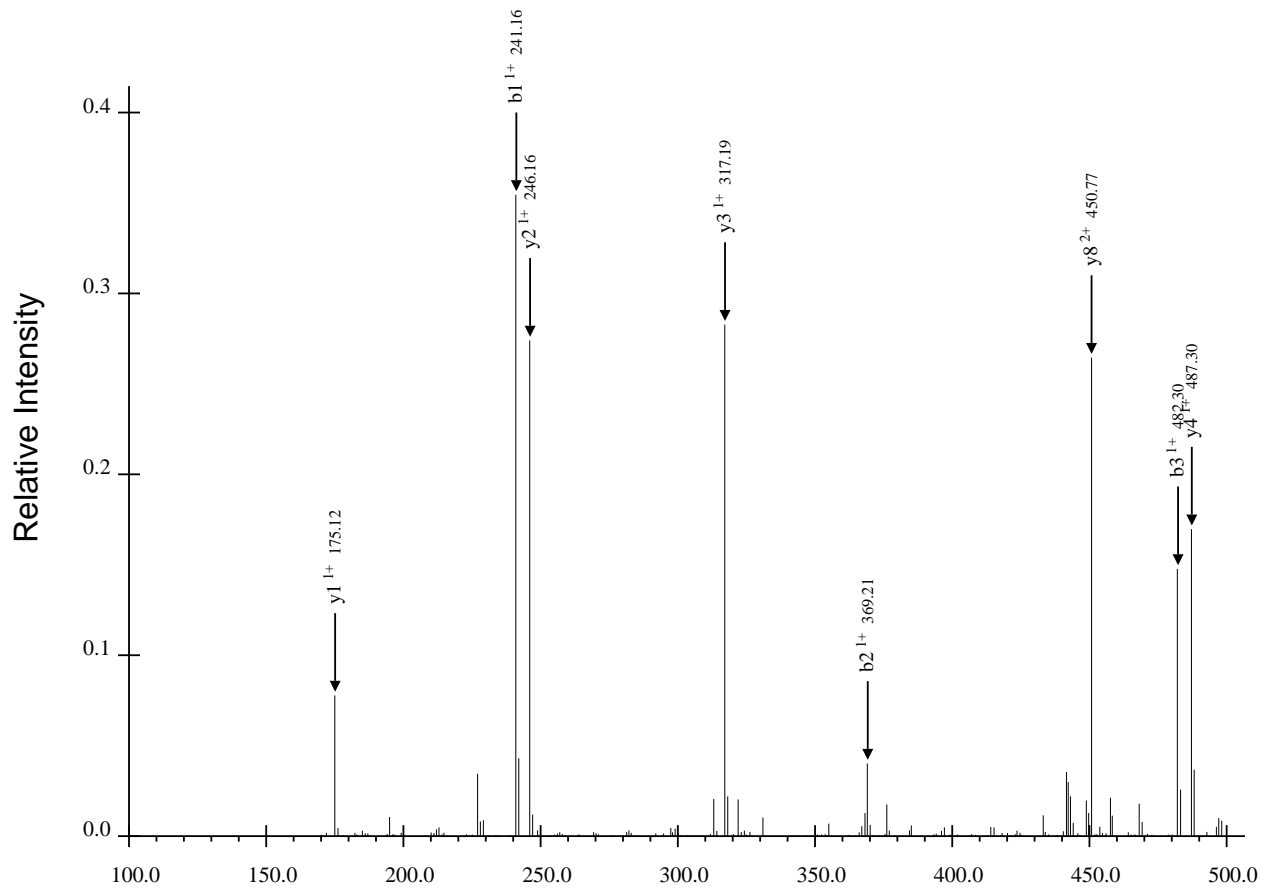

(a) First Region for rrKQLATaKAAR, Spectrum 301.dta

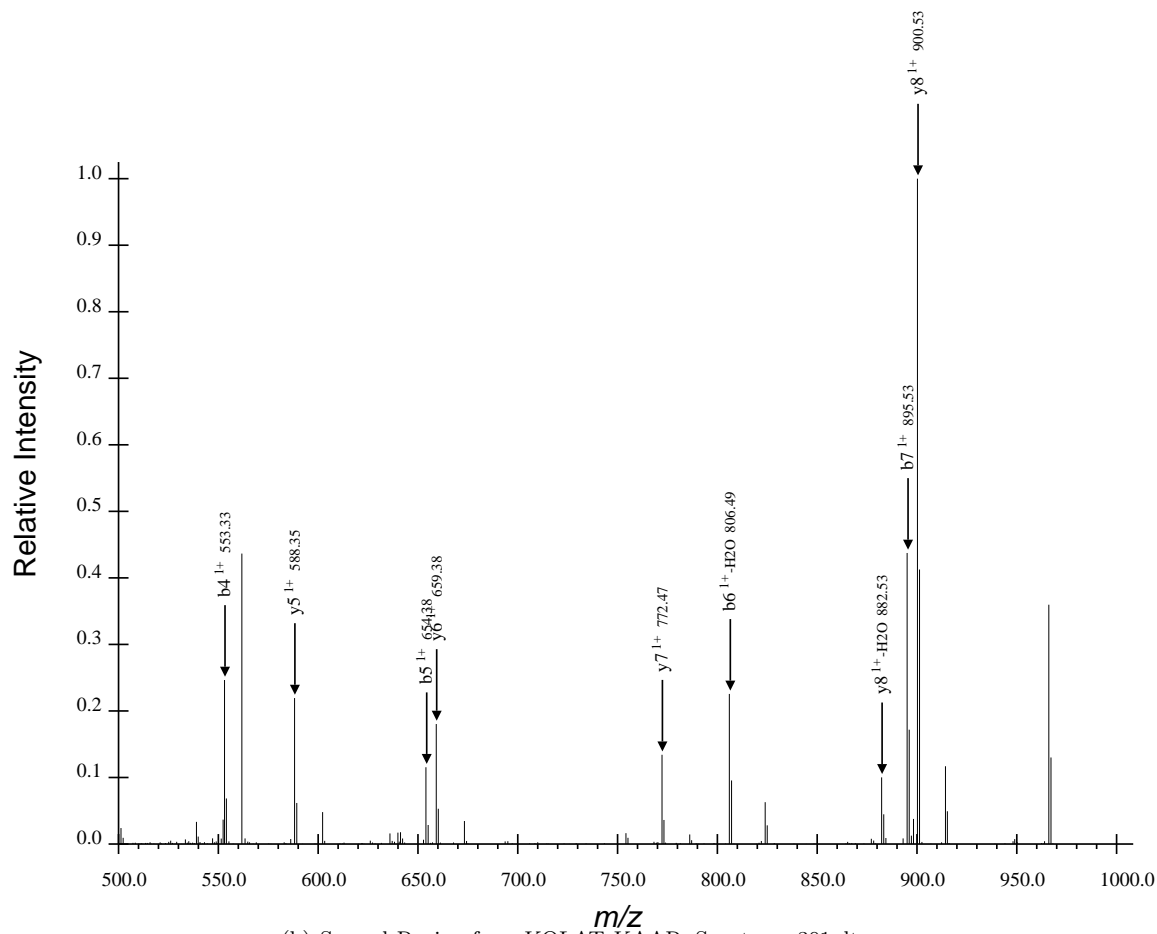

(b) Second Region for rrKQLATaKAAR, Spectrum 301.dta

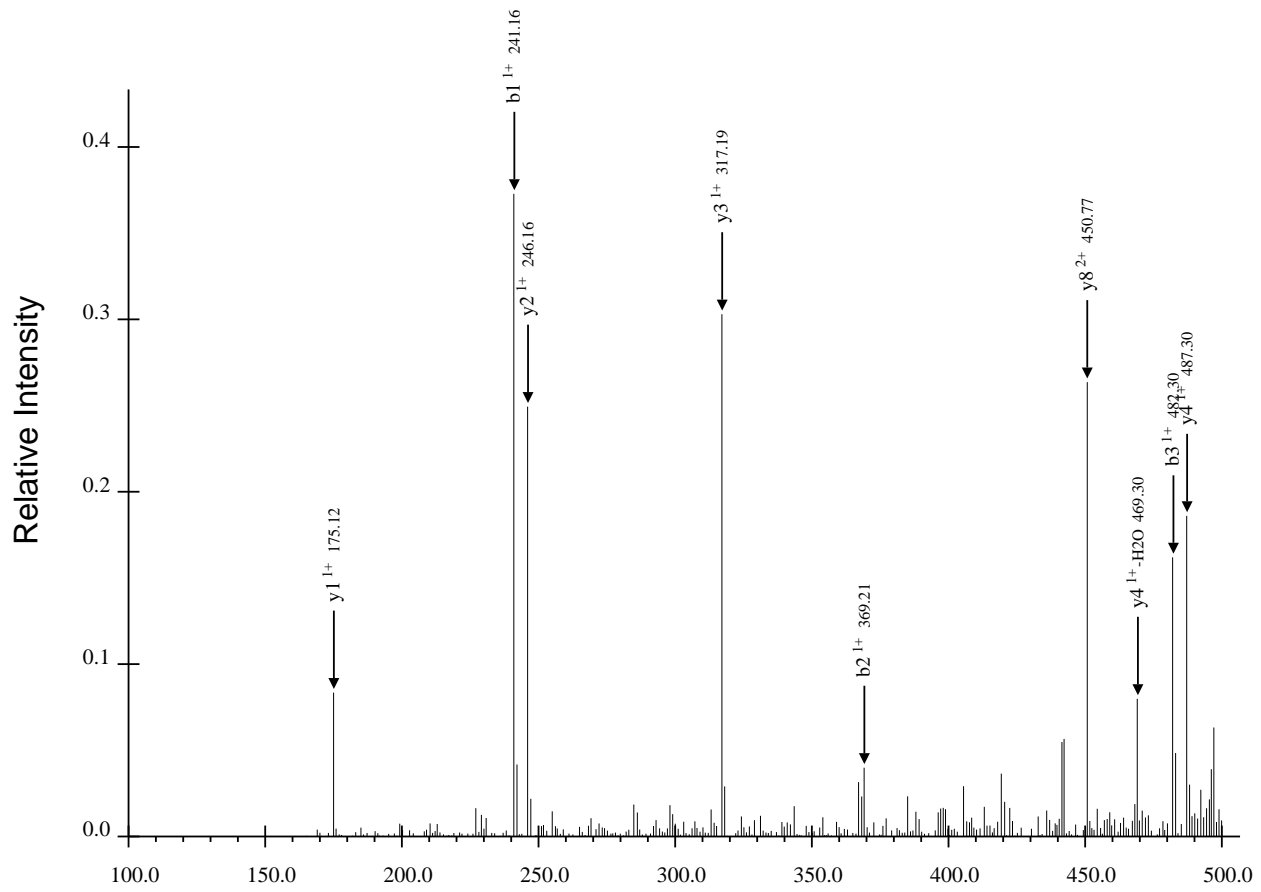

(a) First Region for rrKQLATaKAAR, Spectrum 302.dta

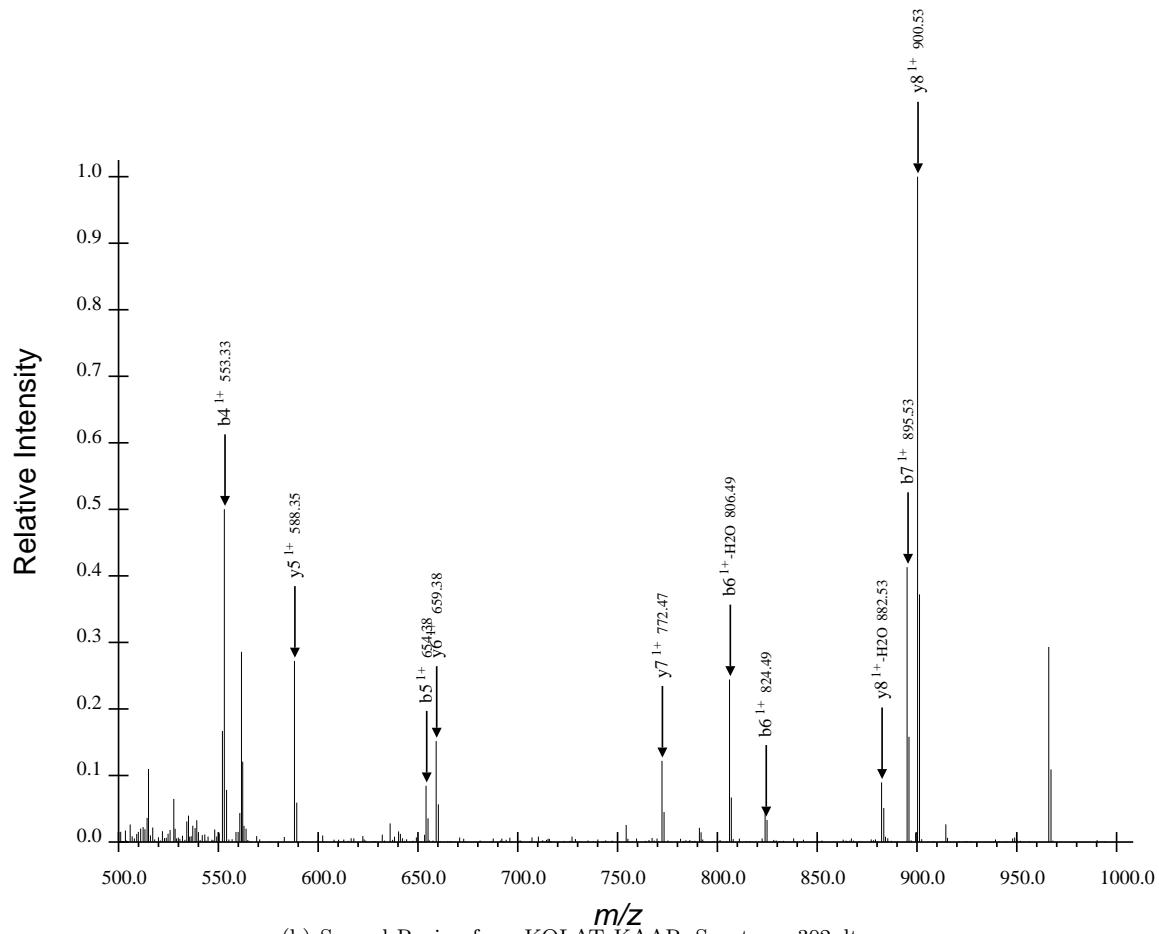

(b) Second Region for rrKQLATaKAAR, Spectrum 302.dta

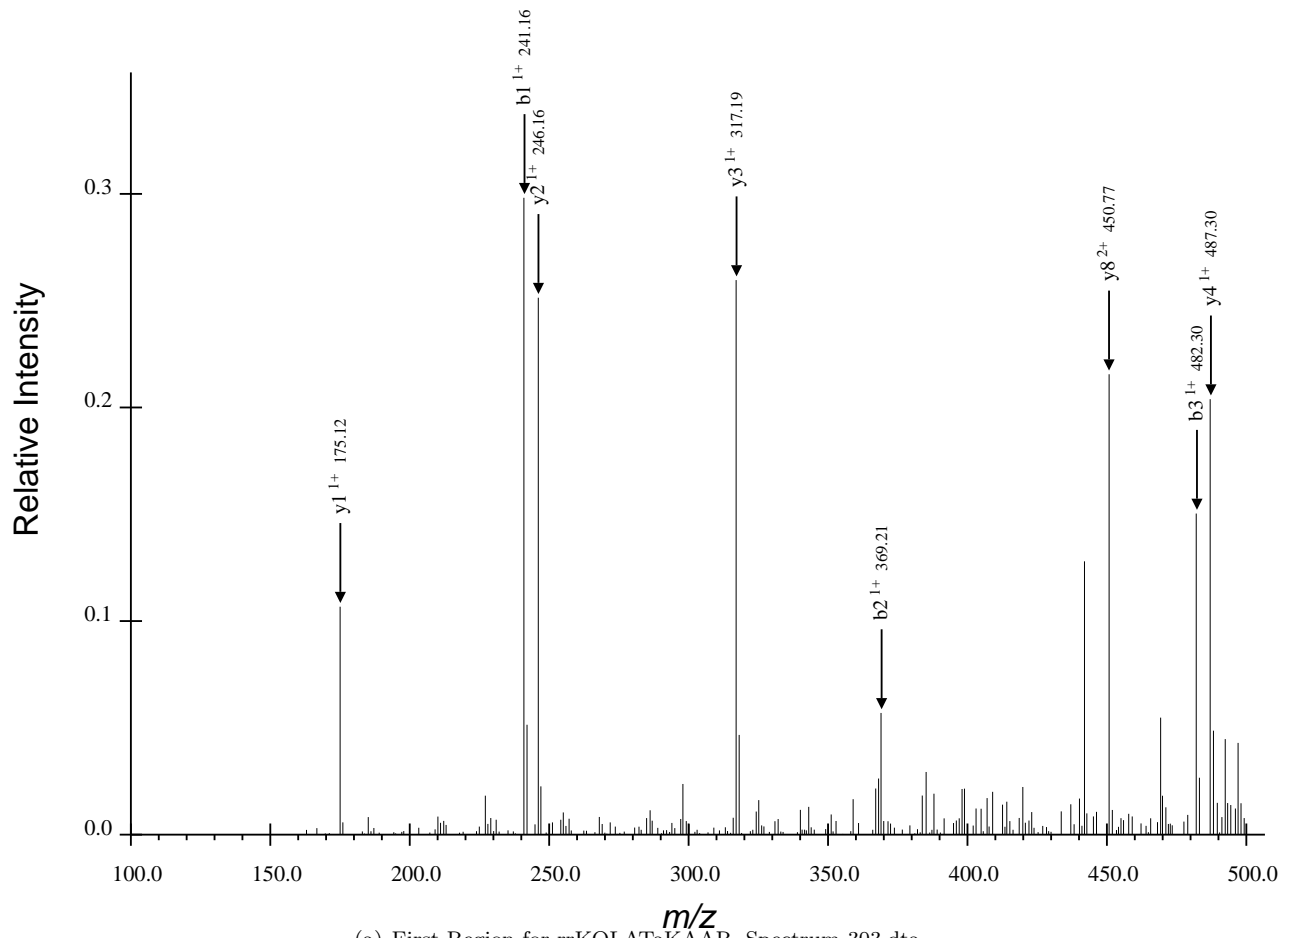

(a) First Region for rrKQLATaKAAR, Spectrum 303.dta

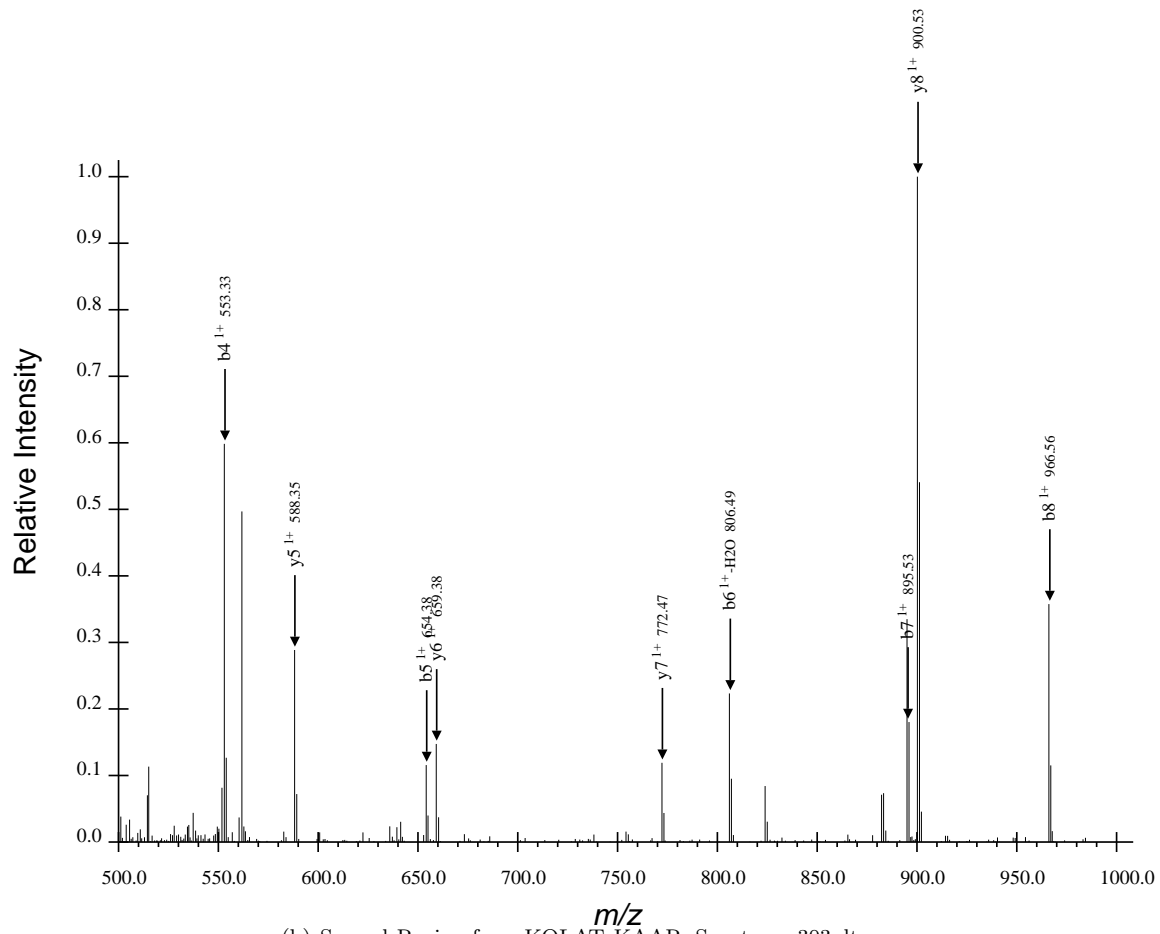

(b) Second Region for rrKQLATaKAAR, Spectrum 303.dta

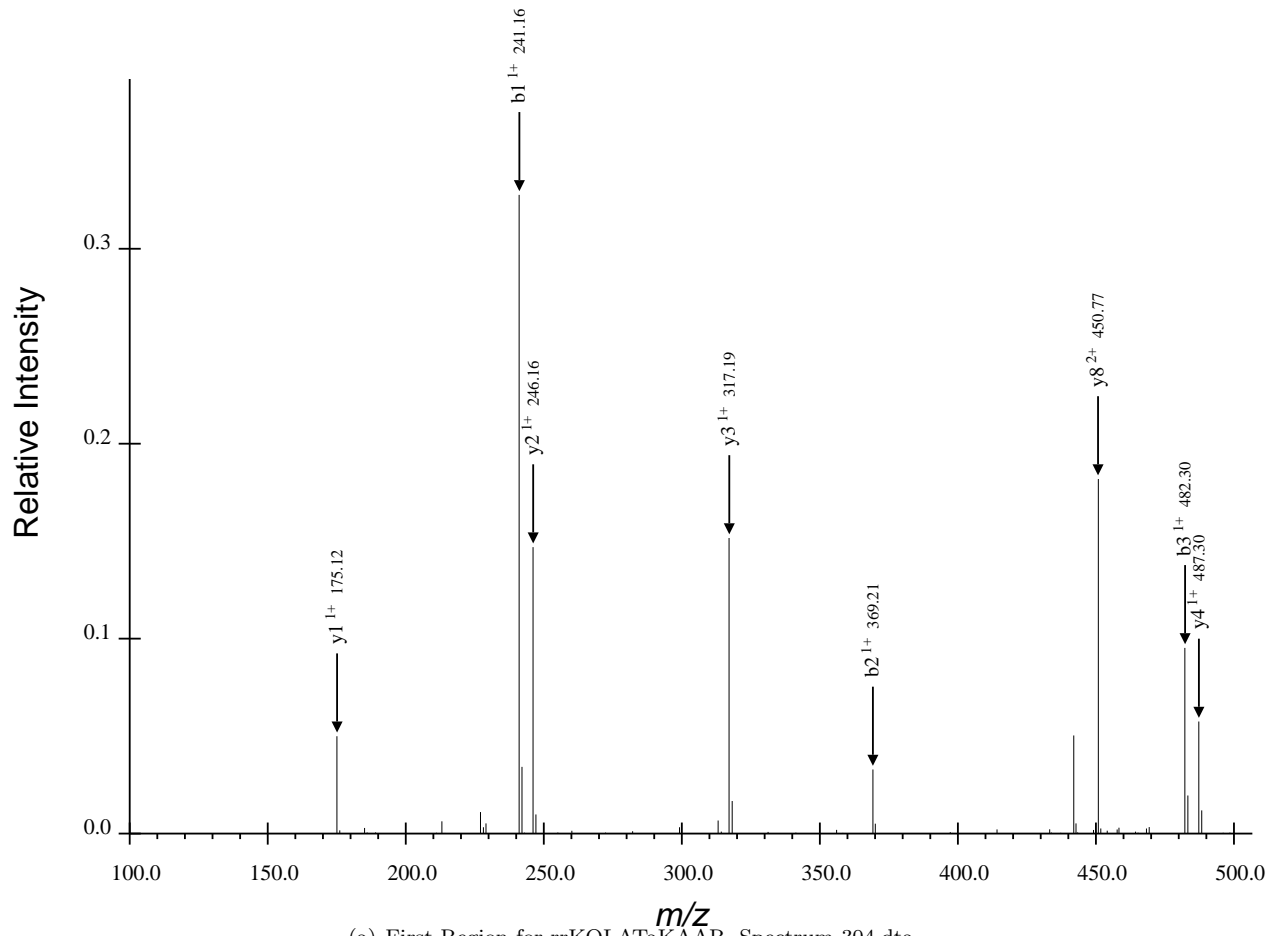

(a) First Region for rrKQLATaKAAR, Spectrum 304.dta

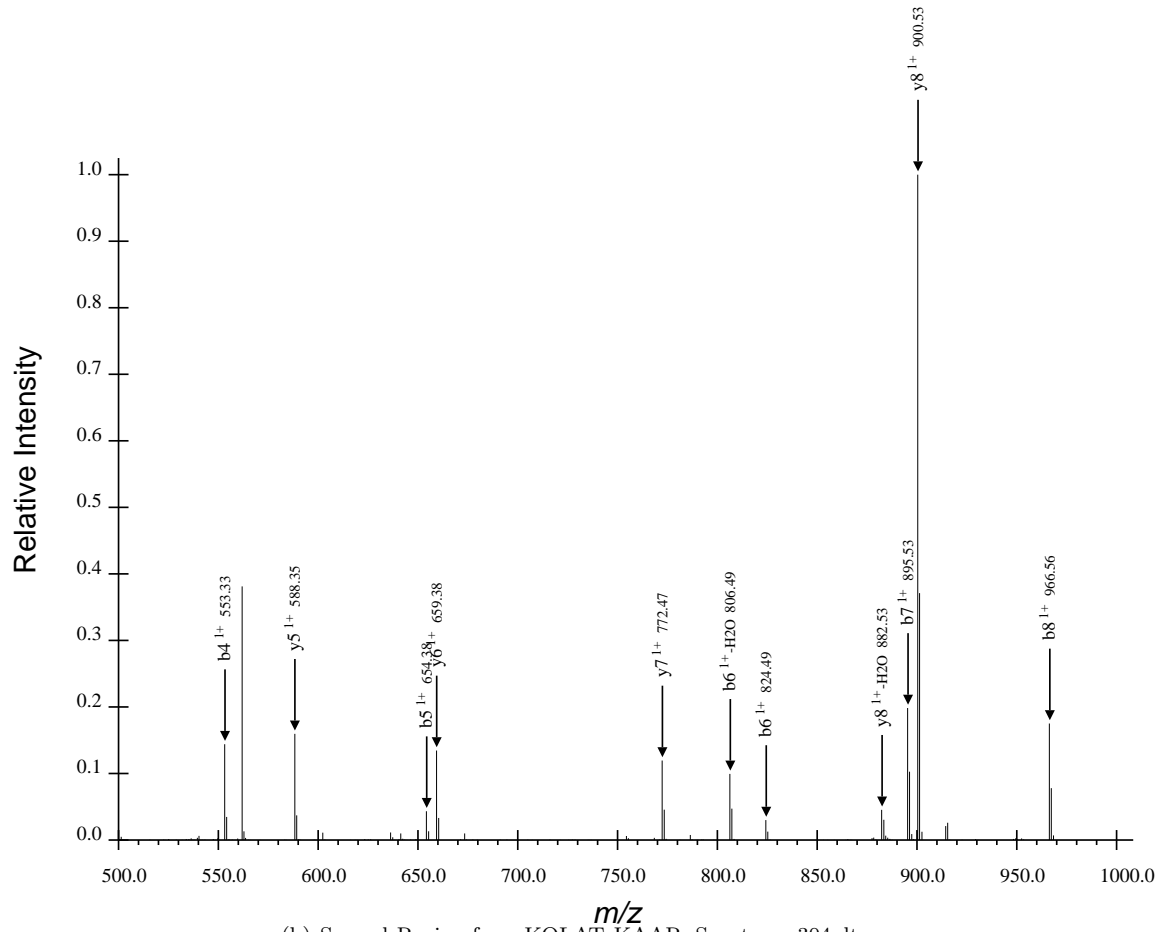

(b) Second Region for rrKQLATaKAAR, Spectrum 304.dta



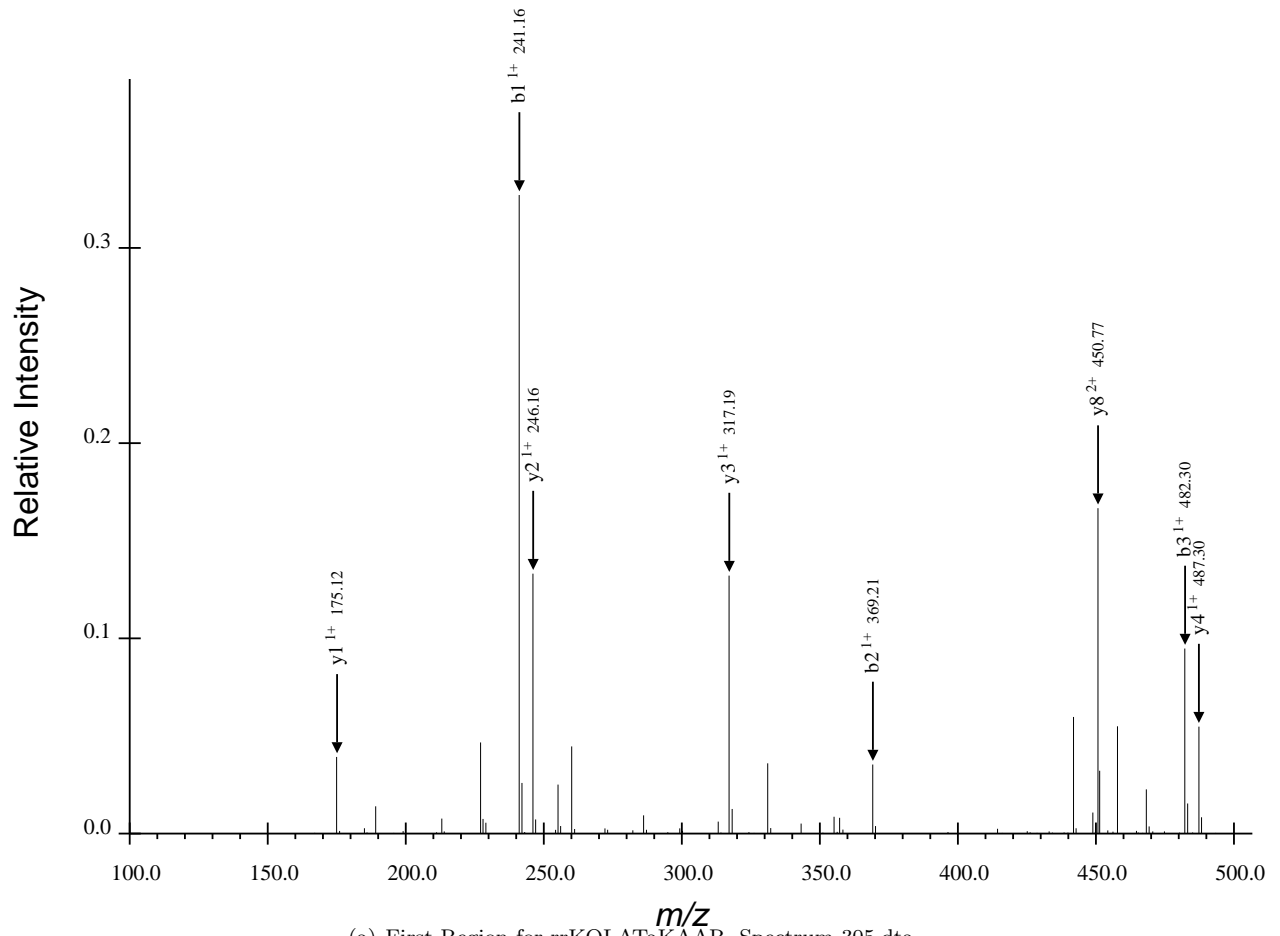

(a) First Region for rrKQLATaKAAR, Spectrum 305.dta

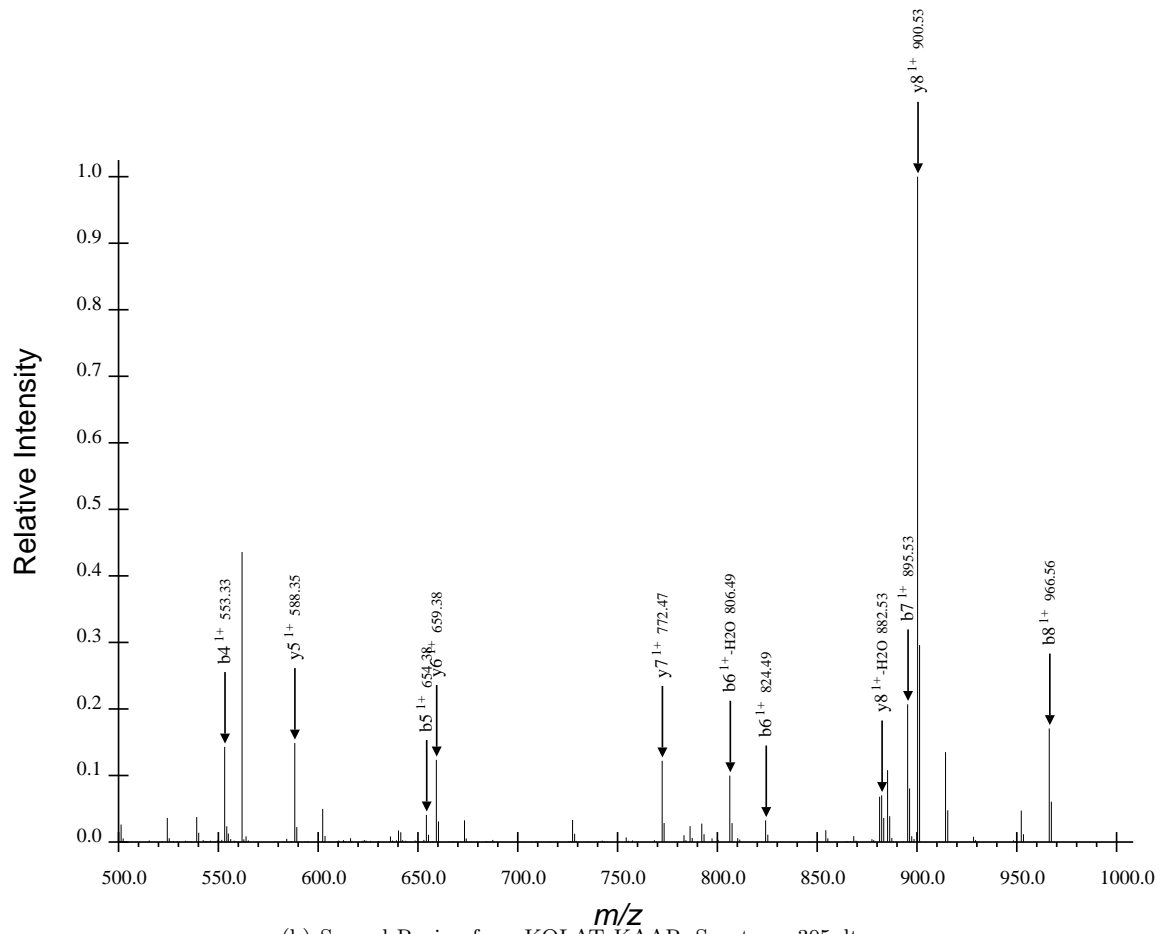

(b) Second Region for rrKQLATaKAAR, Spectrum 305.dta

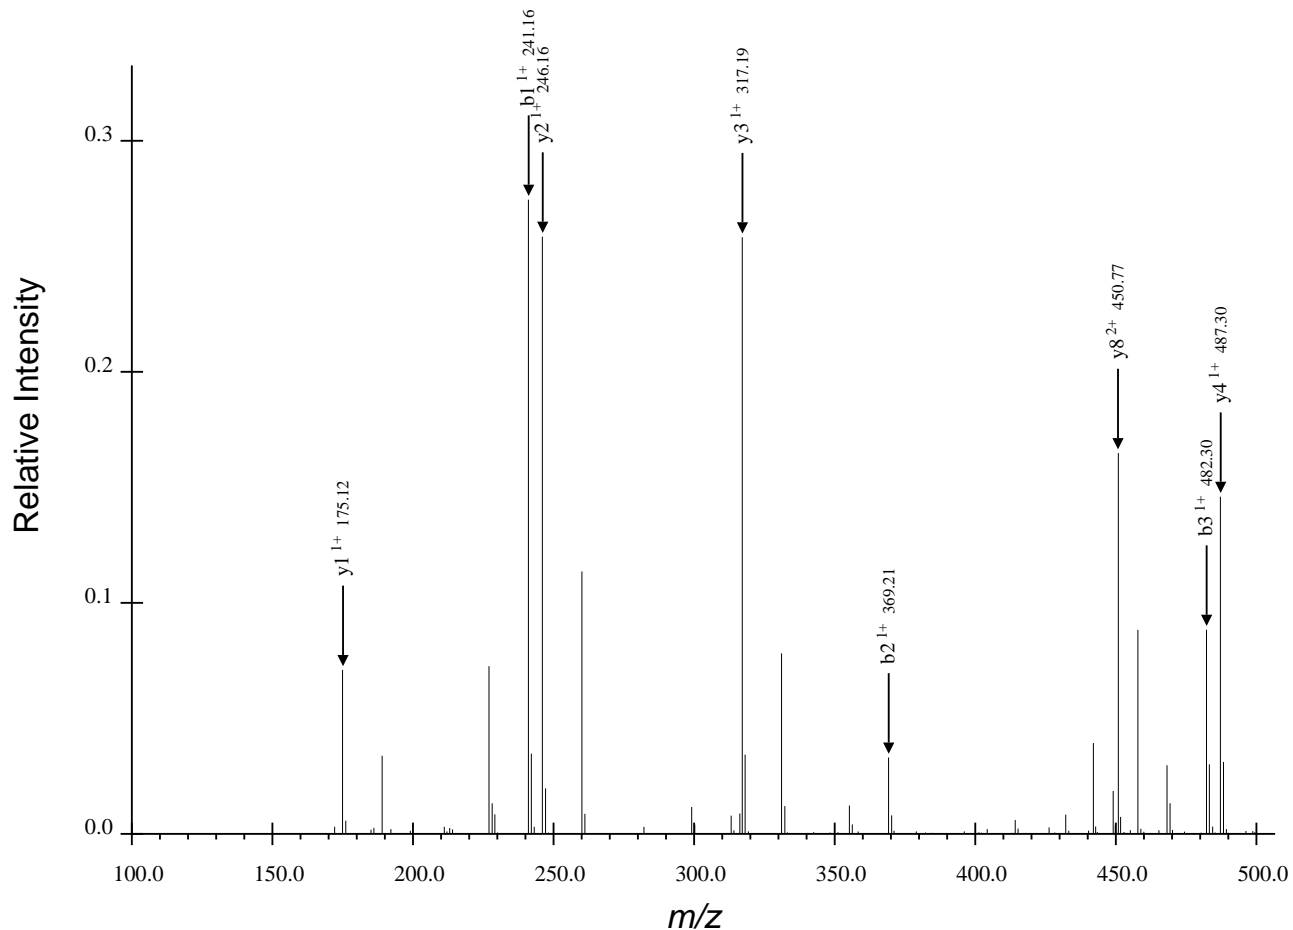

(a) First Region for rrKQLATaKAAR, Spectrum 306.dta

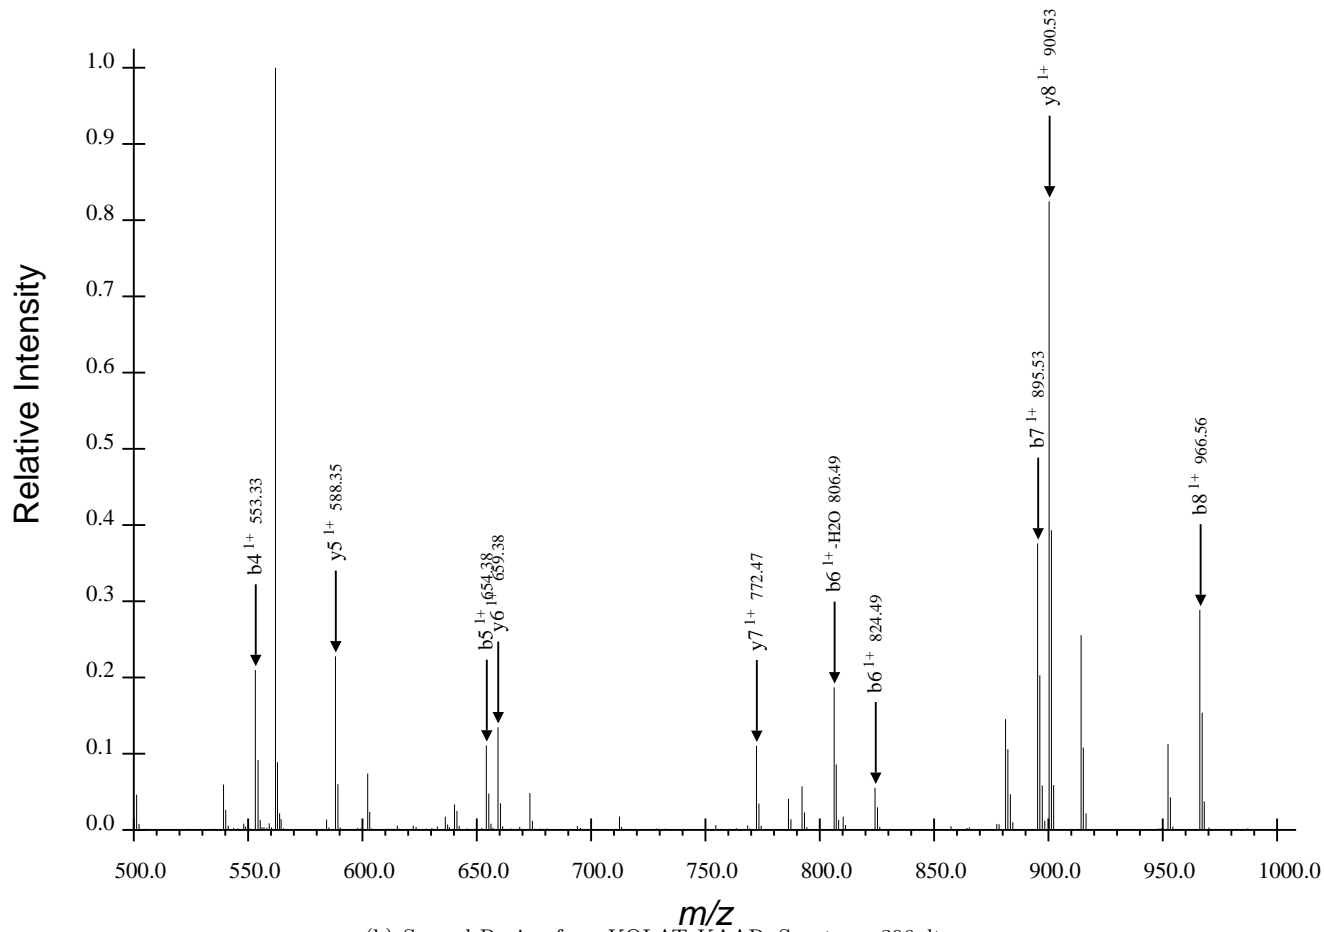

(b) Second Region for rrKQLATaKAAR, Spectrum 306.dta

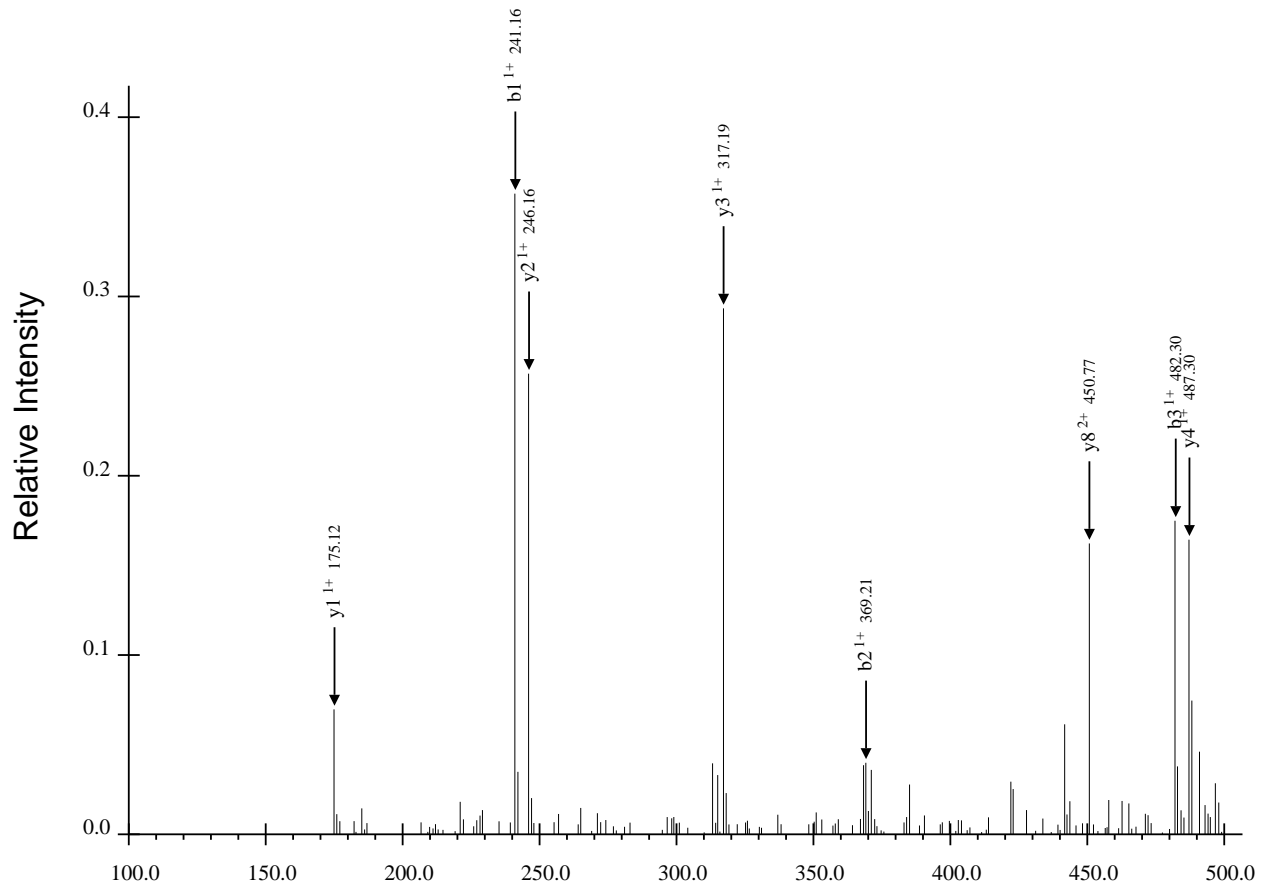

(a) First Region for rrKQLATaKAAR, Spectrum 307.dta

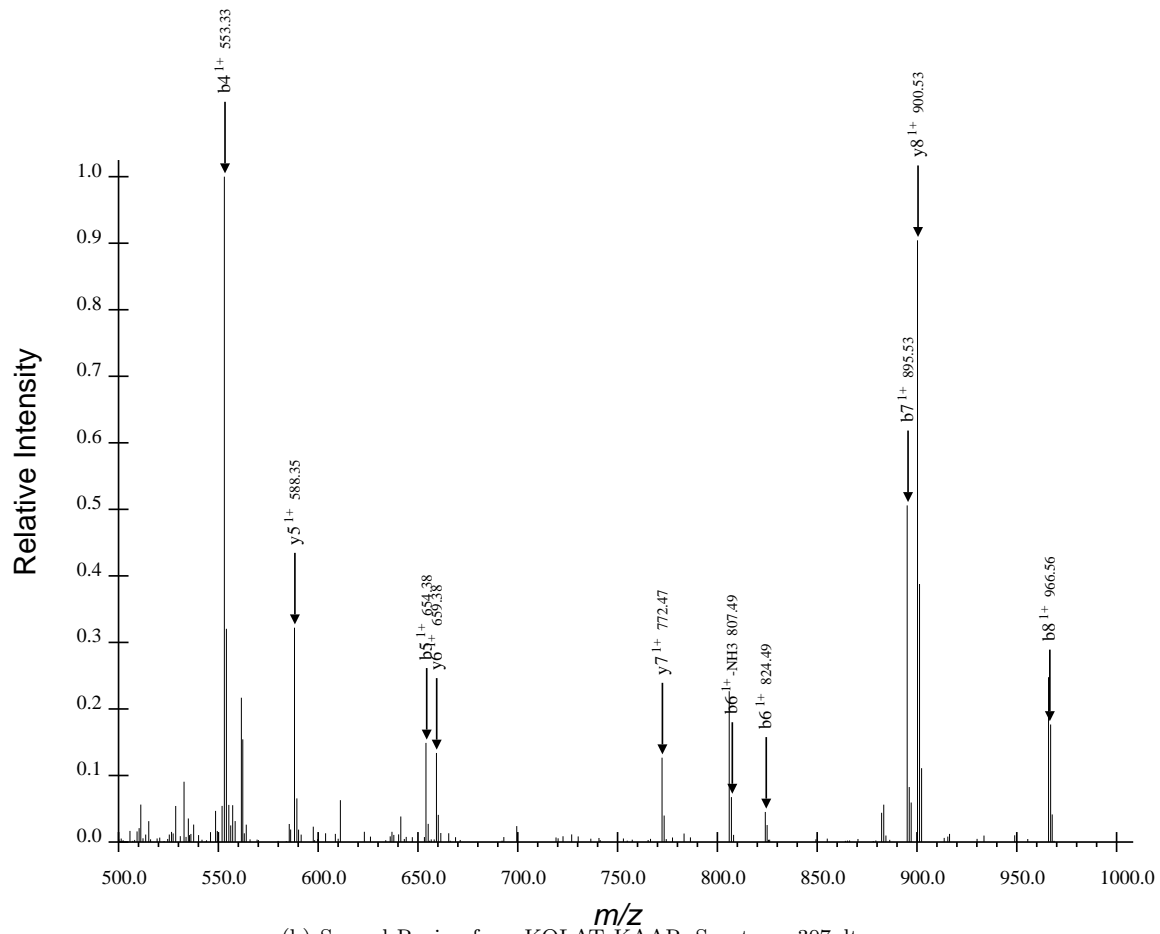

(b) Second Region for rrKQLATaKAAR, Spectrum 307.dta

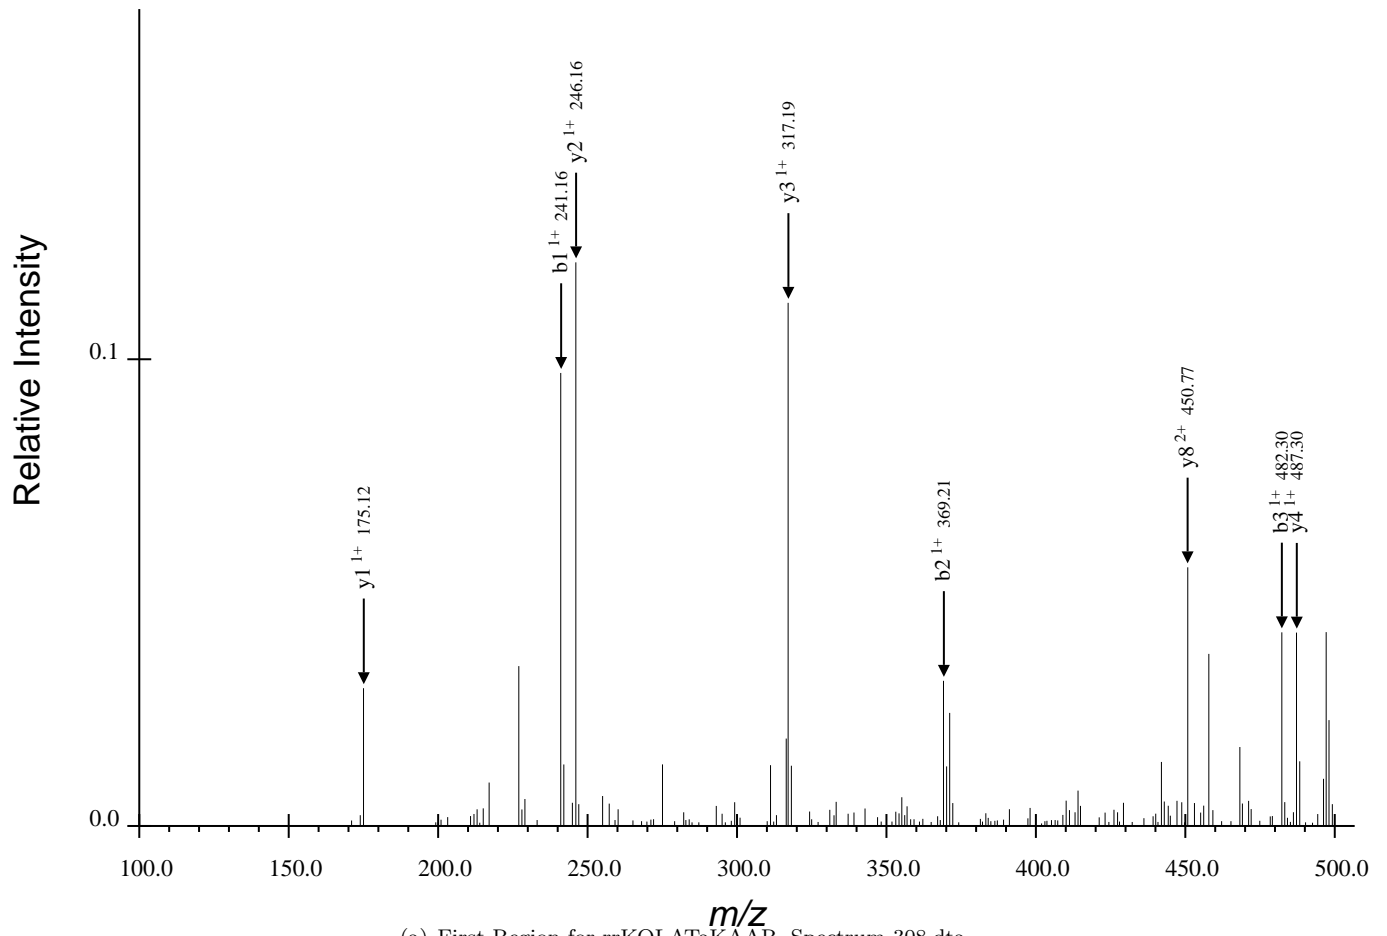

(a) First Region for rrKQLATaKAAR, Spectrum 308.dta

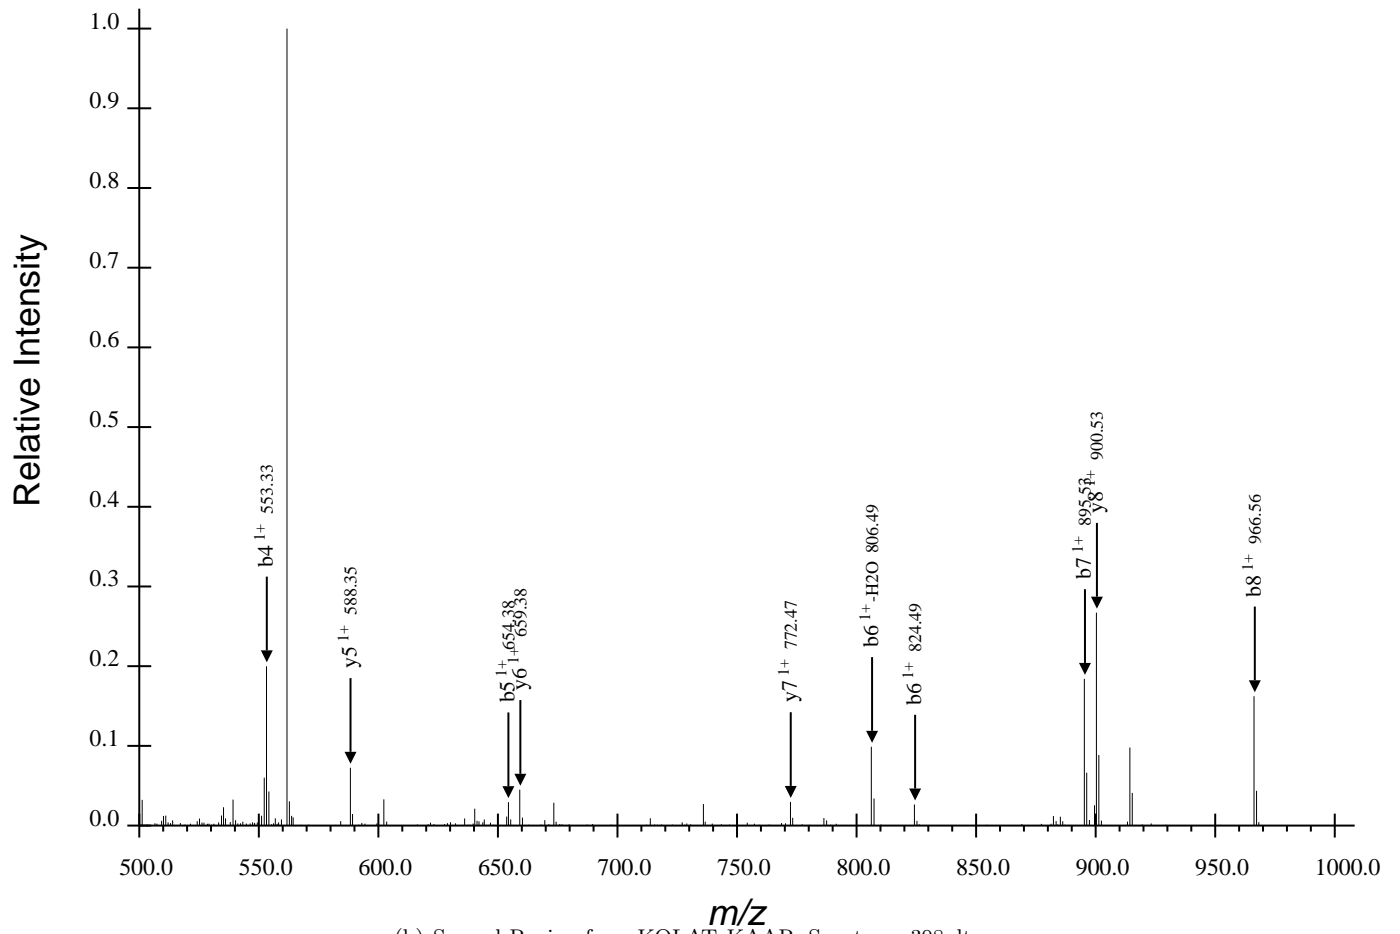

(b) Second Region for rrKQLATaKAAR, Spectrum 308.dta

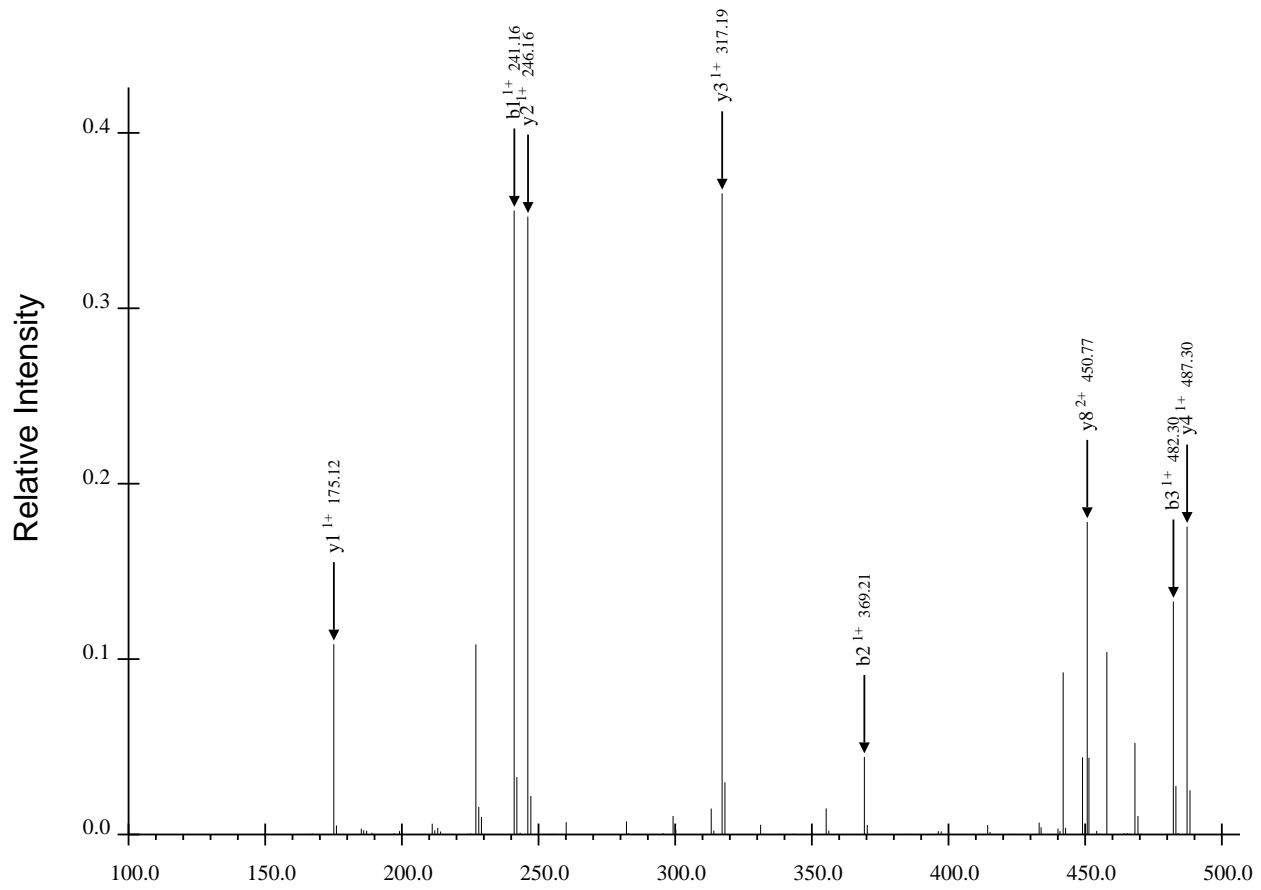

(a) First Region for rrKQLATaKAAR, Spectrum 309.dta

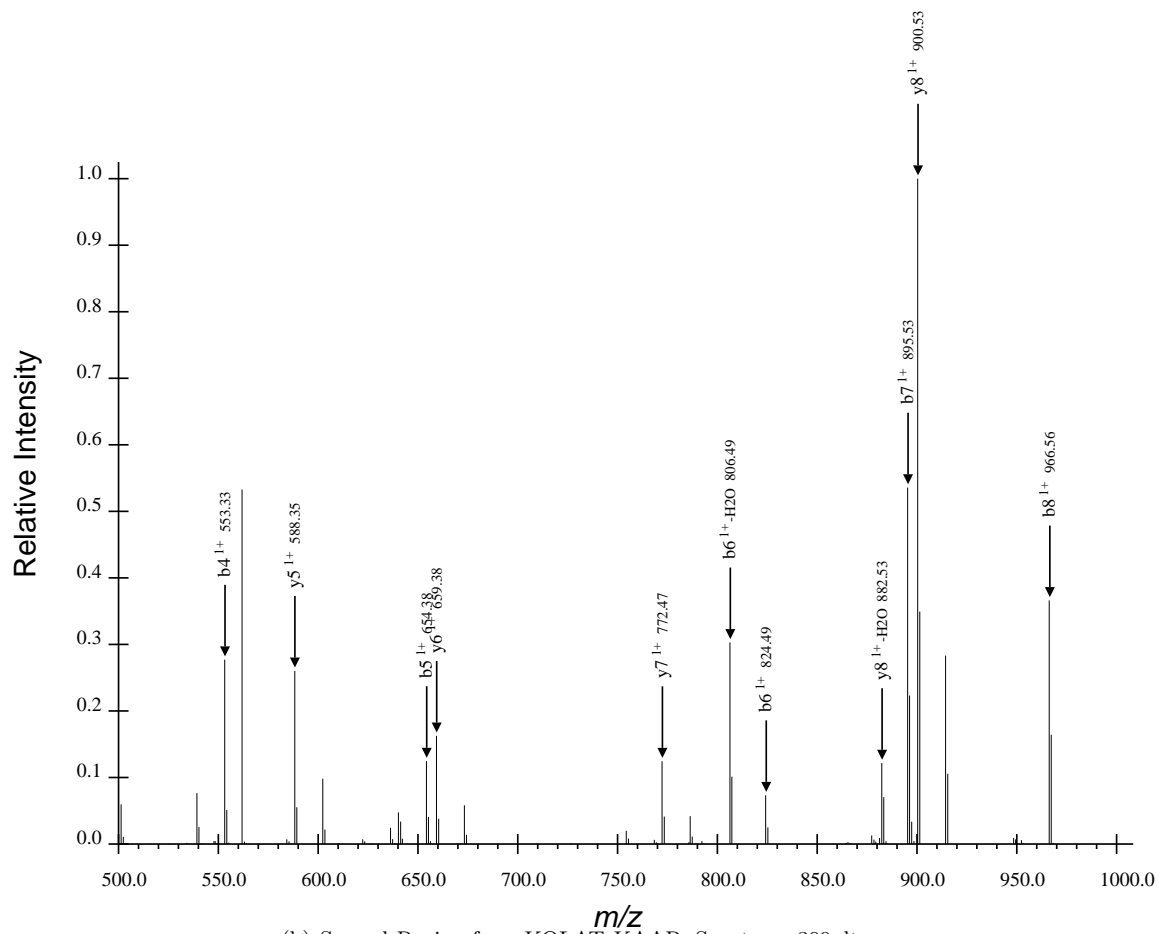

(b) Second Region for rrKQLATaKAAR, Spectrum 309.dta

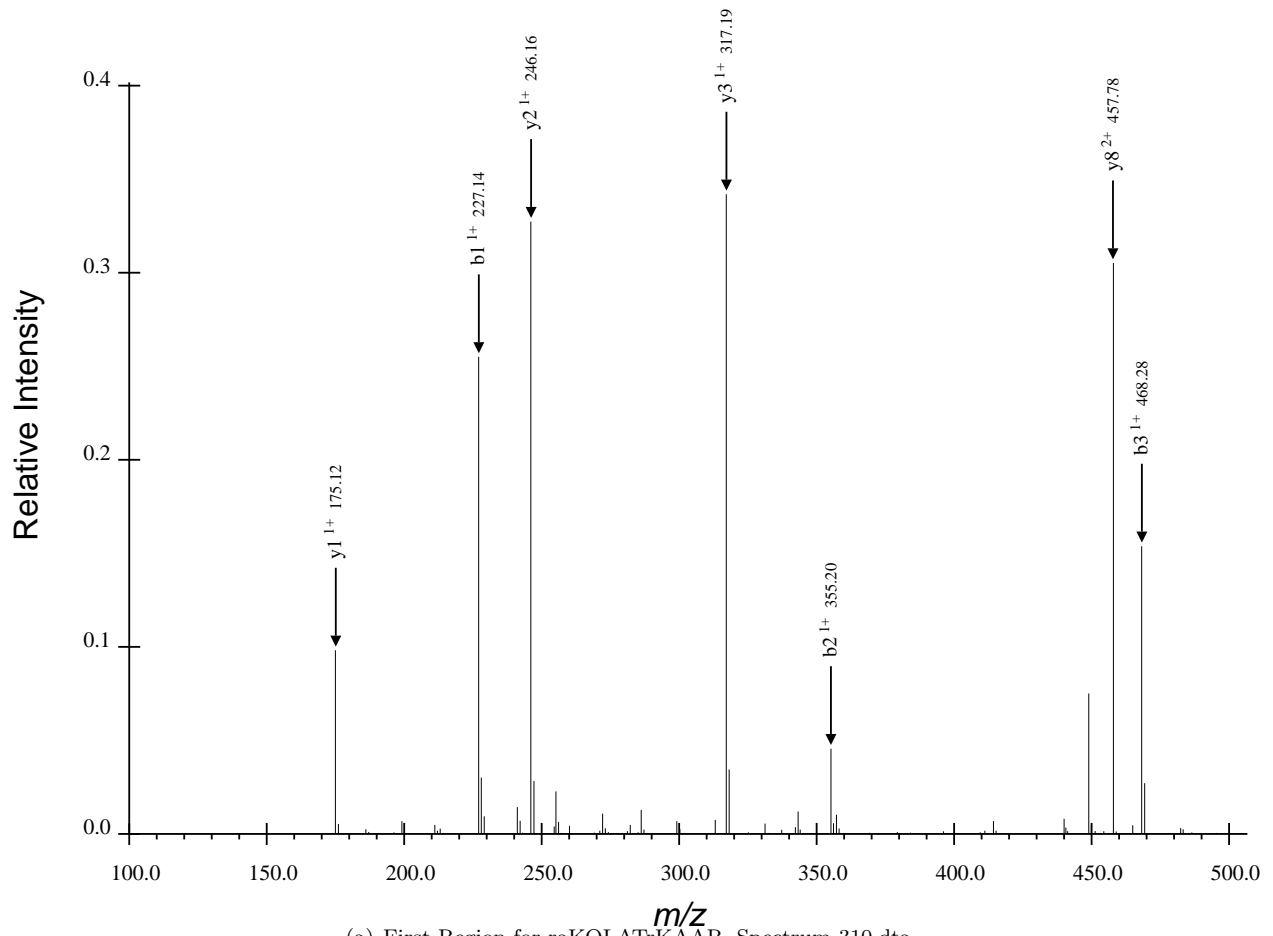

(a) First Region for raKQLATrKAAR, Spectrum 310.dta

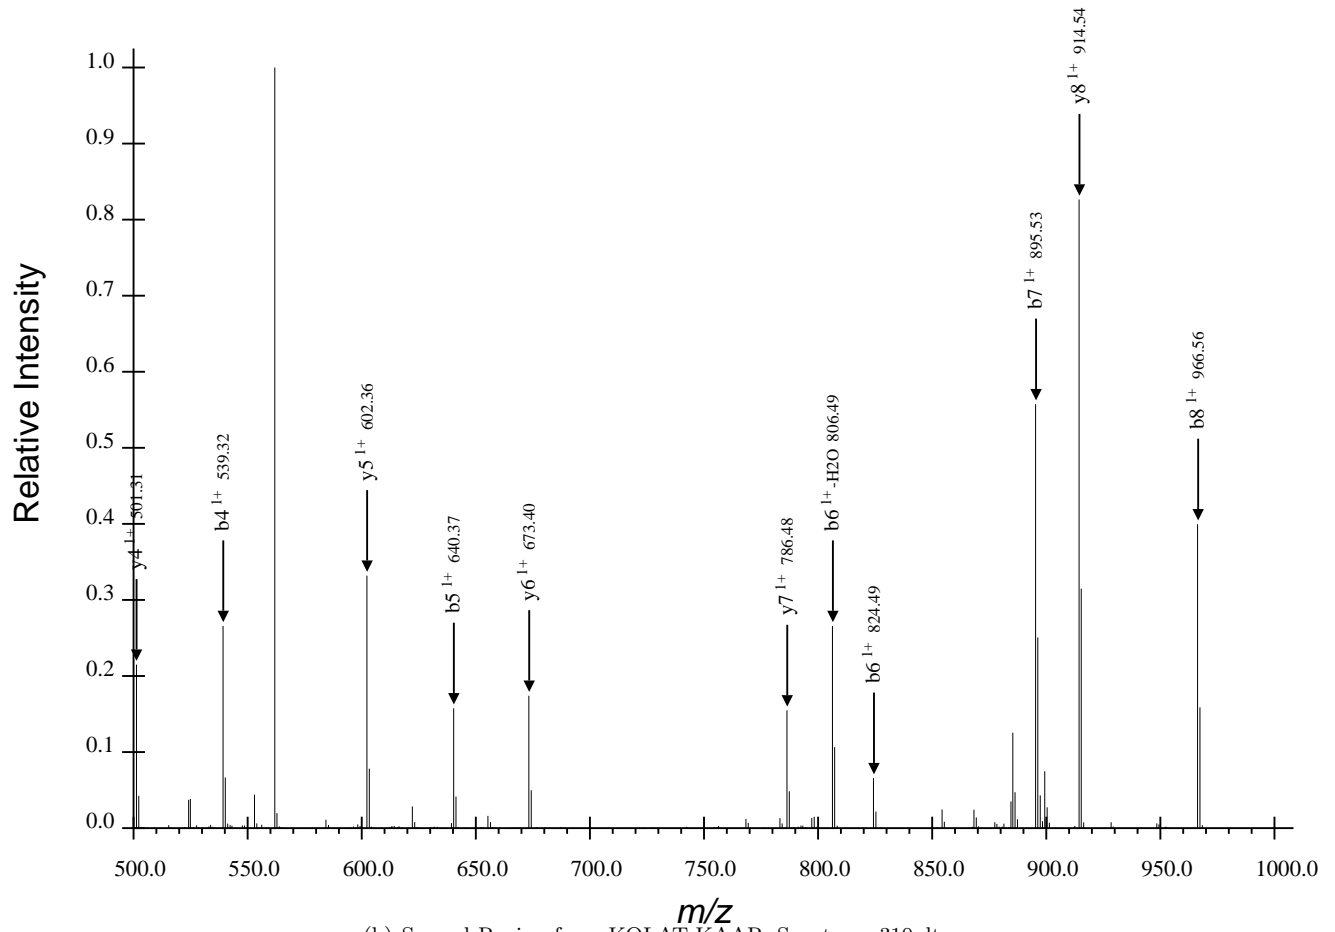

(b) Second Region for raKQLATrKAAR, Spectrum 310.dta

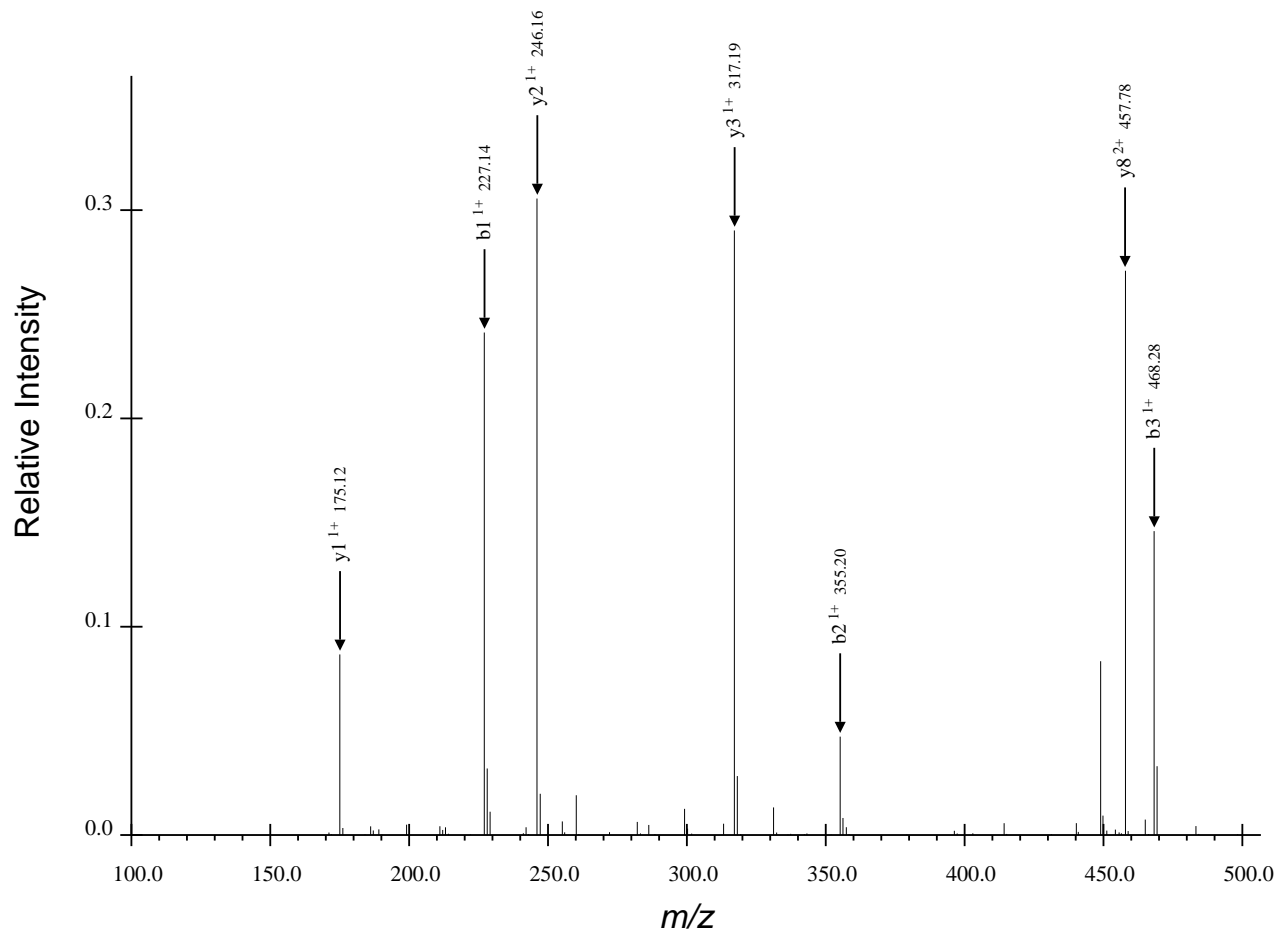

(a) First Region for raKQLATrKAAR, Spectrum 311.dta

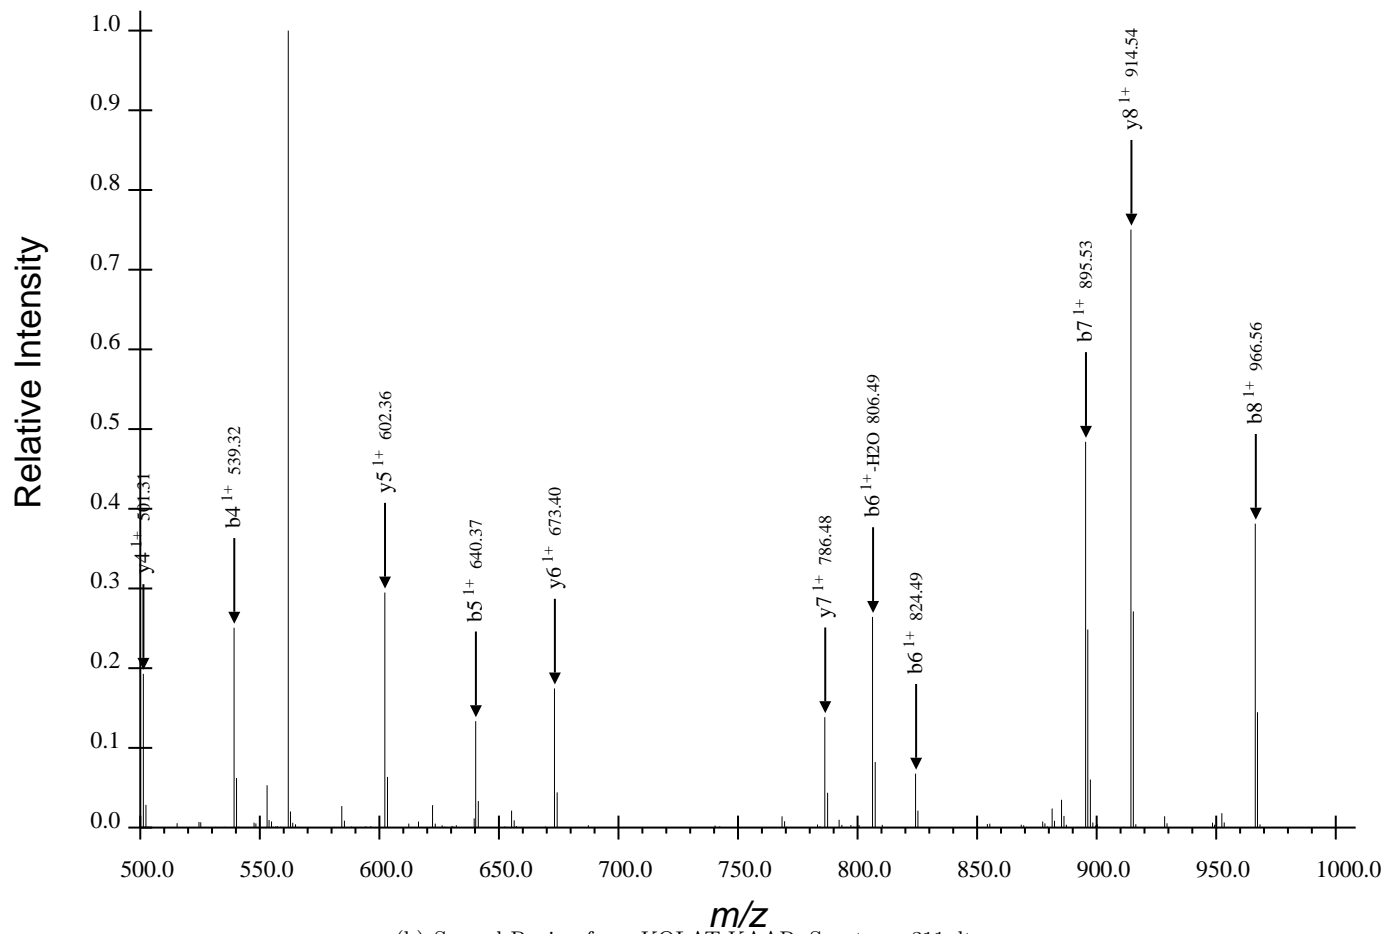

(b) Second Region for raKQLATrKAAR, Spectrum 311.dta

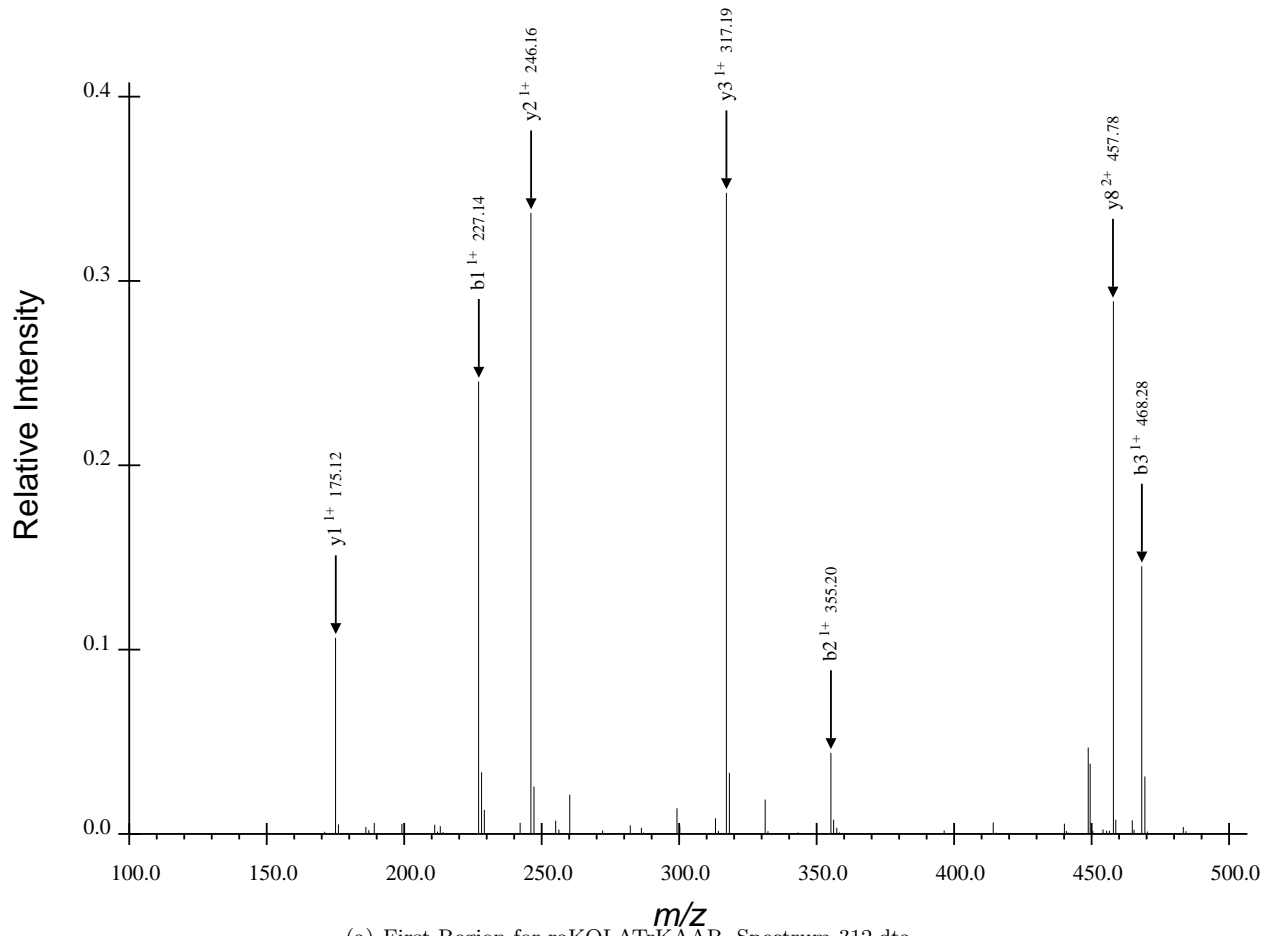

(a) First Region for raKQLATrKAAR, Spectrum 312.dta

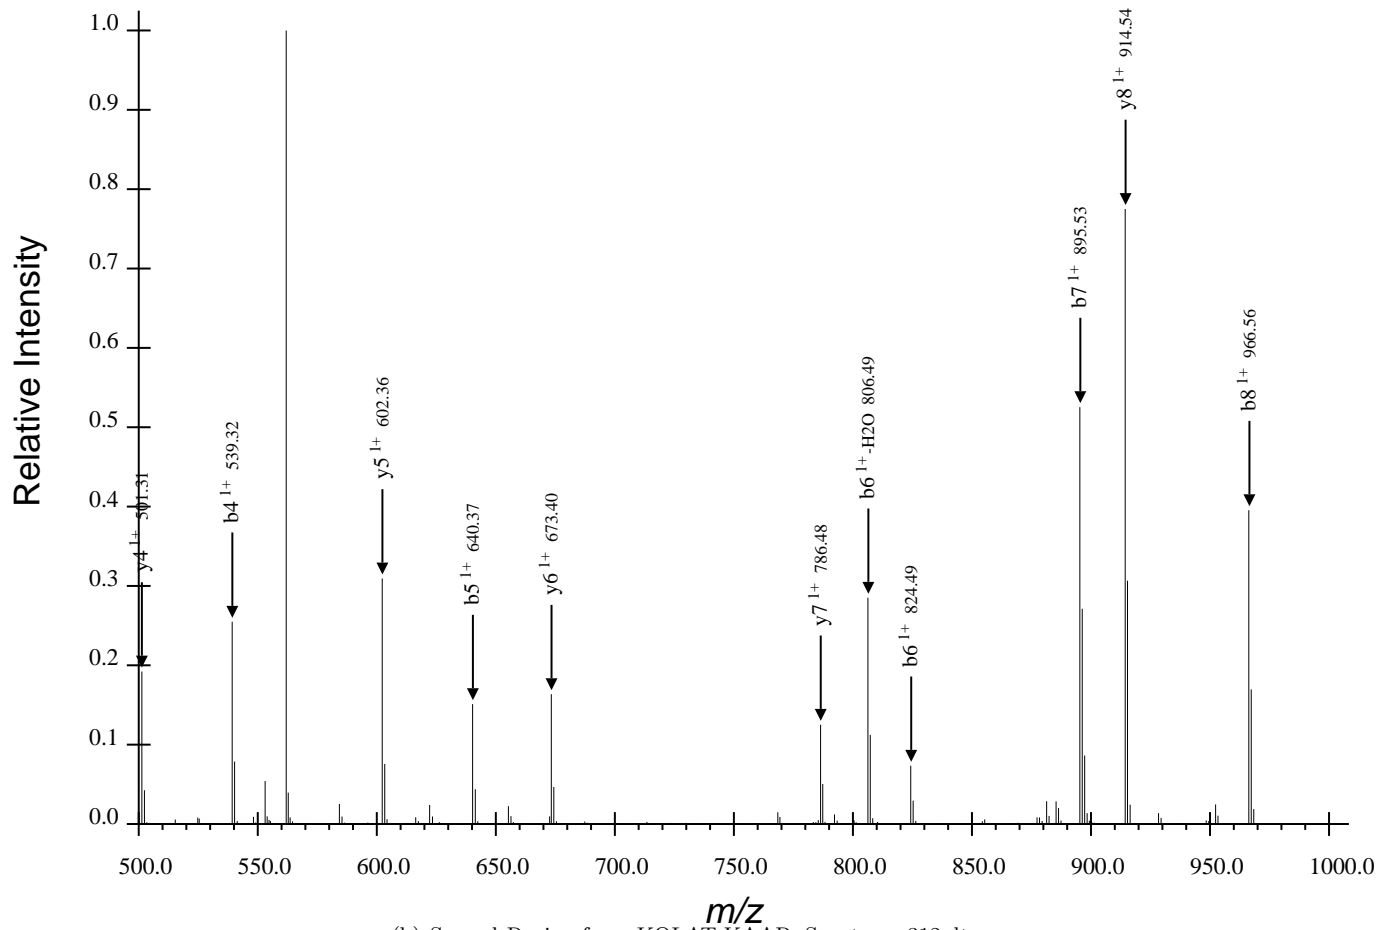

(b) Second Region for raKQLATrKAAR, Spectrum 312.dta



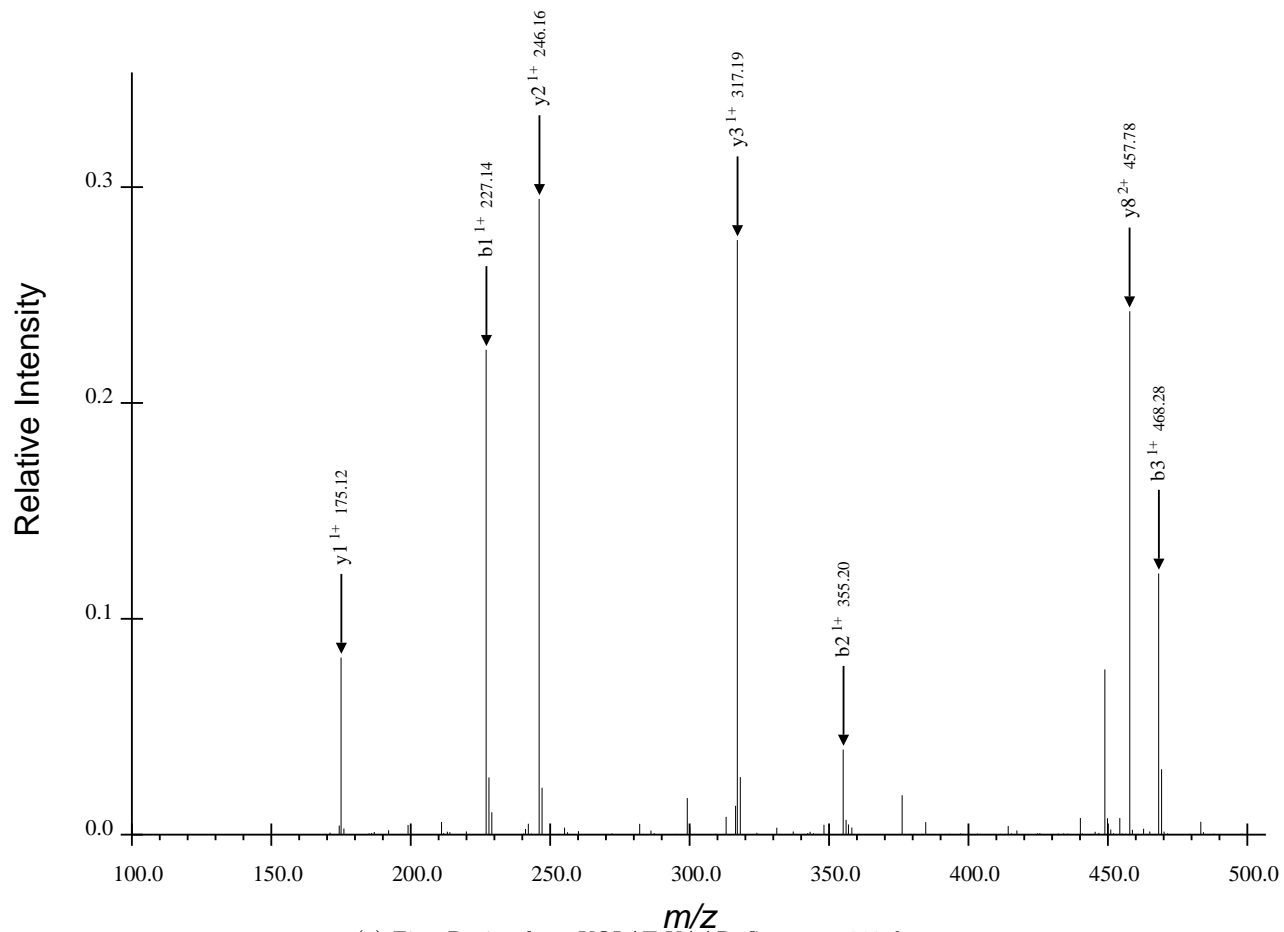

(a) First Region for raKQLATrKAAR, Spectrum 313.dta

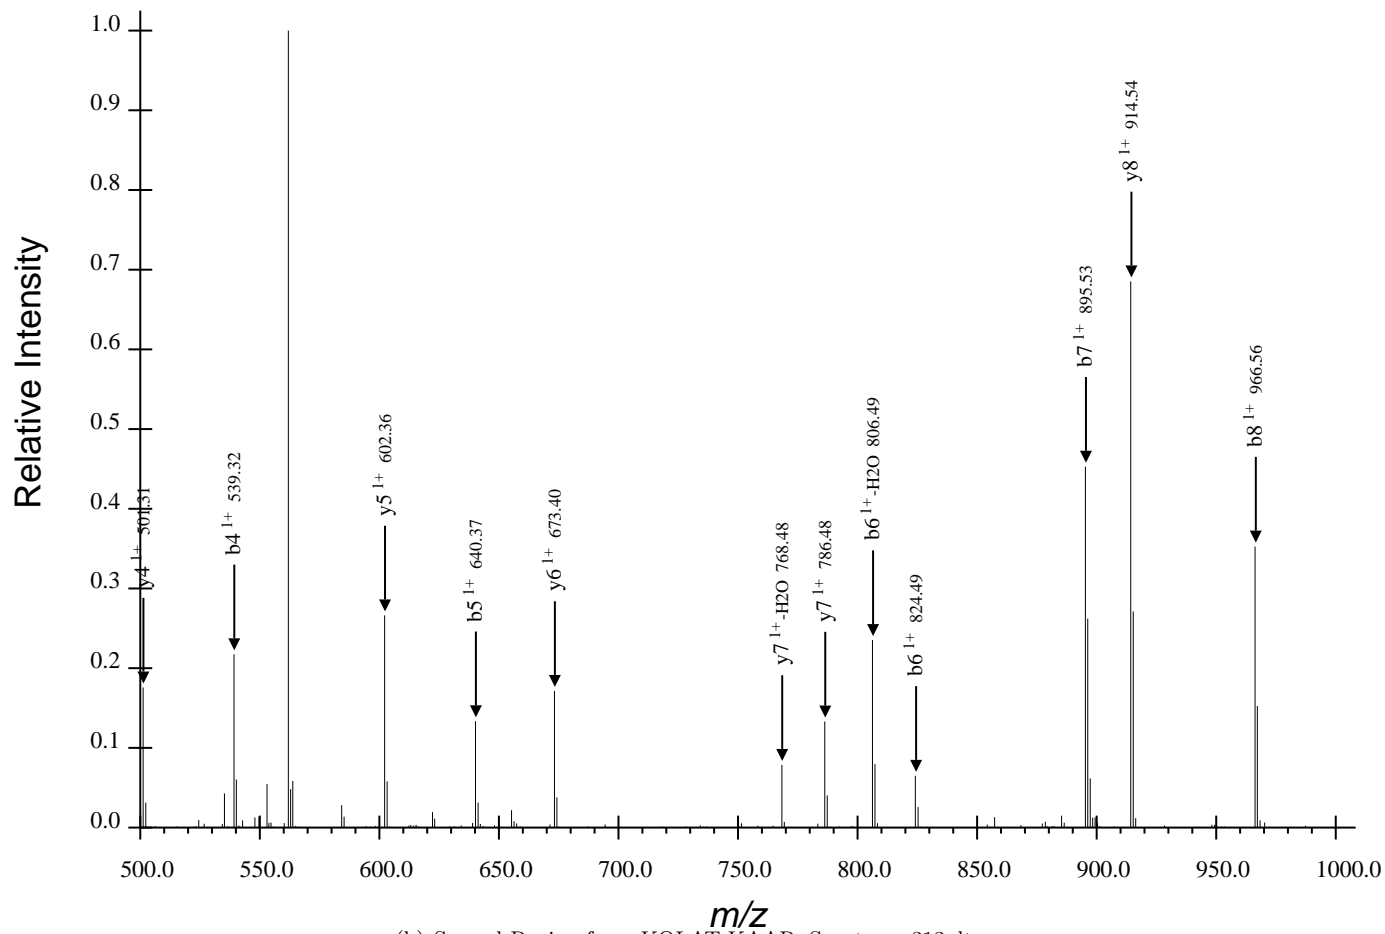

(b) Second Region for raKQLATrKAAR, Spectrum 313.dta

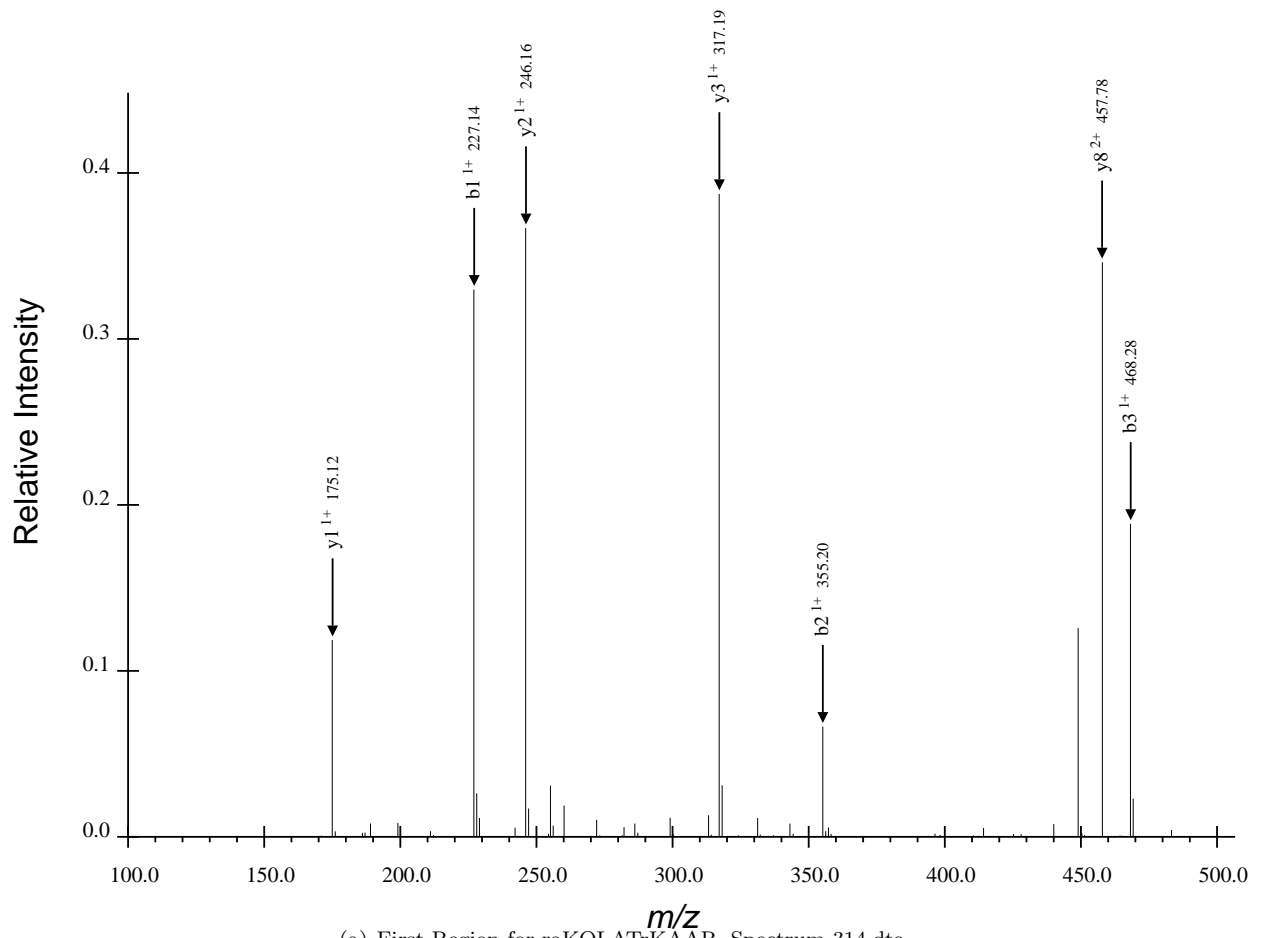

(a) First Region for raKQLATrKAAR, Spectrum 314.dta

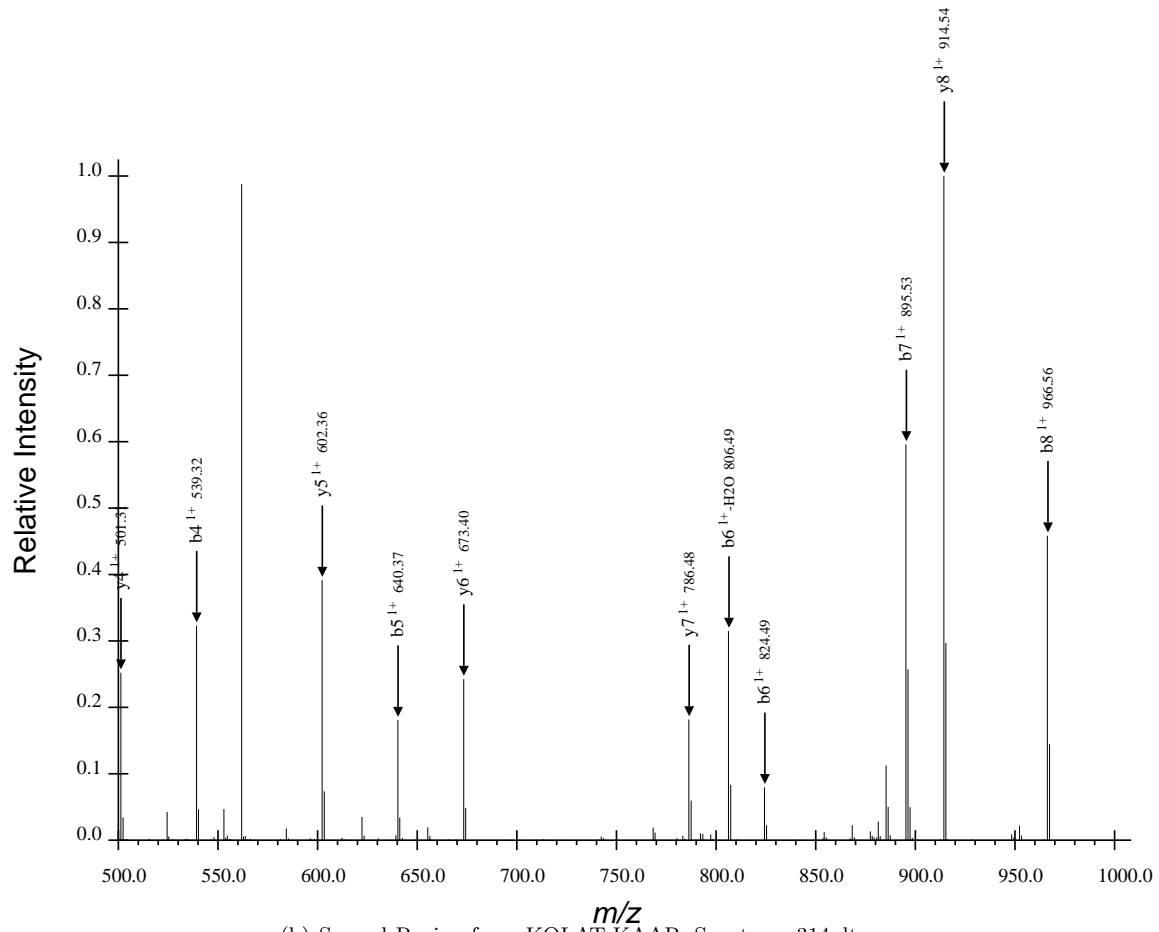

(b) Second Region for raKQLATrKAAR, Spectrum 314.dta

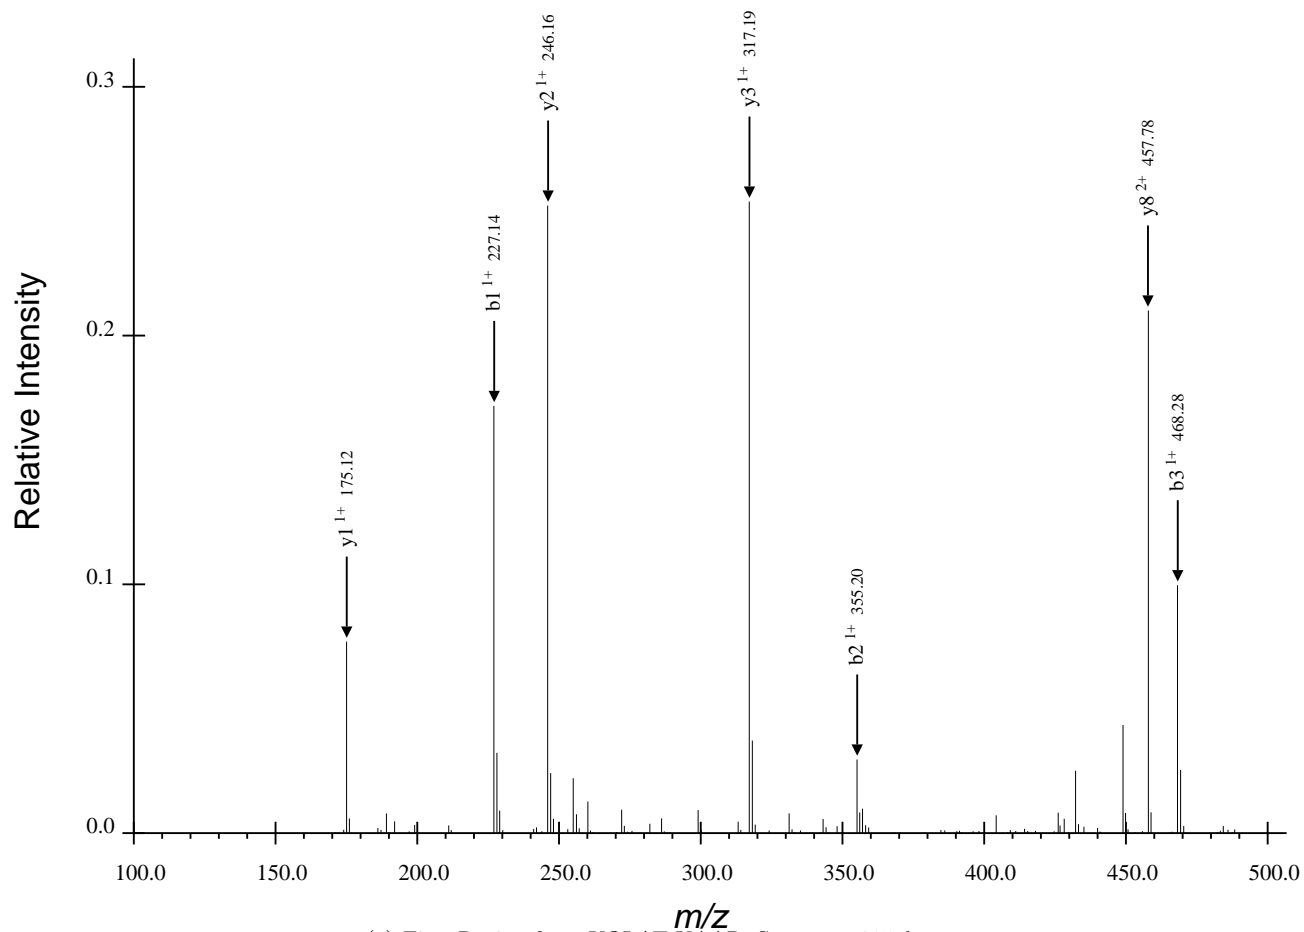

(a) First Region for raKQLATrKAAR, Spectrum 315.dta

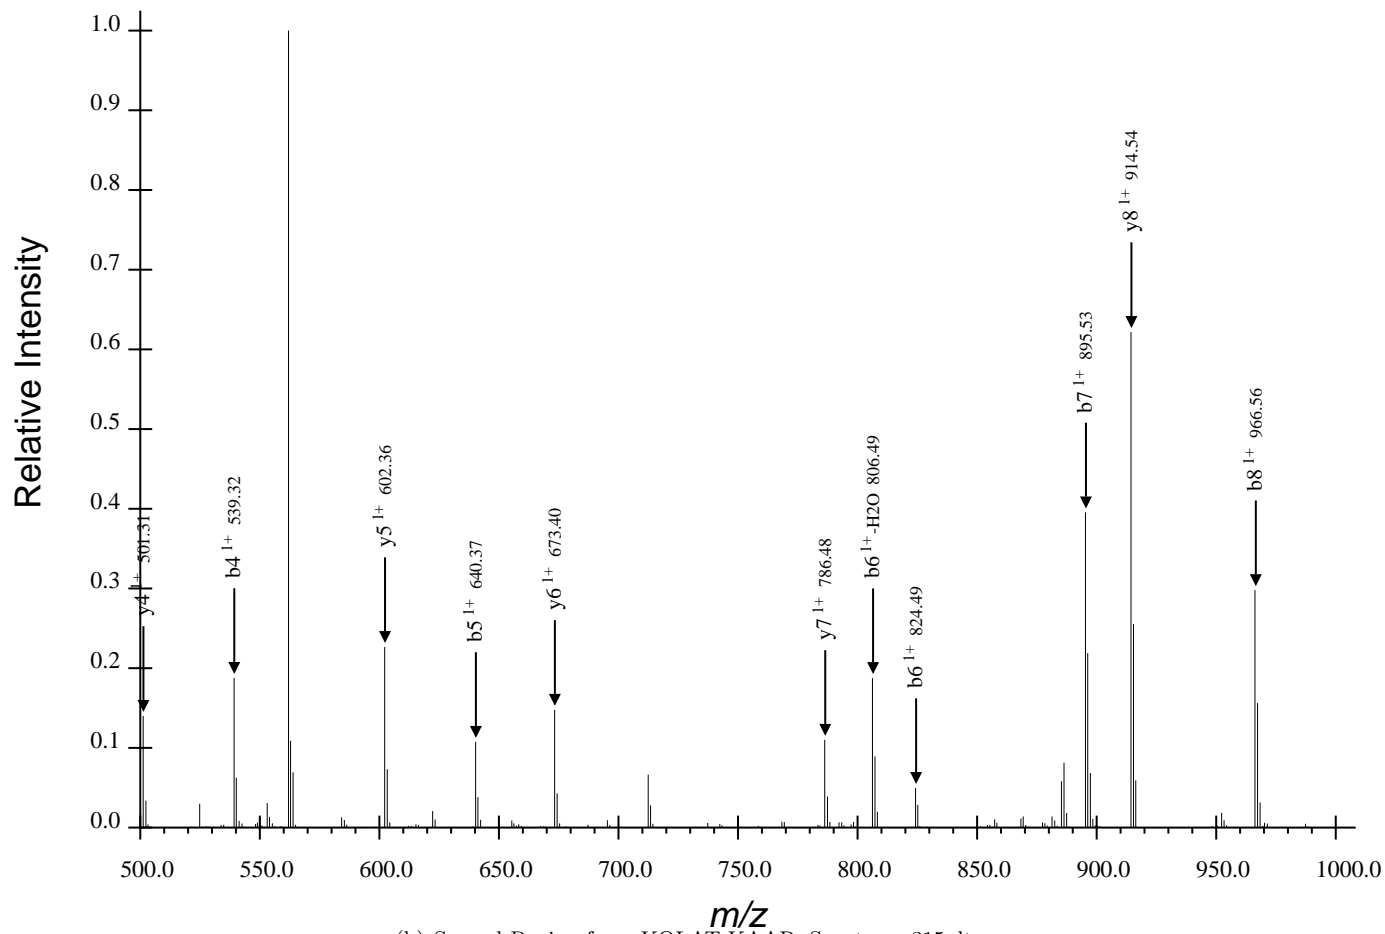

(b) Second Region for raKQLATrKAAR, Spectrum 315.dta

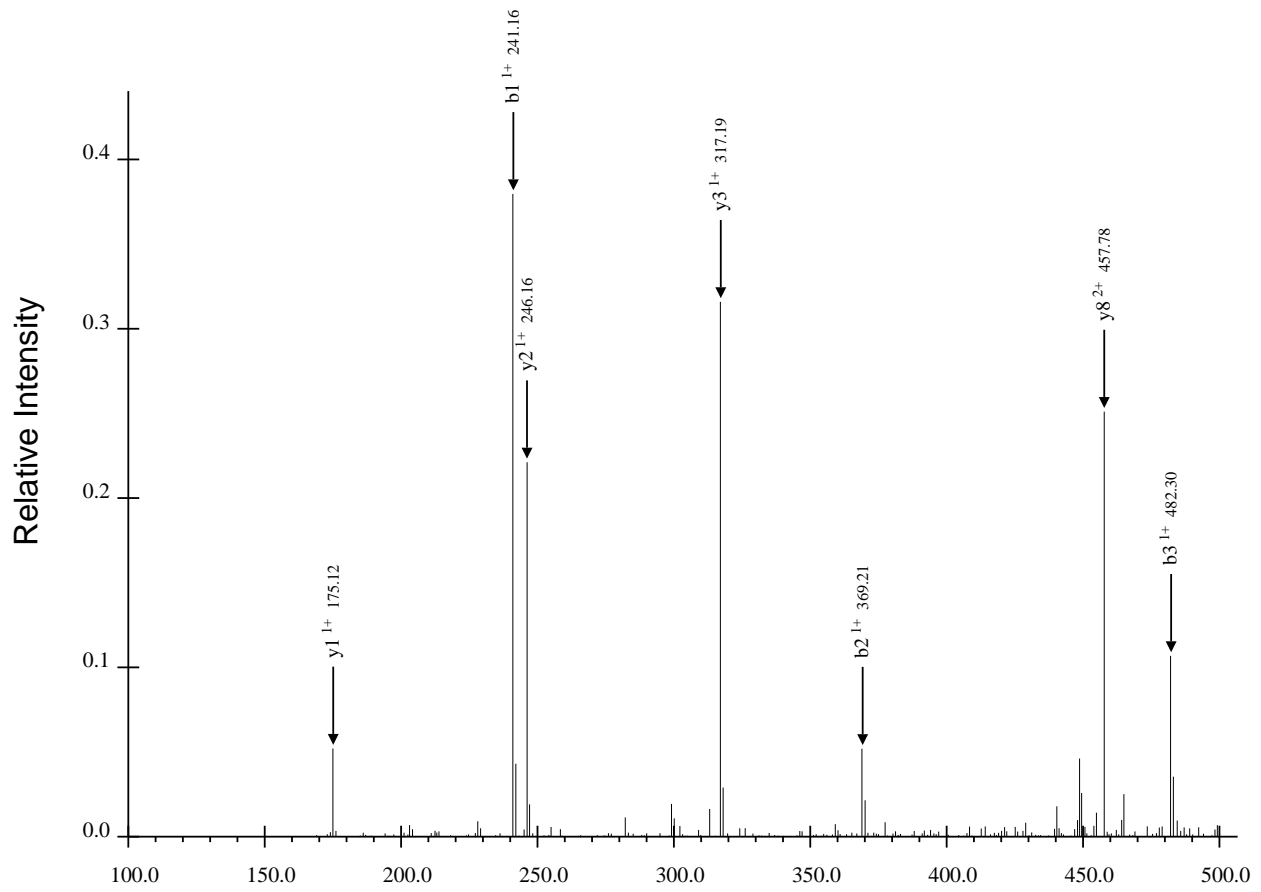

(a) First Region for rrKQLATrKAAR, Spectrum 316.dta

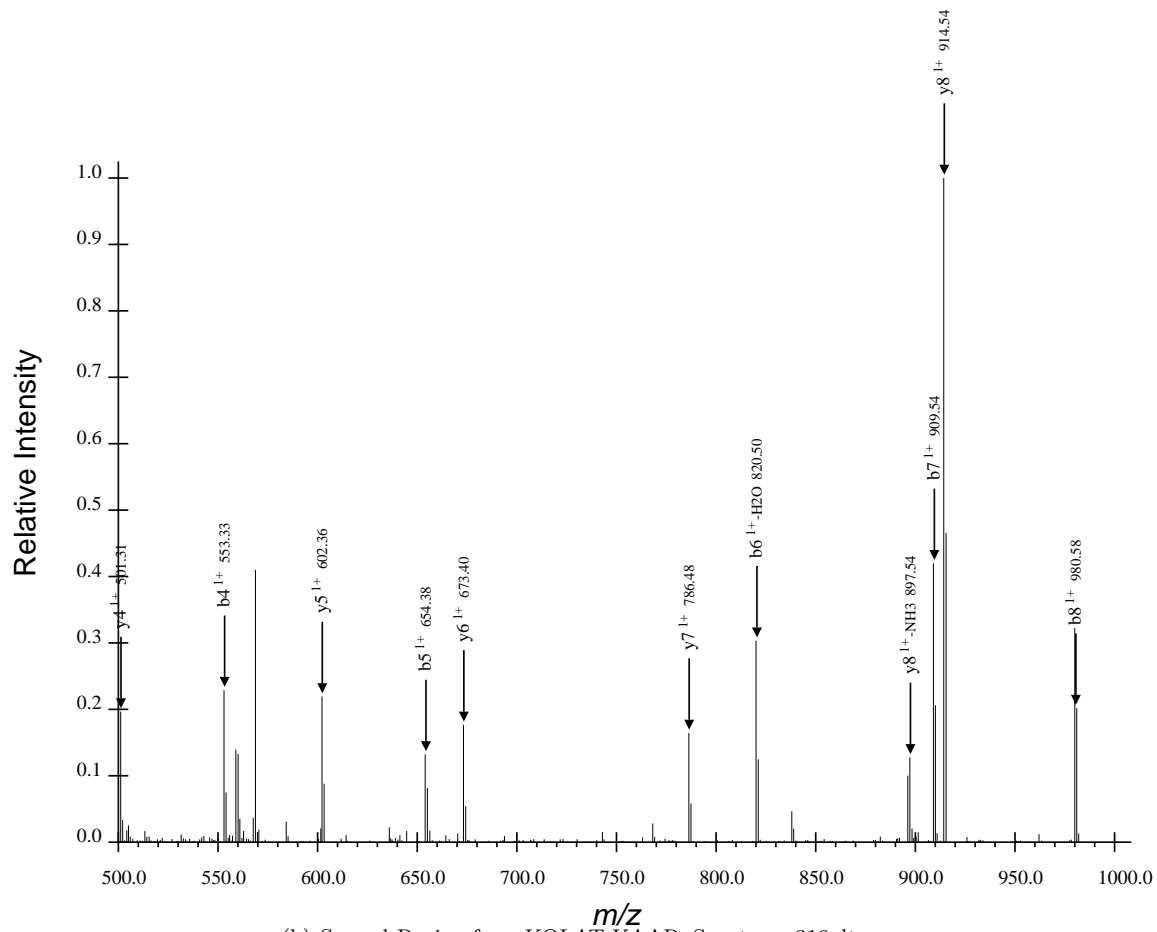

(b) Second Region for rrKQLATrKAAR, Spectrum 316.dta

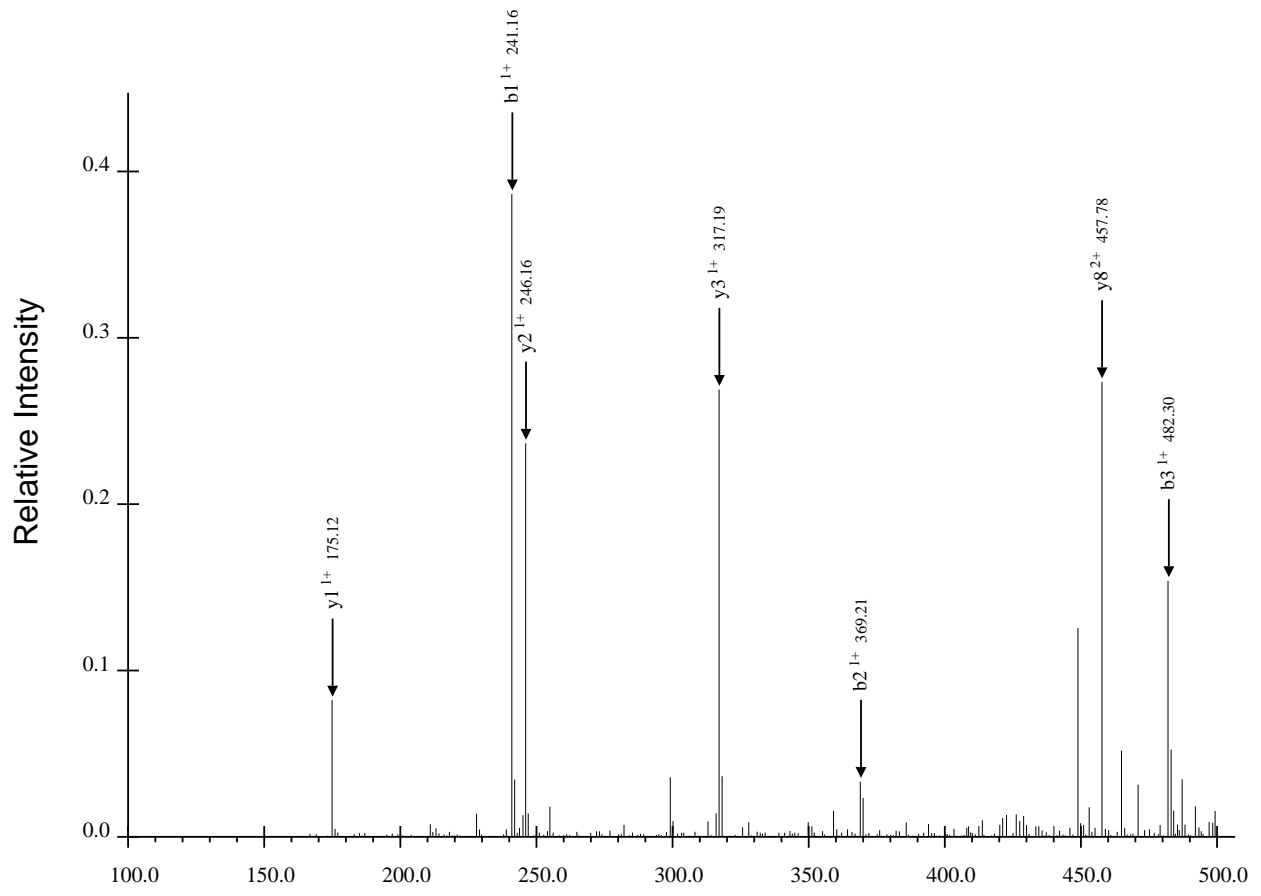

(a) First Region for rrKQLATrKAAR, Spectrum 317.dta

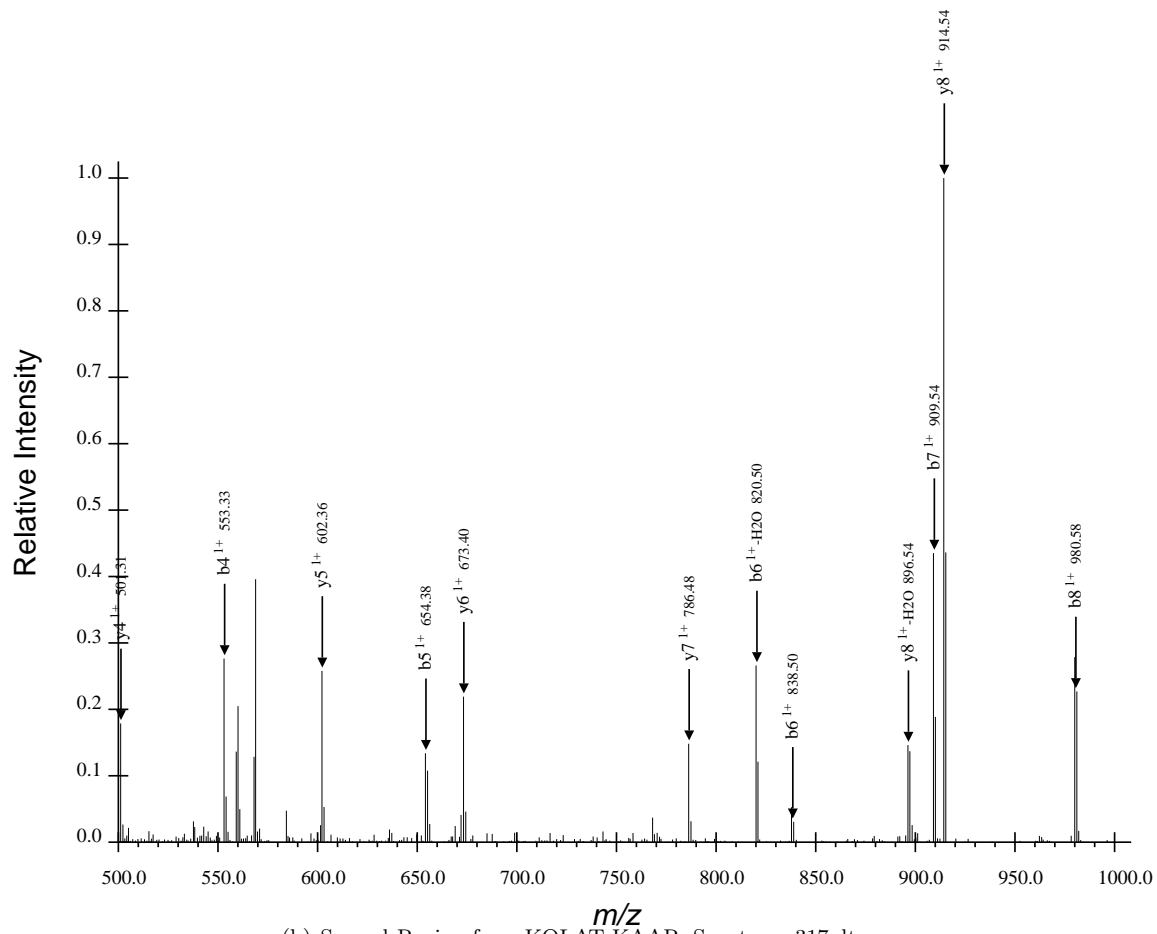

(b) Second Region for rrKQLATrKAAR, Spectrum 317.dta

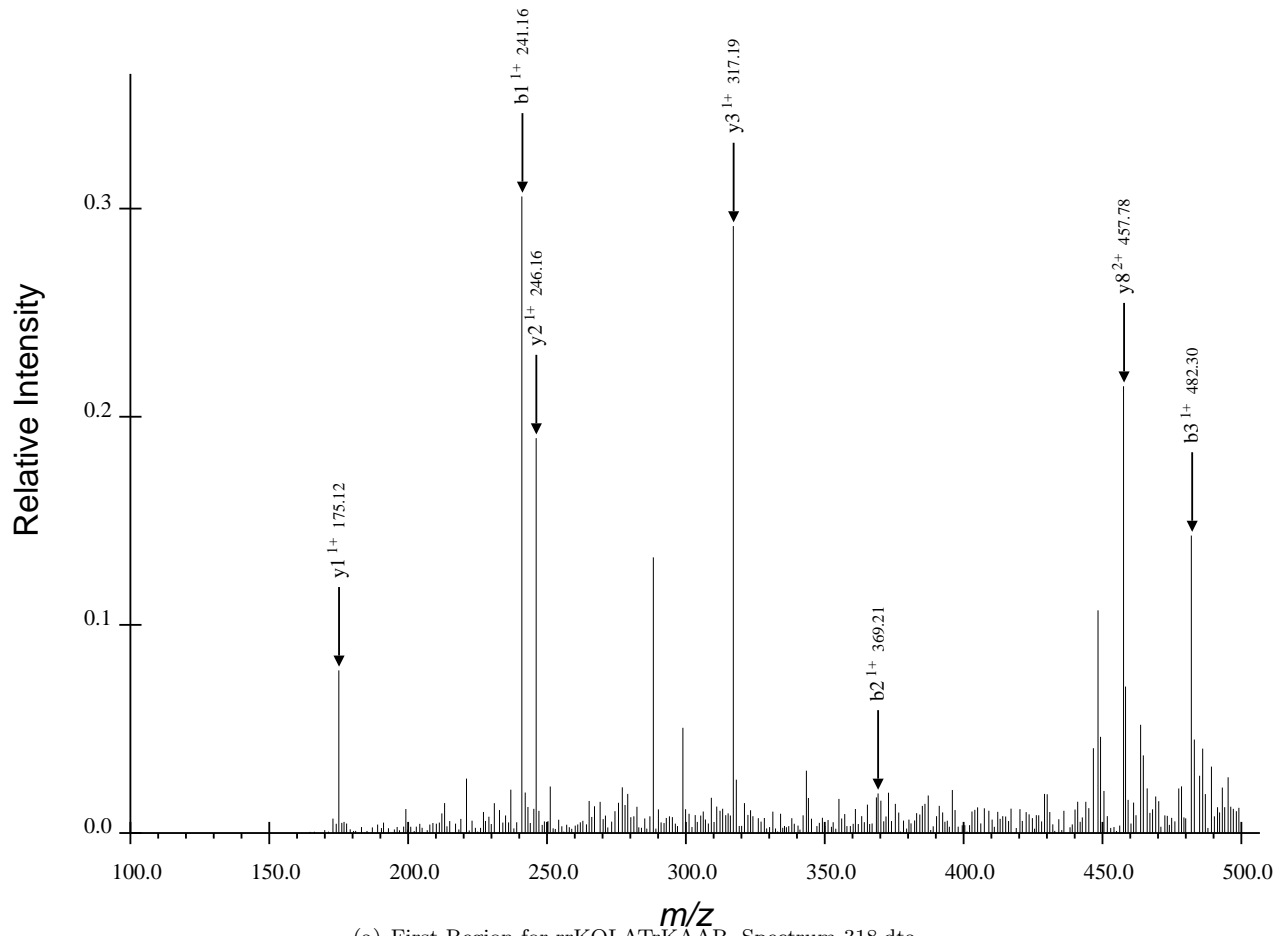

(a) First Region for rrKQLATrKAAR, Spectrum 318.dta

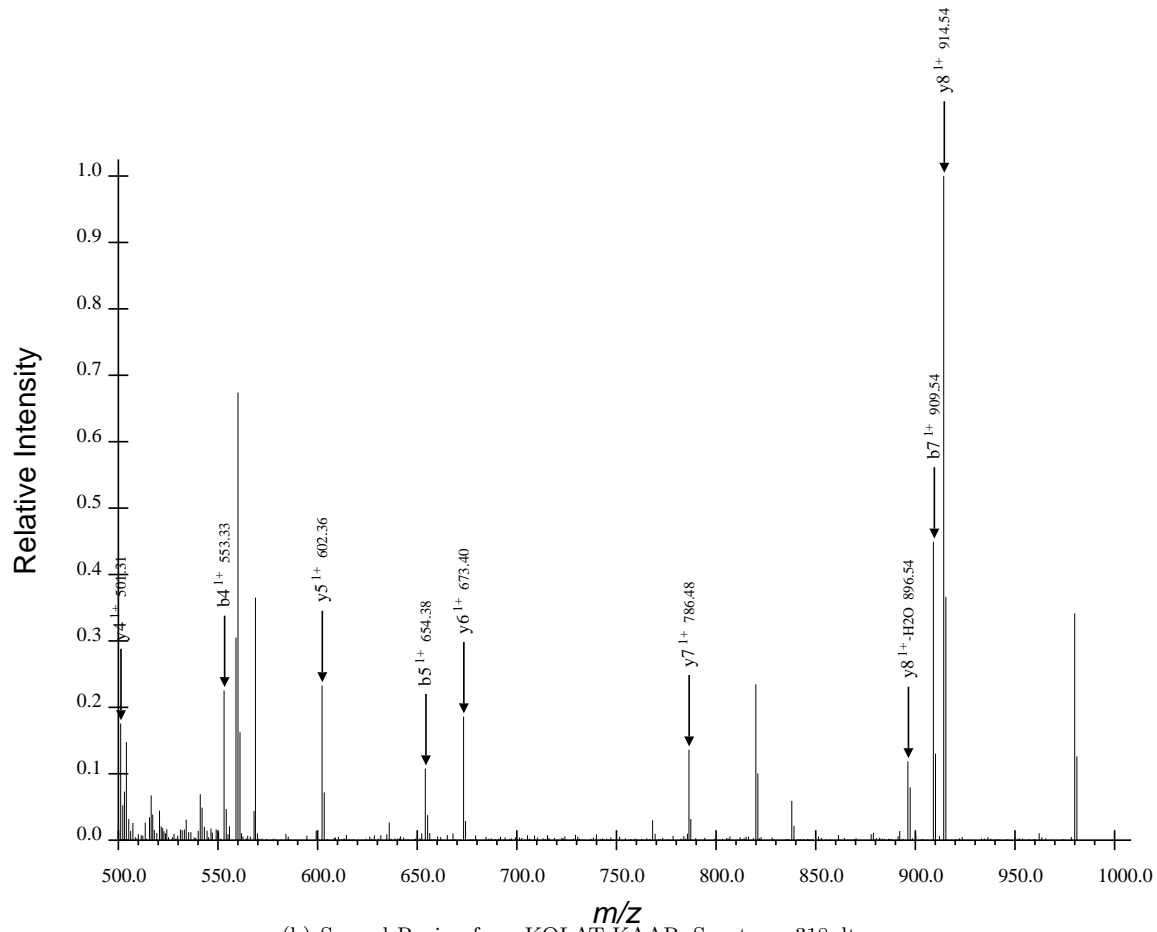

(b) Second Region for rrKQLATrKAAR, Spectrum 318.dta

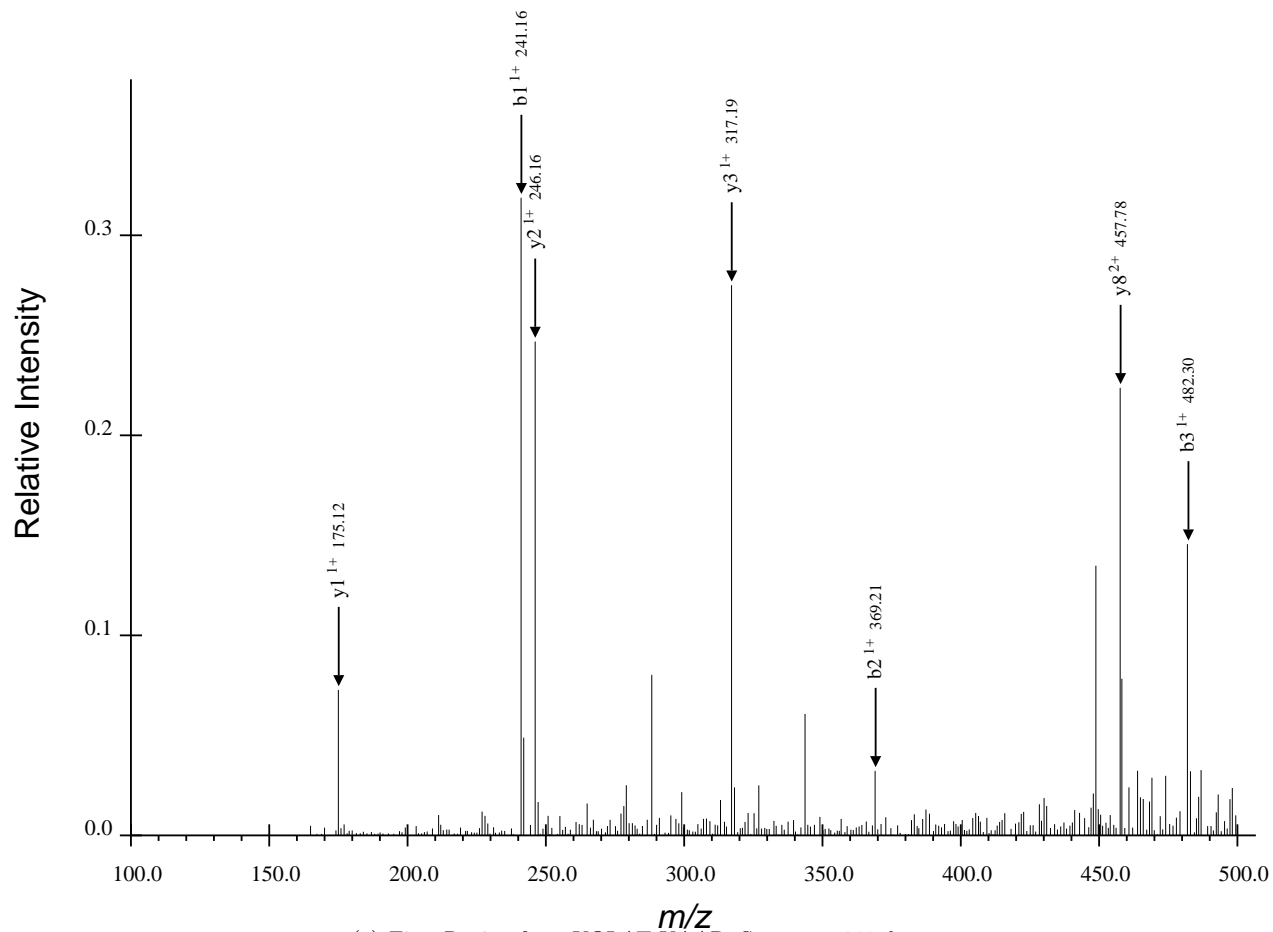

(a) First Region for rrKQLATrKAAR, Spectrum 319.dta

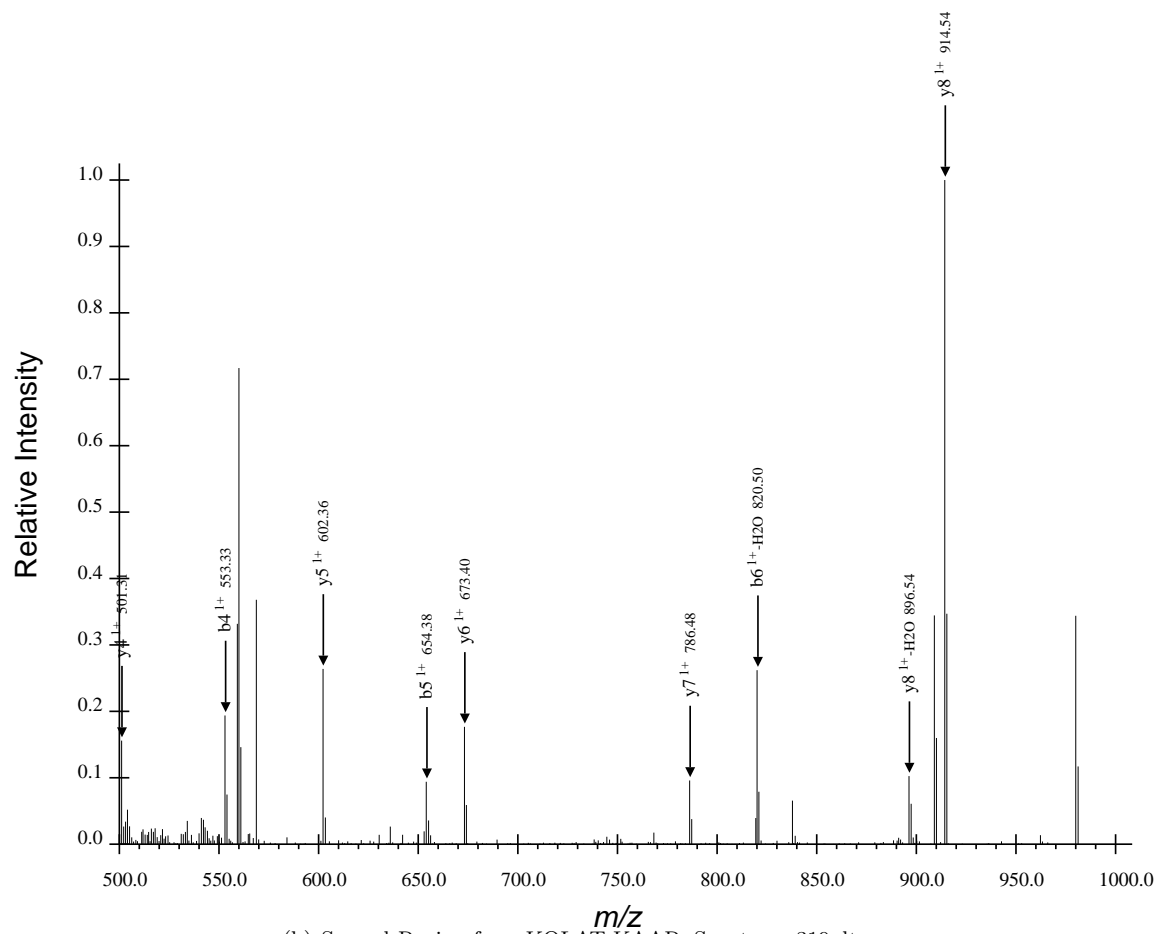

(b) Second Region for rrKQLATrKAAR, Spectrum 319.dta

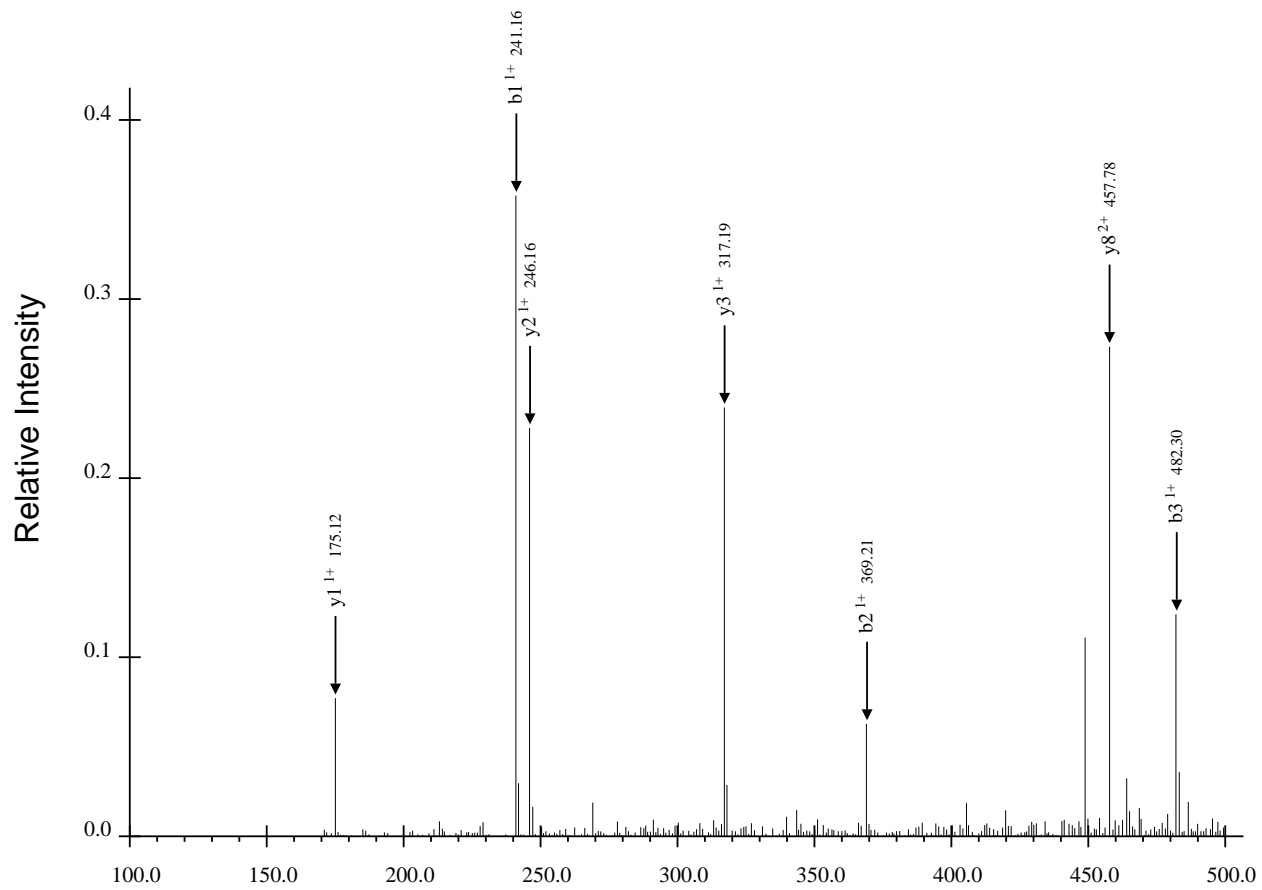

(a) First Region for rrKQLATrKAAR, Spectrum 320.dta

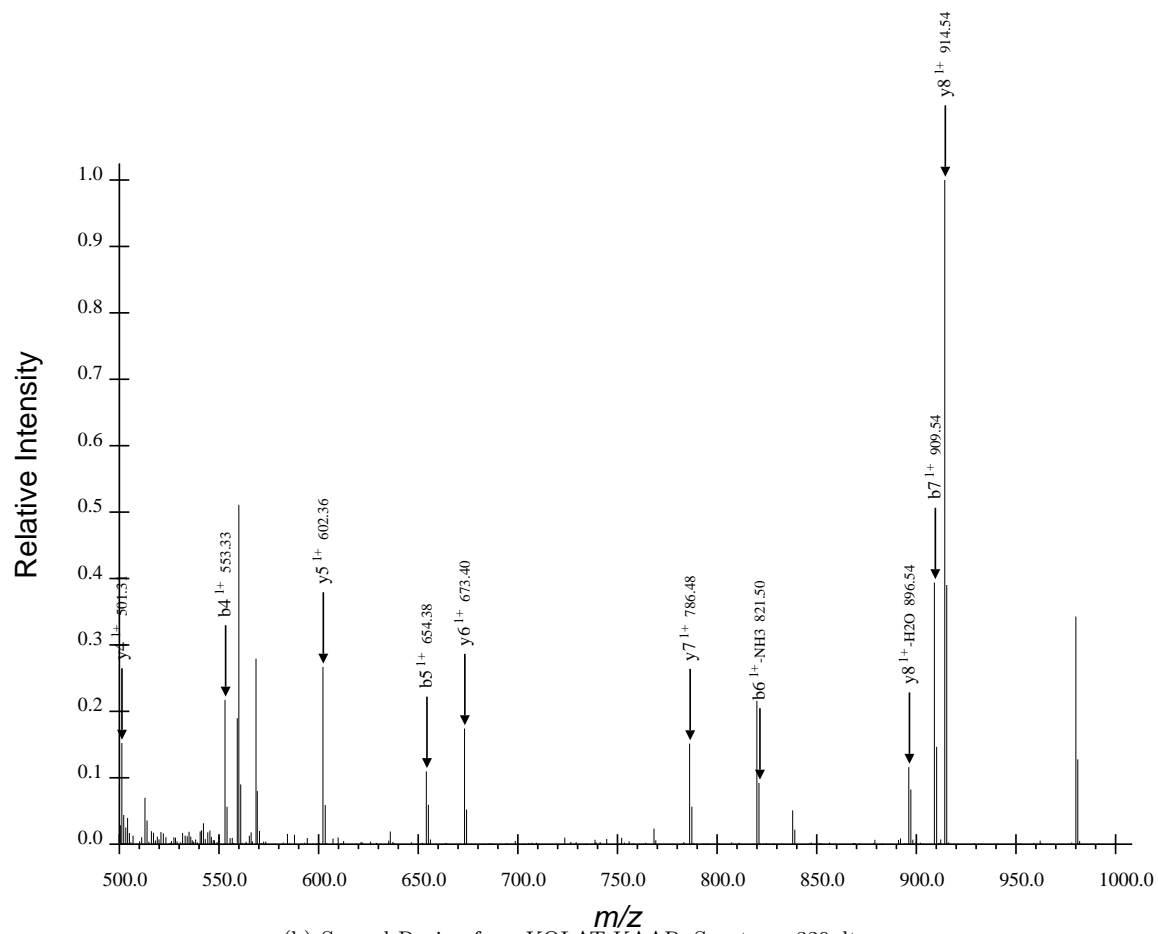

(b) Second Region for rrKQLATrKAAR, Spectrum 320.dta



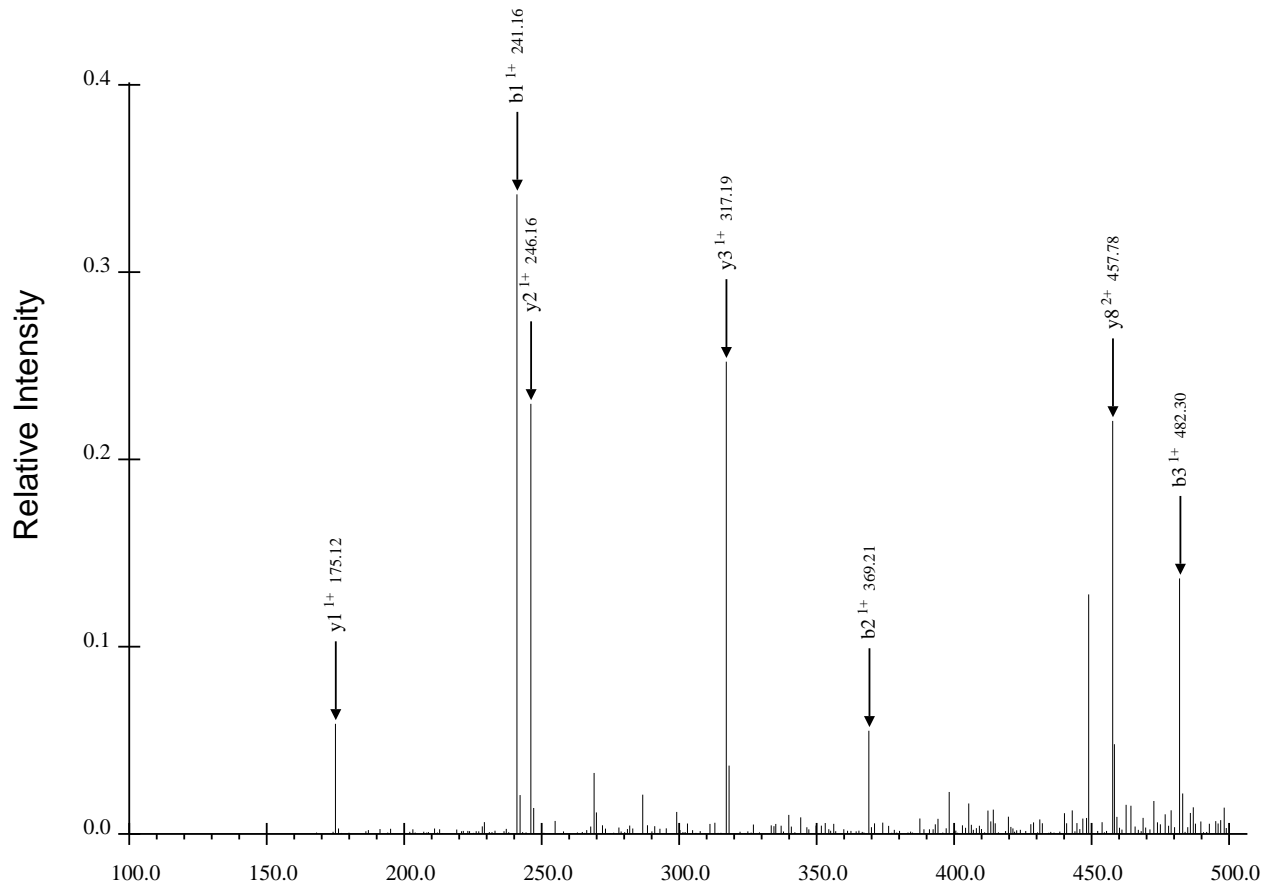

(a) First Region for rrKQLATrKAAR, Spectrum 321.dta

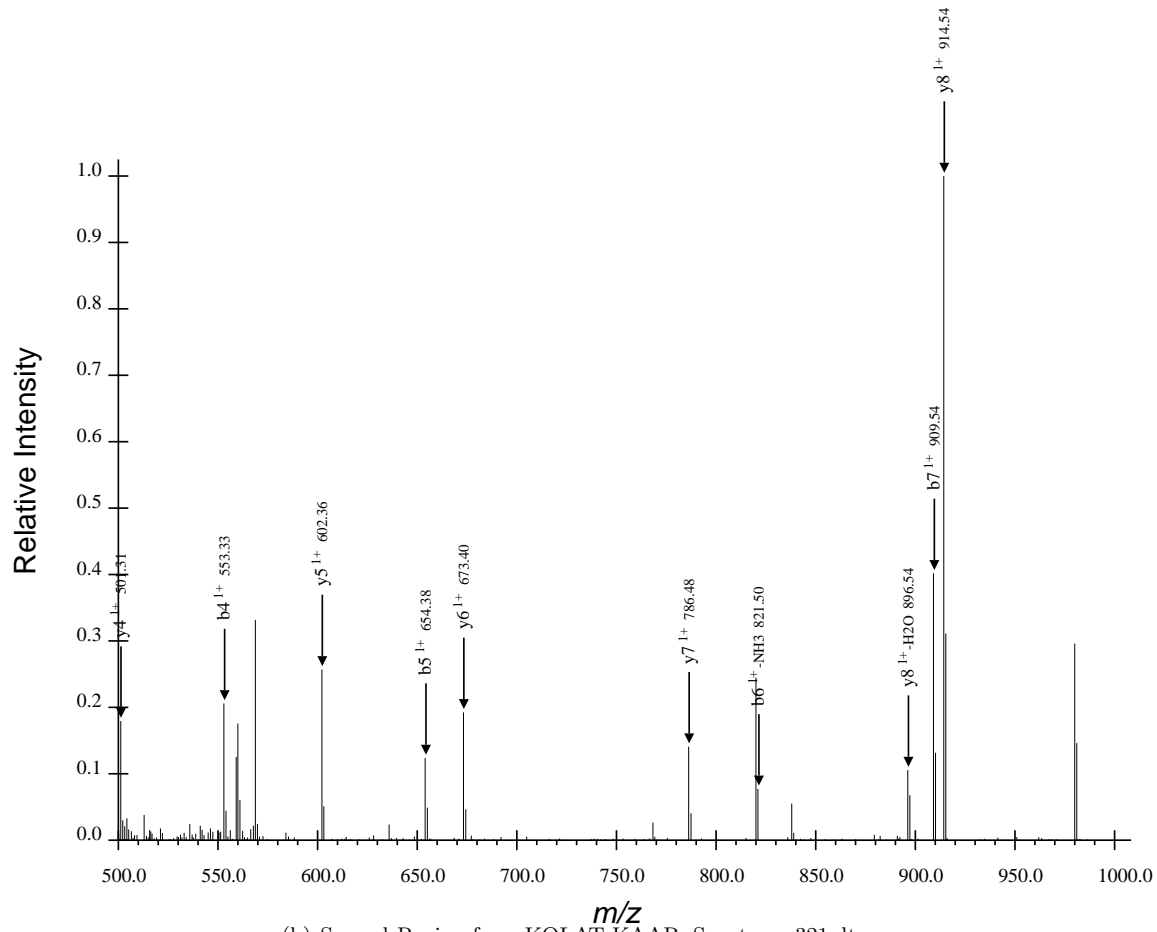

(b) Second Region for rrKQLATrKAAR, Spectrum 321.dta

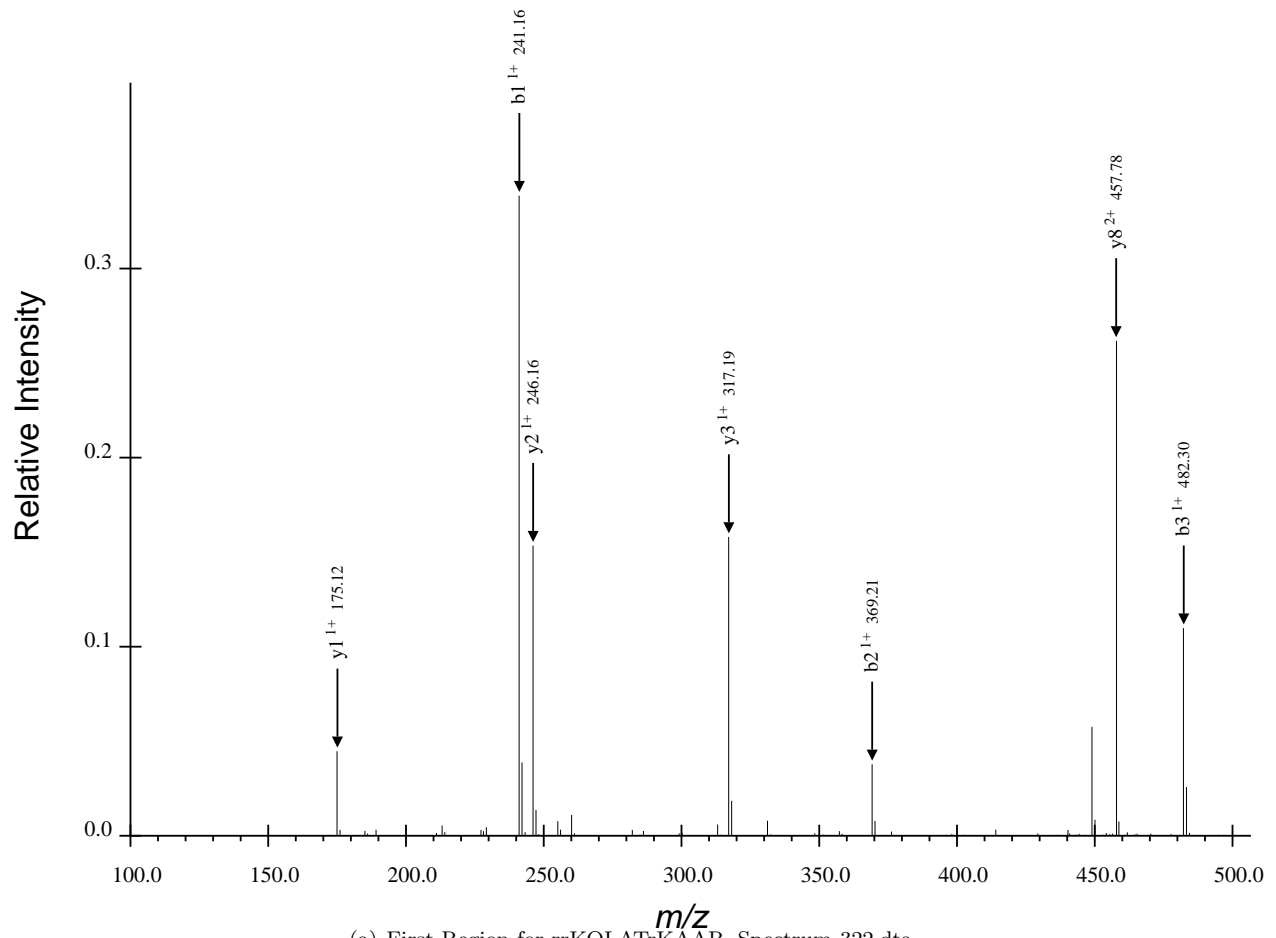

(a) First Region for rrKQLATrKAAR, Spectrum 322.dta

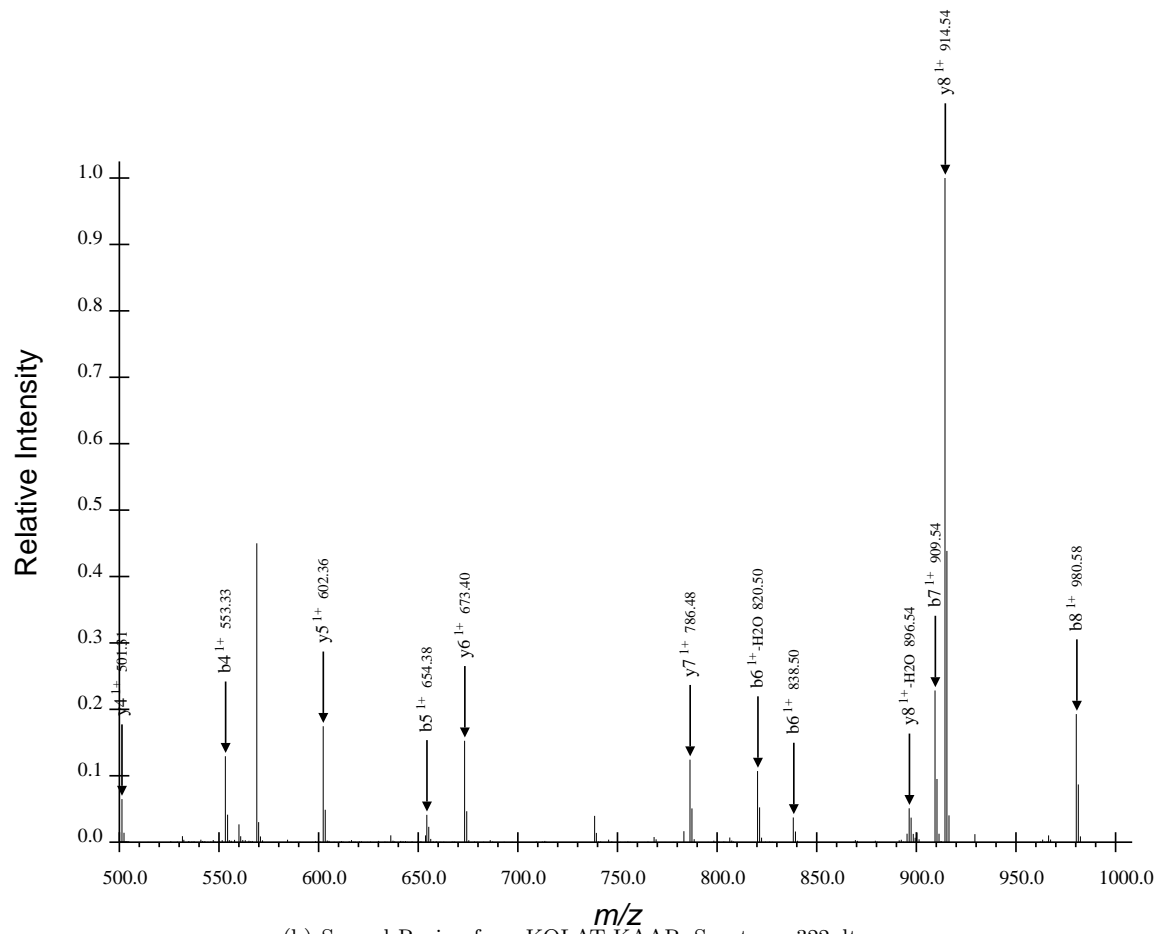

(b) Second Region for rrKQLATrKAAR, Spectrum 322.dta

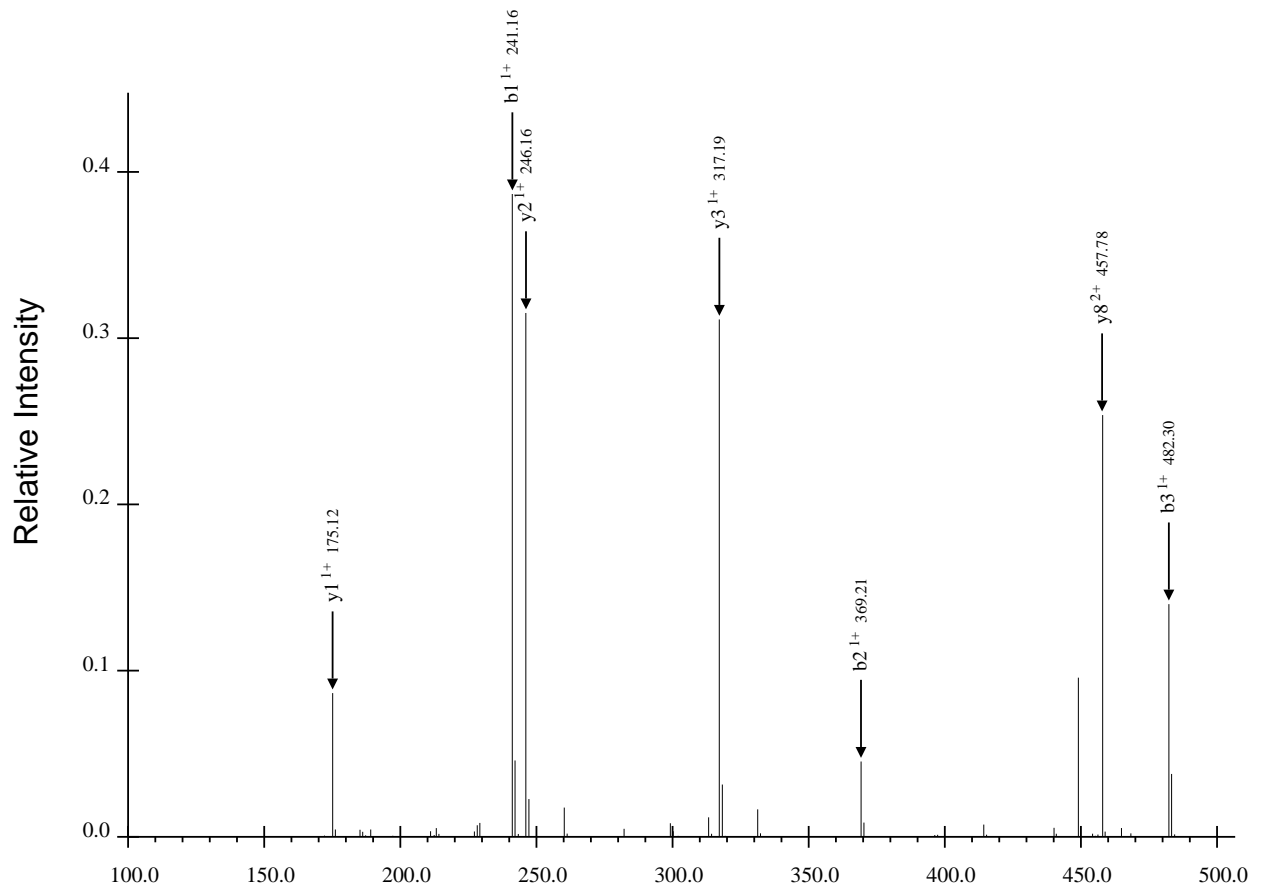

(a) First Region for rrKQLATrKAAR, Spectrum 323.dta

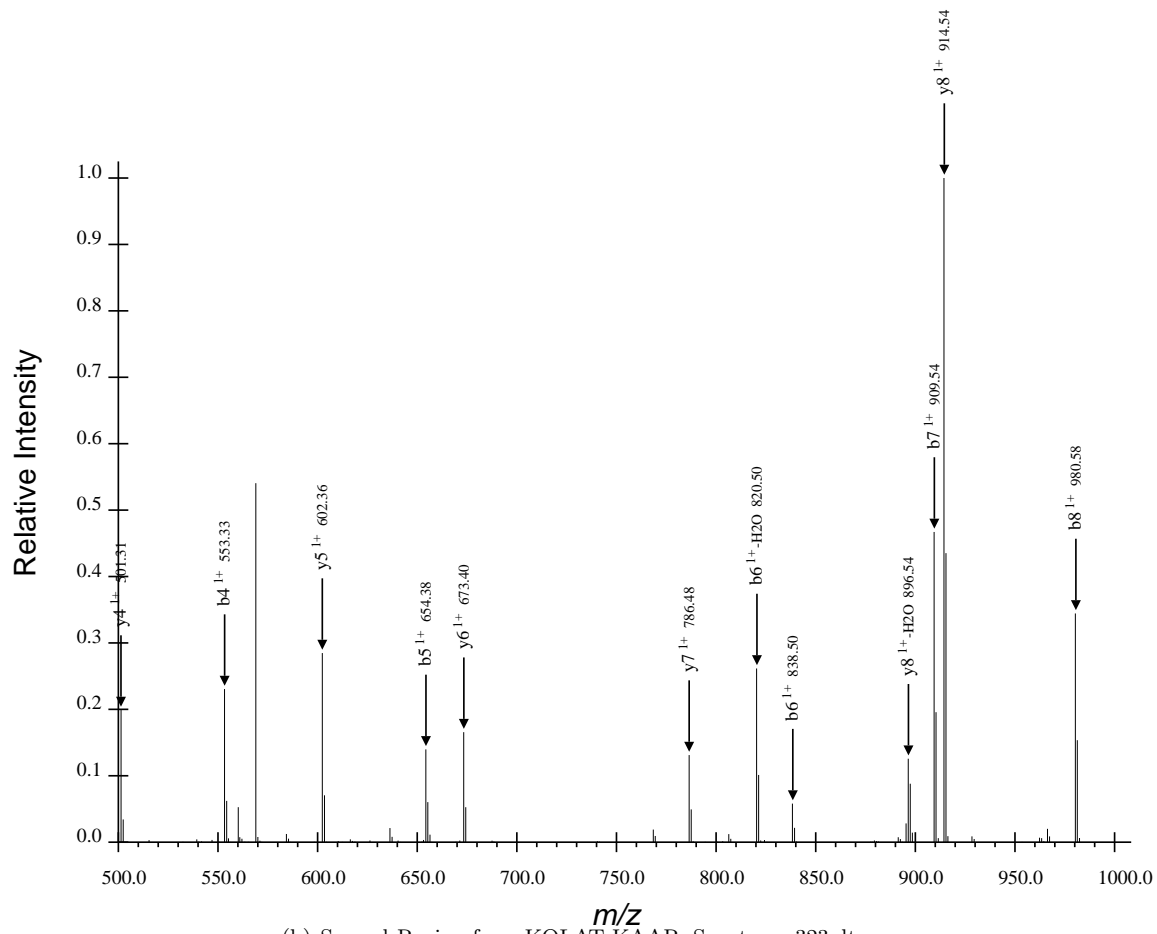

(b) Second Region for rrKQLATrKAAR, Spectrum 323.dta

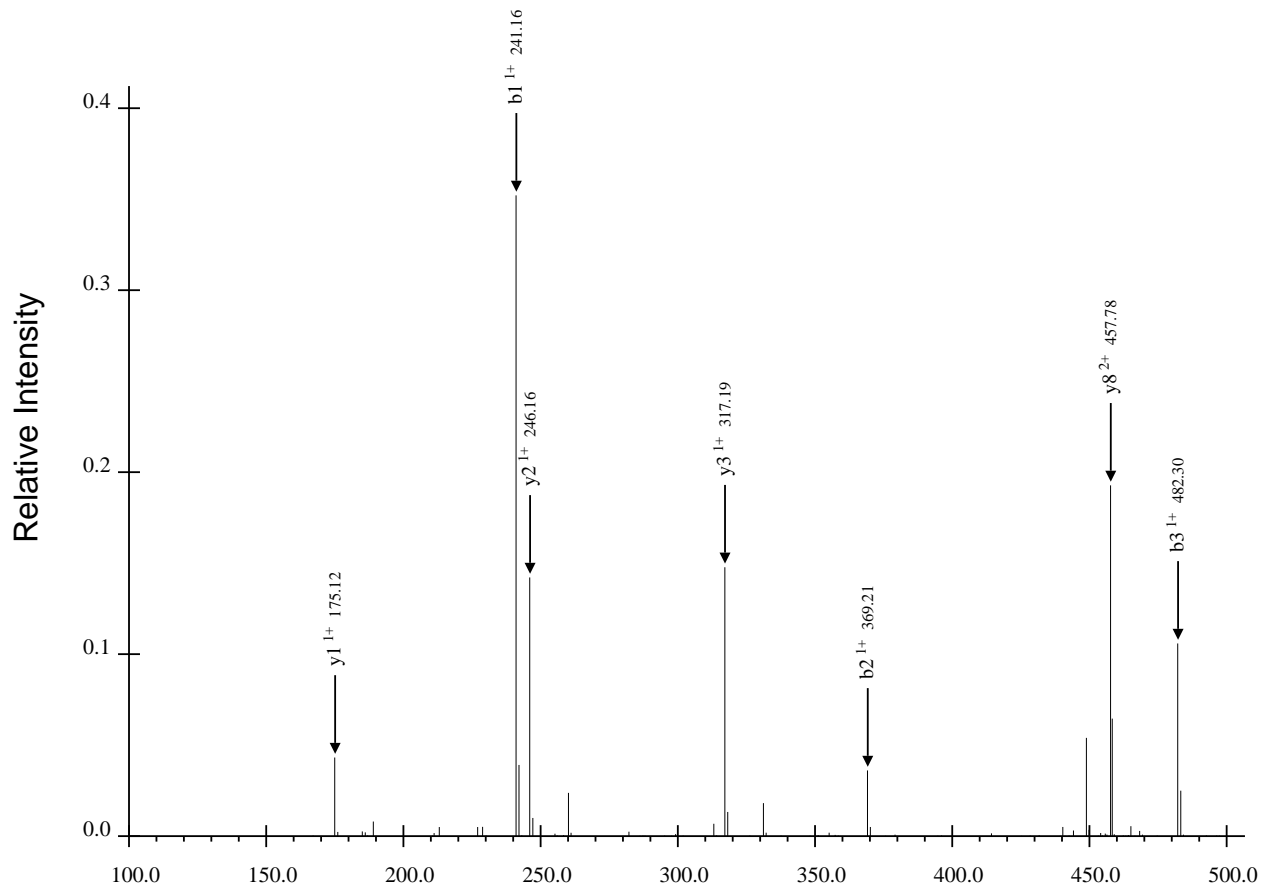

(a) First Region for rrKQLATrKAAR, Spectrum 324.dta

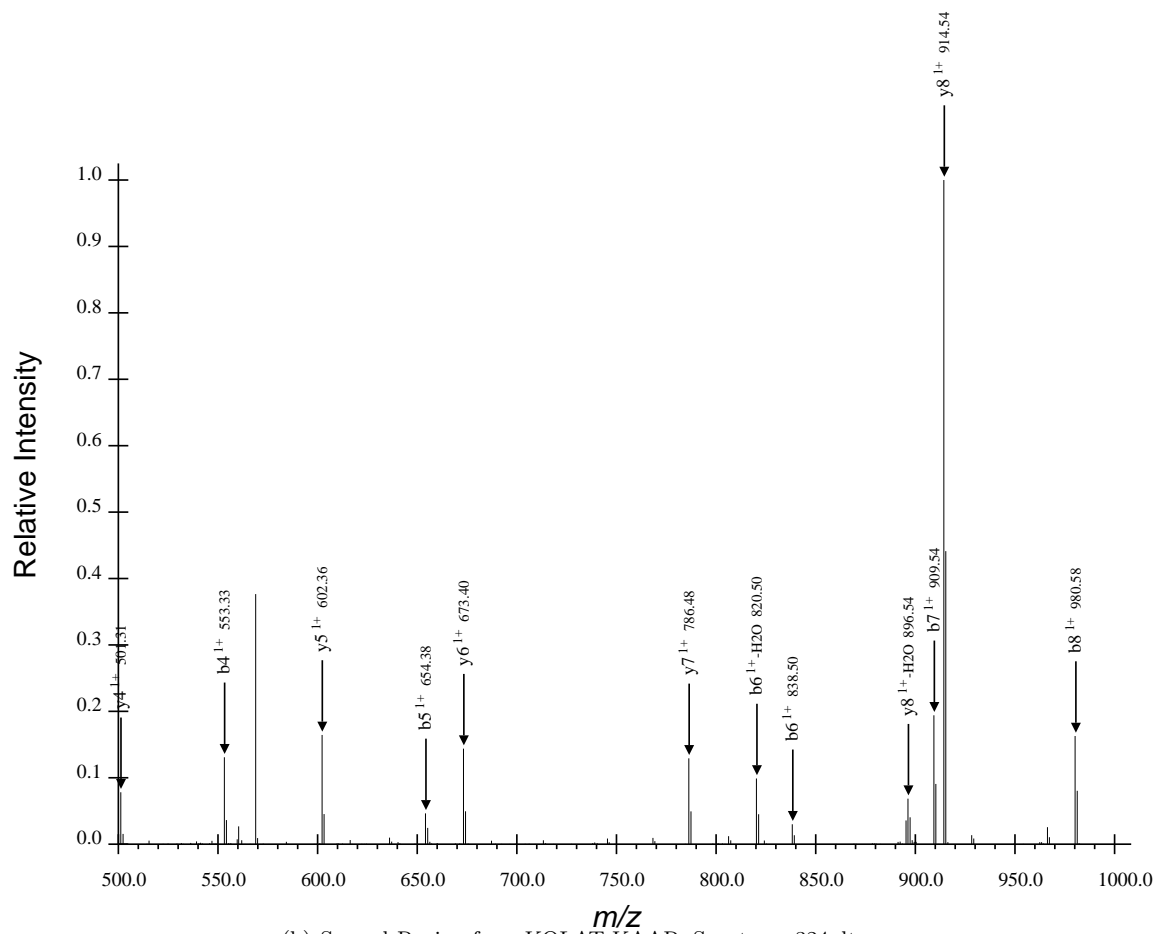

(b) Second Region for rrKQLATrKAAR, Spectrum 324.dta

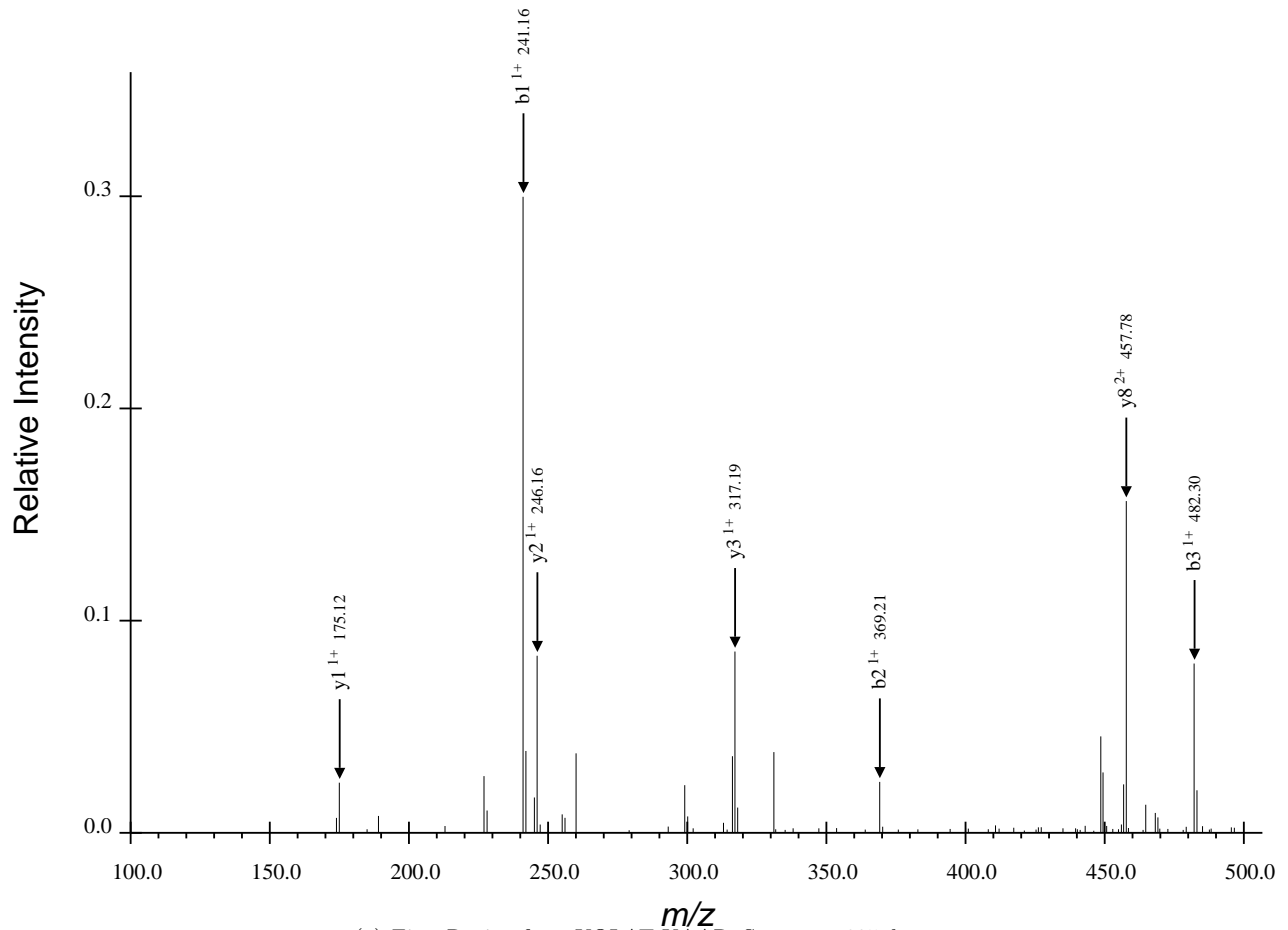

(a) First Region for rrKQLATrKAAR, Spectrum 325.dta

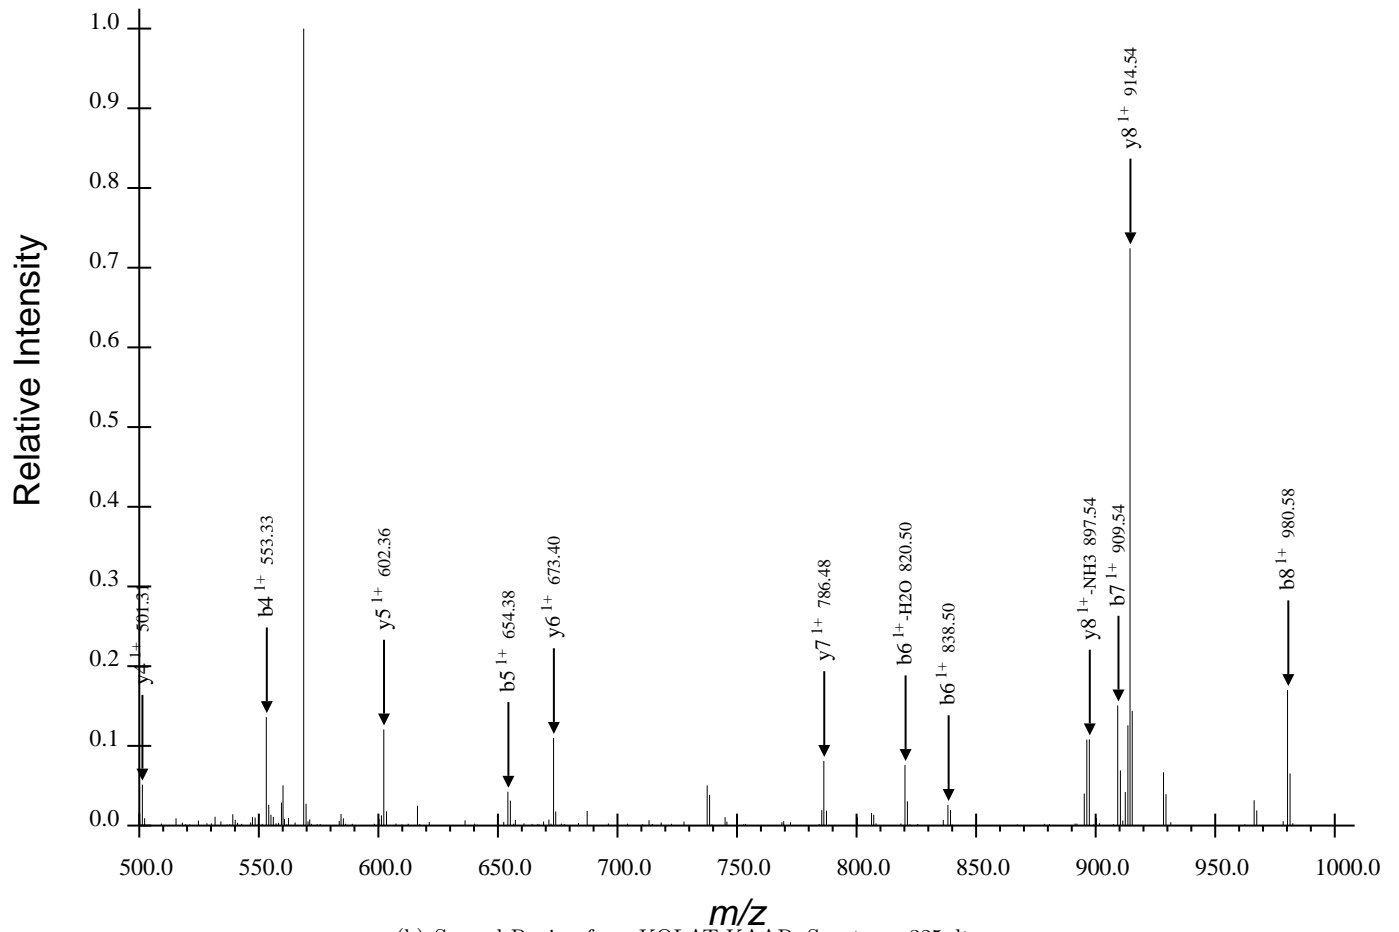

(b) Second Region for rrKQLATrKAAR, Spectrum 325.dta

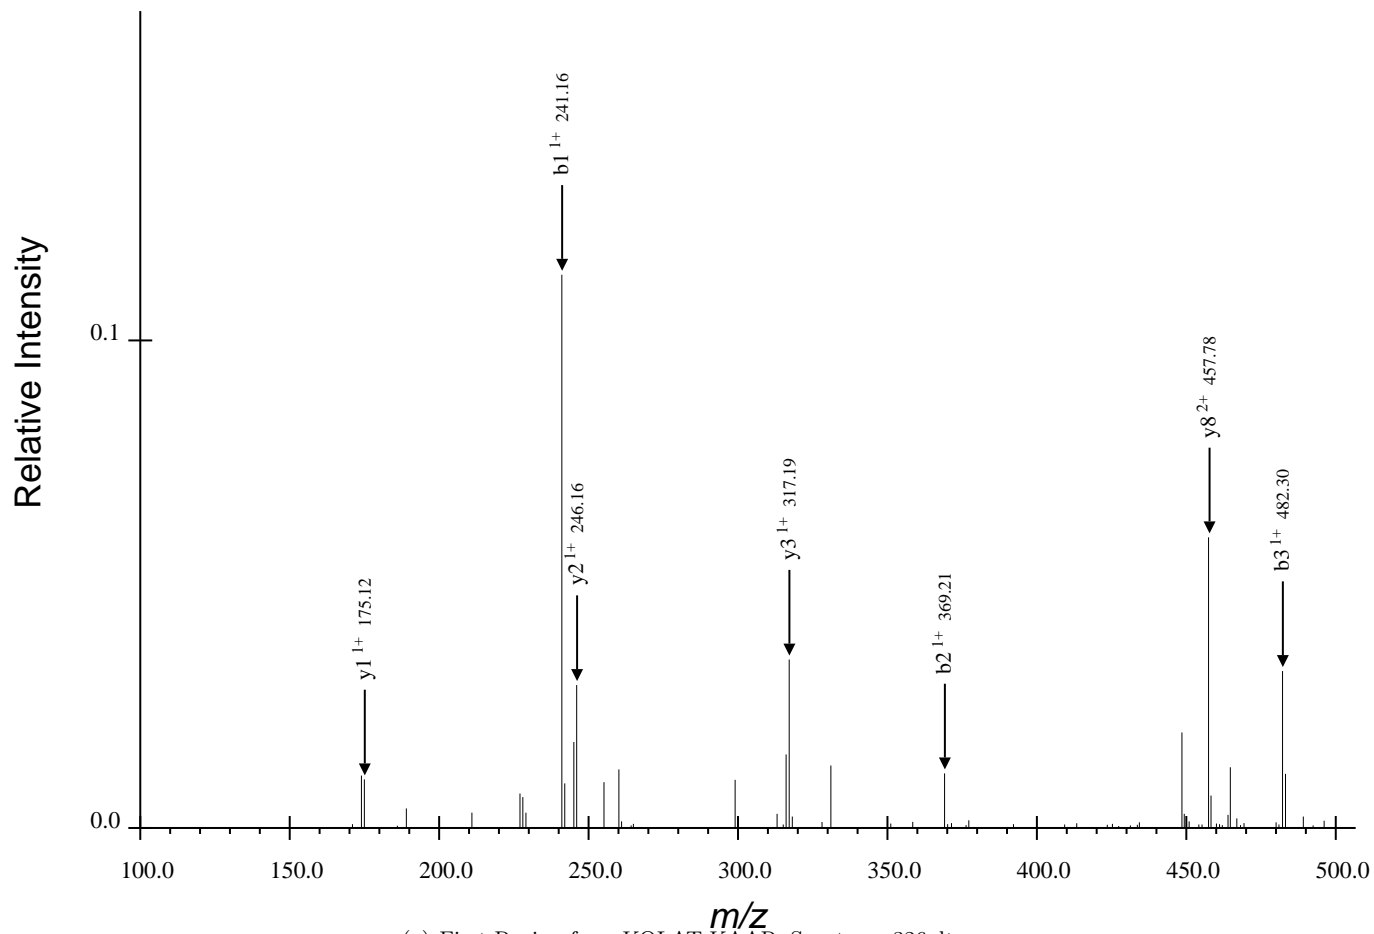

(a) First Region for rrKQLATrKAAR, Spectrum 326.dta

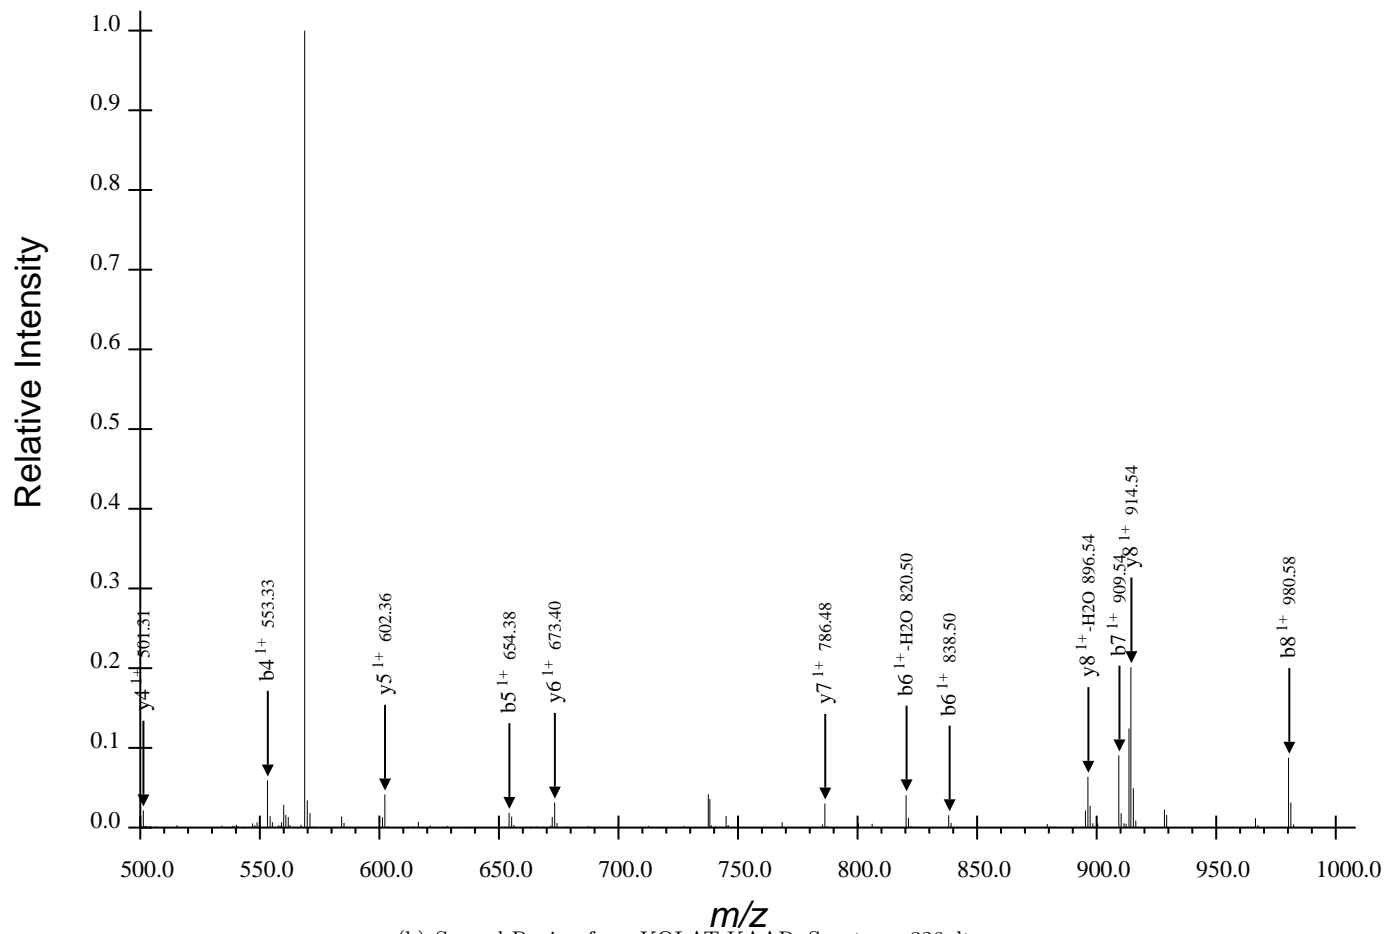

(b) Second Region for rrKQLATrKAAR, Spectrum 326.dta

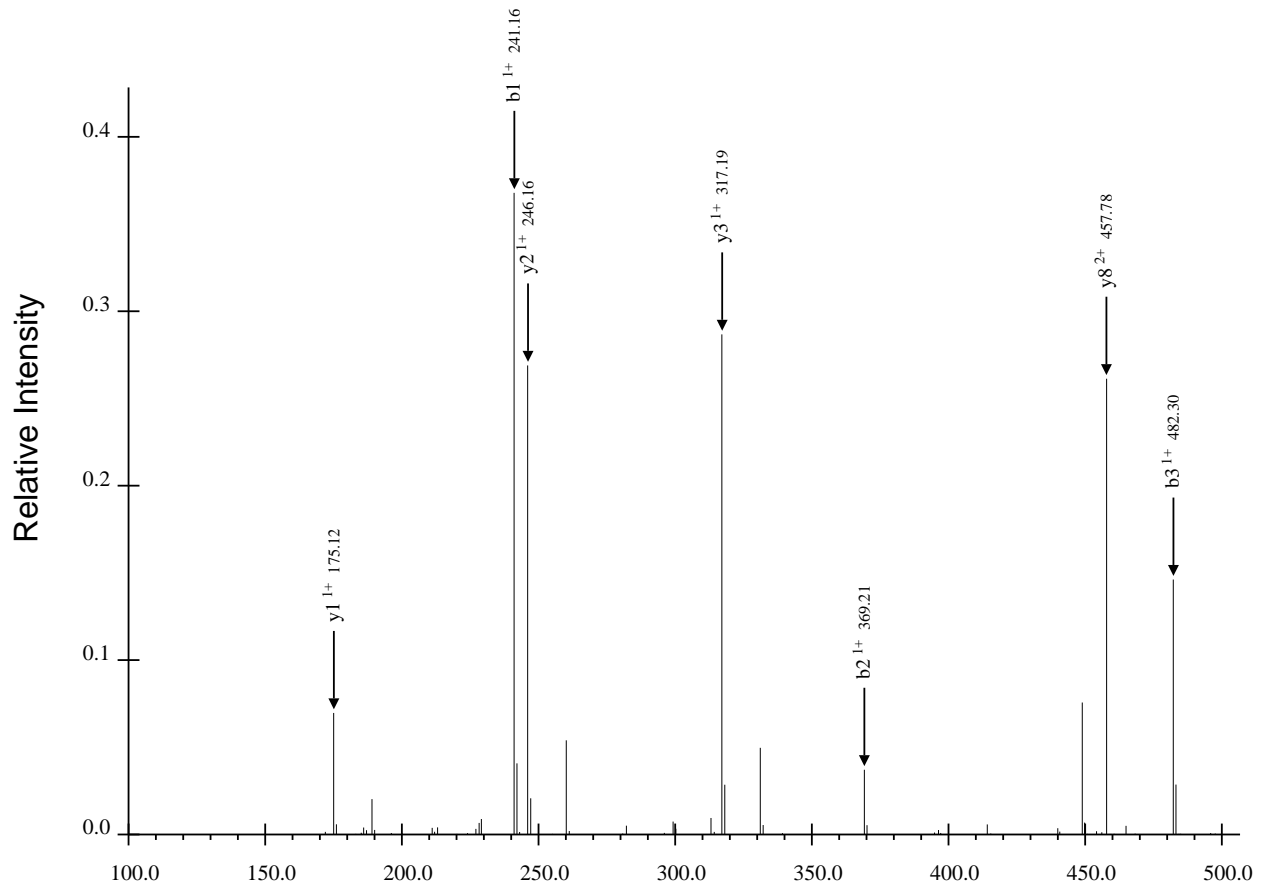

(a) First Region for rrKQLATrKAAR, Spectrum 327.dta

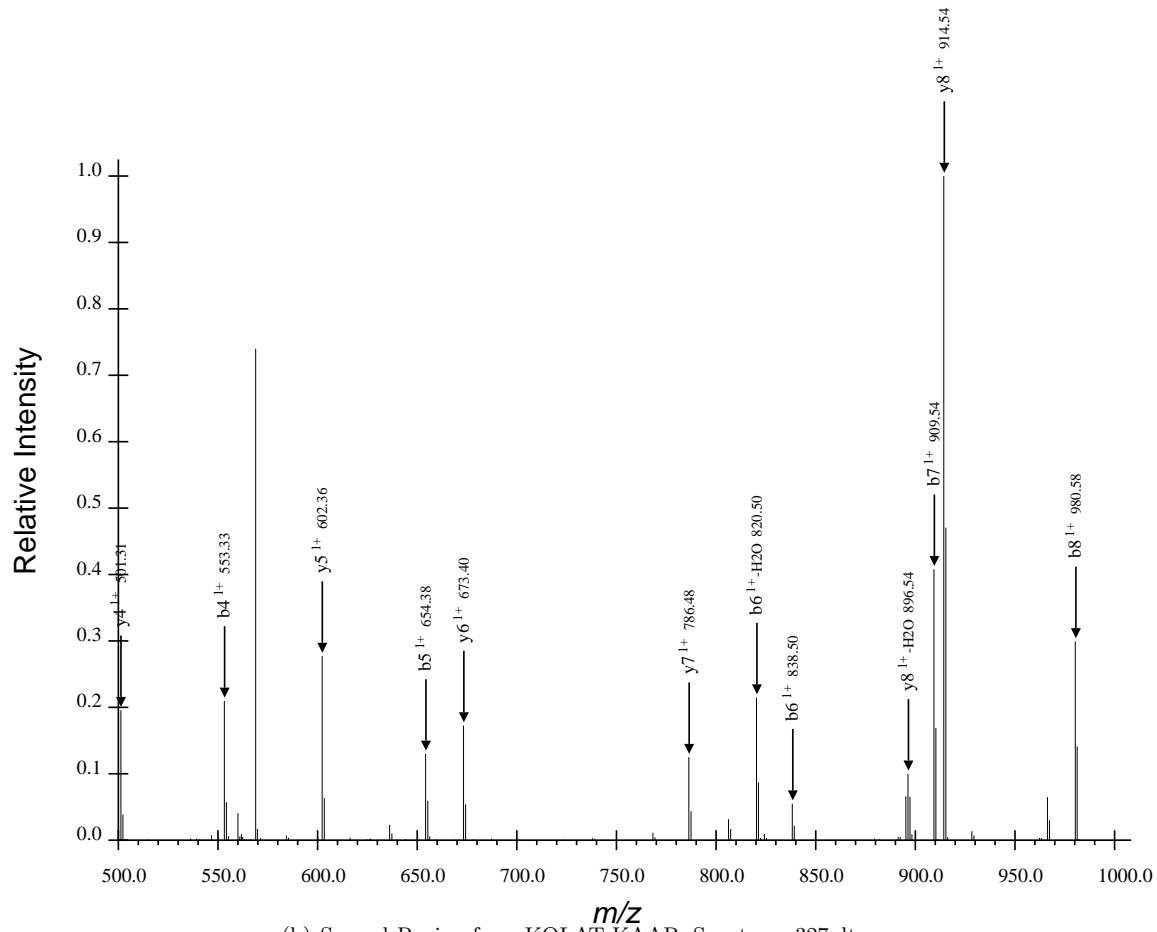

(b) Second Region for rrKQLATrKAAR, Spectrum 327.dta

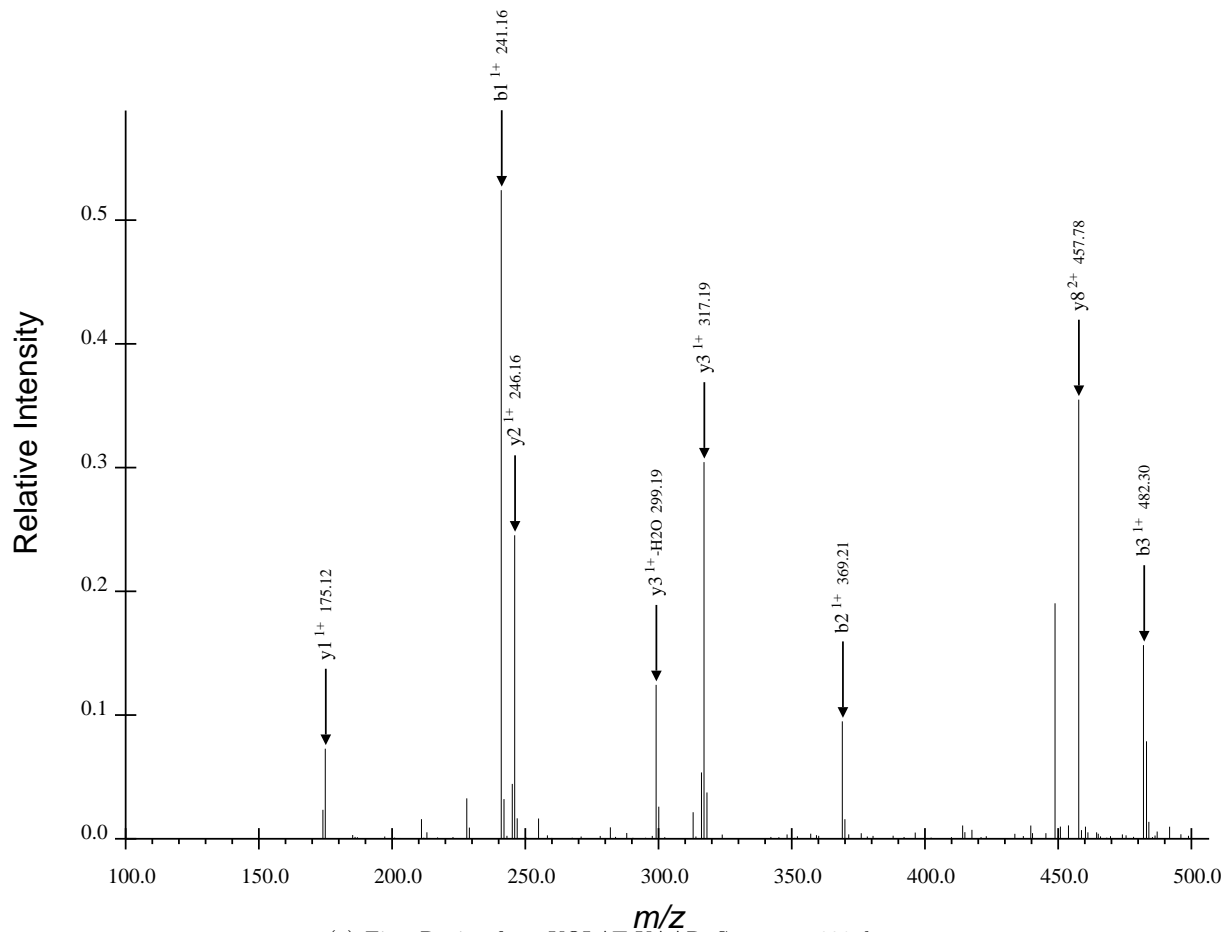

(a) First Region for rrKQLATrKAAR, Spectrum 328.dta

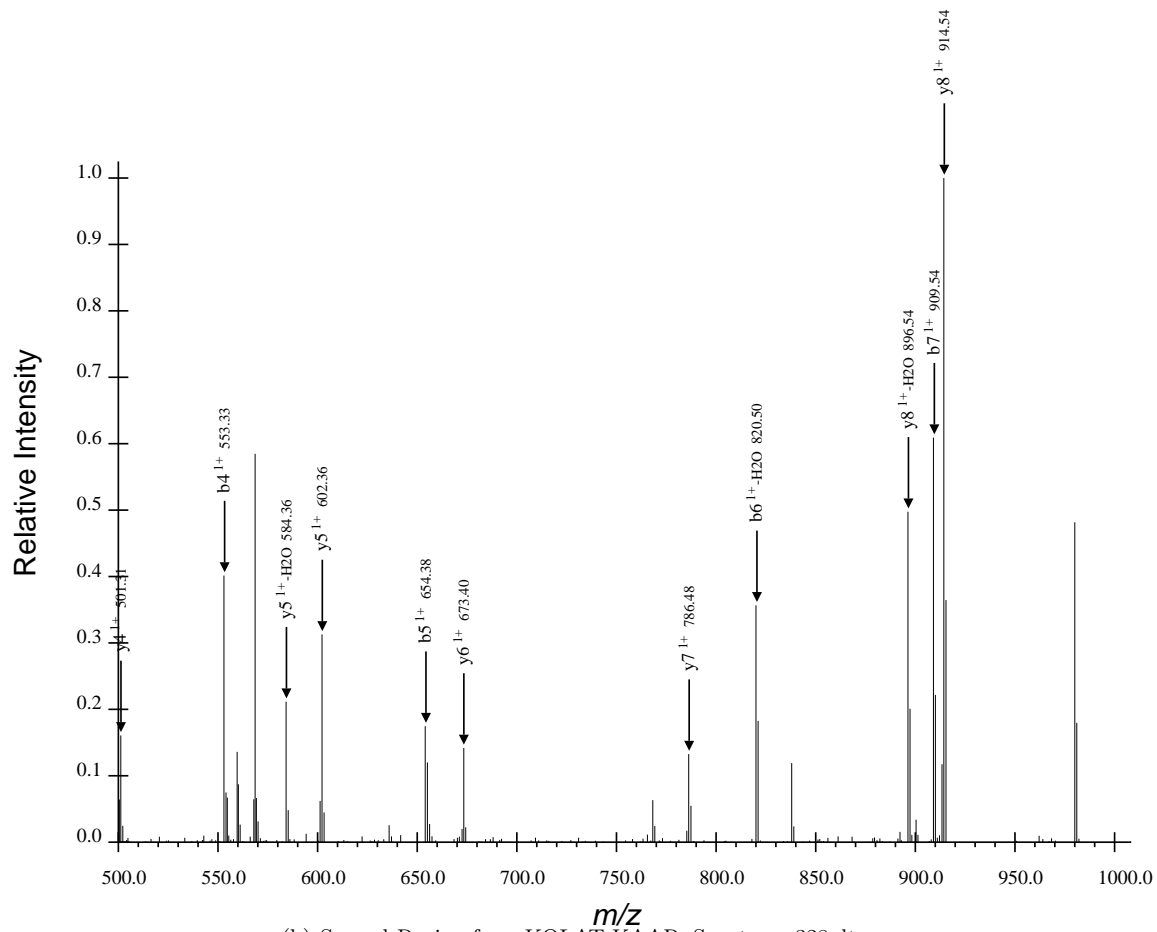

(b) Second Region for rrKQLATrKAAR, Spectrum 328.dta



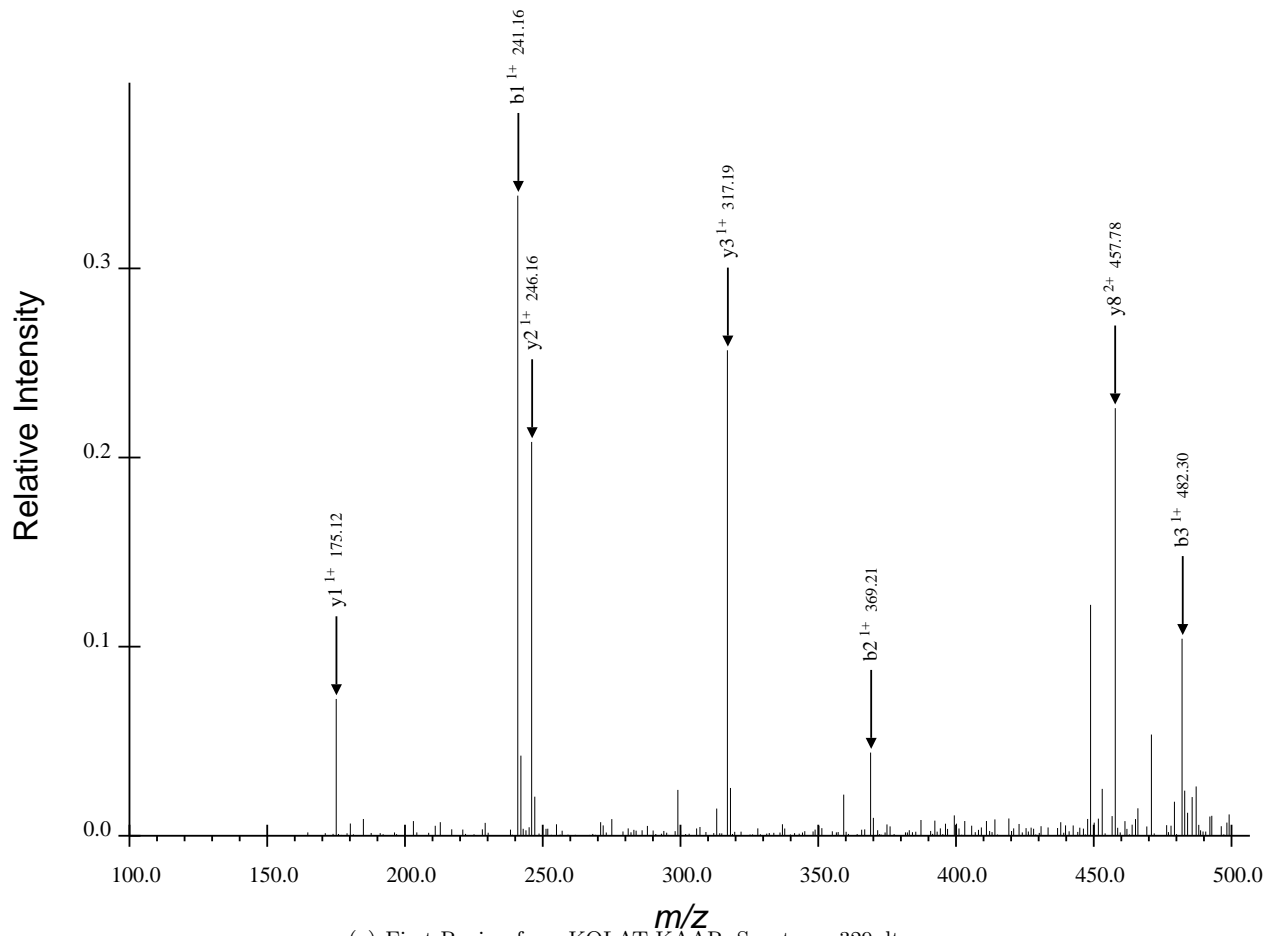

(a) First Region for rrKQLATrKAAR, Spectrum 329.dta

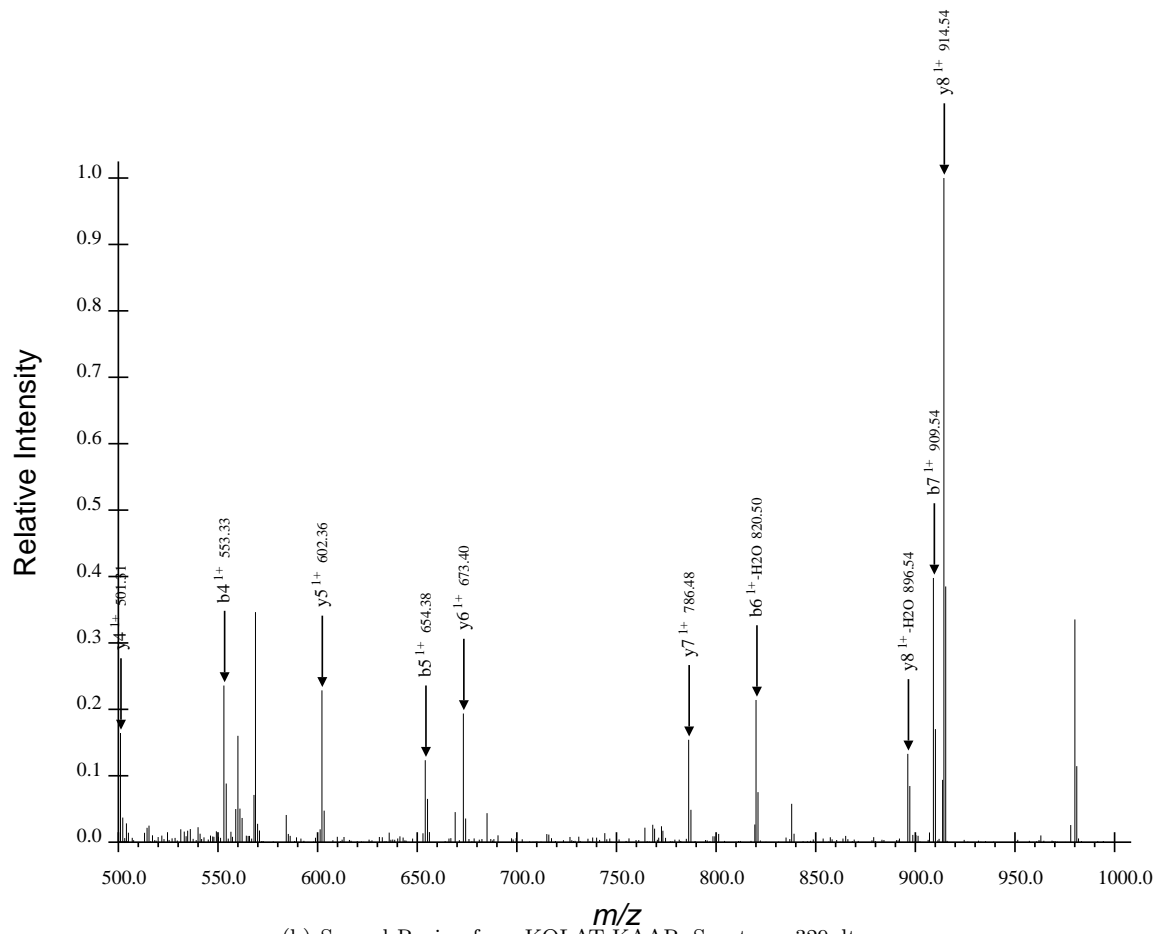

(b) Second Region for rrKQLATrKAAR, Spectrum 329.dta

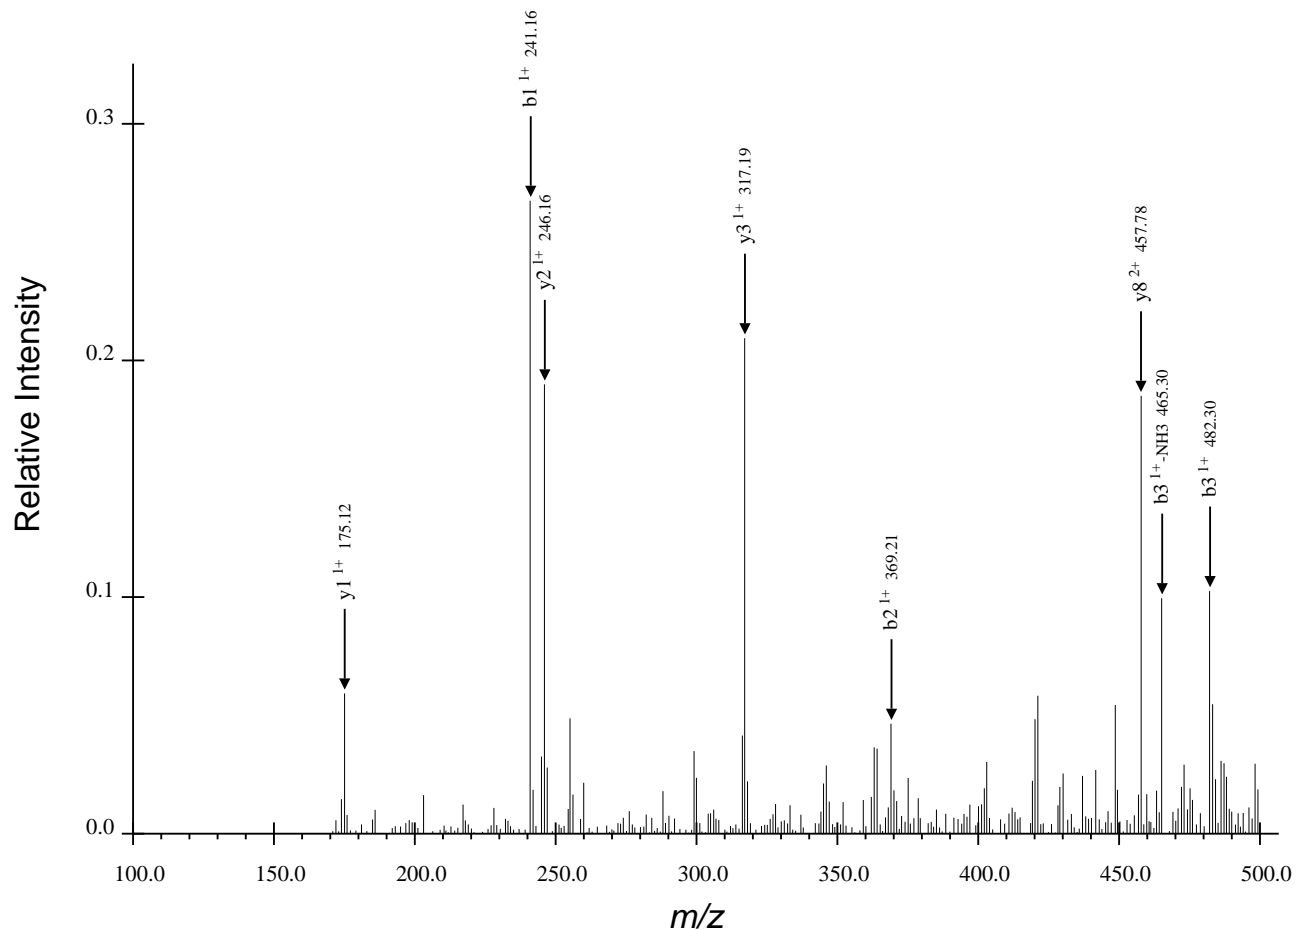

(a) First Region for rrKQLATrKAAR, Spectrum 330.dta

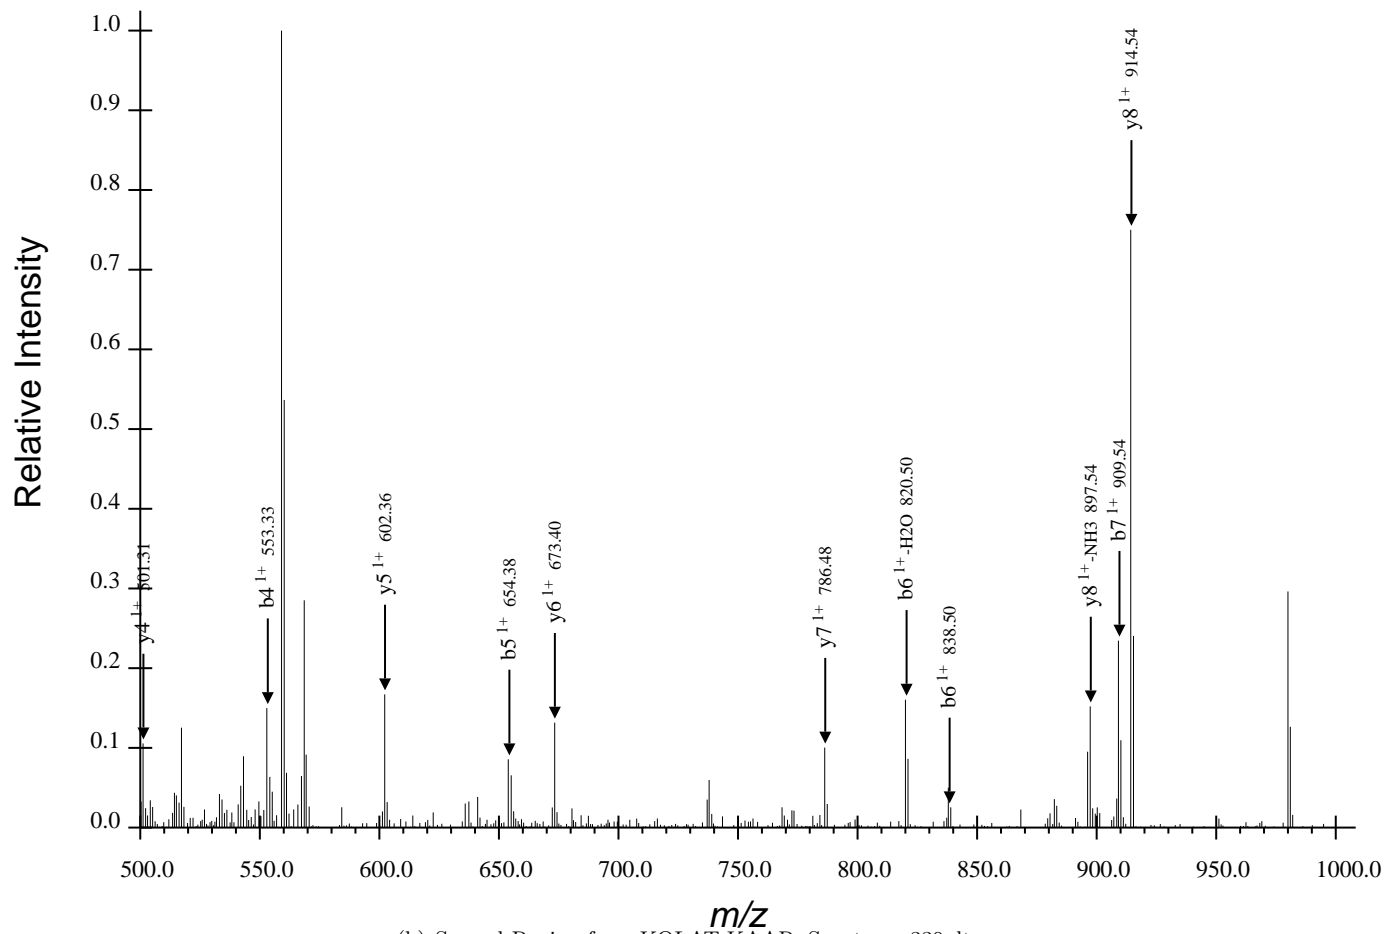

(b) Second Region for rrKQLATrKAAR, Spectrum 330.dta

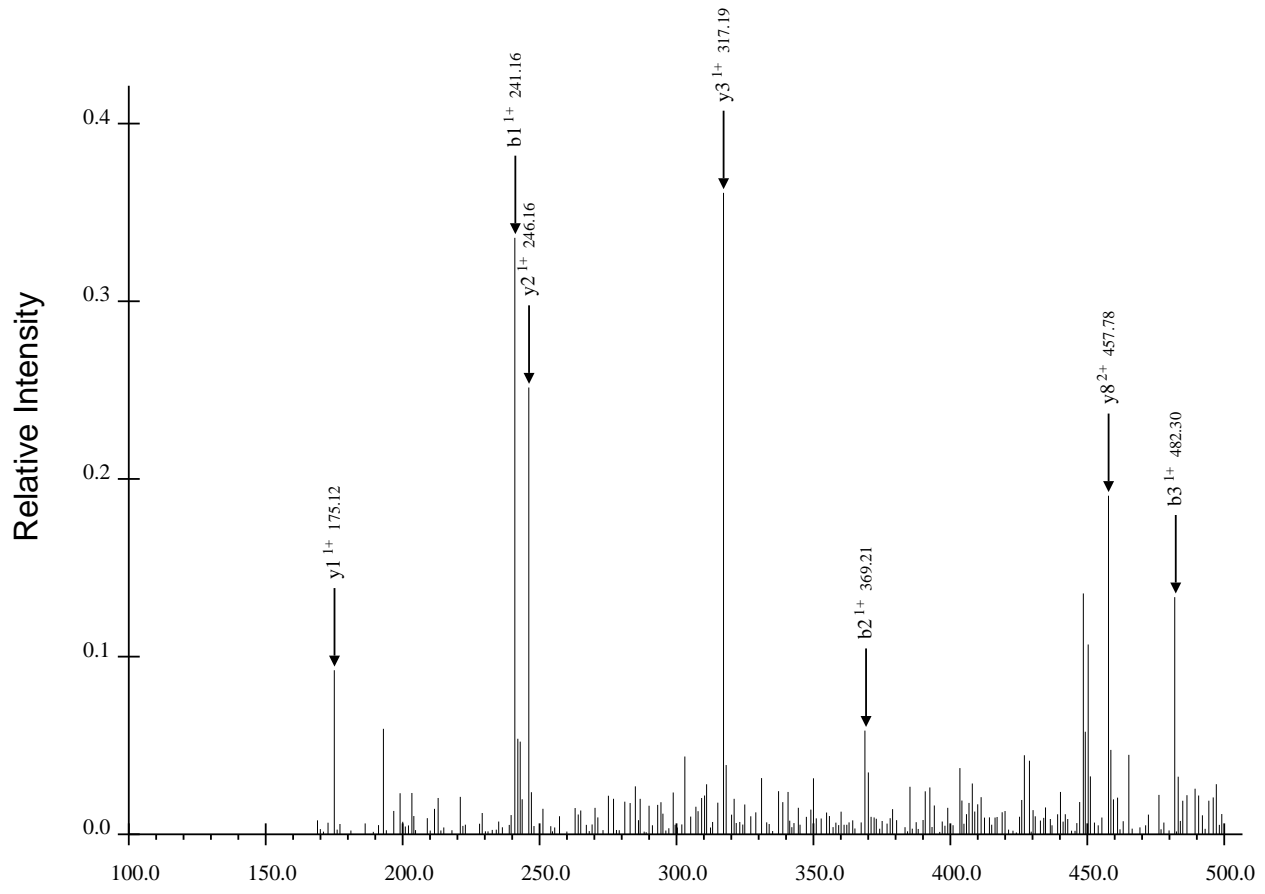

(a) First Region for rrKQLATrKAAR, Spectrum 331.dta

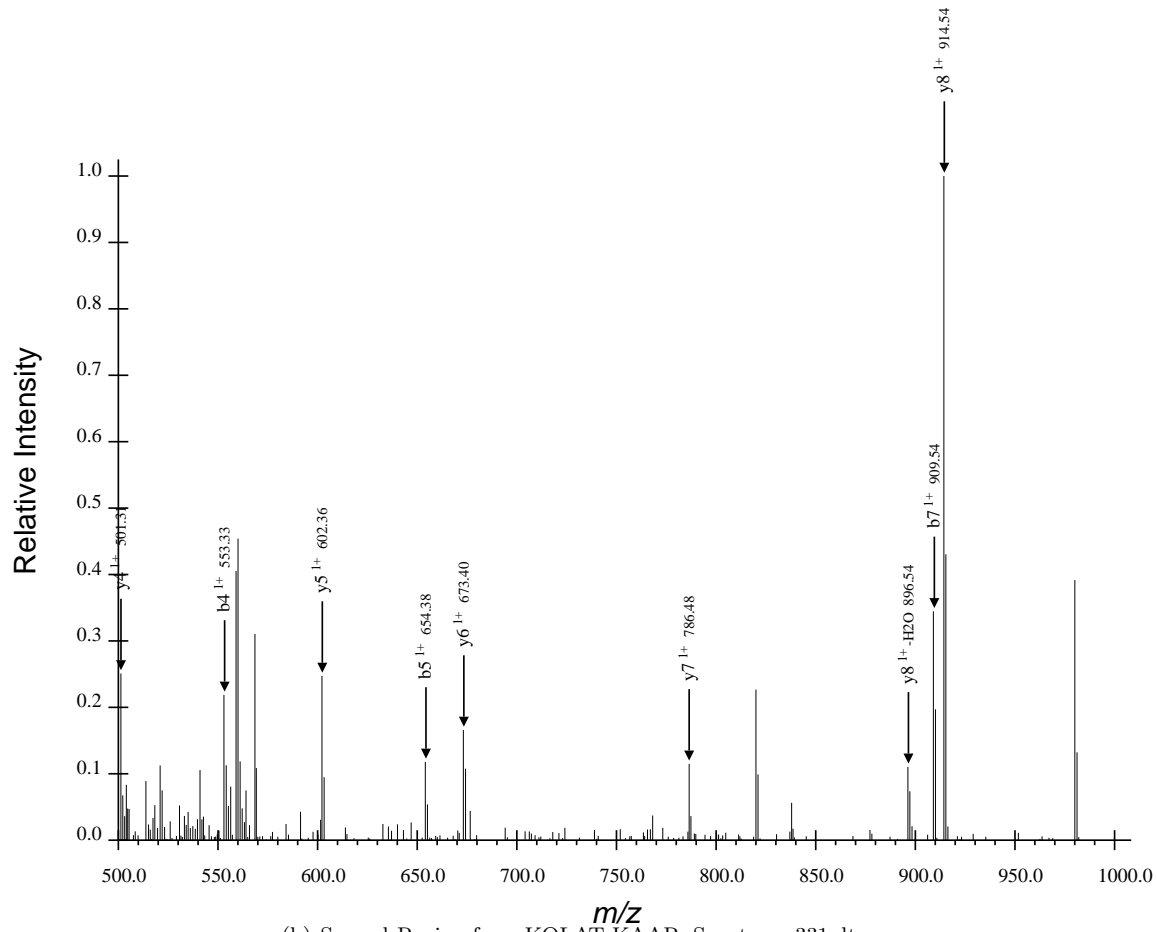

(b) Second Region for rrKQLATrKAAR, Spectrum 331.dta

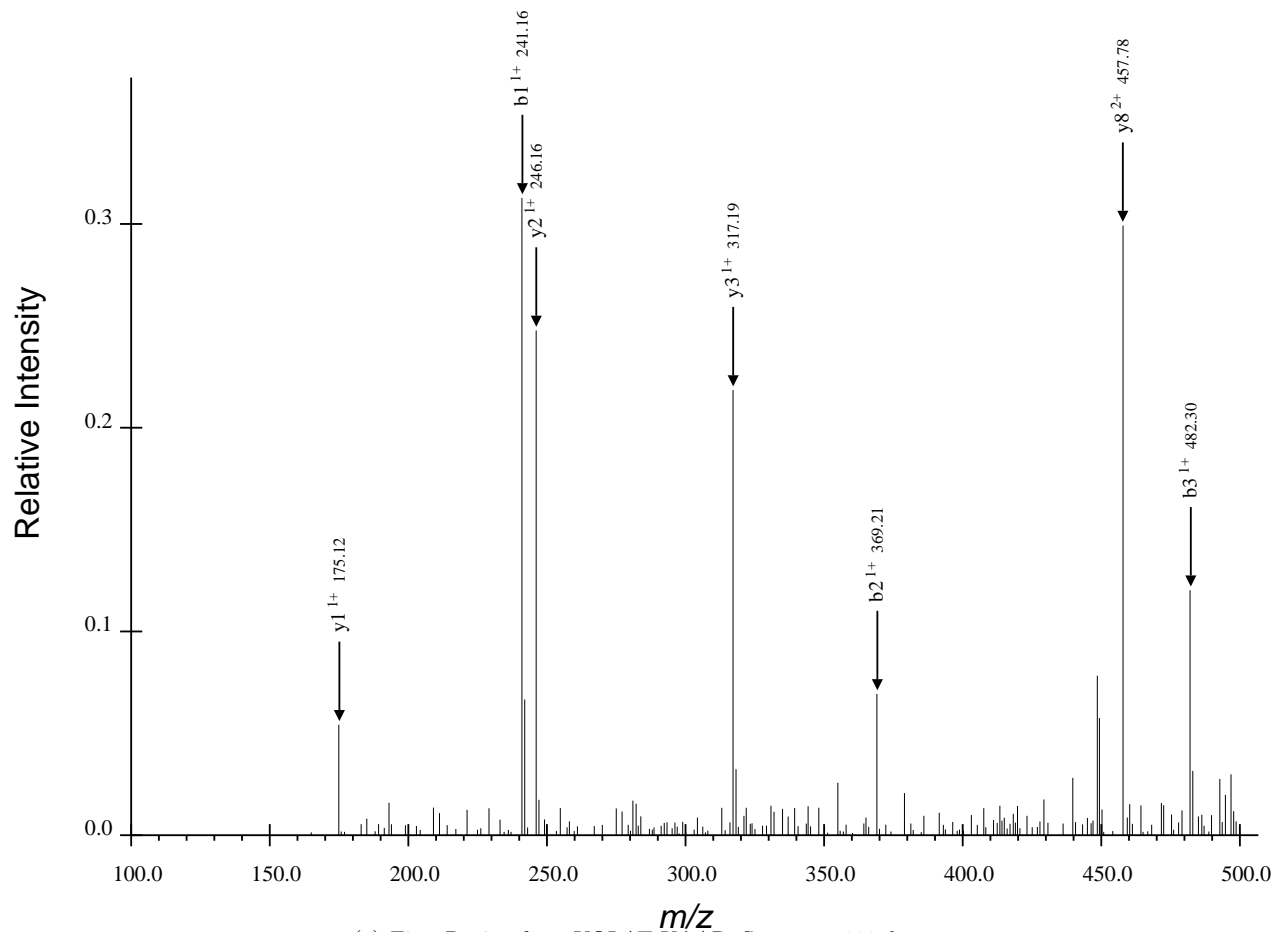

(a) First Region for rrKQLATrKAAR, Spectrum 332.dta

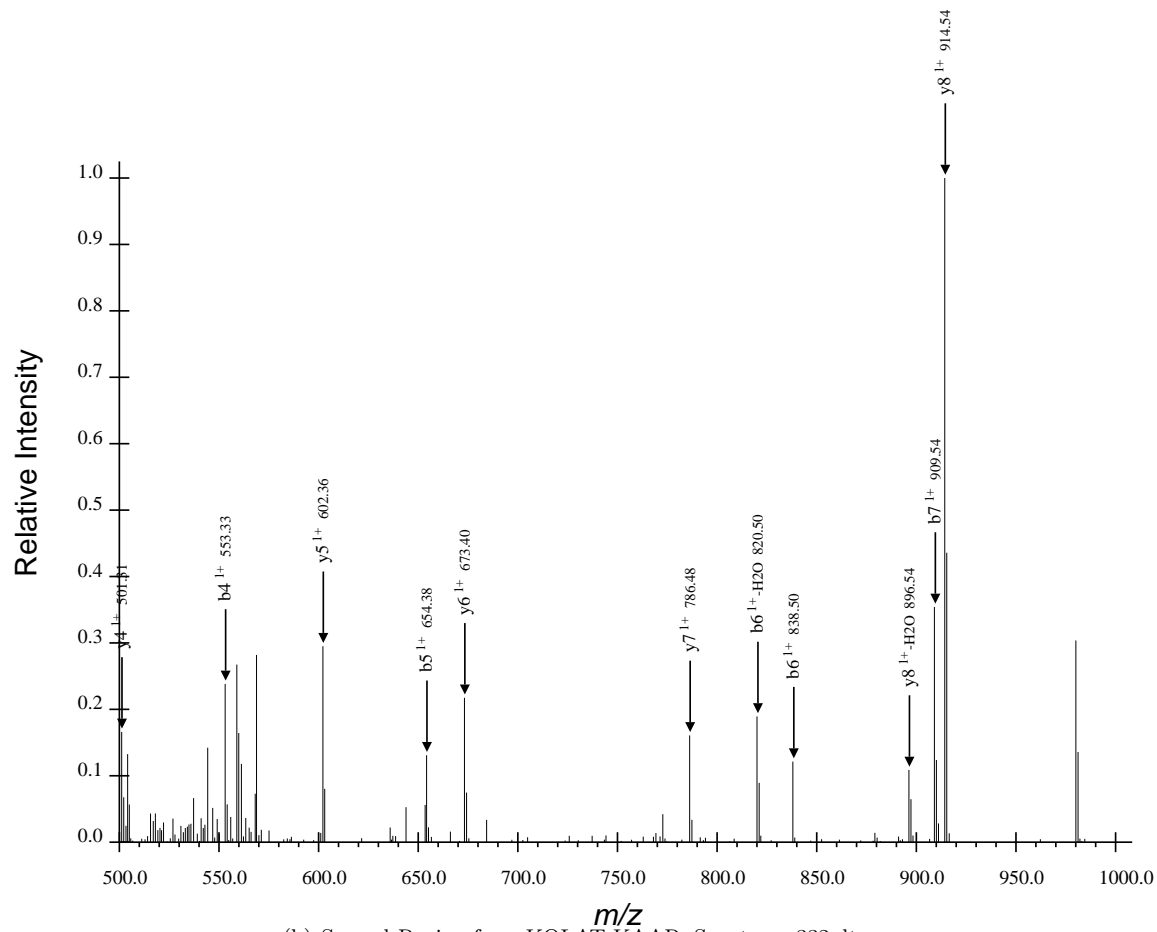

(b) Second Region for rrKQLATrKAAR, Spectrum 332.dta

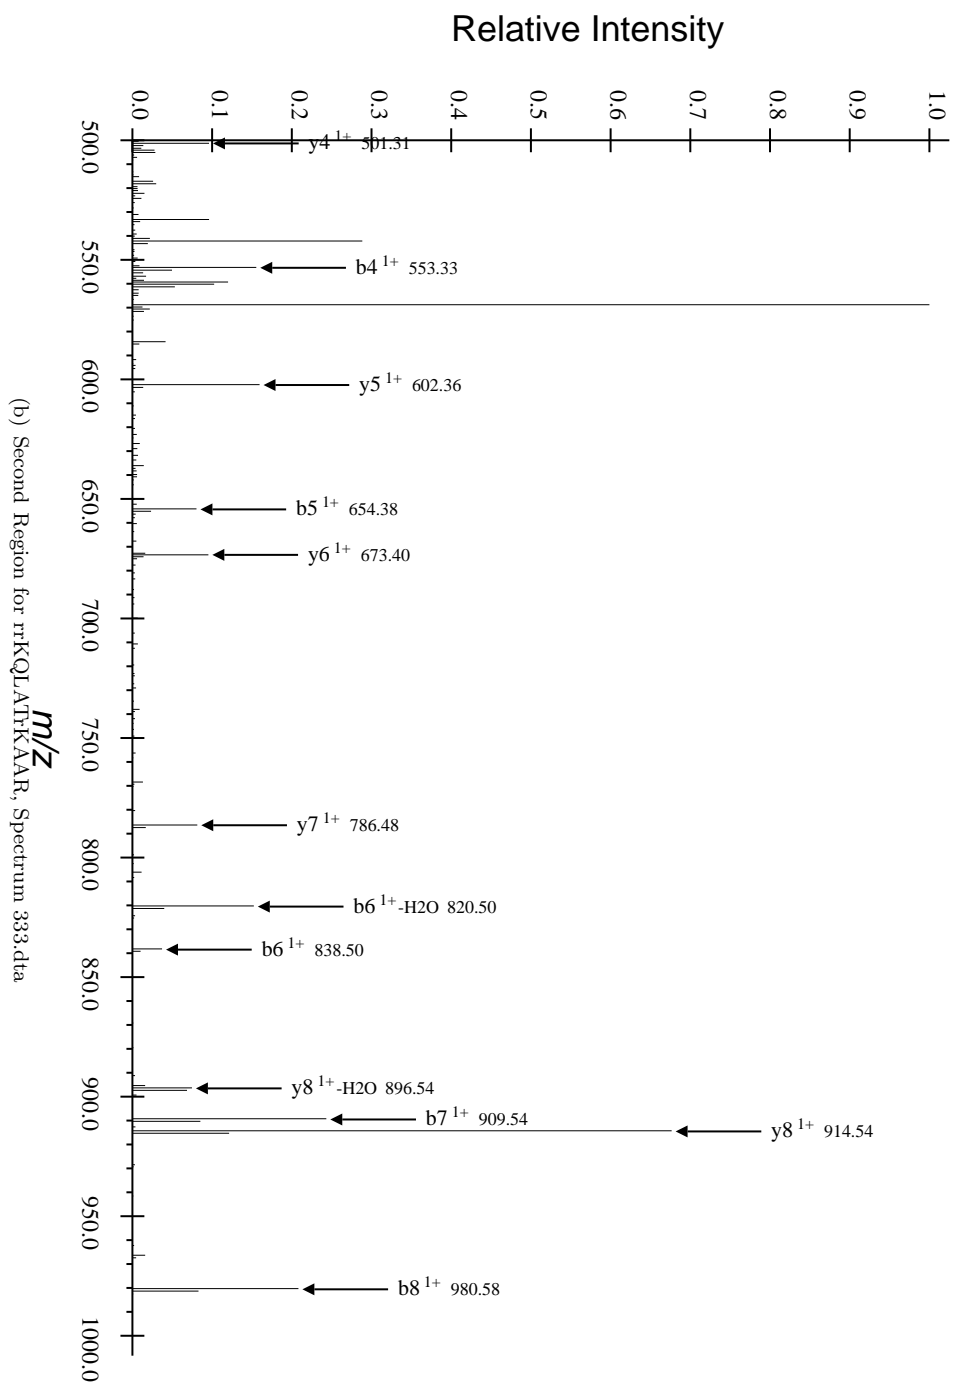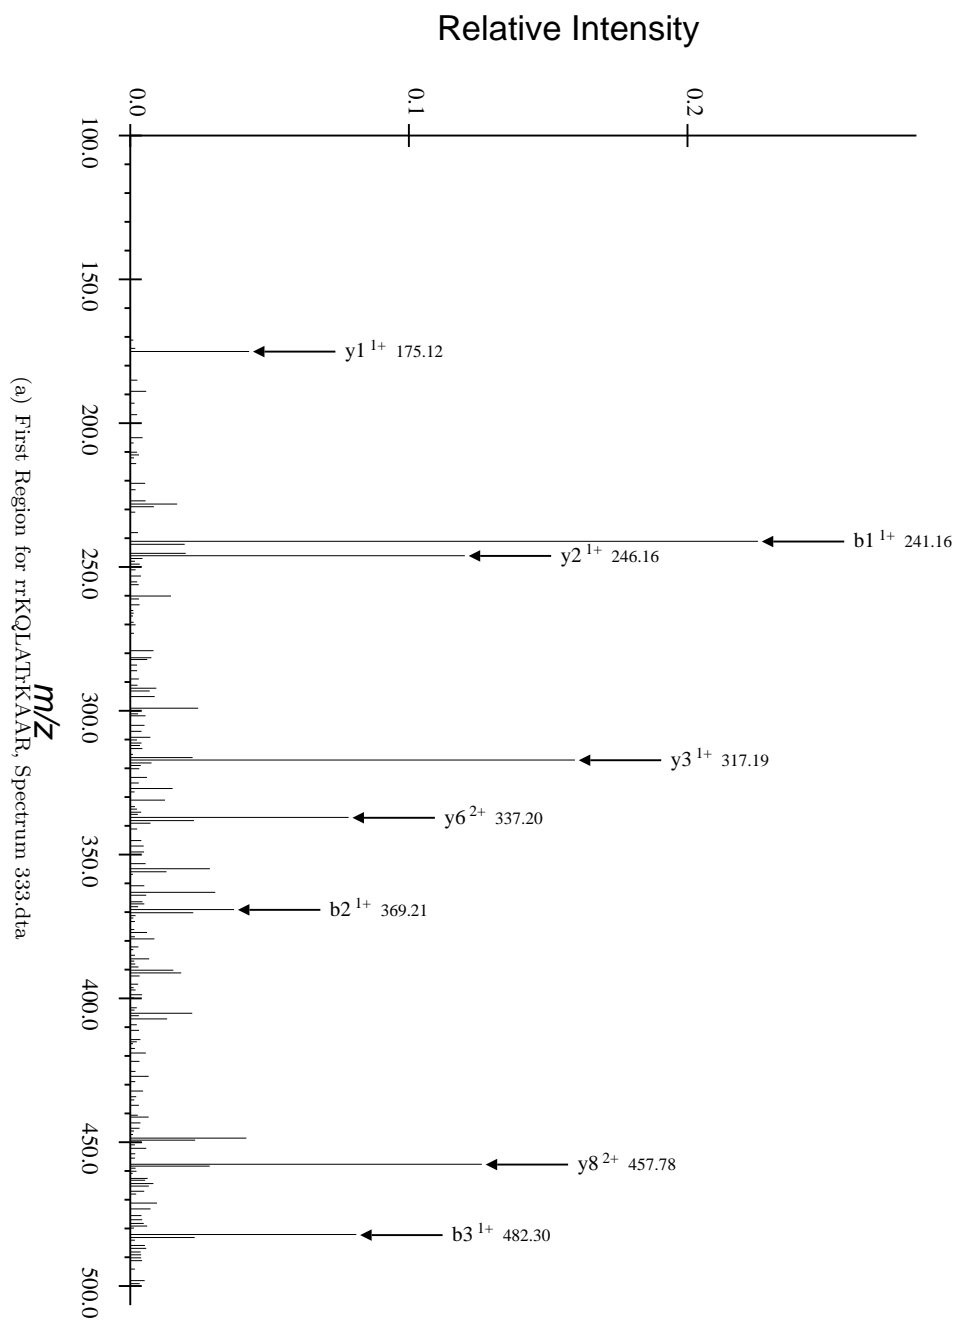

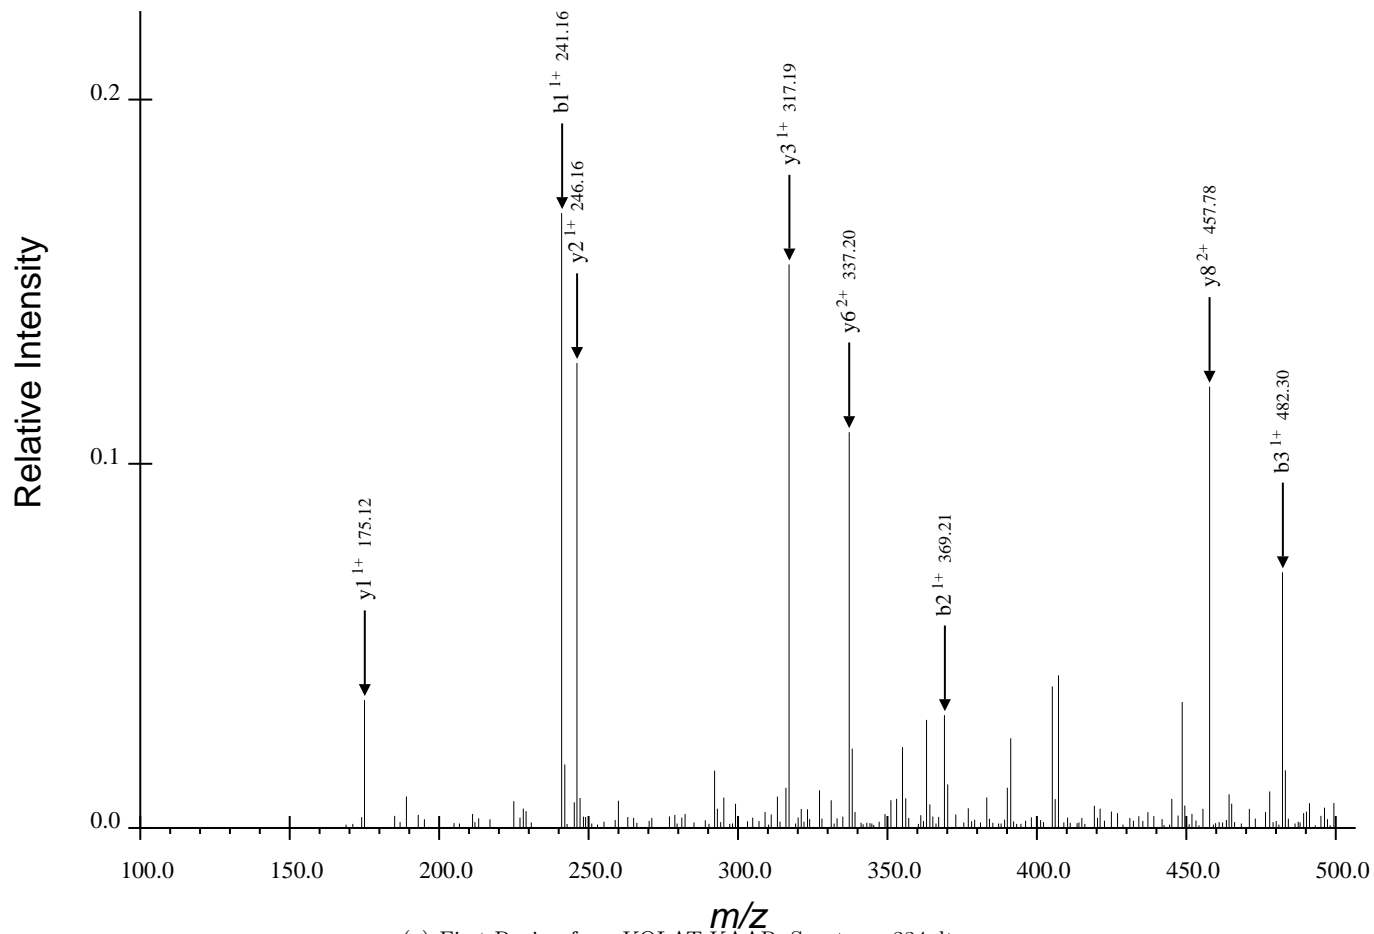

(a) First Region for rrKQLATrKAAR, Spectrum 334.dta

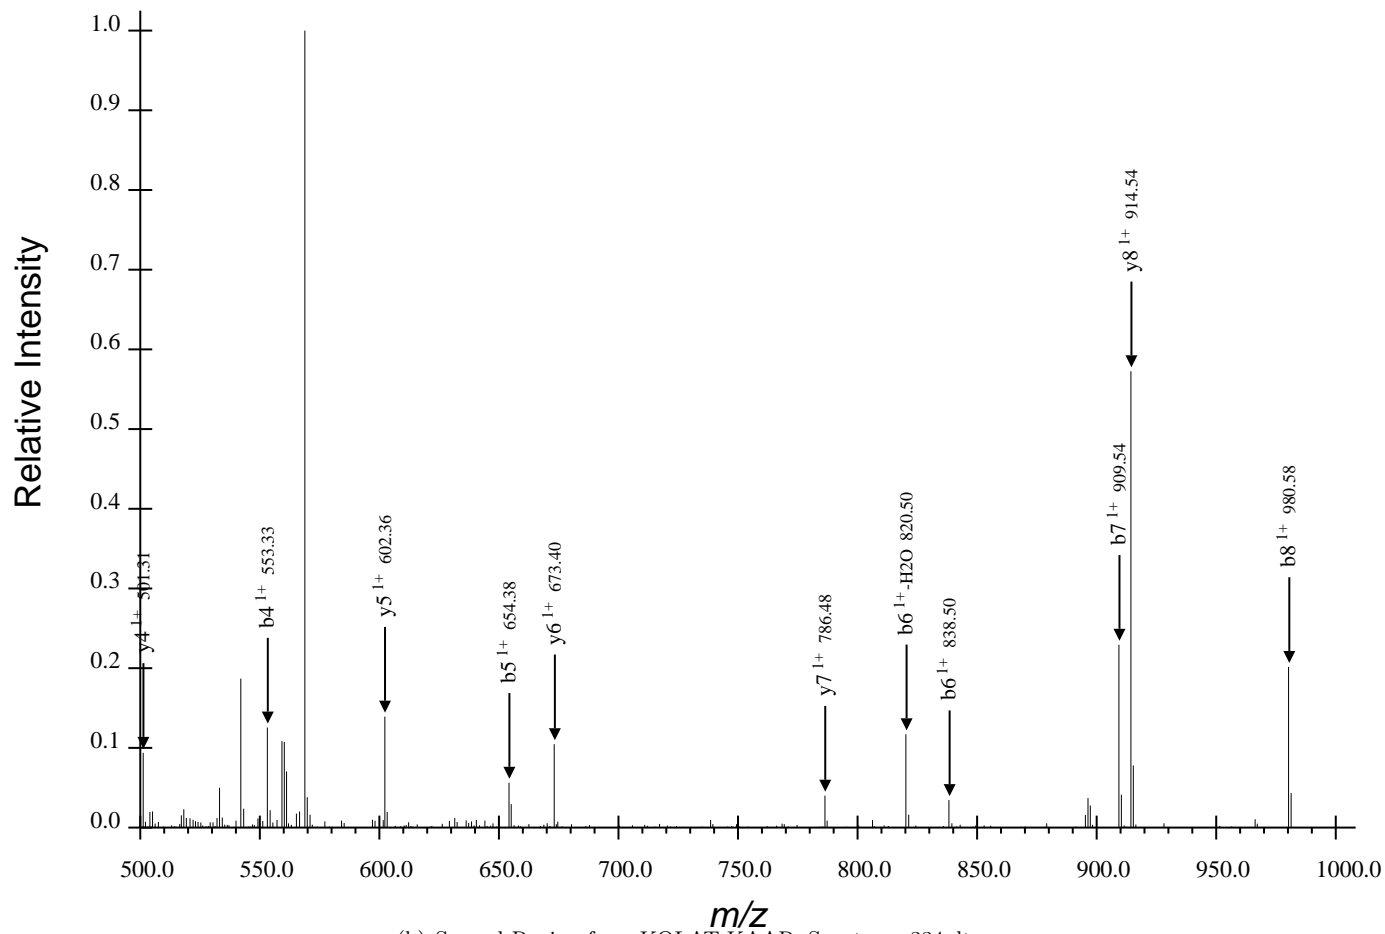

(b) Second Region for rrKQLATrKAAR, Spectrum 334.dta

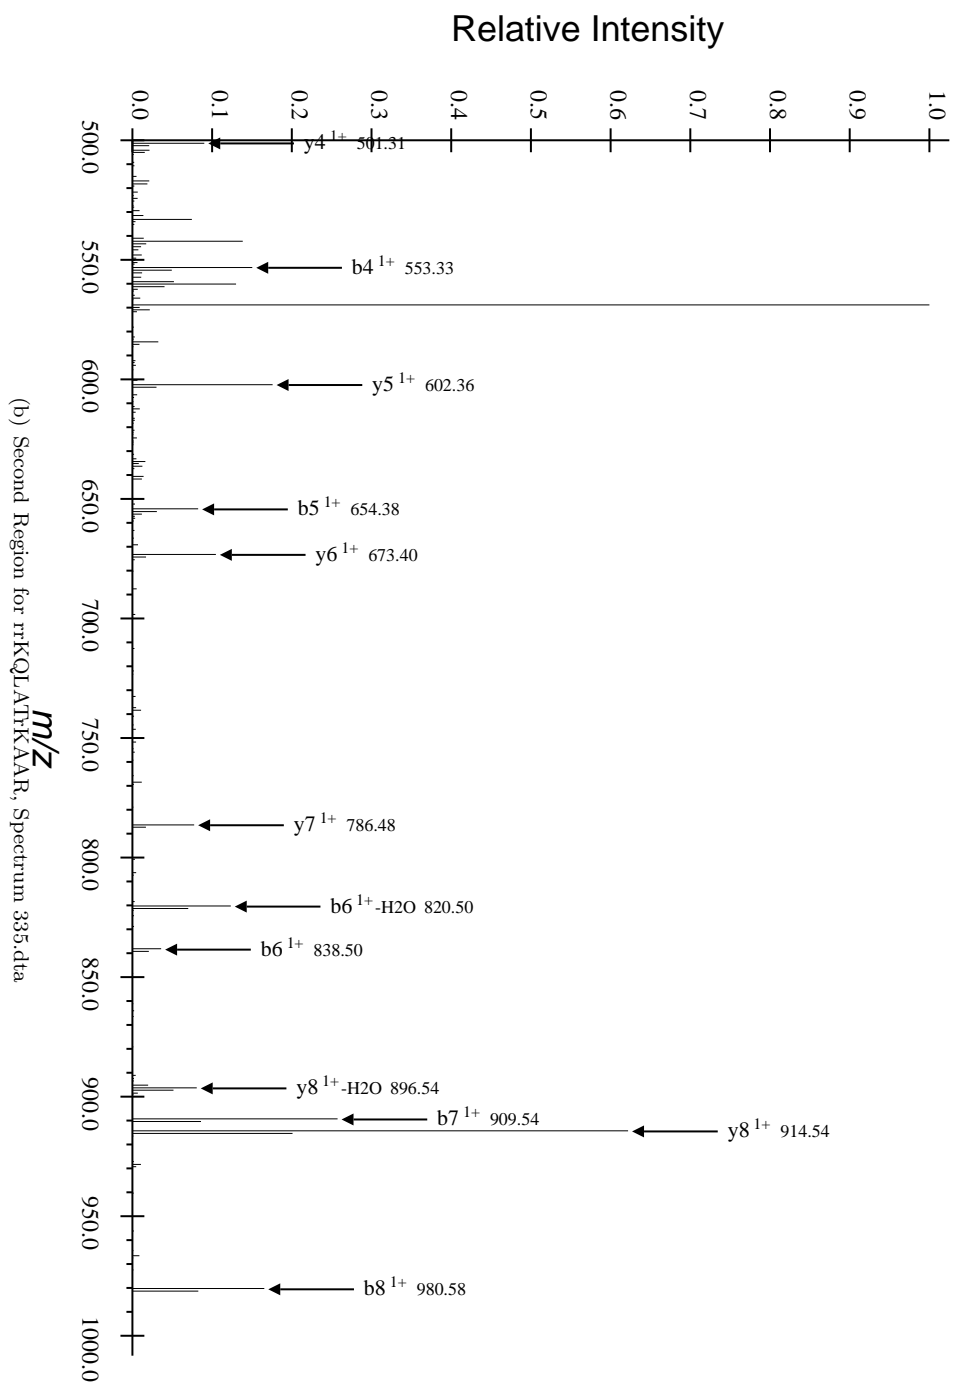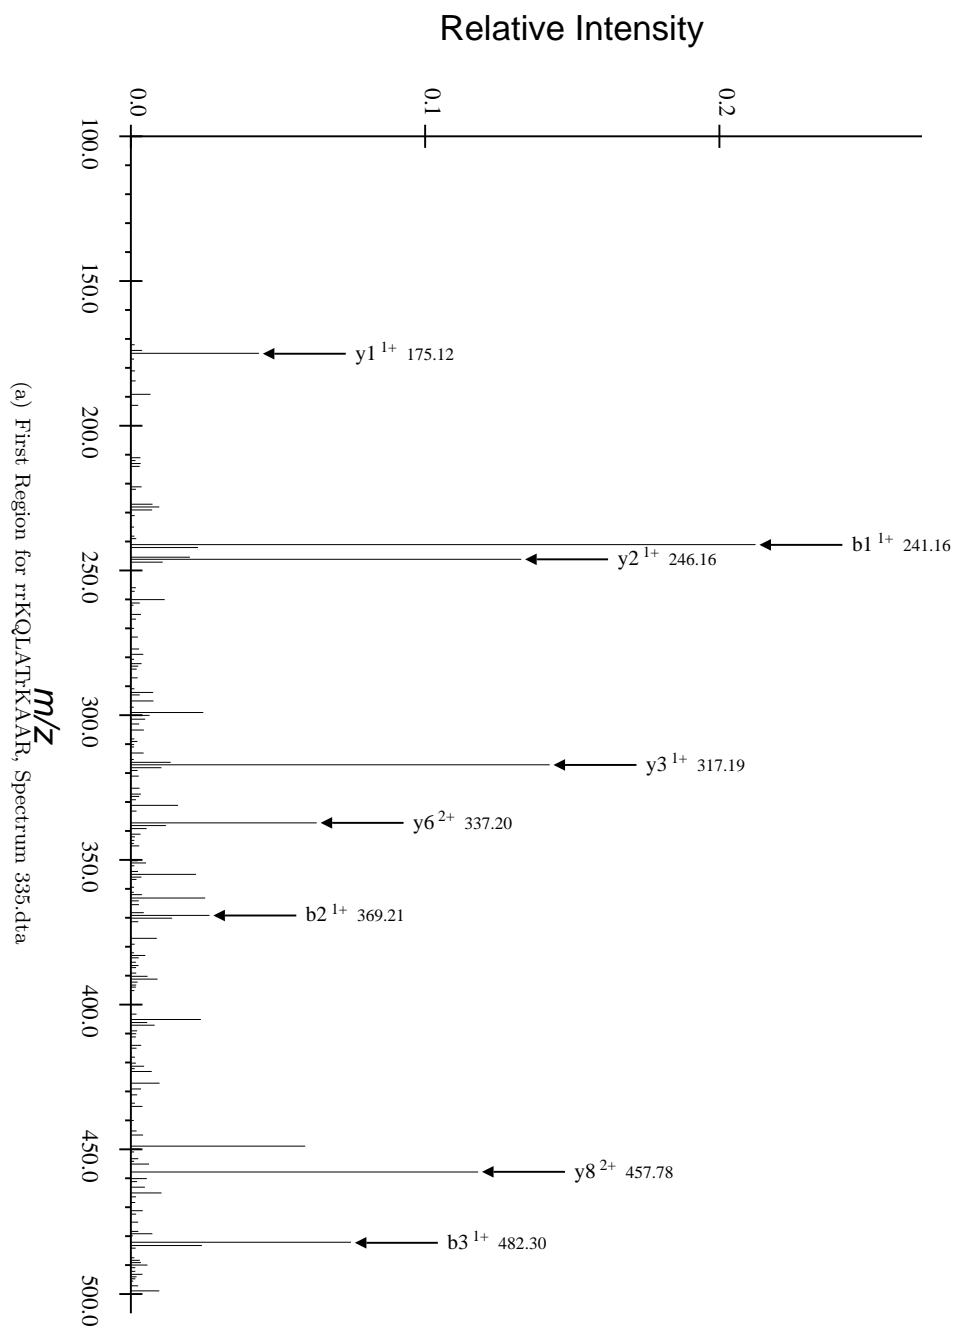

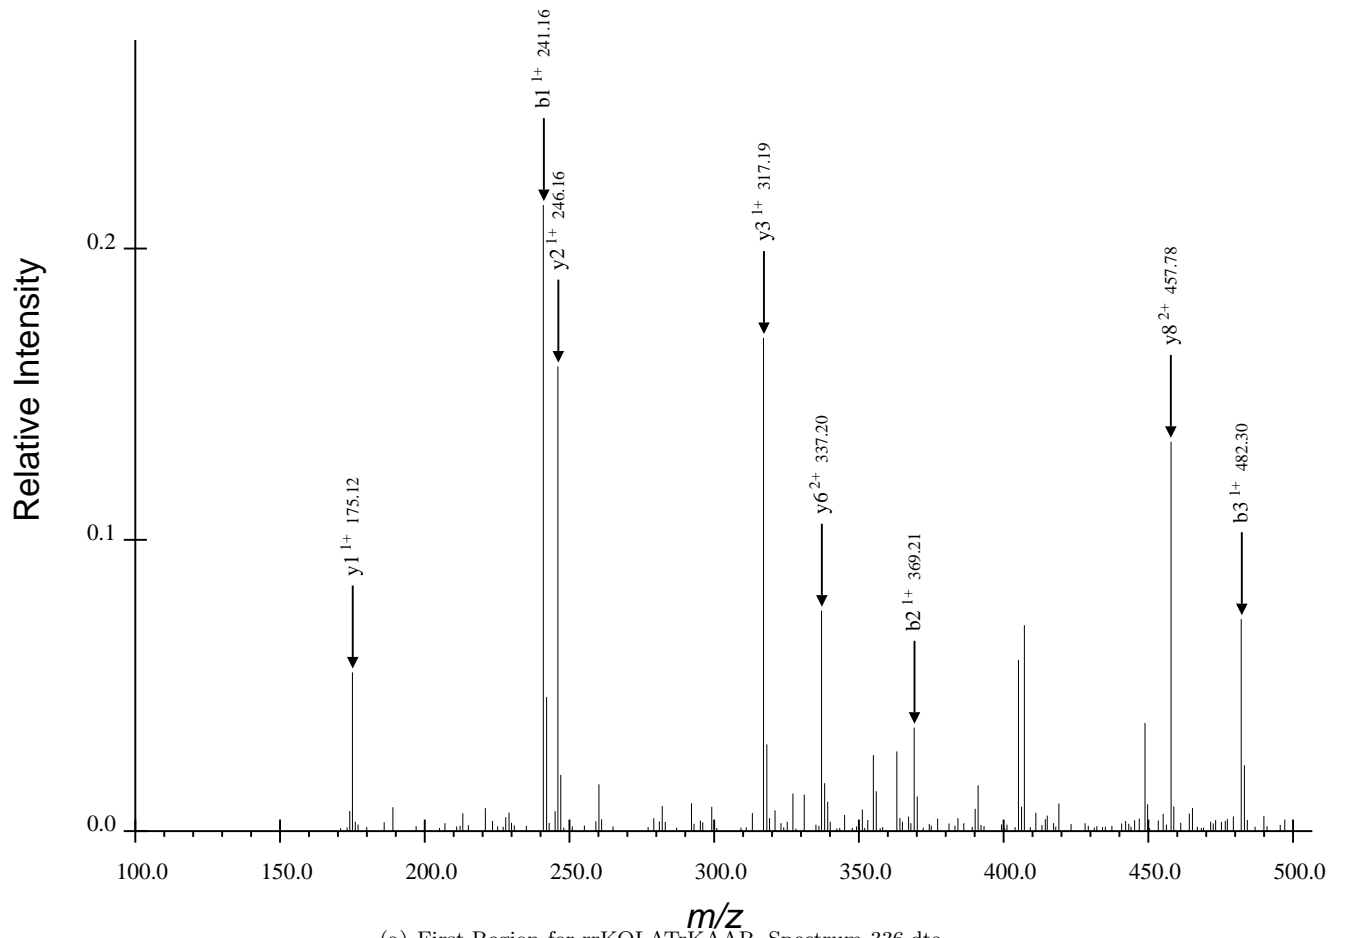

(a) First Region for rrKQLATrKAAR, Spectrum 336.dta

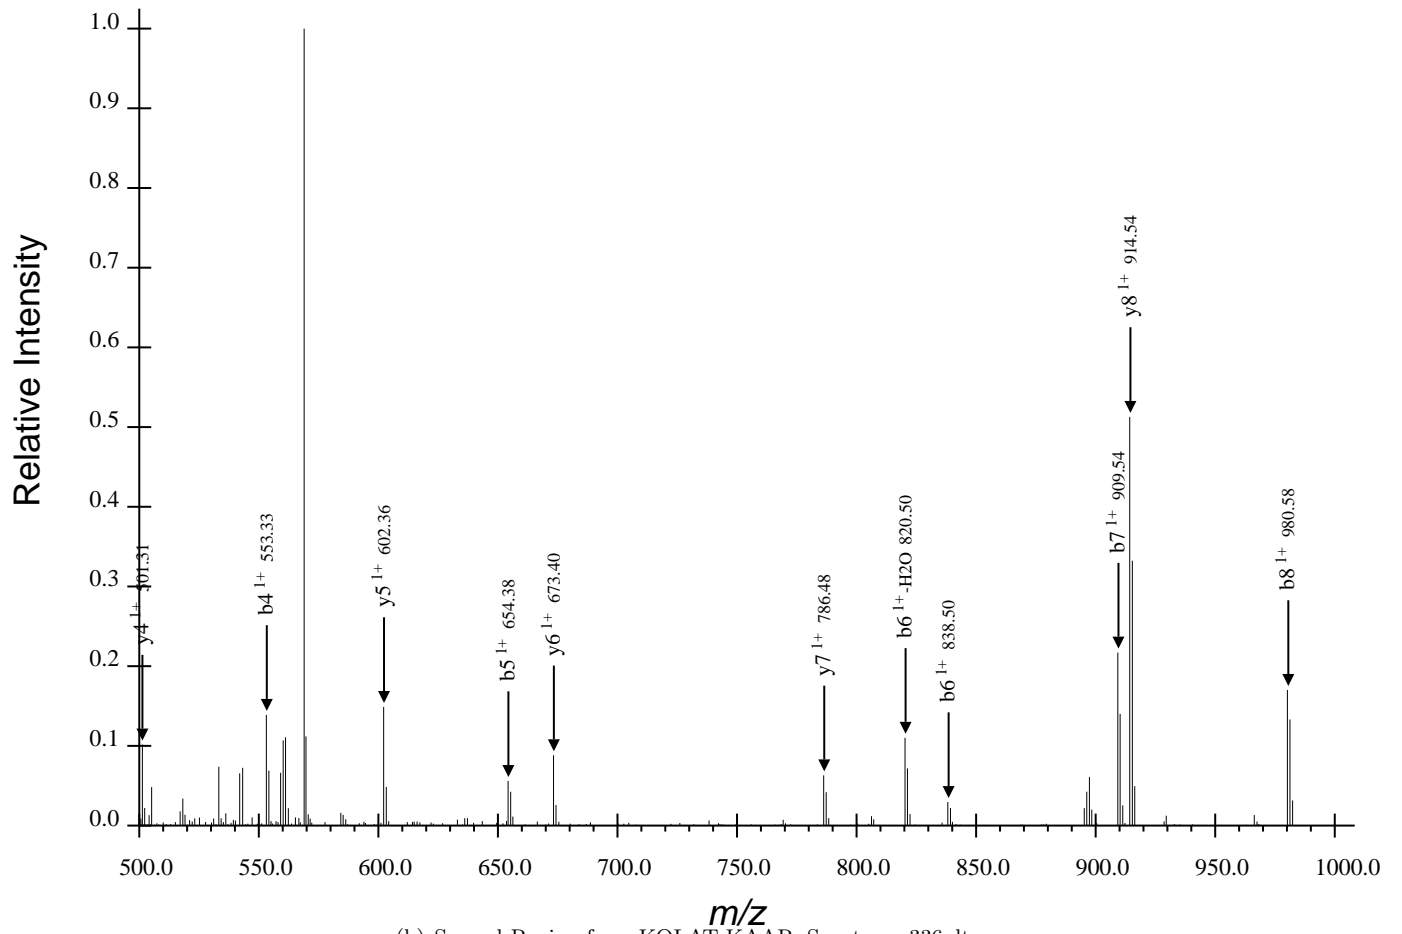

(b) Second Region for rrKQLATrKAAR, Spectrum 336.dta



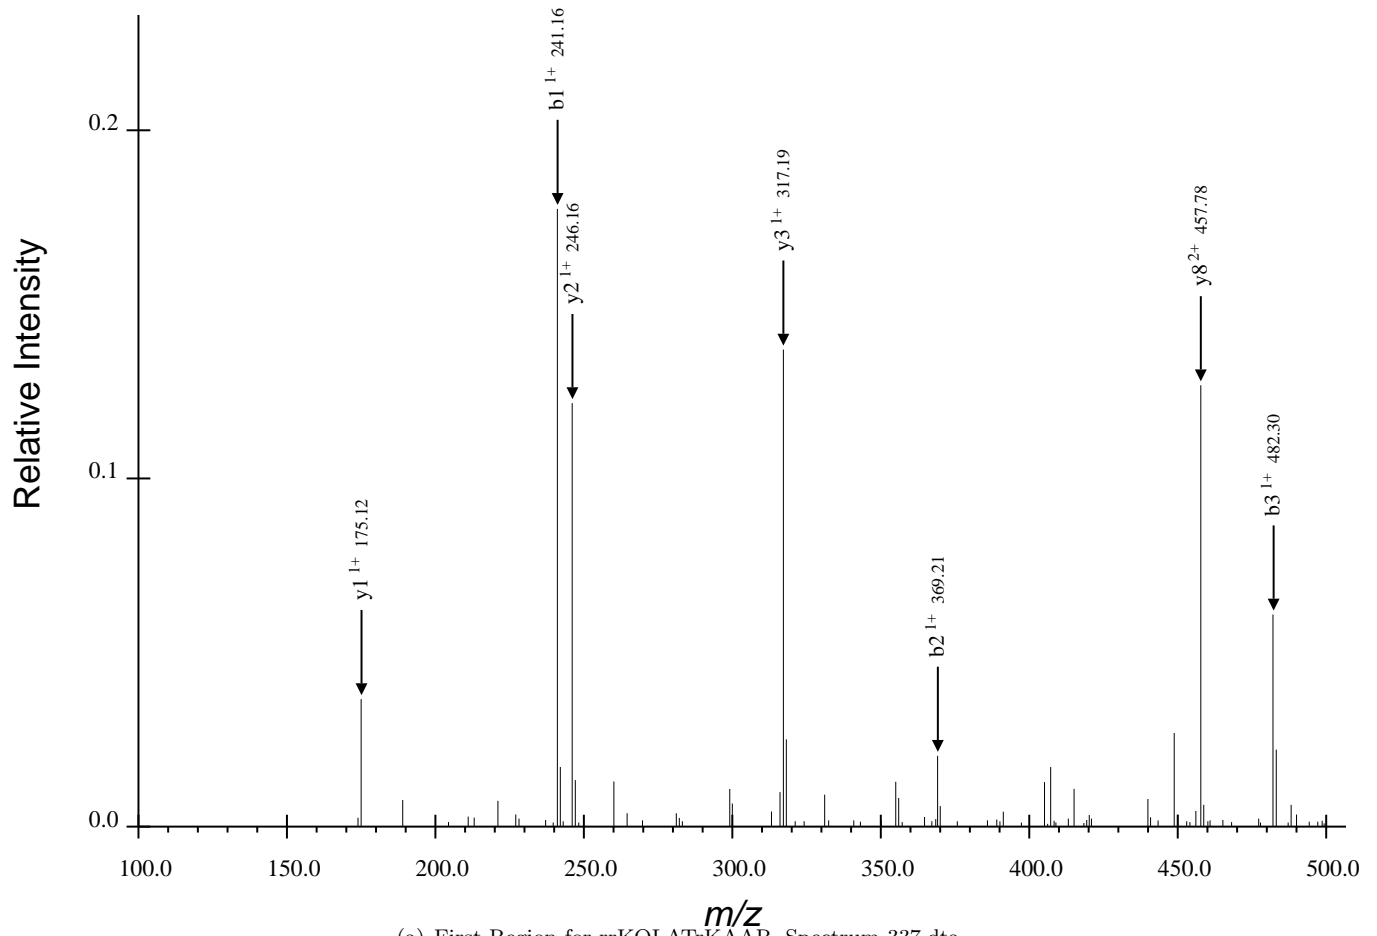

(a) First Region for rrKQLATrKAAR, Spectrum 337.dta

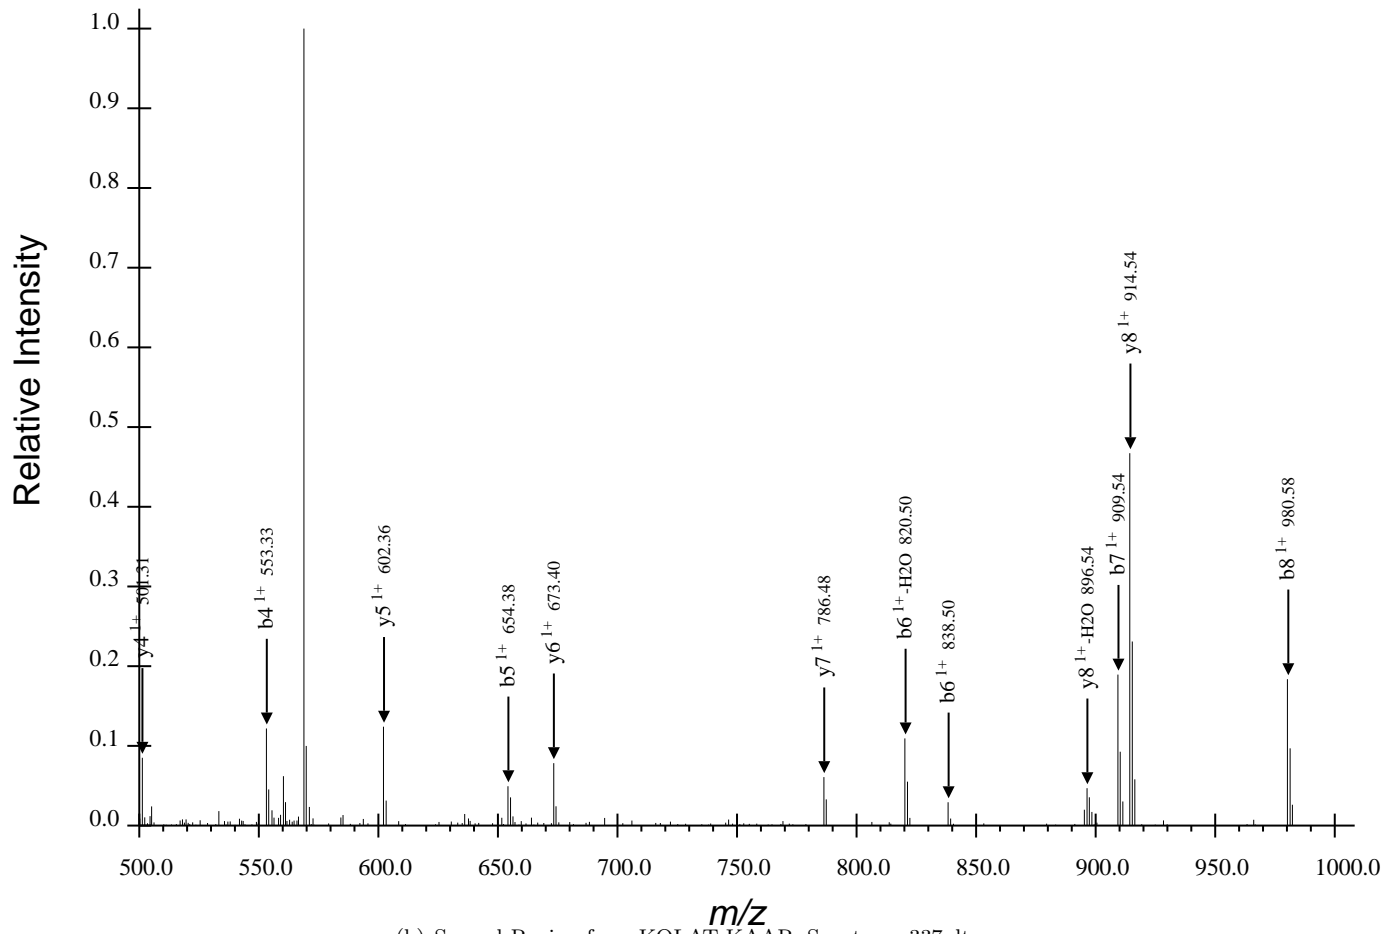

(b) Second Region for rrKQLATrKAAR, Spectrum 337.dta

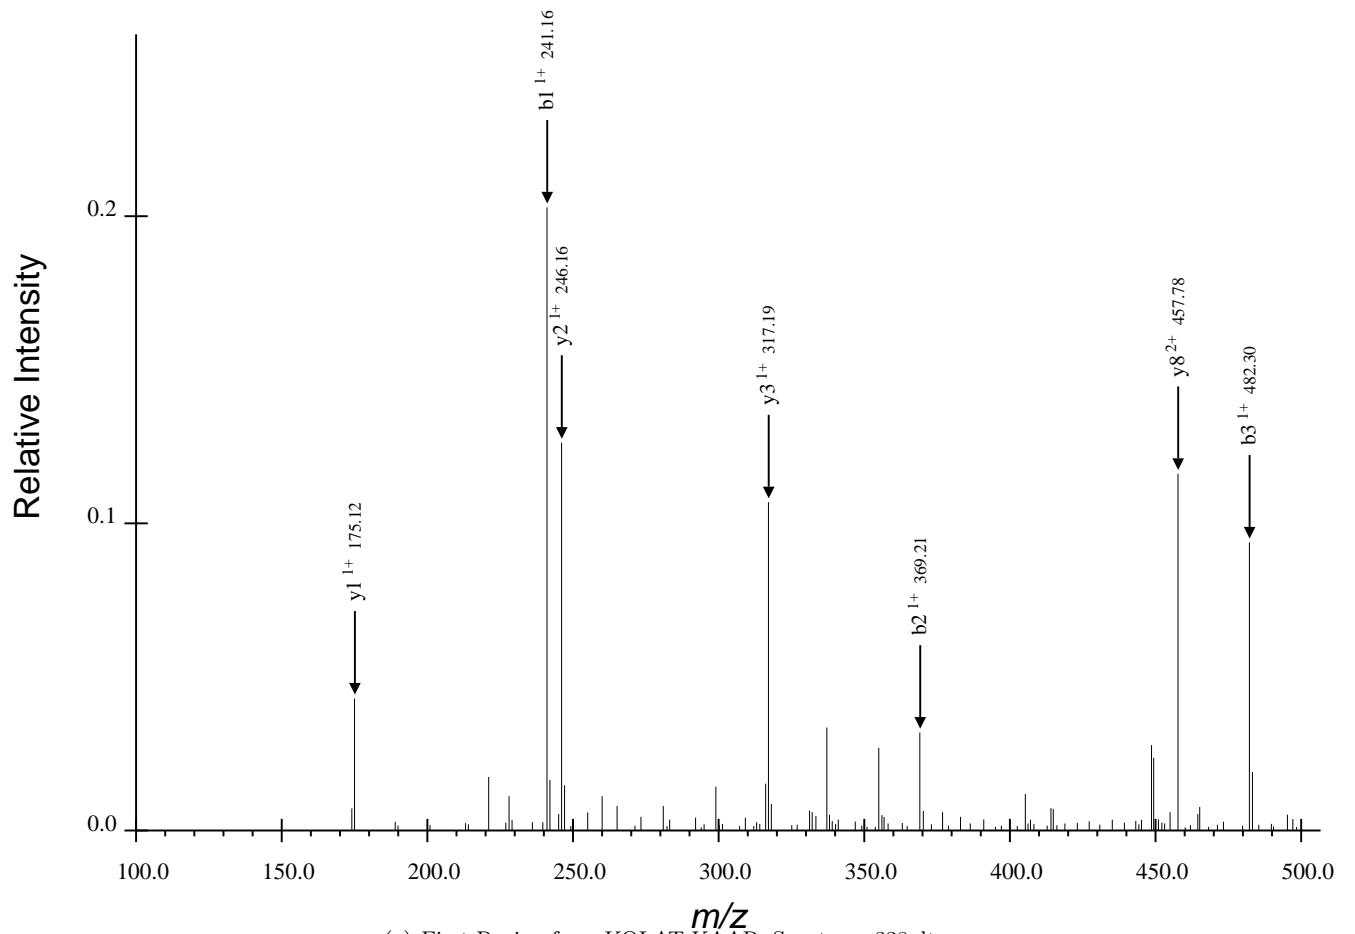

(a) First Region for rrKQLATrKAAR, Spectrum 338.dta

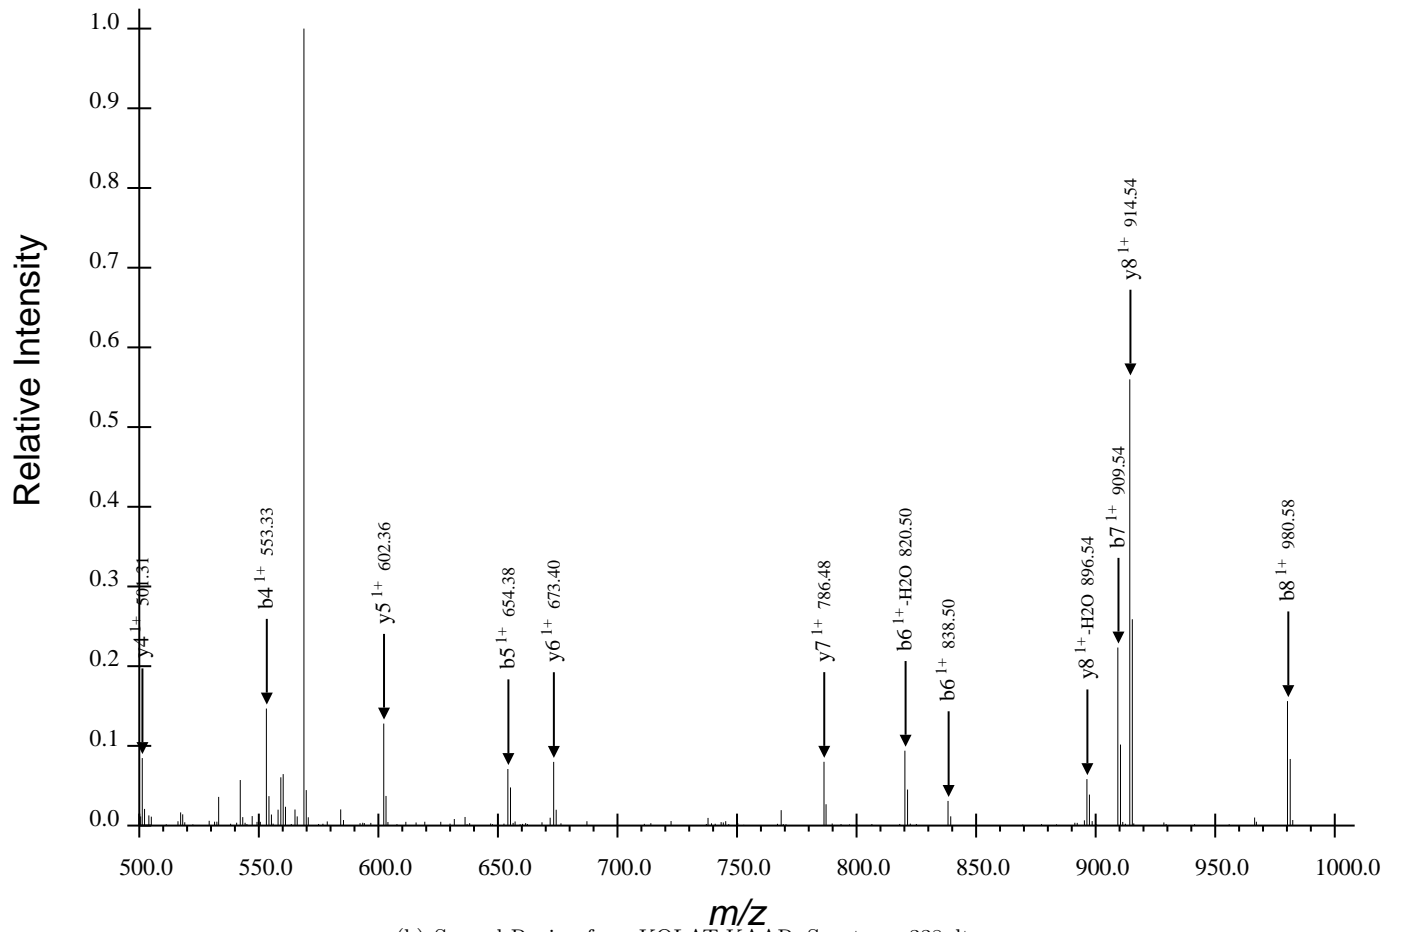

(b) Second Region for rrKQLATrKAAR, Spectrum 338.dta

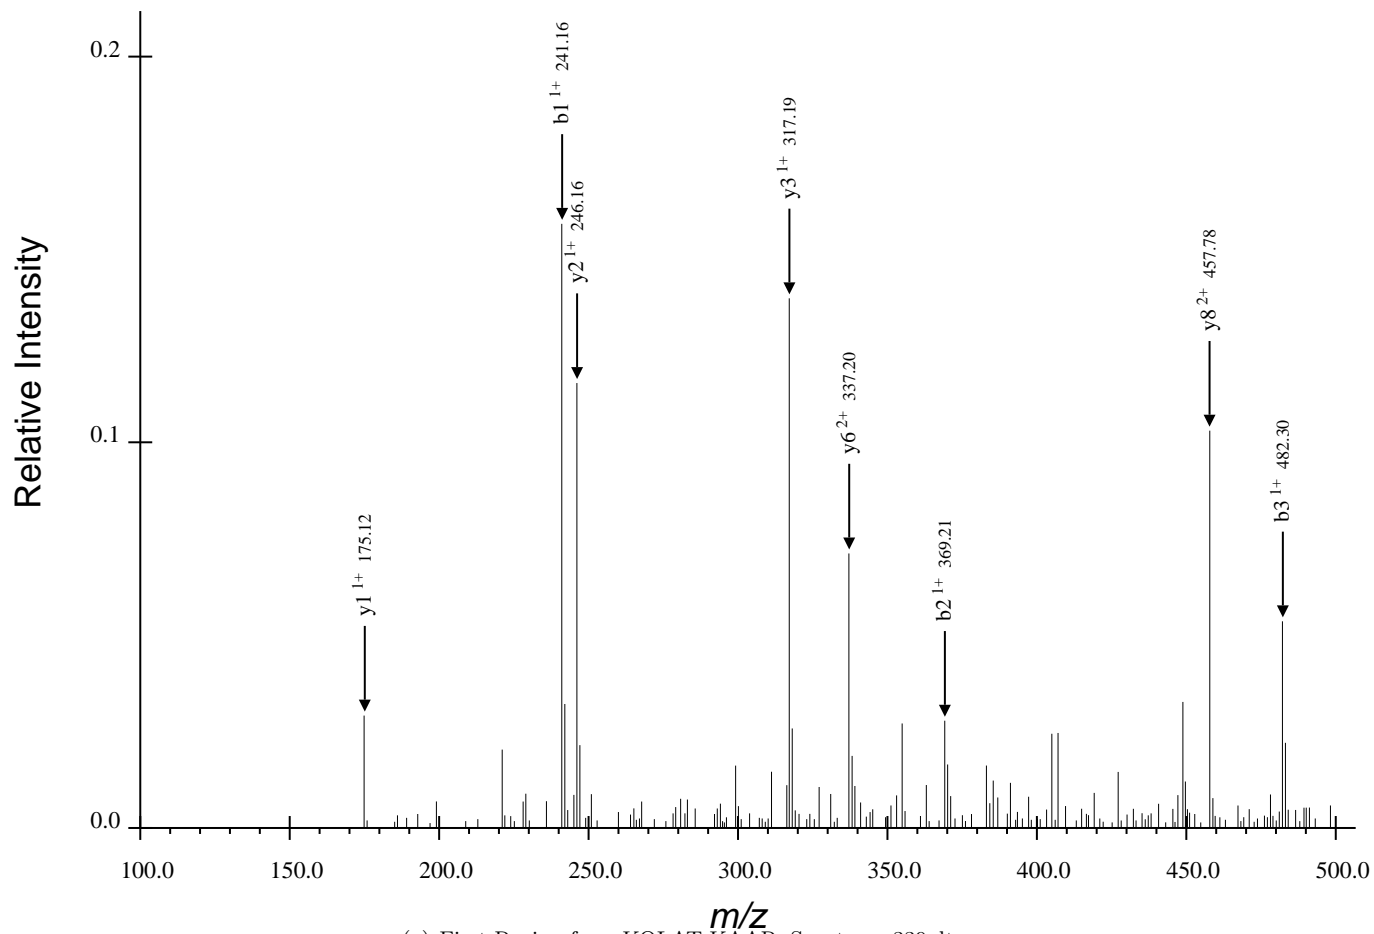

(a) First Region for rrKQLATrKAAR, Spectrum 339.dta

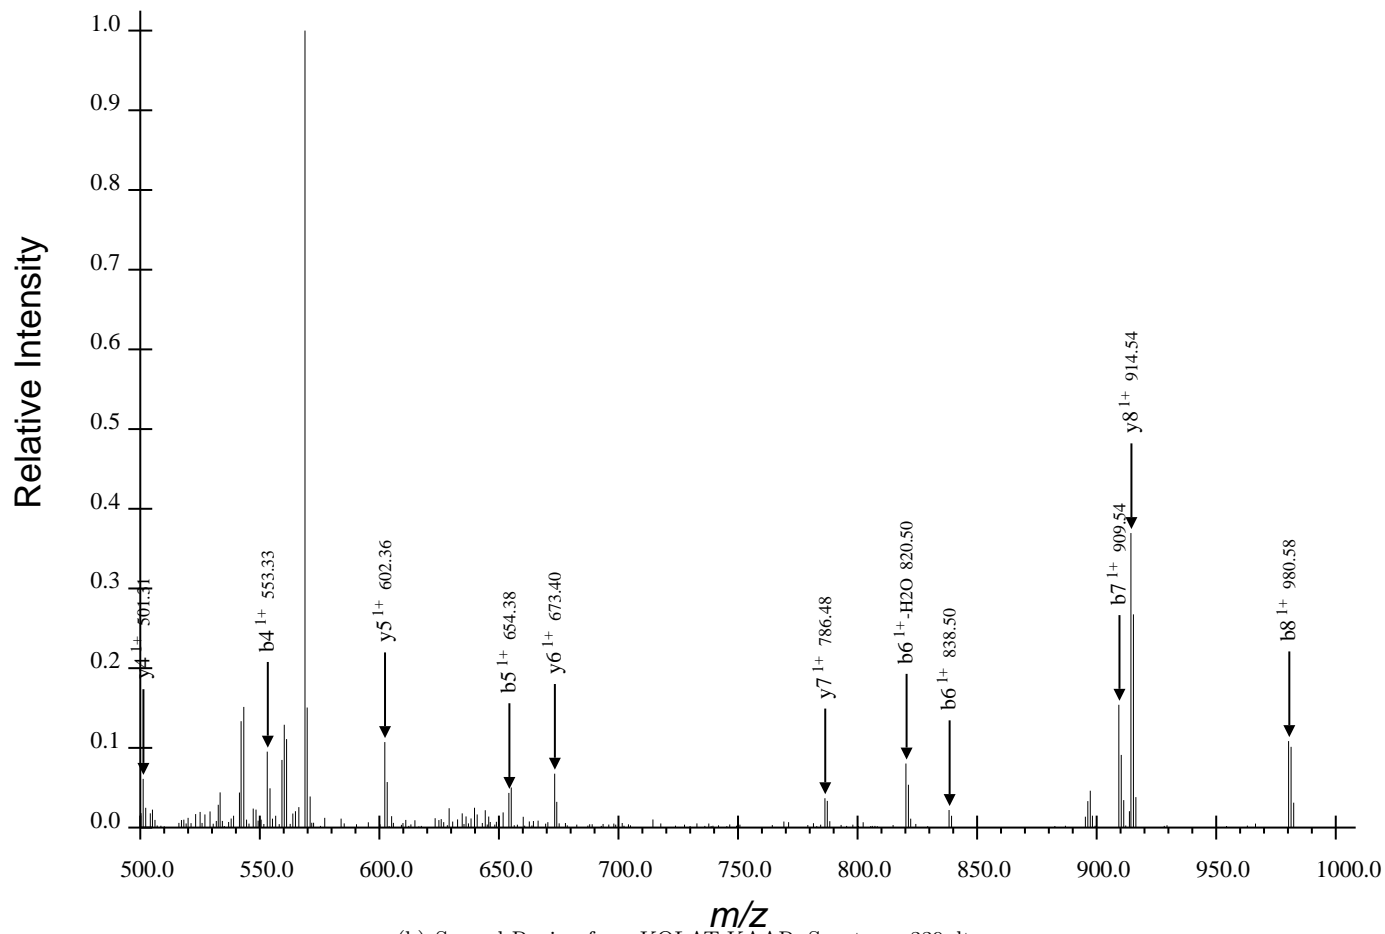

(b) Second Region for rrKQLATrKAAR, Spectrum 339.dta

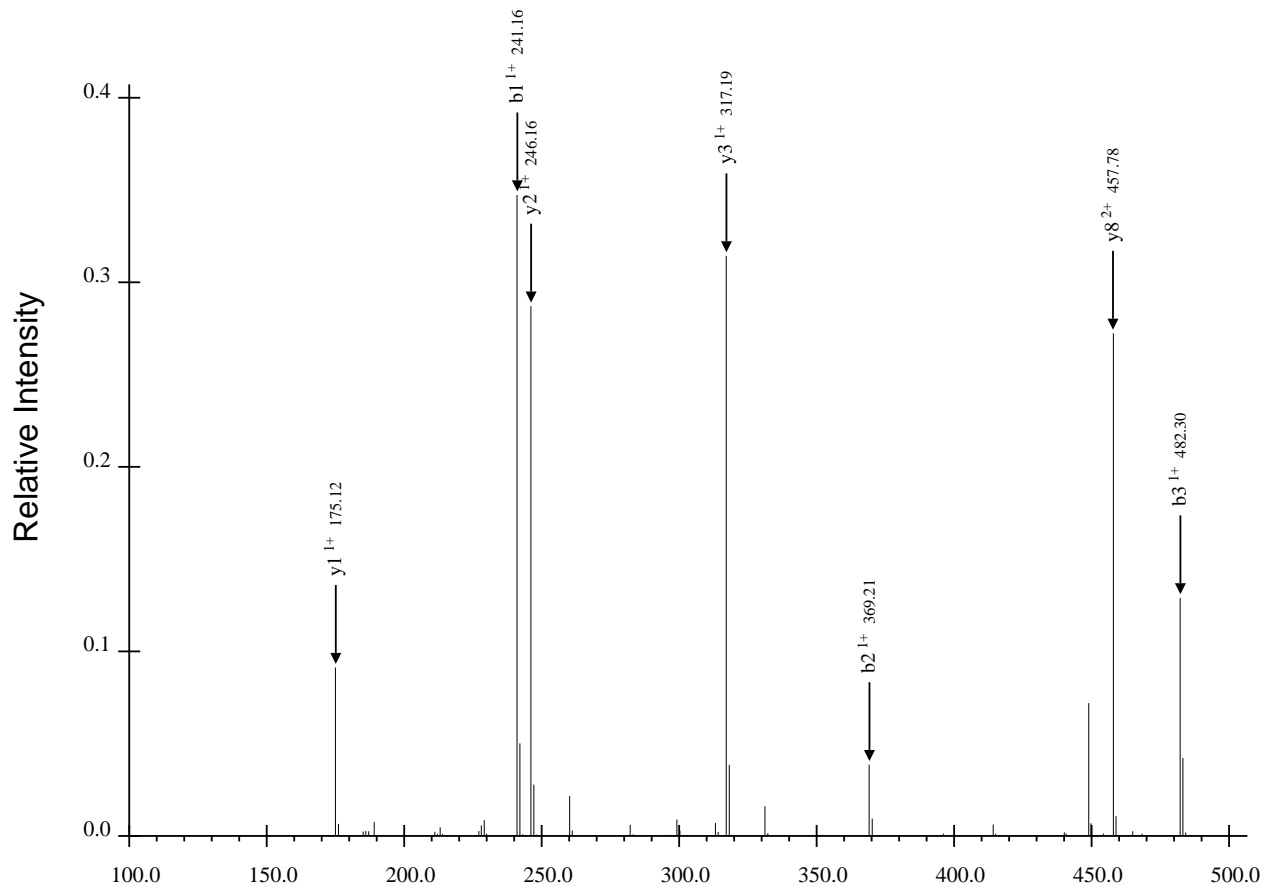

(a) First Region for rrKQLATrKAAR, Spectrum 340.dta

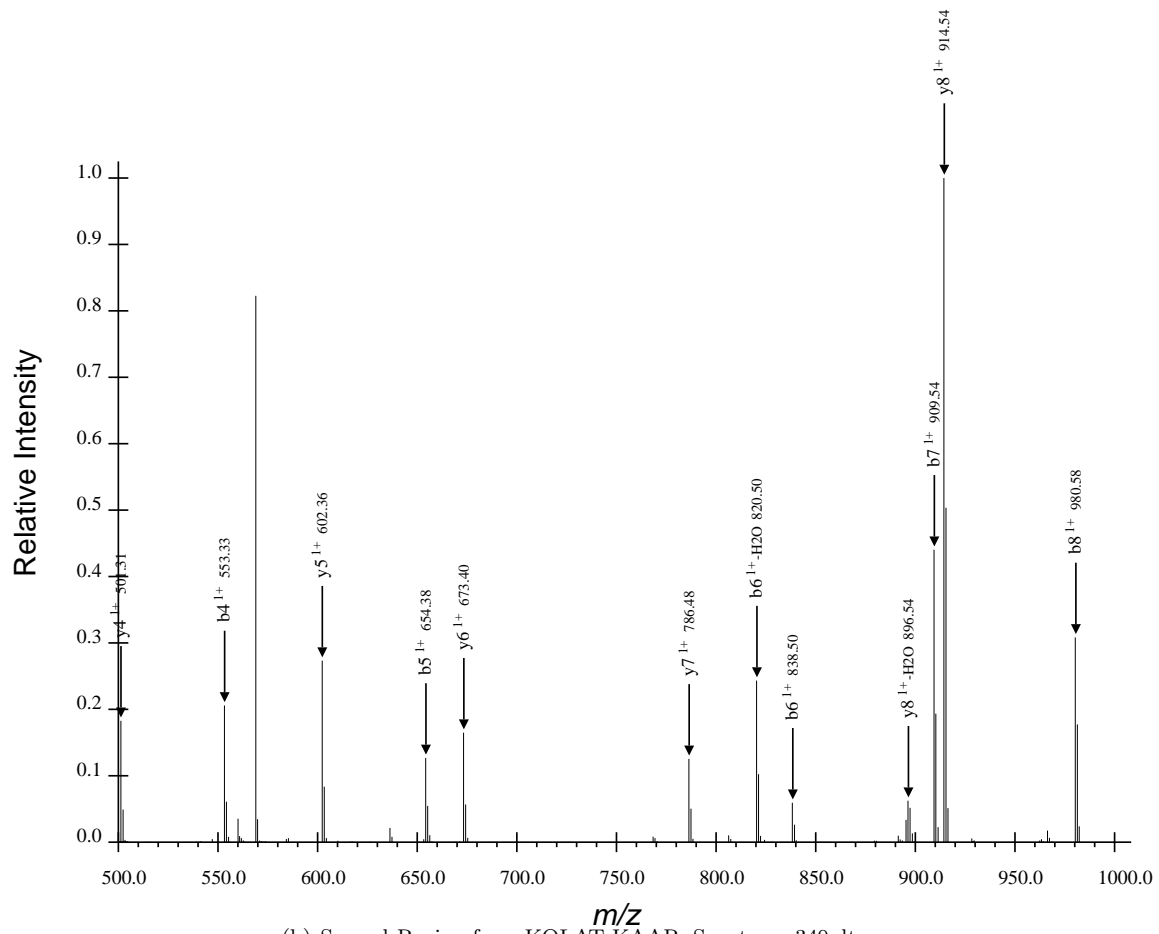

(b) Second Region for rrKQLATrKAAR, Spectrum 340.dta

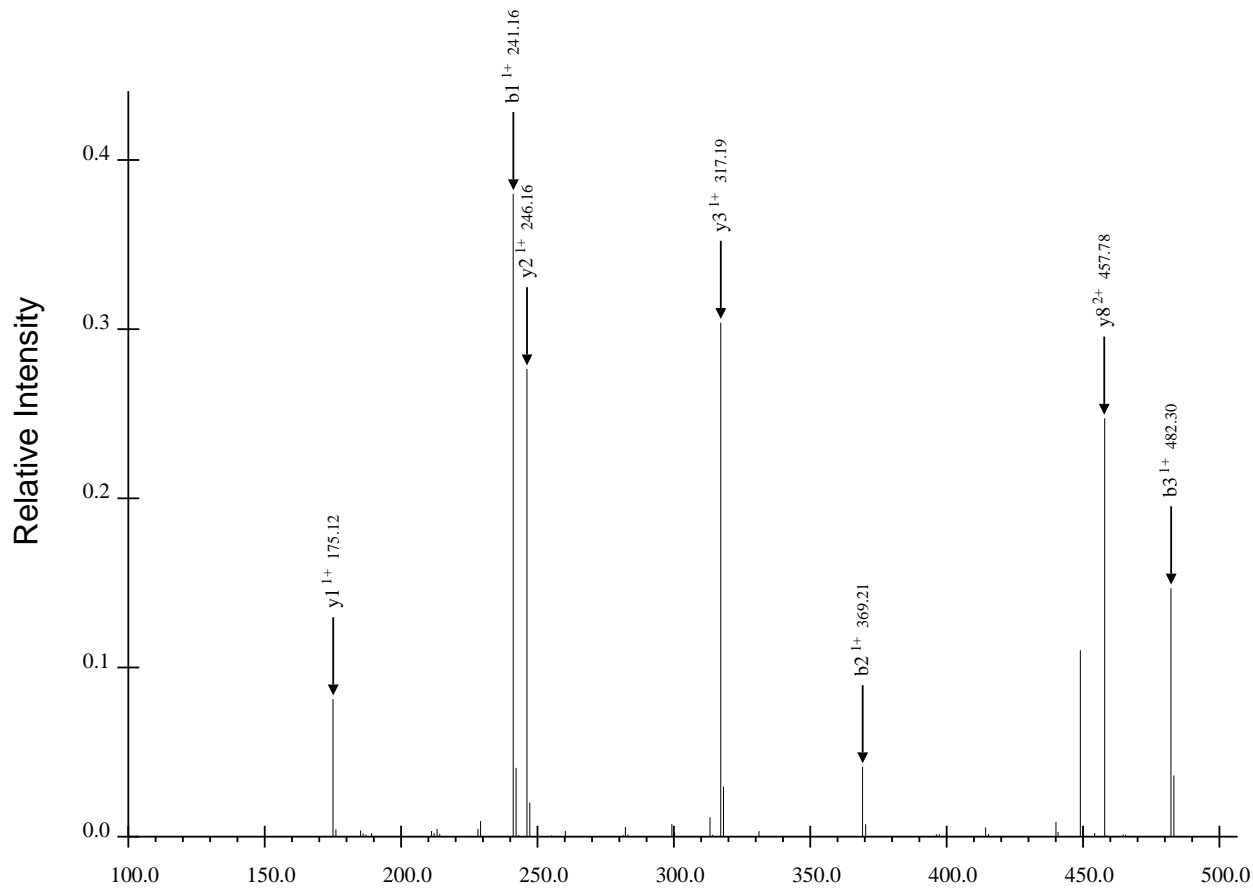

(a) First Region for rrKQLATrKAAR, Spectrum 341.dta

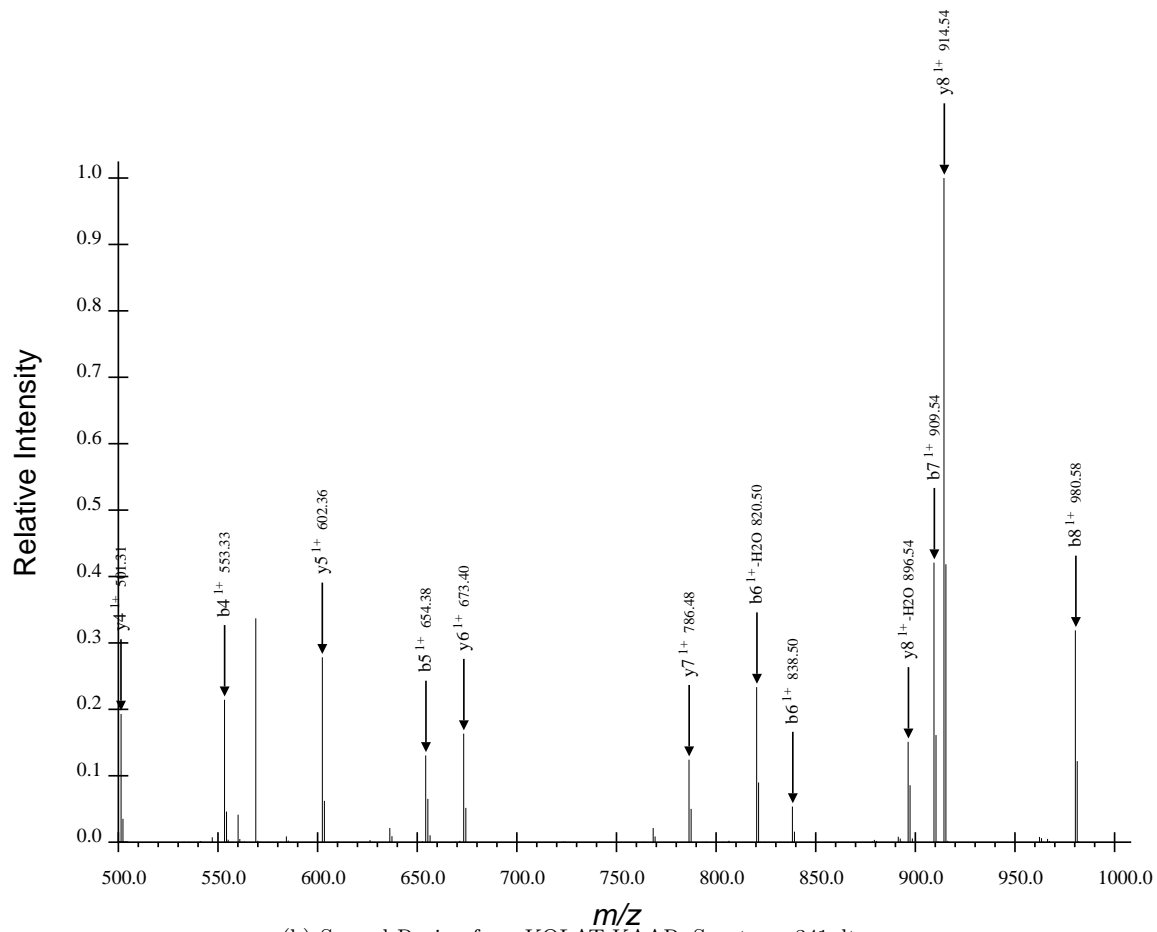

(b) Second Region for rrKQLATrKAAR, Spectrum 341.dta

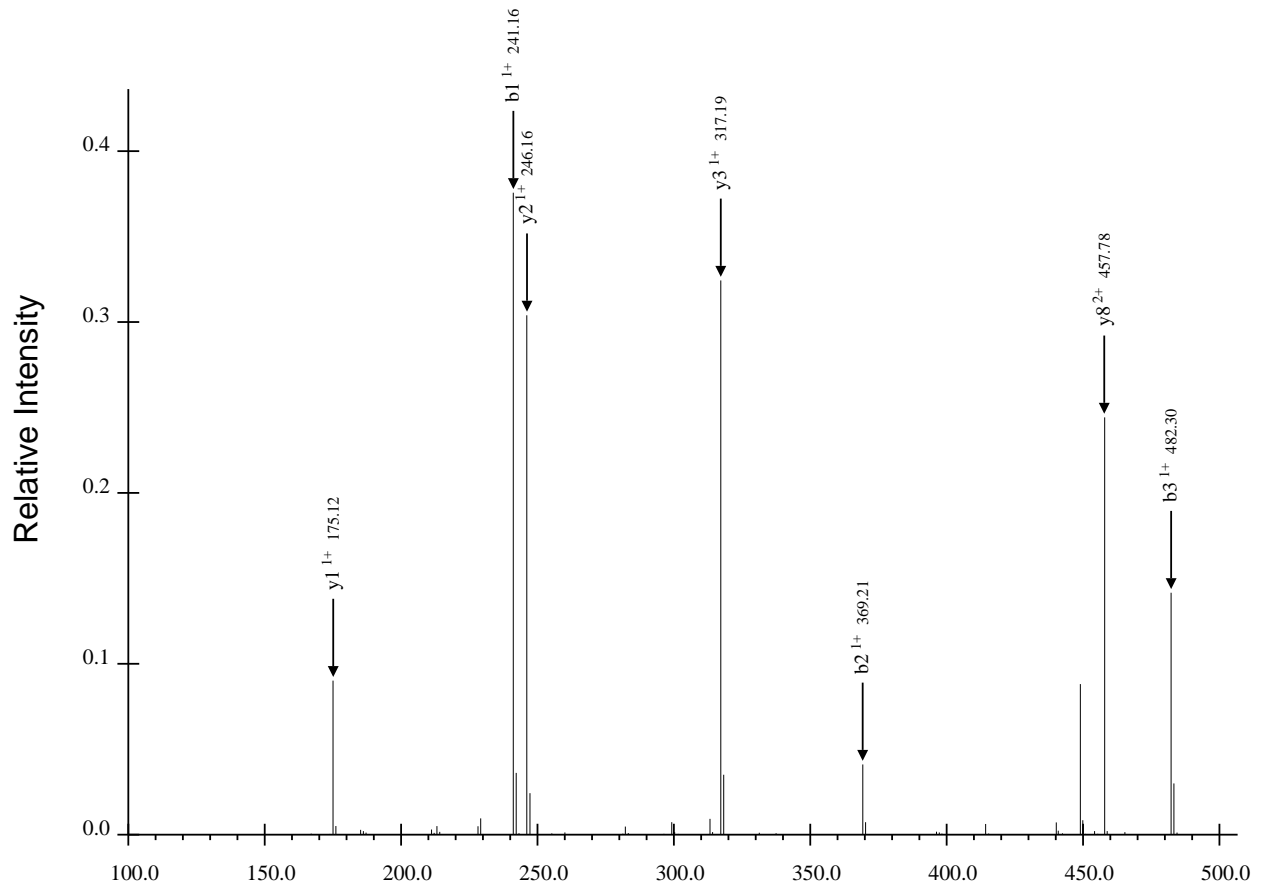

(a) First Region for rrKQLATrKAAR, Spectrum 342.dta

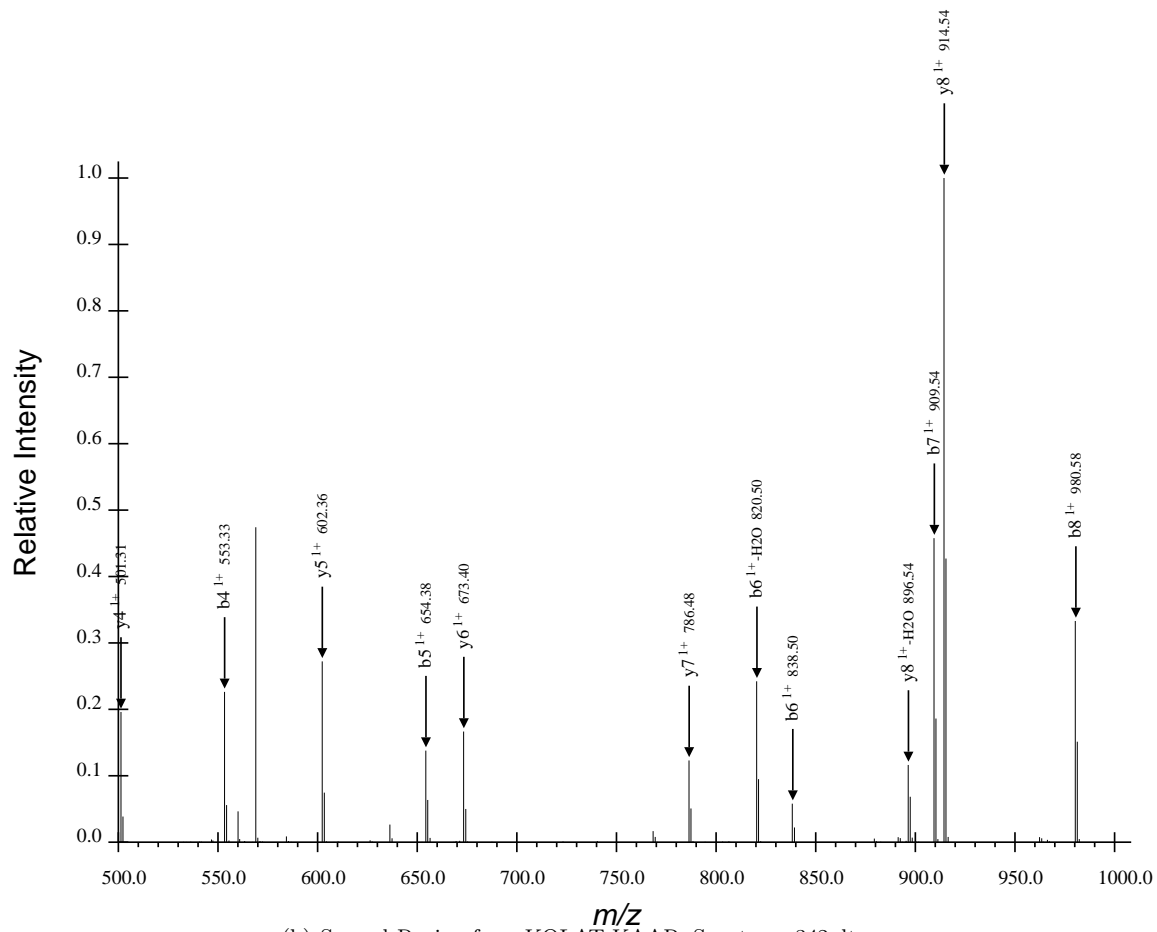

(b) Second Region for rrKQLATrKAAR, Spectrum 342.dta

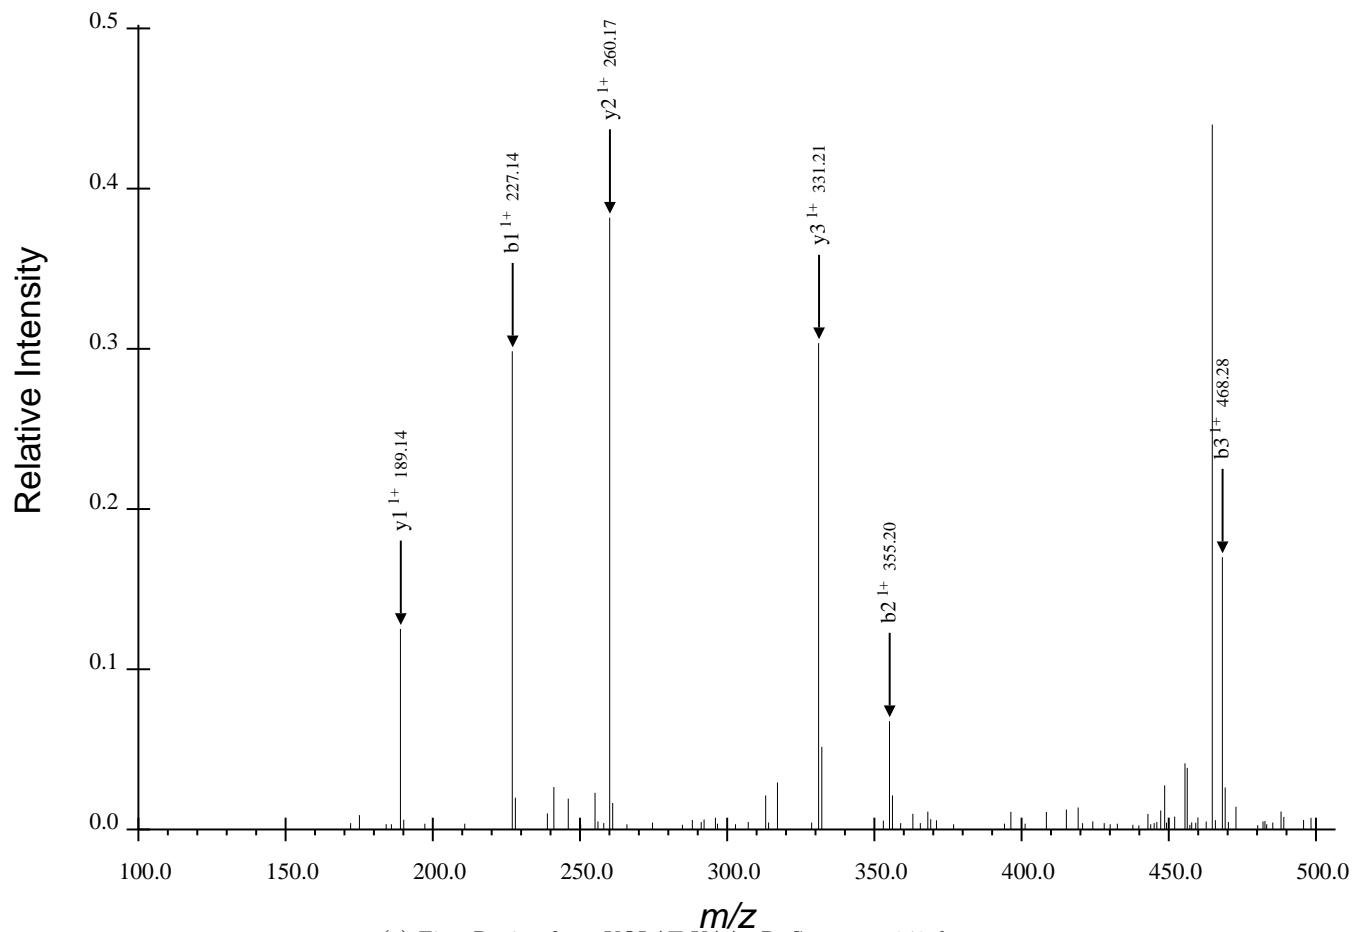

(a) First Region for raKQLATrKAAMR, Spectrum 343.dta

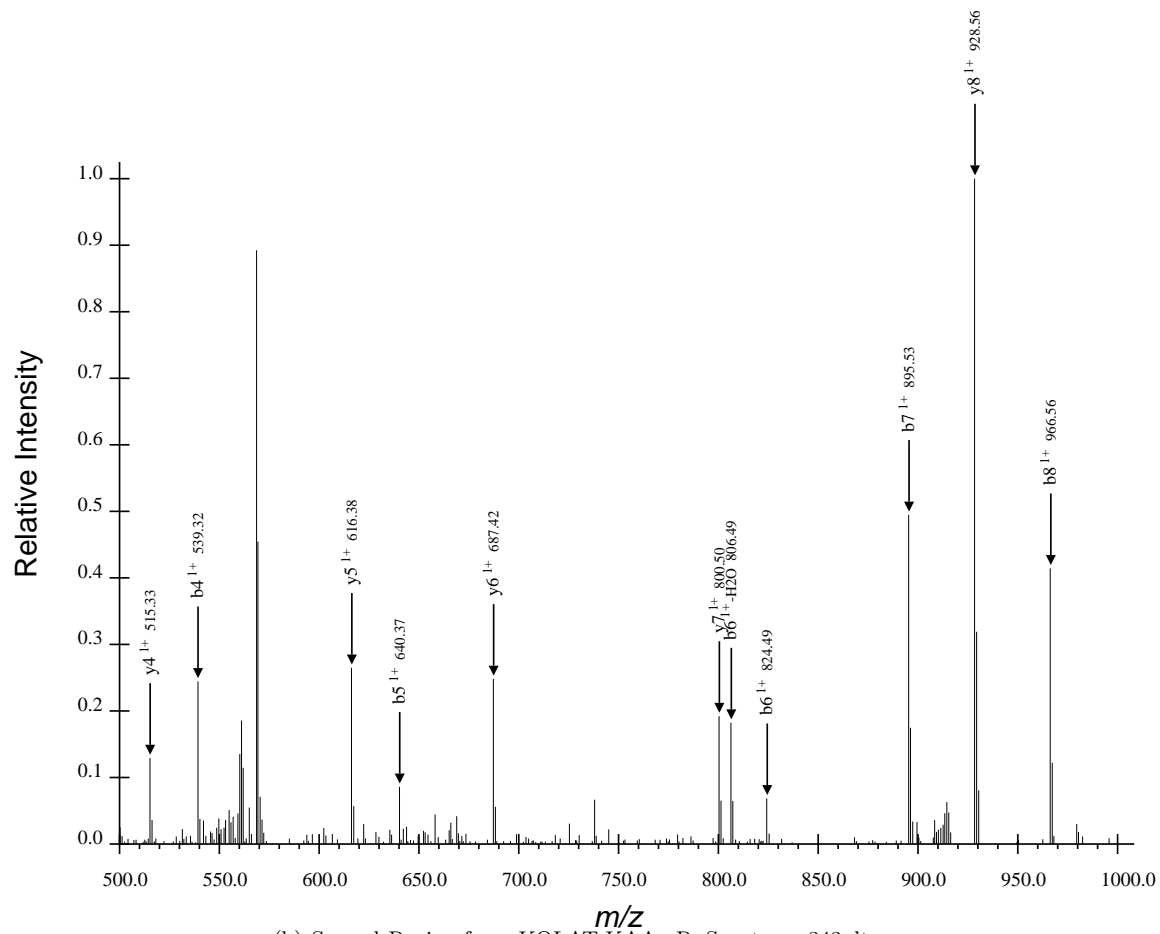

(b) Second Region for raKQLATrKAAMR, Spectrum 343.dta

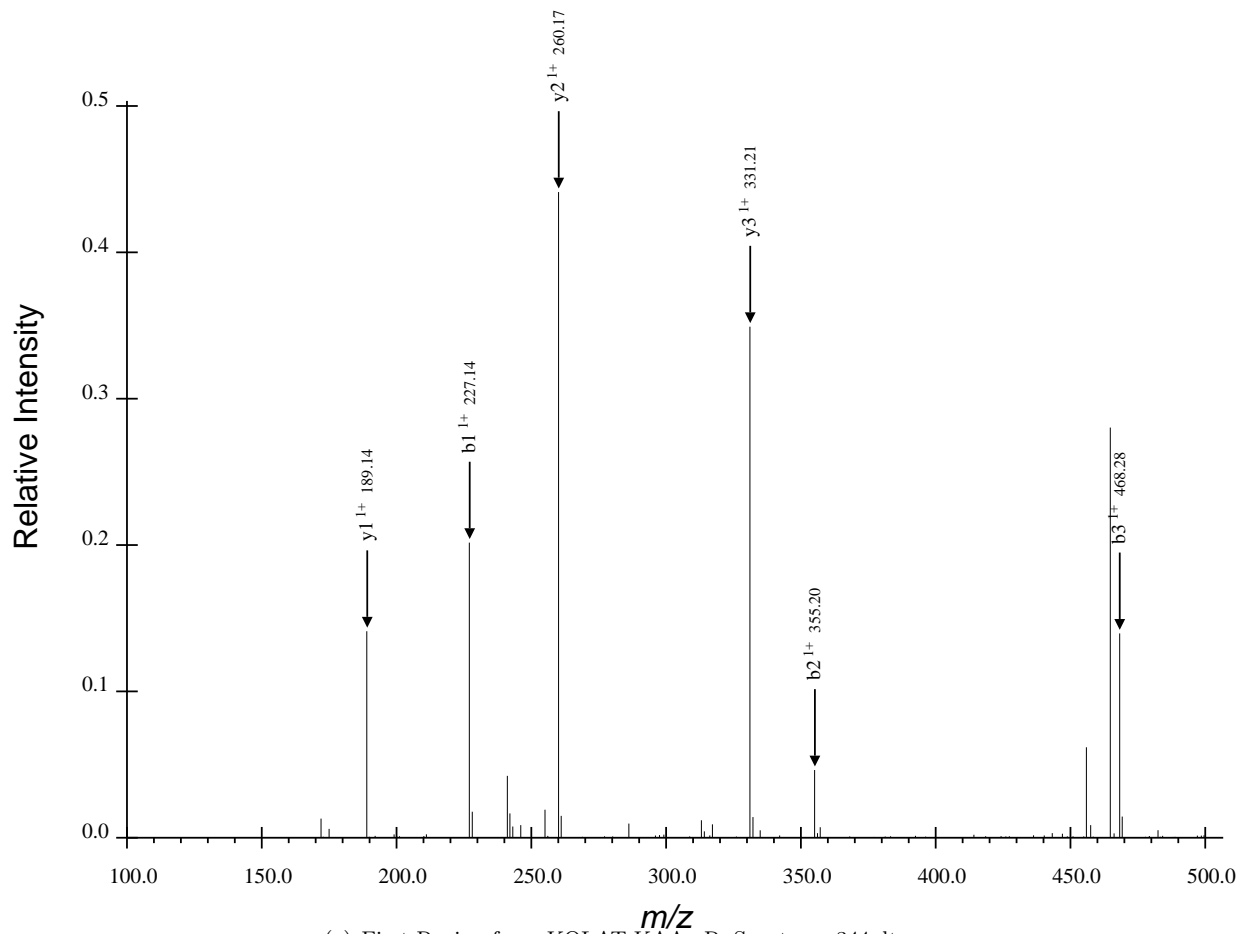

(a) First Region for raKQLATrKAAMR, Spectrum 344.dta

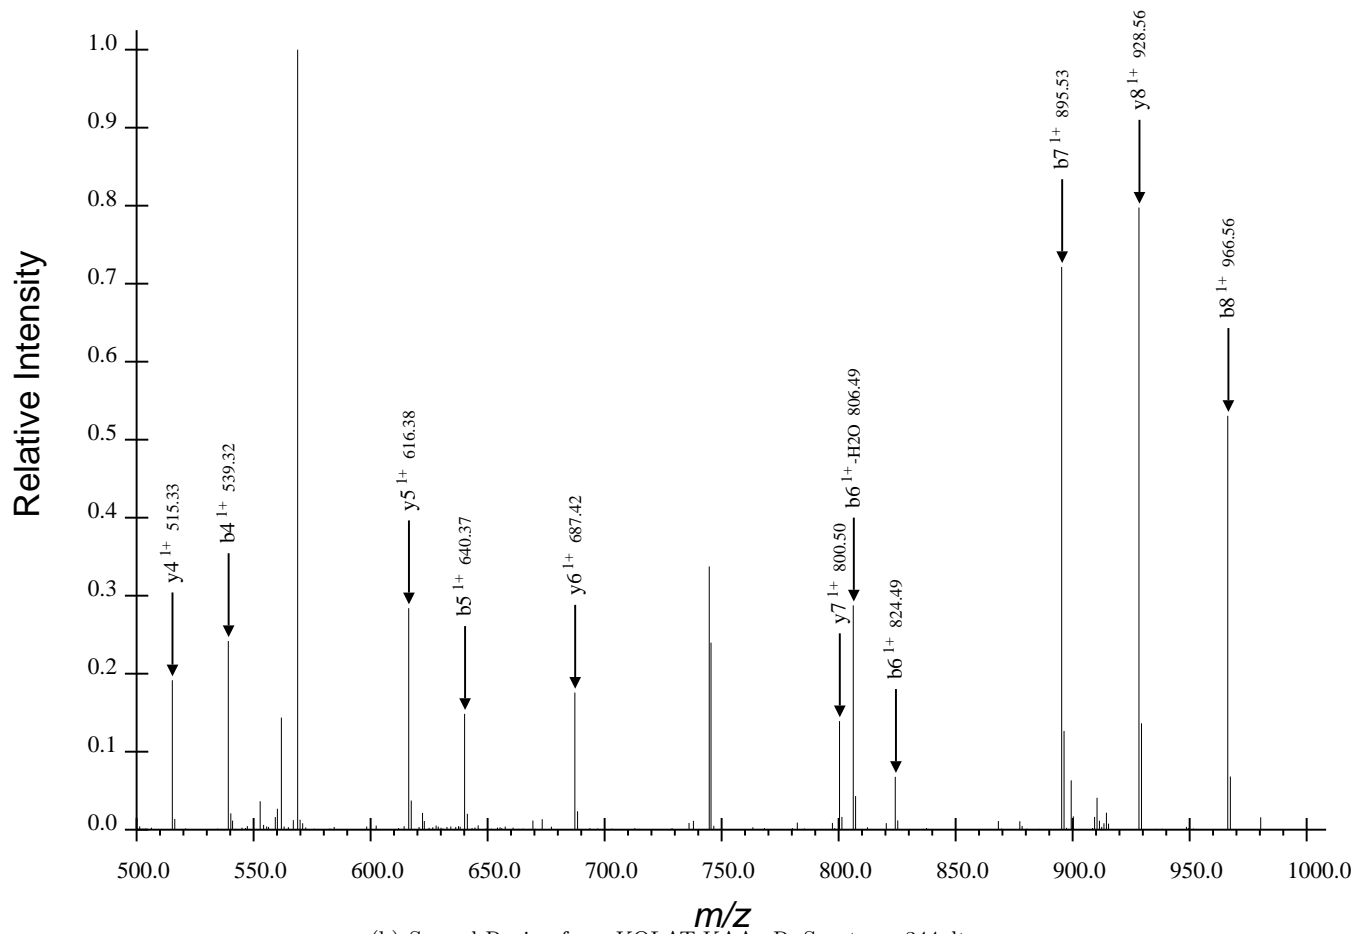

(b) Second Region for raKQLATrKAAMR, Spectrum 344.dta



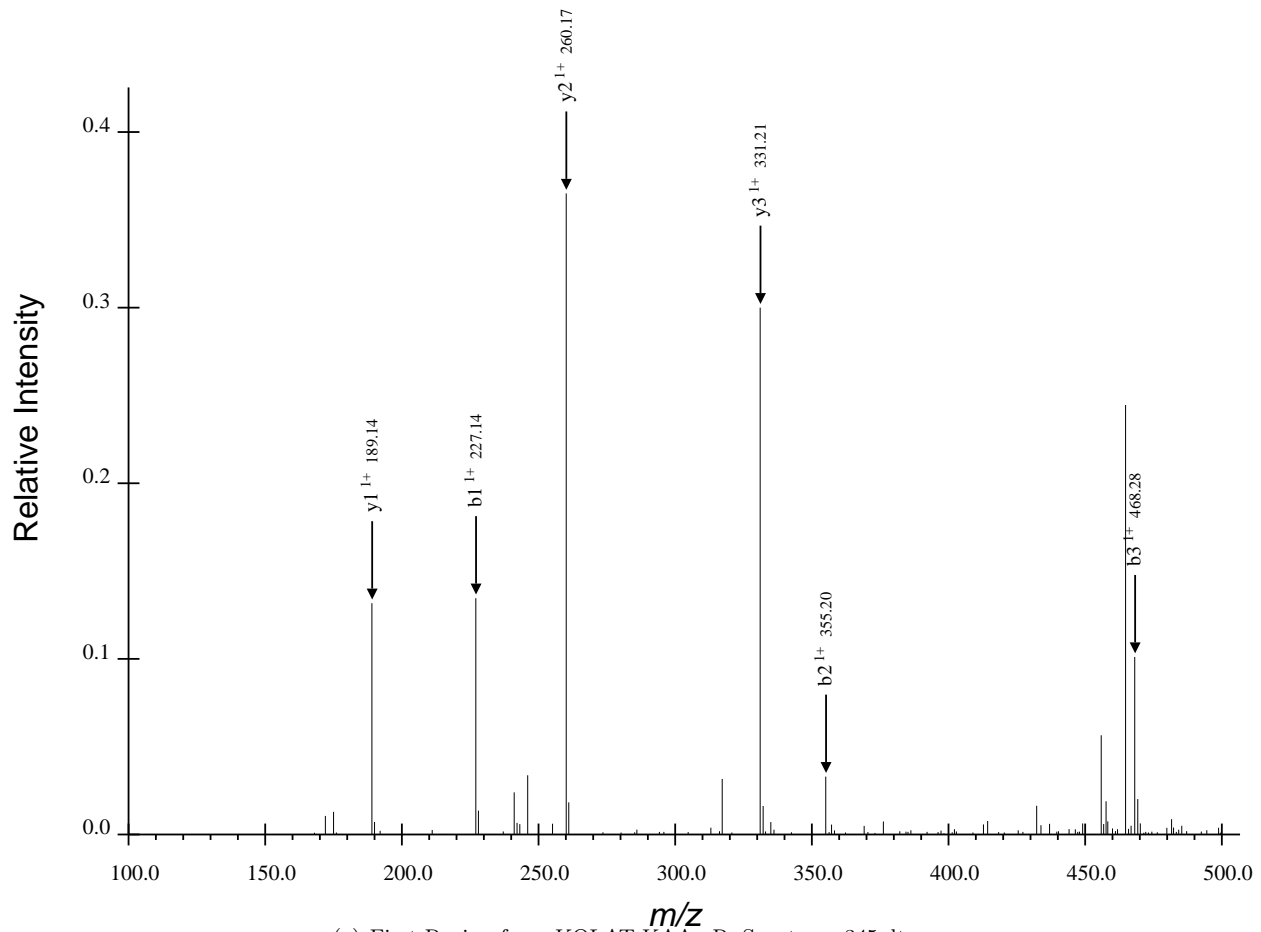

(a) First Region for raKQLATrKAAMR, Spectrum 345.dta

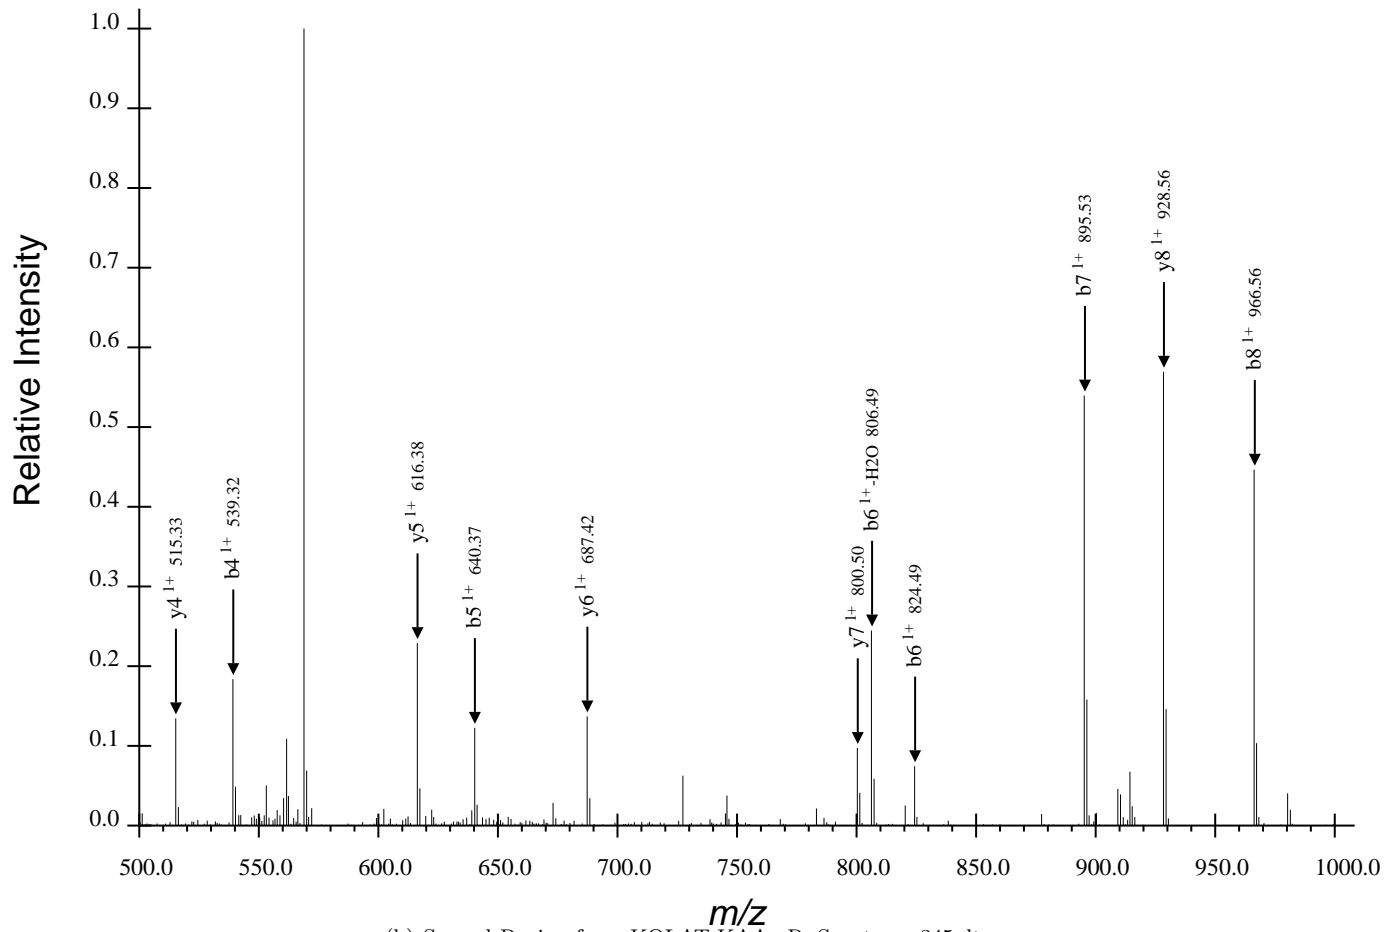

(b) Second Region for raKQLATrKAAMR, Spectrum 345.dta

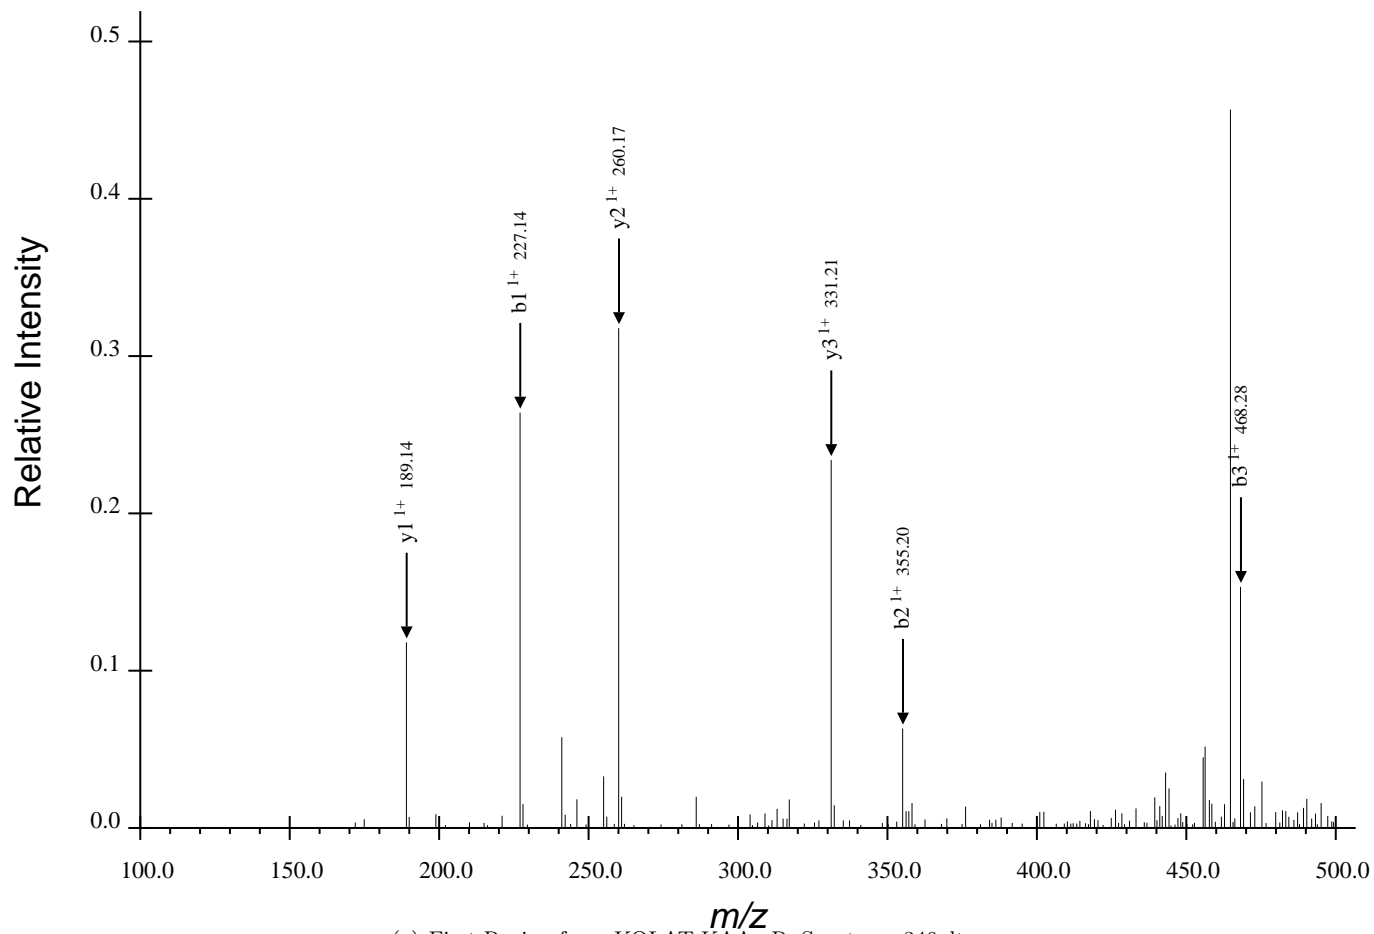

(a) First Region for raKQLATrKAAMR, Spectrum 346.dta

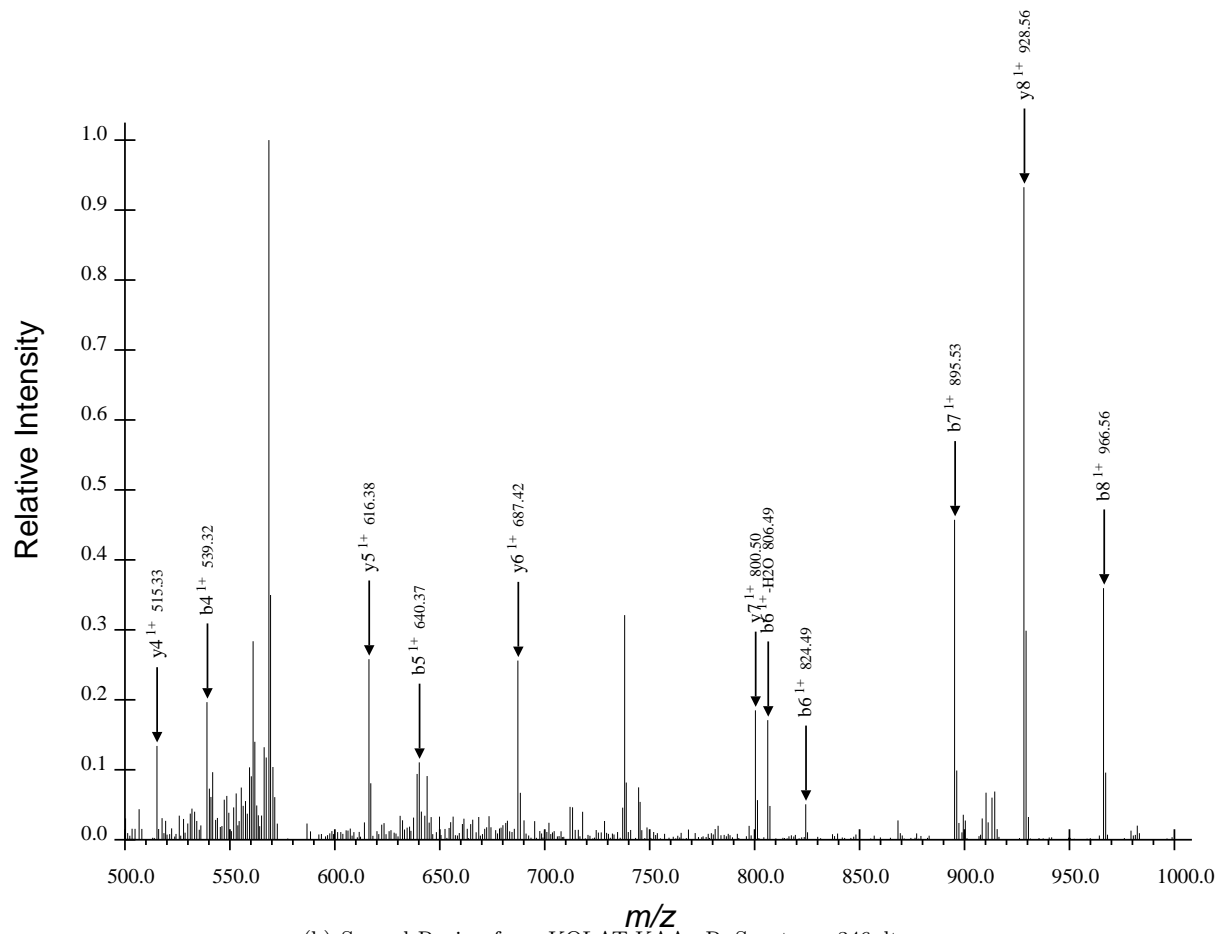

(b) Second Region for raKQLATrKAAMR, Spectrum 346.dta

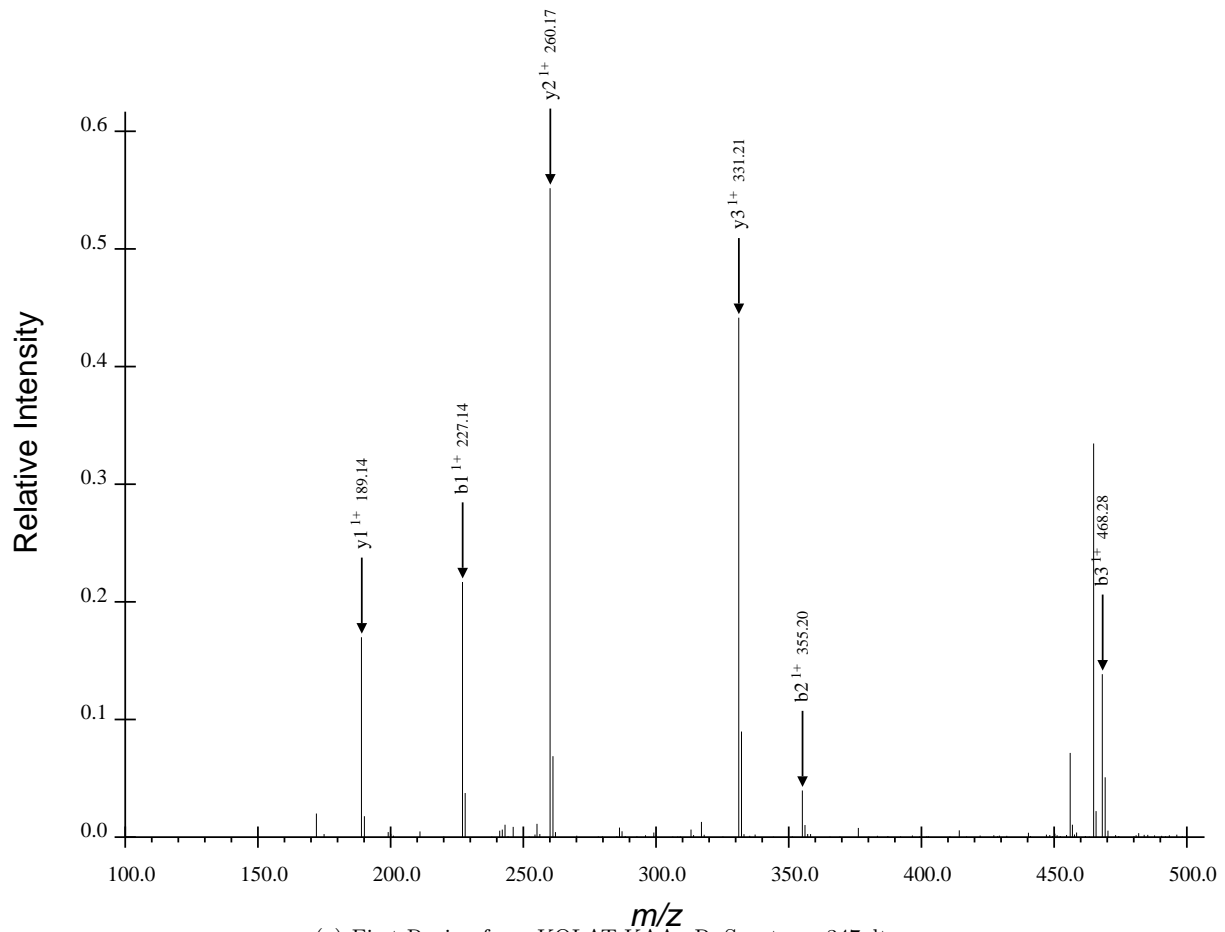

(a) First Region for raKQLATrKAAMR, Spectrum 347.dta

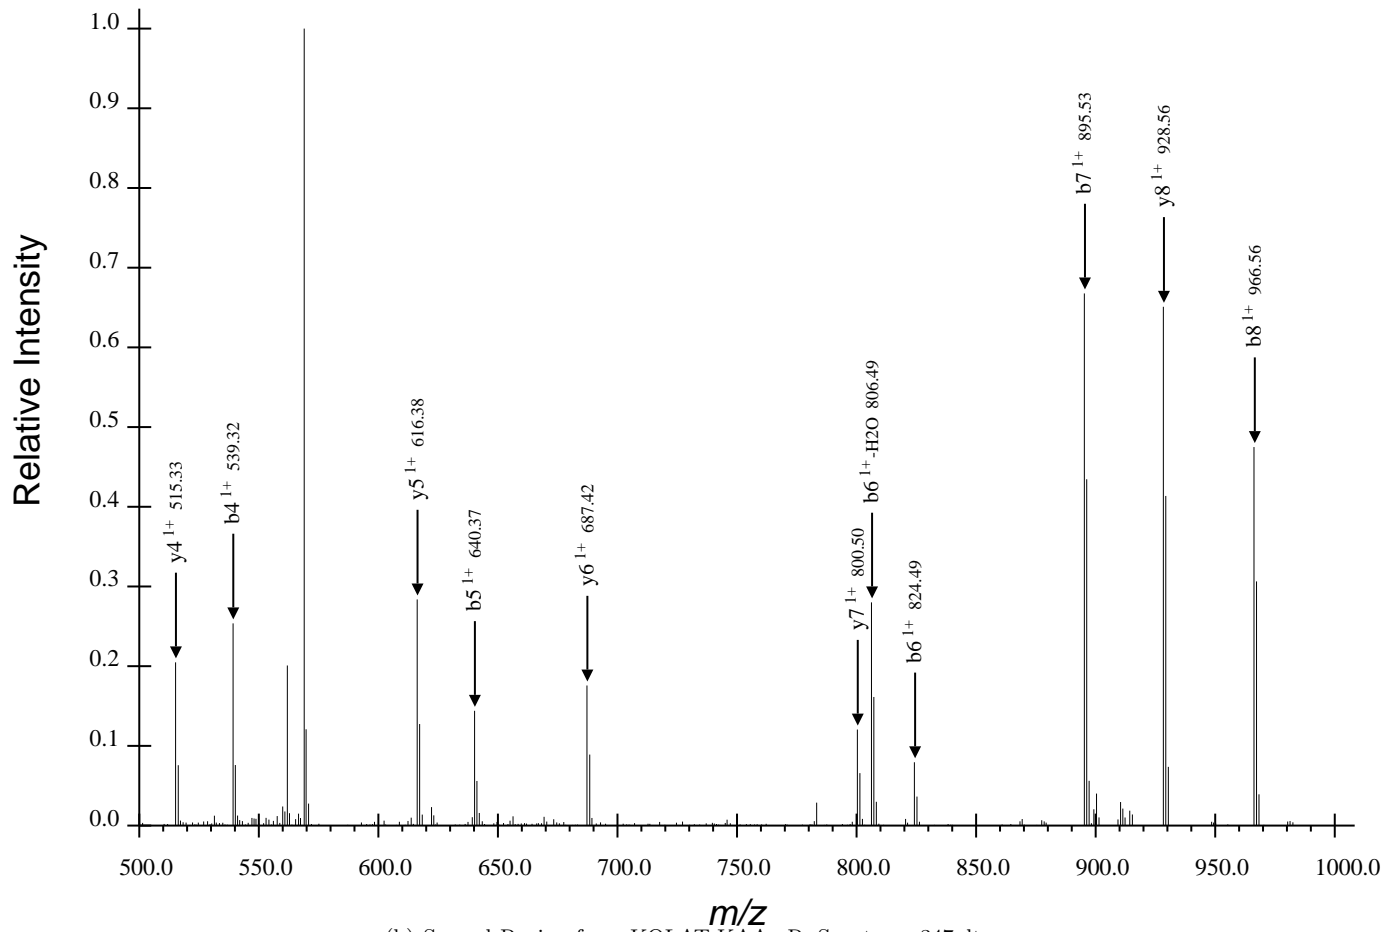

(b) Second Region for raKQLATrKAAMR, Spectrum 347.dta

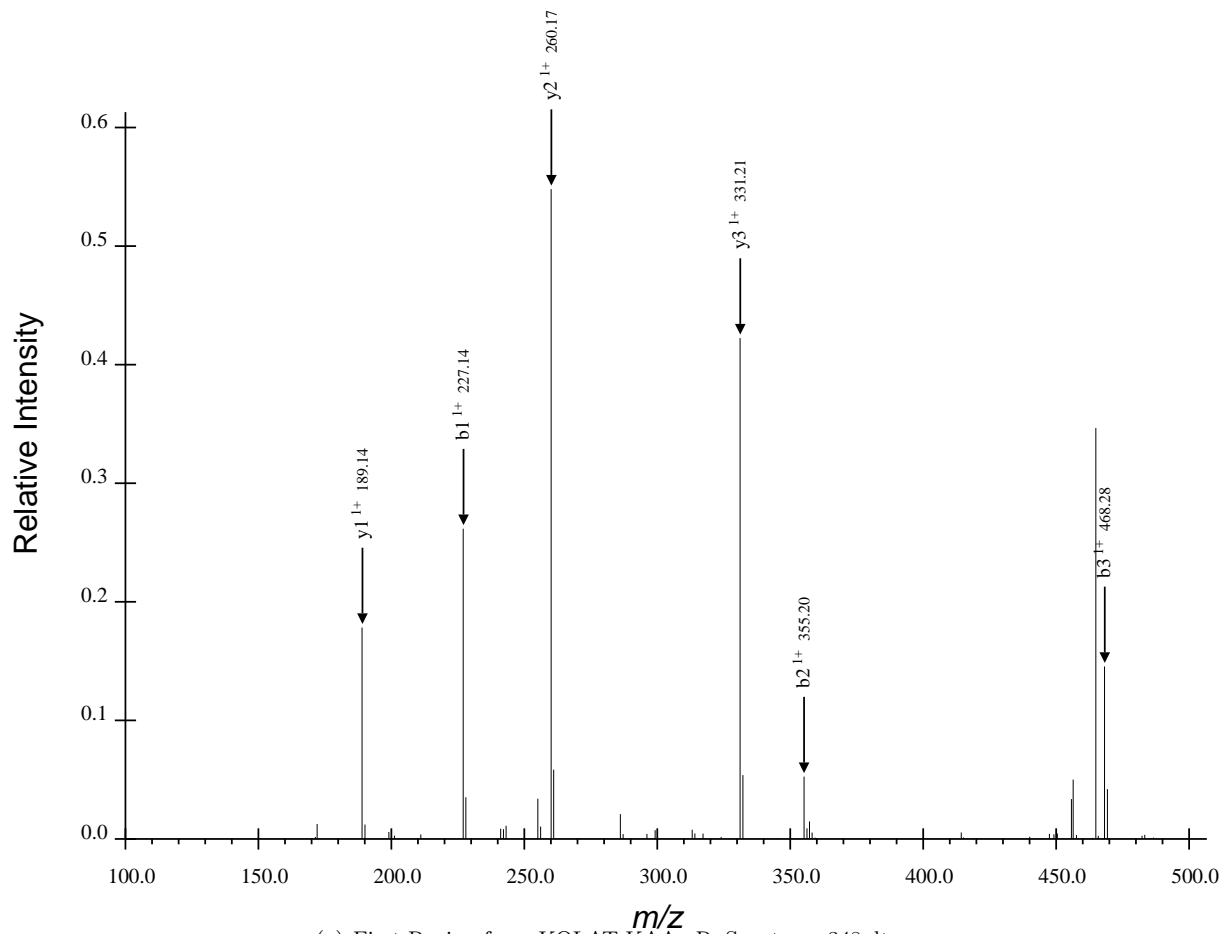

(a) First Region for raKQLATrKAAMR, Spectrum 348.dta

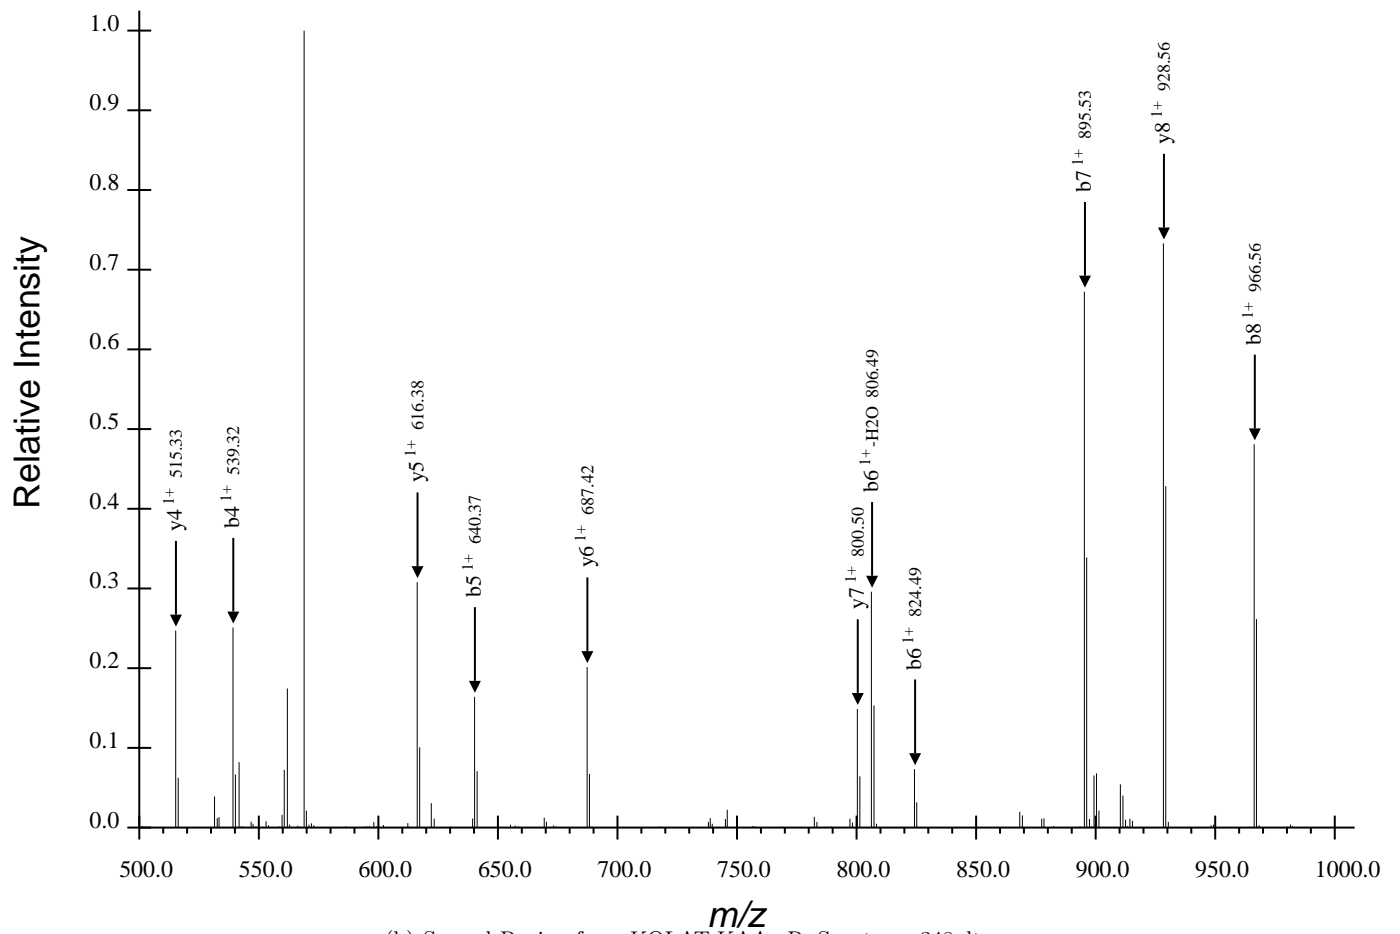

(b) Second Region for raKQLATrKAAMR, Spectrum 348.dta

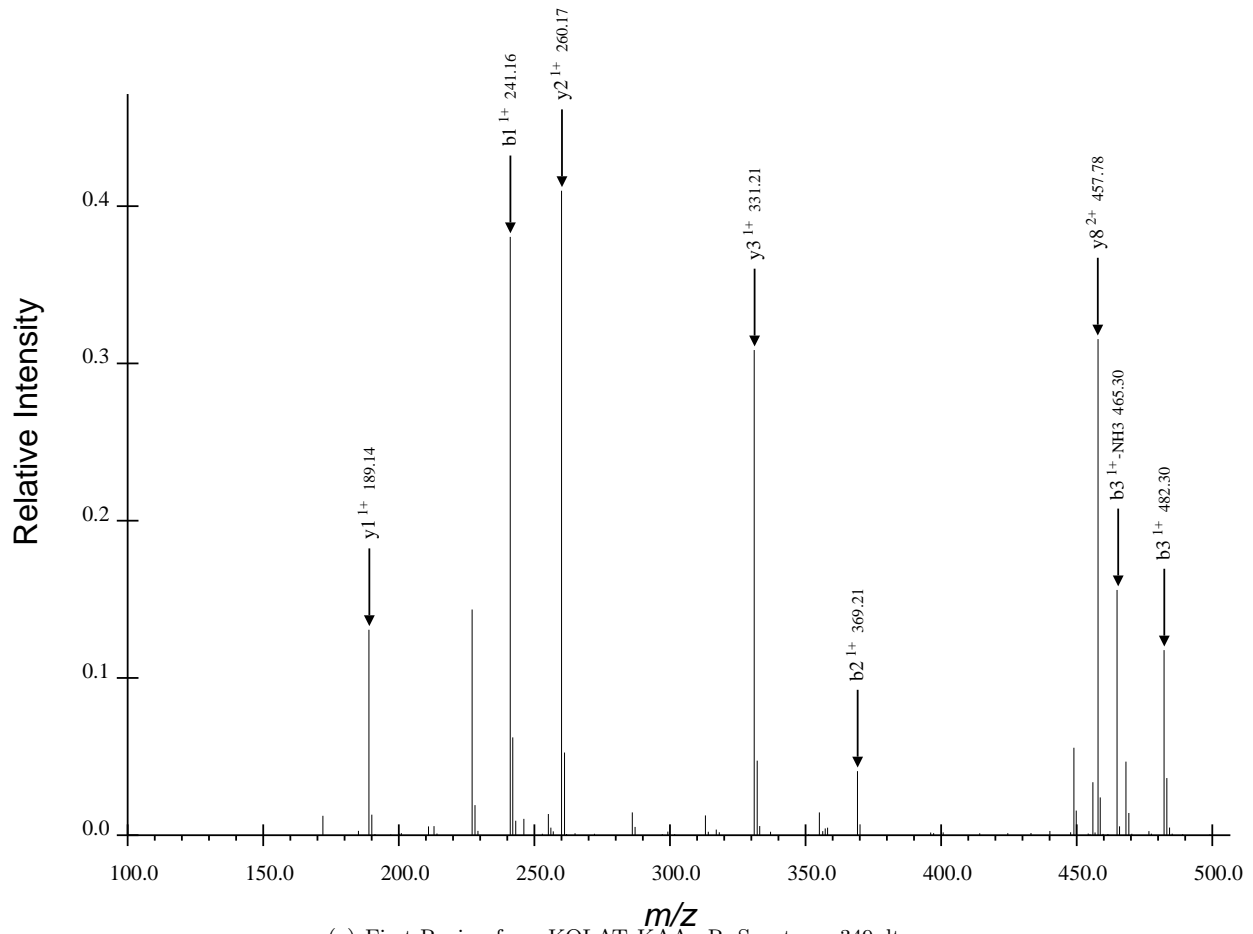

(a) First Region for rrKQLATaKAaMR, Spectrum 349.dta

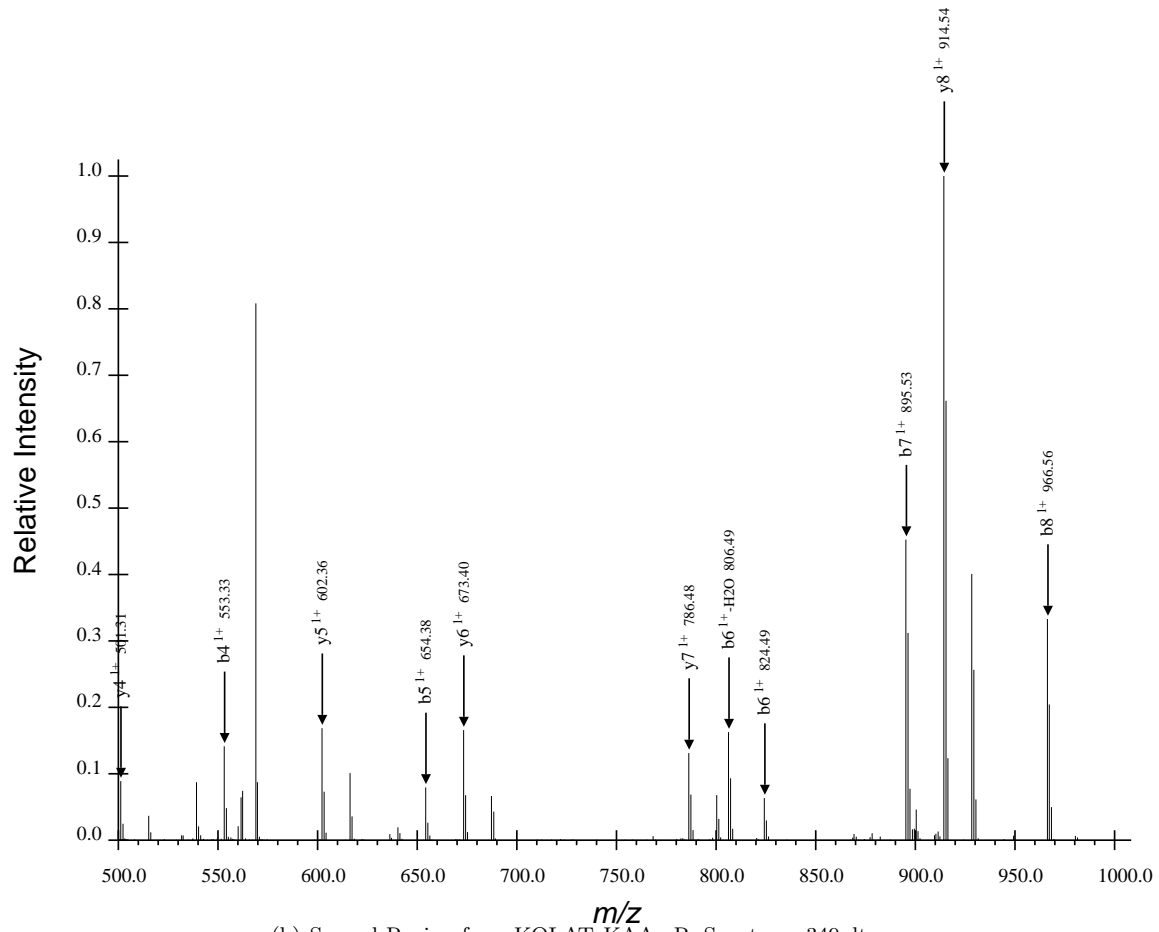

(b) Second Region for rrKQLATaKAaMR, Spectrum 349.dta

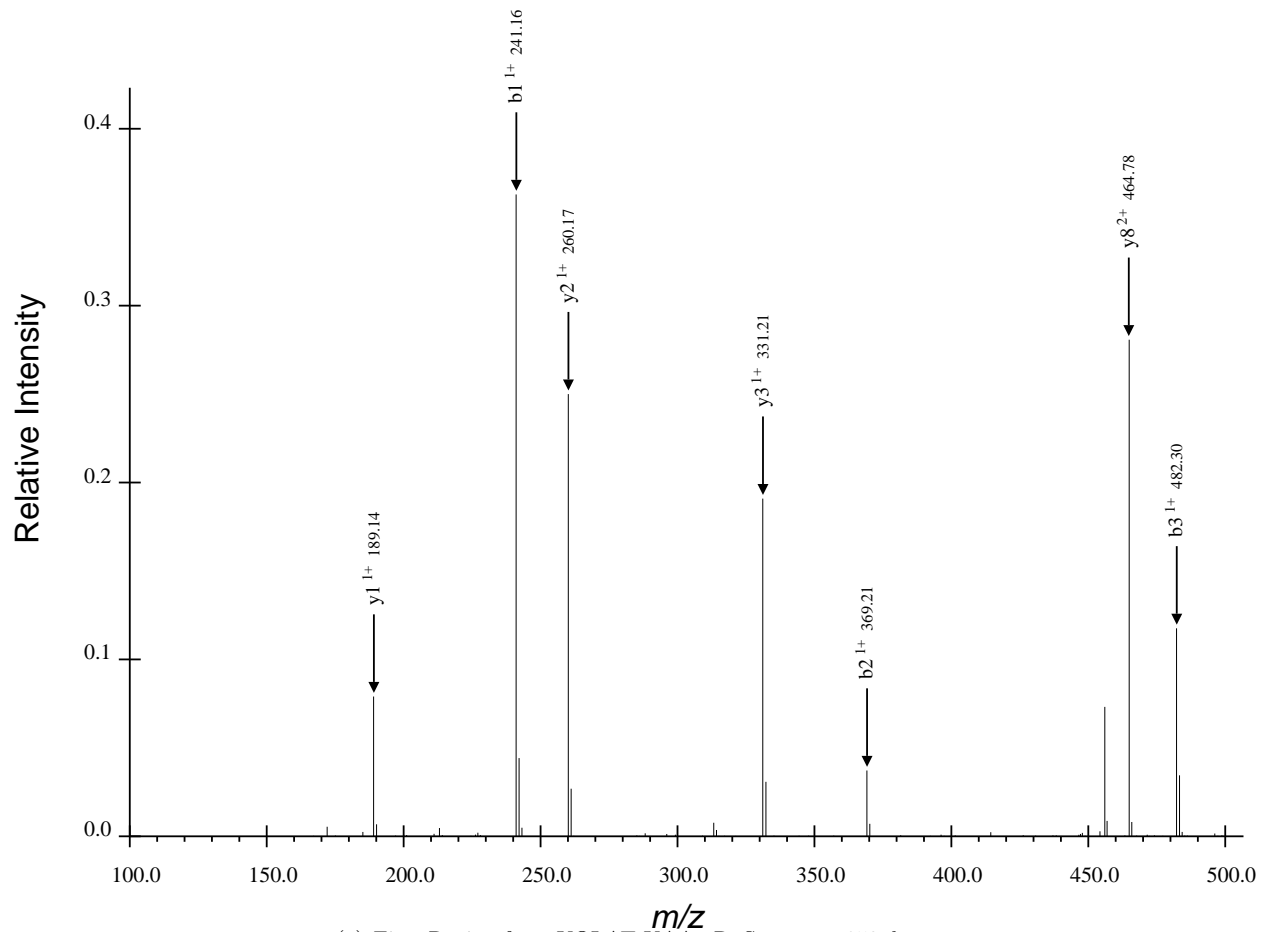

(a) First Region for rrKQLATrKAaM, Spectrum 350.dta

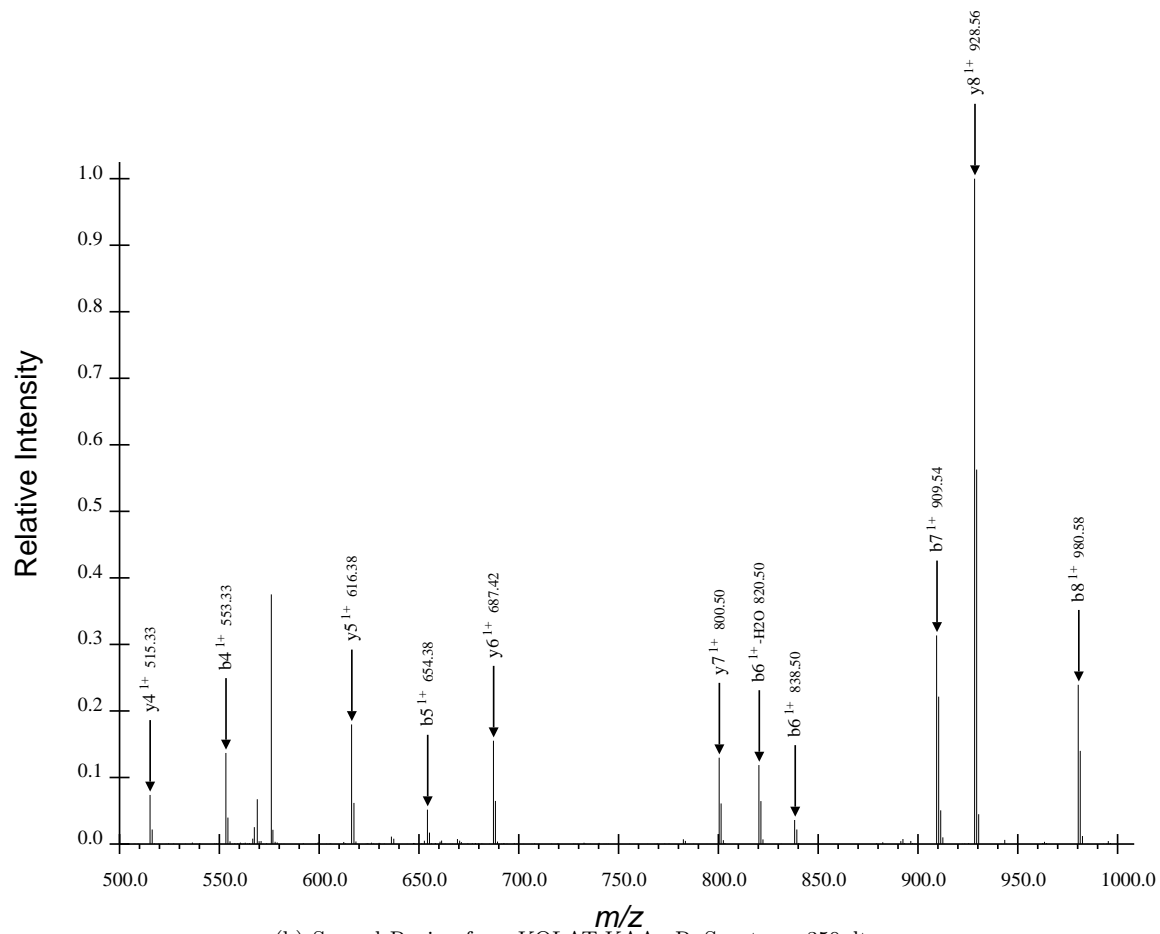

(b) Second Region for rrKQLATrKAaM, Spectrum 350.dta

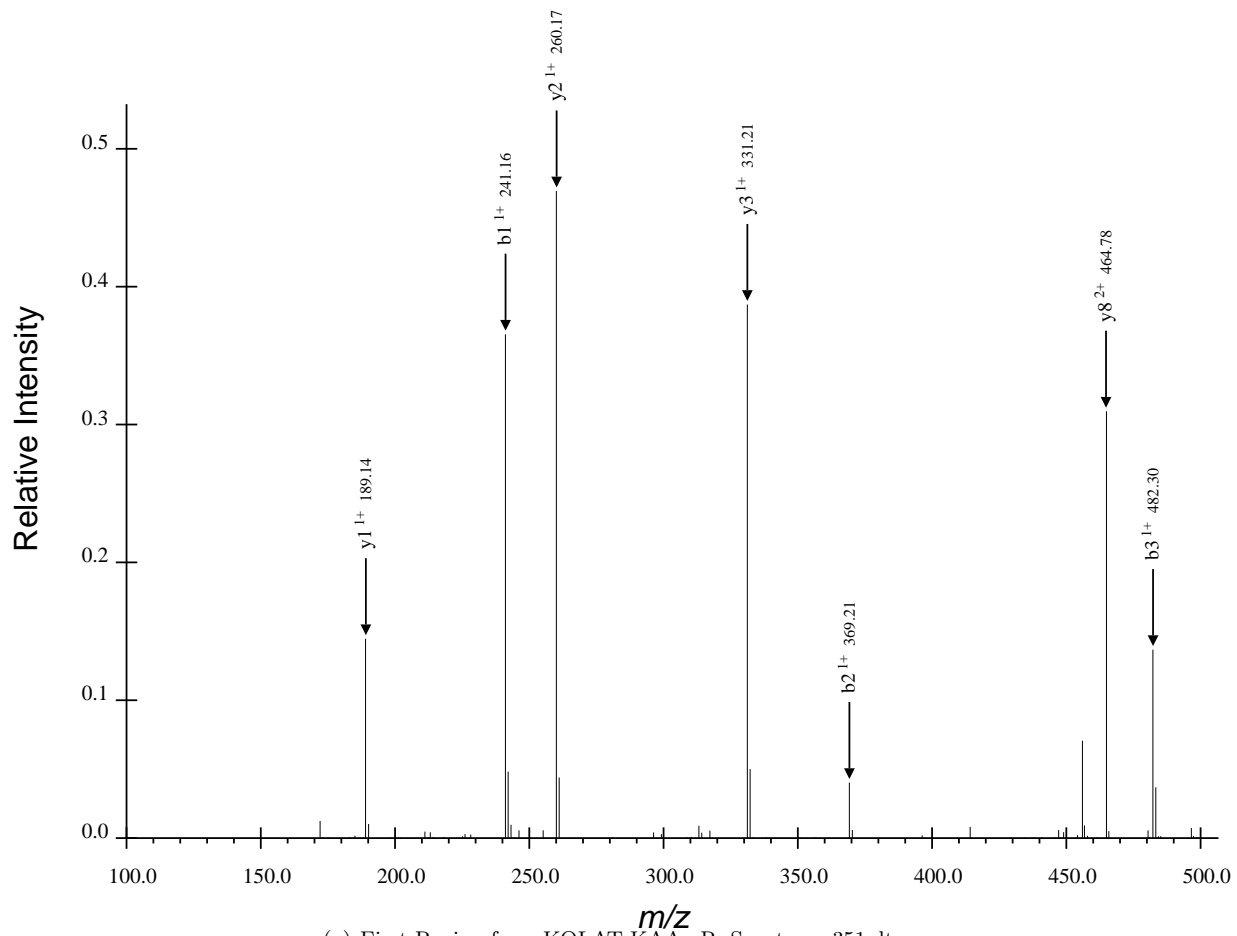

(a) First Region for rrKQLATrKAAMR, Spectrum 351.dta

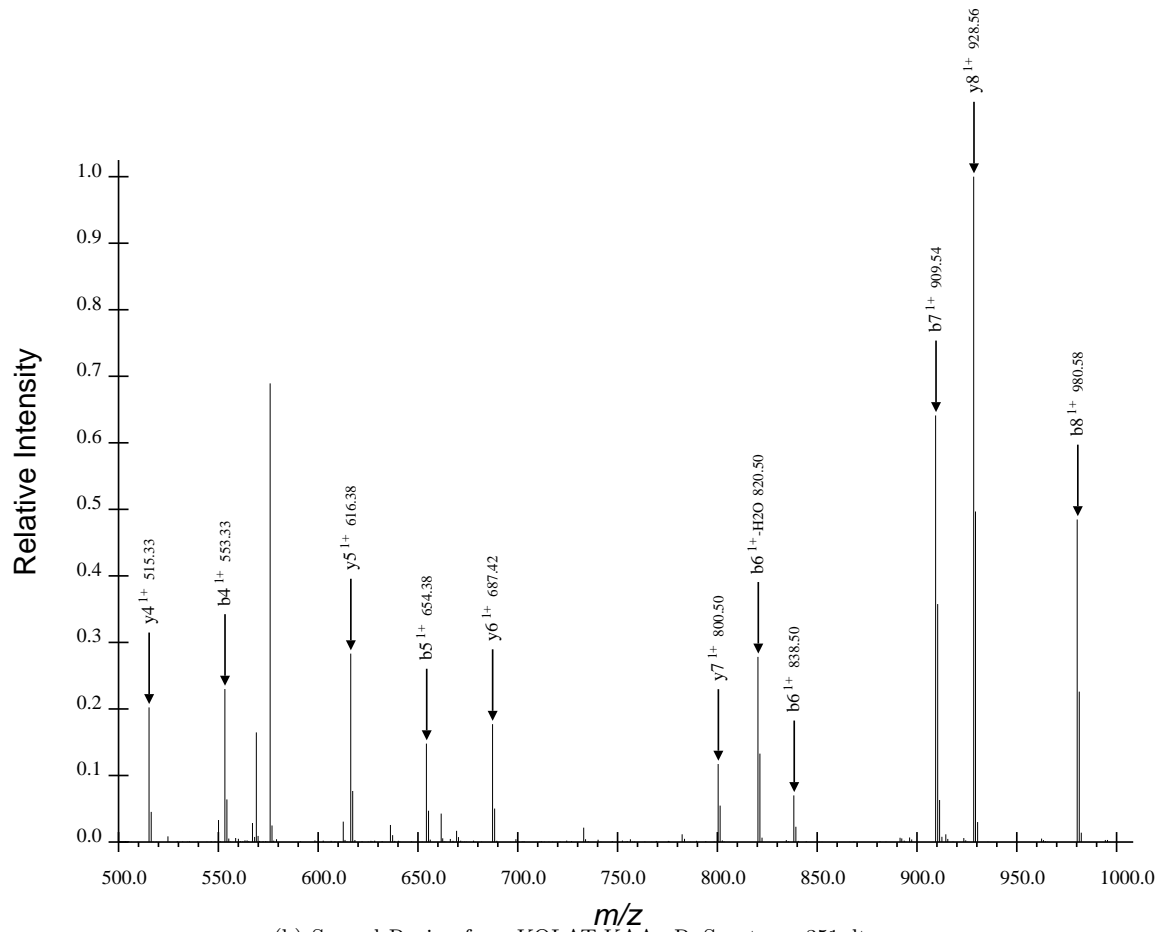

(b) Second Region for rrKQLATrKAAMR, Spectrum 351.dta

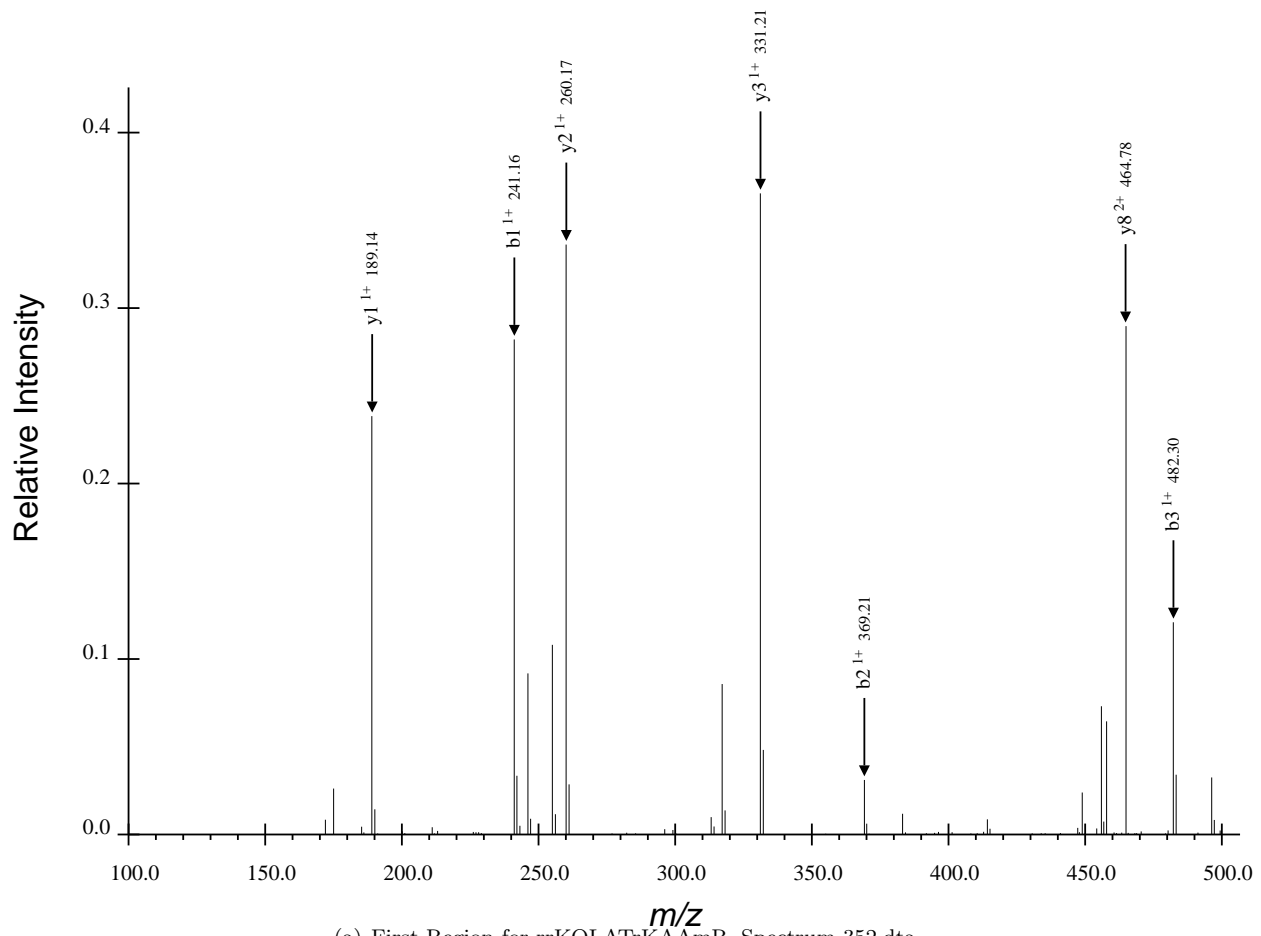

(a) First Region for rrKQLATrKAAMR, Spectrum 352.dta

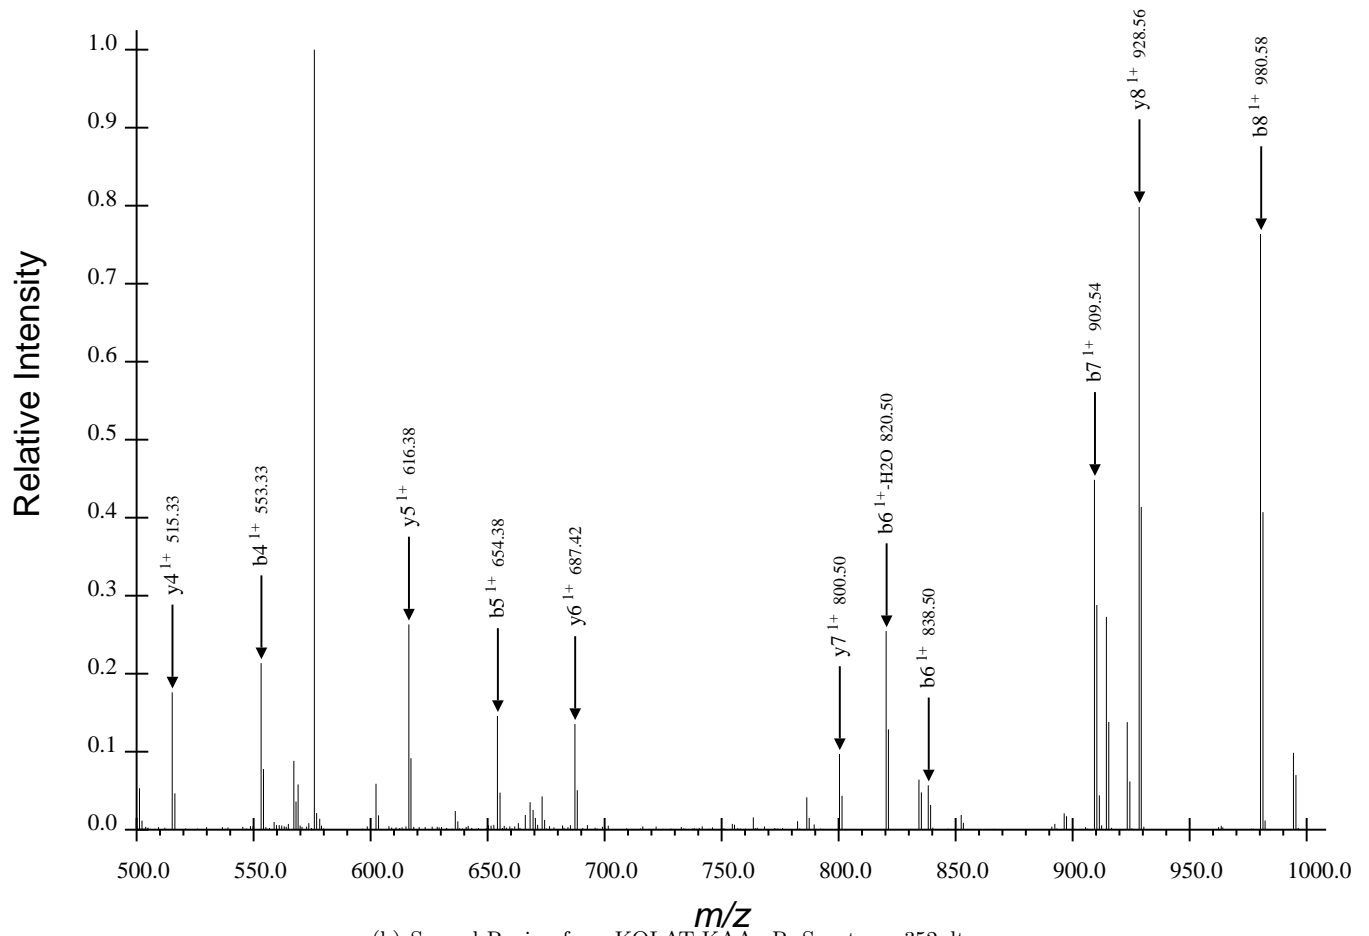

(b) Second Region for rrKQLATrKAAMR, Spectrum 352.dta



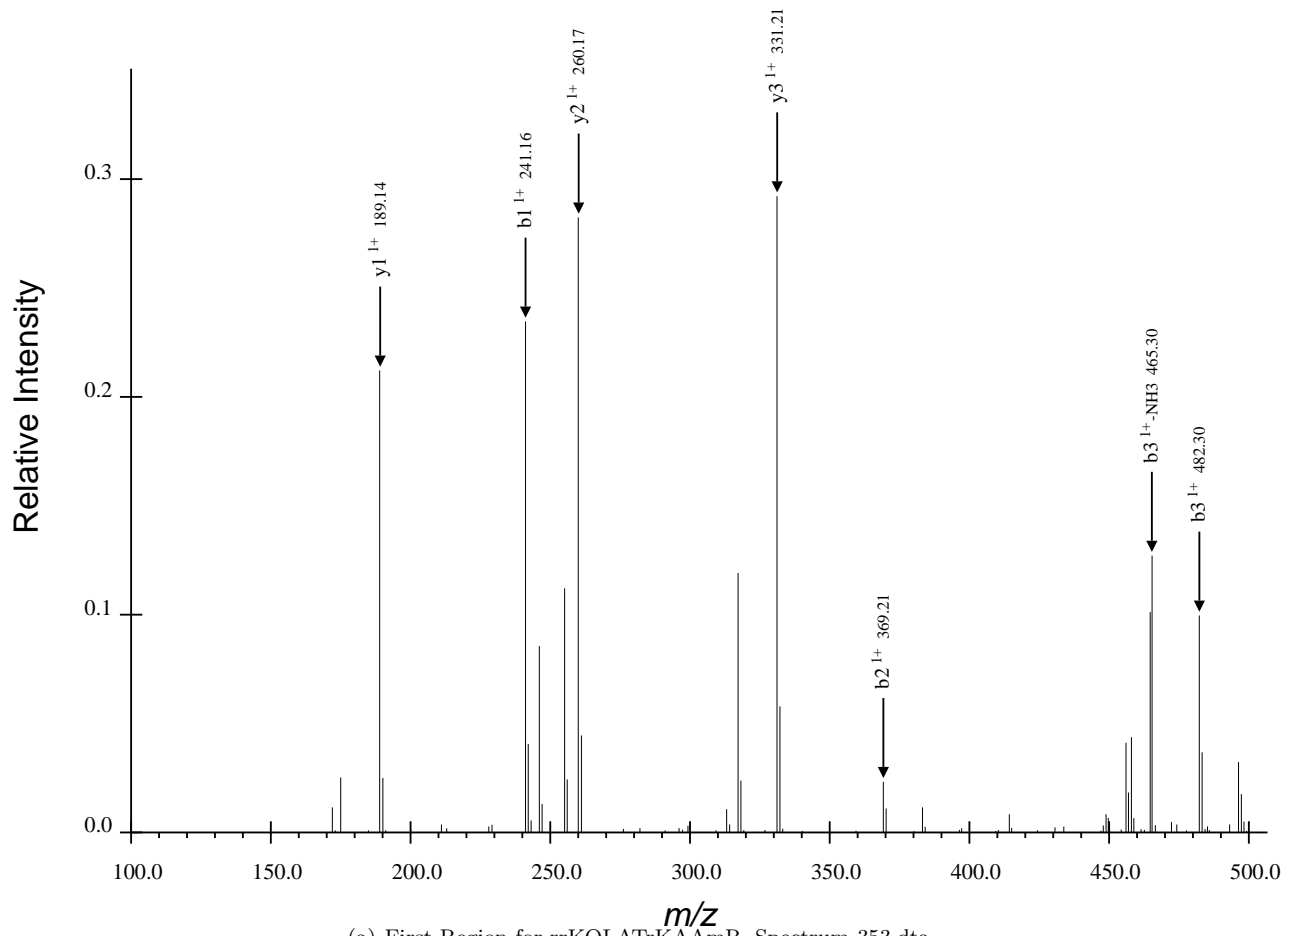

(a) First Region for rrKQLATrKAAMR, Spectrum 353.dta

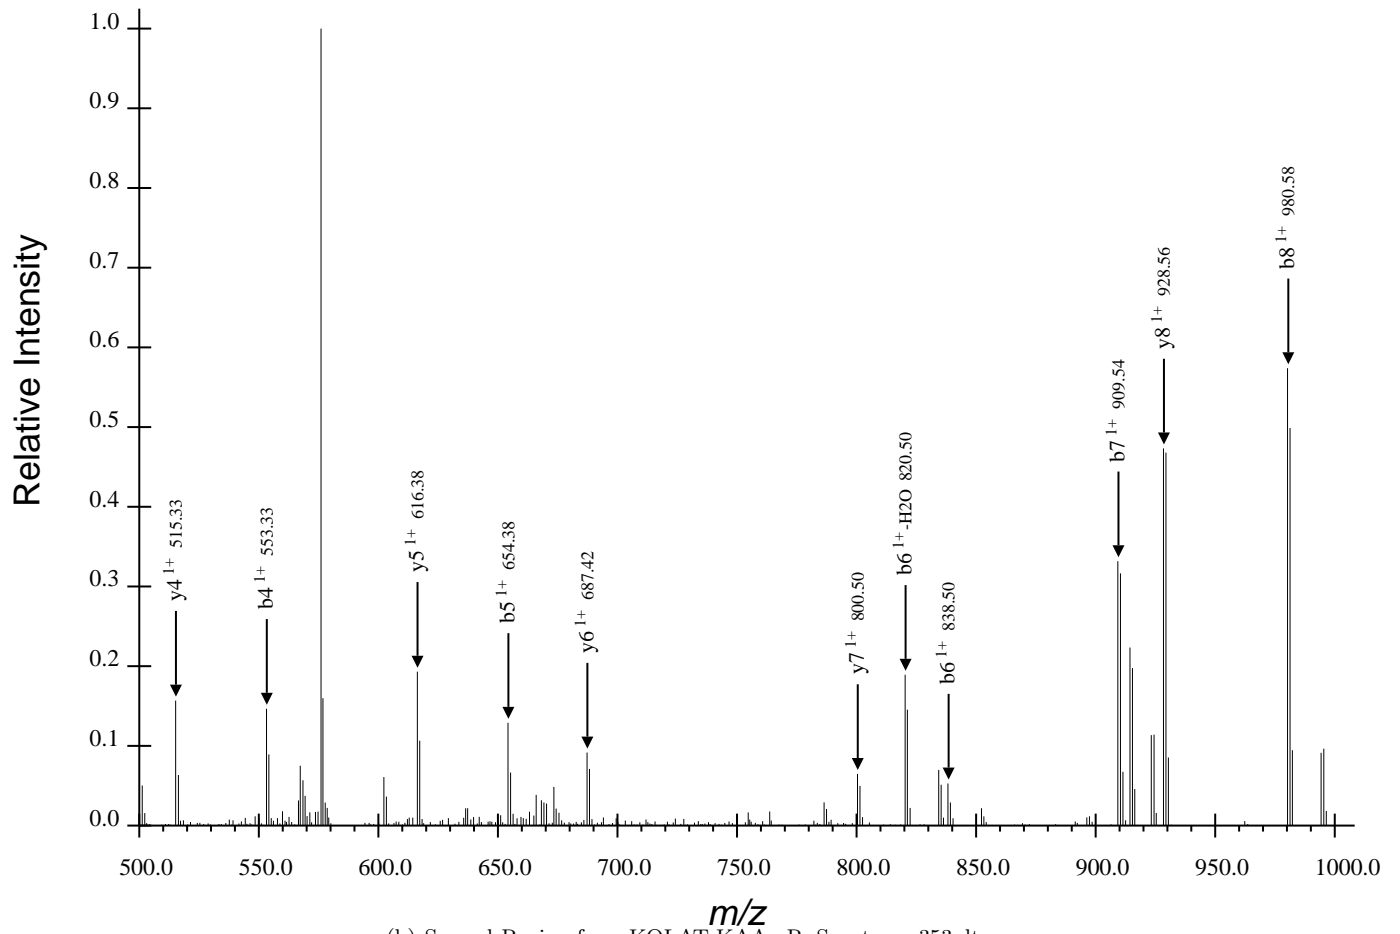

(b) Second Region for rrKQLATrKAAMR, Spectrum 353.dta

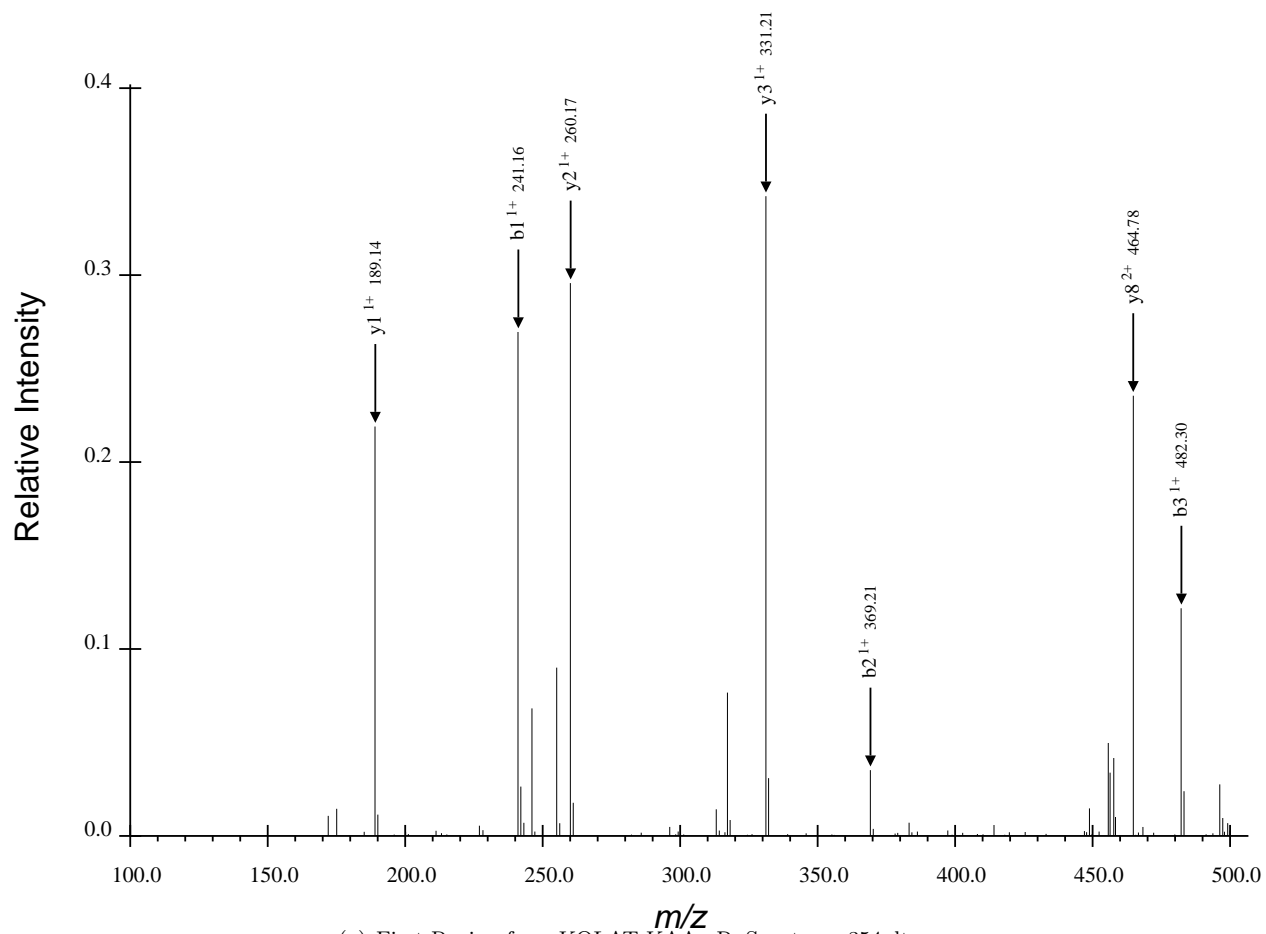

(a) First Region for rrKQLATrKAAMR, Spectrum 354.dta

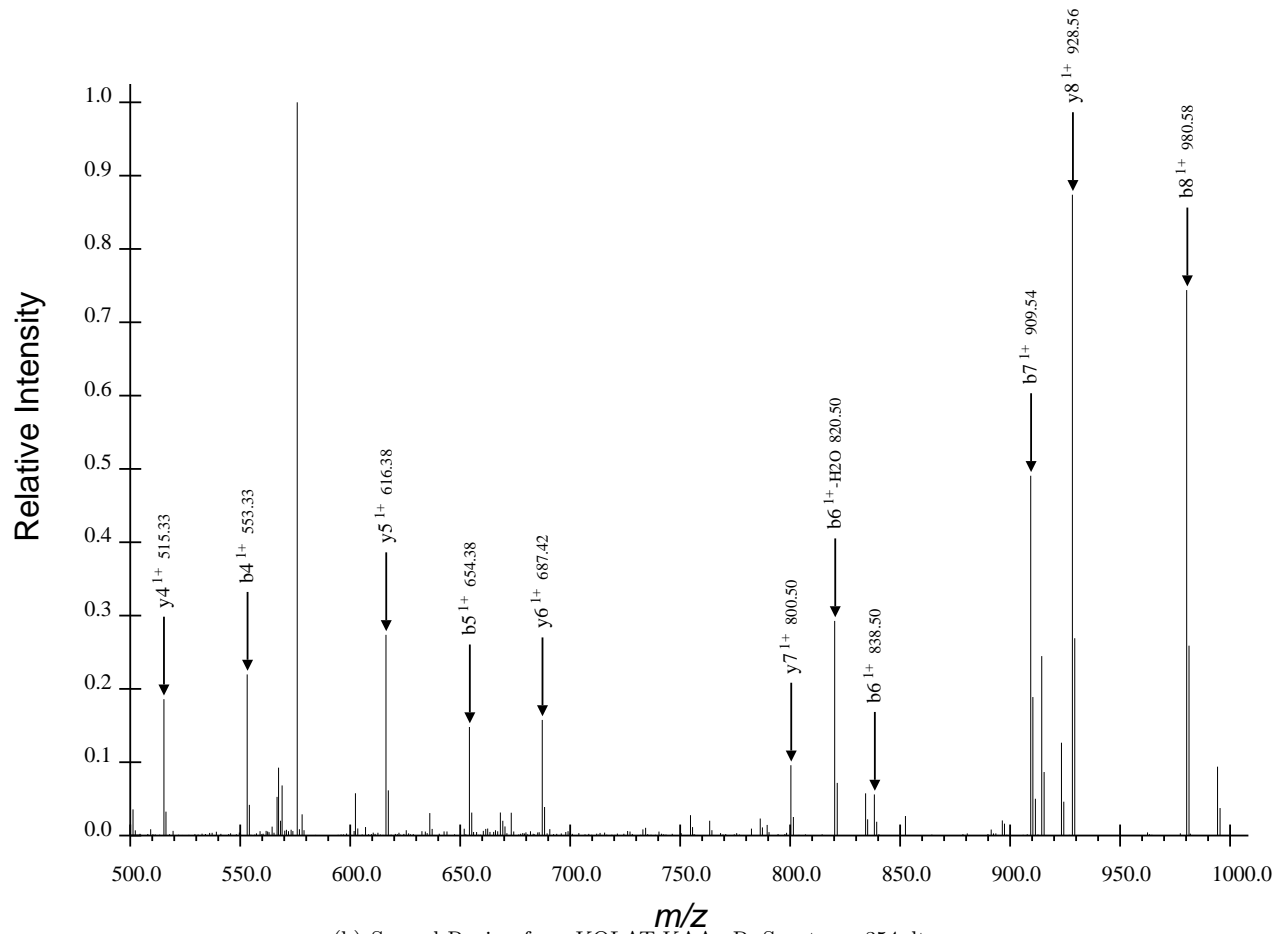

(b) Second Region for rrKQLATrKAAMR, Spectrum 354.dta

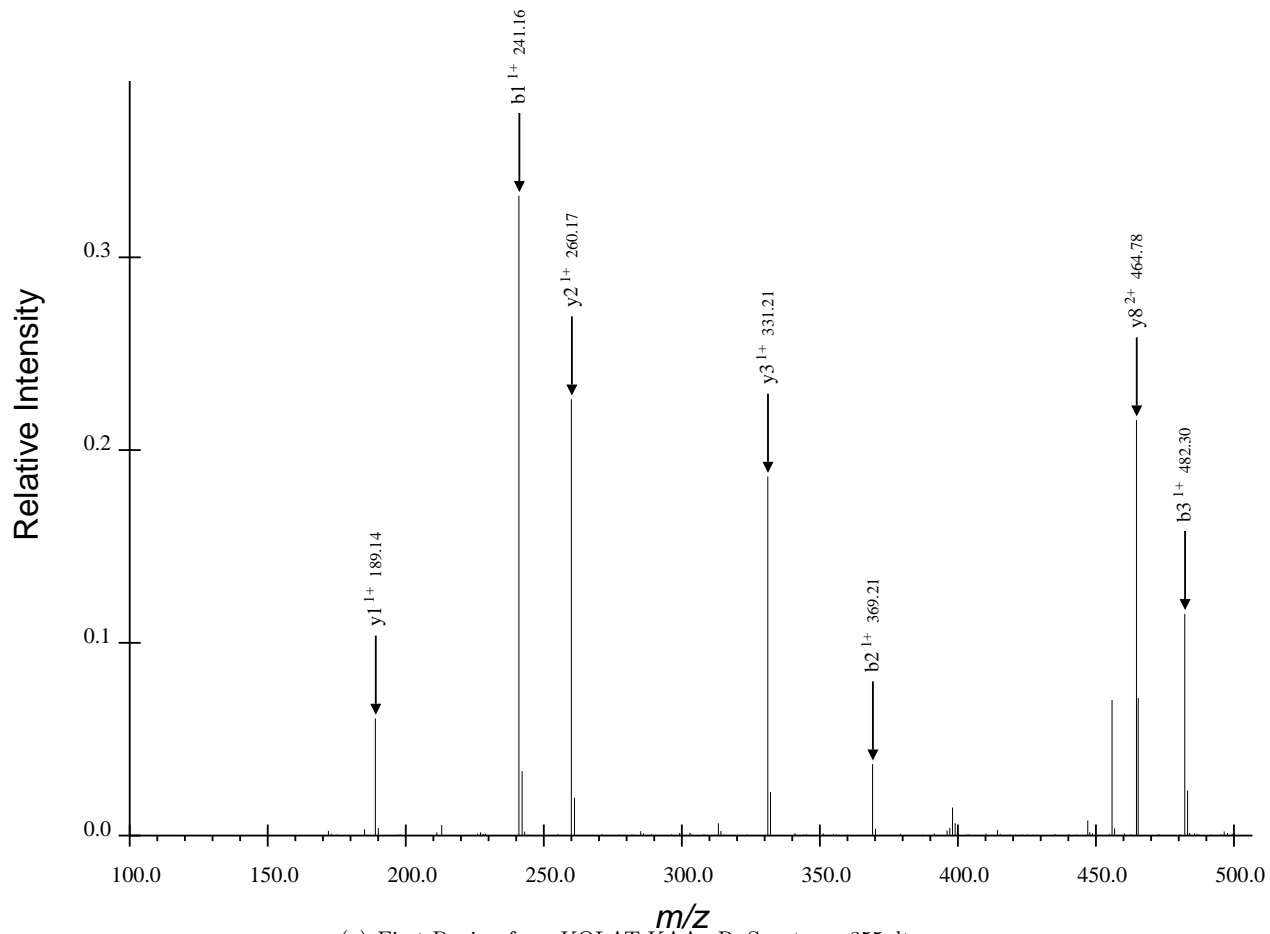

(a) First Region for rrKQLATrKAAMR, Spectrum 355.dta

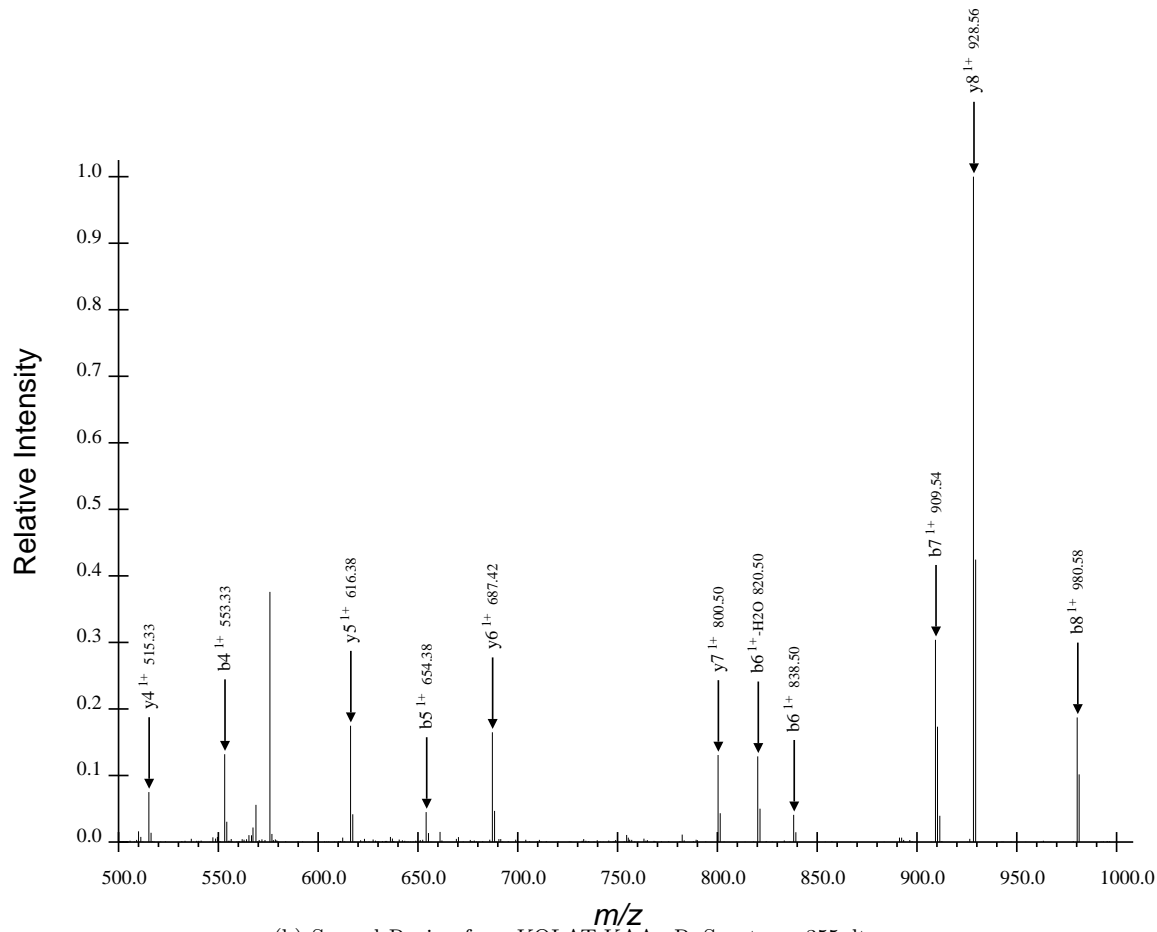

(b) Second Region for rrKQLATrKAAMR, Spectrum 355.dta

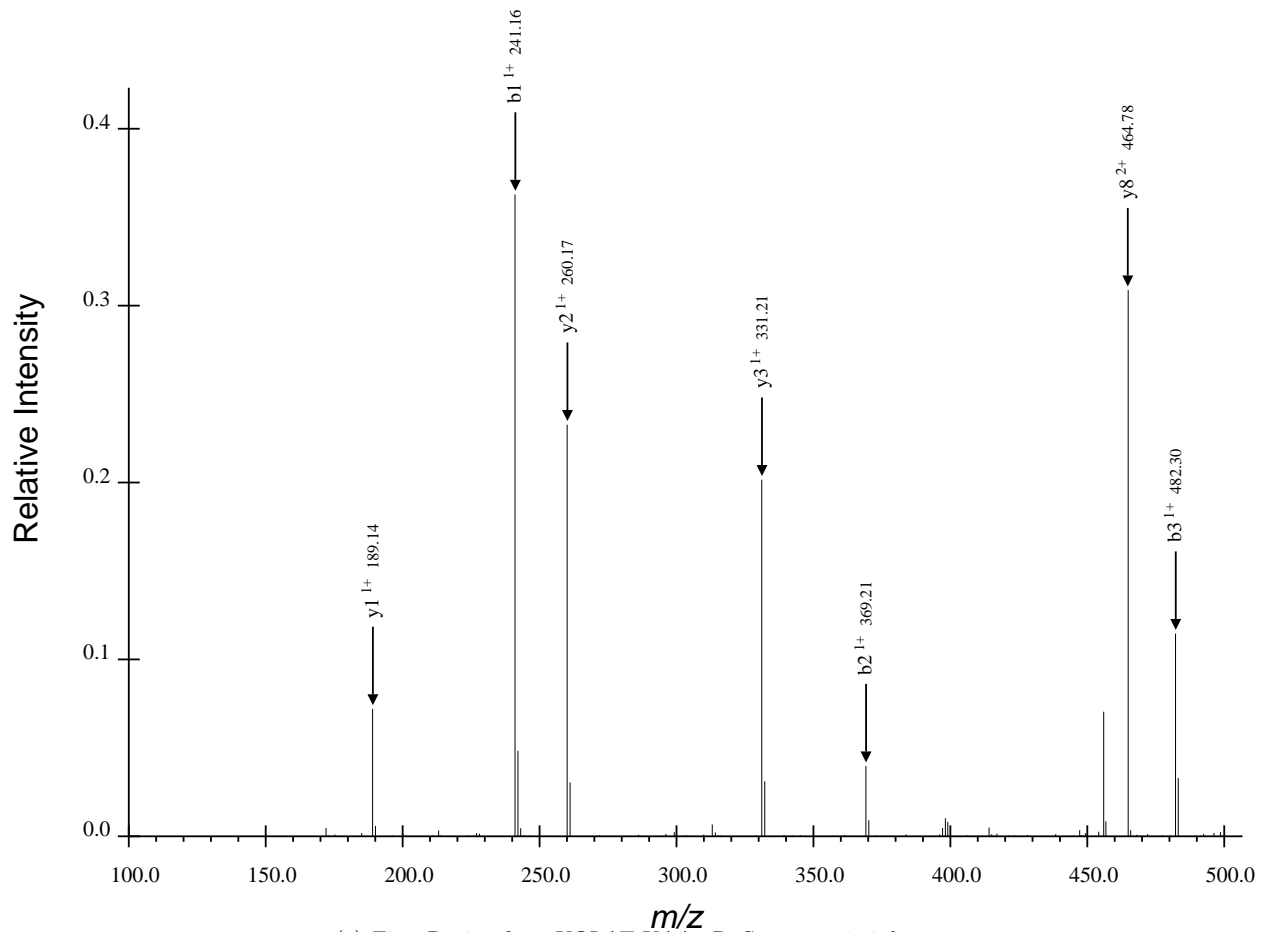

(a) First Region for rrKQLATrKAaM R, Spectrum 356.dta

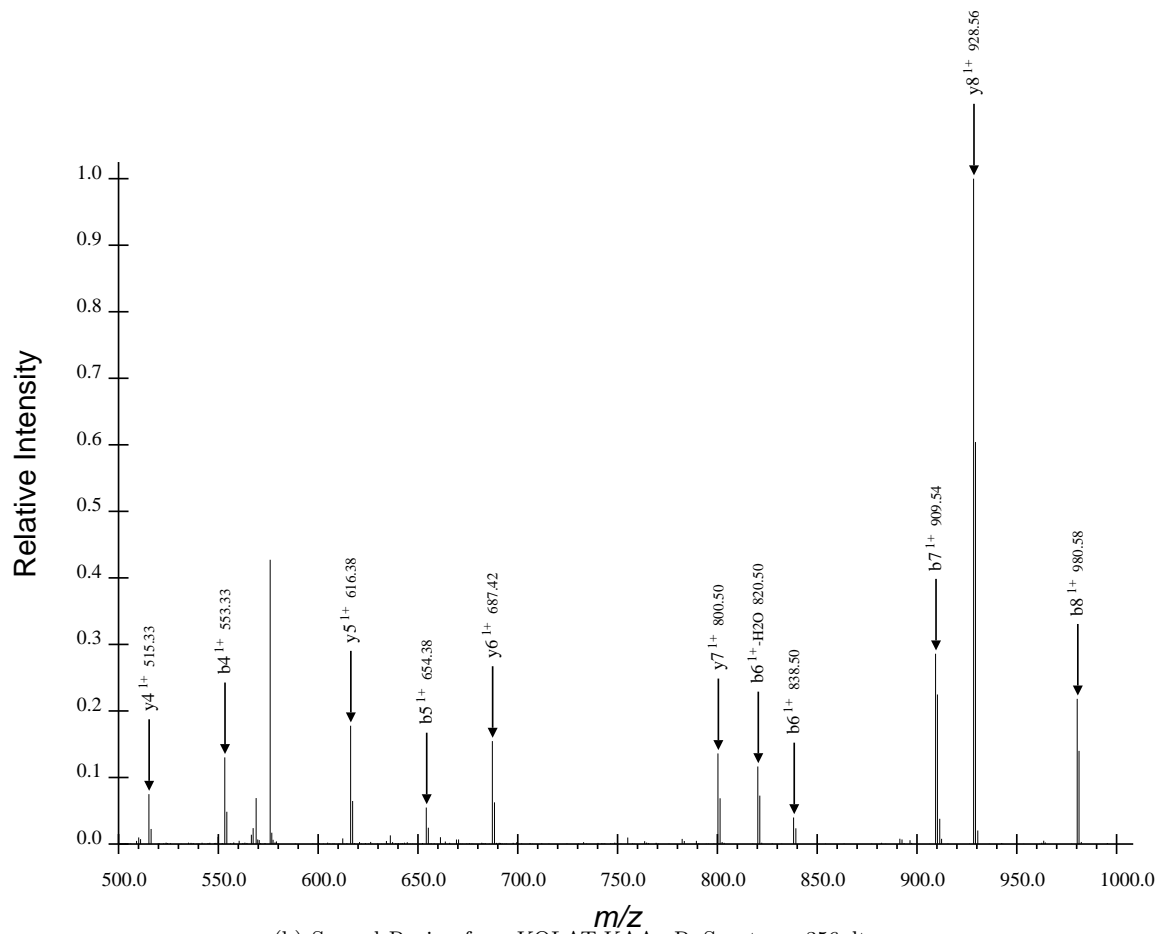

(b) Second Region for rrKQLATrKAaM R, Spectrum 356.dta

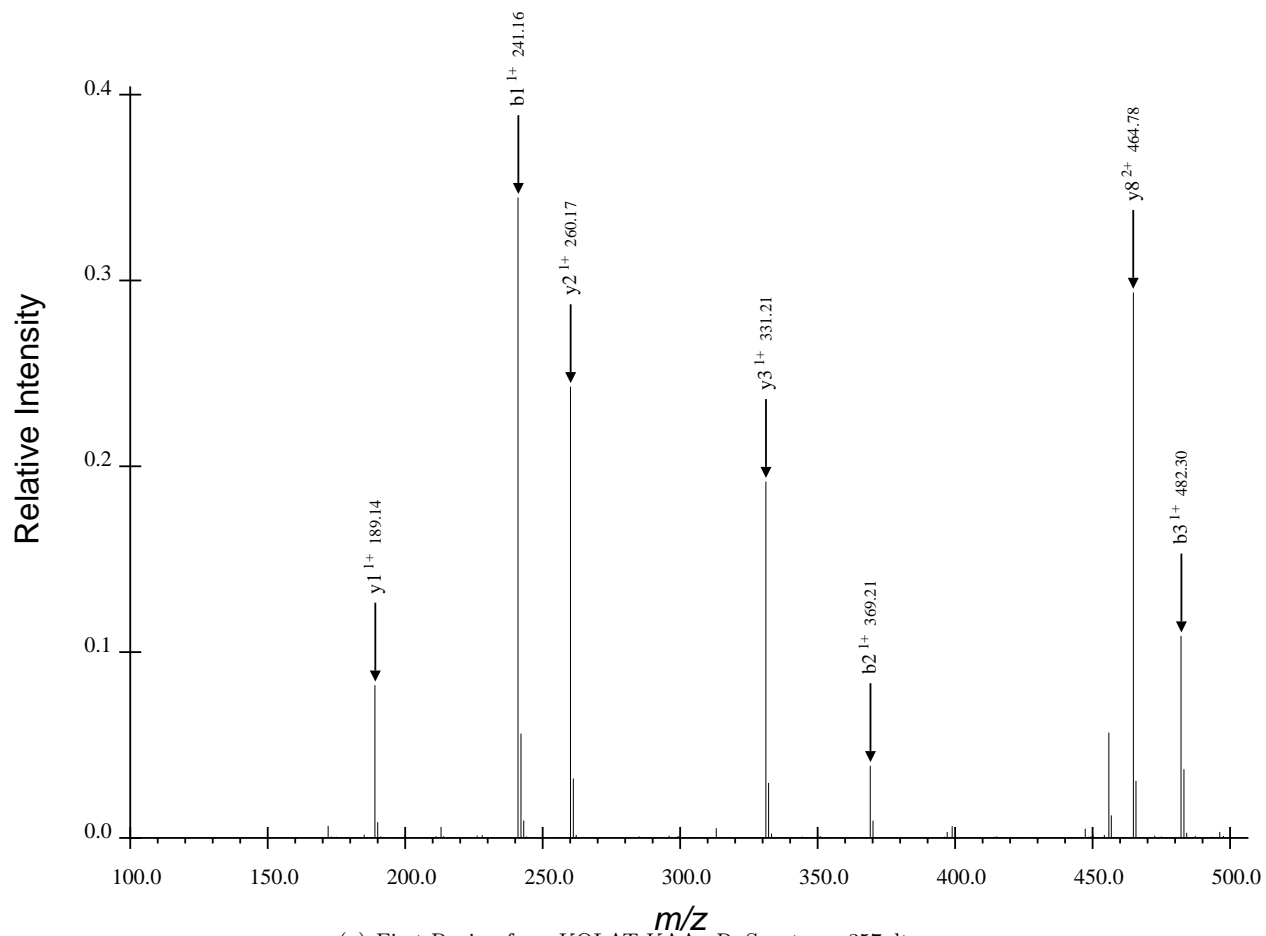

(a) First Region for rrKQLATrKAAmR, Spectrum 357.dta

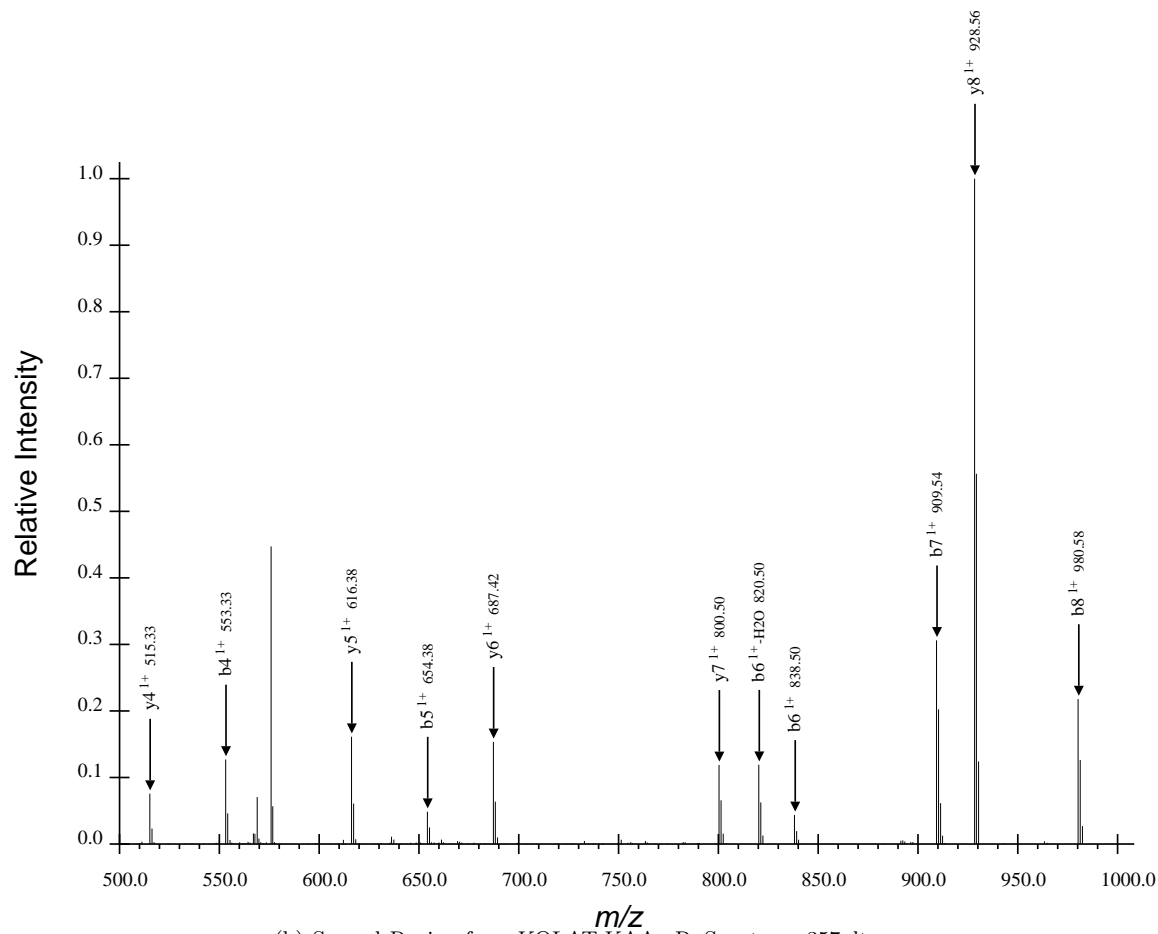

(b) Second Region for rrKQLATrKAAmR, Spectrum 357.dta

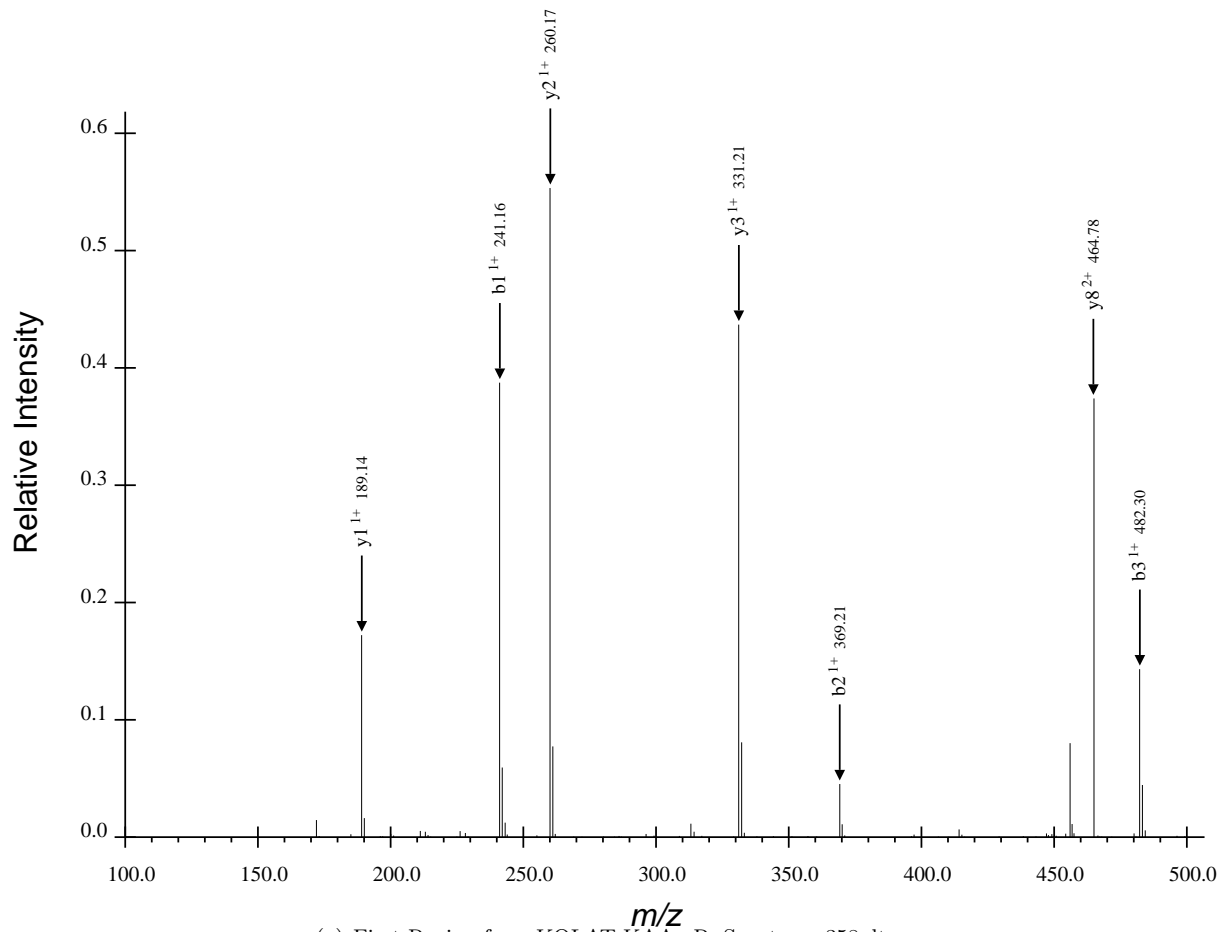

(a) First Region for rrKQLATrKAAMR, Spectrum 358.dta

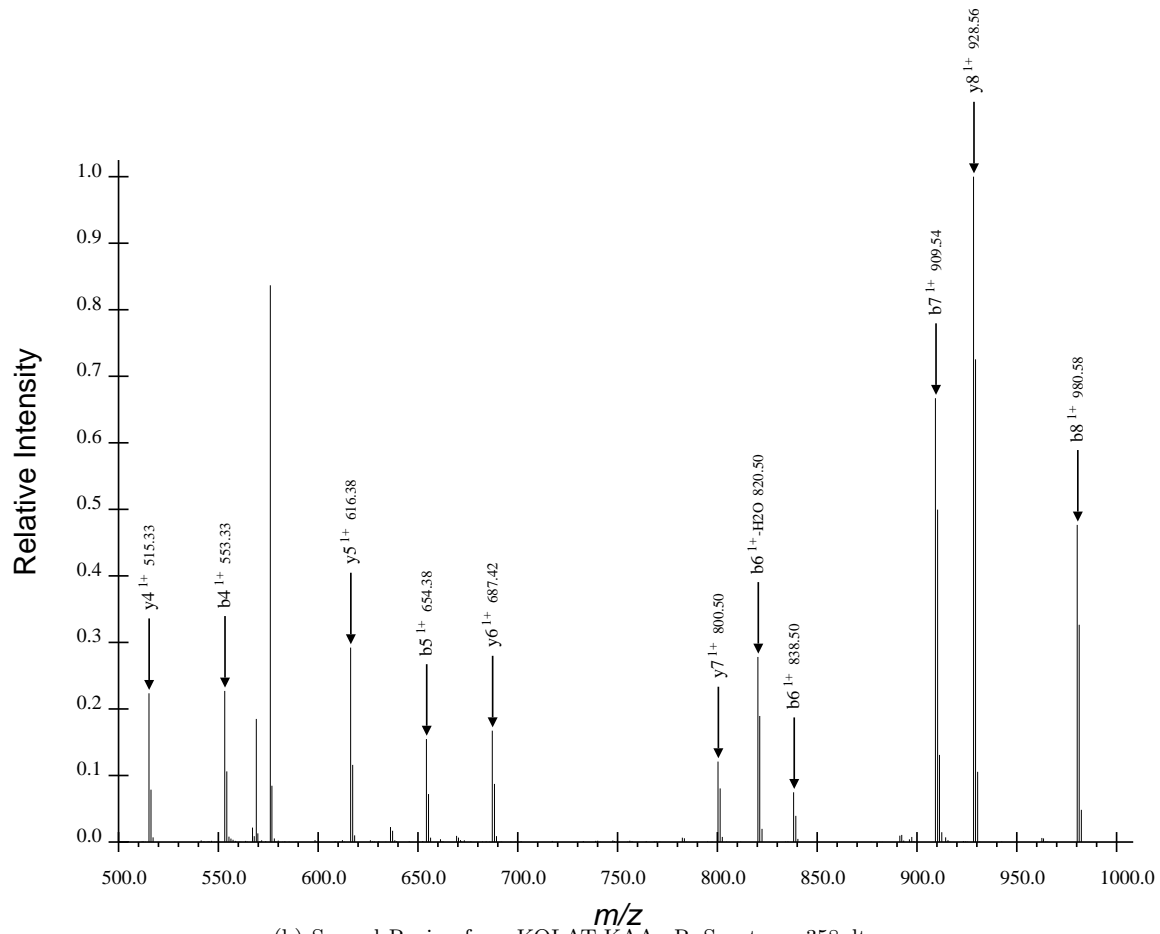

(b) Second Region for rrKQLATrKAAMR, Spectrum 358.dta

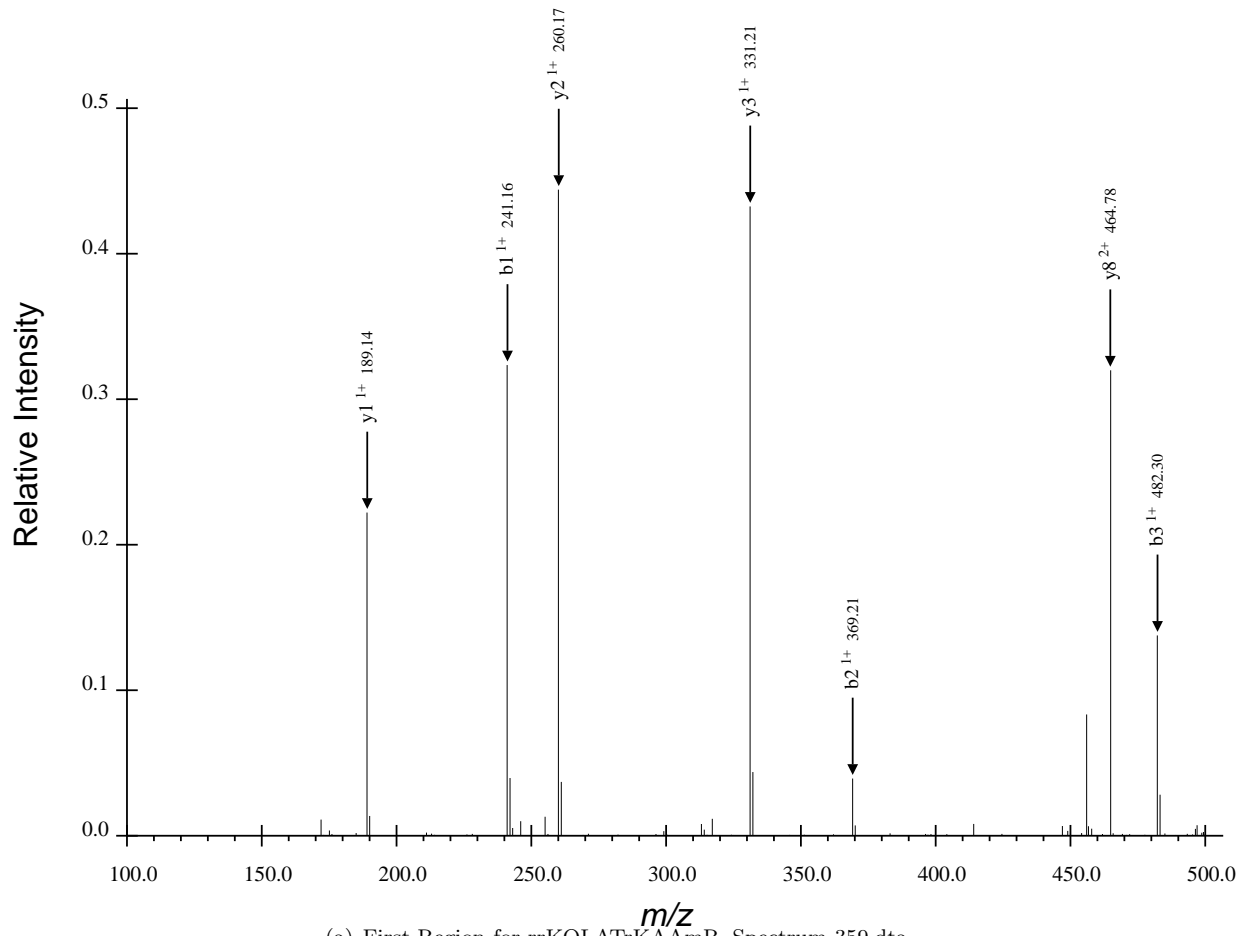

(a) First Region for rrKQLATrKAAMR, Spectrum 359.dta

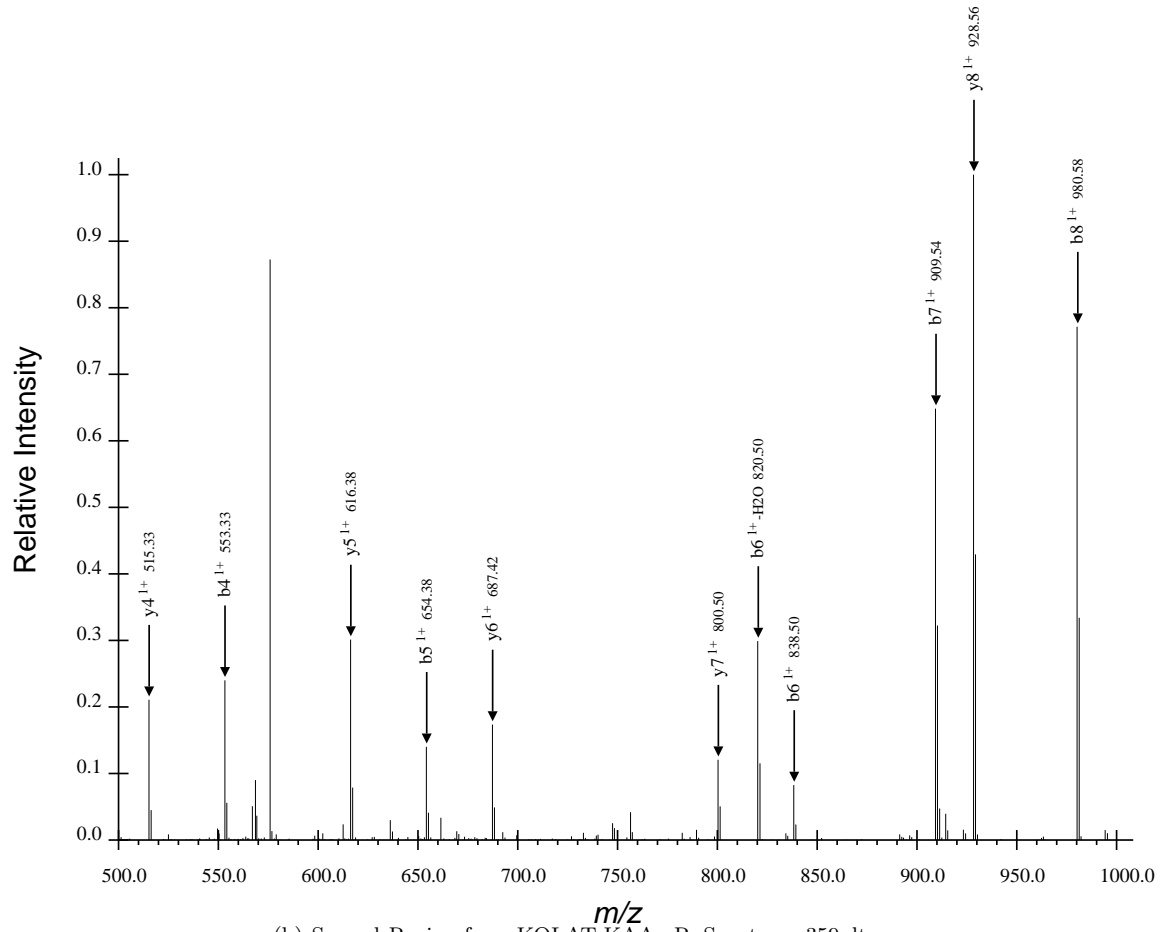

(b) Second Region for rrKQLATrKAAMR, Spectrum 359.dta

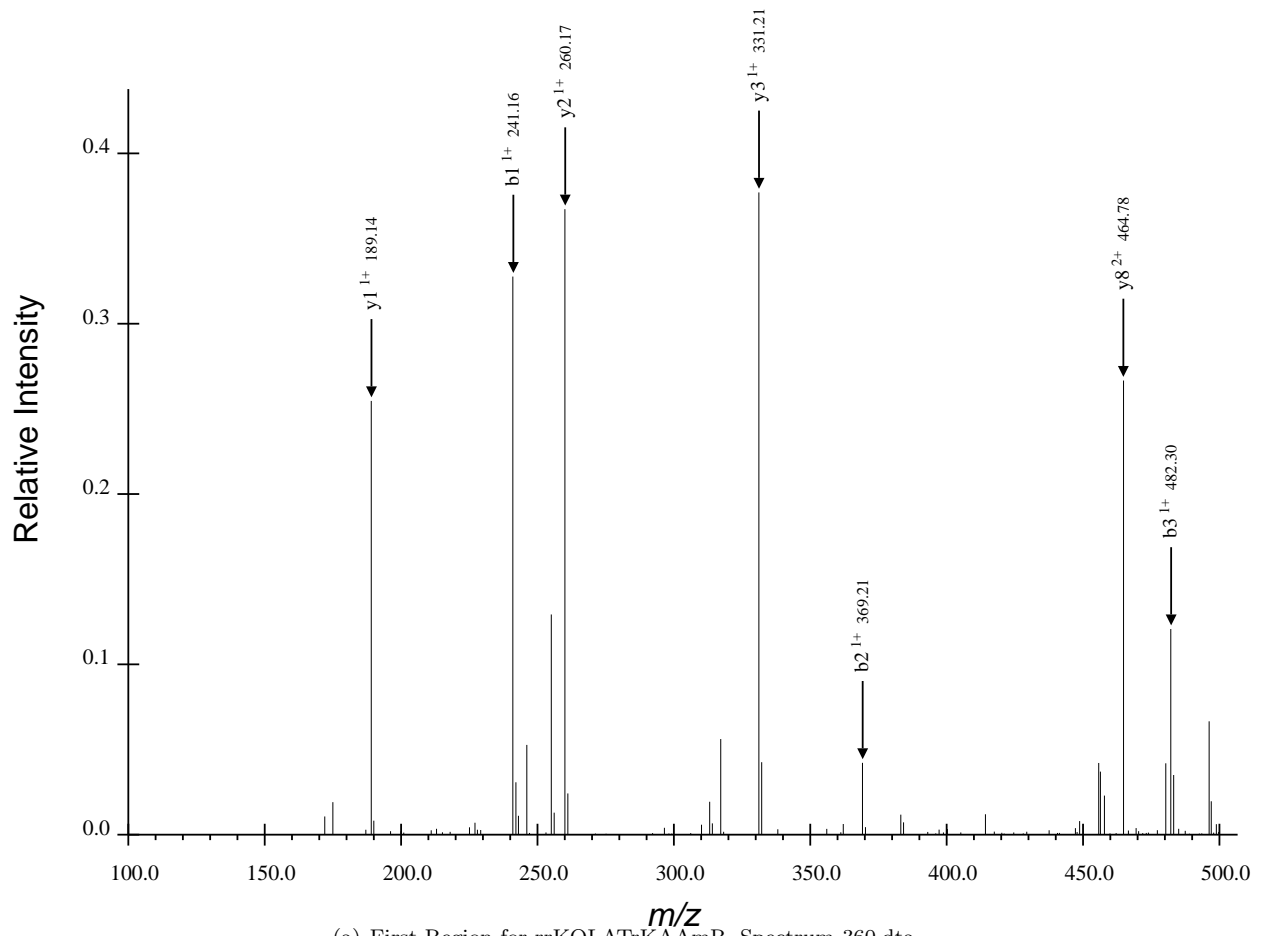

(a) First Region for rrKQLATrKAAMR, Spectrum 360.dta

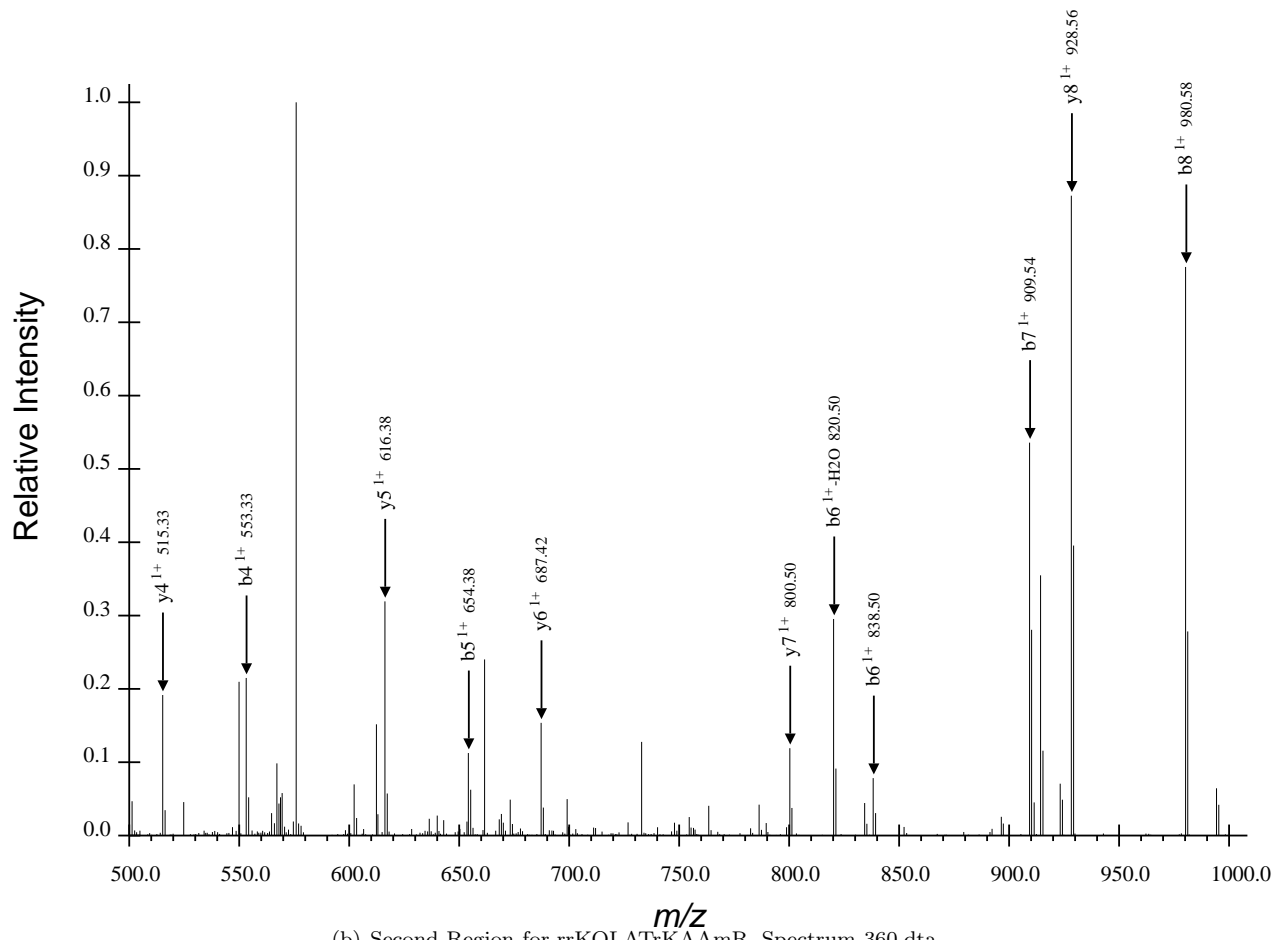

(b) Second Region for rrKQLATrKAAMR, Spectrum 360.dta



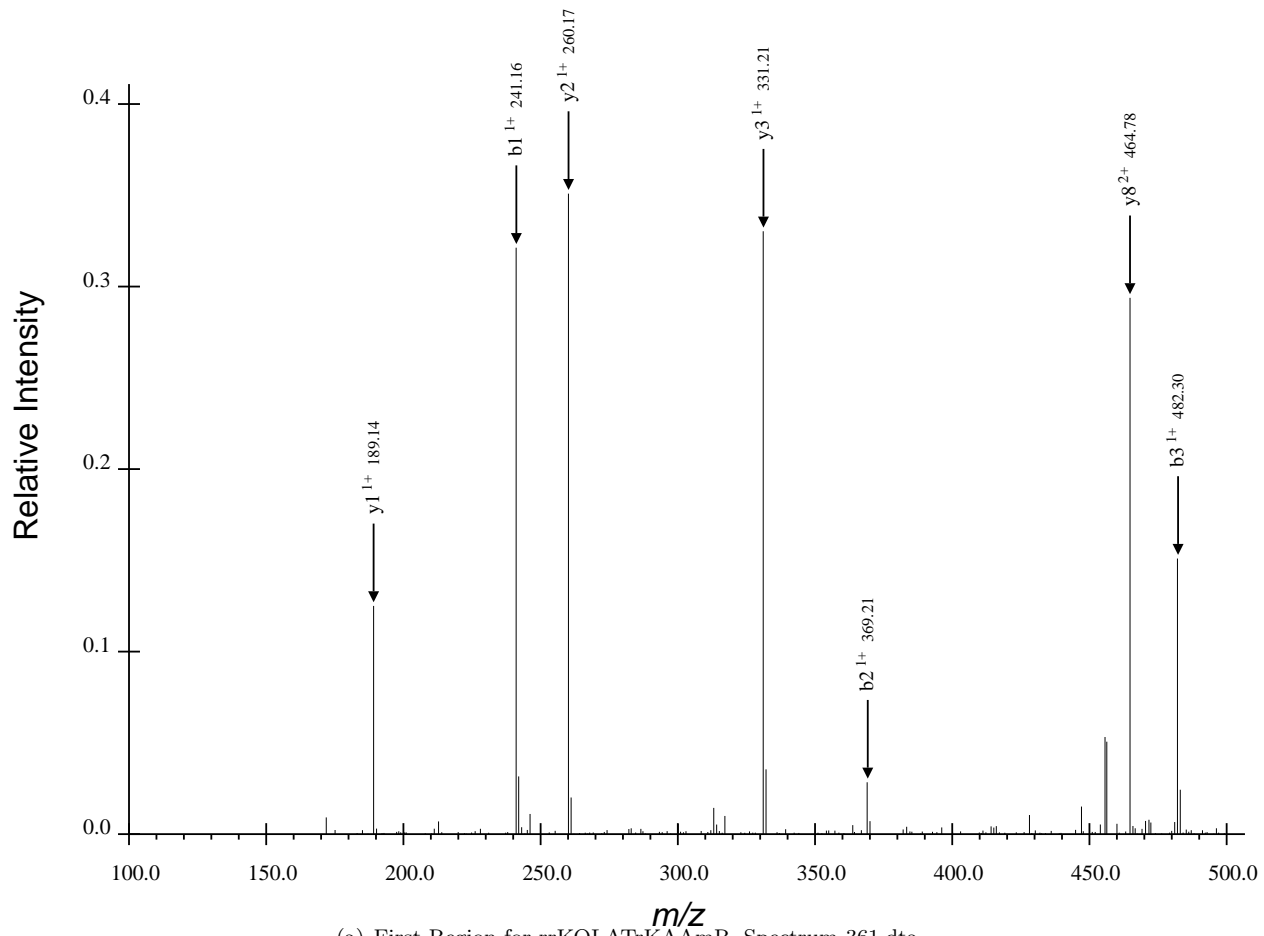

(a) First Region for rrKQLATrKAAmR, Spectrum 361.dta

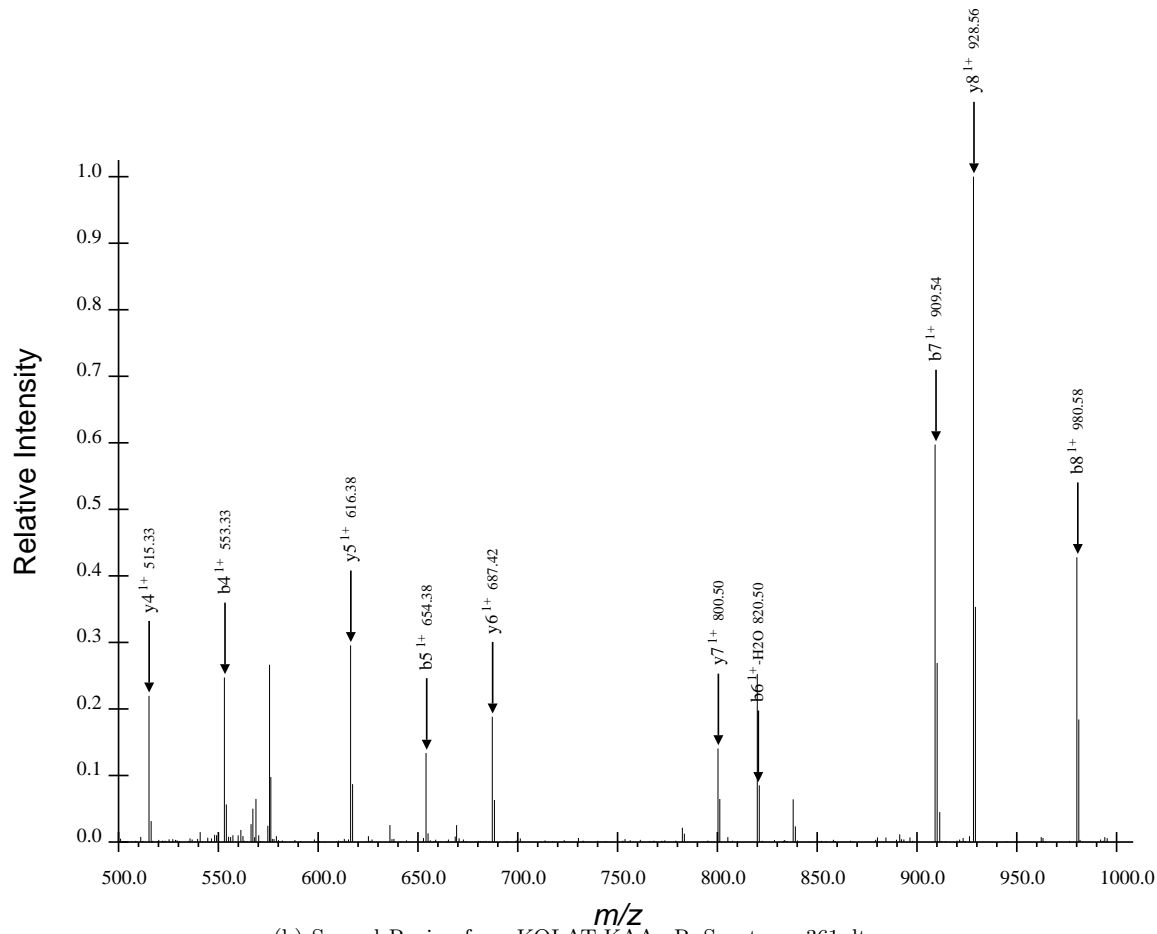

(b) Second Region for rrKQLATrKAAmR, Spectrum 361.dta

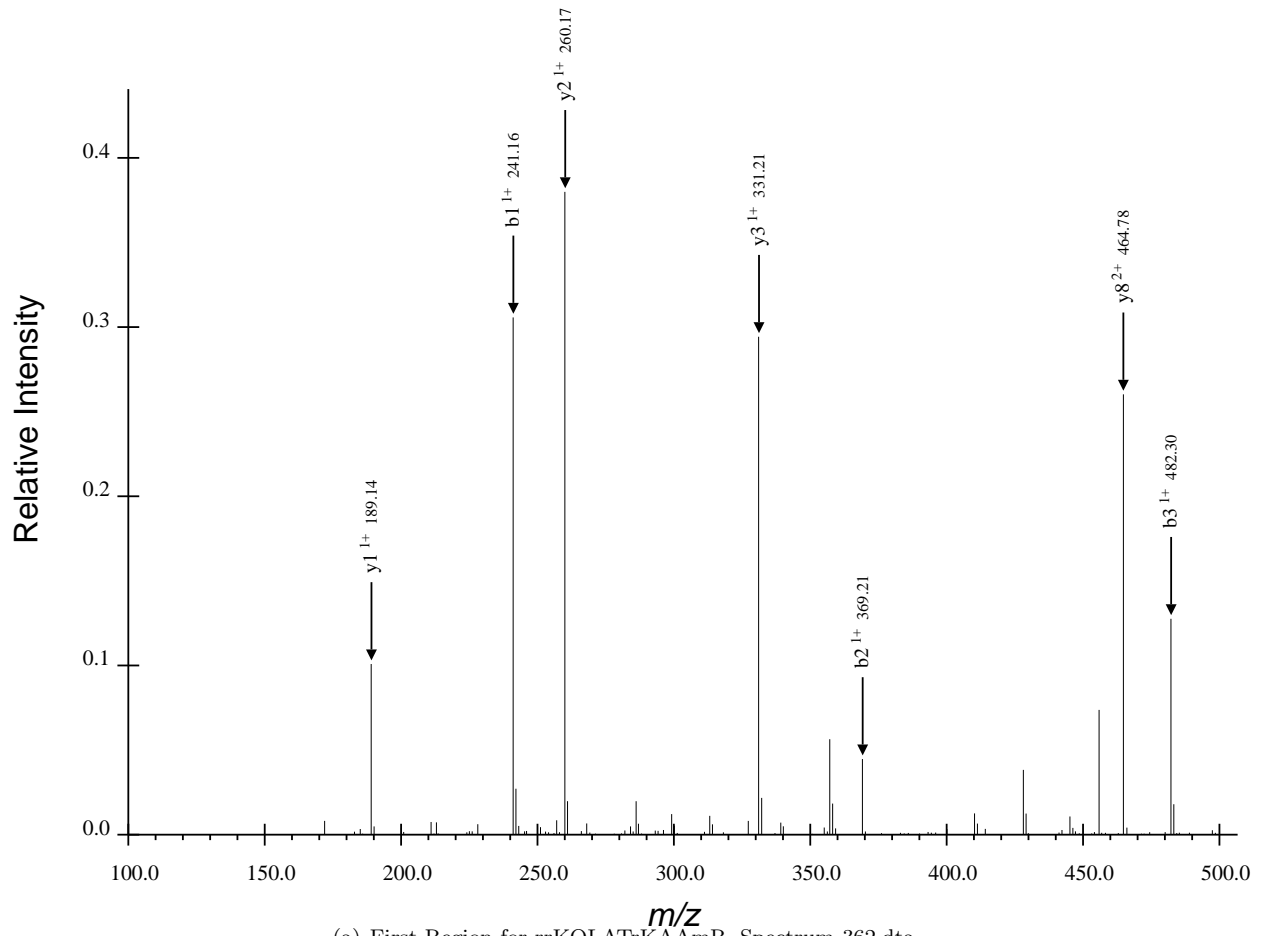

(a) First Region for rrKQLATrKAAMR, Spectrum 362.dta

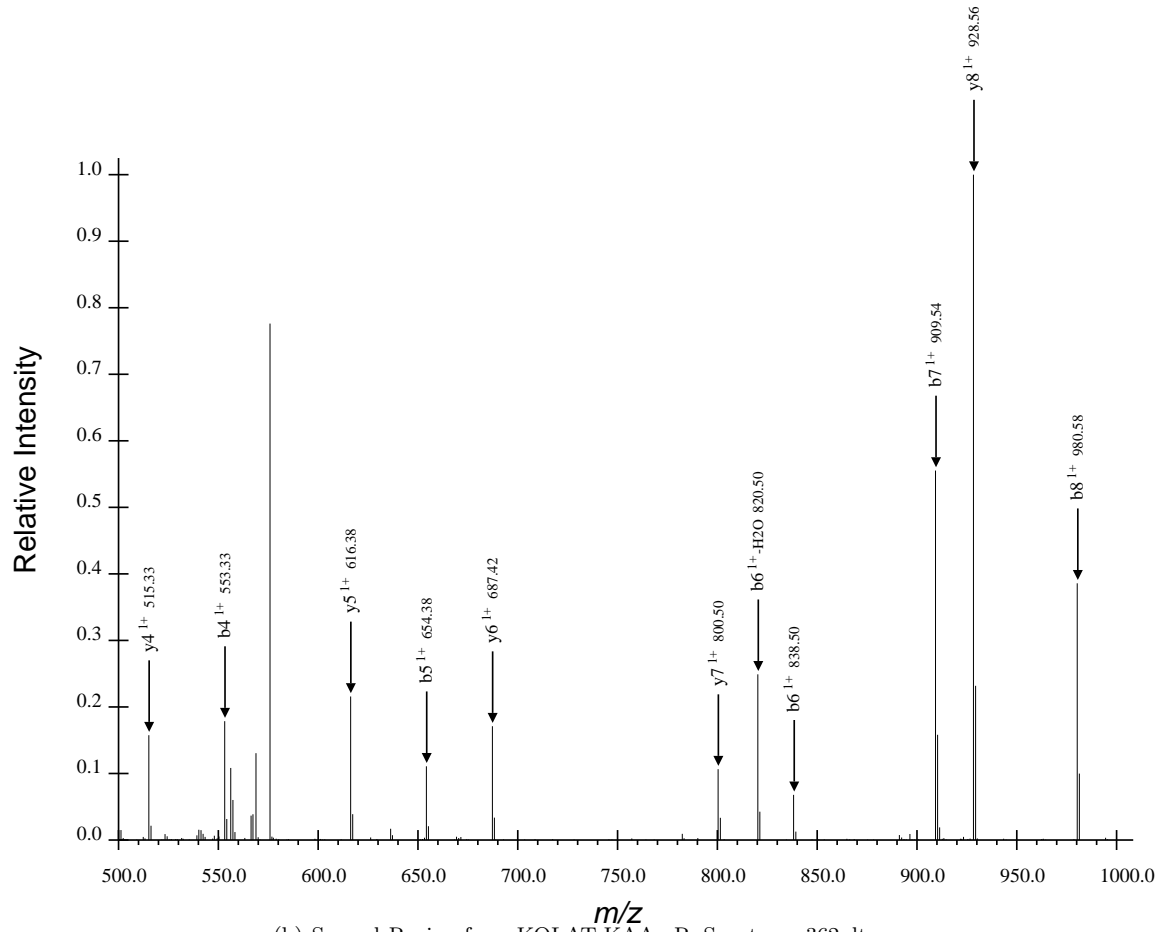

(b) Second Region for rrKQLATrKAAMR, Spectrum 362.dta

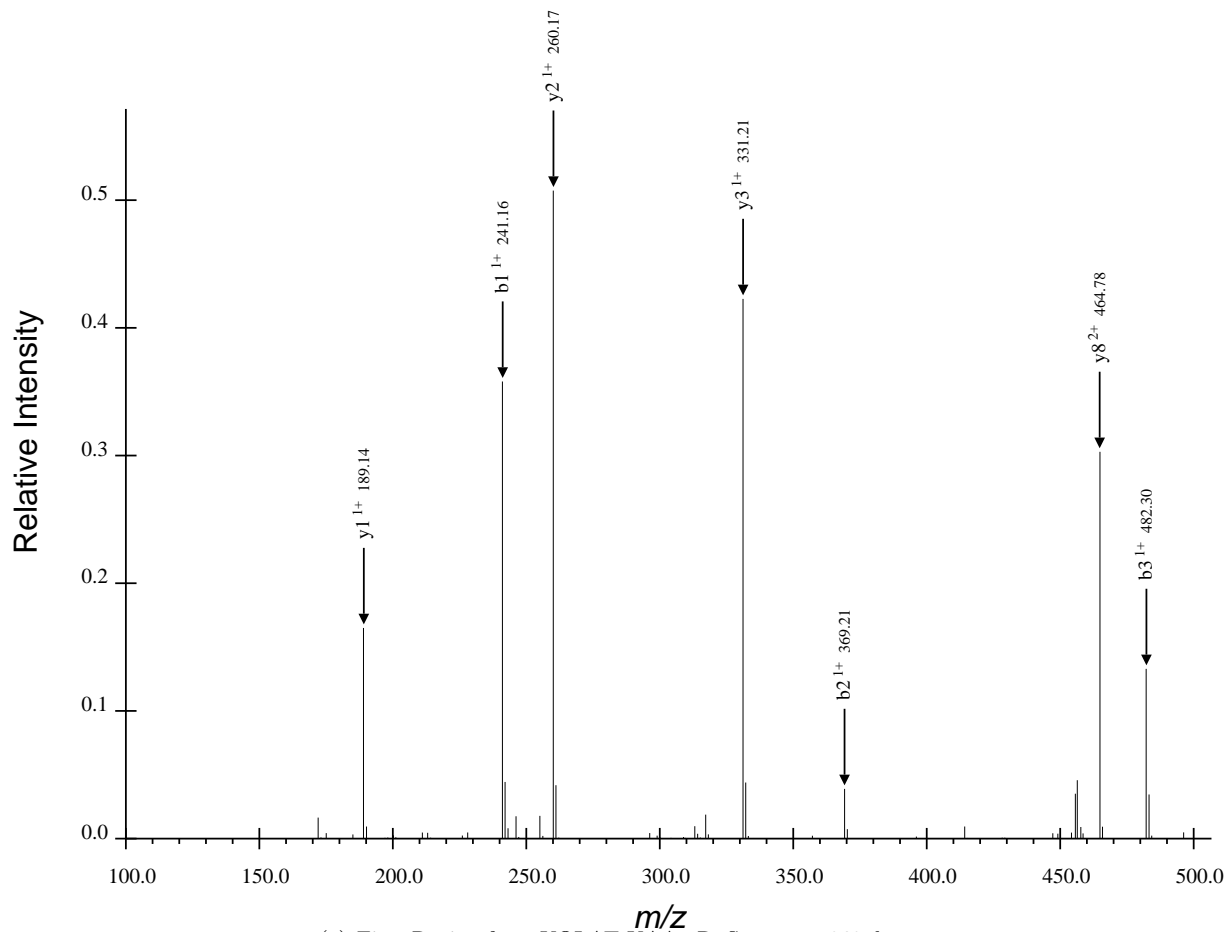

(a) First Region for rrKQLATrKAAmR, Spectrum 363.dta

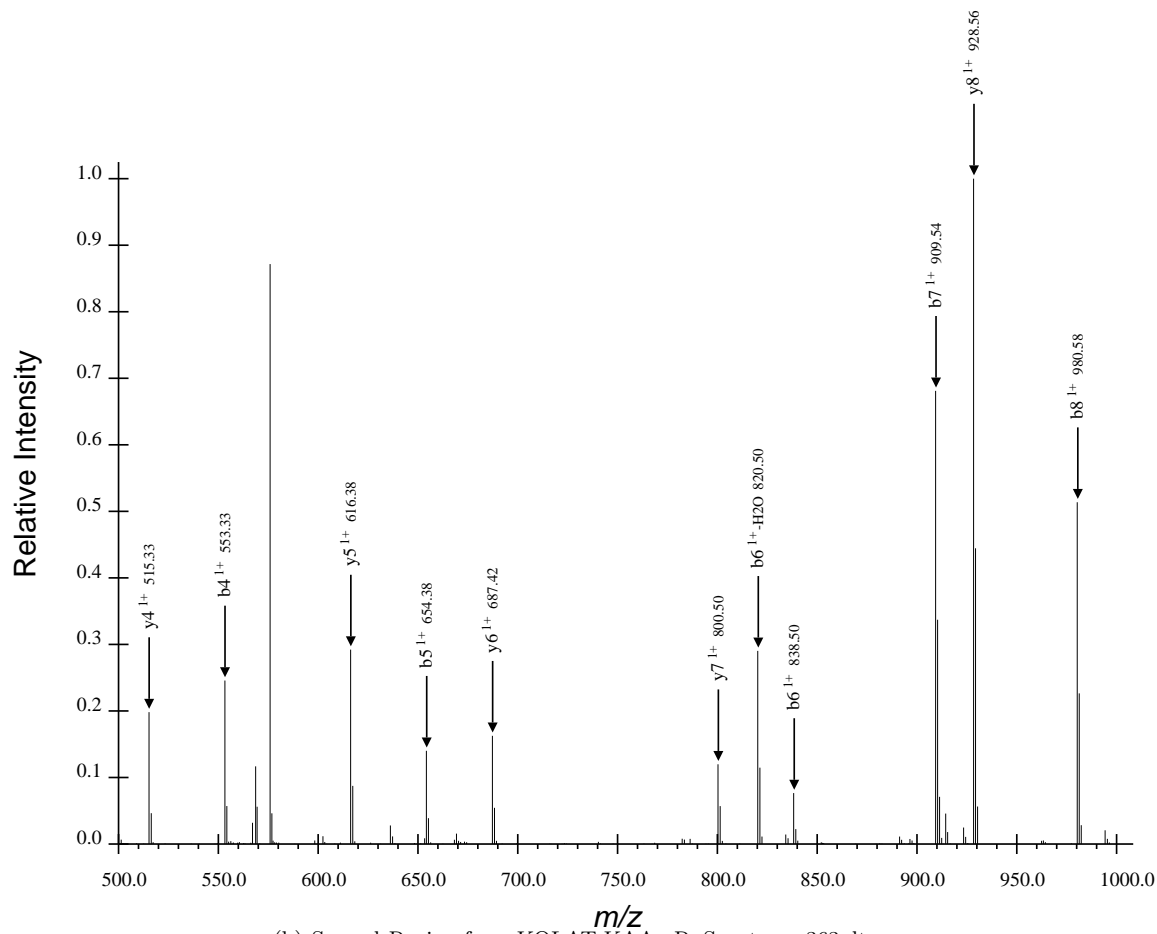

(b) Second Region for rrKQLATrKAAmR, Spectrum 363.dta

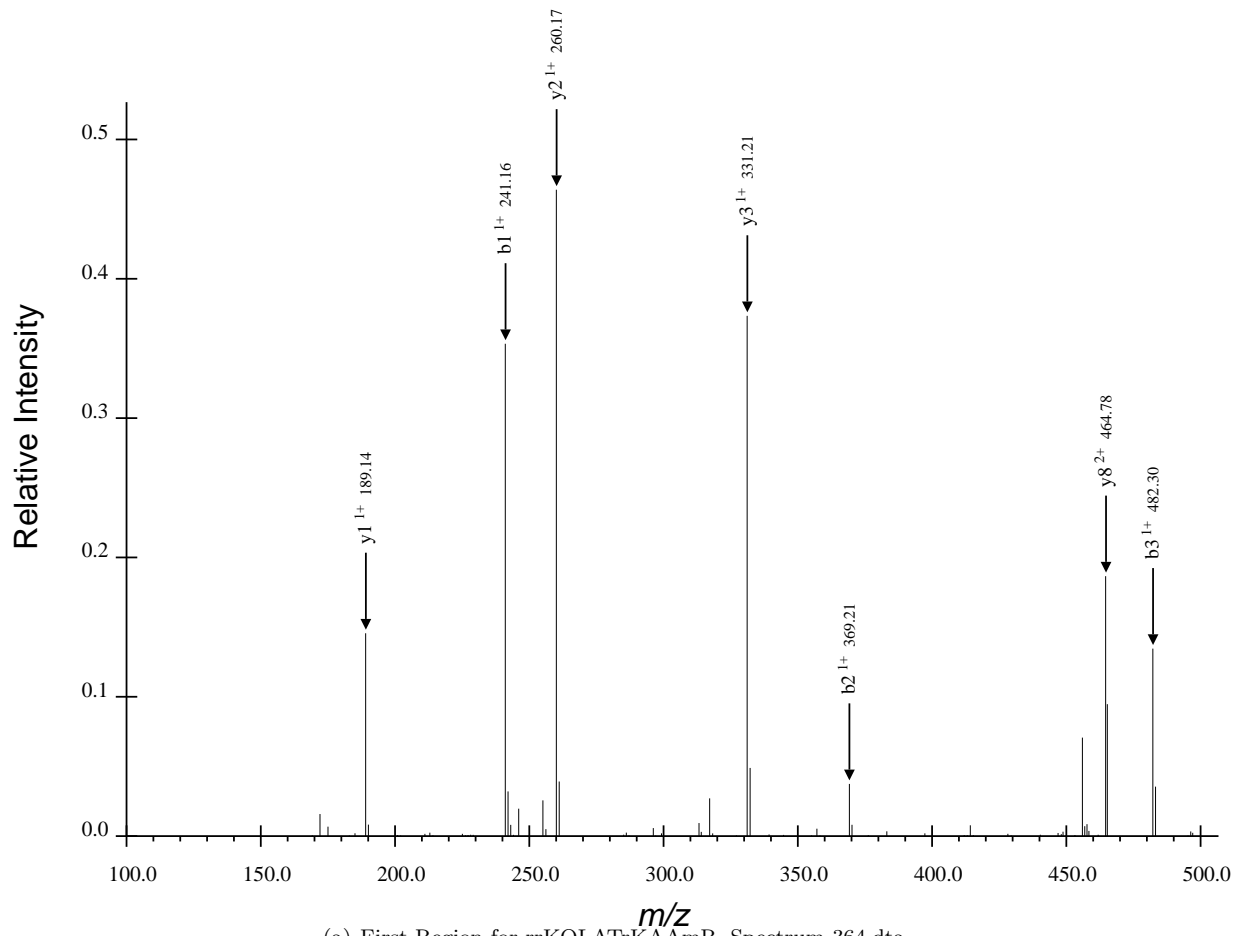

(a) First Region for rrKQLATrKAAMR, Spectrum 364.dta

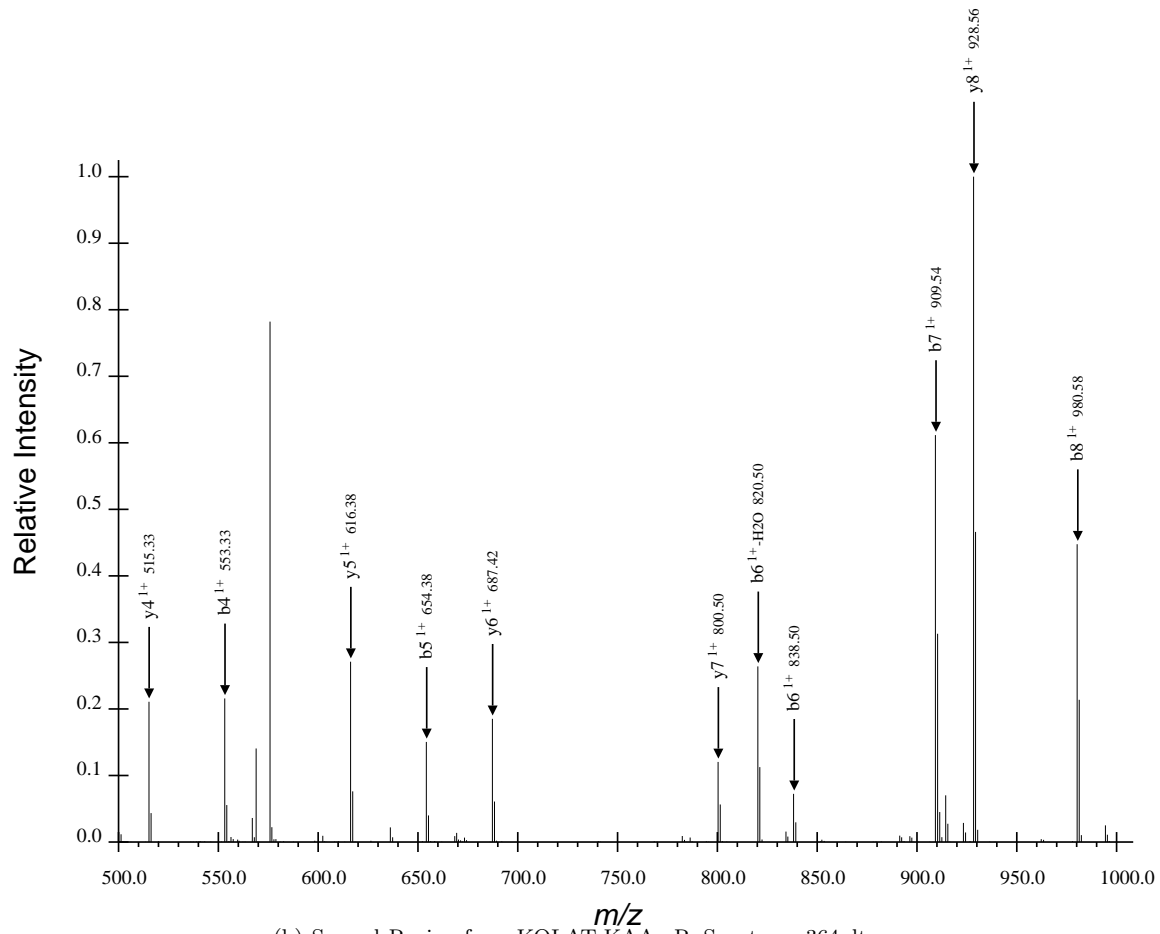

(b) Second Region for rrKQLATrKAAMR, Spectrum 364.dta

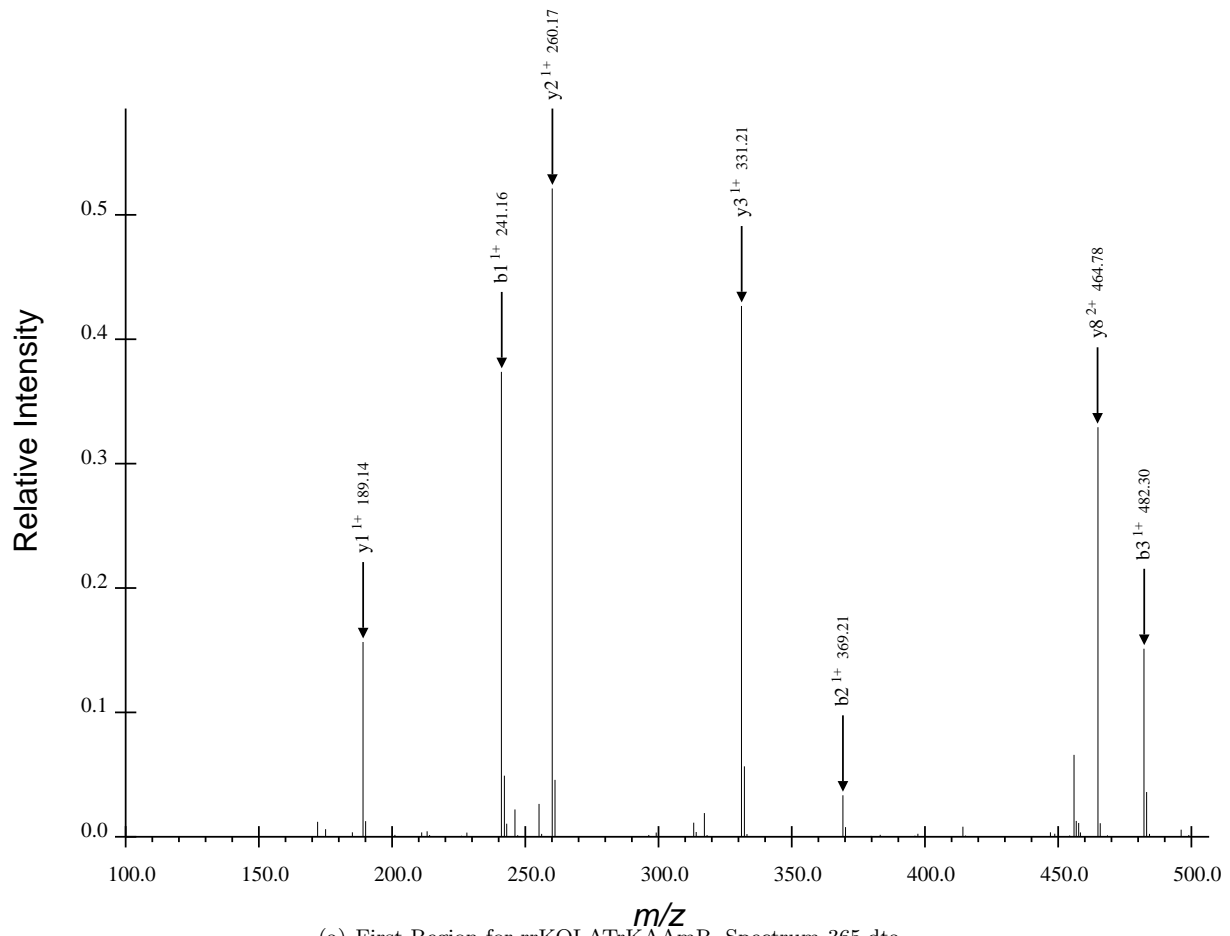

(a) First Region for rrKQLATrKAAMR, Spectrum 365.dta

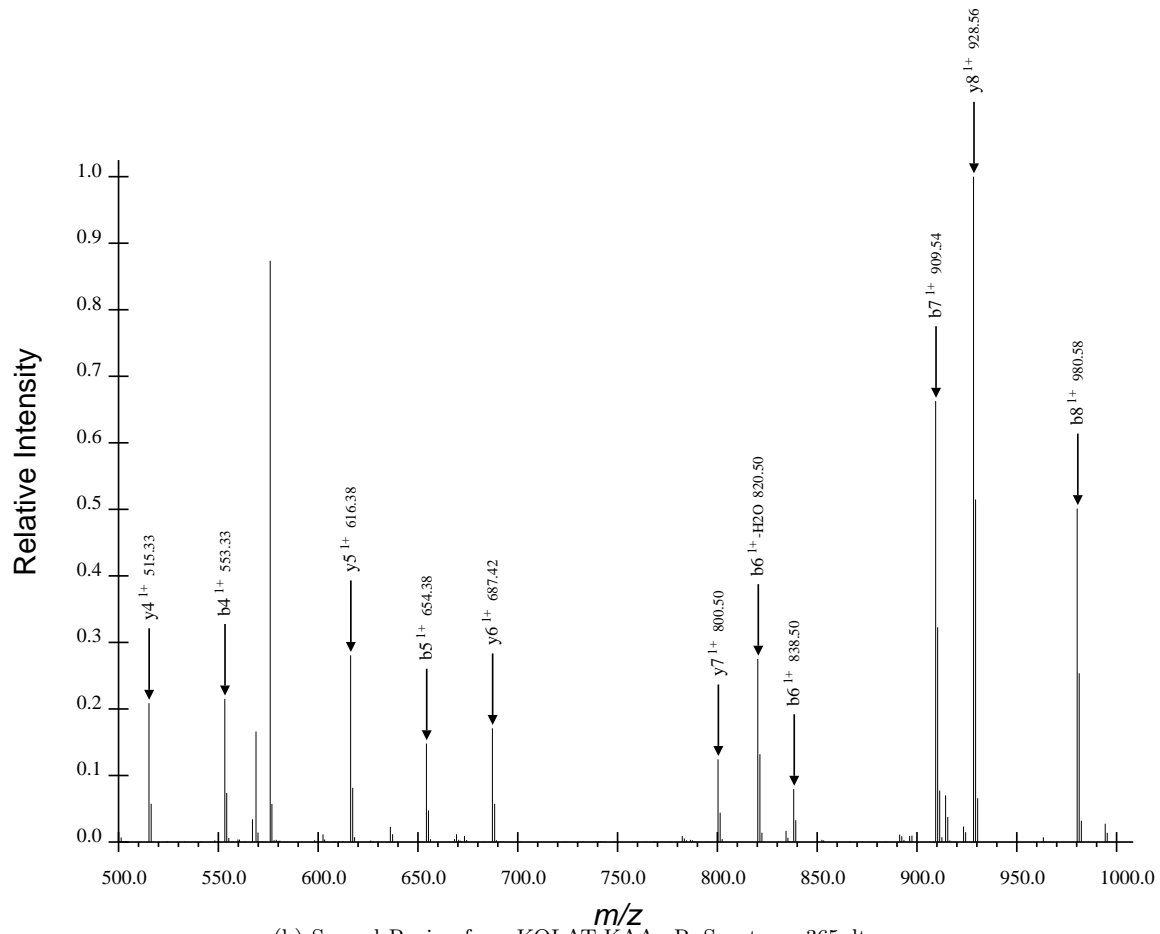

(b) Second Region for rrKQLATrKAAMR, Spectrum 365.dta

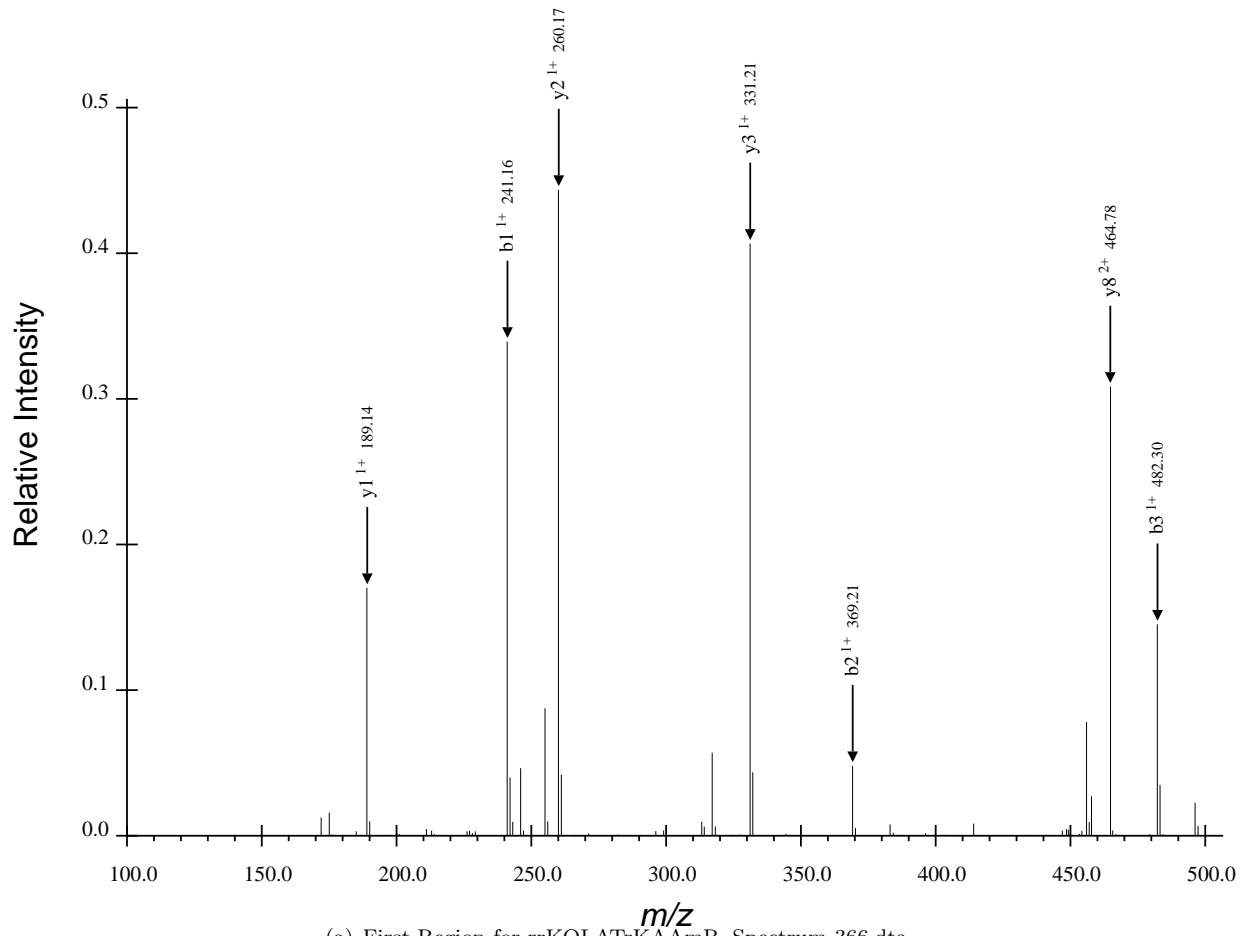

(a) First Region for rrKQLATrKAAMR, Spectrum 366.dta

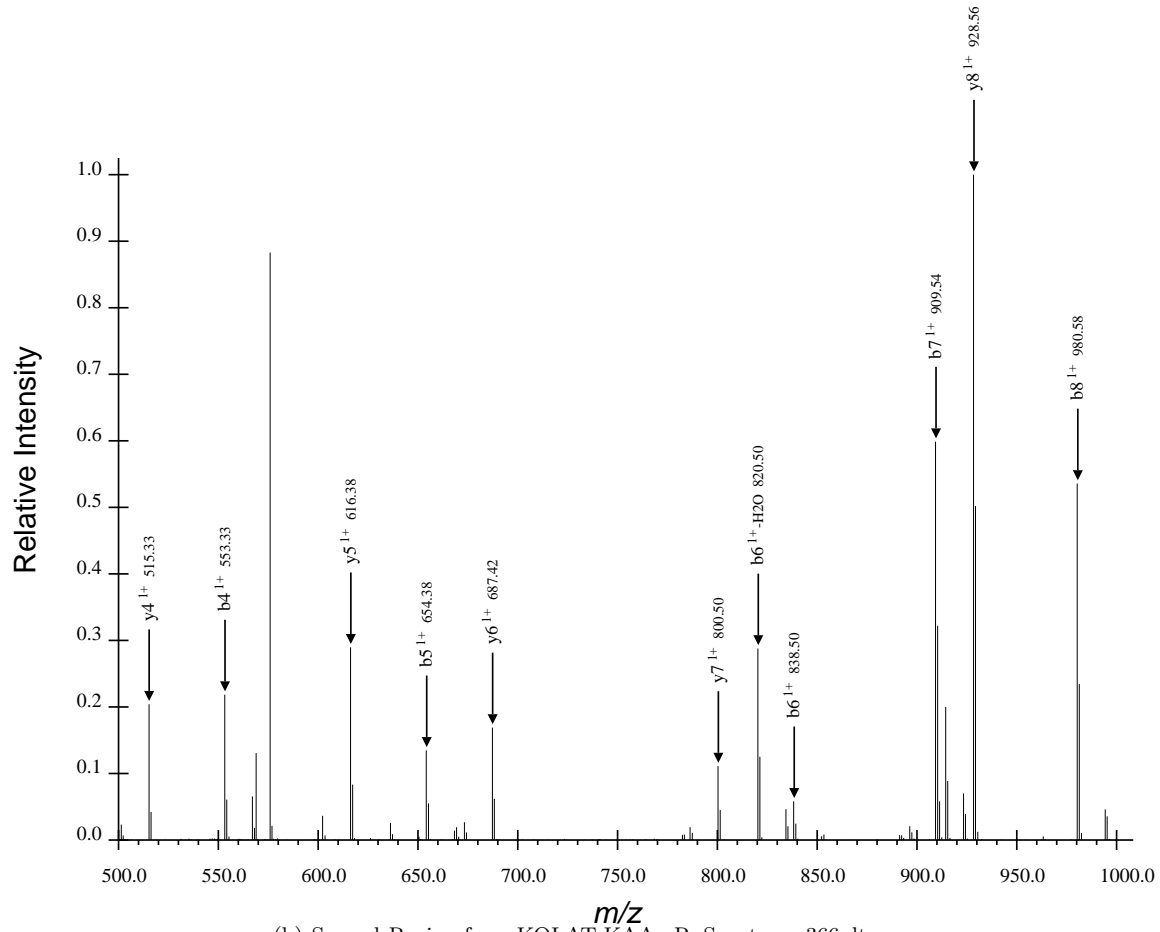

(b) Second Region for rrKQLATrKAAMR, Spectrum 366.dta

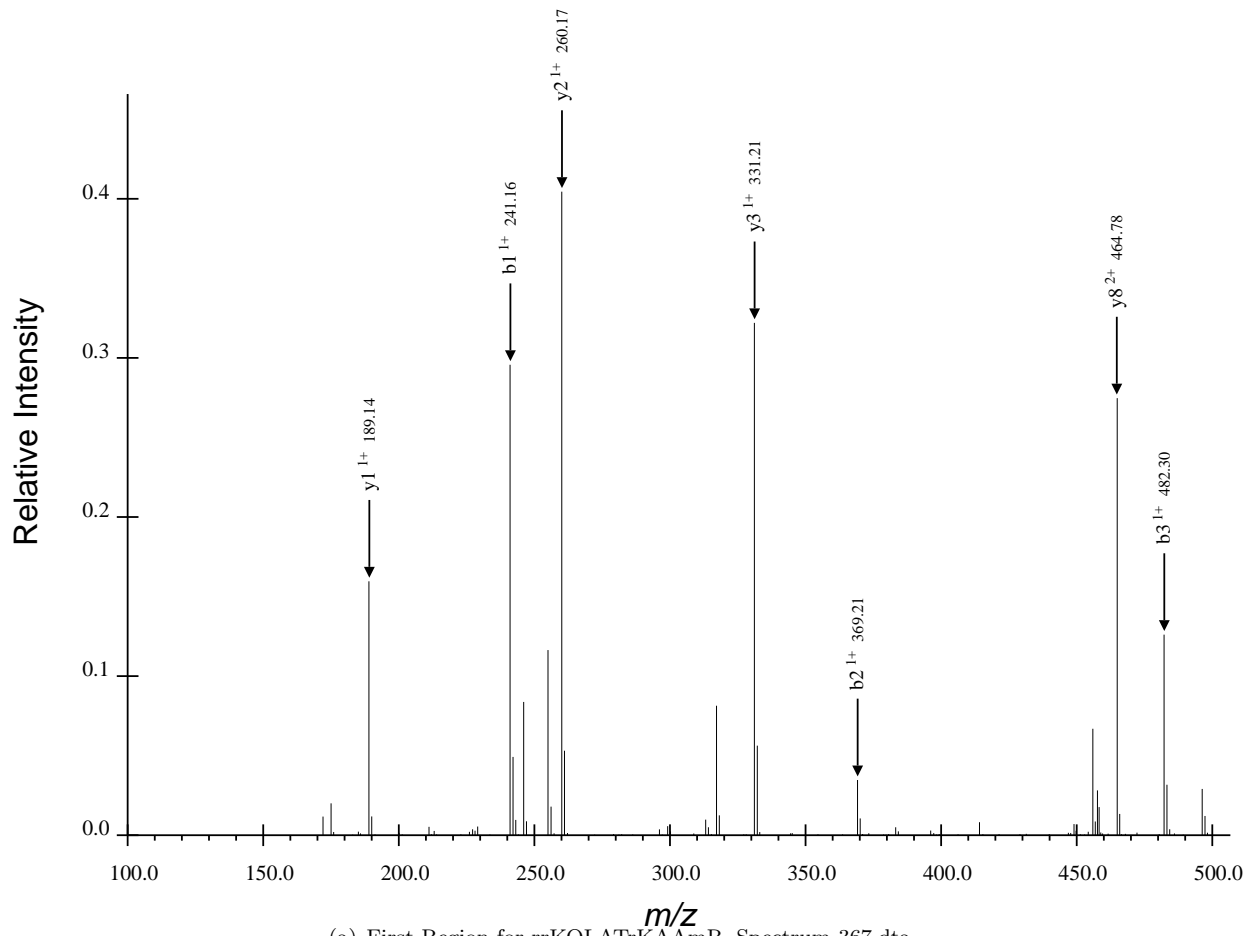

(a) First Region for rrKQLATrKAAMR, Spectrum 367.dta

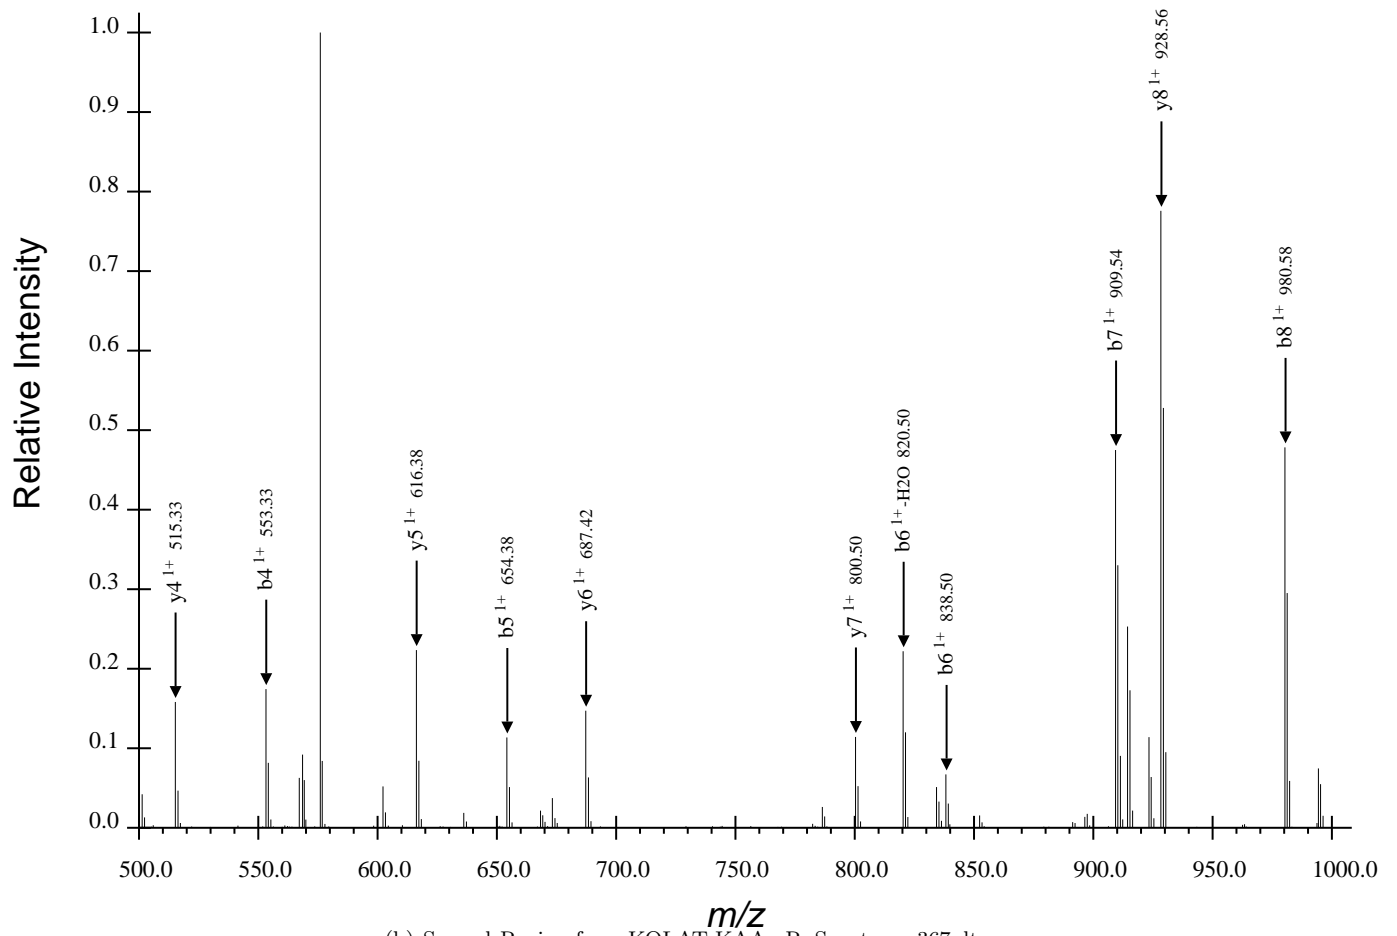

(b) Second Region for rrKQLATrKAAMR, Spectrum 367.dta

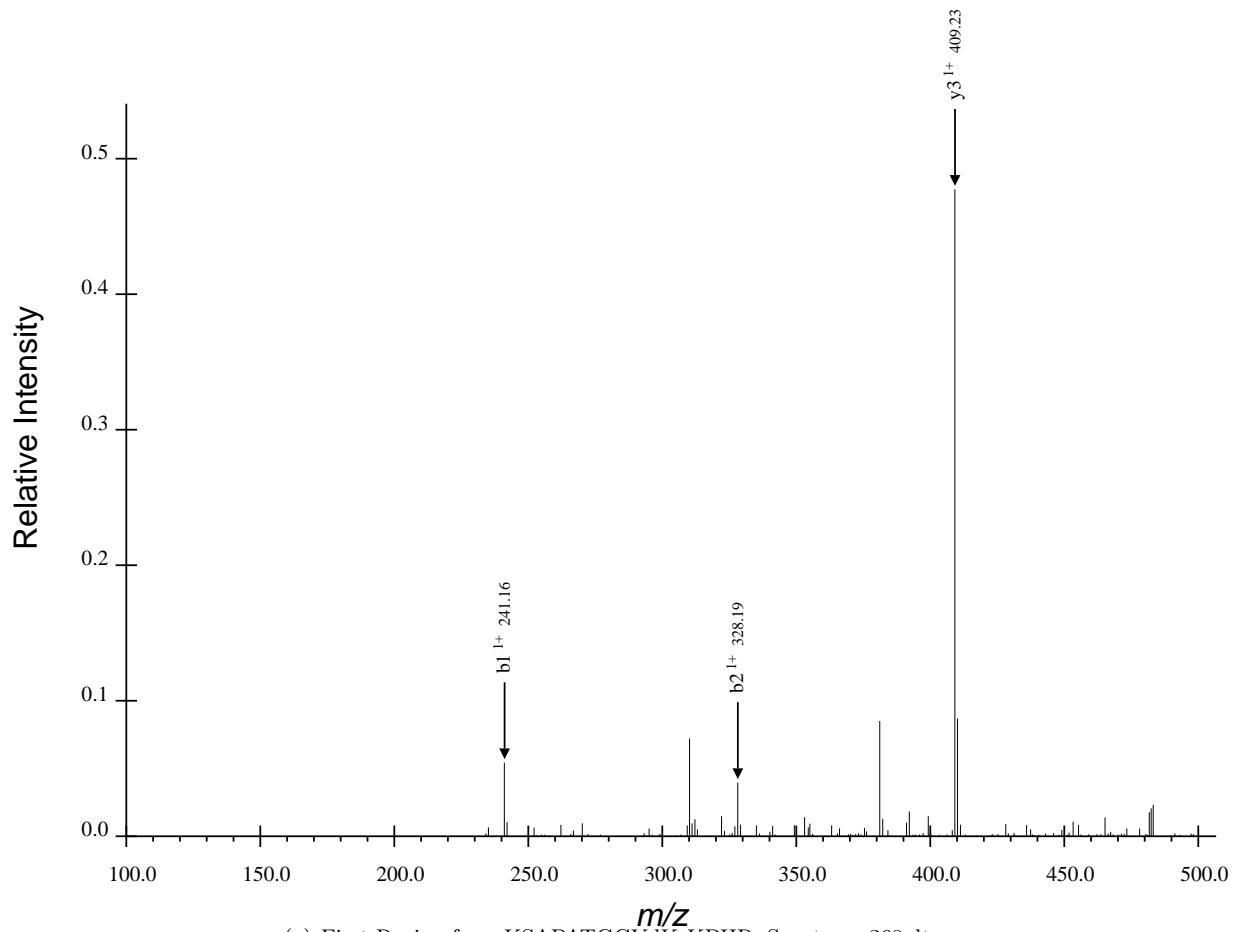

(a) First Region for rrKSAPATGGVdKrKPHR, Spectrum 368.dta

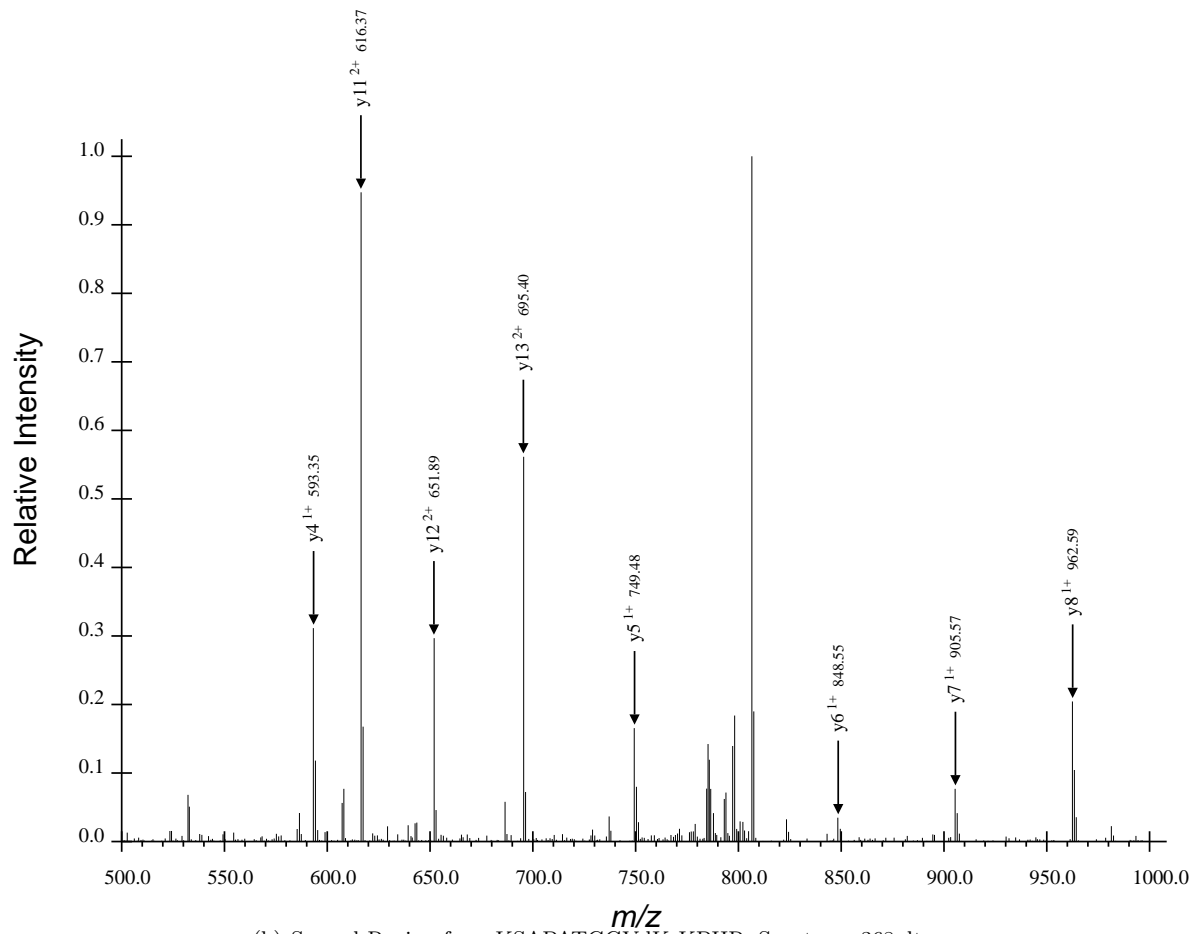

(b) Second Region for rrKSAPATGGVdKrKPHR, Spectrum 368.dta



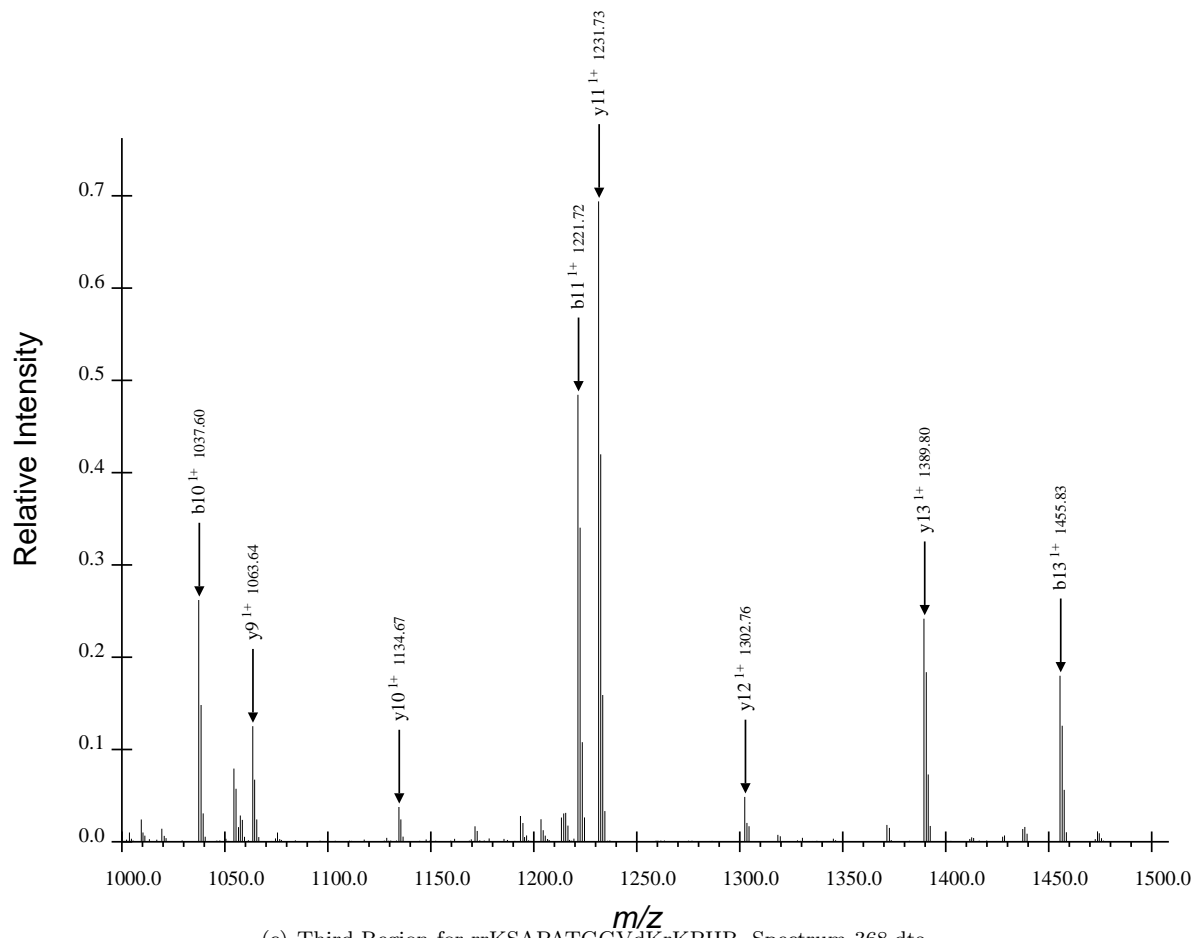

(c) Third Region for rrKSAPATGGVdKrKPHR, Spectrum 368.dta

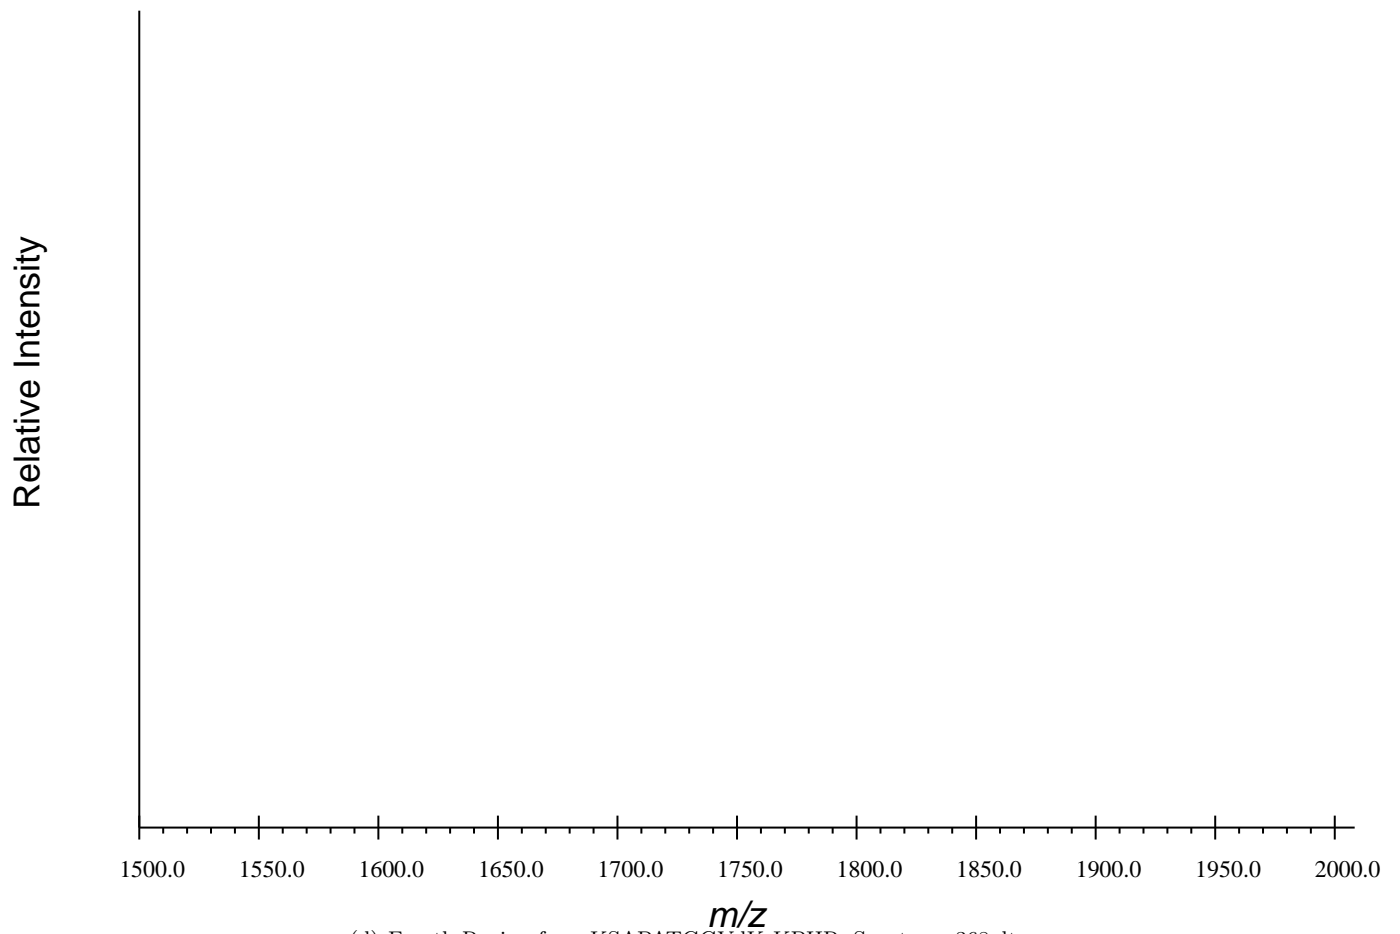

(d) Fourth Region for rrKSAPATGGVdKrKPHR, Spectrum 368.dta

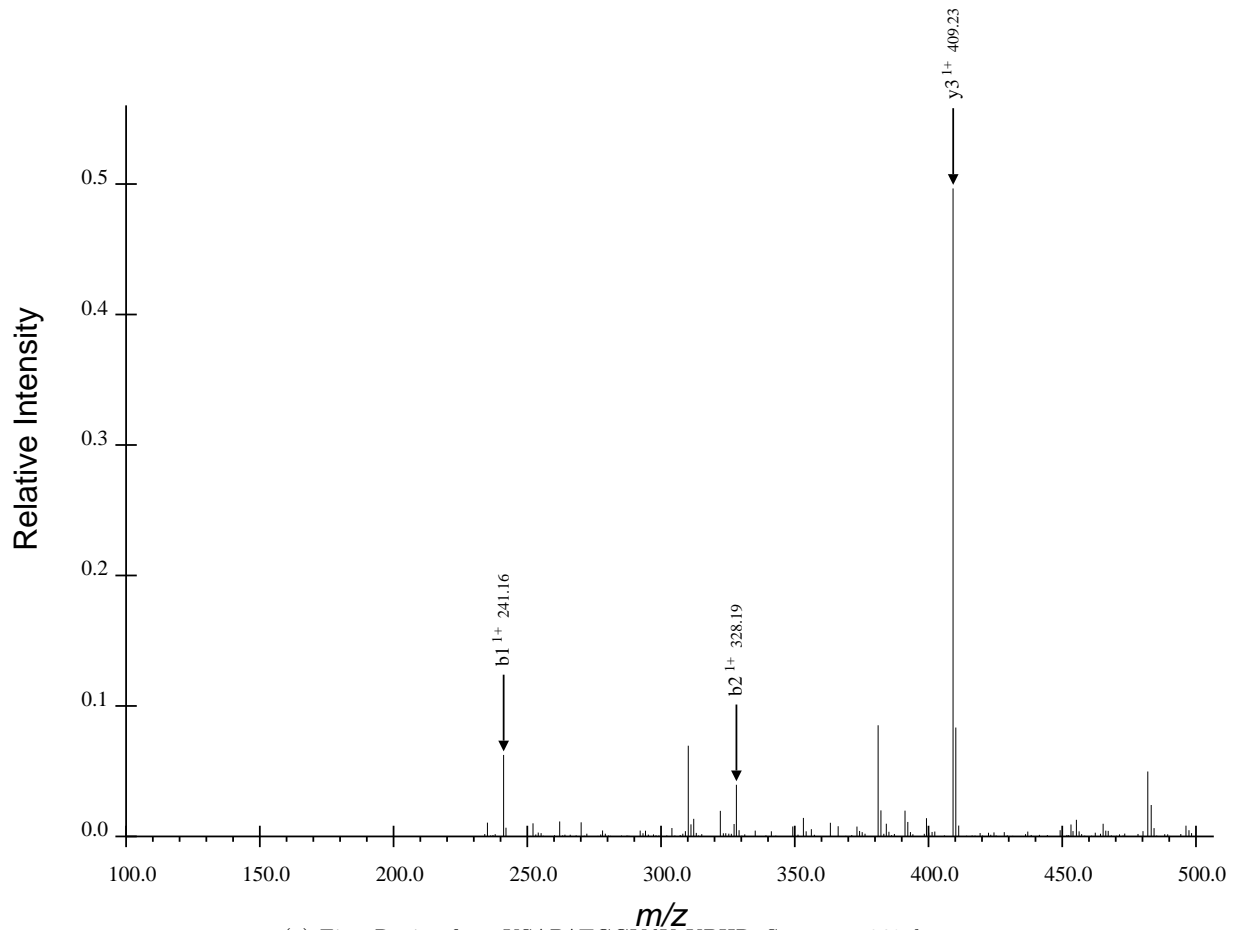

(a) First Region for rrKSAPATGGVdKrKPHR, Spectrum 369.dta

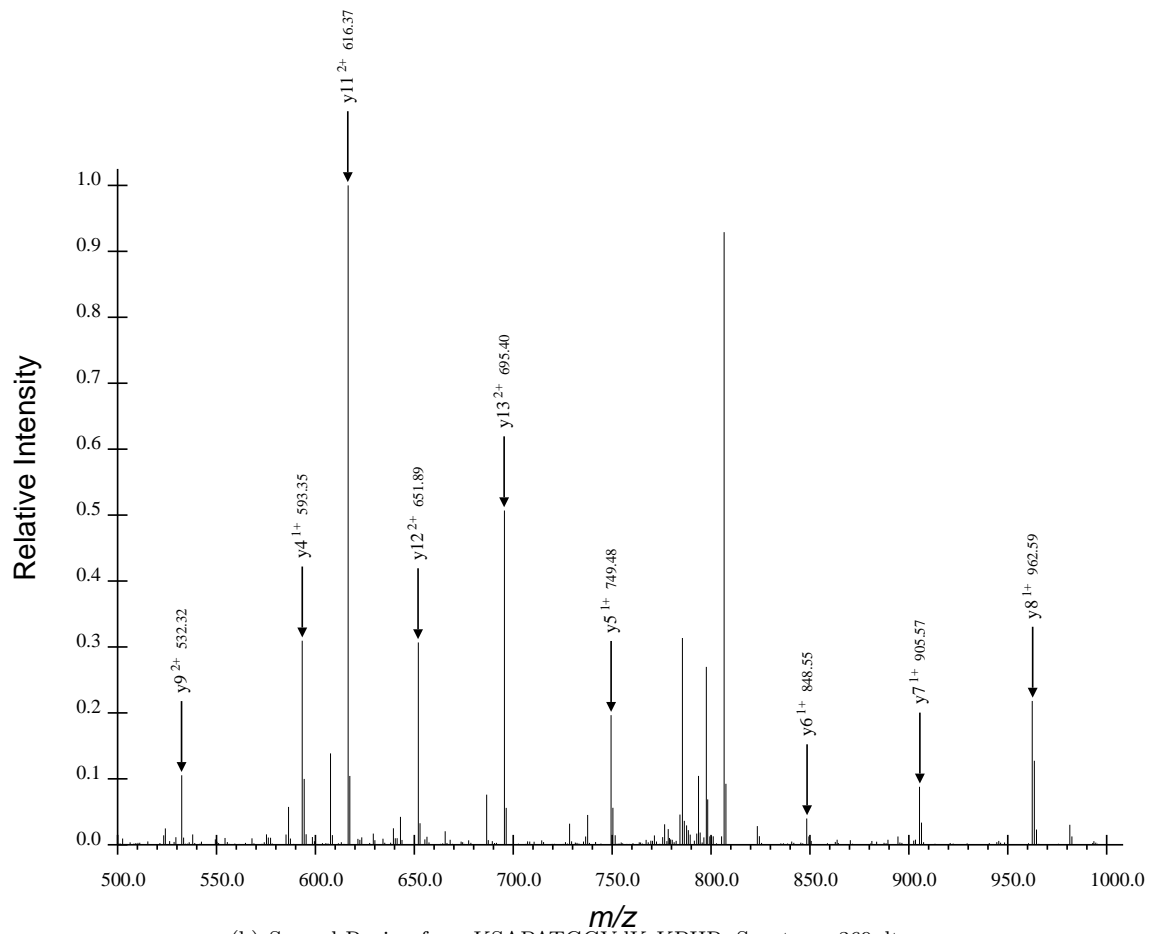

(b) Second Region for rrKSAPATGGVdKrKPHR, Spectrum 369.dta

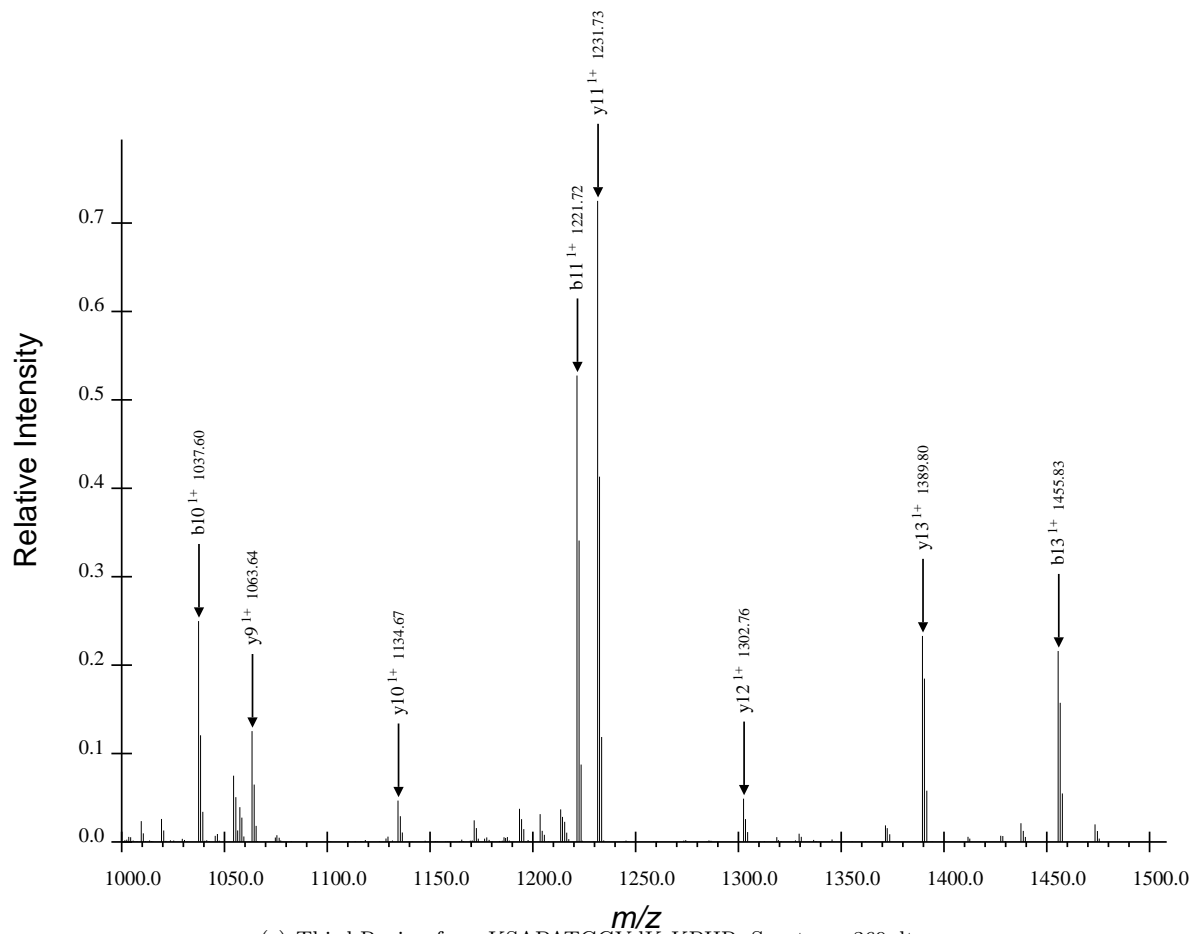

(c) Third Region for rrKSAPATGGVdKrKPHR, Spectrum 369.dta

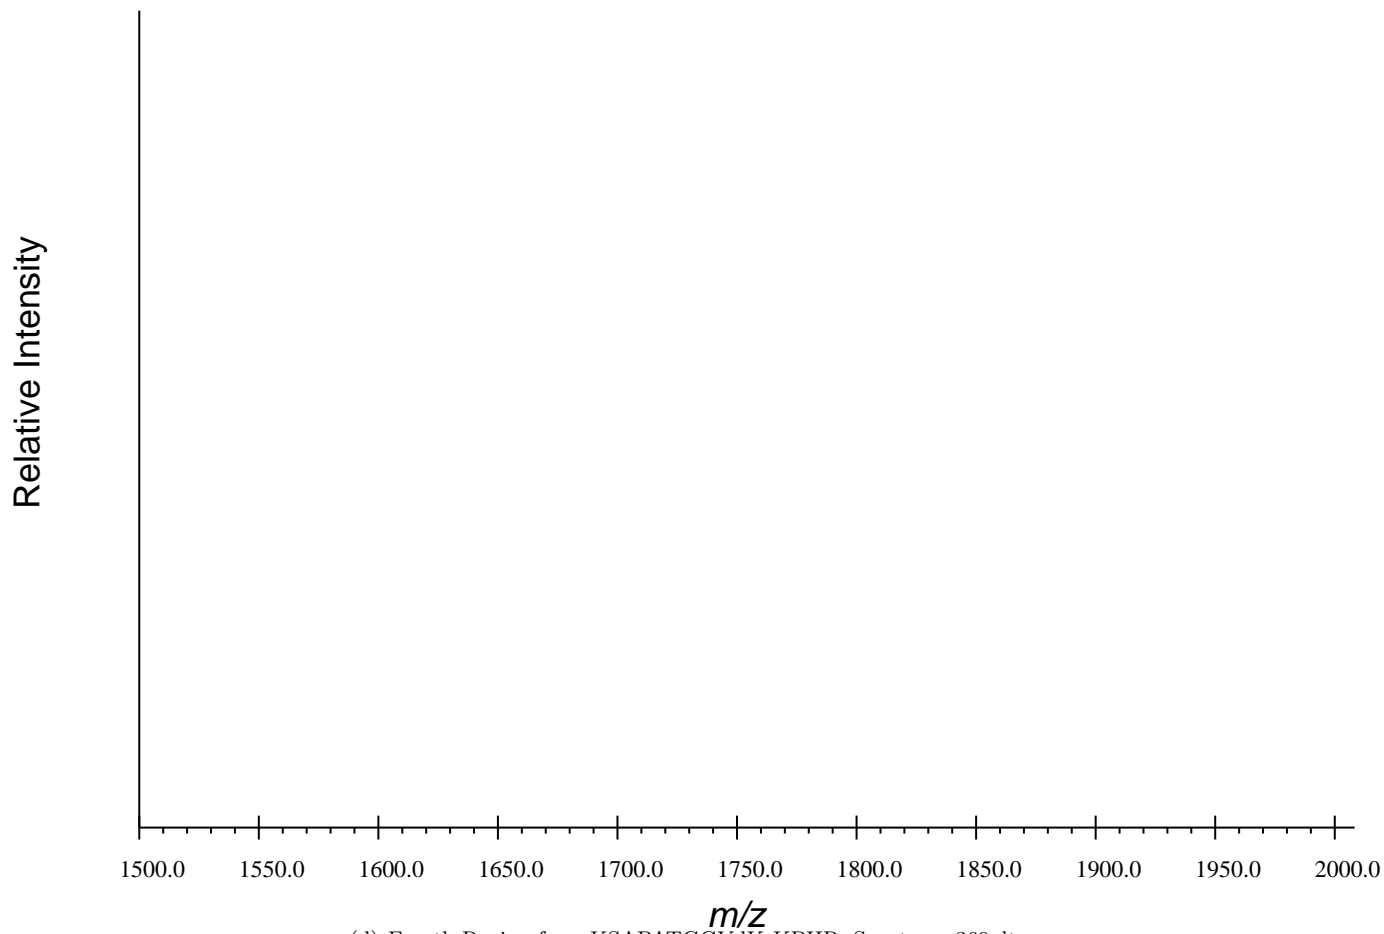

(d) Fourth Region for rrKSAPATGGVdKrKPHR, Spectrum 369.dta

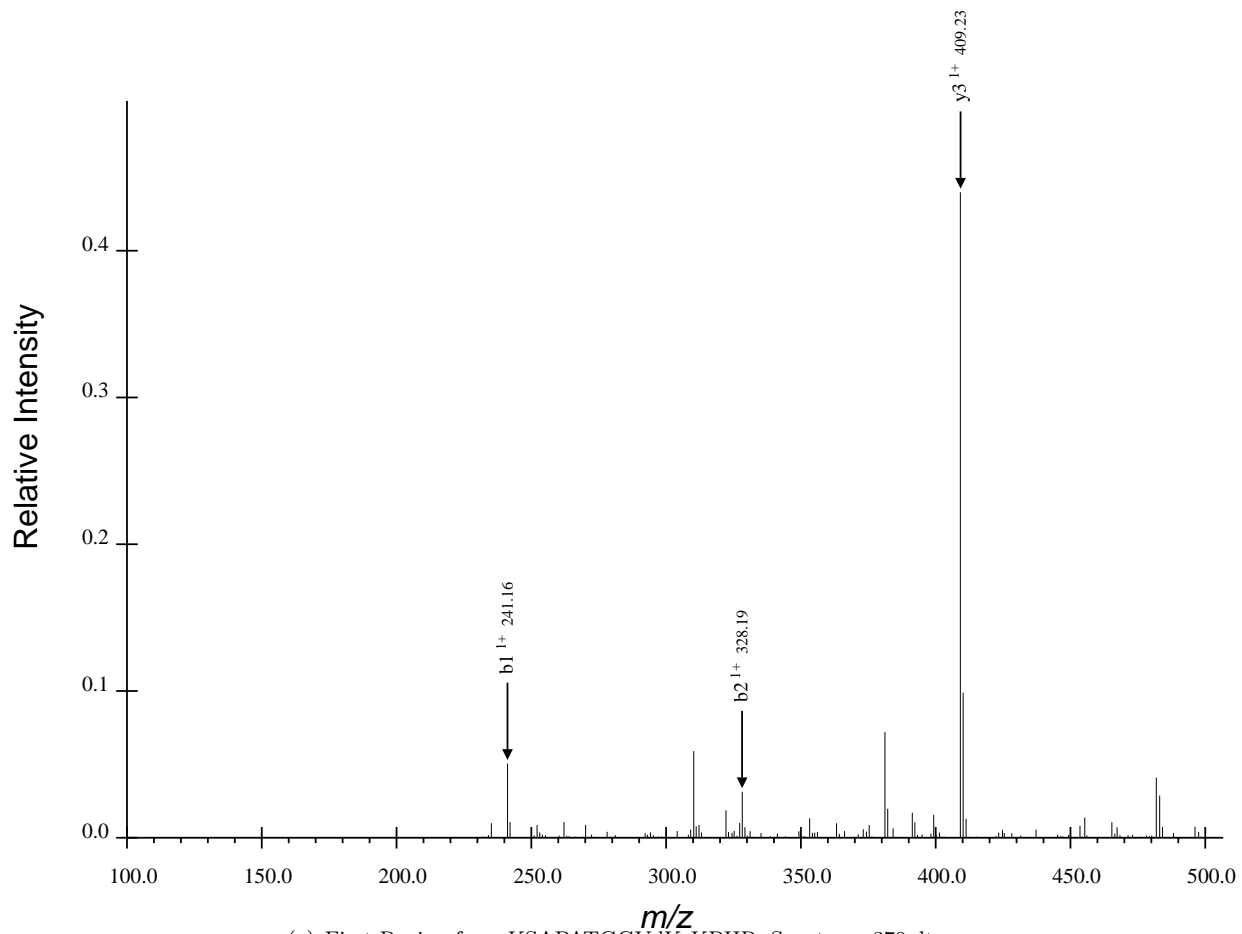

(a) First Region for rrKSAPATGGVdKrKPHR, Spectrum 370.dta

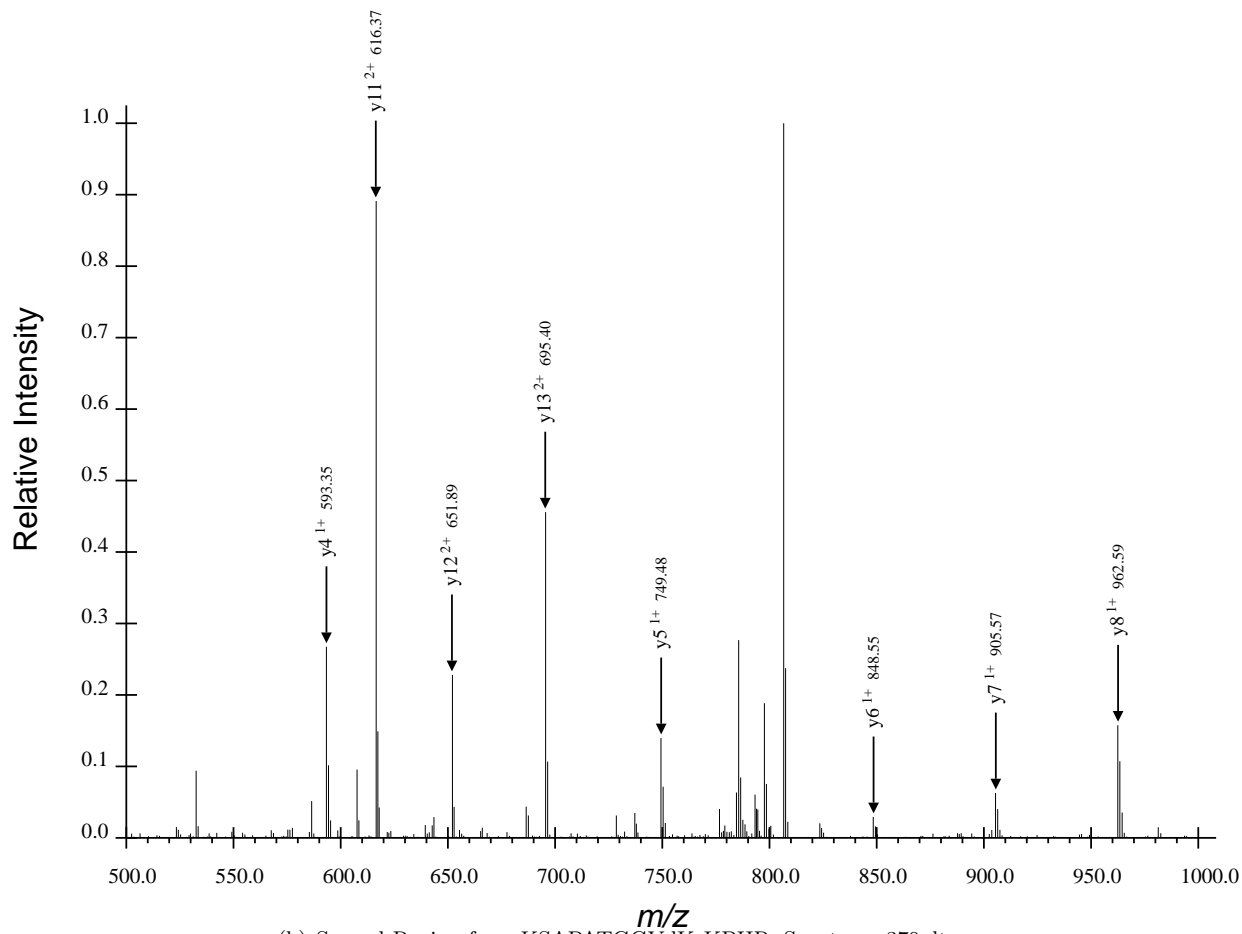

(b) Second Region for rrKSAPATGGVdKrKPHR, Spectrum 370.dta

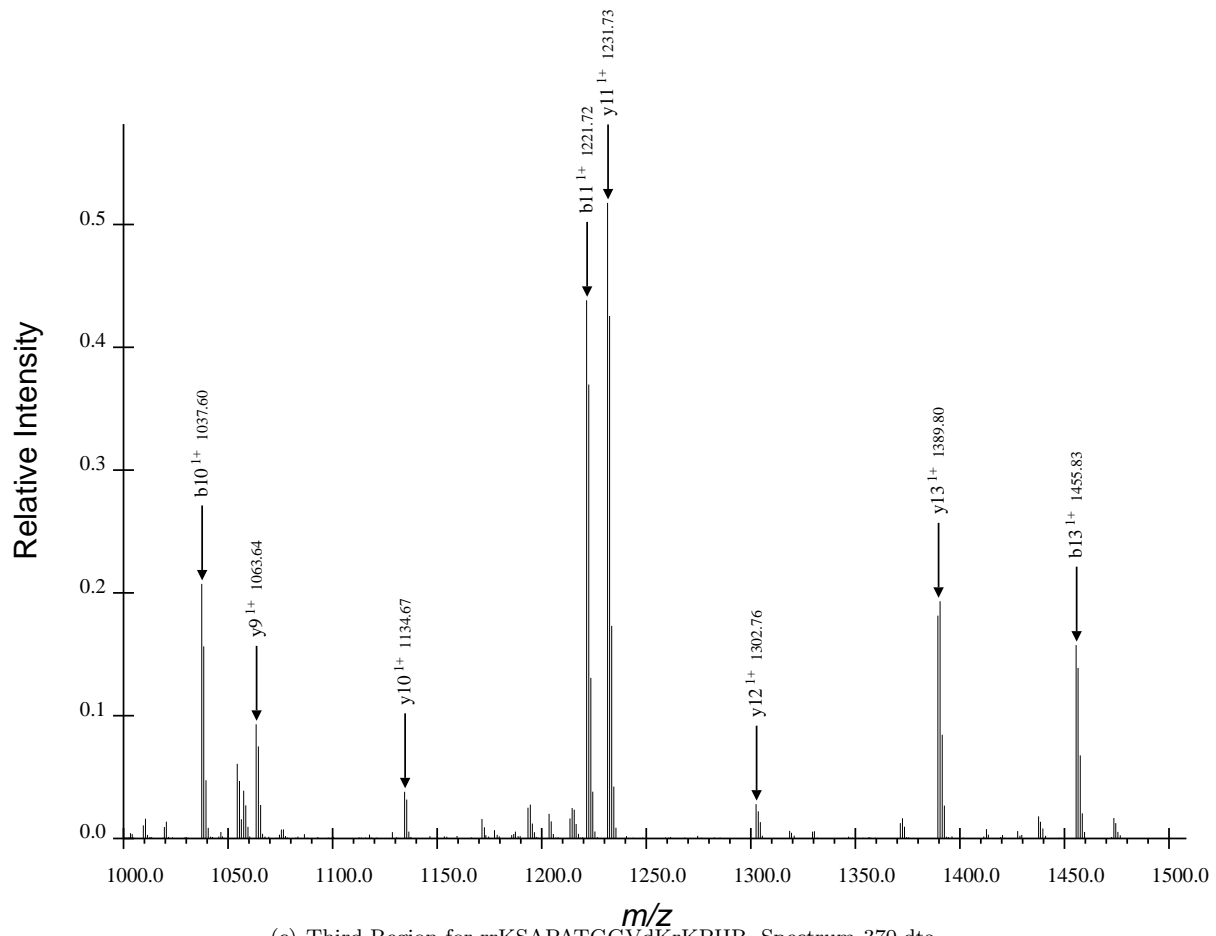

(c) Third Region for rrKSAPATGGVdKrKPHR, Spectrum 370.dta

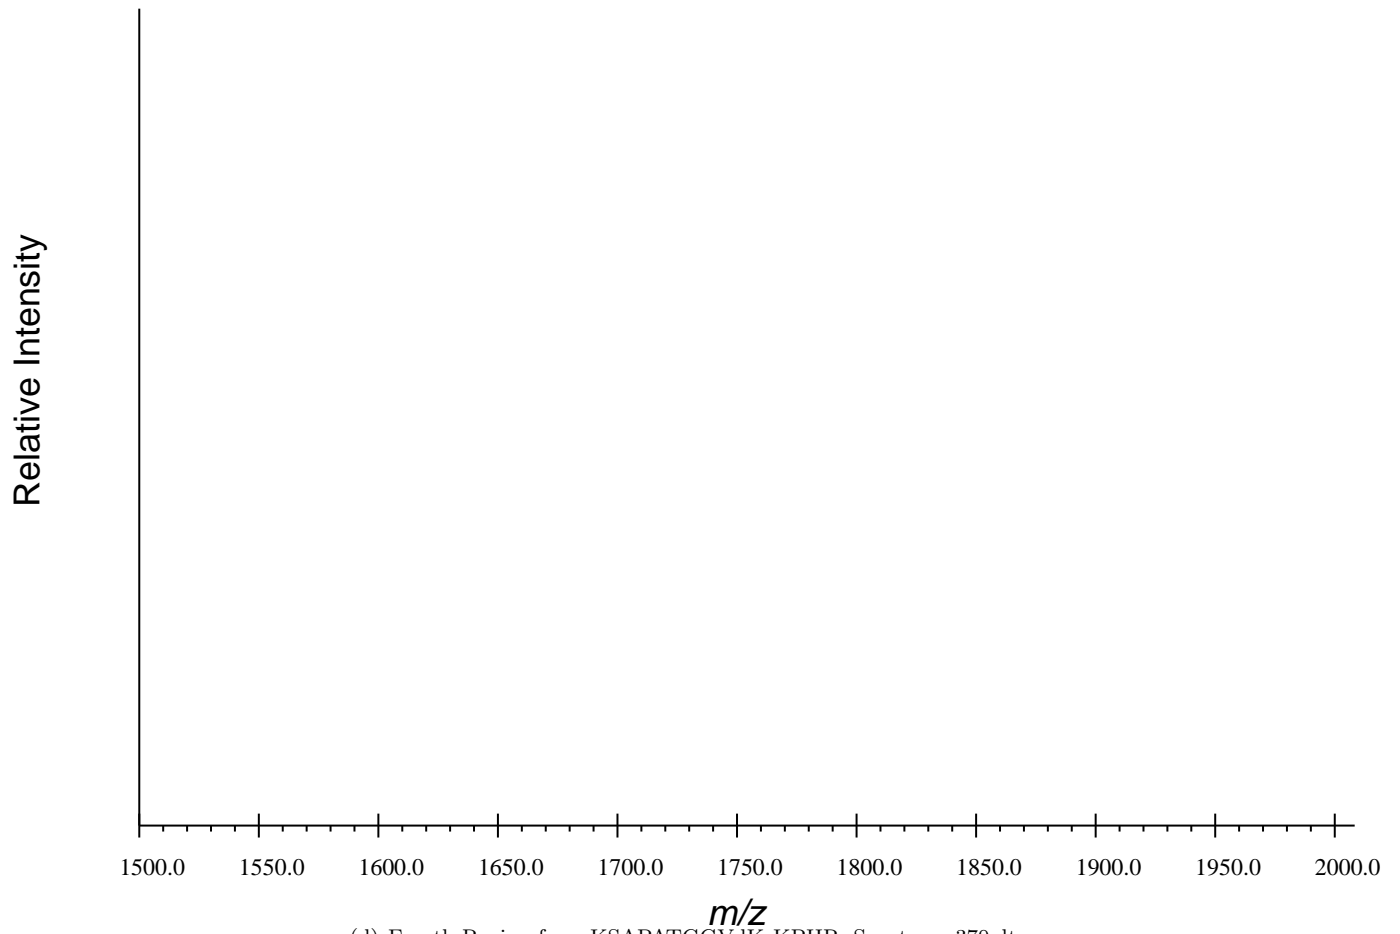

(d) Fourth Region for rrKSAPATGGVdKrKPHR, Spectrum 370.dta

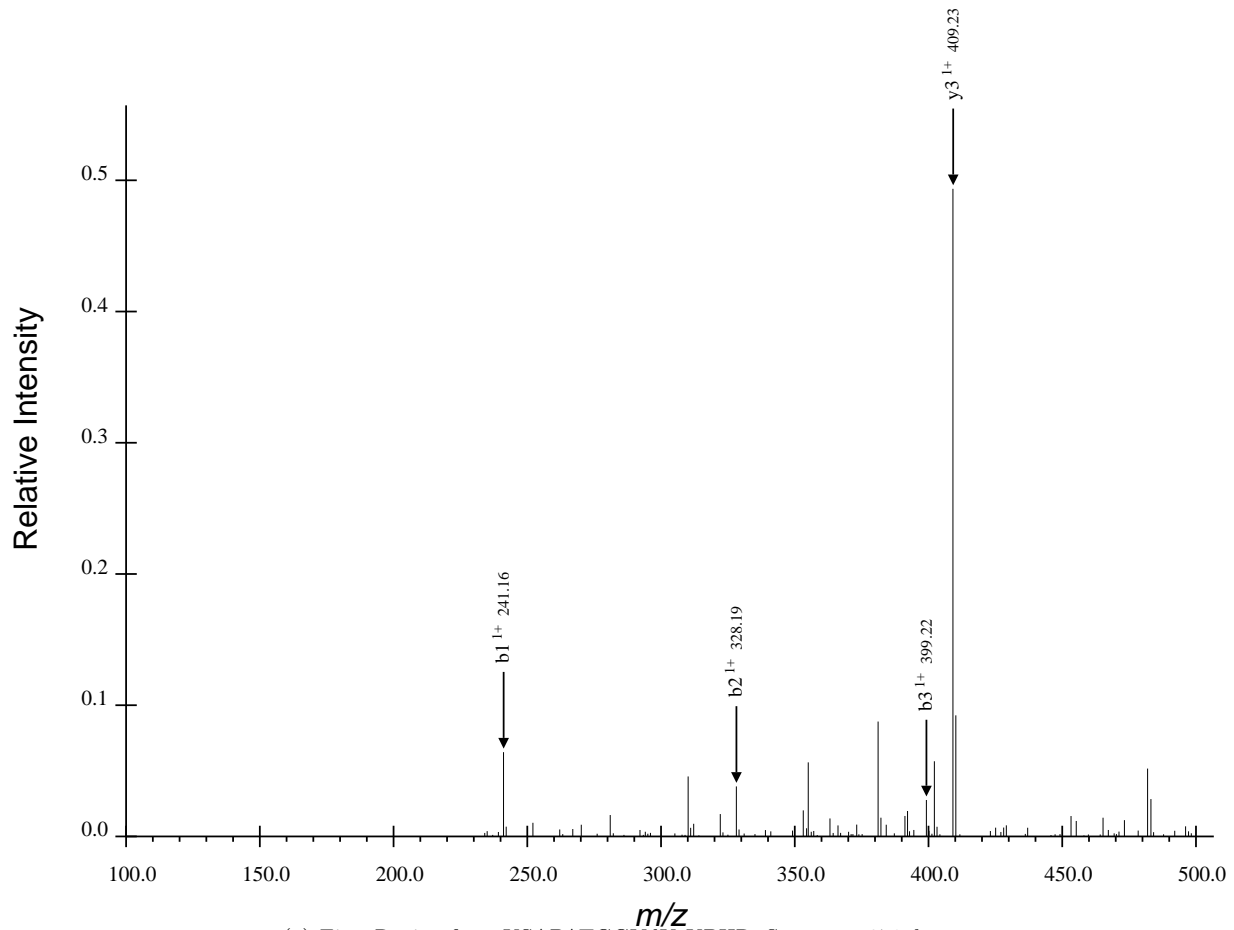

(a) First Region for rrKSAPATGGVdKrKPHR, Spectrum 371.dta

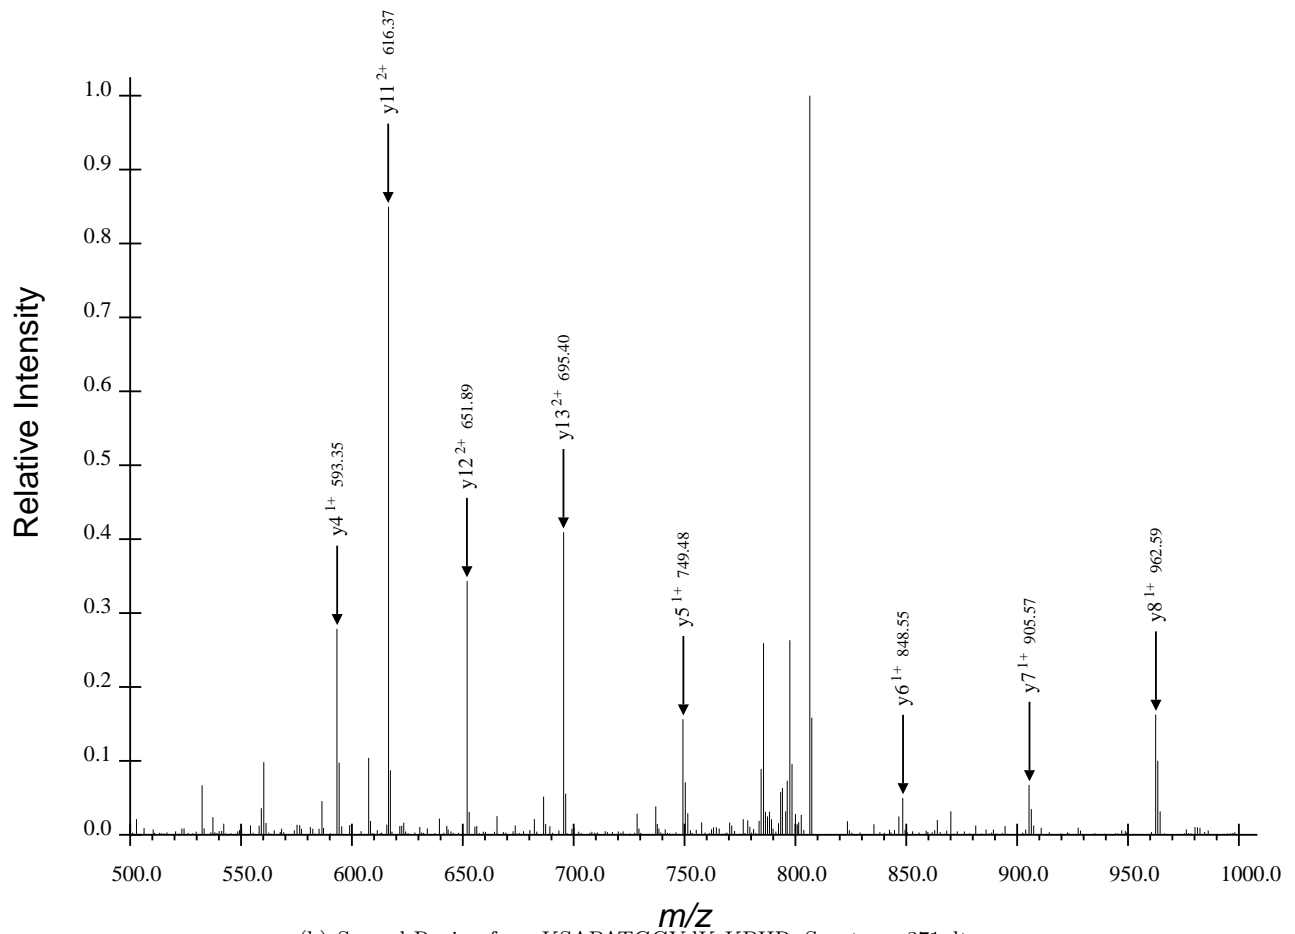

(b) Second Region for rrKSAPATGGVdKrKPHR, Spectrum 371.dta

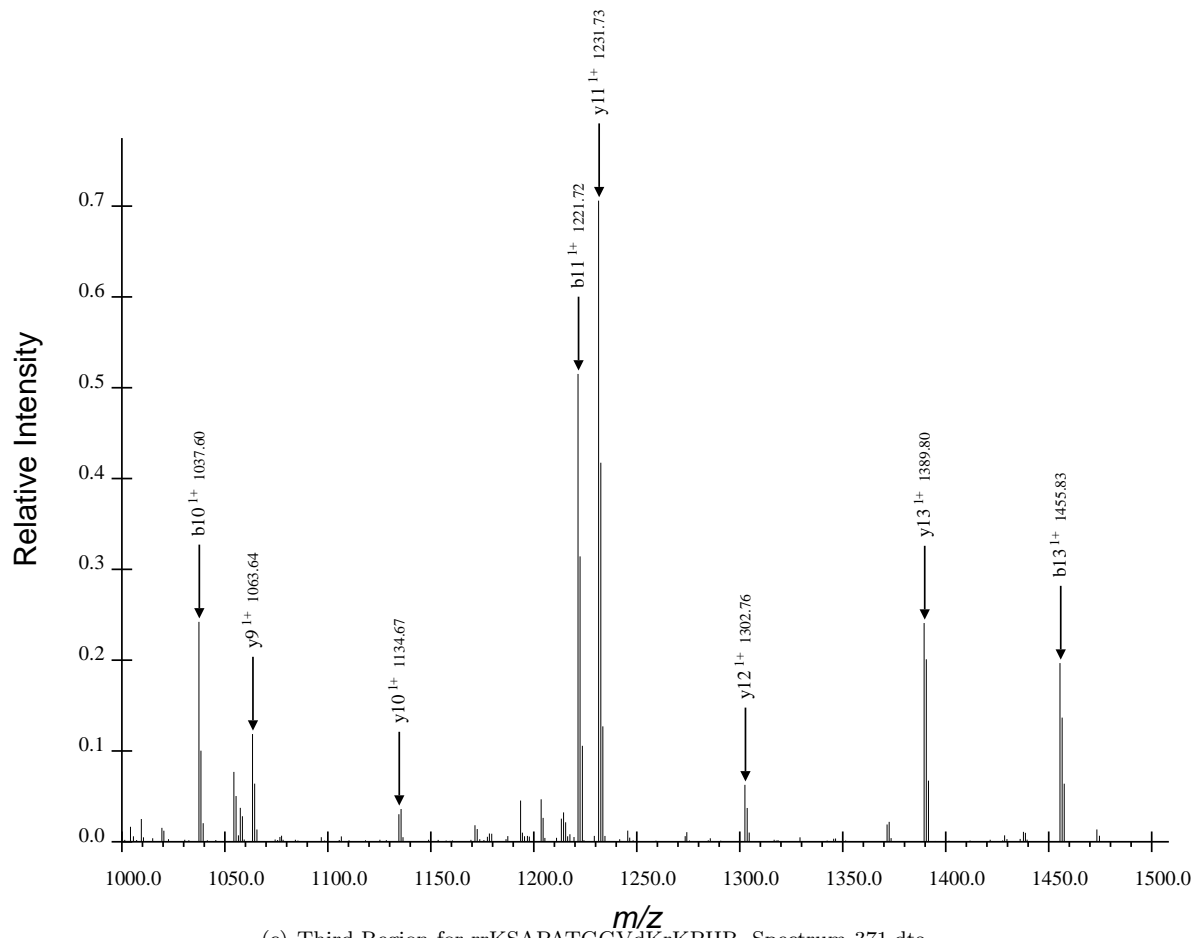

(c) Third Region for rrKSAPATGGVdKrKPHR, Spectrum 371.dta

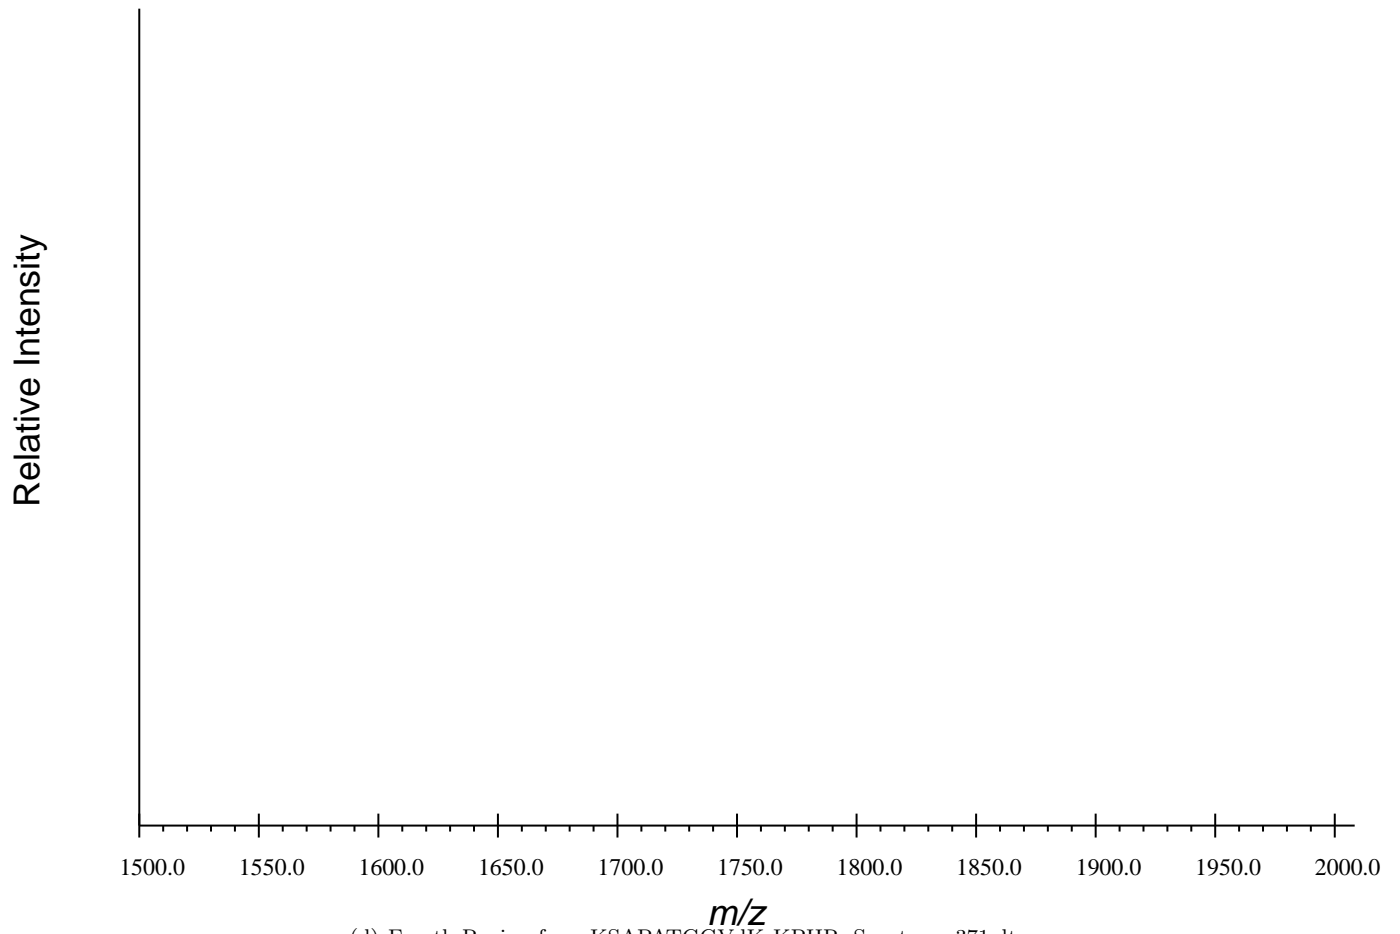

(d) Fourth Region for rrKSAPATGGVdKrKPHR, Spectrum 371.dta

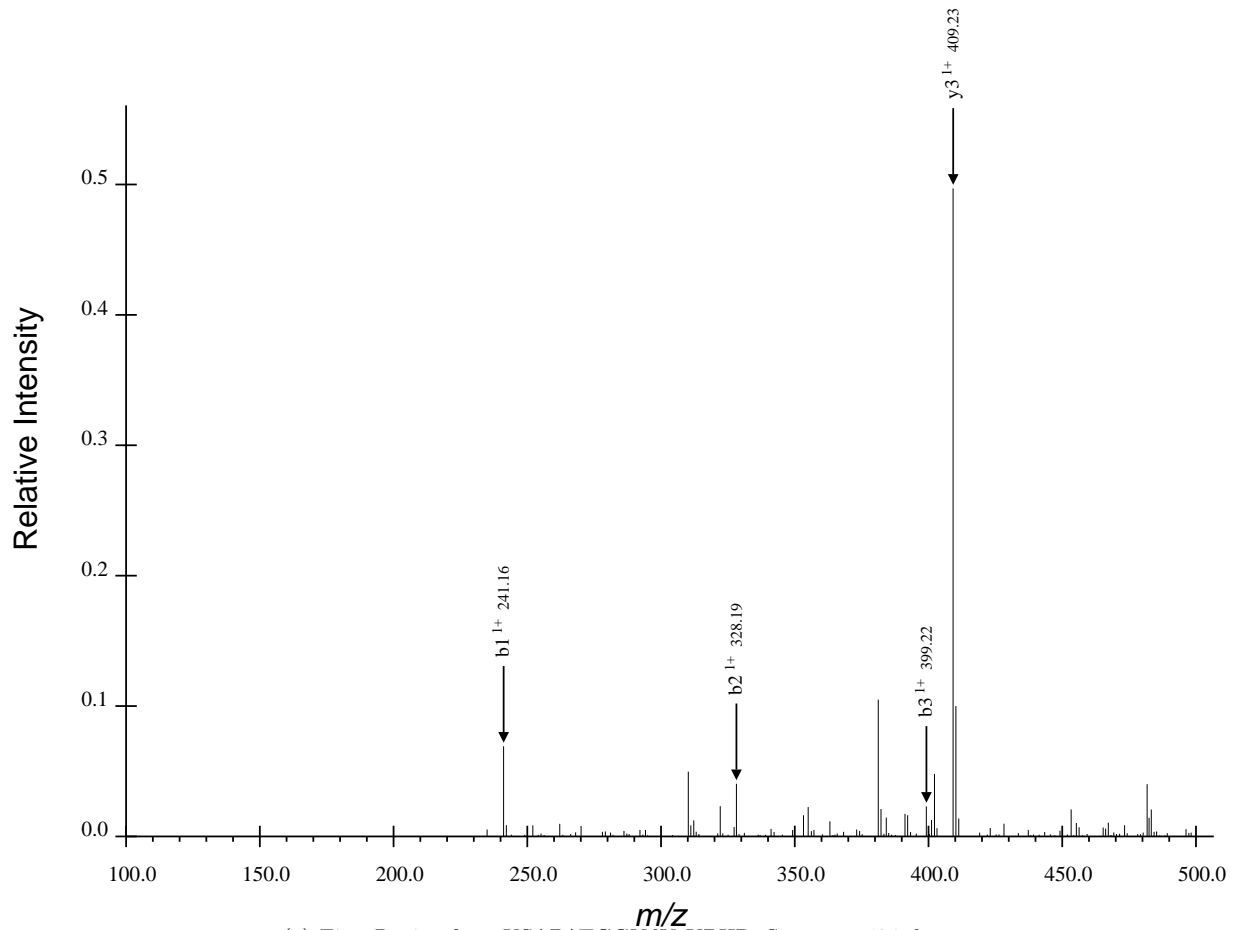

(a) First Region for rrKSAPATGGVdKrKPHR, Spectrum 372.dta

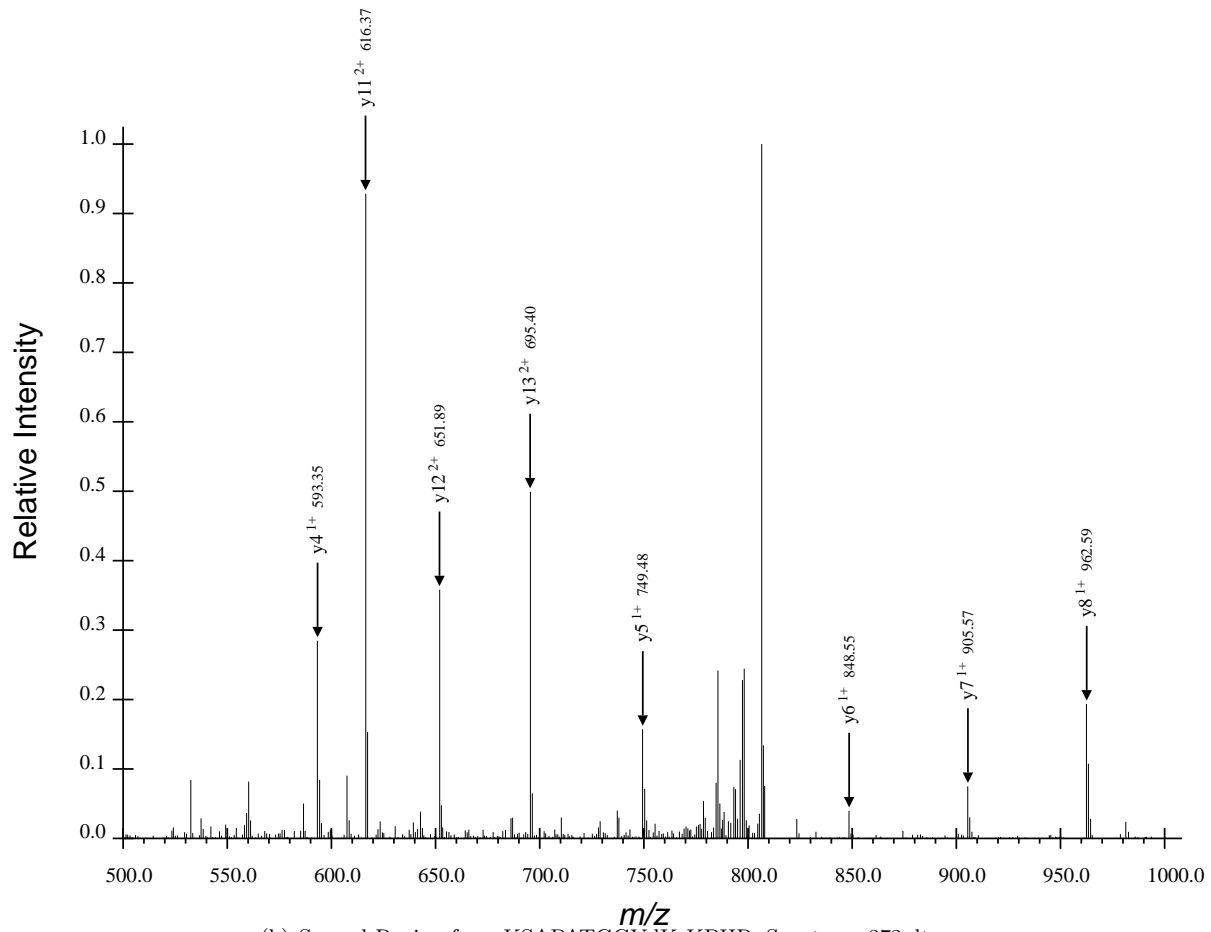

(b) Second Region for rrKSAPATGGVdKrKPHR, Spectrum 372.dta



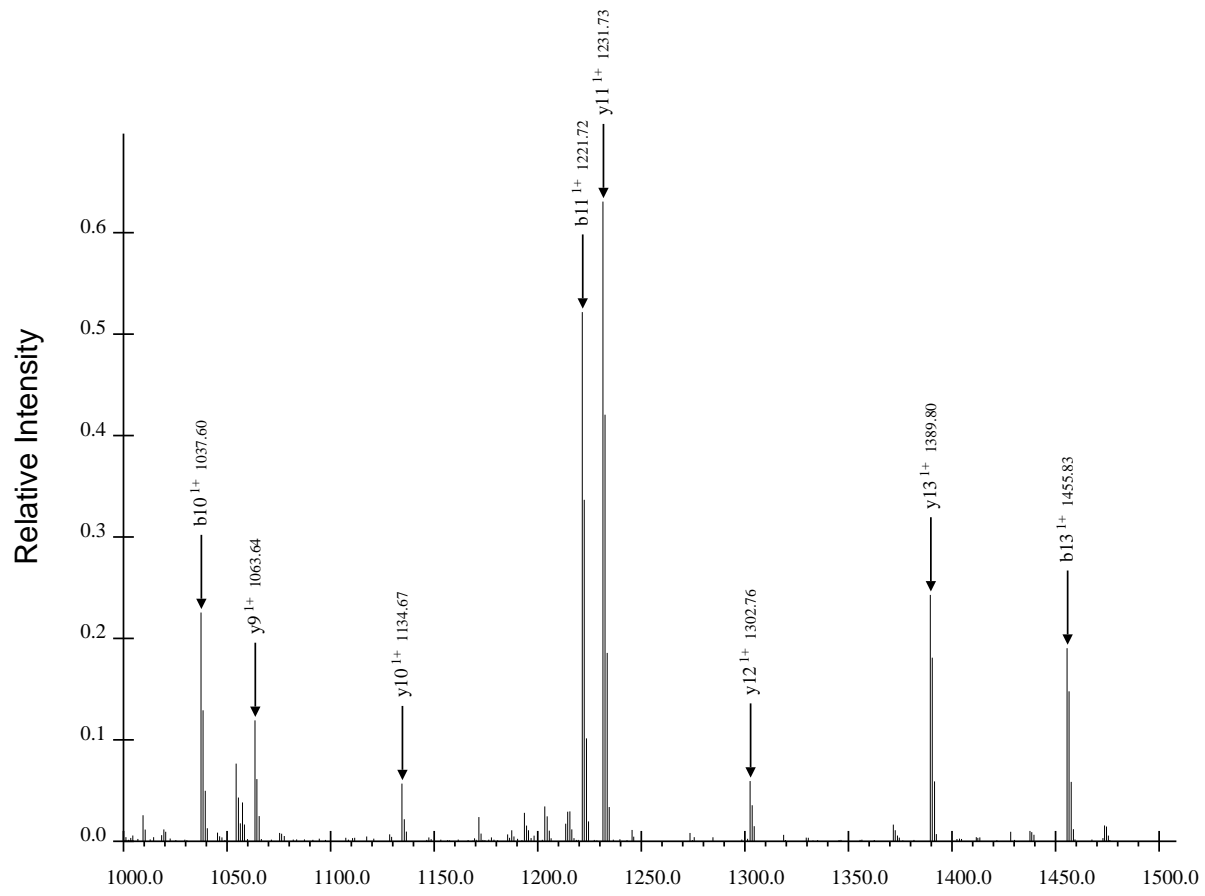

(c) Third Region for rrKSAPATGGVdKrKPHR, Spectrum 372.dta

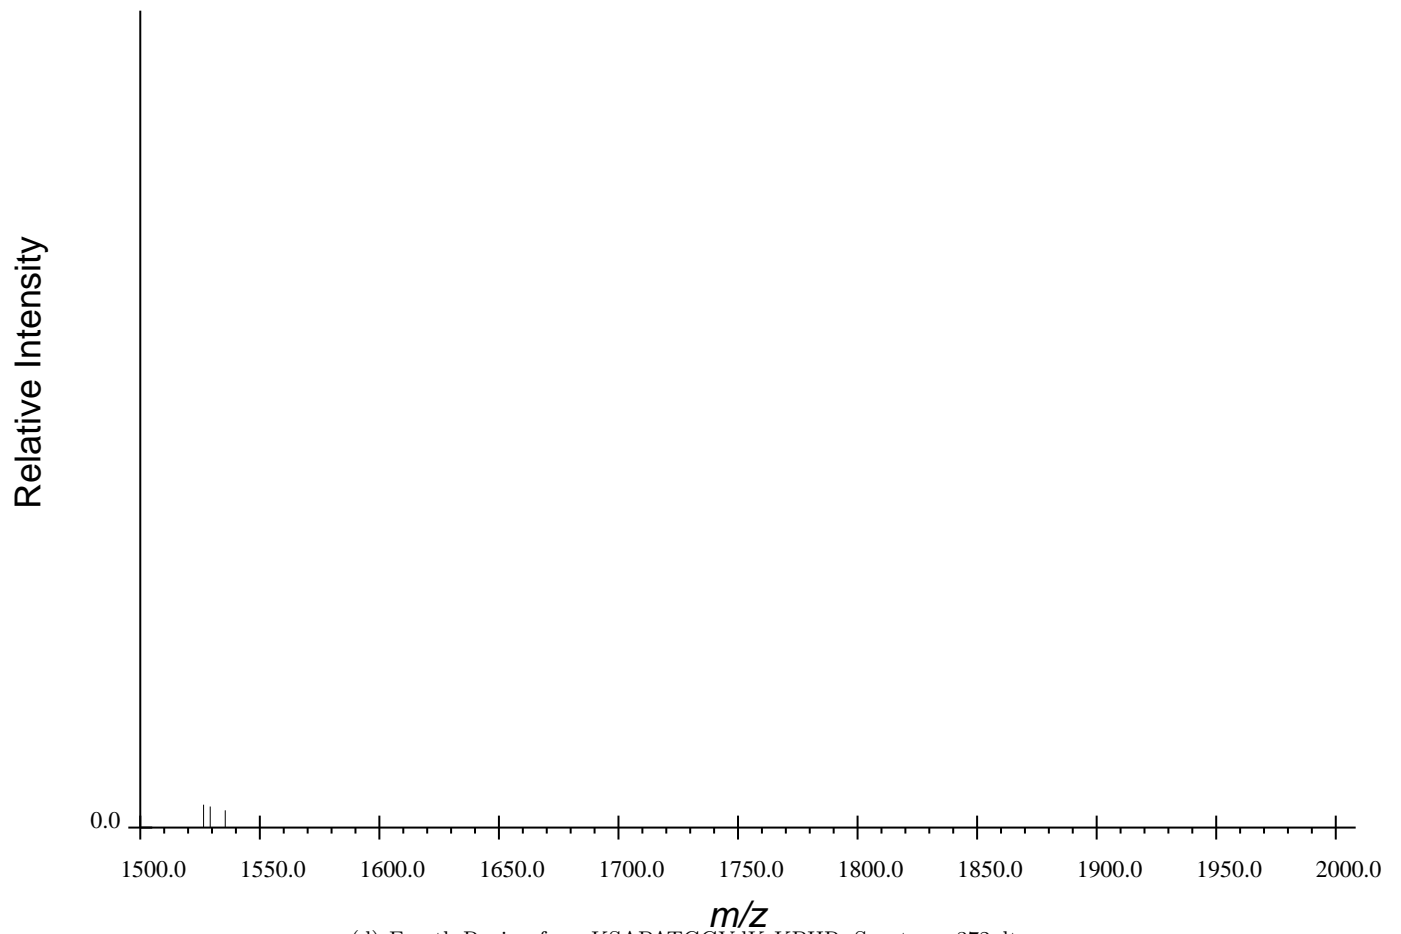

(d) Fourth Region for rrKSAPATGGVdKrKPHR, Spectrum 372.dta

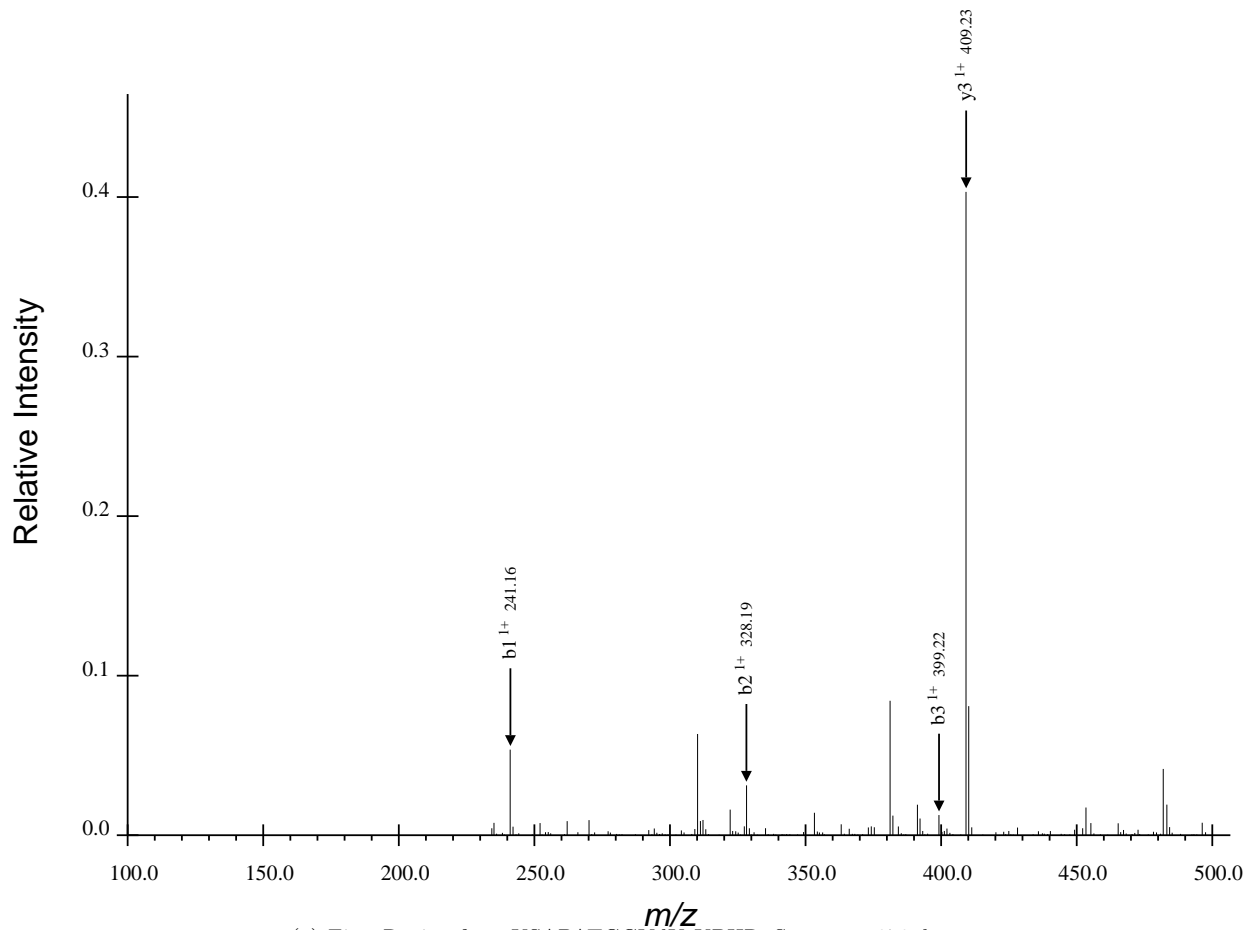

(a) First Region for rrKSAPATGGVdKrKPHR, Spectrum 373.dta

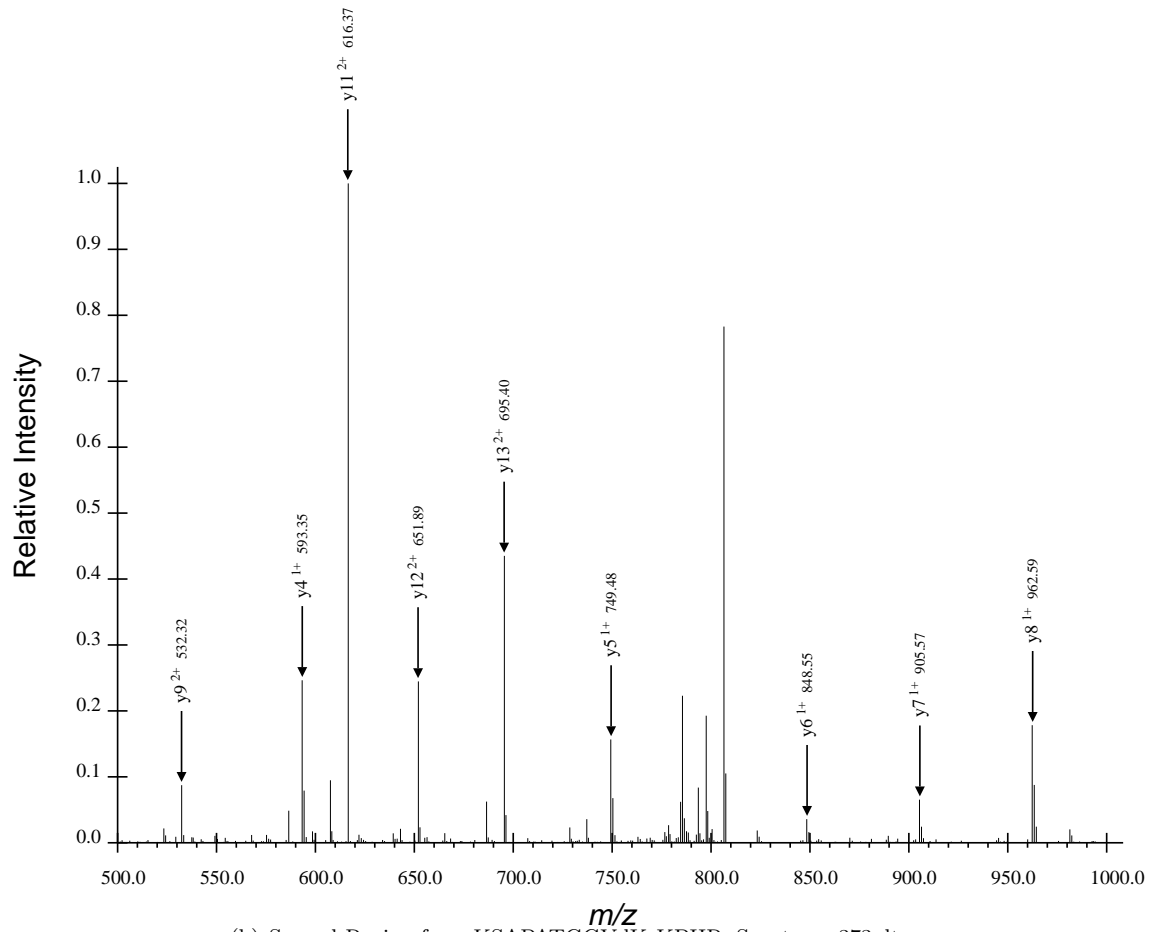

(b) Second Region for rrKSAPATGGVdKrKPHR, Spectrum 373.dta

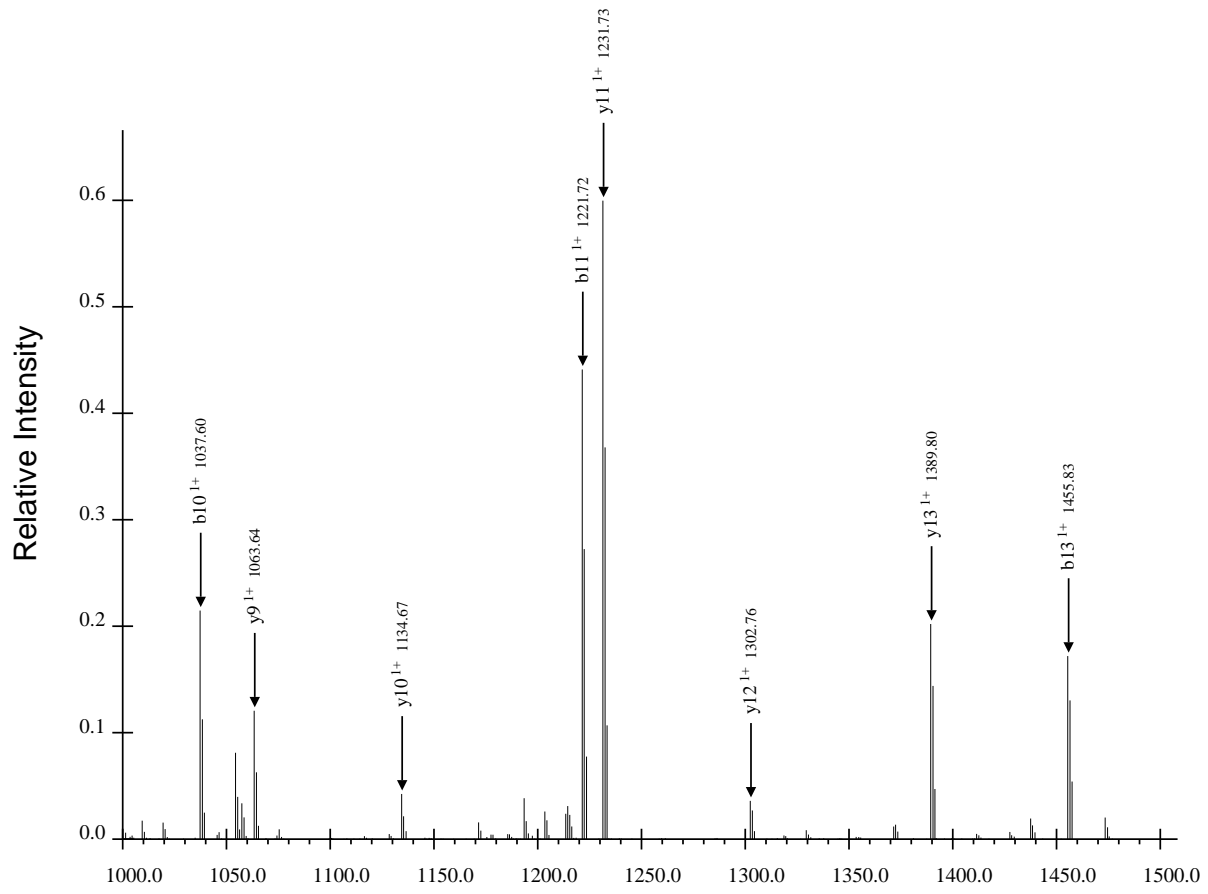

(c) Third Region for rrKSAPATGGVdKrKPHR, Spectrum 373.dta

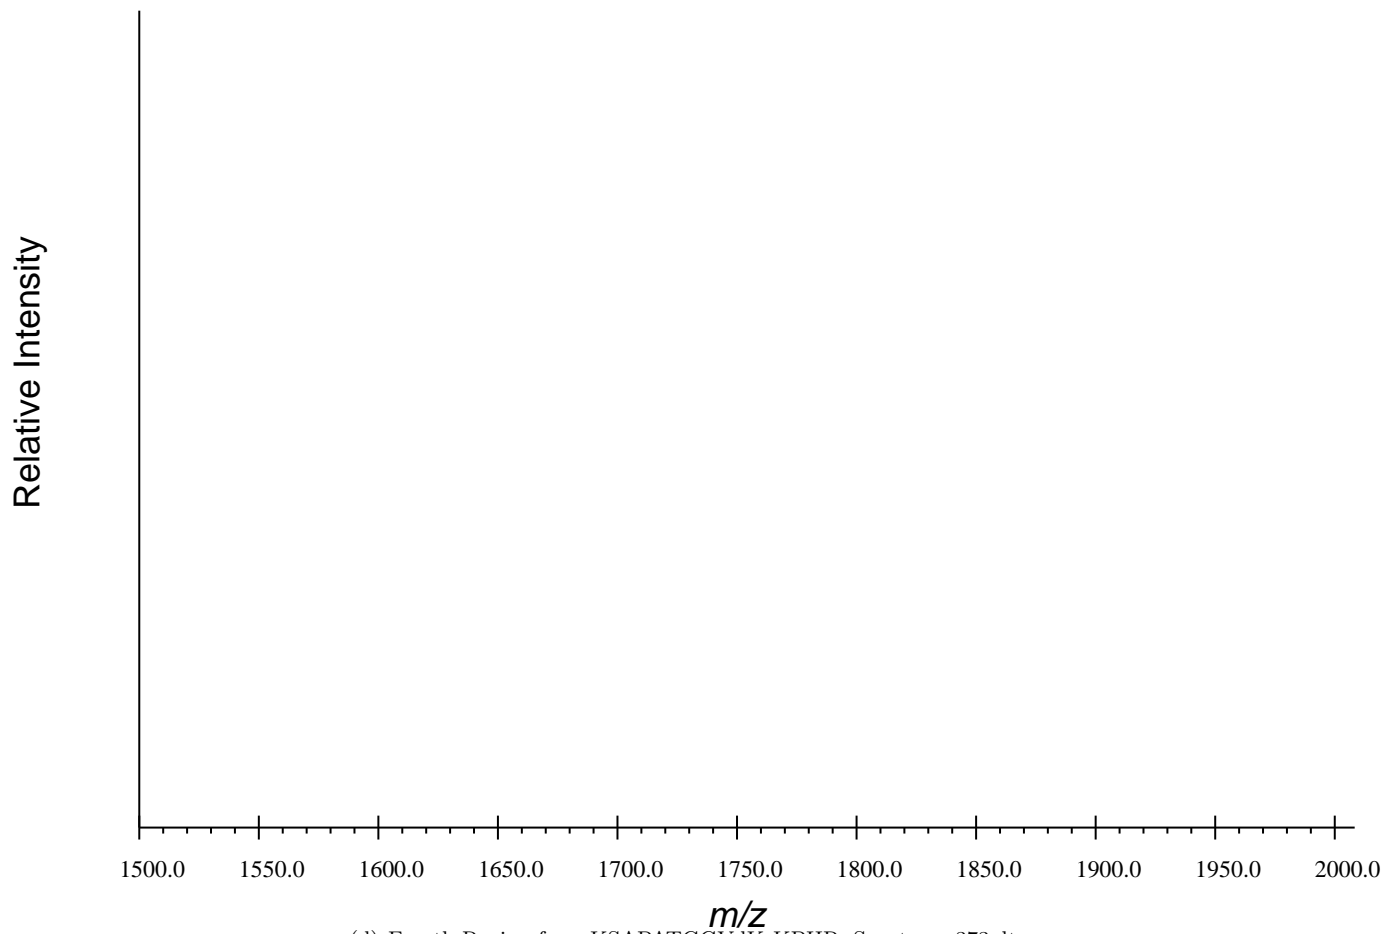

(d) Fourth Region for rrKSAPATGGVdKrKPHR, Spectrum 373.dta

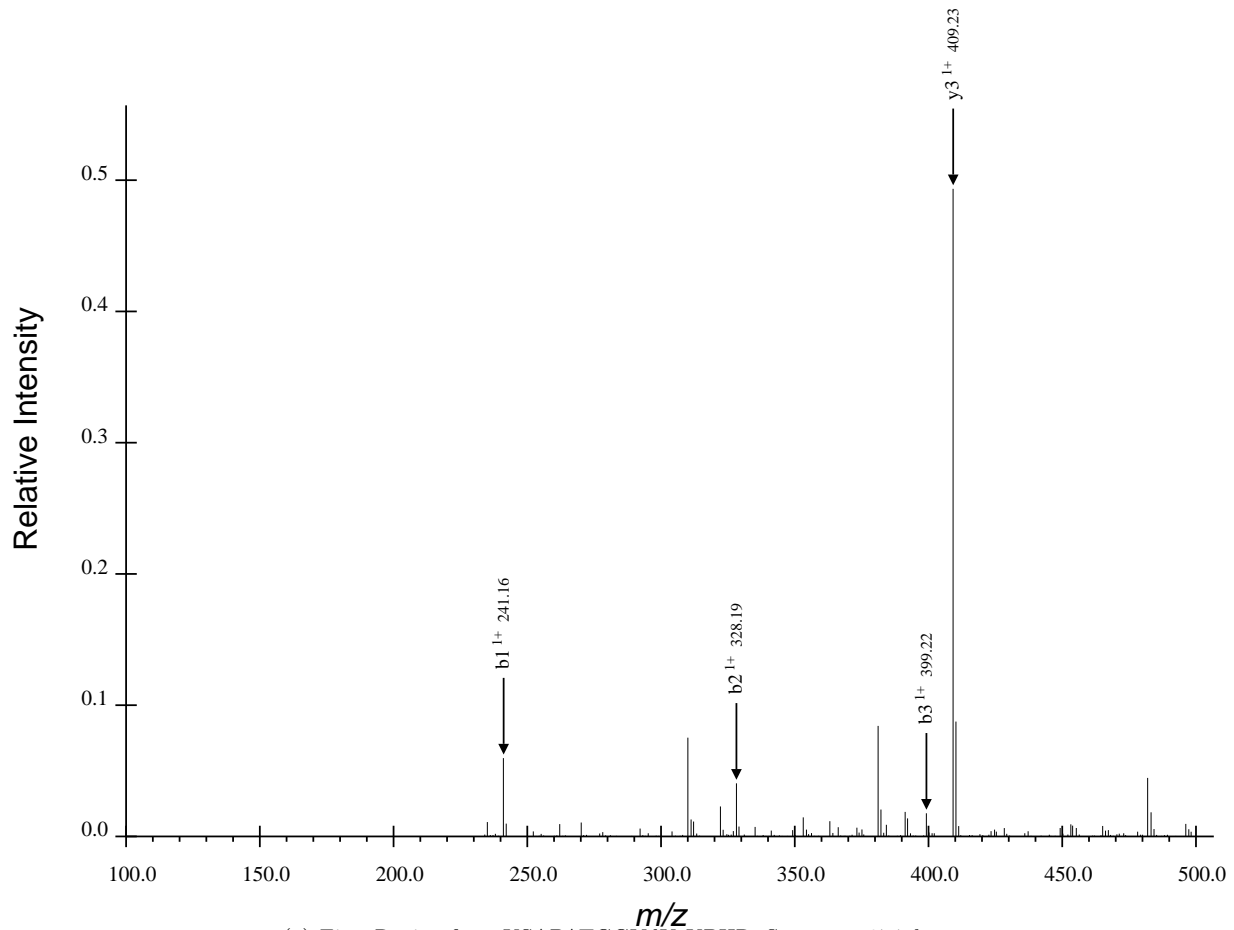

(a) First Region for rrKSAPATGGVdKrKPHR, Spectrum 374.dta

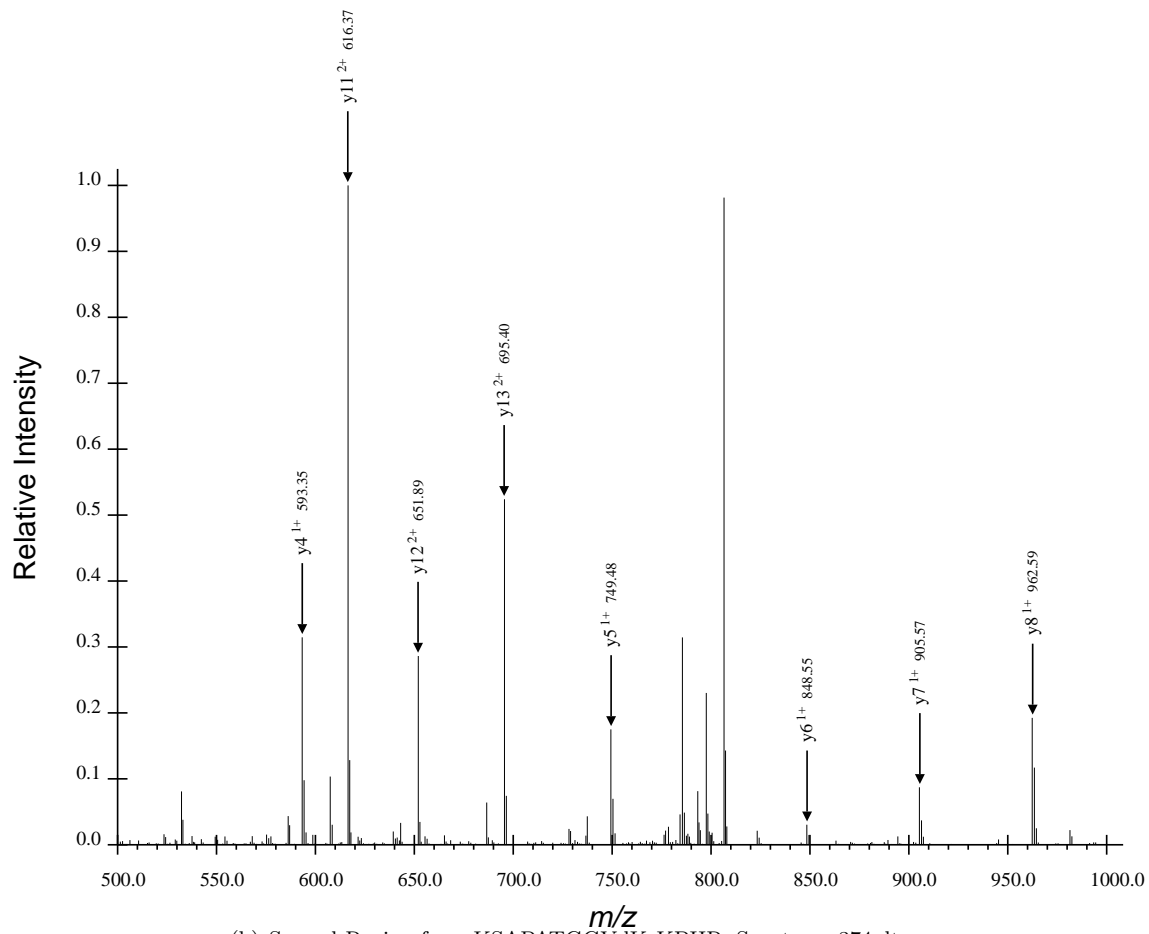

(b) Second Region for rrKSAPATGGVdKrKPHR, Spectrum 374.dta

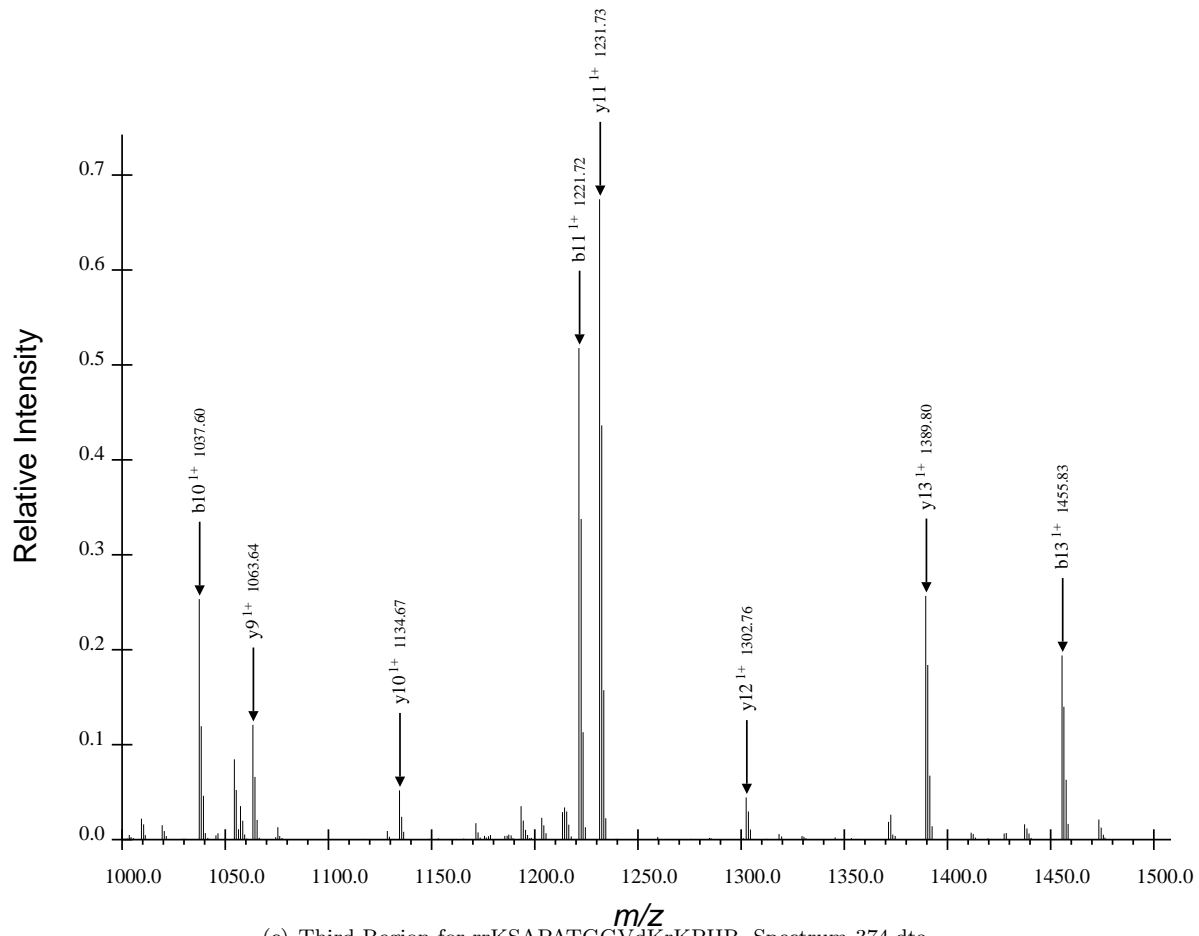

(c) Third Region for rrKSAPATGGVdKrKPHR, Spectrum 374.dta

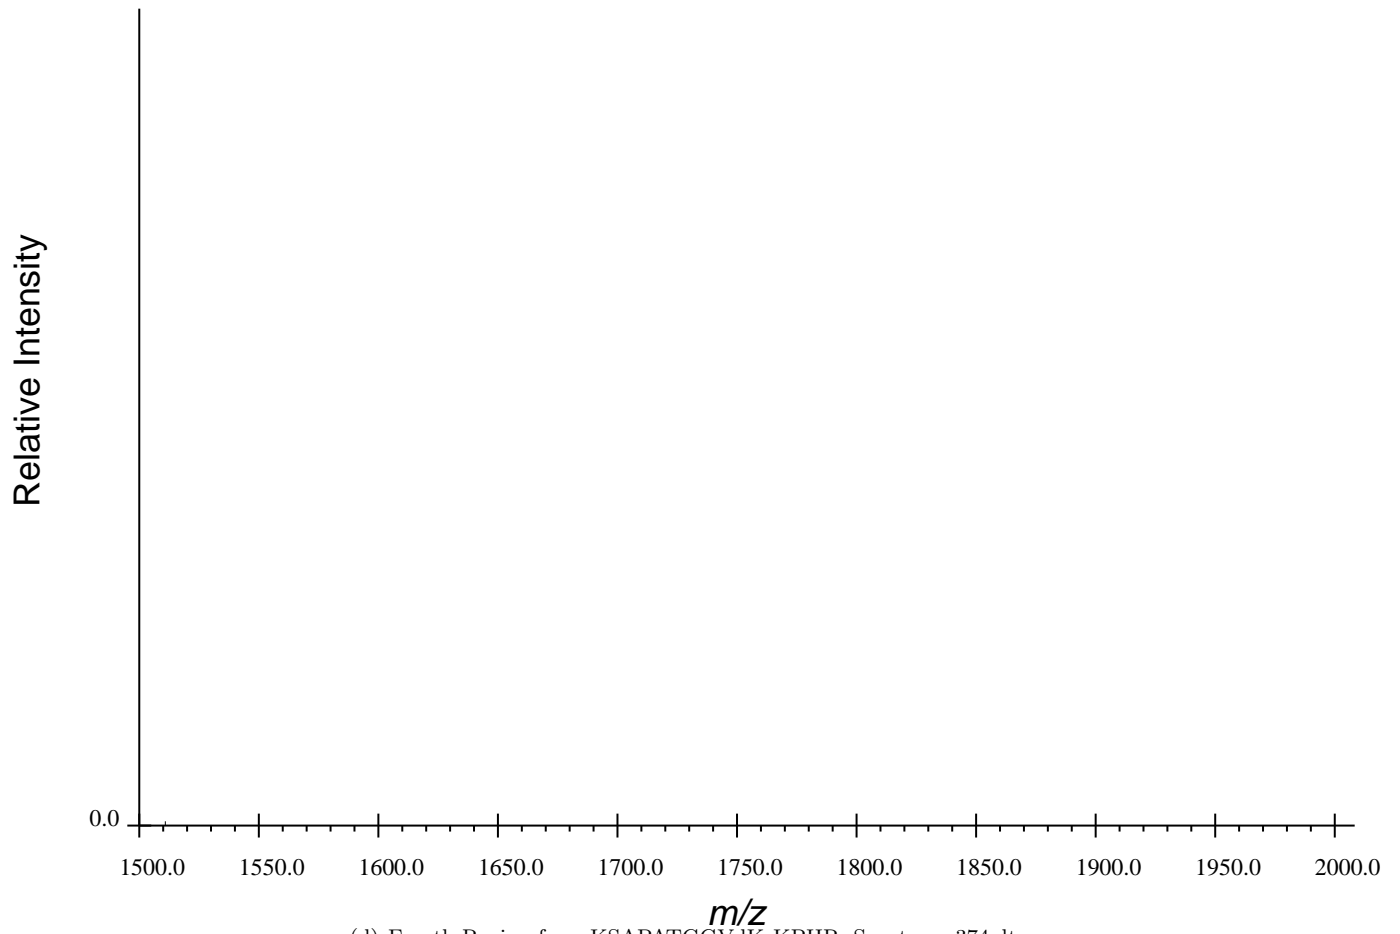

(d) Fourth Region for rrKSAPATGGVdKrKPHR, Spectrum 374.dta

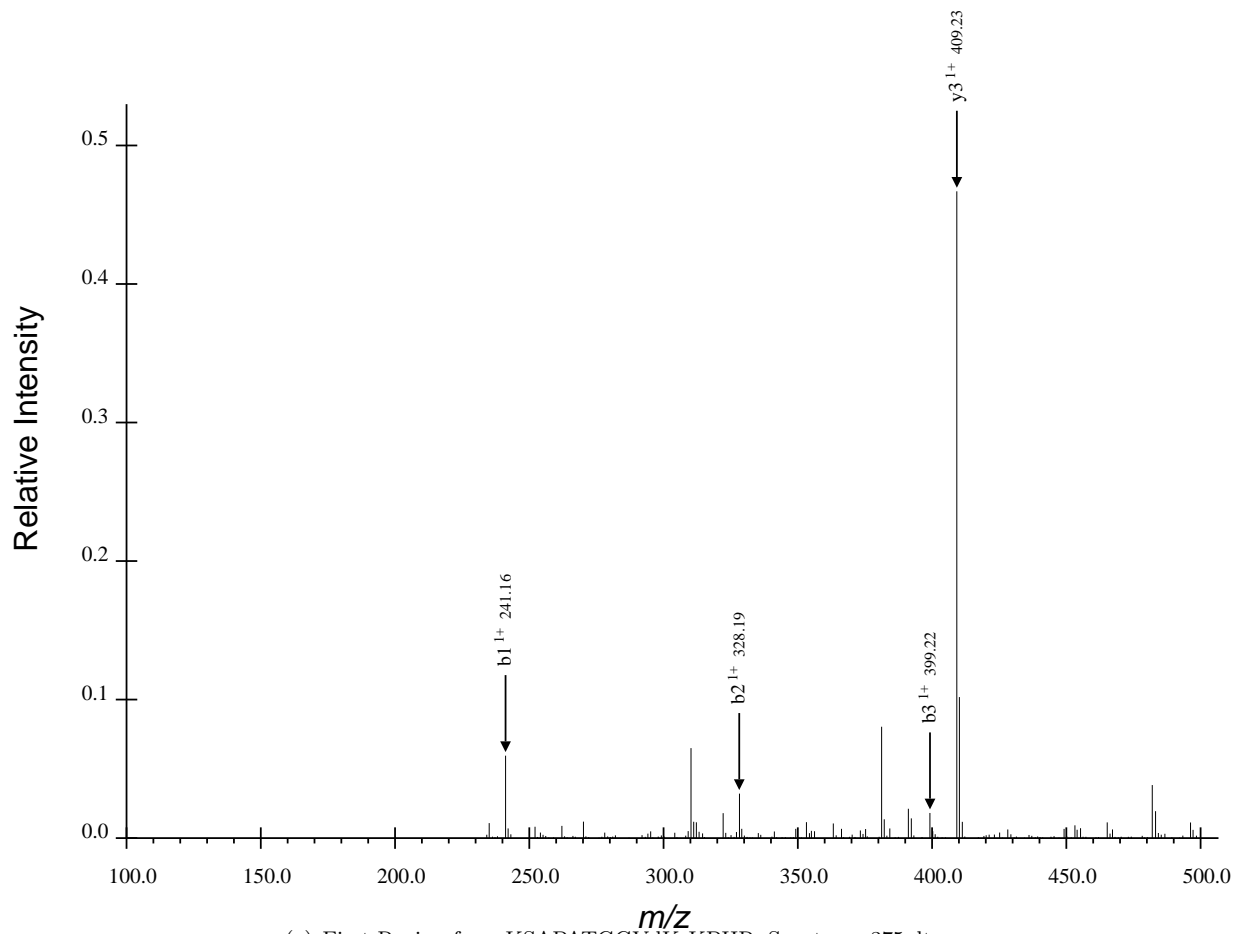

(a) First Region for rrKSAPATGGVdKrKPHR, Spectrum 375.dta

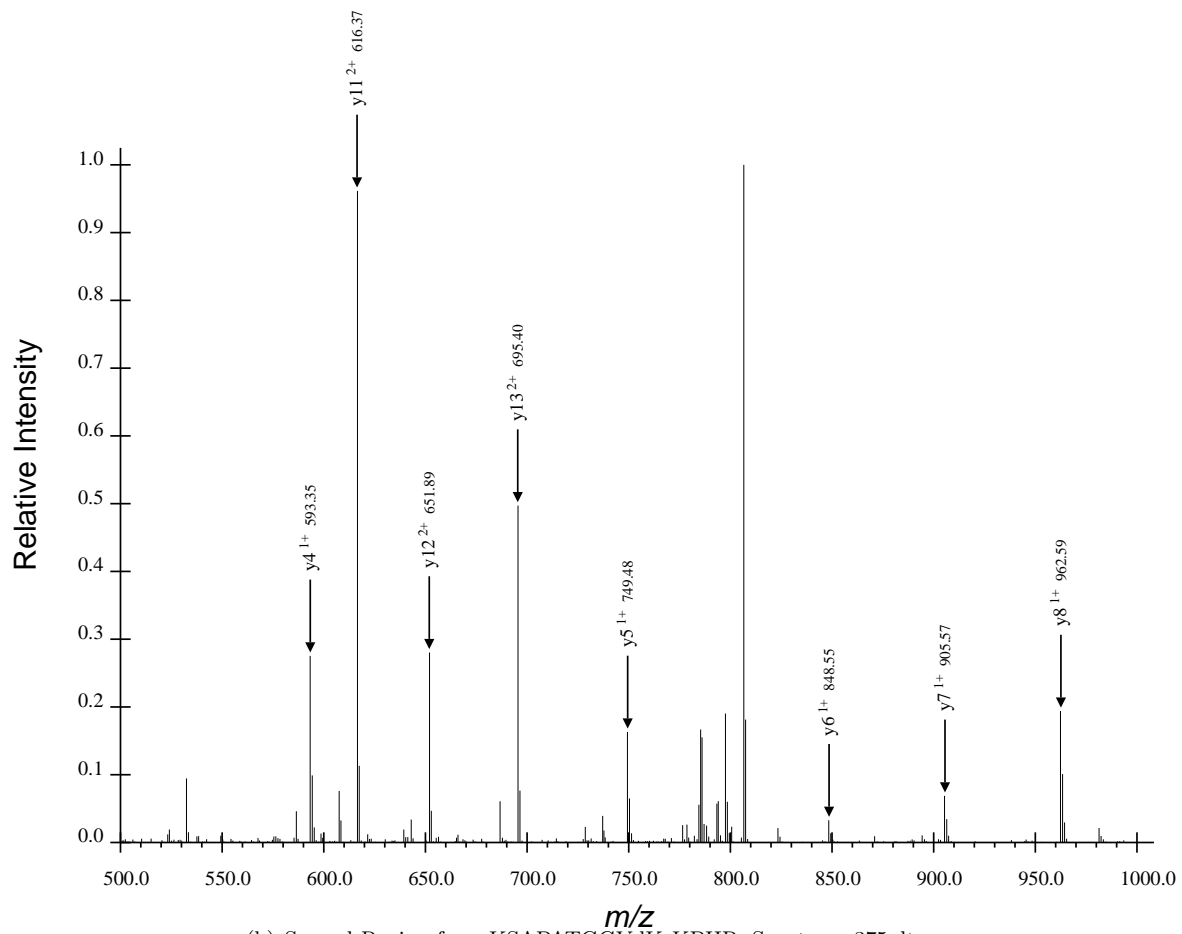

(b) Second Region for rrKSAPATGGVdKrKPHR, Spectrum 375.dta

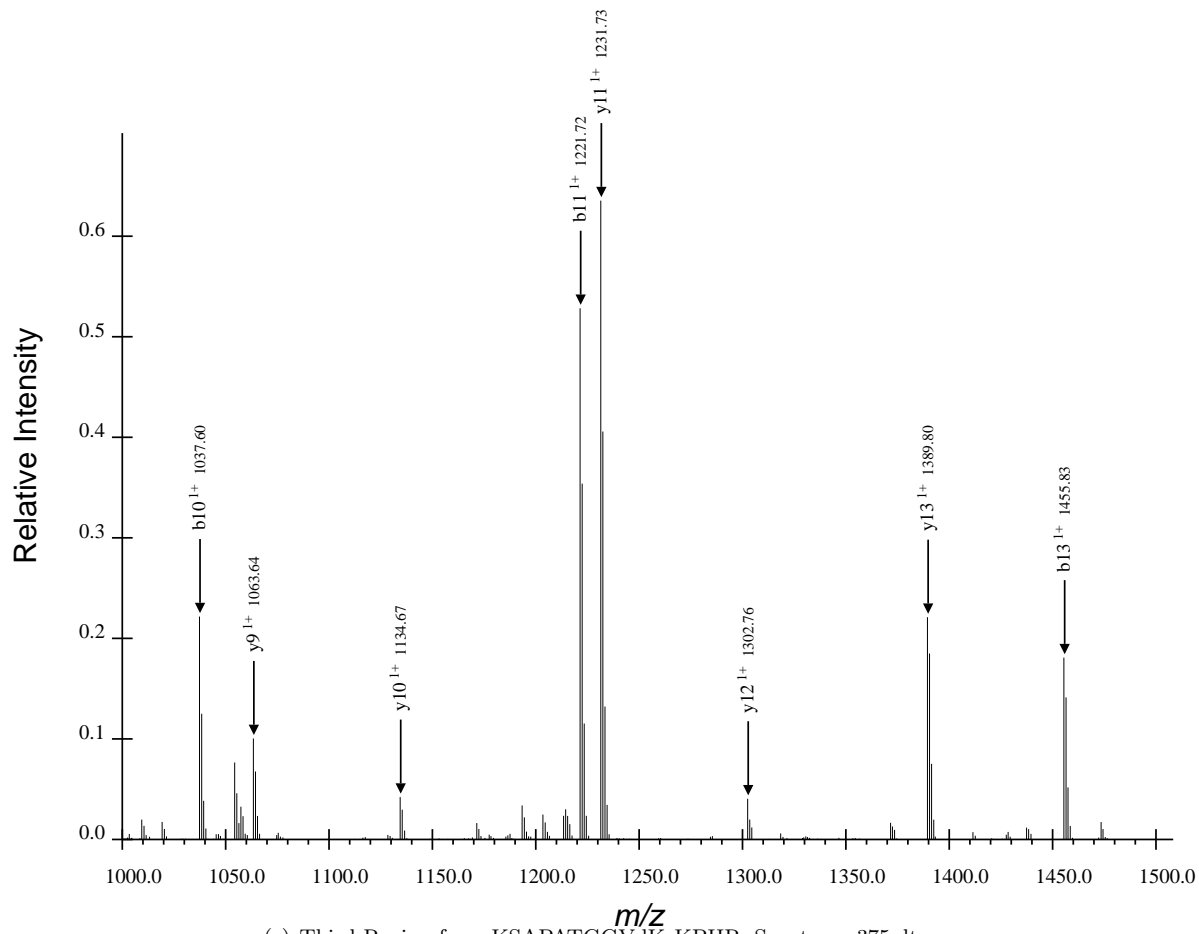

(c) Third Region for rrKSAPATGGVdKrKPHR, Spectrum 375.dta

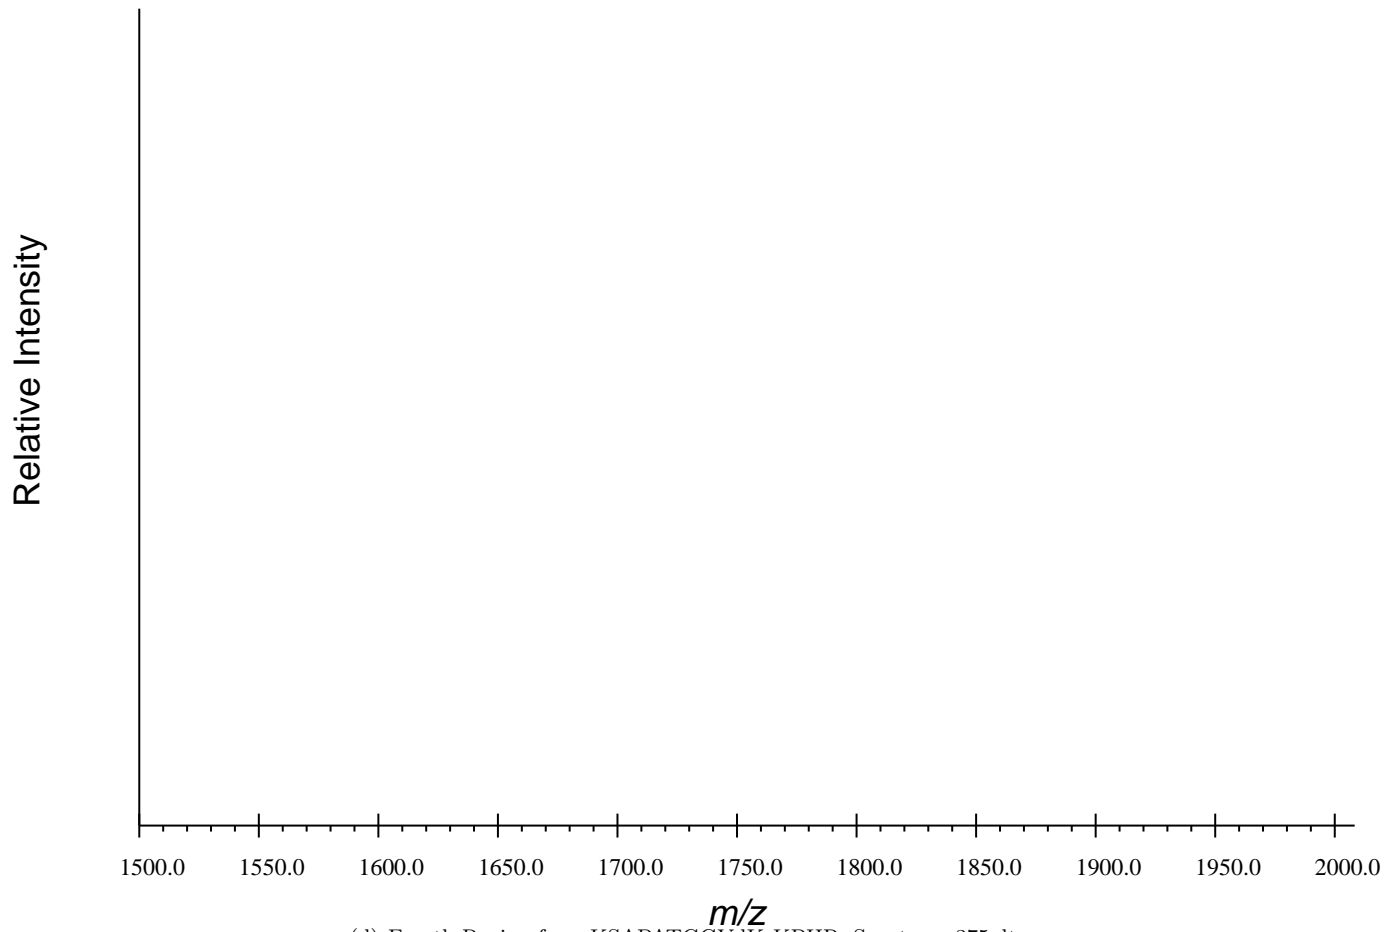

(d) Fourth Region for rrKSAPATGGVdKrKPHR, Spectrum 375.dta

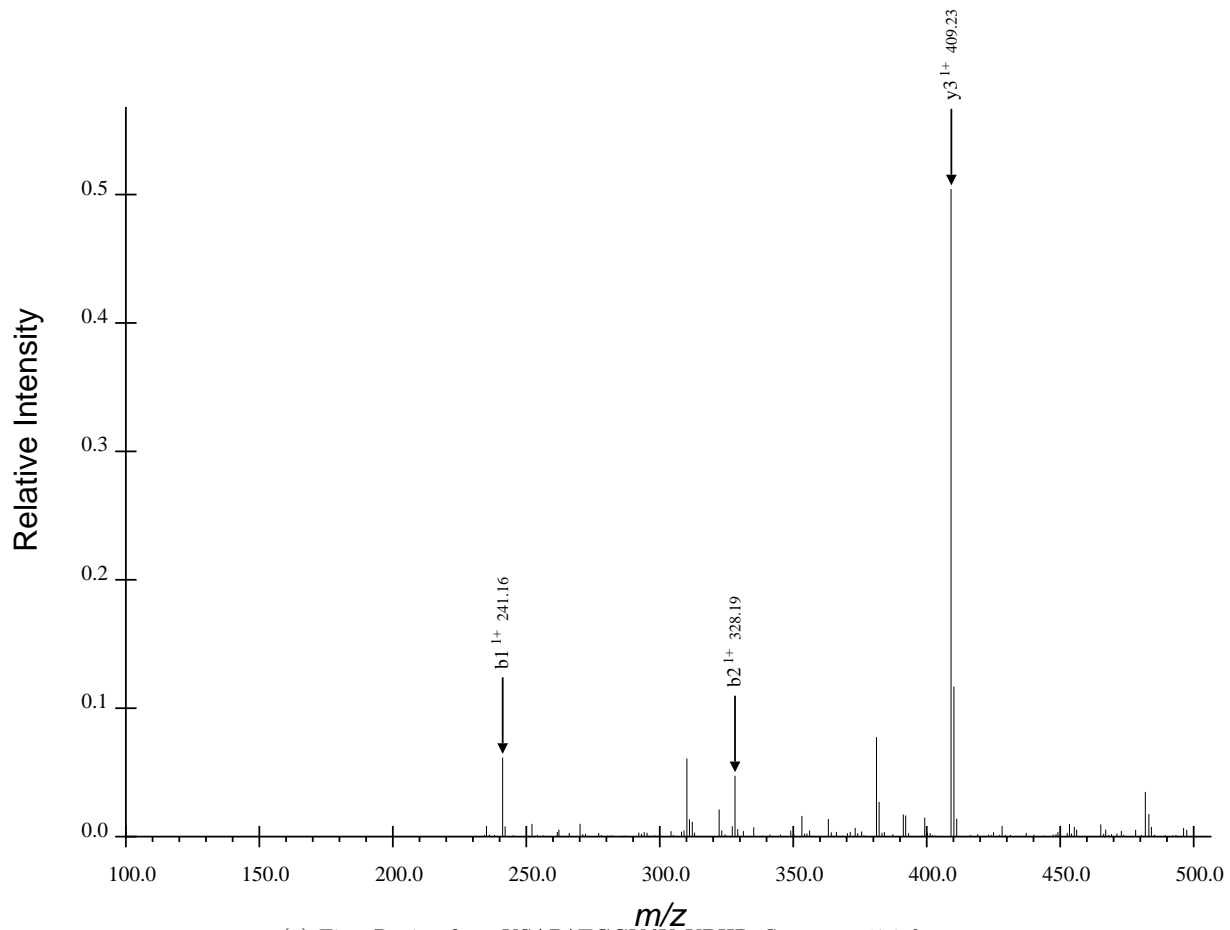

(a) First Region for rrKSAPATGGVdKrKPHR, Spectrum 376.dta

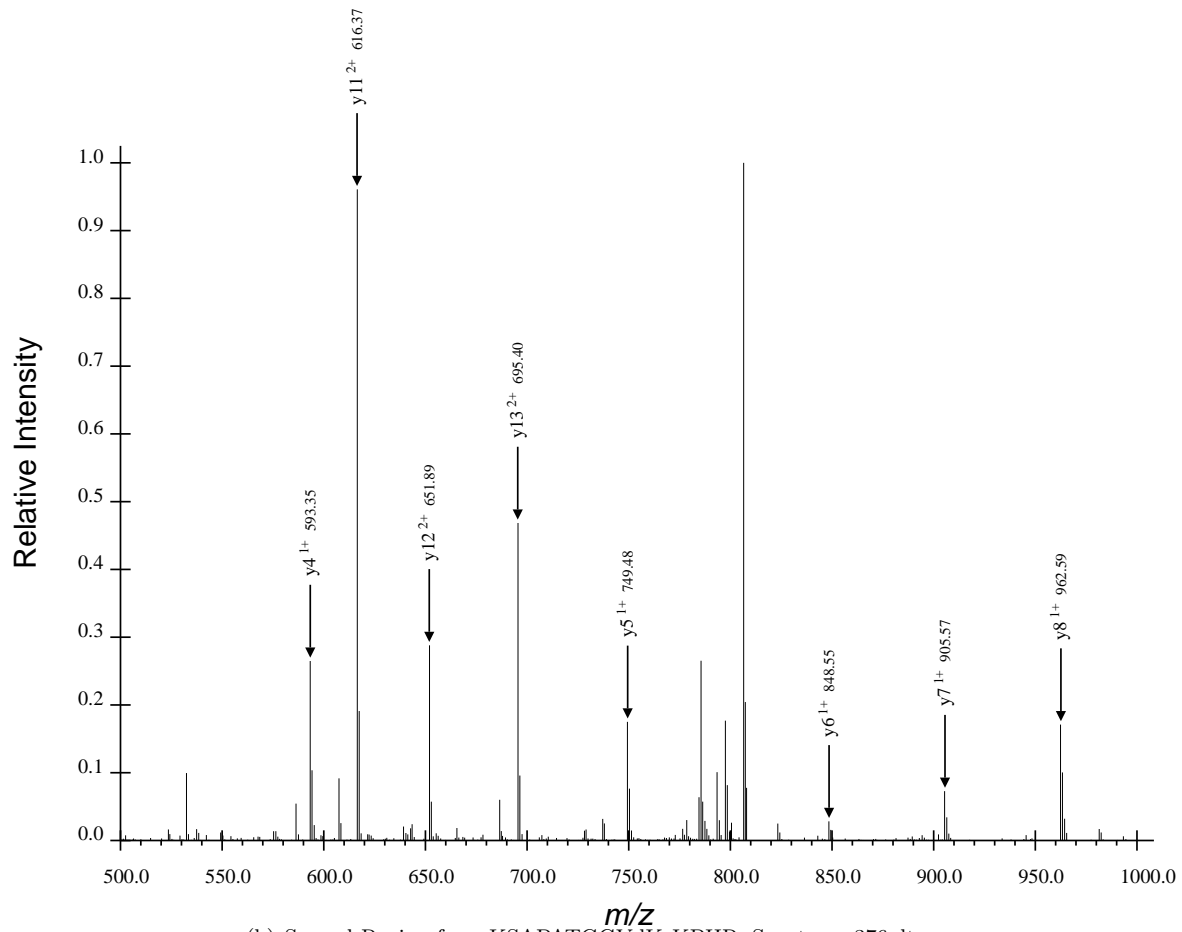

(b) Second Region for rrKSAPATGGVdKrKPHR, Spectrum 376.dta



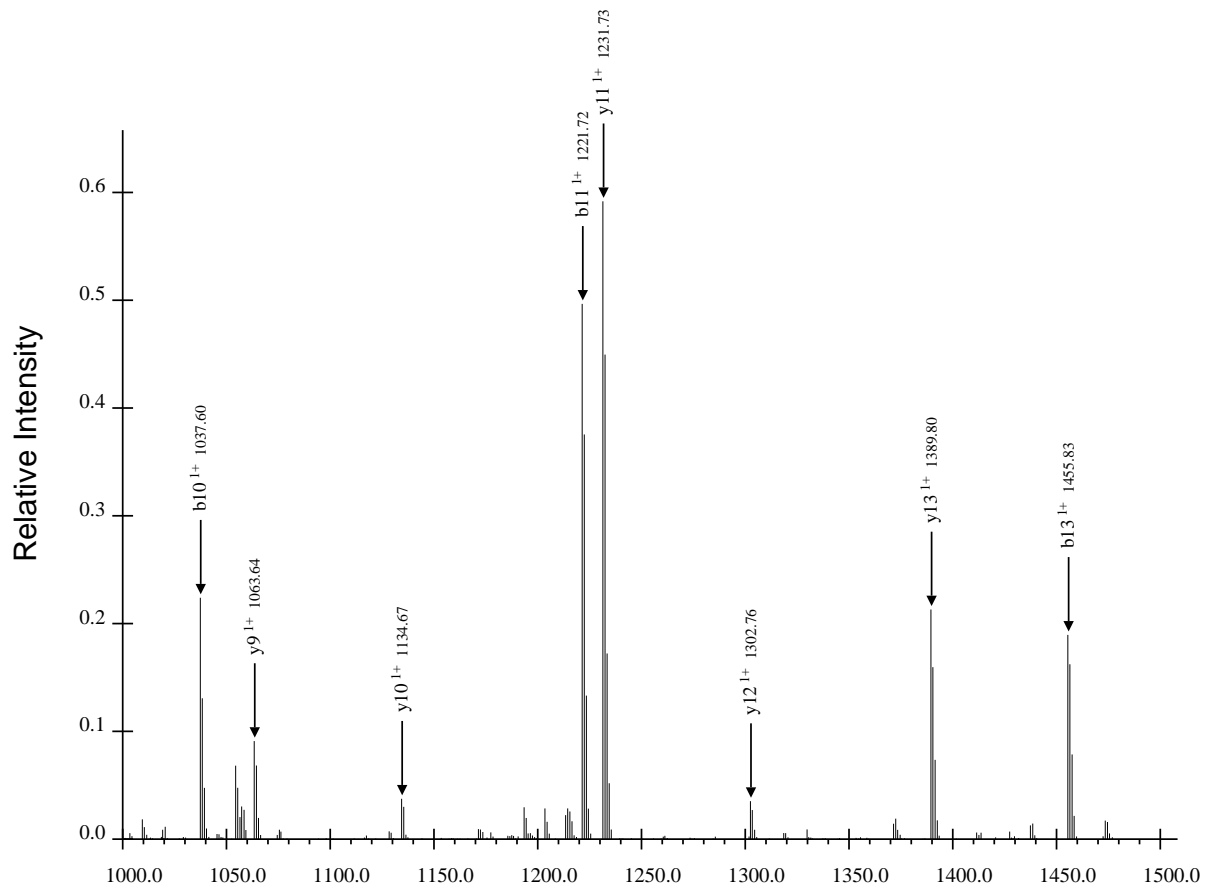

(c) Third Region for rrKSAPATGGVdKrKPHR, Spectrum 376.dta

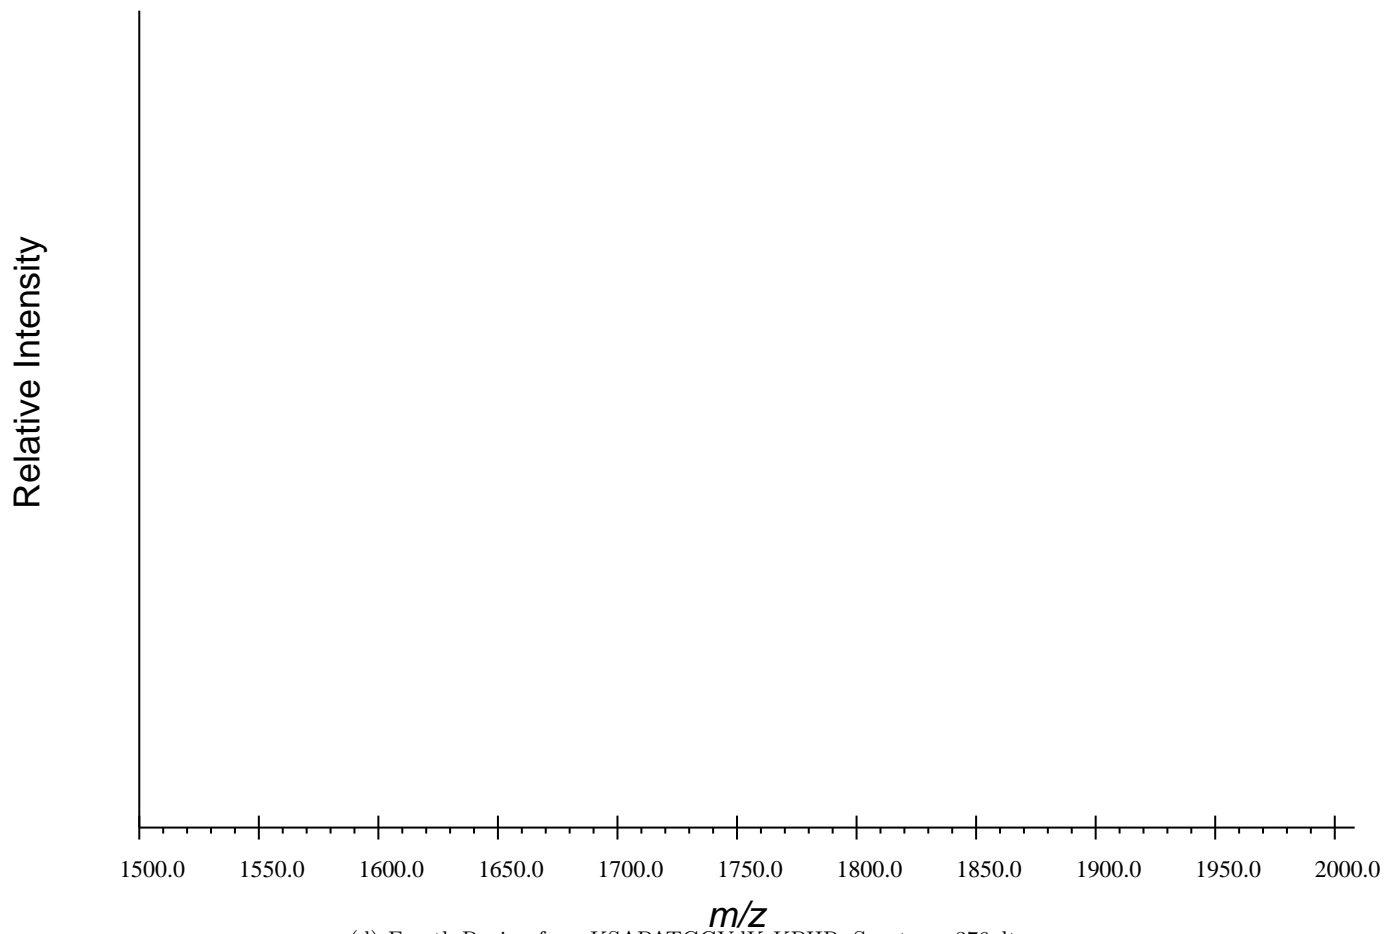

(d) Fourth Region for rrKSAPATGGVdKrKPHR, Spectrum 376.dta

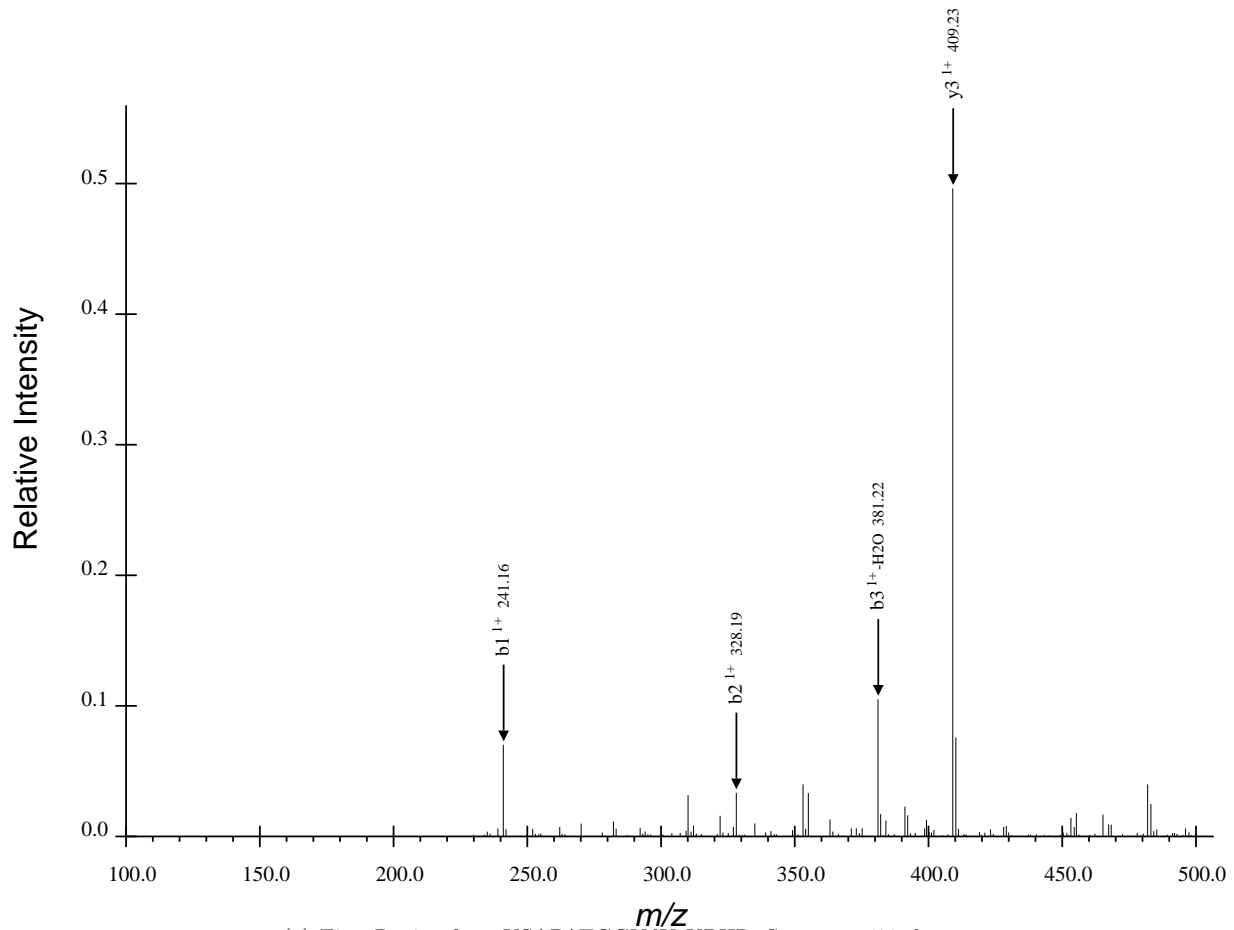

(a) First Region for rrKSAPATGGVdKrKPHR, Spectrum 377.dta

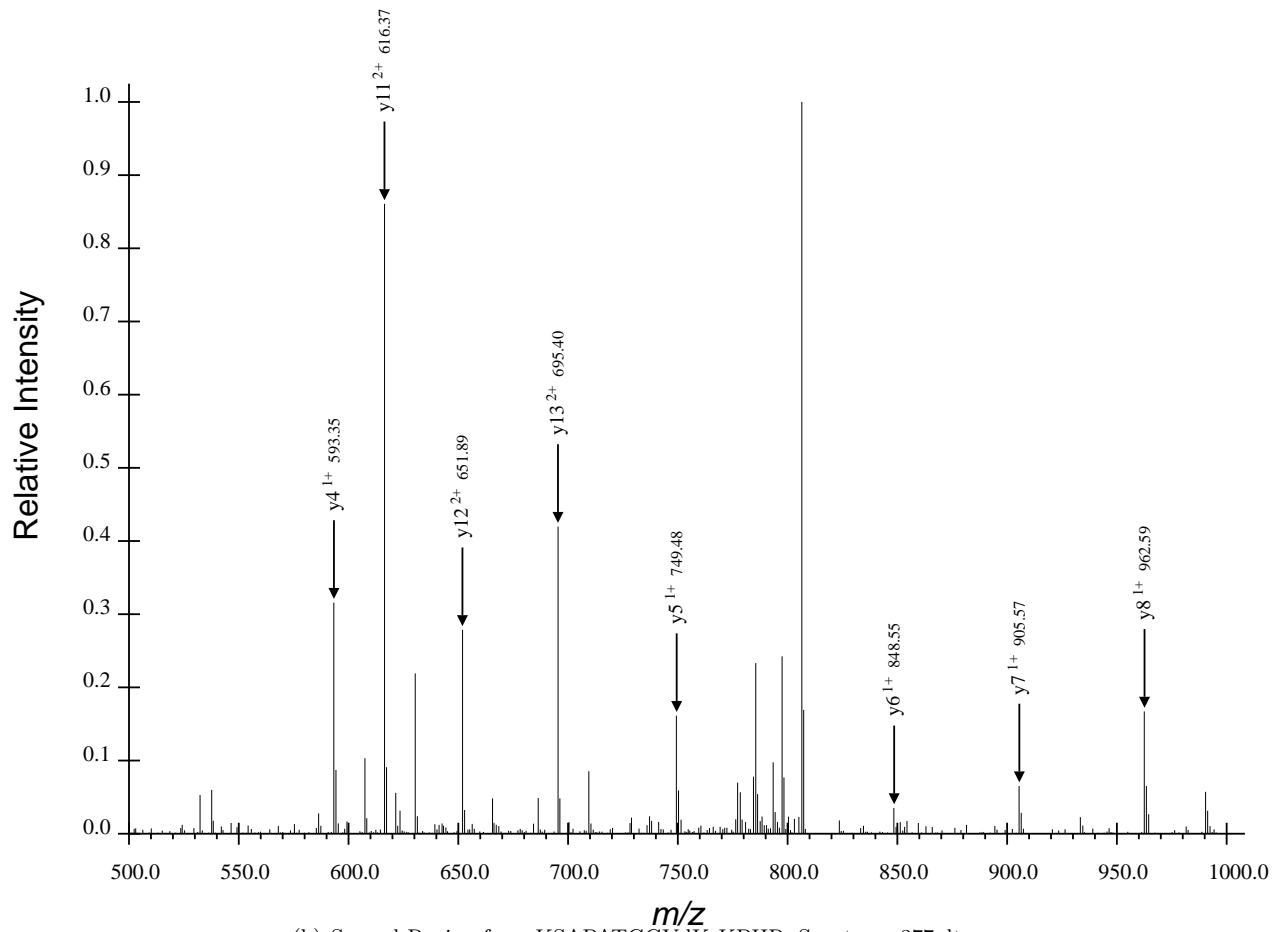

(b) Second Region for rrKSAPATGGVdKrKPHR, Spectrum 377.dta

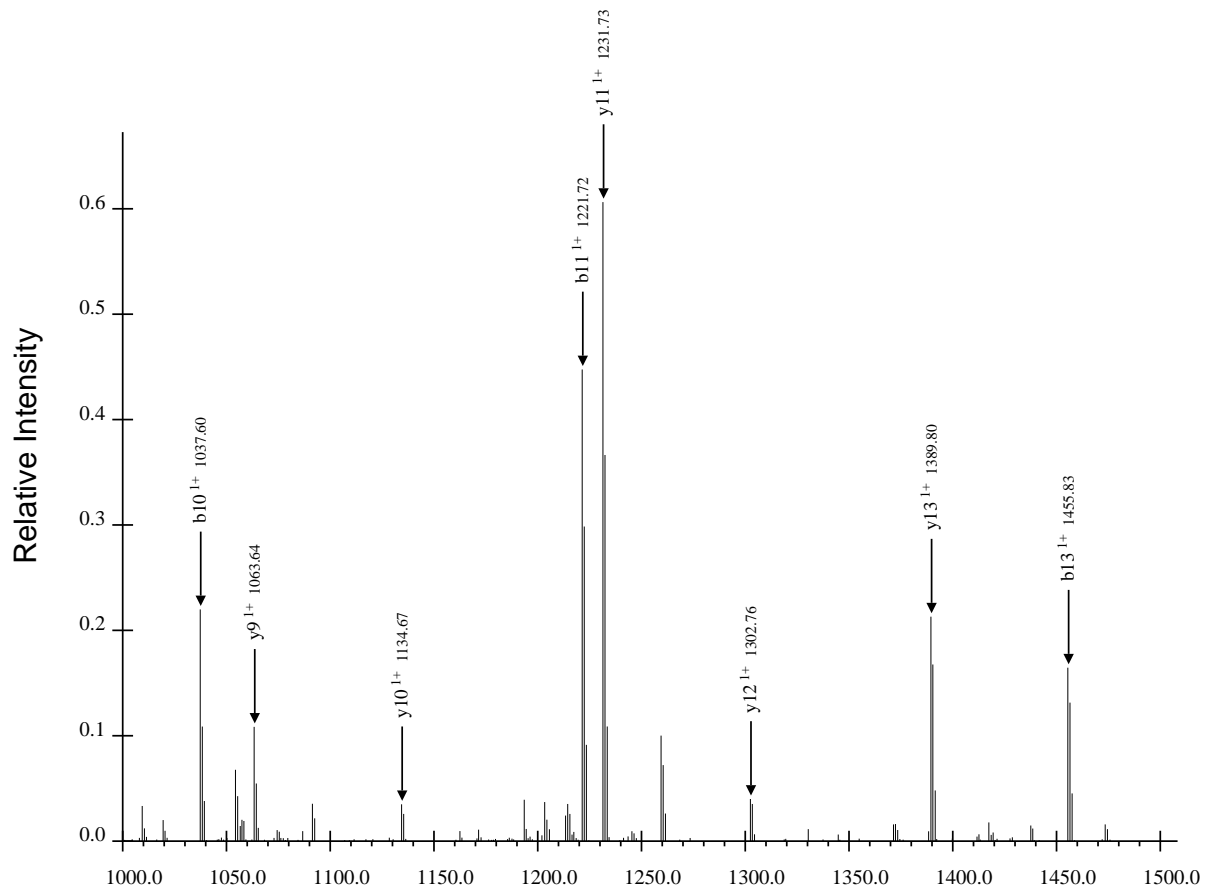

(c) Third Region for rrKSAPATGGVdKrKPHR, Spectrum 377.dta

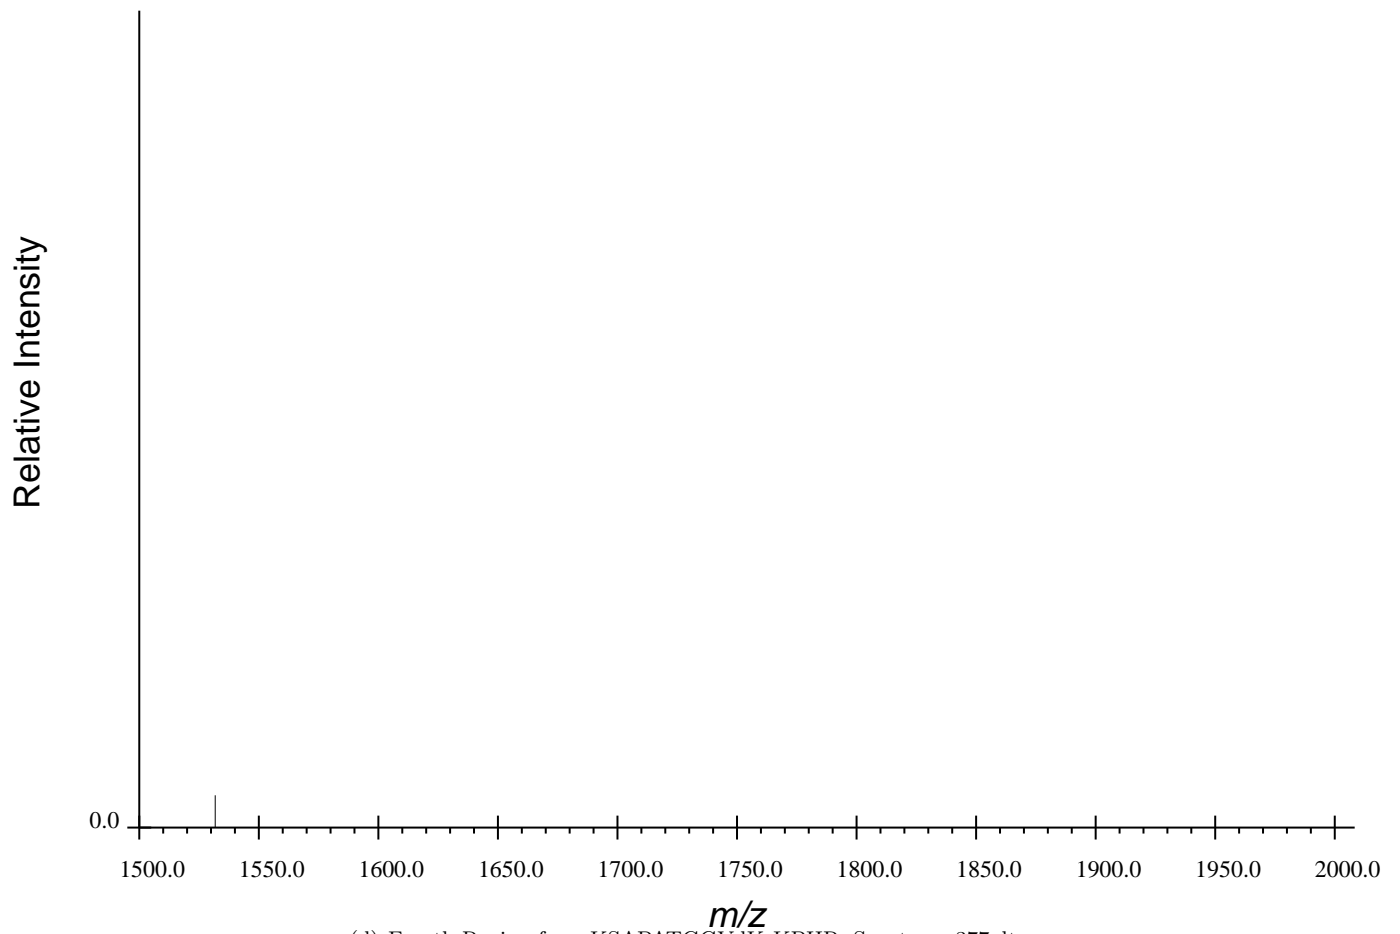

(d) Fourth Region for rrKSAPATGGVdKrKPHR, Spectrum 377.dta

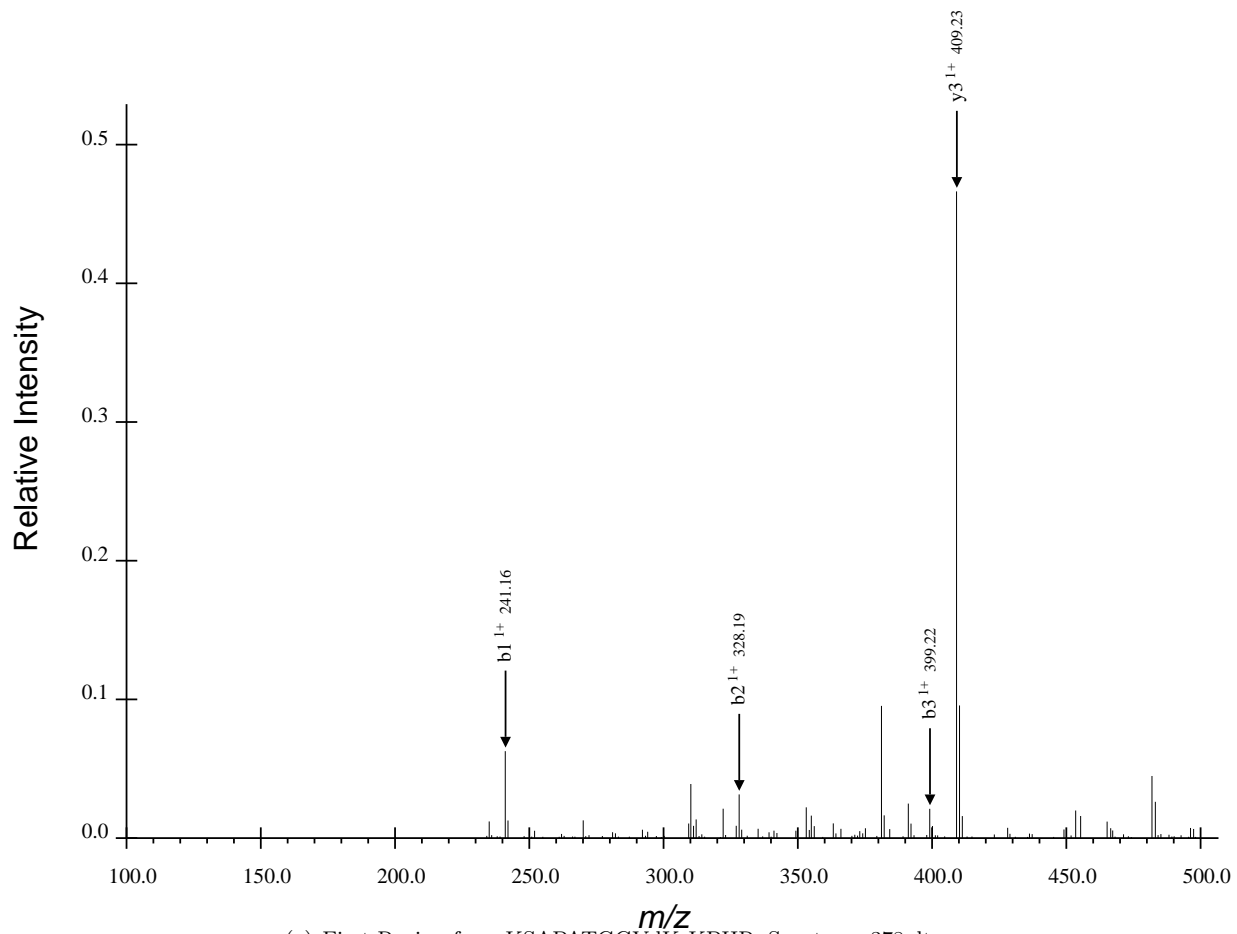

(a) First Region for rrKSAPATGGVdKrKPHR, Spectrum 378.dta

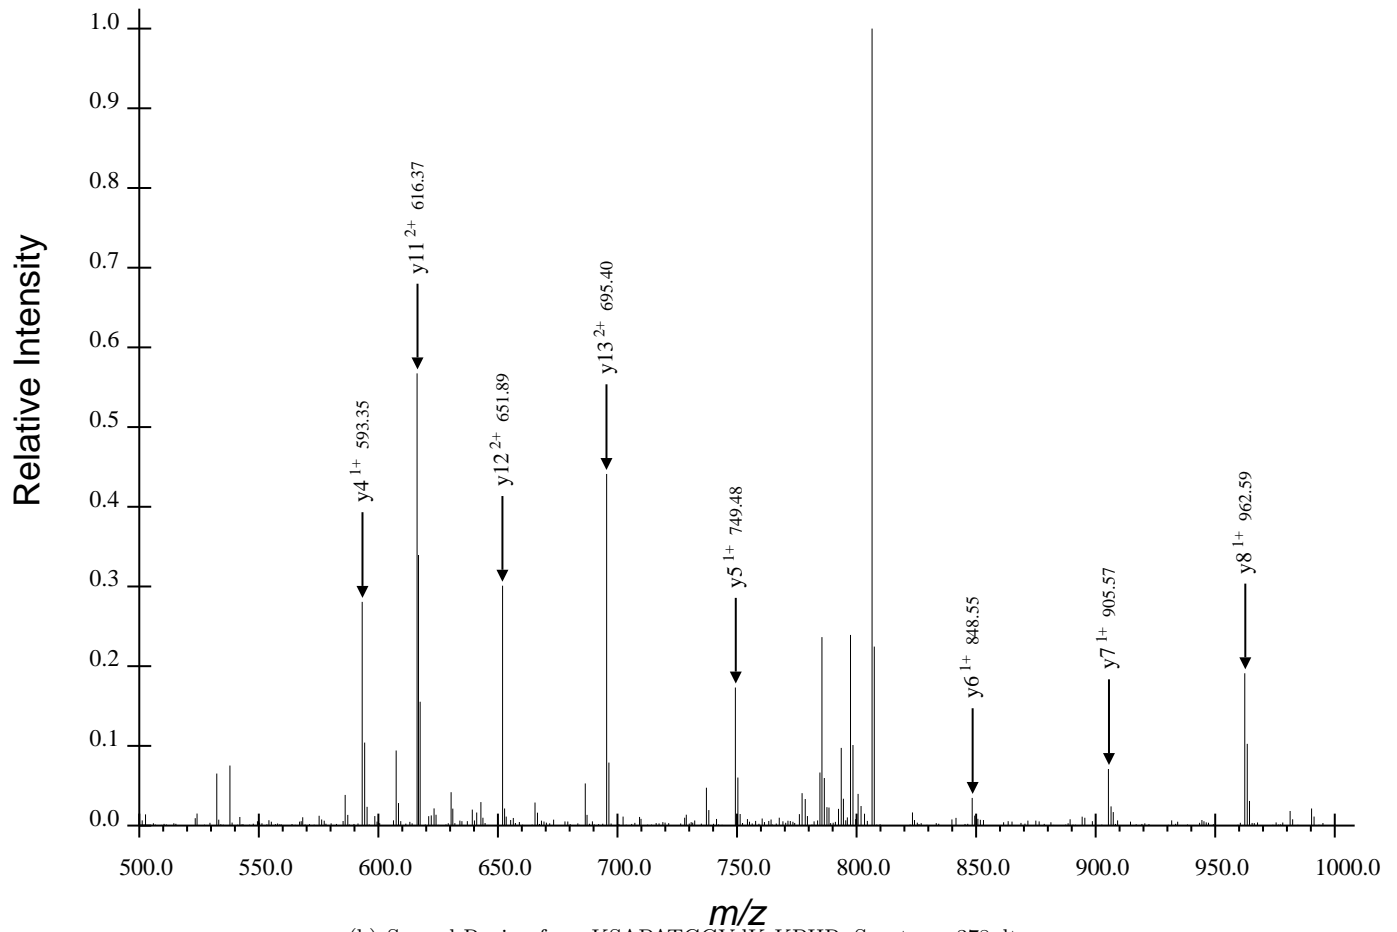

(b) Second Region for rrKSAPATGGVdKrKPHR, Spectrum 378.dta

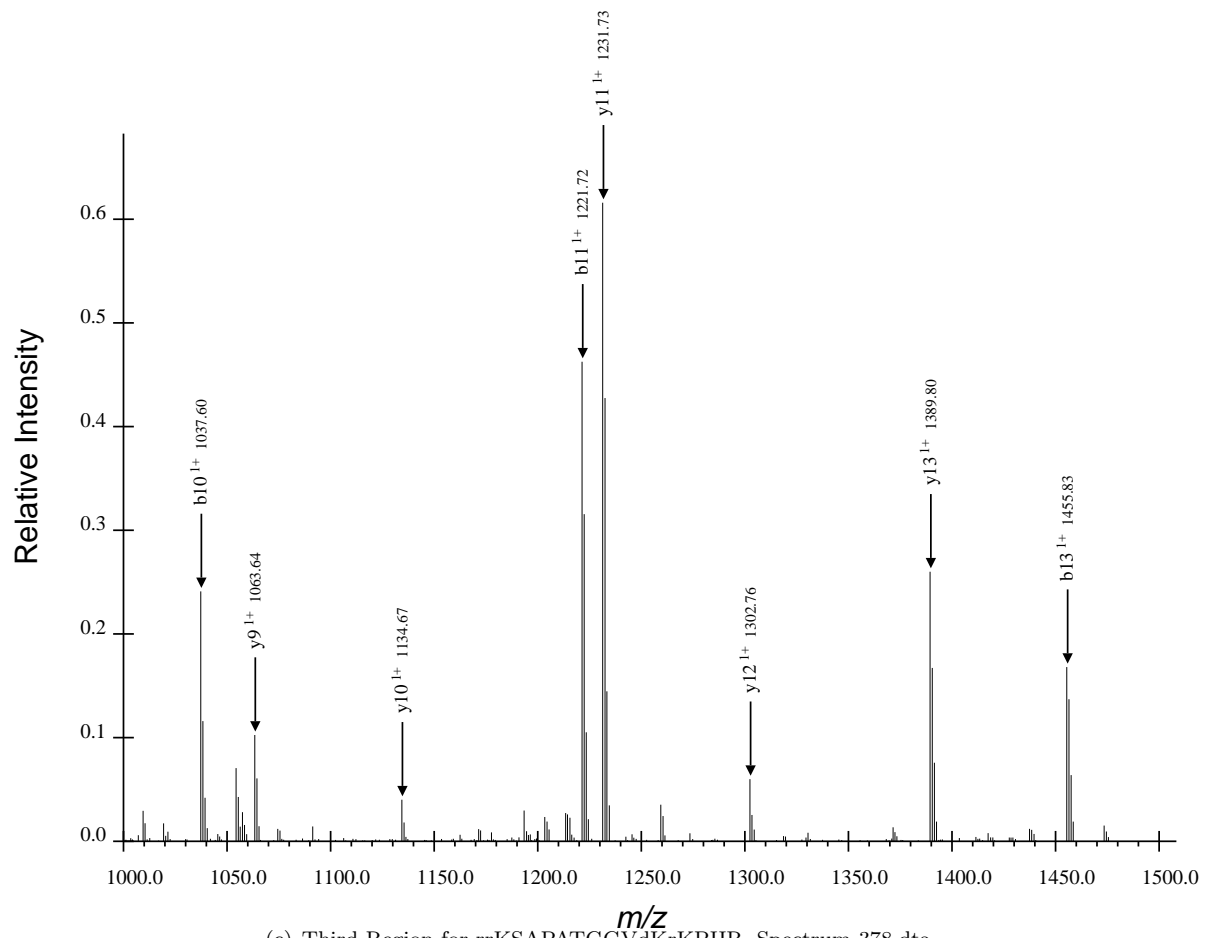

(c) Third Region for rrKSAPATGGVdKrKPHR, Spectrum 378.dta

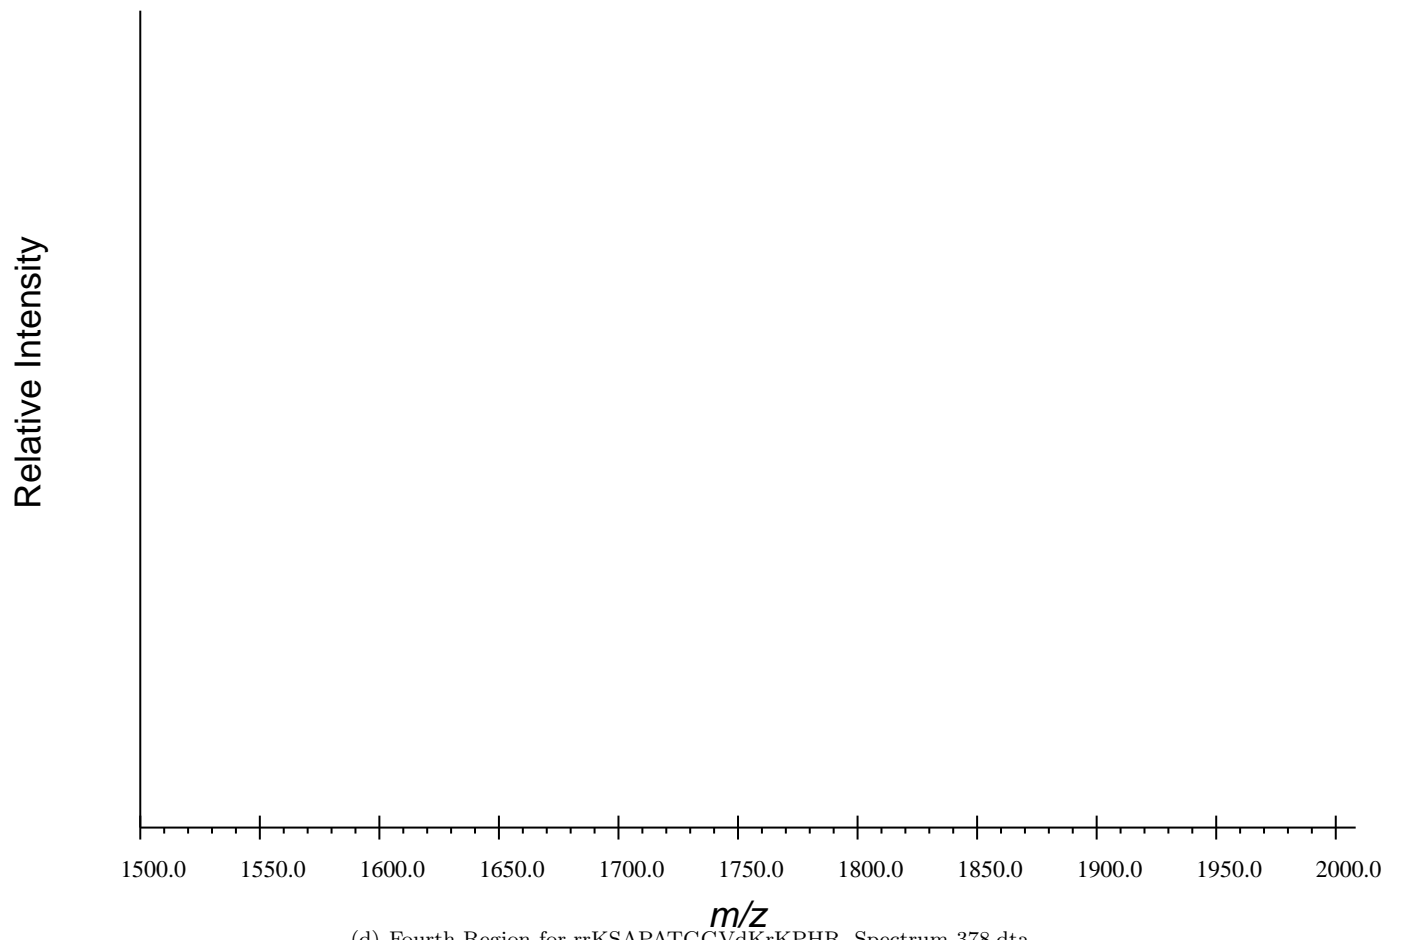

(d) Fourth Region for rrKSAPATGGVdKrKPHR, Spectrum 378.dta

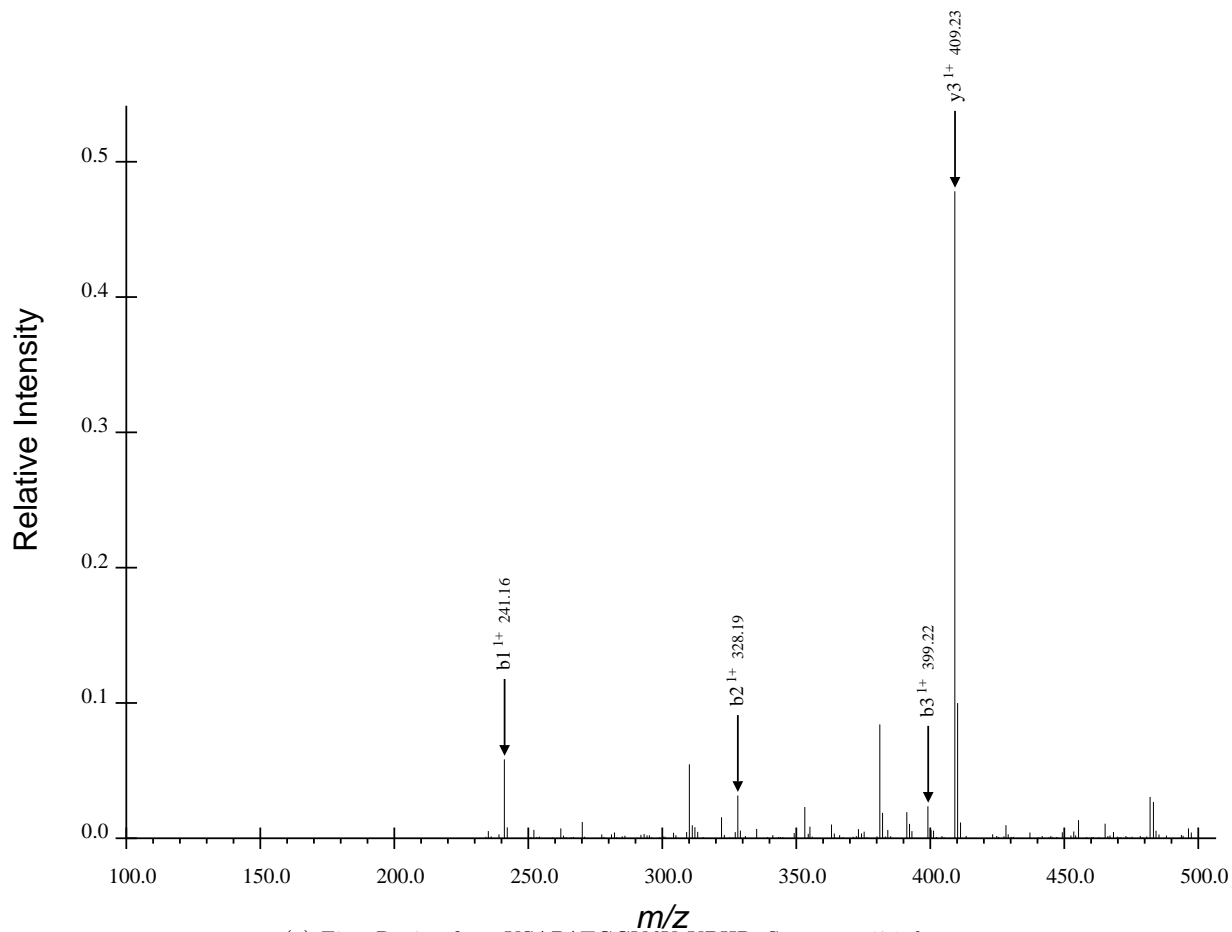

(a) First Region for rrKSAPATGGVdKrKPHR, Spectrum 379.dta

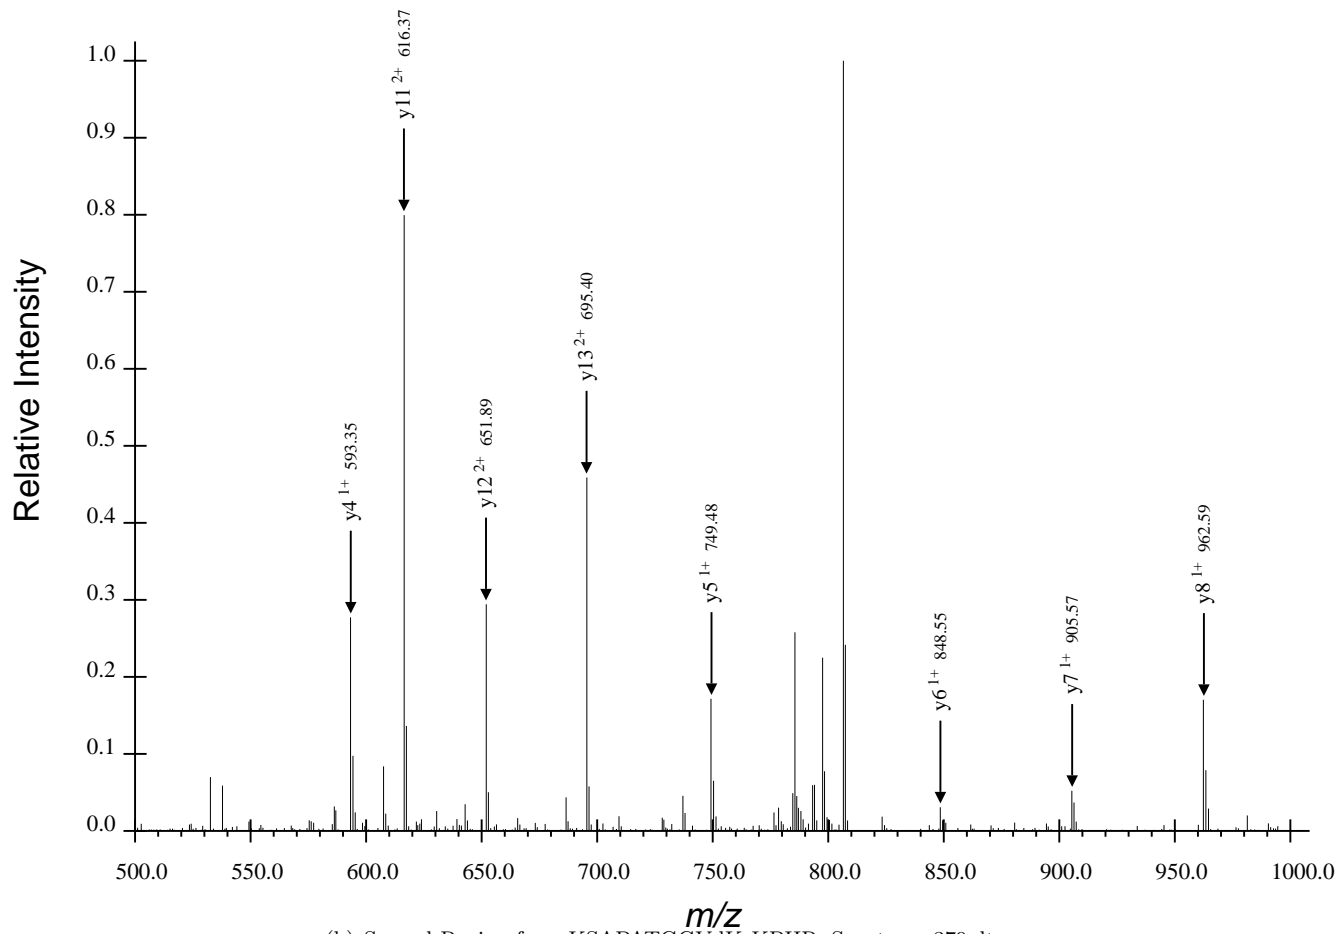

(b) Second Region for rrKSAPATGGVdKrKPHR, Spectrum 379.dta

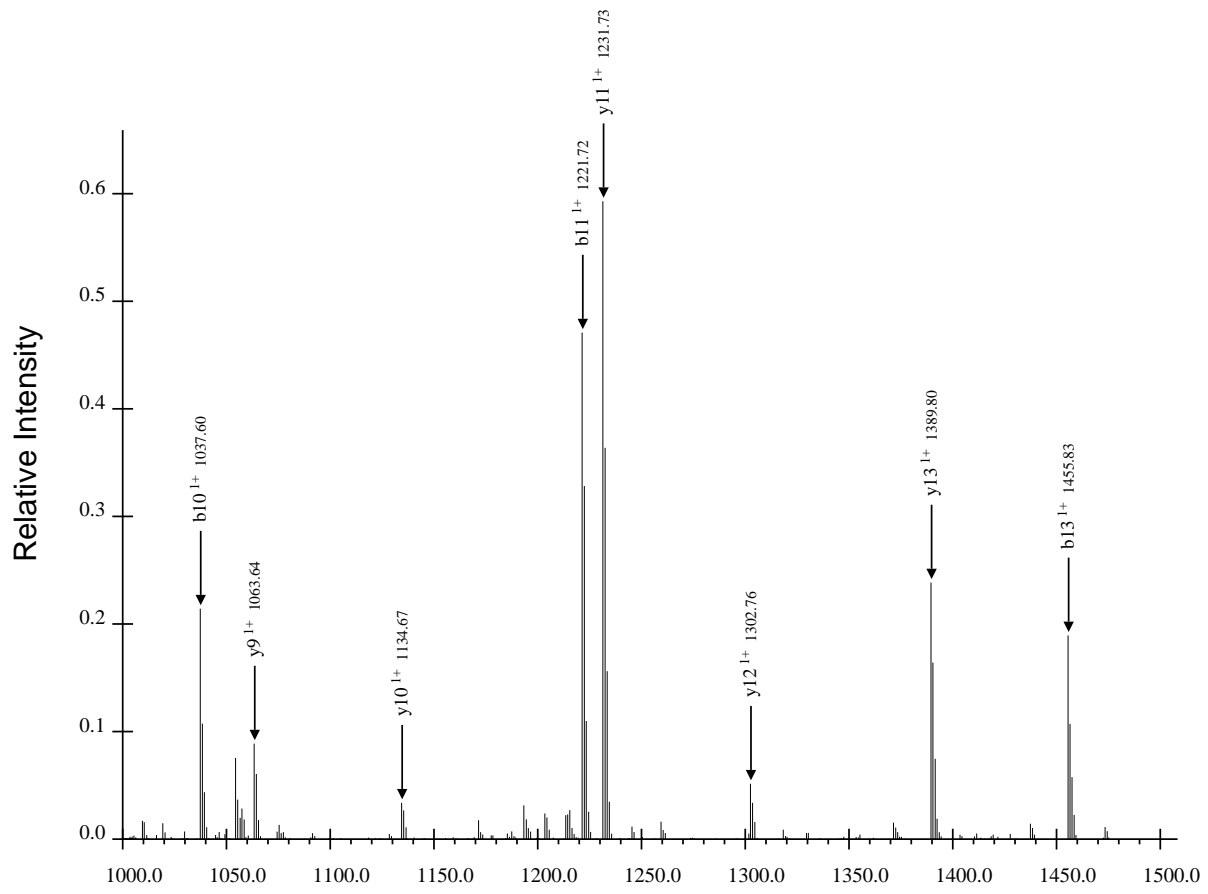

(c) Third Region for rrKSAPATGGVdKrKPHR, Spectrum 379.dta

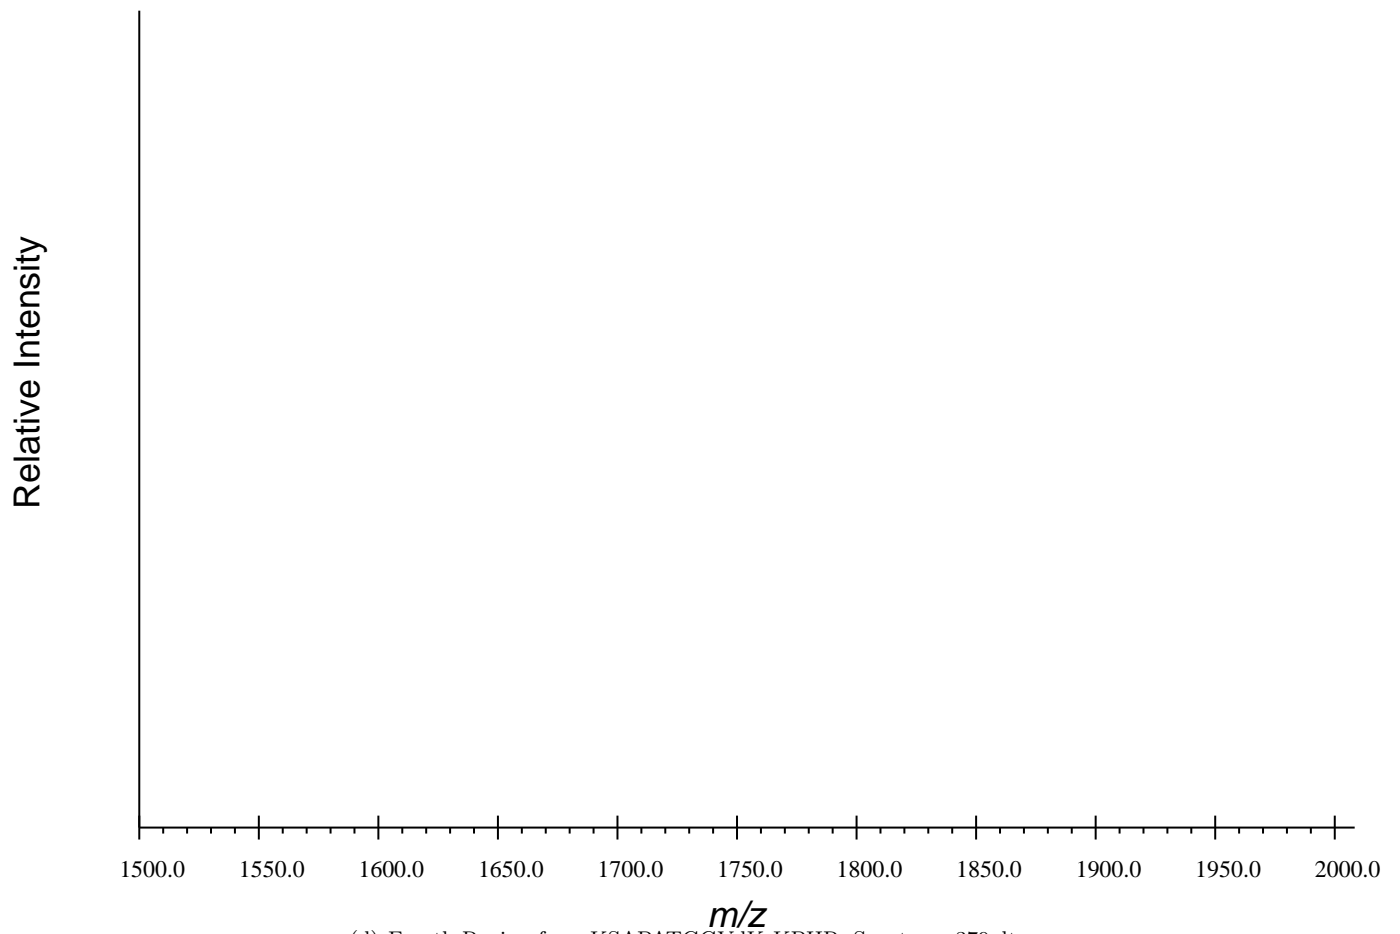

(d) Fourth Region for rrKSAPATGGVdKrKPHR, Spectrum 379.dta

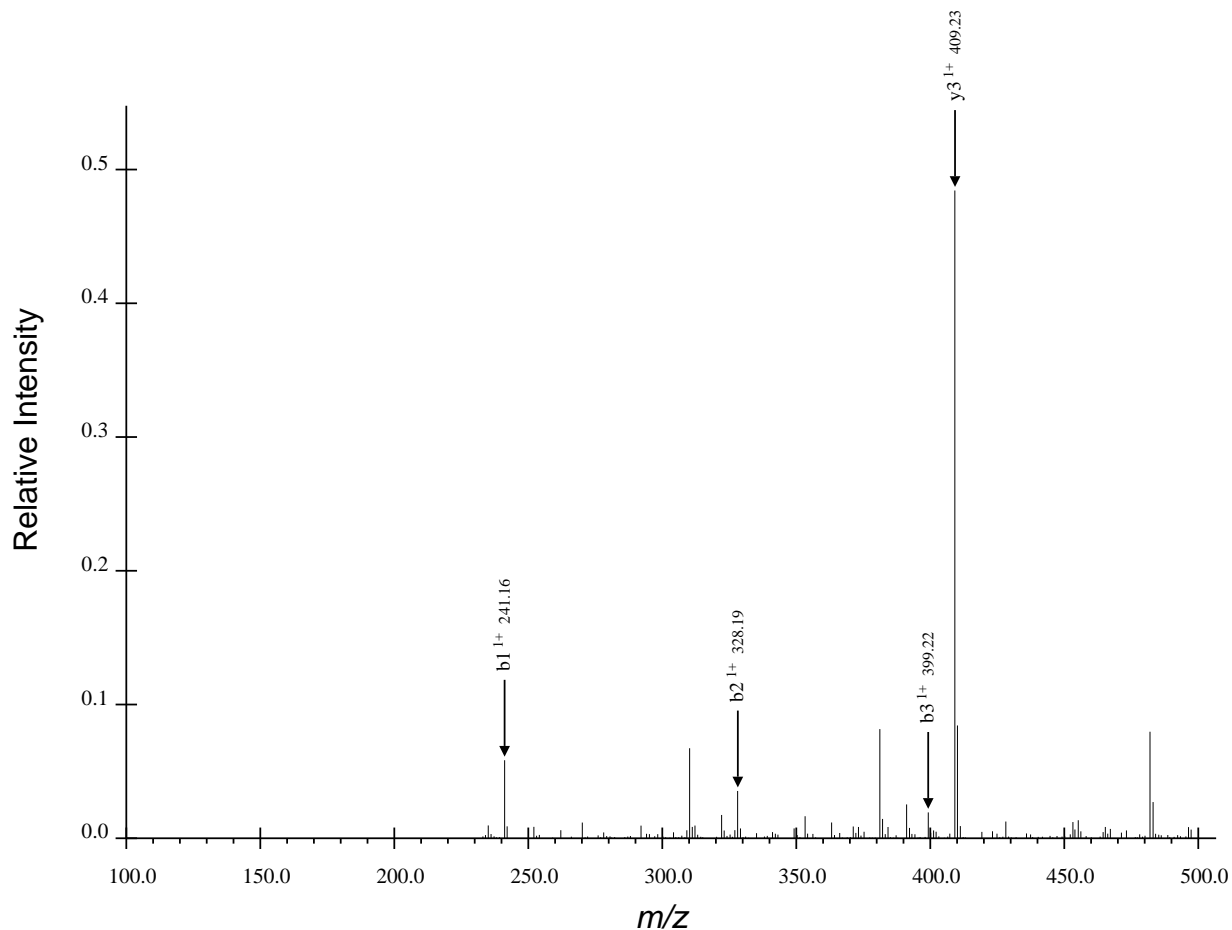

(a) First Region for rrKSAPATGGVdKrKPHR, Spectrum 380.dta

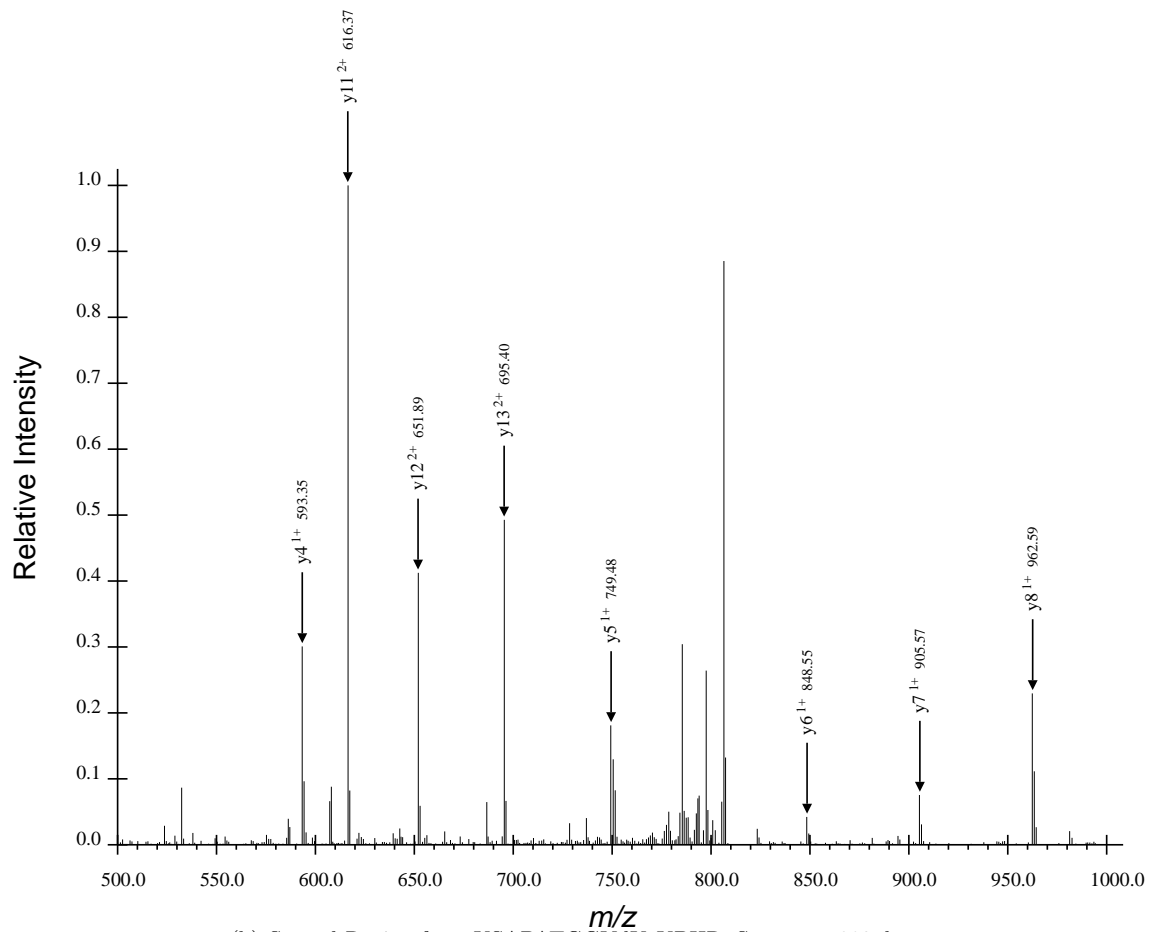

(b) Second Region for rrKSAPATGGVdKrKPHR, Spectrum 380.dta



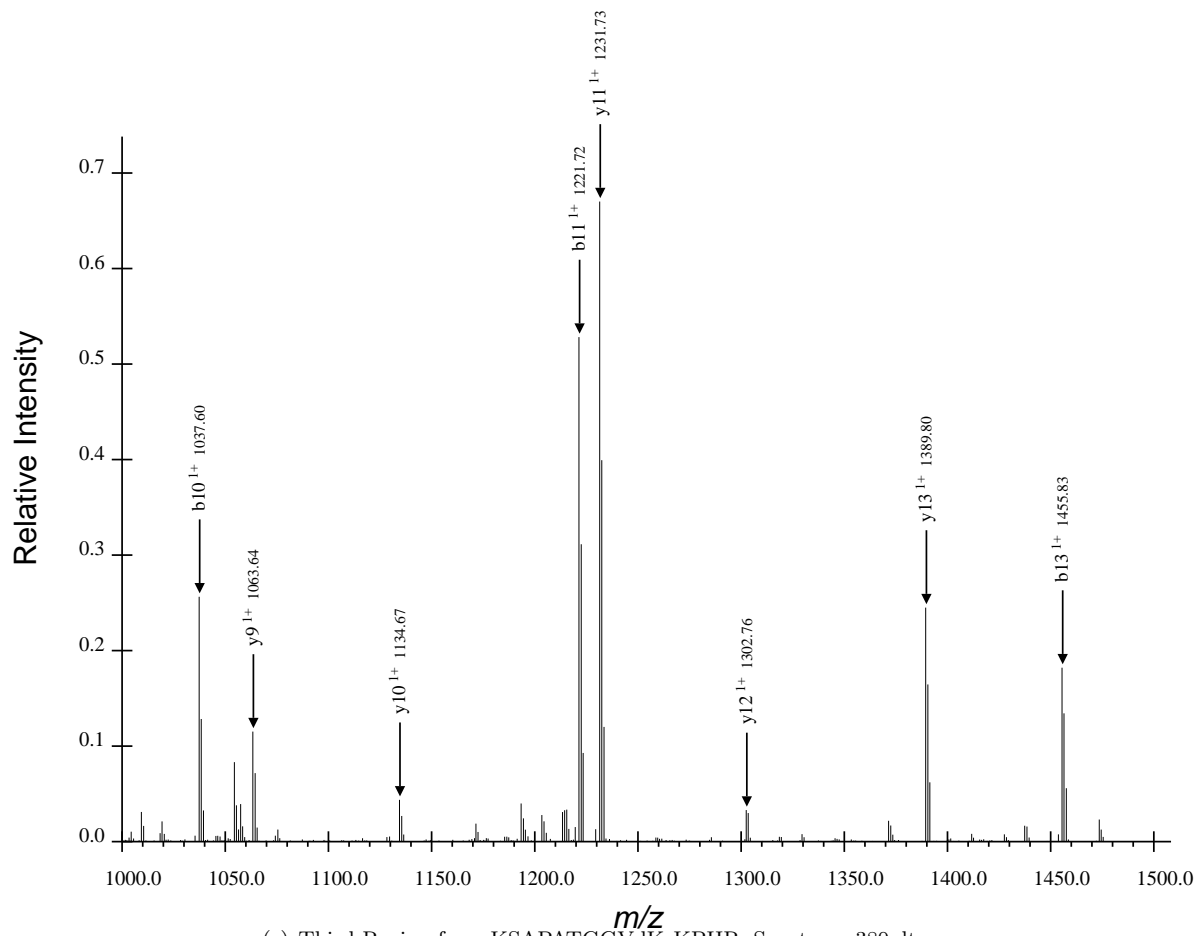

(c) Third Region for rrKSAPATGGVdKrKPHR, Spectrum 380.dta

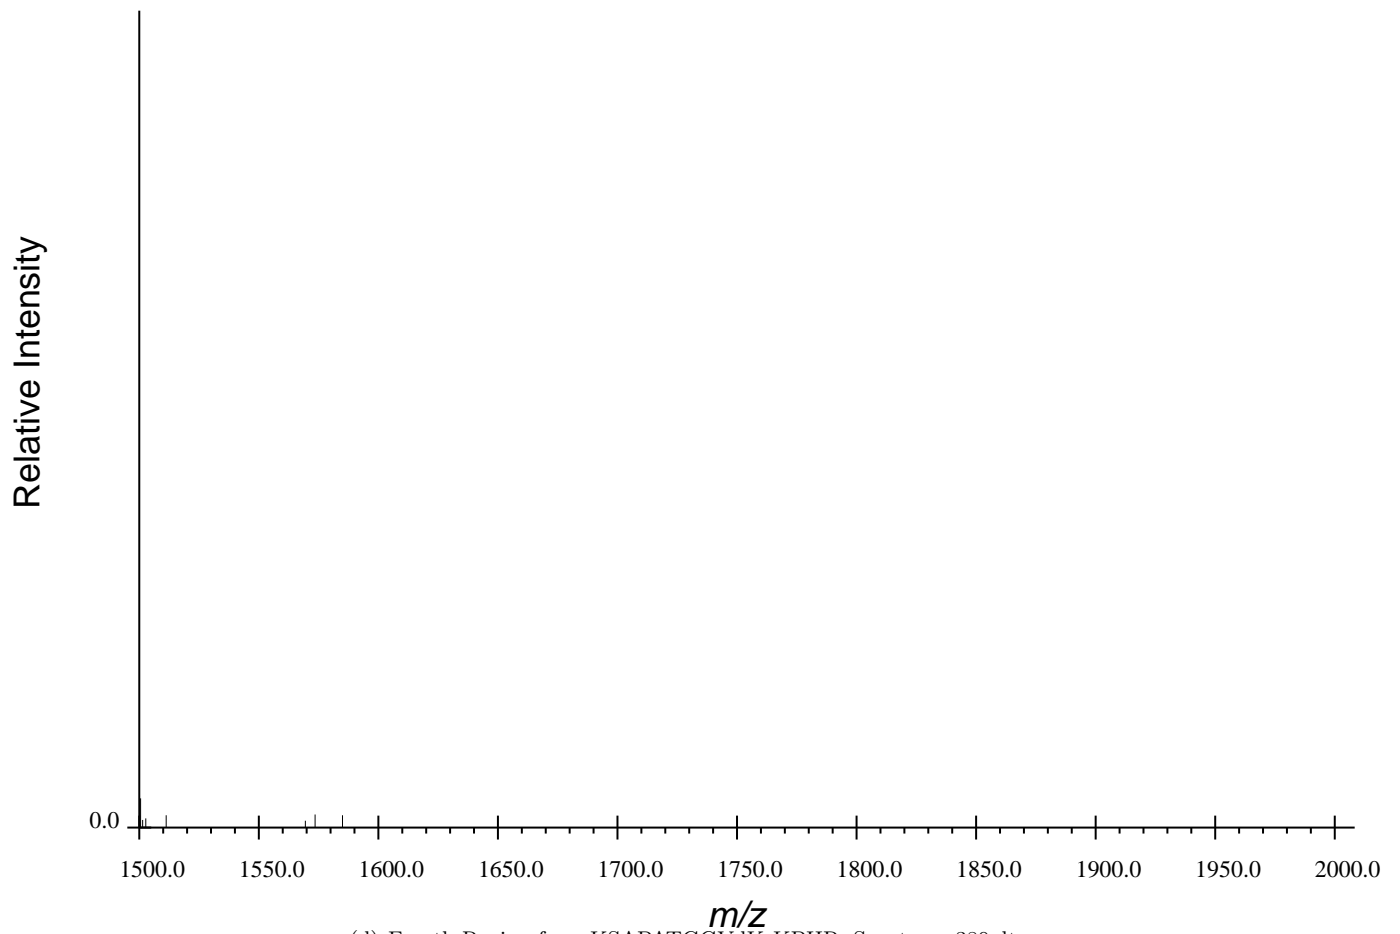

(d) Fourth Region for rrKSAPATGGVdKrKPHR, Spectrum 380.dta

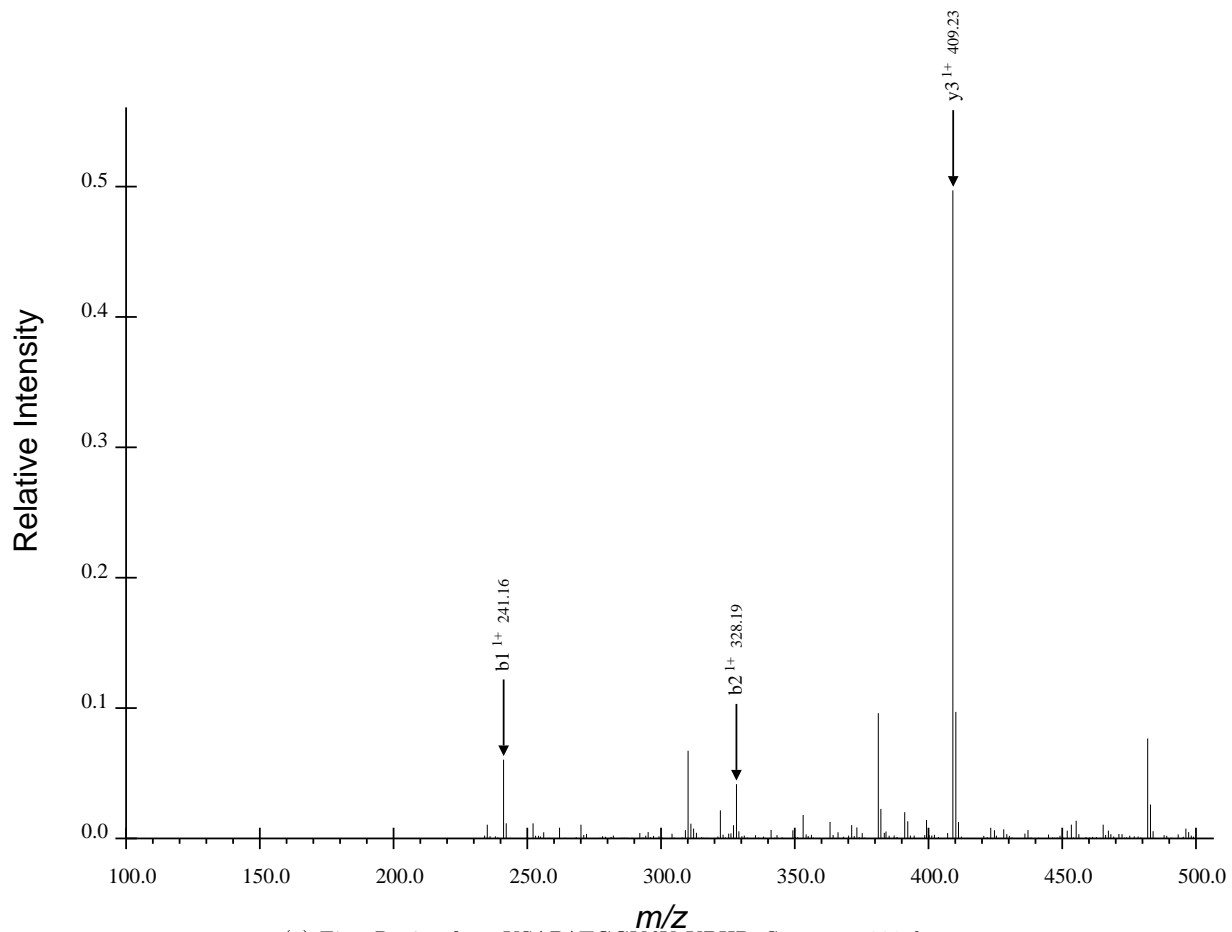

(a) First Region for rrKSAPATGGVdKrKPHR, Spectrum 381.dta

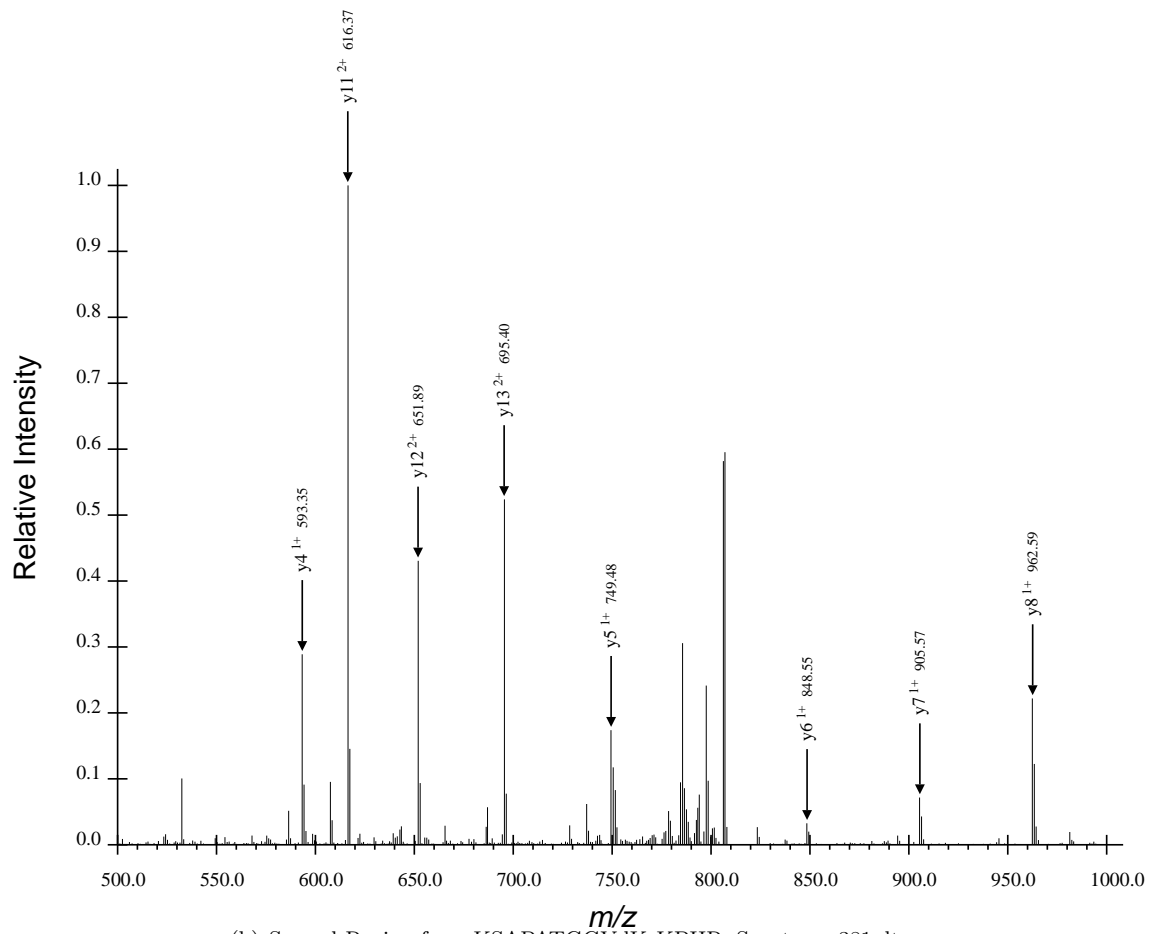

(b) Second Region for rrKSAPATGGVdKrKPHR, Spectrum 381.dta

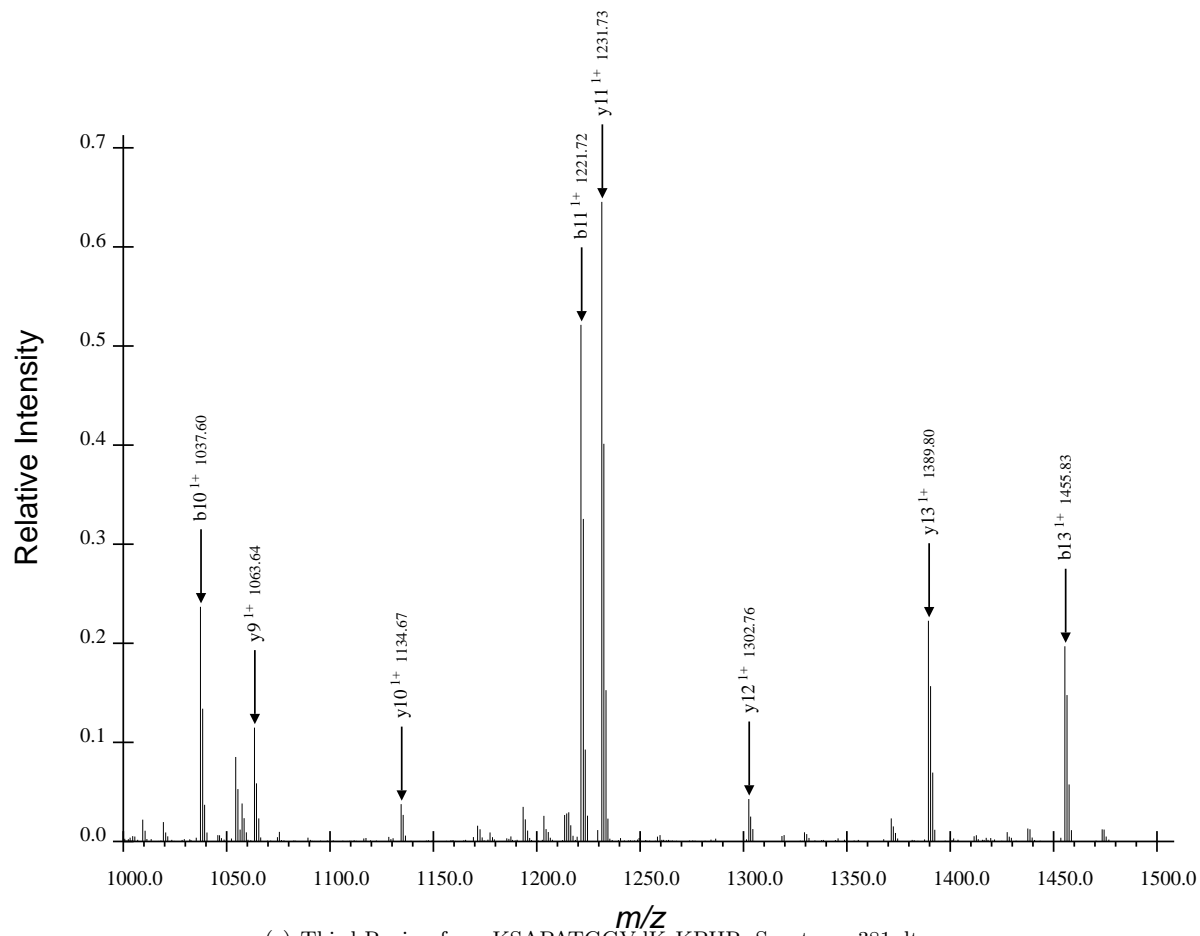

(c) Third Region for rrKSAPATGGVdKrKPHR, Spectrum 381.dta

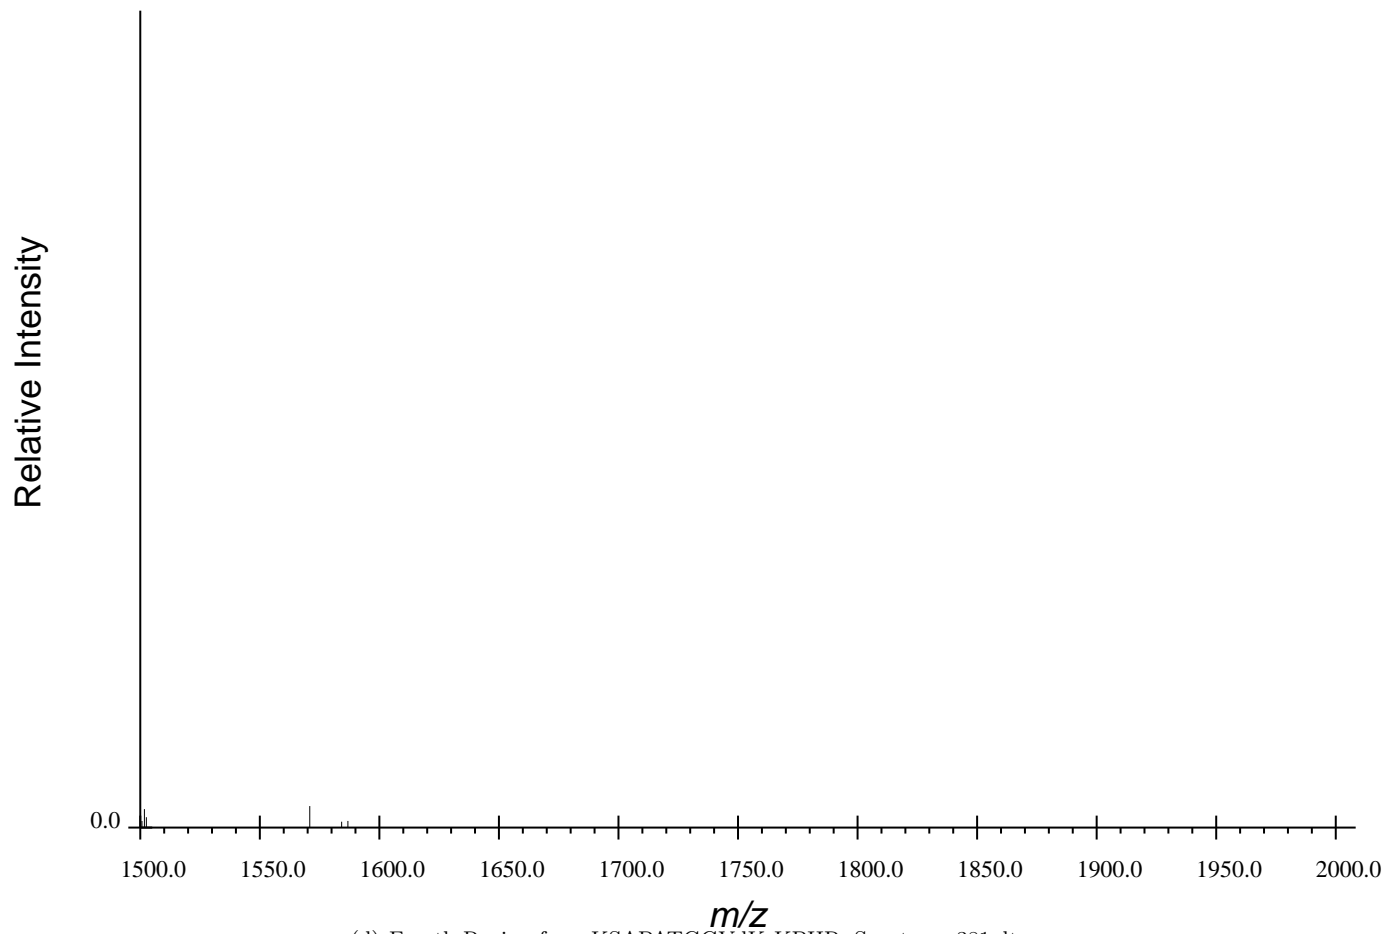

(d) Fourth Region for rrKSAPATGGVdKrKPHR, Spectrum 381.dta

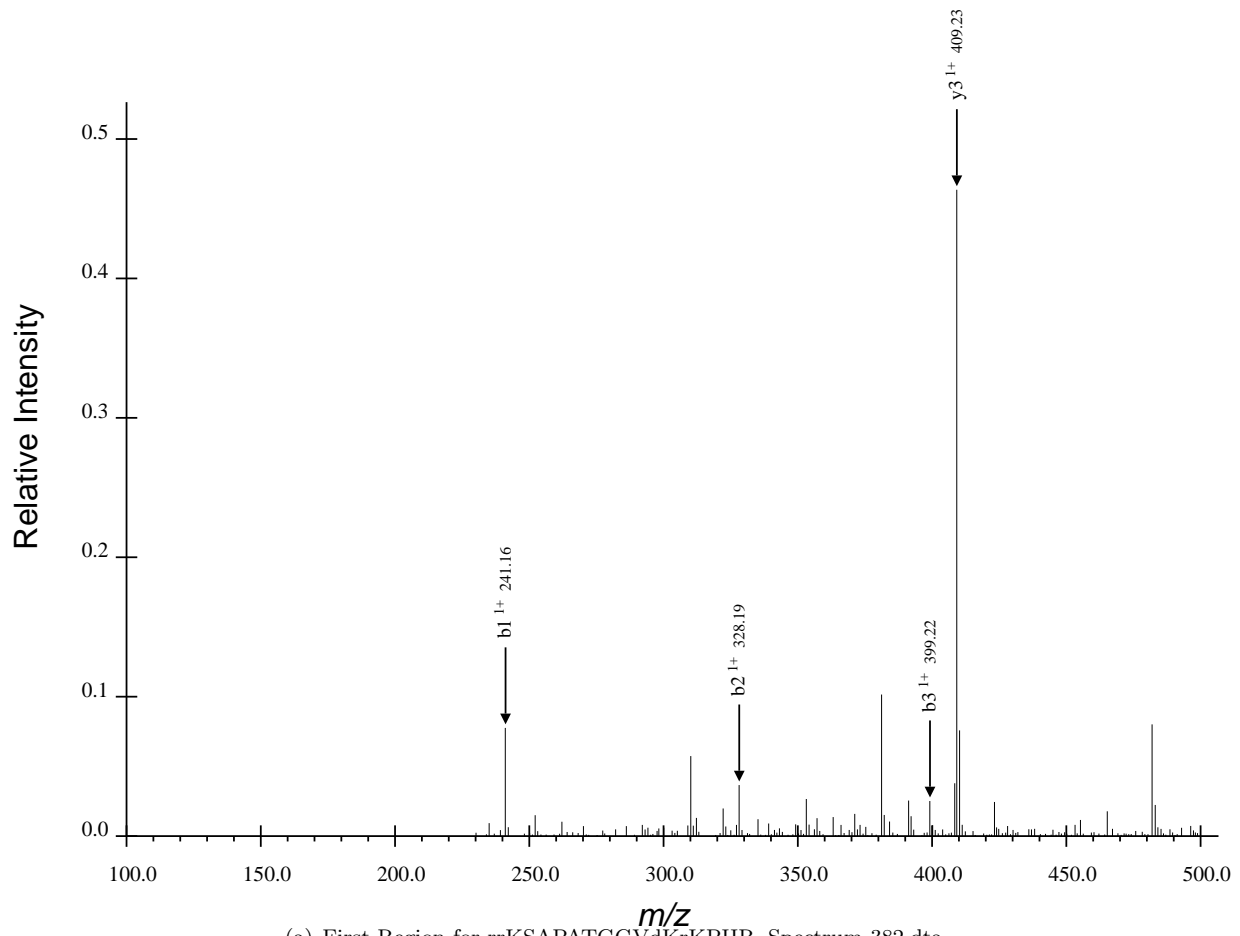

(a) First Region for rrKSAPATGGVdKrKPHR, Spectrum 382.dta

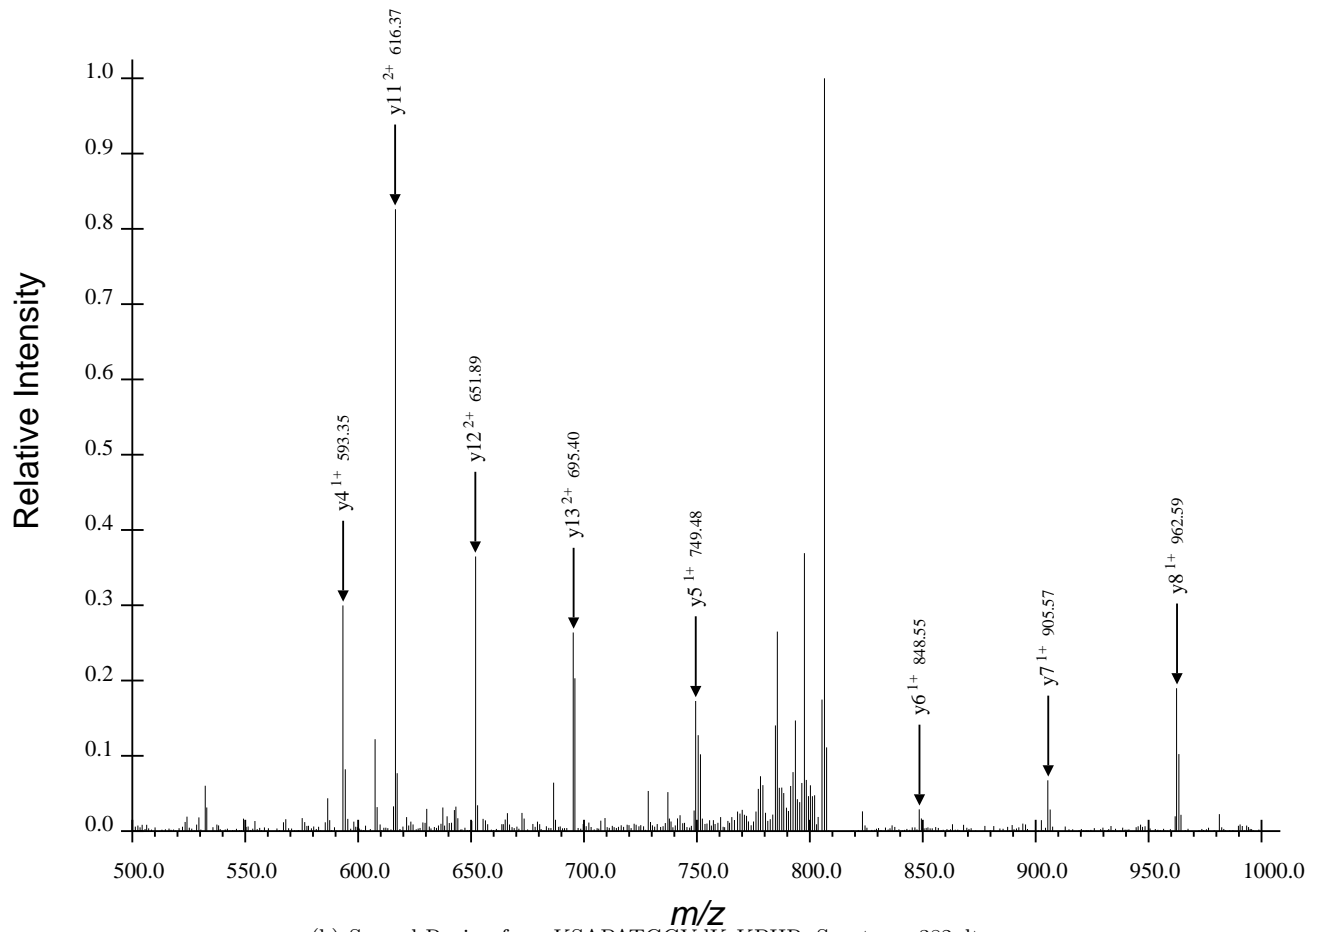

(b) Second Region for rrKSAPATGGVdKrKPHR, Spectrum 382.dta

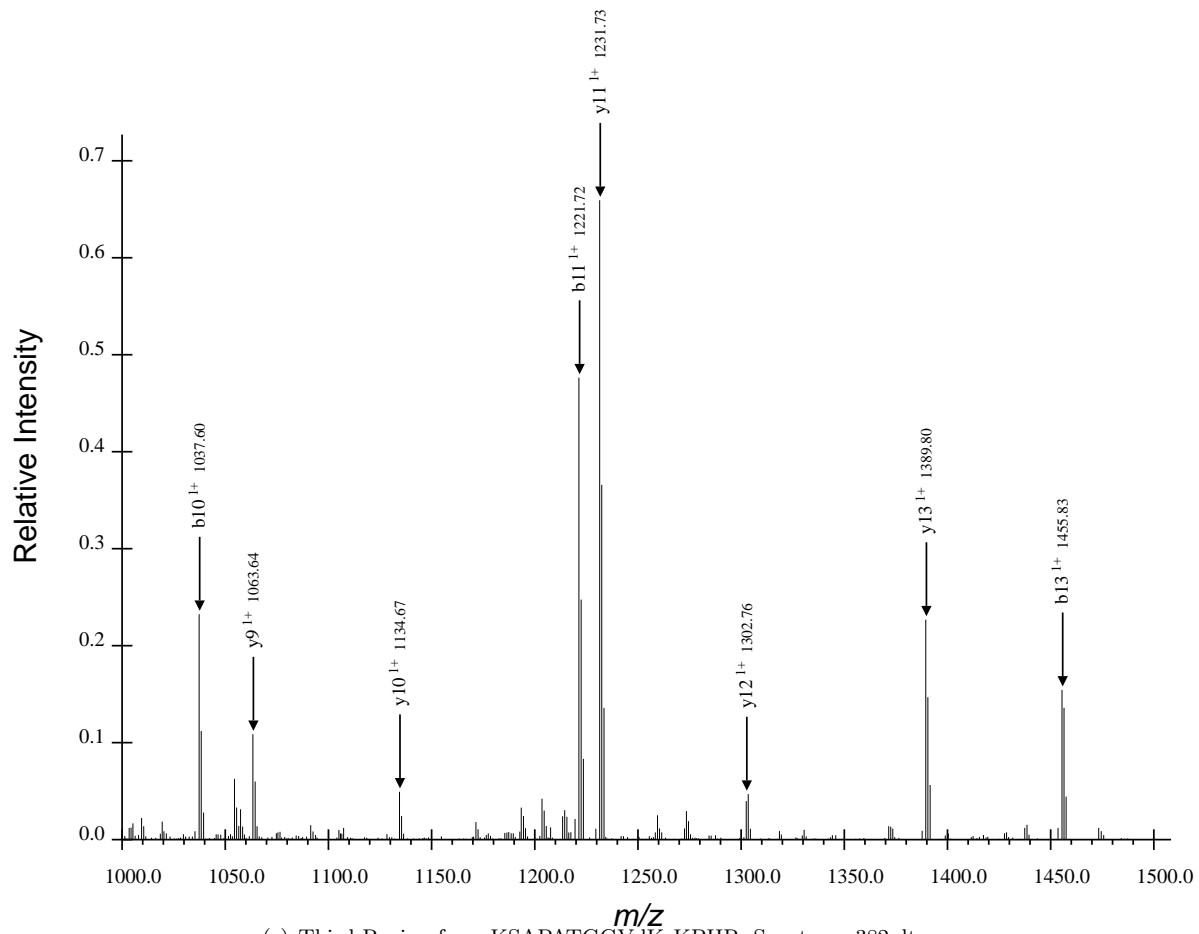

(c) Third Region for rrKSAPATGGVdKrKPHR, Spectrum 382.dta

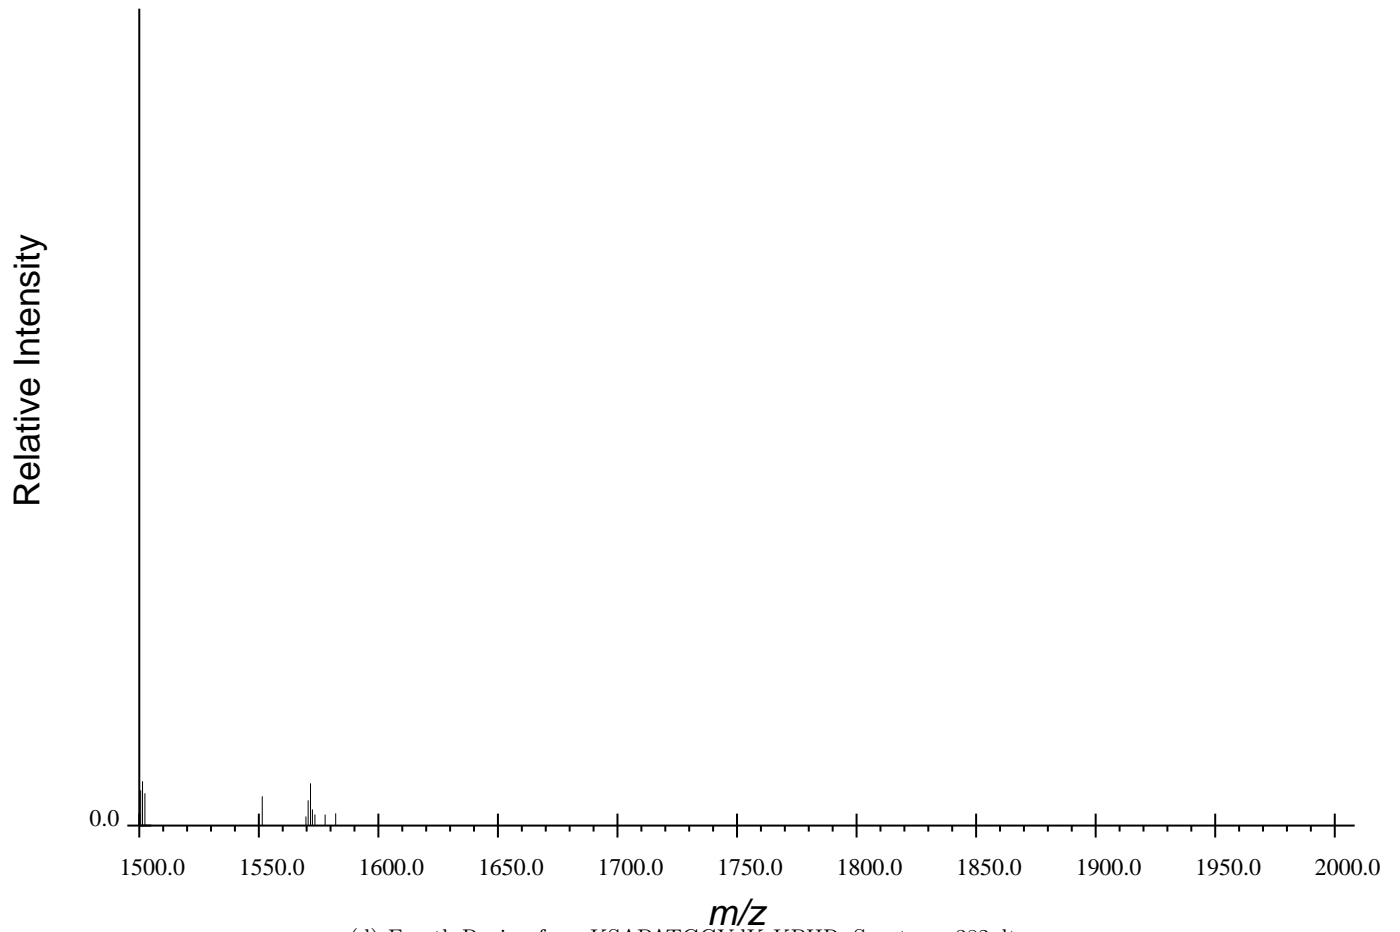

(d) Fourth Region for rrKSAPATGGVdKrKPHR, Spectrum 382.dta

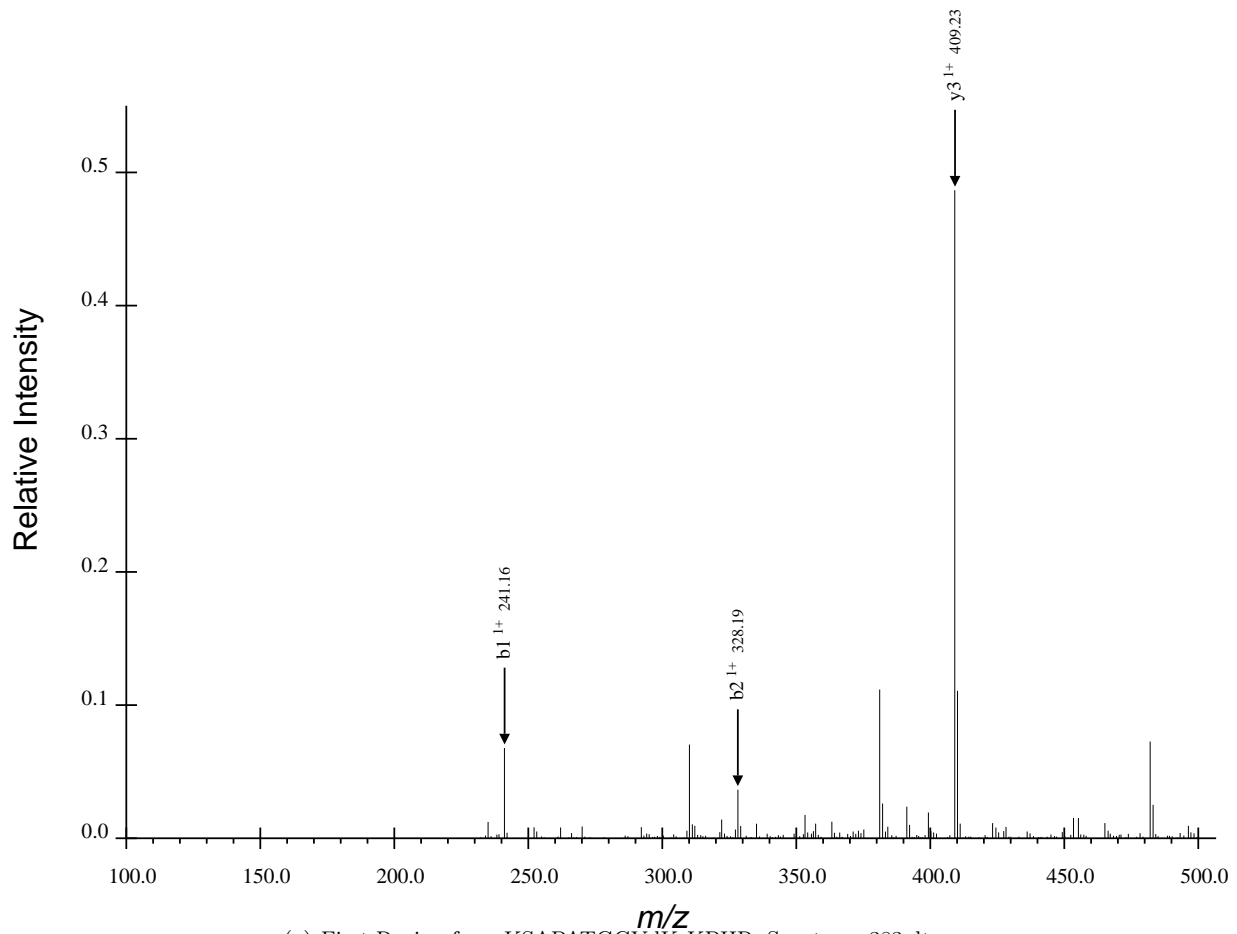

(a) First Region for rrKSAPATGGVdKrKPHR, Spectrum 383.dta

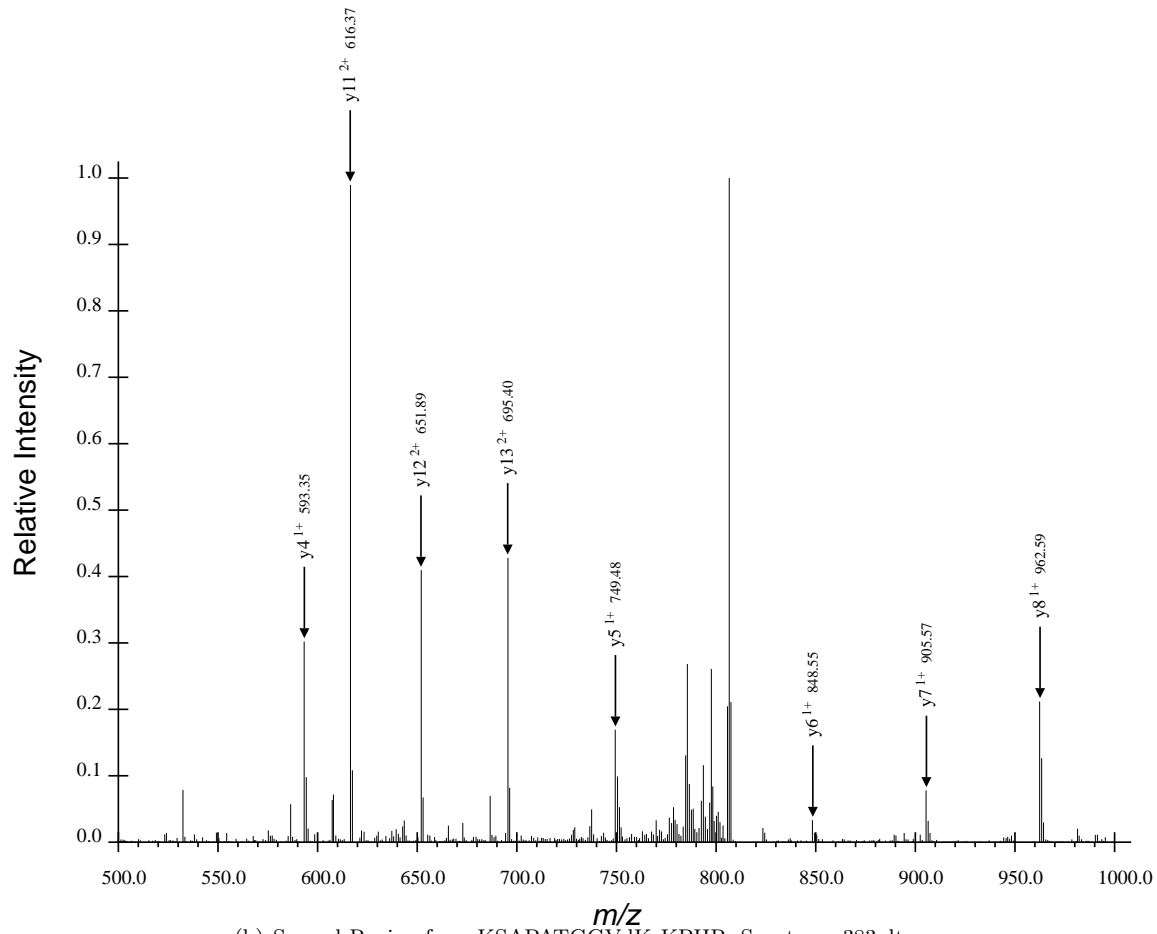

(b) Second Region for rrKSAPATGGVdKrKPHR, Spectrum 383.dta

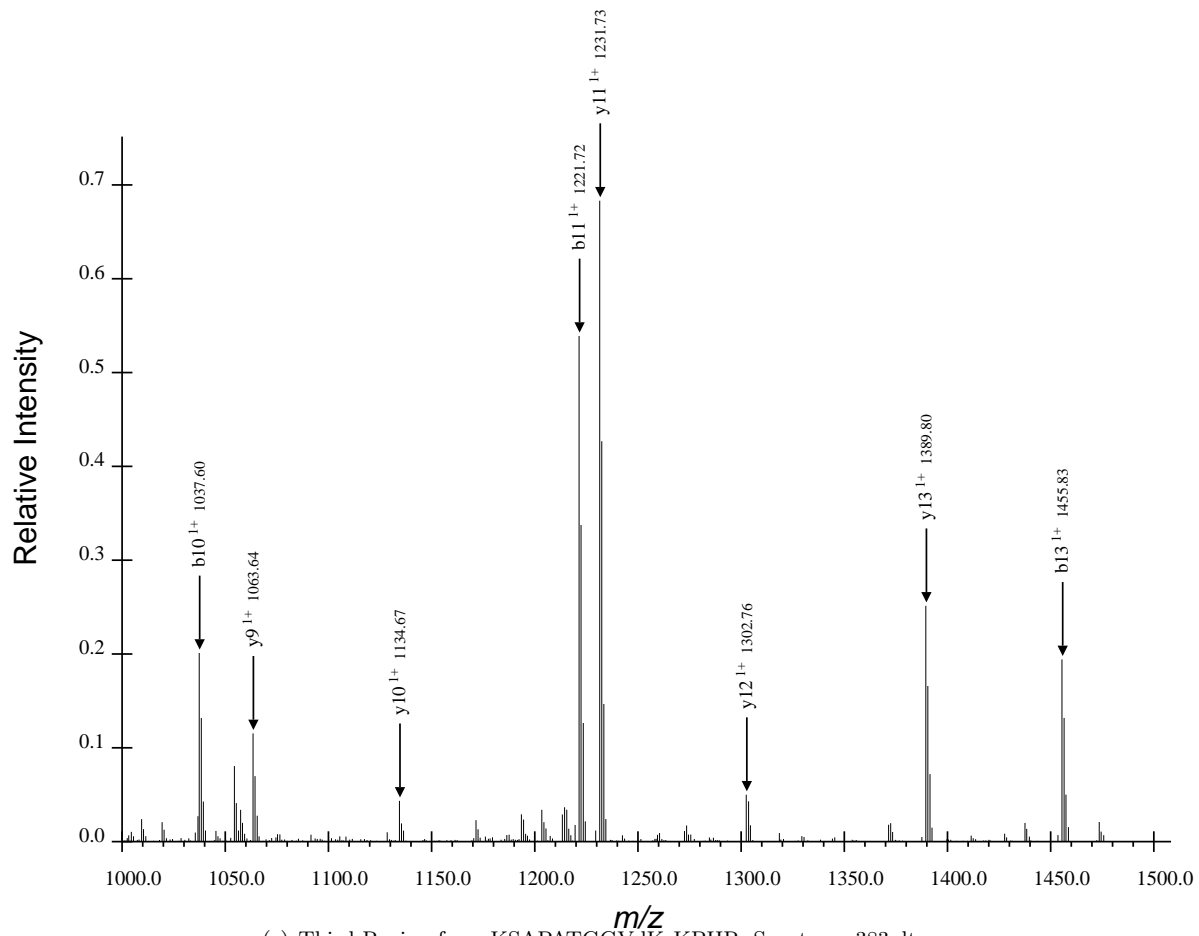

(c) Third Region for rrKSAPATGGVdKrKPHR, Spectrum 383.dta

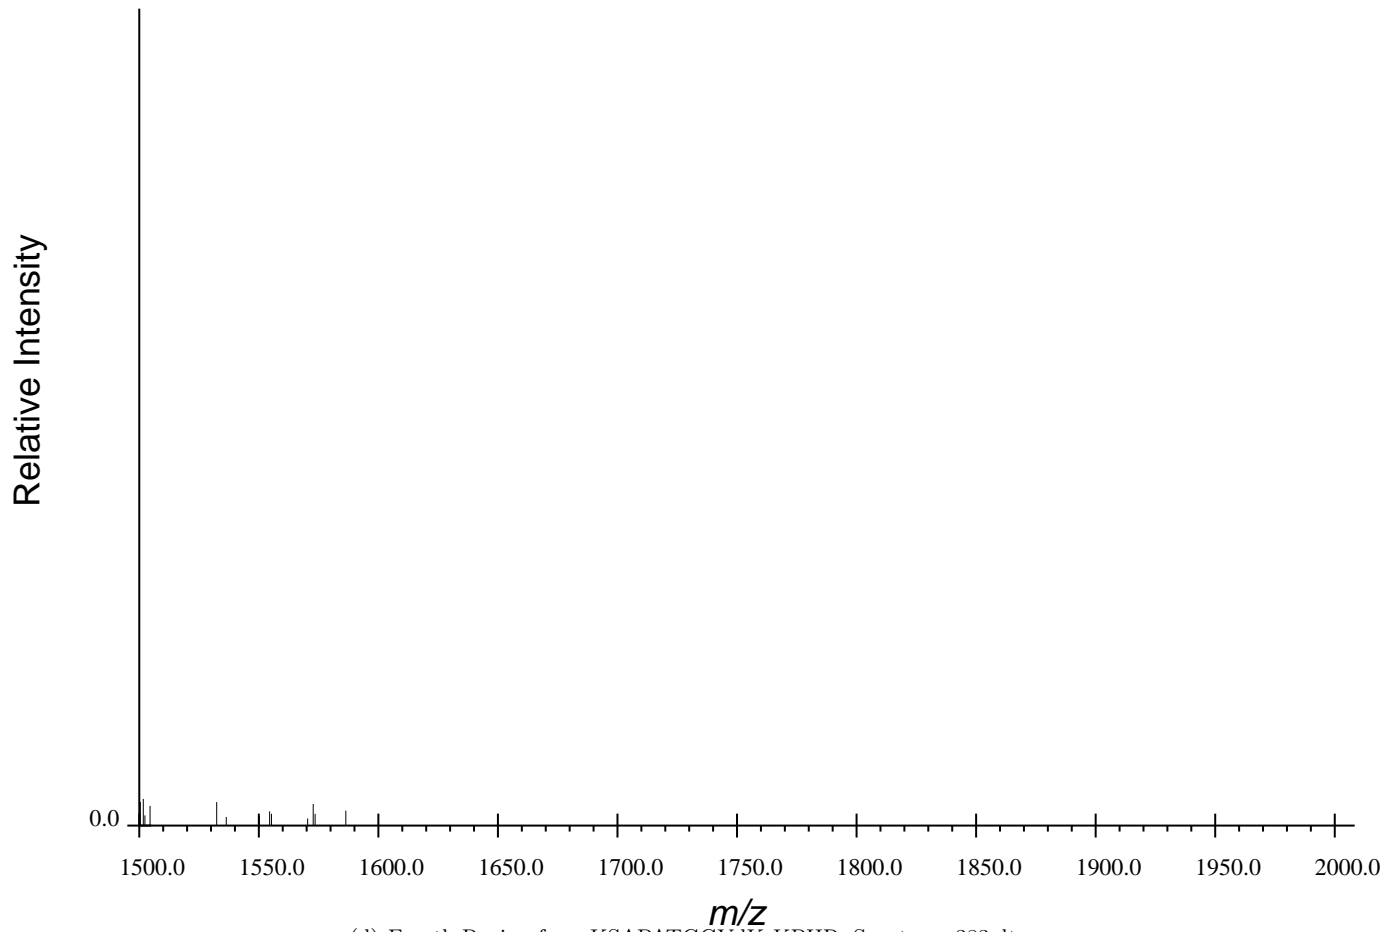

(d) Fourth Region for rrKSAPATGGVdKrKPHR, Spectrum 383.dta

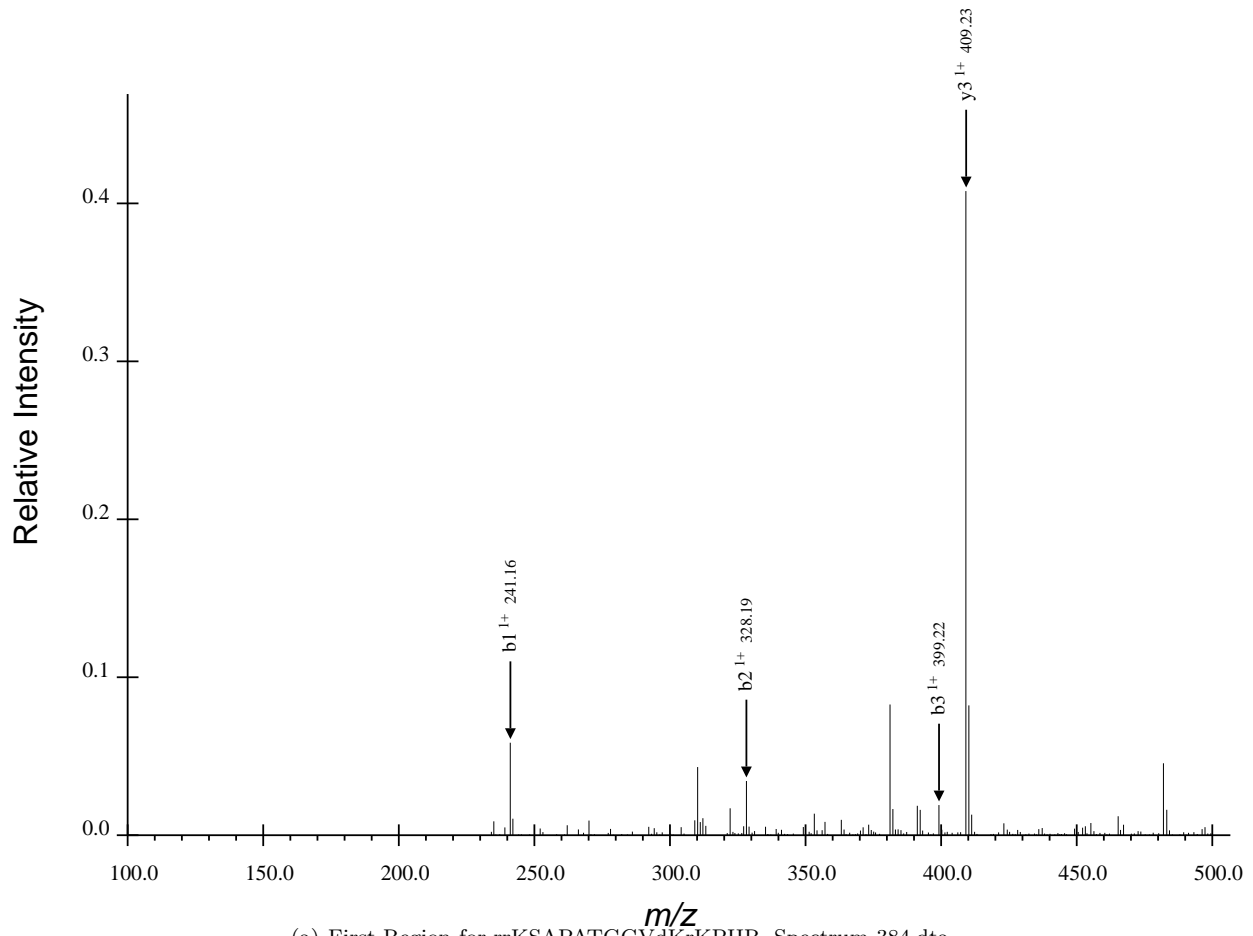

(a) First Region for rrKSAPATGGVdKrKPHR, Spectrum 384.dta

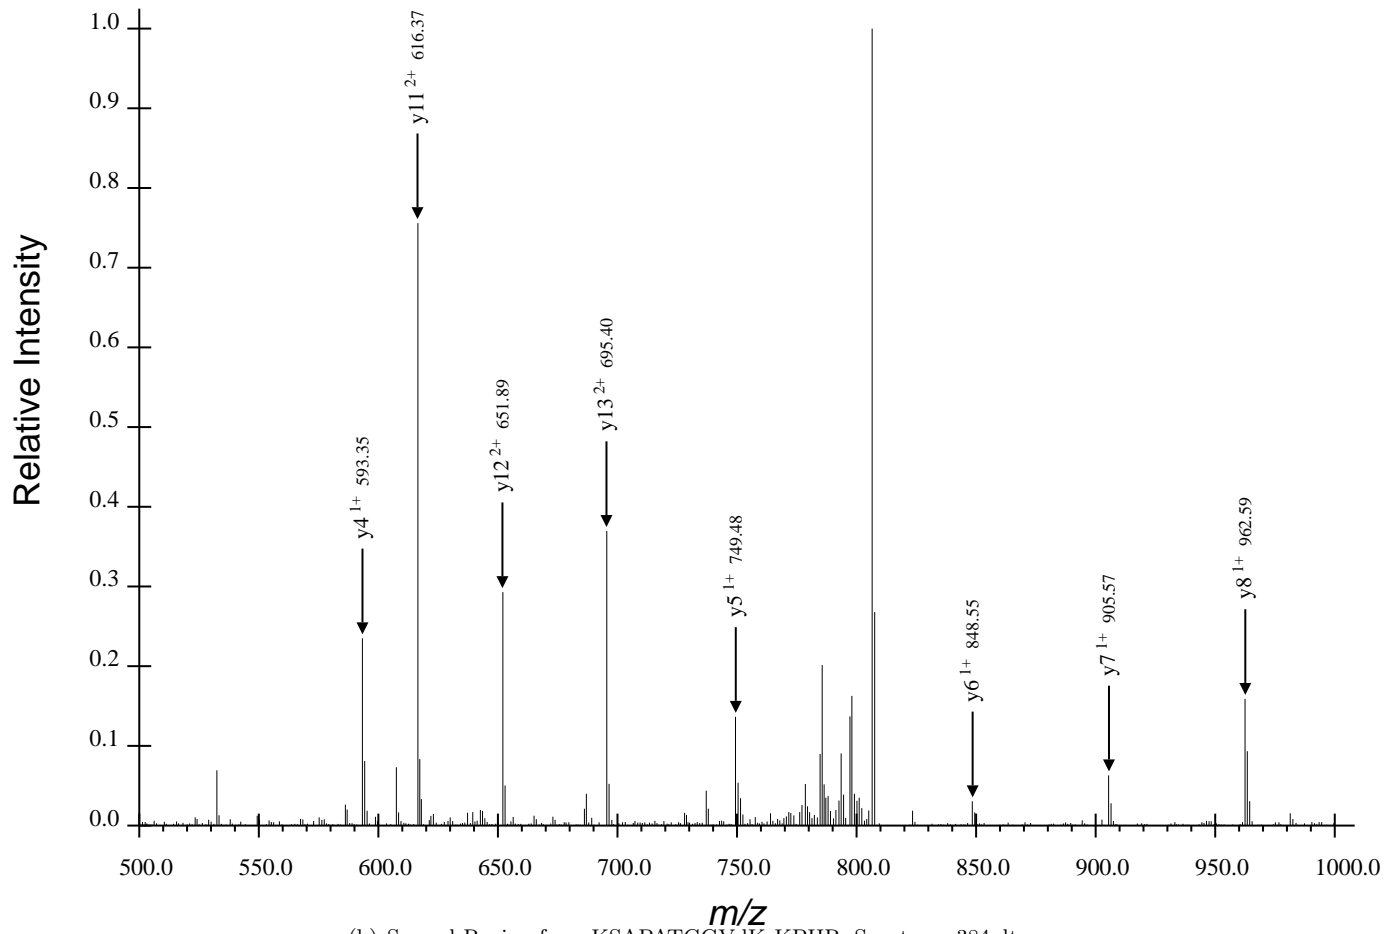

(b) Second Region for rrKSAPATGGVdKrKPHR, Spectrum 384.dta



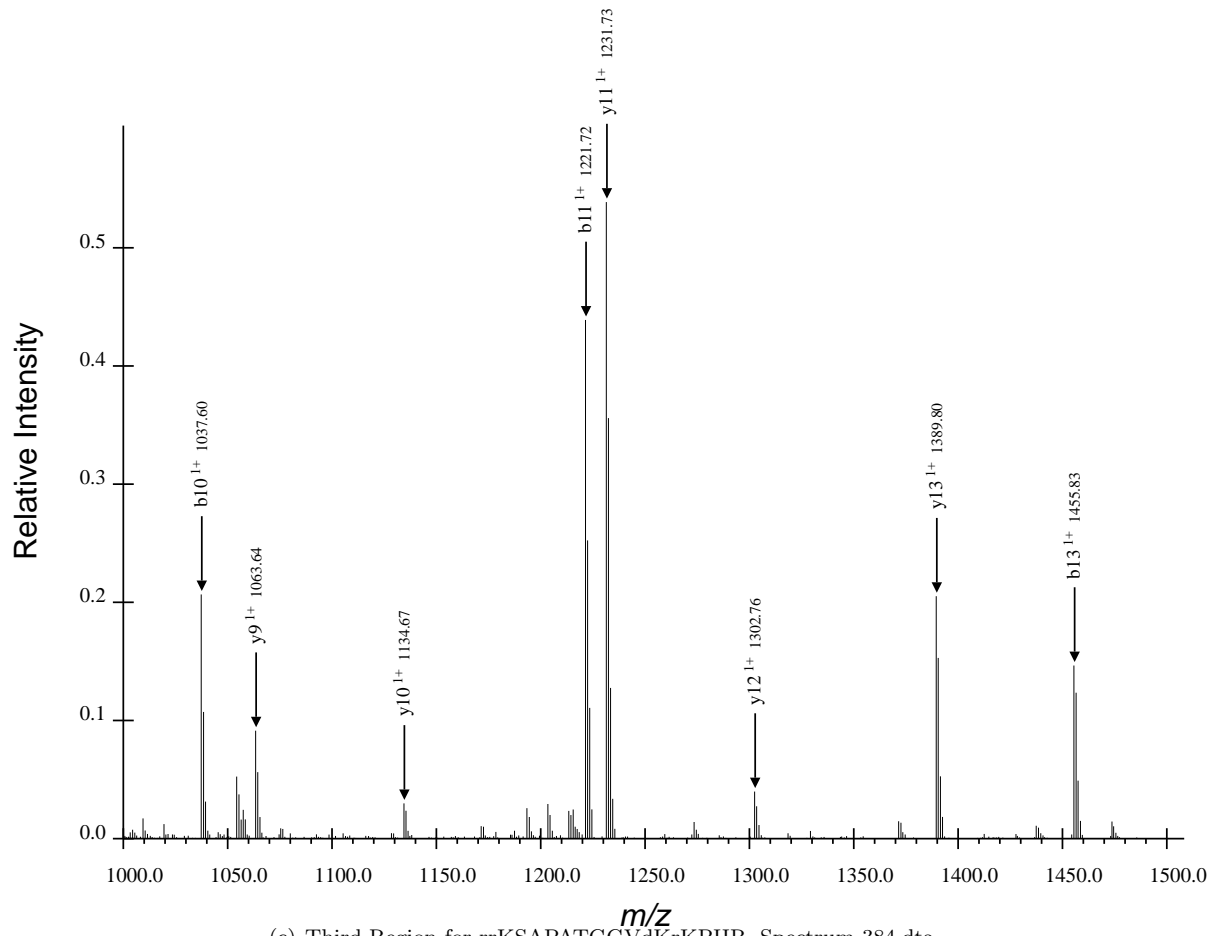

(c) Third Region for rrKSAPATGGVdKrKPHR, Spectrum 384.dta

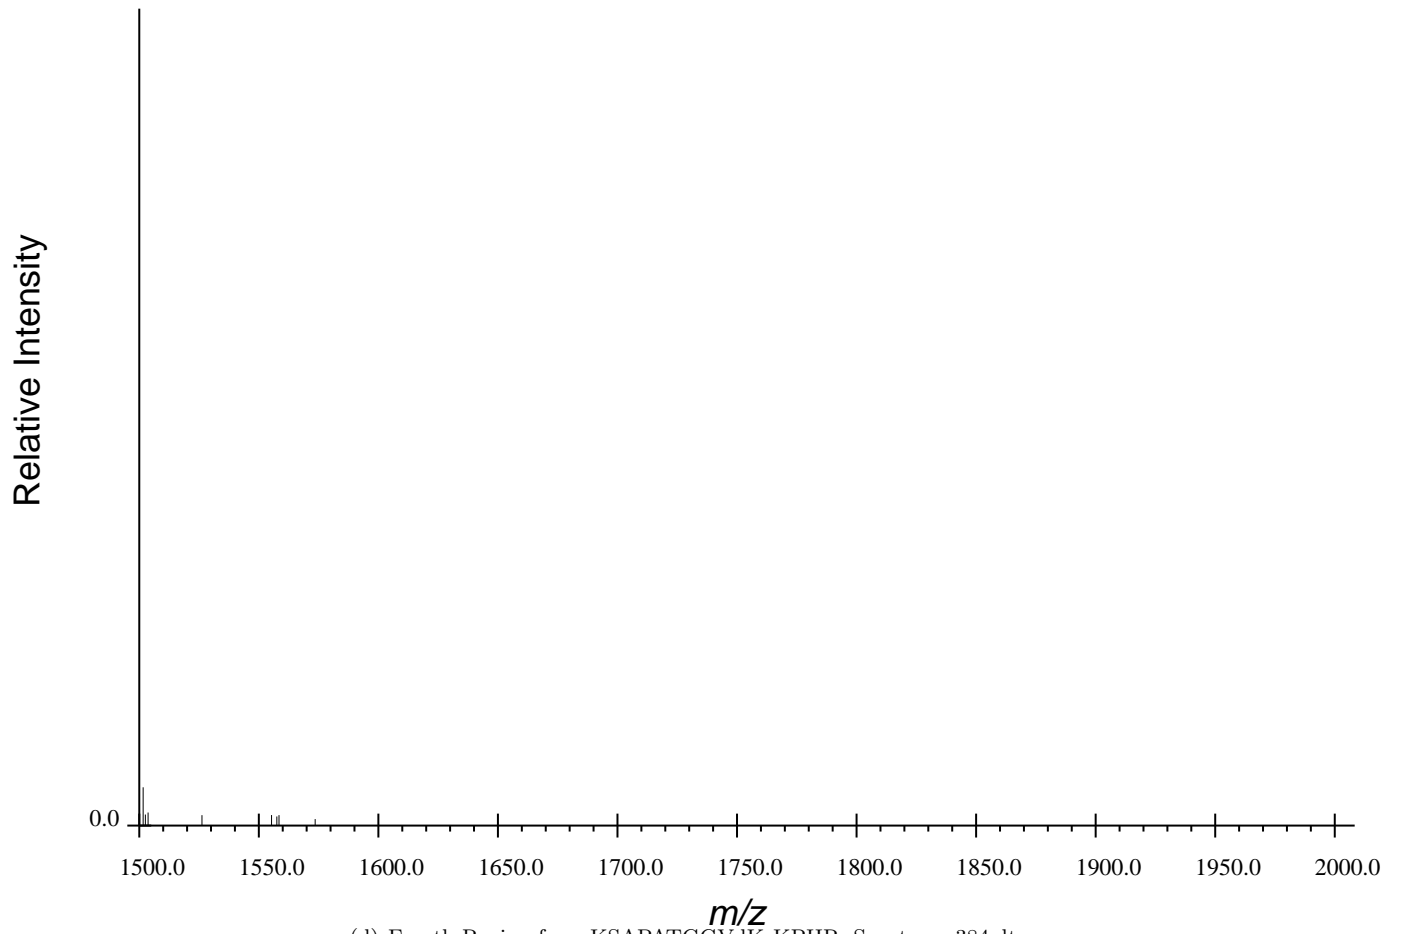

(d) Fourth Region for rrKSAPATGGVdKrKPHR, Spectrum 384.dta

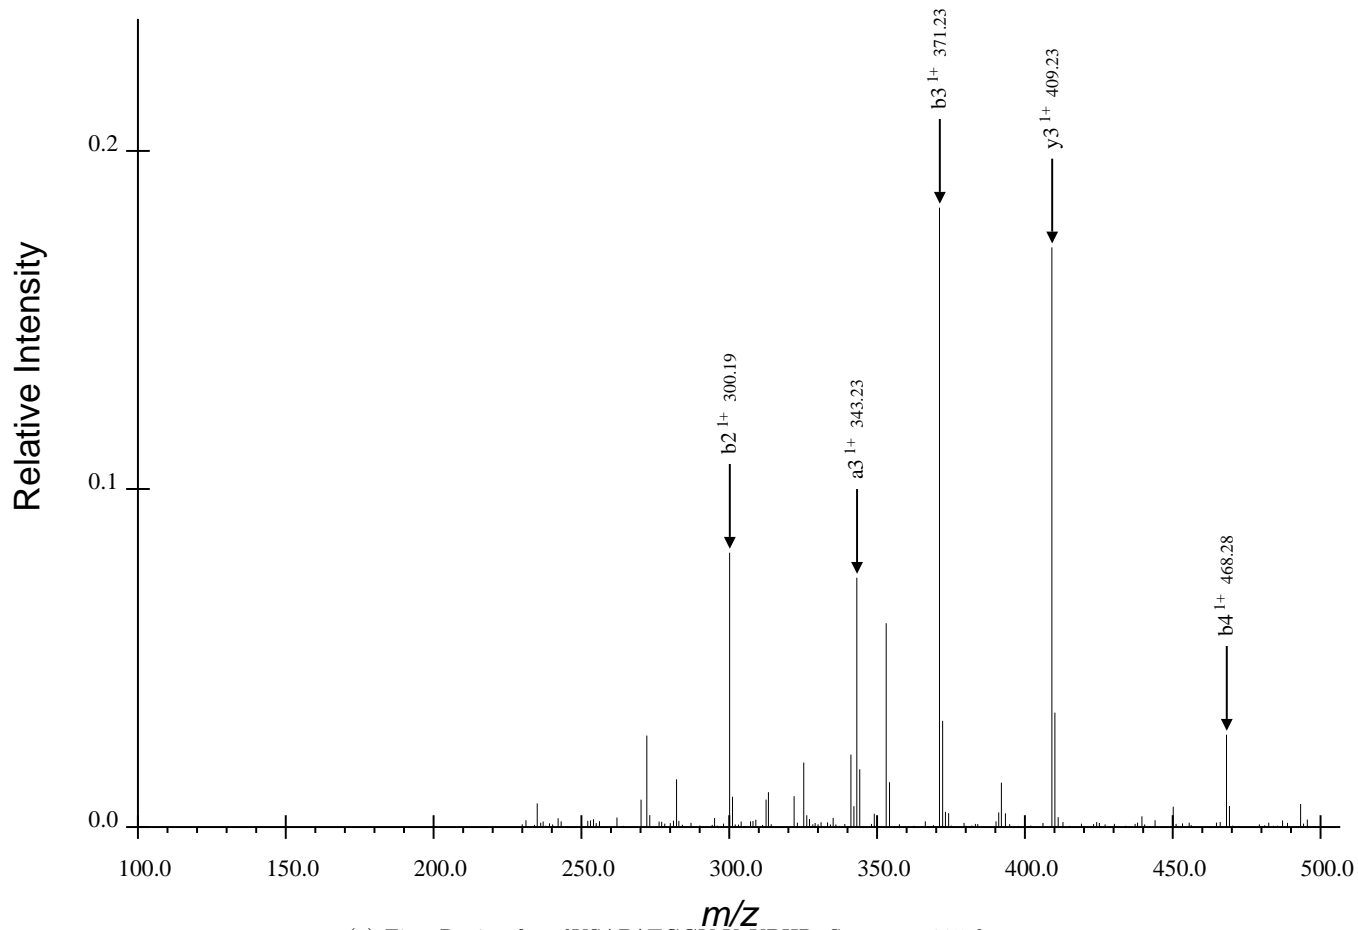

(a) First Region for rdKSAPATGGVrKrKPHR, Spectrum 385.dta

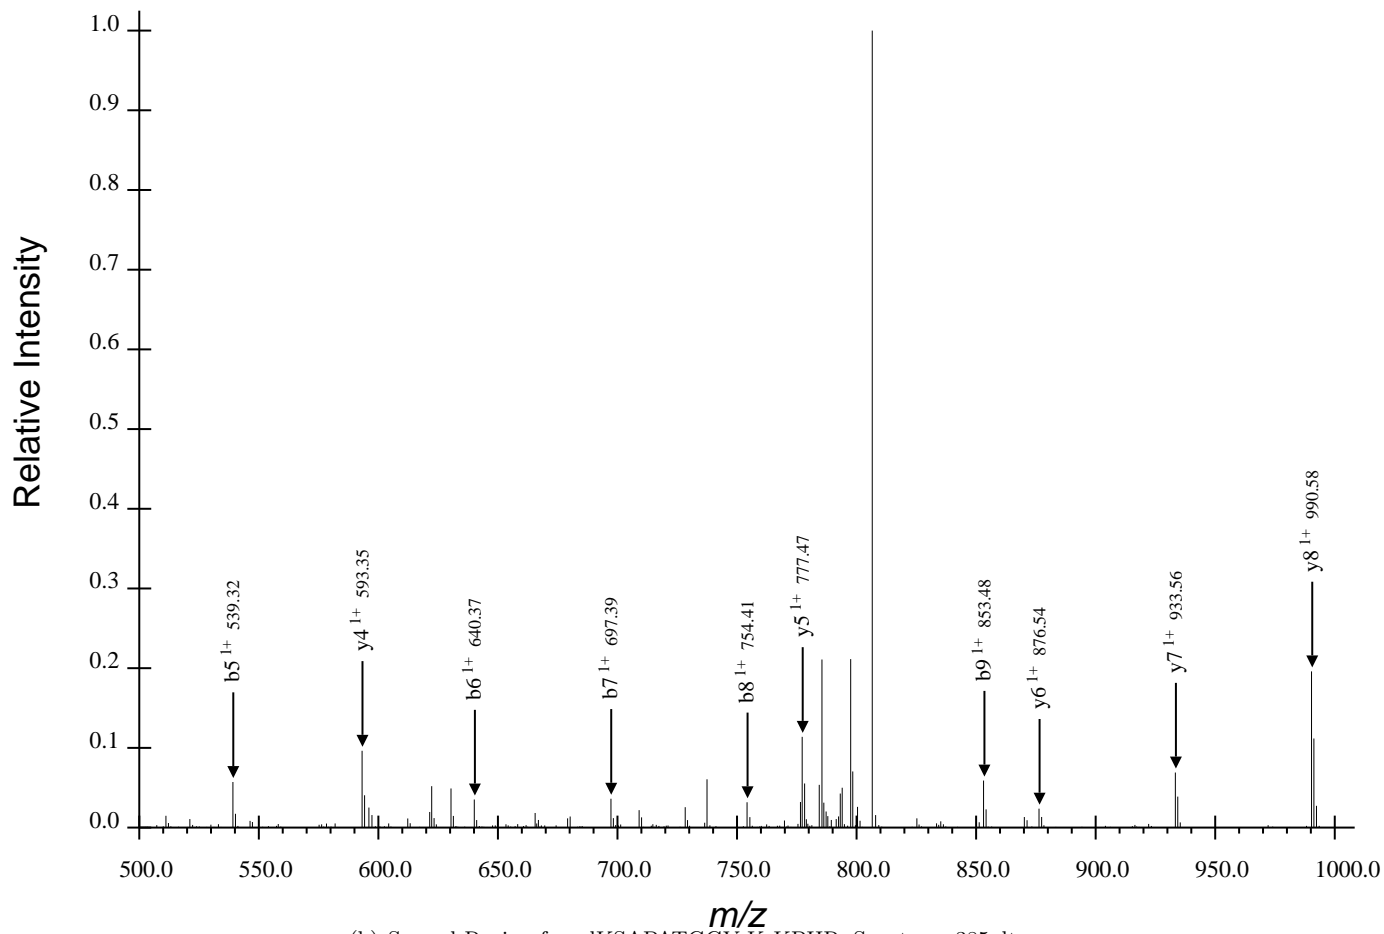

(b) Second Region for rdKSAPATGGVrKrKPHR, Spectrum 385.dta

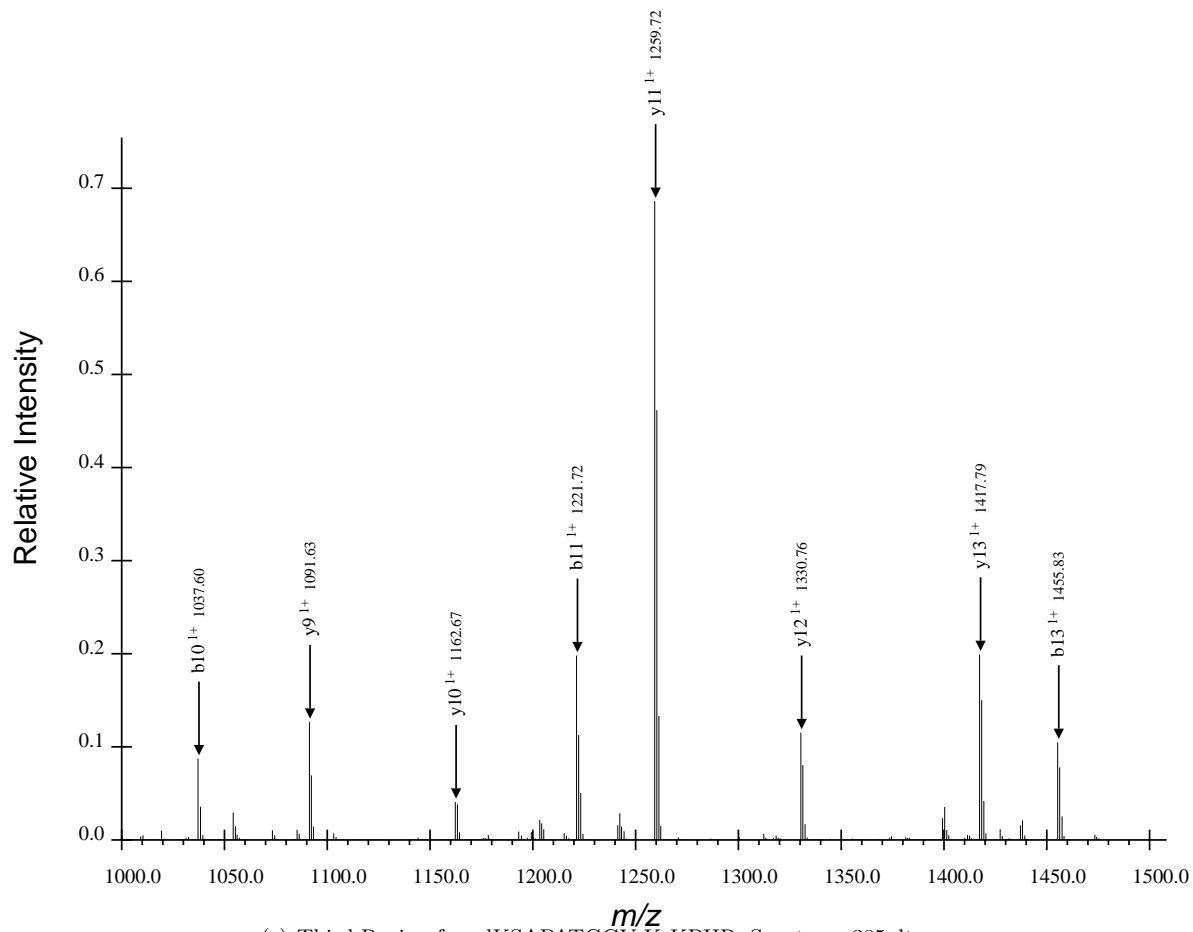

(c) Third Region for rdKSAPATGGVrKrKPHR, Spectrum 385.dta

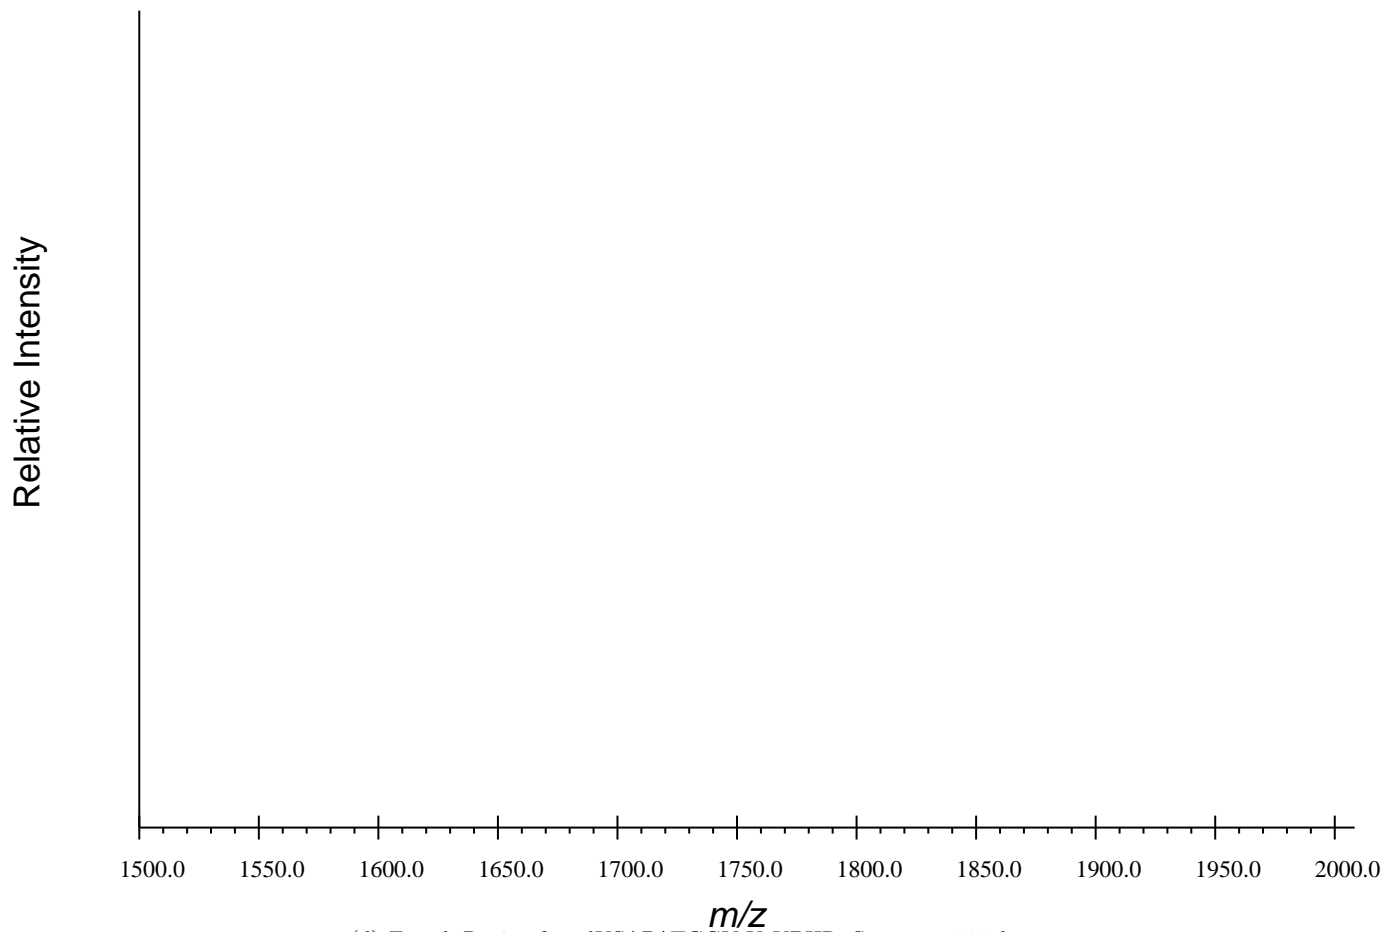

(d) Fourth Region for rdKSAPATGGVrKrKPHR, Spectrum 385.dta

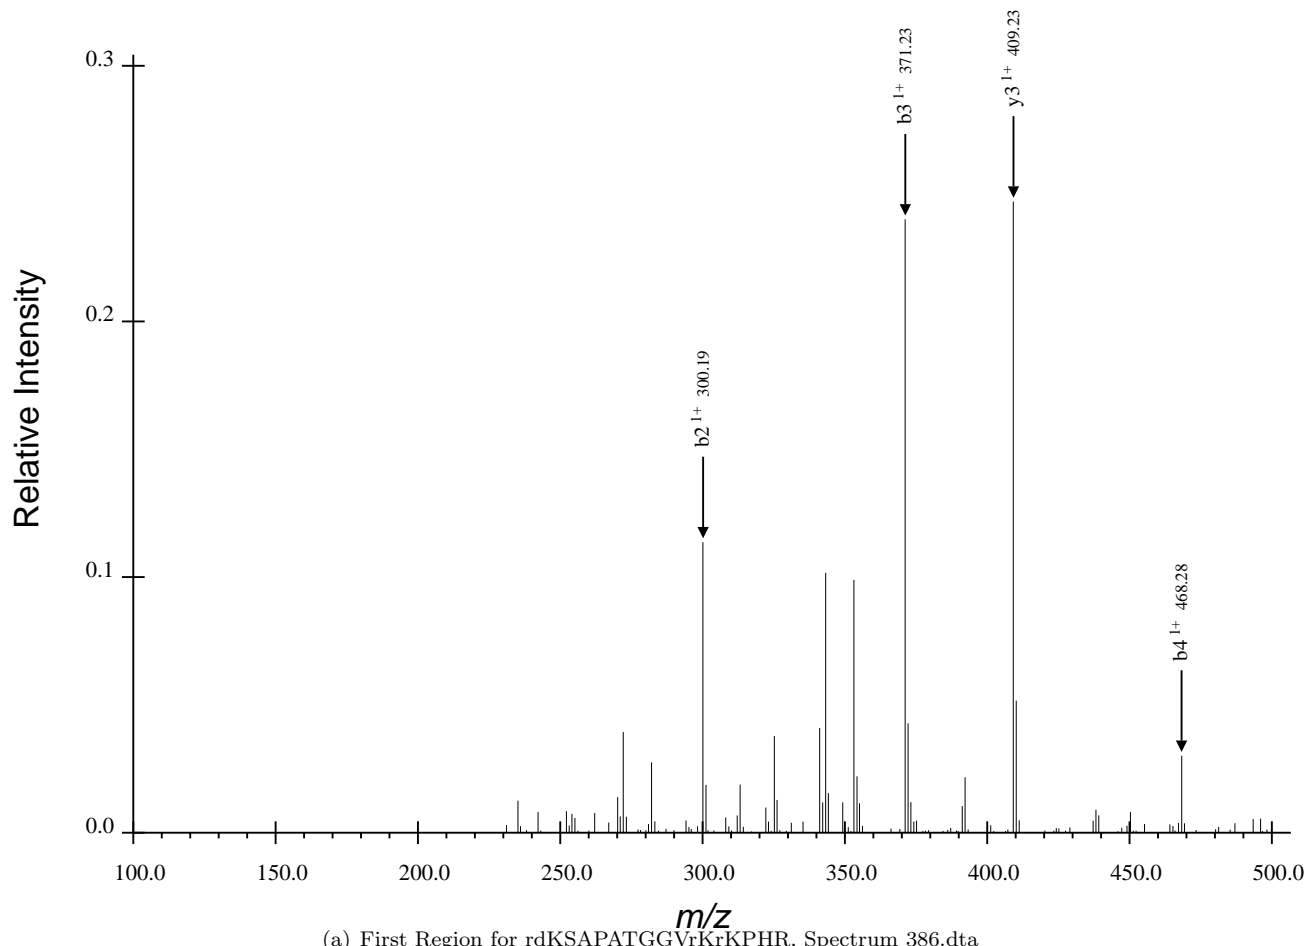

(a) First Region for rdKSAPATGGVrKrKPHR, Spectrum 386.dta

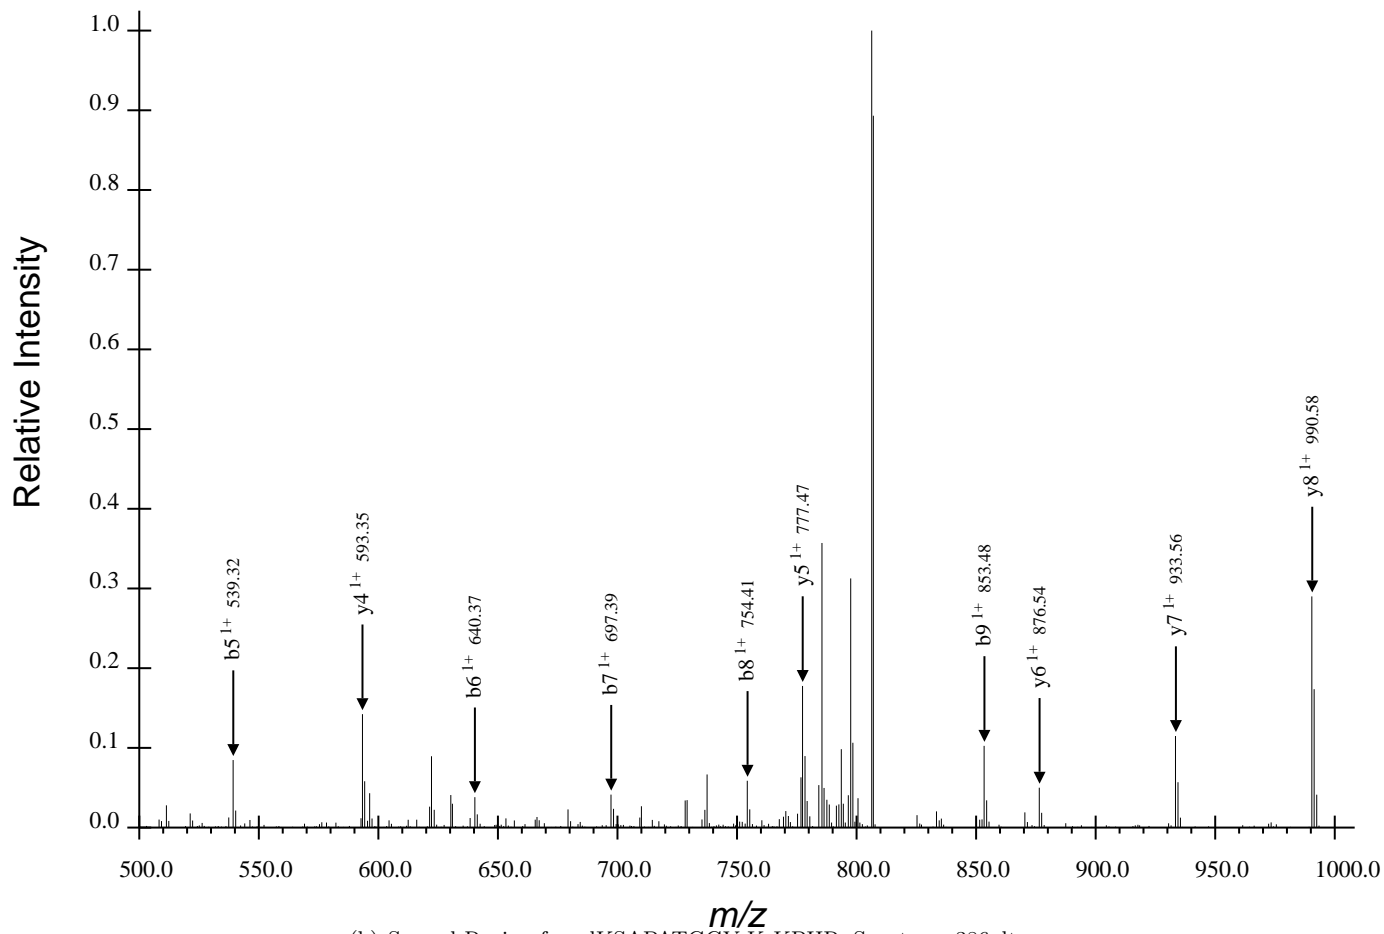

(b) Second Region for rdKSAPATGGVrKrKPHR, Spectrum 386.dta

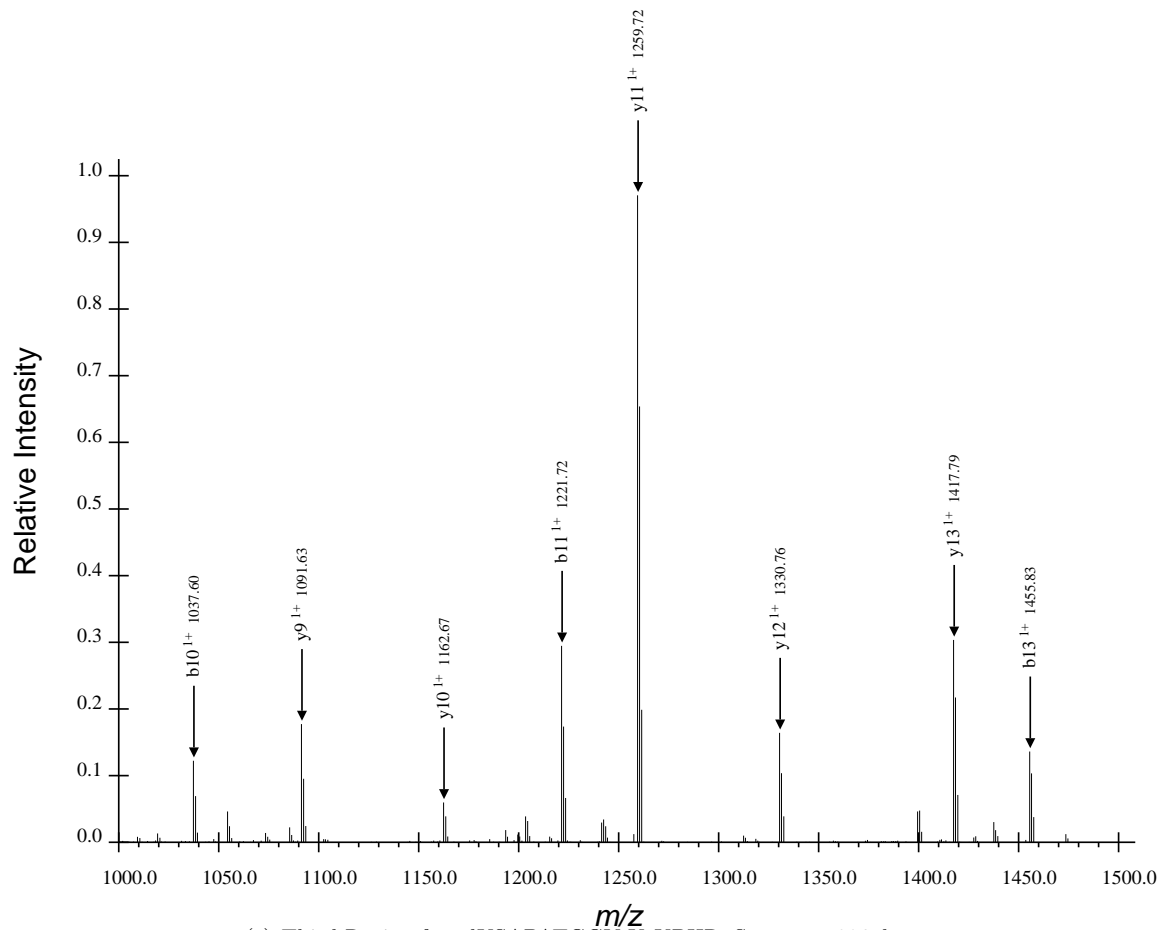

(c) Third Region for rdKSAPATGGVrKrKPHR, Spectrum 386.dta

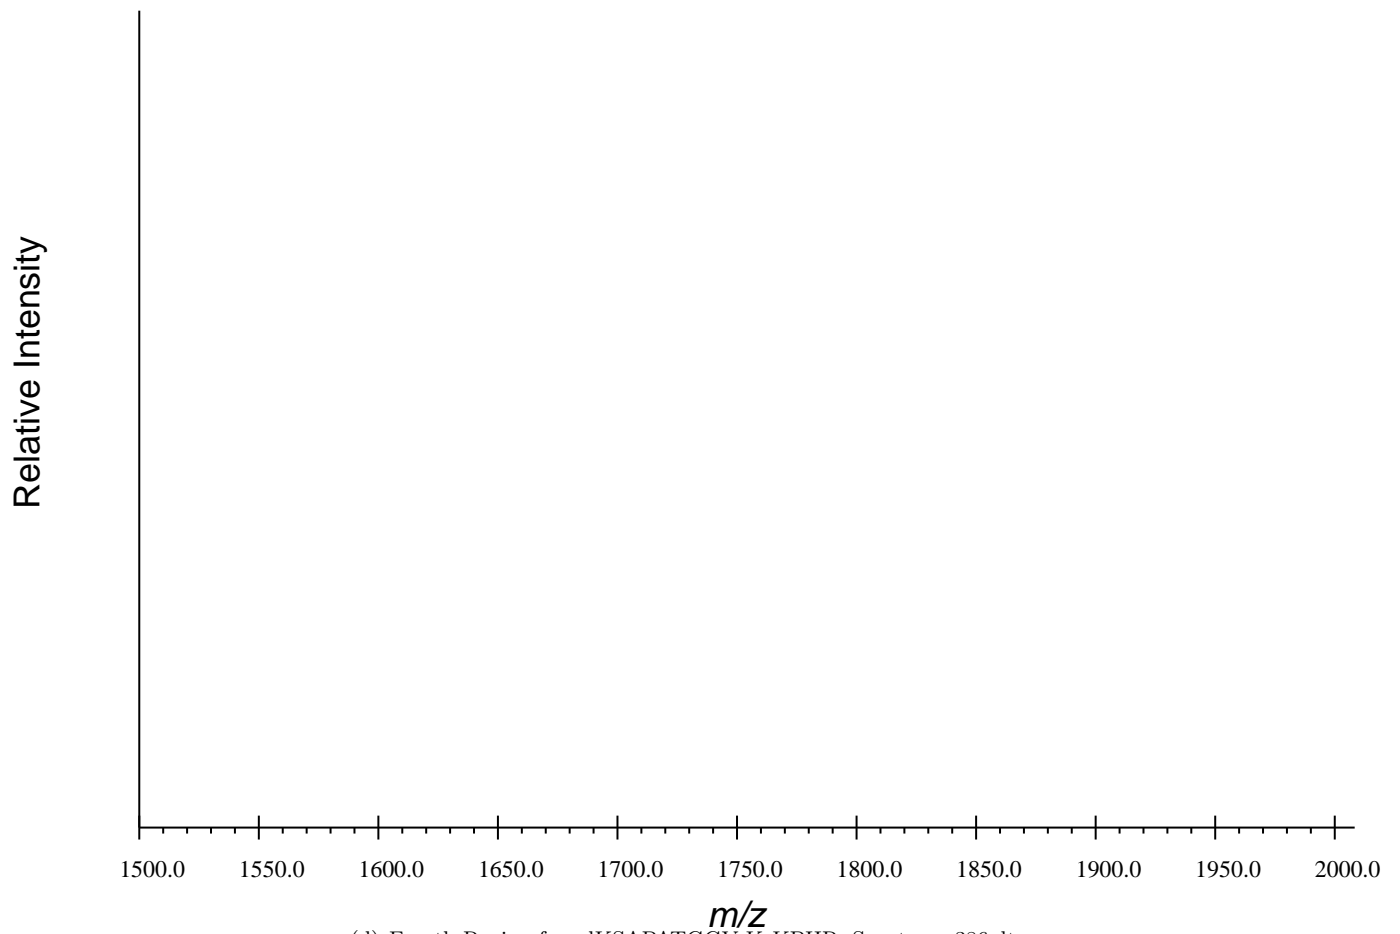

(d) Fourth Region for rdKSAPATGGVrKrKPHR, Spectrum 386.dta

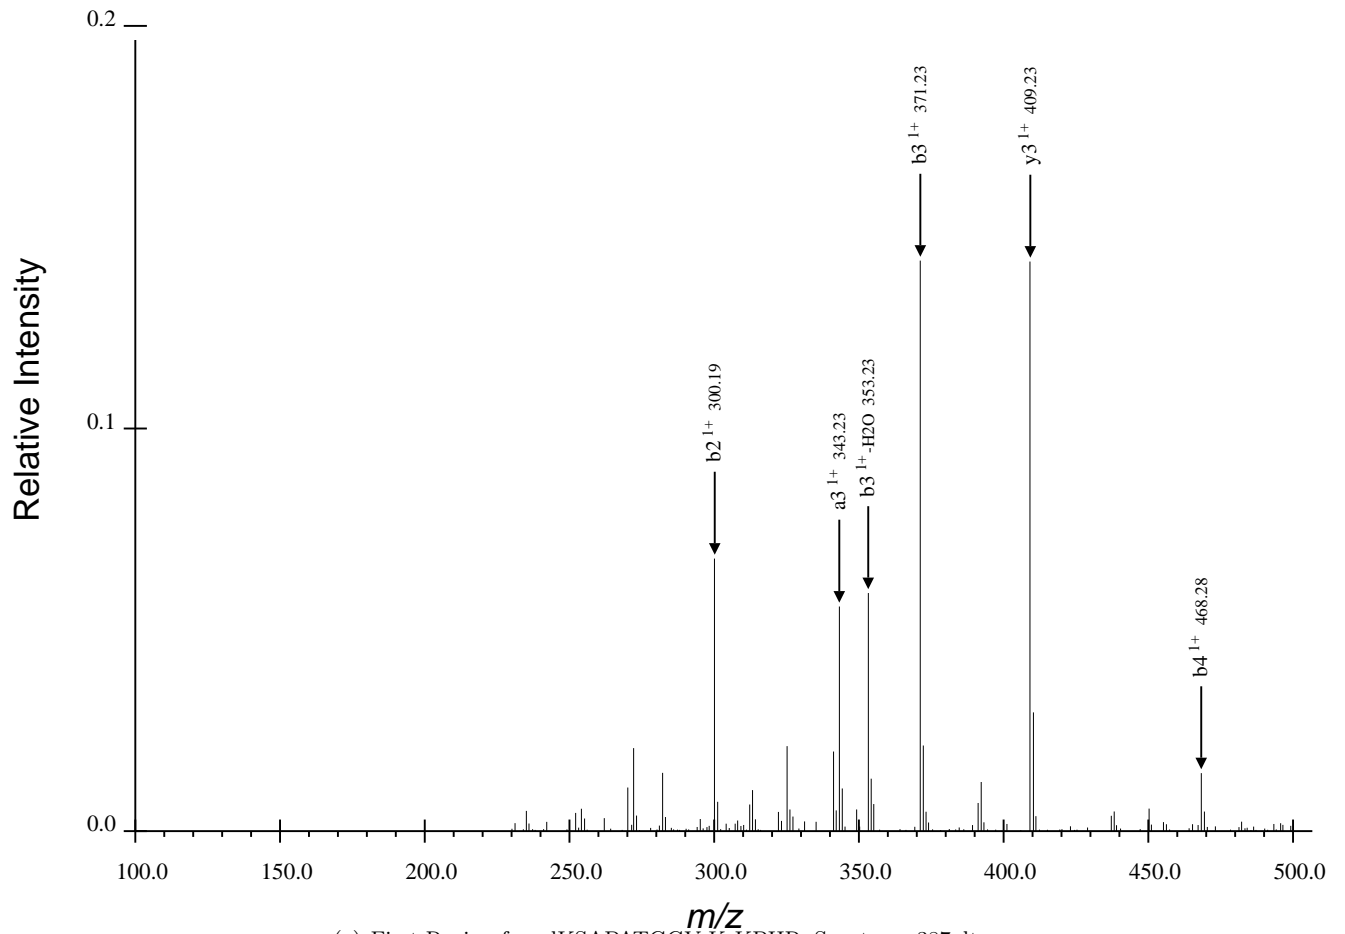

(a) First Region for rdKSAPATGGVrKrKPHR, Spectrum 387.dta

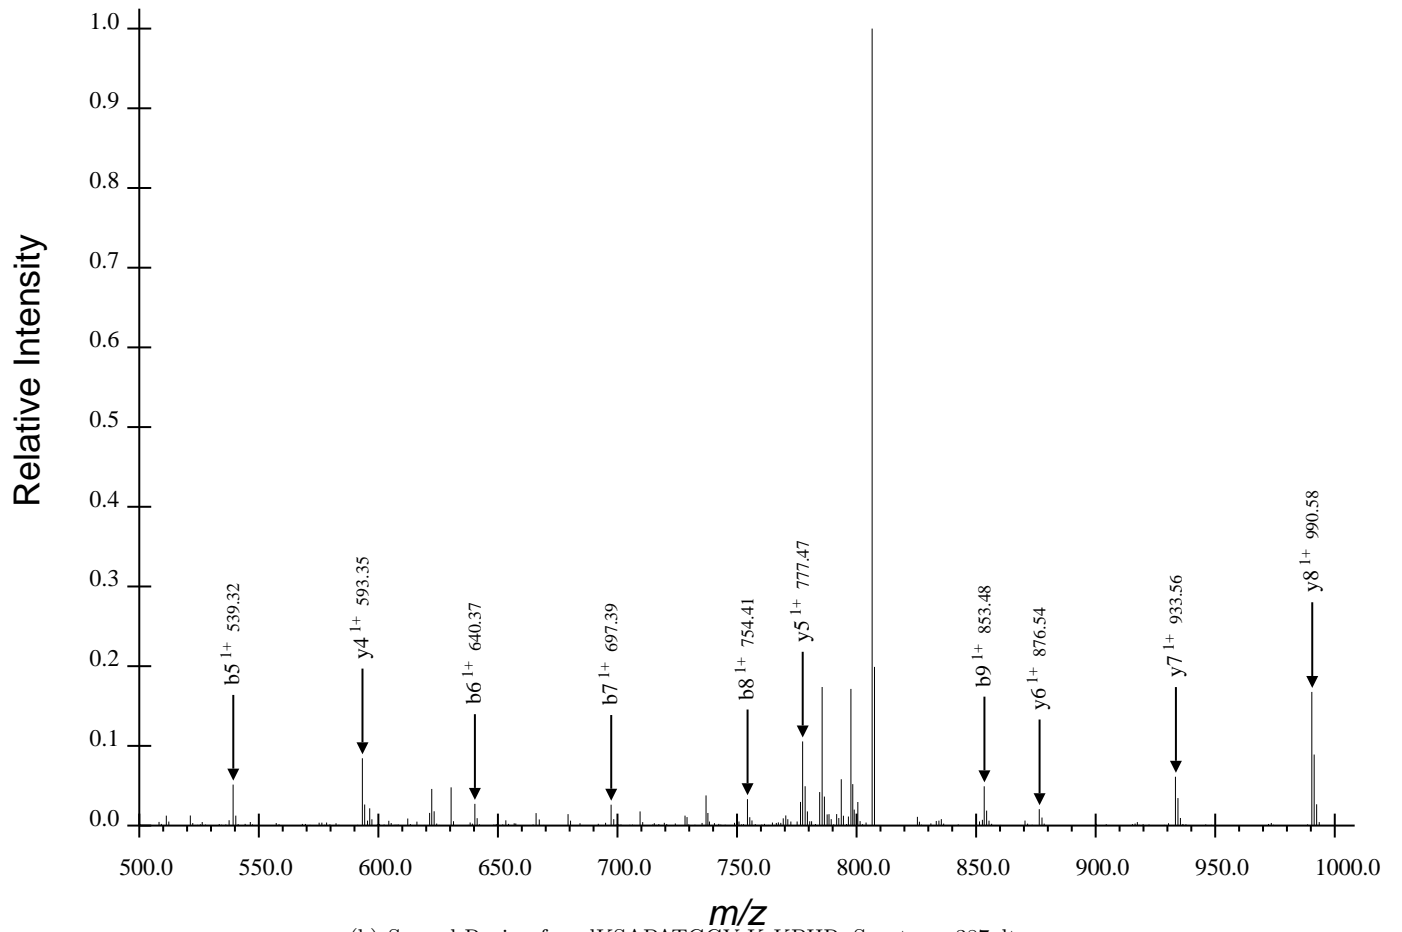

(b) Second Region for rdKSAPATGGVrKrKPHR, Spectrum 387.dta

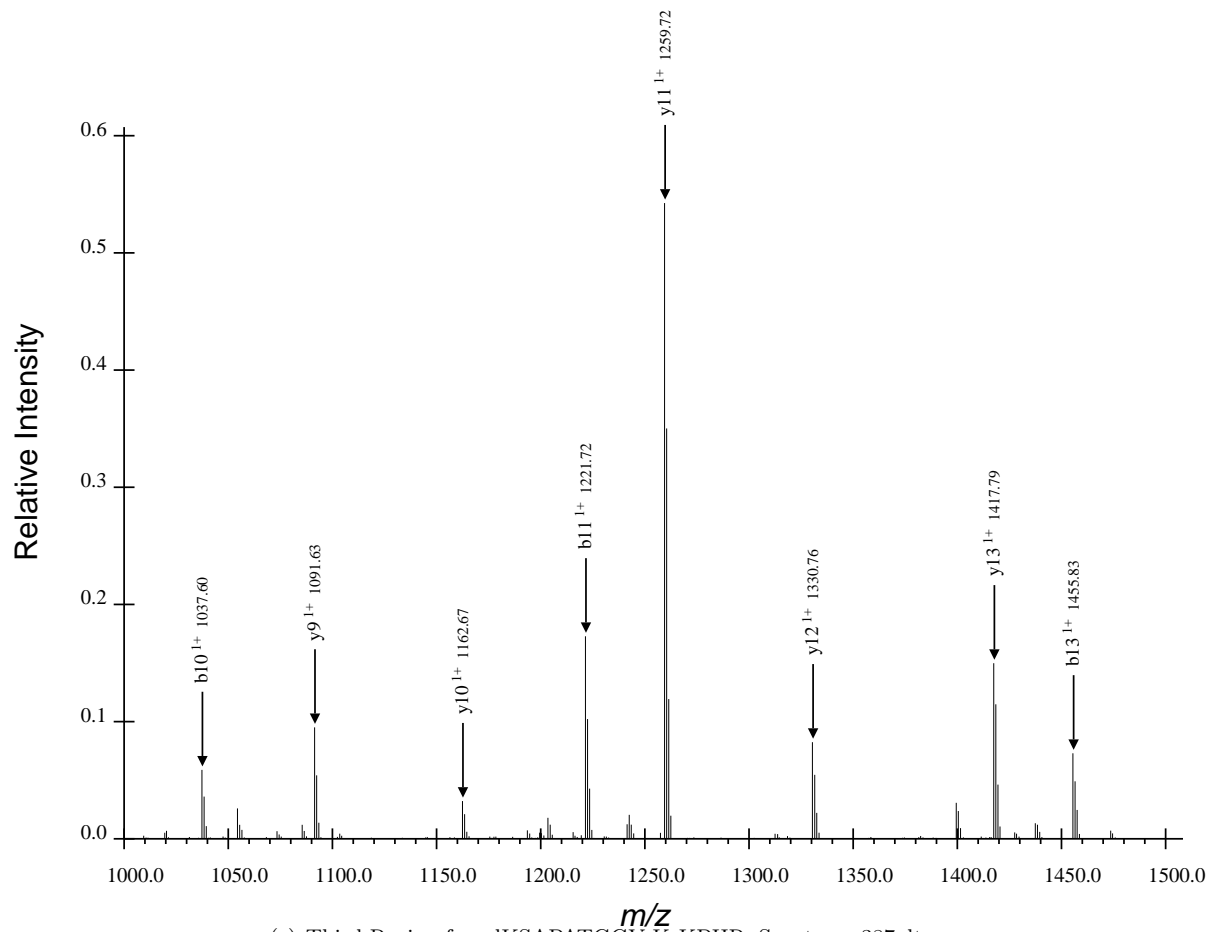

(c) Third Region for rdKSAPATGGVrKrKPHR, Spectrum 387.dta

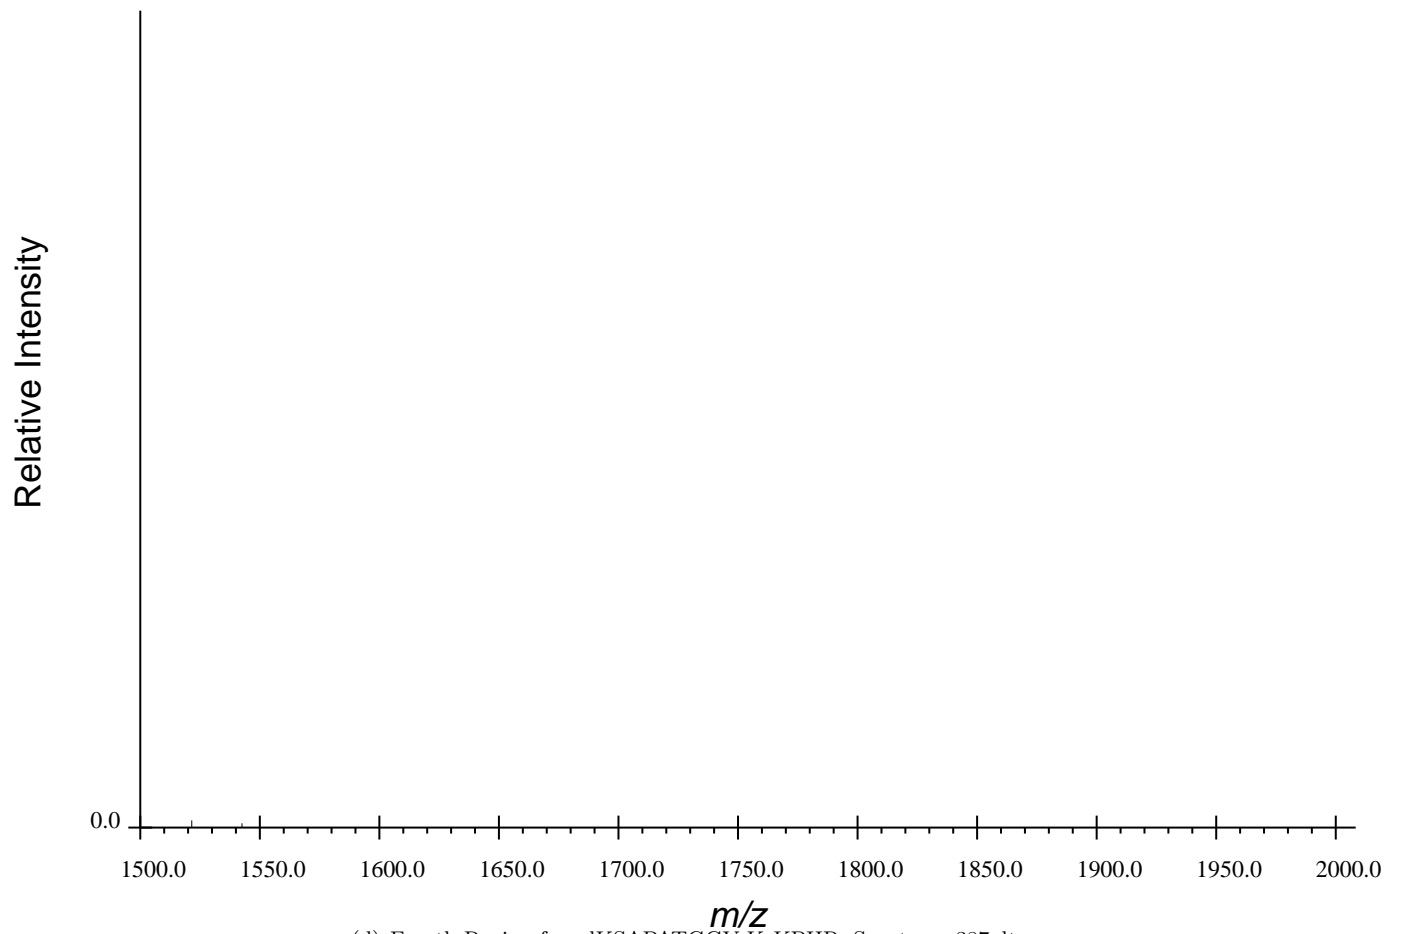

(d) Fourth Region for rdKSAPATGGVrKrKPHR, Spectrum 387.dta

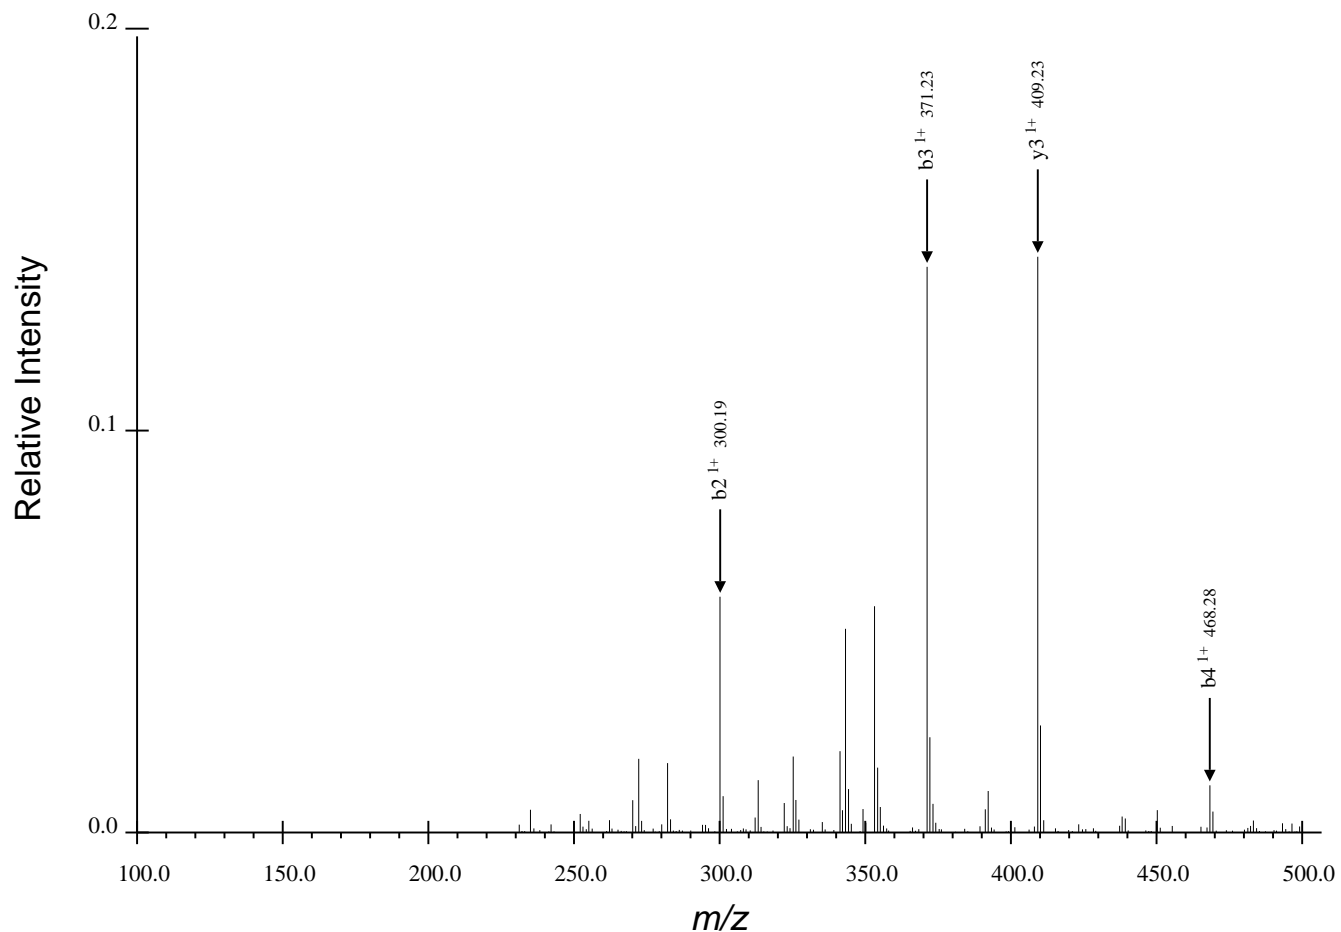

(a) First Region for rdKSAPATGGVrKrKPHR, Spectrum 388.dta

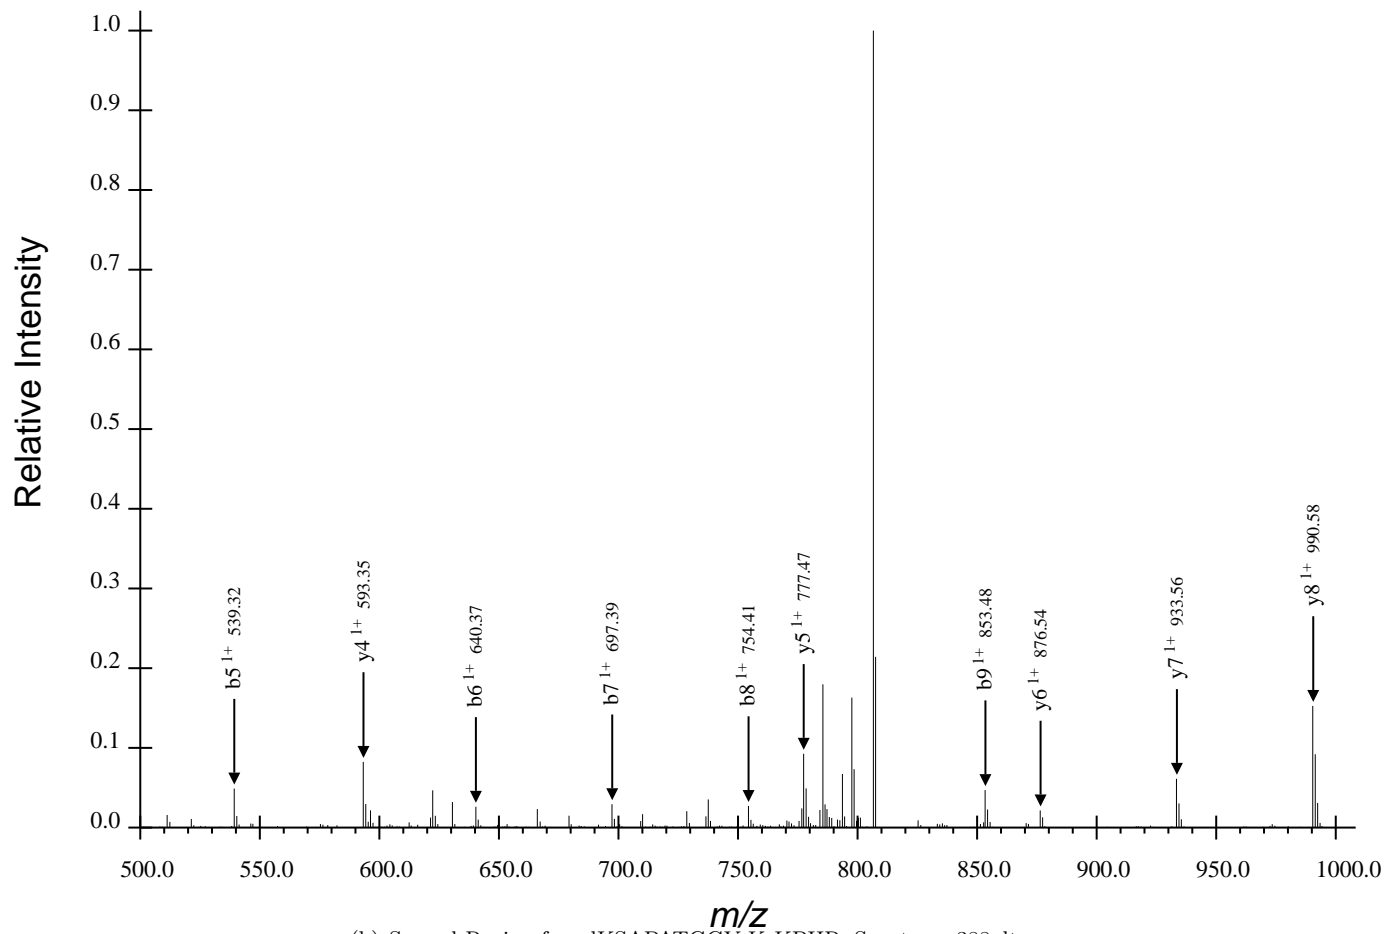

(b) Second Region for rdKSAPATGGVrKrKPHR, Spectrum 388.dta



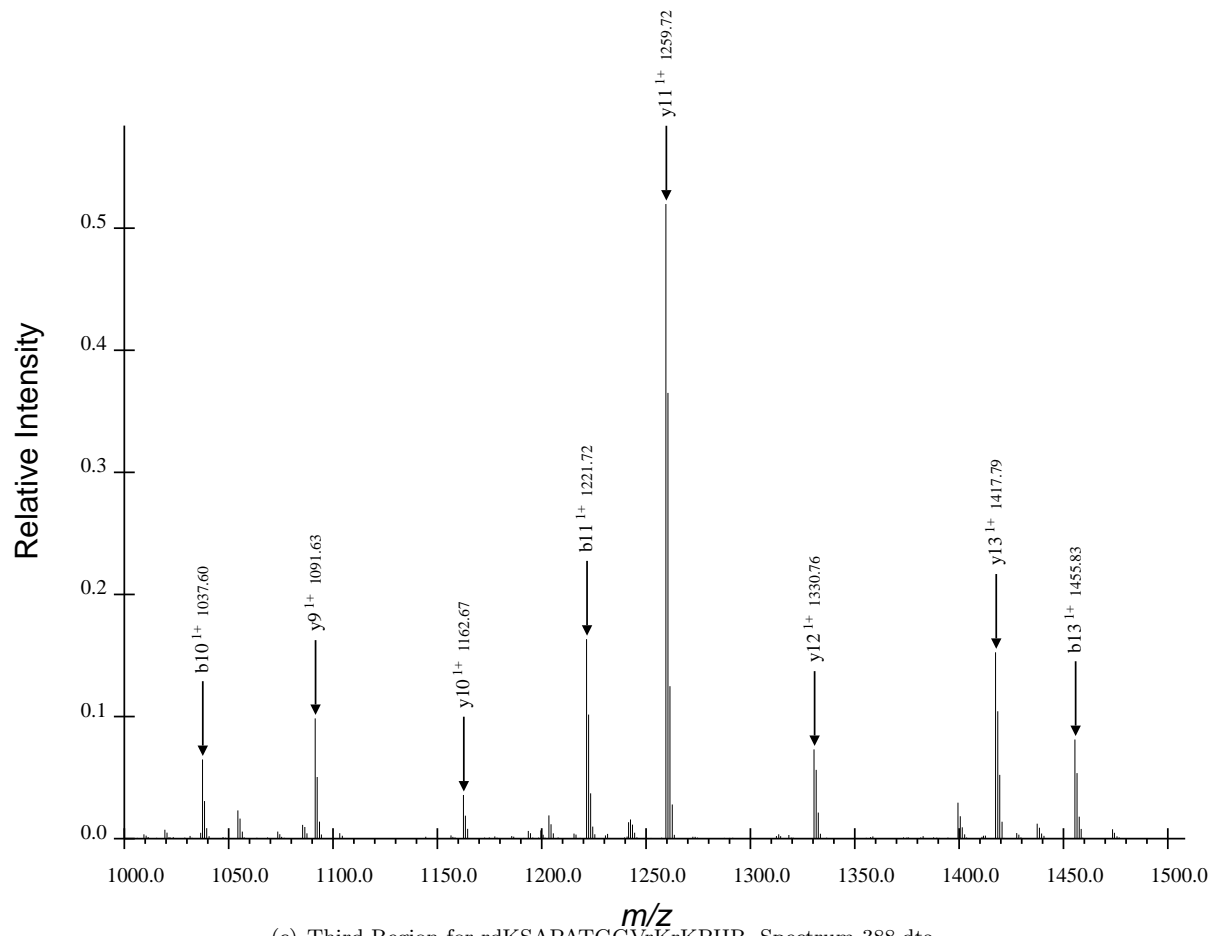

(c) Third Region for rdKSAPATGGVrKrKPHR, Spectrum 388.dta

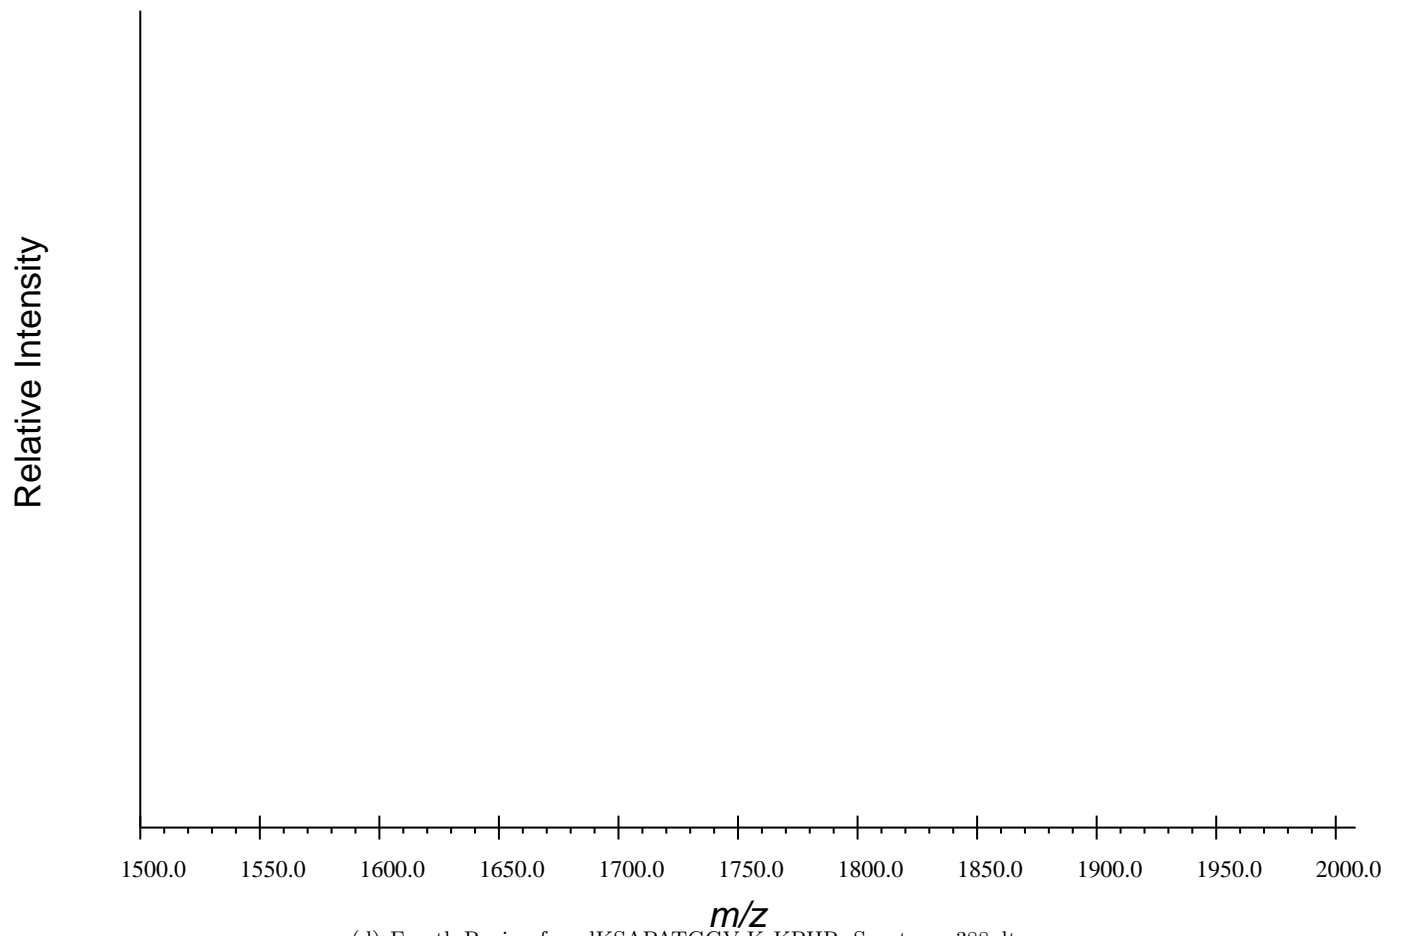

(d) Fourth Region for rdKSAPATGGVrKrKPHR, Spectrum 388.dta

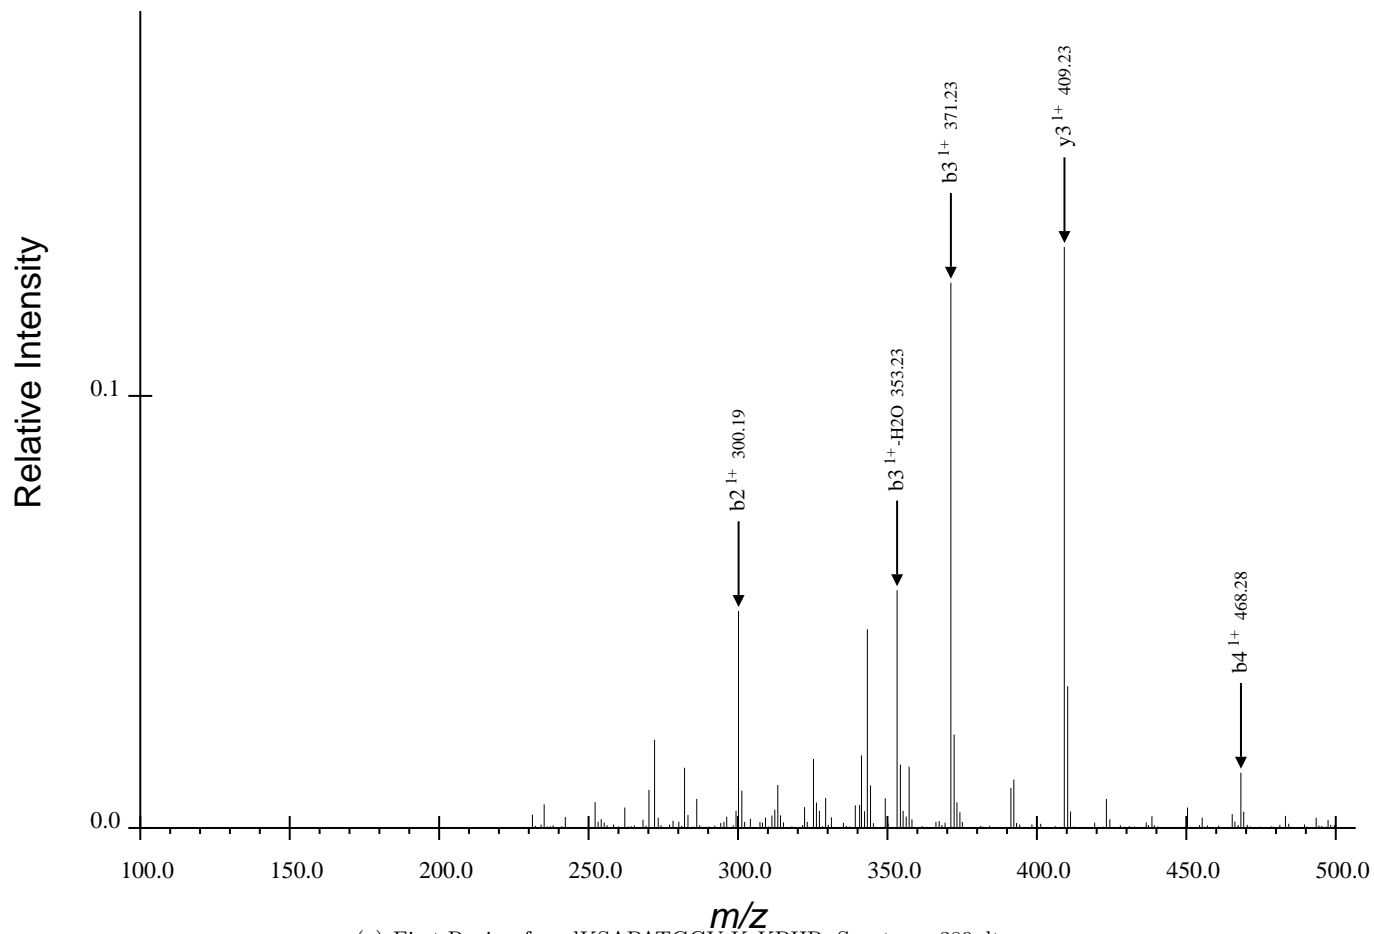

(a) First Region for rdKSAPATGGVrKrKPHR, Spectrum 389.dta

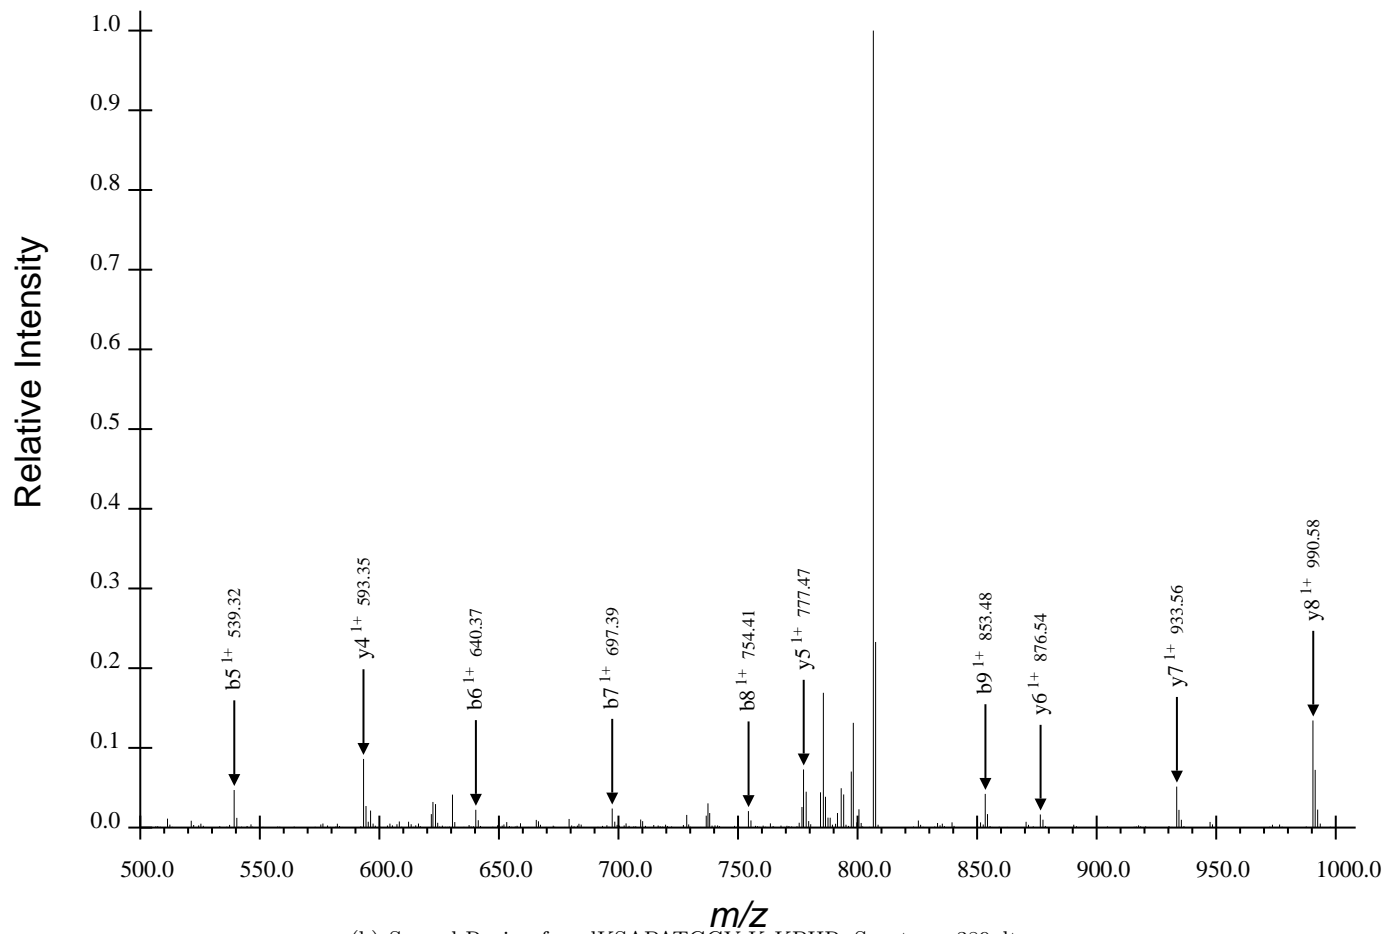

(b) Second Region for rdKSAPATGGVrKrKPHR, Spectrum 389.dta

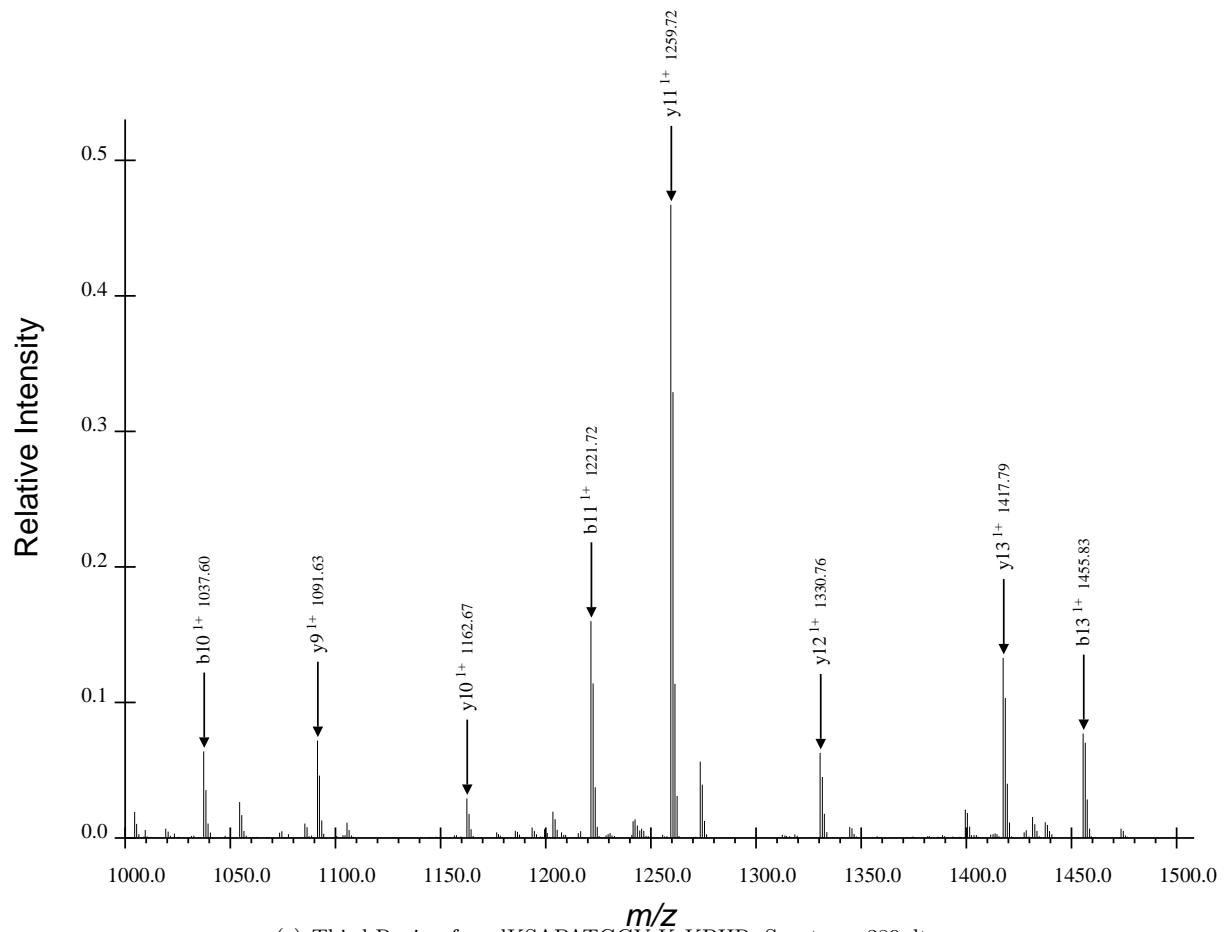

(c) Third Region for rdKSAPATGGVrKrKPHR, Spectrum 389.dta

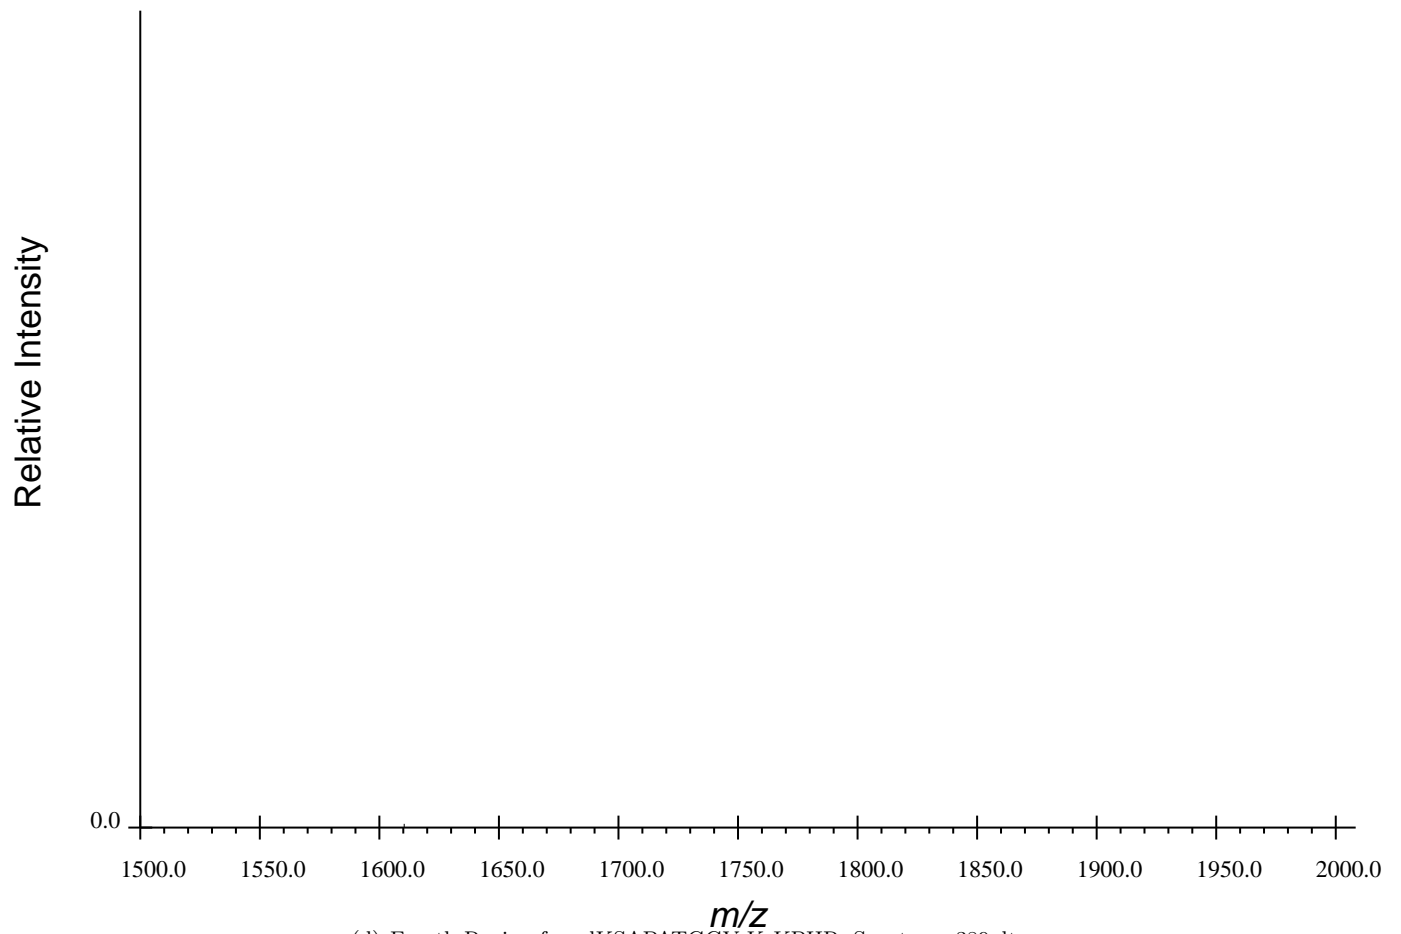

(d) Fourth Region for rdKSAPATGGVrKrKPHR, Spectrum 389.dta

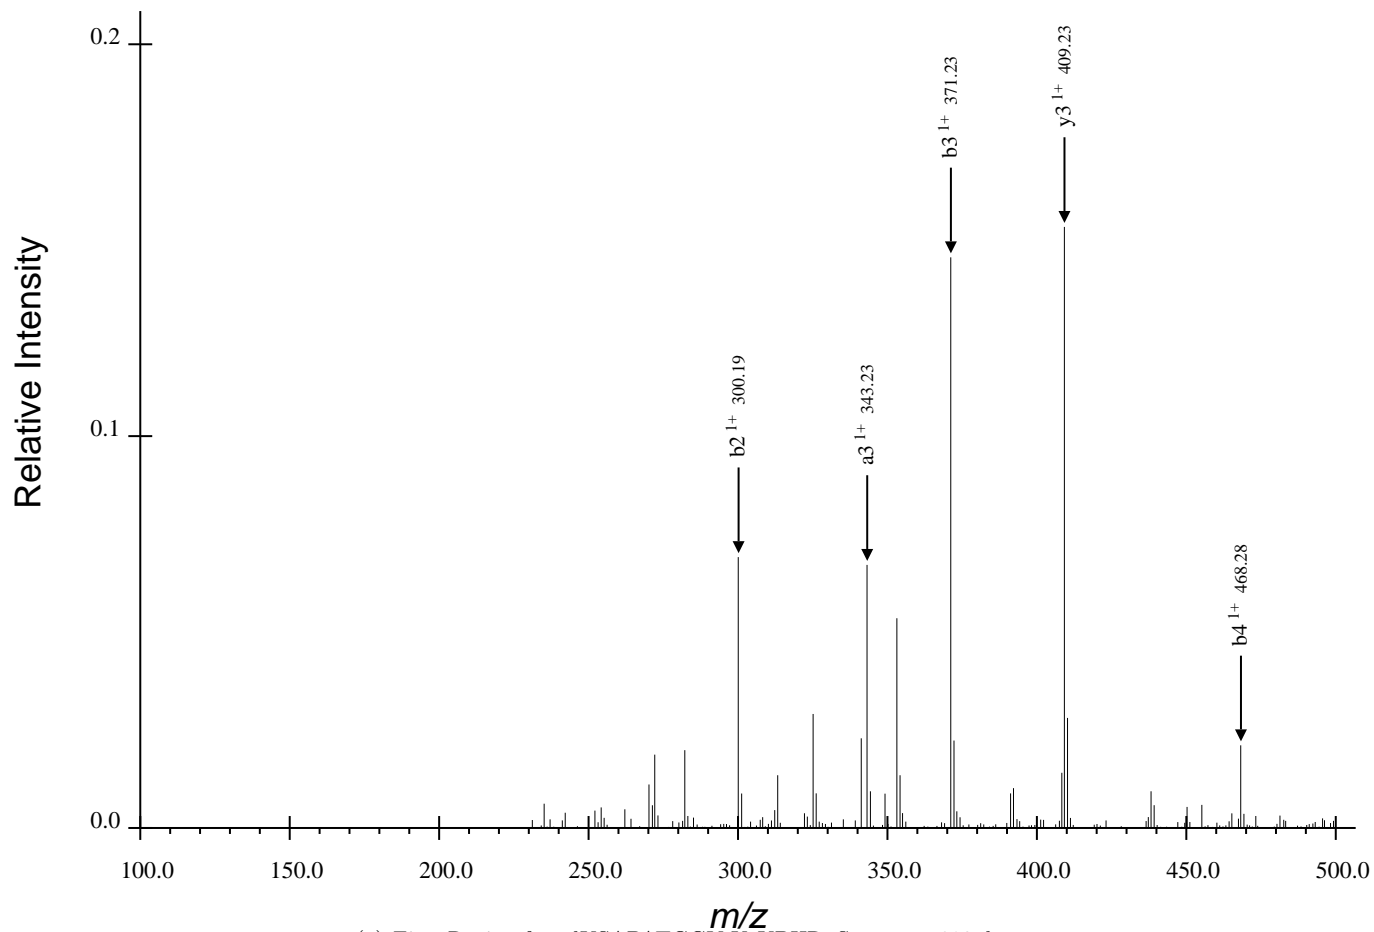

(a) First Region for rdKSAPATGGVrKrKPHR, Spectrum 390.dta

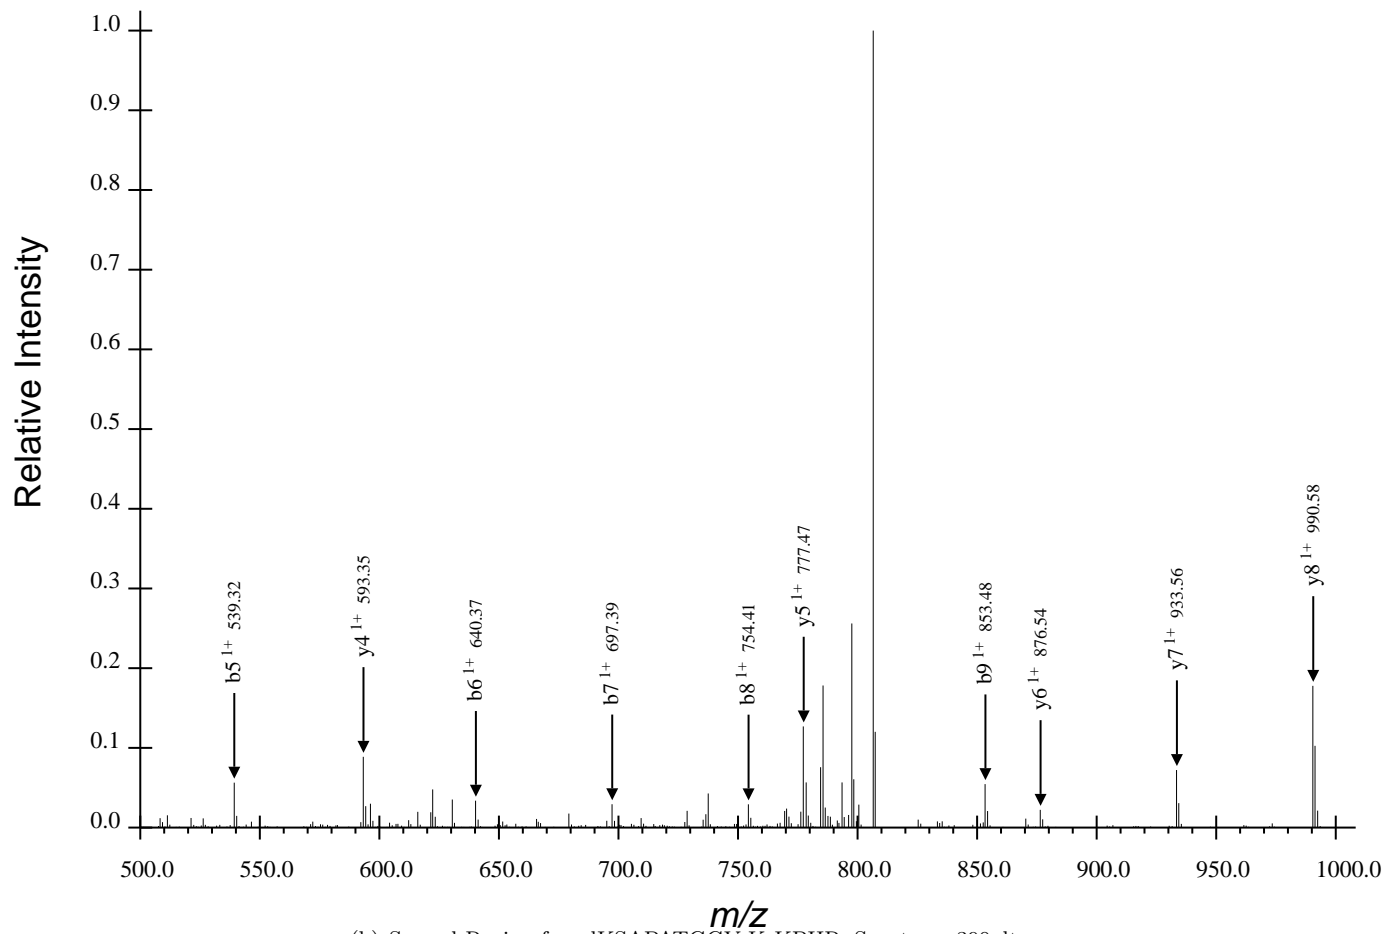

(b) Second Region for rdKSAPATGGVrKrKPHR, Spectrum 390.dta

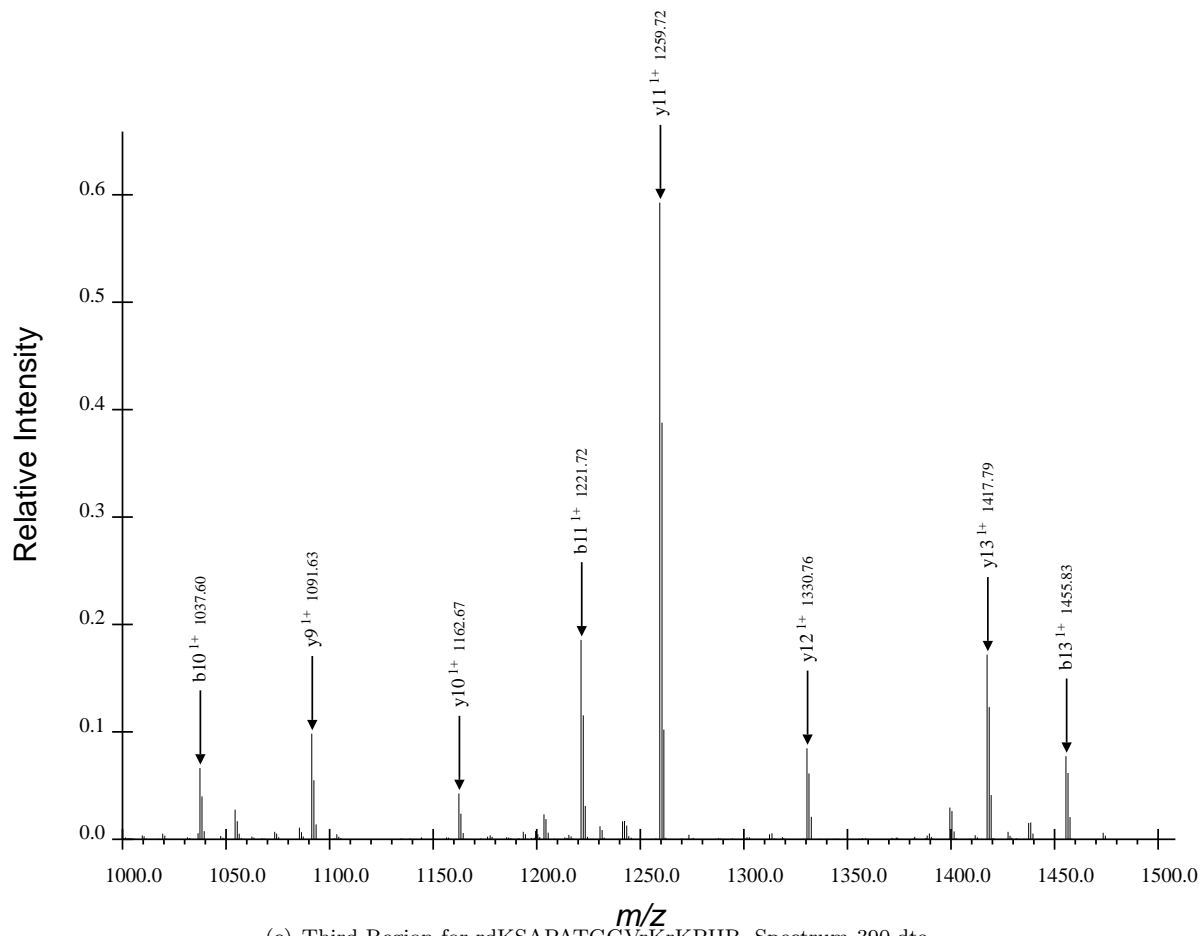

(c) Third Region for rdKSAPATGGVrKrKPHR, Spectrum 390.dta

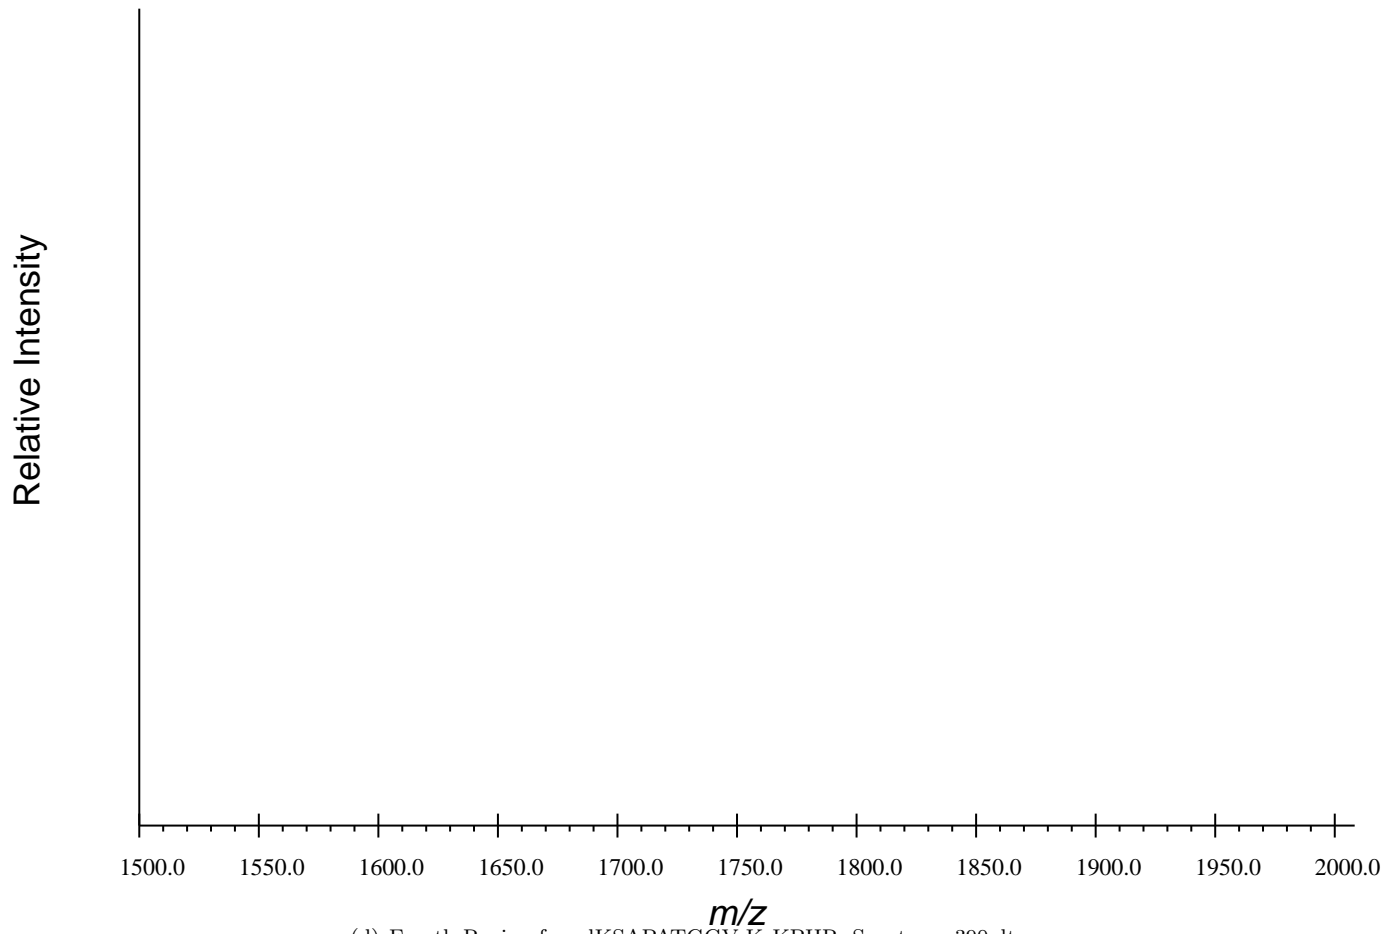

(d) Fourth Region for rdKSAPATGGVrKrKPHR, Spectrum 390.dta

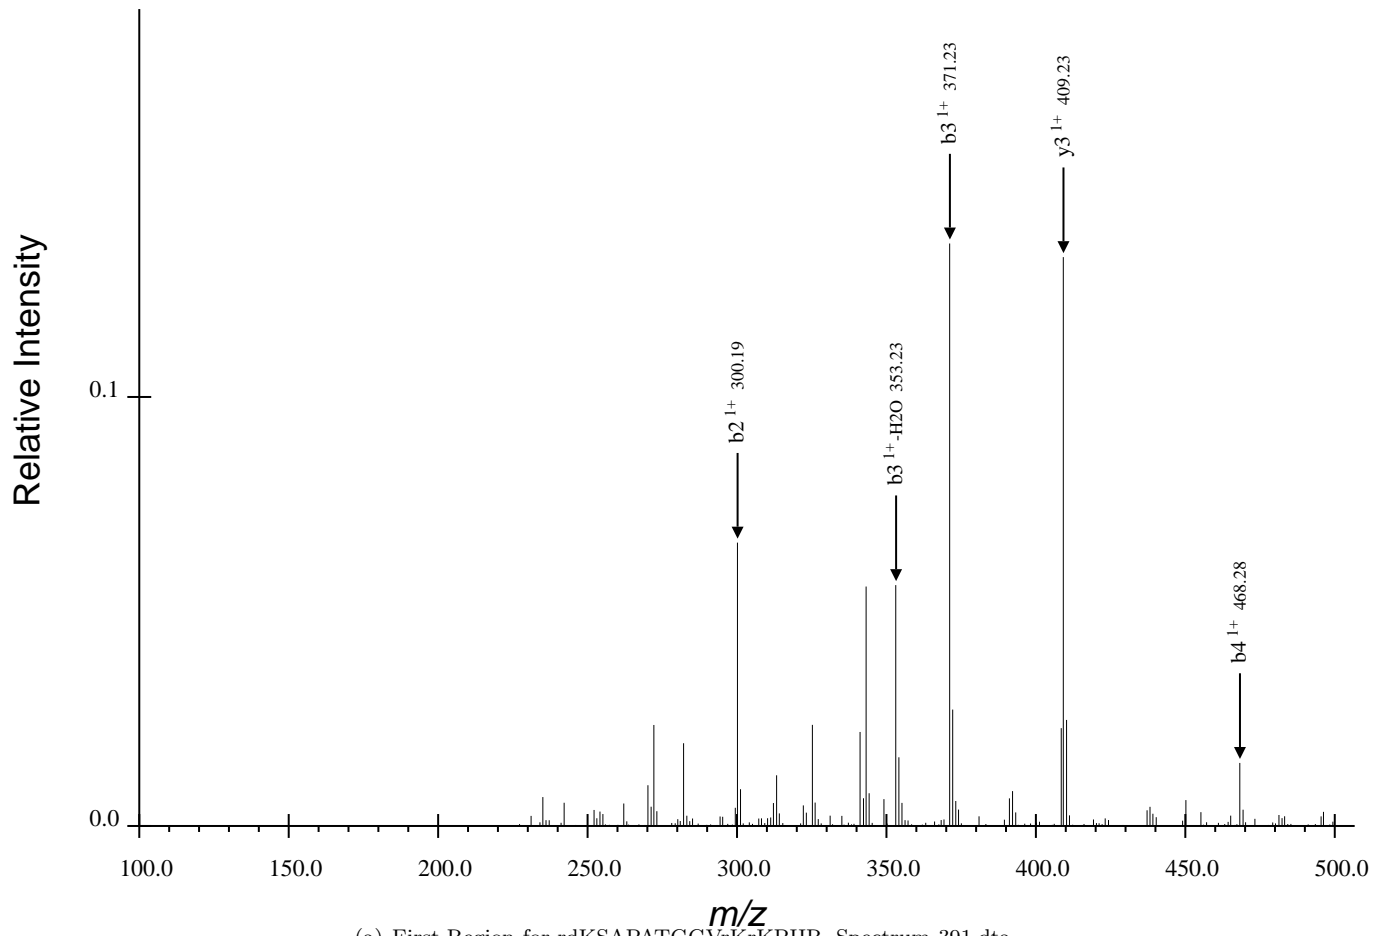

(a) First Region for rdKSAPATGGVrKrKPHR, Spectrum 391.dta

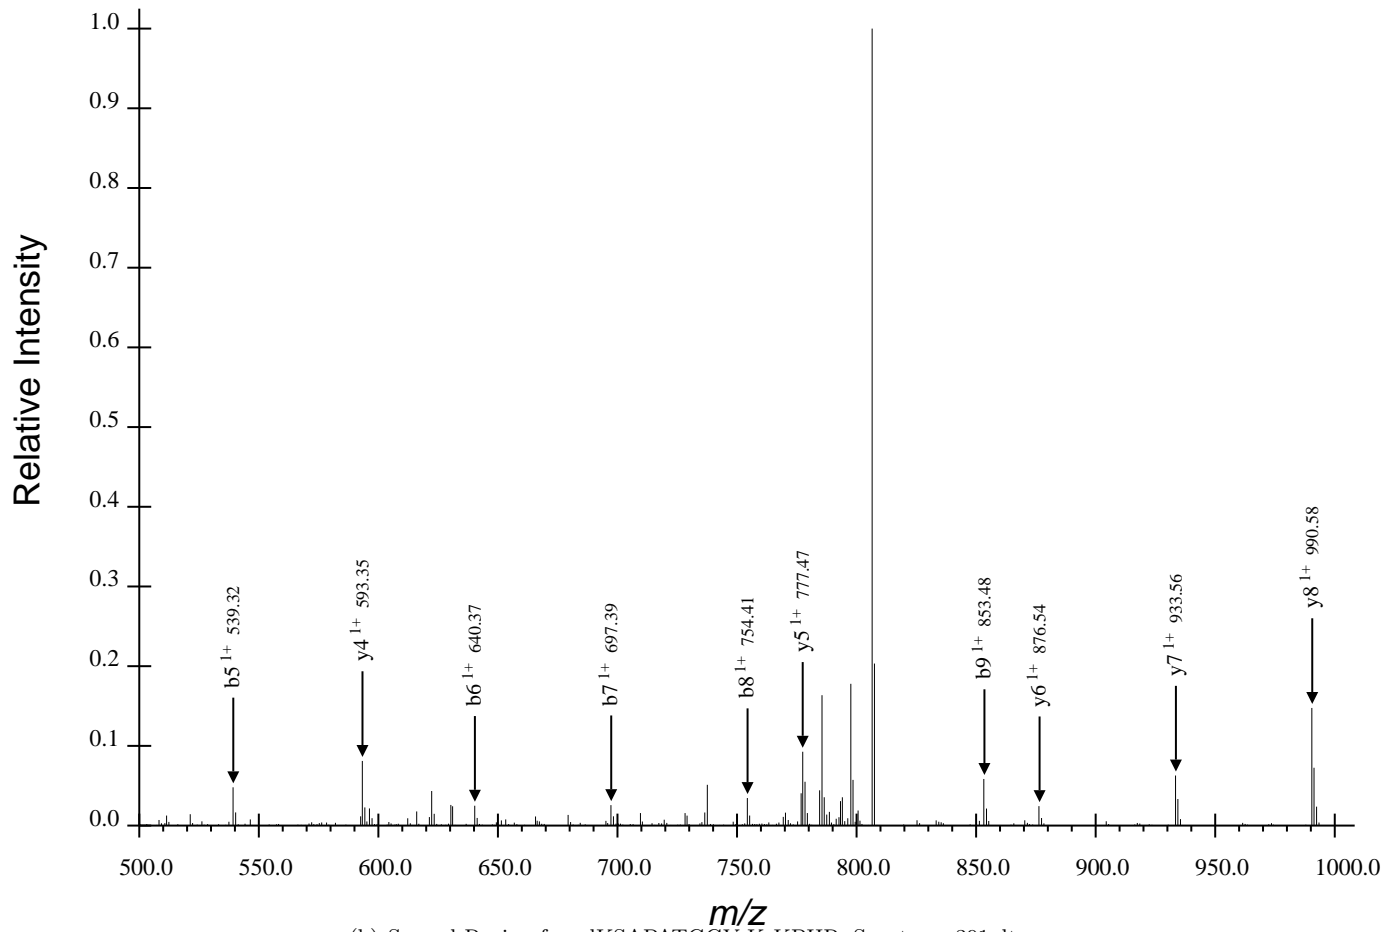

(b) Second Region for rdKSAPATGGVrKrKPHR, Spectrum 391.dta

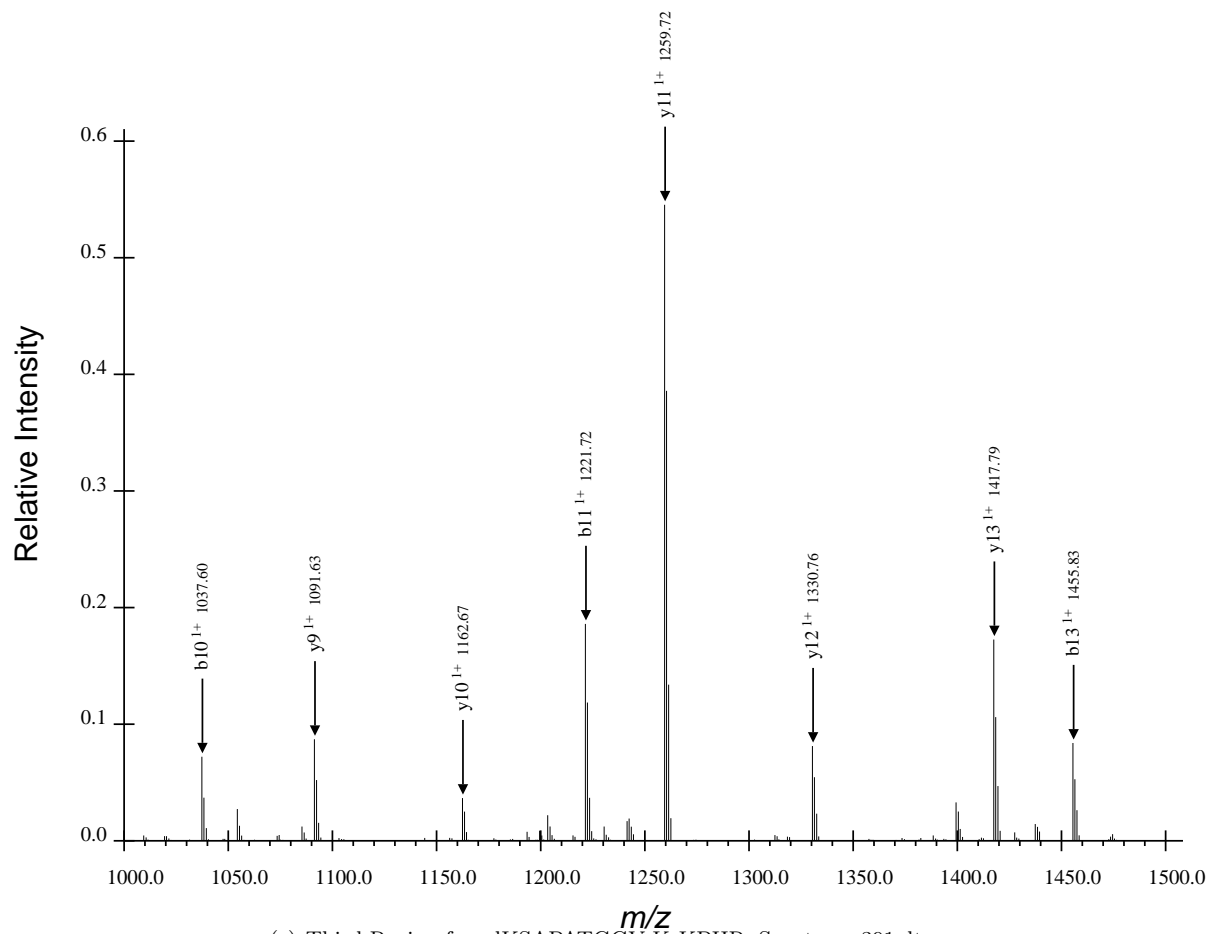

(c) Third Region for rdKSAPATGGVrKrKPHR, Spectrum 391.dta

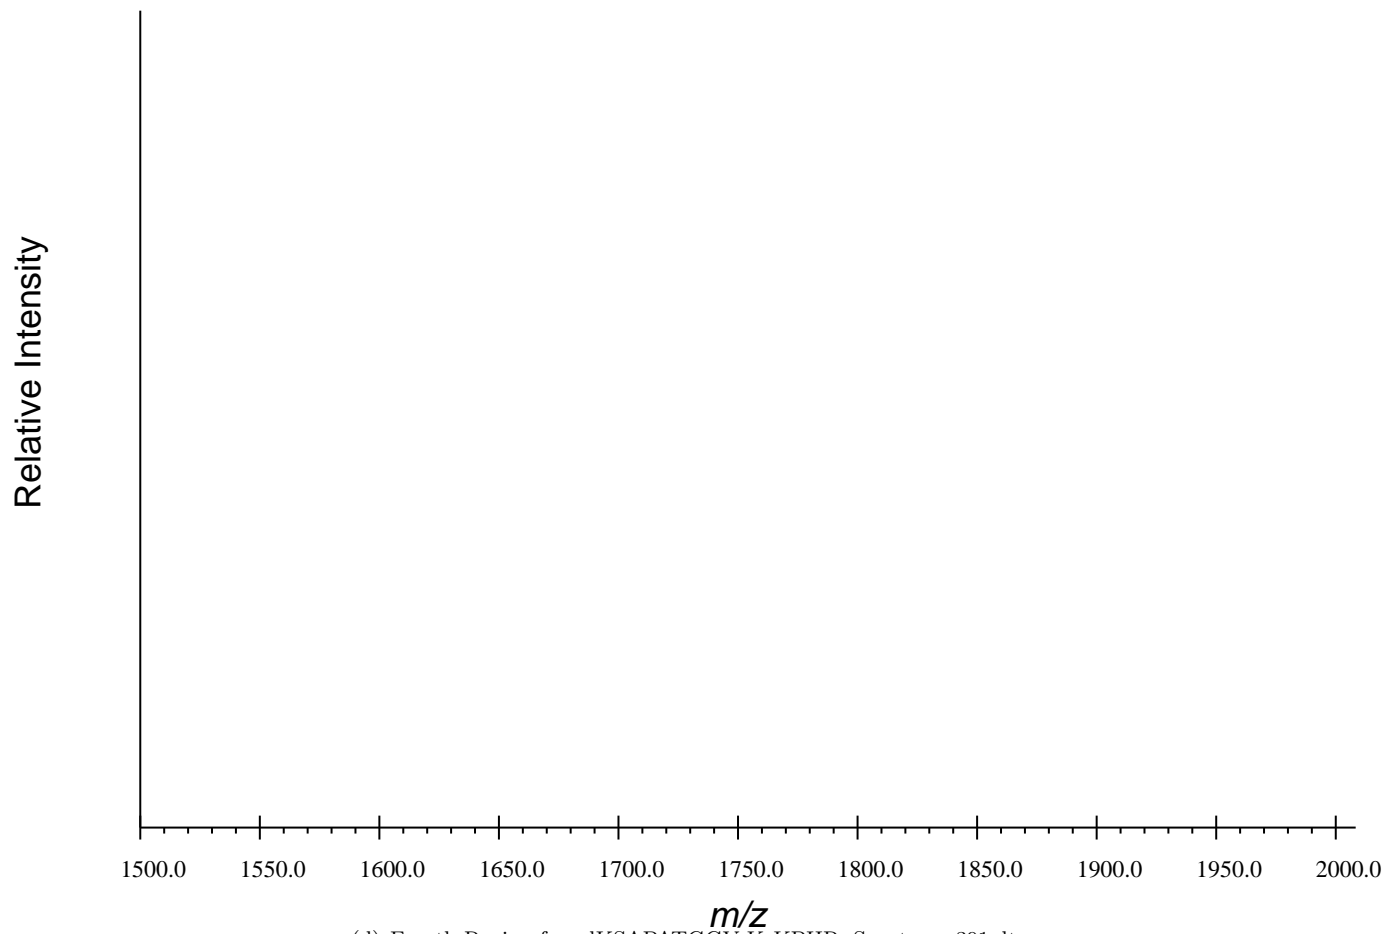

(d) Fourth Region for rdKSAPATGGVrKrKPHR, Spectrum 391.dta

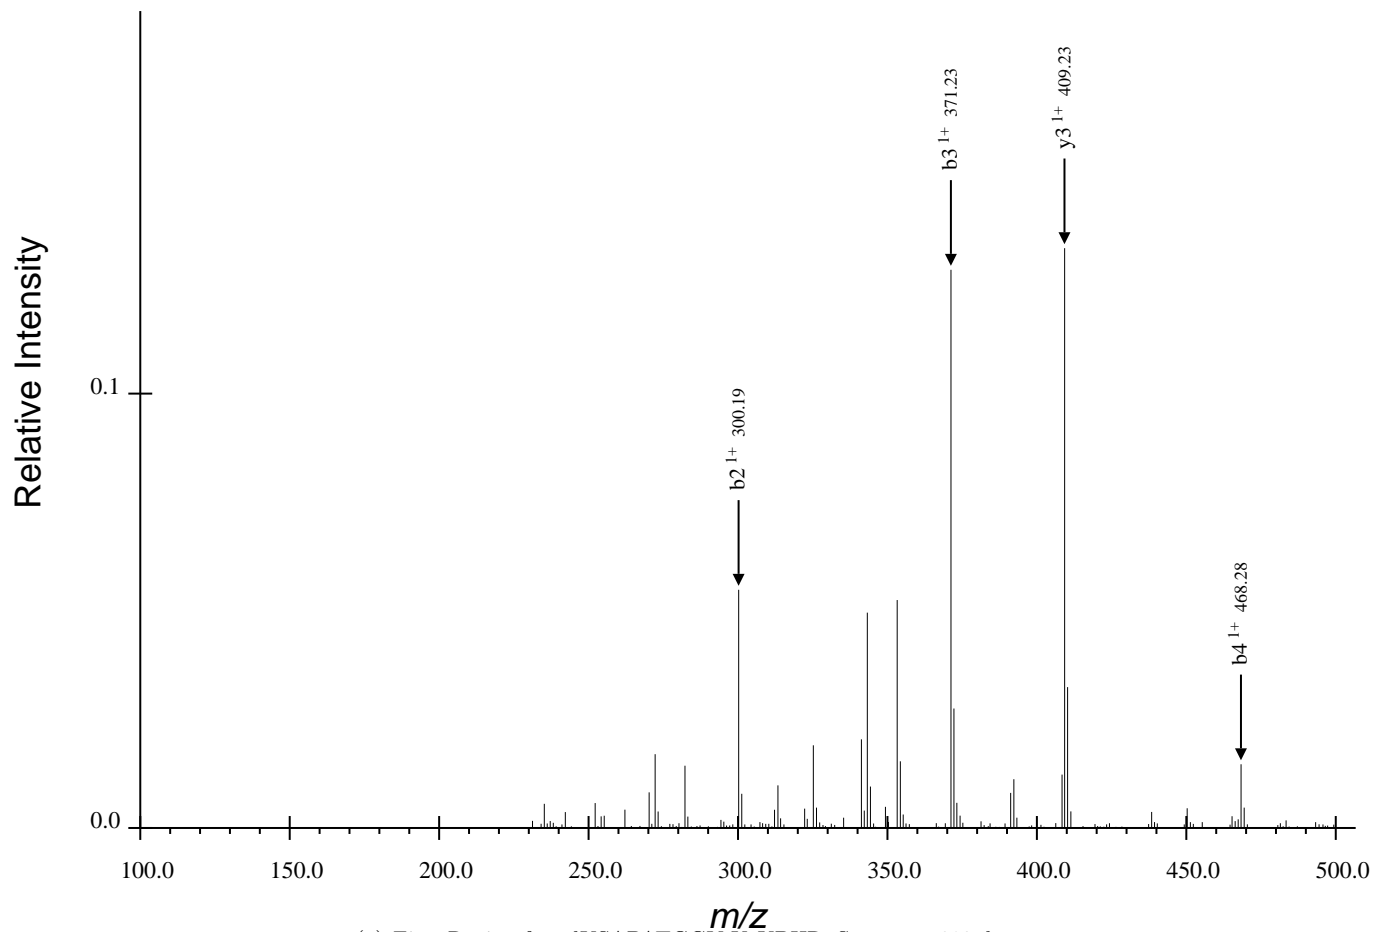

(a) First Region for rdKSAPATGGVrKrKPHR, Spectrum 392.dta

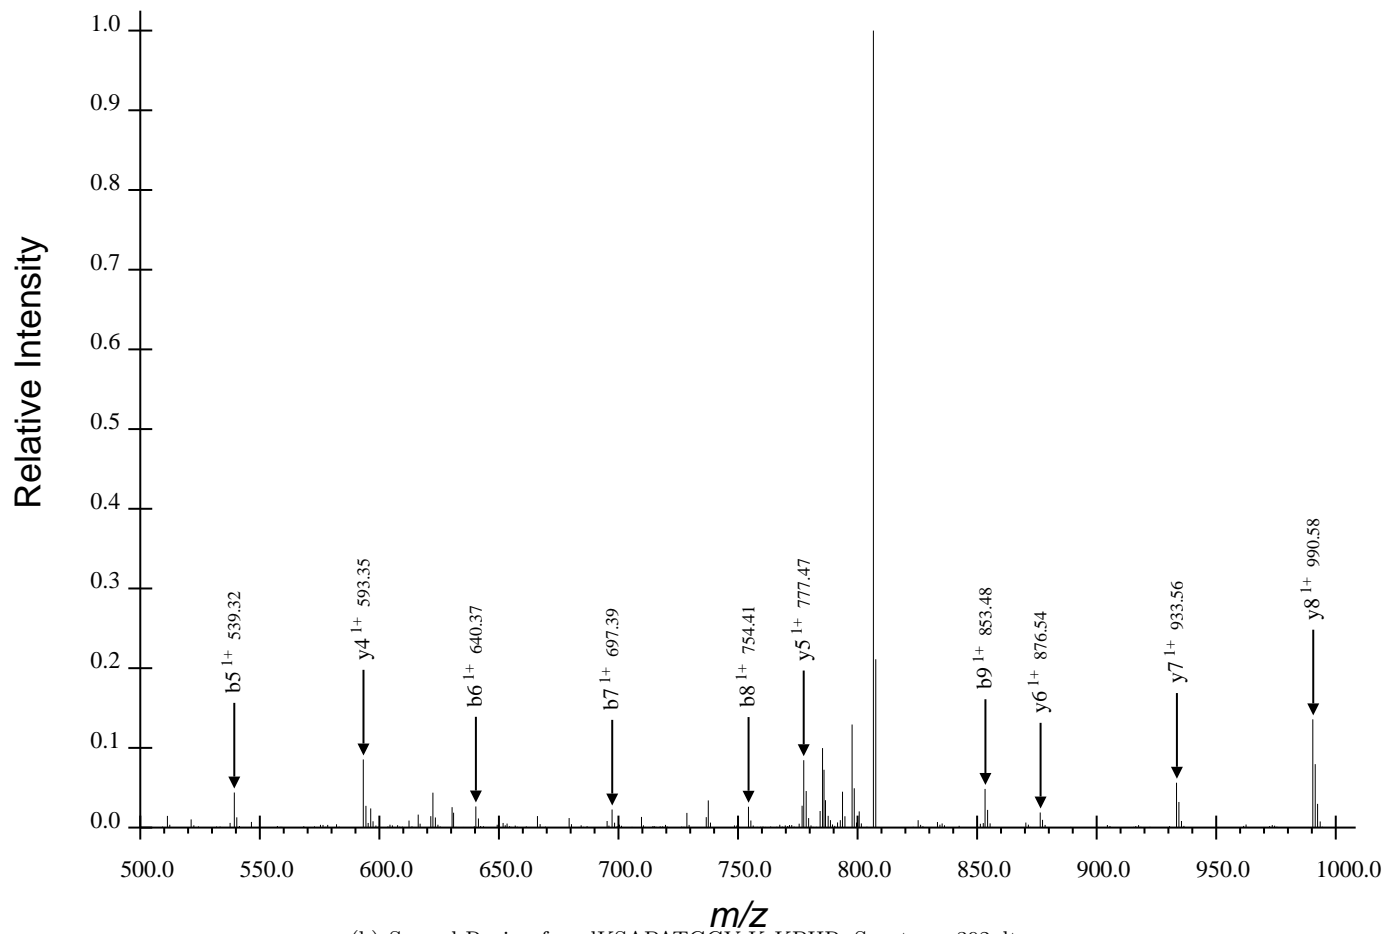

(b) Second Region for rdKSAPATGGVrKrKPHR, Spectrum 392.dta



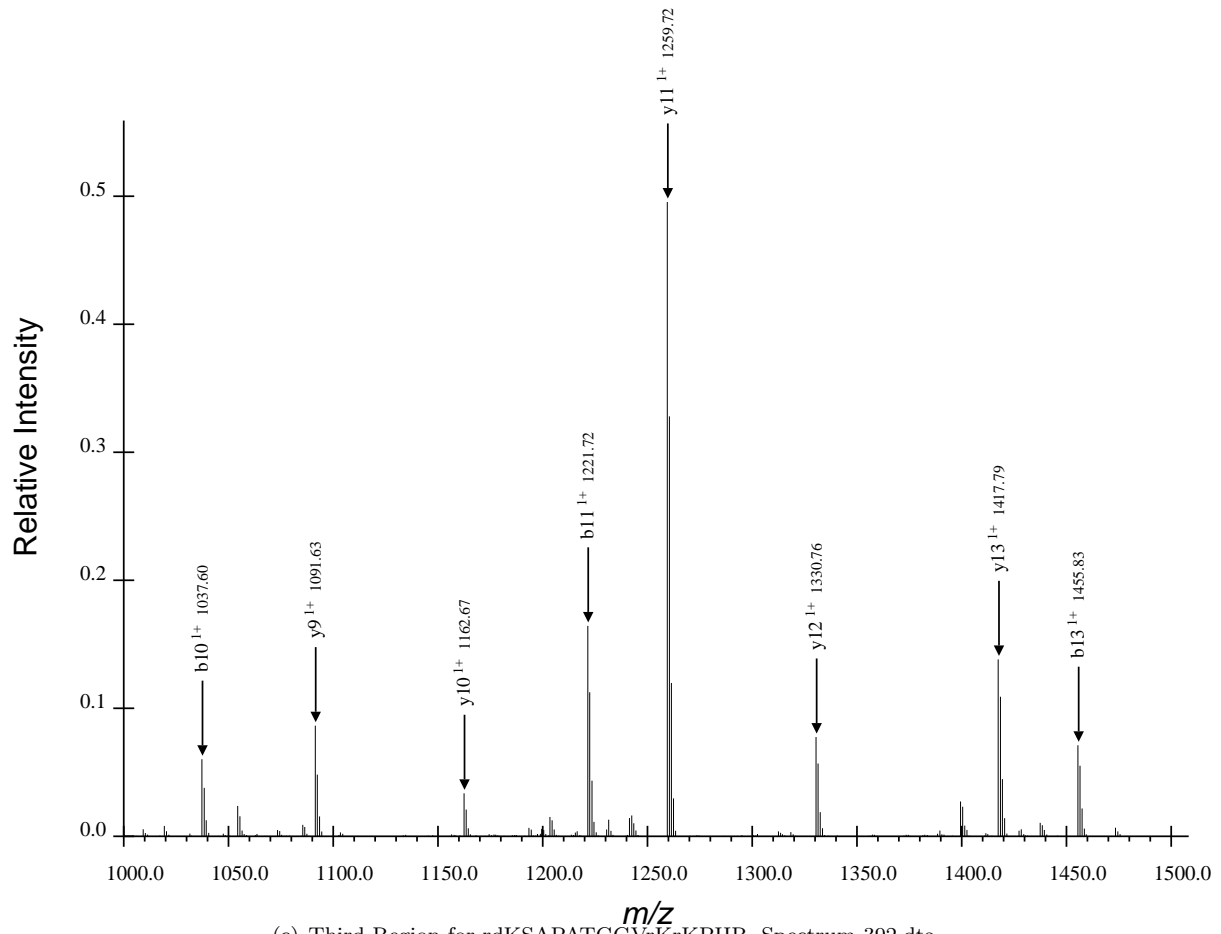

(c) Third Region for rdKSAPATGGVrKrKPHR, Spectrum 392.dta

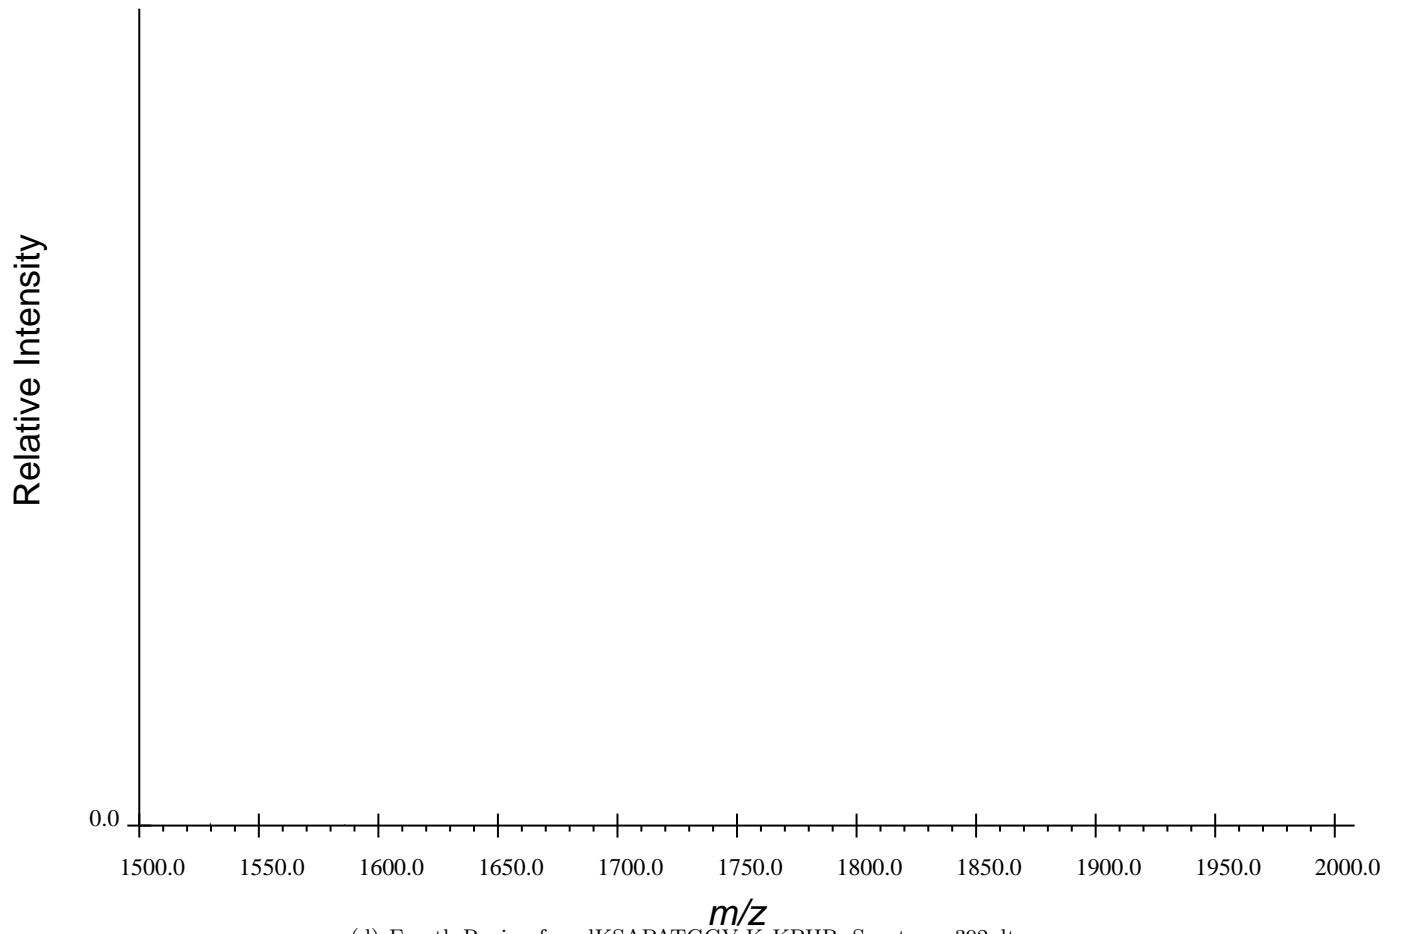

(d) Fourth Region for rdKSAPATGGVrKrKPHR, Spectrum 392.dta

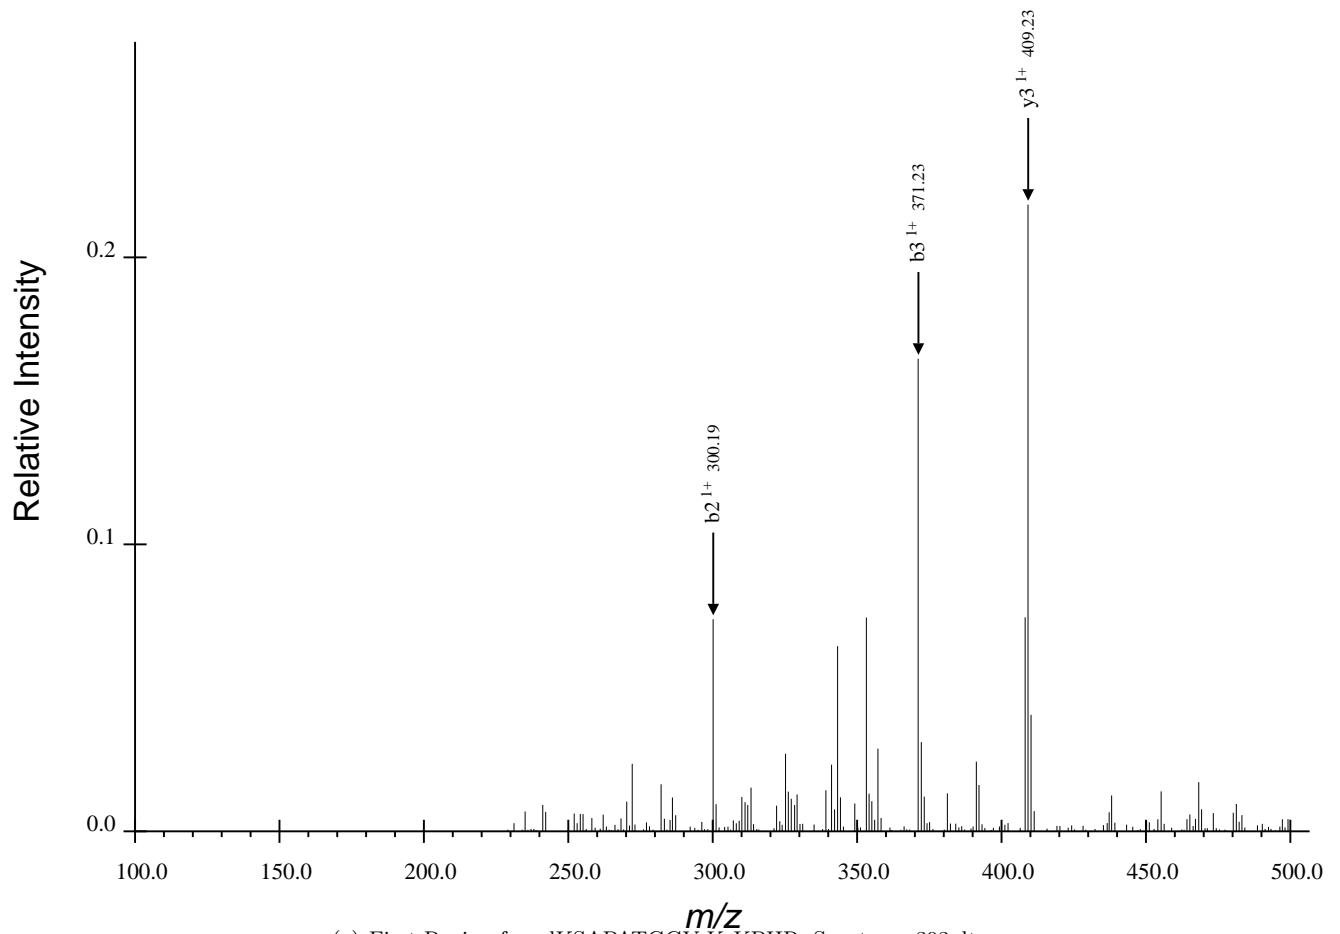

(a) First Region for rdKSAPATGGVrKrKPHR, Spectrum 393.dta

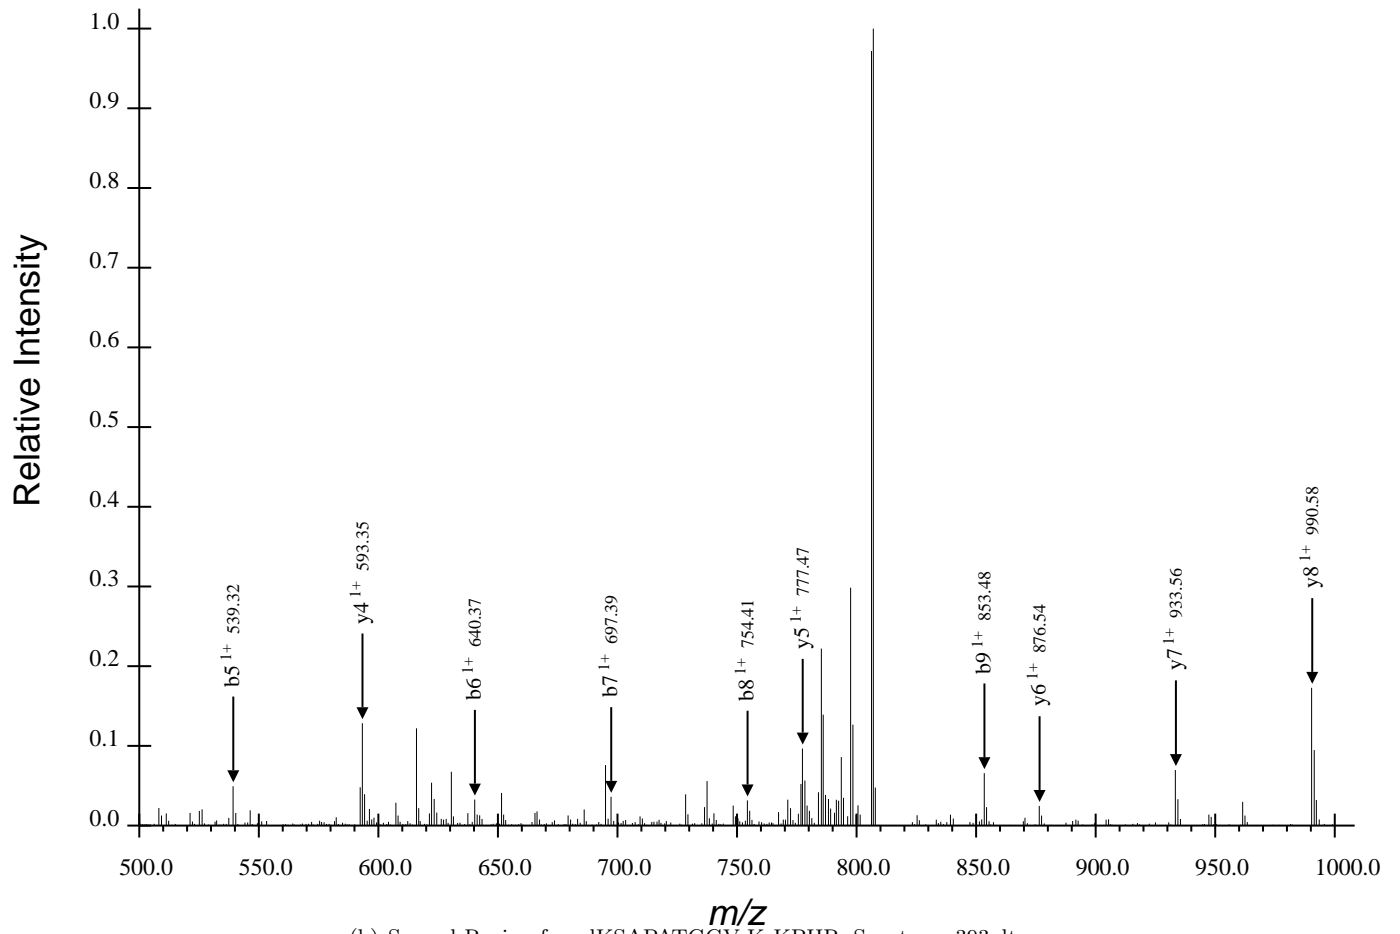

(b) Second Region for rdKSAPATGGVrKrKPHR, Spectrum 393.dta

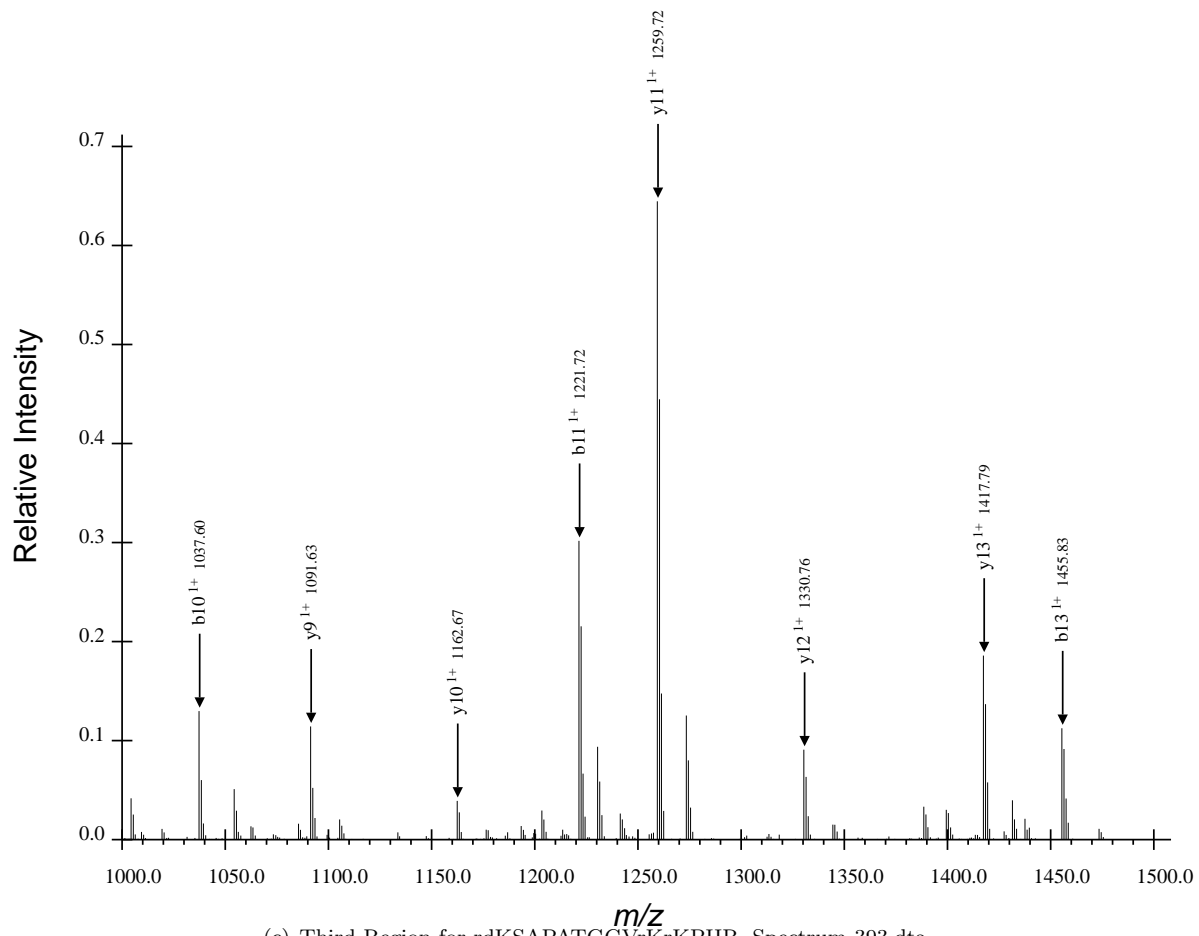

(c) Third Region for rdKSAPATGGVrKrKPHR, Spectrum 393.dta

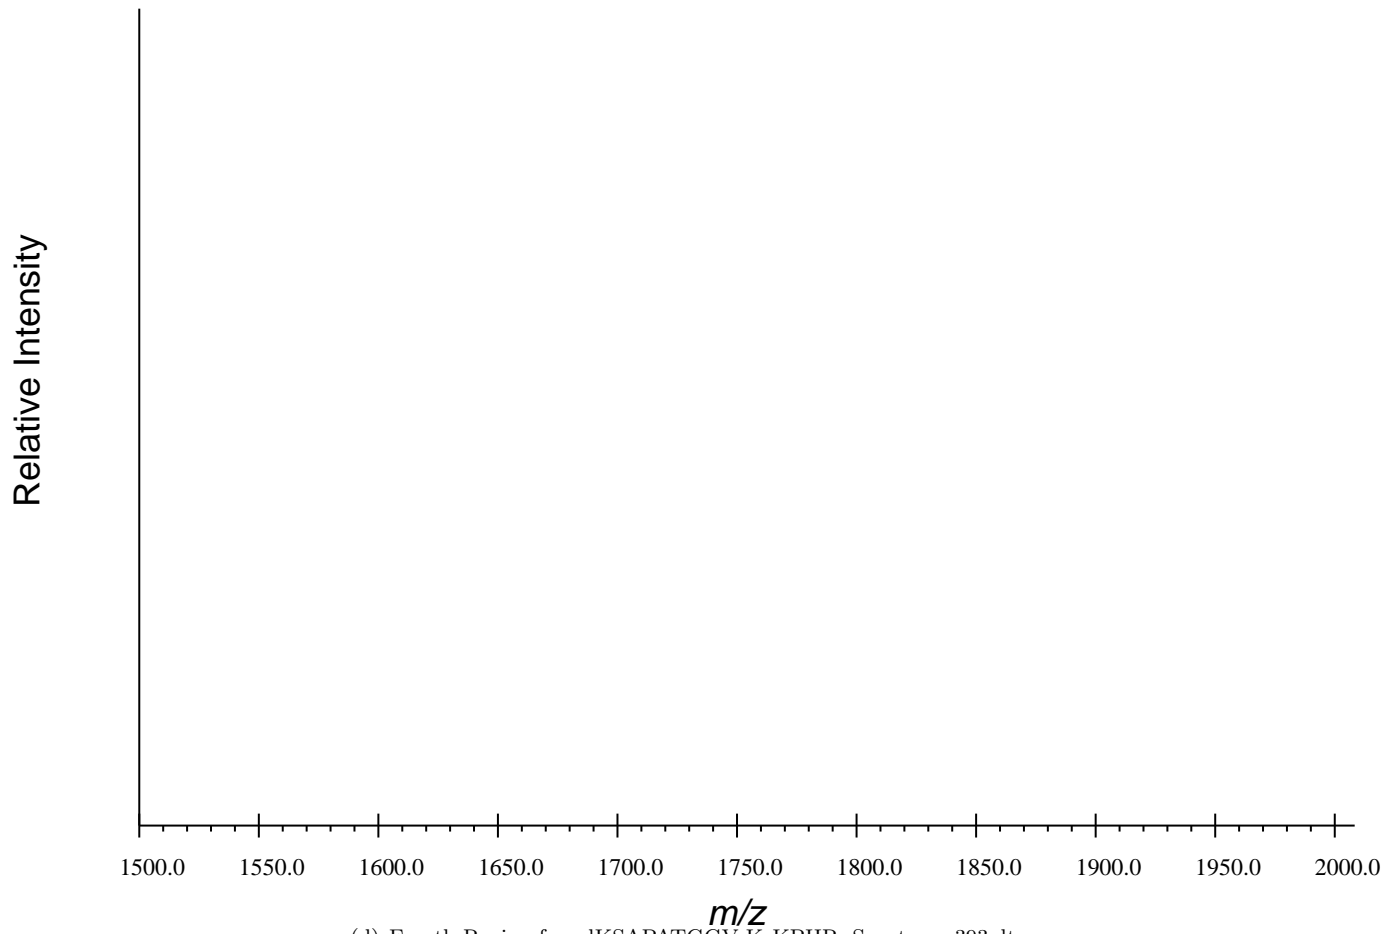

(d) Fourth Region for rdKSAPATGGVrKrKPHR, Spectrum 393.dta

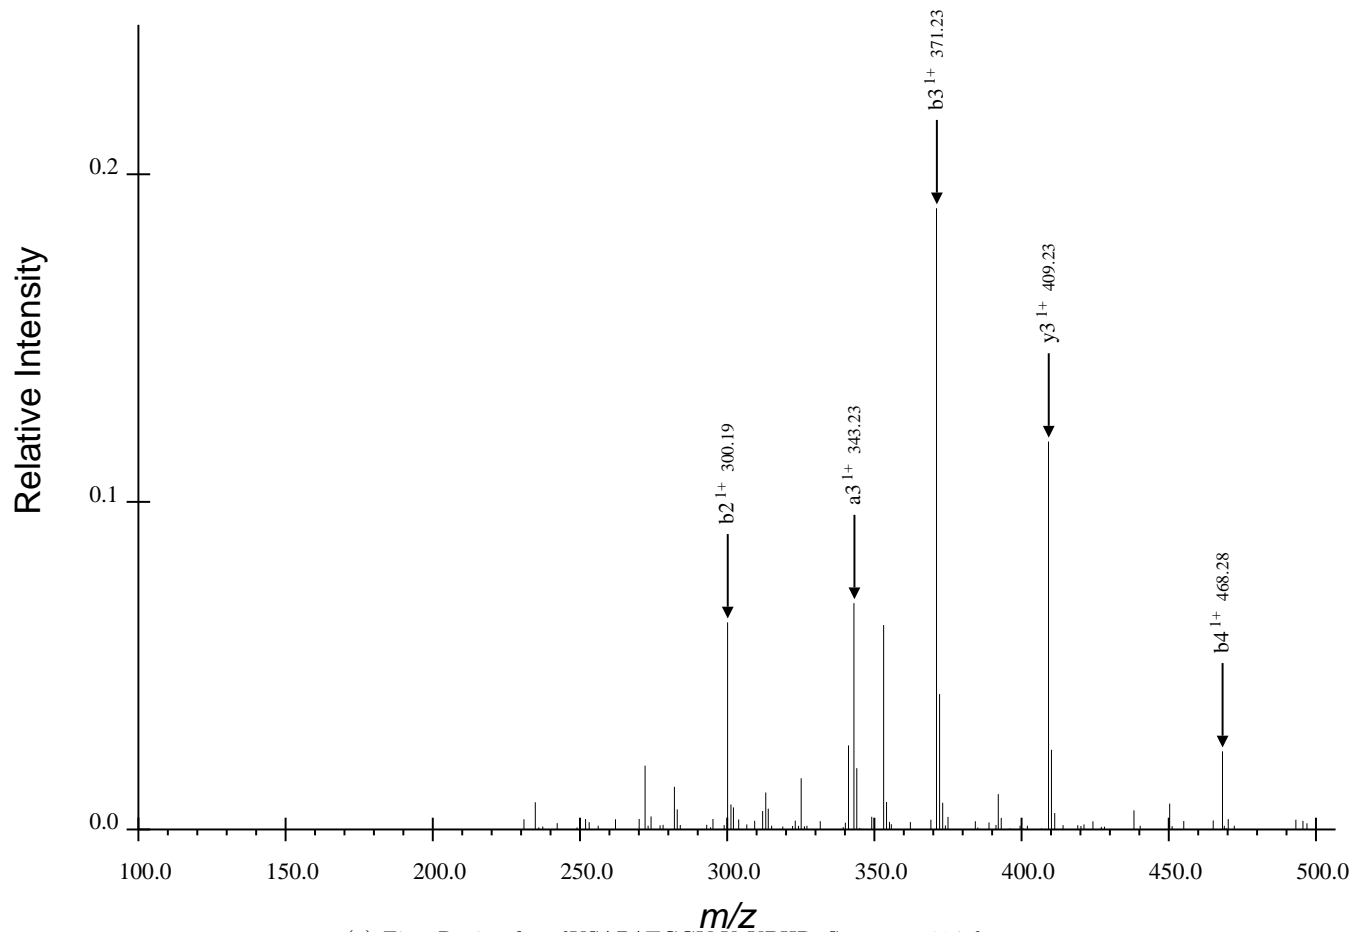

(a) First Region for rdKSAPATGGVrKrKPHR, Spectrum 394.dta

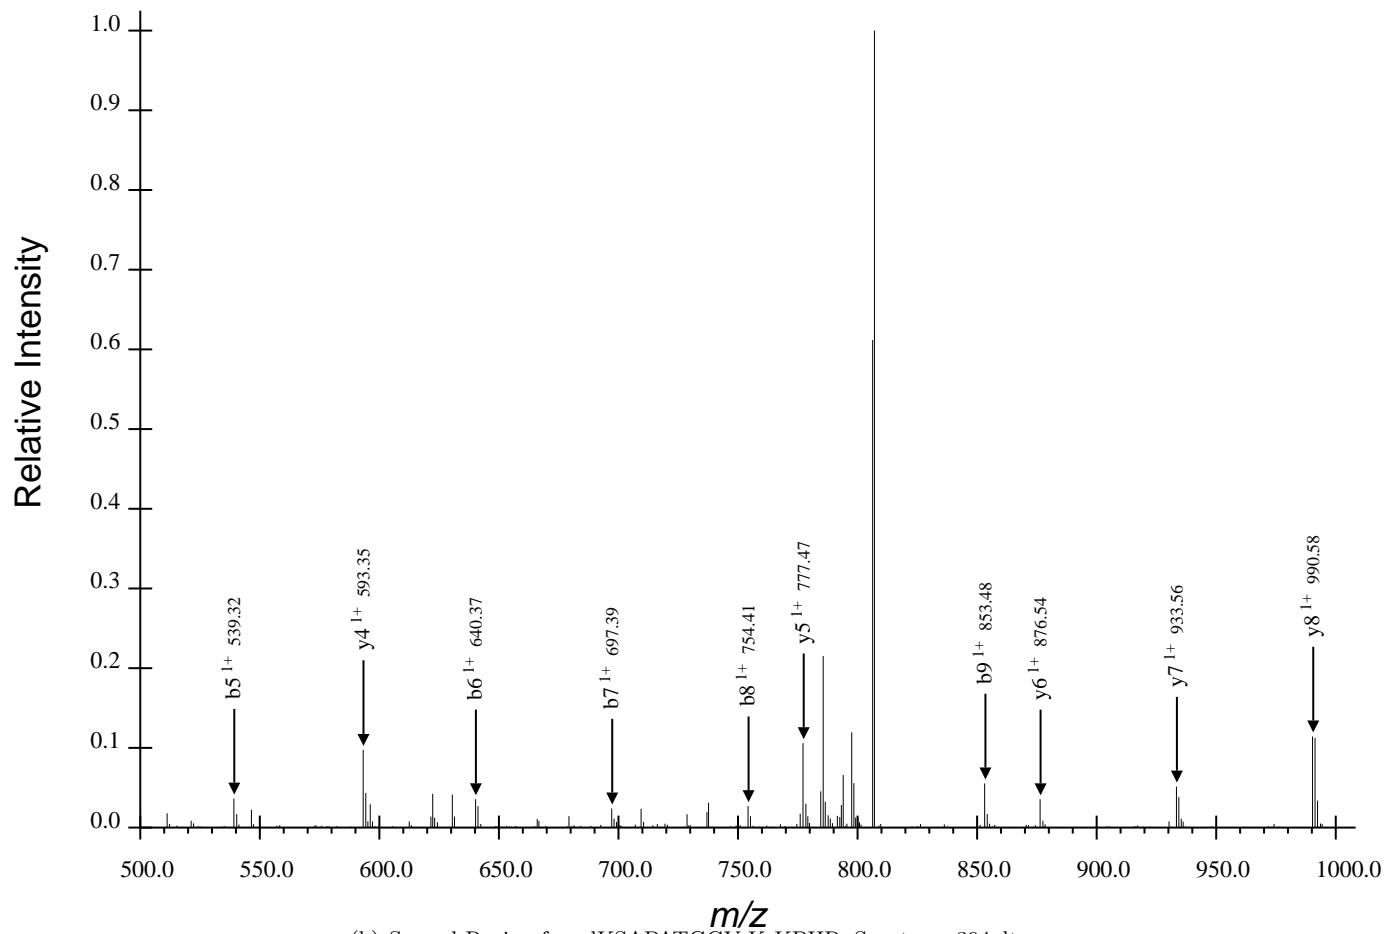

(b) Second Region for rdKSAPATGGVrKrKPHR, Spectrum 394.dta

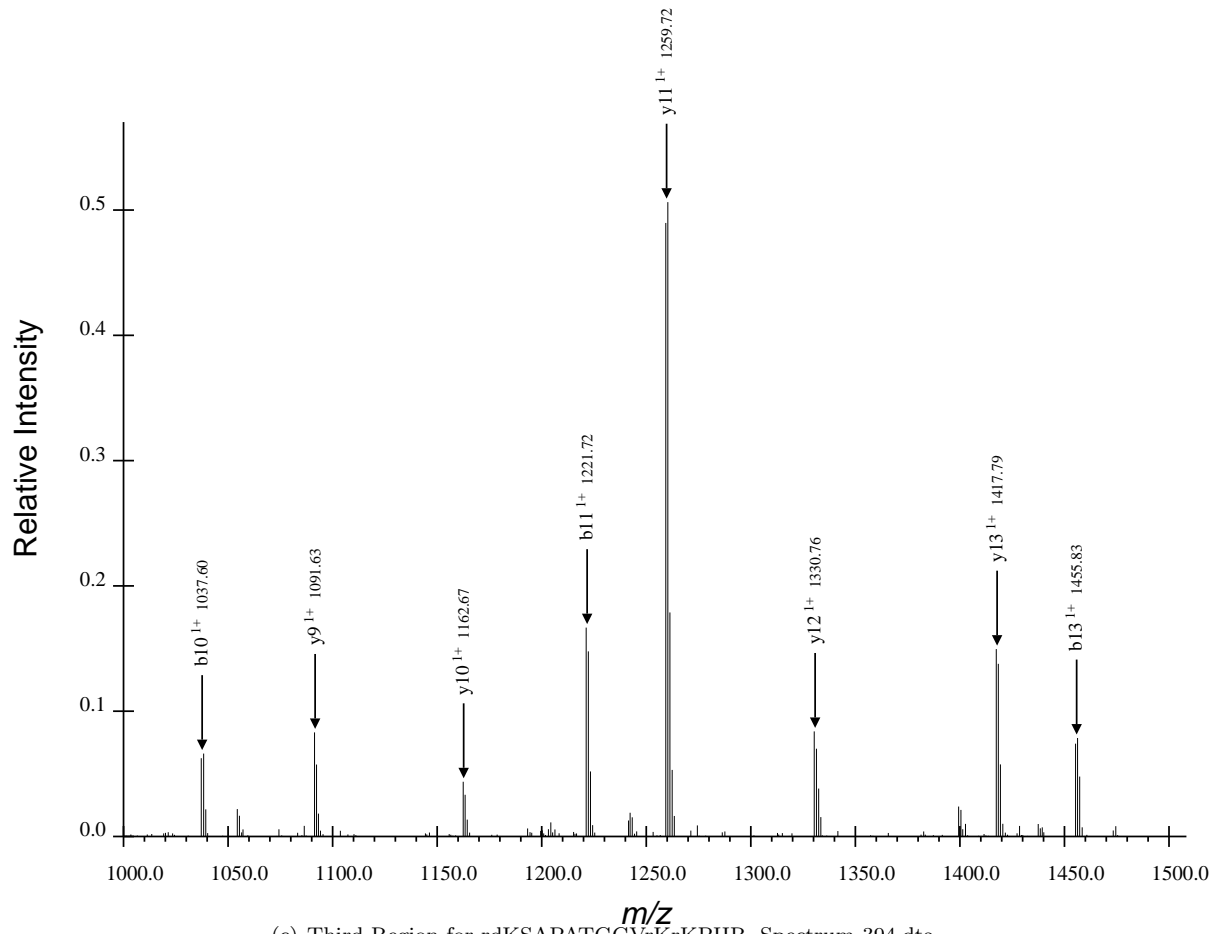

(c) Third Region for rdKSAPATGGVrKrKPHR, Spectrum 394.dta

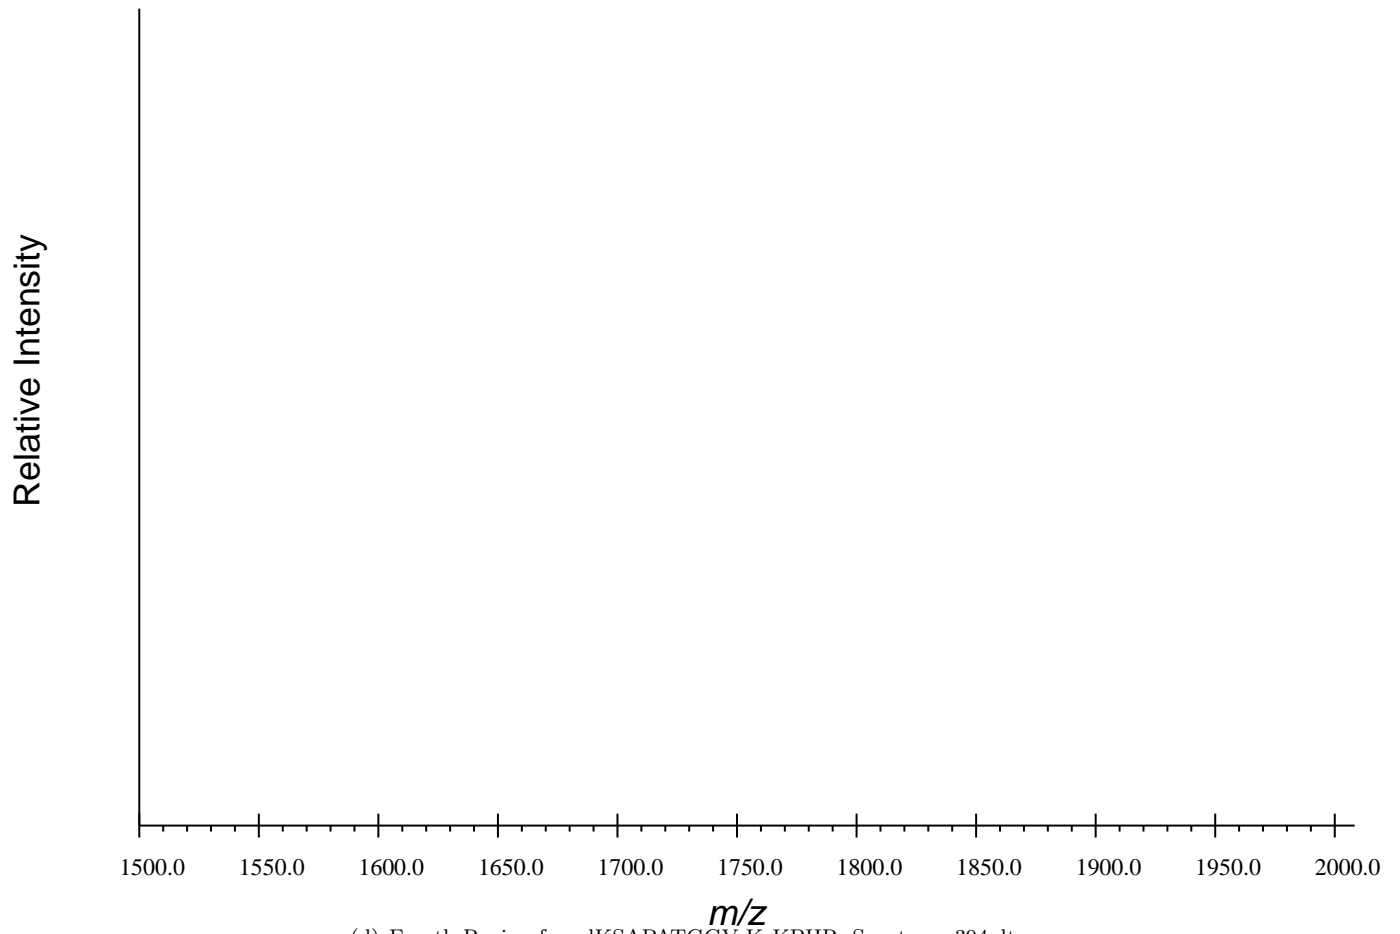

(d) Fourth Region for rdKSAPATGGVrKrKPHR, Spectrum 394.dta

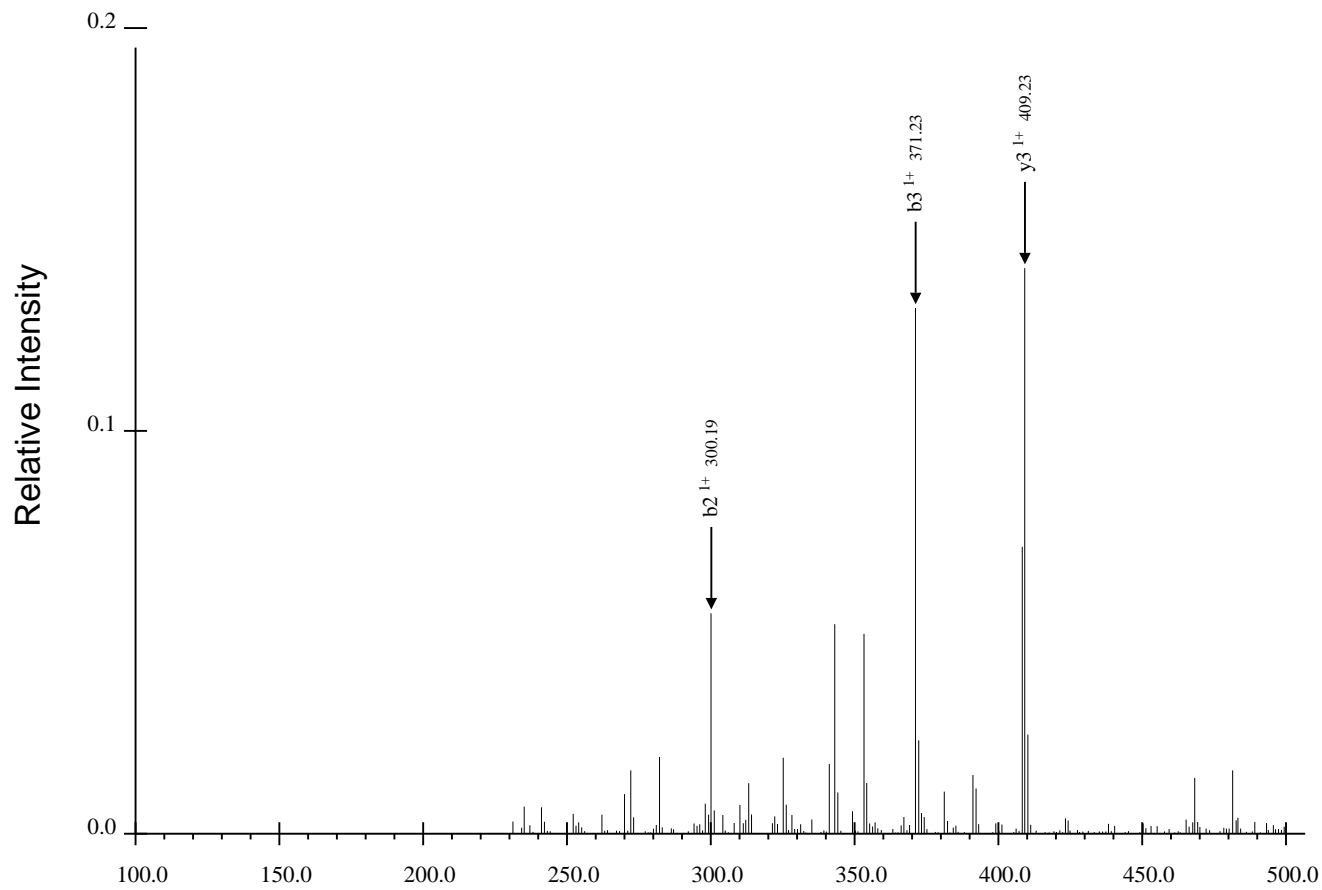

(a) First Region for rdKSAPATGGVrKrKPHR, Spectrum 395.dta

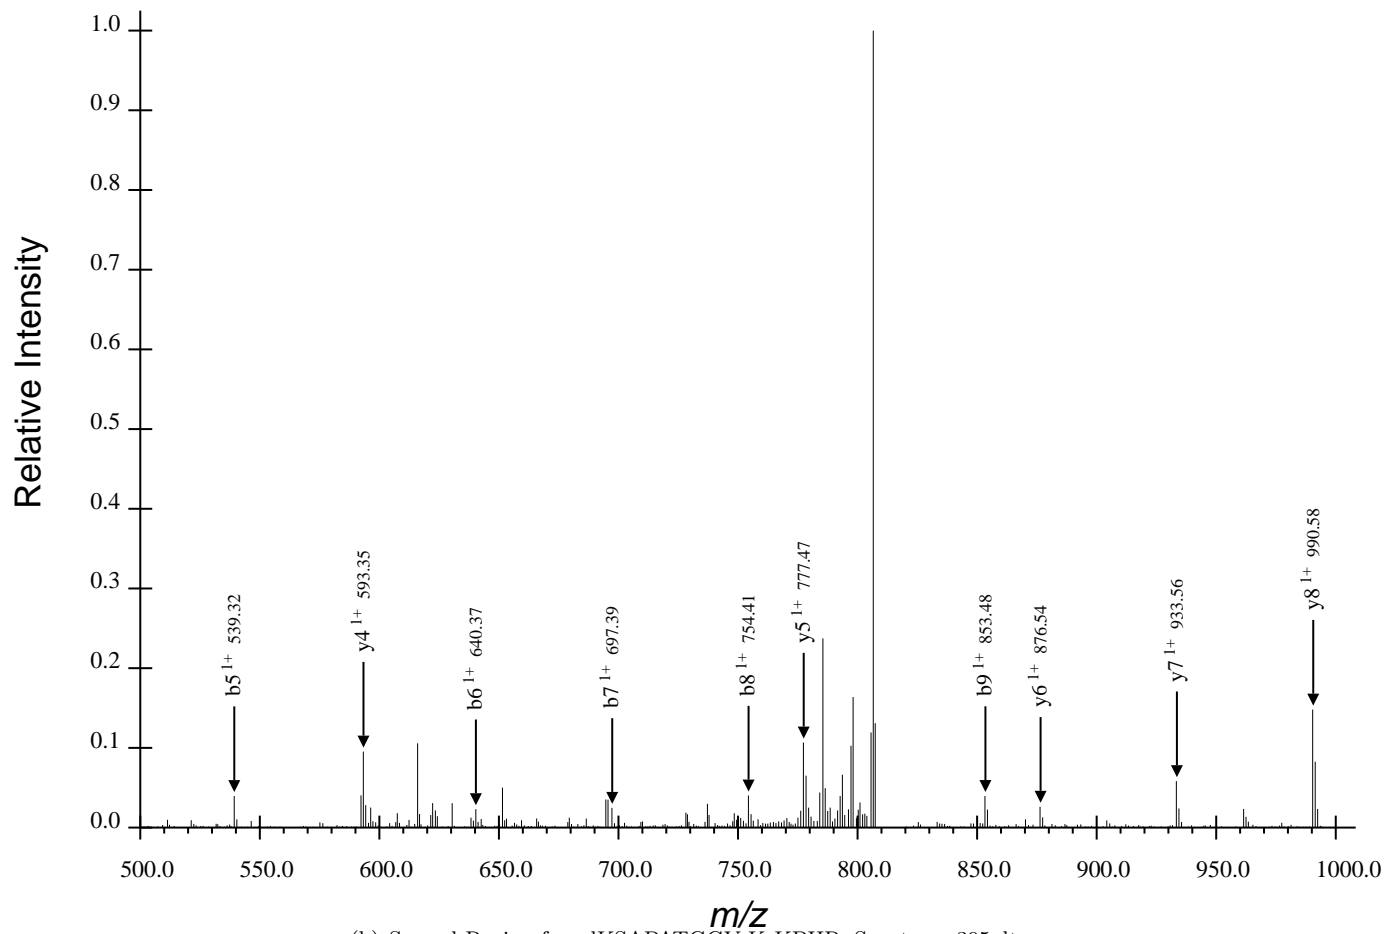

(b) Second Region for rdKSAPATGGVrKrKPHR, Spectrum 395.dta

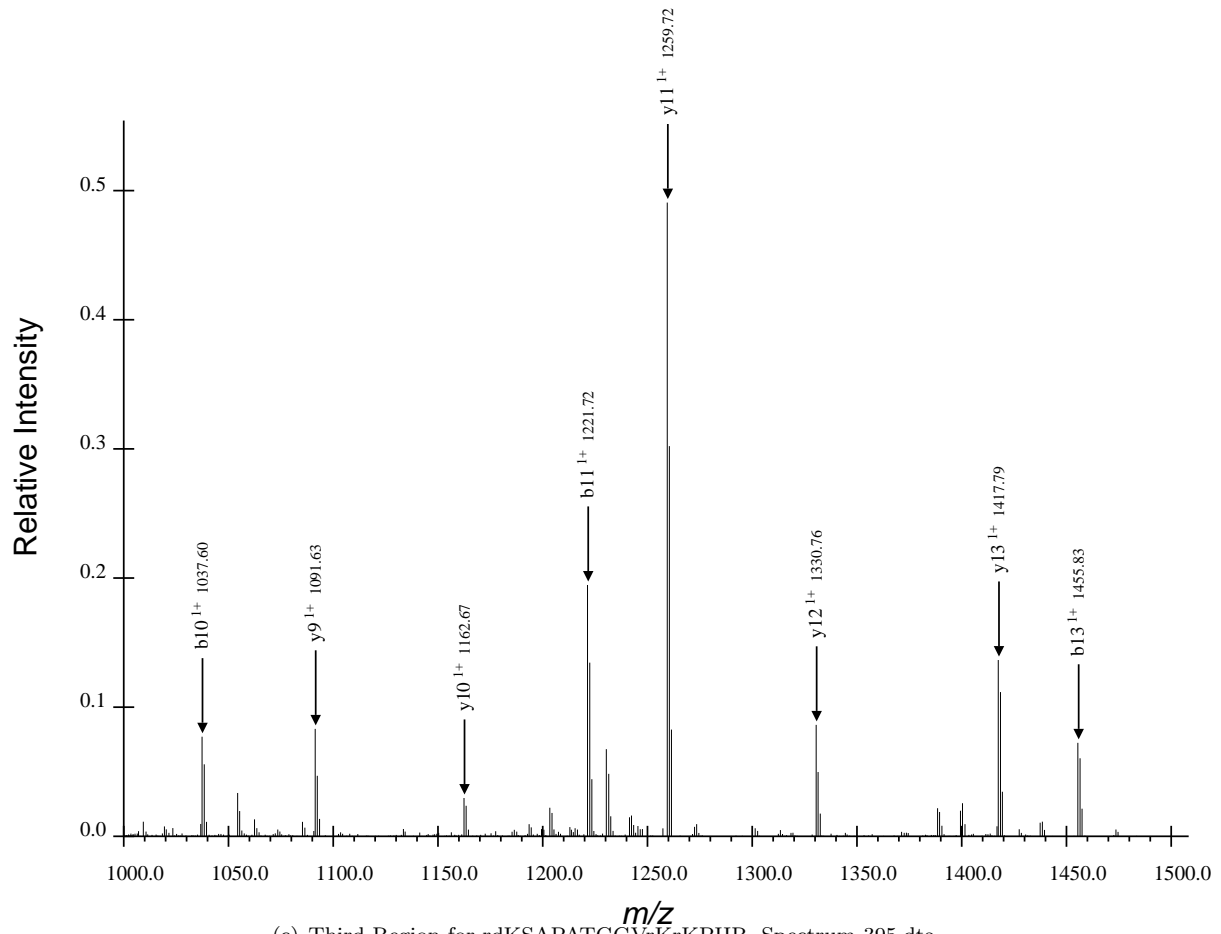

(c) Third Region for rdKSAPATGGVrKrKPHR, Spectrum 395.dta

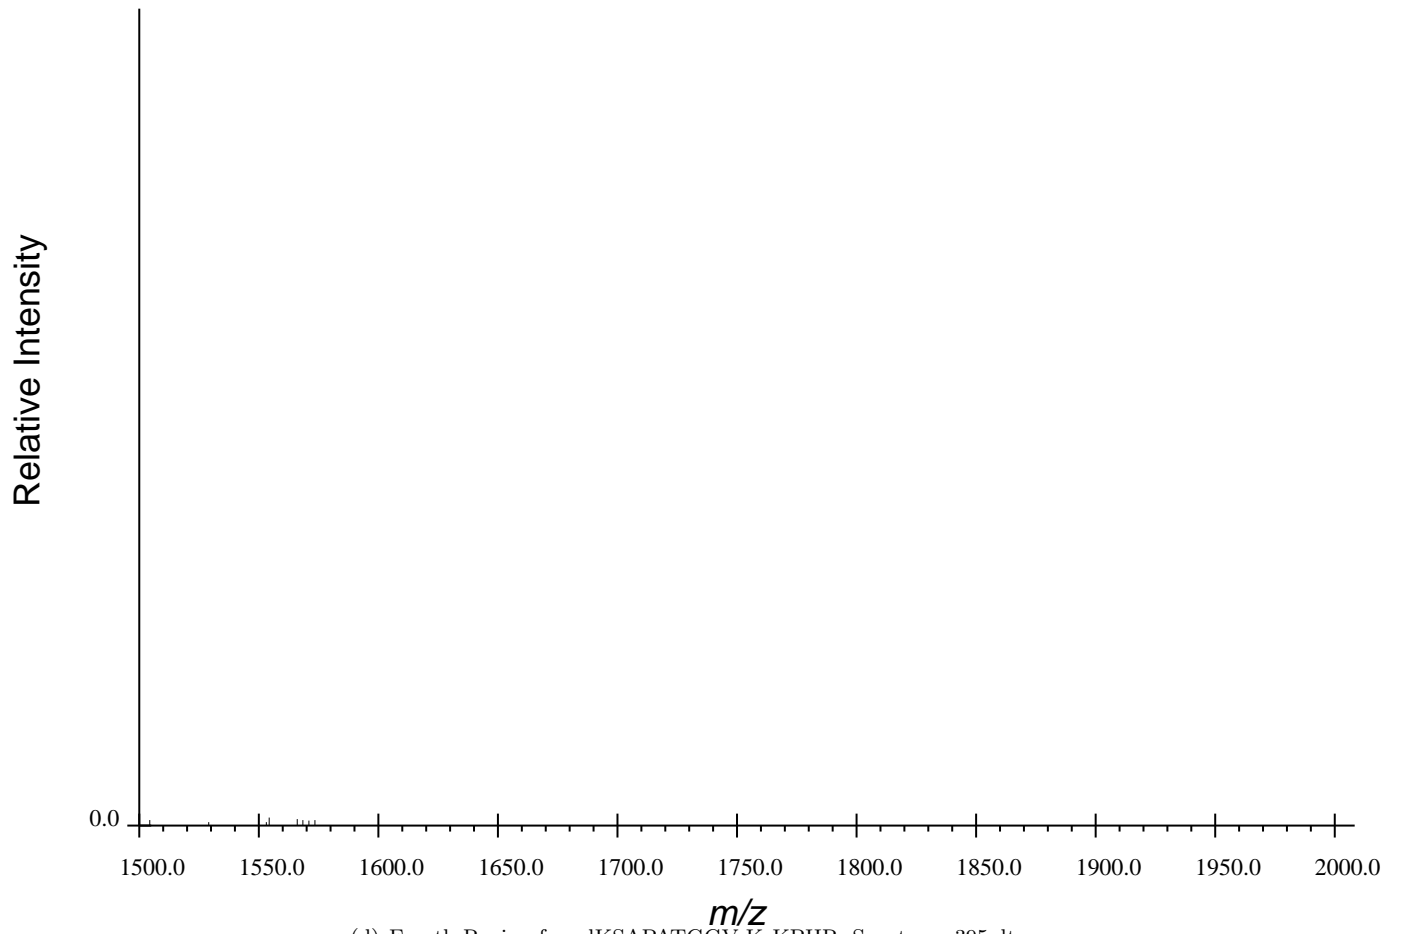

(d) Fourth Region for rdKSAPATGGVrKrKPHR, Spectrum 395.dta

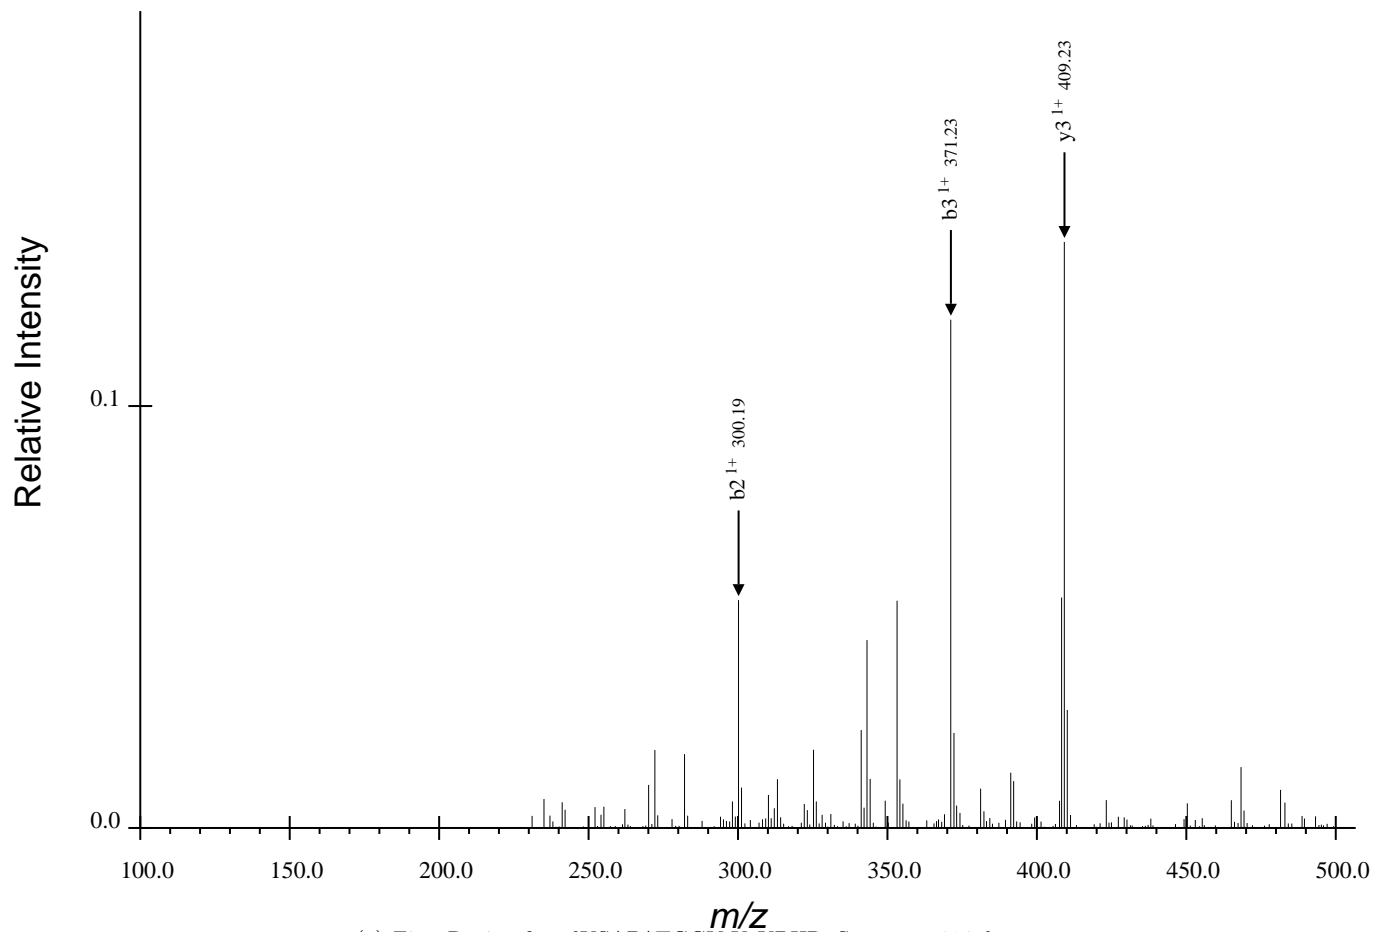

(a) First Region for rdKSAPATGGVrKrKPHR, Spectrum 396.dta

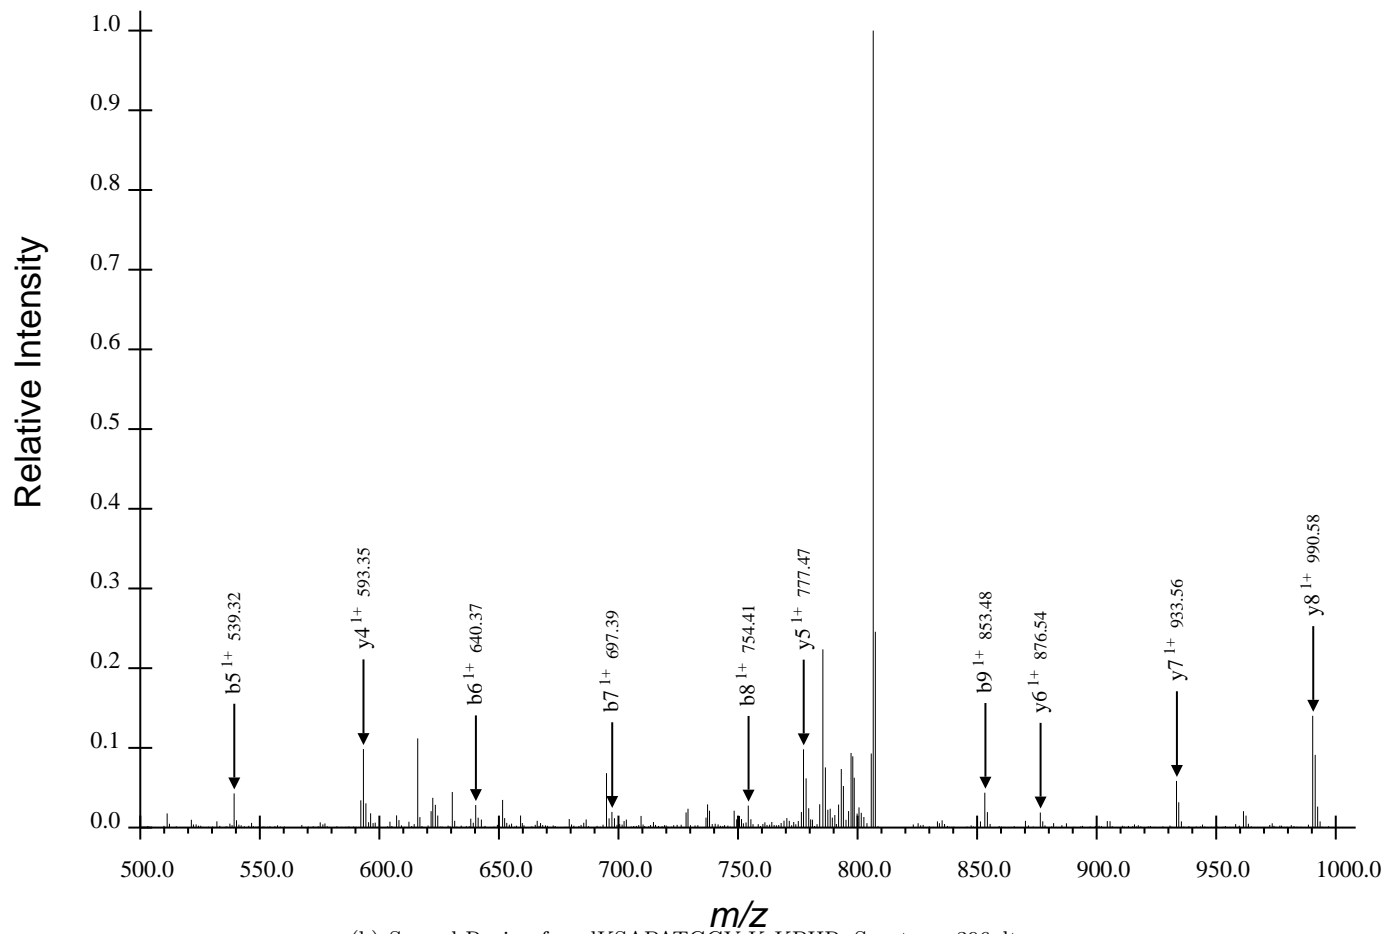

(b) Second Region for rdKSAPATGGVrKrKPHR, Spectrum 396.dta



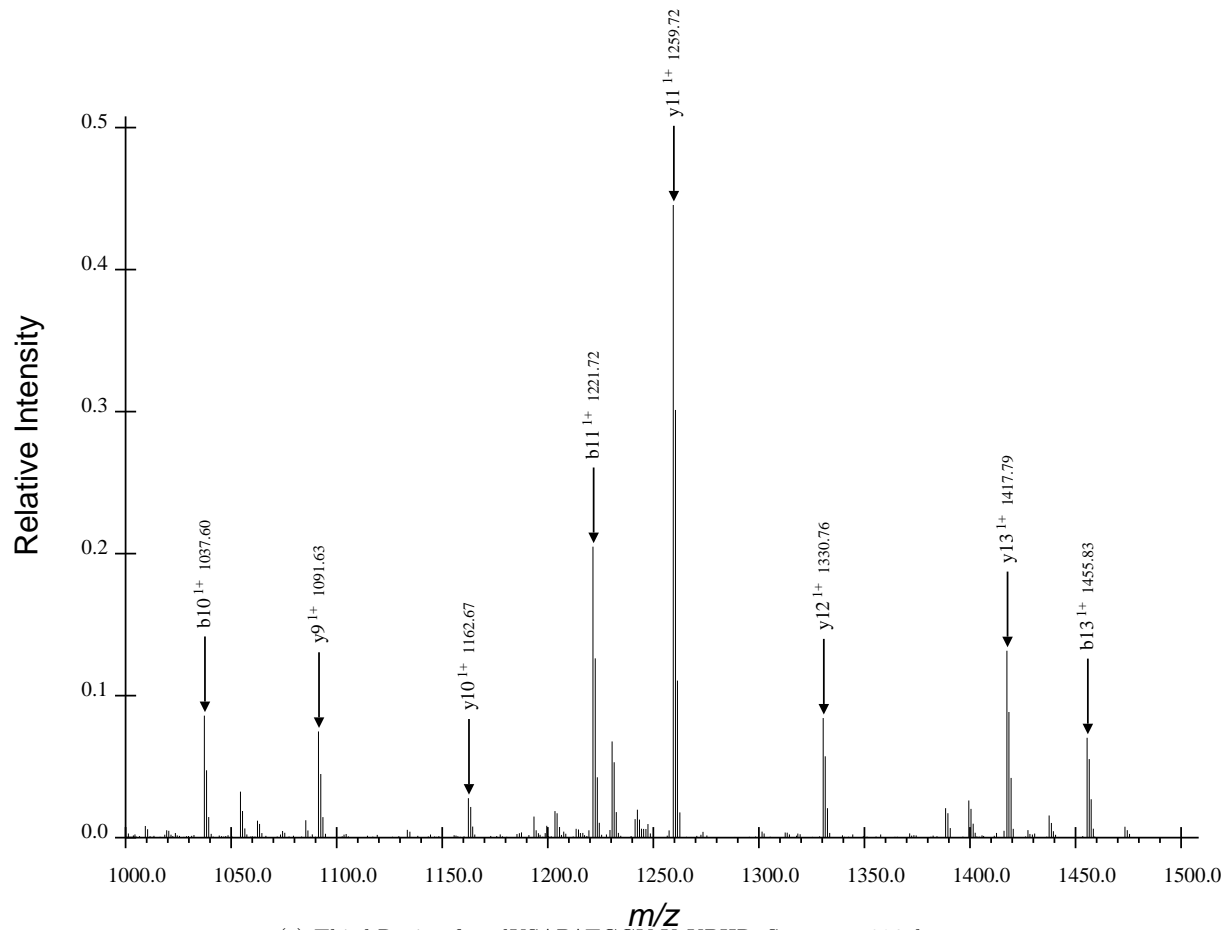

(c) Third Region for rdKSAPATGGVrKrKPHR, Spectrum 396.dta

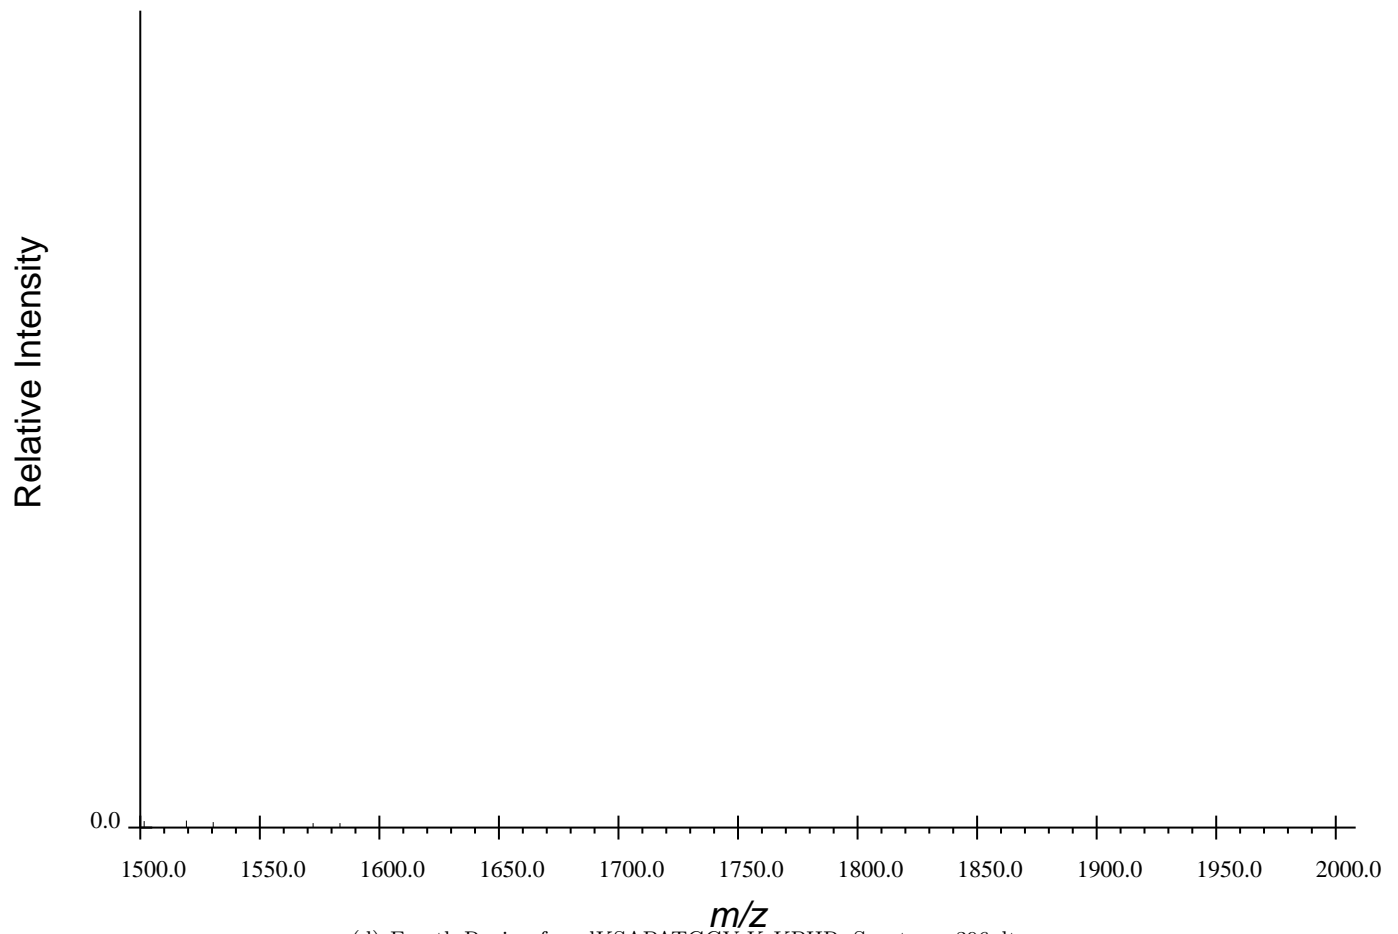

(d) Fourth Region for rdKSAPATGGVrKrKPHR, Spectrum 396.dta

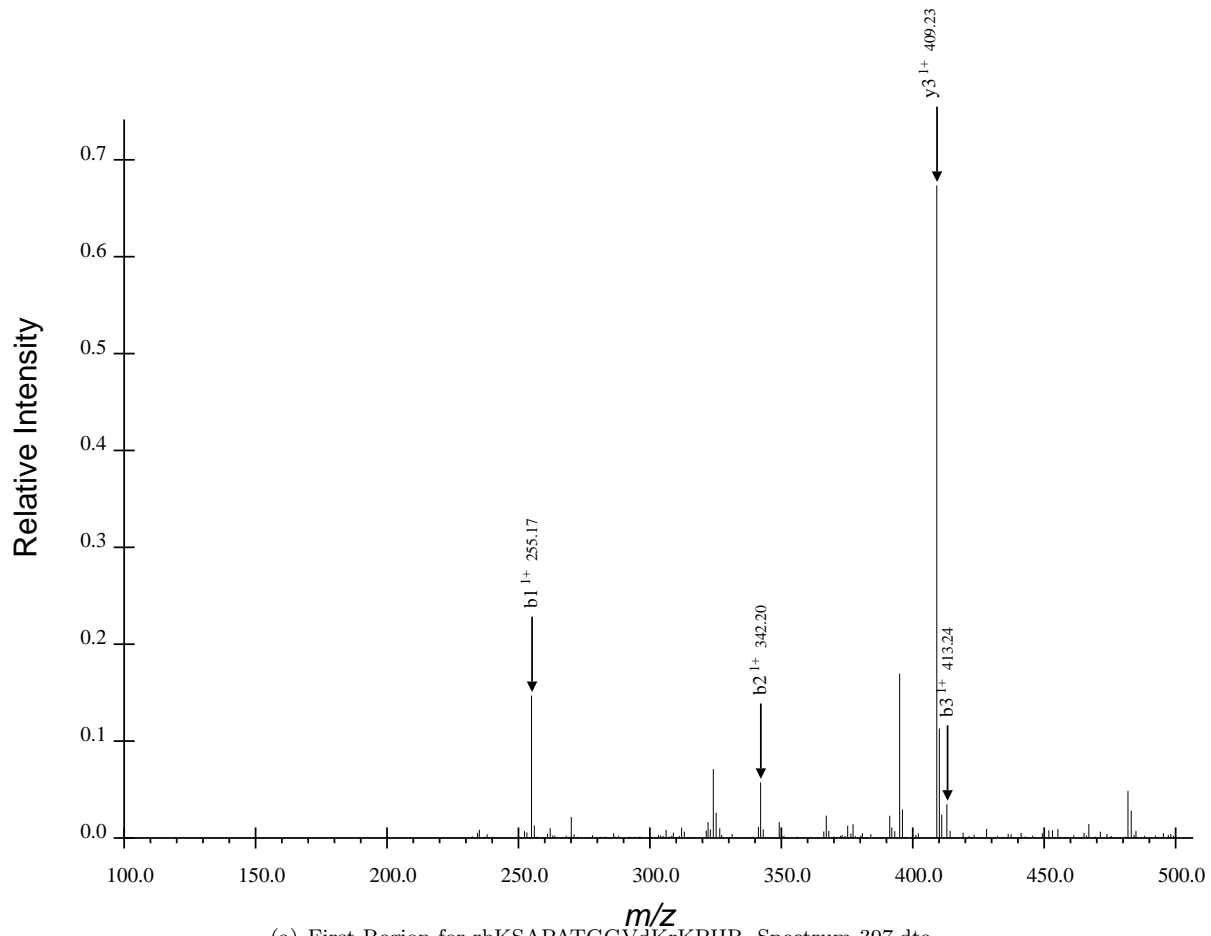

(a) First Region for rhKSAPATGGVdKrKPHR, Spectrum 397.dta

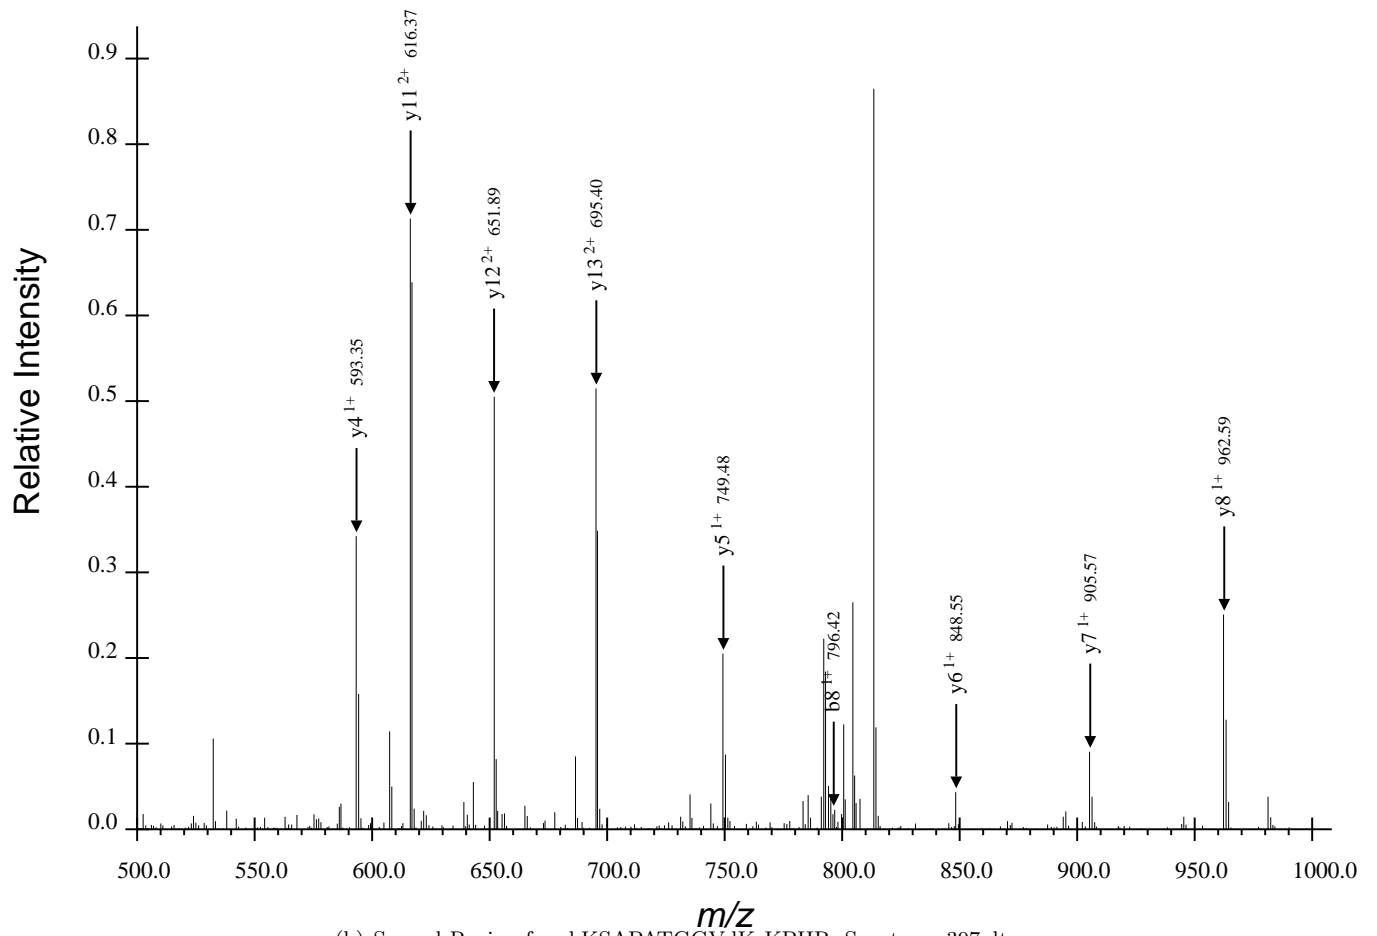

(b) Second Region for rhKSAPATGGVdKrKPHR, Spectrum 397.dta

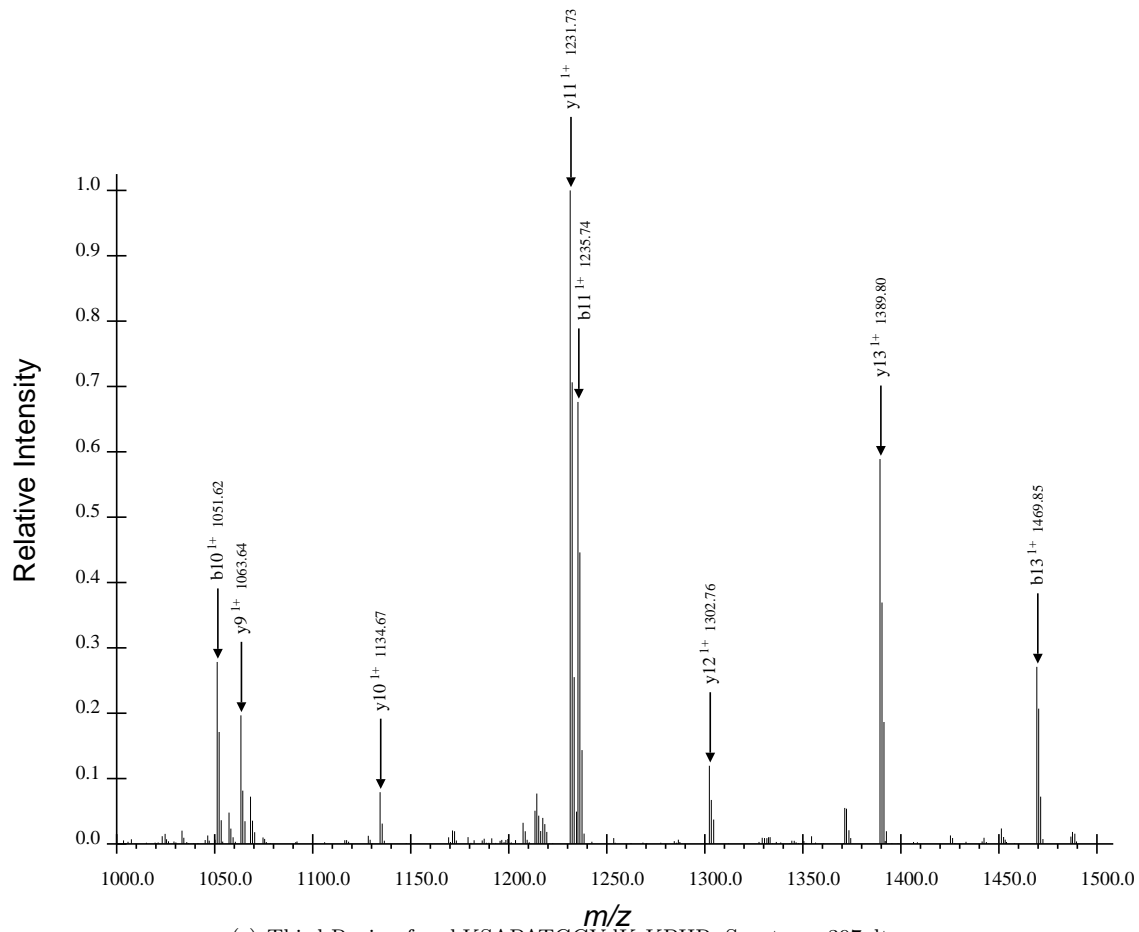

(c) Third Region for rhKSAPATGGVdKrKPHR, Spectrum 397.dta

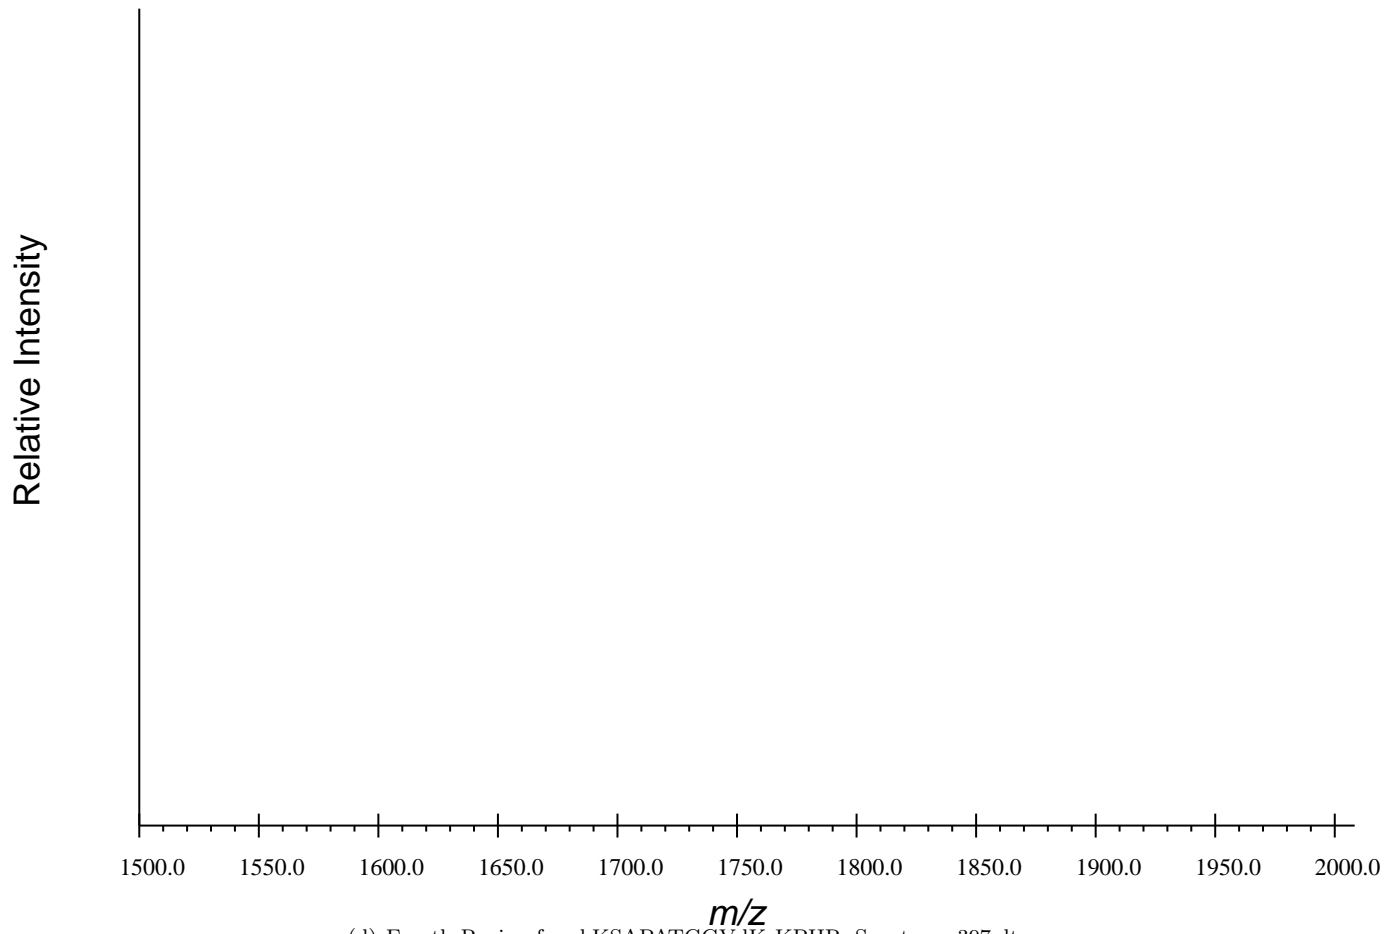

(d) Fourth Region for rhKSAPATGGVdKrKPHR, Spectrum 397.dta

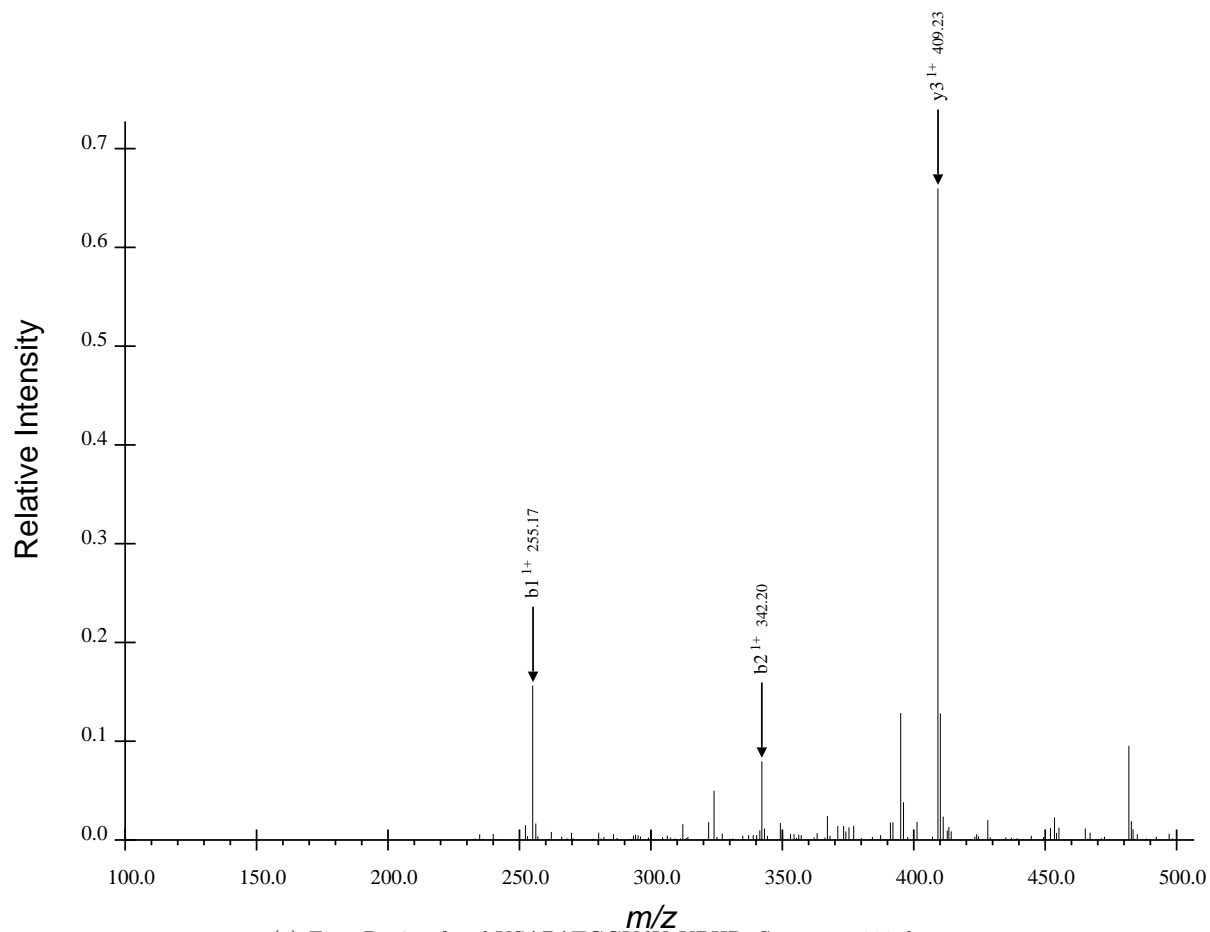

(a) First Region for rhKSAPATGGVdKrKPHR, Spectrum 398.dta

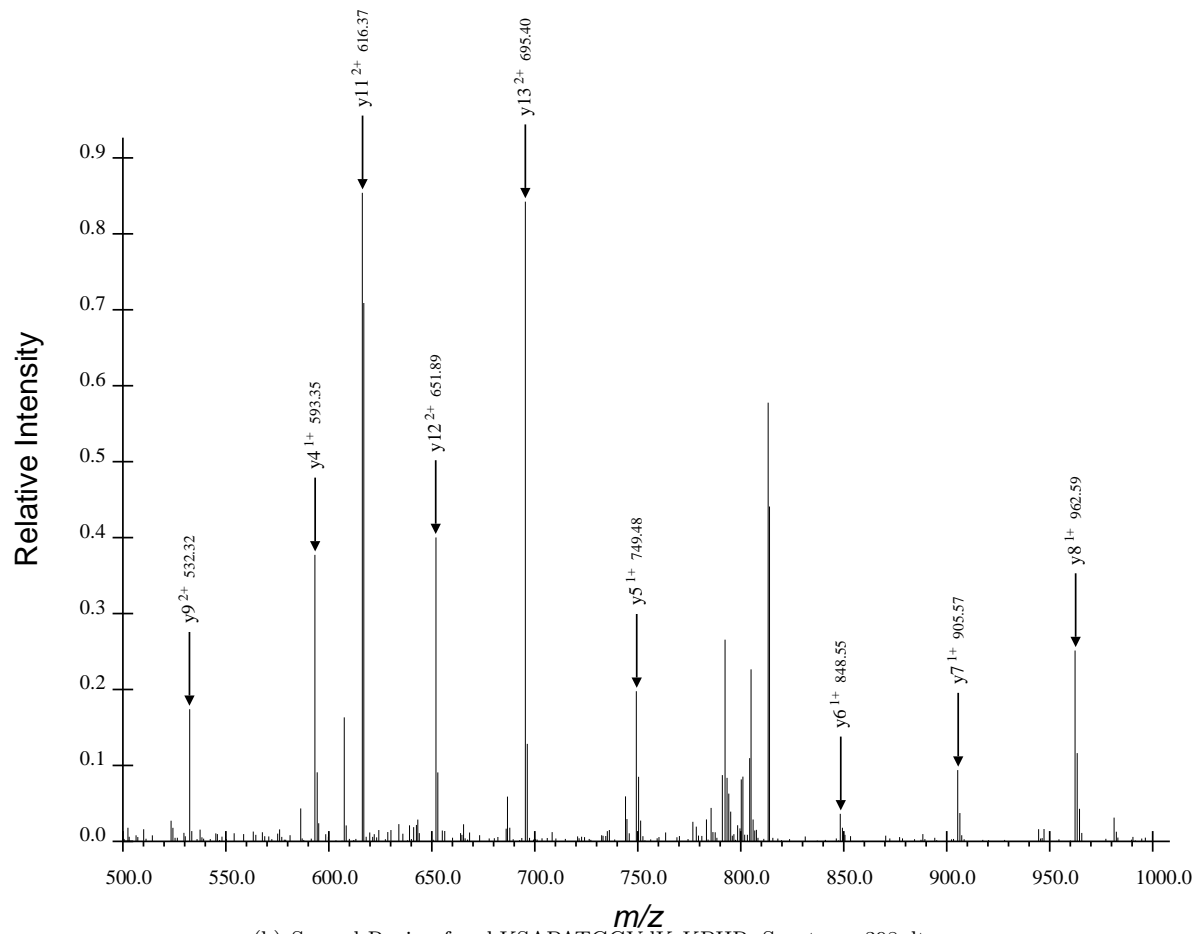

(b) Second Region for rhKSAPATGGVdKrKPHR, Spectrum 398.dta

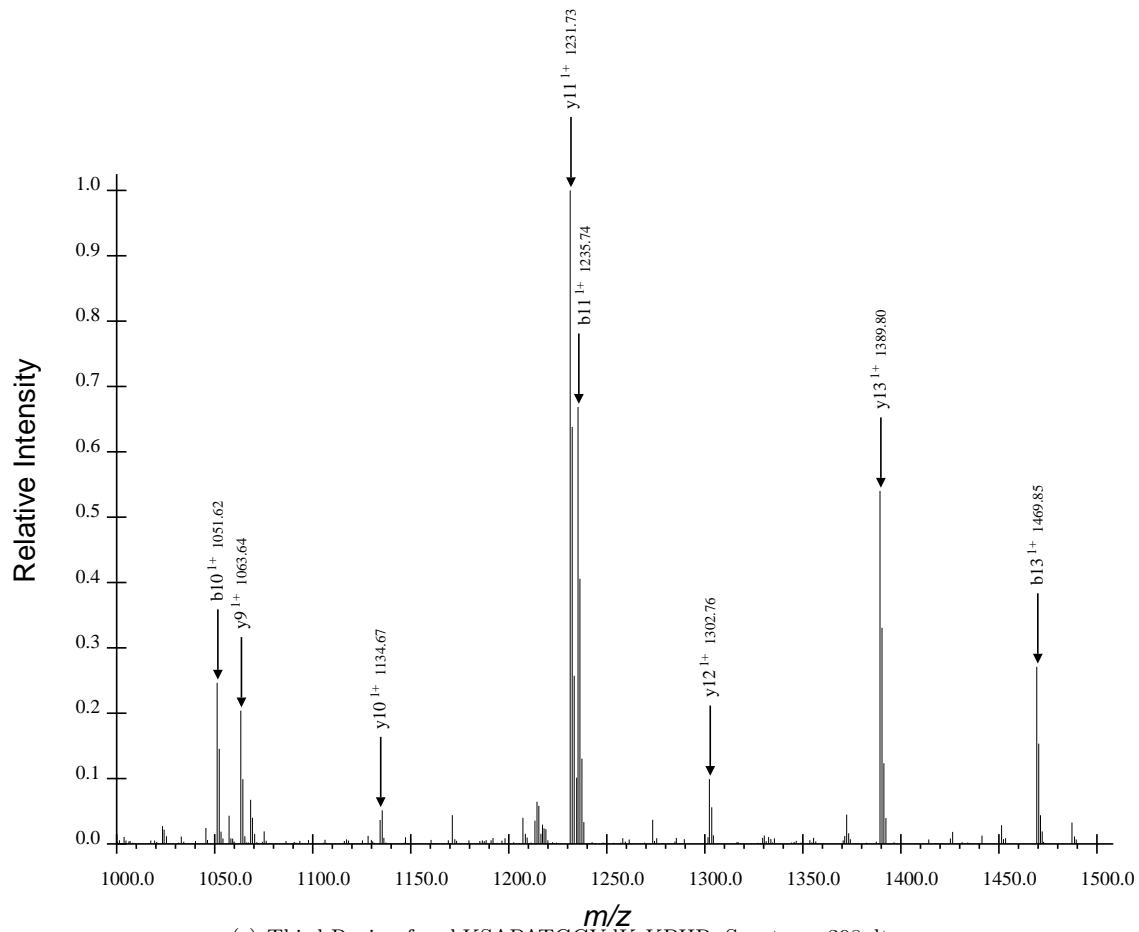

(c) Third Region for rhKSAPATGGVdKrKPHR, Spectrum 398.dta

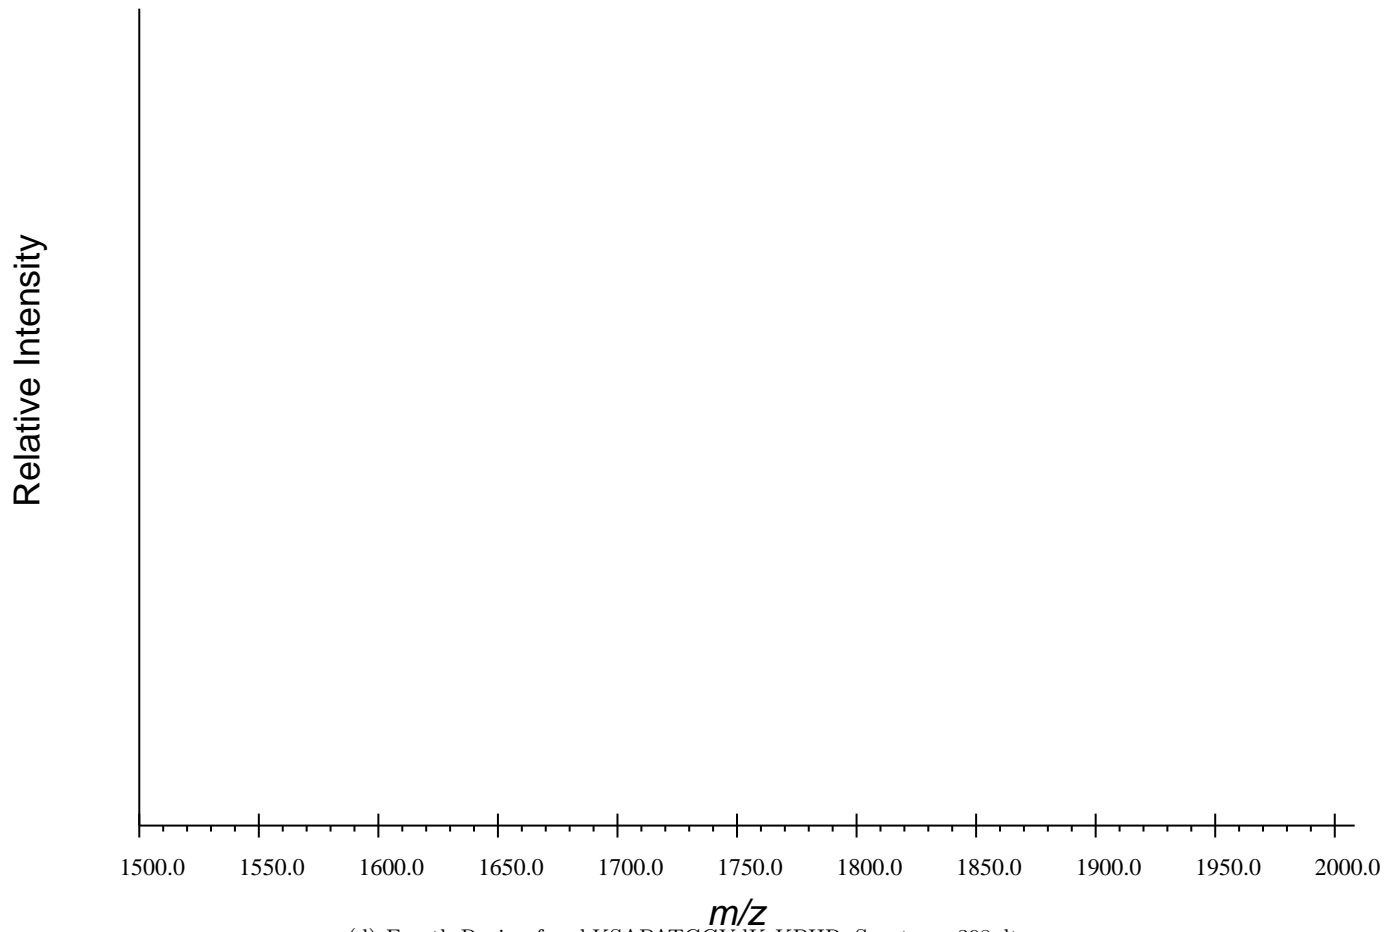

(d) Fourth Region for rhKSAPATGGVdKrKPHR, Spectrum 398.dta

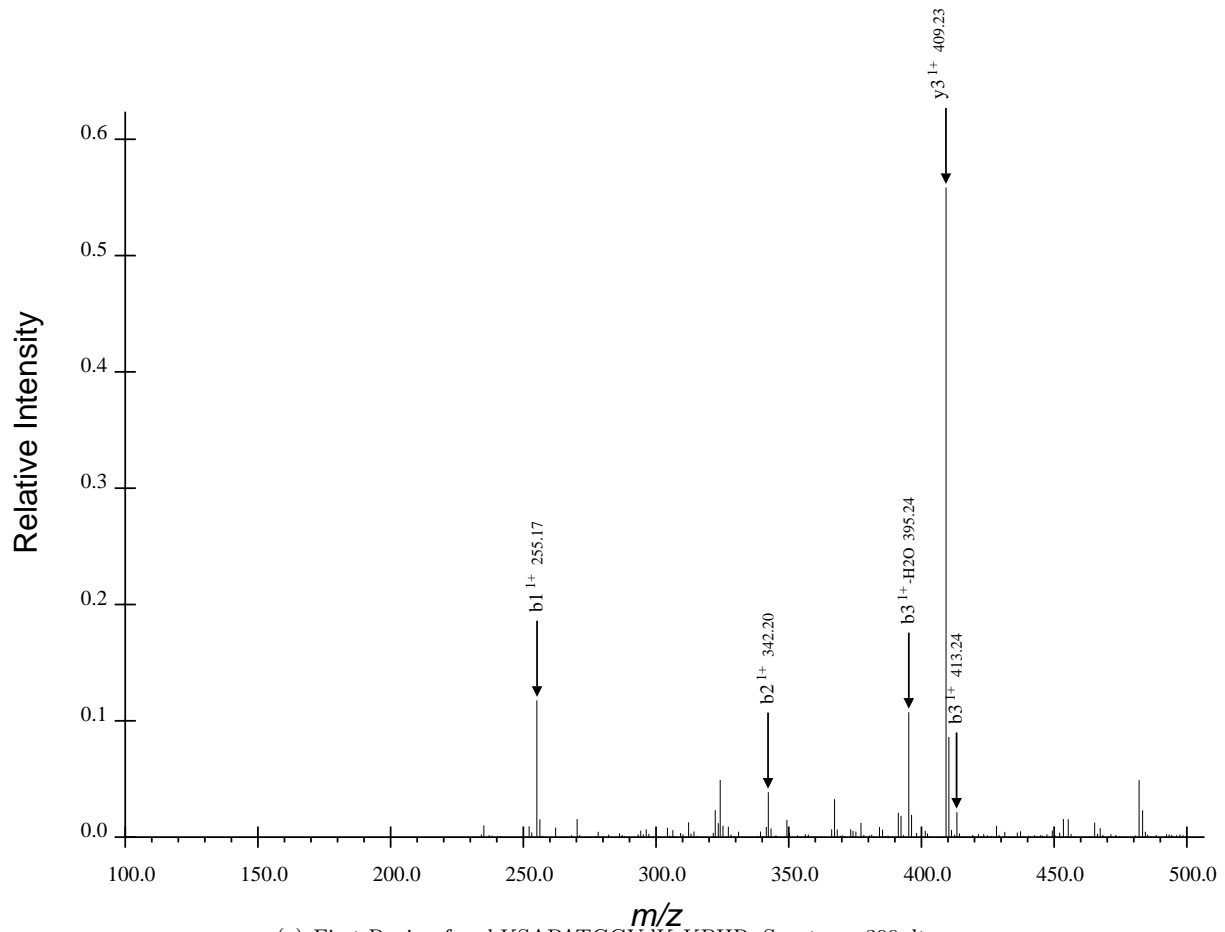

(a) First Region for rhKSAPATGGVdKrKPHR, Spectrum 399.dta

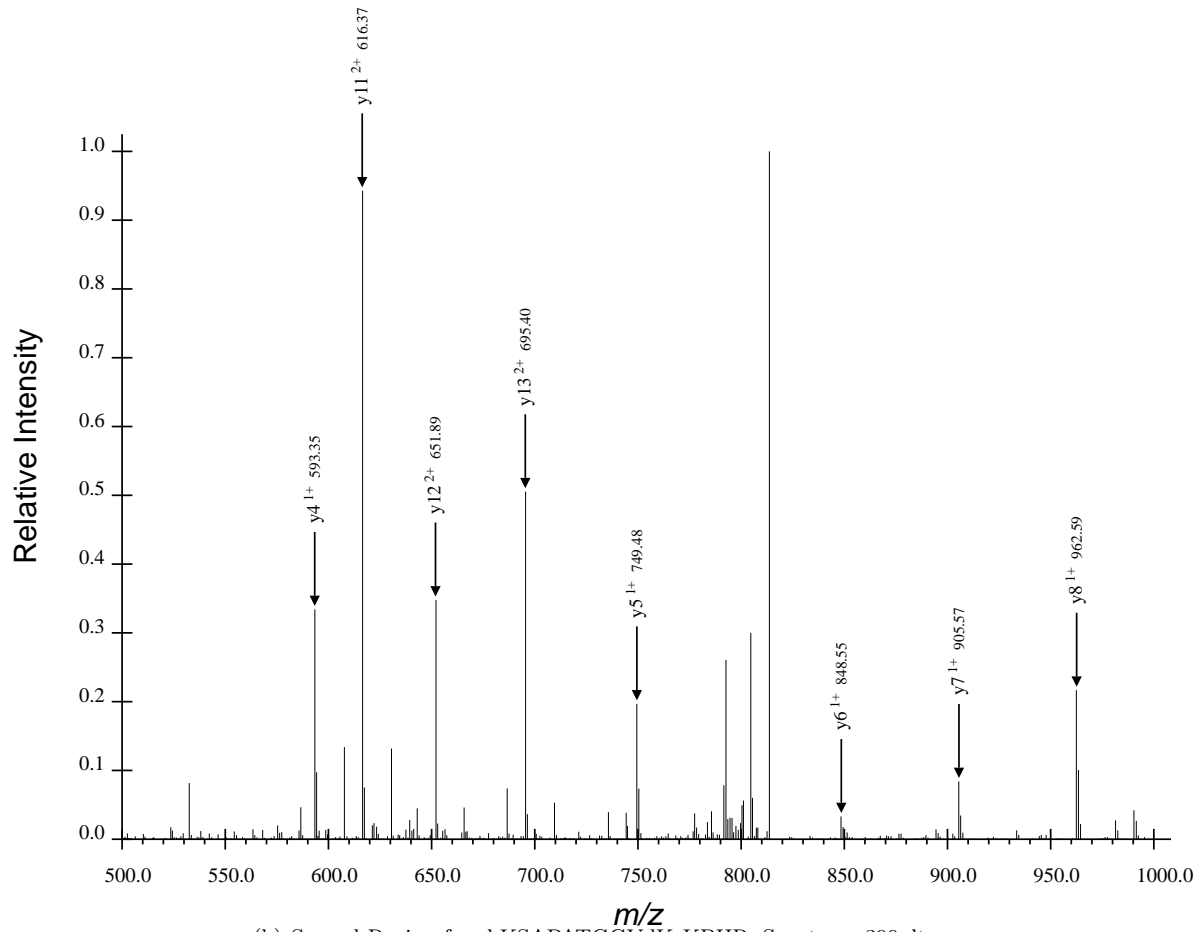

(b) Second Region for rhKSAPATGGVdKrKPHR, Spectrum 399.dta

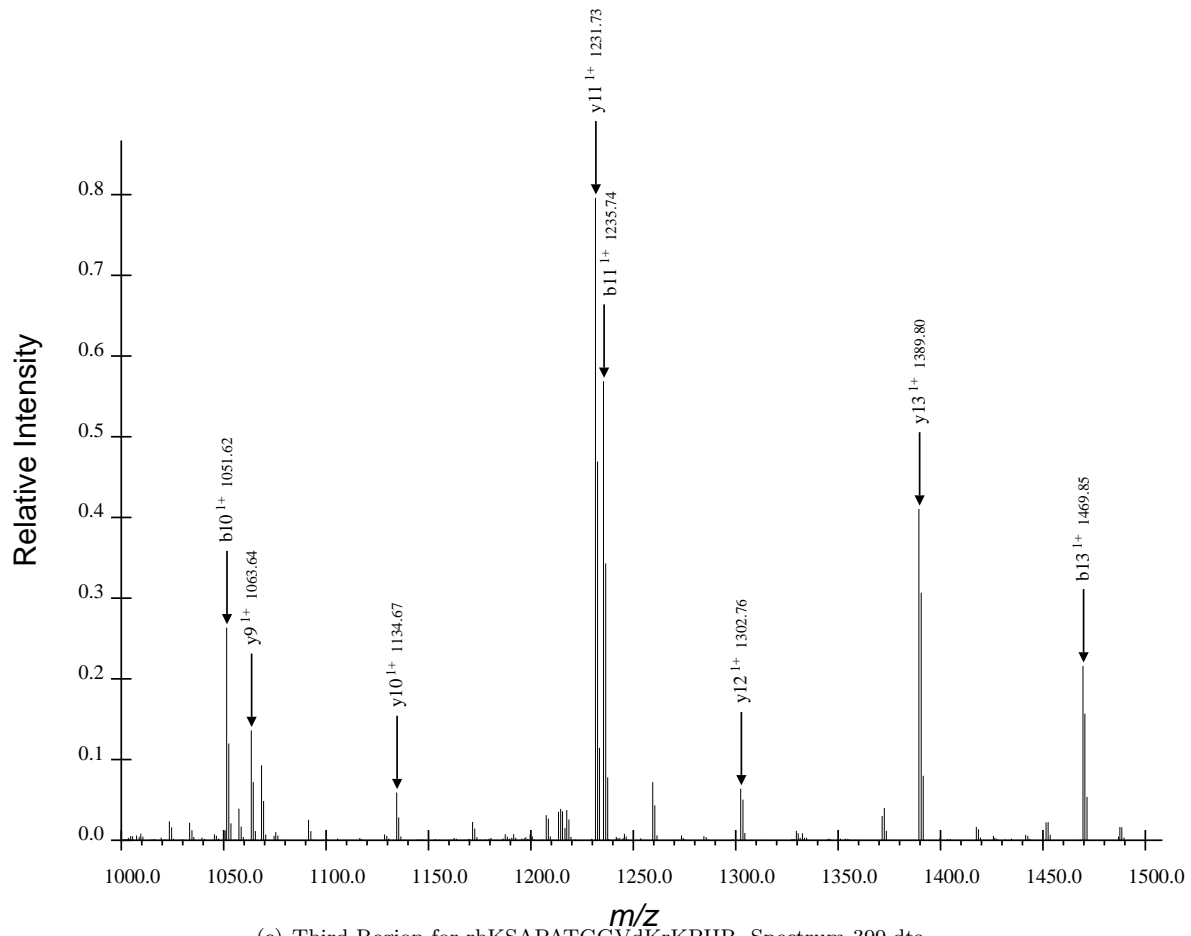

(c) Third Region for rhKSAPATGGVdKrKPHR, Spectrum 399.dta

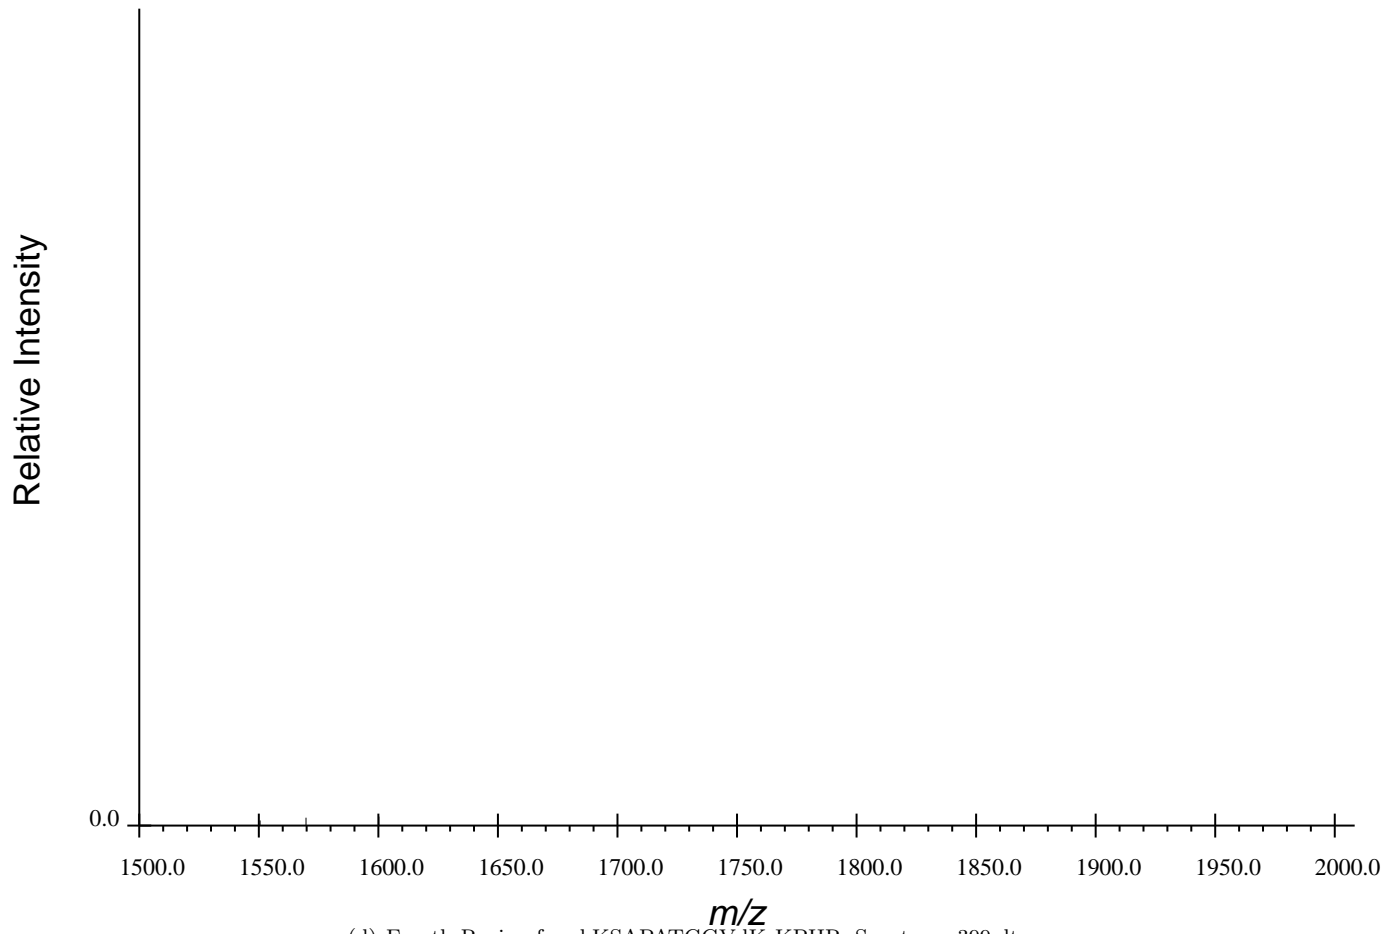

(d) Fourth Region for rhKSAPATGGVdKrKPHR, Spectrum 399.dta

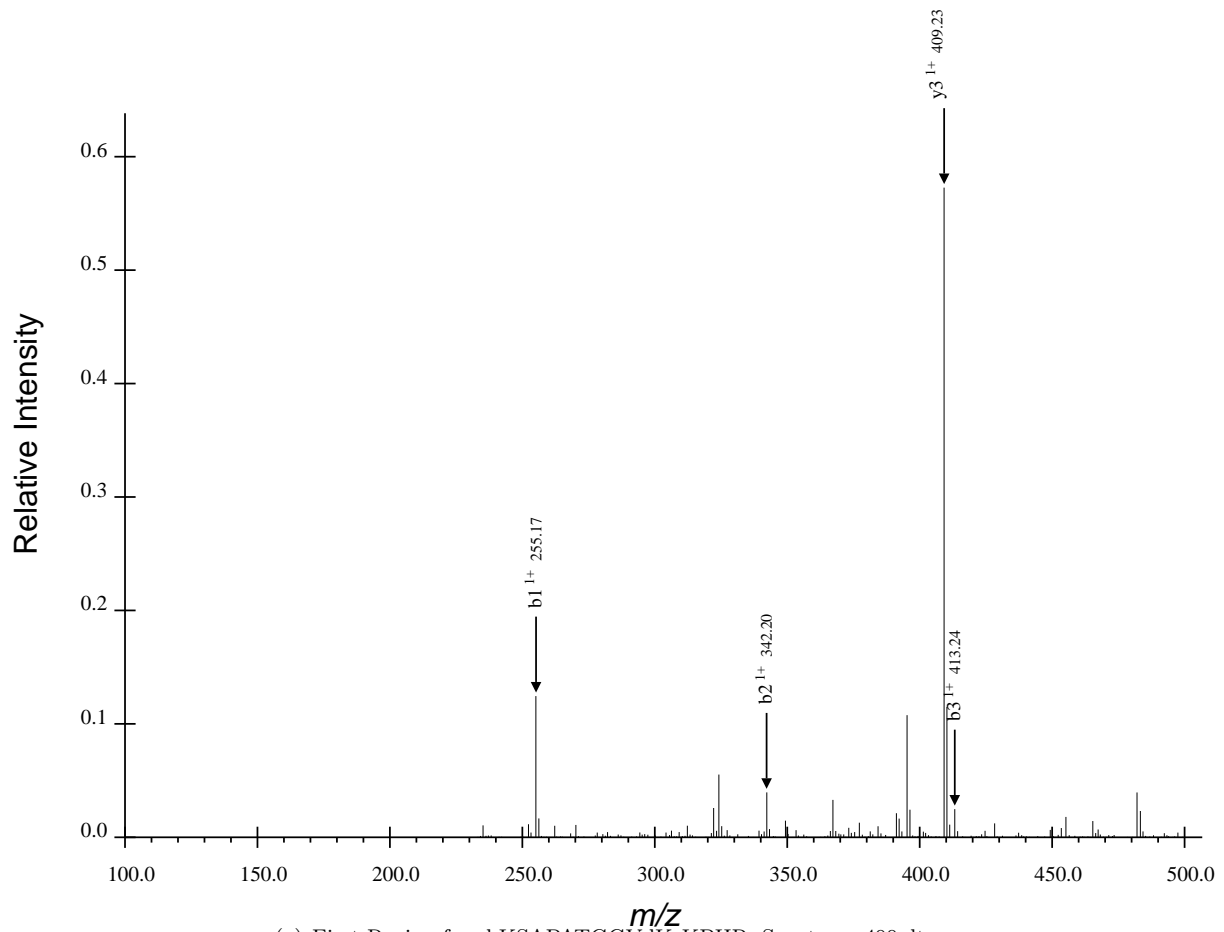

(a) First Region for rhKSAPATGGVdKrKPHR, Spectrum 400.dta

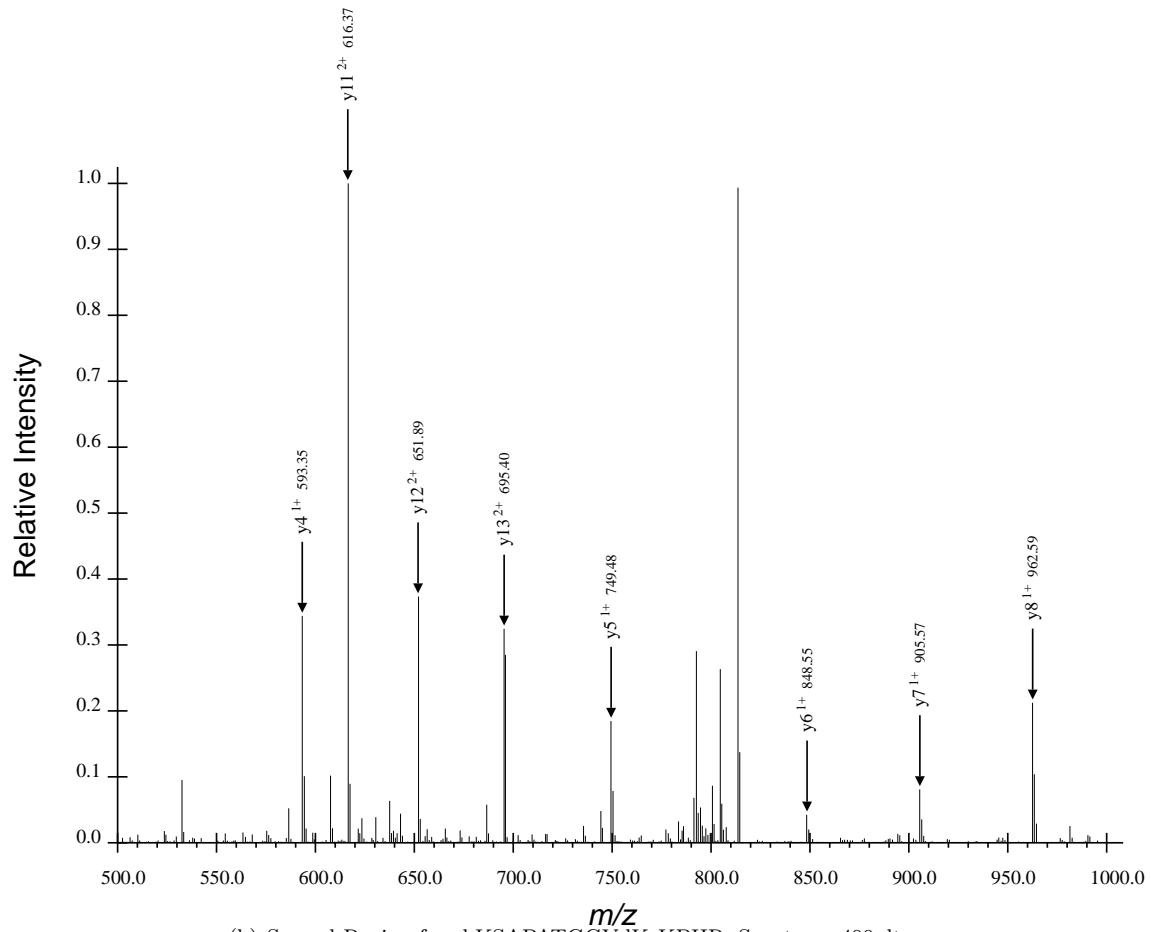

(b) Second Region for rhKSAPATGGVdKrKPHR, Spectrum 400.dta



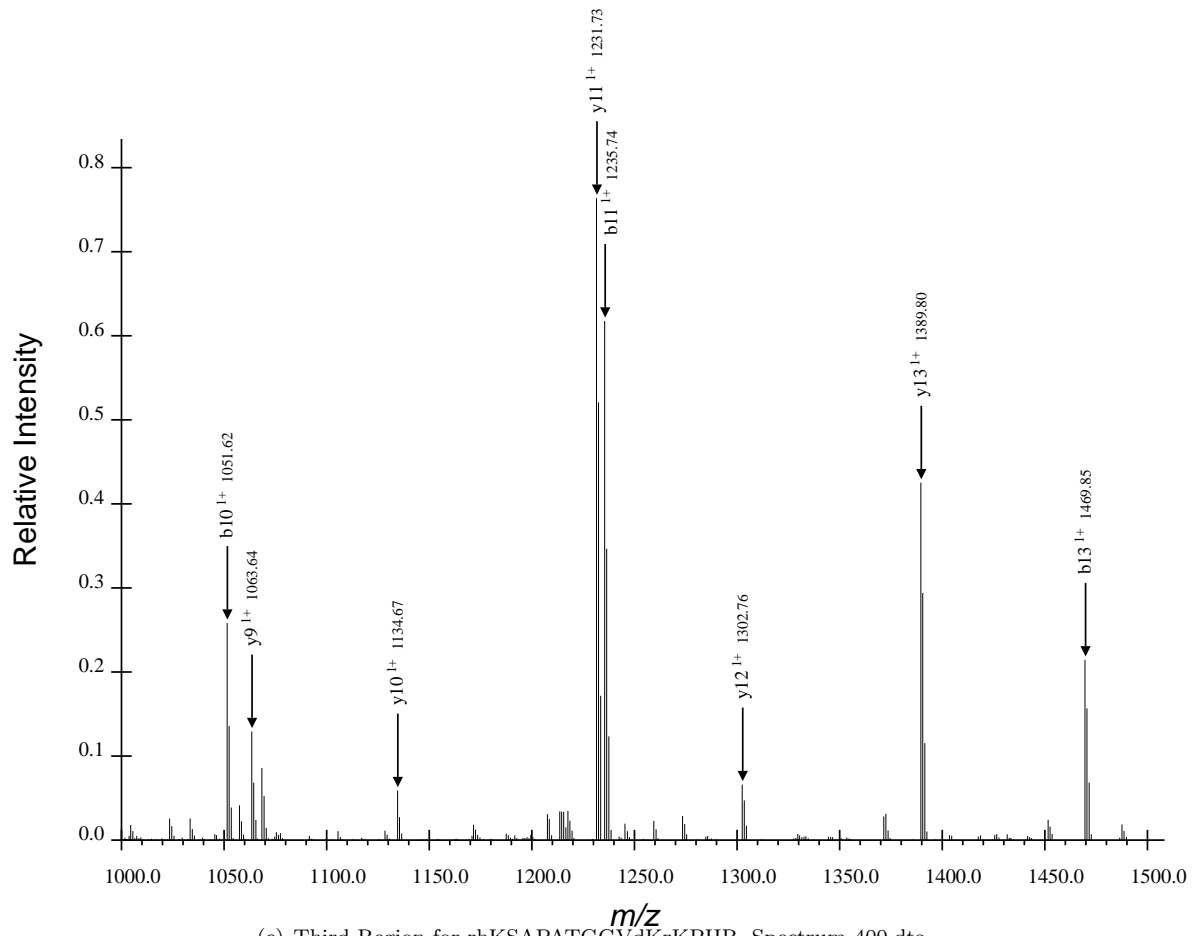

(c) Third Region for rhKSAPATGGVdKrKPHR, Spectrum 400.dta

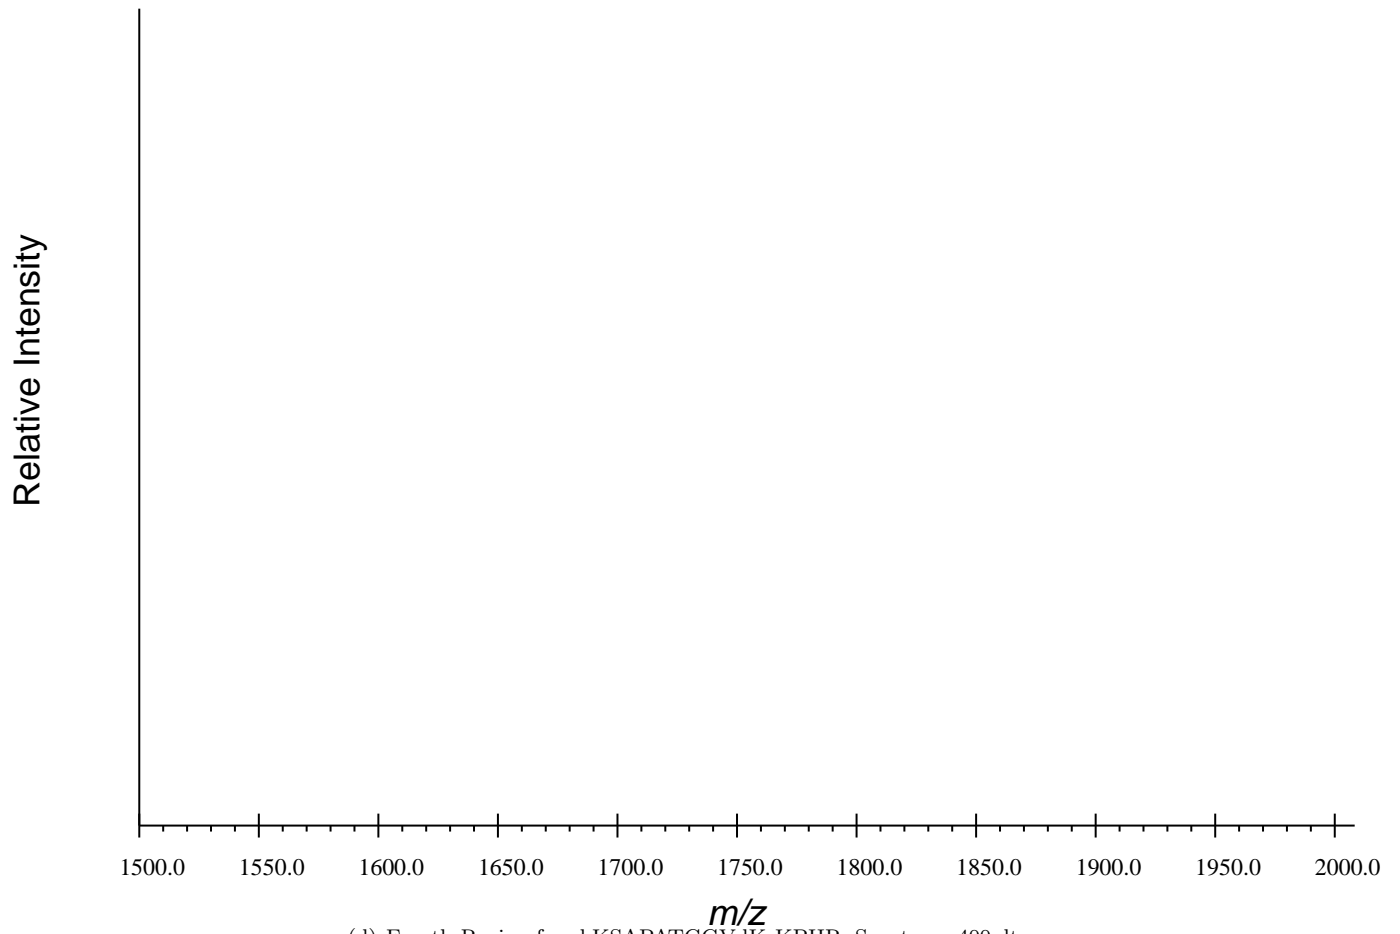

(d) Fourth Region for rhKSAPATGGVdKrKPHR, Spectrum 400.dta

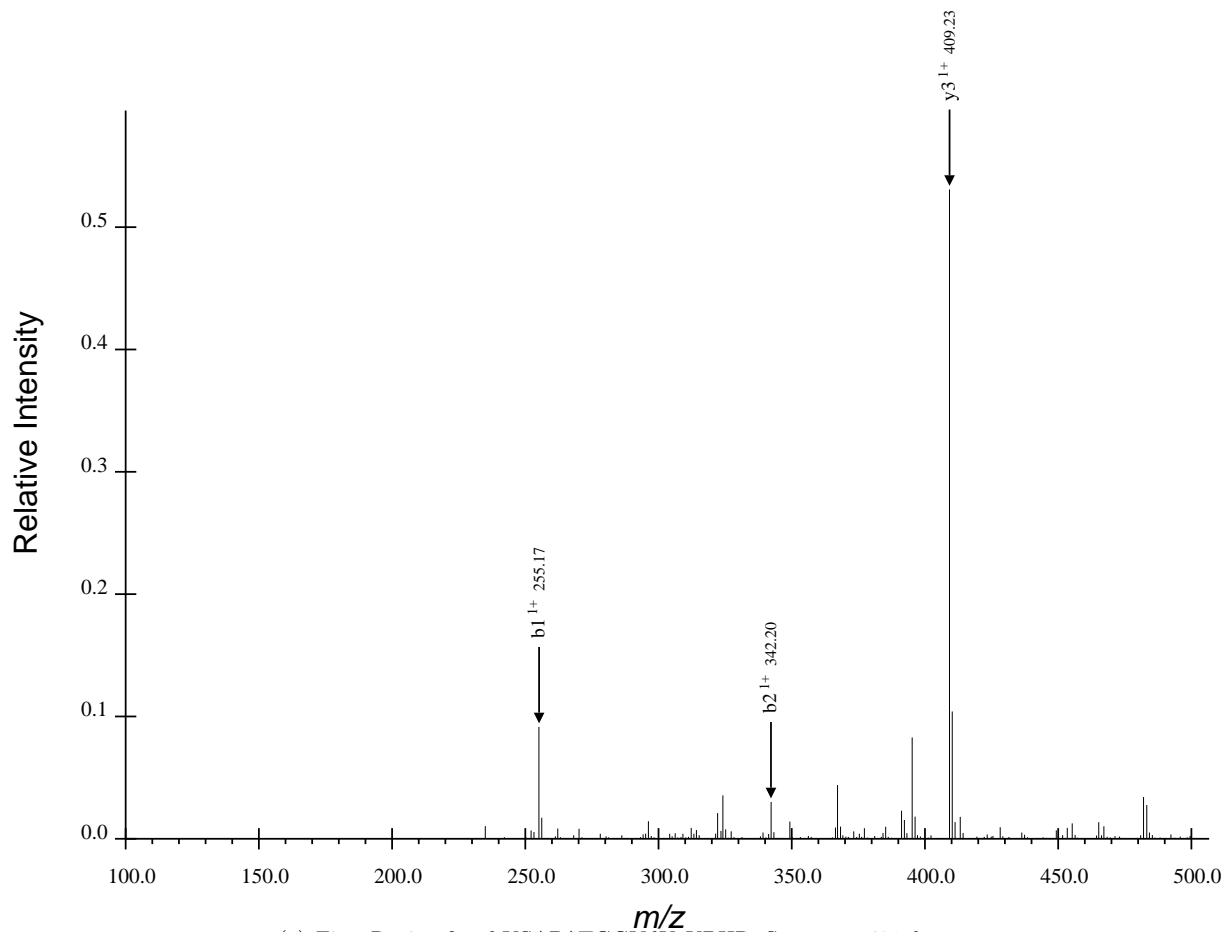

(a) First Region for rhKSAPATGGVdKrKPHR, Spectrum 401.dta

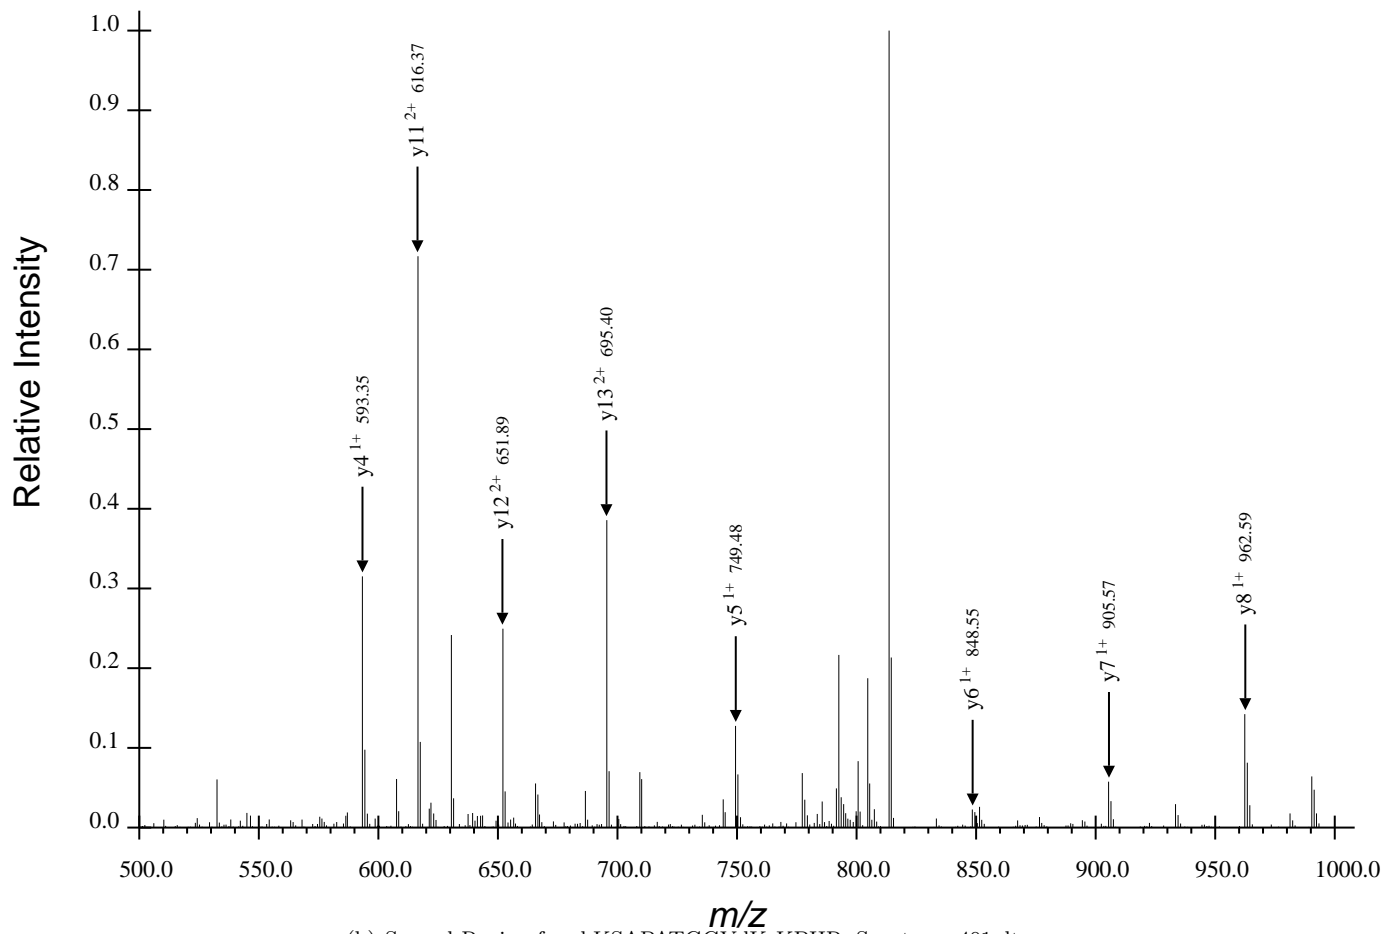

(b) Second Region for rhKSAPATGGVdKrKPHR, Spectrum 401.dta

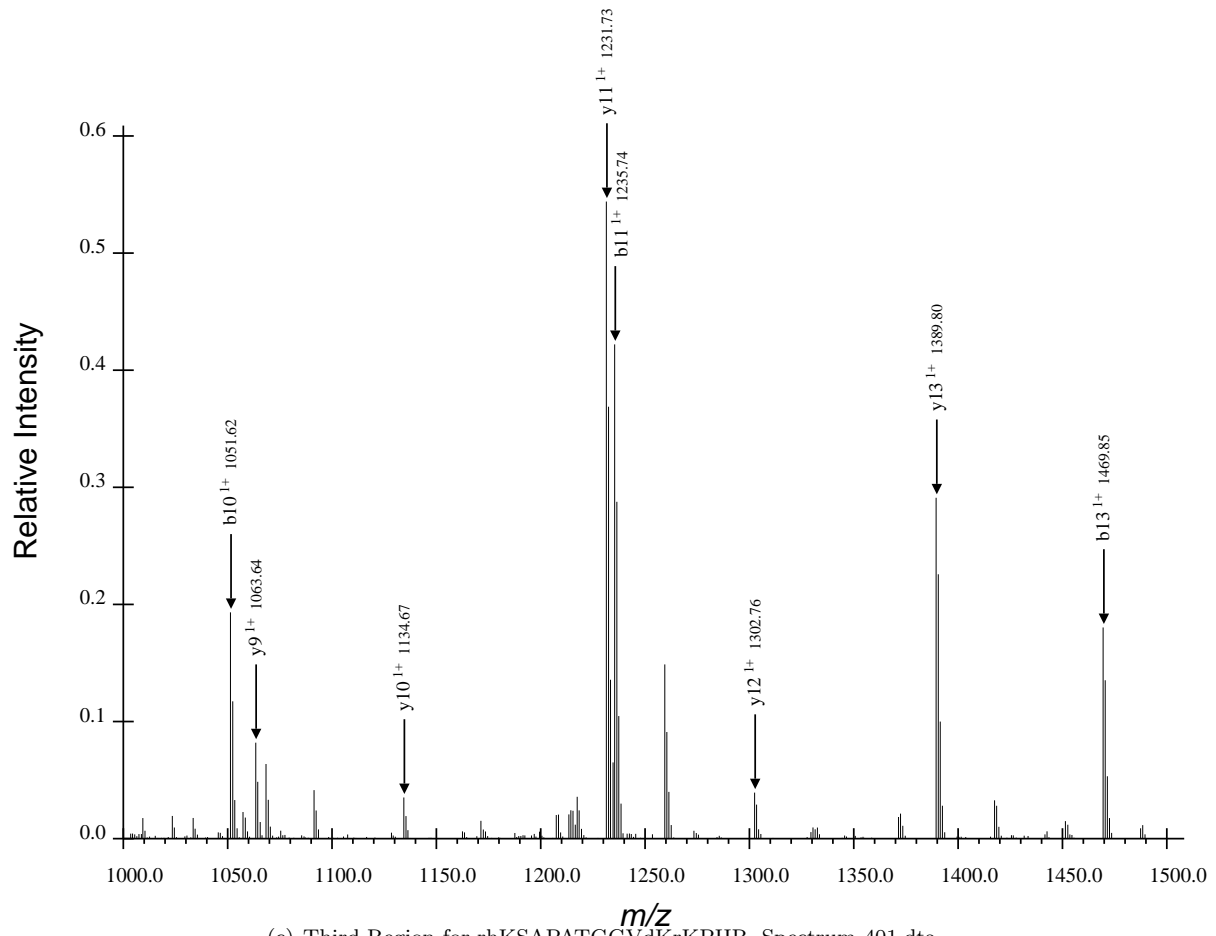

(c) Third Region for rhKSAPATGGVdKrKPHR, Spectrum 401.dta

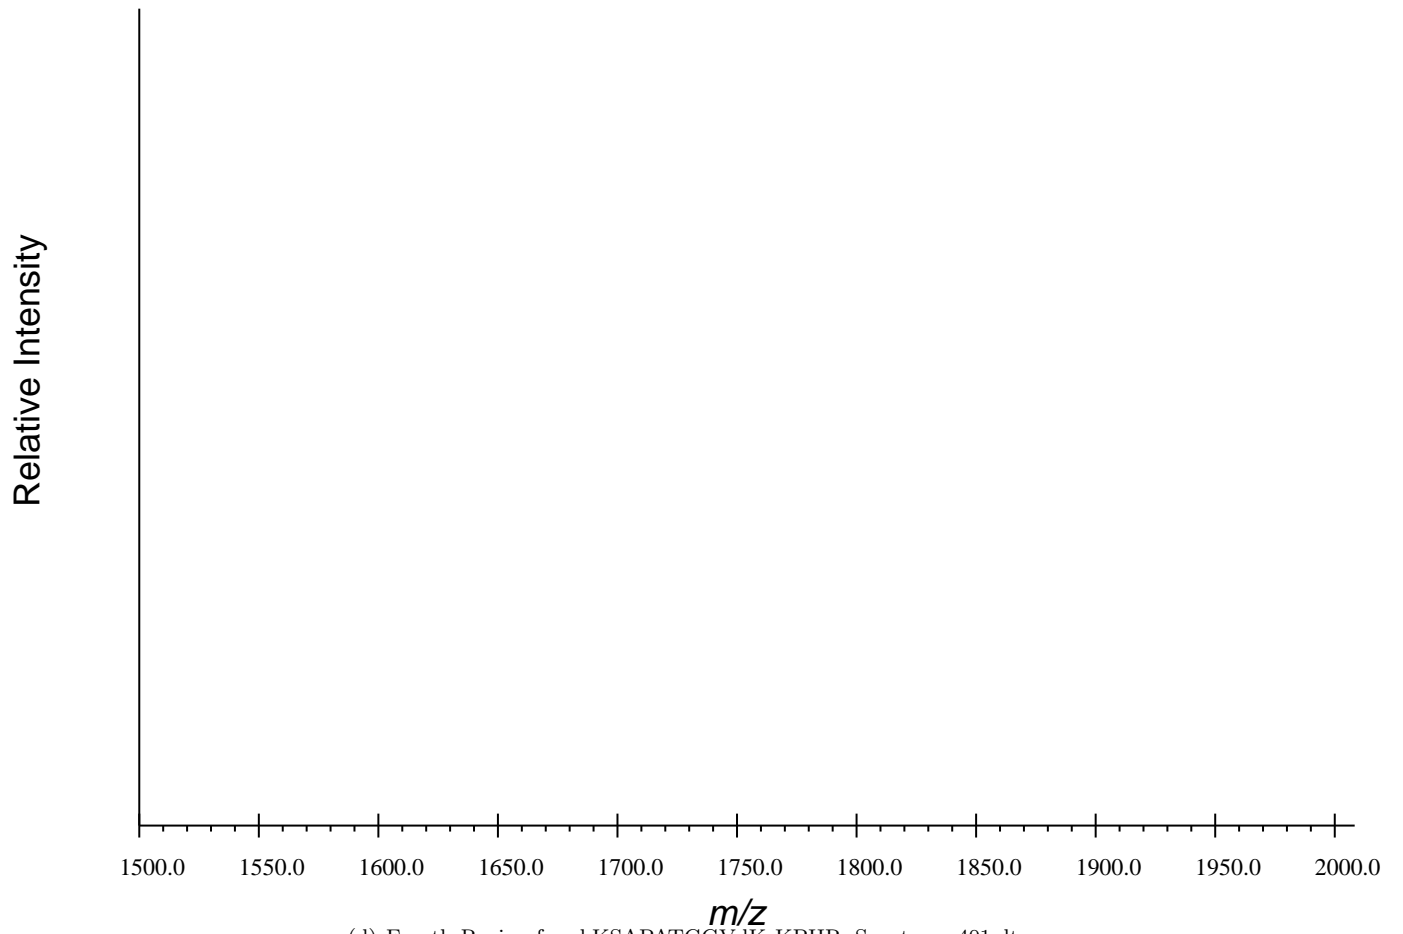

(d) Fourth Region for rhKSAPATGGVdKrKPHR, Spectrum 401.dta

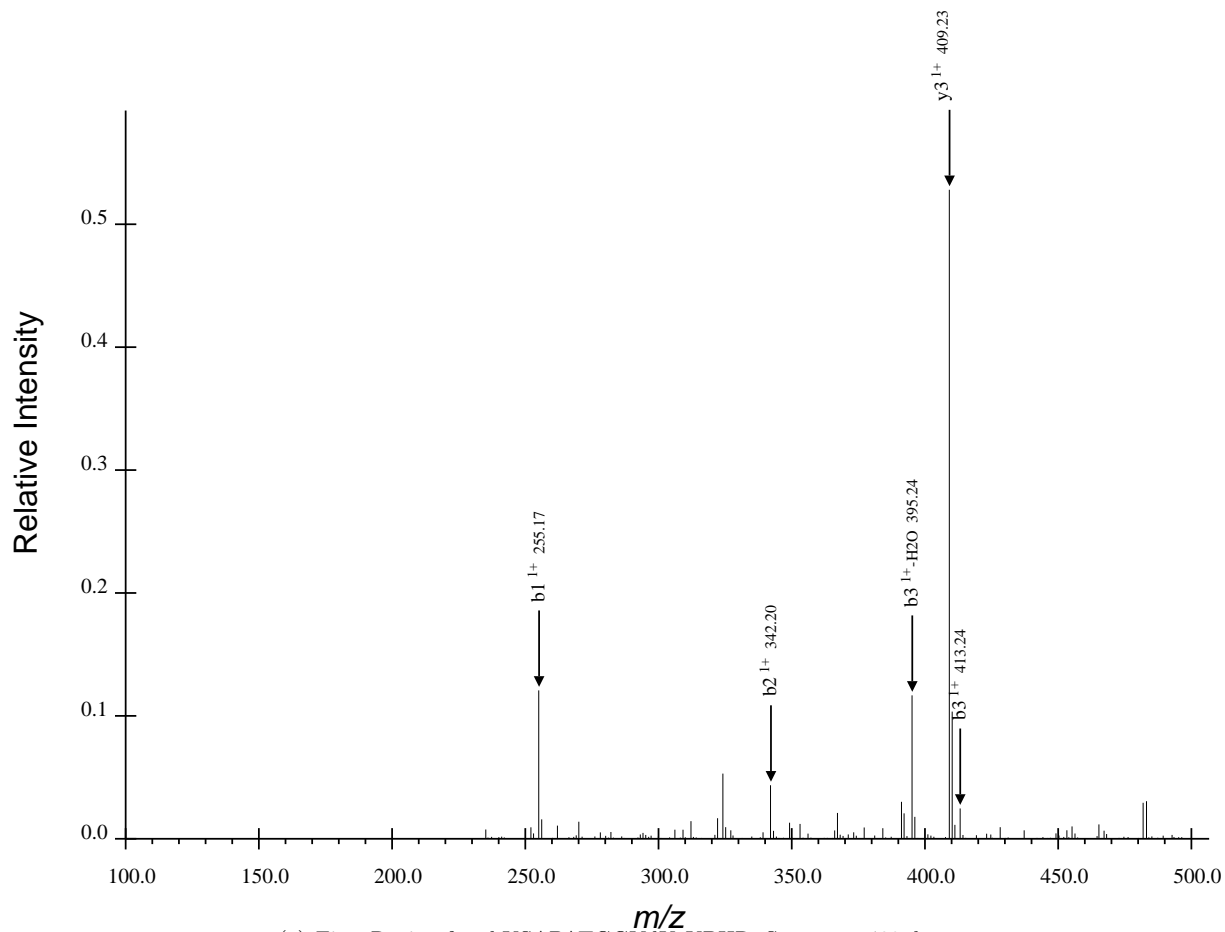

(a) First Region for rhKSAPATGGVdKrKPHR, Spectrum 402.dta

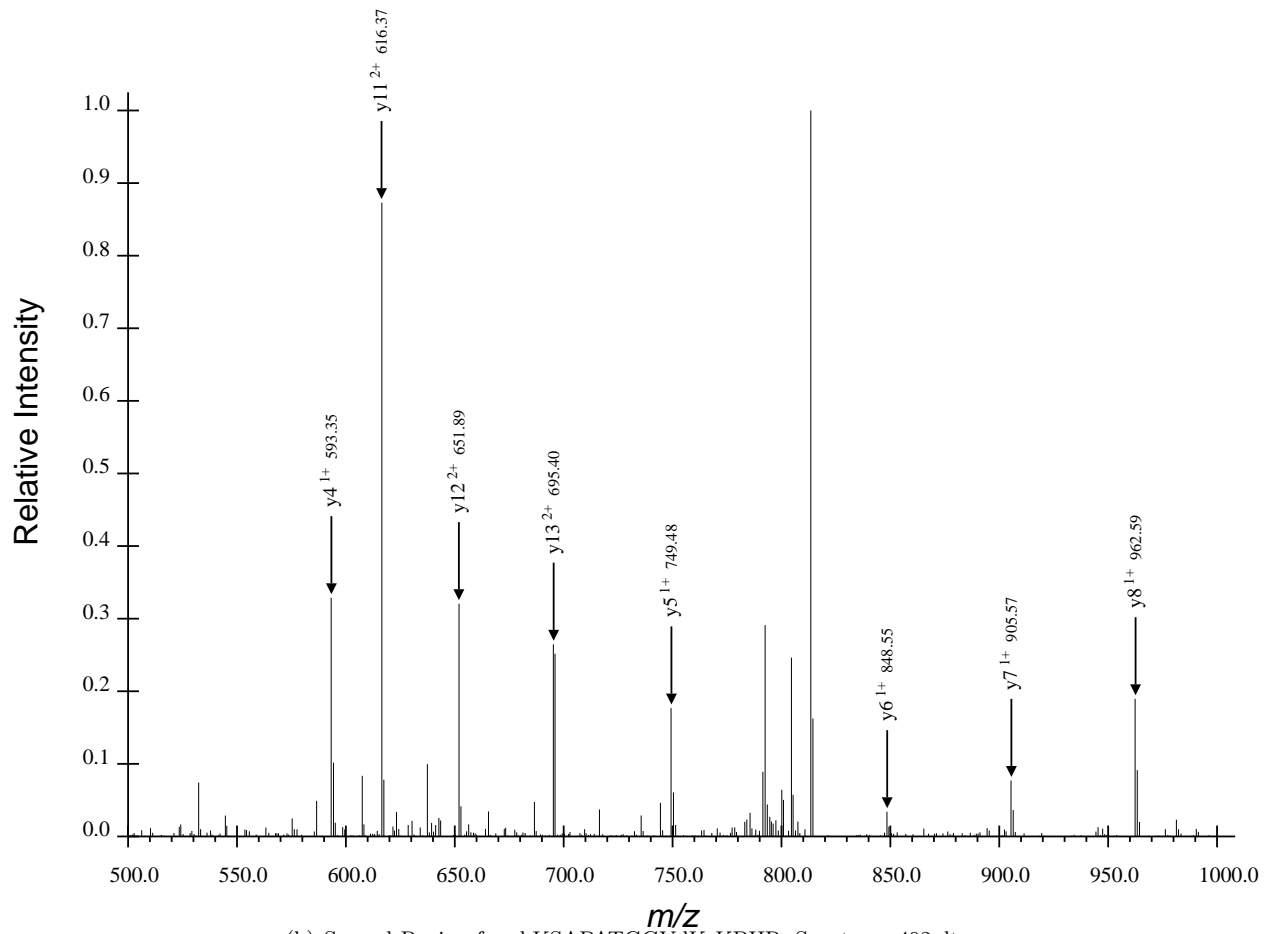

(b) Second Region for rhKSAPATGGVdKrKPHR, Spectrum 402.dta

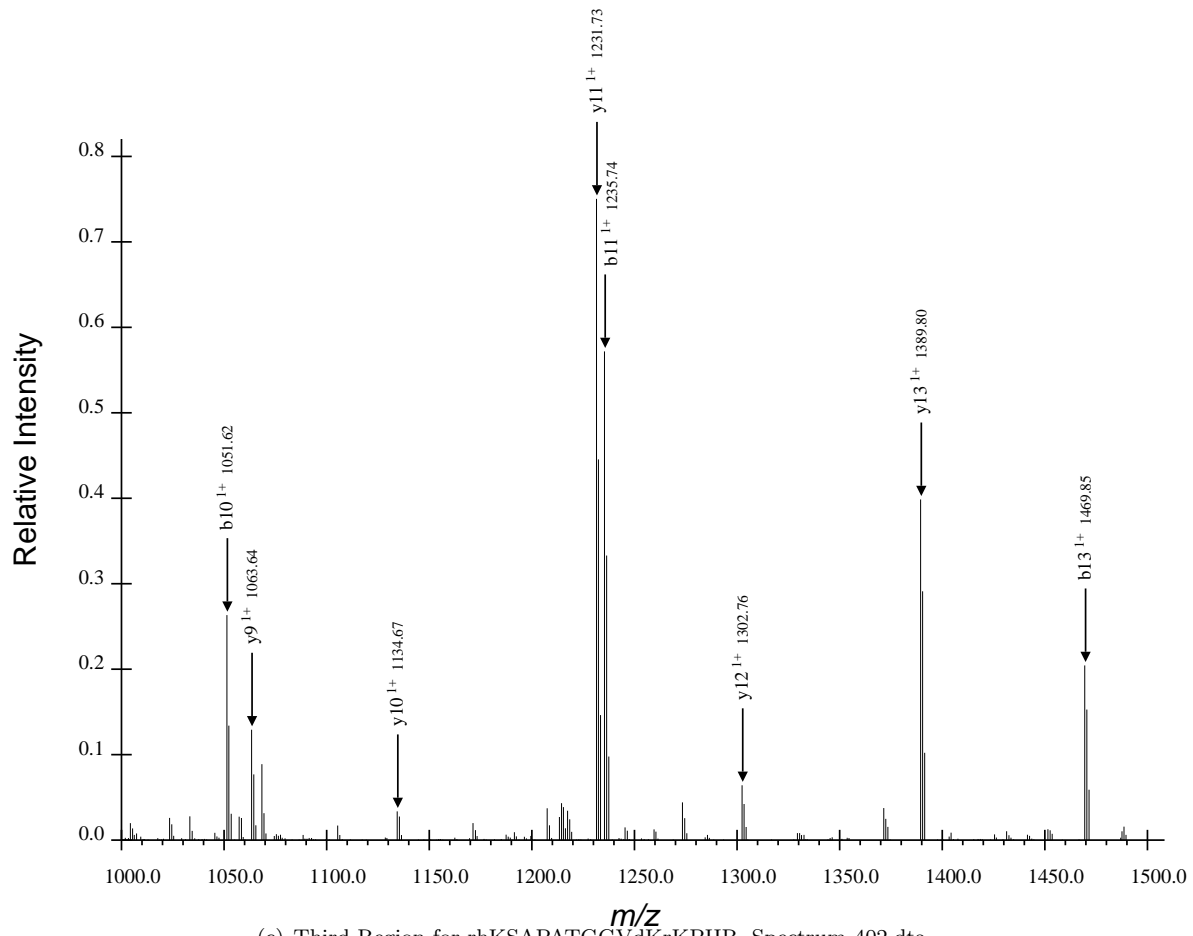

(c) Third Region for rhKSAPATGGVdKrKPHR, Spectrum 402.dta

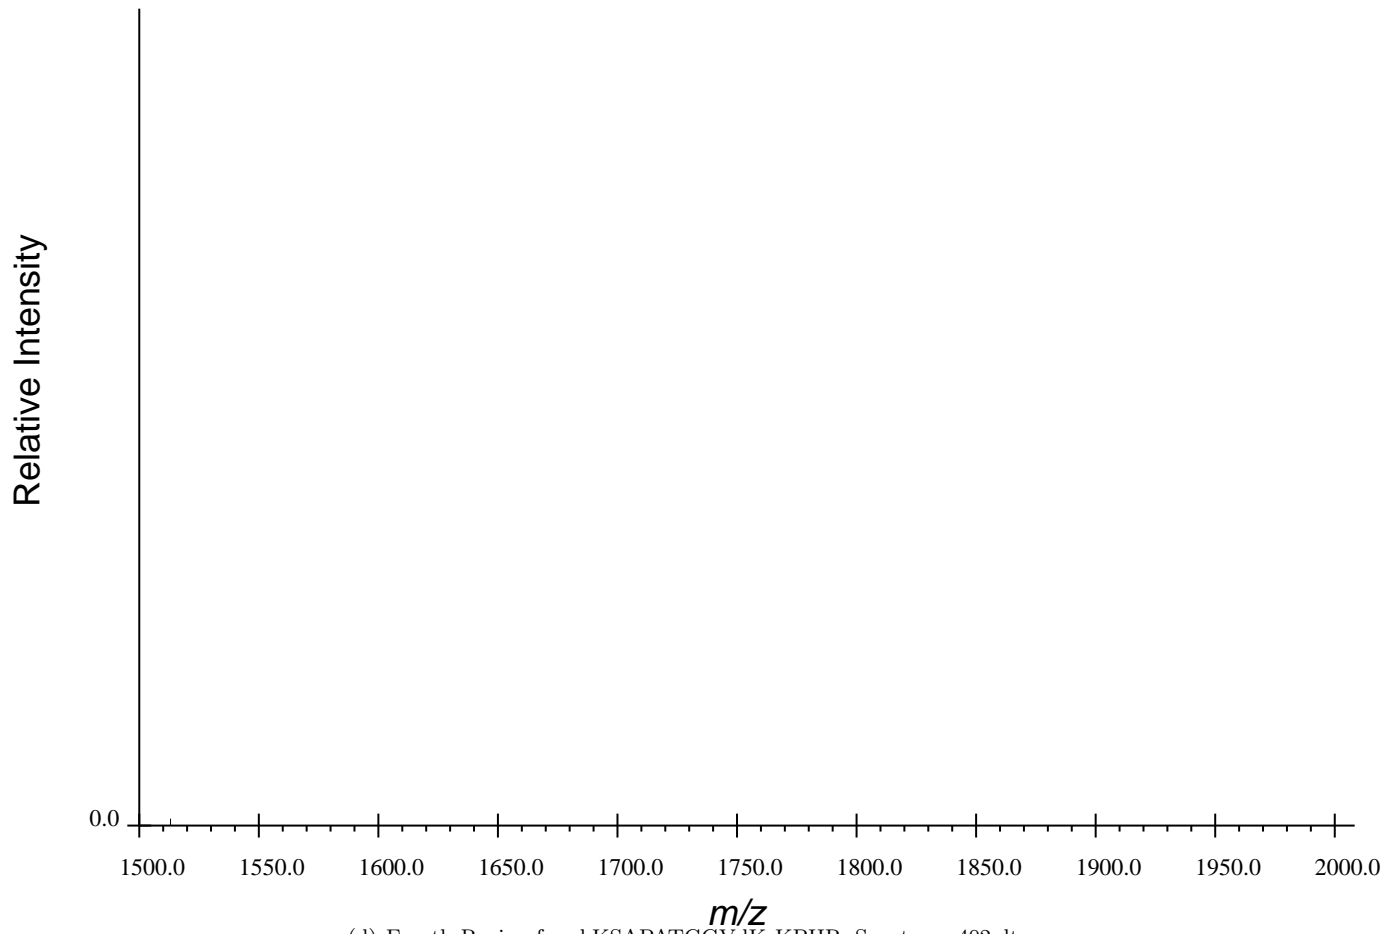

(d) Fourth Region for rhKSAPATGGVdKrKPHR, Spectrum 402.dta

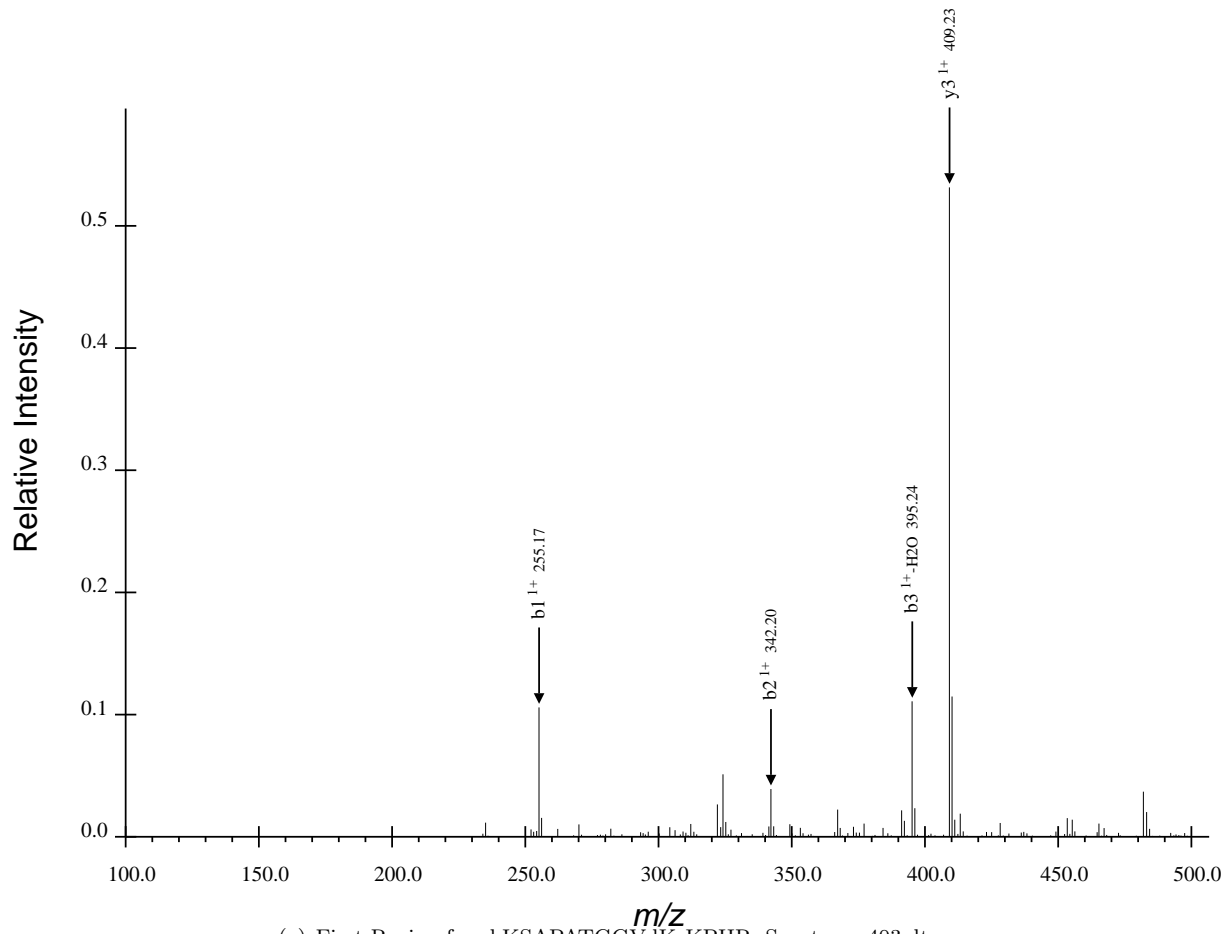

(a) First Region for rhKSAPATGGVdKrKPHR, Spectrum 403.dta

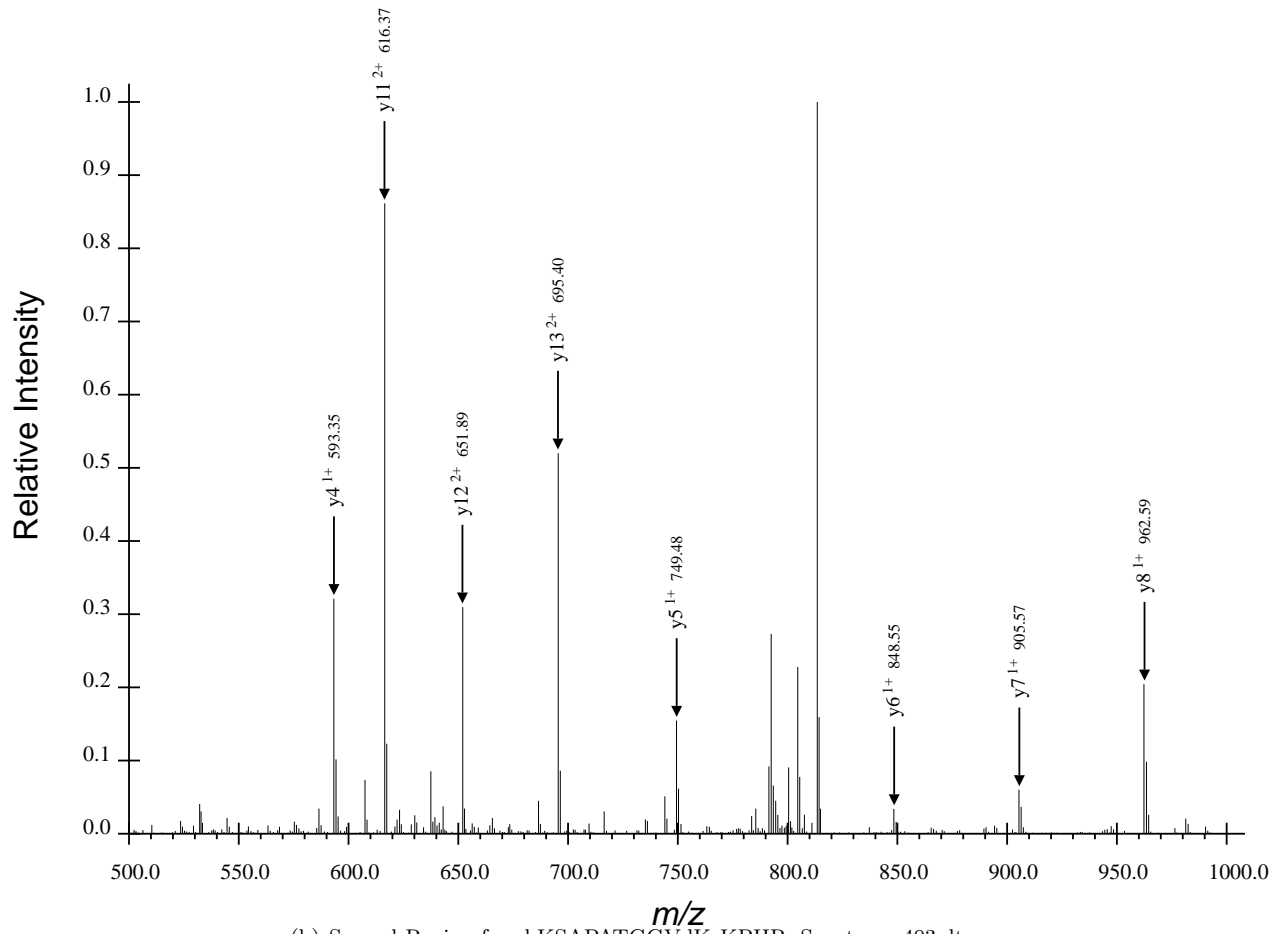

(b) Second Region for rhKSAPATGGVdKrKPHR, Spectrum 403.dta

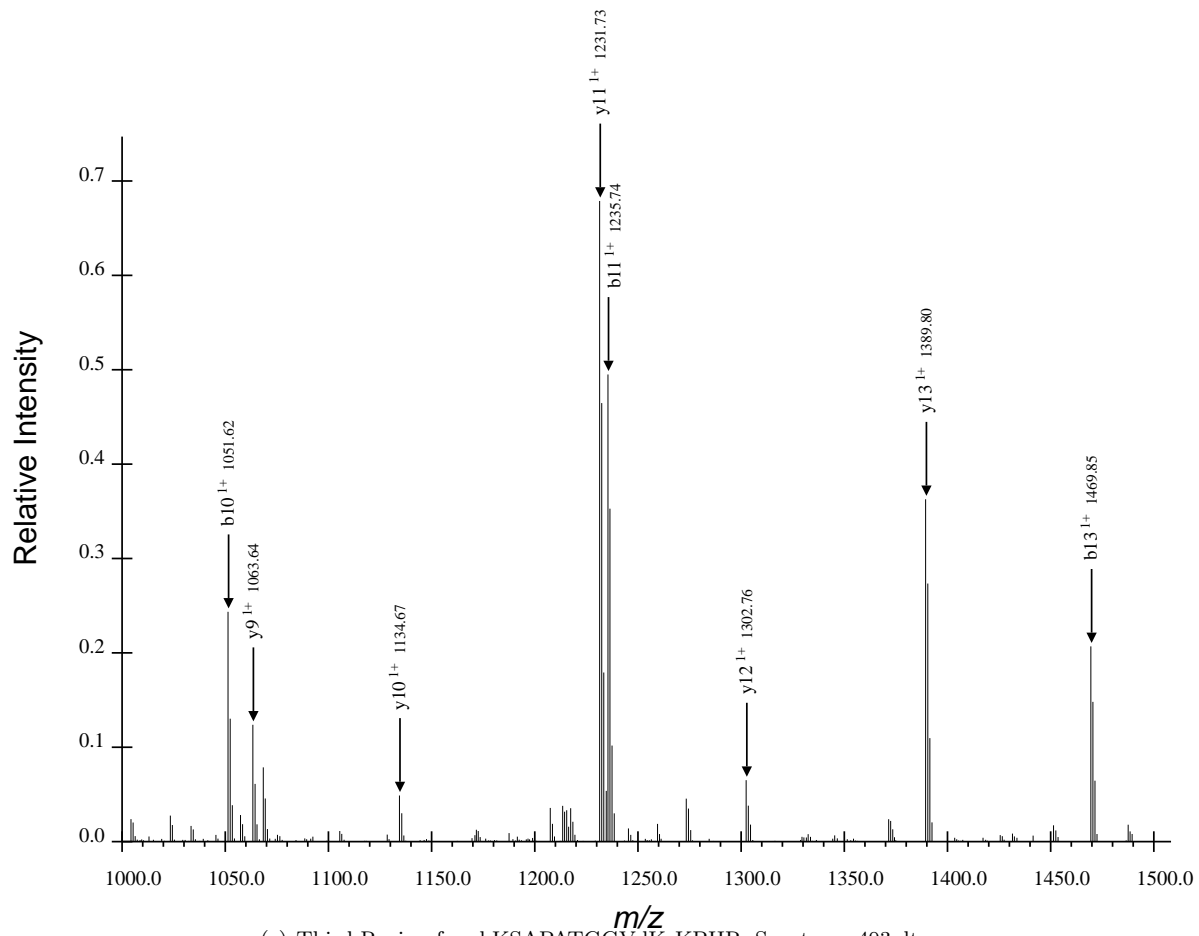

(c) Third Region for rhKSAPATGGVdKrKPHR, Spectrum 403.dta

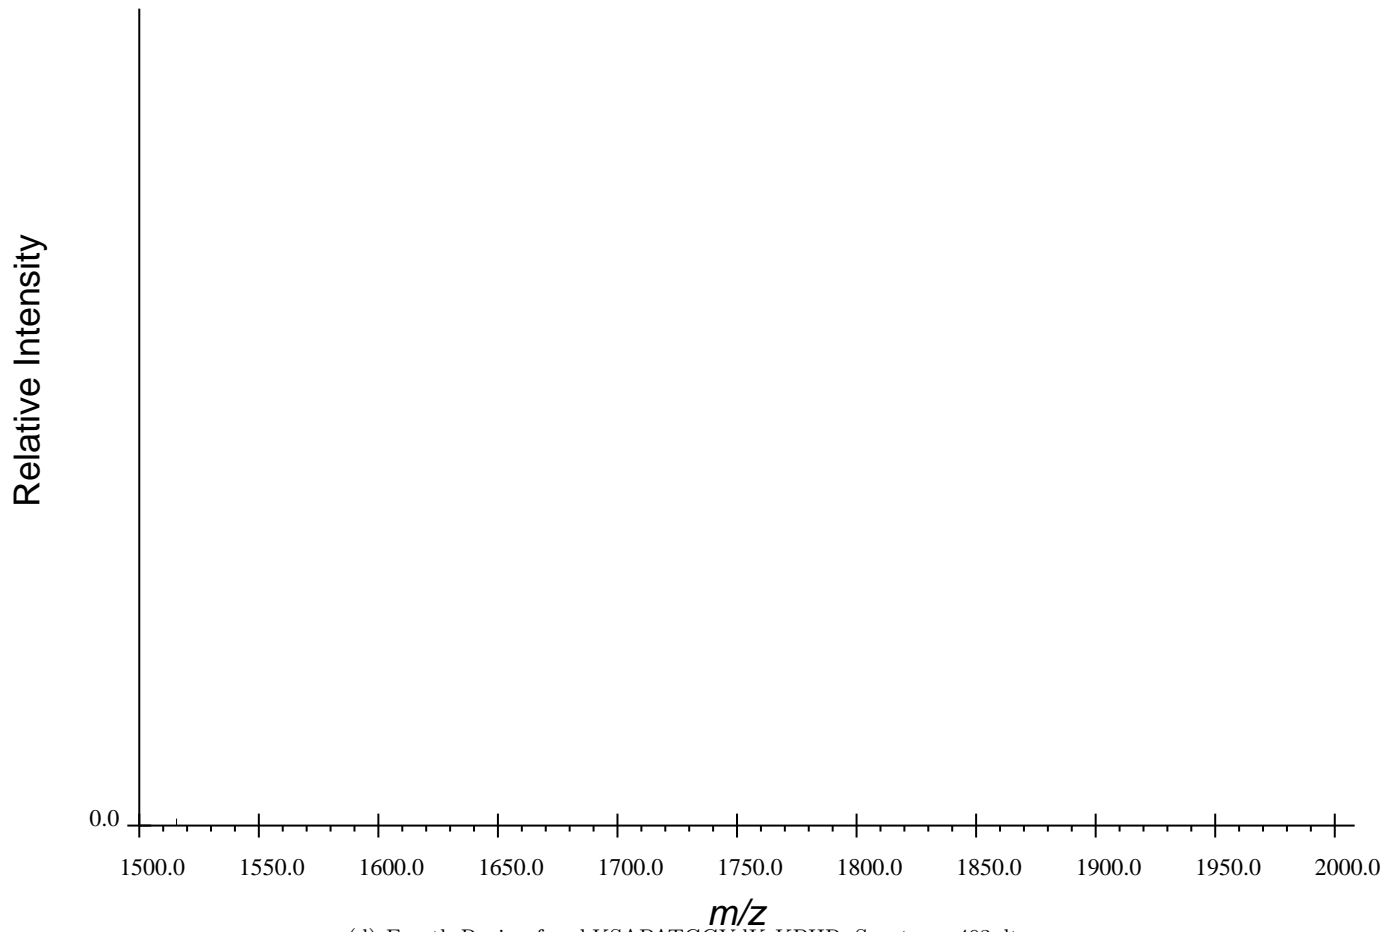

(d) Fourth Region for rhKSAPATGGVdKrKPHR, Spectrum 403.dta

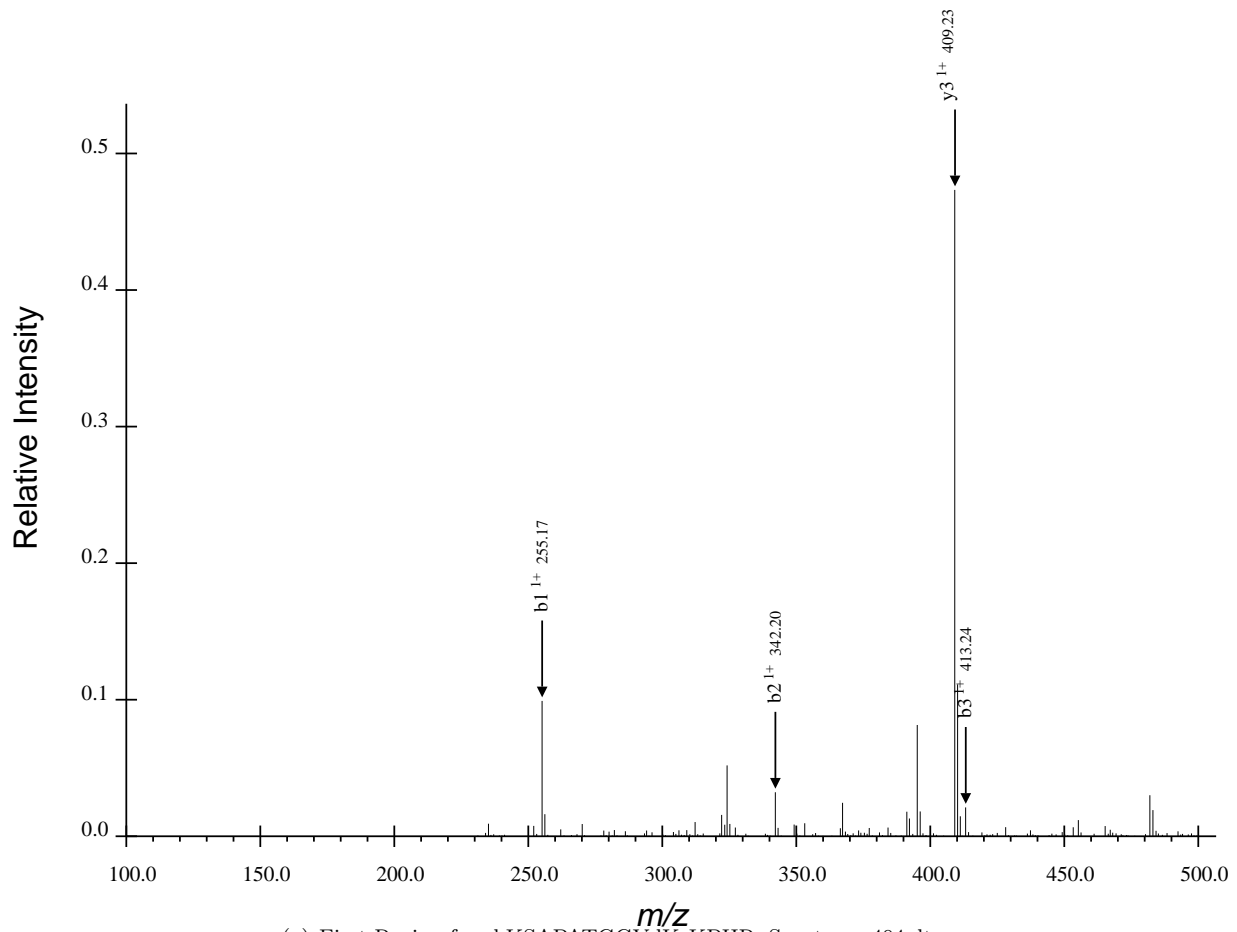

(a) First Region for rhKSAPATGGVdKrKPHR, Spectrum 404.dta

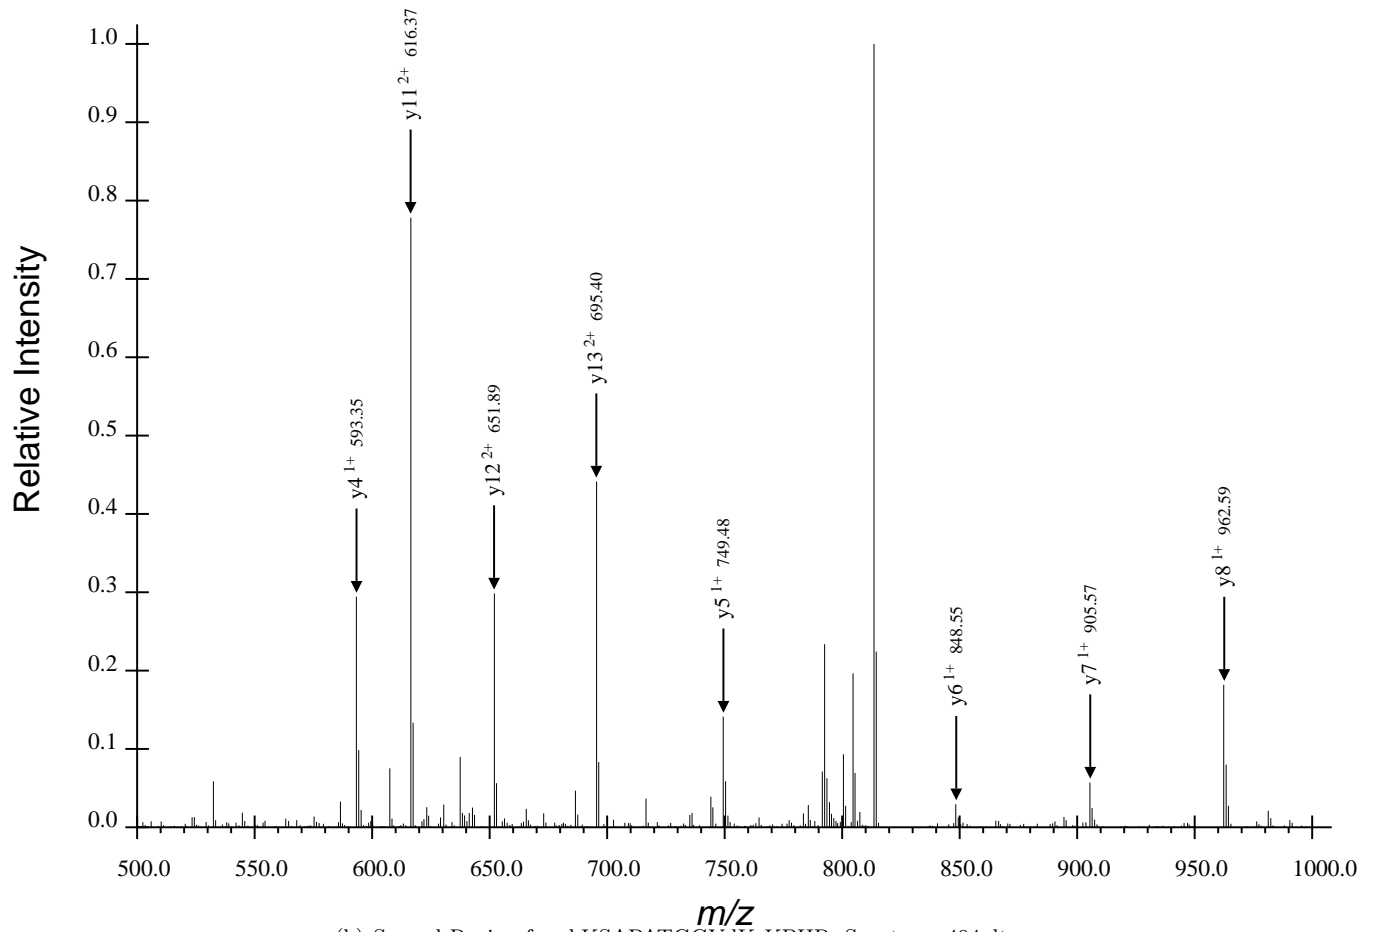

(b) Second Region for rhKSAPATGGVdKrKPHR, Spectrum 404.dta



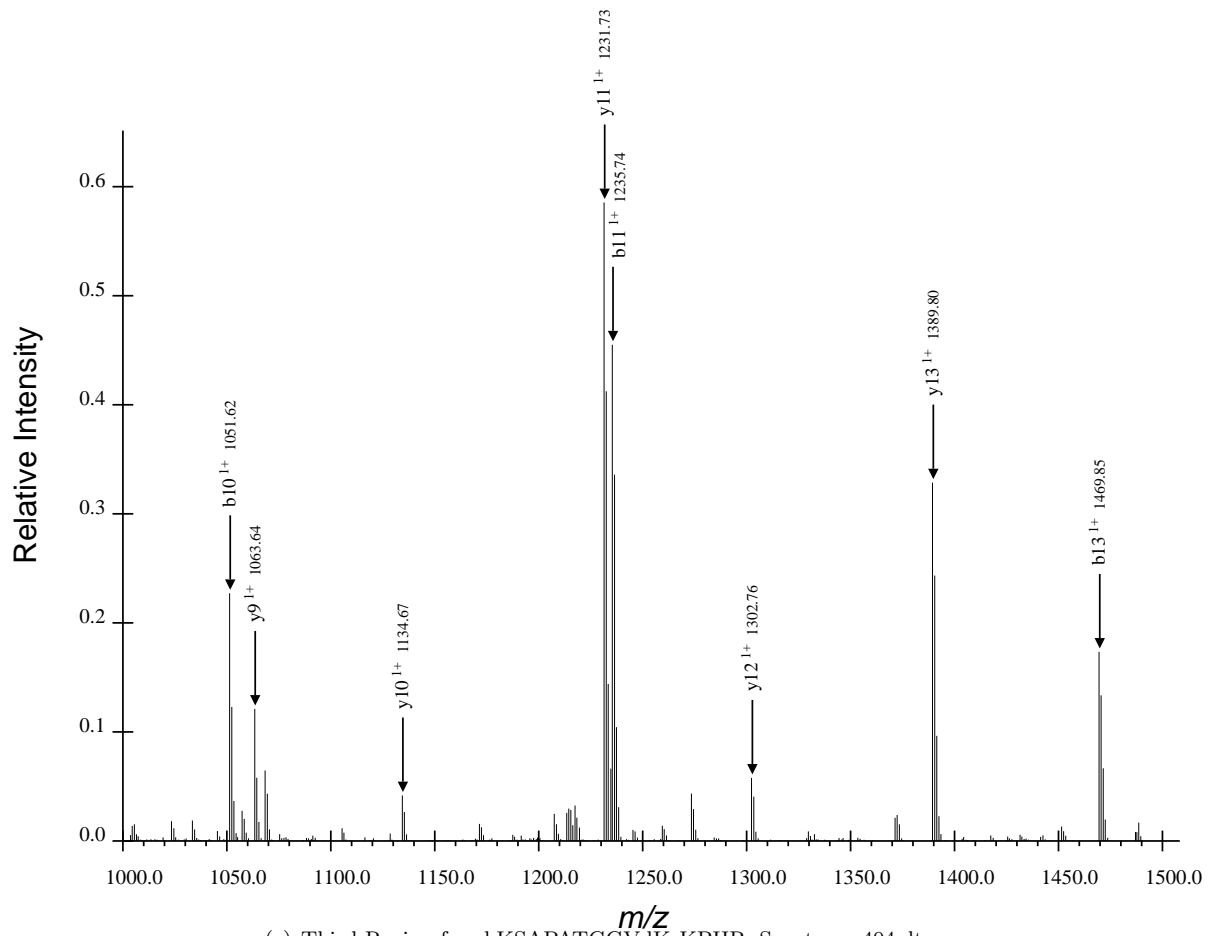

(c) Third Region for rhKSAPATGGVdKrKPHR, Spectrum 404.dta

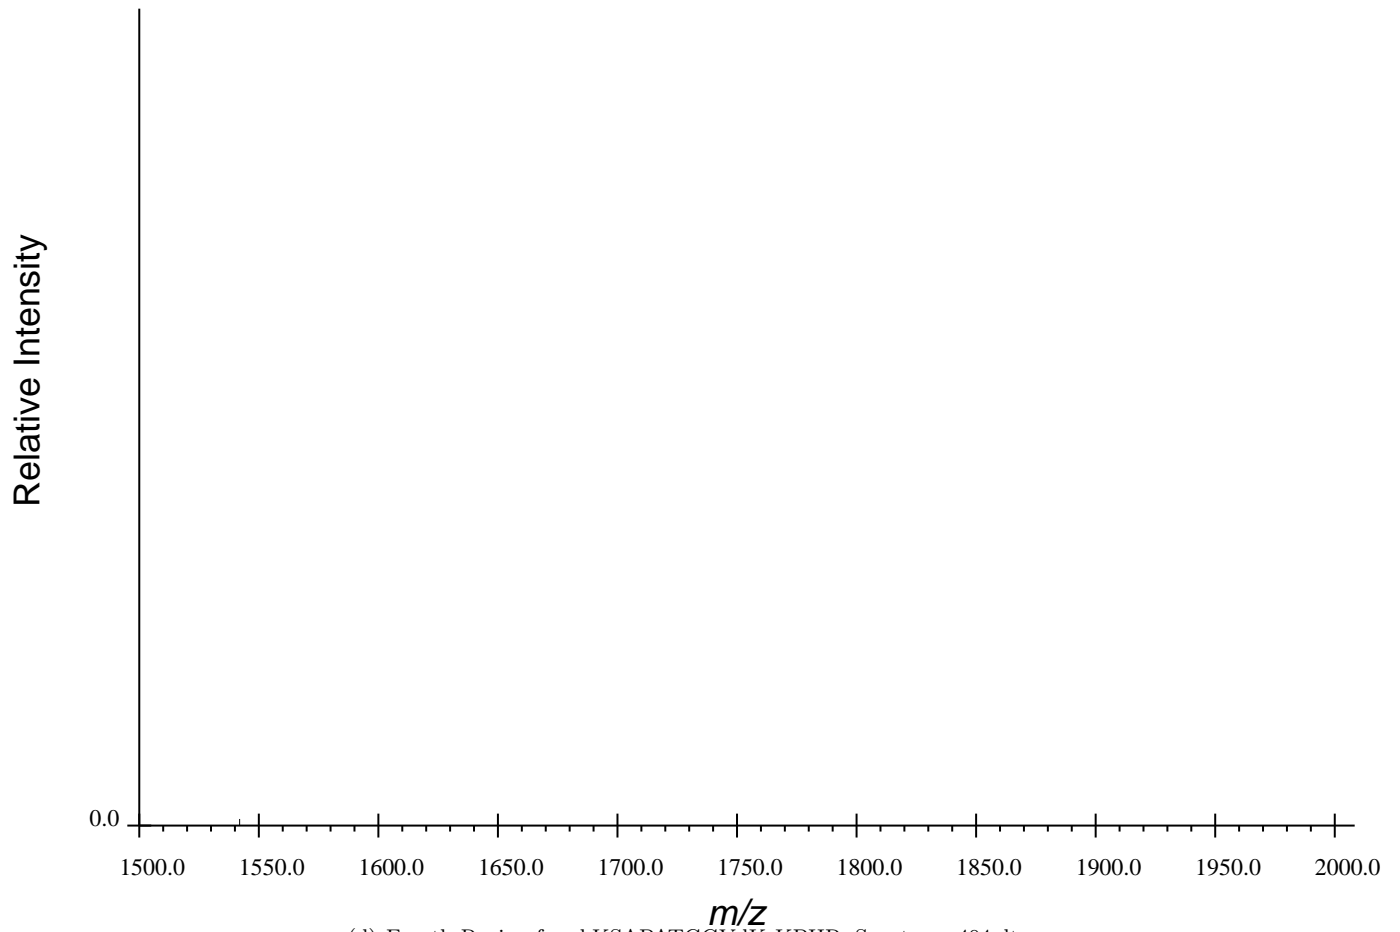

(d) Fourth Region for rhKSAPATGGVdKrKPHR, Spectrum 404.dta

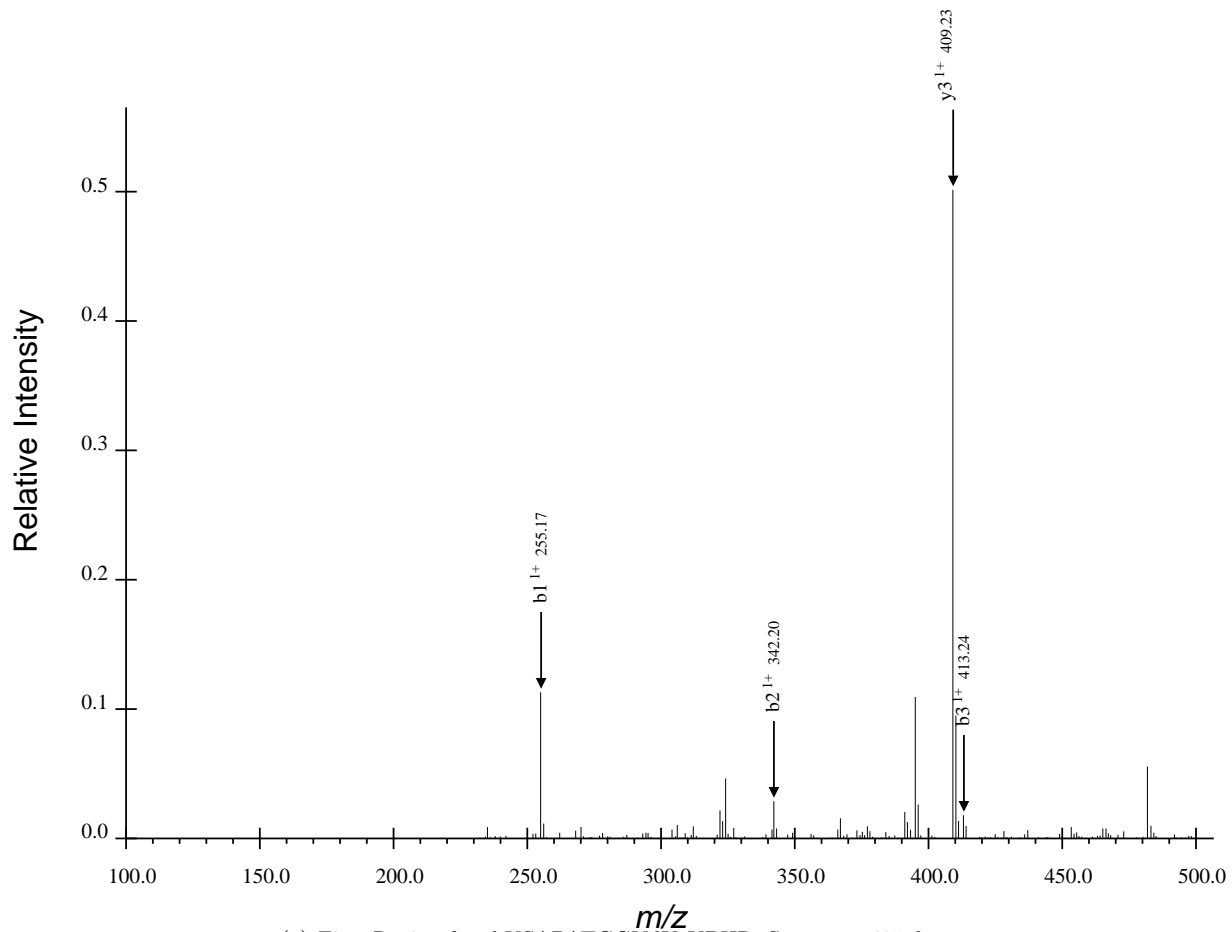

(a) First Region for rhKSAPATGGVdKrKPHR, Spectrum 405.dta

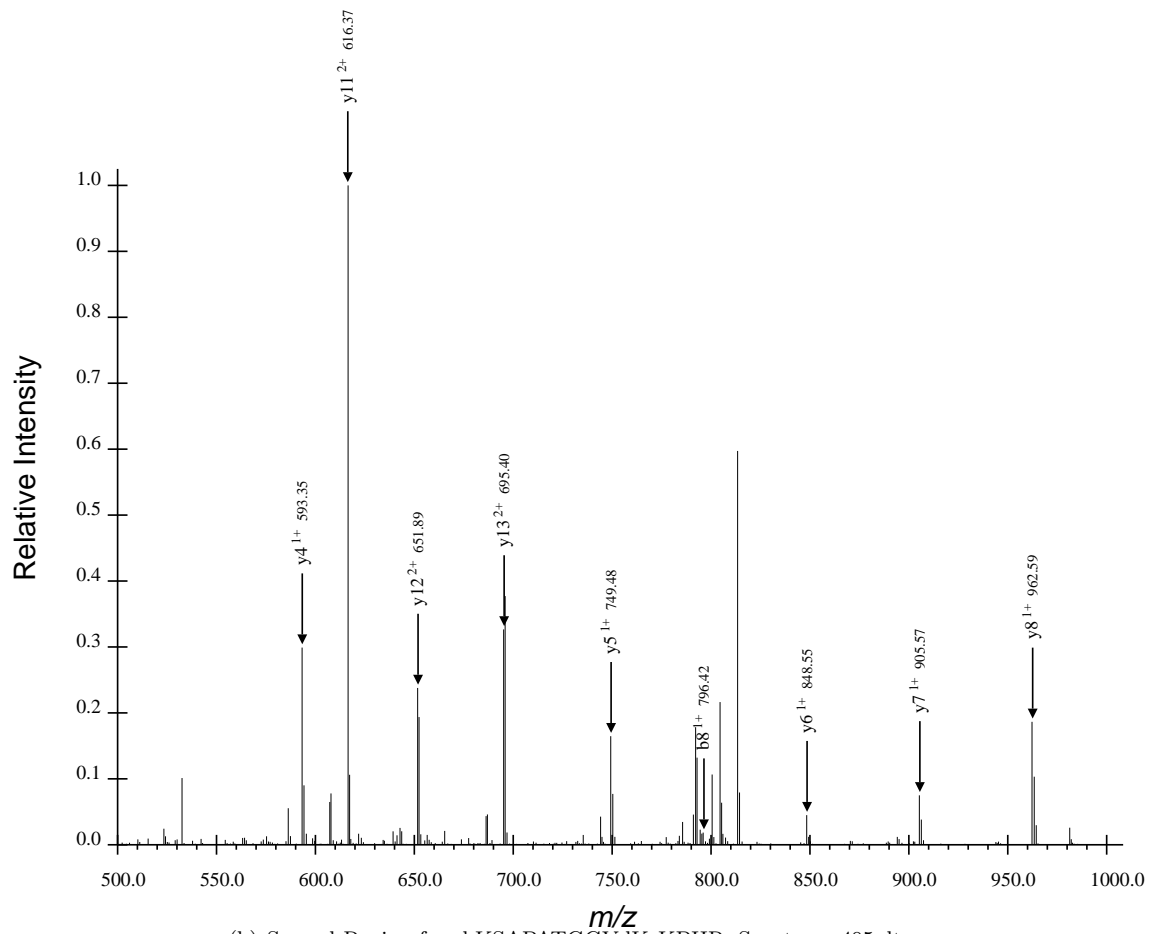

(b) Second Region for rhKSAPATGGVdKrKPHR, Spectrum 405.dta

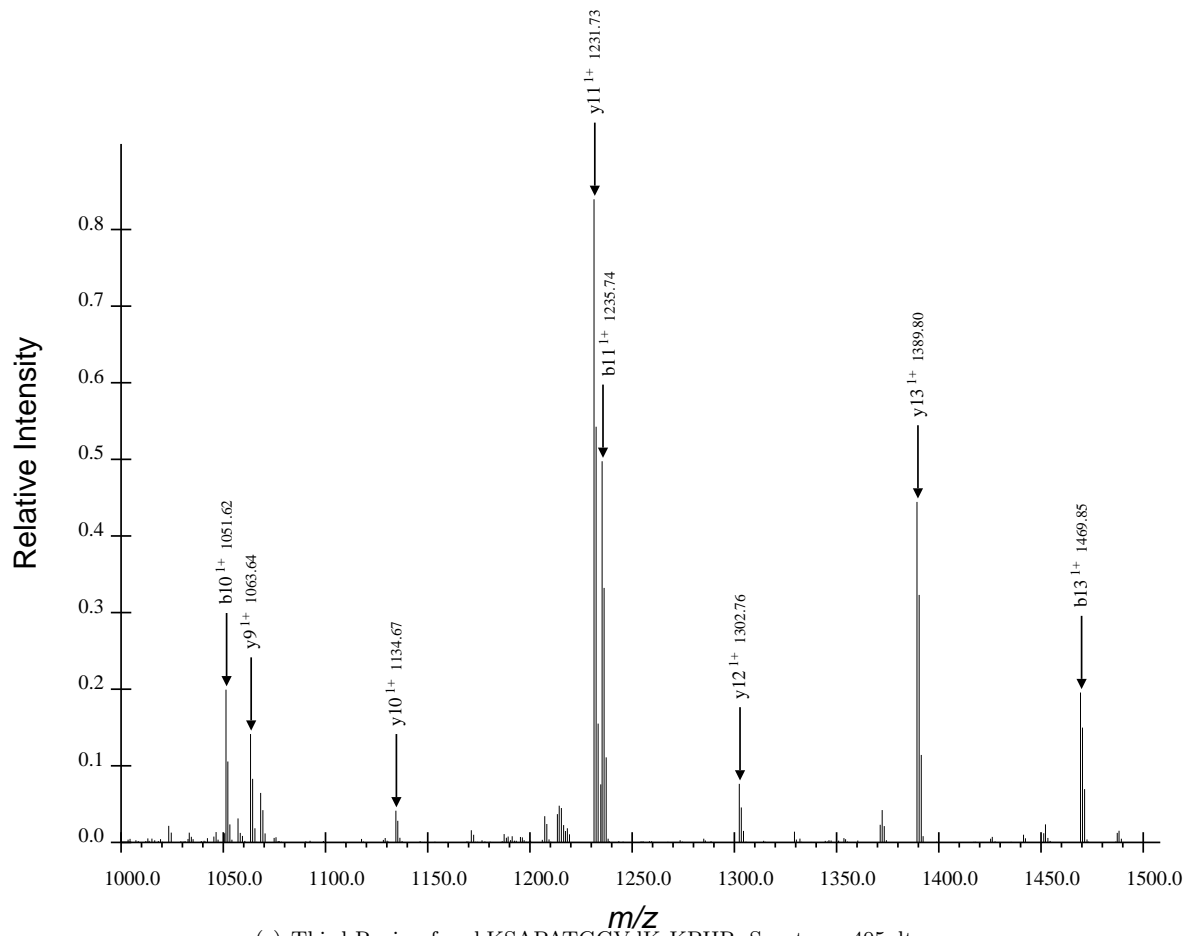

(c) Third Region for rhKSAPATGGVdKrKPHR, Spectrum 405.dta

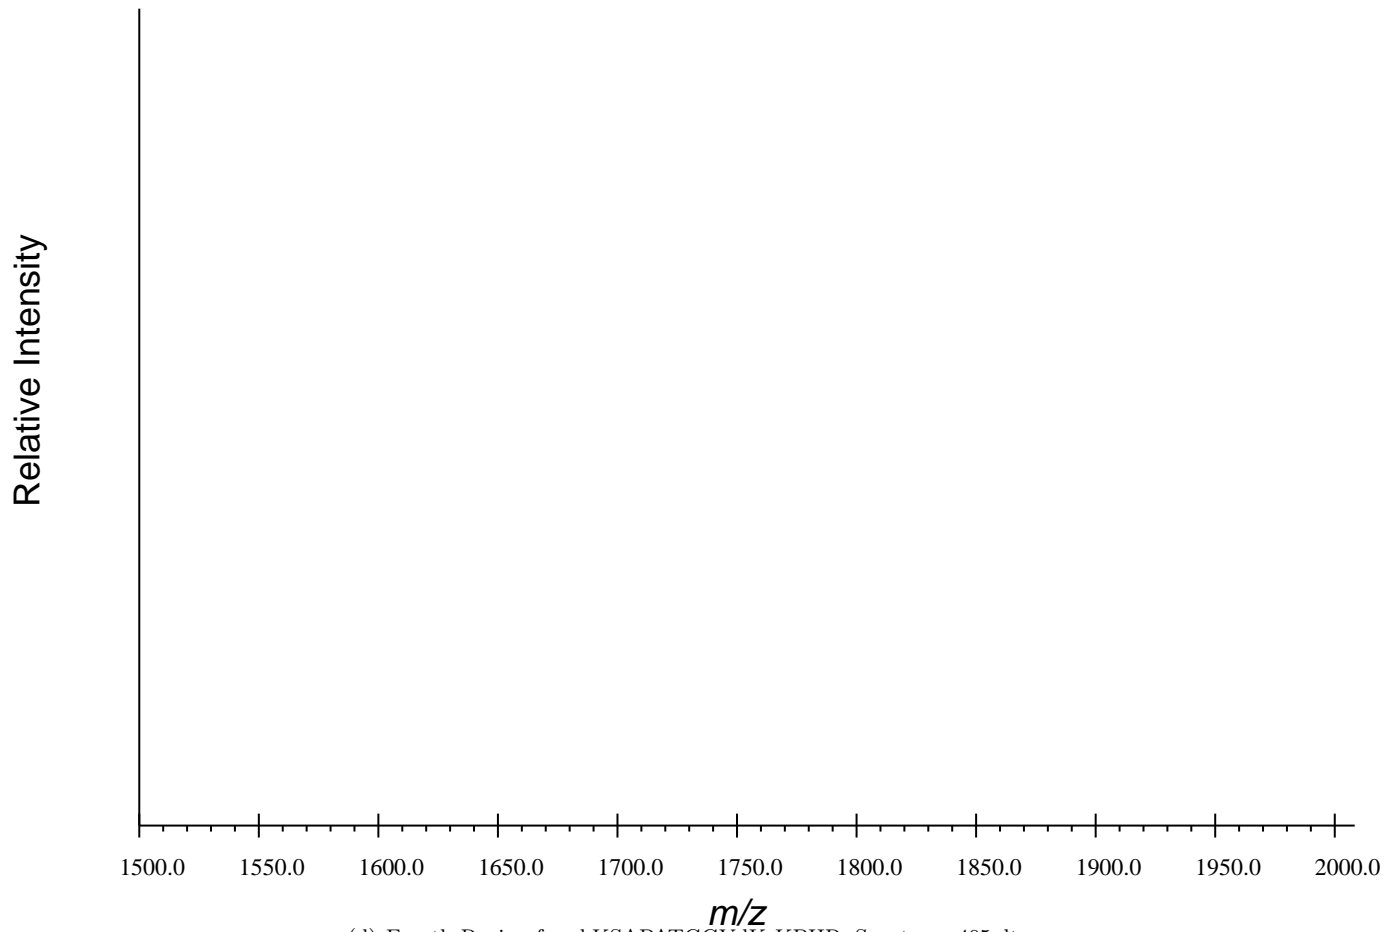

(d) Fourth Region for rhKSAPATGGVdKrKPHR, Spectrum 405.dta

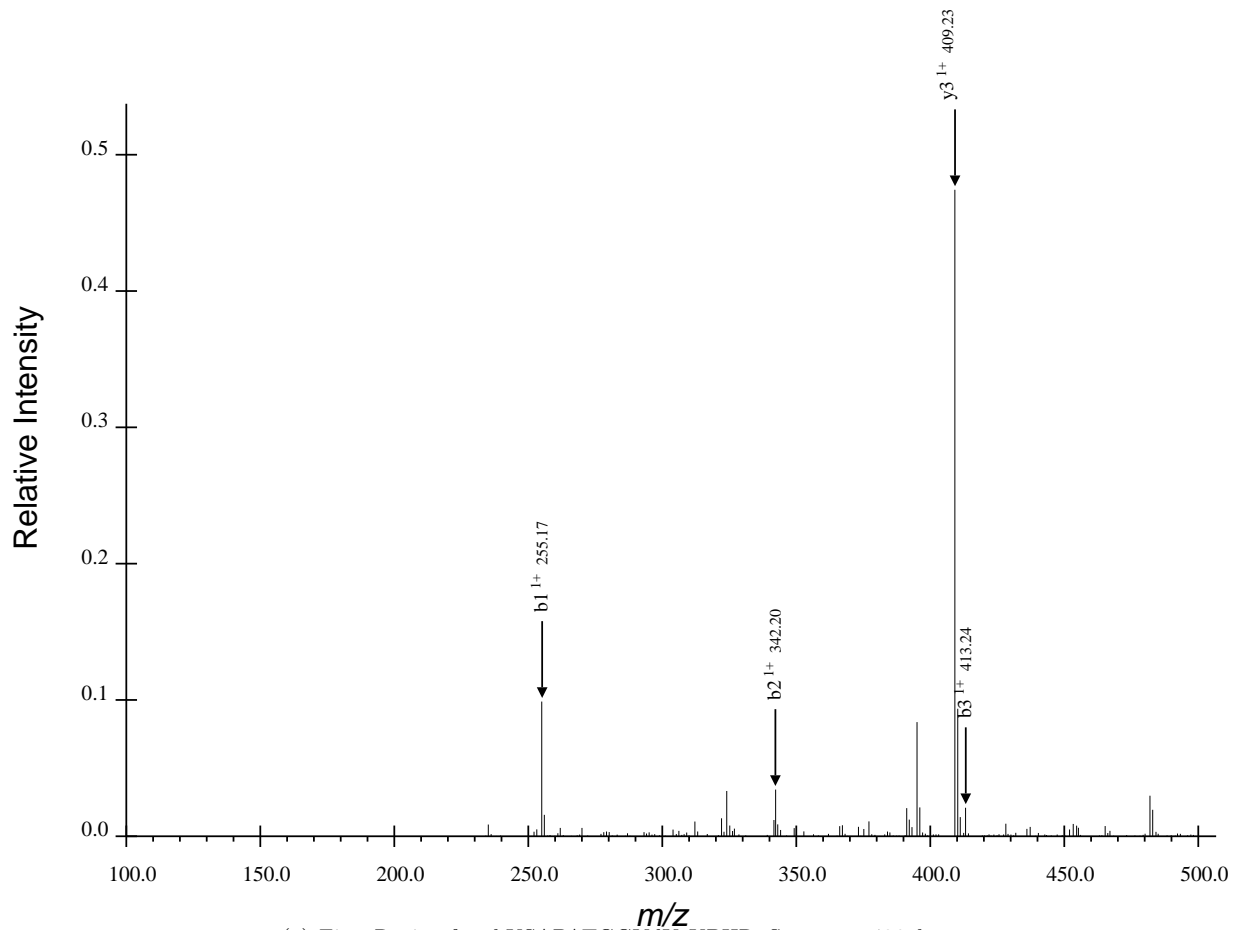

(a) First Region for rhKSAPATGGVdKrKPHR, Spectrum 406.dta

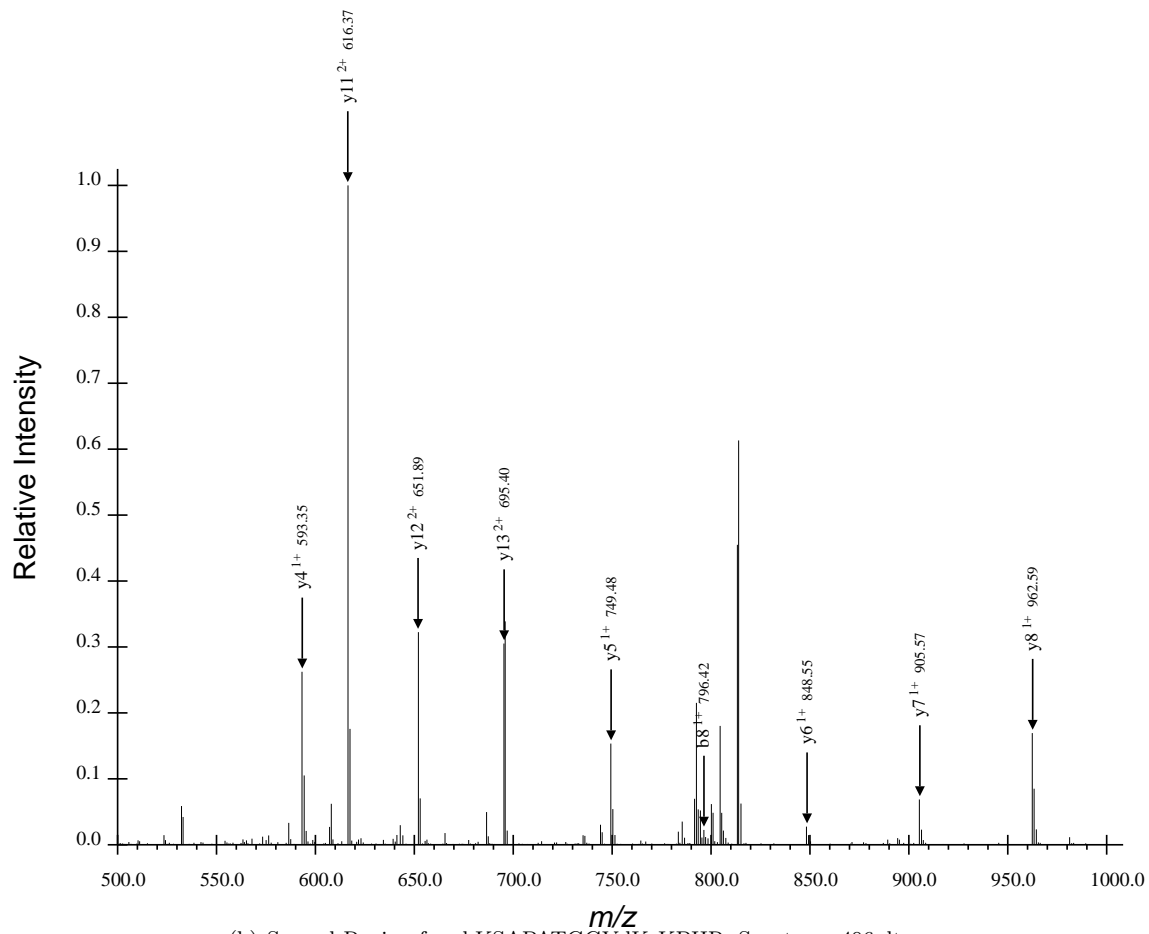

(b) Second Region for rhKSAPATGGVdKrKPHR, Spectrum 406.dta

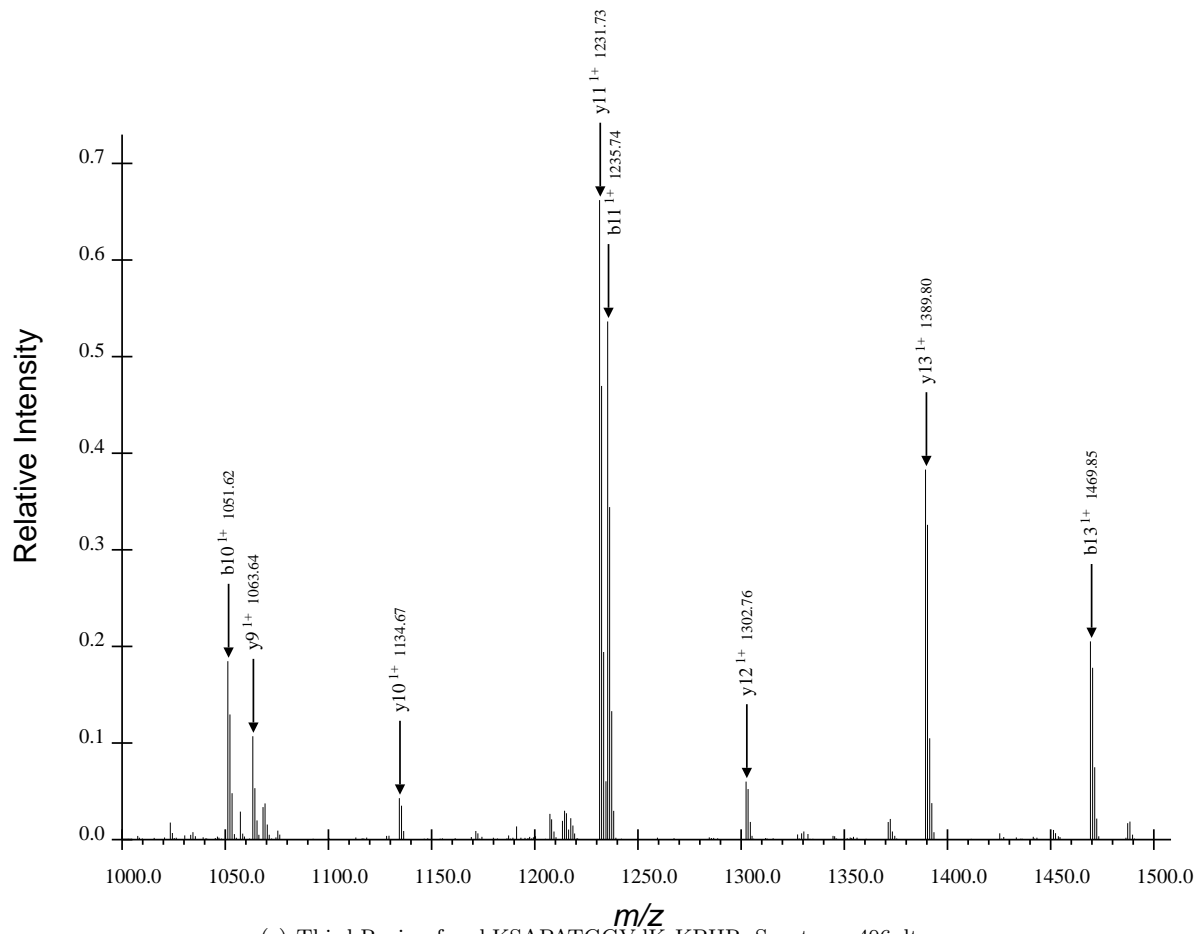

(c) Third Region for rhKSAPATGGVdKrKPHR, Spectrum 406.dta

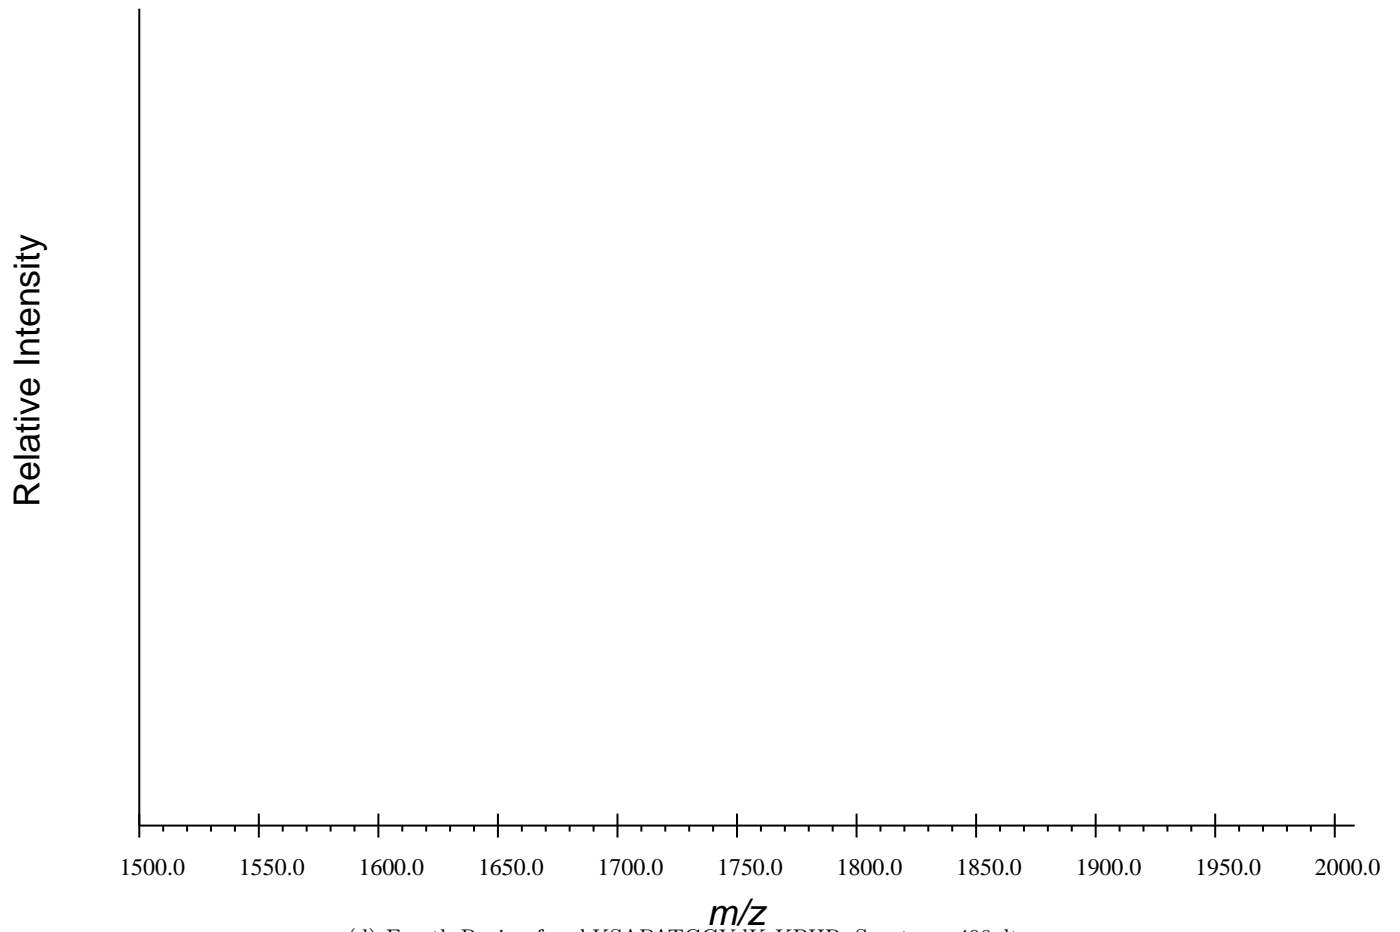

(d) Fourth Region for rhKSAPATGGVdKrKPHR, Spectrum 406.dta

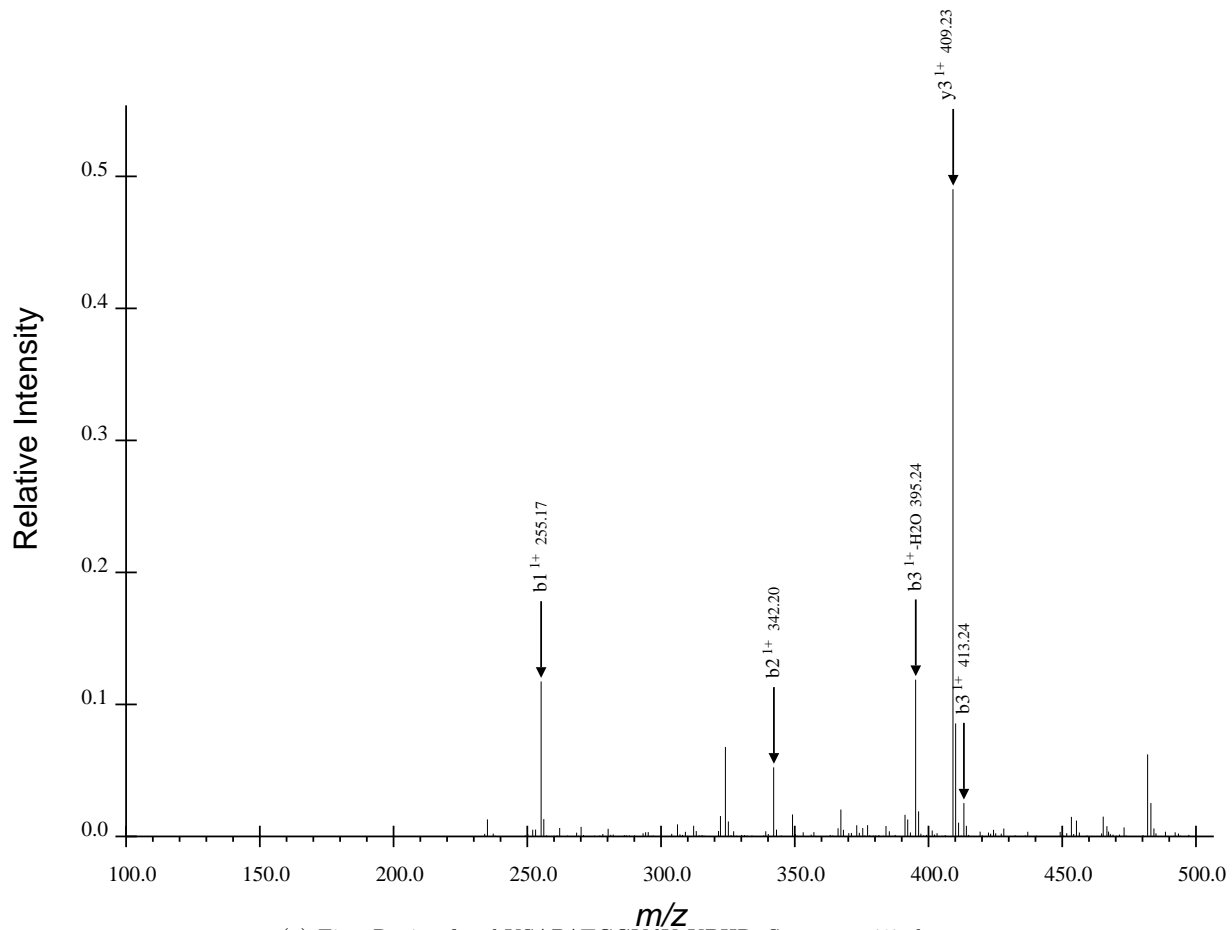

(a) First Region for rhKSAPATGGVdKrKPHR, Spectrum 407.dta

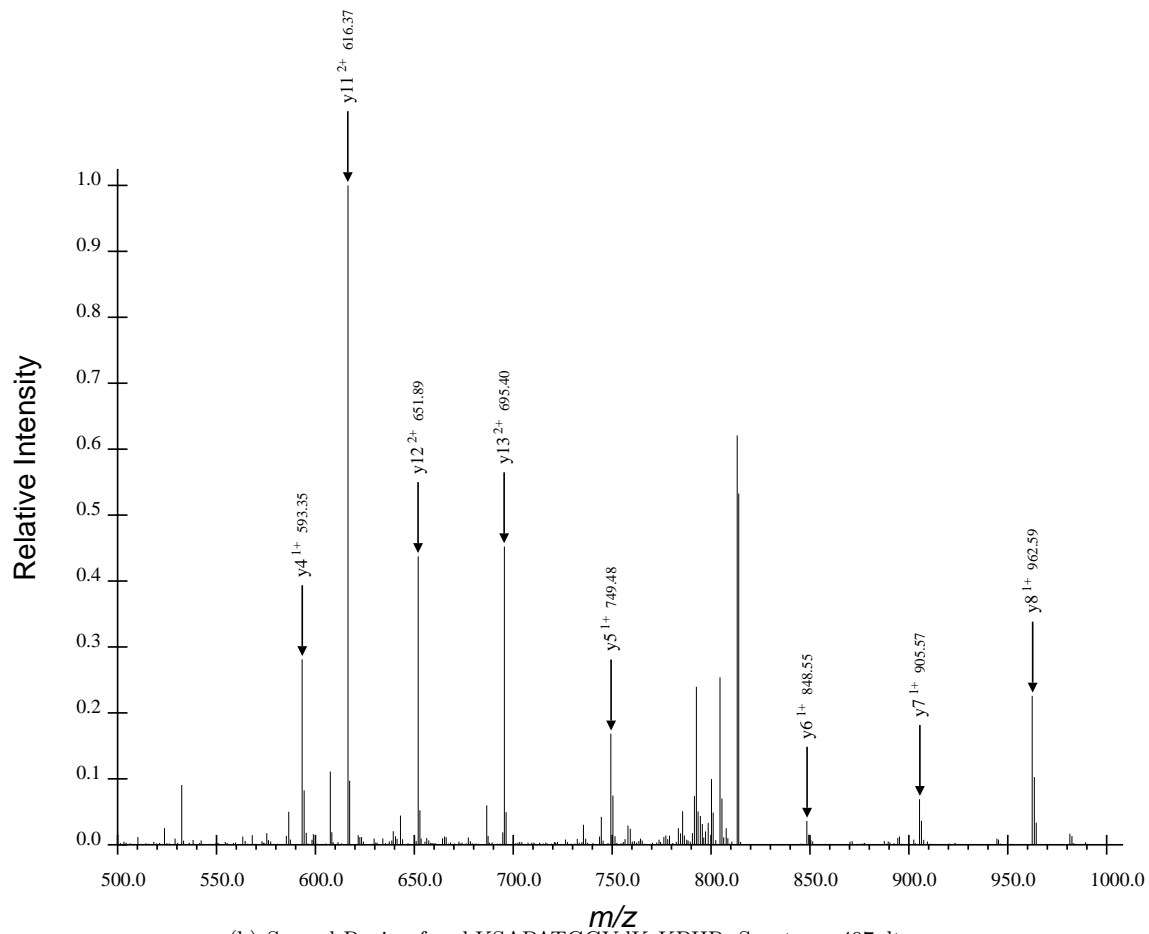

(b) Second Region for rhKSAPATGGVdKrKPHR, Spectrum 407.dta

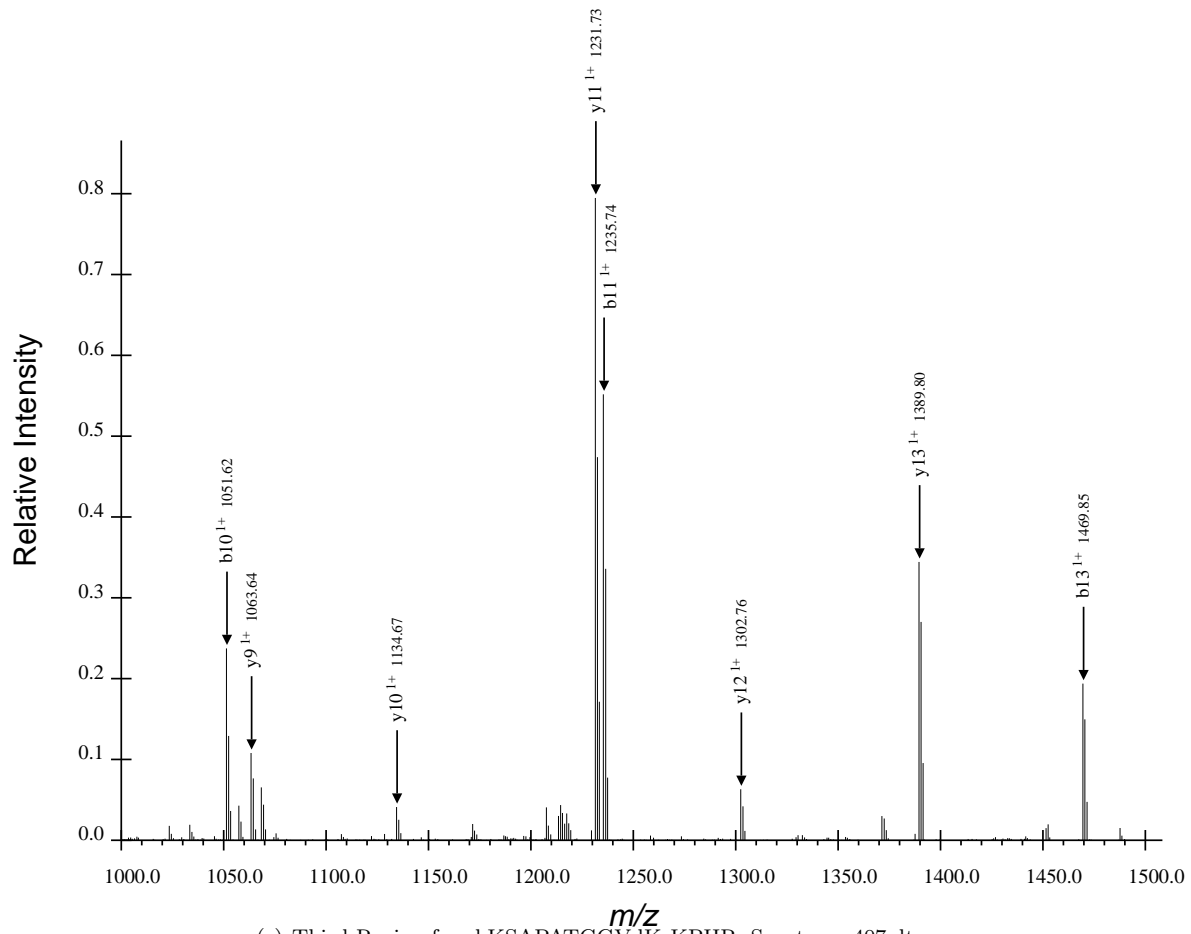

(c) Third Region for rhKSAPATGGVdKrKPHR, Spectrum 407.dta

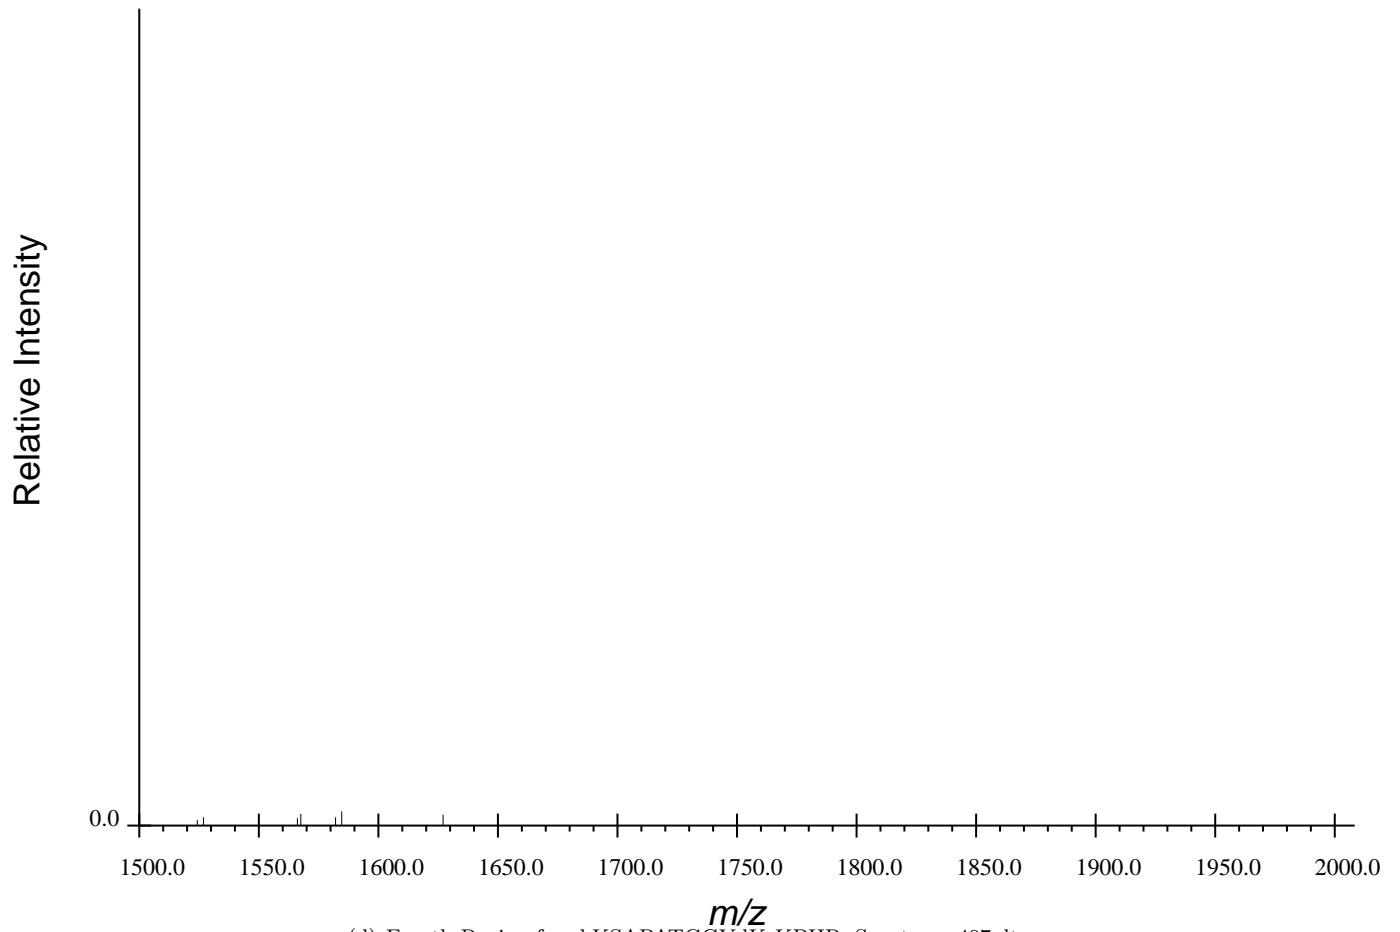

(d) Fourth Region for rhKSAPATGGVdKrKPHR, Spectrum 407.dta

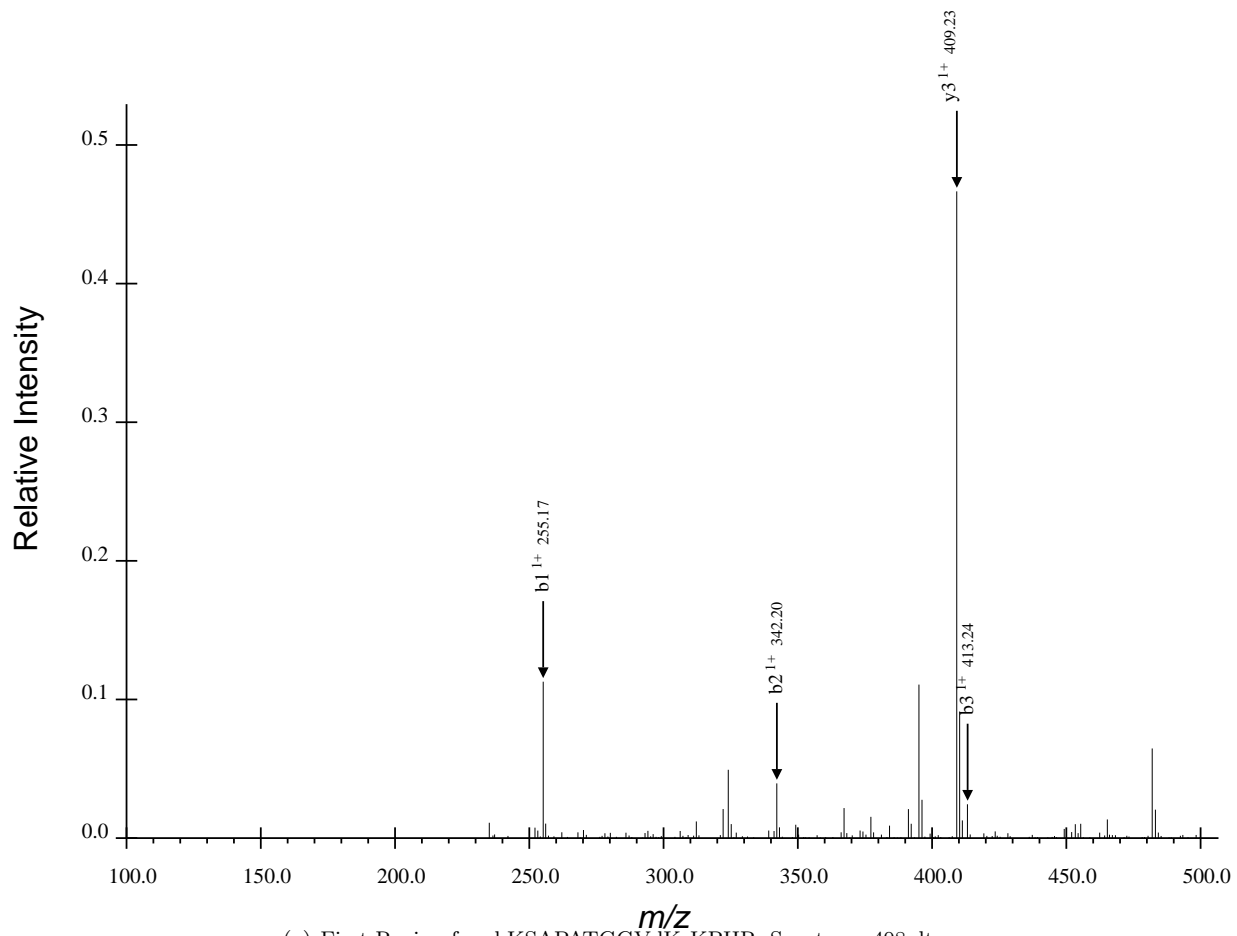

(a) First Region for rhKSAPATGGVdKrKPHR, Spectrum 408.dta

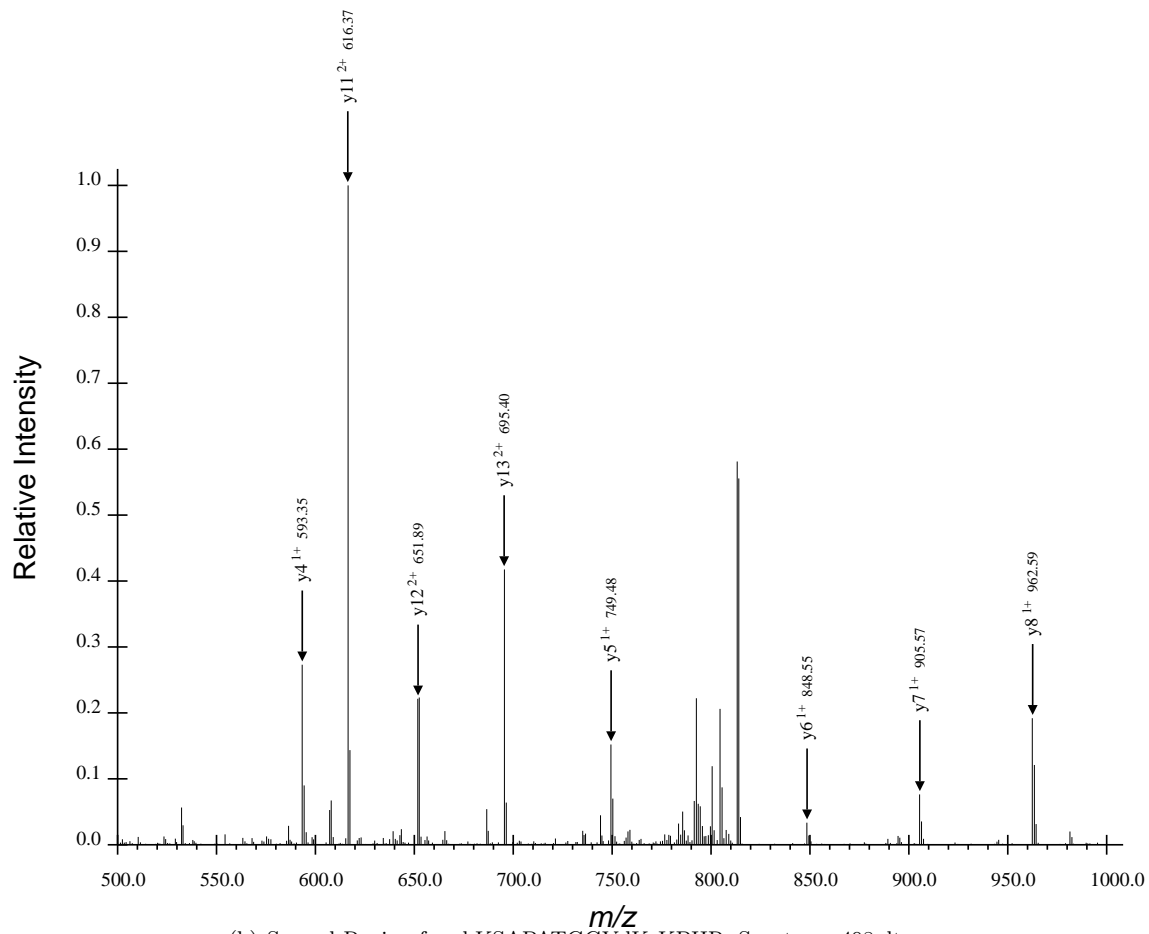

(b) Second Region for rhKSAPATGGVdKrKPHR, Spectrum 408.dta



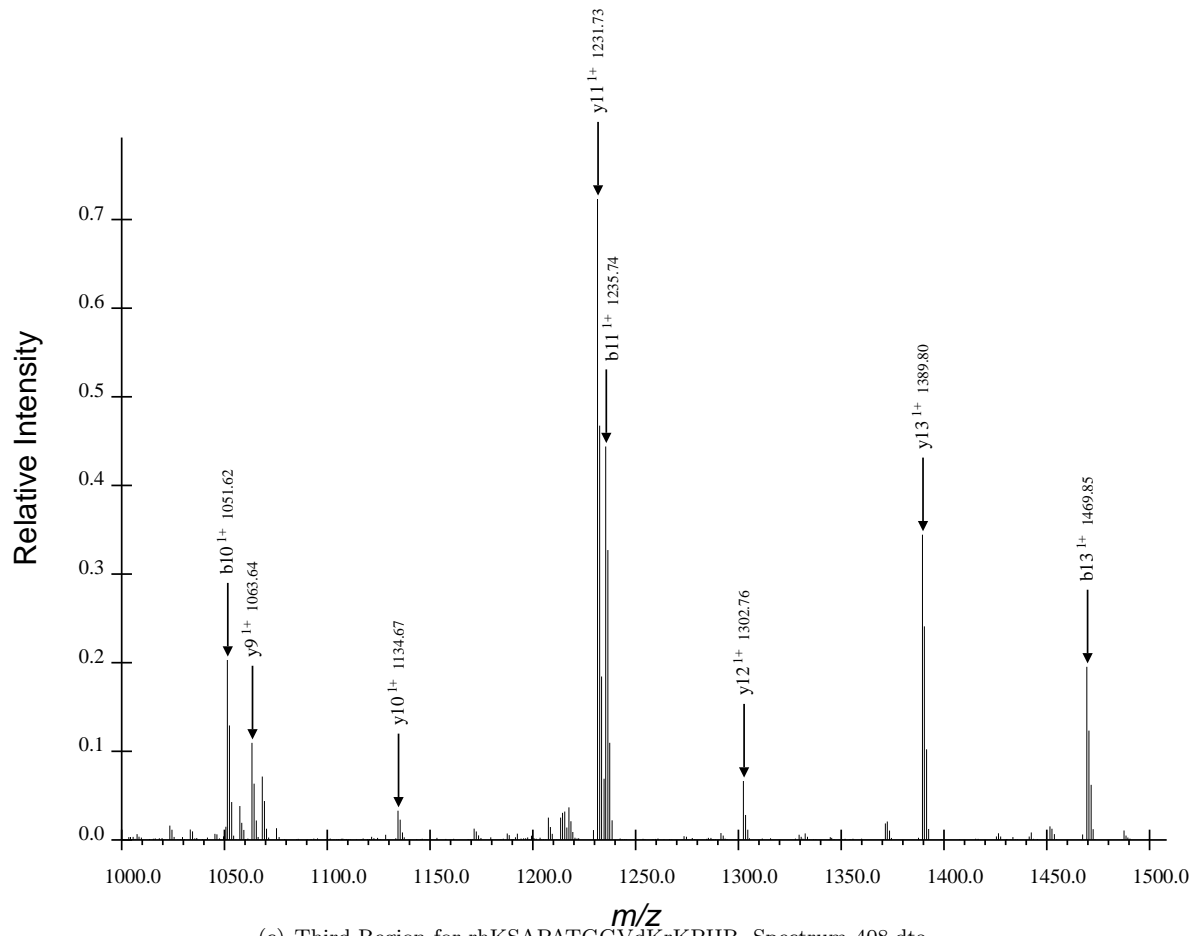

(c) Third Region for rhKSAPATGGVdKrKPHR, Spectrum 408.dta

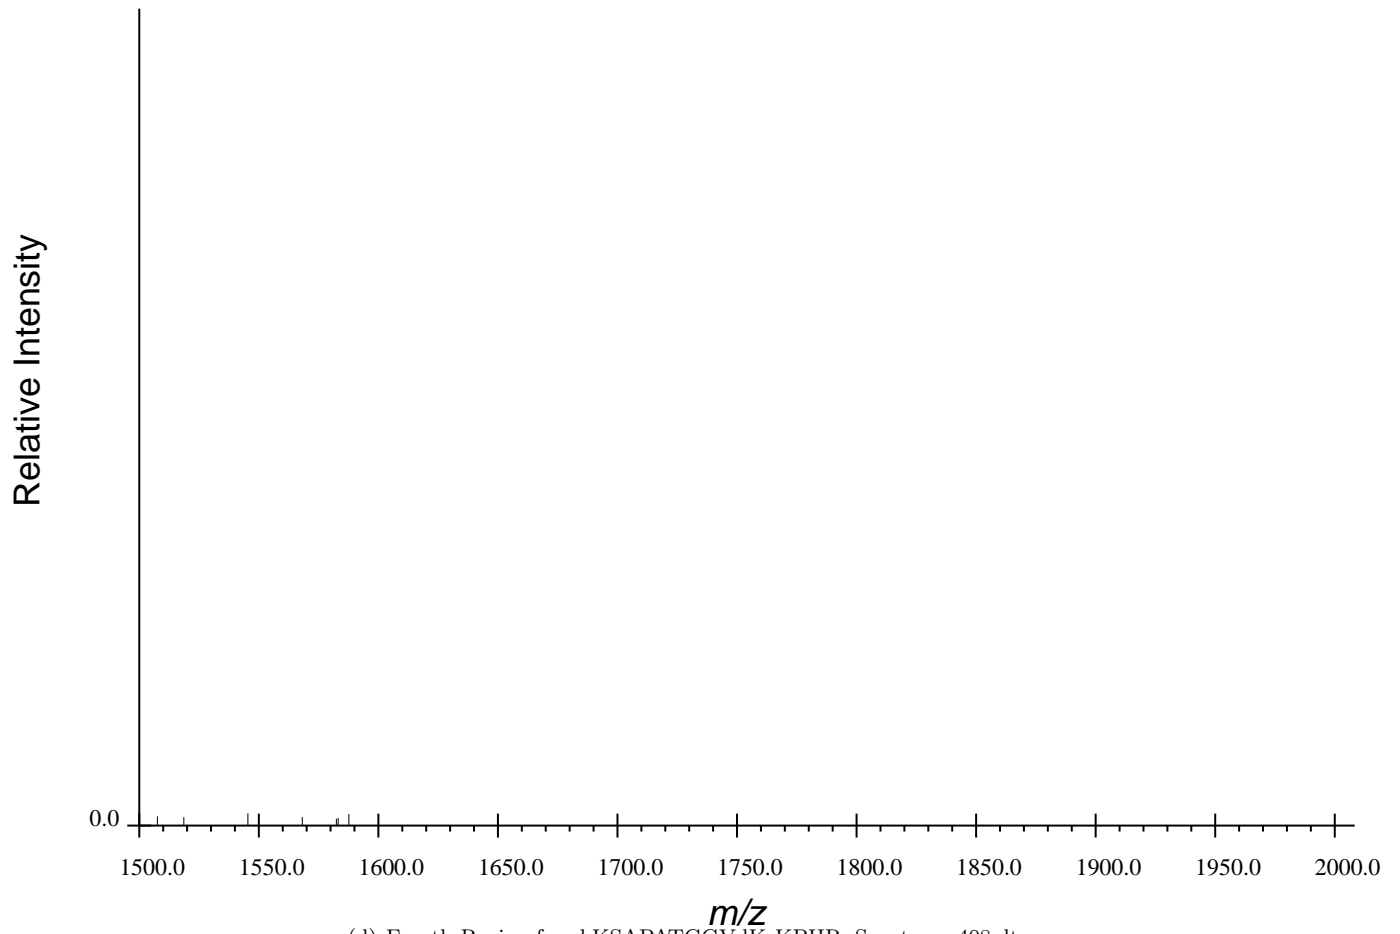

(d) Fourth Region for rhKSAPATGGVdKrKPHR, Spectrum 408.dta

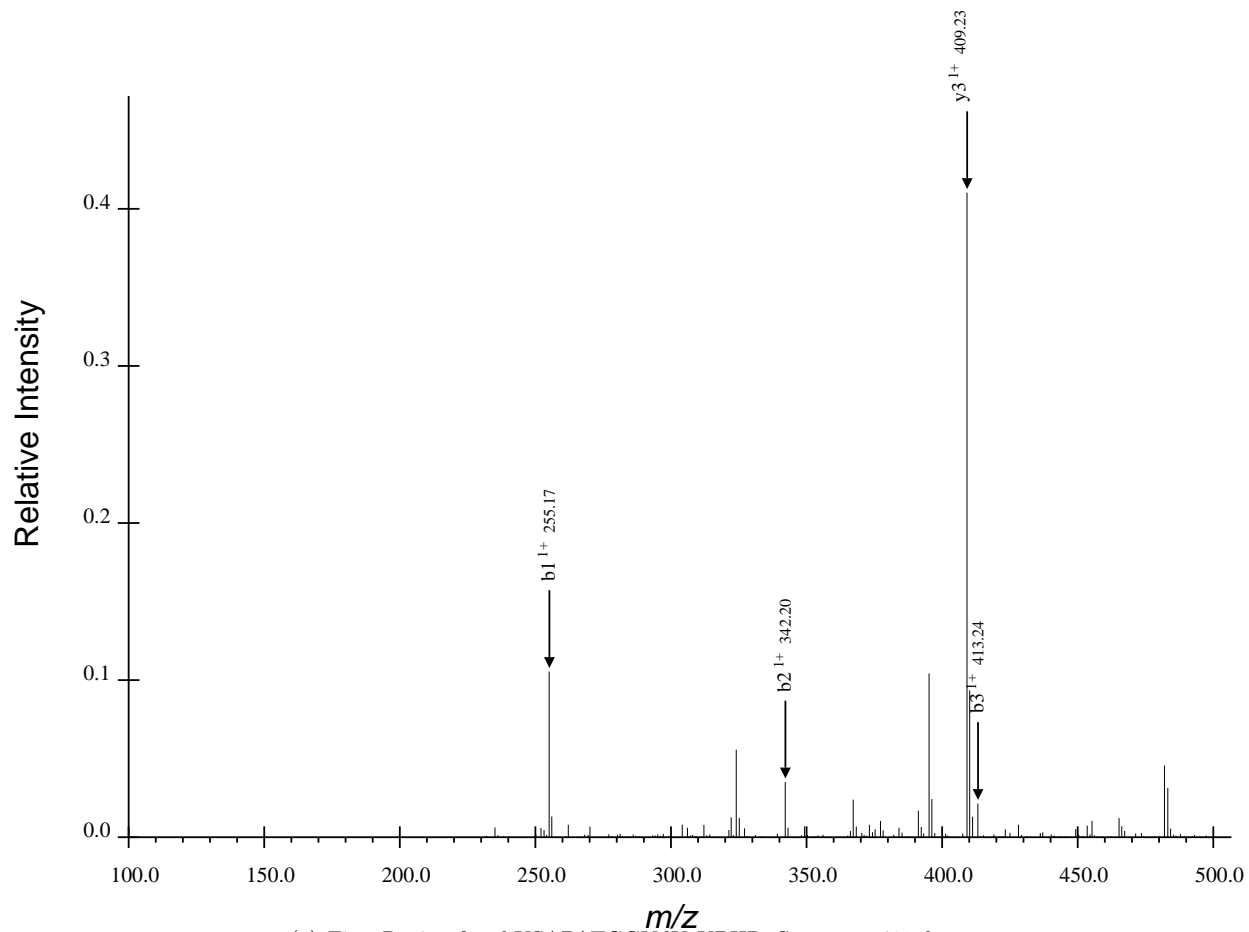

(a) First Region for rhKSAPATGGVdKrKPHR, Spectrum 409.dta

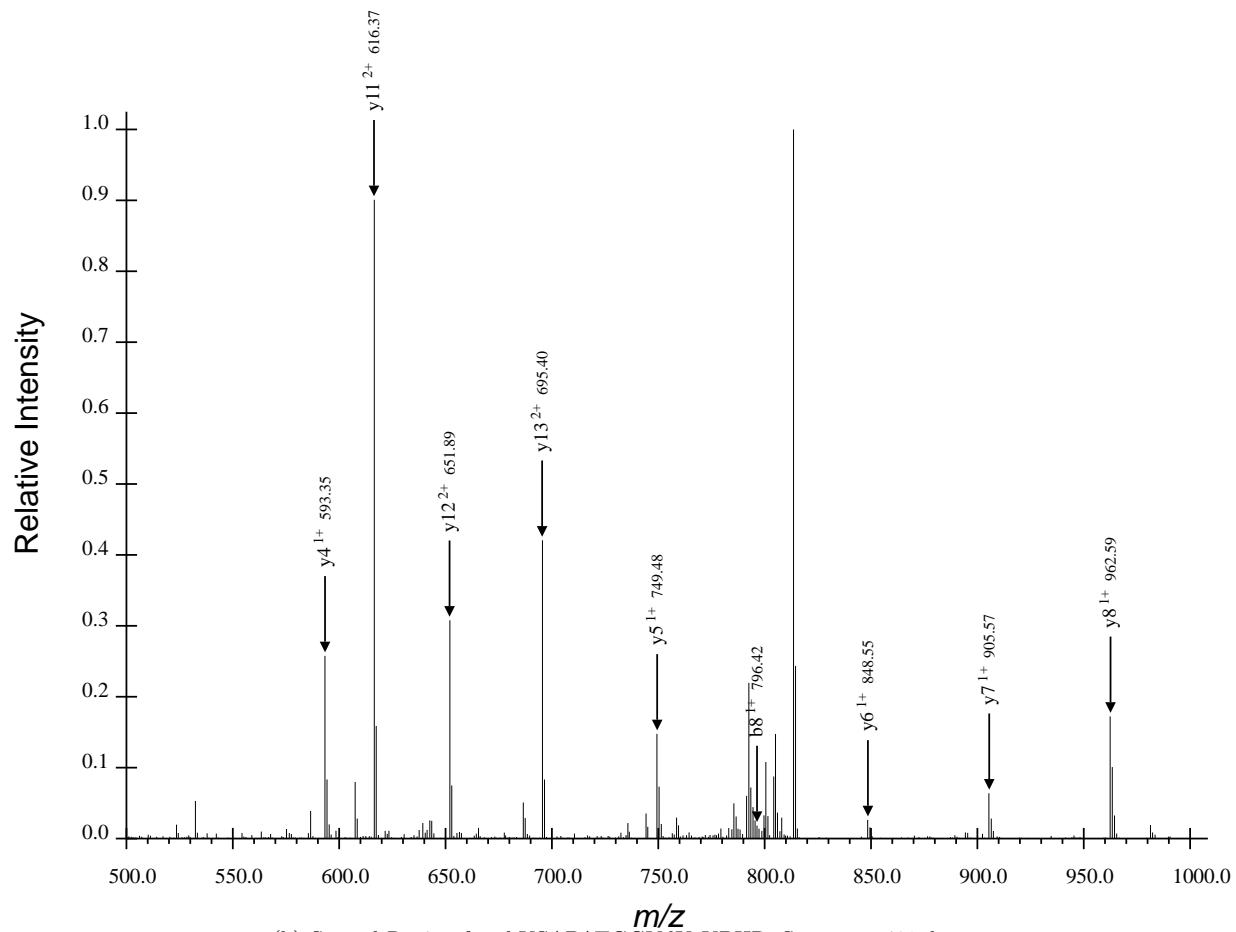

(b) Second Region for rhKSAPATGGVdKrKPHR, Spectrum 409.dta

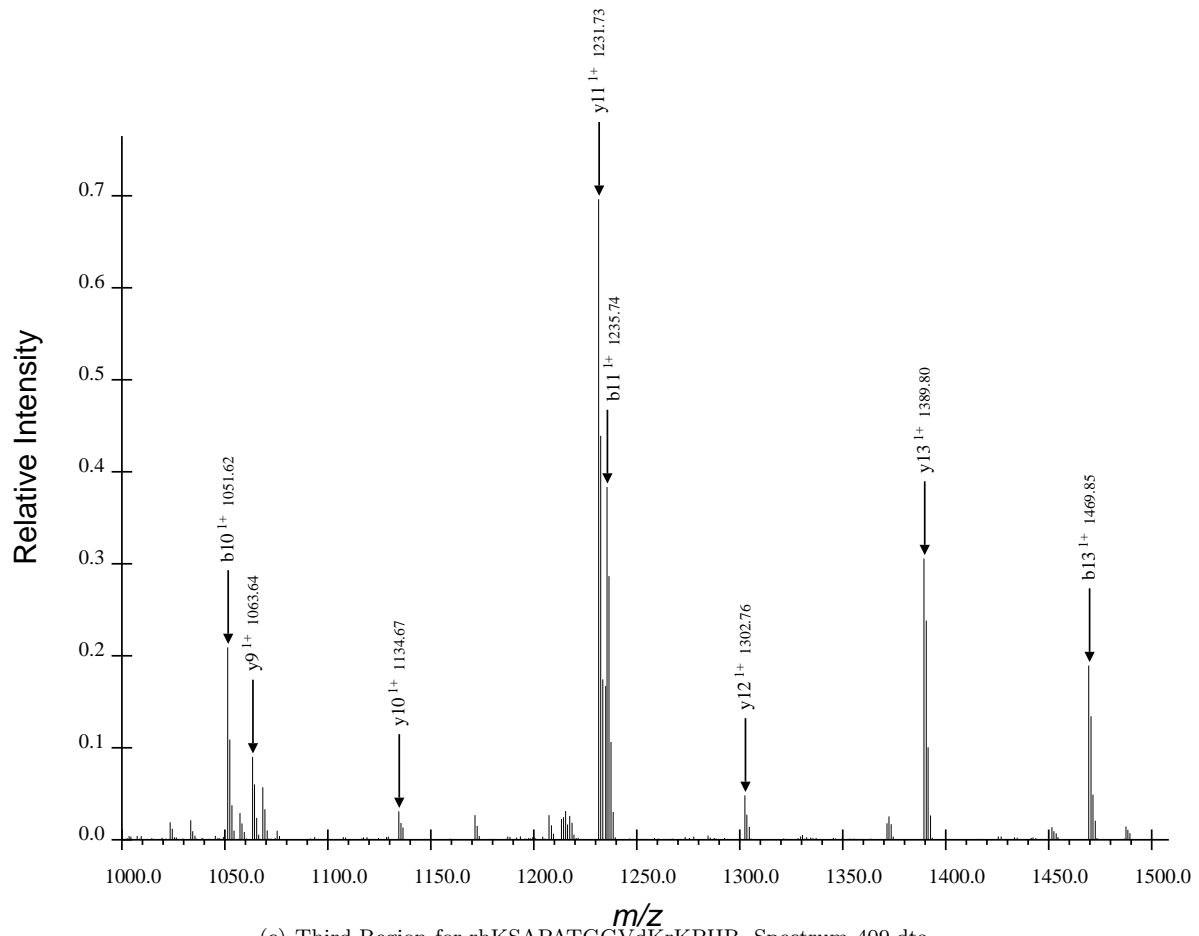

(c) Third Region for rhKSAPATGGVdKrKPHR, Spectrum 409.dta

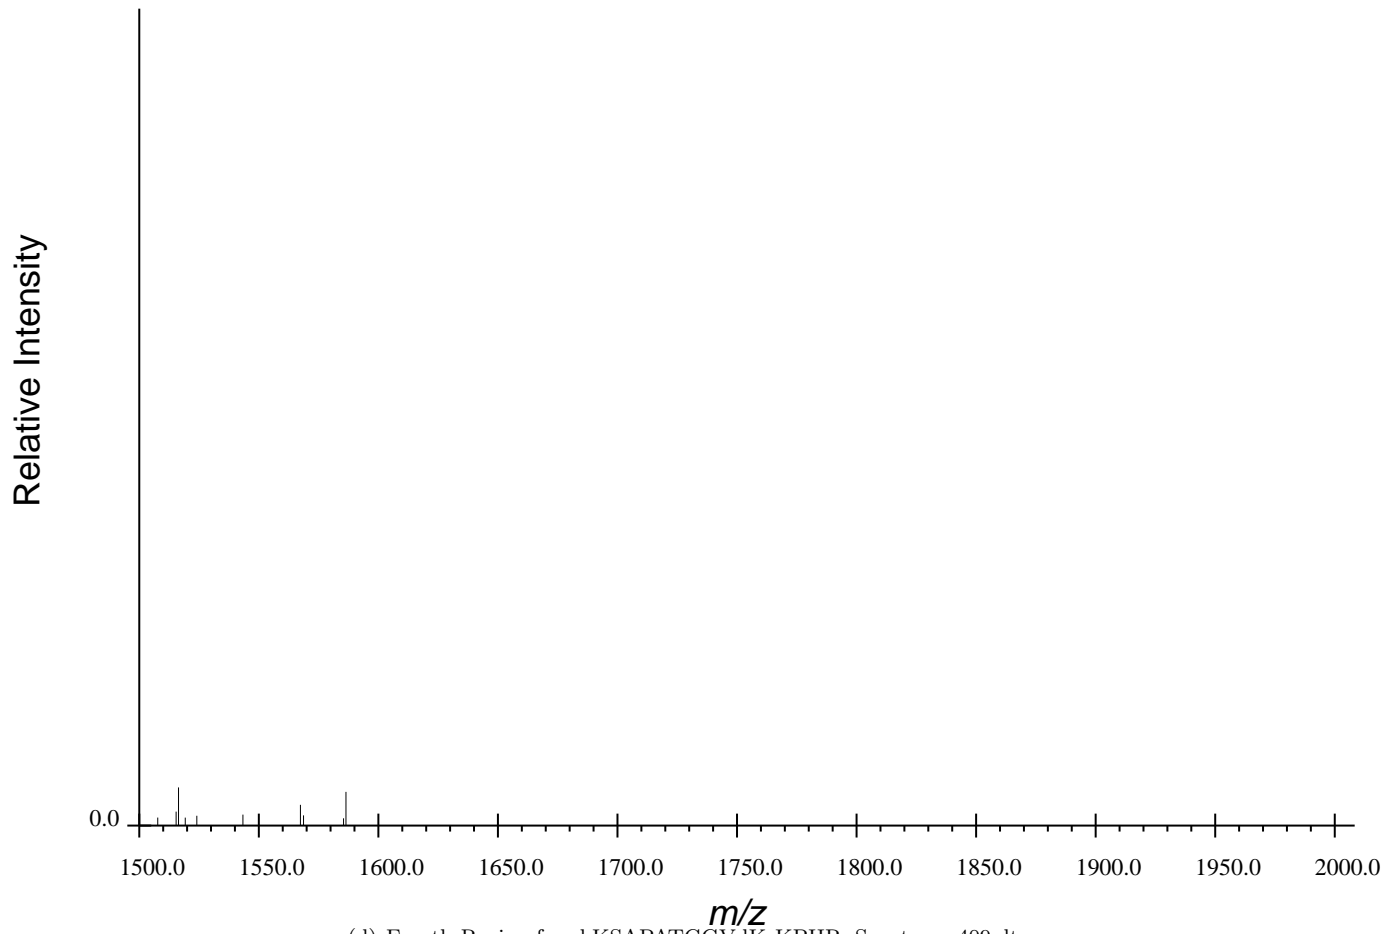

(d) Fourth Region for rhKSAPATGGVdKrKPHR, Spectrum 409.dta

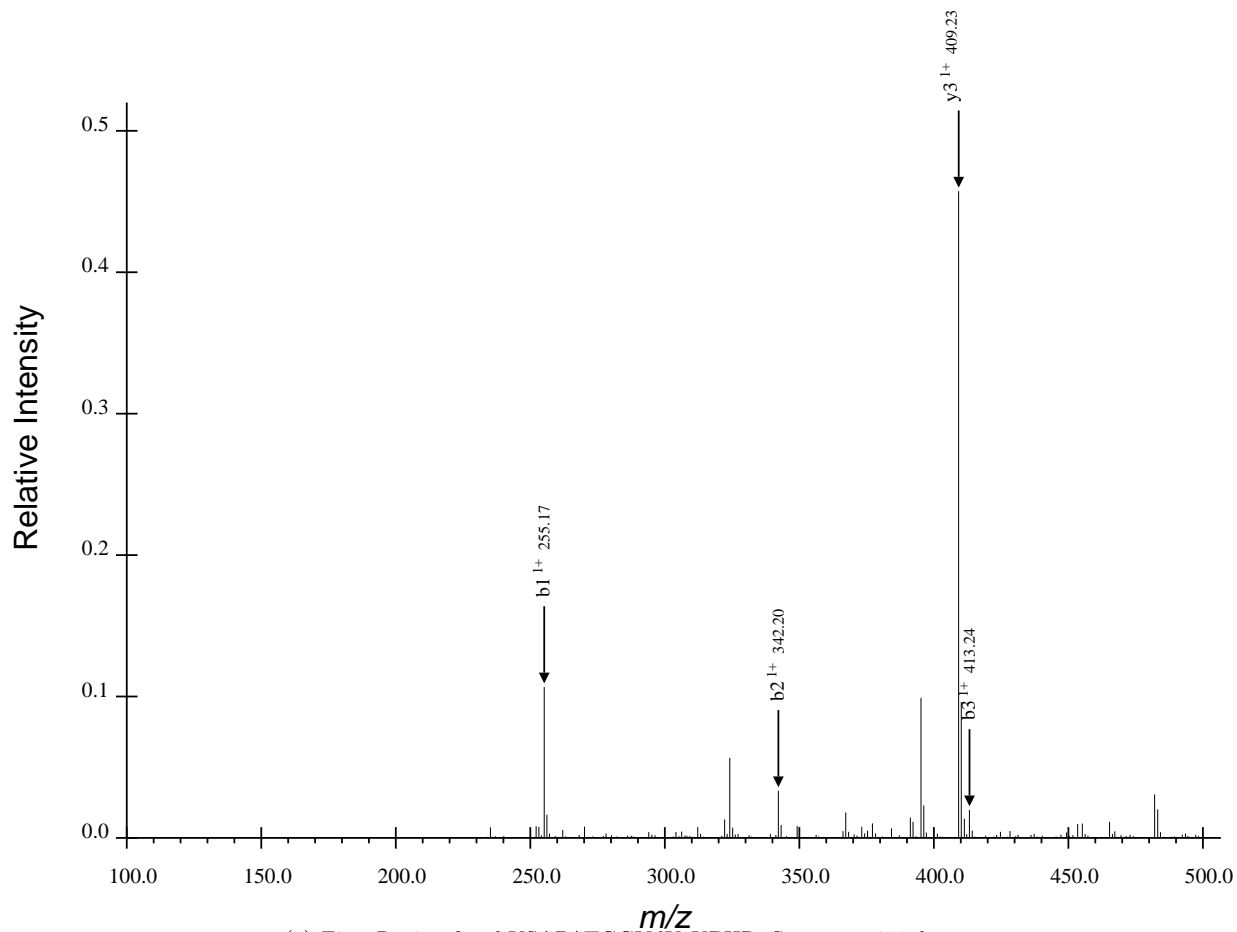

(a) First Region for rhKSAPATGGVdKrKPHR, Spectrum 410.dta

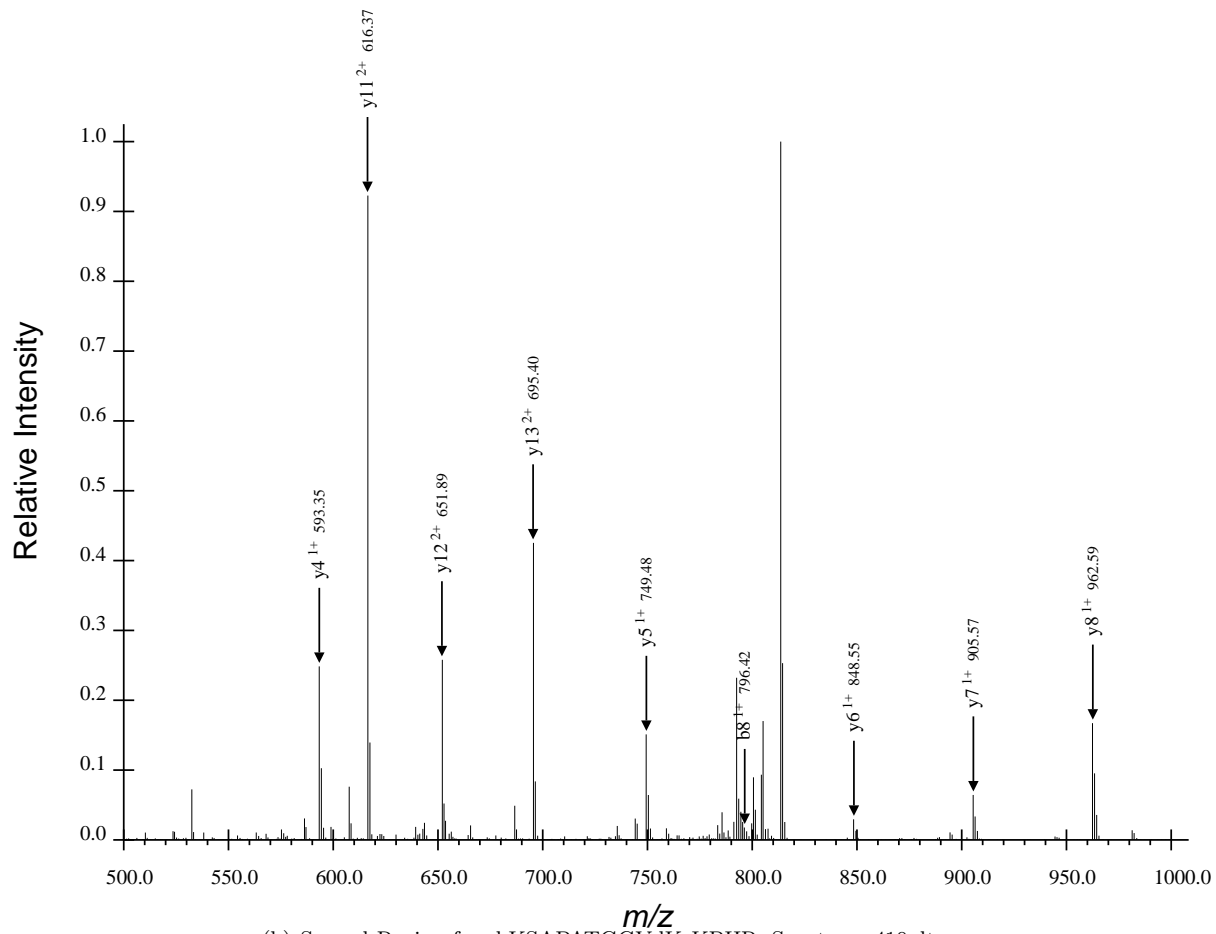

(b) Second Region for rhKSAPATGGVdKrKPHR, Spectrum 410.dta

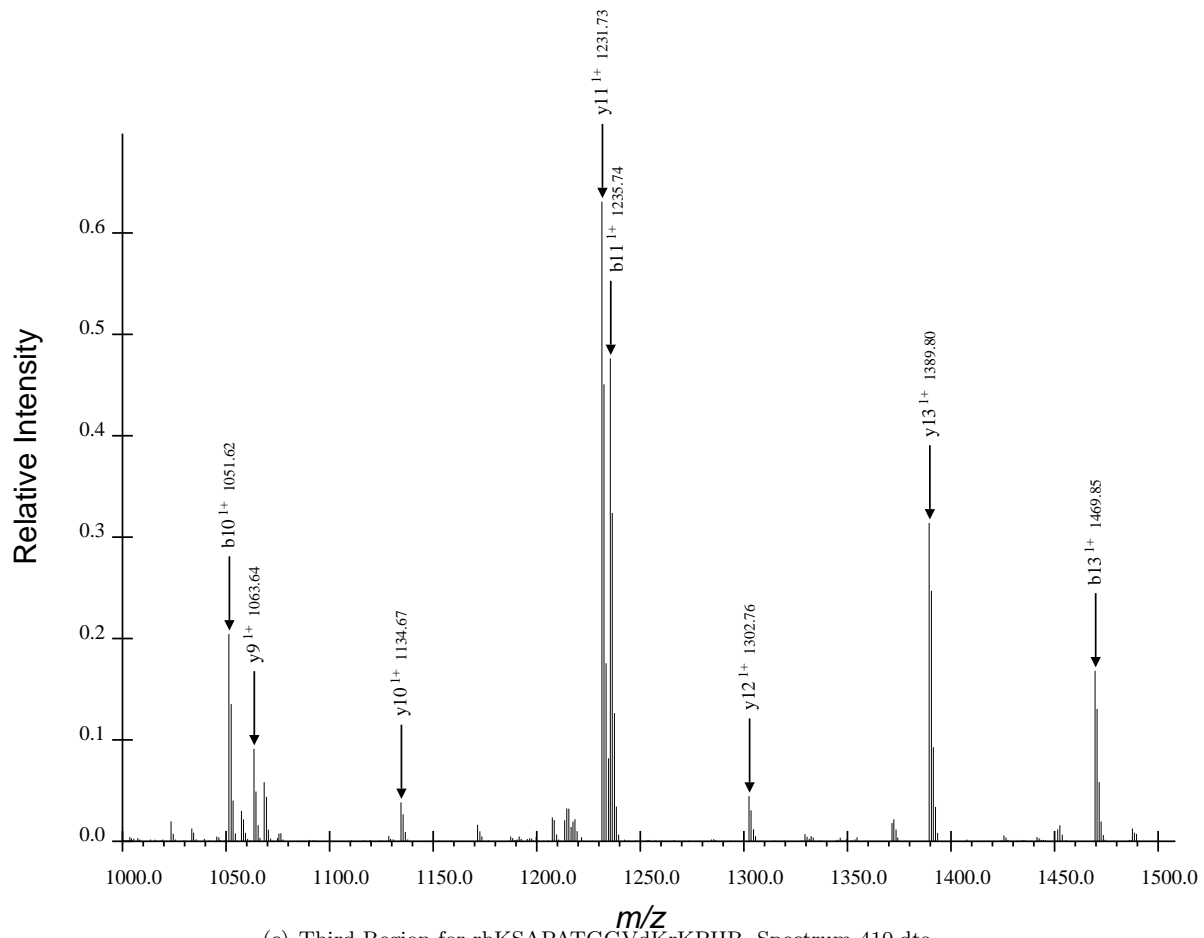

(c) Third Region for rhKSAPATGGVdKrKPHR, Spectrum 410.dta

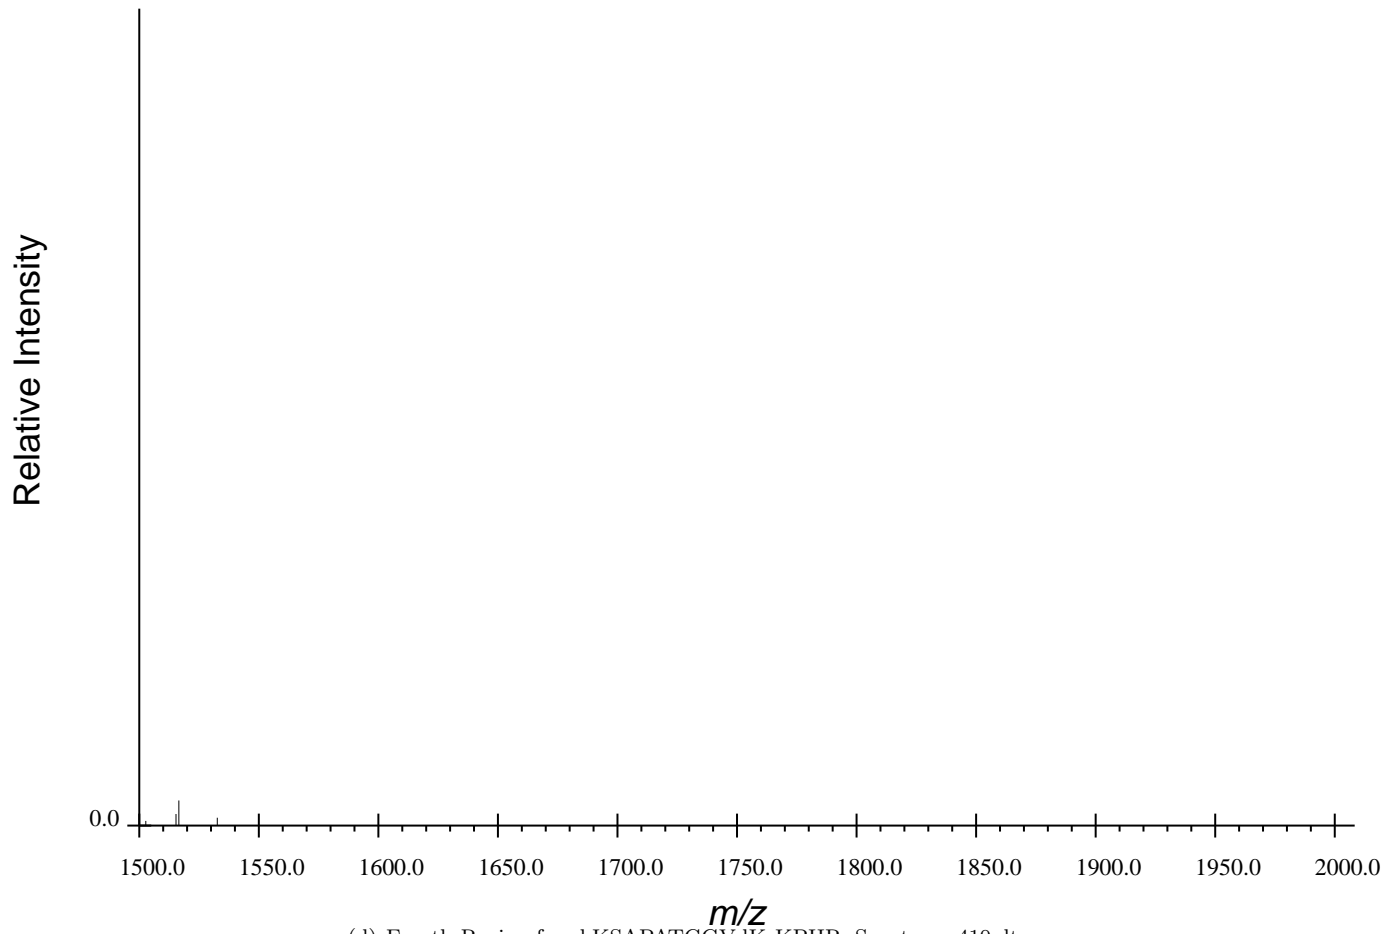

(d) Fourth Region for rhKSAPATGGVdKrKPHR, Spectrum 410.dta

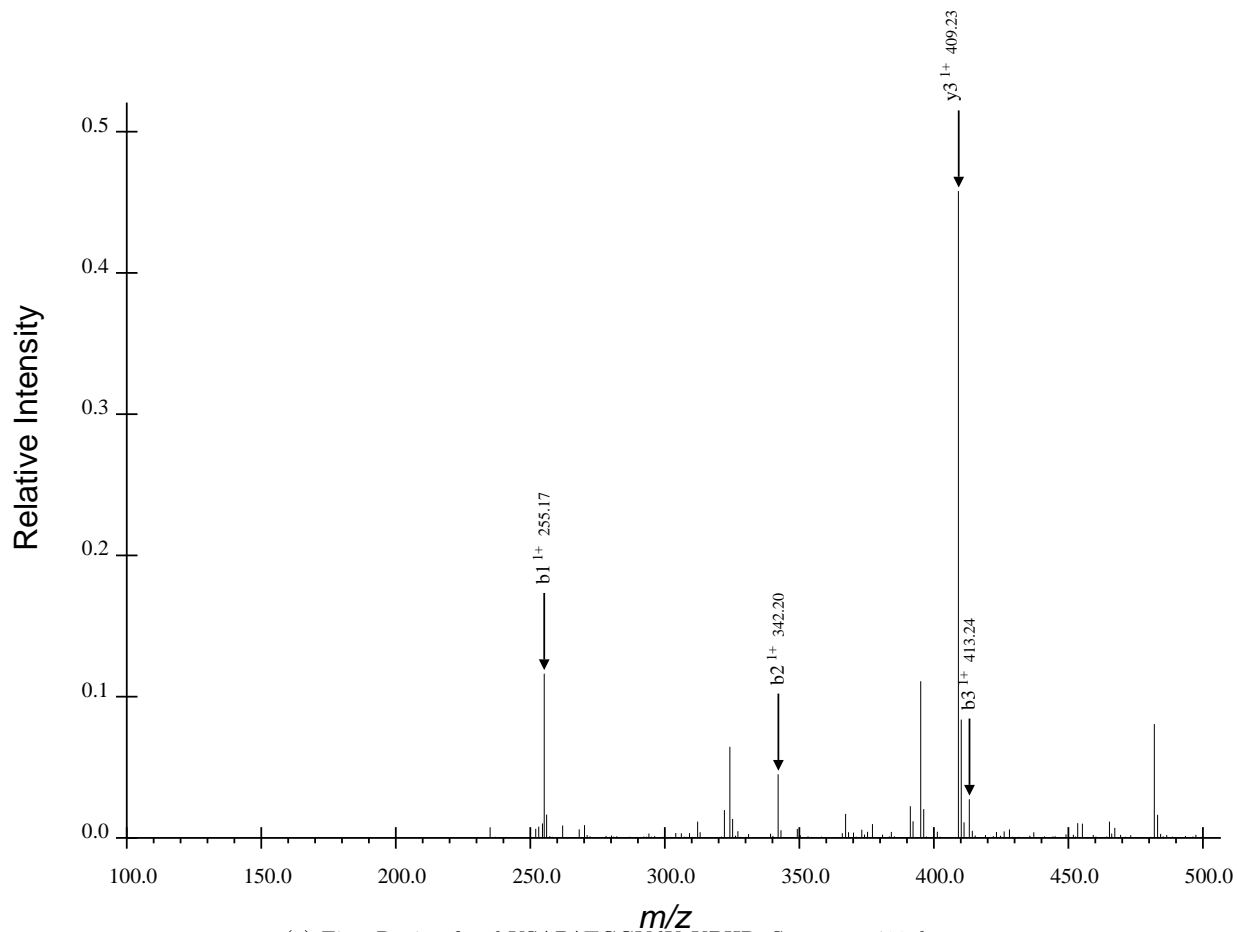

(a) First Region for rhKSAPATGGVdKrKPHR, Spectrum 411.dta

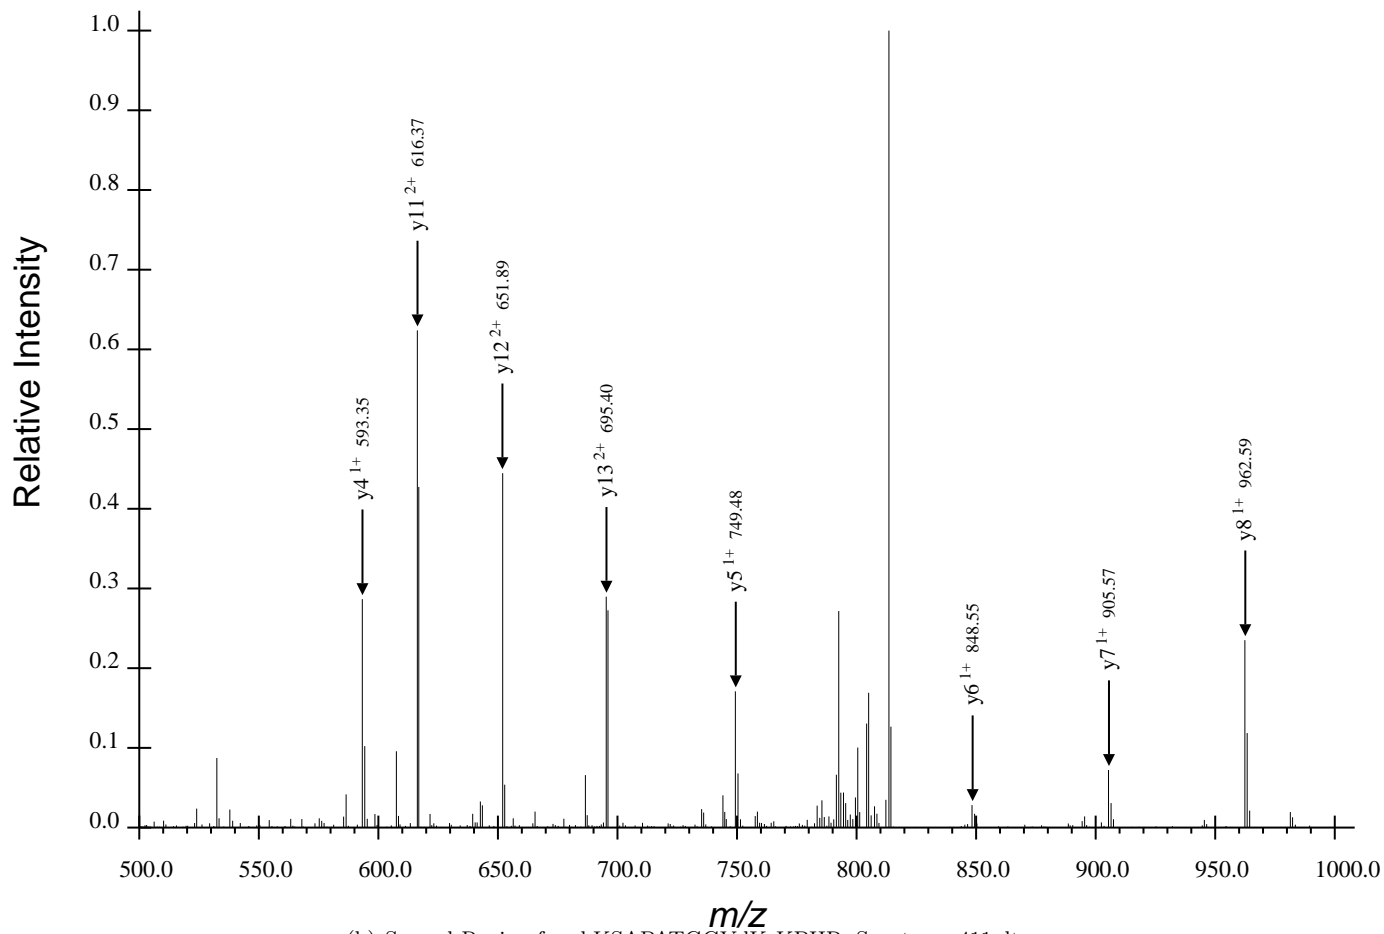

(b) Second Region for rhKSAPATGGVdKrKPHR, Spectrum 411.dta

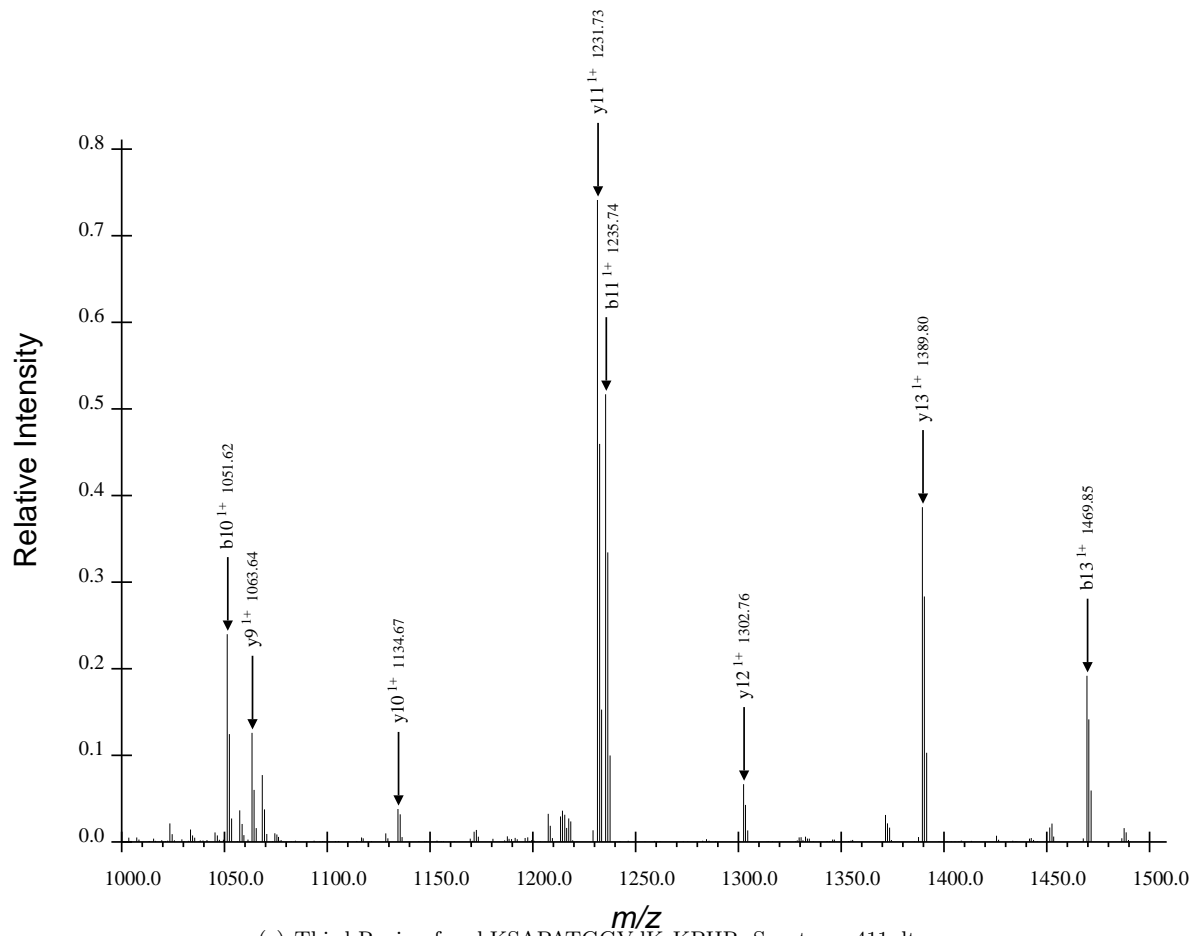

(c) Third Region for rhKSAPATGGVdKrKPHR, Spectrum 411.dta

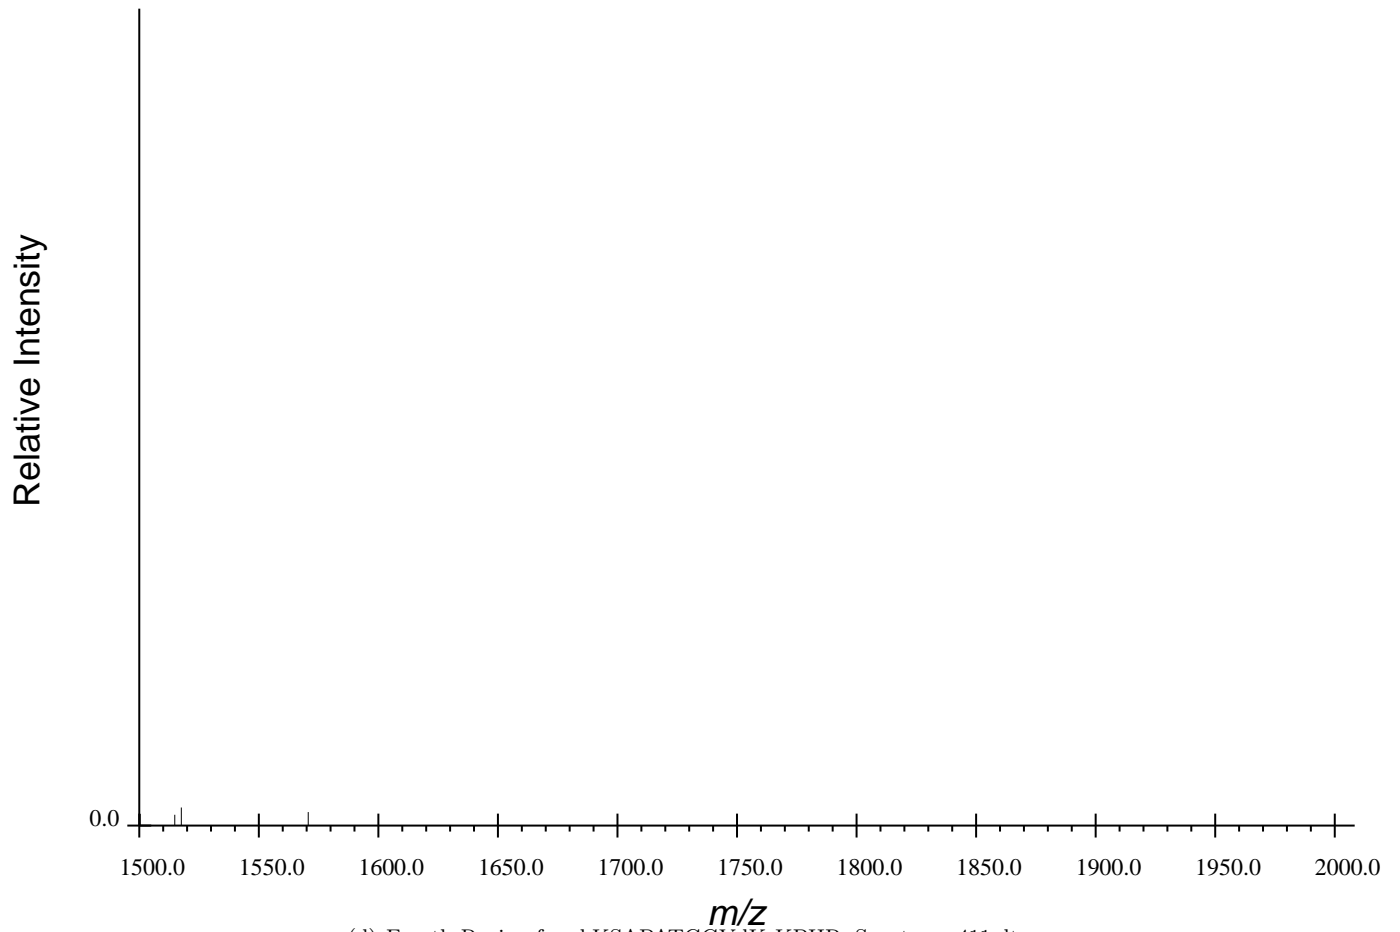

(d) Fourth Region for rhKSAPATGGVdKrKPHR, Spectrum 411.dta

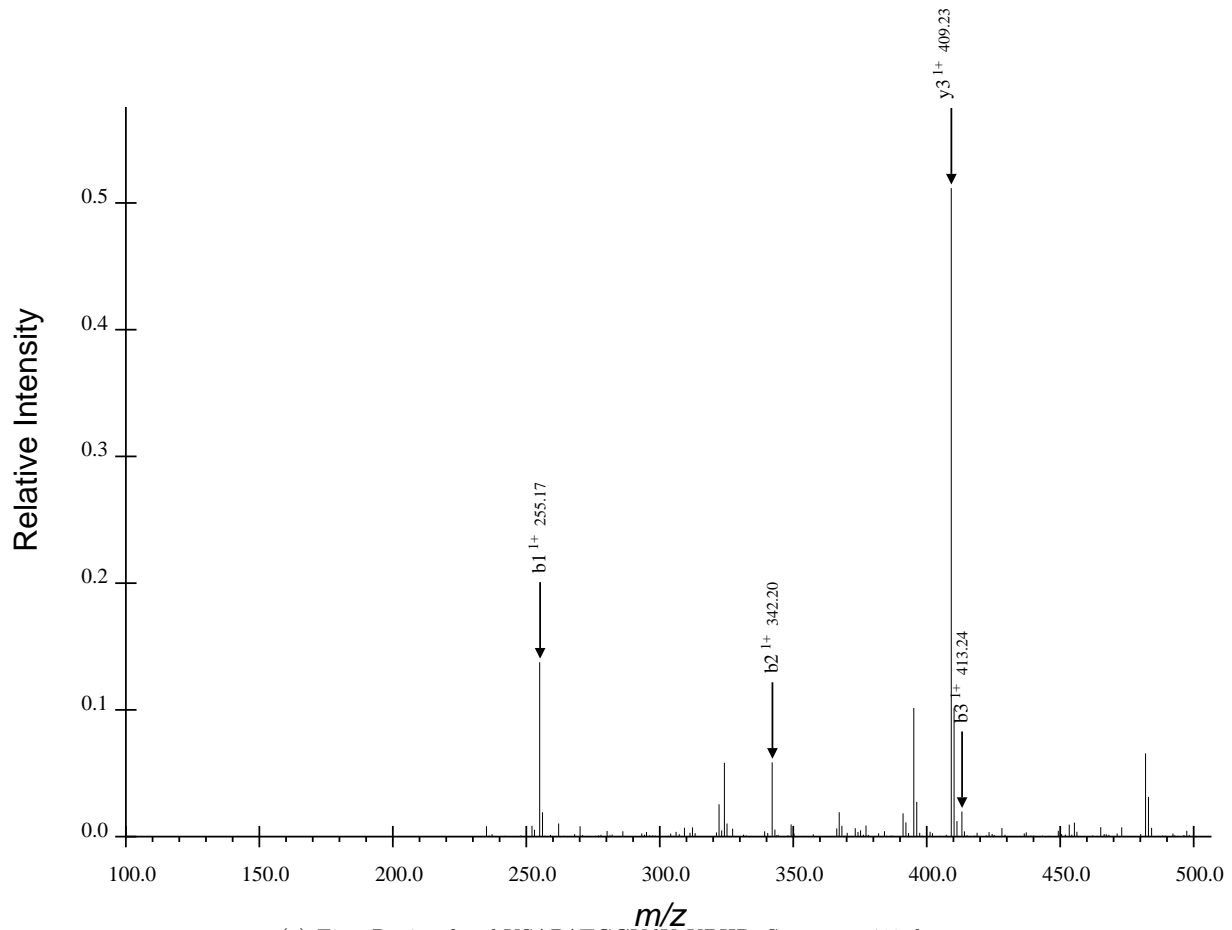

(a) First Region for rhKSAPATGGVdKrKPHR, Spectrum 412.dta

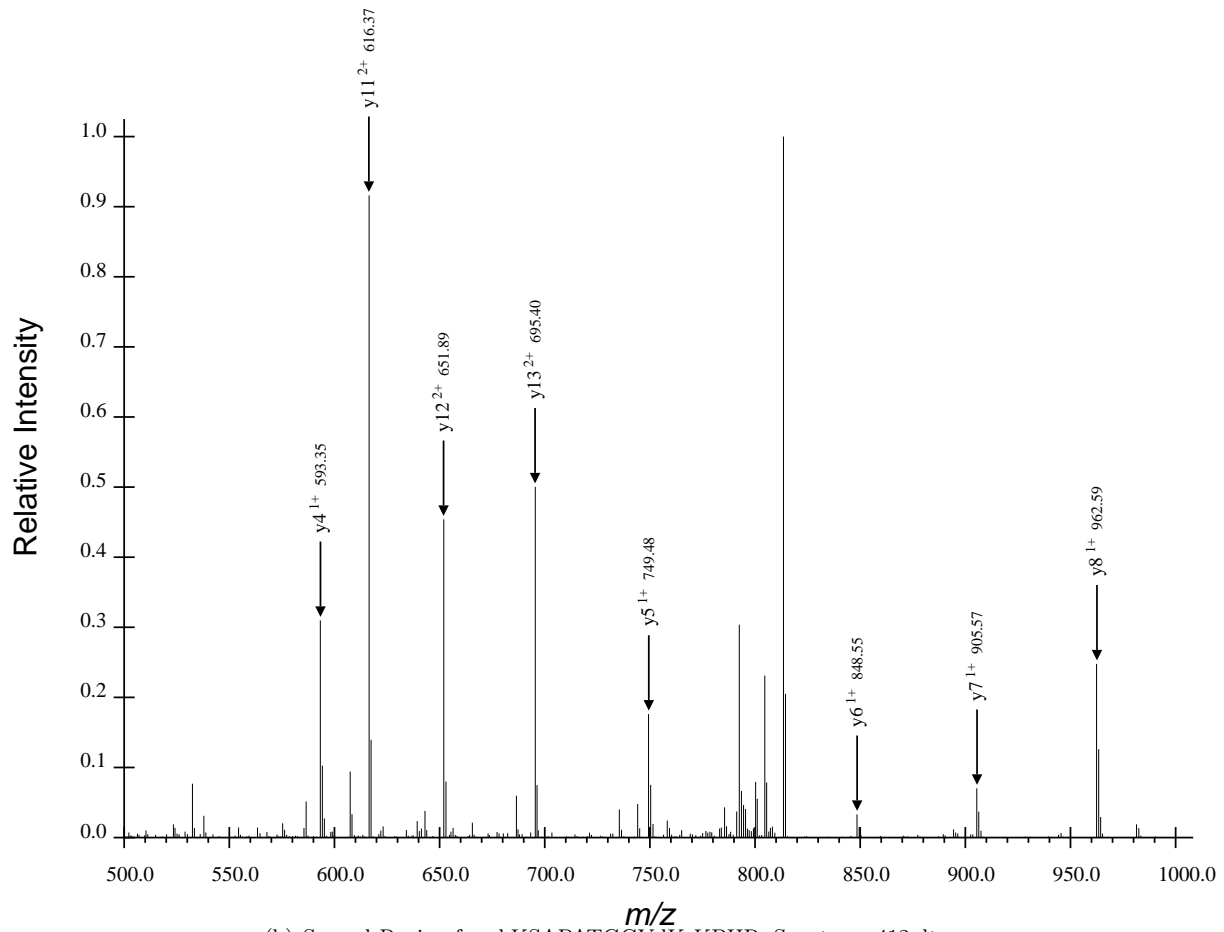

(b) Second Region for rhKSAPATGGVdKrKPHR, Spectrum 412.dta



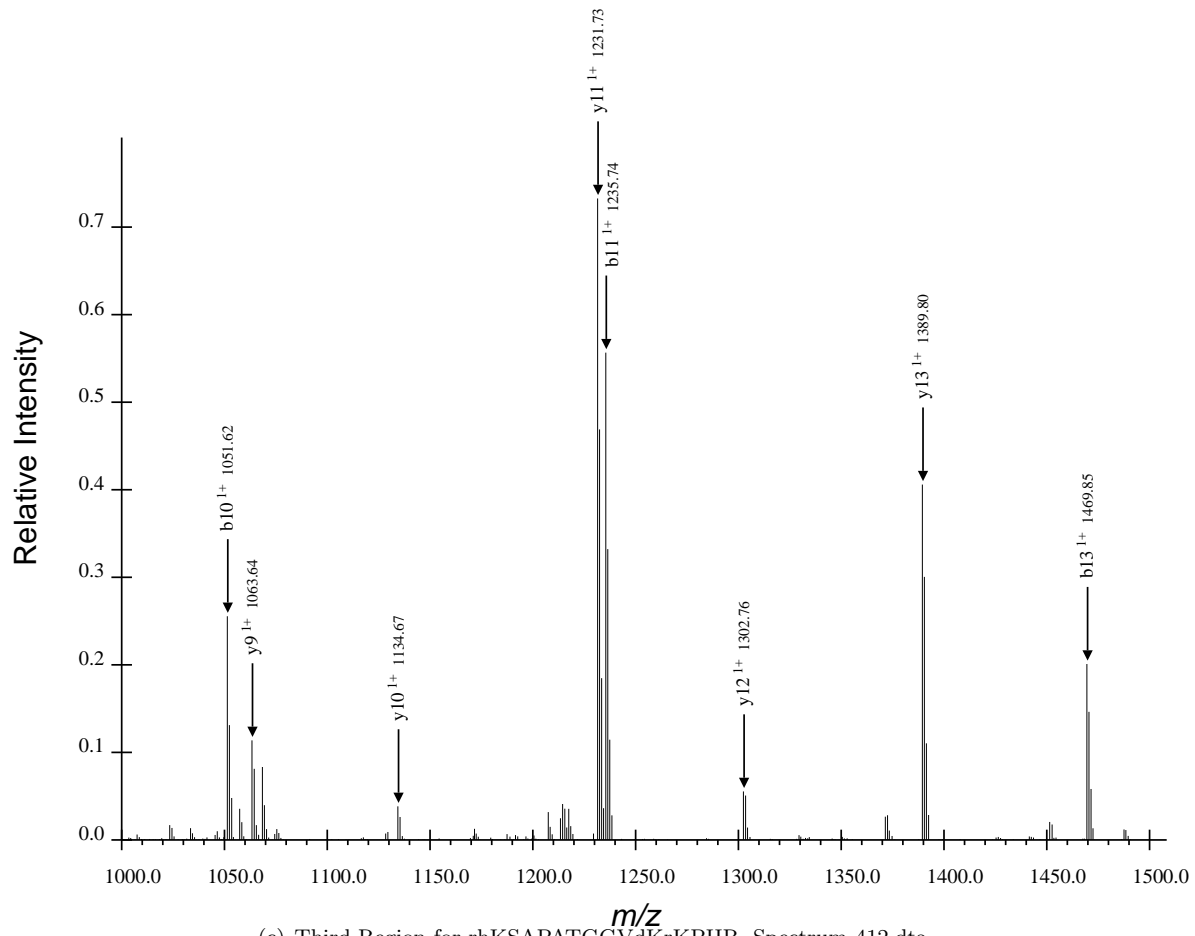

(c) Third Region for rhKSAPATGGVdKrKPHR, Spectrum 412.dta

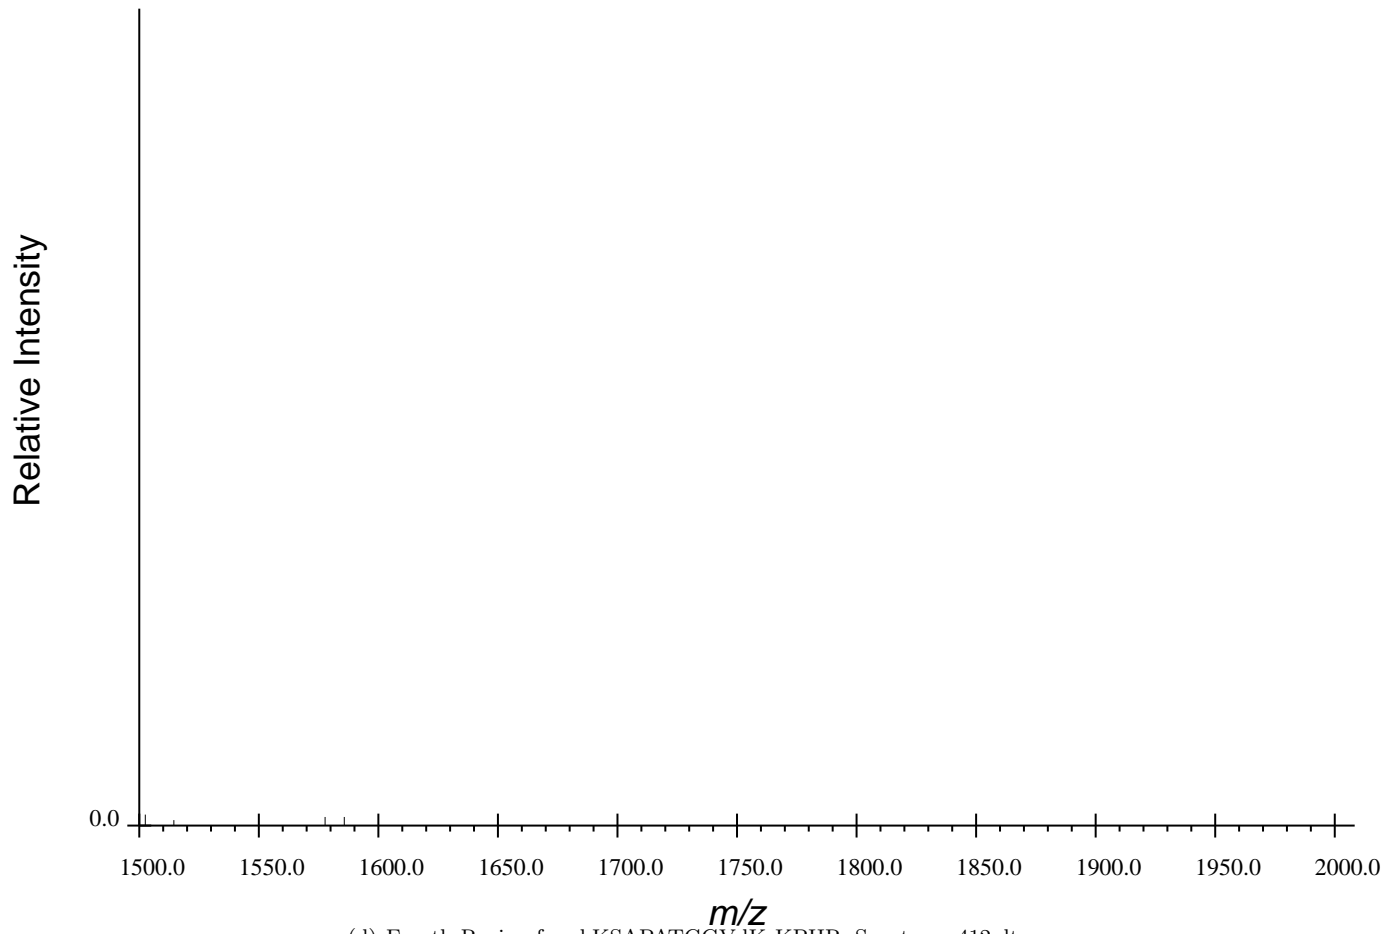

(d) Fourth Region for rhKSAPATGGVdKrKPHR, Spectrum 412.dta

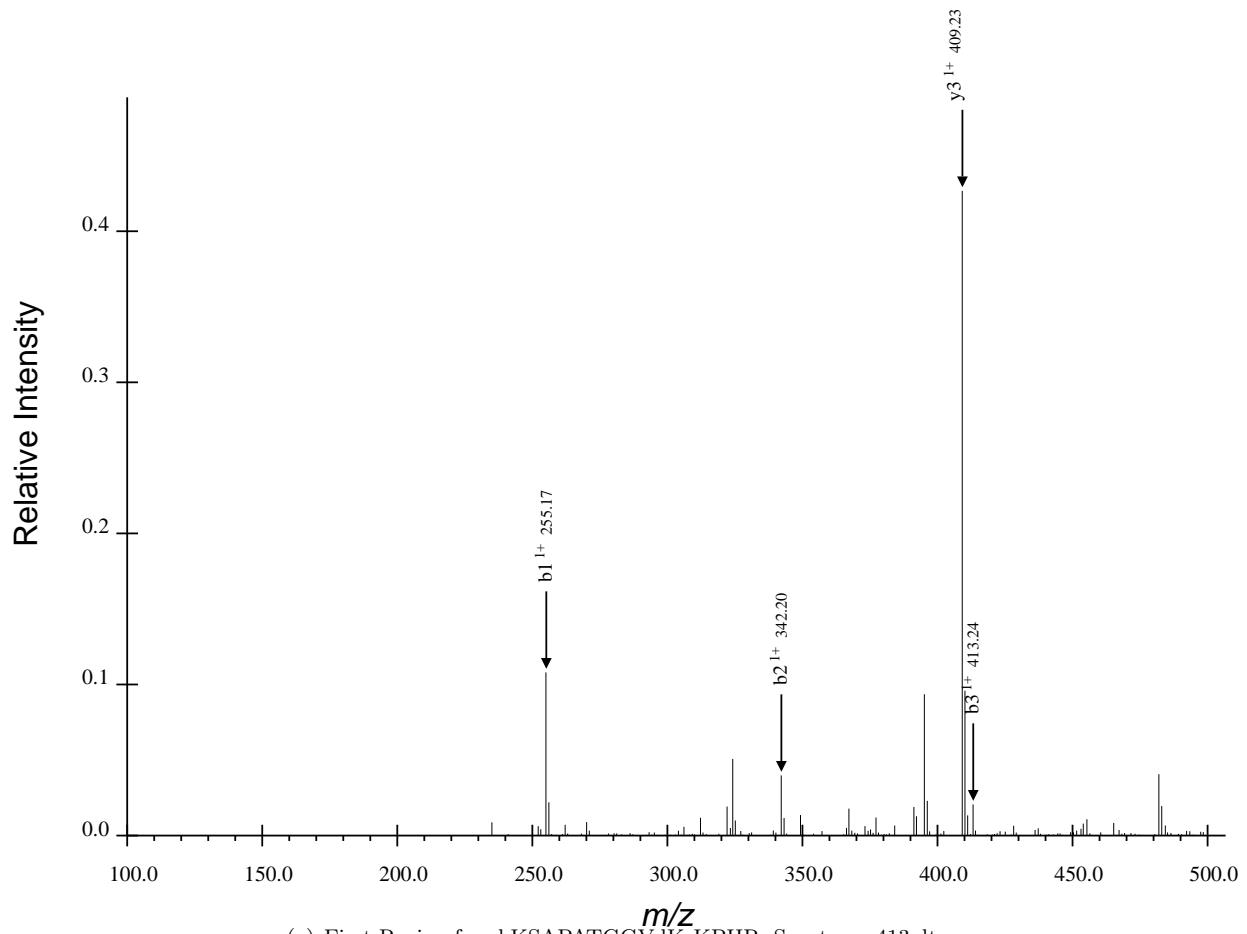

(a) First Region for rhKSAPATGGVdKrKPHR, Spectrum 413.dta

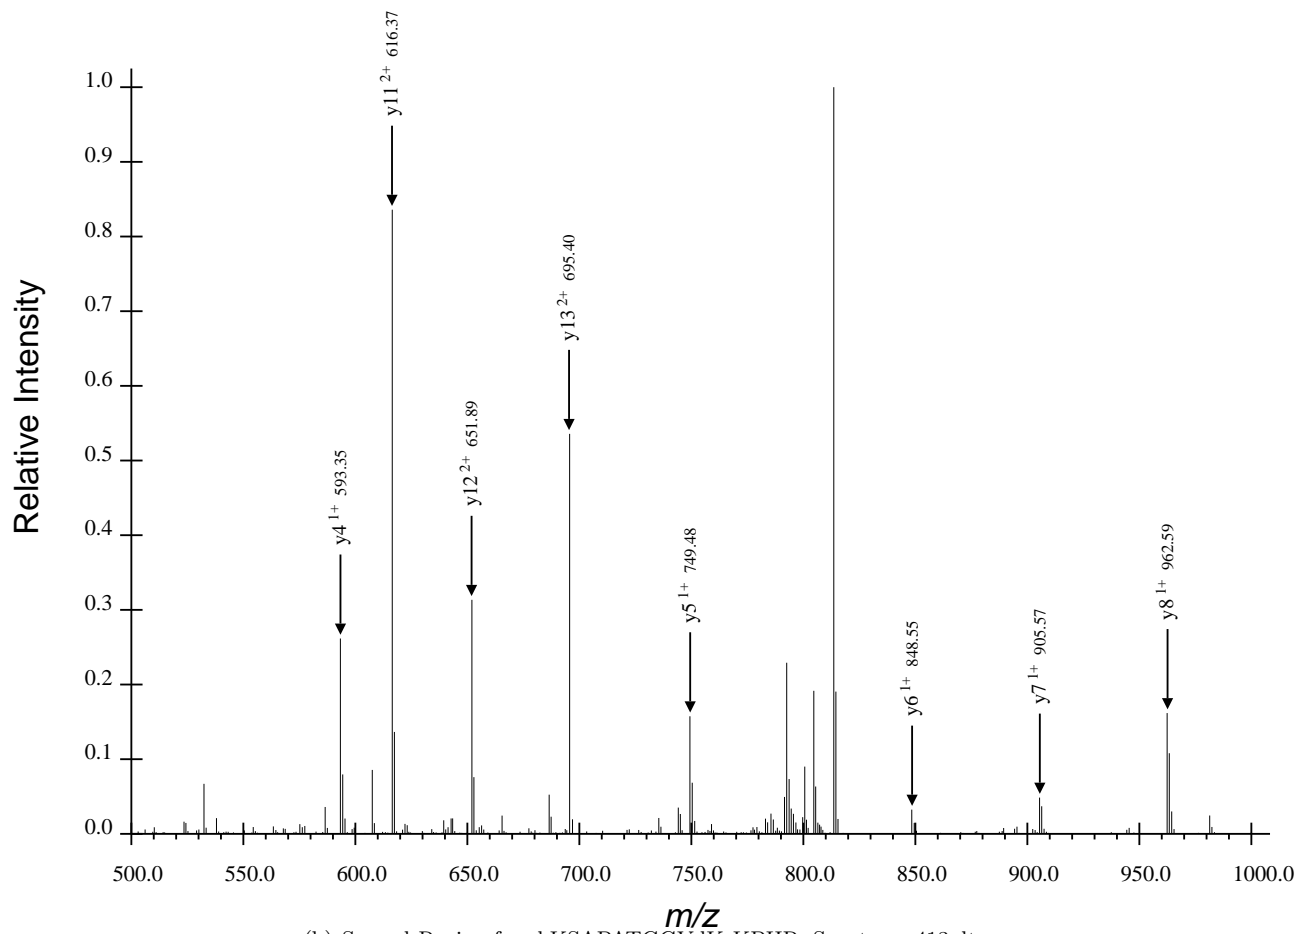

(b) Second Region for rhKSAPATGGVdKrKPHR, Spectrum 413.dta

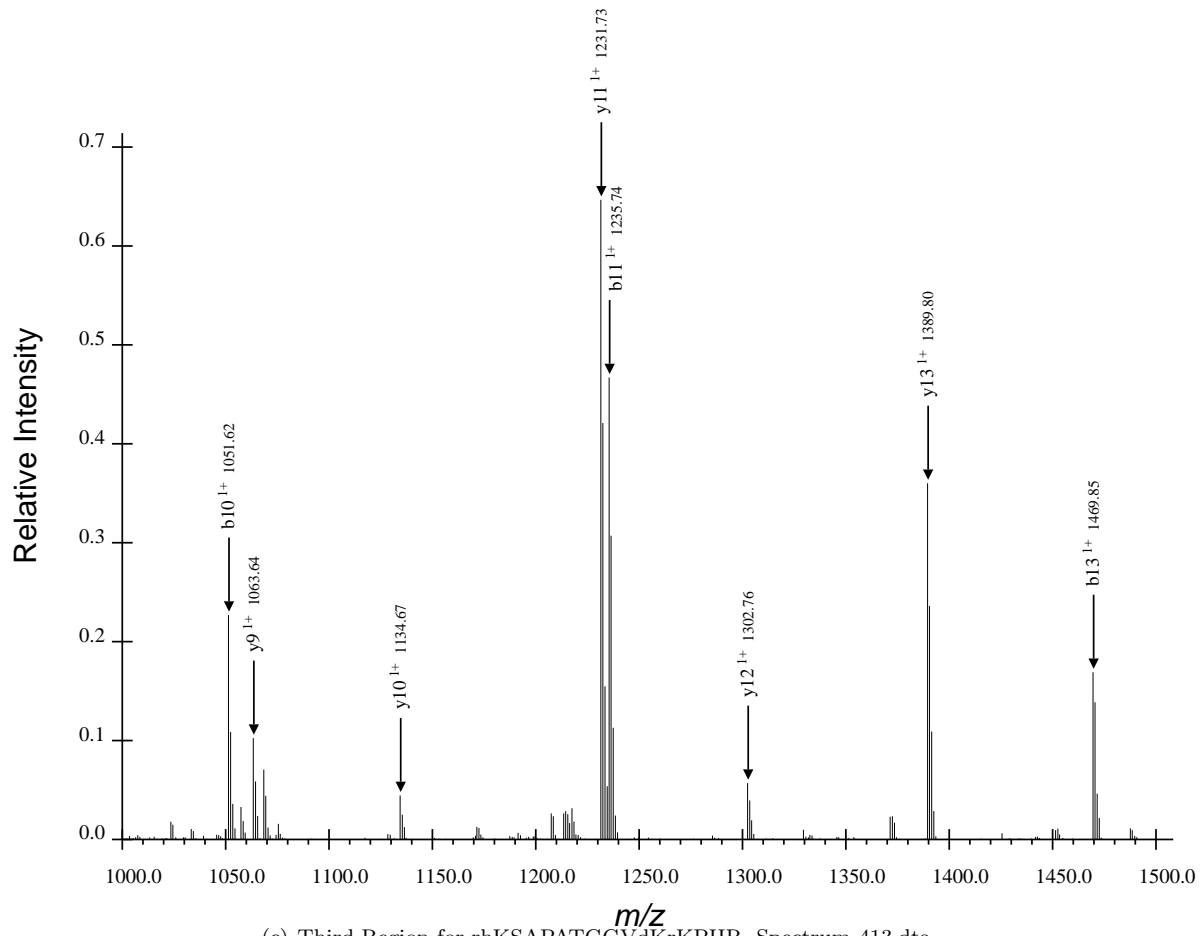

(c) Third Region for rhKSAPATGGVdKrKPHR, Spectrum 413.dta

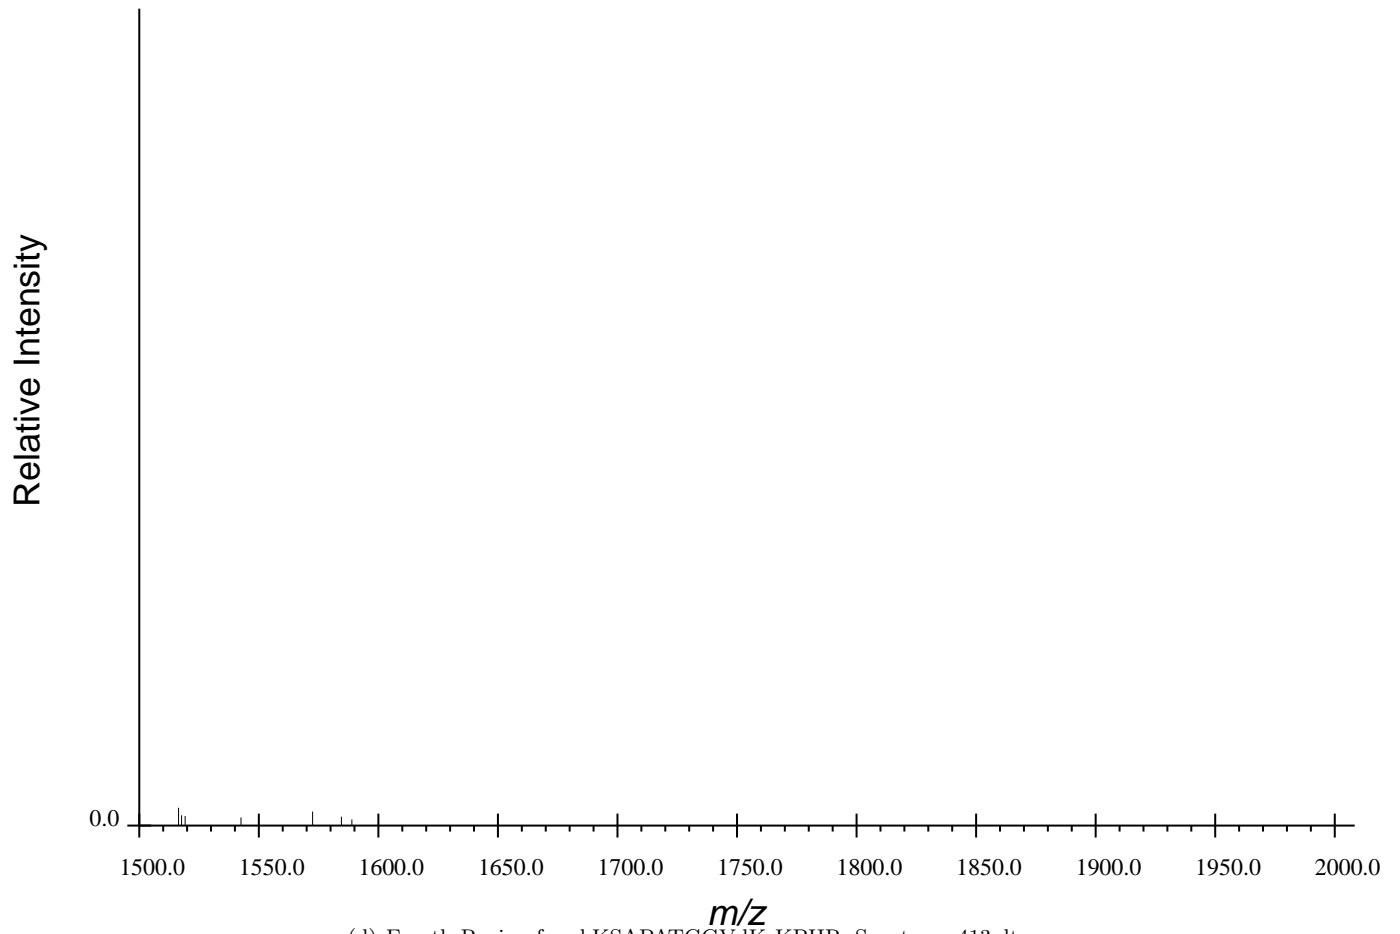

(d) Fourth Region for rhKSAPATGGVdKrKPHR, Spectrum 413.dta

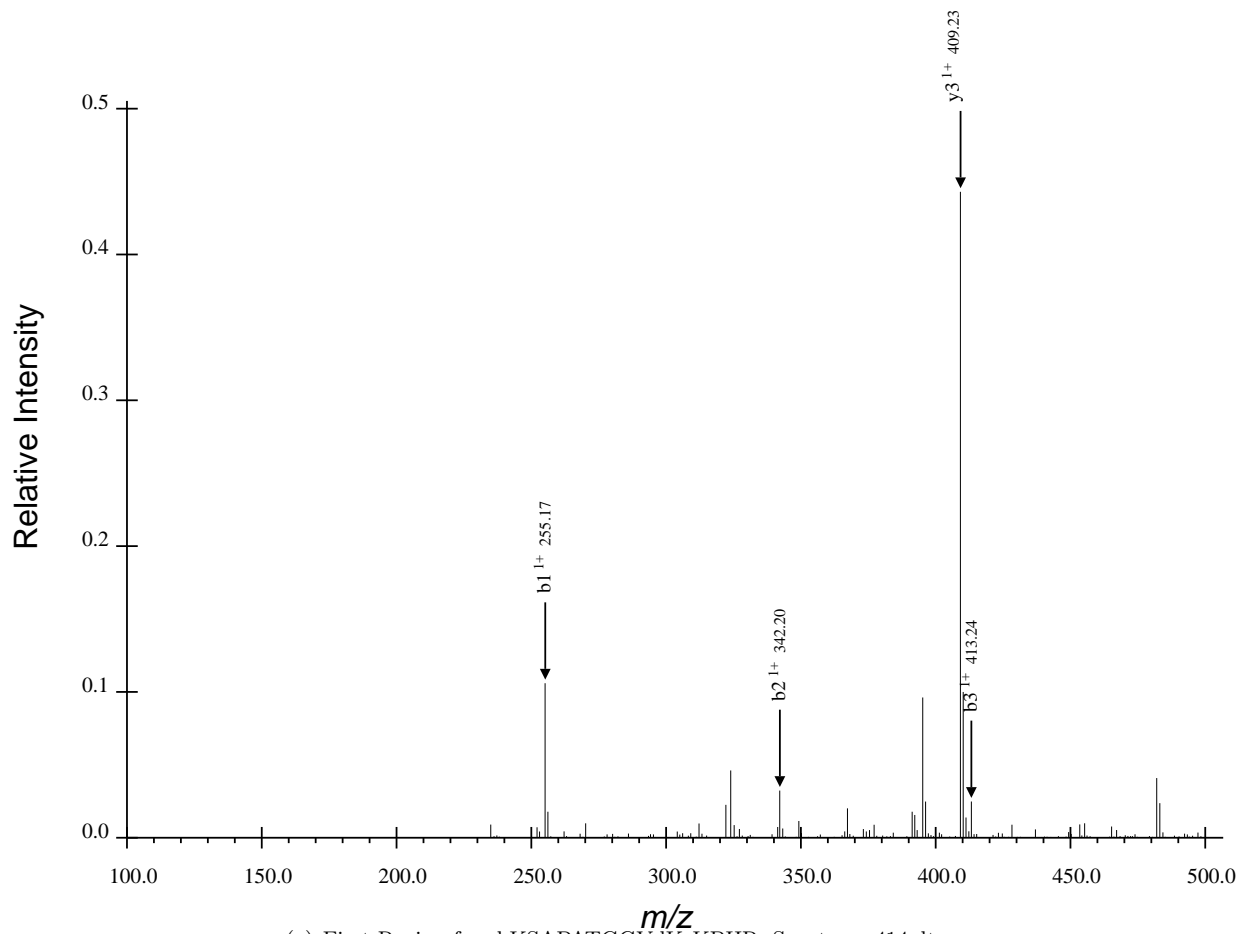

(a) First Region for rhKSAPATGGVdKrKPHR, Spectrum 414.dta

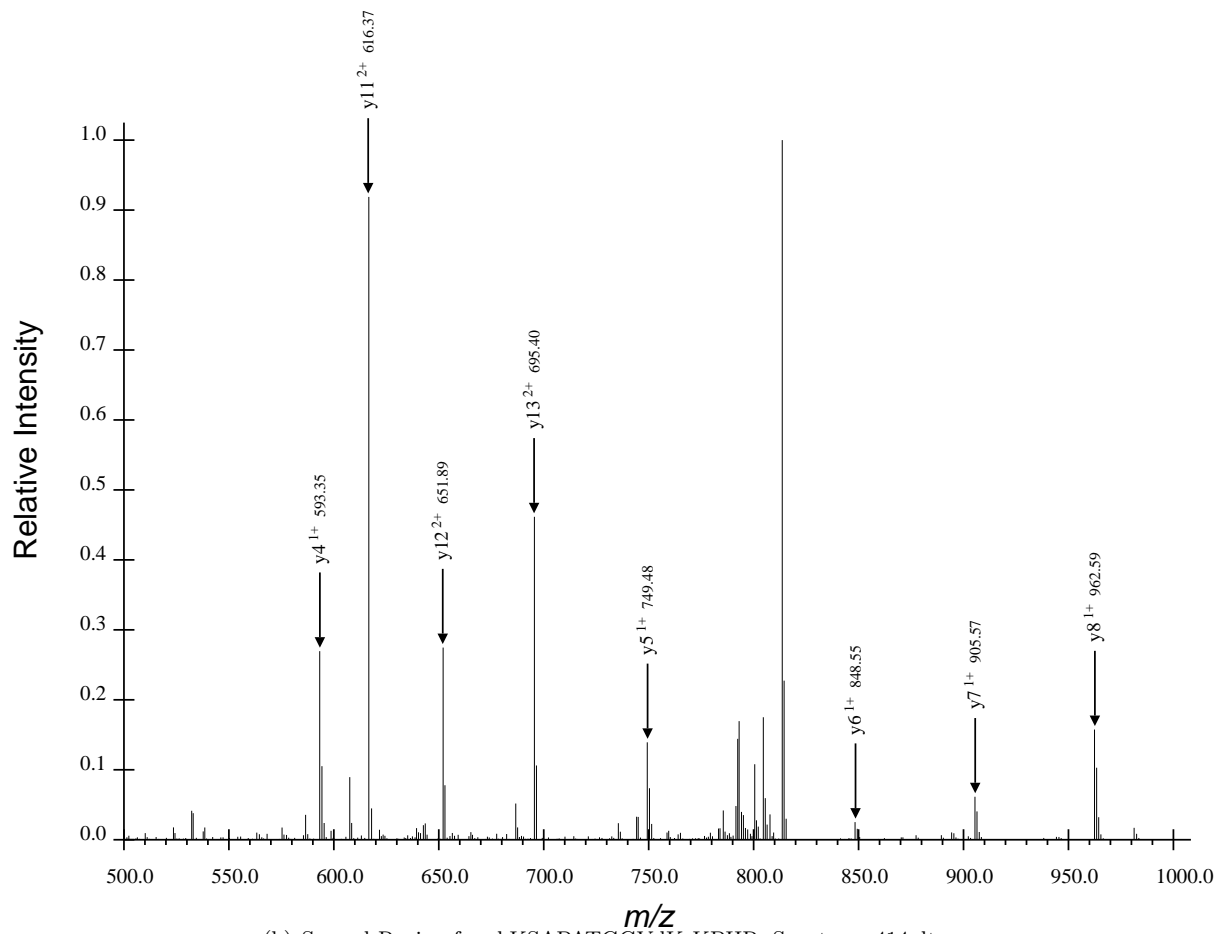

(b) Second Region for rhKSAPATGGVdKrKPHR, Spectrum 414.dta

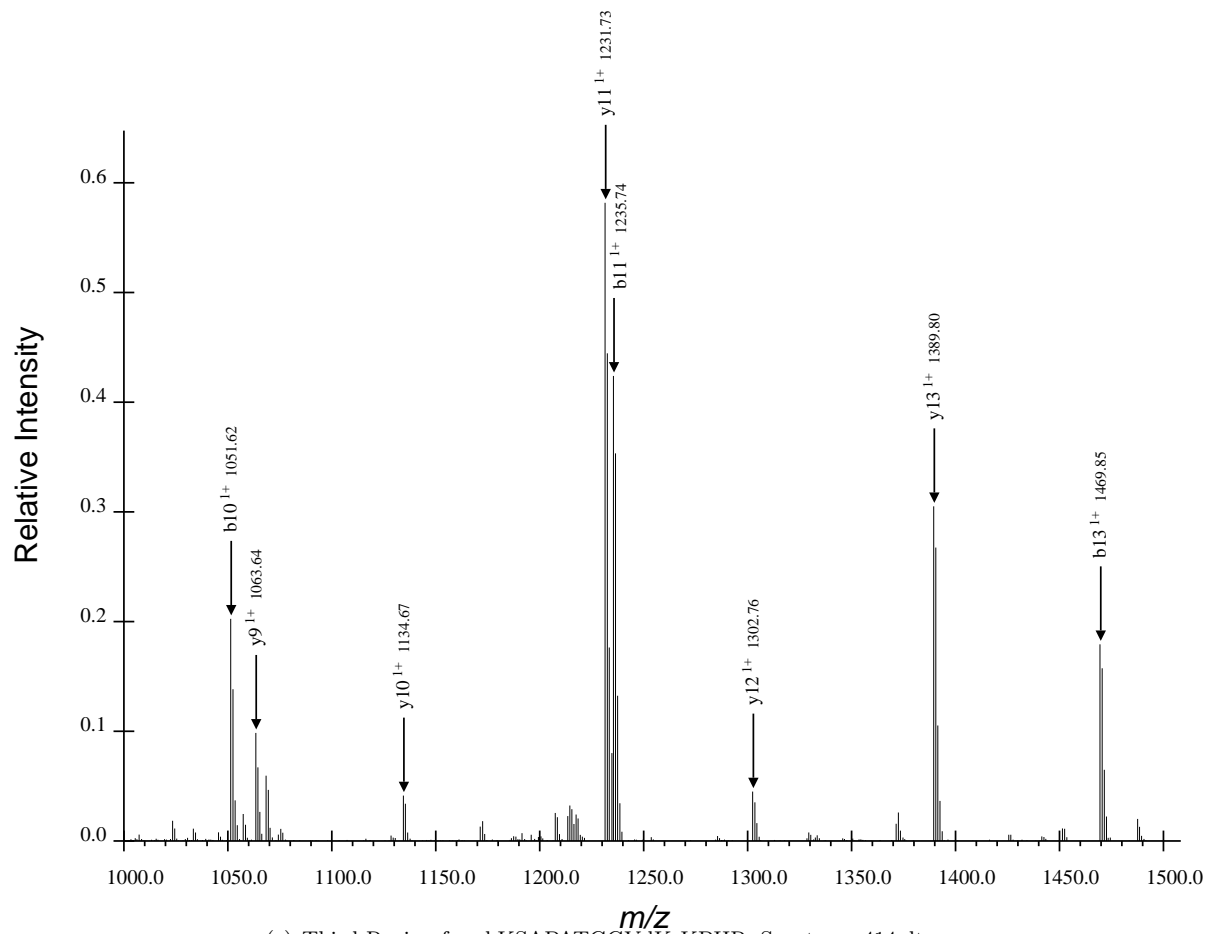

(c) Third Region for rhKSAPATGGVdKrKPHR, Spectrum 414.dta

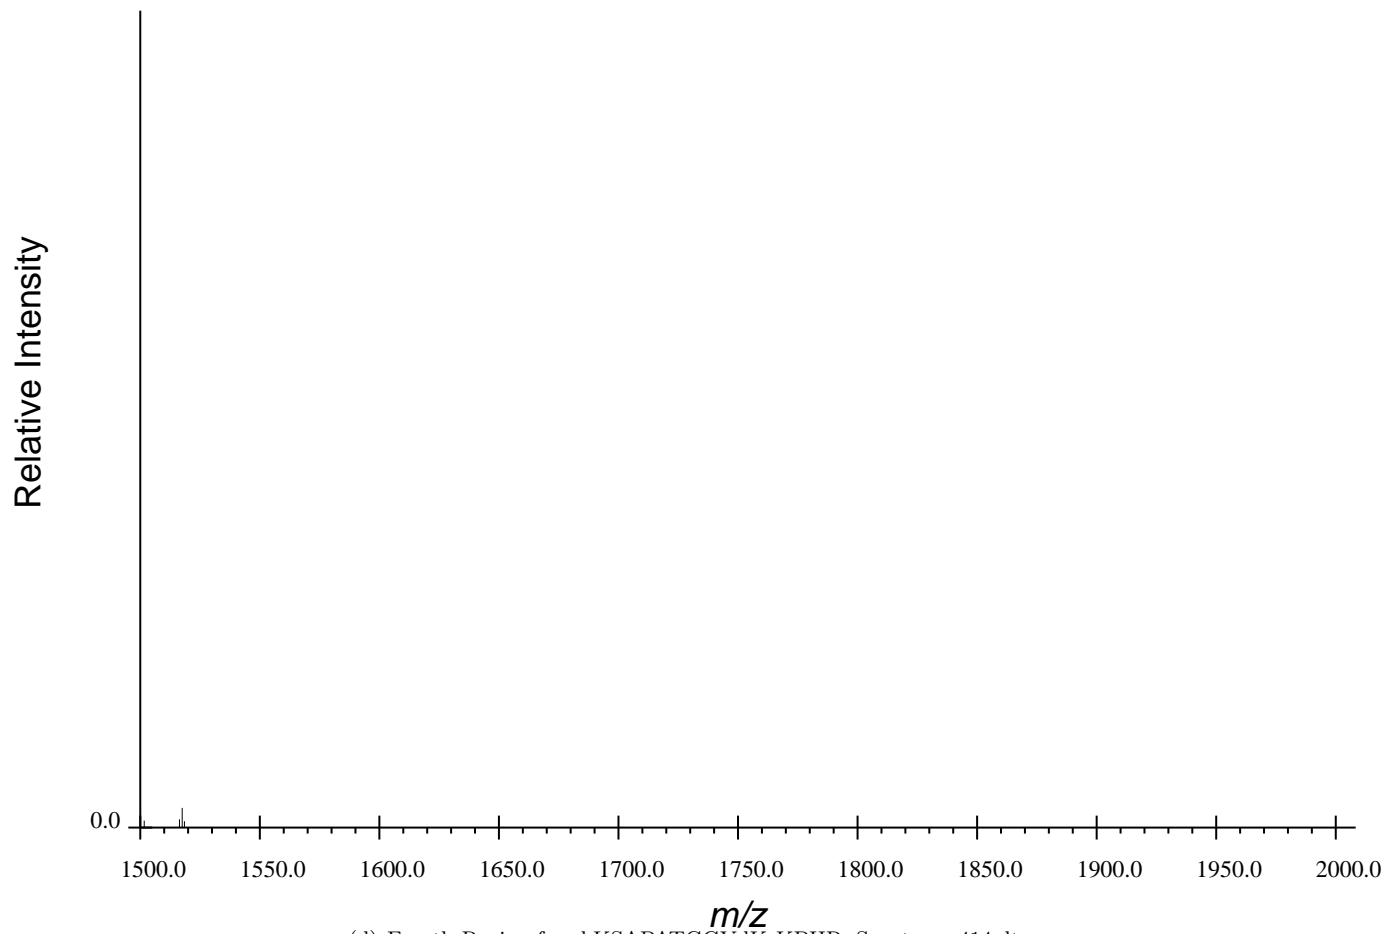

(d) Fourth Region for rhKSAPATGGVdKrKPHR, Spectrum 414.dta

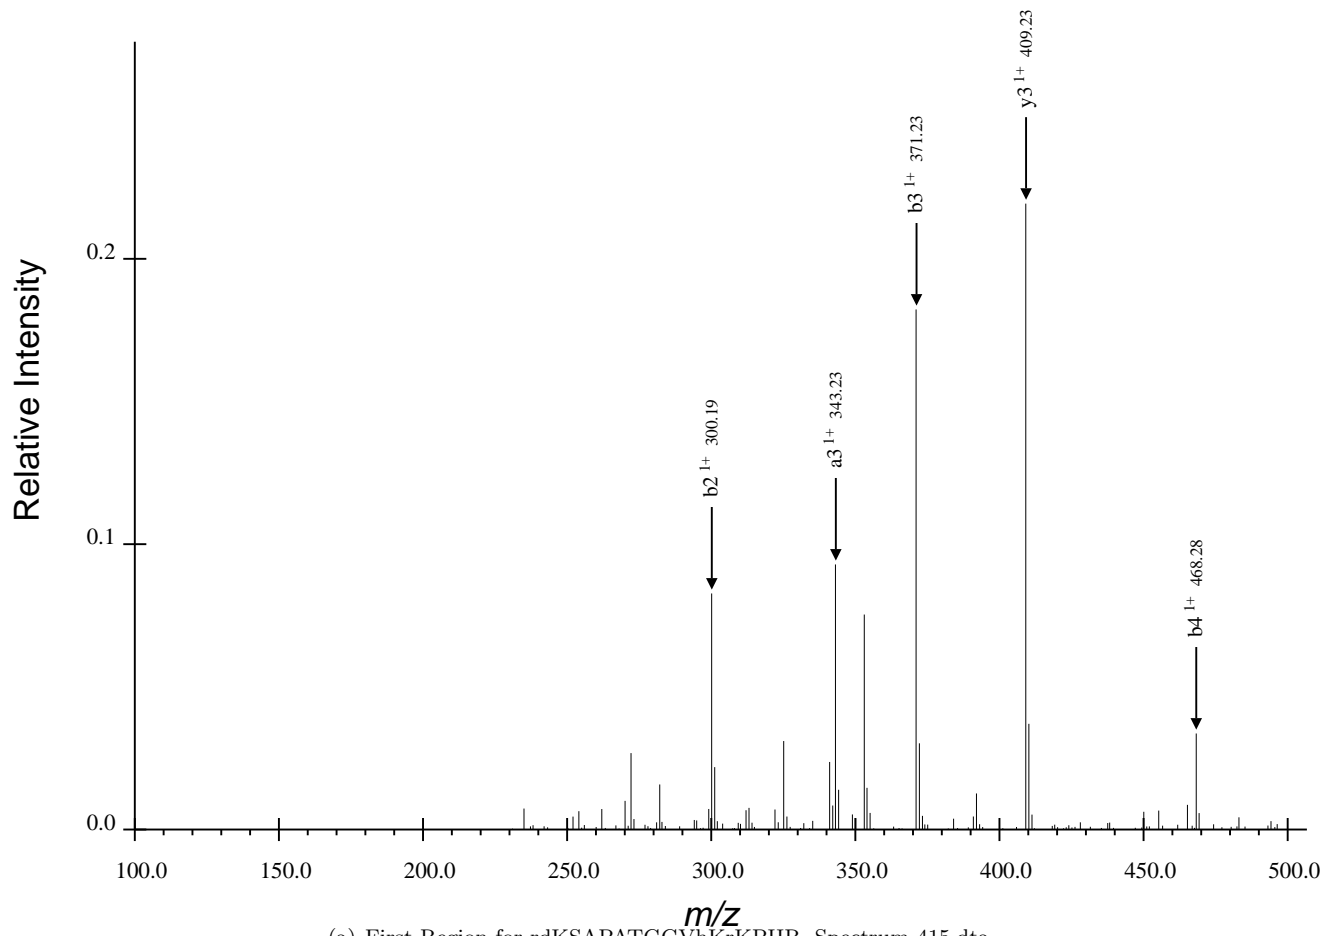

(a) First Region for rdKSAPATGGVhKrKPHR, Spectrum 415.dta

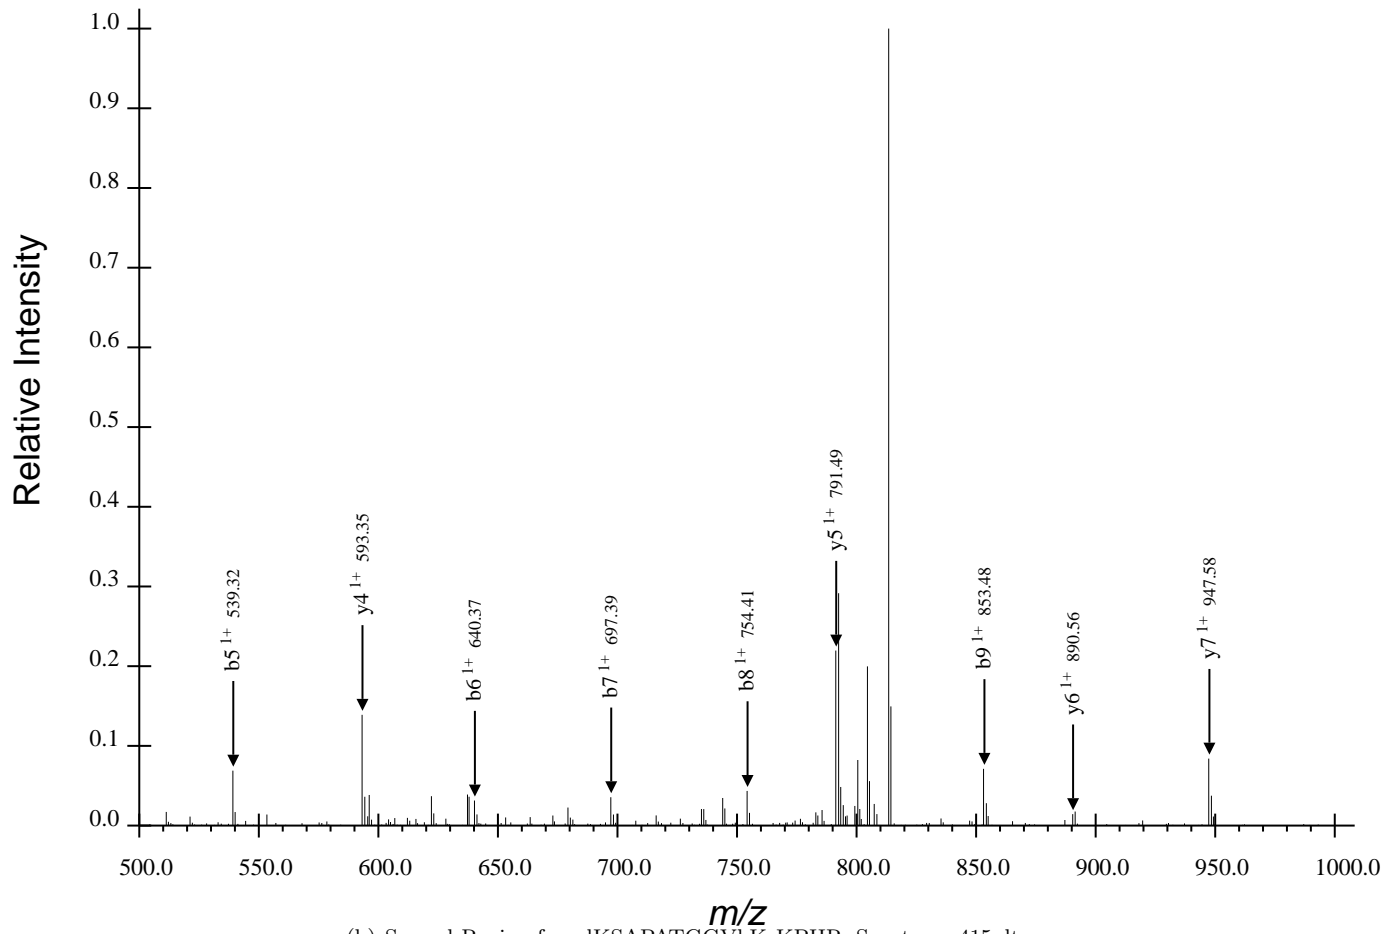

(b) Second Region for rdKSAPATGGVhKrKPHR, Spectrum 415.dta

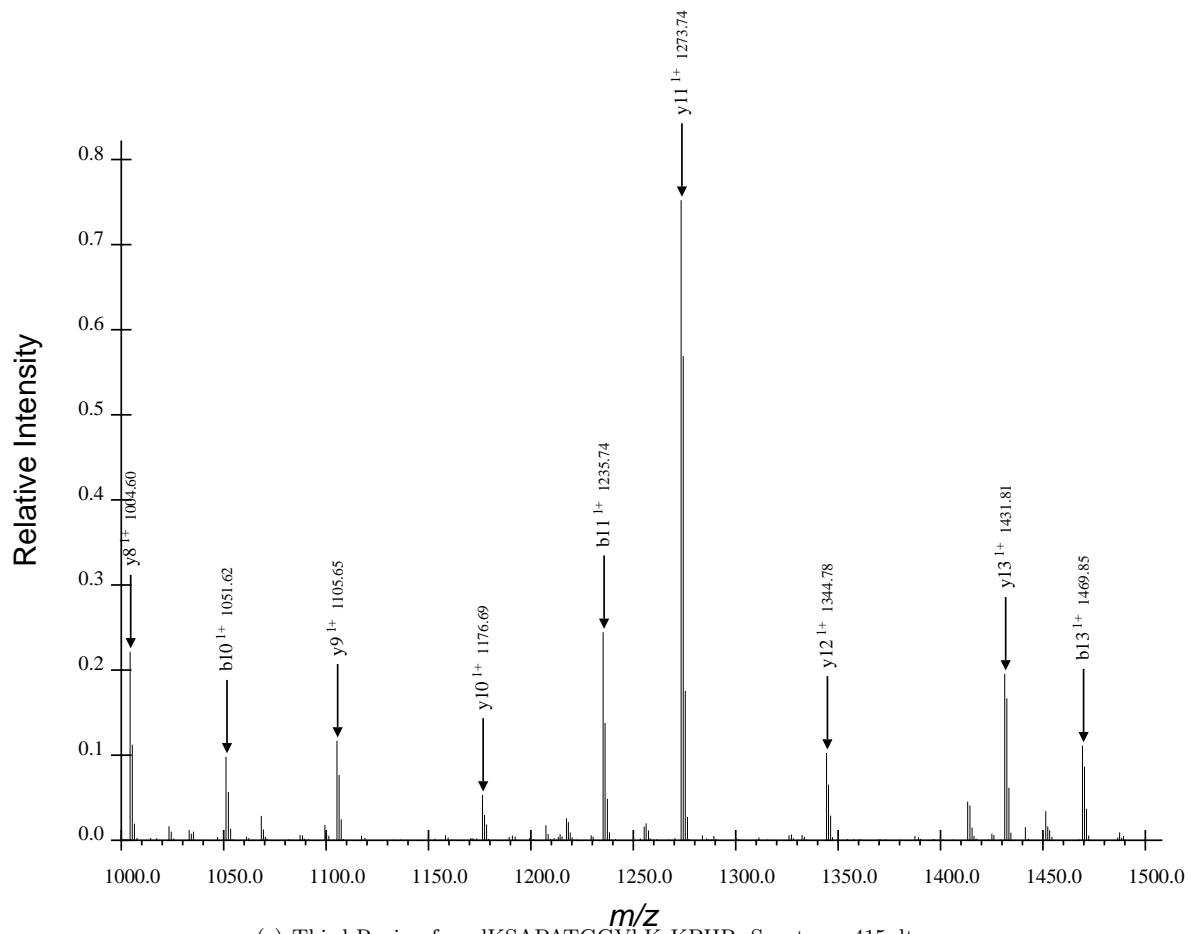

(c) Third Region for rdKSAPATGGVhKrKPHR, Spectrum 415.dta

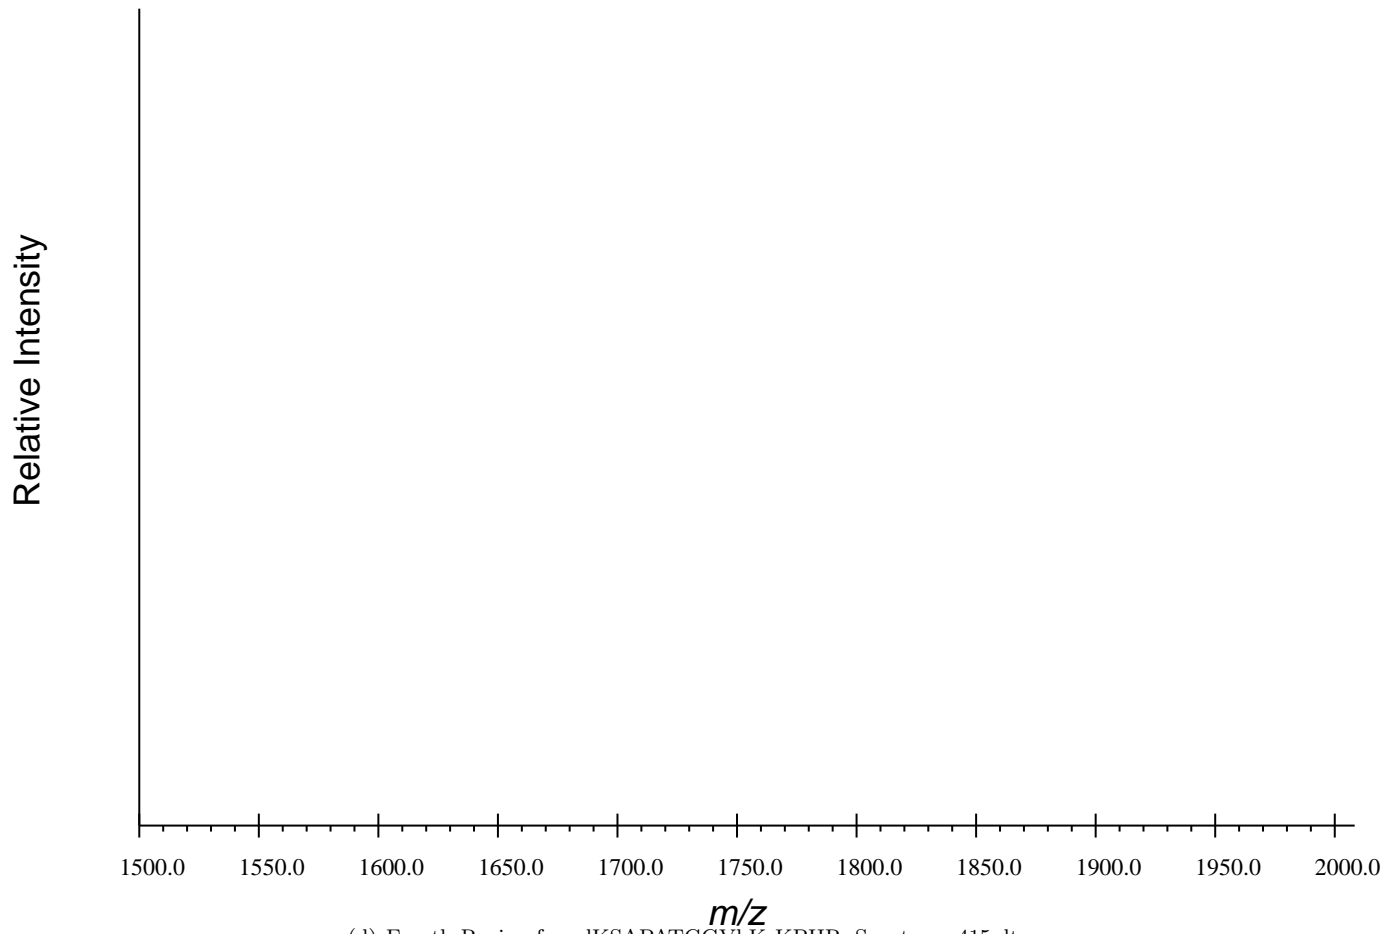

(d) Fourth Region for rdKSAPATGGVhKrKPHR, Spectrum 415.dta

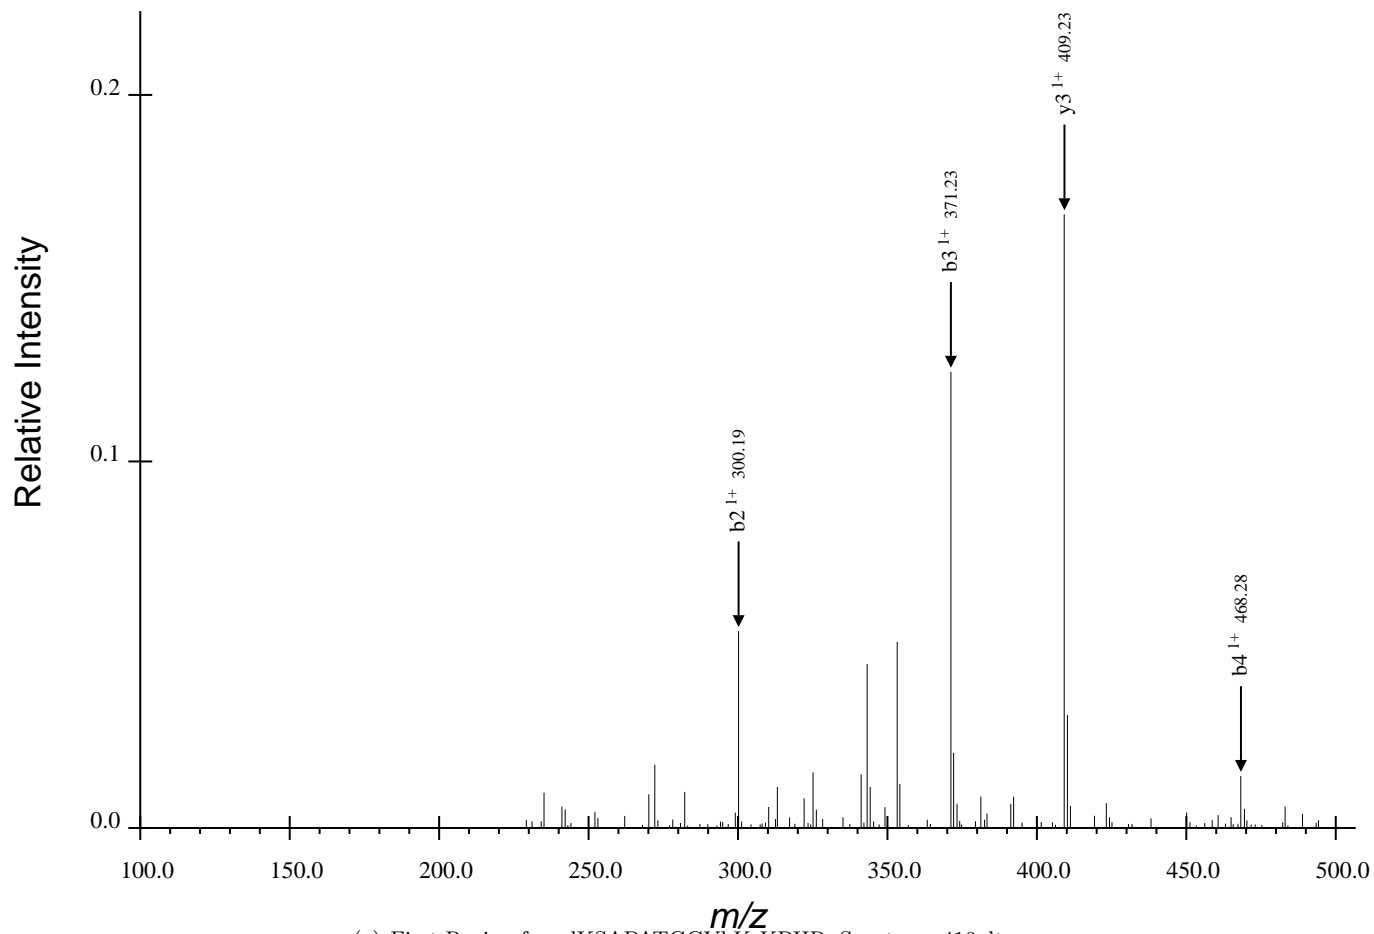

(a) First Region for rdKSAPATGGVhKrKPHR, Spectrum 416.dta

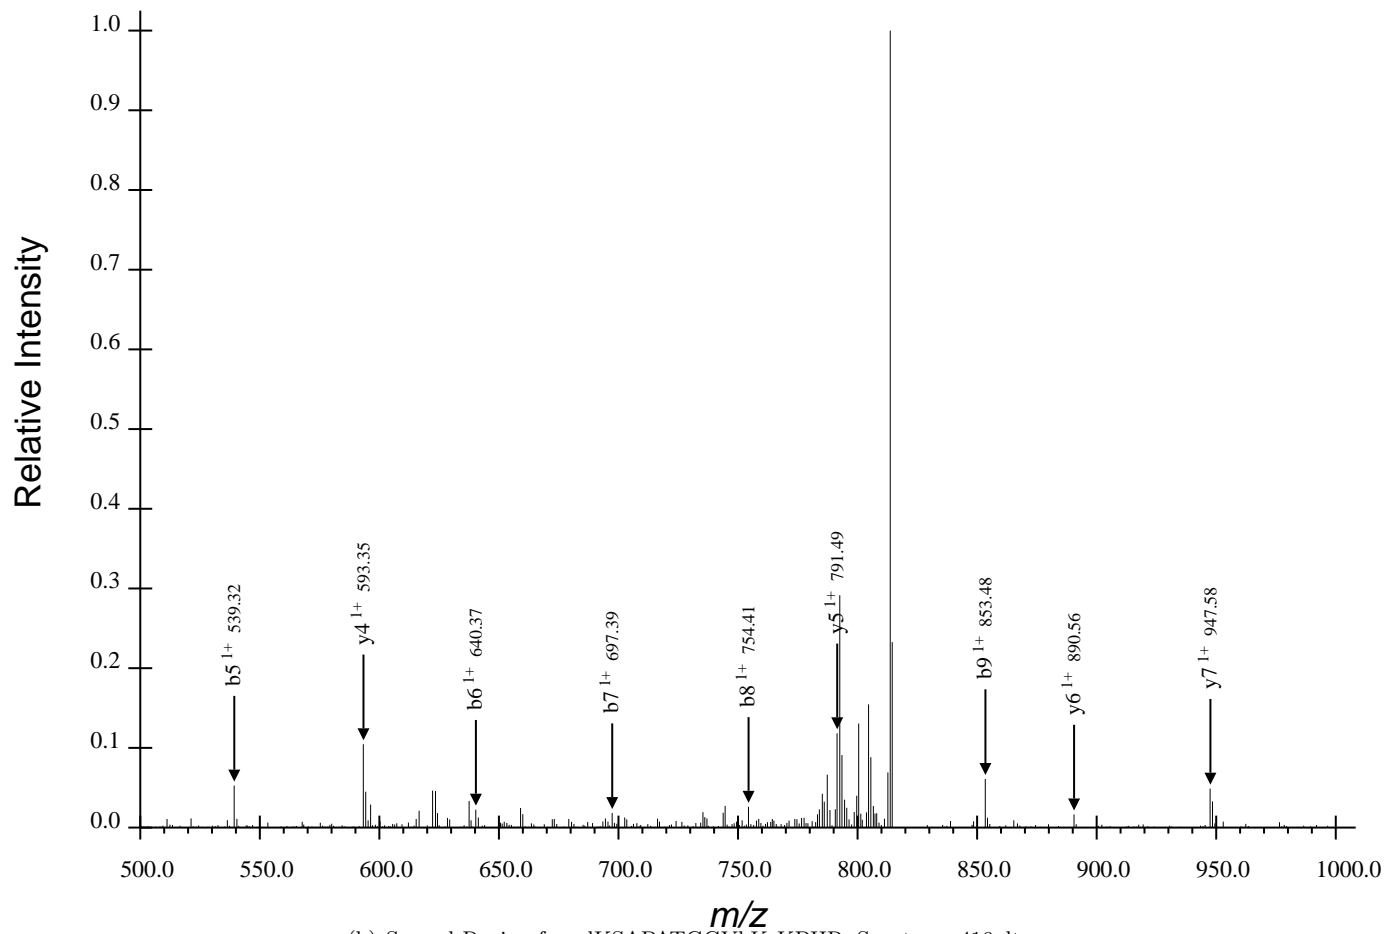

(b) Second Region for rdKSAPATGGVhKrKPHR, Spectrum 416.dta



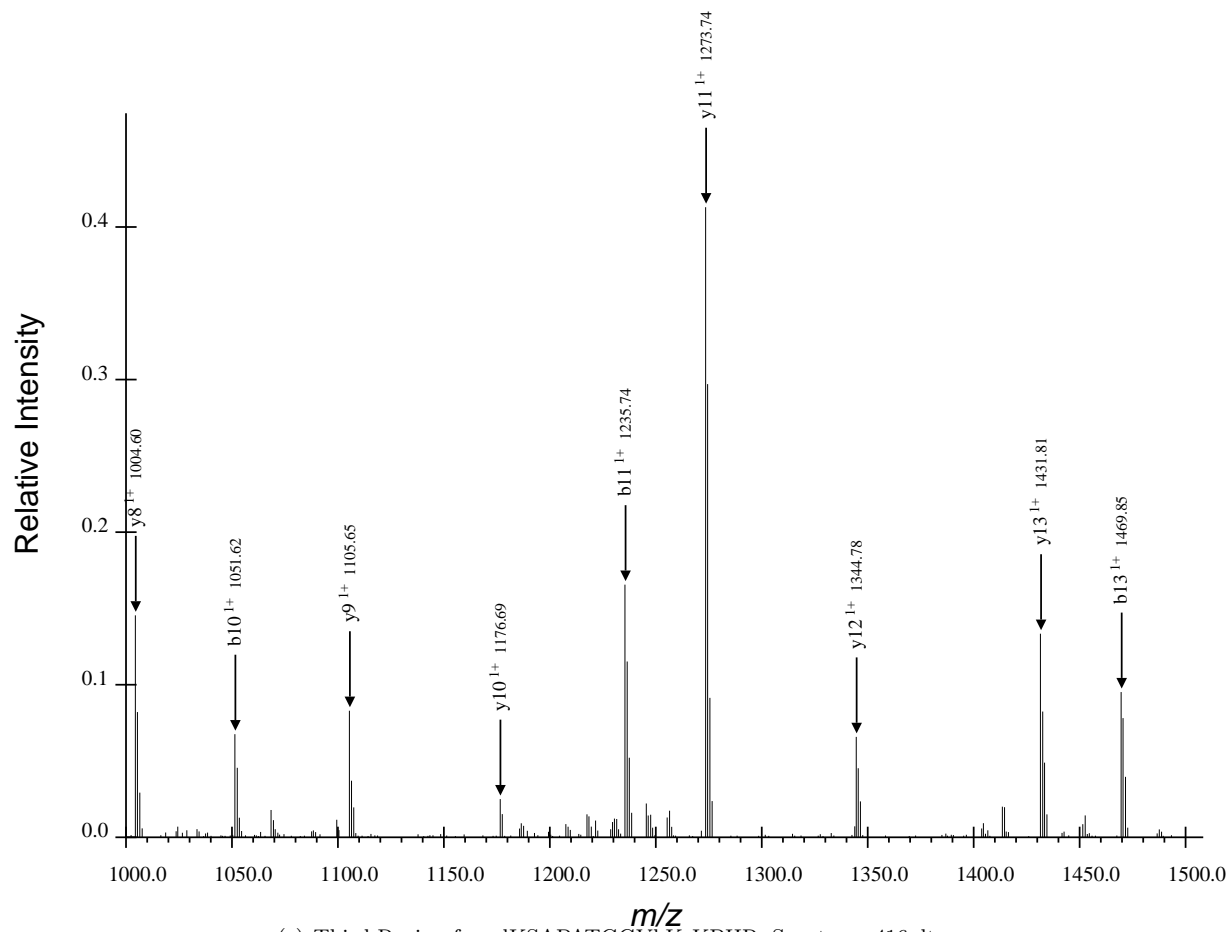

(c) Third Region for rdKSAPATGGVhKrKPHR, Spectrum 416.dta

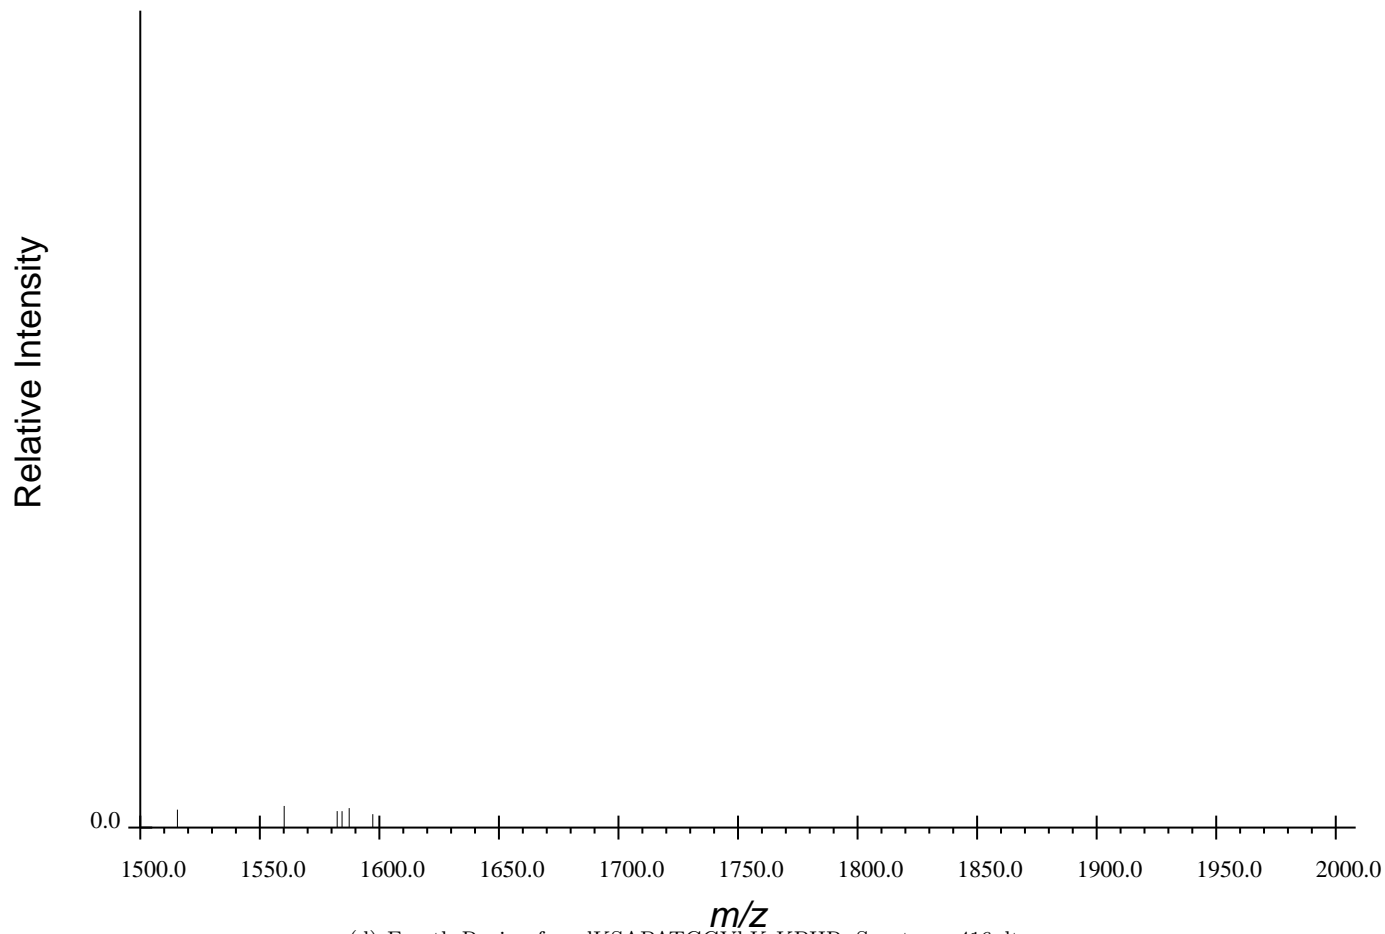

(d) Fourth Region for rdKSAPATGGVhKrKPHR, Spectrum 416.dta

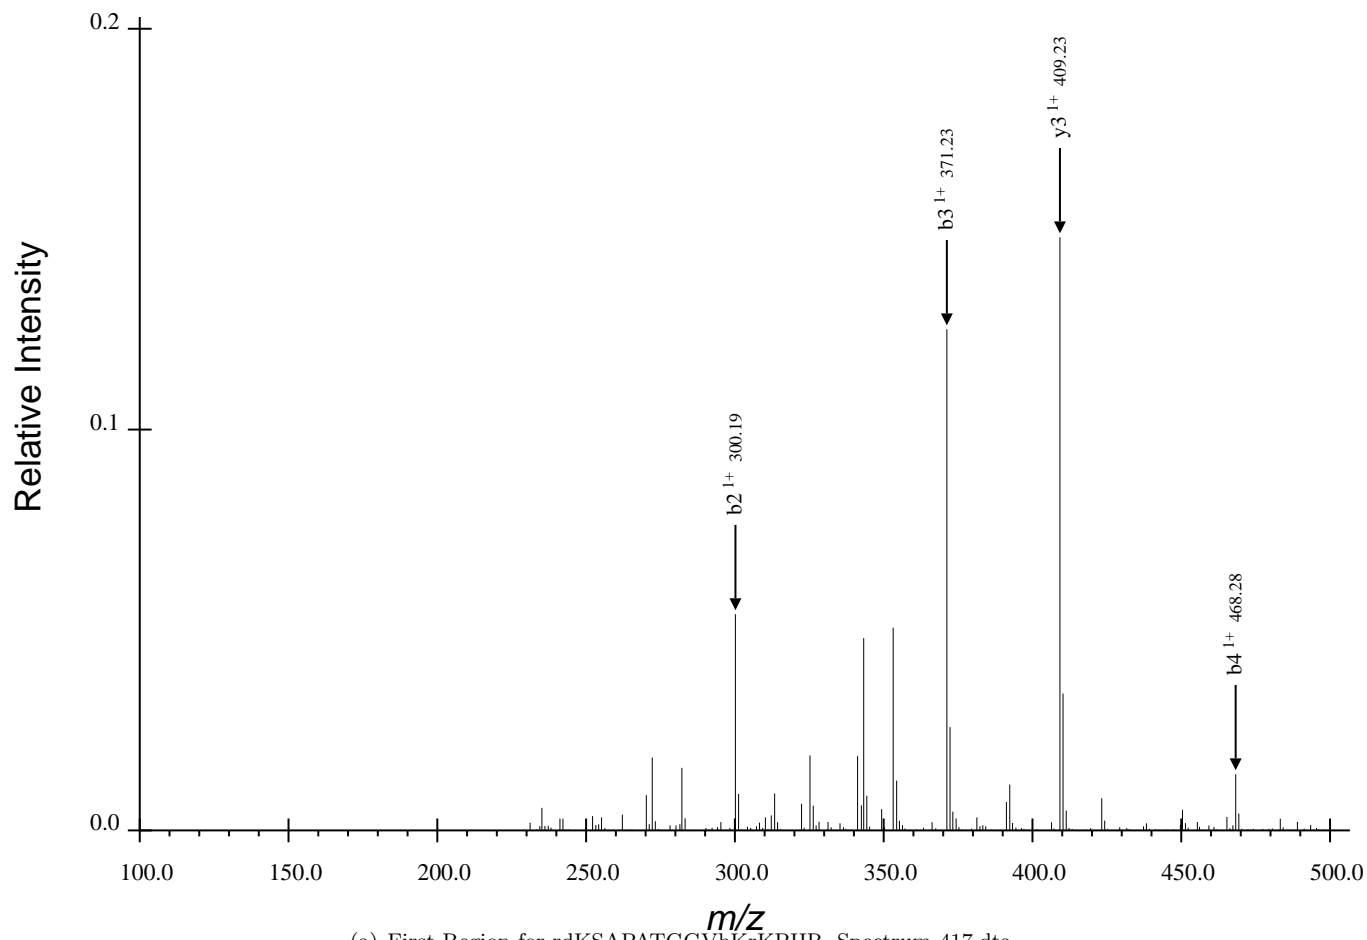

(a) First Region for rdKSAPATGGVhKrKPHR, Spectrum 417.dta

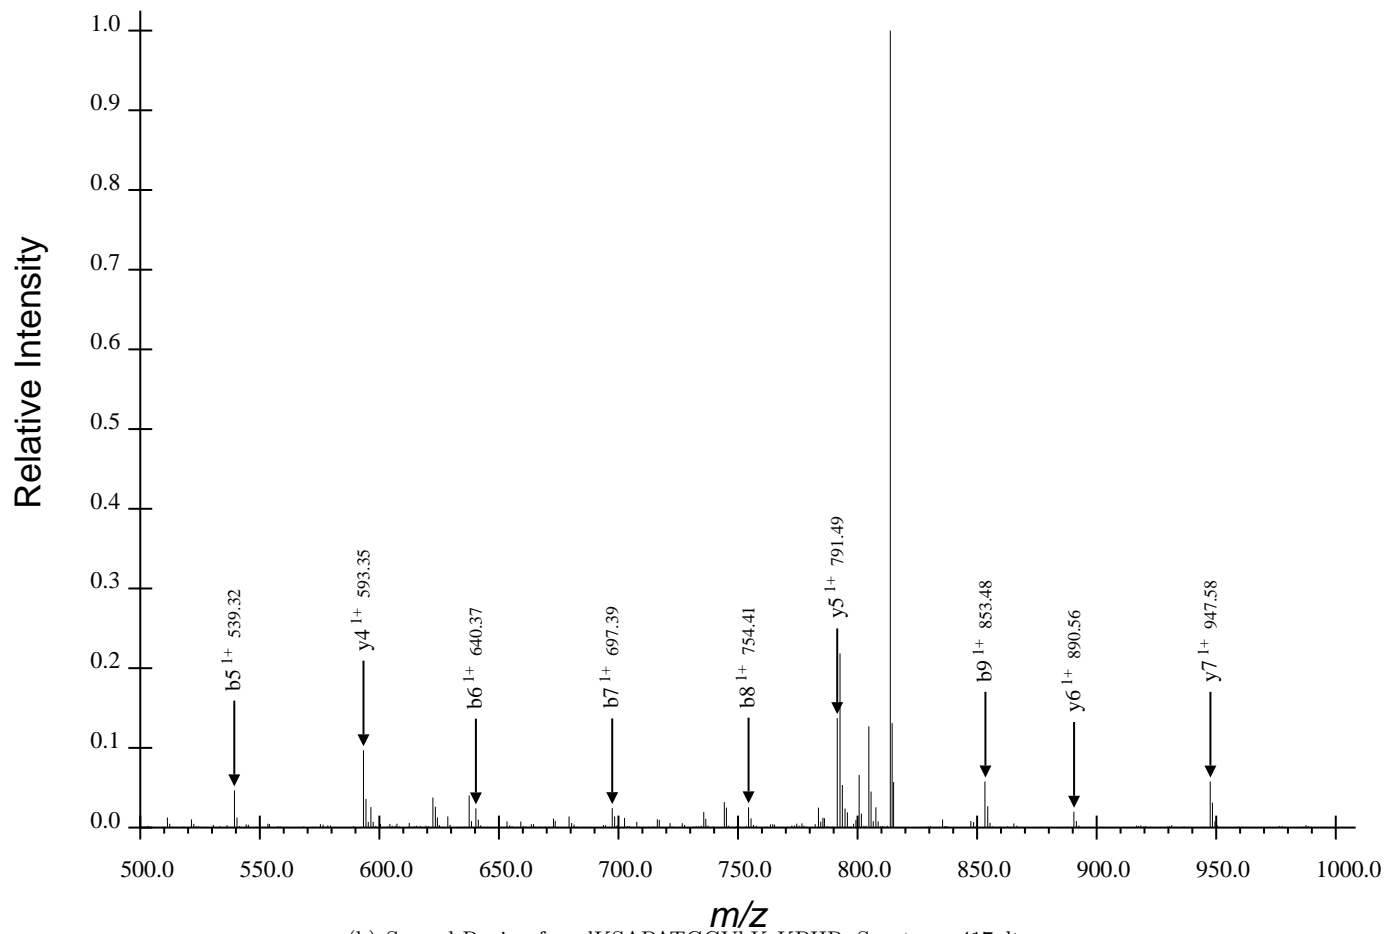

(b) Second Region for rdKSAPATGGVhKrKPHR, Spectrum 417.dta

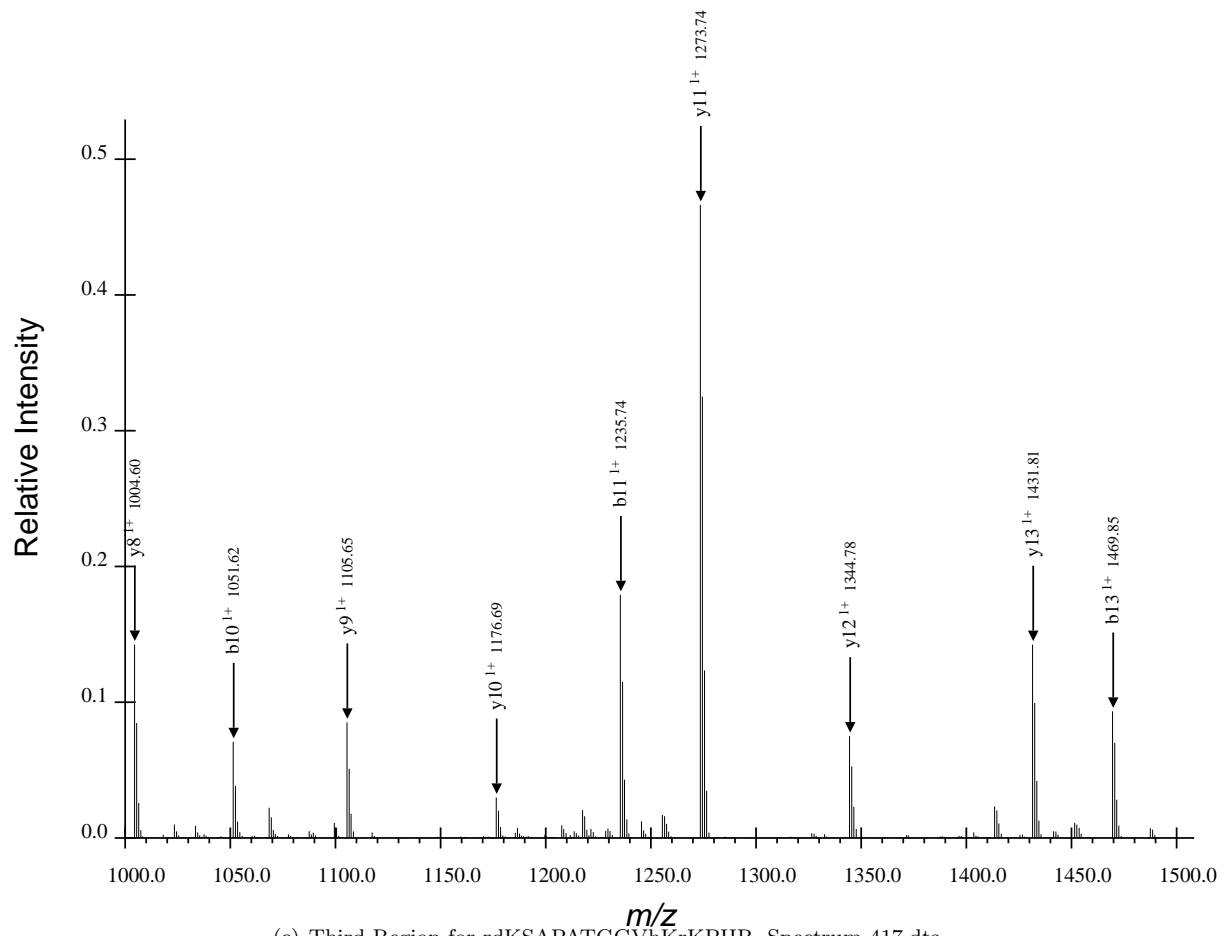

(c) Third Region for rdKSAPATGGVhKrKPHR, Spectrum 417.dta

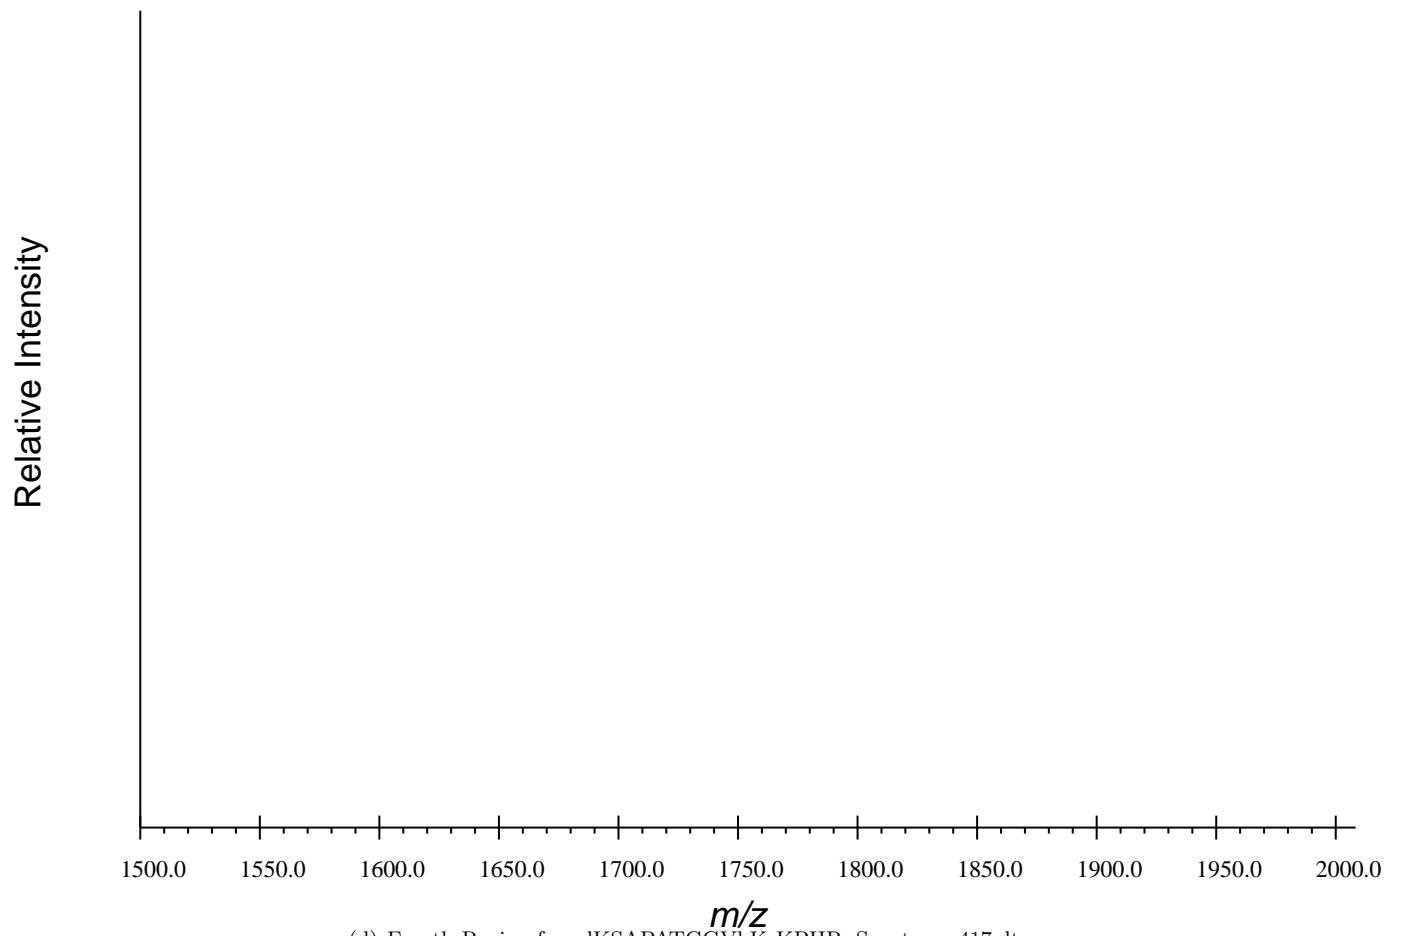

(d) Fourth Region for rdKSAPATGGVhKrKPHR, Spectrum 417.dta

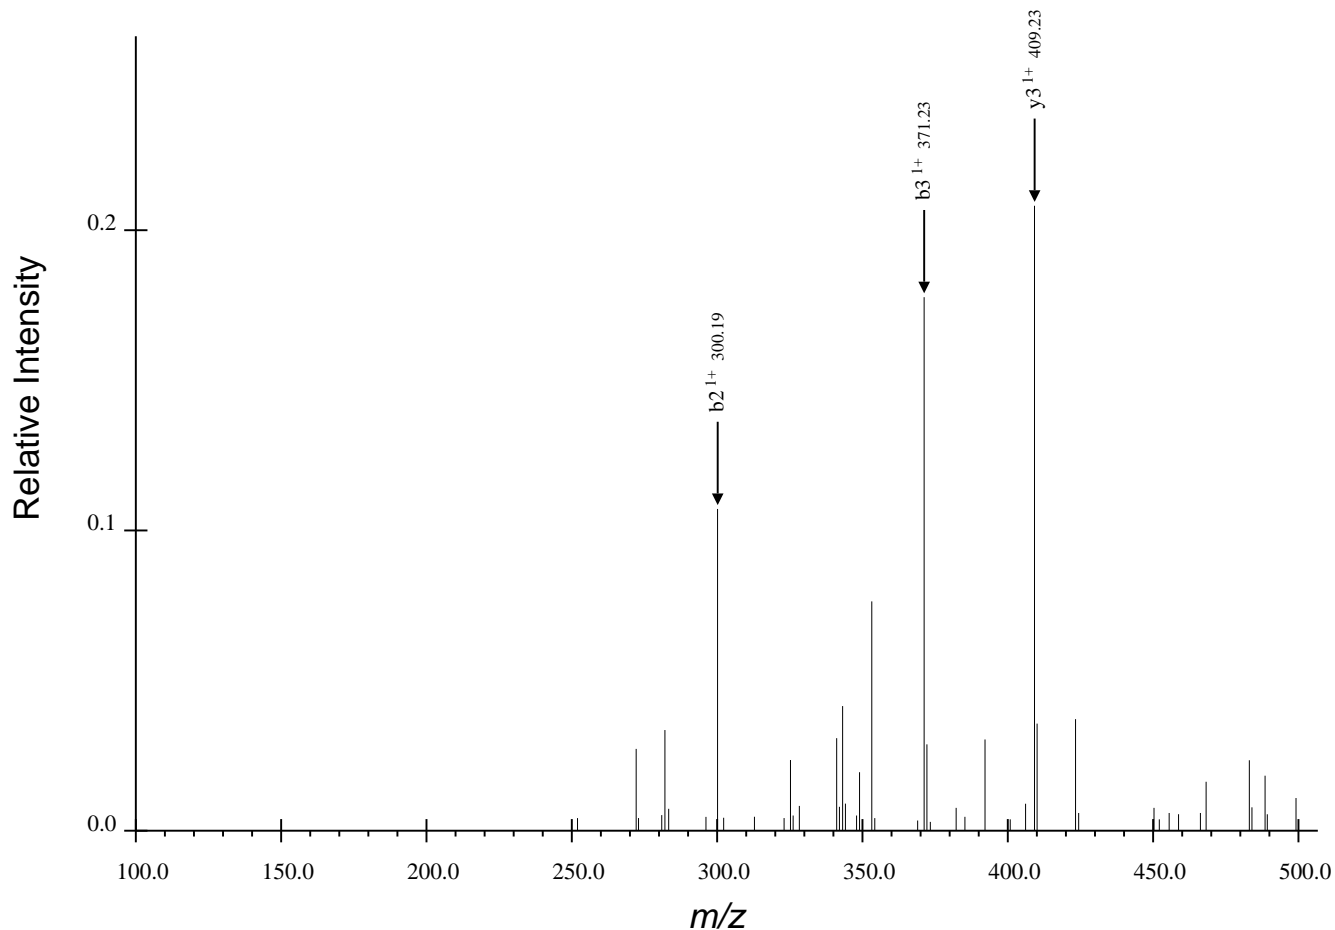

(a) First Region for rdKSAPATGGVhKrKPHR, Spectrum 418.dta

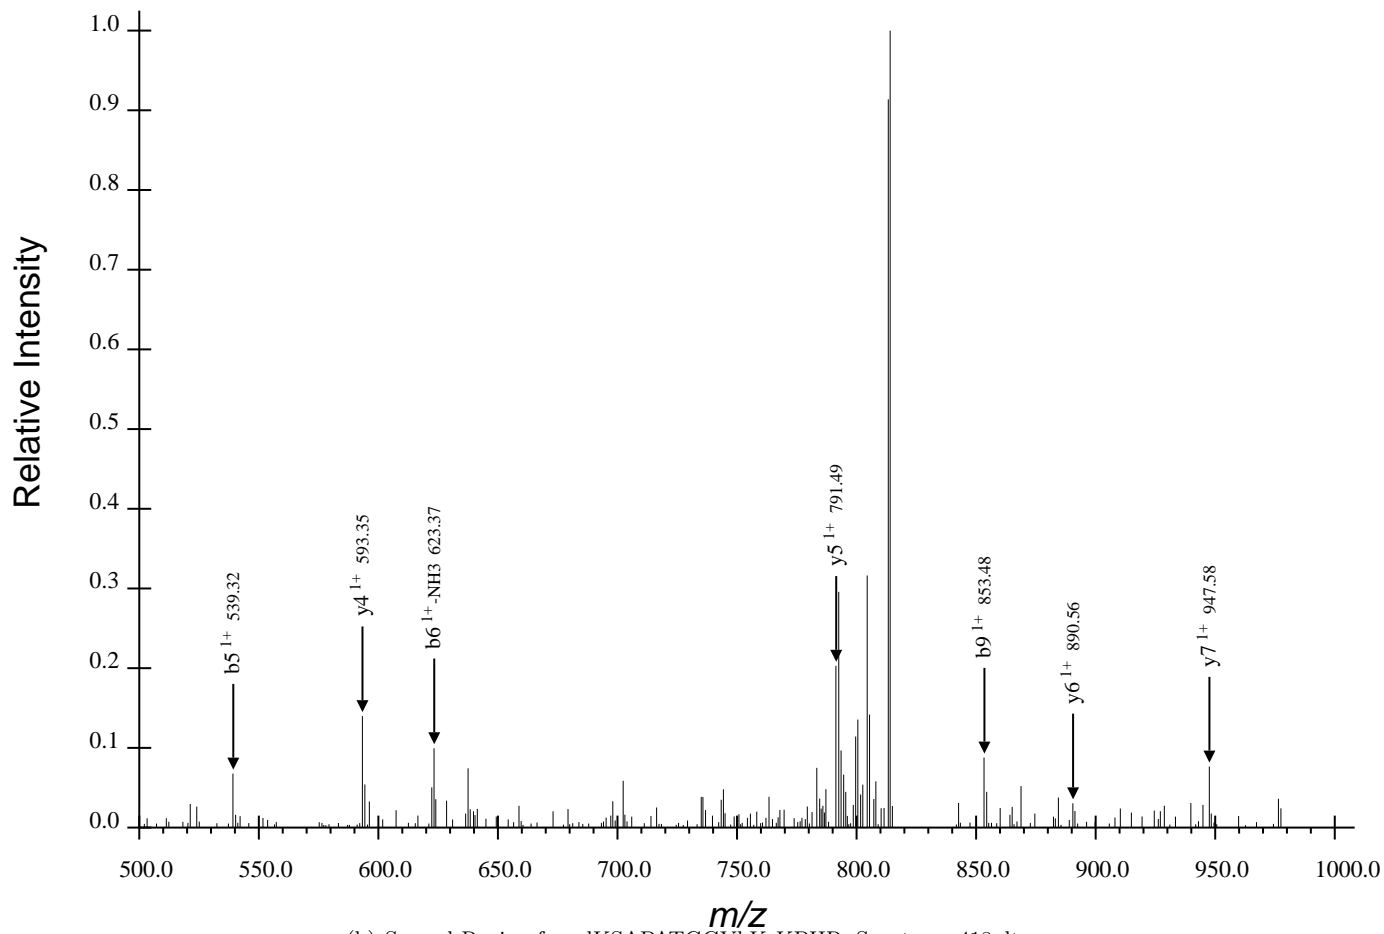

(b) Second Region for rdKSAPATGGVhKrKPHR, Spectrum 418.dta

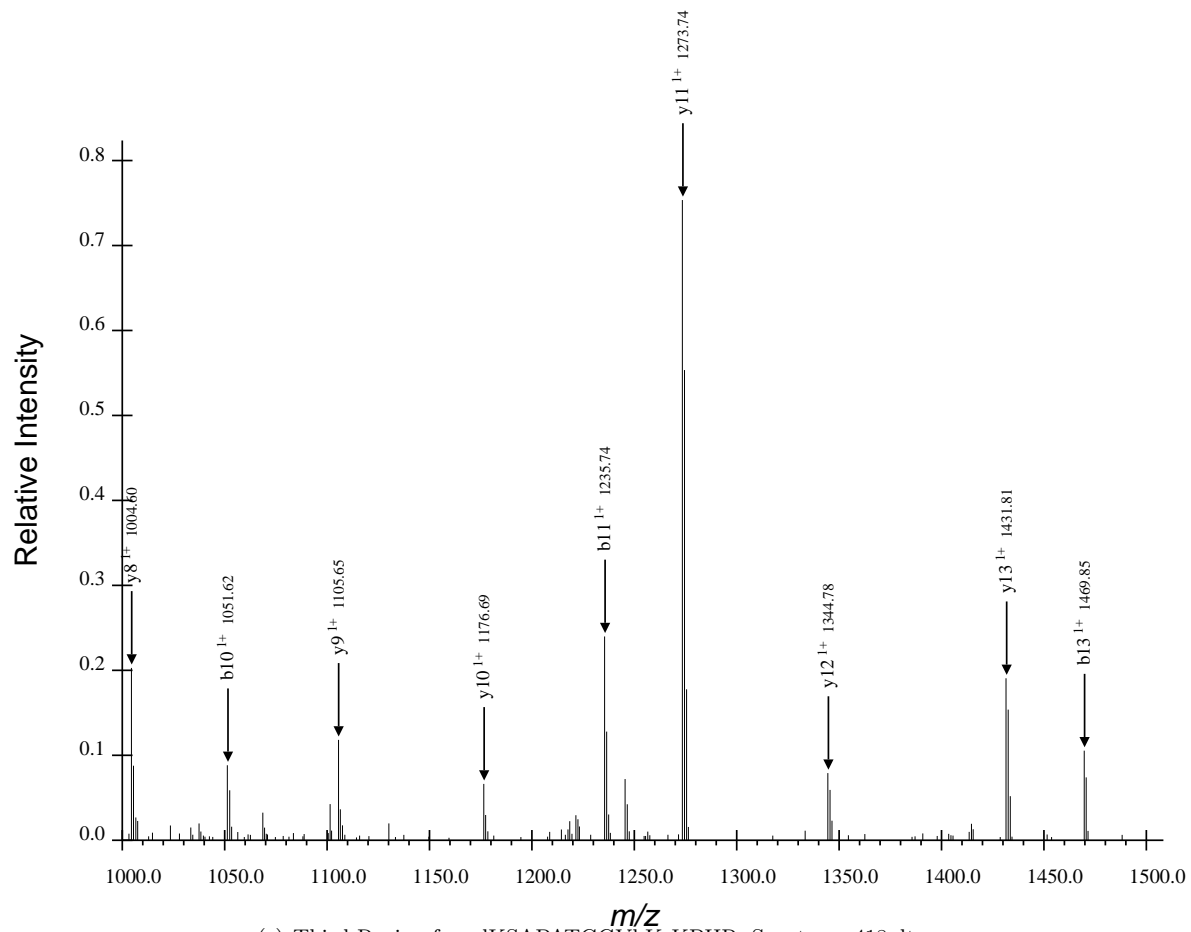

(c) Third Region for rdKSAPATGGVhKrKPHR, Spectrum 418.dta

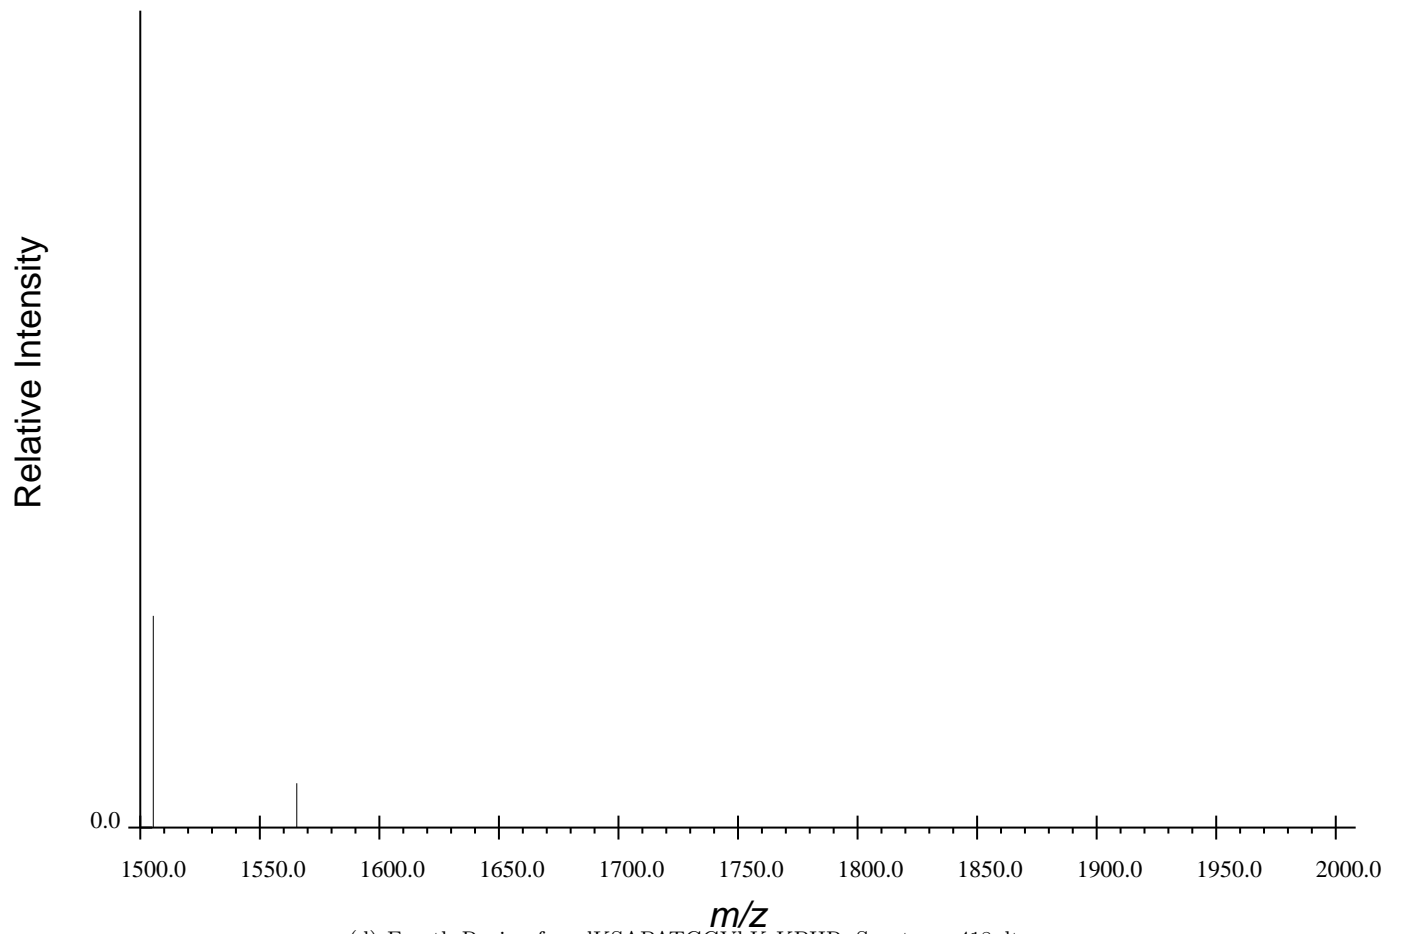

(d) Fourth Region for rdKSAPATGGVhKrKPHR, Spectrum 418.dta

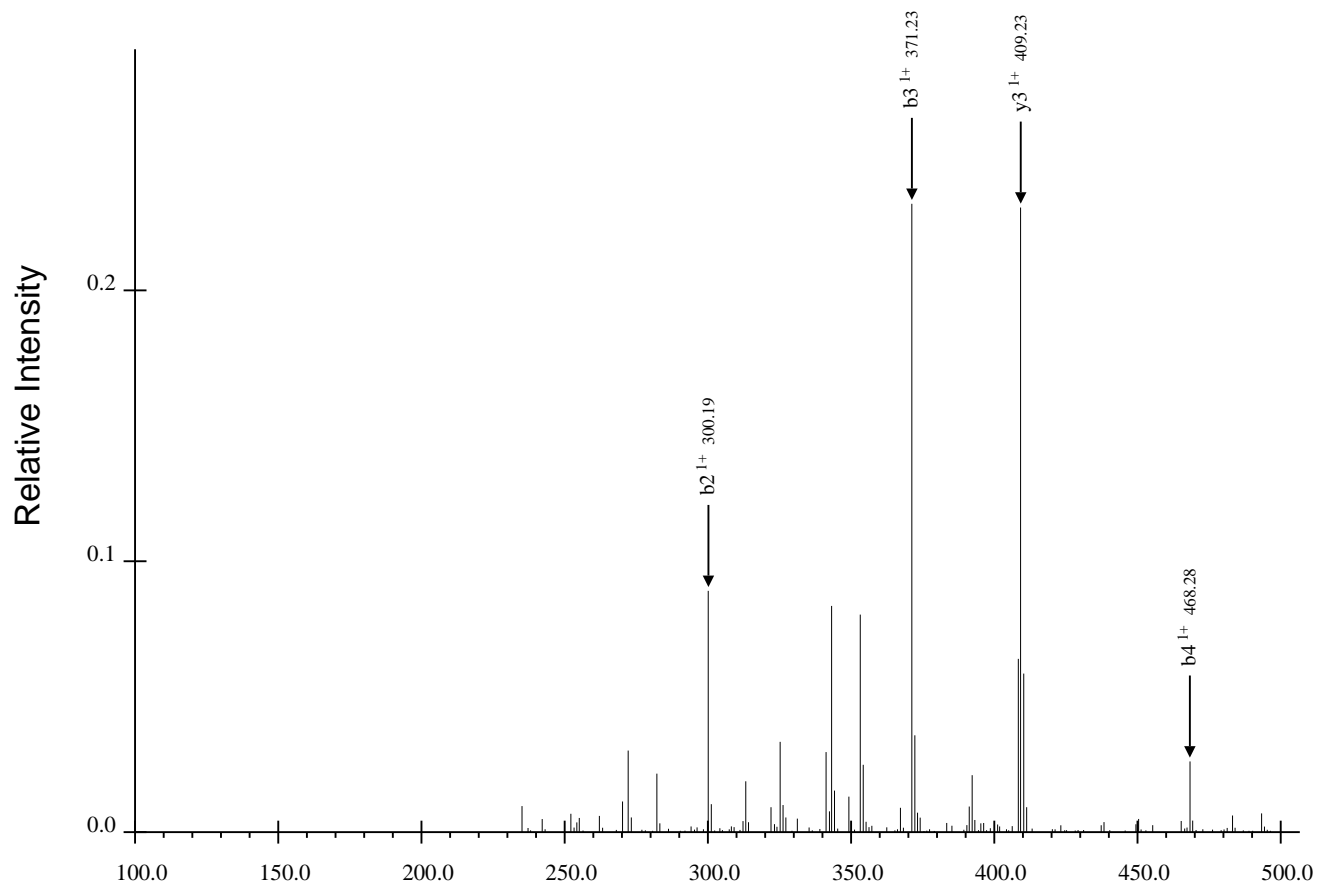

(a) First Region for rdKSAPATGGVhKrKPHR, Spectrum 419.dta

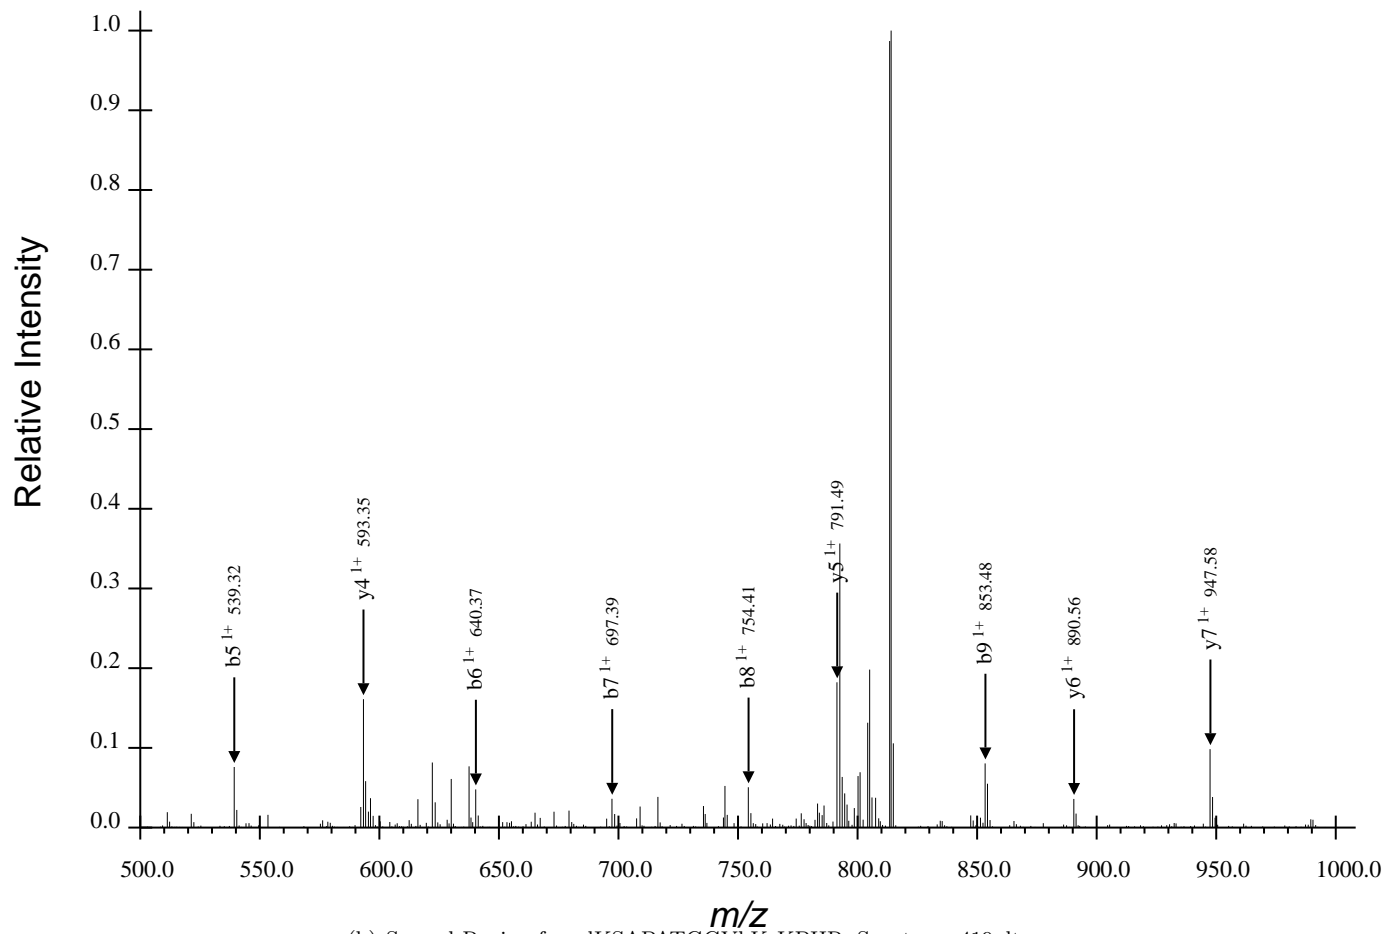

(b) Second Region for rdKSAPATGGVhKrKPHR, Spectrum 419.dta

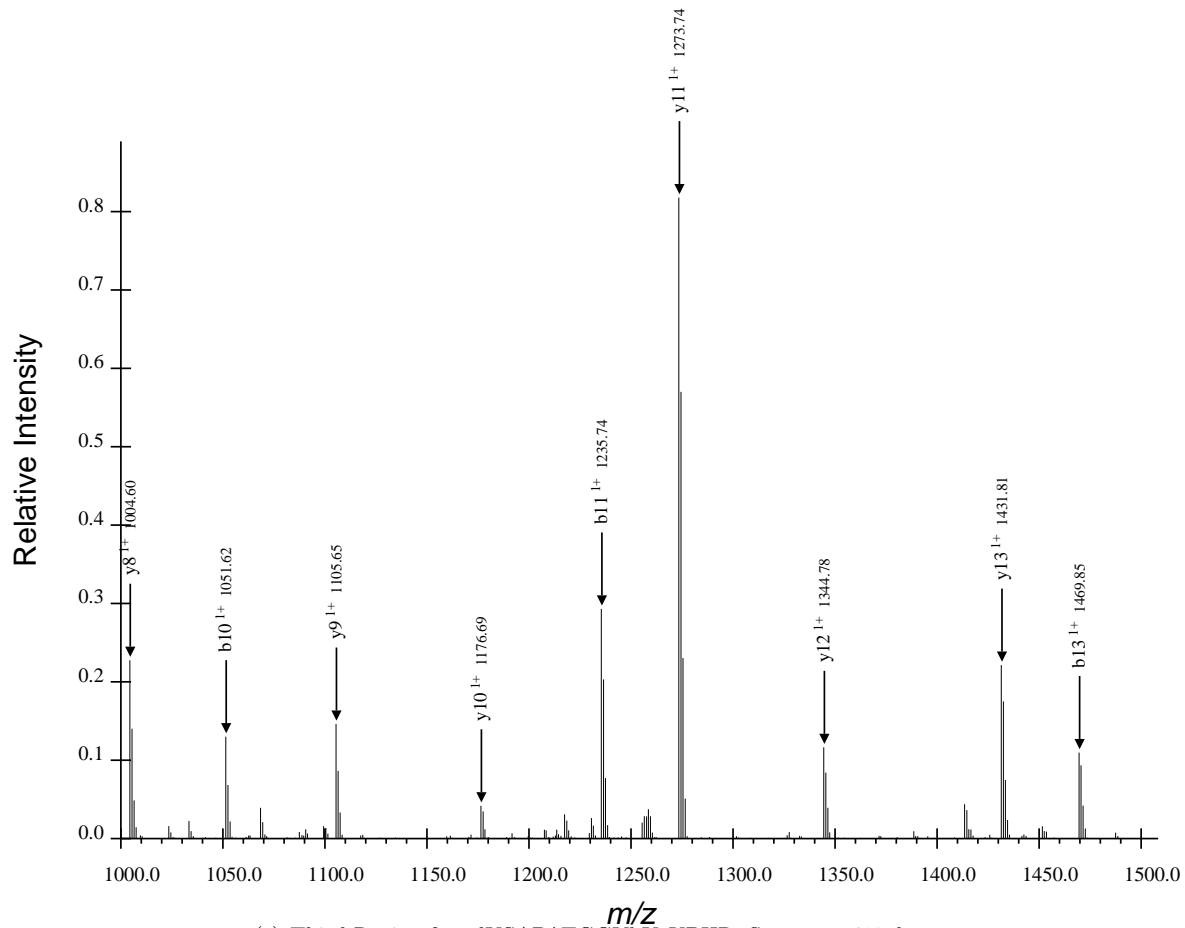

(c) Third Region for rdKSAPATGGVhKrKPHR, Spectrum 419.dta

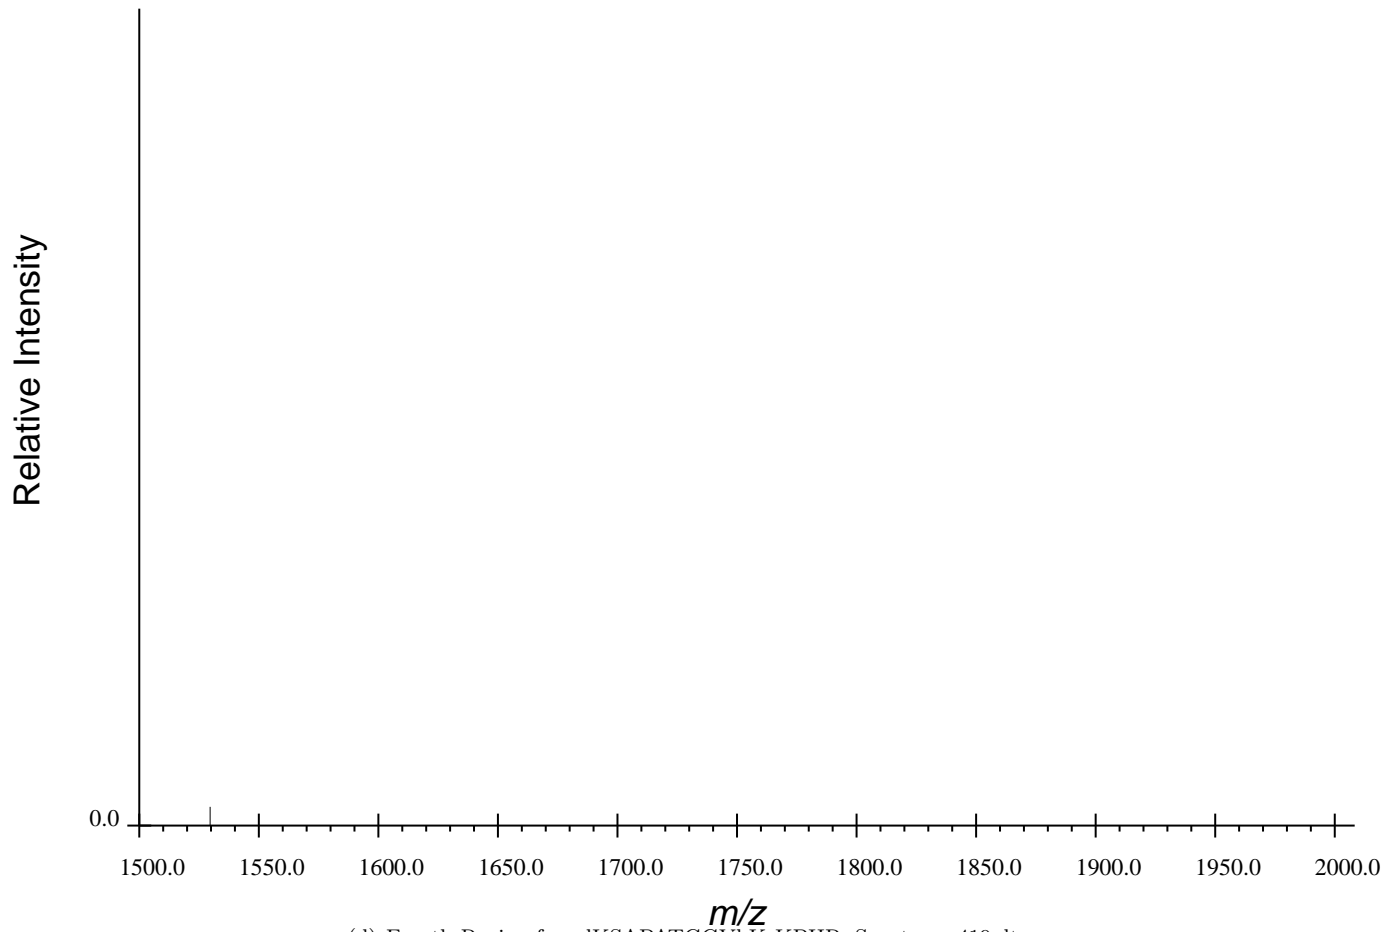

(d) Fourth Region for rdKSAPATGGVhKrKPHR, Spectrum 419.dta

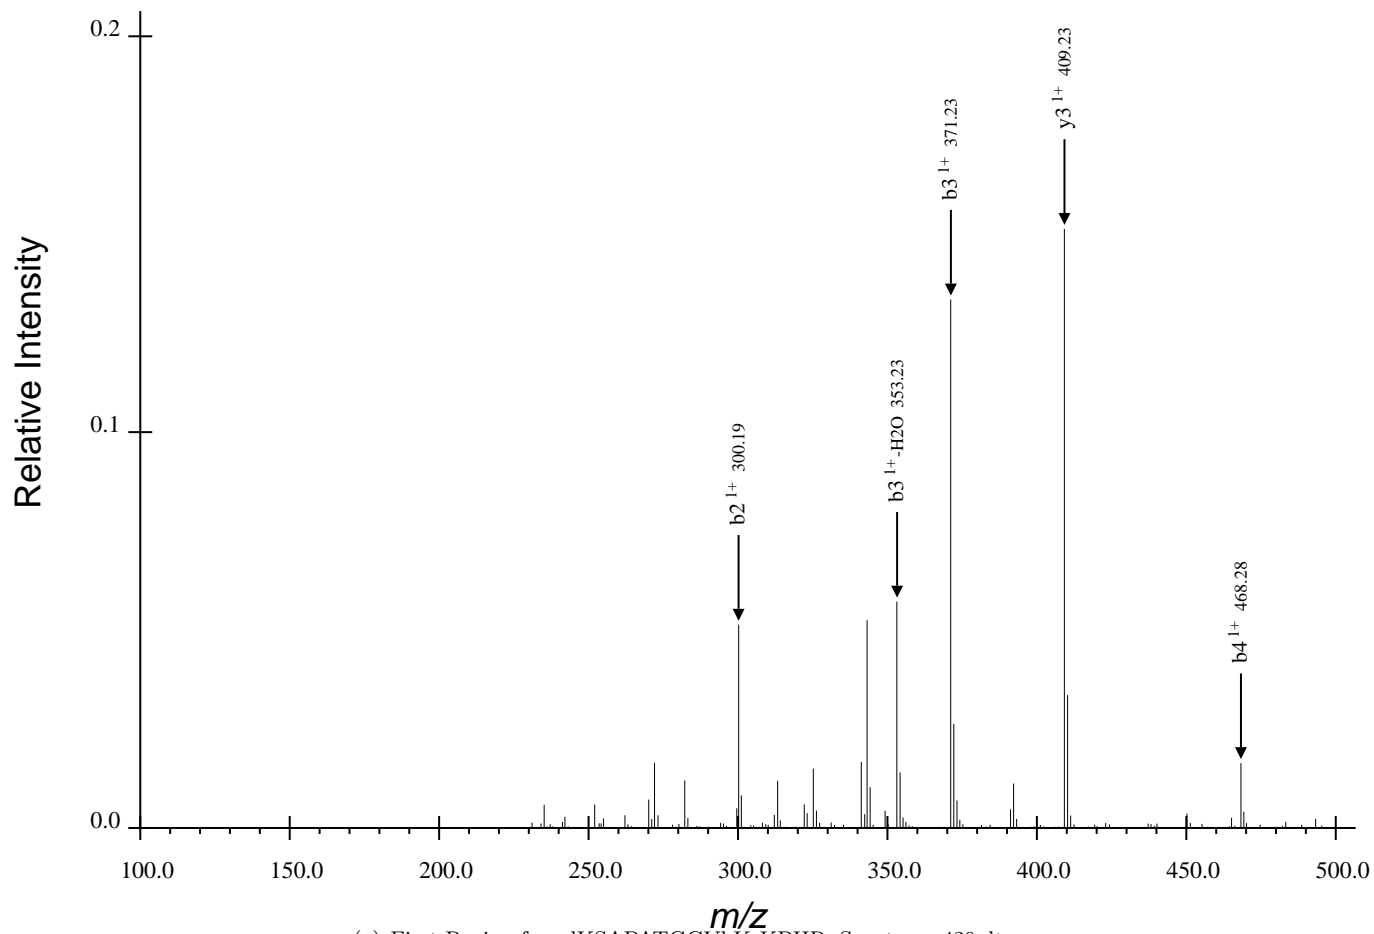

(a) First Region for rdKSAPATGGVhKrKPHR, Spectrum 420.dta

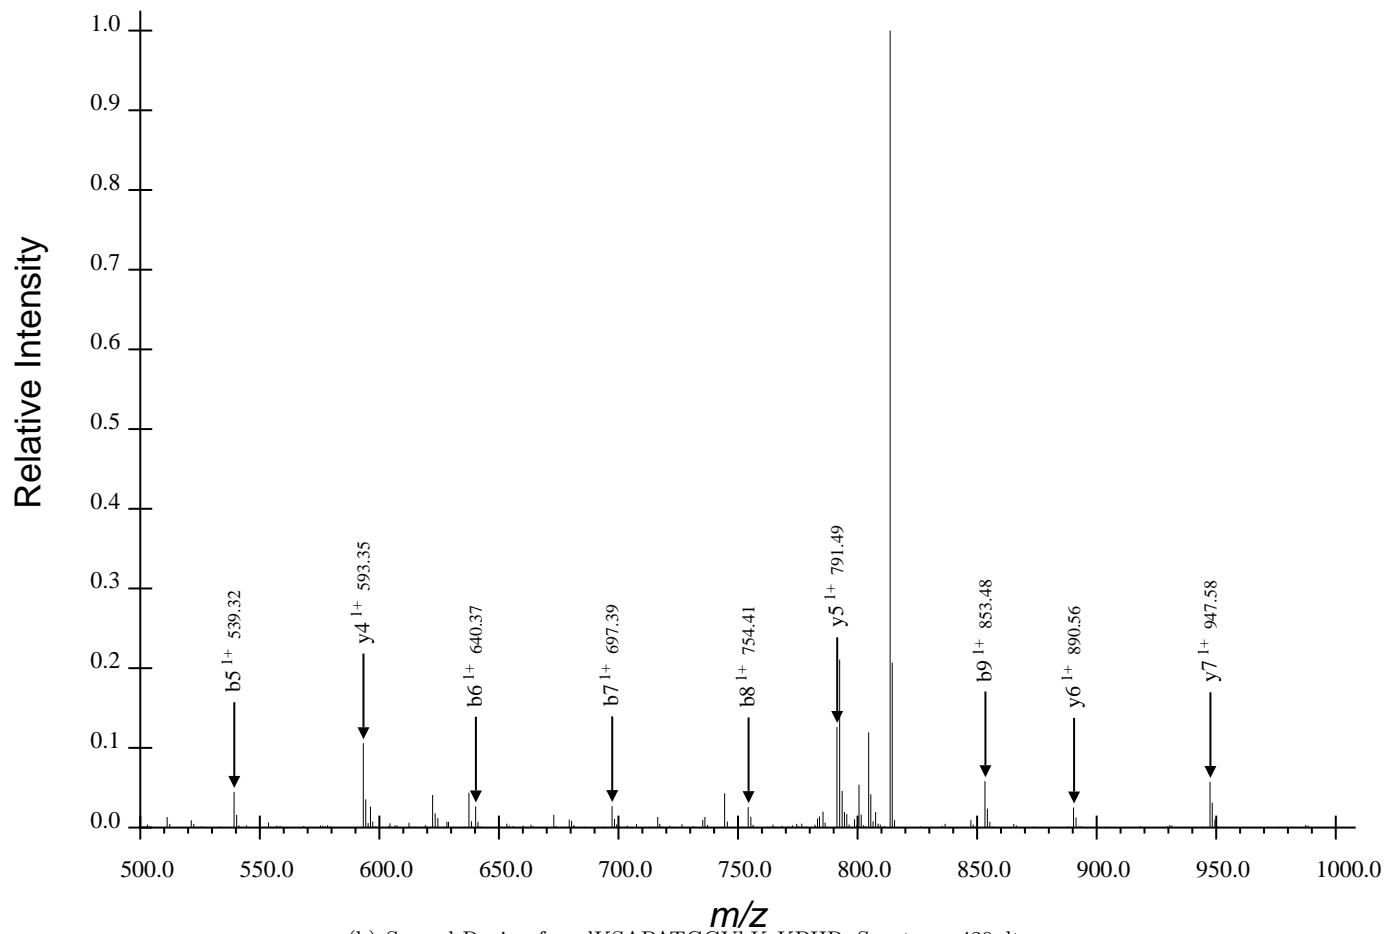

(b) Second Region for rdKSAPATGGVhKrKPHR, Spectrum 420.dta



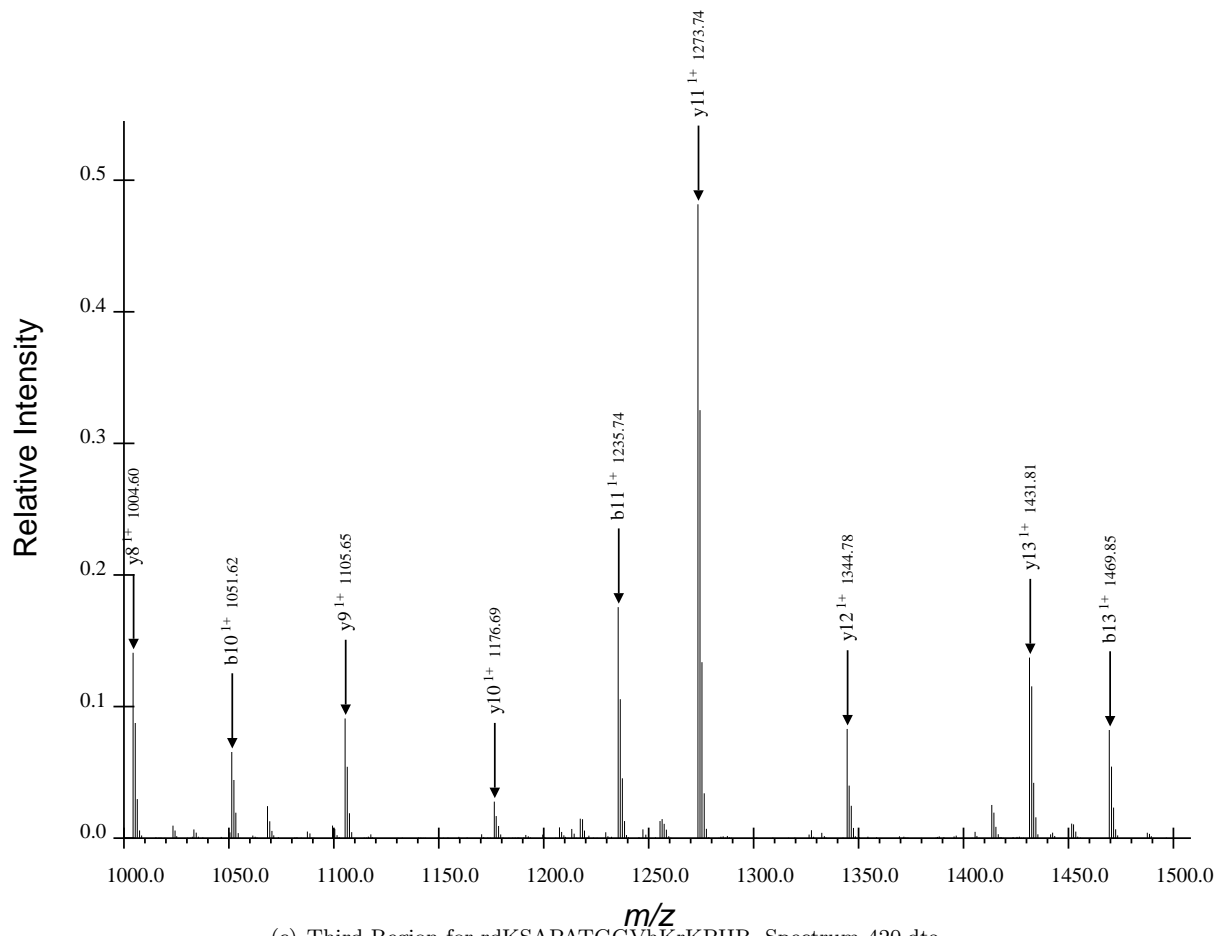

(c) Third Region for rdKSAPATGGVhKrKPHR, Spectrum 420.dta

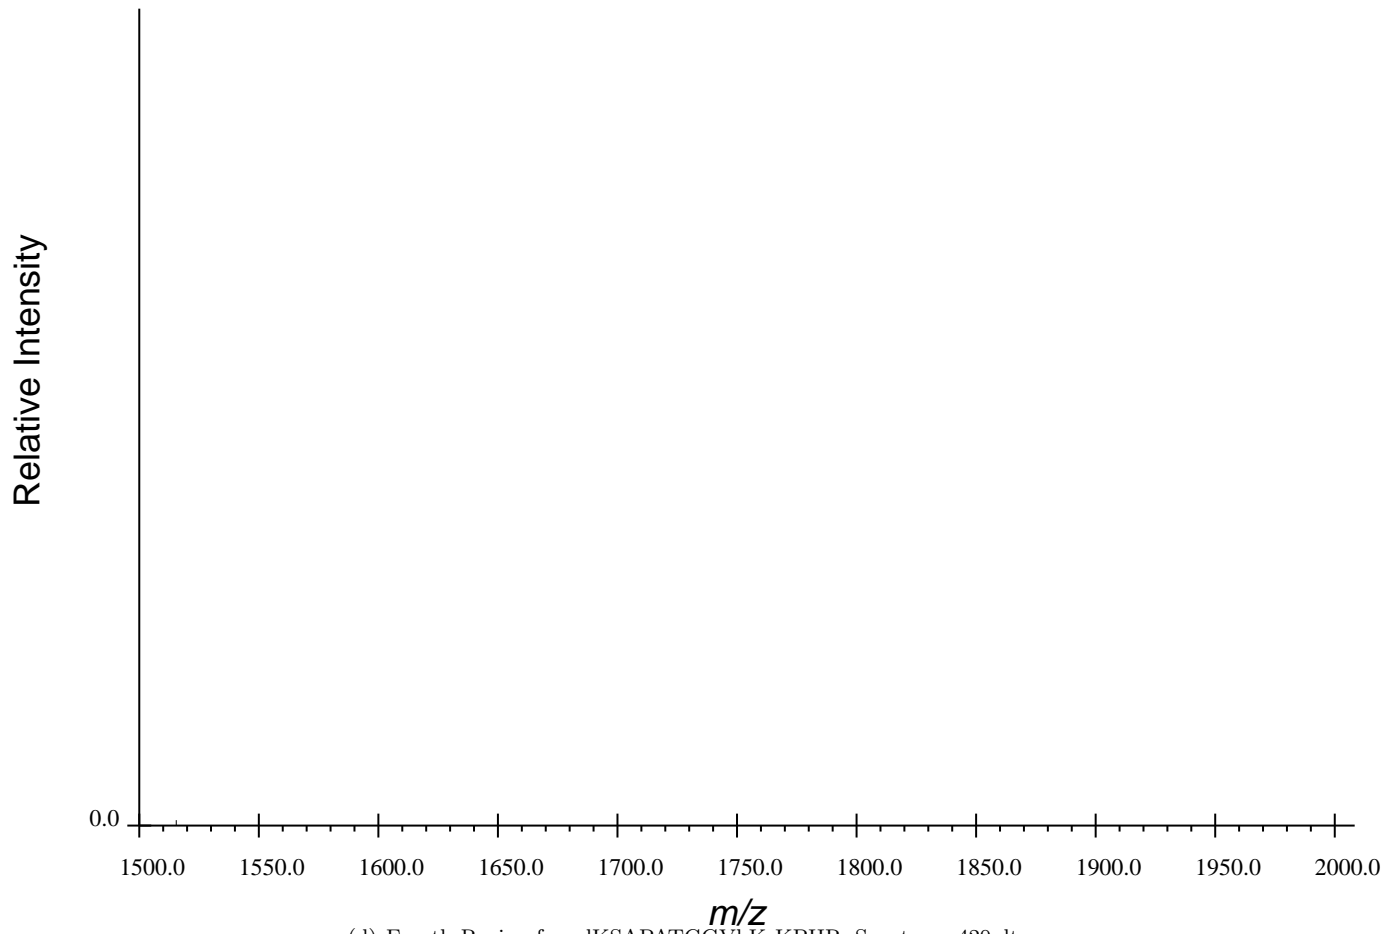

(d) Fourth Region for rdKSAPATGGVhKrKPHR, Spectrum 420.dta

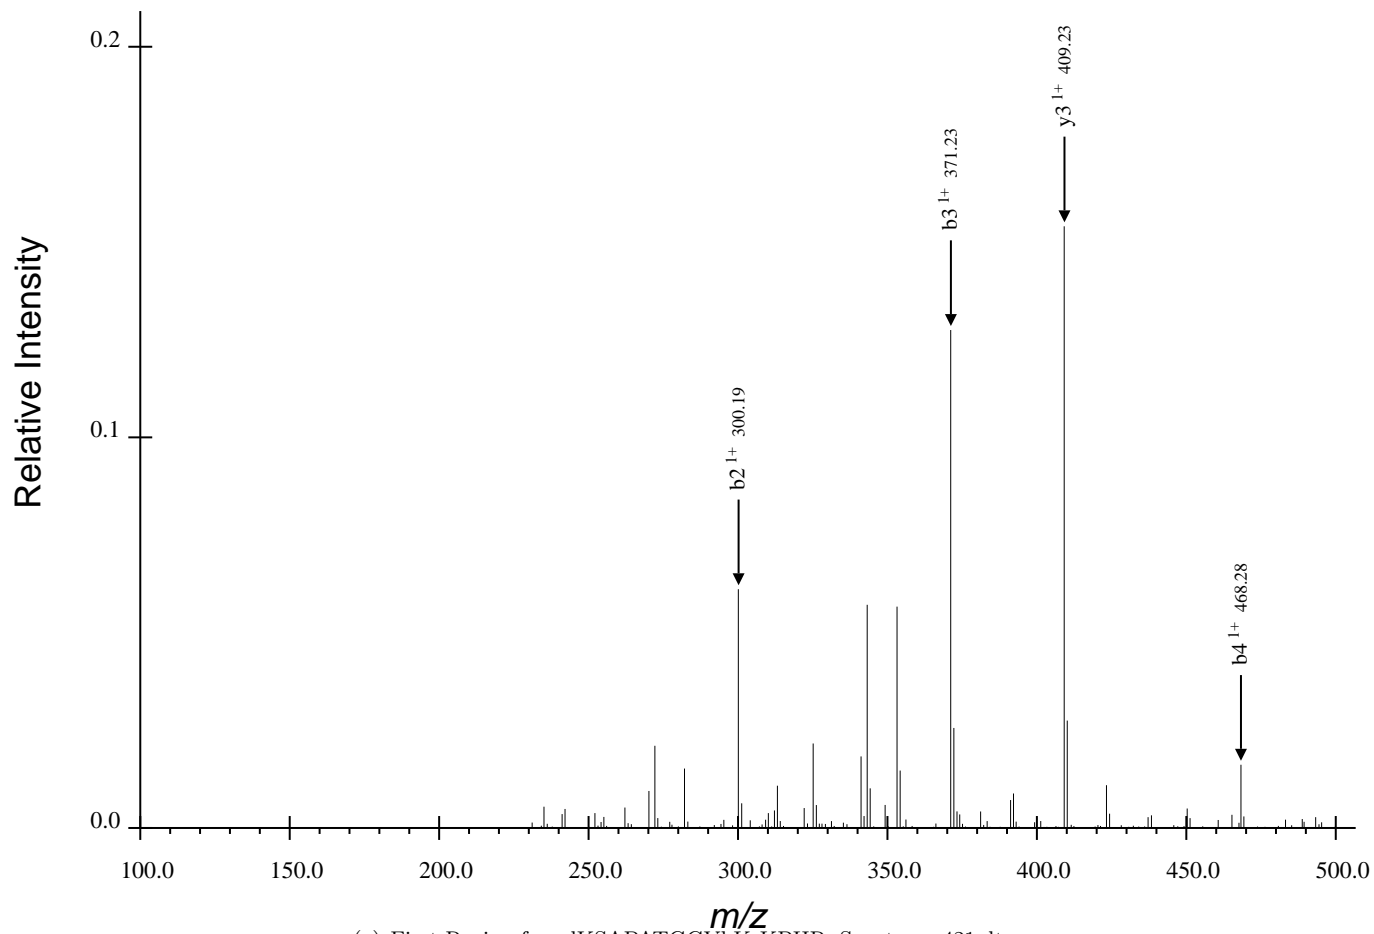

(a) First Region for rdKSAPATGGVhKrKPHR, Spectrum 421.dta

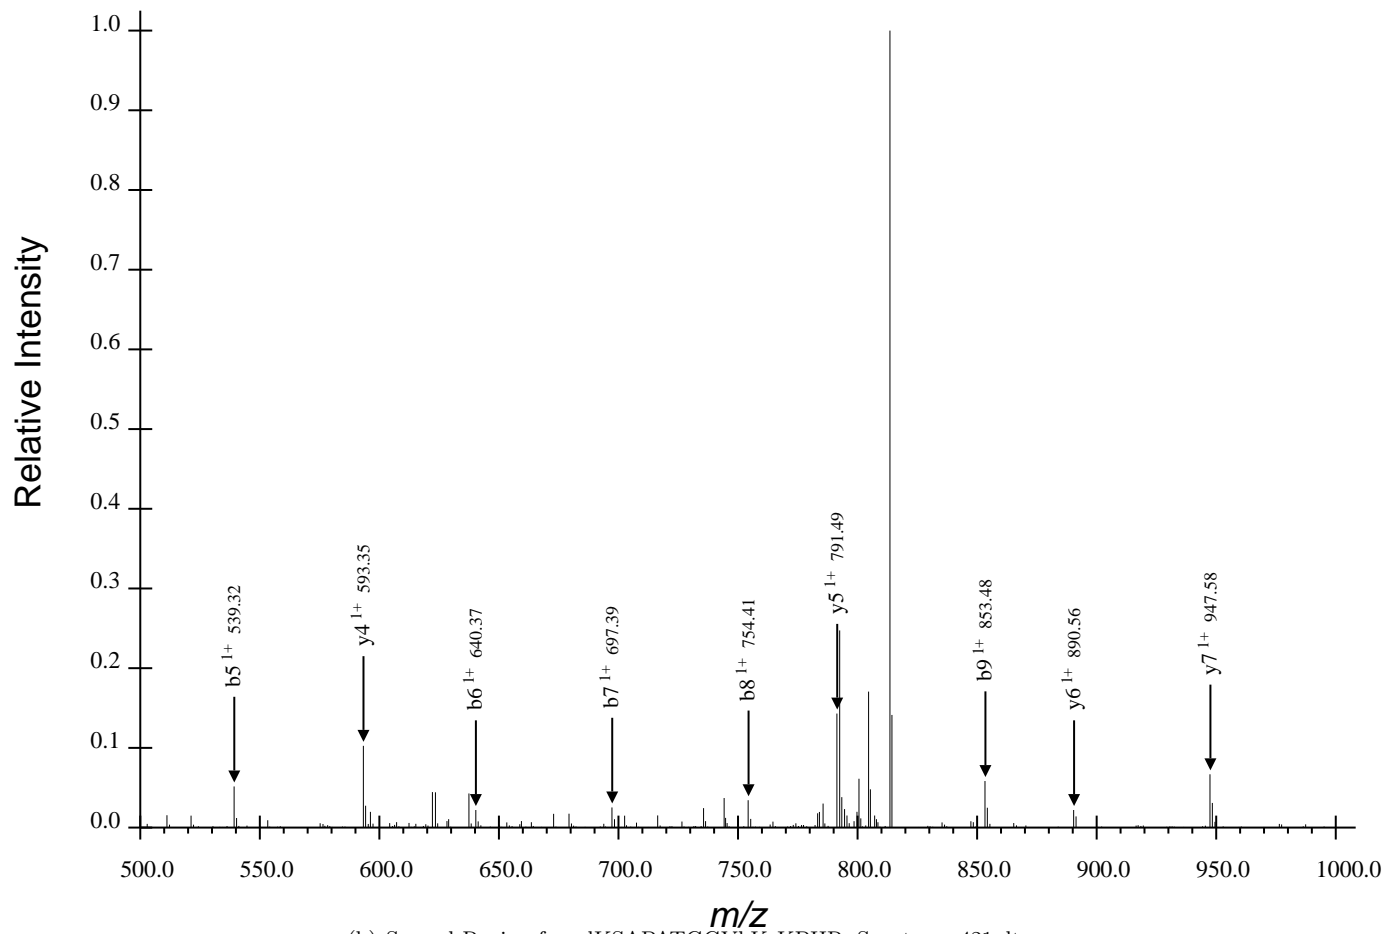

(b) Second Region for rdKSAPATGGVhKrKPHR, Spectrum 421.dta

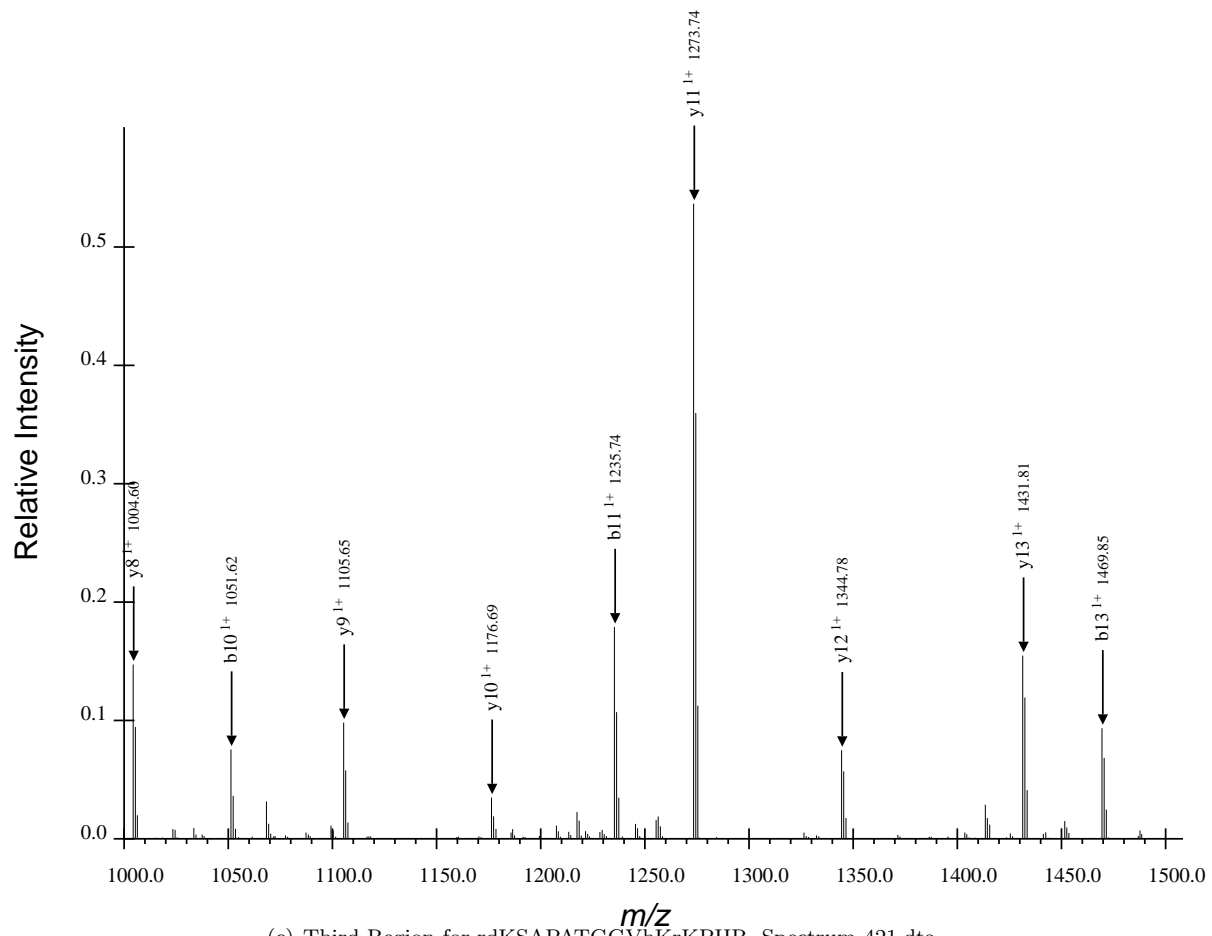

(c) Third Region for rdKSAPATGGVhKrKPHR, Spectrum 421.dta

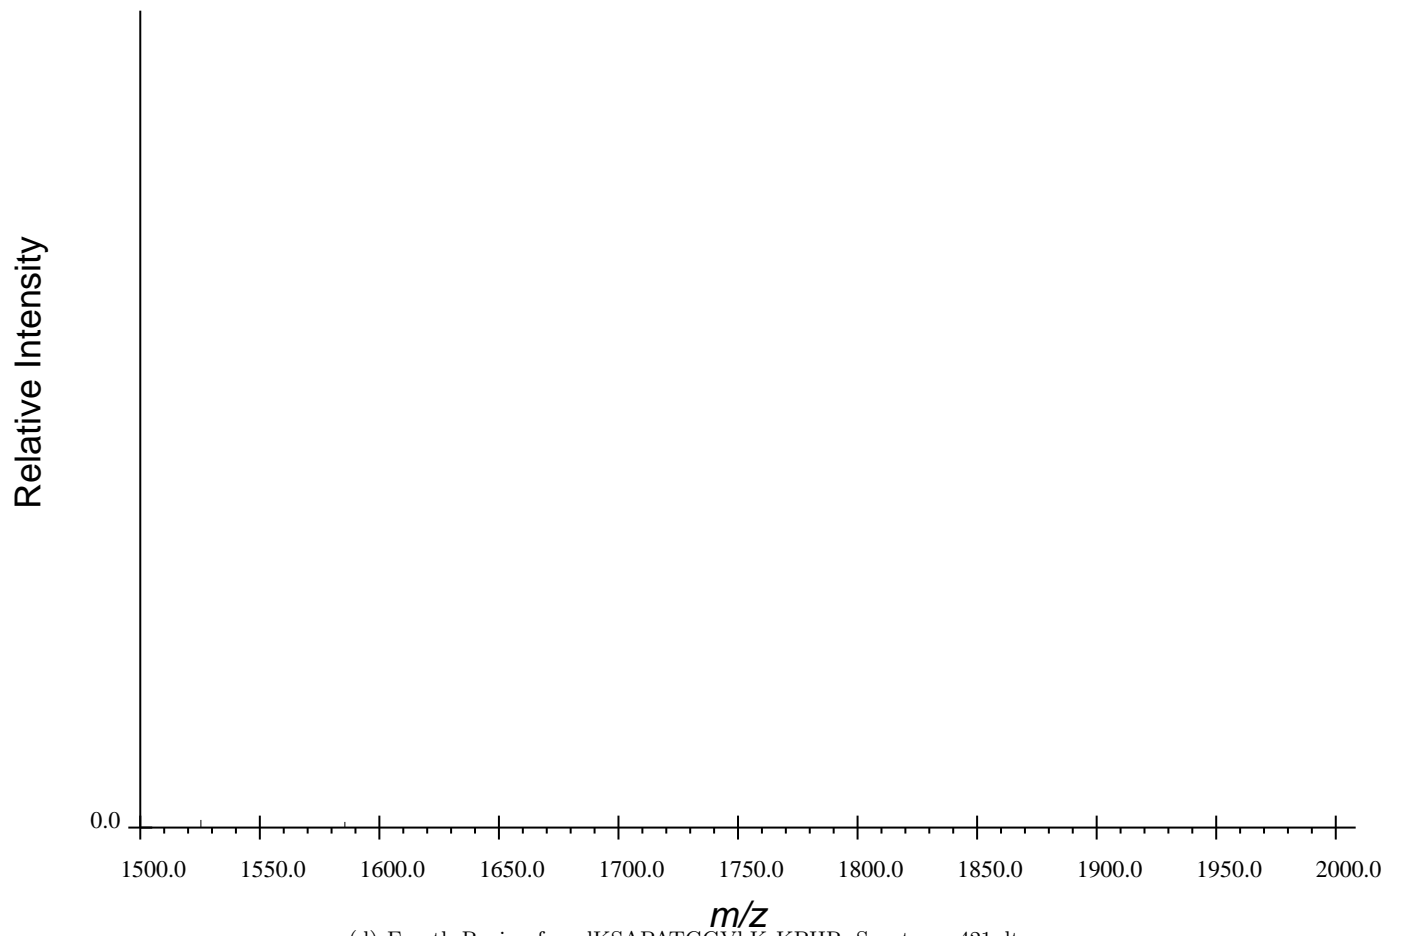

(d) Fourth Region for rdKSAPATGGVhKrKPHR, Spectrum 421.dta

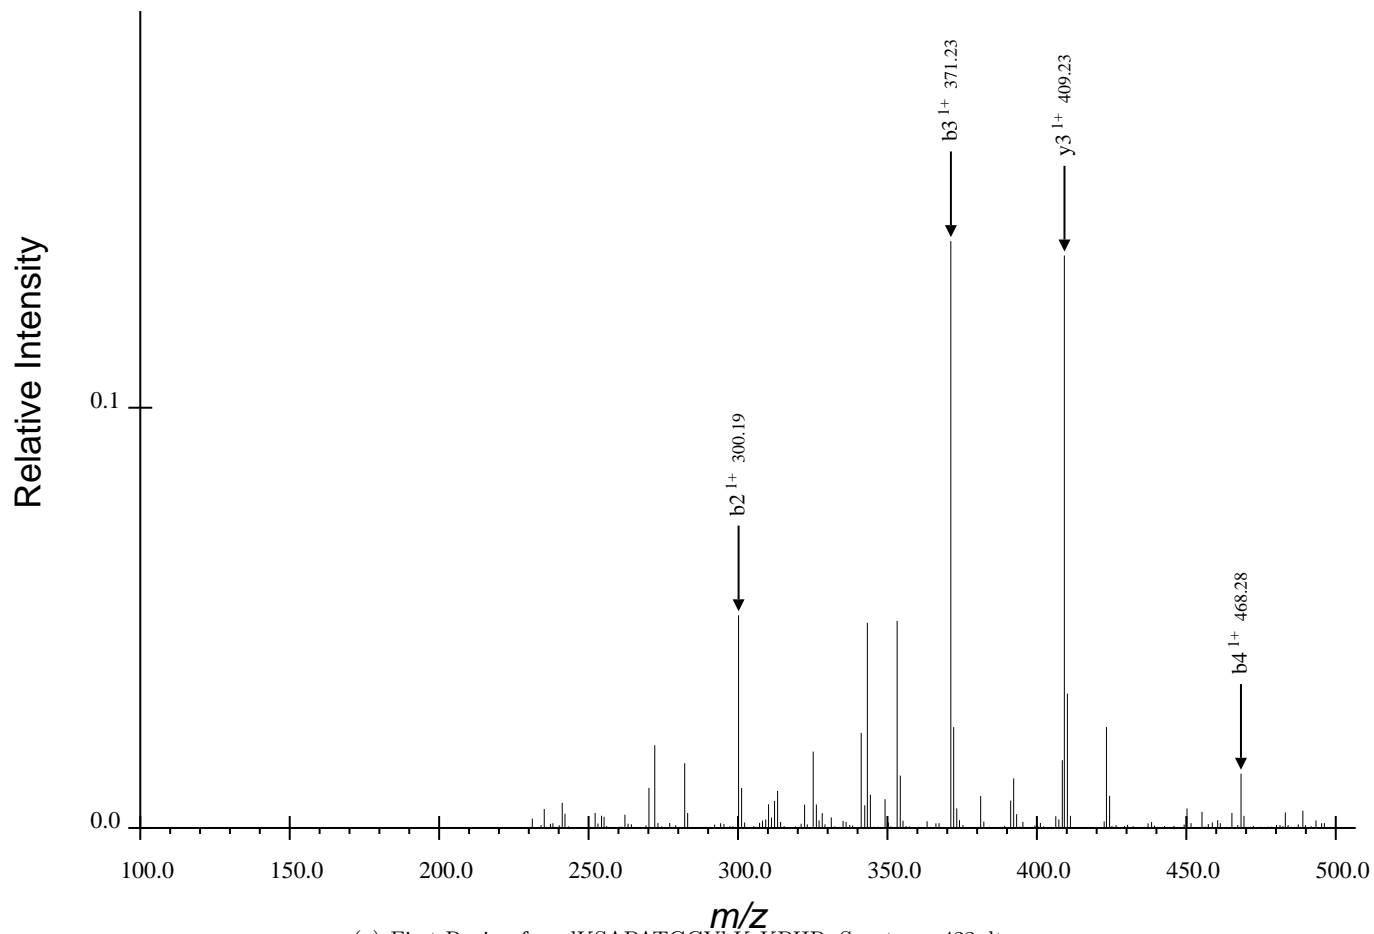

(a) First Region for rdKSAPATGGVhKrKPHR, Spectrum 422.dta

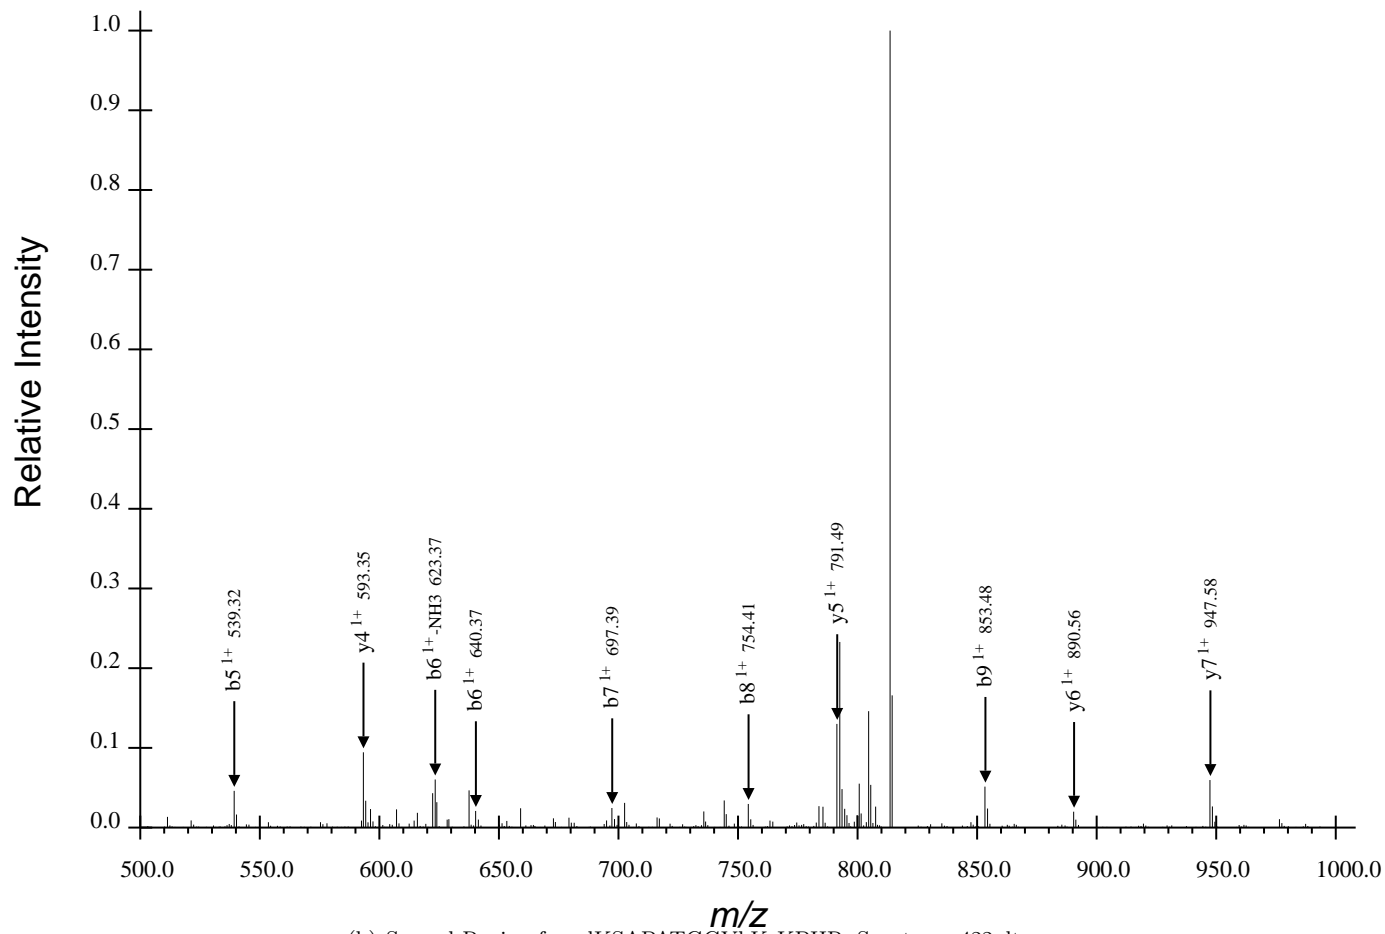

(b) Second Region for rdKSAPATGGVhKrKPHR, Spectrum 422.dta

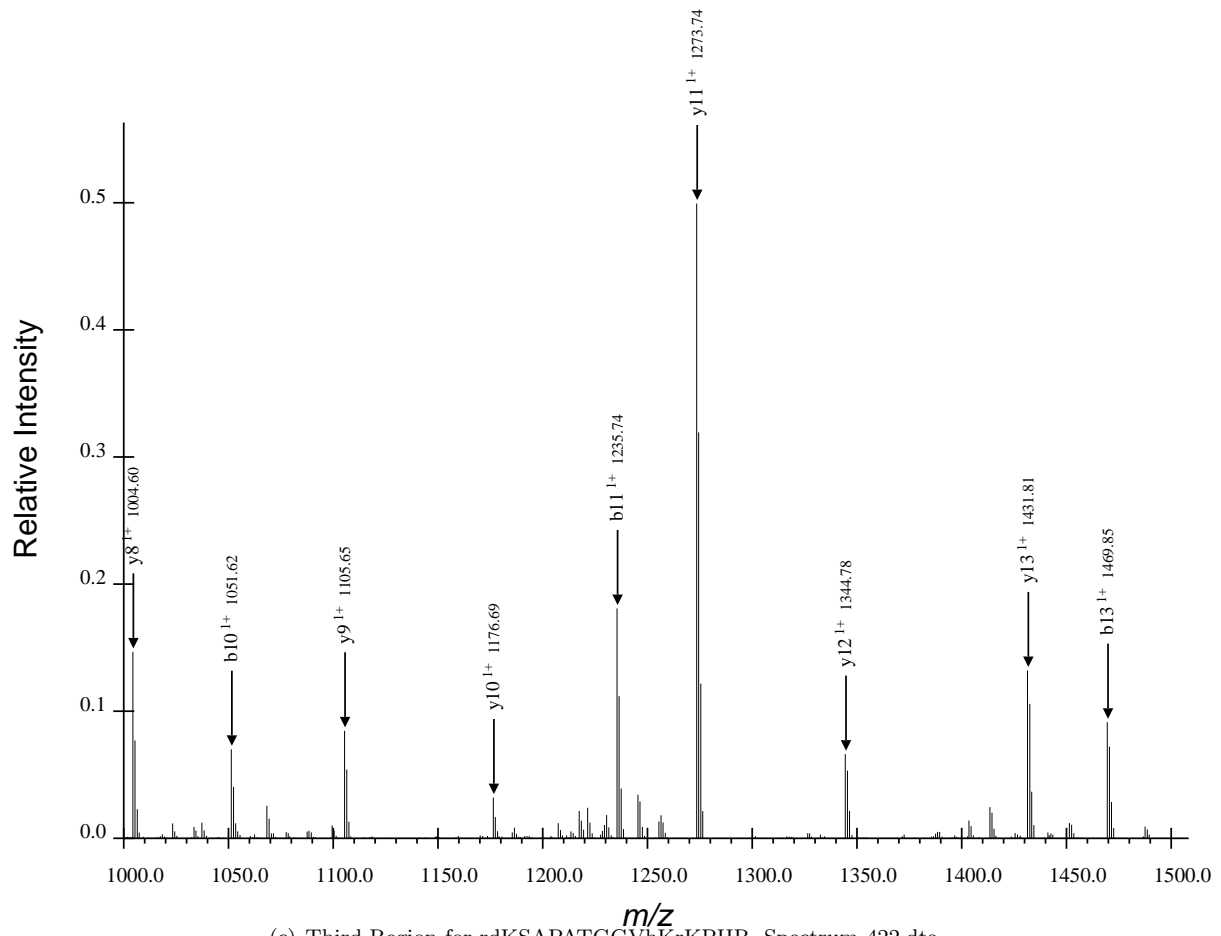

(c) Third Region for rdKSAPATGGVhKrKPHR, Spectrum 422.dta

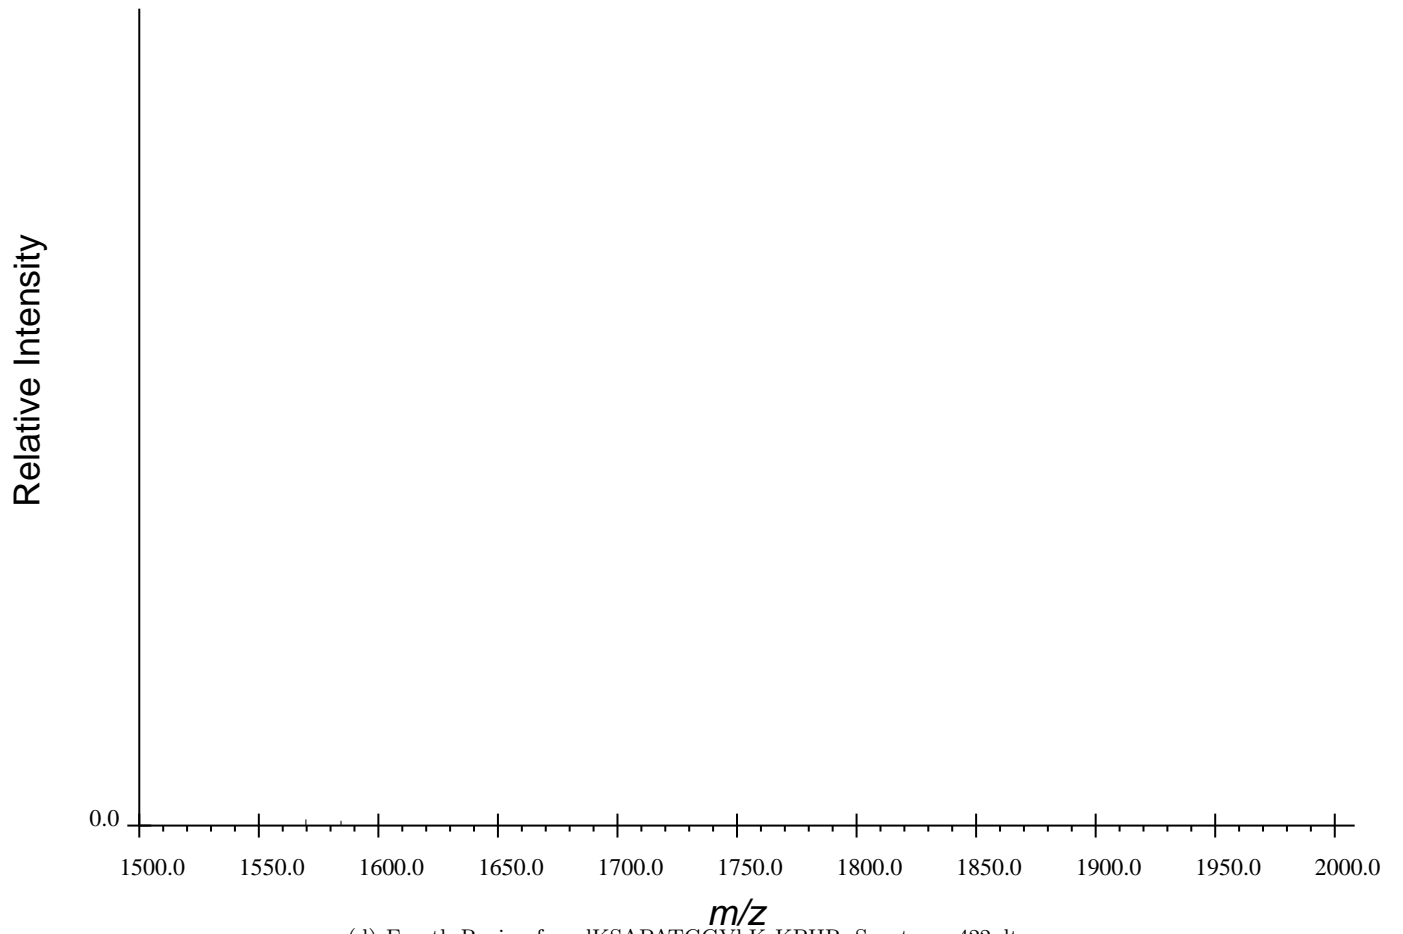

(d) Fourth Region for rdKSAPATGGVhKrKPHR, Spectrum 422.dta

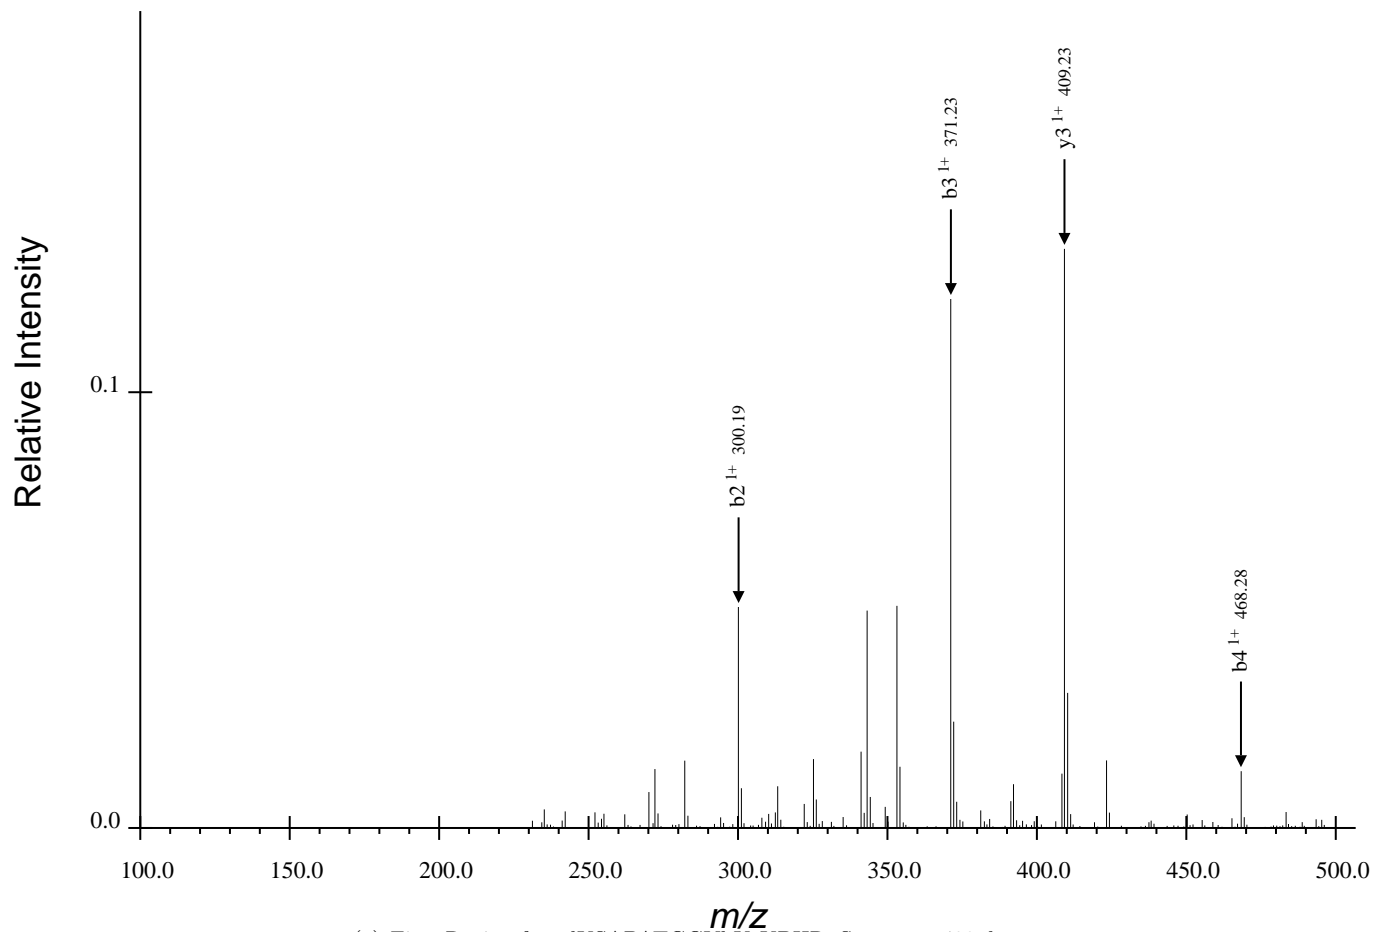

(a) First Region for rdKSAPATGGVhKrKPHR, Spectrum 423.dta

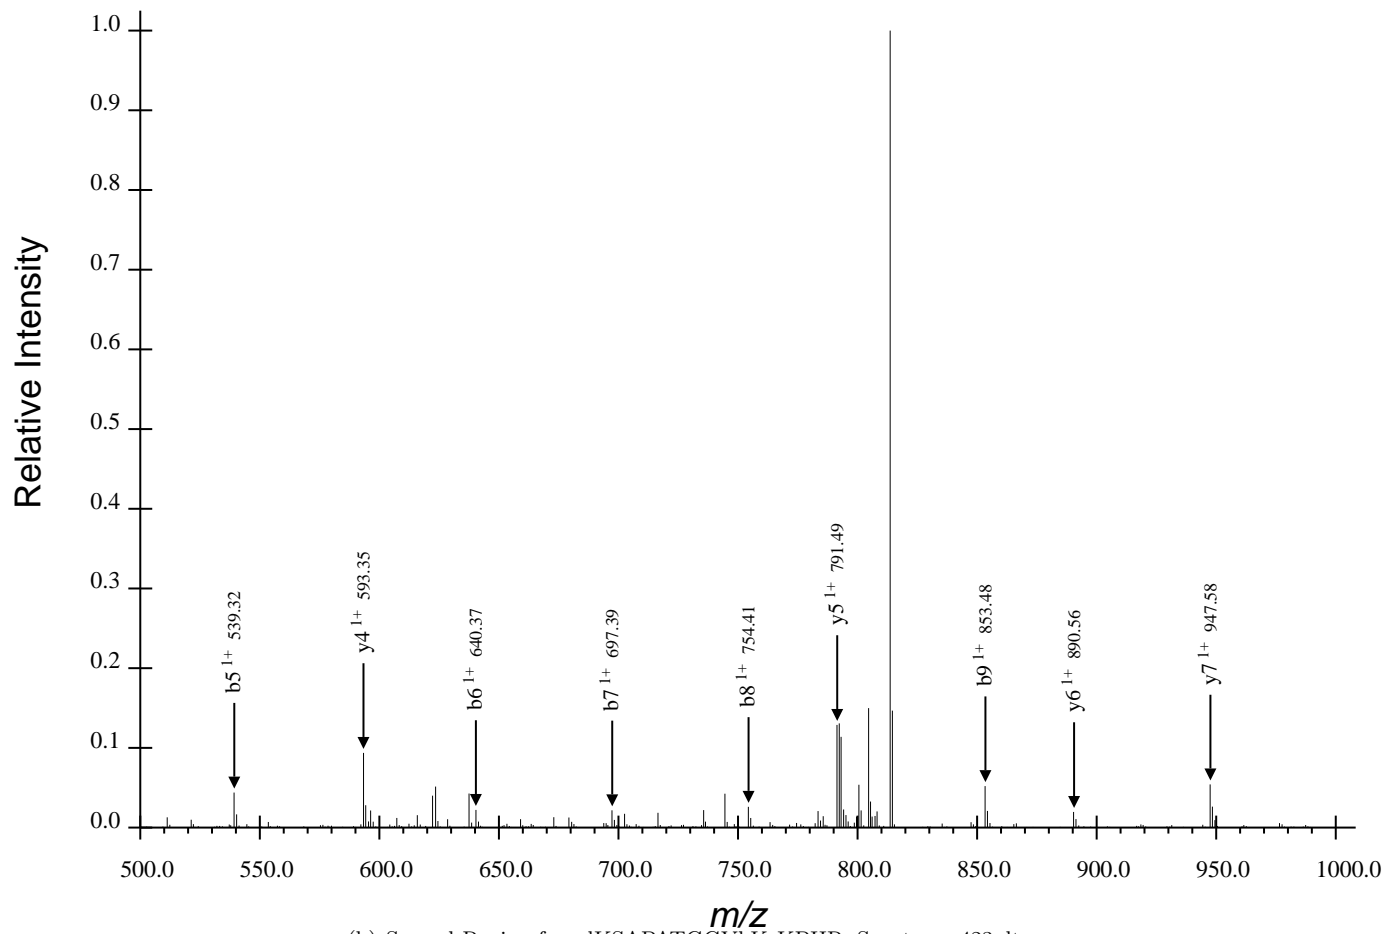

(b) Second Region for rdKSAPATGGVhKrKPHR, Spectrum 423.dta

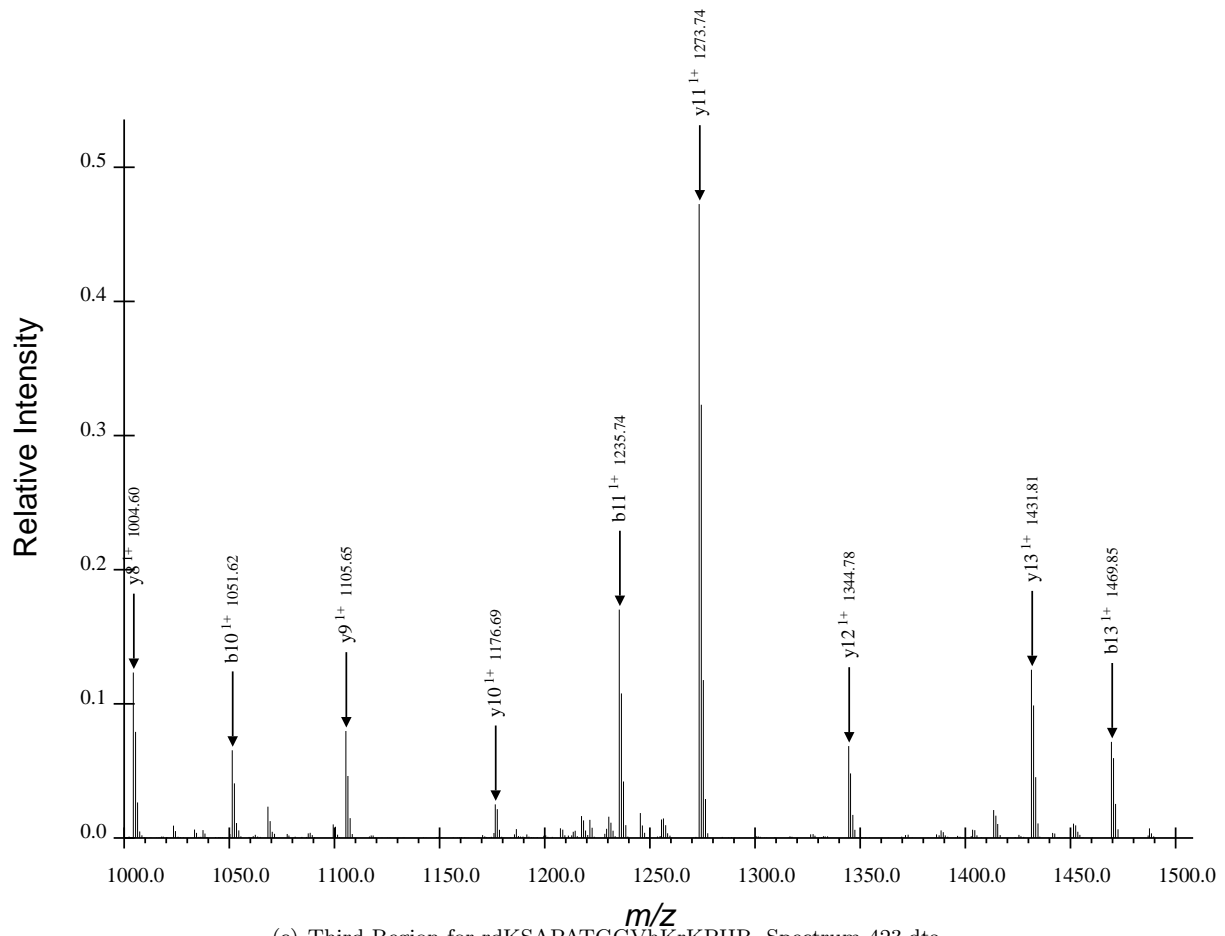

(c) Third Region for rdKSAPATGGVhKrKPHR, Spectrum 423.dta

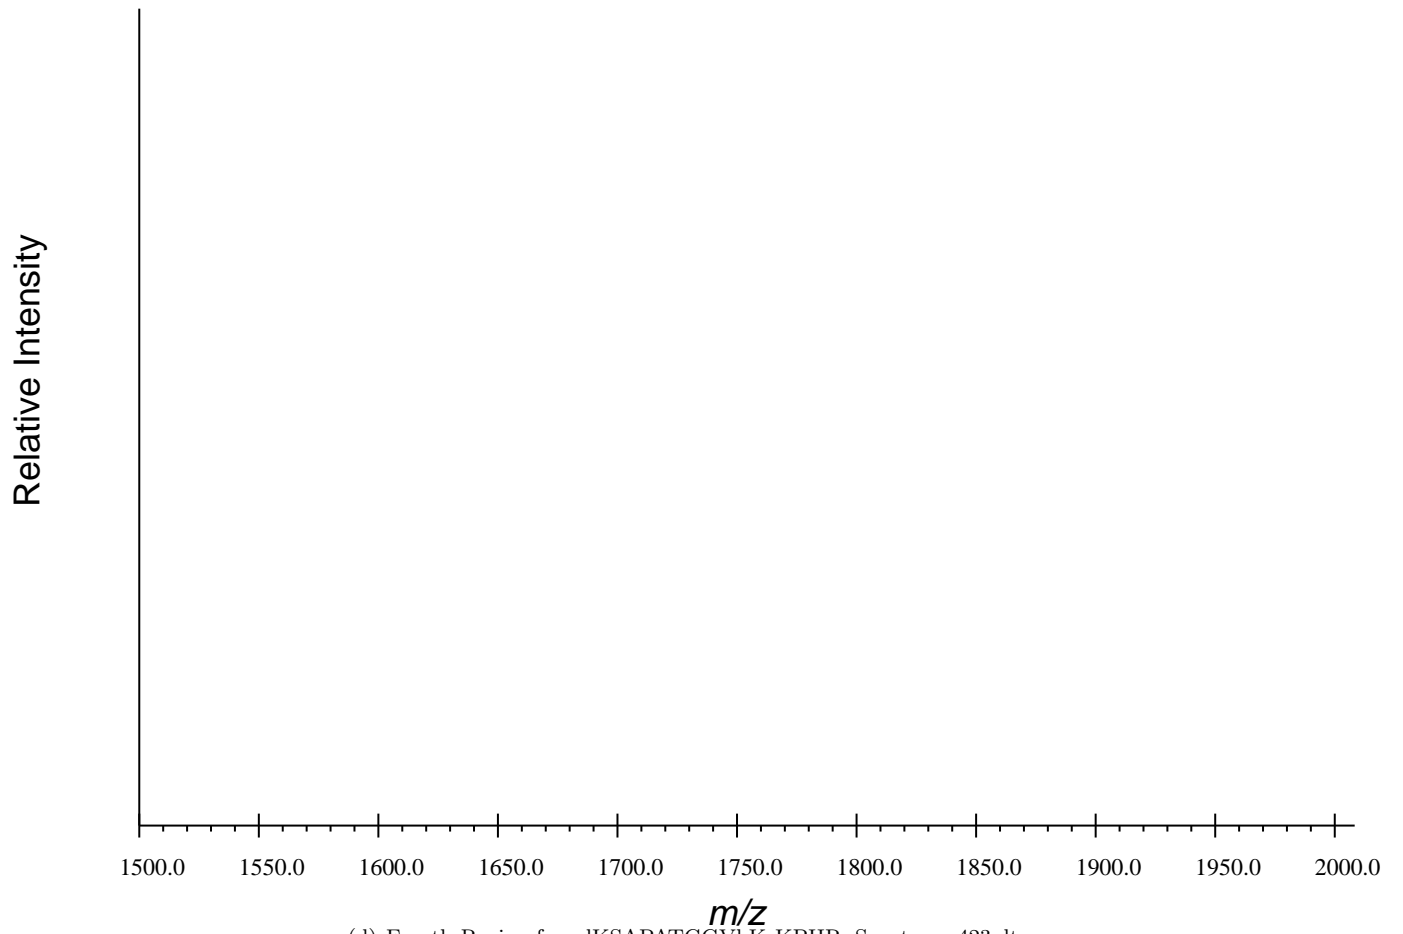

(d) Fourth Region for rdKSAPATGGVhKrKPHR, Spectrum 423.dta

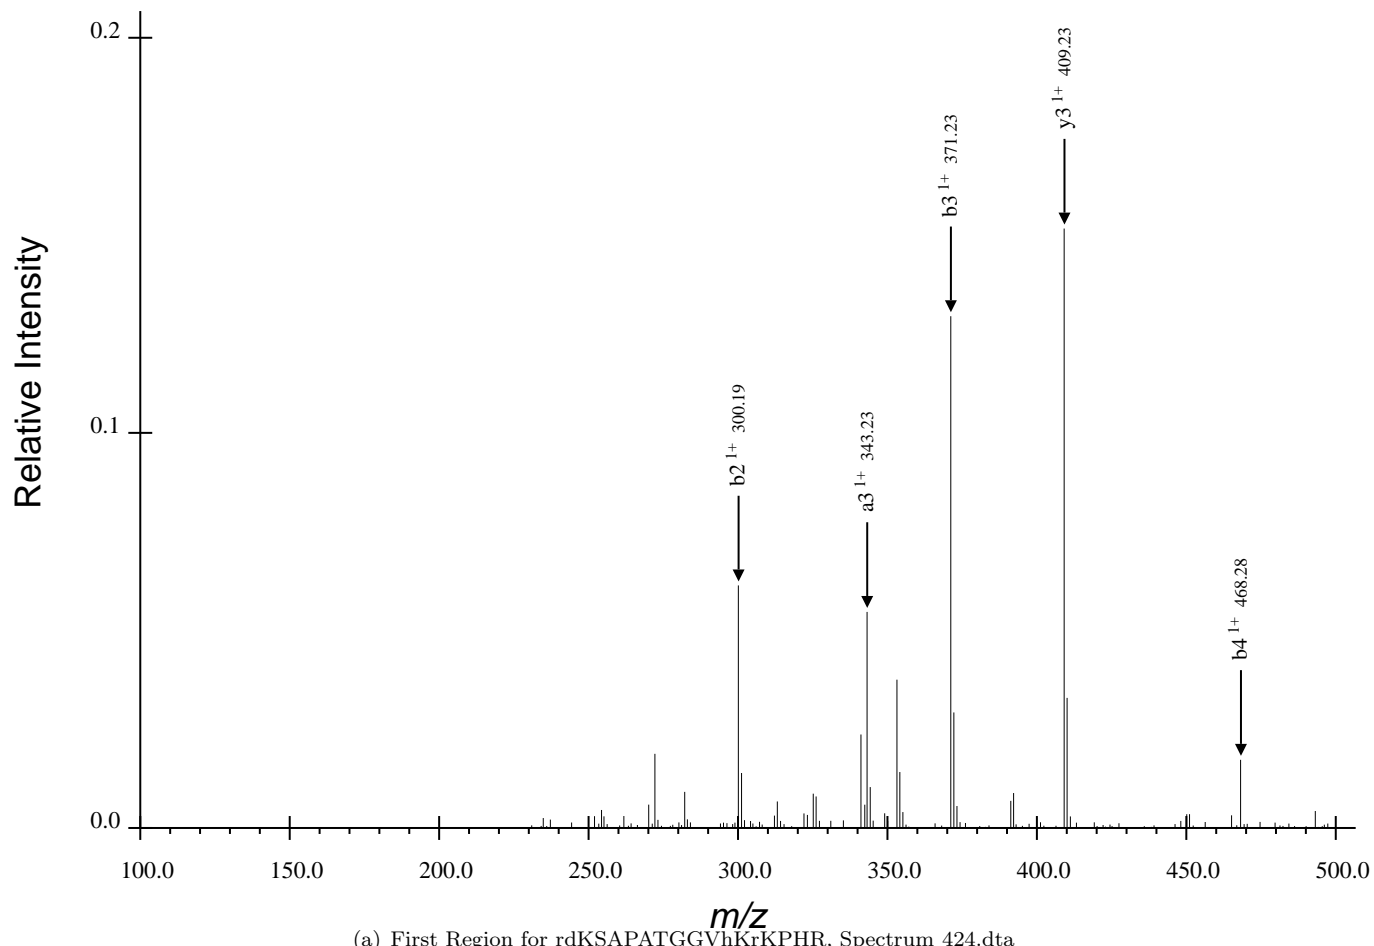

(a) First Region for rdKSAPATGGVhKrKPHR, Spectrum 424.dta

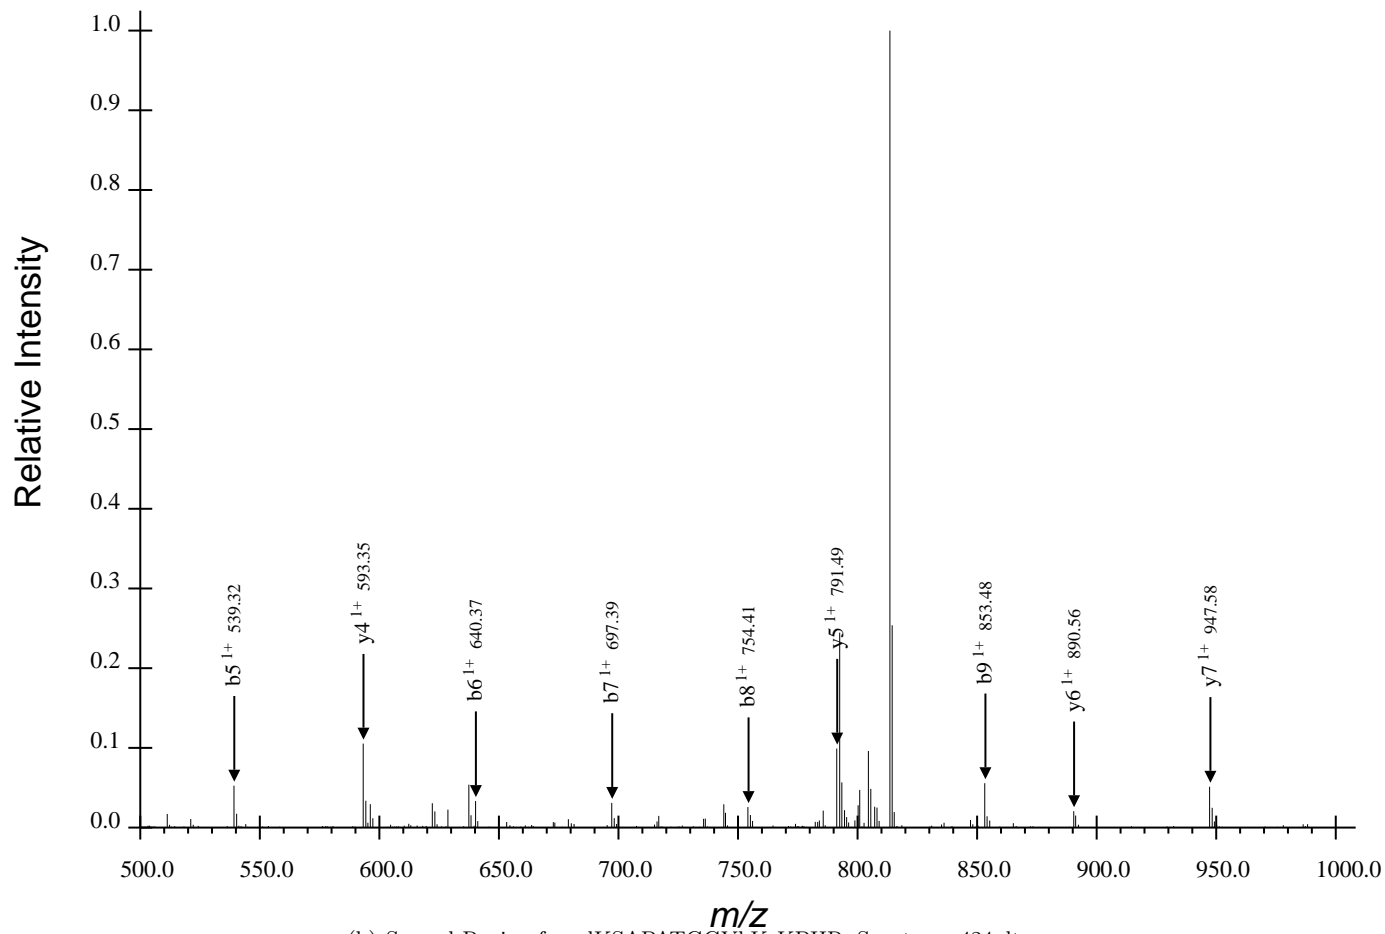

(b) Second Region for rdKSAPATGGVhKrKPHR, Spectrum 424.dta



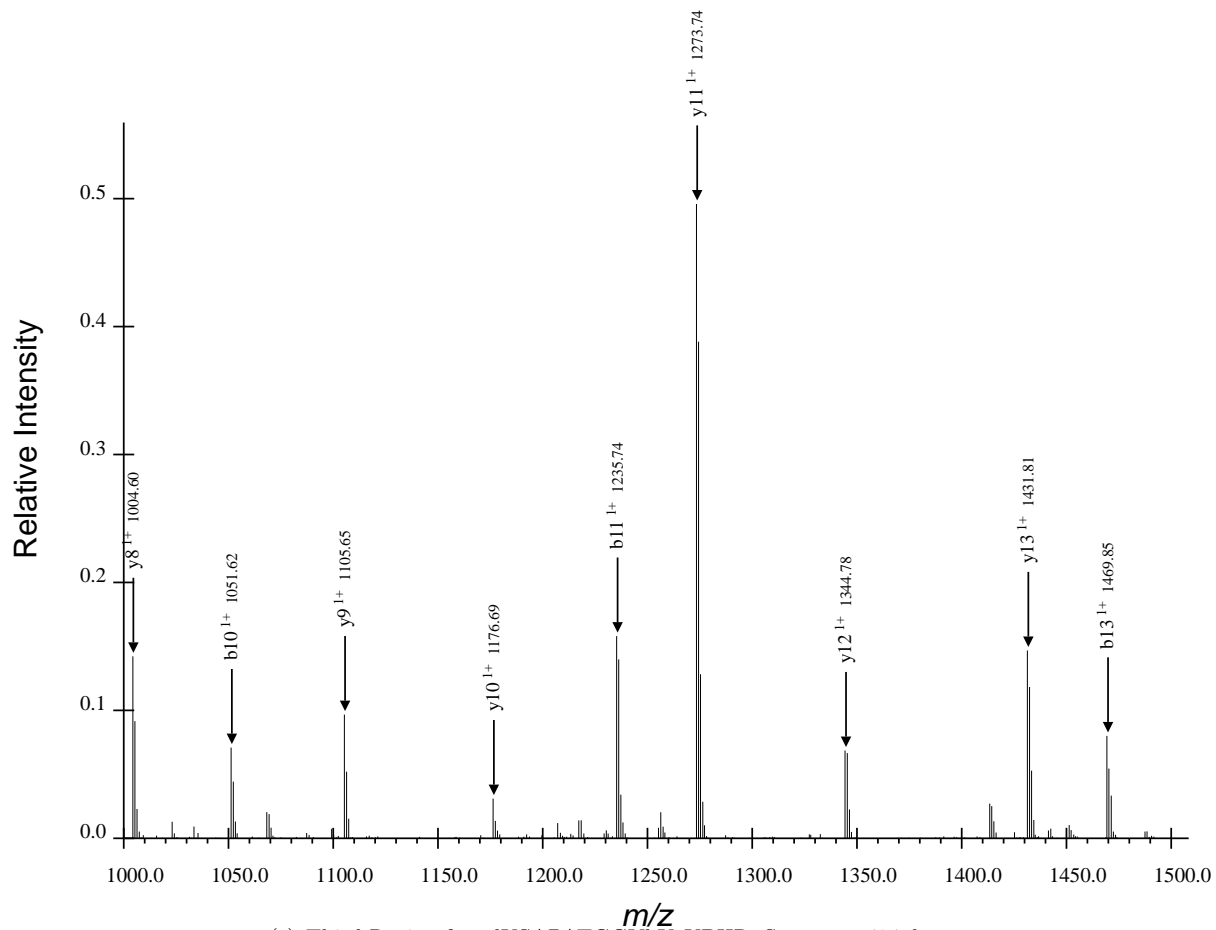

(c) Third Region for rdKSAPATGGVhKrKPHR, Spectrum 424.dta

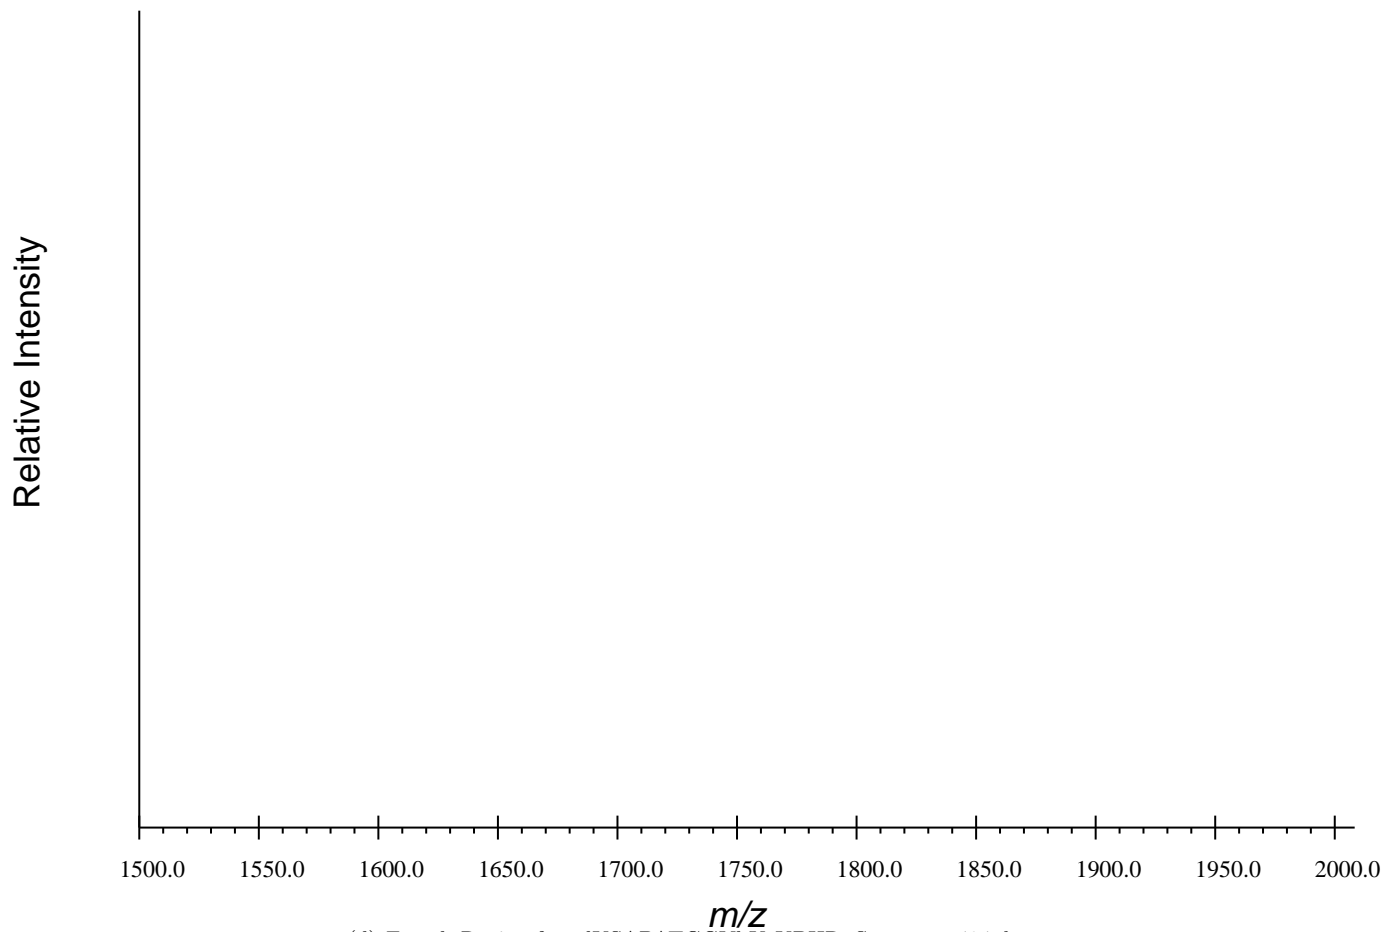

(d) Fourth Region for rdKSAPATGGVhKrKPHR, Spectrum 424.dta

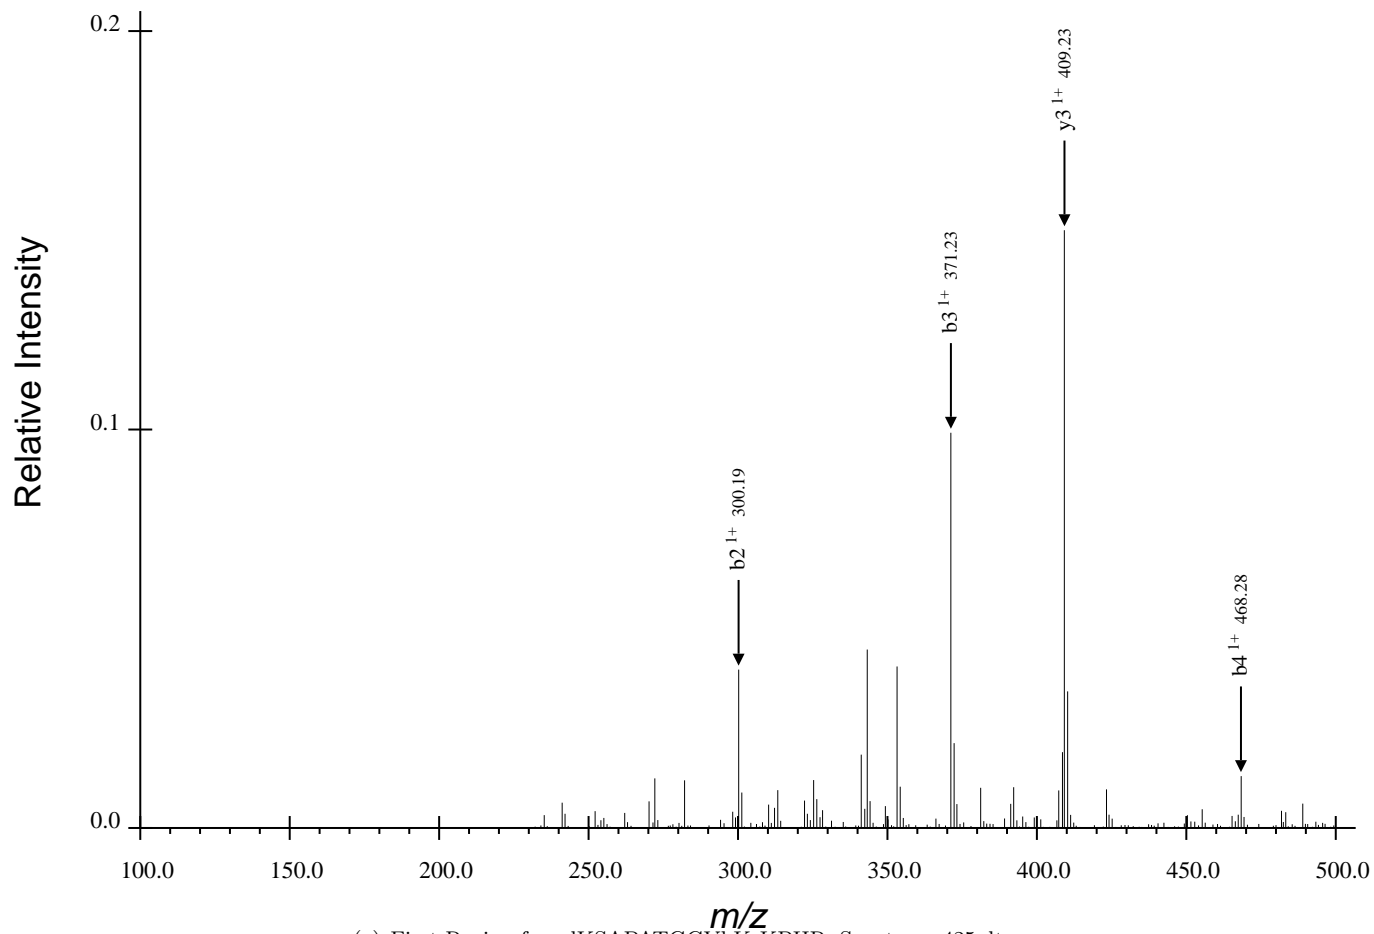

(a) First Region for rdKSAPATGGVhKrKPHR, Spectrum 425.dta

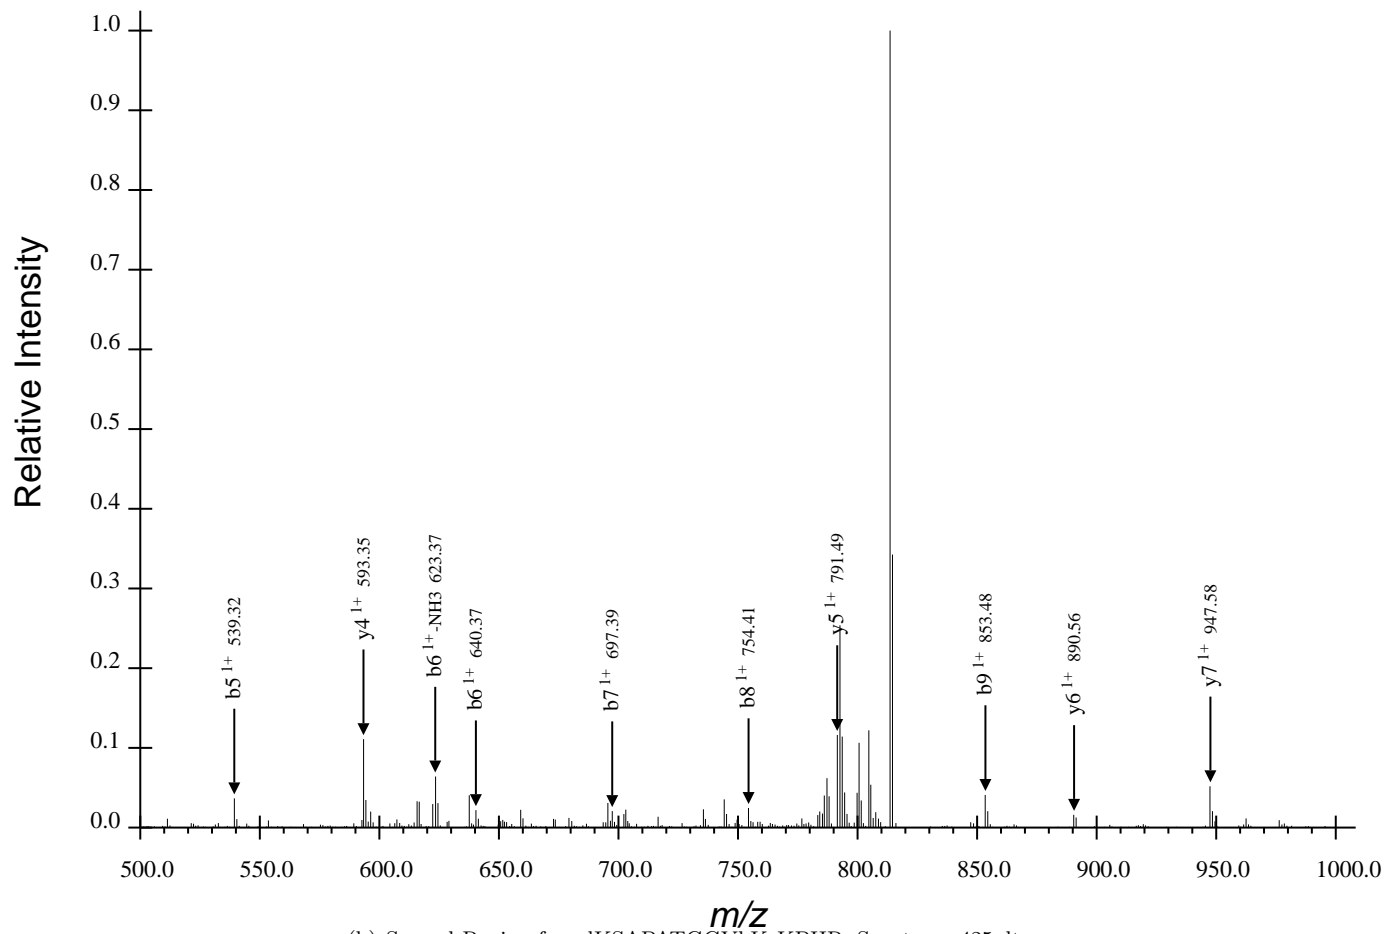

(b) Second Region for rdKSAPATGGVhKrKPHR, Spectrum 425.dta

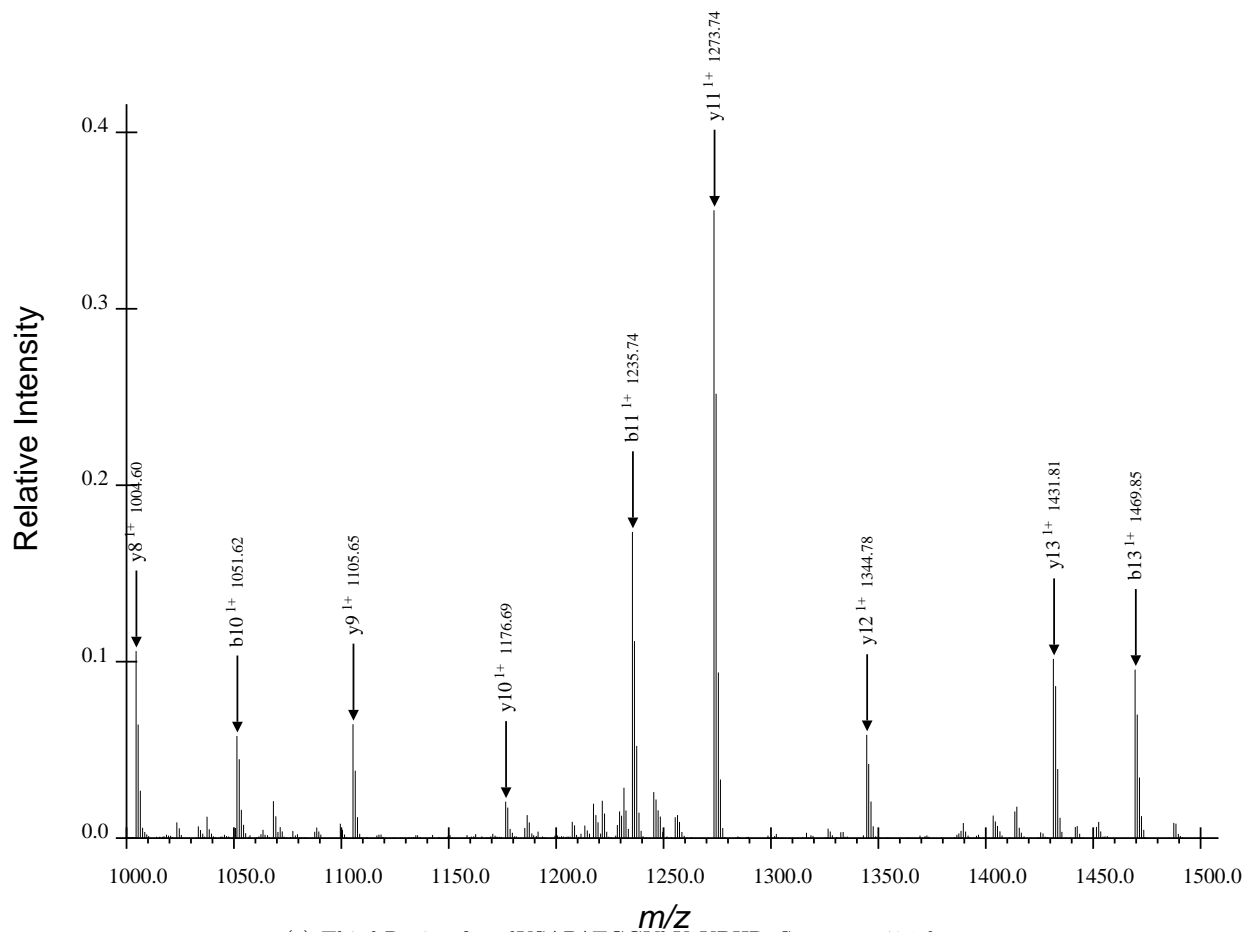

(c) Third Region for rdKSAPATGGVhKrKPHR, Spectrum 425.dta

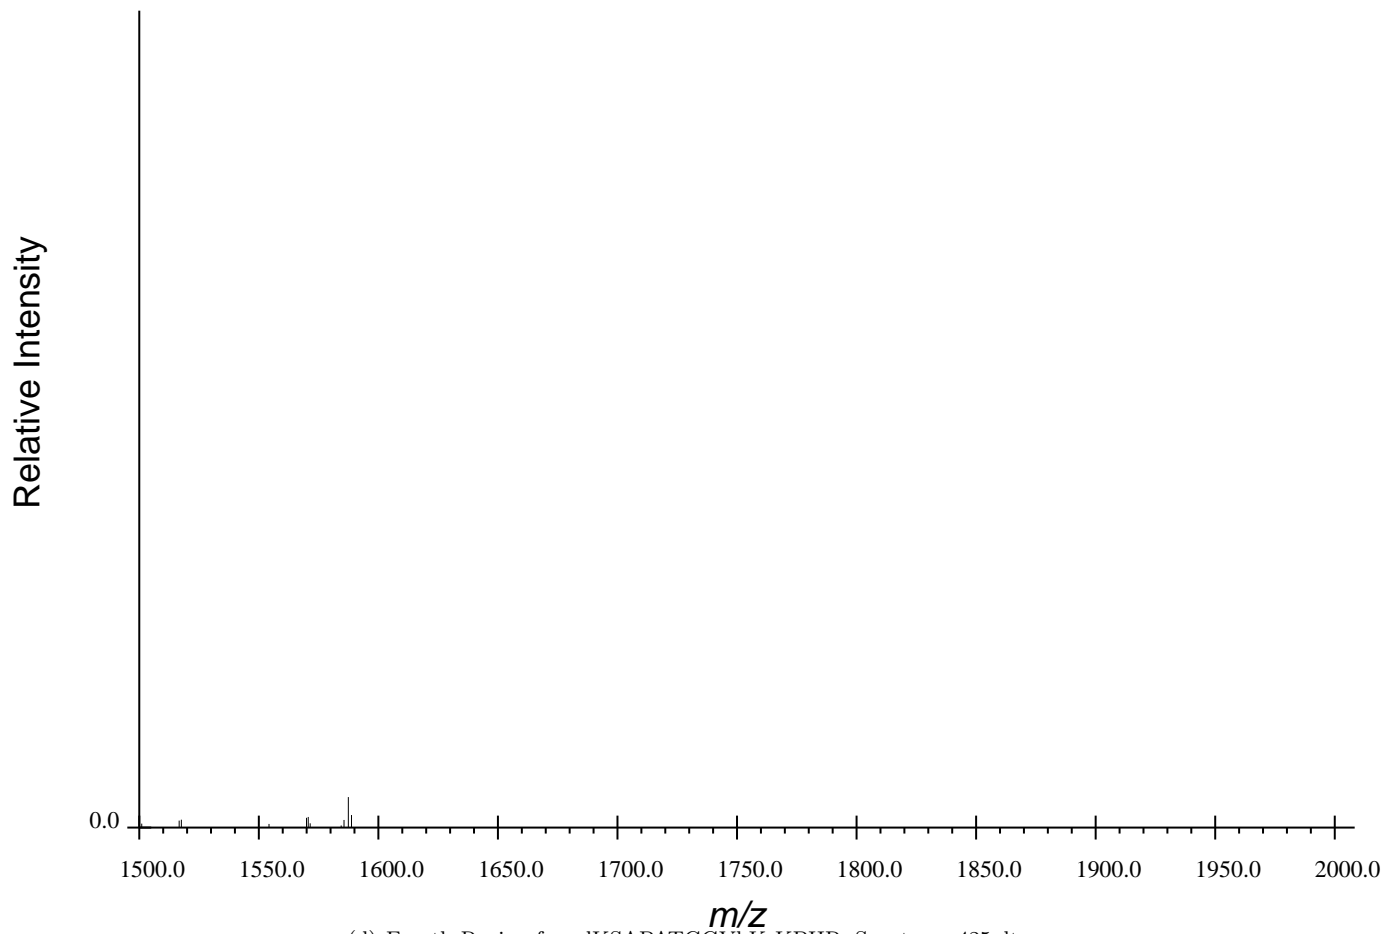

(d) Fourth Region for rdKSAPATGGVhKrKPHR, Spectrum 425.dta

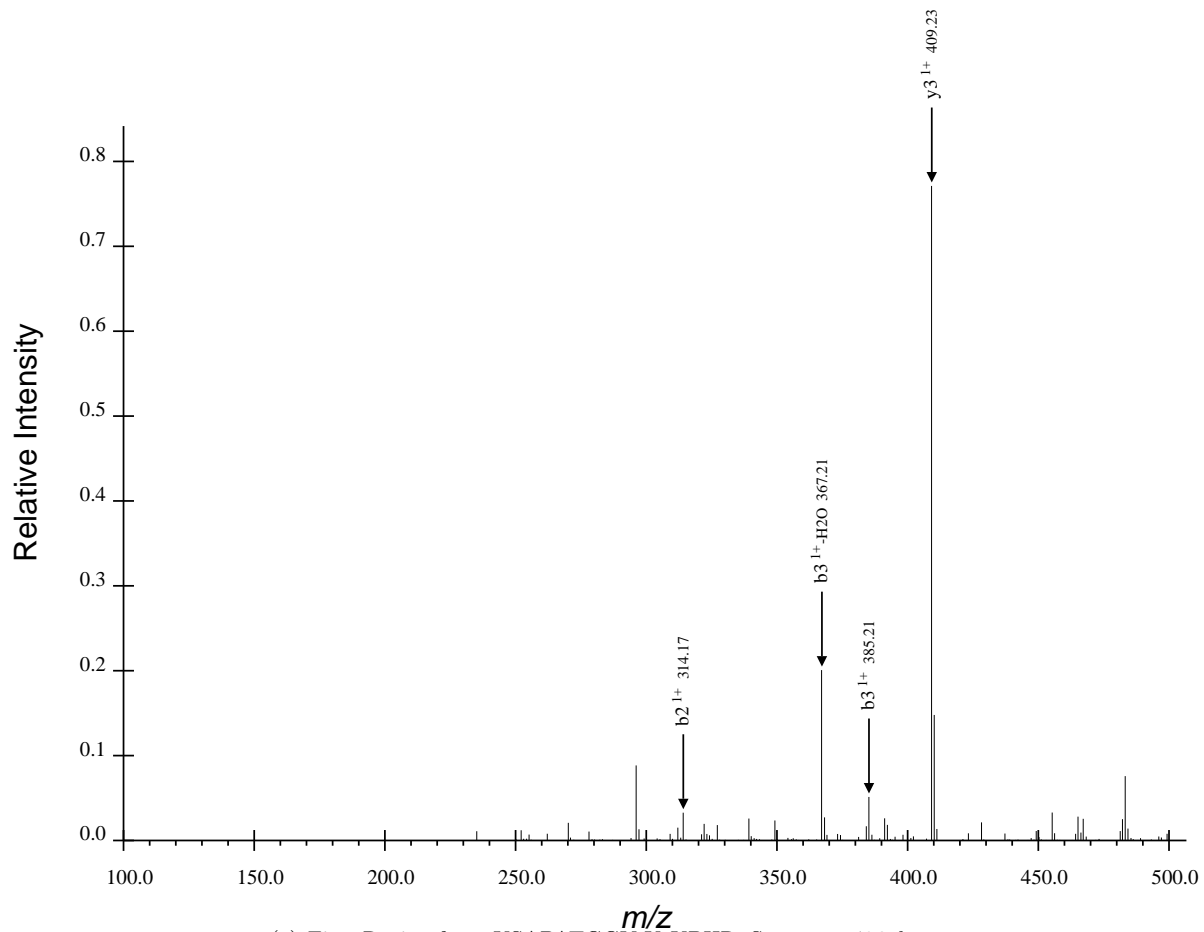

(a) First Region for raKSAPATGGVrKrKPHR, Spectrum 426.dta

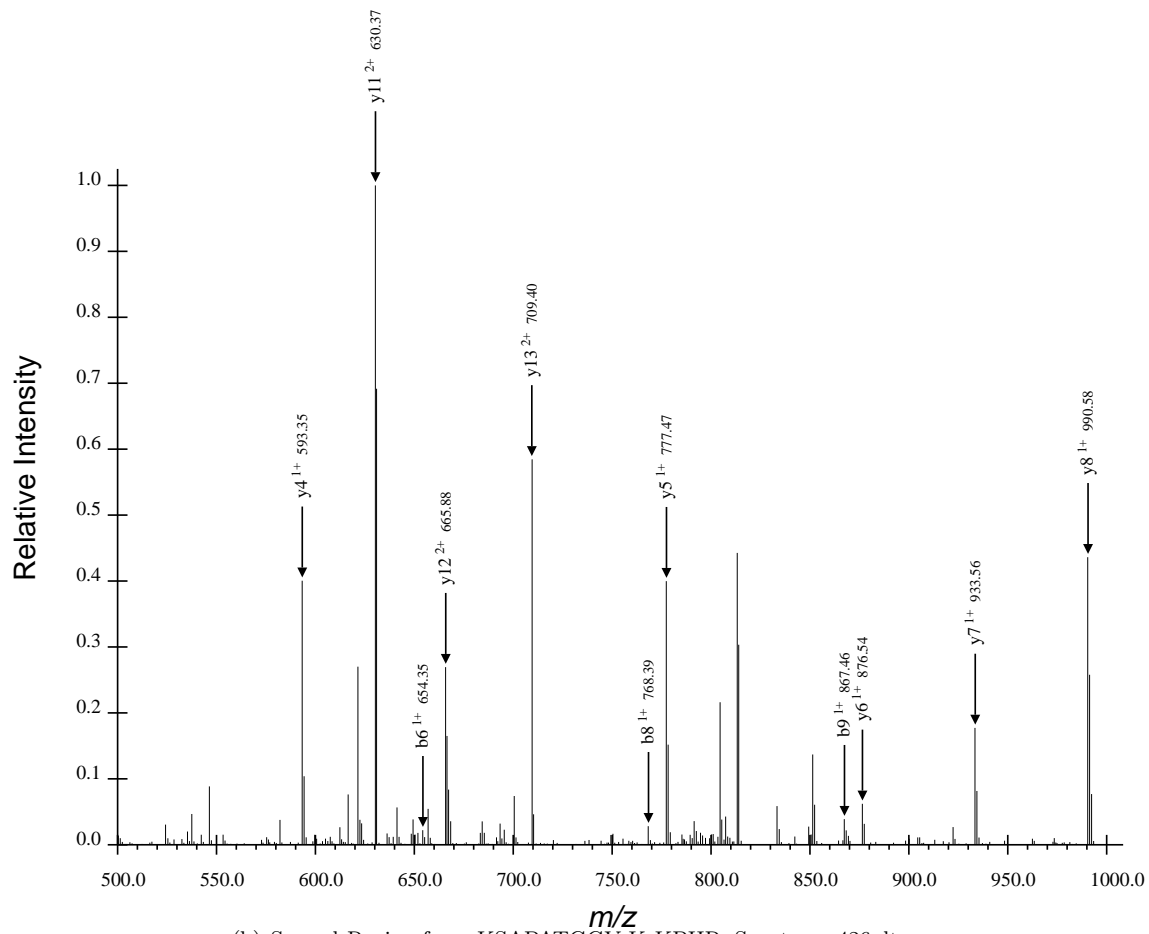

(b) Second Region for raKSAPATGGVrKrKPHR, Spectrum 426.dta

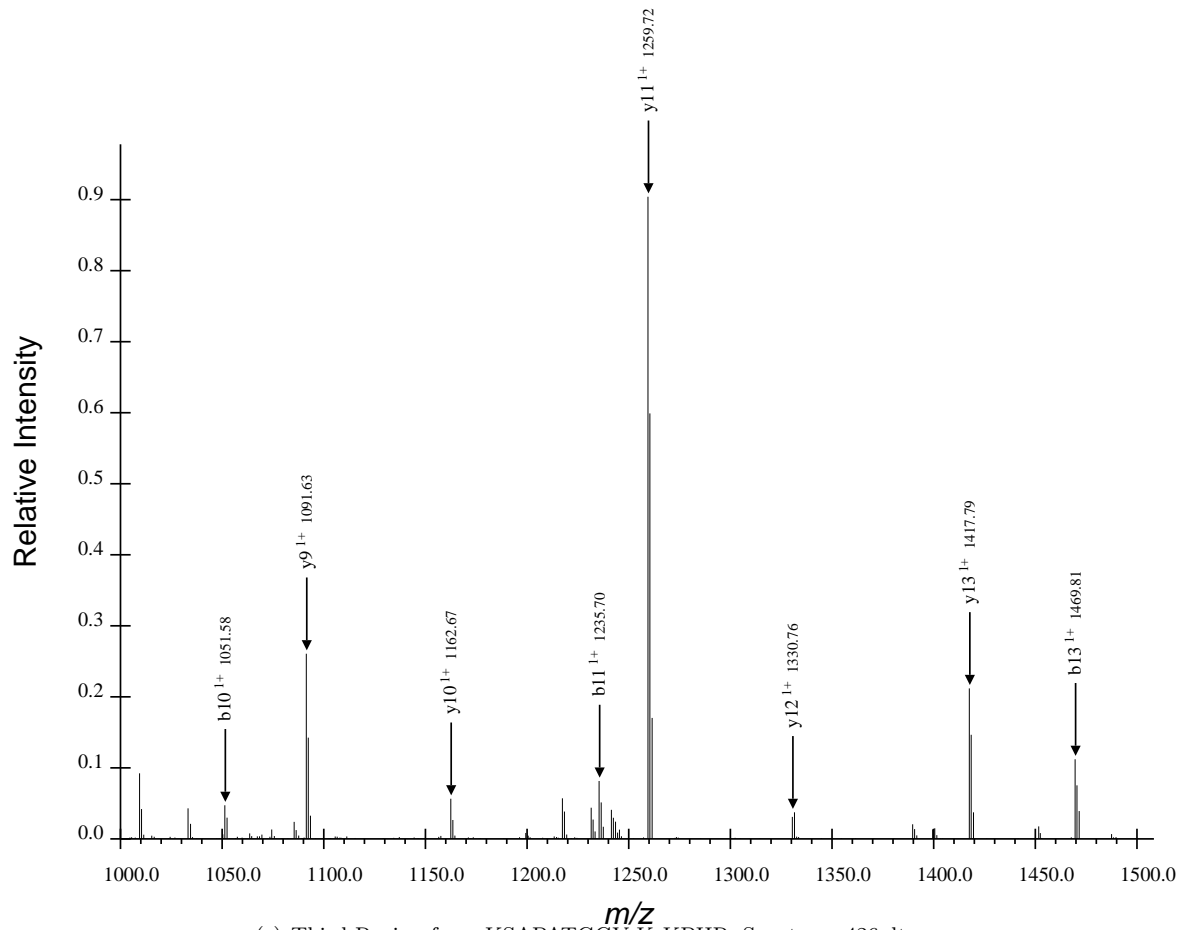

(c) Third Region for raKSAPATGGVrKrKPHR, Spectrum 426.dta

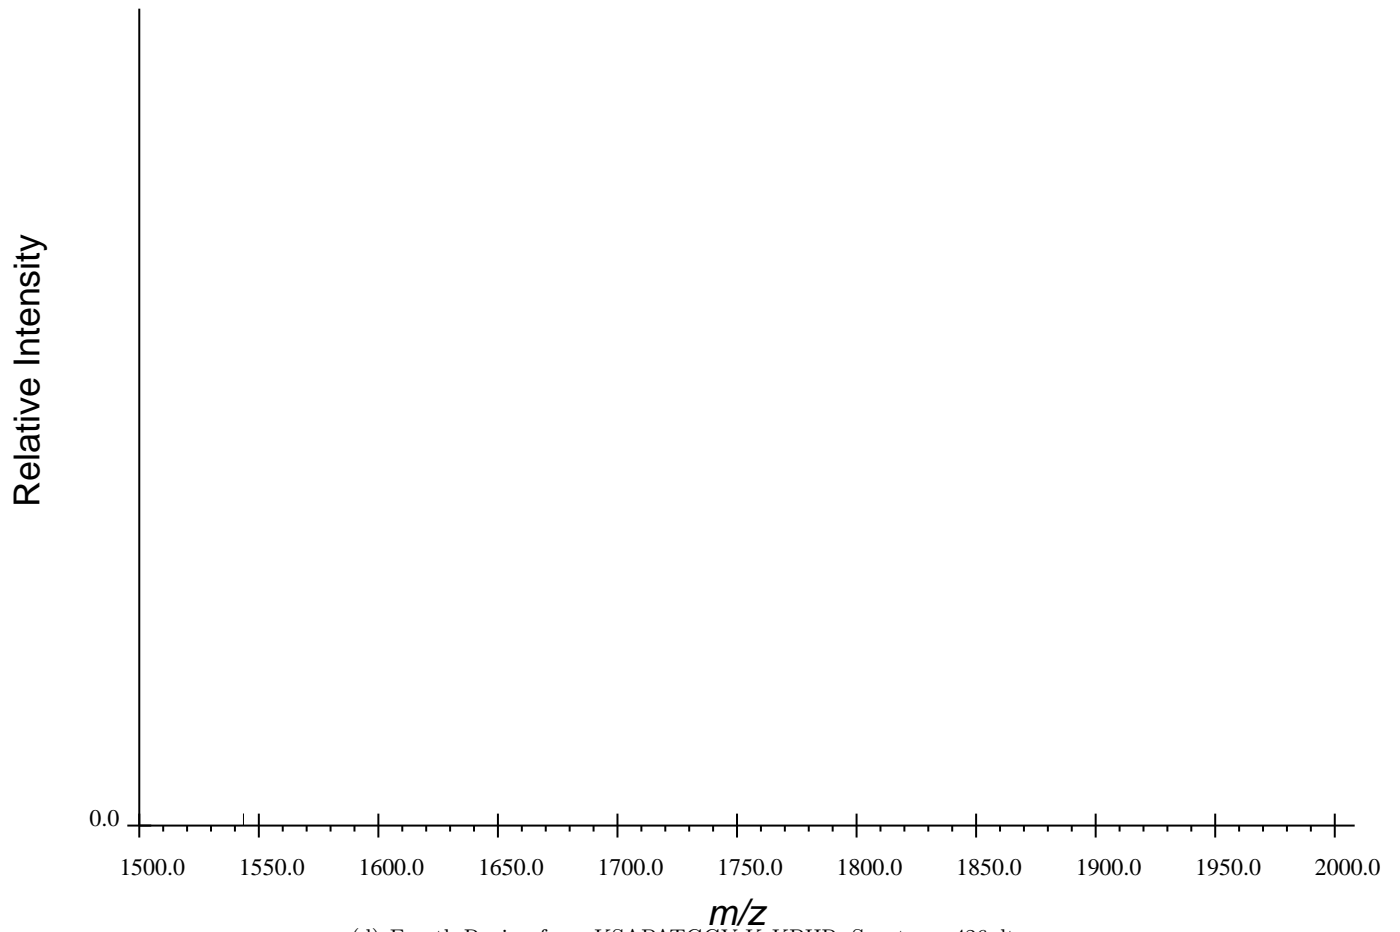

(d) Fourth Region for raKSAPATGGVrKrKPHR, Spectrum 426.dta

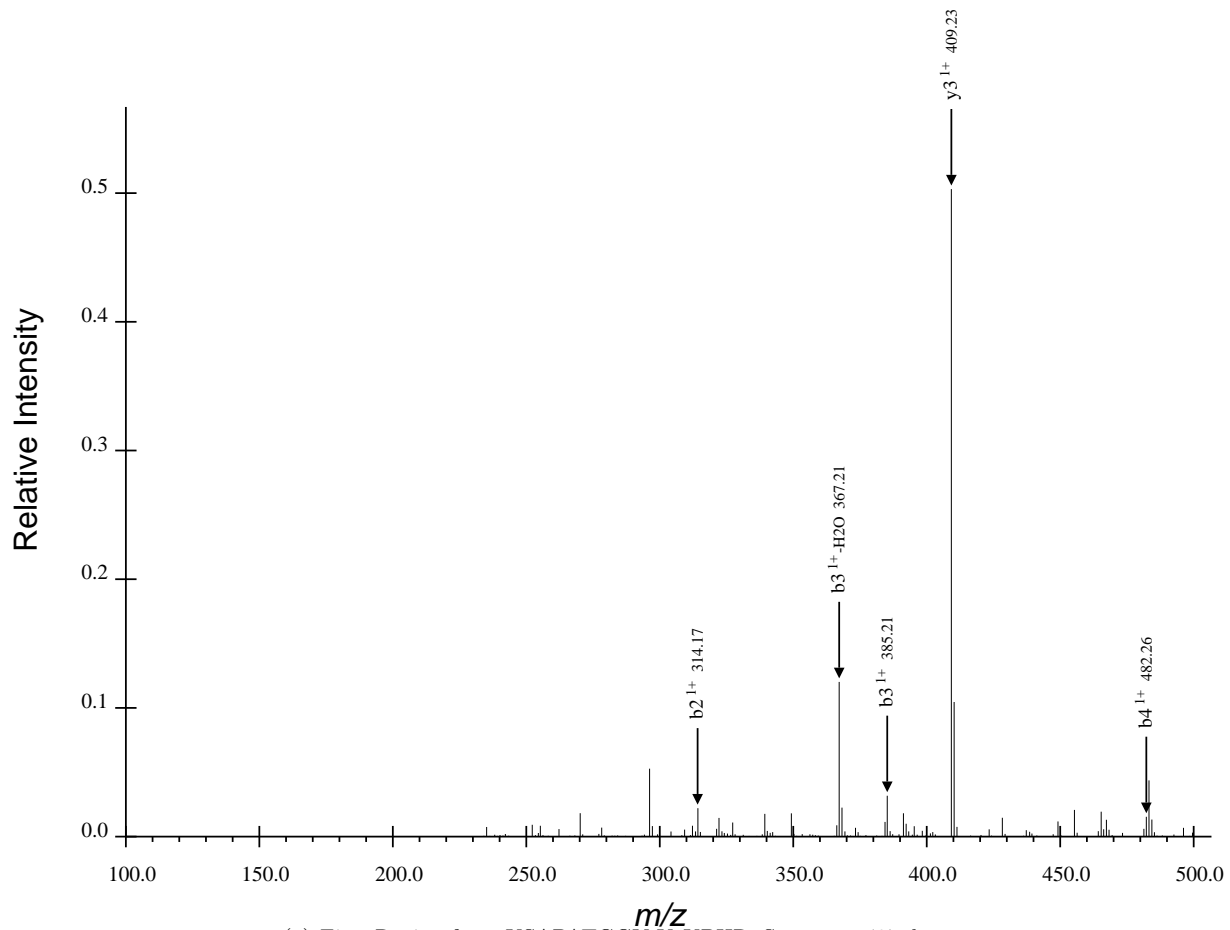

(a) First Region for raKSAPATGGVrKrKPHR, Spectrum 427.dta

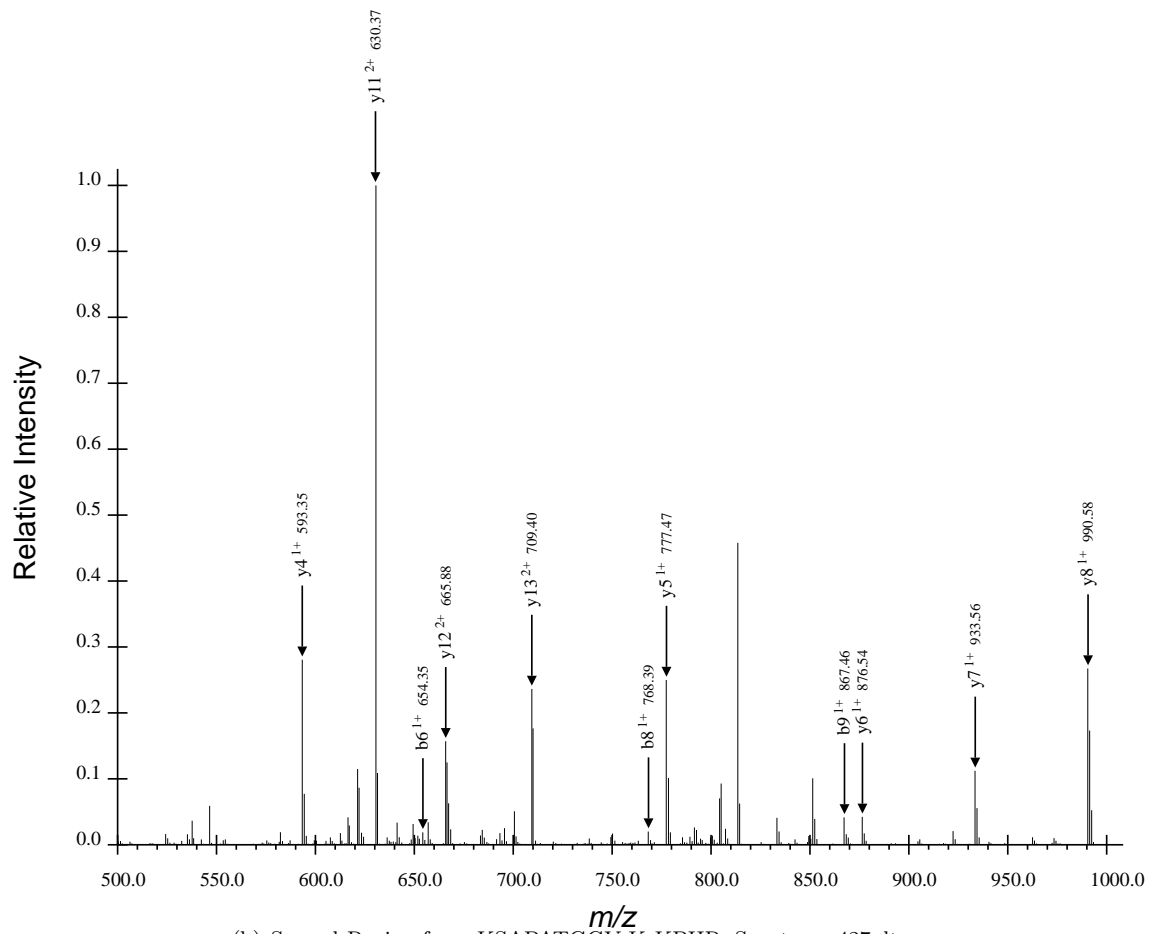

(b) Second Region for raKSAPATGGVrKrKPHR, Spectrum 427.dta

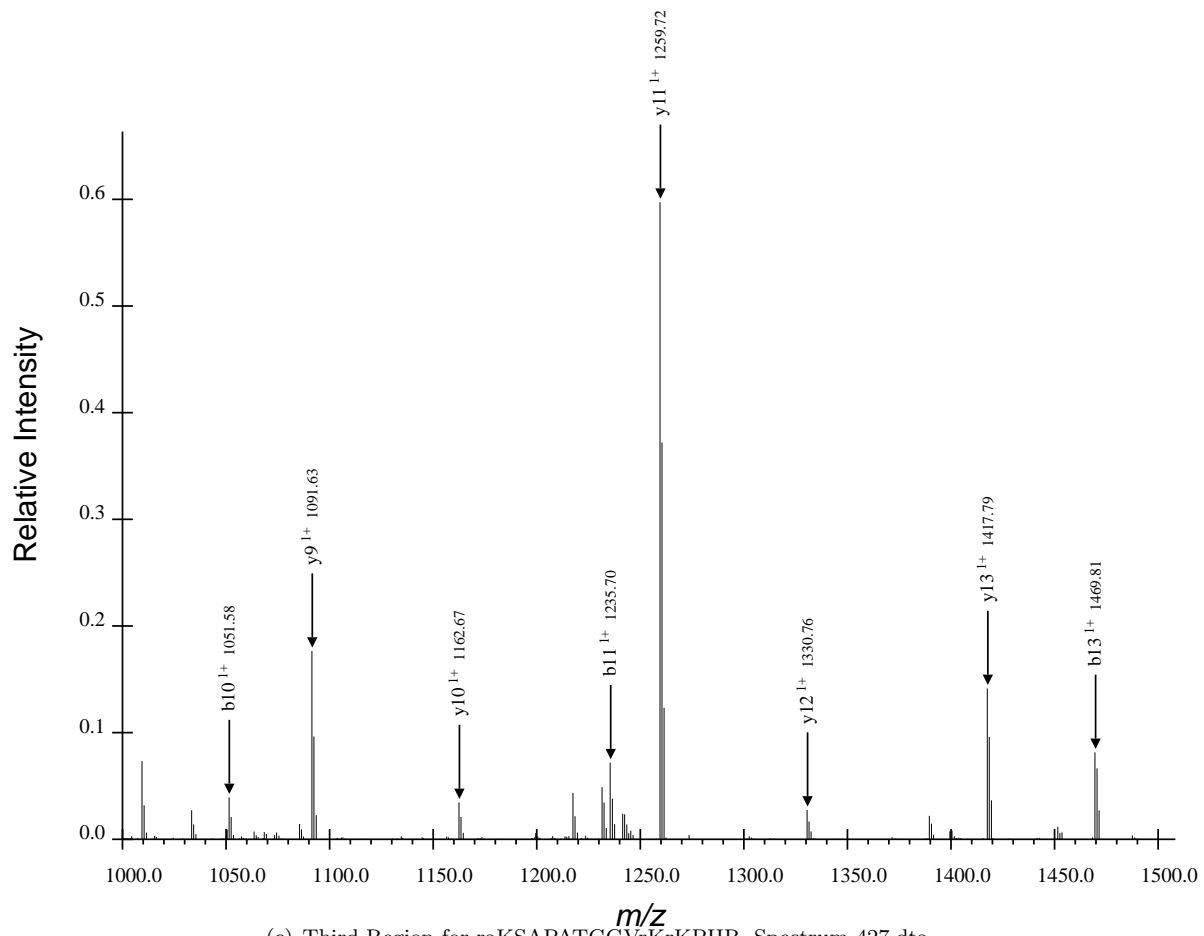

(c) Third Region for raKSAPATGGVrKrKPHR, Spectrum 427.dta

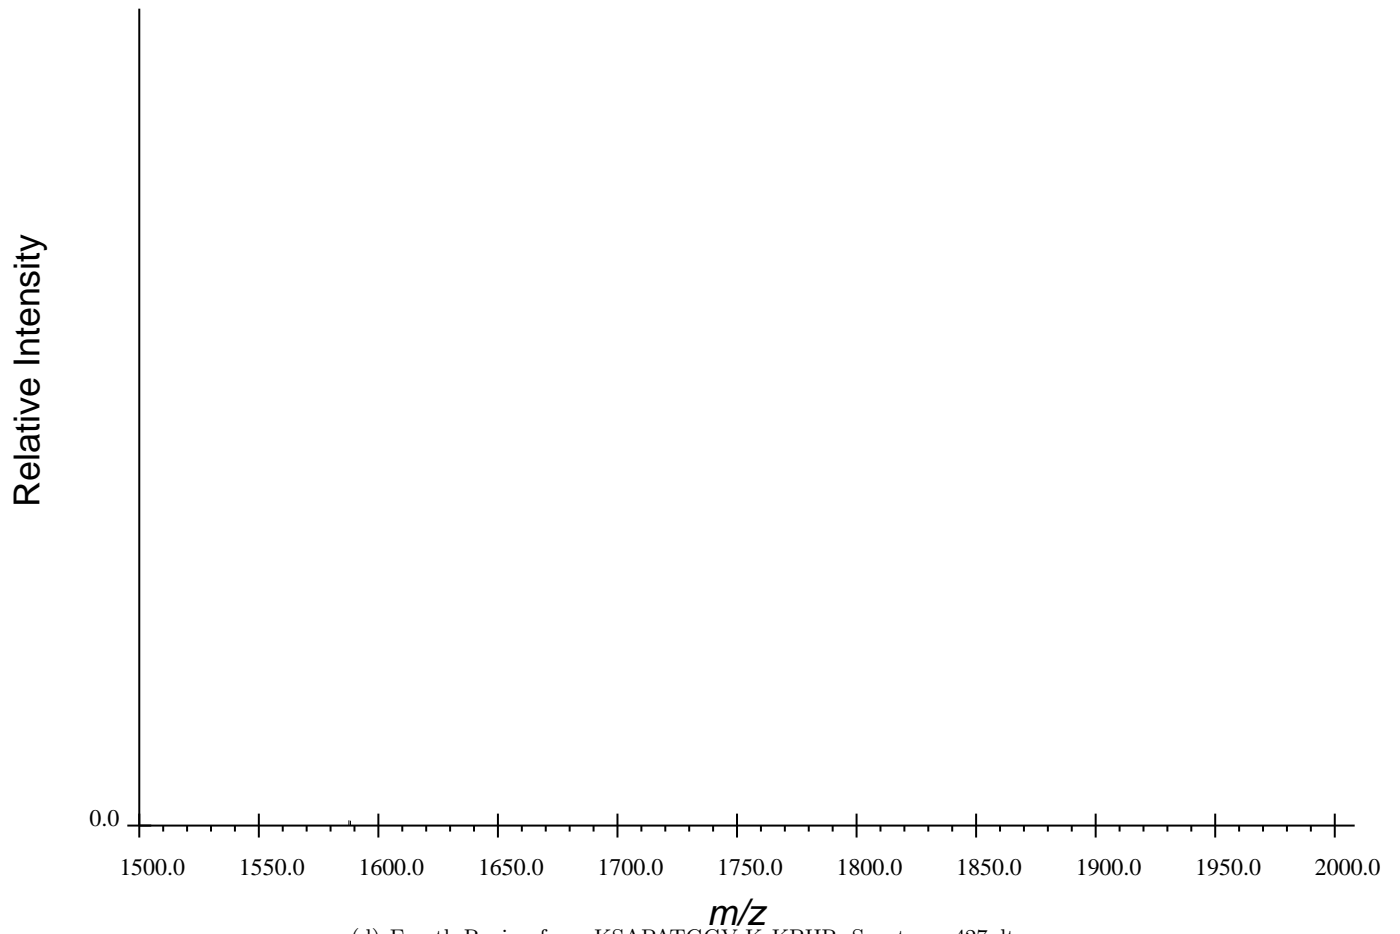

(d) Fourth Region for raKSAPATGGVrKrKPHR, Spectrum 427.dta

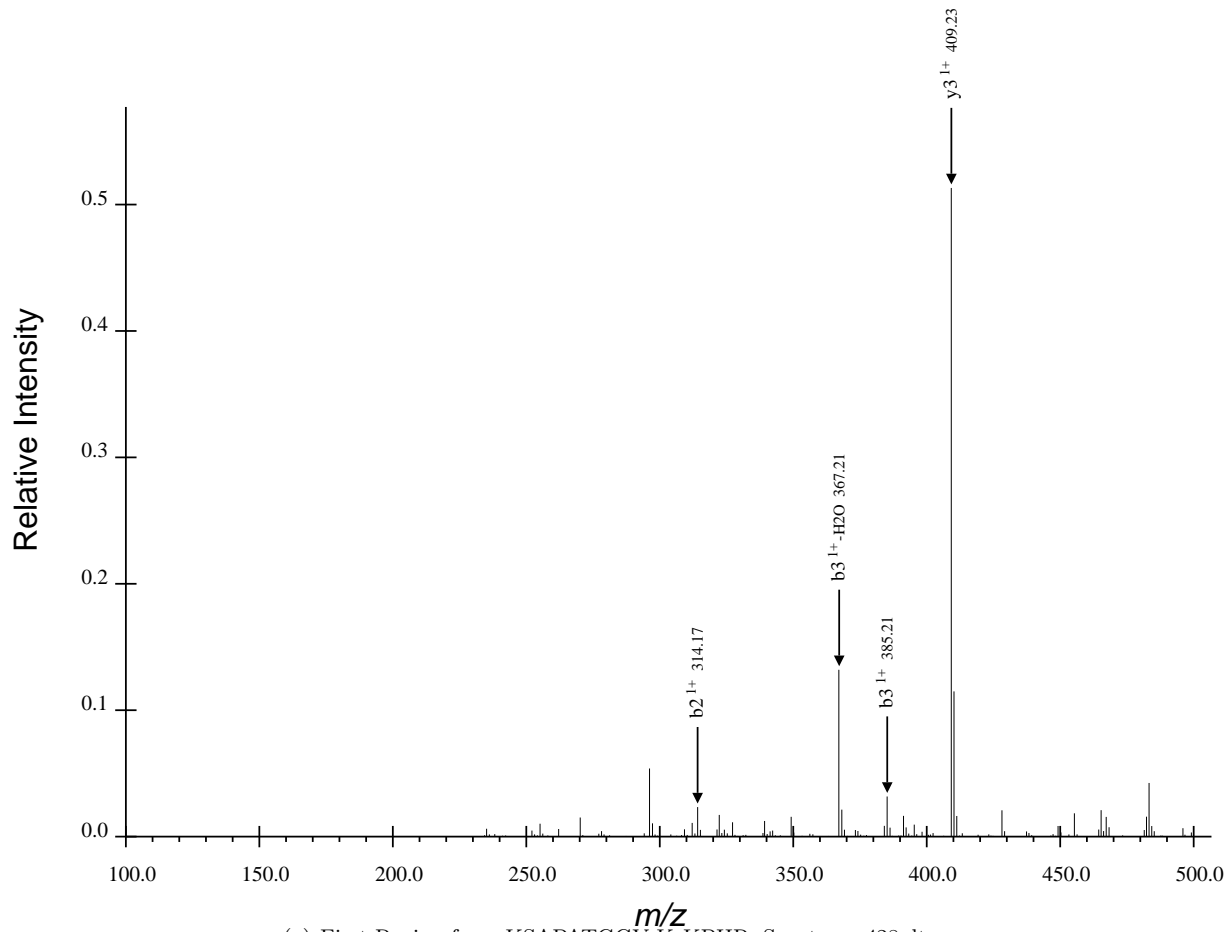

(a) First Region for raKSAPATGGVrKrKPHR, Spectrum 428.dta

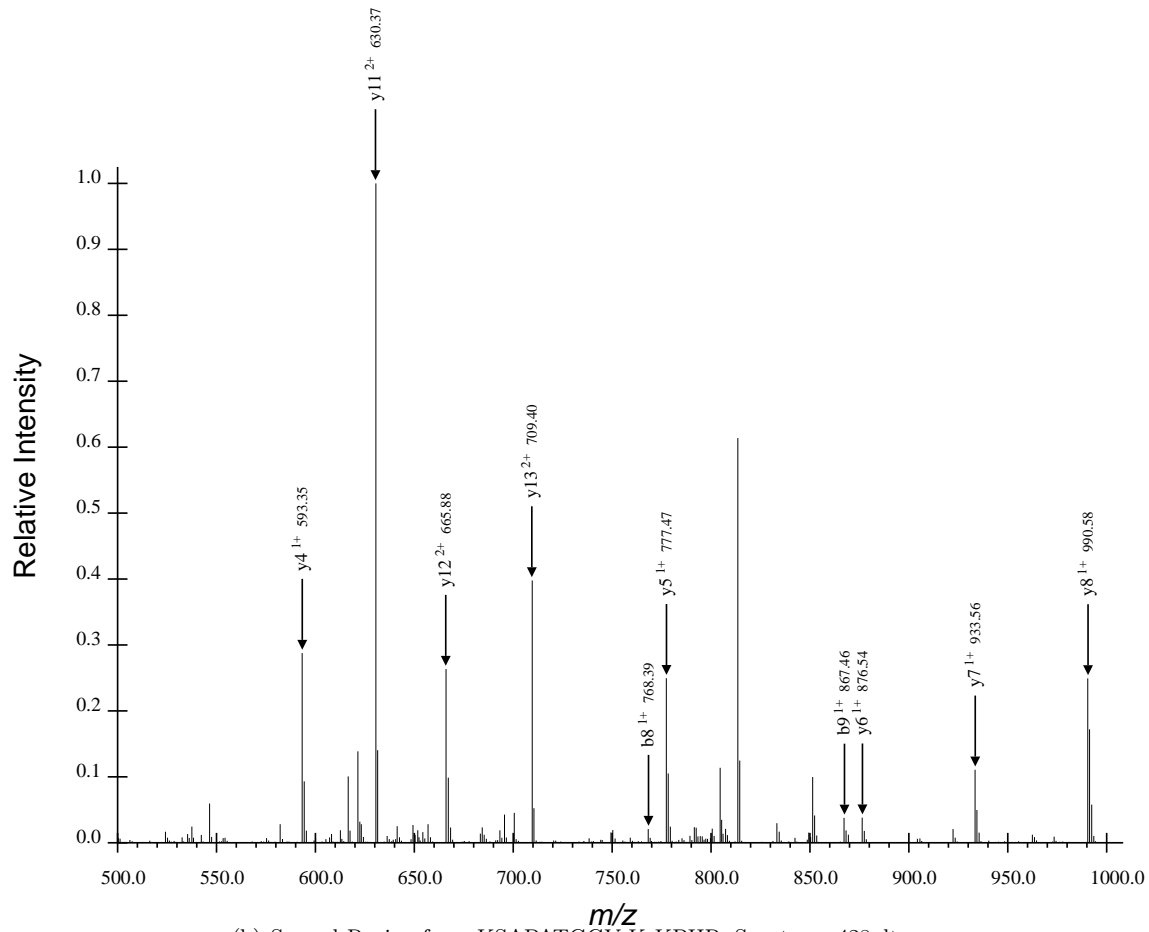

(b) Second Region for raKSAPATGGVrKrKPHR, Spectrum 428.dta



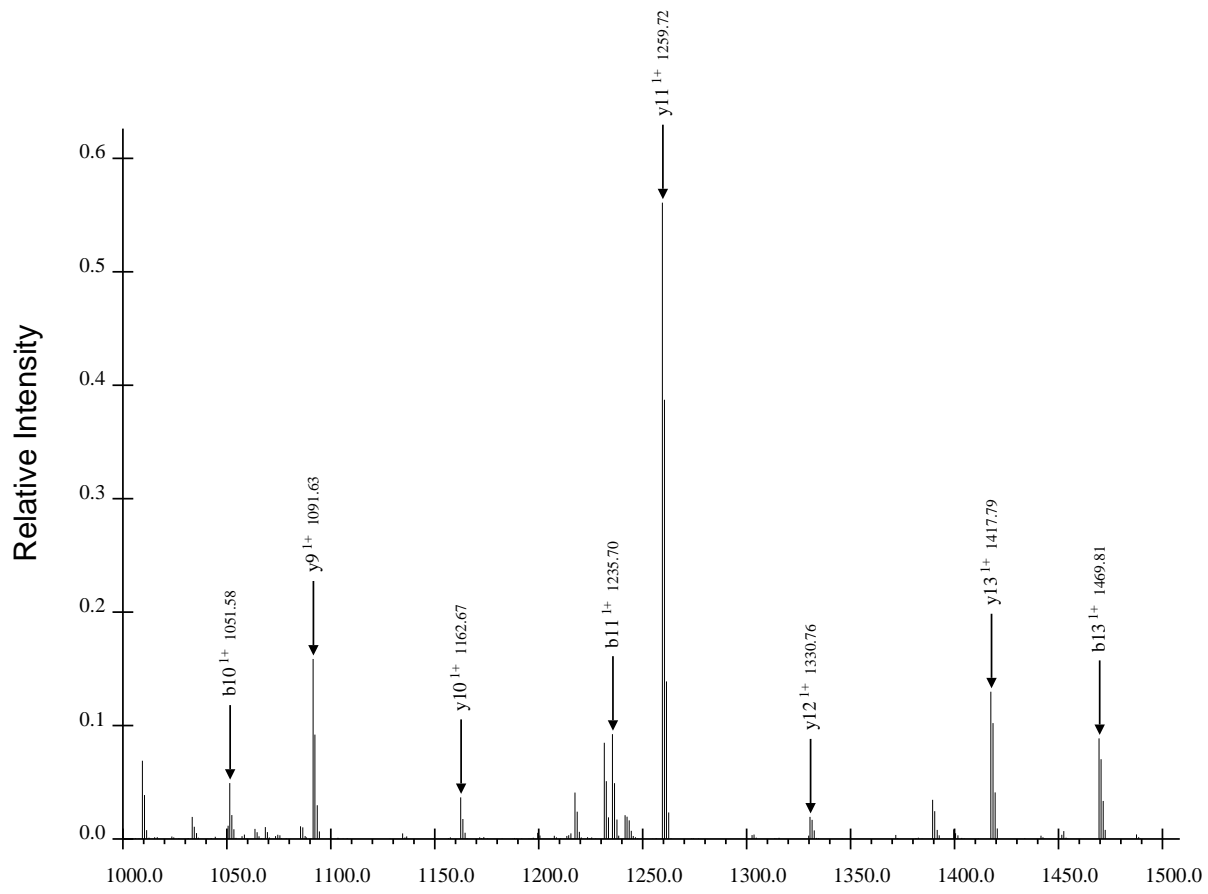

(c) Third Region for raKSAPATGGVrKrKPHR, Spectrum 428.dta

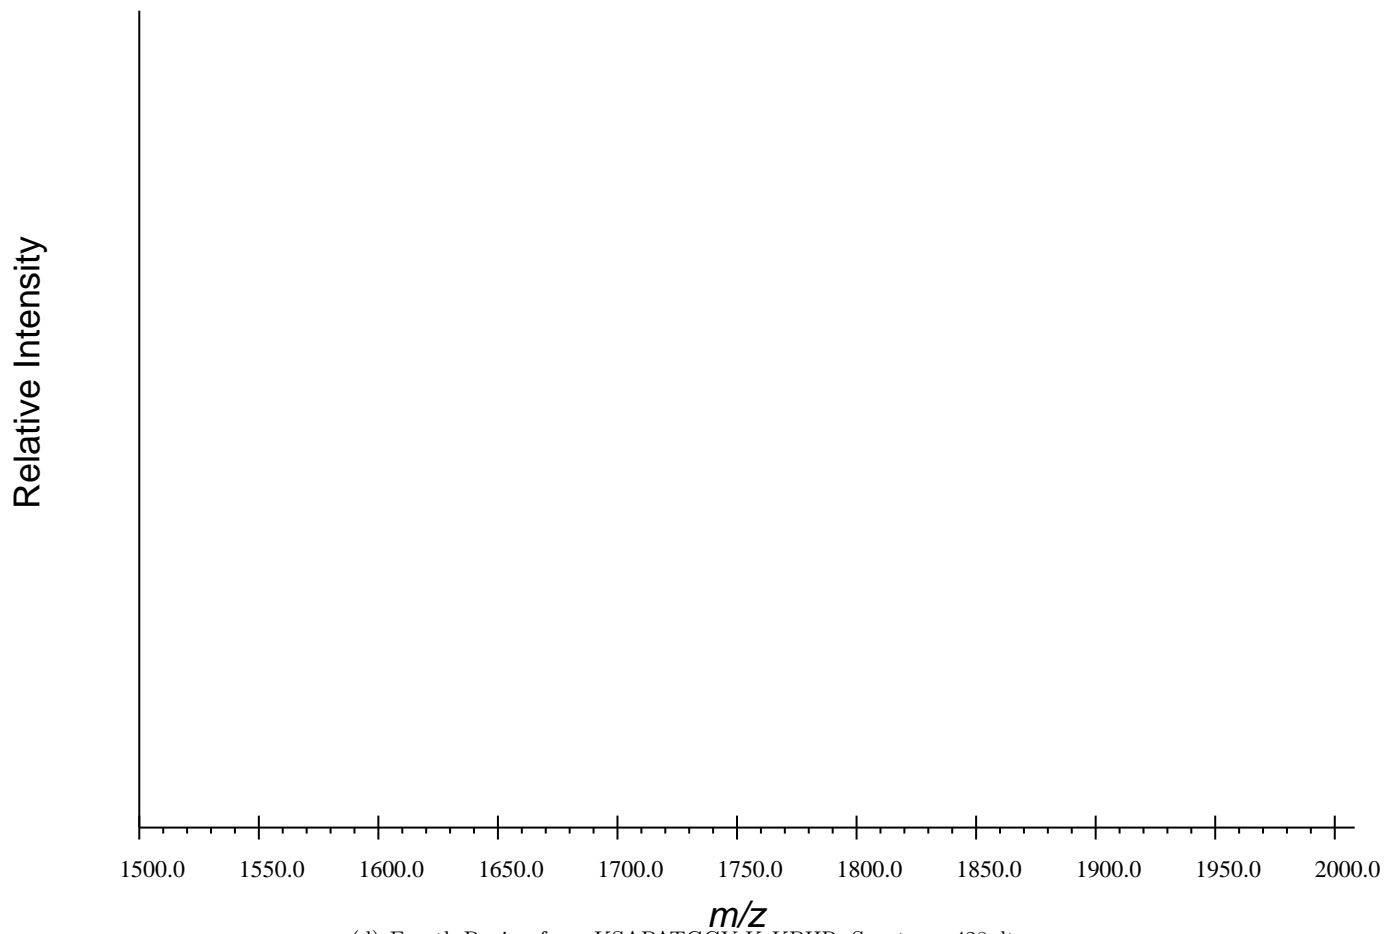

(d) Fourth Region for raKSAPATGGVrKrKPHR, Spectrum 428.dta

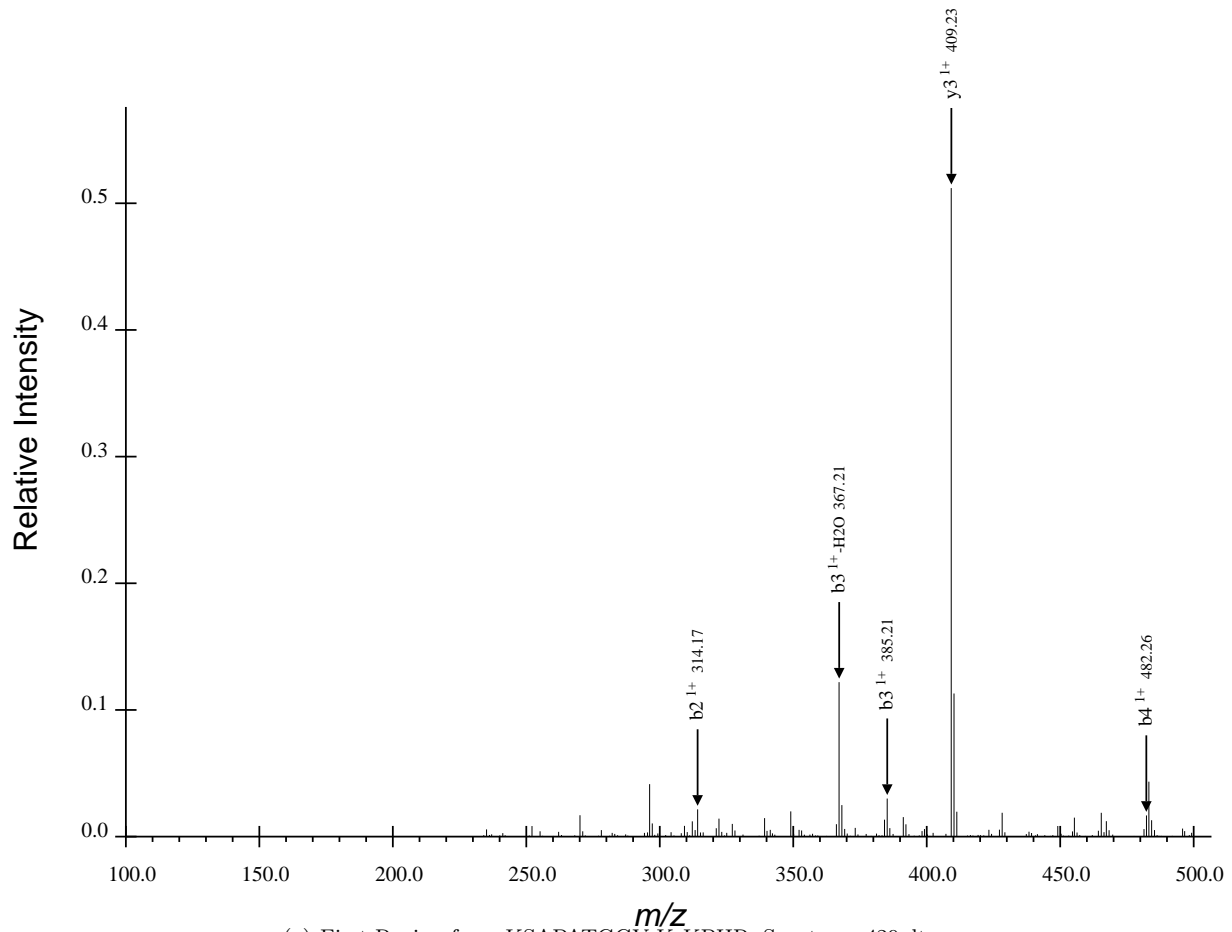

(a) First Region for raKSAPATGGVrKrKPHR, Spectrum 429.dta

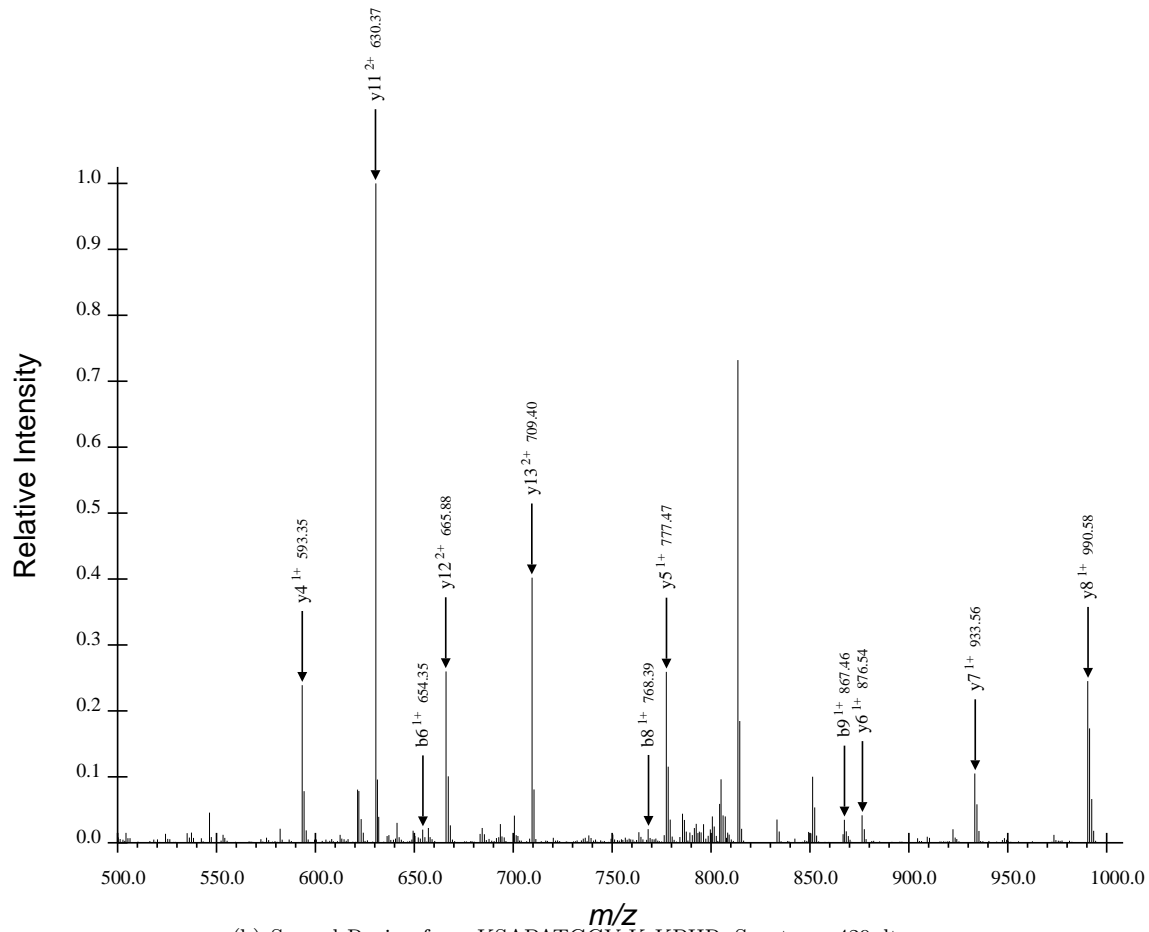

(b) Second Region for raKSAPATGGVrKrKPHR, Spectrum 429.dta

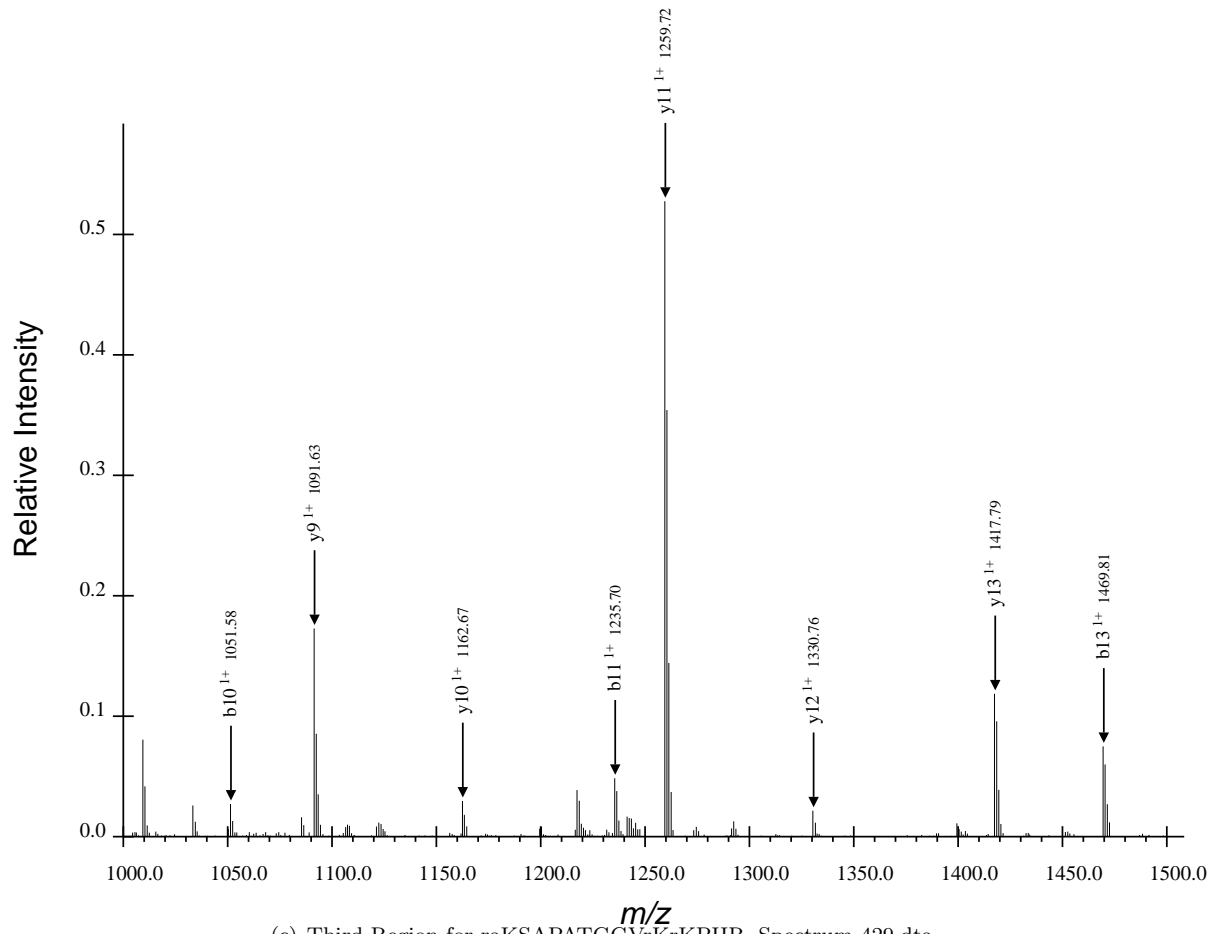

(c) Third Region for raKSAPATGGVrKrKPHR, Spectrum 429.dta

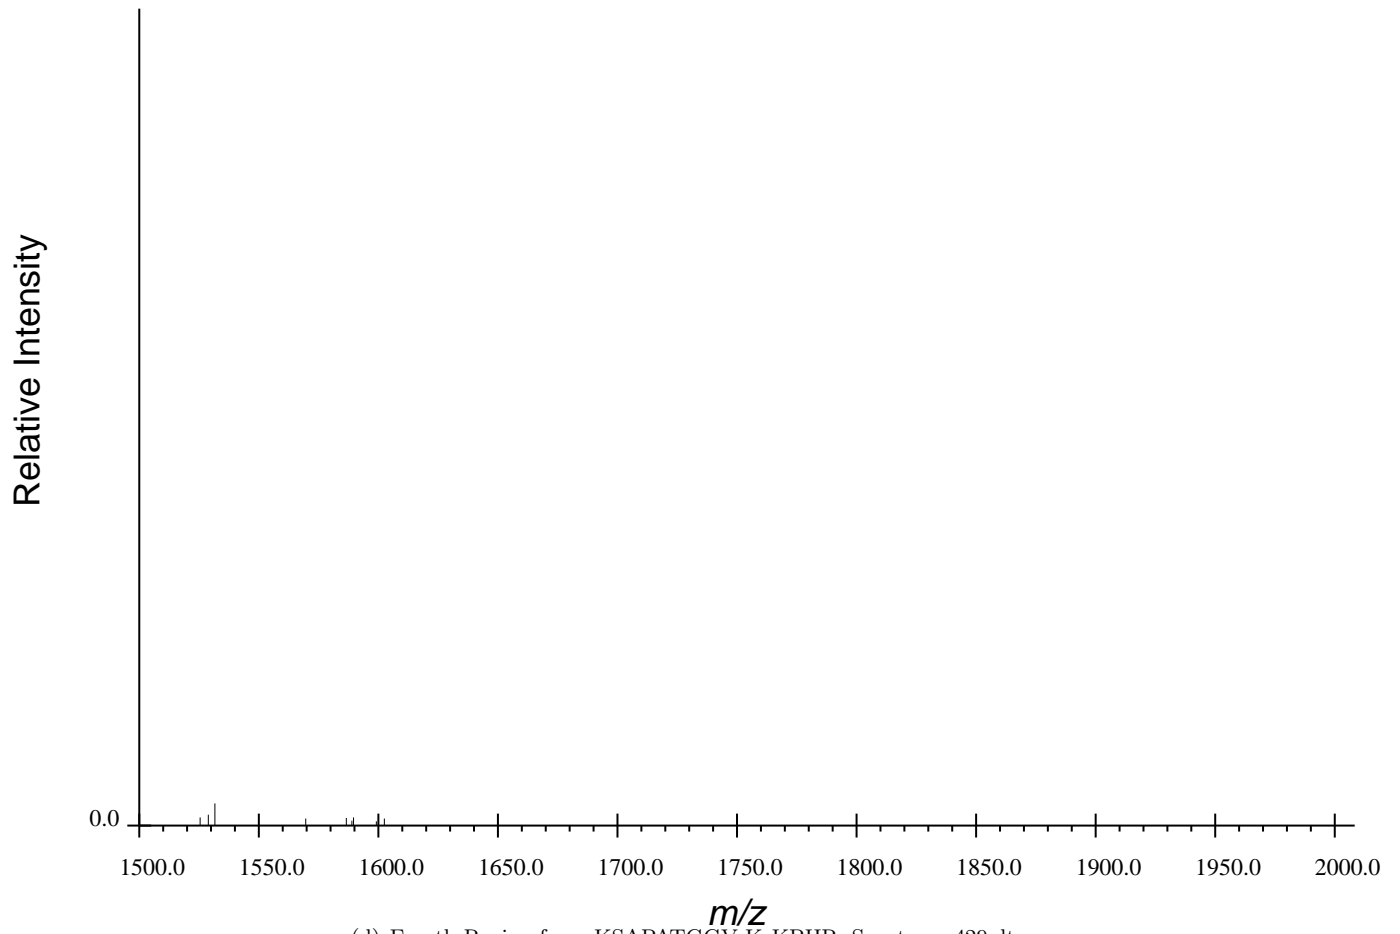

(d) Fourth Region for raKSAPATGGVrKrKPHR, Spectrum 429.dta

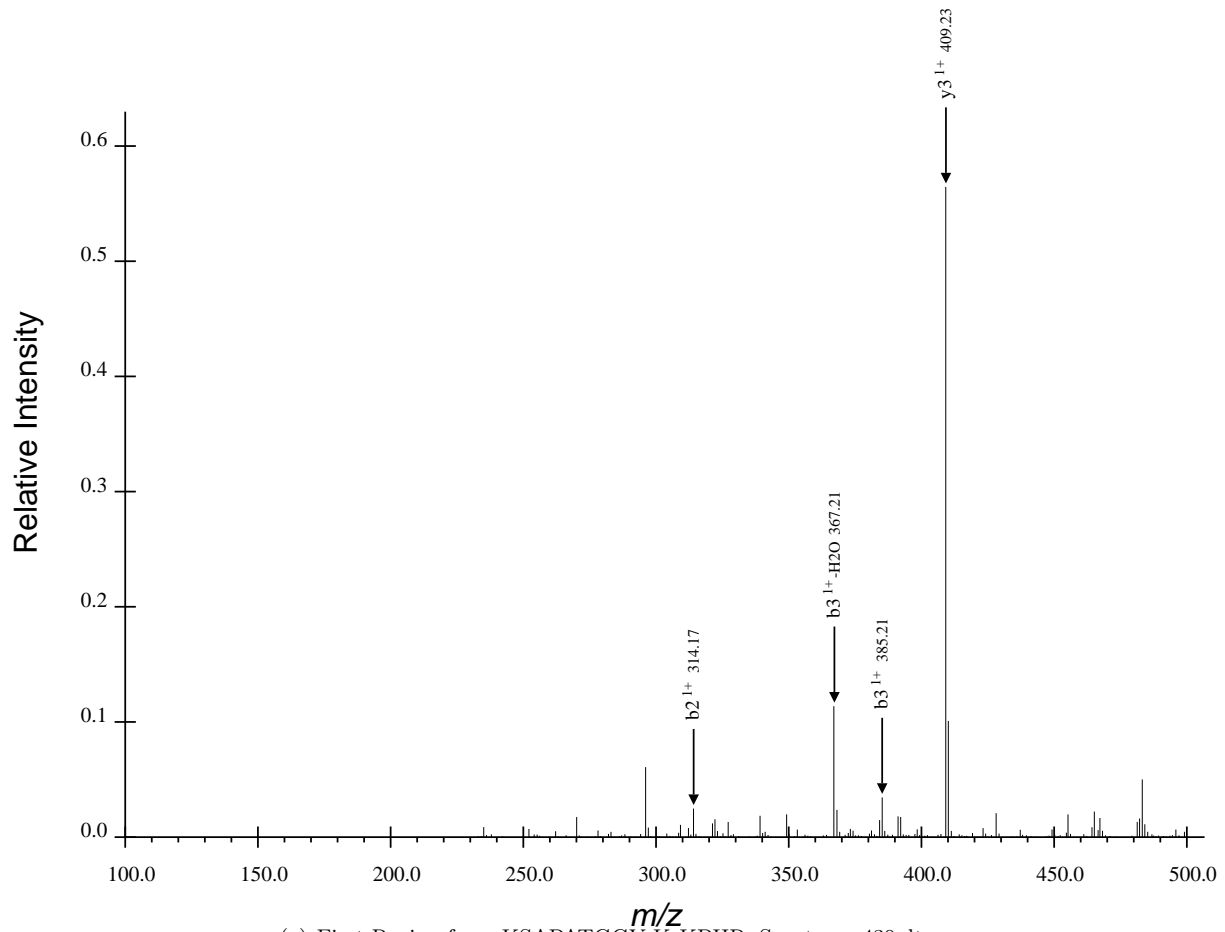

(a) First Region for raKSAPATGGVrKrKPHR, Spectrum 430.dta

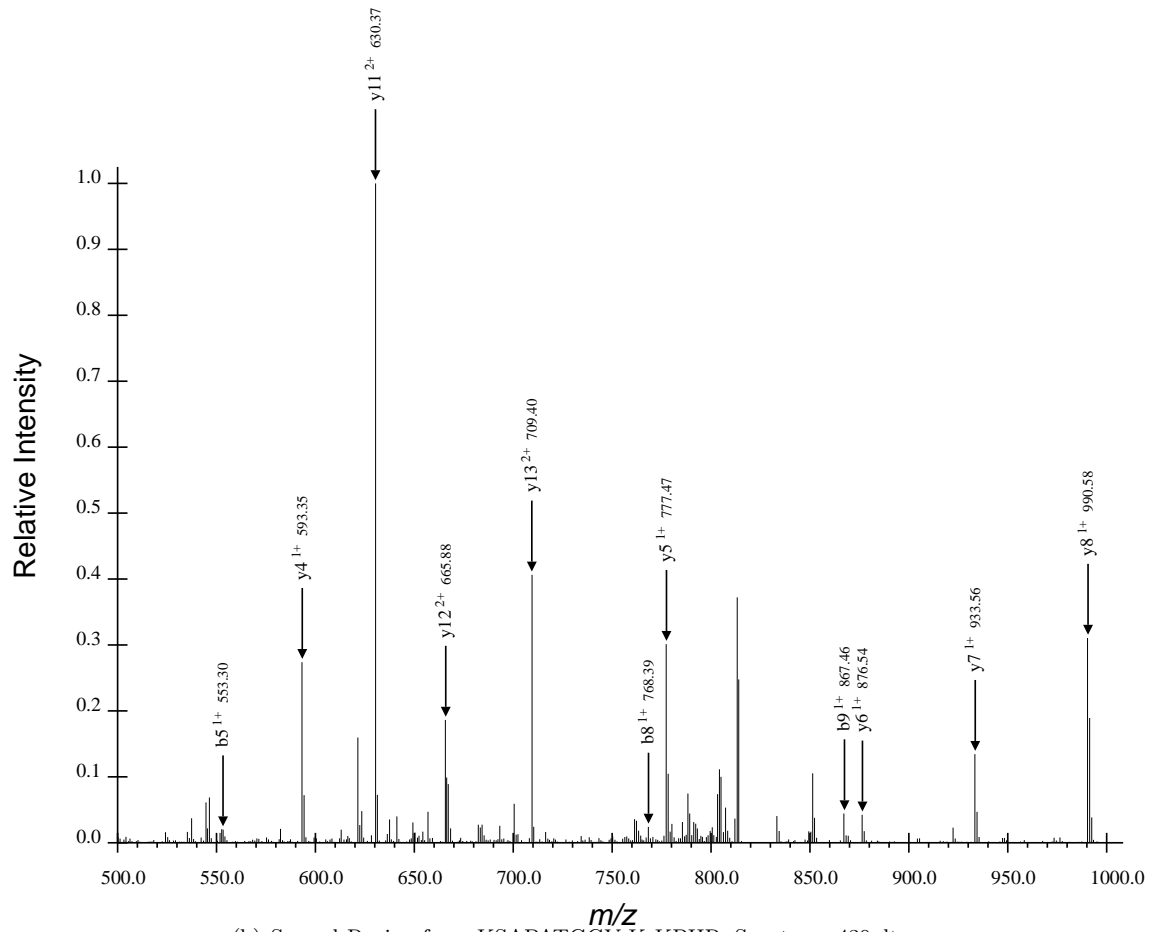

(b) Second Region for raKSAPATGGVrKrKPHR, Spectrum 430.dta

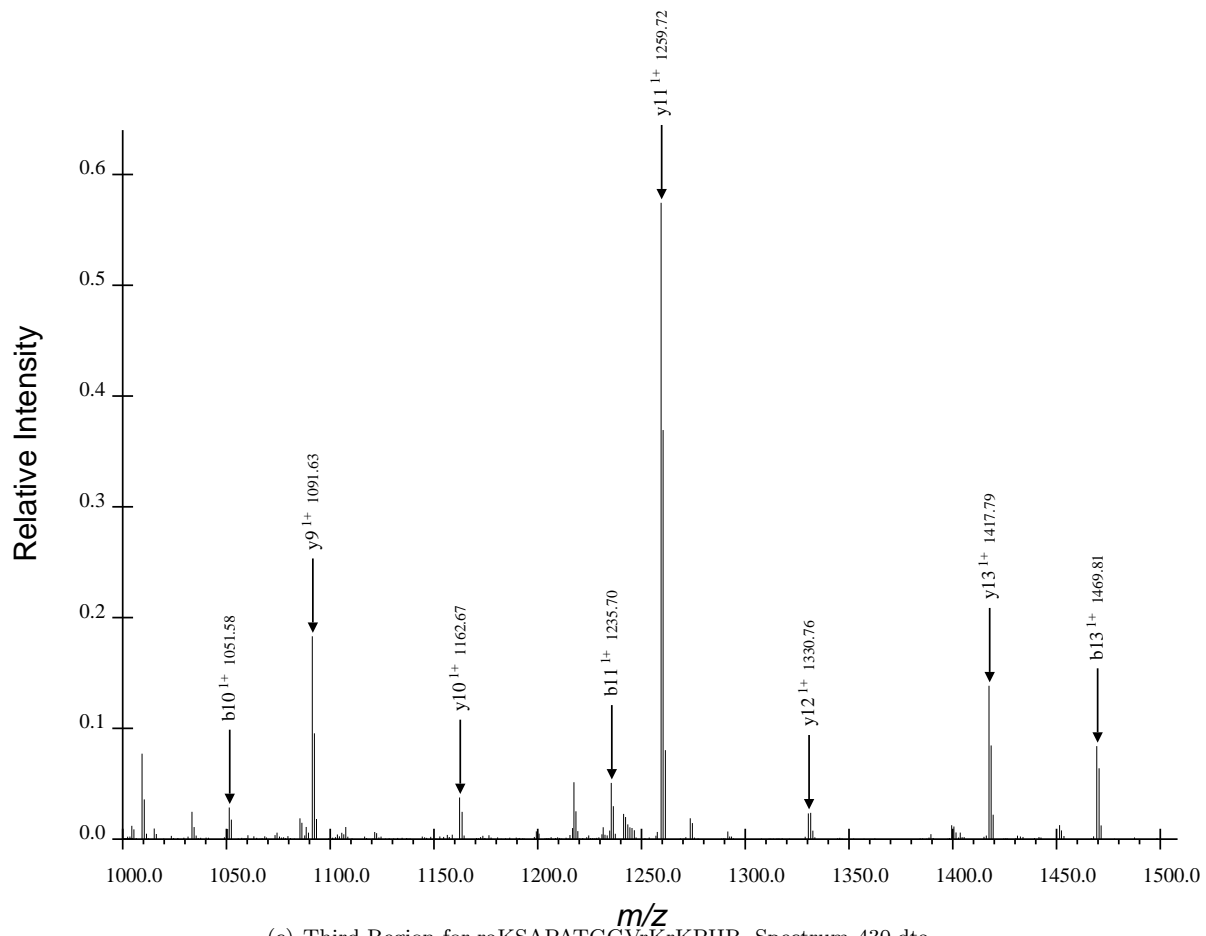

(c) Third Region for raKSAPATGGVrKrKPHR, Spectrum 430.dta

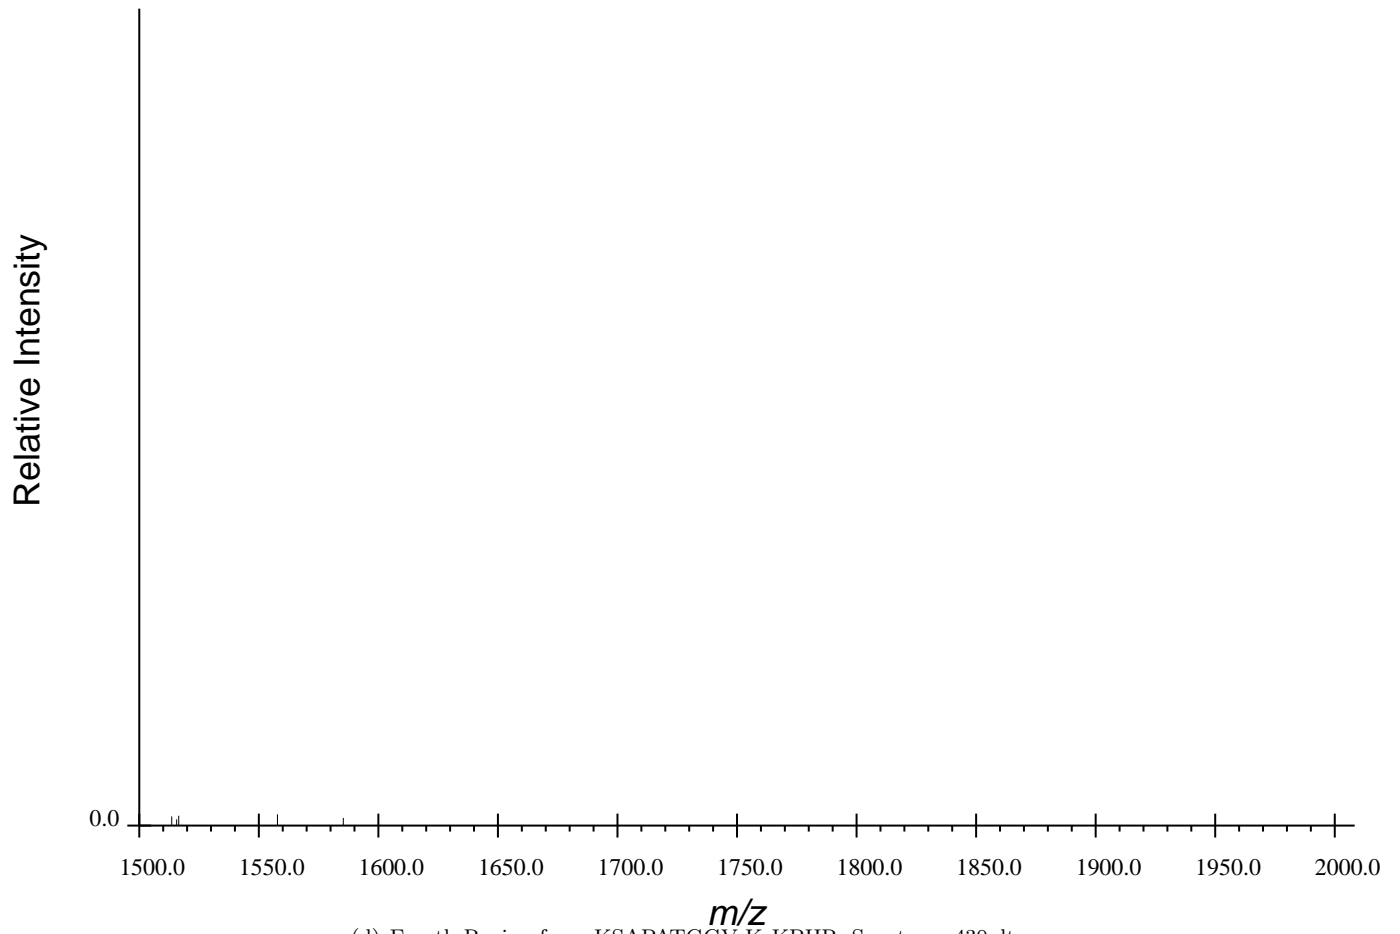

(d) Fourth Region for raKSAPATGGVrKrKPHR, Spectrum 430.dta

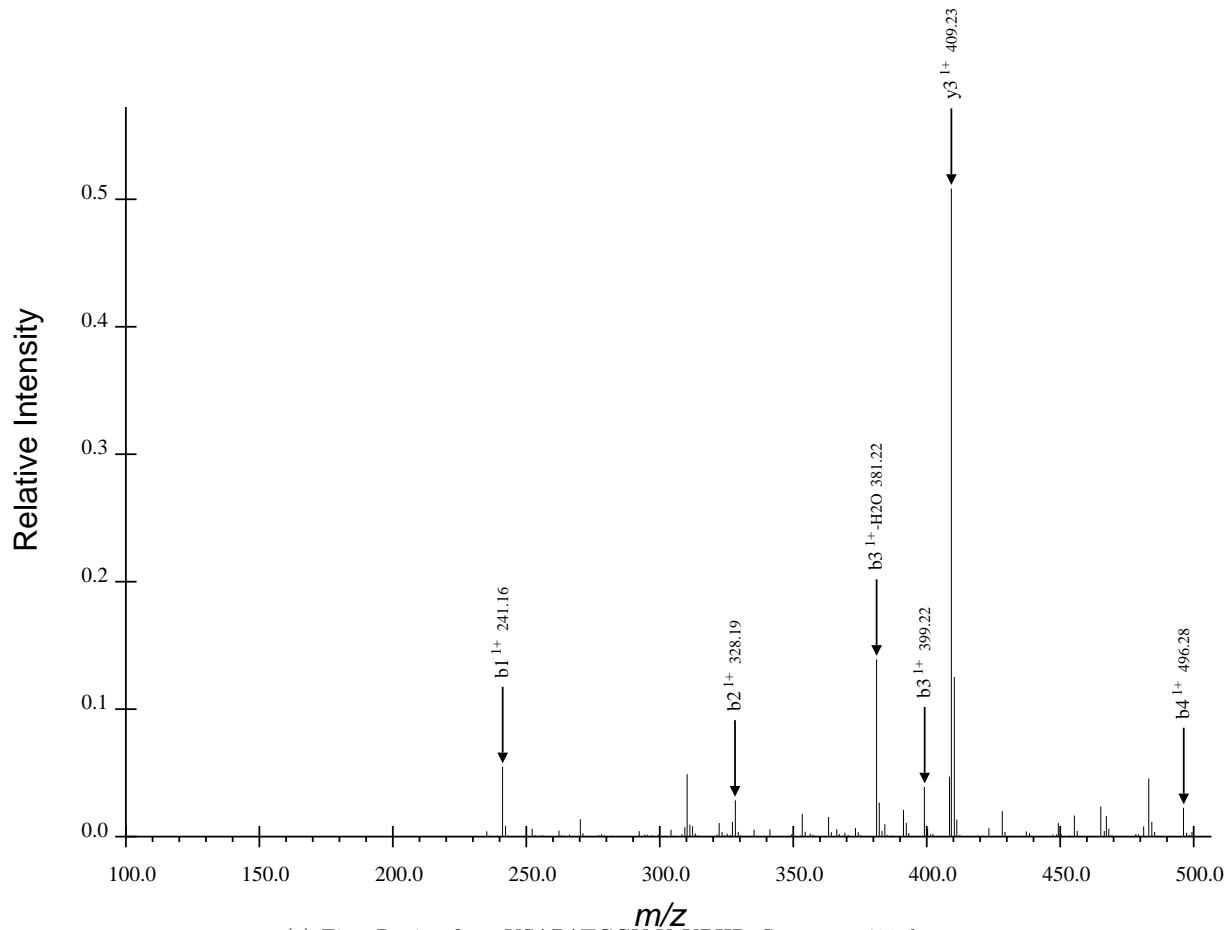

(a) First Region for rrKSAPATGGVrKrKPHR, Spectrum 431.dta

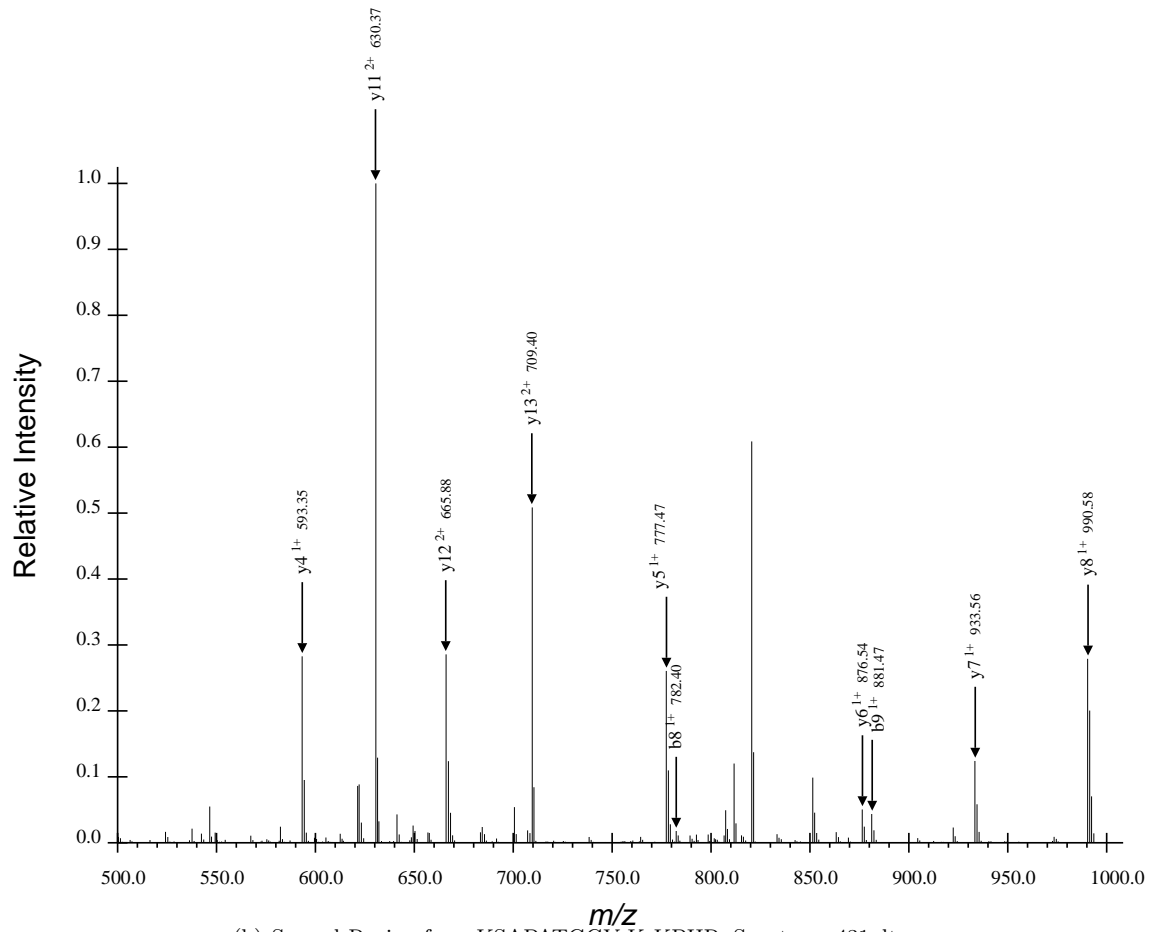

(b) Second Region for rrKSAPATGGVrKrKPHR, Spectrum 431.dta

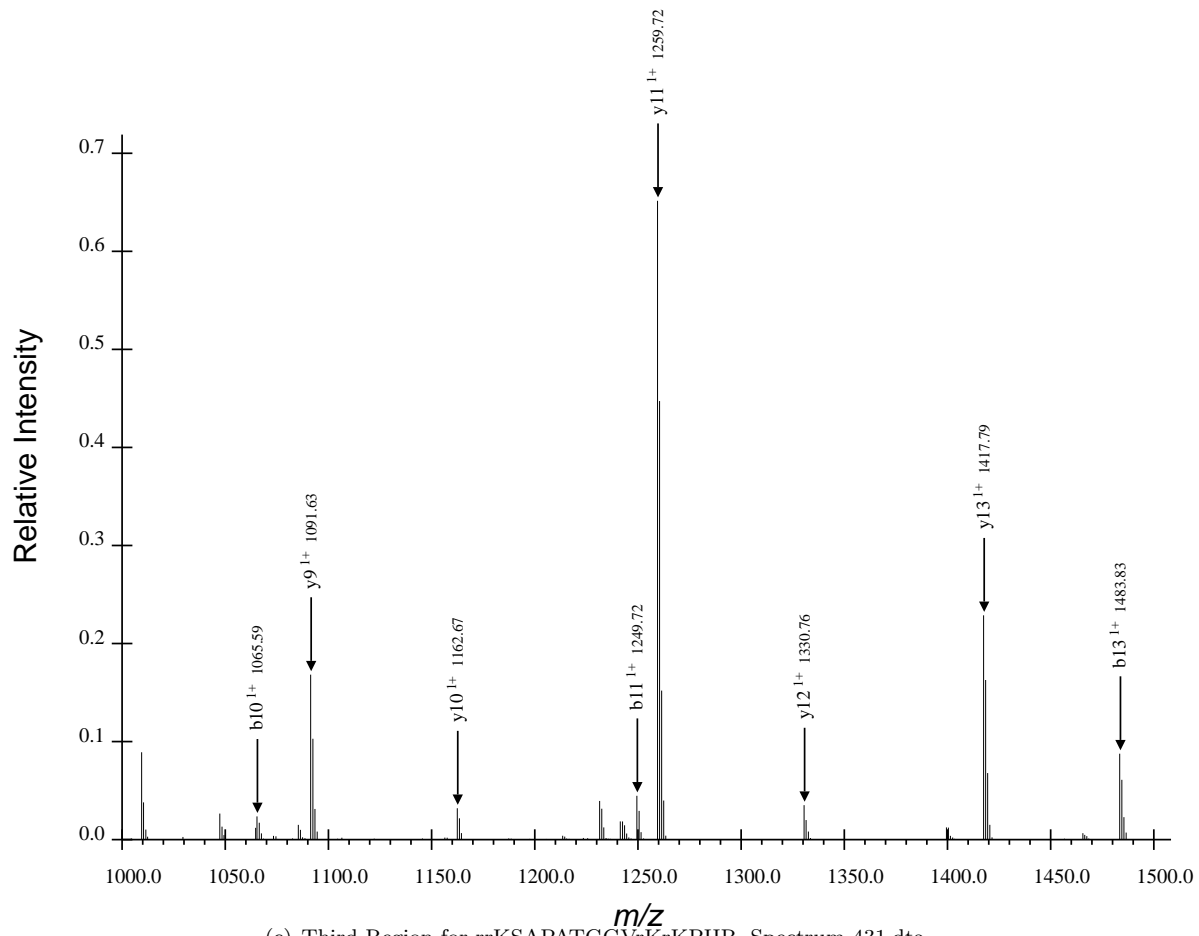

(c) Third Region for rrKSAPATGGVrKrKPHR, Spectrum 431.dta

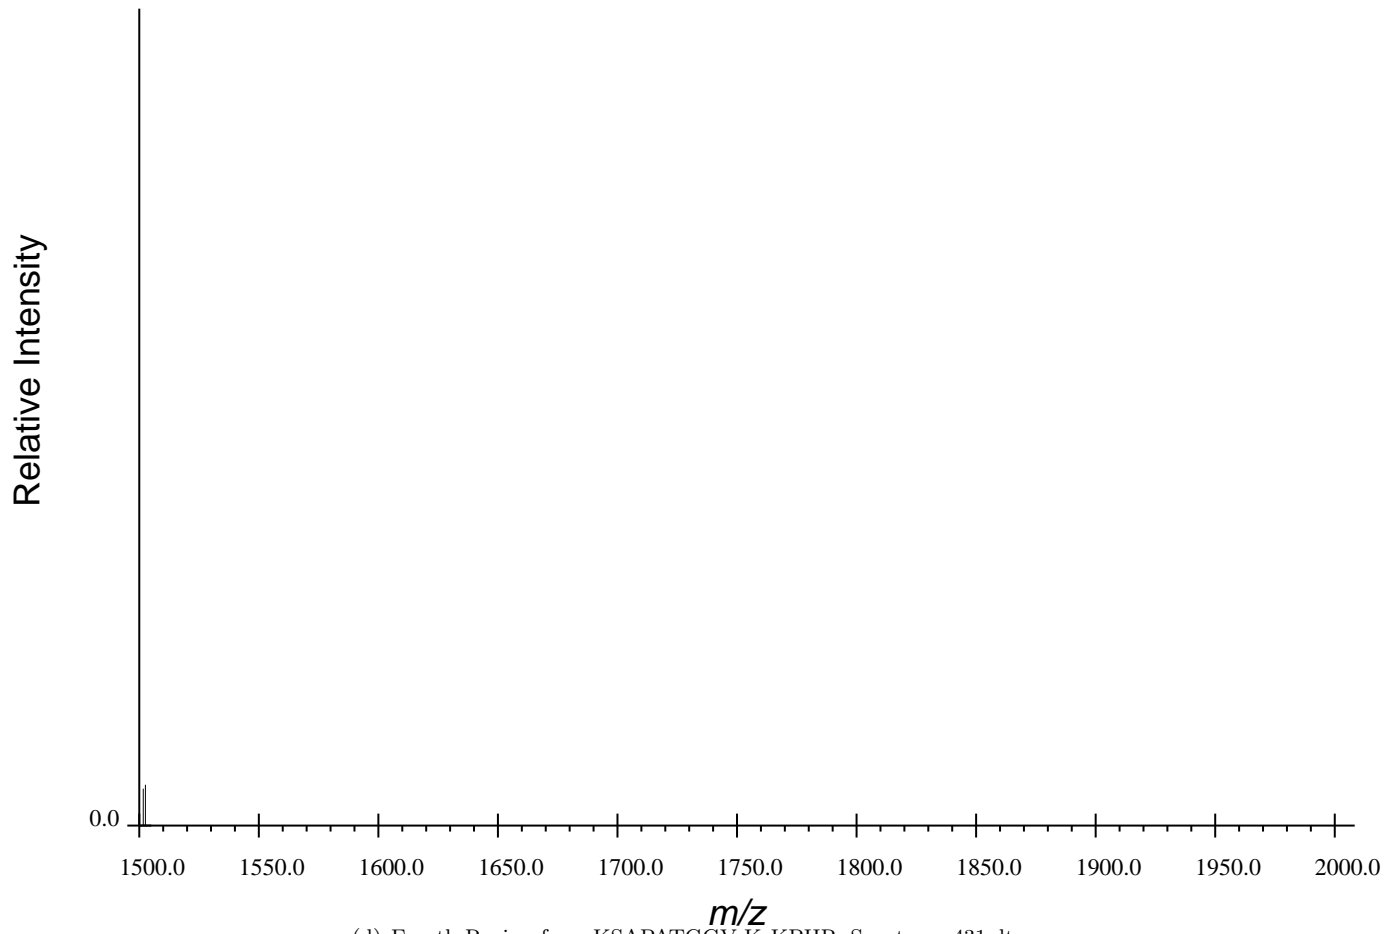

(d) Fourth Region for rrKSAPATGGVrKrKPHR, Spectrum 431.dta

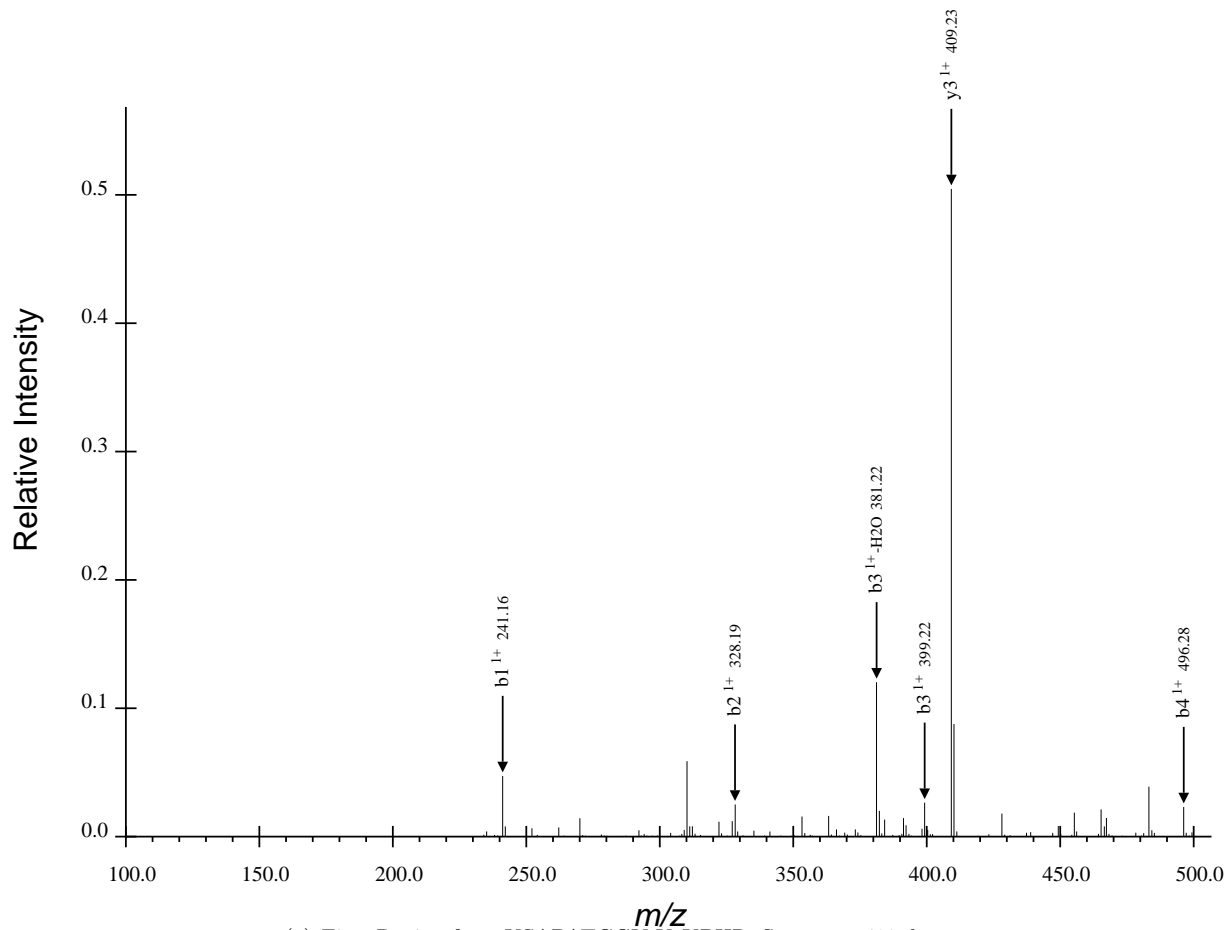

(a) First Region for rrKSAPATGGVrKrKPHR, Spectrum 432.dta

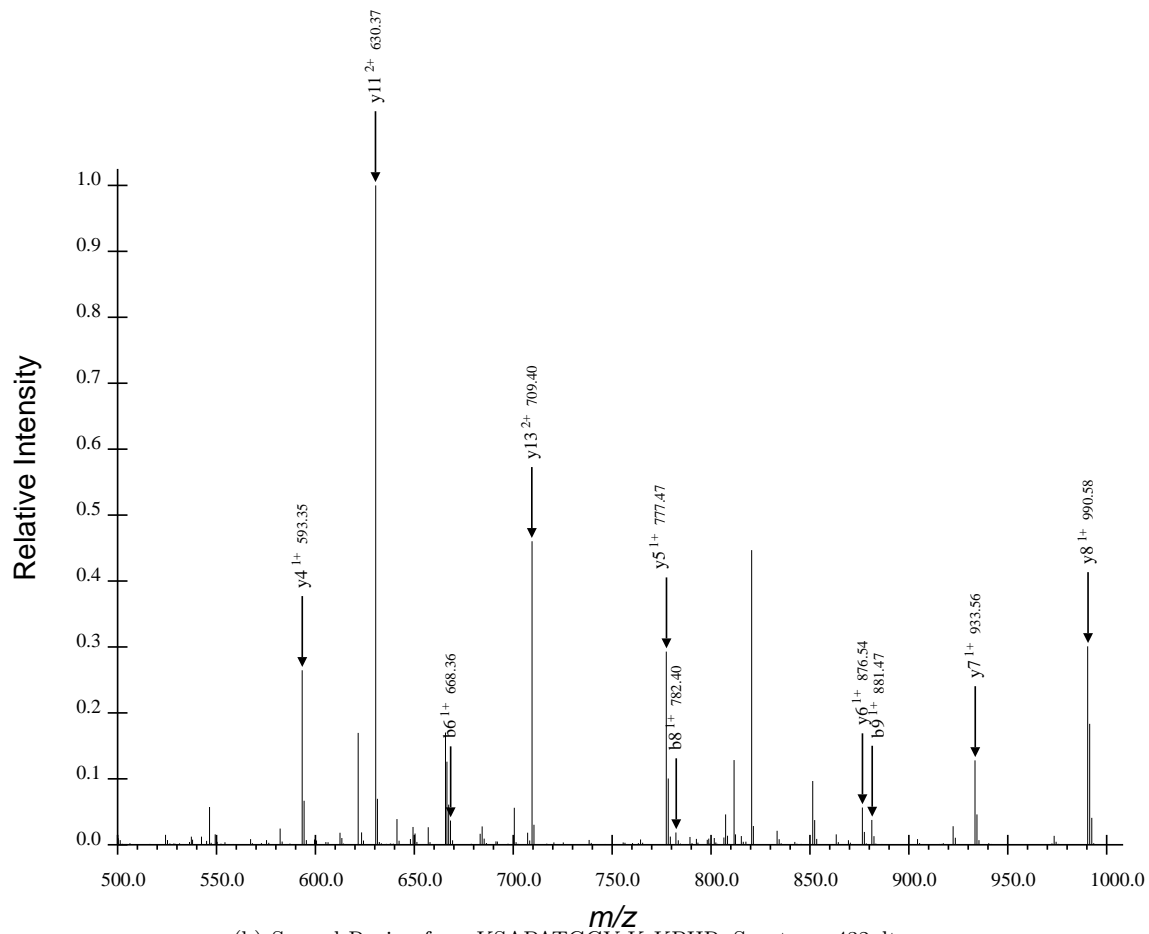

(b) Second Region for rrKSAPATGGVrKrKPHR, Spectrum 432.dta



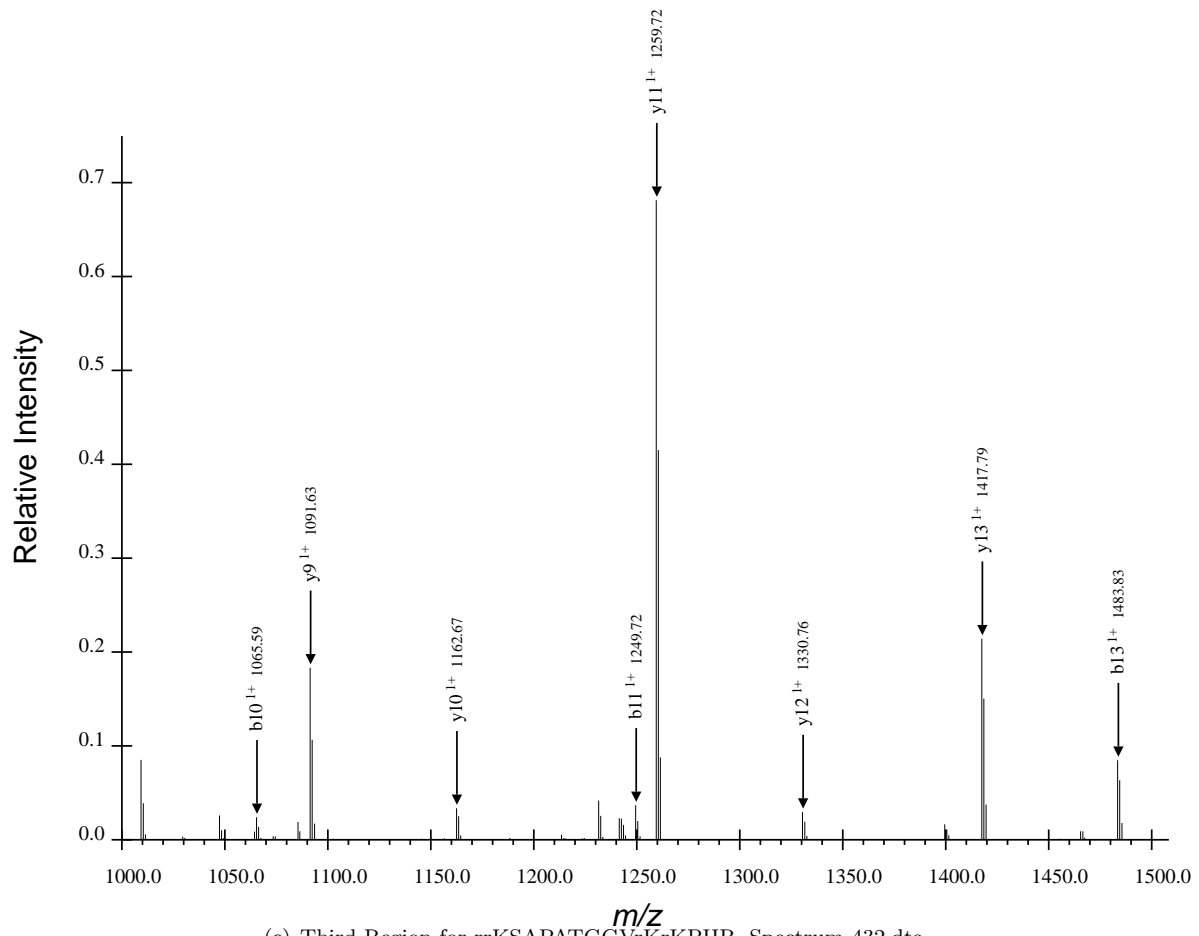

(c) Third Region for rrKSAPATGGVrKrKPHR, Spectrum 432.dta

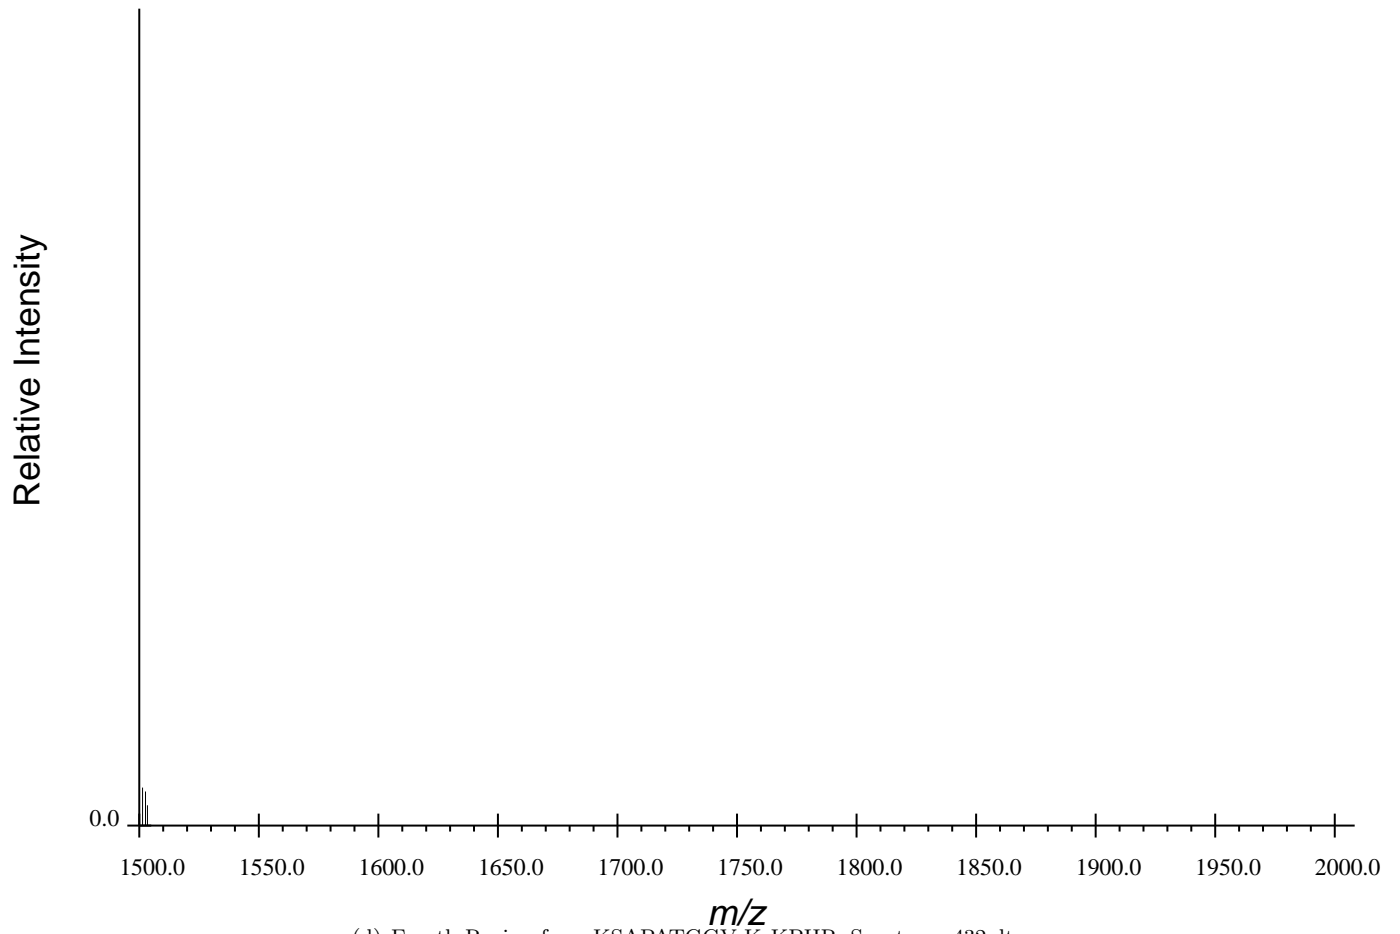

(d) Fourth Region for rrKSAPATGGVrKrKPHR, Spectrum 432.dta

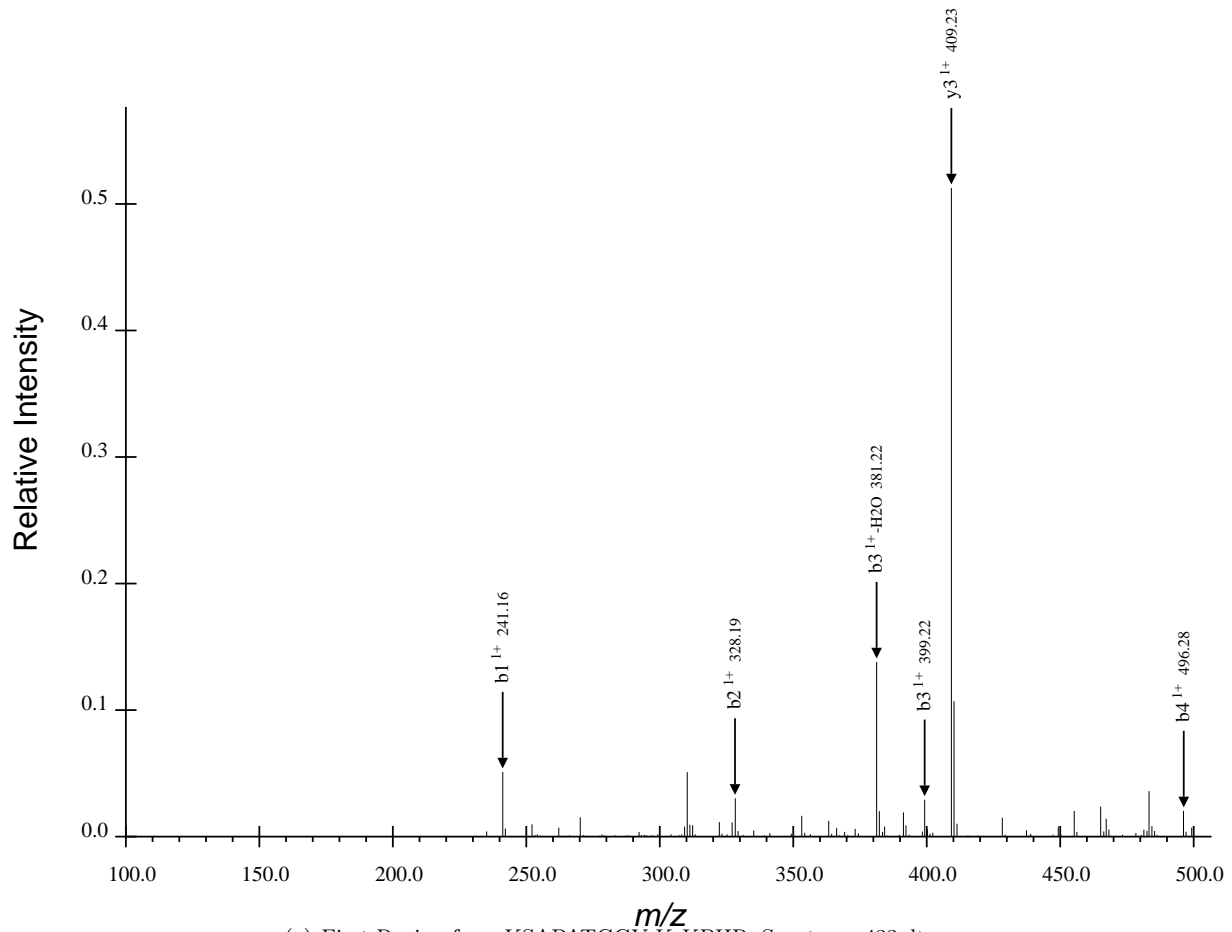

(a) First Region for rrKSAPATGGVrKrKPHR, Spectrum 433.dta

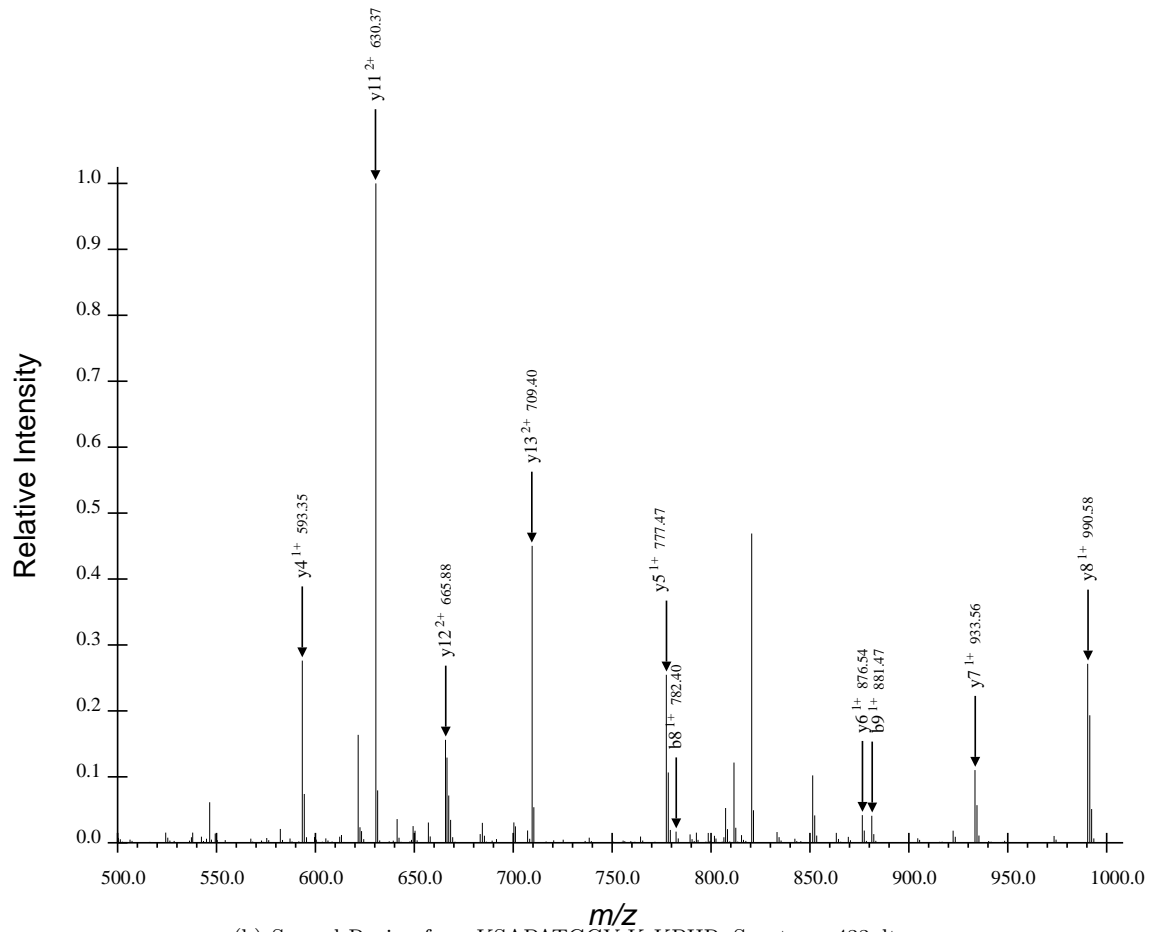

(b) Second Region for rrKSAPATGGVrKrKPHR, Spectrum 433.dta

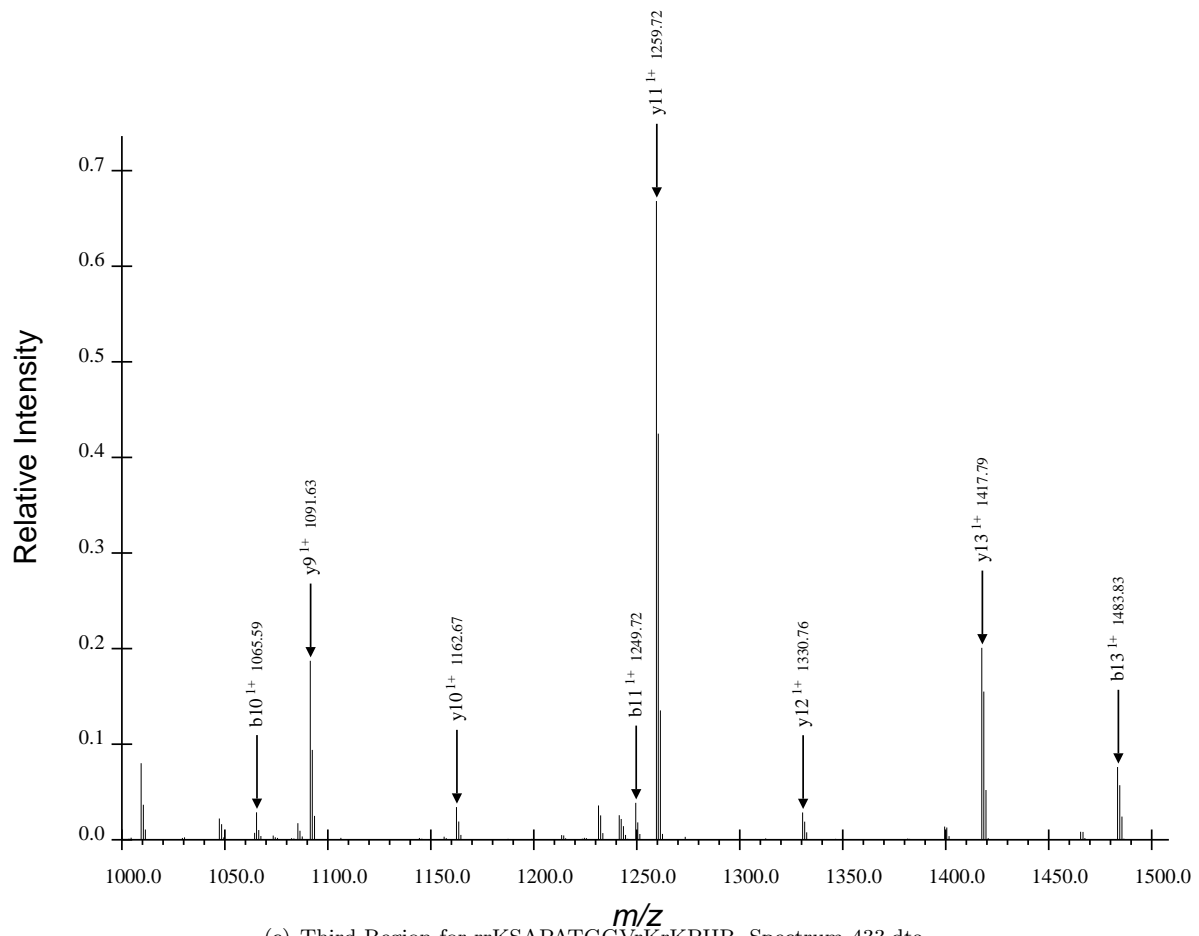

(c) Third Region for rrKSAPATGGVrKrKPHR, Spectrum 433.dta

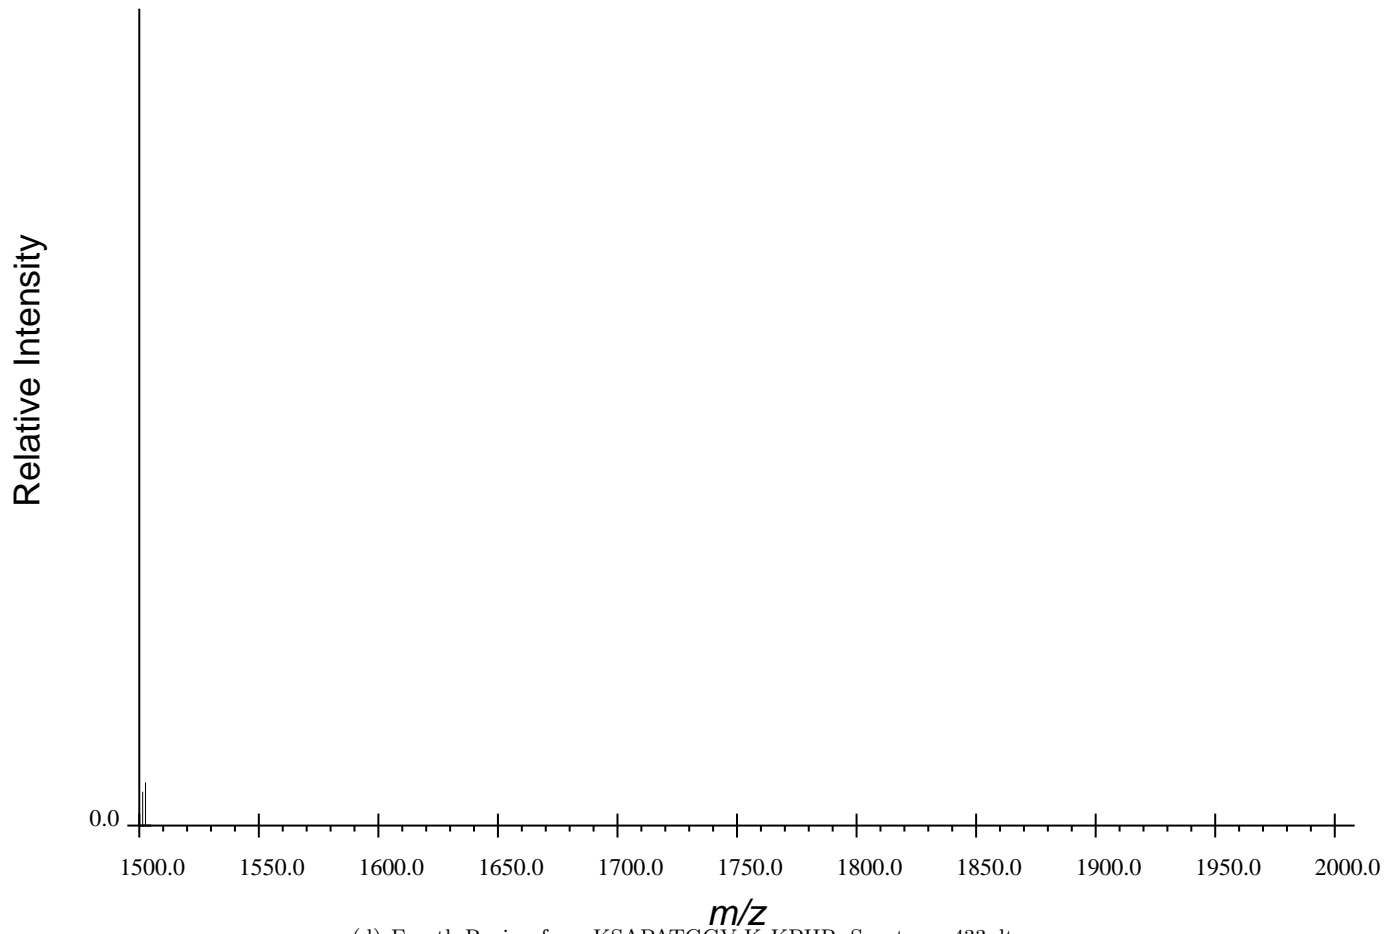

(d) Fourth Region for rrKSAPATGGVrKrKPHR, Spectrum 433.dta

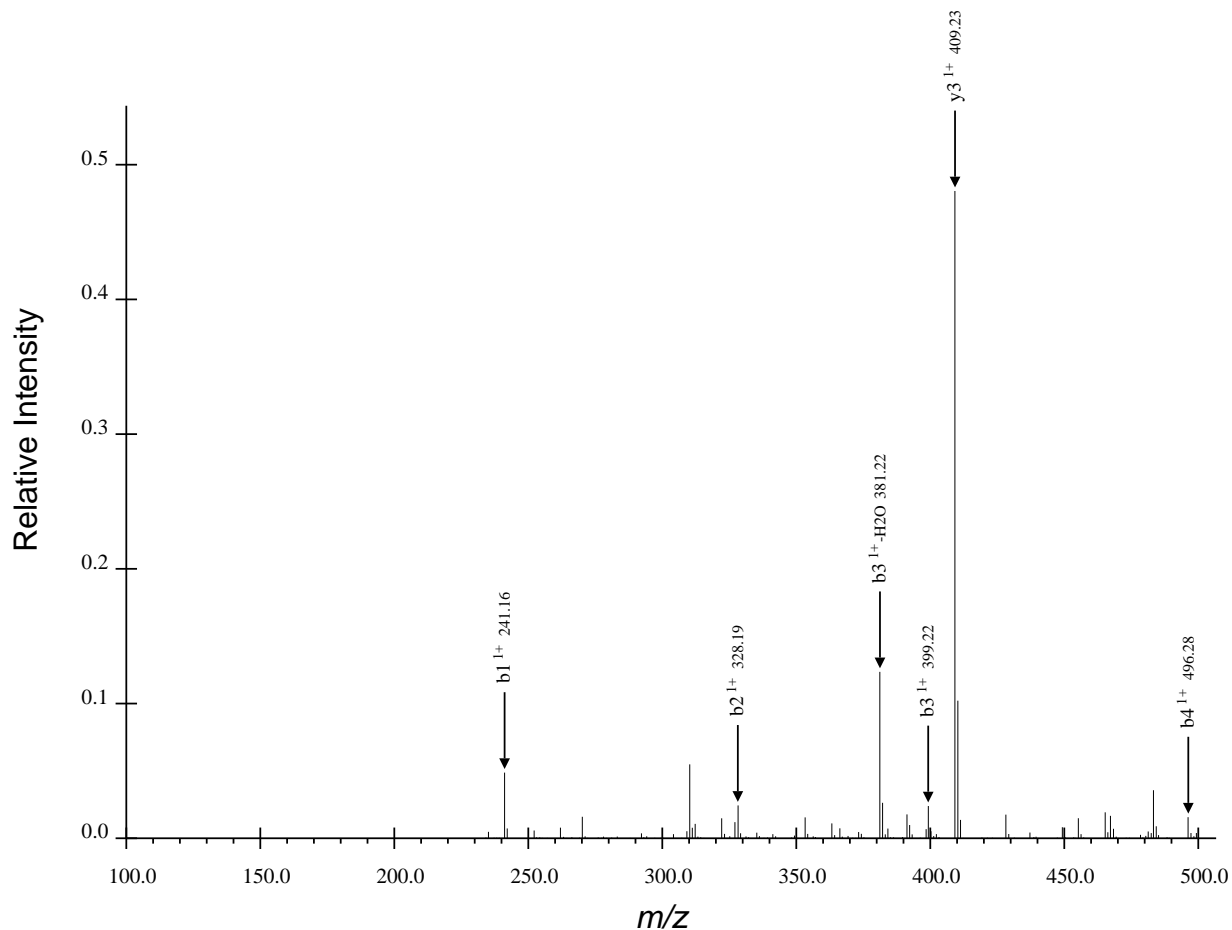

(a) First Region for rrKSAPATGGVrKrKPHR, Spectrum 434.dta

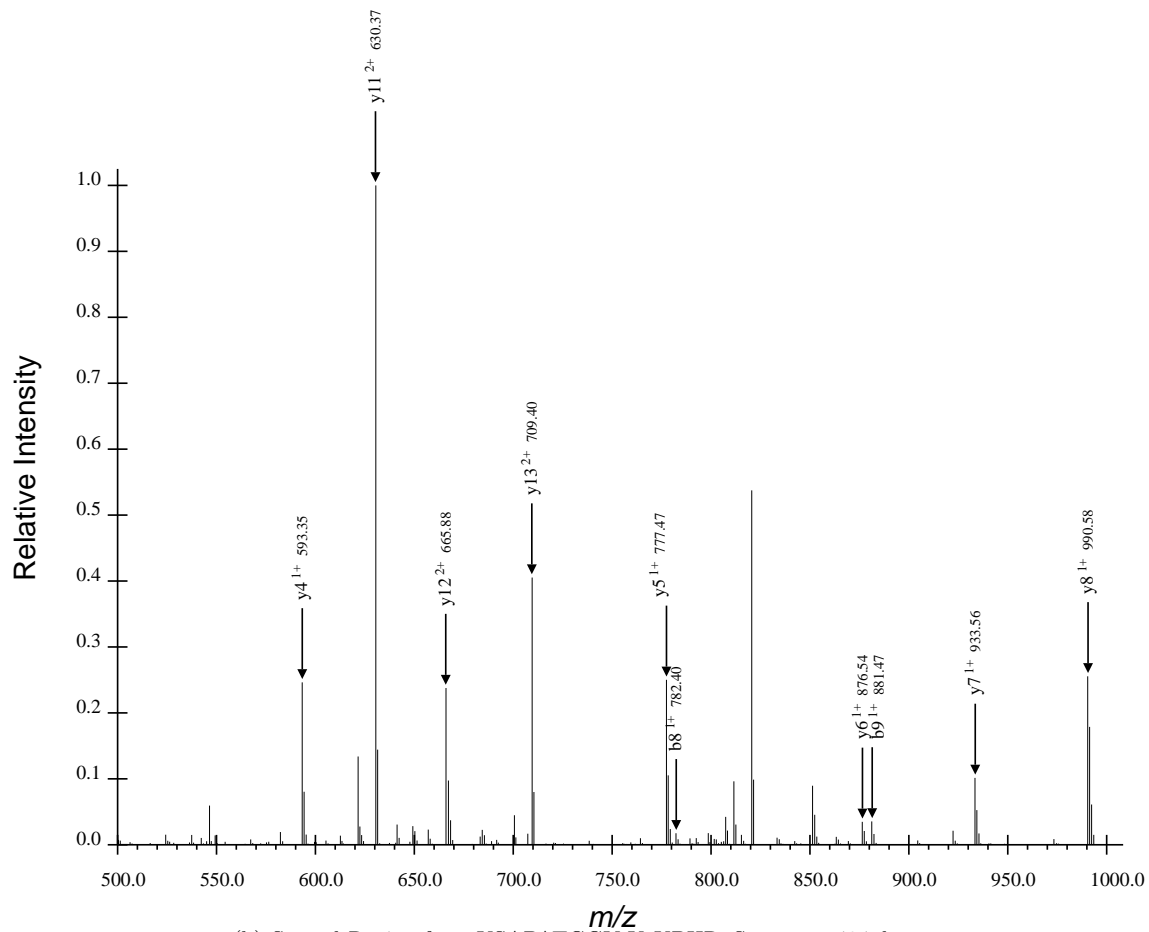

(b) Second Region for rrKSAPATGGVrKrKPHR, Spectrum 434.dta

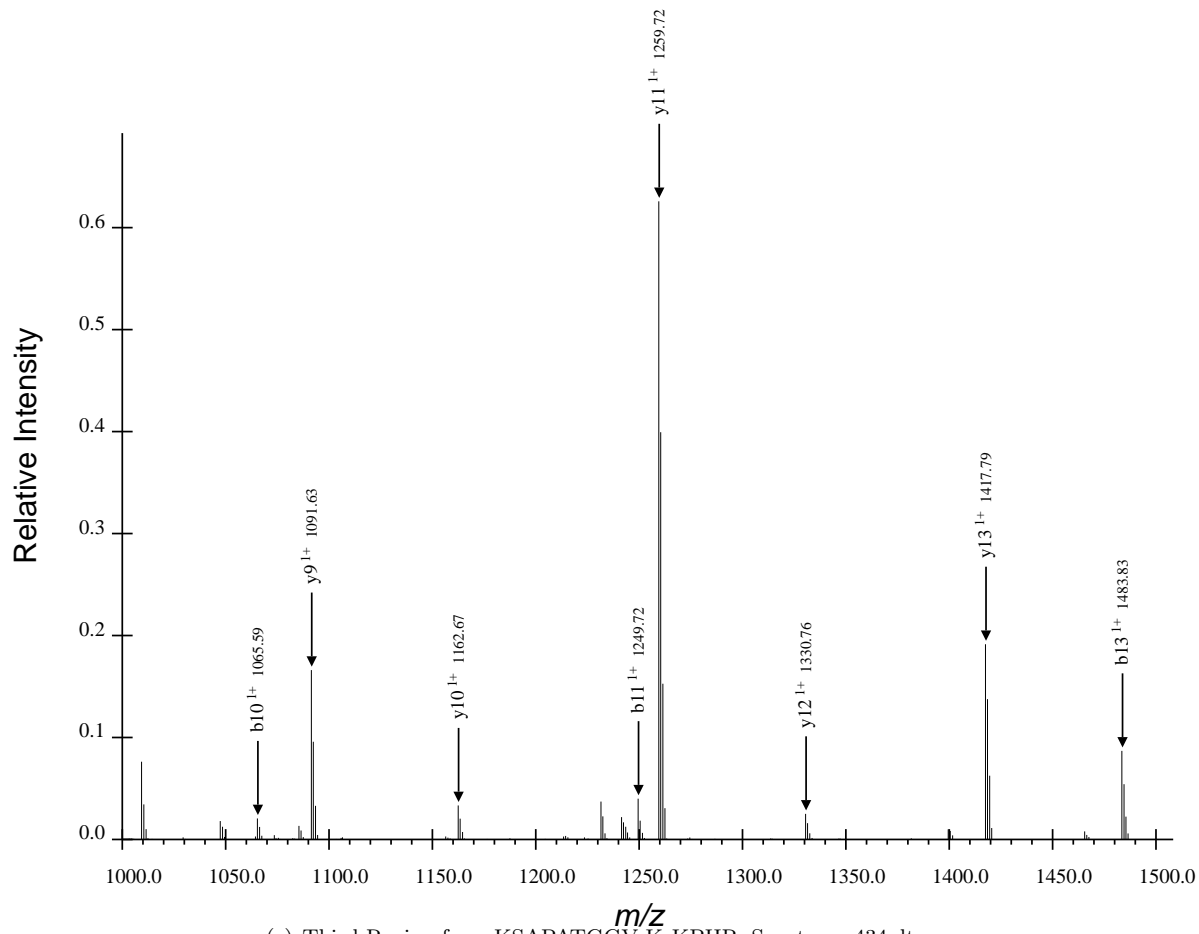

(c) Third Region for rrKSAPATGGVrKrKPHR, Spectrum 434.dta

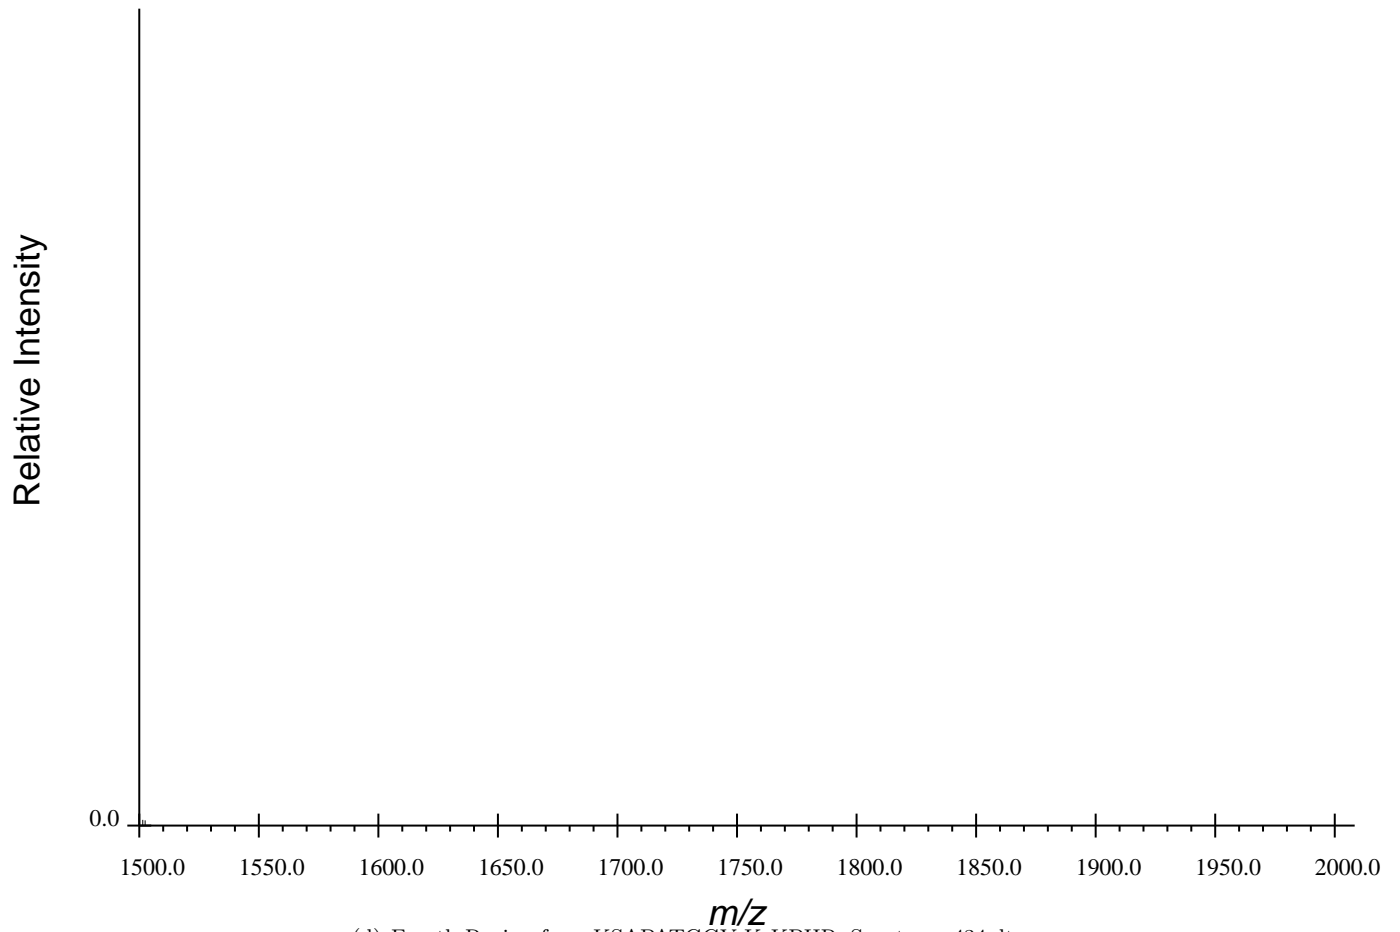

(d) Fourth Region for rrKSAPATGGVrKrKPHR, Spectrum 434.dta

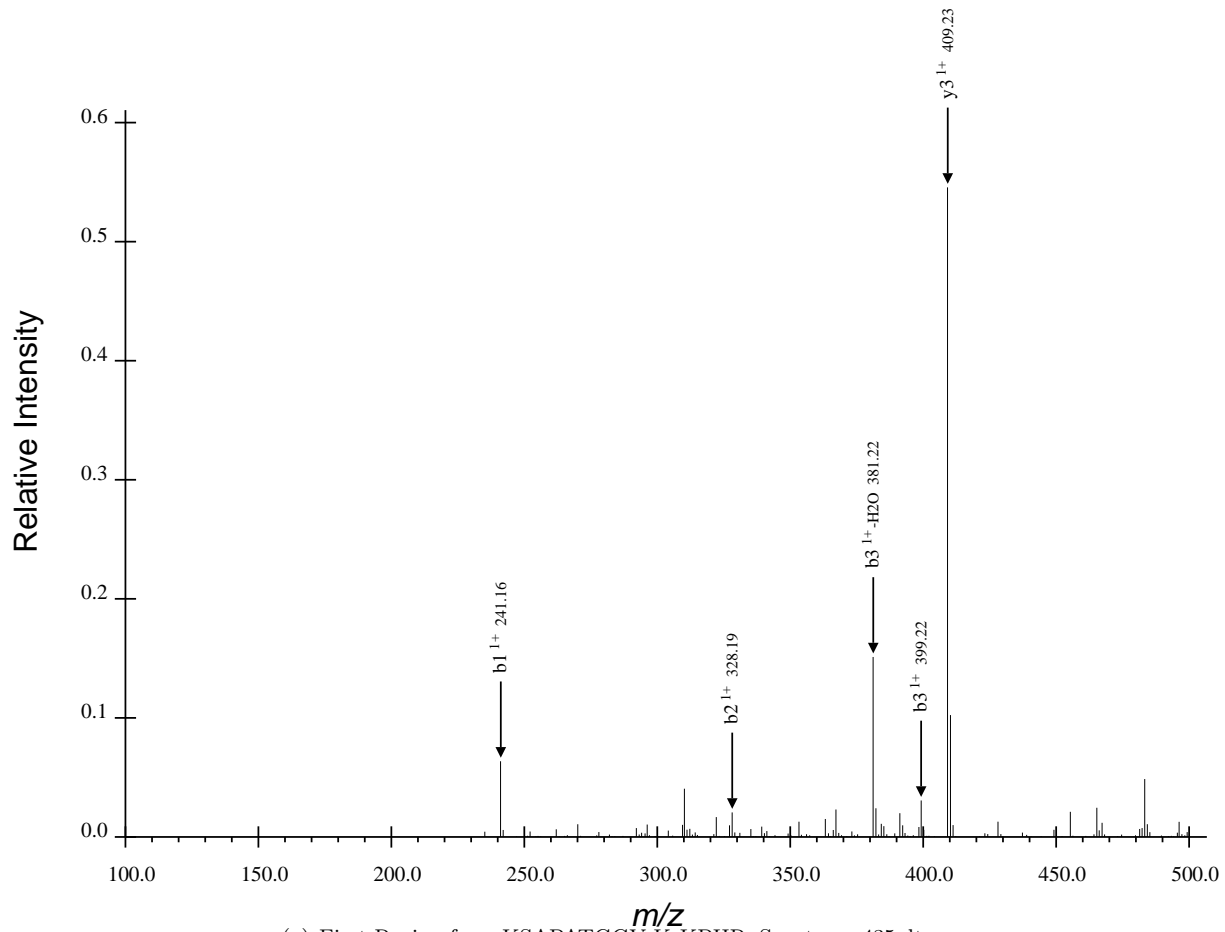

(a) First Region for rrKSAPATGGVrKrKPHR, Spectrum 435.dta

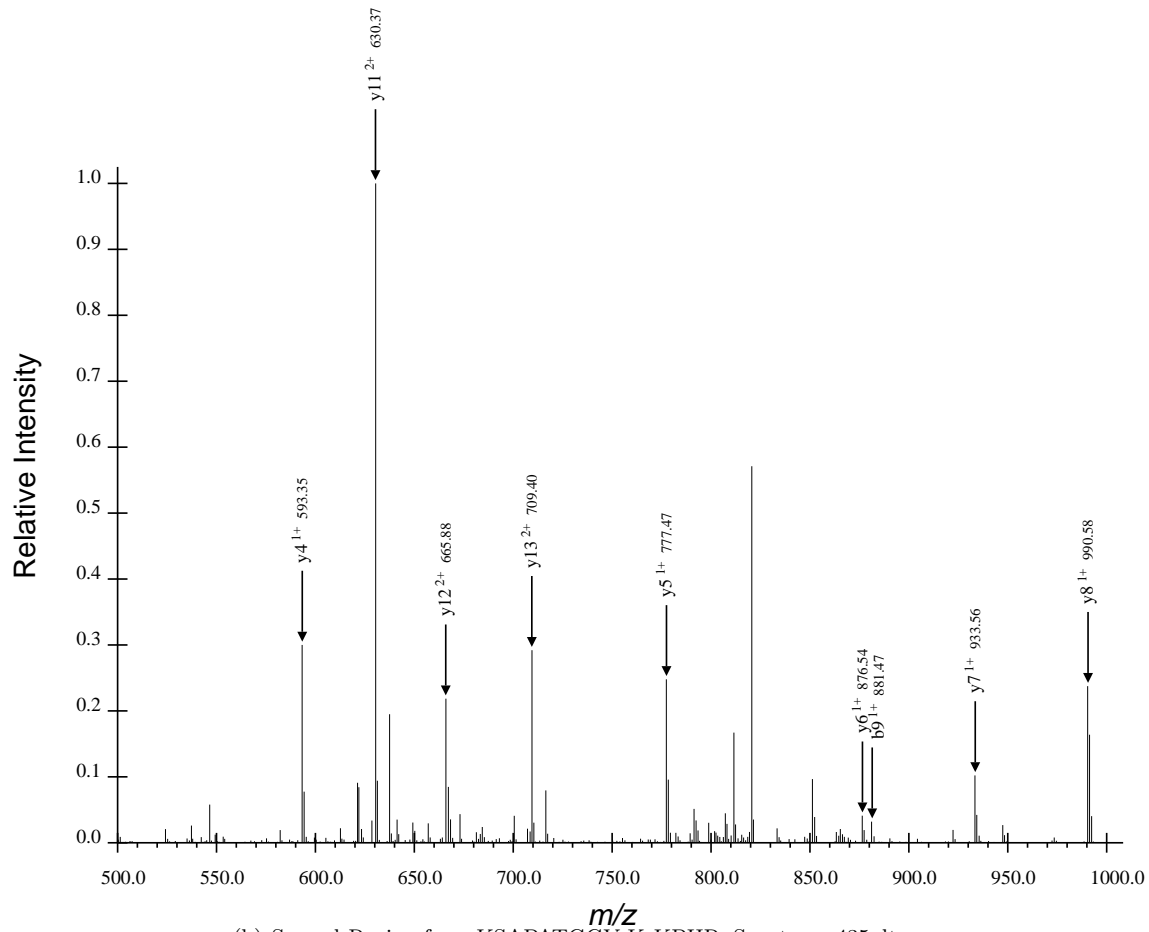

(b) Second Region for rrKSAPATGGVrKrKPHR, Spectrum 435.dta

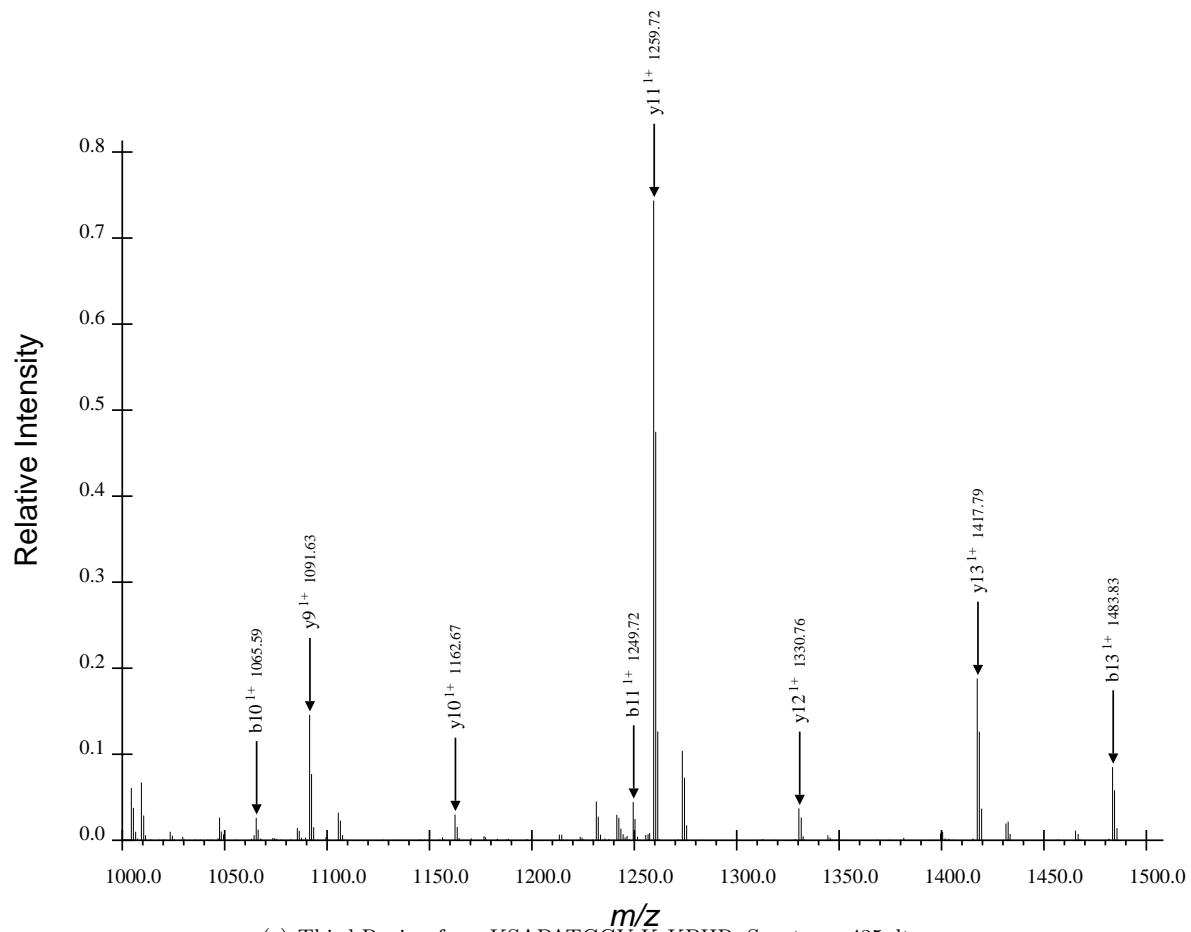

(c) Third Region for rrKSAPATGGVrKrKPHR, Spectrum 435.dta

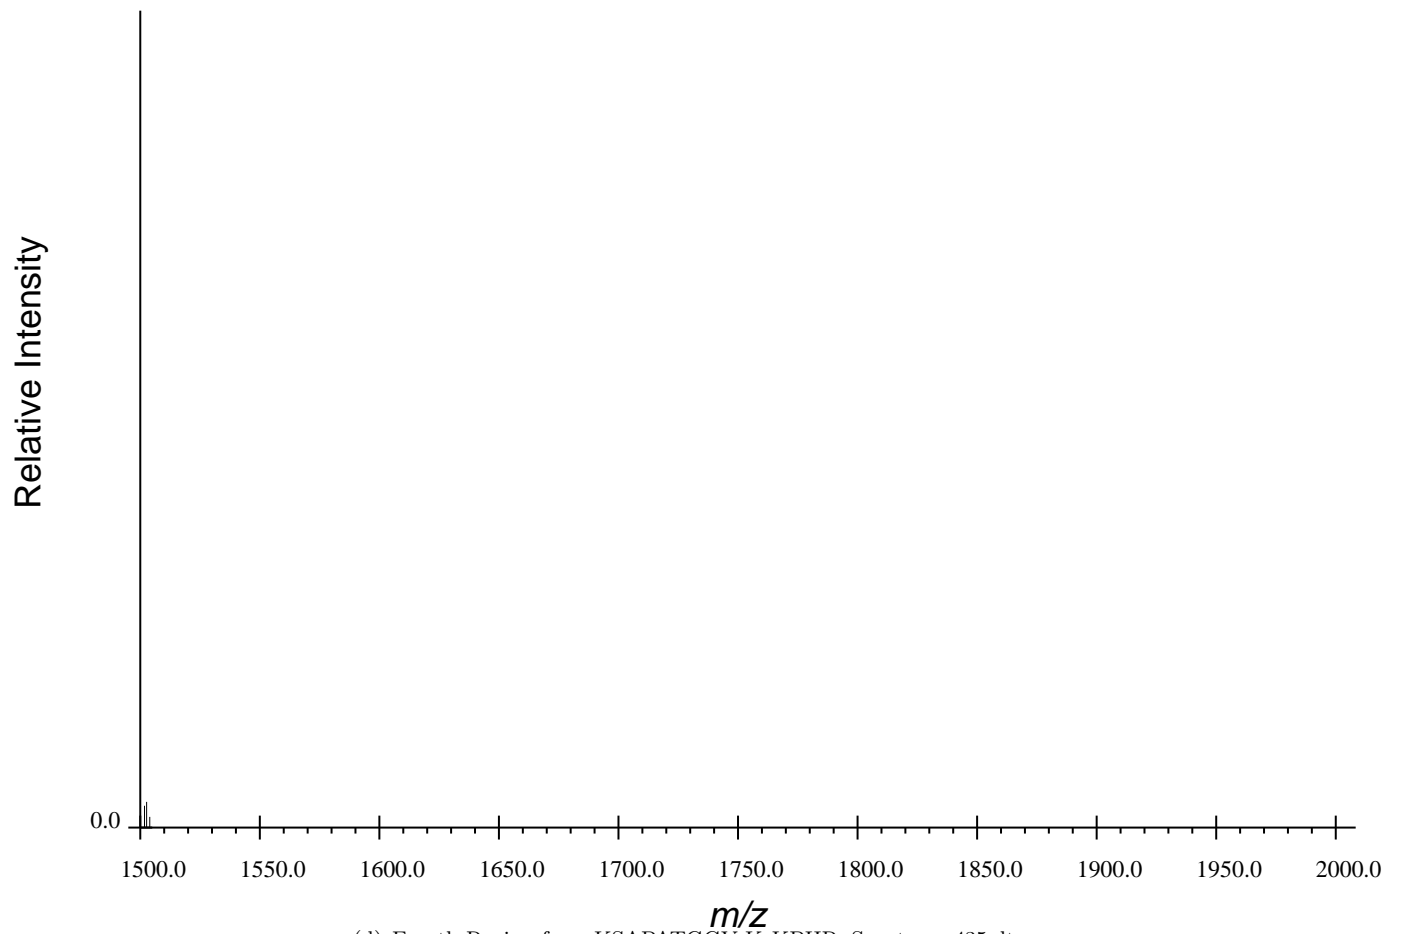

(d) Fourth Region for rrKSAPATGGVrKrKPHR, Spectrum 435.dta

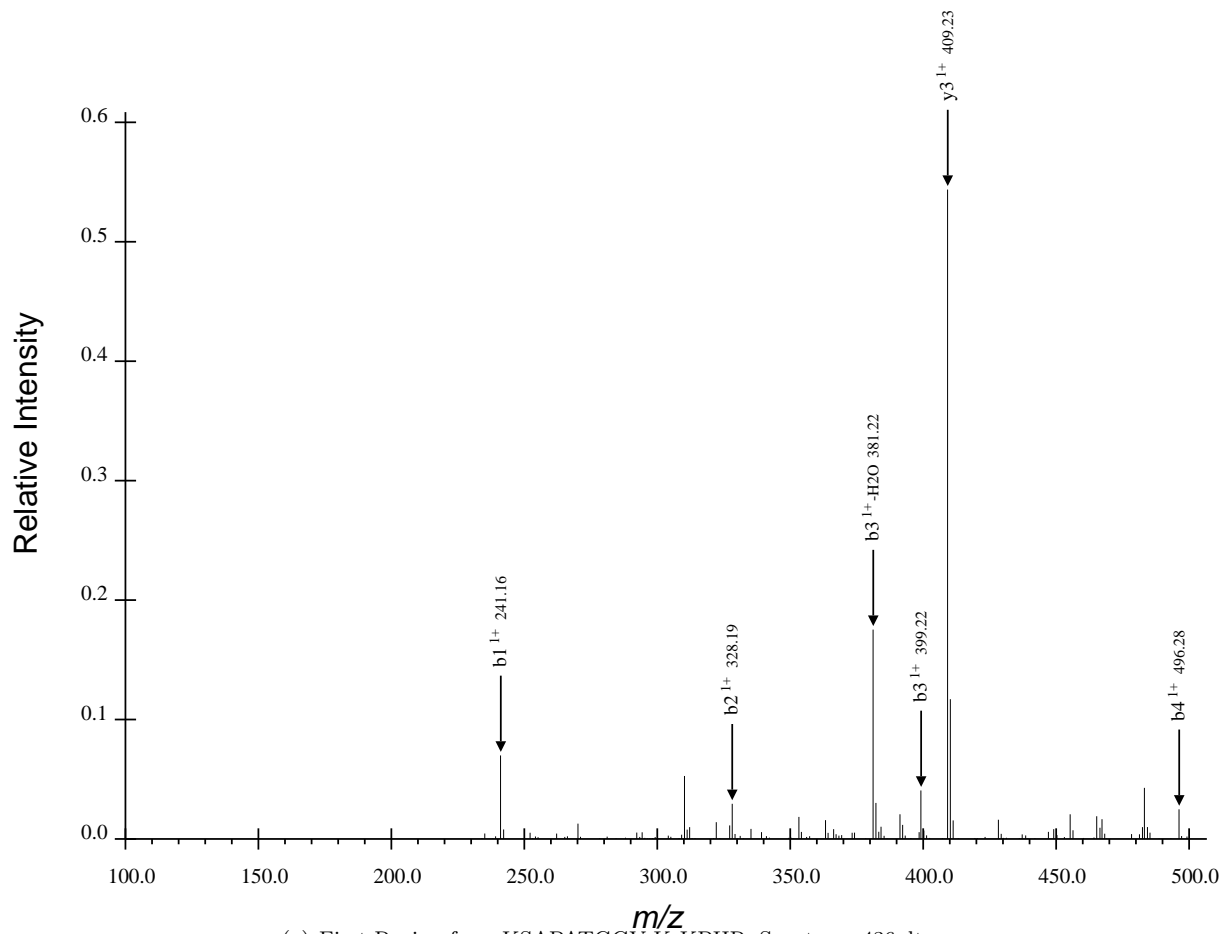

(a) First Region for rrKSAPATGGVrKrKPHR, Spectrum 436.dta

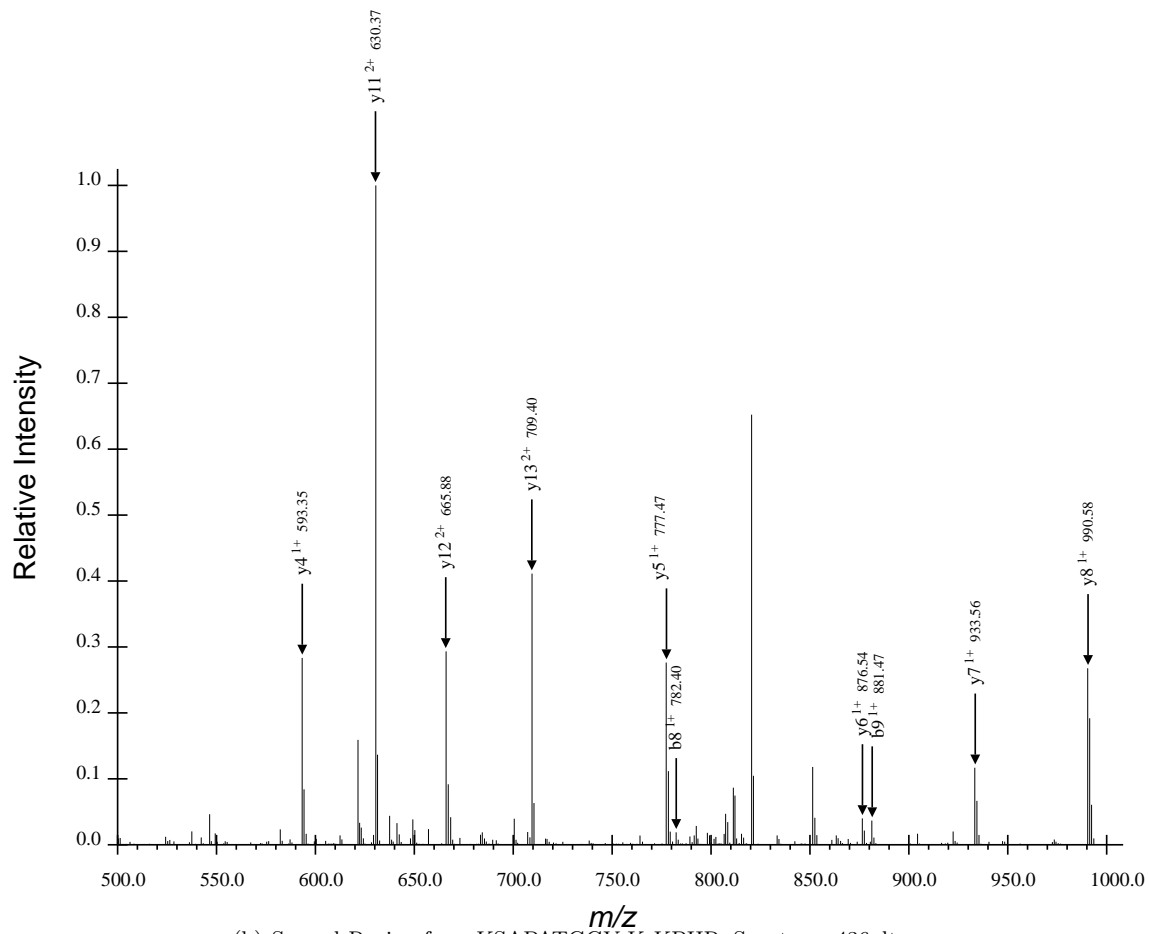

(b) Second Region for rrKSAPATGGVrKrKPHR, Spectrum 436.dta



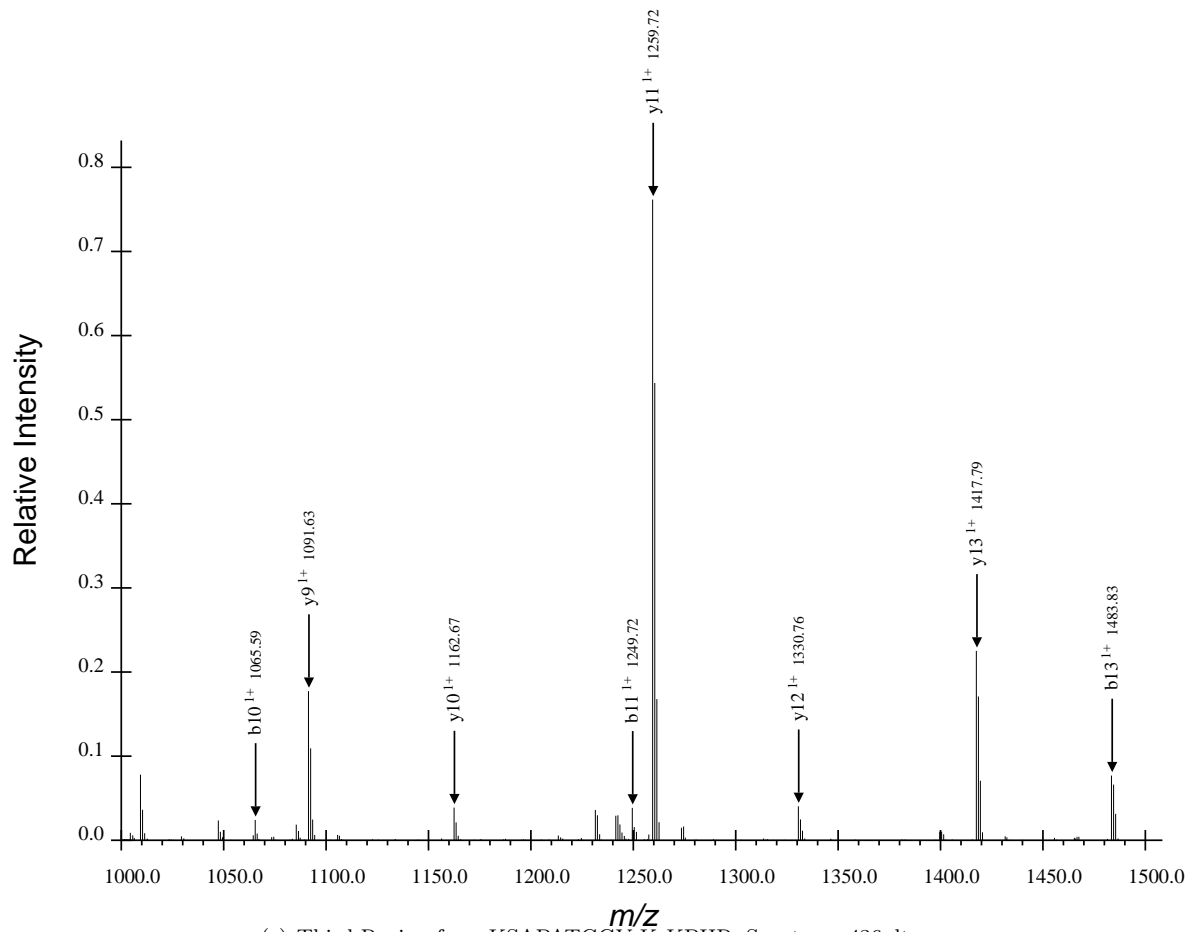

(c) Third Region for rrKSAPATGGVrKrKPHR, Spectrum 436.dta

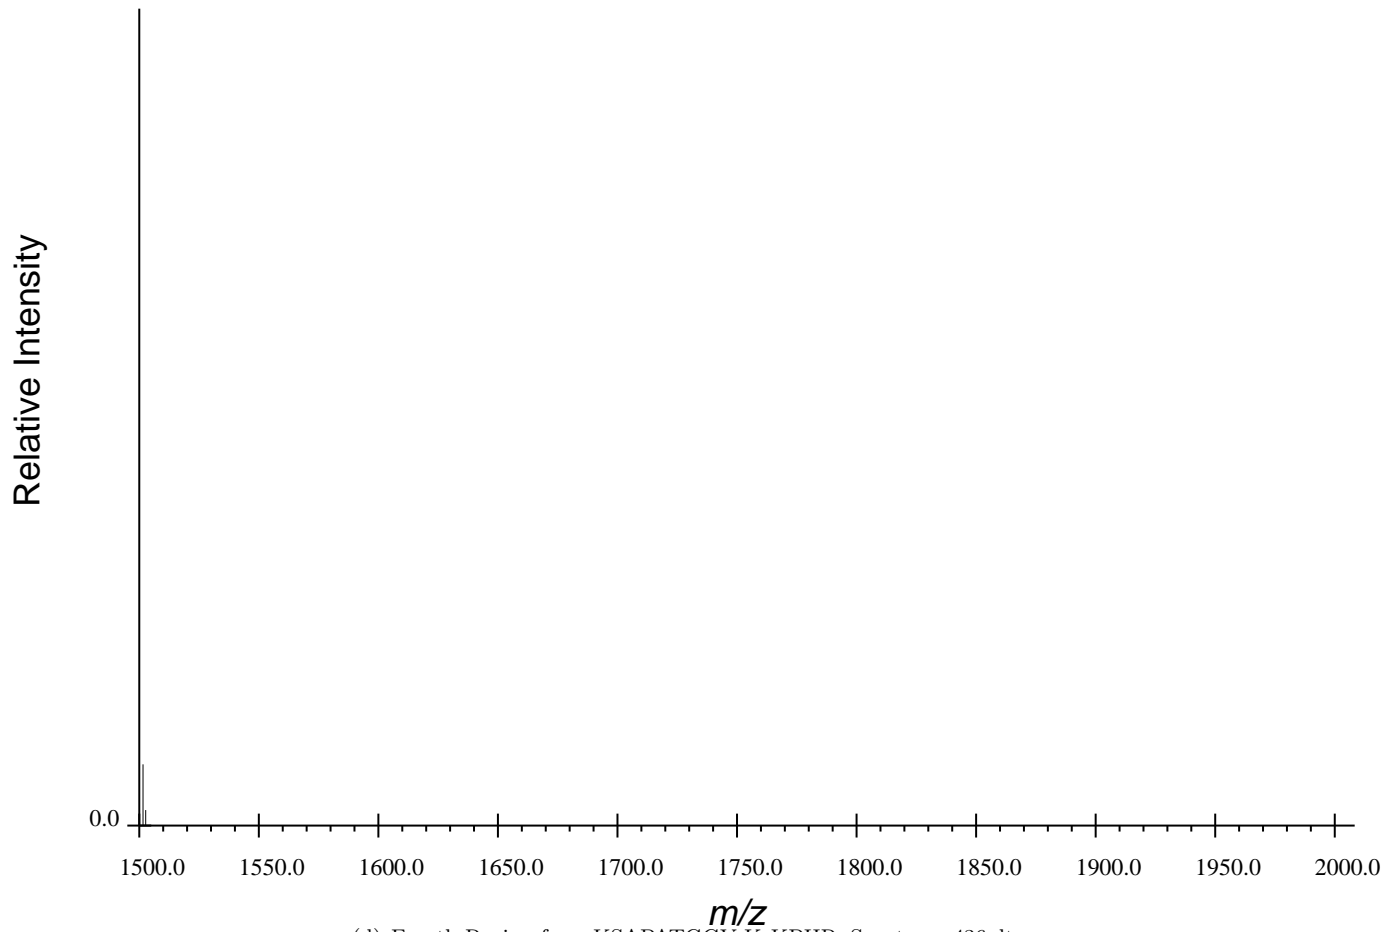

(d) Fourth Region for rrKSAPATGGVrKrKPHR, Spectrum 436.dta

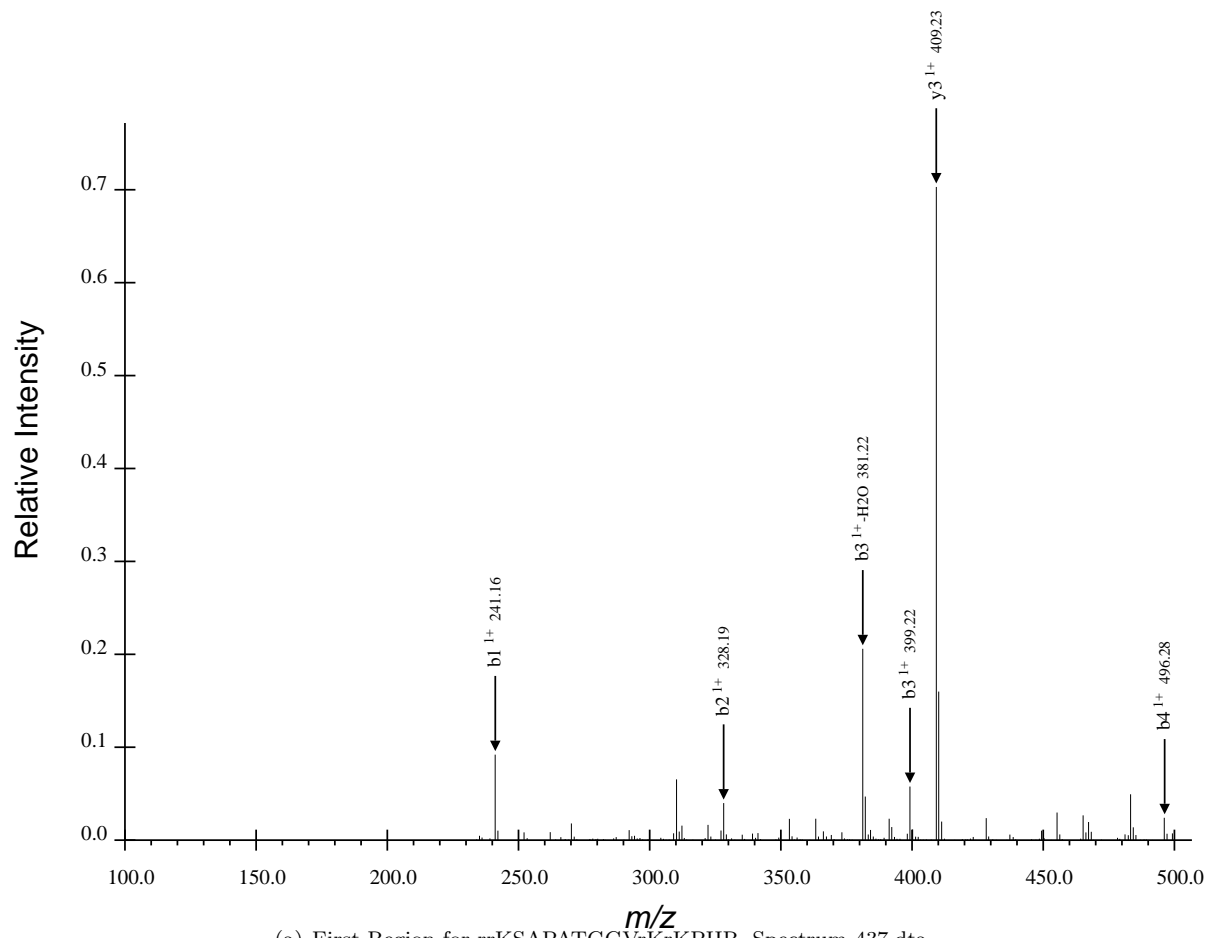

(a) First Region for rrKSAPATGGVrKrKPHR, Spectrum 437.dta

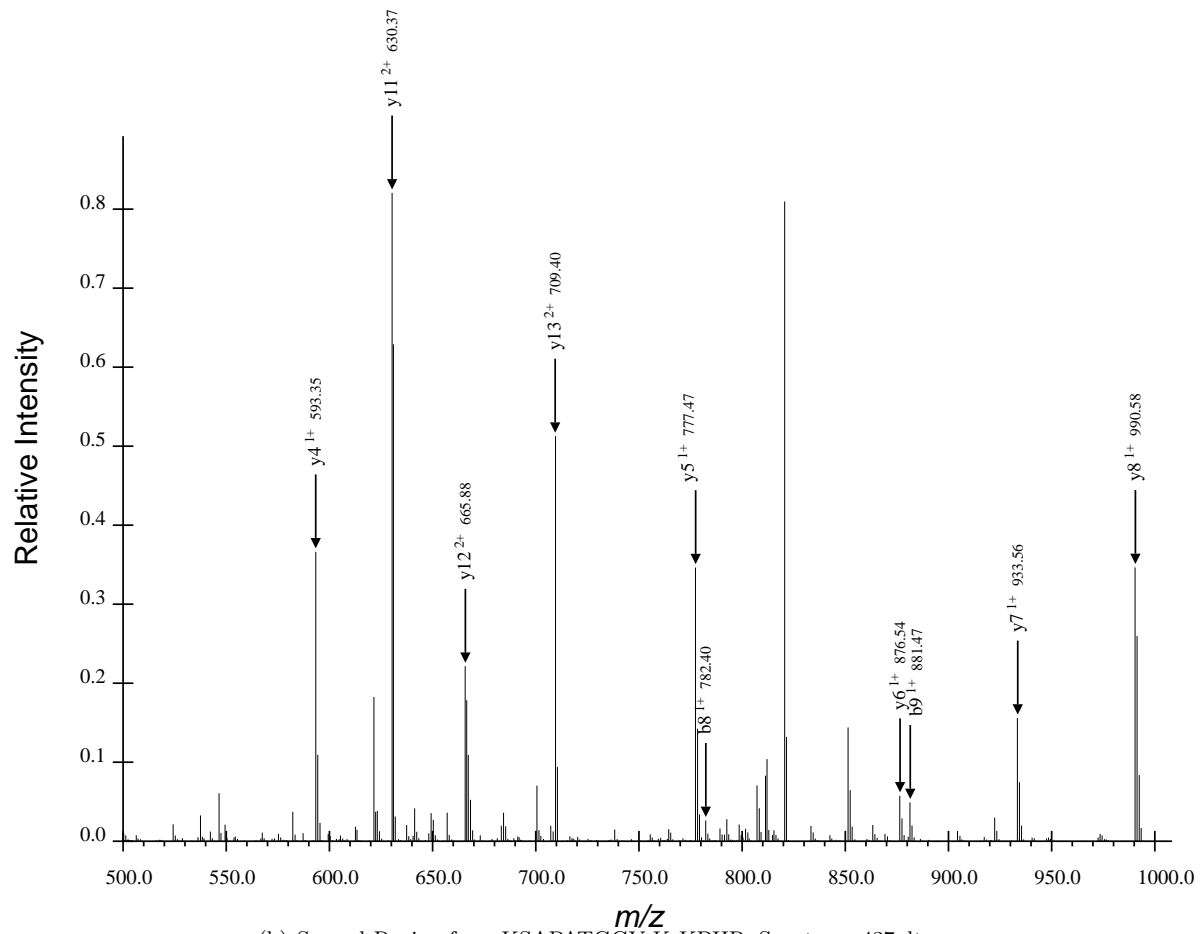

(b) Second Region for rrKSAPATGGVrKrKPHR, Spectrum 437.dta

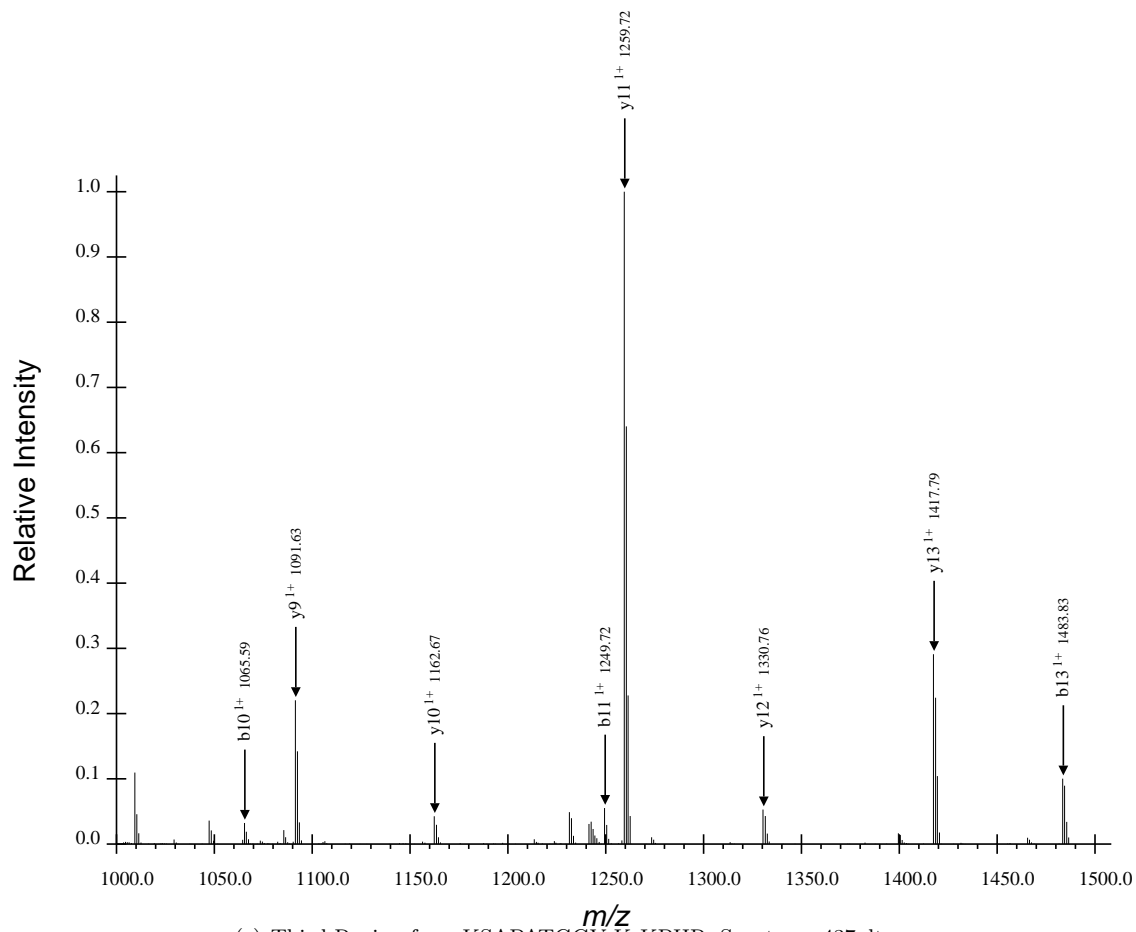

(c) Third Region for rrKSAPATGGVrKrKPHR, Spectrum 437.dta

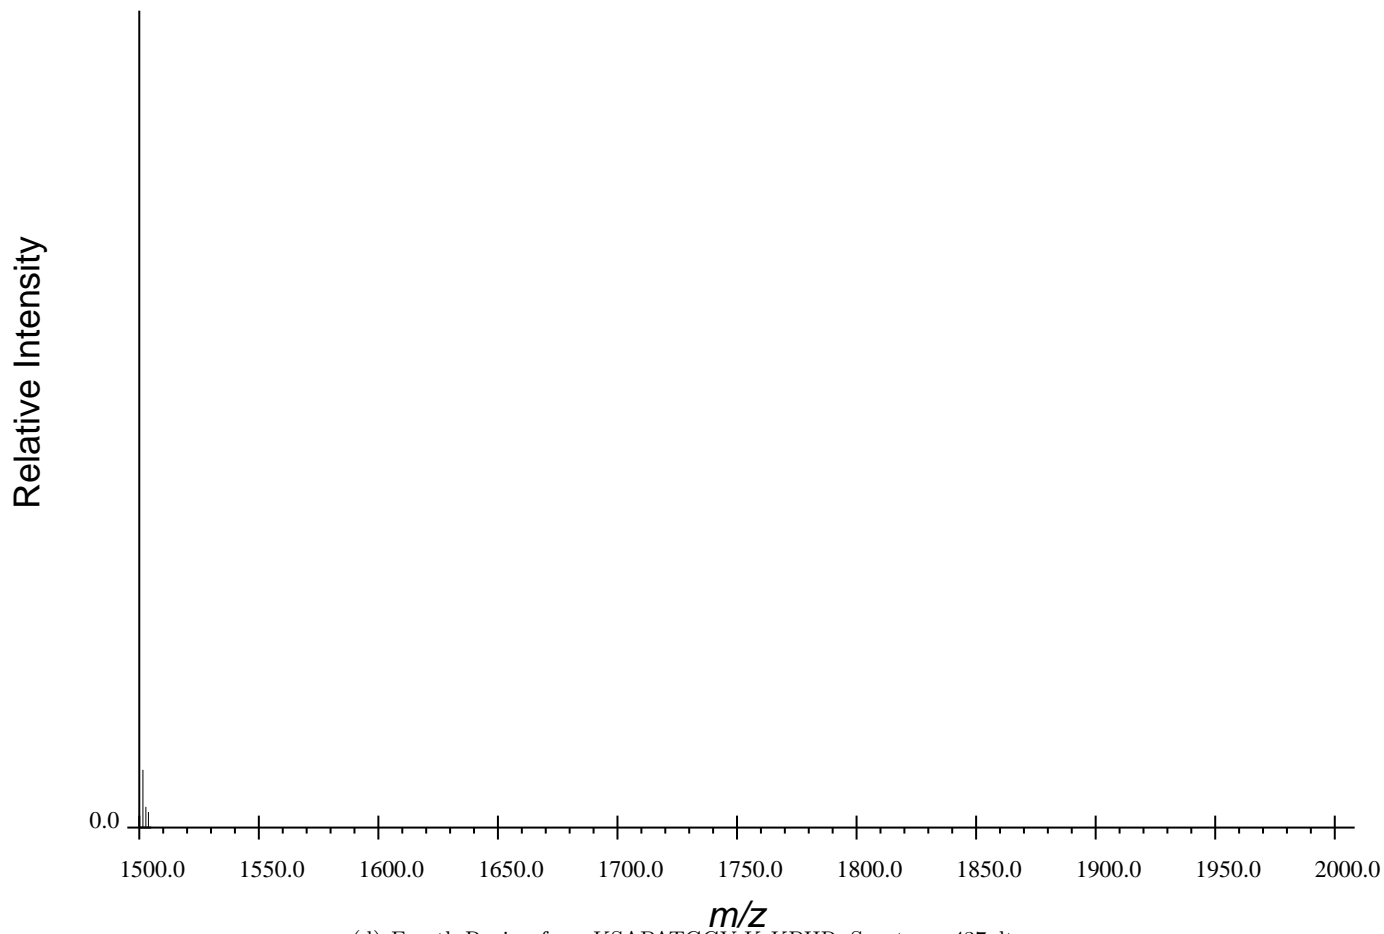

(d) Fourth Region for rrKSAPATGGVrKrKPHR, Spectrum 437.dta

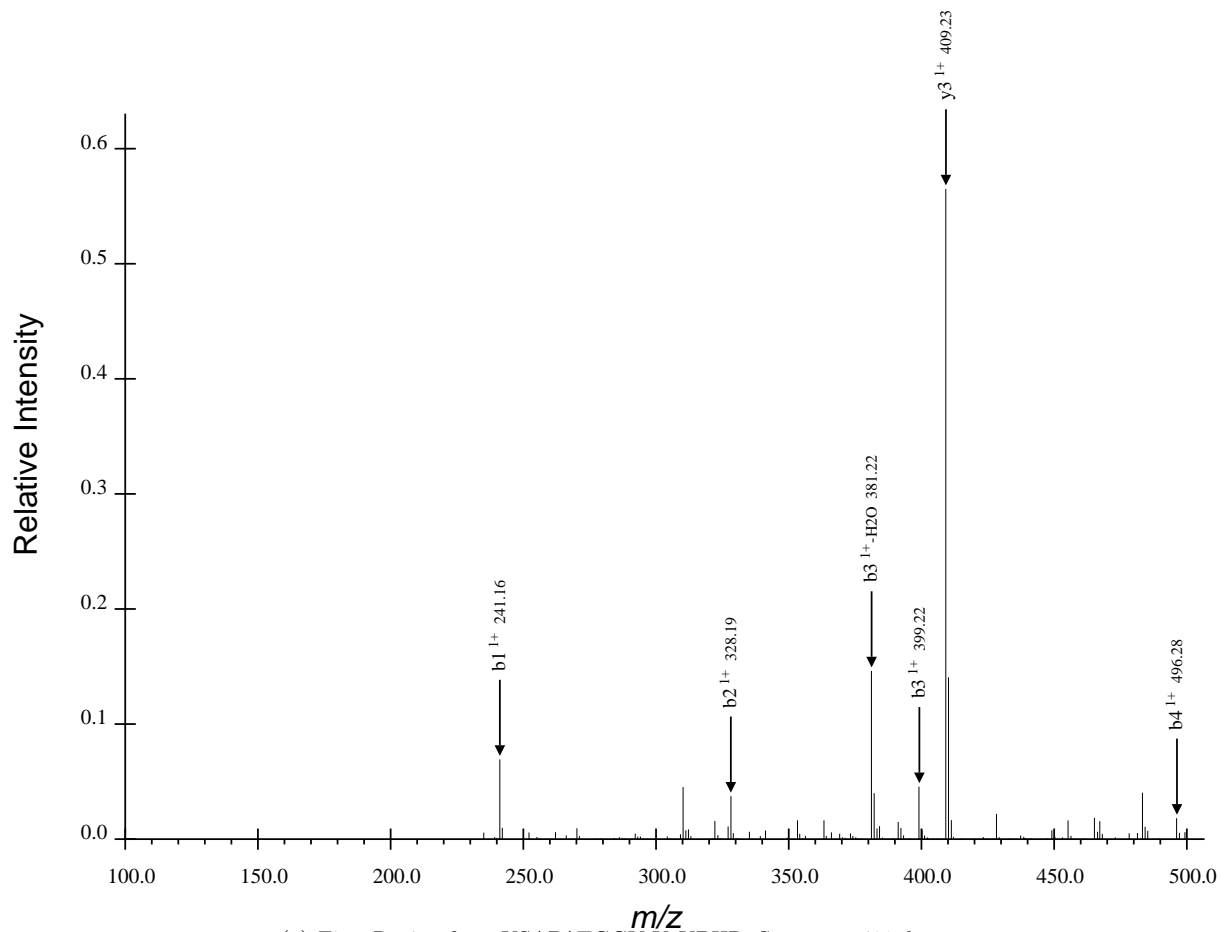

(a) First Region for rrKSAPATGGVrKrKPHR, Spectrum 438.dta

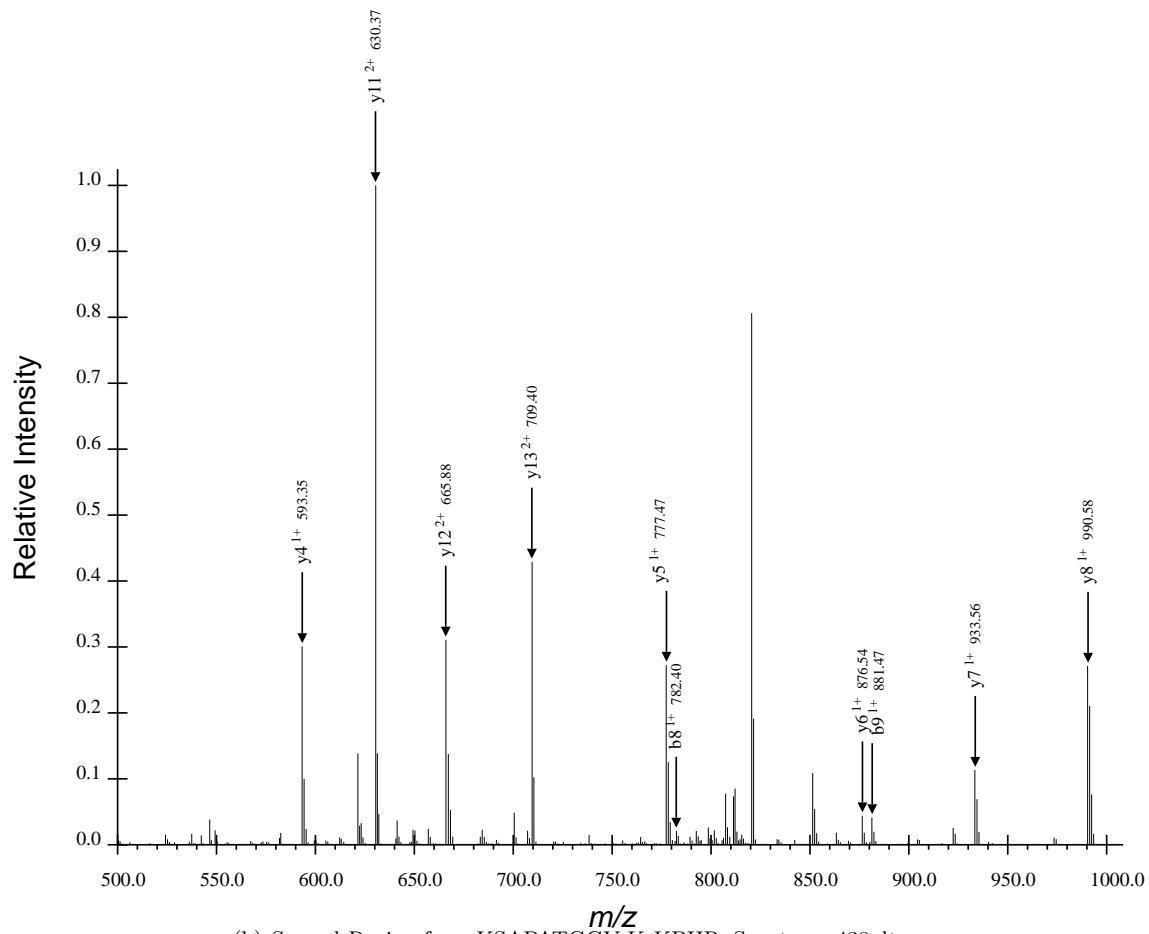

(b) Second Region for rrKSAPATGGVrKrKPHR, Spectrum 438.dta

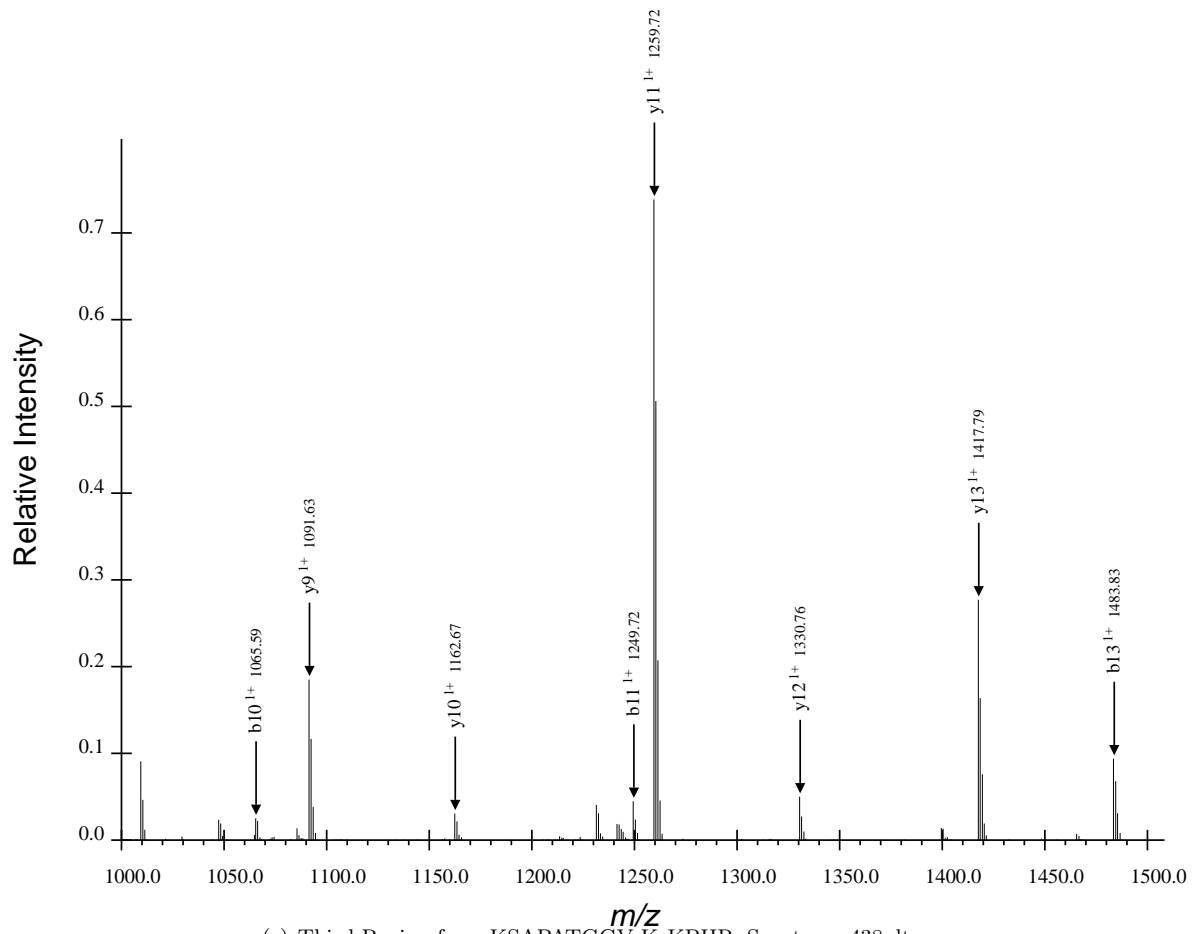

(c) Third Region for rrKSAPATGGVrKrKPHR, Spectrum 438.dta

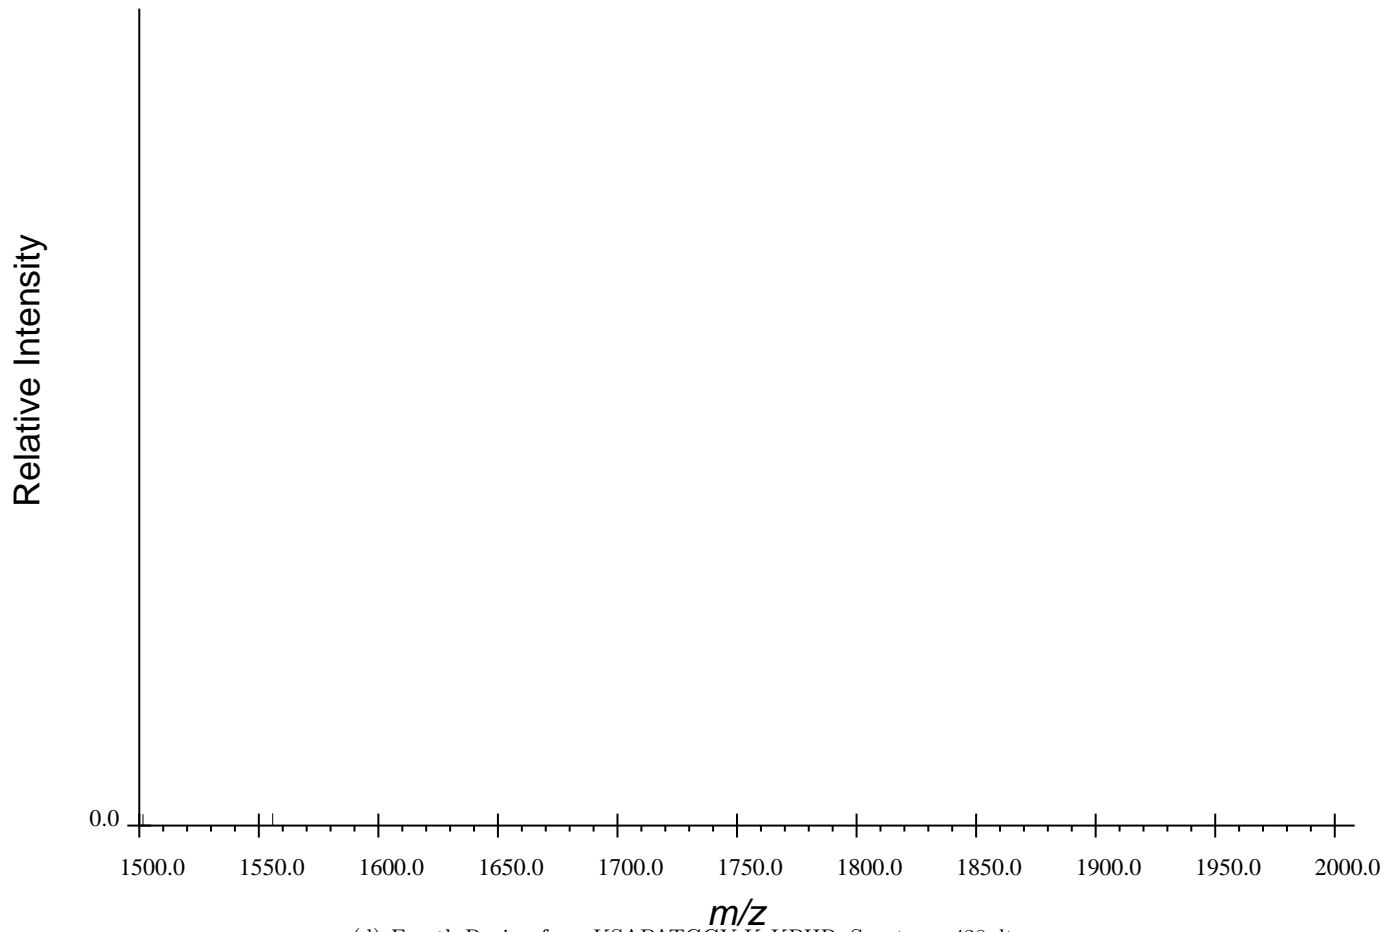

(d) Fourth Region for rrKSAPATGGVrKrKPHR, Spectrum 438.dta

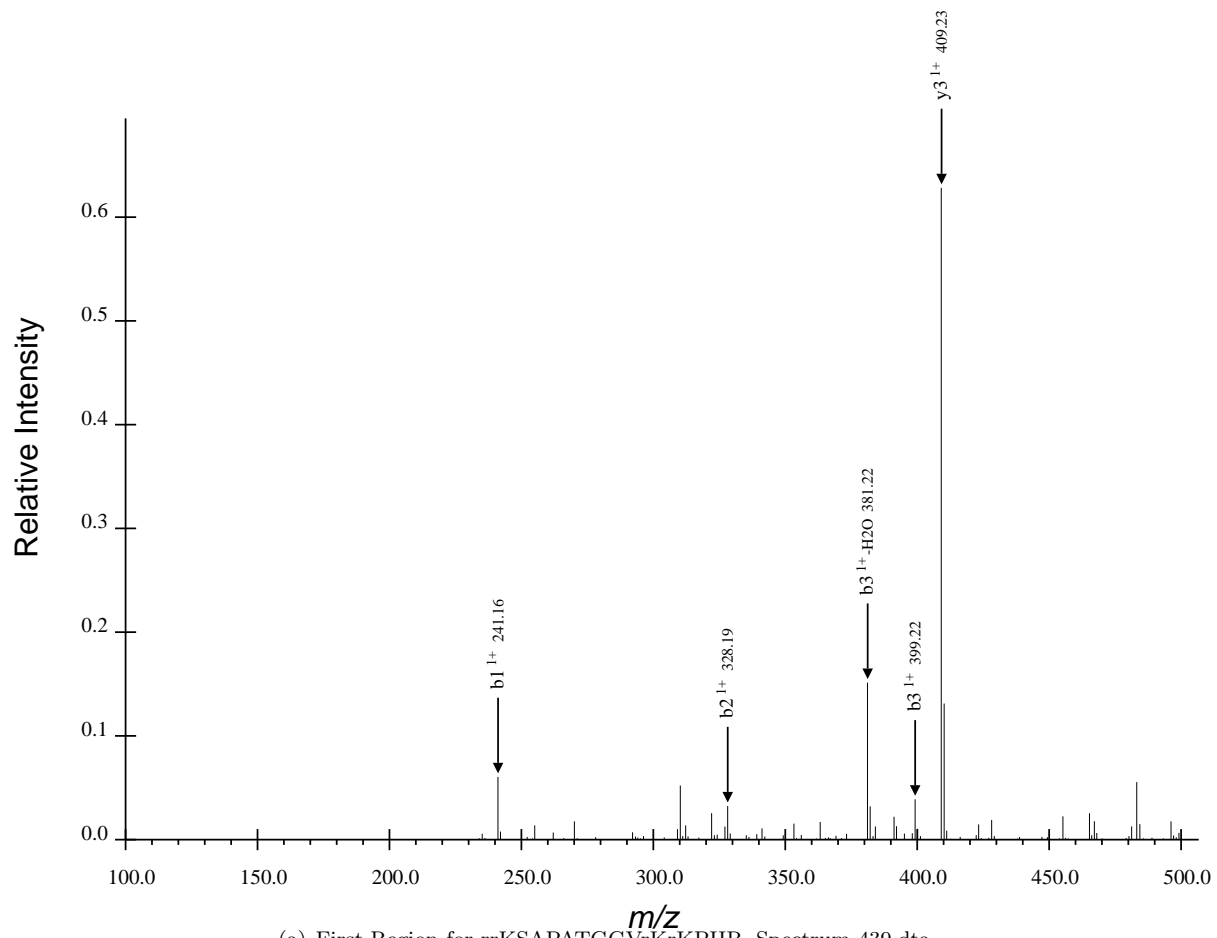

(a) First Region for rrKSAPATGGVrKrKPHR, Spectrum 439.dta

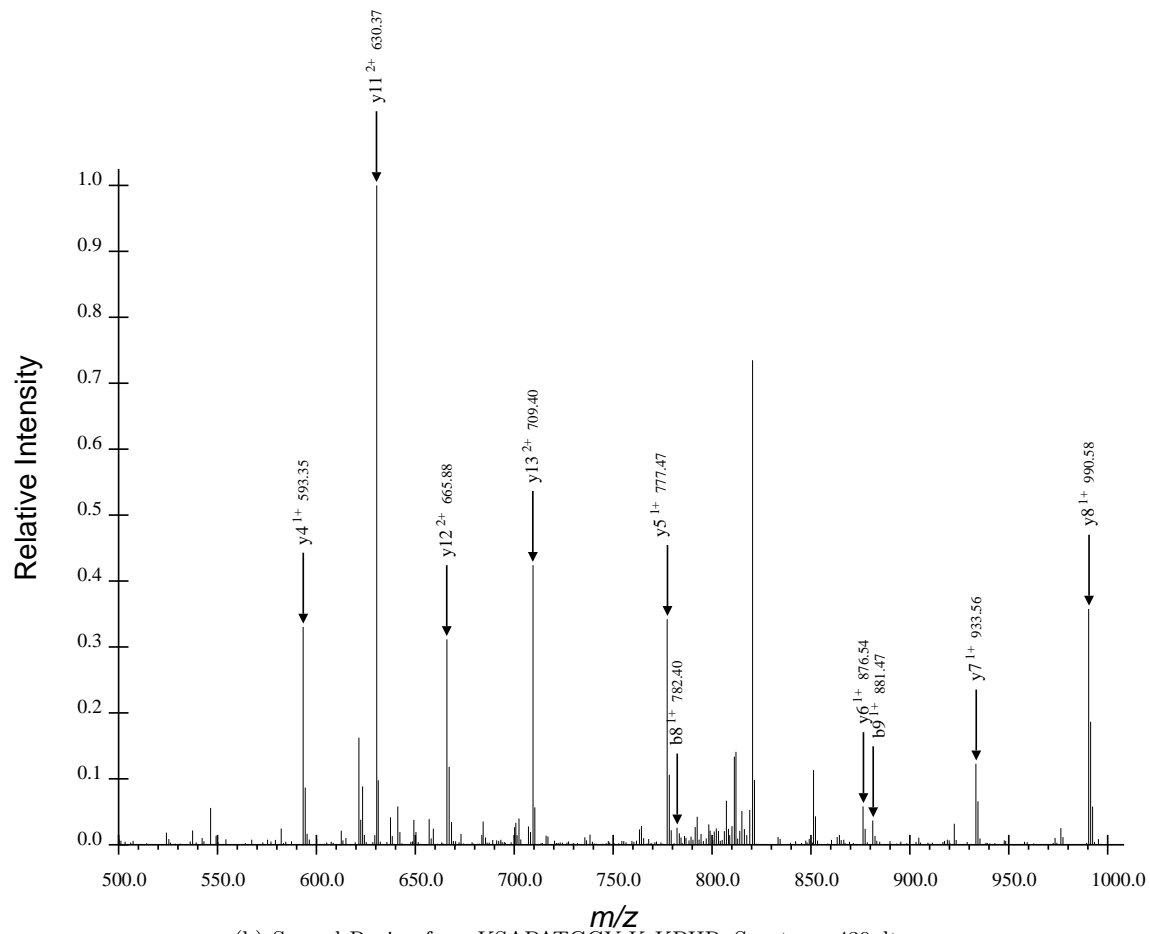

(b) Second Region for rrKSAPATGGVrKrKPHR, Spectrum 439.dta

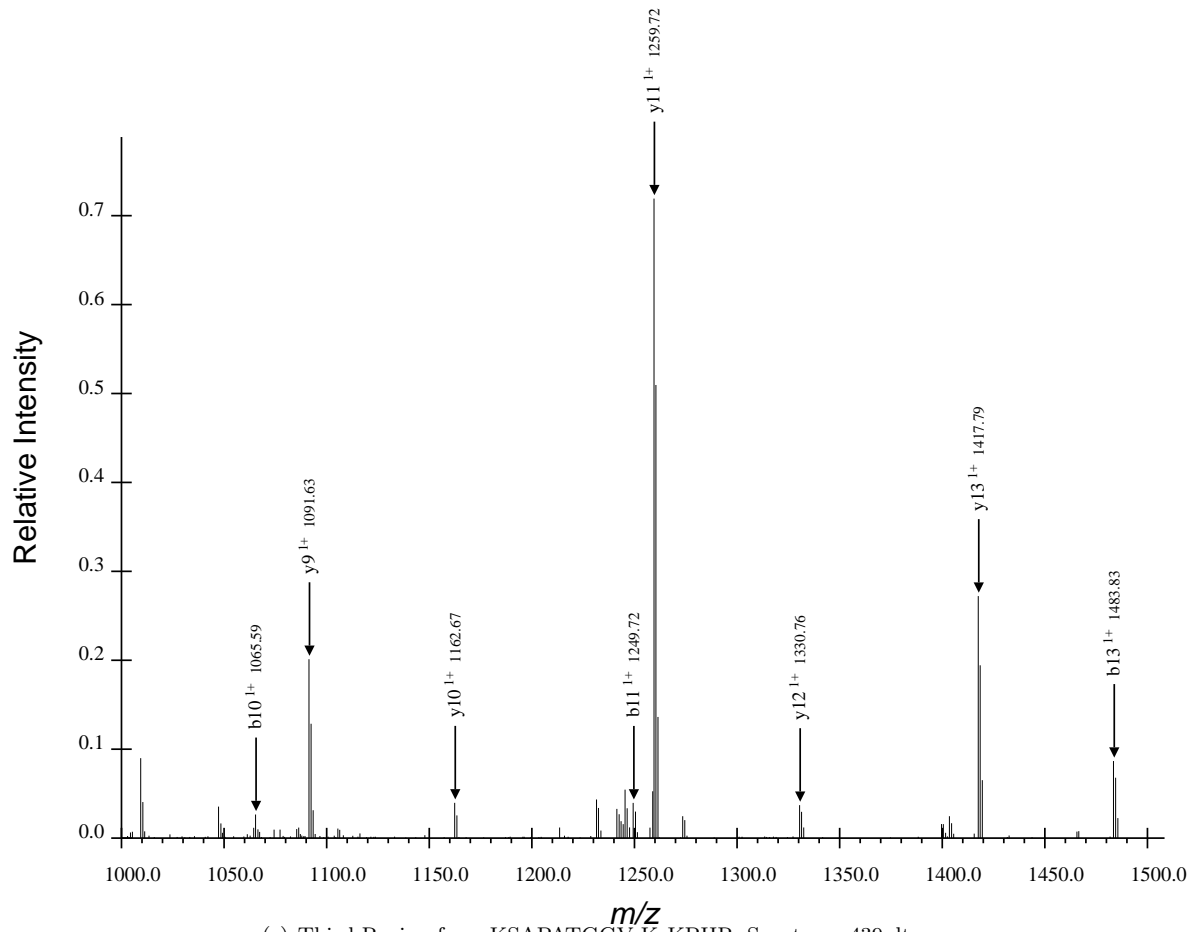

(c) Third Region for rrKSAPATGGVrKrKPHR, Spectrum 439.dta

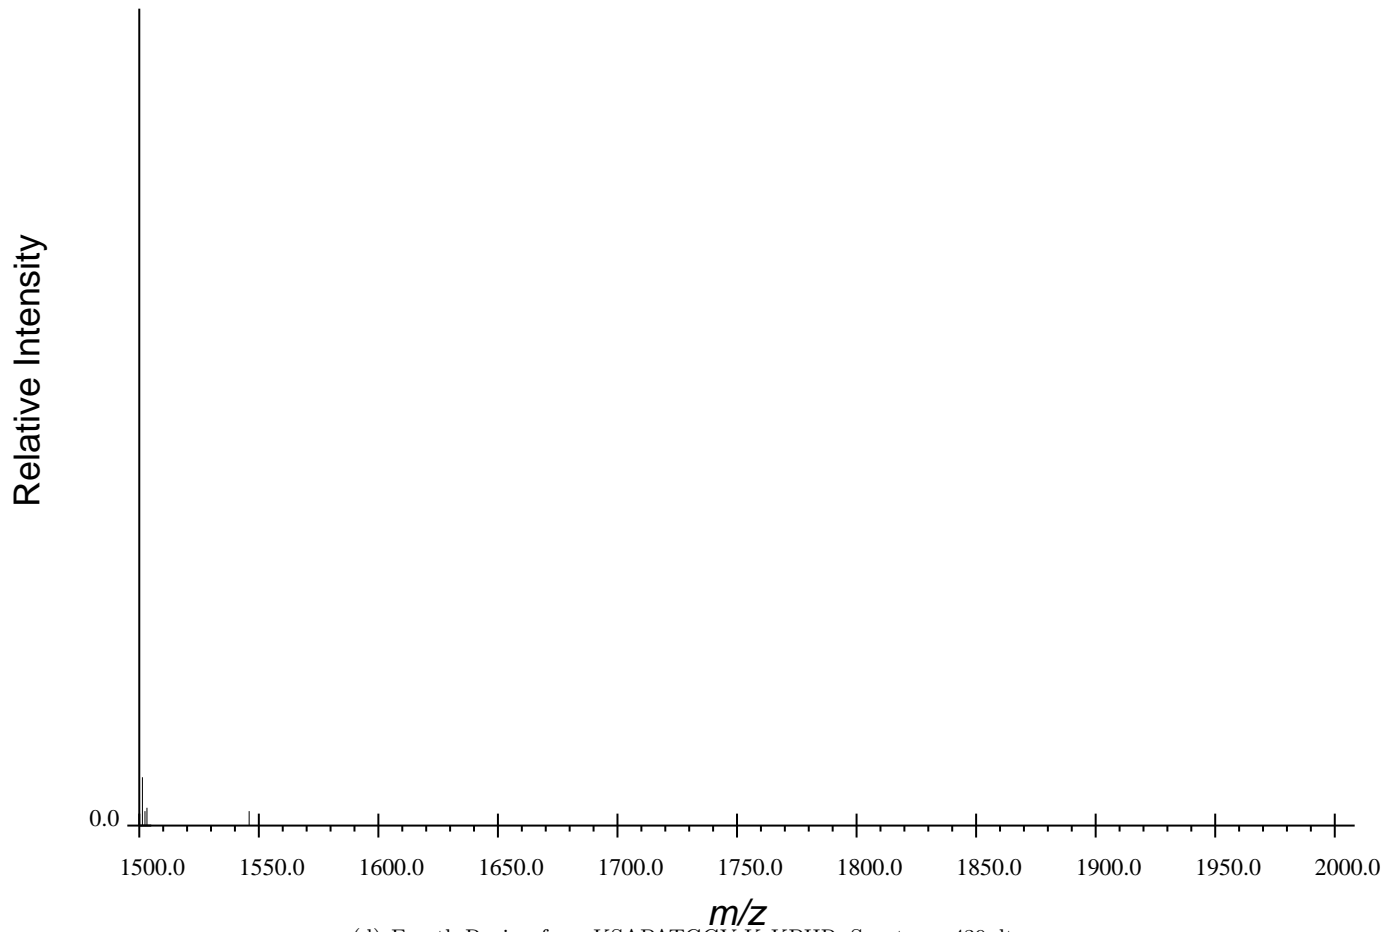

(d) Fourth Region for rrKSAPATGGVrKrKPHR, Spectrum 439.dta

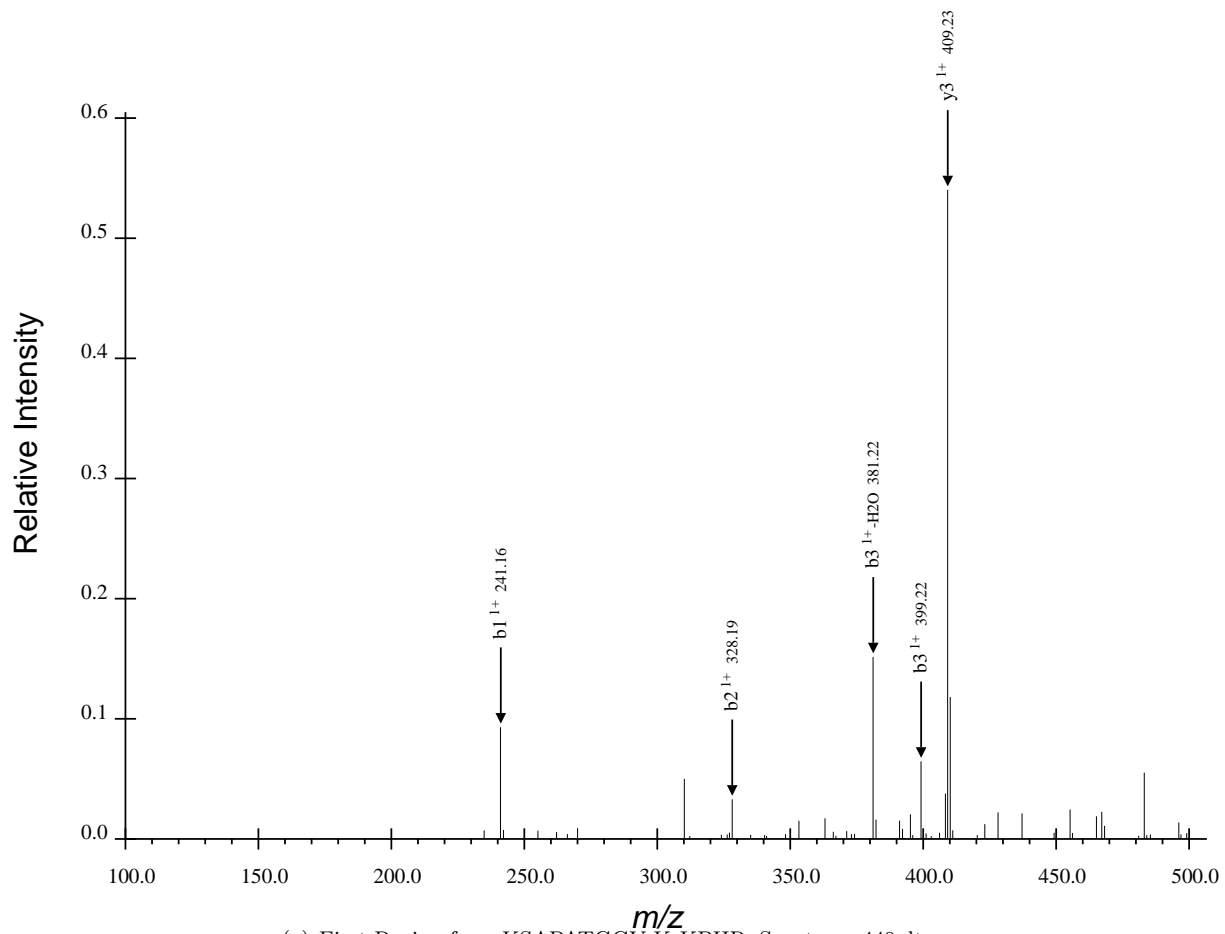

(a) First Region for rrKSAPATGGVrKrKPHR, Spectrum 440.dta

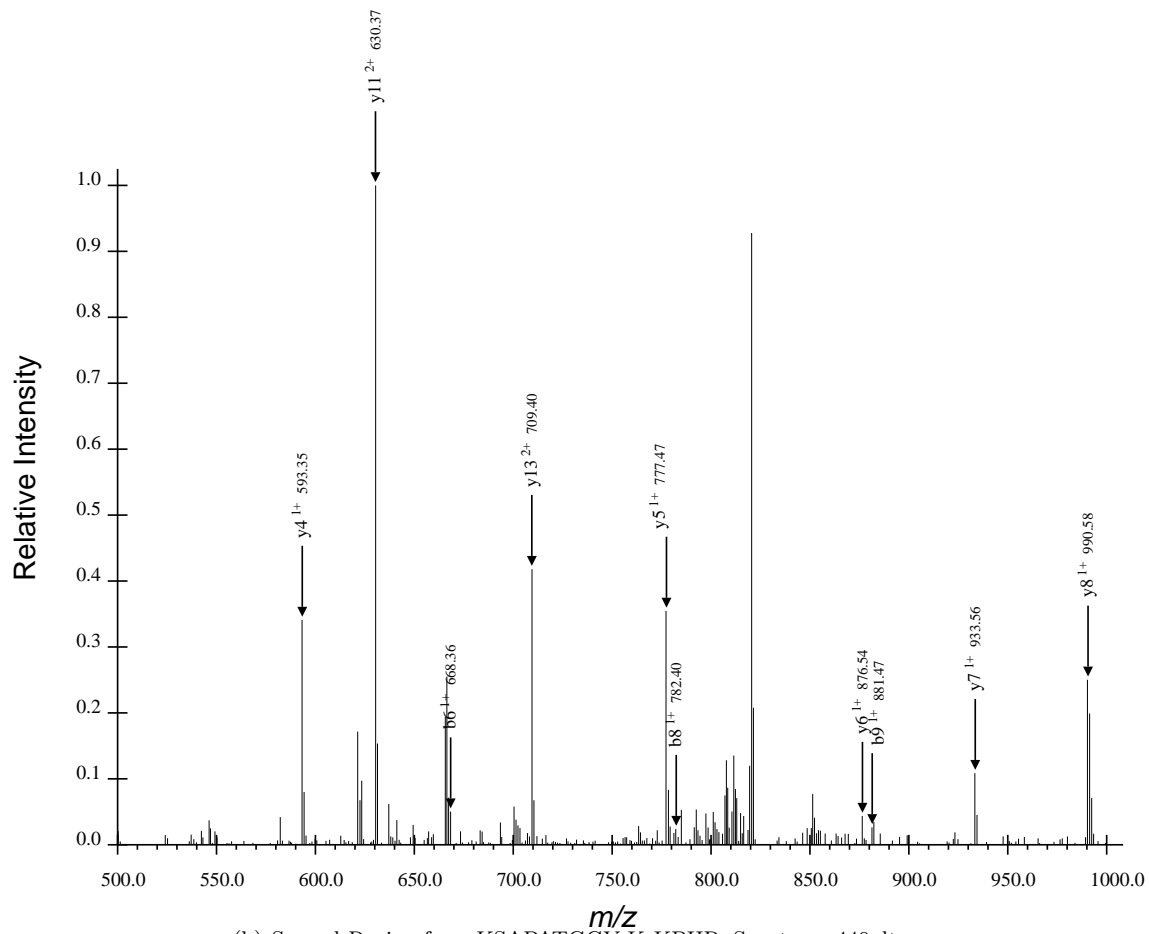

(b) Second Region for rrKSAPATGGVrKrKPHR, Spectrum 440.dta



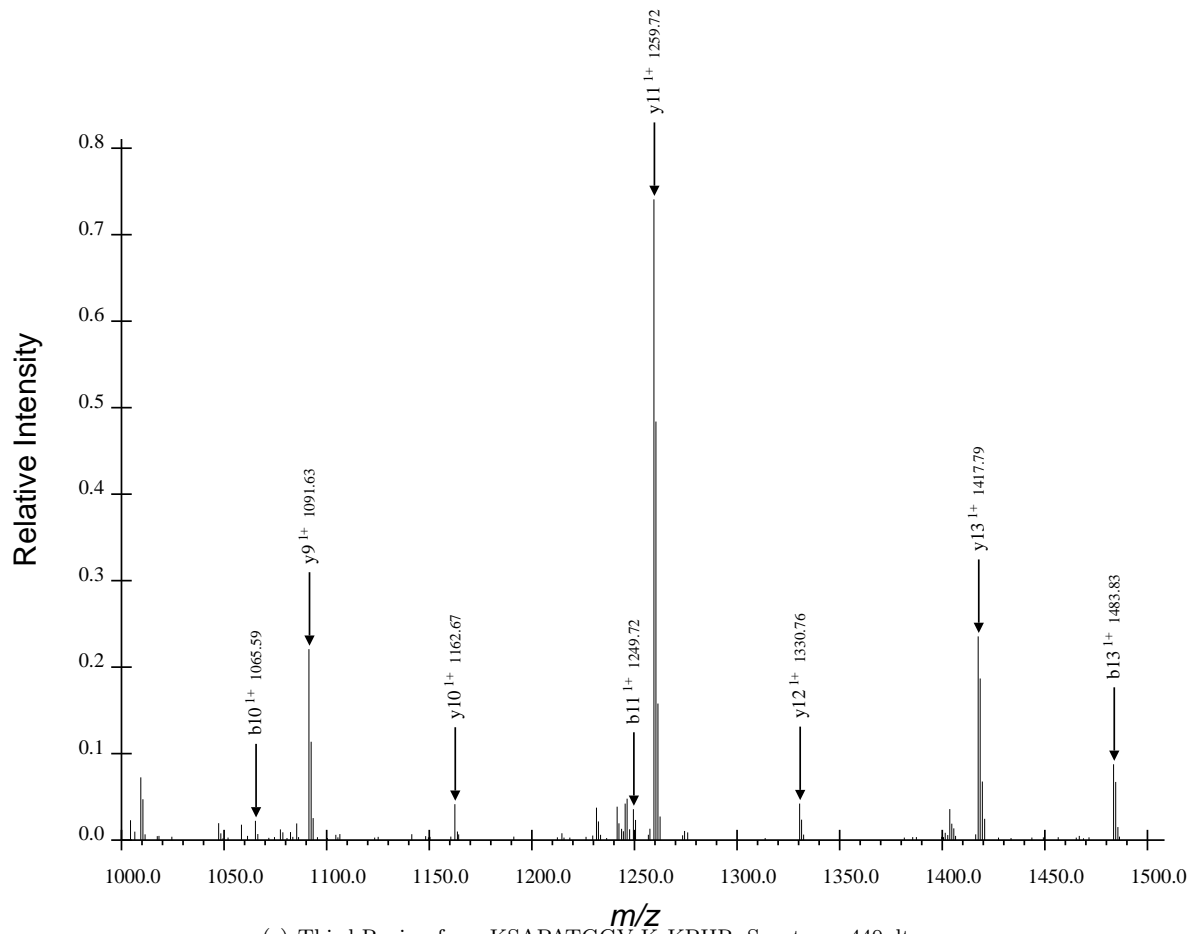

(c) Third Region for rrKSAPATGGVrKrKPHR, Spectrum 440.dta

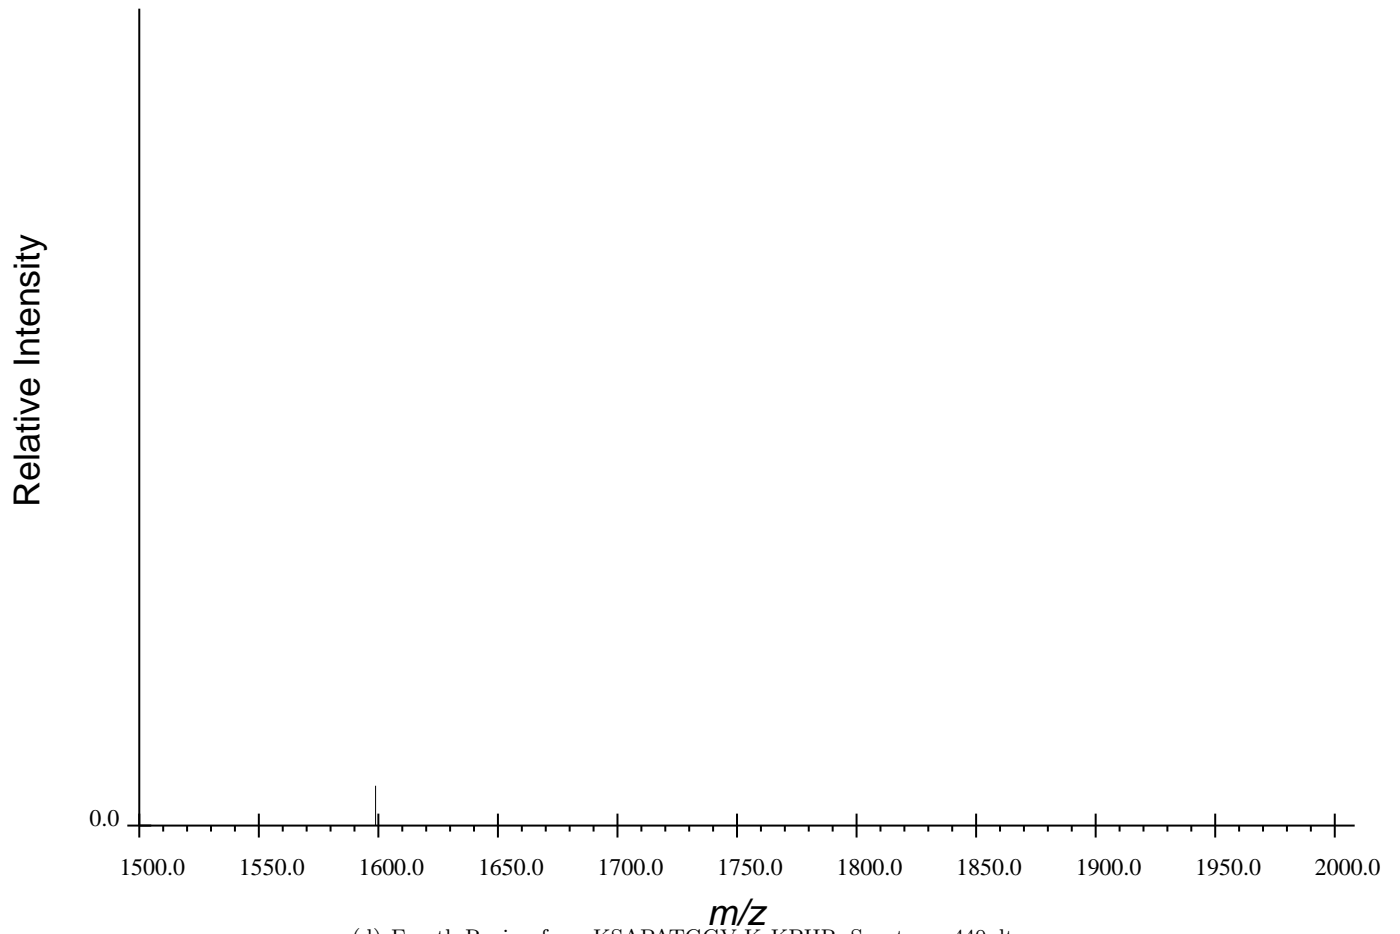

(d) Fourth Region for rrKSAPATGGVrKrKPHR, Spectrum 440.dta

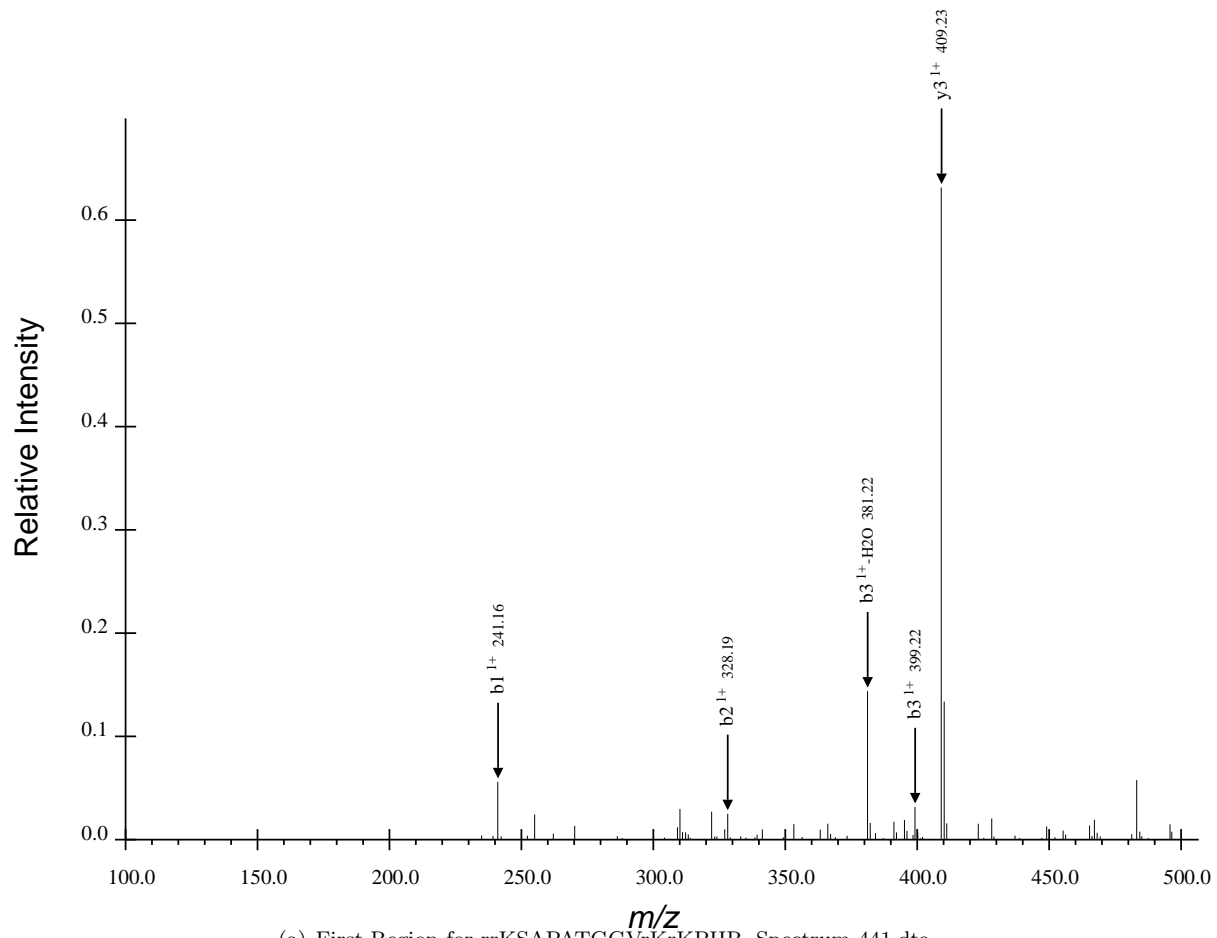

(a) First Region for rrKSAPATGGVrKrKPHR, Spectrum 441.dta

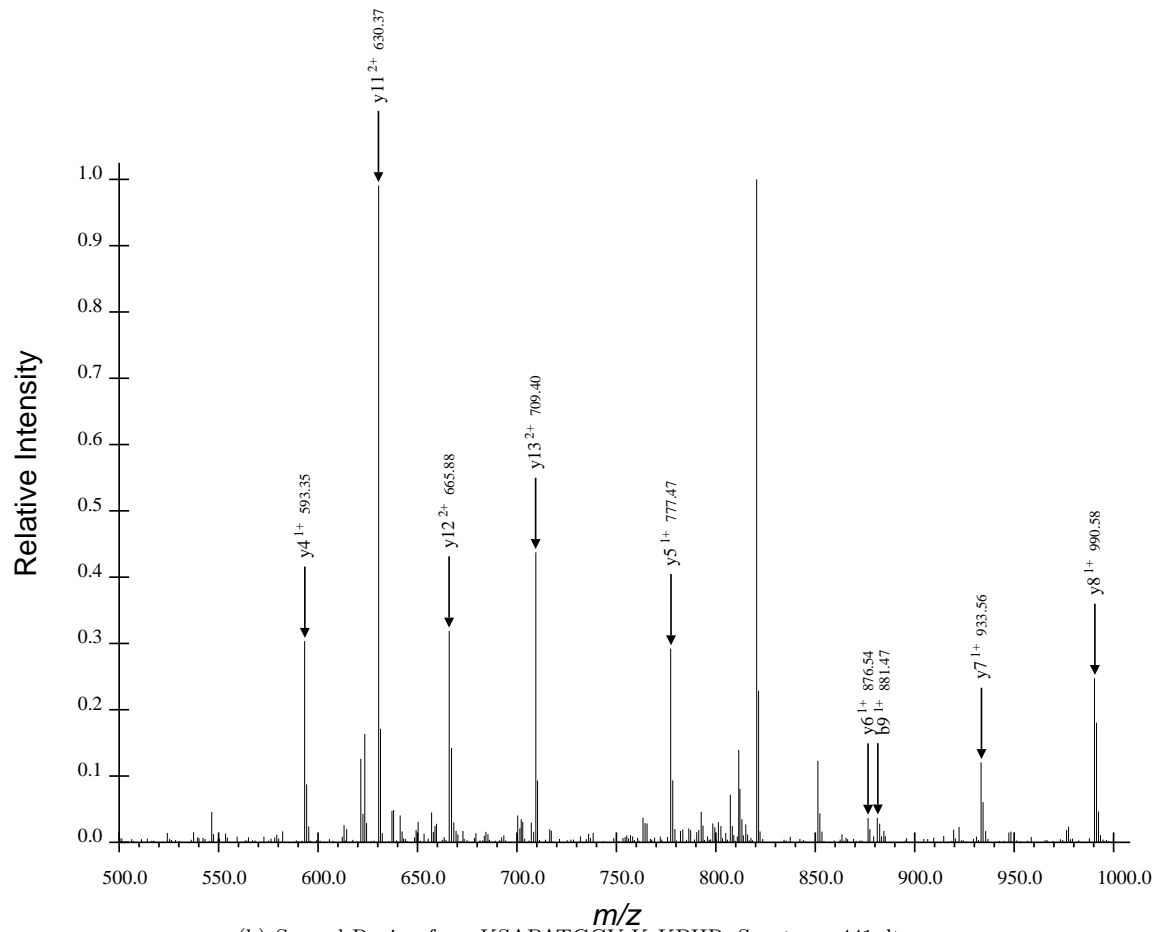

(b) Second Region for rrKSAPATGGVrKrKPHR, Spectrum 441.dta

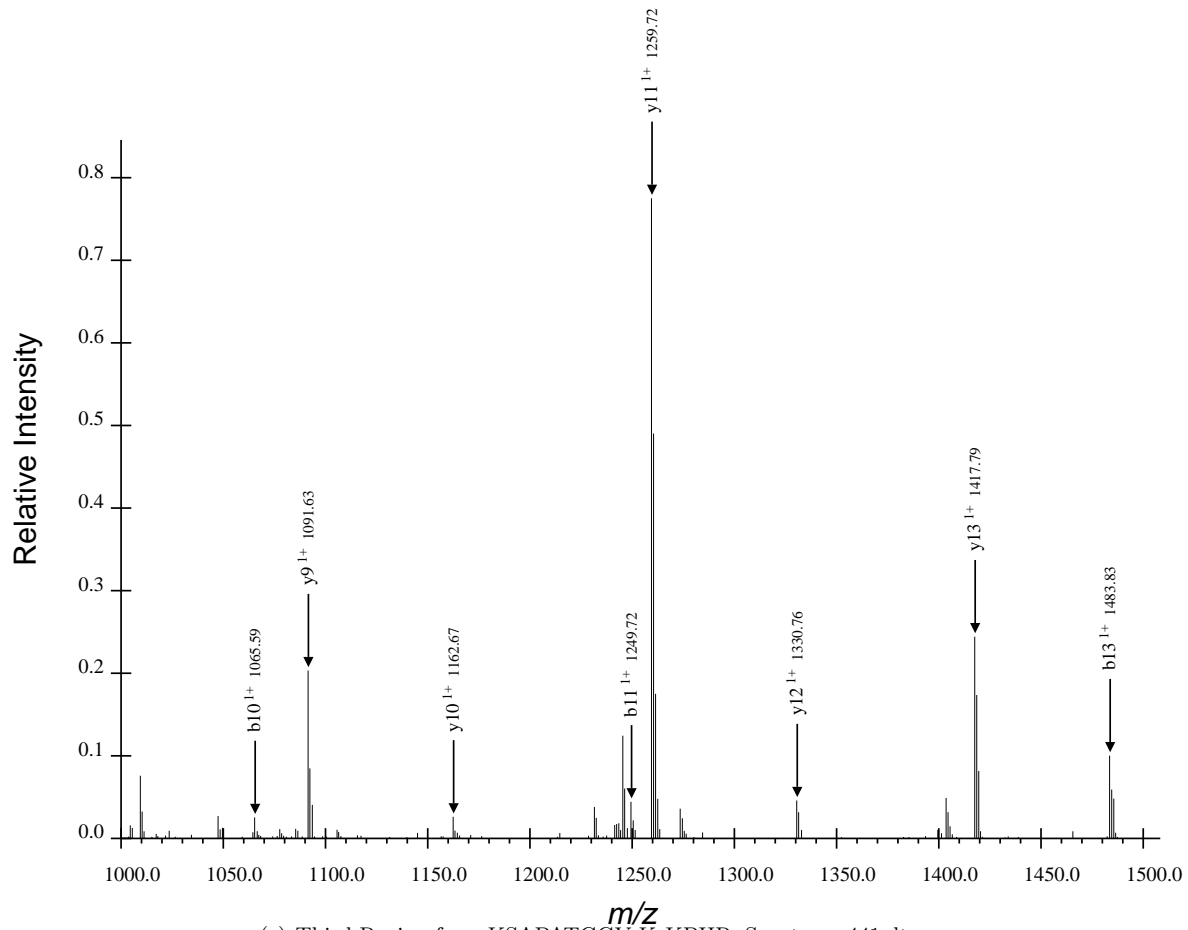

(c) Third Region for rrKSAPATGGVrKrKPHR, Spectrum 441.dta

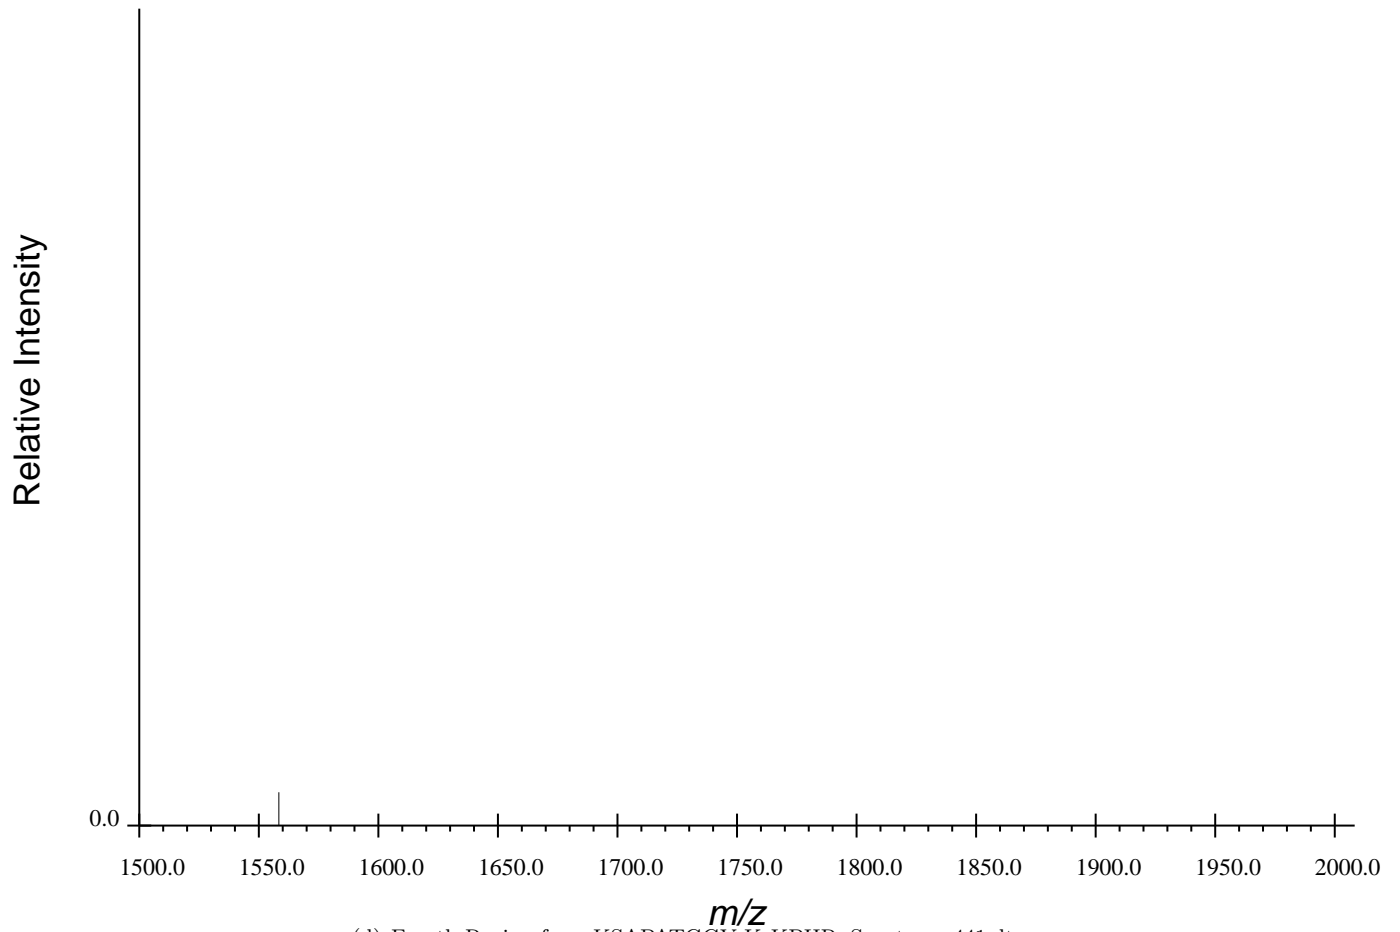

(d) Fourth Region for rrKSAPATGGVrKrKPHR, Spectrum 441.dta

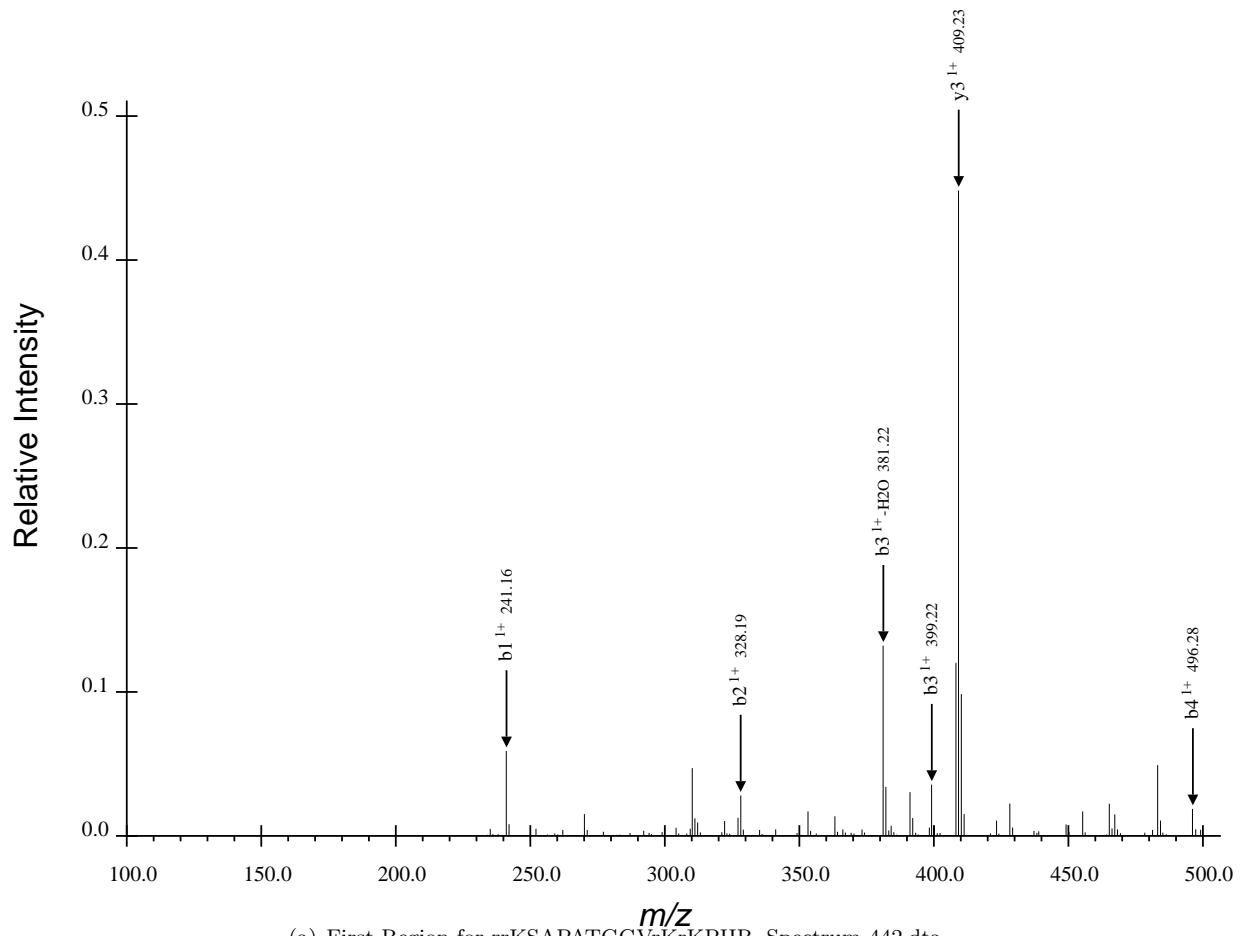

(a) First Region for rrKSAPATGGVrKrKPHR, Spectrum 442.dta

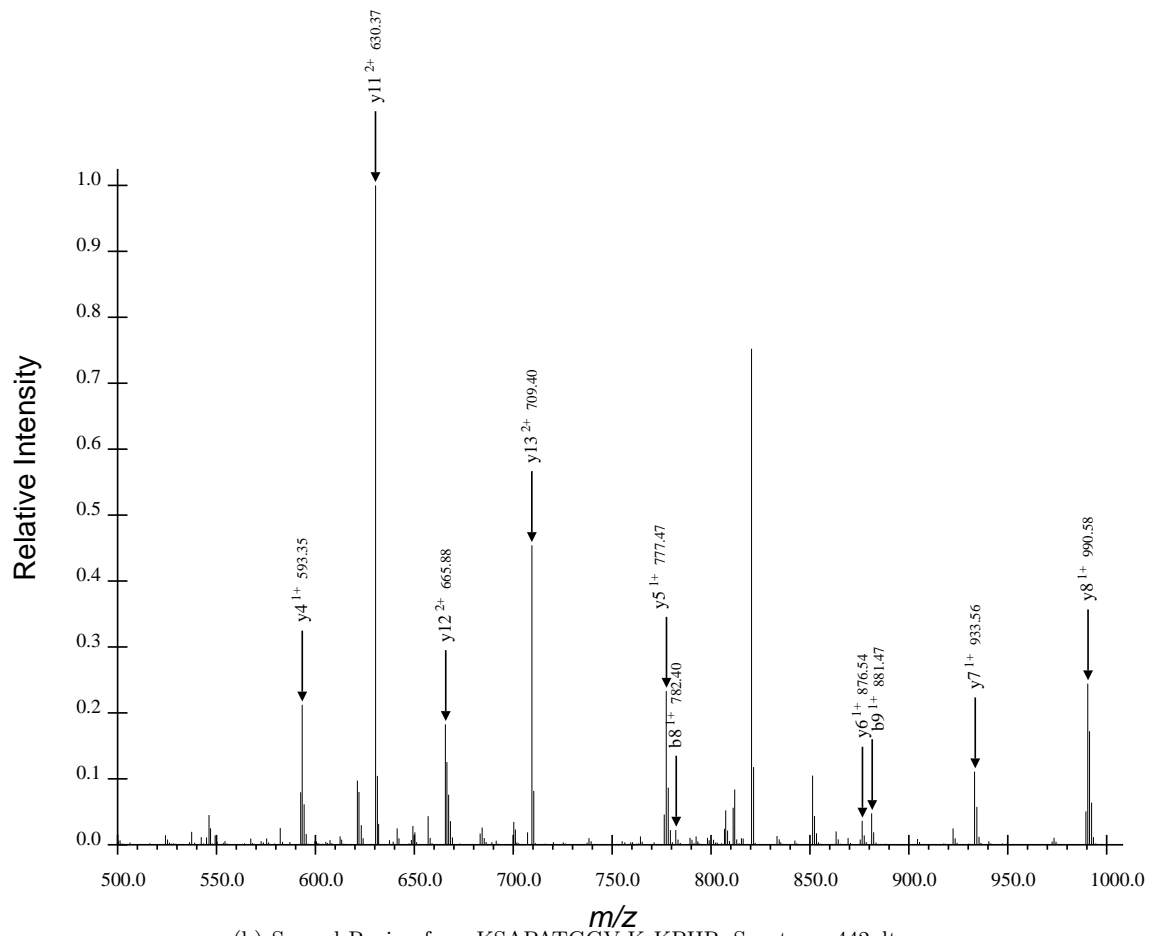

(b) Second Region for rrKSAPATGGVrKrKPHR, Spectrum 442.dta

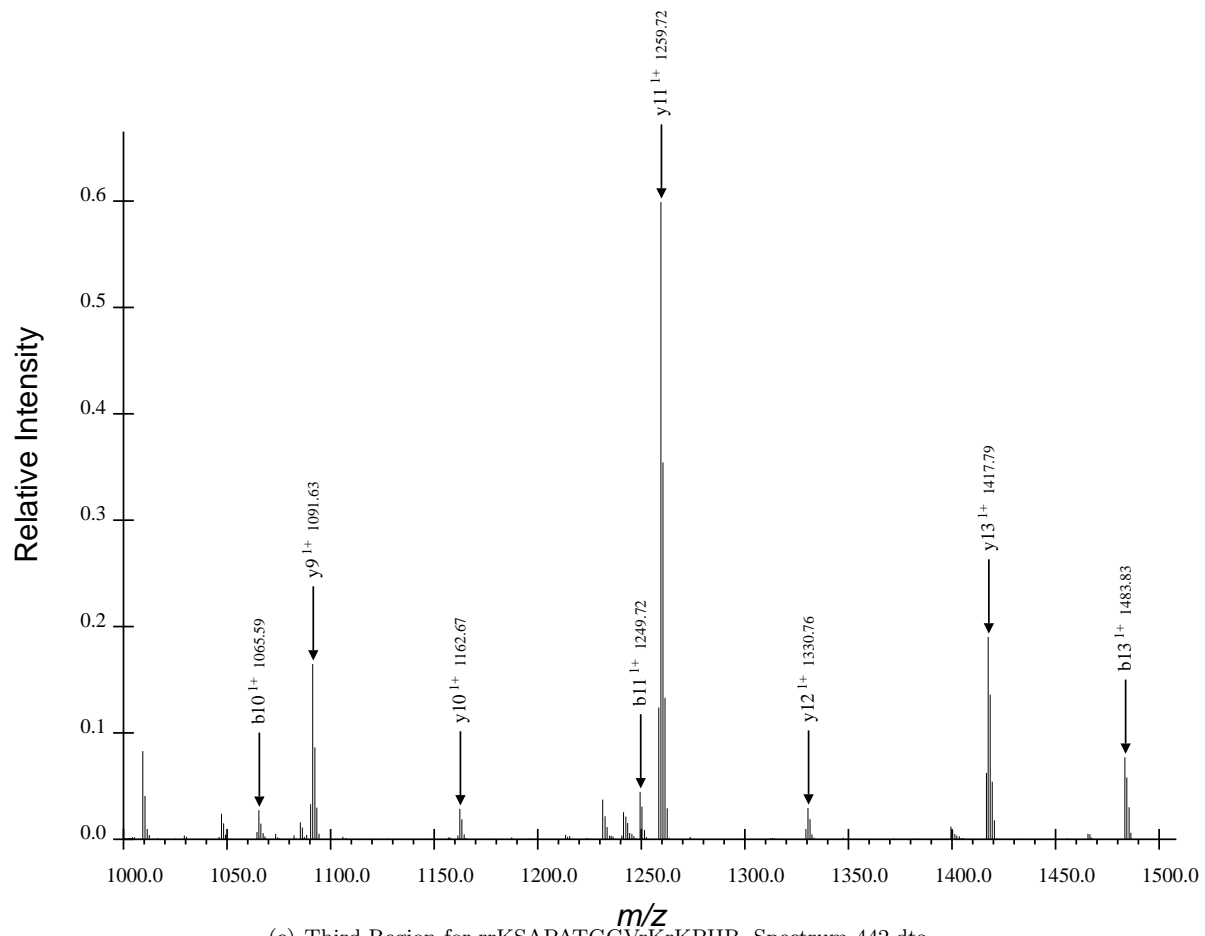

(c) Third Region for rrKSAPATGGVrKrKPHR, Spectrum 442.dta

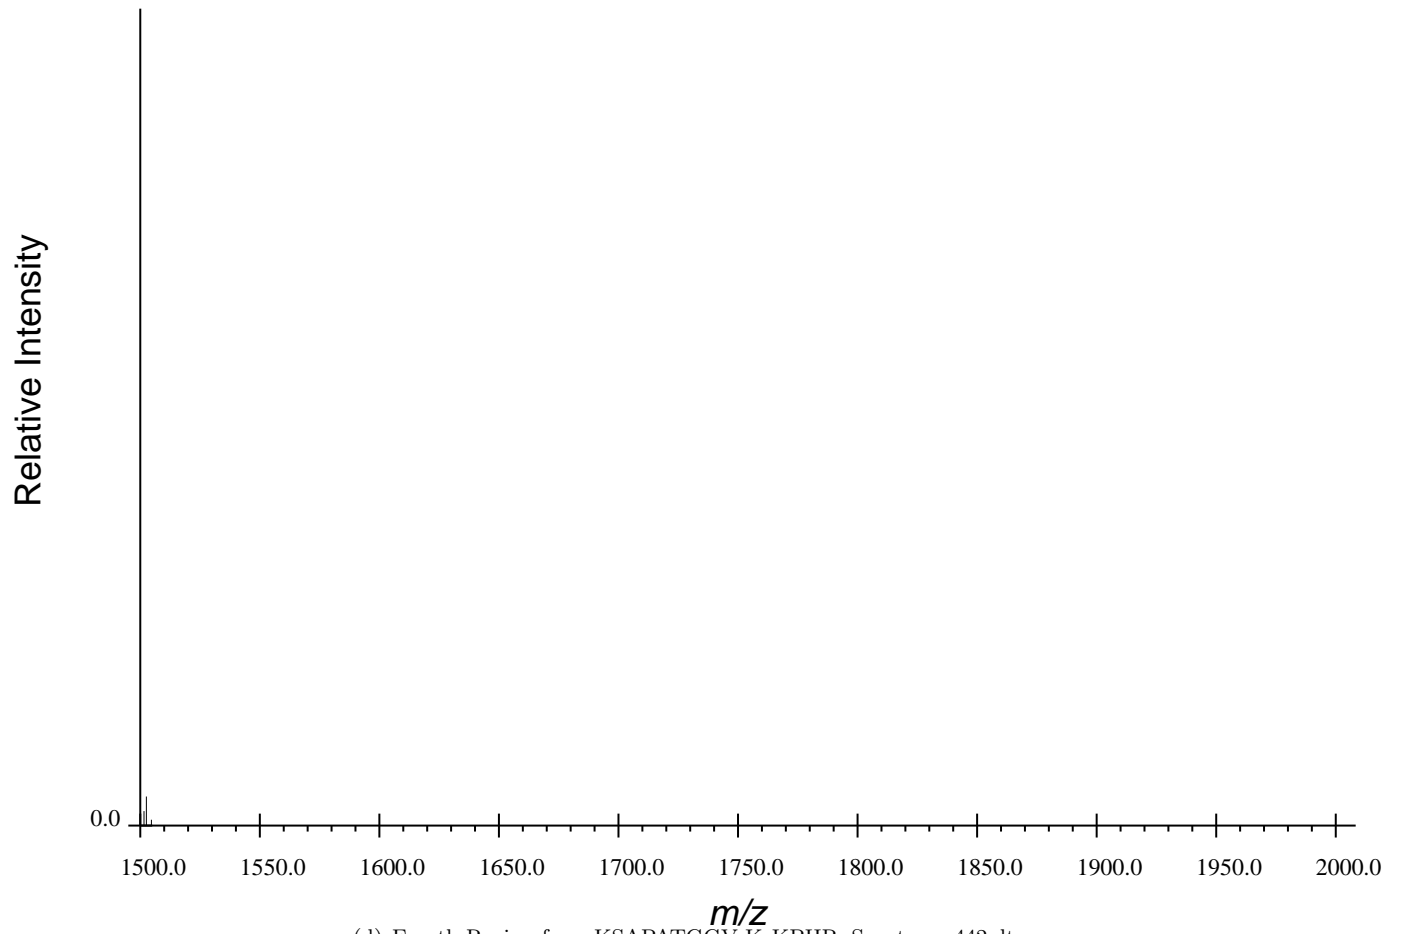

(d) Fourth Region for rrKSAPATGGVrKrKPHR, Spectrum 442.dta

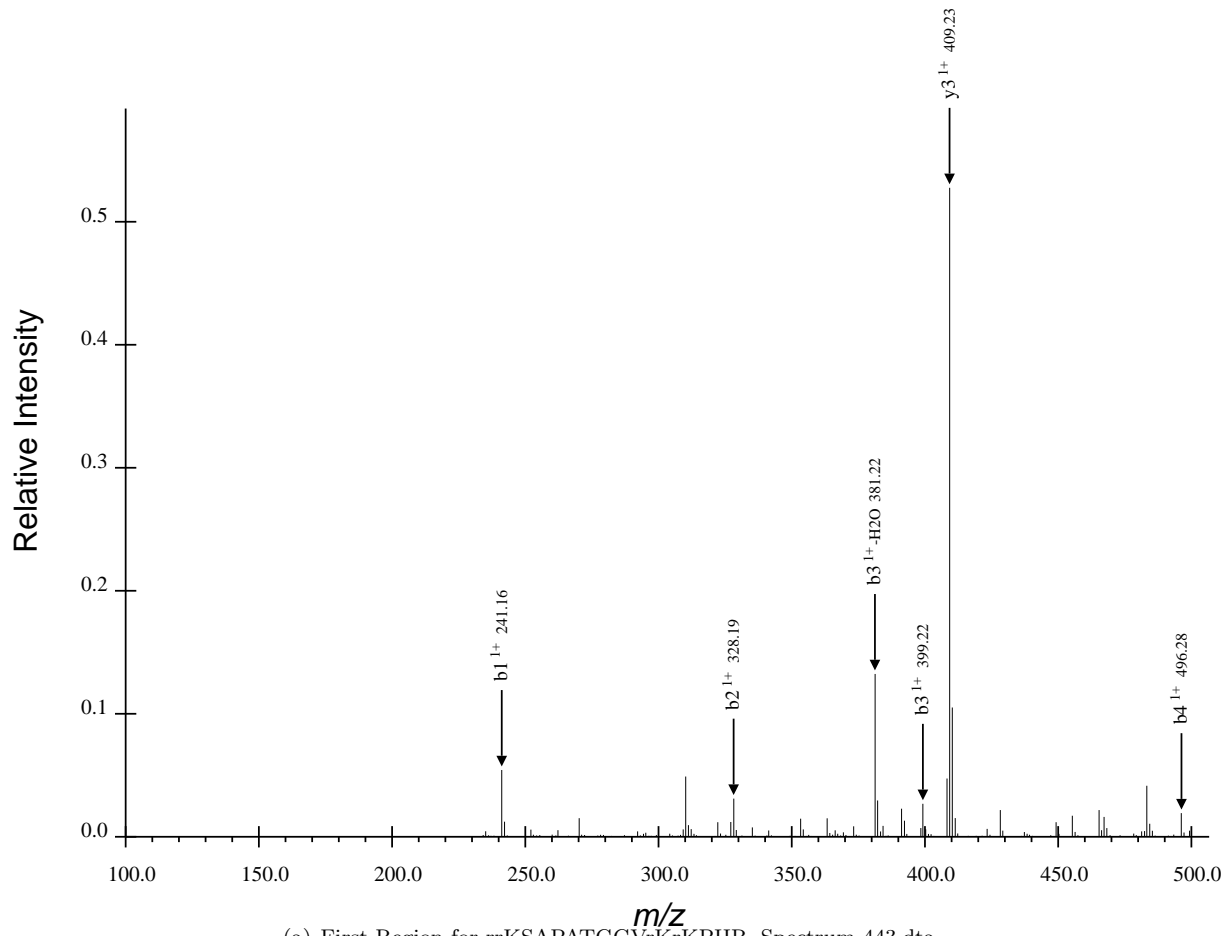

(a) First Region for rrKSAPATGGVrKrKPHR, Spectrum 443.dta

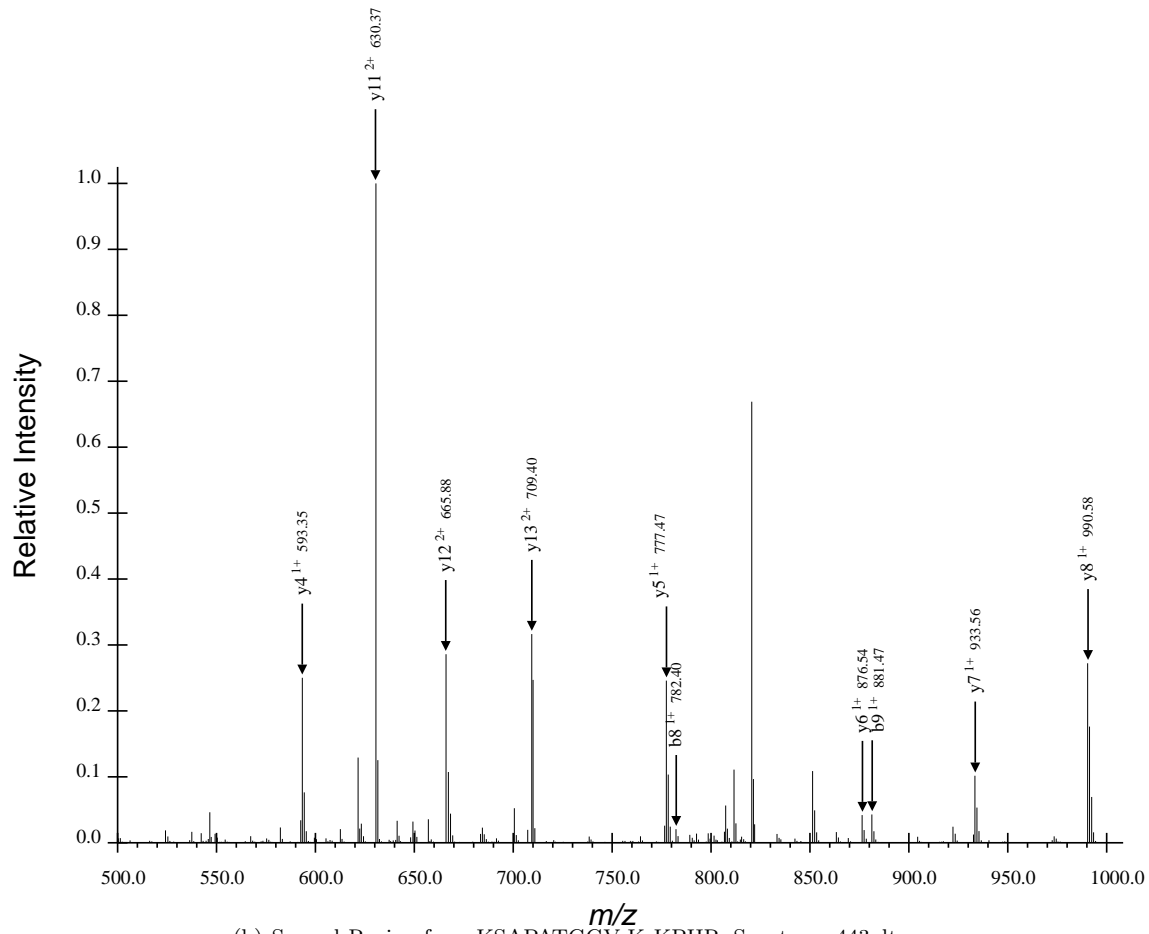

(b) Second Region for rrKSAPATGGVrKrKPHR, Spectrum 443.dta

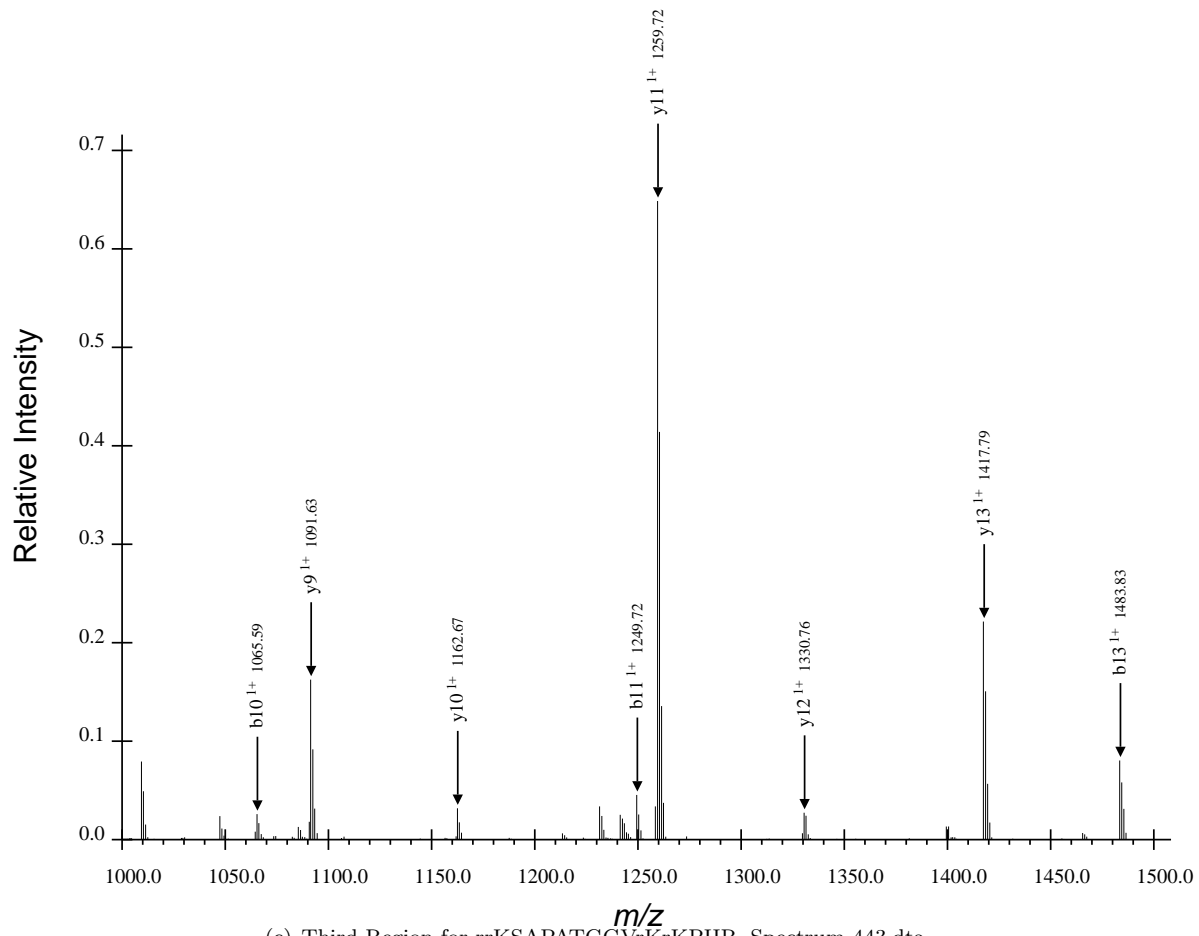

(c) Third Region for rrKSAPATGGVrKrKPHR, Spectrum 443.dta

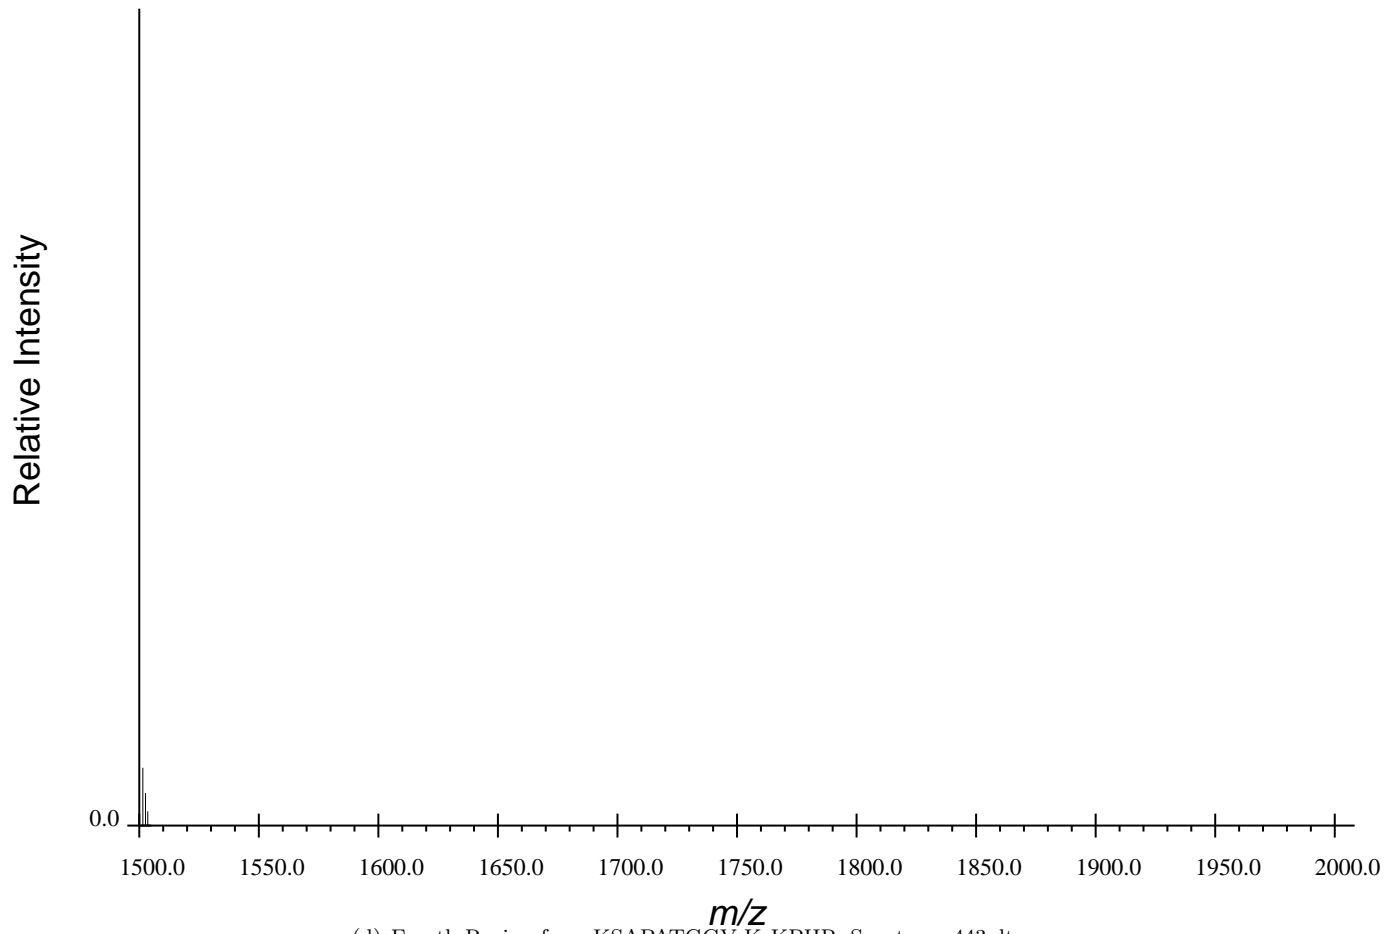

(d) Fourth Region for rrKSAPATGGVrKrKPHR, Spectrum 443.dta

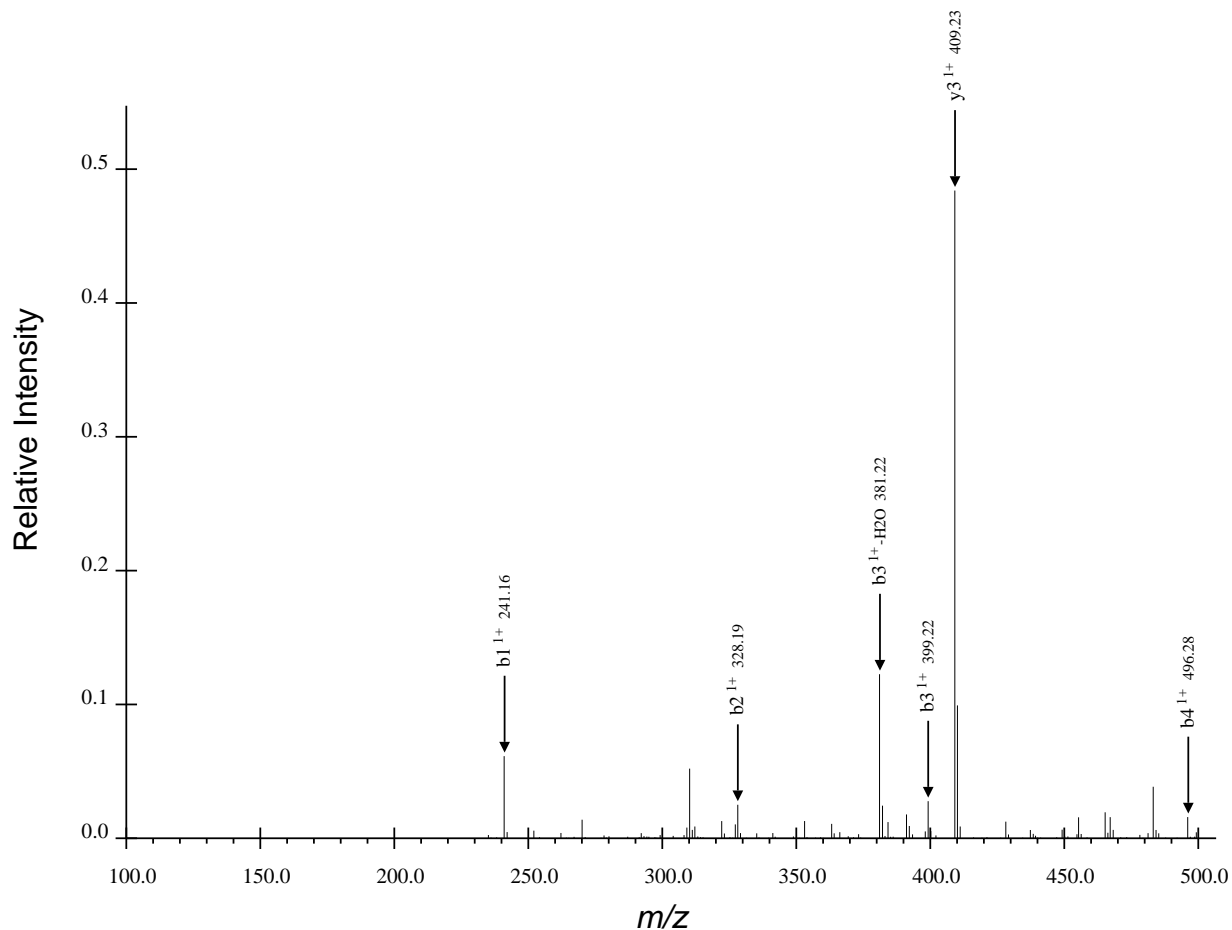

(a) First Region for rrKSAPATGGVrKrKPHR, Spectrum 444.dta

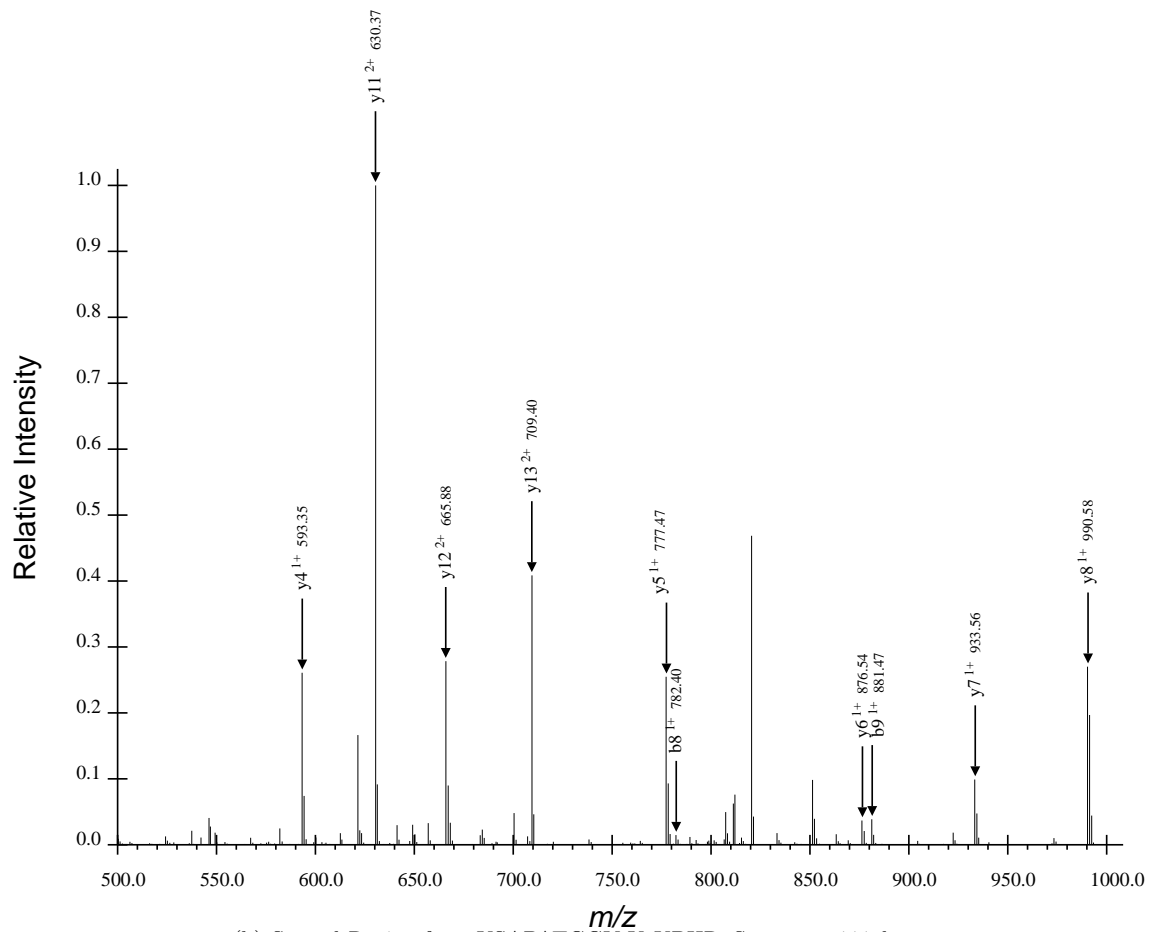

(b) Second Region for rrKSAPATGGVrKrKPHR, Spectrum 444.dta



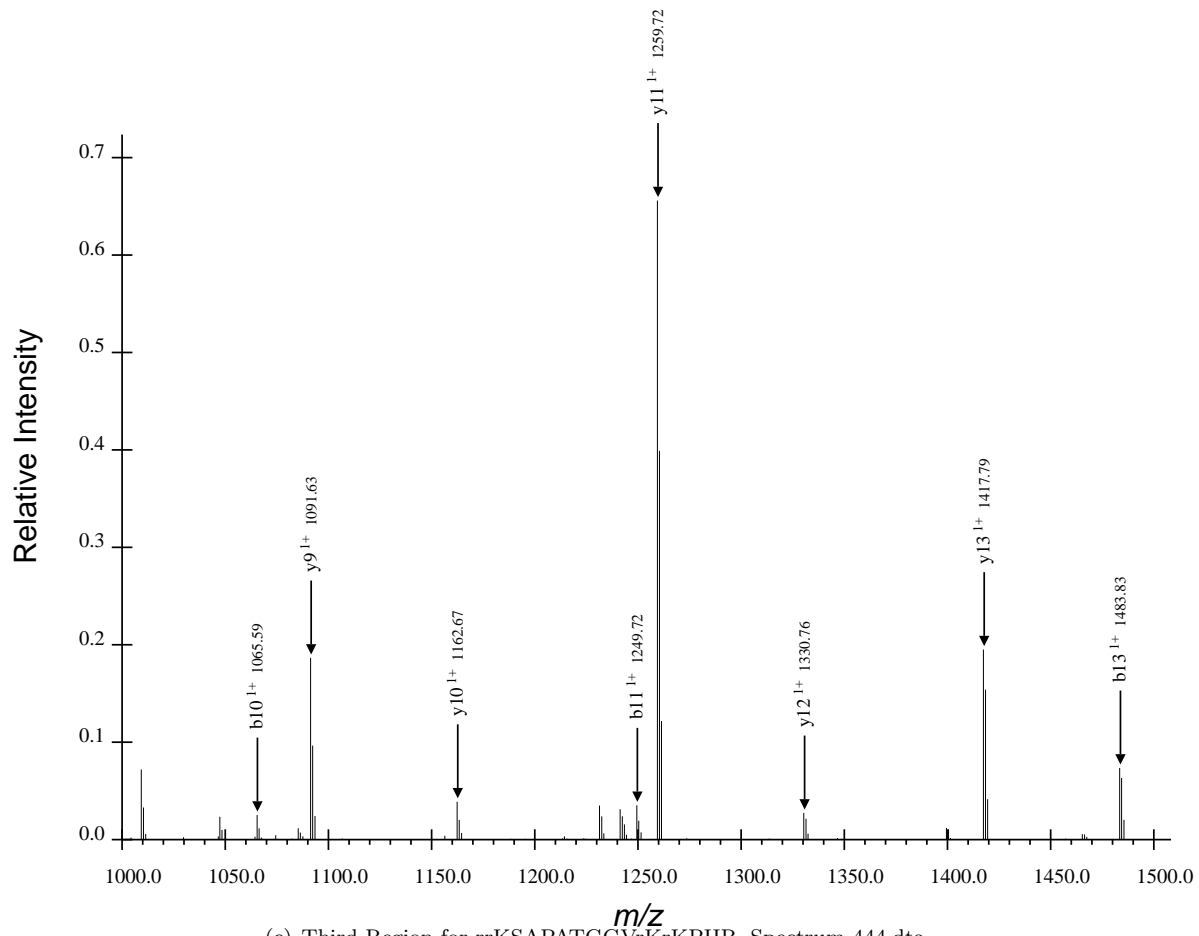

(c) Third Region for rrKSAPATGGVrKrKPHR, Spectrum 444.dta

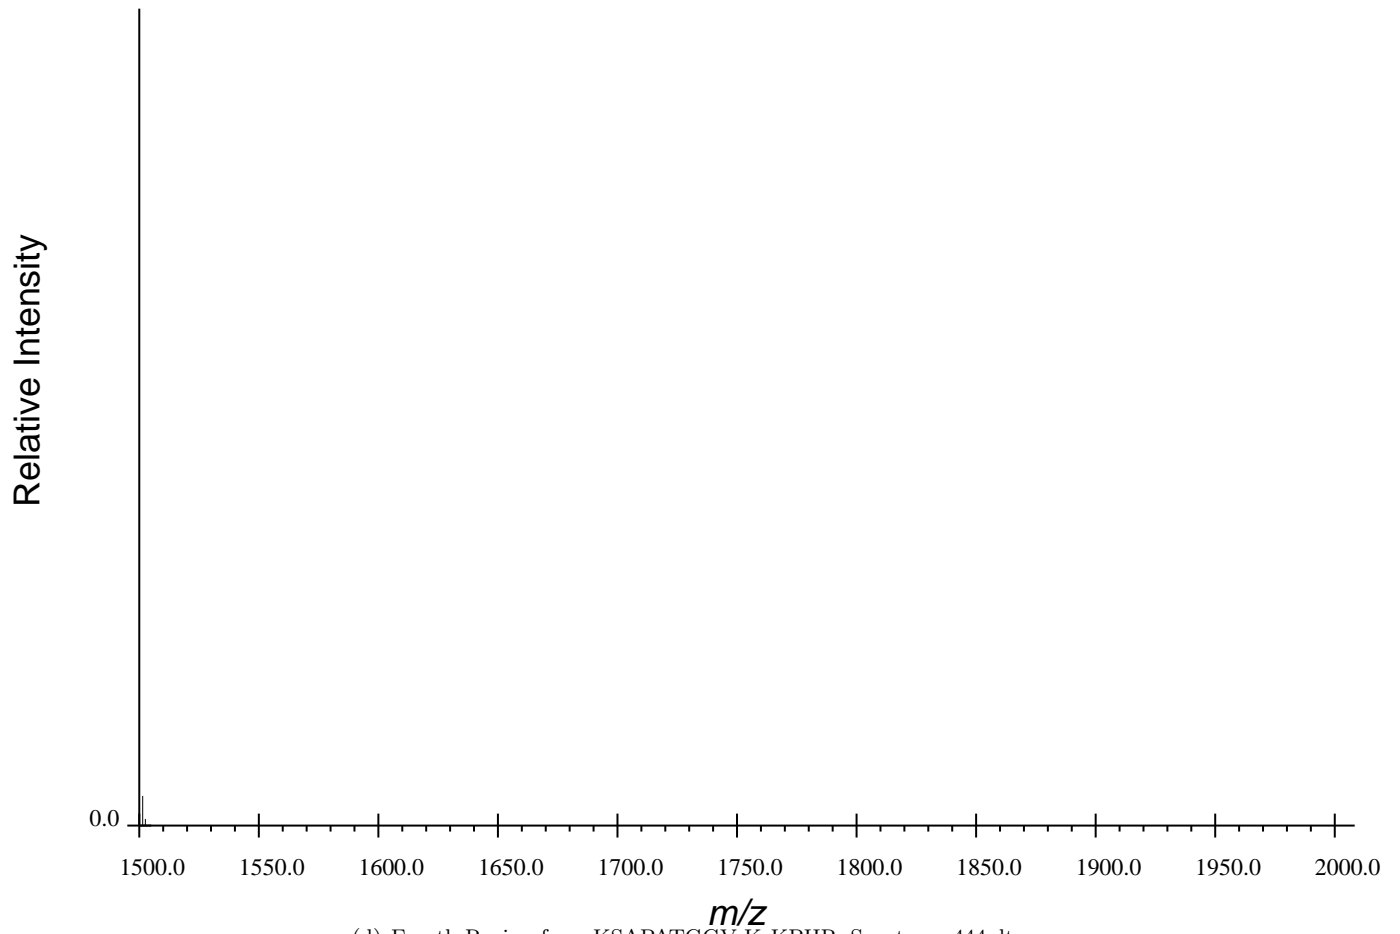

(d) Fourth Region for rrKSAPATGGVrKrKPHR, Spectrum 444.dta

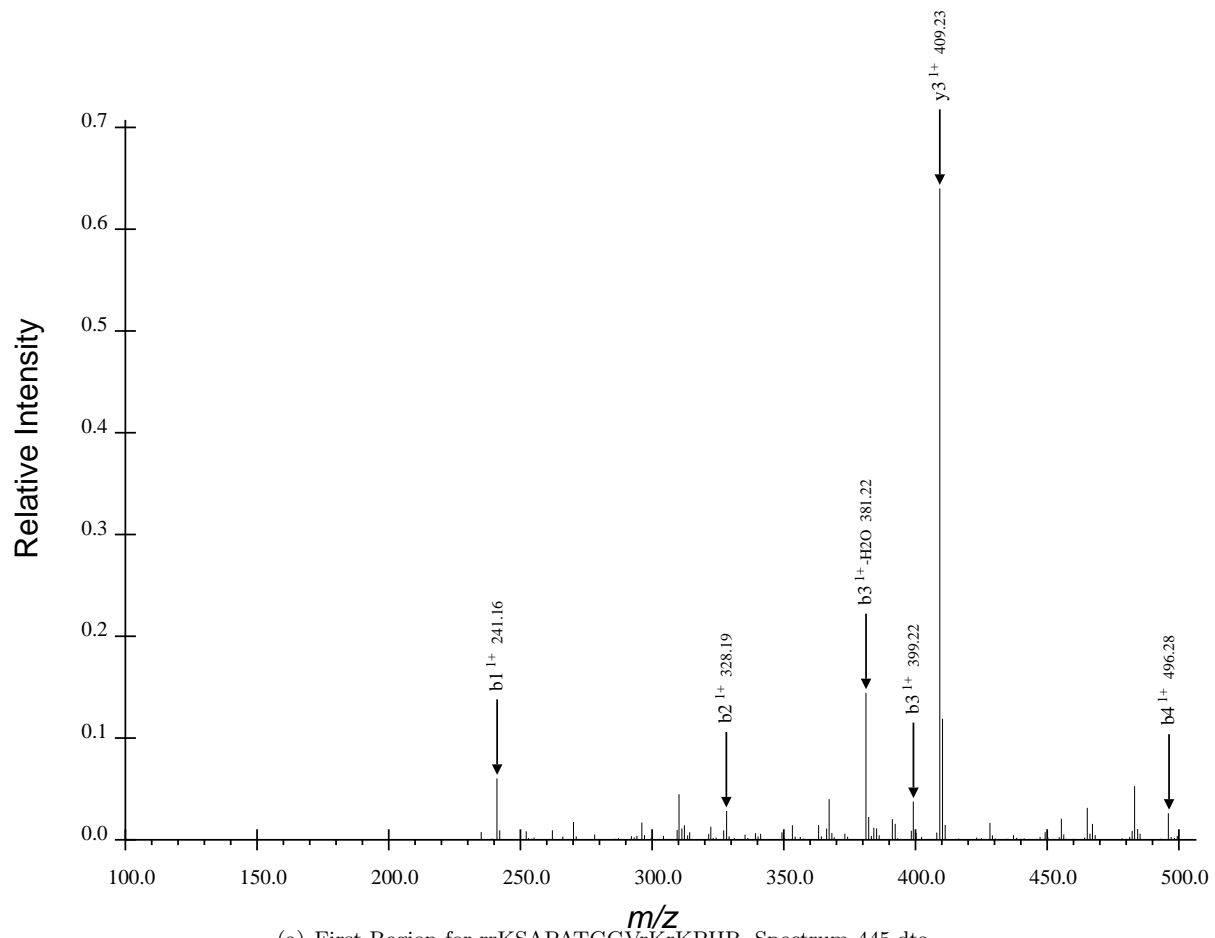

(a) First Region for rrKSAPATGGVrKrKPHR, Spectrum 445.dta

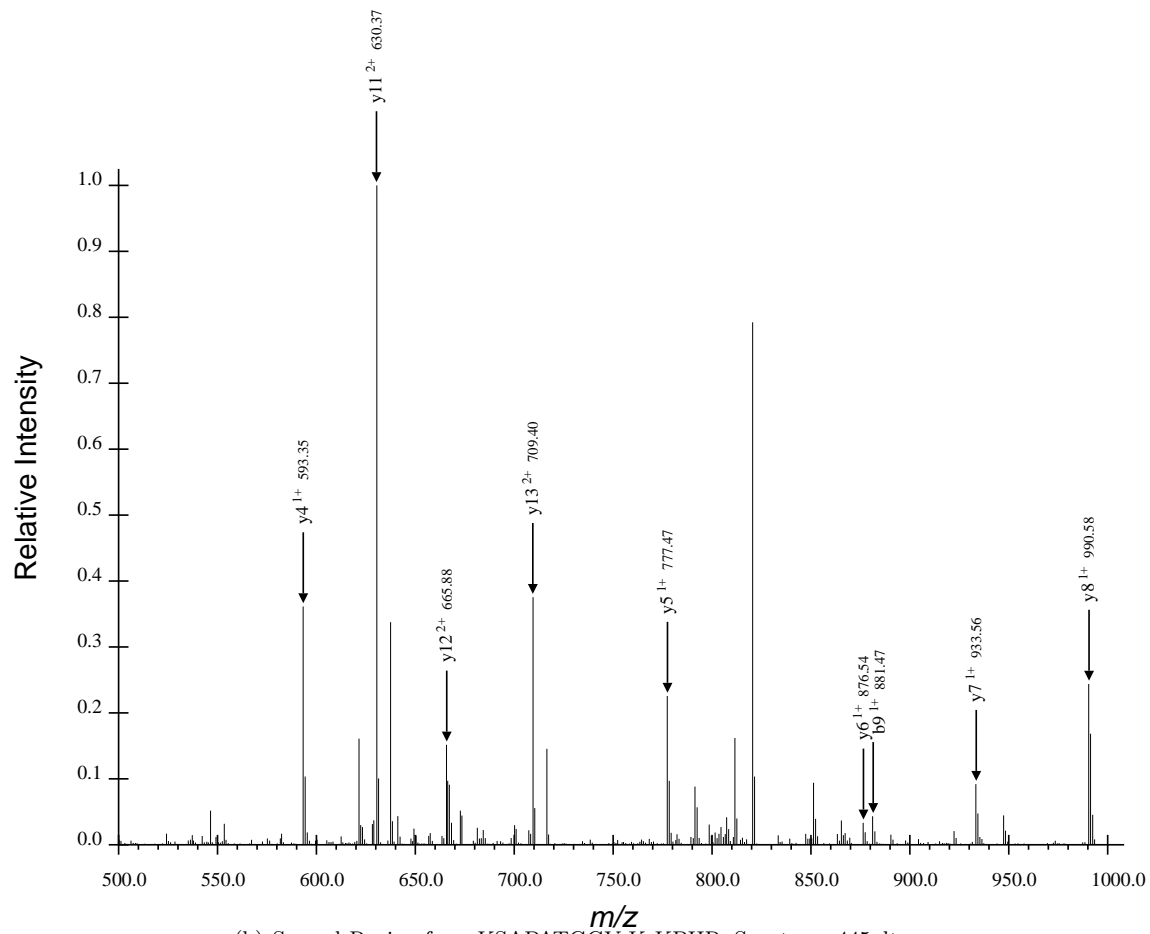

(b) Second Region for rrKSAPATGGVrKrKPHR, Spectrum 445.dta

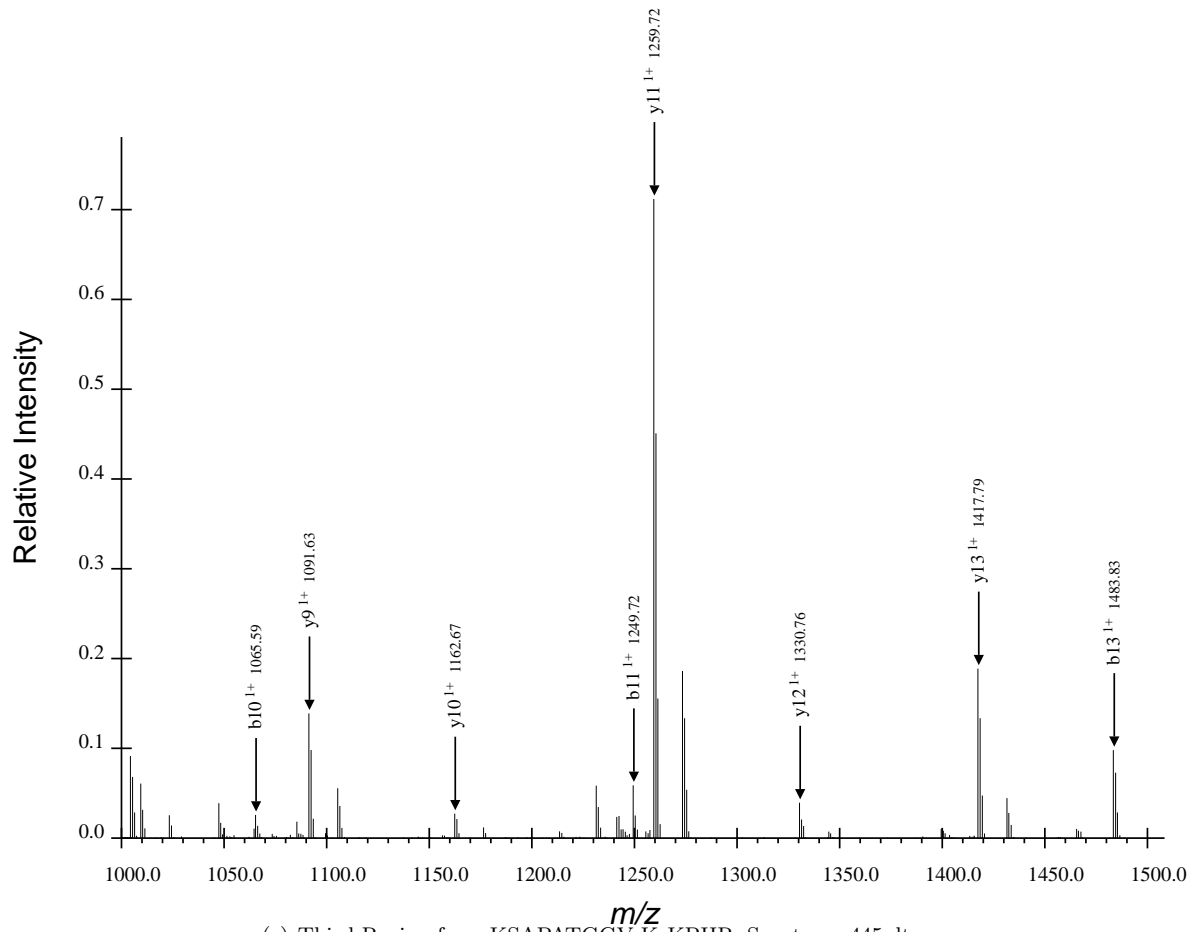

(c) Third Region for rrKSAPATGGVrKrKPHR, Spectrum 445.dta

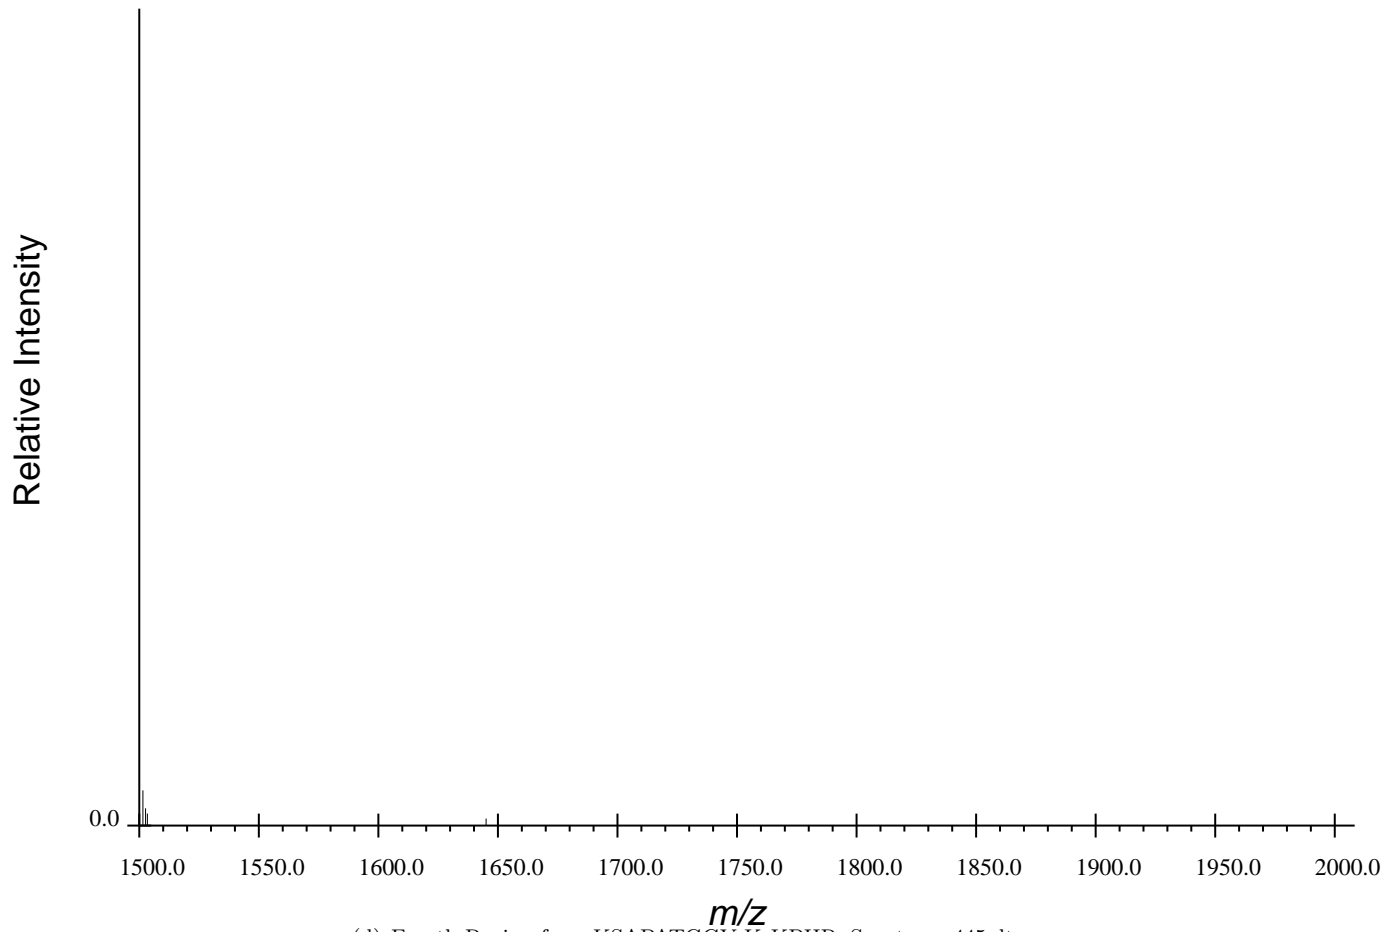

(d) Fourth Region for rrKSAPATGGVrKrKPHR, Spectrum 445.dta

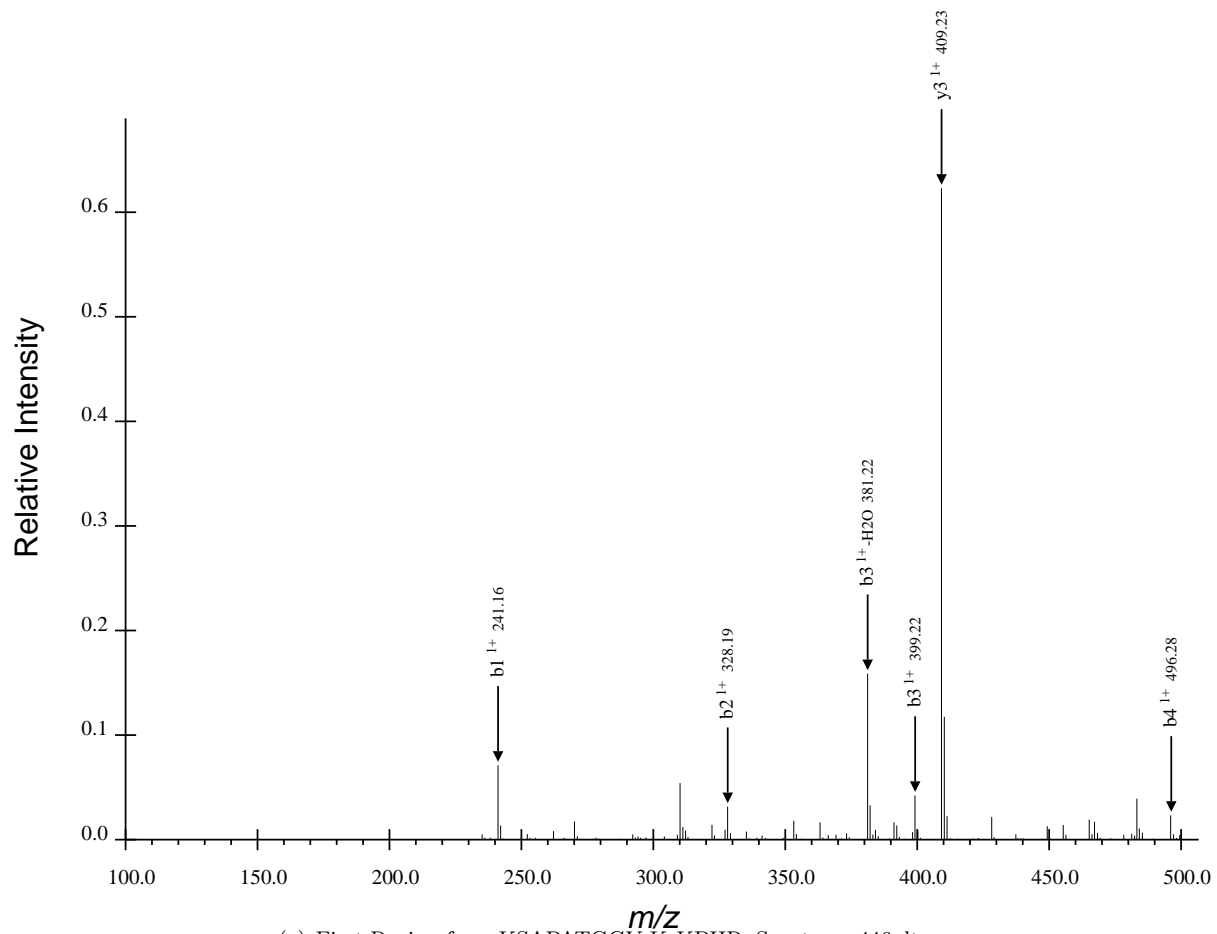

(a) First Region for rrKSAPATGGVrKrKPHR, Spectrum 446.dta

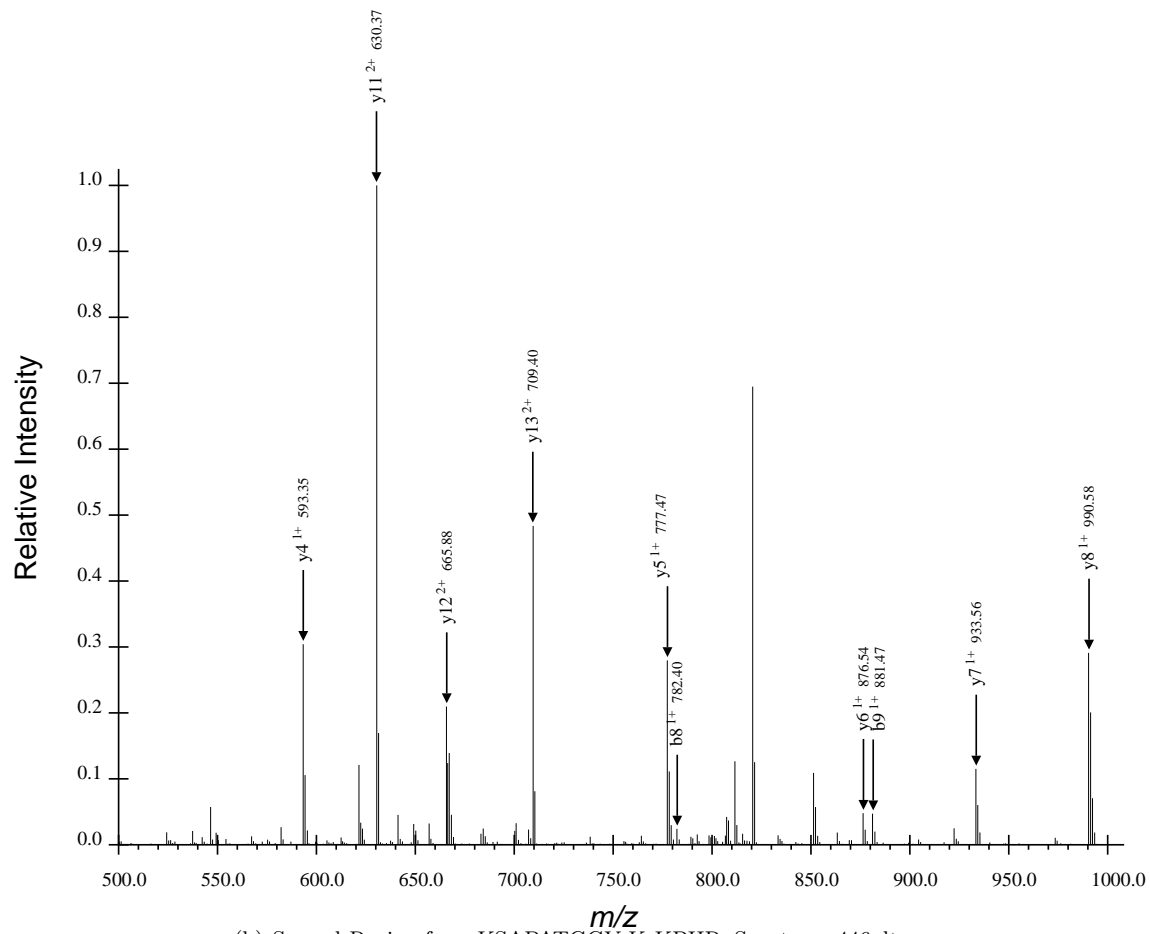

(b) Second Region for rrKSAPATGGVrKrKPHR, Spectrum 446.dta

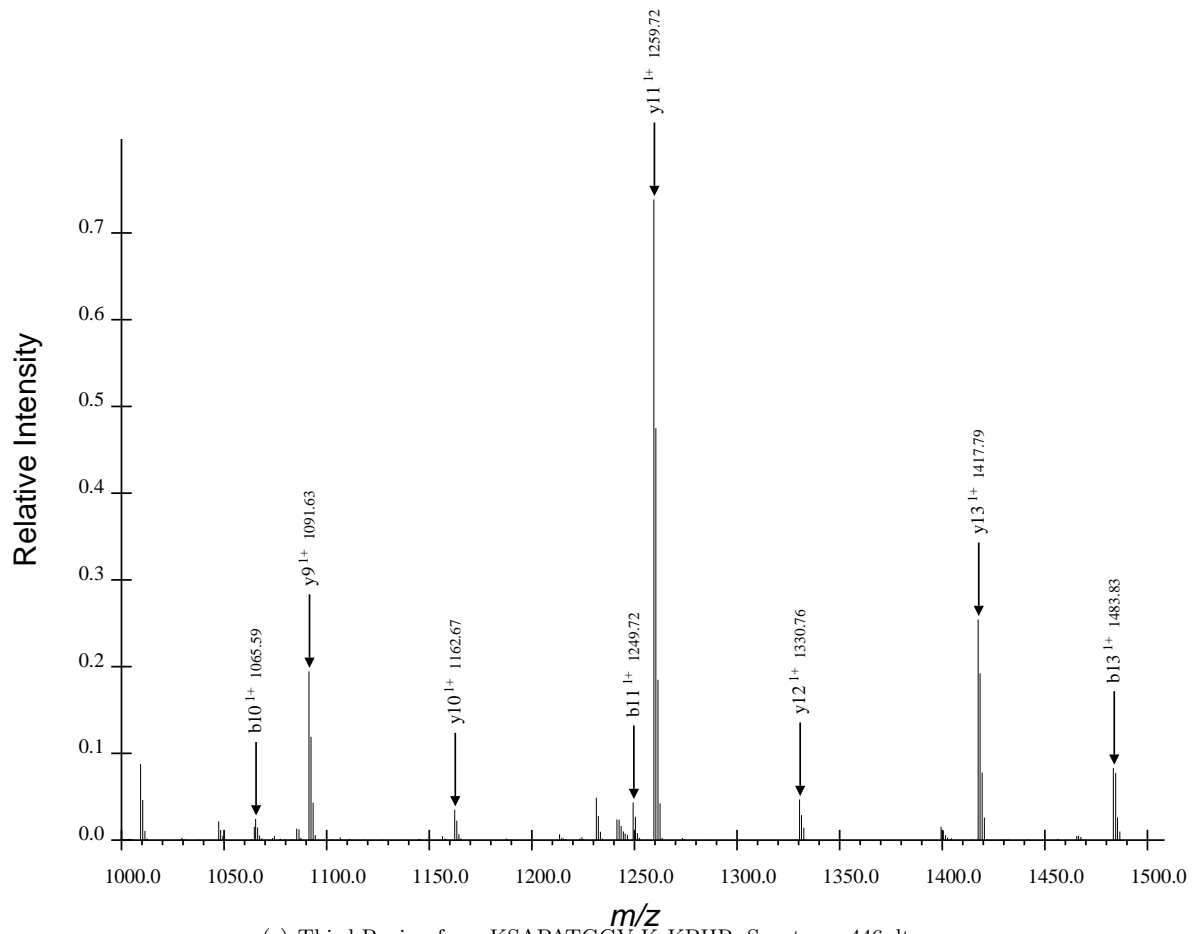

(c) Third Region for rrKSAPATGGVrKrKPHR, Spectrum 446.dta

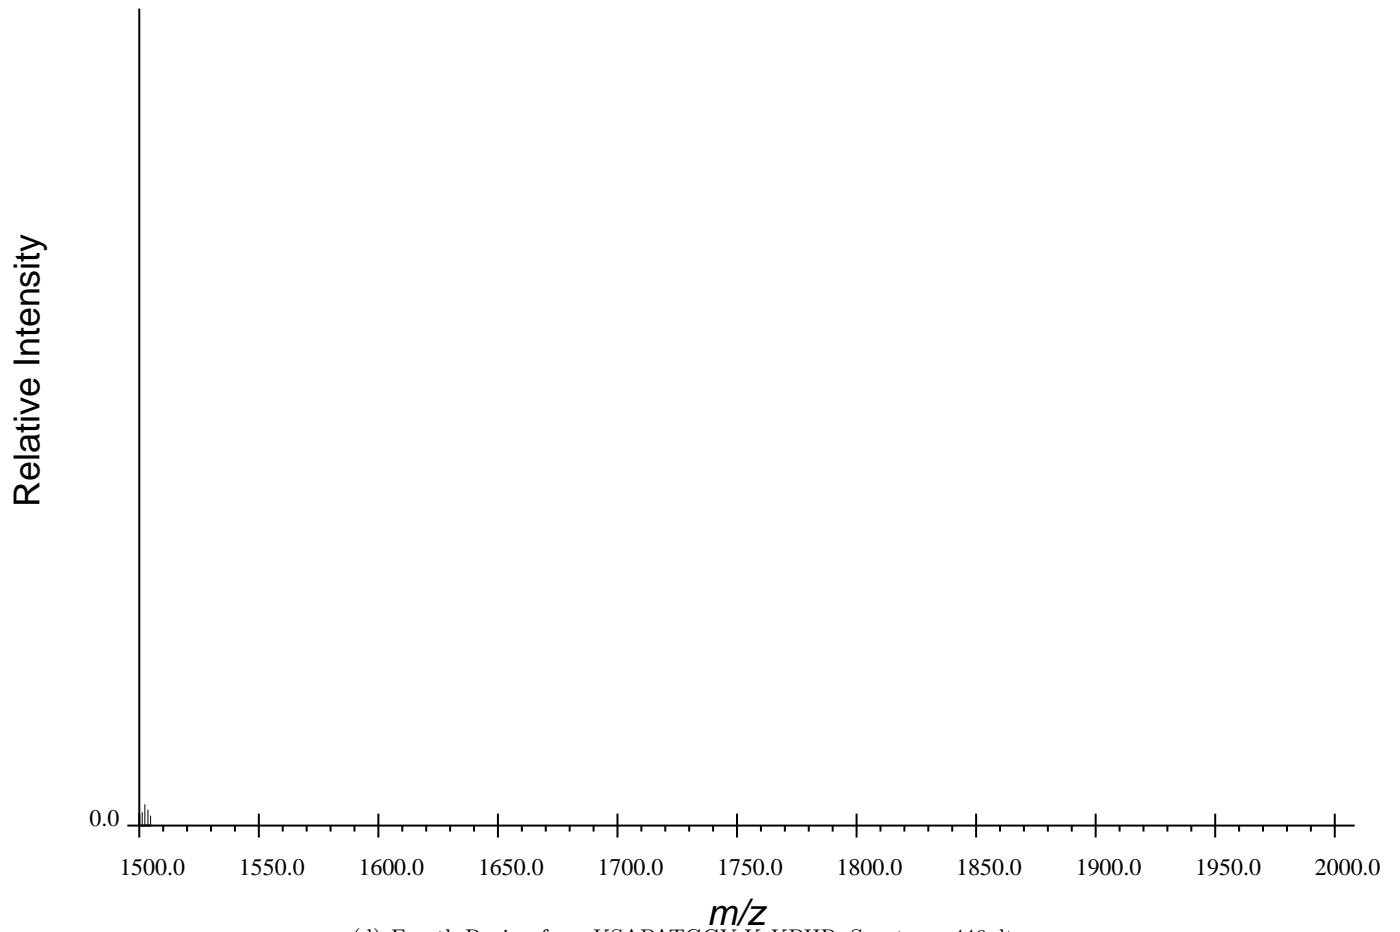

(d) Fourth Region for rrKSAPATGGVrKrKPHR, Spectrum 446.dta

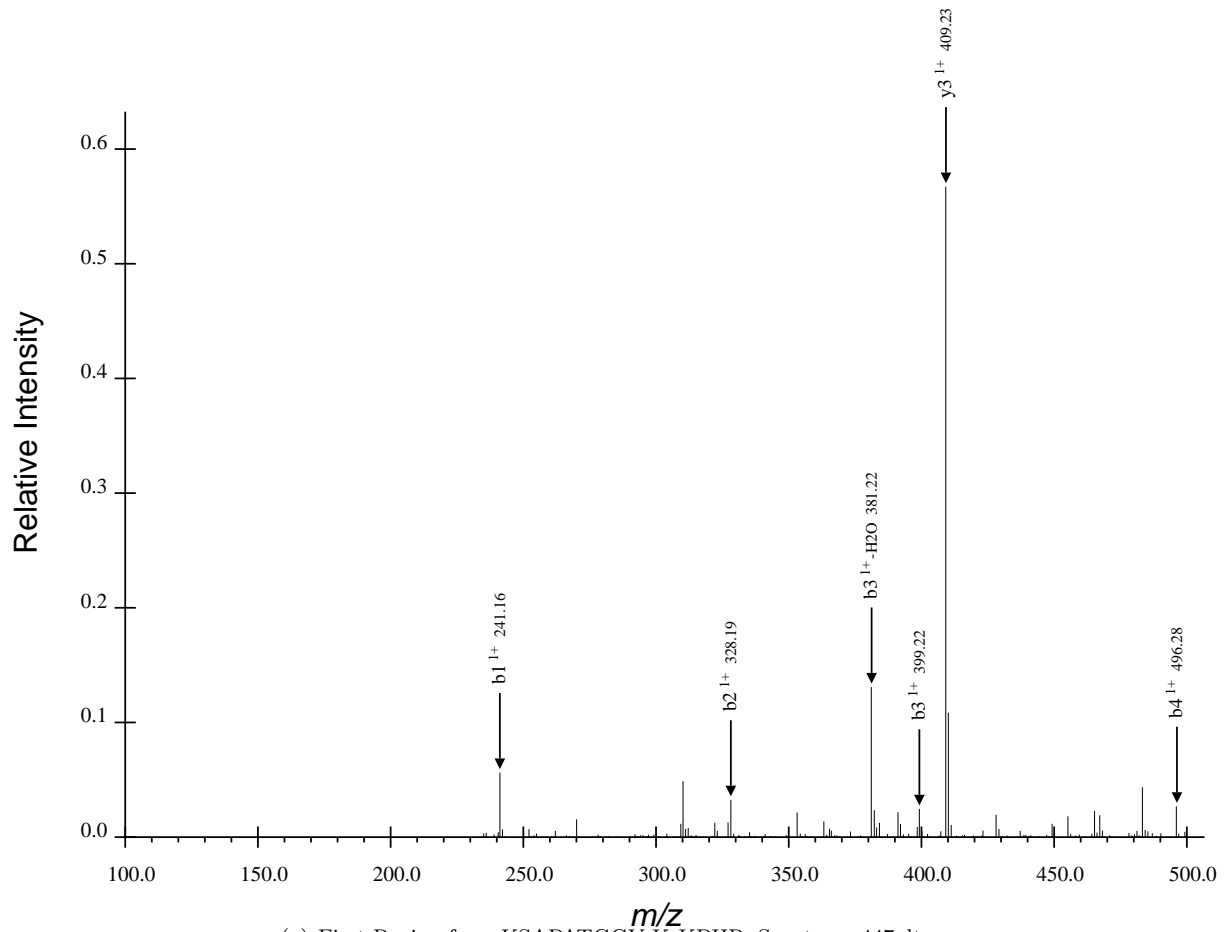

(a) First Region for rrKSAPATGGVrKrKPHR, Spectrum 447.dta

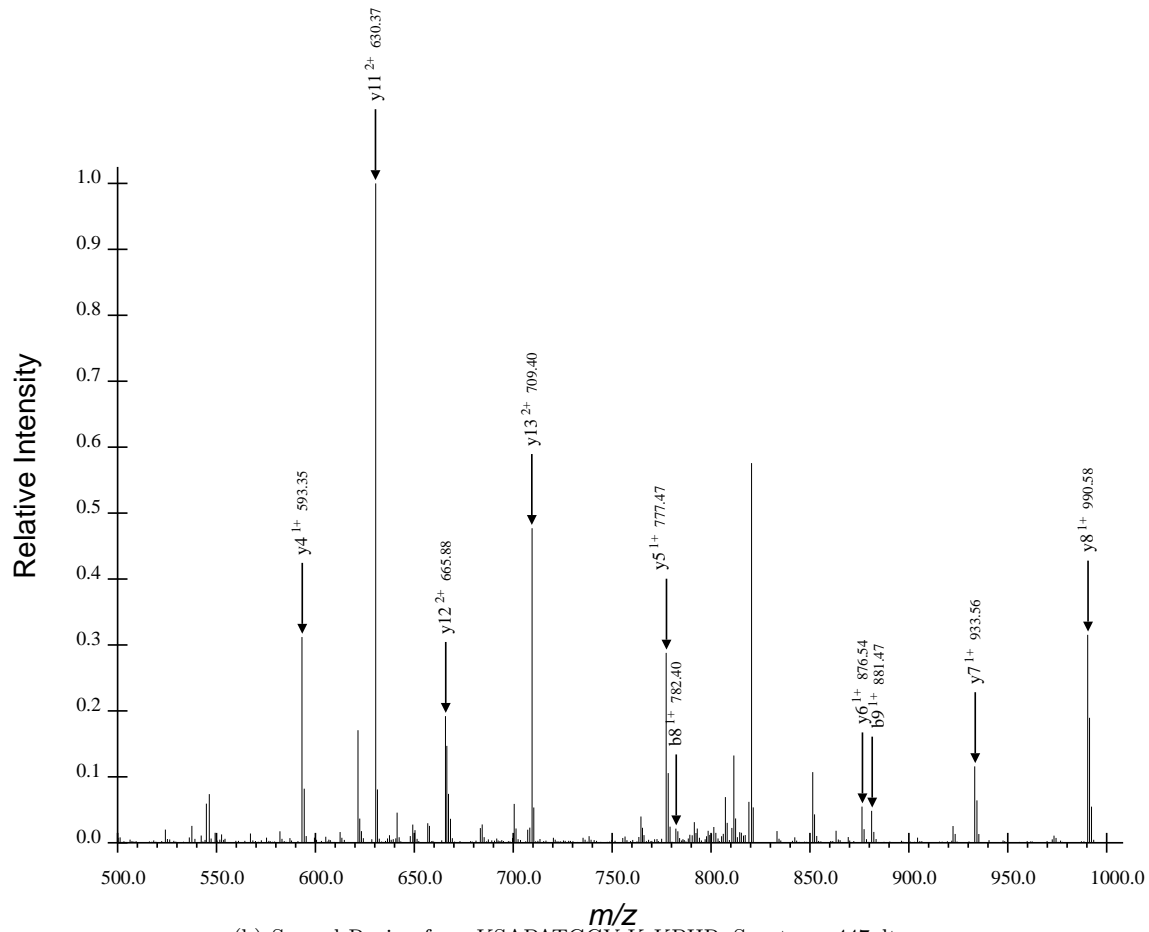

(b) Second Region for rrKSAPATGGVrKrKPHR, Spectrum 447.dta

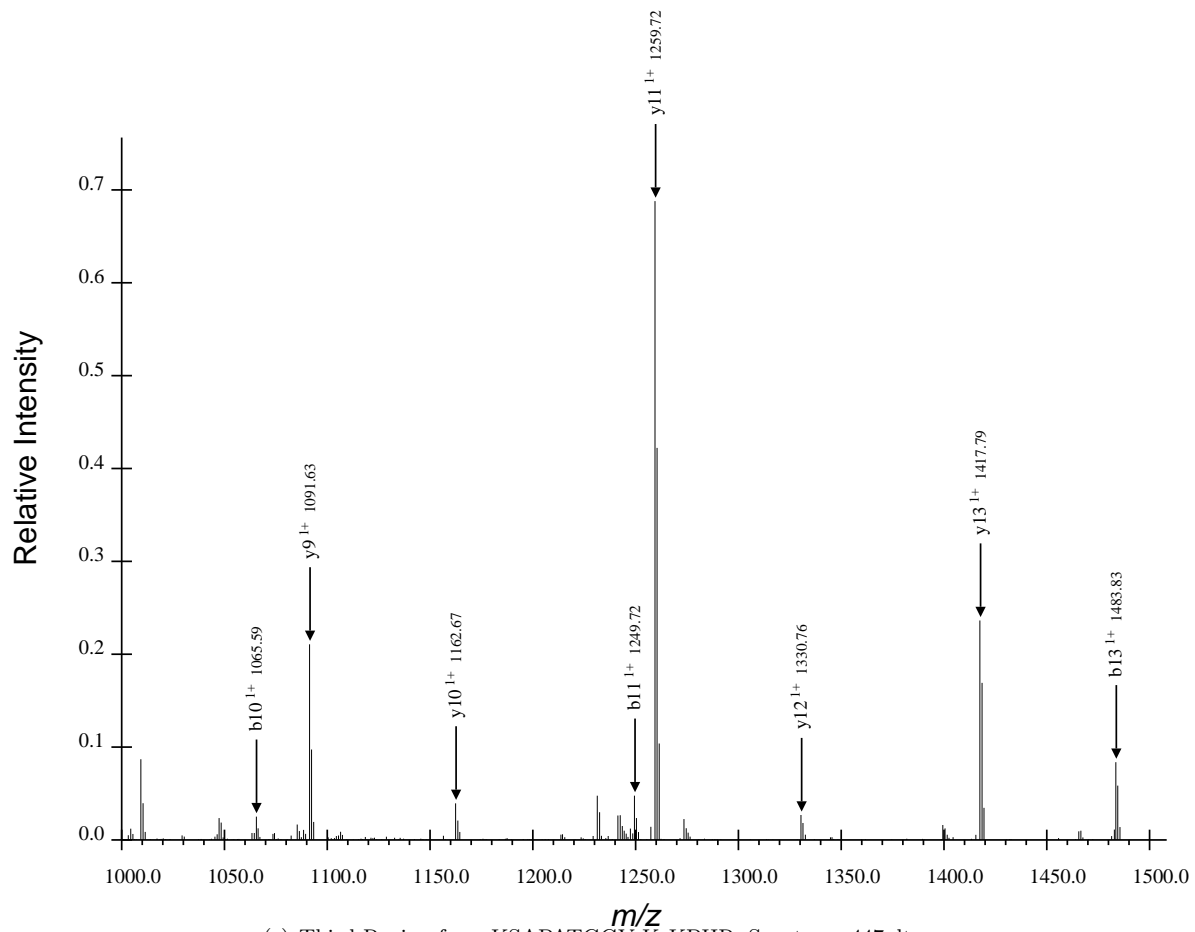

(c) Third Region for rrKSAPATGGVrKrKPHR, Spectrum 447.dta

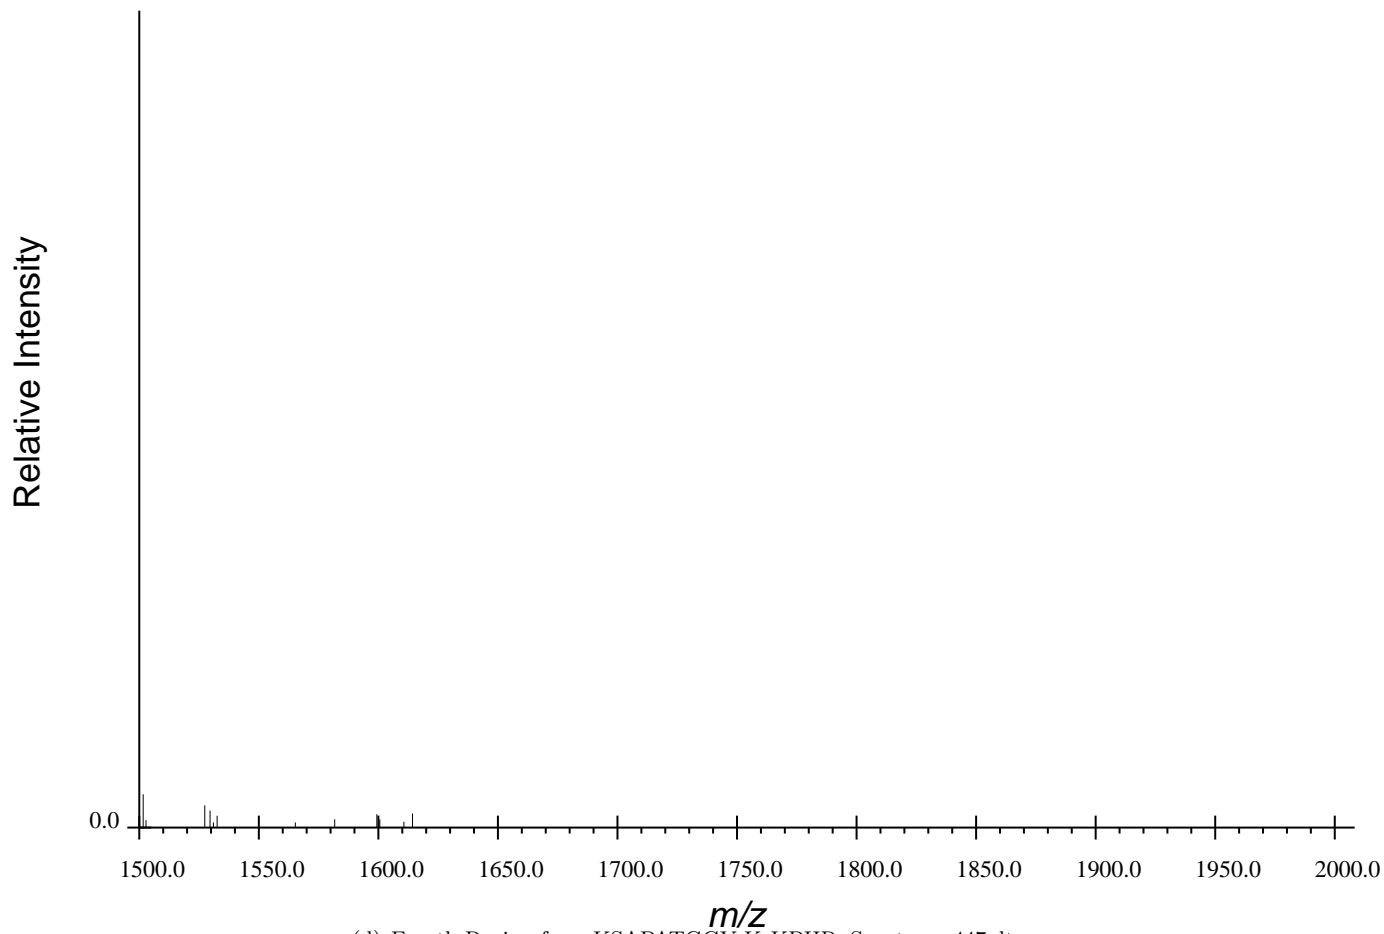

(d) Fourth Region for rrKSAPATGGVrKrKPHR, Spectrum 447.dta

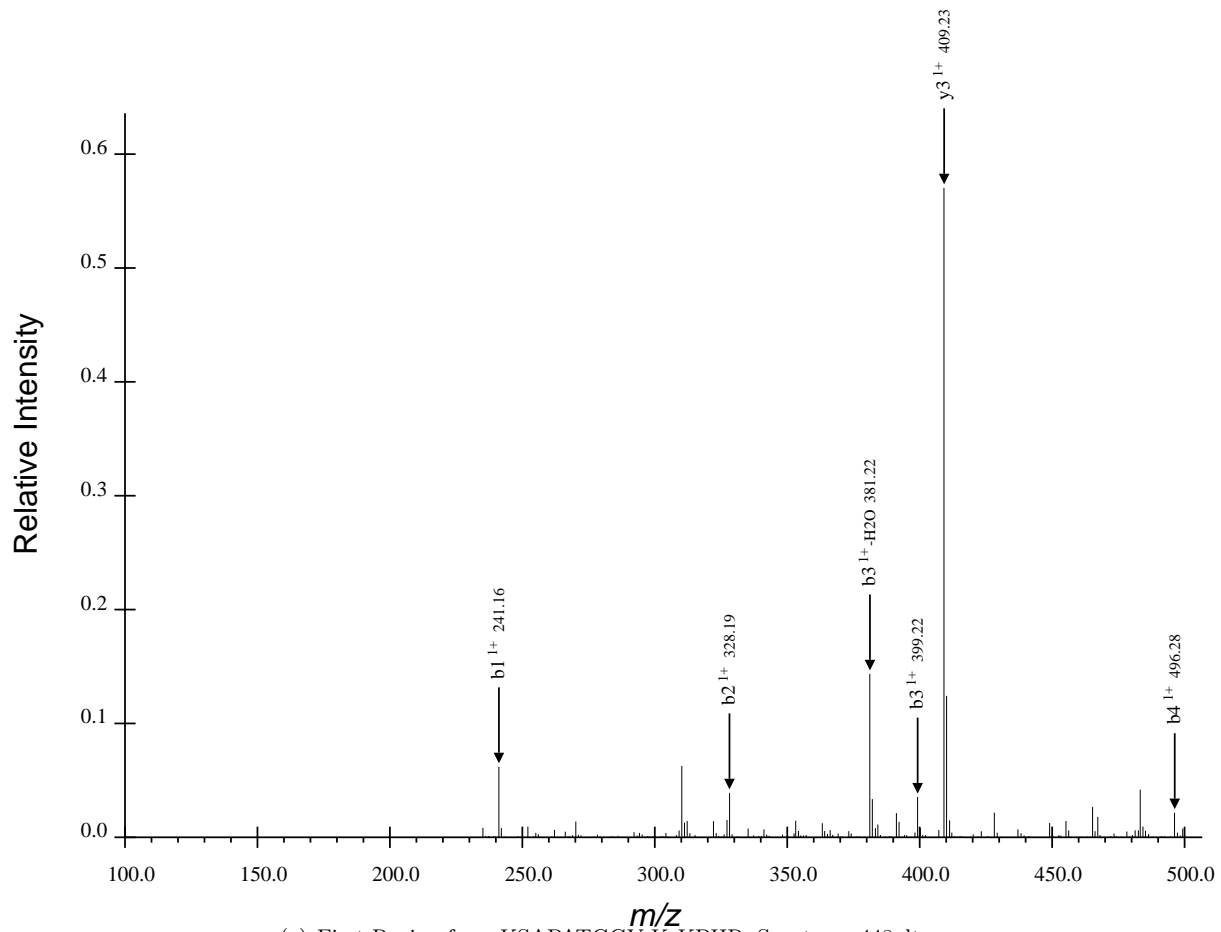

(a) First Region for rrKSAPATGGVrKrKPHR, Spectrum 448.dta

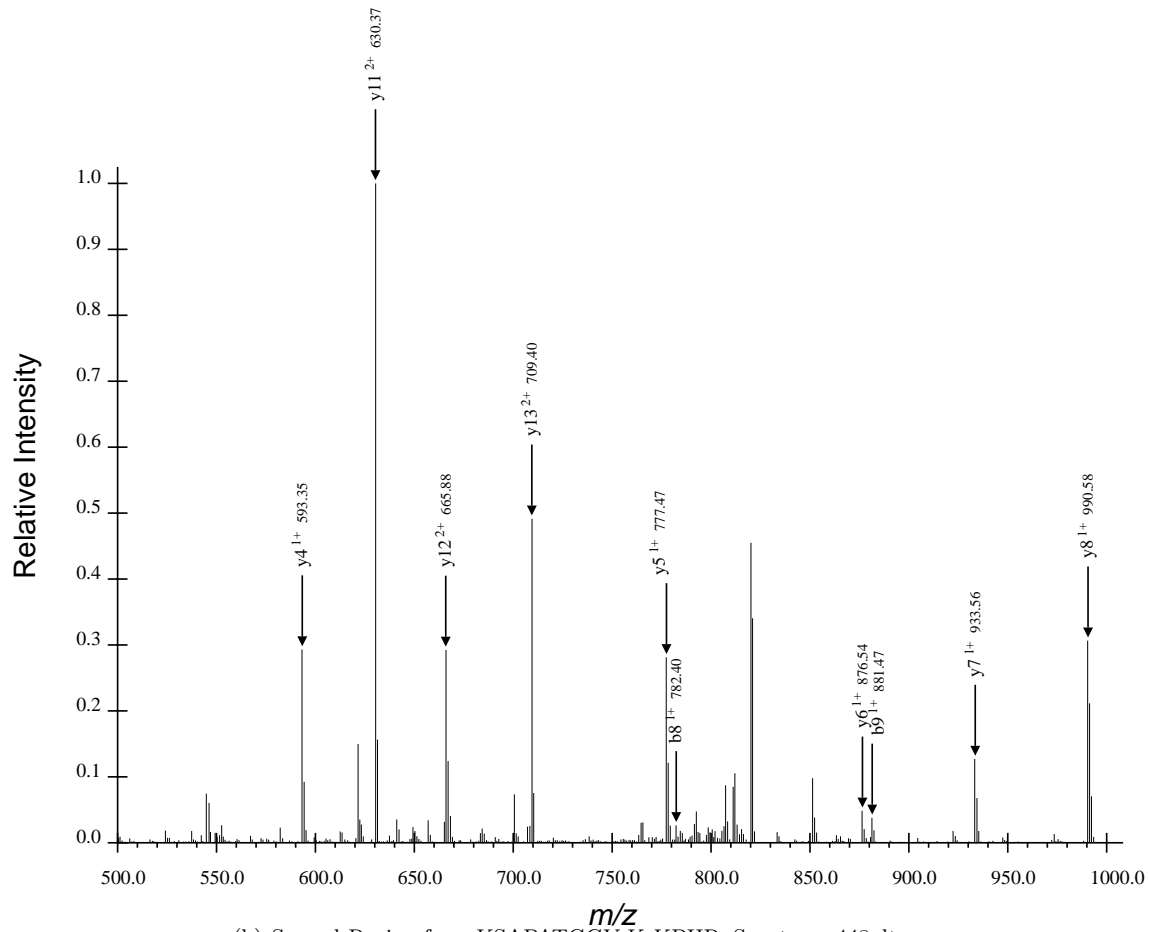

(b) Second Region for rrKSAPATGGVrKrKPHR, Spectrum 448.dta



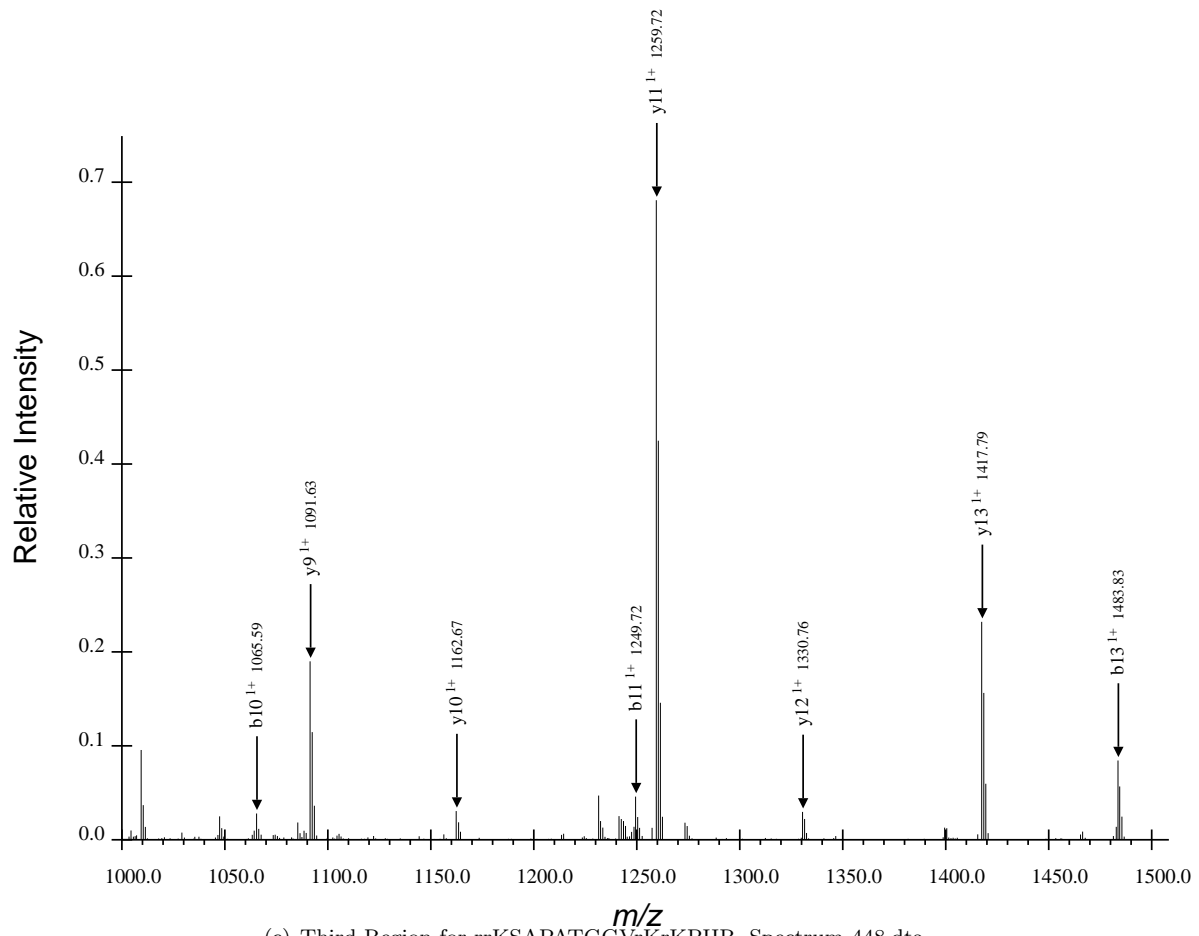

(c) Third Region for rrKSAPATGGVrKrKPHR, Spectrum 448.dta

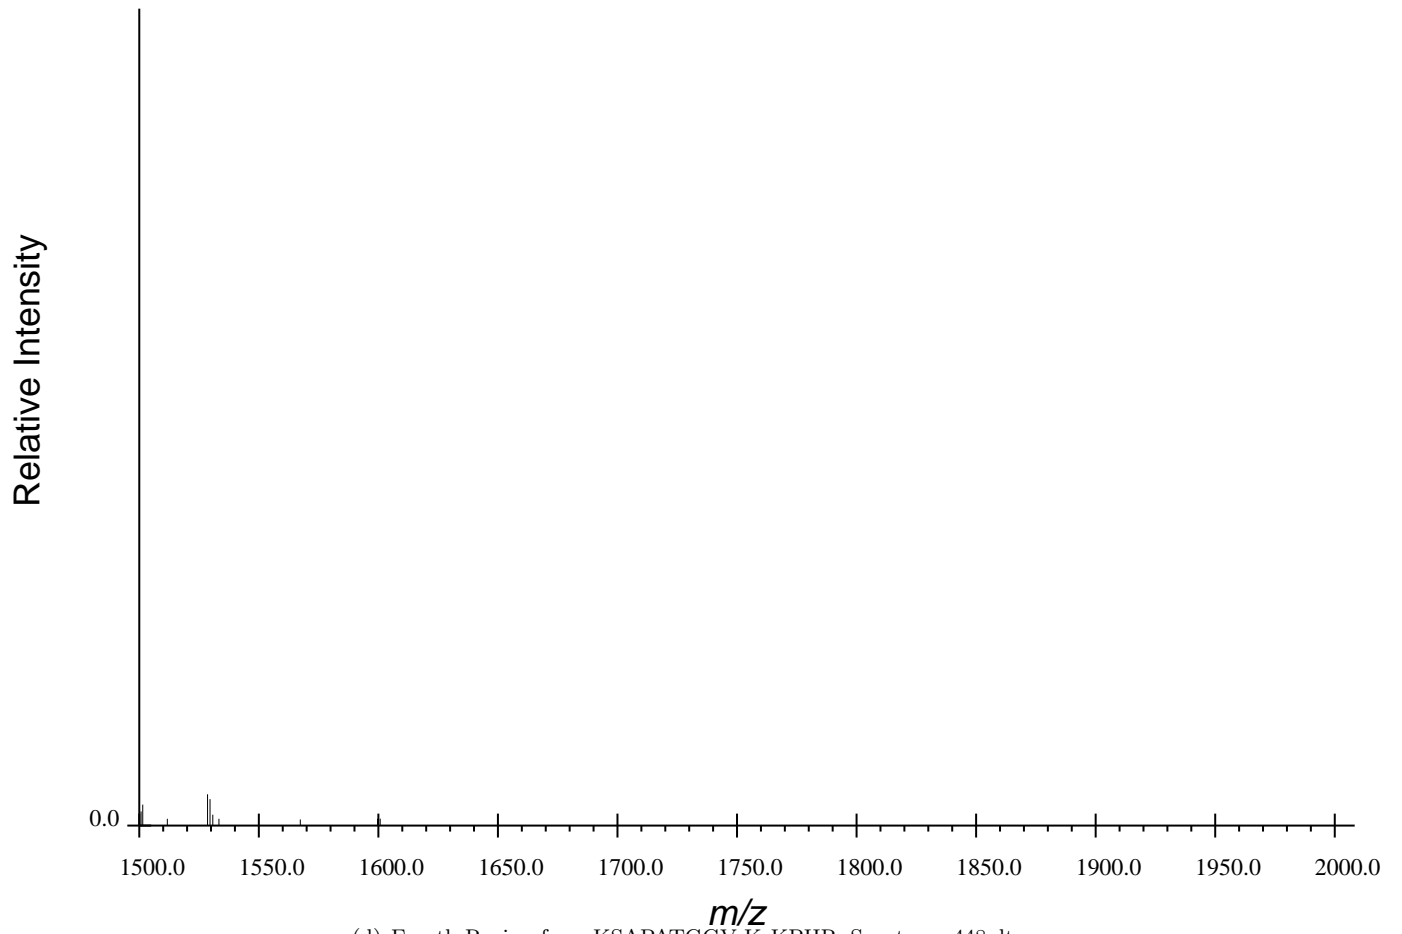

(d) Fourth Region for rrKSAPATGGVrKrKPHR, Spectrum 448.dta

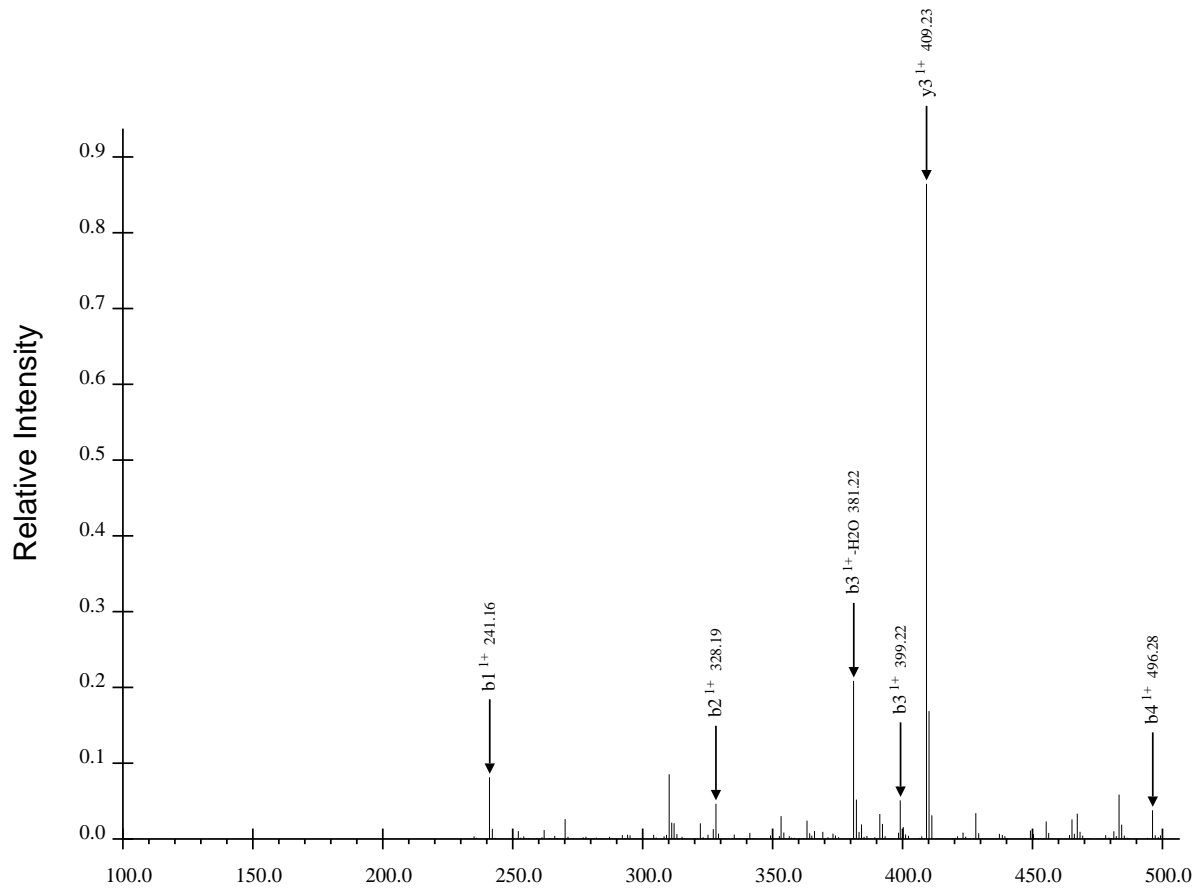

(a) First Region for rrKSAPATGGVrKrKPHR, Spectrum 449.dta

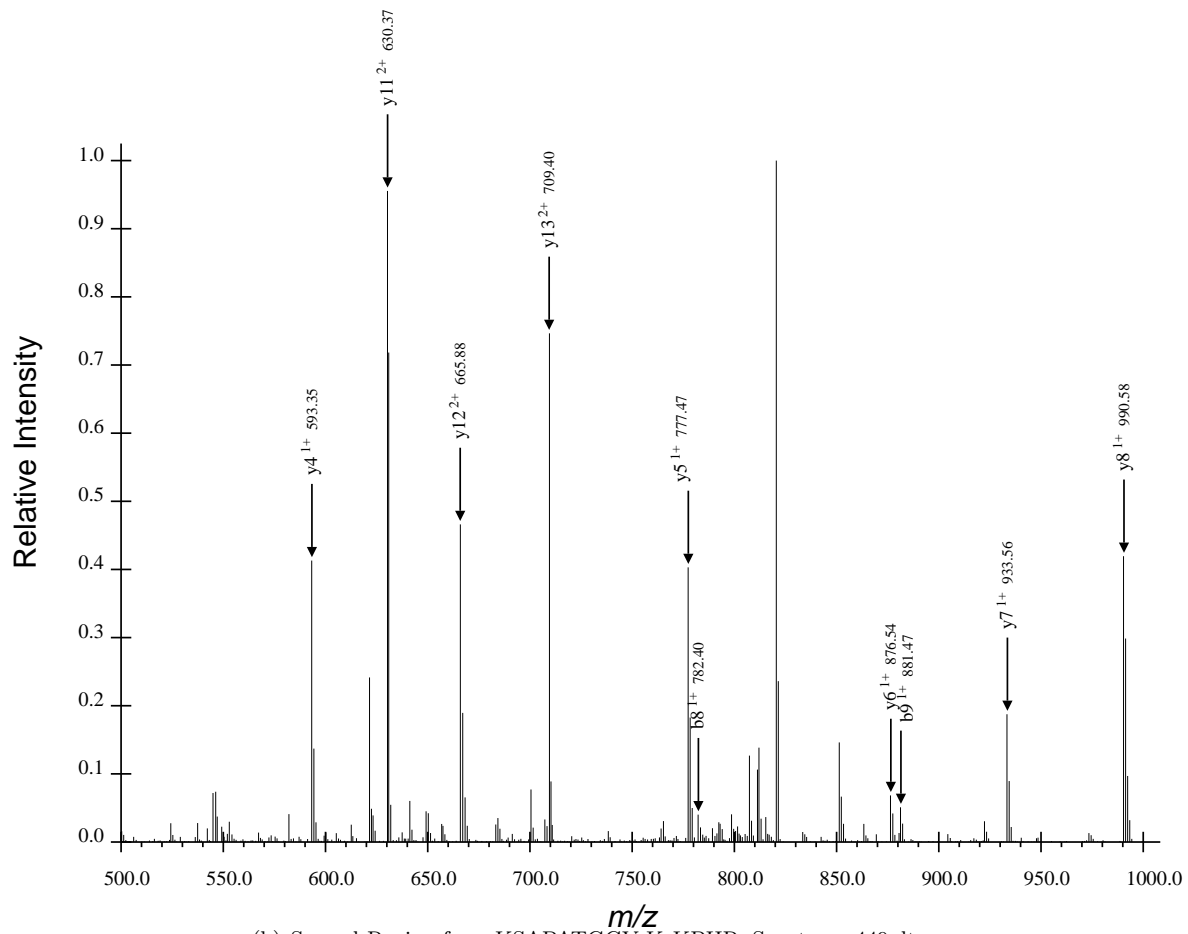

(b) Second Region for rrKSAPATGGVrKrKPHR, Spectrum 449.dta

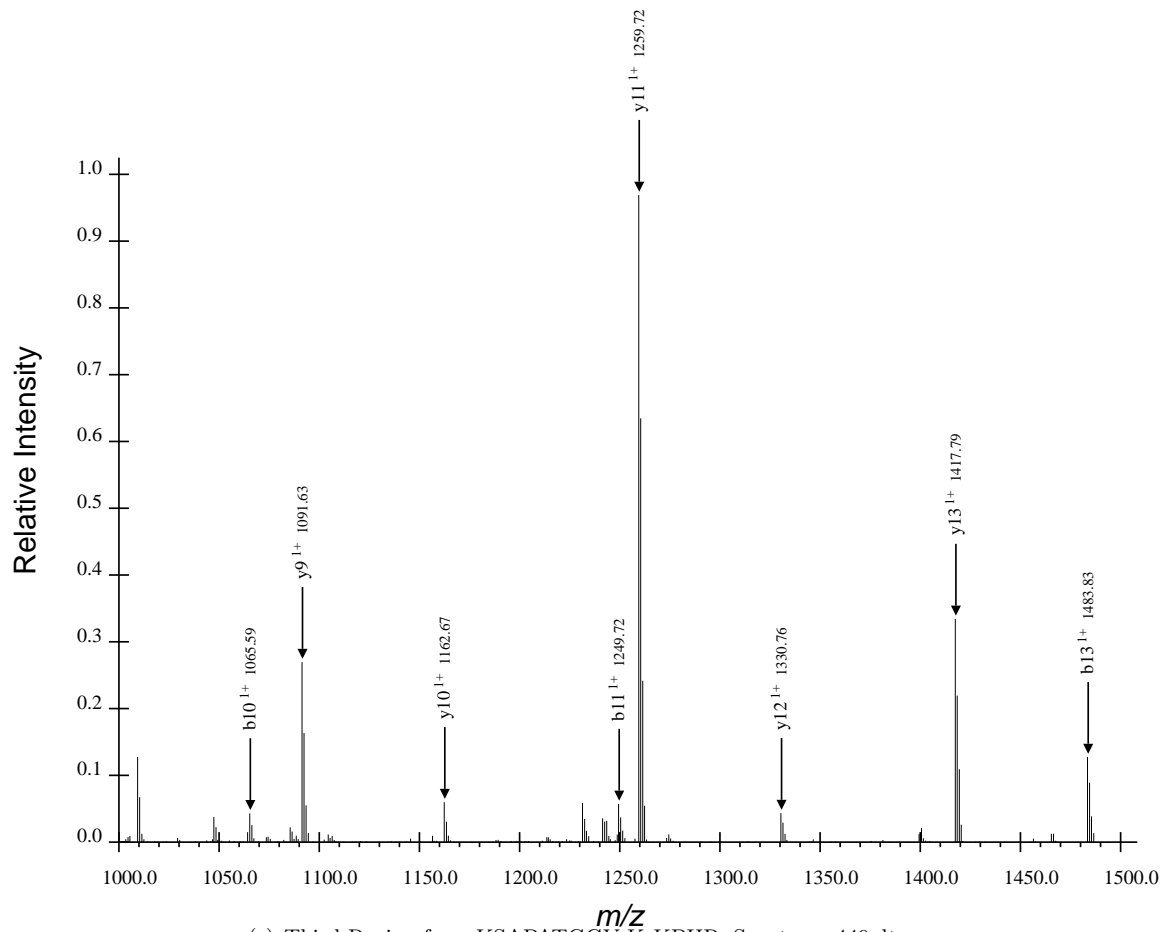

(c) Third Region for rrKSAPATGGVrKrKPHR, Spectrum 449.dta

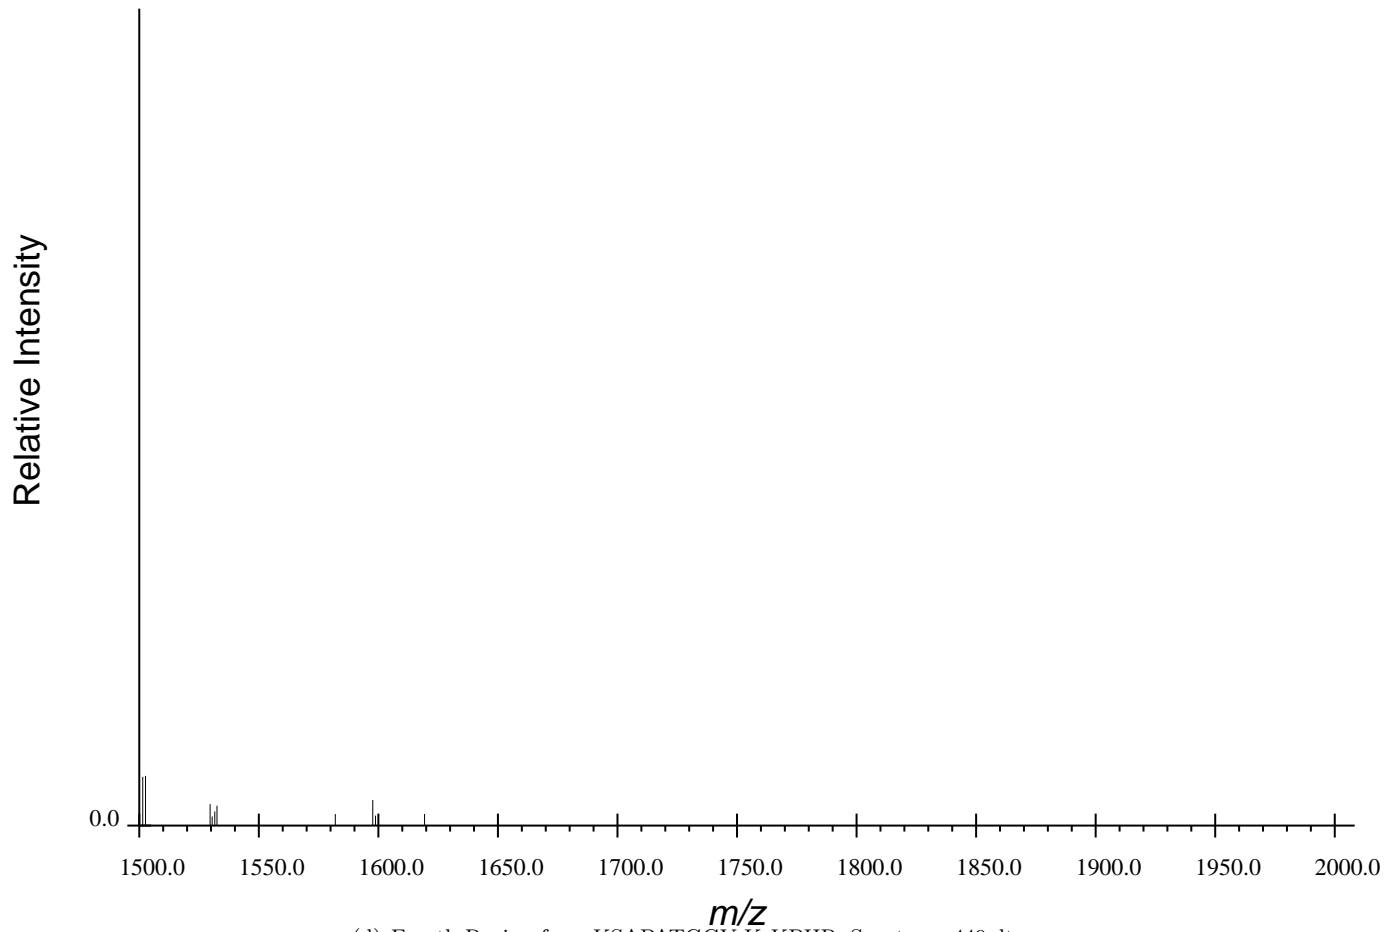

(d) Fourth Region for rrKSAPATGGVrKrKPHR, Spectrum 449.dta

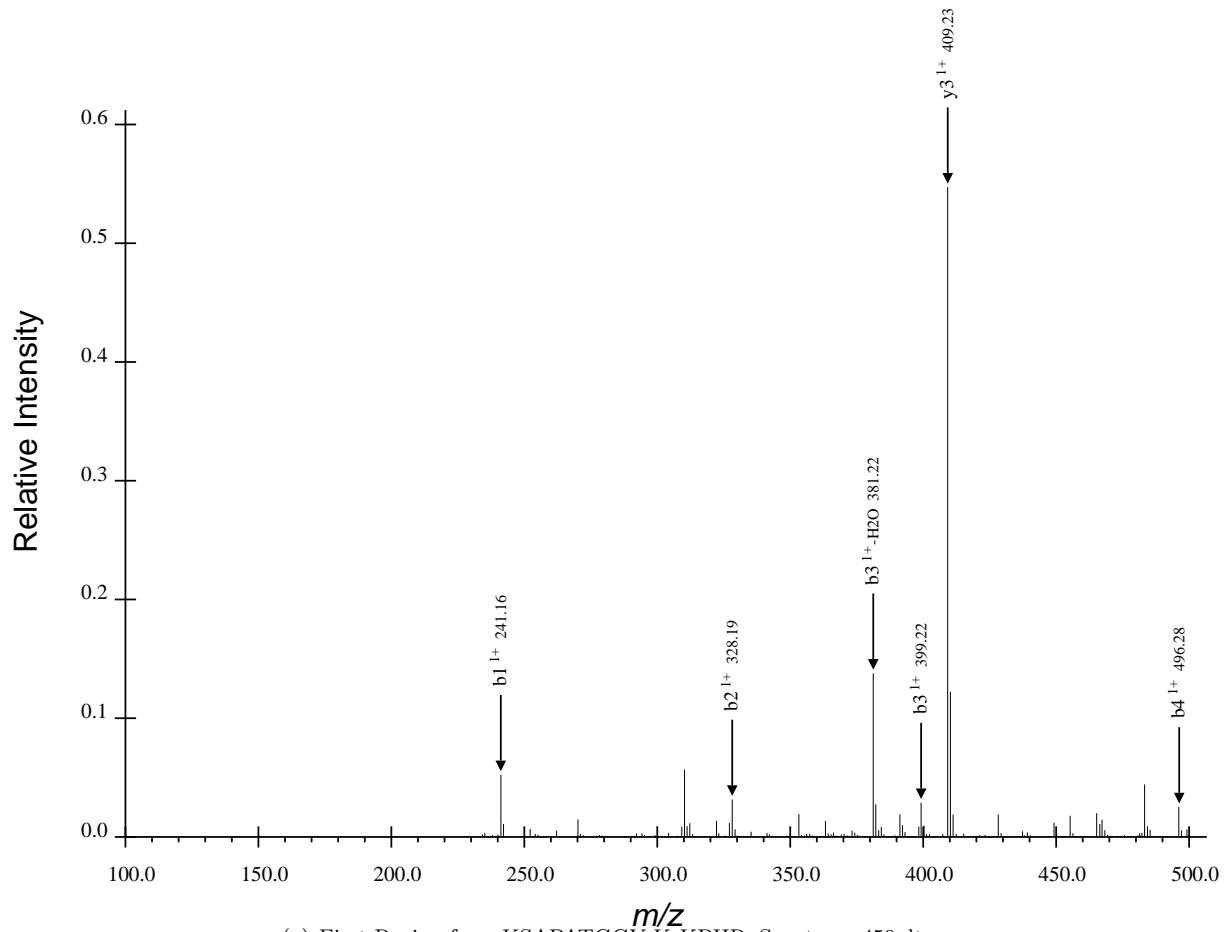

(a) First Region for rrKSAPATGGVrKrKPHR, Spectrum 450.dta

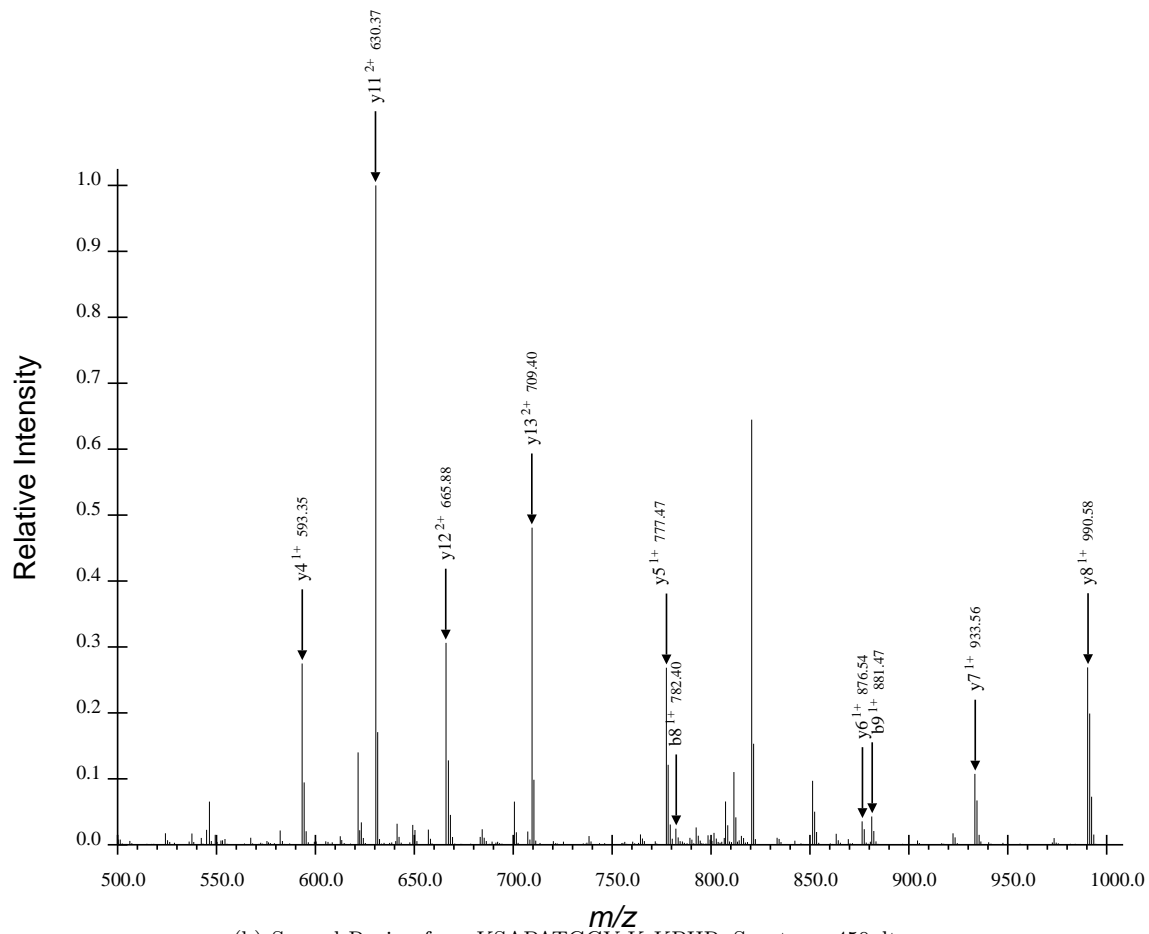

(b) Second Region for rrKSAPATGGVrKrKPHR, Spectrum 450.dta

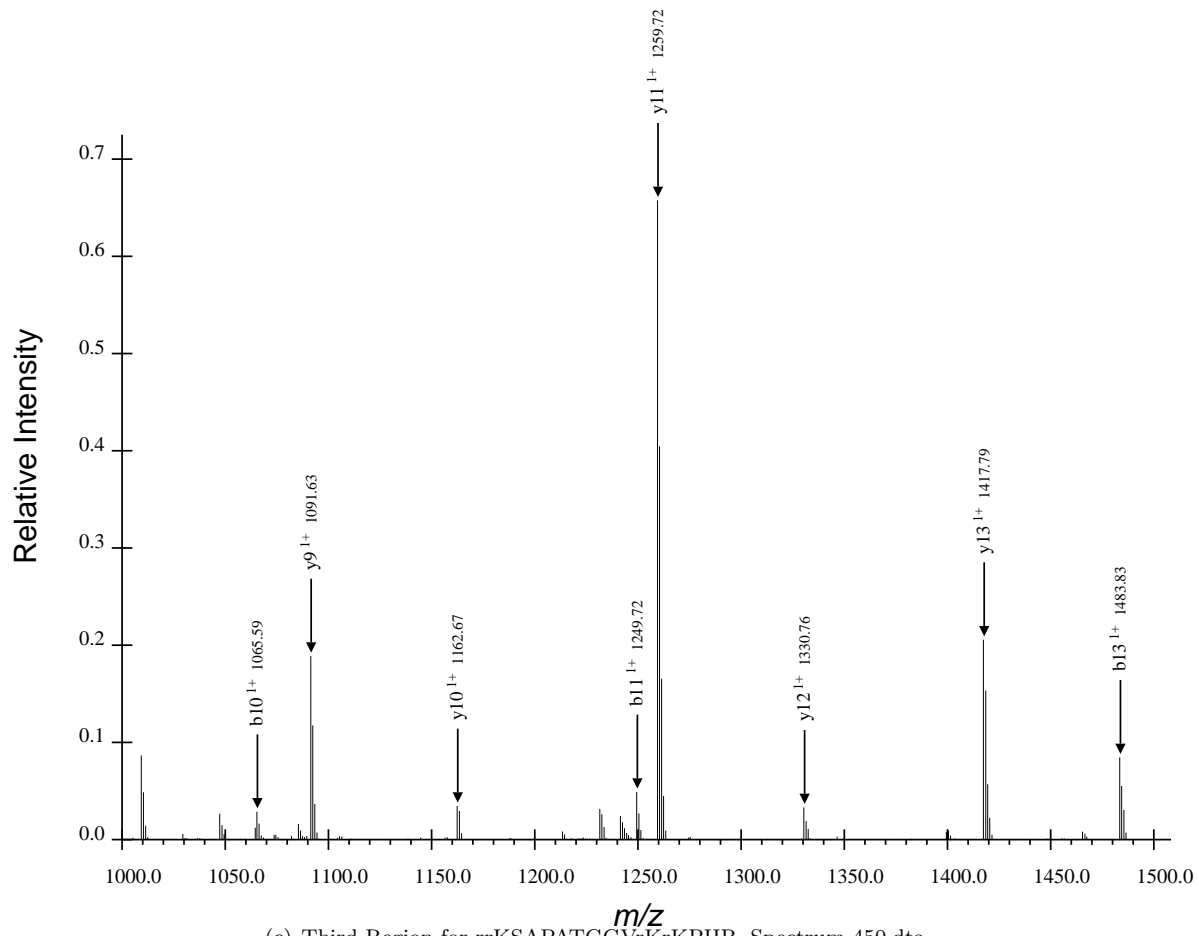

(c) Third Region for rrKSAPATGGVrKrKPHR, Spectrum 450.dta

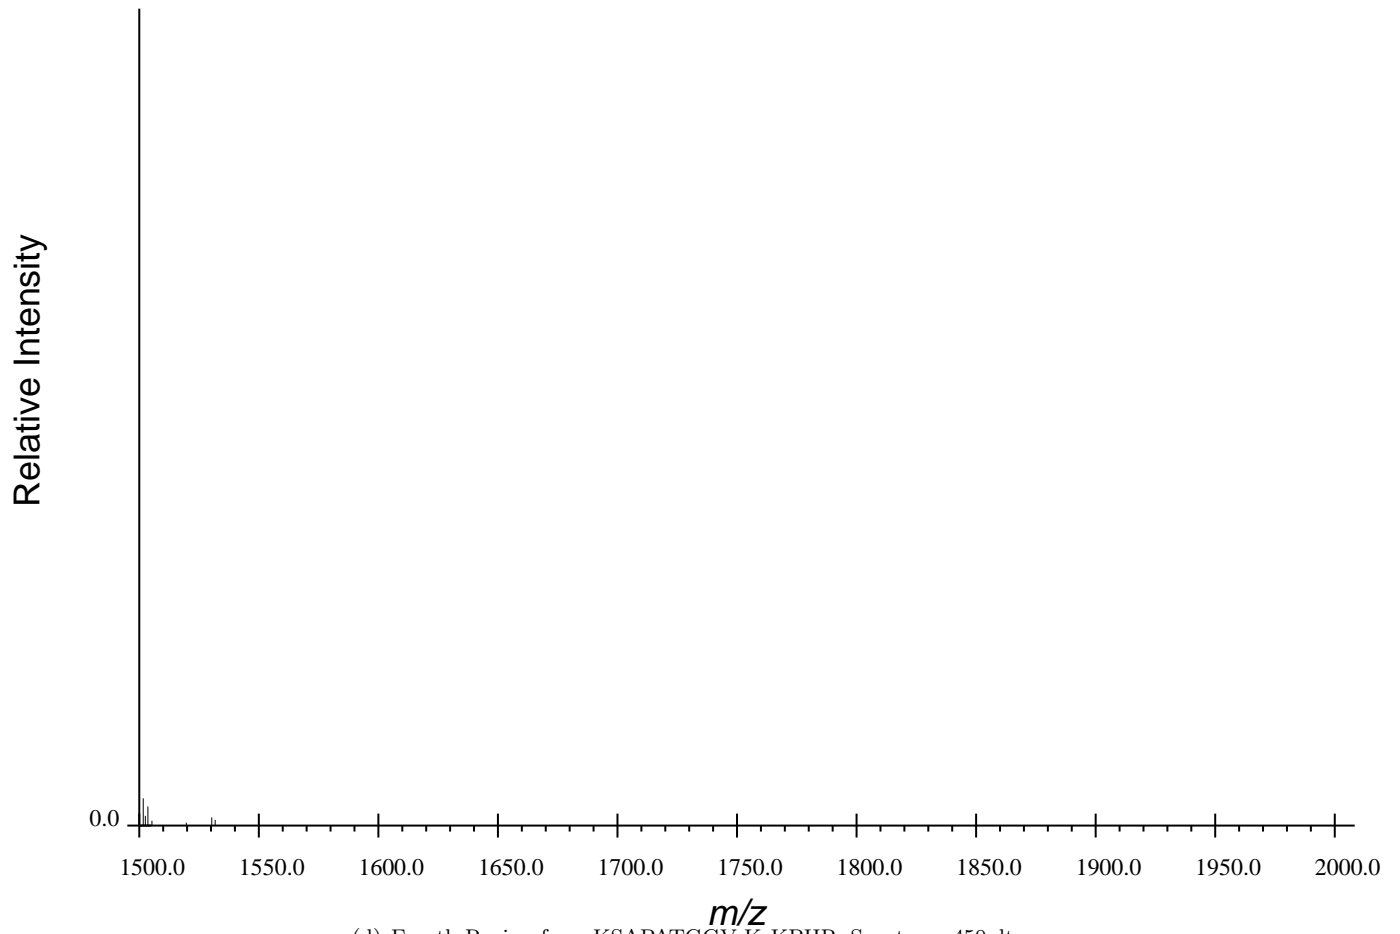

(d) Fourth Region for rrKSAPATGGVrKrKPHR, Spectrum 450.dta

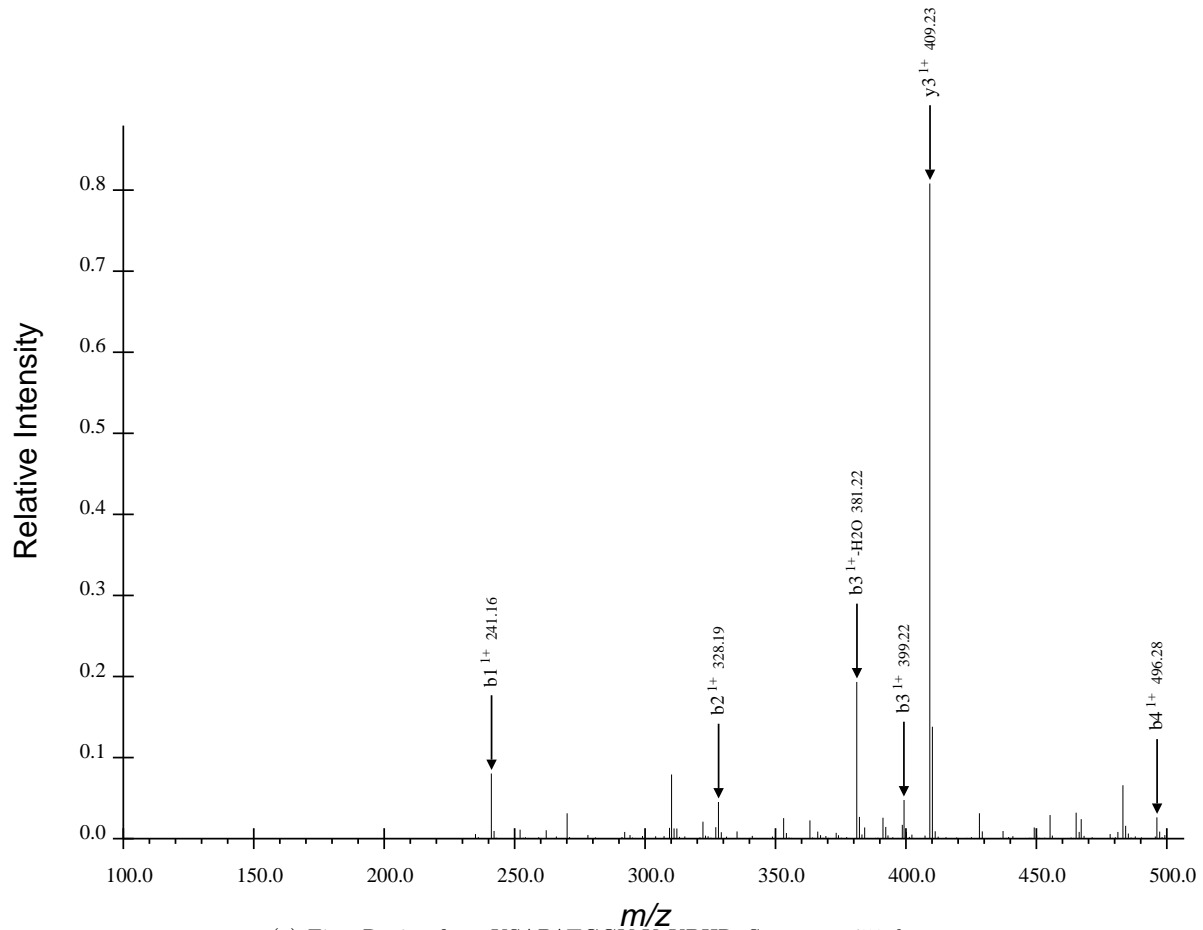

(a) First Region for rrKSAPATGGVrKrKPHR, Spectrum 451.dta

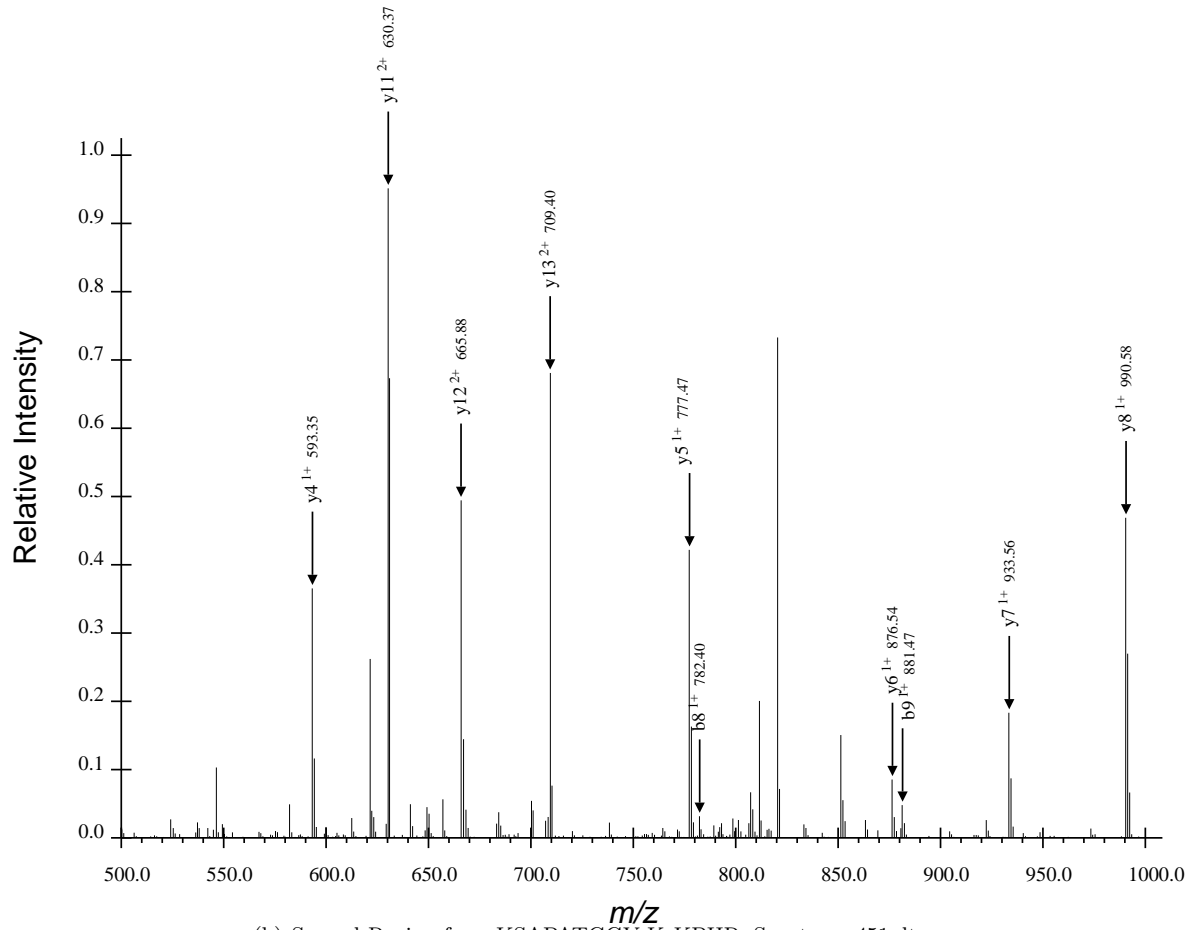

(b) Second Region for rrKSAPATGGVrKrKPHR, Spectrum 451.dta

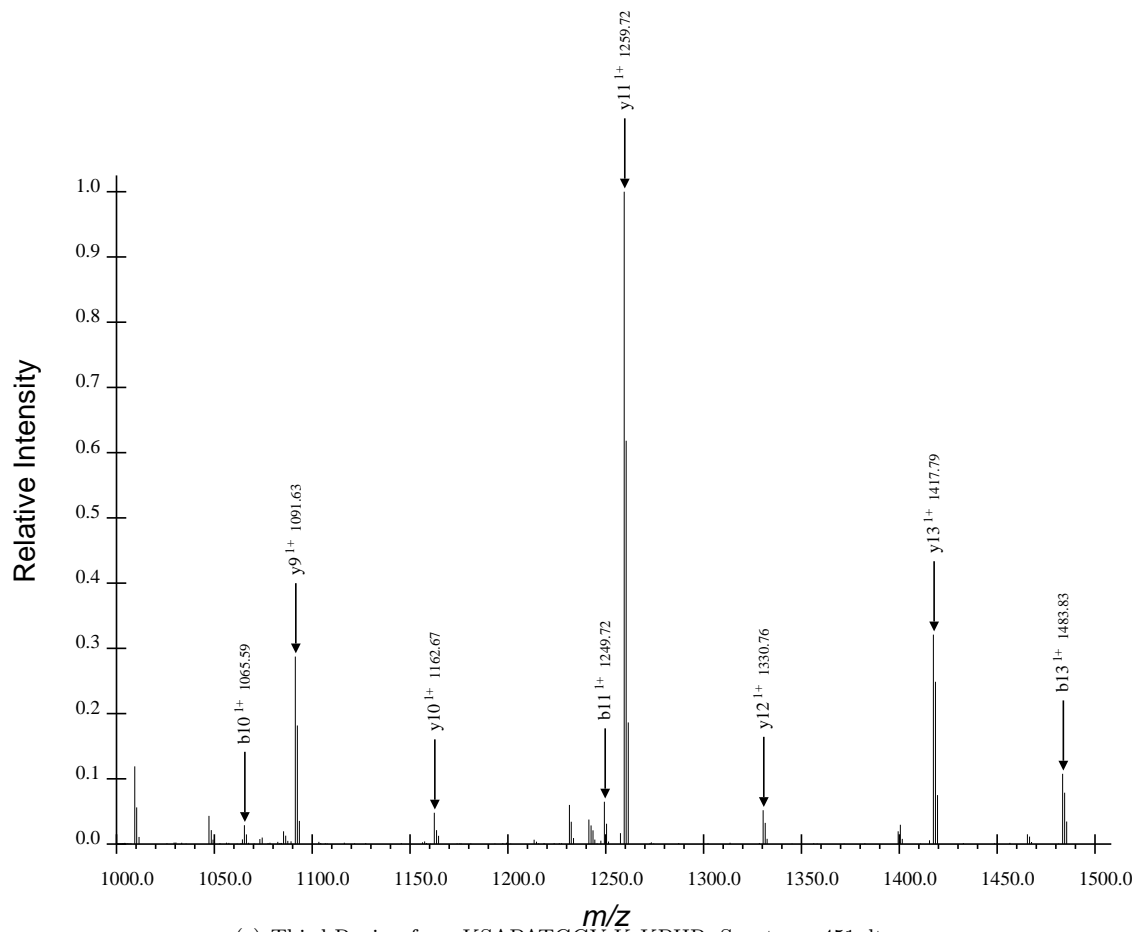

(c) Third Region for rrKSAPATGGVrKrKPHR, Spectrum 451.dta

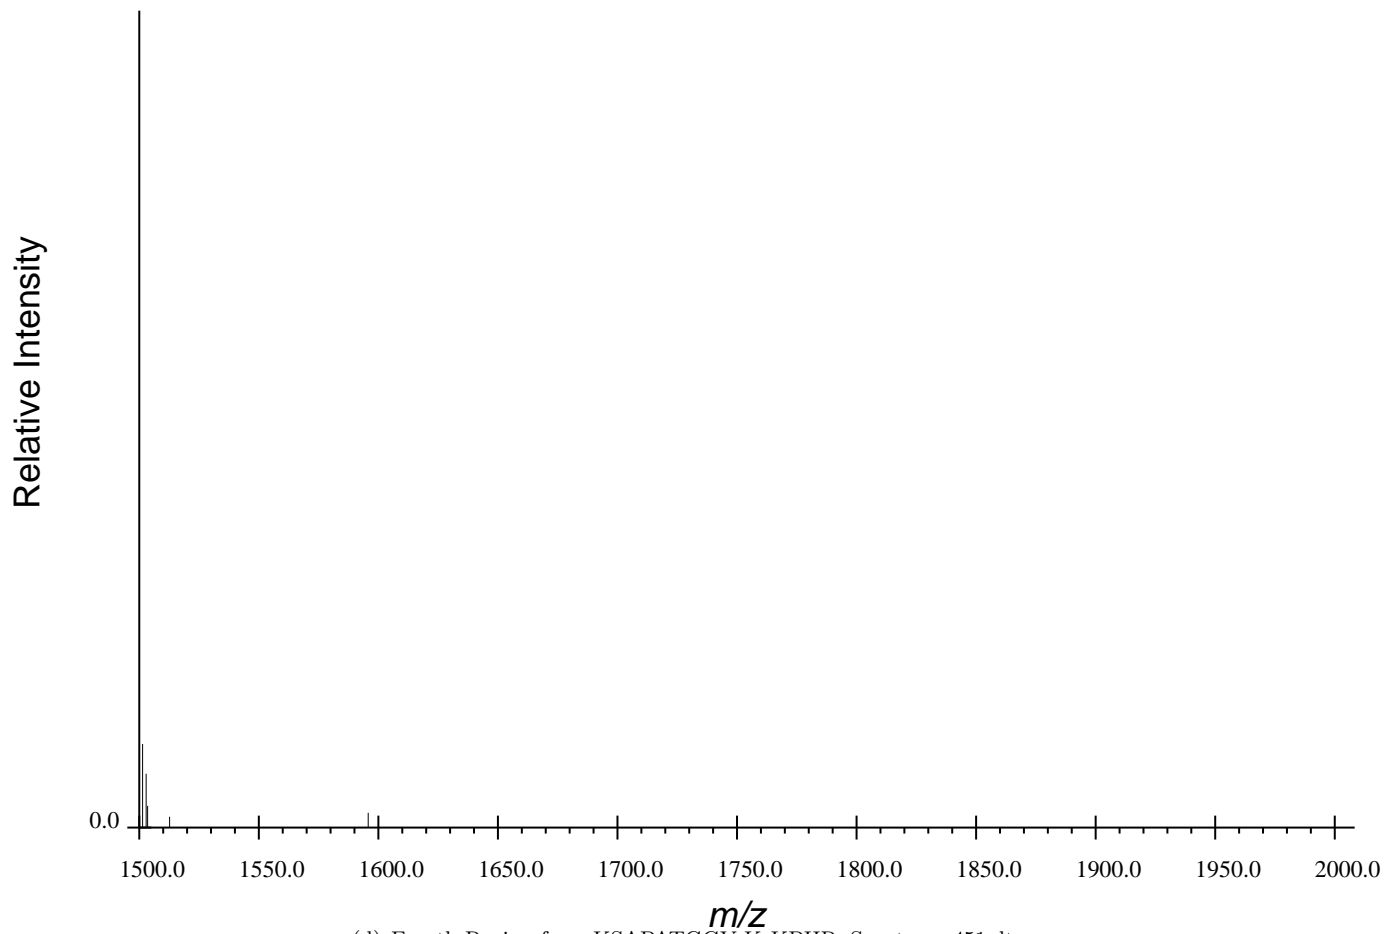

(d) Fourth Region for rrKSAPATGGVrKrKPHR, Spectrum 451.dta

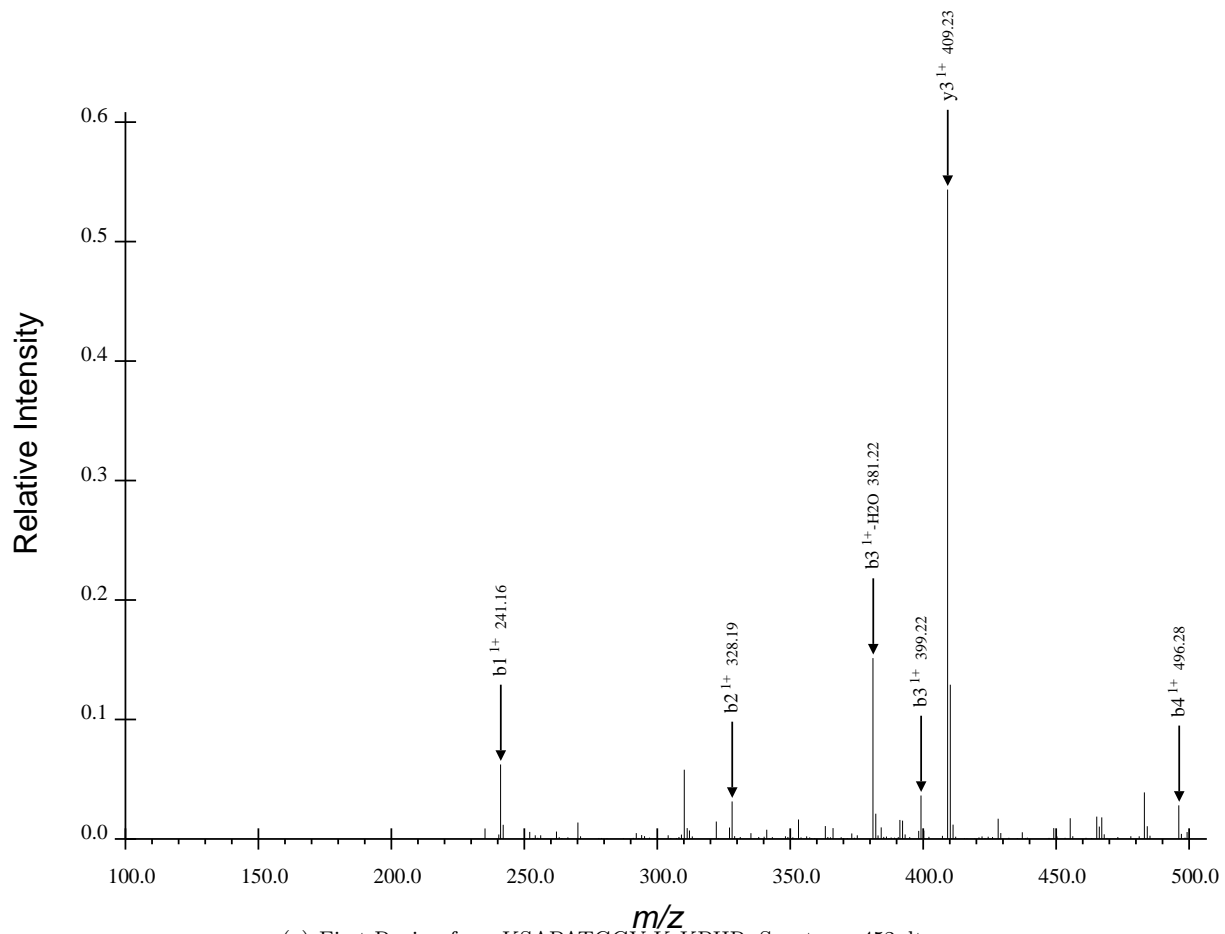

(a) First Region for rrKSAPATGGVrKrKPHR, Spectrum 452.dta

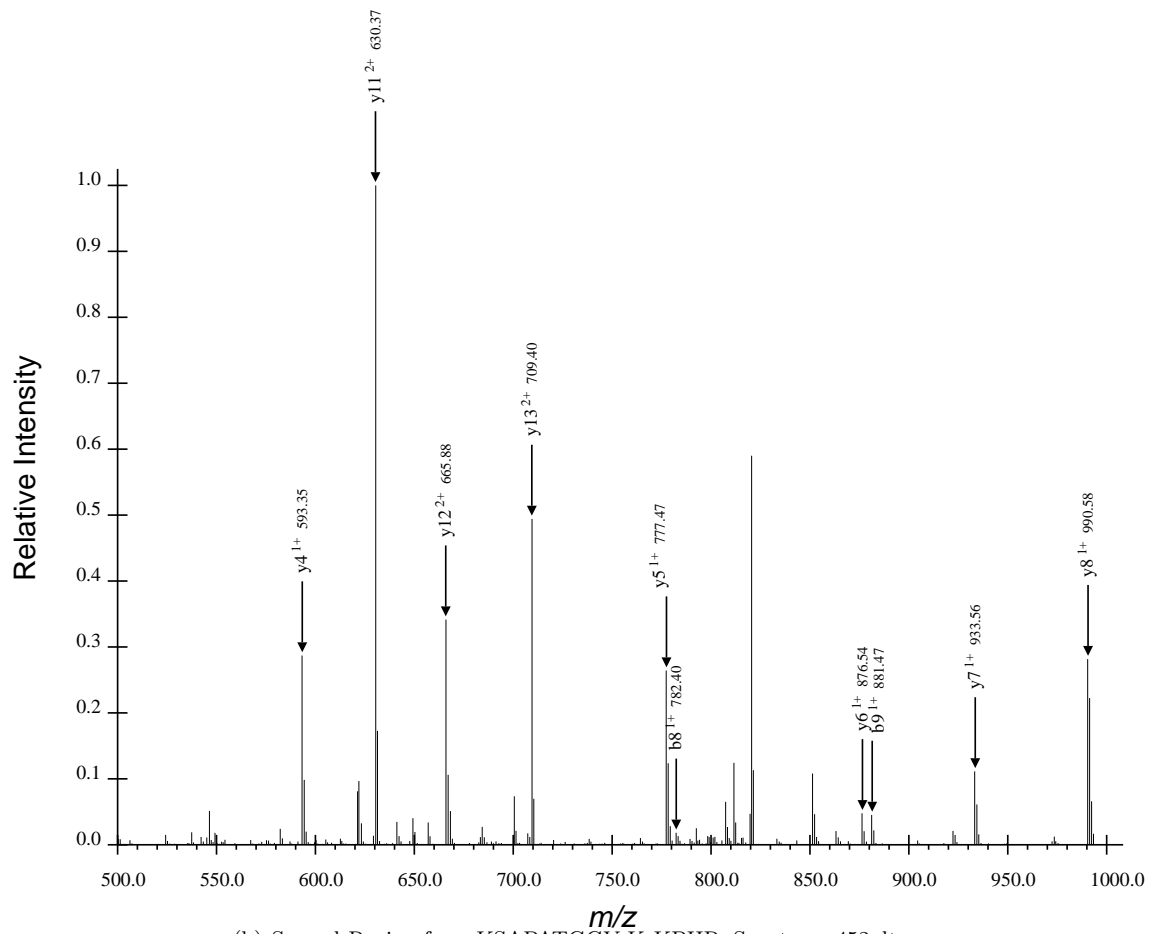

(b) Second Region for rrKSAPATGGVrKrKPHR, Spectrum 452.dta



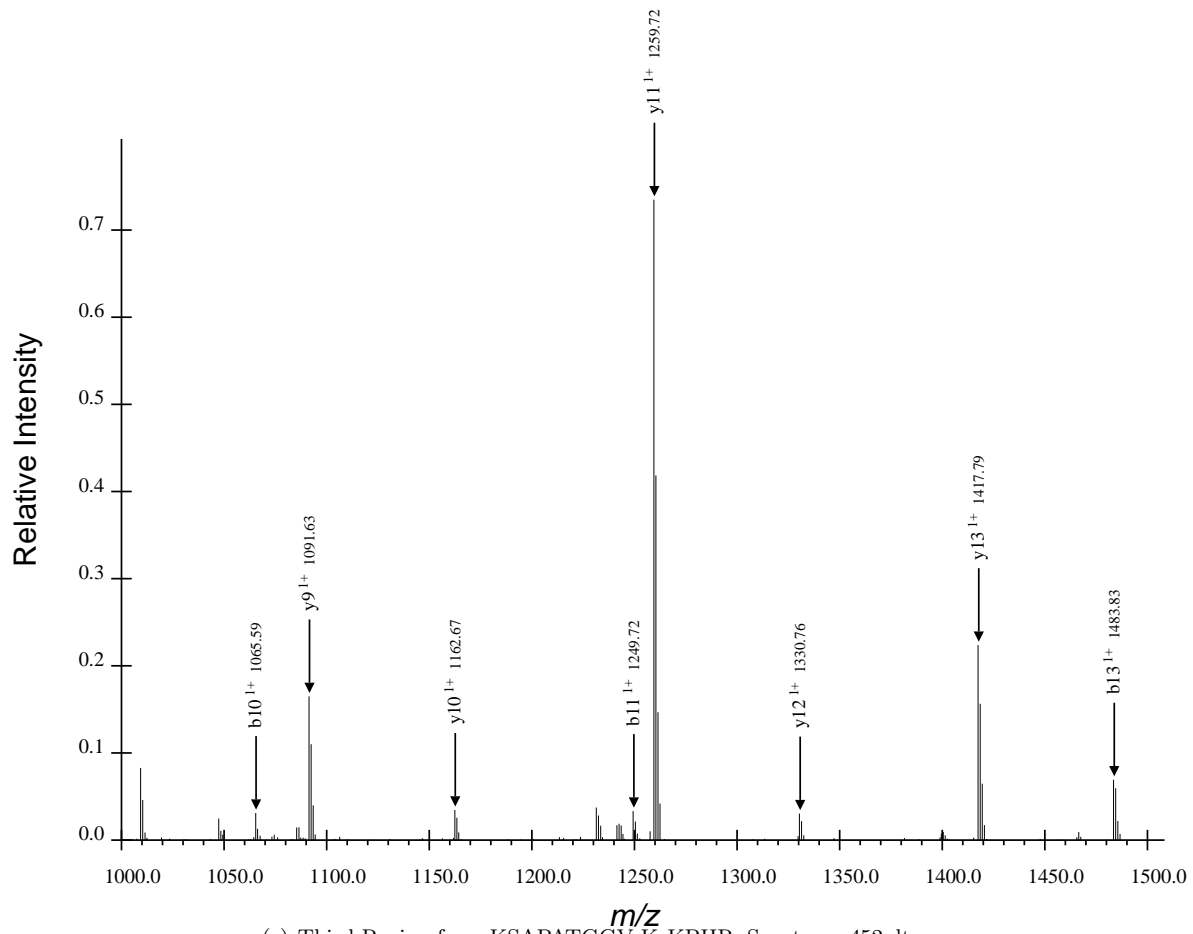

(c) Third Region for rrKSAPATGGVrKrKPHR, Spectrum 452.dta

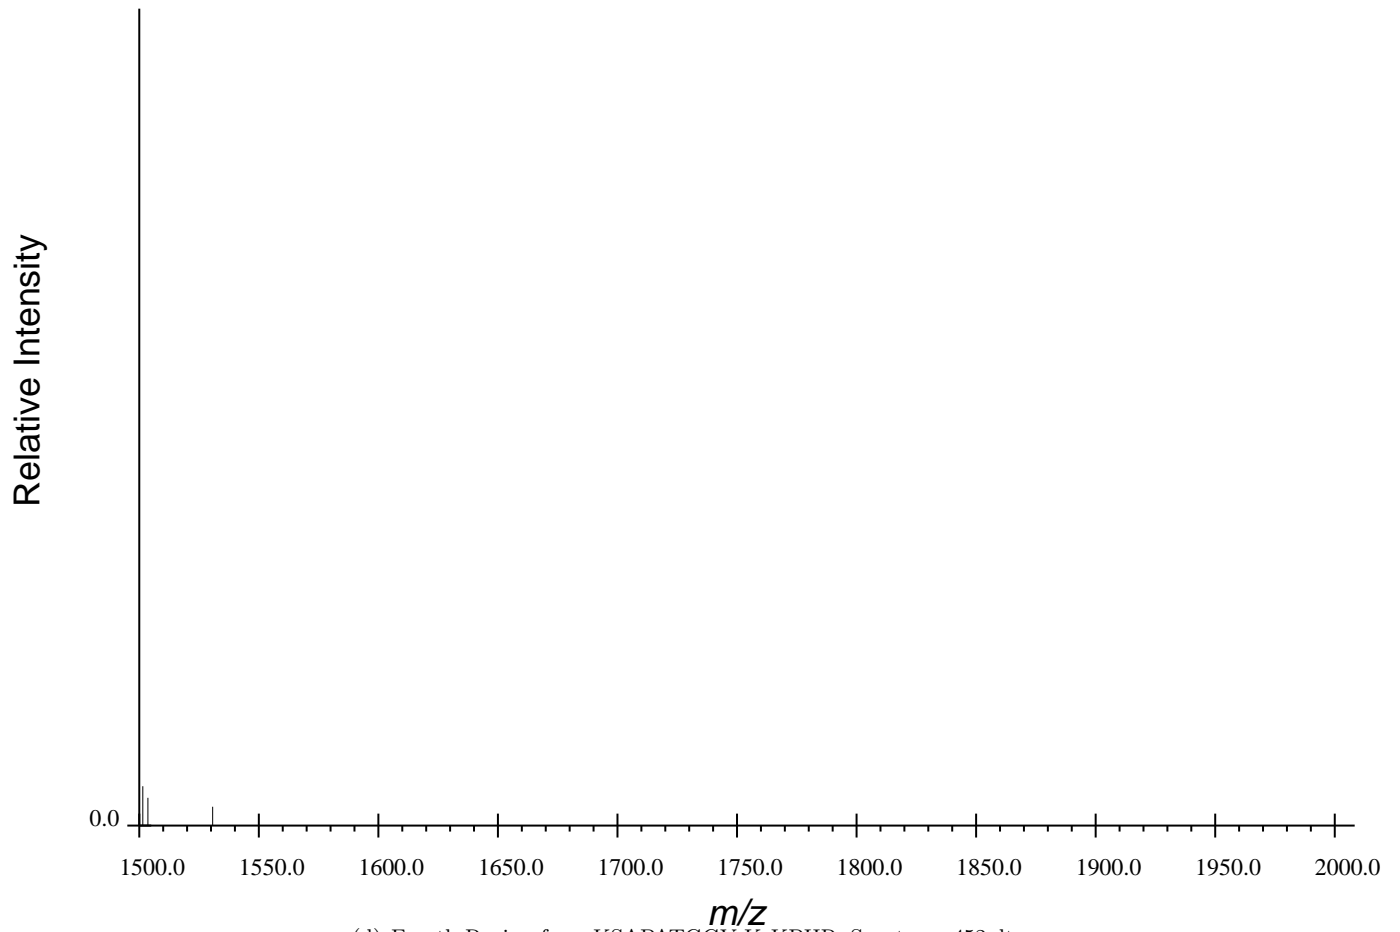

(d) Fourth Region for rrKSAPATGGVrKrKPHR, Spectrum 452.dta

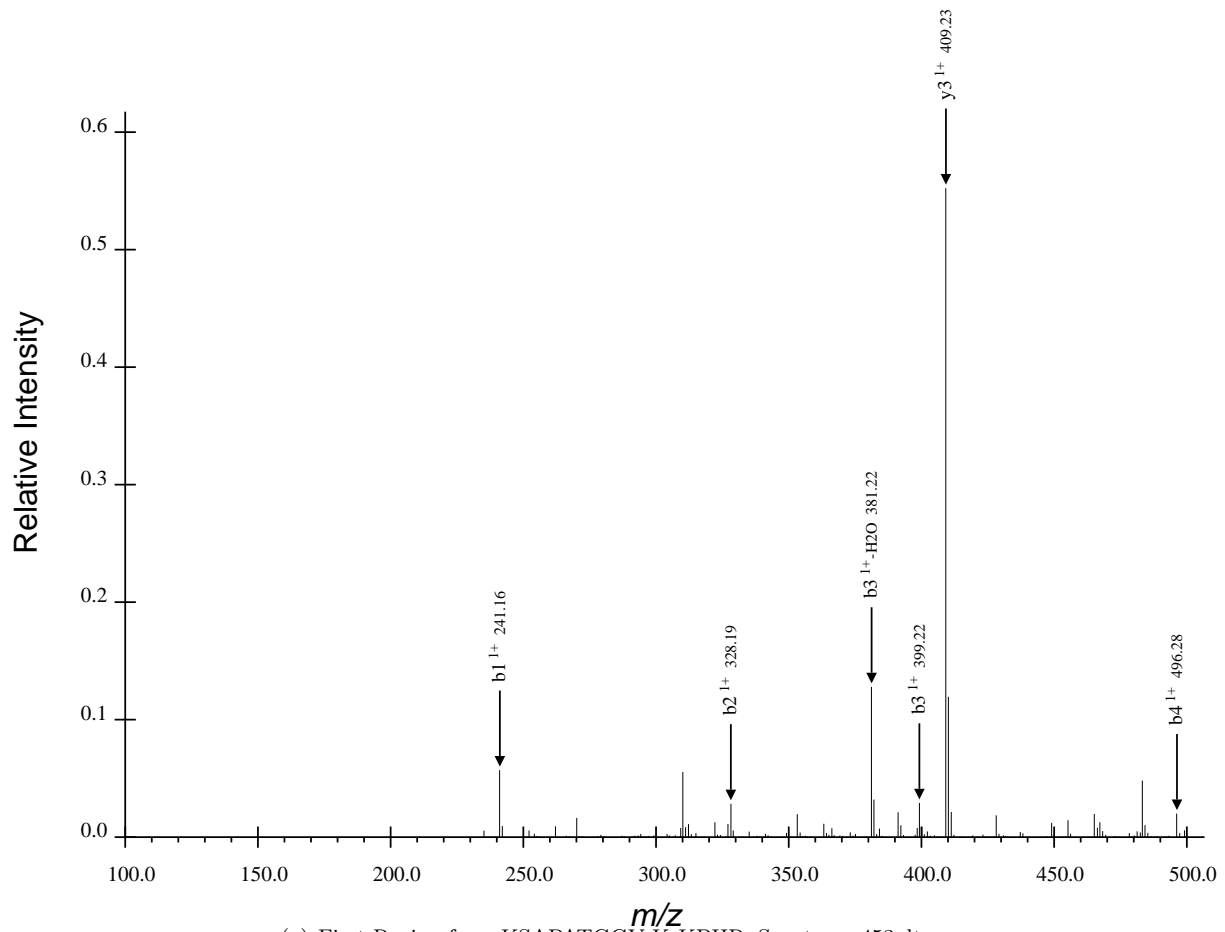

(a) First Region for rrKSAPATGGVrKrKPHR, Spectrum 453.dta

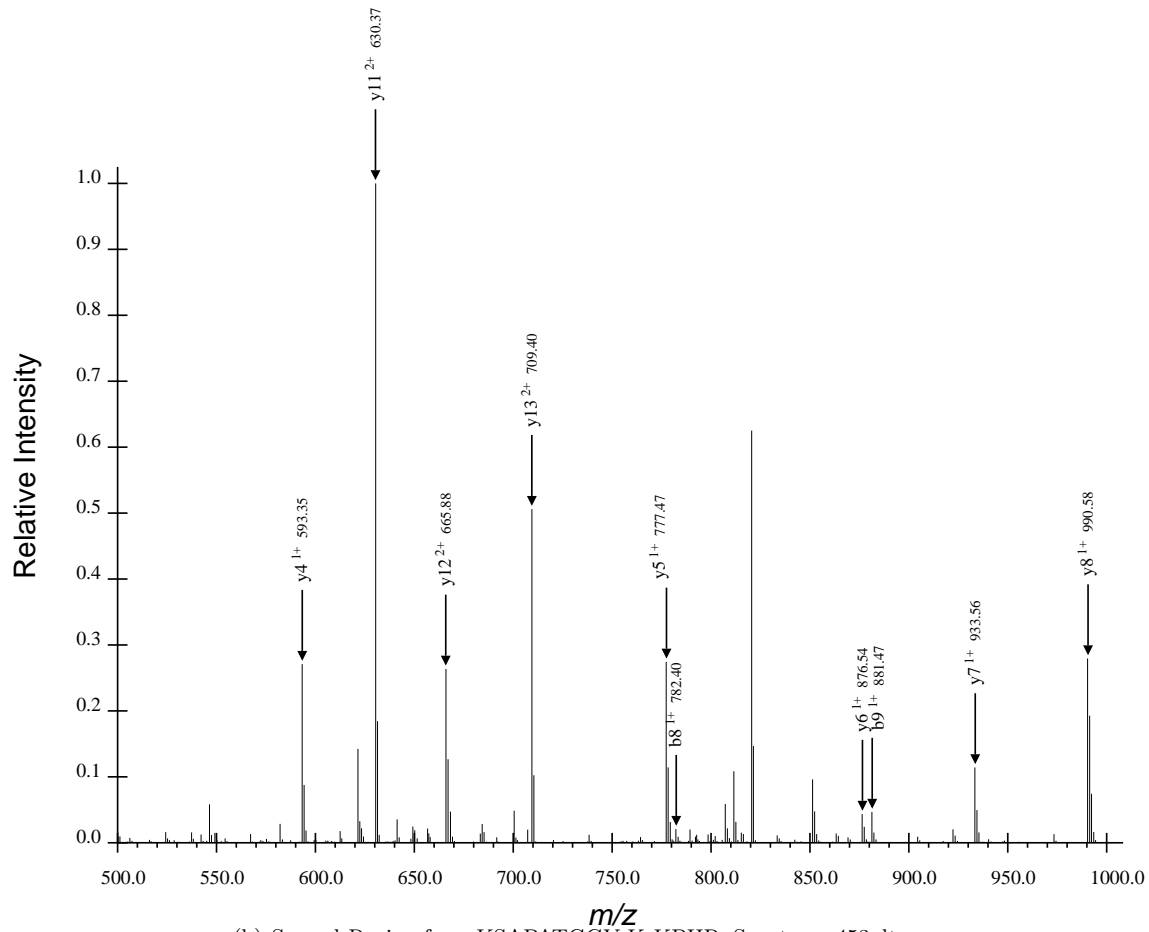

(b) Second Region for rrKSAPATGGVrKrKPHR, Spectrum 453.dta

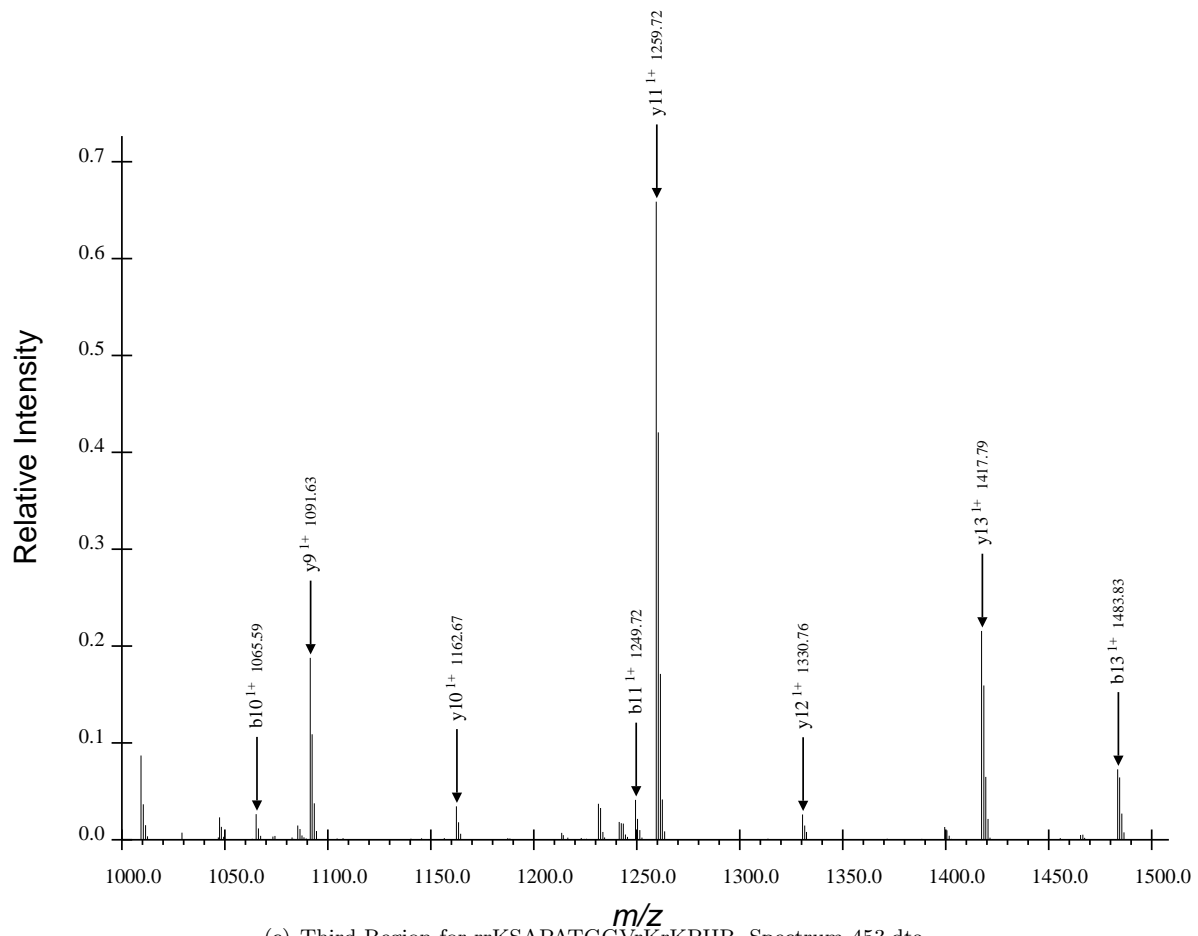

(c) Third Region for rrKSAPATGGVrKrKPHR, Spectrum 453.dta

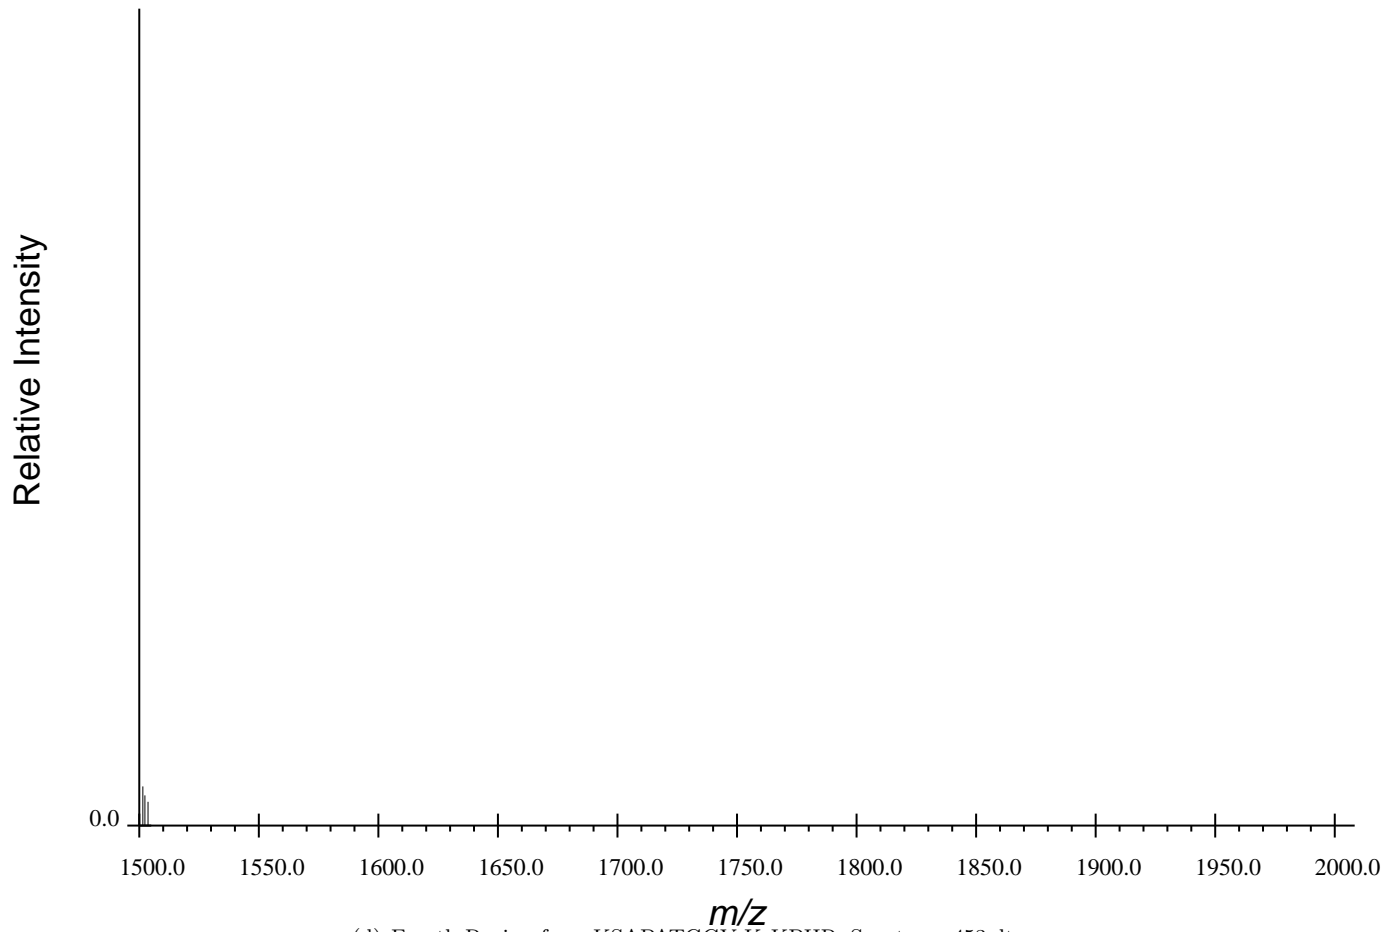

(d) Fourth Region for rrKSAPATGGVrKrKPHR, Spectrum 453.dta

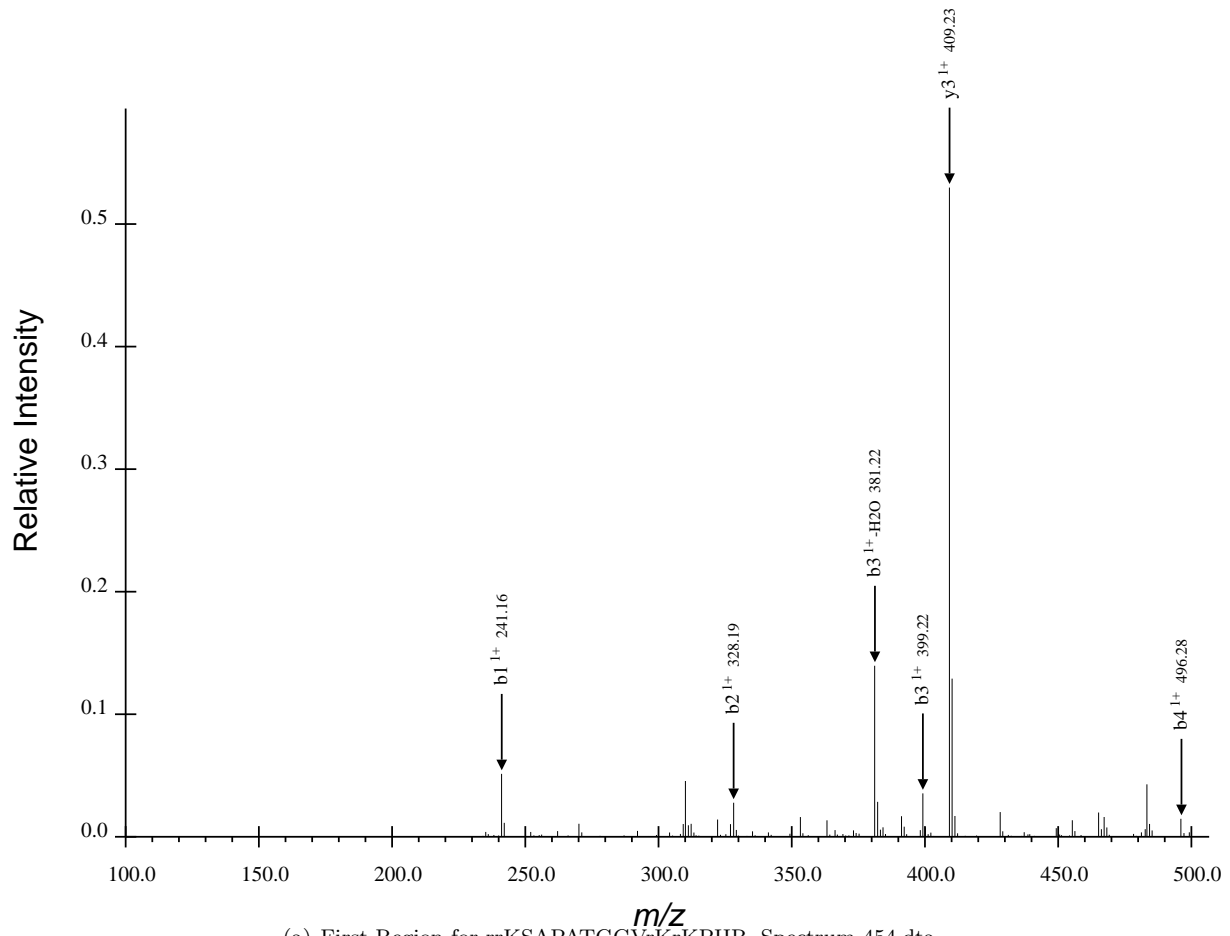

(a) First Region for rrKSAPATGGVrKrKPHR, Spectrum 454.dta

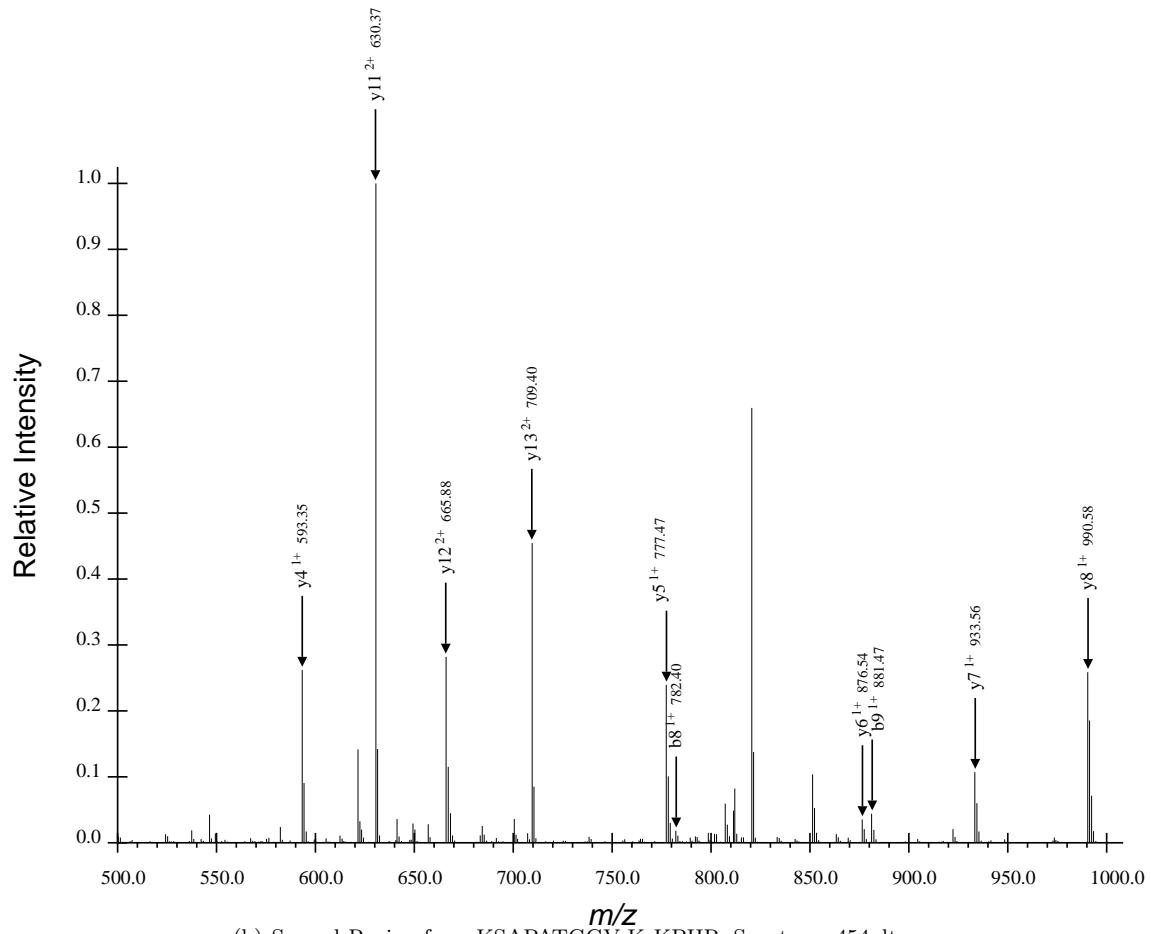

(b) Second Region for rrKSAPATGGVrKrKPHR, Spectrum 454.dta

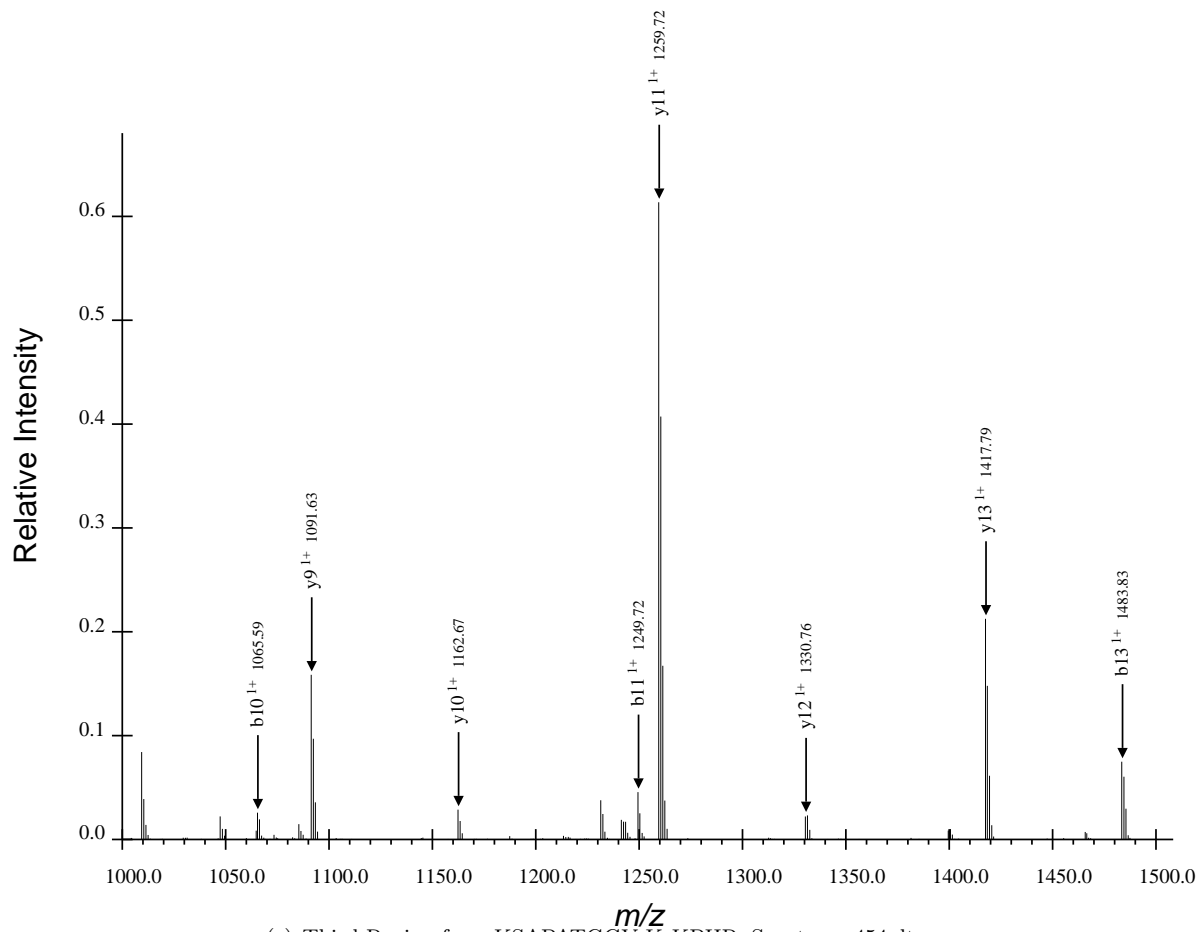

(c) Third Region for rrKSAPATGGVrKrKPHR, Spectrum 454.dta

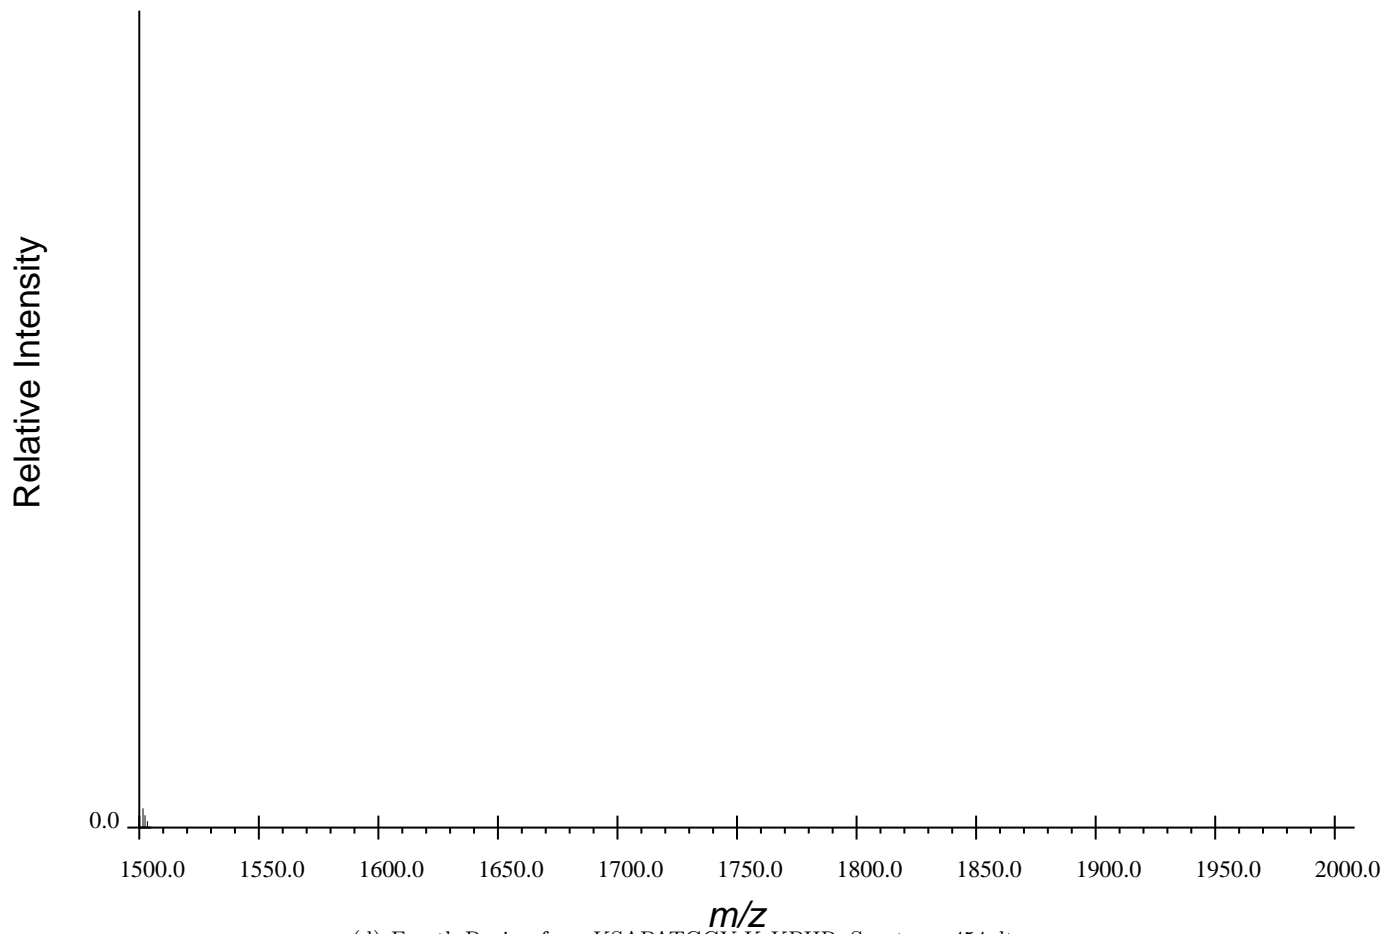

(d) Fourth Region for rrKSAPATGGVrKrKPHR, Spectrum 454.dta

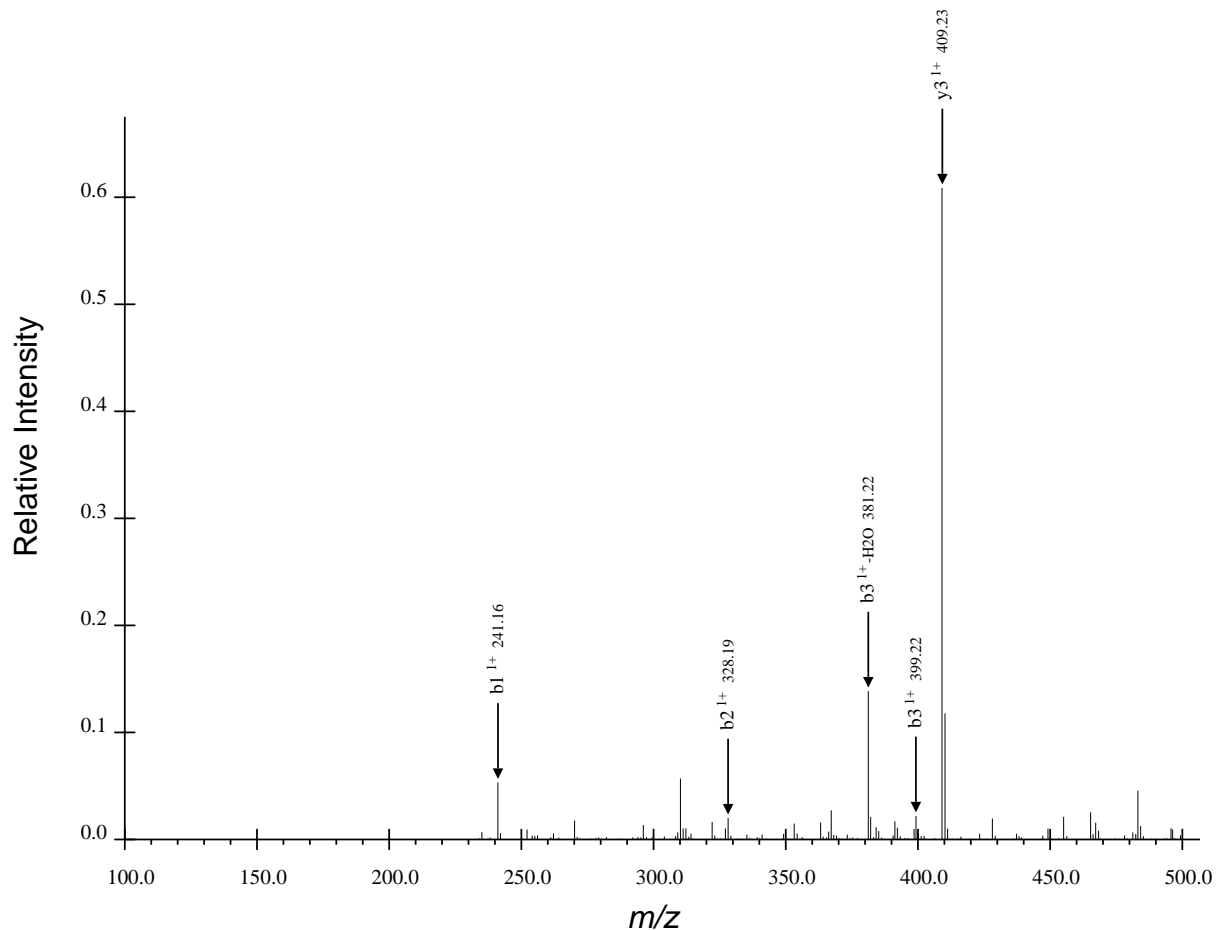

(a) First Region for rrKSAPATGGVrKrKPHR, Spectrum 455.dta

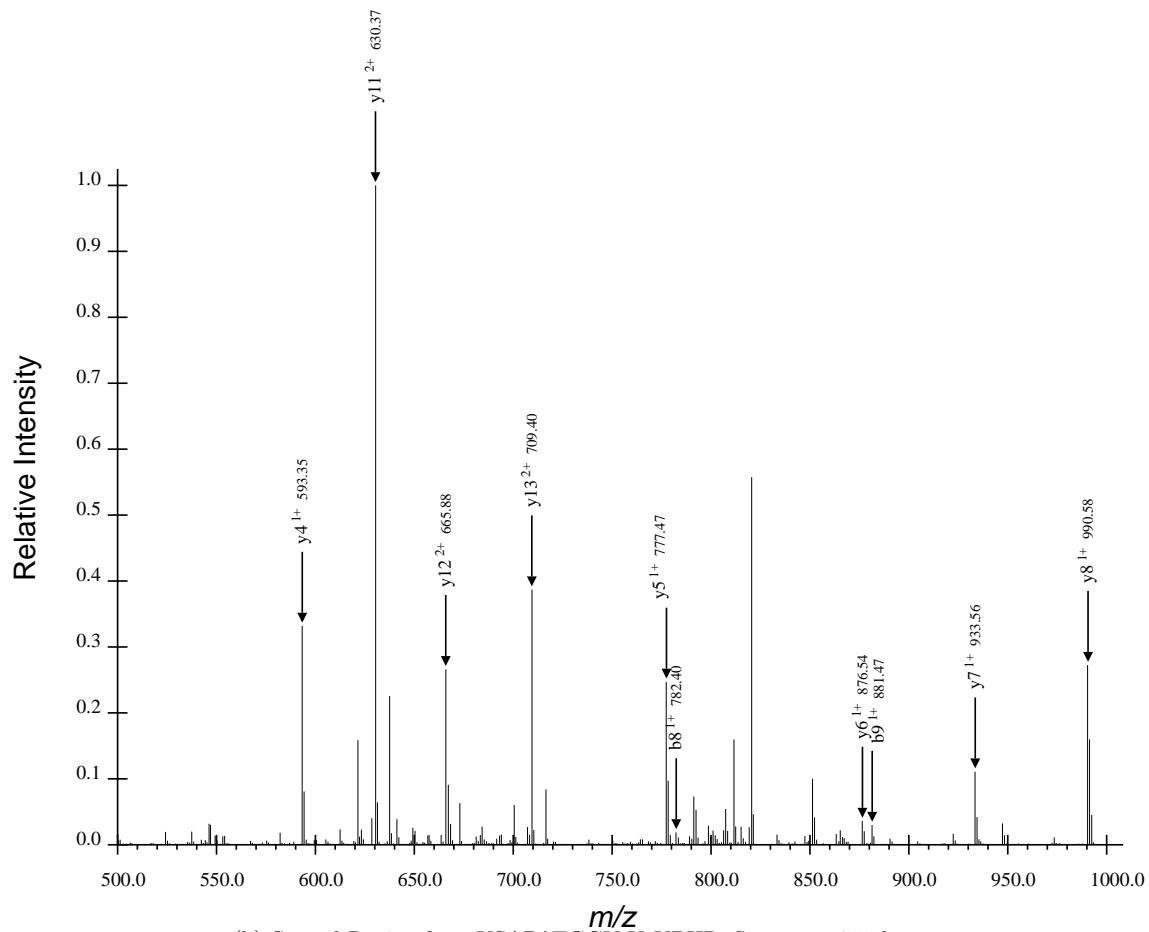

(b) Second Region for rrKSAPATGGVrKrKPHR, Spectrum 455.dta

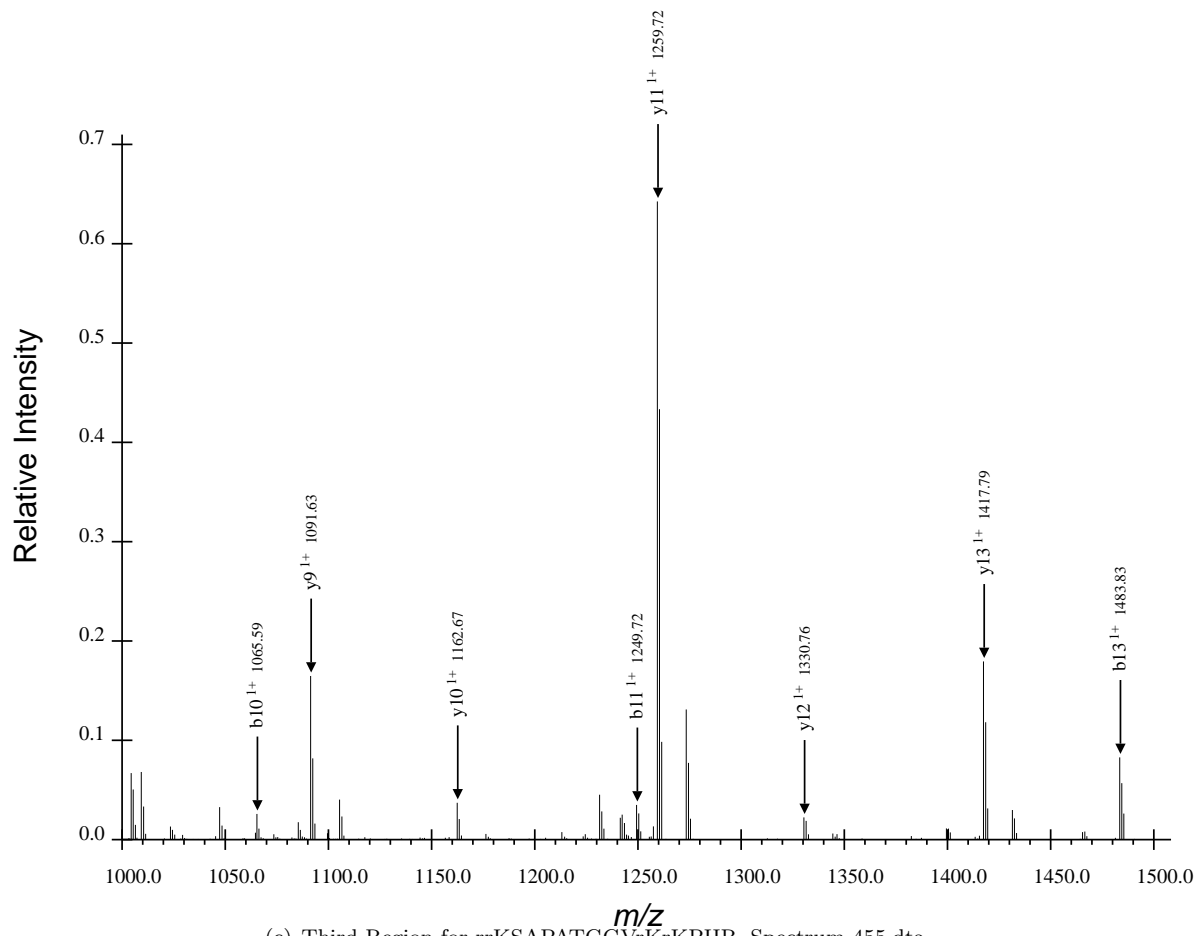

(c) Third Region for rrKSAPATGGVrKrKPHR, Spectrum 455.dta

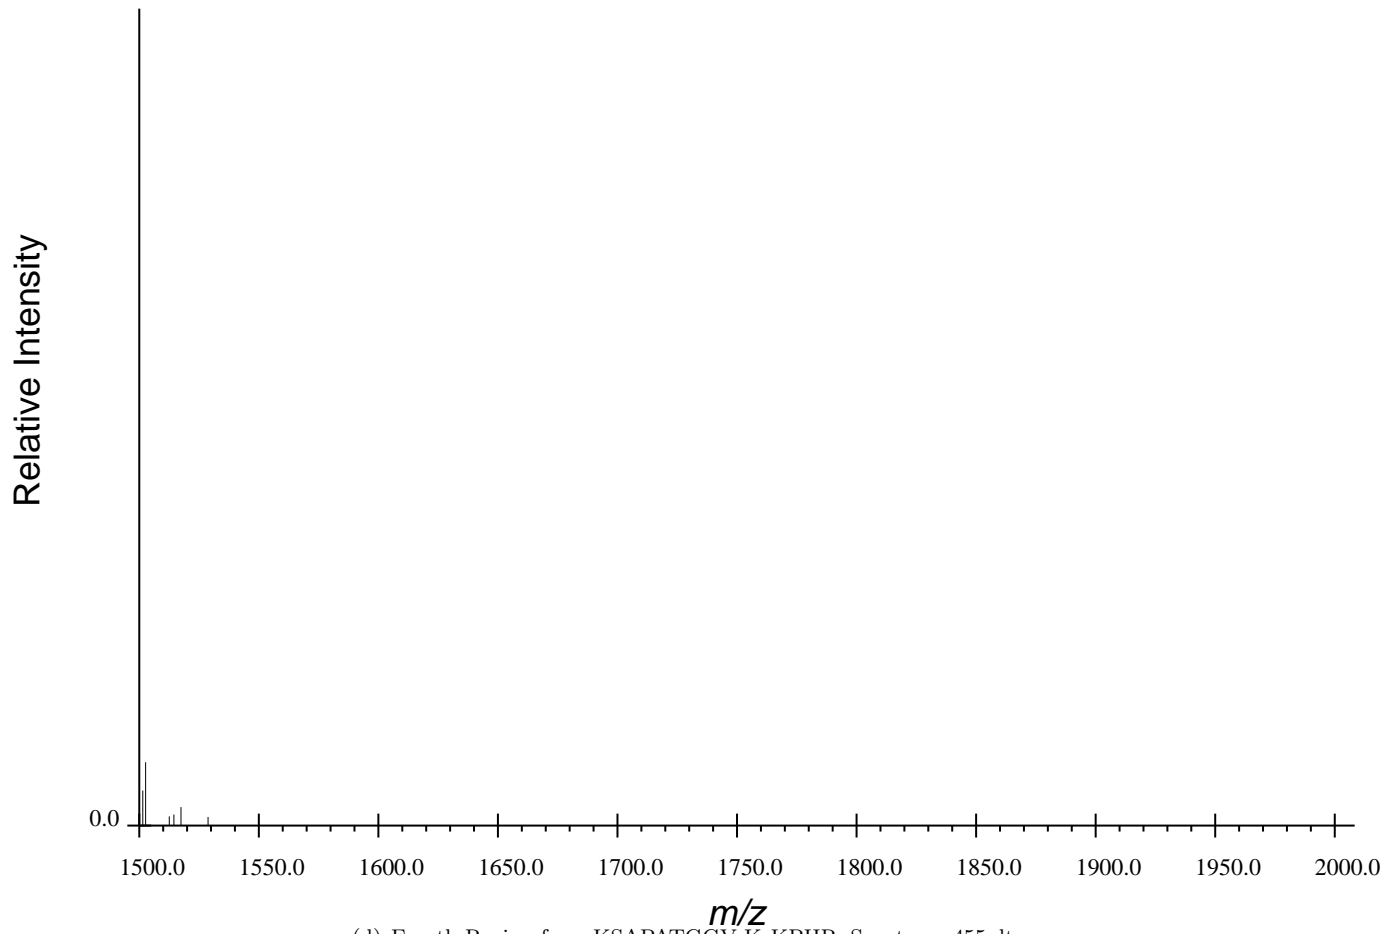

(d) Fourth Region for rrKSAPATGGVrKrKPHR, Spectrum 455.dta

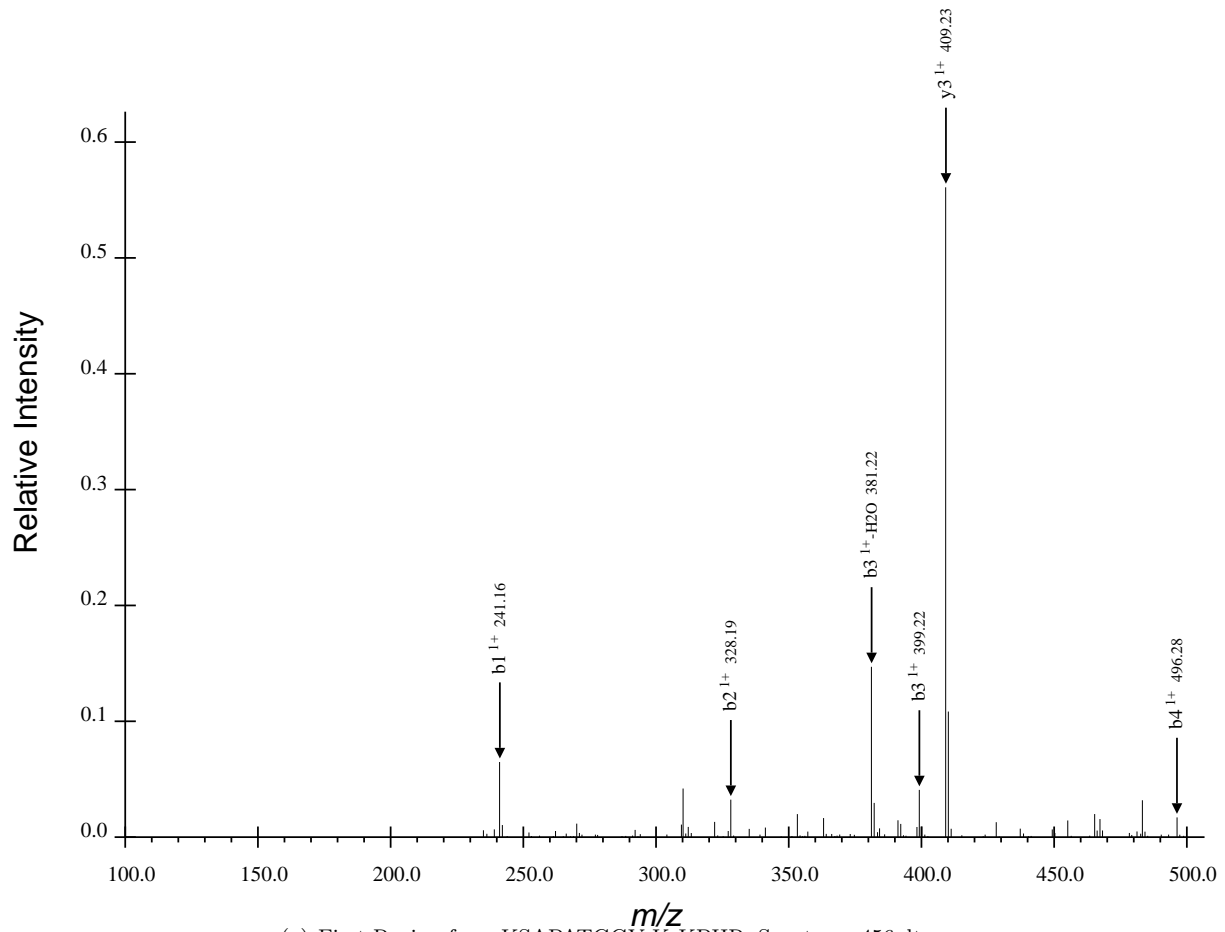

(a) First Region for rrKSAPATGGVrKrKPHR, Spectrum 456.dta

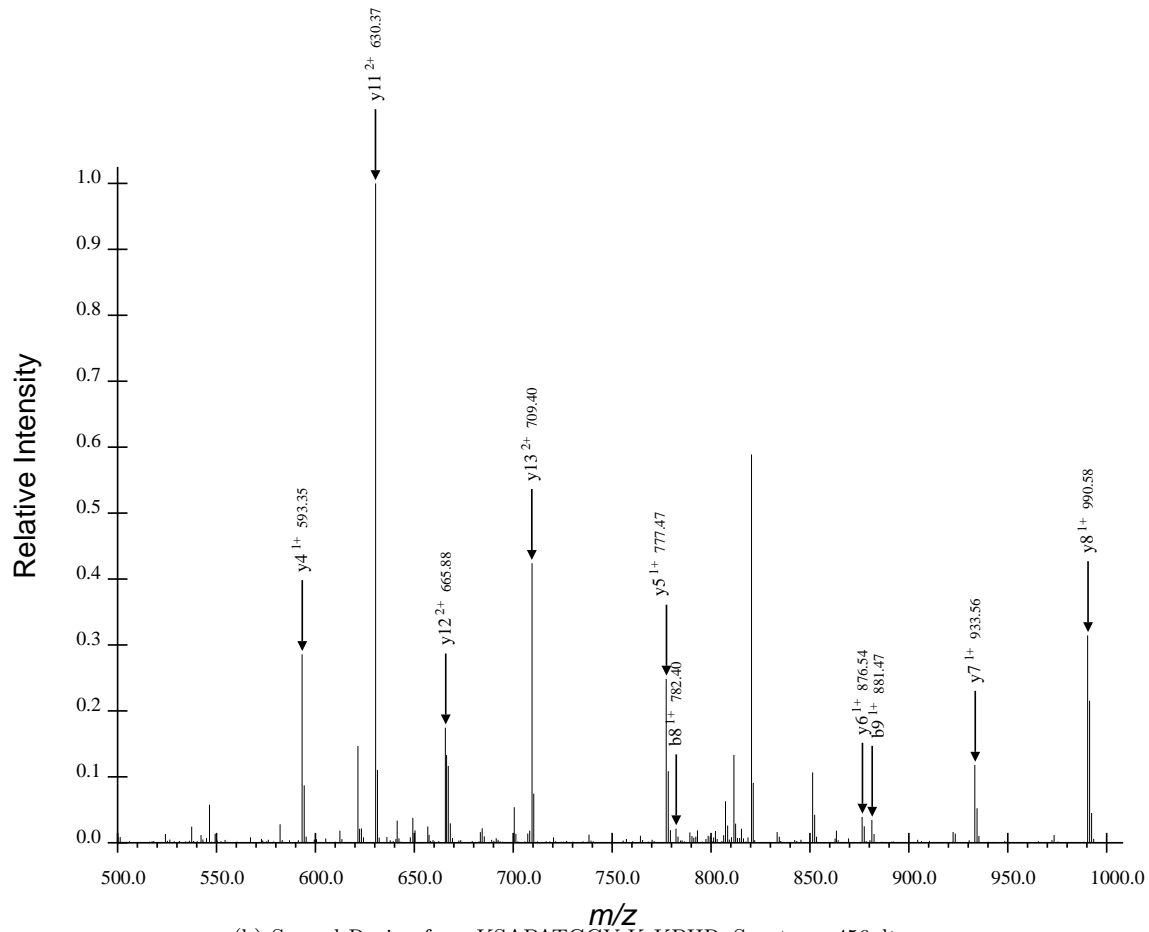

(b) Second Region for rrKSAPATGGVrKrKPHR, Spectrum 456.dta



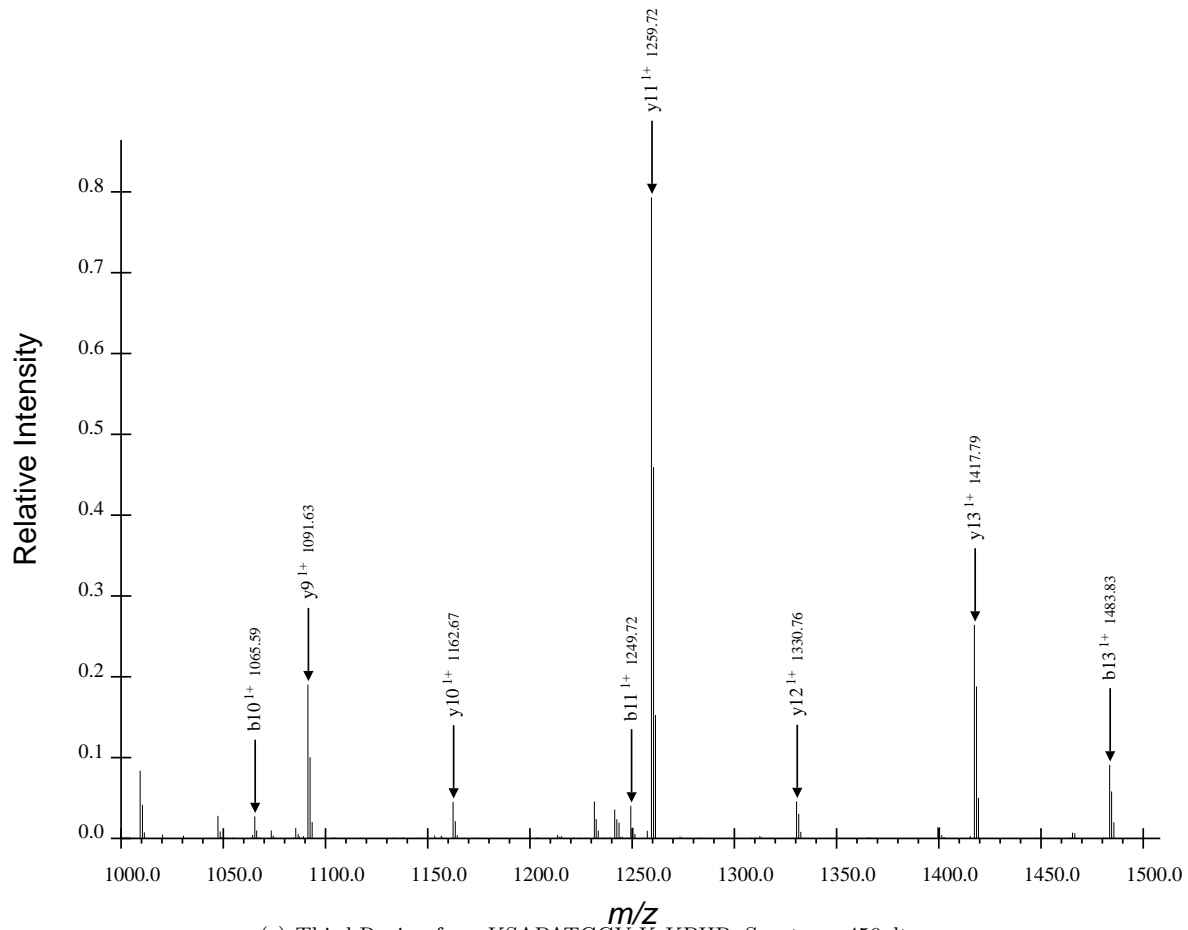

(c) Third Region for rrKSAPATGGVrKrKPHR, Spectrum 456.dta

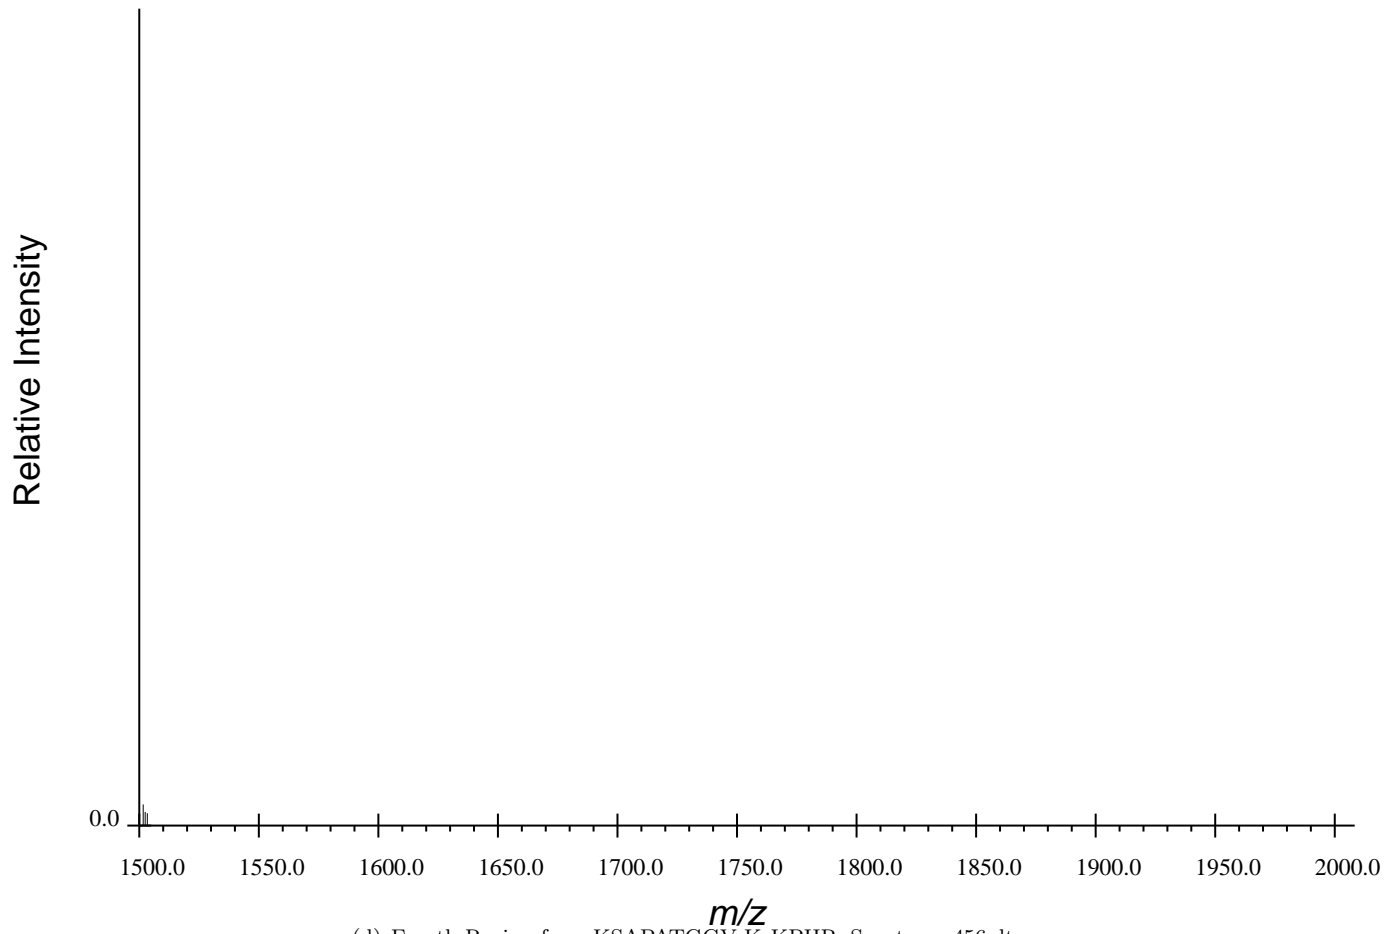

(d) Fourth Region for rrKSAPATGGVrKrKPHR, Spectrum 456.dta

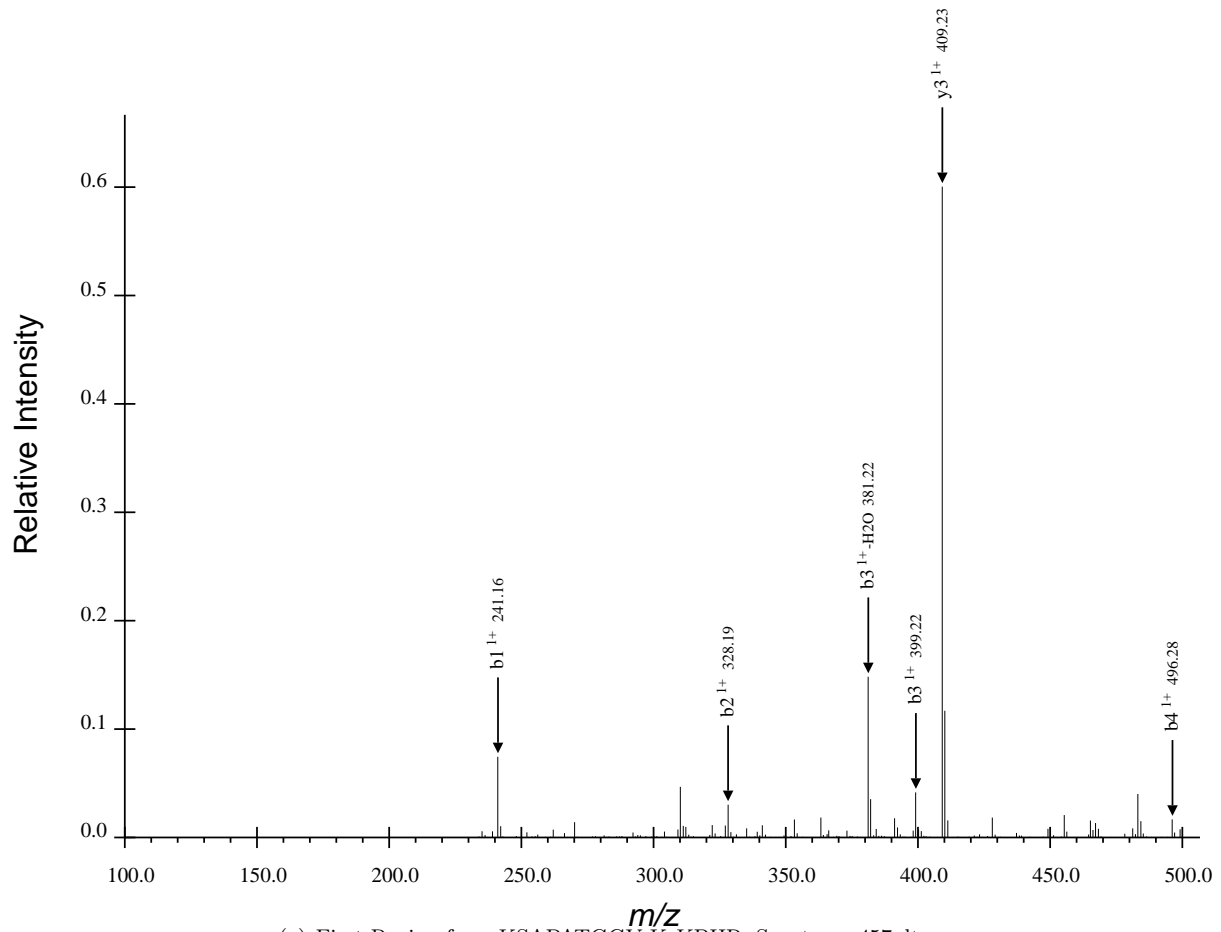

(a) First Region for rrKSAPATGGVrKrKPHR, Spectrum 457.dta

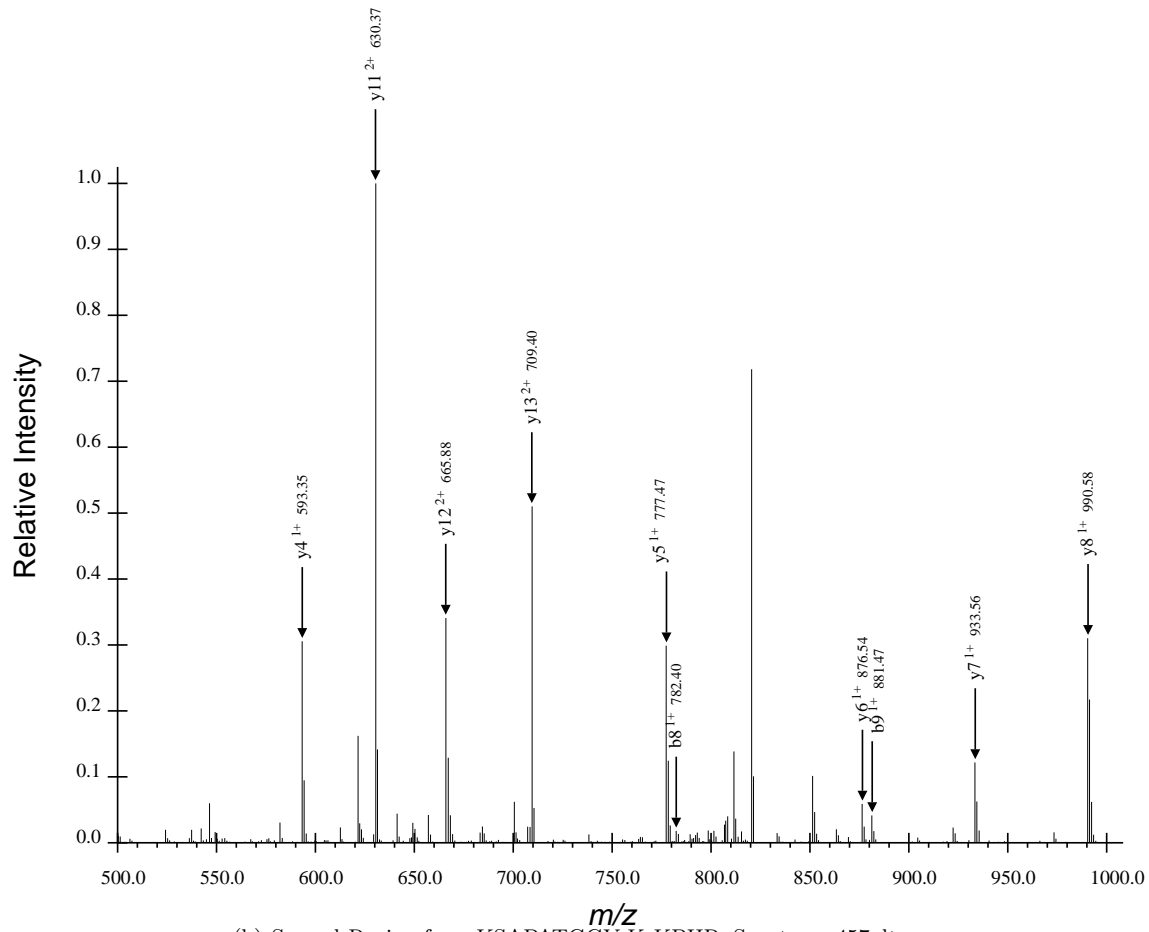

(b) Second Region for rrKSAPATGGVrKrKPHR, Spectrum 457.dta

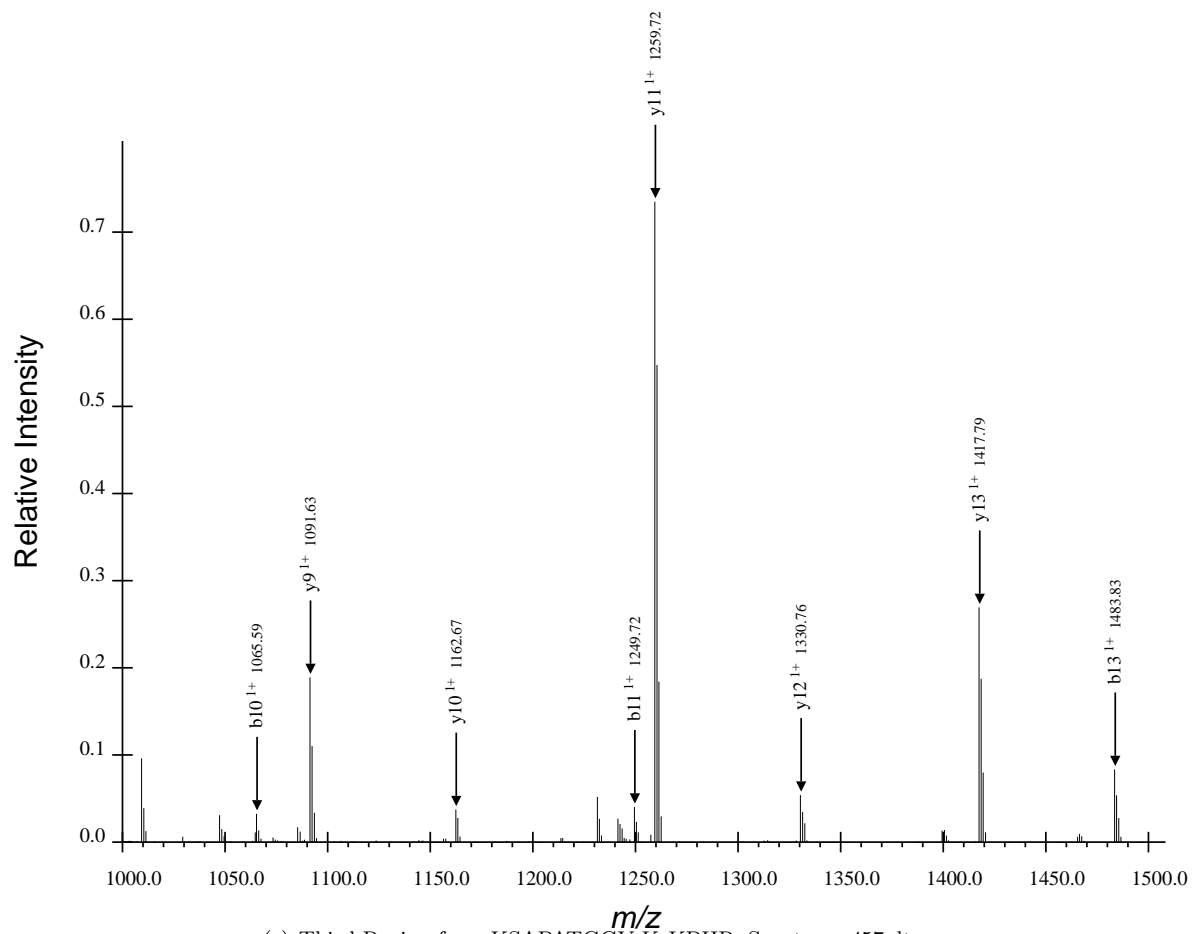

(c) Third Region for rrKSAPATGGVrKrKPHR, Spectrum 457.dta

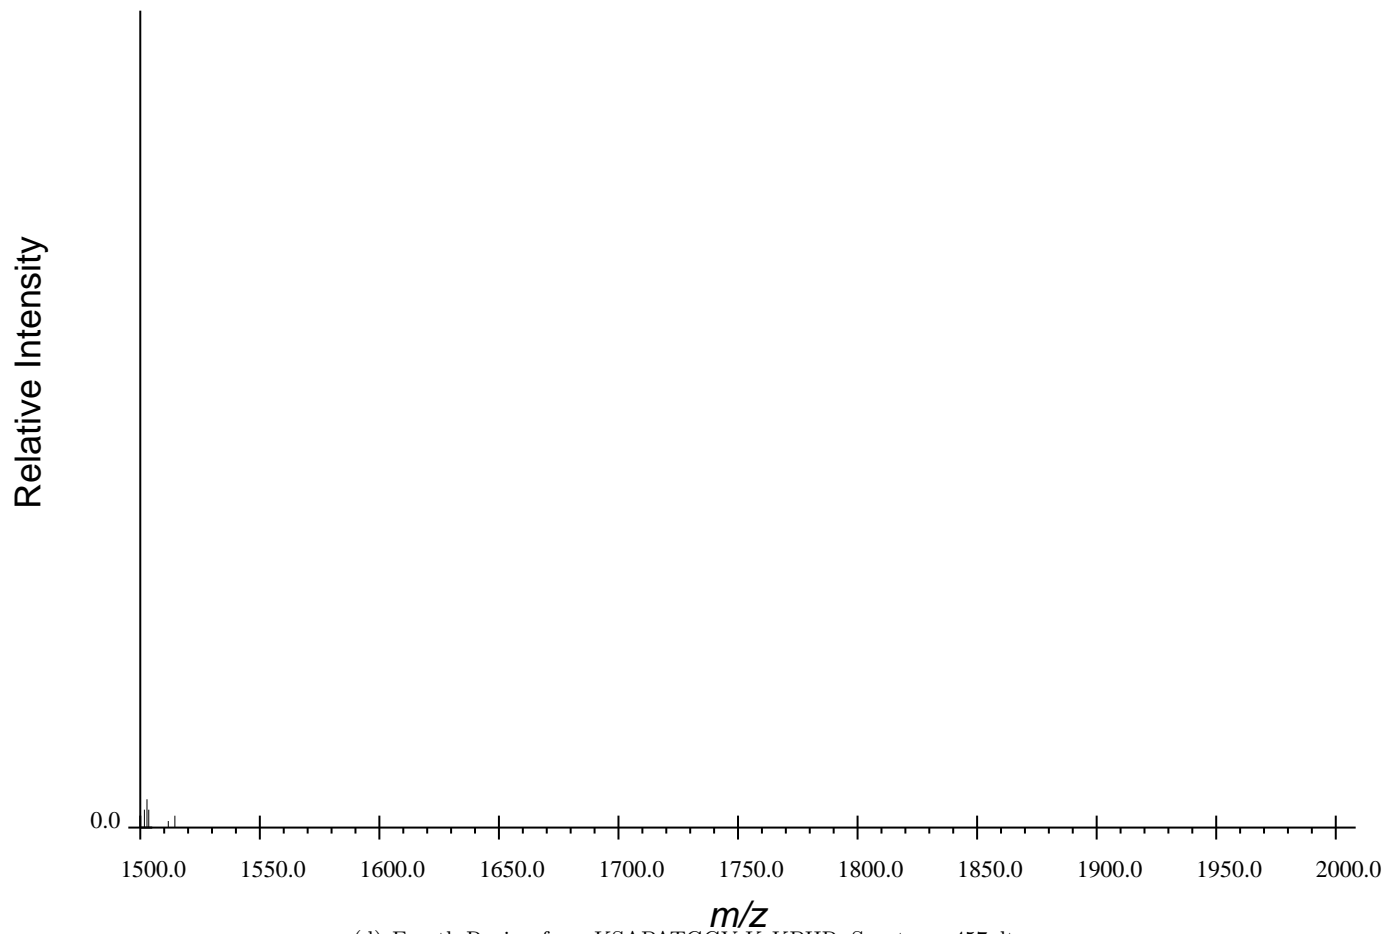

(d) Fourth Region for rrKSAPATGGVrKrKPHR, Spectrum 457.dta

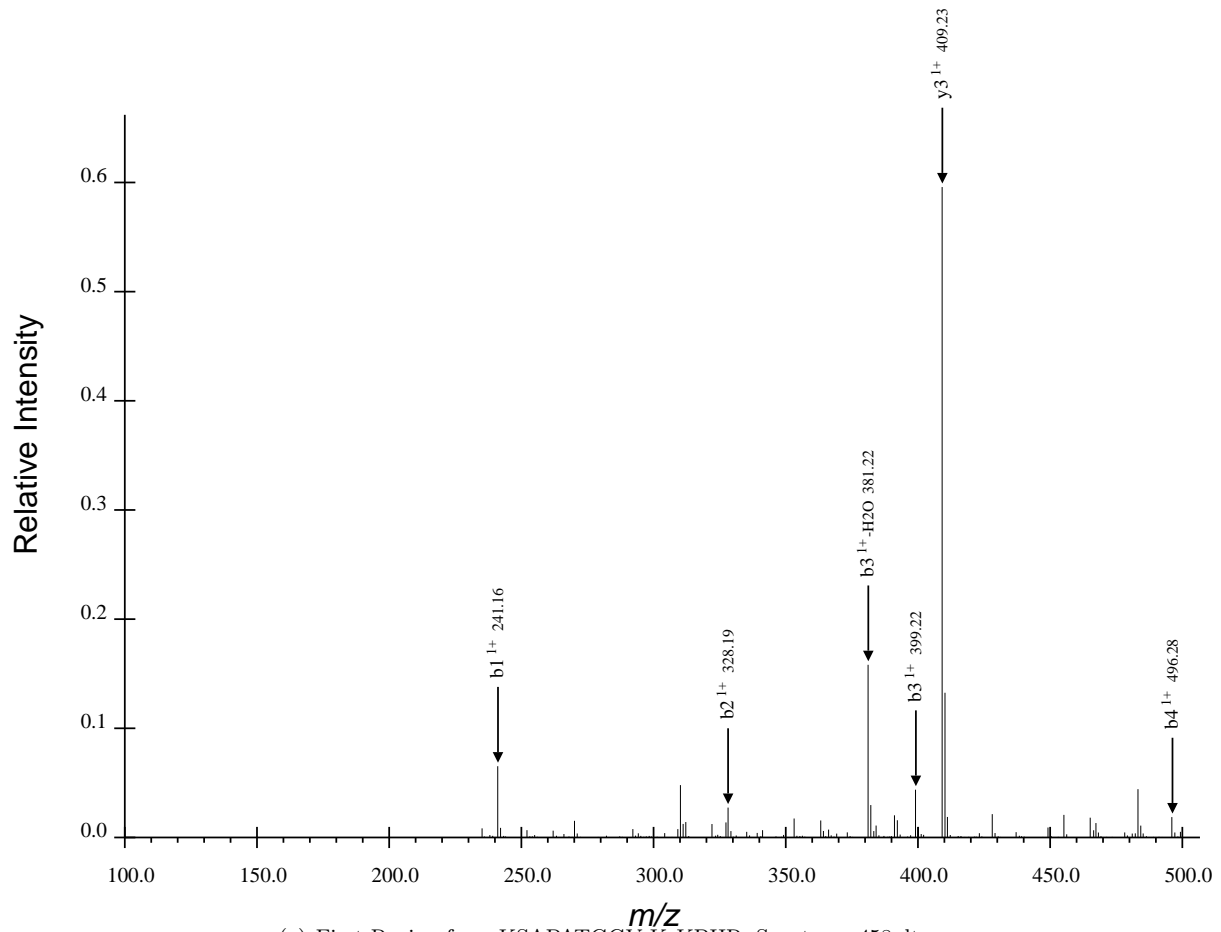

(a) First Region for rrKSAPATGGVrKrKPHR, Spectrum 458.dta

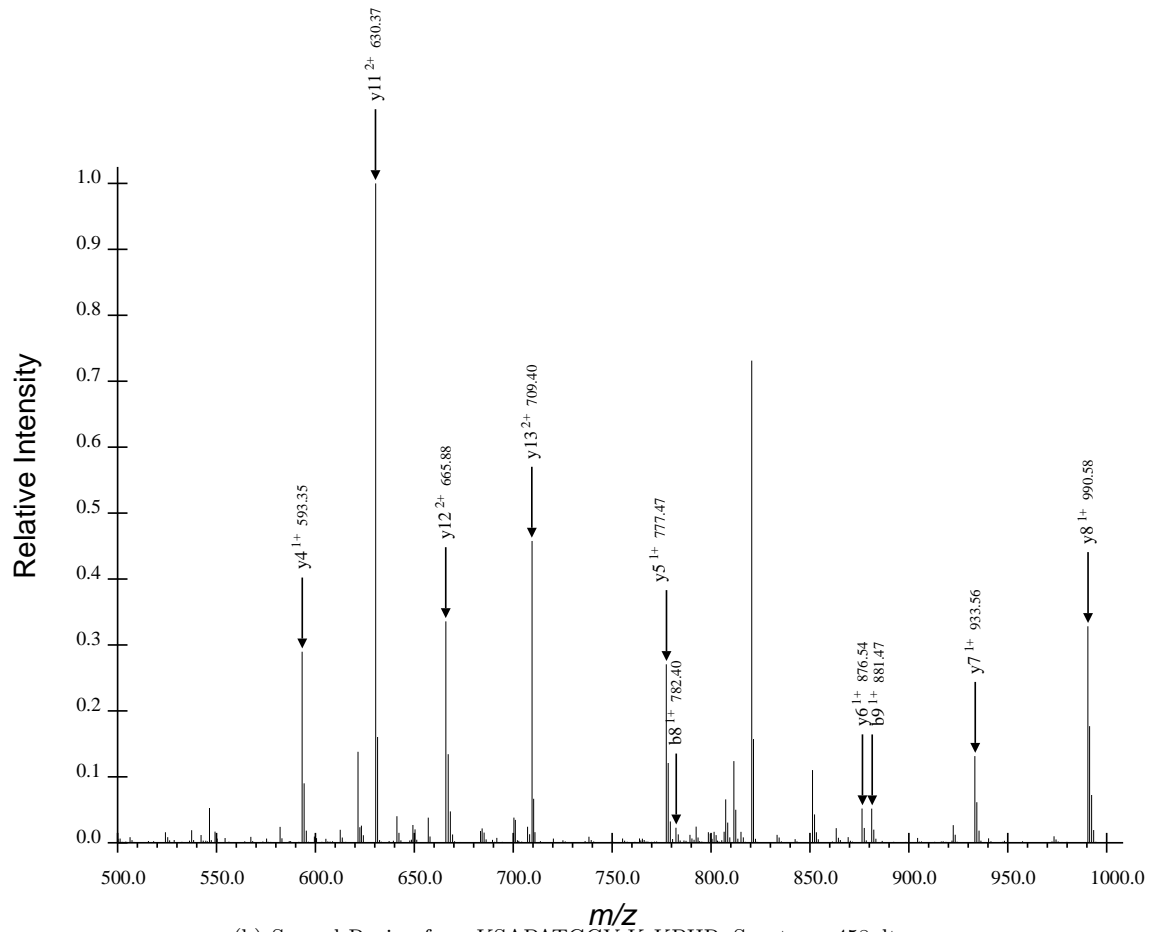

(b) Second Region for rrKSAPATGGVrKrKPHR, Spectrum 458.dta

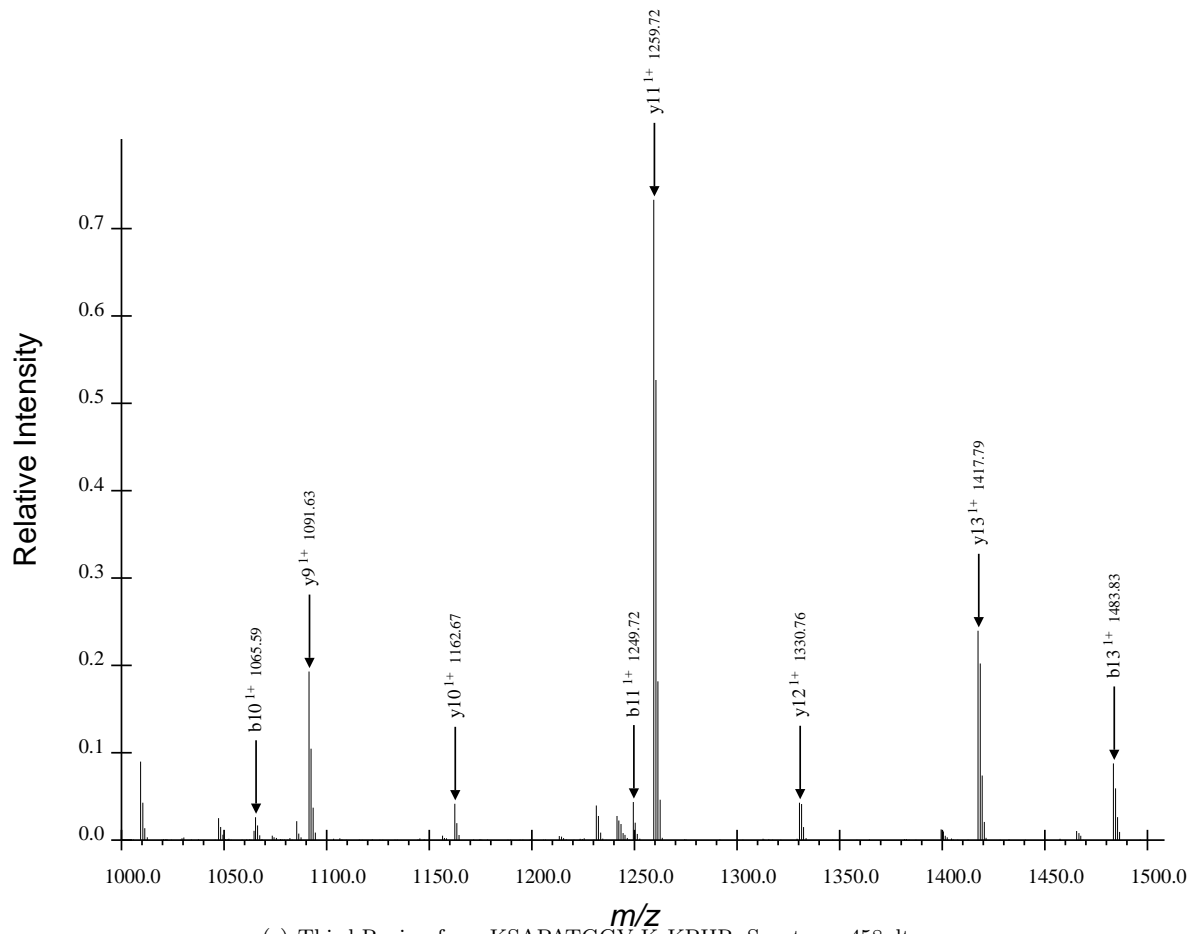

(c) Third Region for rrKSAPATGGVrKrKPHR, Spectrum 458.dta

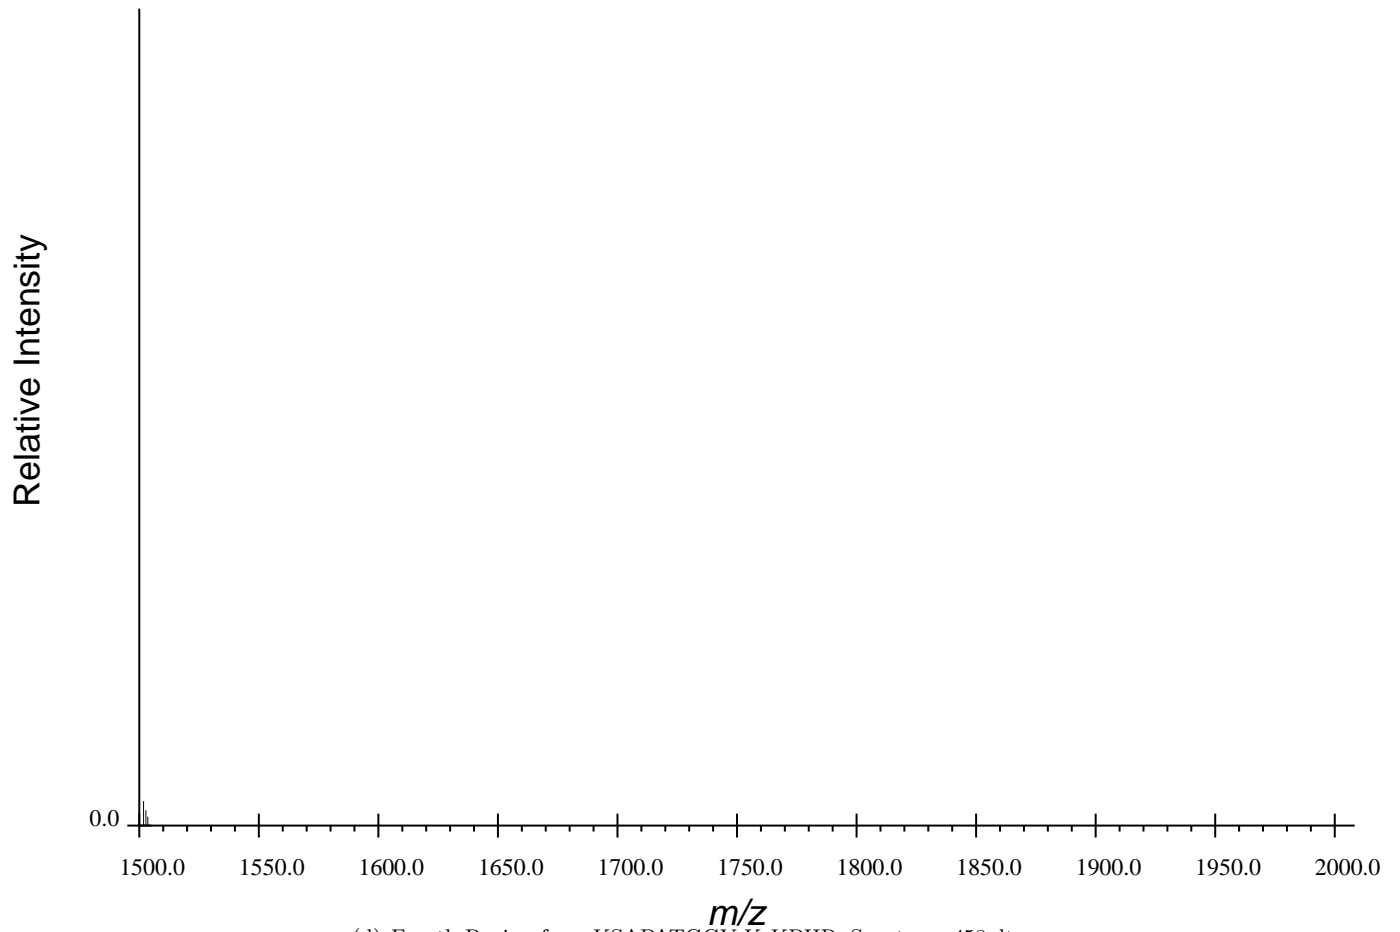

(d) Fourth Region for rrKSAPATGGVrKrKPHR, Spectrum 458.dta

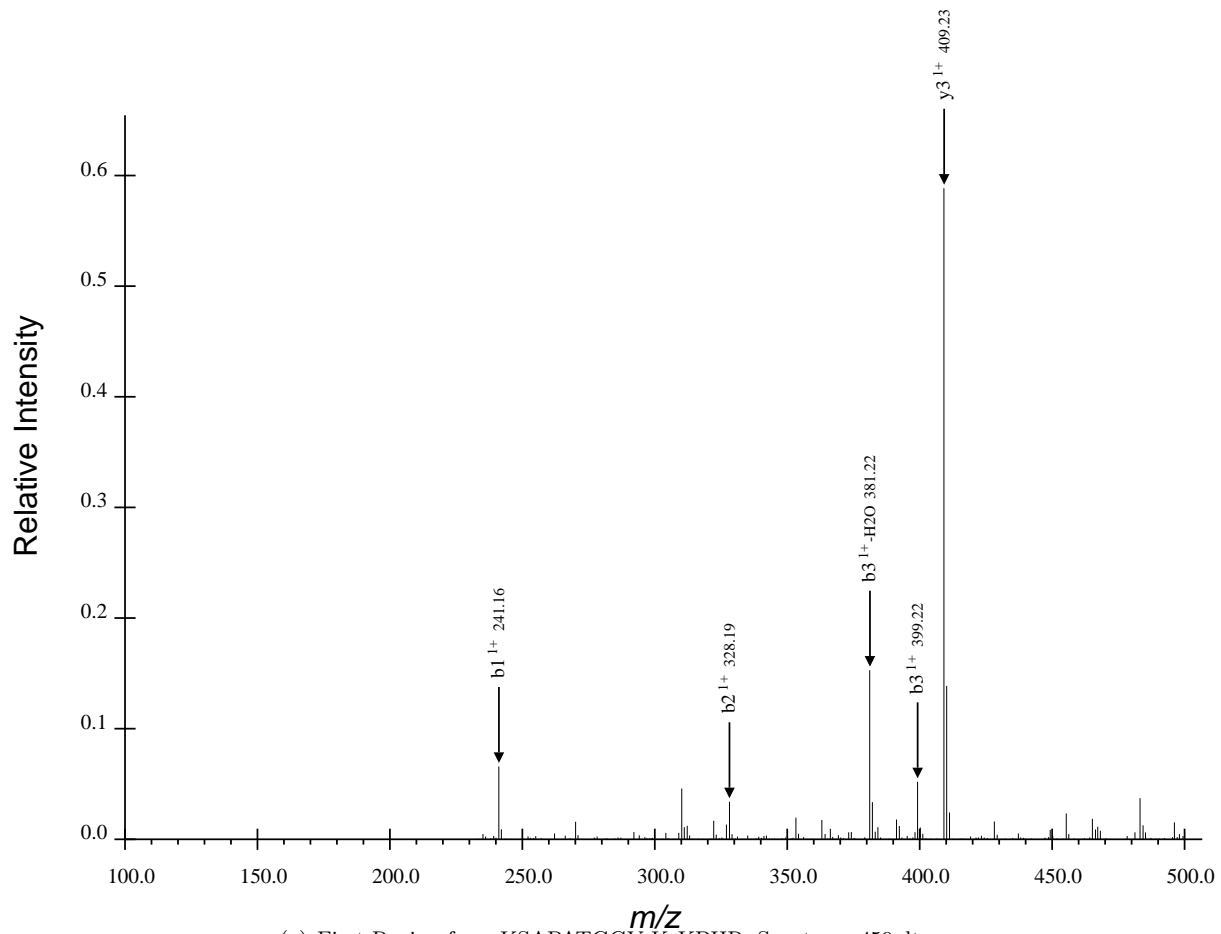

(a) First Region for rrKSAPATGGVrKrKPHR, Spectrum 459.dta

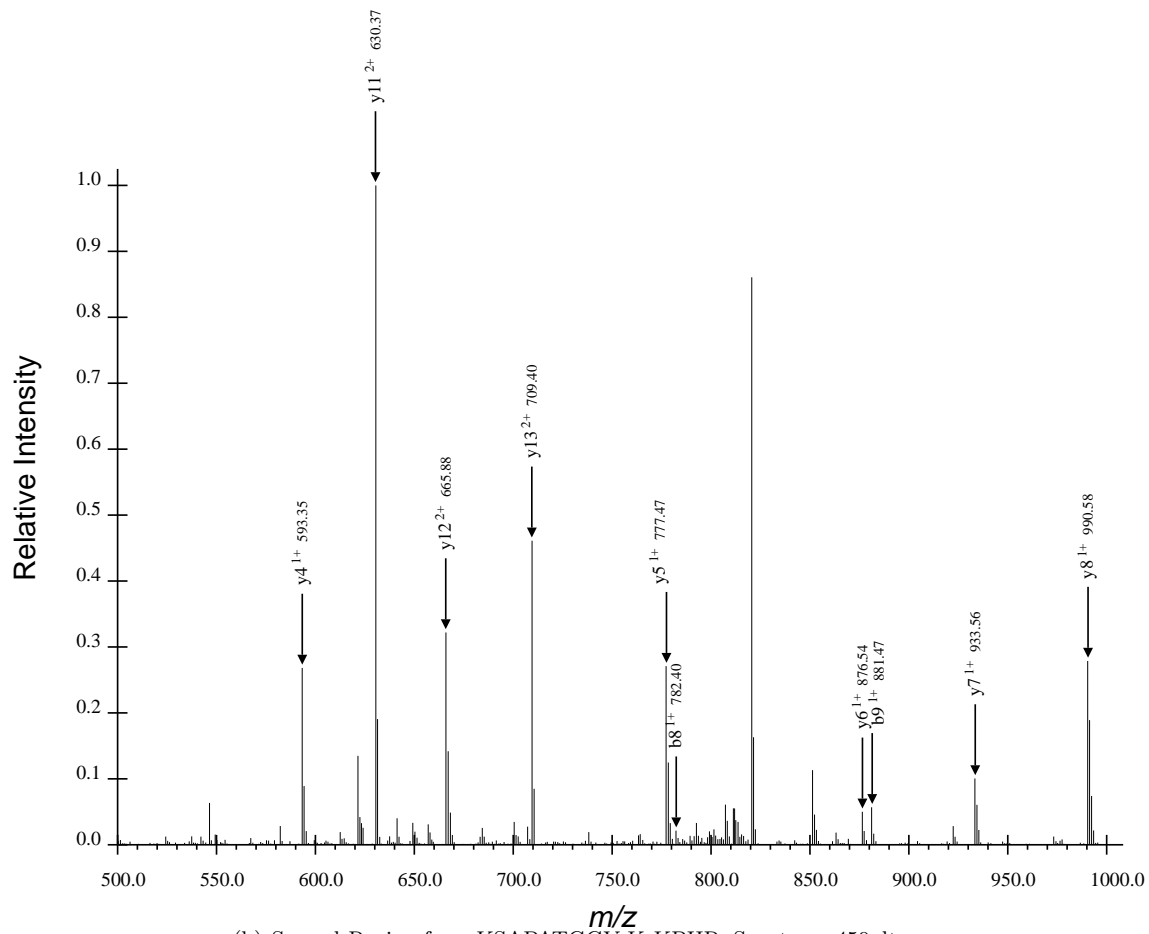

(b) Second Region for rrKSAPATGGVrKrKPHR, Spectrum 459.dta

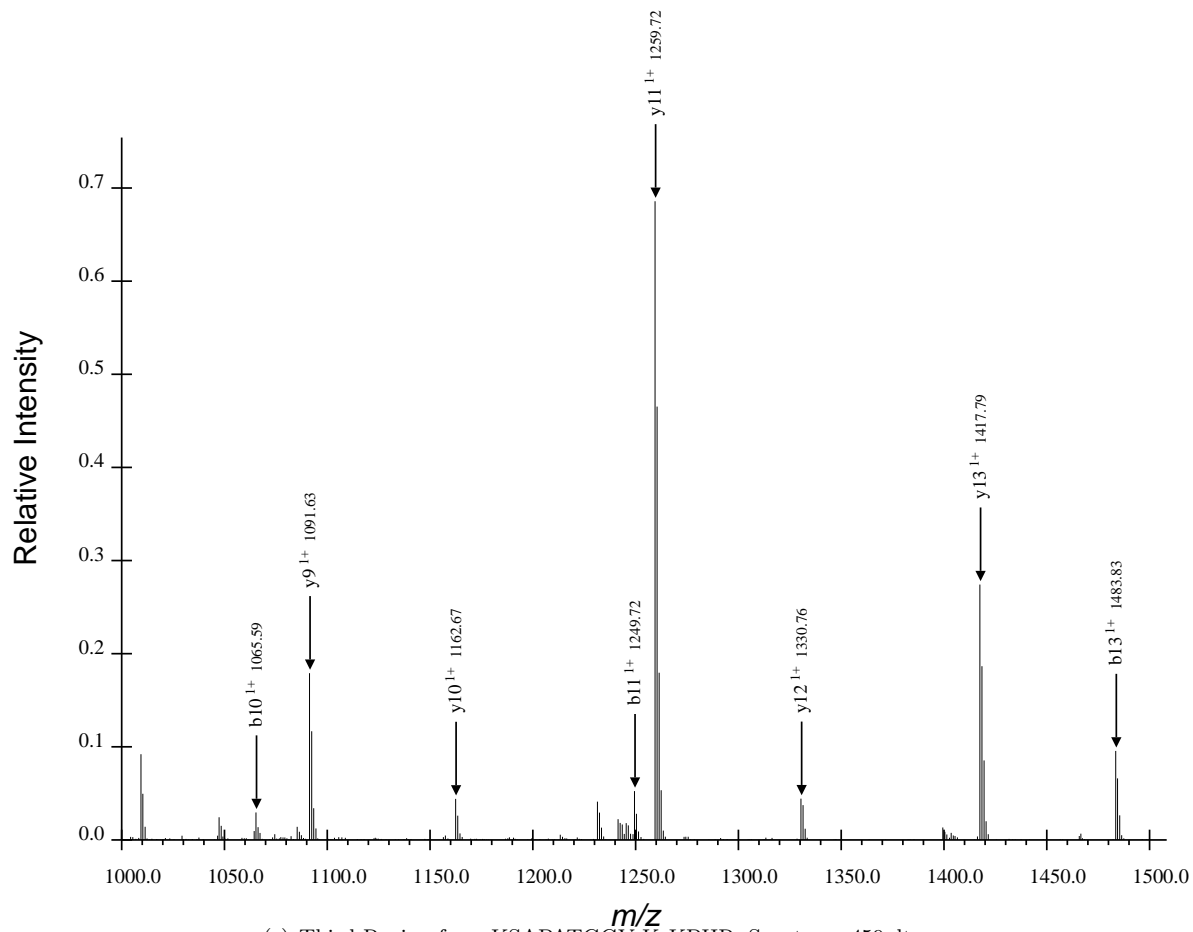

(c) Third Region for rrKSAPATGGVrKrKPHR, Spectrum 459.dta

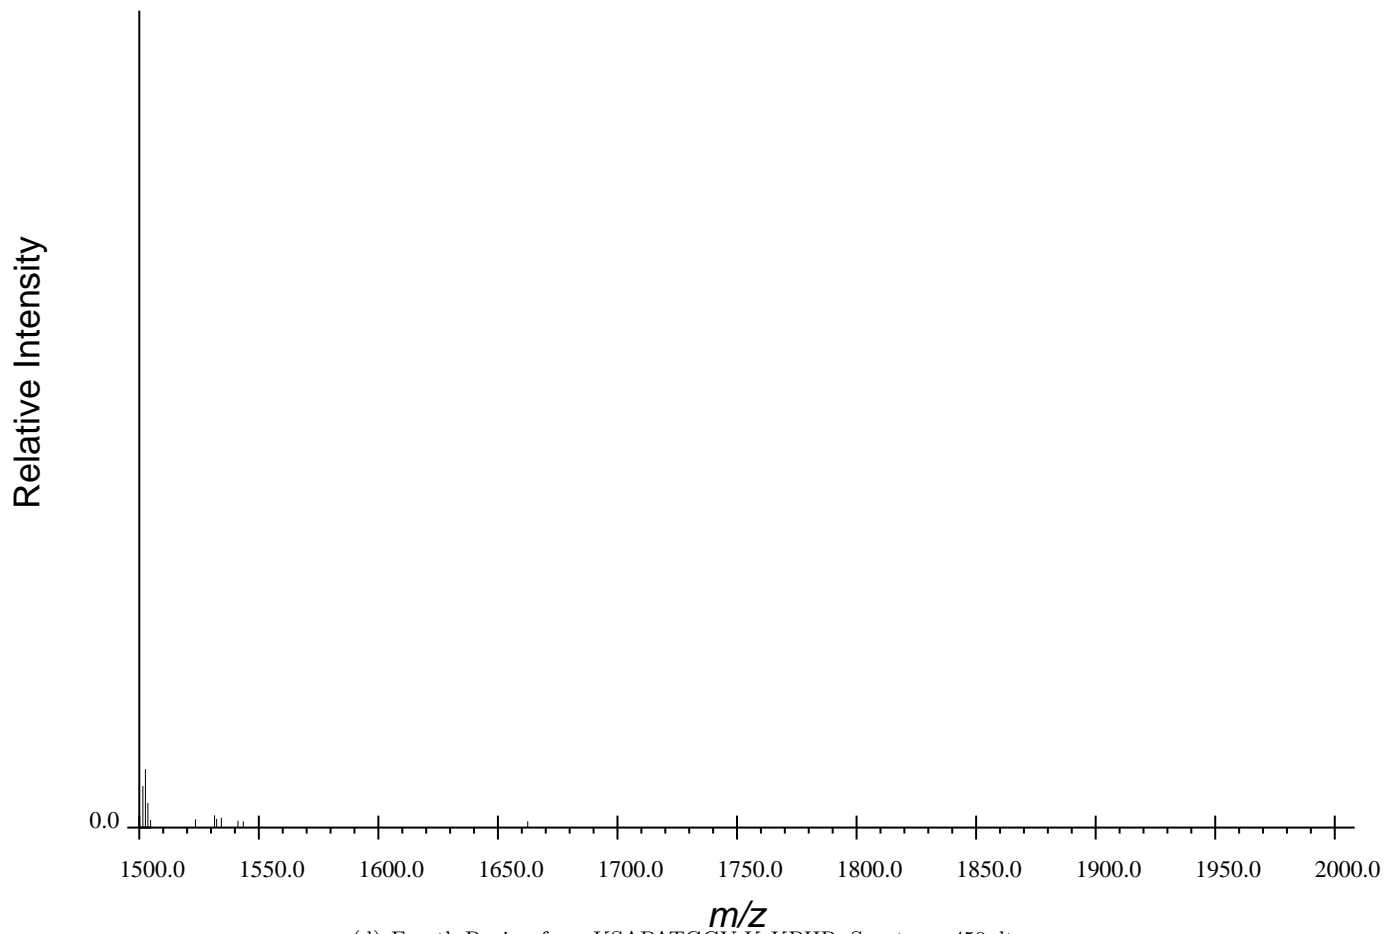

(d) Fourth Region for rrKSAPATGGVrKrKPHR, Spectrum 459.dta

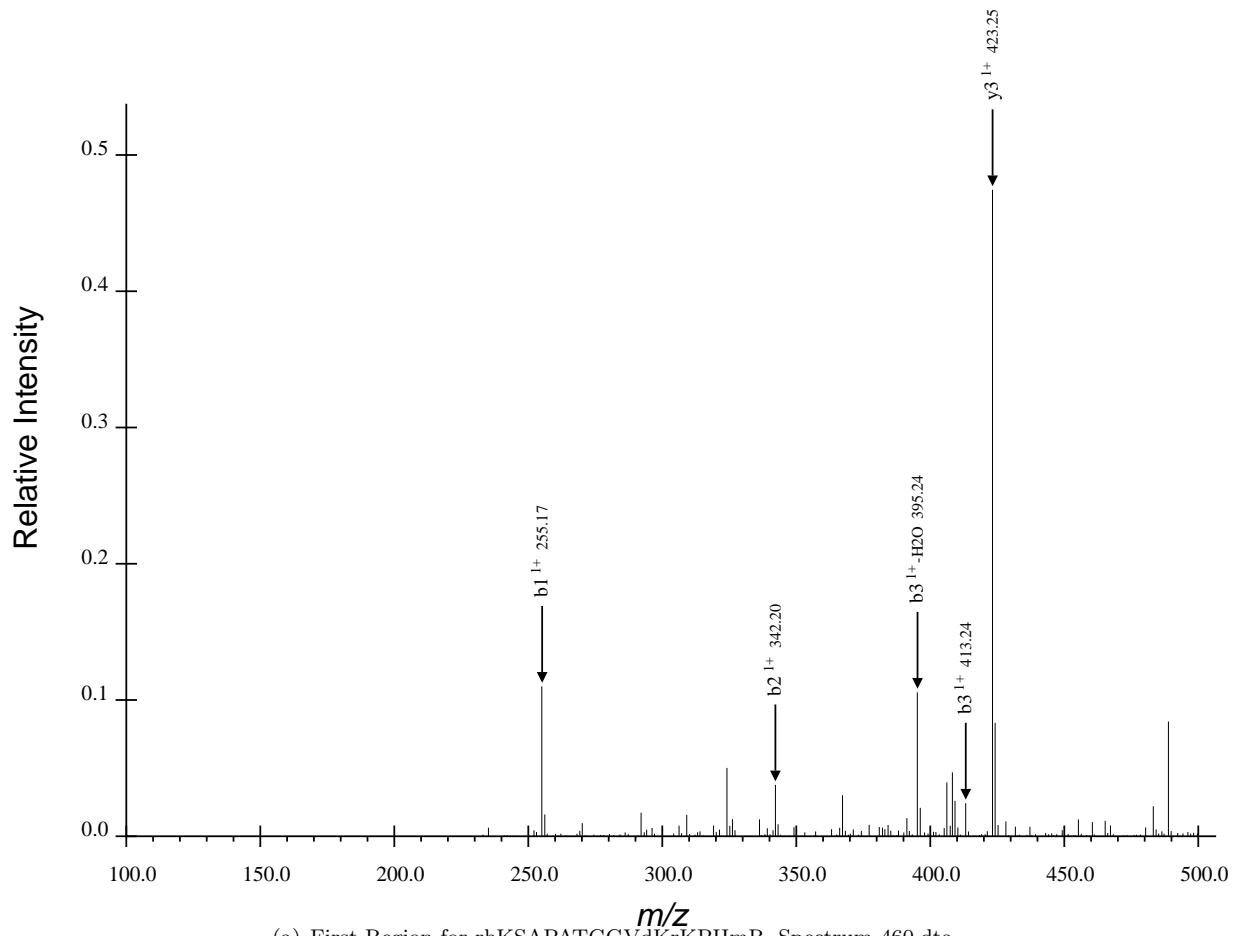

(a) First Region for rhKSAPATGGVdKrKPHmR, Spectrum 460.dta

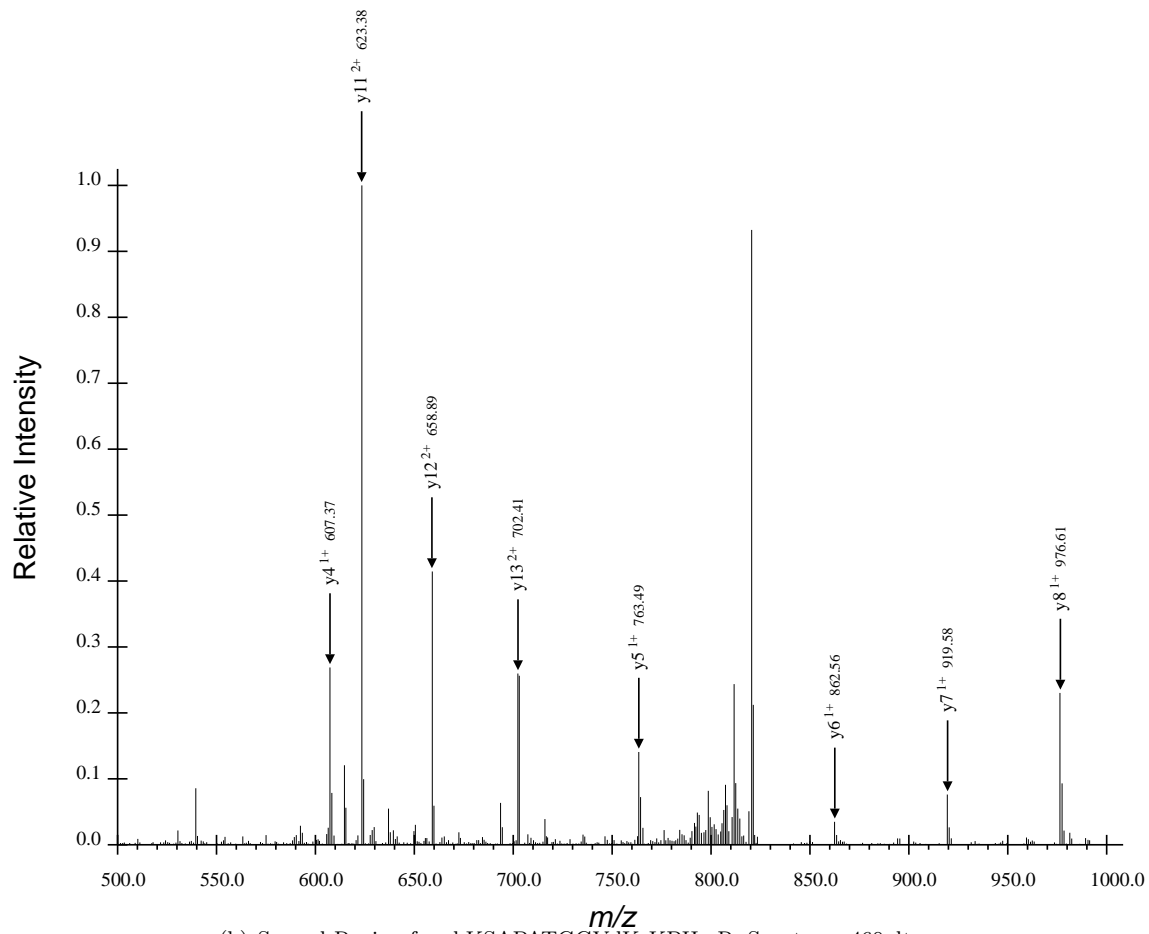

(b) Second Region for rhKSAPATGGVdKrKPHmR, Spectrum 460.dta



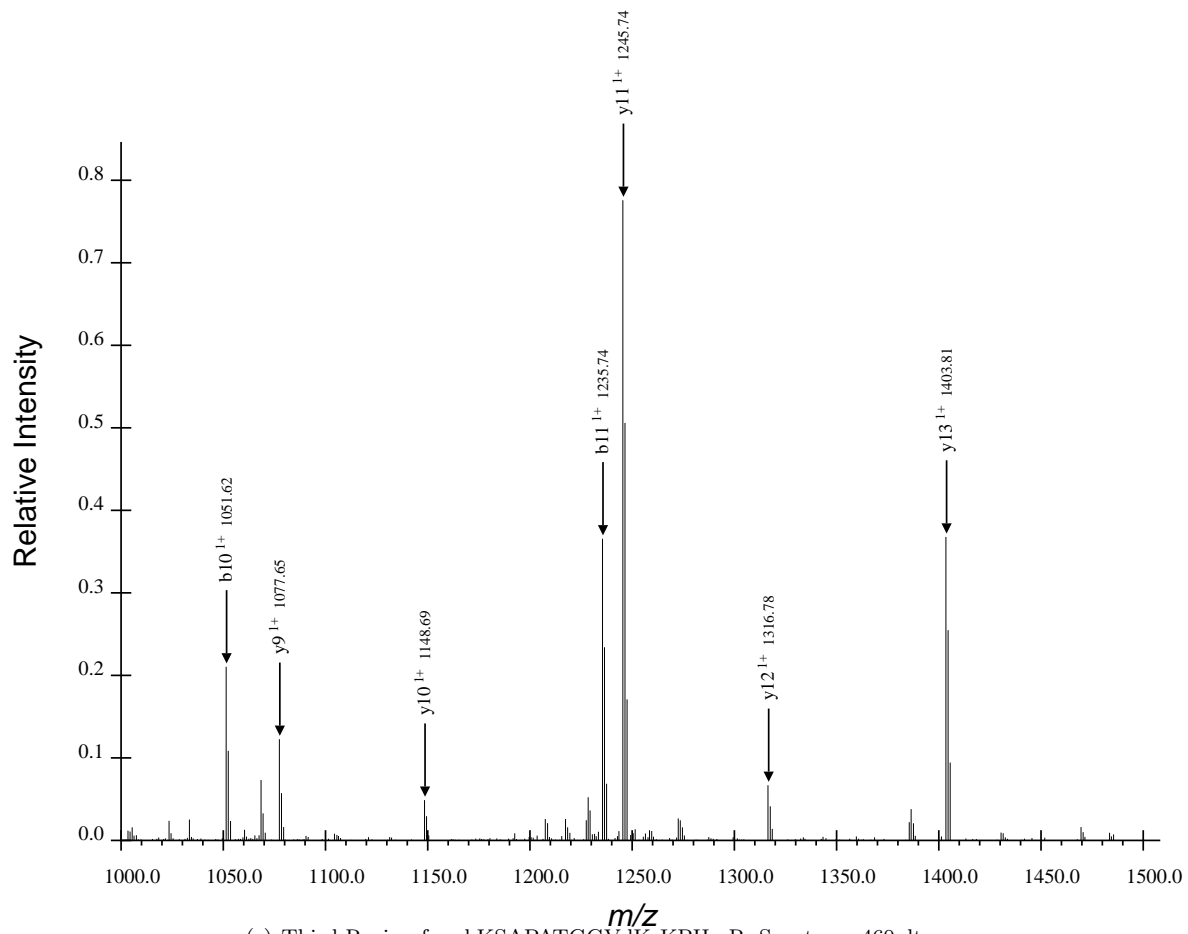

(c) Third Region for rhKSAPATGGVdKrKPHmR, Spectrum 460.dta

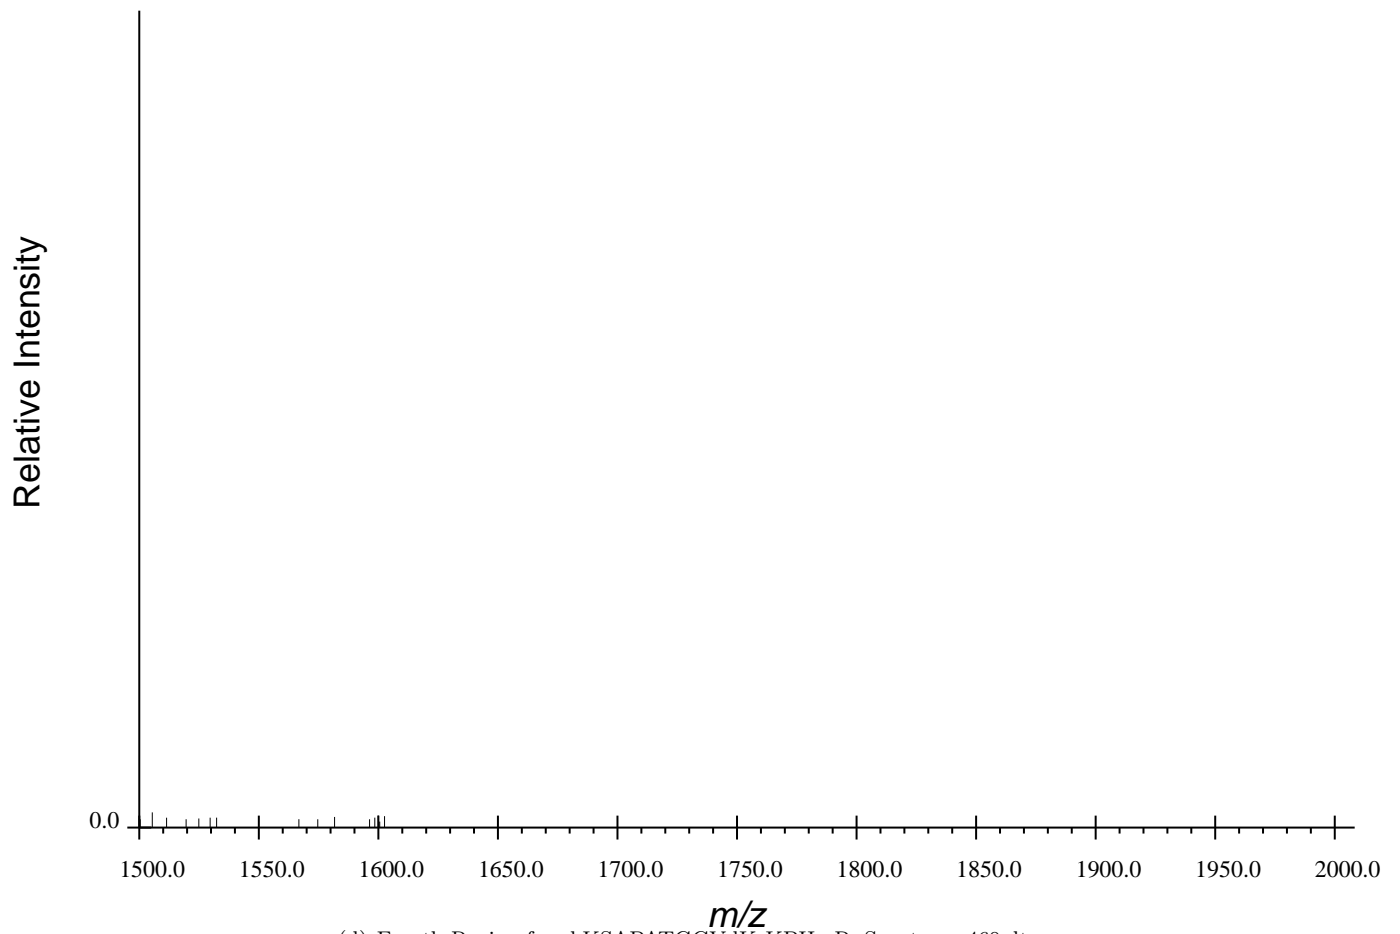

(d) Fourth Region for rhKSAPATGGVdKrKPHmR, Spectrum 460.dta

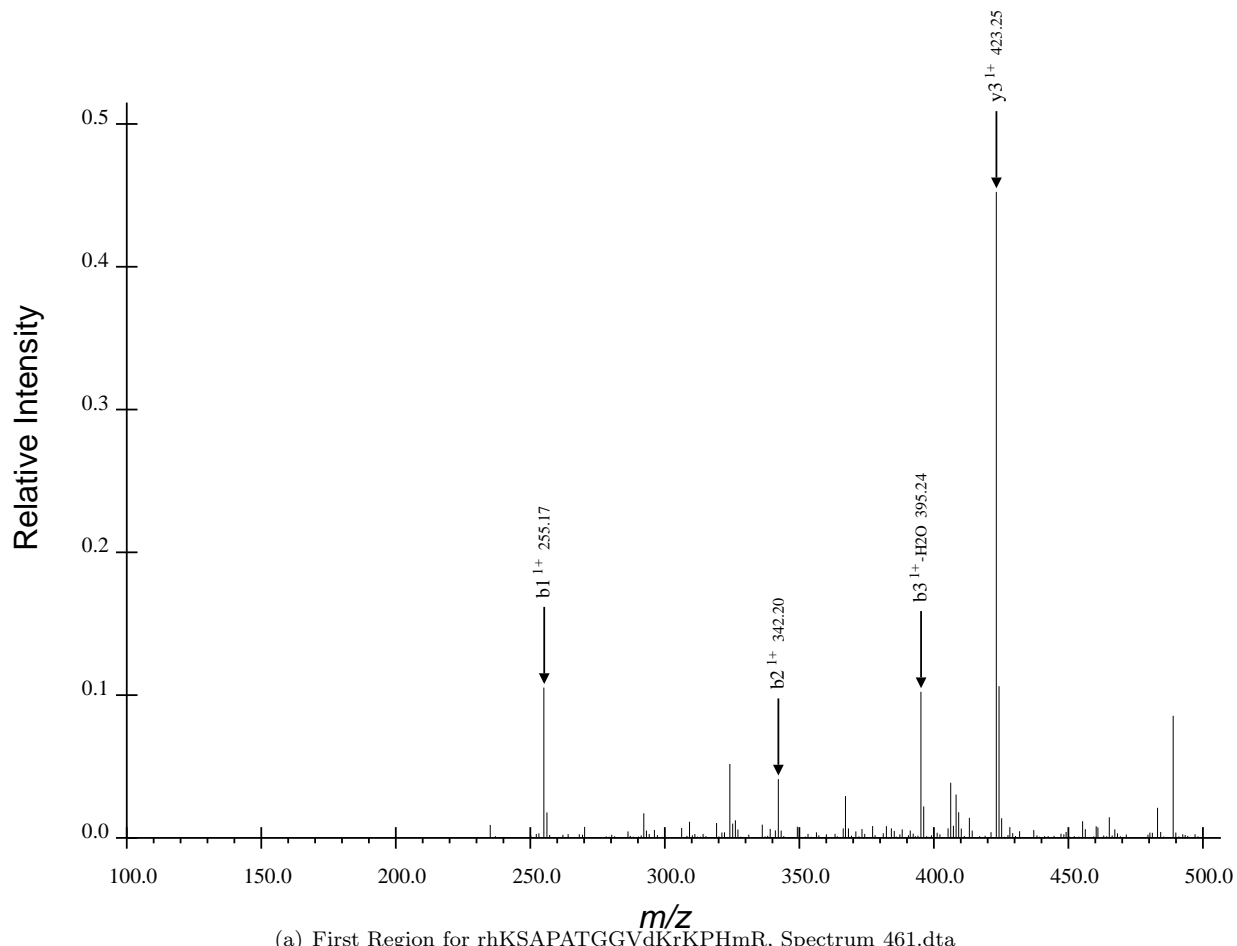

(a) First Region for rhKSAPATGGVdKrKPHmR, Spectrum 461.dta

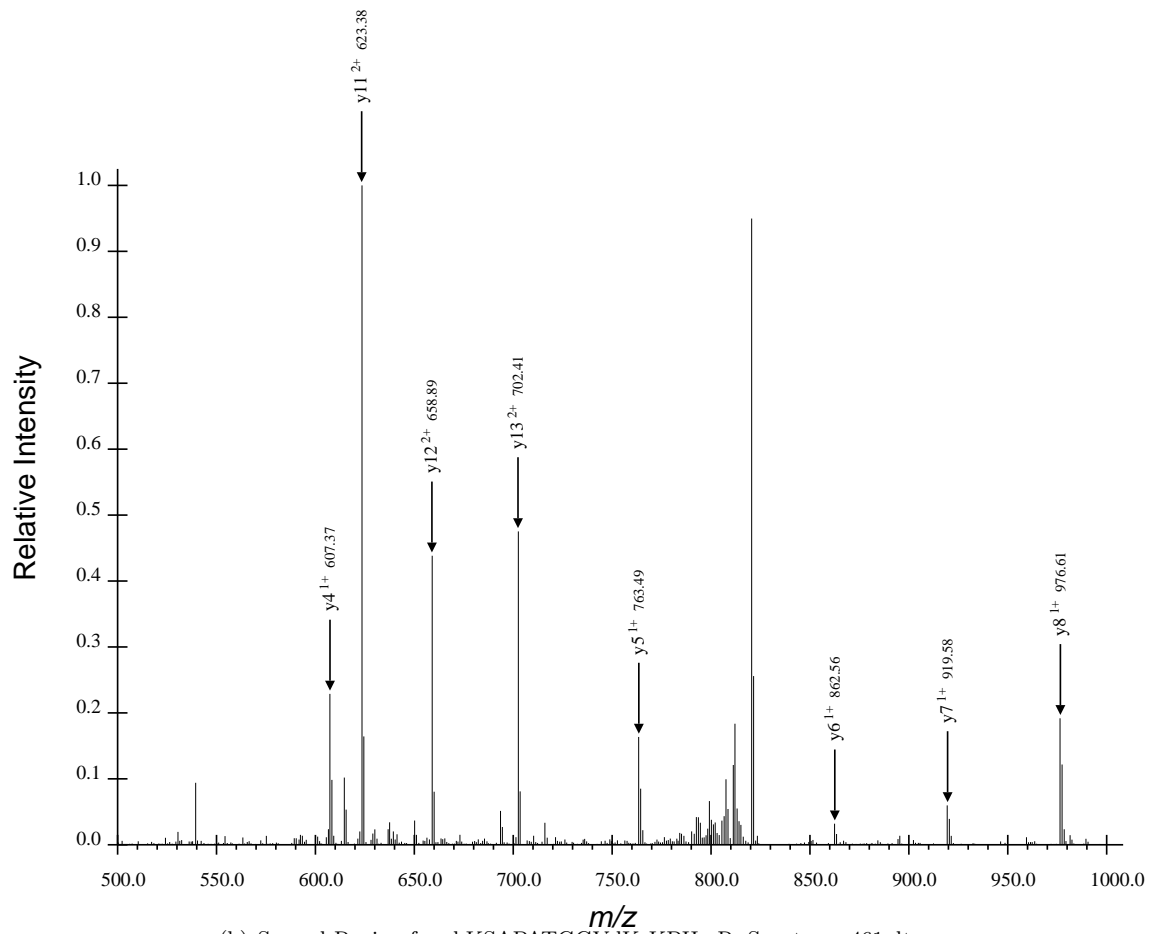

(b) Second Region for rhKSAPATGGVdKrKPHmR, Spectrum 461.dta

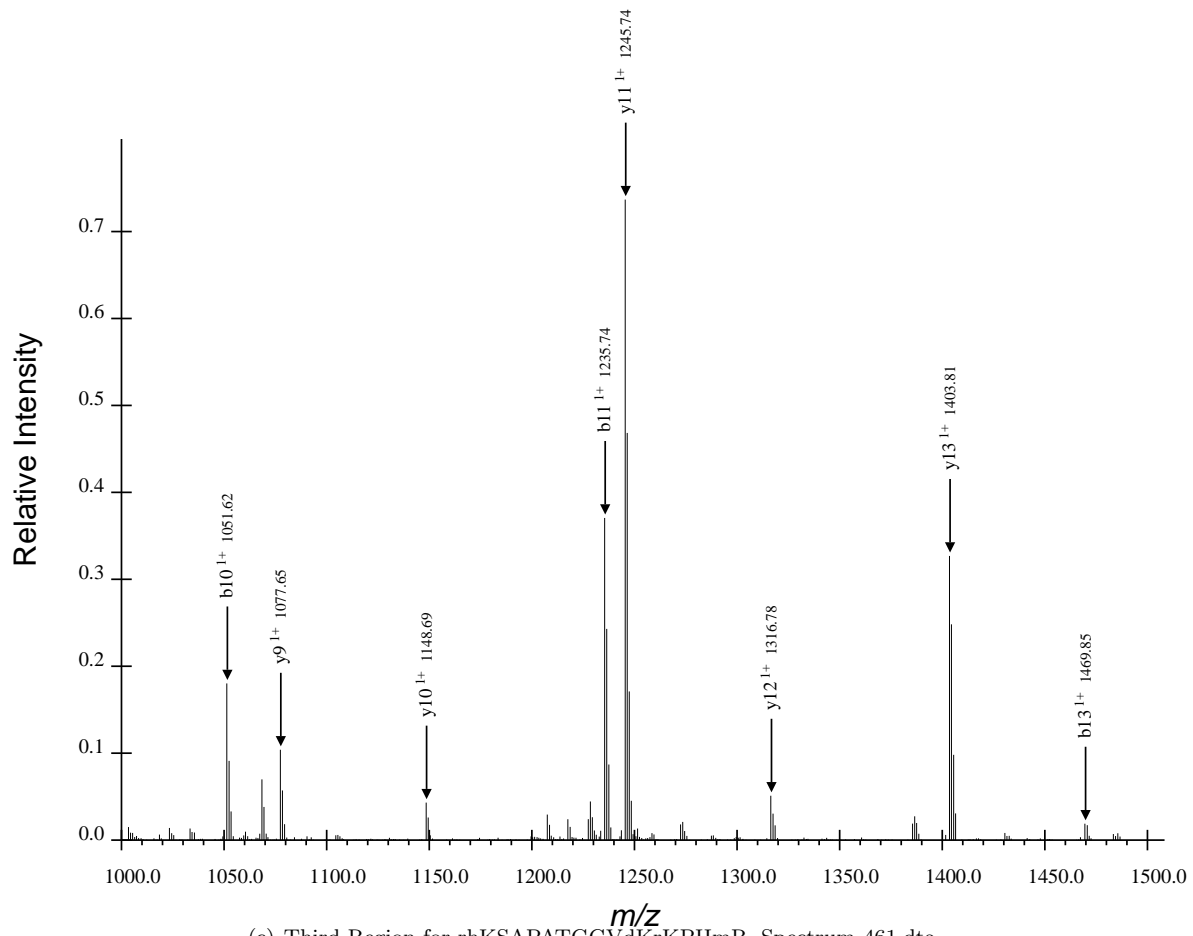

(c) Third Region for rhKSAPATGGVdKrKPHmR, Spectrum 461.dta

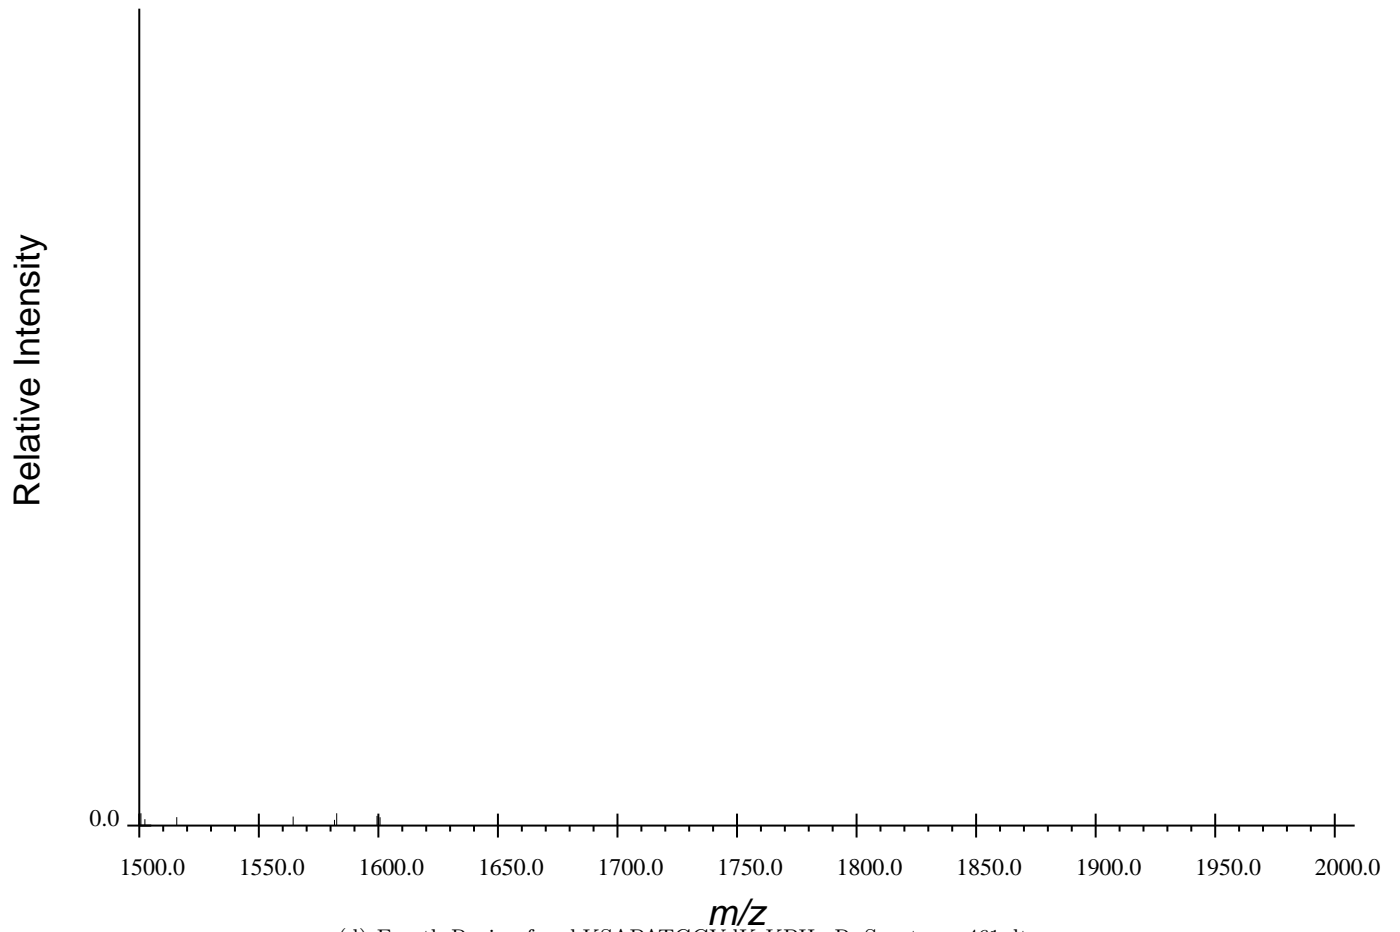

(d) Fourth Region for rhKSAPATGGVdKrKPHmR, Spectrum 461.dta

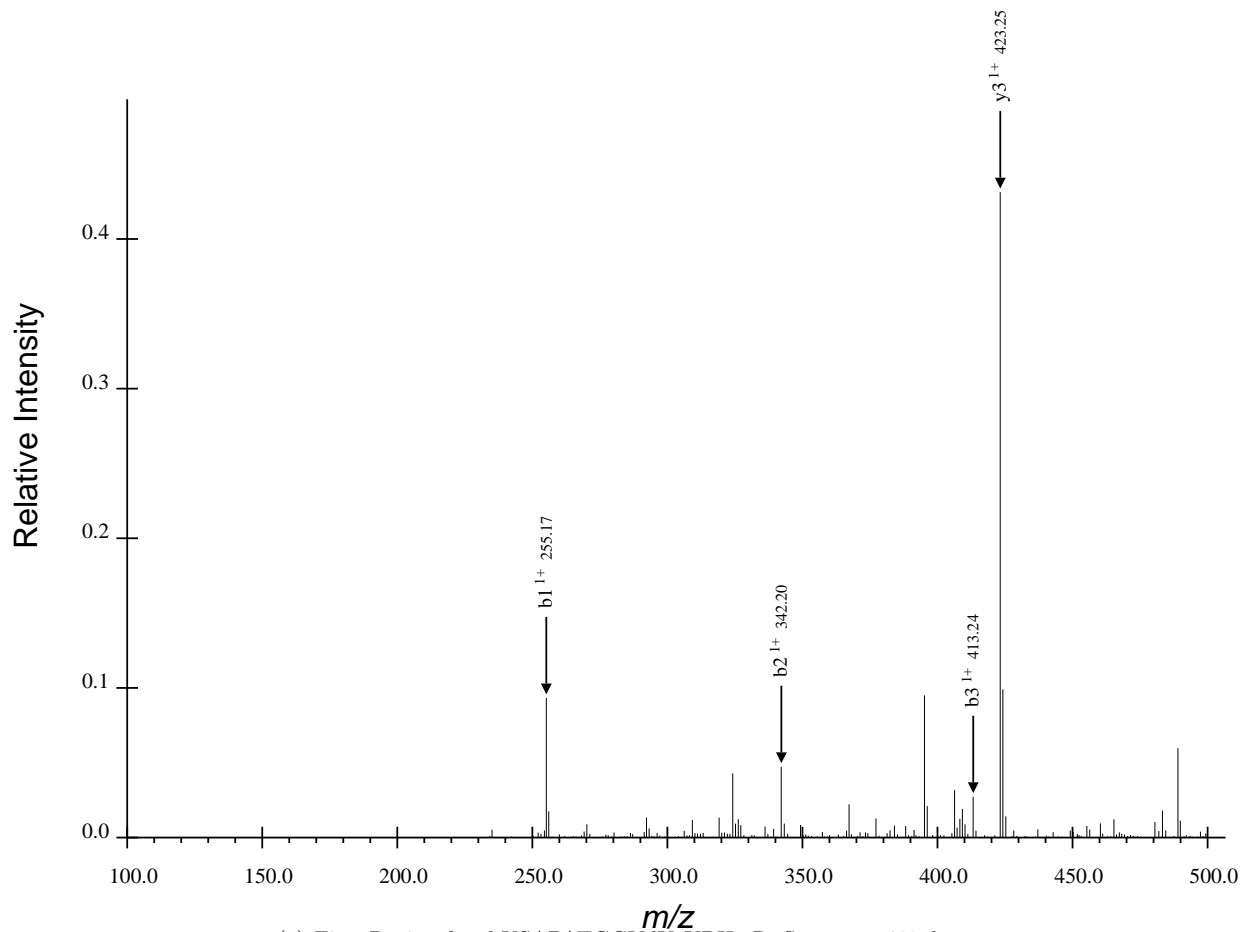

(a) First Region for rhKSAPATGGVdKrKPHmR, Spectrum 462.dta

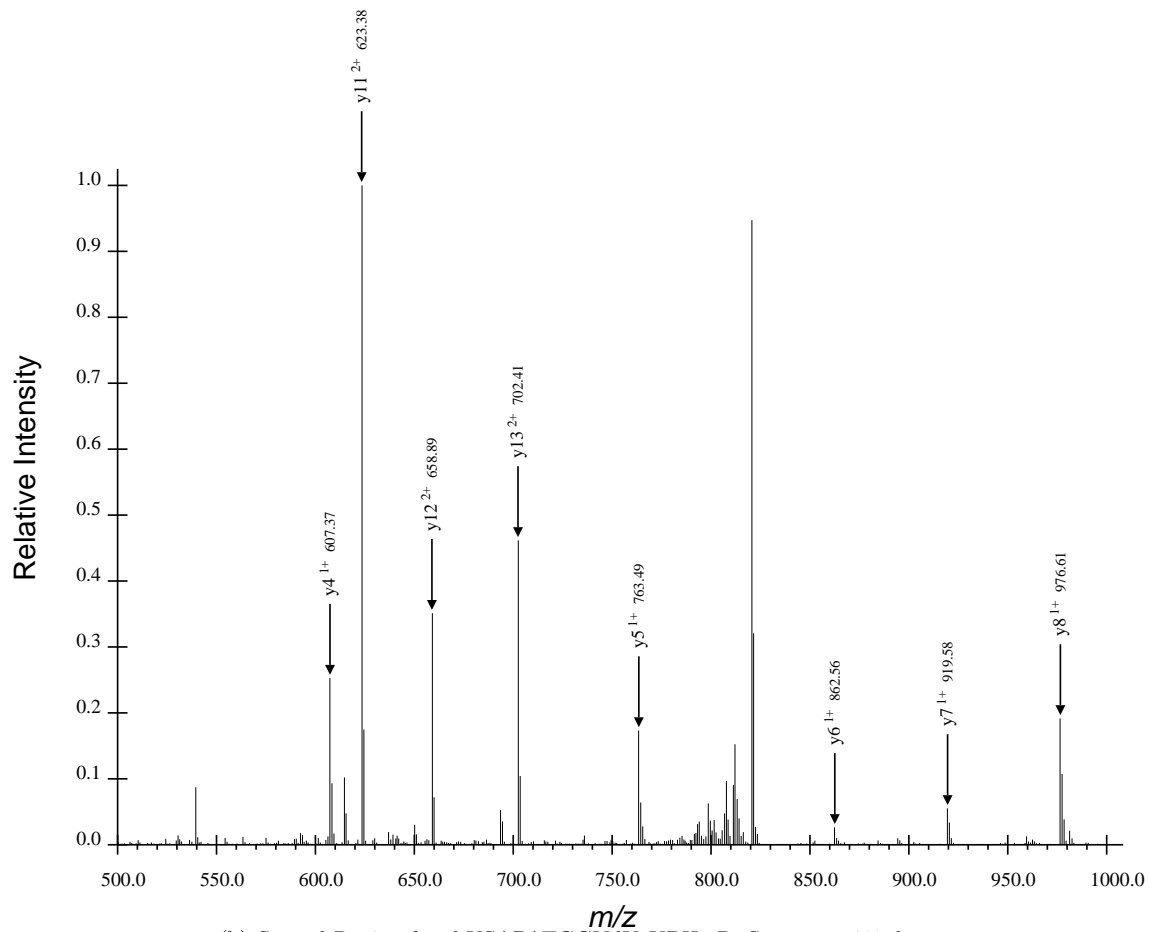

(b) Second Region for rhKSAPATGGVdKrKPHmR, Spectrum 462.dta

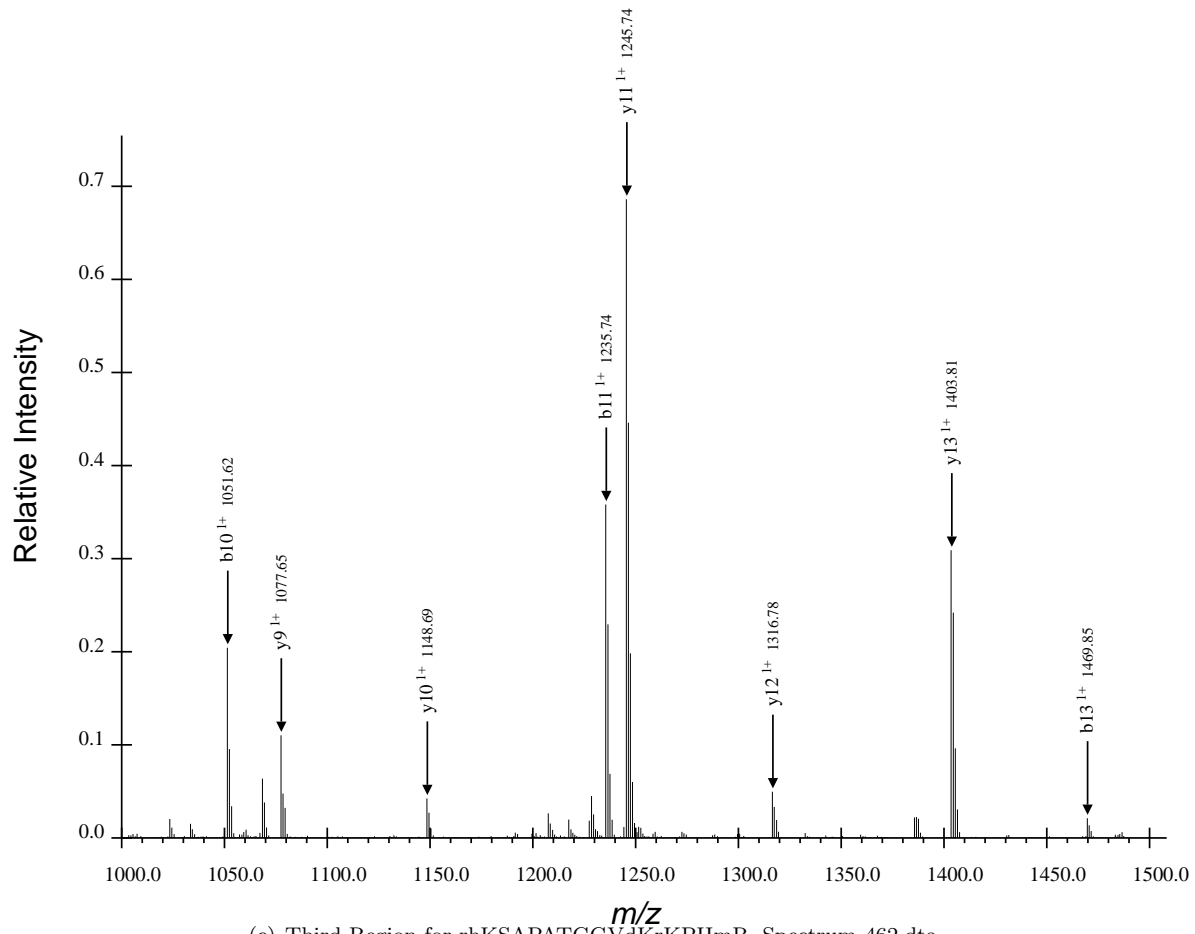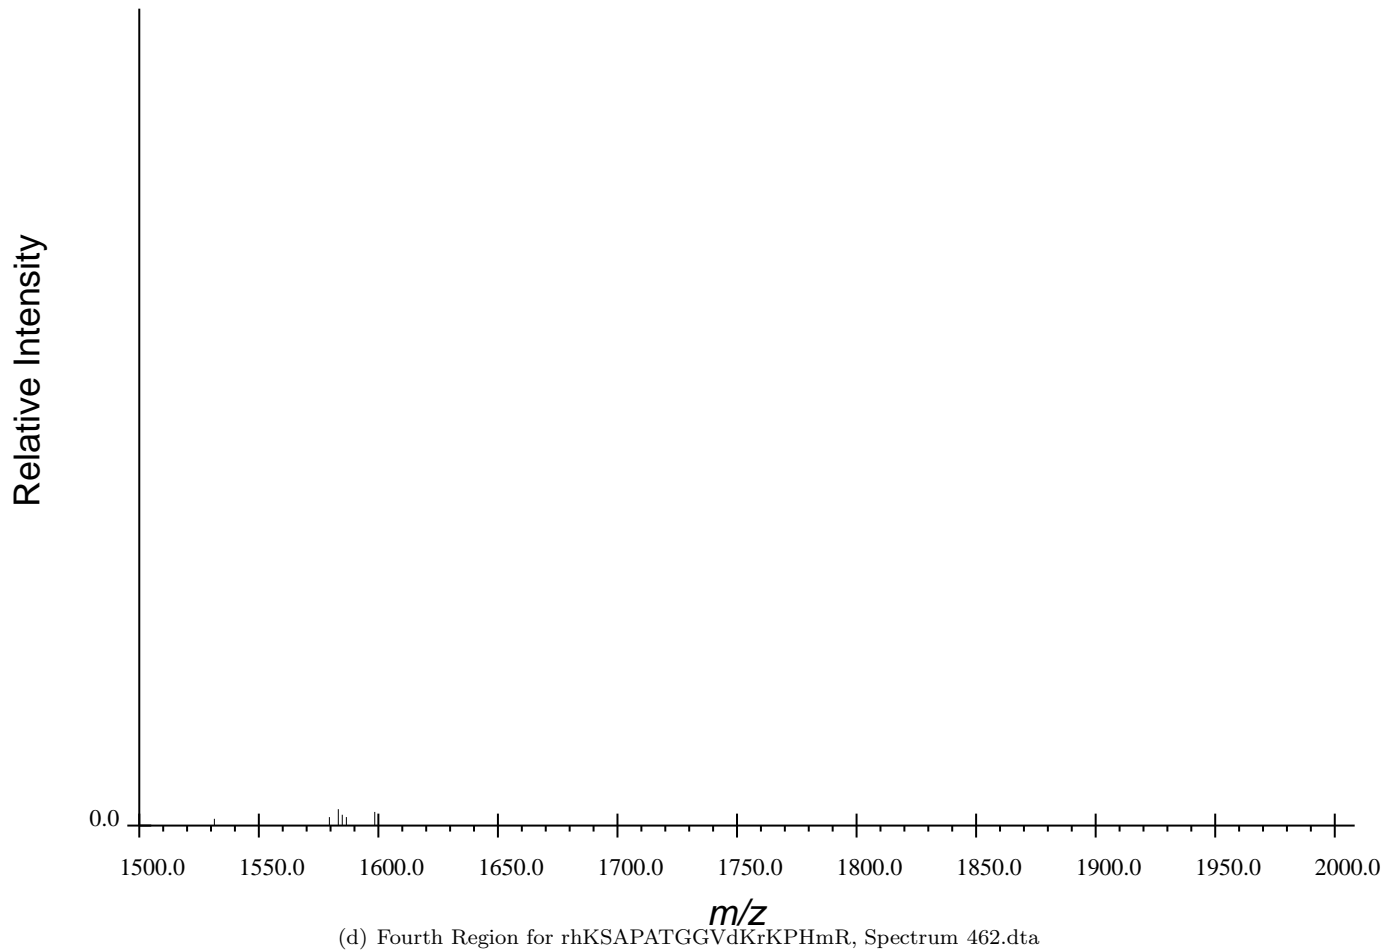

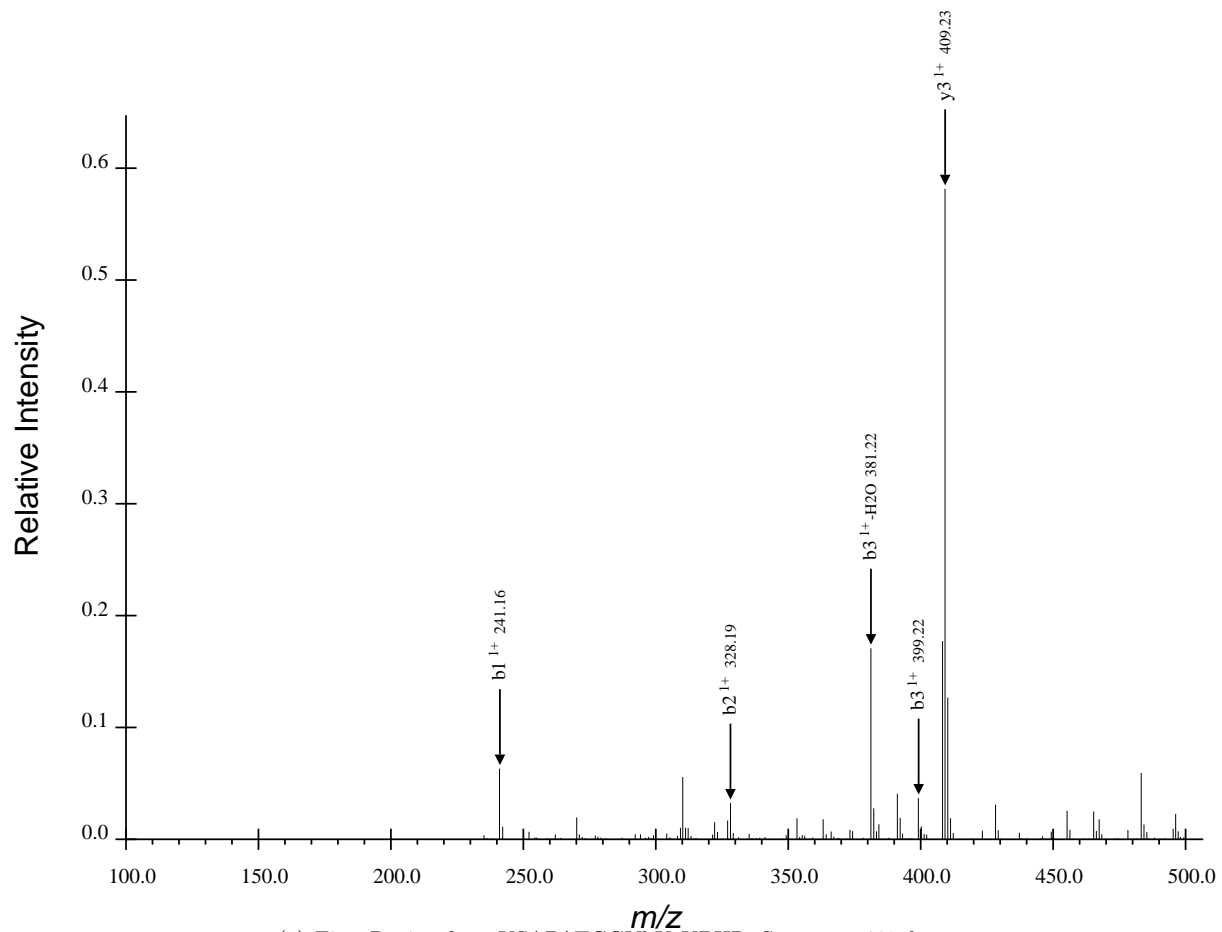

(a) First Region for rrKSAPATGGVhKrKPHR, Spectrum 463.dta

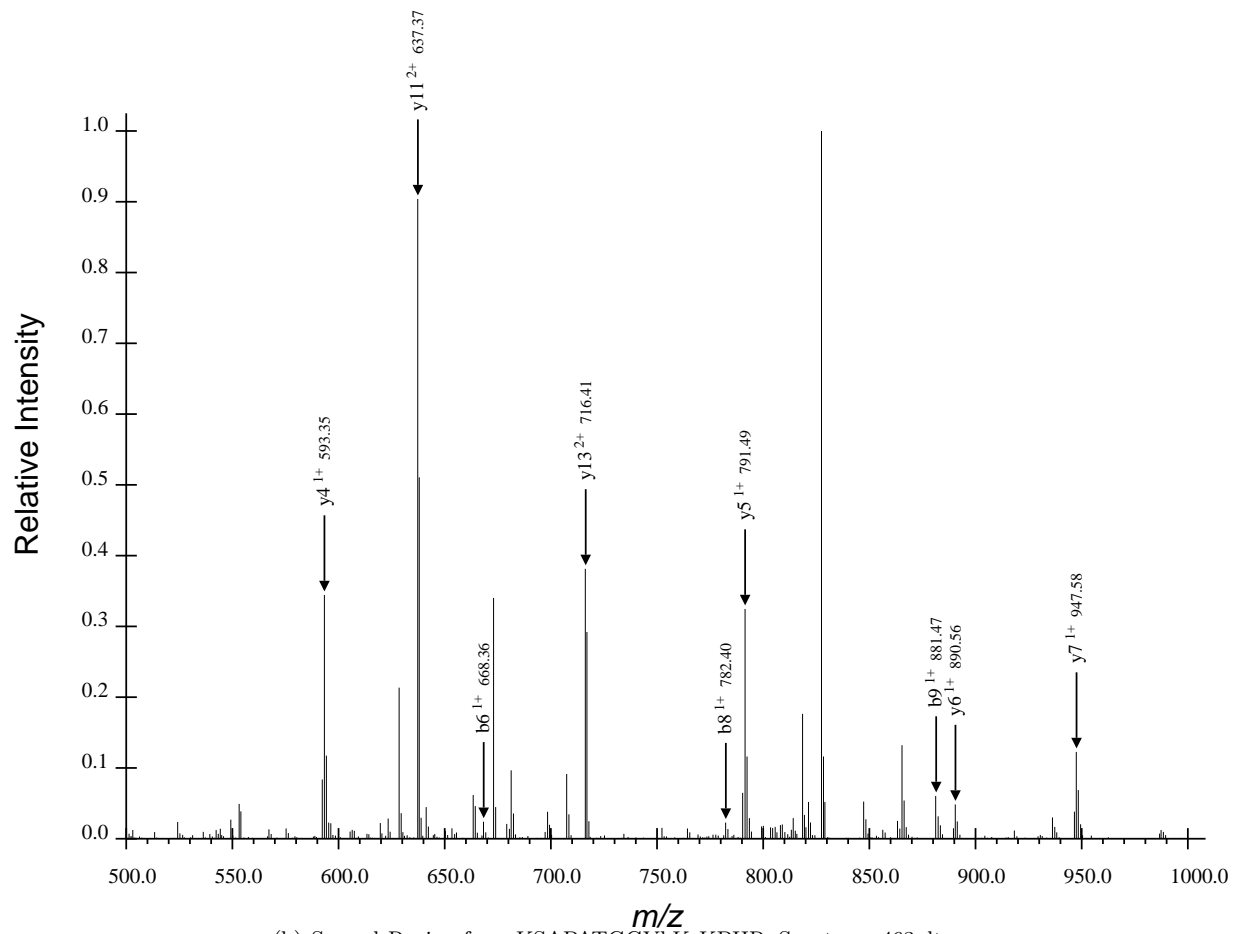

(b) Second Region for rrKSAPATGGVhKrKPHR, Spectrum 463.dta

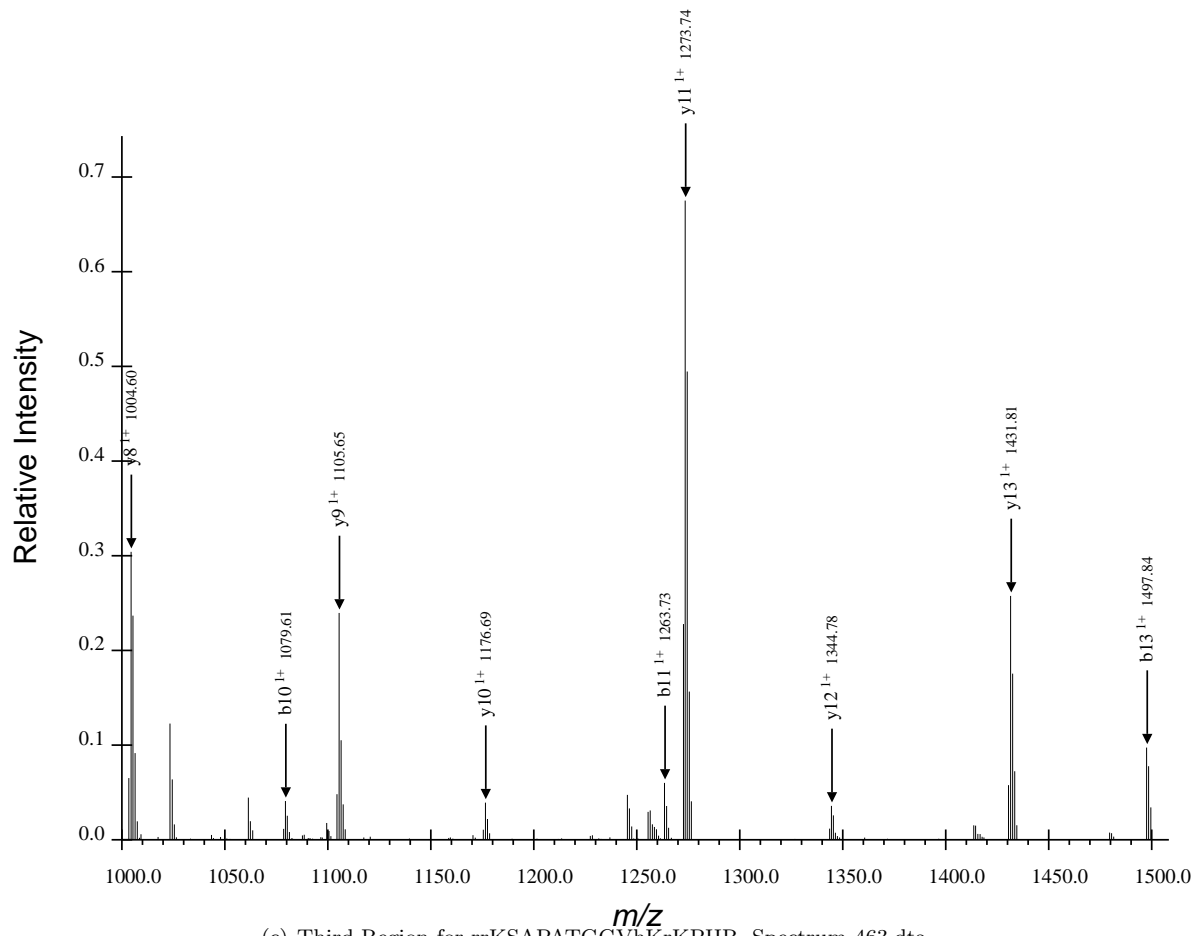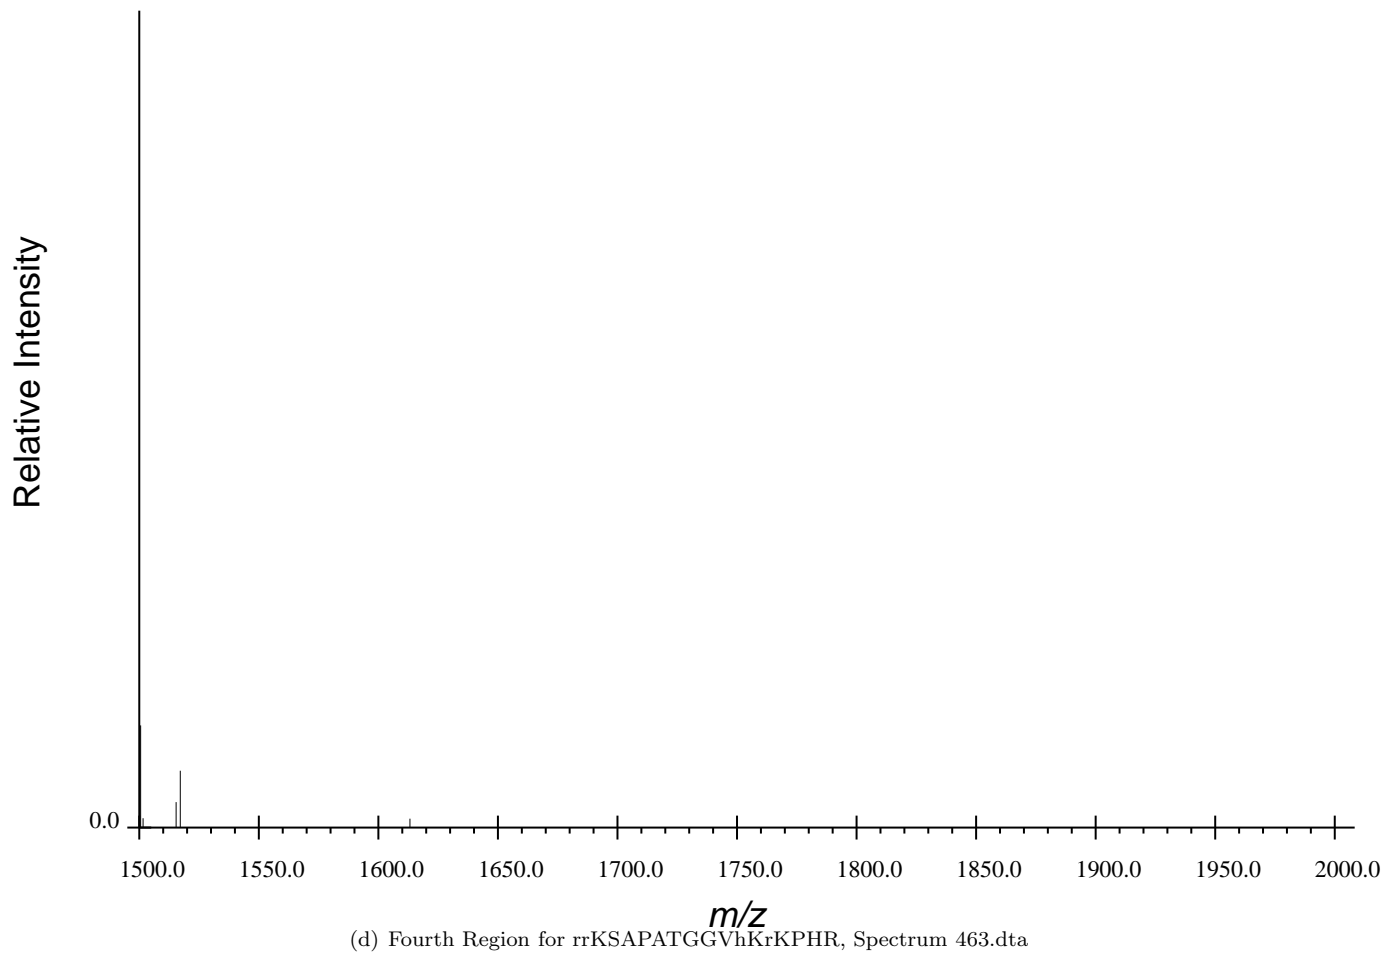

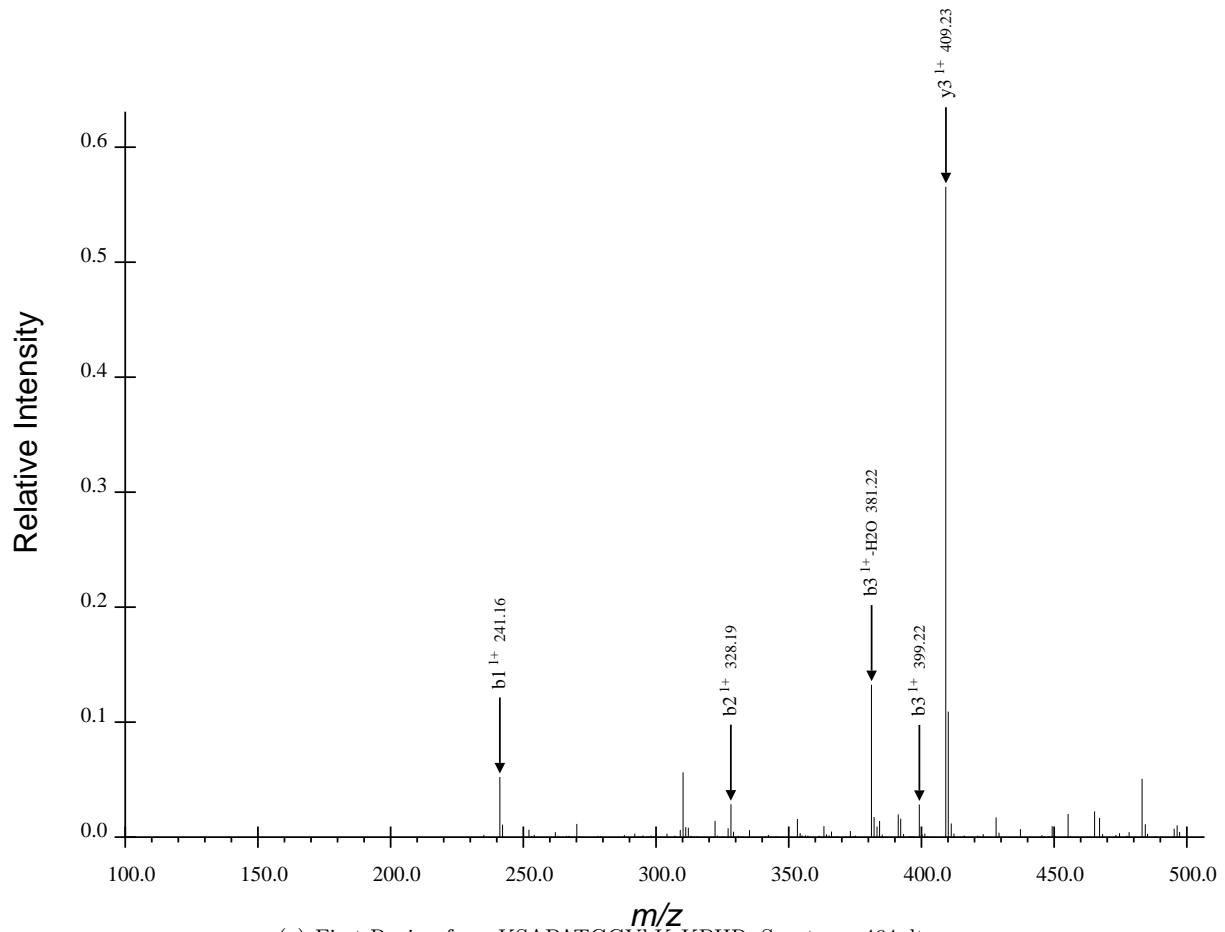

(a) First Region for rrKSAPATGGVhKrKPHR, Spectrum 464.dta

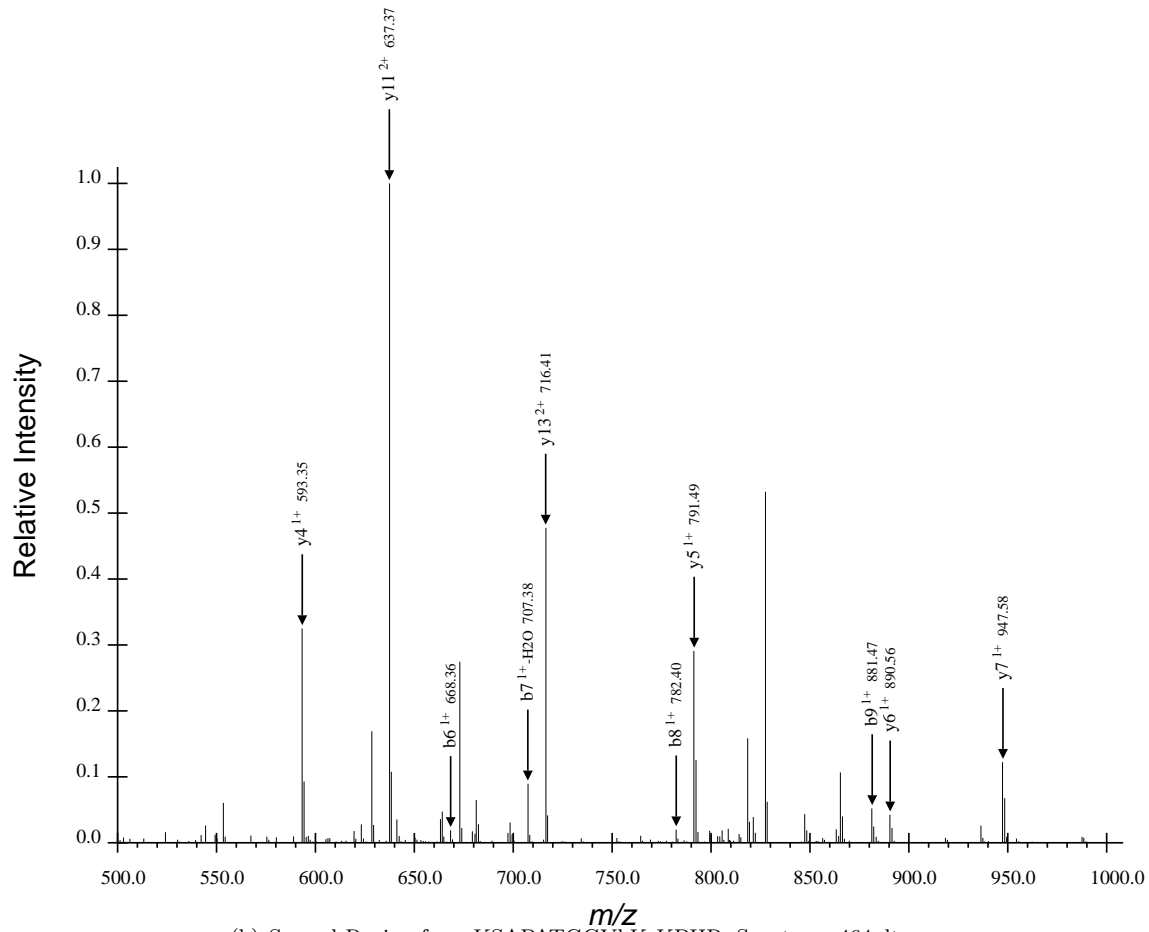

(b) Second Region for rrKSAPATGGVhKrKPHR, Spectrum 464.dta



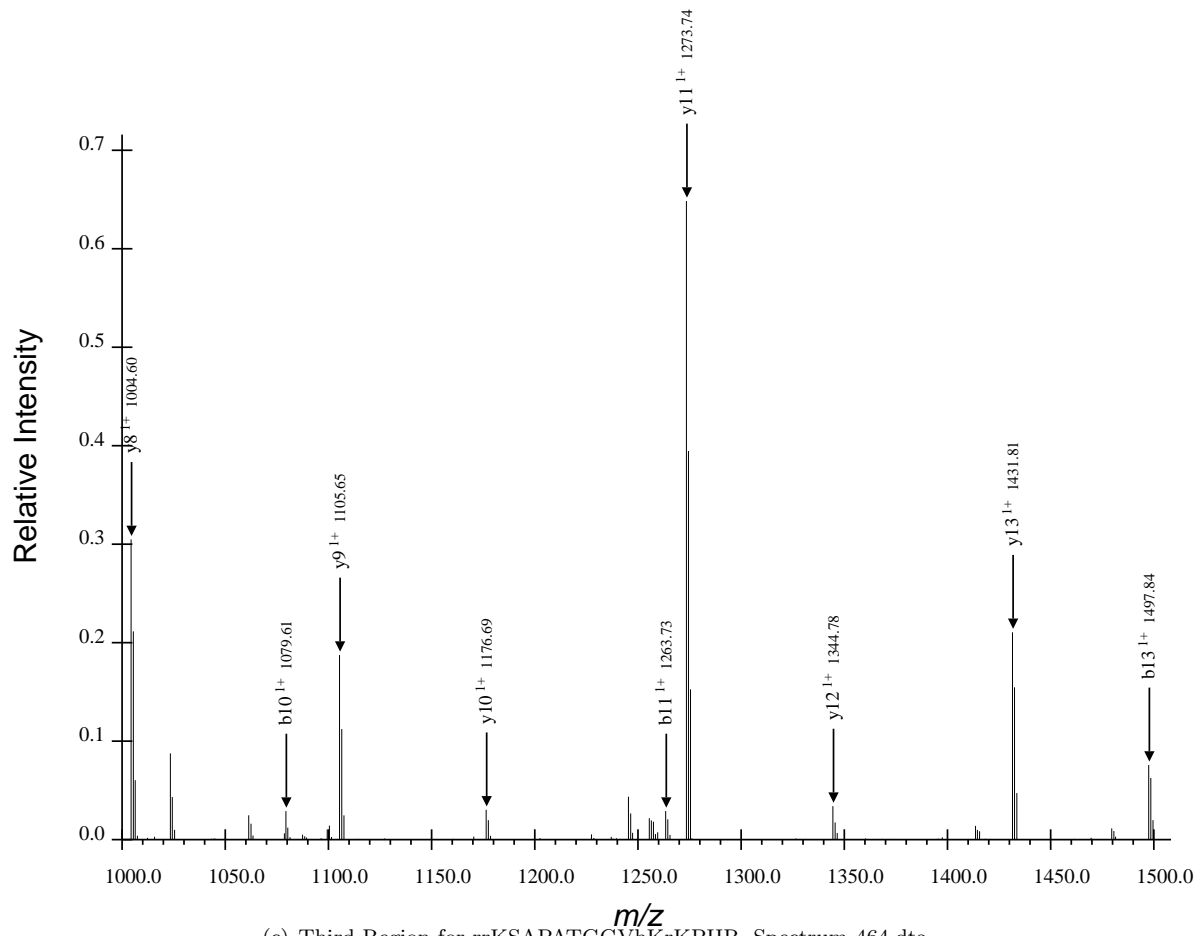

(c) Third Region for rrKSAPATGGVhKrKPHR, Spectrum 464.dta

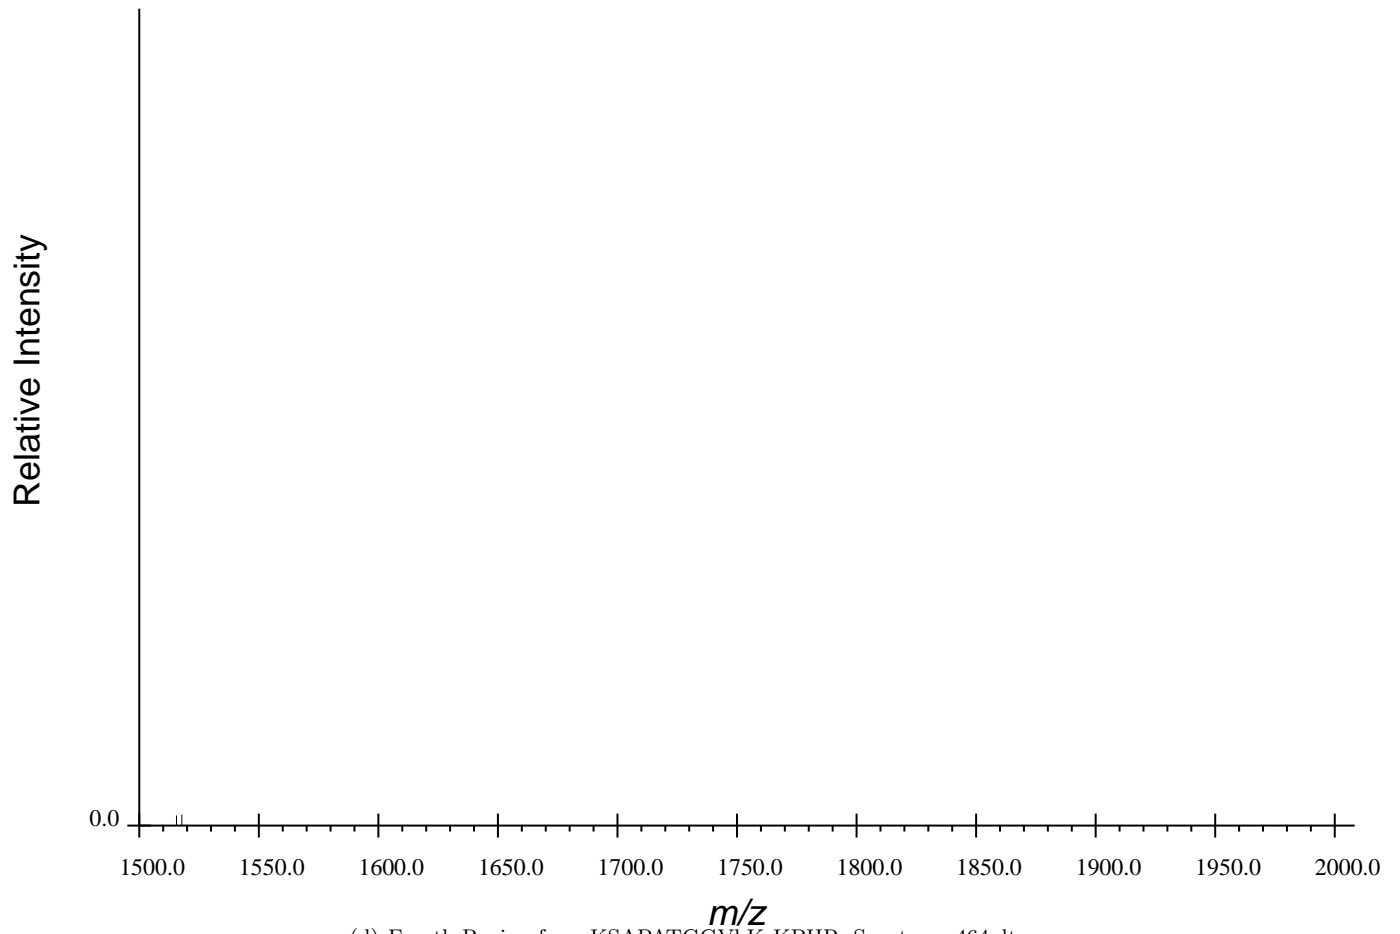

(d) Fourth Region for rrKSAPATGGVhKrKPHR, Spectrum 464.dta

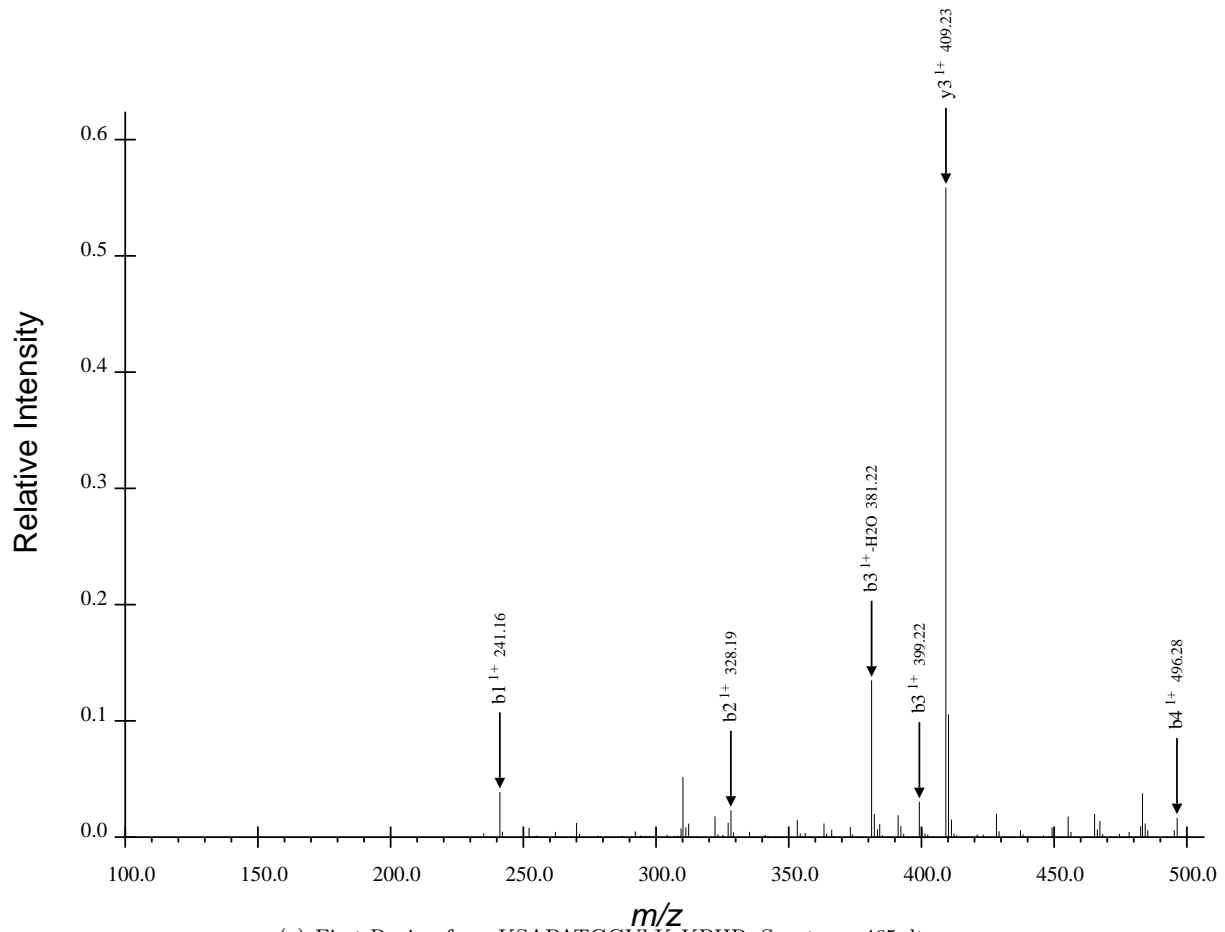

(a) First Region for rrKSAPATGGVhKrKPHR, Spectrum 465.dta

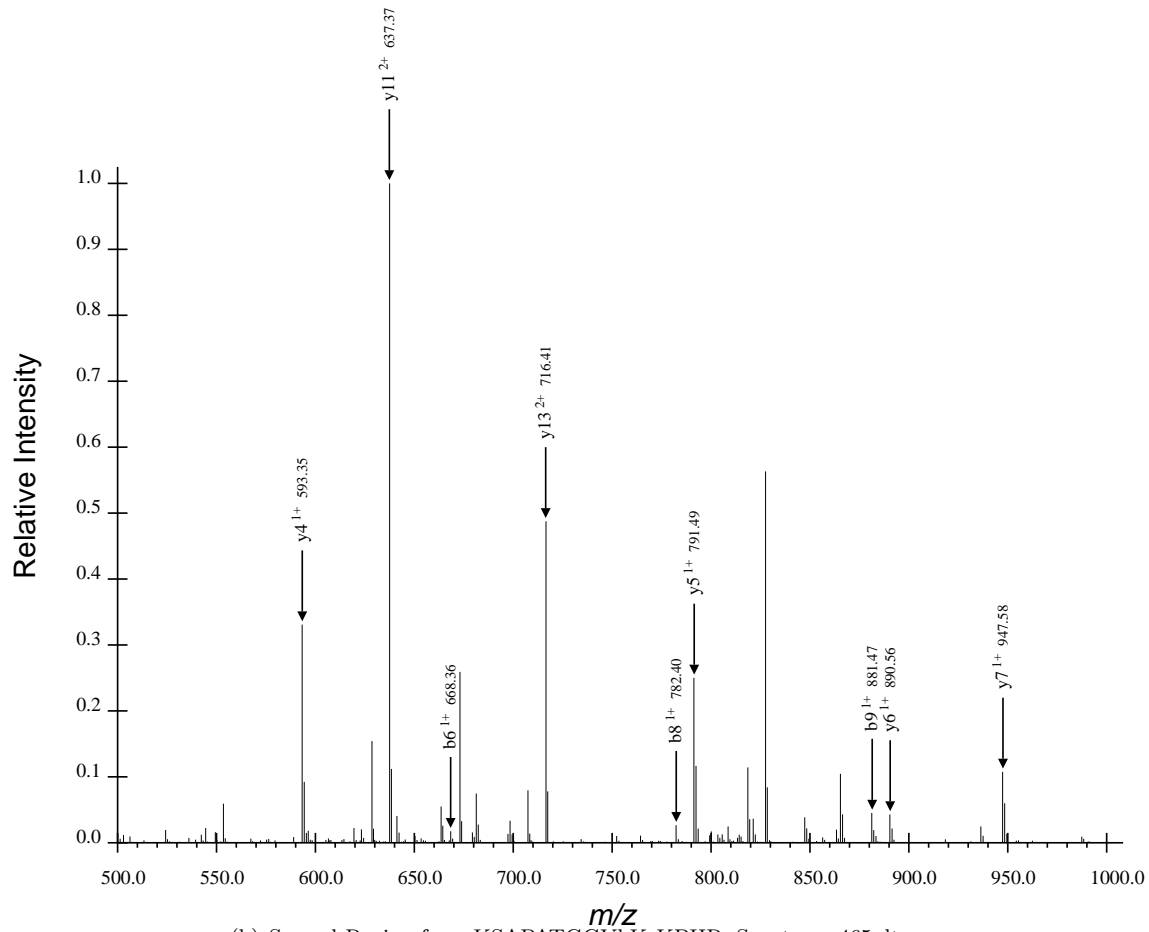

(b) Second Region for rrKSAPATGGVhKrKPHR, Spectrum 465.dta

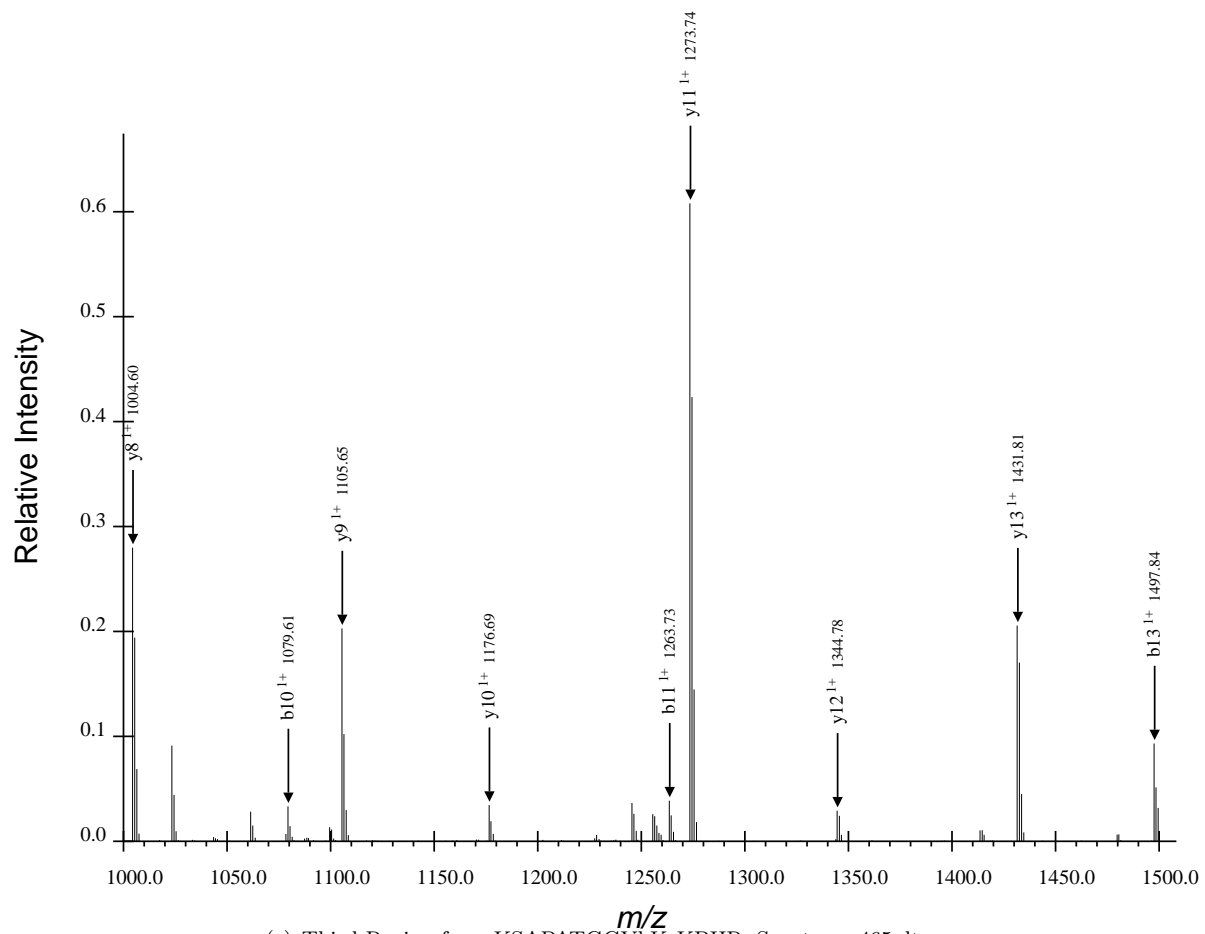

(c) Third Region for rrKSAPATGGVhKrKPHR, Spectrum 465.dta

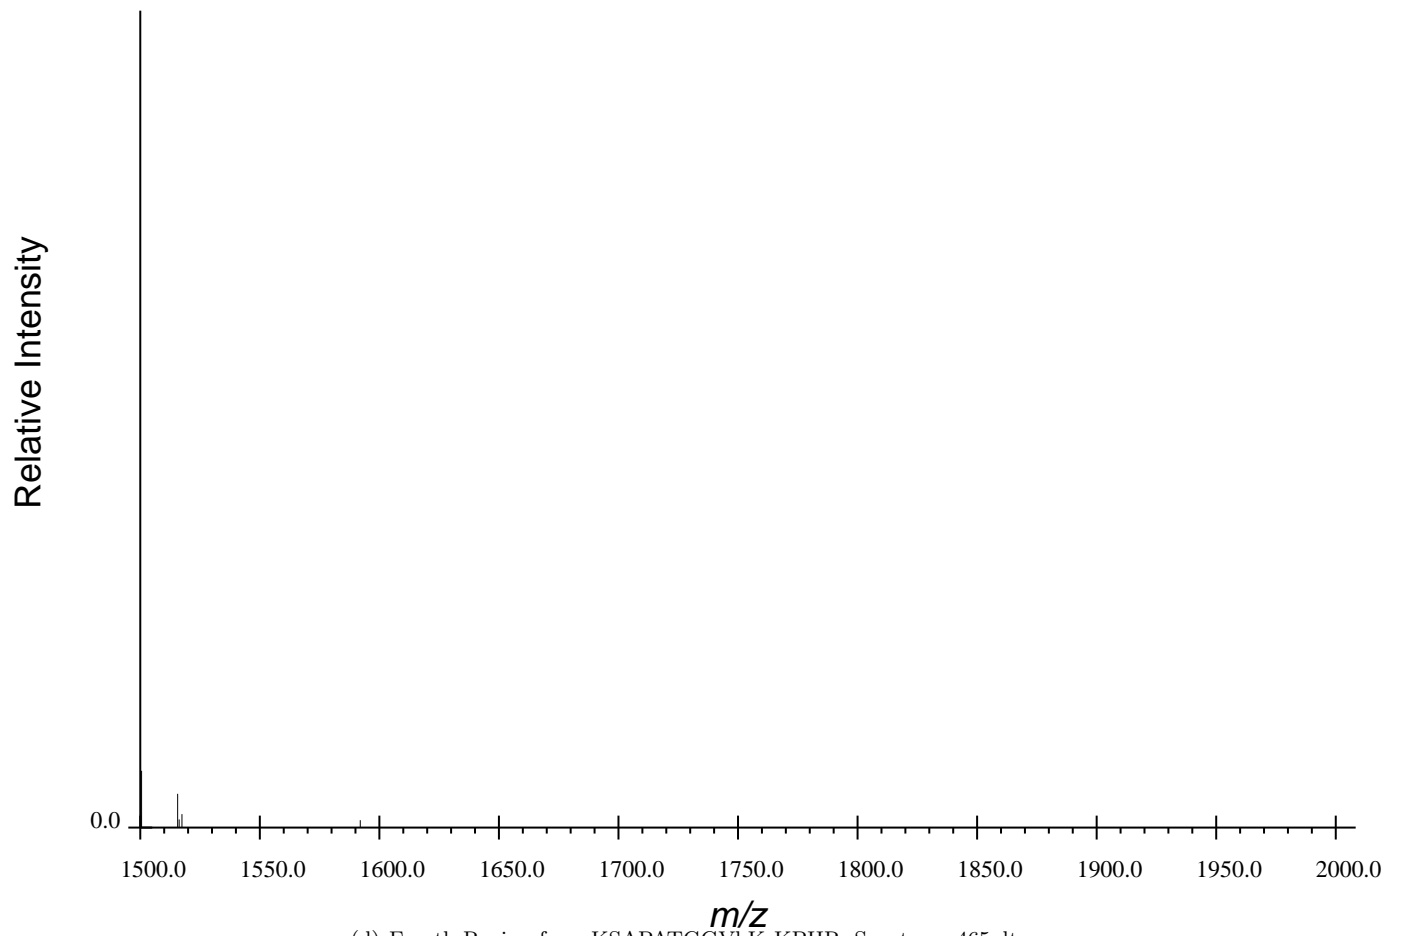

(d) Fourth Region for rrKSAPATGGVhKrKPHR, Spectrum 465.dta

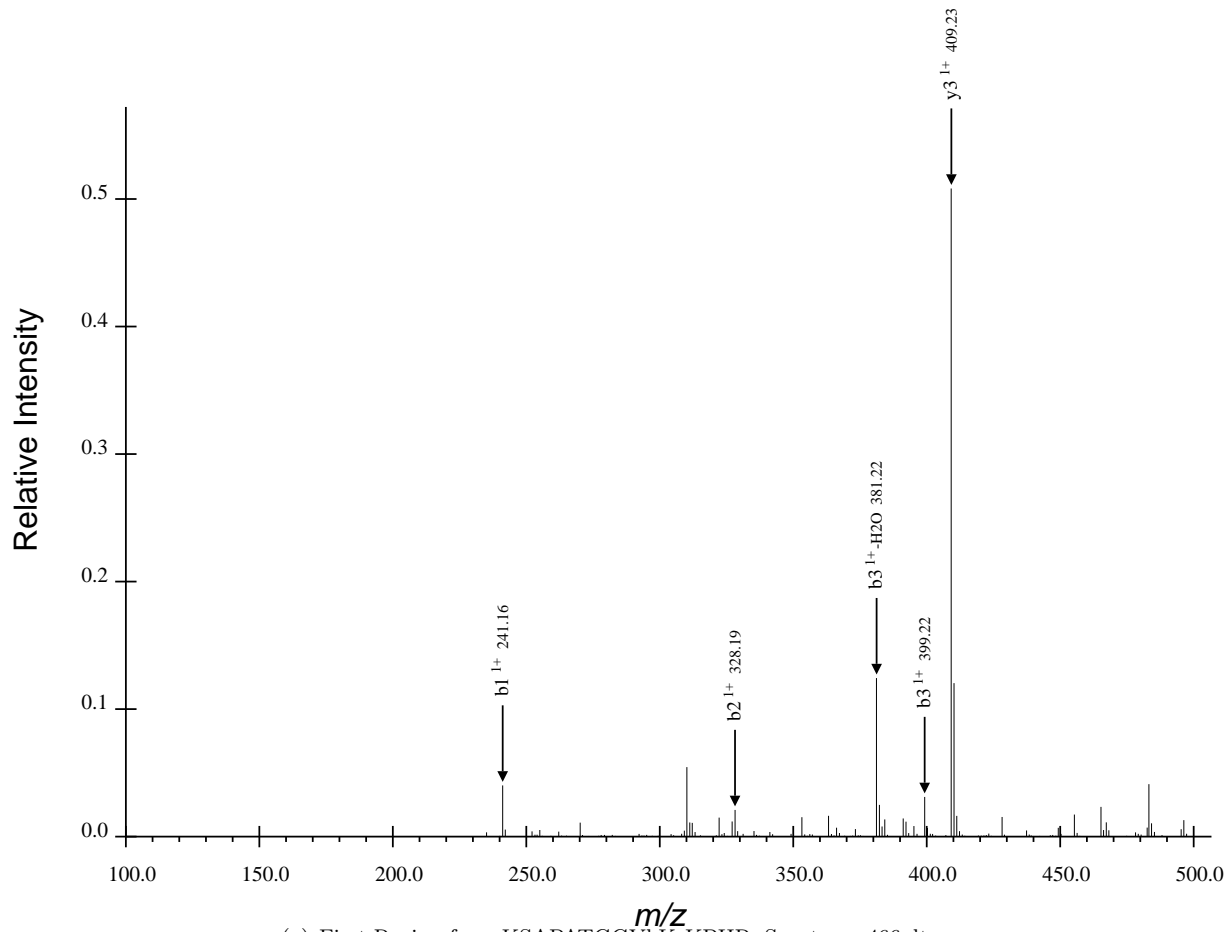

(a) First Region for rrKSAPATGGVhKrKPHR, Spectrum 466.dta

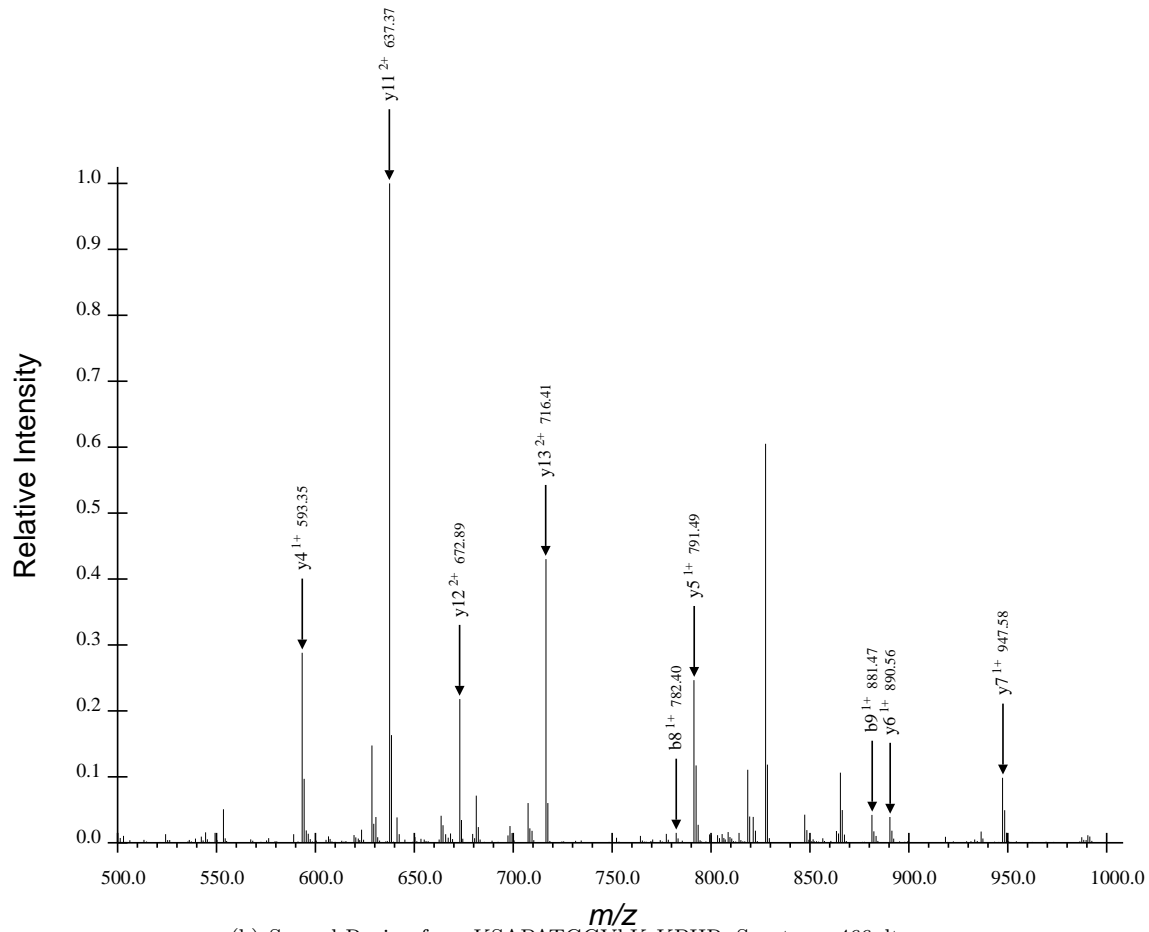

(b) Second Region for rrKSAPATGGVhKrKPHR, Spectrum 466.dta

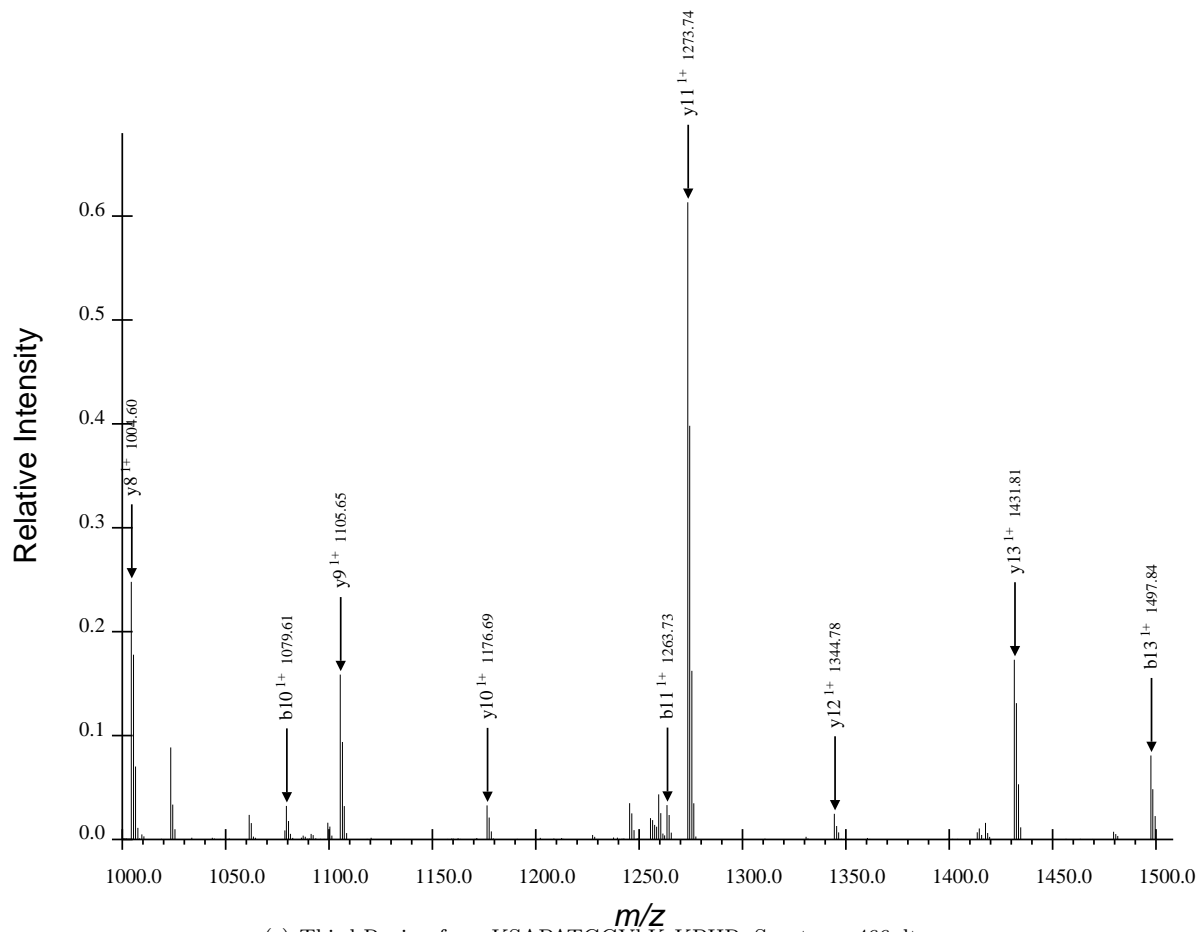

(c) Third Region for rrKSAPATGGVhKrKPHR, Spectrum 466.dta

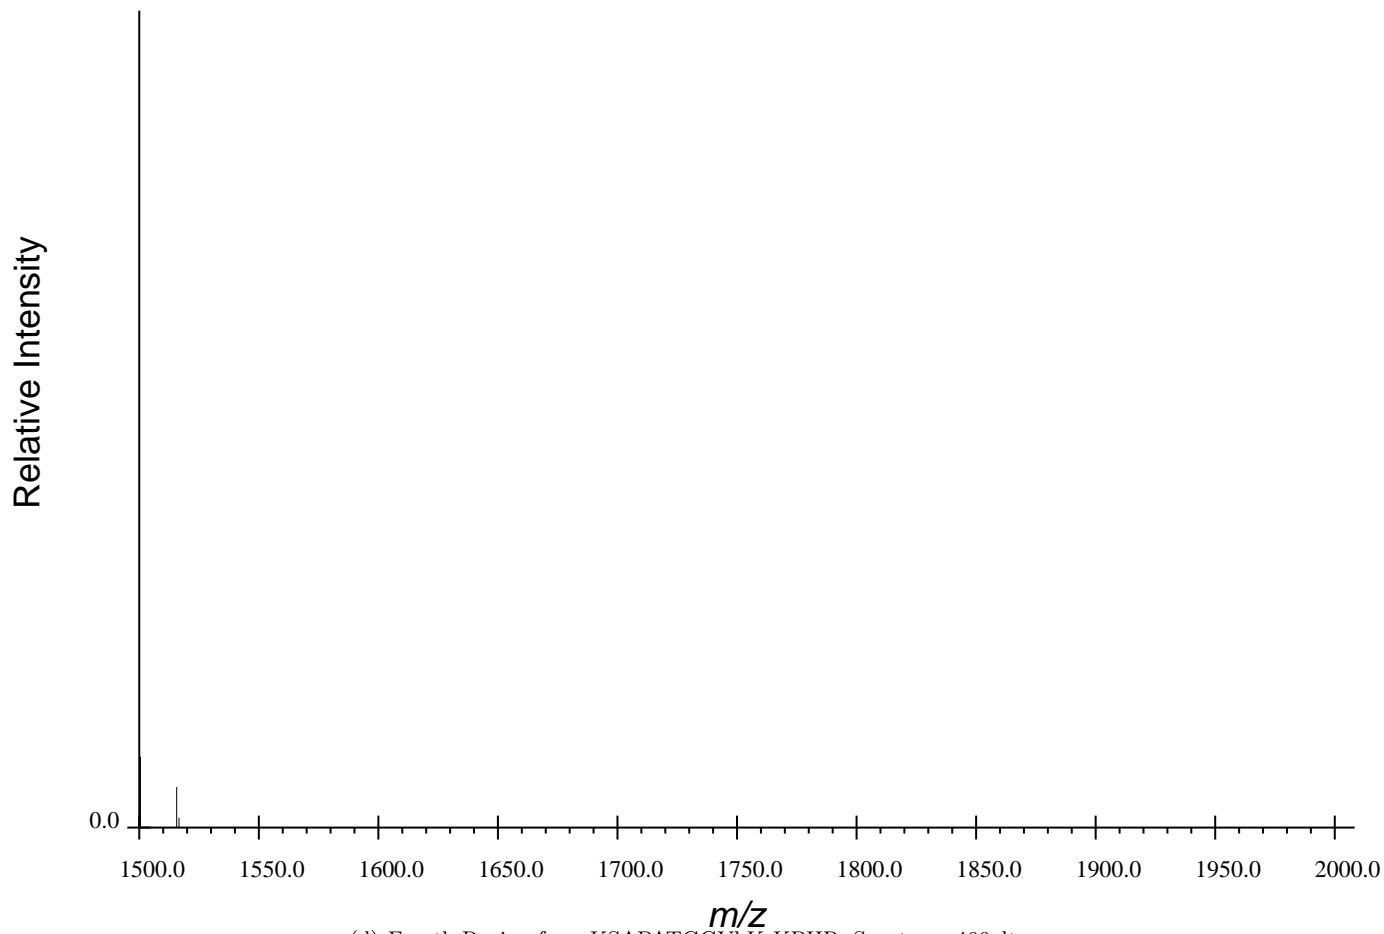

(d) Fourth Region for rrKSAPATGGVhKrKPHR, Spectrum 466.dta

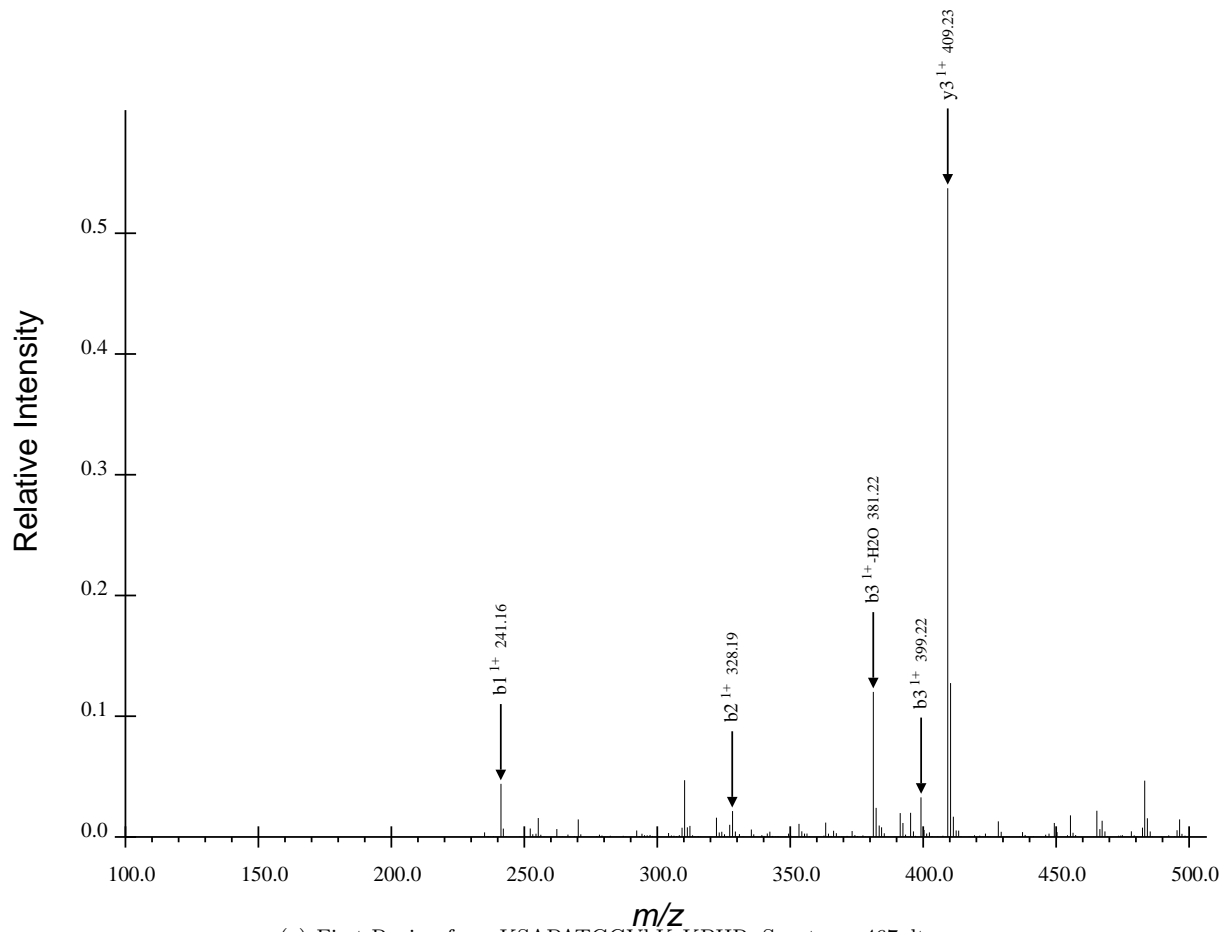

(a) First Region for rrKSAPATGGVhKrKPHR, Spectrum 467.dta

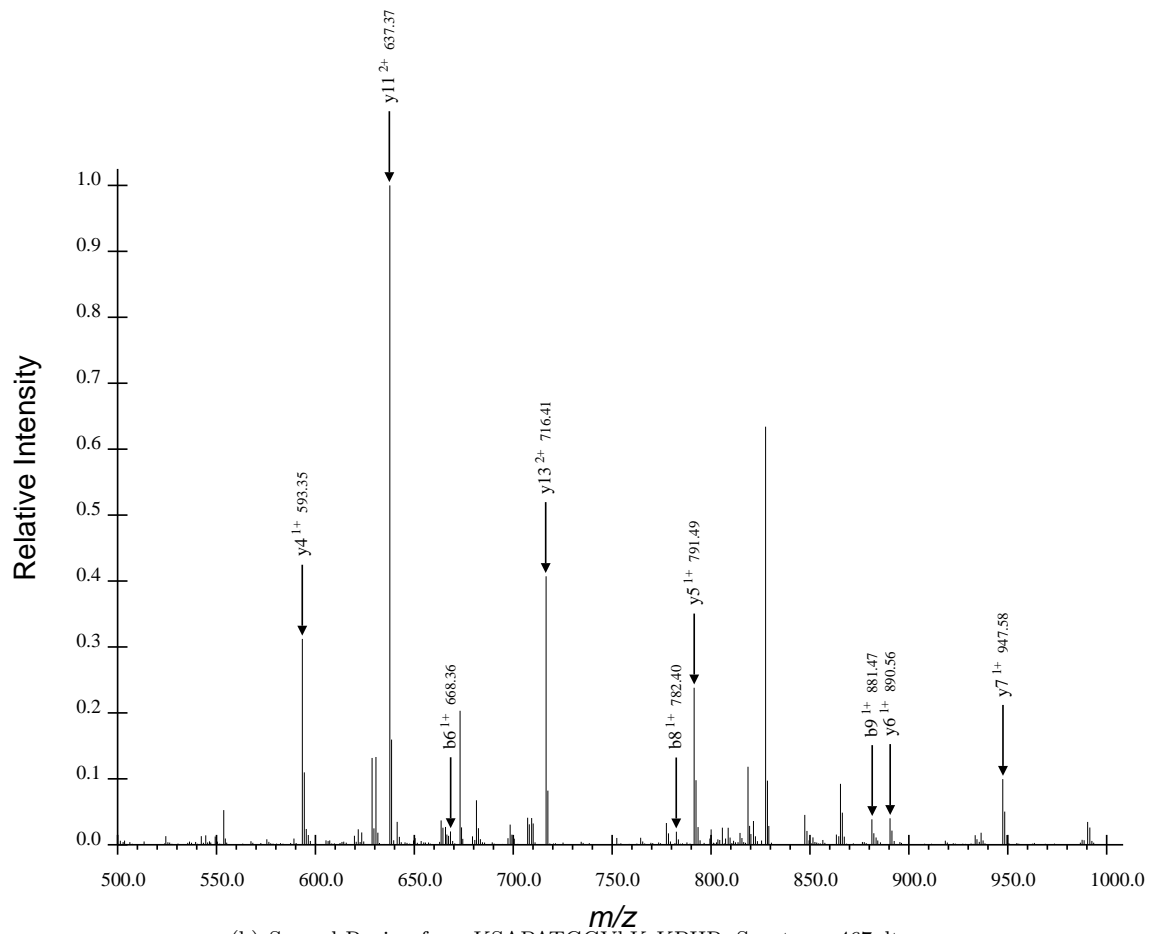

(b) Second Region for rrKSAPATGGVhKrKPHR, Spectrum 467.dta

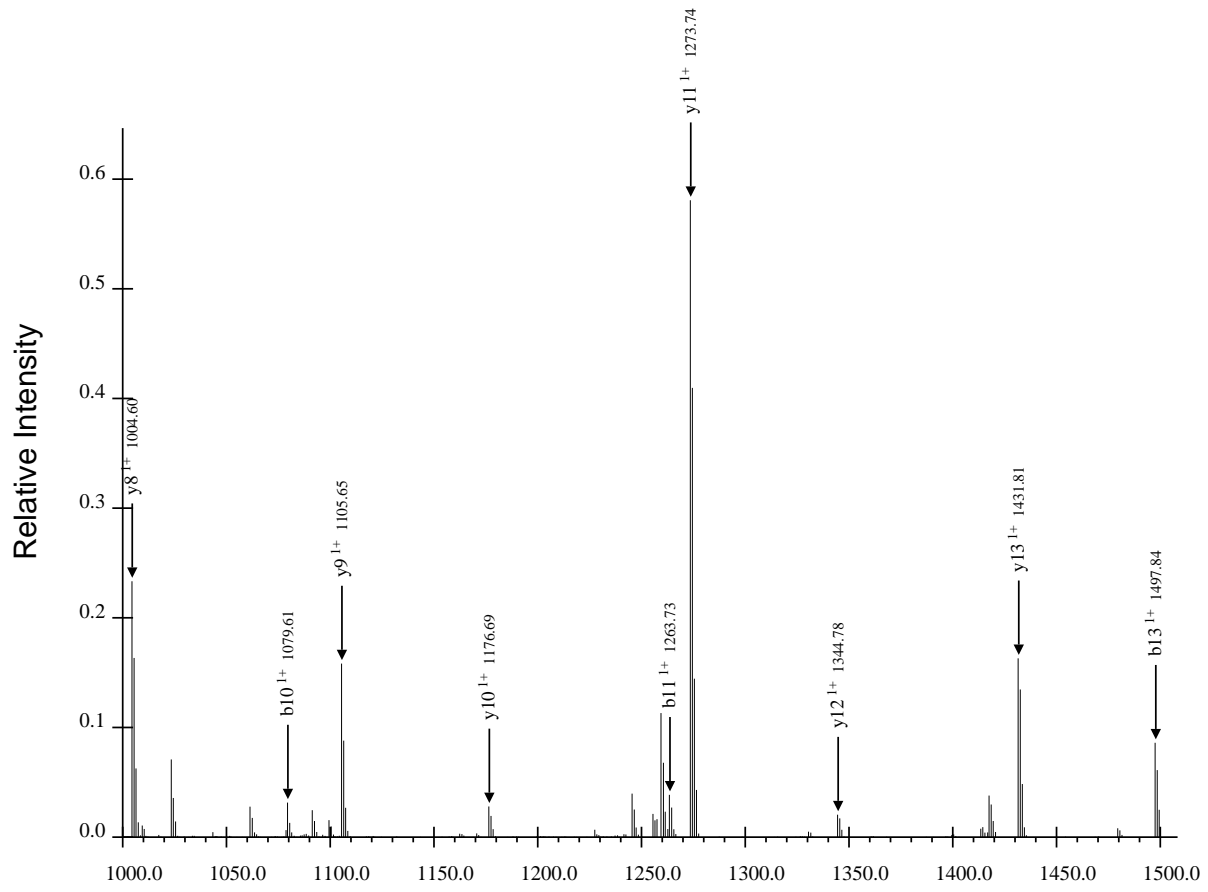

(c) Third Region for rrKSAPATGGVhKrKPHR, Spectrum 467.dta

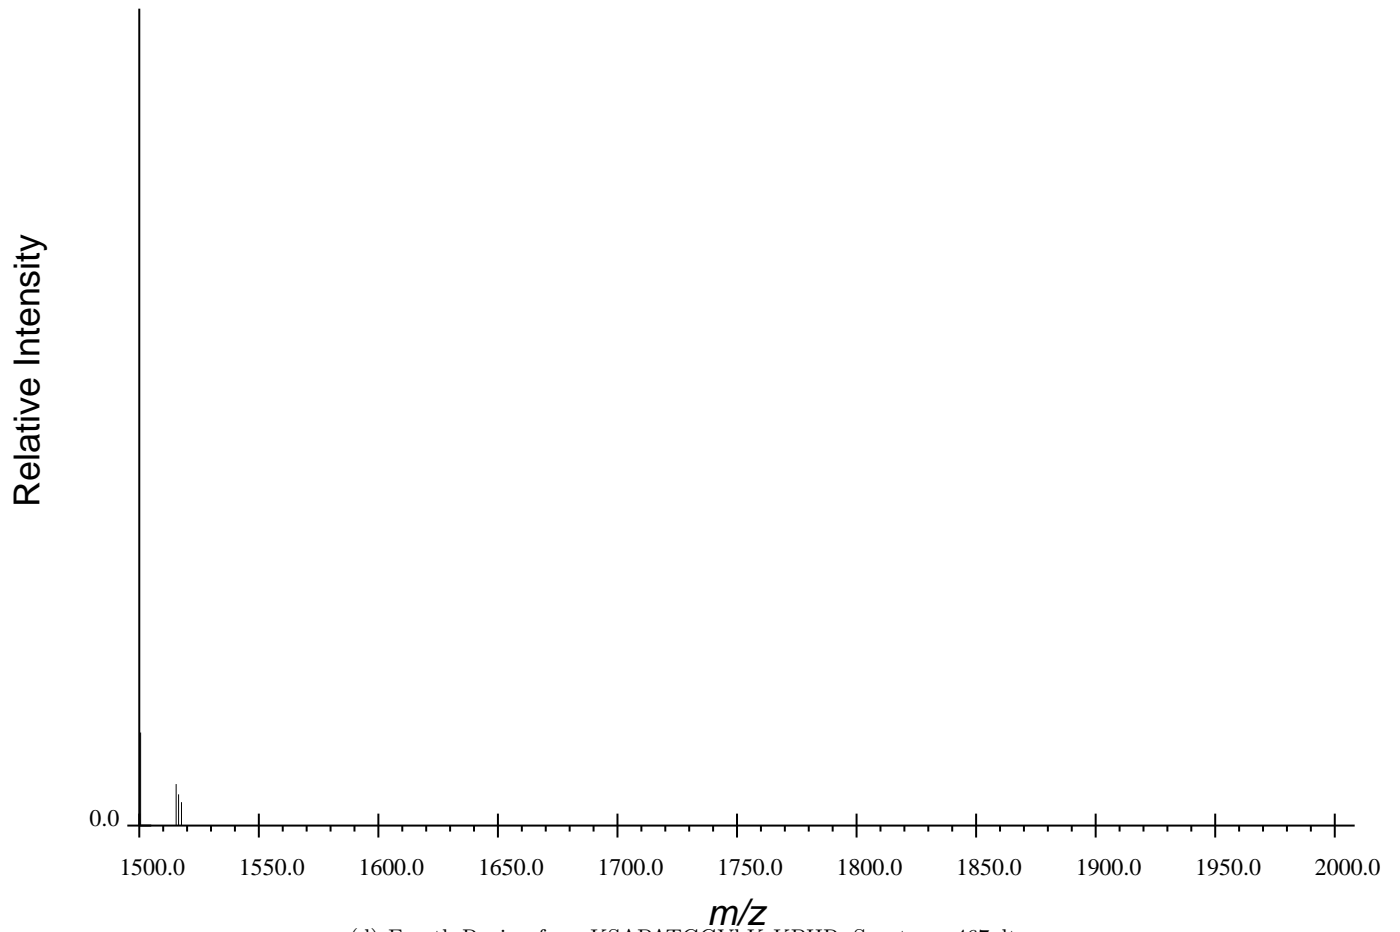

(d) Fourth Region for rrKSAPATGGVhKrKPHR, Spectrum 467.dta

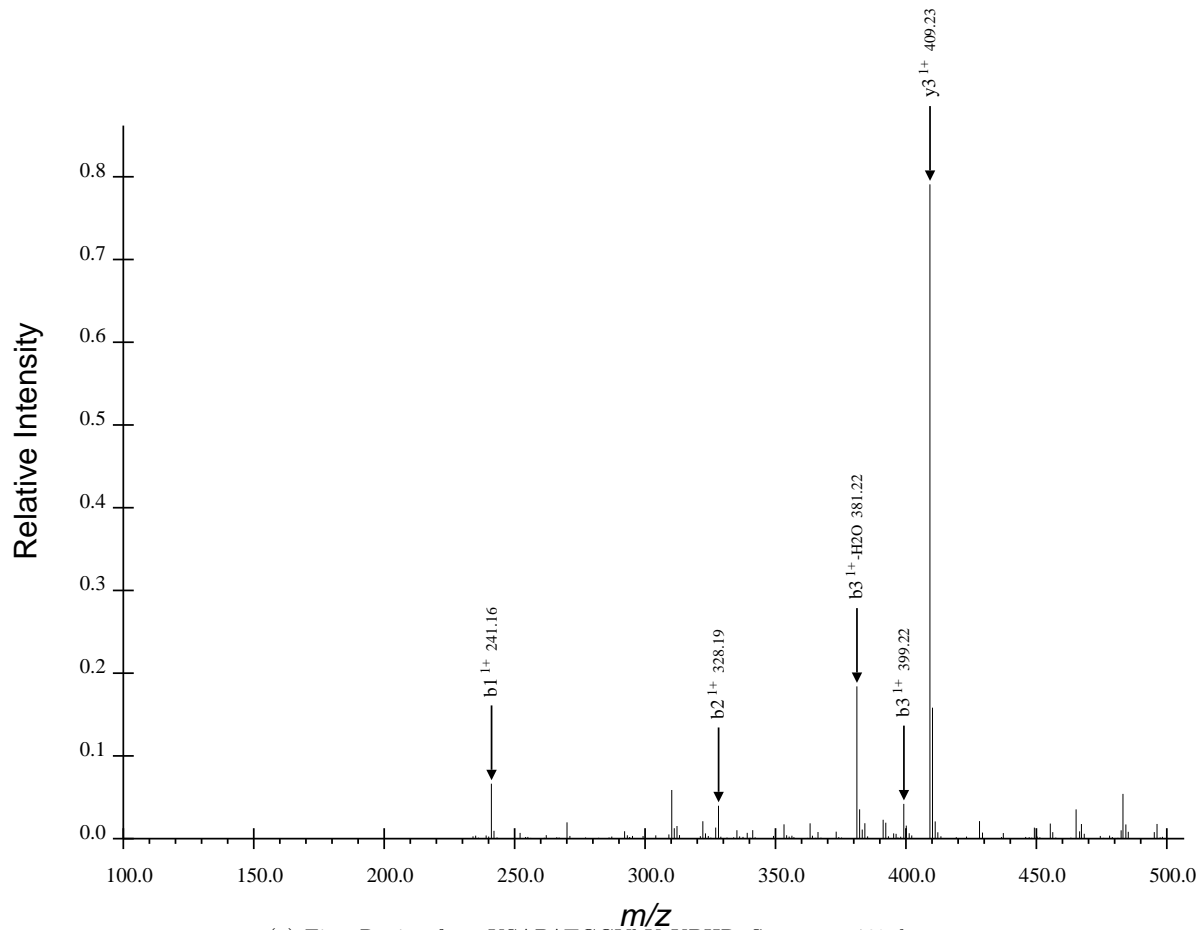

(a) First Region for rrKSAPATGGVhKrKPHR, Spectrum 468.dta

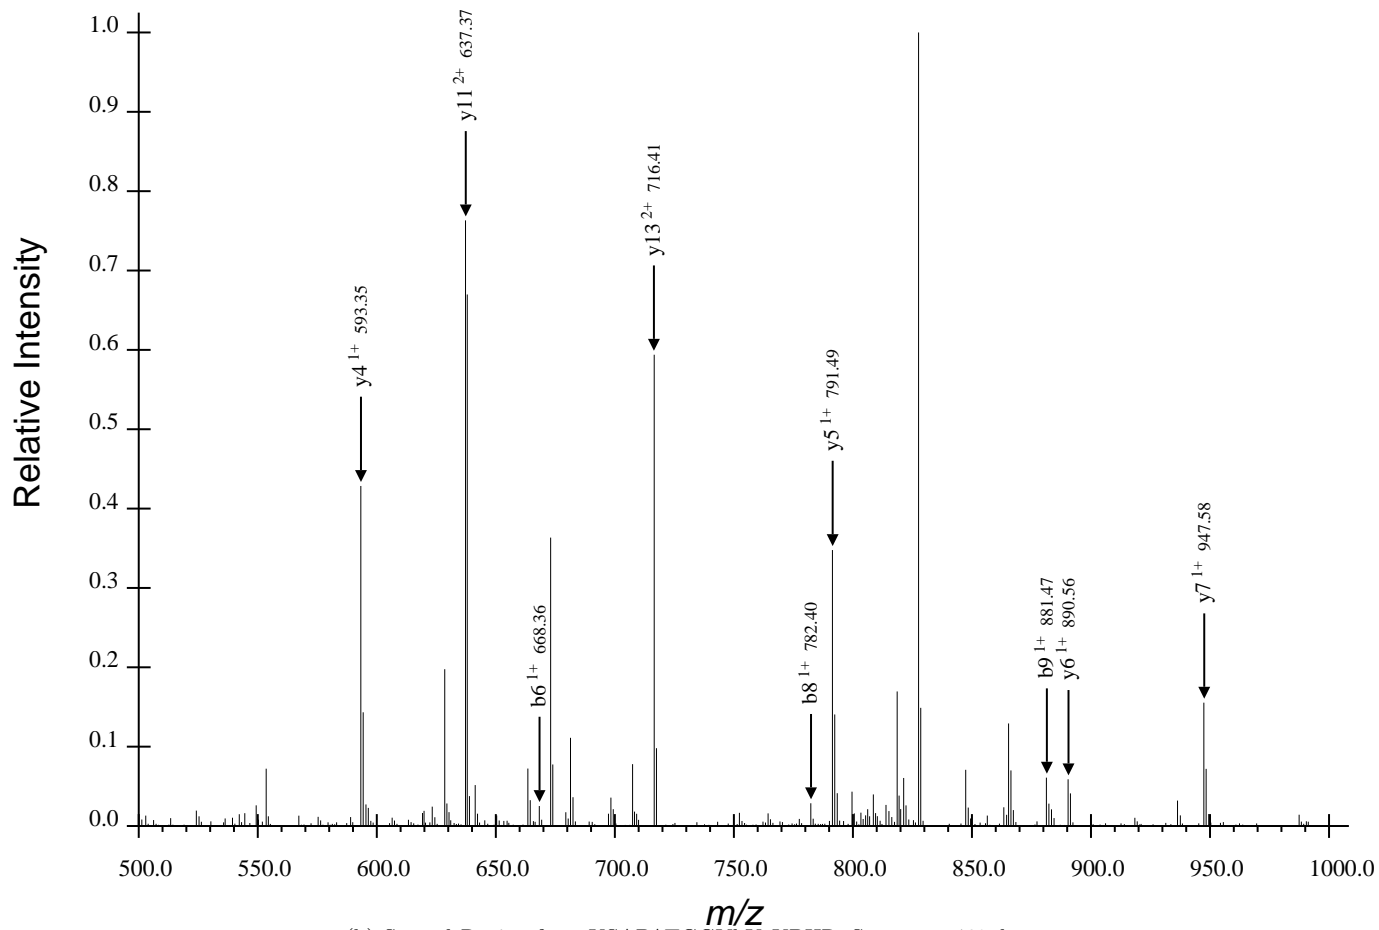

(b) Second Region for rrKSAPATGGVhKrKPHR, Spectrum 468.dta



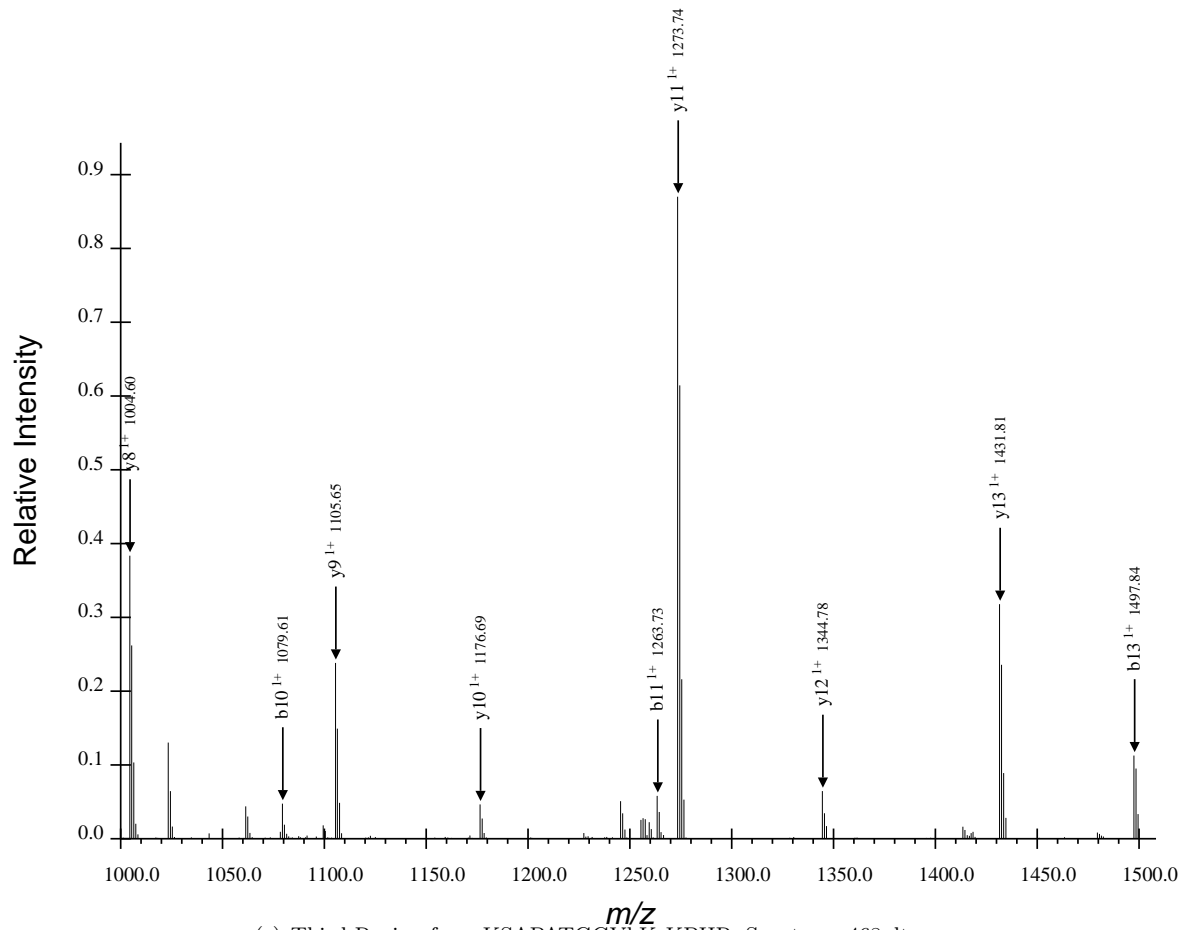

(c) Third Region for rrKSAPATGGVhKrKPHR, Spectrum 468.dta

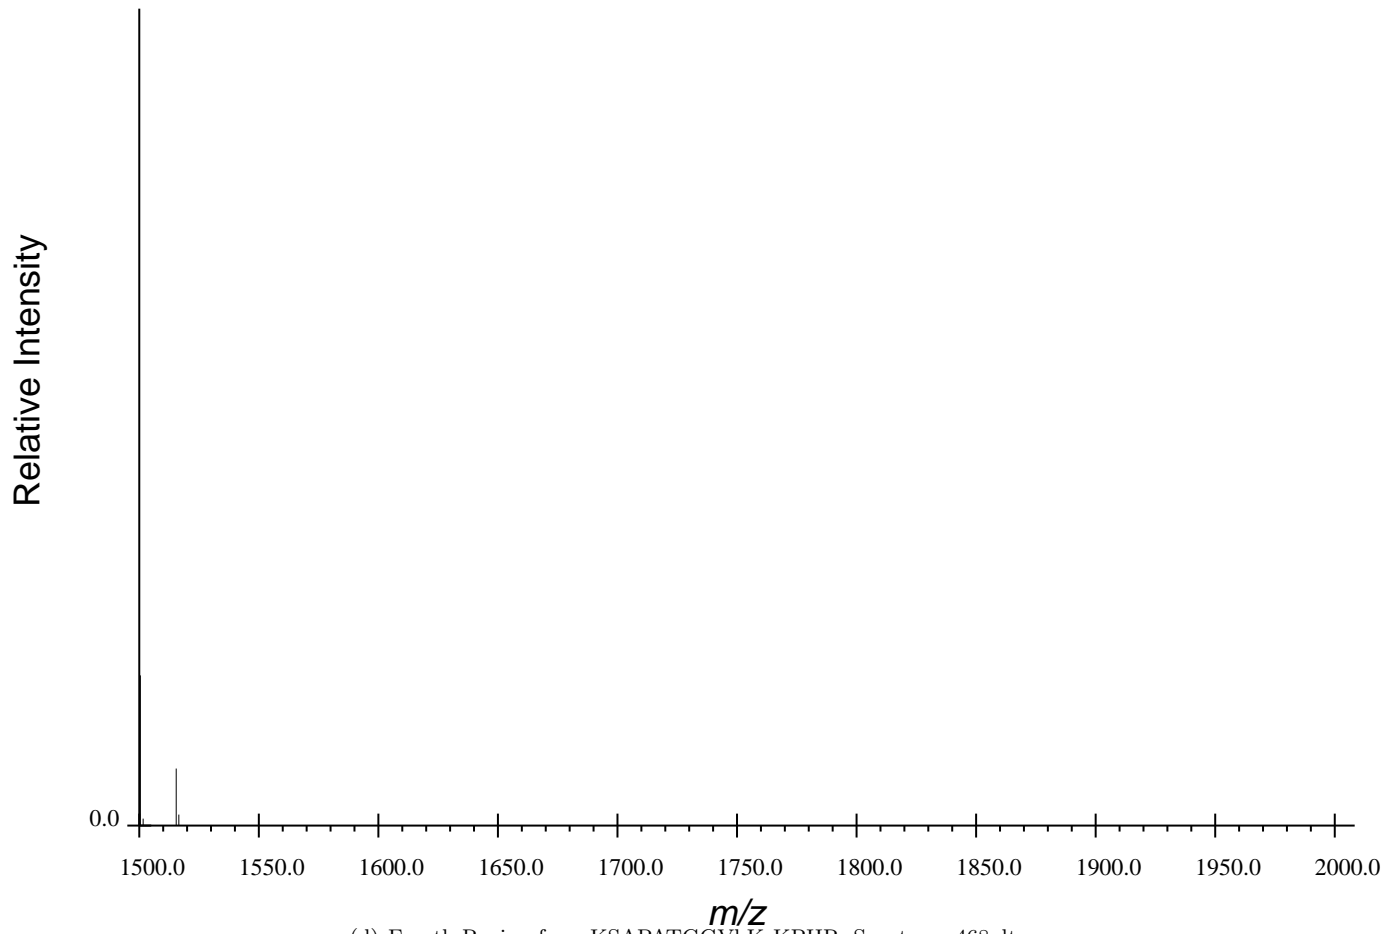

(d) Fourth Region for rrKSAPATGGVhKrKPHR, Spectrum 468.dta

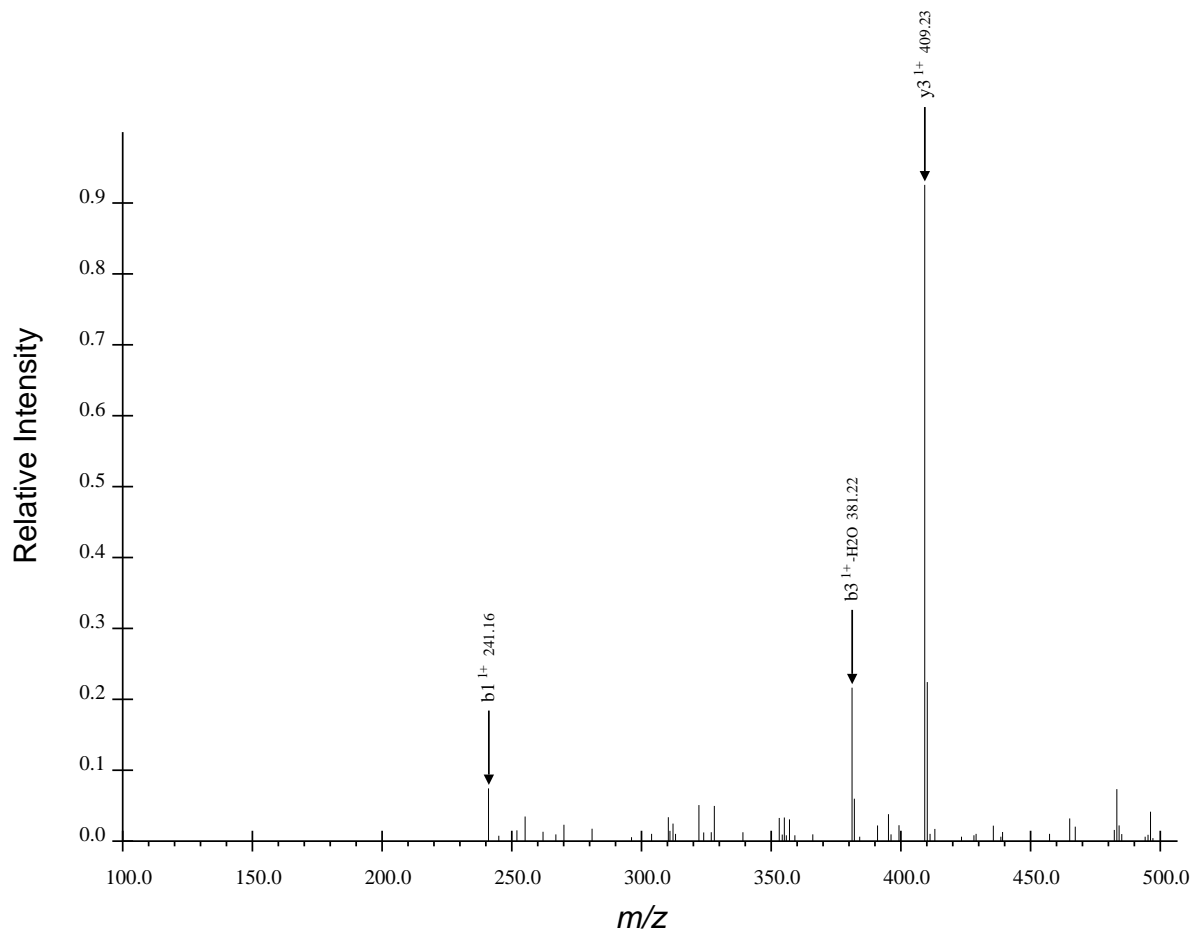

(a) First Region for rrKSAPATGGVhKrKPHR, Spectrum 469.dta

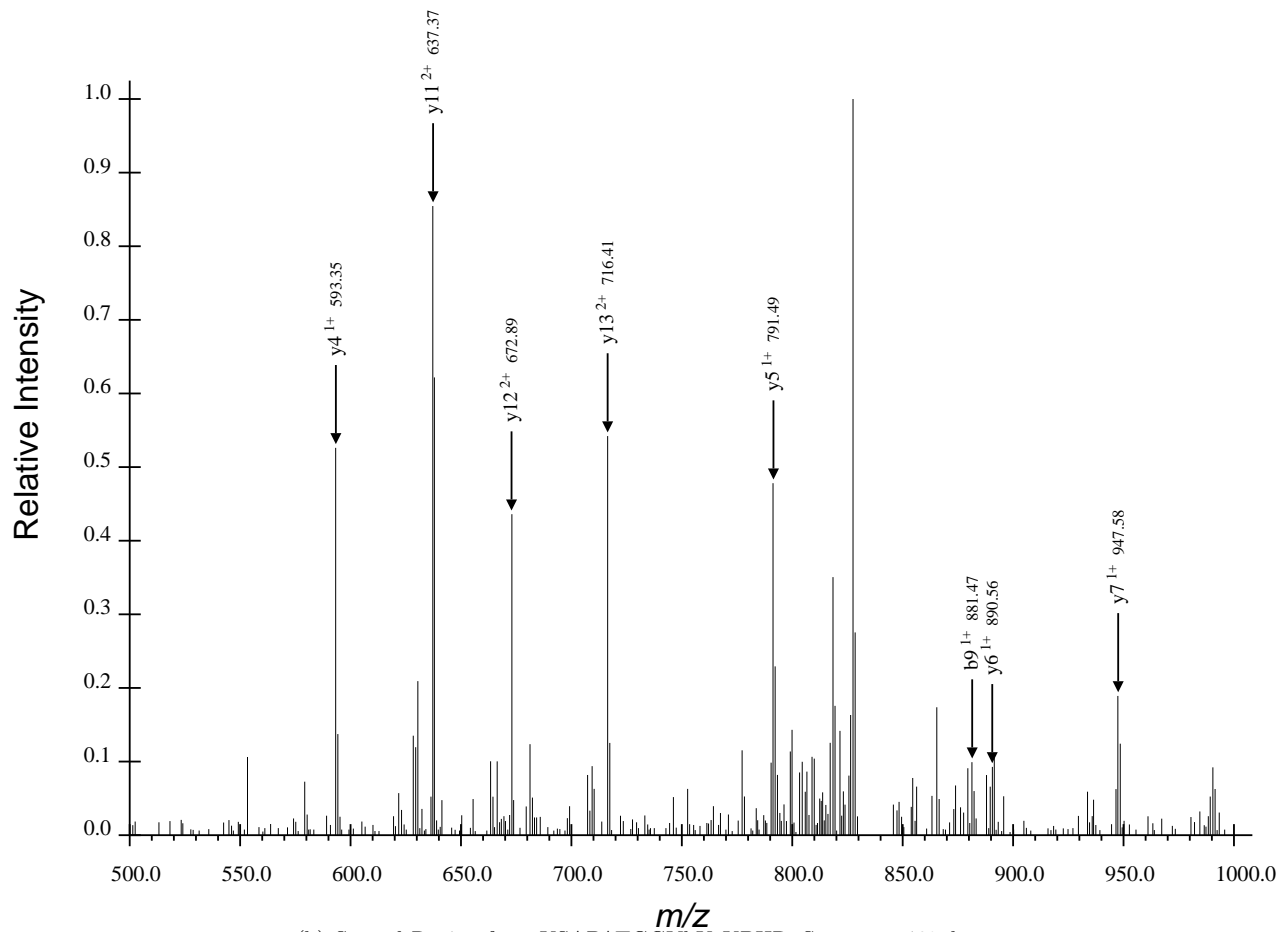

(b) Second Region for rrKSAPATGGVhKrKPHR, Spectrum 469.dta

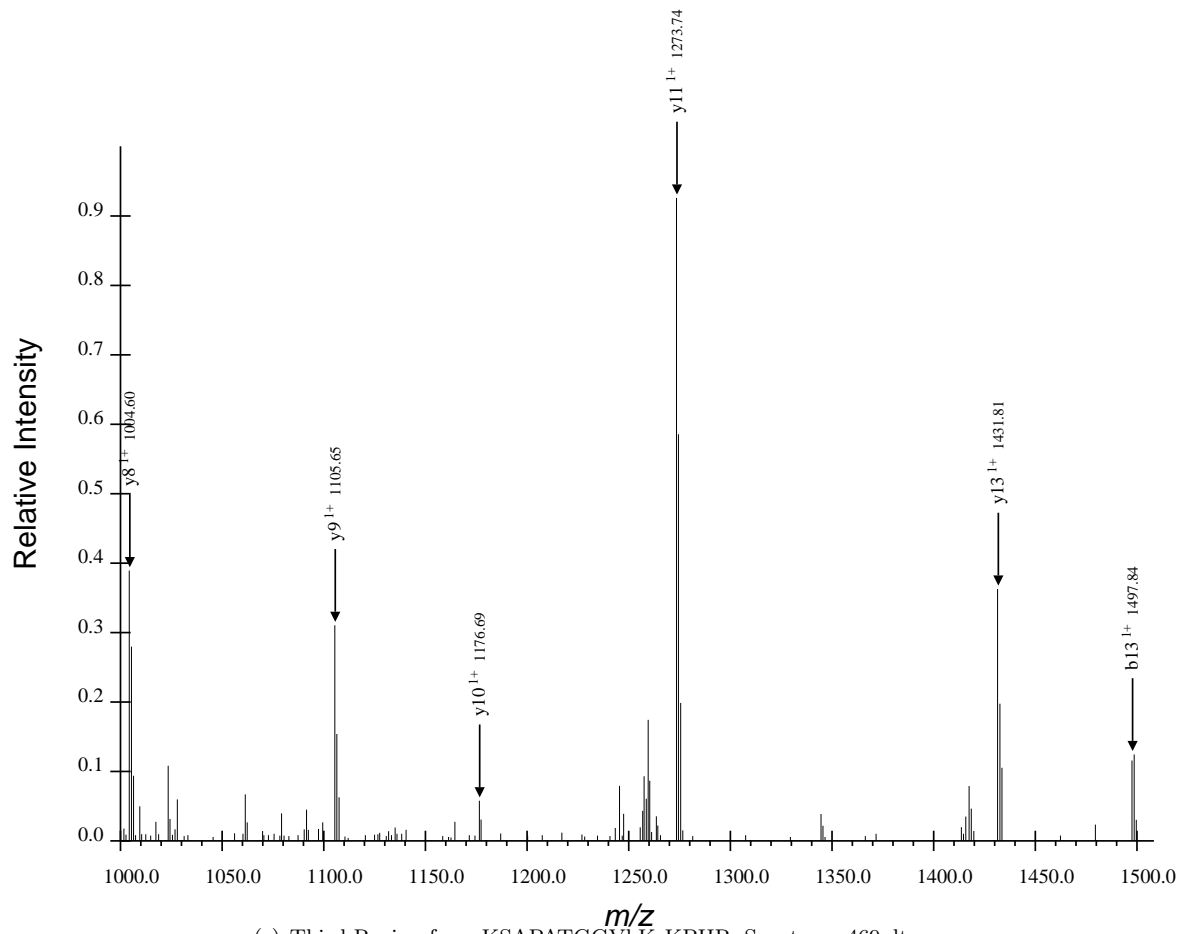

(c) Third Region for rrKSAPATGGVhKrKPHR, Spectrum 469.dta

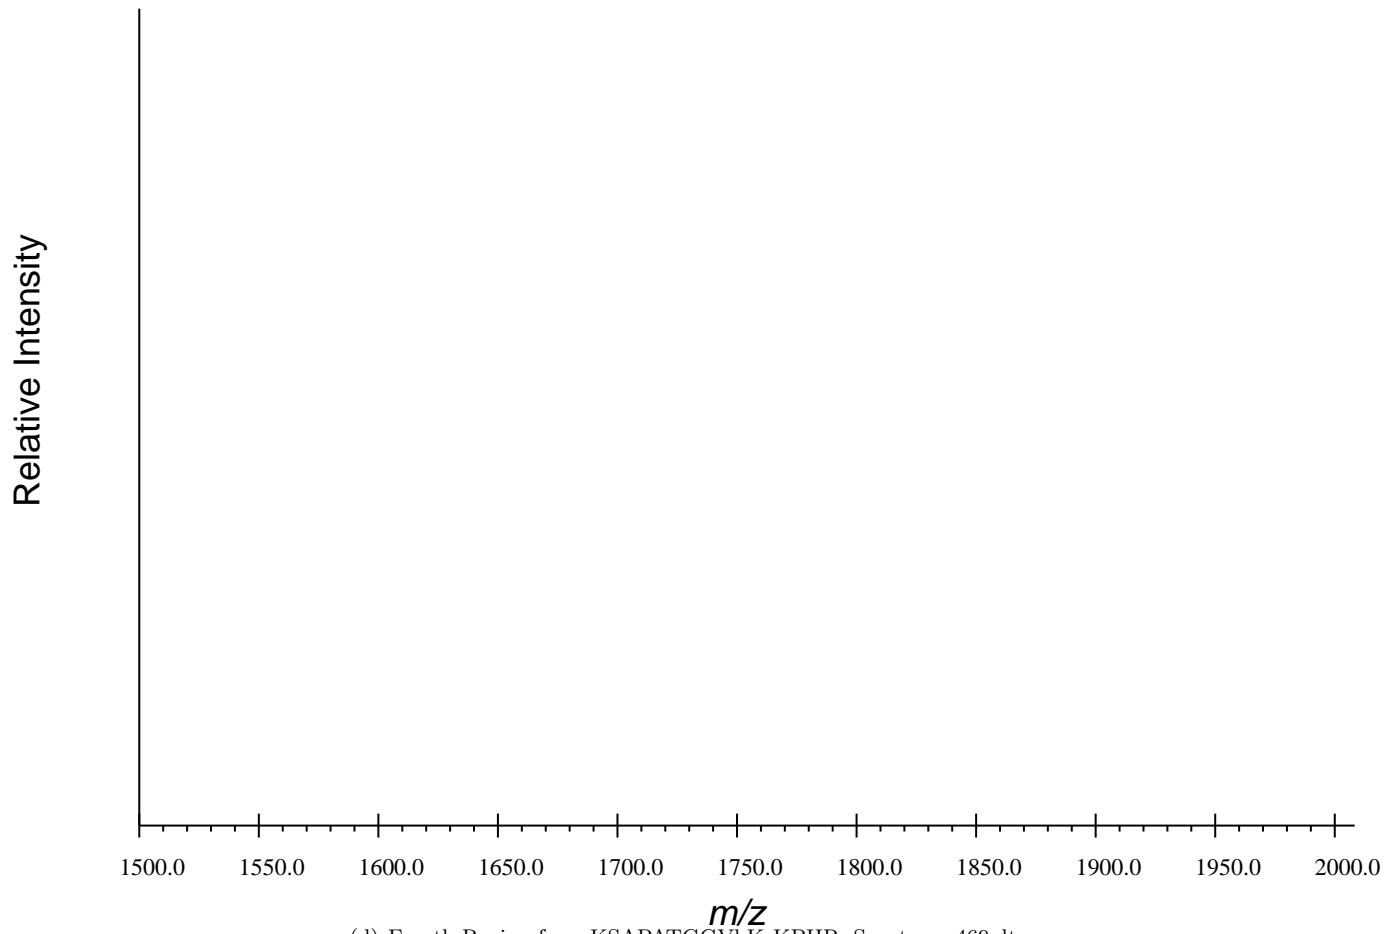

(d) Fourth Region for rrKSAPATGGVhKrKPHR, Spectrum 469.dta

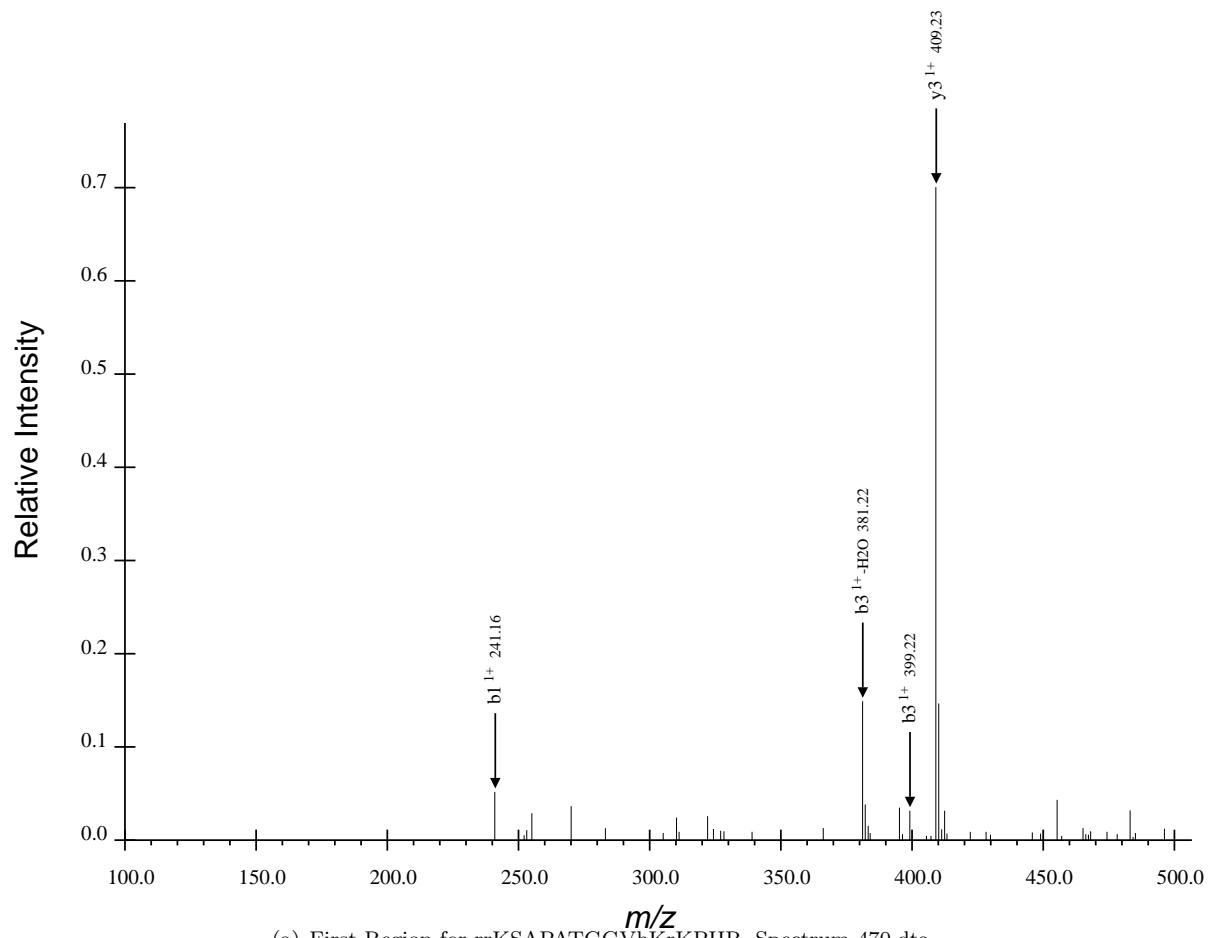

(a) First Region for rrKSAPATGGVhKrKPHR, Spectrum 470.dta

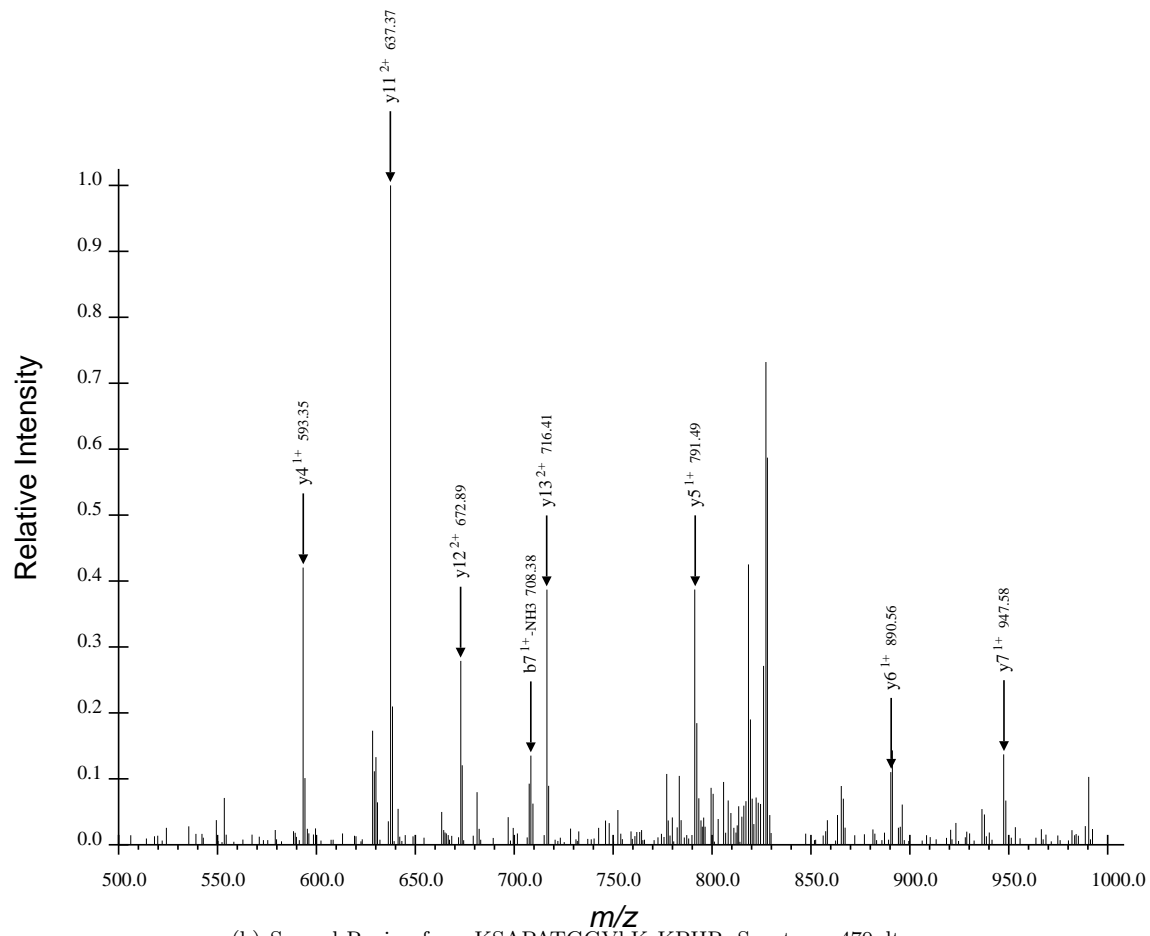

(b) Second Region for rrKSAPATGGVhKrKPHR, Spectrum 470.dta

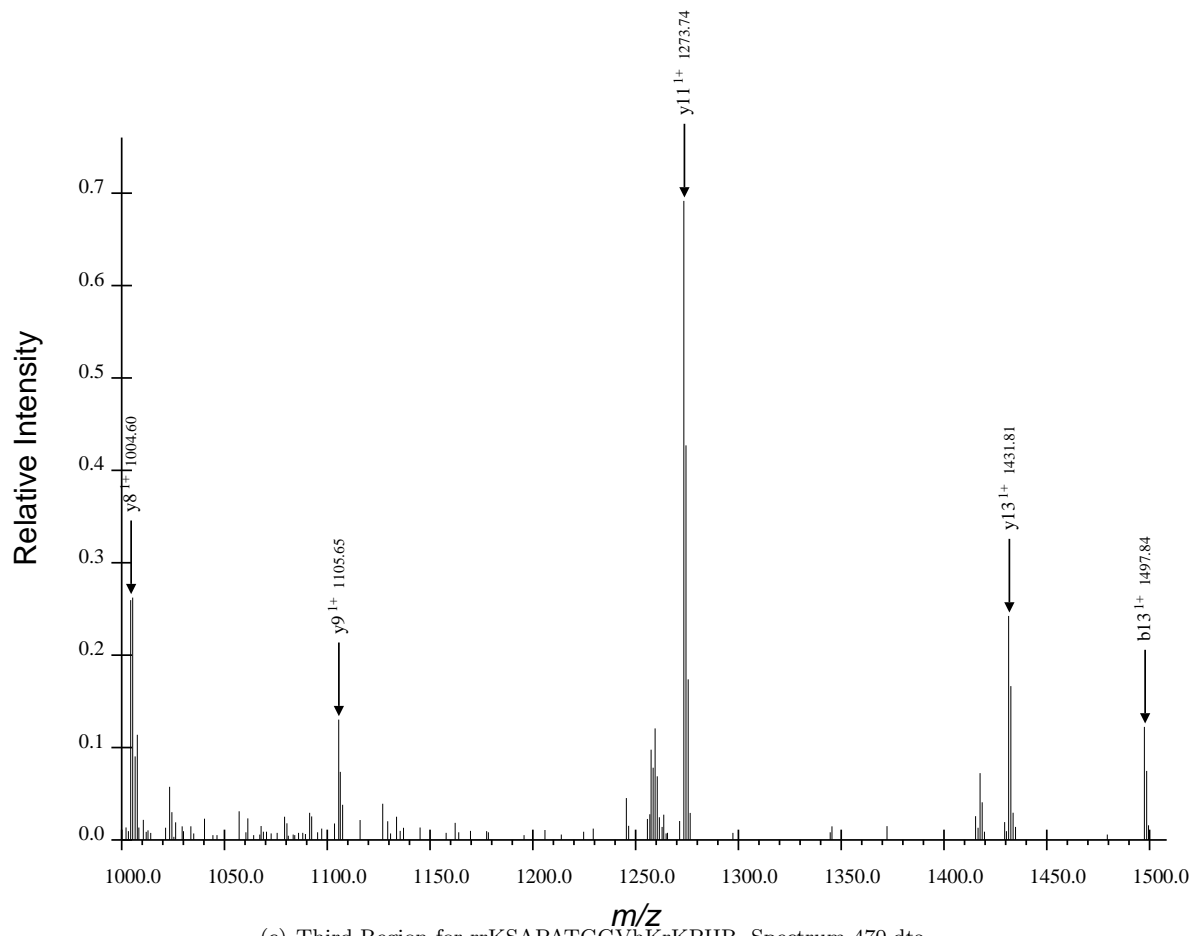

(c) Third Region for rrKSAPATGGVhKrKPHR, Spectrum 470.dta

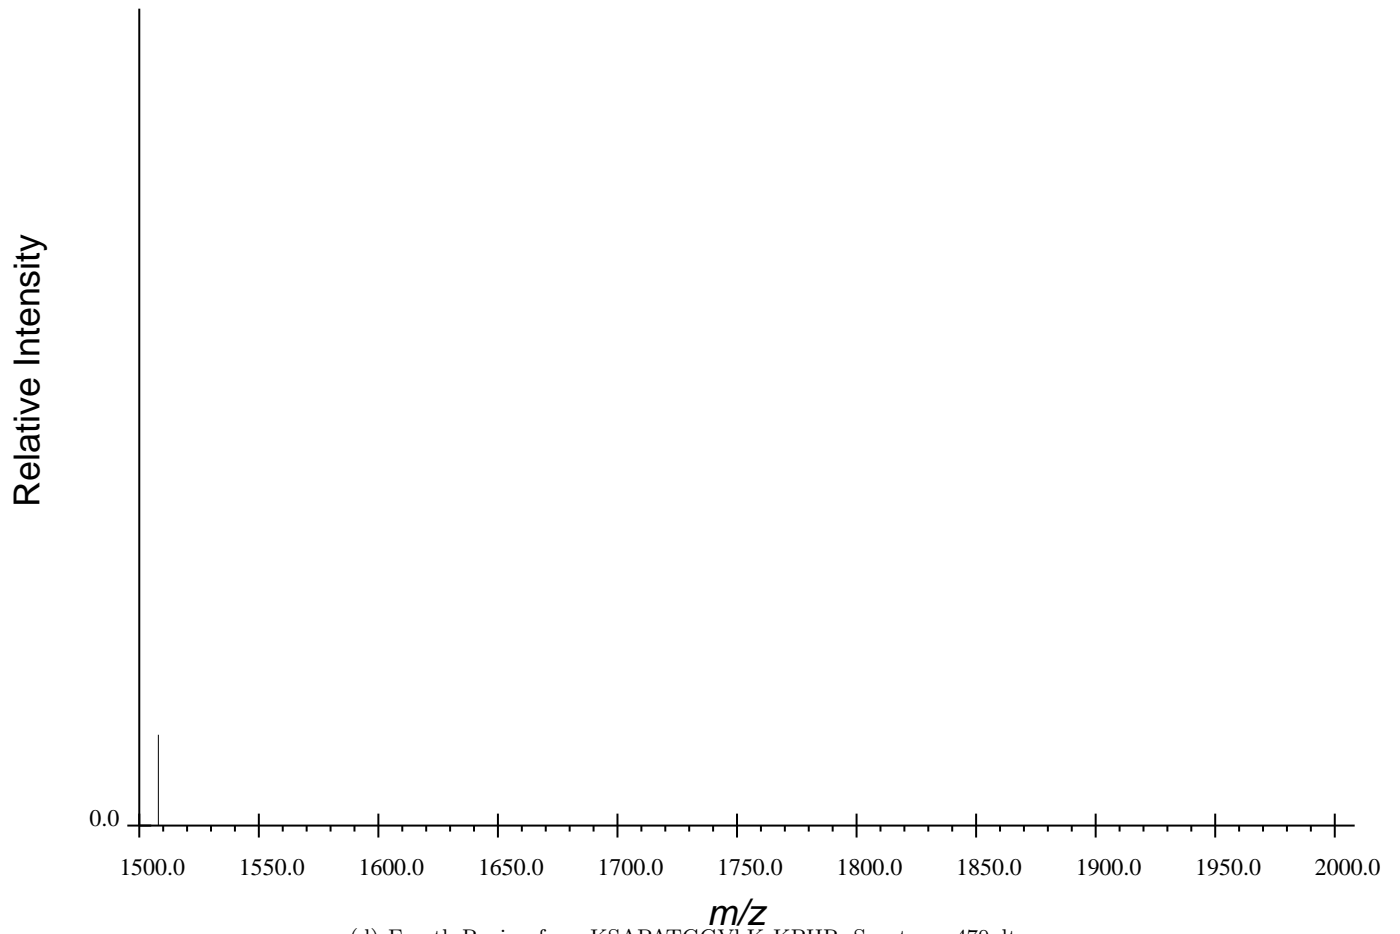

(d) Fourth Region for rrKSAPATGGVhKrKPHR, Spectrum 470.dta

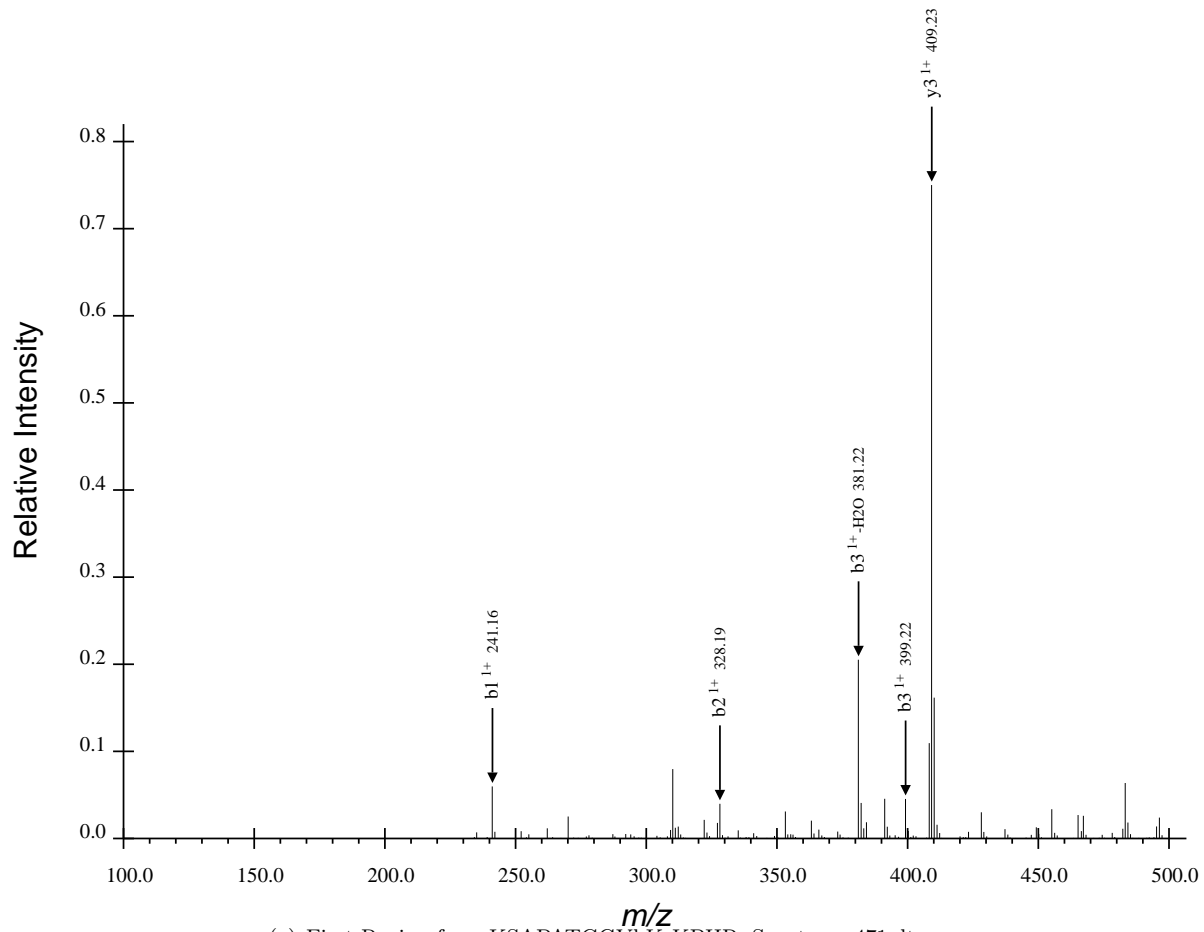

(a) First Region for rrKSAPATGGVhKrKPHR, Spectrum 471.dta

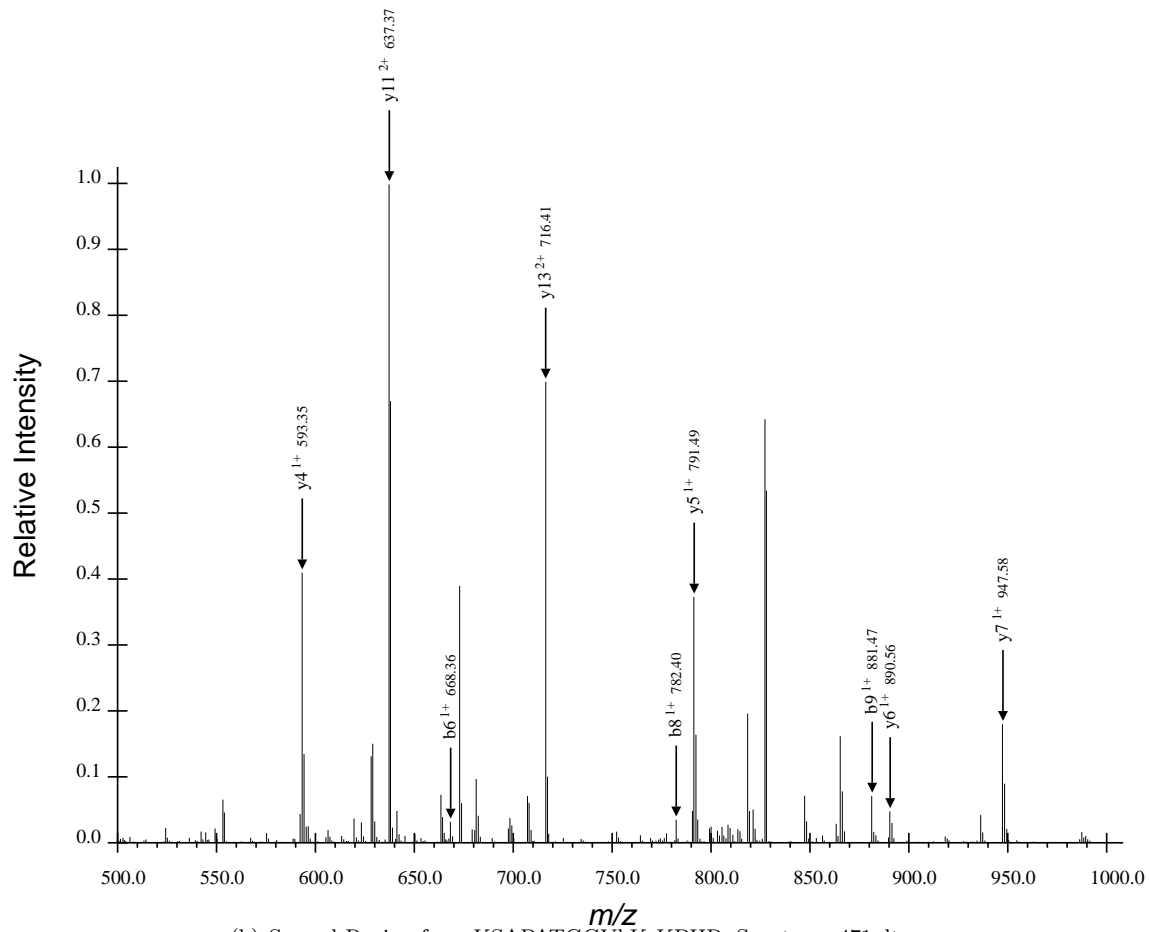

(b) Second Region for rrKSAPATGGVhKrKPHR, Spectrum 471.dta

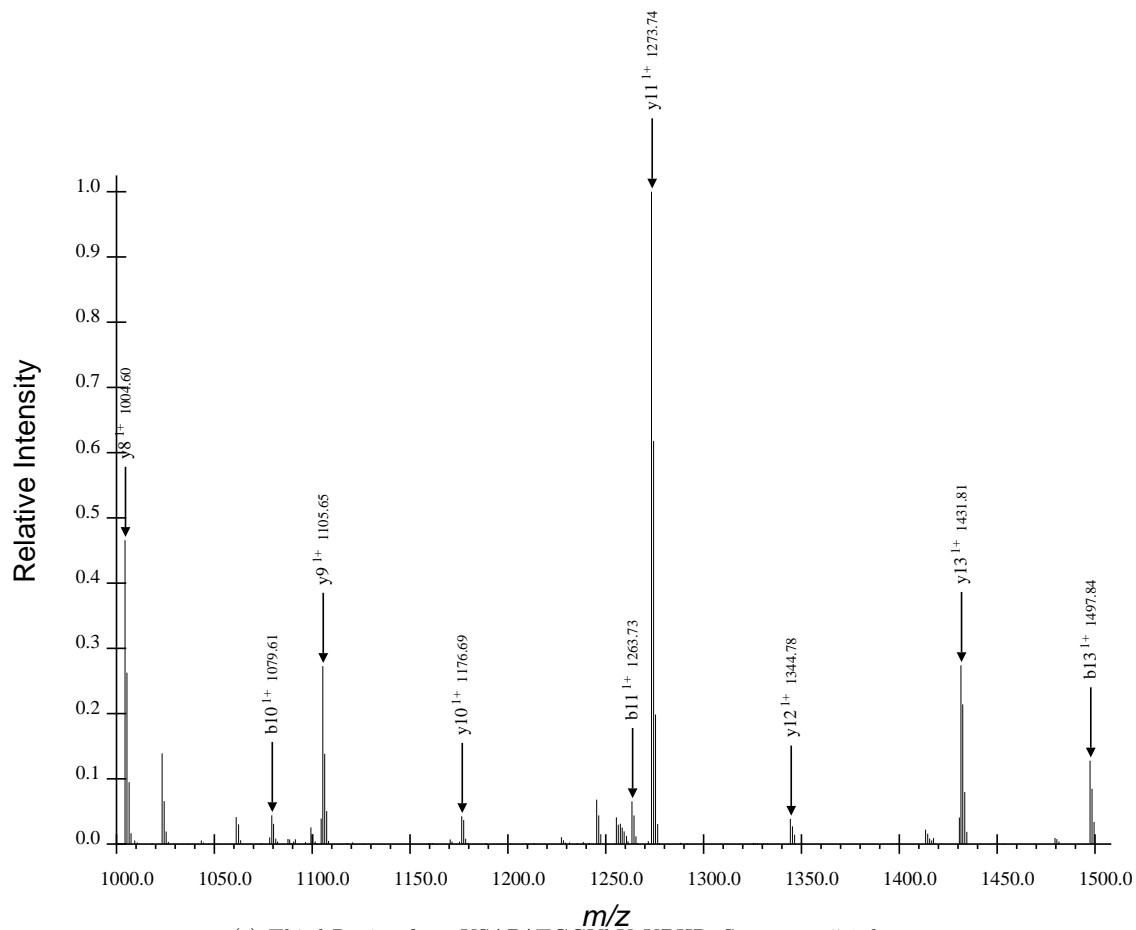

(c) Third Region for rrKSAPATGGVhKrKPHR, Spectrum 471.dta

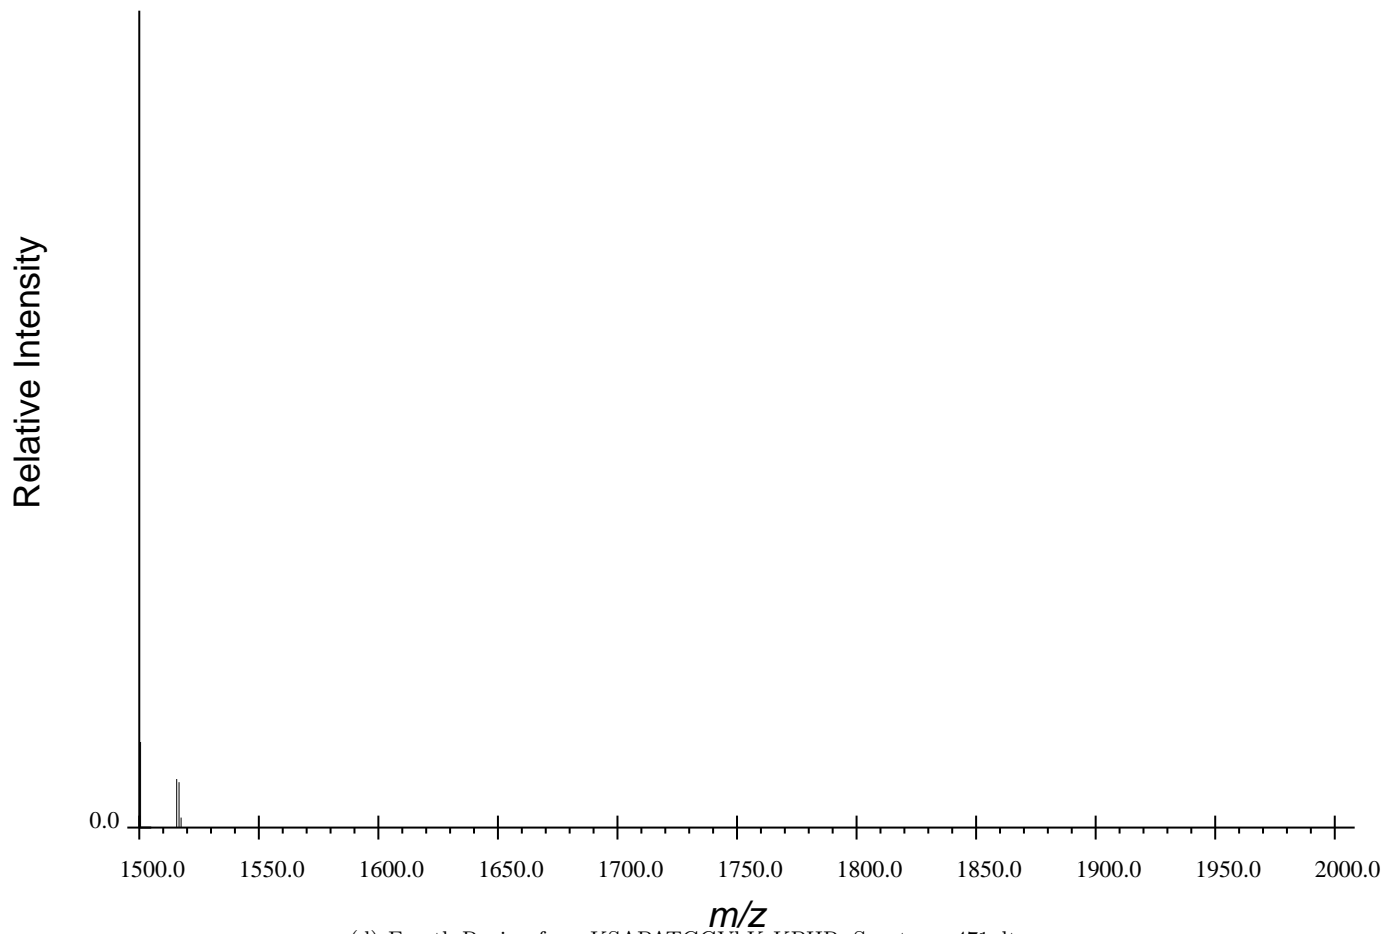

(d) Fourth Region for rrKSAPATGGVhKrKPHR, Spectrum 471.dta

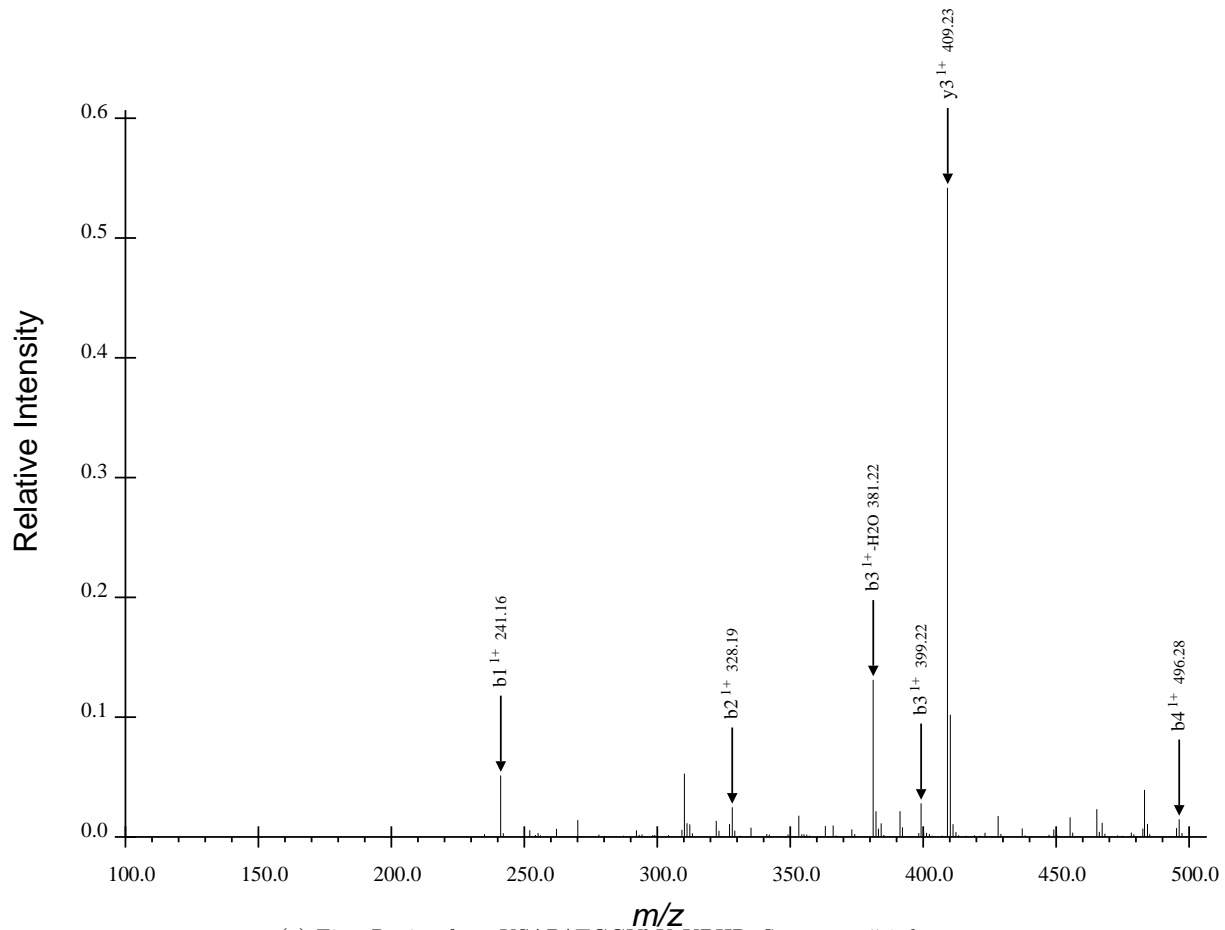

(a) First Region for rrKSAPATGGVhKrKPHR, Spectrum 472.dta

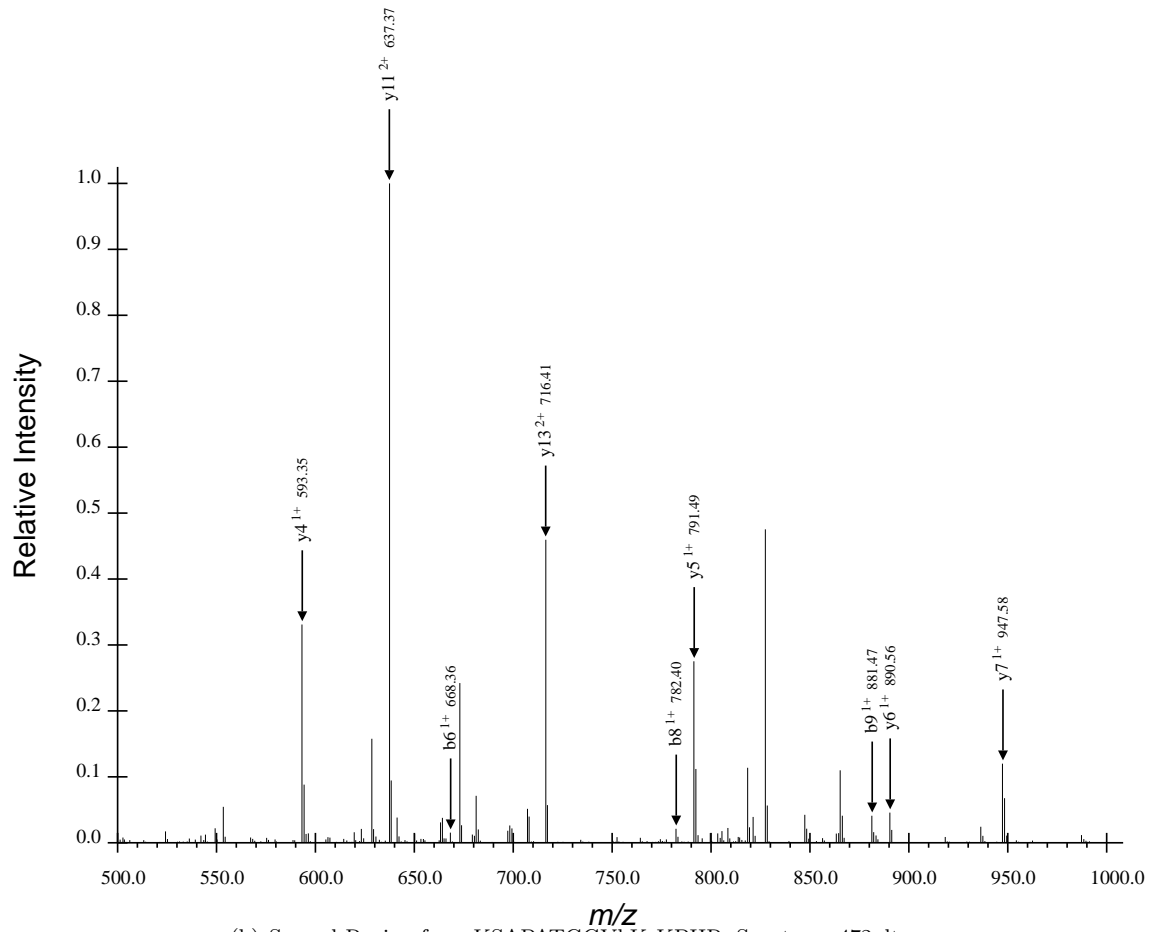

(b) Second Region for rrKSAPATGGVhKrKPHR, Spectrum 472.dta



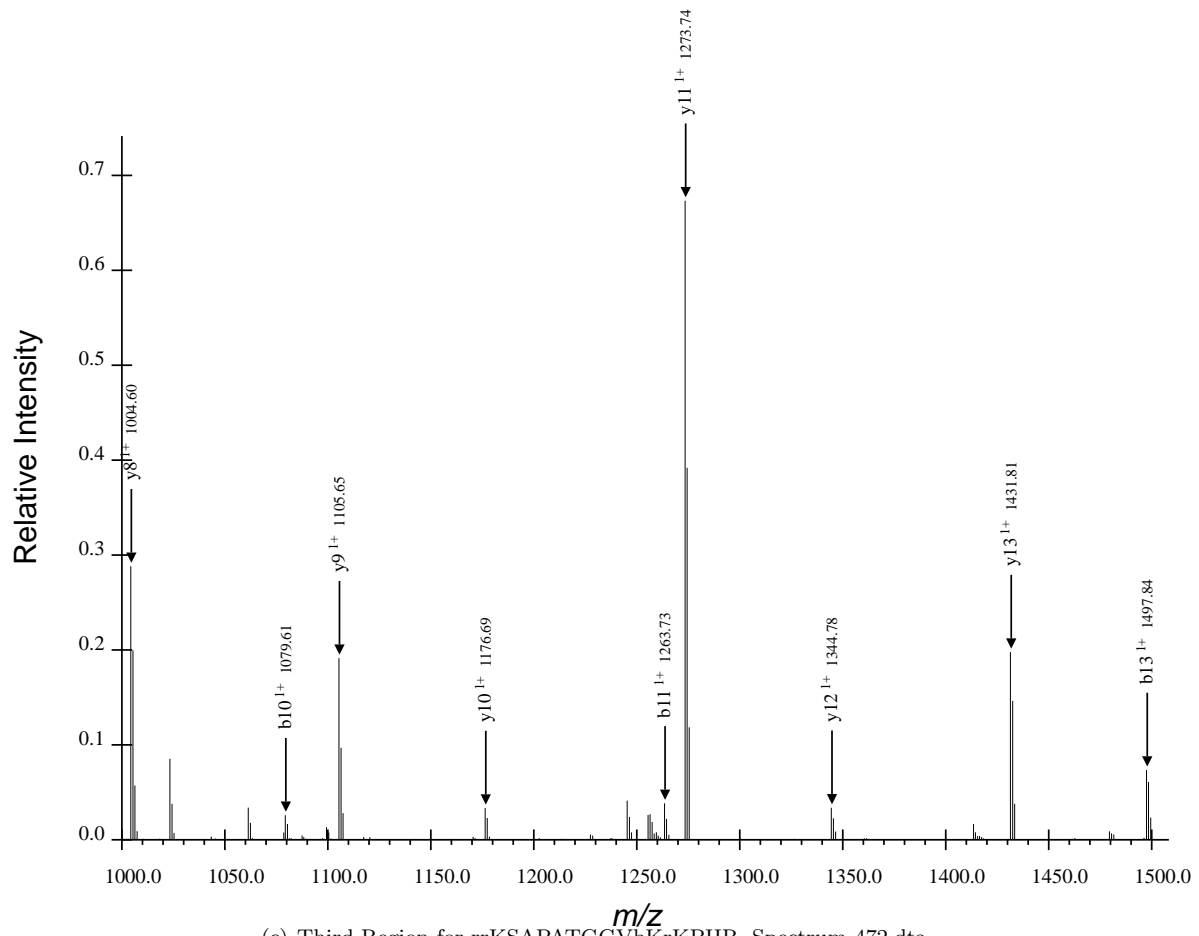

(c) Third Region for rrKSAPATGGVhKrKPHR, Spectrum 472.dta

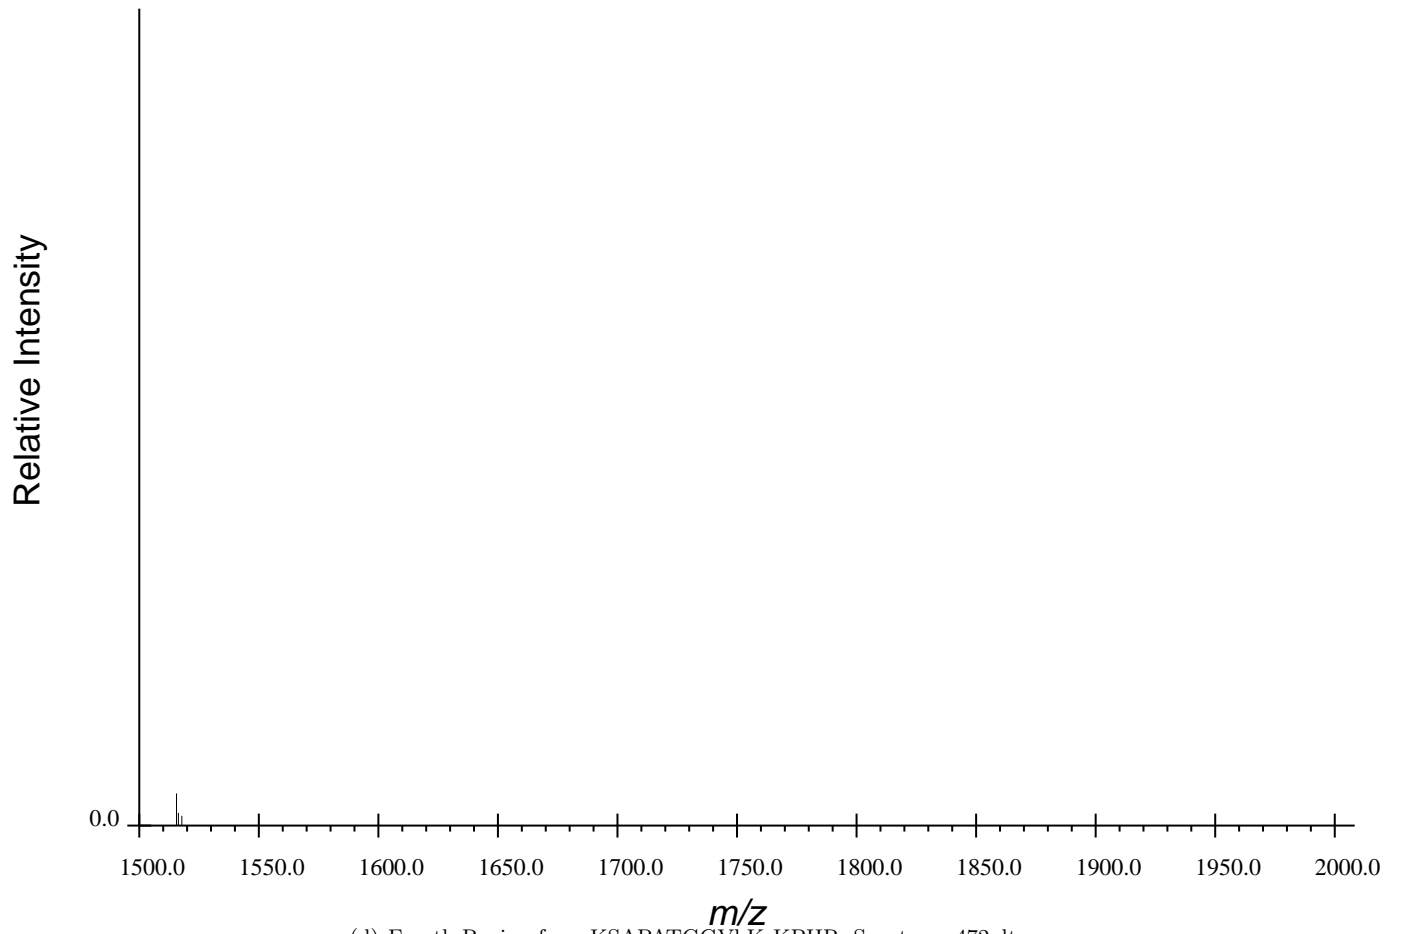

(d) Fourth Region for rrKSAPATGGVhKrKPHR, Spectrum 472.dta

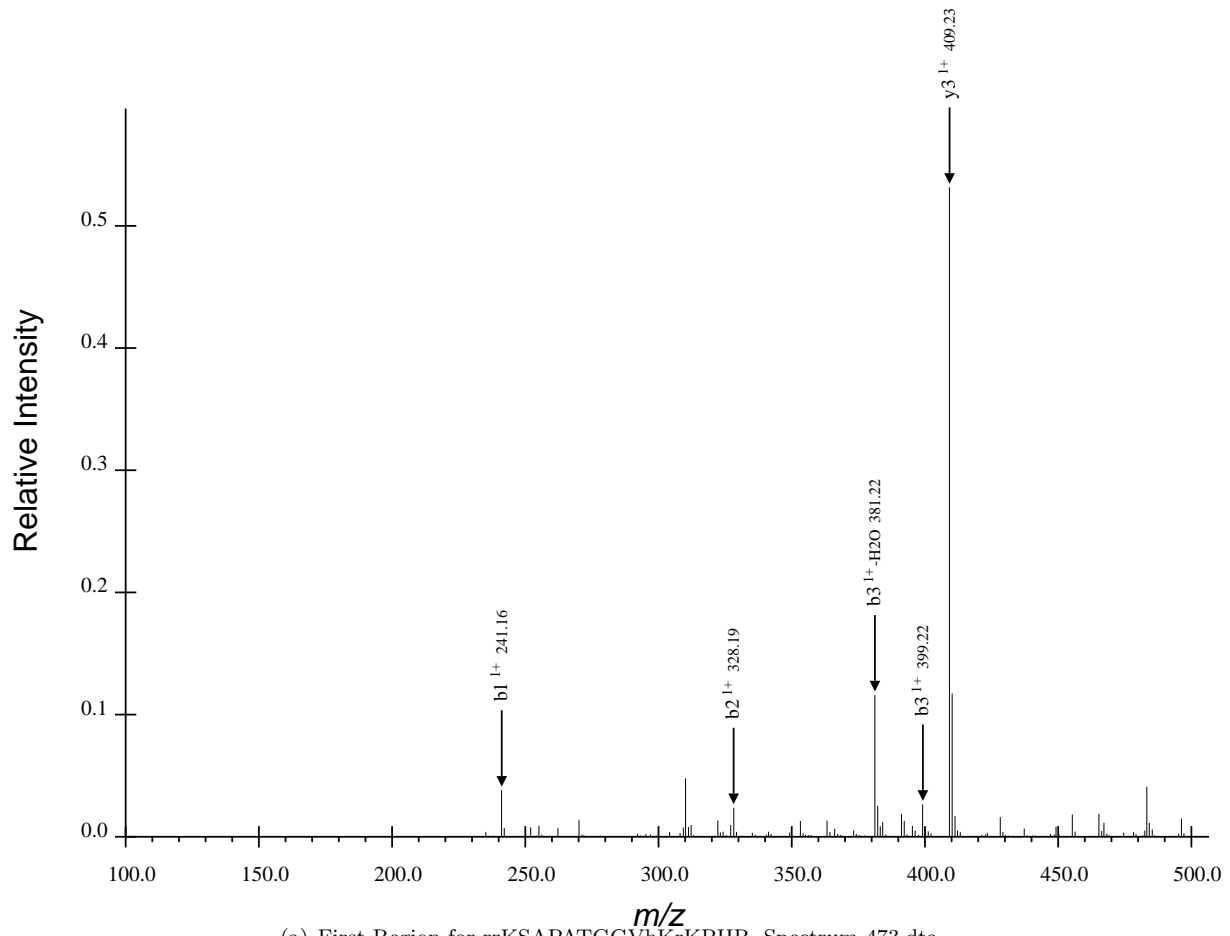

(a) First Region for rrKSAPATGGVhKrKPHR, Spectrum 473.dta

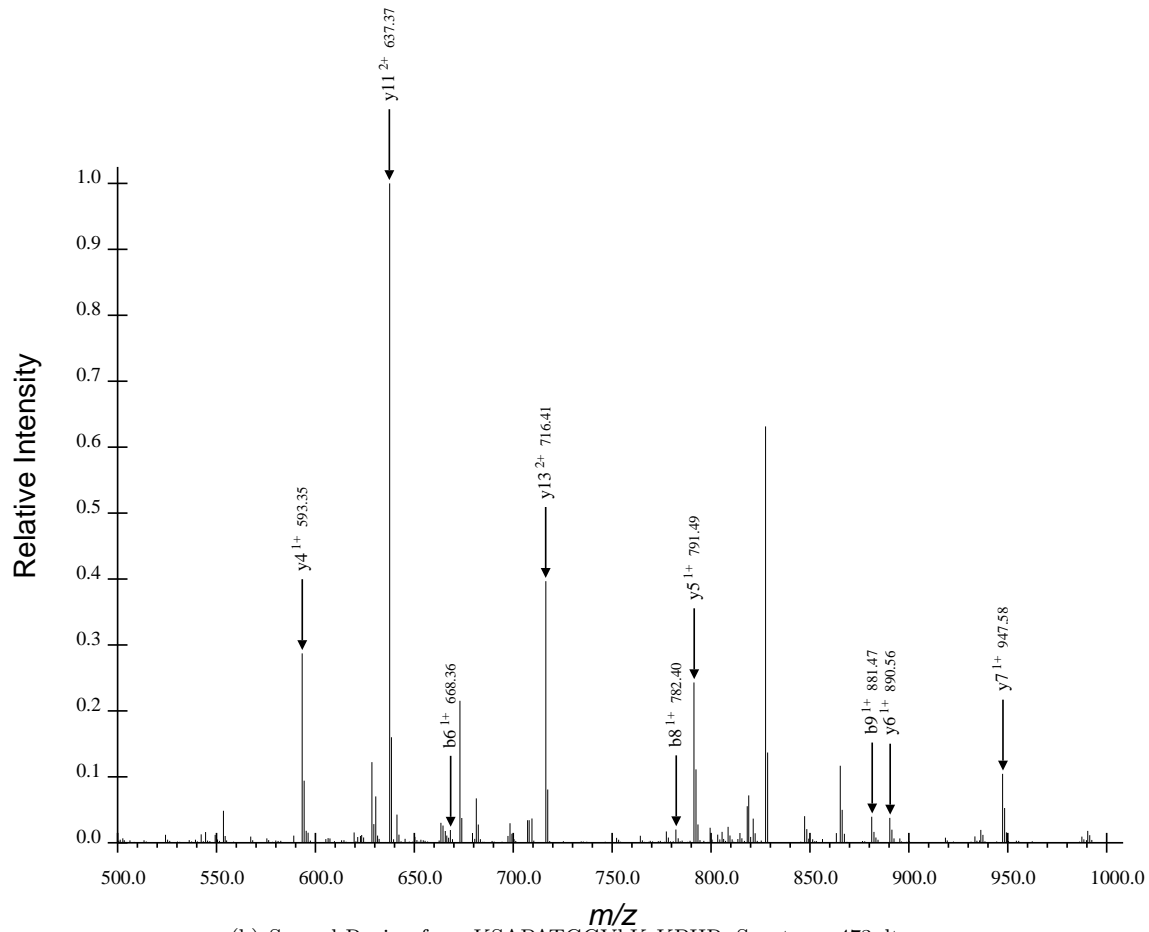

(b) Second Region for rrKSAPATGGVhKrKPHR, Spectrum 473.dta

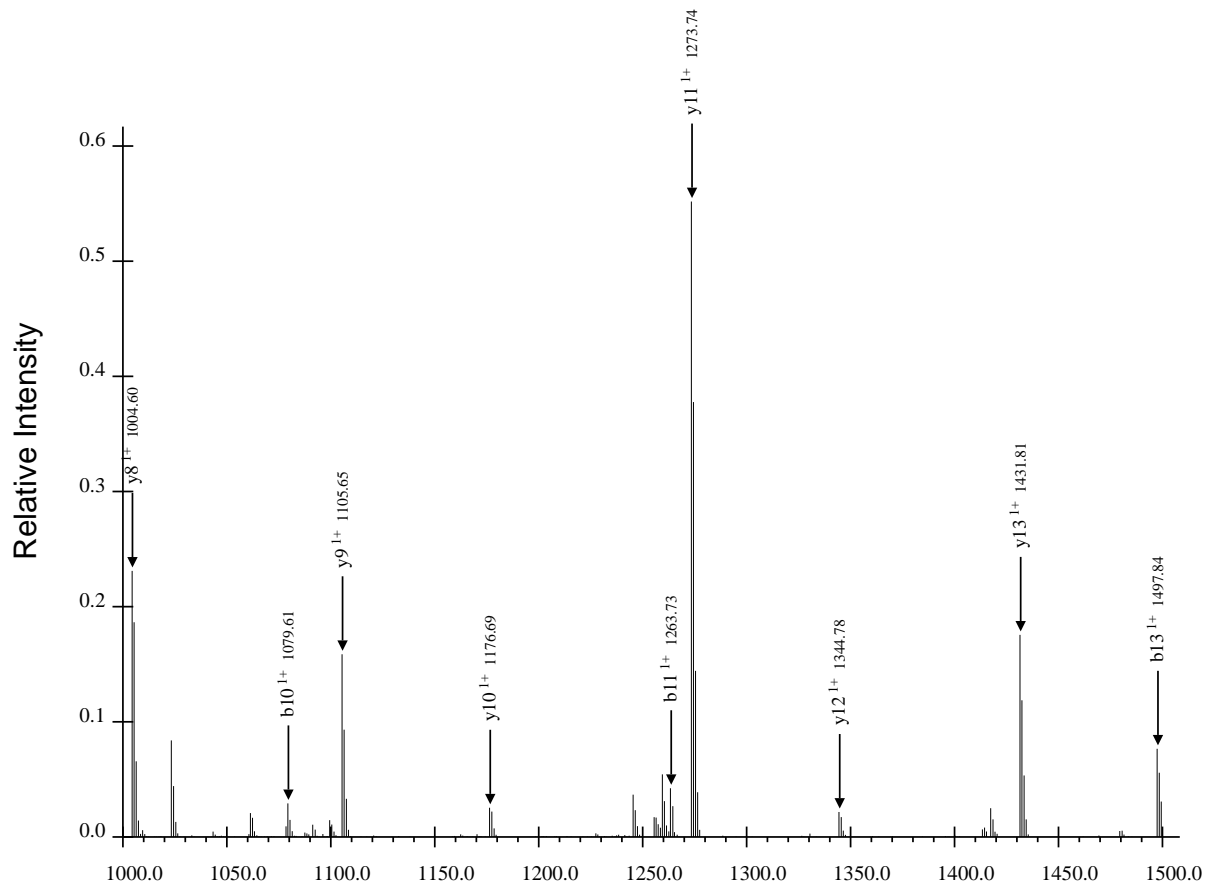

(c) Third Region for rrKSAPATGGVhKrKPHR, Spectrum 473.dta

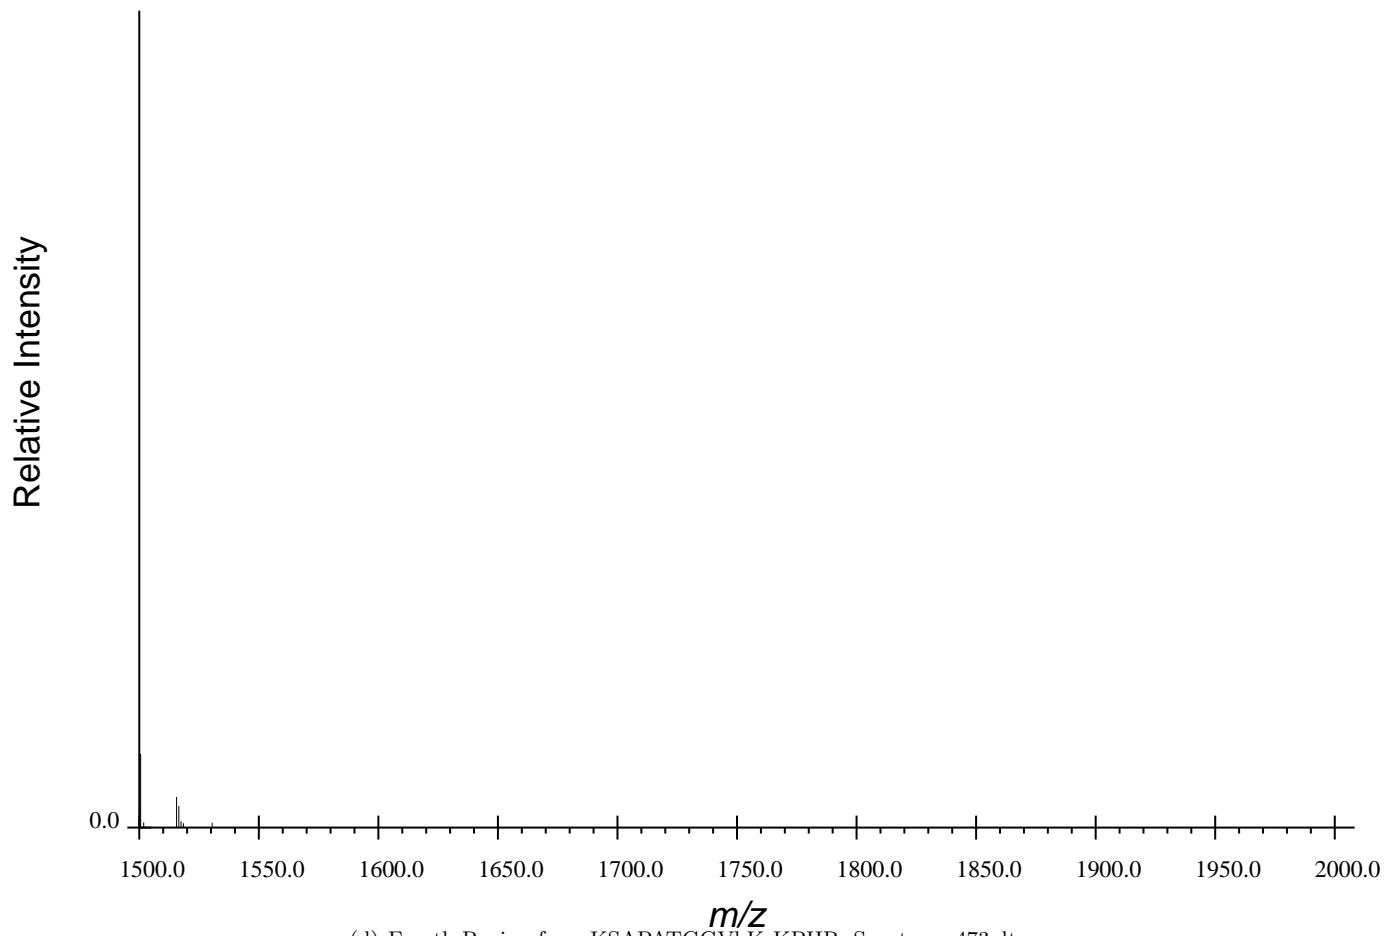

(d) Fourth Region for rrKSAPATGGVhKrKPHR, Spectrum 473.dta

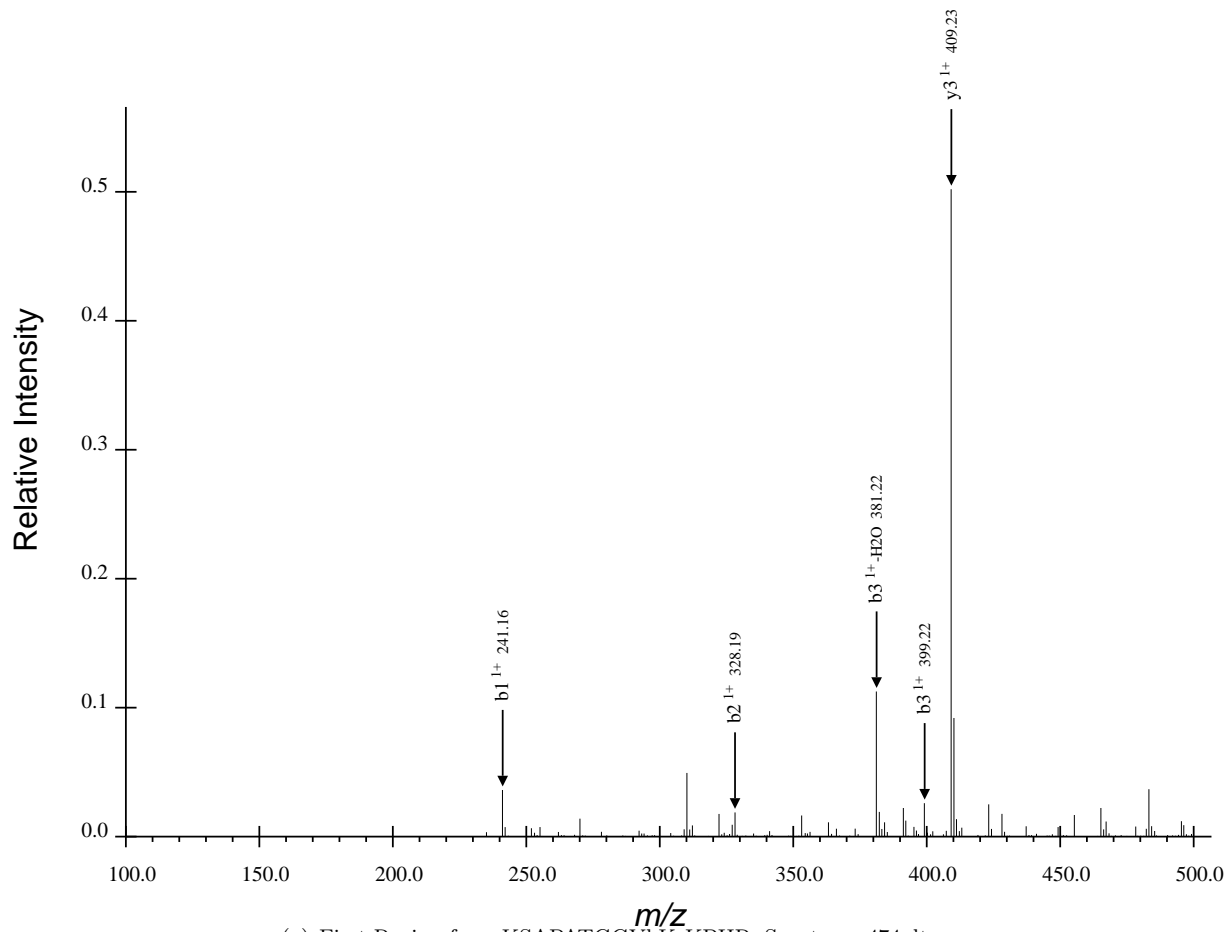

(a) First Region for rrKSAPATGGVhKrKPHR, Spectrum 474.dta

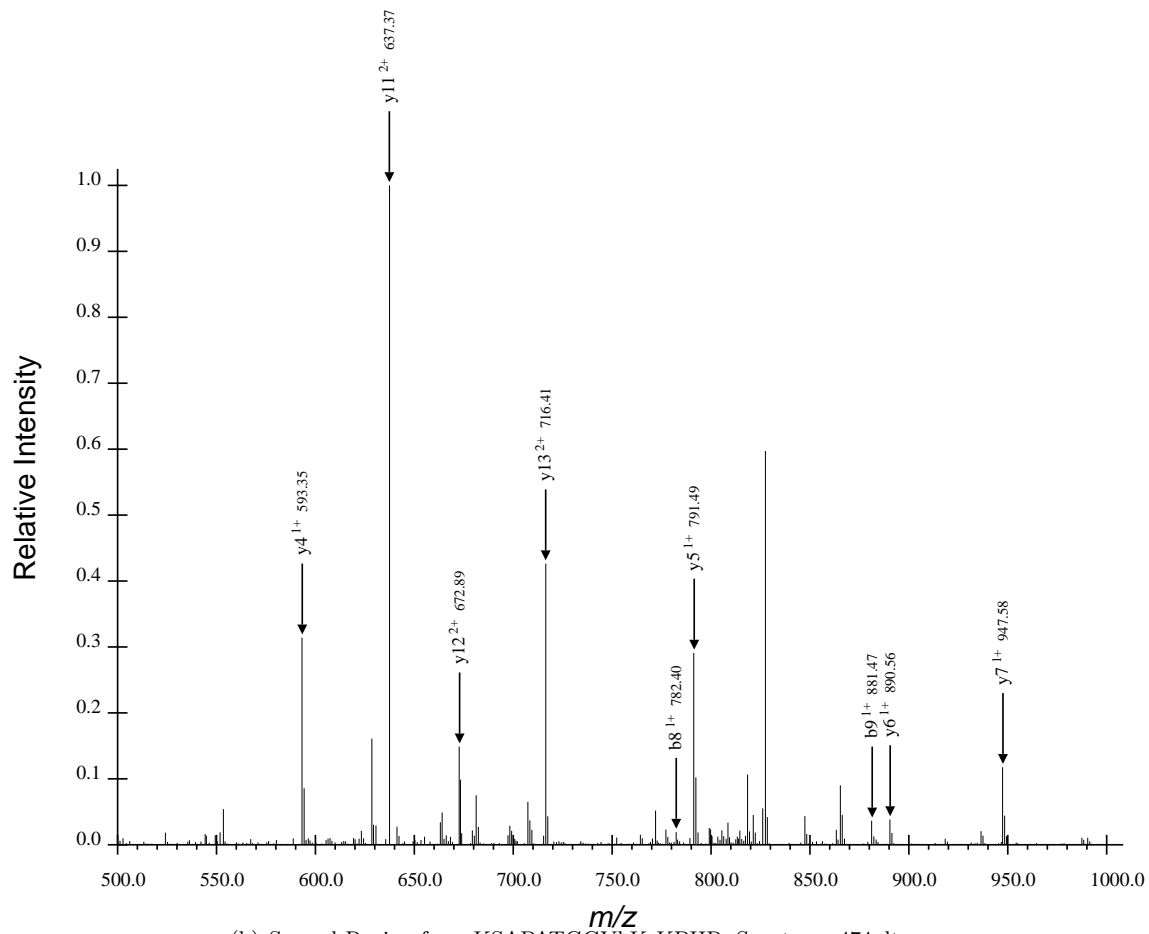

(b) Second Region for rrKSAPATGGVhKrKPHR, Spectrum 474.dta

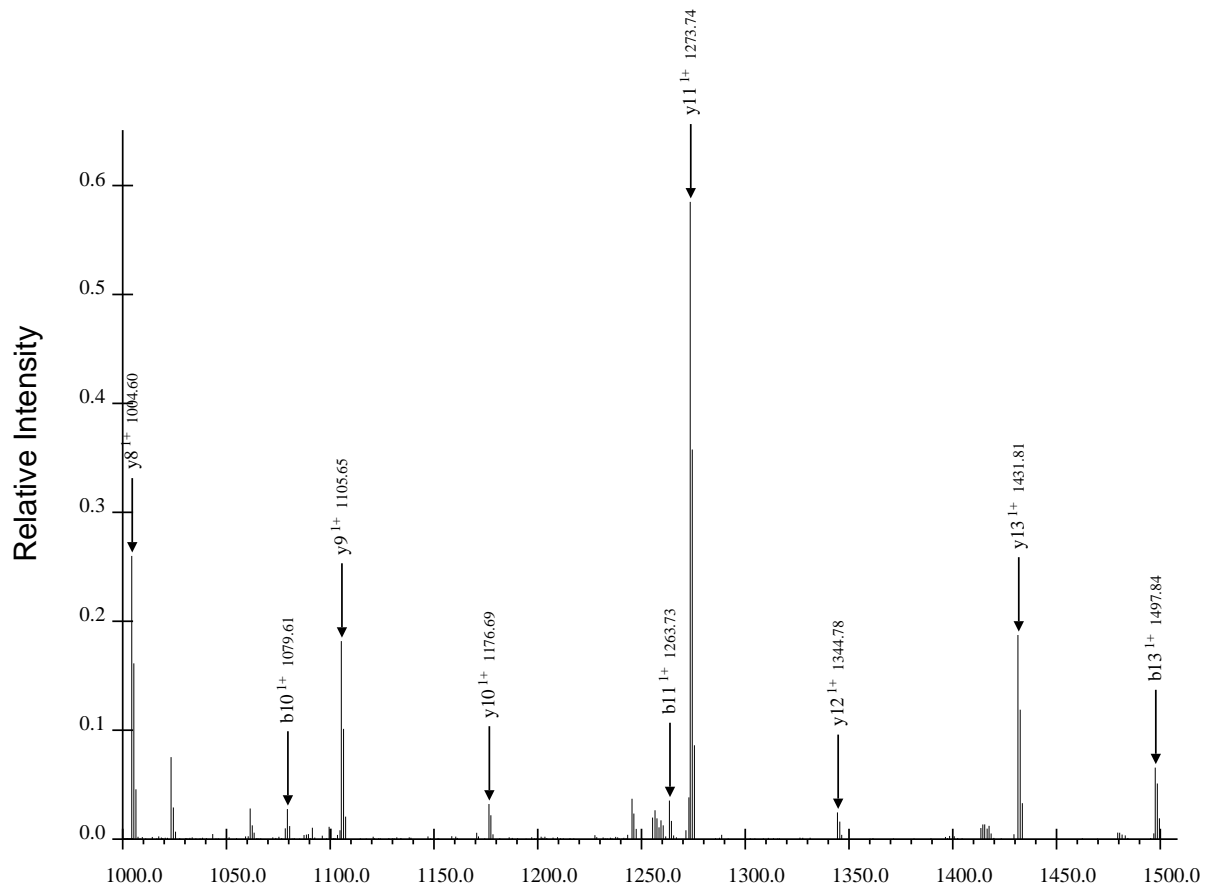

(c) Third Region for rrKSAPATGGVhKrKPHR, Spectrum 474.dta

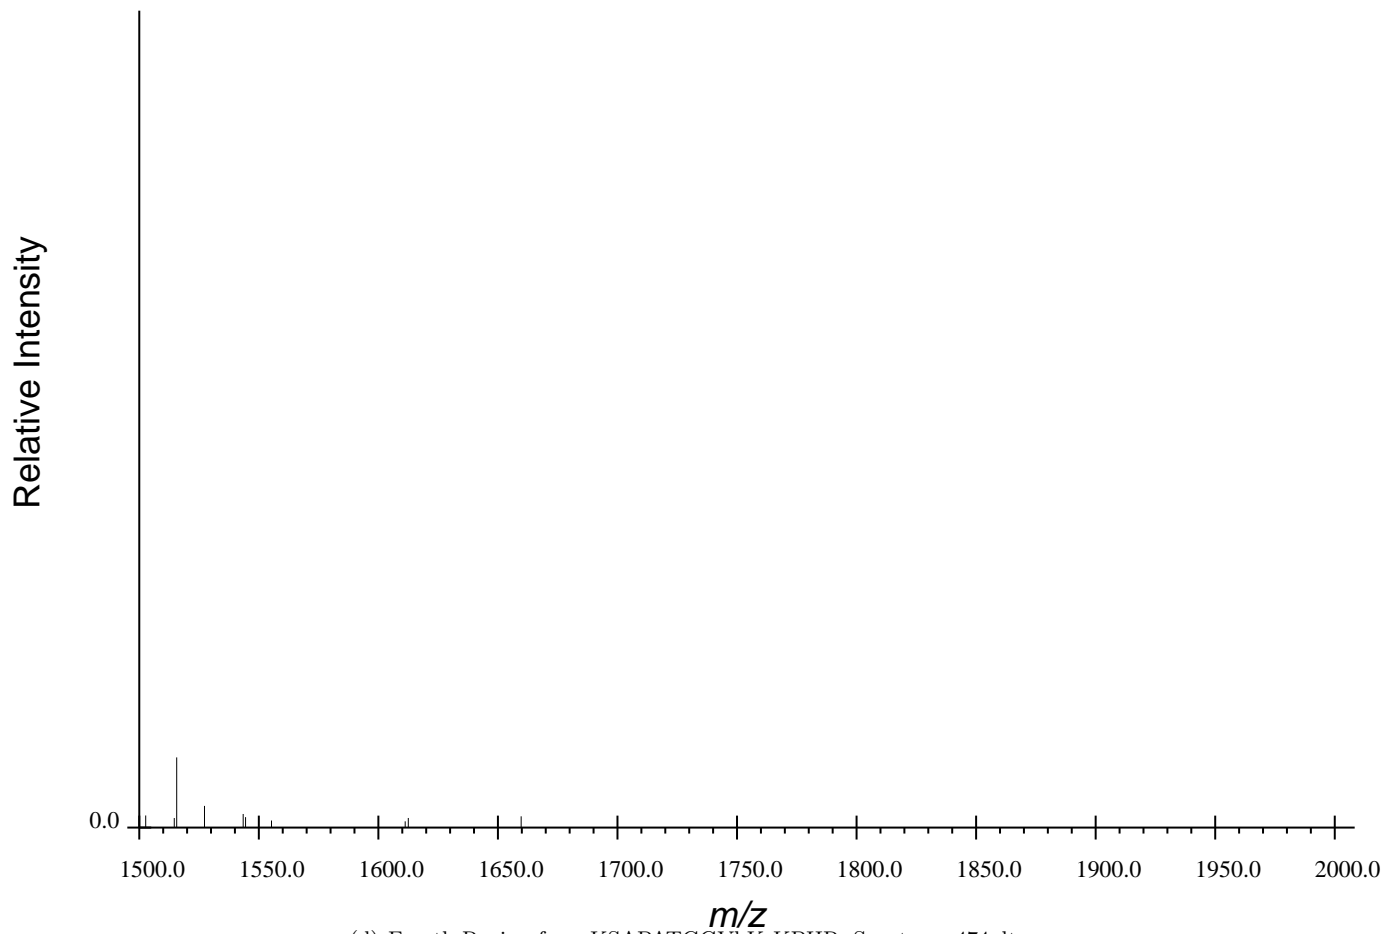

(d) Fourth Region for rrKSAPATGGVhKrKPHR, Spectrum 474.dta

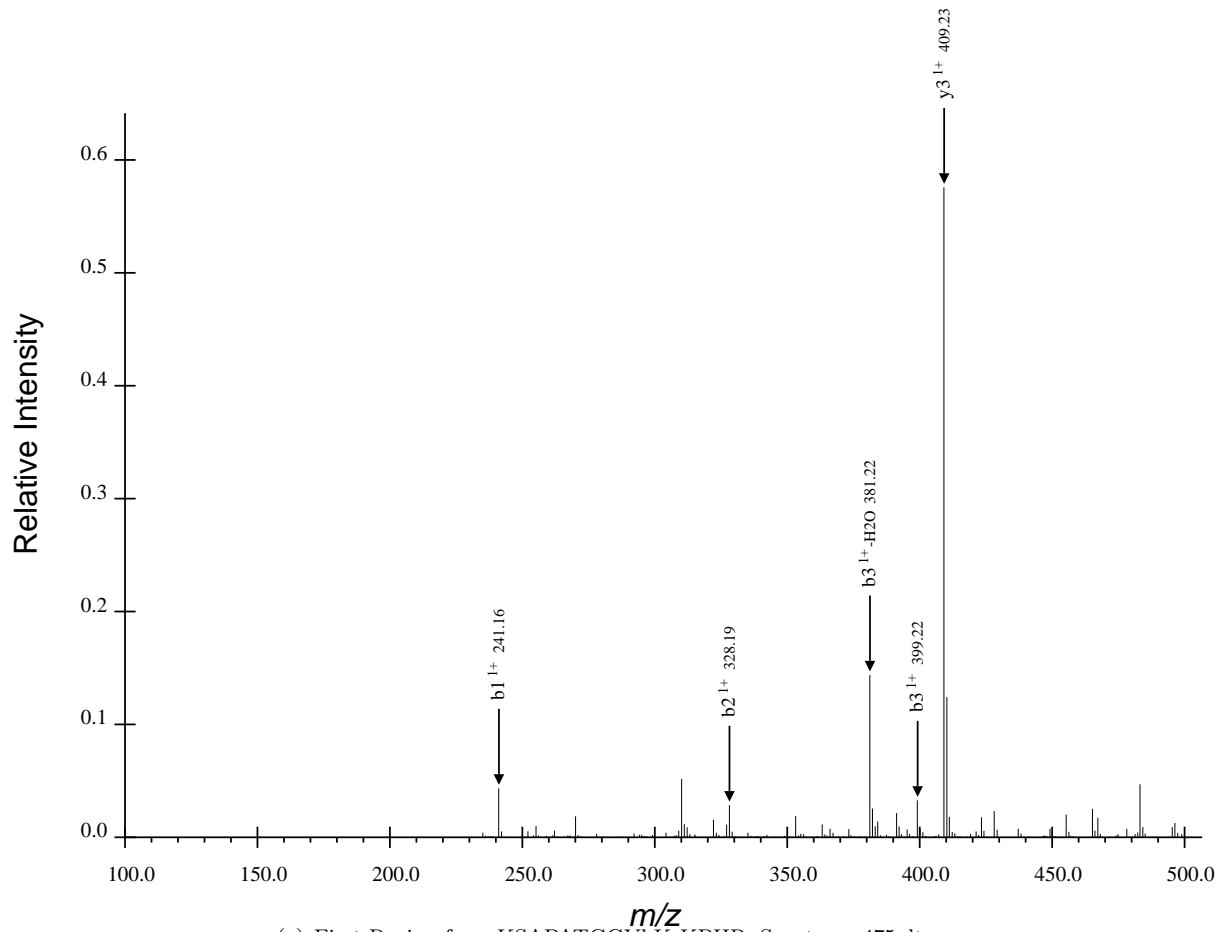

(a) First Region for rrKSAPATGGVhKrKPHR, Spectrum 475.dta

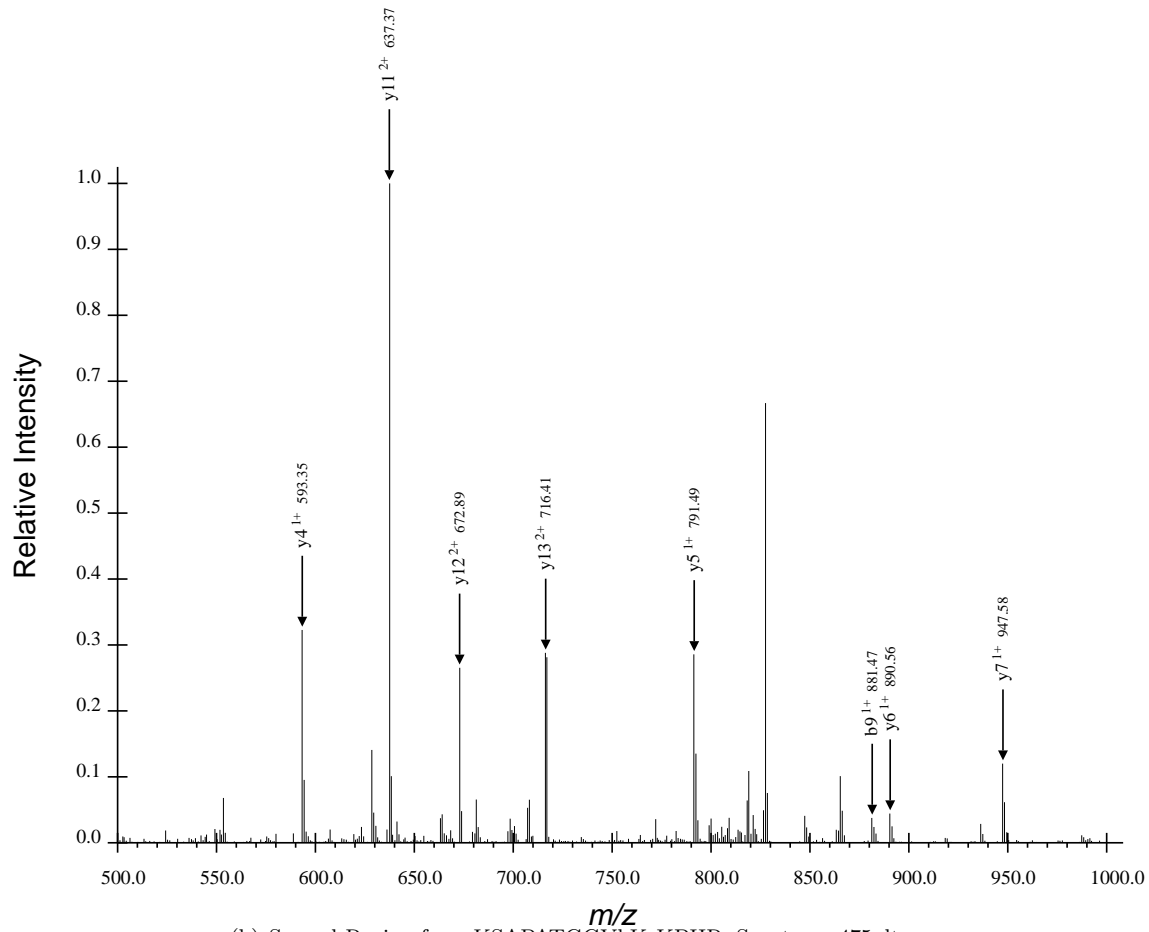

(b) Second Region for rrKSAPATGGVhKrKPHR, Spectrum 475.dta

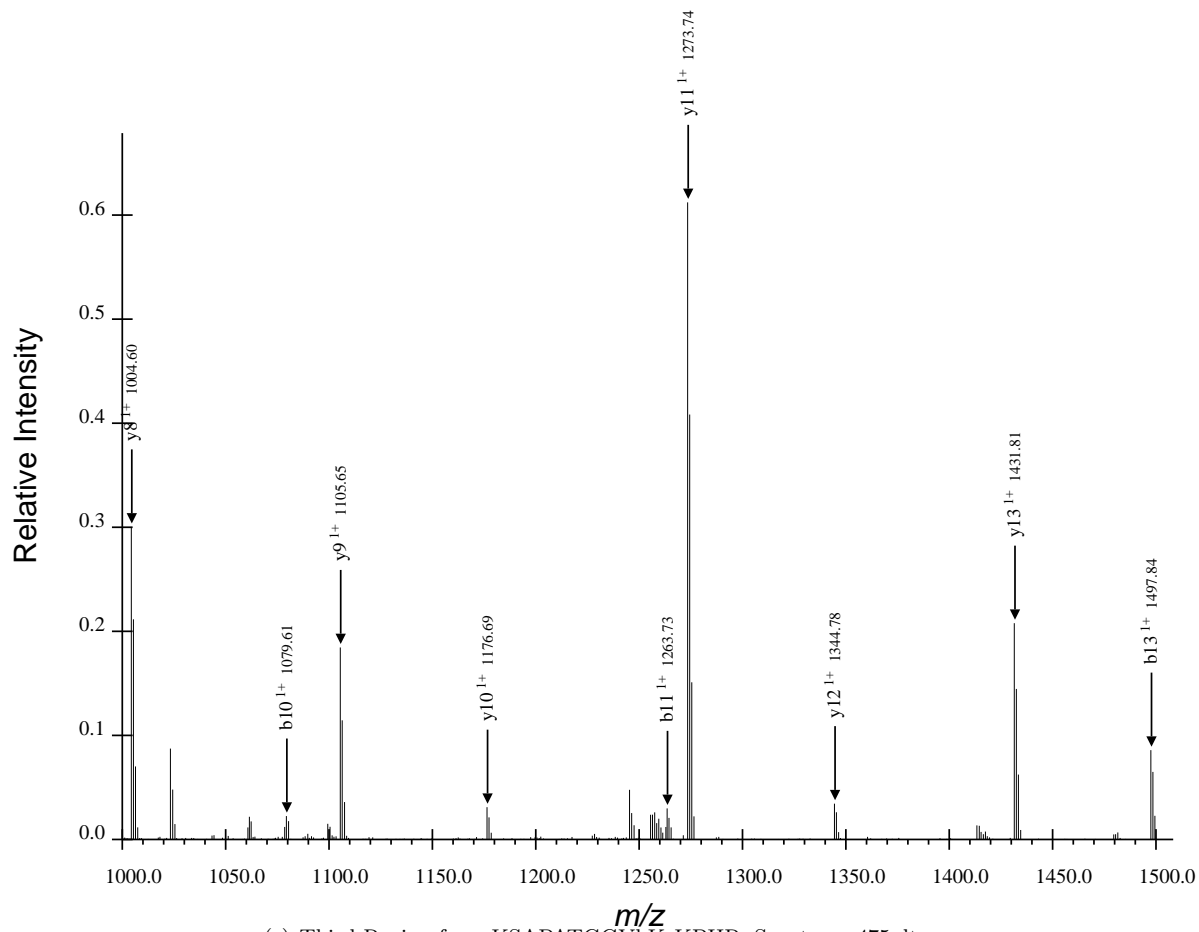

(c) Third Region for rrKSAPATGGVhKrKPHR, Spectrum 475.dta

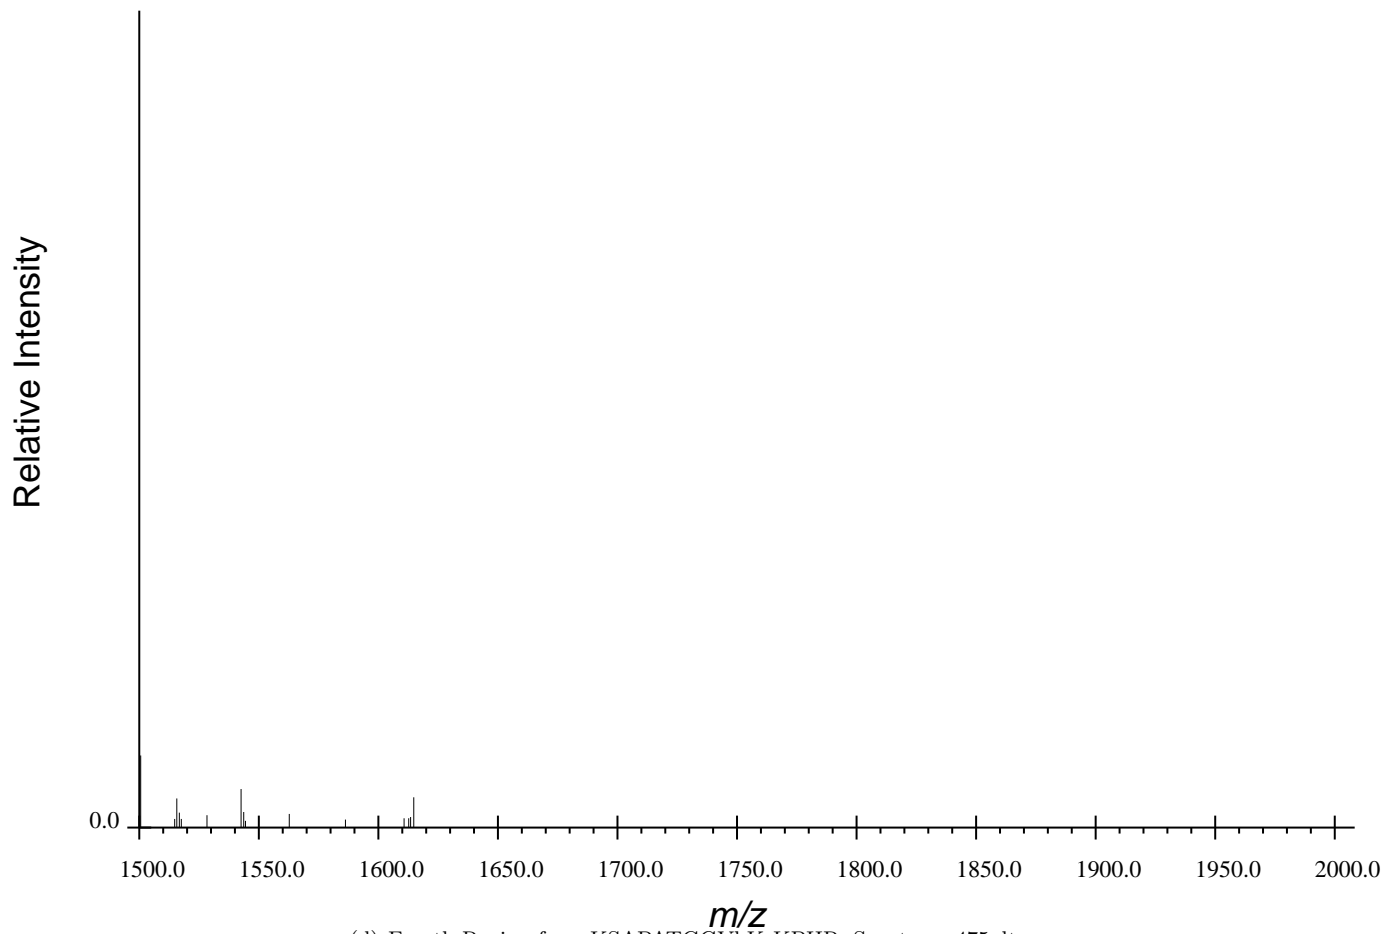

(d) Fourth Region for rrKSAPATGGVhKrKPHR, Spectrum 475.dta

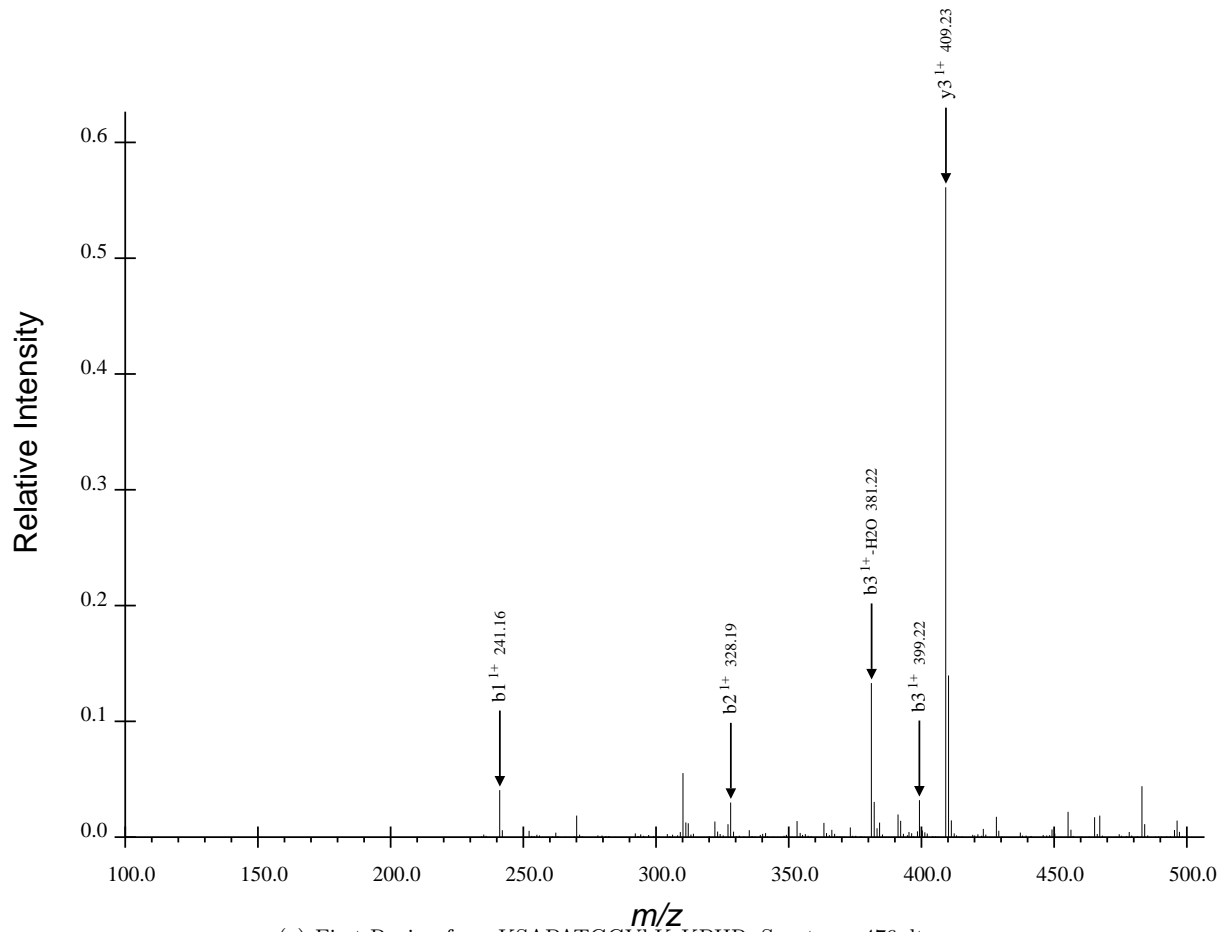

(a) First Region for rrKSAPATGGVhKrKPHR, Spectrum 476.dta

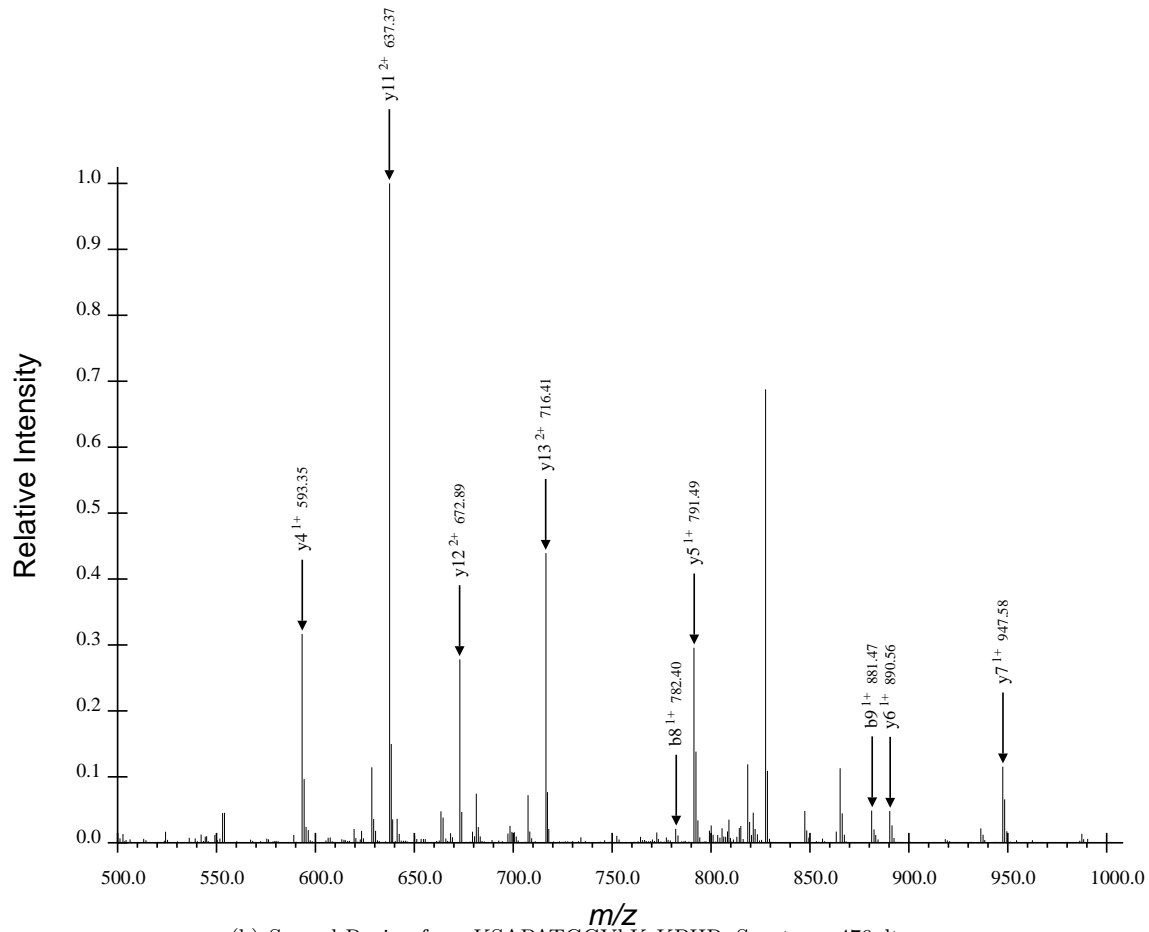

(b) Second Region for rrKSAPATGGVhKrKPHR, Spectrum 476.dta



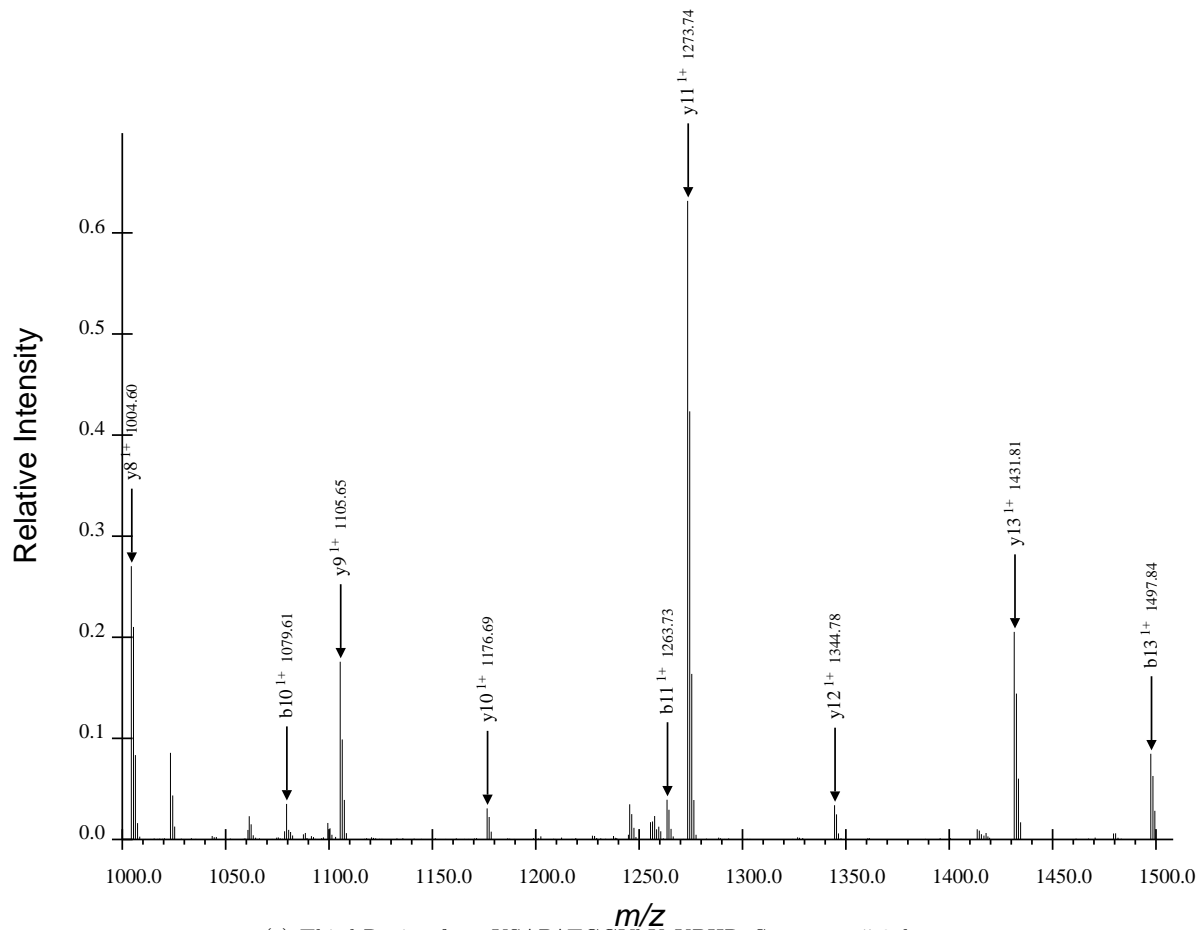

(c) Third Region for rrKSAPATGGVhKrKPHR, Spectrum 476.dta

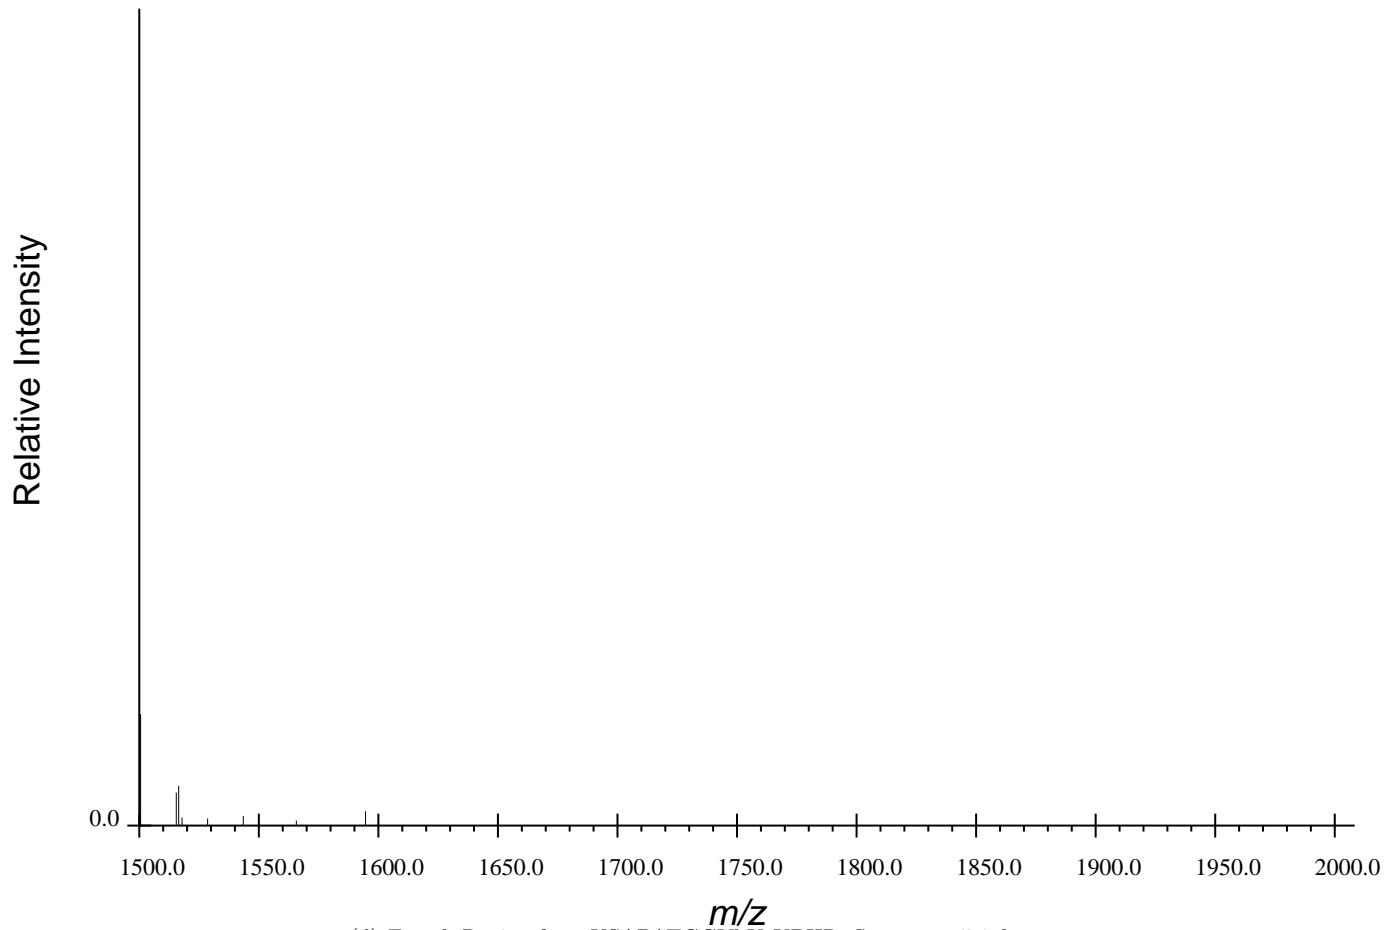

(d) Fourth Region for rrKSAPATGGVhKrKPHR, Spectrum 476.dta

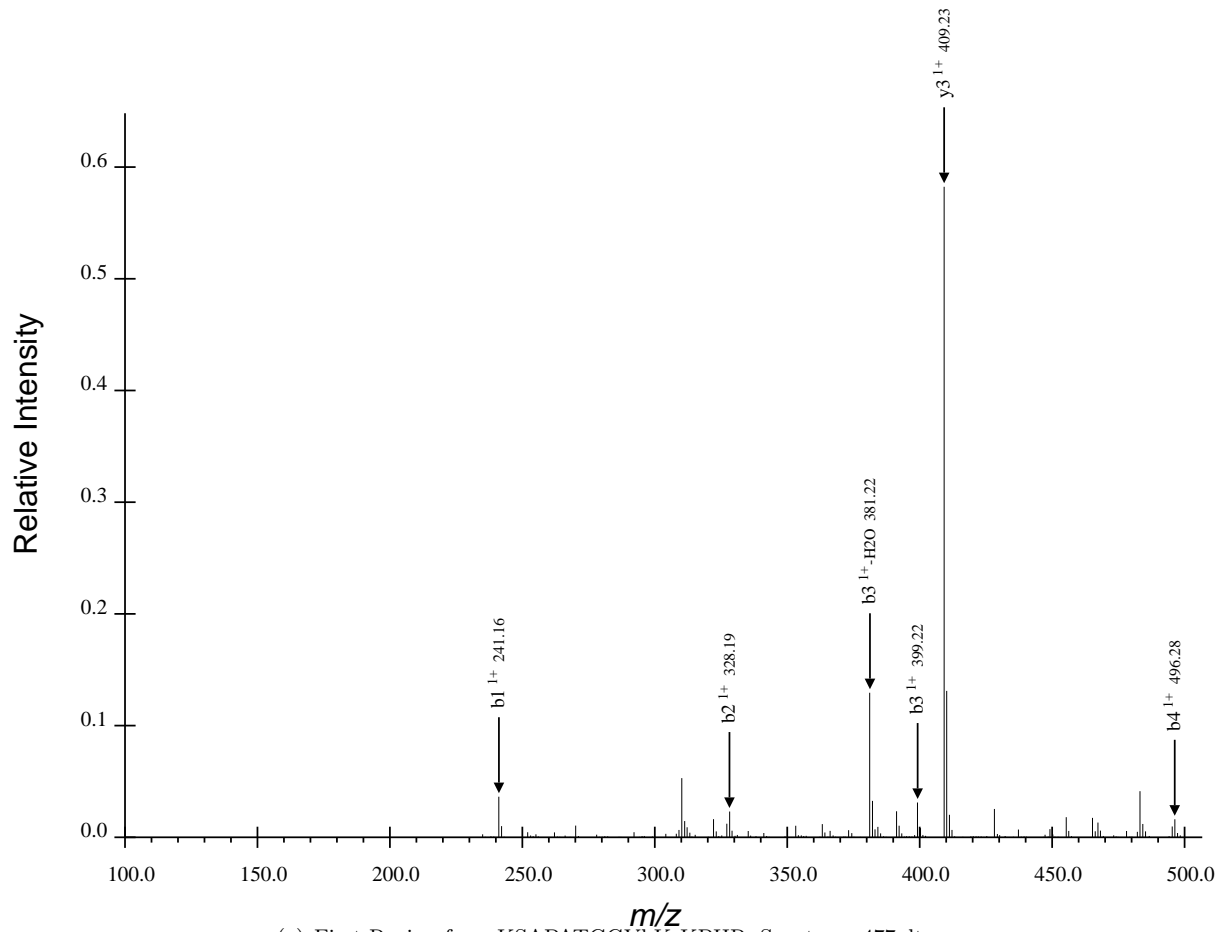

(a) First Region for rrKSAPATGGVhKrKPHR, Spectrum 477.dta

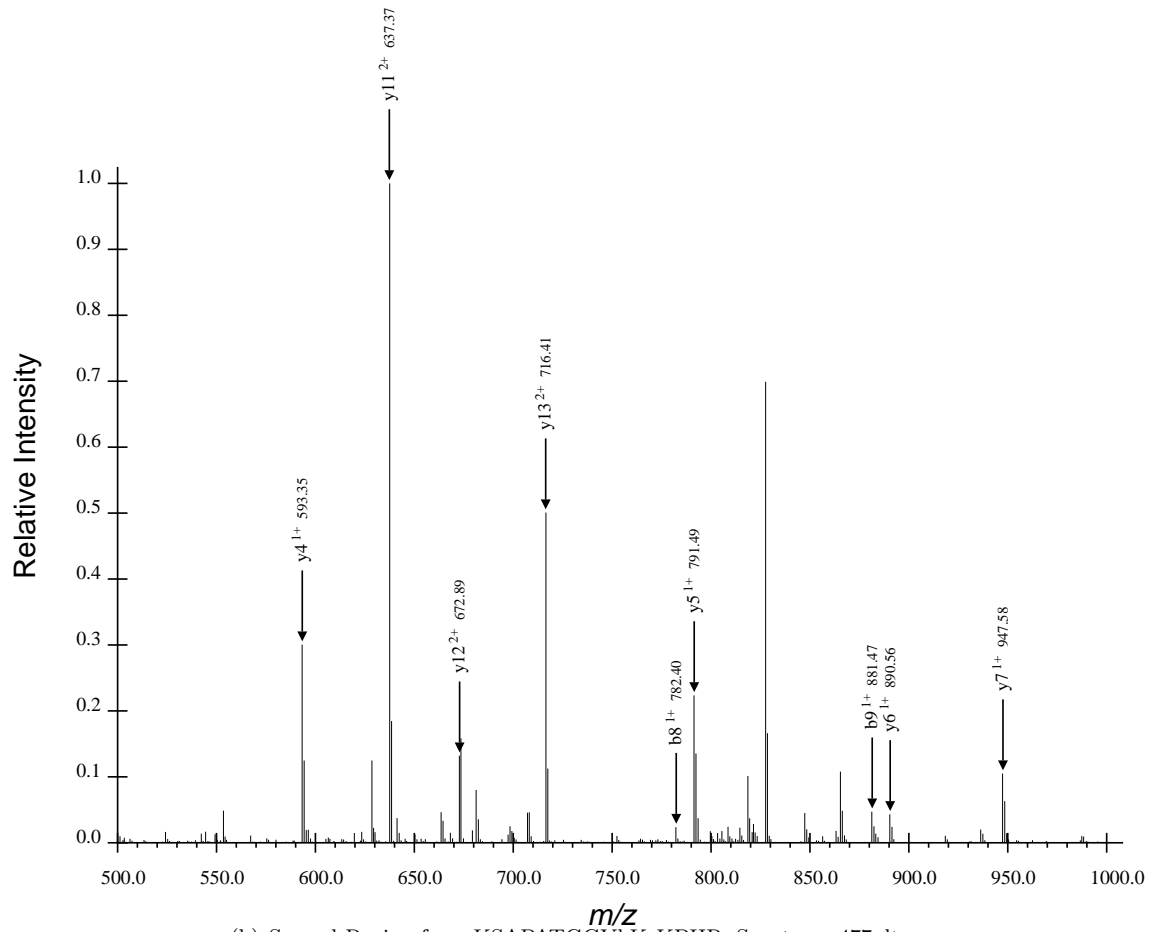

(b) Second Region for rrKSAPATGGVhKrKPHR, Spectrum 477.dta

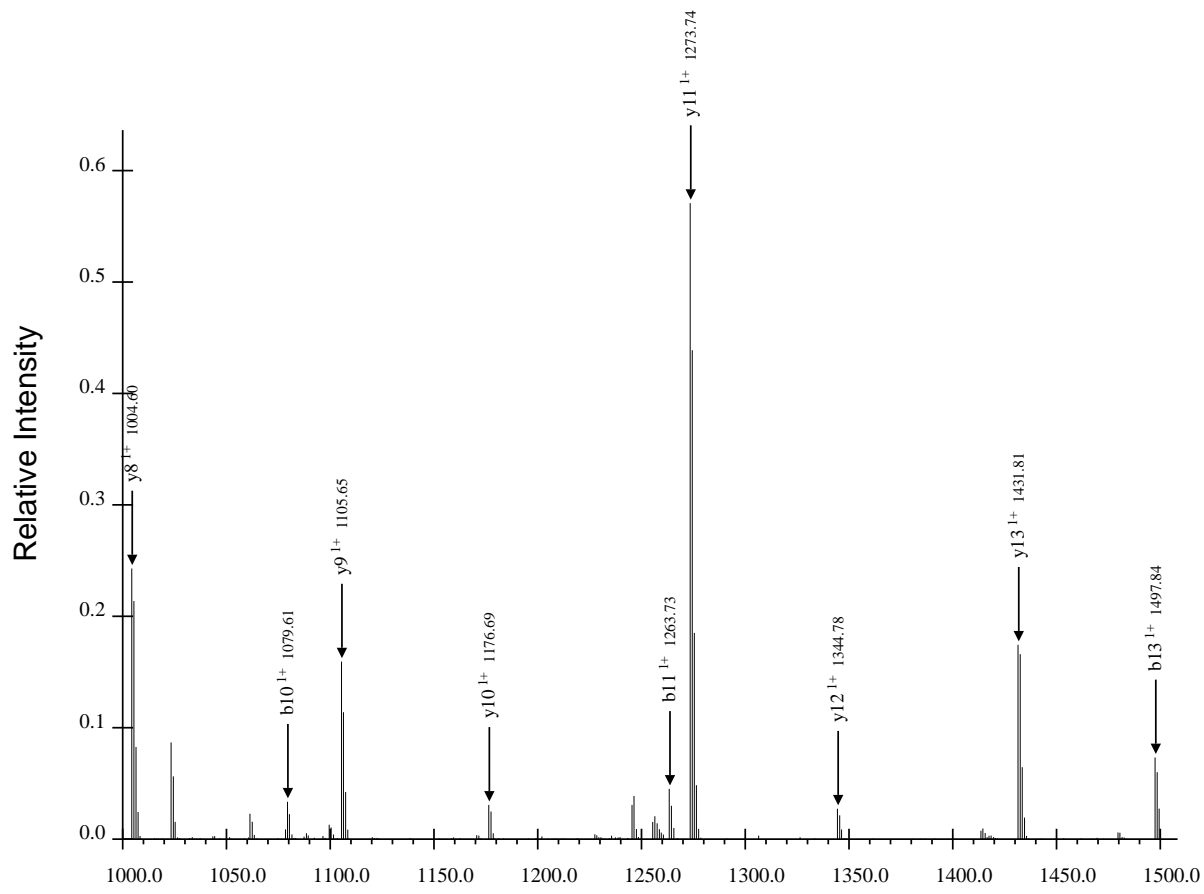

(c) Third Region for rrKSAPATGGVhKrKPHR, Spectrum 477.dta

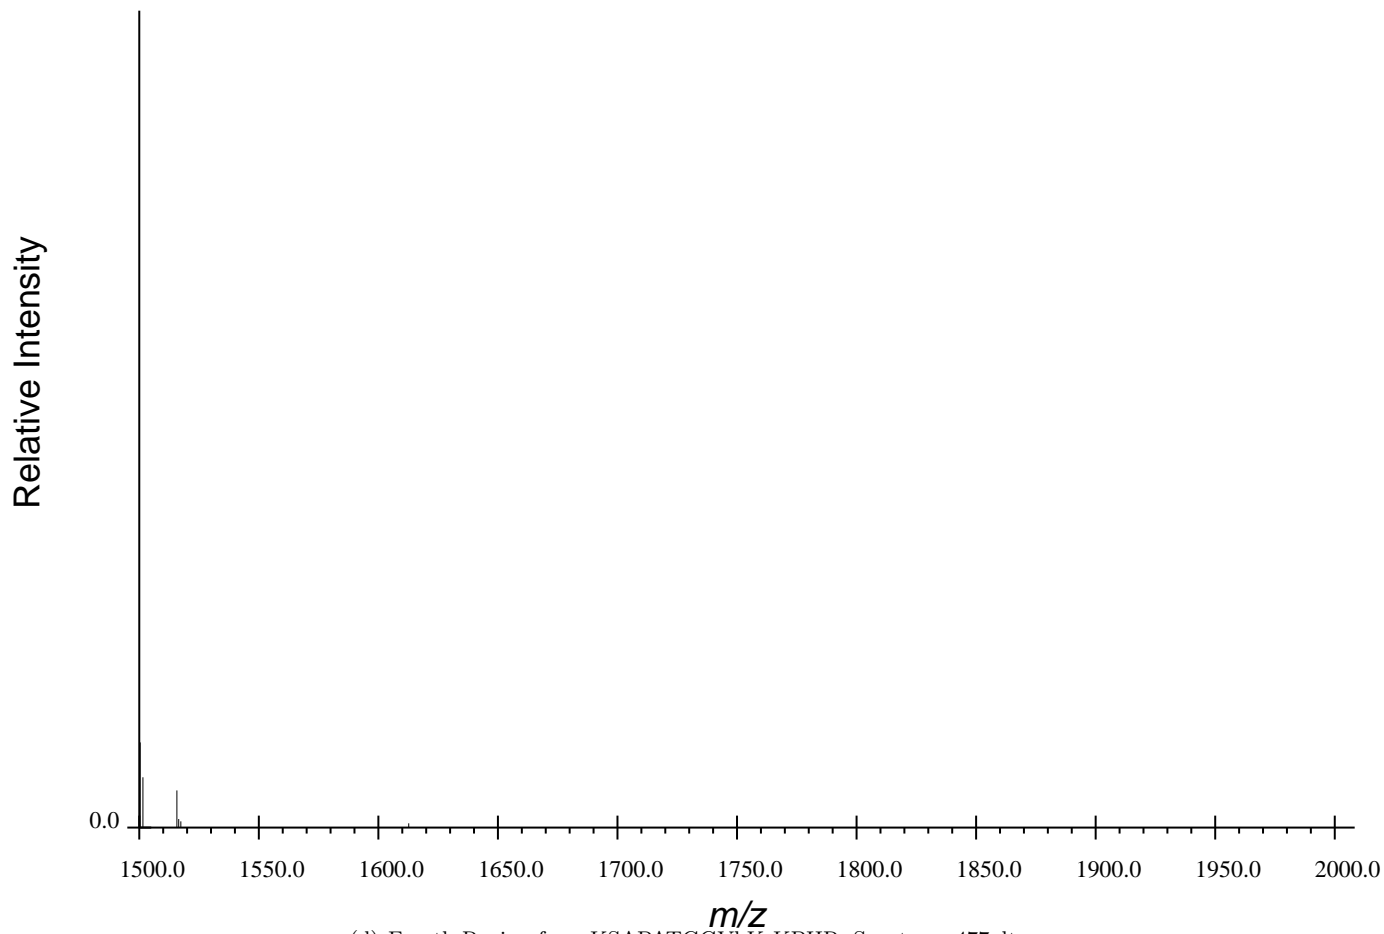

(d) Fourth Region for rrKSAPATGGVhKrKPHR, Spectrum 477.dta

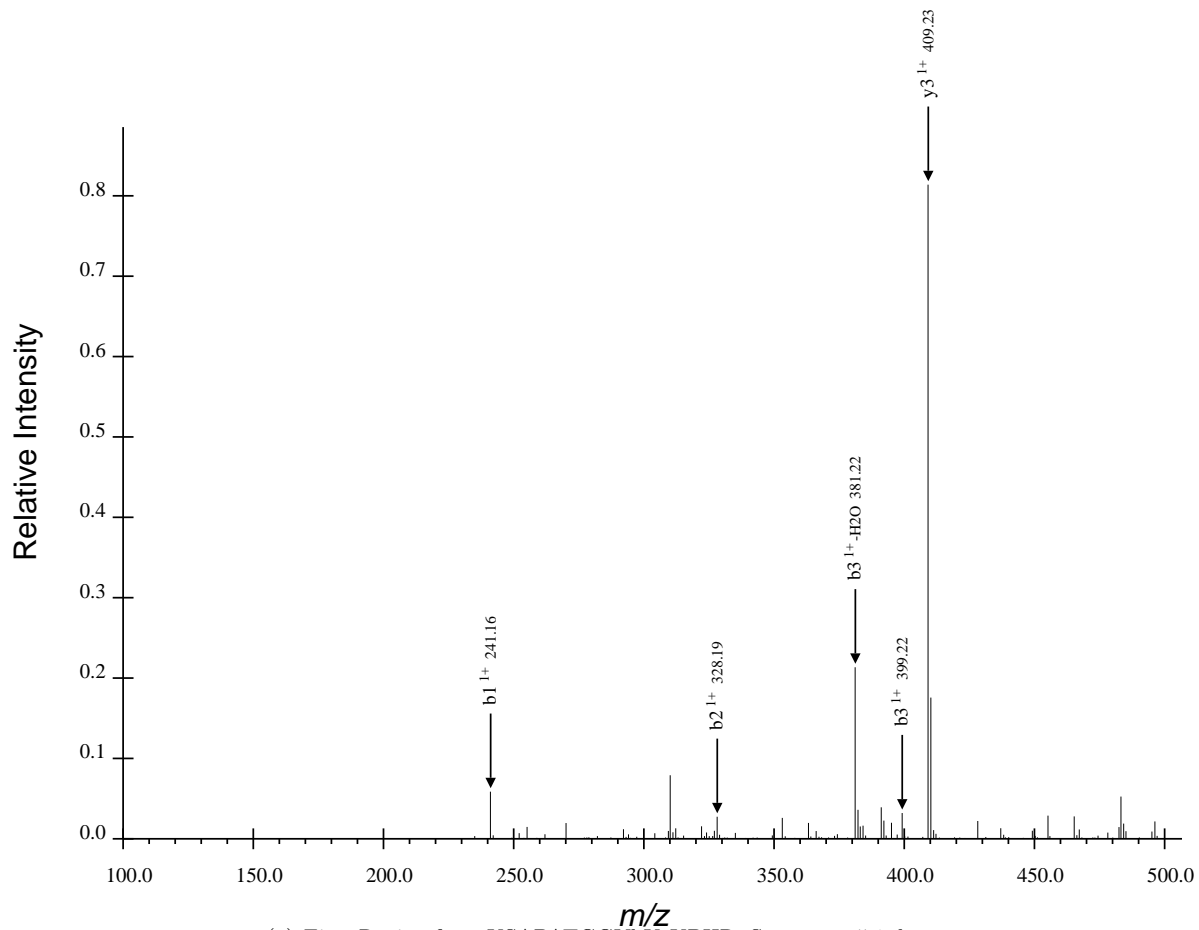

(a) First Region for rrKSAPATGGVhKrKPHR, Spectrum 478.dta

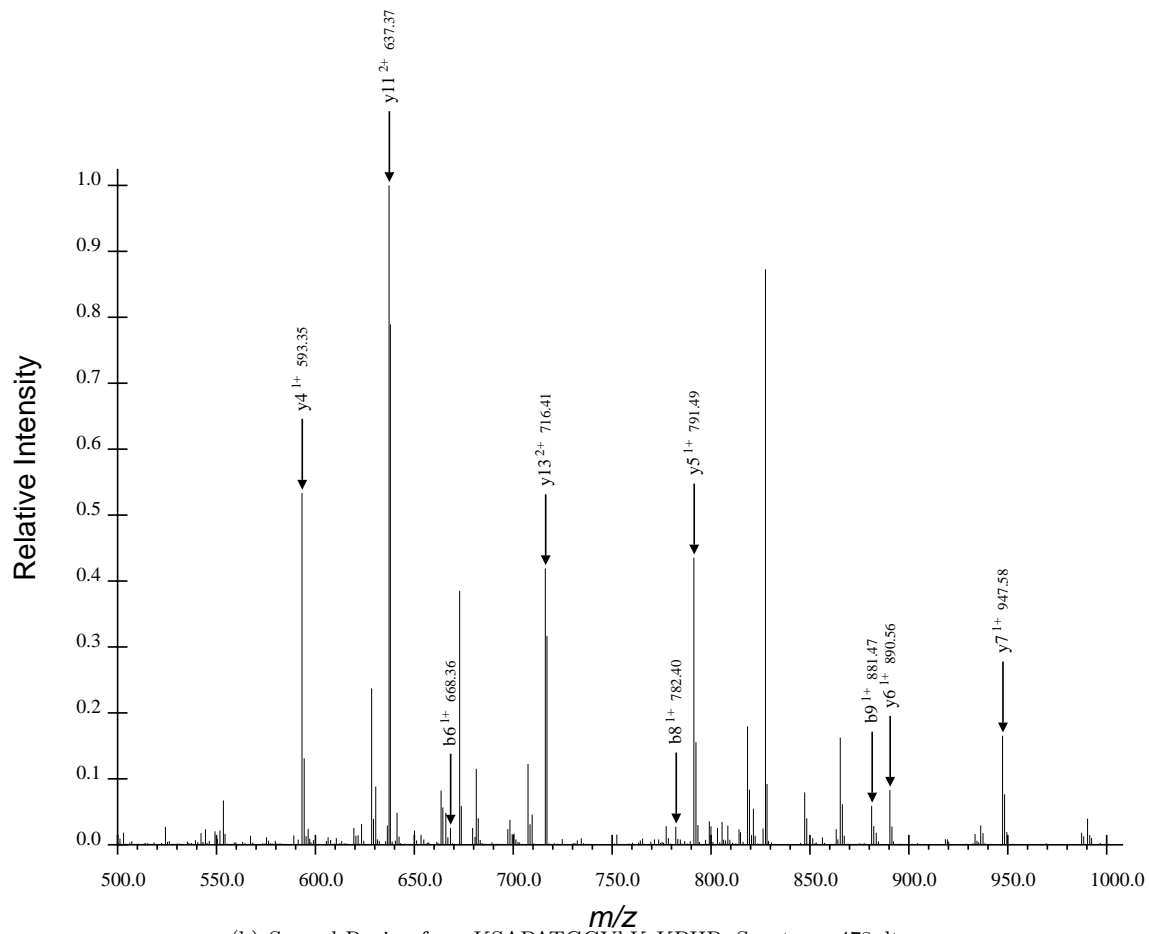

(b) Second Region for rrKSAPATGGVhKrKPHR, Spectrum 478.dta

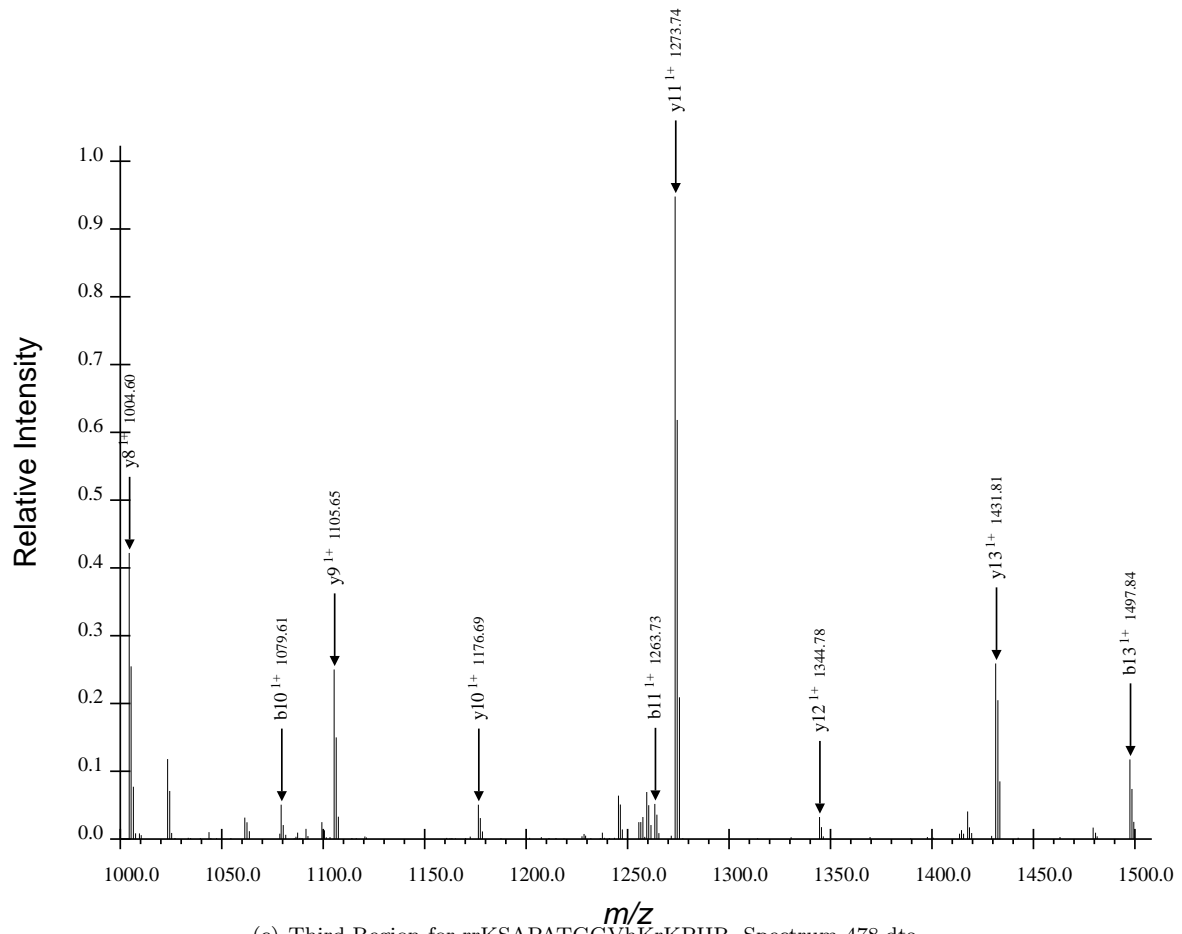

(c) Third Region for rrKSAPATGGVhKrKPHR, Spectrum 478.dta

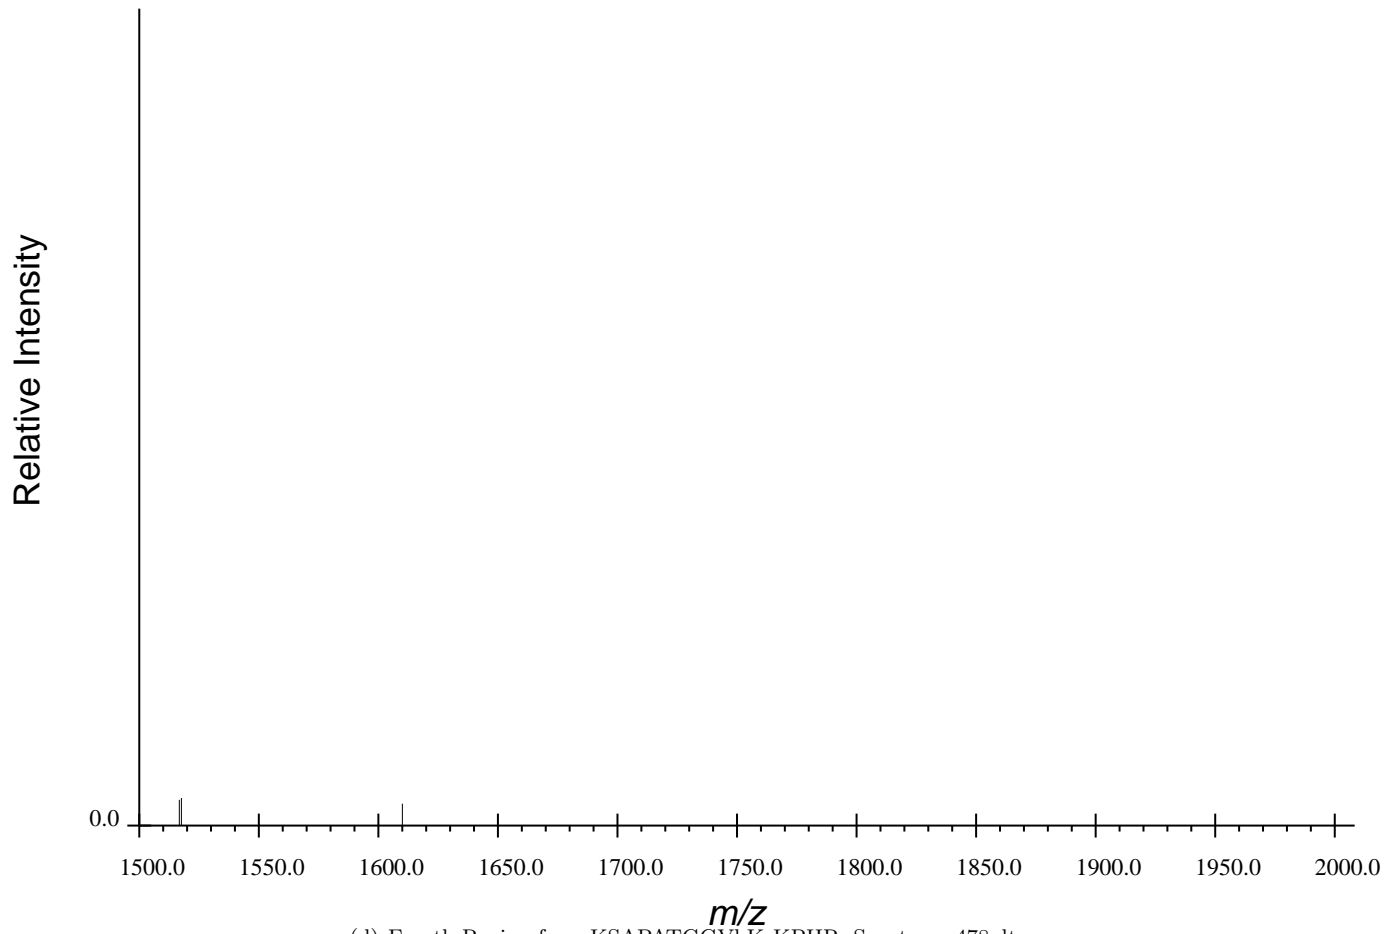

(d) Fourth Region for rrKSAPATGGVhKrKPHR, Spectrum 478.dta

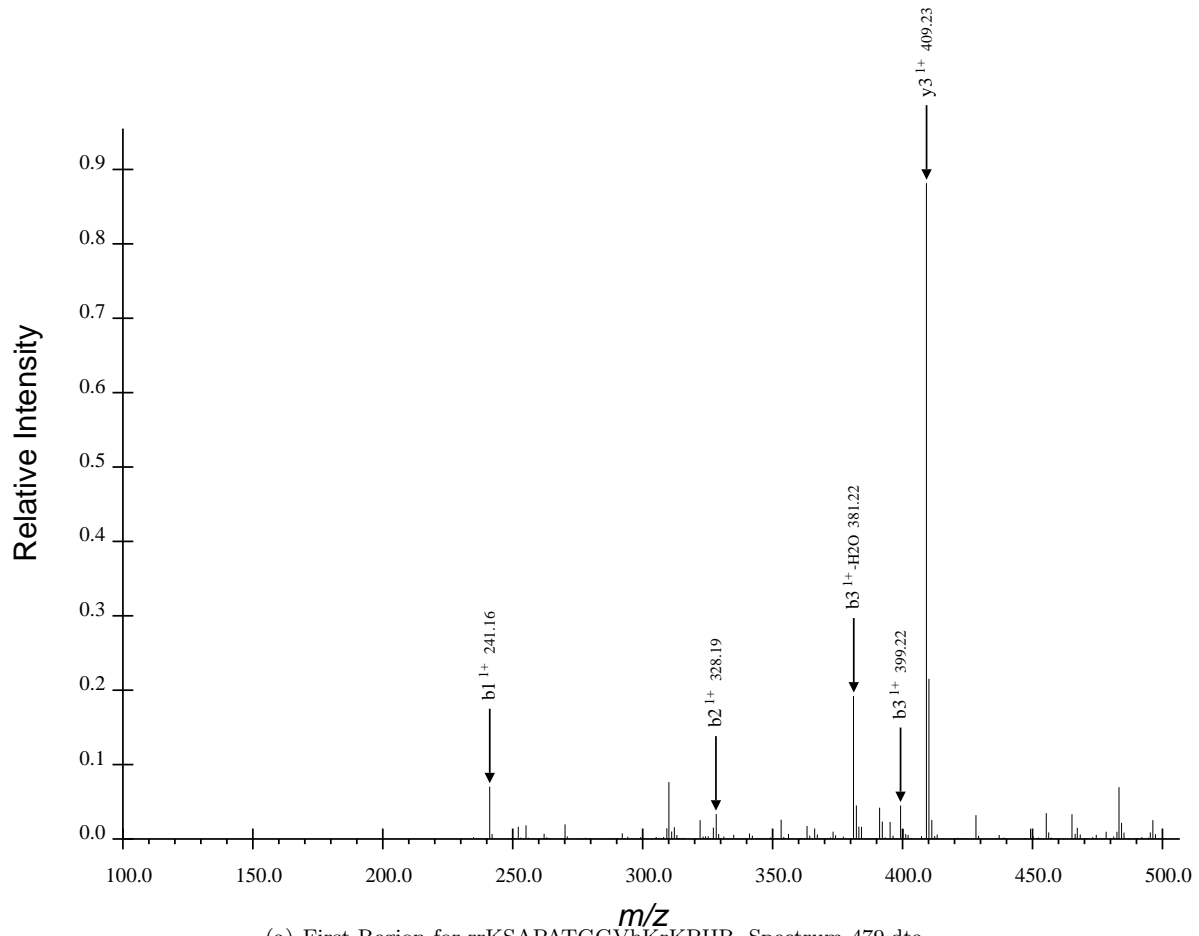

(a) First Region for rrKSAPATGGVhKrKPHR, Spectrum 479.dta

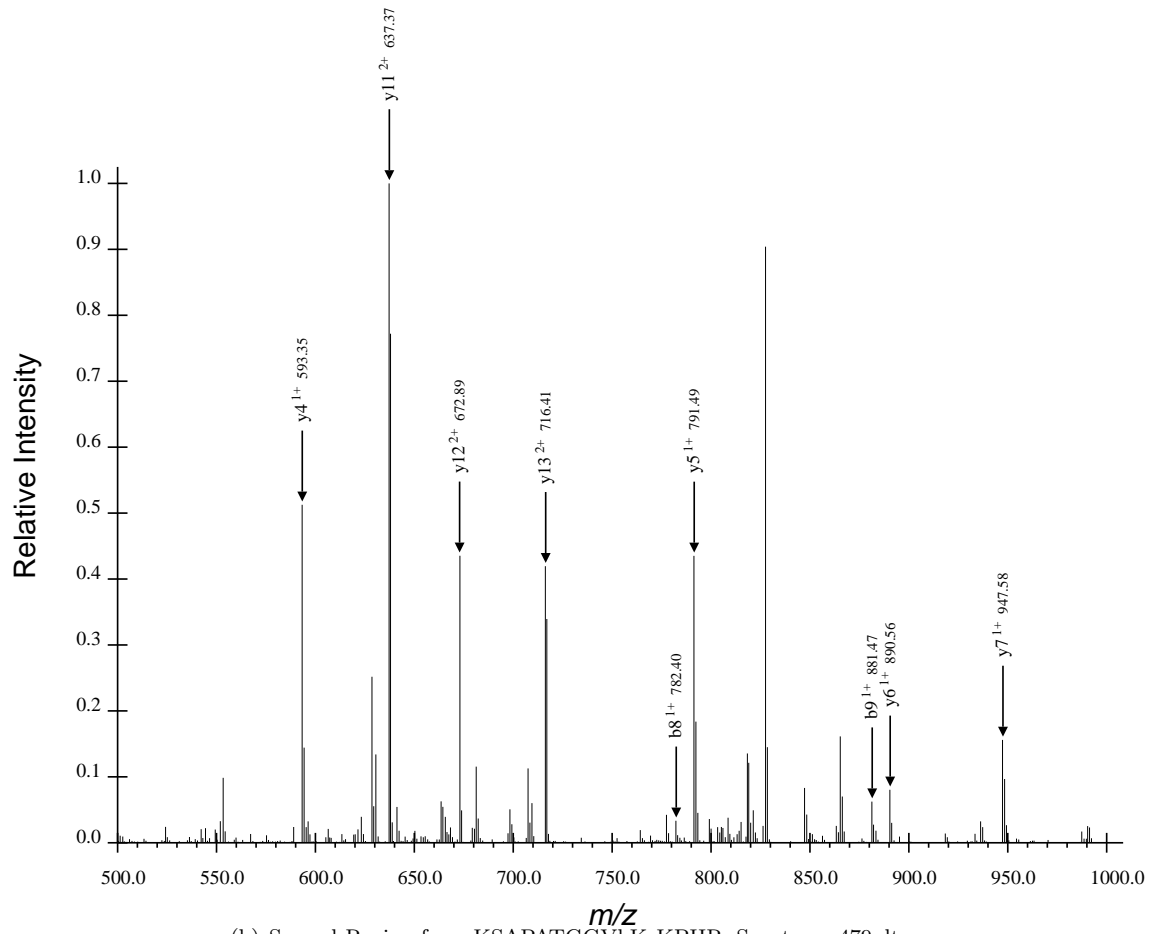

(b) Second Region for rrKSAPATGGVhKrKPHR, Spectrum 479.dta

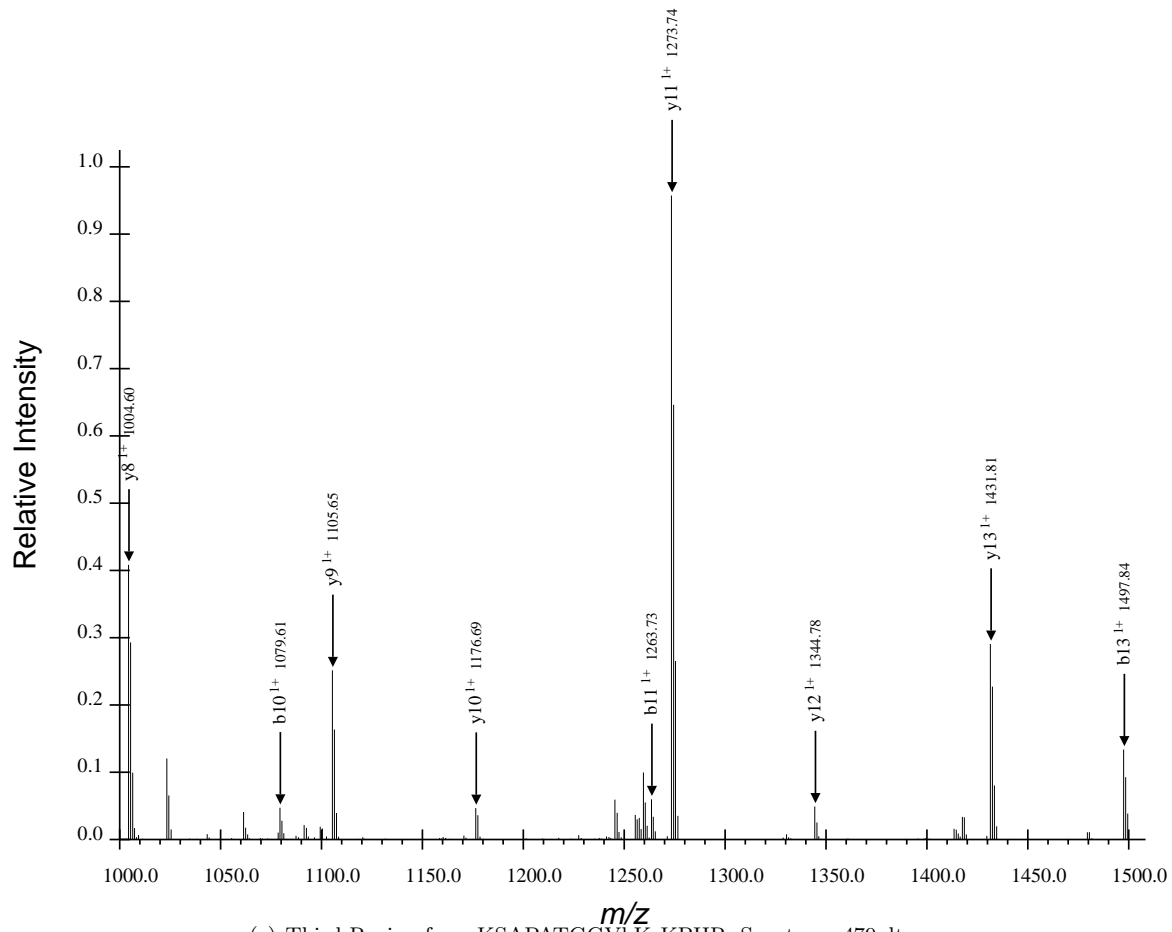

(c) Third Region for rrKSAPATGGVhKrKPHR, Spectrum 479.dta

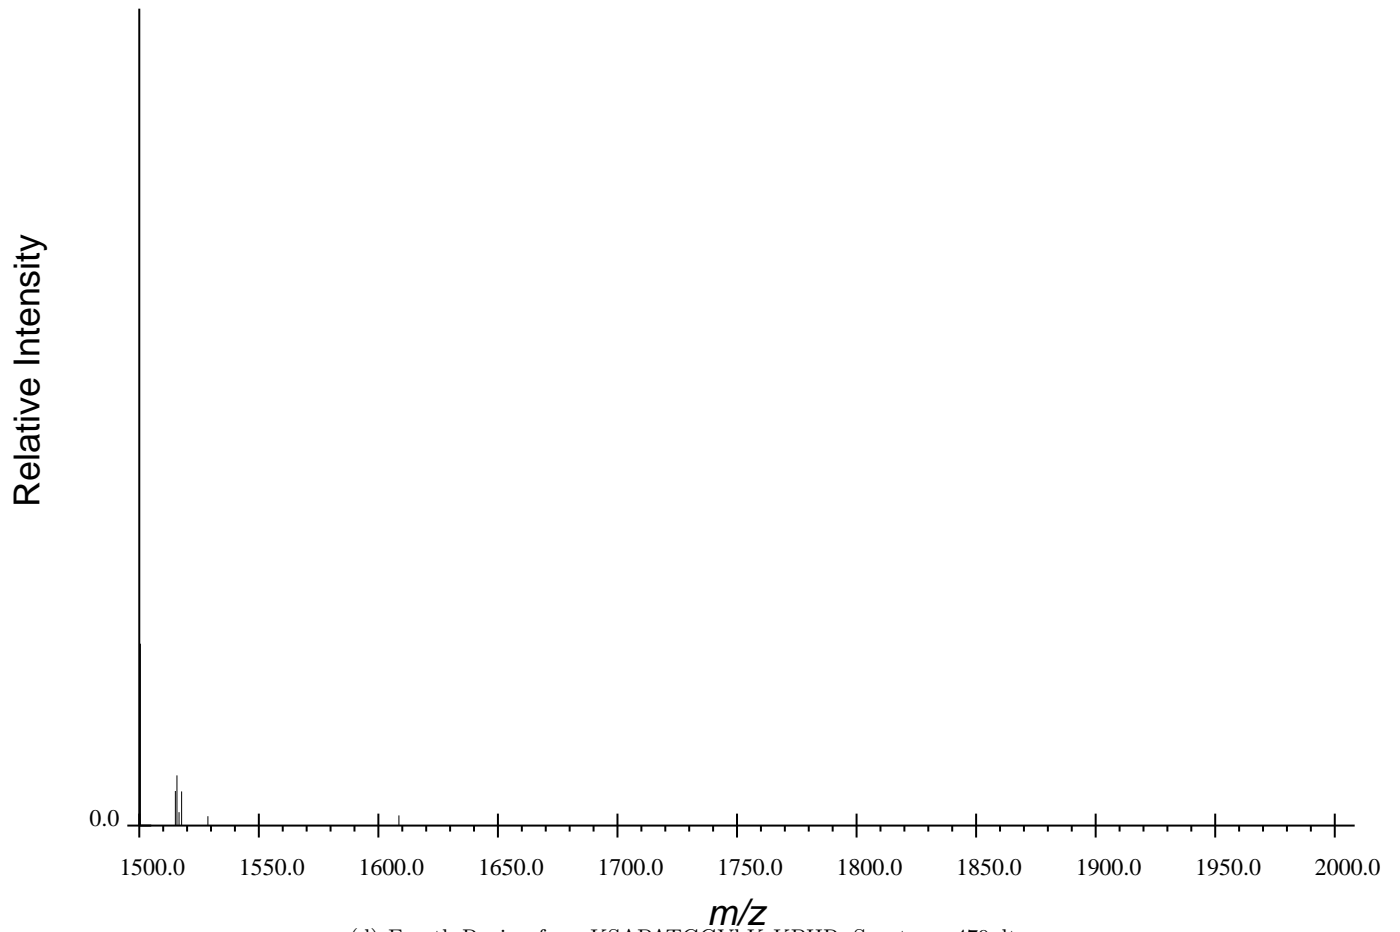

(d) Fourth Region for rrKSAPATGGVhKrKPHR, Spectrum 479.dta

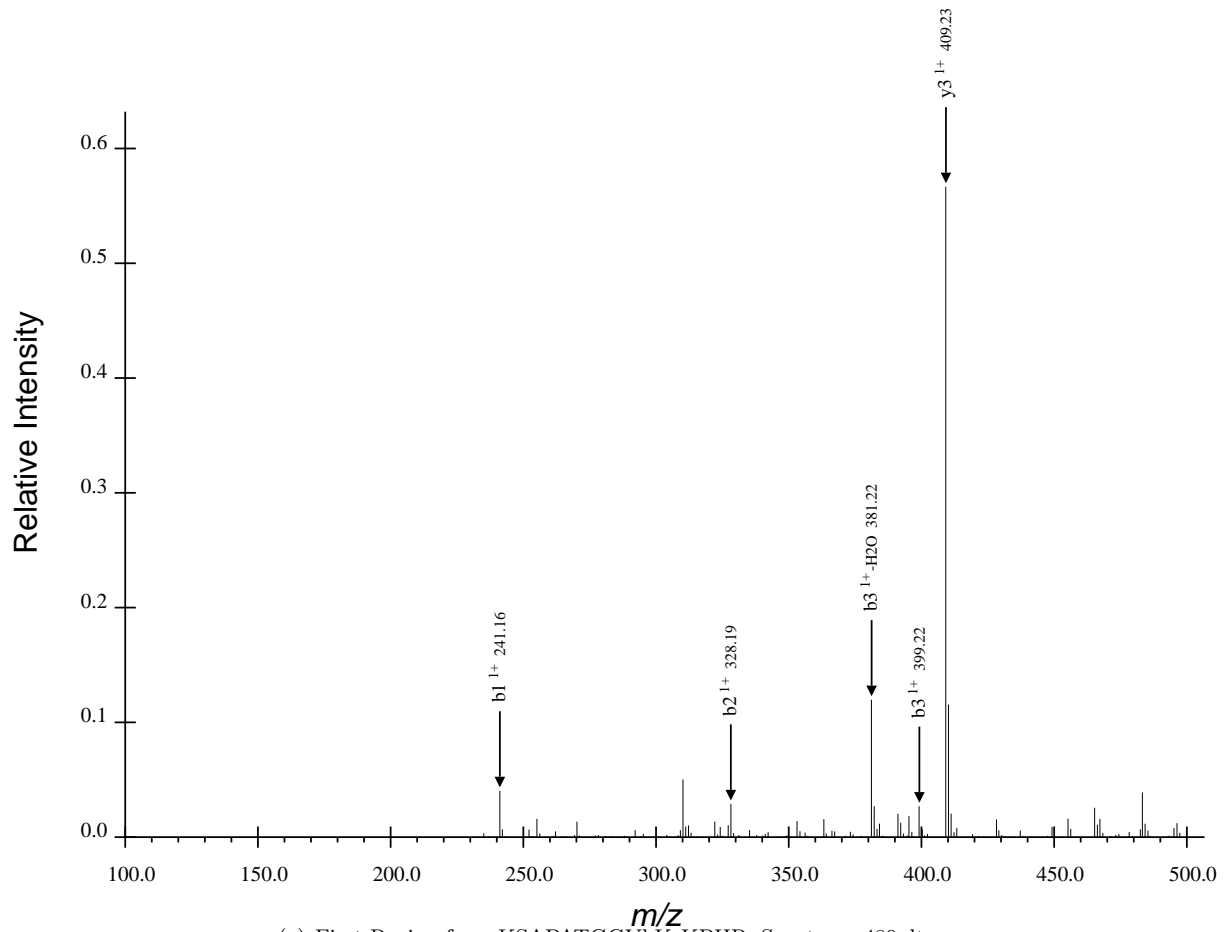

(a) First Region for rrKSAPATGGVhKrKPHR, Spectrum 480.dta

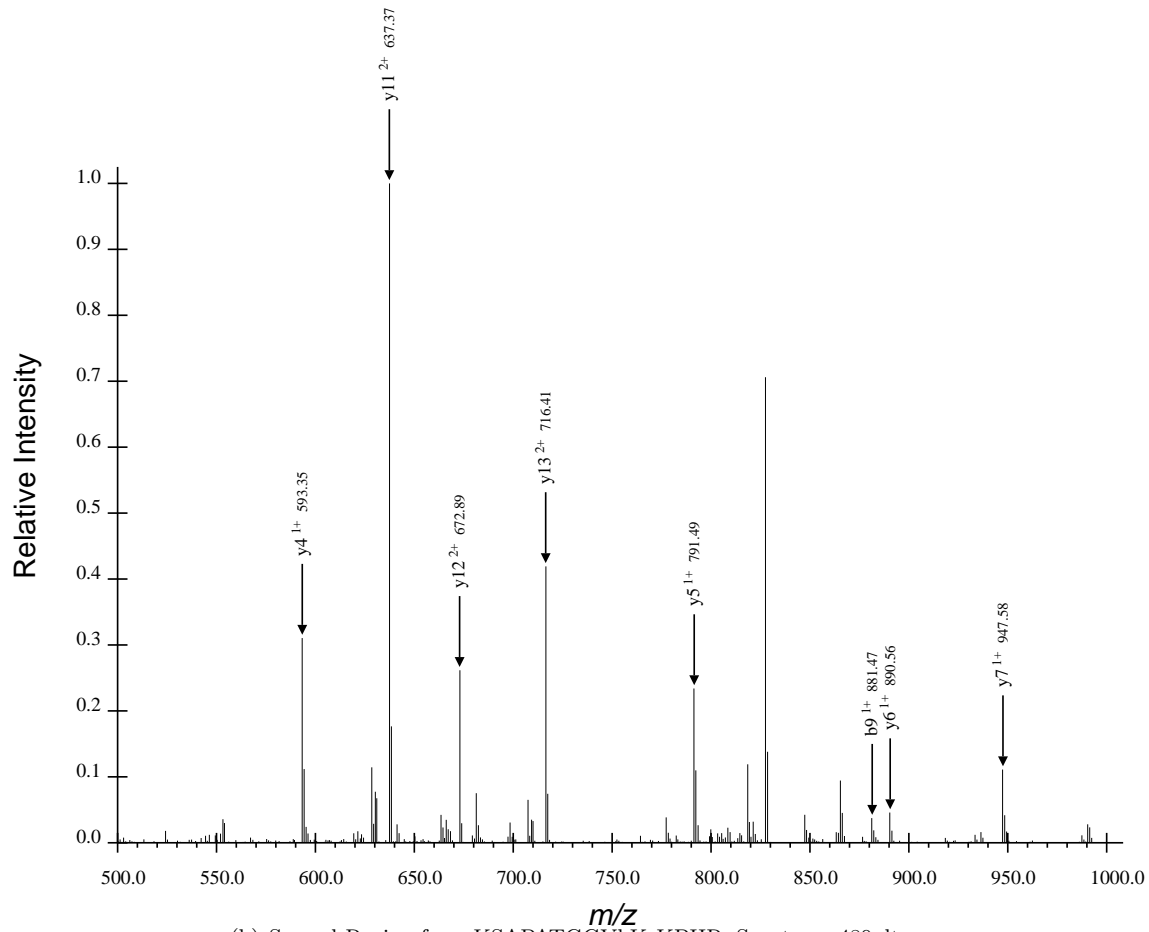

(b) Second Region for rrKSAPATGGVhKrKPHR, Spectrum 480.dta



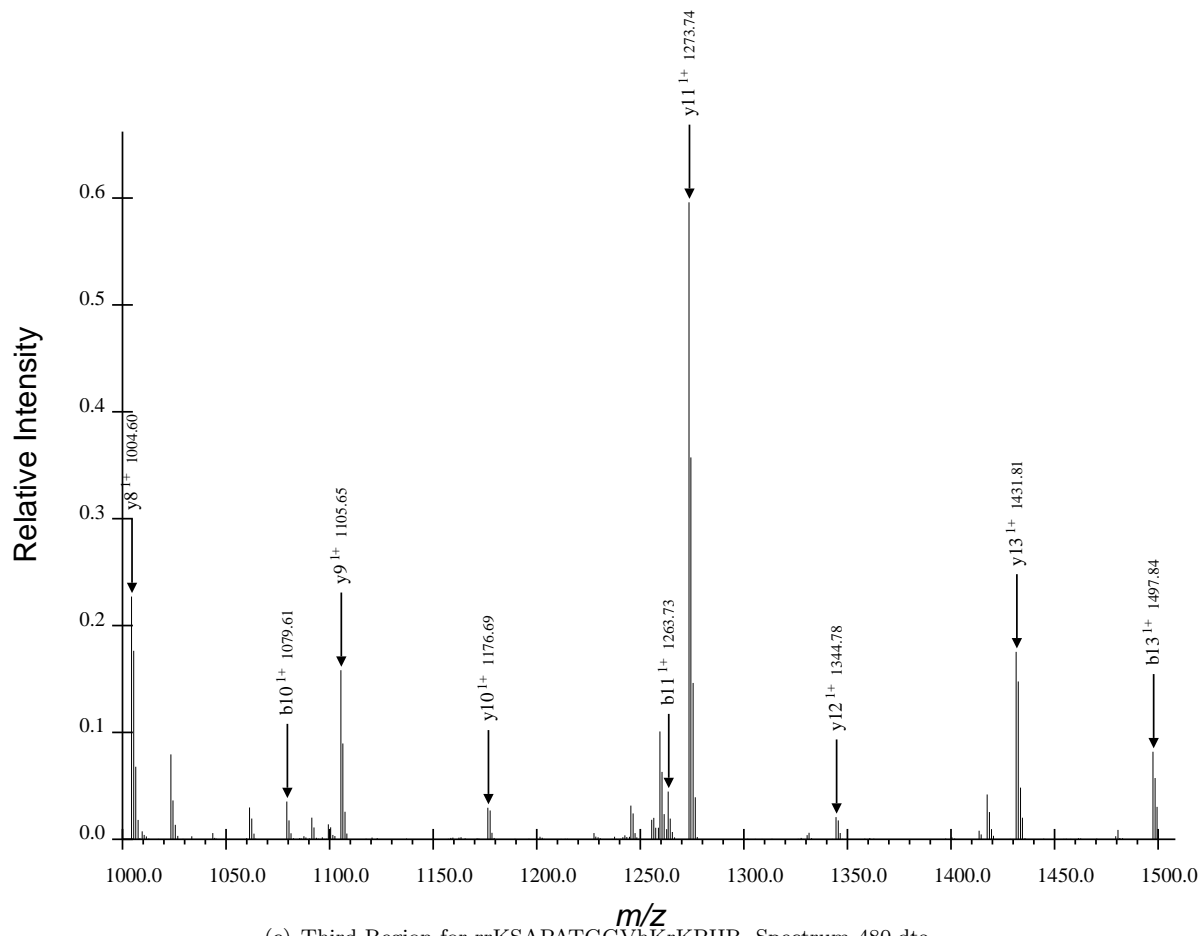

(c) Third Region for rrKSAPATGGVhKrKPHR, Spectrum 480.dta

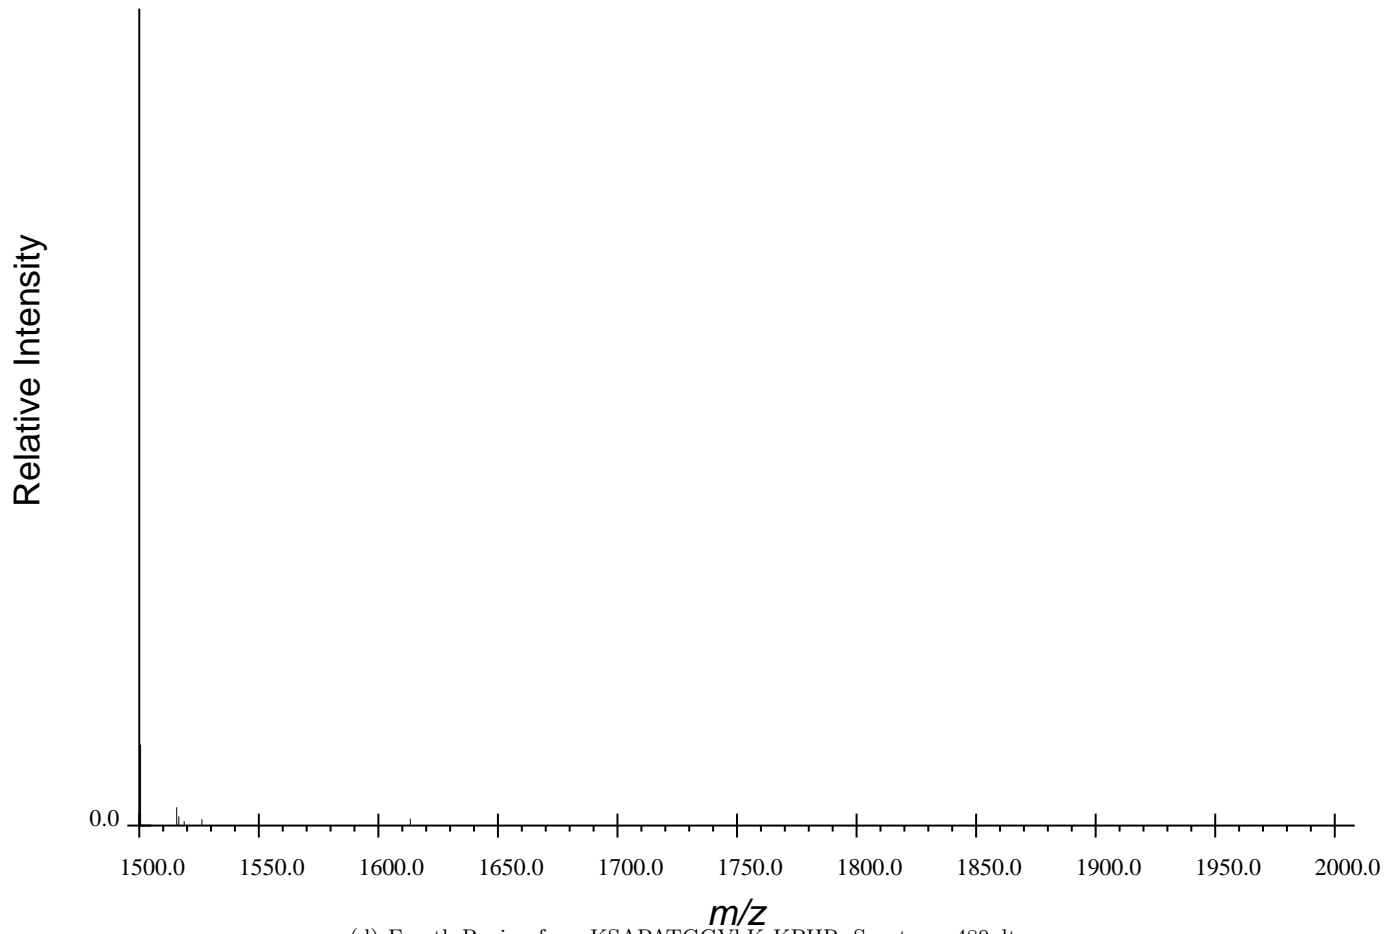

(d) Fourth Region for rrKSAPATGGVhKrKPHR, Spectrum 480.dta

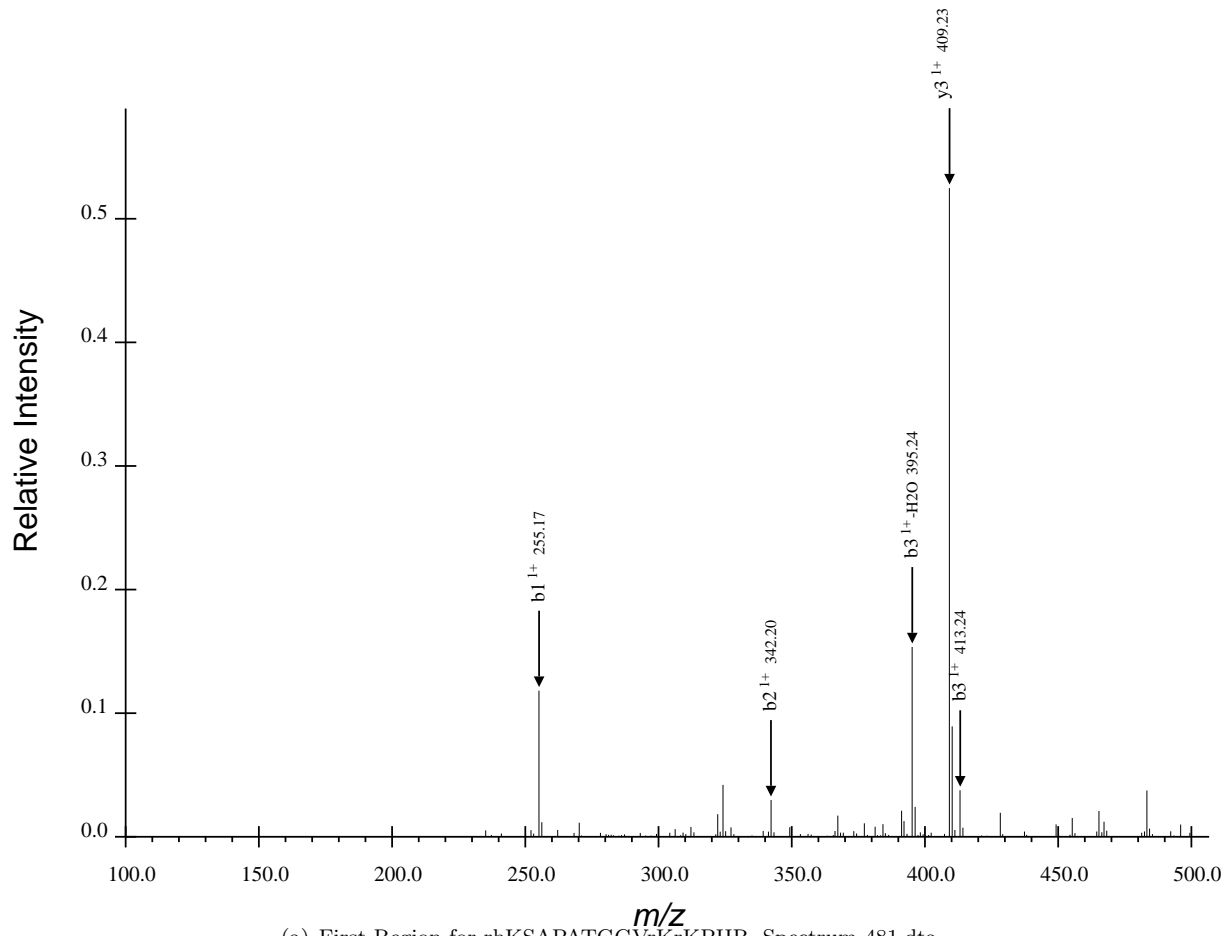

(a) First Region for rhKSAPATGGVrKrKPHR, Spectrum 481.dta

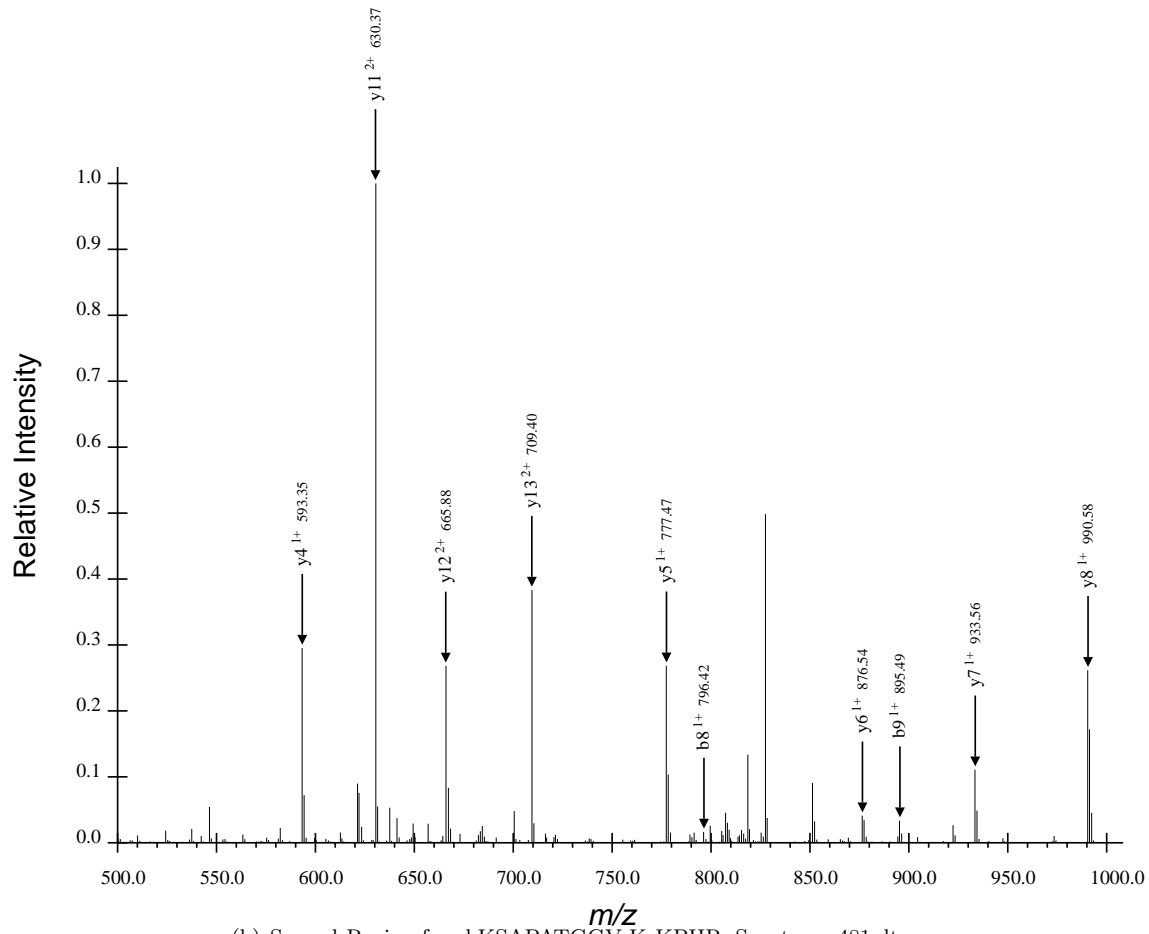

(b) Second Region for rhKSAPATGGVrKrKPHR, Spectrum 481.dta

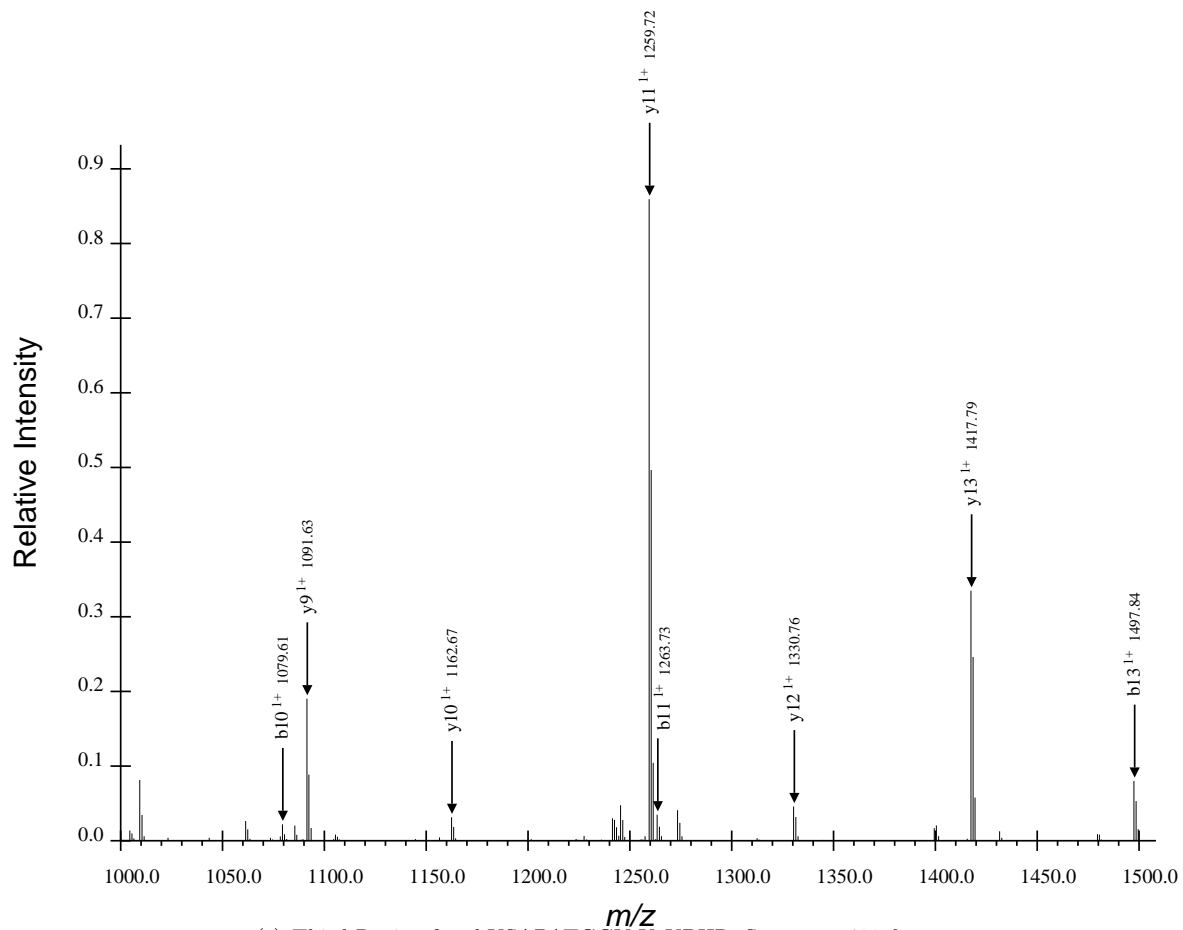

(c) Third Region for rhKSAPATGGVrKrKPHR, Spectrum 481.dta

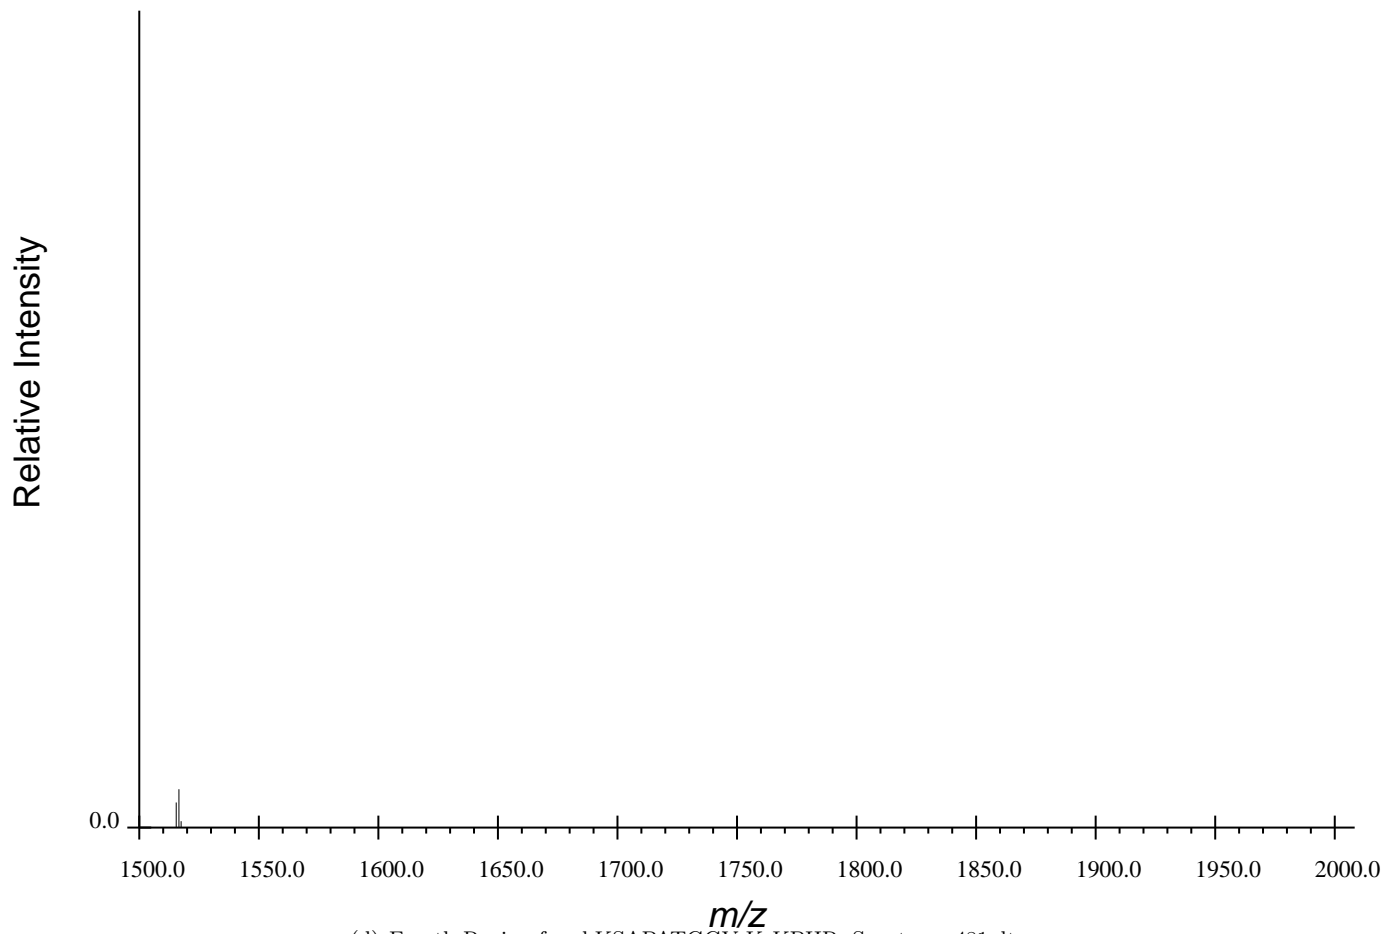

(d) Fourth Region for rhKSAPATGGVrKrKPHR, Spectrum 481.dta

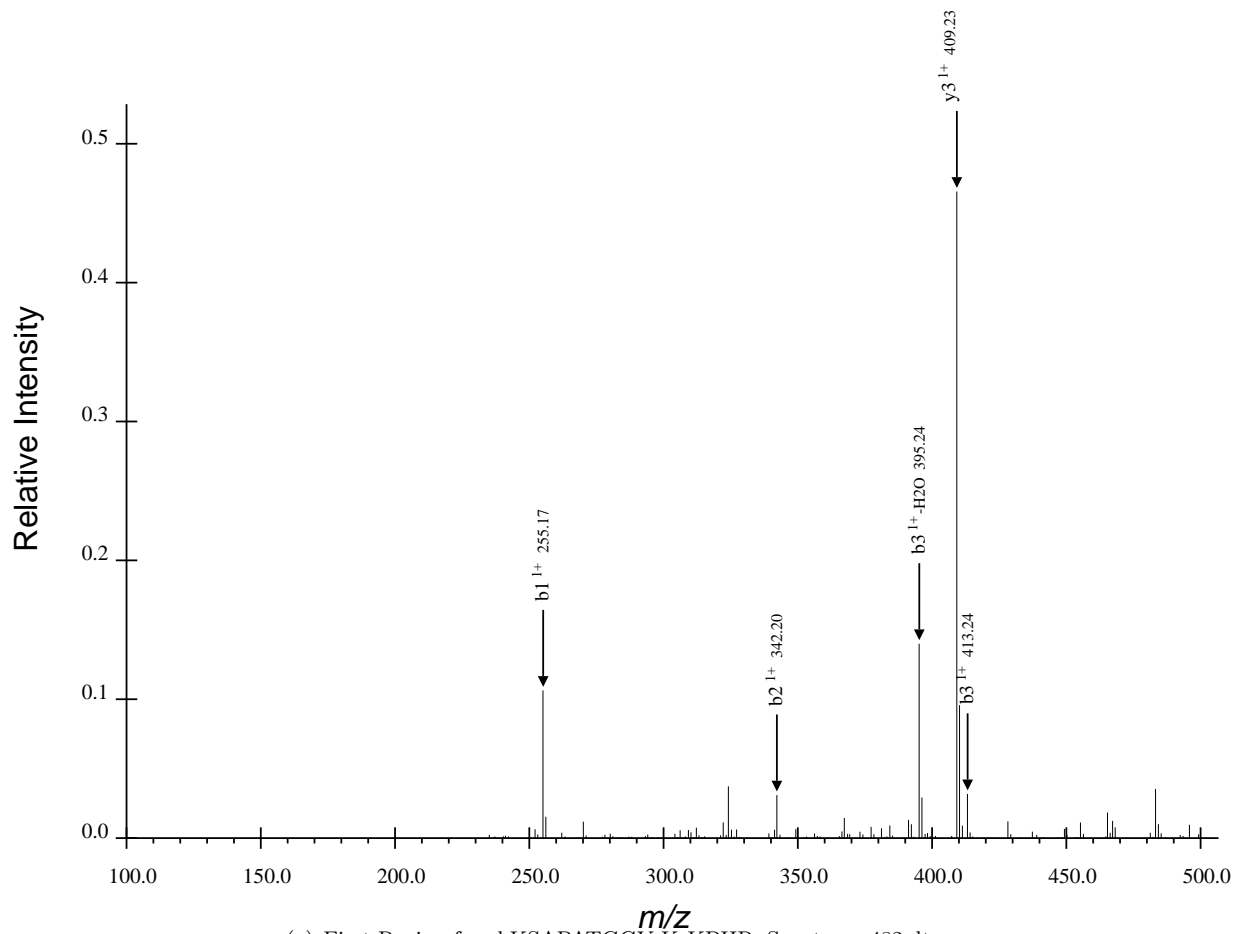

(a) First Region for rhKSAPATGGVrKrKPHR, Spectrum 482.dta

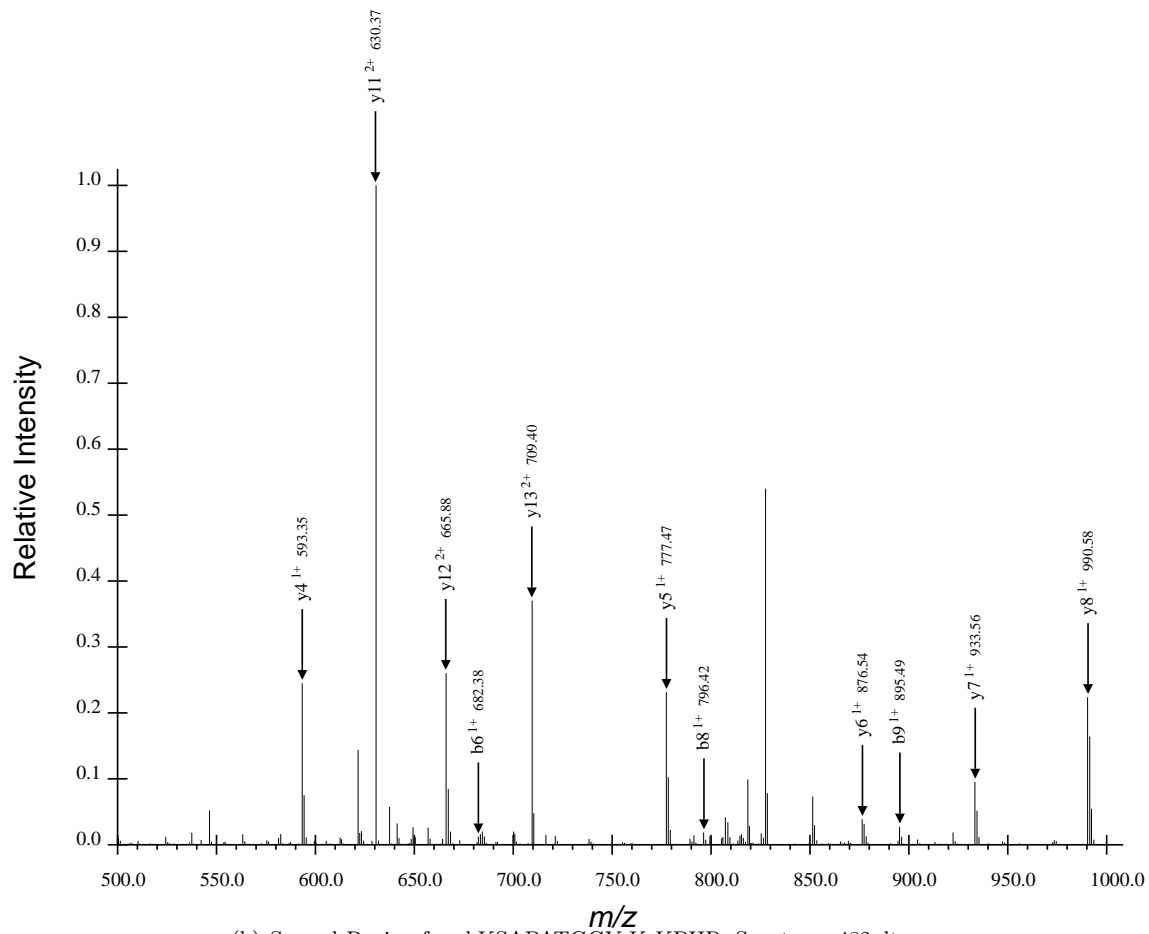

(b) Second Region for rhKSAPATGGVrKrKPHR, Spectrum 482.dta

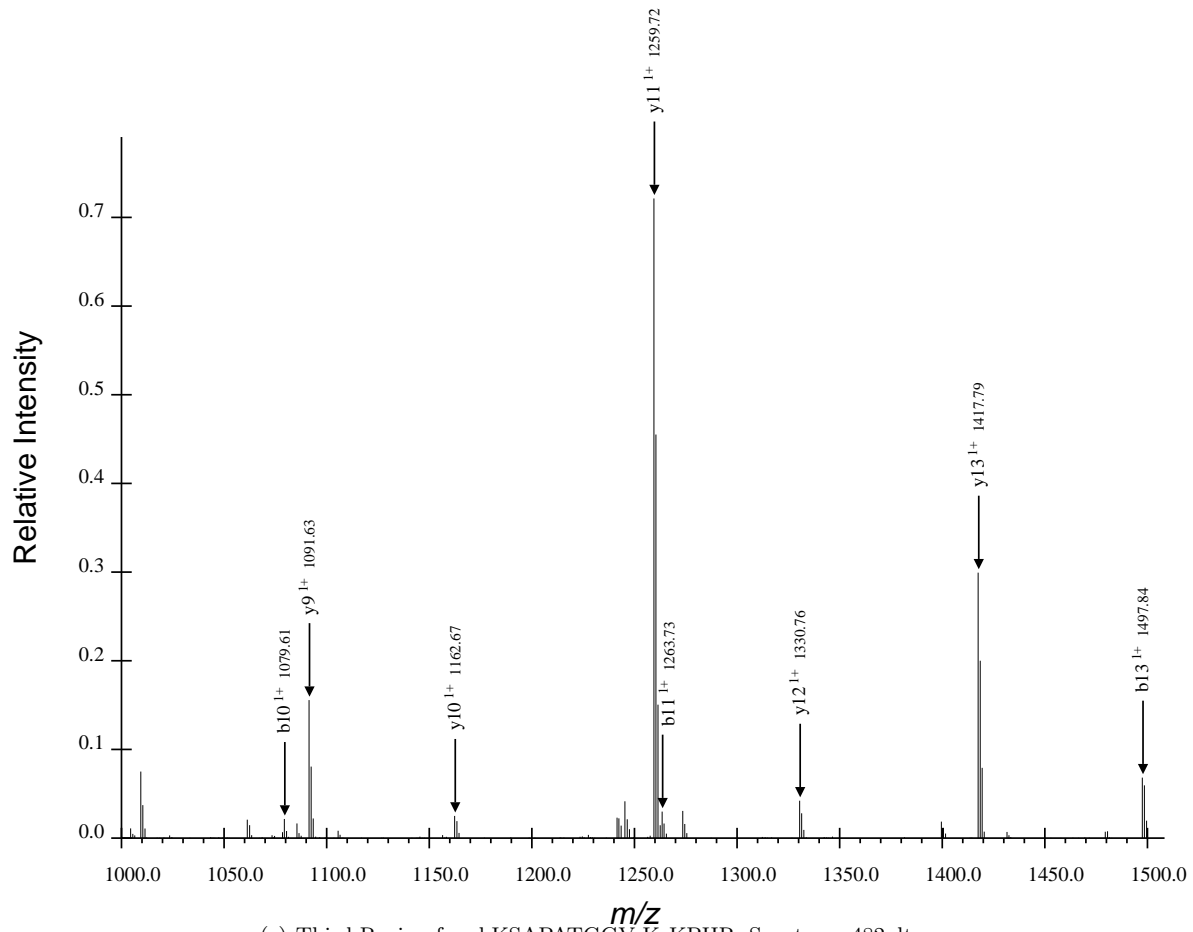

(c) Third Region for rhKSAPATGGVrKrKPHR, Spectrum 482.dta

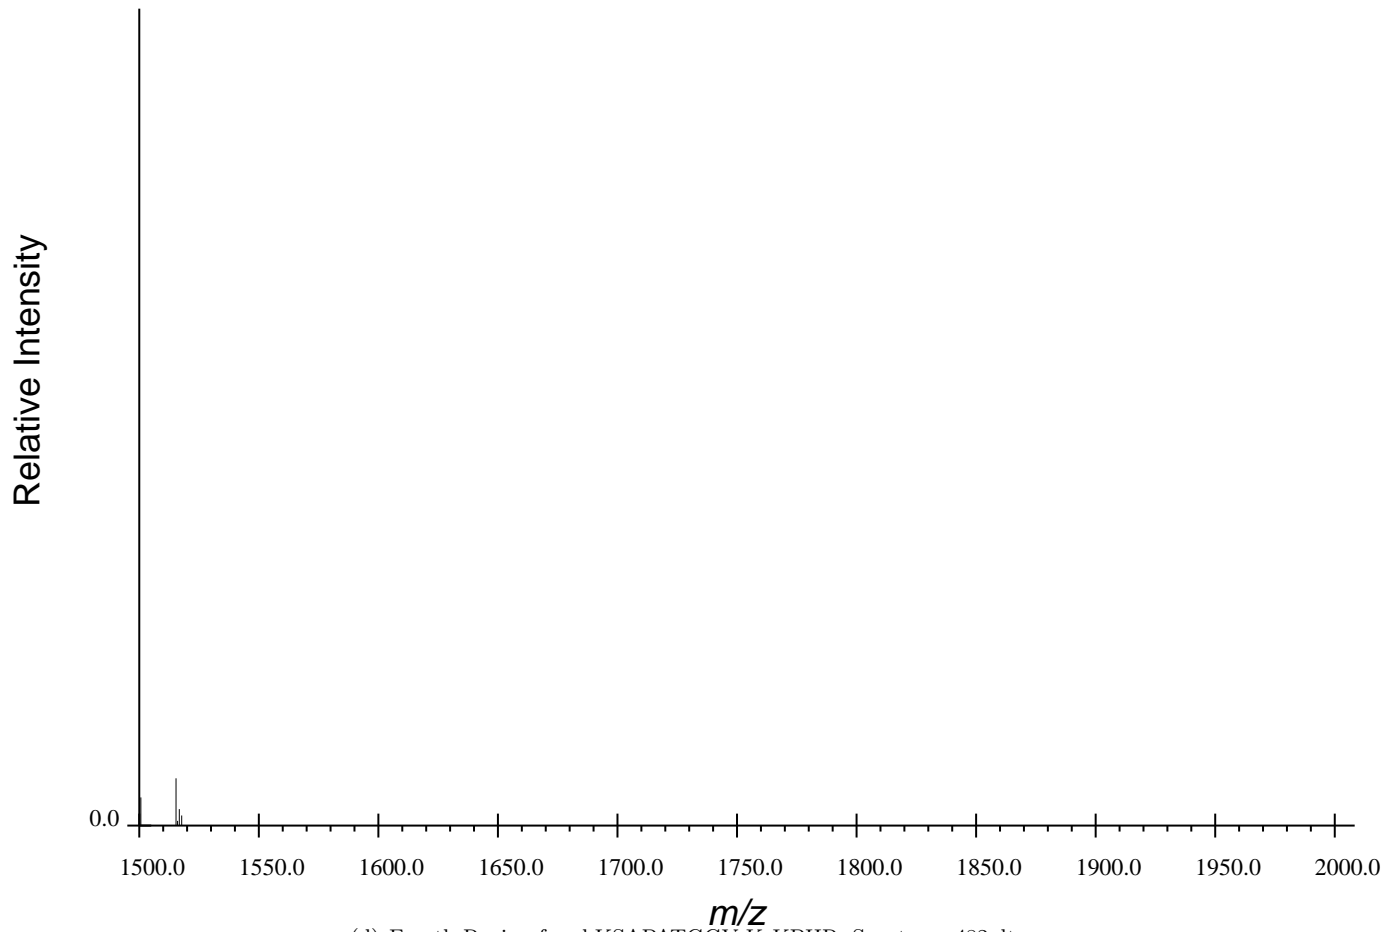

(d) Fourth Region for rhKSAPATGGVrKrKPHR, Spectrum 482.dta

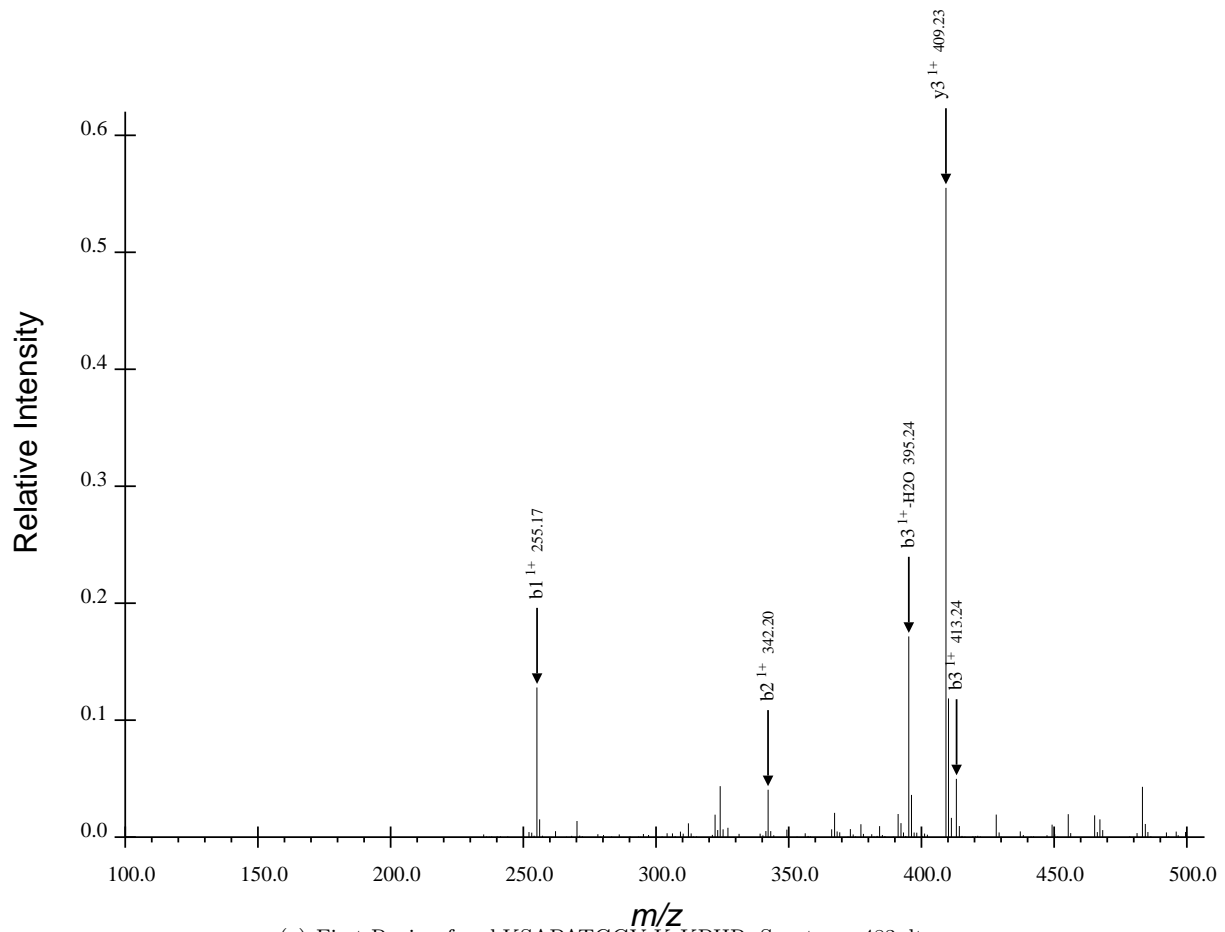

(a) First Region for rhKSAPATGGVrKrKPHR, Spectrum 483.dta

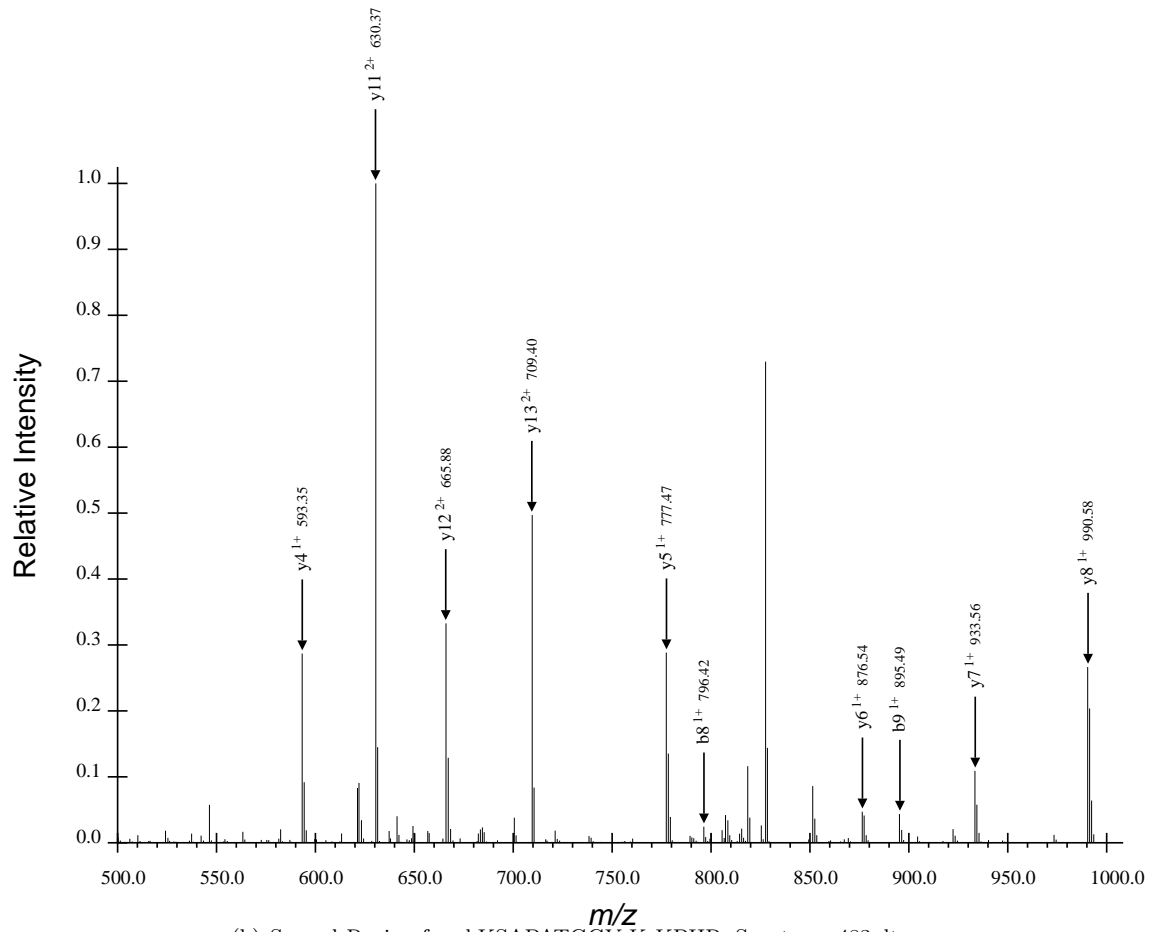

(b) Second Region for rhKSAPATGGVrKrKPHR, Spectrum 483.dta

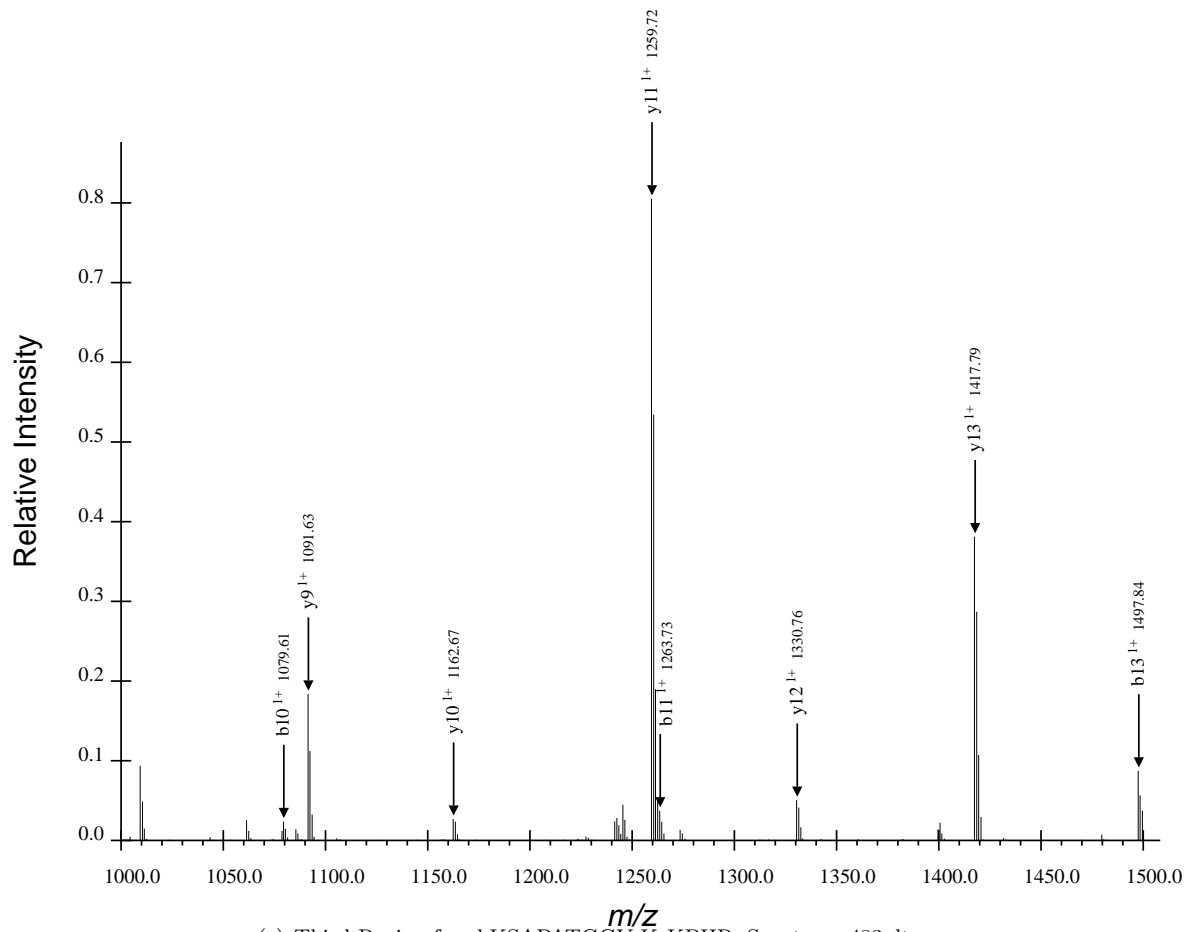

(c) Third Region for rhKSAPATGGVrKrKPHR, Spectrum 483.dta

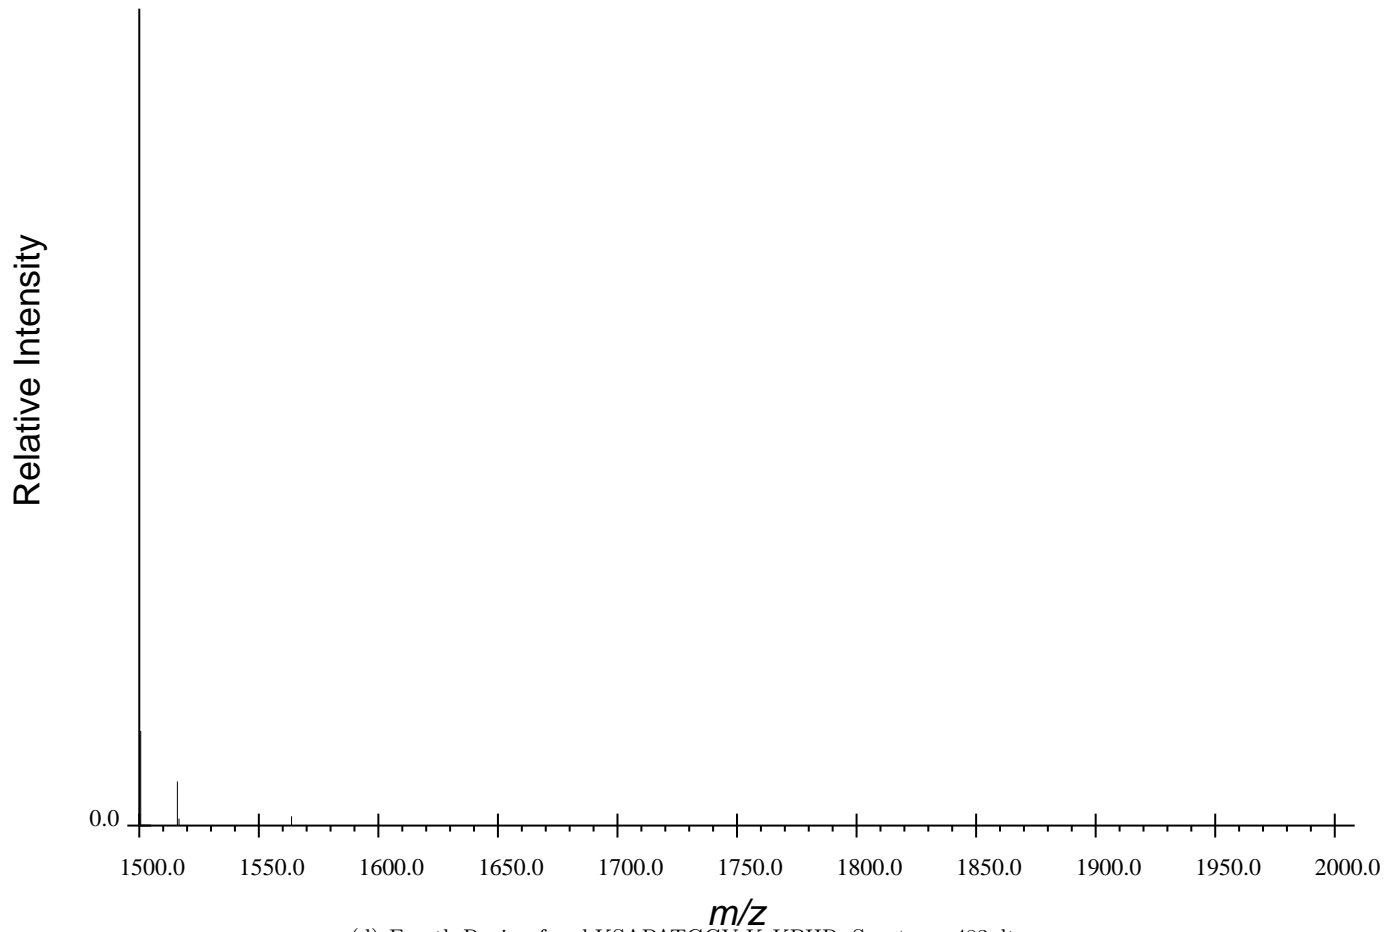

(d) Fourth Region for rhKSAPATGGVrKrKPHR, Spectrum 483.dta

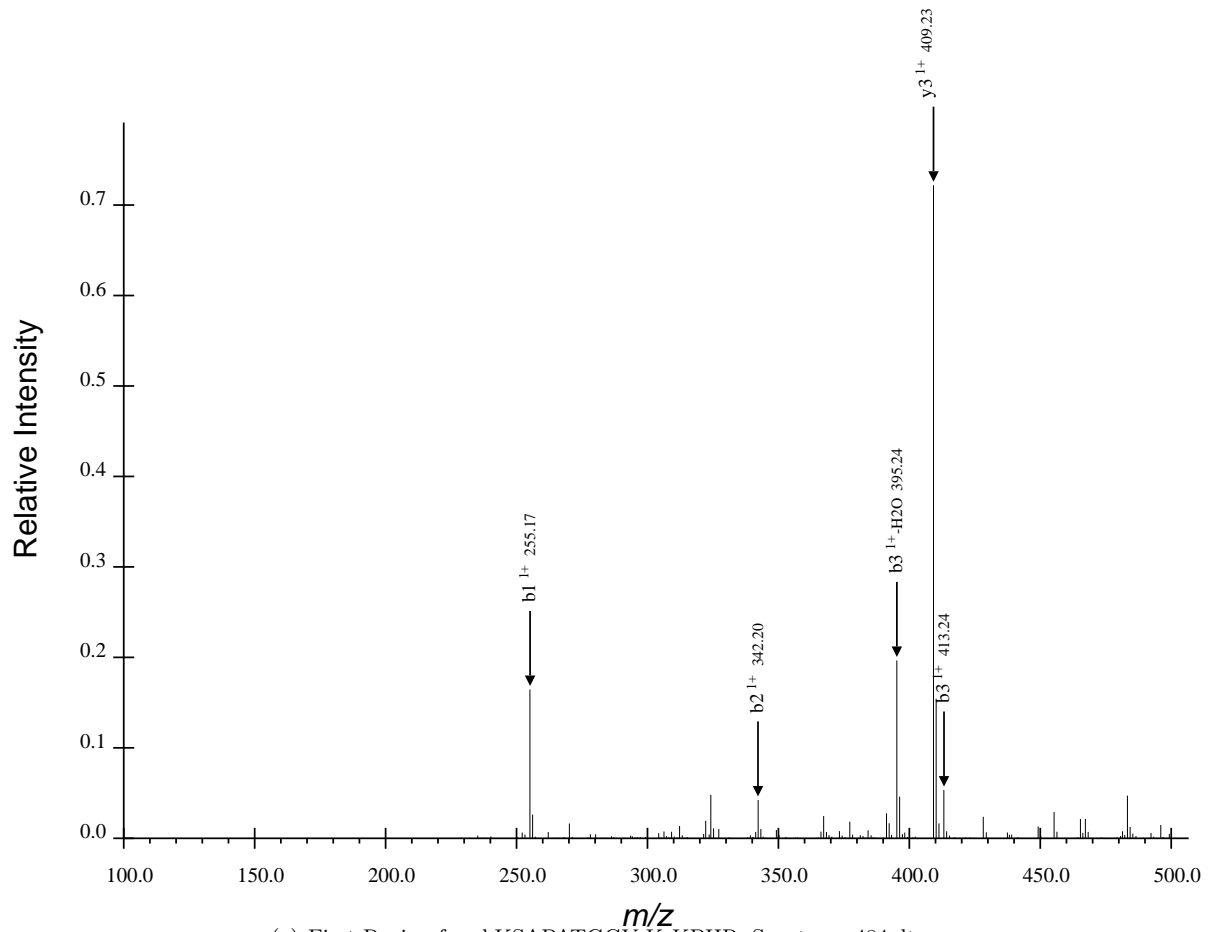

(a) First Region for rhKSAPATGGVrKrKPHR, Spectrum 484.dta

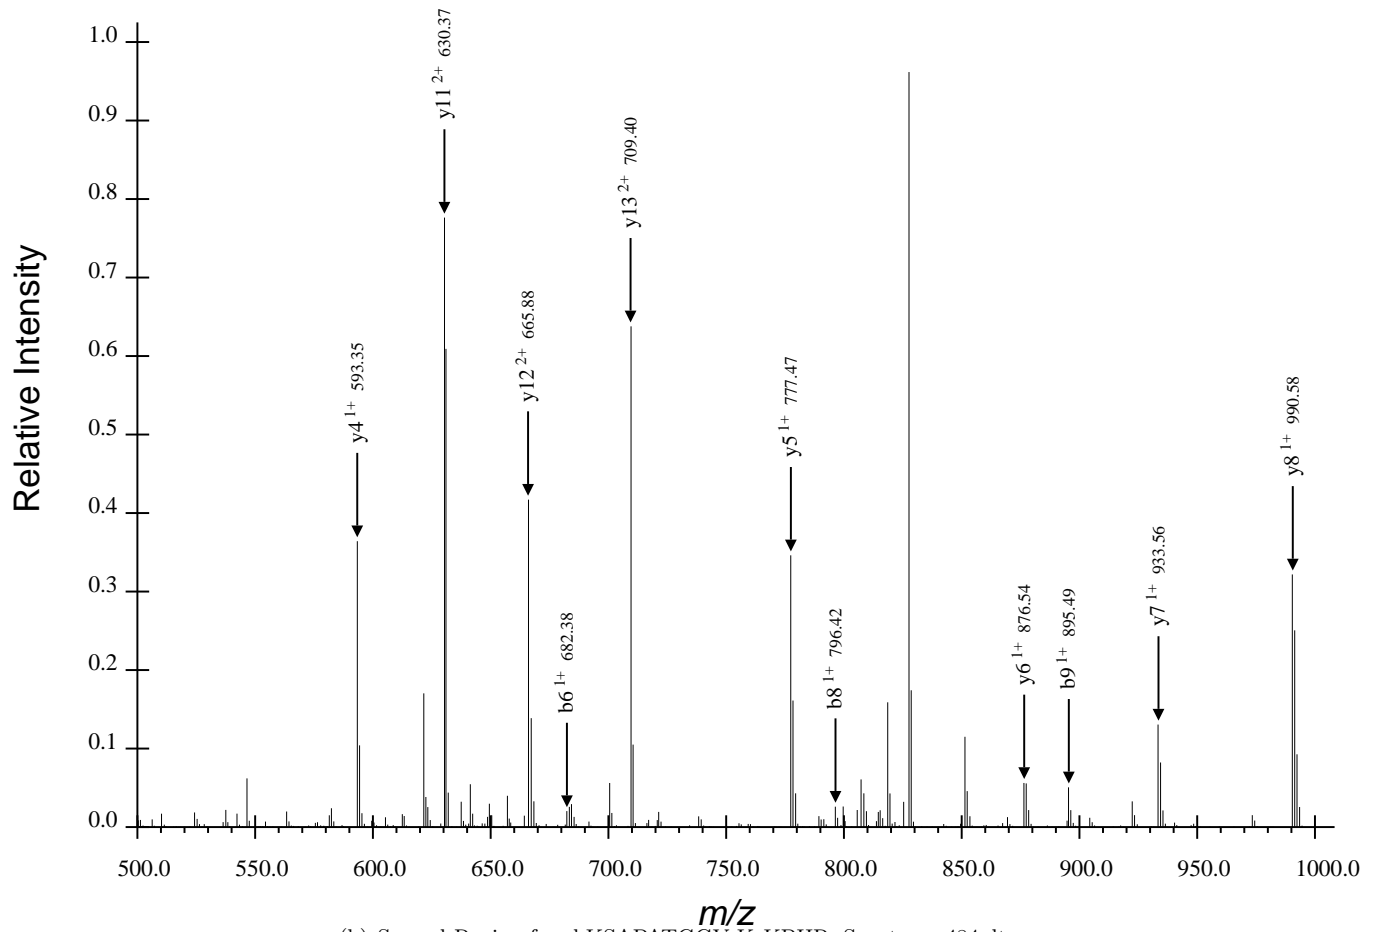

(b) Second Region for rhKSAPATGGVrKrKPHR, Spectrum 484.dta



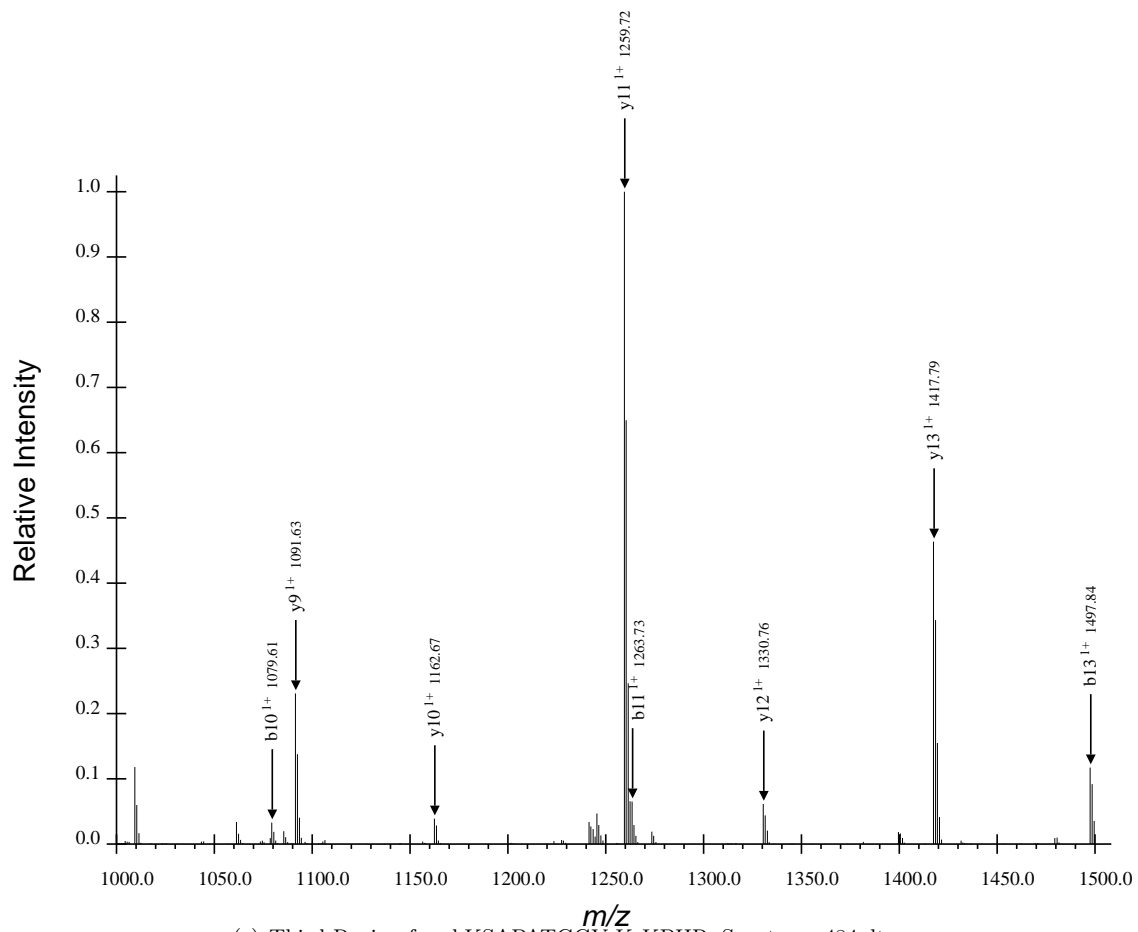

(c) Third Region for rhKSAPATGGVrKrKPHR, Spectrum 484.dta

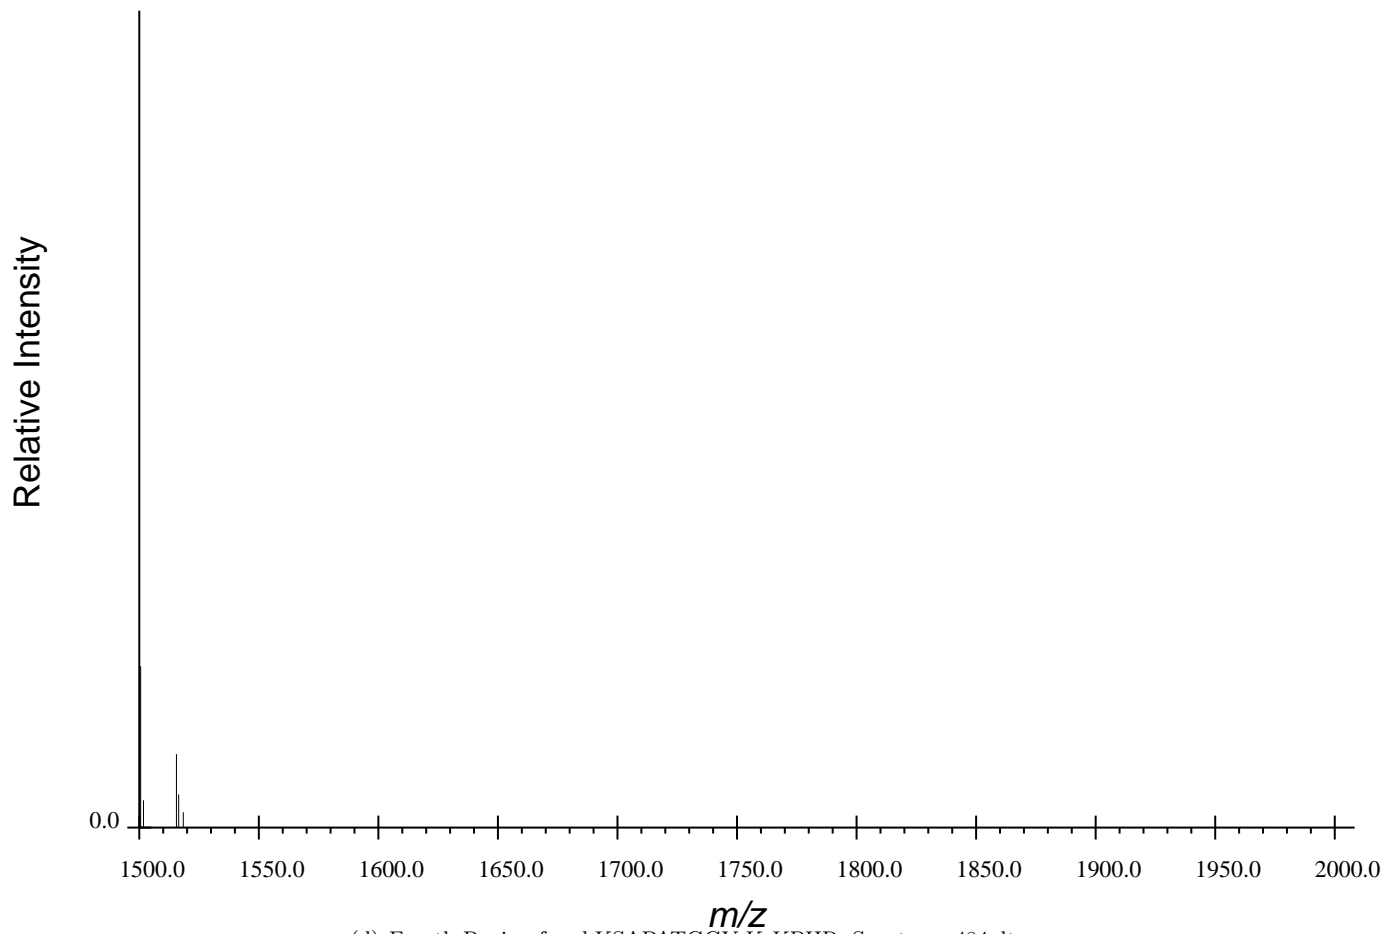

(d) Fourth Region for rhKSAPATGGVrKrKPHR, Spectrum 484.dta

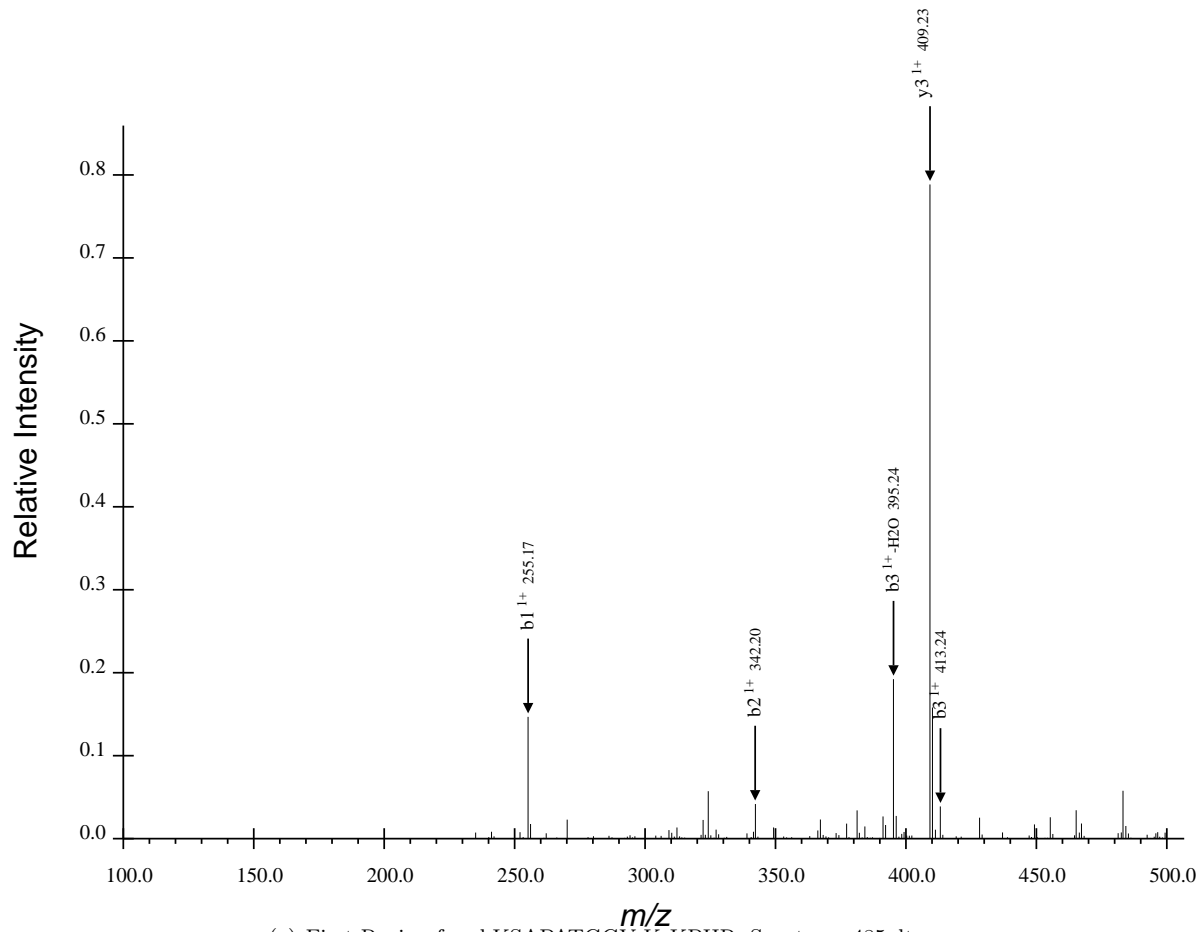

(a) First Region for rhKSAPATGGVrKrKPHR, Spectrum 485.dta

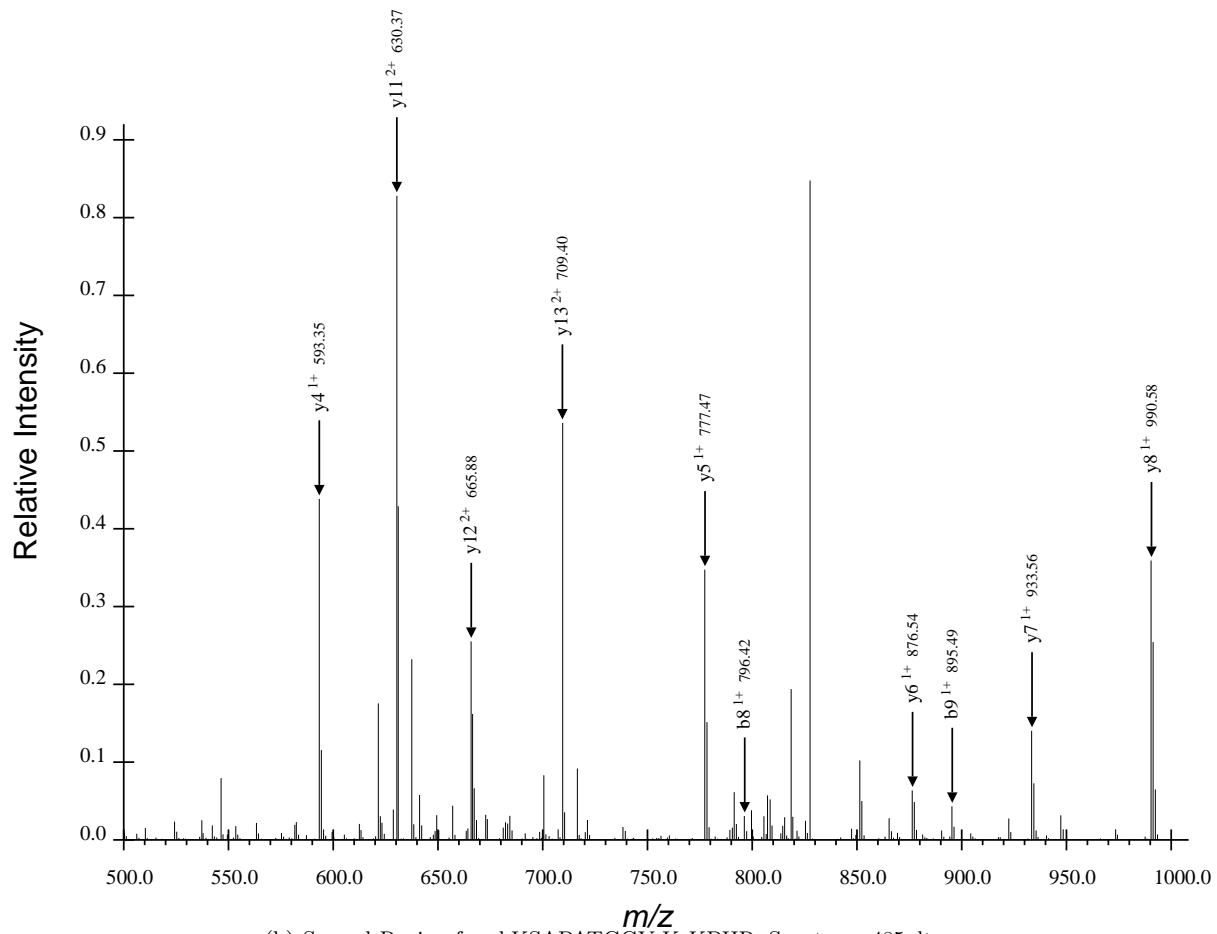

(b) Second Region for rhKSAPATGGVrKrKPHR, Spectrum 485.dta

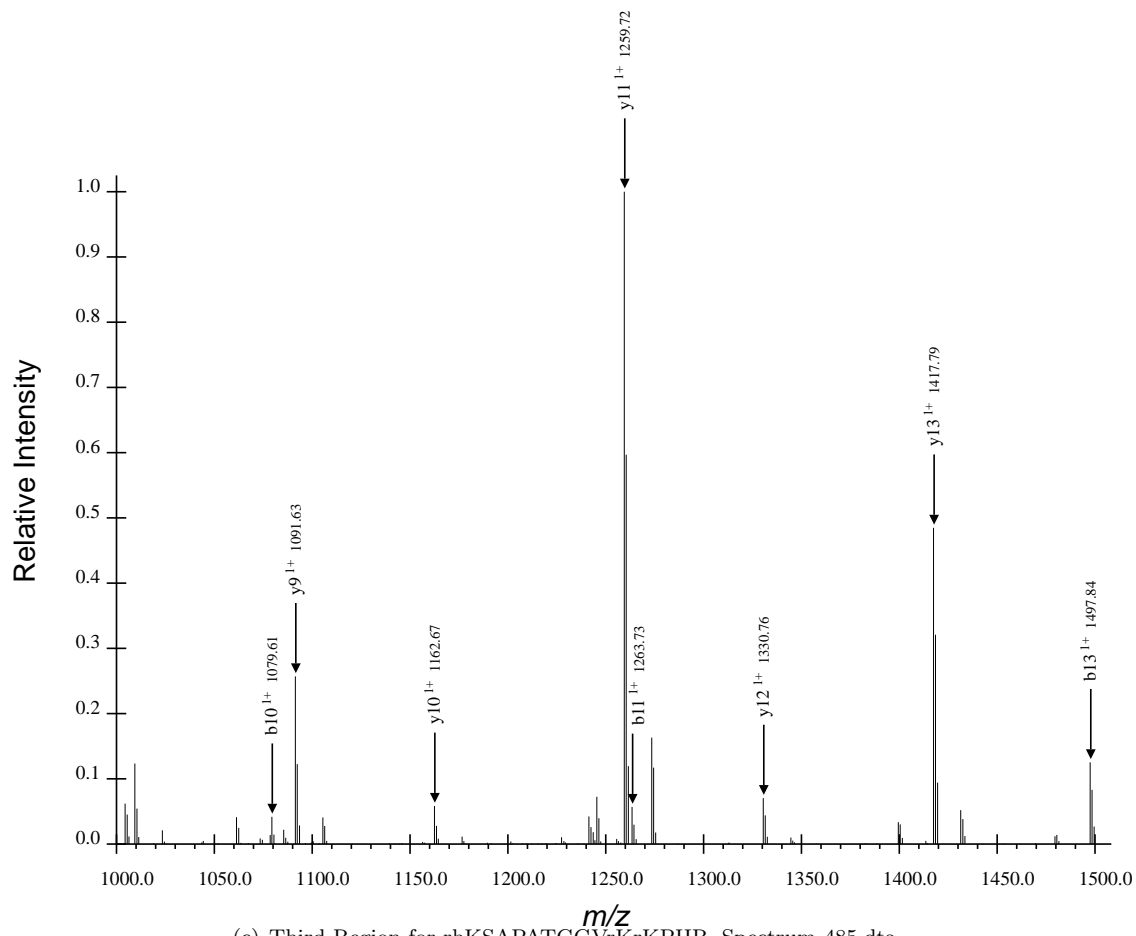

(c) Third Region for rhKSAPATGGVrKrKPHR, Spectrum 485.dta

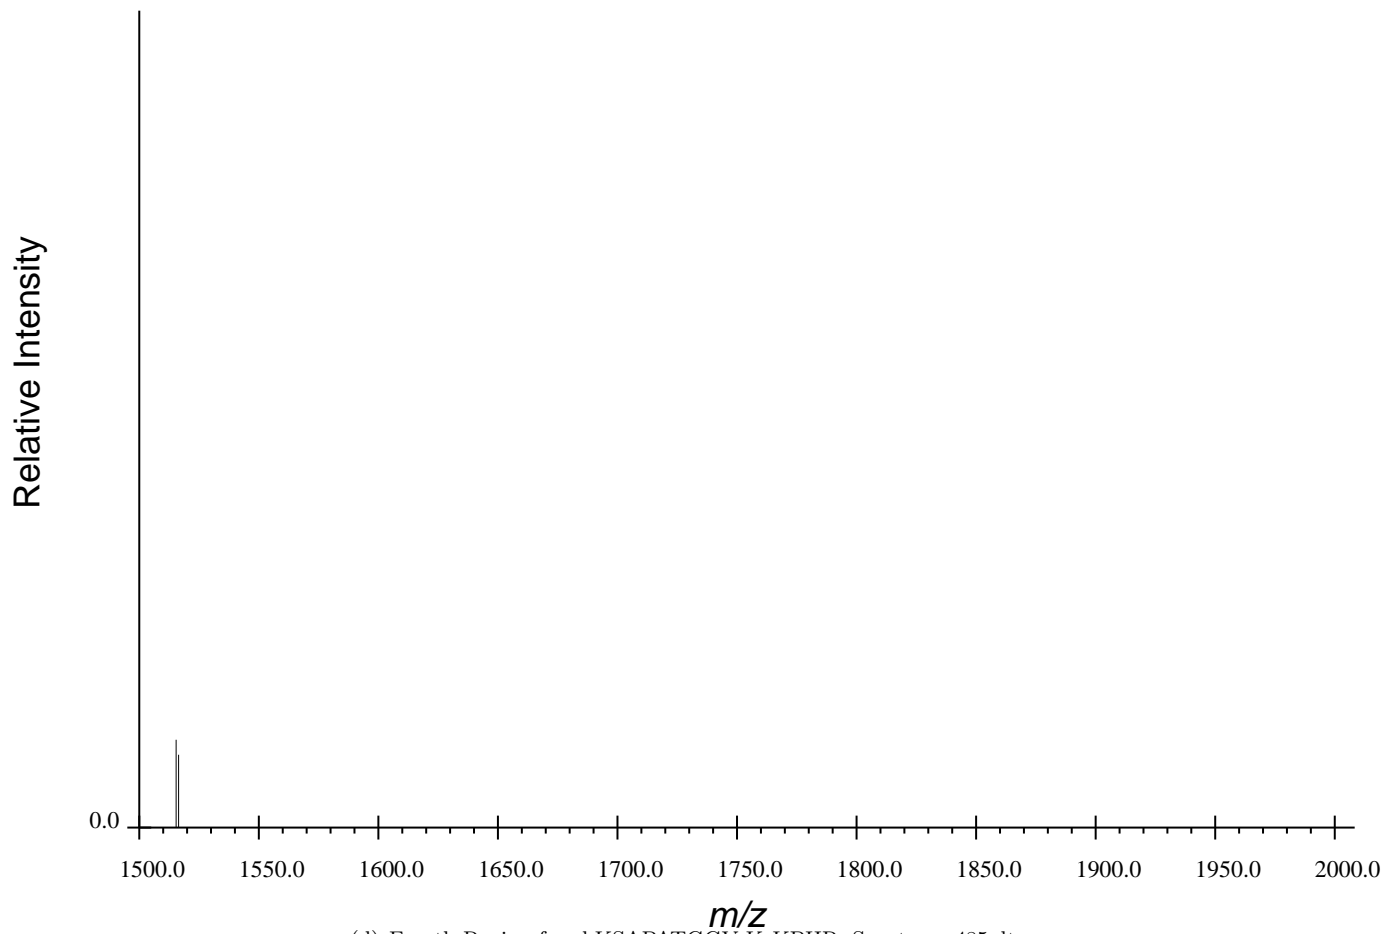

(d) Fourth Region for rhKSAPATGGVrKrKPHR, Spectrum 485.dta

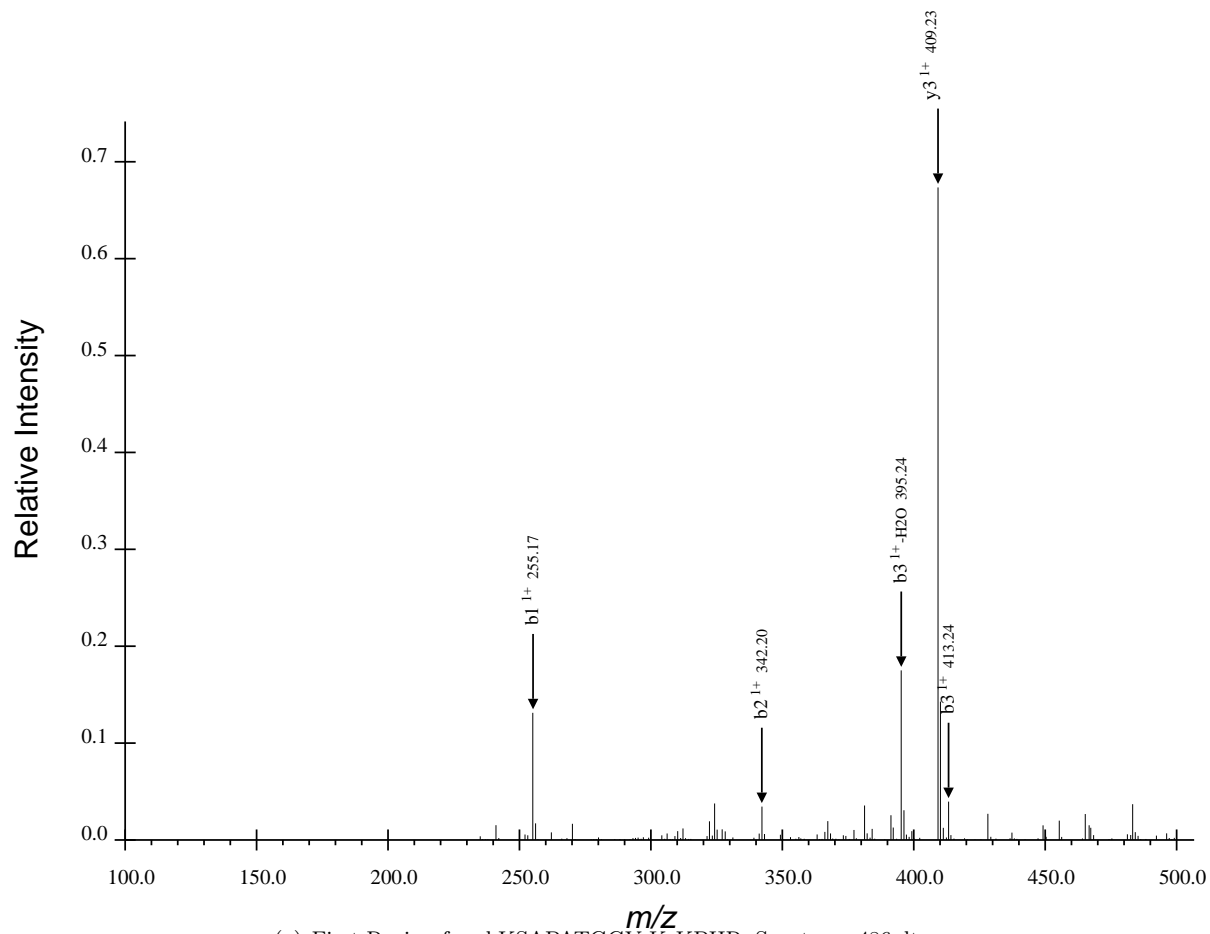

(a) First Region for rhKSAPATGGVrKrKPHR, Spectrum 486.dta

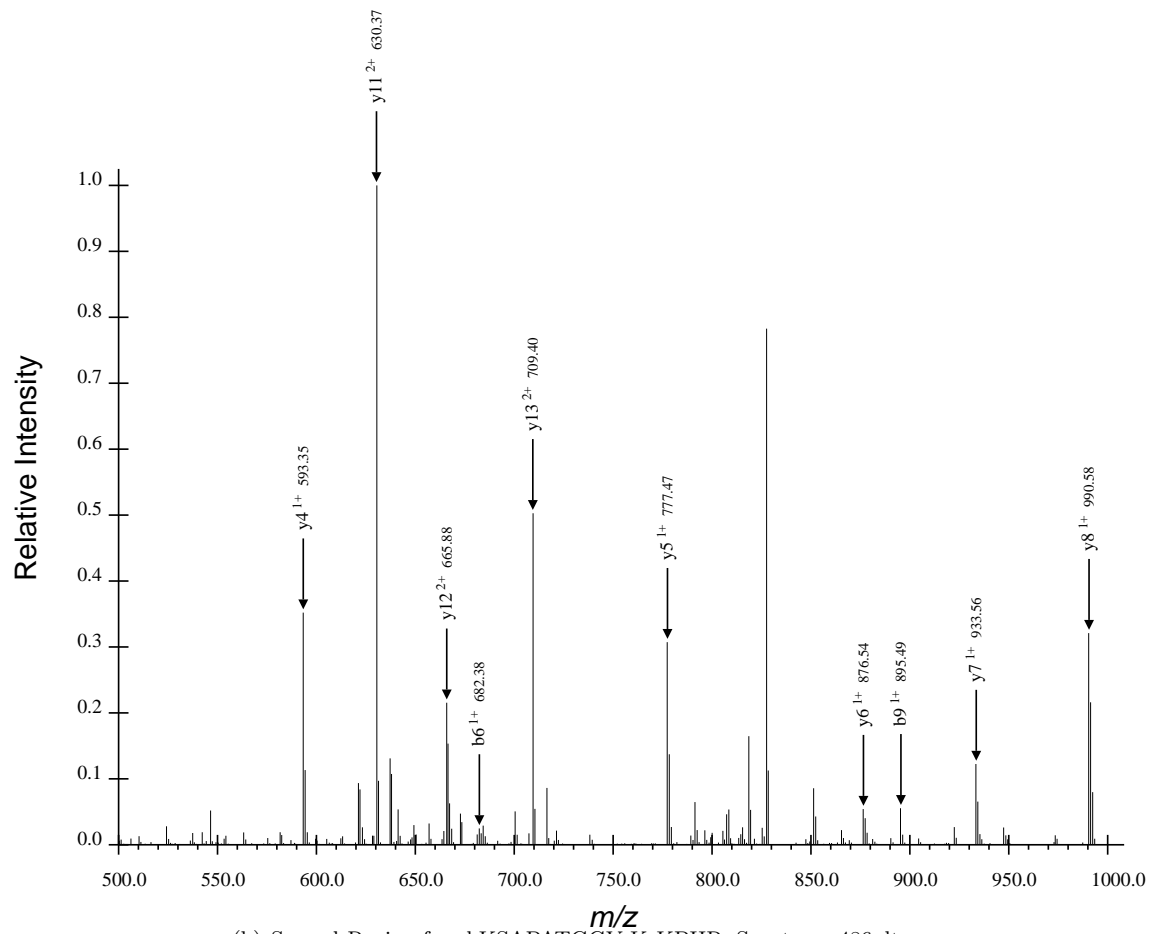

(b) Second Region for rhKSAPATGGVrKrKPHR, Spectrum 486.dta

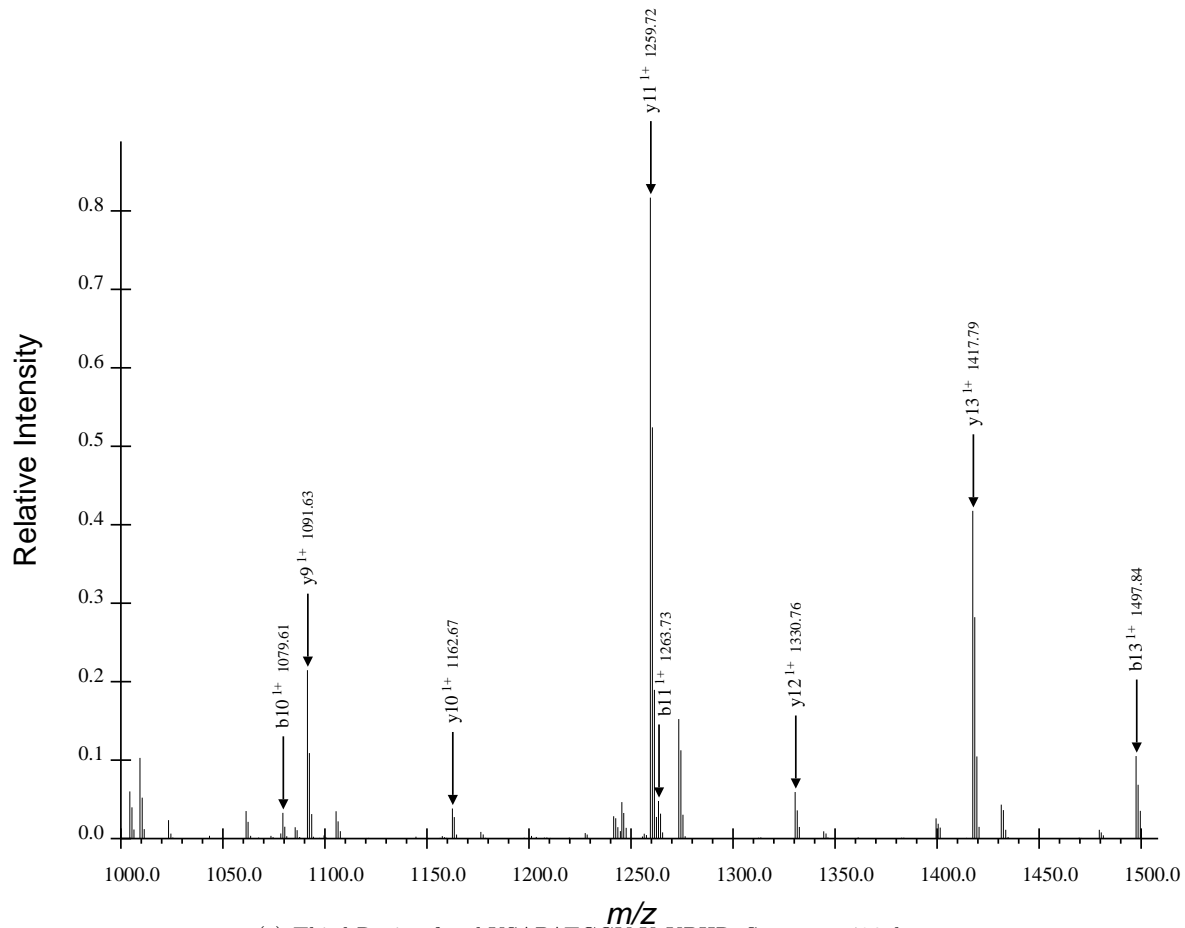

(c) Third Region for rhKSAPATGGVrKrKPHR, Spectrum 486.dta

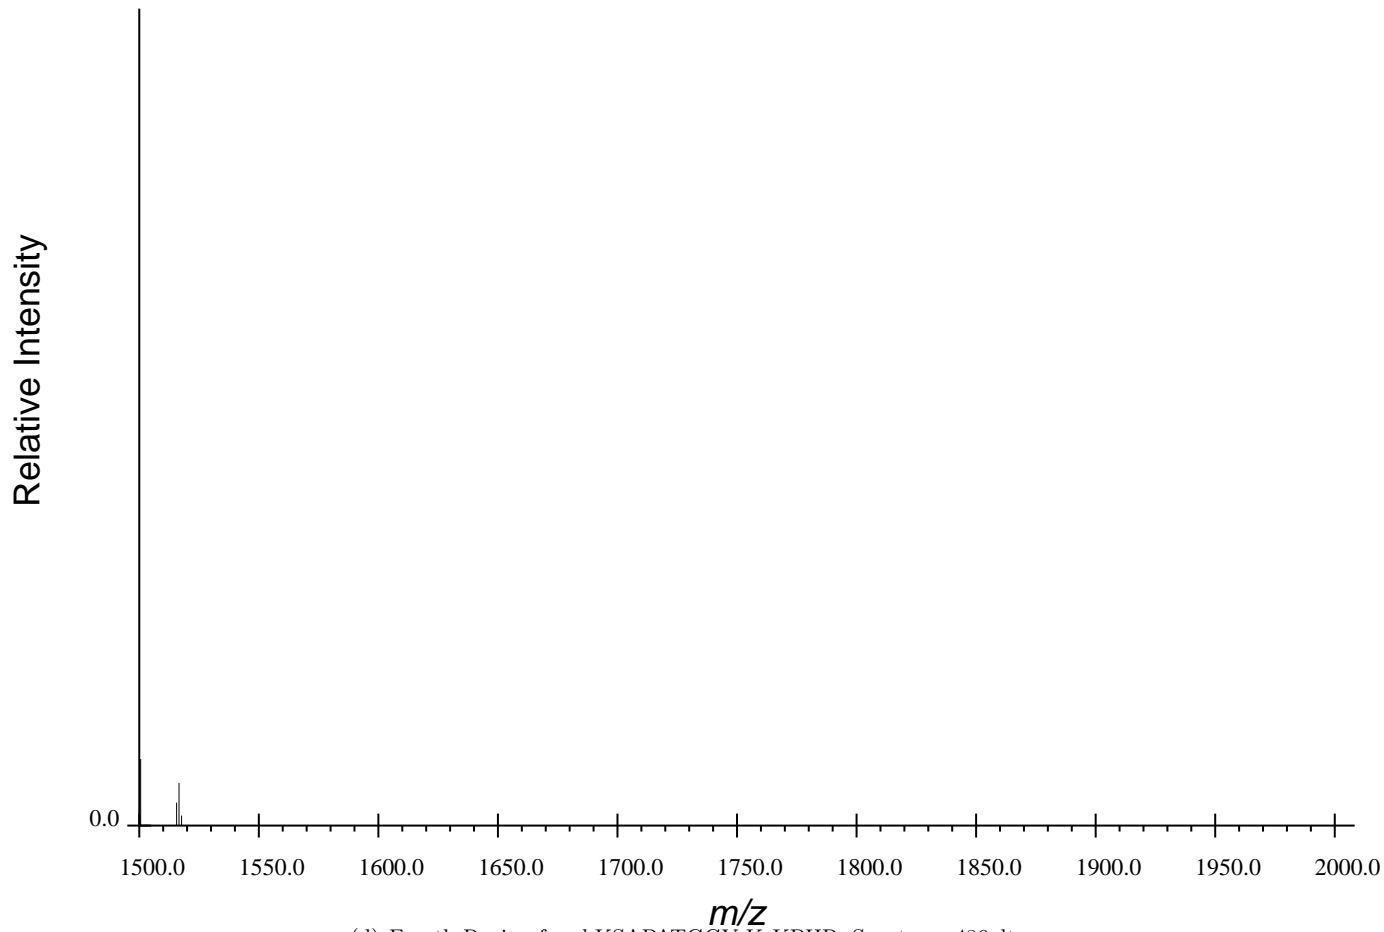

(d) Fourth Region for rhKSAPATGGVrKrKPHR, Spectrum 486.dta

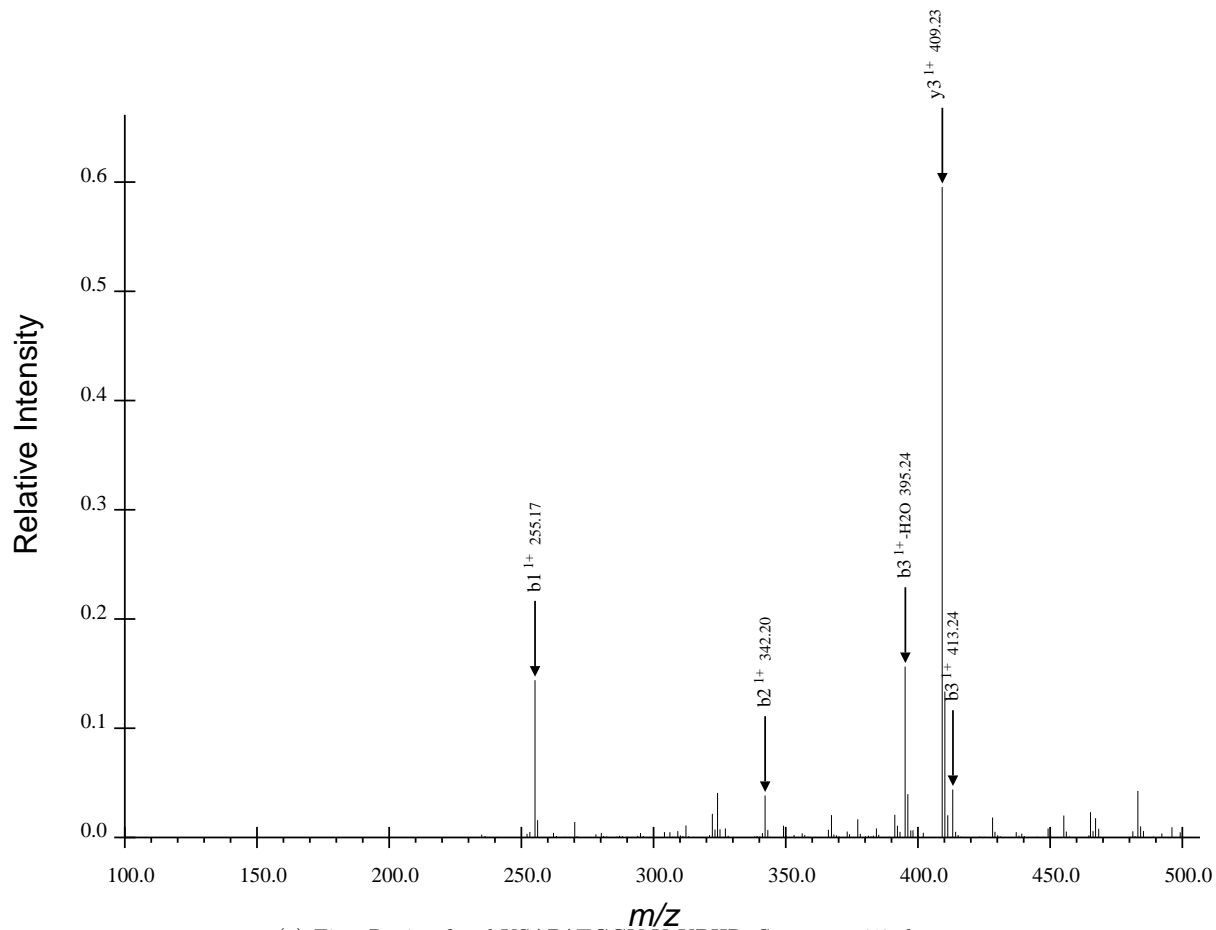

(a) First Region for rhKSAPATGGVrKrKPHR, Spectrum 487.dta

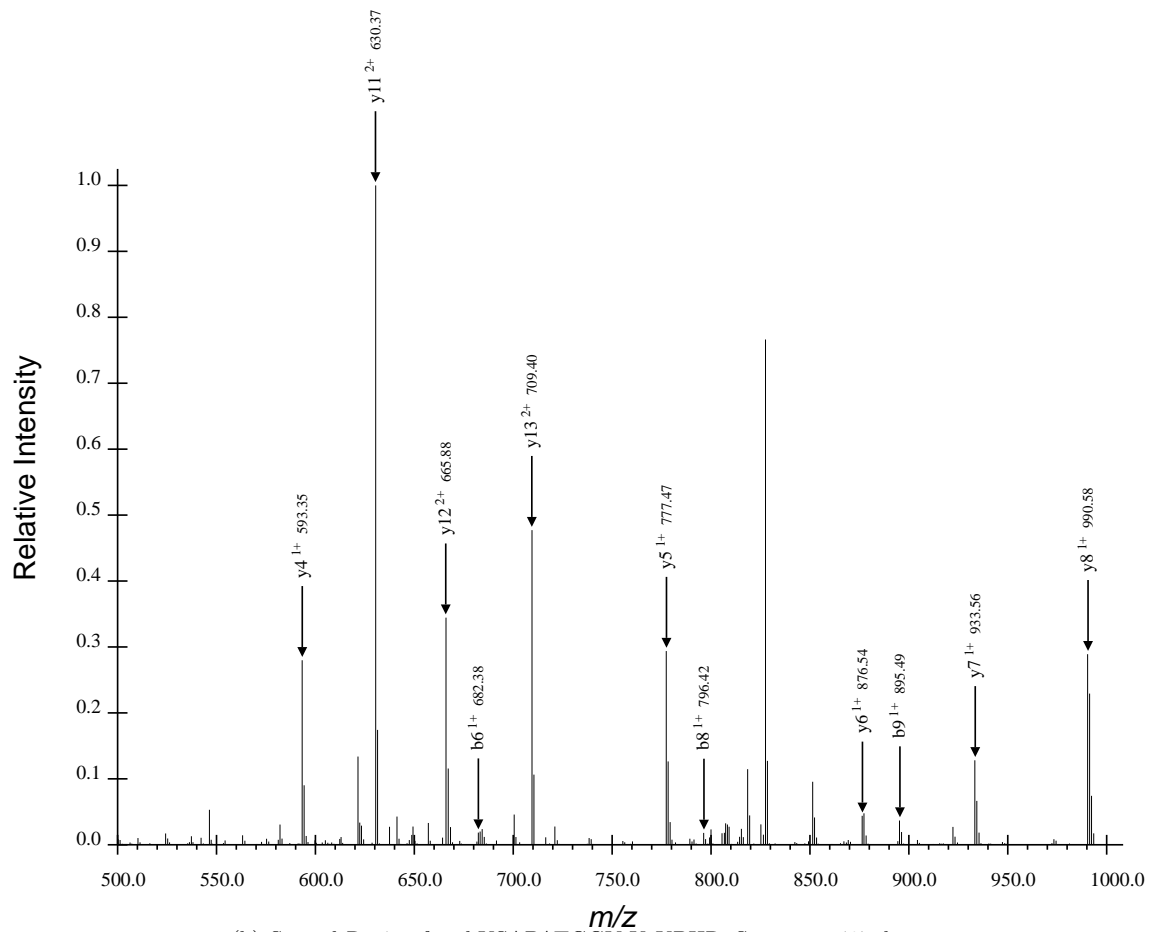

(b) Second Region for rhKSAPATGGVrKrKPHR, Spectrum 487.dta

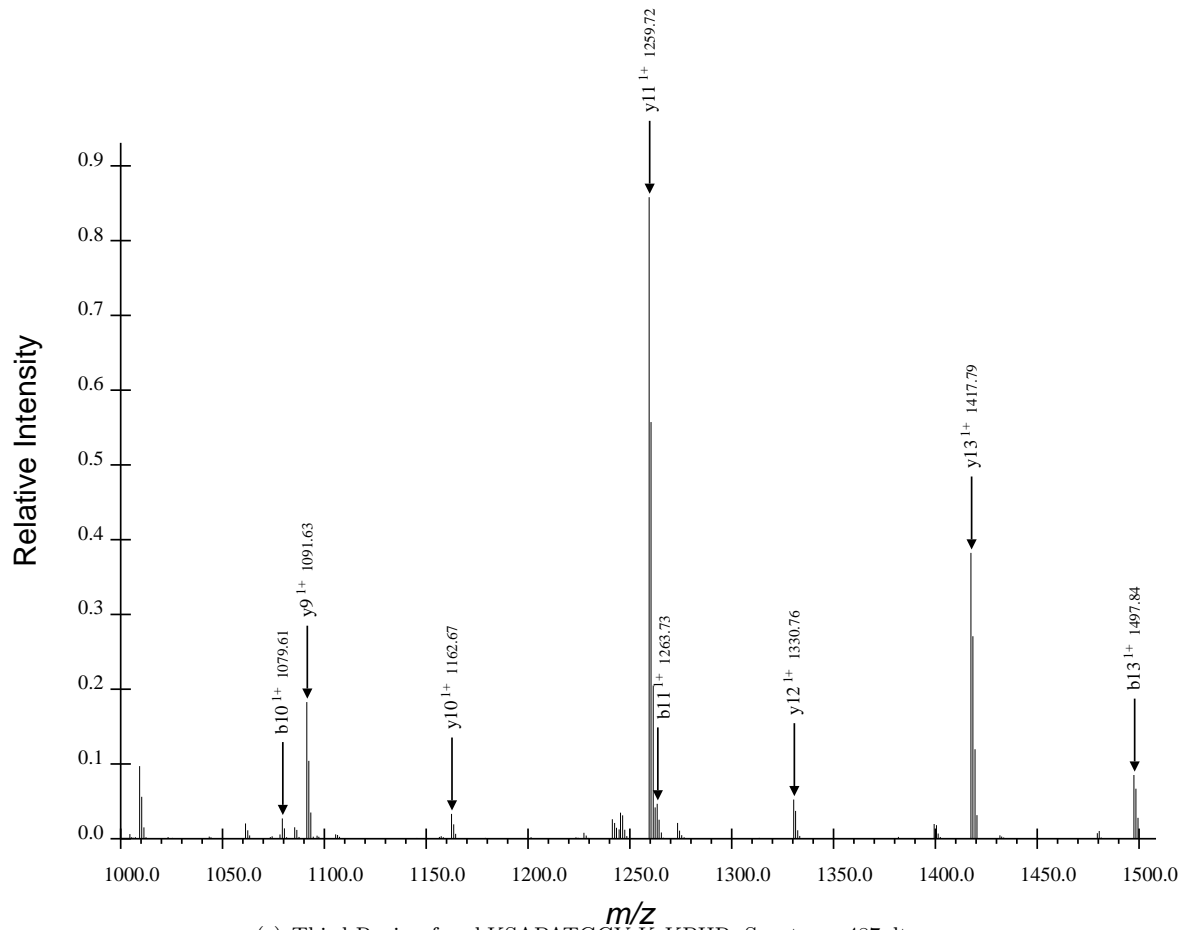

(c) Third Region for rhKSAPATGGVrKrKPHR, Spectrum 487.dta

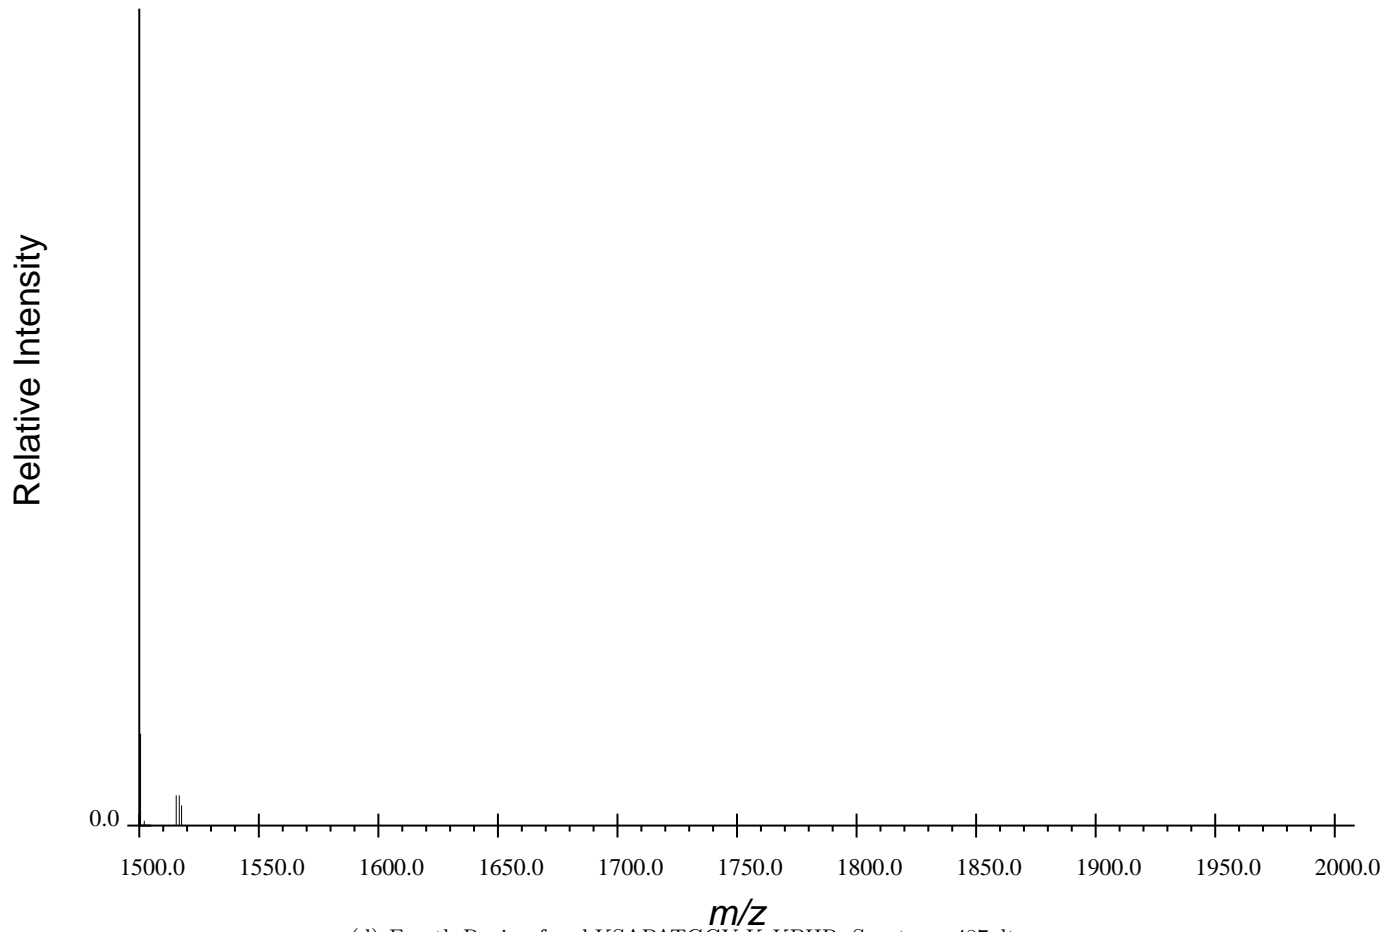

(d) Fourth Region for rhKSAPATGGVrKrKPHR, Spectrum 487.dta

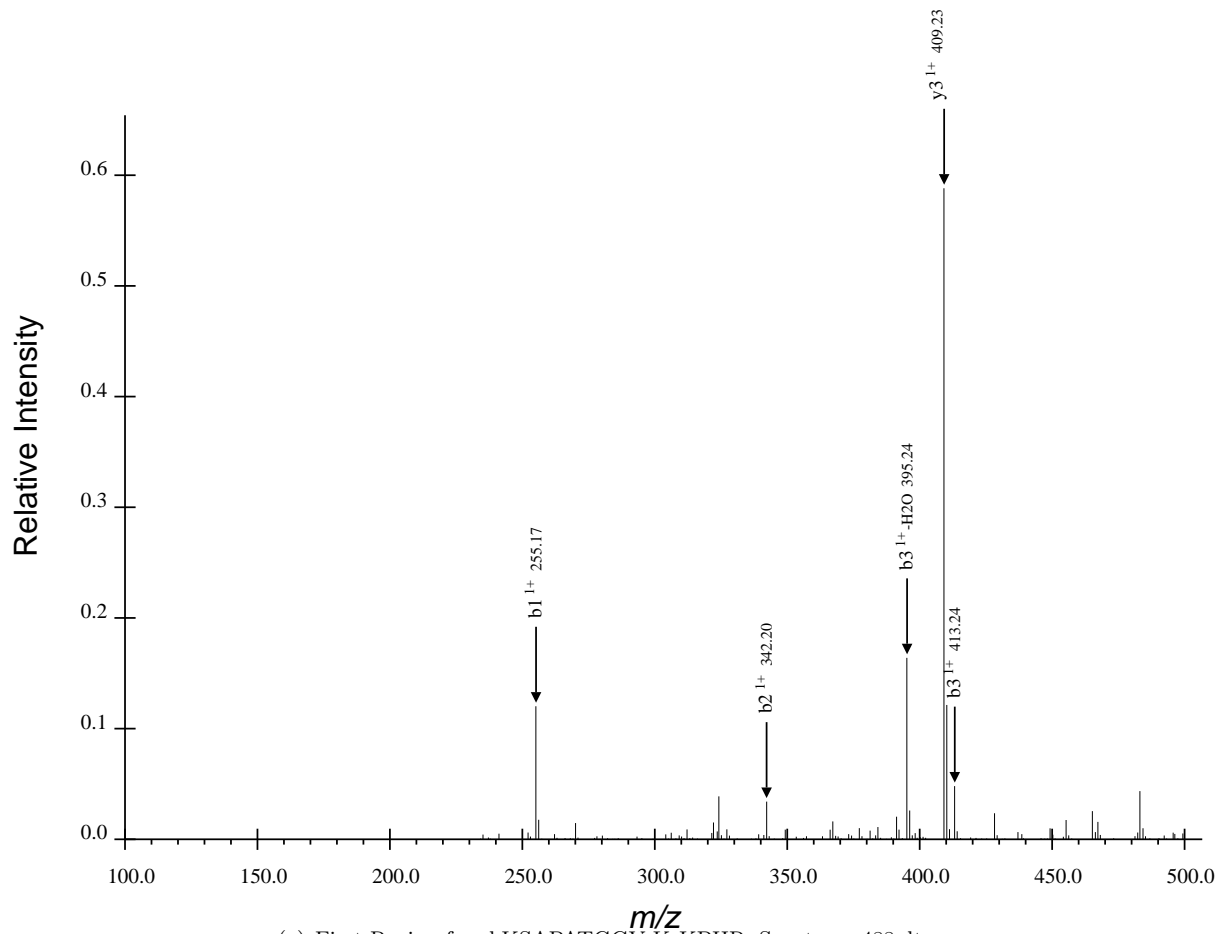

(a) First Region for rhKSAPATGGVrKrKPHR, Spectrum 488.dta

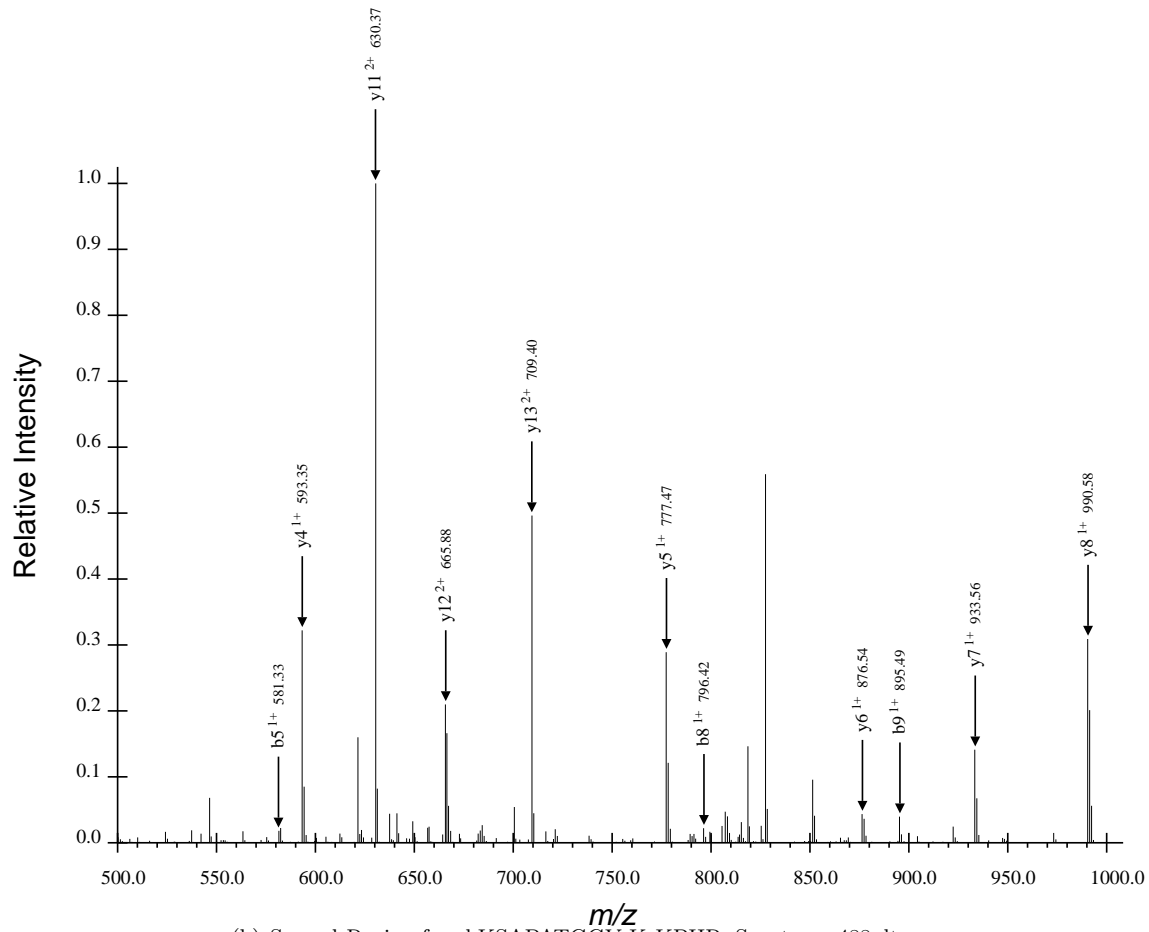

(b) Second Region for rhKSAPATGGVrKrKPHR, Spectrum 488.dta



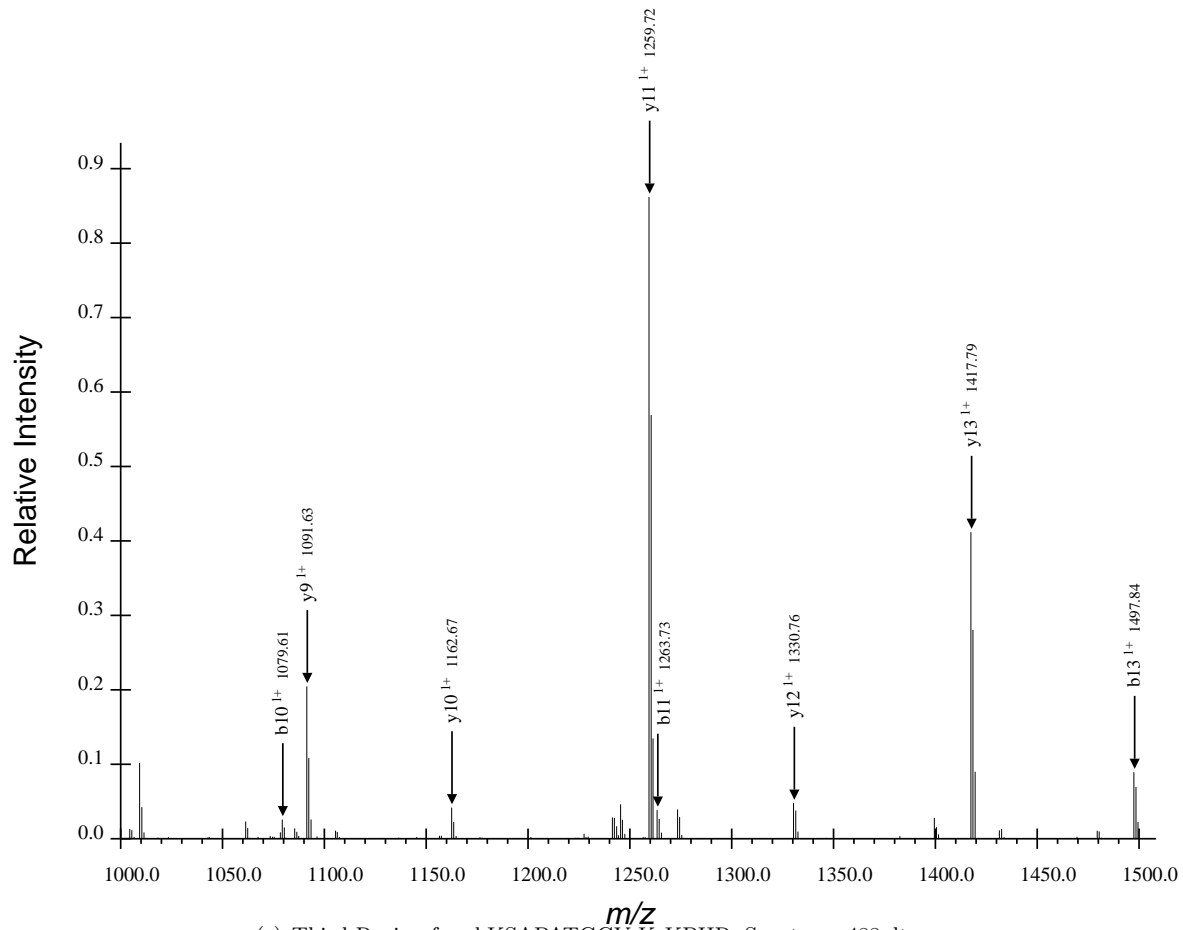

(c) Third Region for rhKSAPATGGVrKrKPHR, Spectrum 488.dta

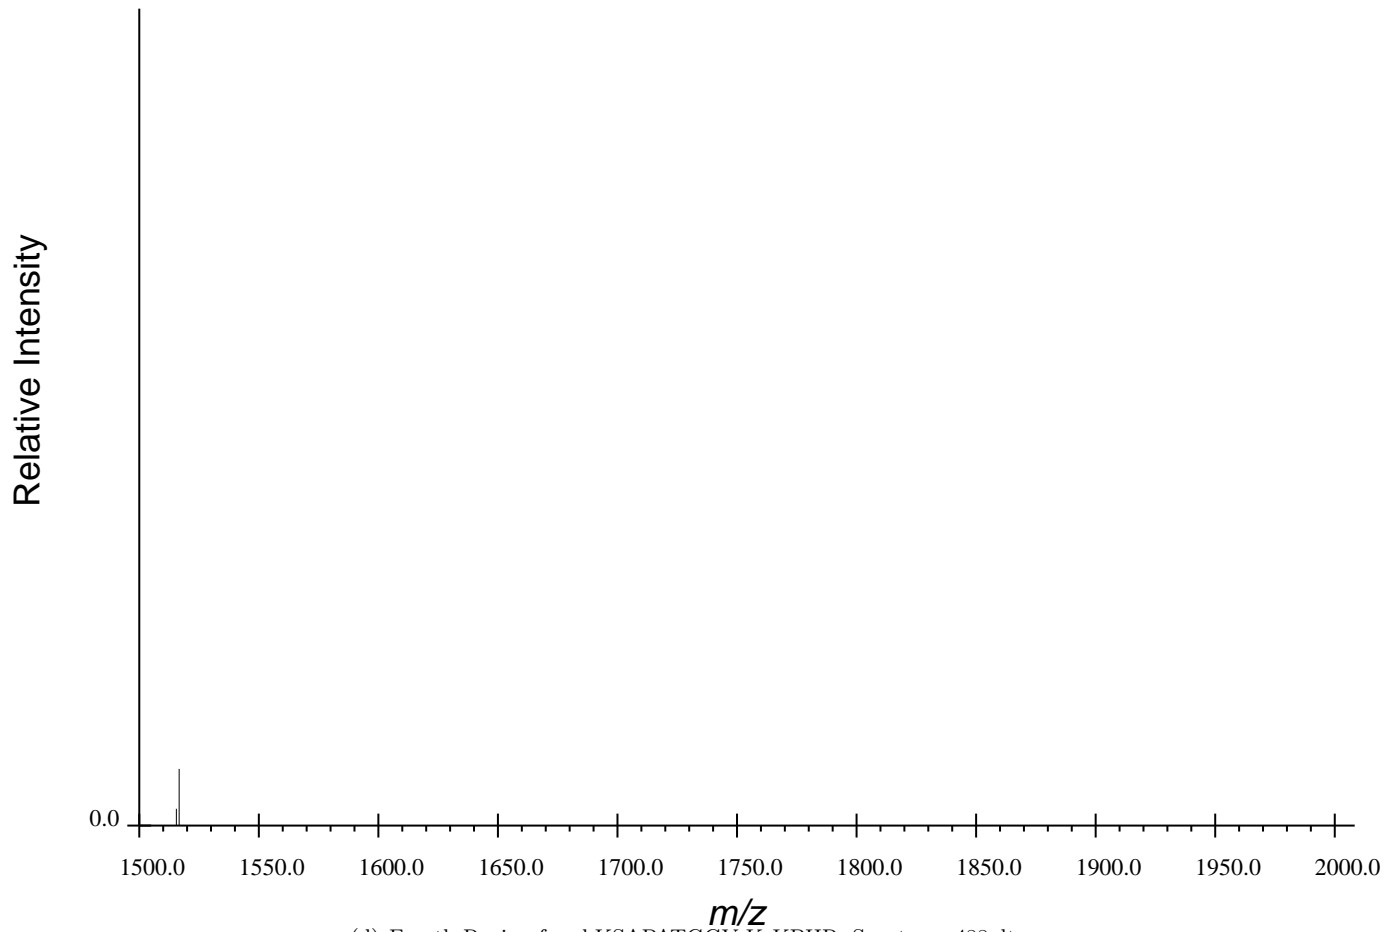

(d) Fourth Region for rhKSAPATGGVrKrKPHR, Spectrum 488.dta

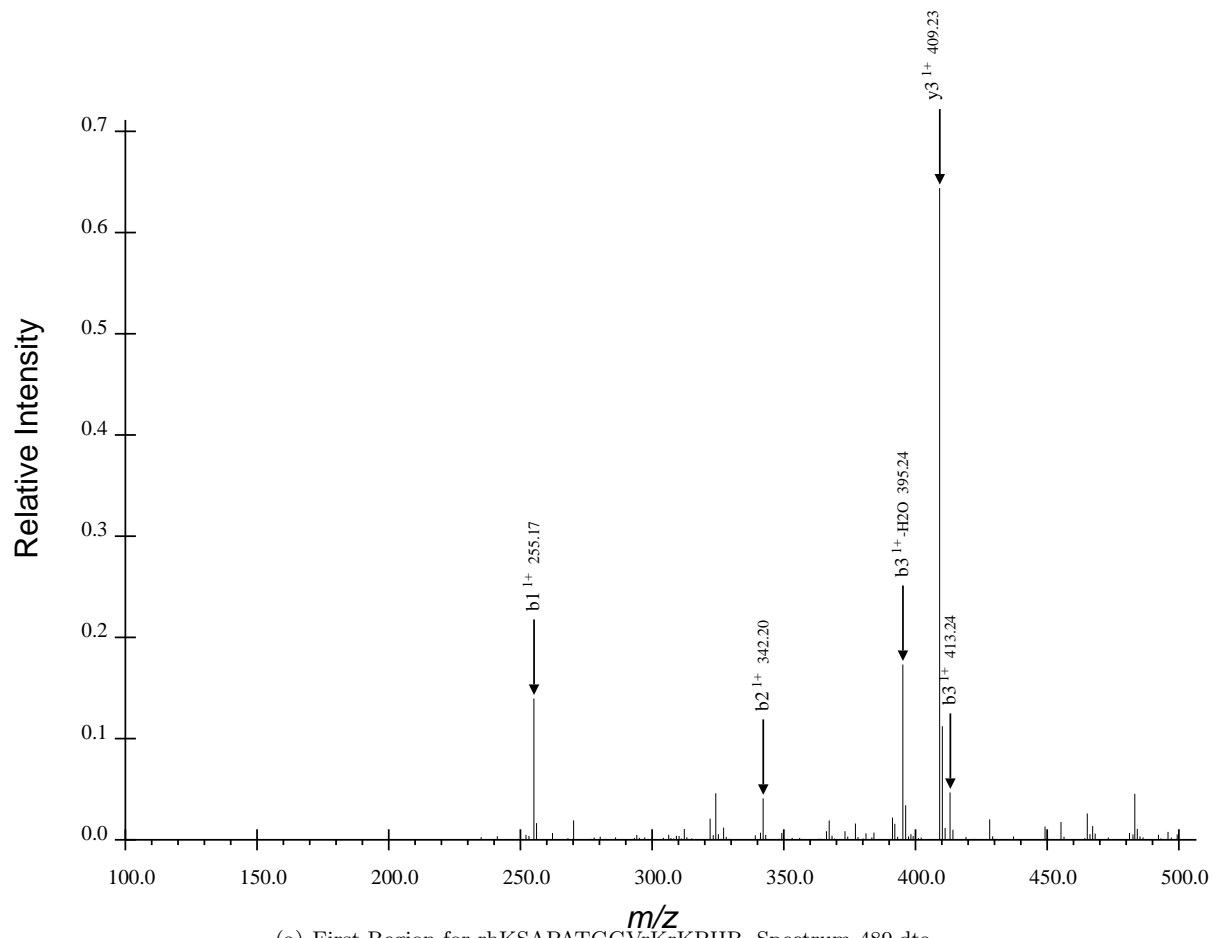

(a) First Region for rhKSAPATGGVrKrKPHR, Spectrum 489.dta

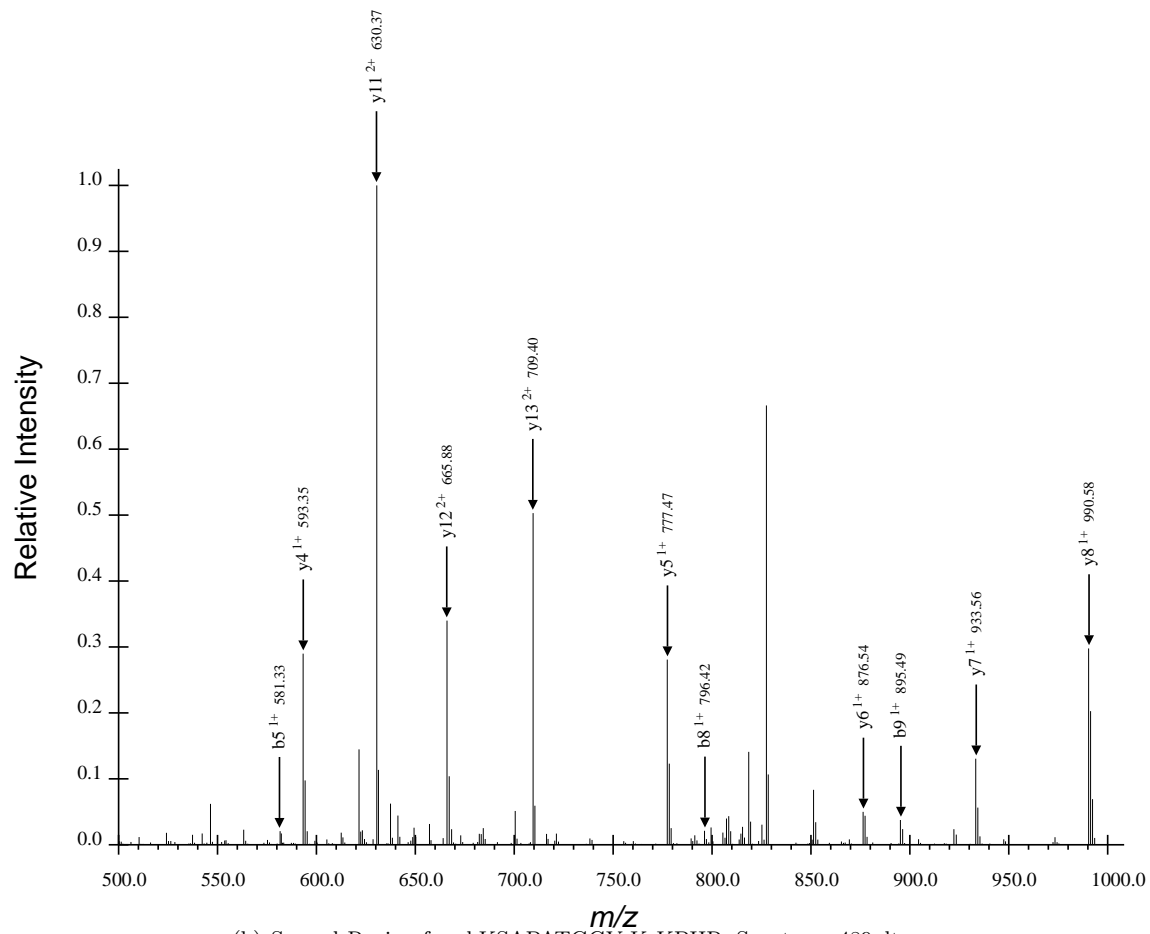

(b) Second Region for rhKSAPATGGVrKrKPHR, Spectrum 489.dta

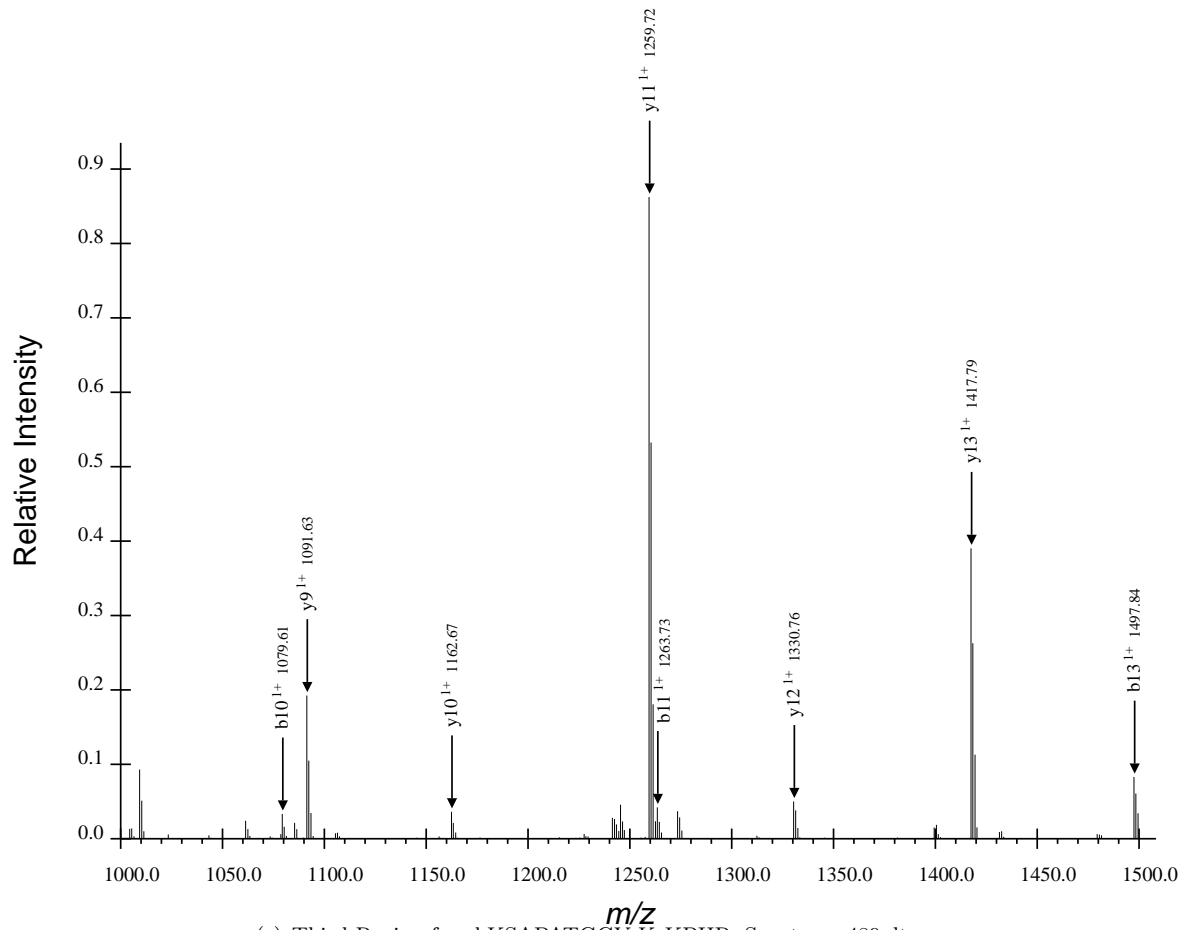

(c) Third Region for rhKSAPATGGVrKrKPHR, Spectrum 489.dta

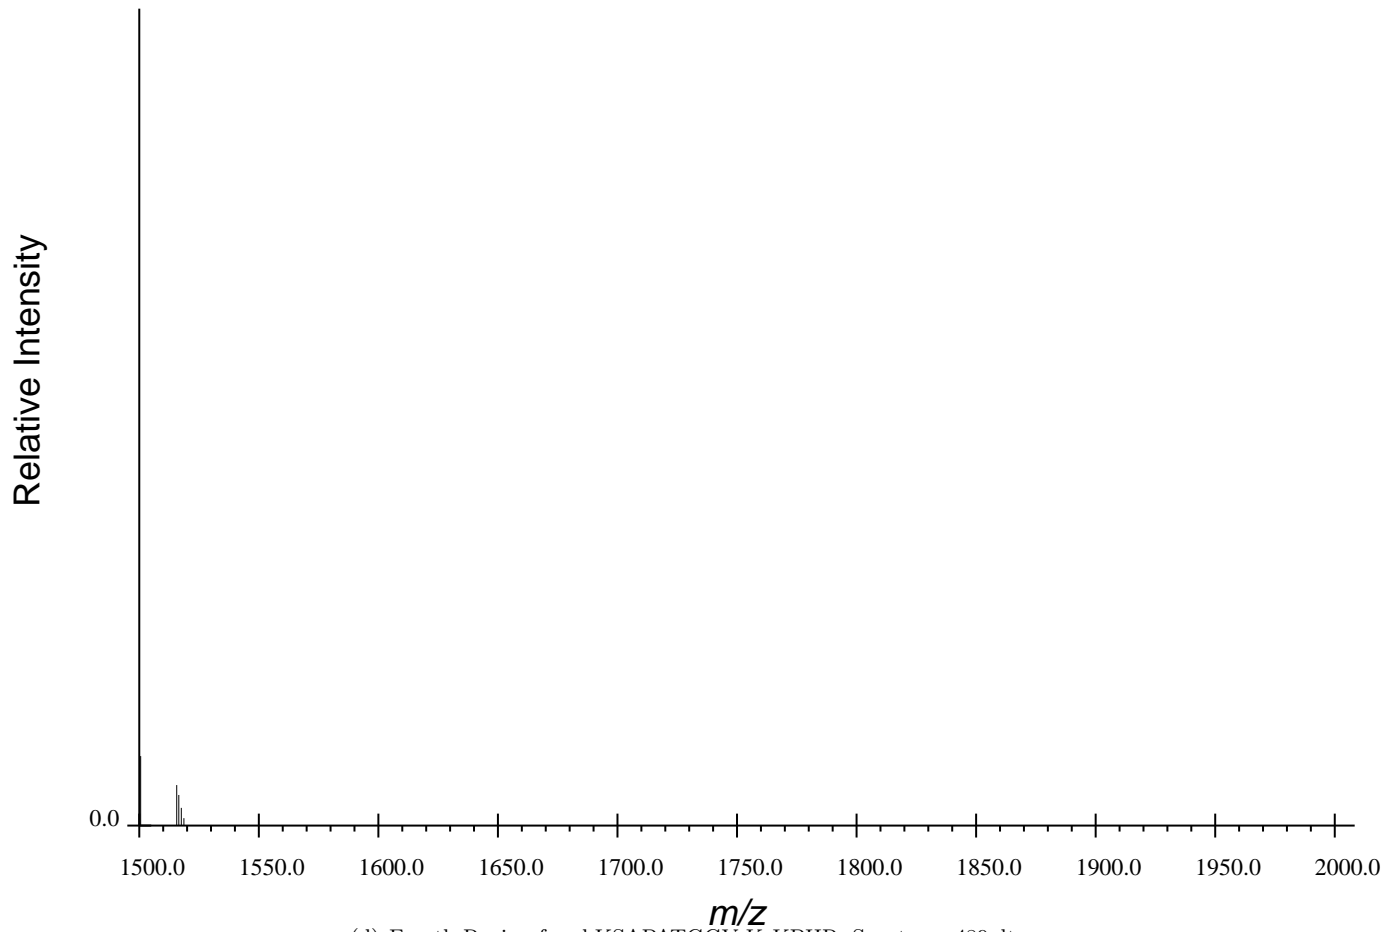

(d) Fourth Region for rhKSAPATGGVrKrKPHR, Spectrum 489.dta

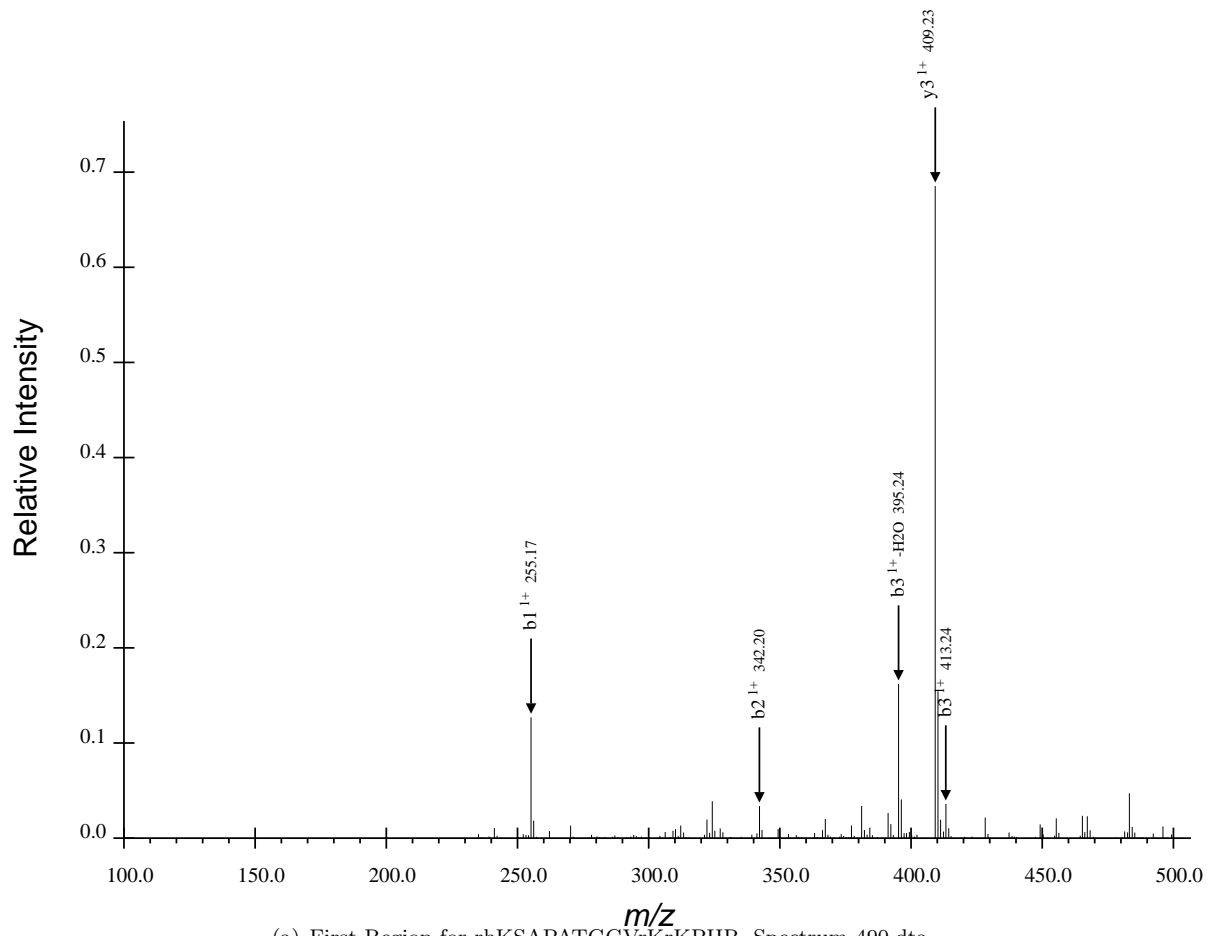

(a) First Region for rhKSAPATGGVrKrKPHR, Spectrum 490.dta

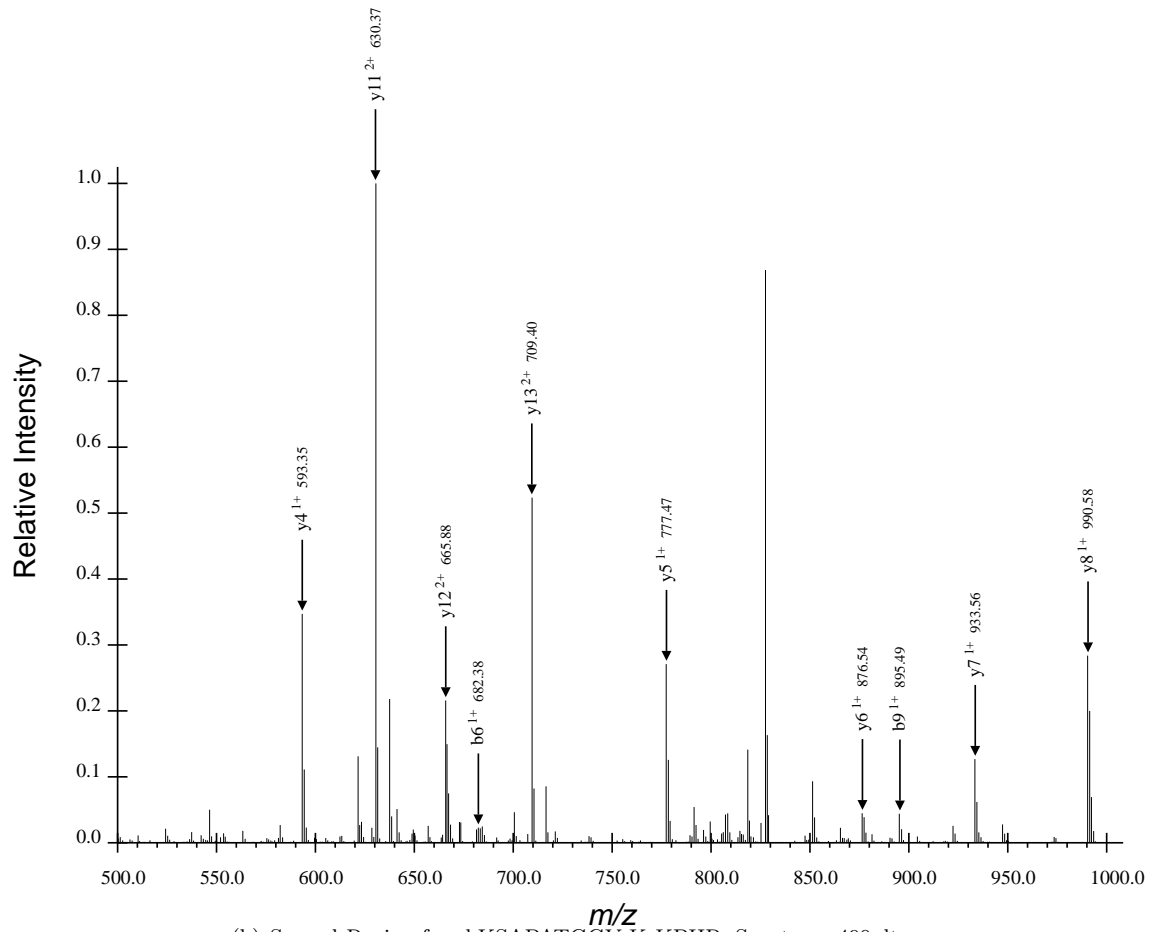

(b) Second Region for rhKSAPATGGVrKrKPHR, Spectrum 490.dta

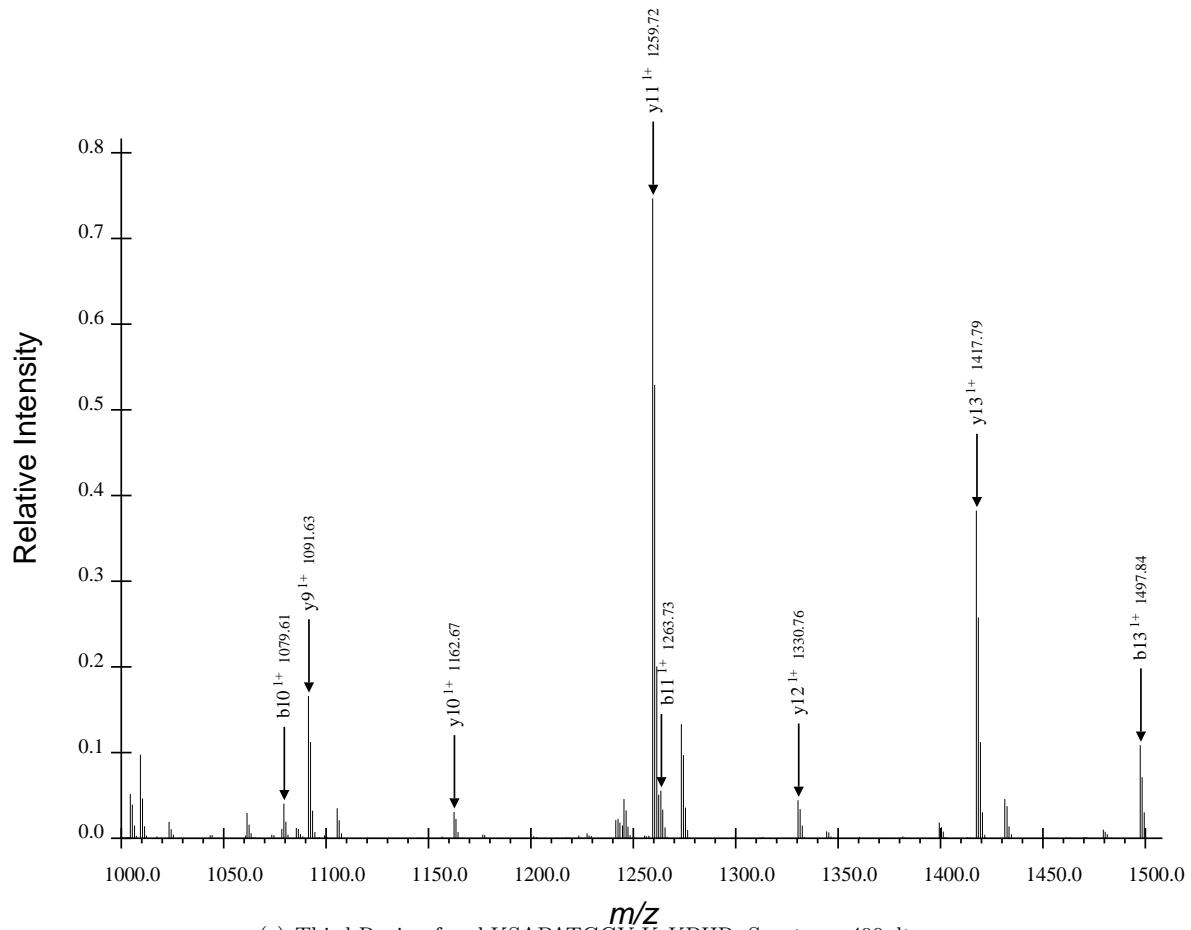

(c) Third Region for rhKSAPATGGVrKrKPHR, Spectrum 490.dta

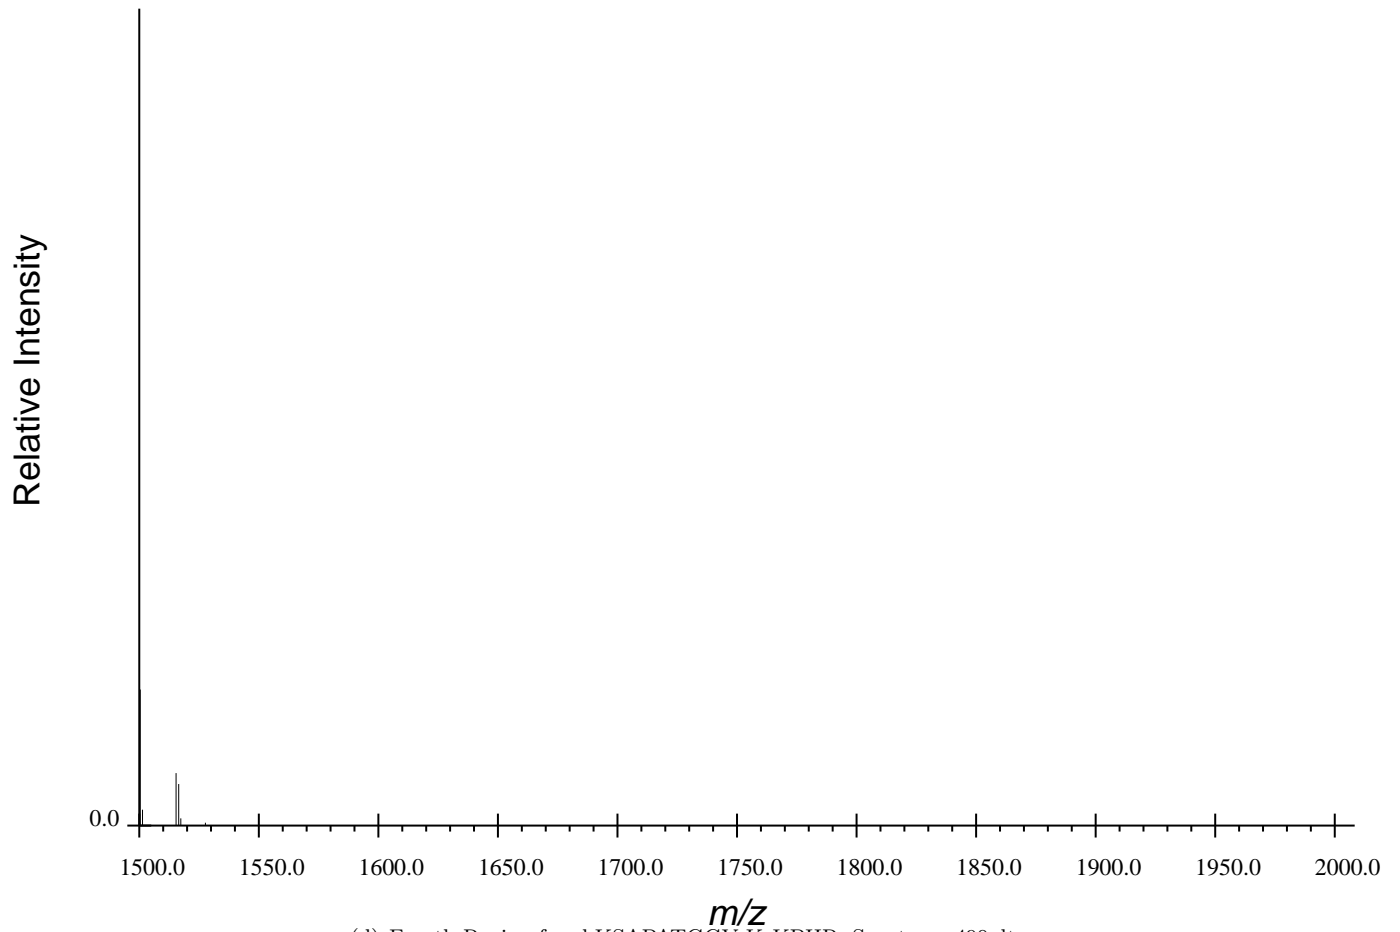

(d) Fourth Region for rhKSAPATGGVrKrKPHR, Spectrum 490.dta

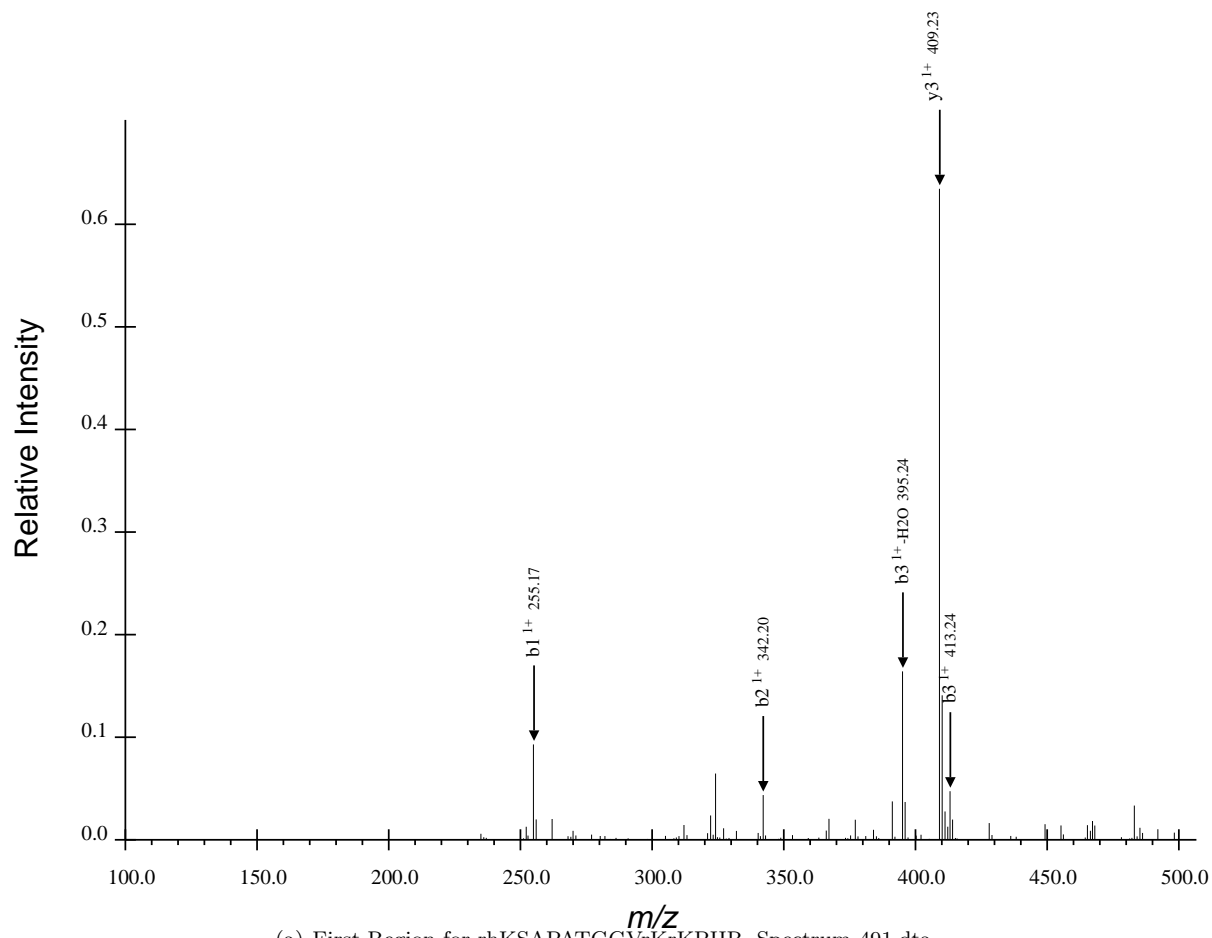

(a) First Region for rhKSAPATGGVrKrKPHR, Spectrum 491.dta

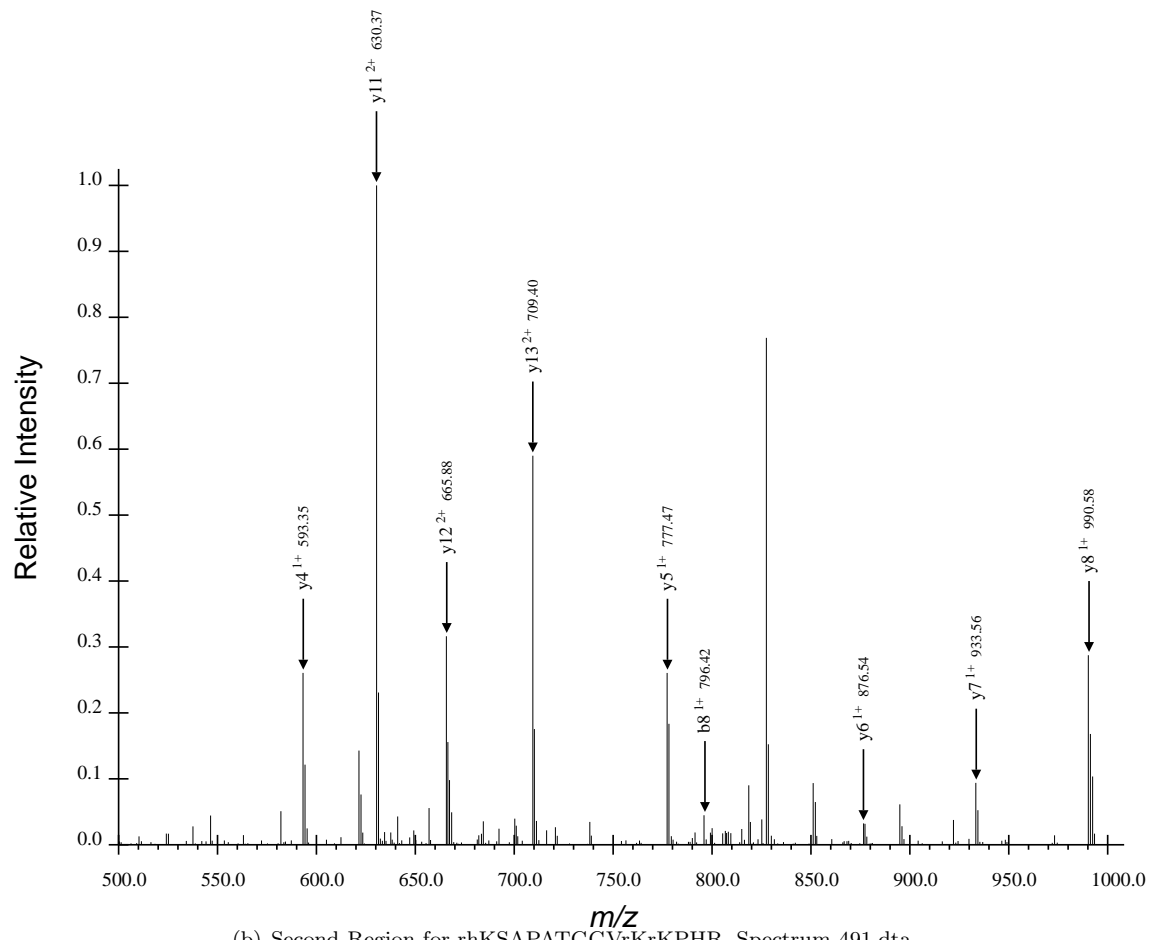

(b) Second Region for rhKSAPATGGVrKrKPHR, Spectrum 491.dta

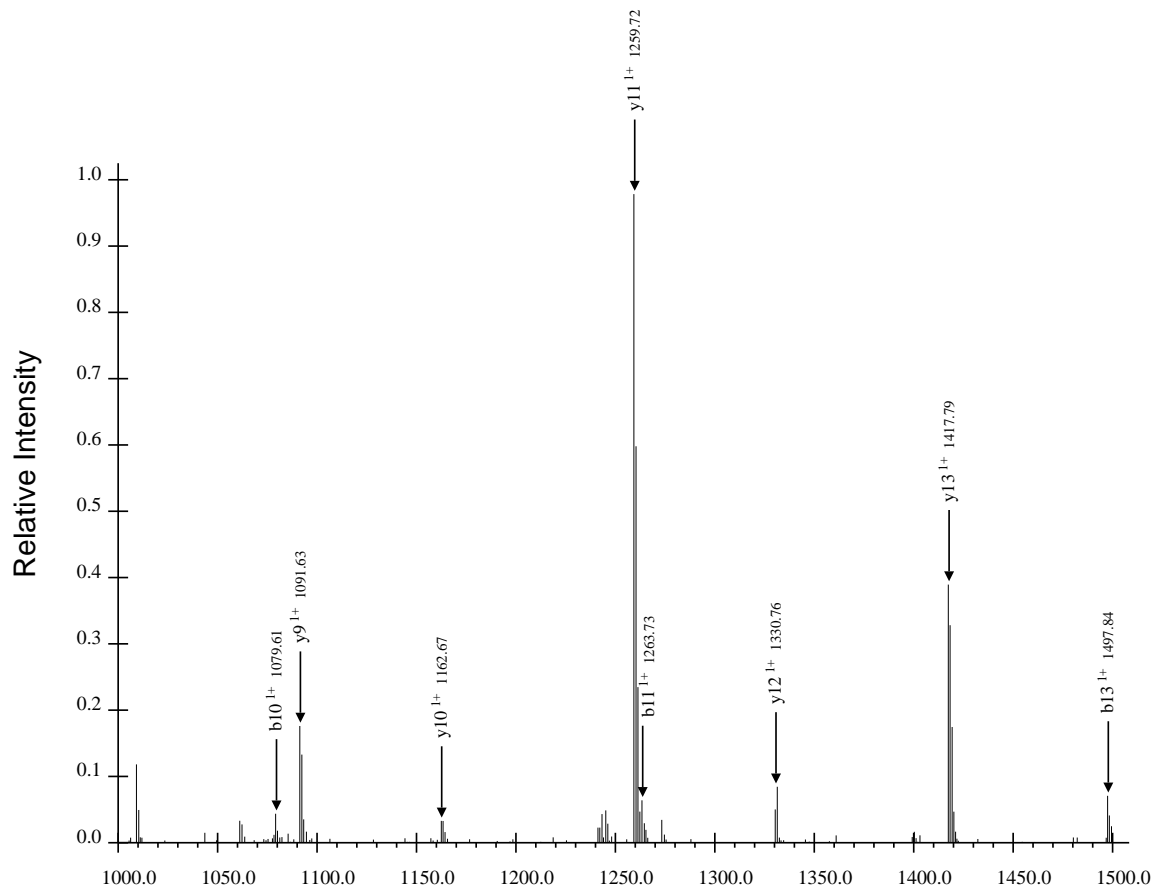

(c) Third Region for rhKSAPATGGVrKrKPHR, Spectrum 491.dta

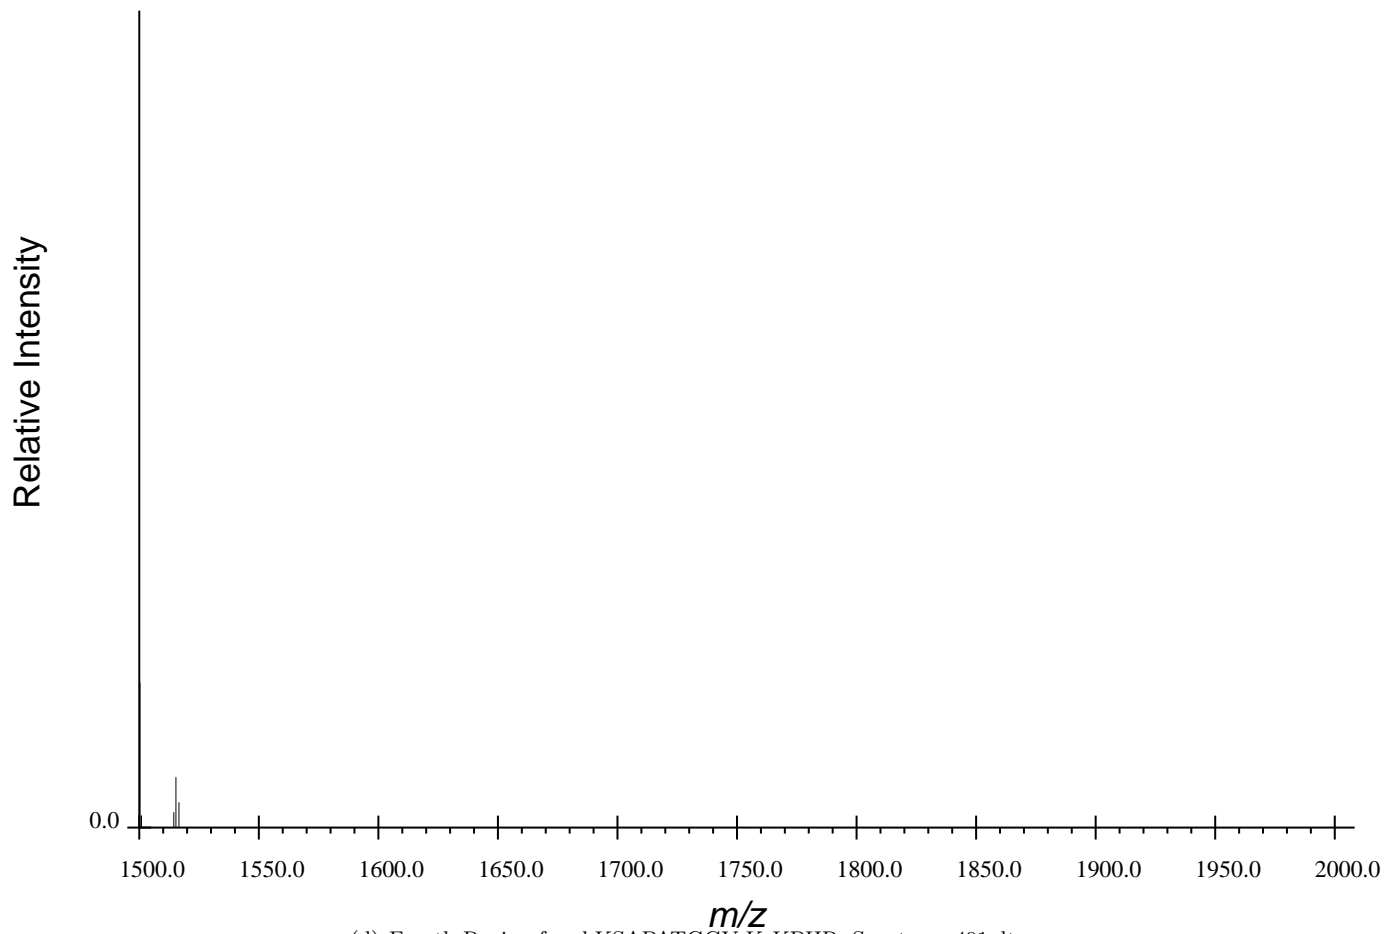

(d) Fourth Region for rhKSAPATGGVrKrKPHR, Spectrum 491.dta

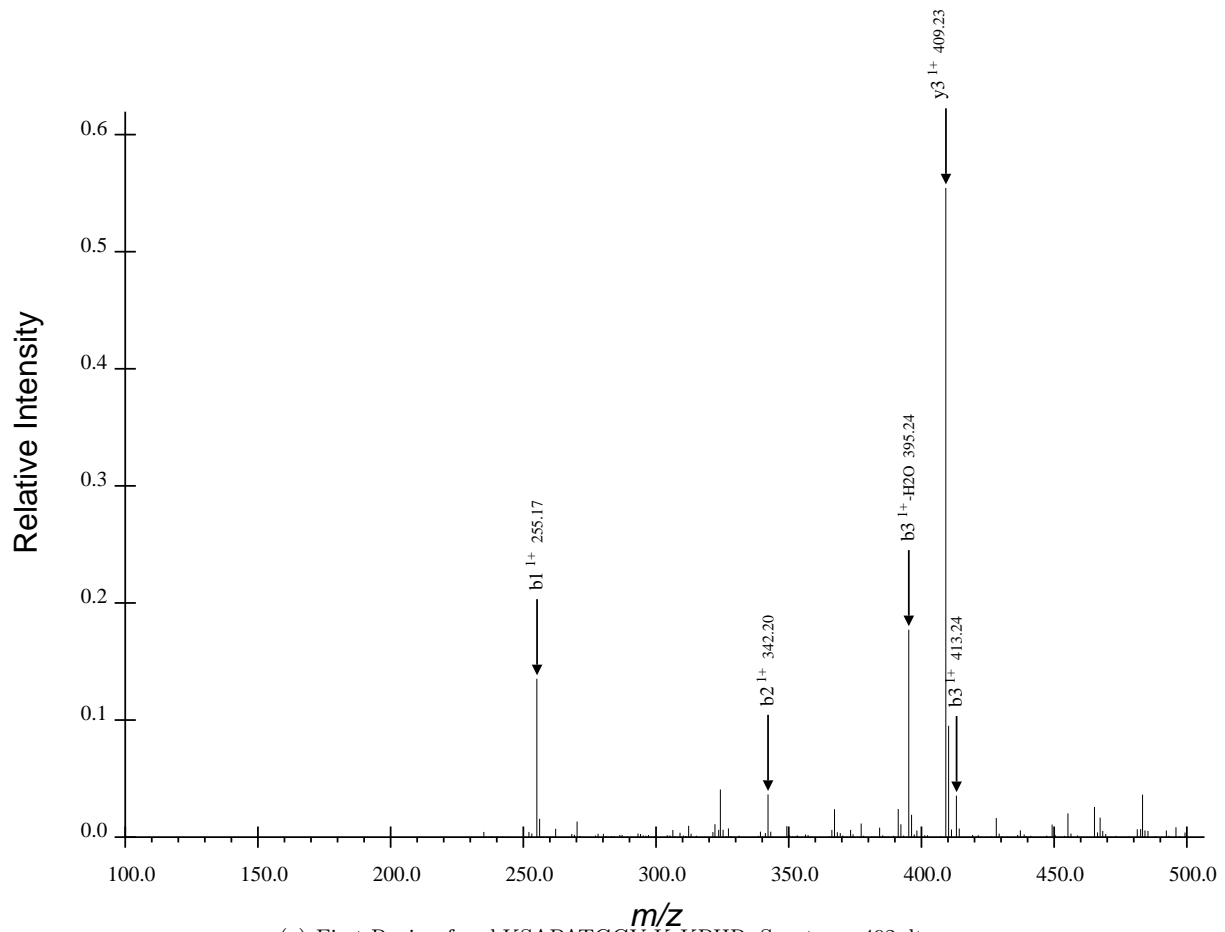

(a) First Region for rhKSAPATGGVrKrKPHR, Spectrum 492.dta

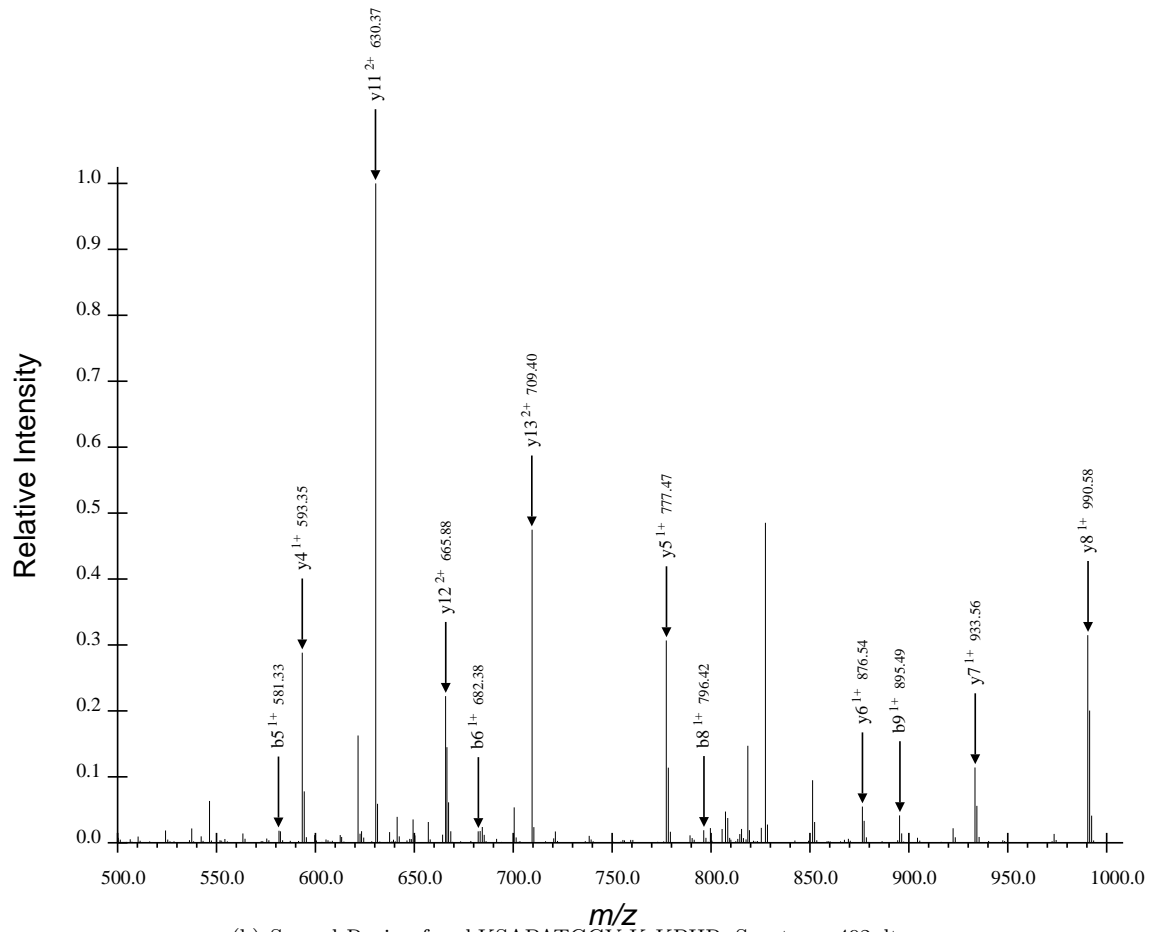

(b) Second Region for rhKSAPATGGVrKrKPHR, Spectrum 492.dta



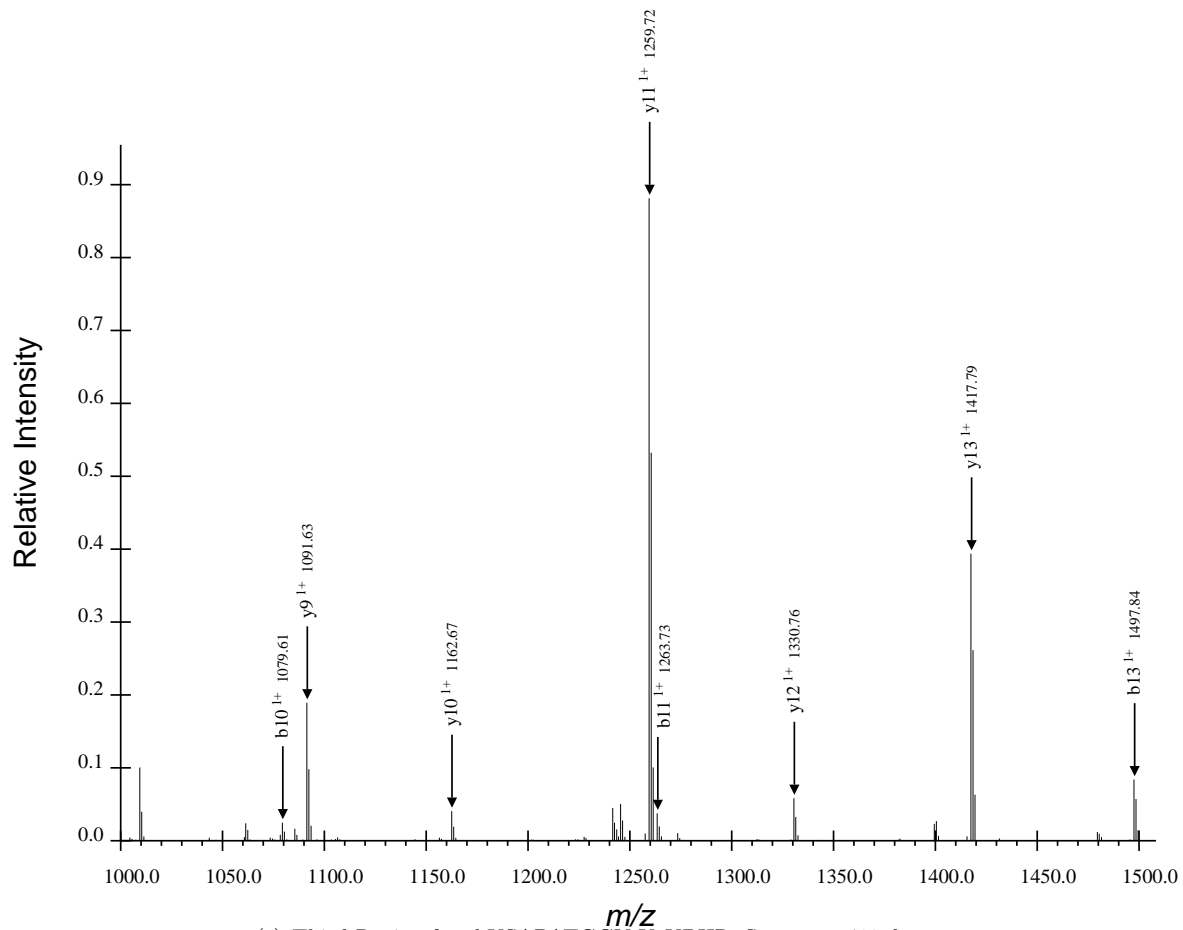

(c) Third Region for rhKSAPATGGVrKrKPHR, Spectrum 492.dta

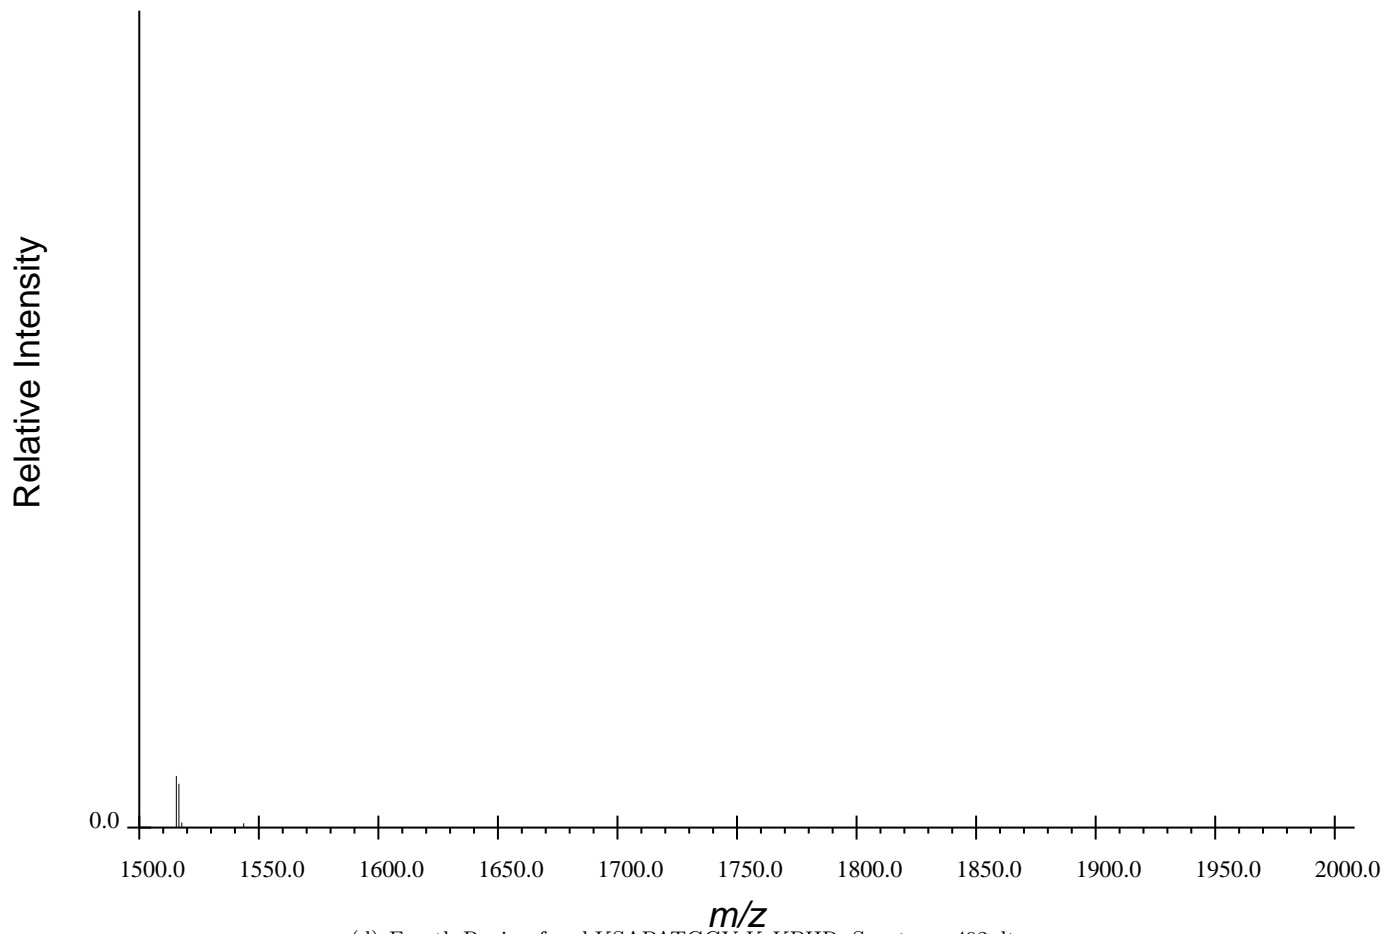

(d) Fourth Region for rhKSAPATGGVrKrKPHR, Spectrum 492.dta

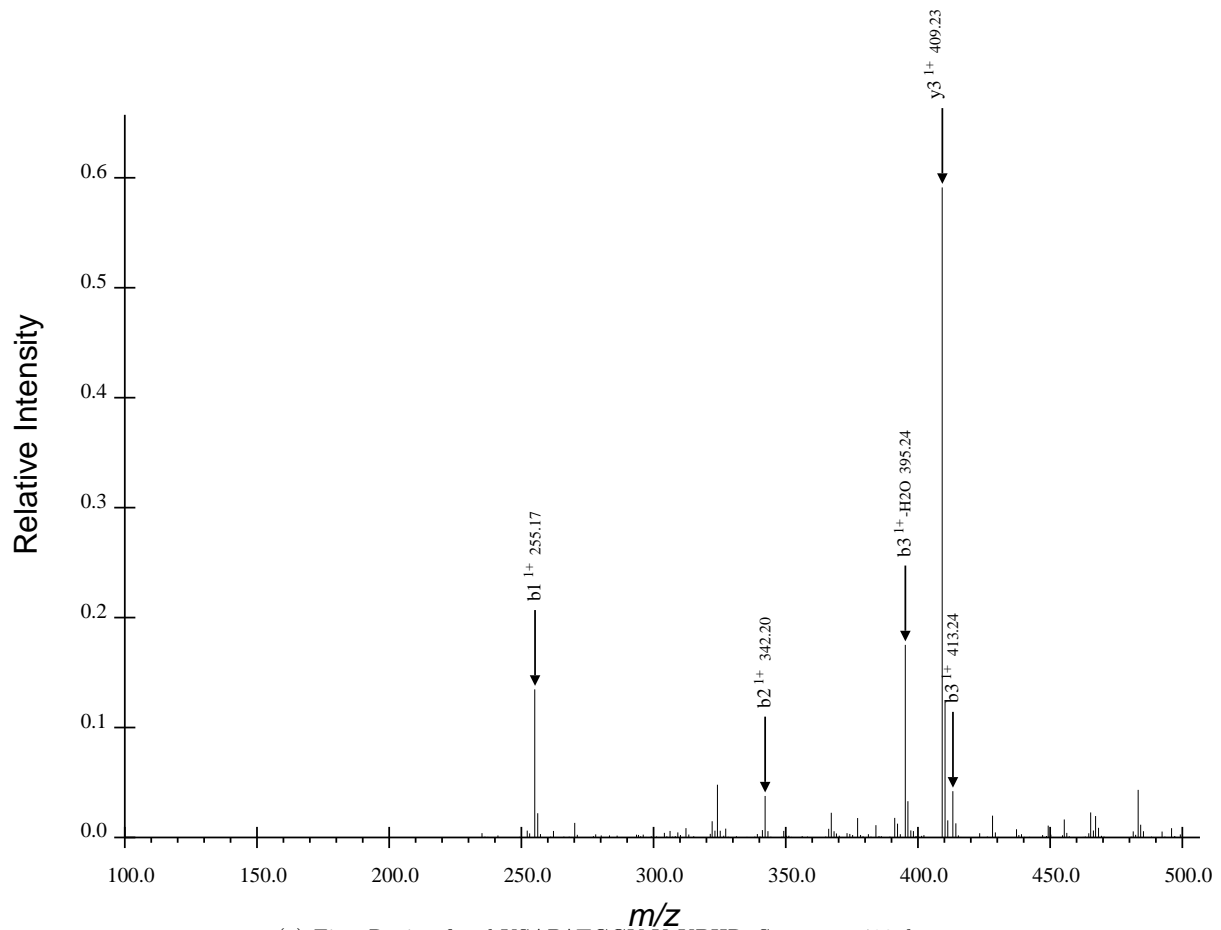

(a) First Region for rhKSAPATGGVrKrKPHR, Spectrum 493.dta

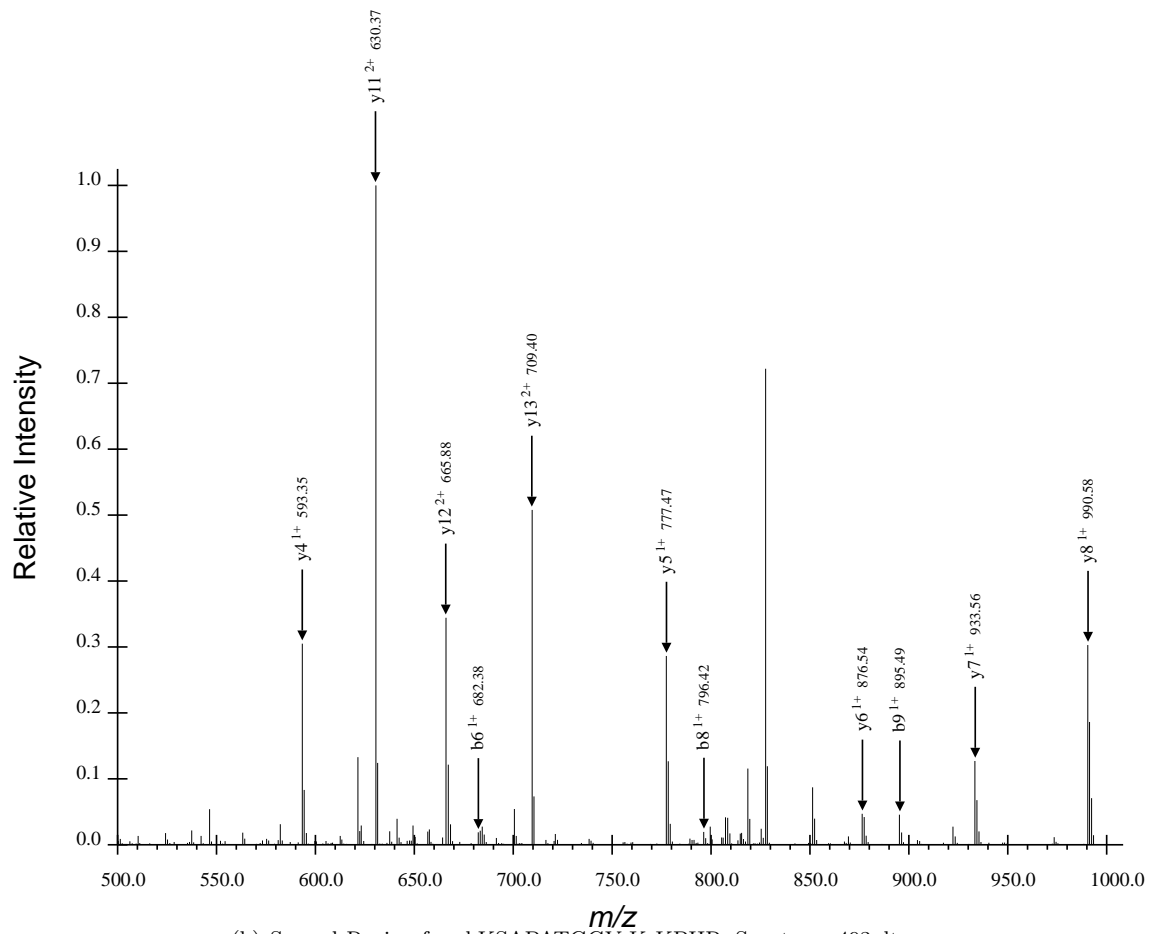

(b) Second Region for rhKSAPATGGVrKrKPHR, Spectrum 493.dta

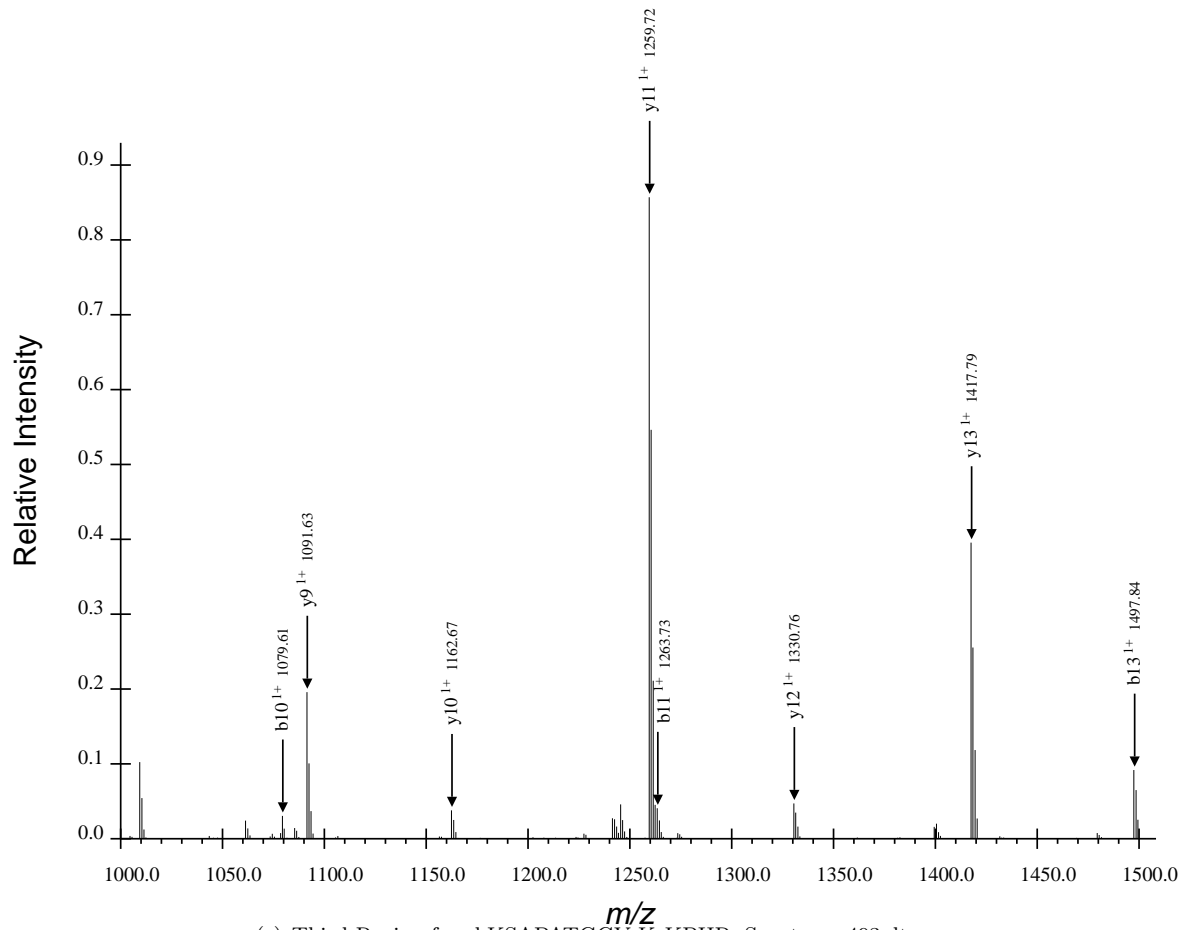

(c) Third Region for rhKSAPATGGVrKrKPHR, Spectrum 493.dta

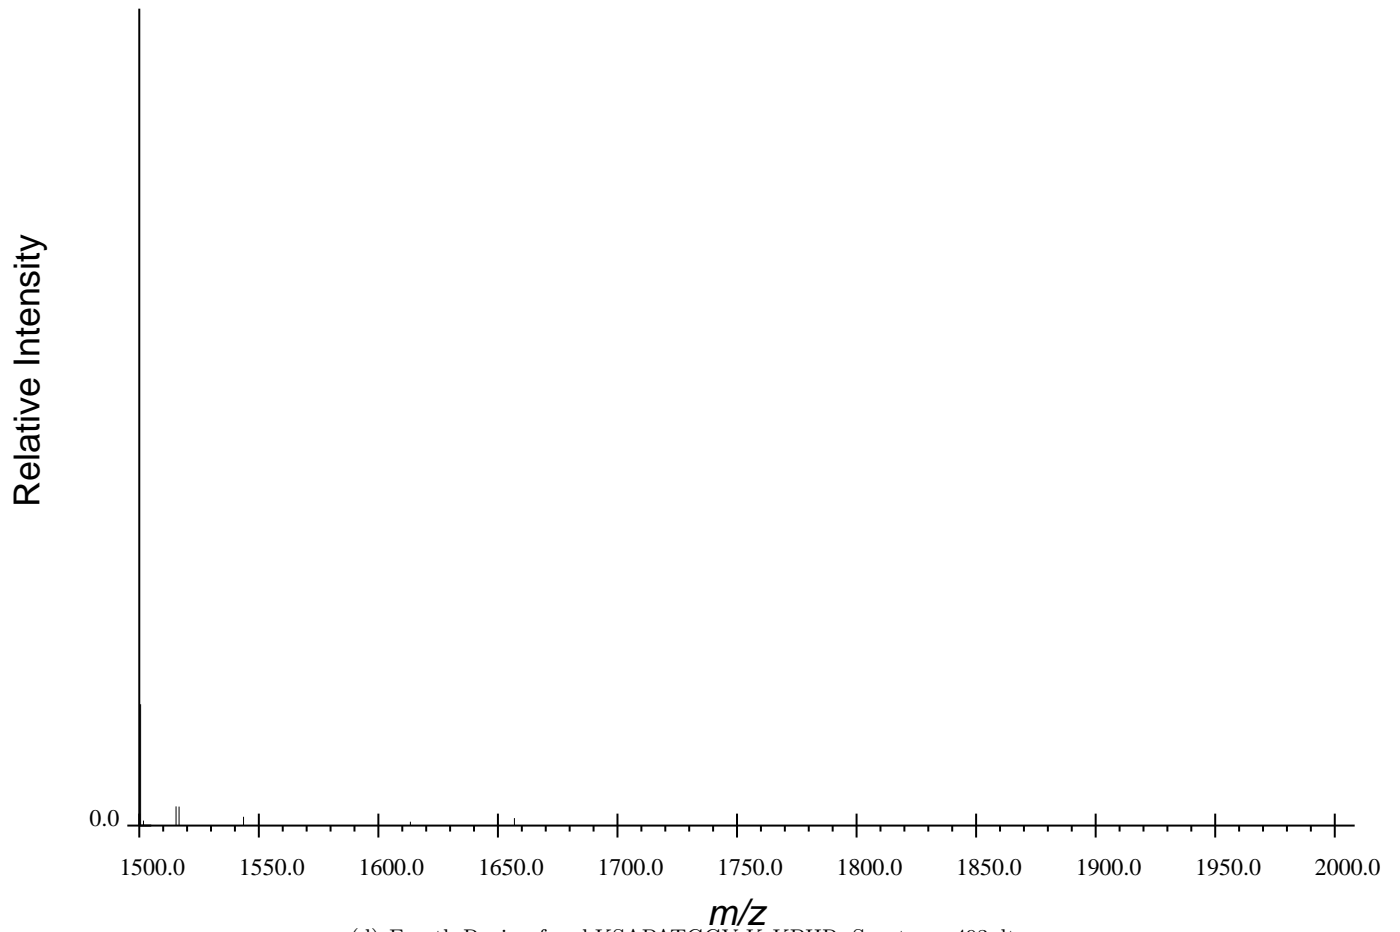

(d) Fourth Region for rhKSAPATGGVrKrKPHR, Spectrum 493.dta

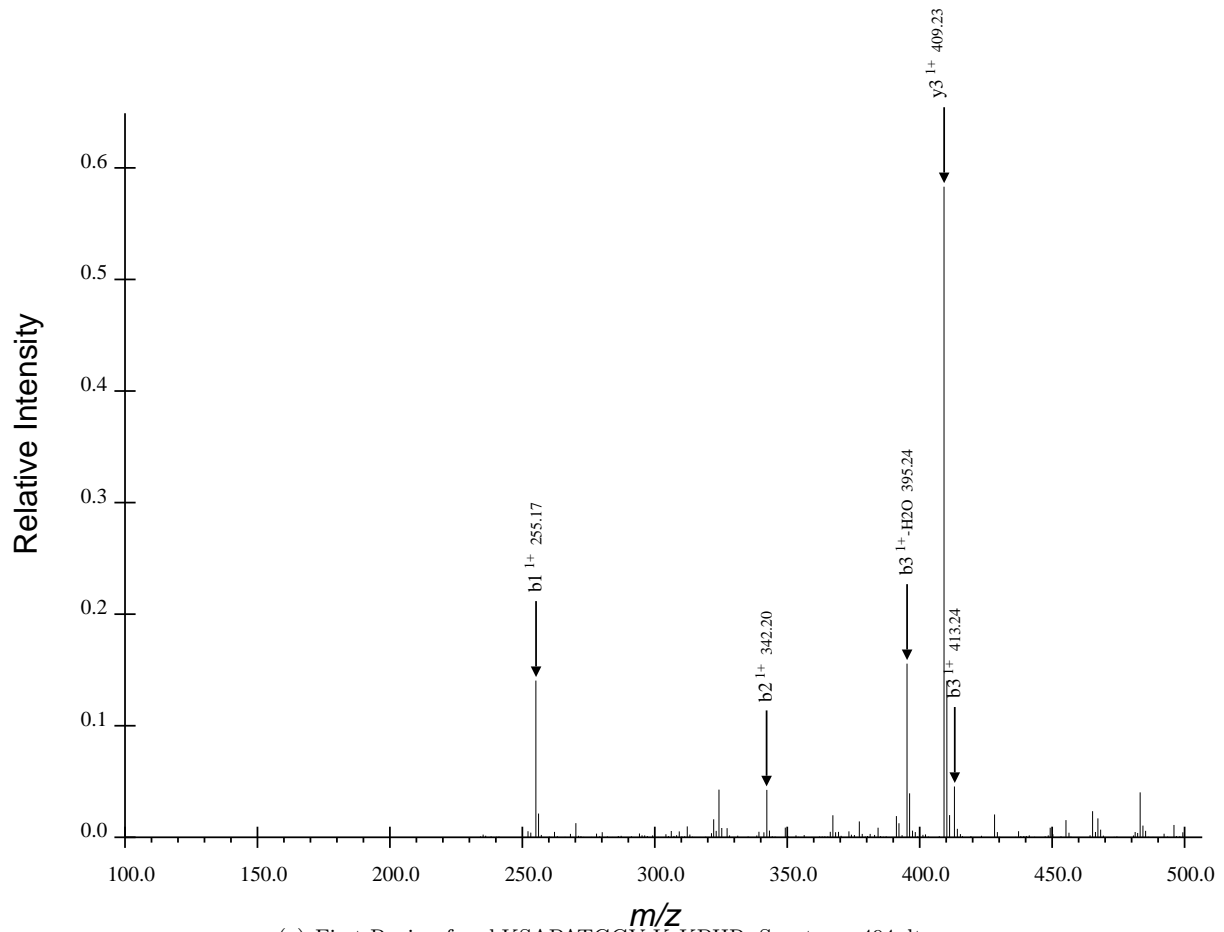

(a) First Region for rhKSAPATGGVrKrKPHR, Spectrum 494.dta

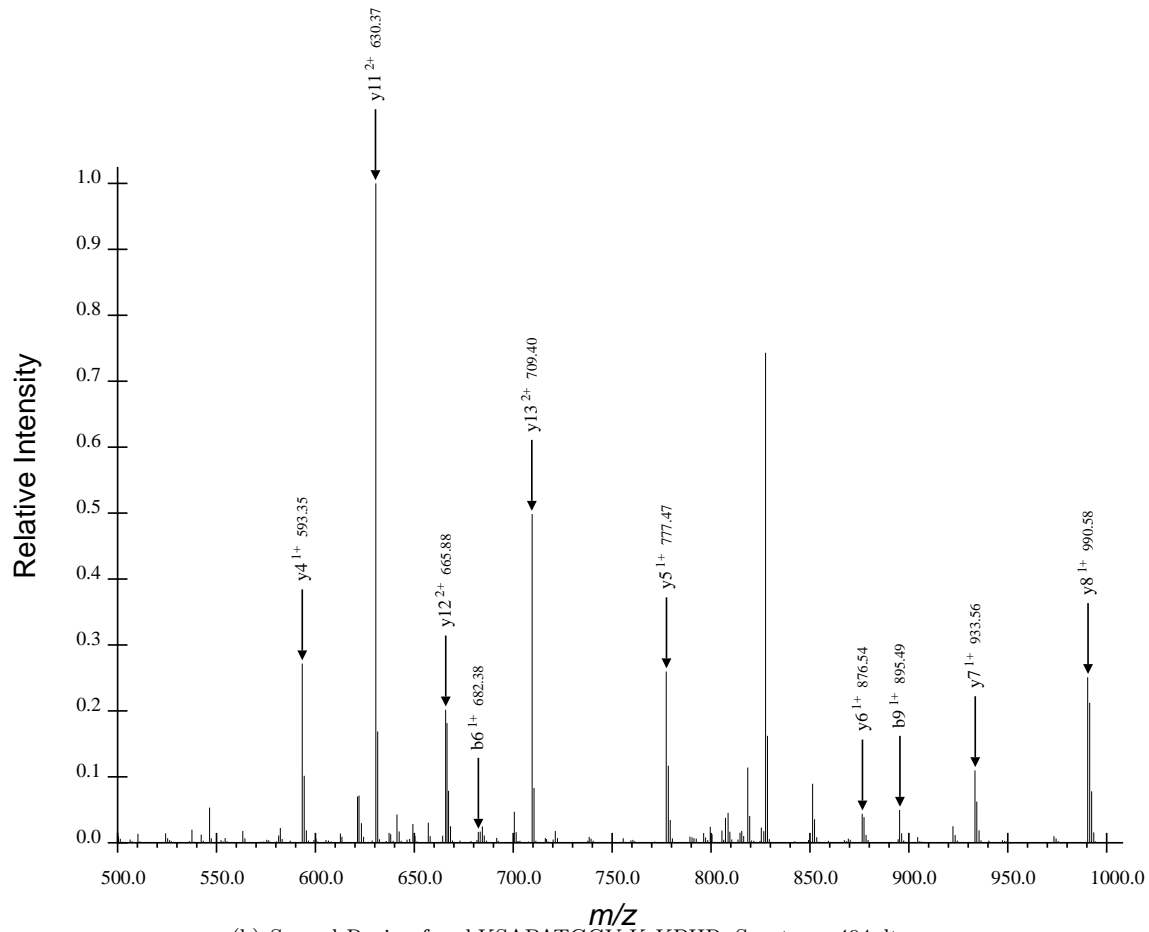

(b) Second Region for rhKSAPATGGVrKrKPHR, Spectrum 494.dta

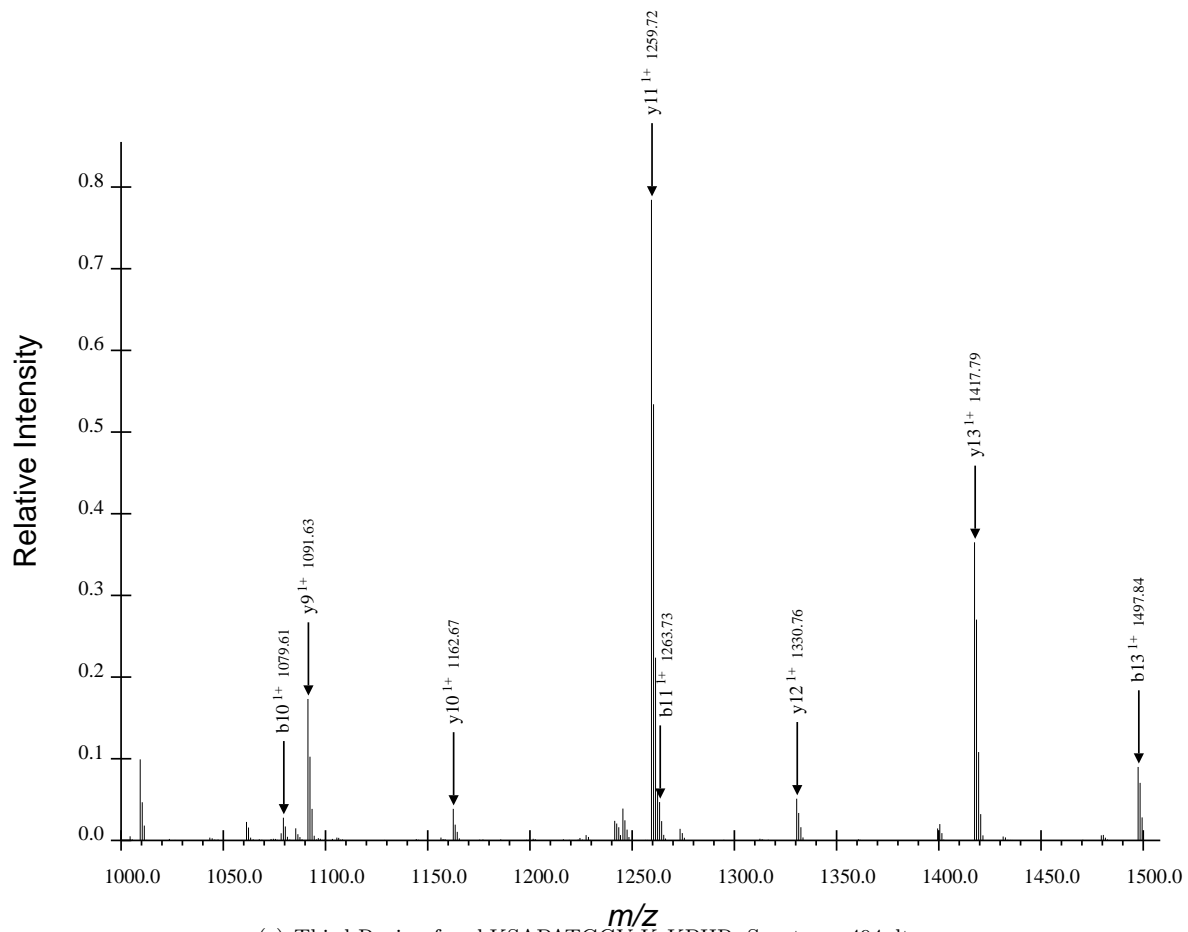

(c) Third Region for rhKSAPATGGVrKrKPHR, Spectrum 494.dta

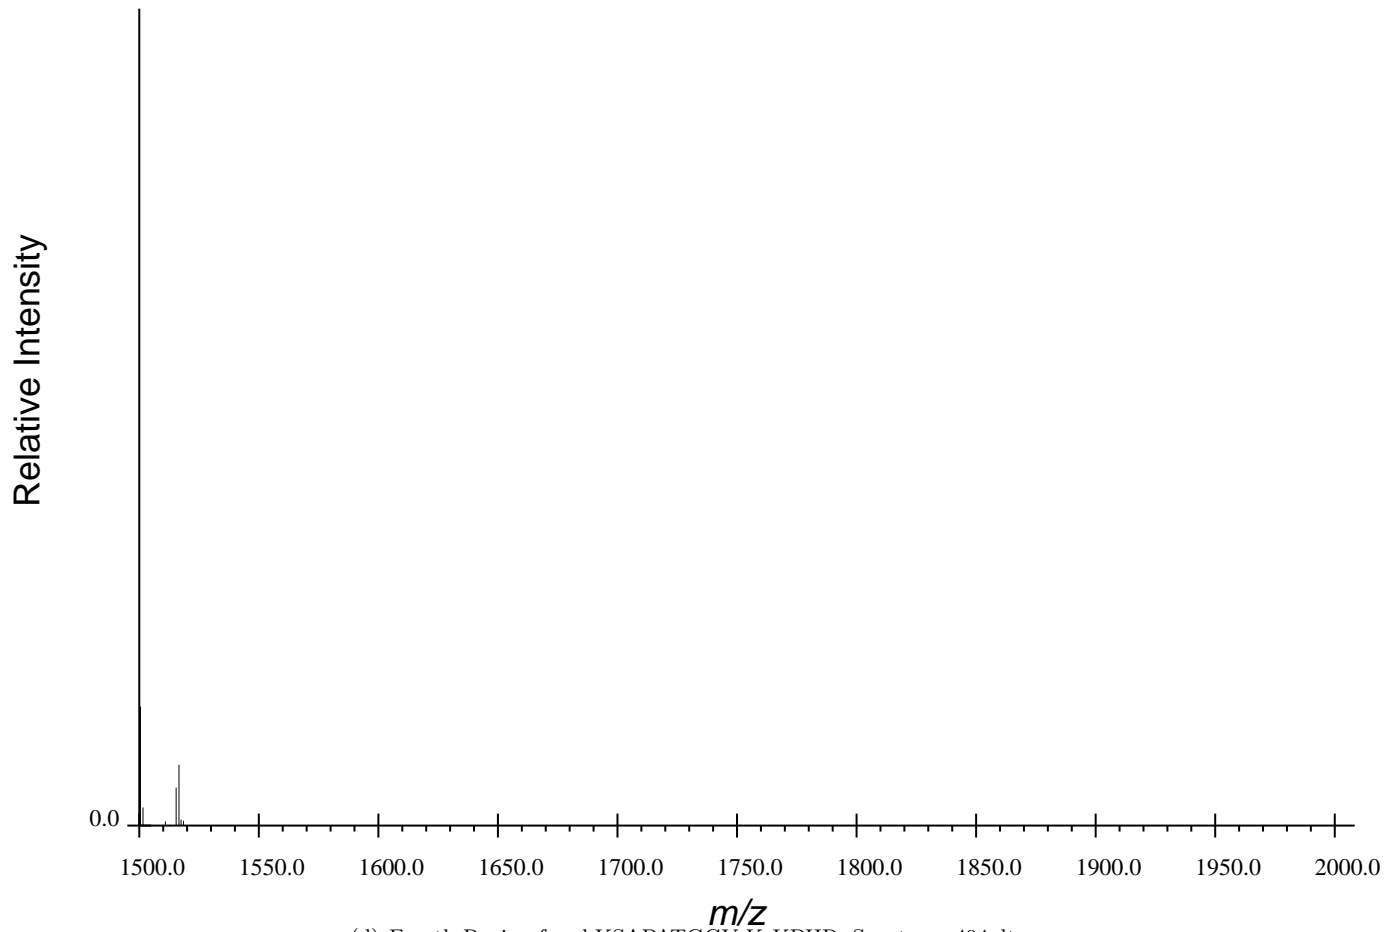

(d) Fourth Region for rhKSAPATGGVrKrKPHR, Spectrum 494.dta

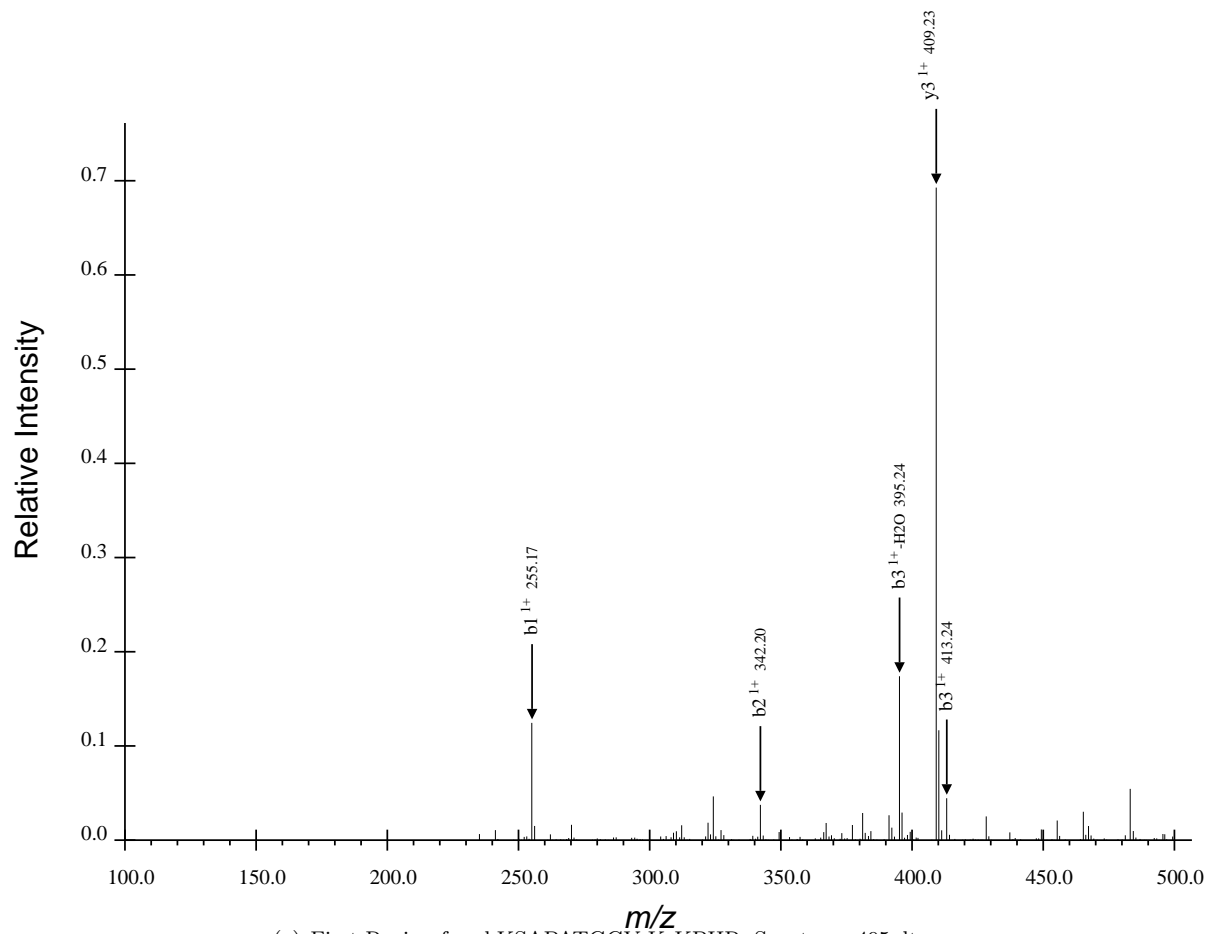

(a) First Region for rhKSAPATGGVrKrKPHR, Spectrum 495.dta

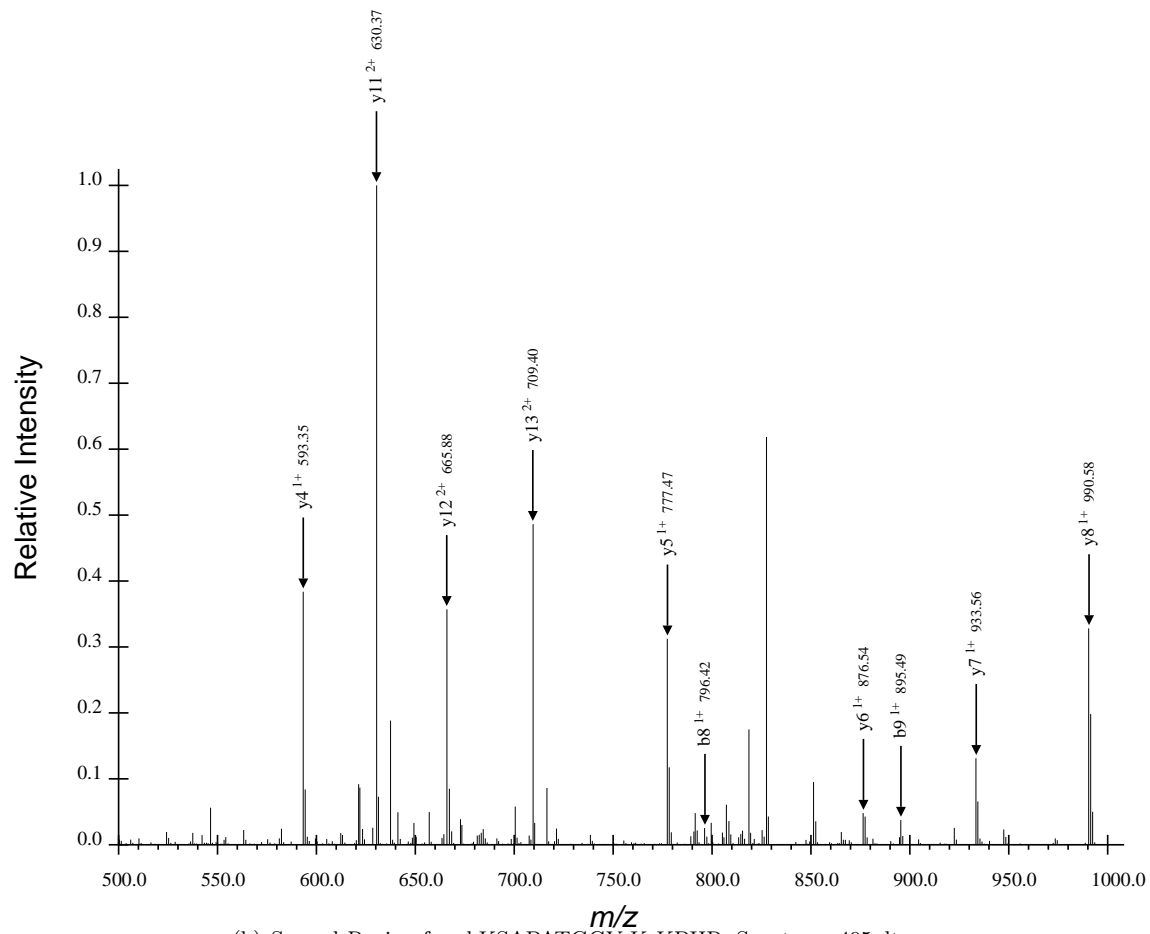

(b) Second Region for rhKSAPATGGVrKrKPHR, Spectrum 495.dta

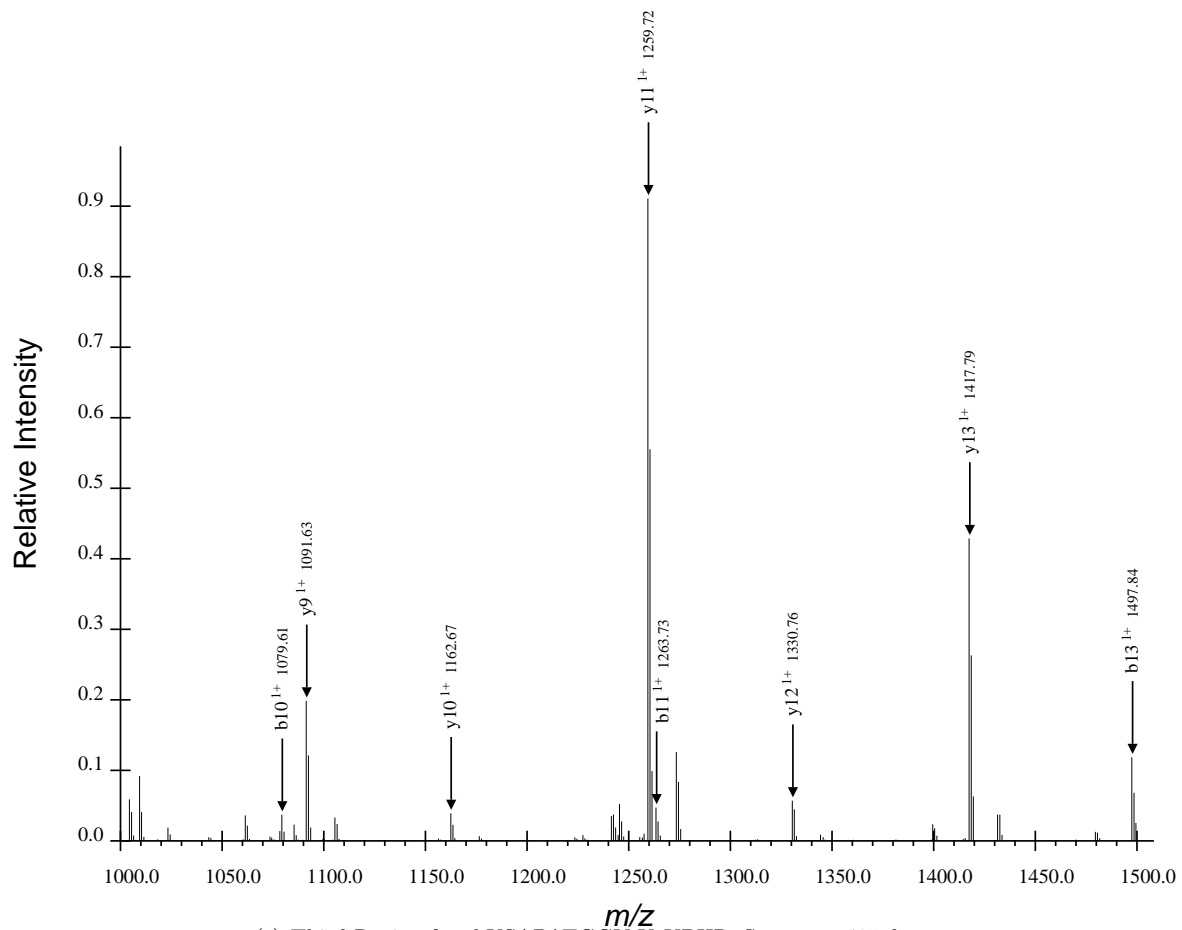

(c) Third Region for rhKSAPATGGVrKrKPHR, Spectrum 495.dta

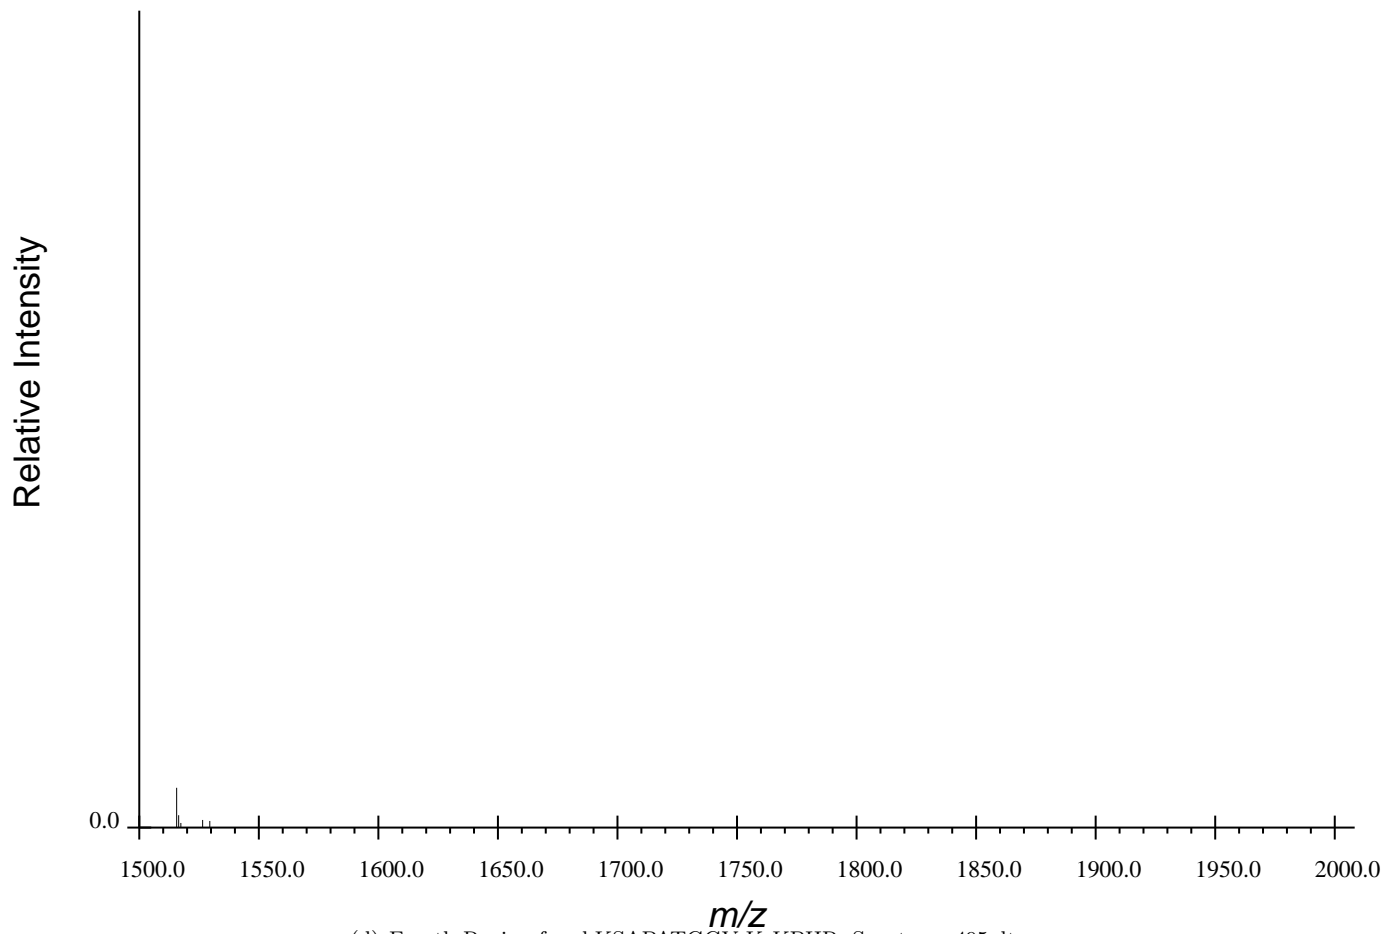

(d) Fourth Region for rhKSAPATGGVrKrKPHR, Spectrum 495.dta

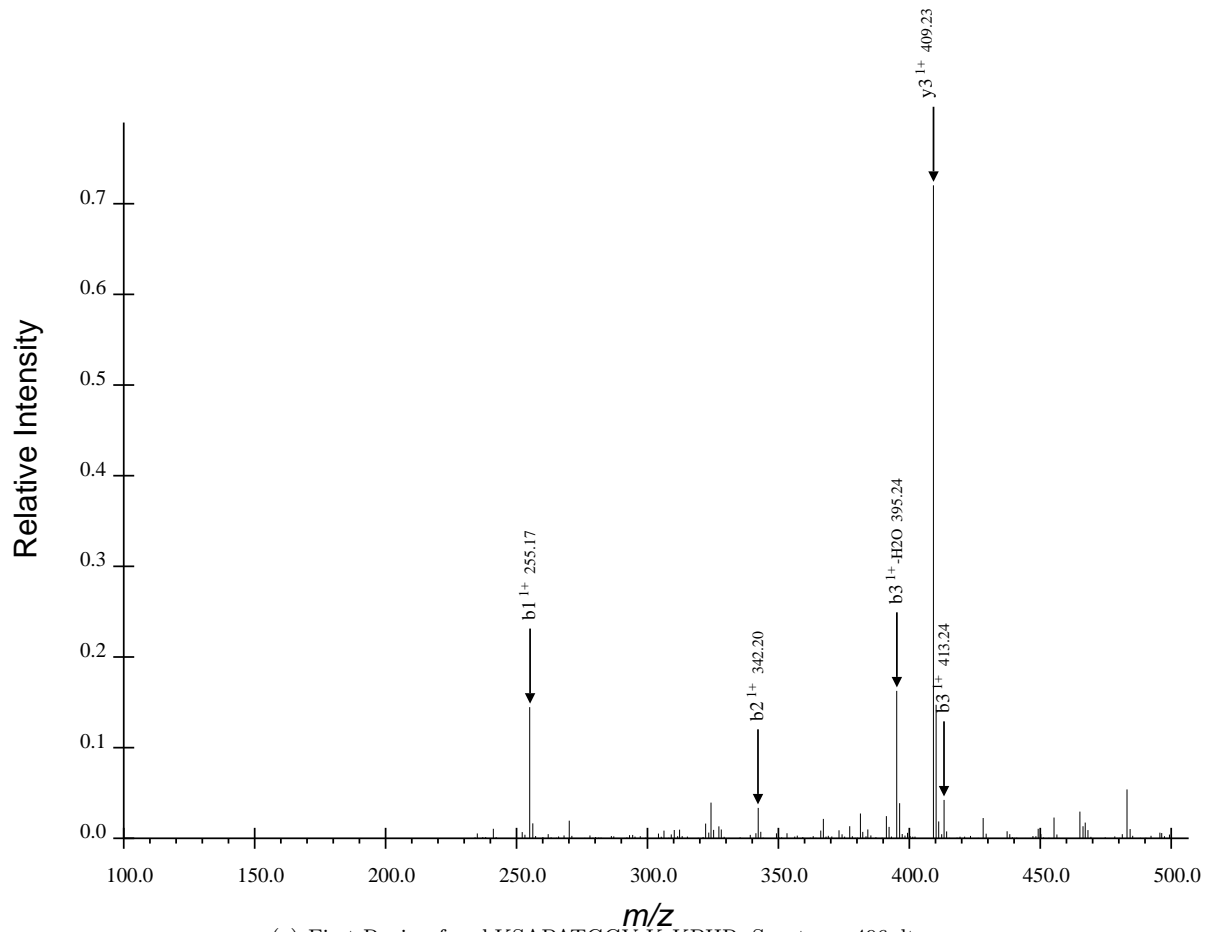

(a) First Region for rhKSAPATGGVrKrKPHR, Spectrum 496.dta

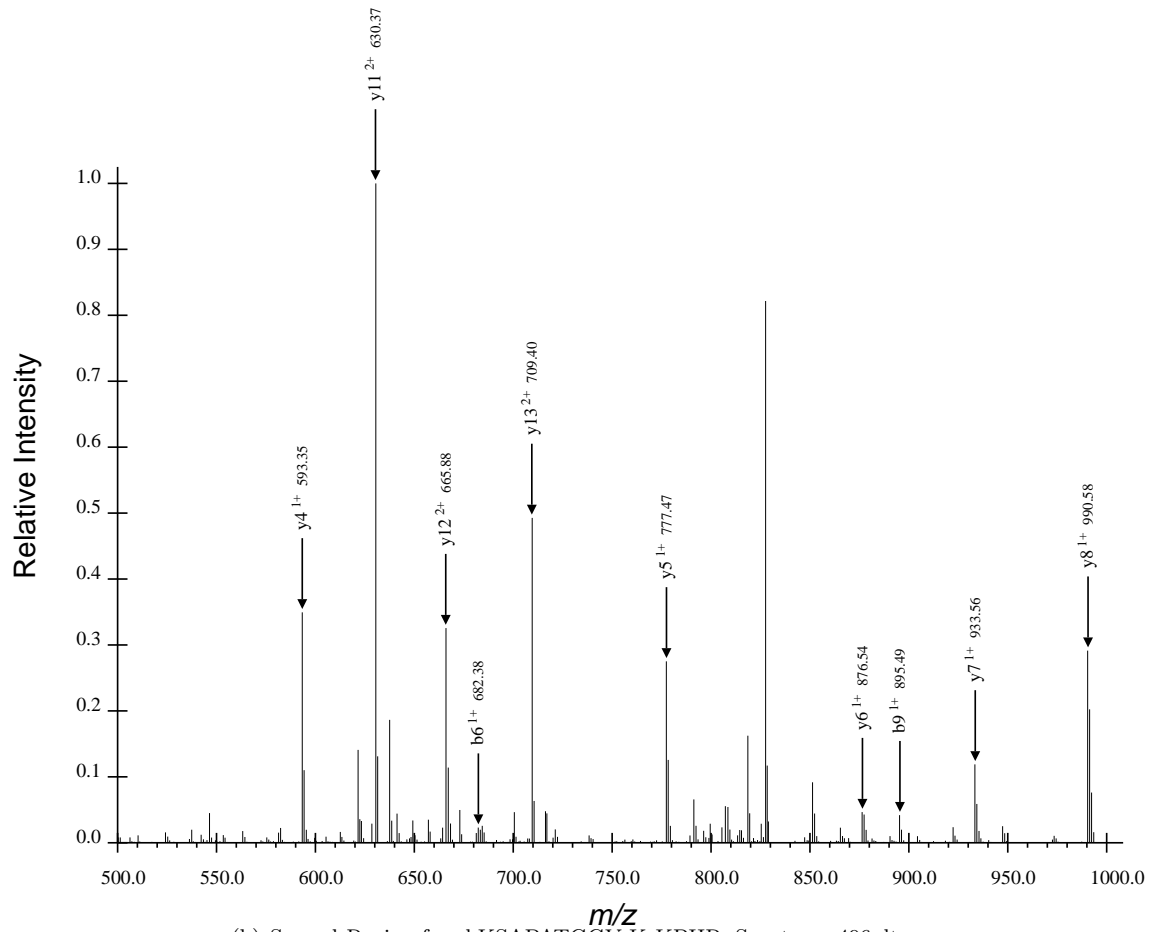

(b) Second Region for rhKSAPATGGVrKrKPHR, Spectrum 496.dta



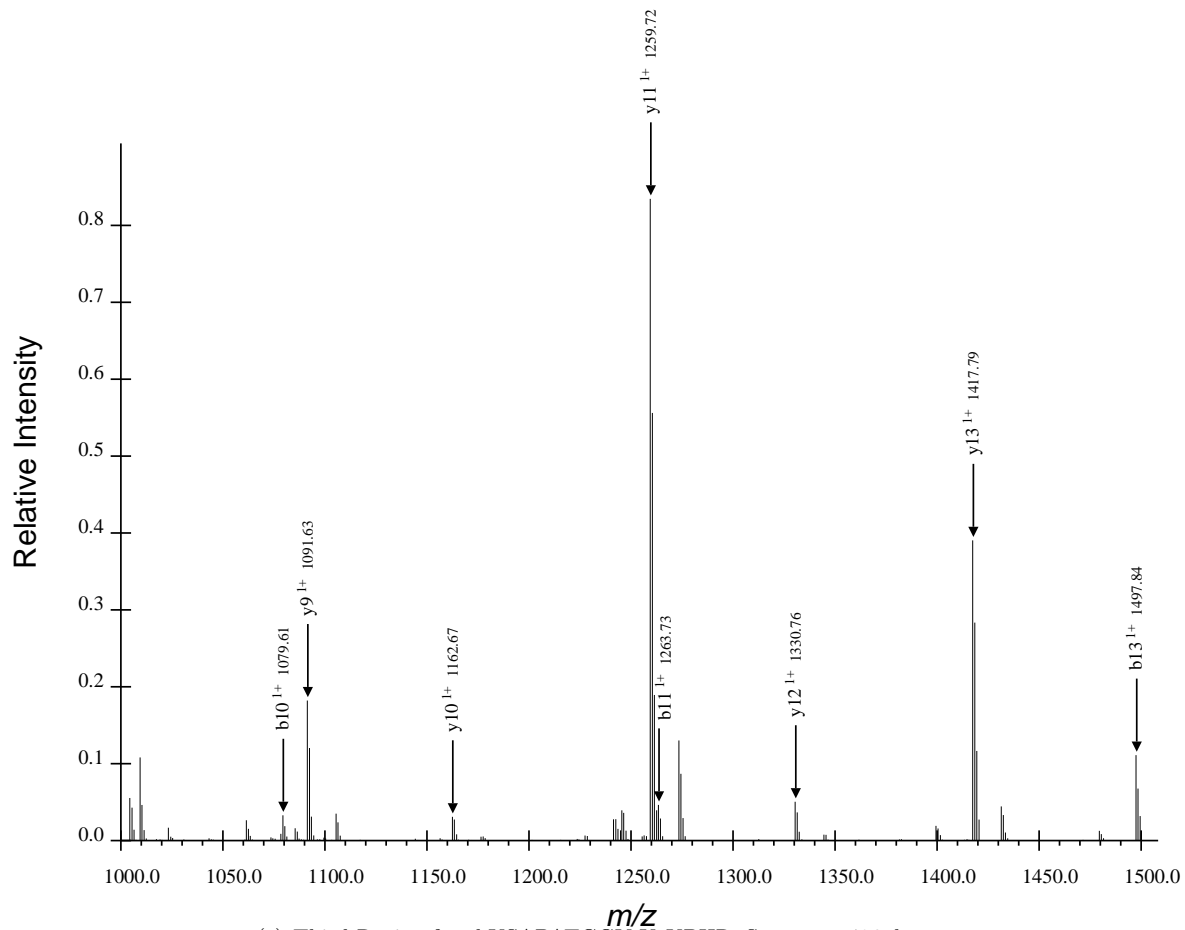

(c) Third Region for rhKSAPATGGVrKrKPHR, Spectrum 496.dta

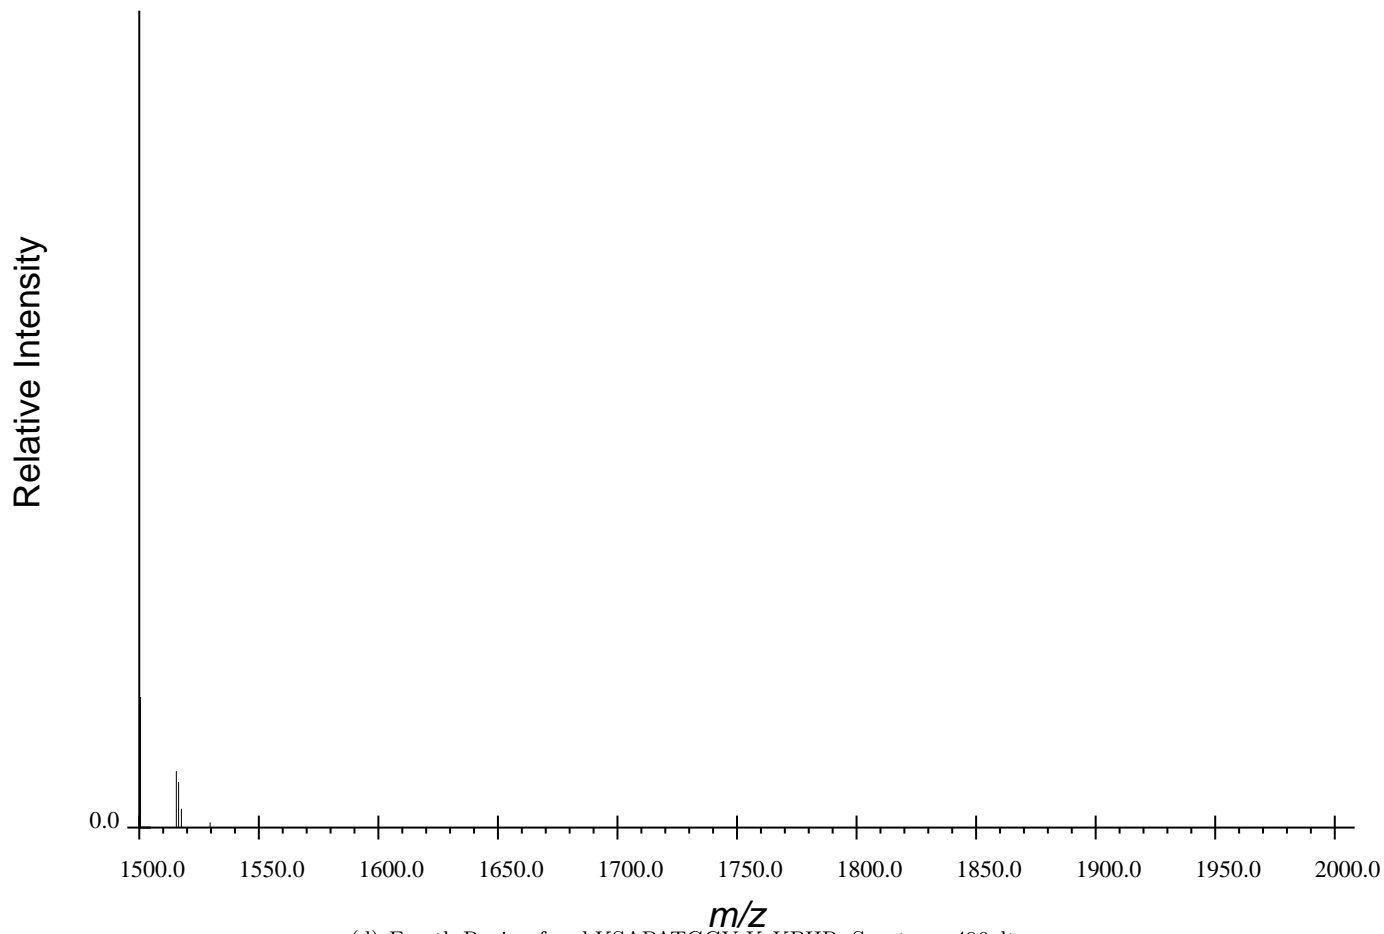

(d) Fourth Region for rhKSAPATGGVrKrKPHR, Spectrum 496.dta

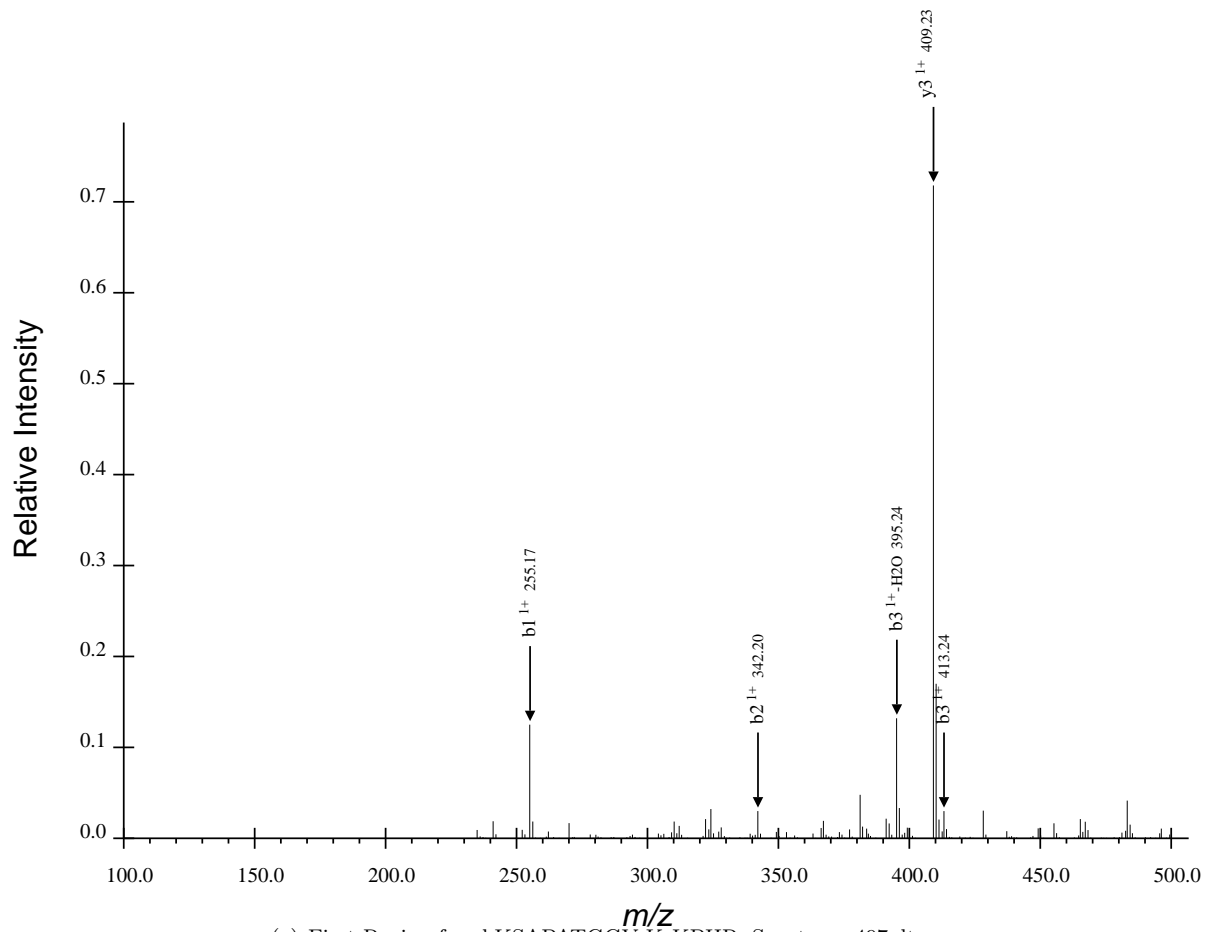

(a) First Region for rhKSAPATGGVrKrKPHR, Spectrum 497.dta

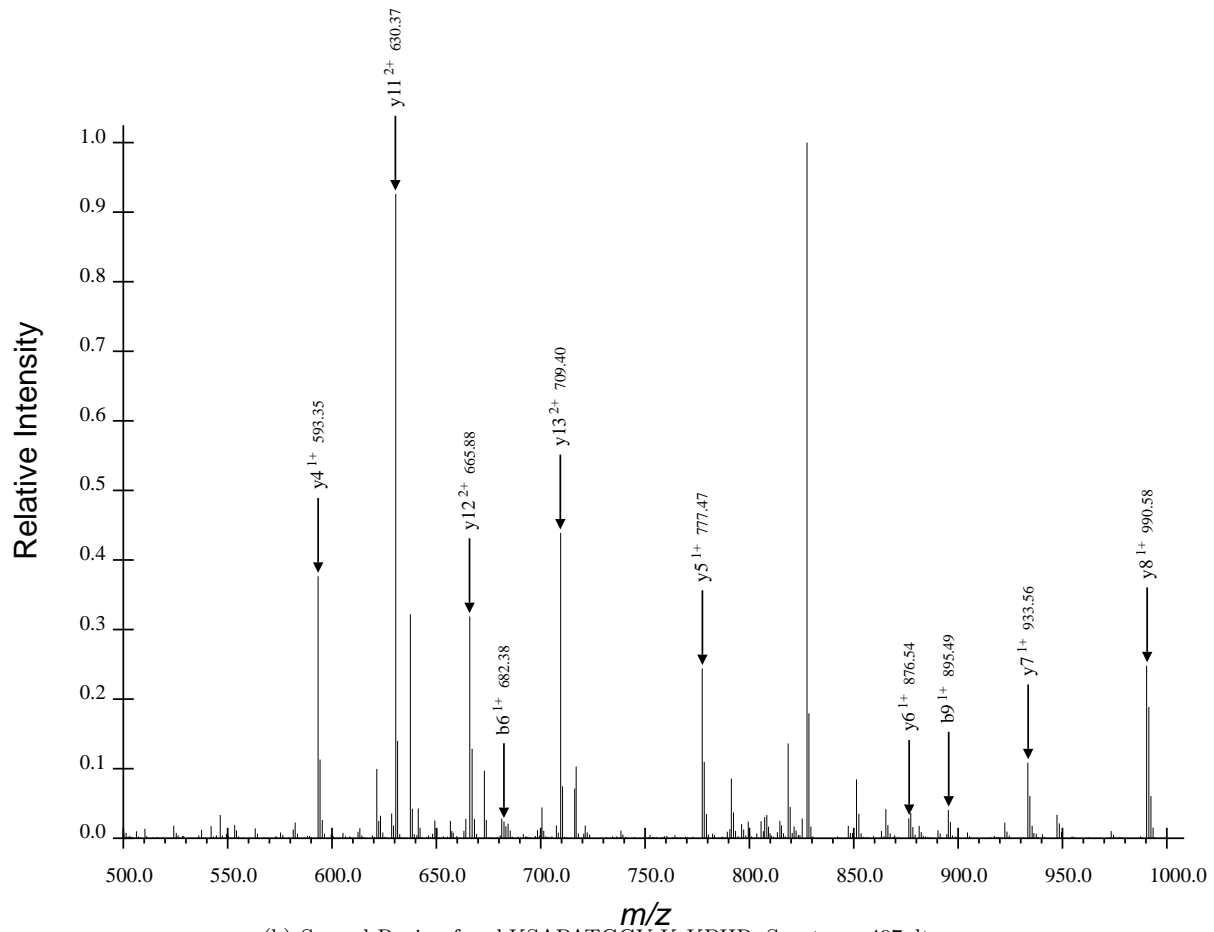

(b) Second Region for rhKSAPATGGVrKrKPHR, Spectrum 497.dta

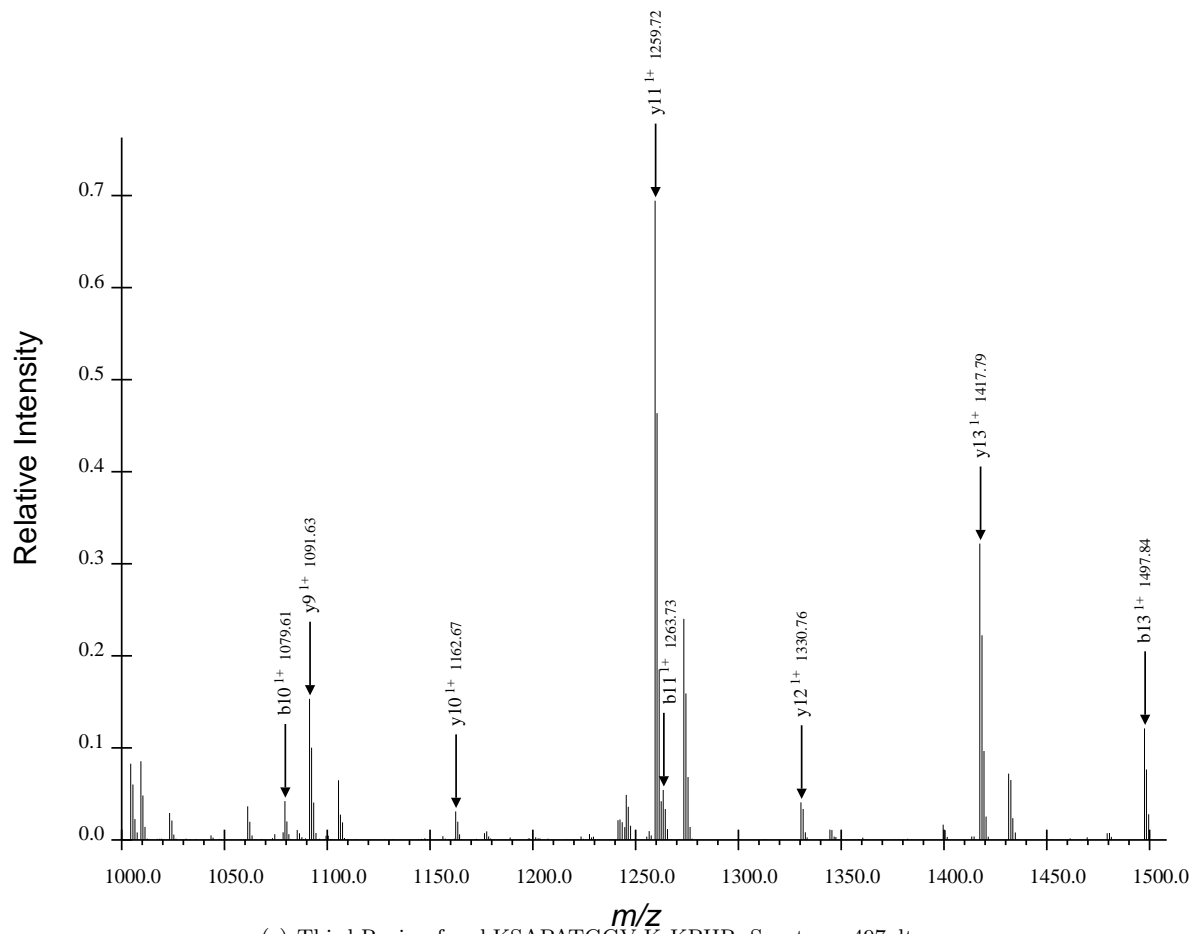

(c) Third Region for rhKSAPATGGVrKrKPHR, Spectrum 497.dta

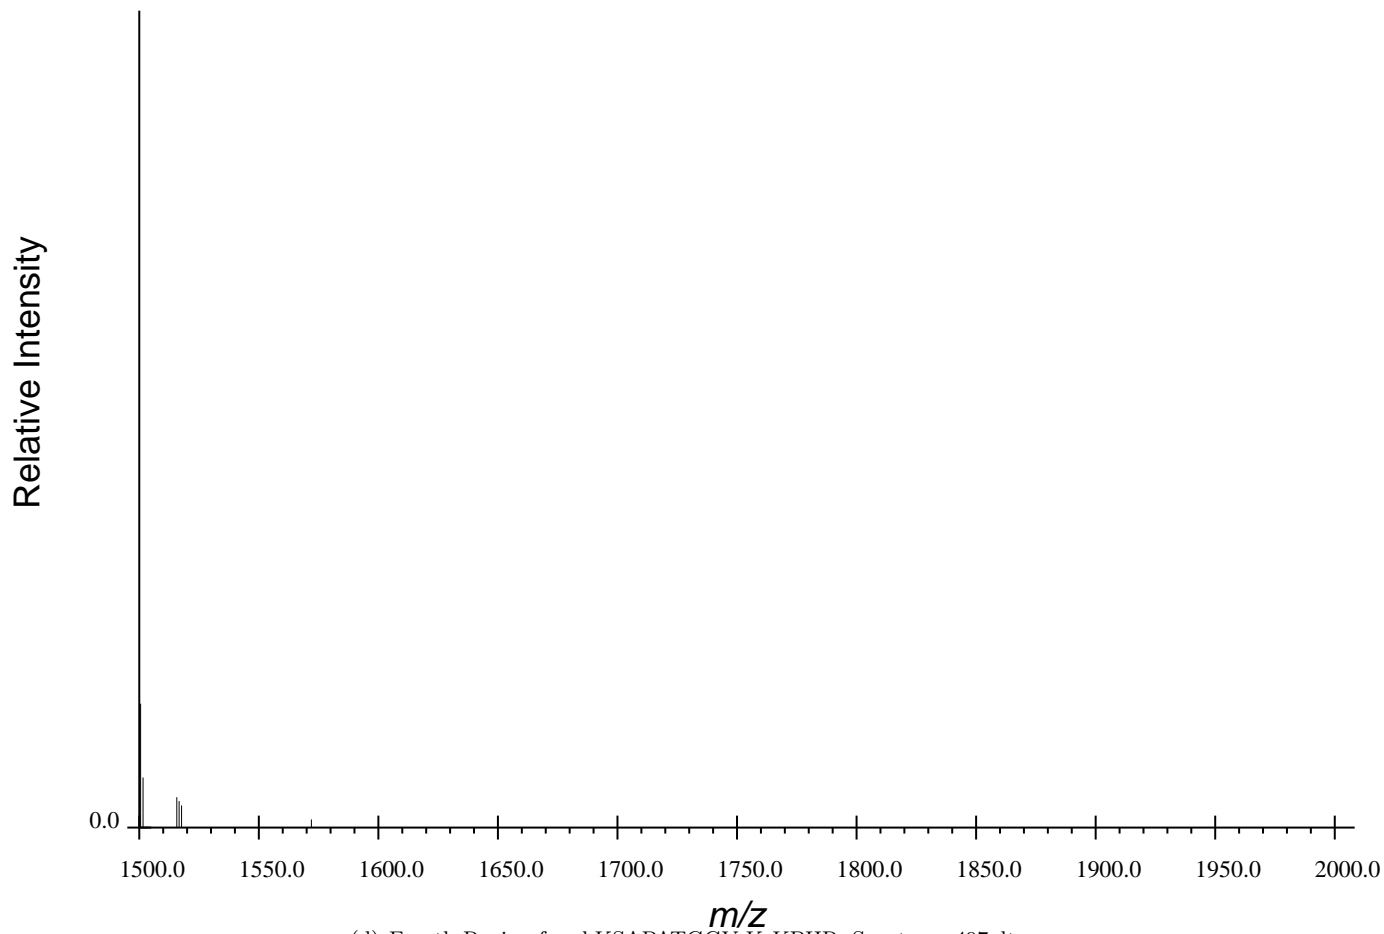

(d) Fourth Region for rhKSAPATGGVrKrKPHR, Spectrum 497.dta

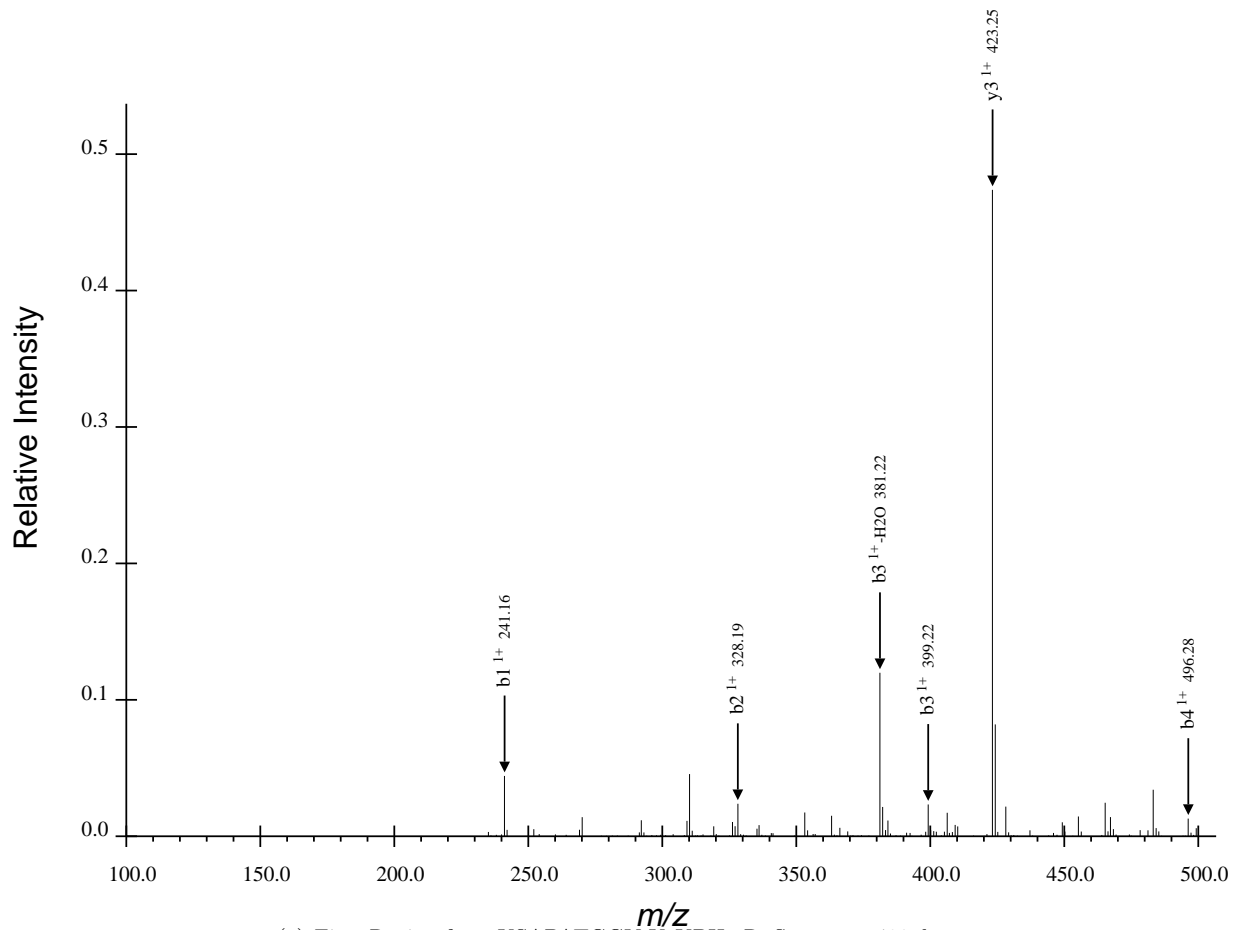

(a) First Region for rrKSAPATGGVrKrKPHmR, Spectrum 498.dta

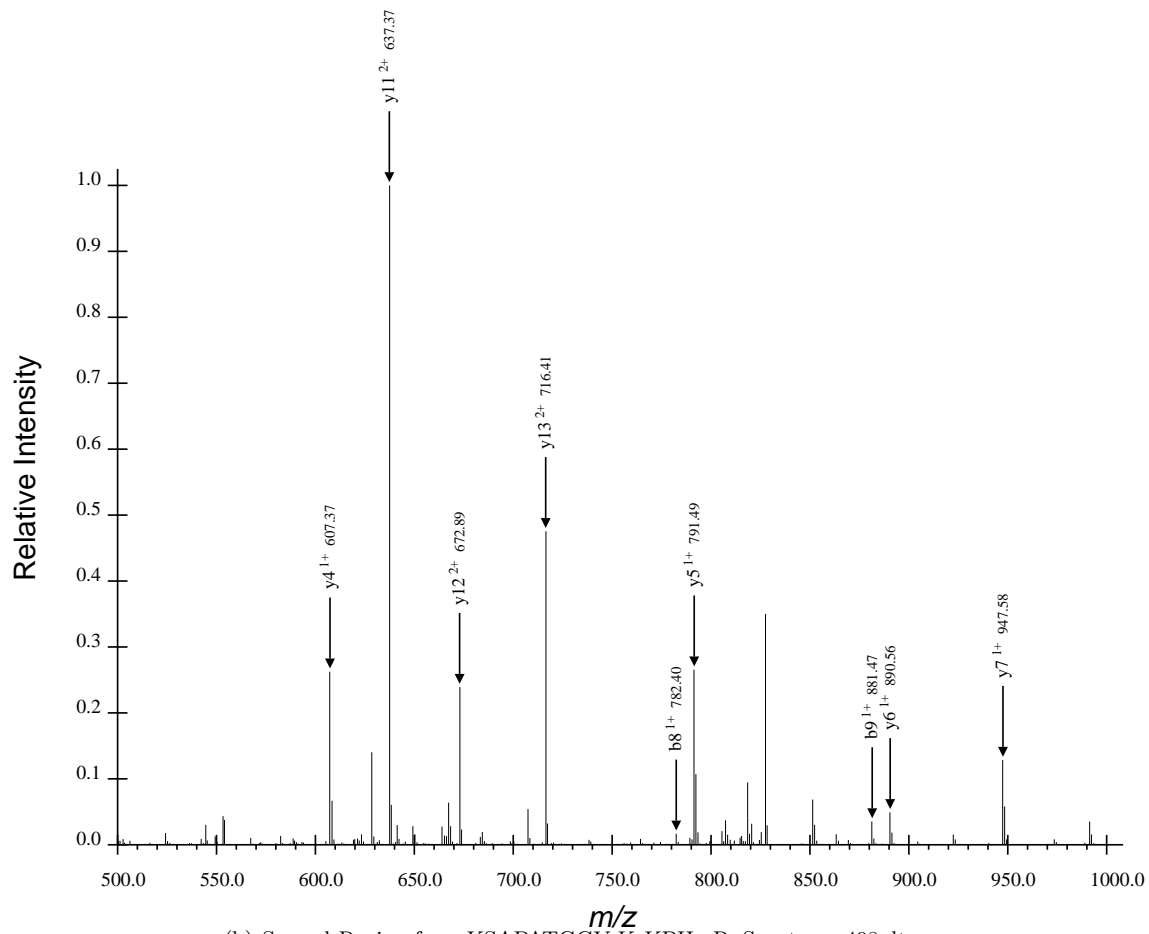

(b) Second Region for rrKSAPATGGVrKrKPHmR, Spectrum 498.dta

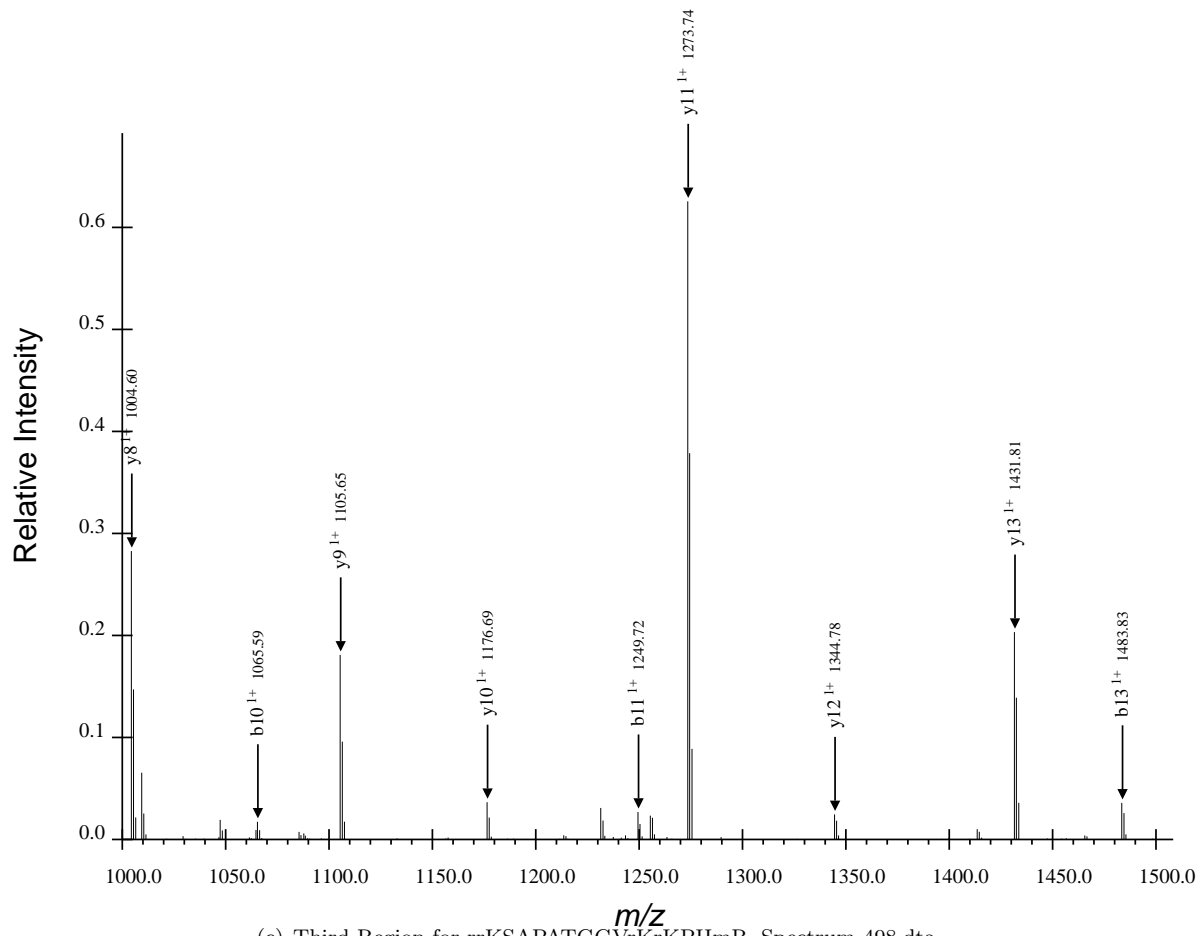

(c) Third Region for rrKSAPATGGVrKrKPHmR, Spectrum 498.dta

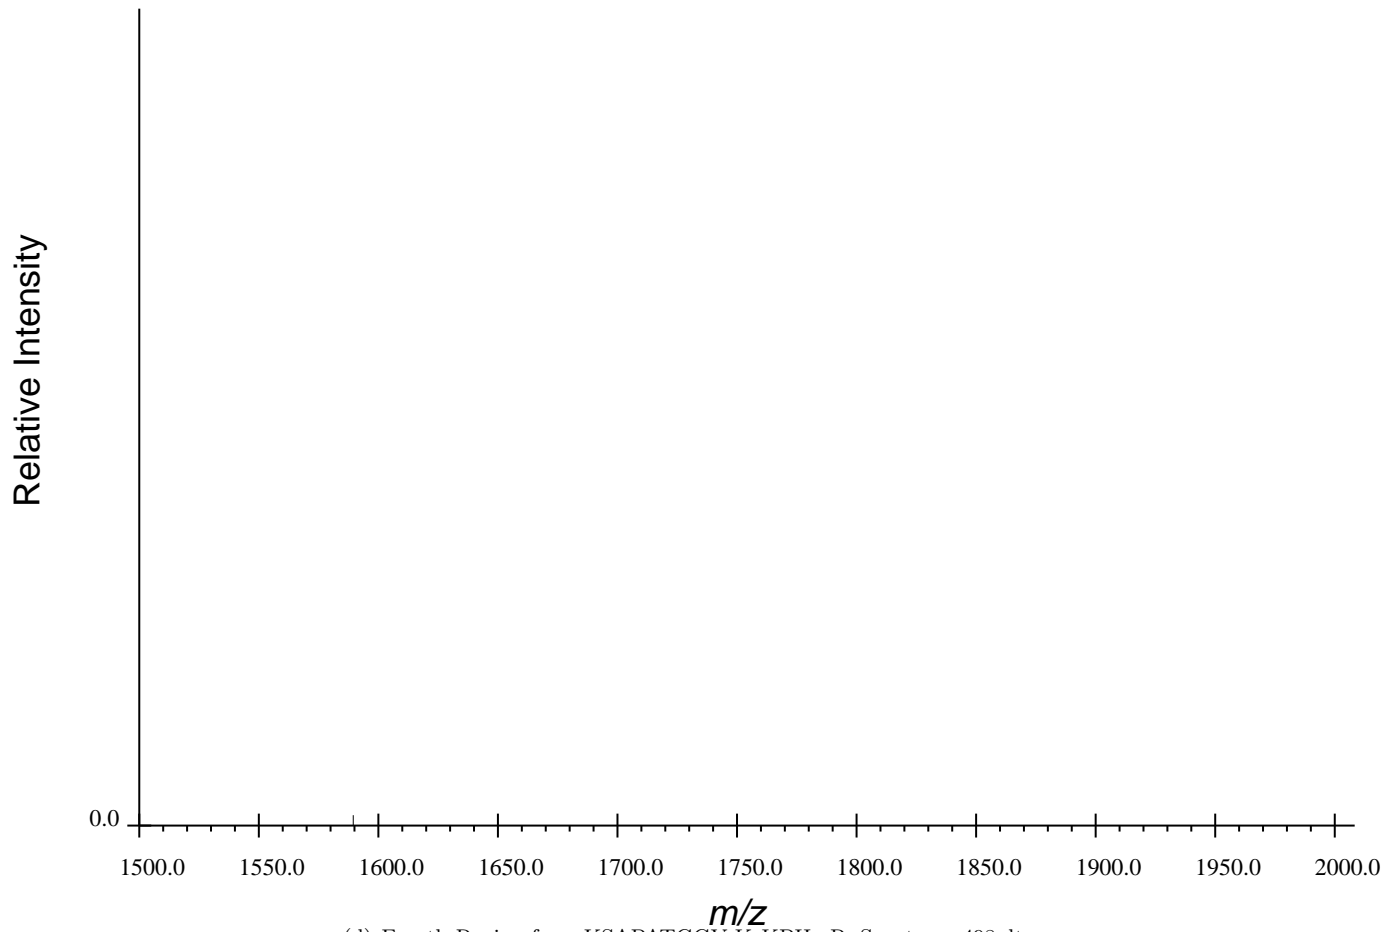

(d) Fourth Region for rrKSAPATGGVrKrKPHmR, Spectrum 498.dta

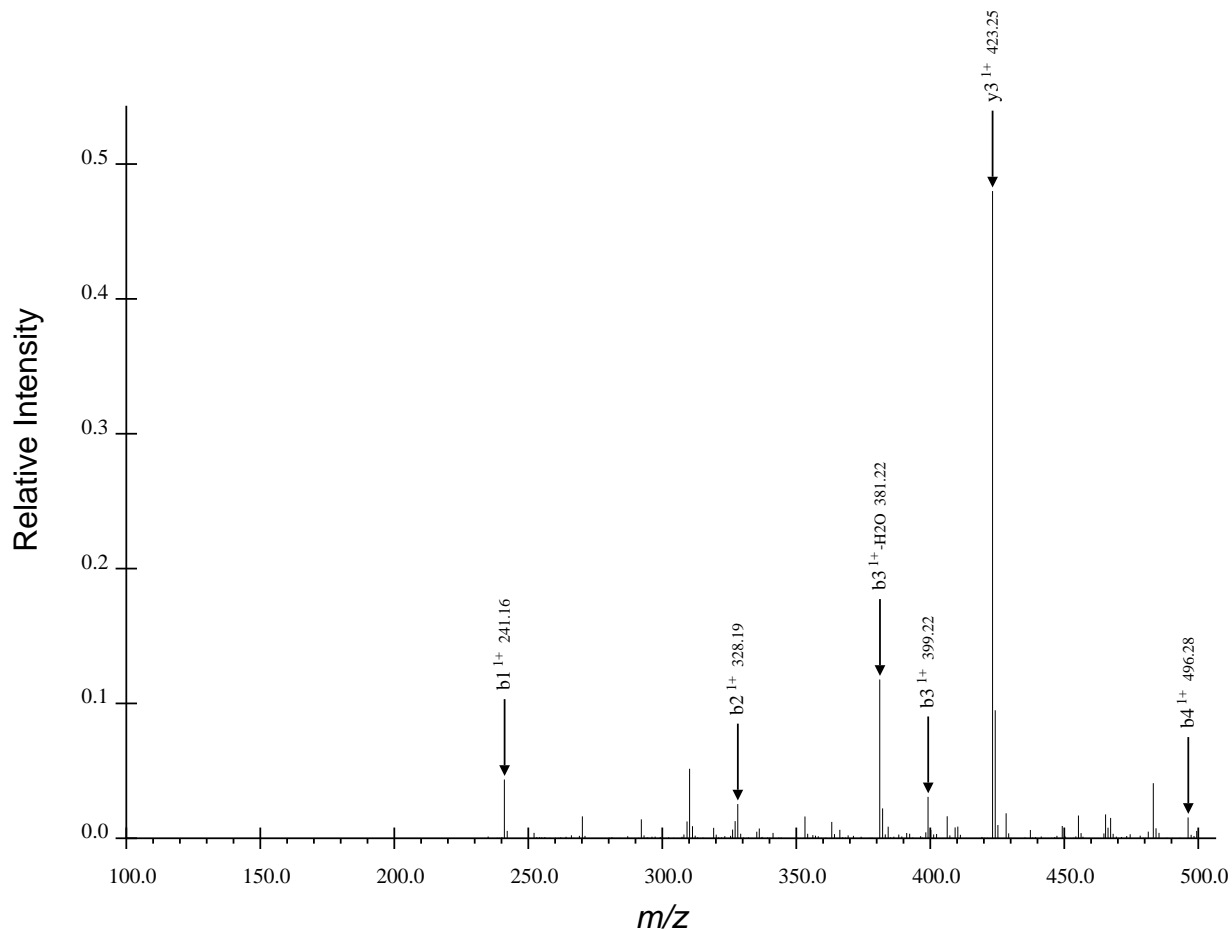

(a) First Region for rrKSAPATGGVrKrKPHmR, Spectrum 499.dta

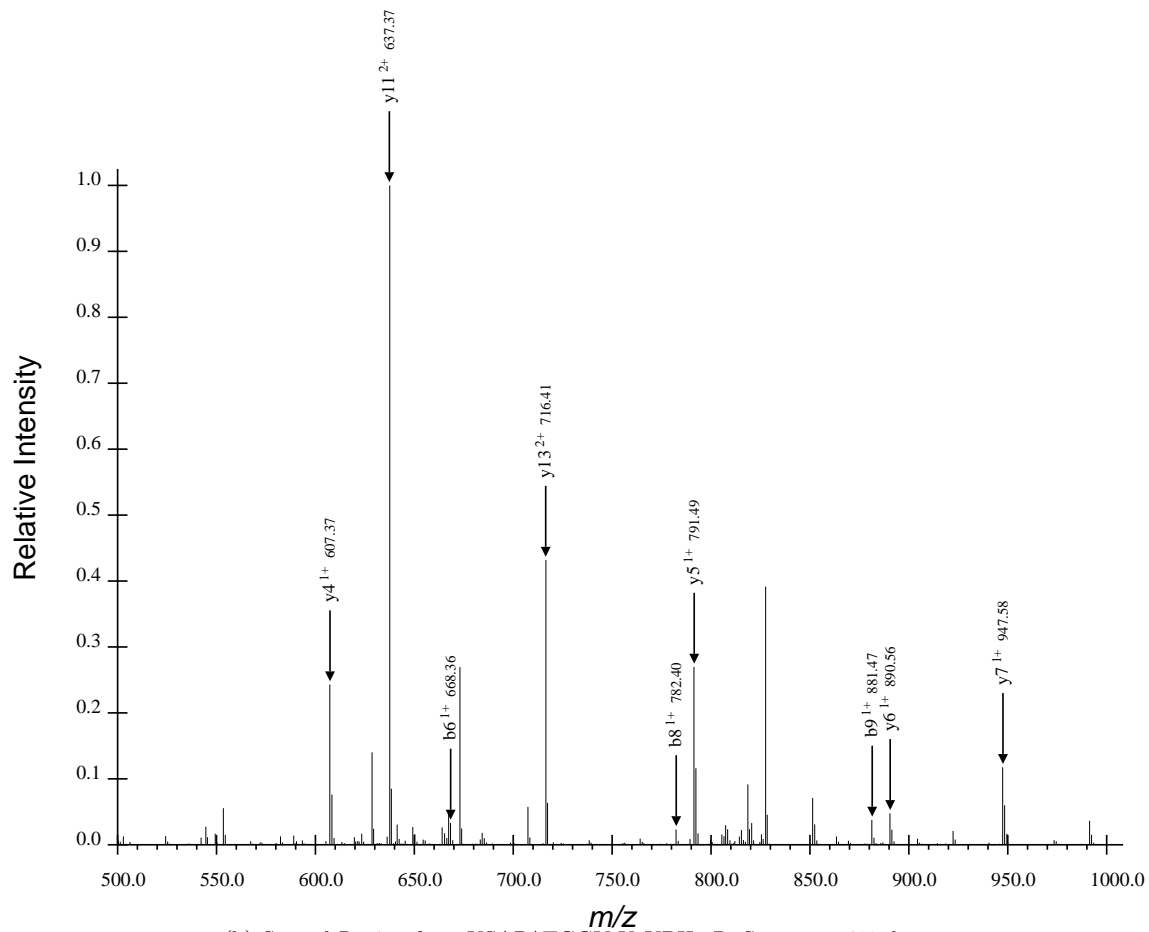

(b) Second Region for rrKSAPATGGVrKrKPHmR, Spectrum 499.dta

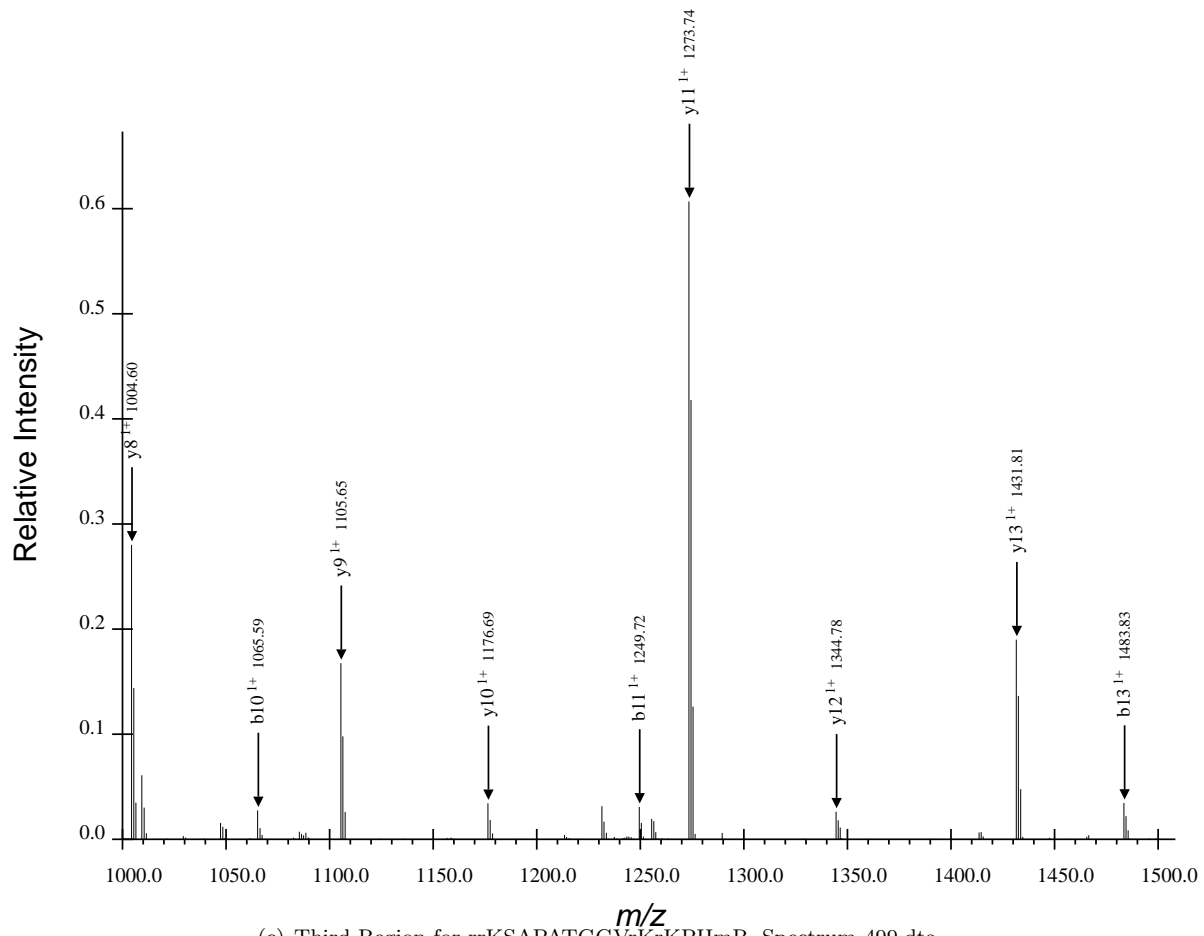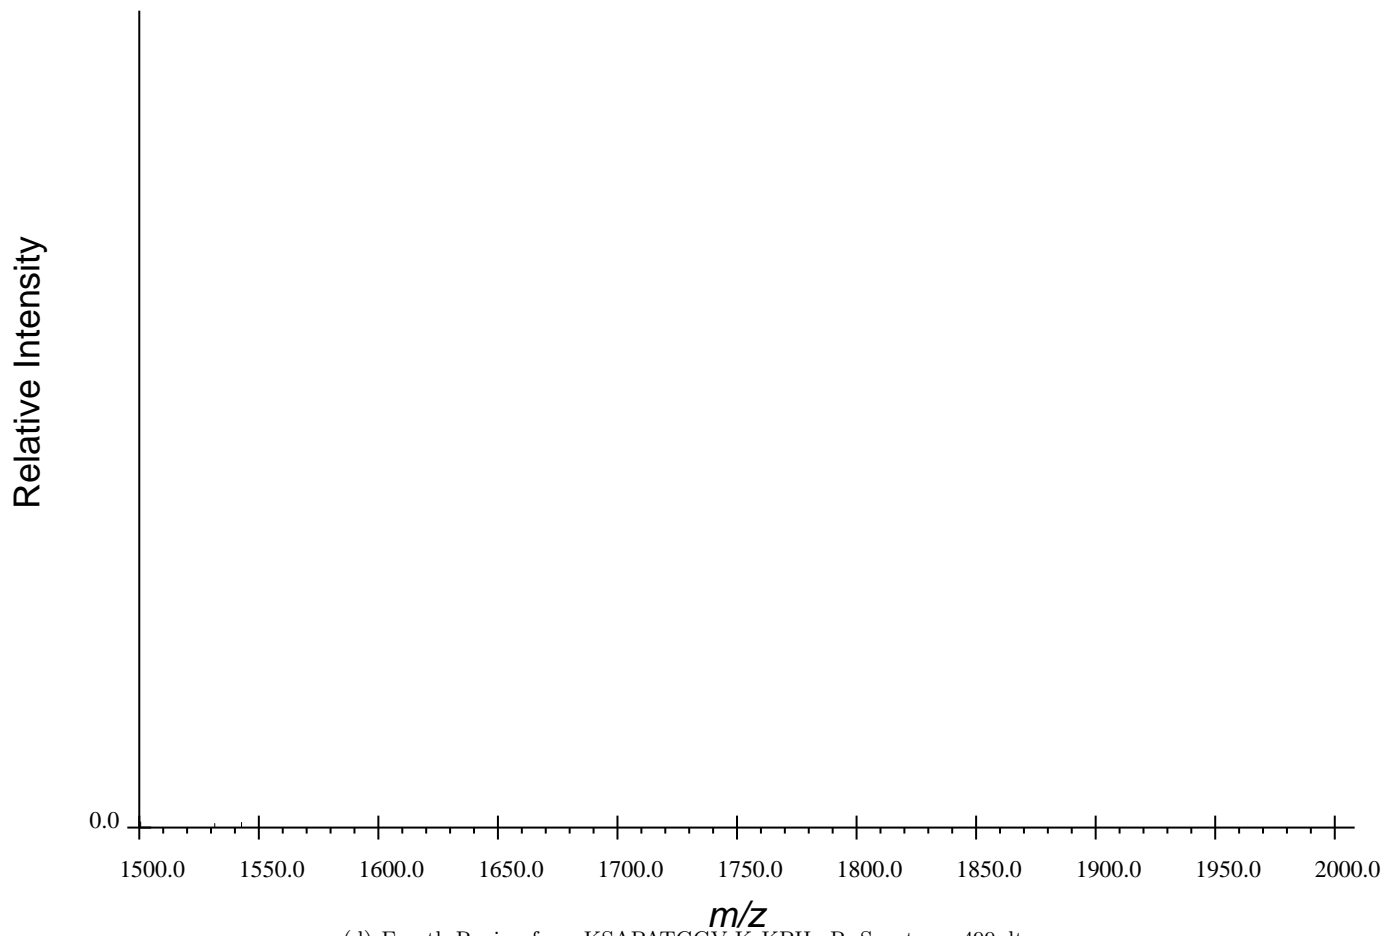

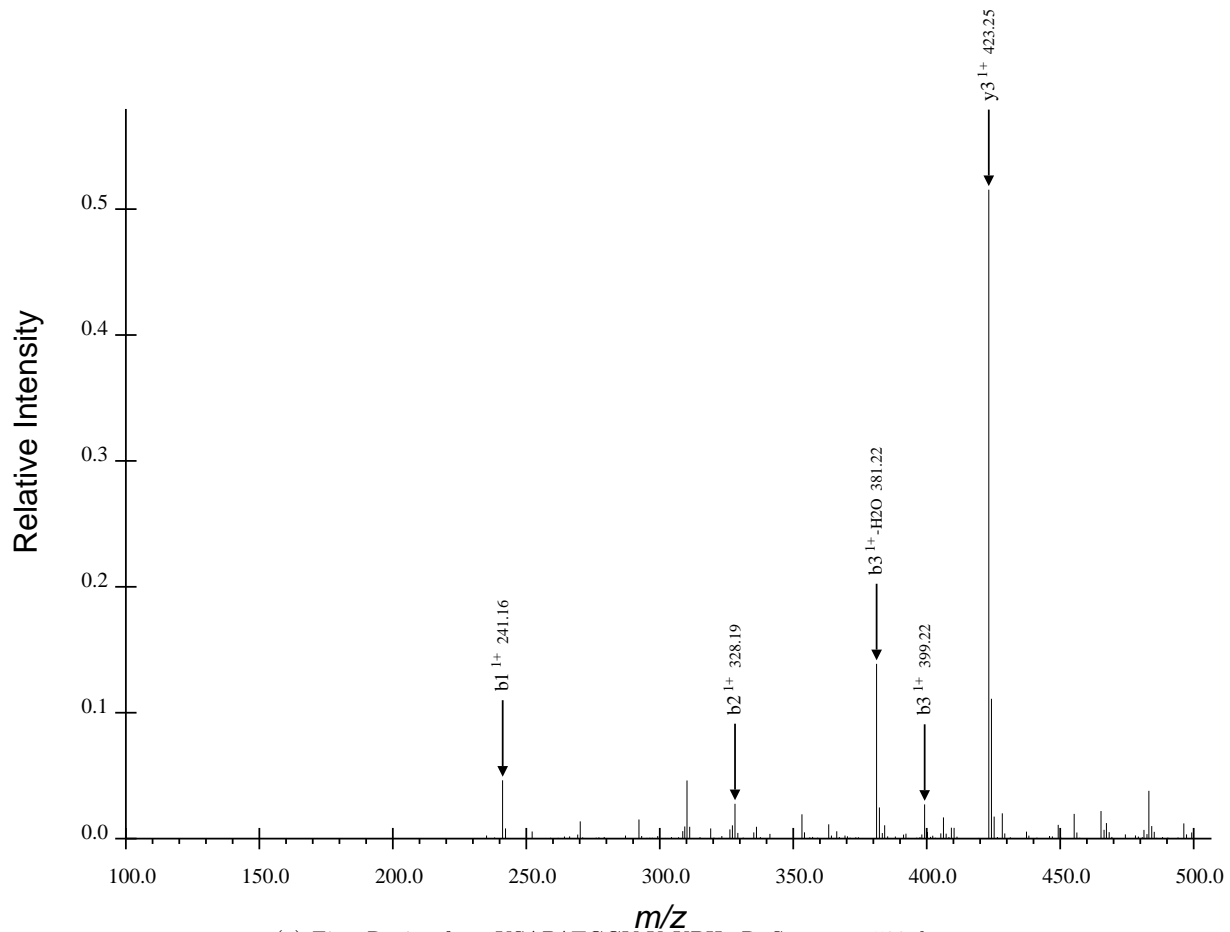

(a) First Region for rrKSAPATGGVrKrKPHmR, Spectrum 500.dta

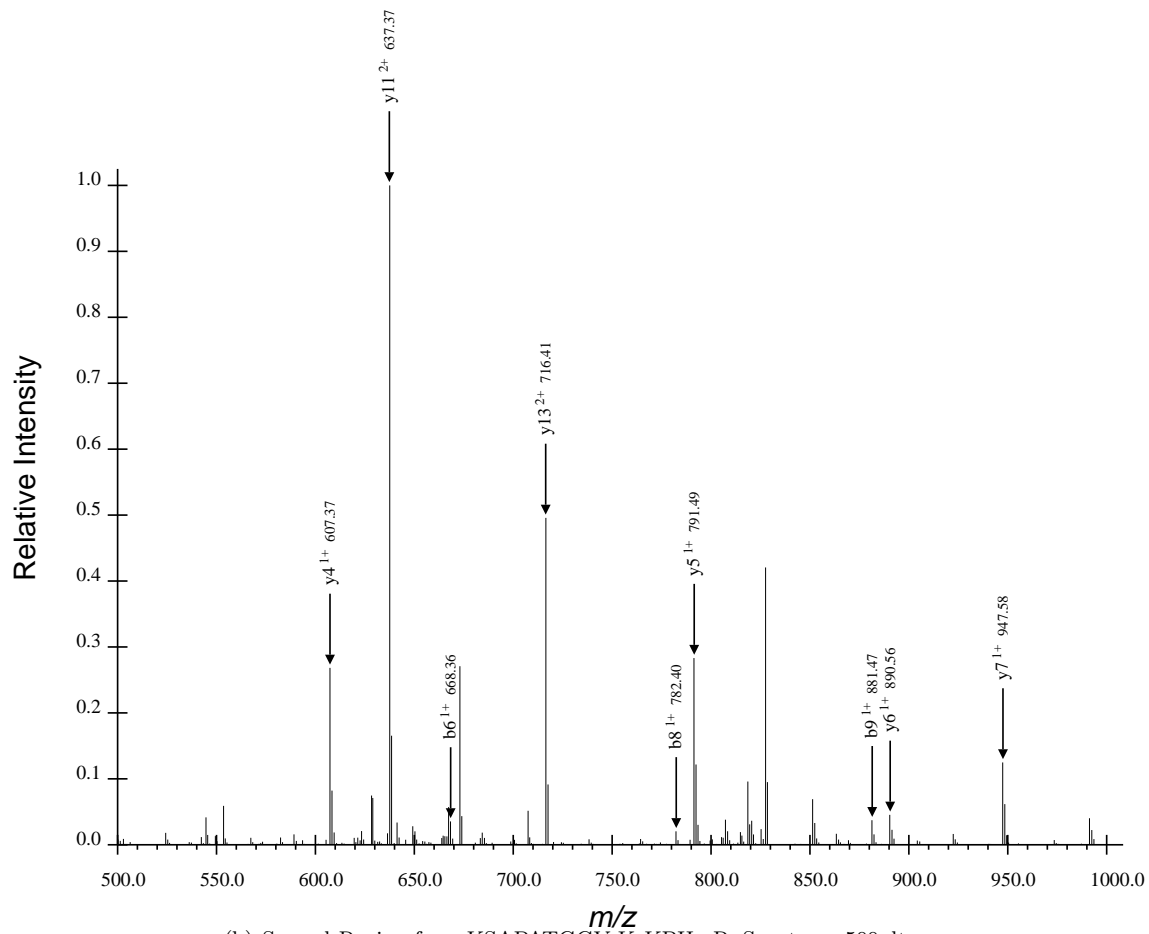

(b) Second Region for rrKSAPATGGVrKrKPHmR, Spectrum 500.dta



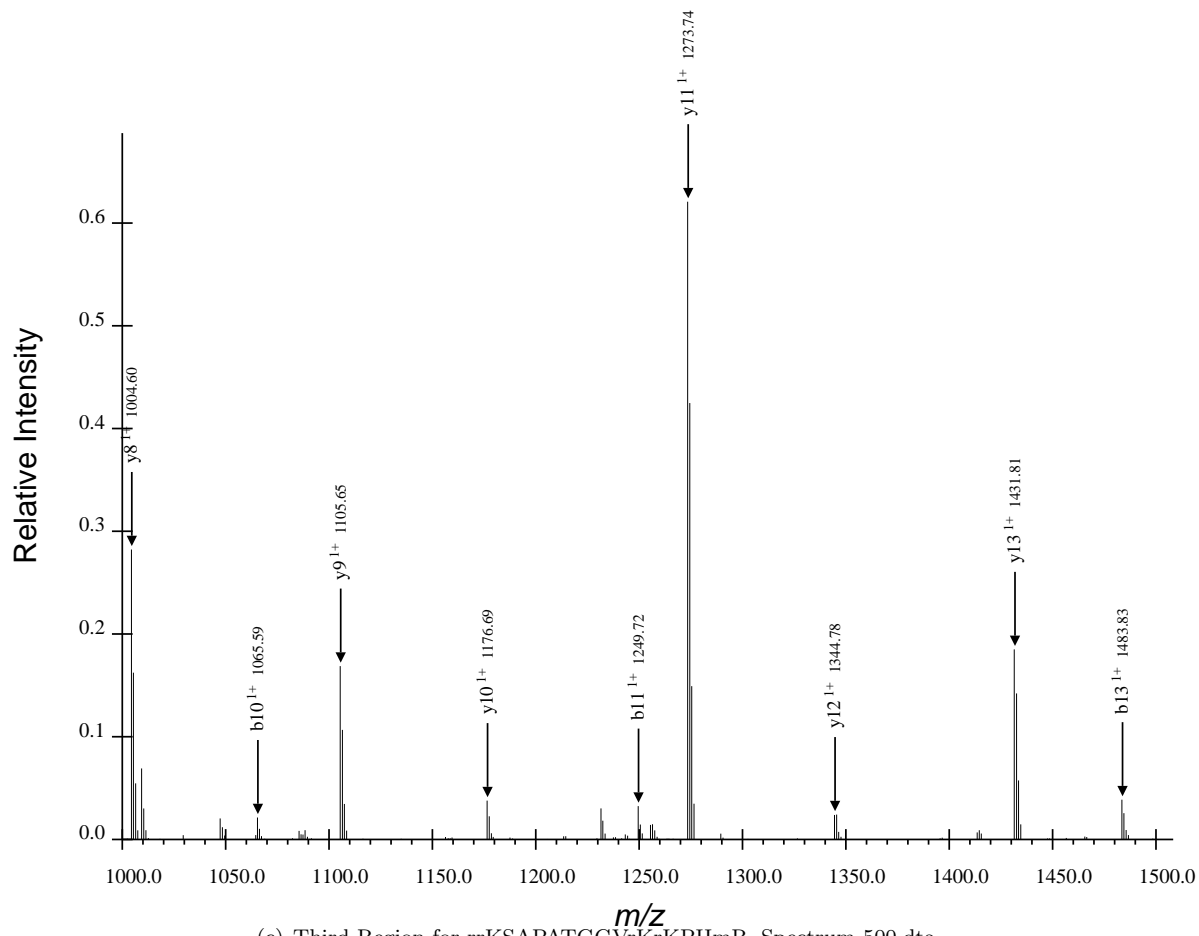

(c) Third Region for rrKSAPATGGVrKrKPHmR, Spectrum 500.dta

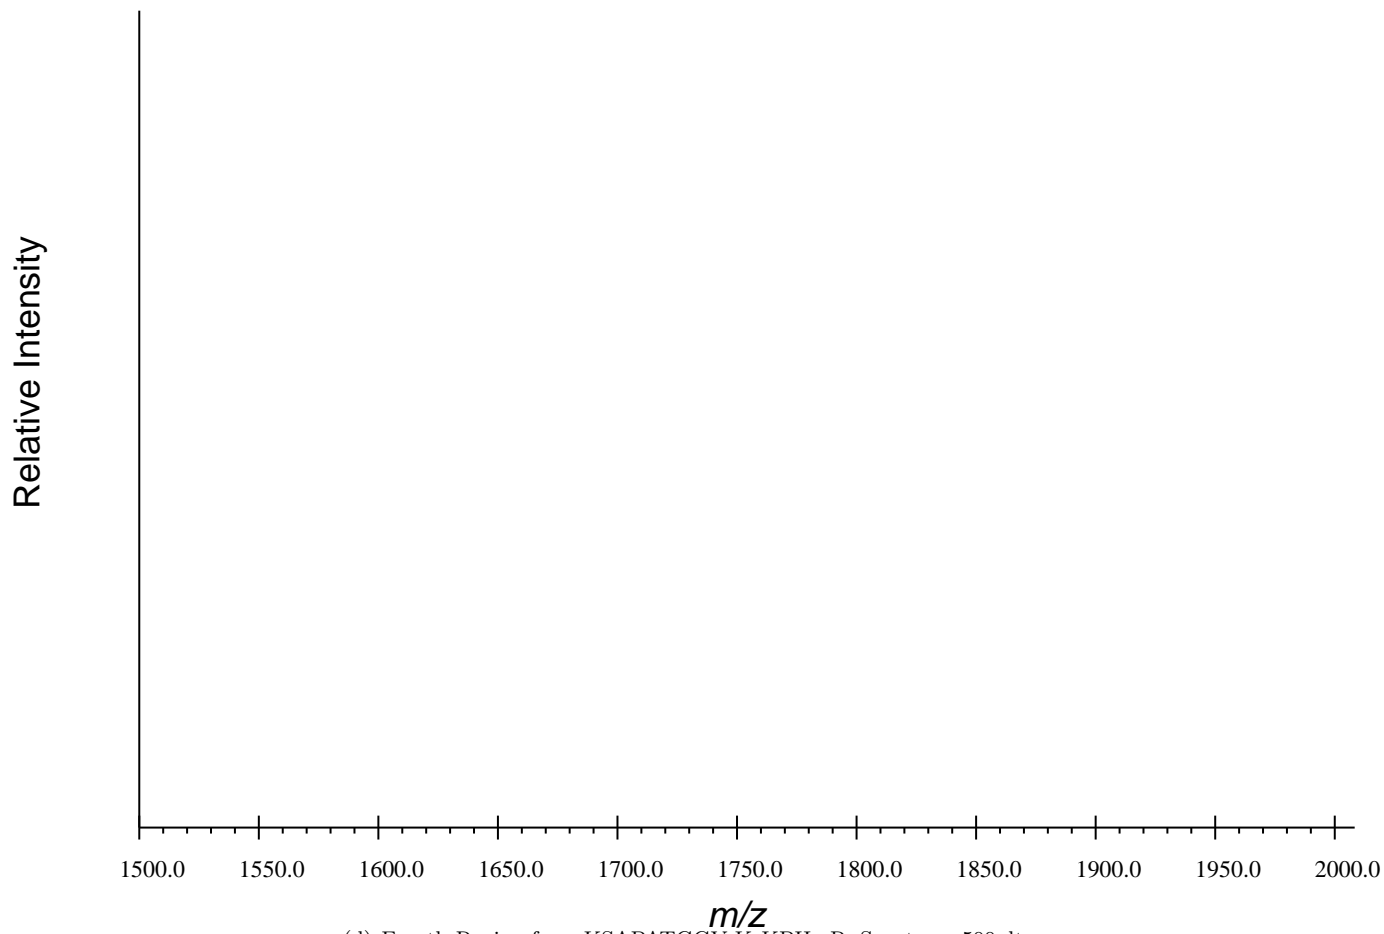

(d) Fourth Region for rrKSAPATGGVrKrKPHmR, Spectrum 500.dta

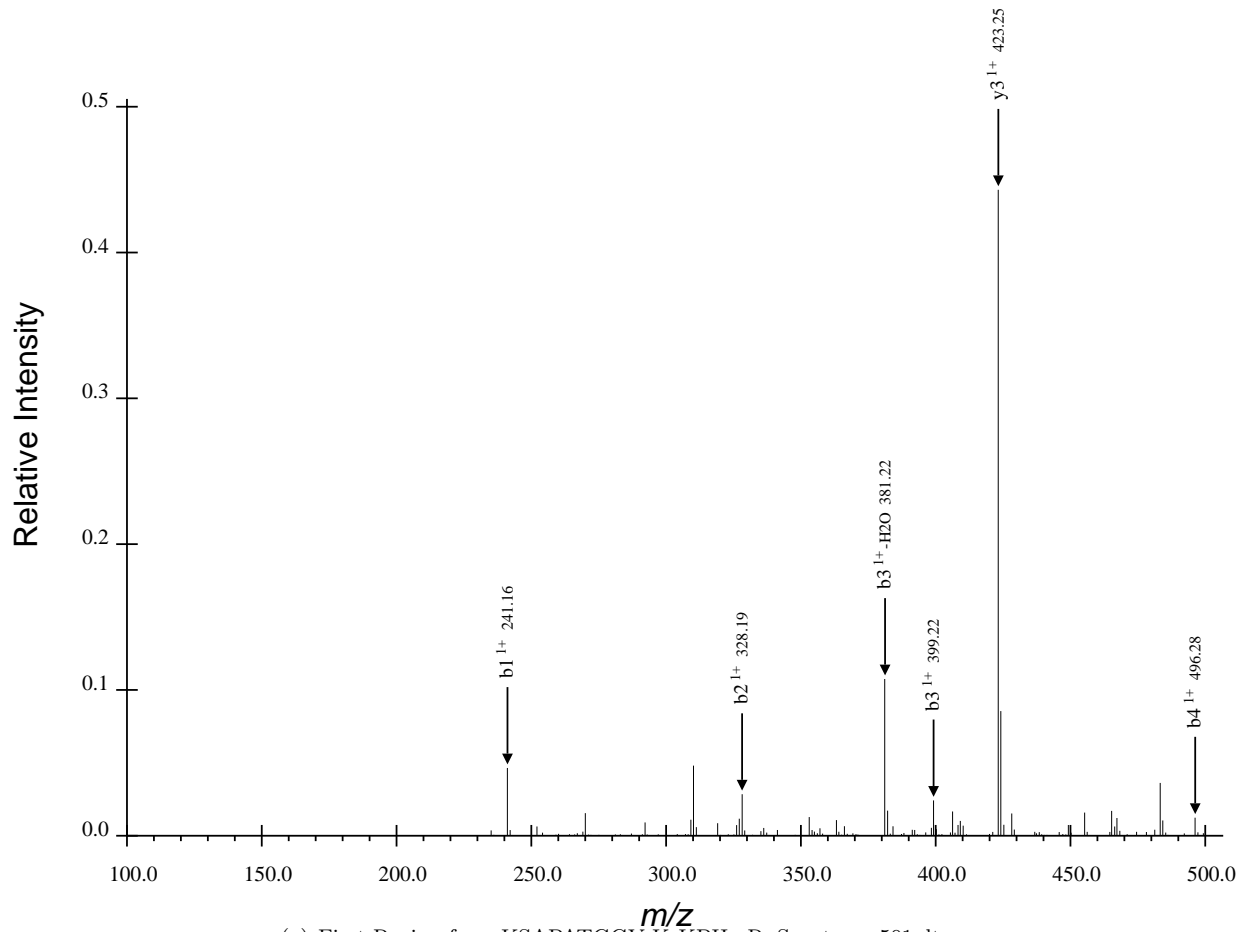

(a) First Region for rrKSAPATGGVrKrKPHmR, Spectrum 501.dta

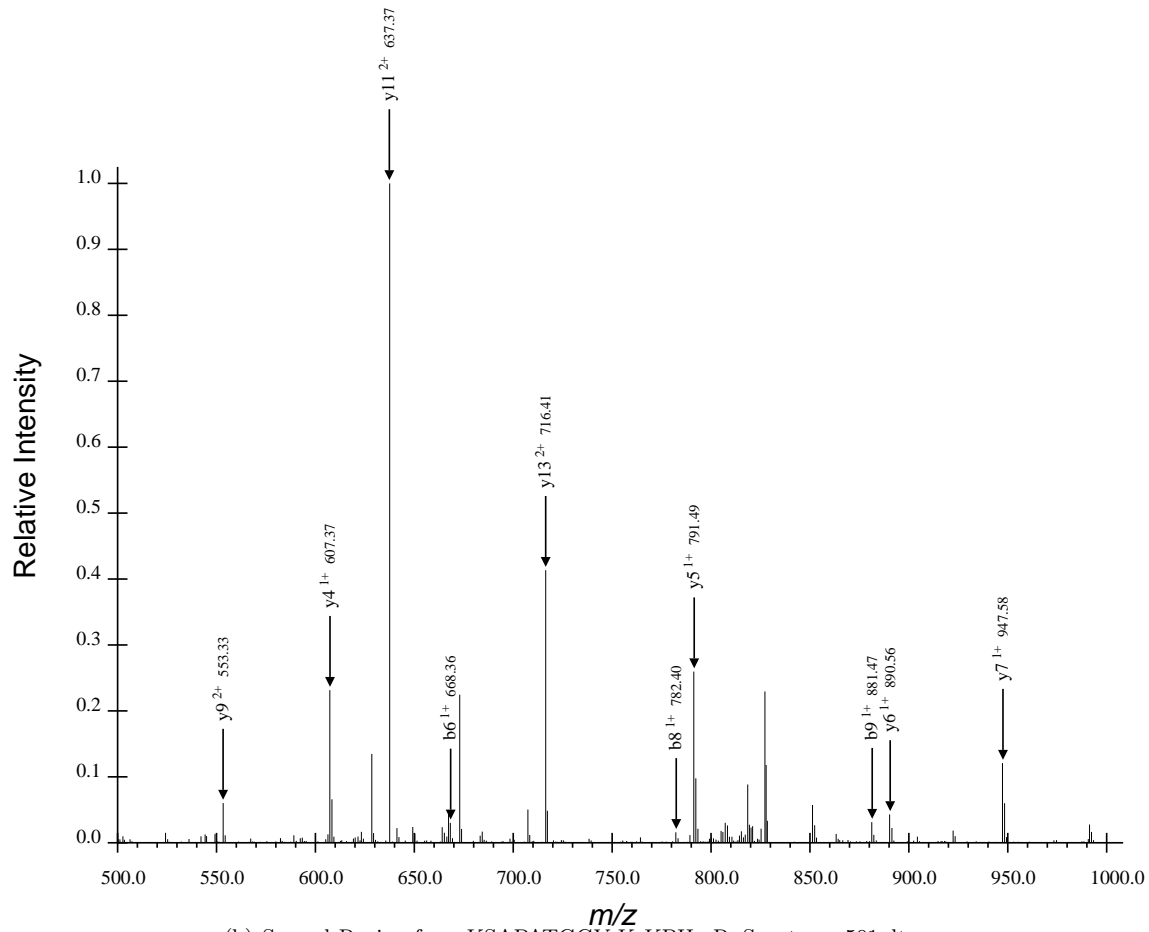

(b) Second Region for rrKSAPATGGVrKrKPHmR, Spectrum 501.dta

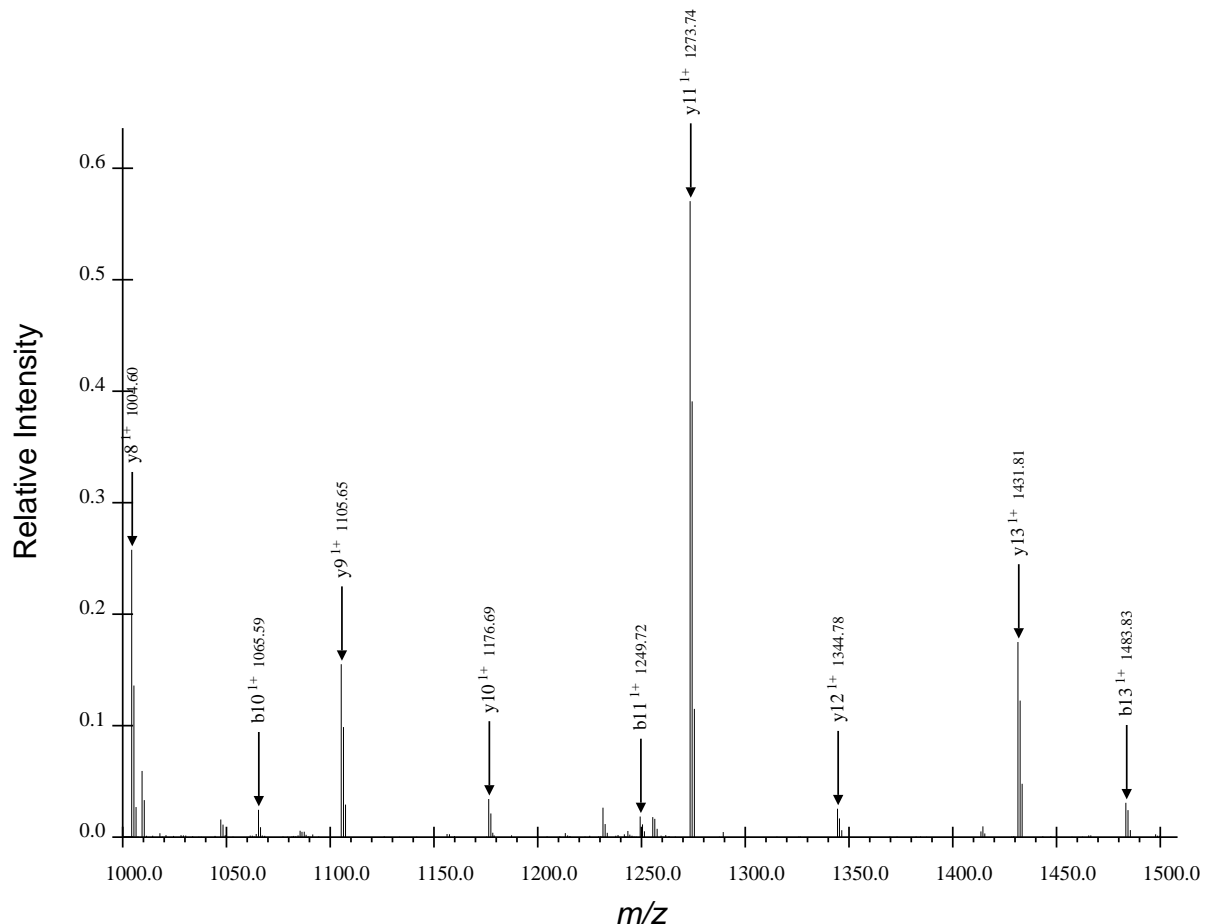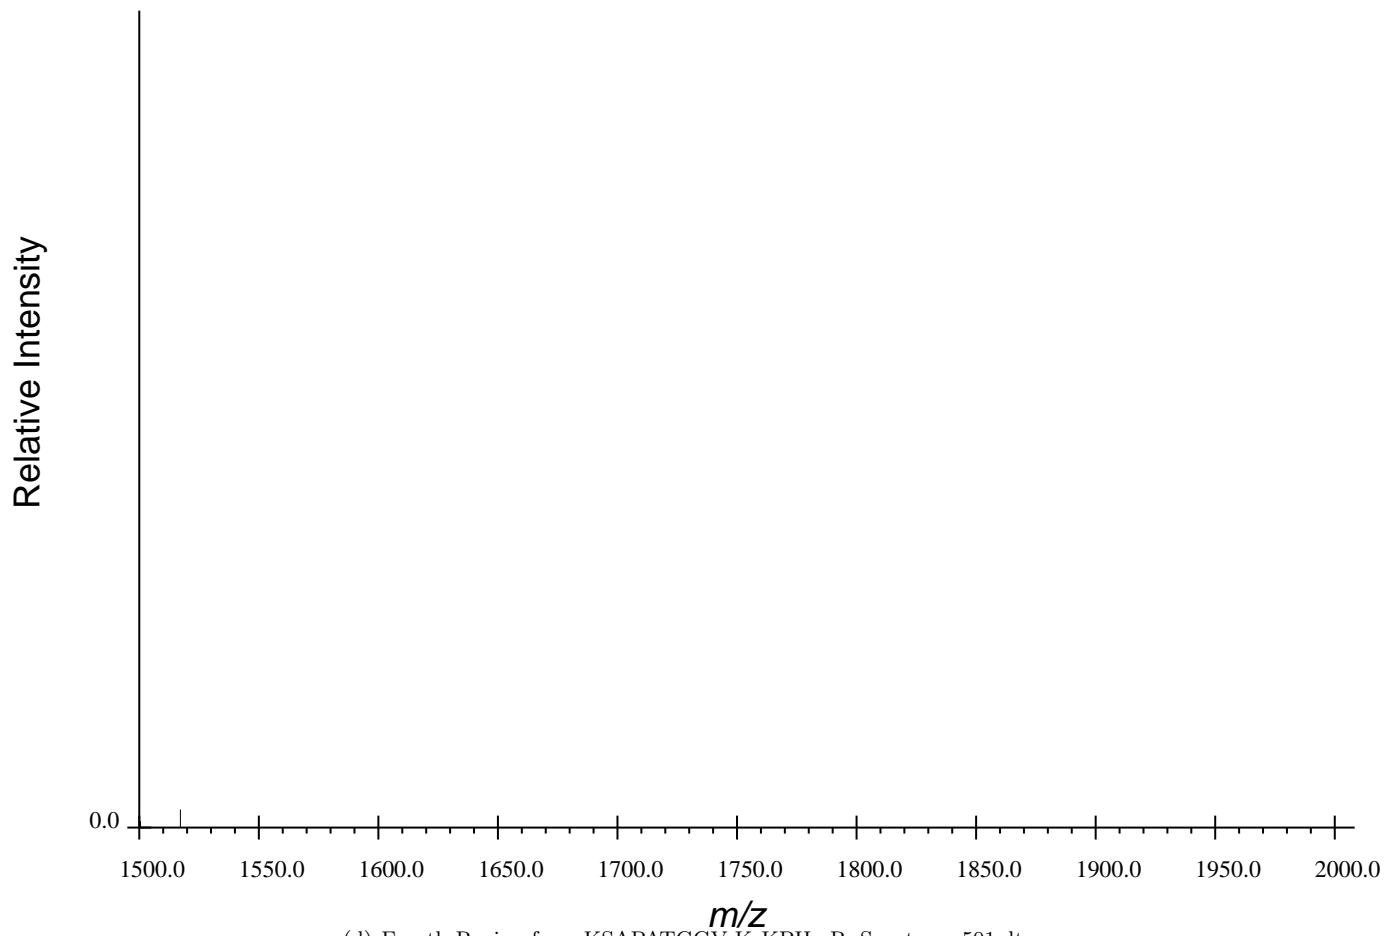

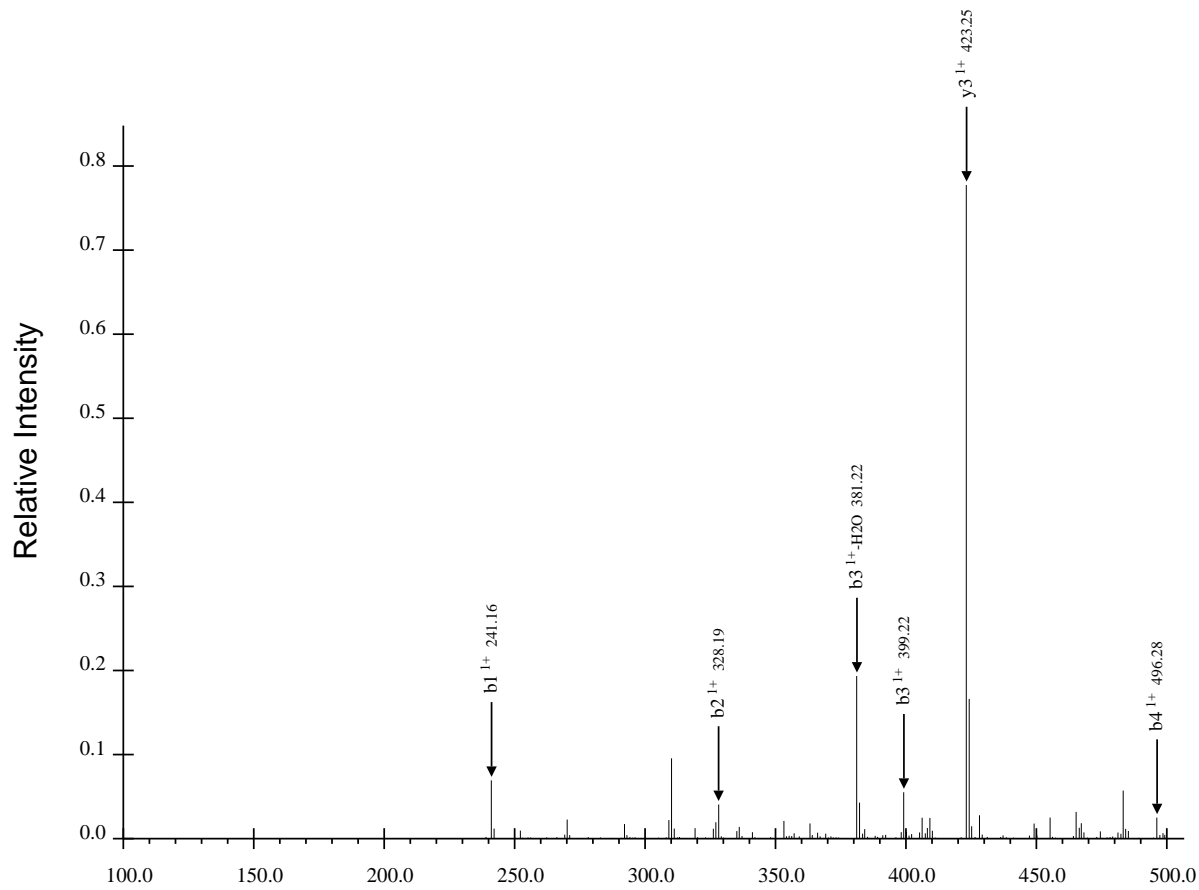

(a) First Region for rrKSAPATGGVrKrKPHmR, Spectrum 502.dta

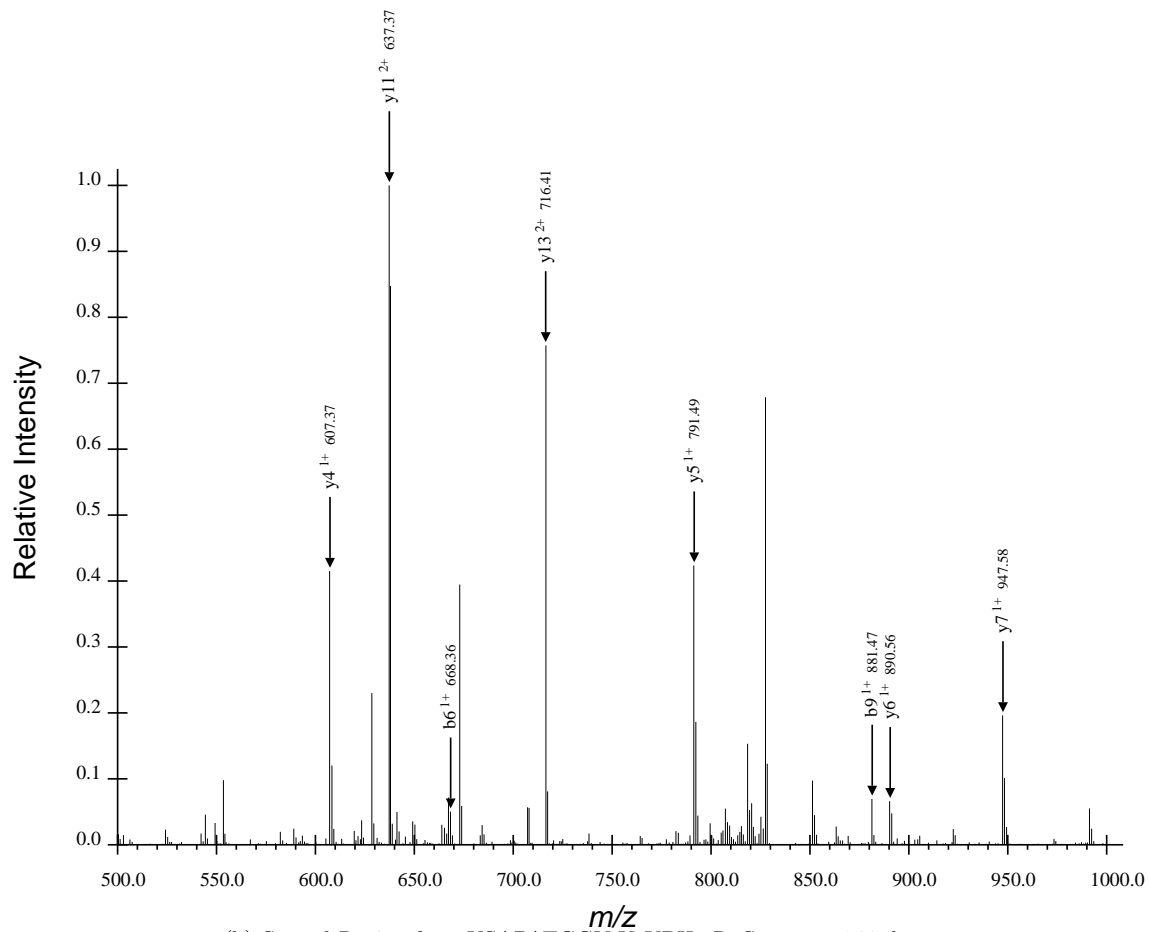

(b) Second Region for rrKSAPATGGVrKrKPHmR, Spectrum 502.dta

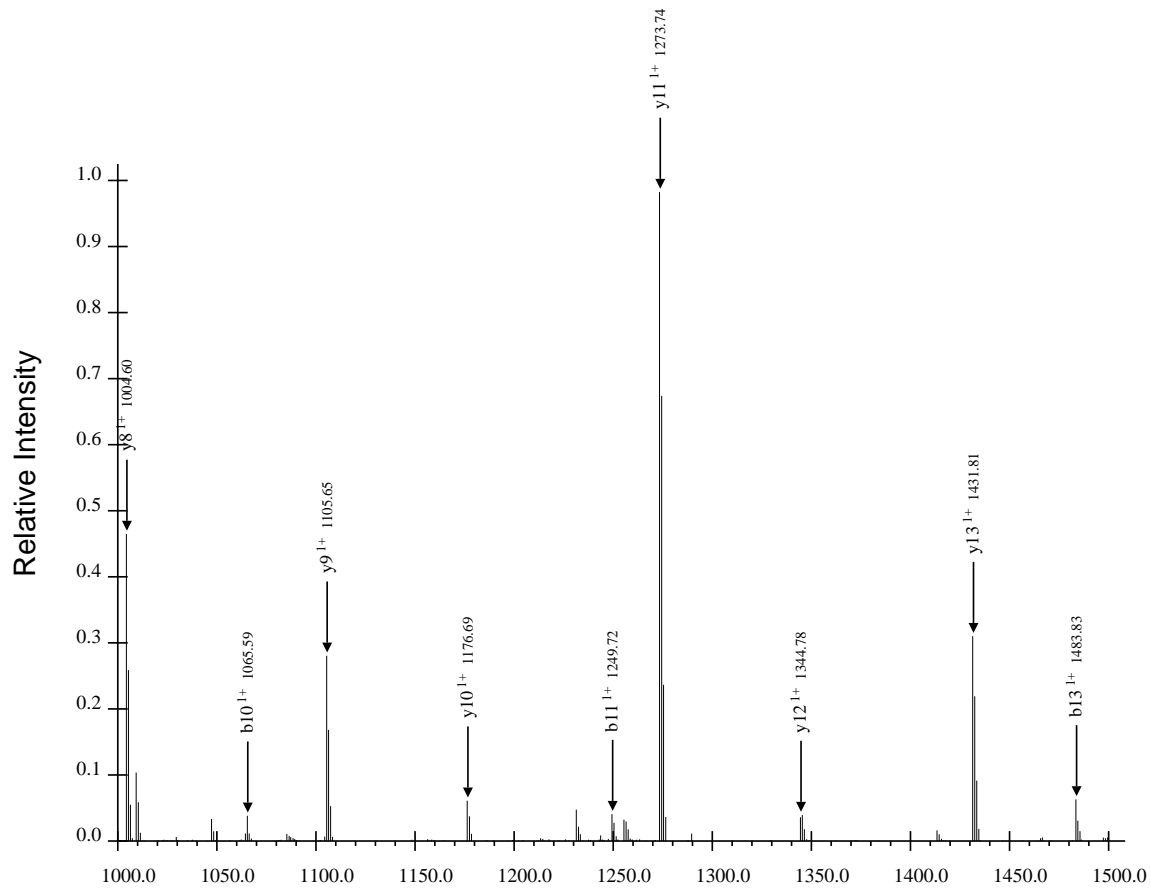

(c) Third Region for rrKSAPATGGVrKrKPHmR, Spectrum 502.dta

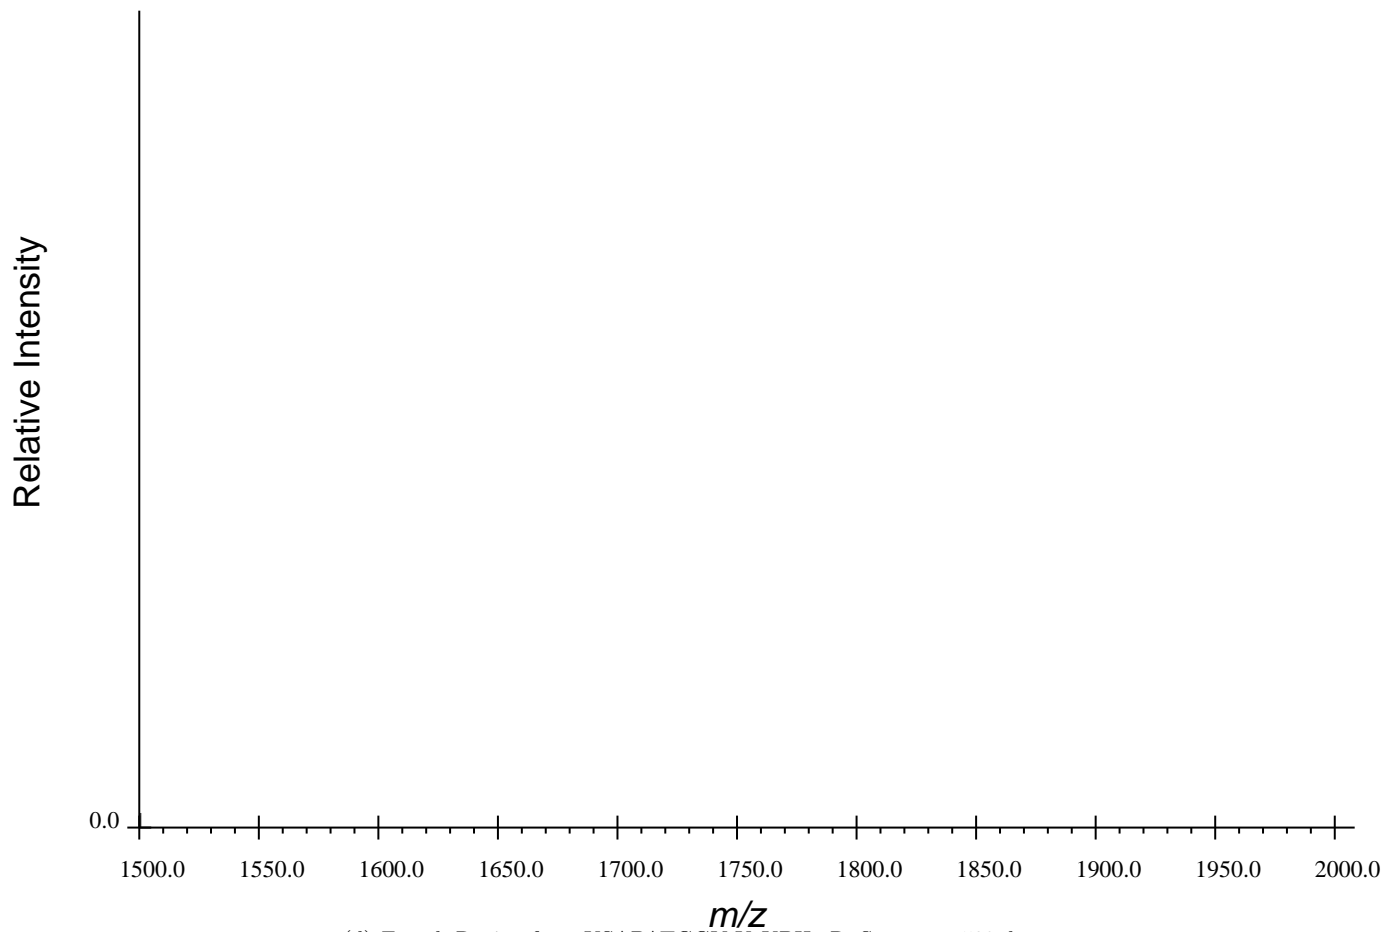

(d) Fourth Region for rrKSAPATGGVrKrKPHmR, Spectrum 502.dta

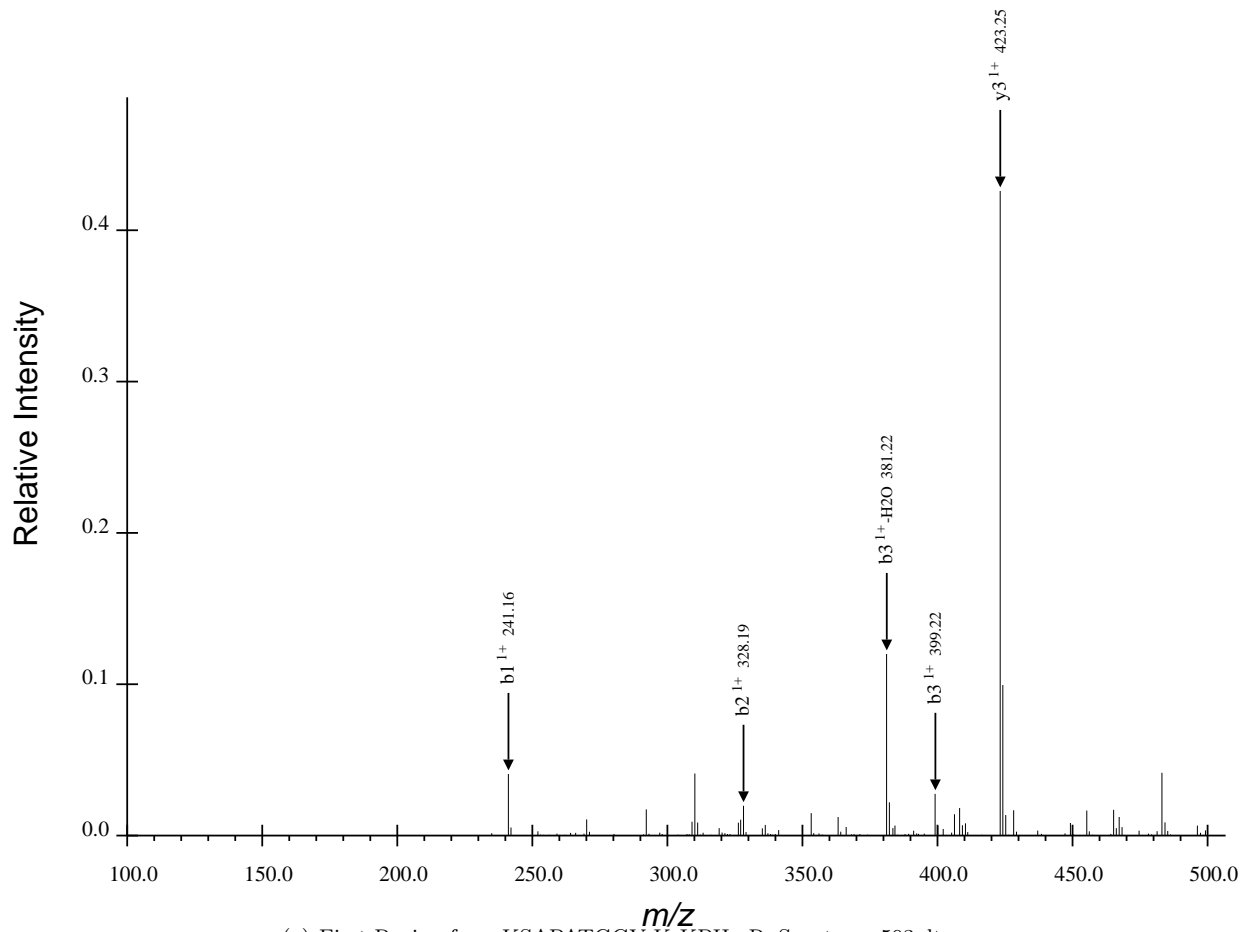

(a) First Region for rrKSAPATGGVrKrKPHmR, Spectrum 503.dta

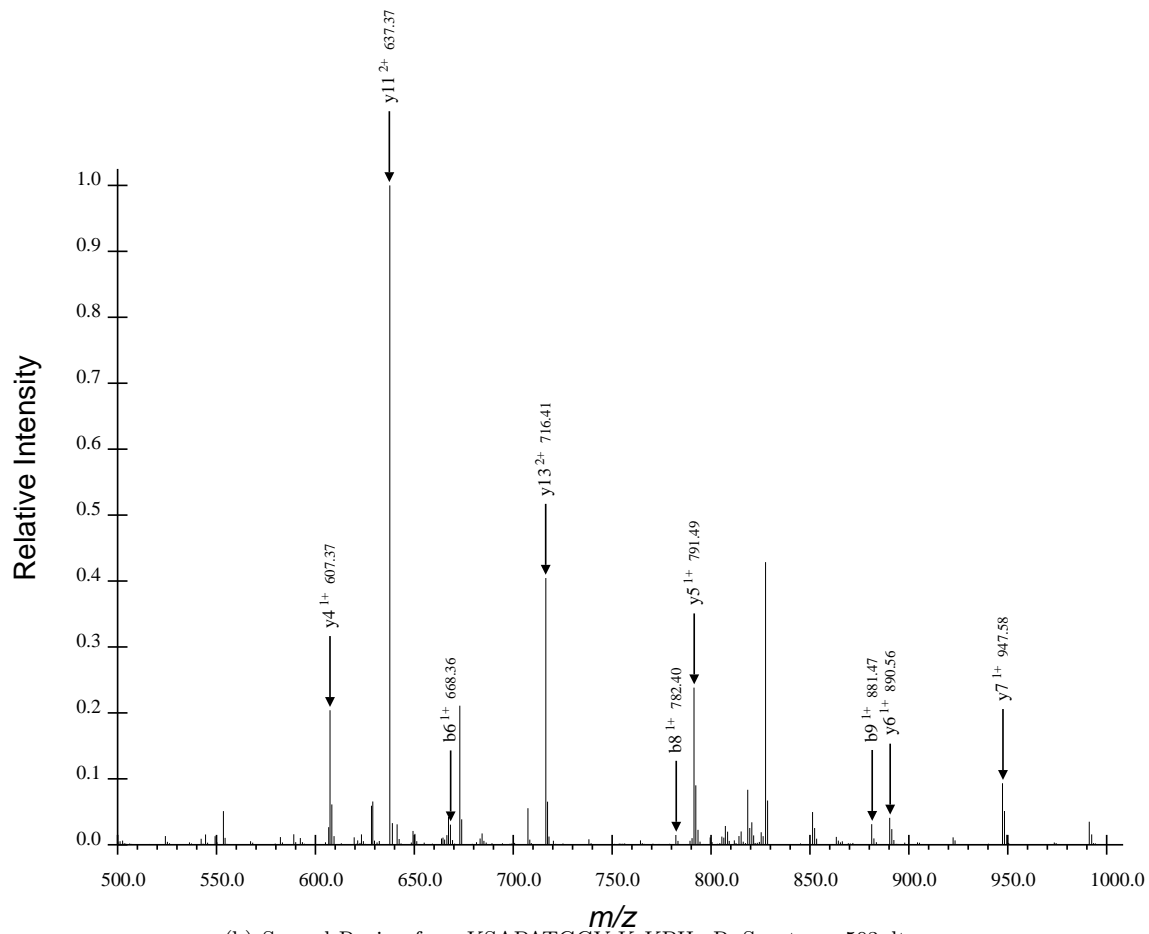

(b) Second Region for rrKSAPATGGVrKrKPHmR, Spectrum 503.dta

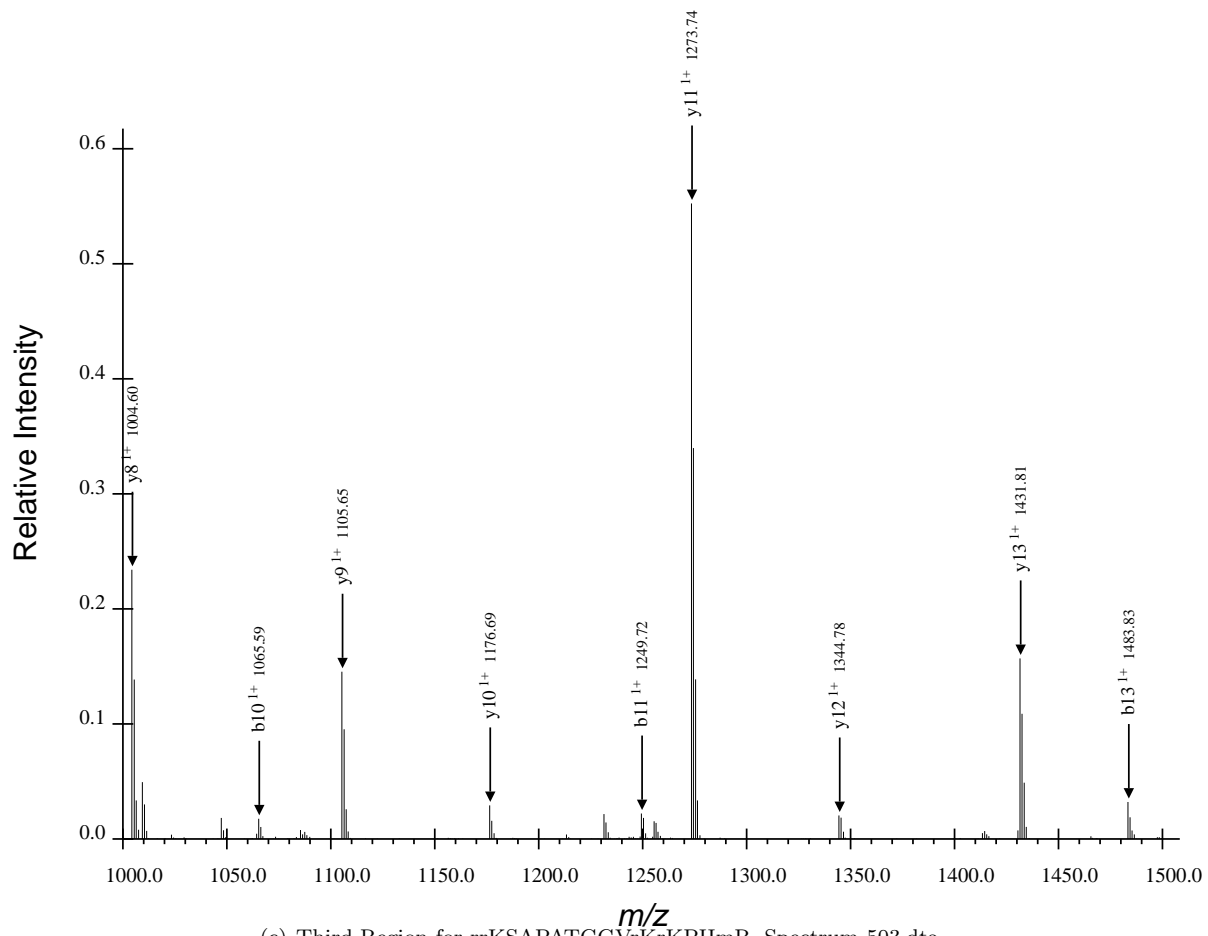

(c) Third Region for rrKSAPATGGVrKrKPHmR, Spectrum 503.dta

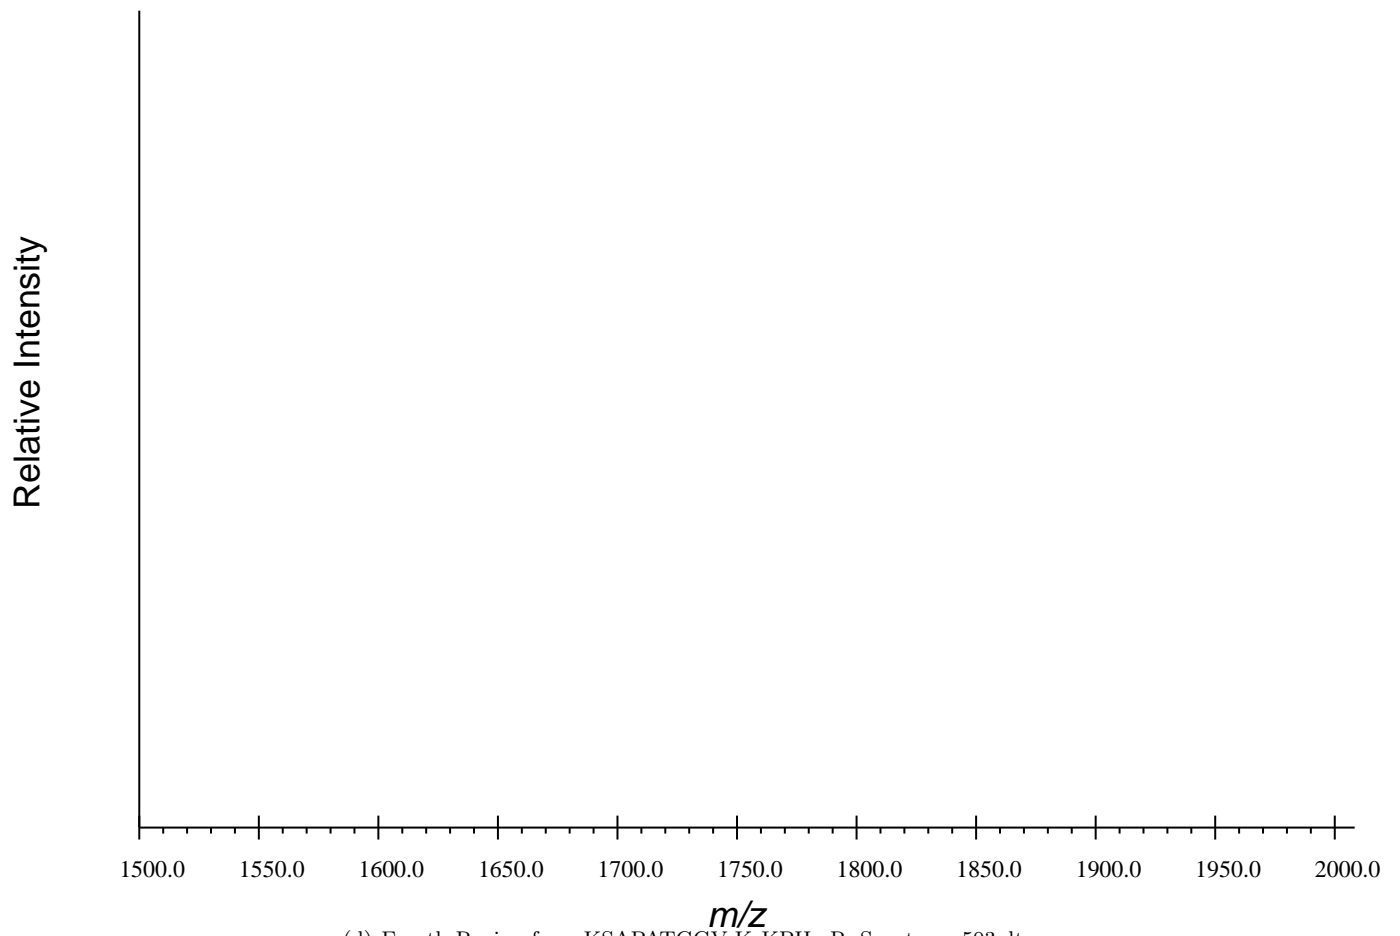

(d) Fourth Region for rrKSAPATGGVrKrKPHmR, Spectrum 503.dta

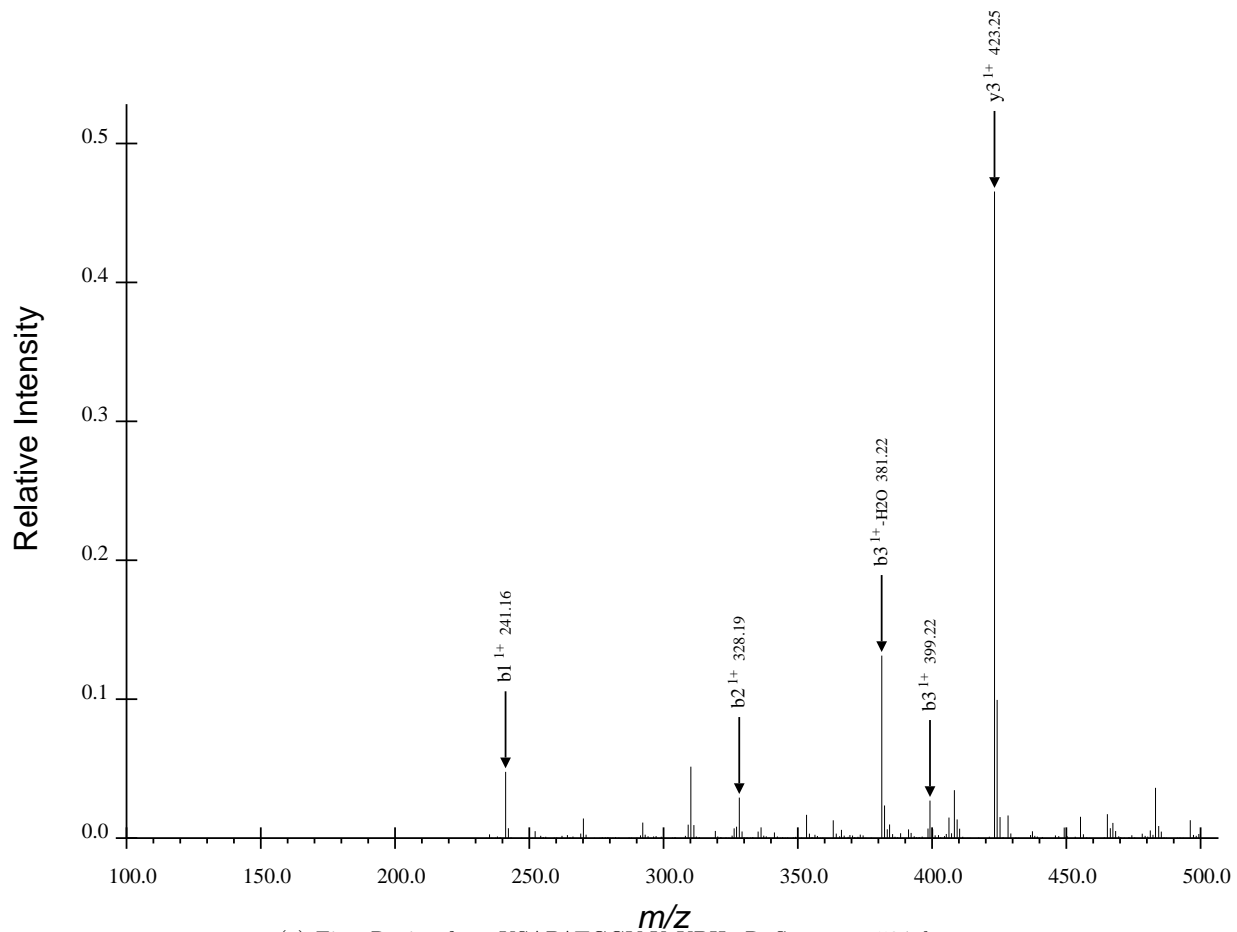

(a) First Region for rrKSAPATGGVrKrKPHmR, Spectrum 504.dta

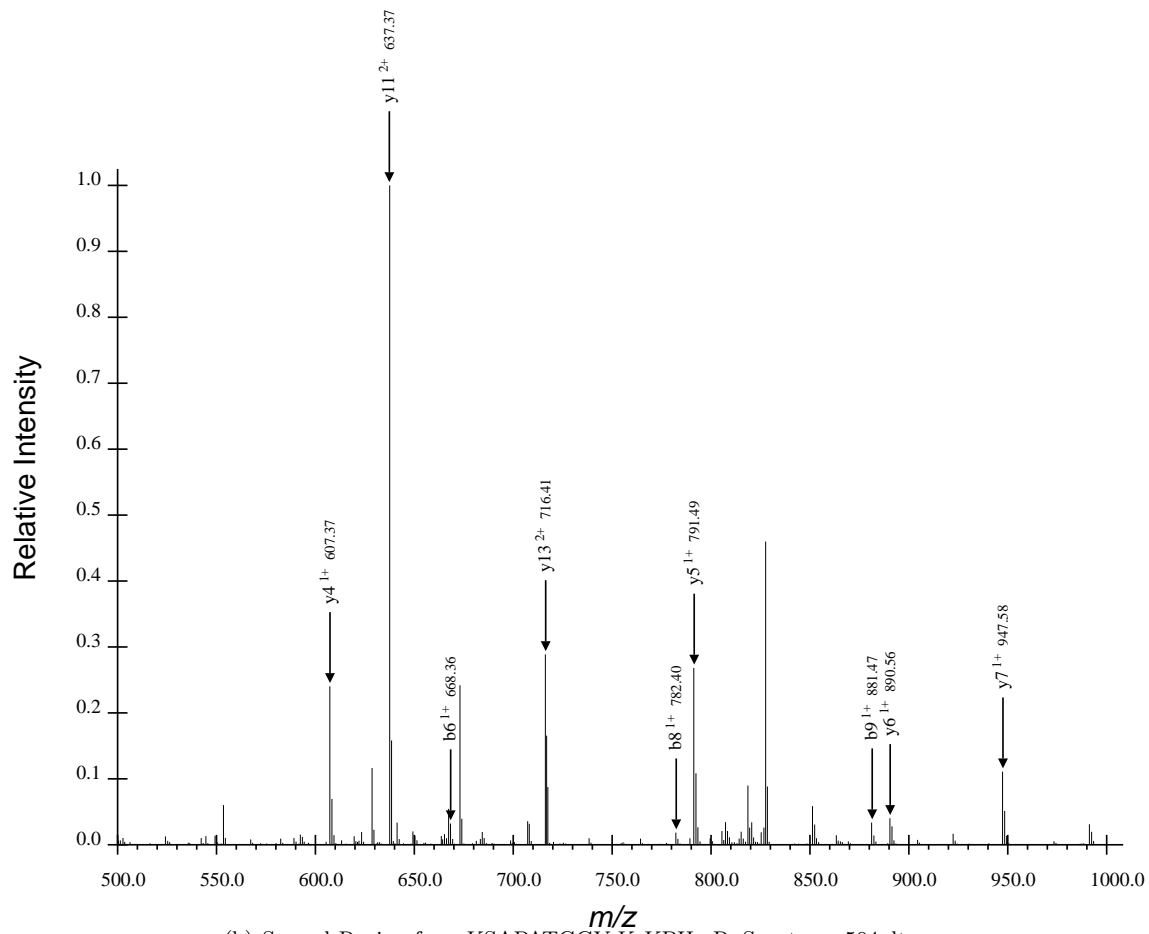

(b) Second Region for rrKSAPATGGVrKrKPHmR, Spectrum 504.dta



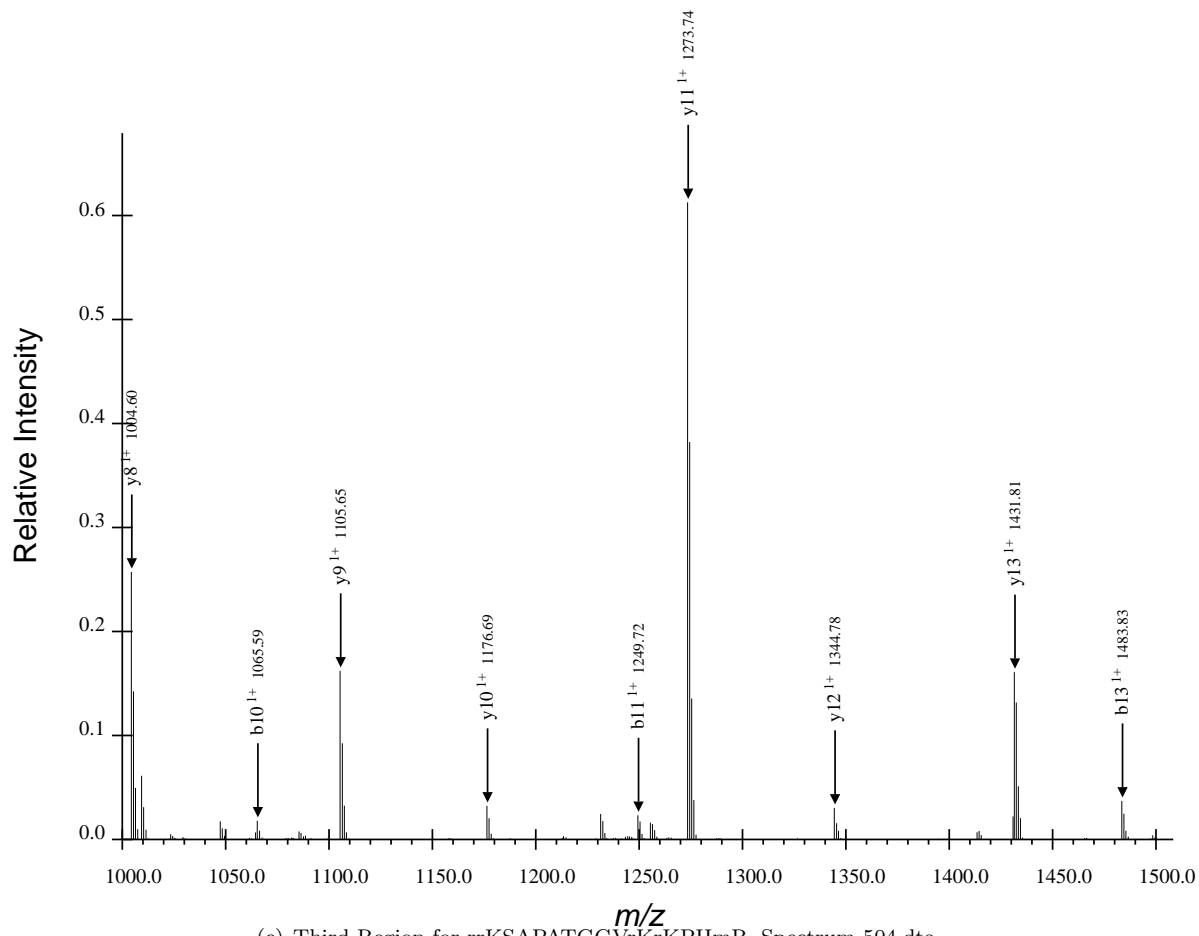

(c) Third Region for rrKSAPATGGVrKrKPHmR, Spectrum 504.dta

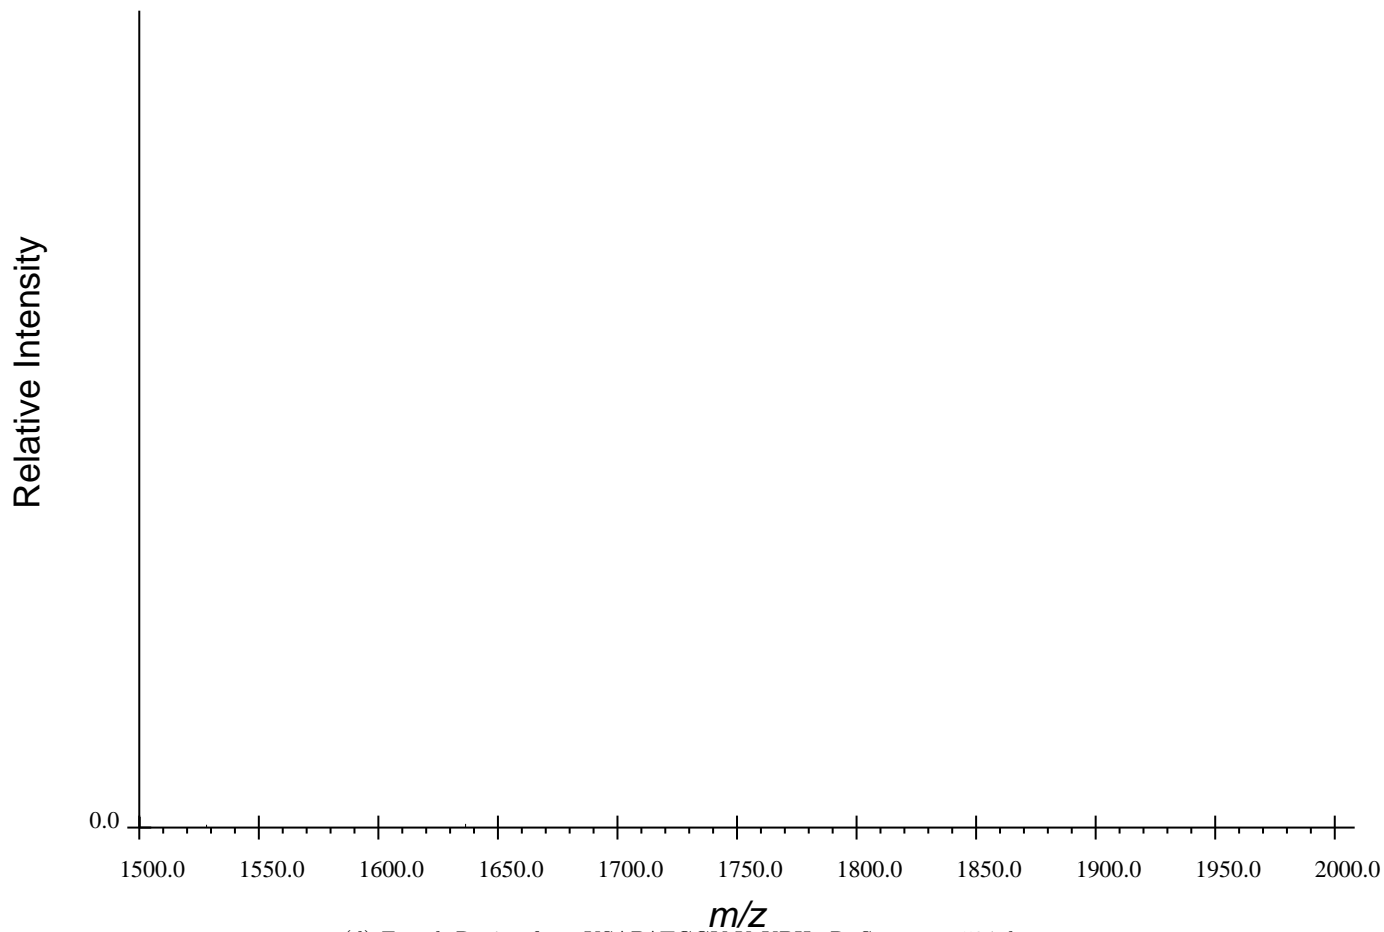

(d) Fourth Region for rrKSAPATGGVrKrKPHmR, Spectrum 504.dta

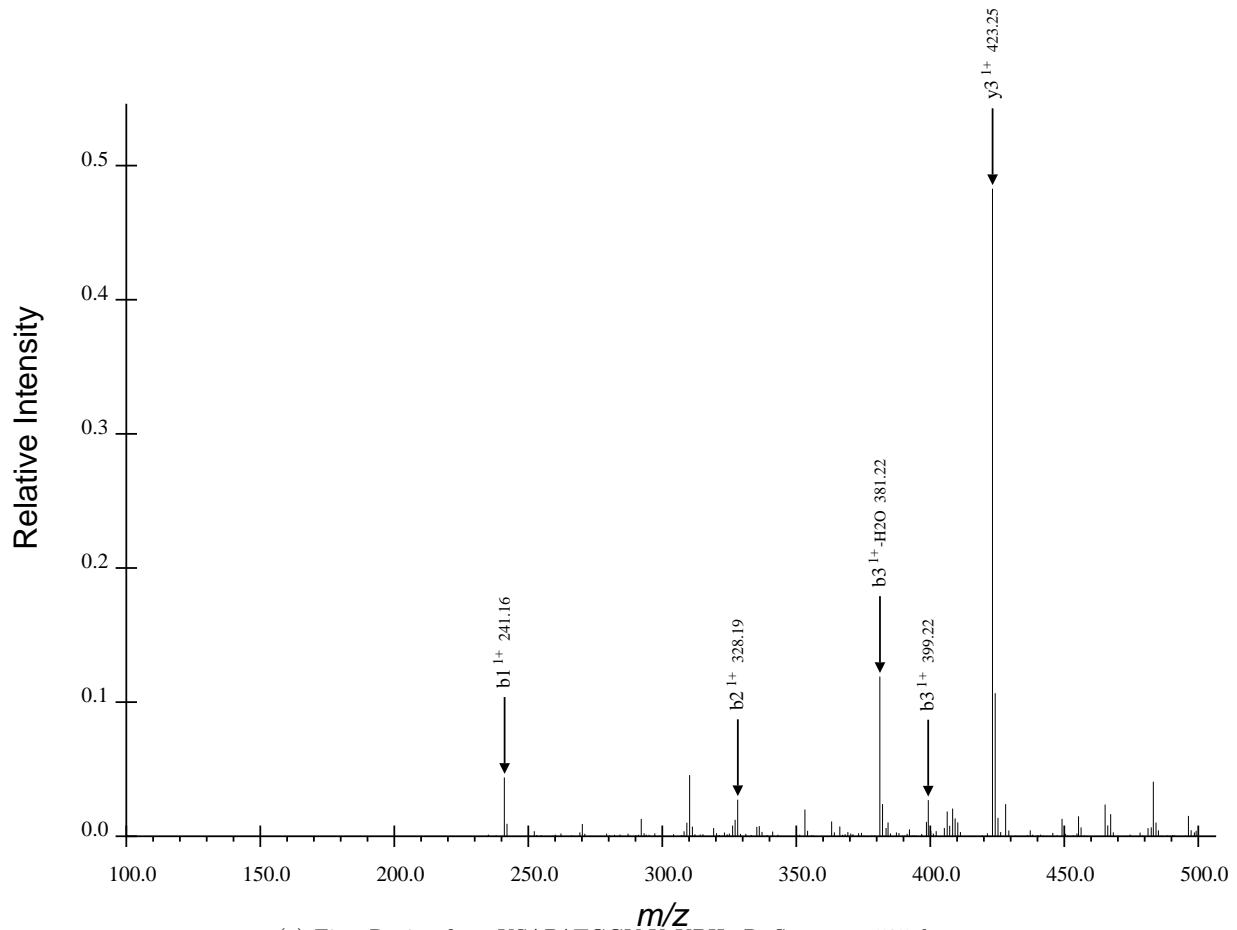

(a) First Region for rrKSAPATGGVrKrKPHmR, Spectrum 505.dta

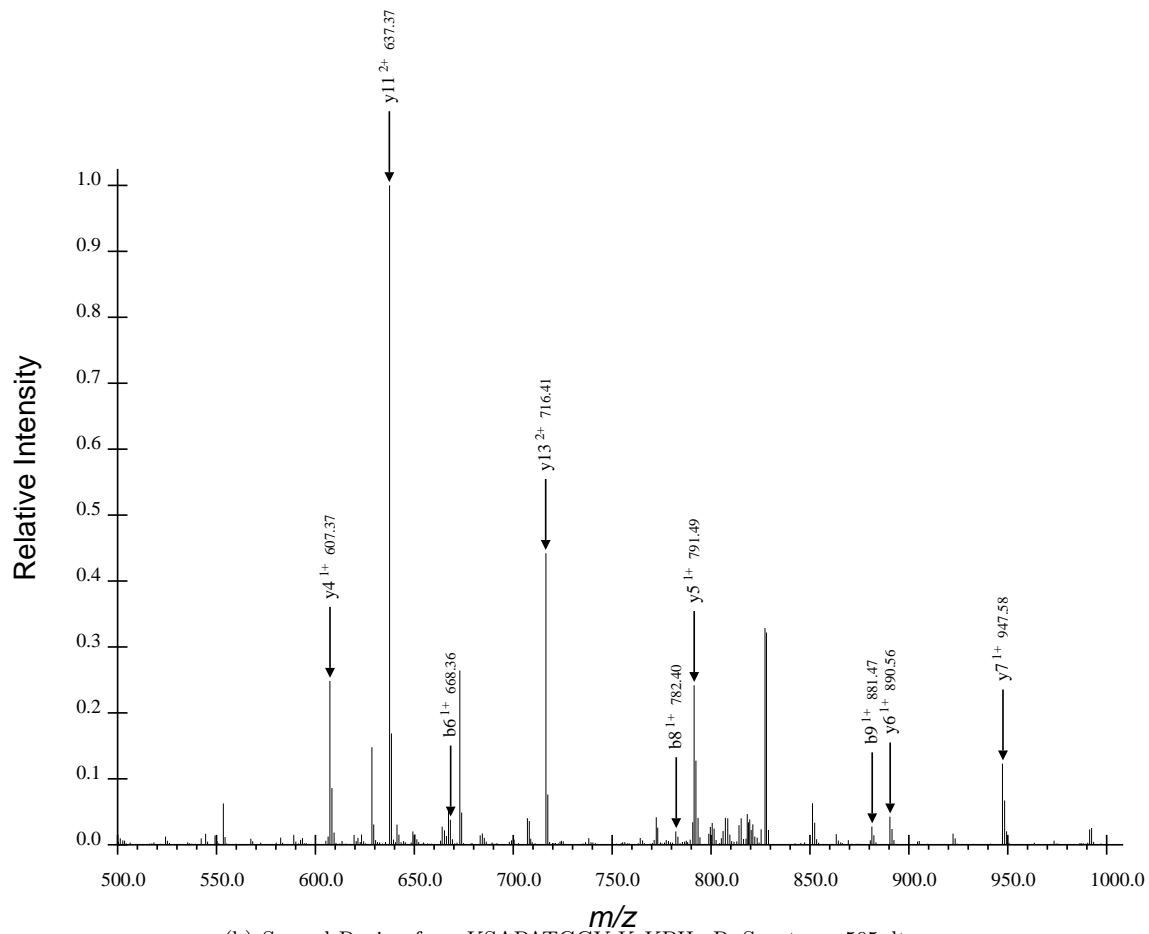

(b) Second Region for rrKSAPATGGVrKrKPHmR, Spectrum 505.dta

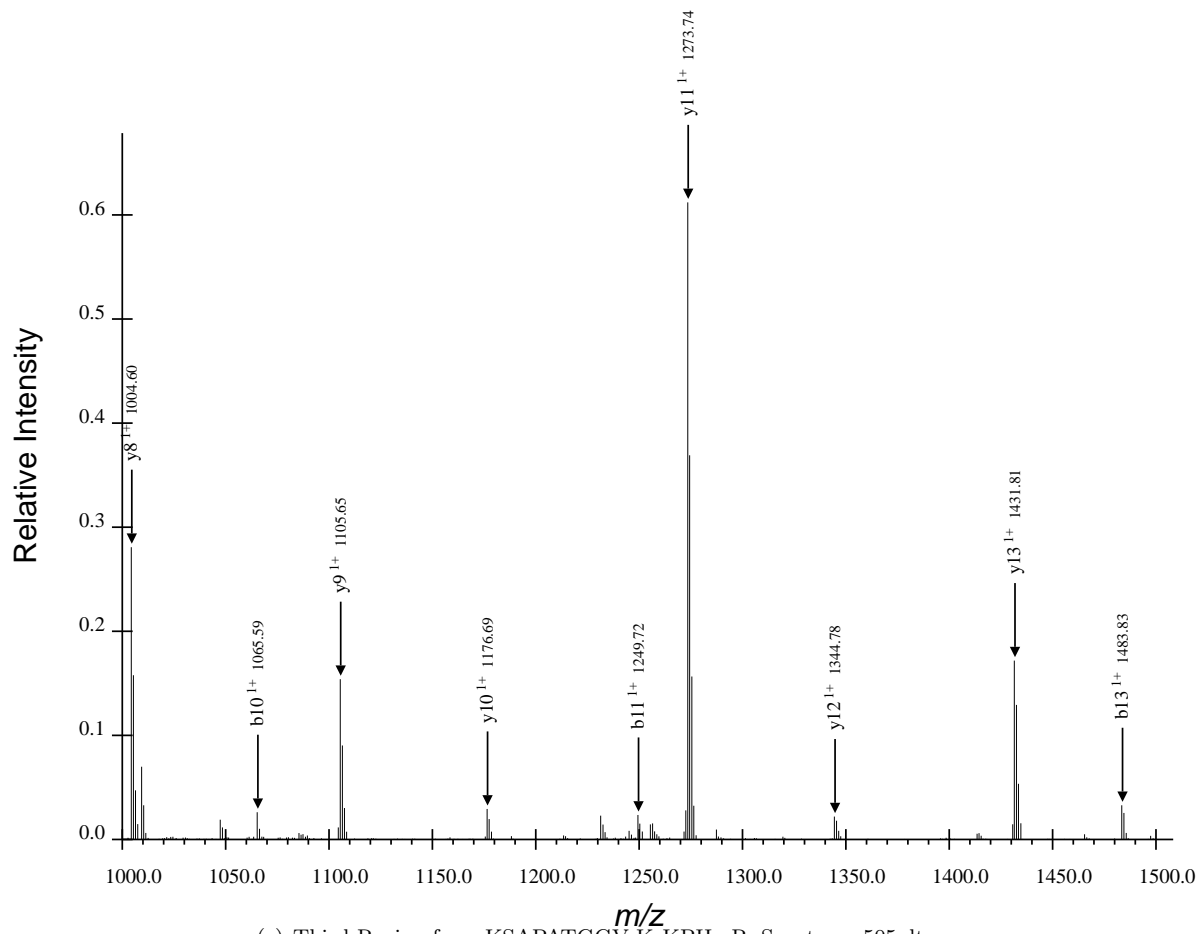

(c) Third Region for rrKSAPATGGVrKrKPHmR, Spectrum 505.dta

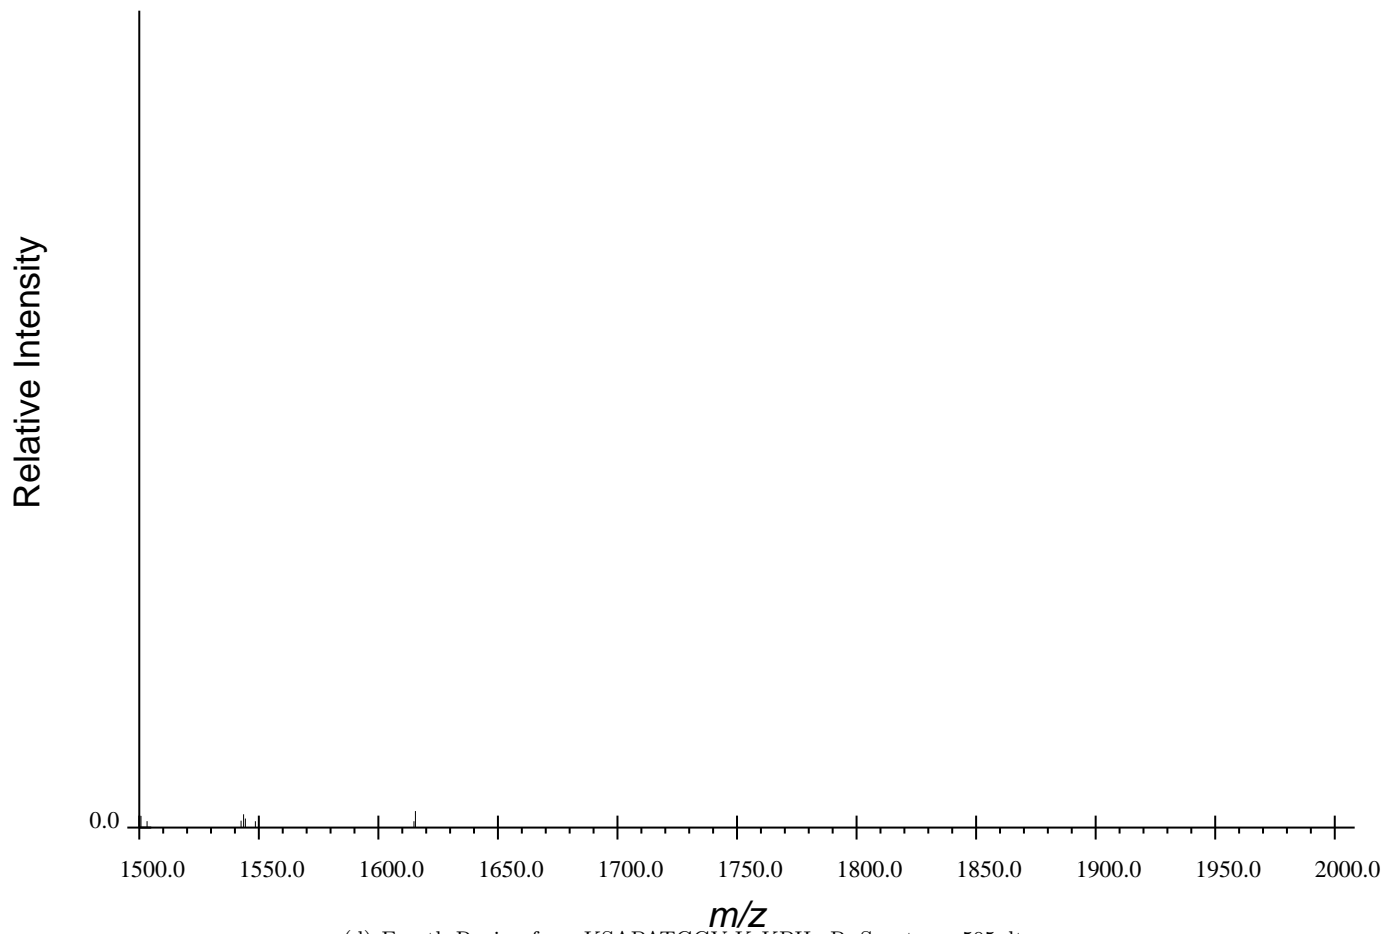

(d) Fourth Region for rrKSAPATGGVrKrKPHmR, Spectrum 505.dta

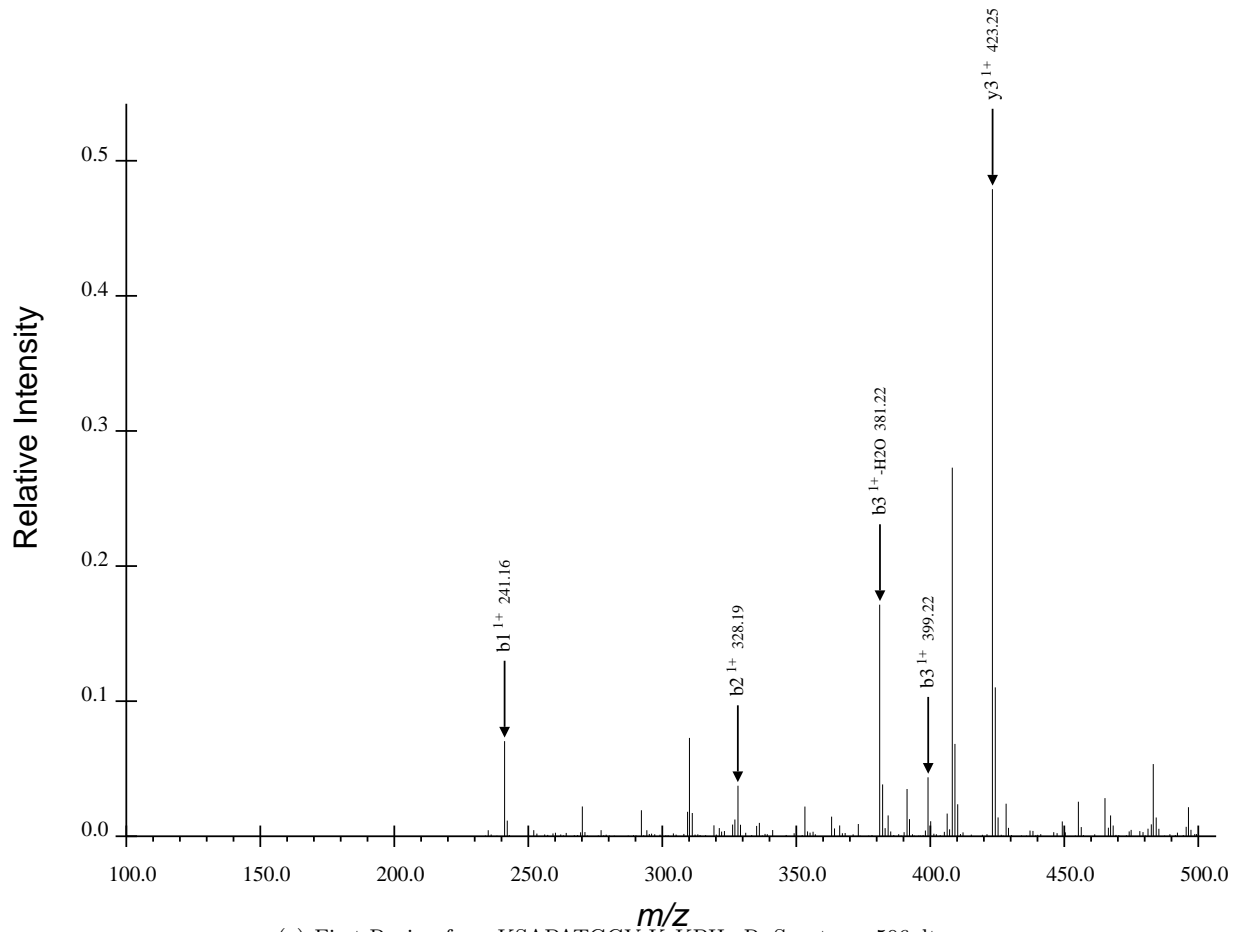

(a) First Region for rrKSAPATGGVrKrKPHmR, Spectrum 506.dta

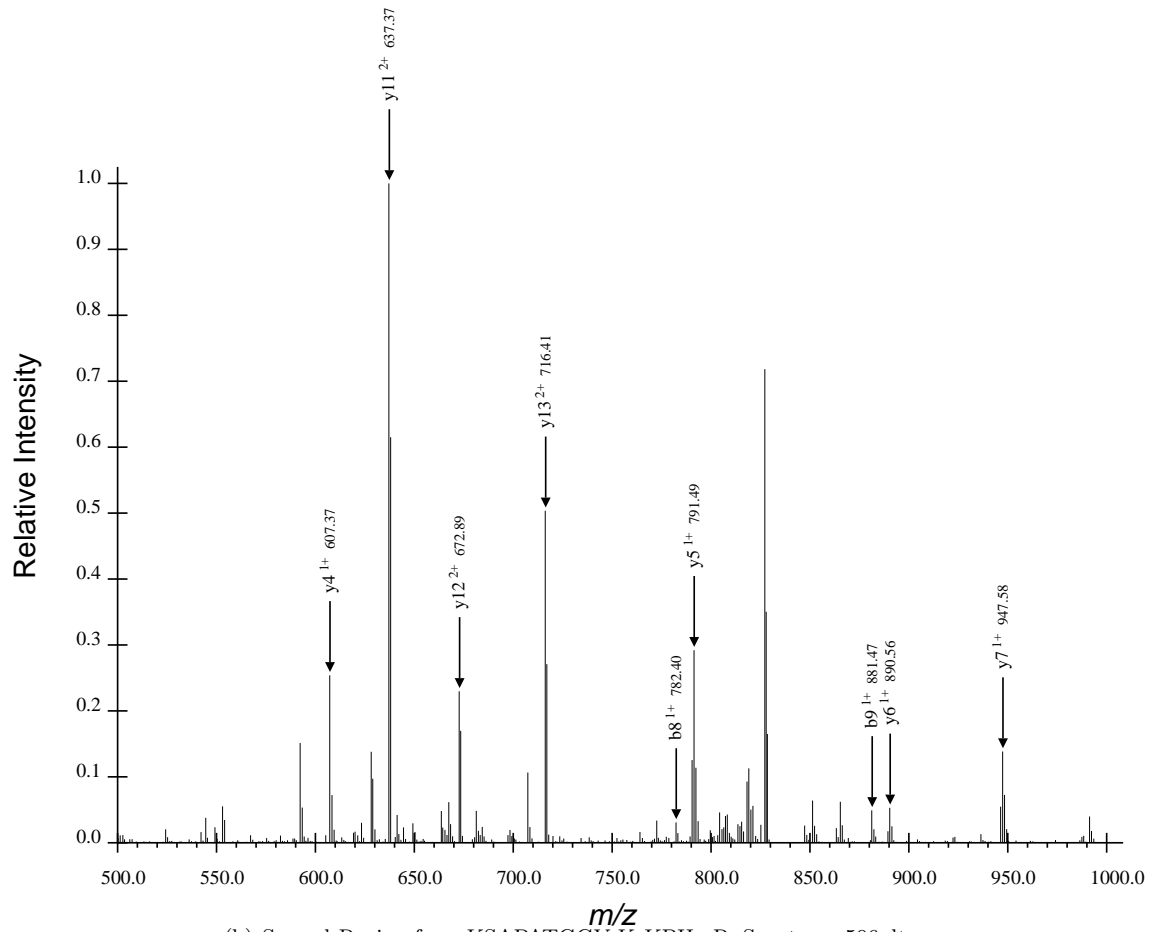

(b) Second Region for rrKSAPATGGVrKrKPHmR, Spectrum 506.dta

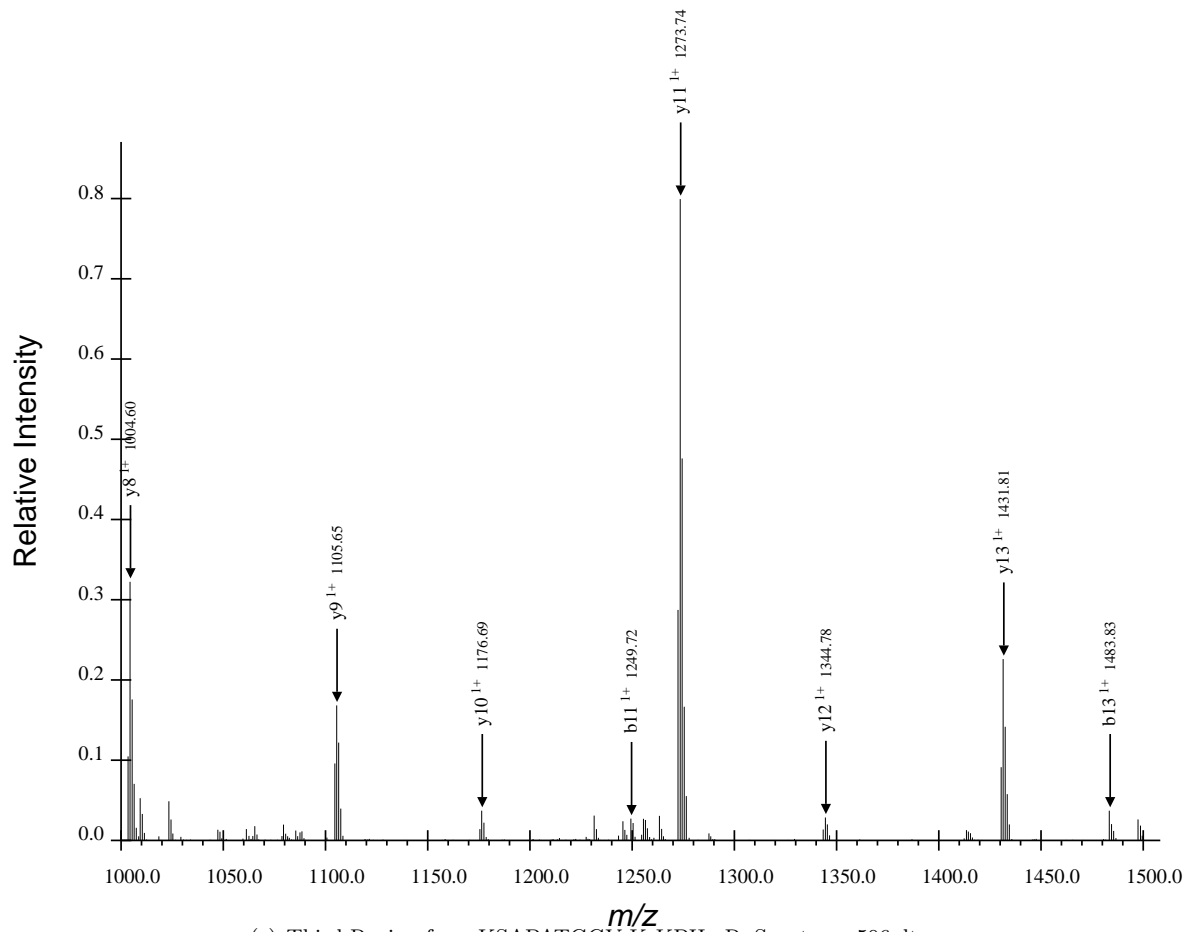

(c) Third Region for rrKSAPATGGVrKrKPHmR, Spectrum 506.dta

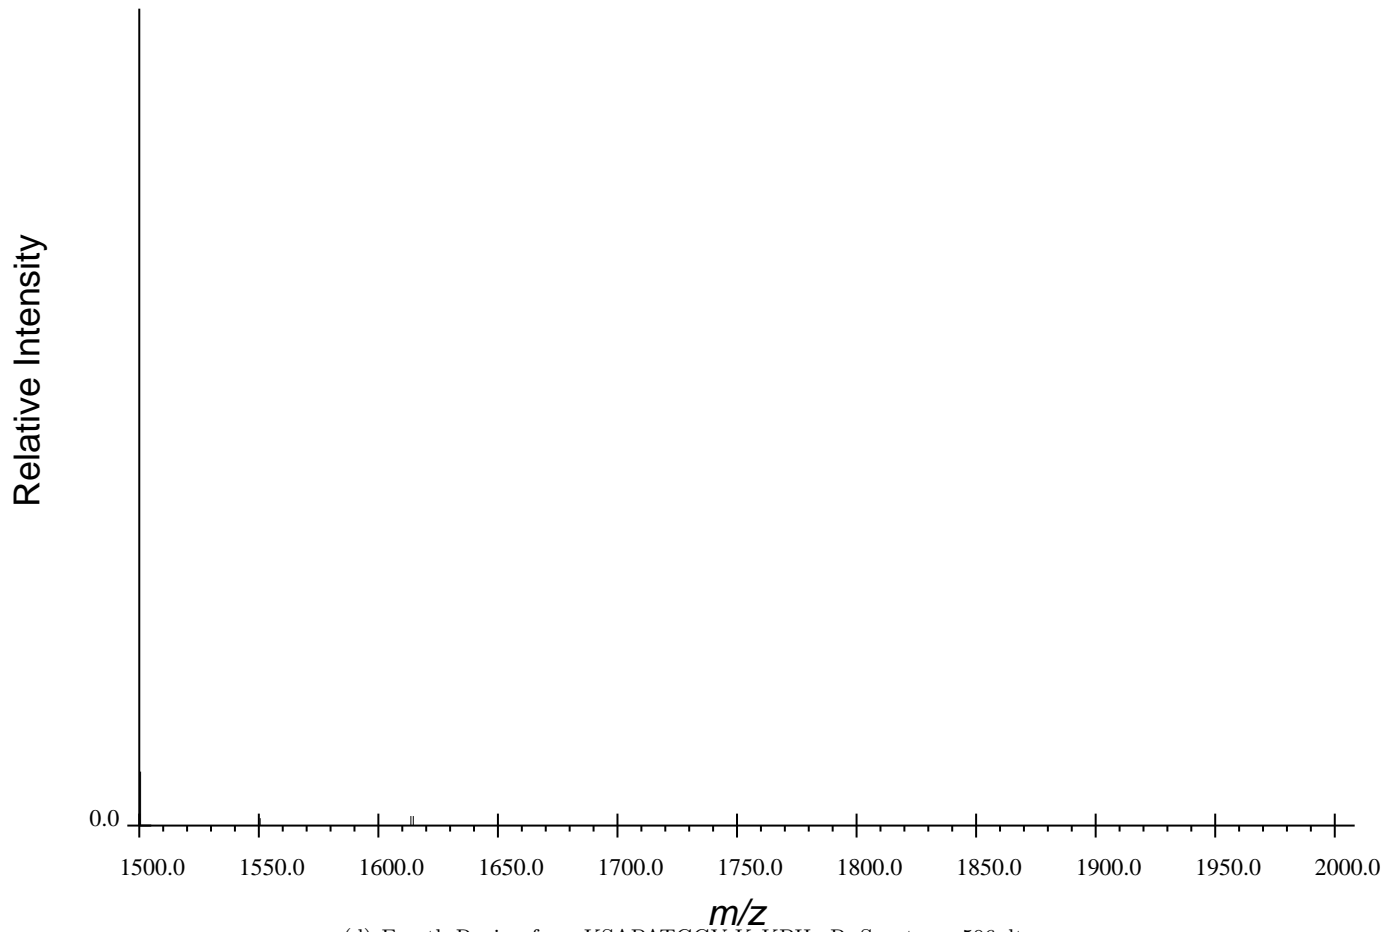

(d) Fourth Region for rrKSAPATGGVrKrKPHmR, Spectrum 506.dta

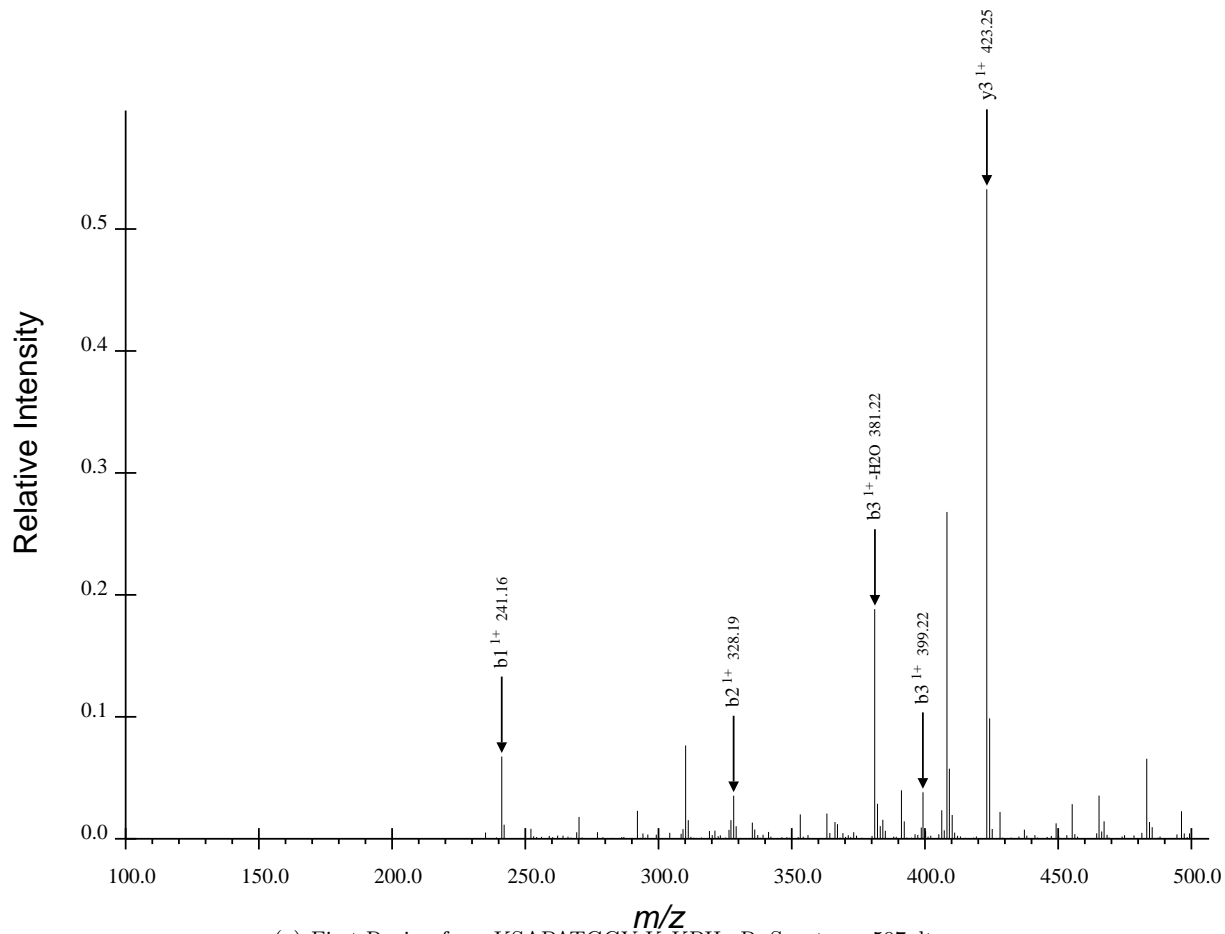

(a) First Region for rrKSAPATGGVrKrKPHmR, Spectrum 507.dta

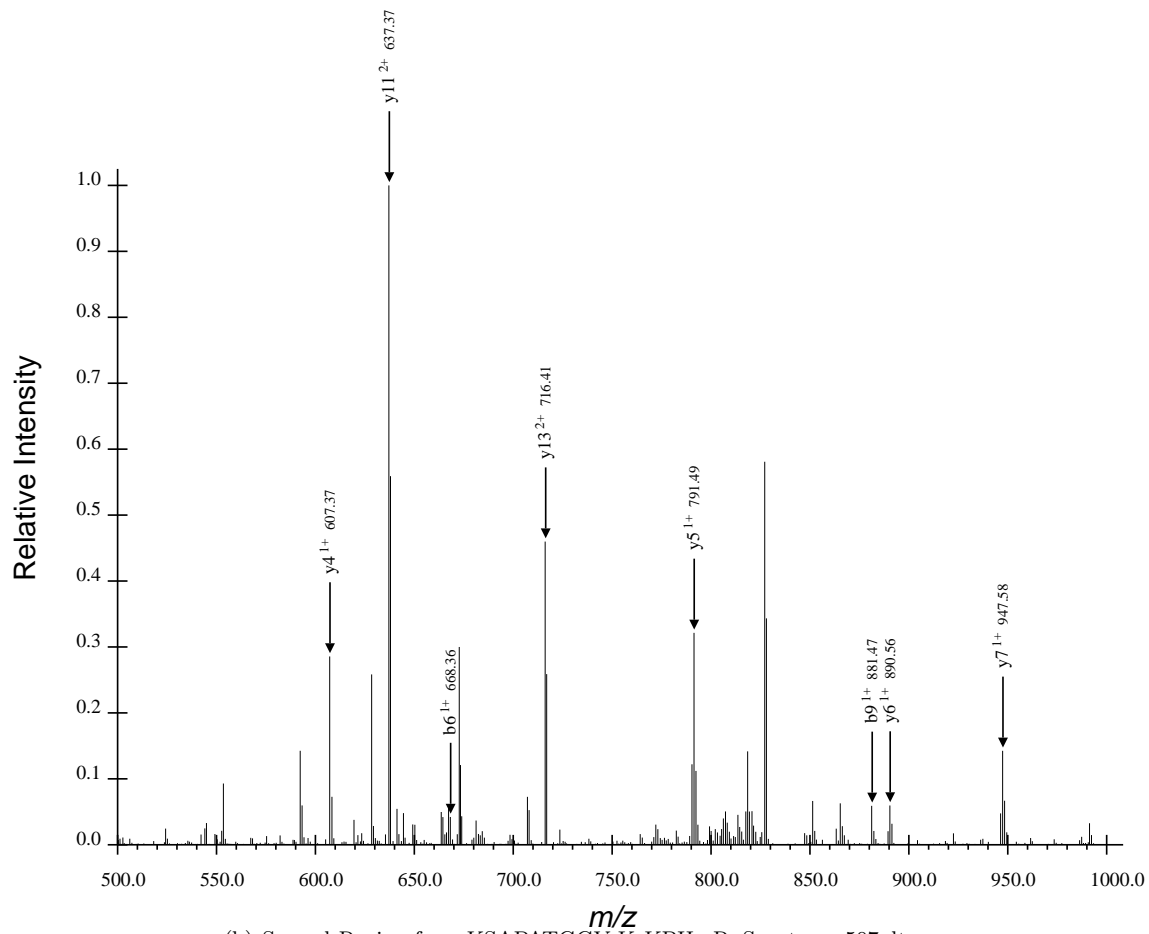

(b) Second Region for rrKSAPATGGVrKrKPHmR, Spectrum 507.dta

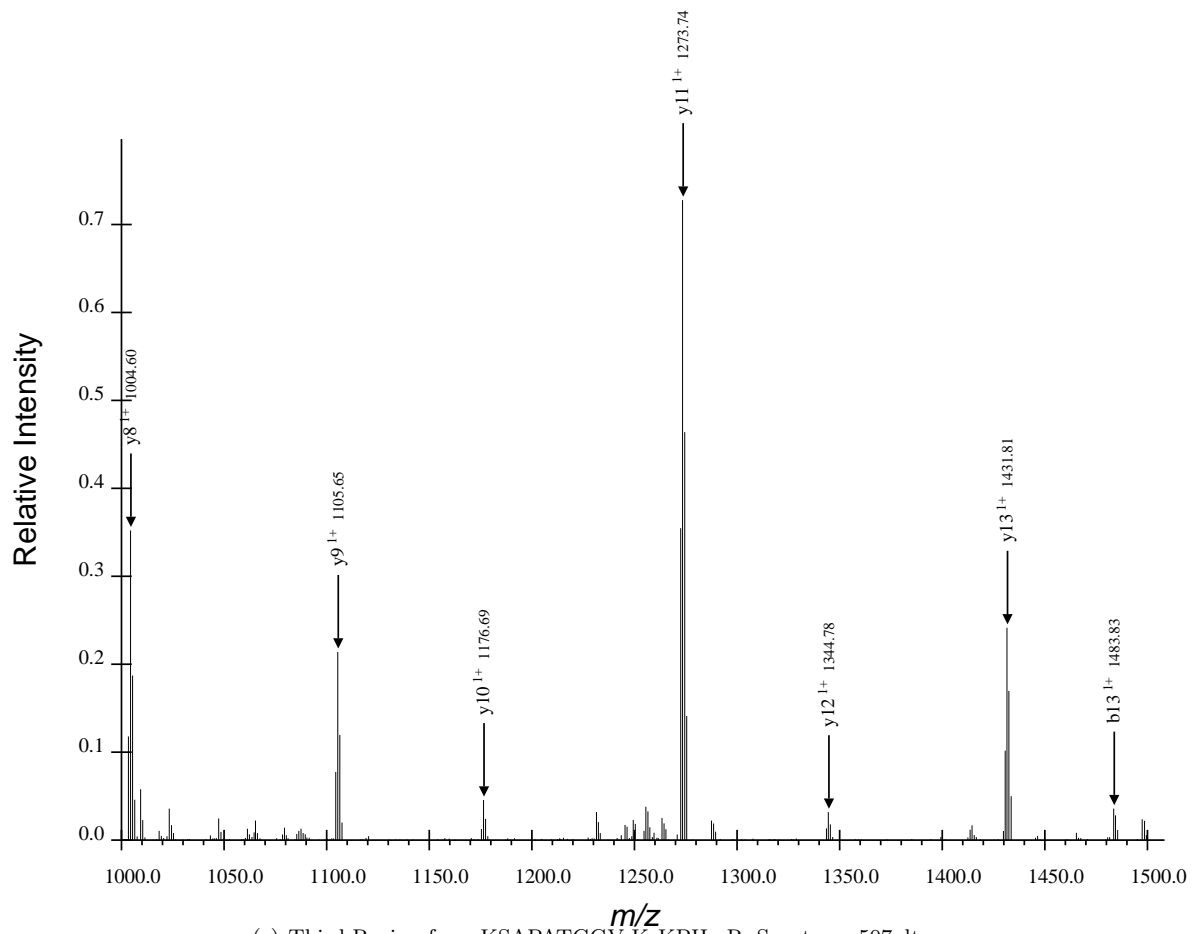

(c) Third Region for rrKSAPATGGVrKrKPHmR, Spectrum 507.dta

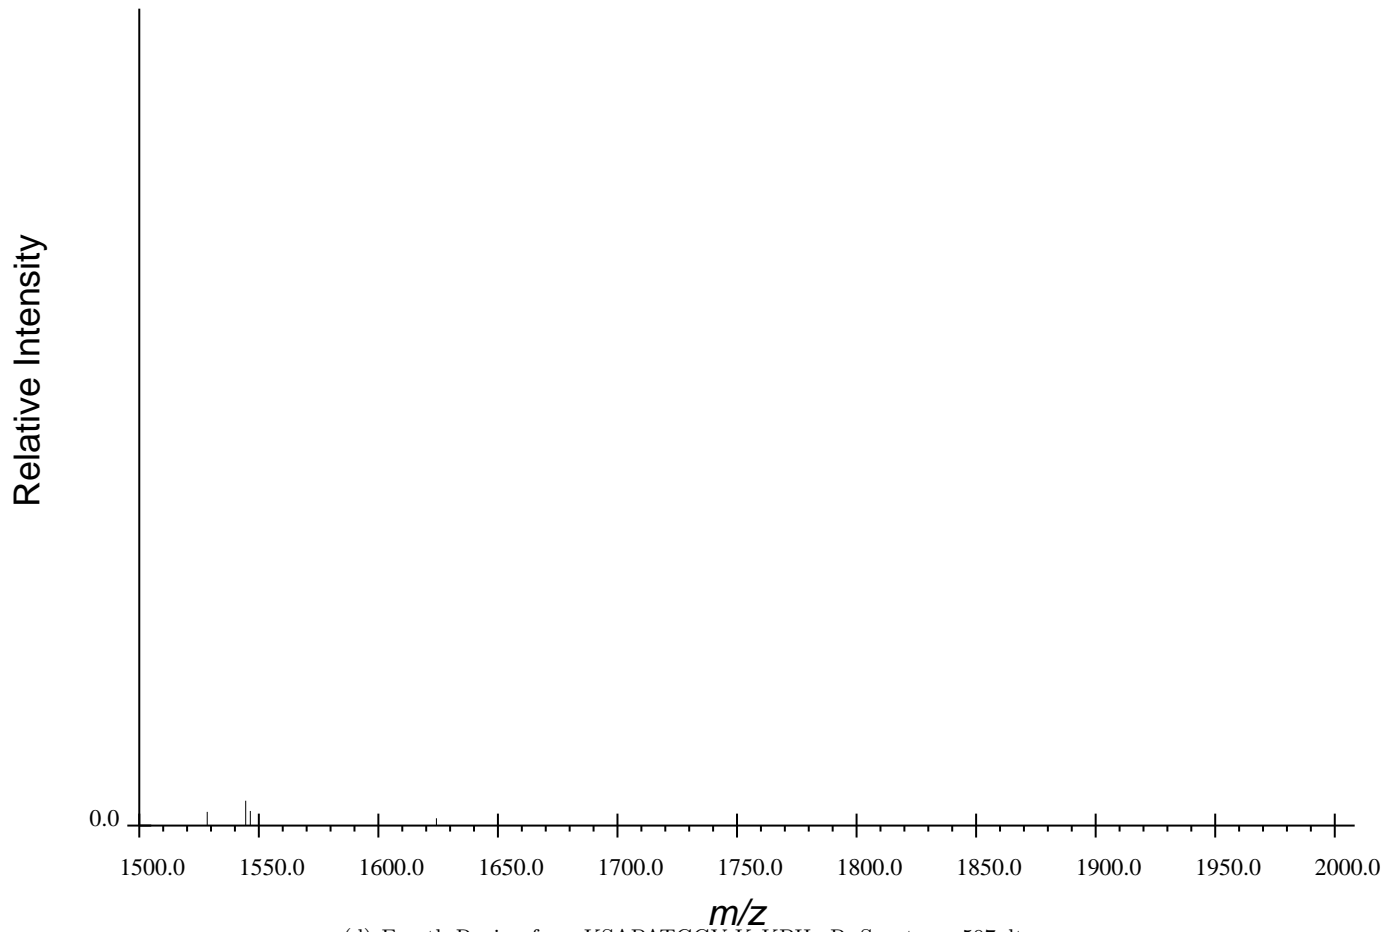

(d) Fourth Region for rrKSAPATGGVrKrKPHmR, Spectrum 507.dta

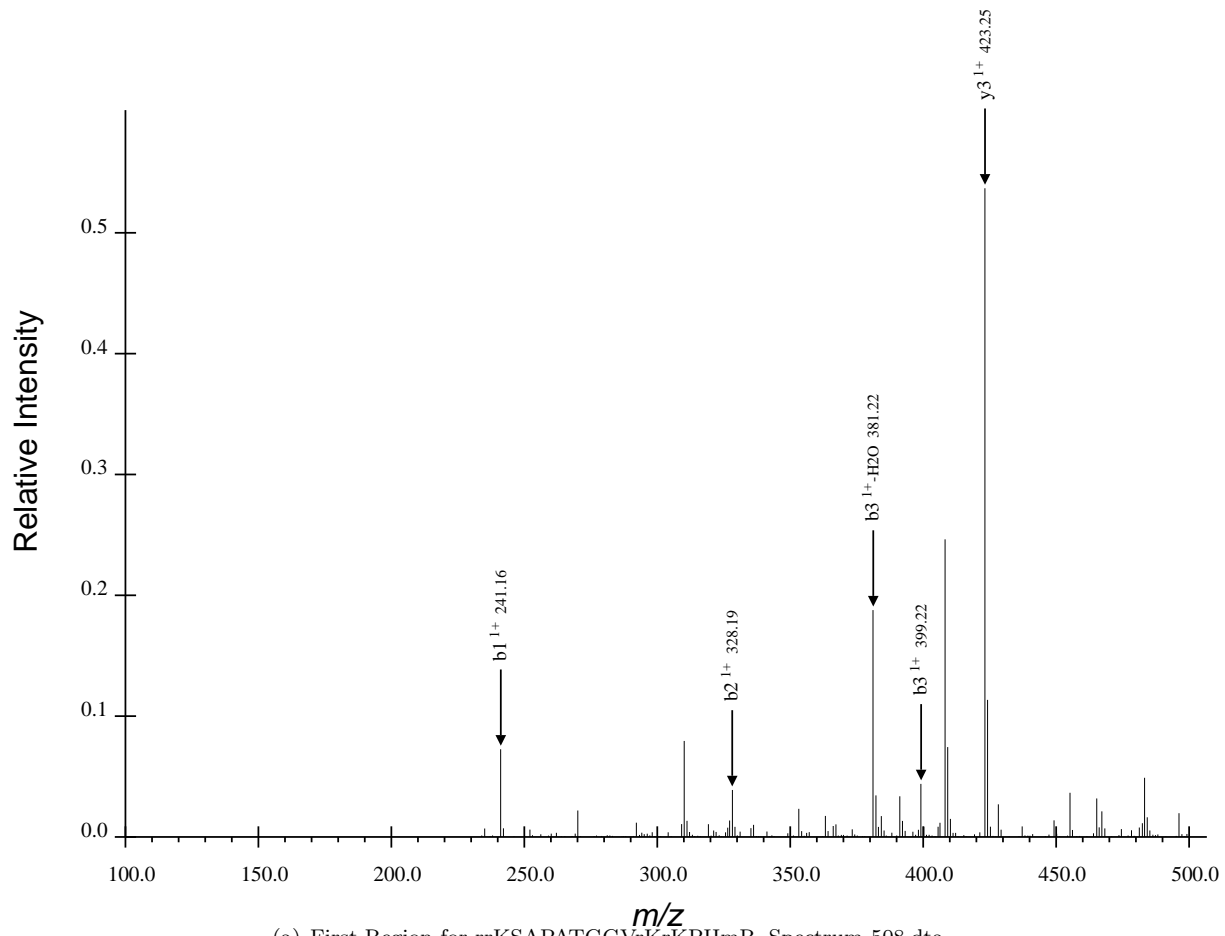

(a) First Region for rrKSAPATGGVrKrKPHmR, Spectrum 508.dta

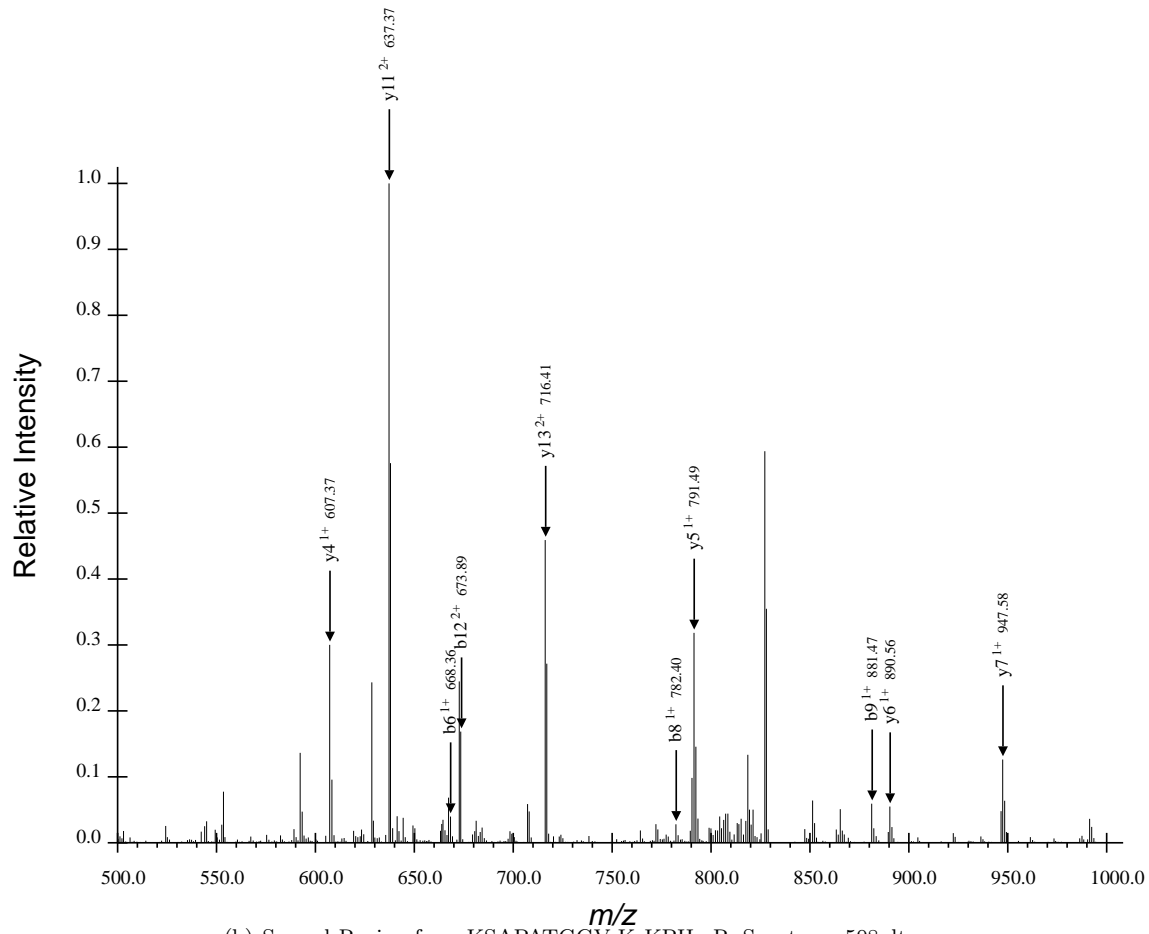

(b) Second Region for rrKSAPATGGVrKrKPHmR, Spectrum 508.dta



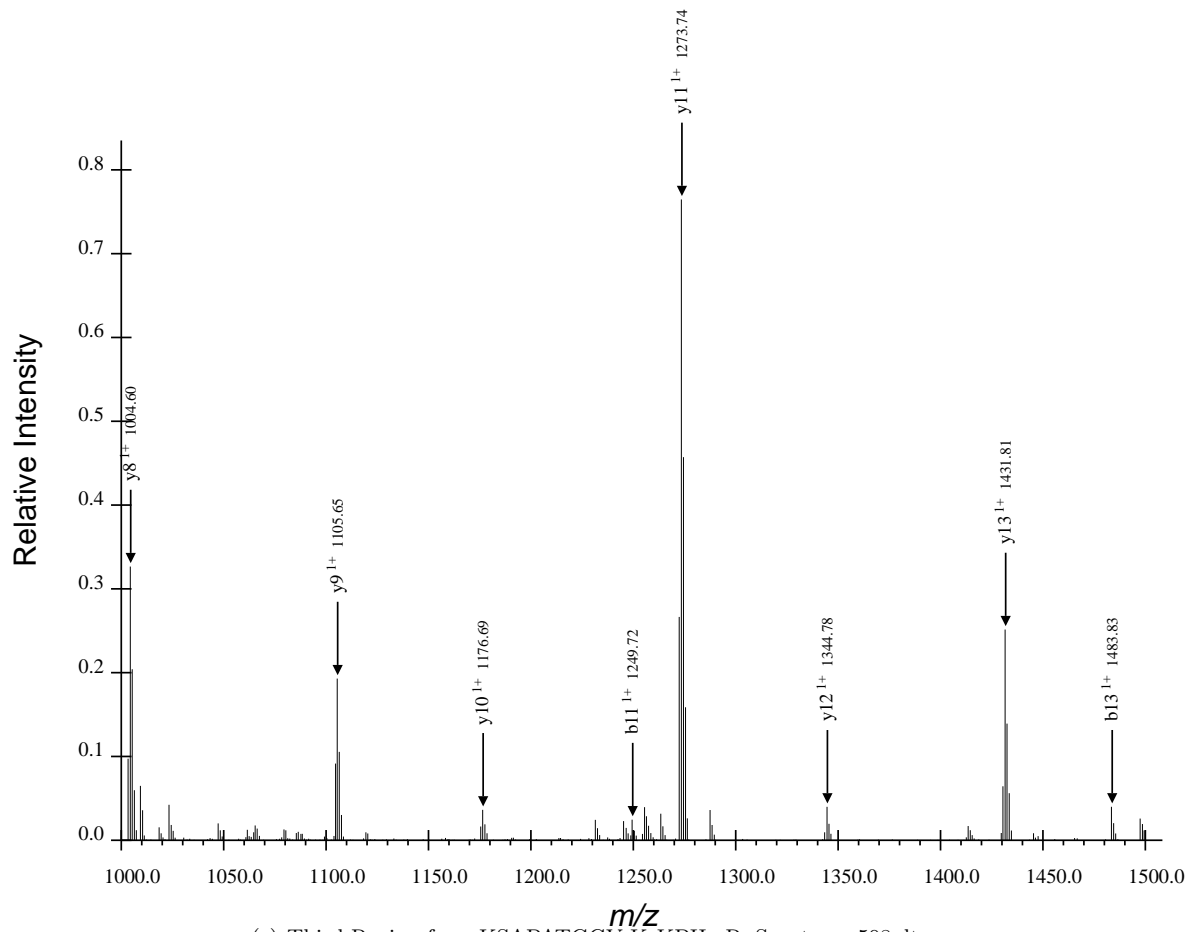

(c) Third Region for rrKSAPATGGVrKrKPHmR, Spectrum 508.dta

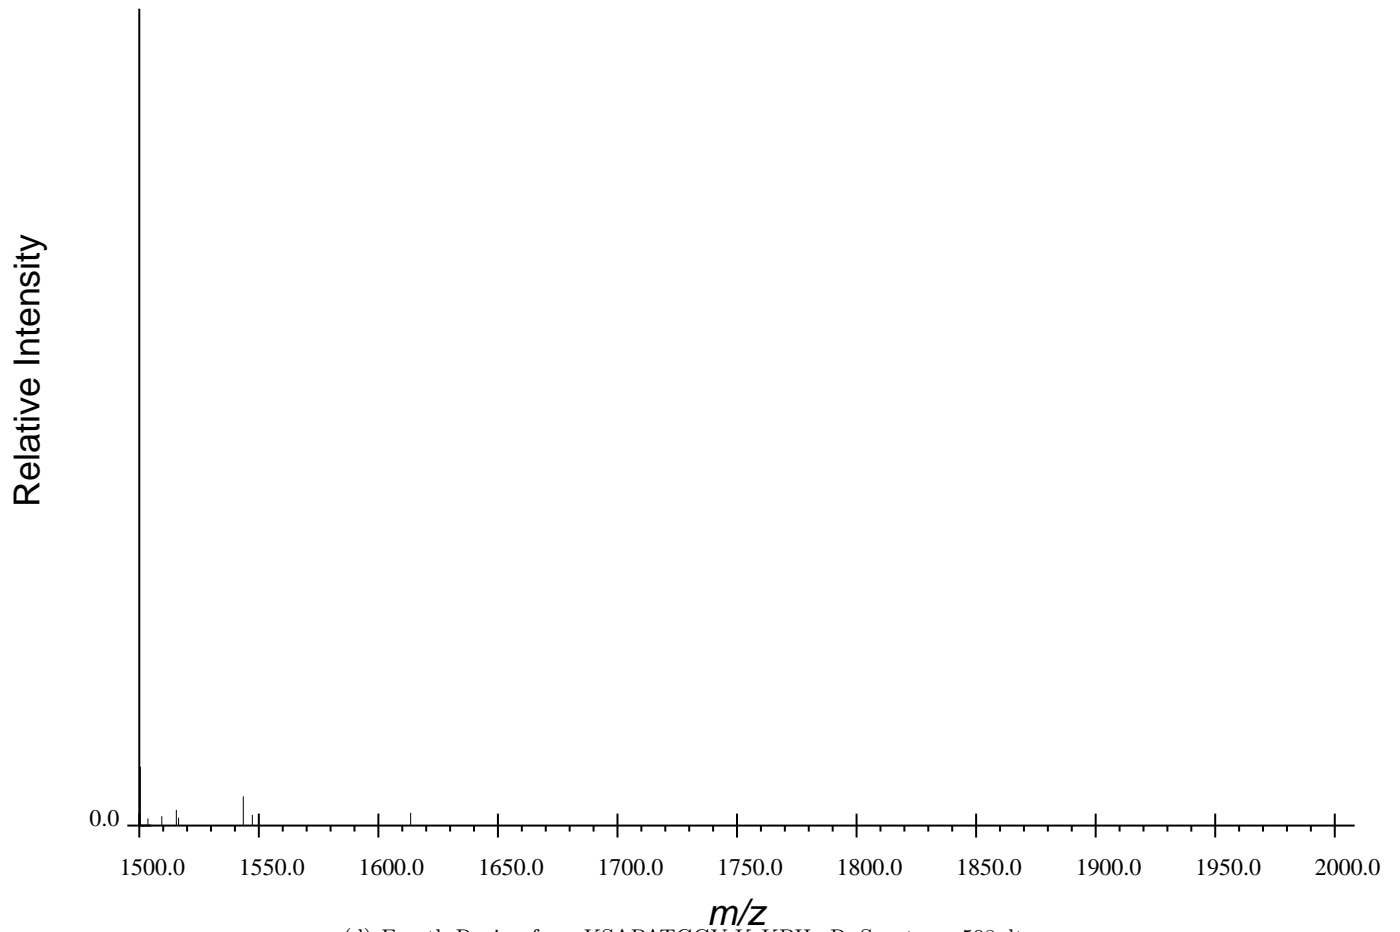

(d) Fourth Region for rrKSAPATGGVrKrKPHmR, Spectrum 508.dta

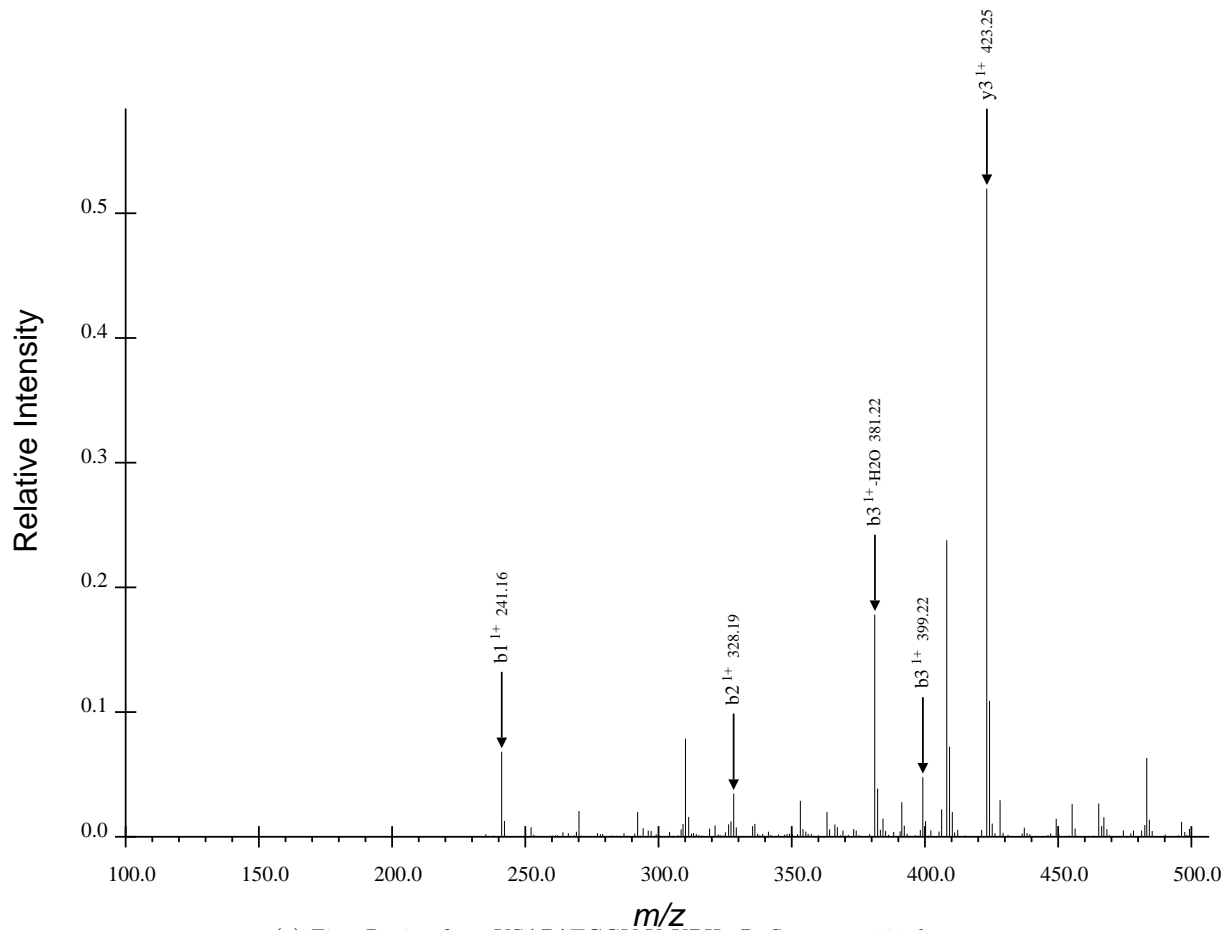

(a) First Region for rrKSAPATGGVrKrKPHmR, Spectrum 509.dta

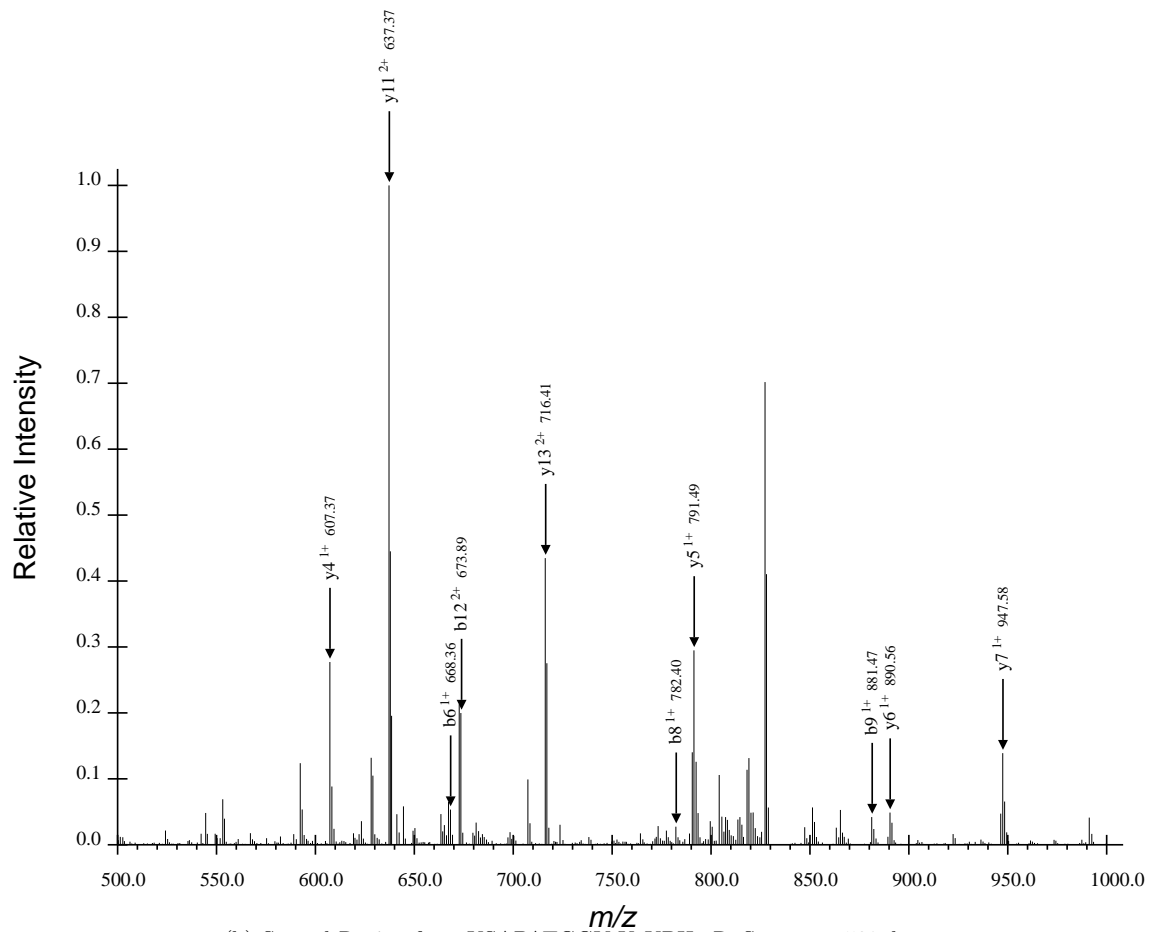

(b) Second Region for rrKSAPATGGVrKrKPHmR, Spectrum 509.dta

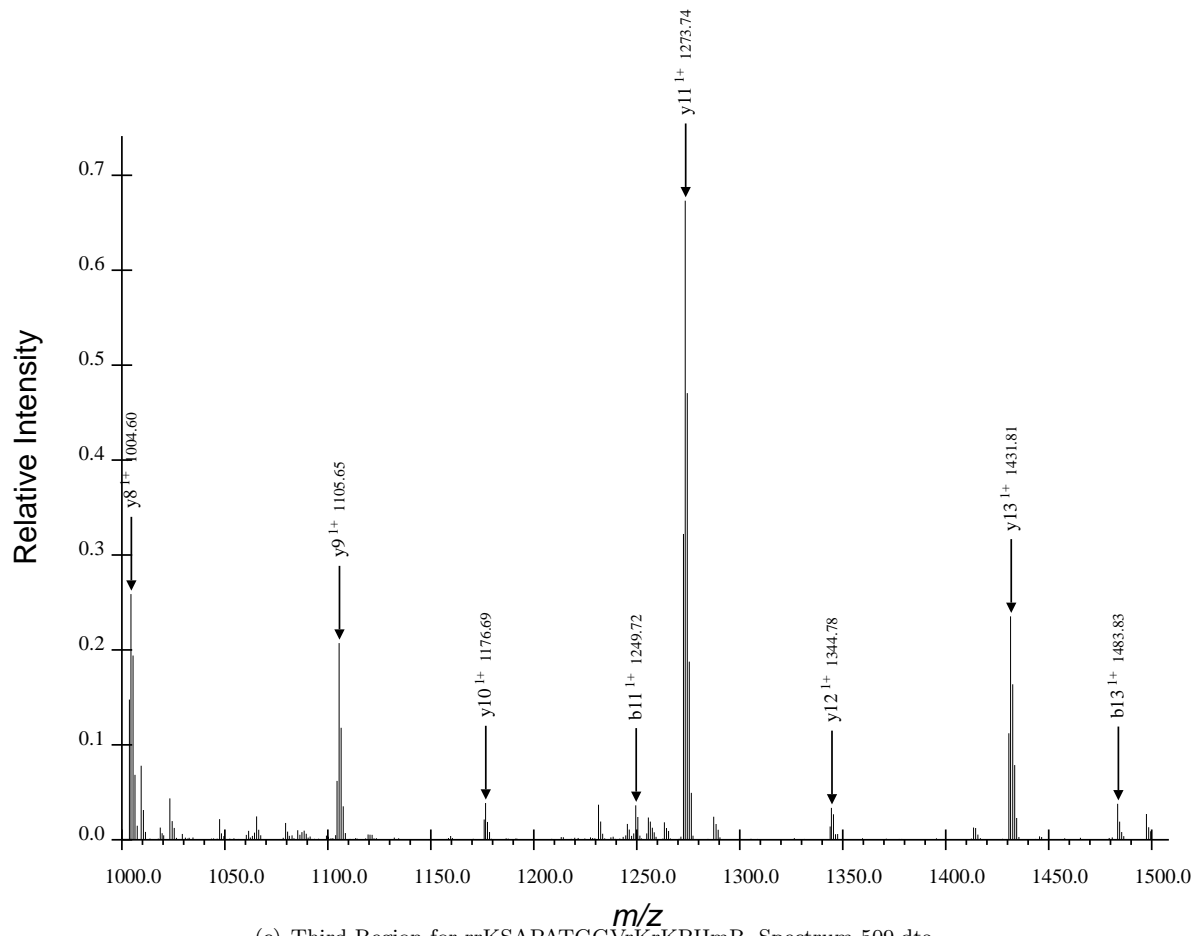

(c) Third Region for rrKSAPATGGVrKrKPHmR, Spectrum 509.dta

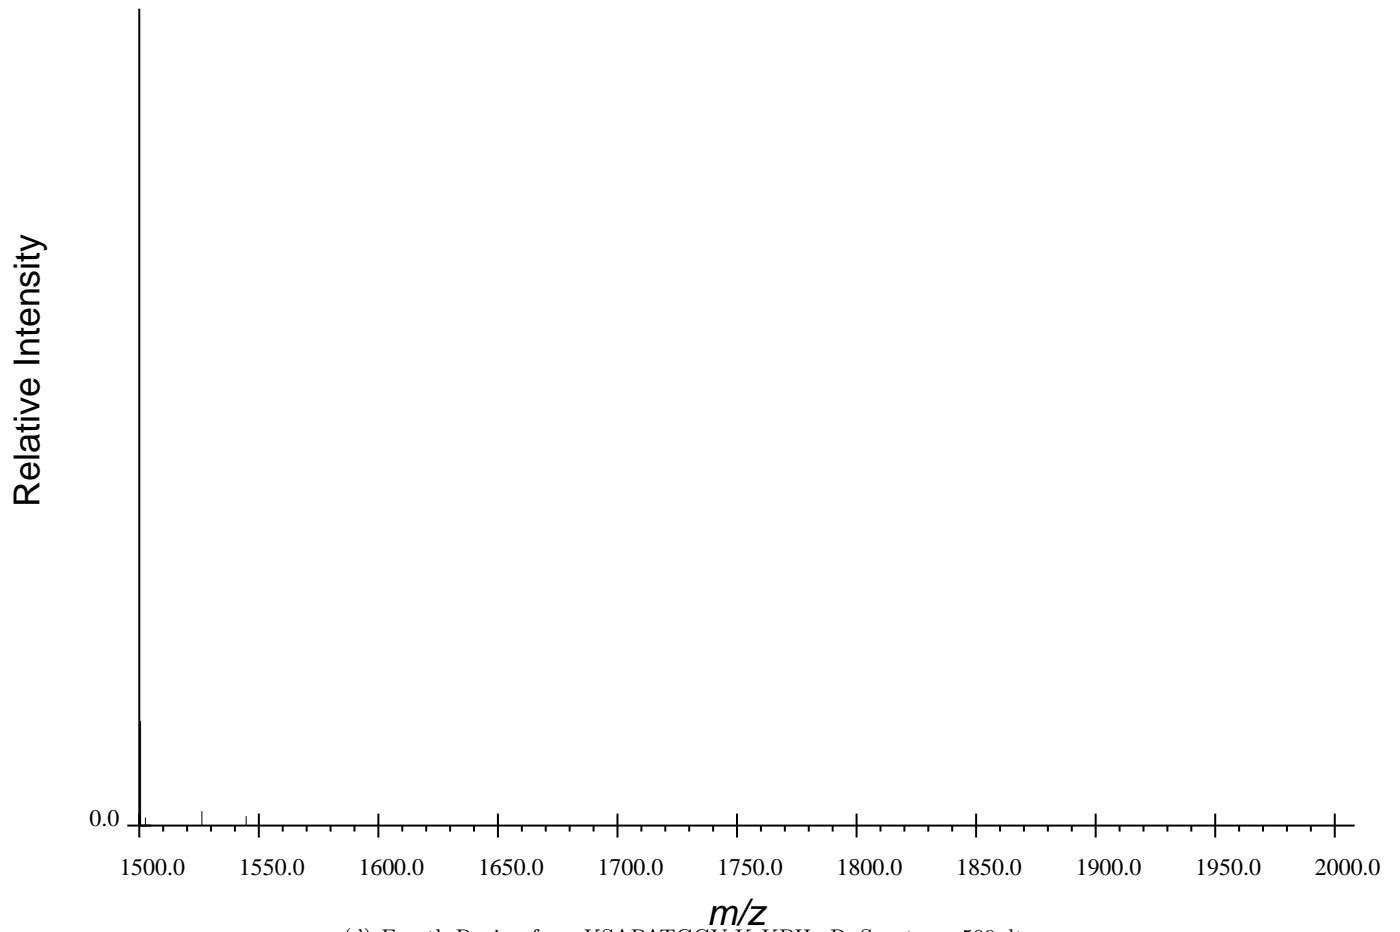

(d) Fourth Region for rrKSAPATGGVrKrKPHmR, Spectrum 509.dta

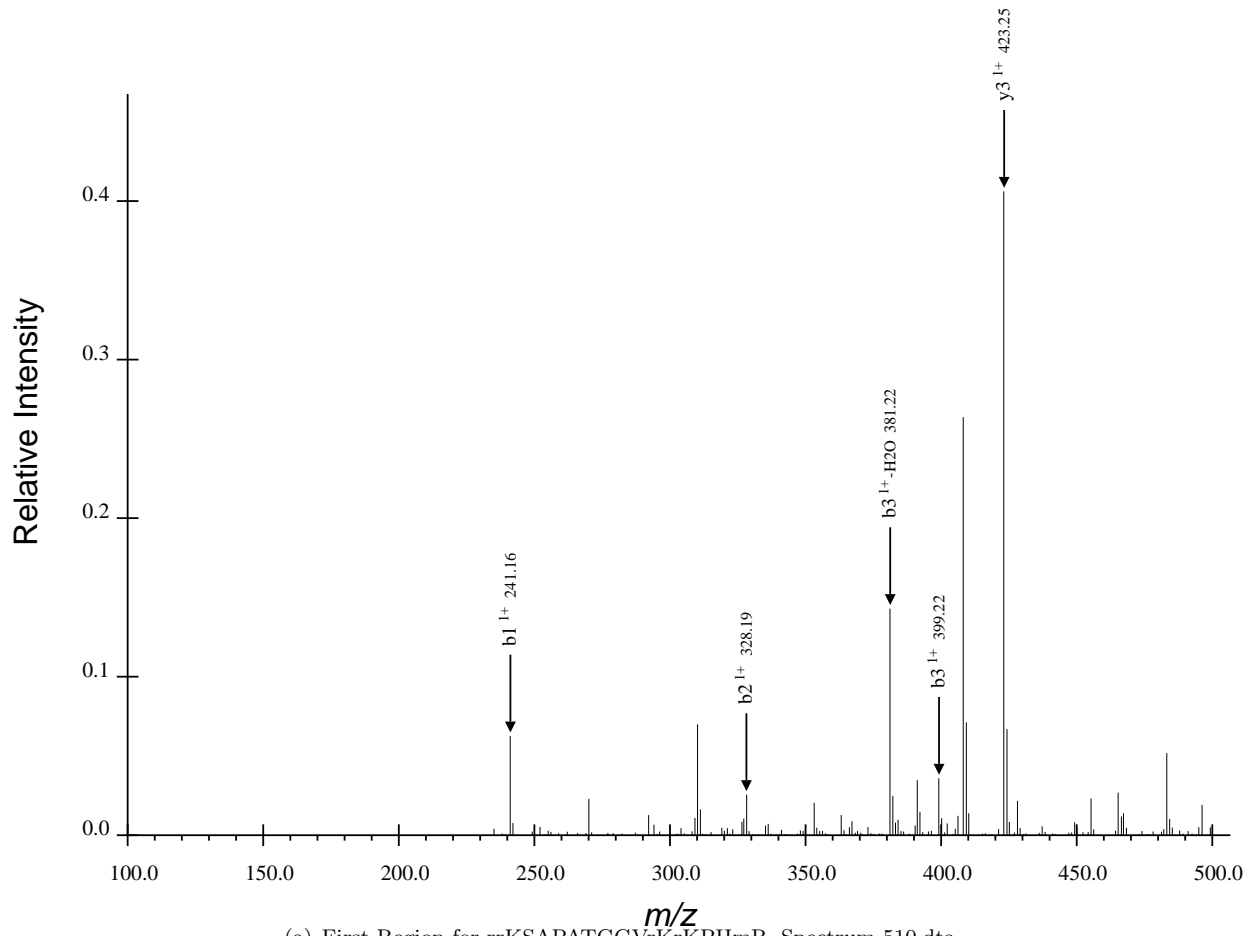

(a) First Region for rrKSAPATGGVrKrKPHmR, Spectrum 510.dta

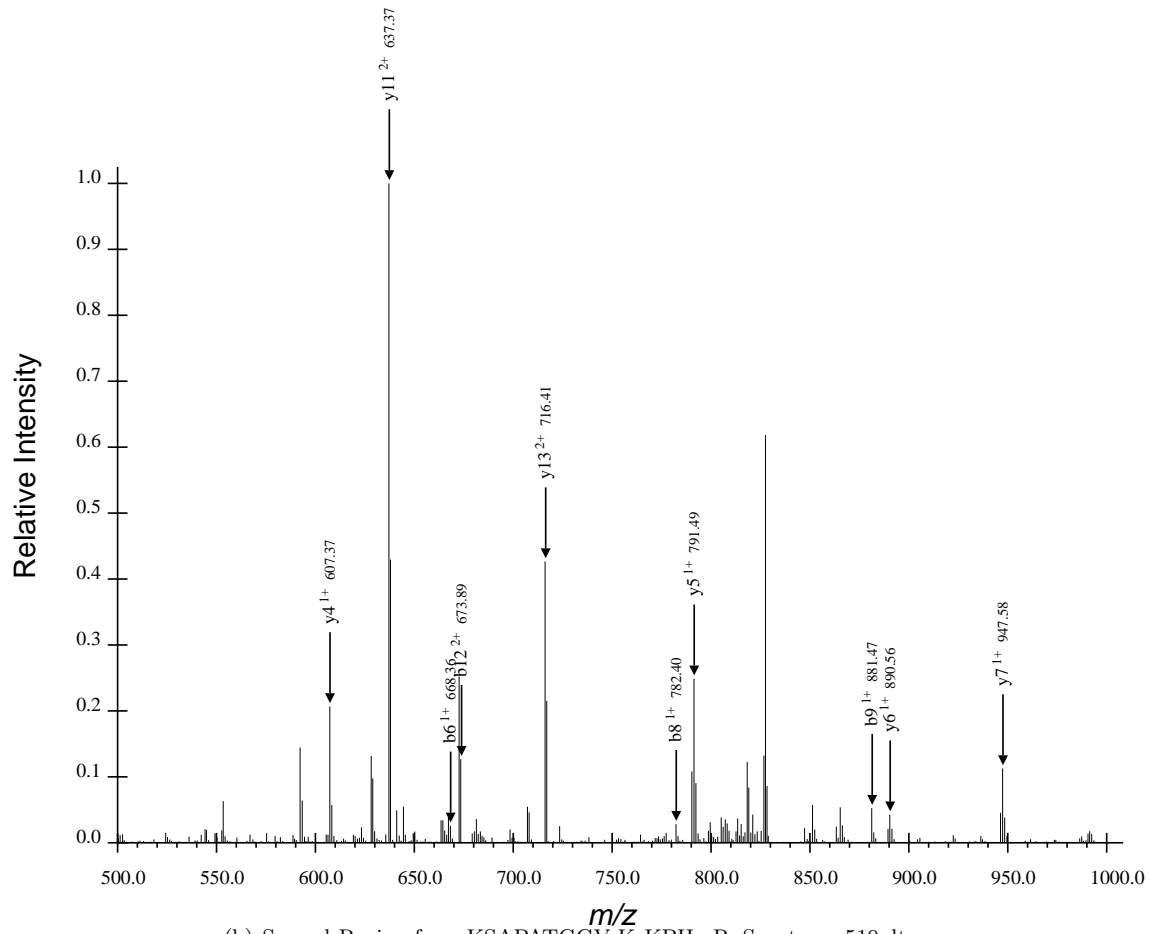

(b) Second Region for rrKSAPATGGVrKrKPHmR, Spectrum 510.dta

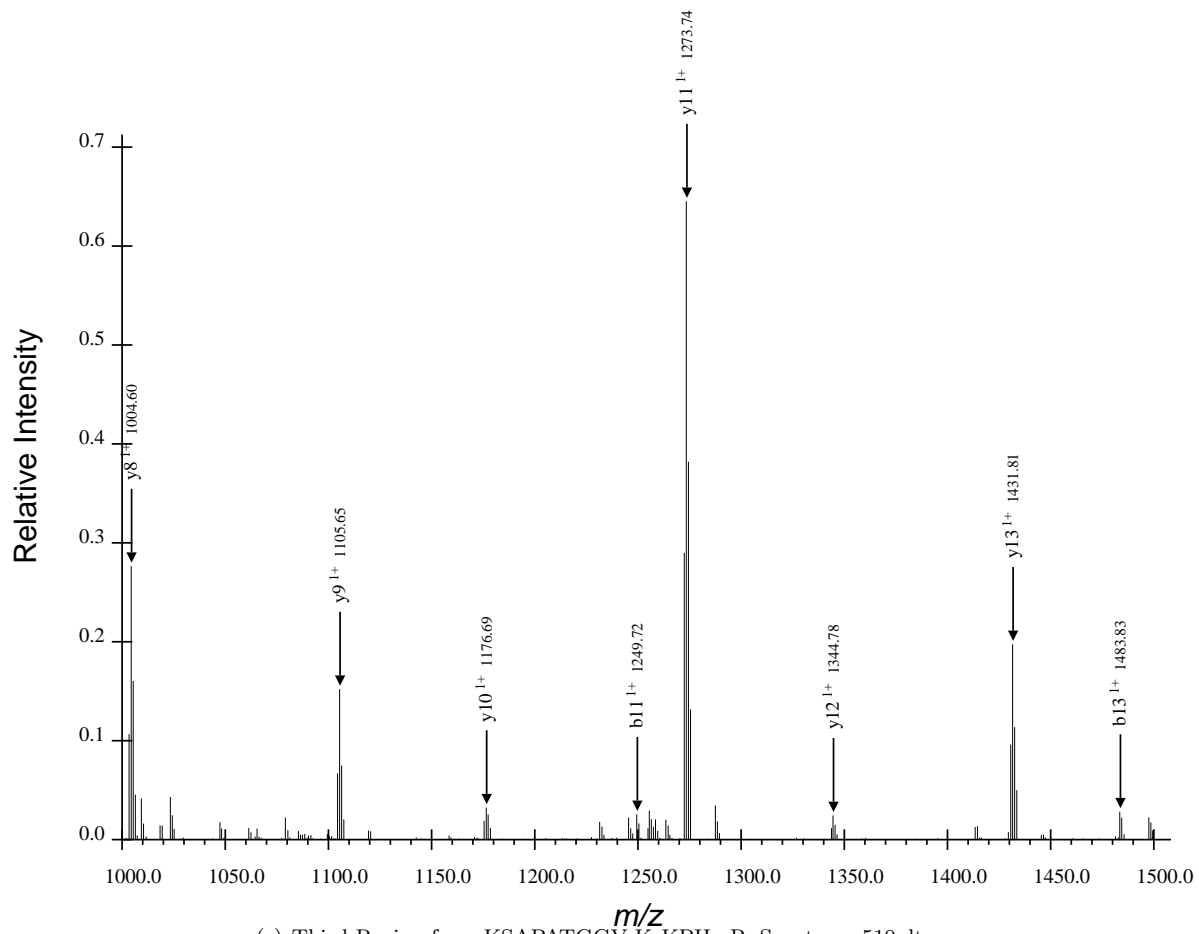

(c) Third Region for rrKSAPATGGVrKrKPHmR, Spectrum 510.dta

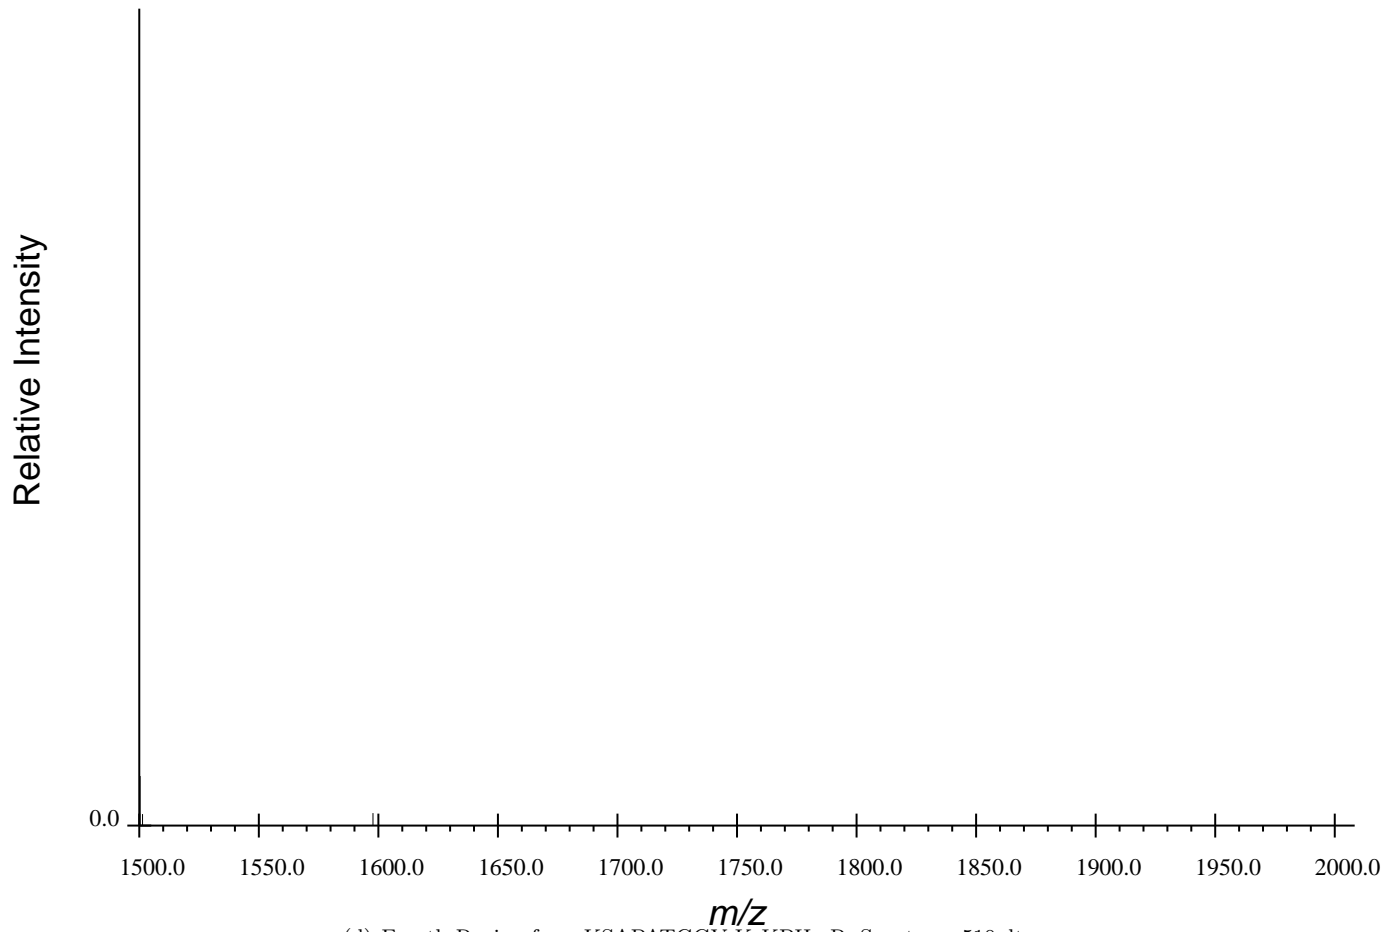

(d) Fourth Region for rrKSAPATGGVrKrKPHmR, Spectrum 510.dta

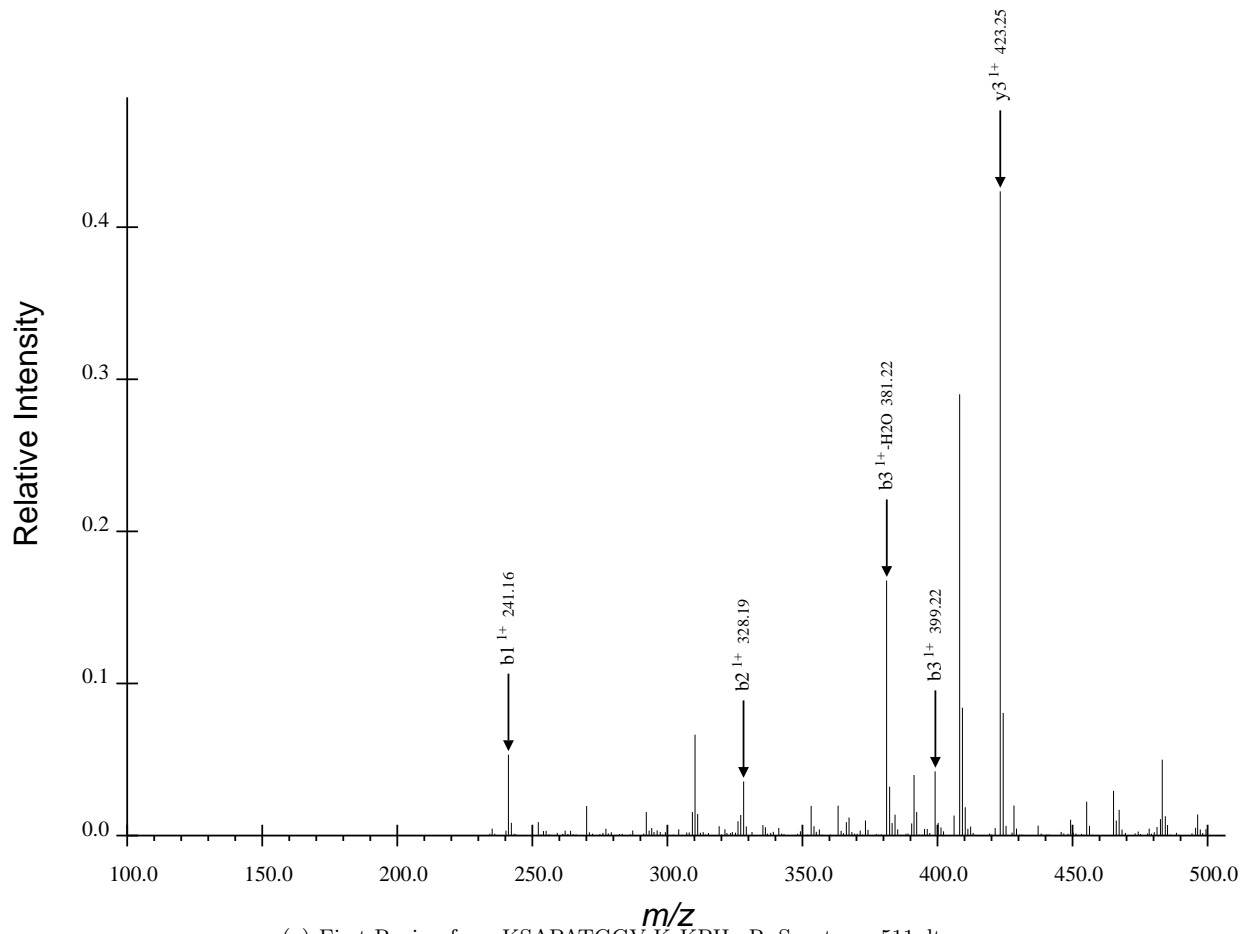

(a) First Region for rrKSAPATGGVrKrKPHmR, Spectrum 511.dta

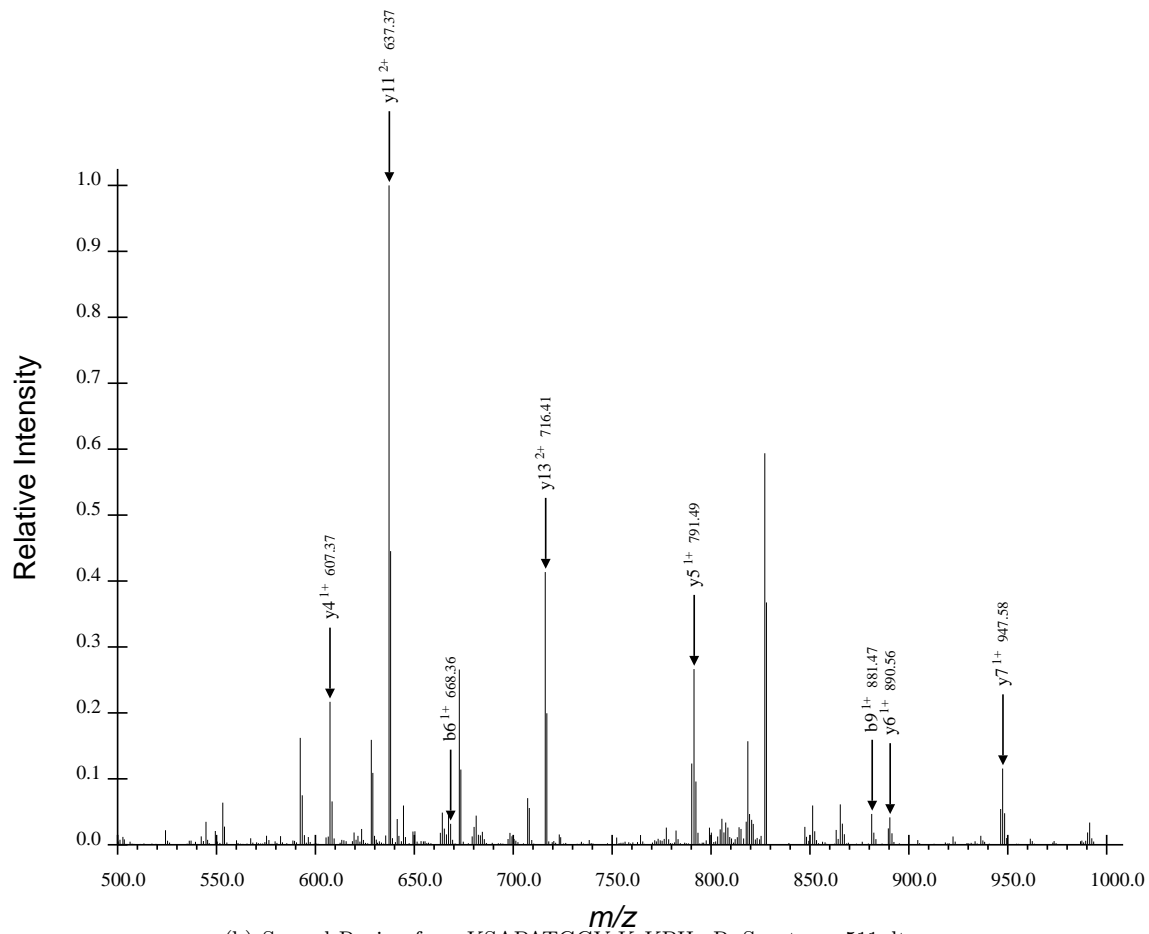

(b) Second Region for rrKSAPATGGVrKrKPHmR, Spectrum 511.dta

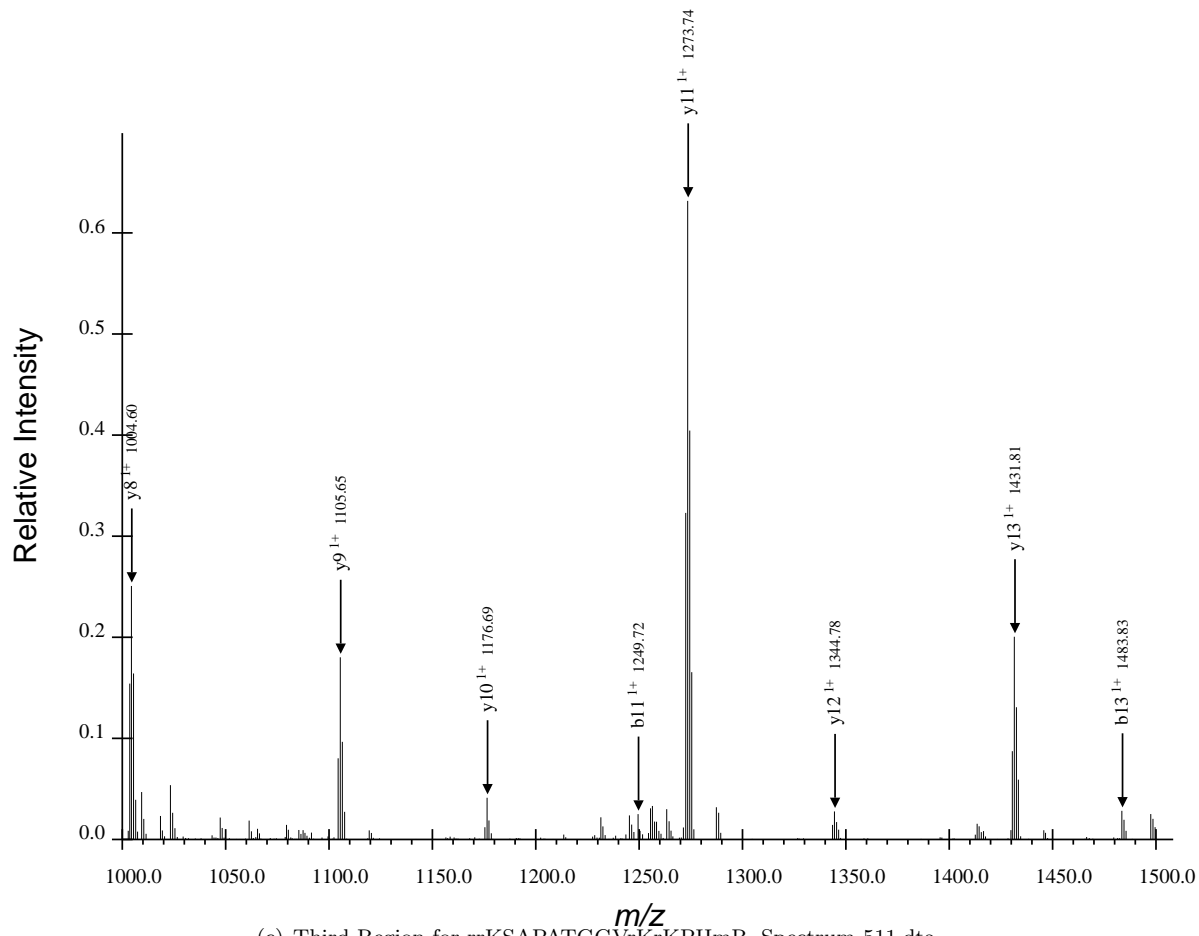

(c) Third Region for rrKSAPATGGVrKrKPHmR, Spectrum 511.dta

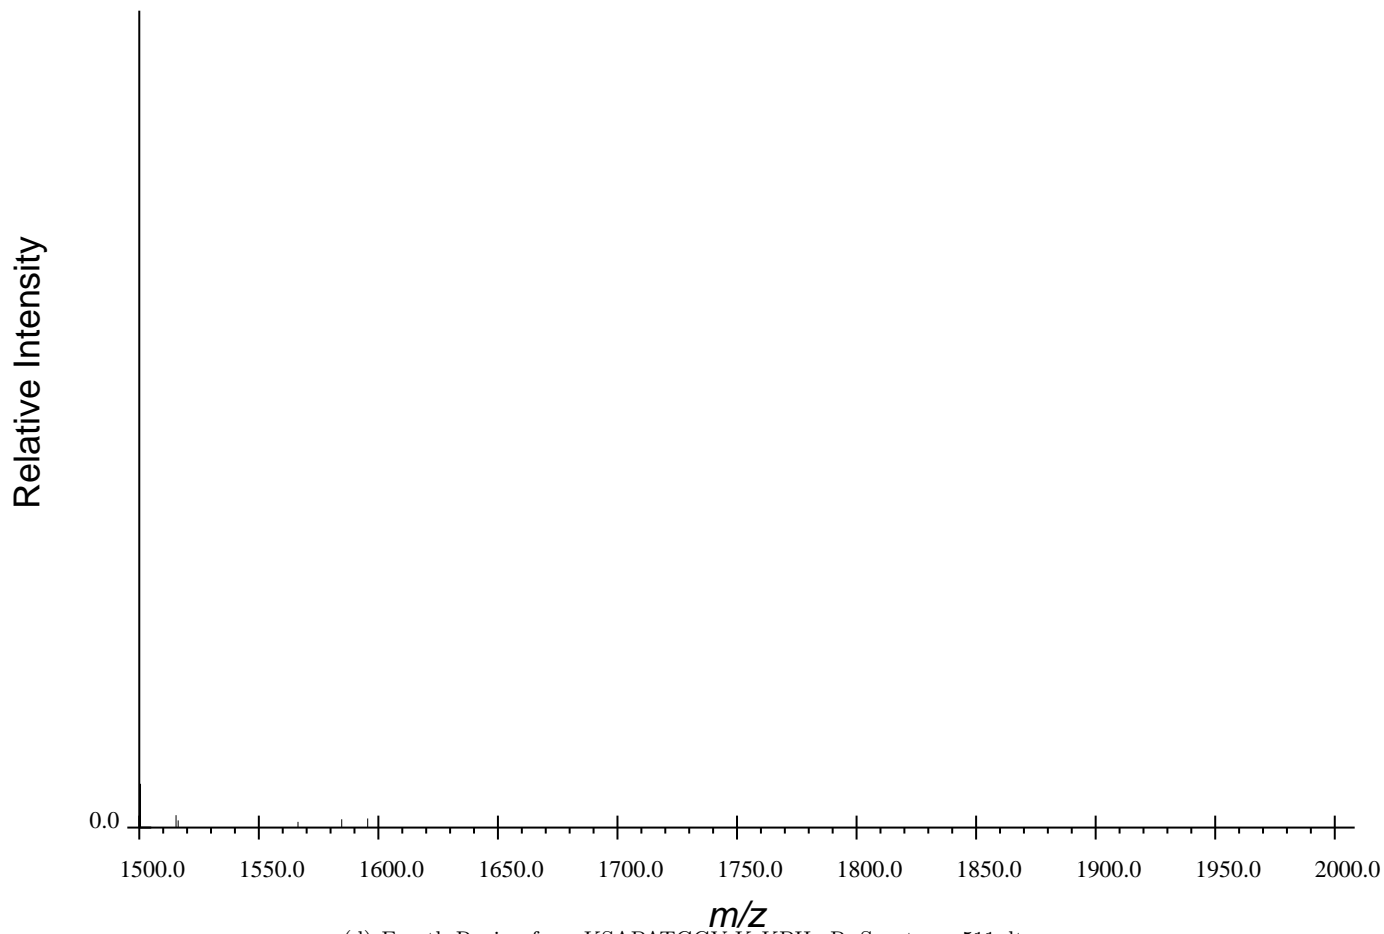

(d) Fourth Region for rrKSAPATGGVrKrKPHmR, Spectrum 511.dta

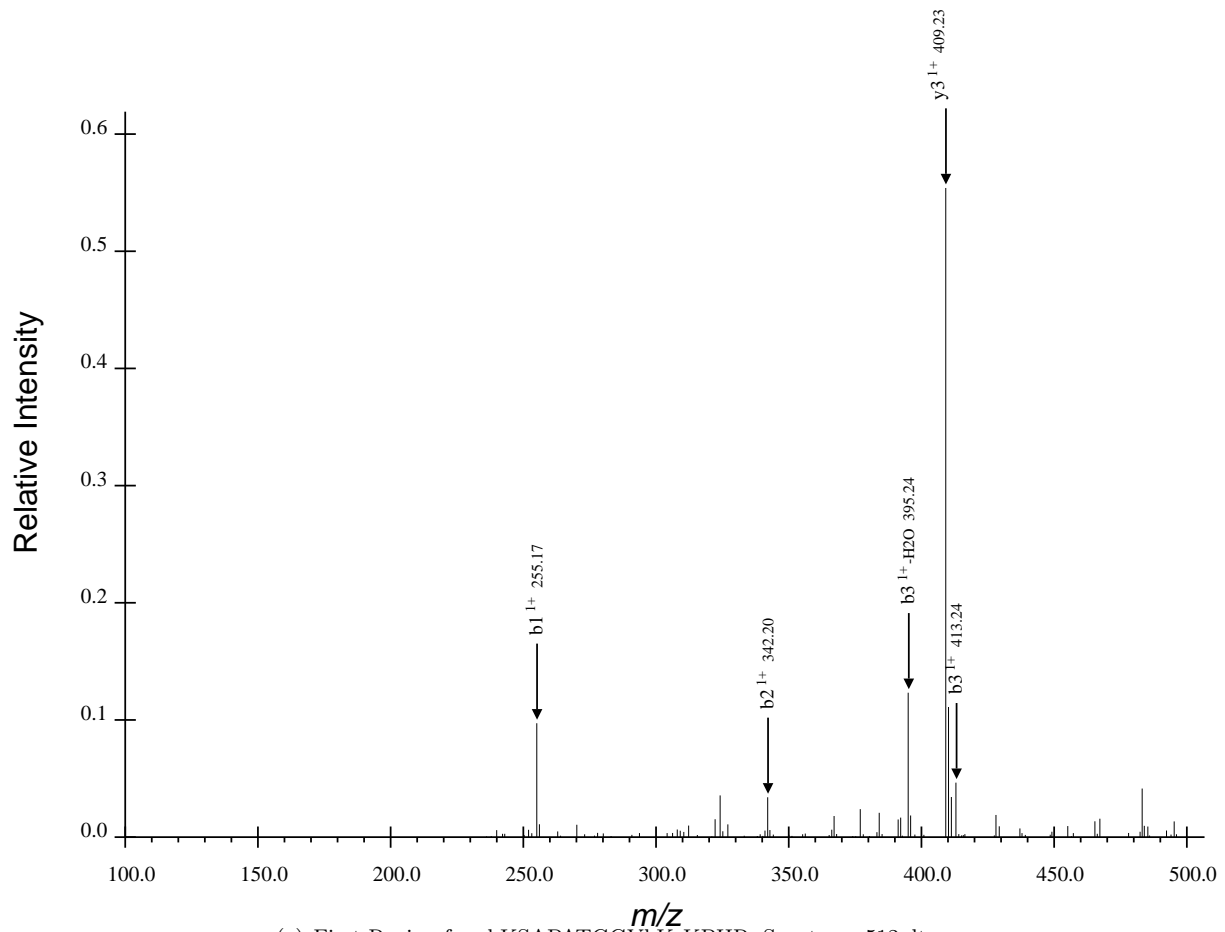

(a) First Region for rhKSAPATGGVhKrKPHR, Spectrum 512.dta

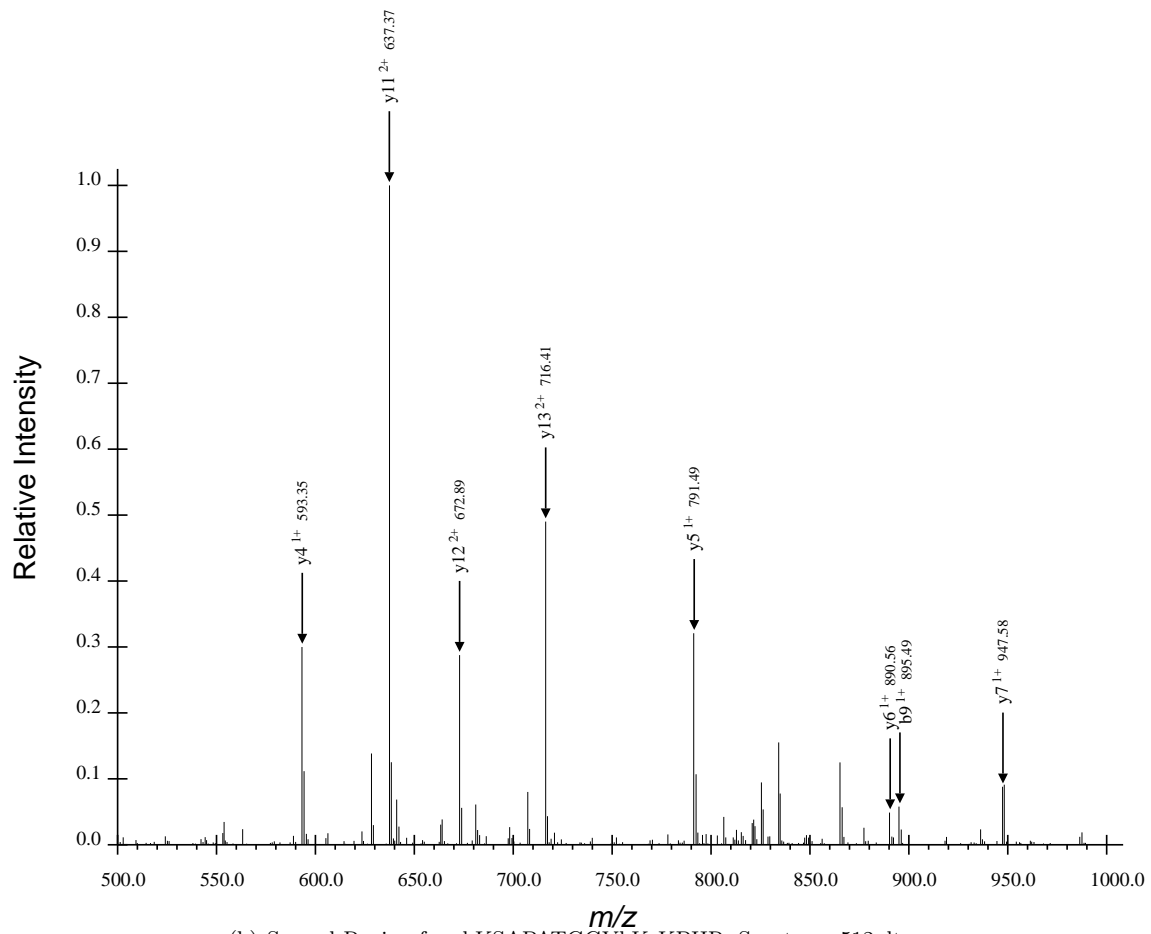

(b) Second Region for rhKSAPATGGVhKrKPHR, Spectrum 512.dta



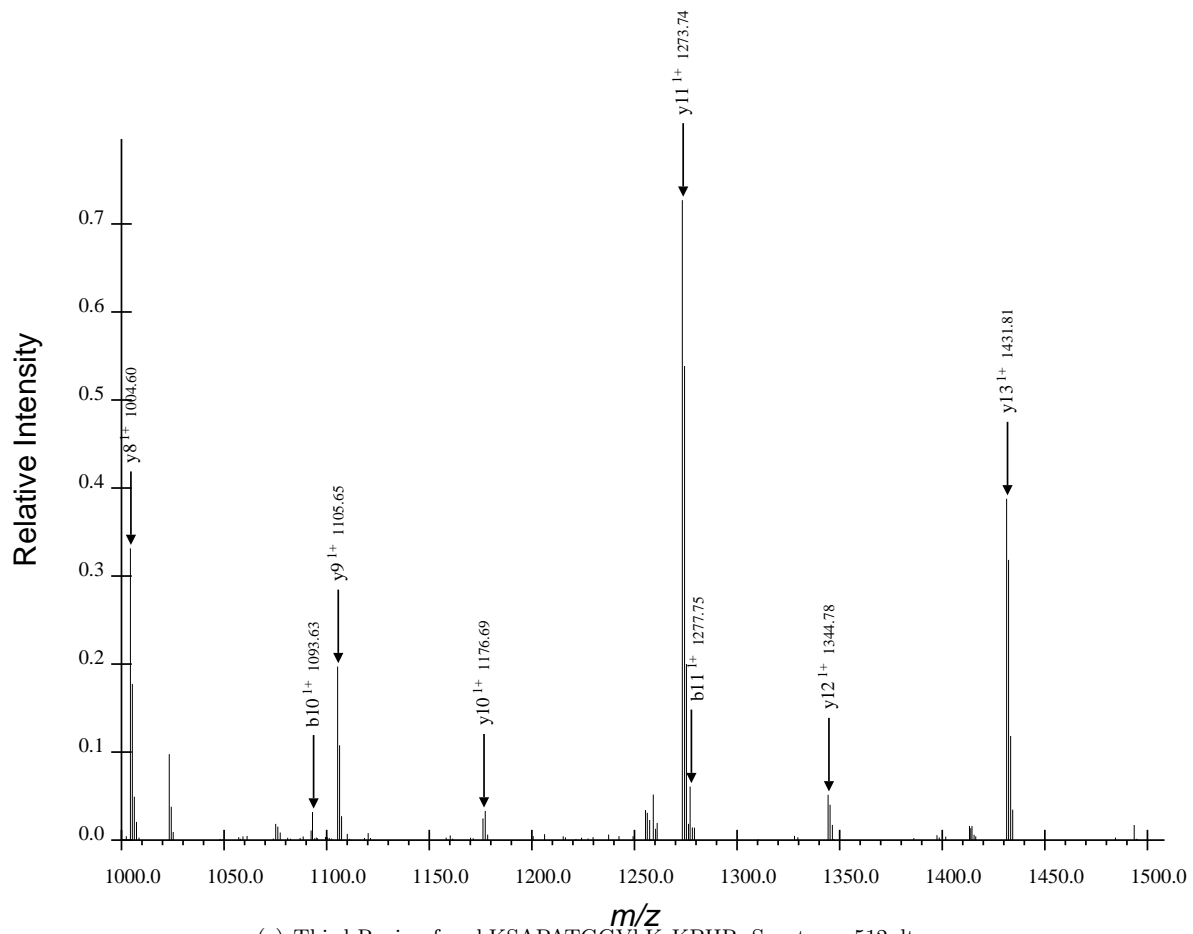

(c) Third Region for rhKSAPATGGVhKrKPHR, Spectrum 512.dta

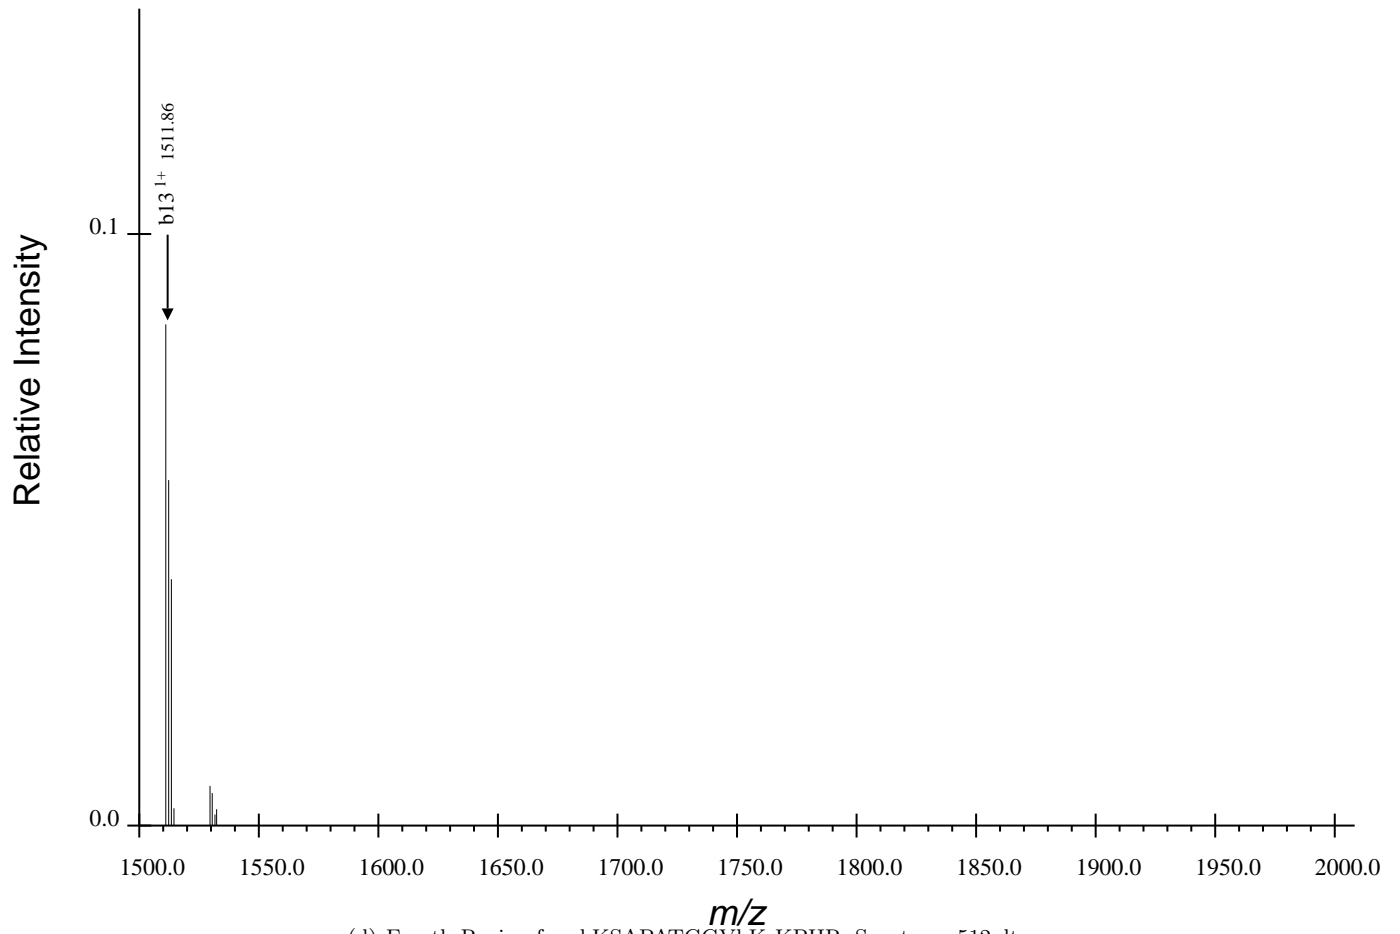

(d) Fourth Region for rhKSAPATGGVhKrKPHR, Spectrum 512.dta

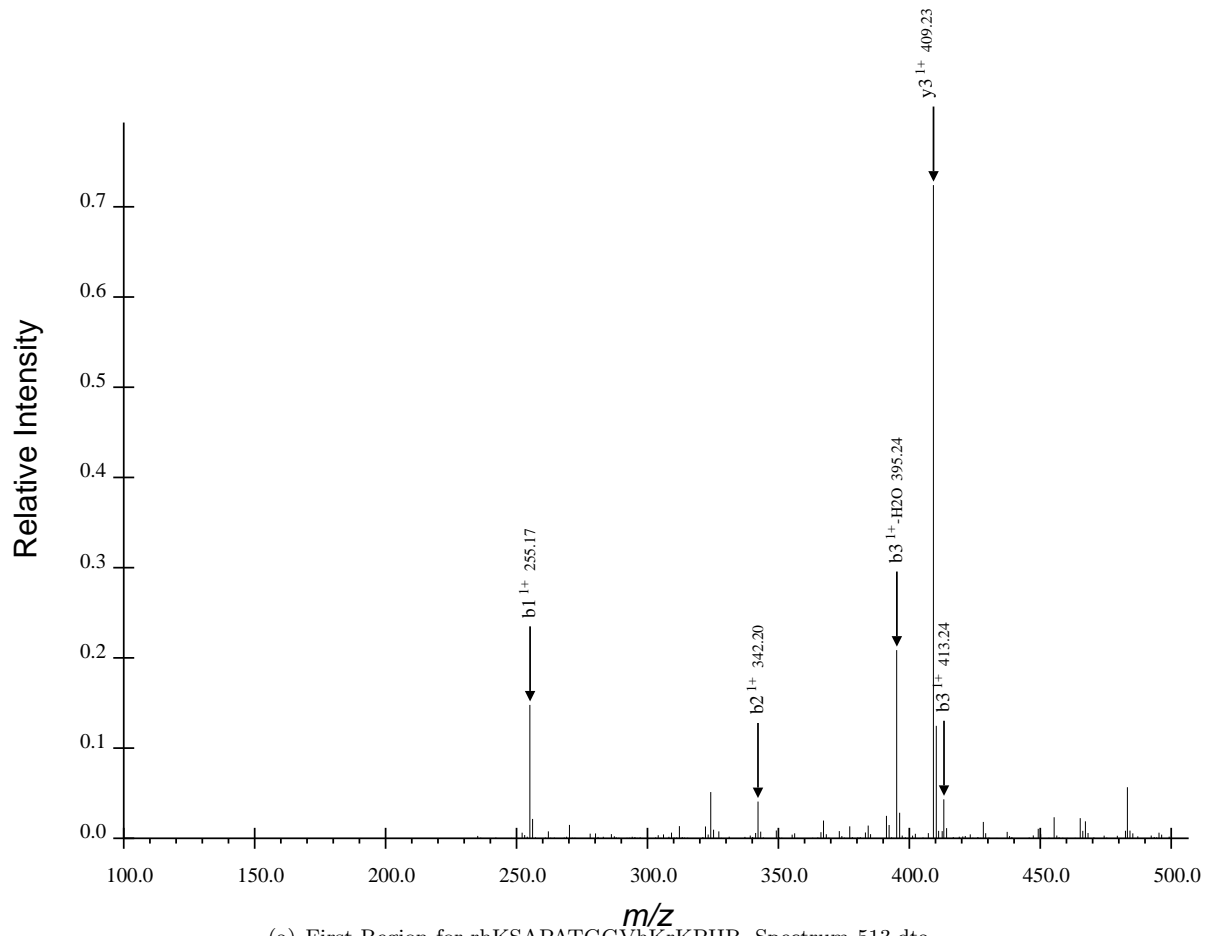

(a) First Region for rhKSAPATGGVhKrKPHR, Spectrum 513.dta

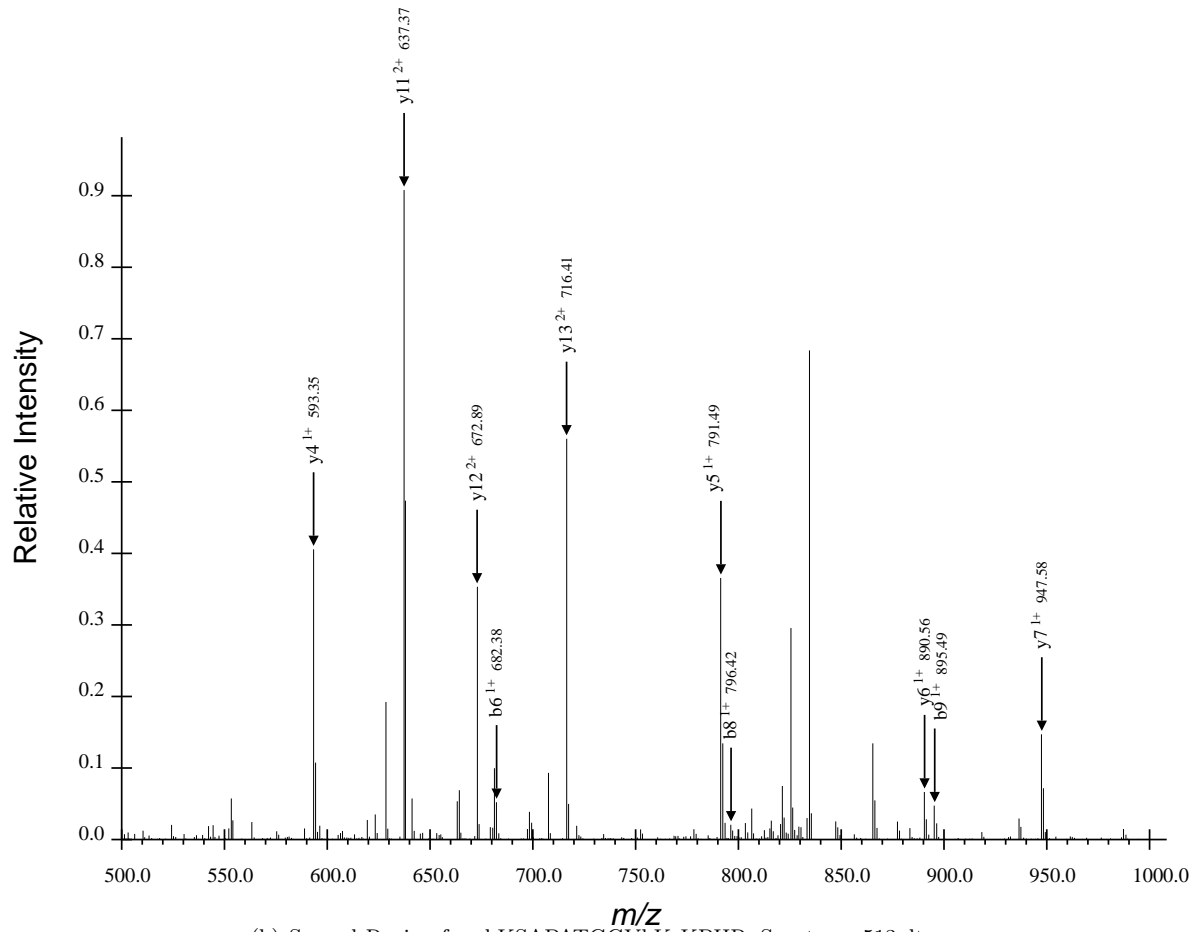

(b) Second Region for rhKSAPATGGVhKrKPHR, Spectrum 513.dta

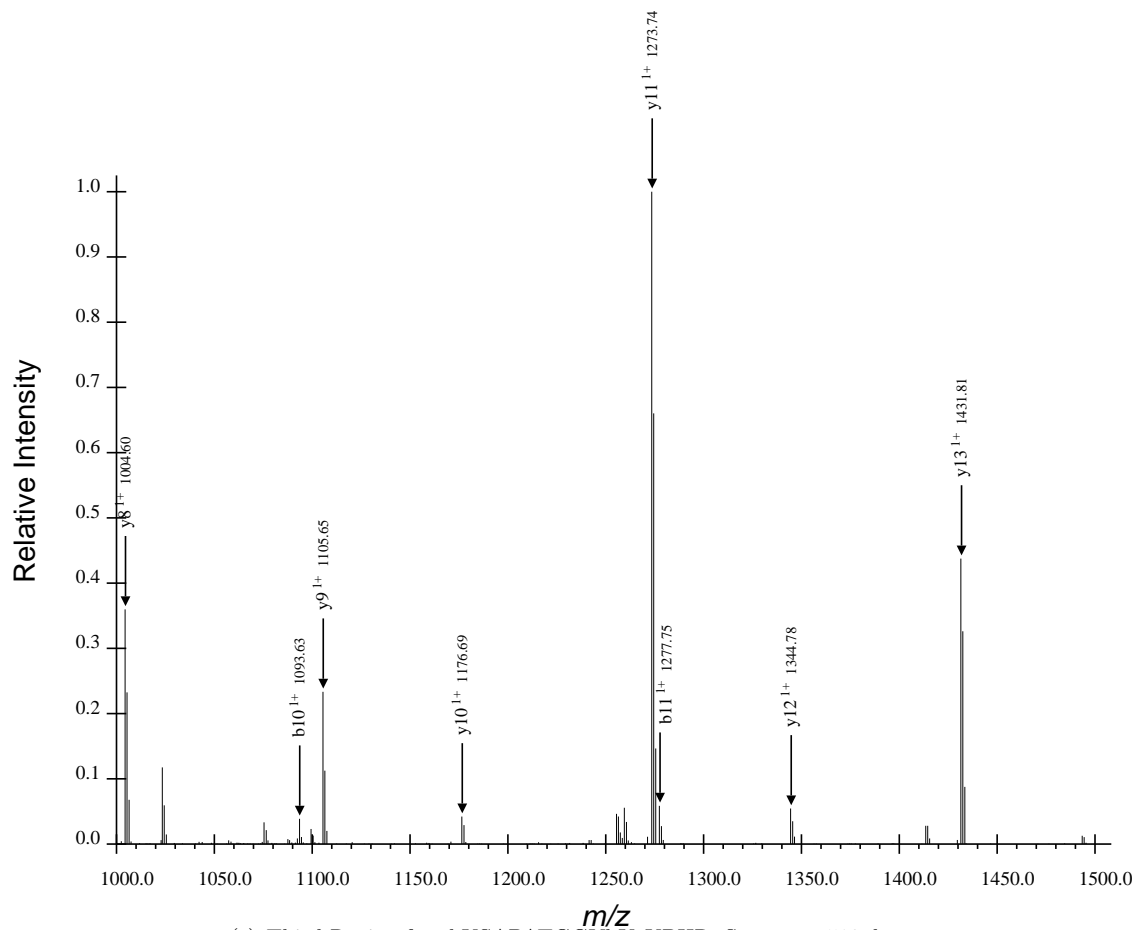

(c) Third Region for rhKSAPATGGVhKrKPHR, Spectrum 513.dta

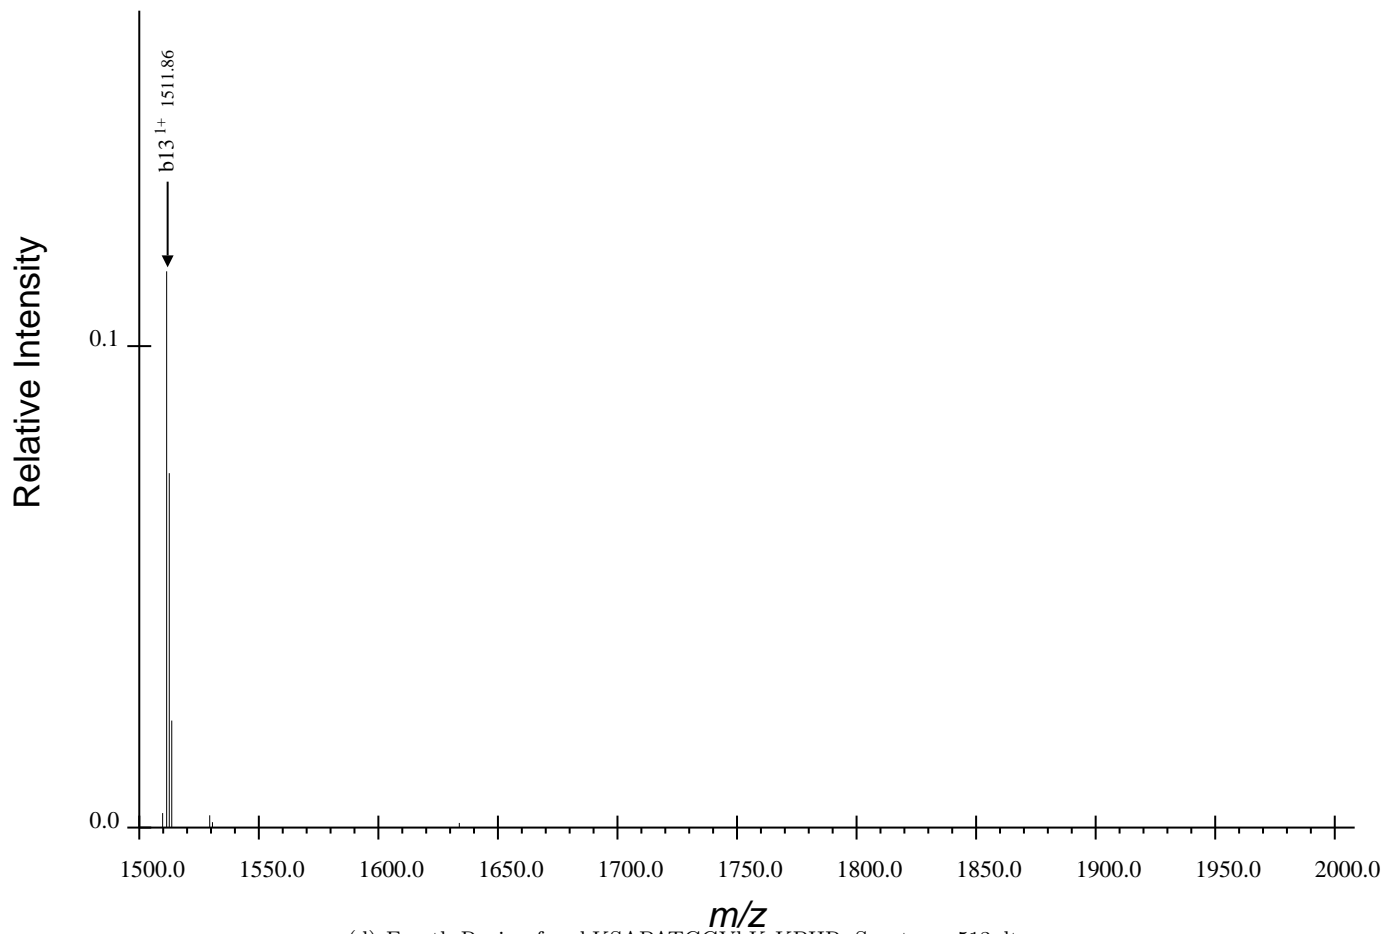

(d) Fourth Region for rhKSAPATGGVhKrKPHR, Spectrum 513.dta

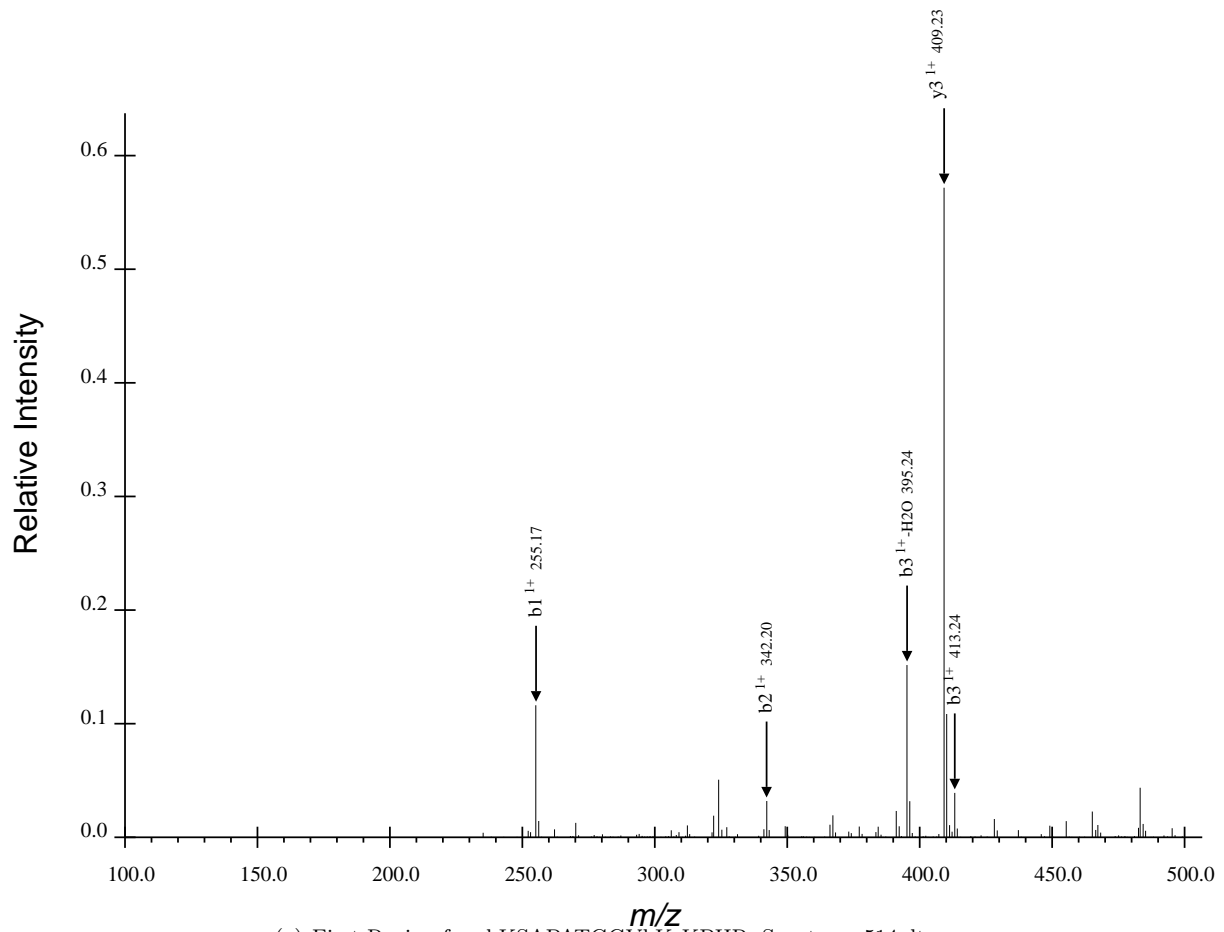

(a) First Region for rhKSAPATGGVhKrKPHR, Spectrum 514.dta

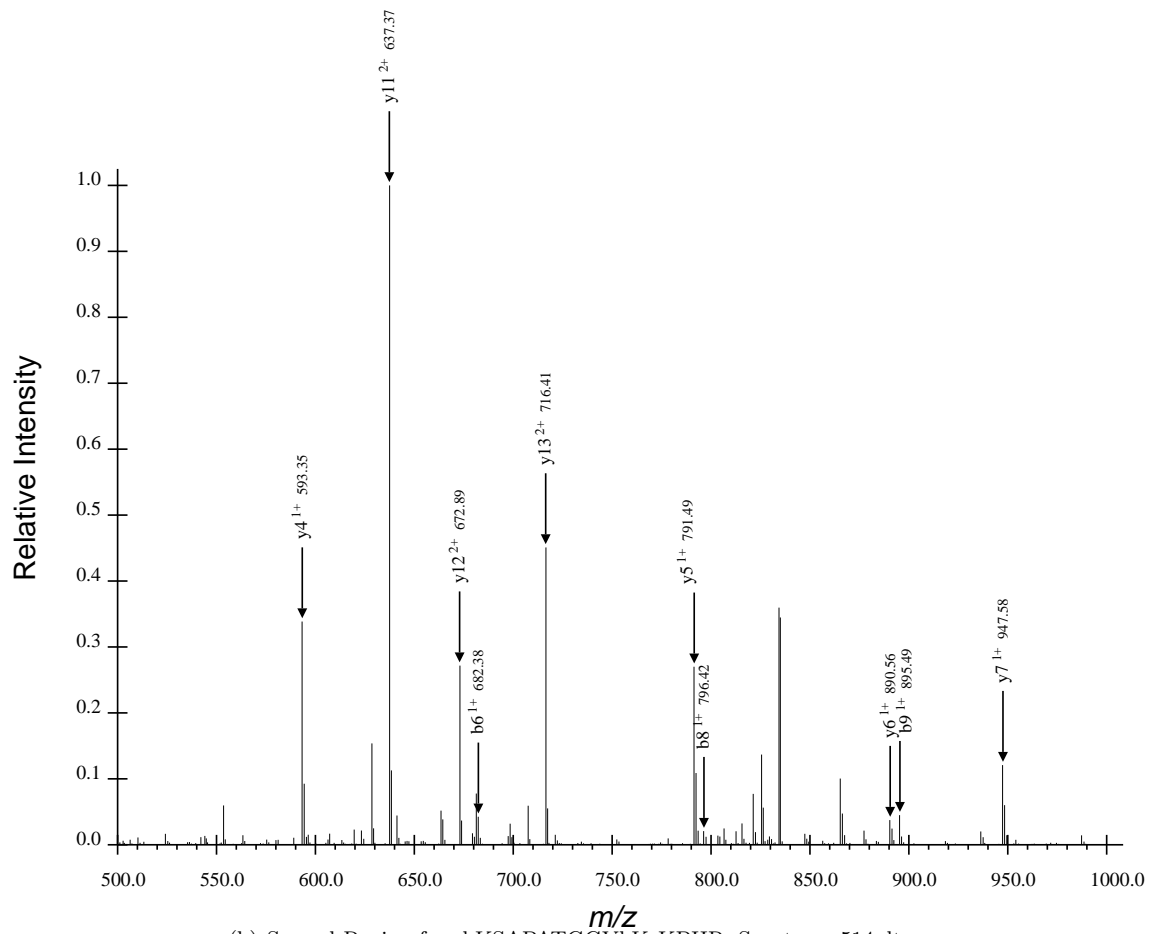

(b) Second Region for rhKSAPATGGVhKrKPHR, Spectrum 514.dta

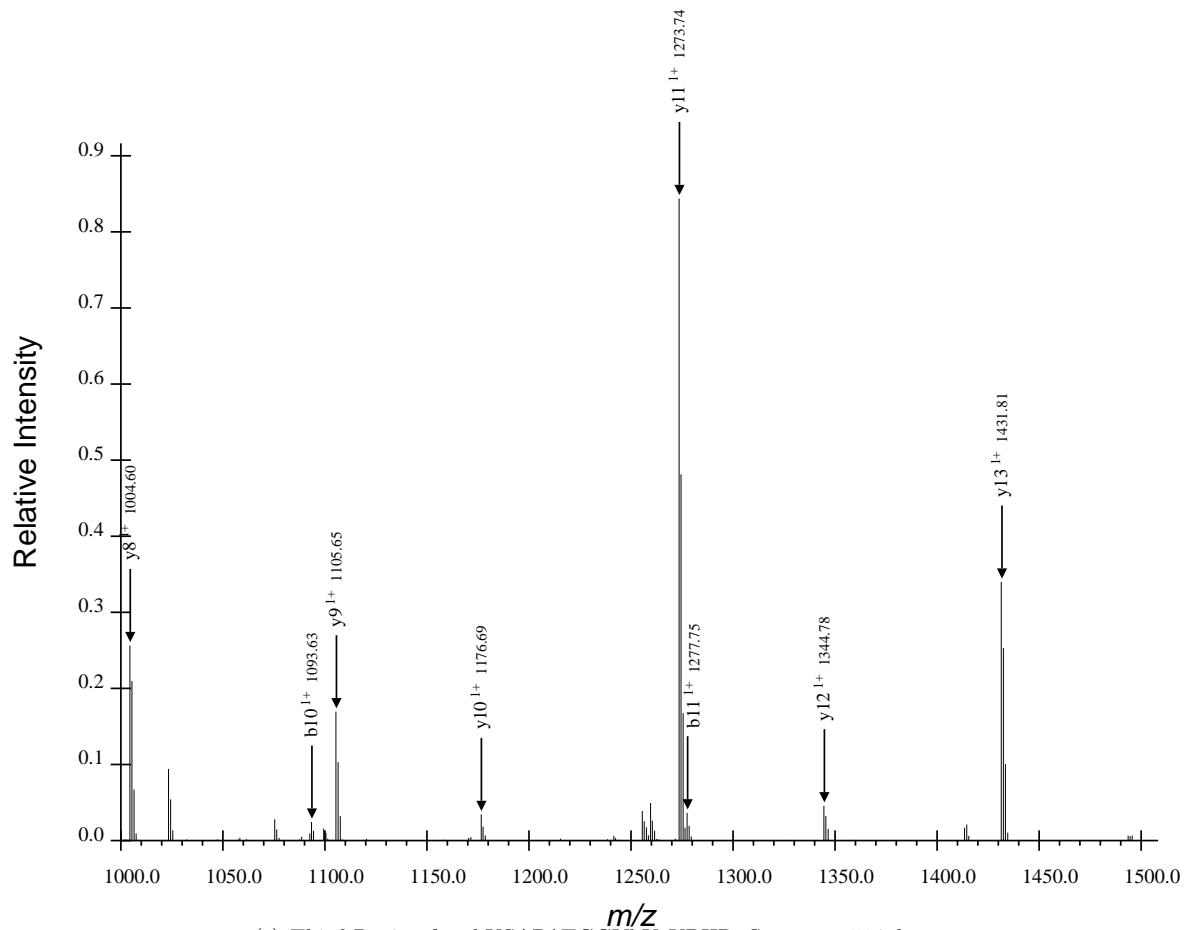

(c) Third Region for rhKSAPATGGVhKrKPHR, Spectrum 514.dta

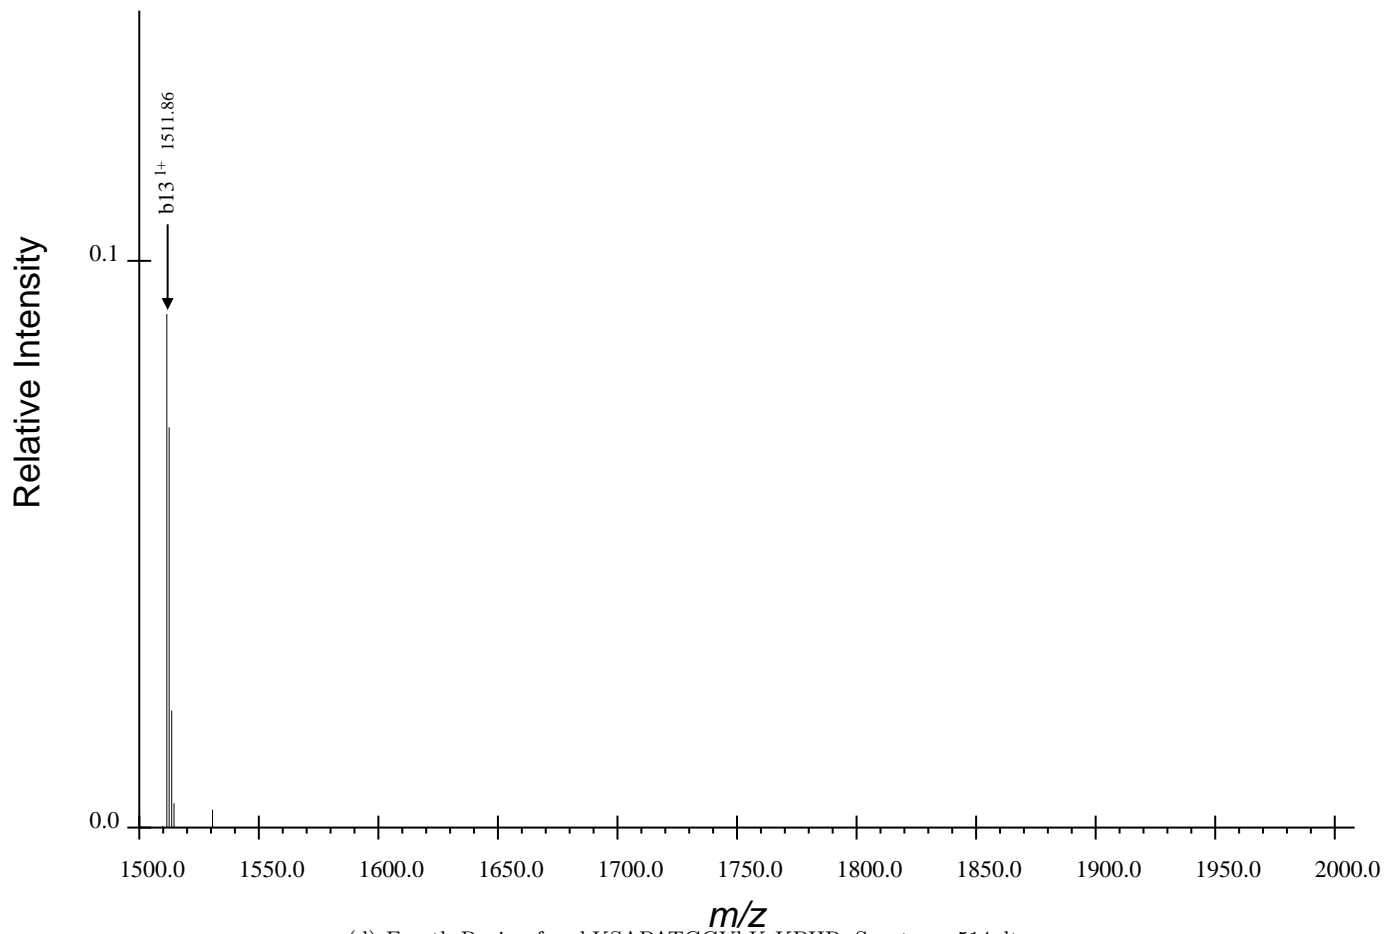

(d) Fourth Region for rhKSAPATGGVhKrKPHR, Spectrum 514.dta

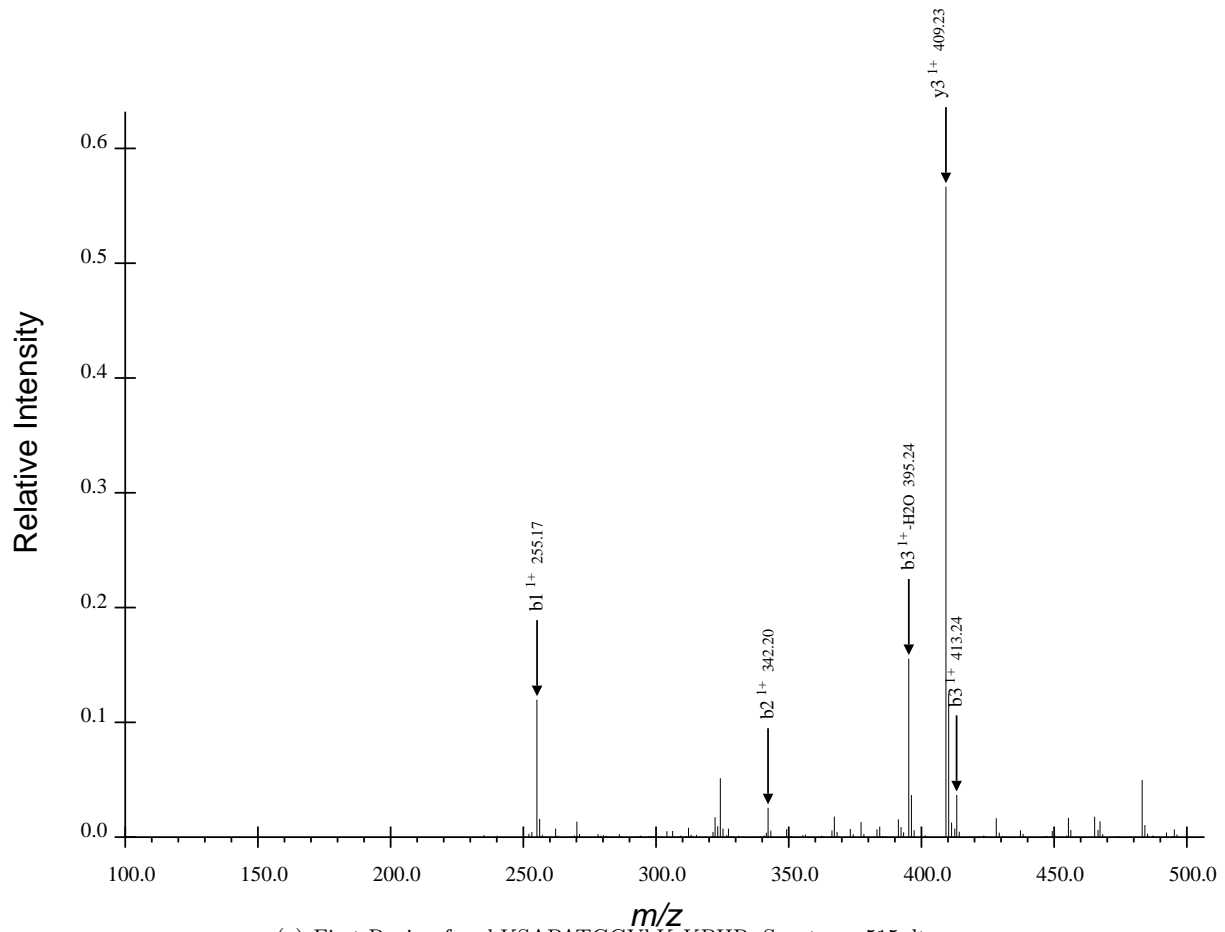

(a) First Region for rhKSAPATGGVhKrKPHR, Spectrum 515.dta

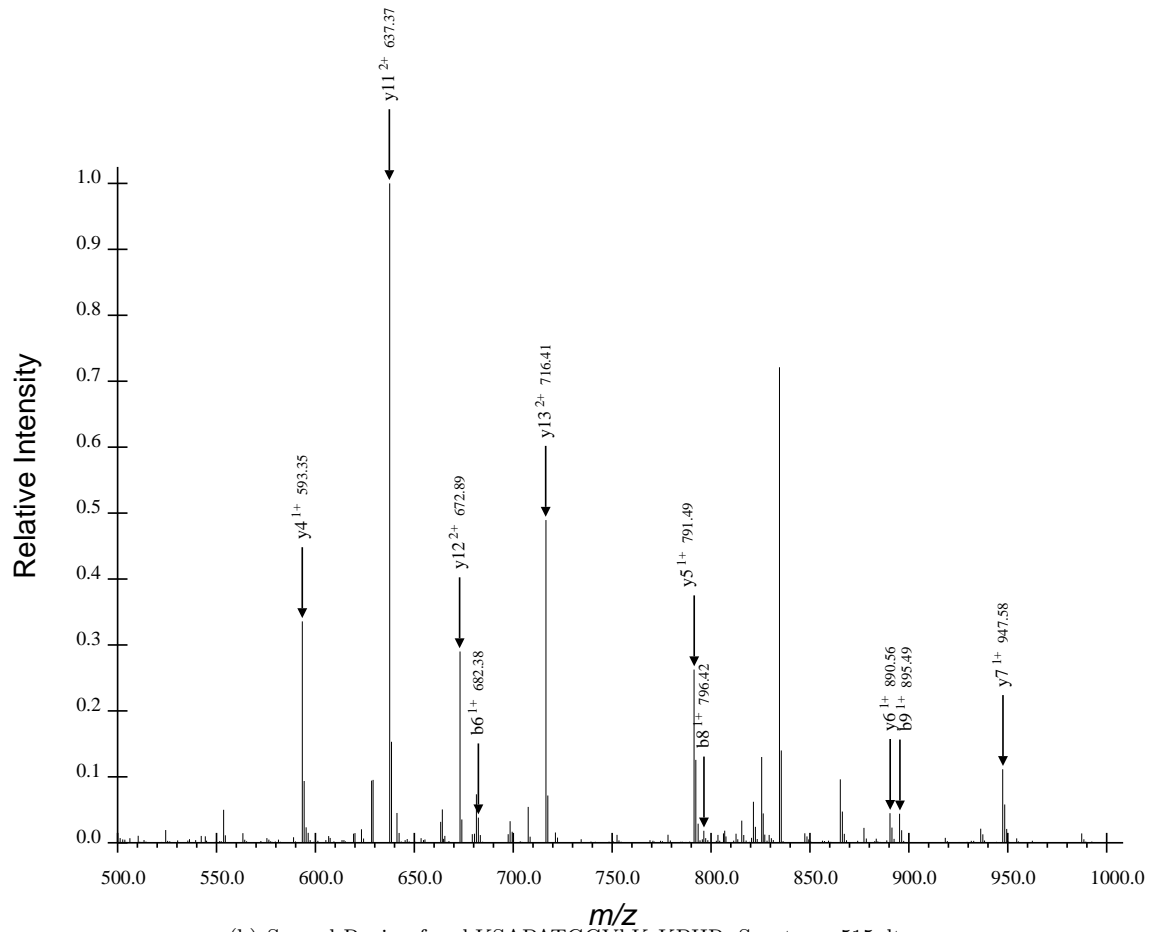

(b) Second Region for rhKSAPATGGVhKrKPHR, Spectrum 515.dta

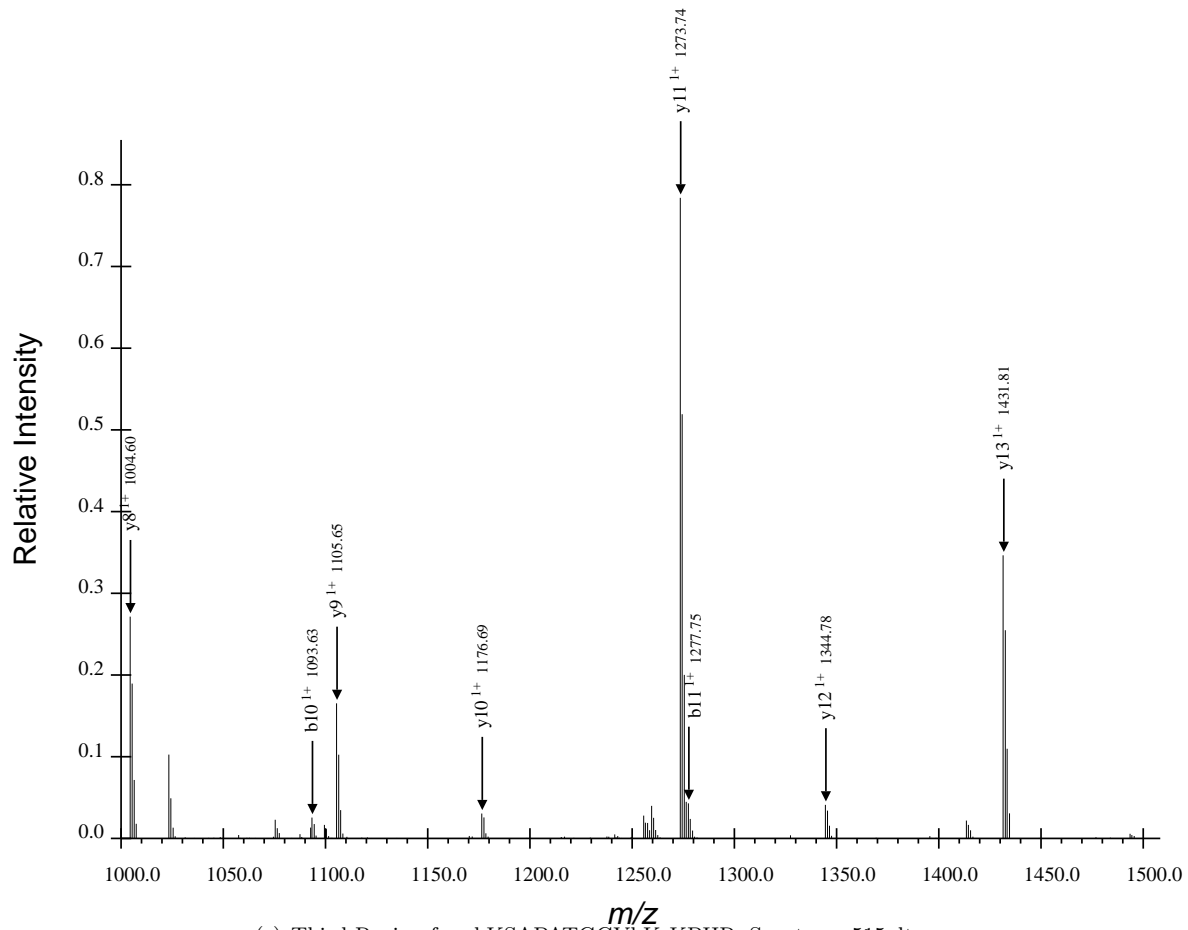

(c) Third Region for rhKSAPATGGVhKrKPHR, Spectrum 515.dta

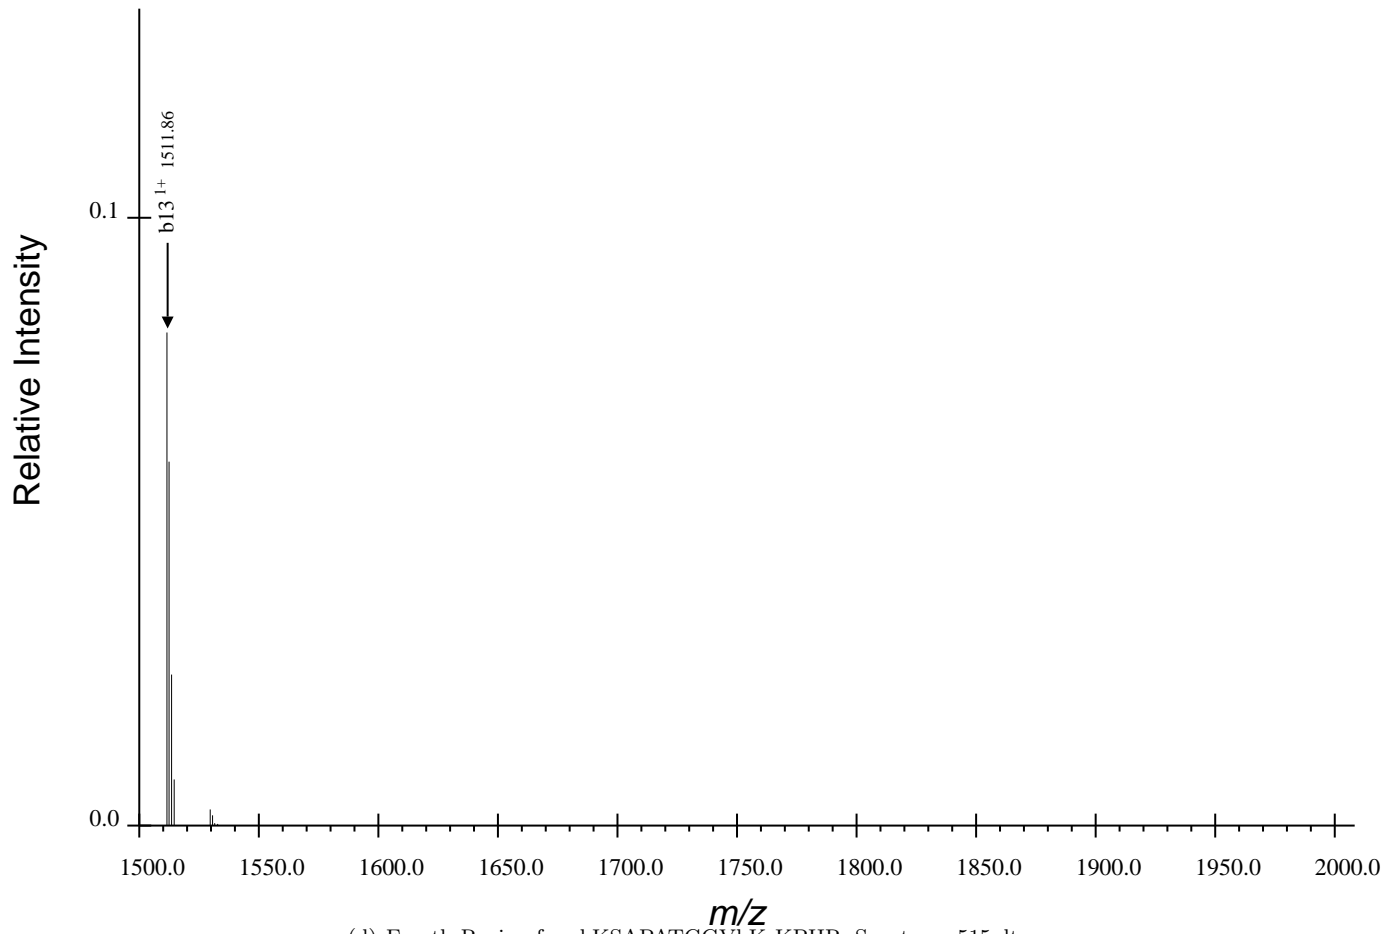

(d) Fourth Region for rhKSAPATGGVhKrKPHR, Spectrum 515.dta

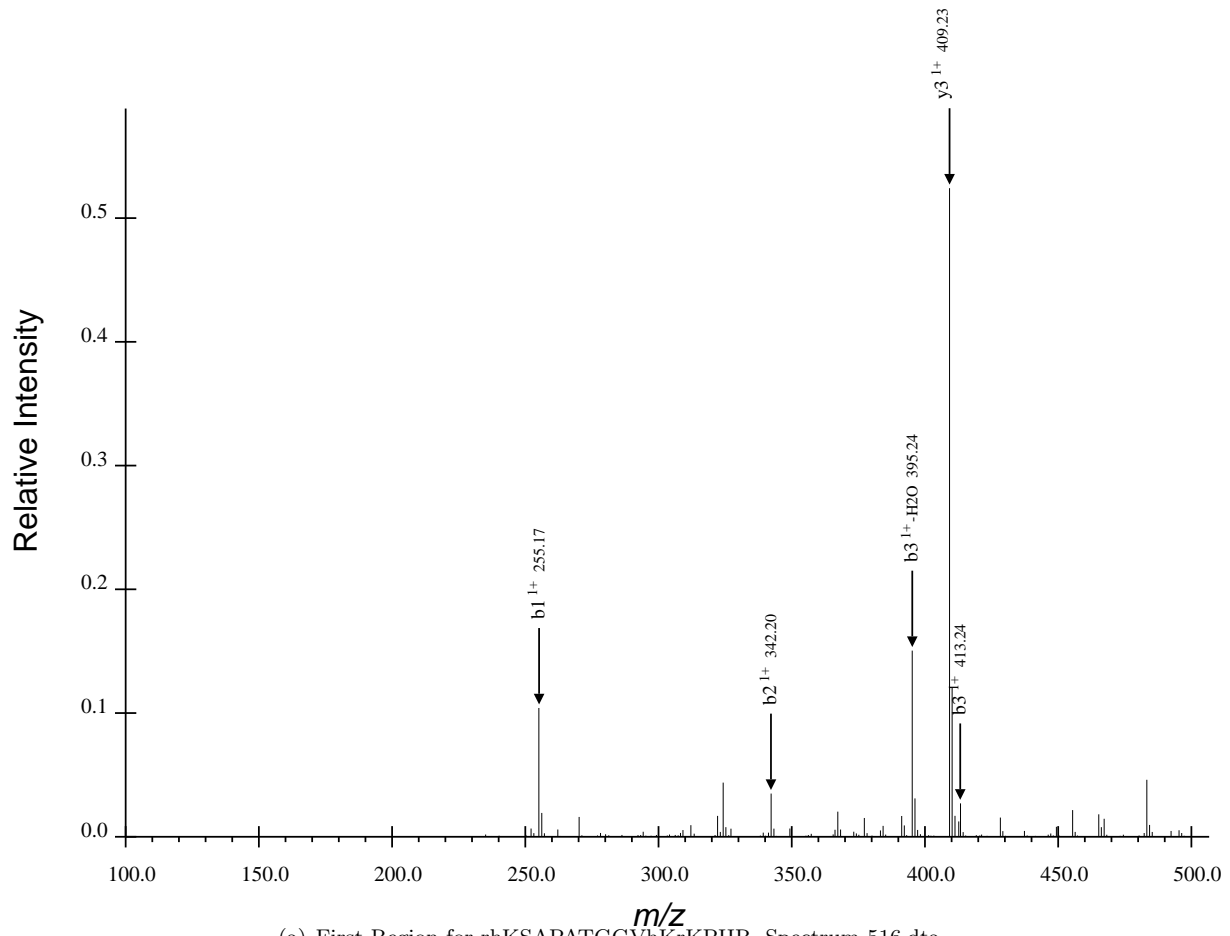

(a) First Region for rhKSAPATGGVhKrKPHR, Spectrum 516.dta

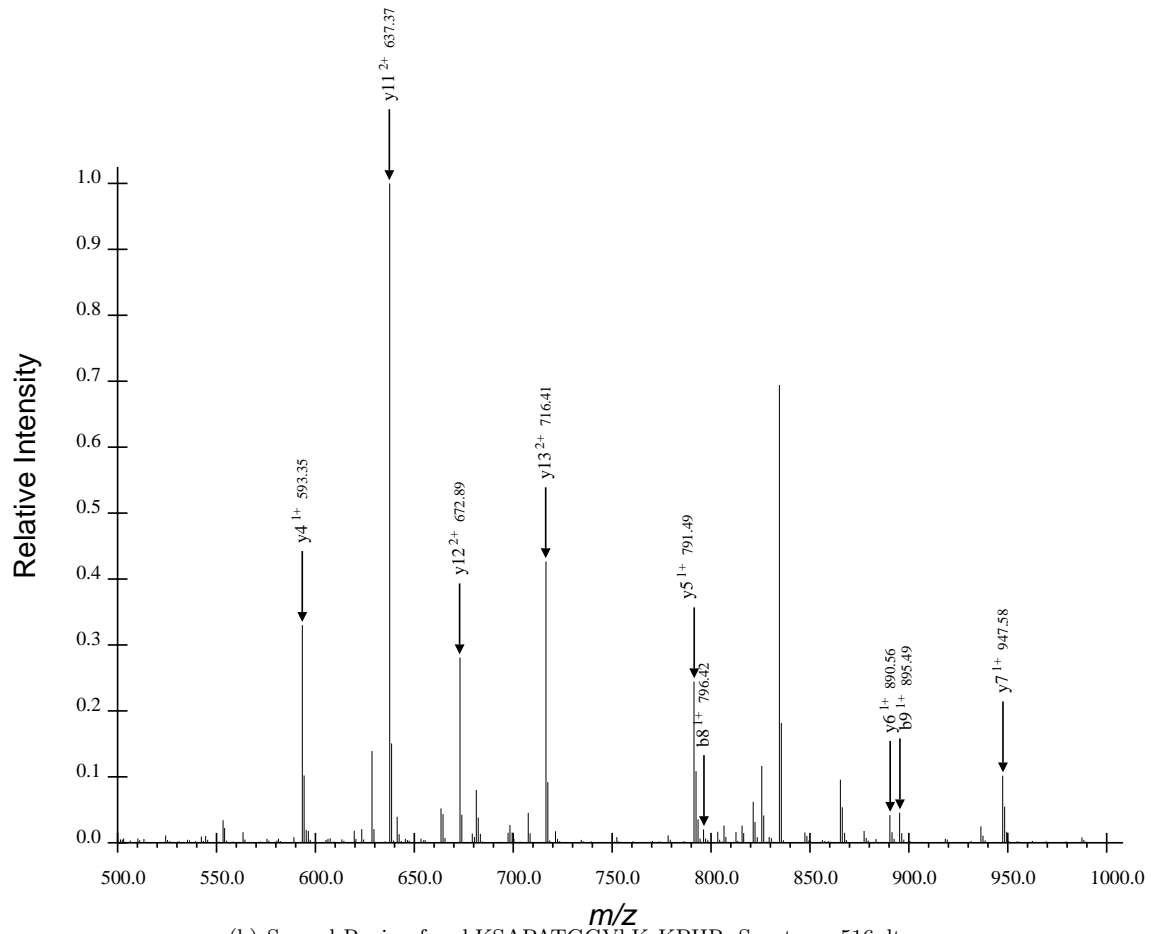

(b) Second Region for rhKSAPATGGVhKrKPHR, Spectrum 516.dta



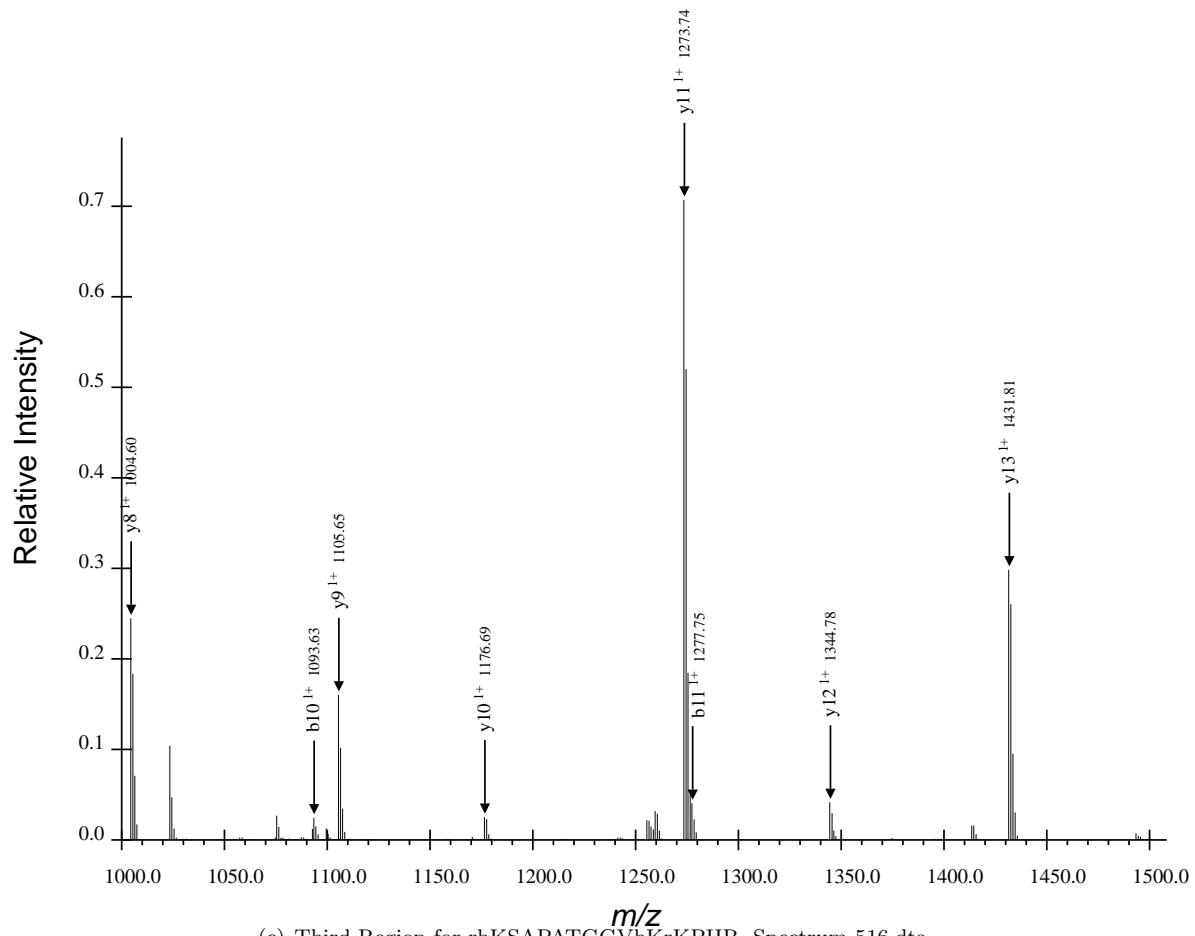

(c) Third Region for rhKSAPATGGVhKrKPHR, Spectrum 516.dta

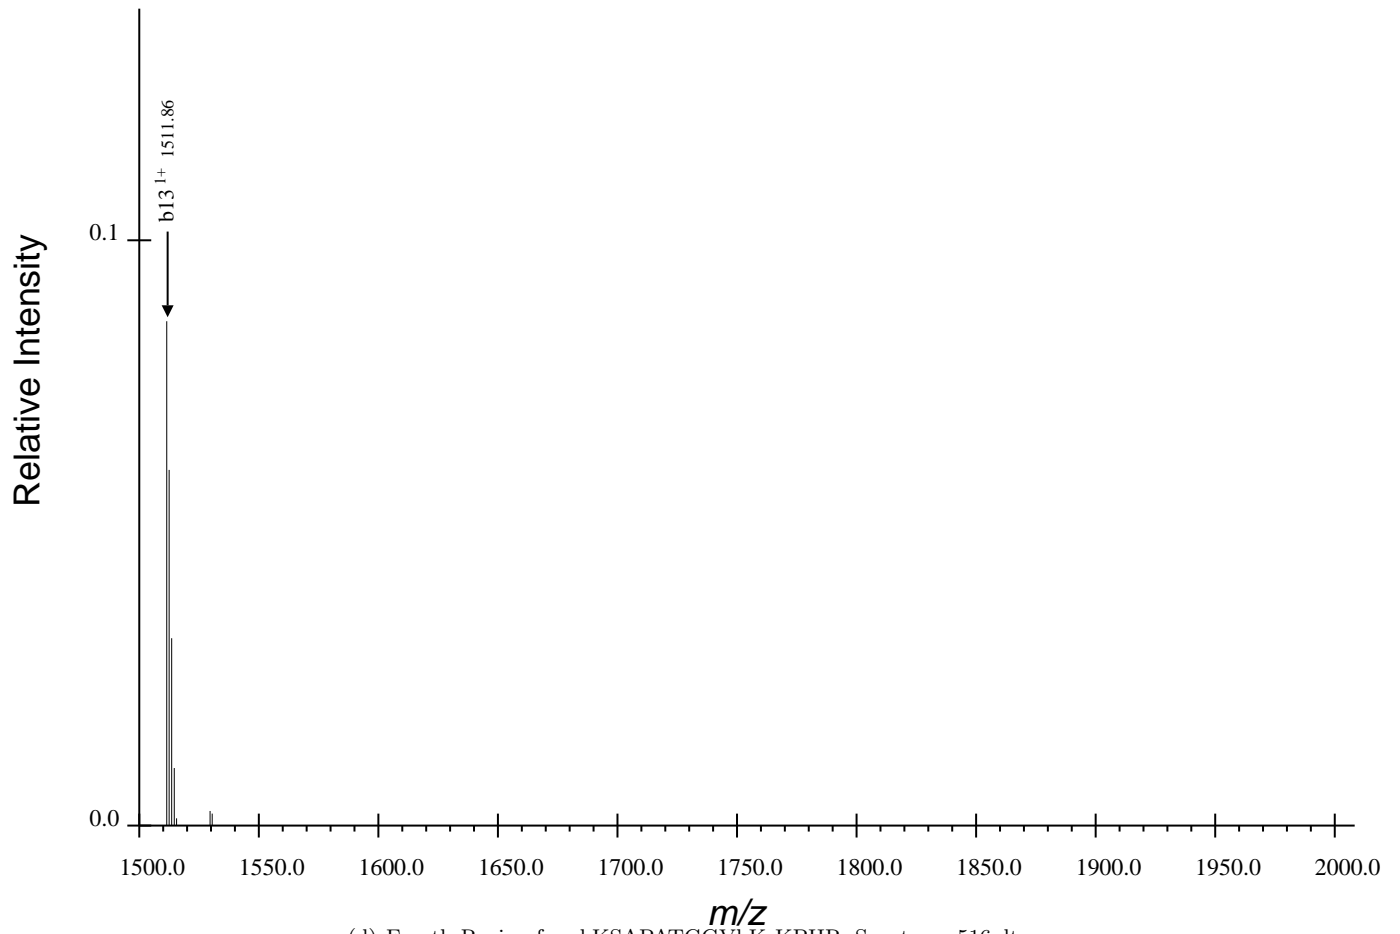

(d) Fourth Region for rhKSAPATGGVhKrKPHR, Spectrum 516.dta

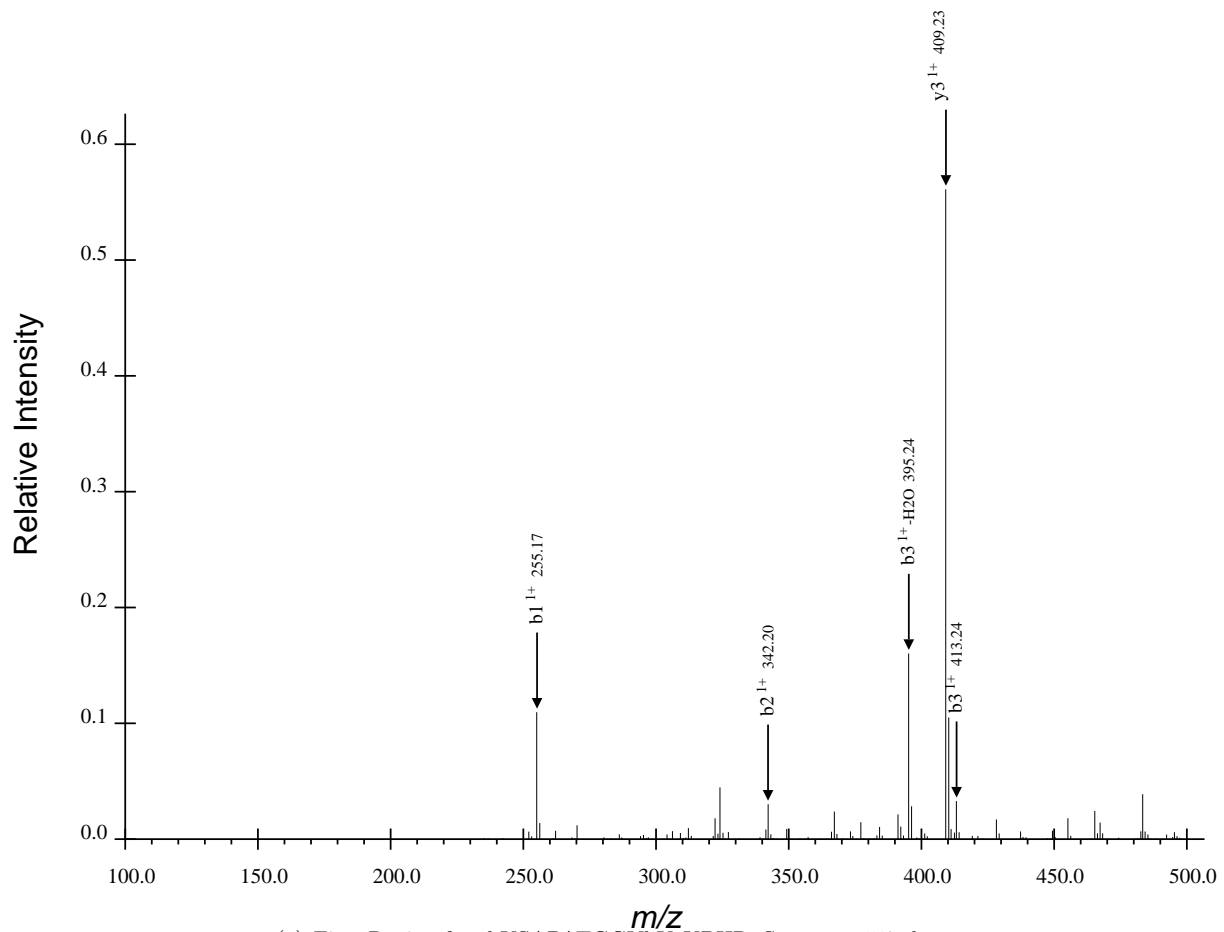

(a) First Region for rhKSAPATGGVhKrKPHR, Spectrum 517.dta

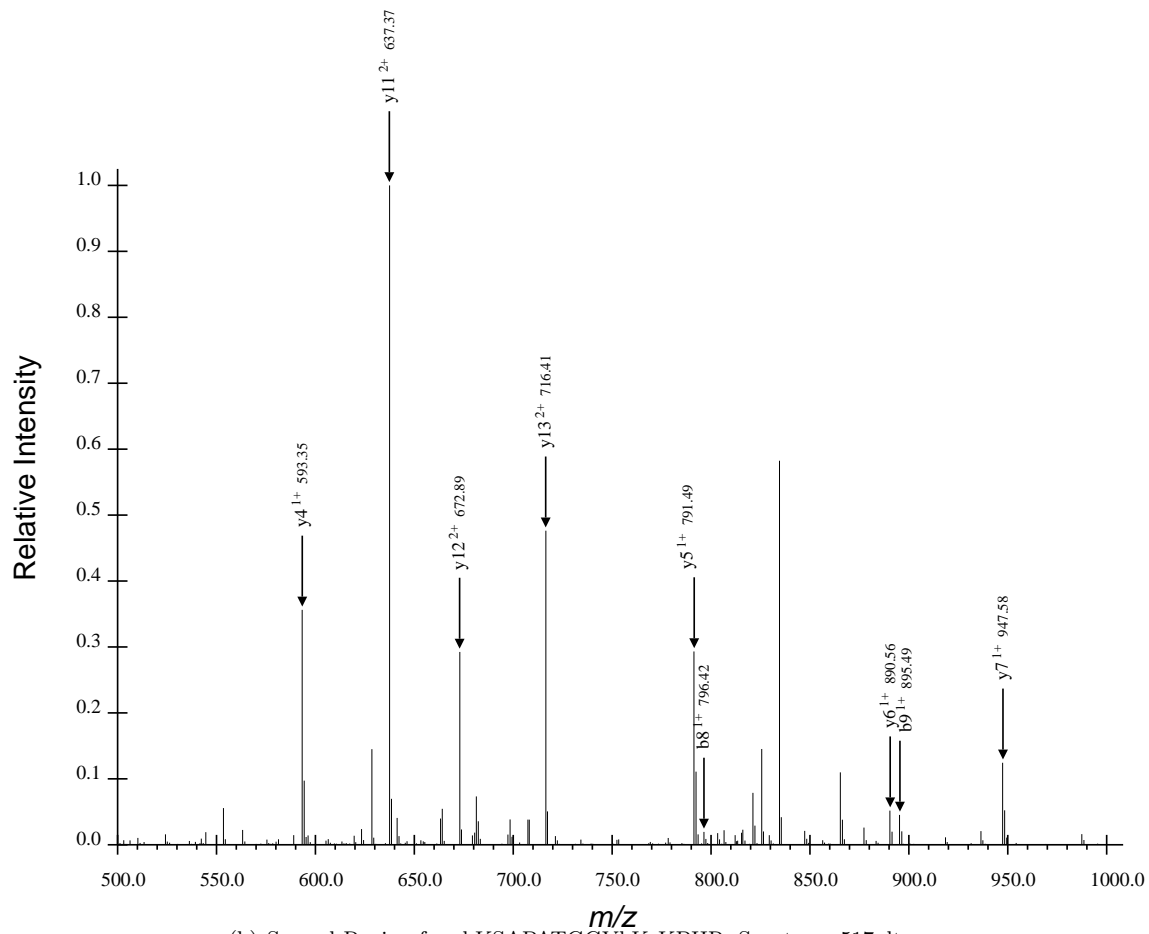

(b) Second Region for rhKSAPATGGVhKrKPHR, Spectrum 517.dta

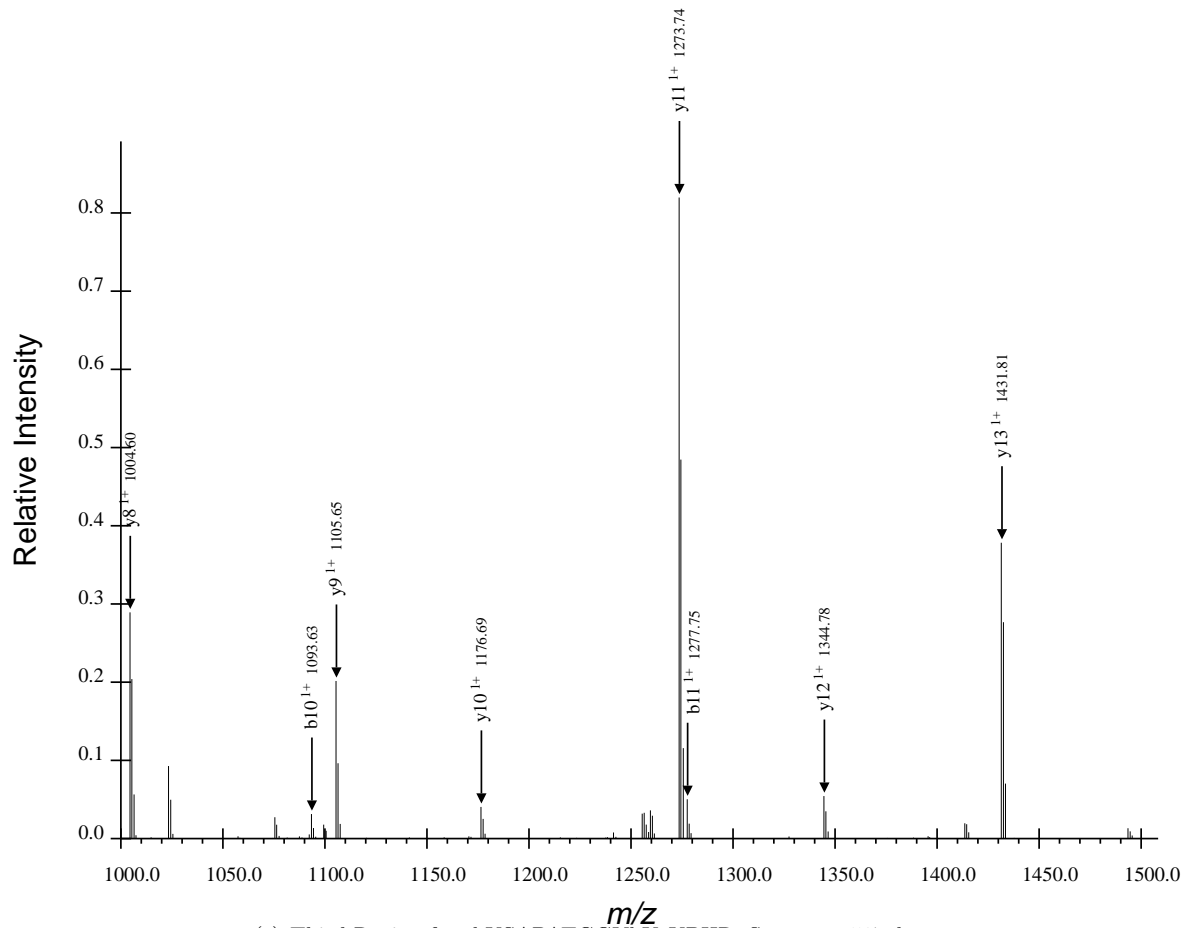

(c) Third Region for rhKSAPATGGVhKrKPHR, Spectrum 517.dta

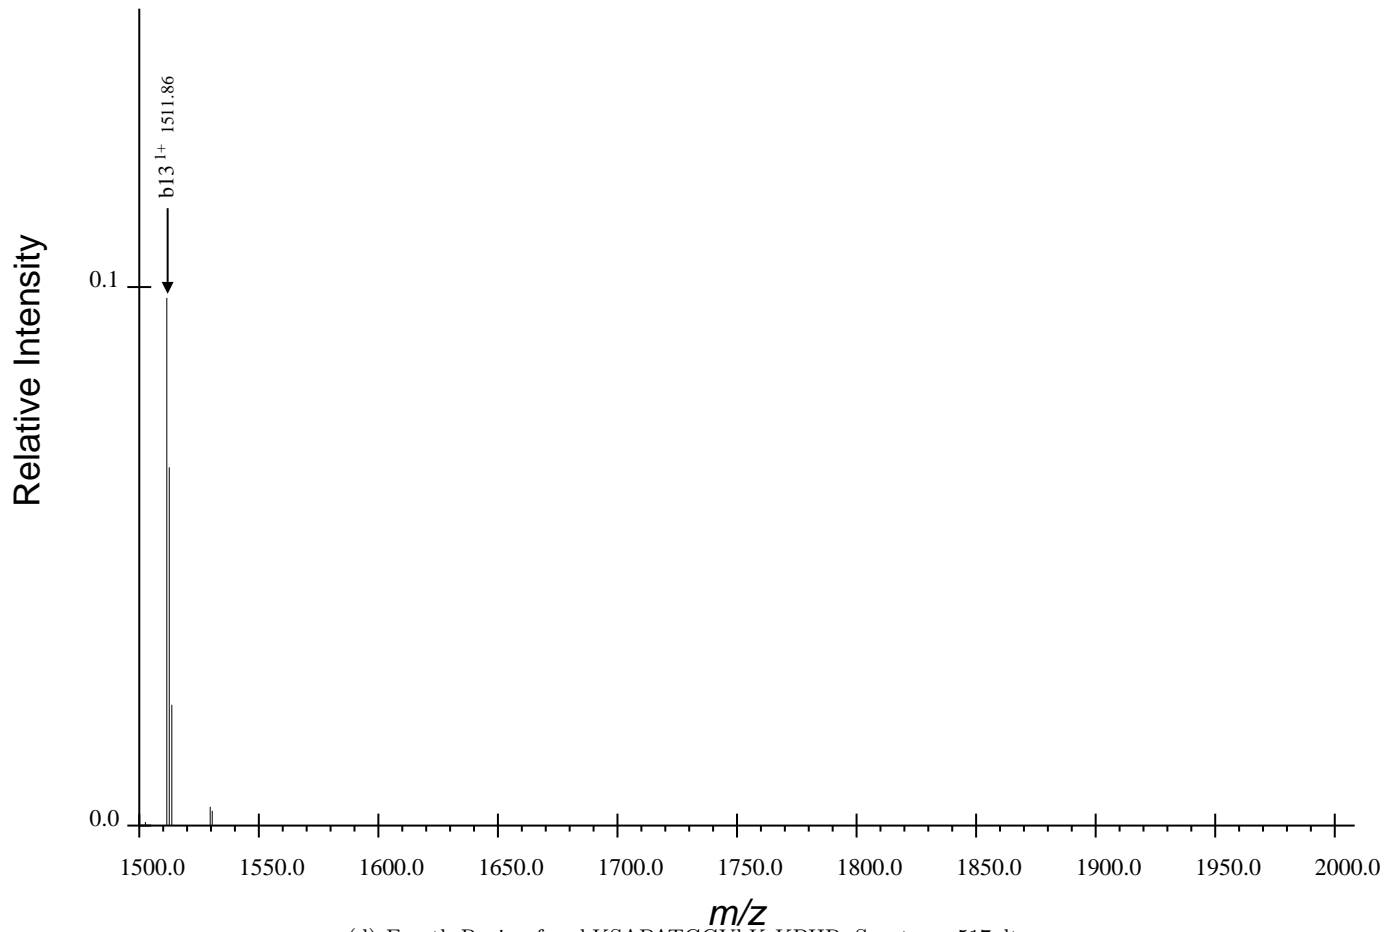

(d) Fourth Region for rhKSAPATGGVhKrKPHR, Spectrum 517.dta

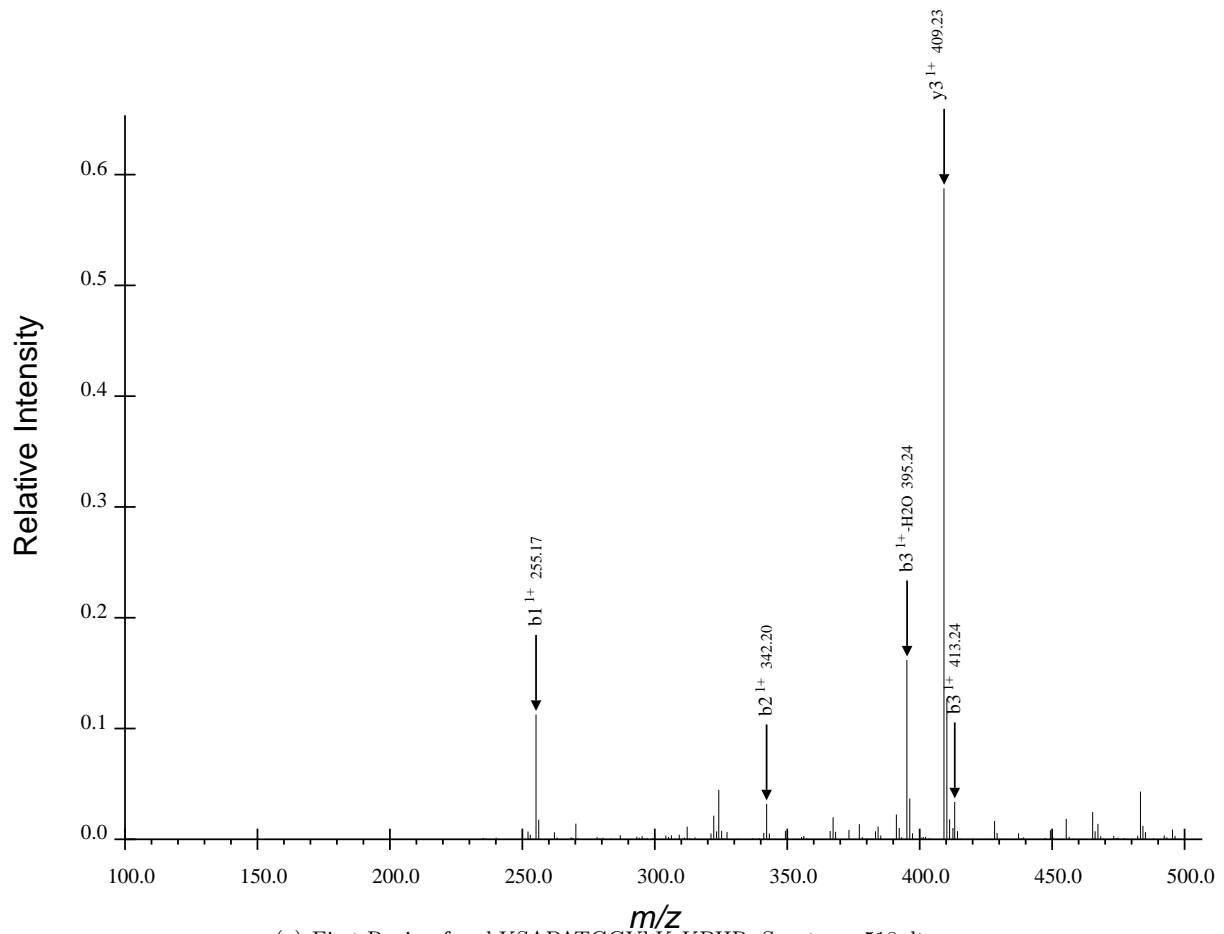

(a) First Region for rhKSAPATGGVhKrKPHR, Spectrum 518.dta

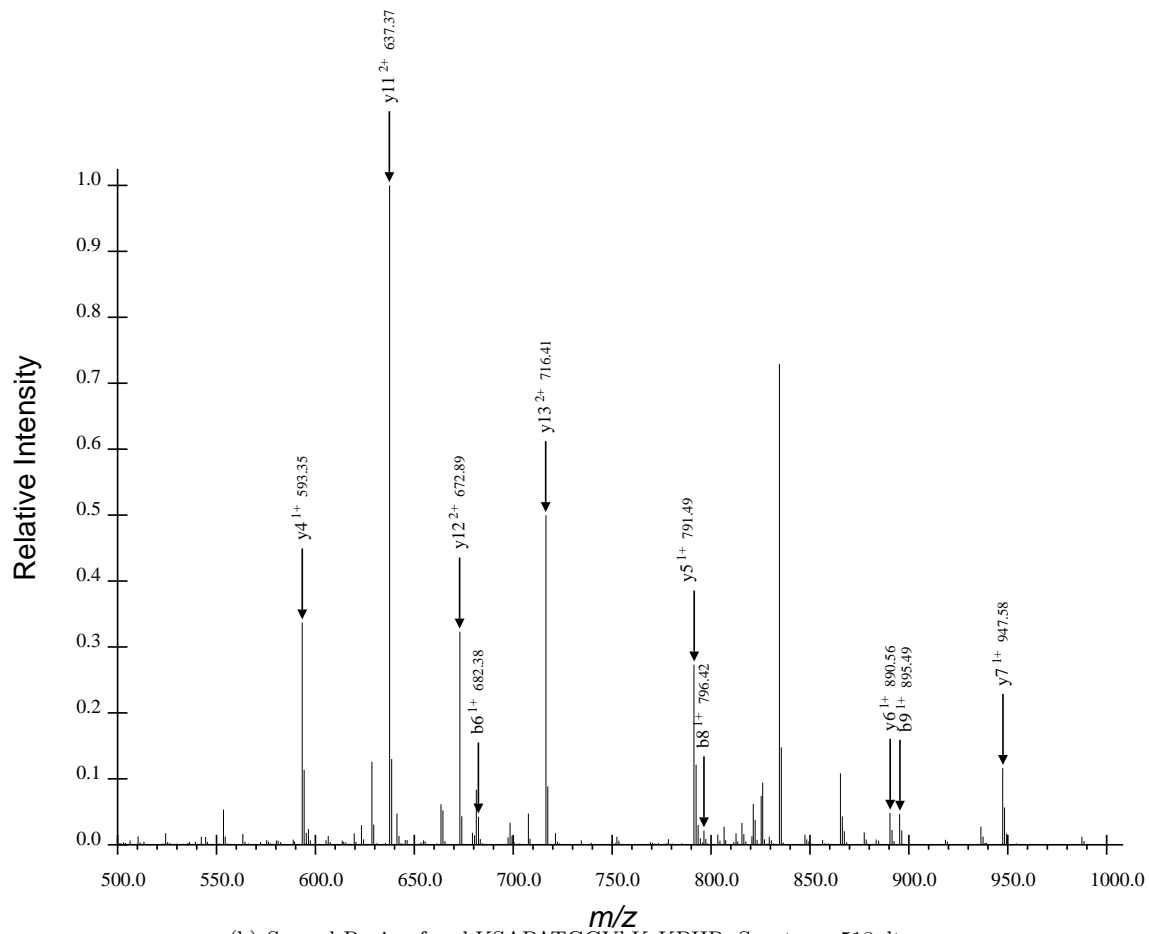

(b) Second Region for rhKSAPATGGVhKrKPHR, Spectrum 518.dta

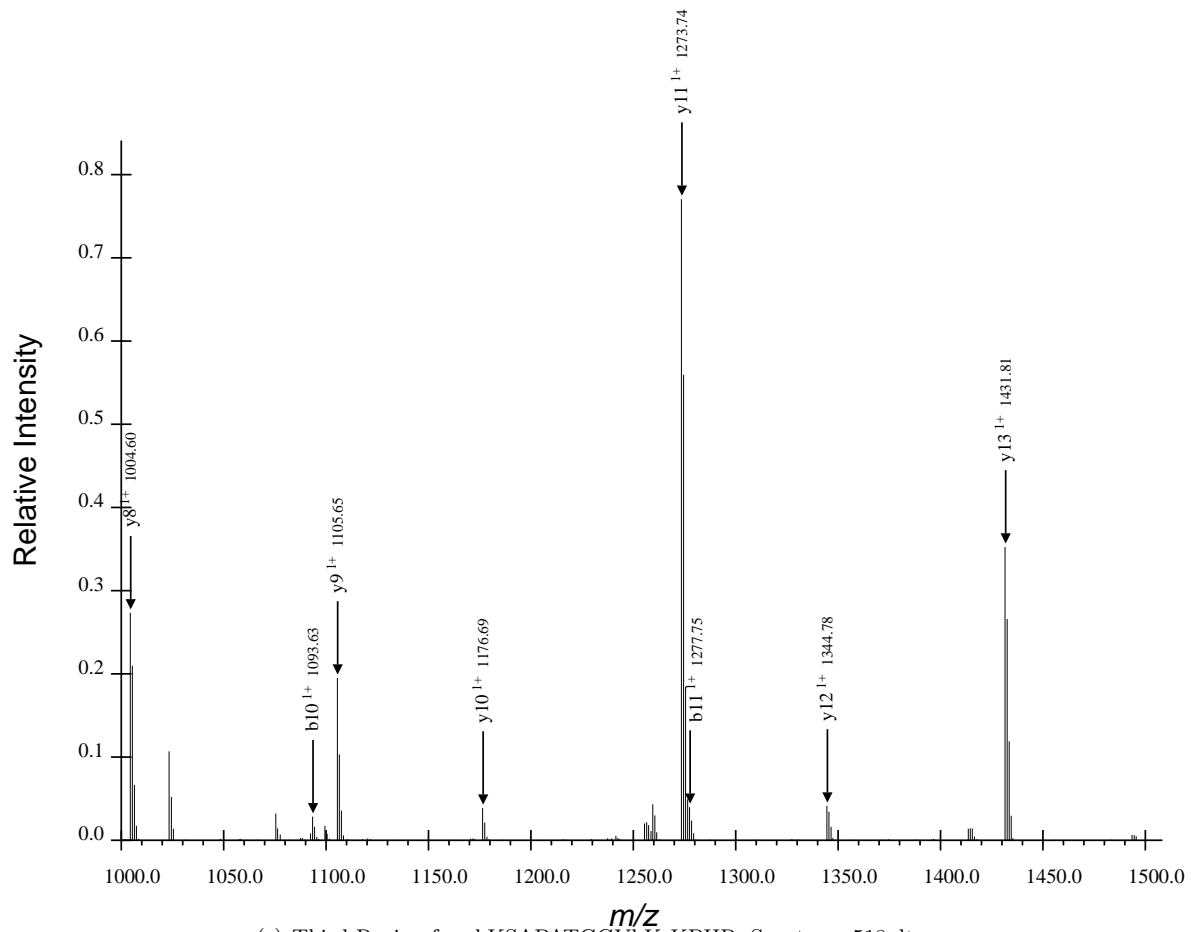

(c) Third Region for rhKSAPATGGVhKrKPHR, Spectrum 518.dta

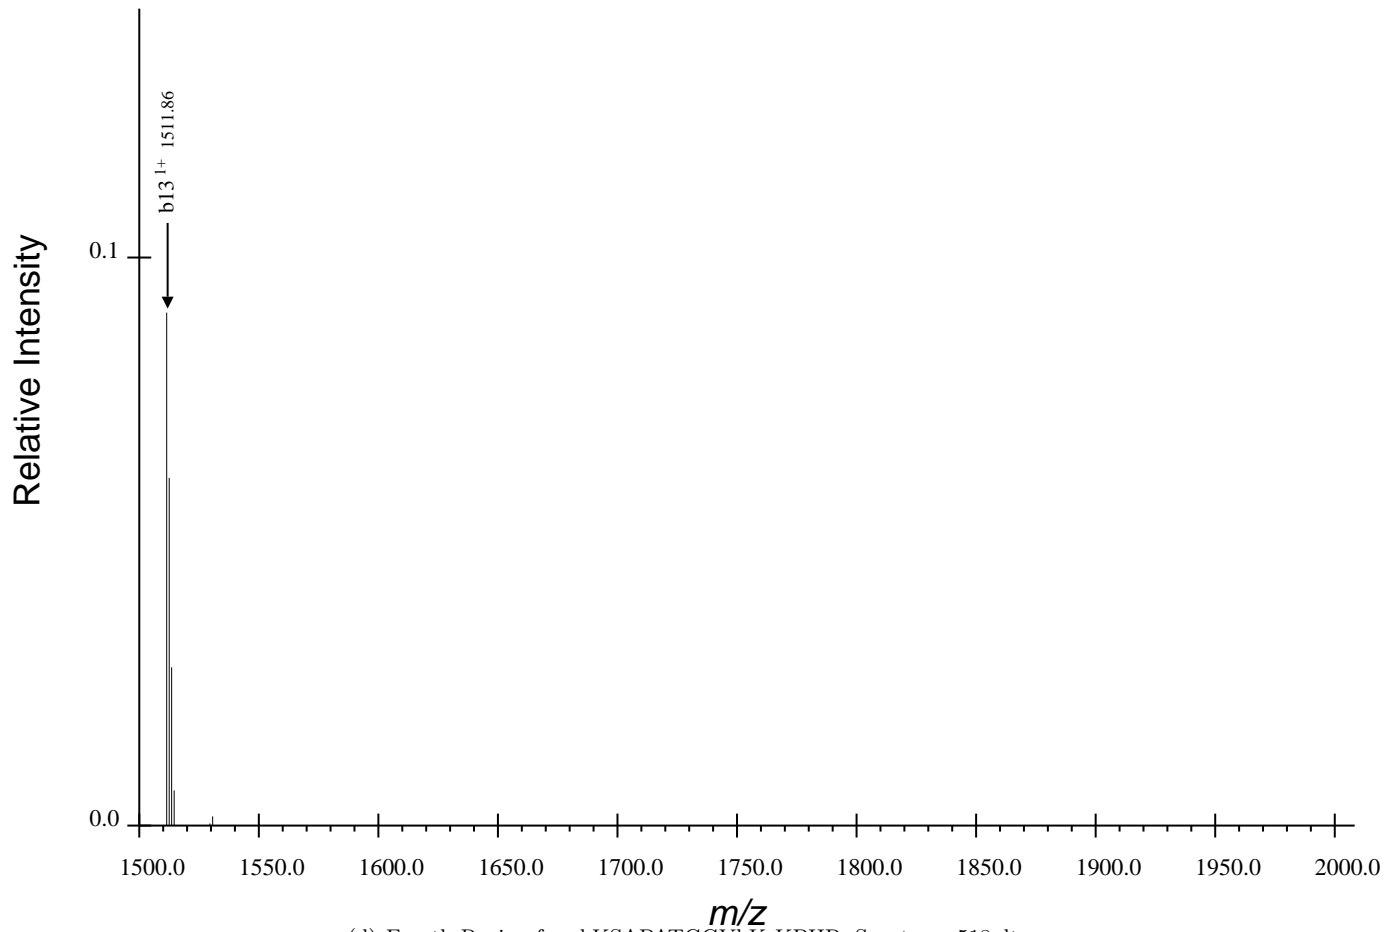

(d) Fourth Region for rhKSAPATGGVhKrKPHR, Spectrum 518.dta

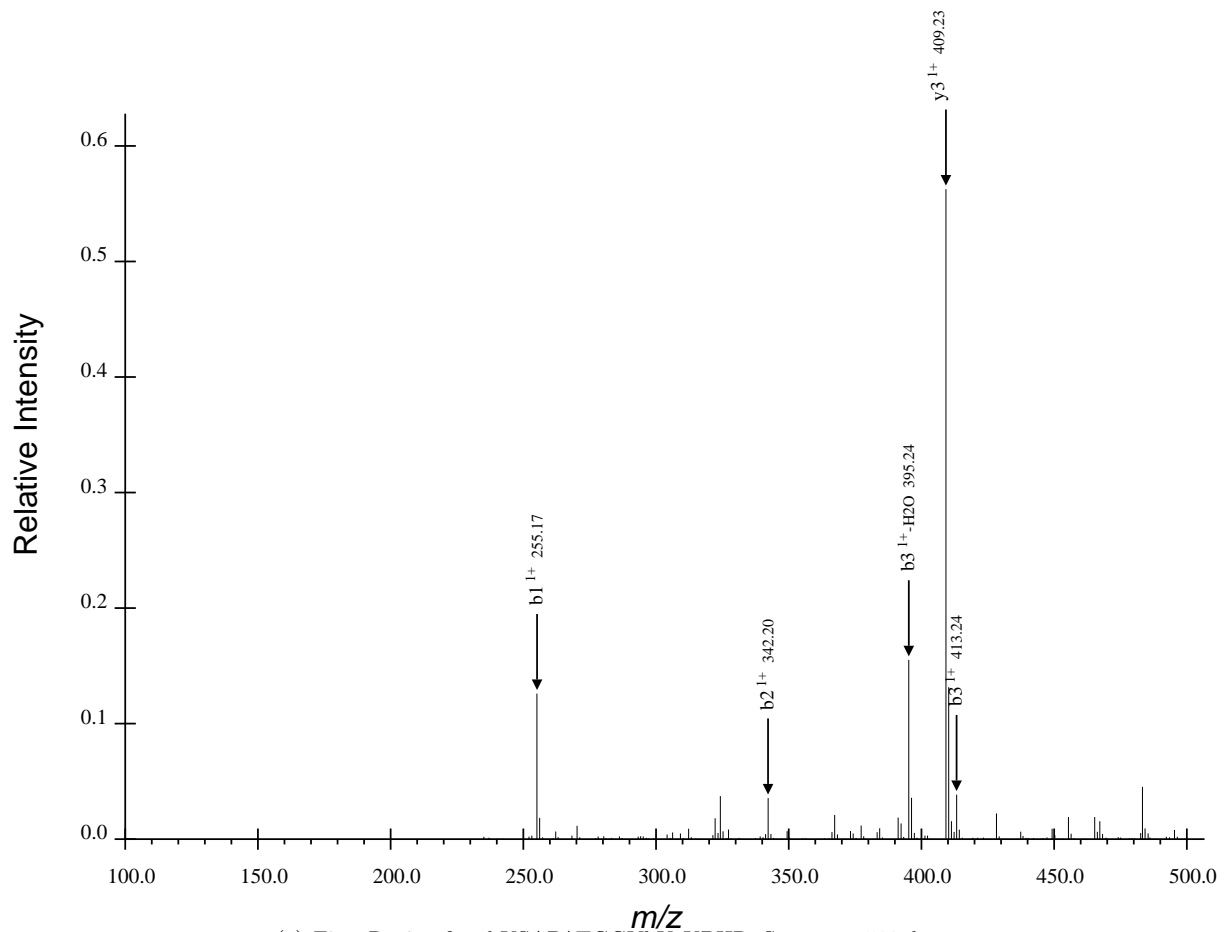

(a) First Region for rhKSAPATGGVhKrKPHR, Spectrum 519.dta

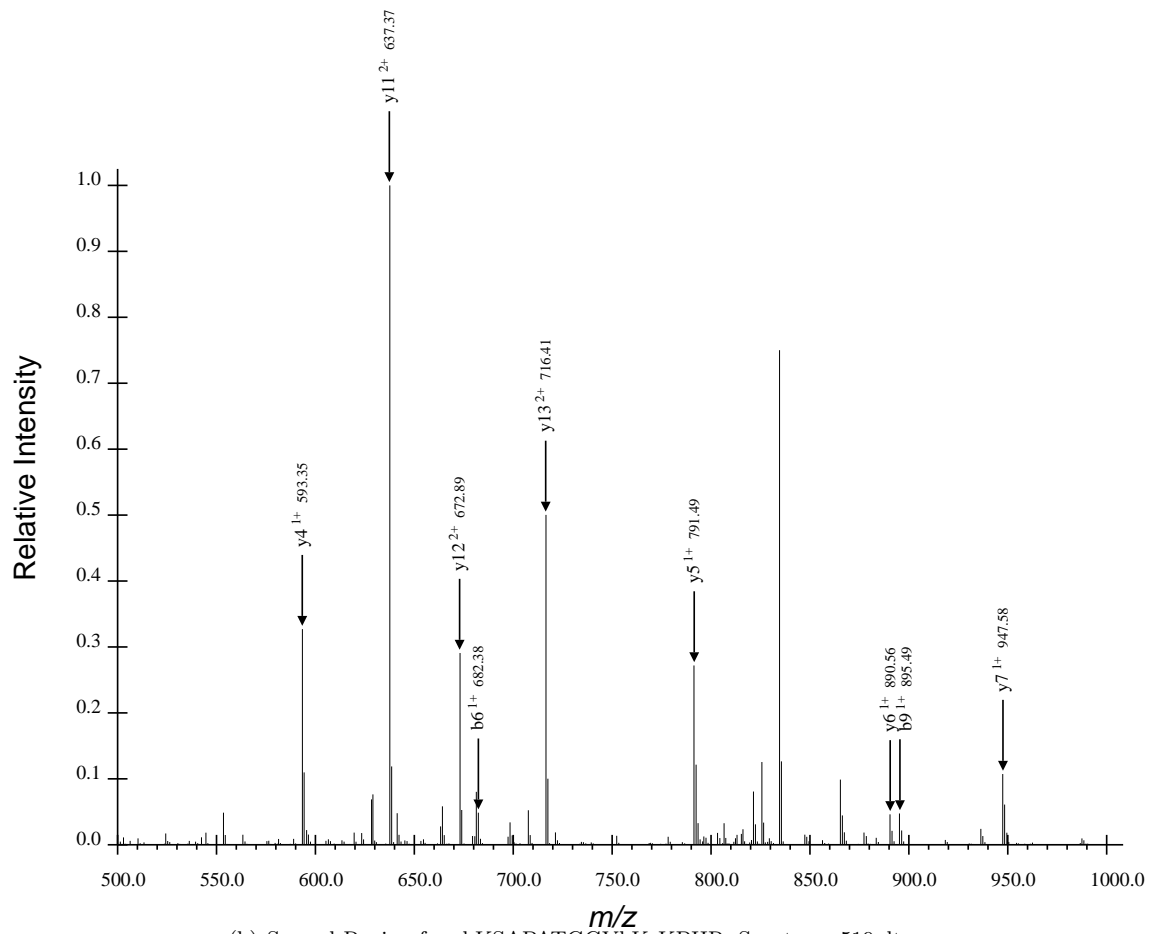

(b) Second Region for rhKSAPATGGVhKrKPHR, Spectrum 519.dta

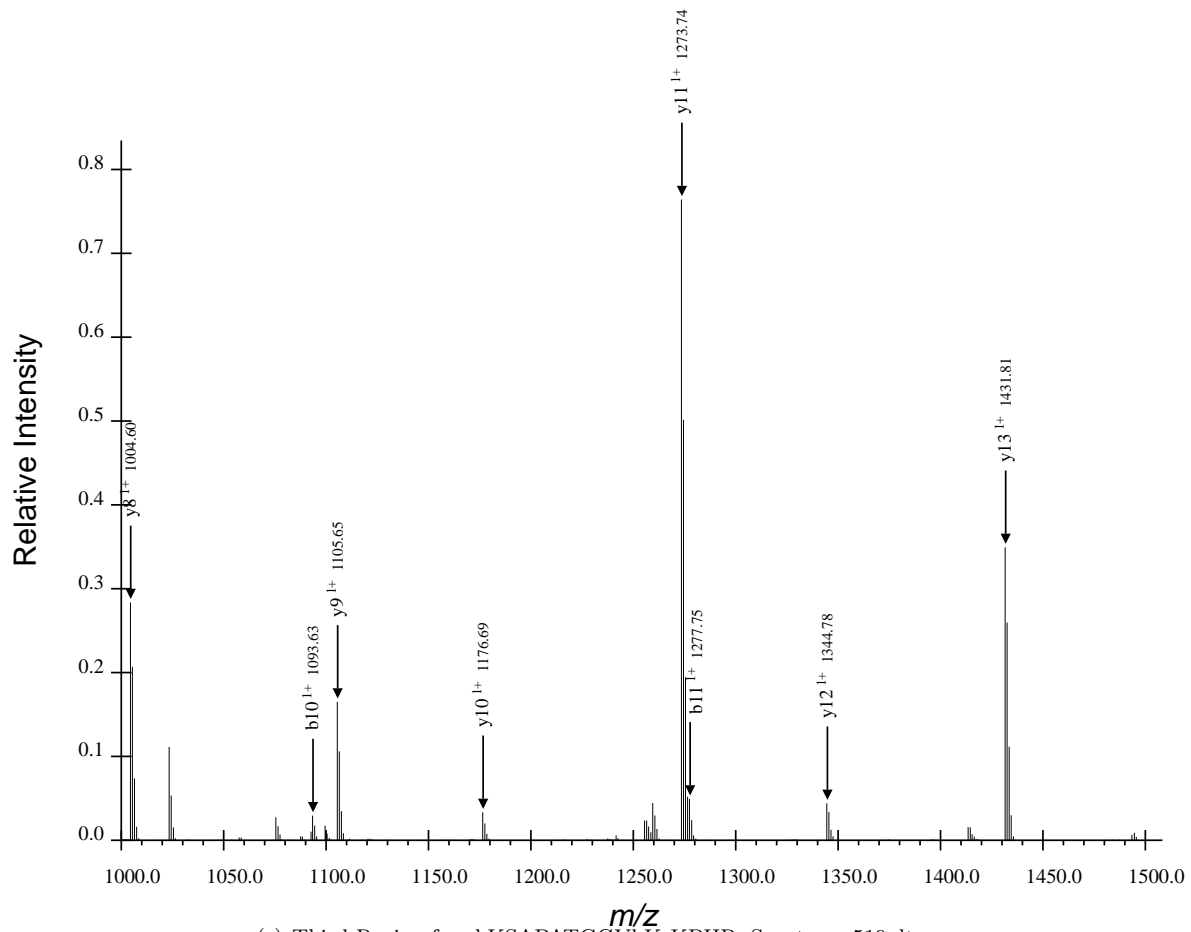

(c) Third Region for rhKSAPATGGVhKrKPHR, Spectrum 519.dta

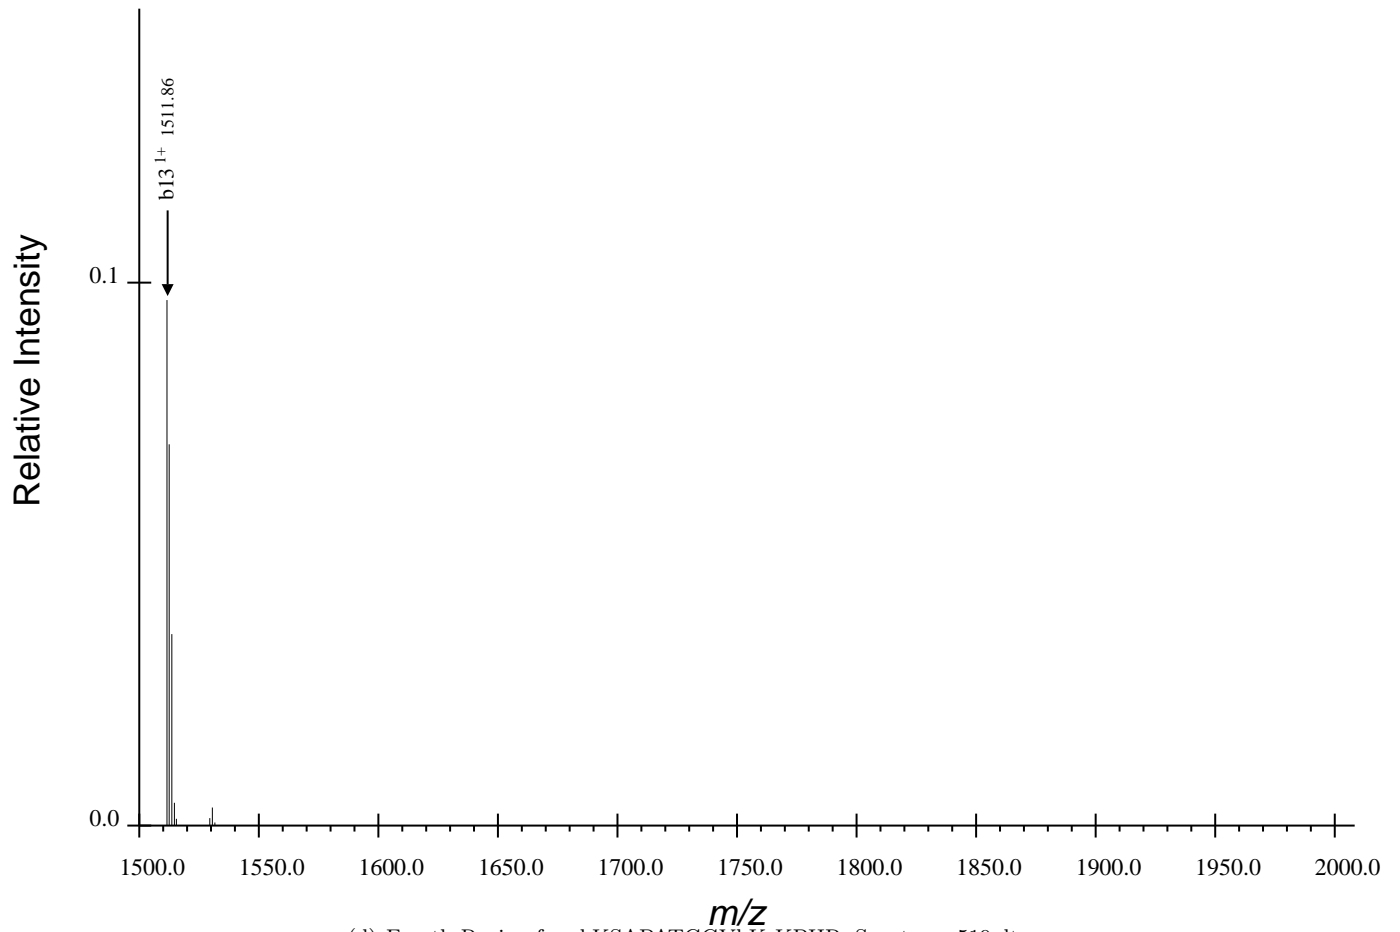

(d) Fourth Region for rhKSAPATGGVhKrKPHR, Spectrum 519.dta

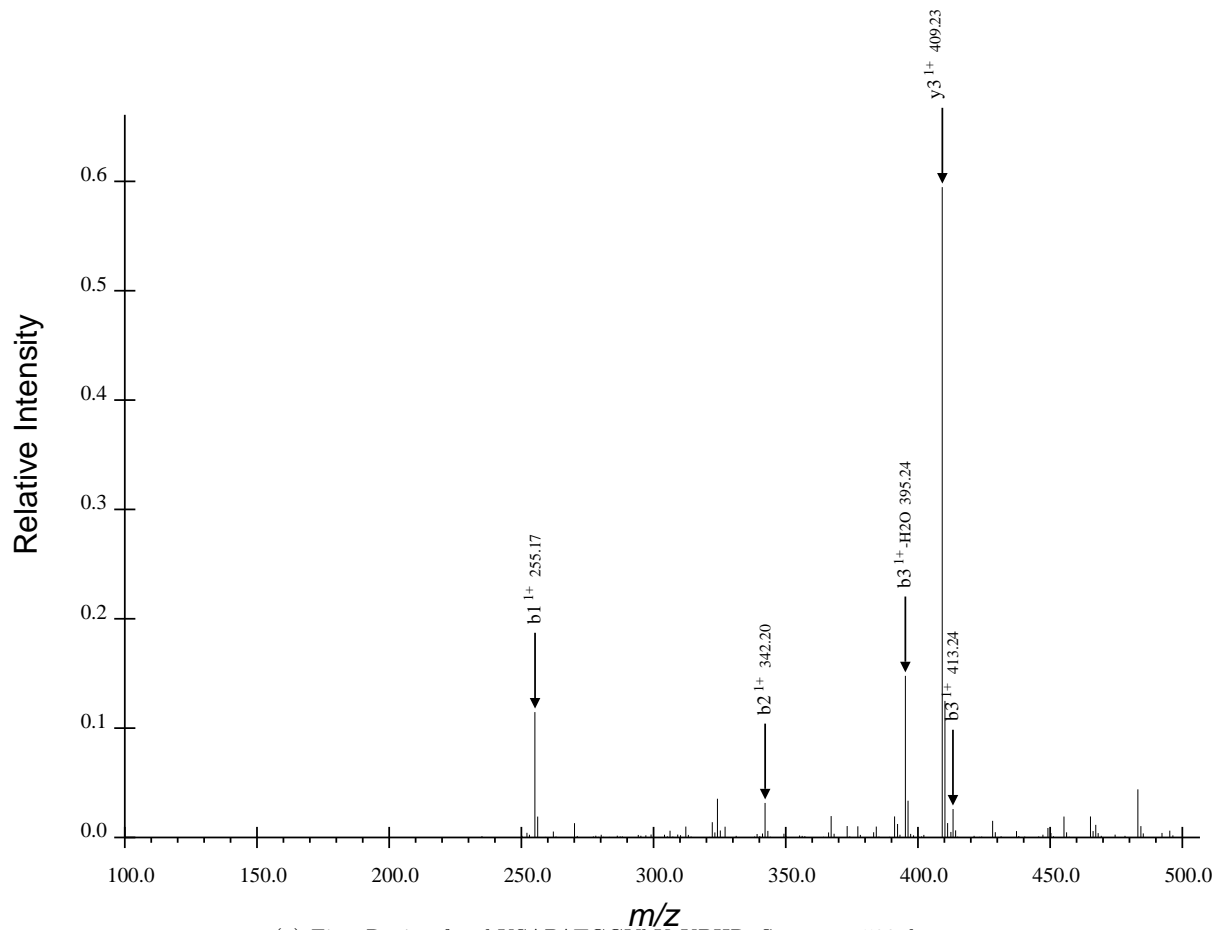

(a) First Region for rhKSAPATGGVhKrKPHR, Spectrum 520.dta

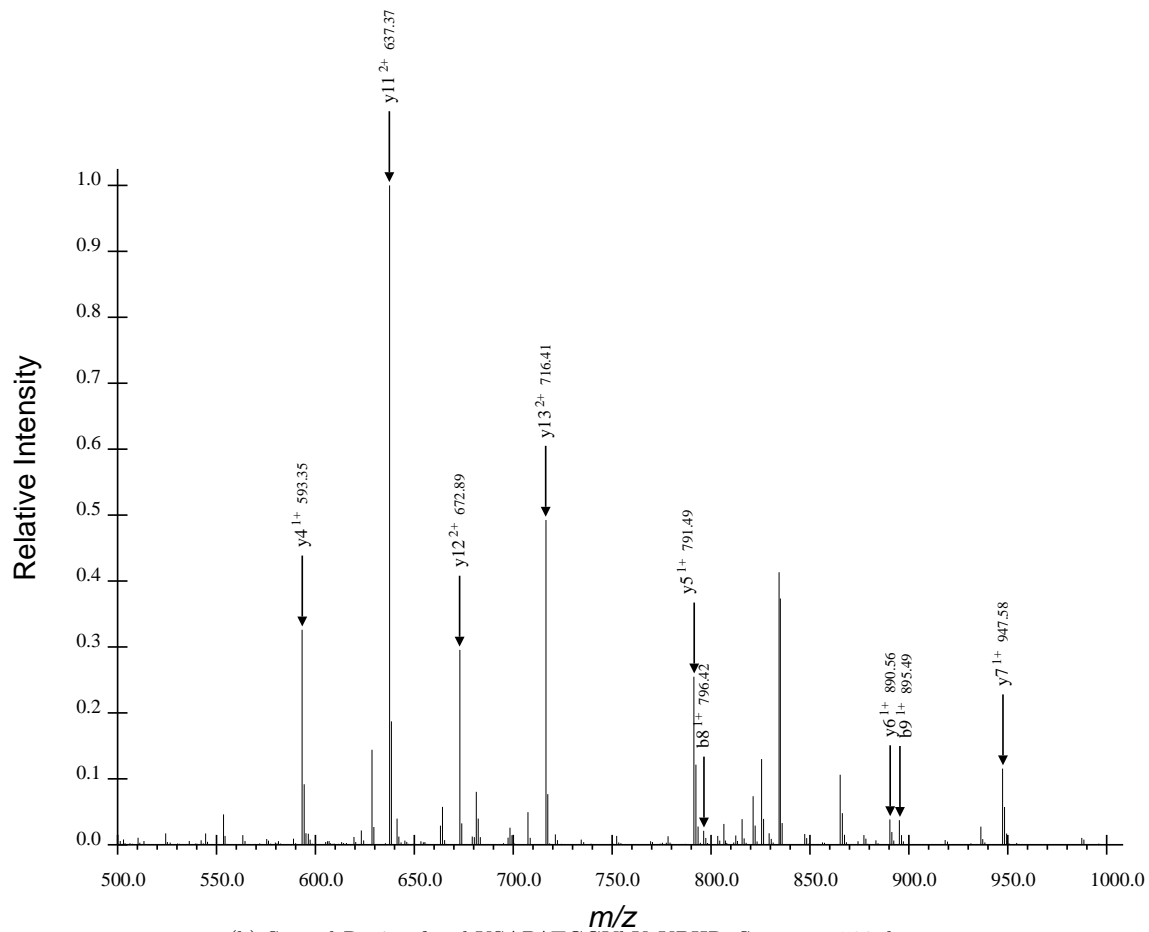

(b) Second Region for rhKSAPATGGVhKrKPHR, Spectrum 520.dta



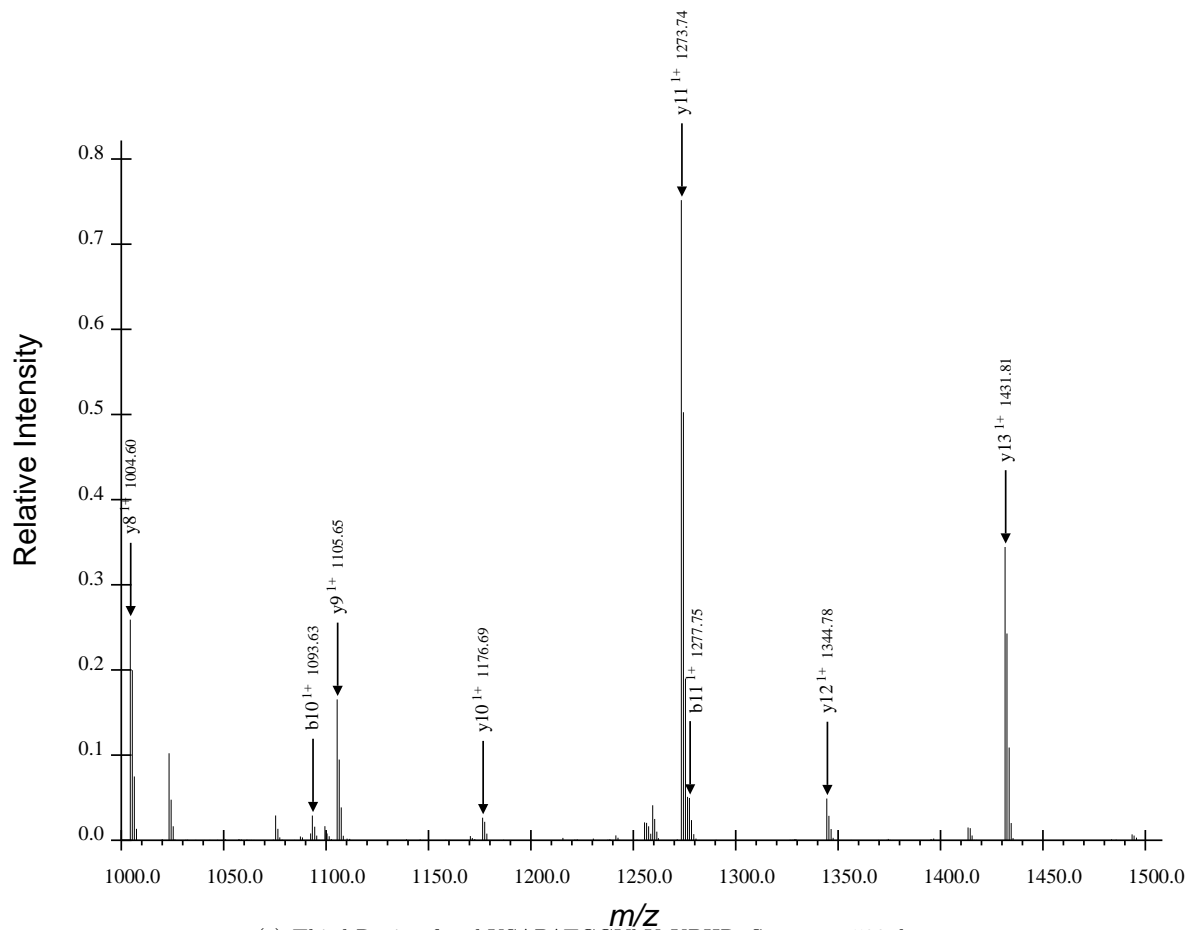

(c) Third Region for rhKSAPATGGVhKrKPHR, Spectrum 520.dta

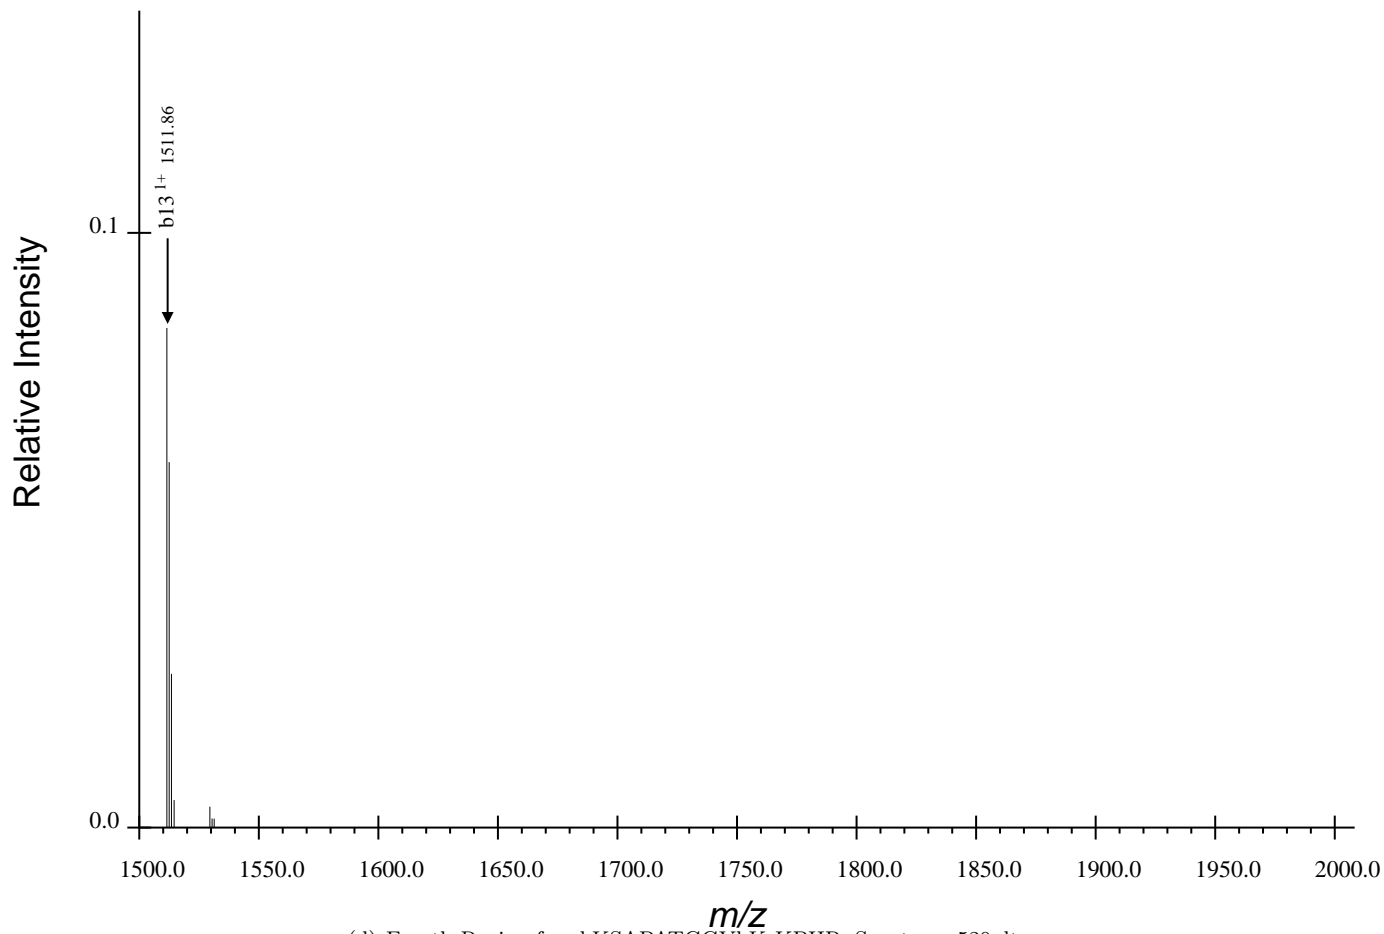

(d) Fourth Region for rhKSAPATGGVhKrKPHR, Spectrum 520.dta

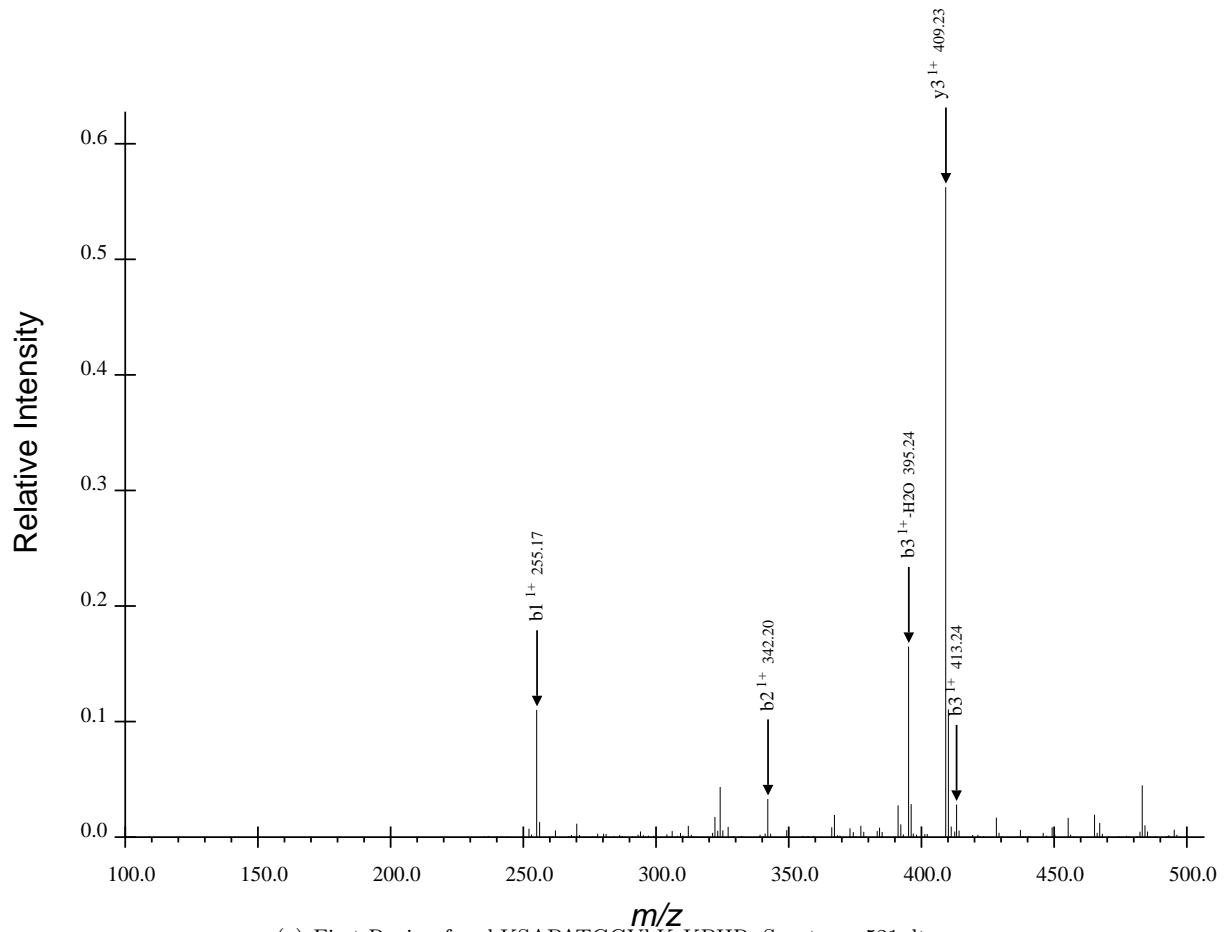

(a) First Region for rhKSAPATGGVhKrKPHR, Spectrum 521.dta

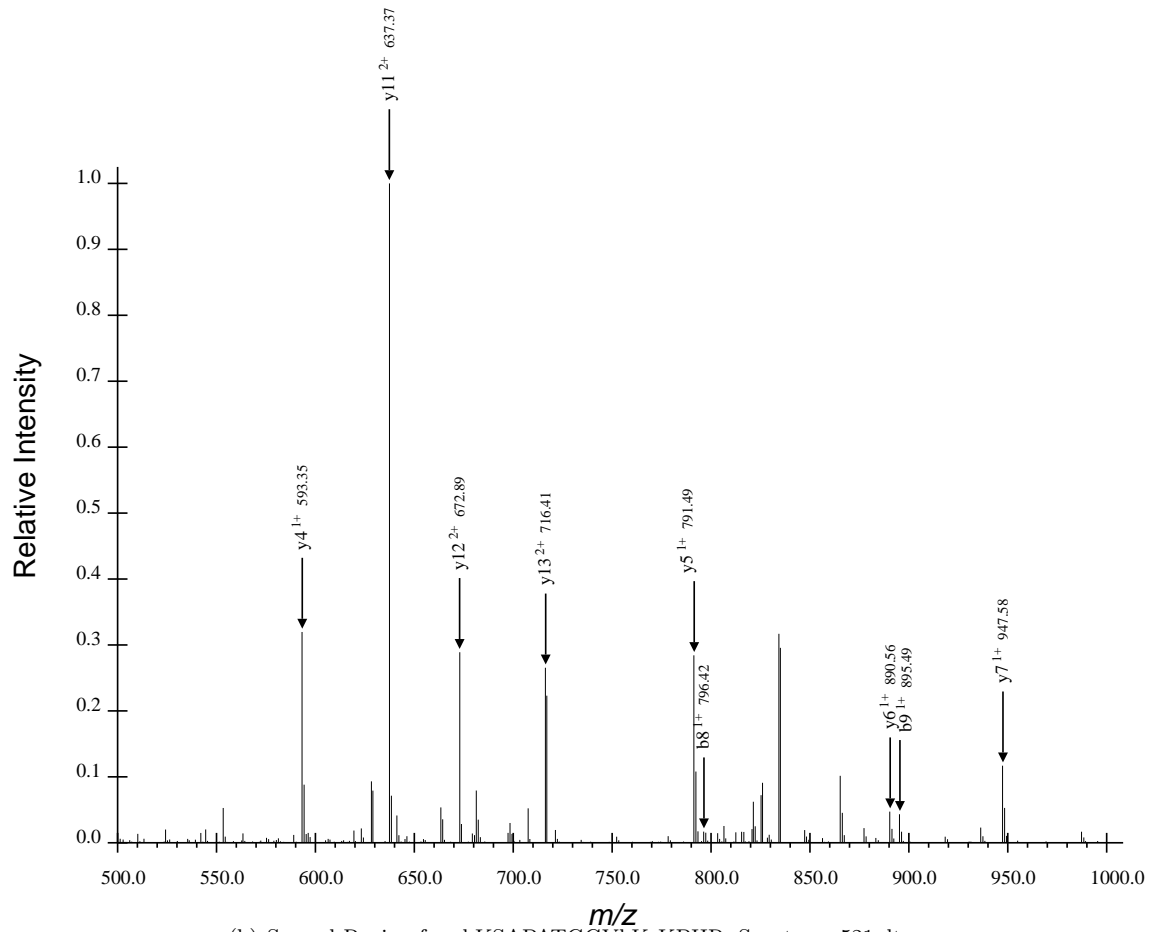

(b) Second Region for rhKSAPATGGVhKrKPHR, Spectrum 521.dta

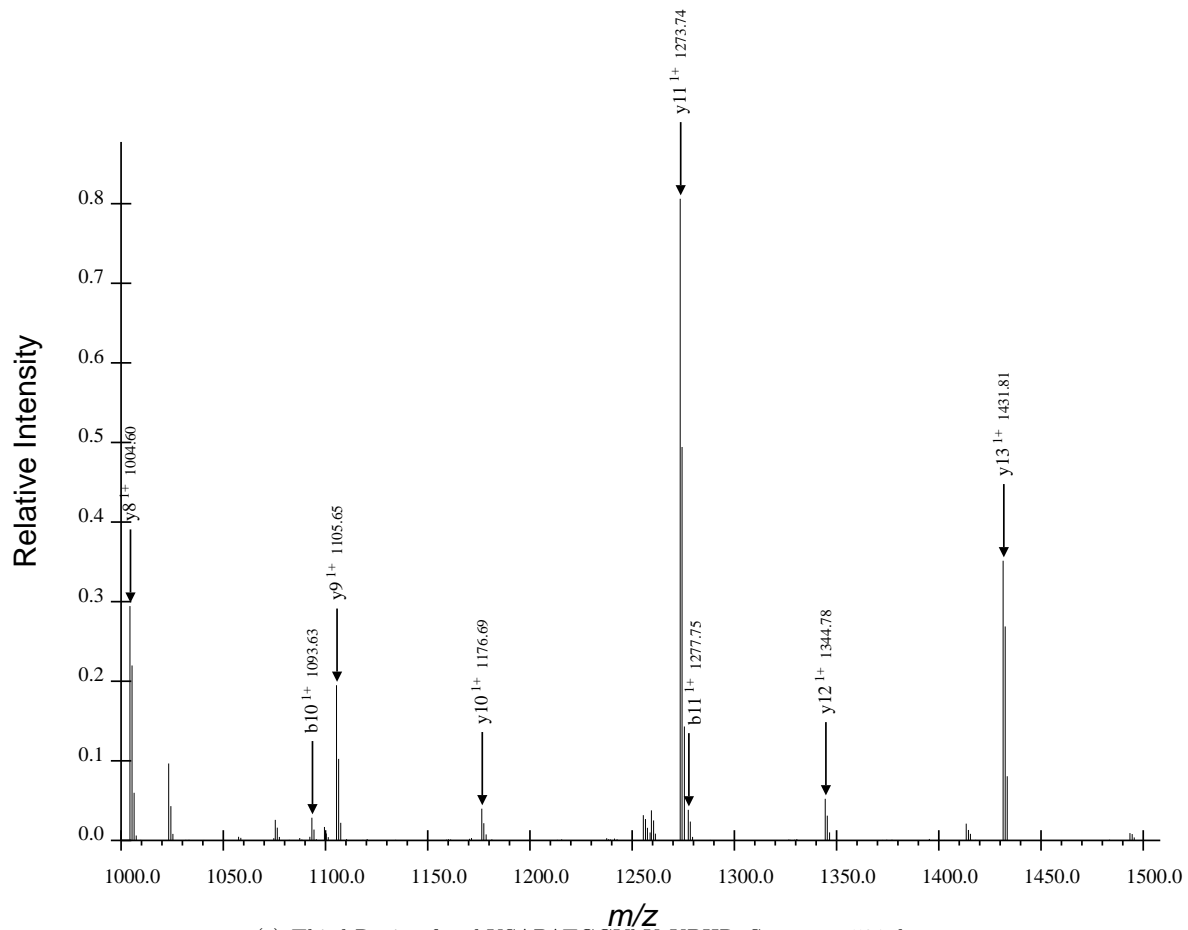

(c) Third Region for rhKSAPATGGVhKrKPHR, Spectrum 521.dta

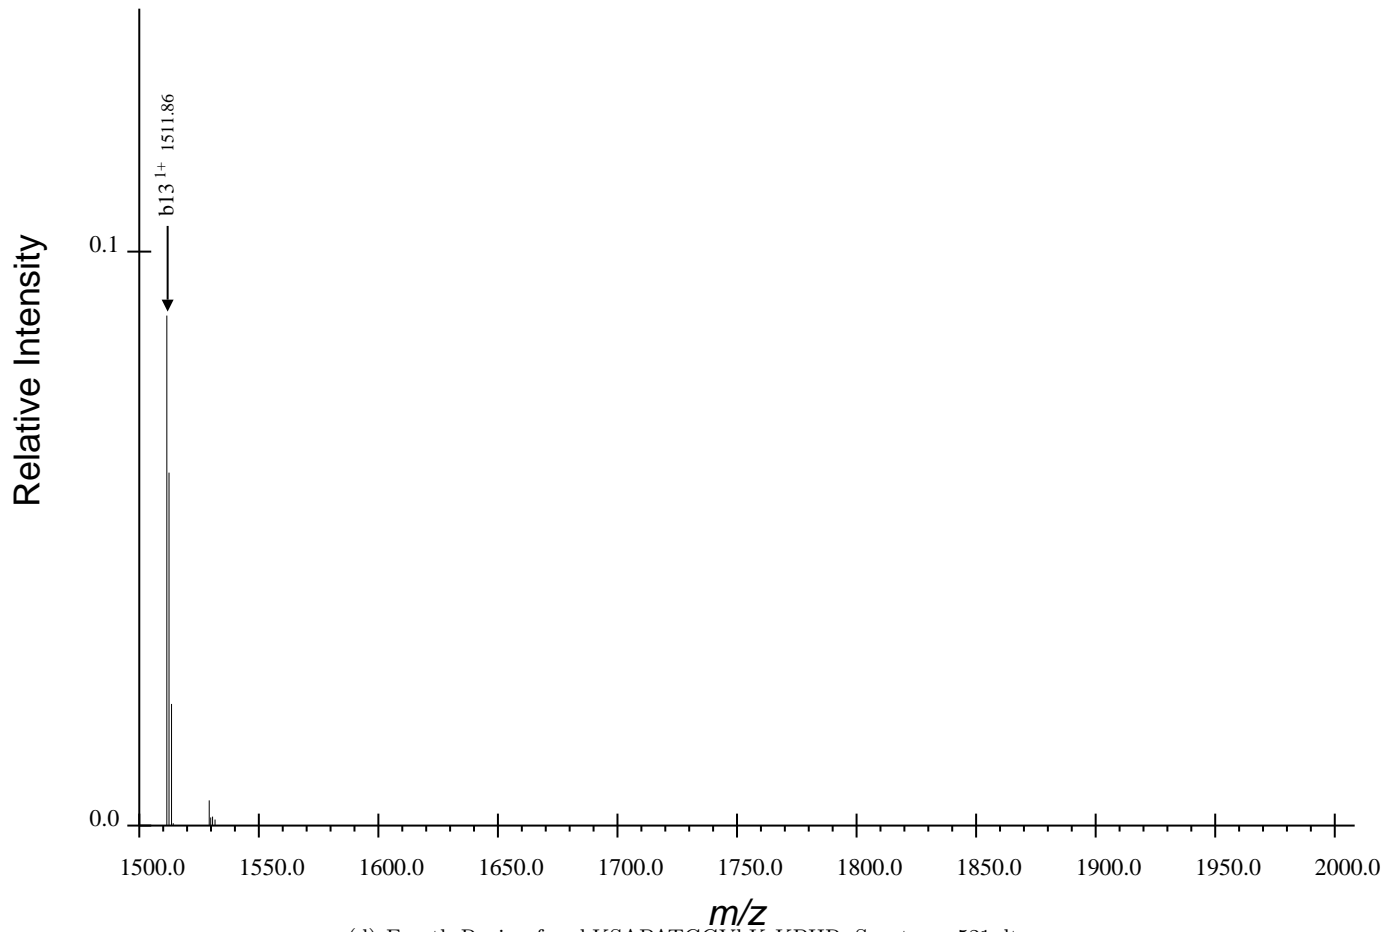

(d) Fourth Region for rhKSAPATGGVhKrKPHR, Spectrum 521.dta

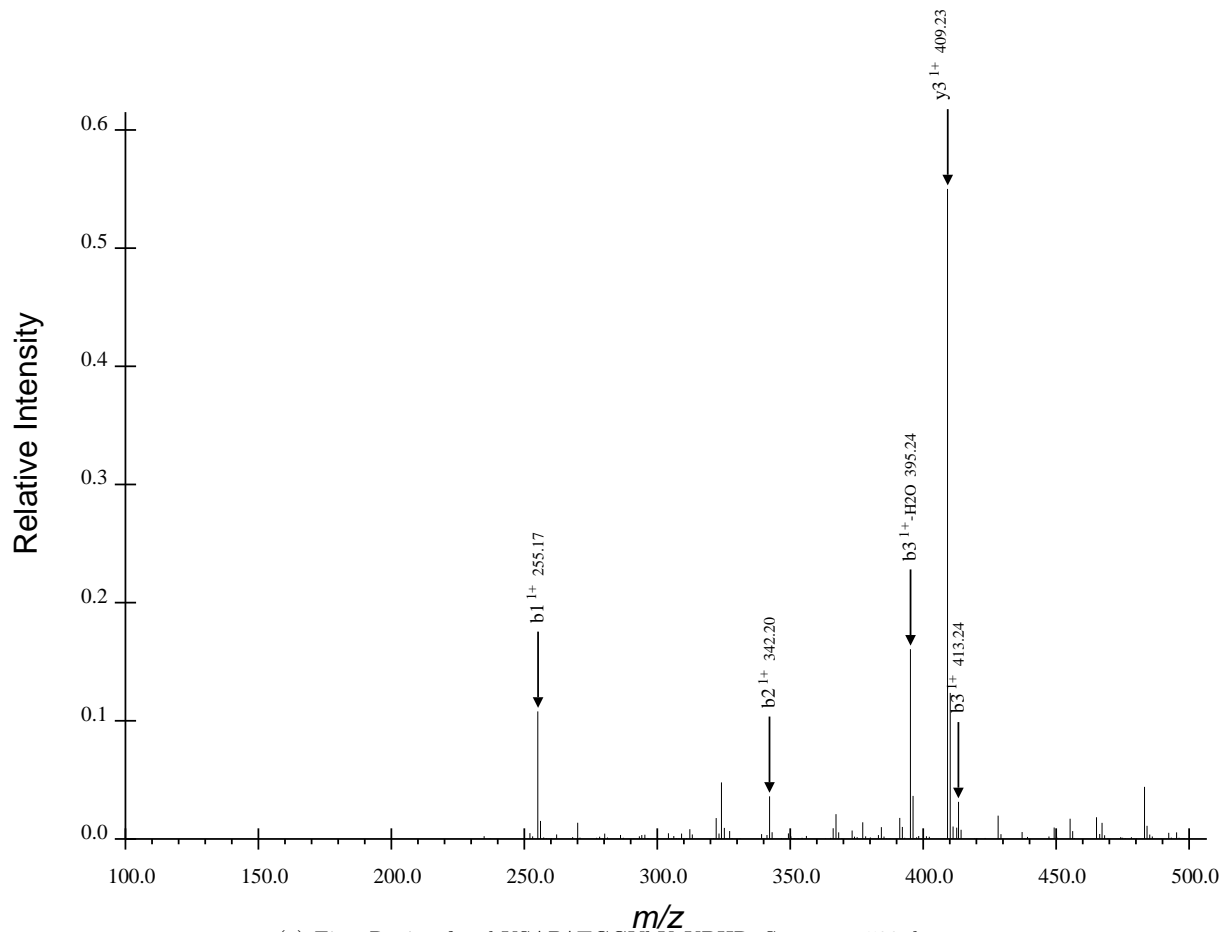

(a) First Region for rhKSAPATGGVhKrKPHR, Spectrum 522.dta

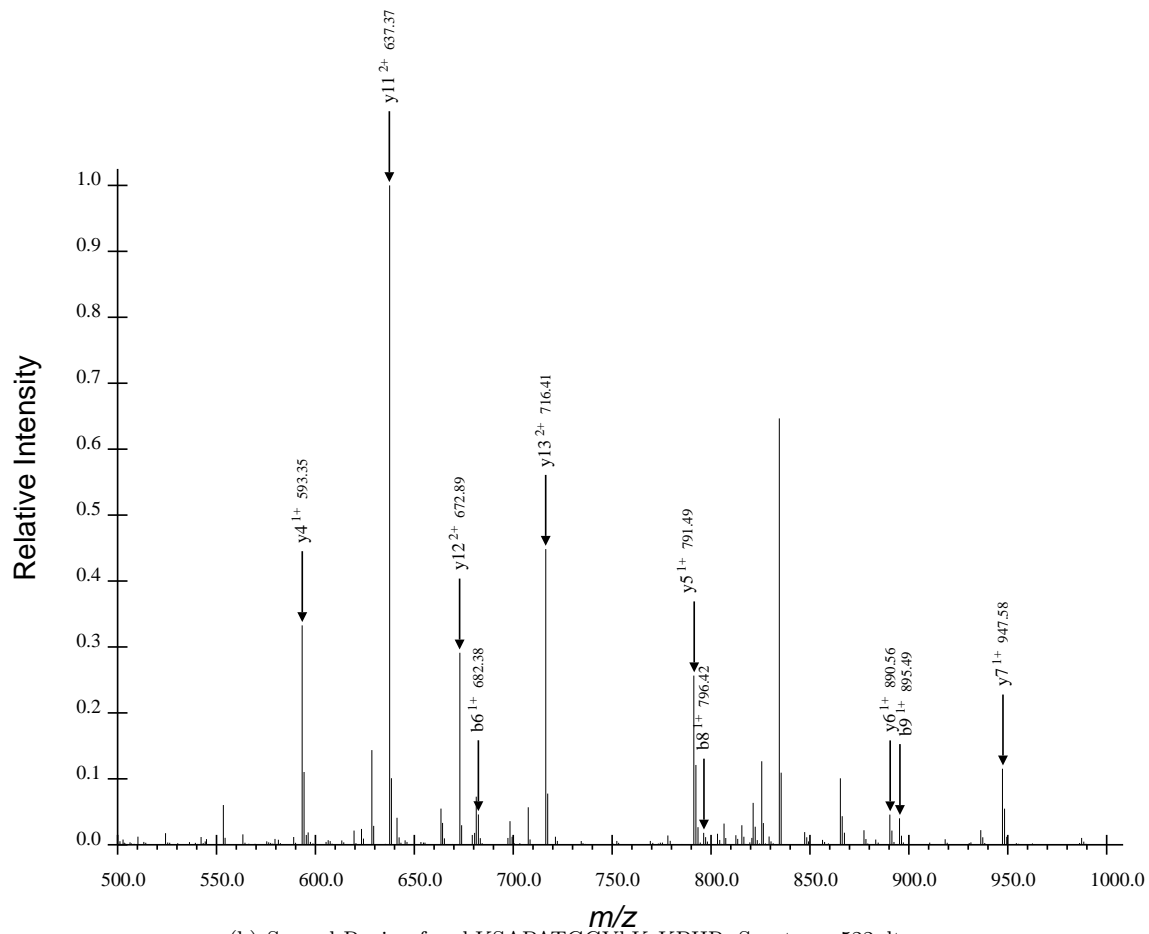

(b) Second Region for rhKSAPATGGVhKrKPHR, Spectrum 522.dta

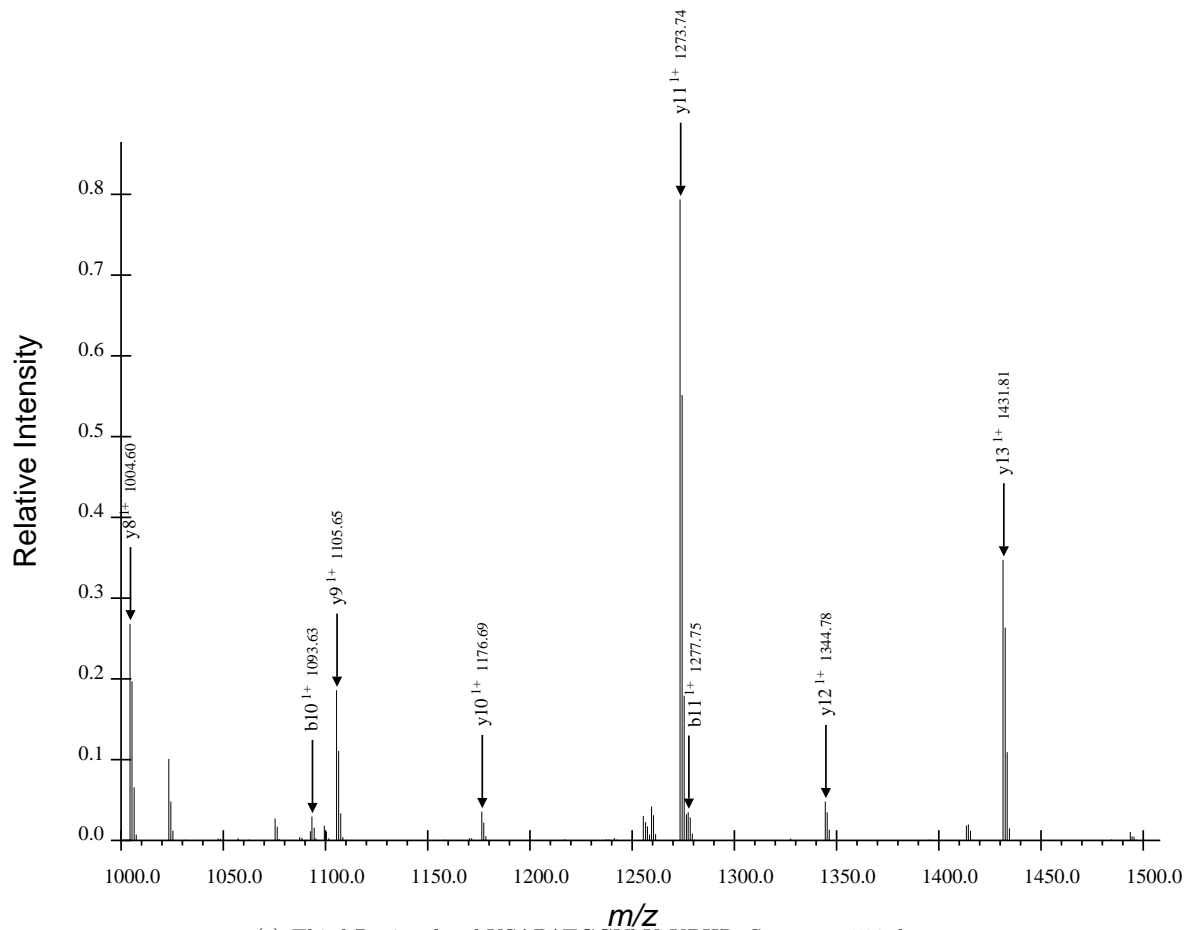

(c) Third Region for rhKSAPATGGVhKrKPHR, Spectrum 522.dta

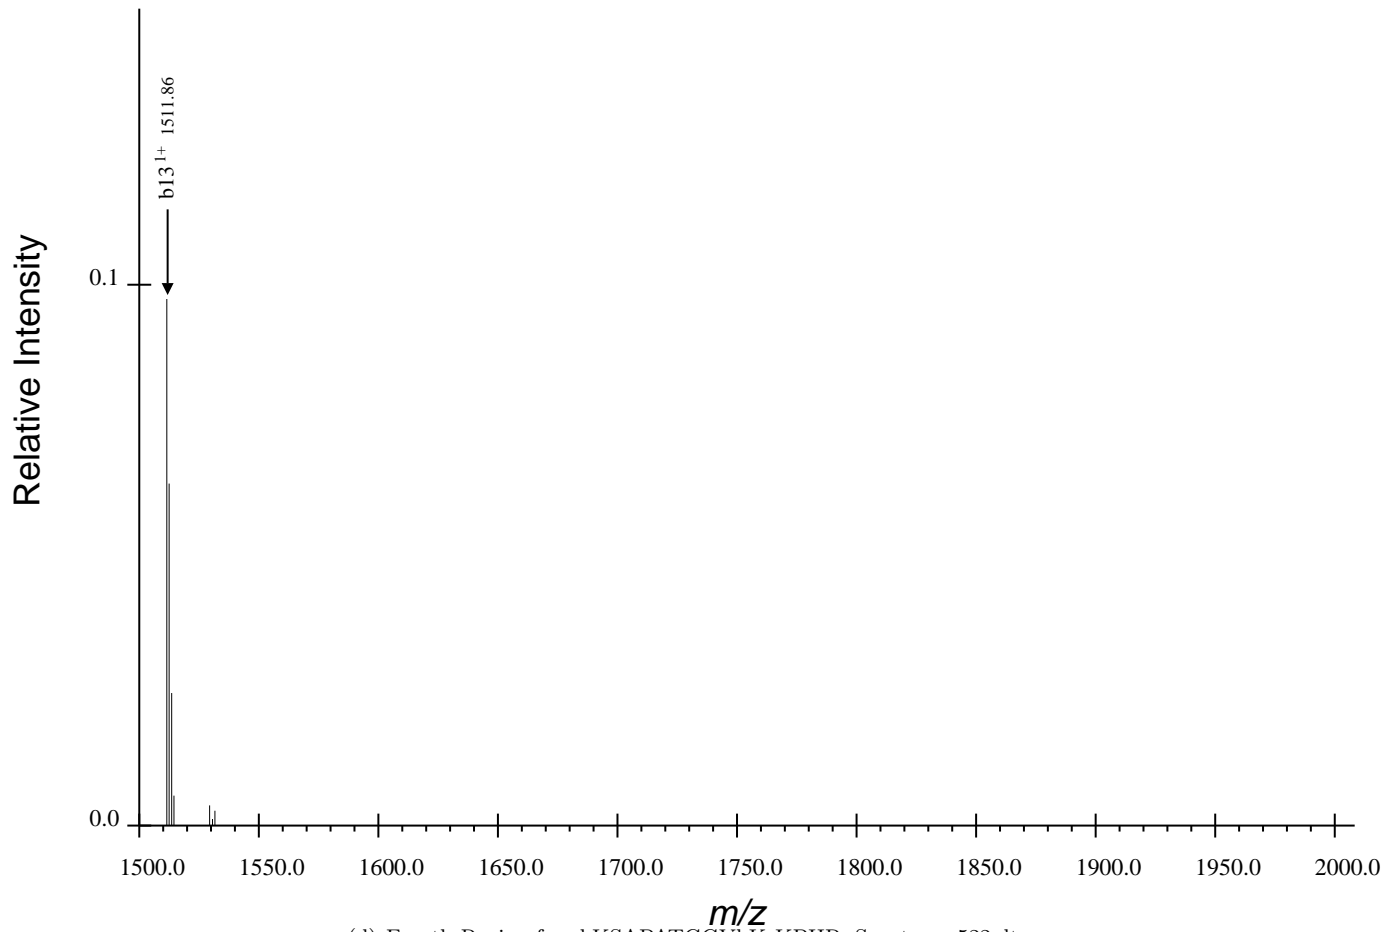

(d) Fourth Region for rhKSAPATGGVhKrKPHR, Spectrum 522.dta

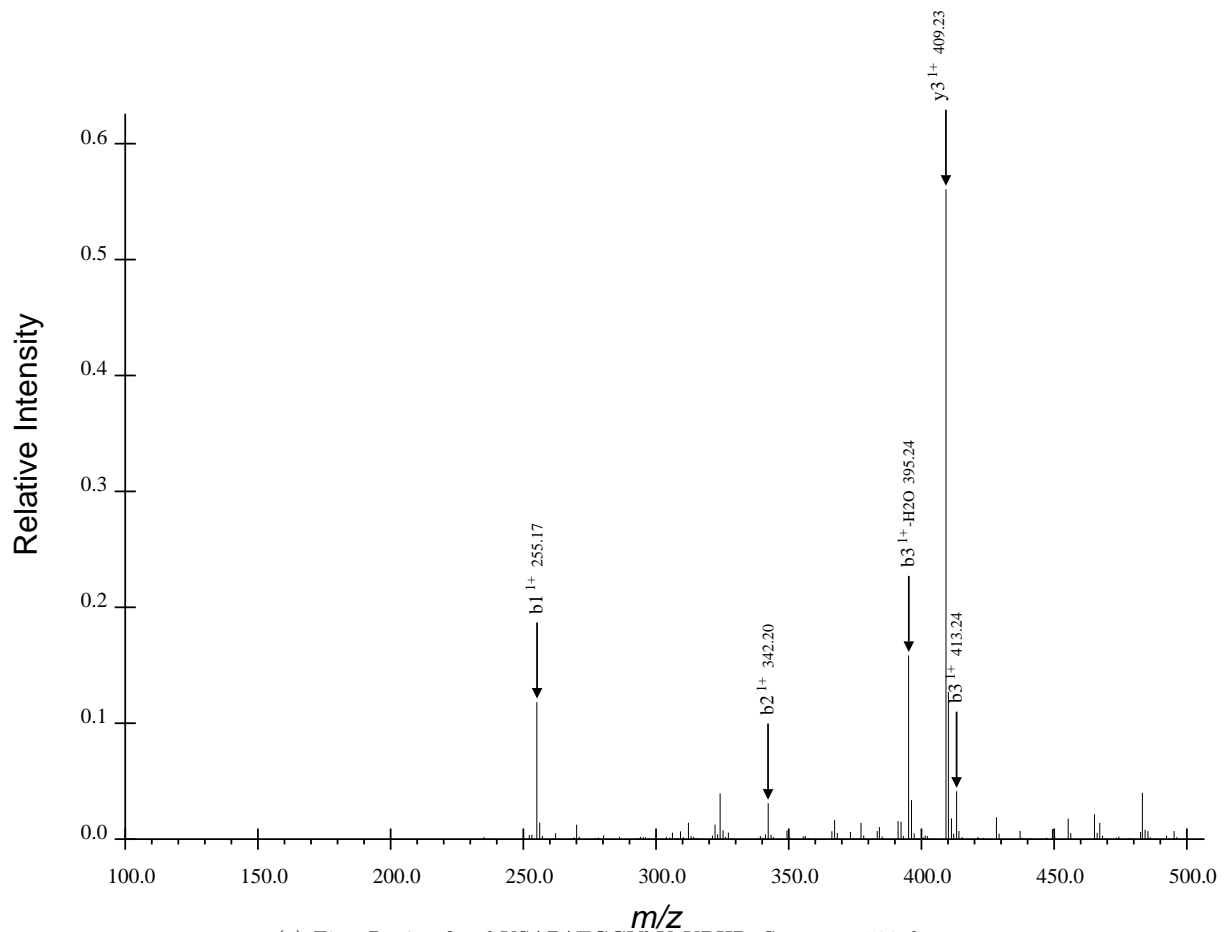

(a) First Region for rhKSAPATGGVhKrKPHR, Spectrum 523.dta

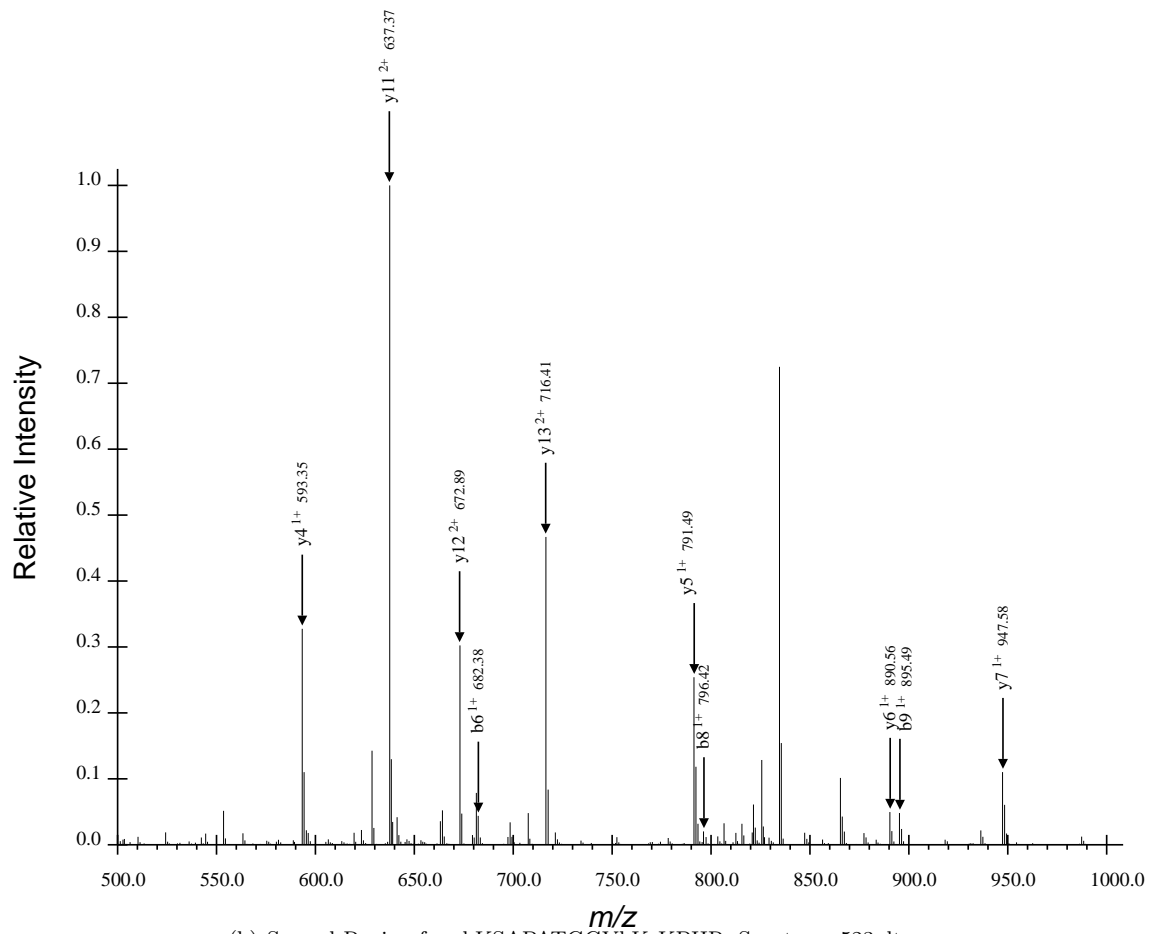

(b) Second Region for rhKSAPATGGVhKrKPHR, Spectrum 523.dta

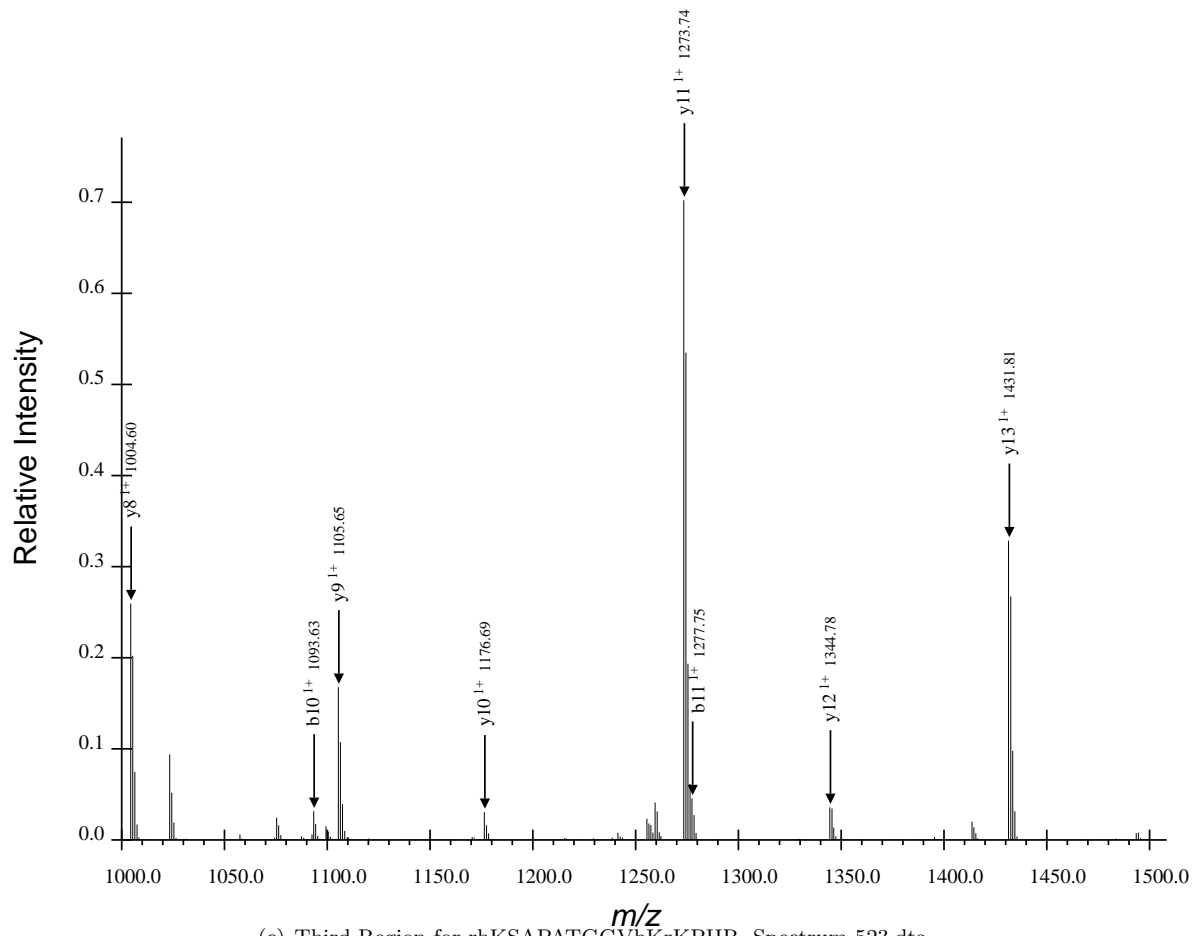

(c) Third Region for rhKSAPATGGVhKrKPHR, Spectrum 523.dta

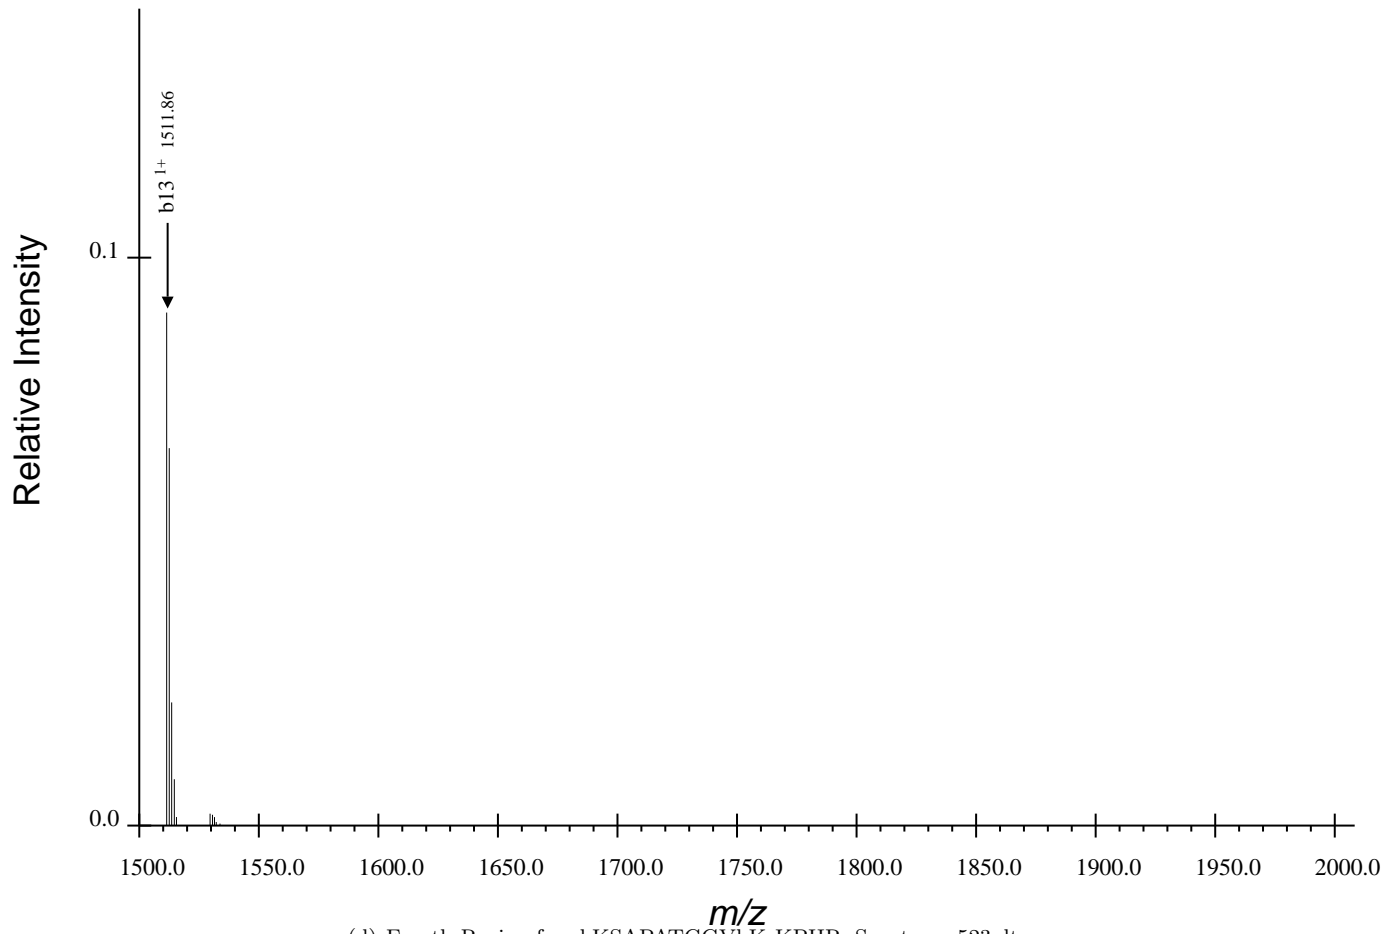

(d) Fourth Region for rhKSAPATGGVhKrKPHR, Spectrum 523.dta

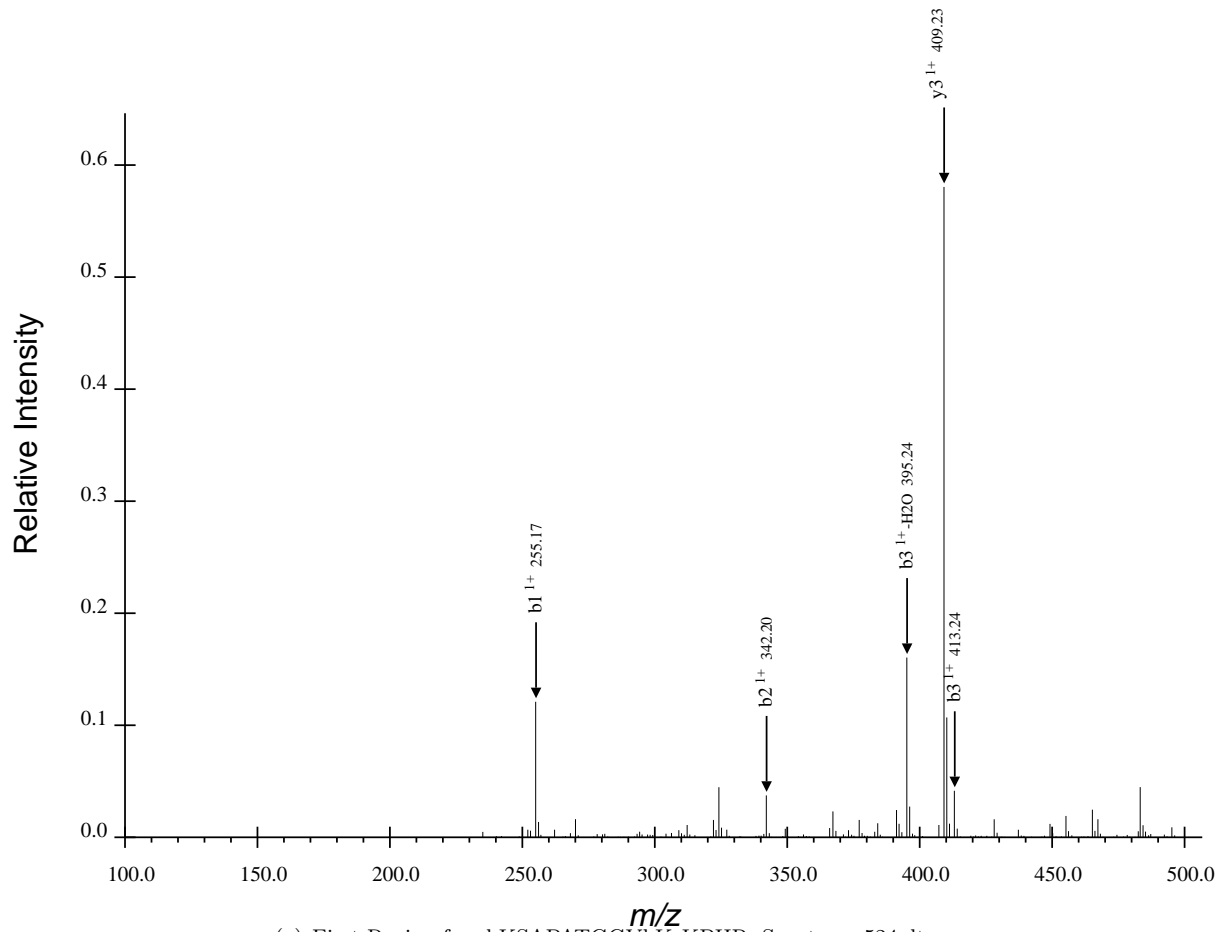

(a) First Region for rhKSAPATGGVhKrKPHR, Spectrum 524.dta

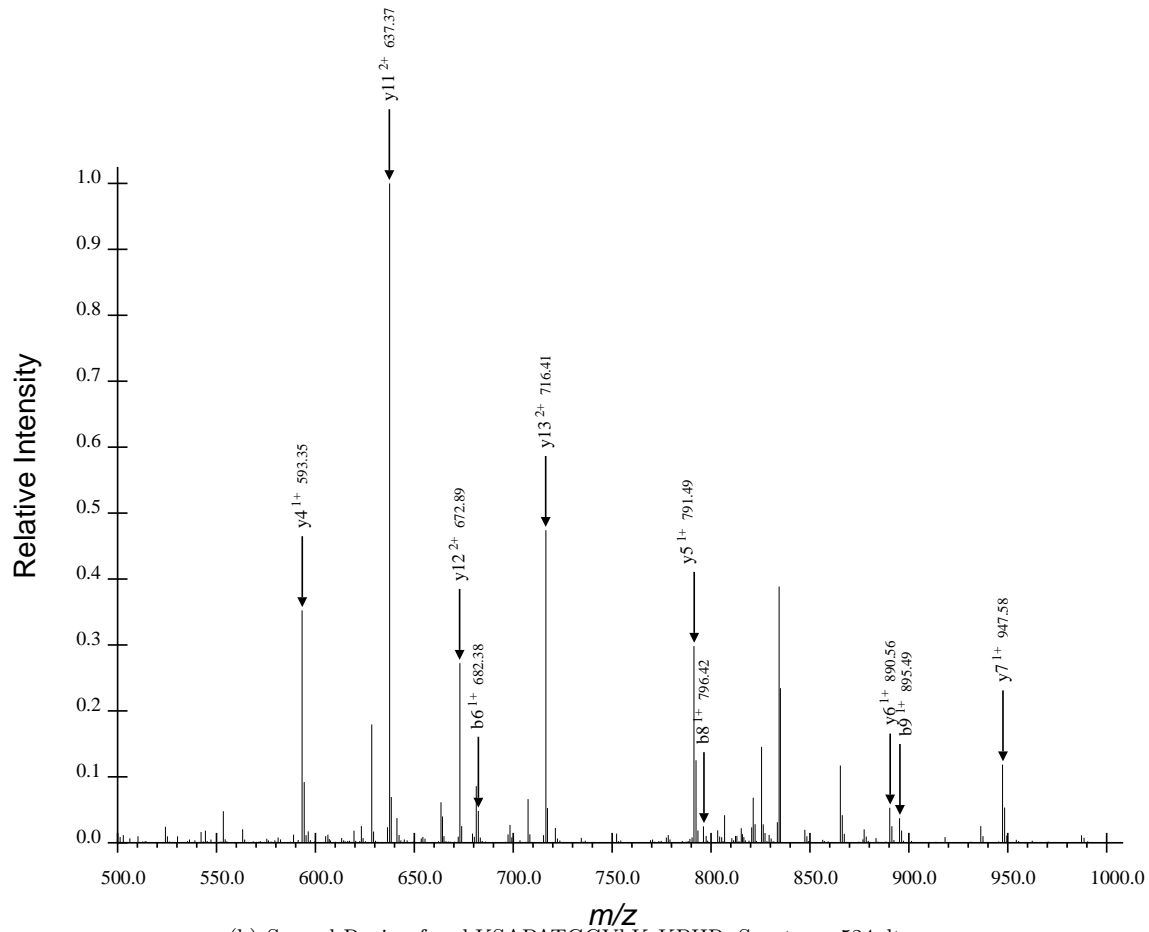

(b) Second Region for rhKSAPATGGVhKrKPHR, Spectrum 524.dta



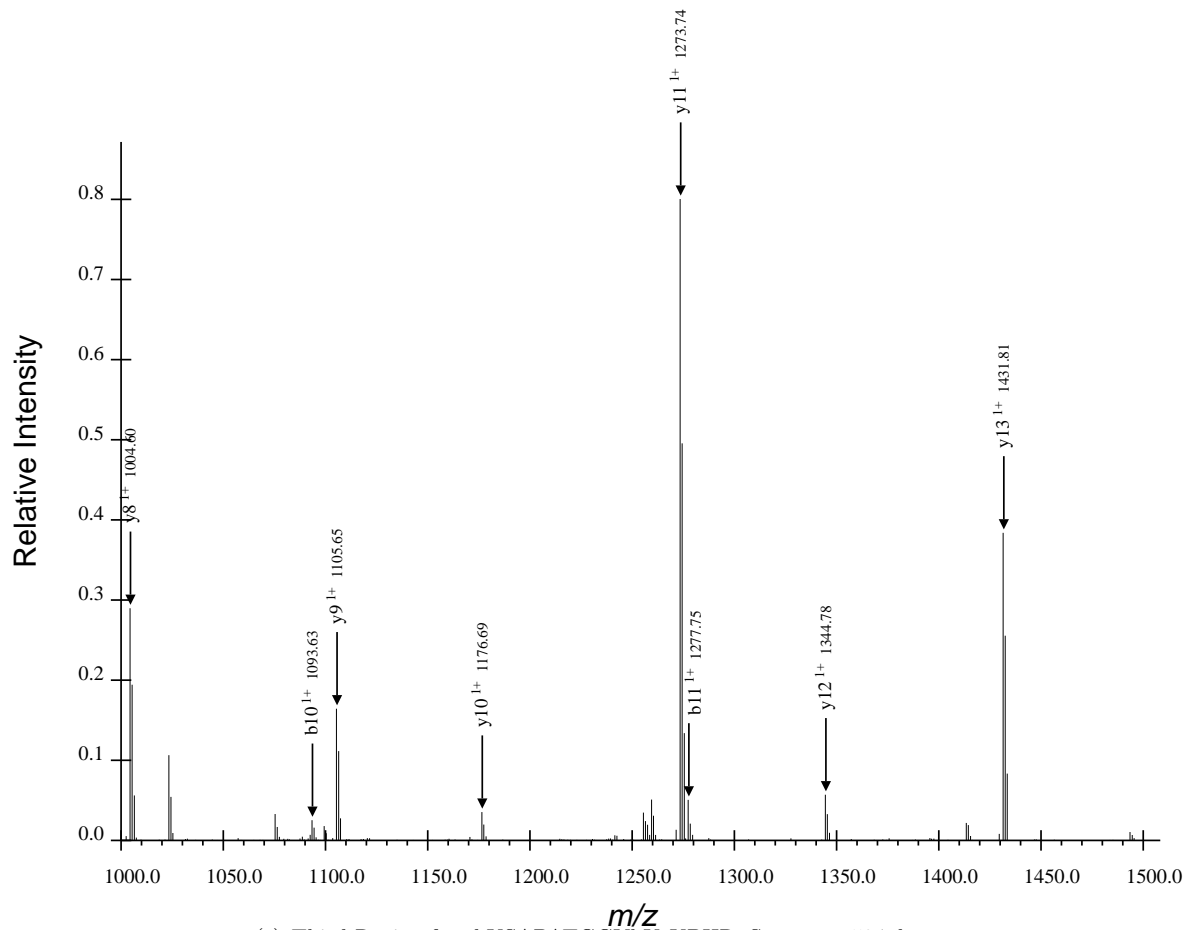

(c) Third Region for rhKSAPATGGVhKrKPHR, Spectrum 524.dta

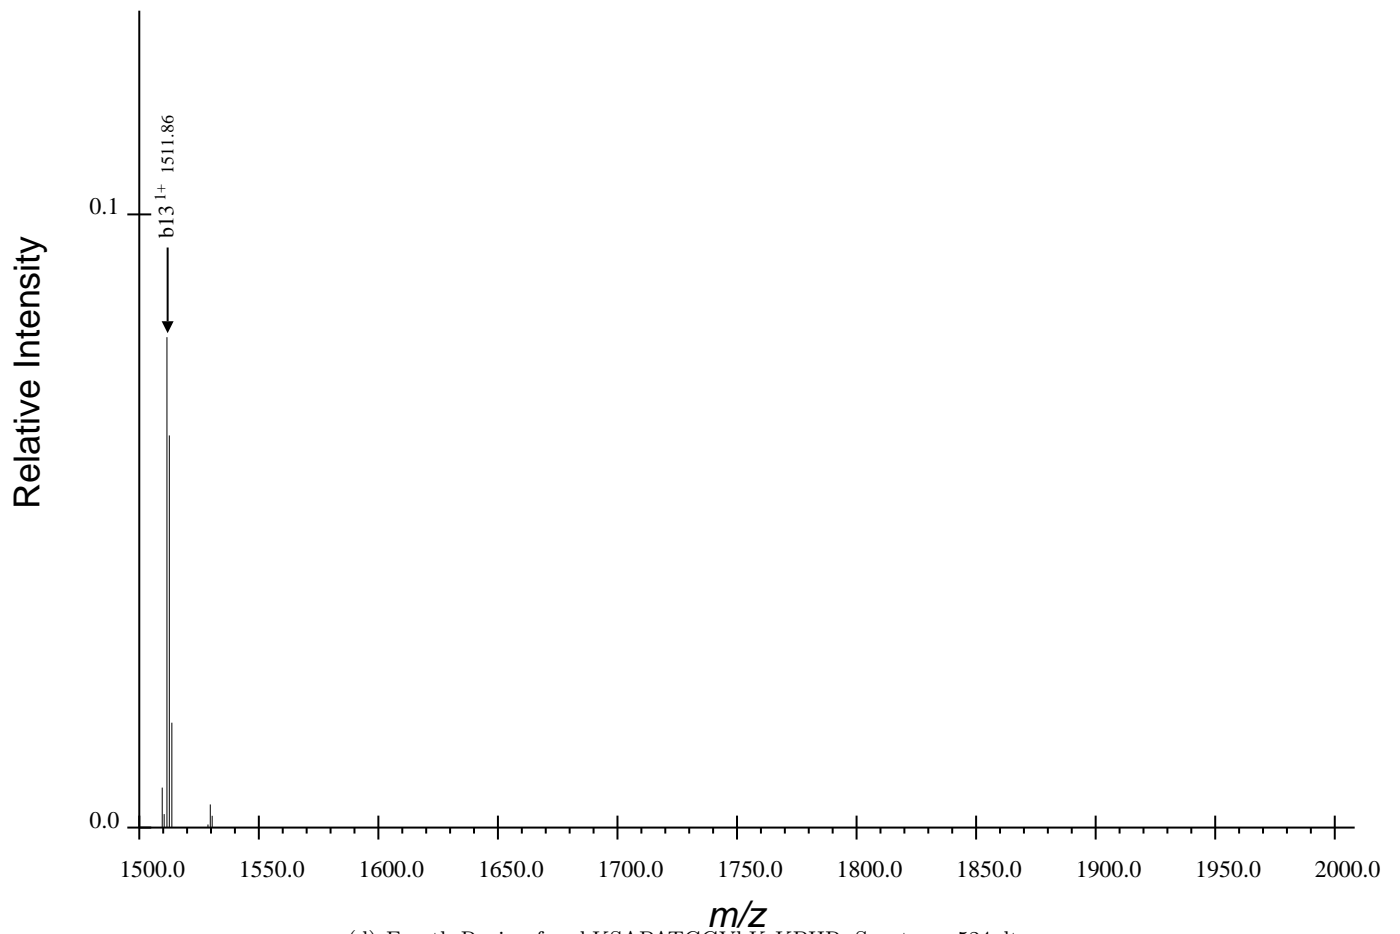

(d) Fourth Region for rhKSAPATGGVhKrKPHR, Spectrum 524.dta

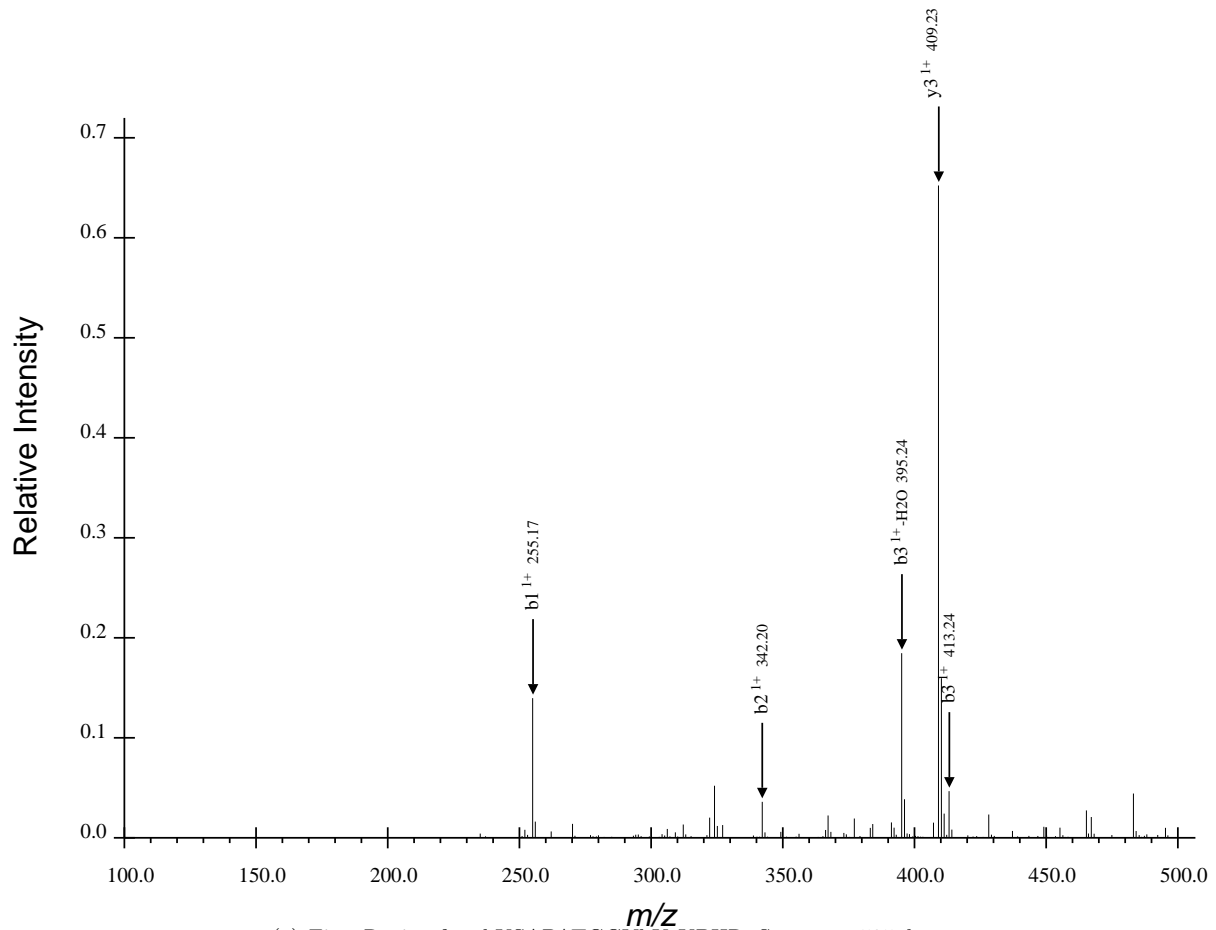

(a) First Region for rhKSAPATGGVhKrKPHR, Spectrum 525.dta

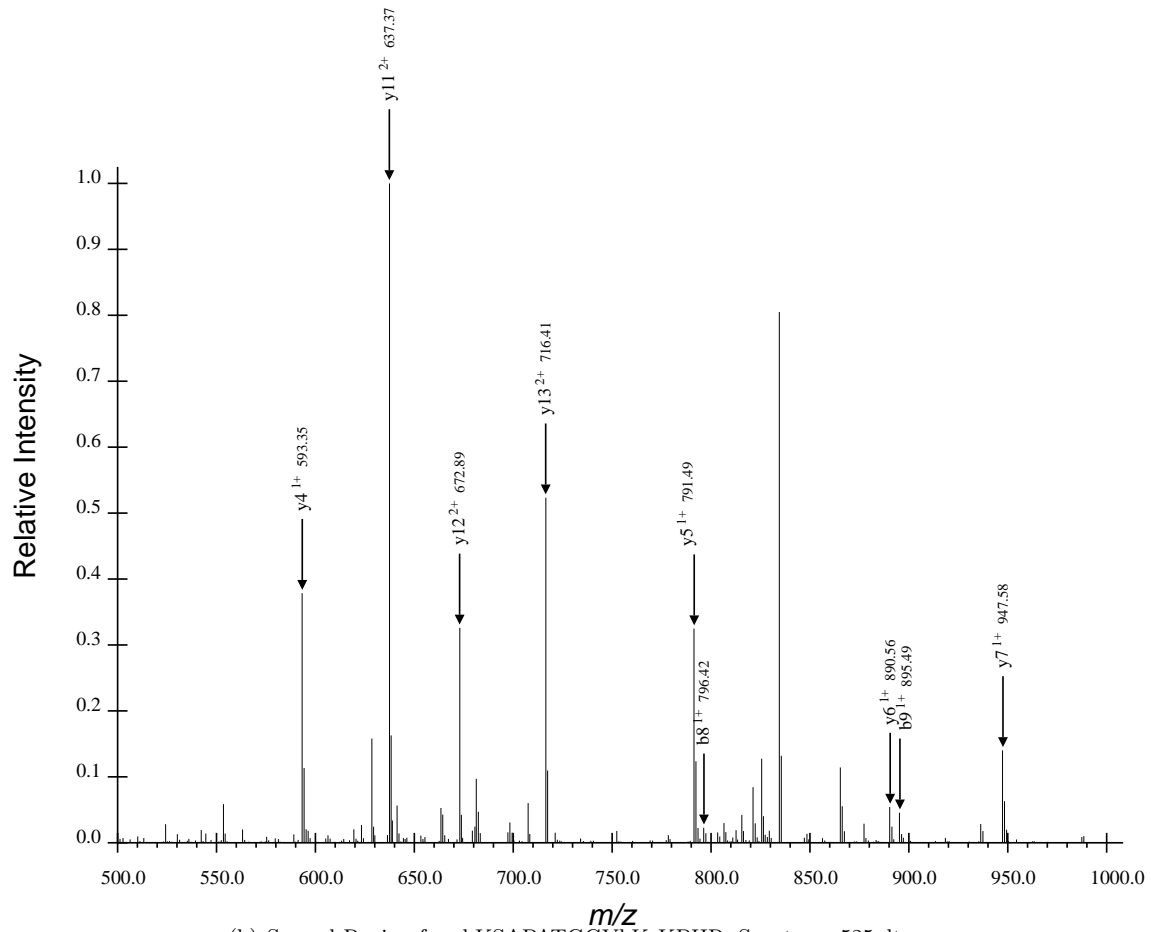

(b) Second Region for rhKSAPATGGVhKrKPHR, Spectrum 525.dta

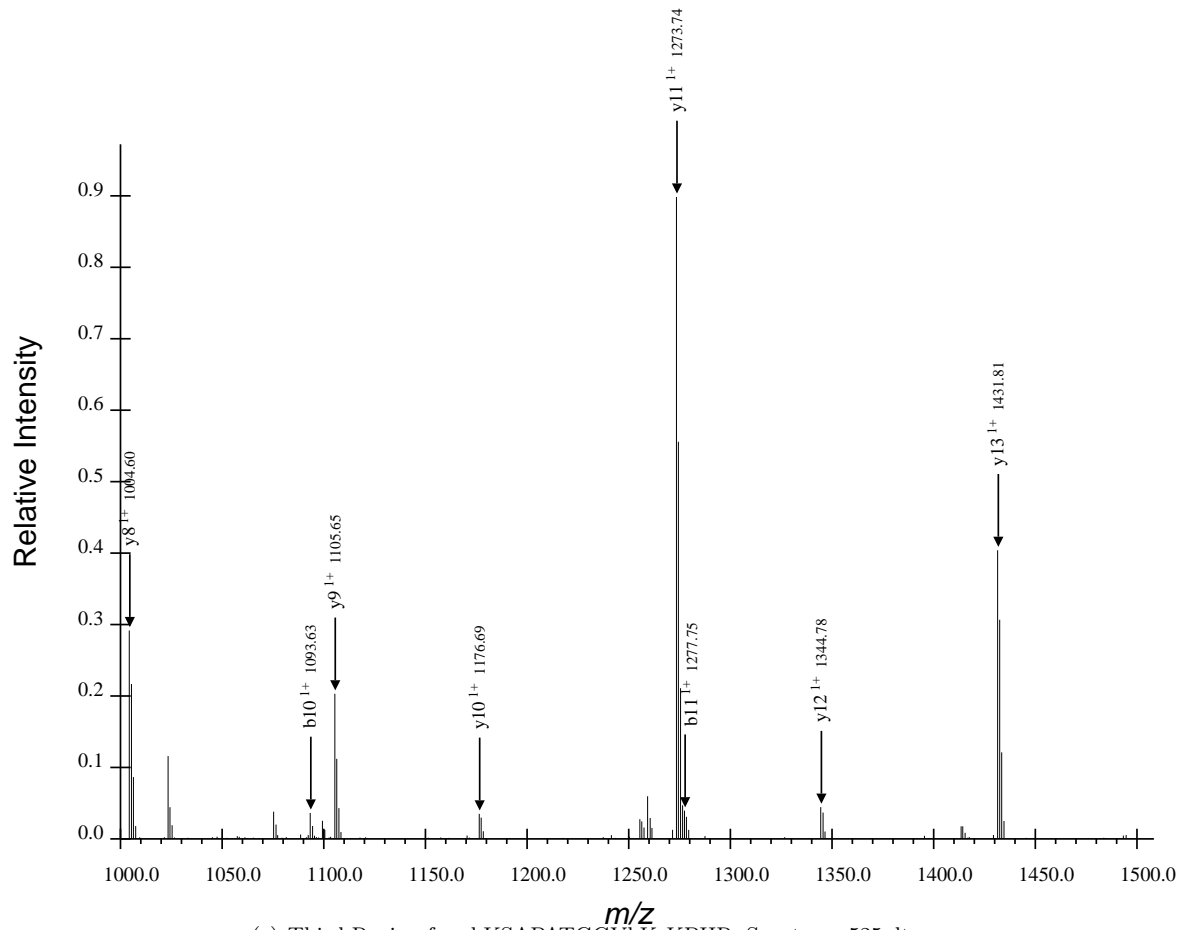

(c) Third Region for rhKSAPATGGVhKrKPHR, Spectrum 525.dta

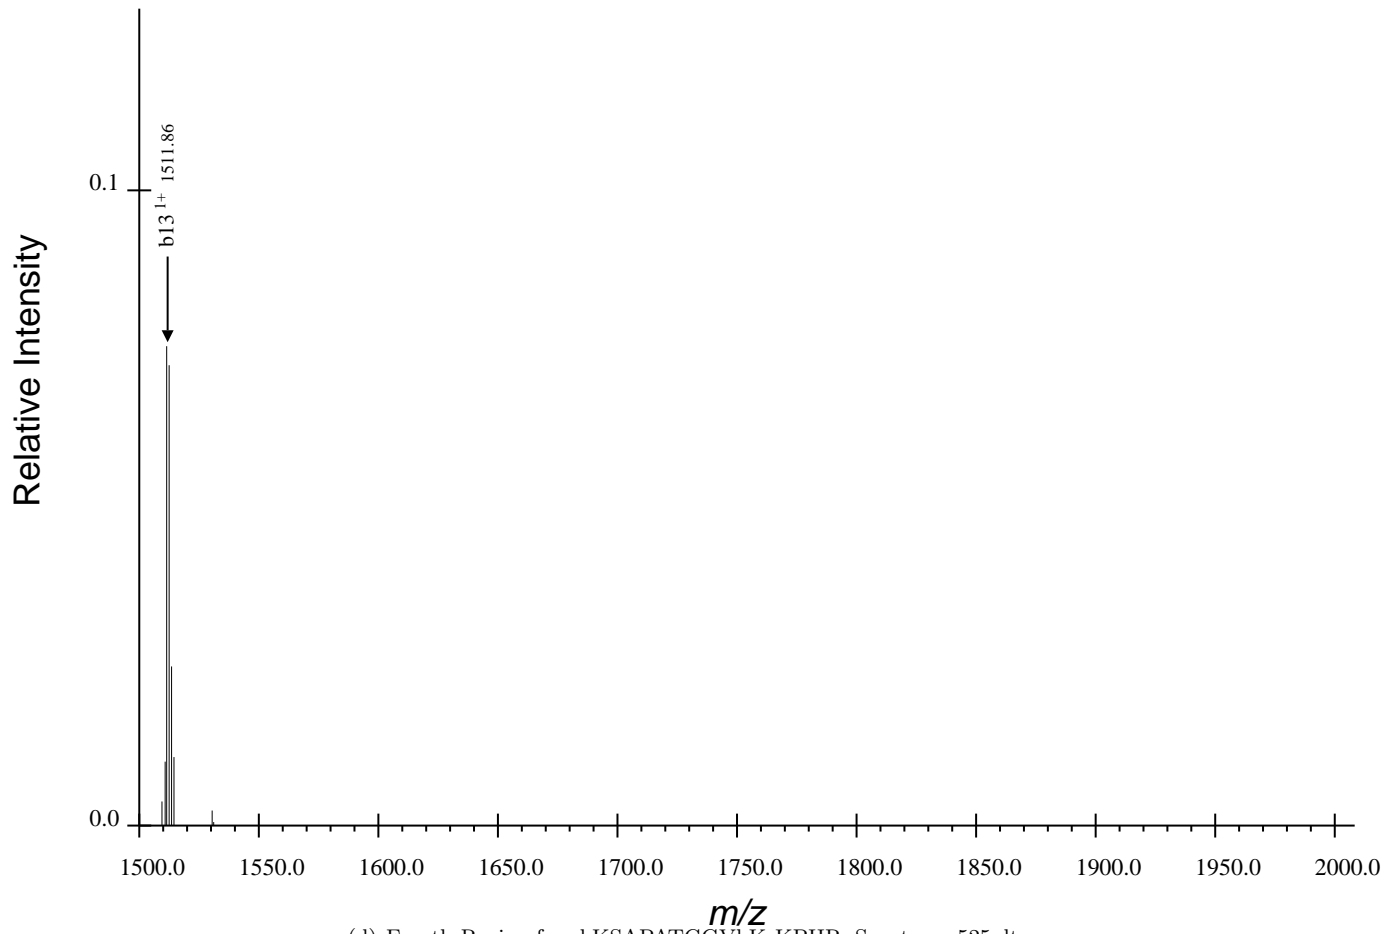

(d) Fourth Region for rhKSAPATGGVhKrKPHR, Spectrum 525.dta

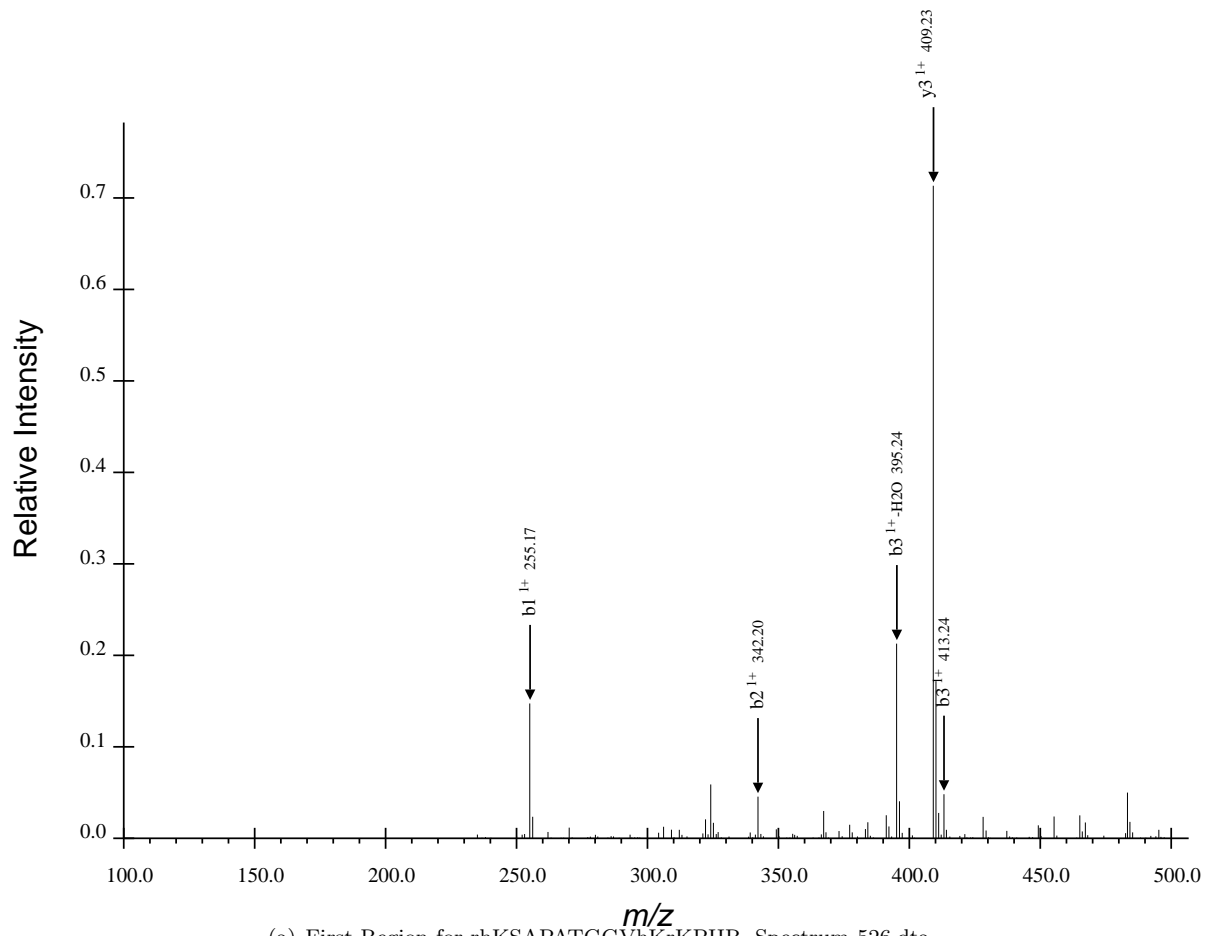

(a) First Region for rhKSAPATGGVhKrKPHR, Spectrum 526.dta

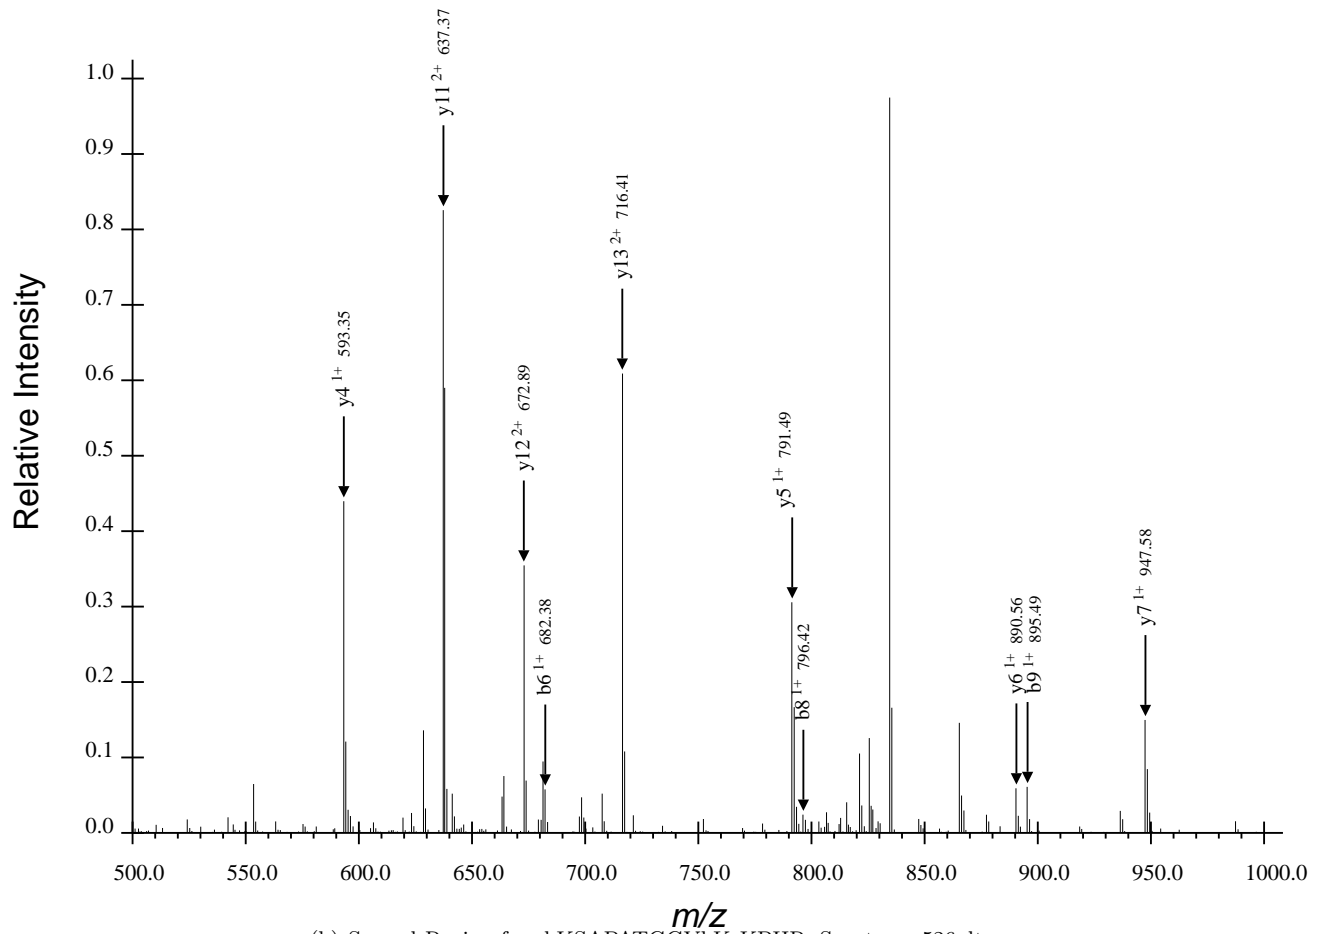

(b) Second Region for rhKSAPATGGVhKrKPHR, Spectrum 526.dta

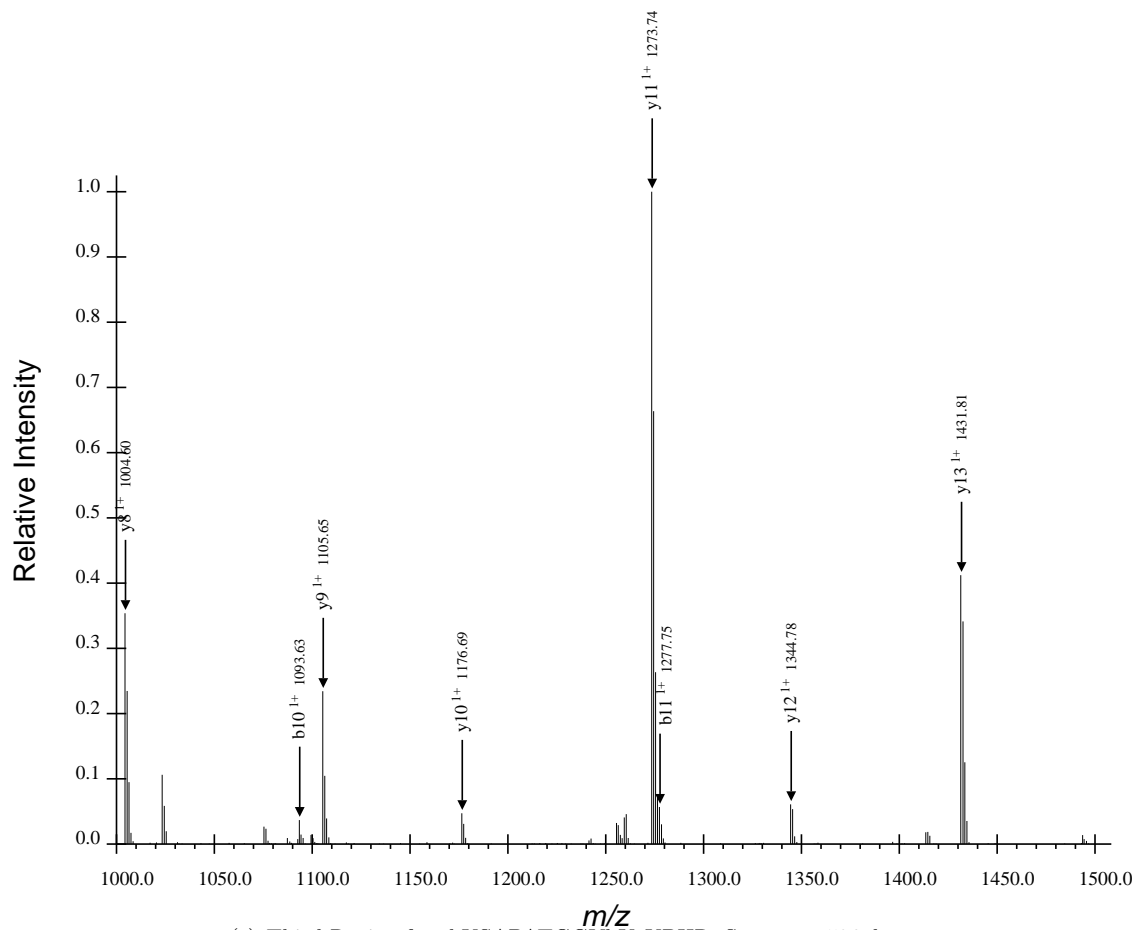

(c) Third Region for rhKSAPATGGVhKrKPHR, Spectrum 526.dta

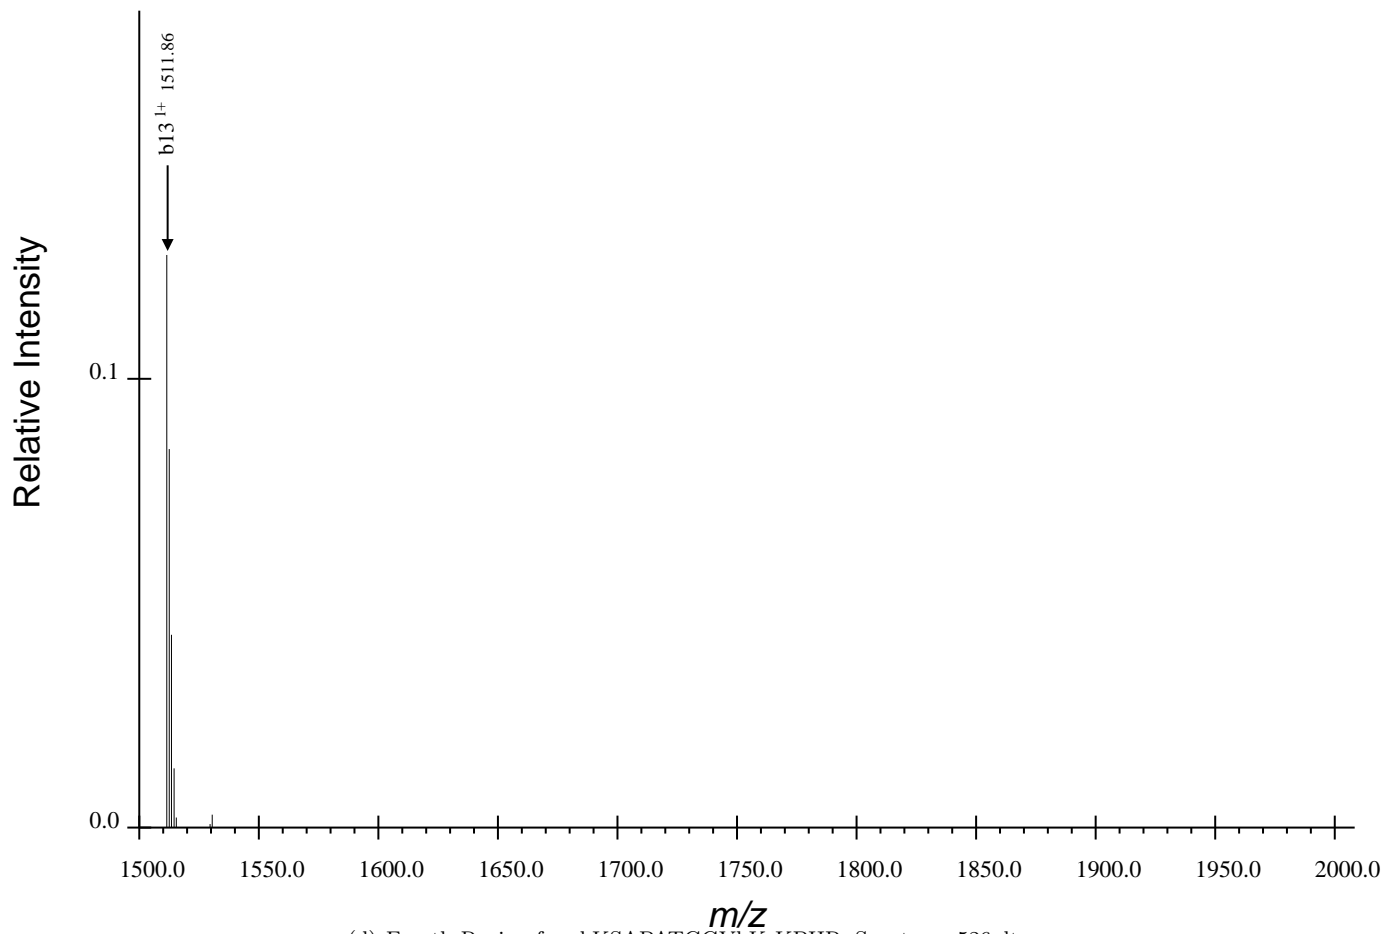

(d) Fourth Region for rhKSAPATGGVhKrKPHR, Spectrum 526.dta

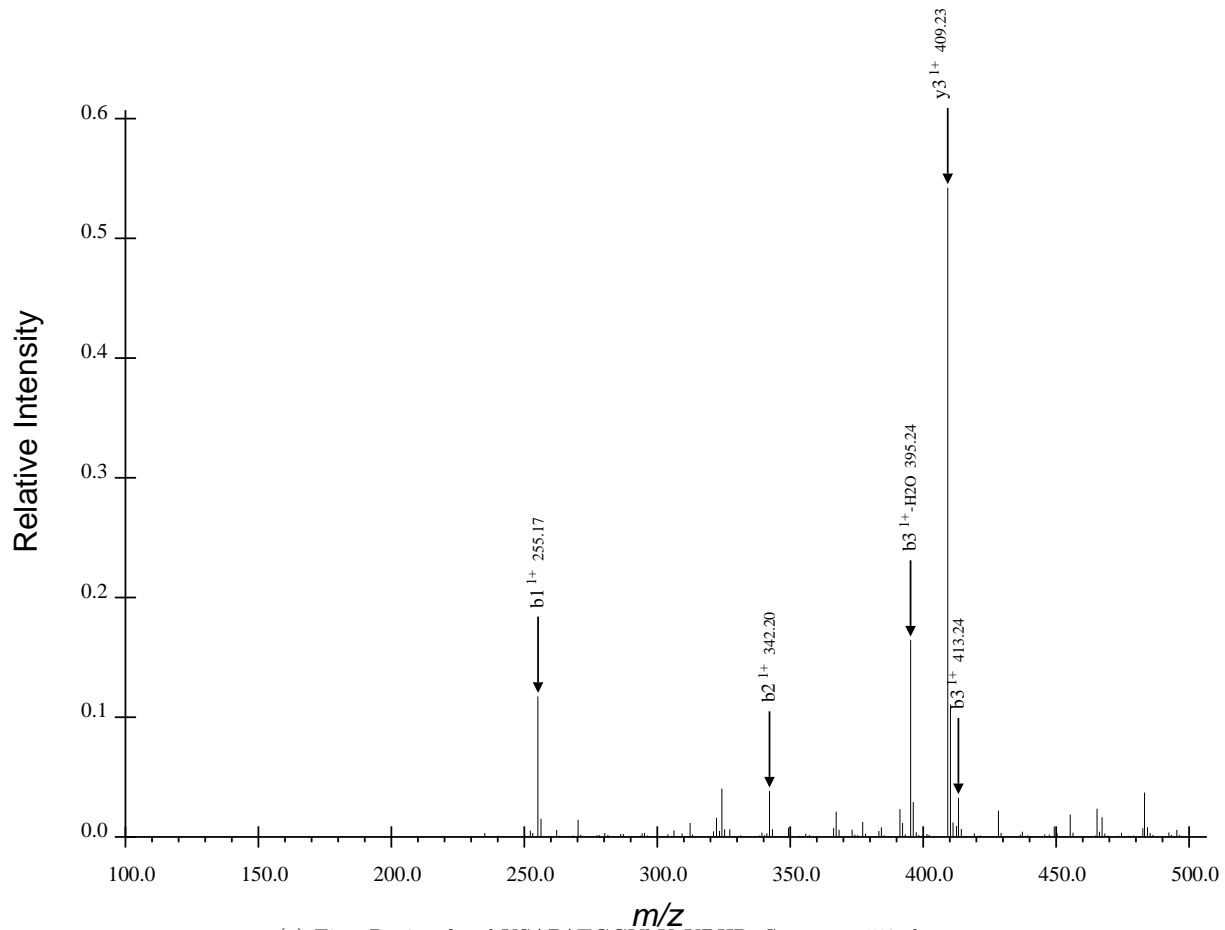

(a) First Region for rhKSAPATGGVhKrKPHR, Spectrum 527.dta

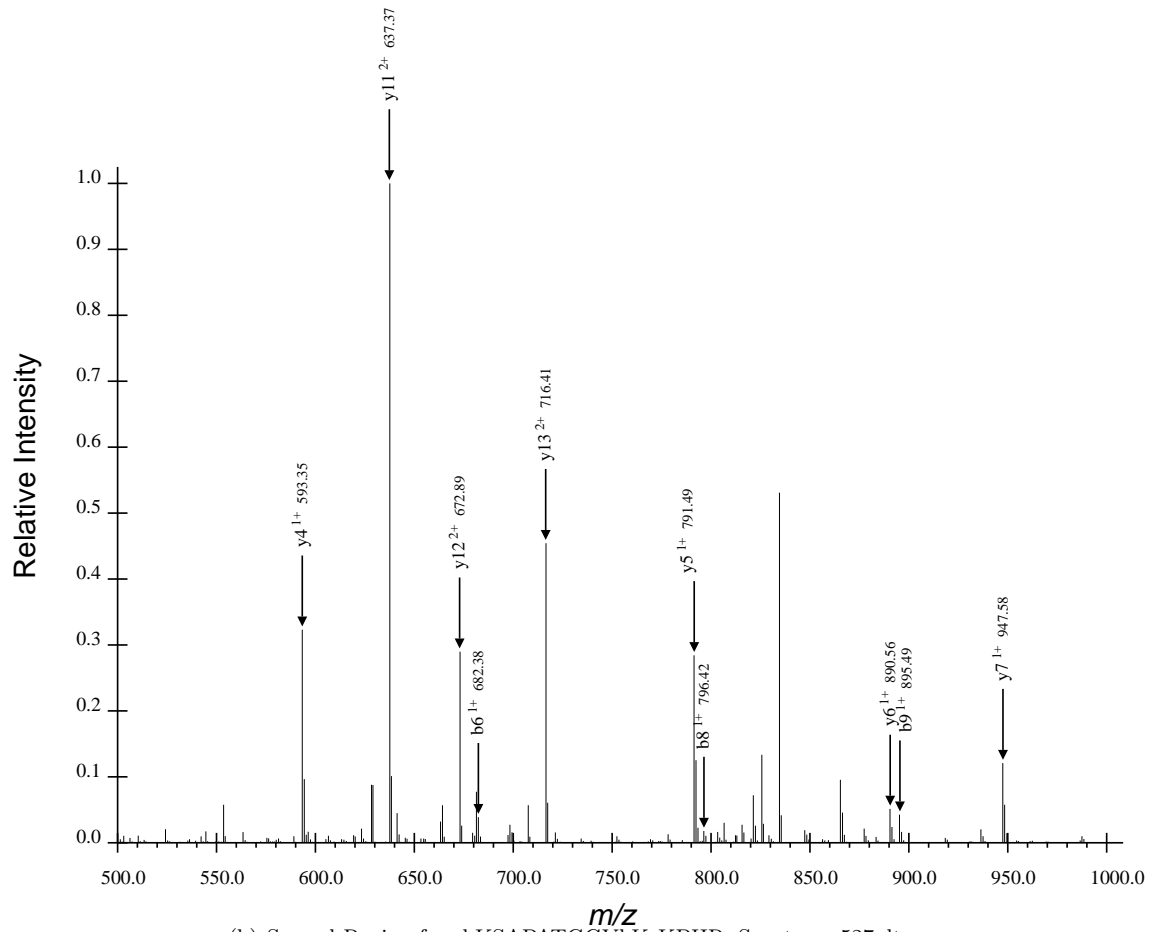

(b) Second Region for rhKSAPATGGVhKrKPHR, Spectrum 527.dta

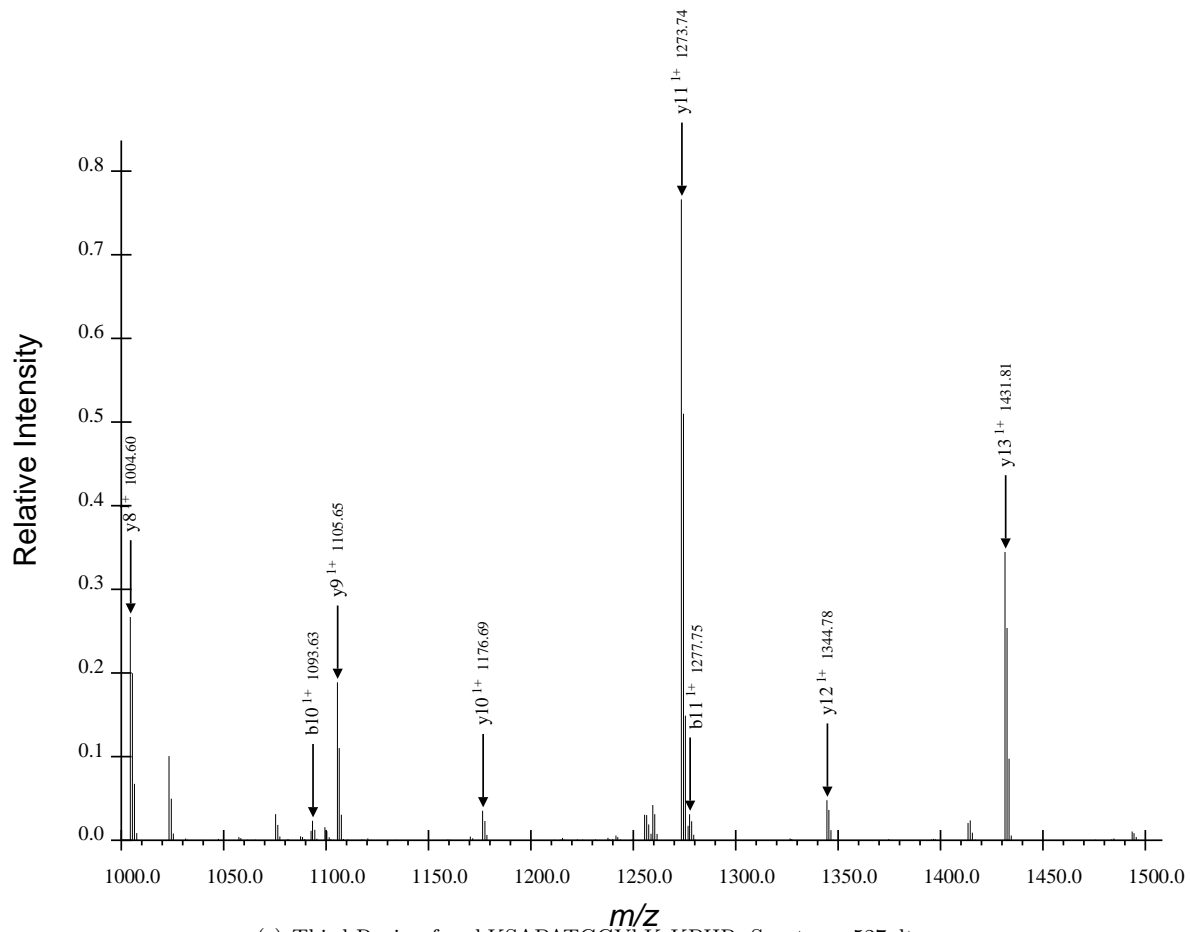

(c) Third Region for rhKSAPATGGVhKrKPHR, Spectrum 527.dta

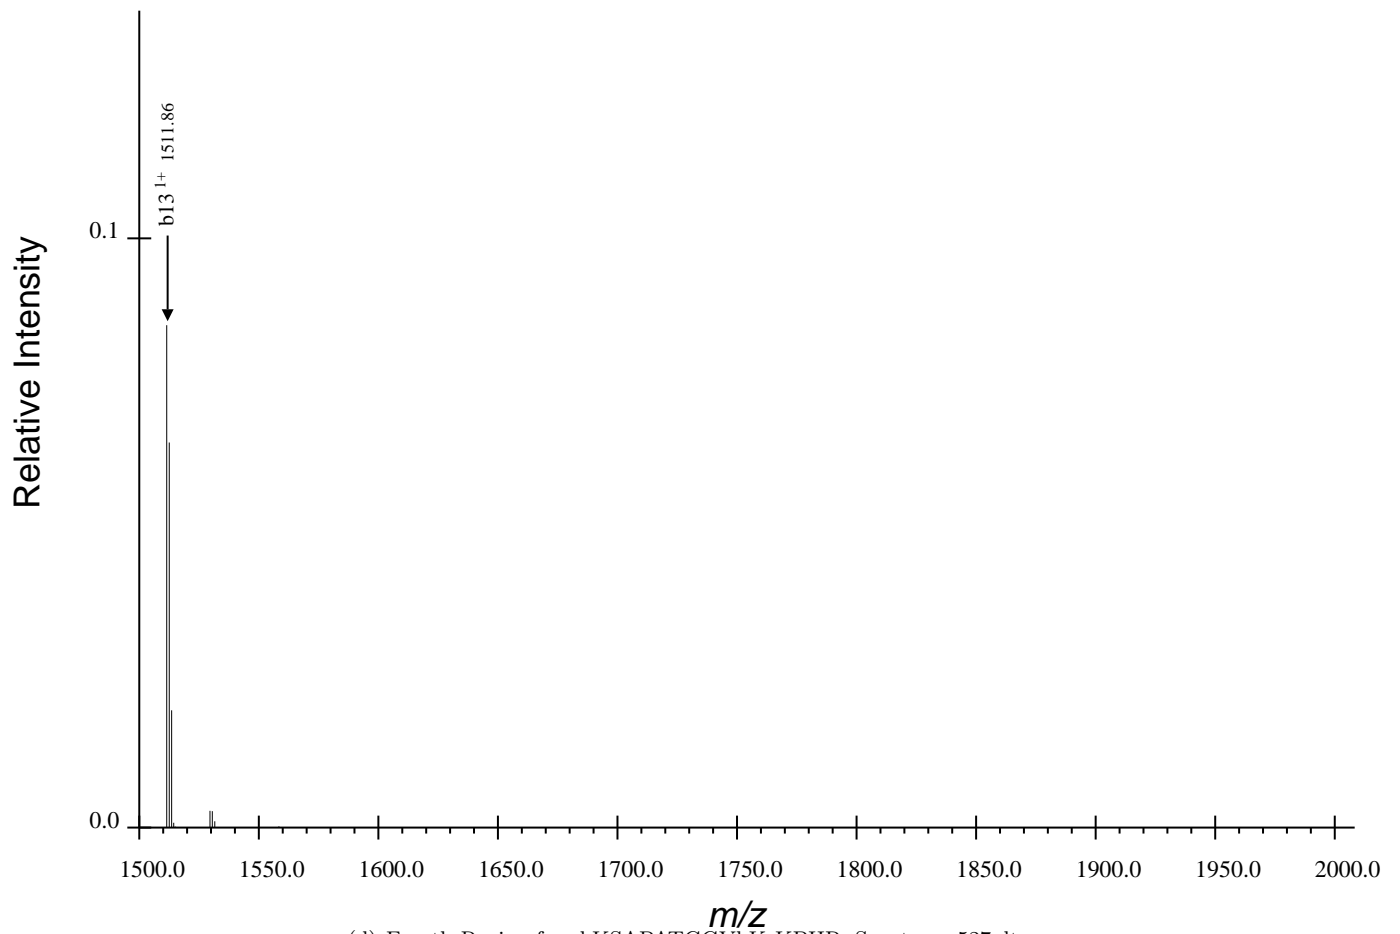

(d) Fourth Region for rhKSAPATGGVhKrKPHR, Spectrum 527.dta

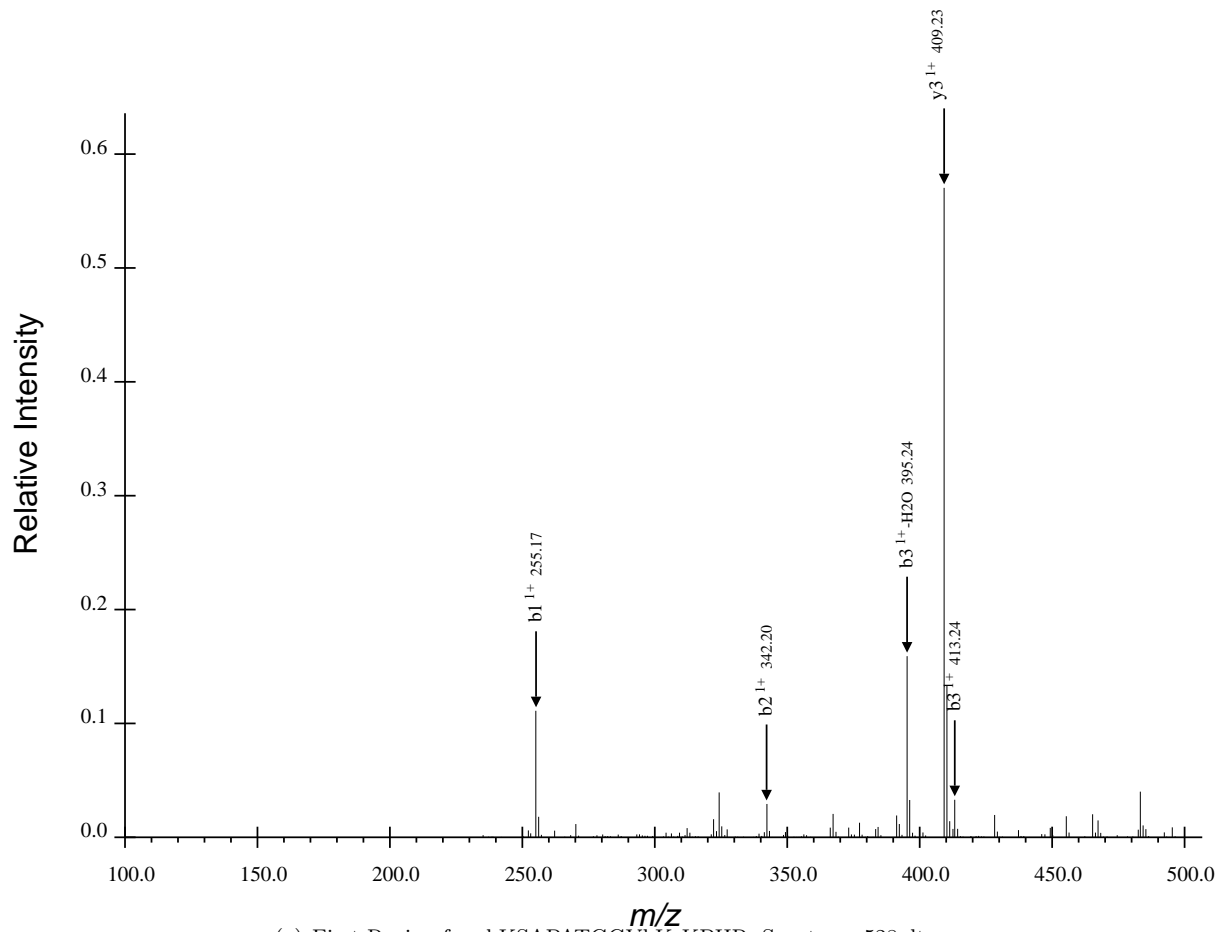

(a) First Region for rhKSAPATGGVhKrKPHR, Spectrum 528.dta

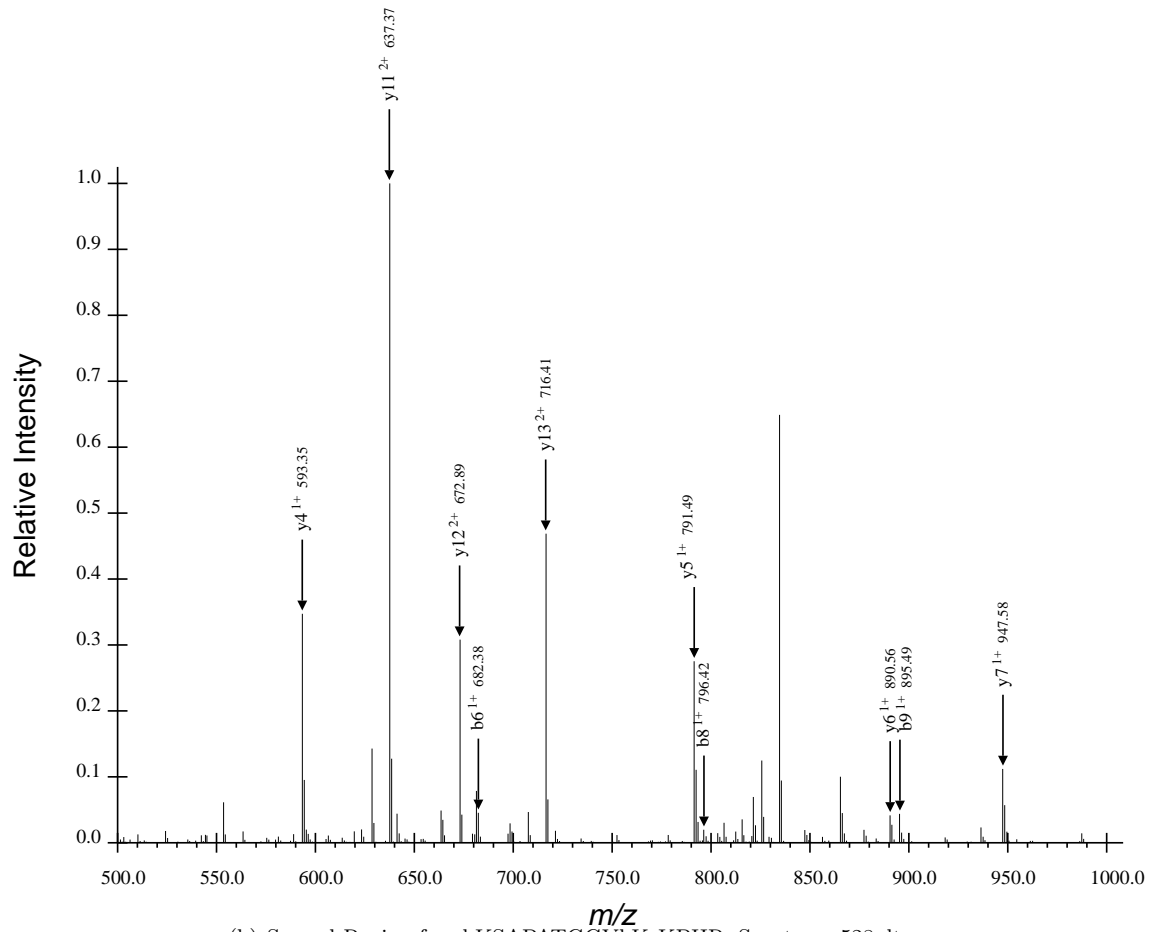

(b) Second Region for rhKSAPATGGVhKrKPHR, Spectrum 528.dta



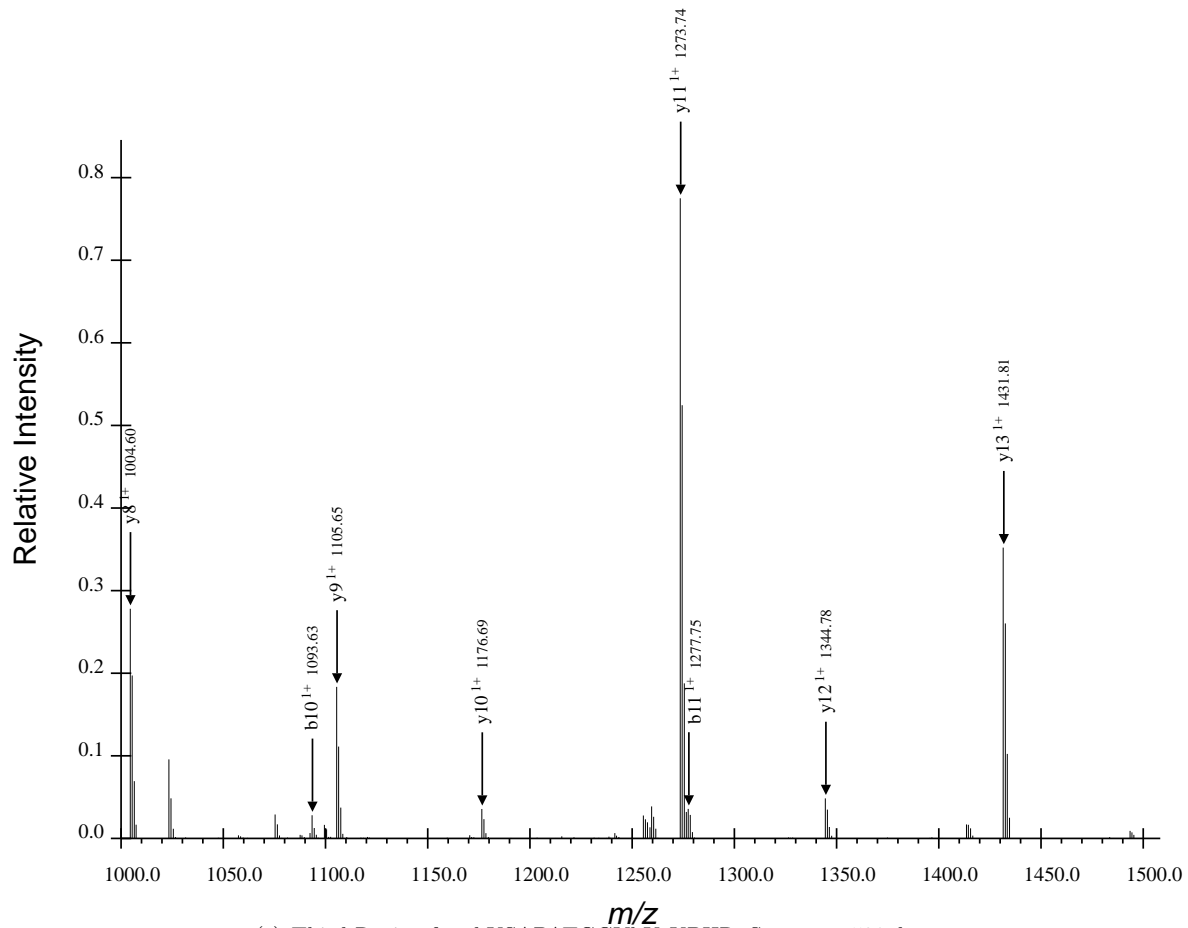

(c) Third Region for rhKSAPATGGVhKrKPHR, Spectrum 528.dta

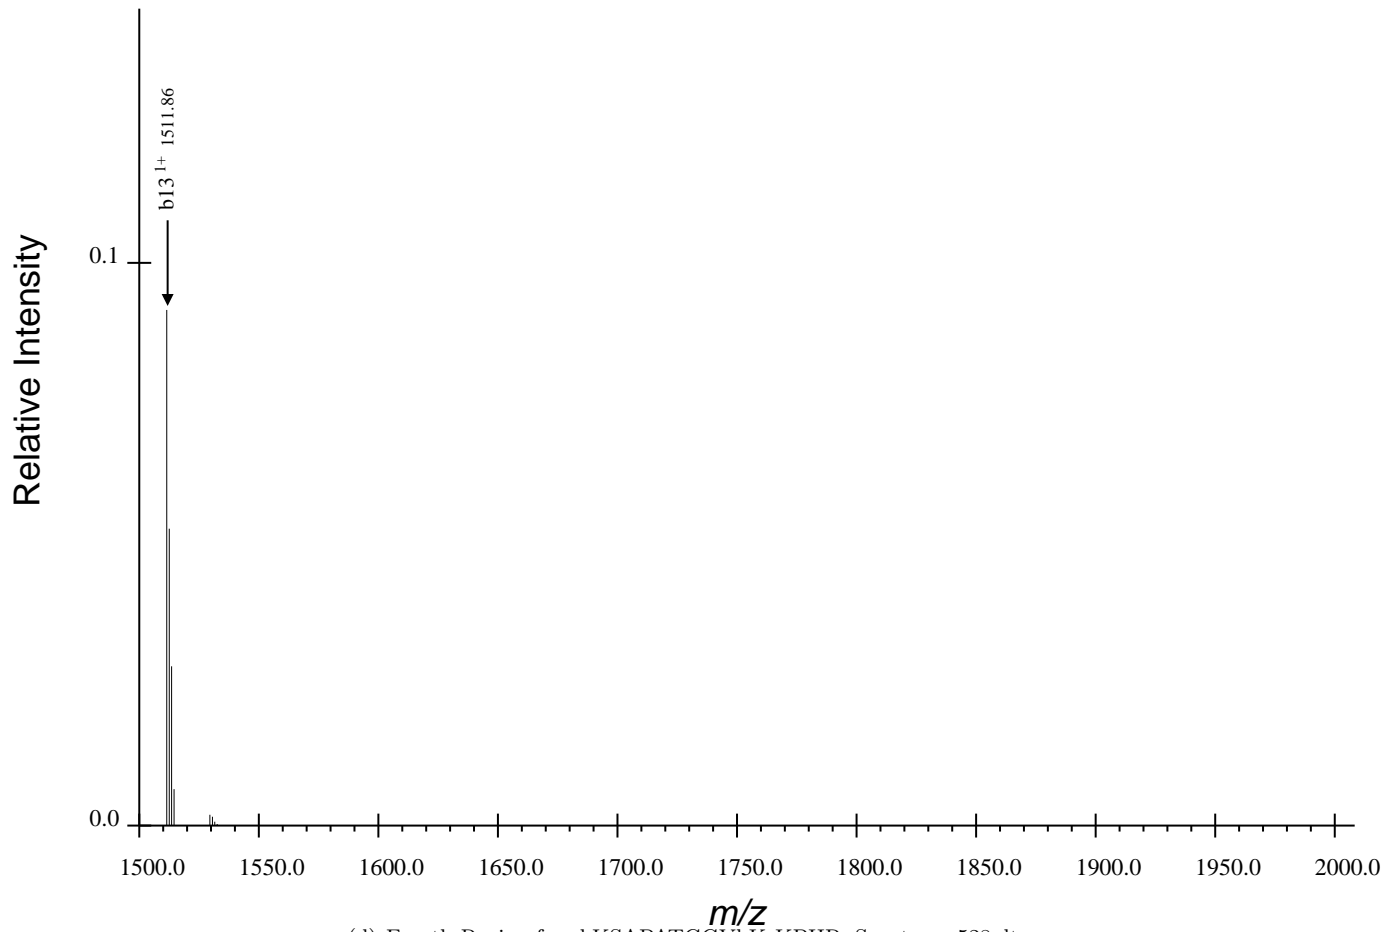

(d) Fourth Region for rhKSAPATGGVhKrKPHR, Spectrum 528.dta

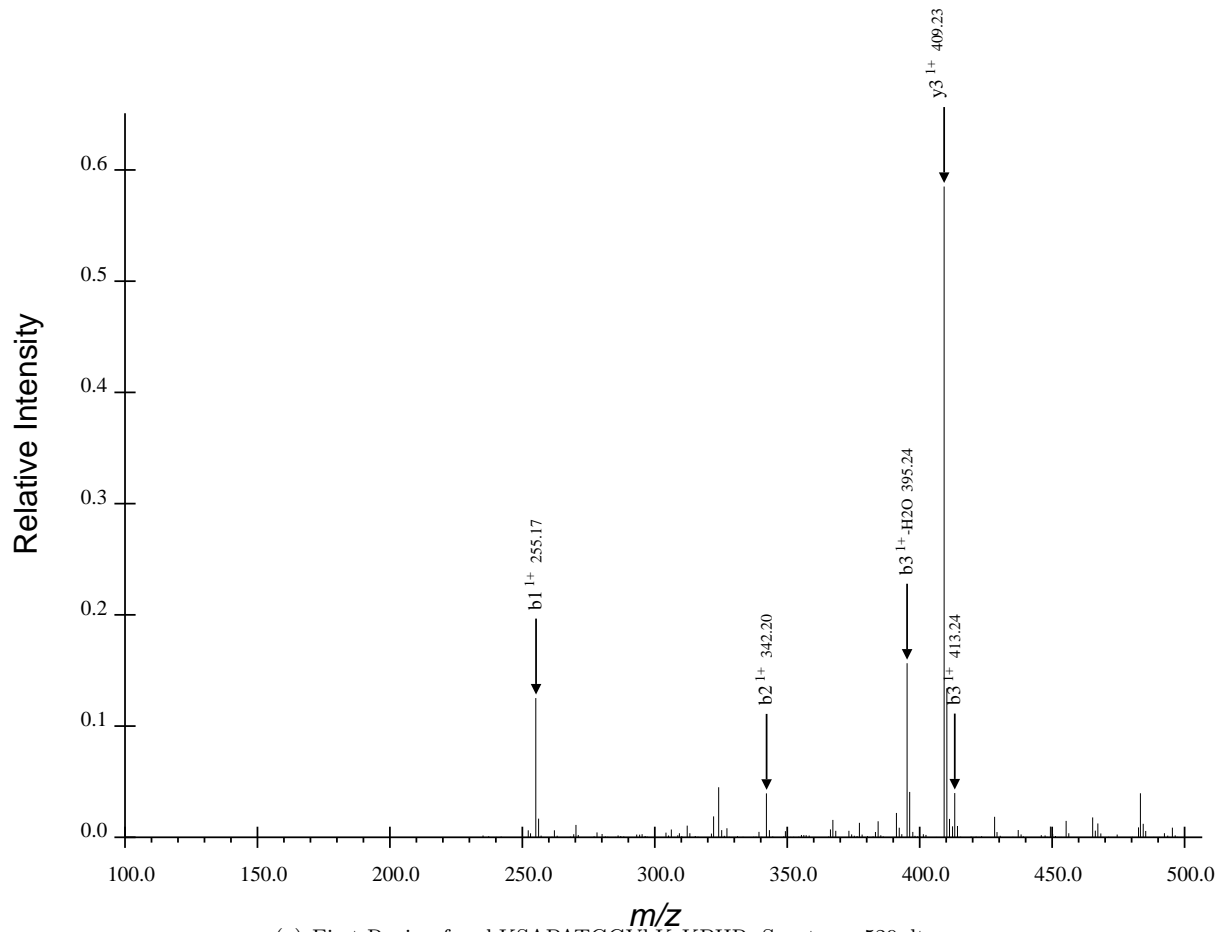

(a) First Region for rhKSAPATGGVhKrKPHR, Spectrum 529.dta

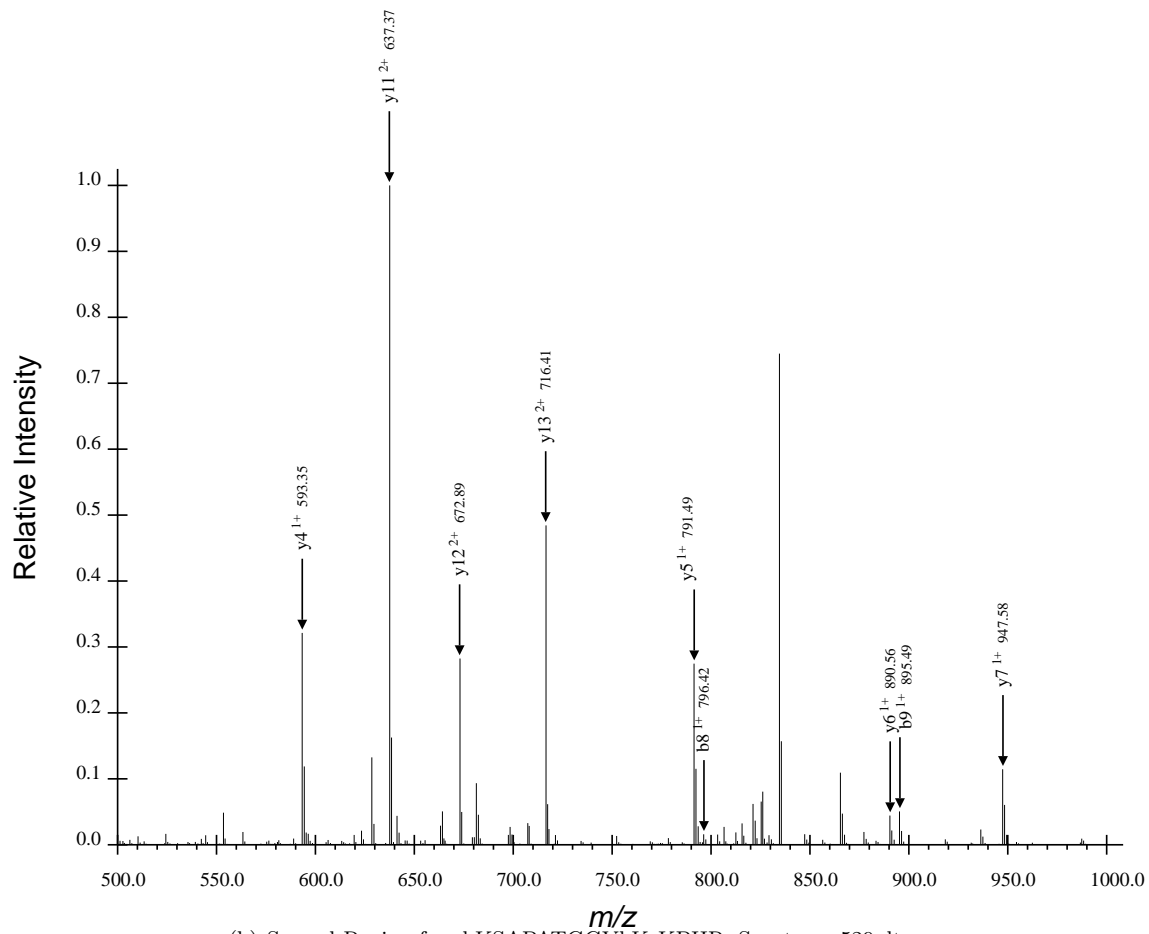

(b) Second Region for rhKSAPATGGVhKrKPHR, Spectrum 529.dta

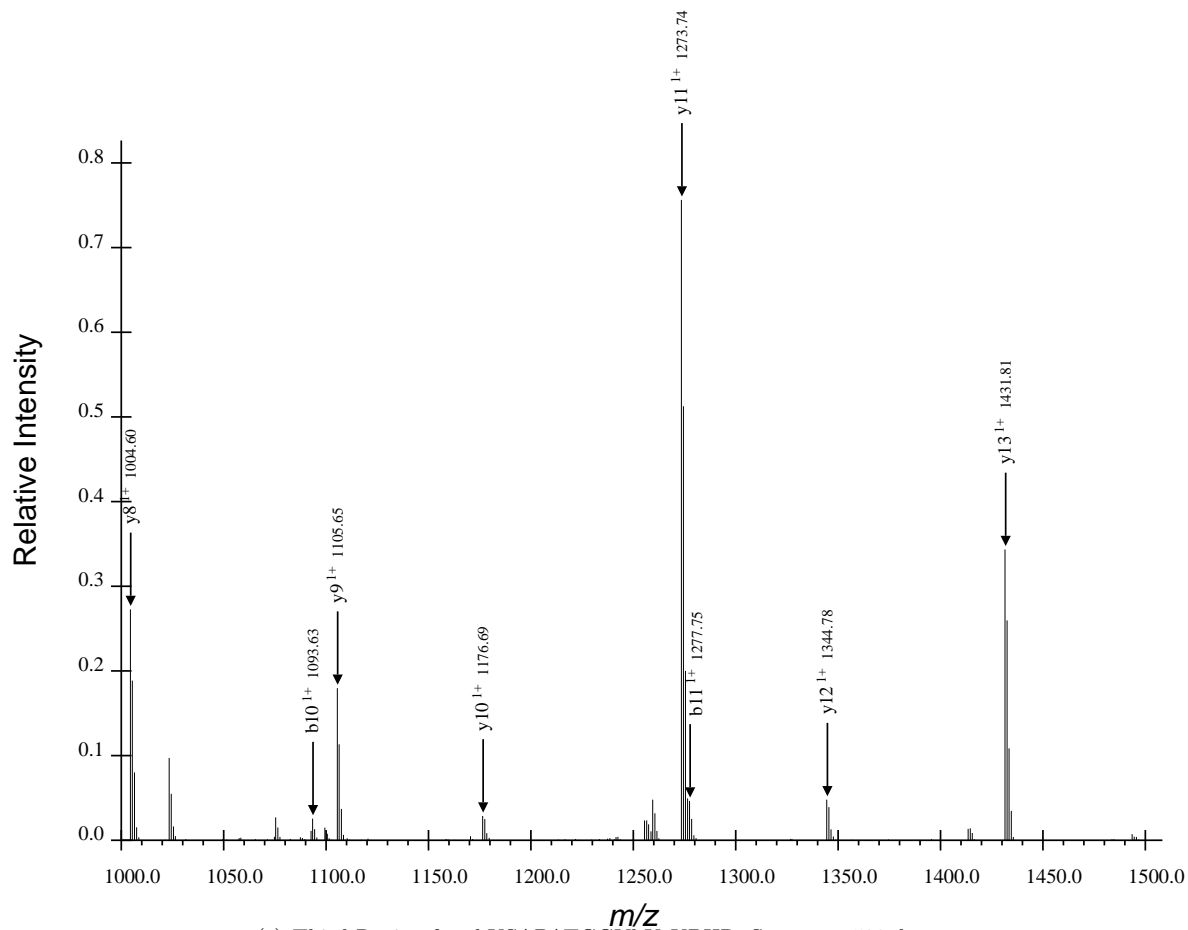

(c) Third Region for rhKSAPATGGVhKrKPHR, Spectrum 529.dta

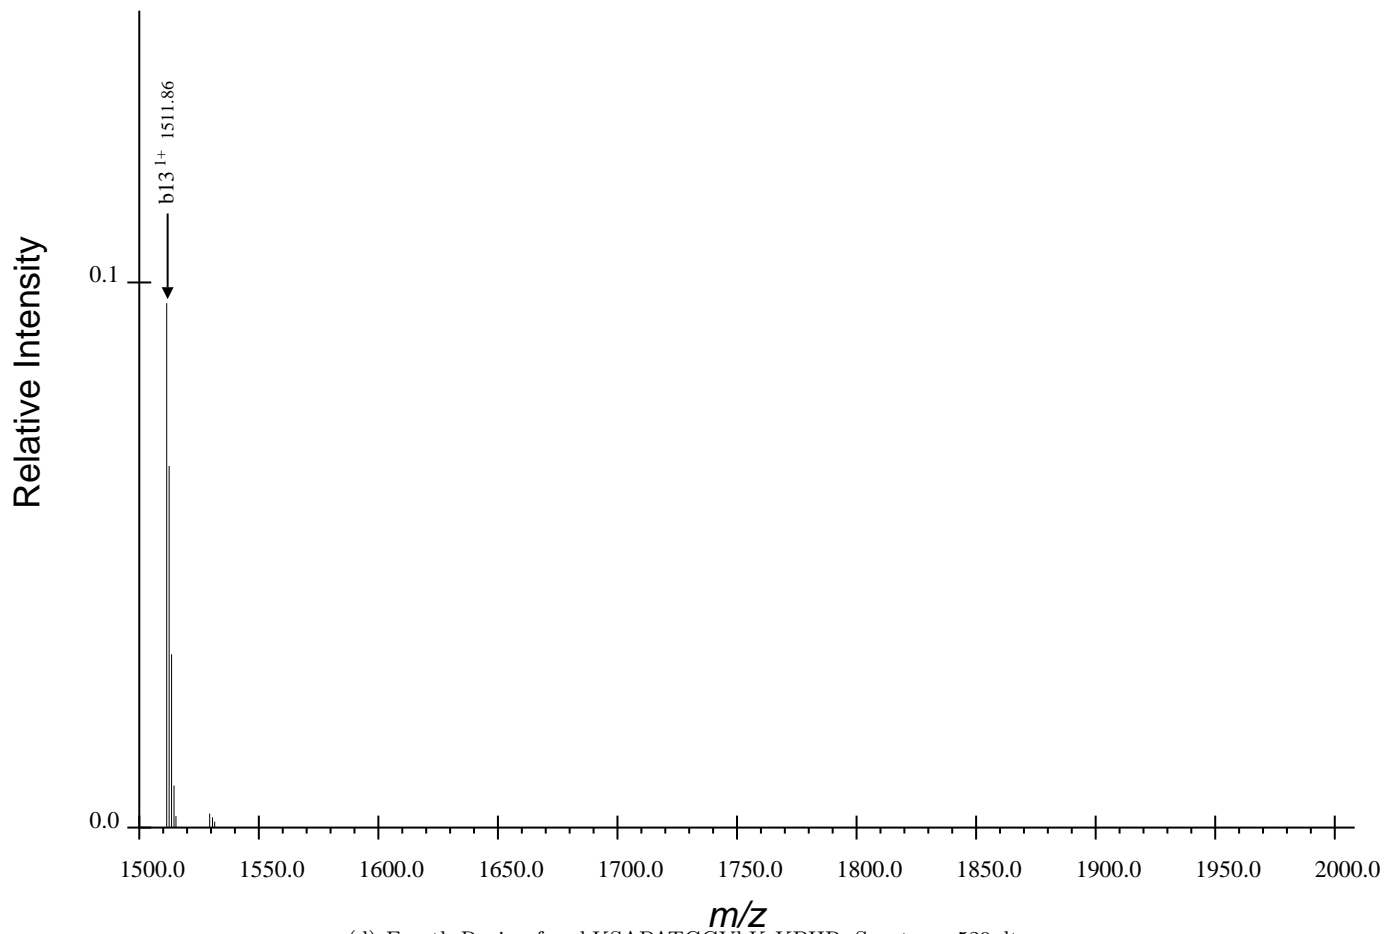

(d) Fourth Region for rhKSAPATGGVhKrKPHR, Spectrum 529.dta

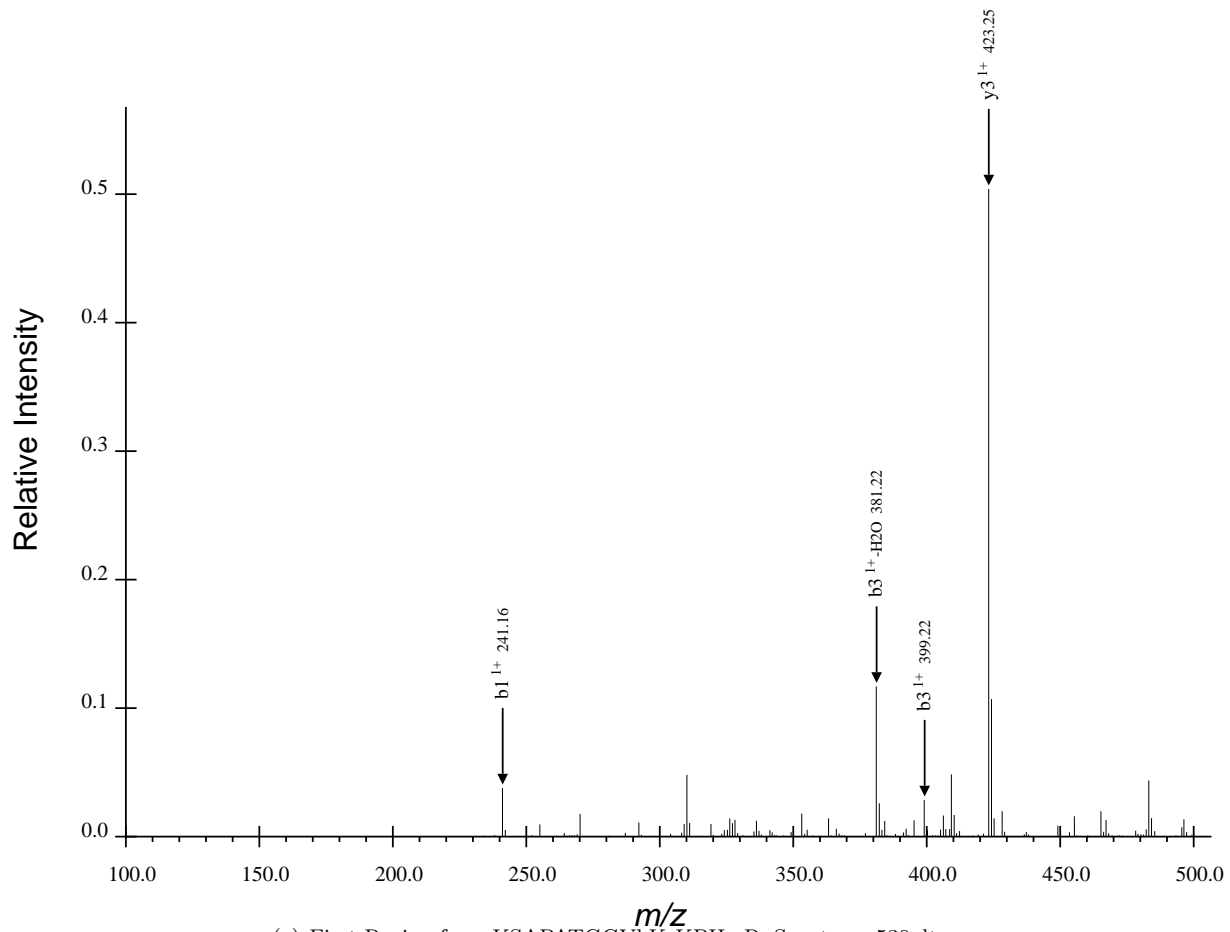

(a) First Region for rrKSAPATGGVhKrKPHmR, Spectrum 530.dta

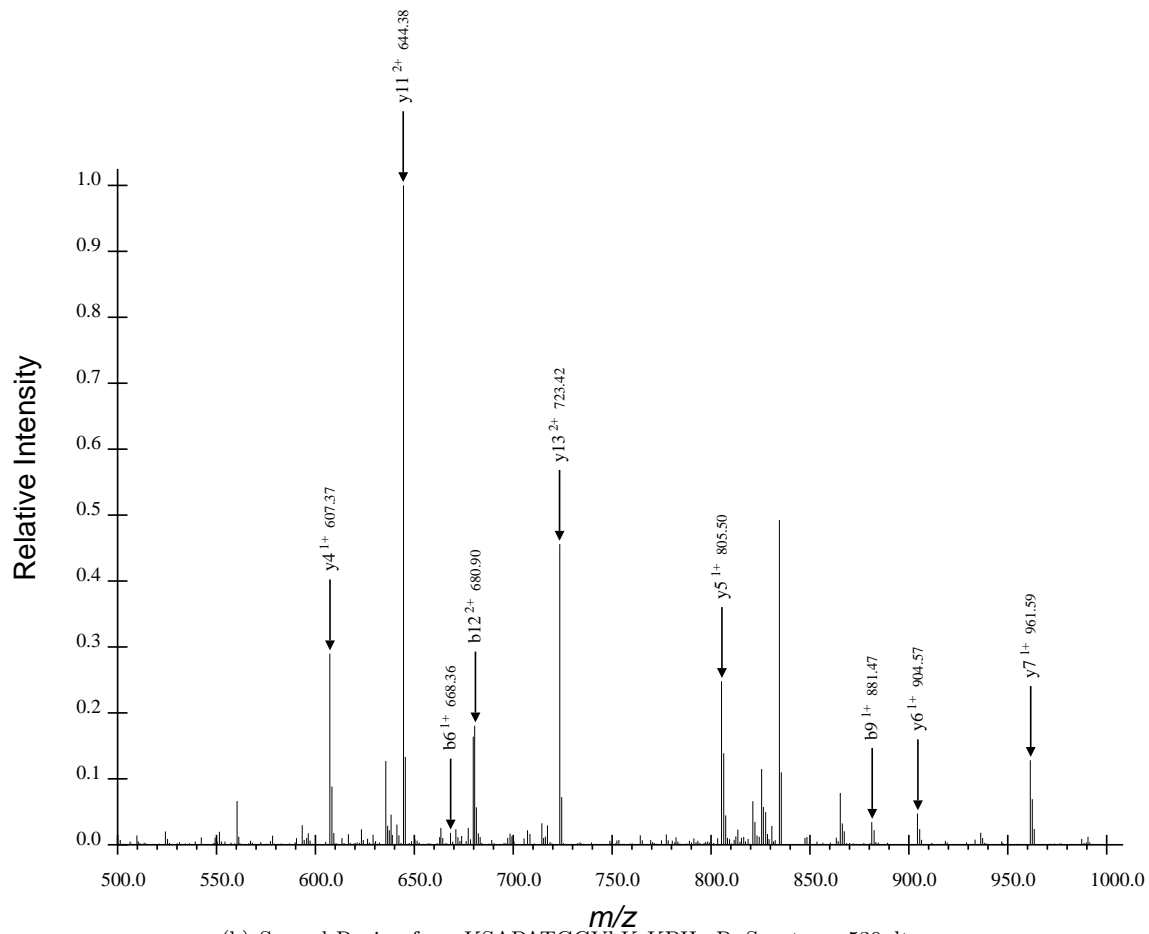

(b) Second Region for rrKSAPATGGVhKrKPHmR, Spectrum 530.dta

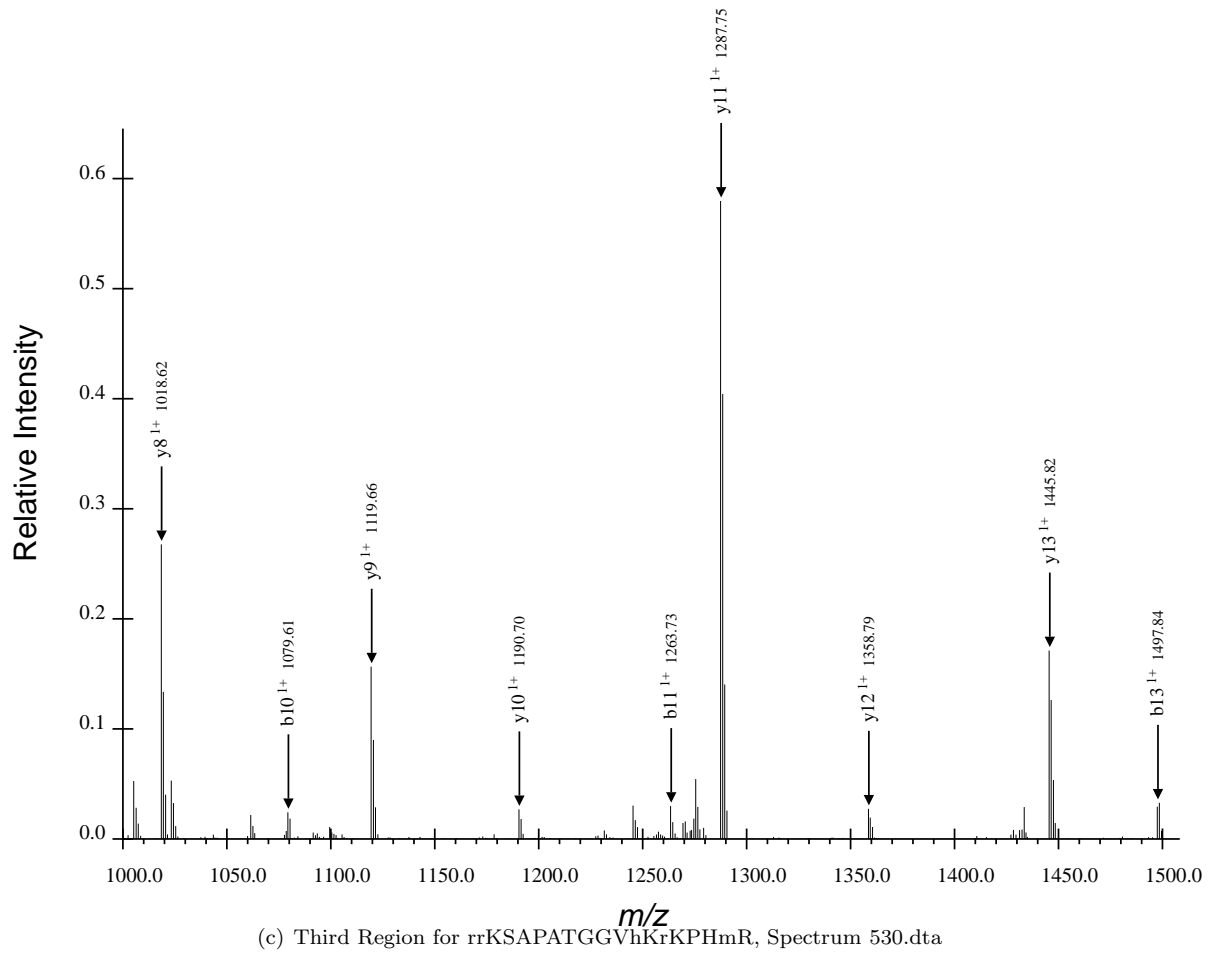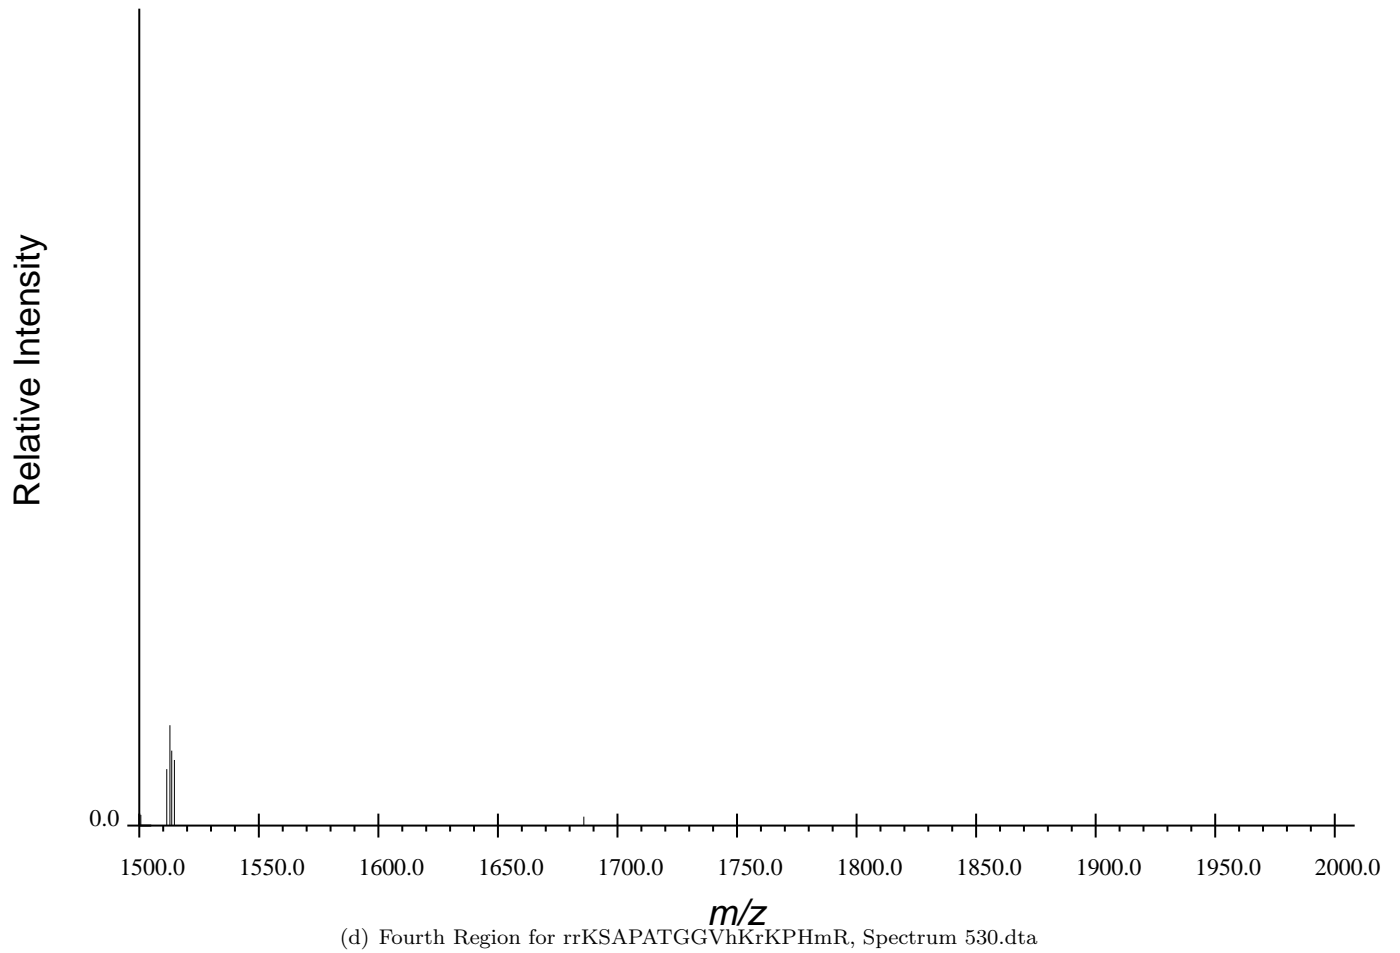

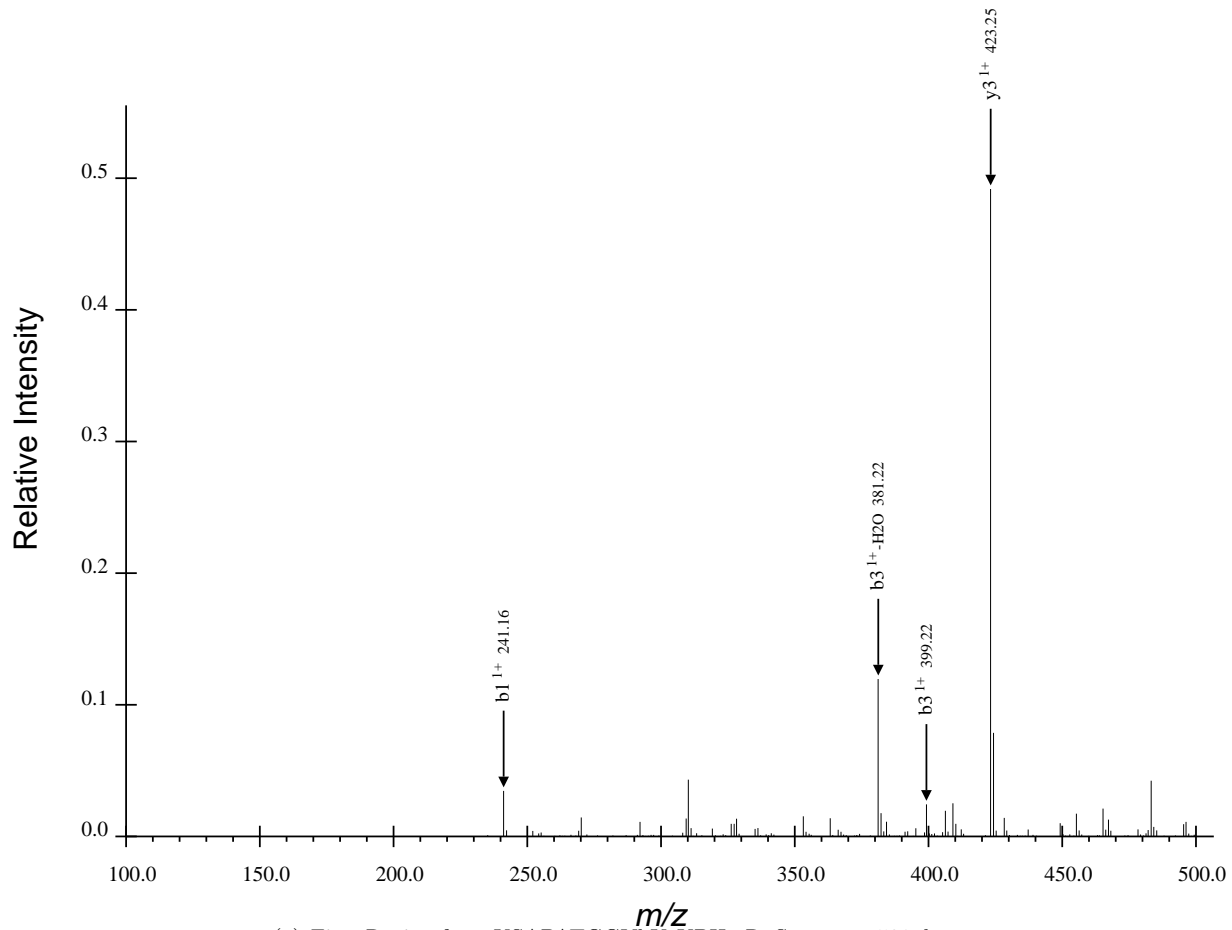

(a) First Region for rrKSAPATGGVhKrKPHmR, Spectrum 531.dta

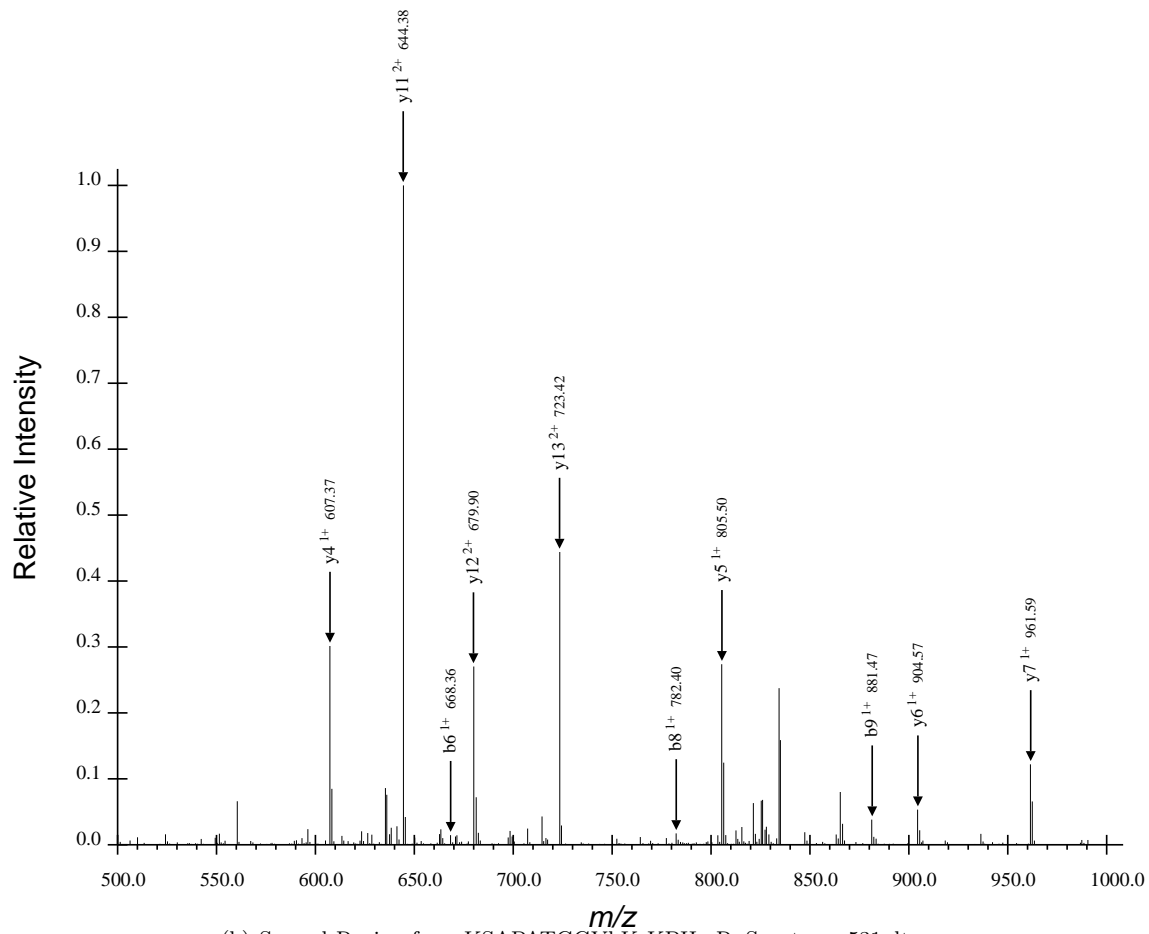

(b) Second Region for rrKSAPATGGVhKrKPHmR, Spectrum 531.dta

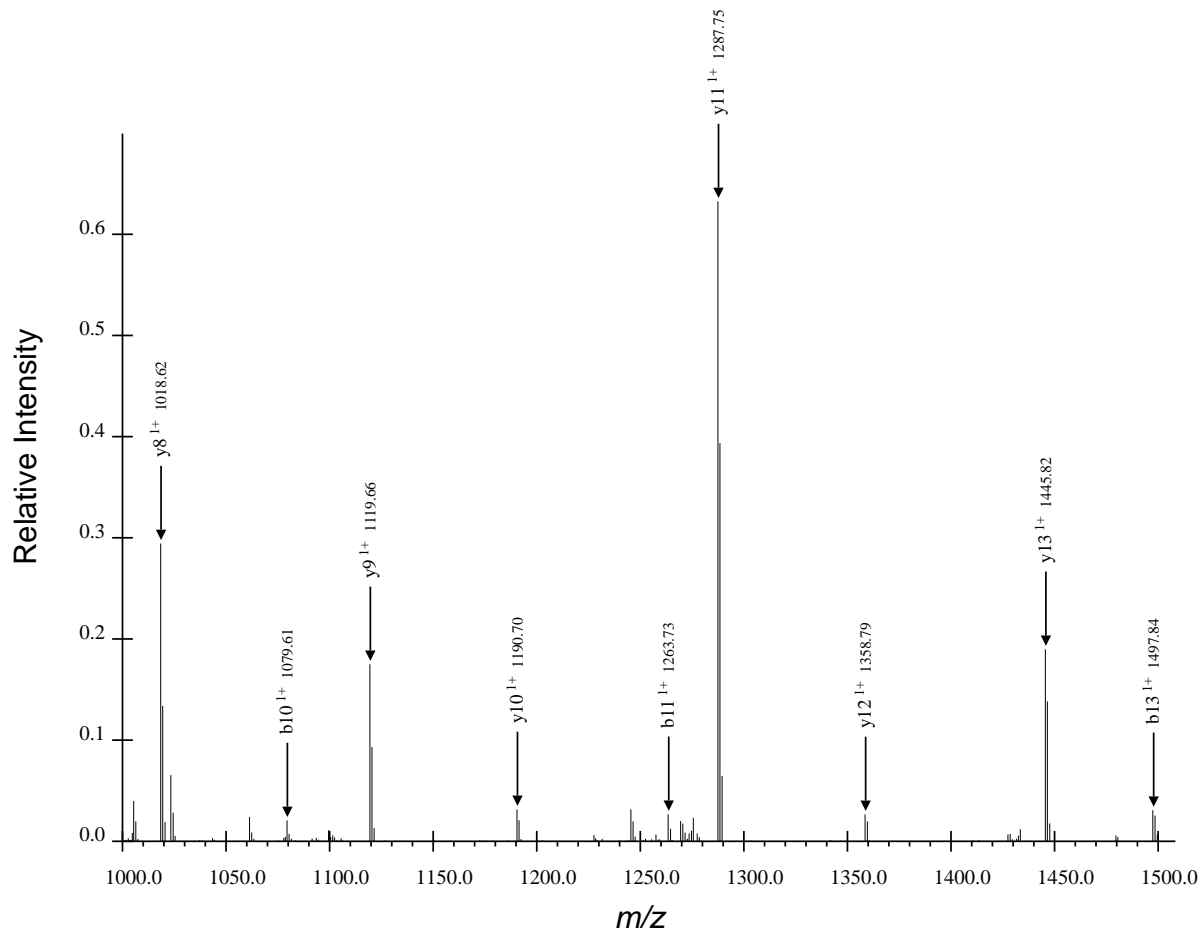

(c) Third Region for rrKSAPATGGVhKrKPHmR, Spectrum 531.dta

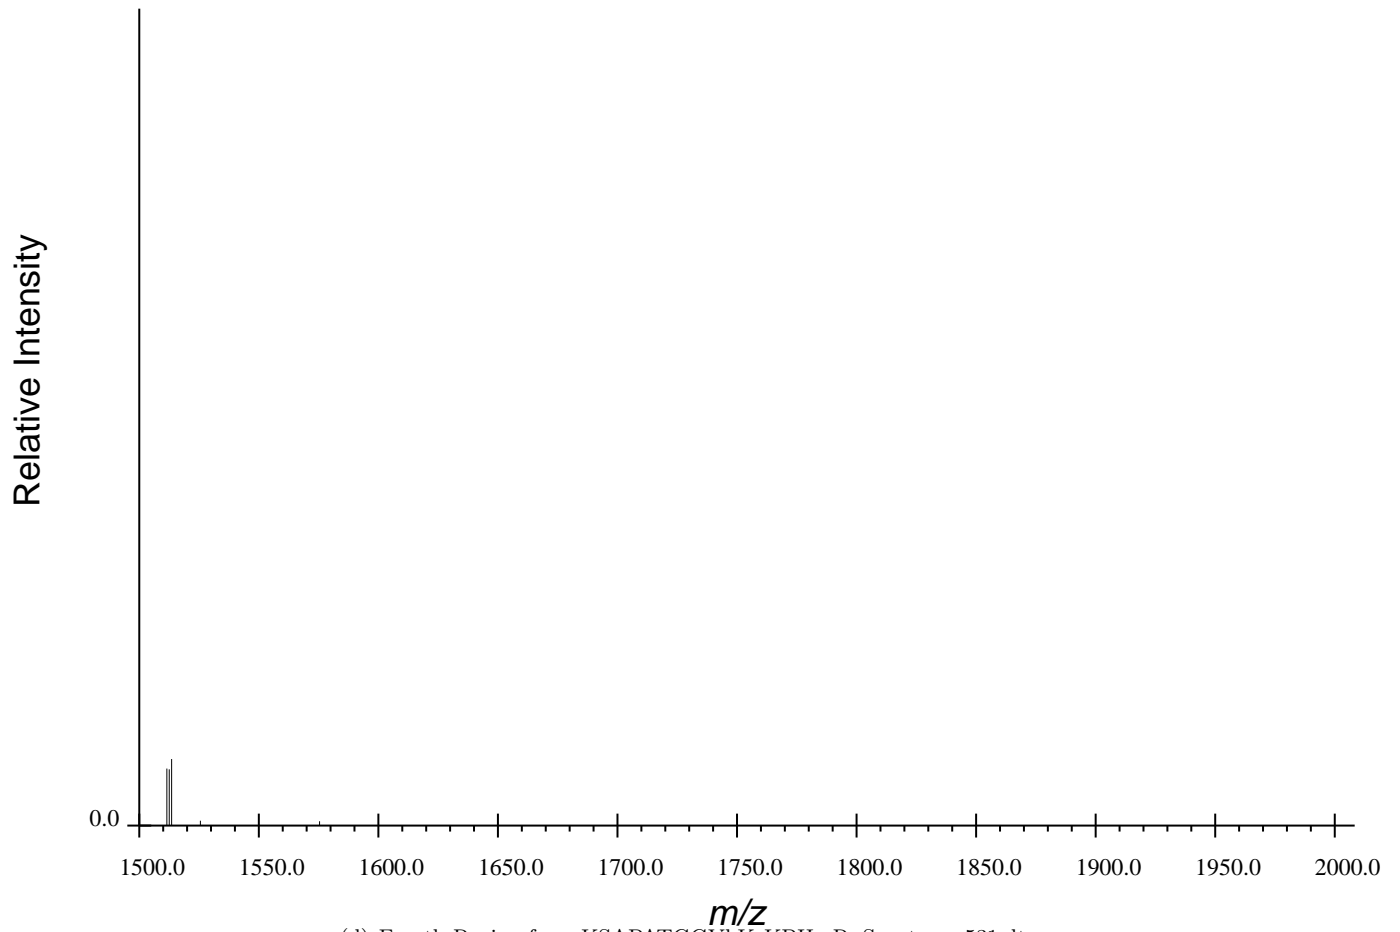

(d) Fourth Region for rrKSAPATGGVhKrKPHmR, Spectrum 531.dta

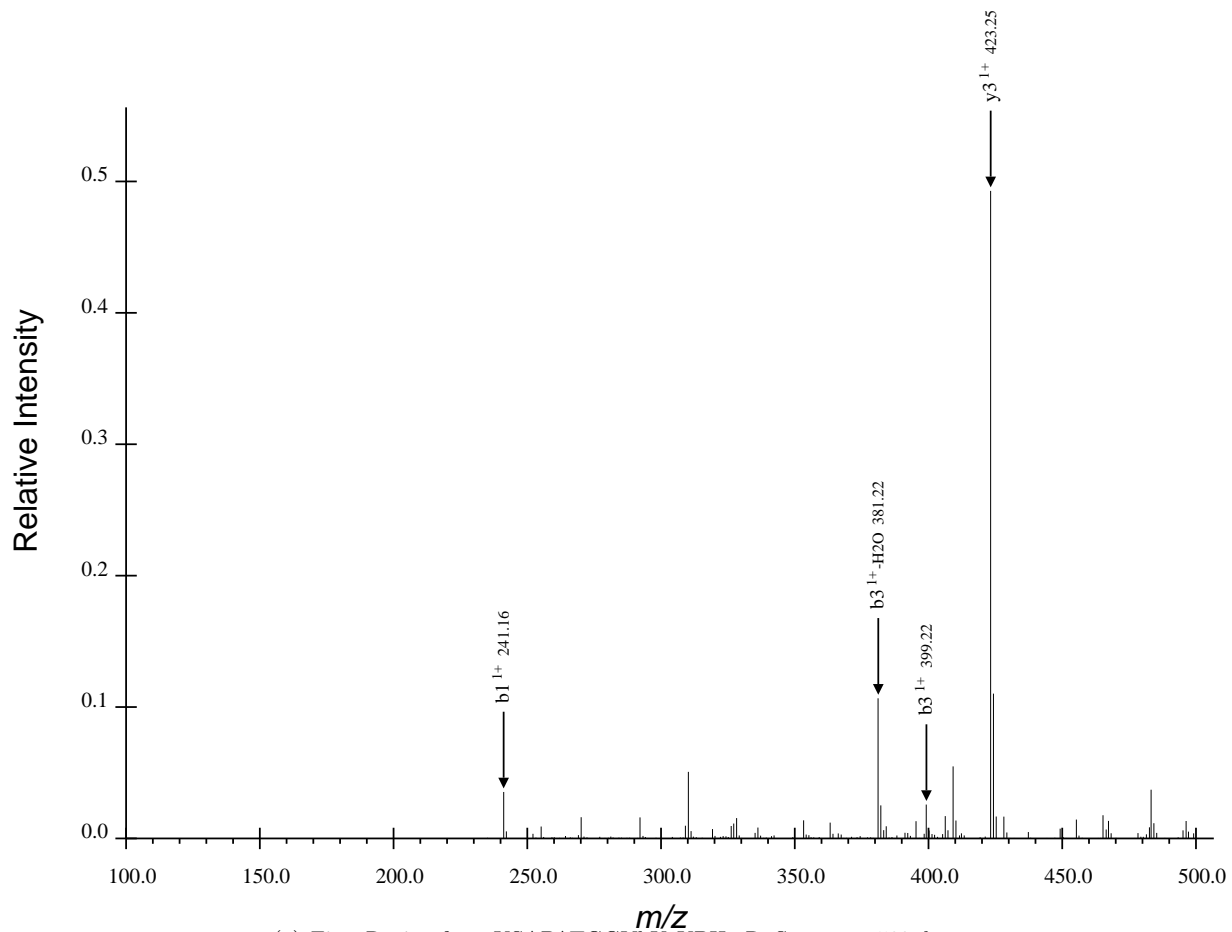

(a) First Region for rrKSAPATGGVhKrKPHmR, Spectrum 532.dta

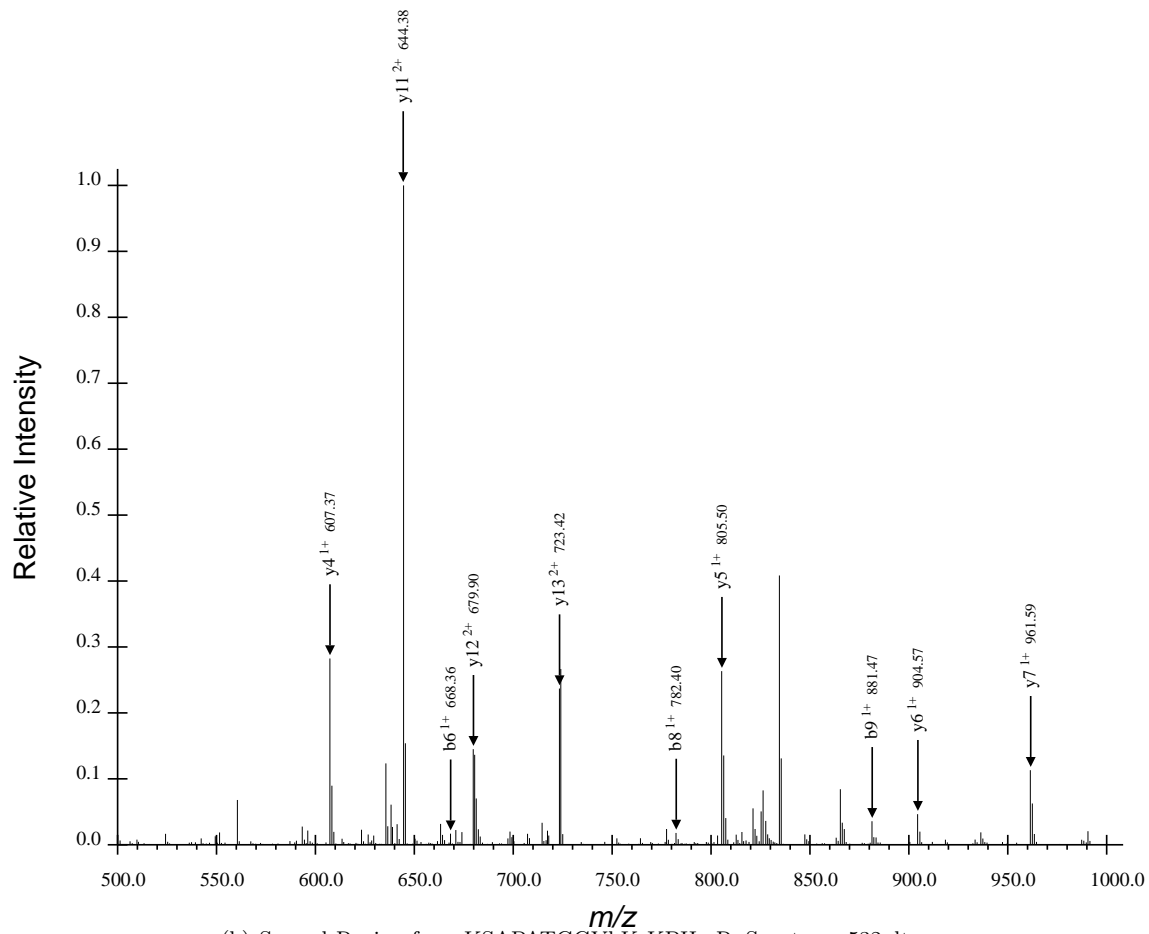

(b) Second Region for rrKSAPATGGVhKrKPHmR, Spectrum 532.dta



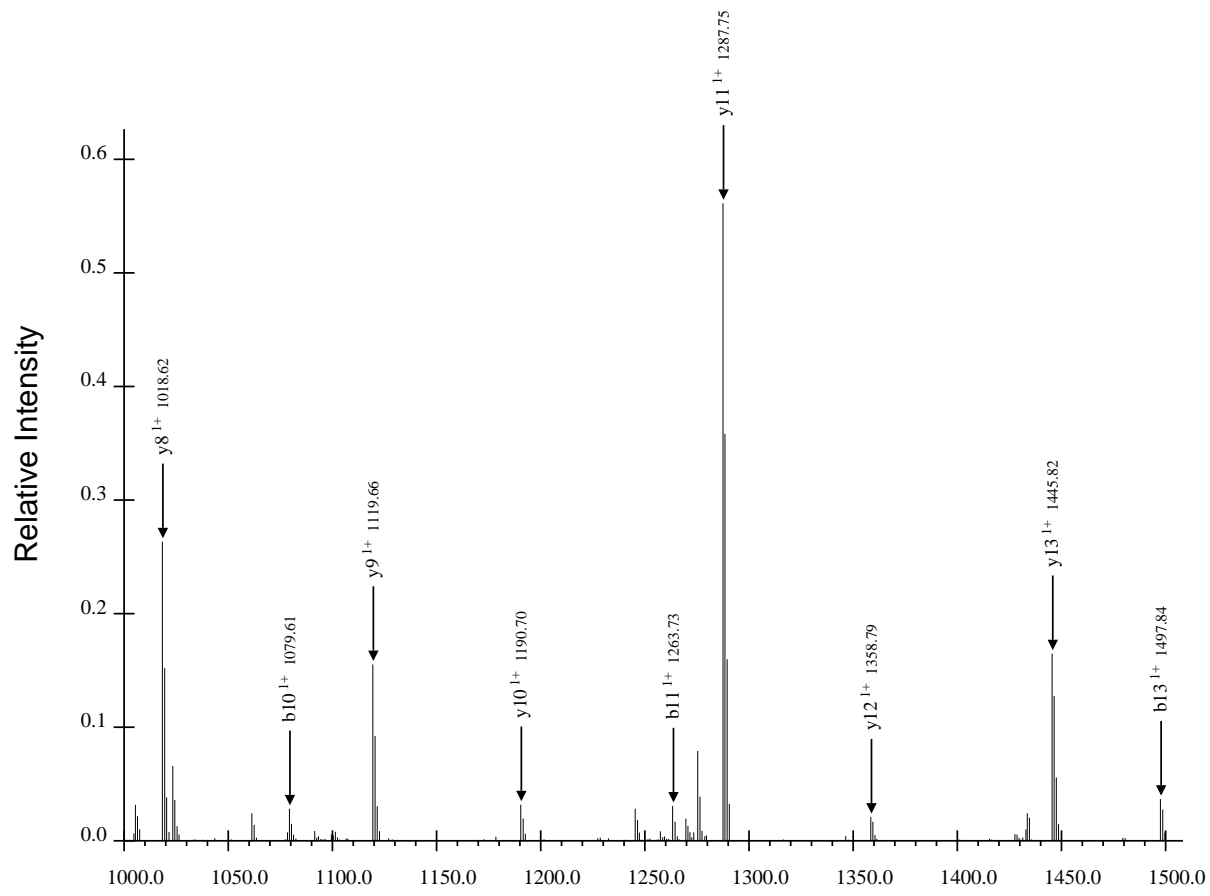

(c) Third Region for rrKSAPATGGVhKrKPHmR, Spectrum 532.dta

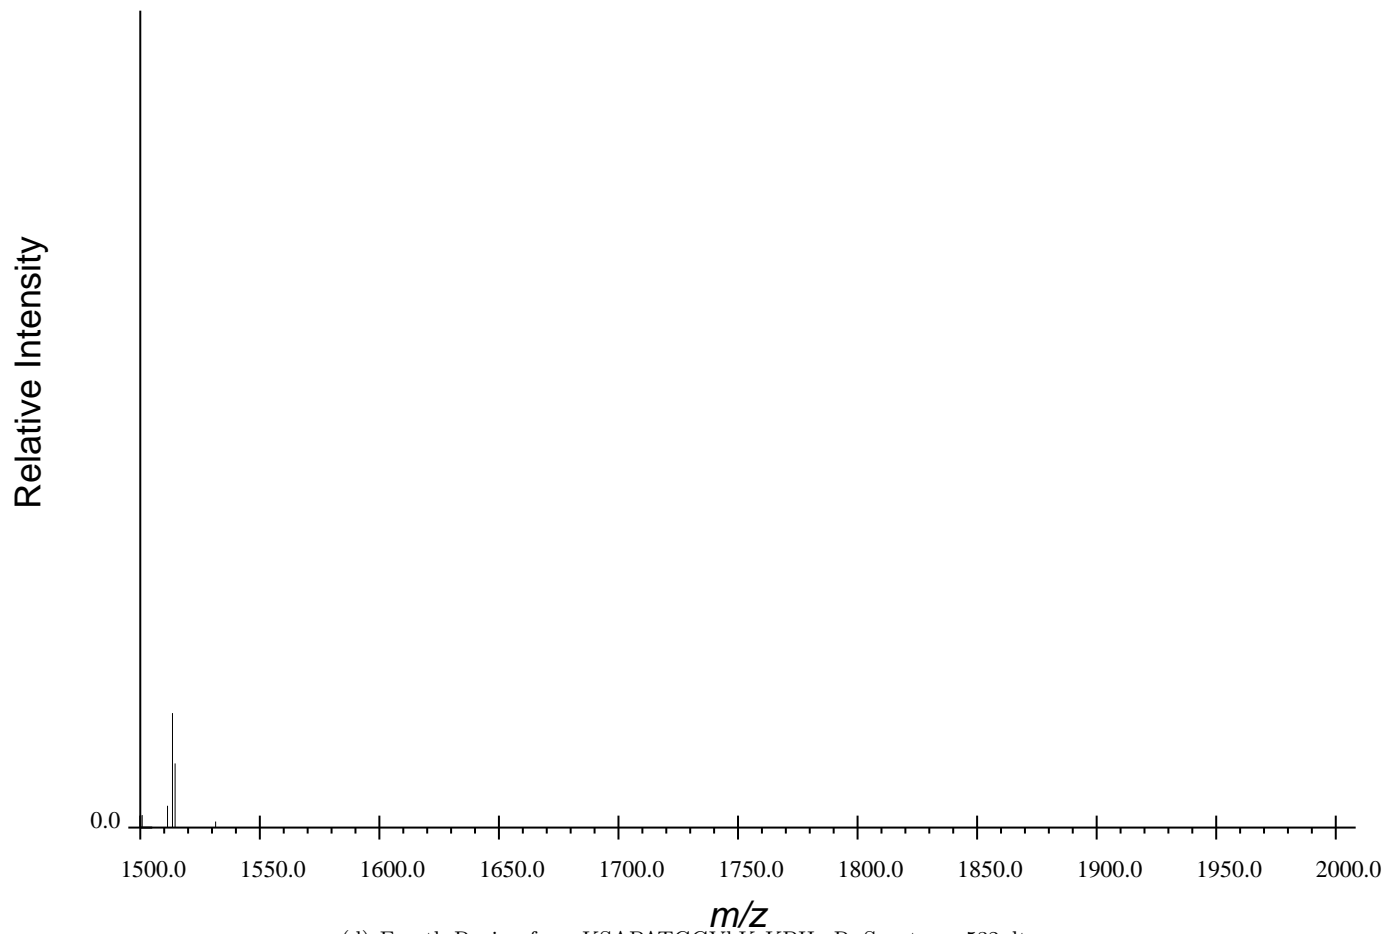

(d) Fourth Region for rrKSAPATGGVhKrKPHmR, Spectrum 532.dta

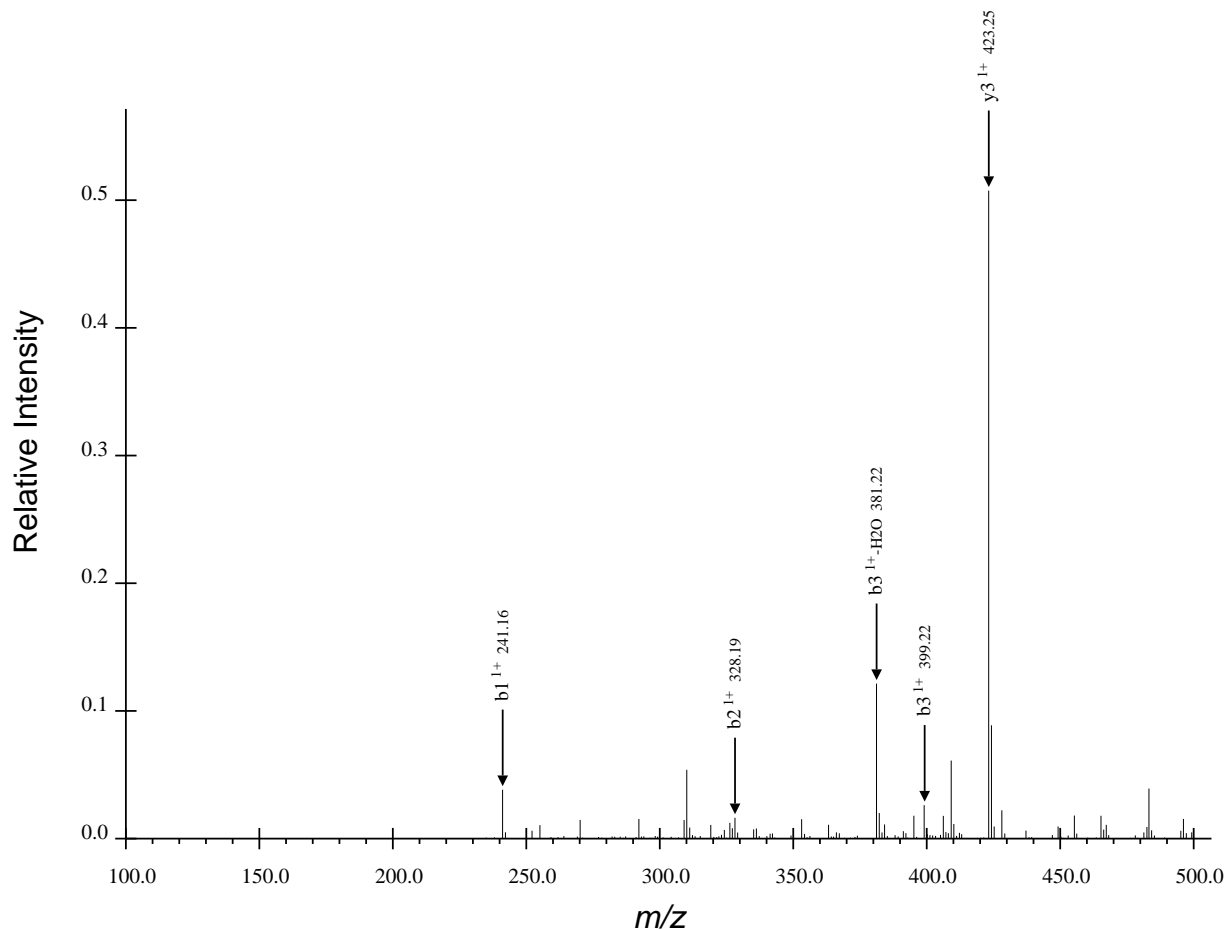

(a) First Region for rrKSAPATGGVhKrKPHmR, Spectrum 533.dta

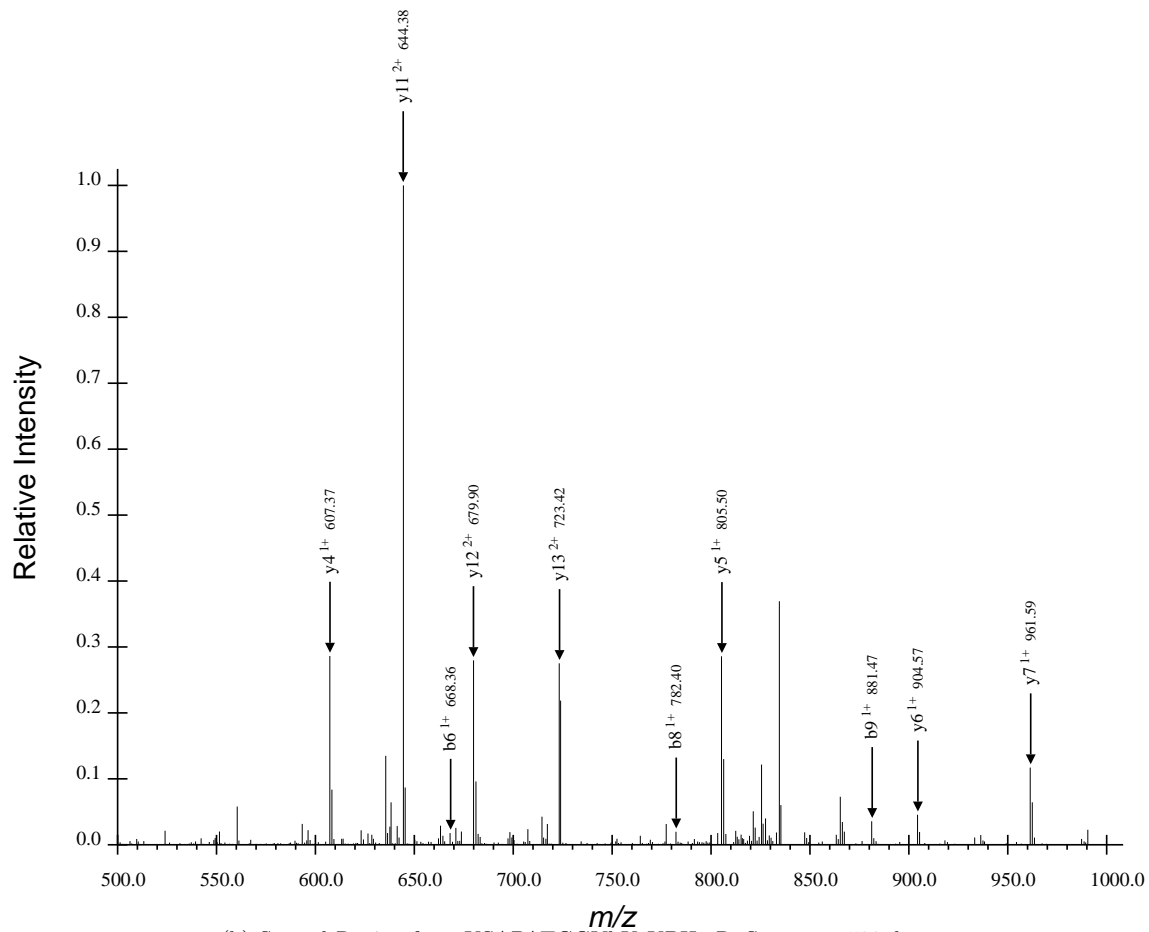

(b) Second Region for rrKSAPATGGVhKrKPHmR, Spectrum 533.dta

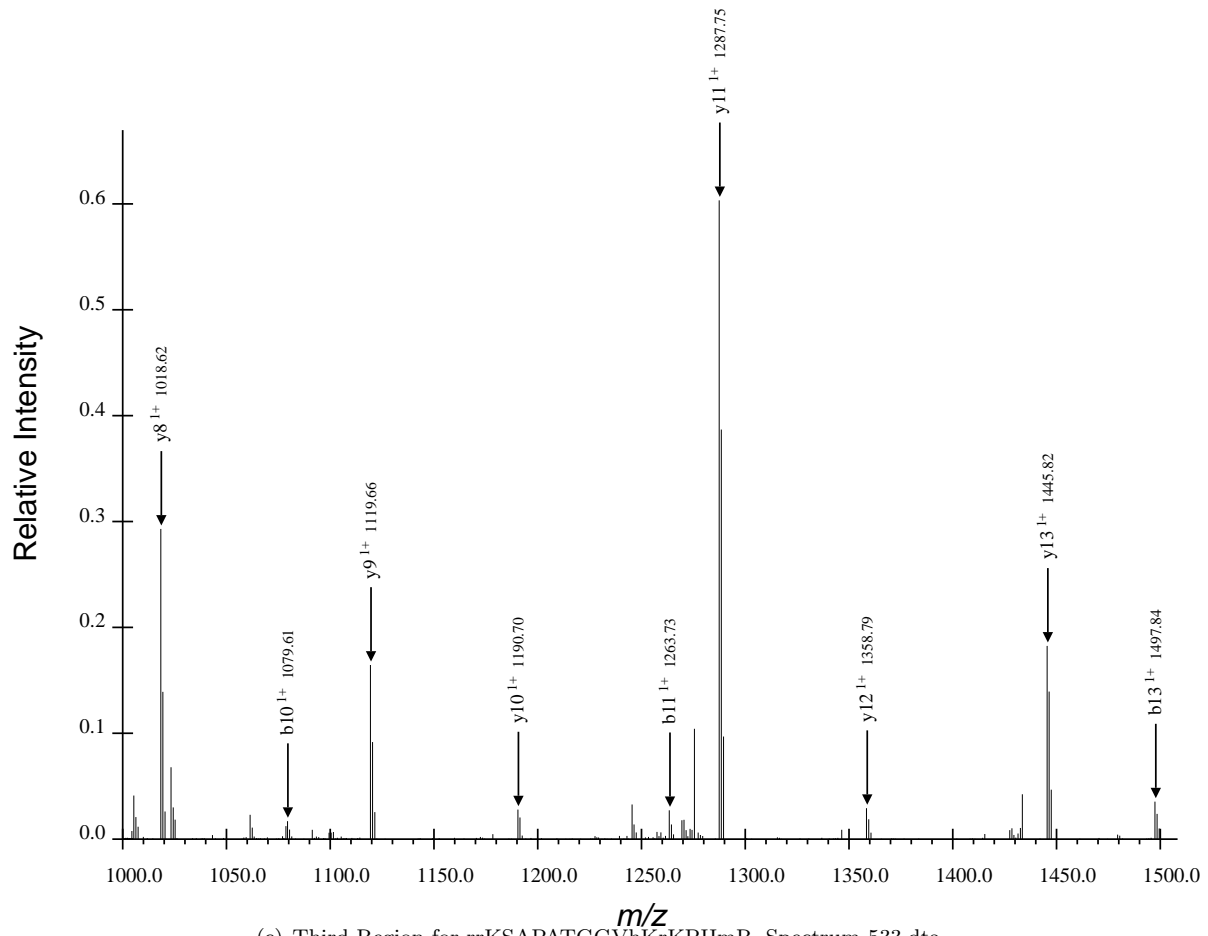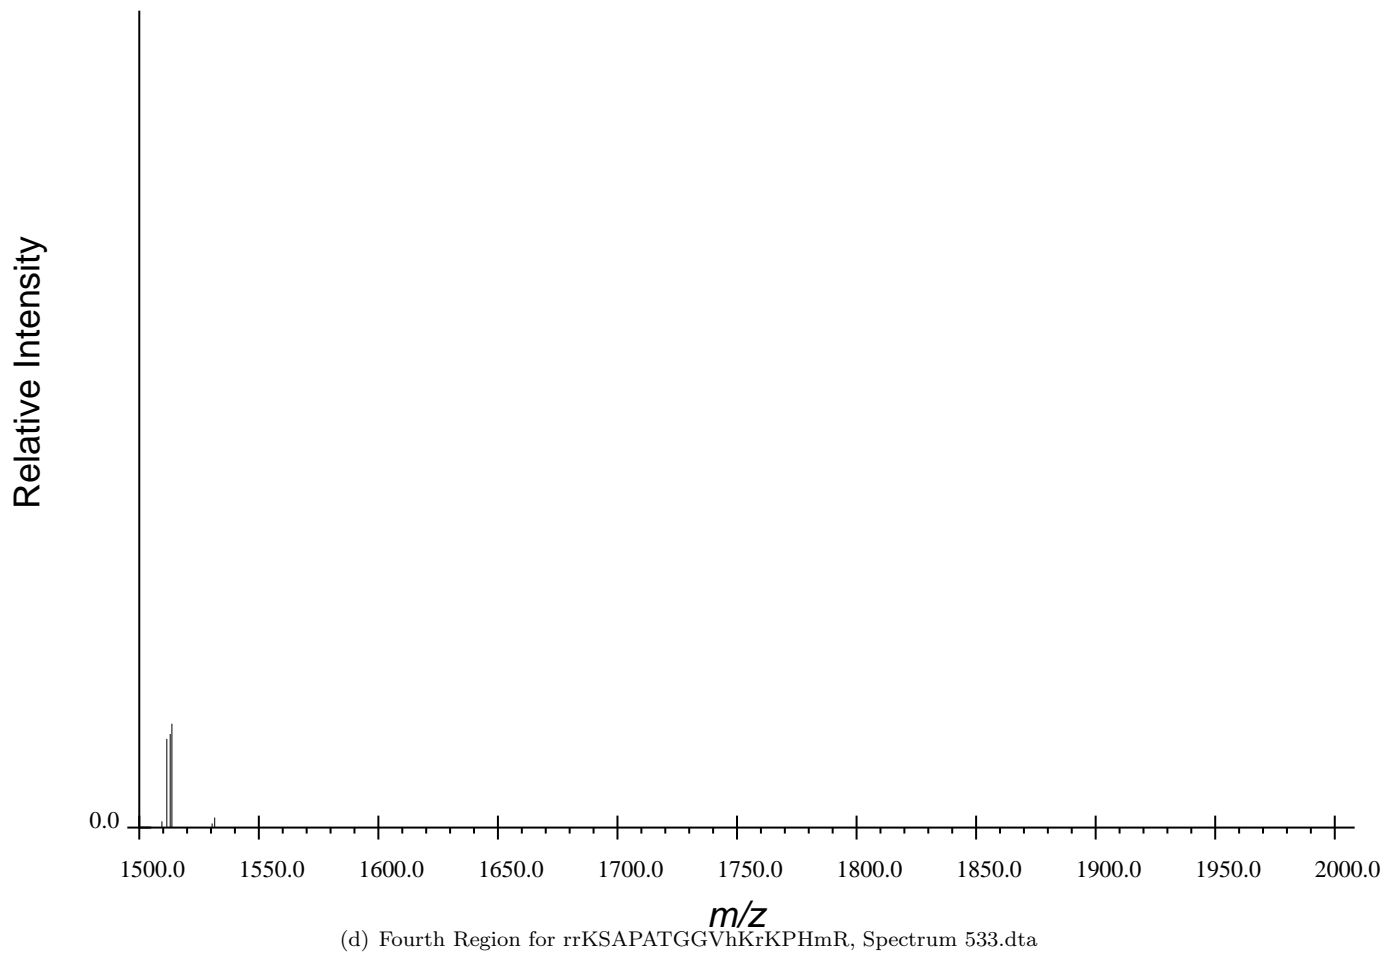

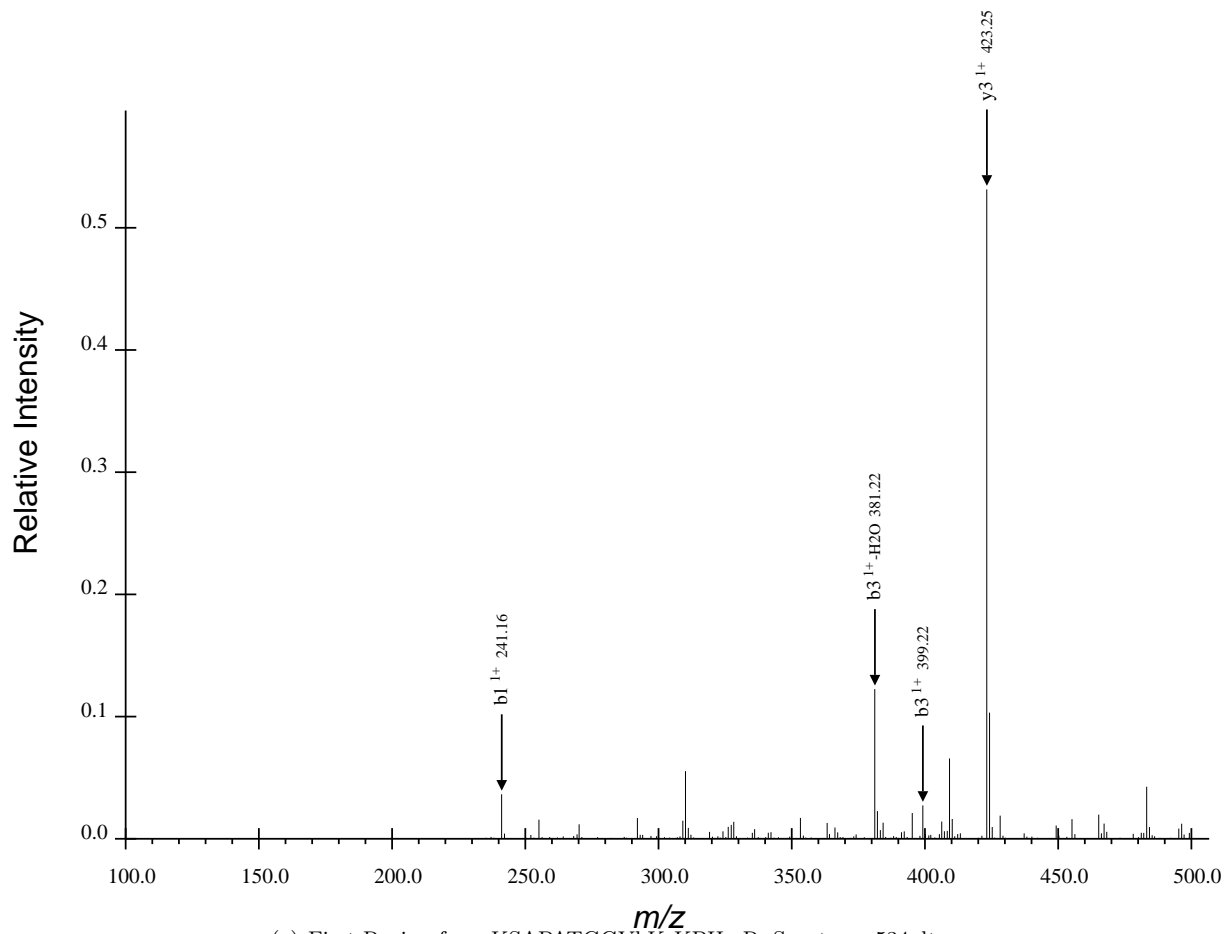

(a) First Region for rrKSAPATGGVhKrKPHmR, Spectrum 534.dta

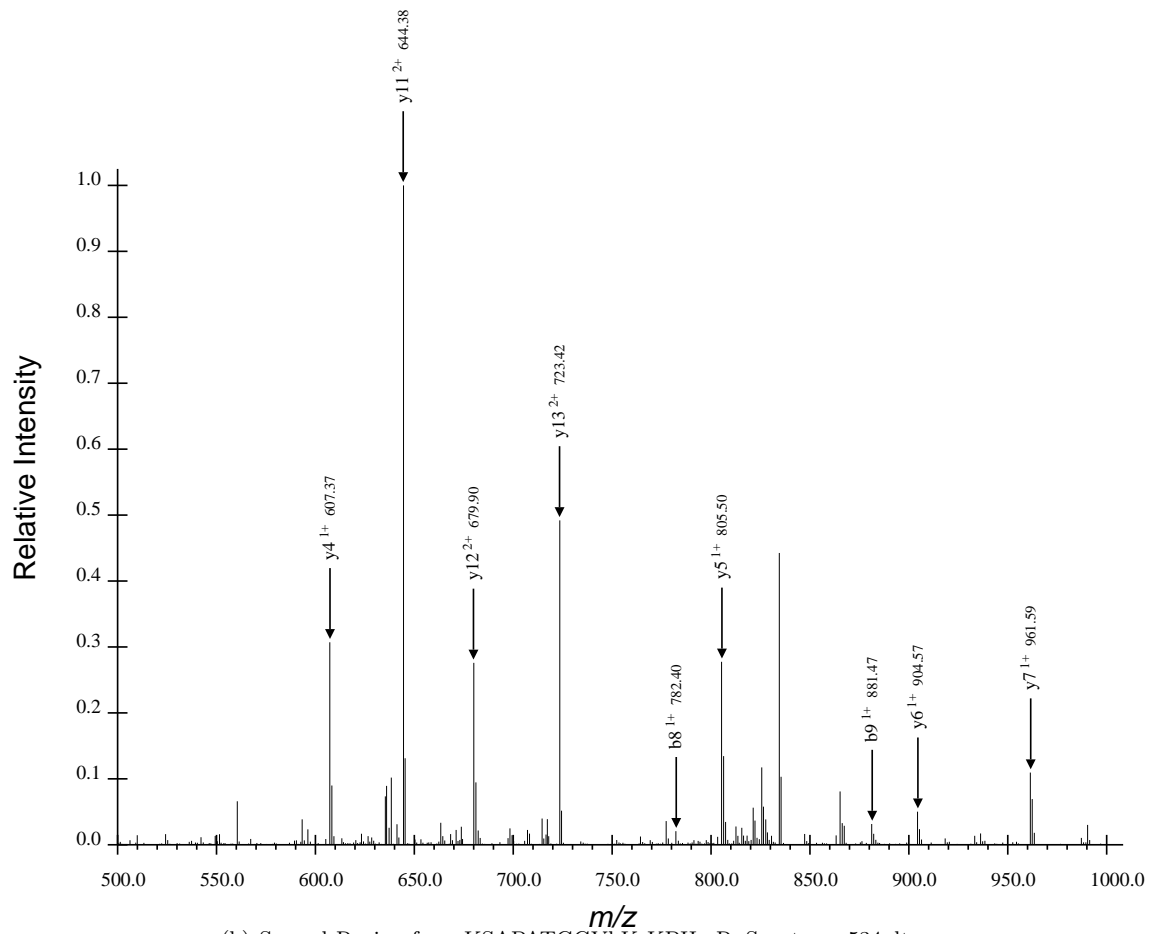

(b) Second Region for rrKSAPATGGVhKrKPHmR, Spectrum 534.dta

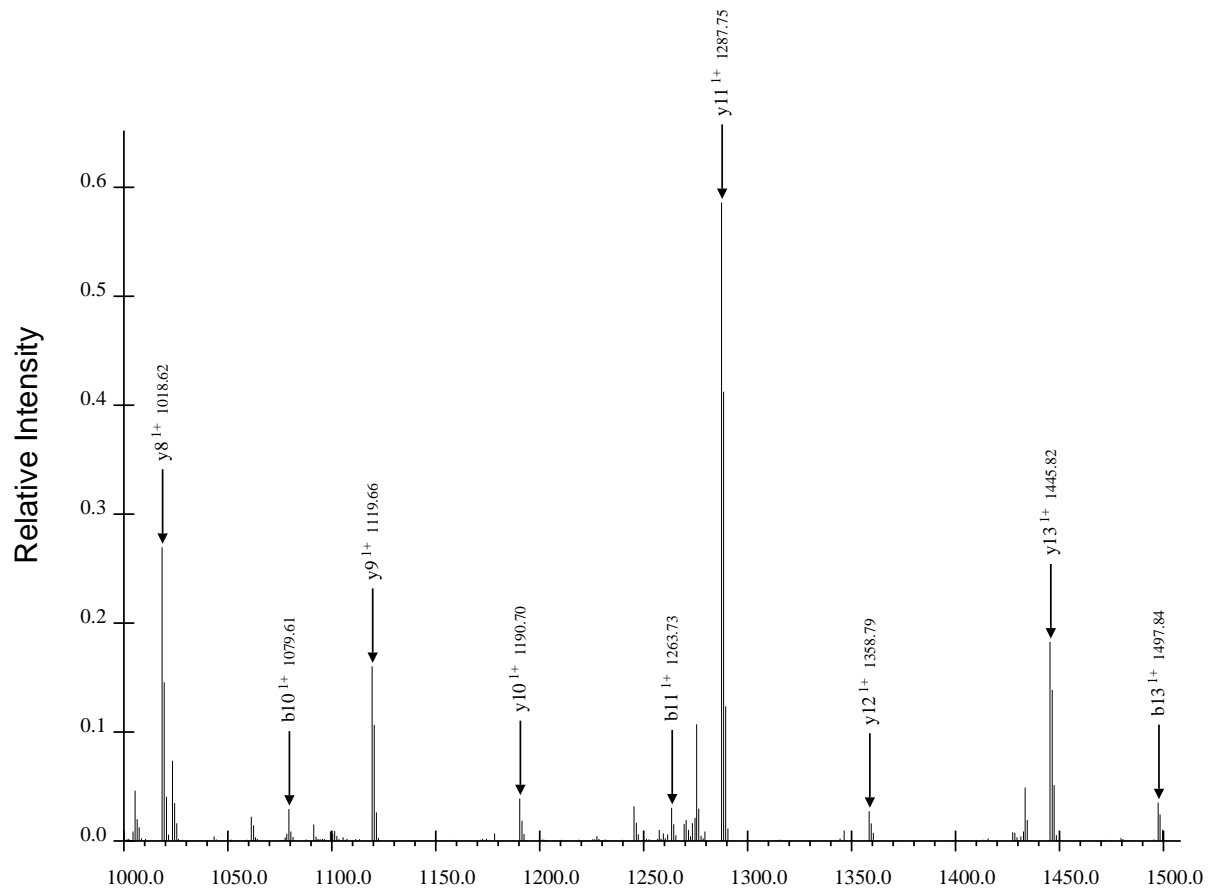

(c) Third Region for rrKSAPATGGVhKrKPHmR, Spectrum 534.dta

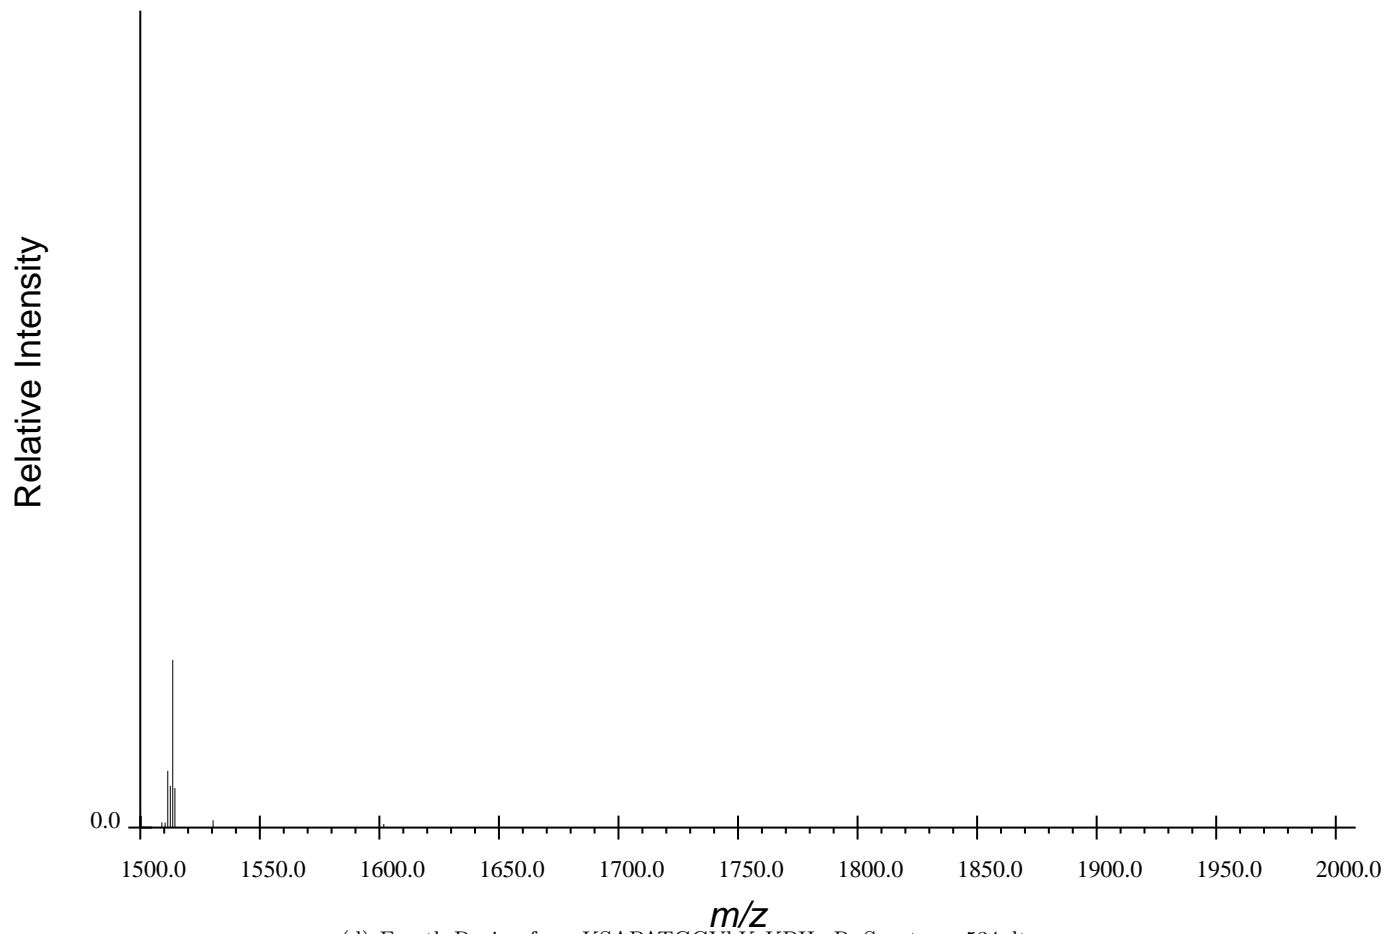

(d) Fourth Region for rrKSAPATGGVhKrKPHmR, Spectrum 534.dta

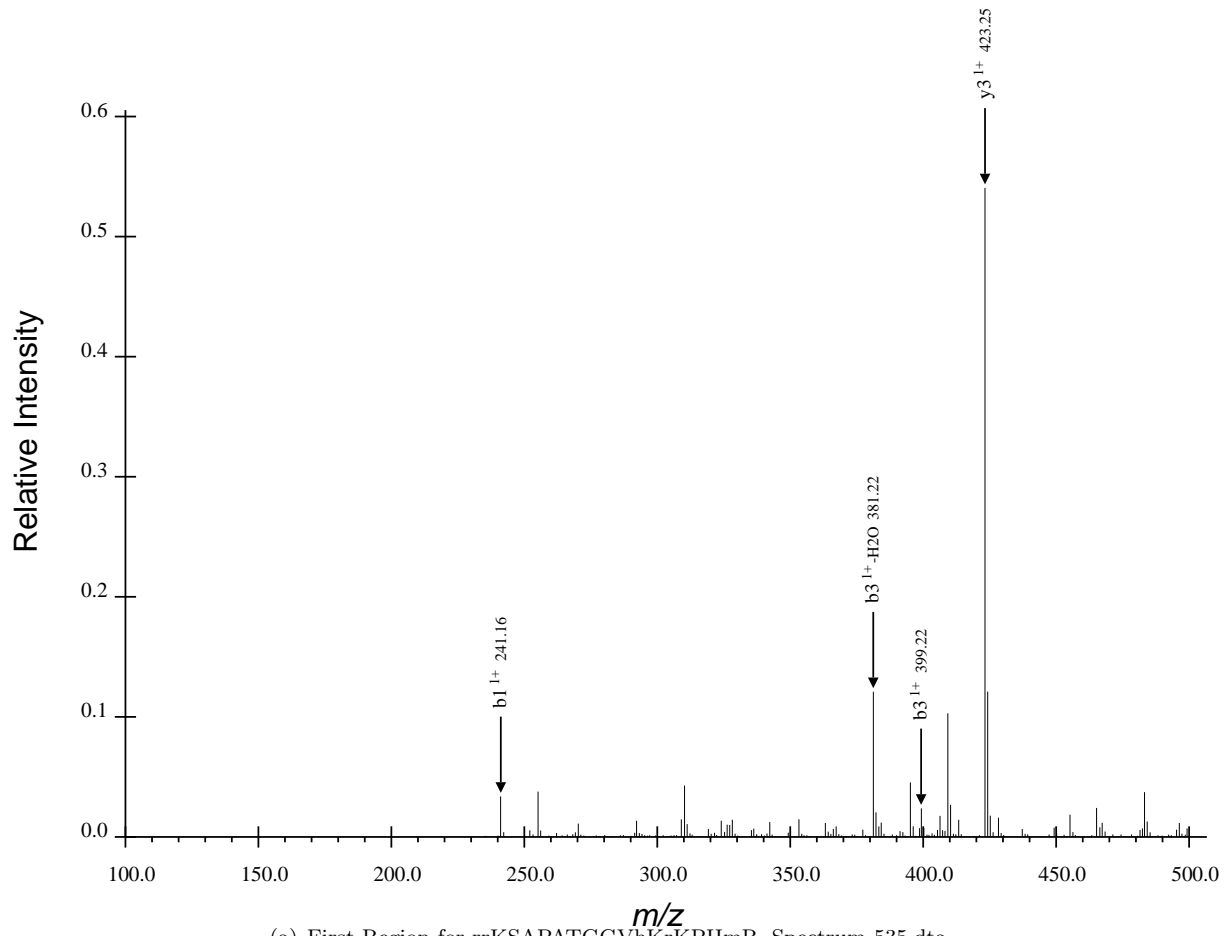

(a) First Region for rrKSAPATGGVhKrKPHmR, Spectrum 535.dta

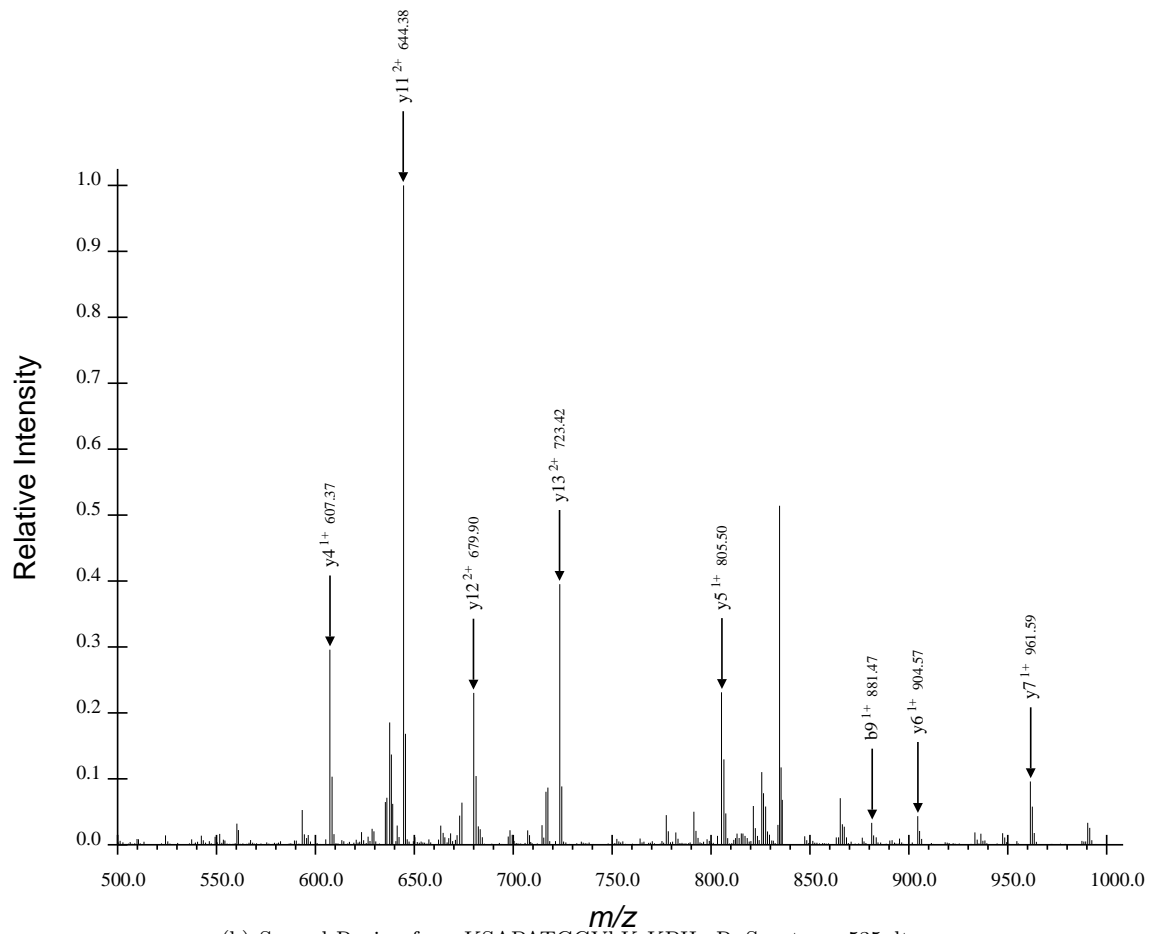

(b) Second Region for rrKSAPATGGVhKrKPHmR, Spectrum 535.dta

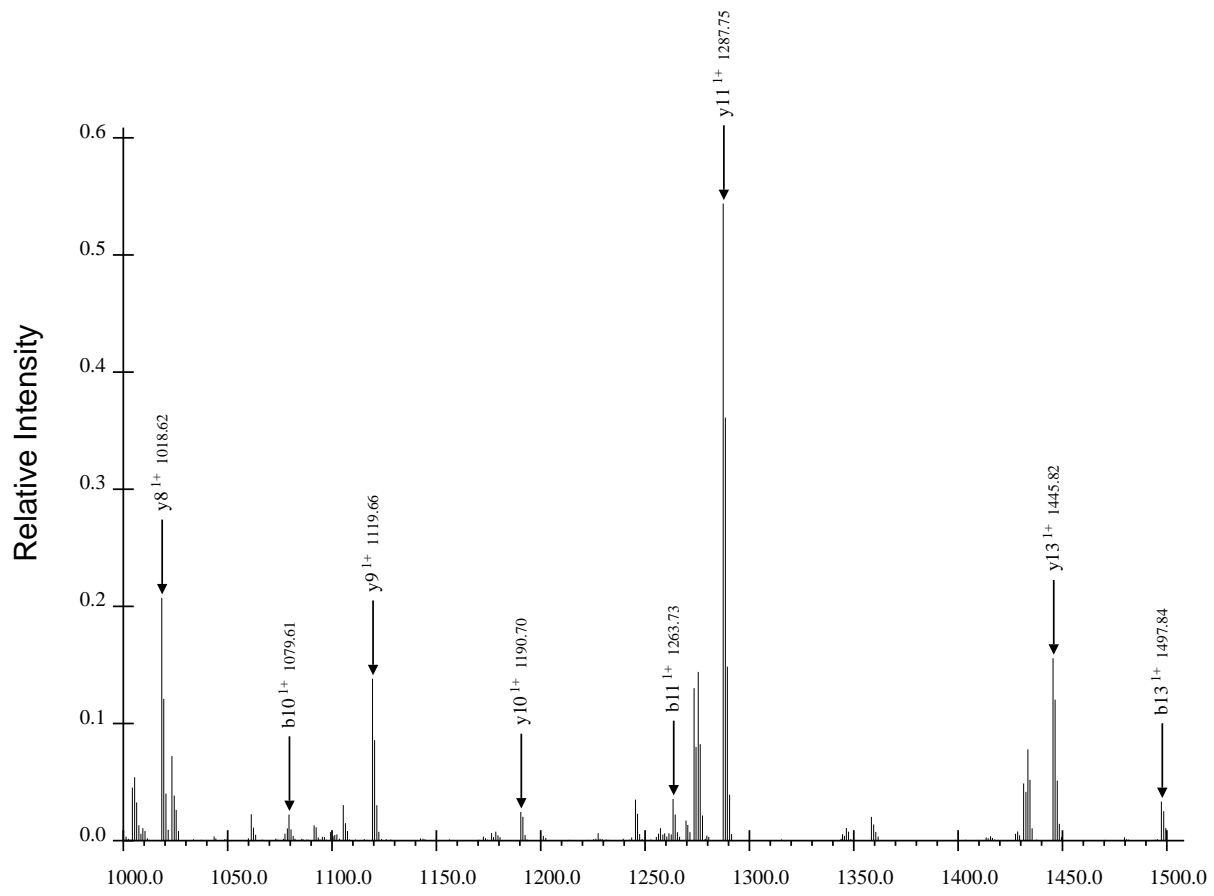

(c) Third Region for rrKSAPATGGVhKrKPHmR, Spectrum 535.dta

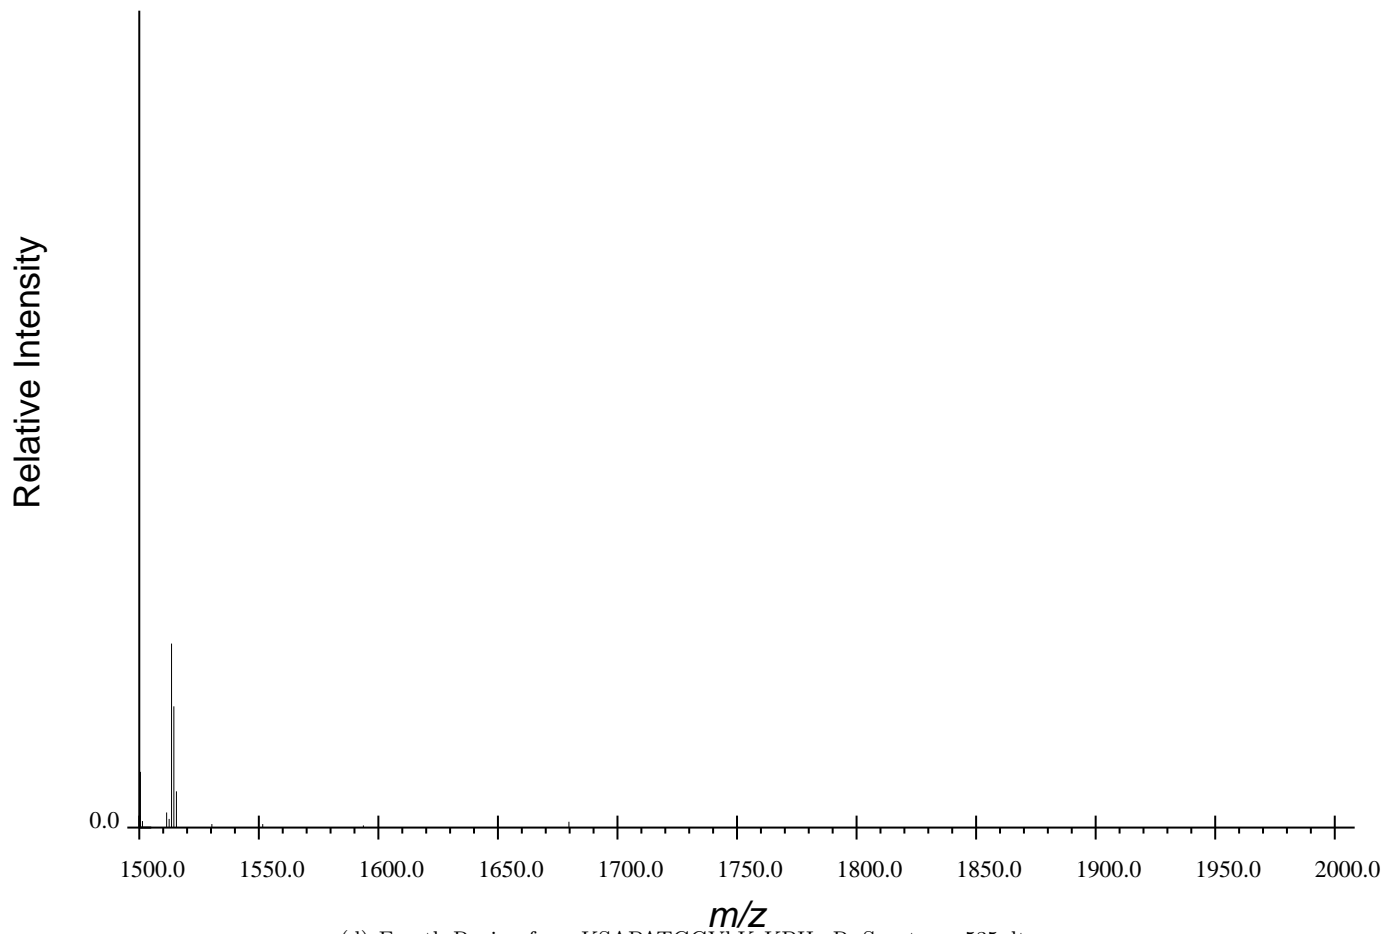

(d) Fourth Region for rrKSAPATGGVhKrKPHmR, Spectrum 535.dta

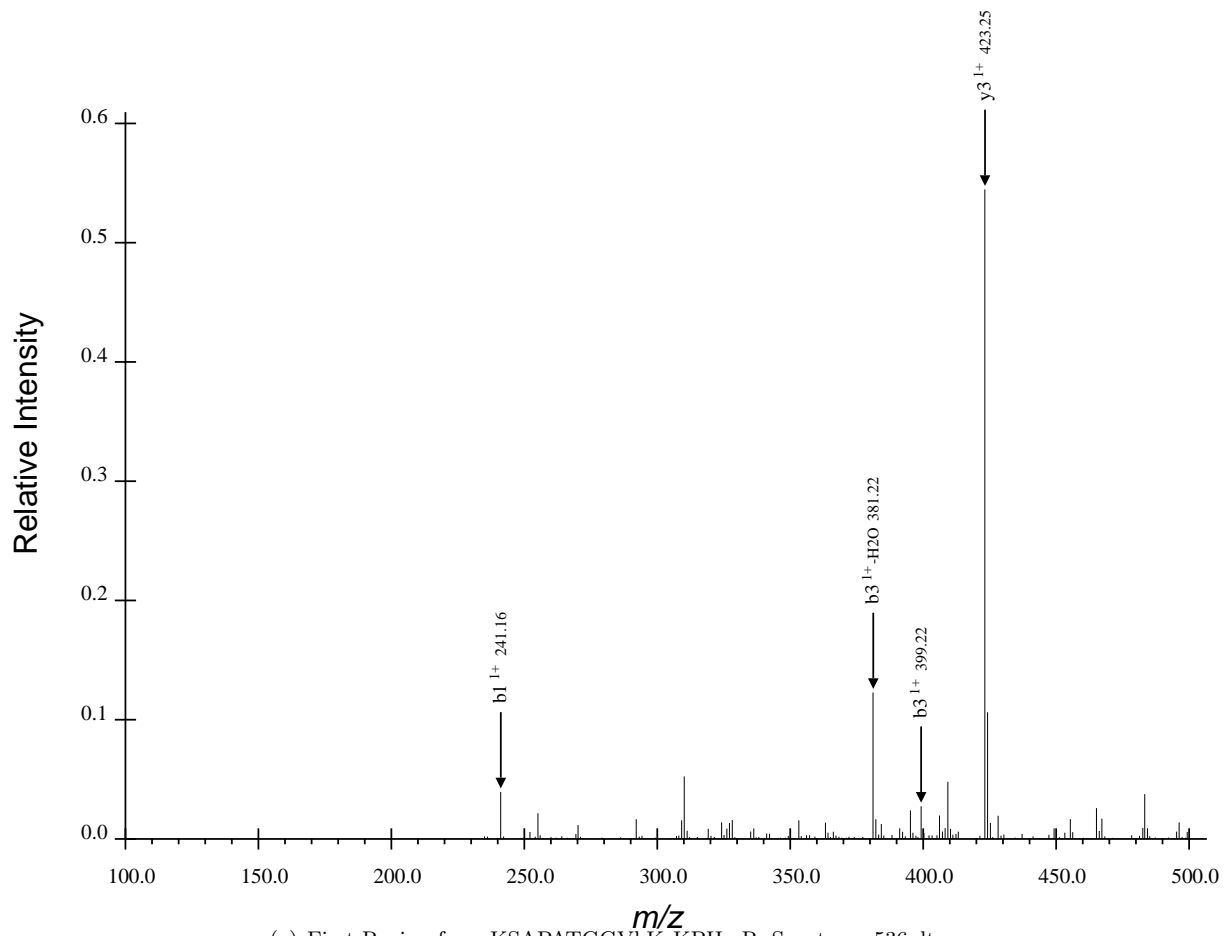

(a) First Region for rrKSAPATGGVhKrKPHmR, Spectrum 536.dta

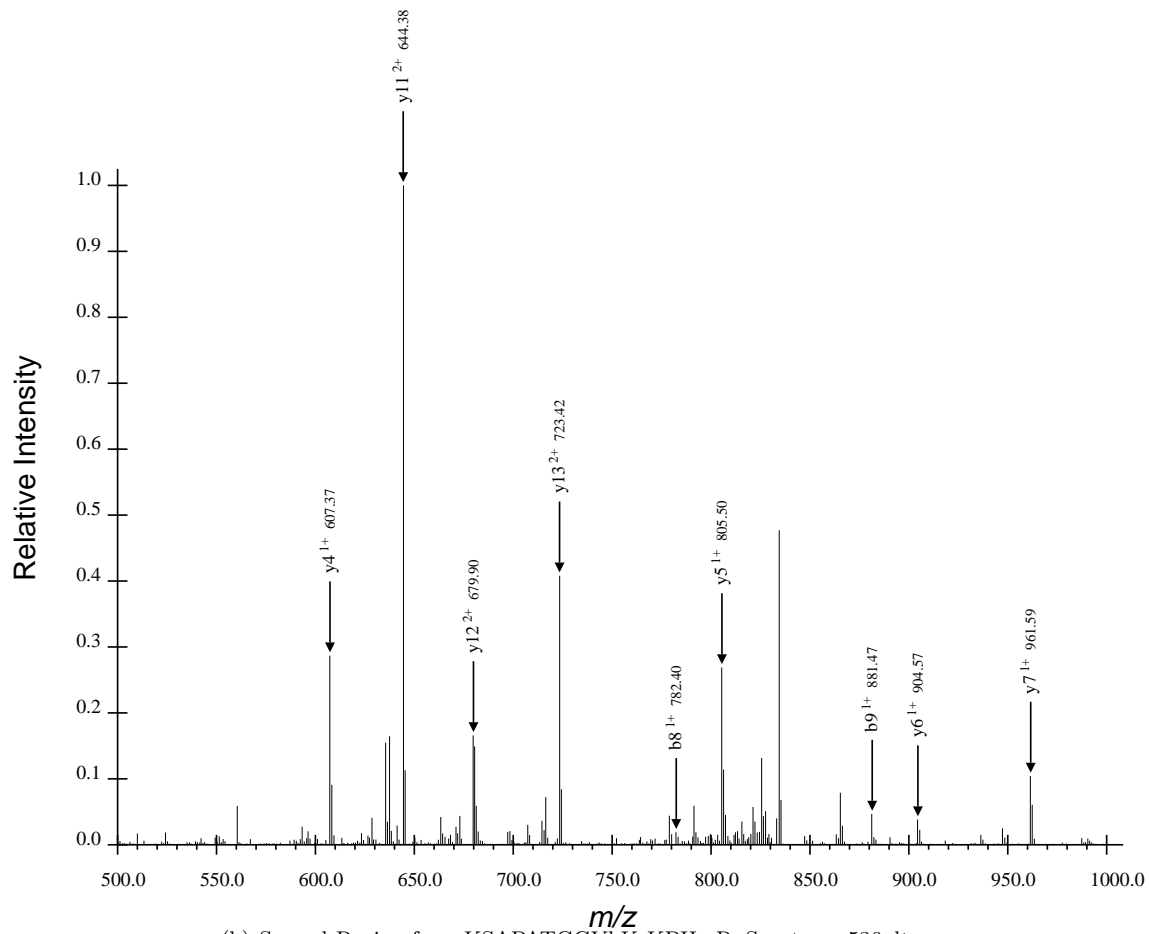

(b) Second Region for rrKSAPATGGVhKrKPHmR, Spectrum 536.dta



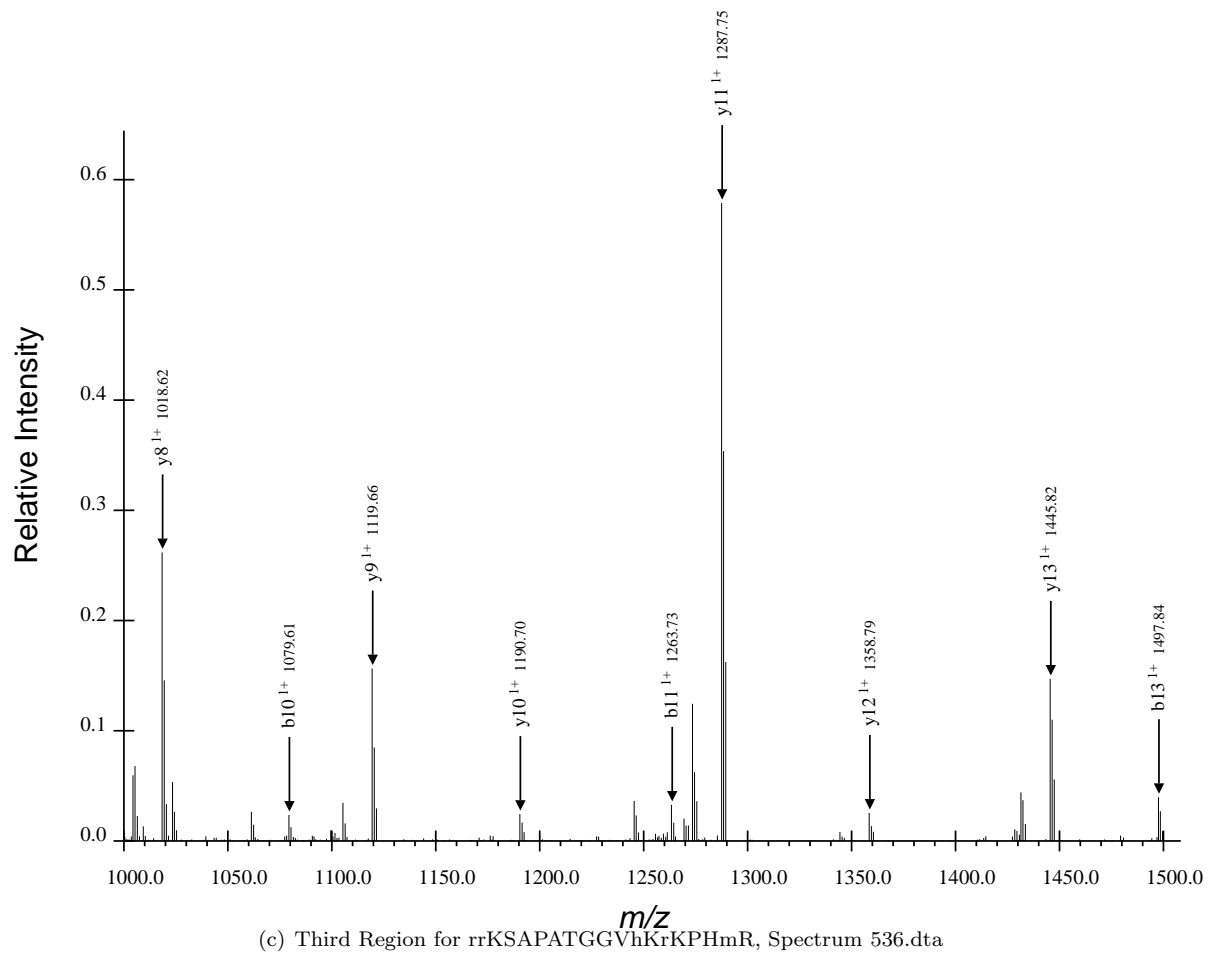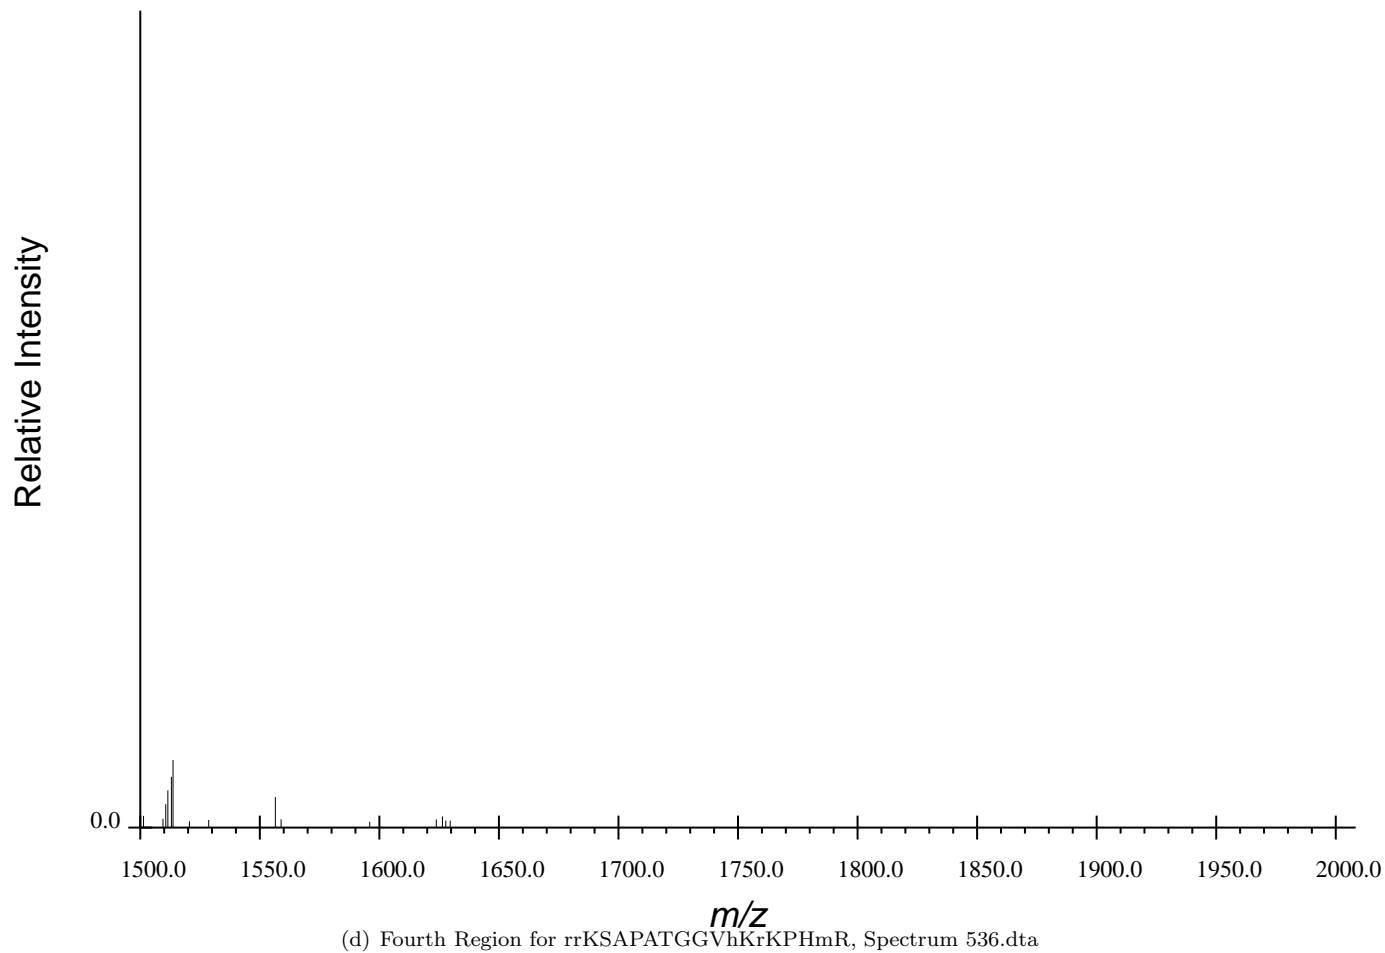

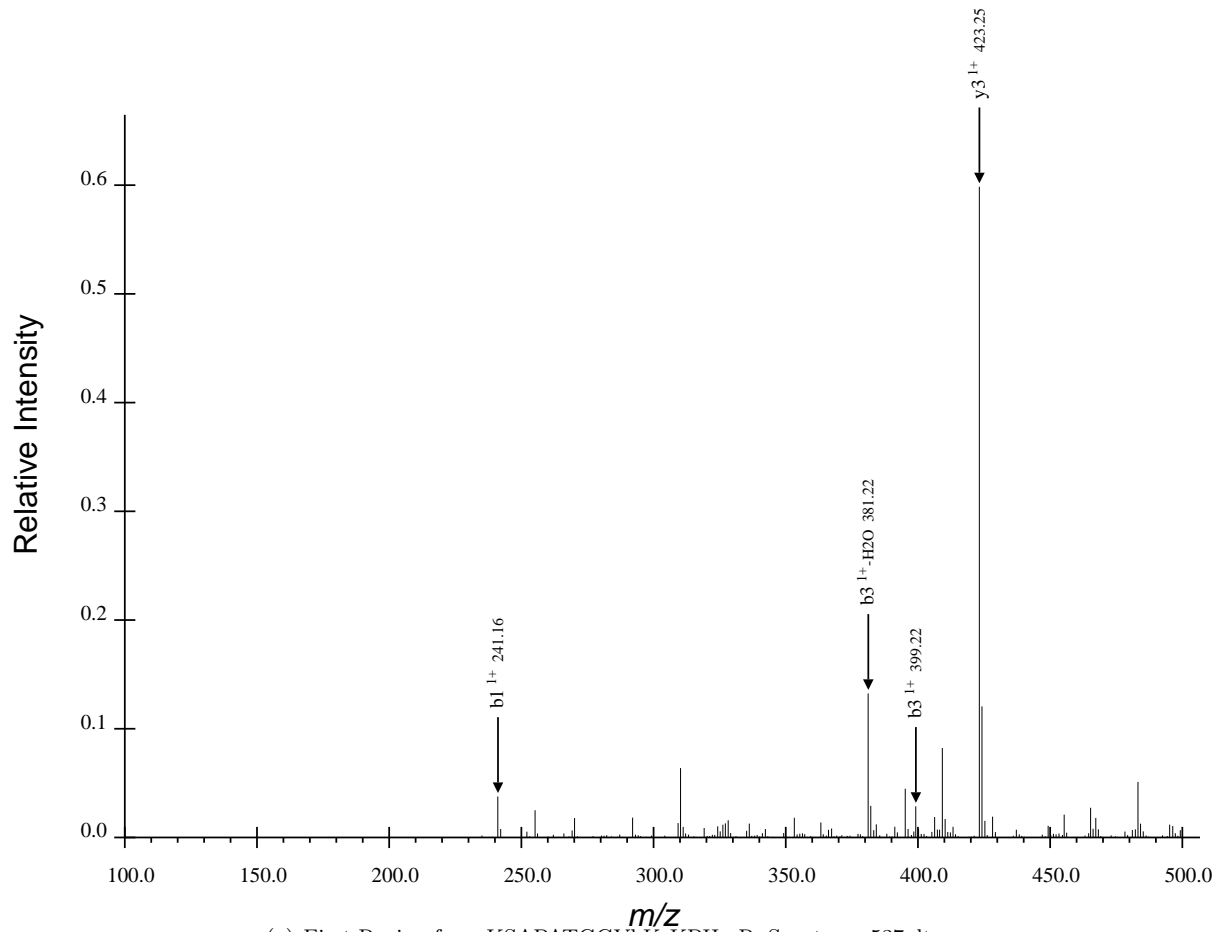

(a) First Region for rrKSAPATGGVhKrKPHmR, Spectrum 537.dta

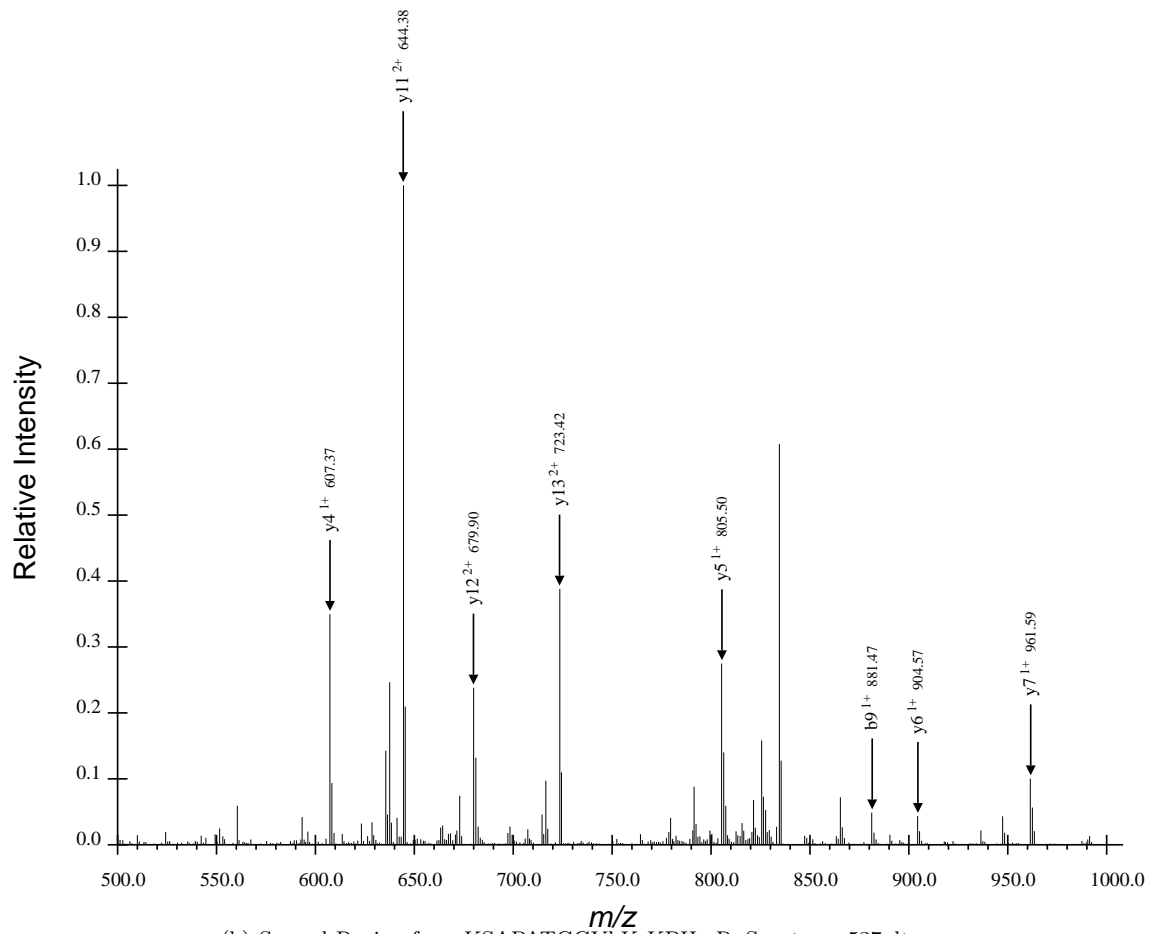

(b) Second Region for rrKSAPATGGVhKrKPHmR, Spectrum 537.dta

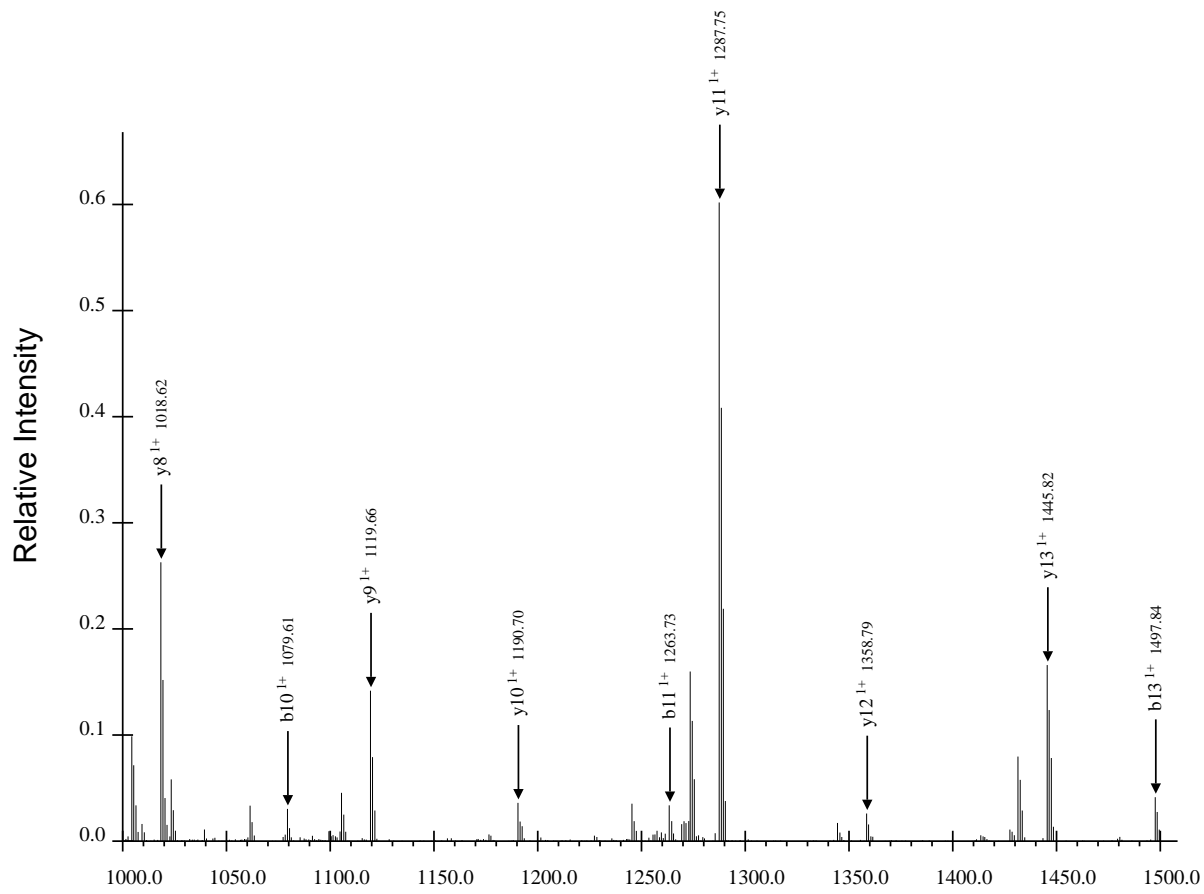

(c) Third Region for rrKSAPATGGVhKrKPHmR, Spectrum 537.dta

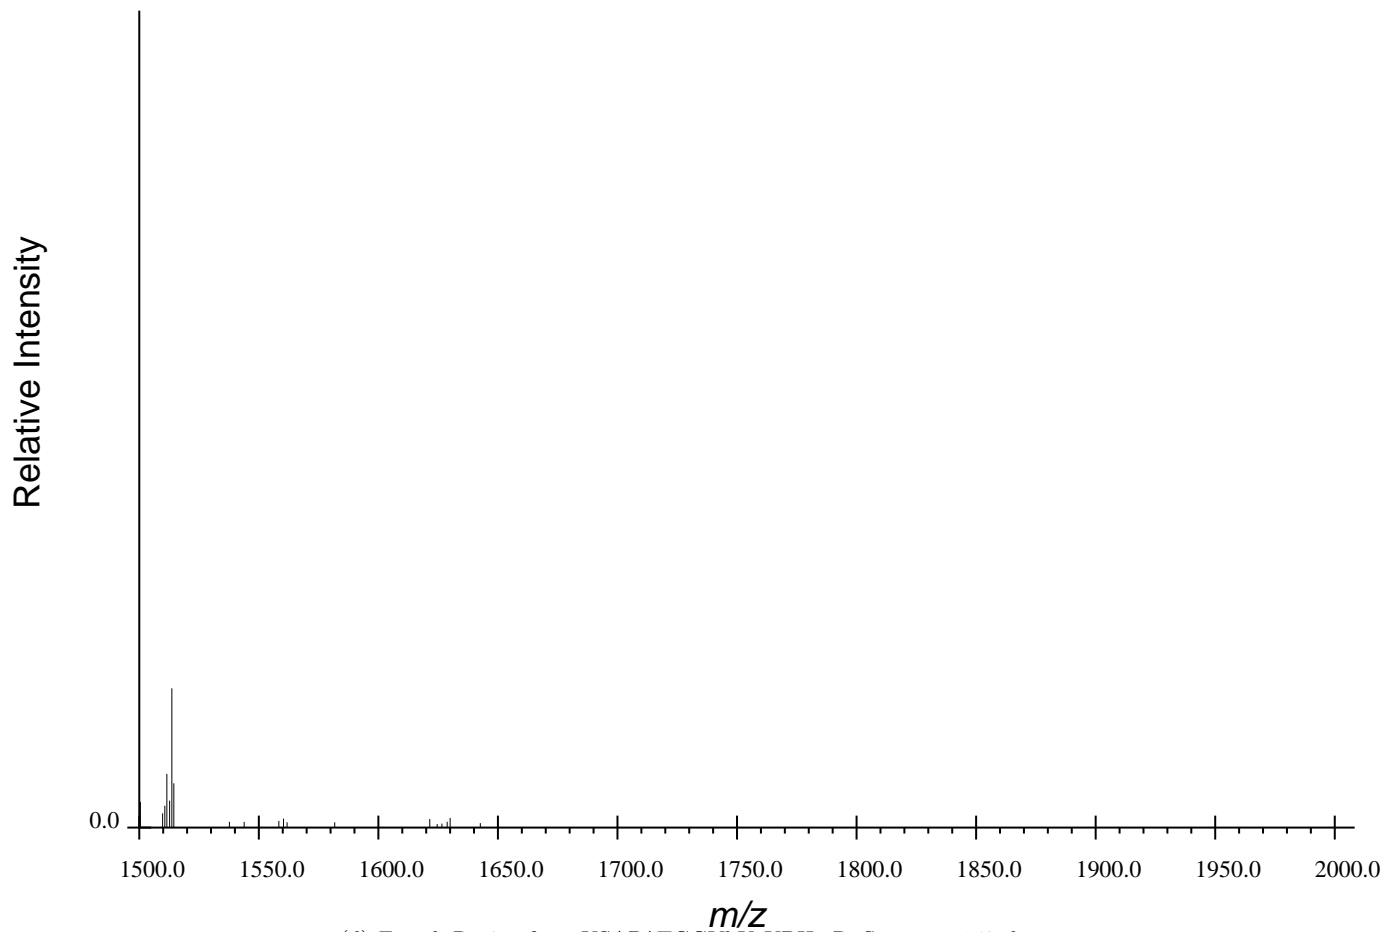

(d) Fourth Region for rrKSAPATGGVhKrKPHmR, Spectrum 537.dta

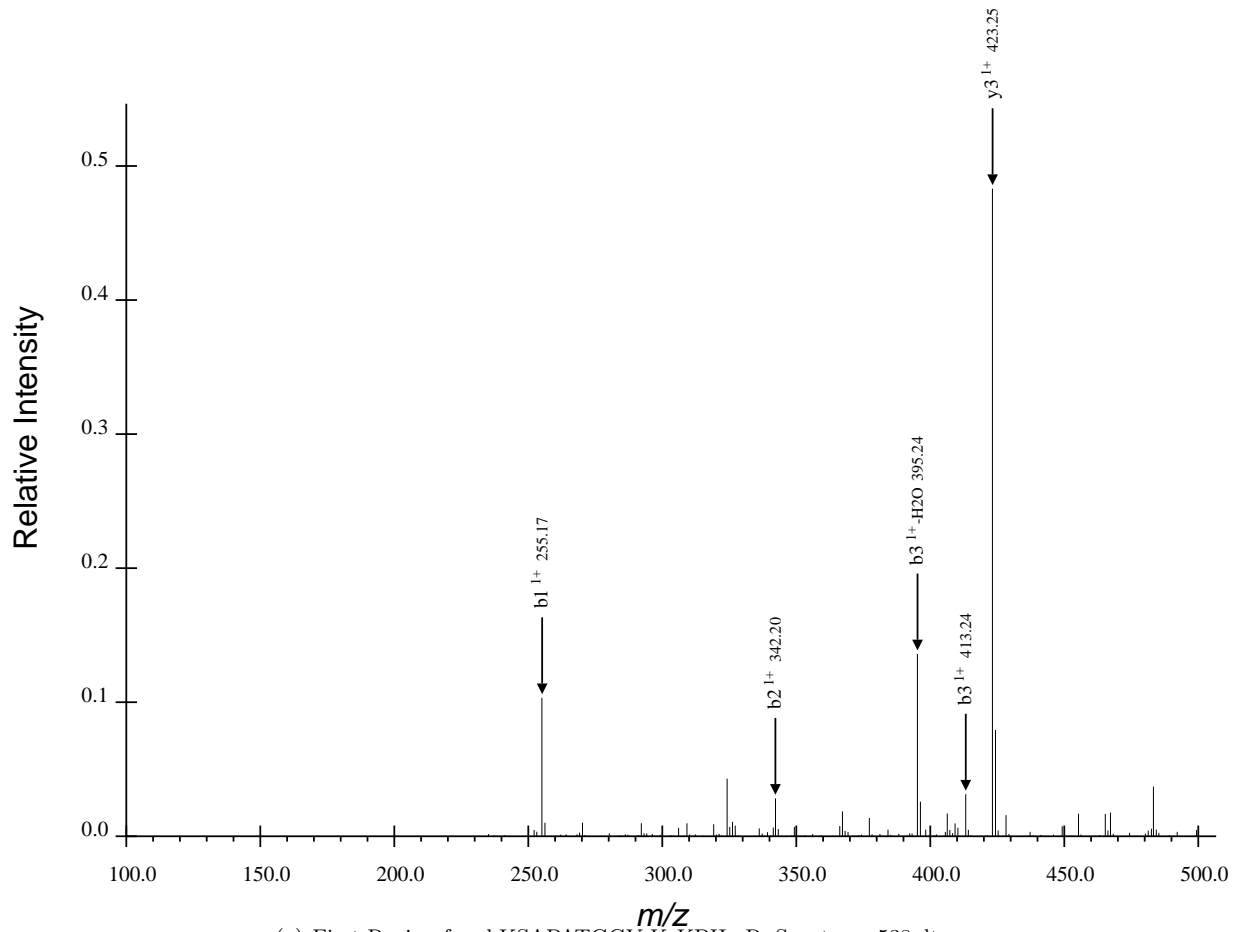

(a) First Region for rhKSAPATGGVrKrKPHmR, Spectrum 538.dta

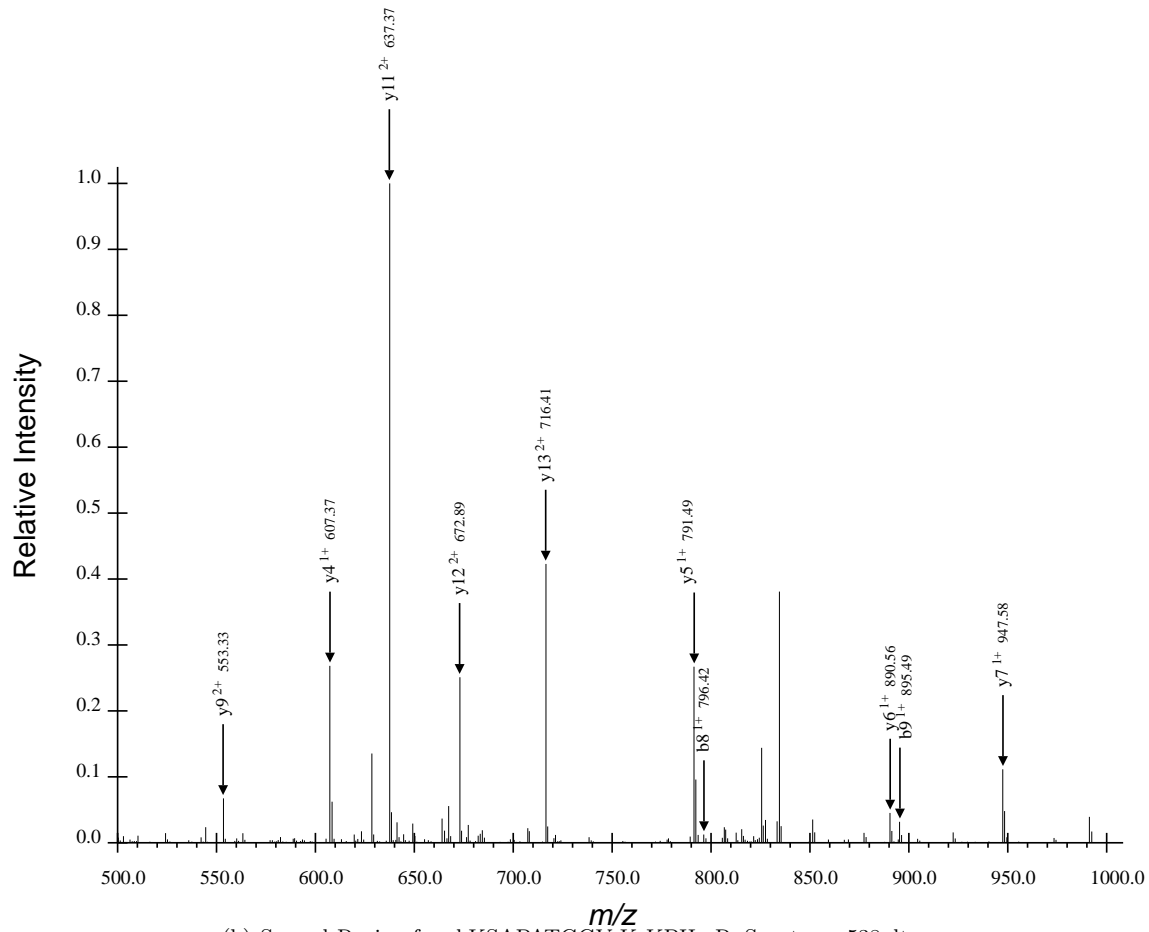

(b) Second Region for rhKSAPATGGVrKrKPHmR, Spectrum 538.dta

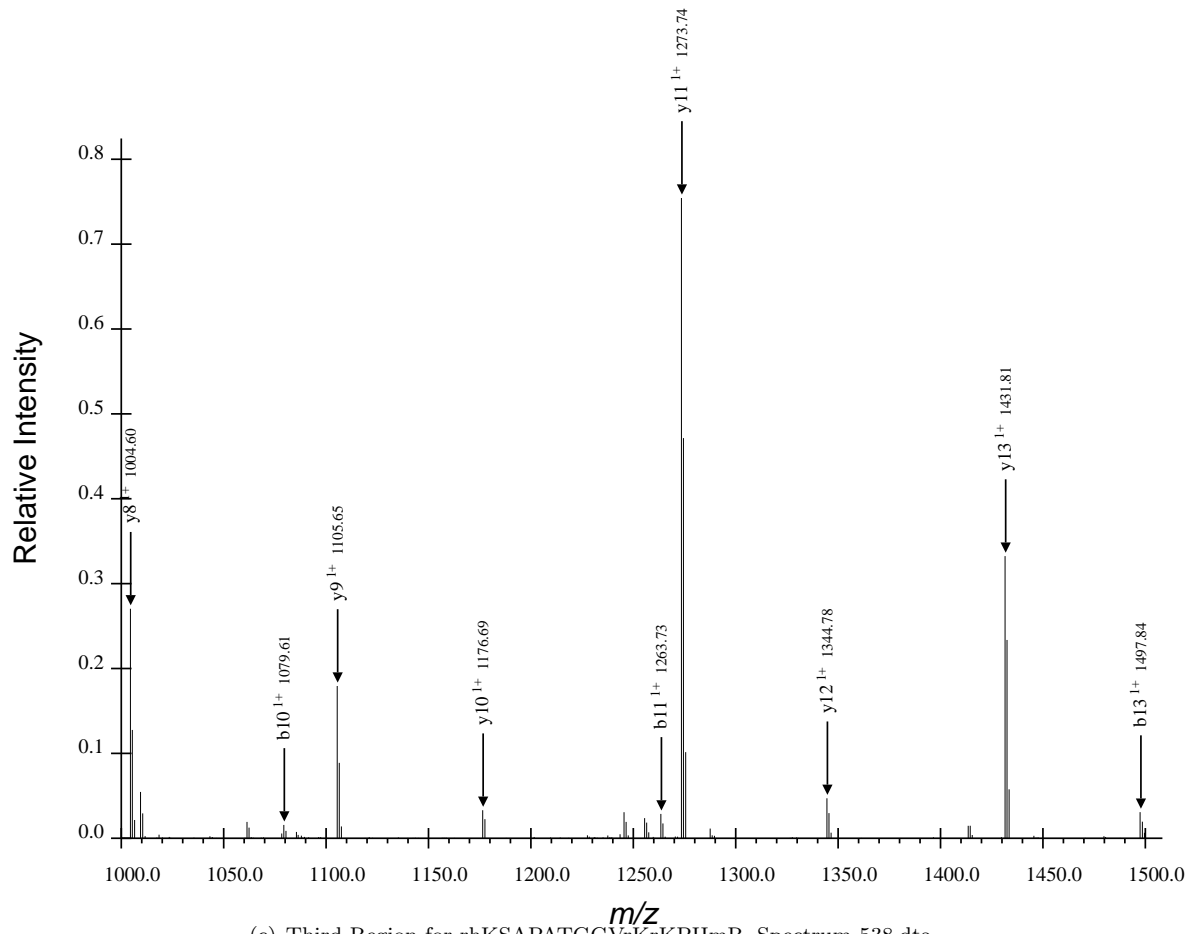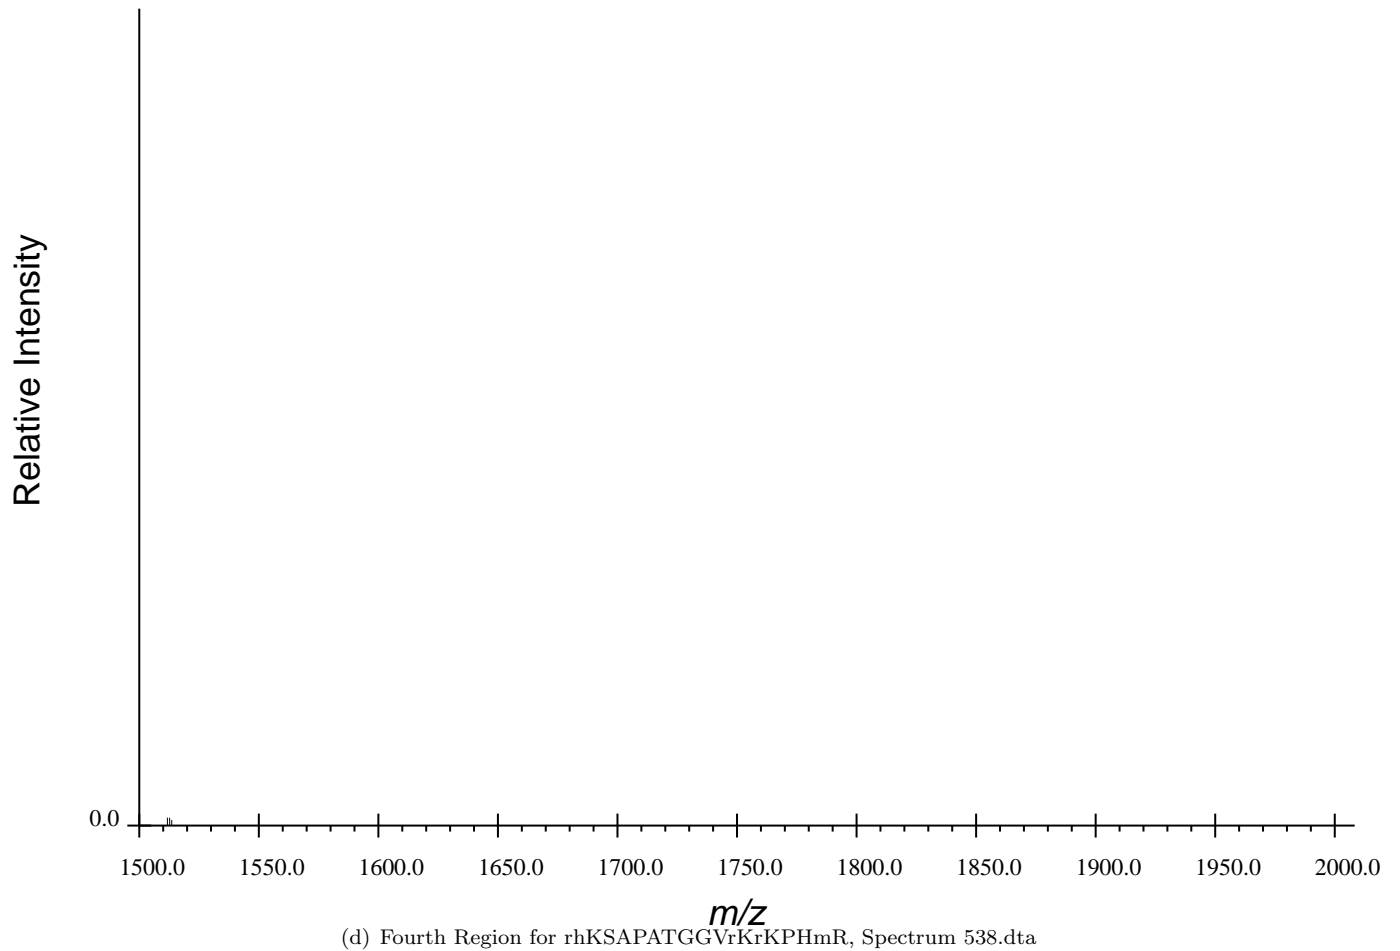

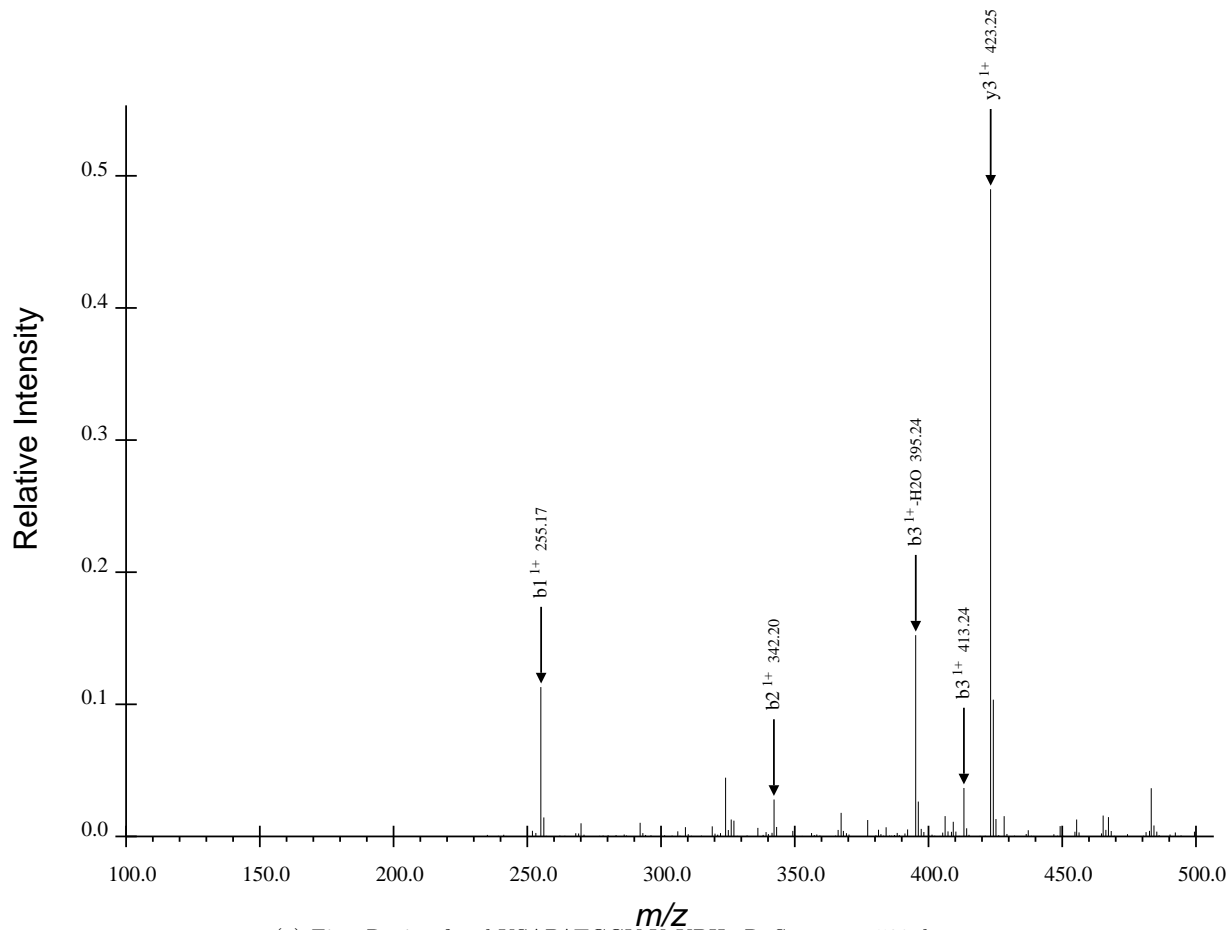

(a) First Region for rhKSAPATGGVrKrKPHmR, Spectrum 539.dta

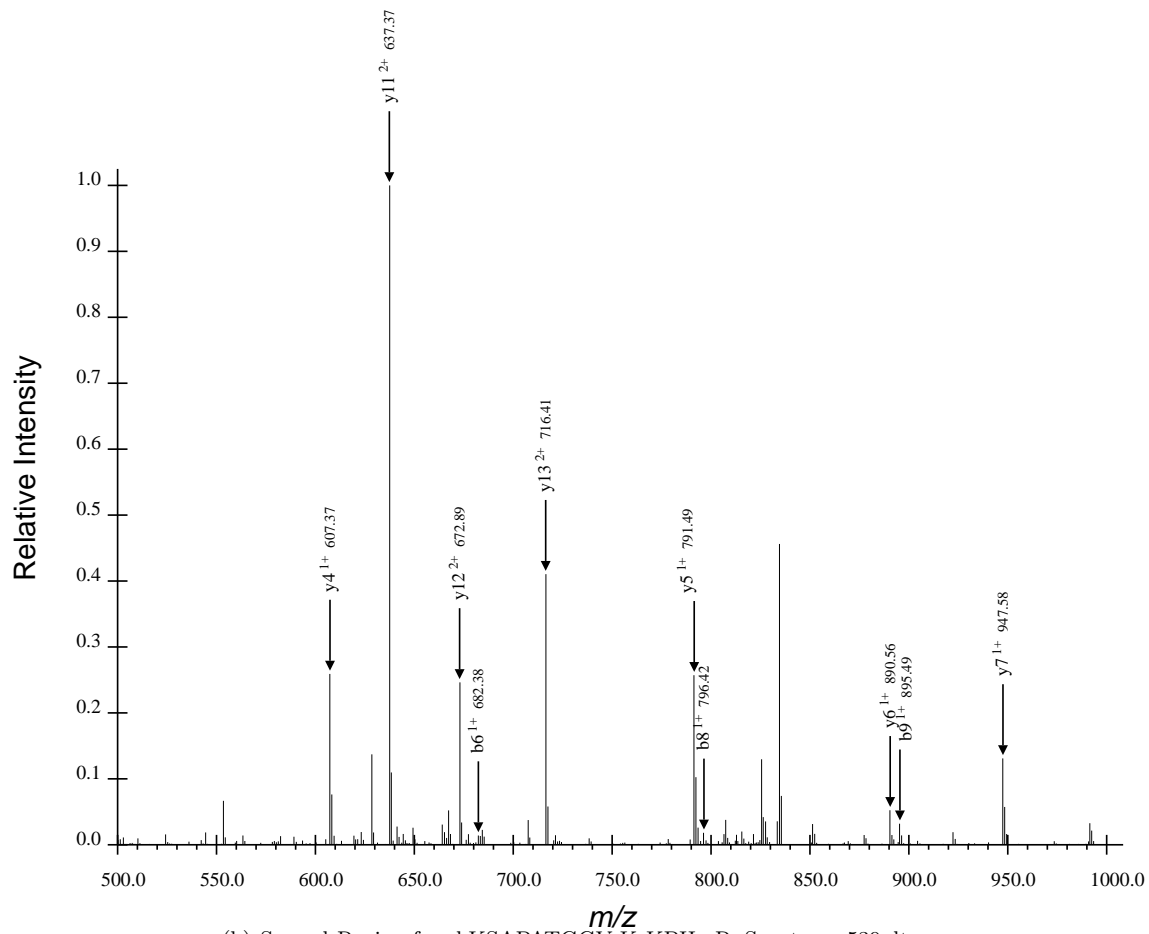

(b) Second Region for rhKSAPATGGVrKrKPHmR, Spectrum 539.dta

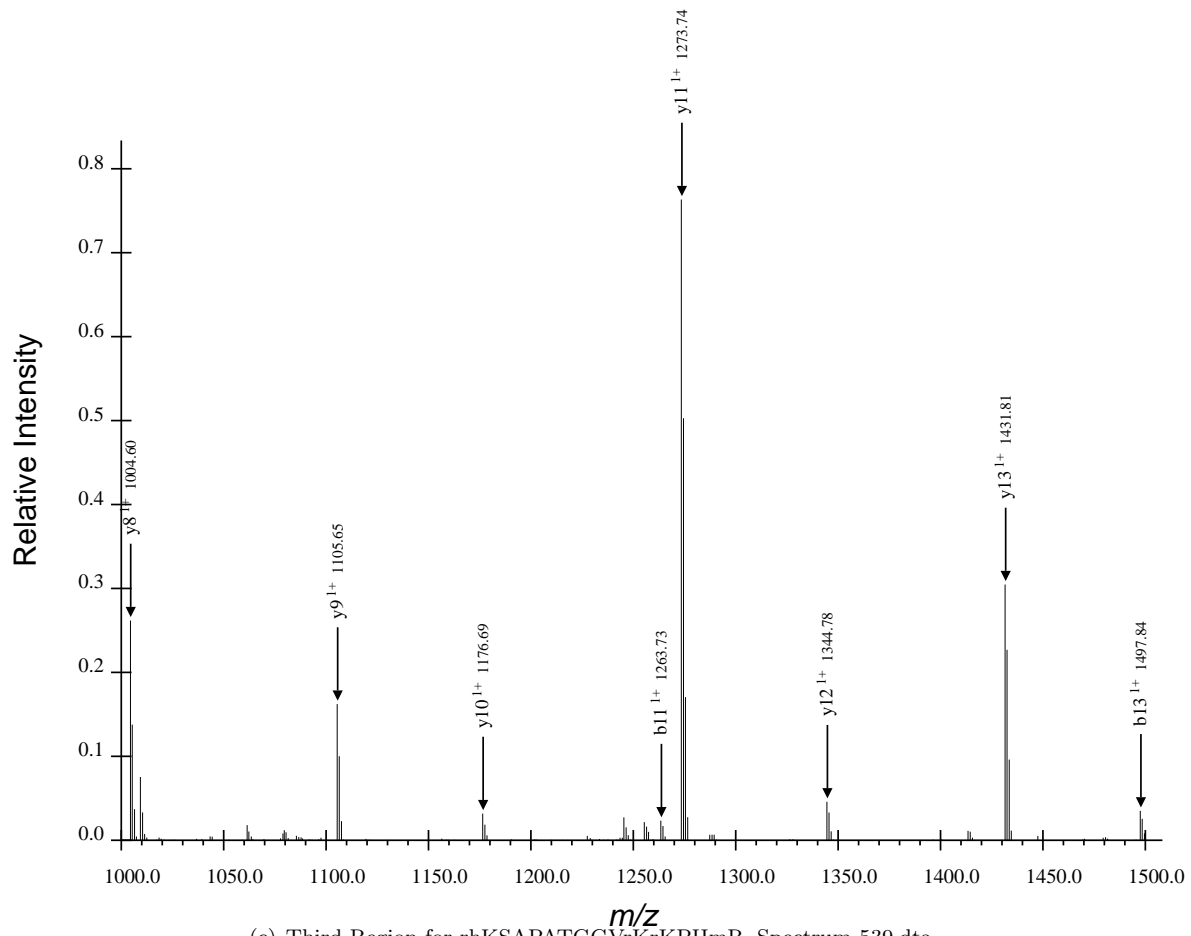

(c) Third Region for rhKSAPATGGVrKrKPHmR, Spectrum 539.dta

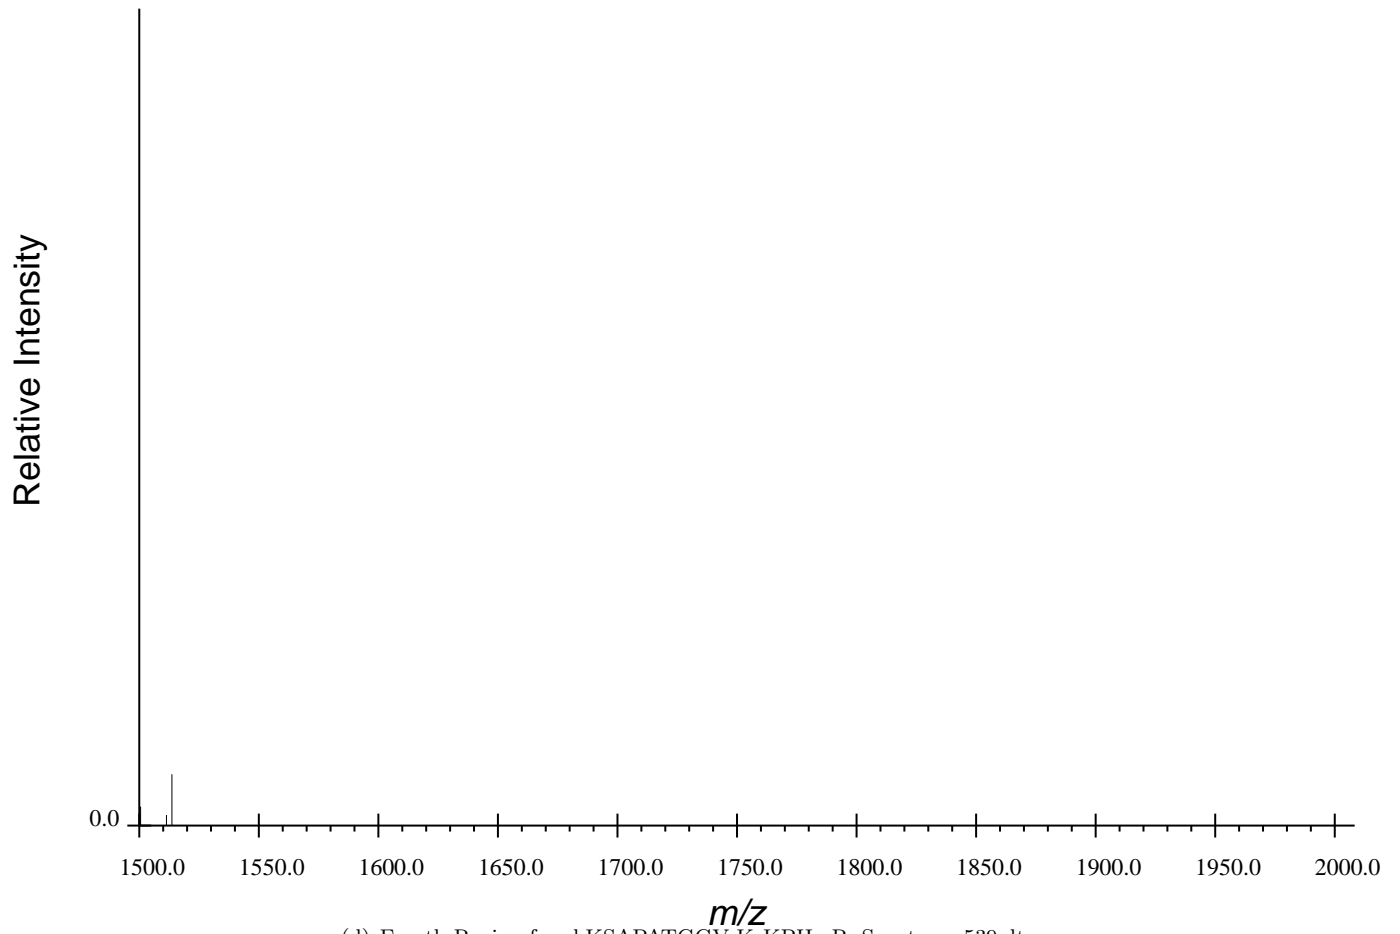

(d) Fourth Region for rhKSAPATGGVrKrKPHmR, Spectrum 539.dta

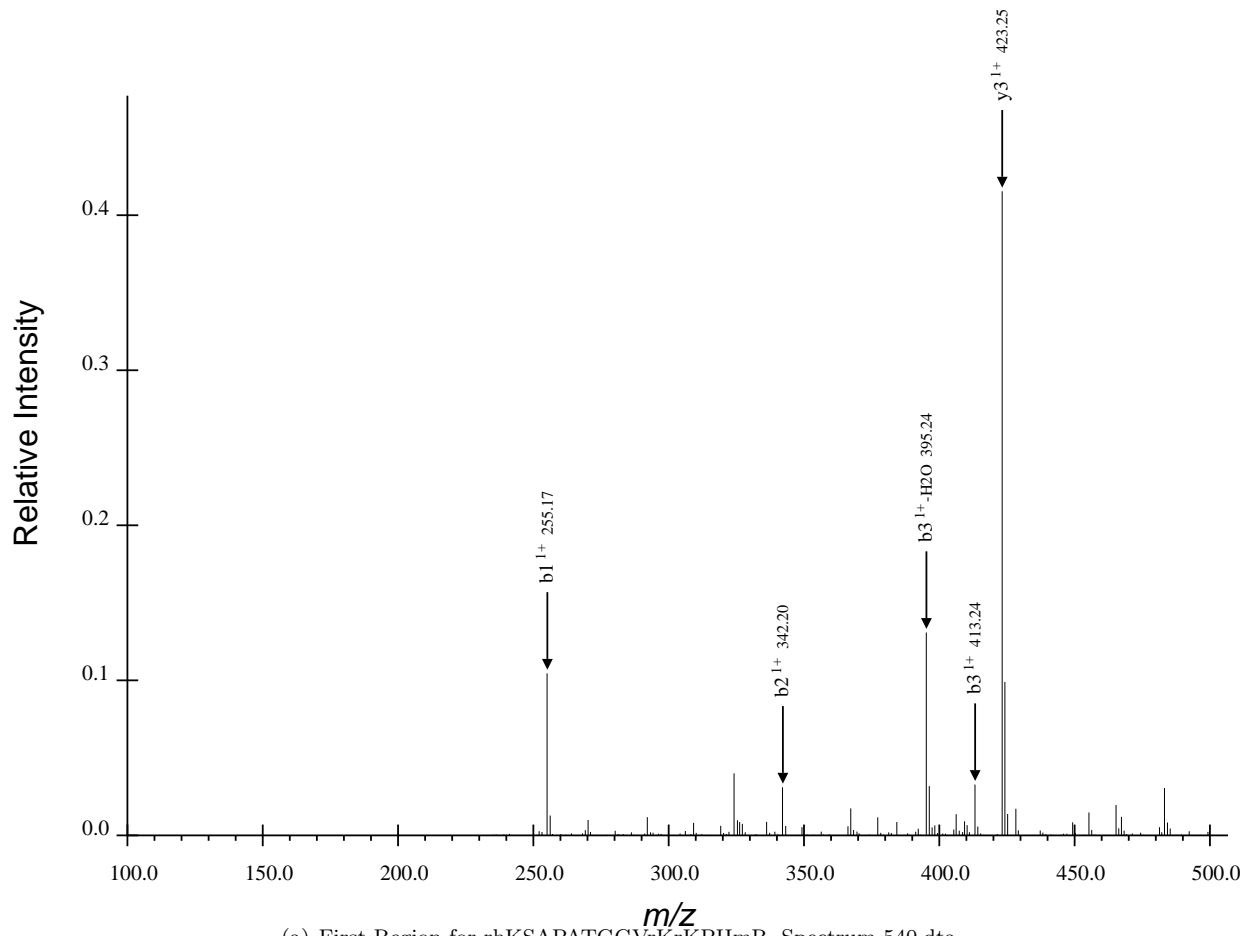

(a) First Region for rhKSAPATGGVrKrKPHmR, Spectrum 540.dta

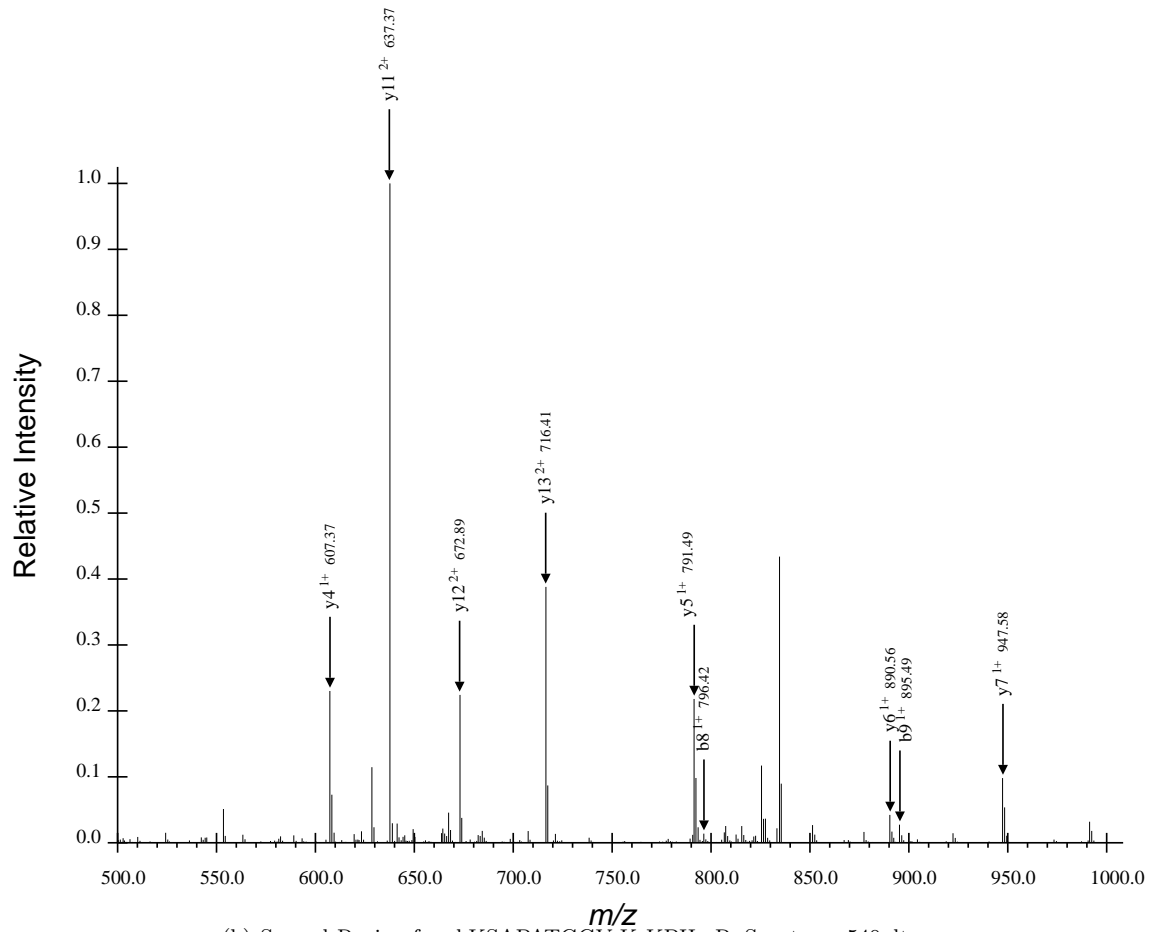

(b) Second Region for rhKSAPATGGVrKrKPHmR, Spectrum 540.dta



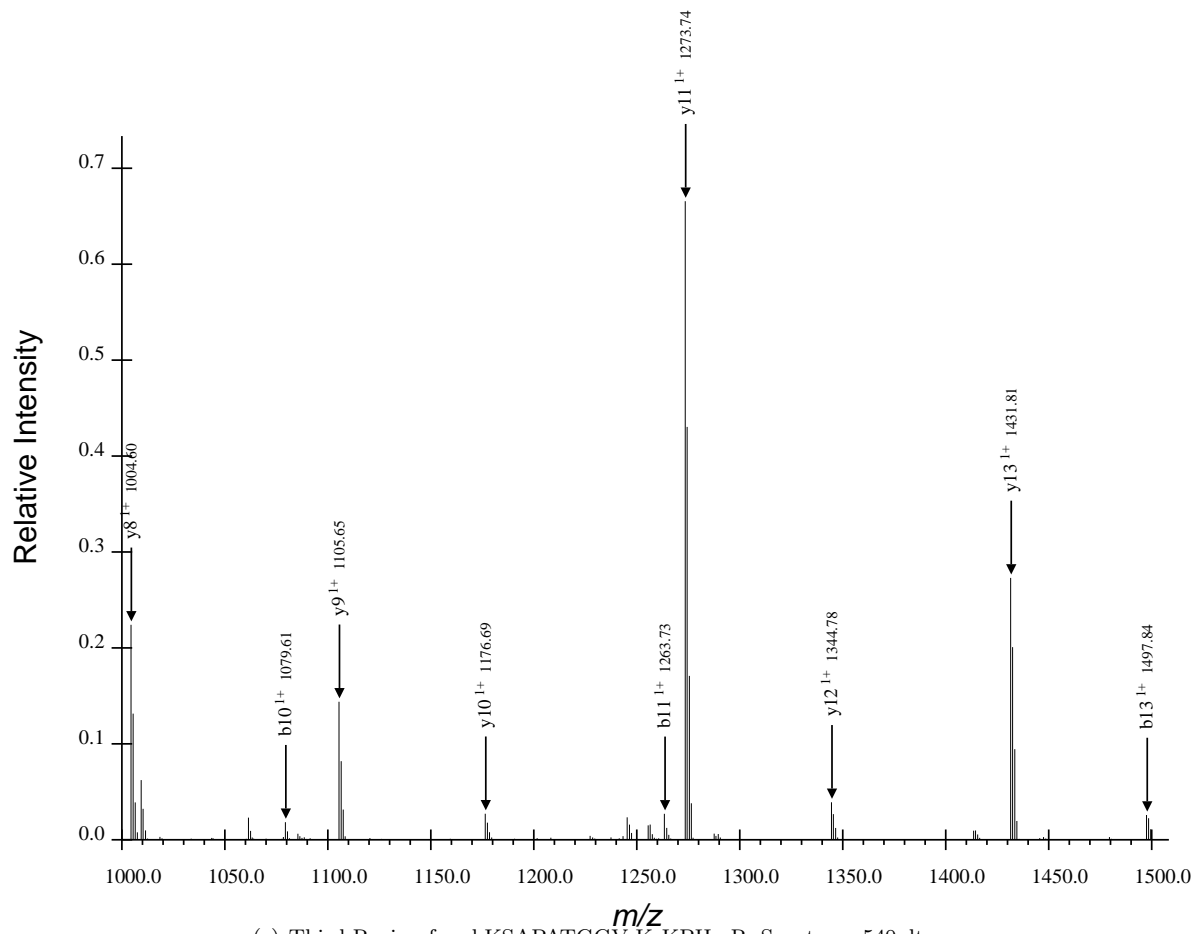

(c) Third Region for rhKSAPATGGVrKrKPHmR, Spectrum 540.dta

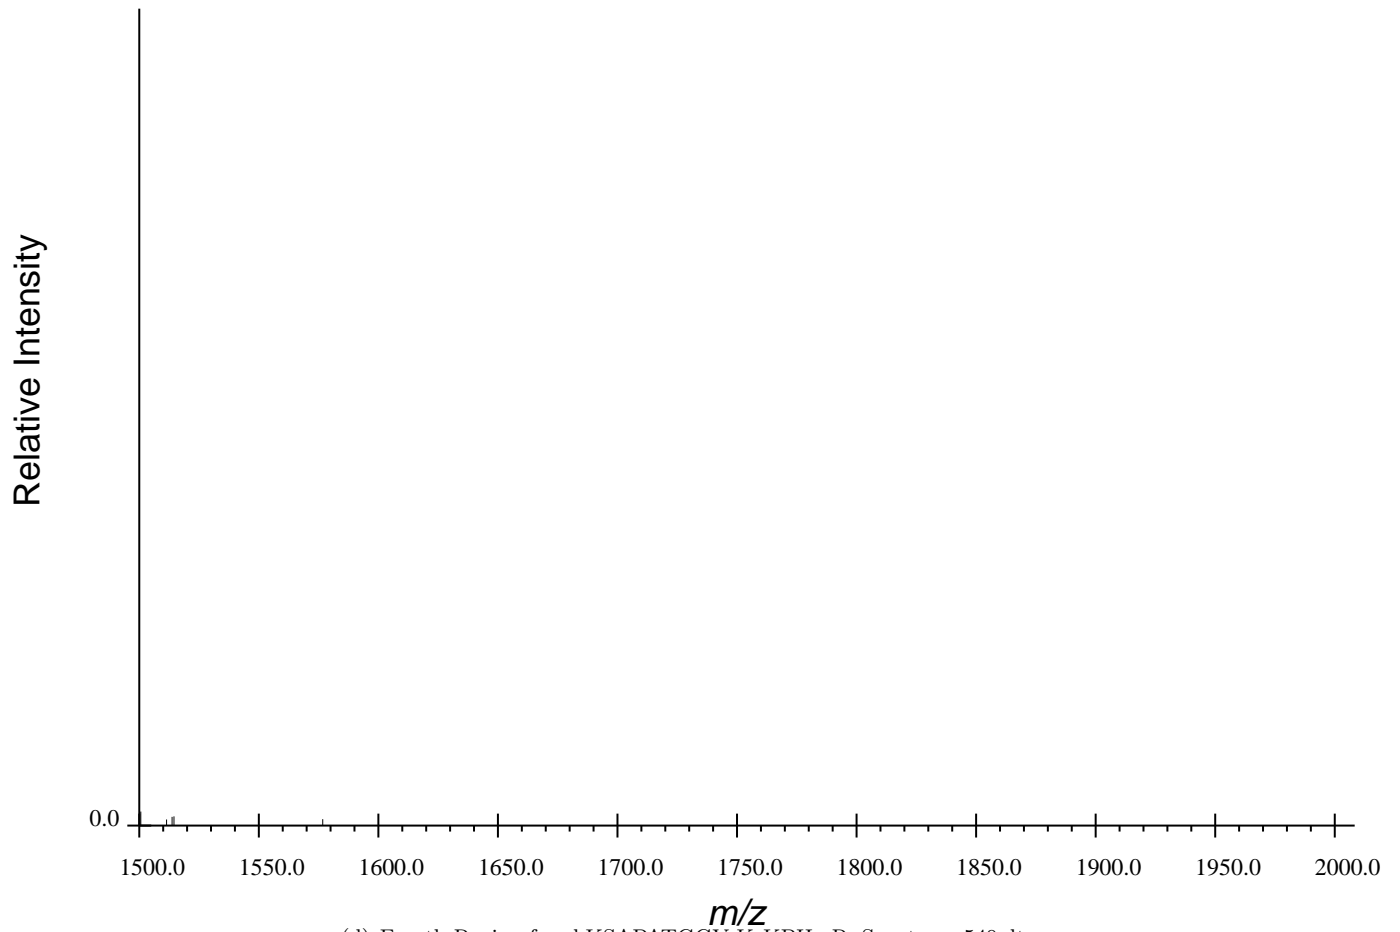

(d) Fourth Region for rhKSAPATGGVrKrKPHmR, Spectrum 540.dta

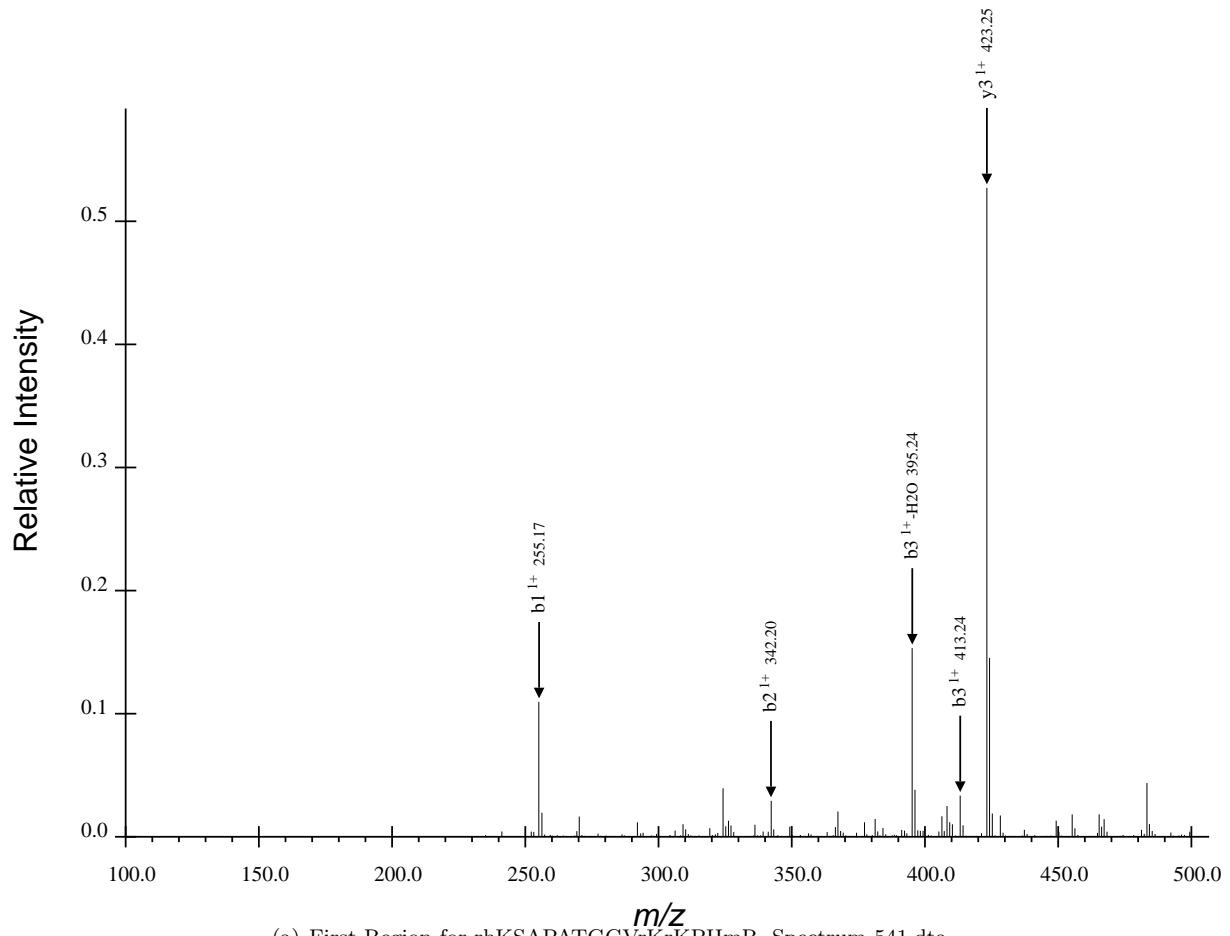

(a) First Region for rhKSAPATGGVrKrKPHmR, Spectrum 541.dta

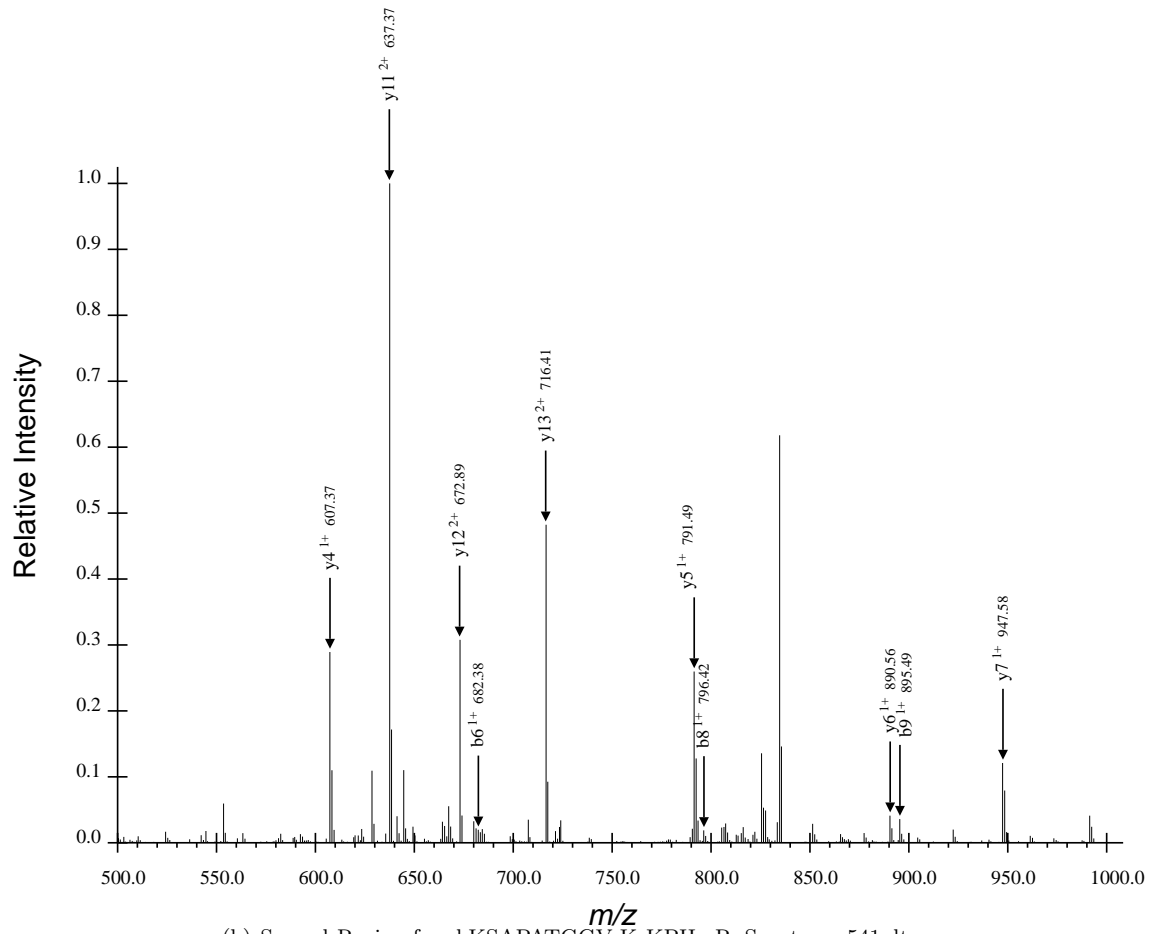

(b) Second Region for rhKSAPATGGVrKrKPHmR, Spectrum 541.dta

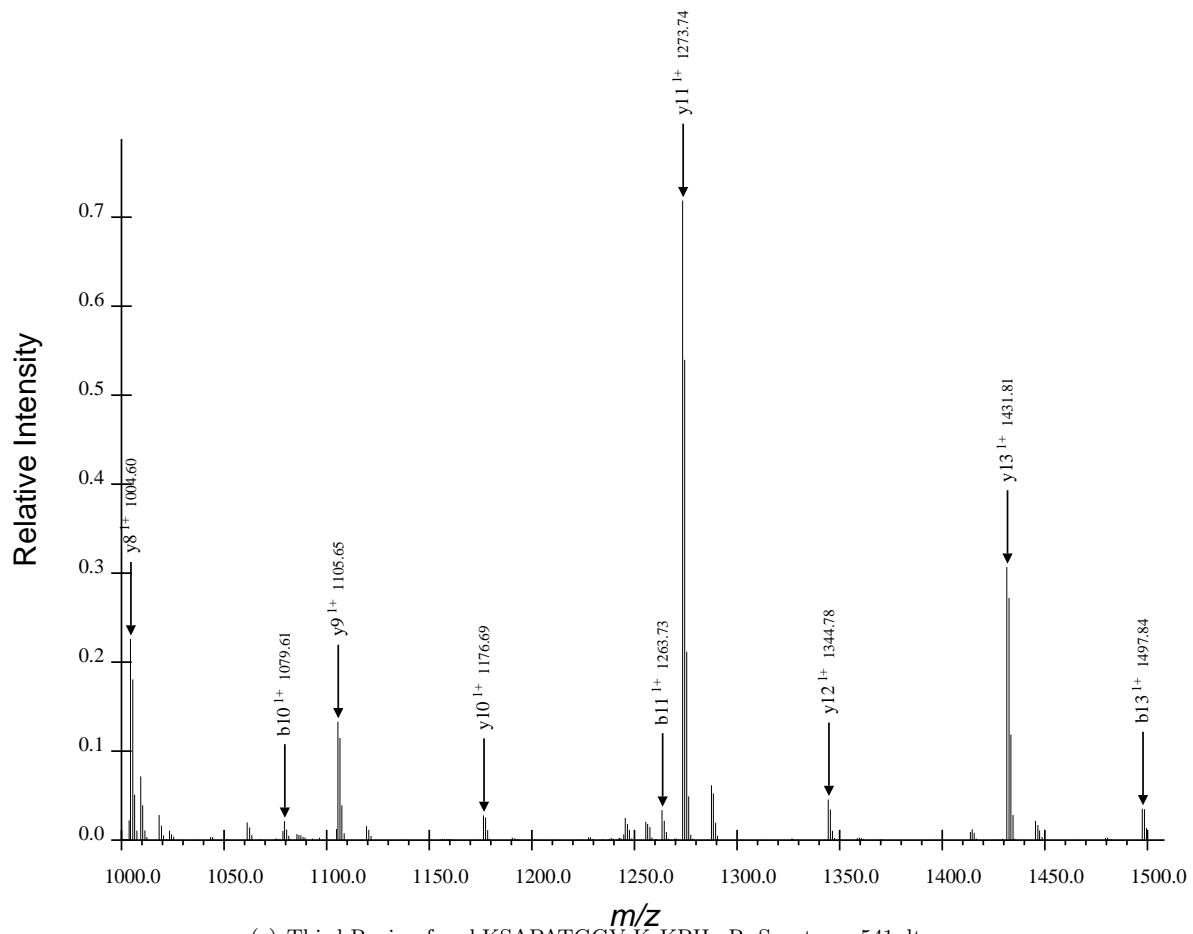

(c) Third Region for rhKSAPATGGVrKrKPHmR, Spectrum 541.dta

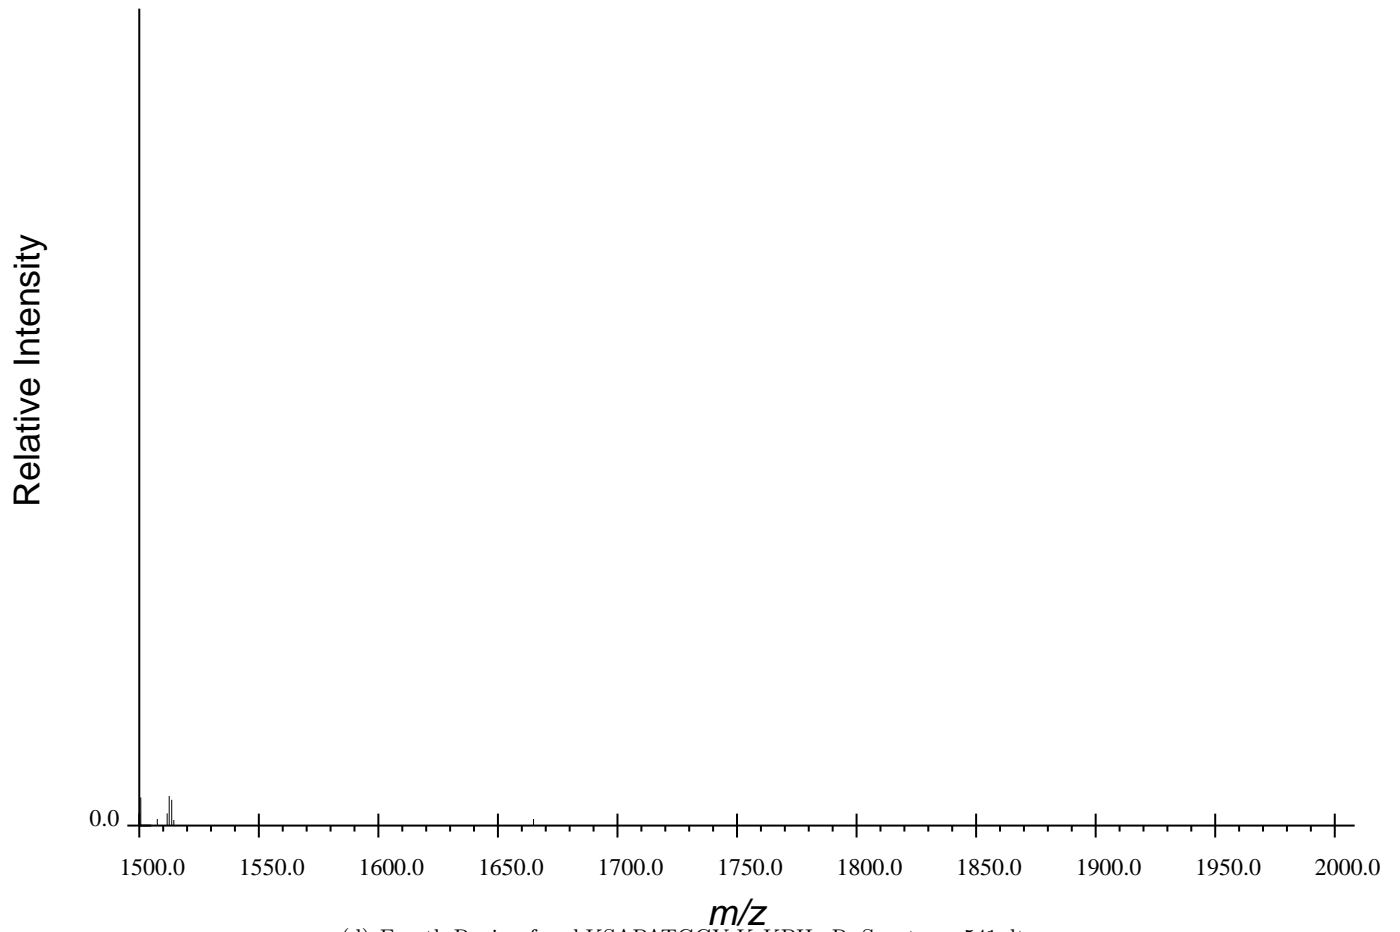

(d) Fourth Region for rhKSAPATGGVrKrKPHmR, Spectrum 541.dta

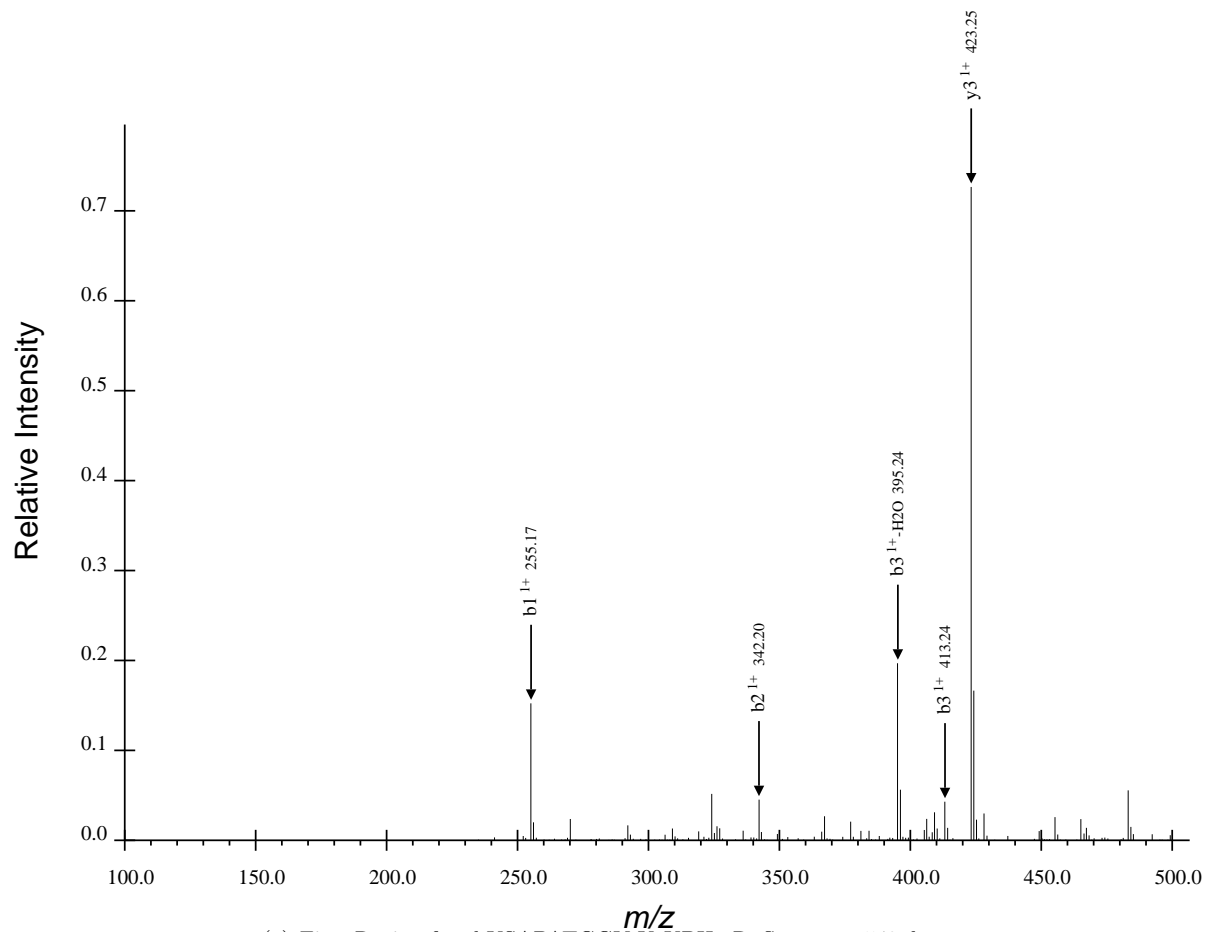

(a) First Region for rhKSAPATGGVrKrKPHmR, Spectrum 542.dta

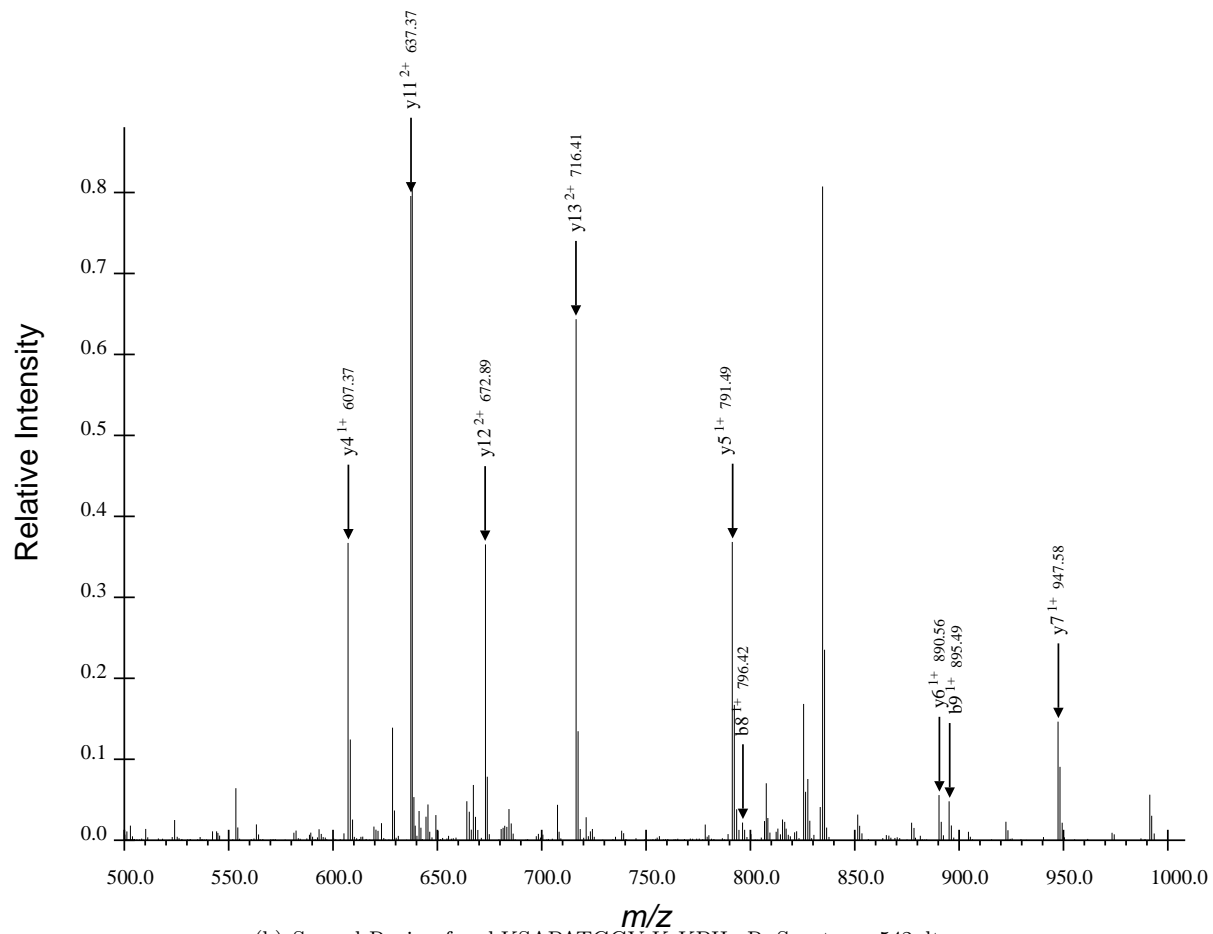

(b) Second Region for rhKSAPATGGVrKrKPHmR, Spectrum 542.dta

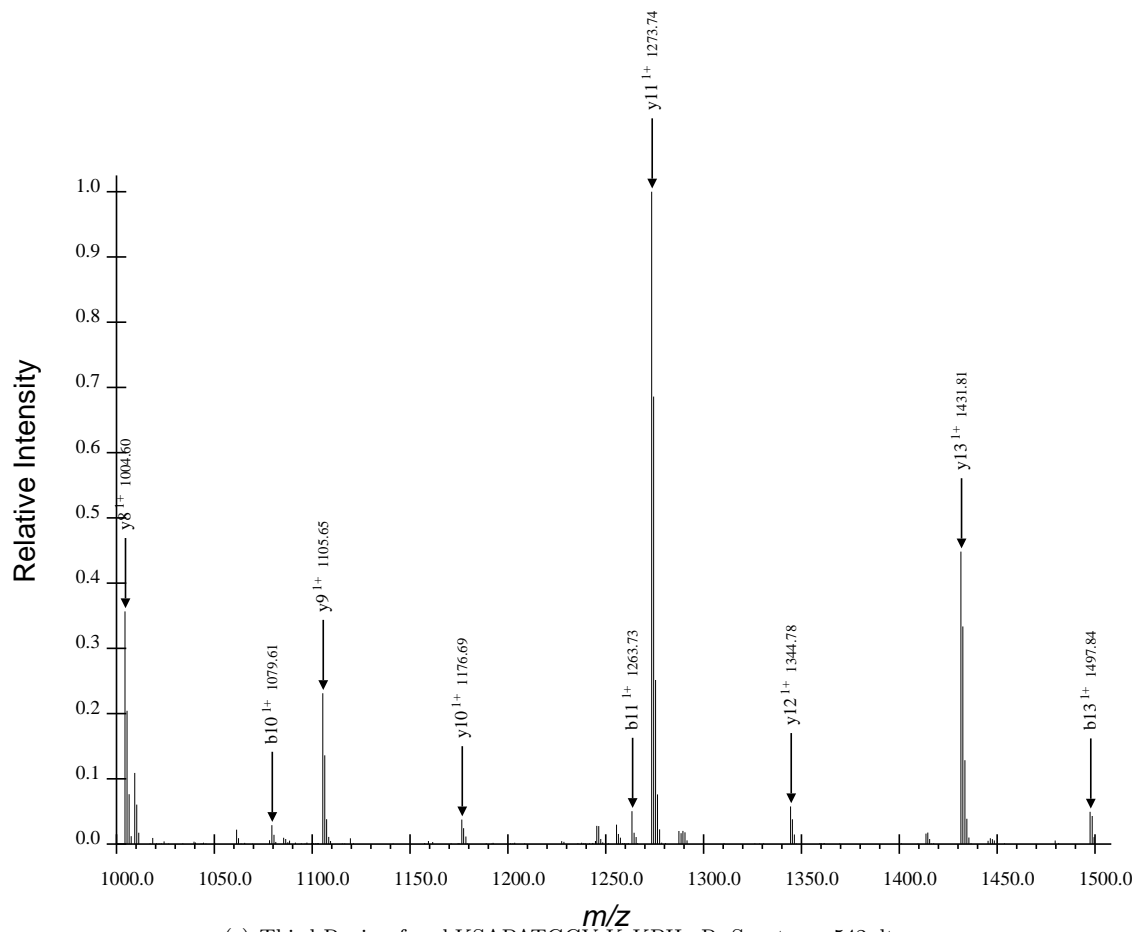

(c) Third Region for rhKSAPATGGVrKrKPHmR, Spectrum 542.dta

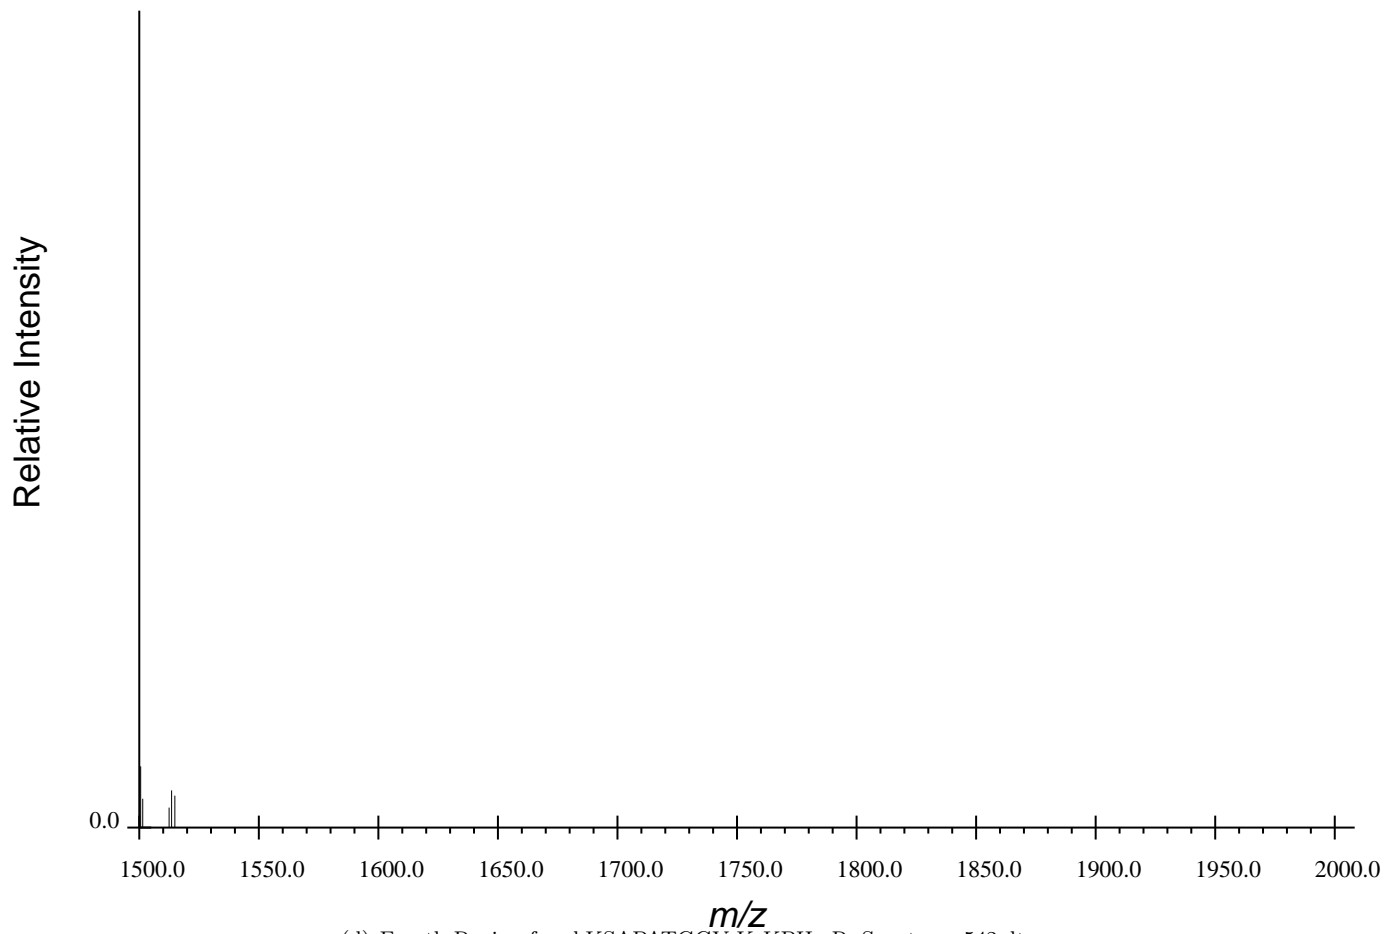

(d) Fourth Region for rhKSAPATGGVrKrKPHmR, Spectrum 542.dta

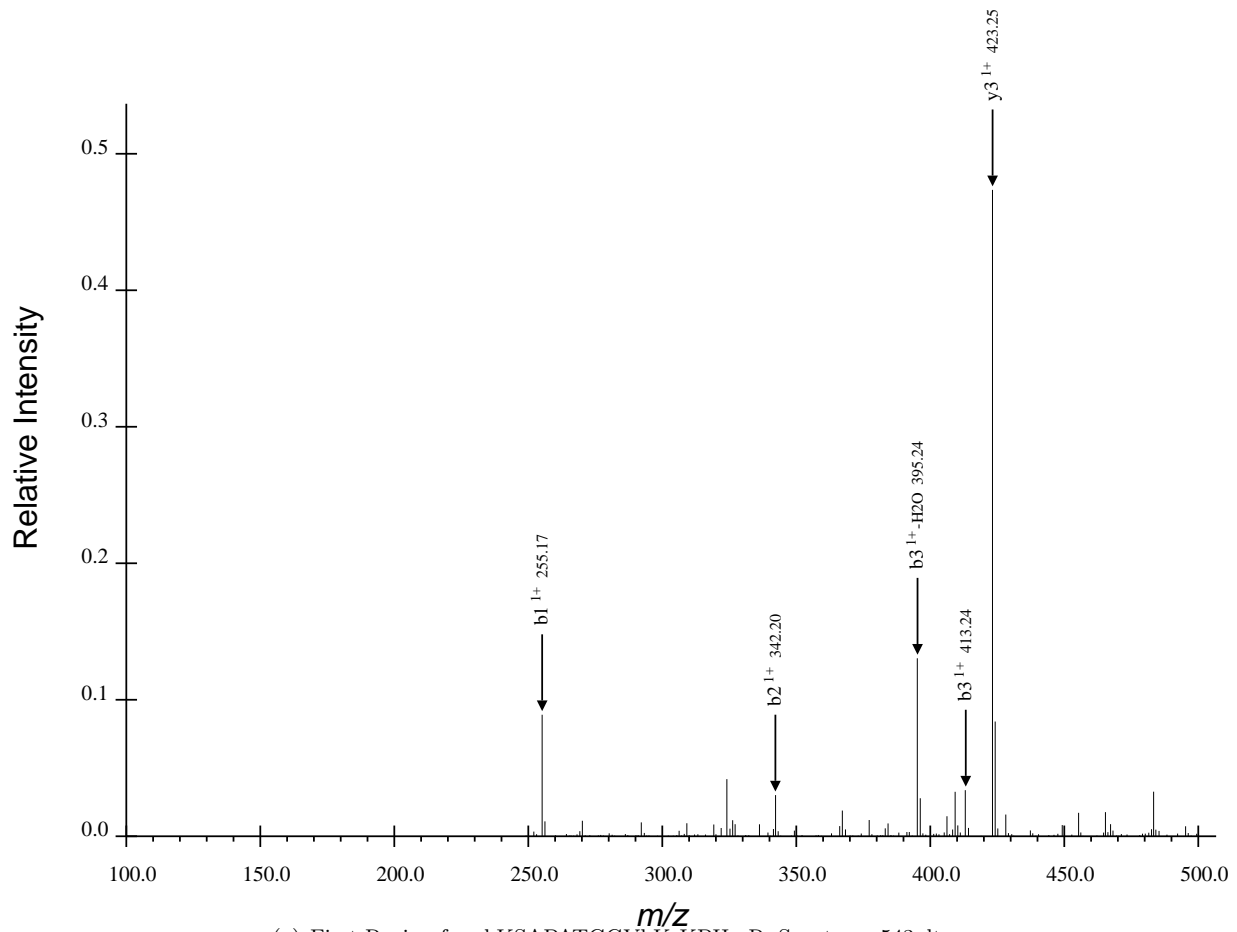

(a) First Region for rhKSAPATGGVhKrKPHmR, Spectrum 543.dta

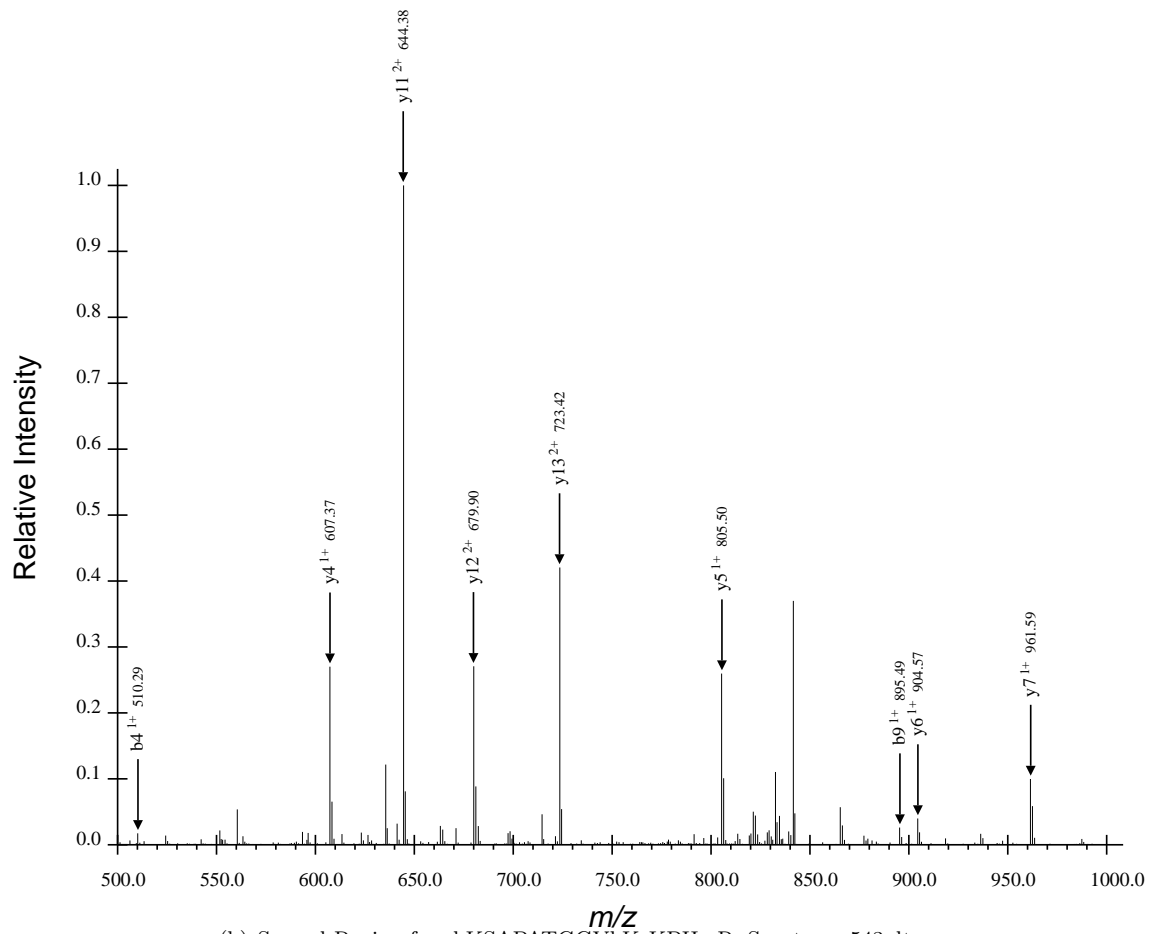

(b) Second Region for rhKSAPATGGVhKrKPHmR, Spectrum 543.dta

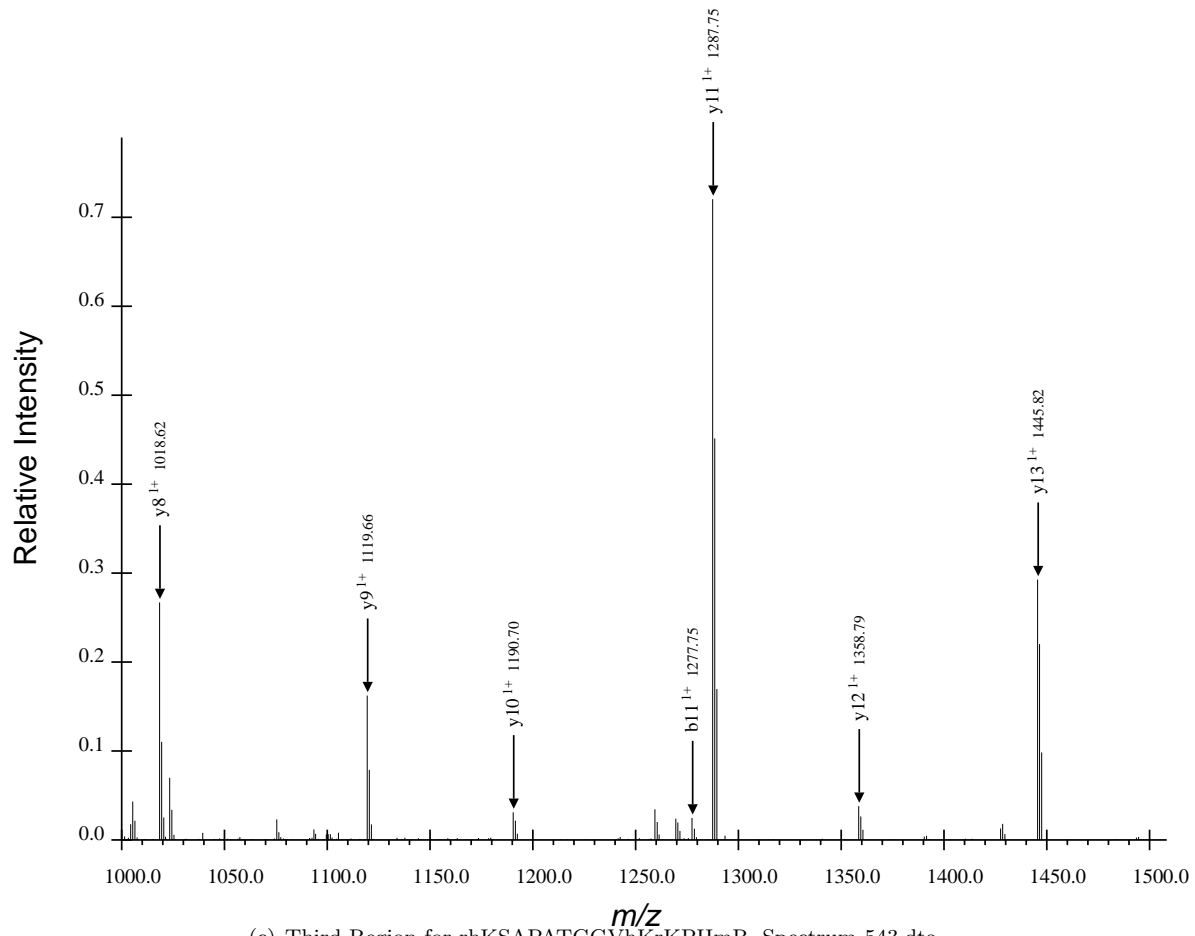

(c) Third Region for rhKSAPATGGVhKrKPHmR, Spectrum 543.dta

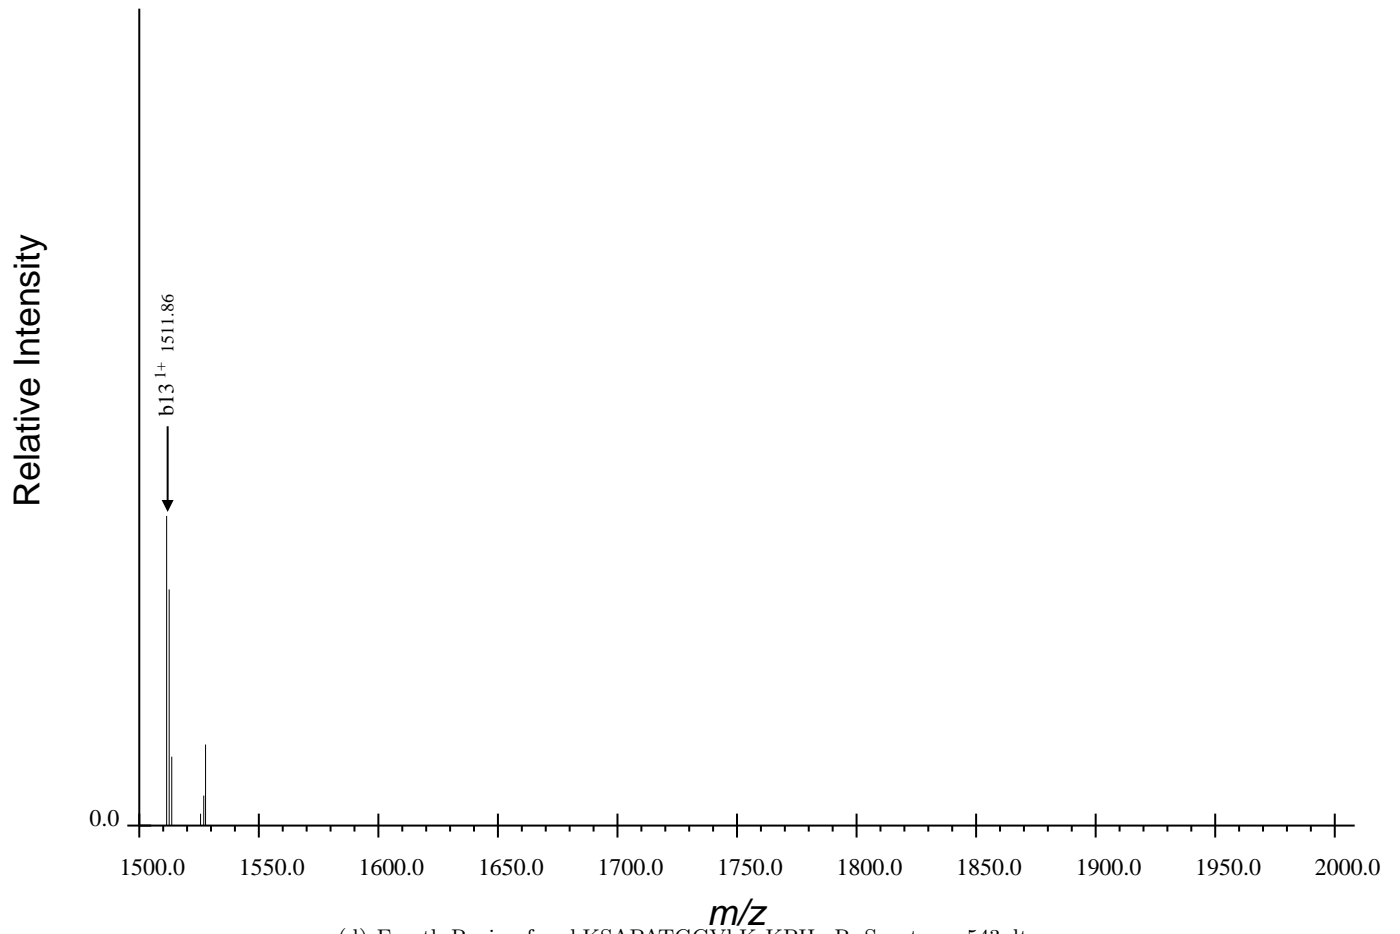

(d) Fourth Region for rhKSAPATGGVhKrKPHmR, Spectrum 543.dta

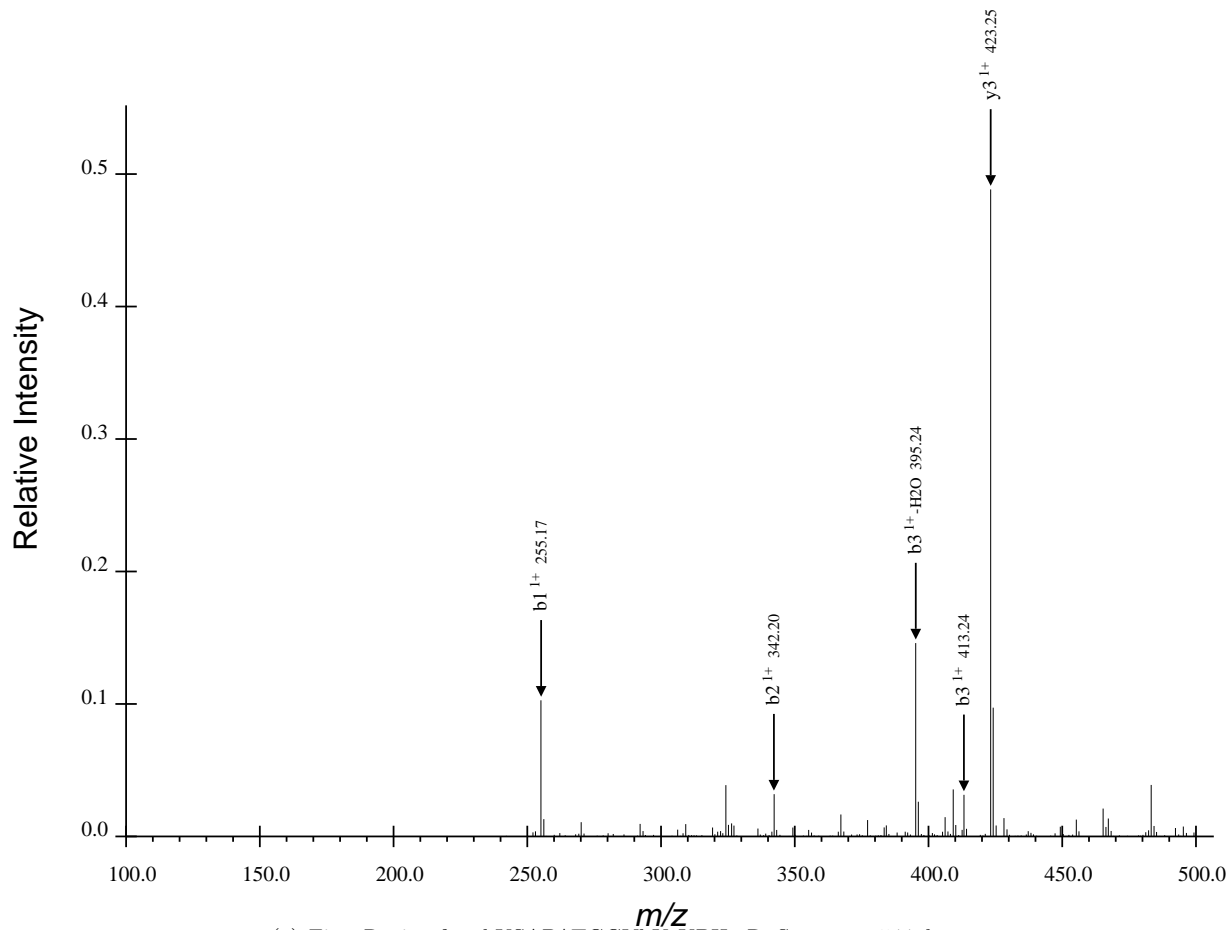

(a) First Region for rhKSAPATGGVhKrKPHmR, Spectrum 544.dta

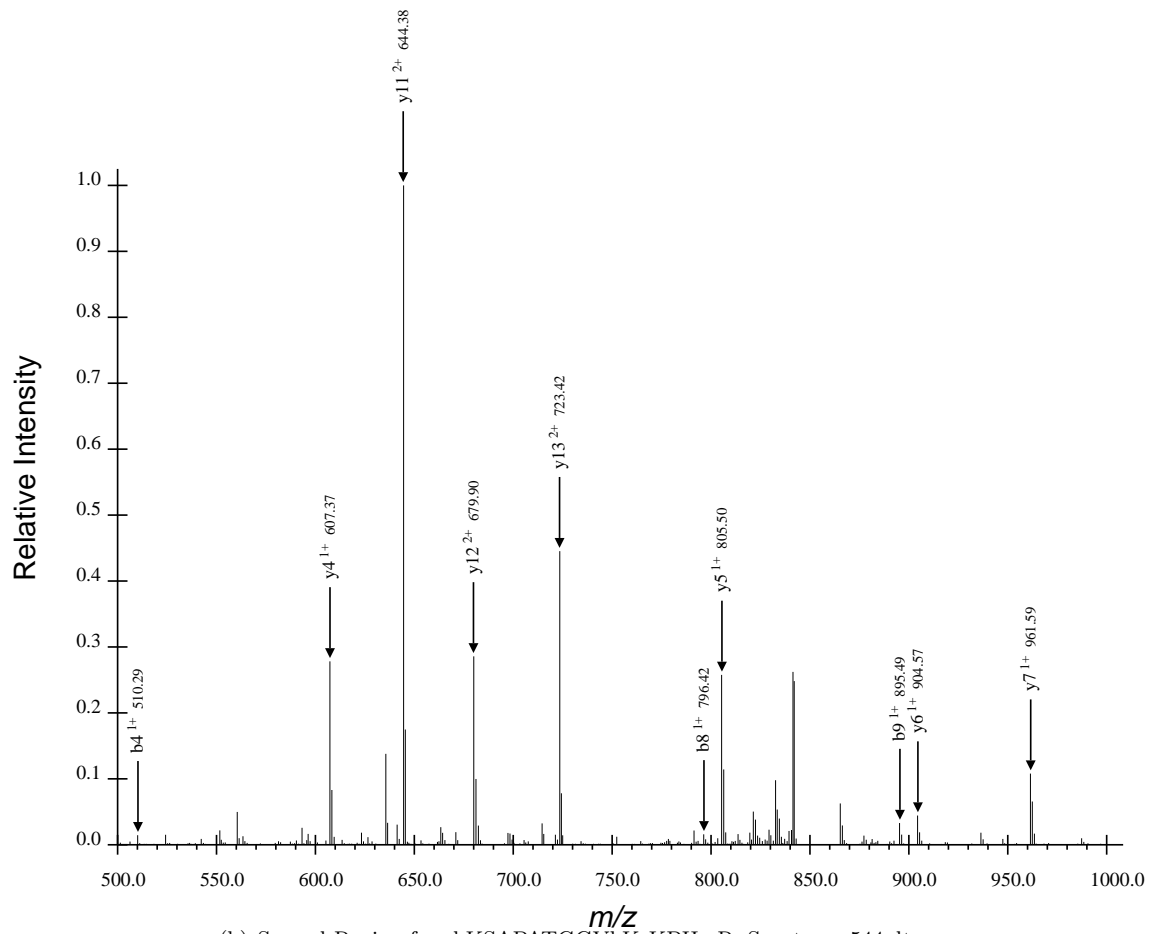

(b) Second Region for rhKSAPATGGVhKrKPHmR, Spectrum 544.dta



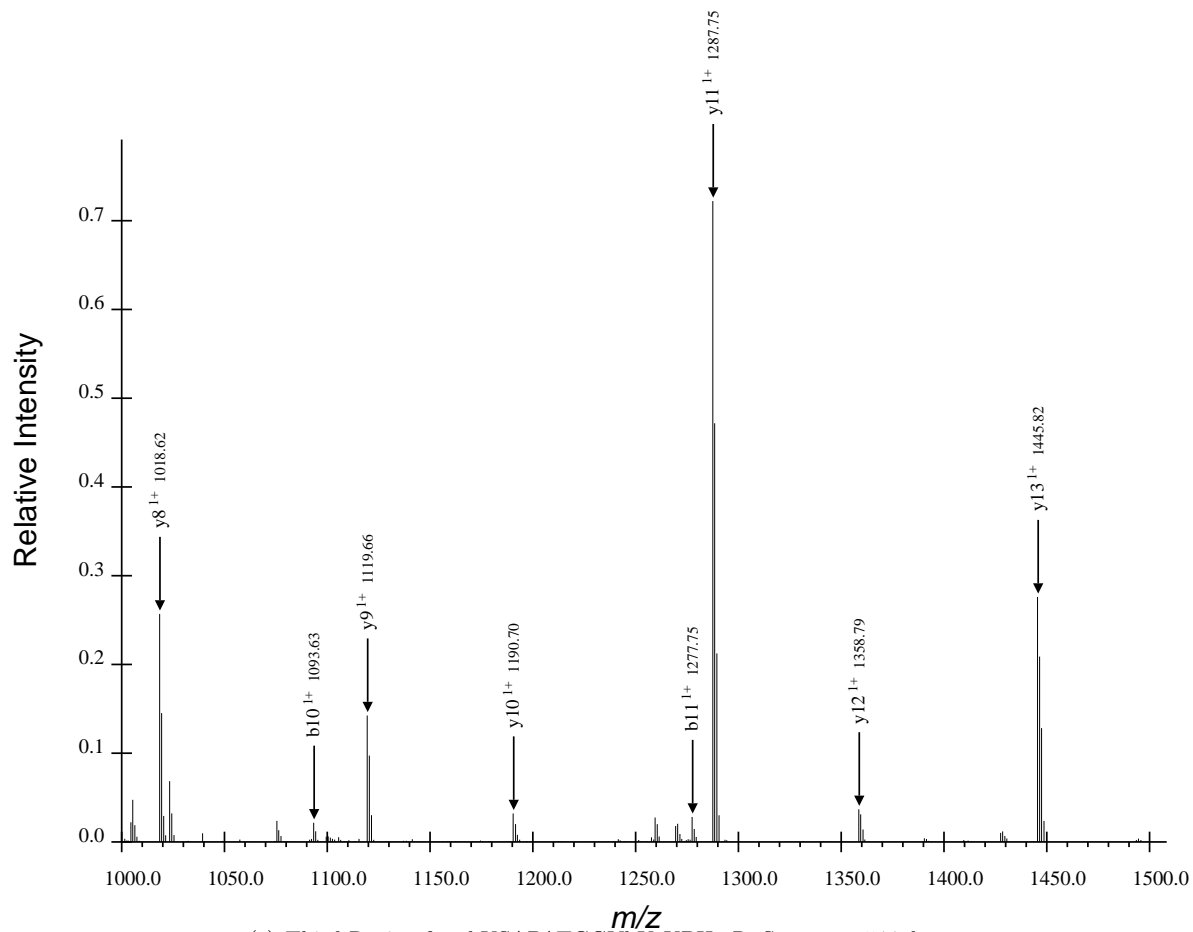

(c) Third Region for rhKSAPATGGVhKrKPHmR, Spectrum 544.dta

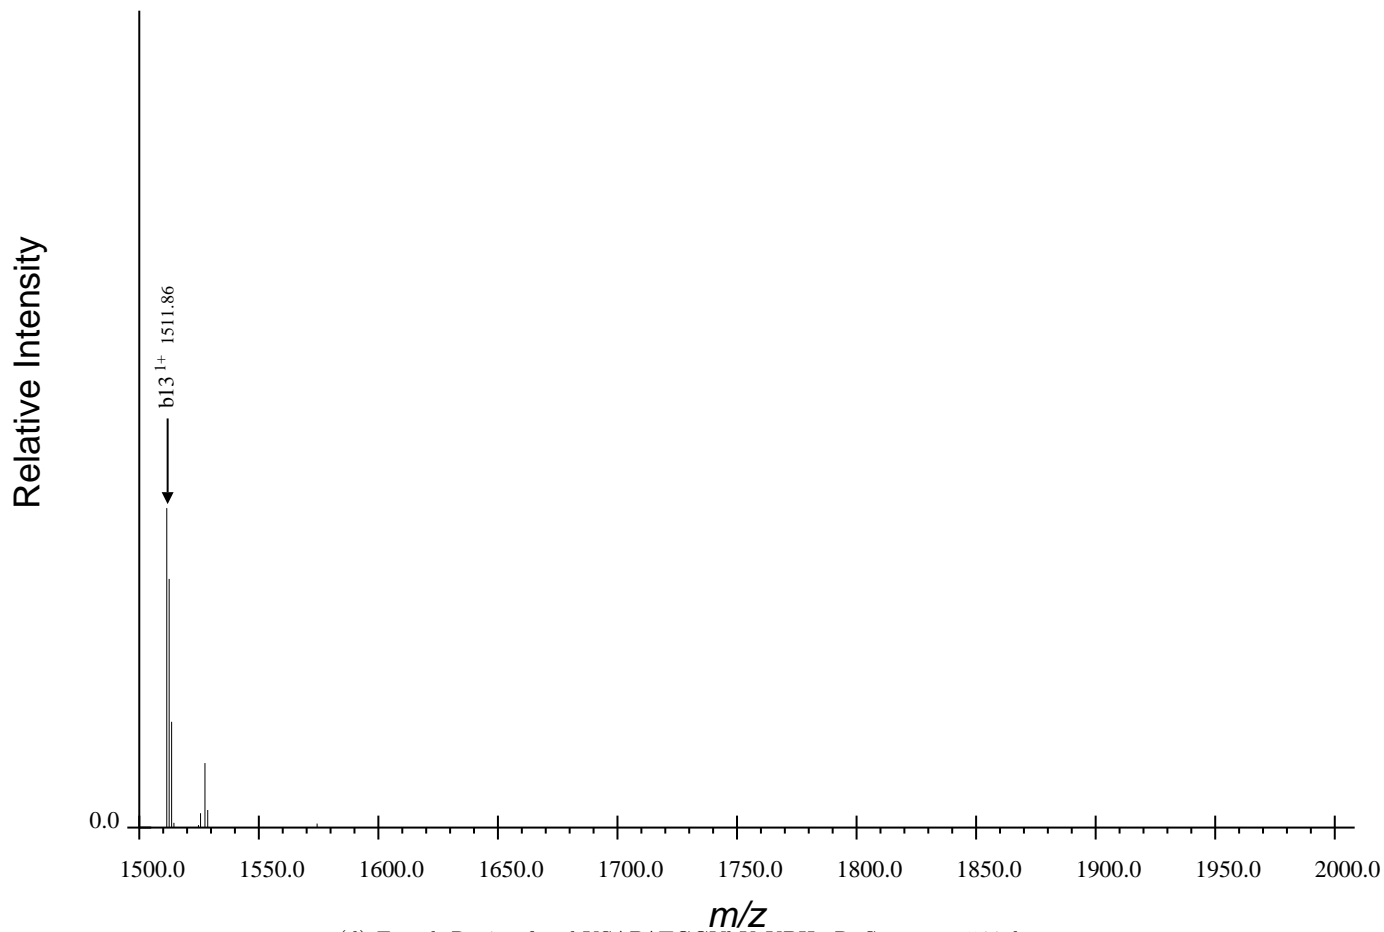

(d) Fourth Region for rhKSAPATGGVhKrKPHmR, Spectrum 544.dta

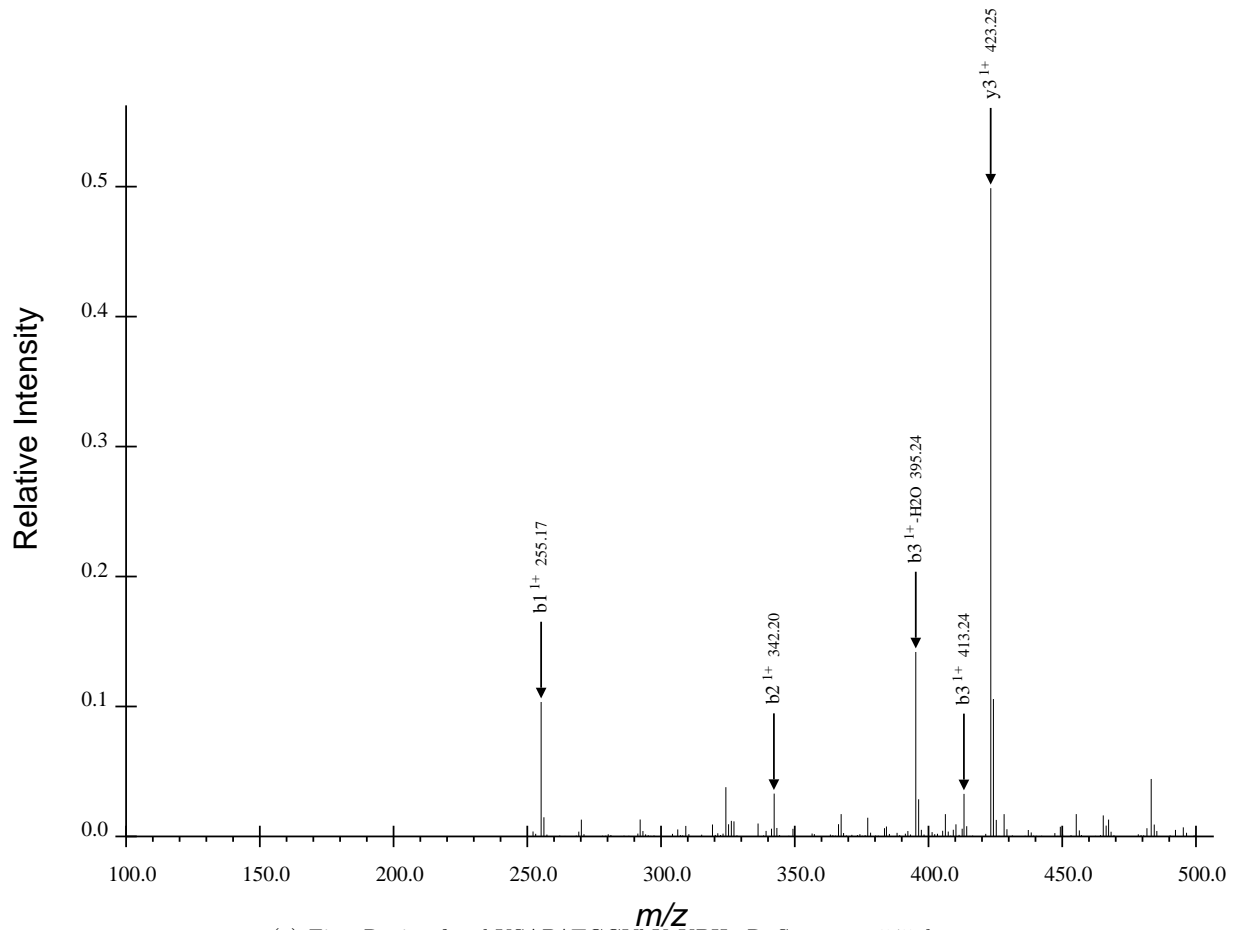

(a) First Region for rhKSAPATGGVhKrKPHmR, Spectrum 545.dta

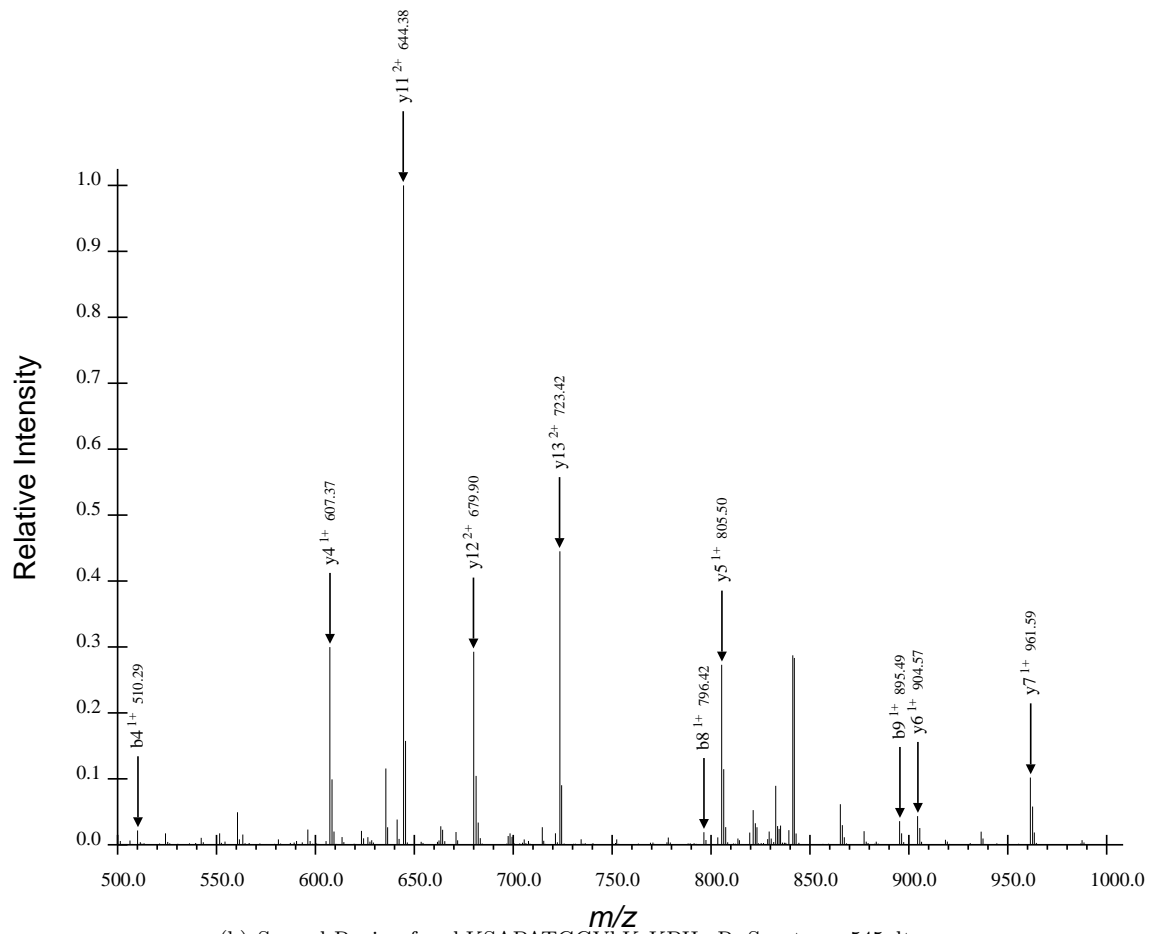

(b) Second Region for rhKSAPATGGVhKrKPHmR, Spectrum 545.dta

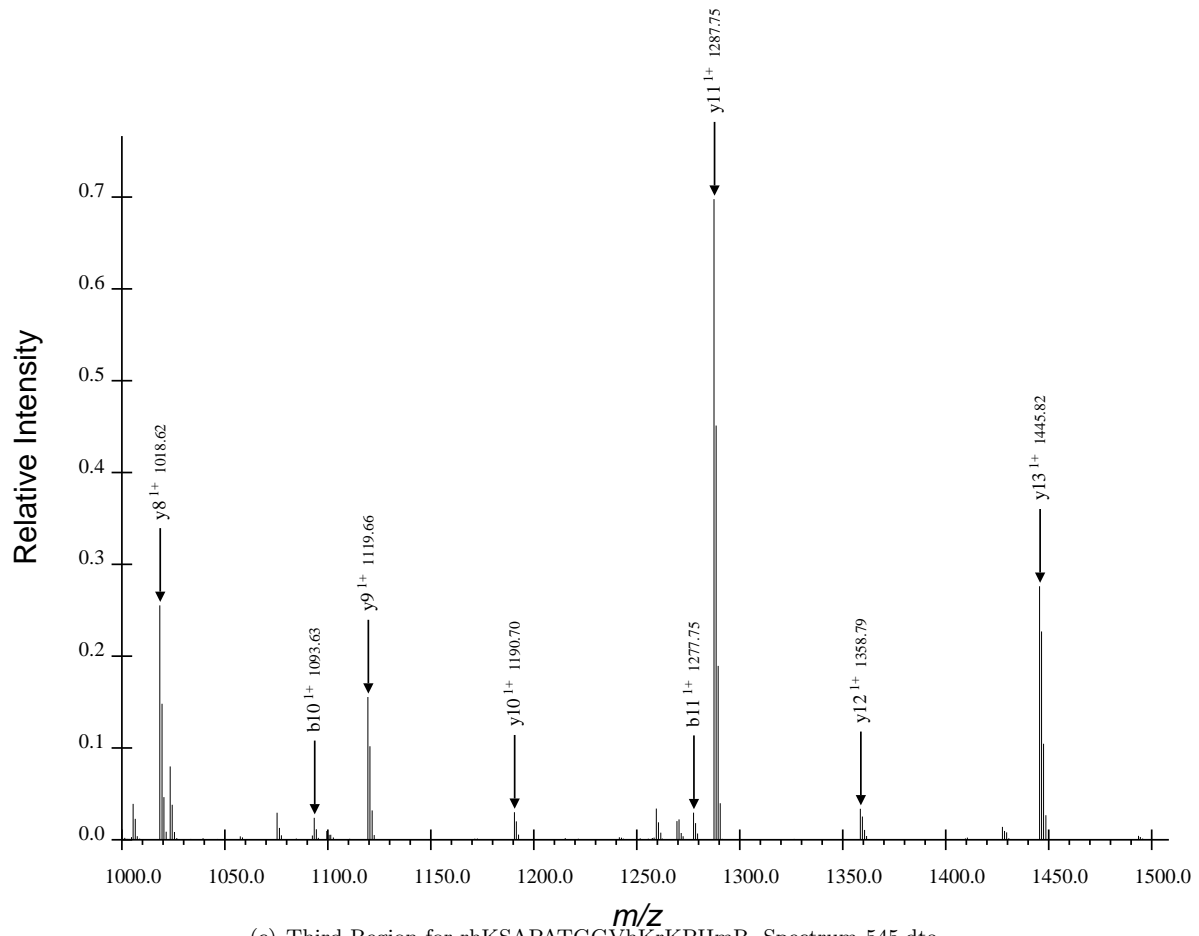

(c) Third Region for rhKSAPATGGVhKrKPHmR, Spectrum 545.dta

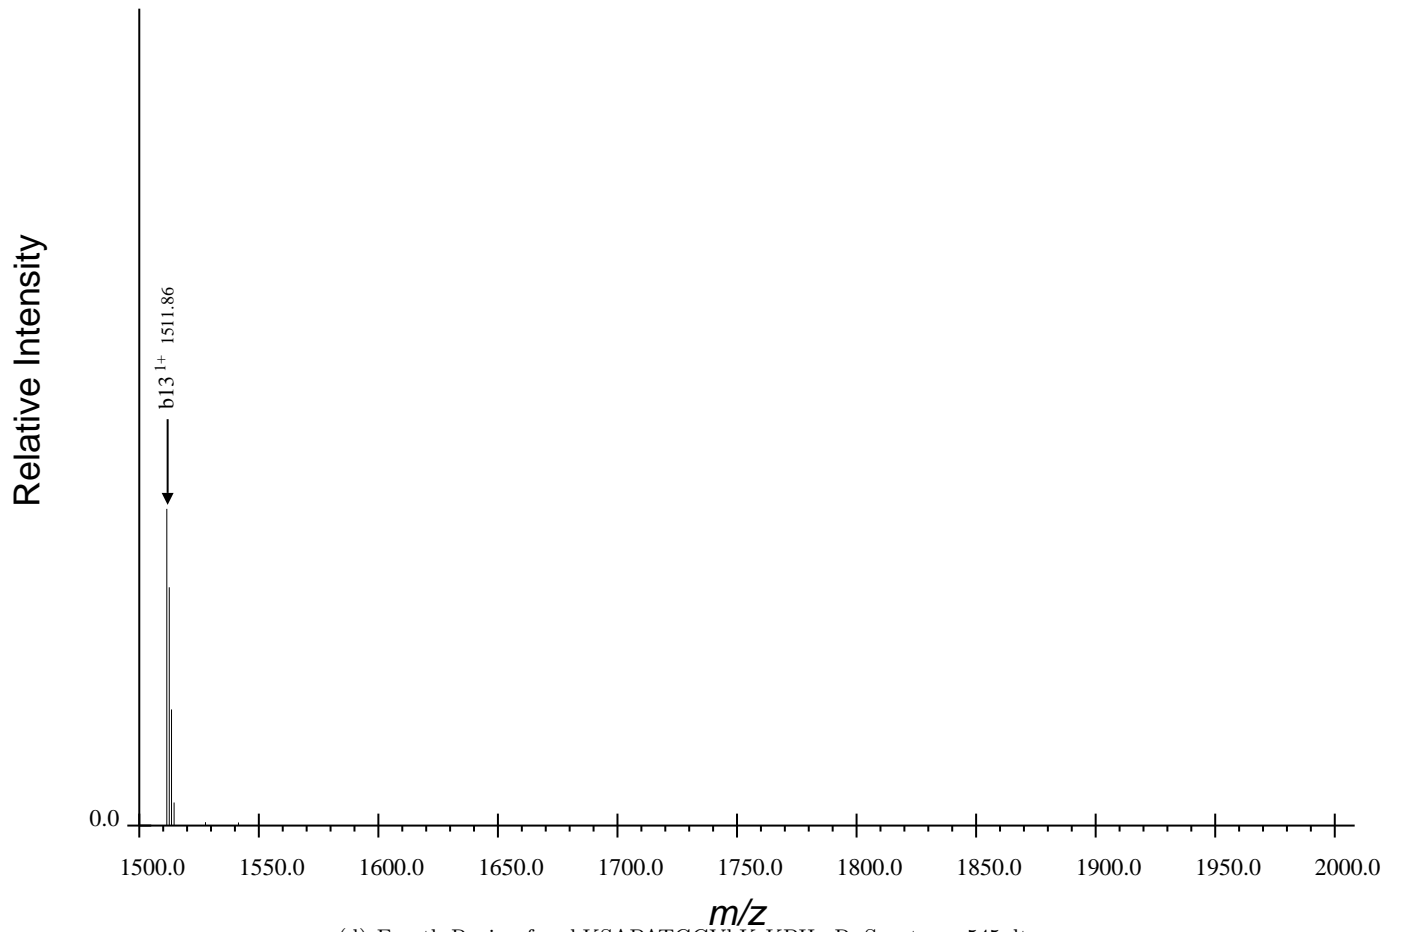

(d) Fourth Region for rhKSAPATGGVhKrKPHmR, Spectrum 545.dta

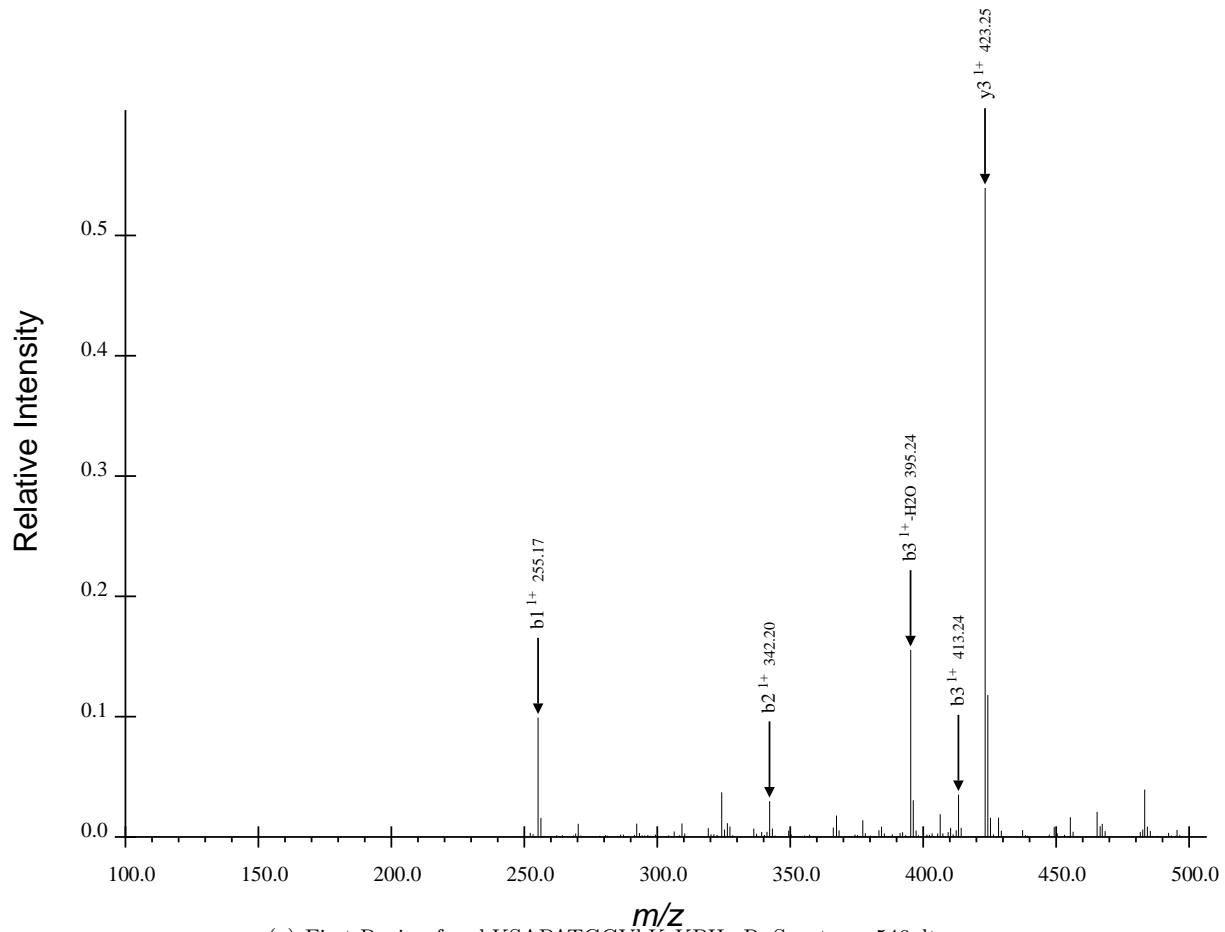

(a) First Region for rhKSAPATGGVhKrKPHmR, Spectrum 546.dta

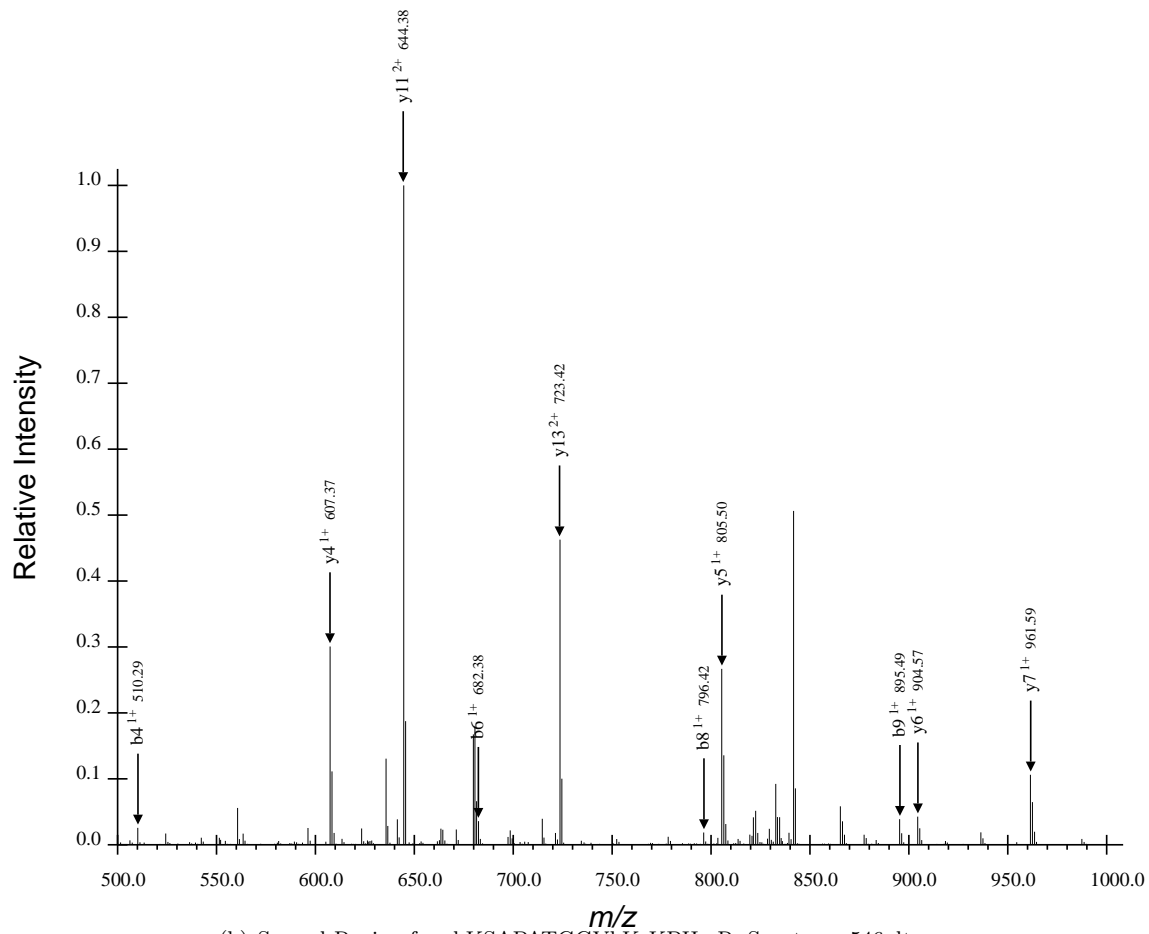

(b) Second Region for rhKSAPATGGVhKrKPHmR, Spectrum 546.dta

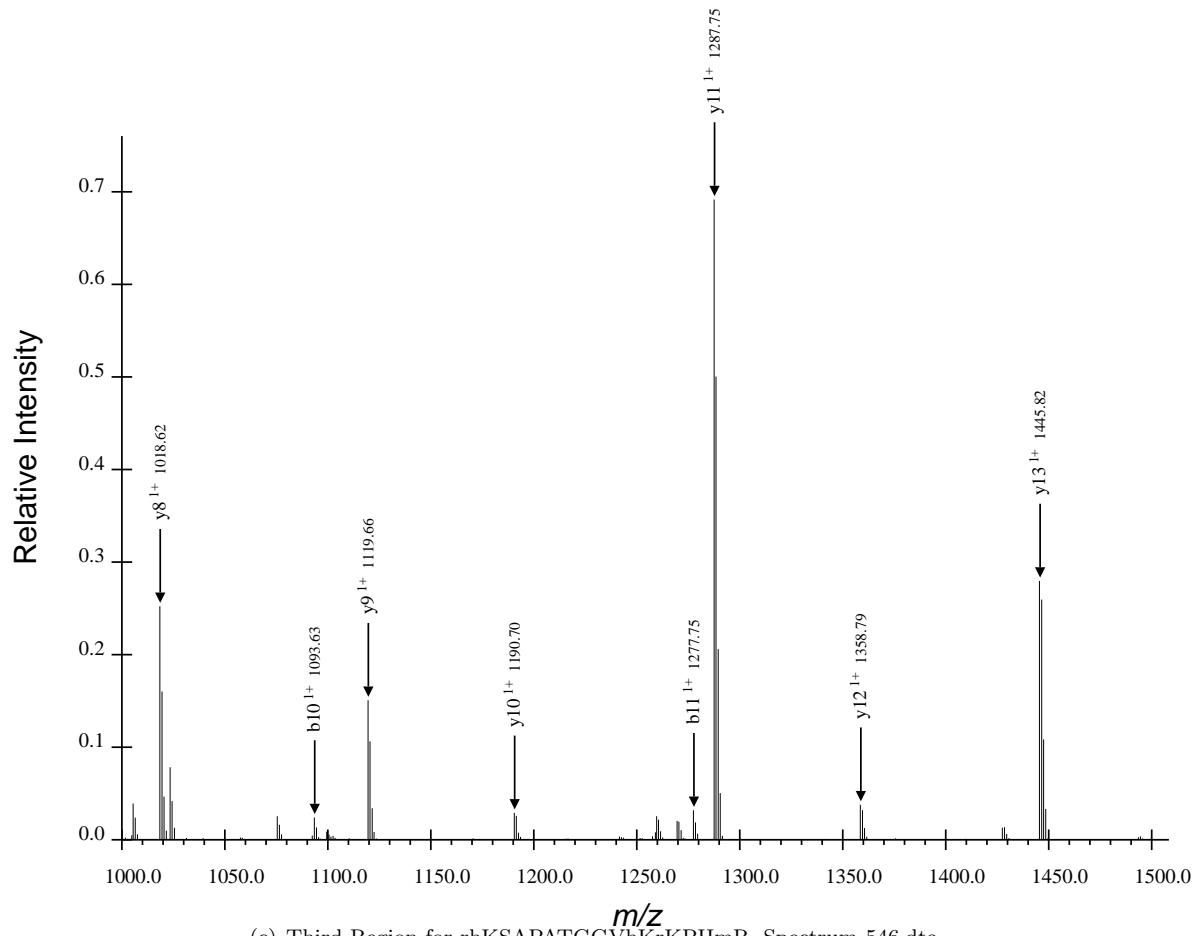

(c) Third Region for rhKSAPATGGVhKrKPHmR, Spectrum 546.dta

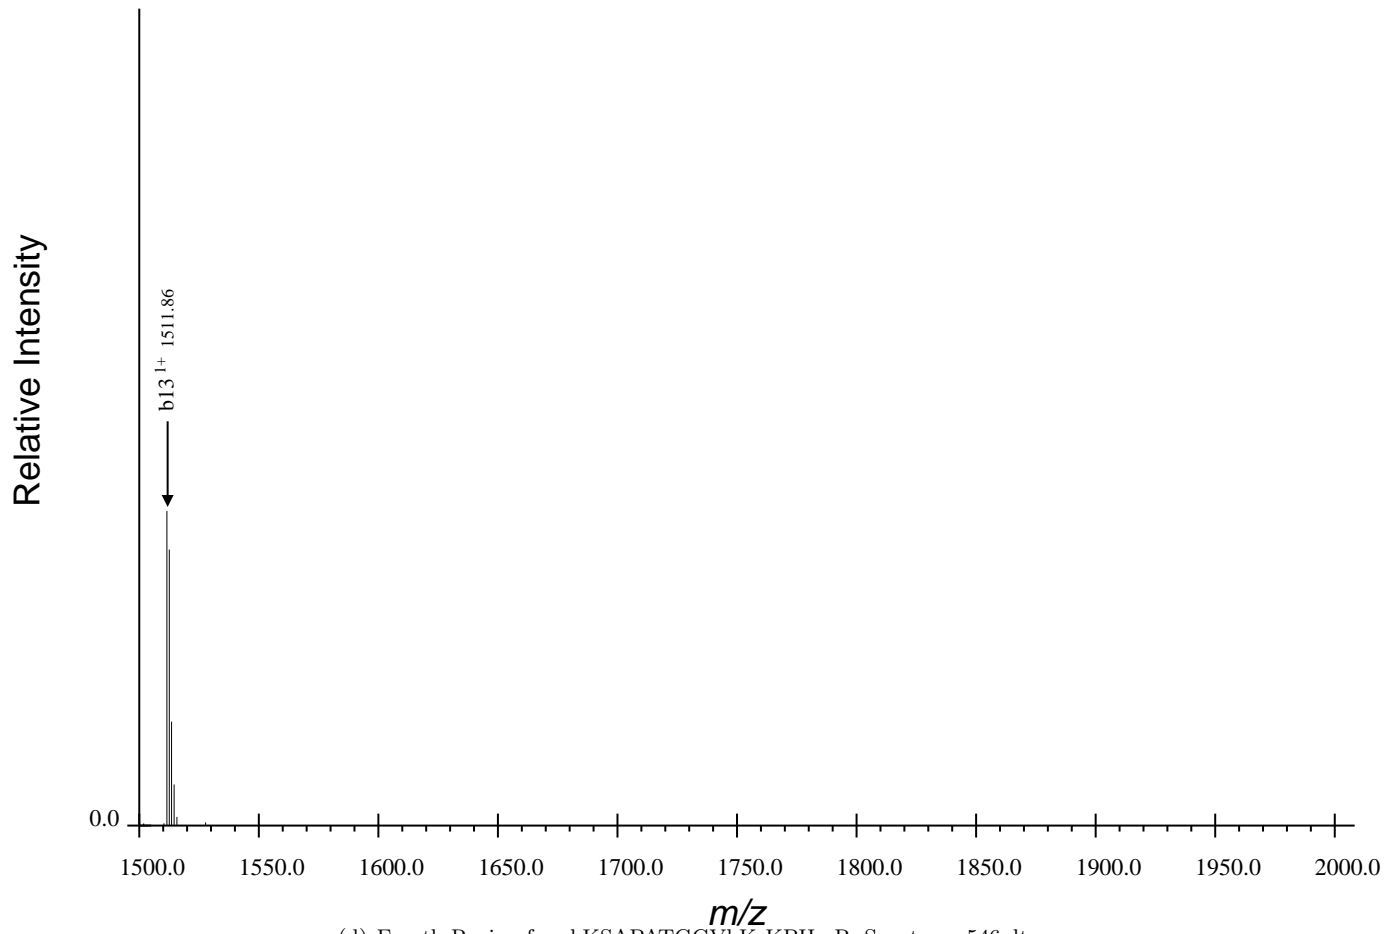

(d) Fourth Region for rhKSAPATGGVhKrKPHmR, Spectrum 546.dta

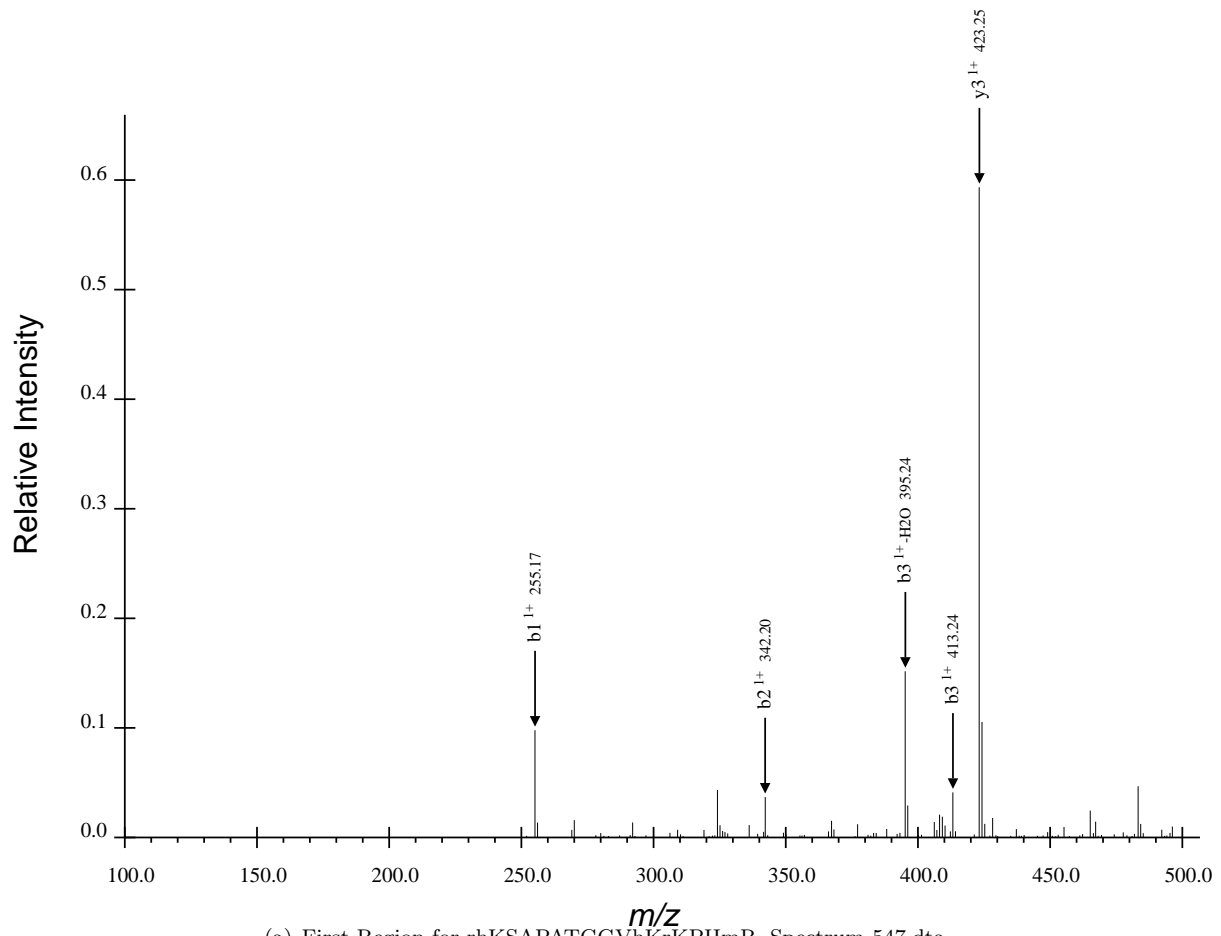

(a) First Region for rhKSAPATGGVhKrKPHmR, Spectrum 547.dta

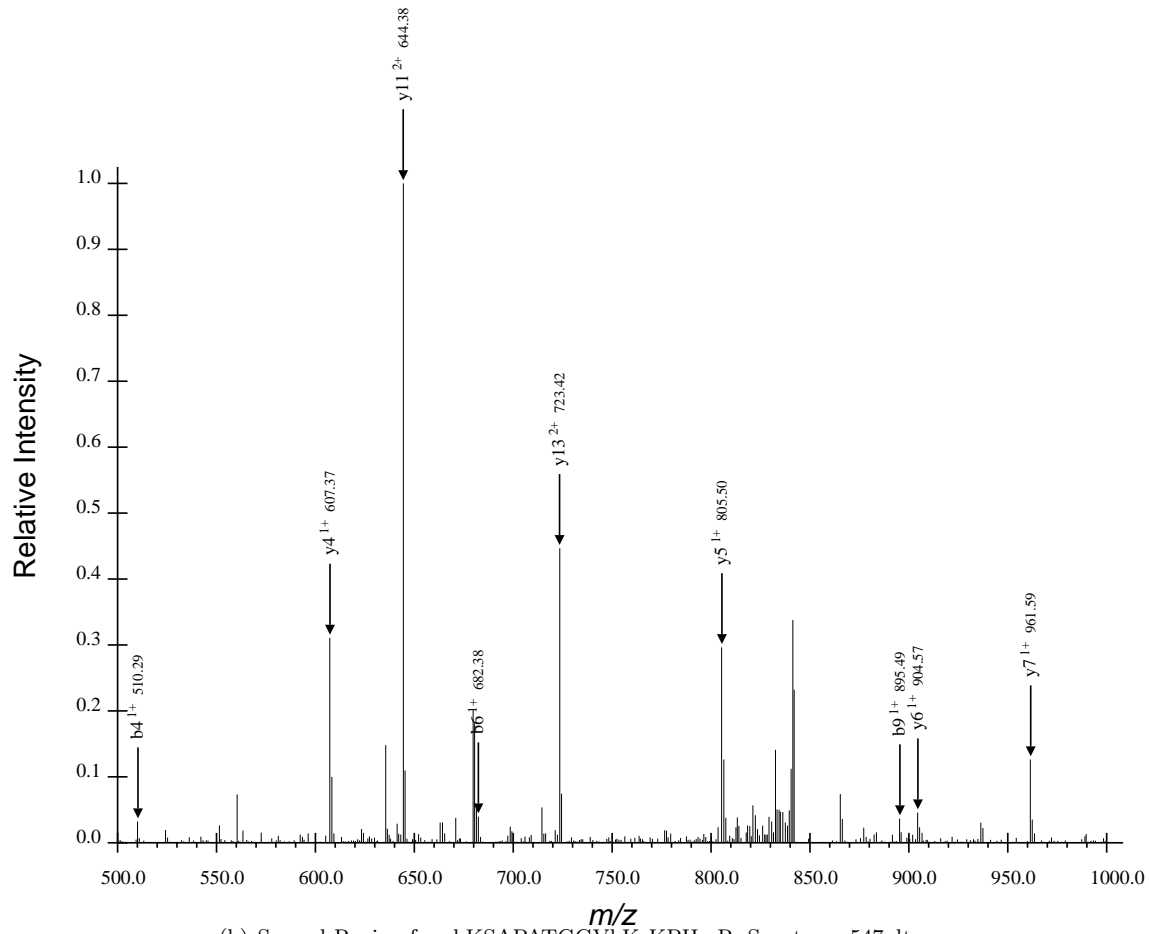

(b) Second Region for rhKSAPATGGVhKrKPHmR, Spectrum 547.dta

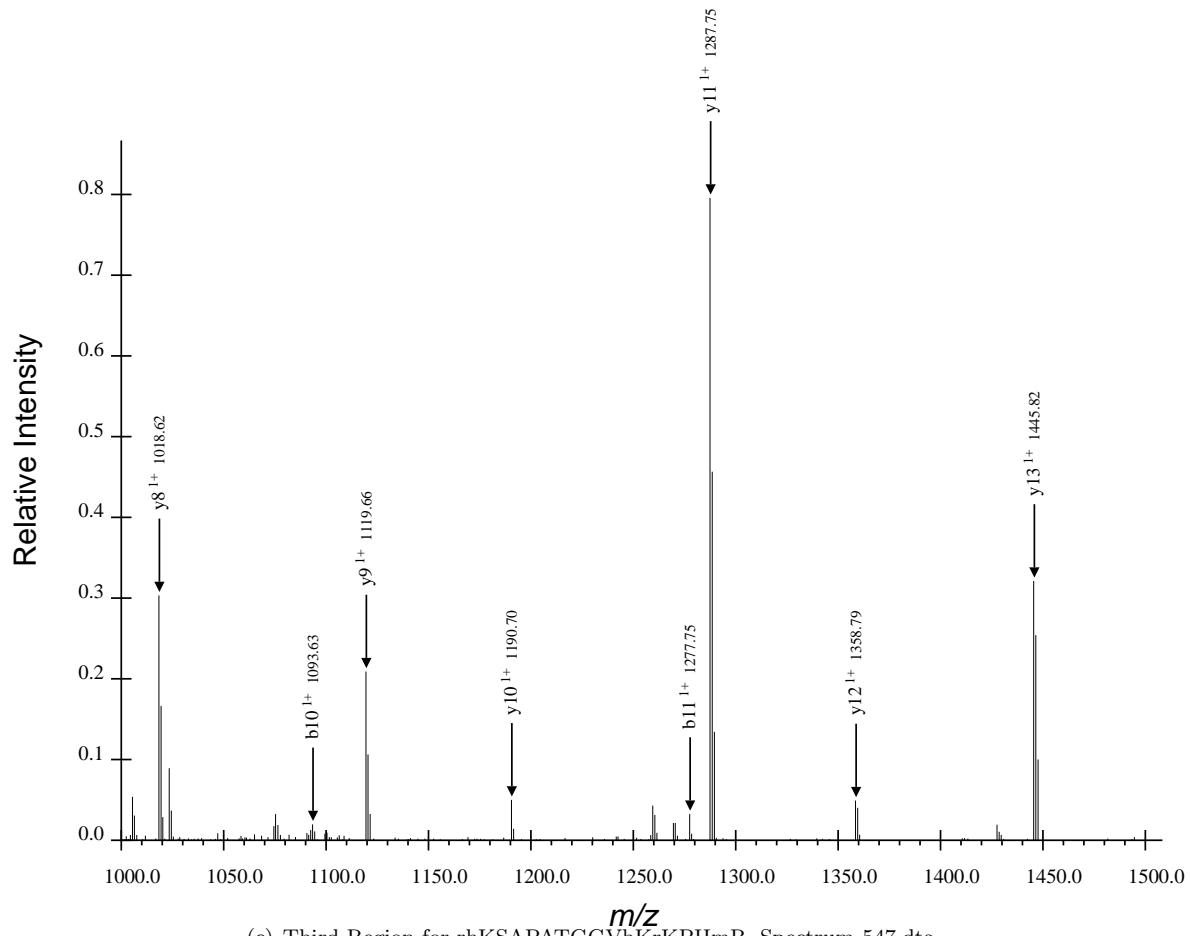

(c) Third Region for rhKSAPATGGVhKrKPHmR, Spectrum 547.dta

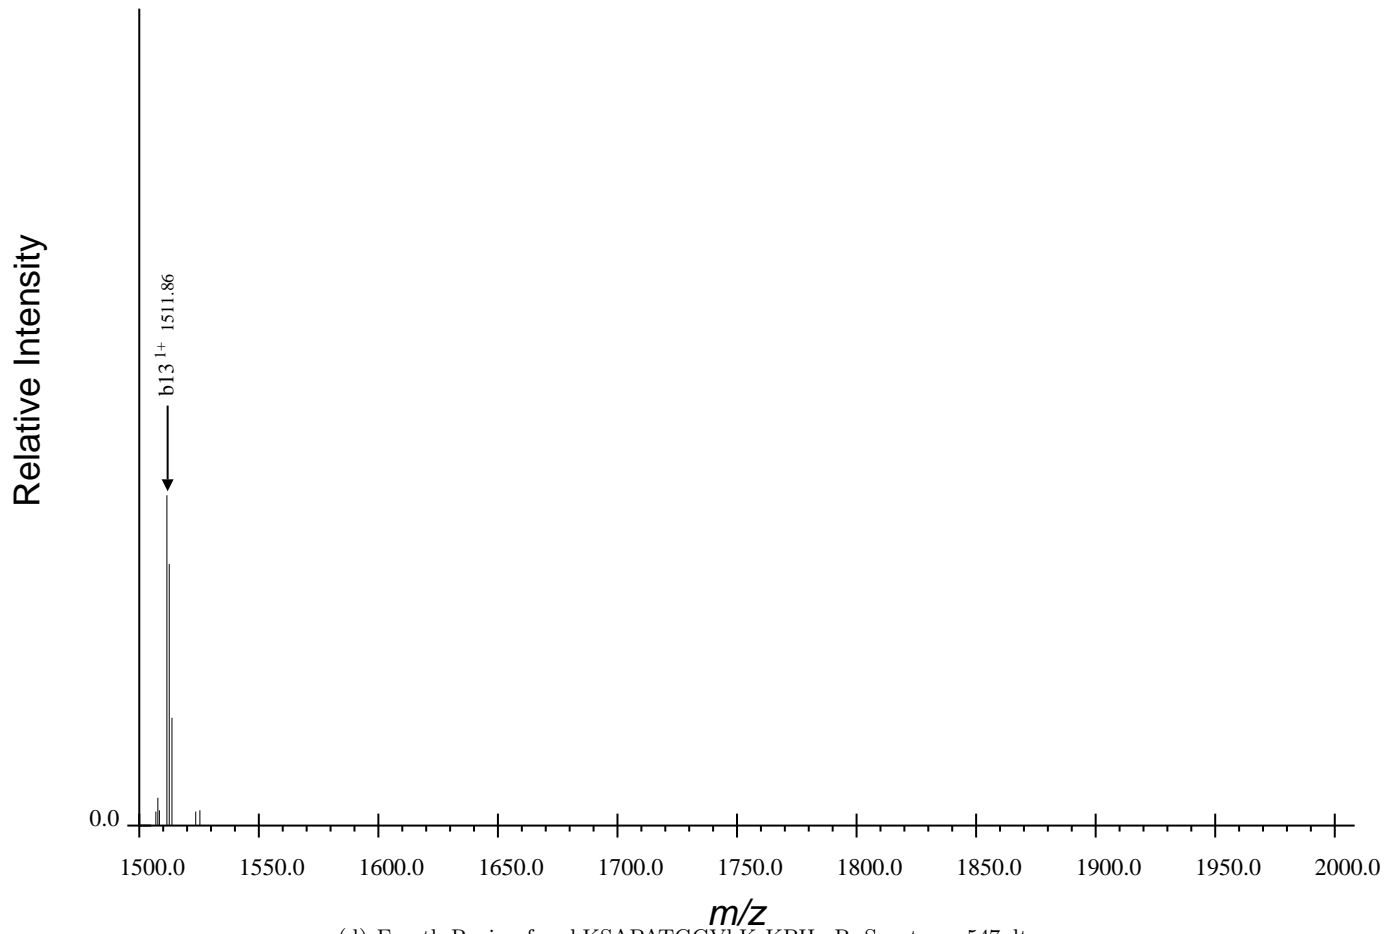

(d) Fourth Region for rhKSAPATGGVhKrKPHmR, Spectrum 547.dta

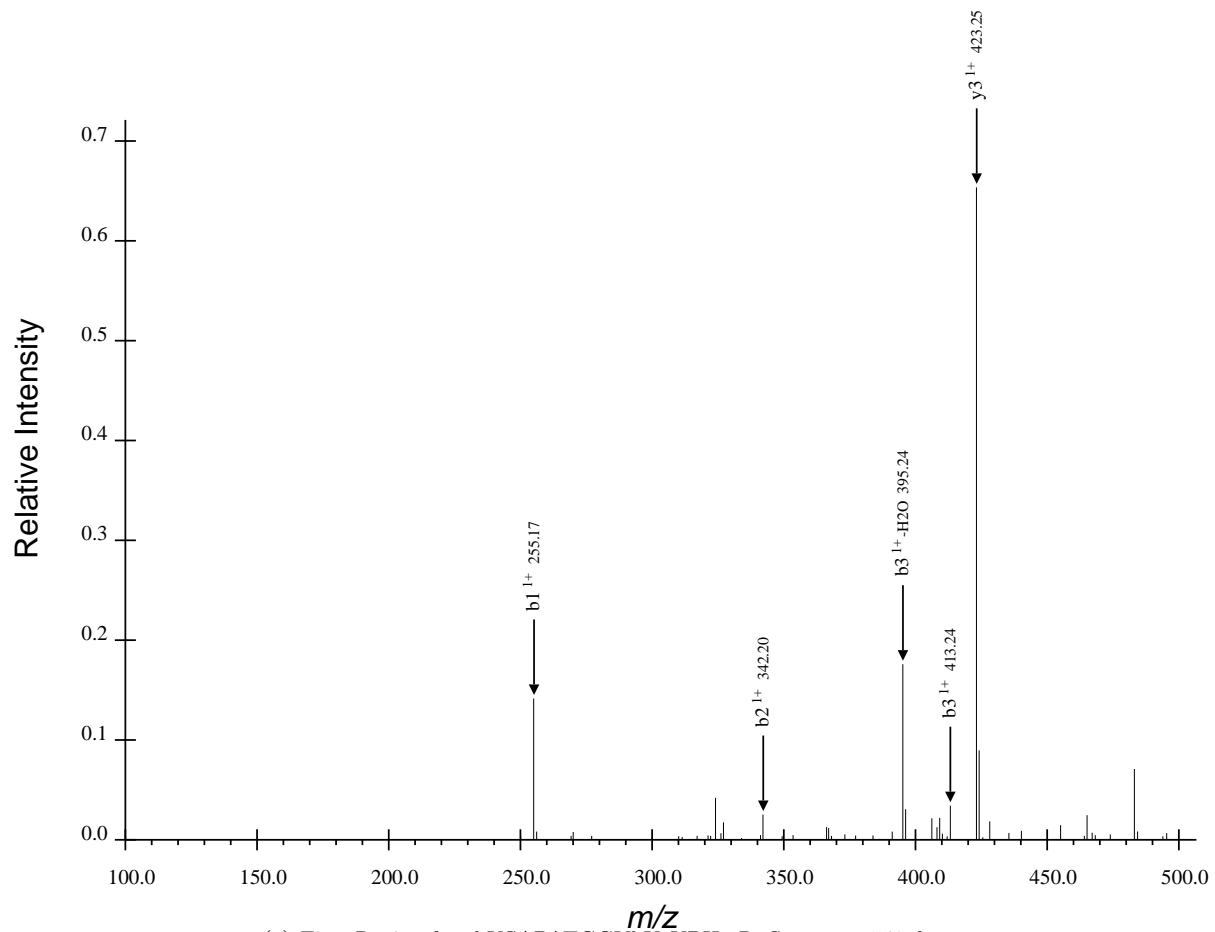

(a) First Region for rhKSAPATGGVhKrKPHmR, Spectrum 548.dta

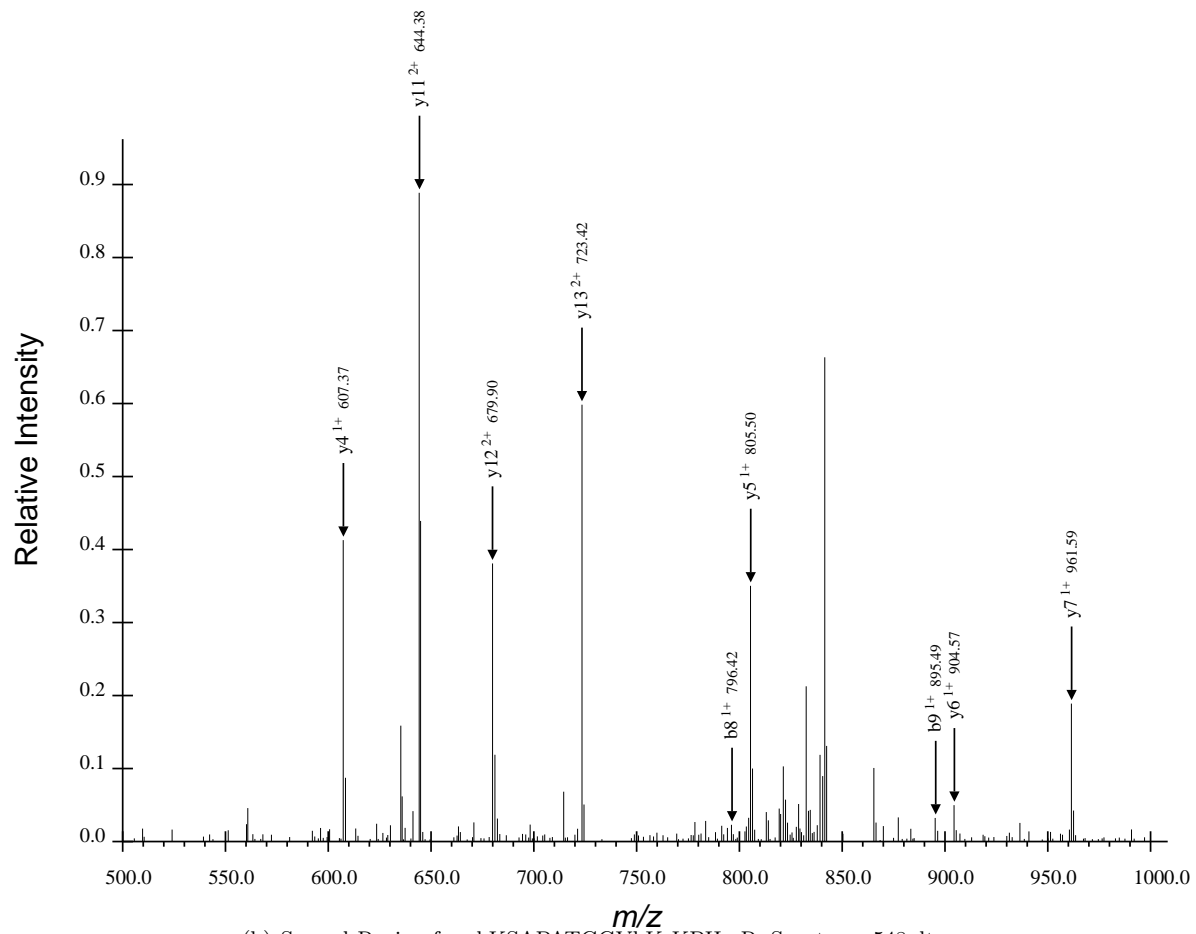

(b) Second Region for rhKSAPATGGVhKrKPHmR, Spectrum 548.dta



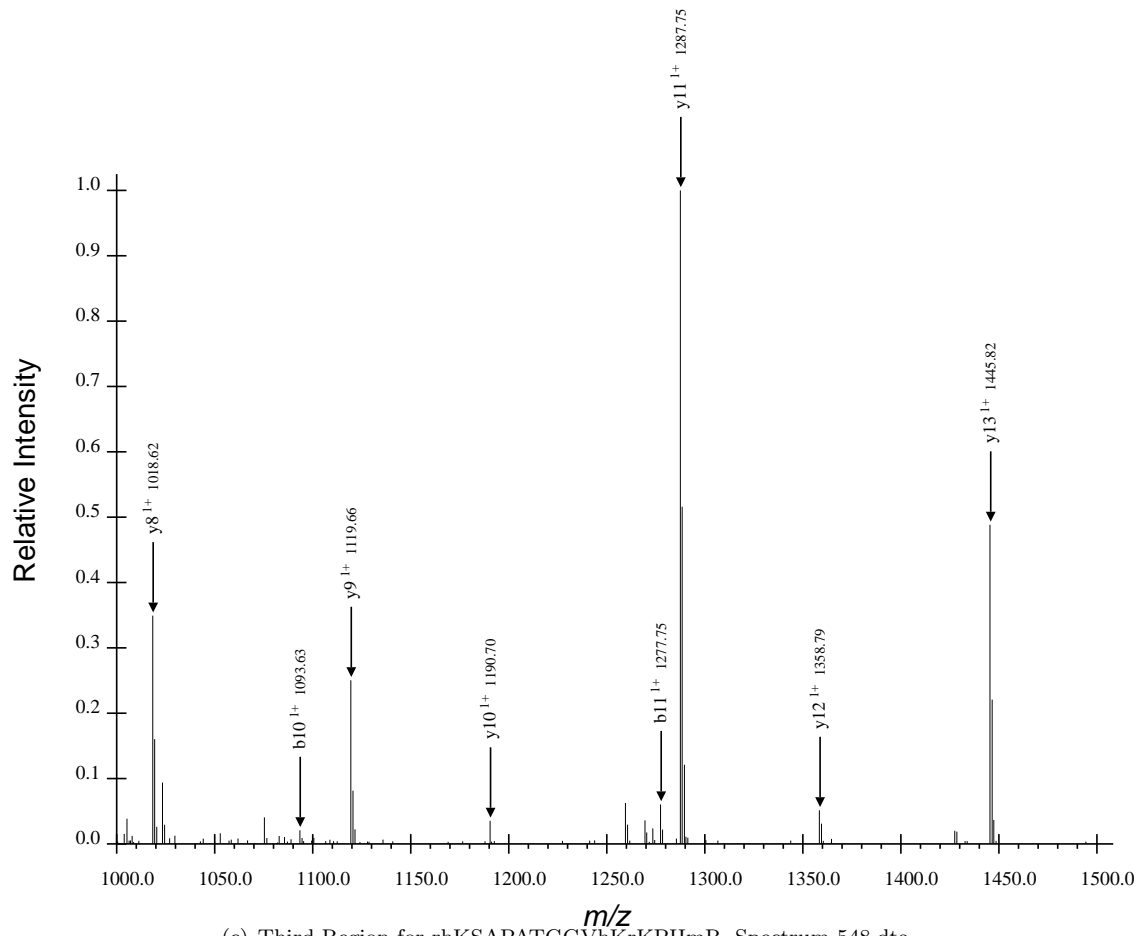

(c) Third Region for rhKSAPATGGVhKrKPHmR, Spectrum 548.dta

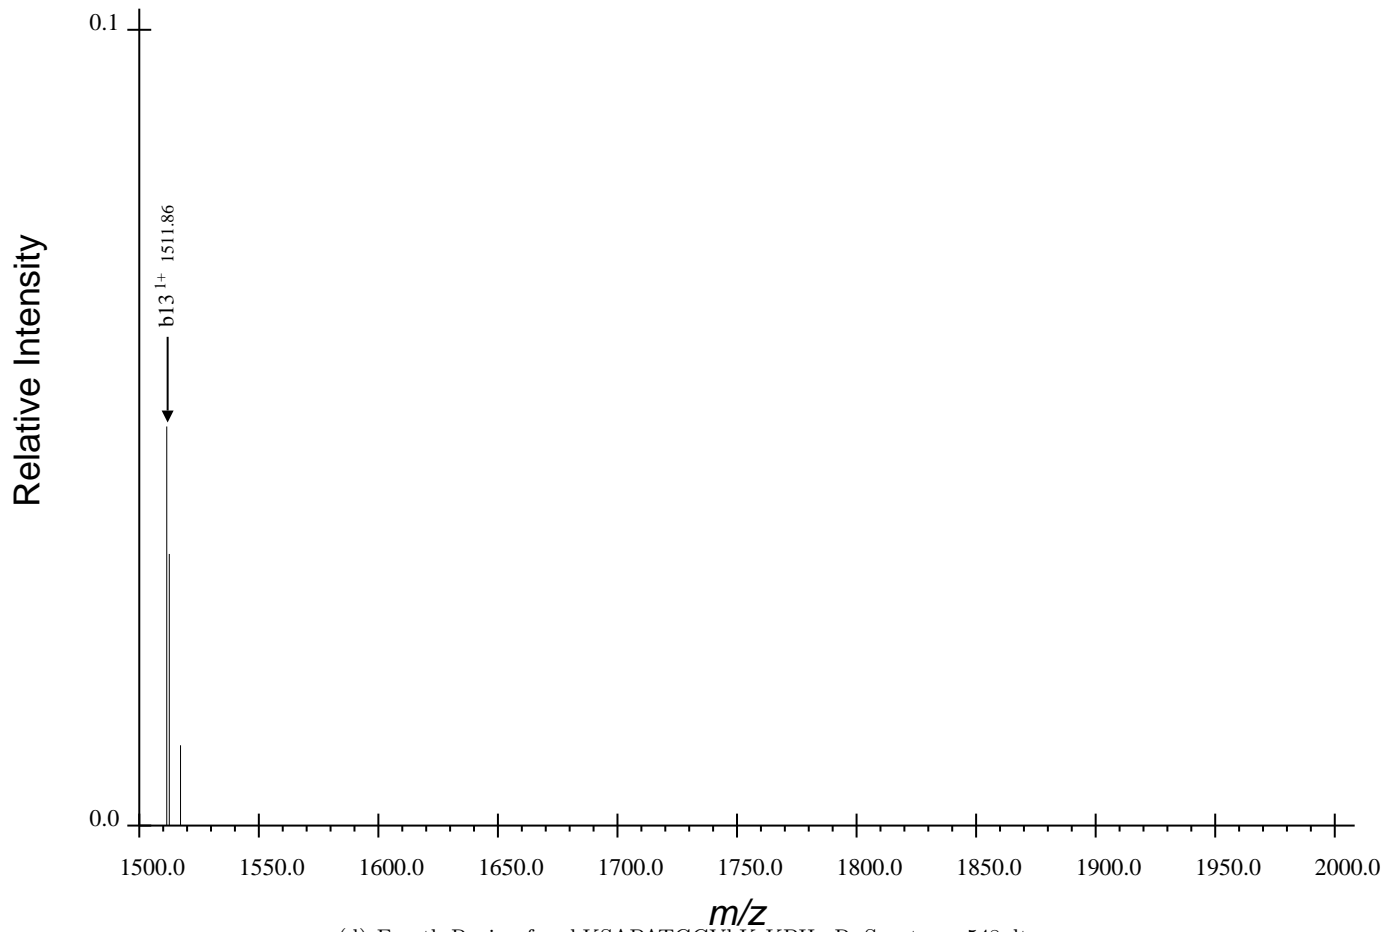

(d) Fourth Region for rhKSAPATGGVhKrKPHmR, Spectrum 548.dta

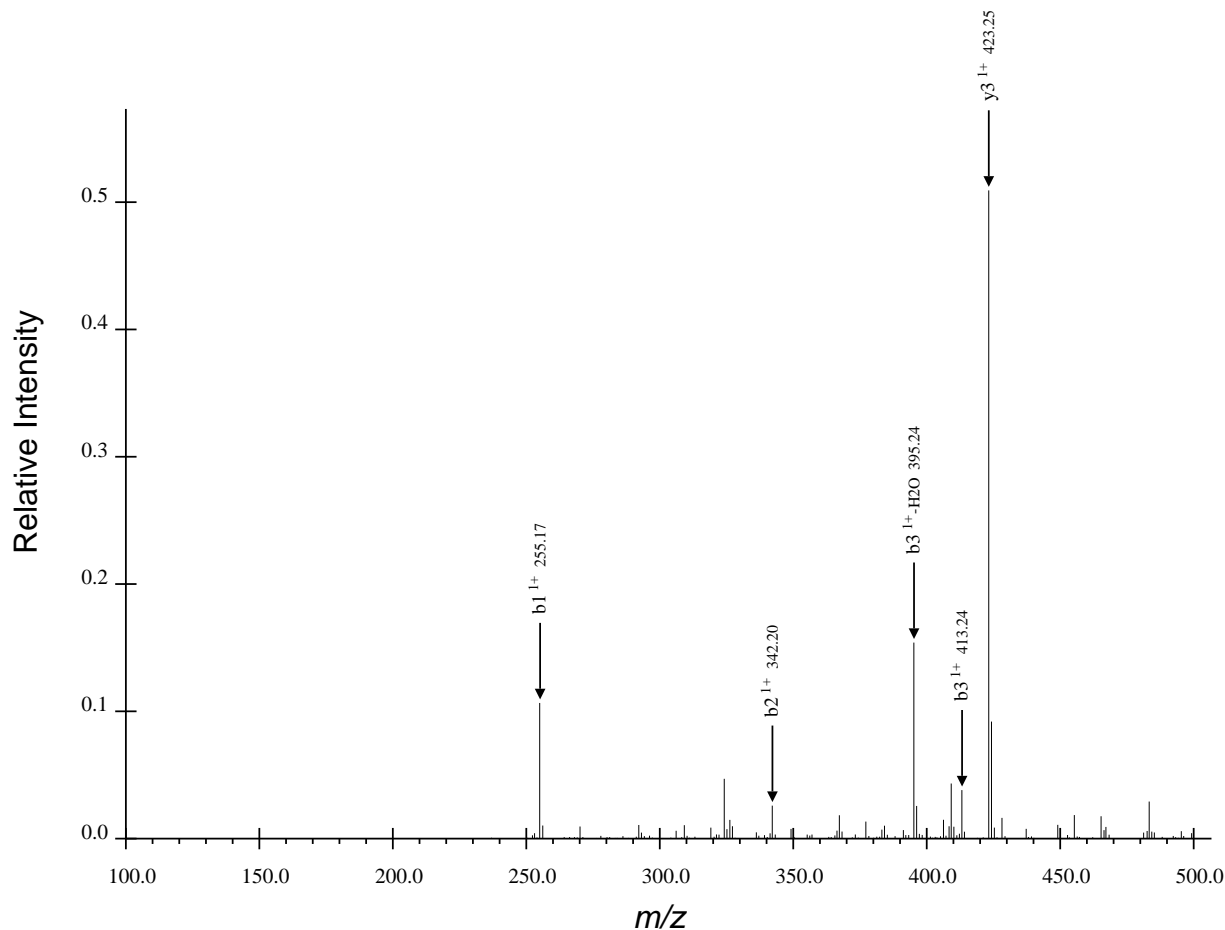

(a) First Region for rhKSAPATGGVhKrKPHmR, Spectrum 549.dta

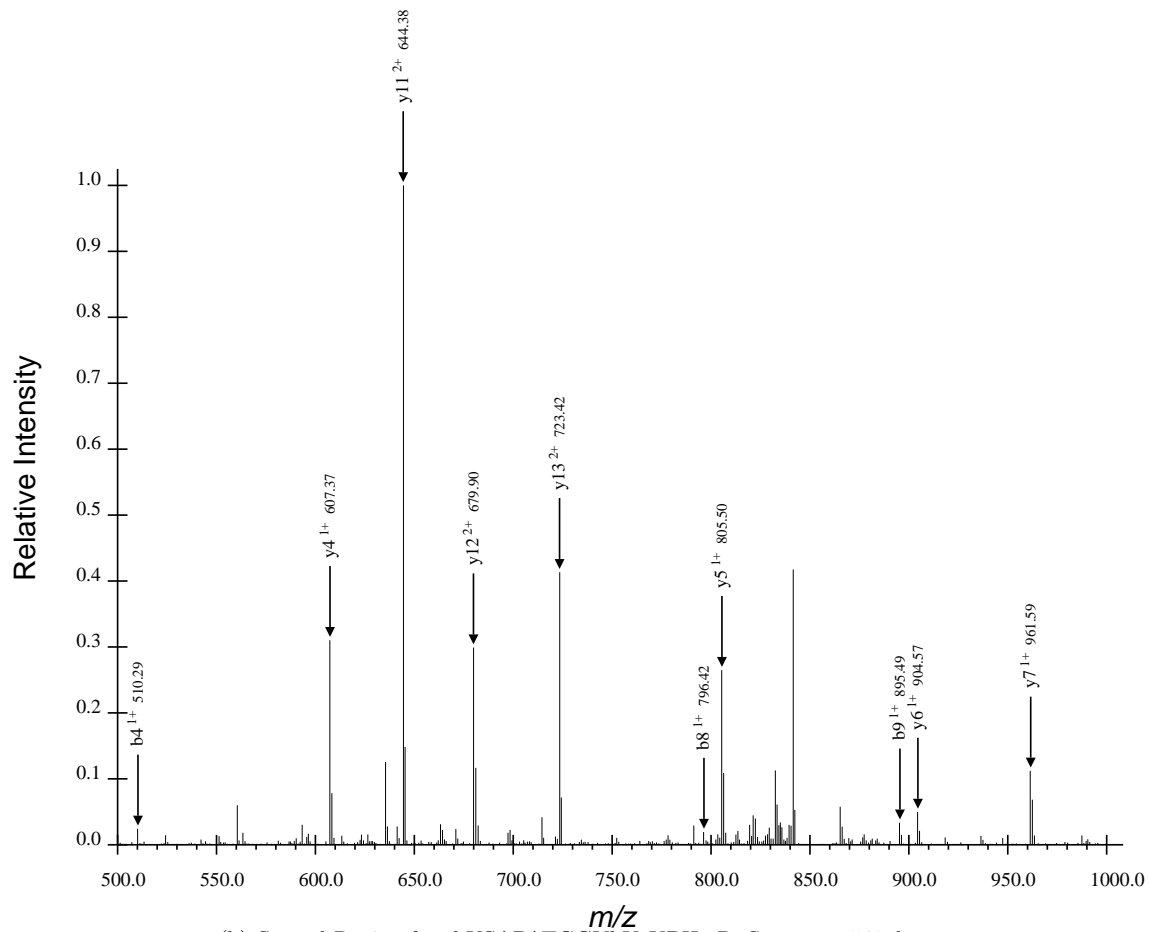

(b) Second Region for rhKSAPATGGVhKrKPHmR, Spectrum 549.dta

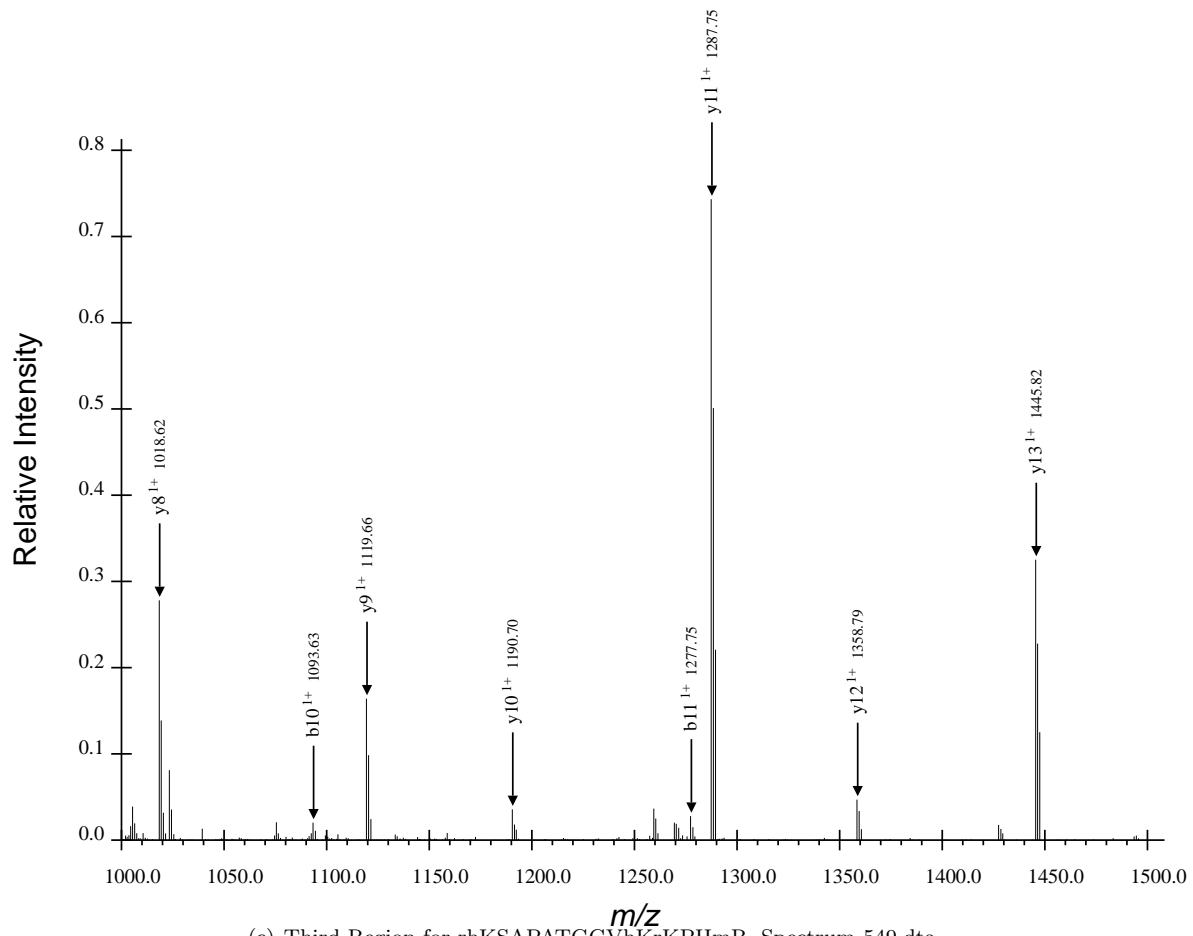

(c) Third Region for rhKSAPATGGVhKrKPHmR, Spectrum 549.dta

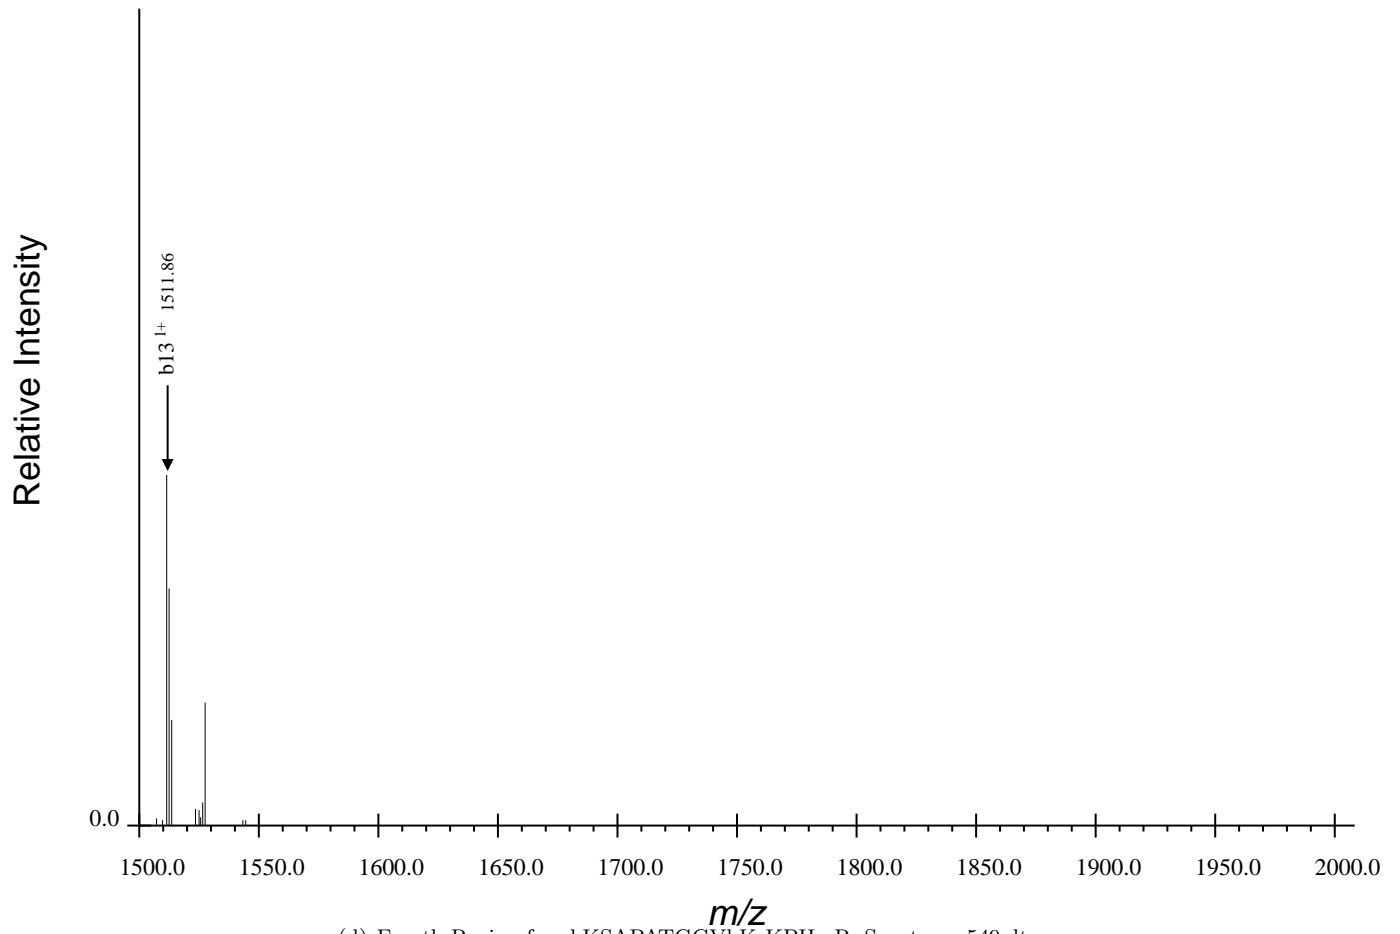

(d) Fourth Region for rhKSAPATGGVhKrKPHmR, Spectrum 549.dta

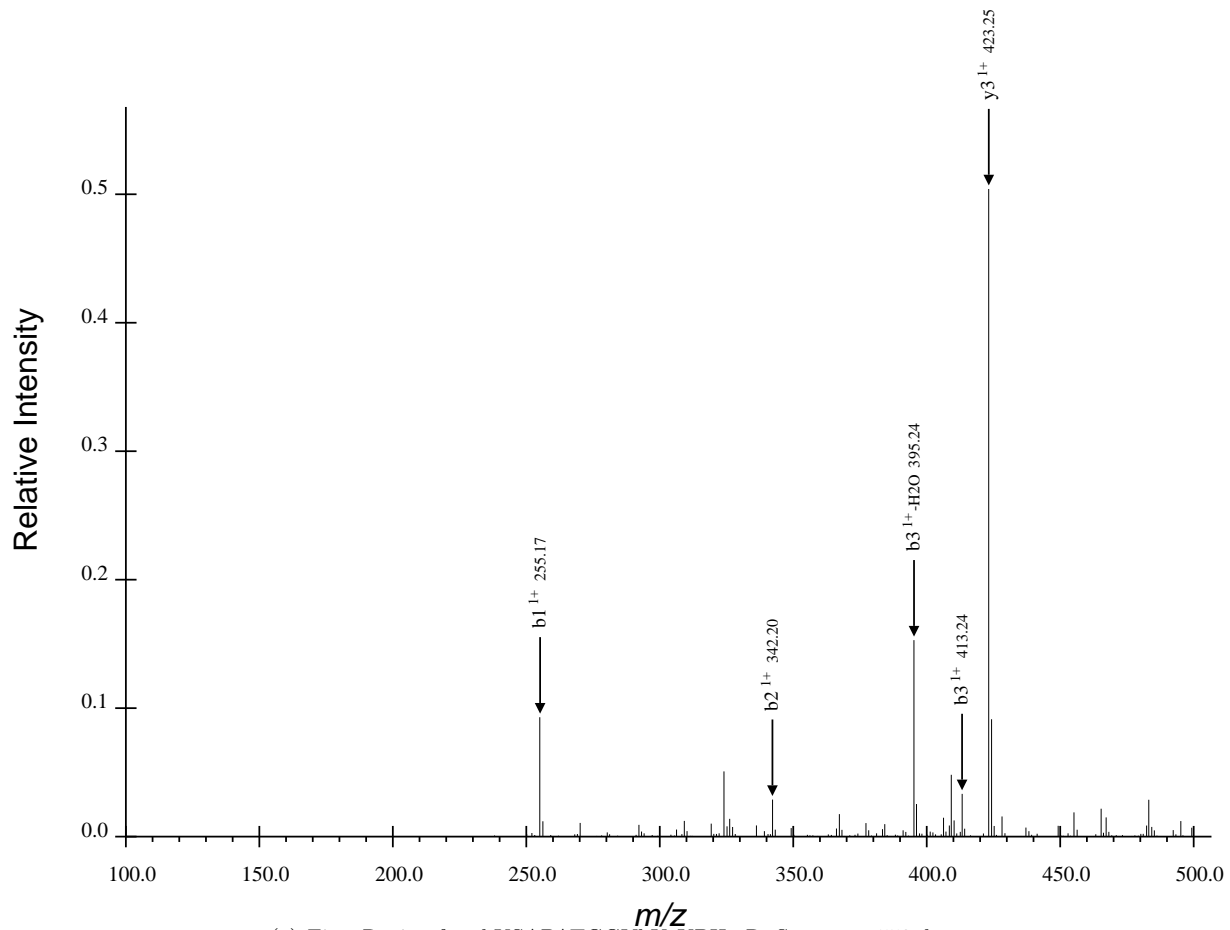

(a) First Region for rhKSAPATGGVhKrKPHmR, Spectrum 550.dta

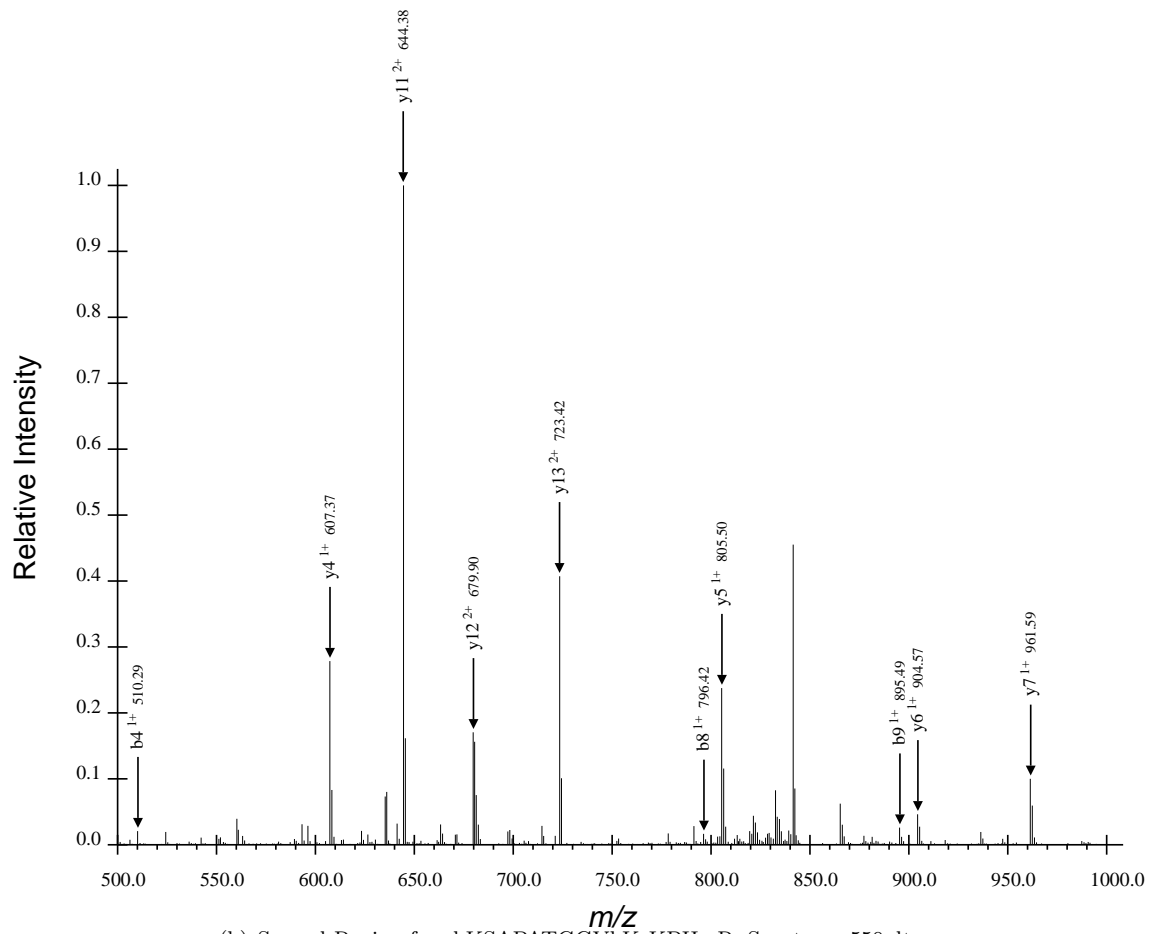

(b) Second Region for rhKSAPATGGVhKrKPHmR, Spectrum 550.dta

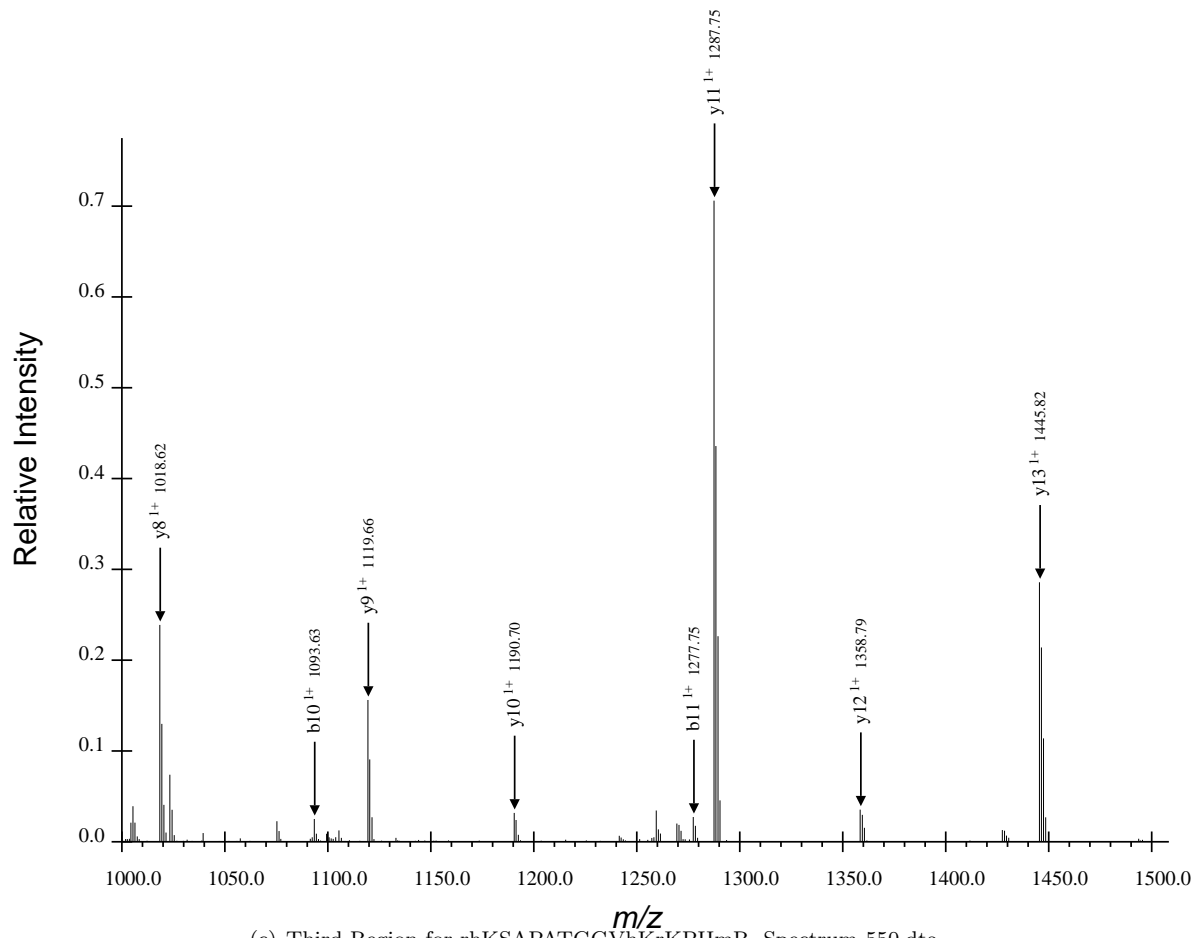

(c) Third Region for rhKSAPATGGVhKrKPHmR, Spectrum 550.dta

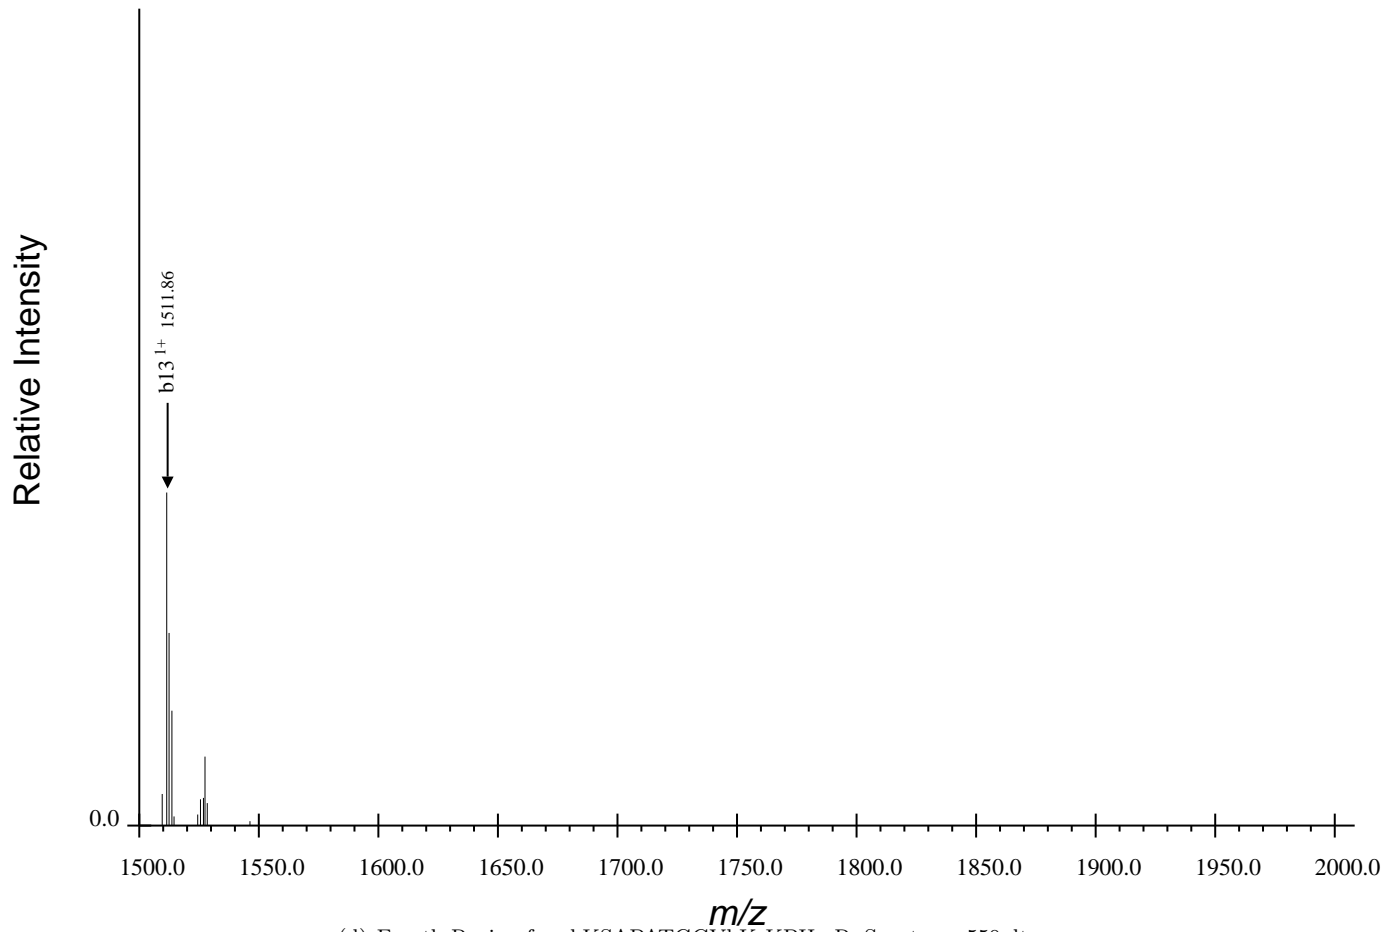

(d) Fourth Region for rhKSAPATGGVhKrKPHmR, Spectrum 550.dta

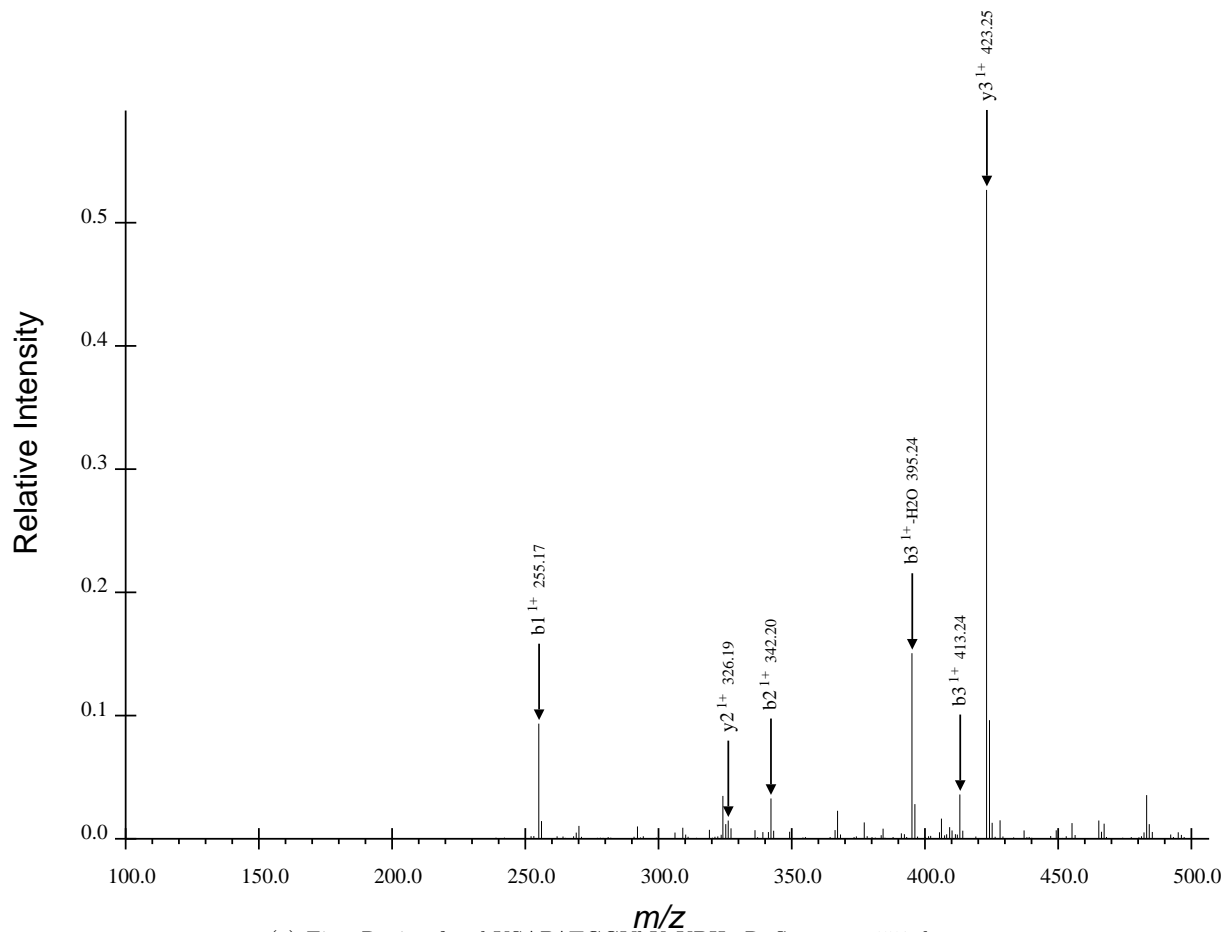

(a) First Region for rhKSAPATGGVhKrKPHmR, Spectrum 551.dta

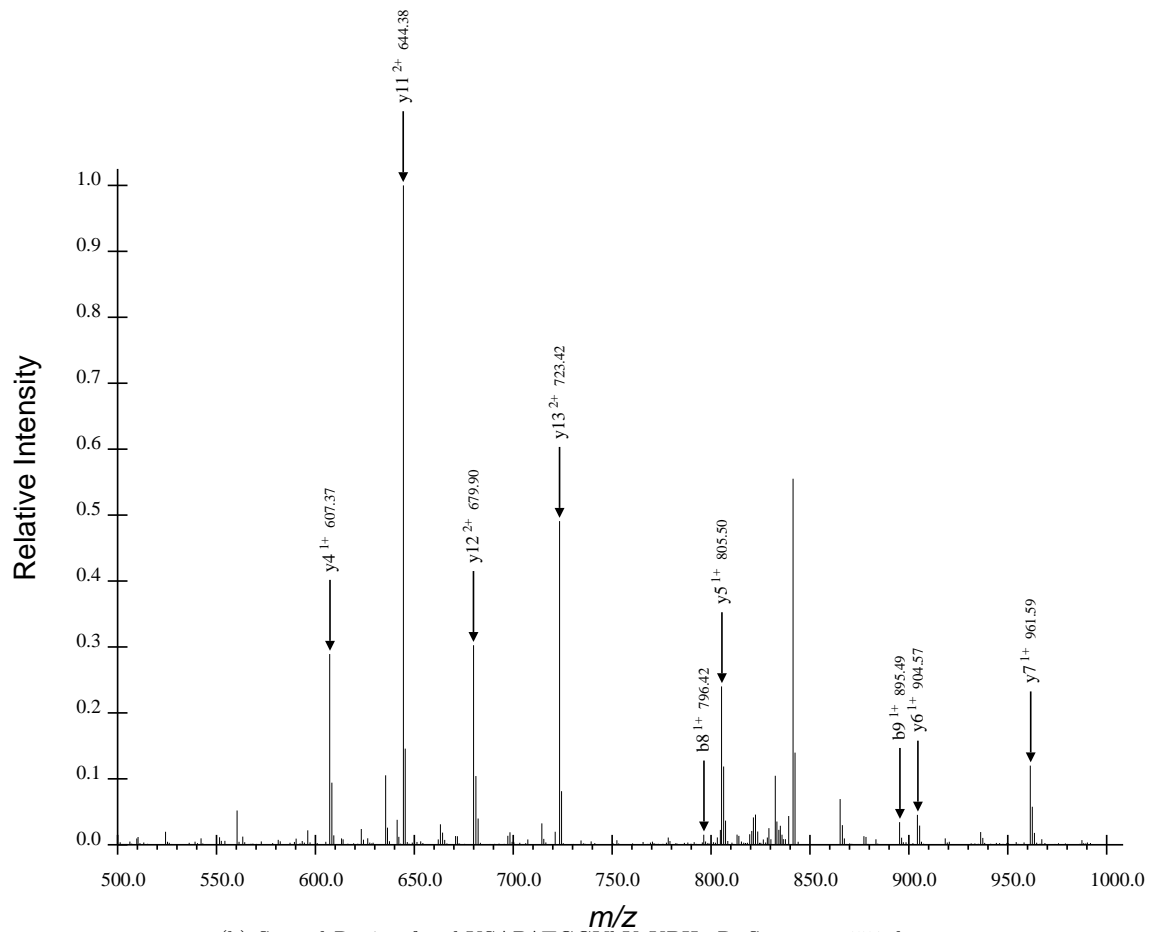

(b) Second Region for rhKSAPATGGVhKrKPHmR, Spectrum 551.dta

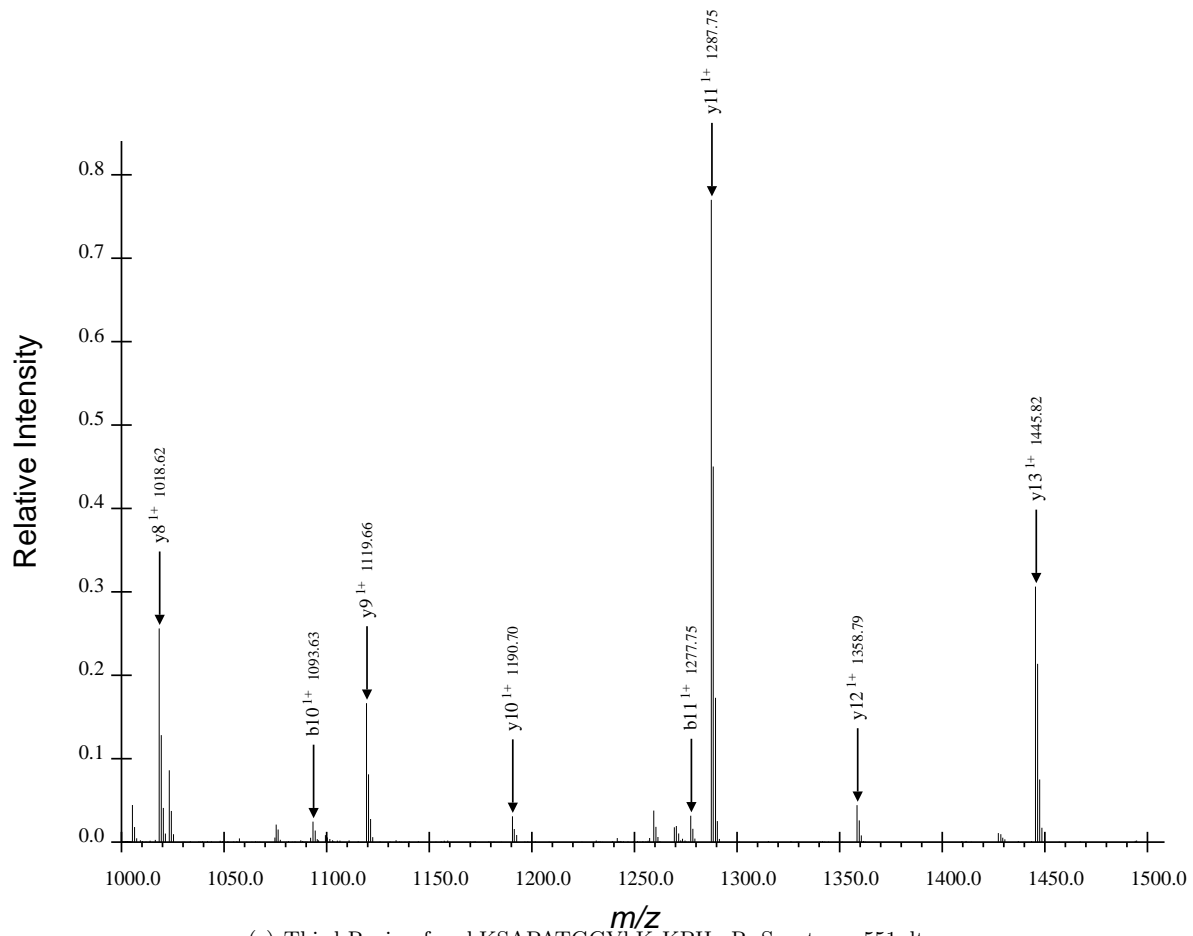

(c) Third Region for rhKSAPATGGVhKrKPHmR, Spectrum 551.dta

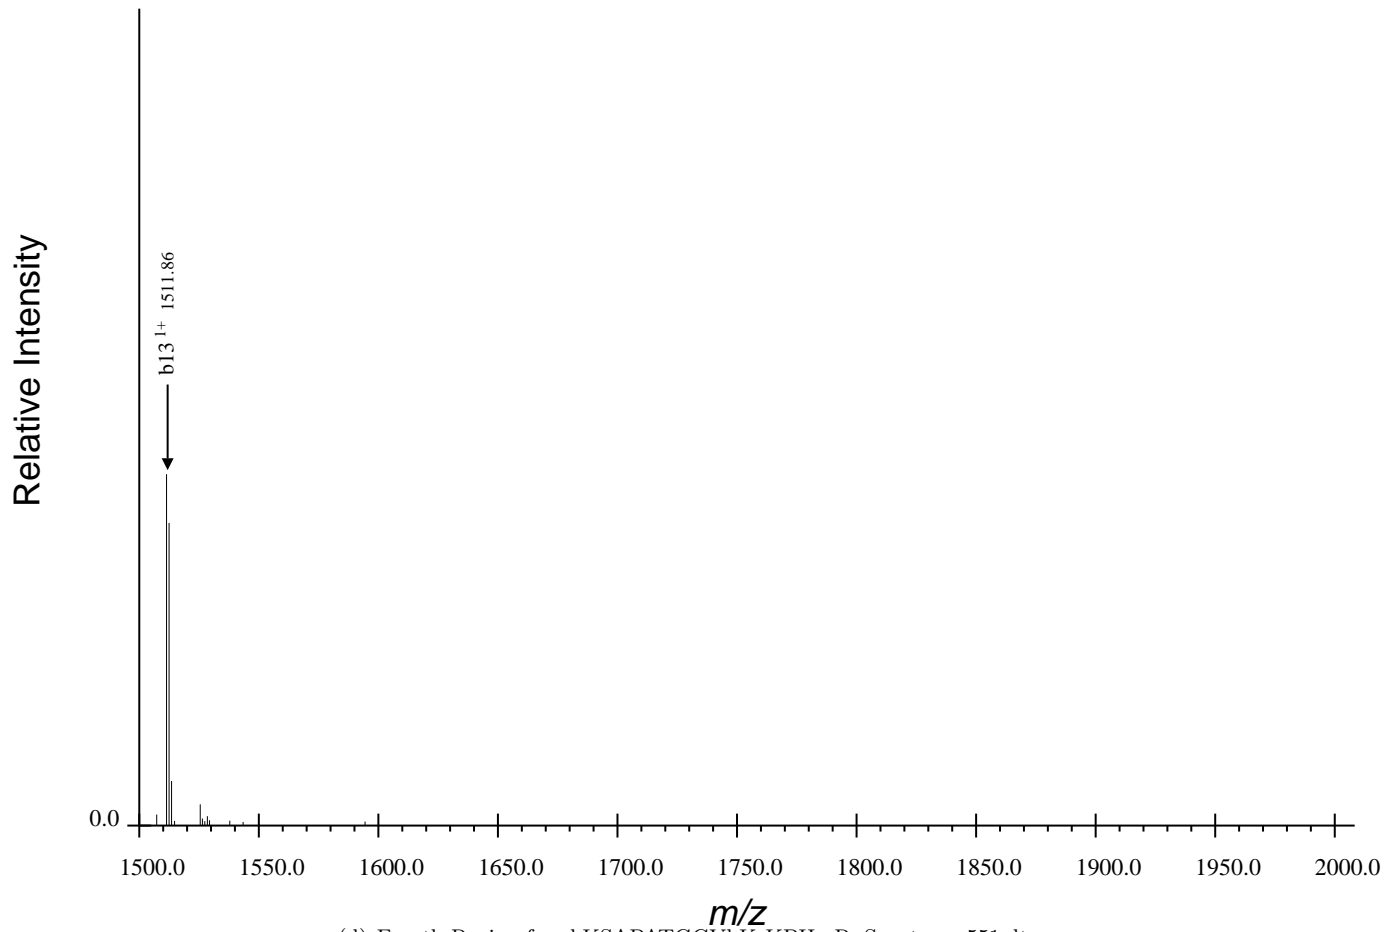

(d) Fourth Region for rhKSAPATGGVhKrKPHmR, Spectrum 551.dta

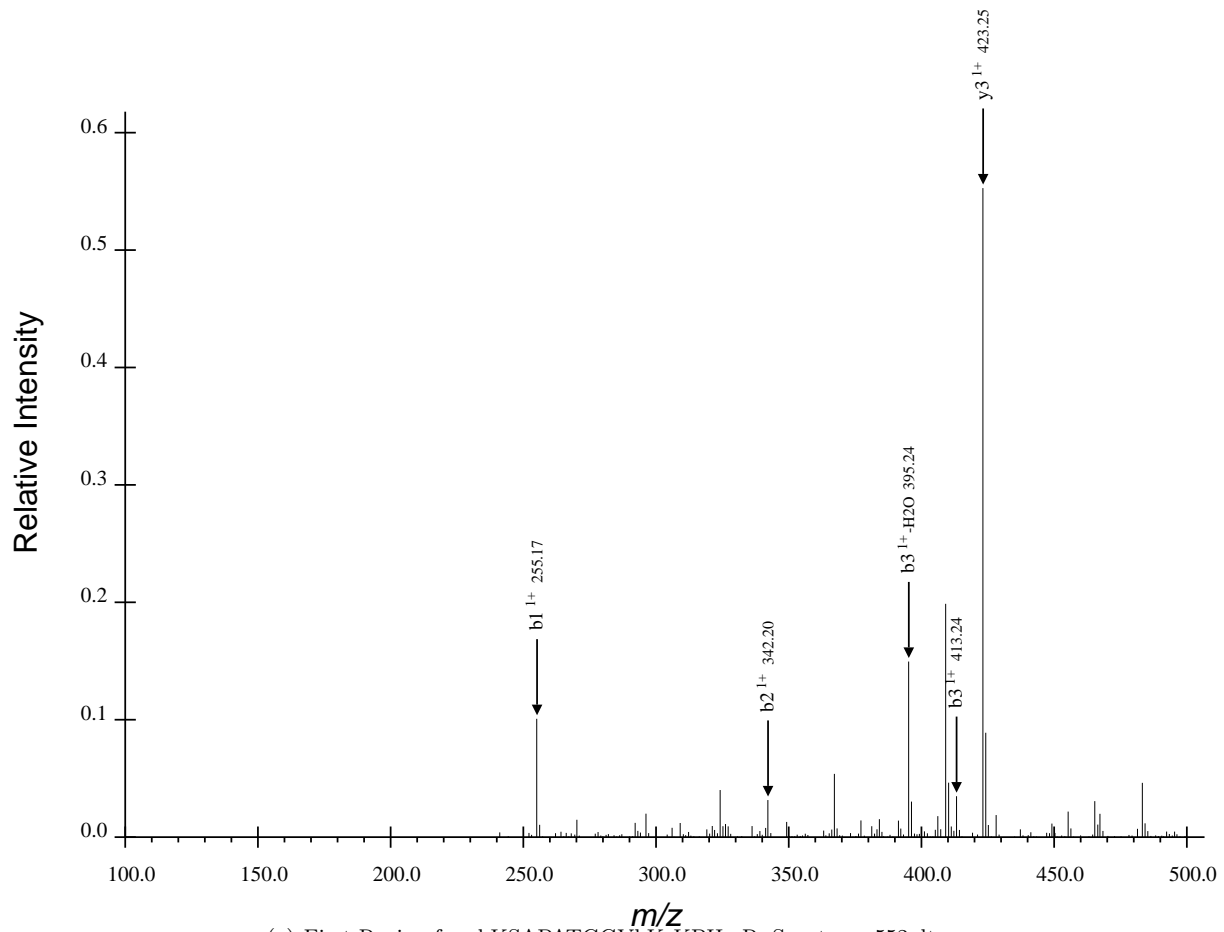

(a) First Region for rhKSAPATGGVhKrKPHmR, Spectrum 552.dta

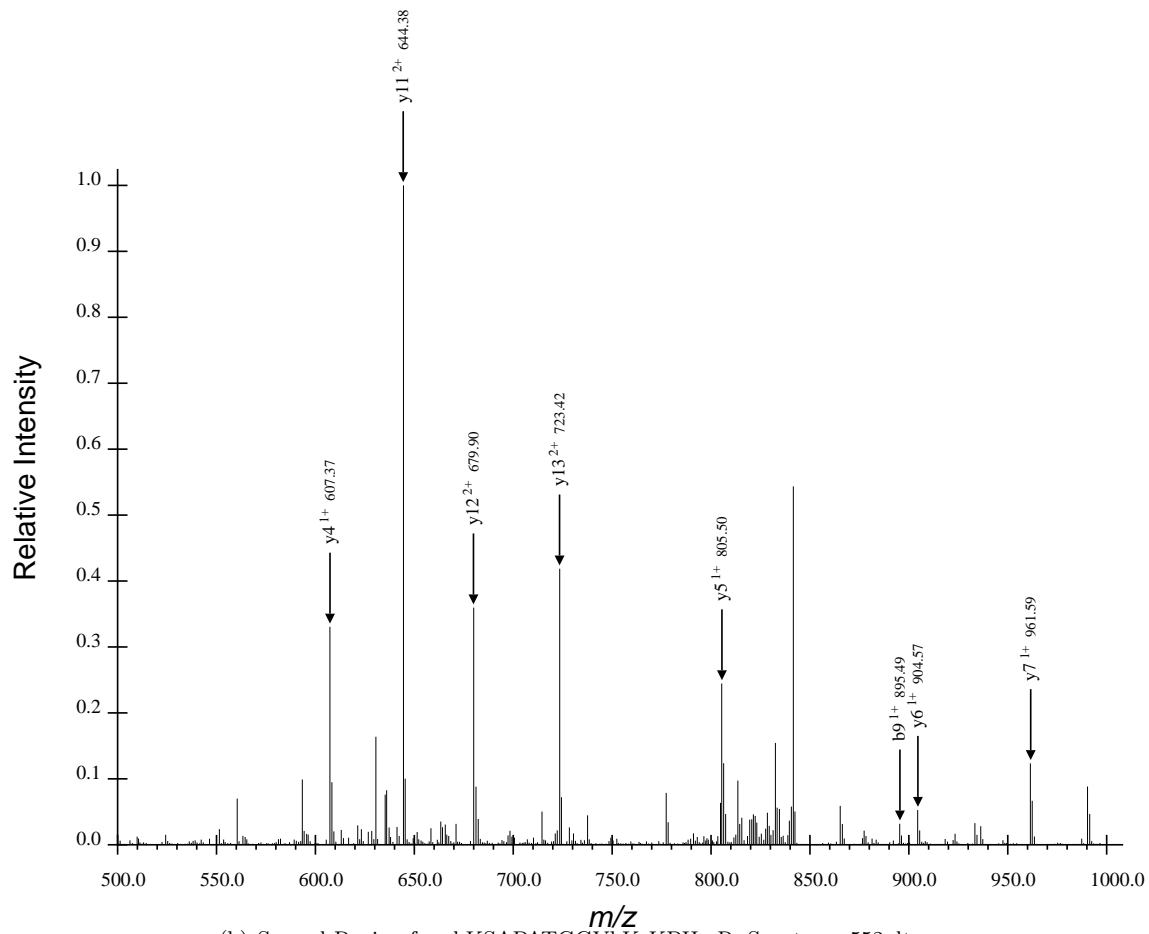

(b) Second Region for rhKSAPATGGVhKrKPHmR, Spectrum 552.dta



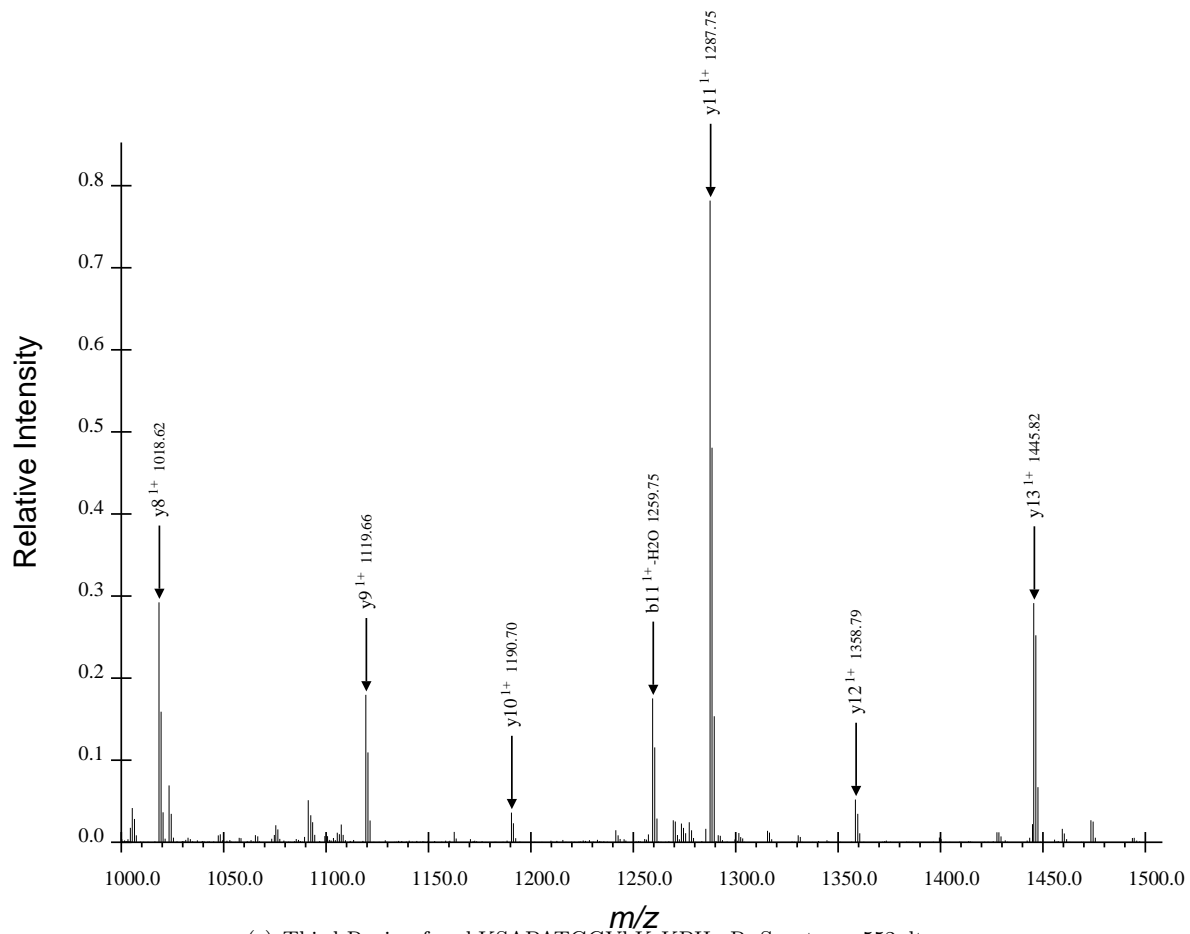

(c) Third Region for rhKSAPATGGVhKrKPHmR, Spectrum 552.dta

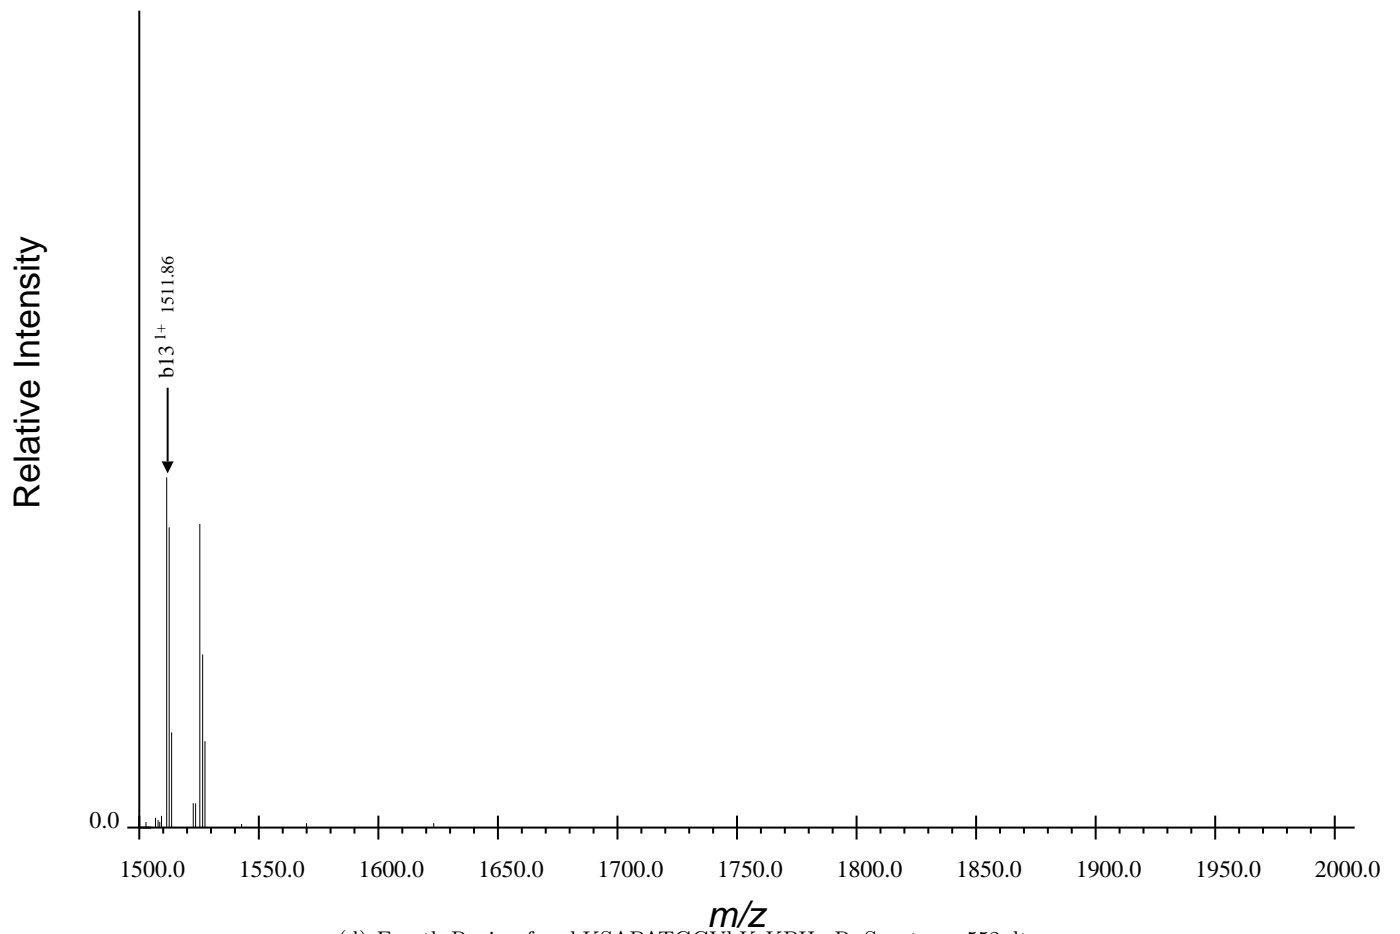

(d) Fourth Region for rhKSAPATGGVhKrKPHmR, Spectrum 552.dta

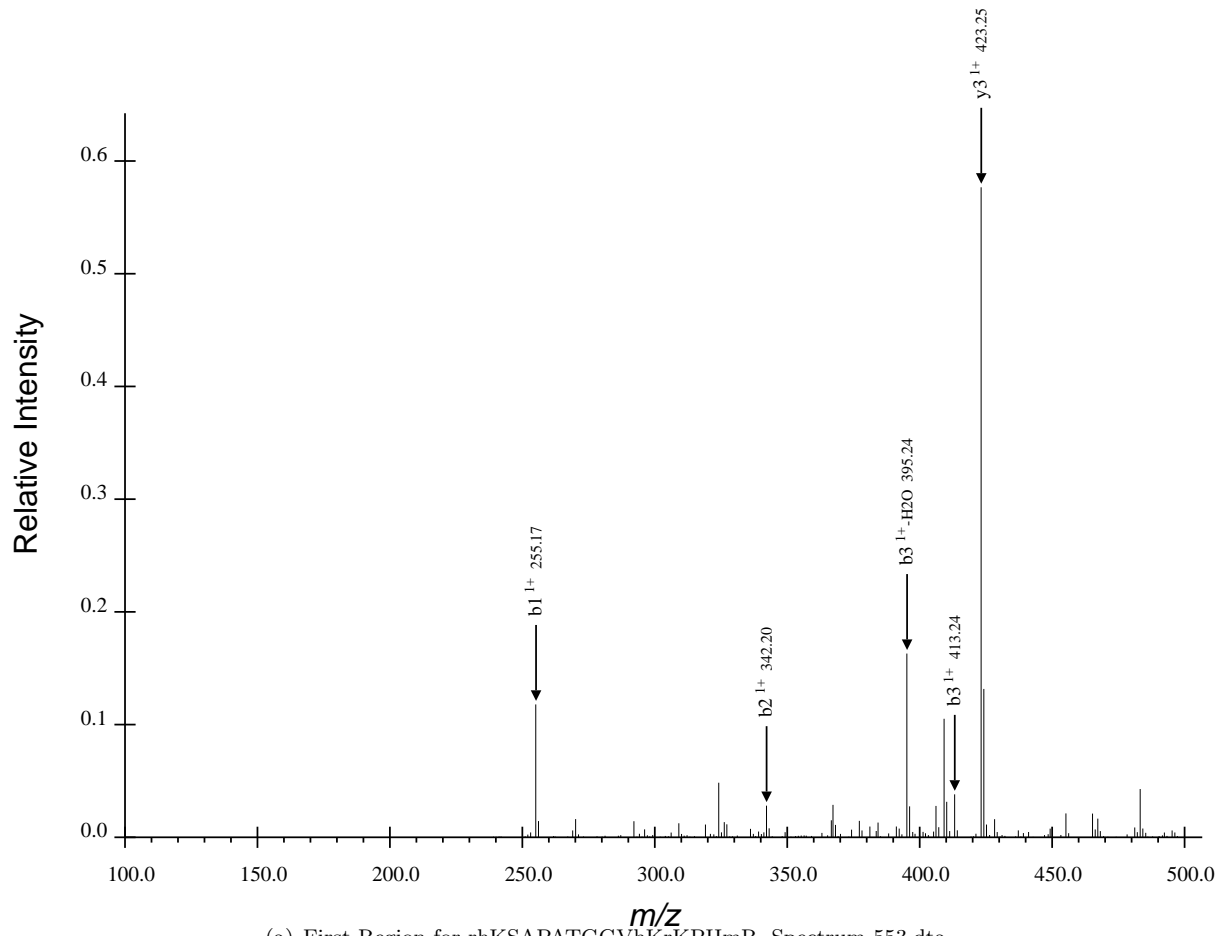

(a) First Region for rhKSAPATGGVhKrKPHmR, Spectrum 553.dta

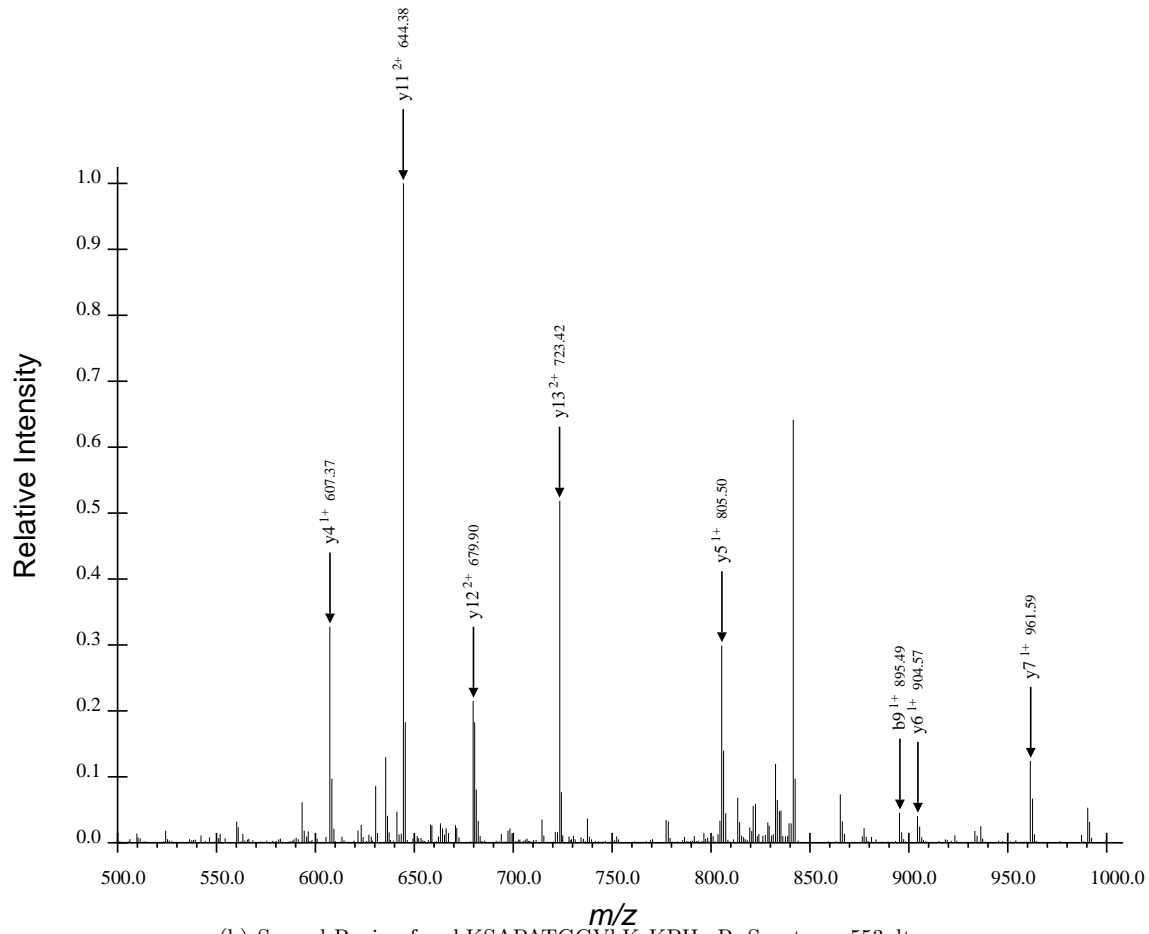

(b) Second Region for rhKSAPATGGVhKrKPHmR, Spectrum 553.dta

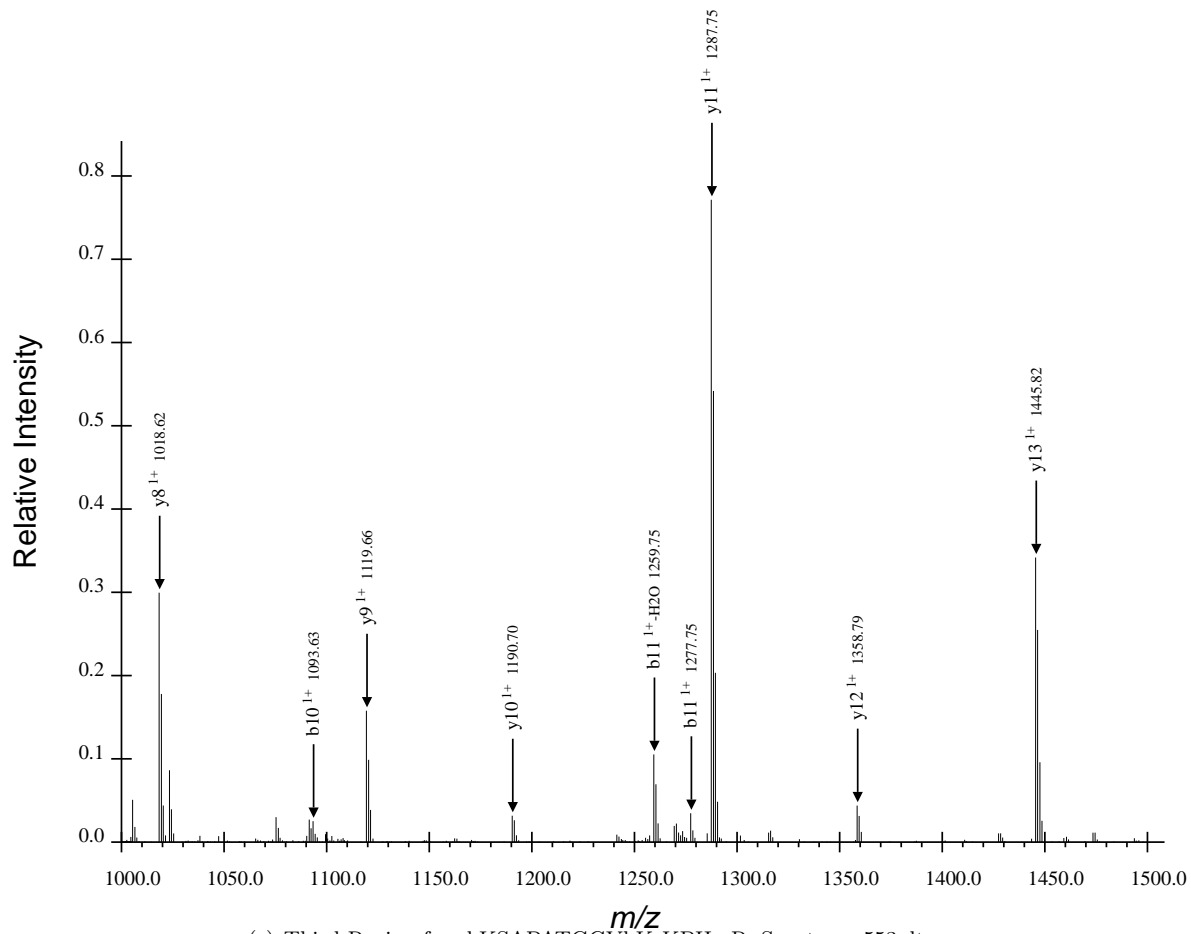

(c) Third Region for rhKSAPATGGVhKrKPHmR, Spectrum 553.dta

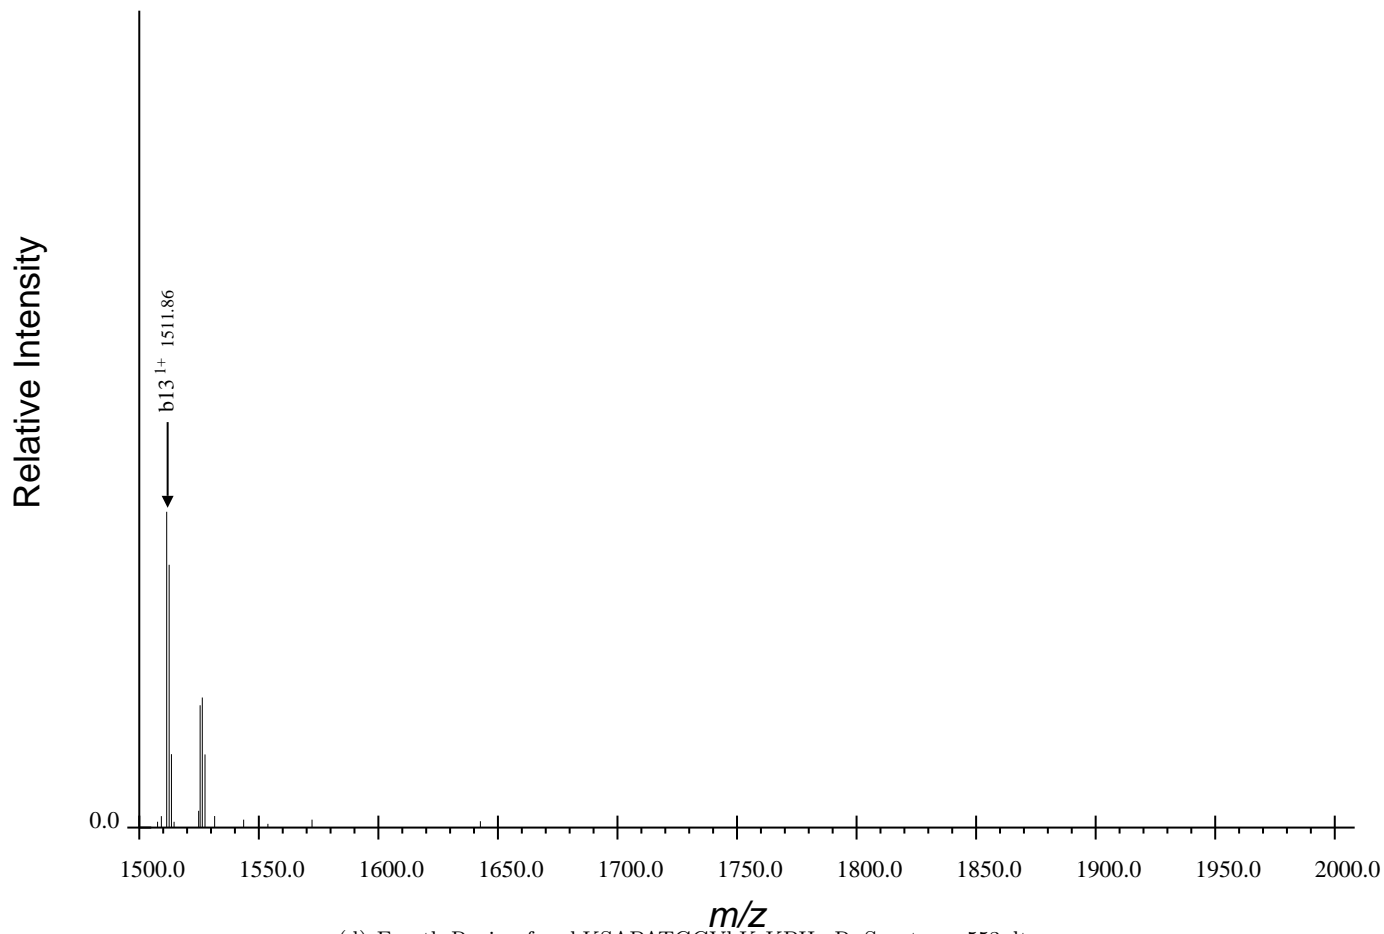

(d) Fourth Region for rhKSAPATGGVhKrKPHmR, Spectrum 553.dta
