# Supplementary material
Source: PubMed Central journal article supplement (PMC2871412)
Supplement: supp_M900487-MCP200_TestSetD1_TotalChromatin.pdf [file supp_M900487-MCP200_TestSetD1_TotalChromatin.pdf]

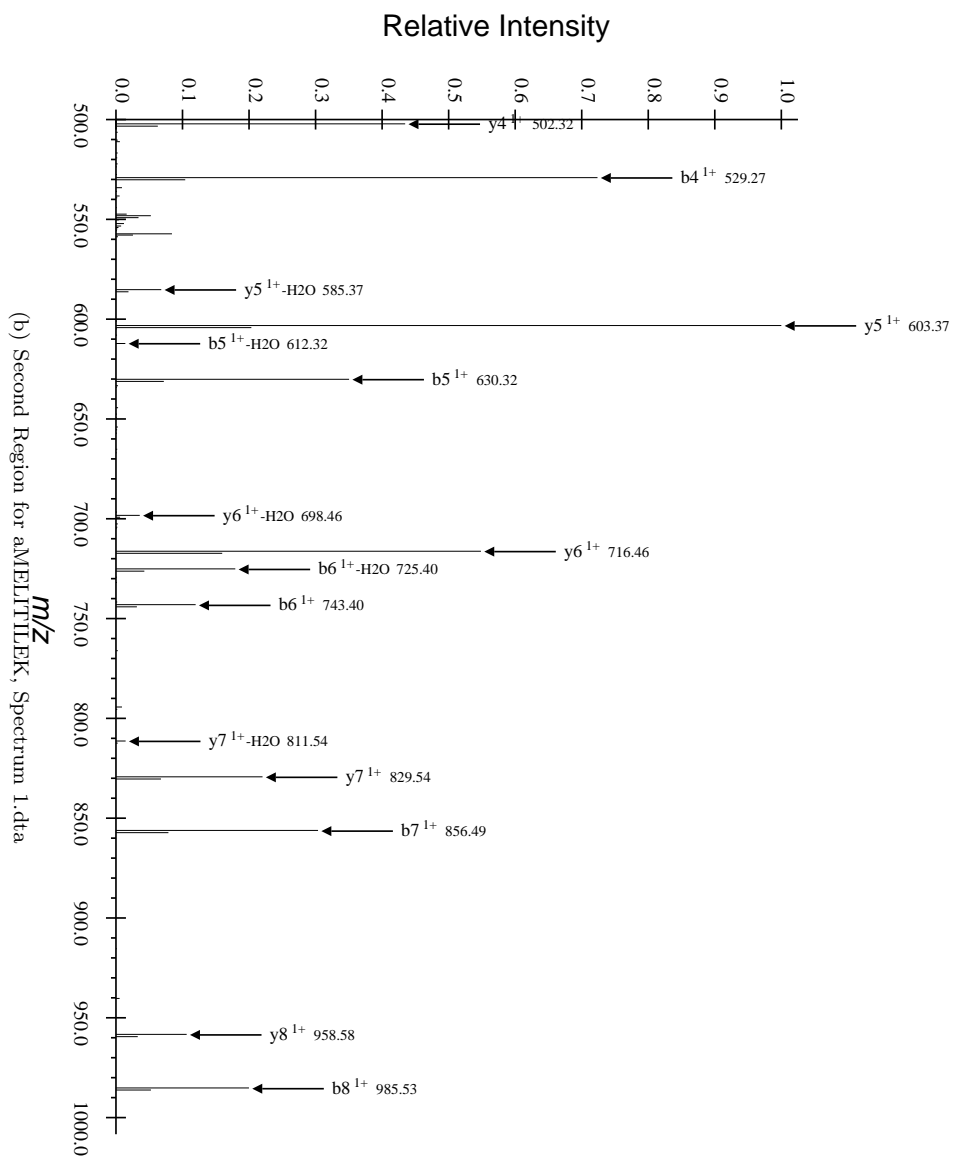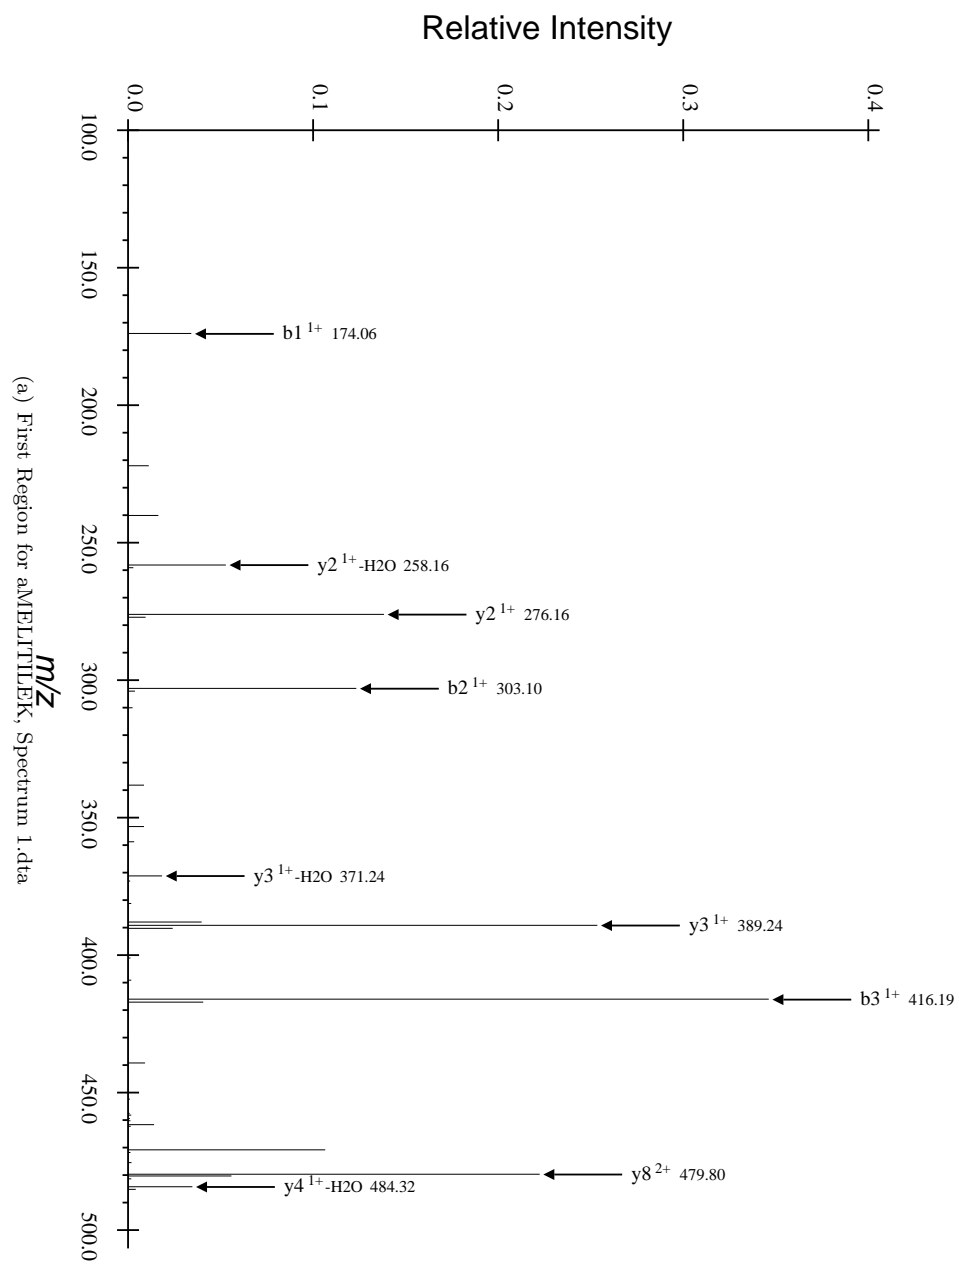

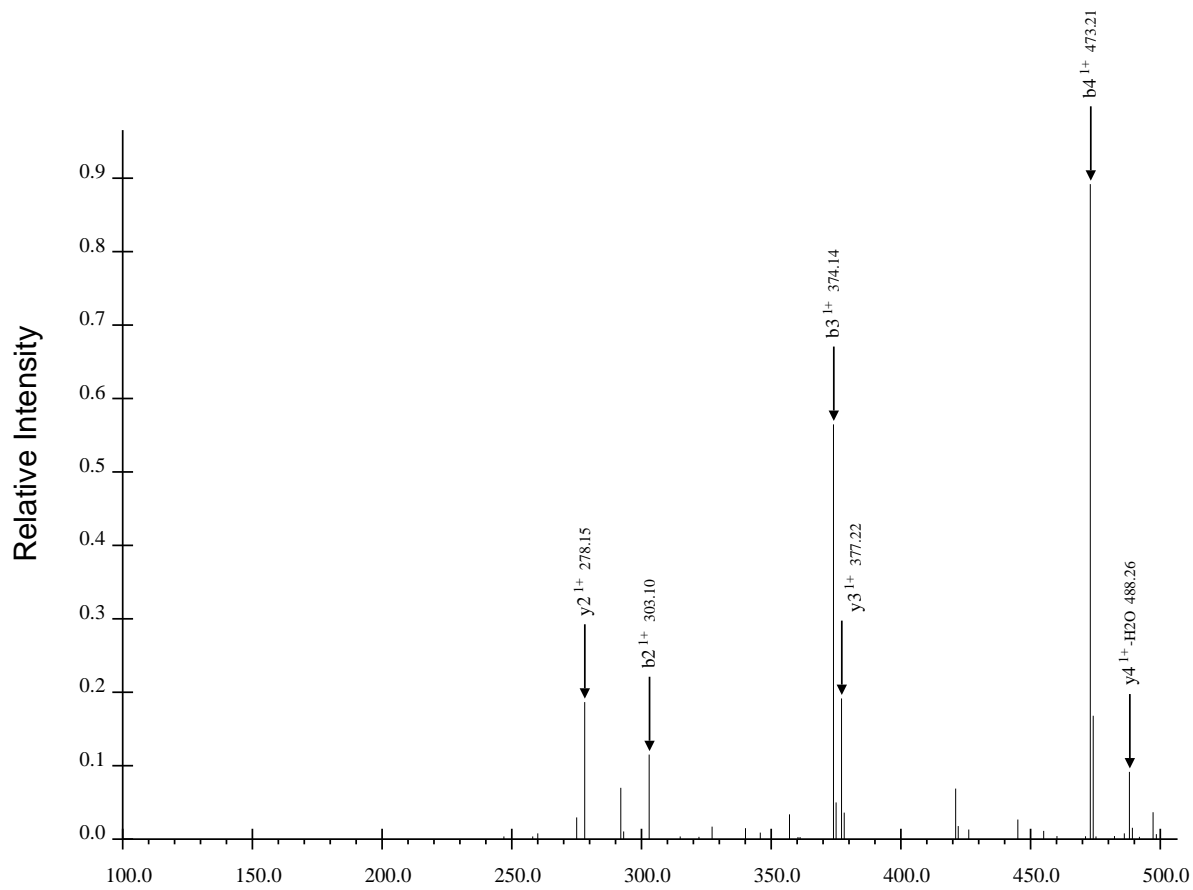

(a) First Region for aMEAVVNLYQEVMSK, Spectrum 2.dta

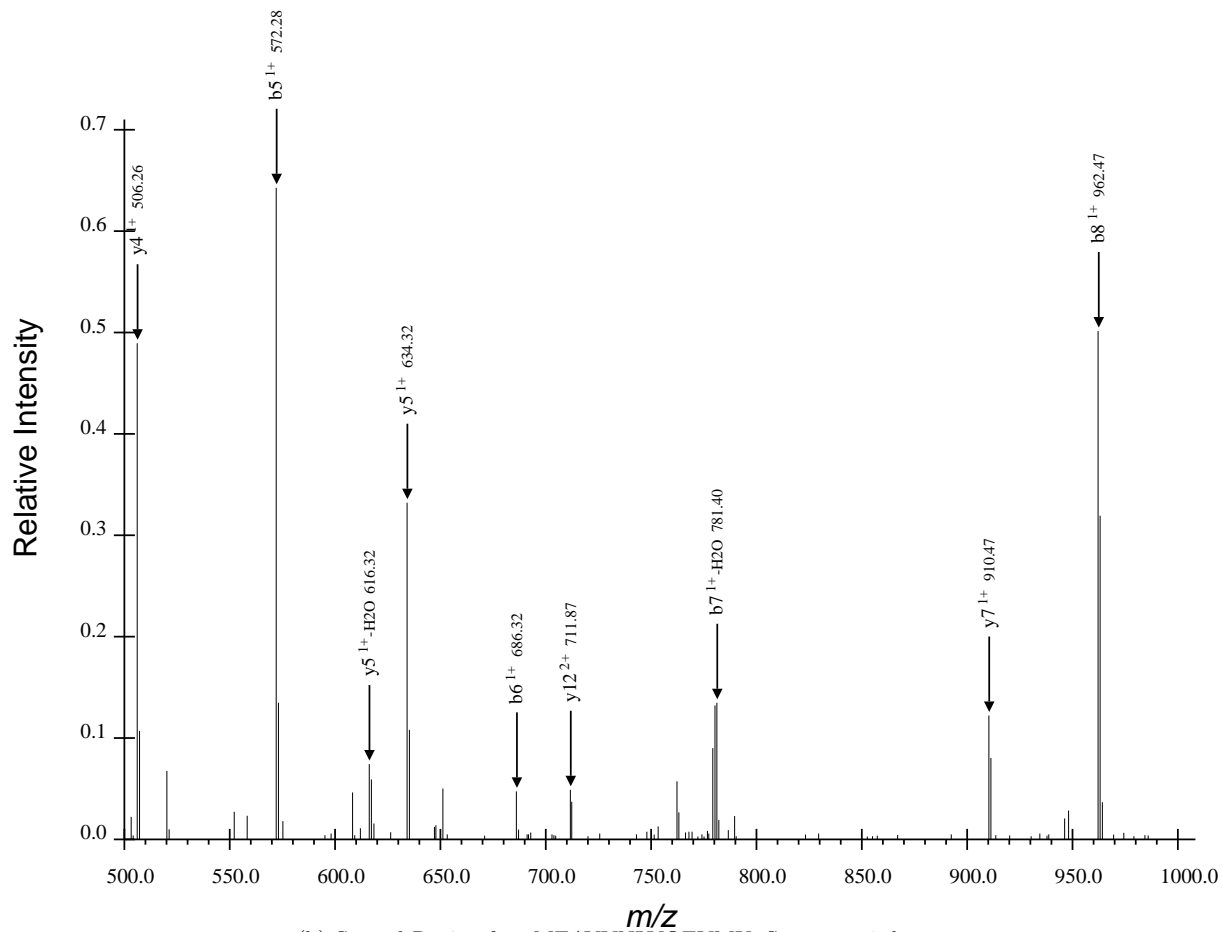

(b) Second Region for aMEAVVNLYQEVMSK, Spectrum 2.dta

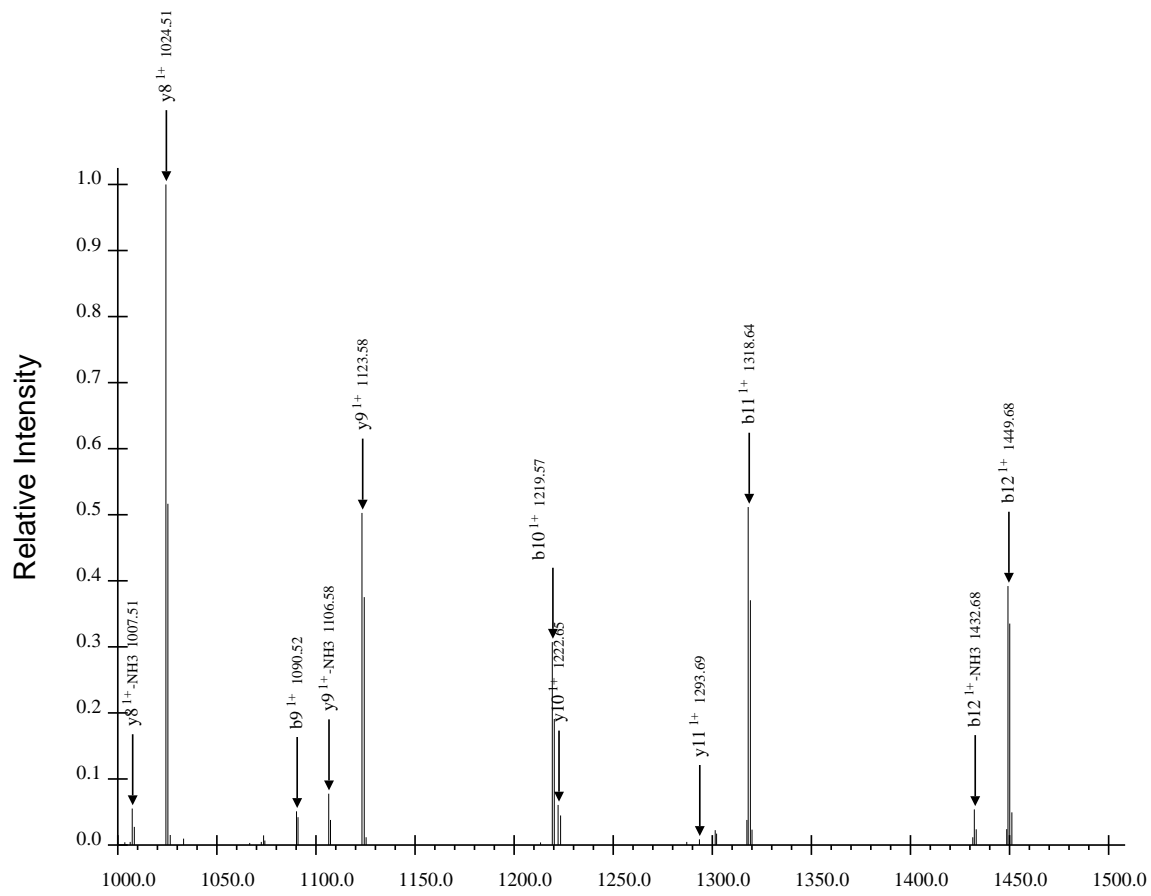

(c) Third Region for aMEAVVNLYQEVMK, Spectrum 2.dta

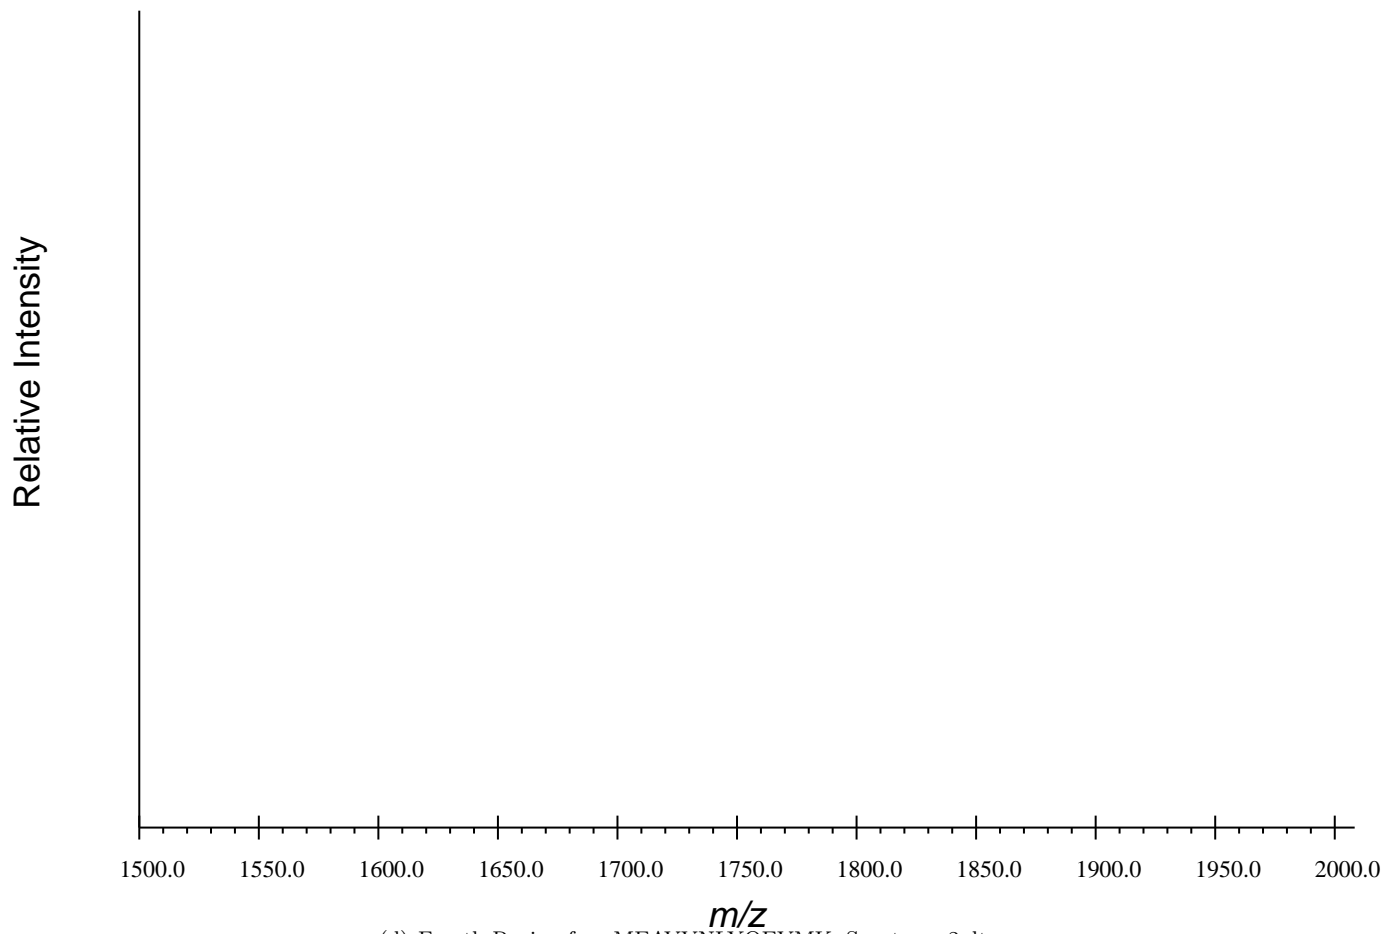

(d) Fourth Region for aMEAVVNLYQEVMK, Spectrum 2.dta

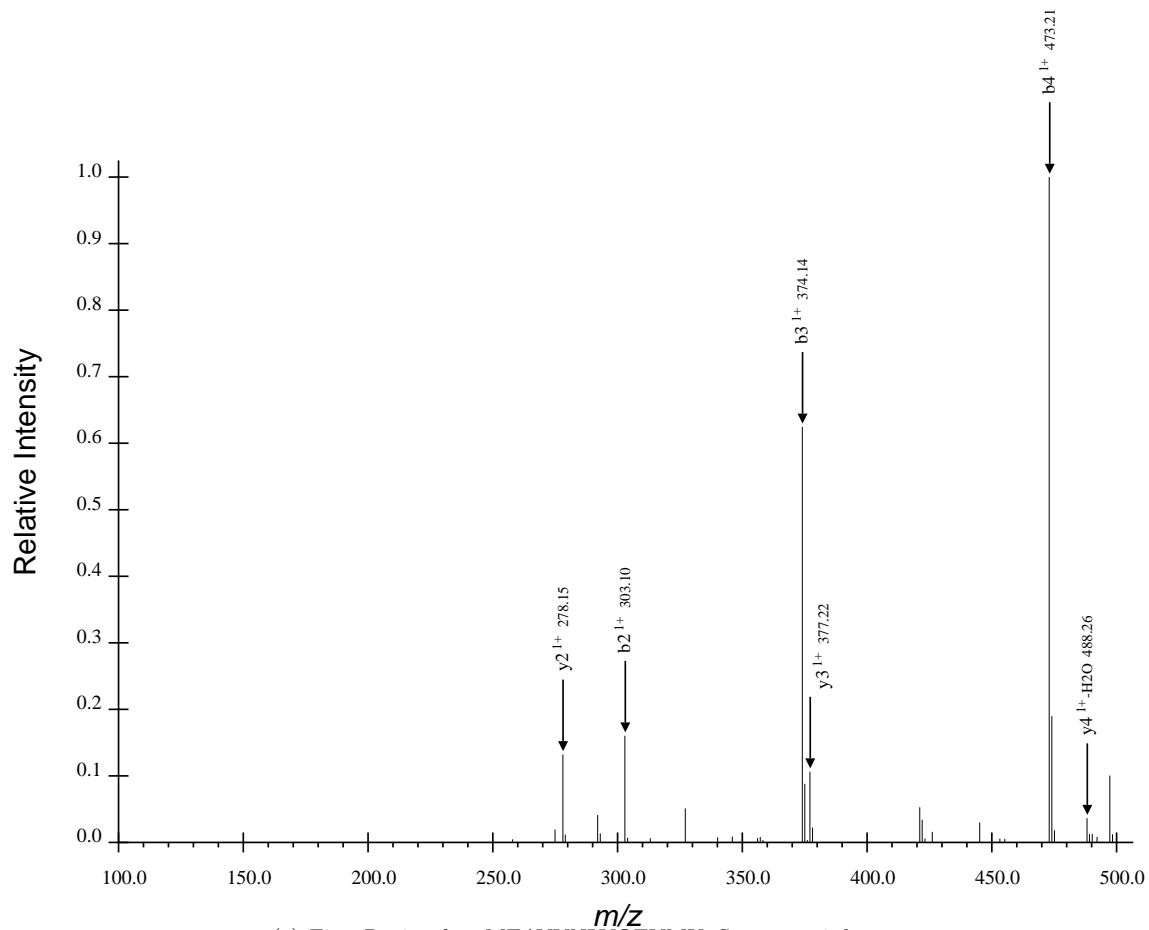

(a) First Region for aMEAVVNLYQEVMK, Spectrum 3.dta

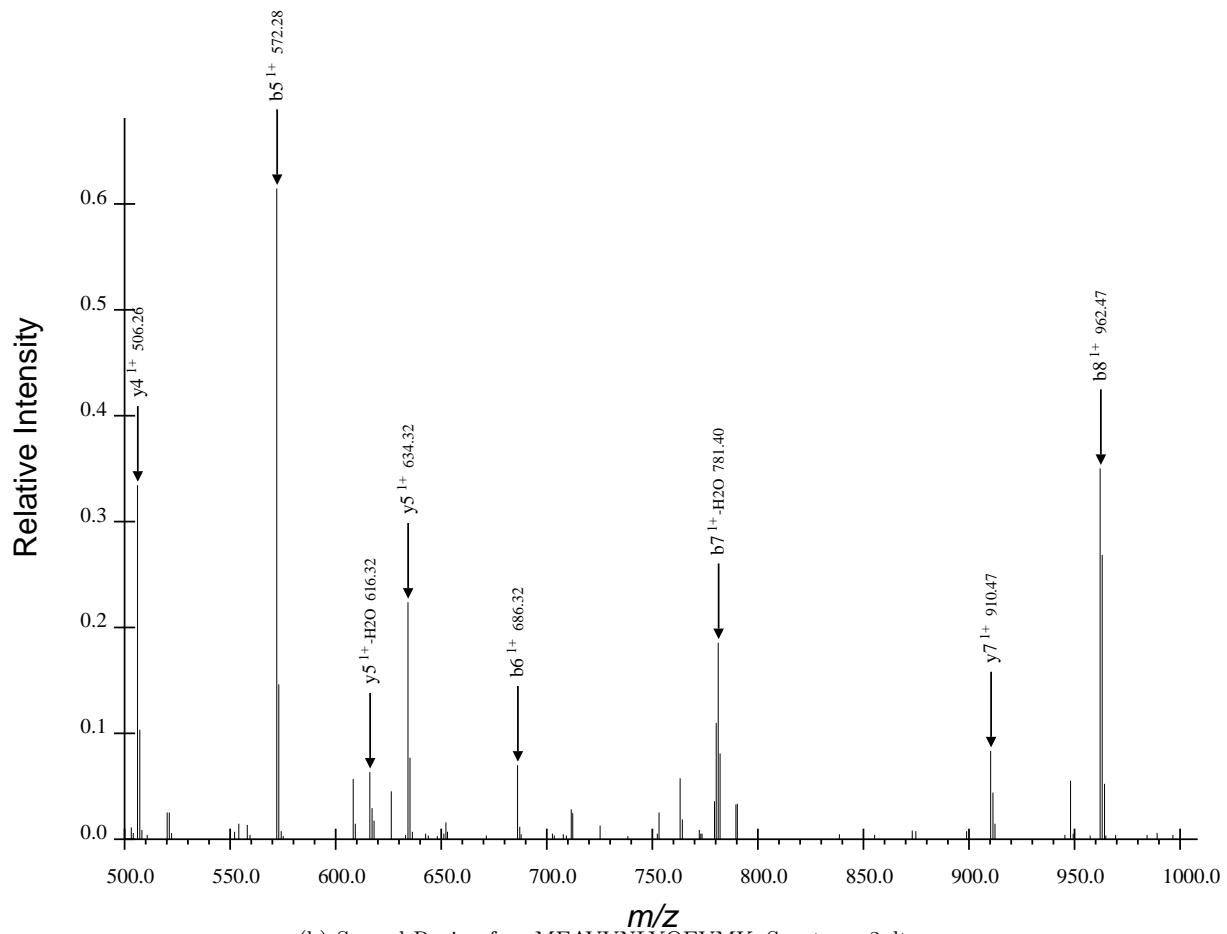

(b) Second Region for aMEAVVNLYQEVMK, Spectrum 3.dta

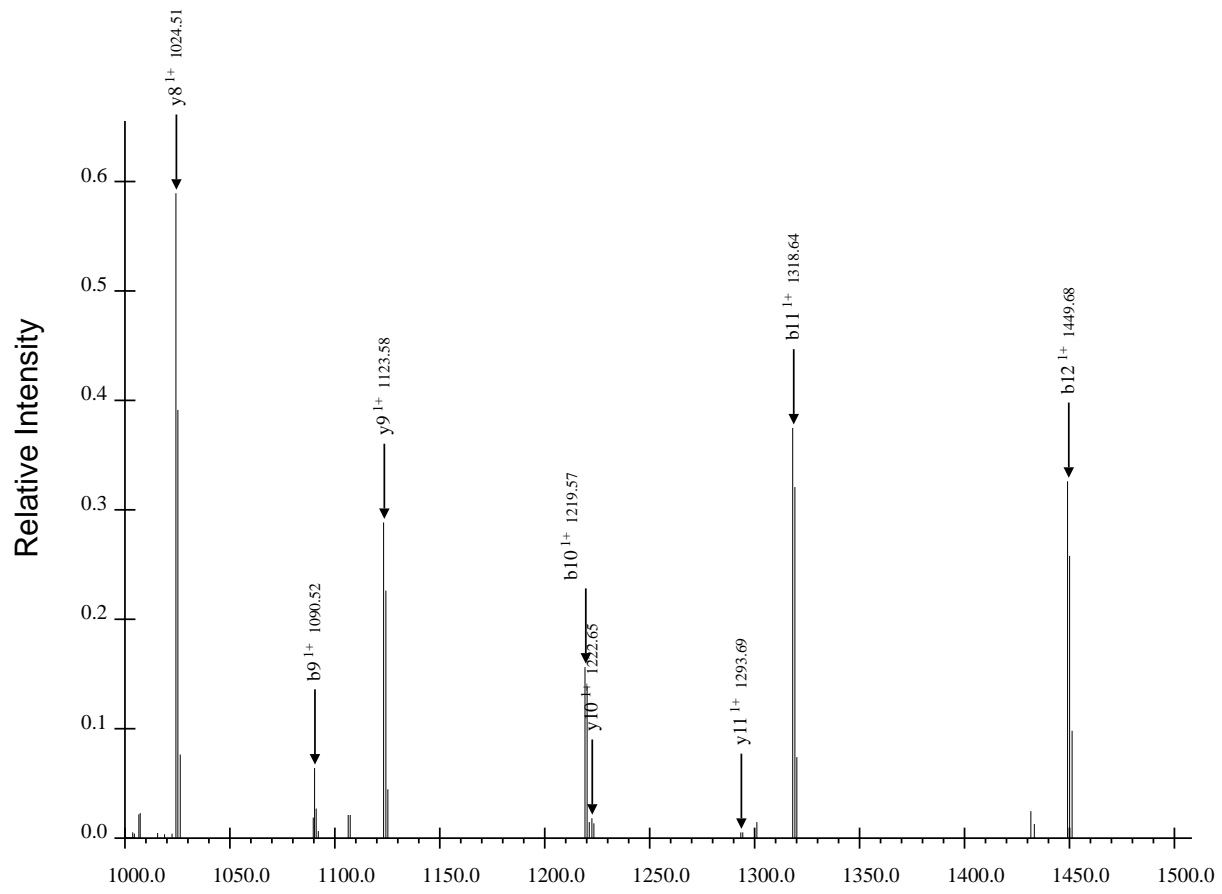

(c) Third Region for aMEAVVNLYQEVMK, Spectrum 3.dta

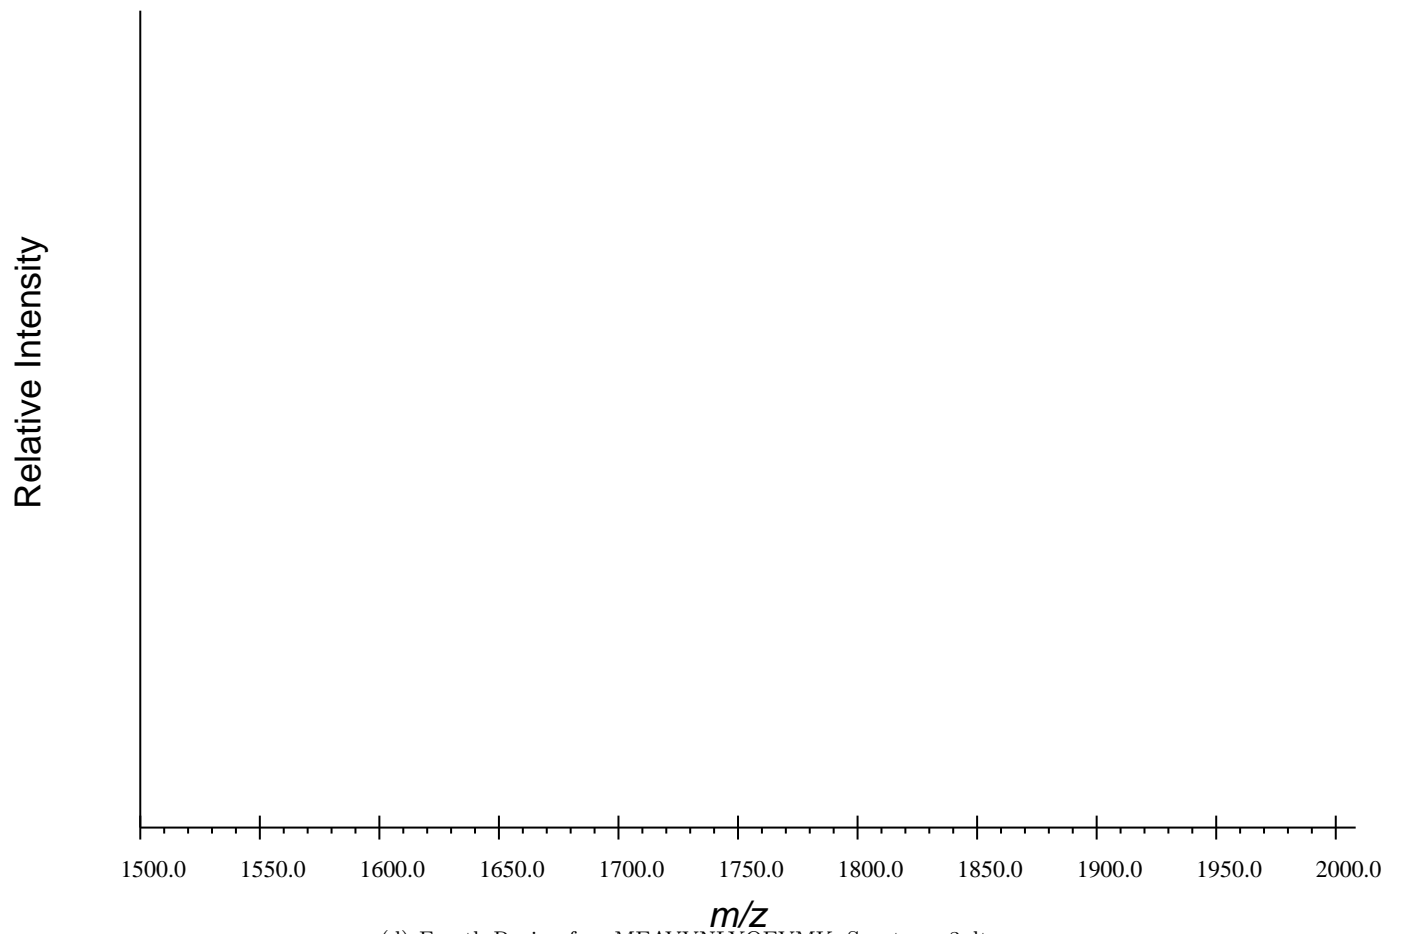

(d) Fourth Region for aMEAVVNLYQEVMK, Spectrum 3.dta

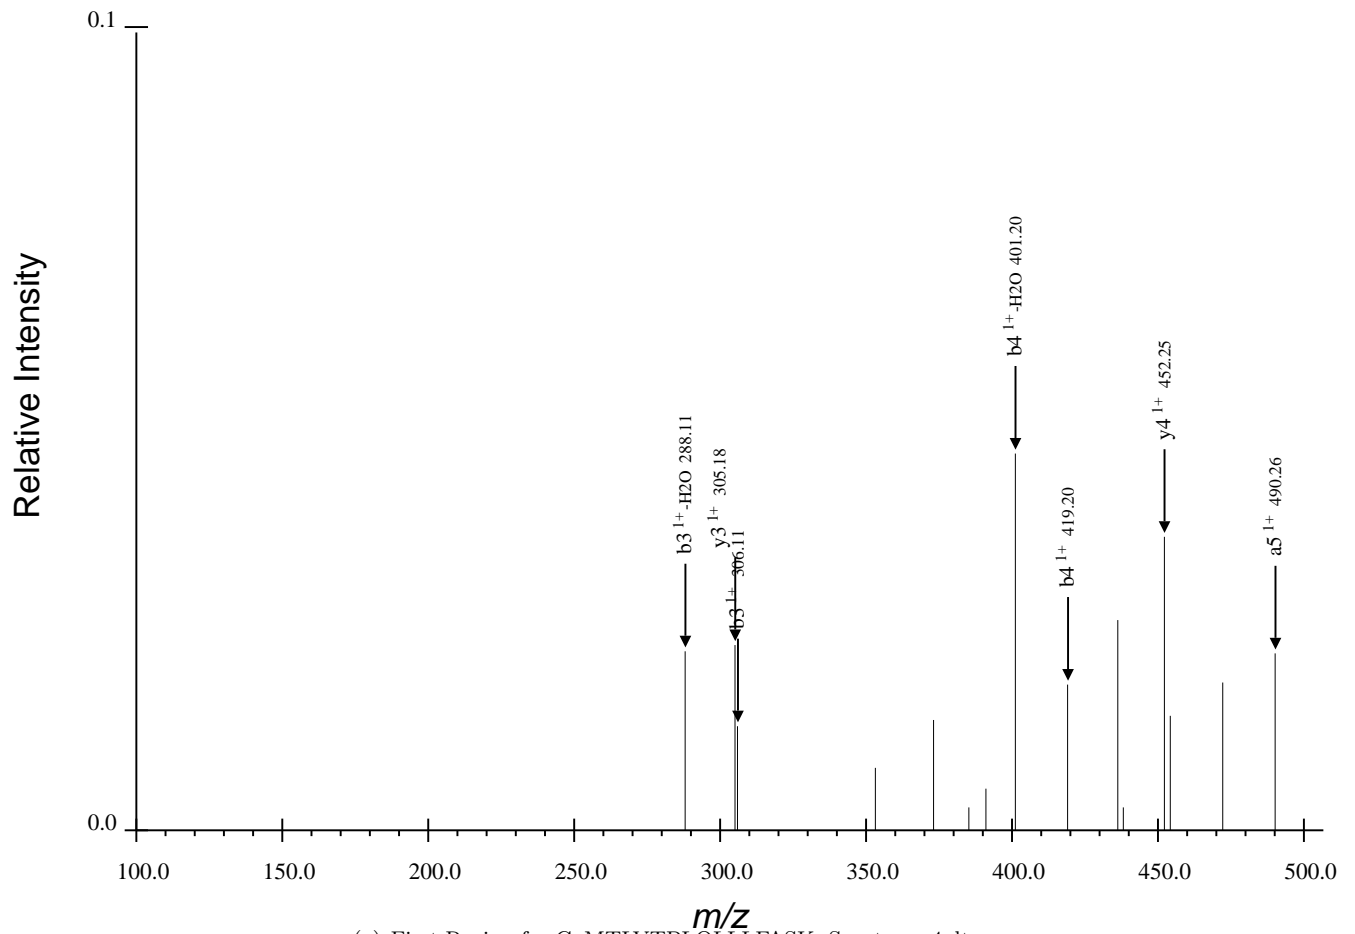

(a) First Region for GoMTLVTPQLQLLFASK, Spectrum 4.dta

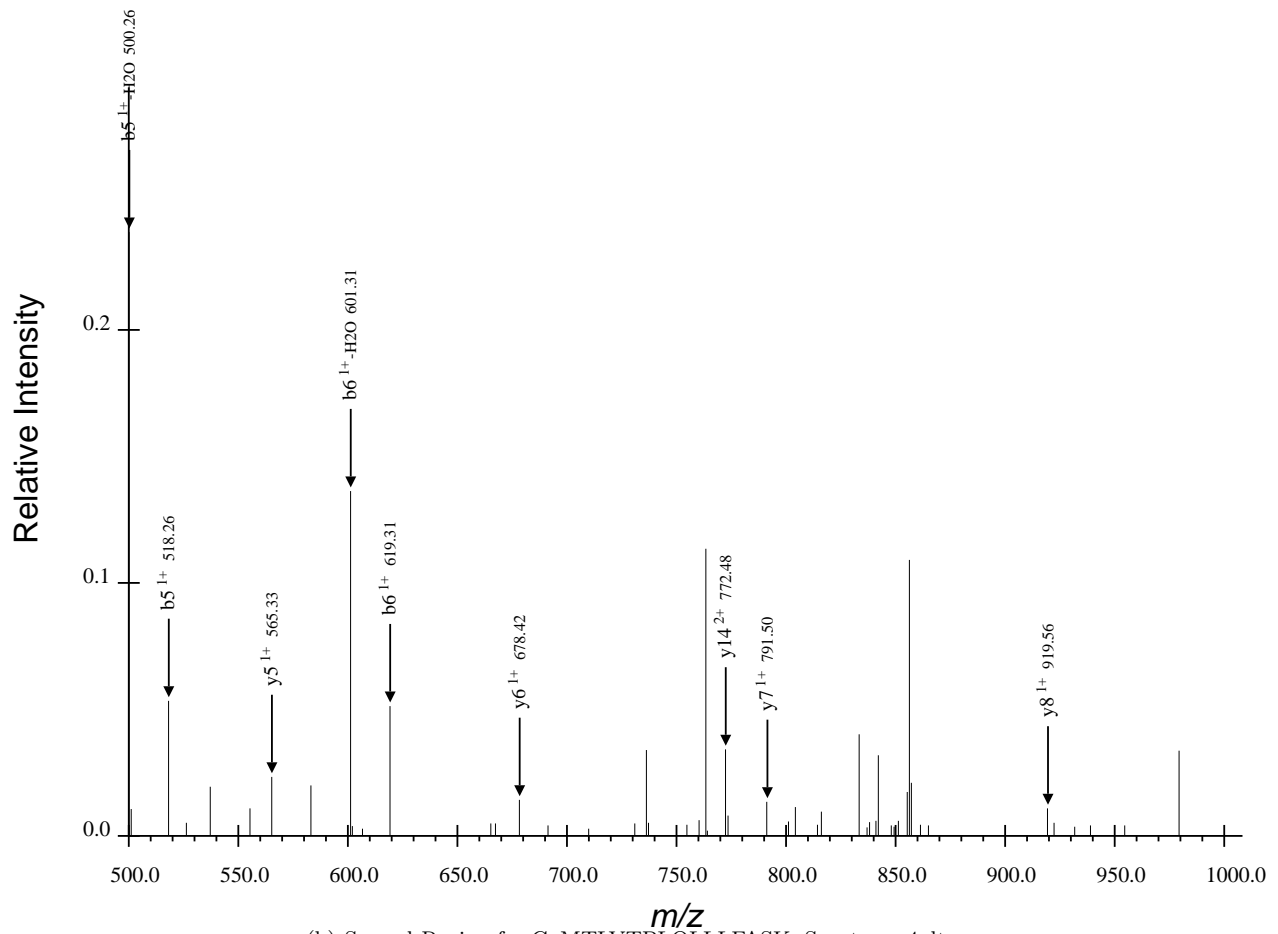

(b) Second Region for GoMTLVTPQLQLLFASK, Spectrum 4.dta

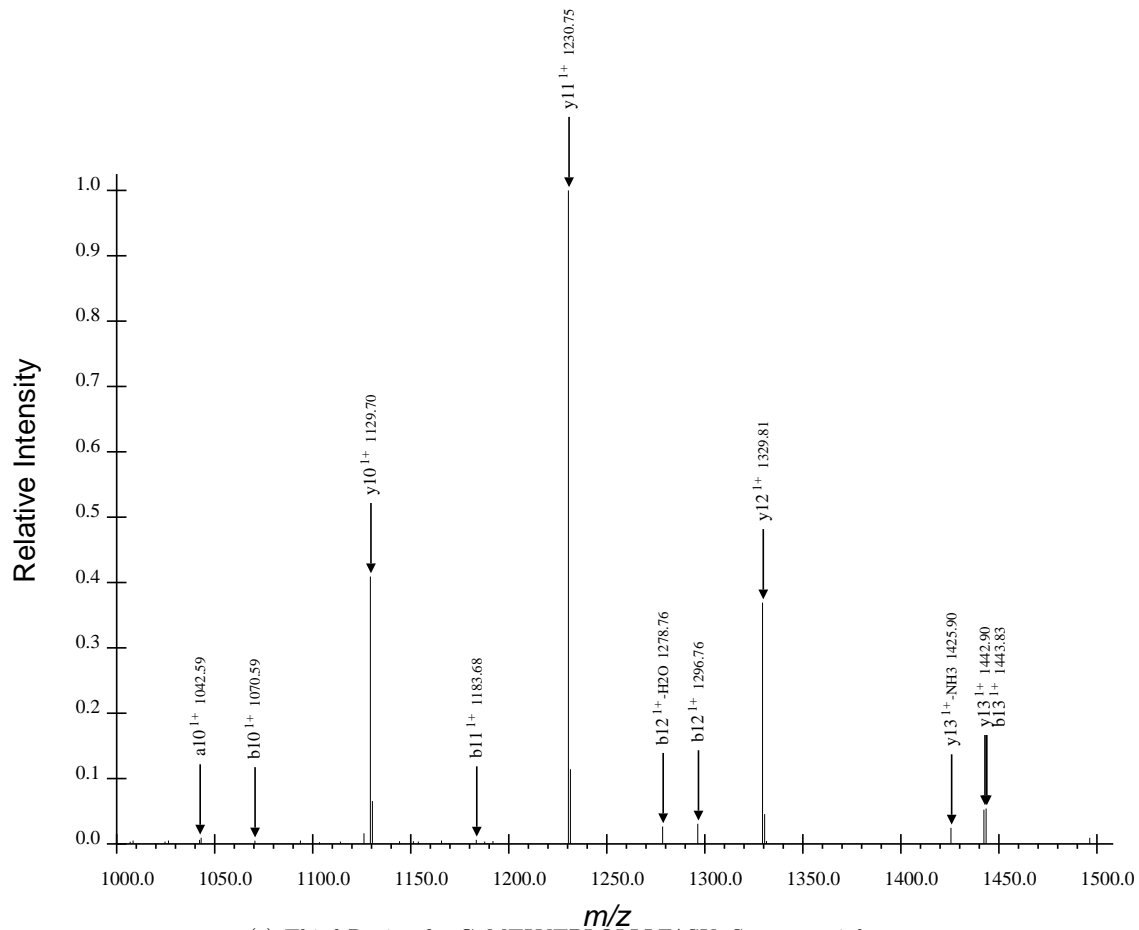

(c) Third Region for GoMTLVTPQLQLLFASK, Spectrum 4.dta

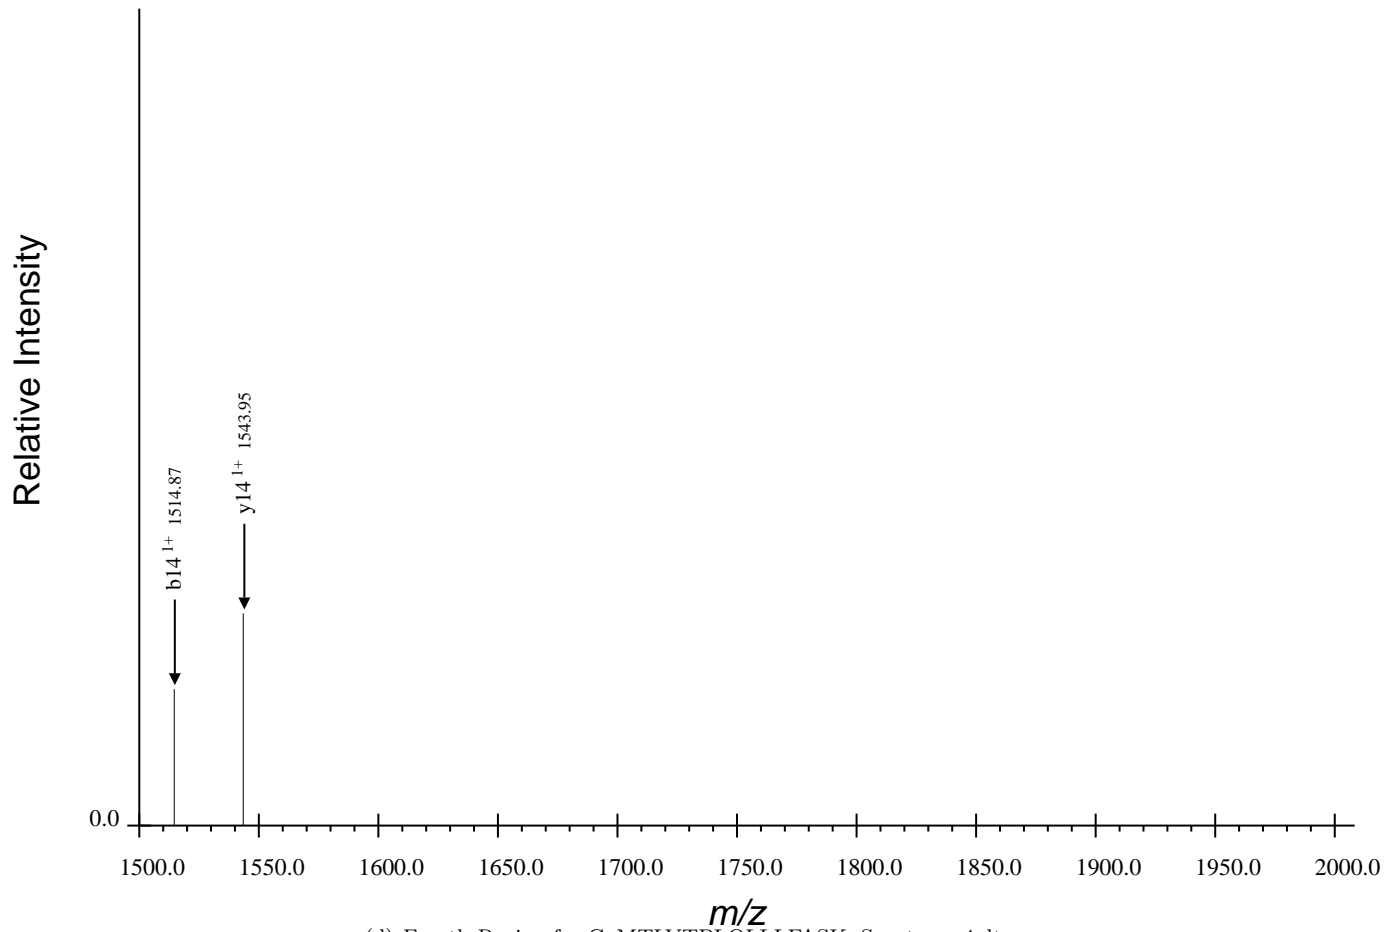

(d) Fourth Region for GoMTLVTPQLQLLFASK, Spectrum 4.dta

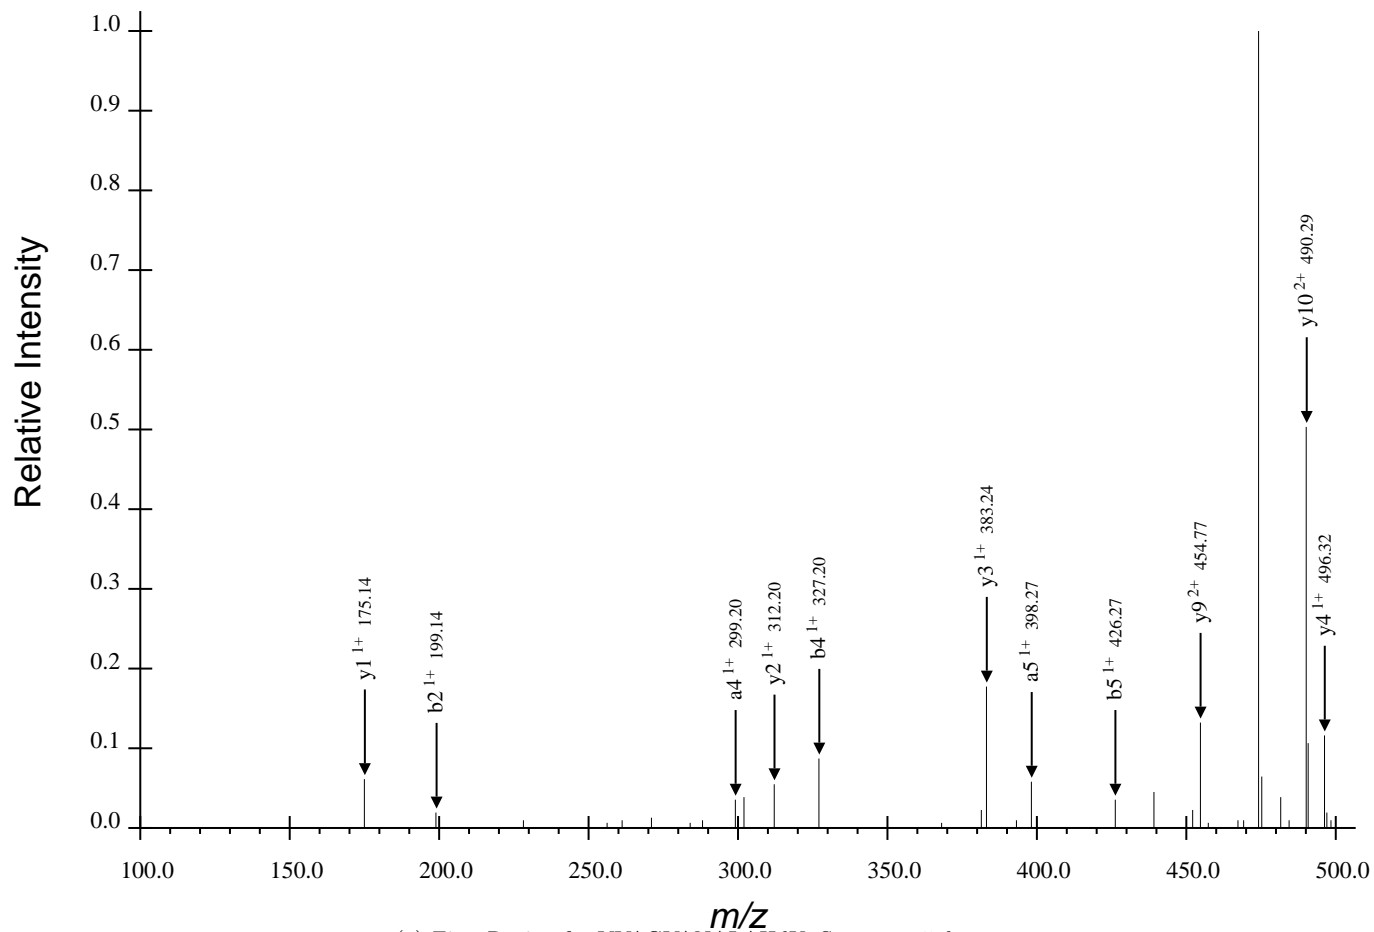

(a) First Region for VVAGVANALAHdK, Spectrum 5.dta

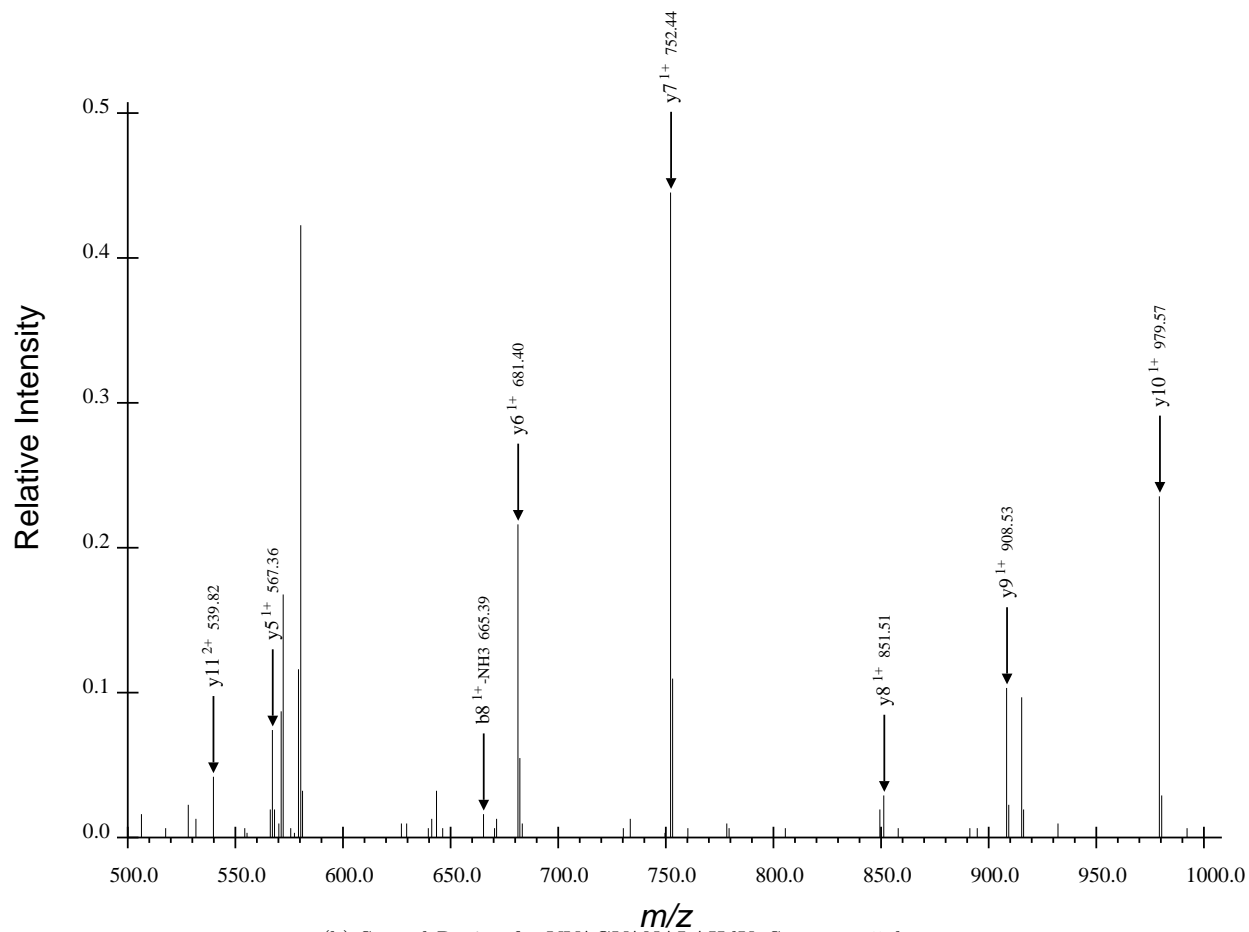

(b) Second Region for VVAGVANALAHdK, Spectrum 5.dta



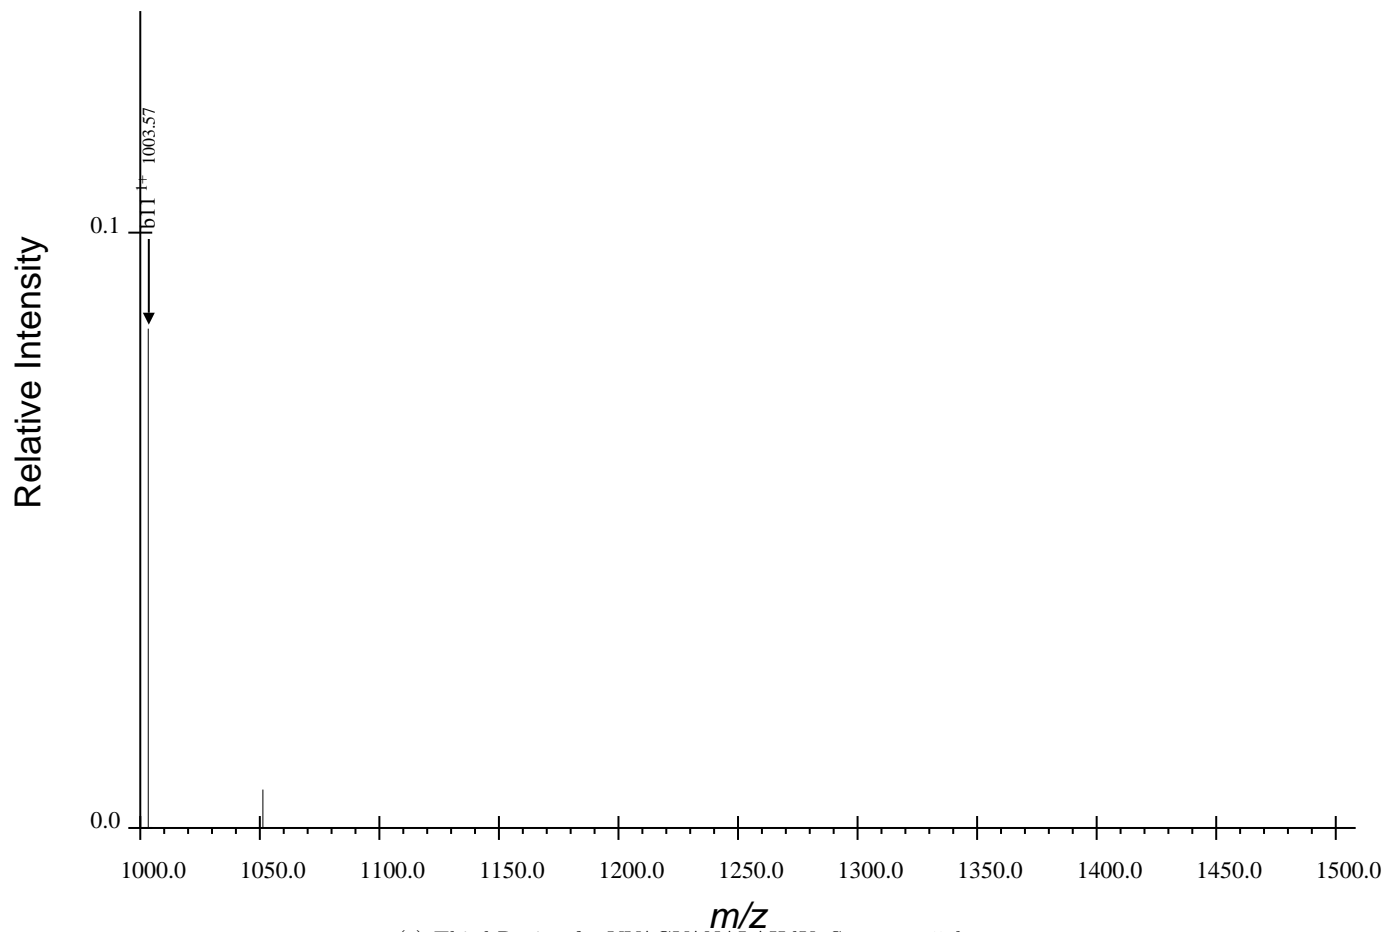

(c) Third Region for VVAGVANALAHdK, Spectrum 5.dta

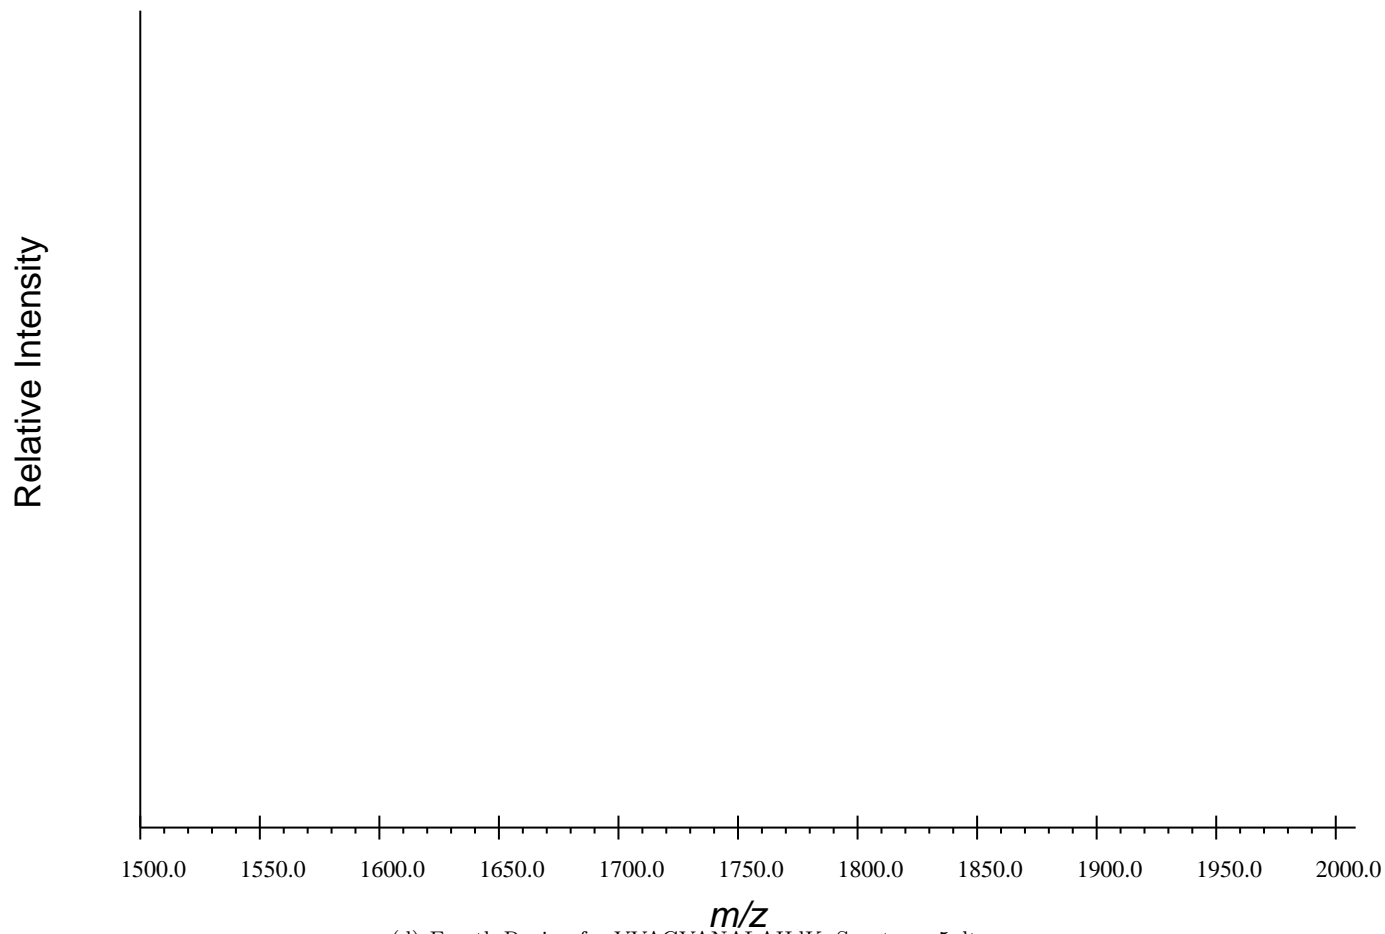

(d) Fourth Region for VVAGVANALAHdK, Spectrum 5.dta

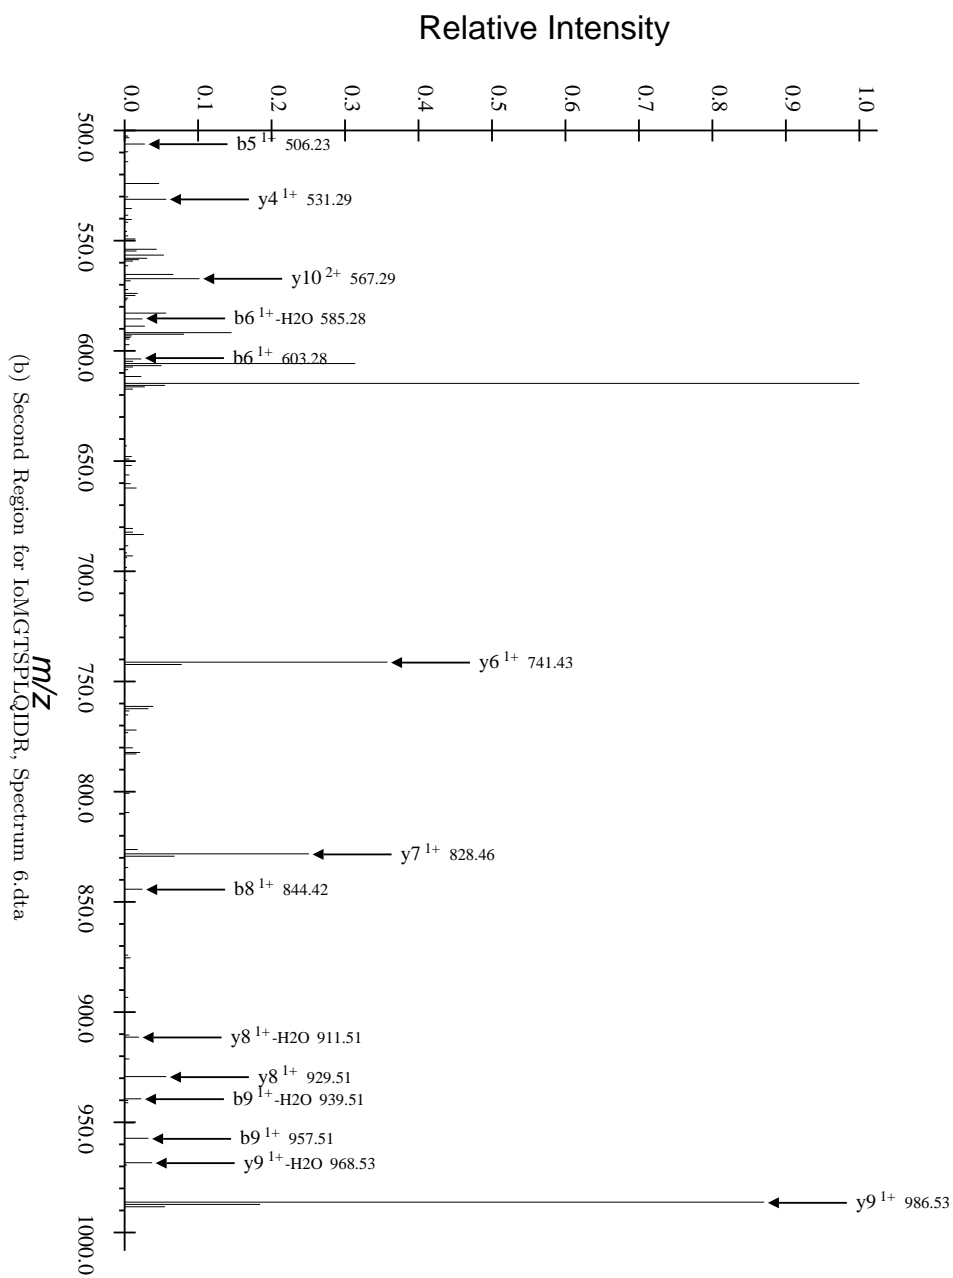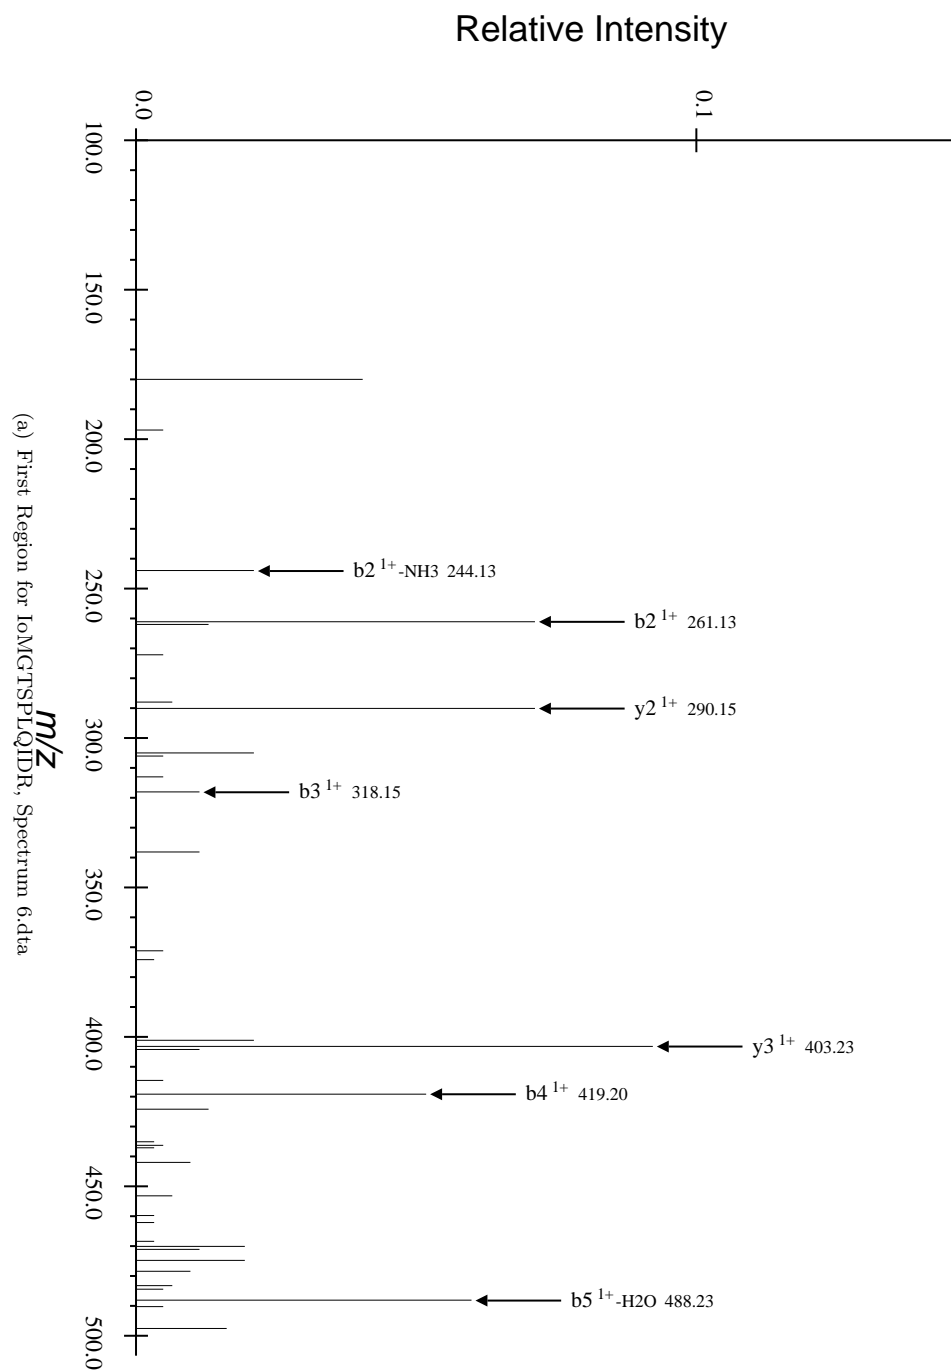

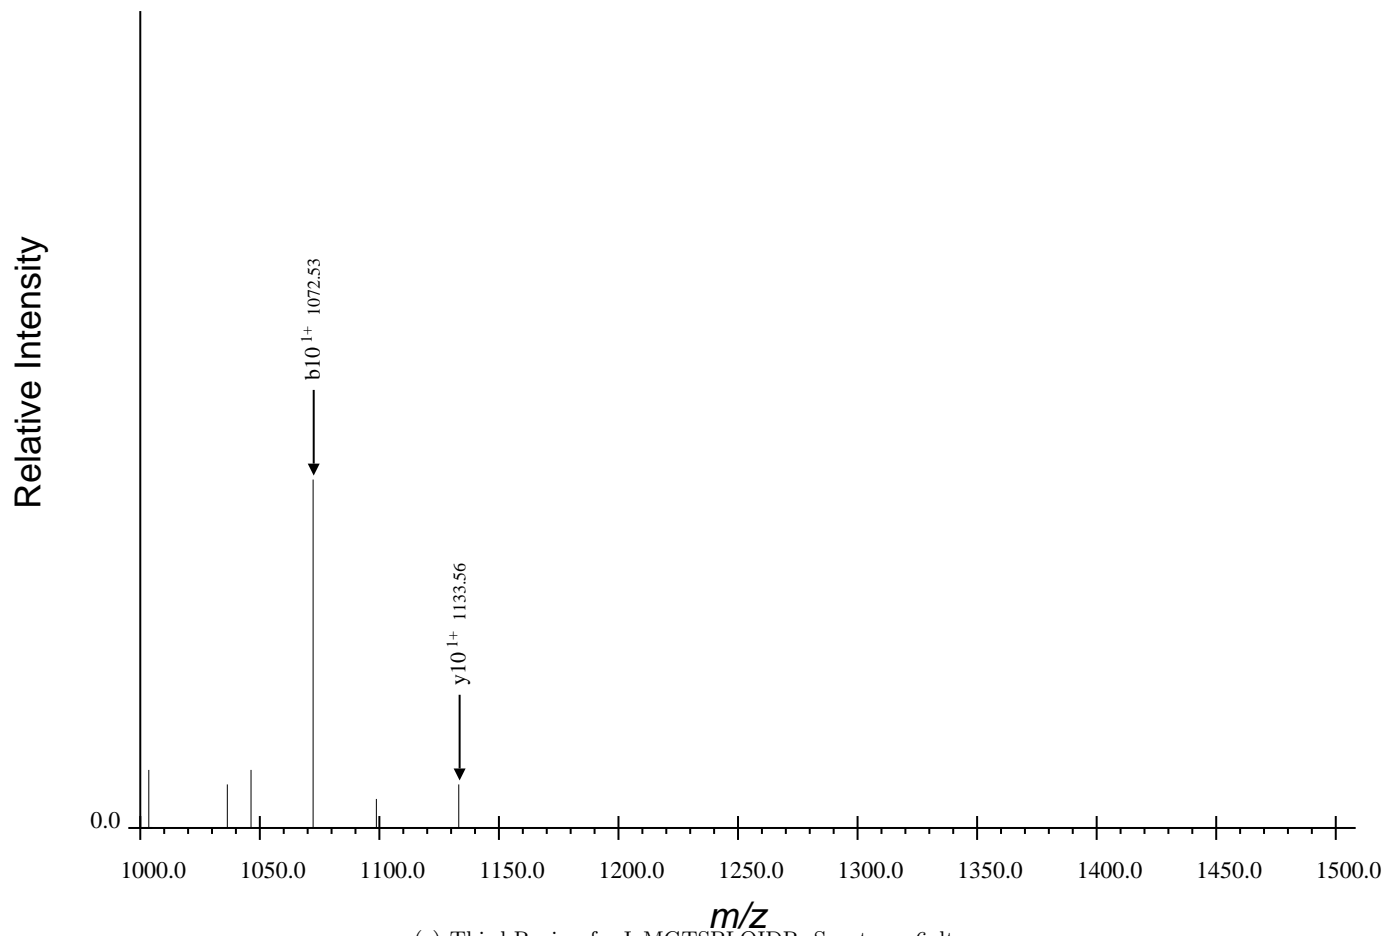

(c) Third Region for IoMGTSPLQIDR, Spectrum 6.dta

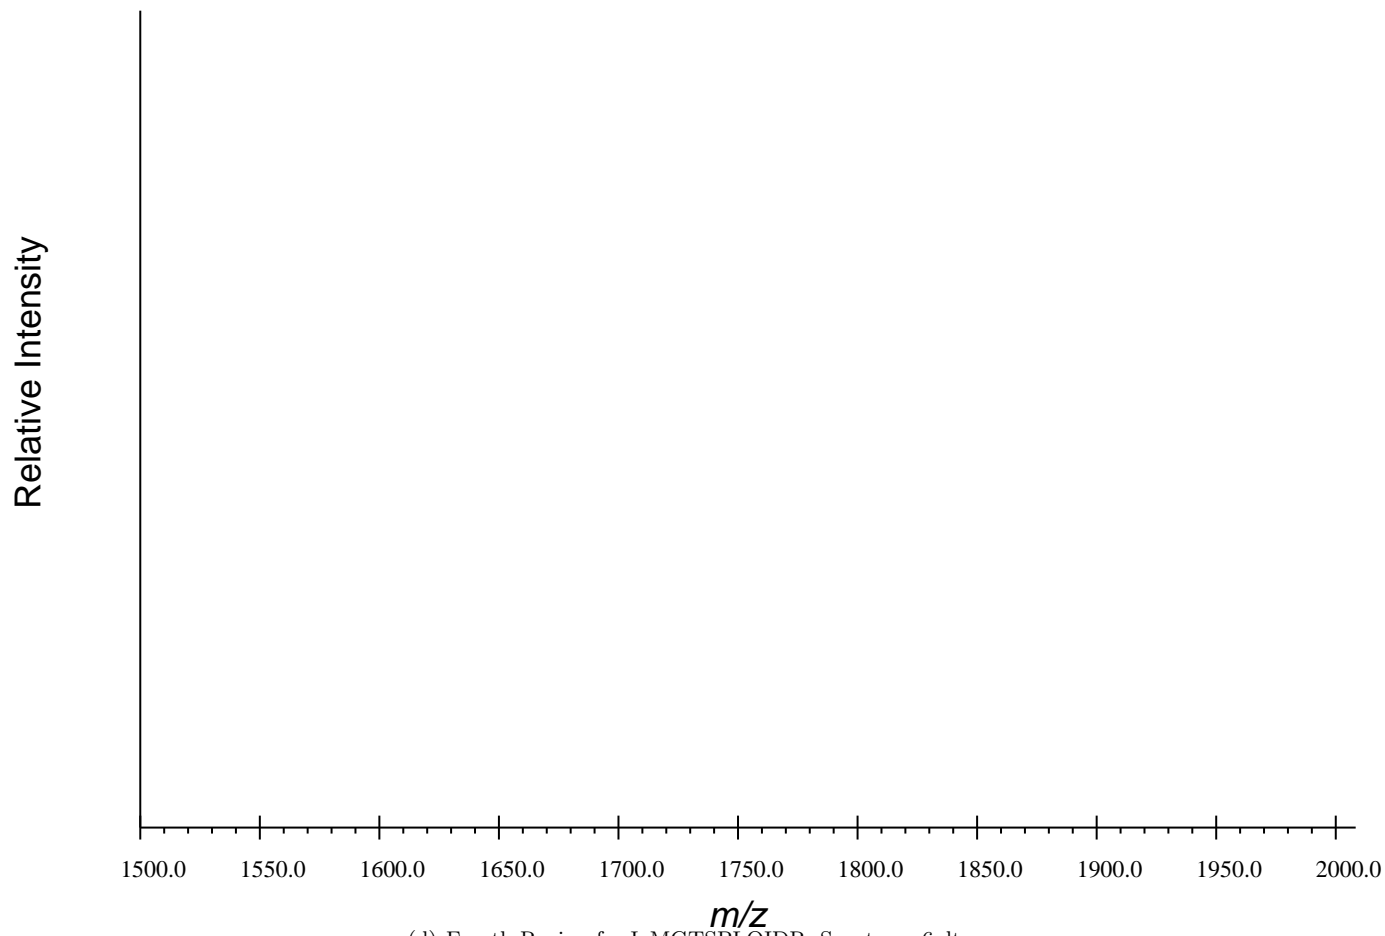

(d) Fourth Region for IoMGTSPLQIDR, Spectrum 6.dta

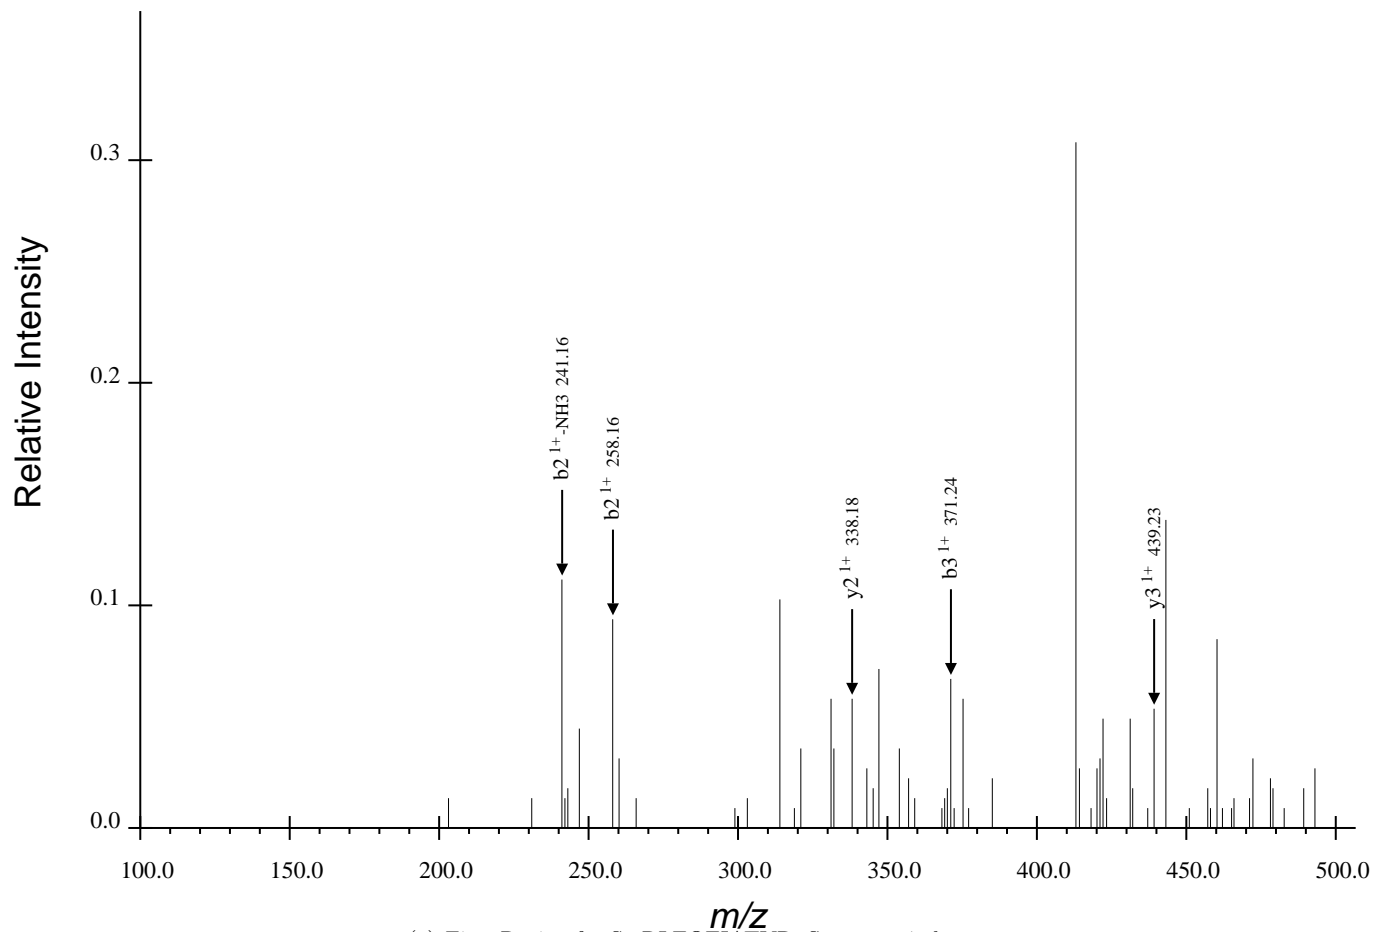

(a) First Region for SmRLEQEIATYR, Spectrum 7.dta

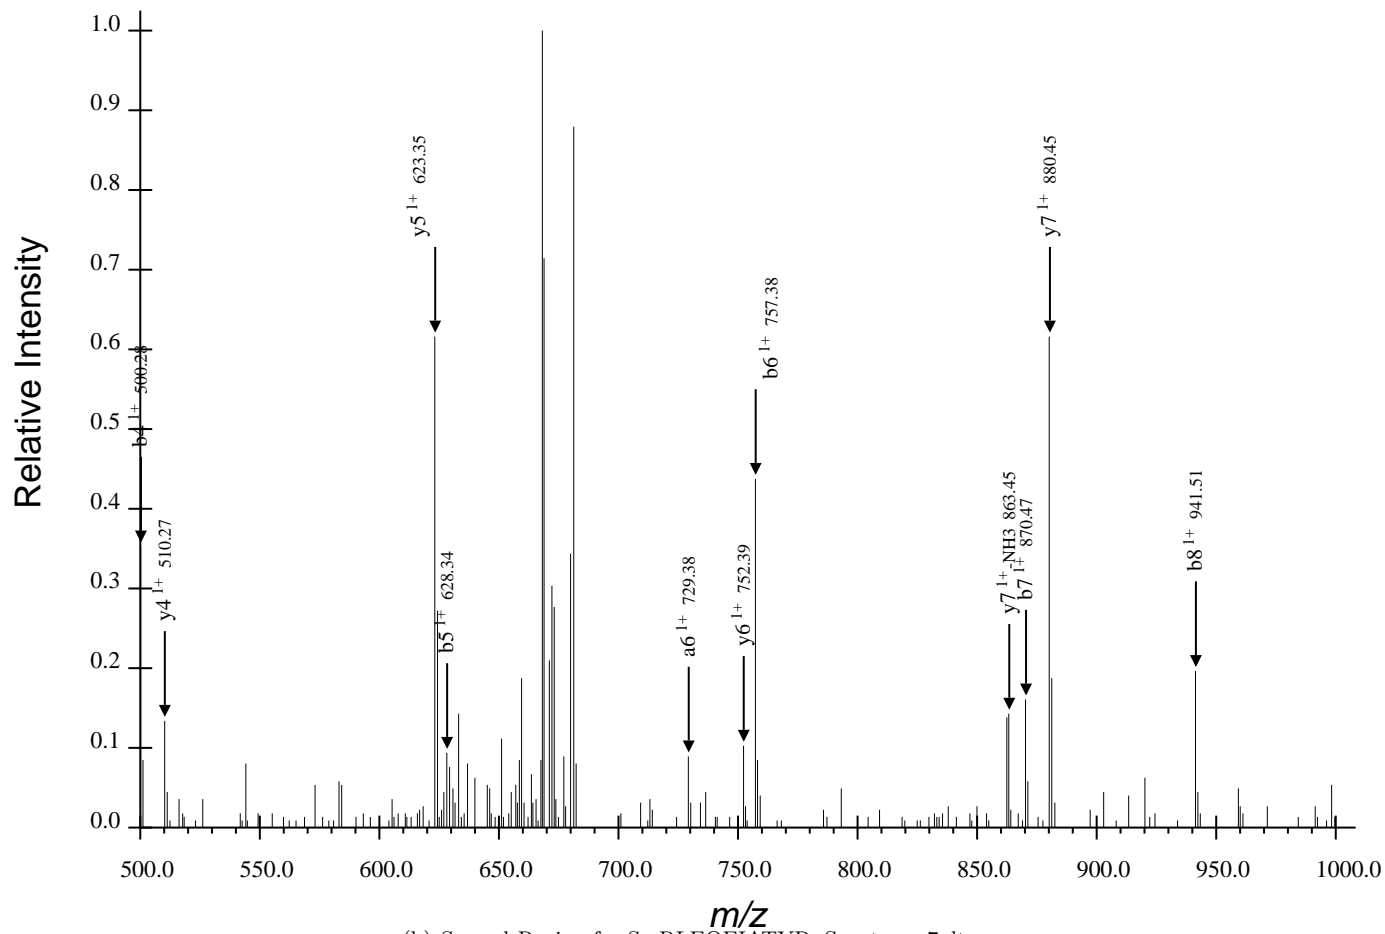

(b) Second Region for SmRLEQEIATYR, Spectrum 7.dta

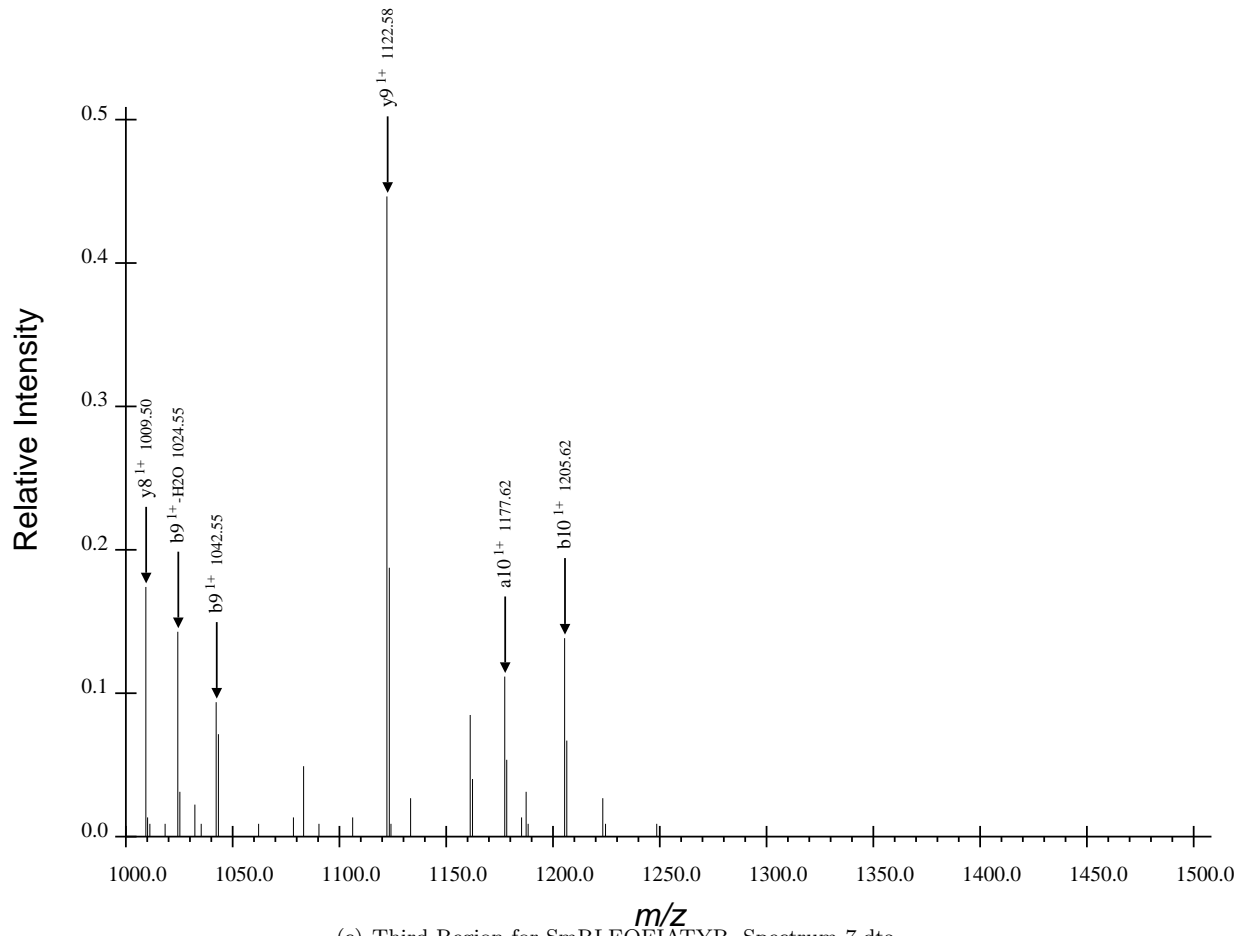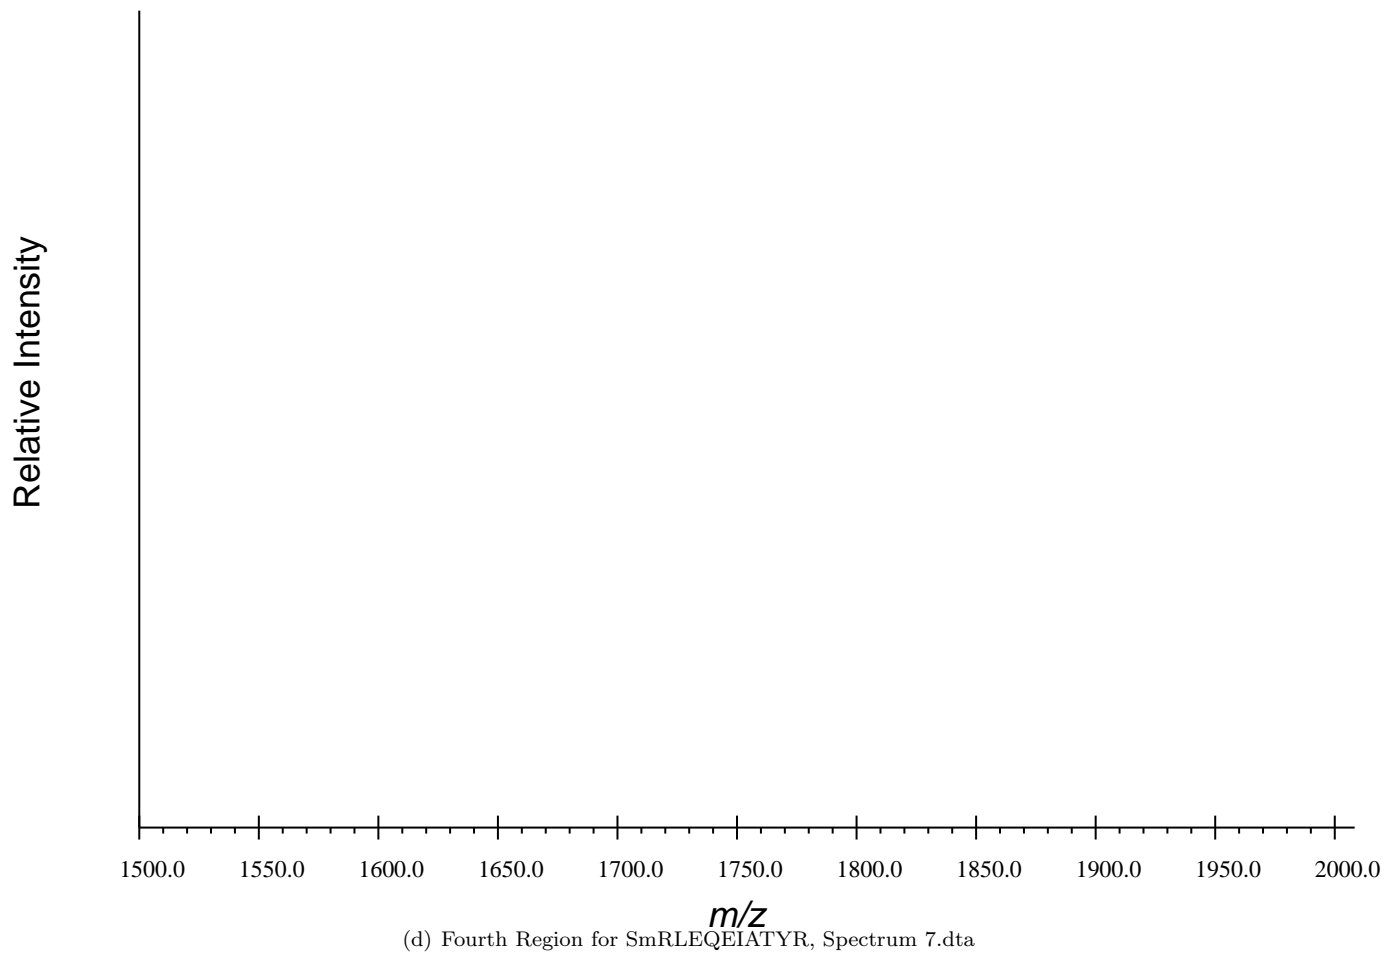

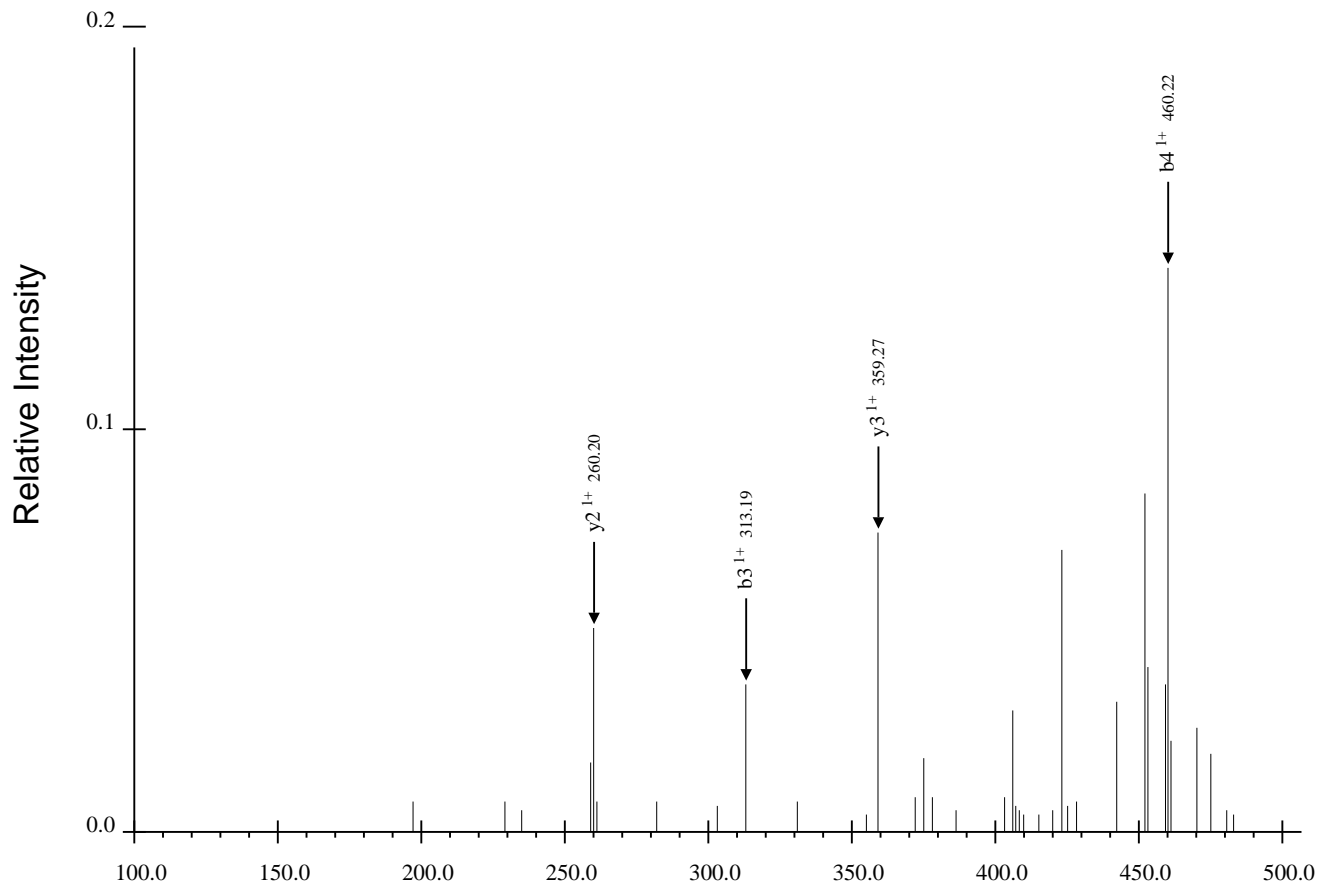

(a) First Region for LAQoMFSDoMVLK, Spectrum 8.dta

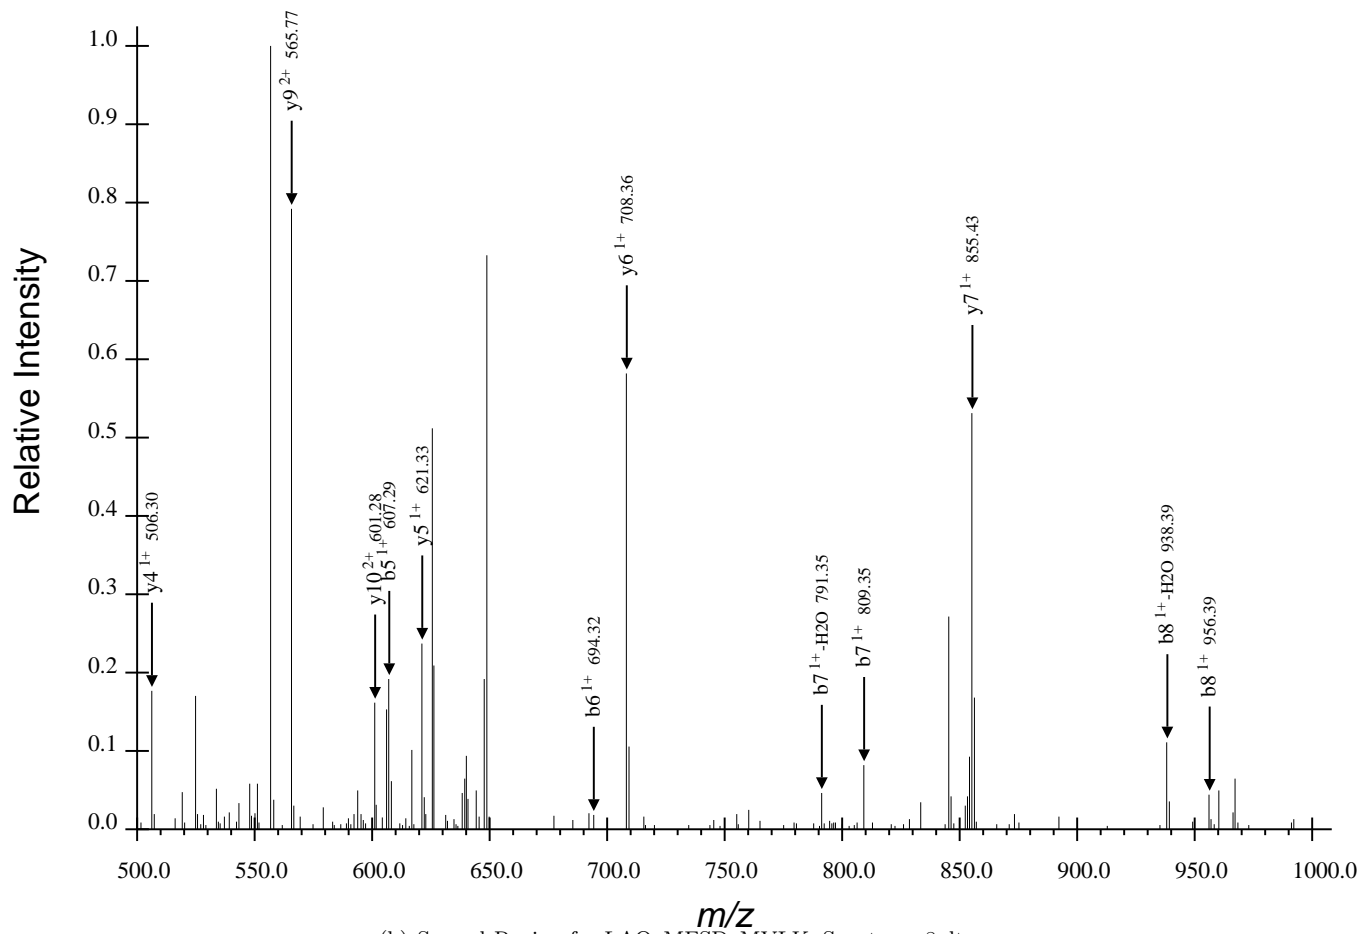

(b) Second Region for LAQoMFSDoMVLK, Spectrum 8.dta

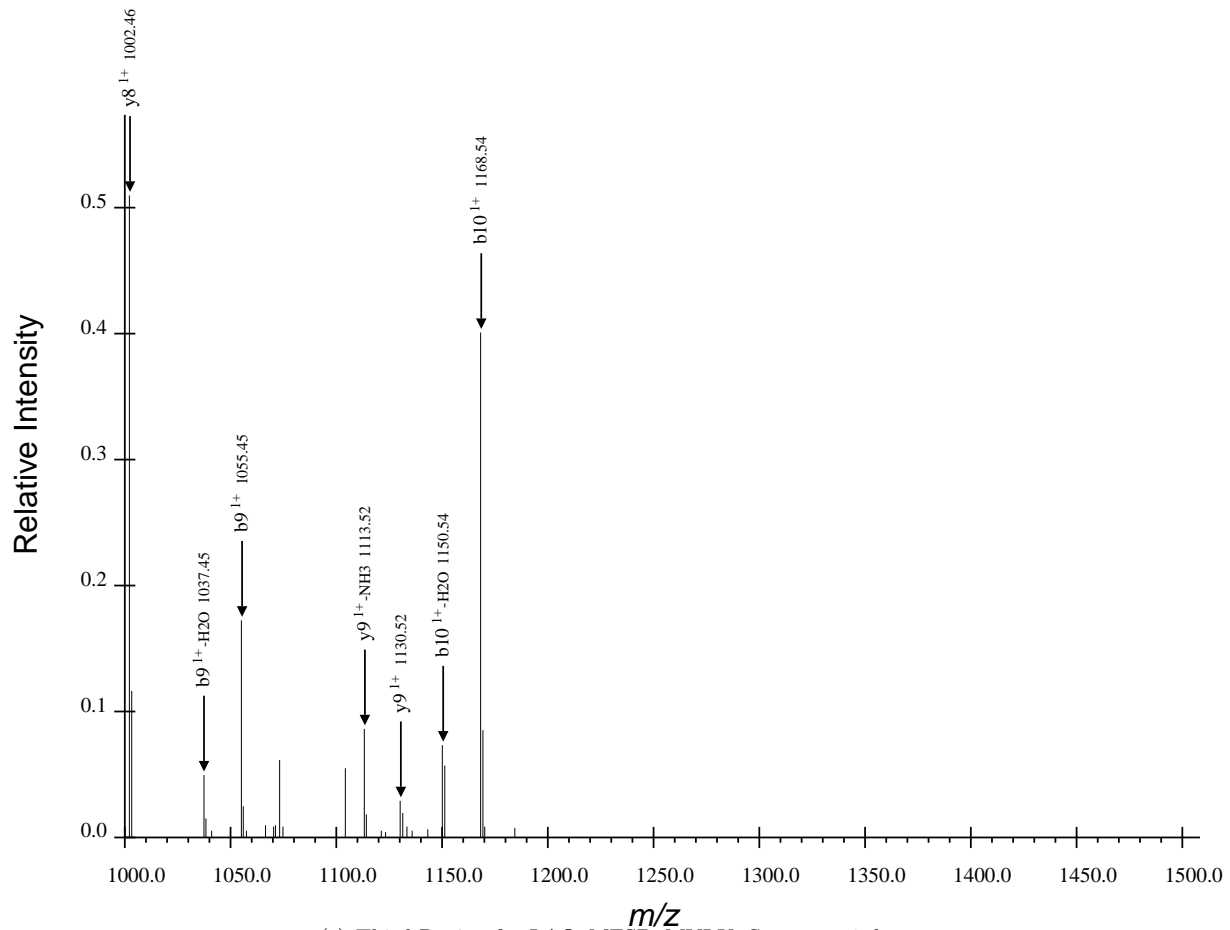

(c) Third Region for LAQoMFSDoMVLK, Spectrum 8.dta

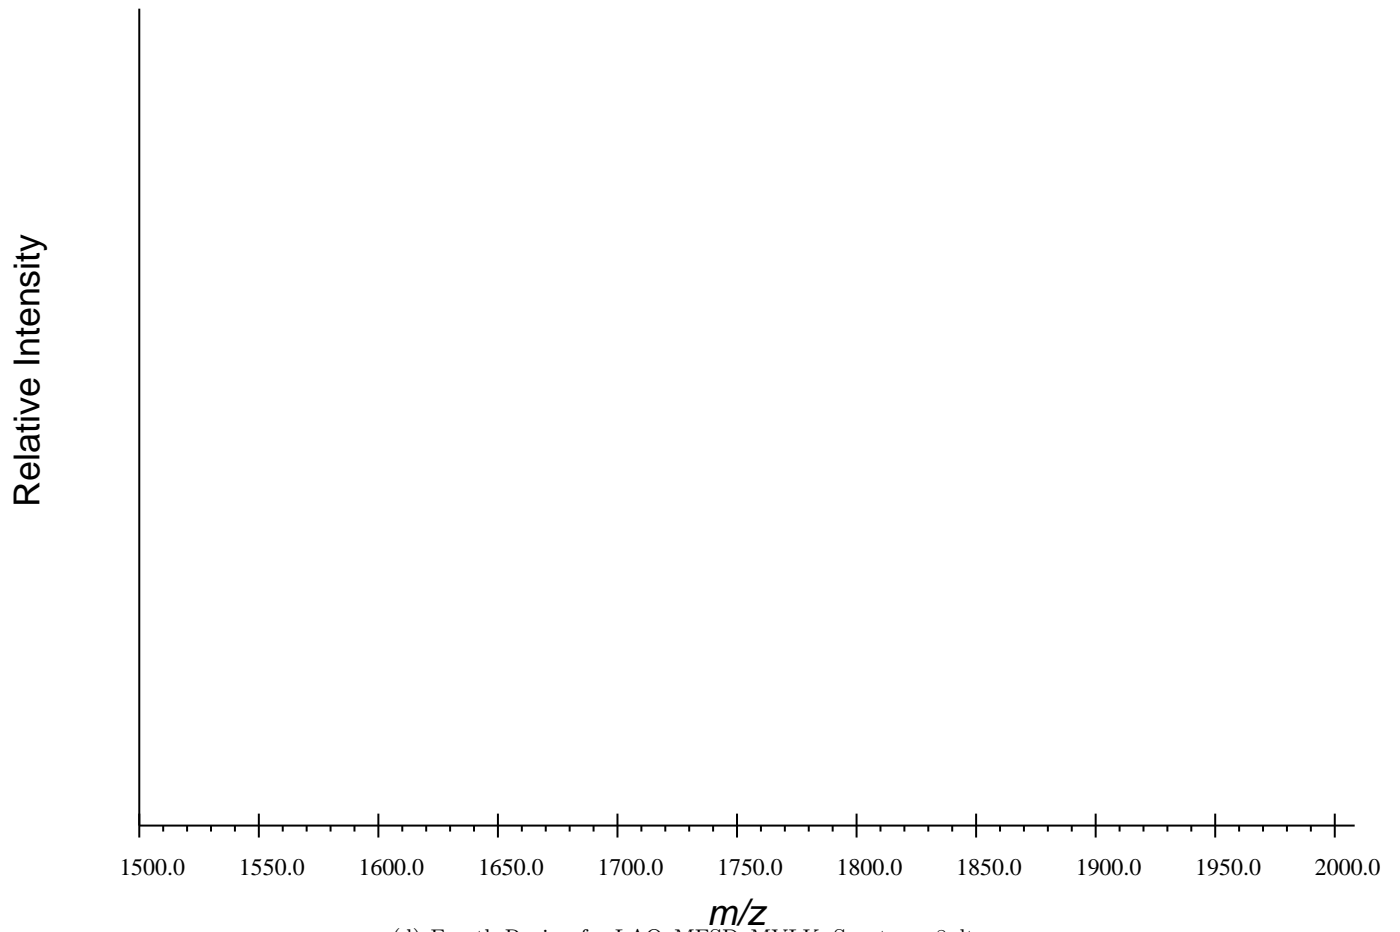

(d) Fourth Region for LAQoMFSDoMVLK, Spectrum 8.dta

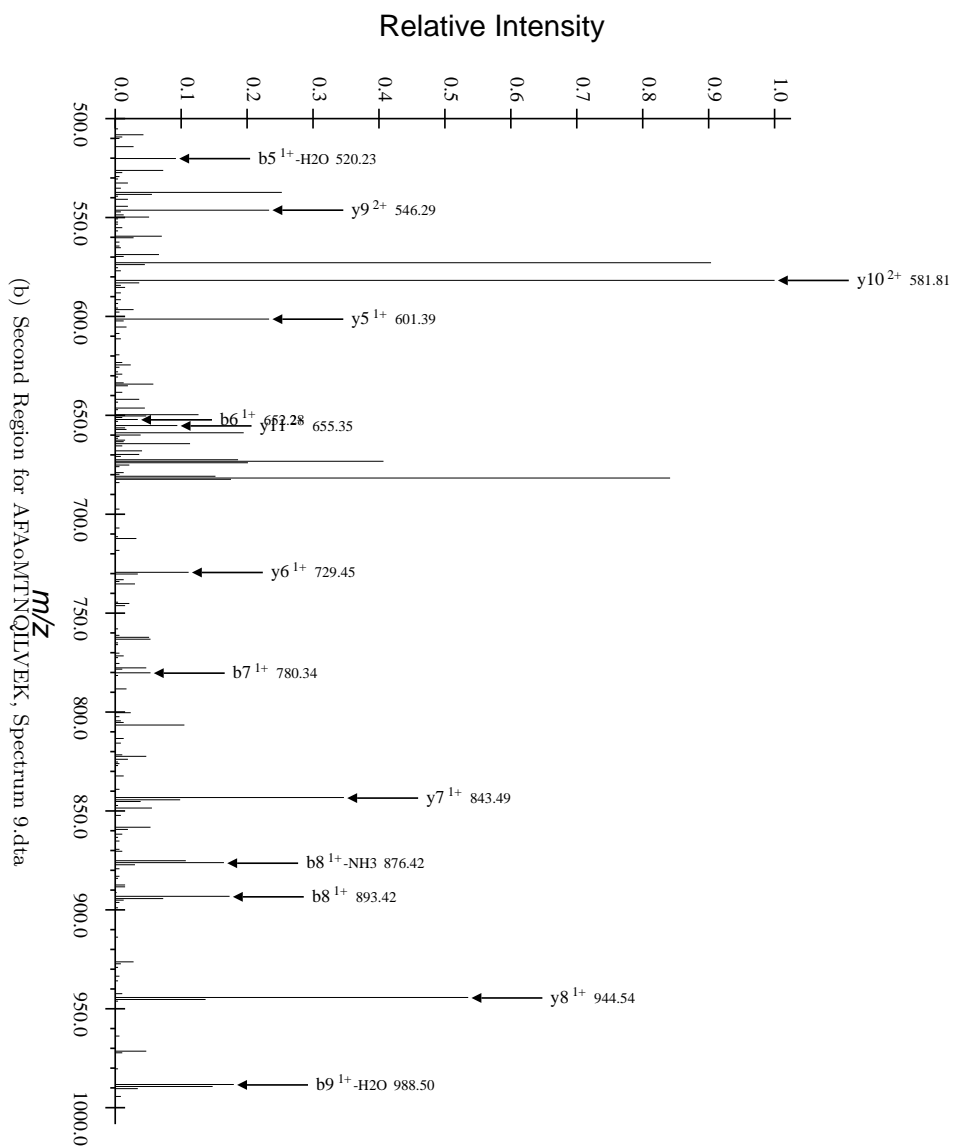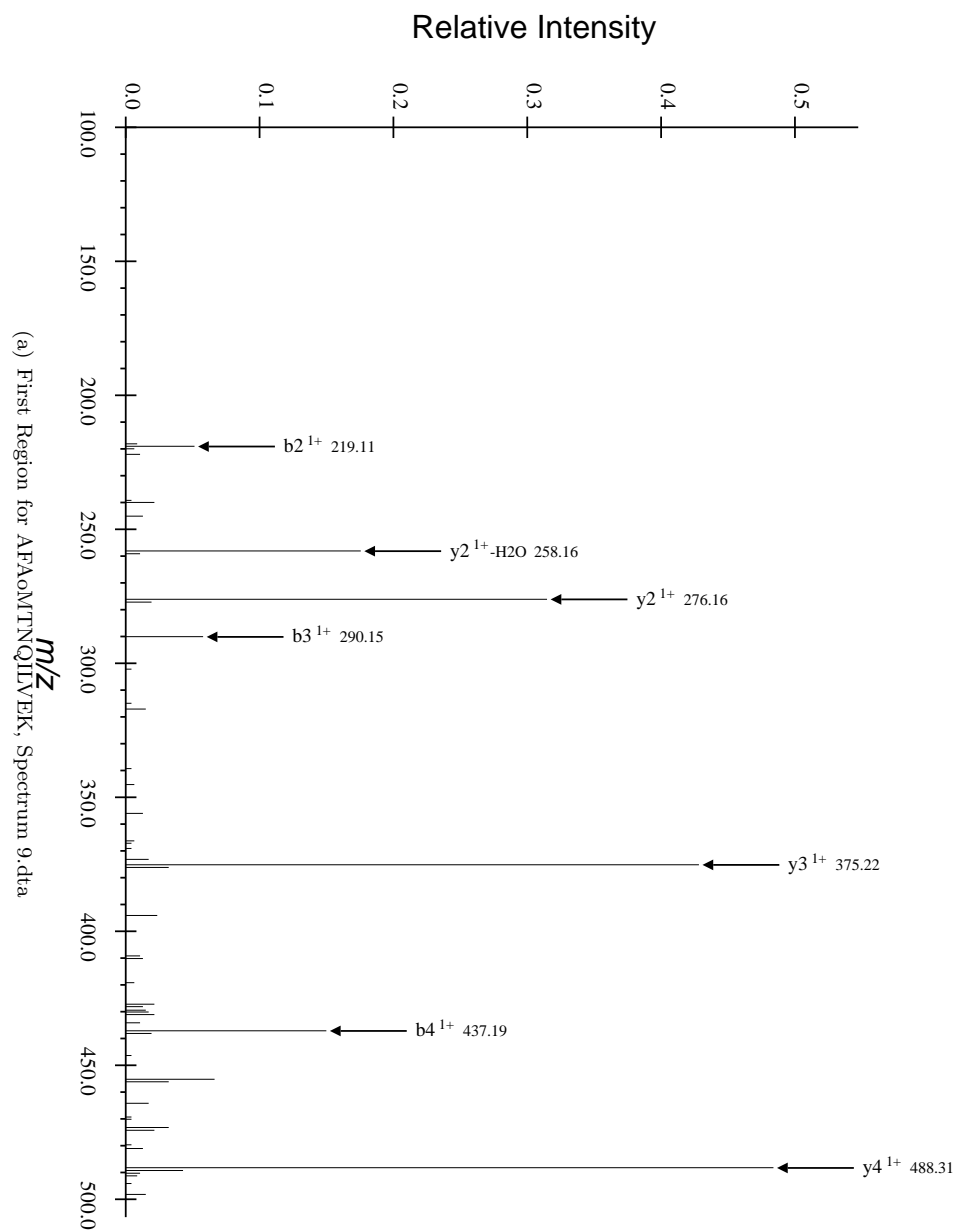



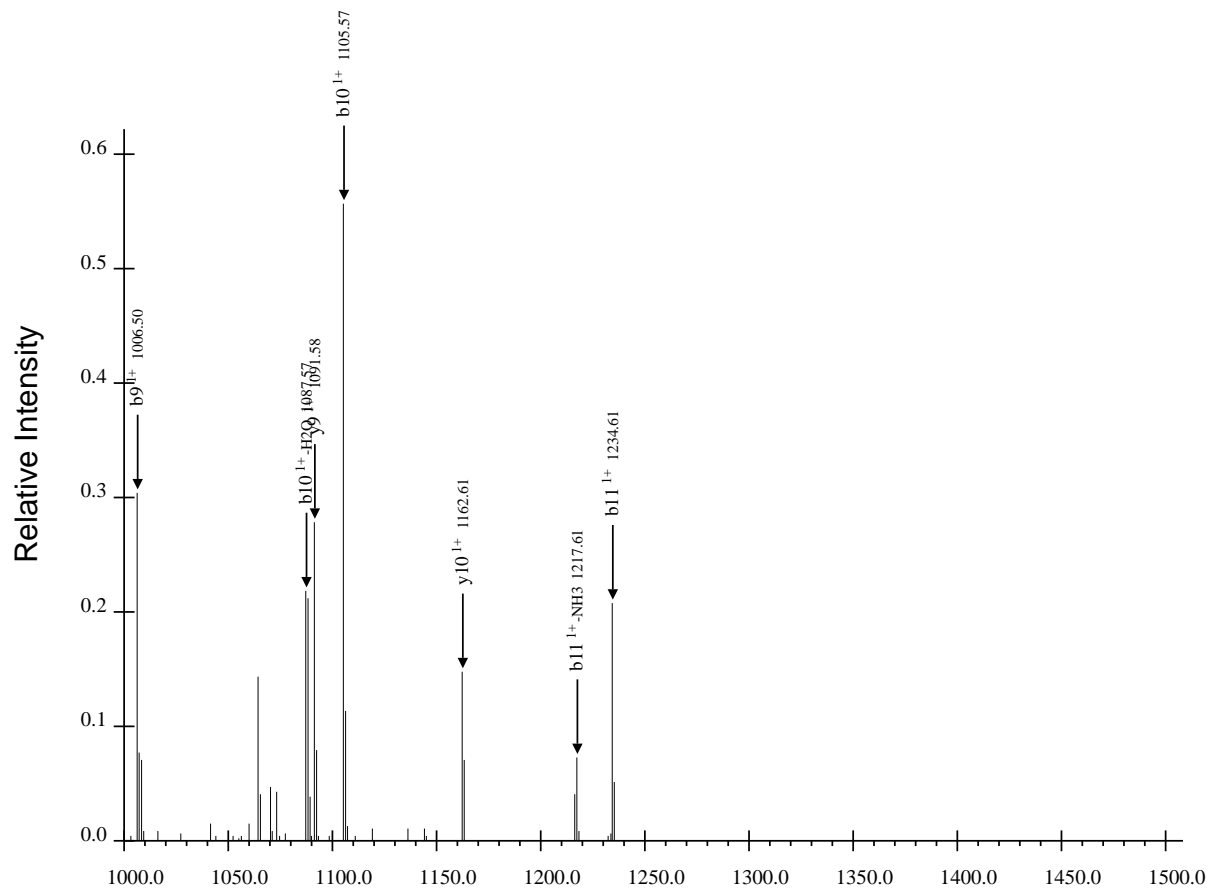

(c) Third Region for AFAoMTNQILVEK, Spectrum 9.dta

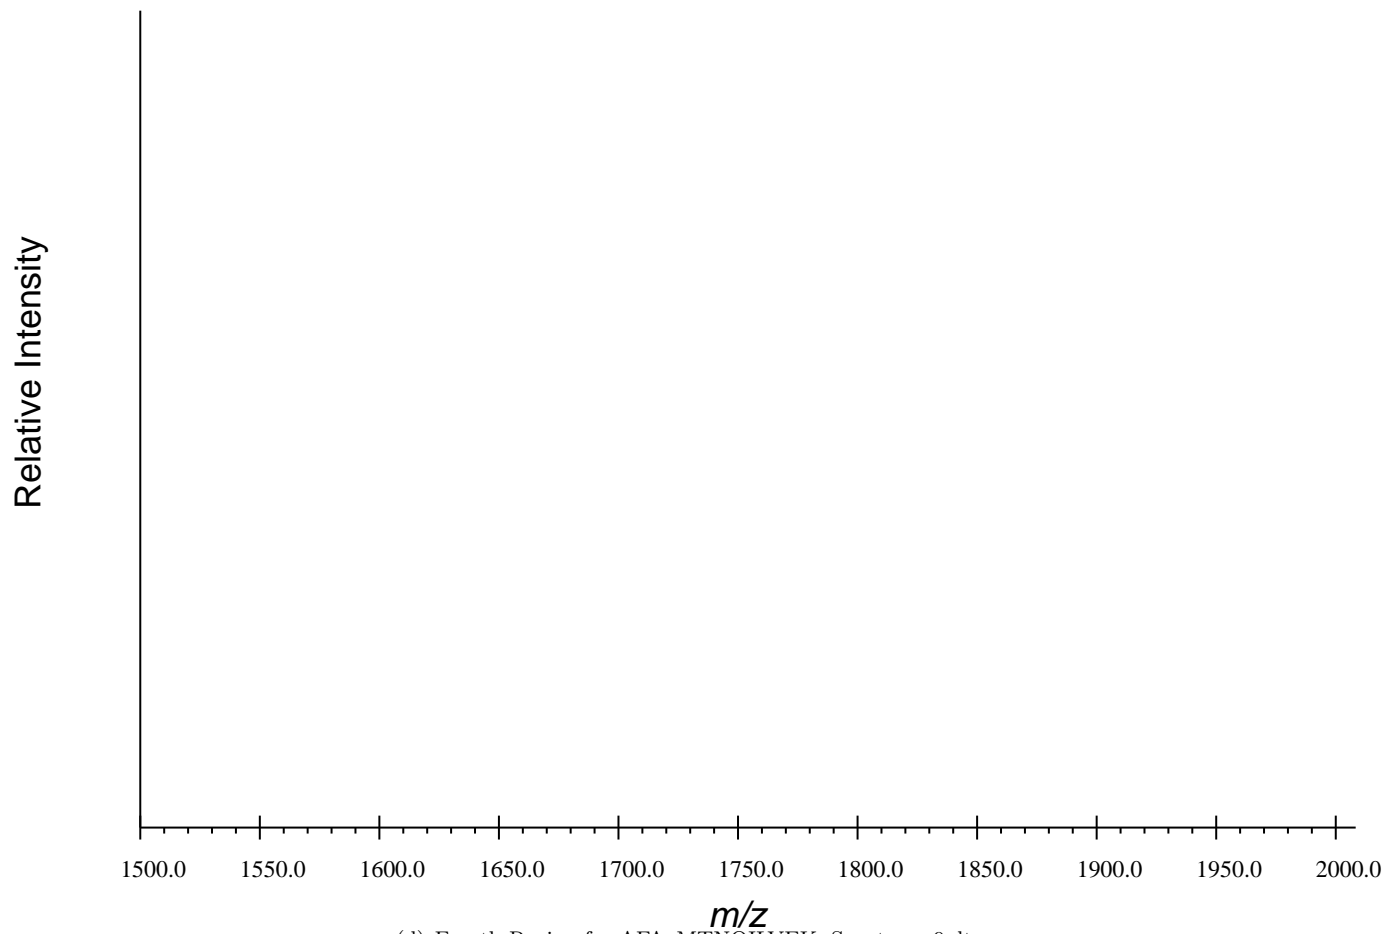

(d) Fourth Region for AFAoMTNQILVEK, Spectrum 9.dta

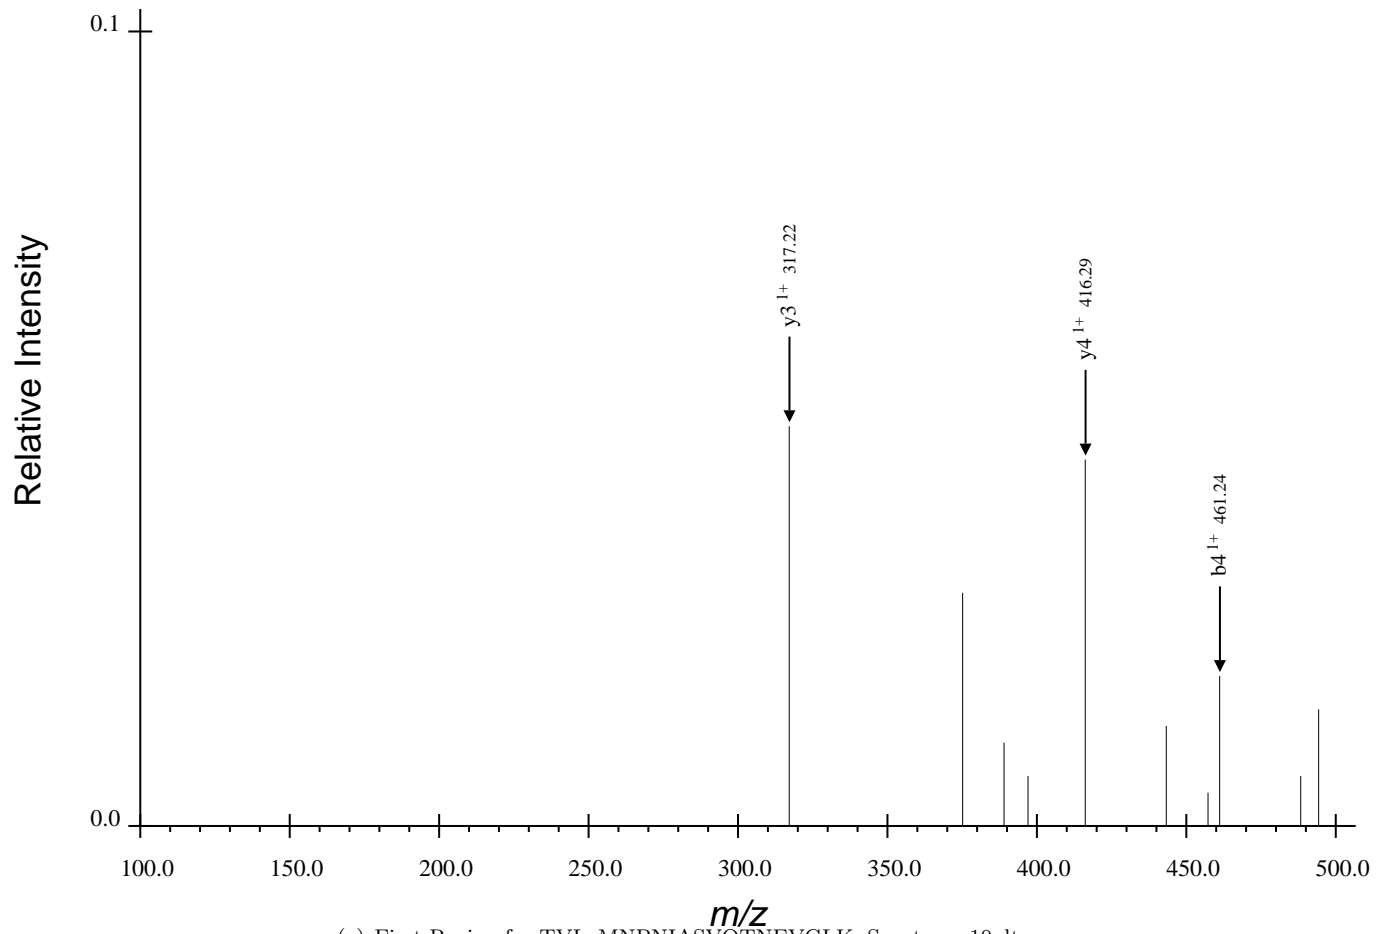

(a) First Region for TVLoMNPNIASVQTNEVGLK, Spectrum 10.dta

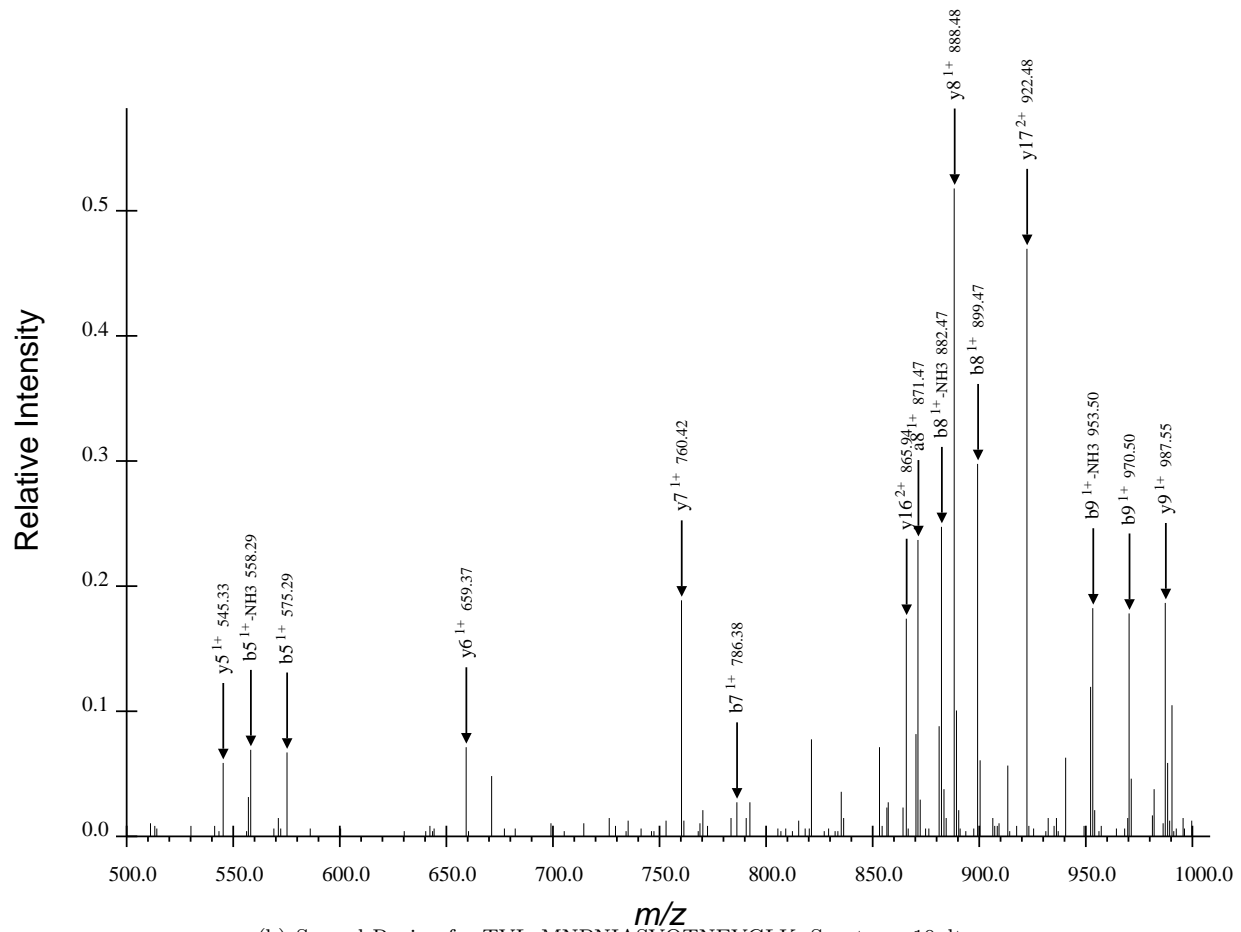

(b) Second Region for TVLoMNPNIASVQTNEVGLK, Spectrum 10.dta

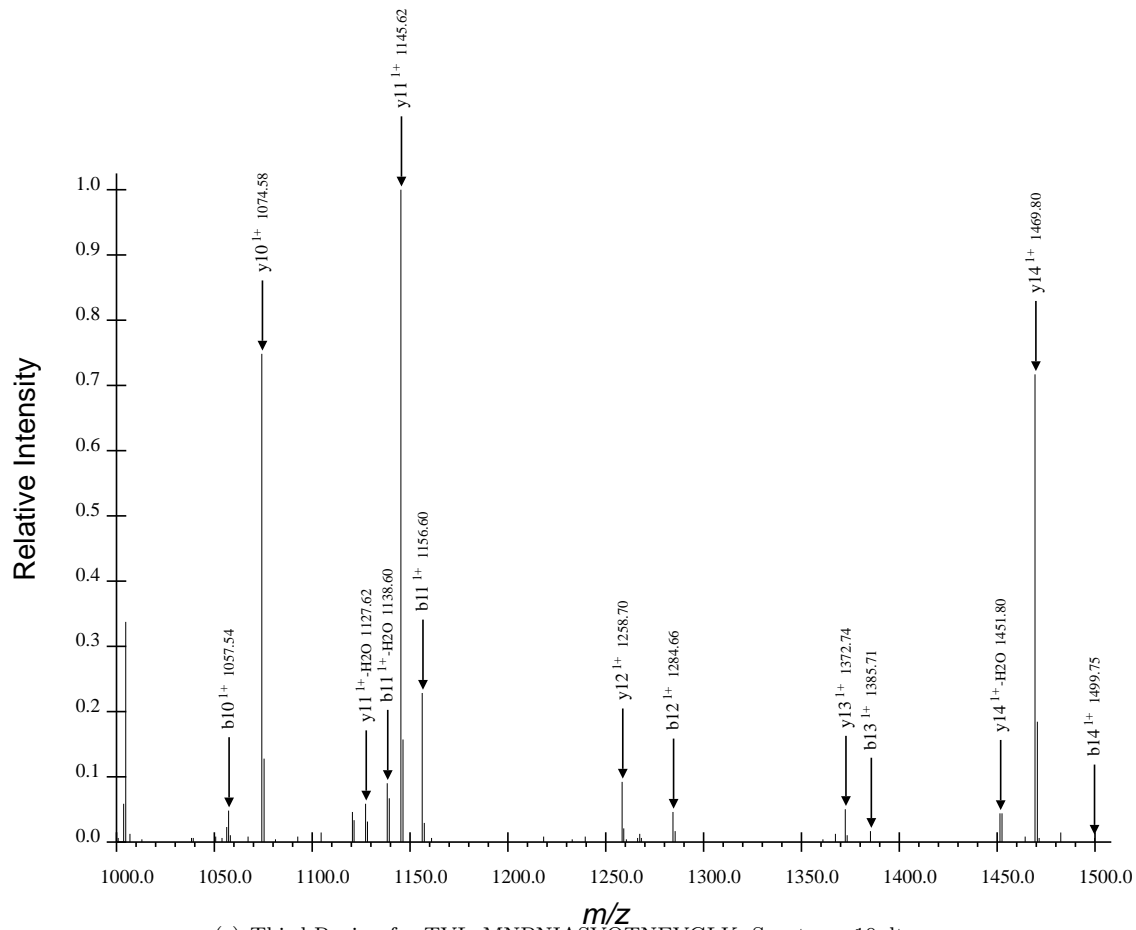

(c) Third Region for TVLoMNPNIASVQTNEVGLK, Spectrum 10.dta

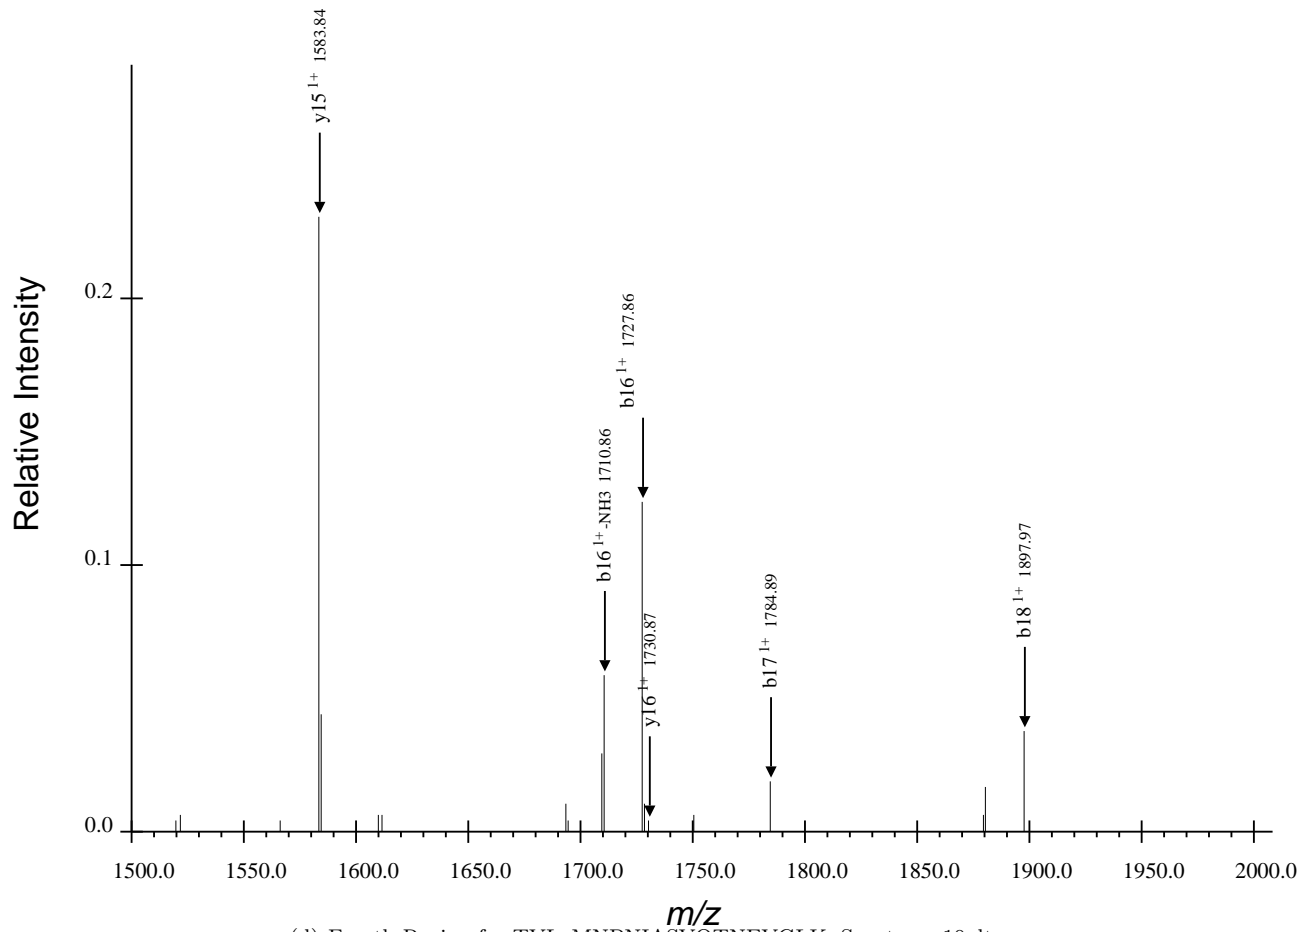

(d) Fourth Region for TVLoMNPNIASVQTNEVGLK, Spectrum 10.dta

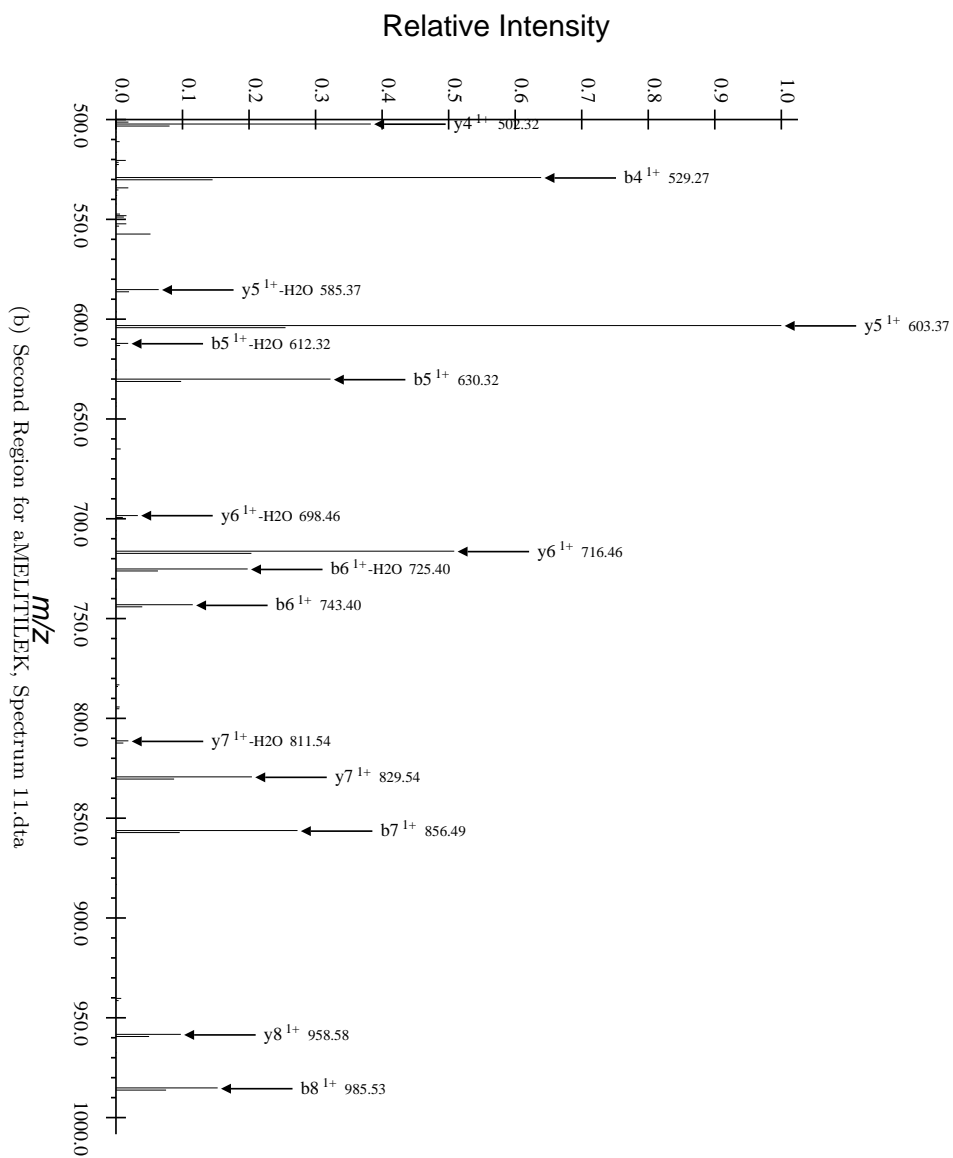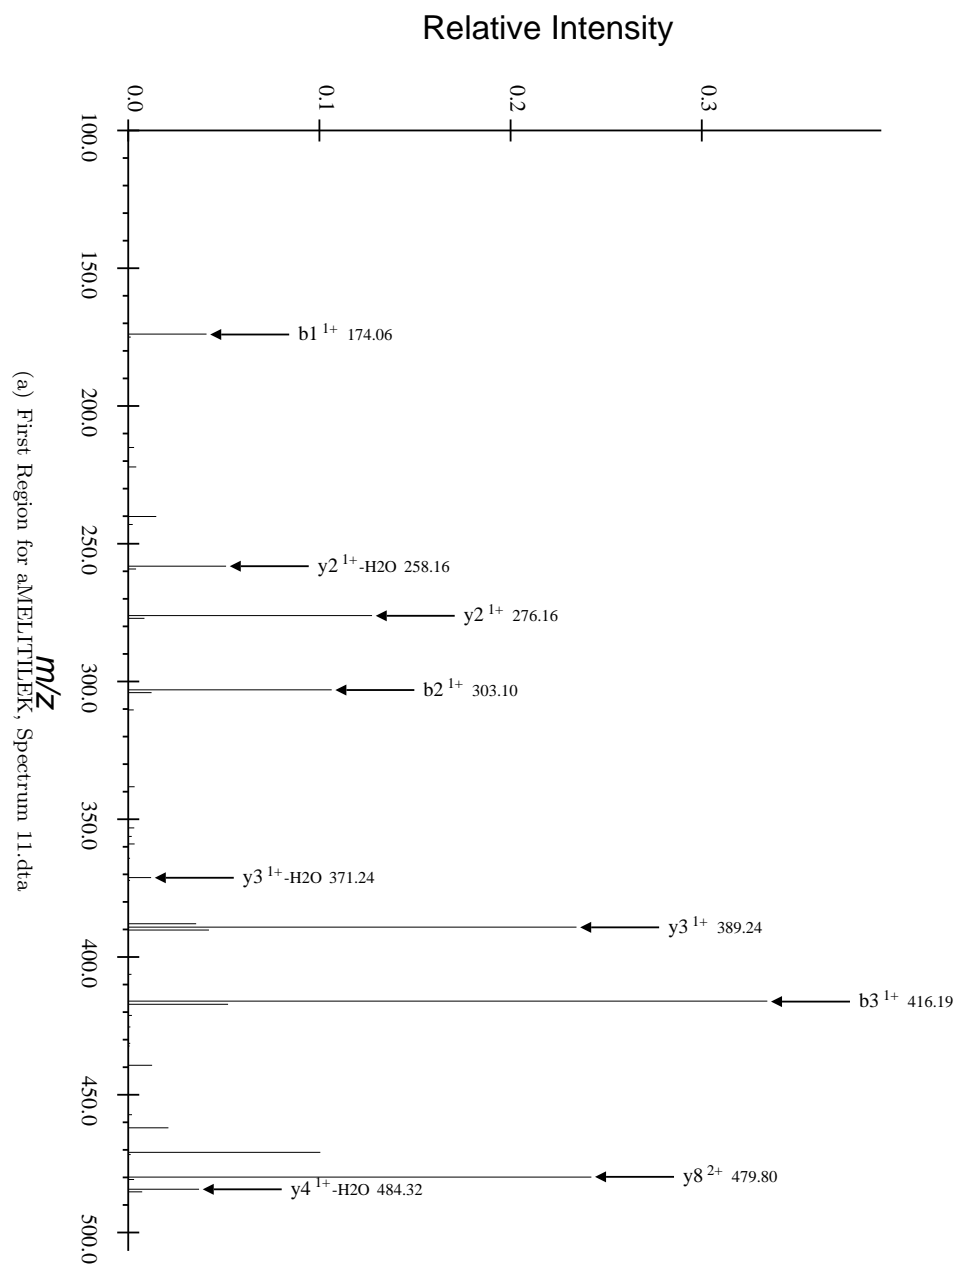

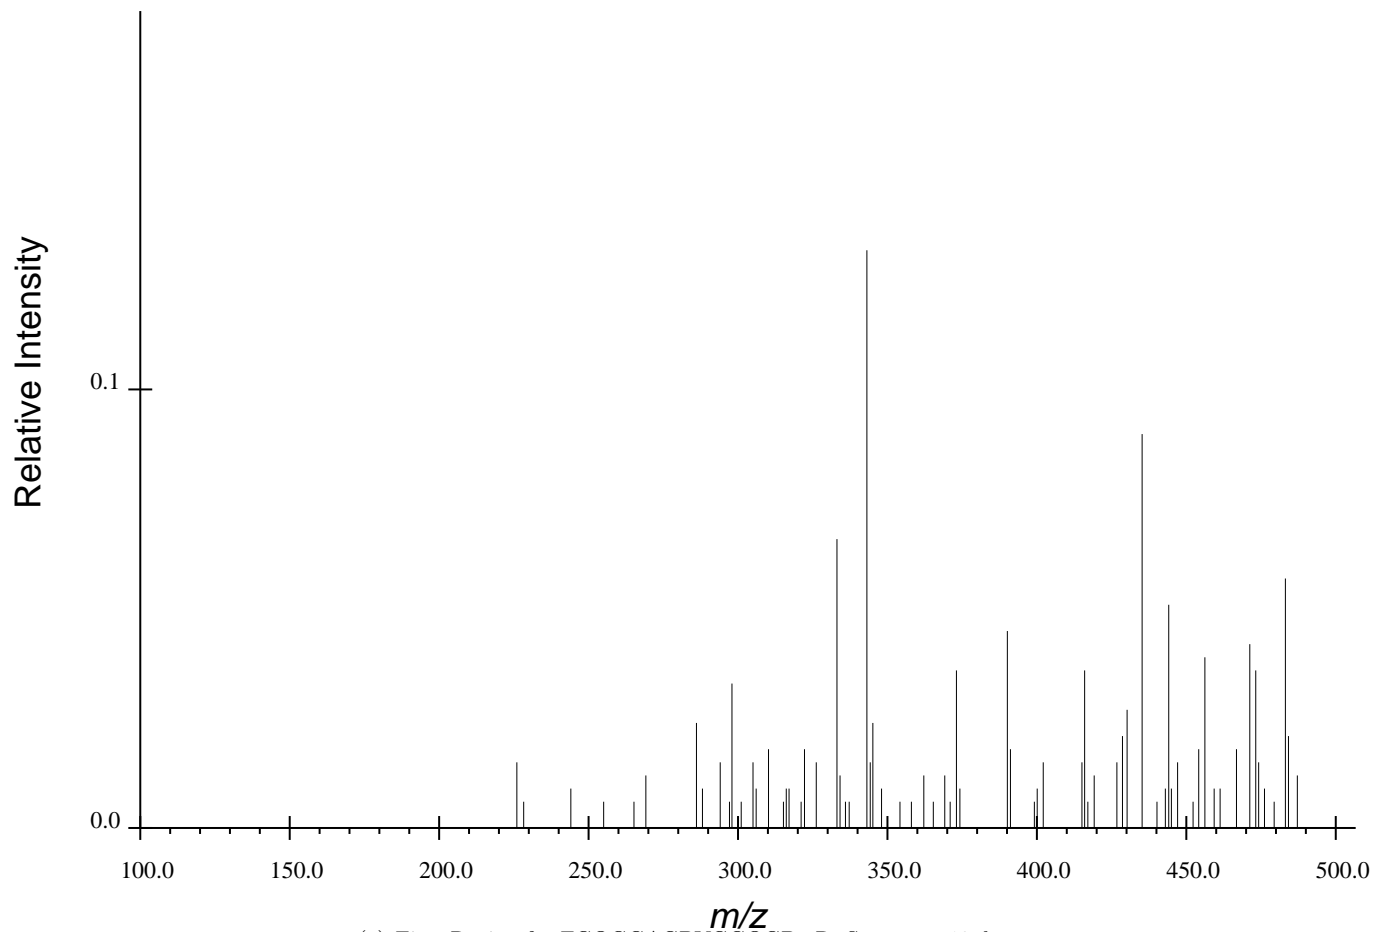

(a) First Region for FGQGGAGPVGQGQPmR, Spectrum 12.dta

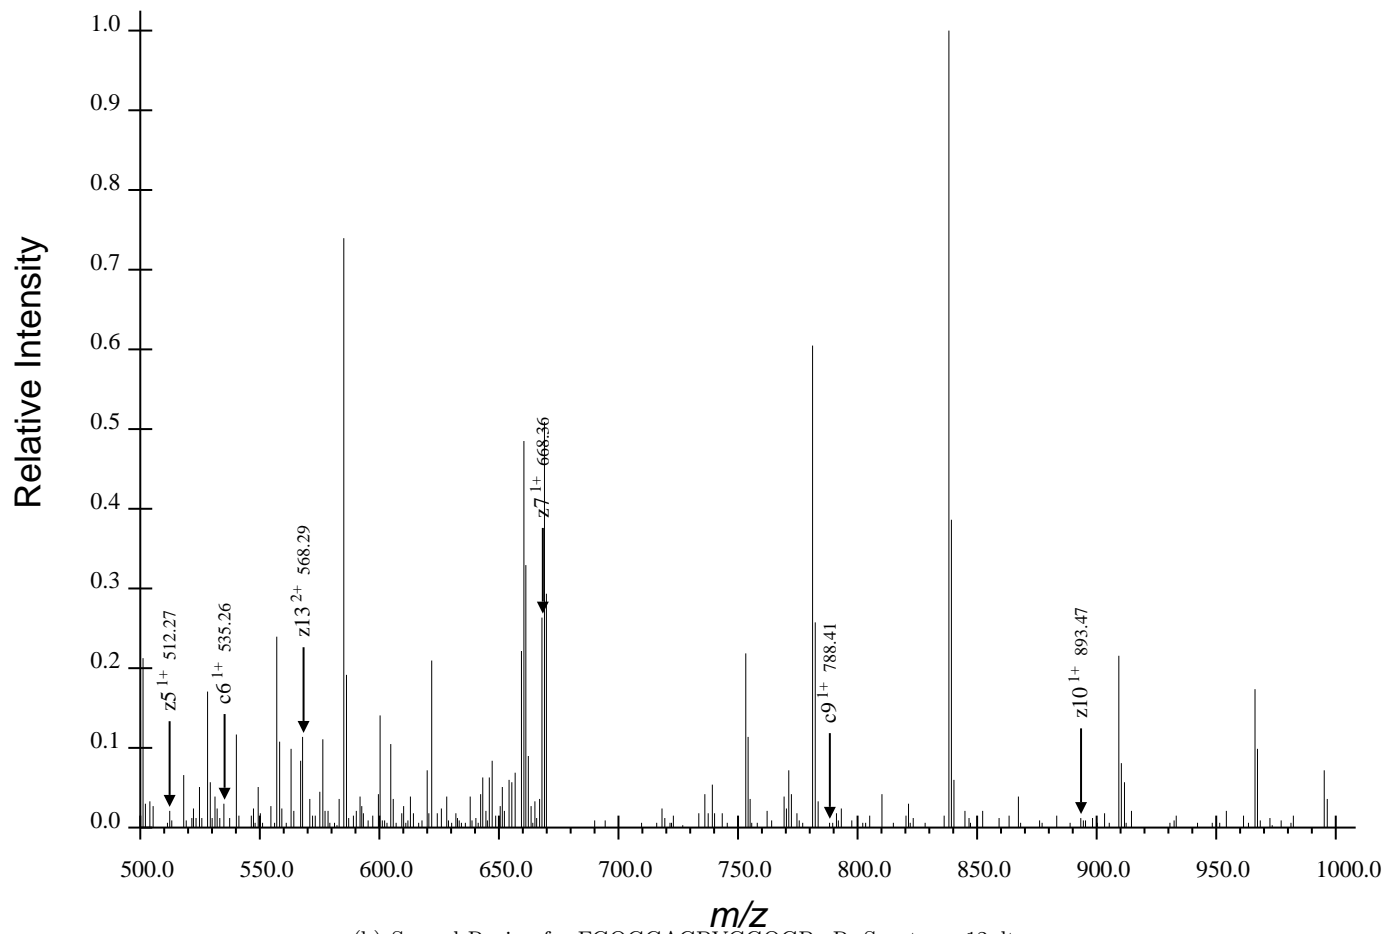

(b) Second Region for FGQGGAGPVGQGQPmR, Spectrum 12.dta

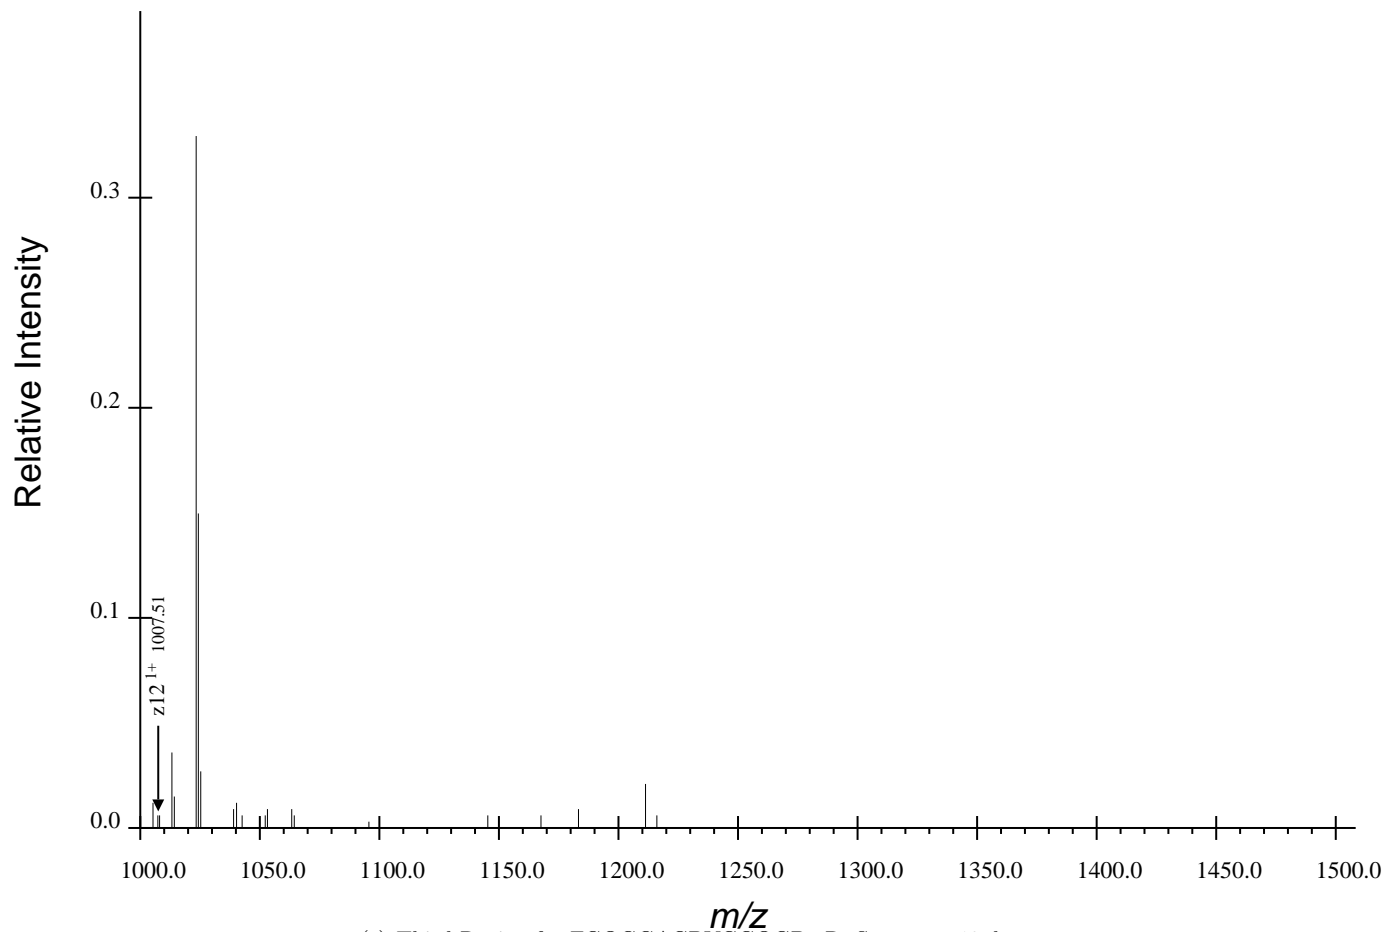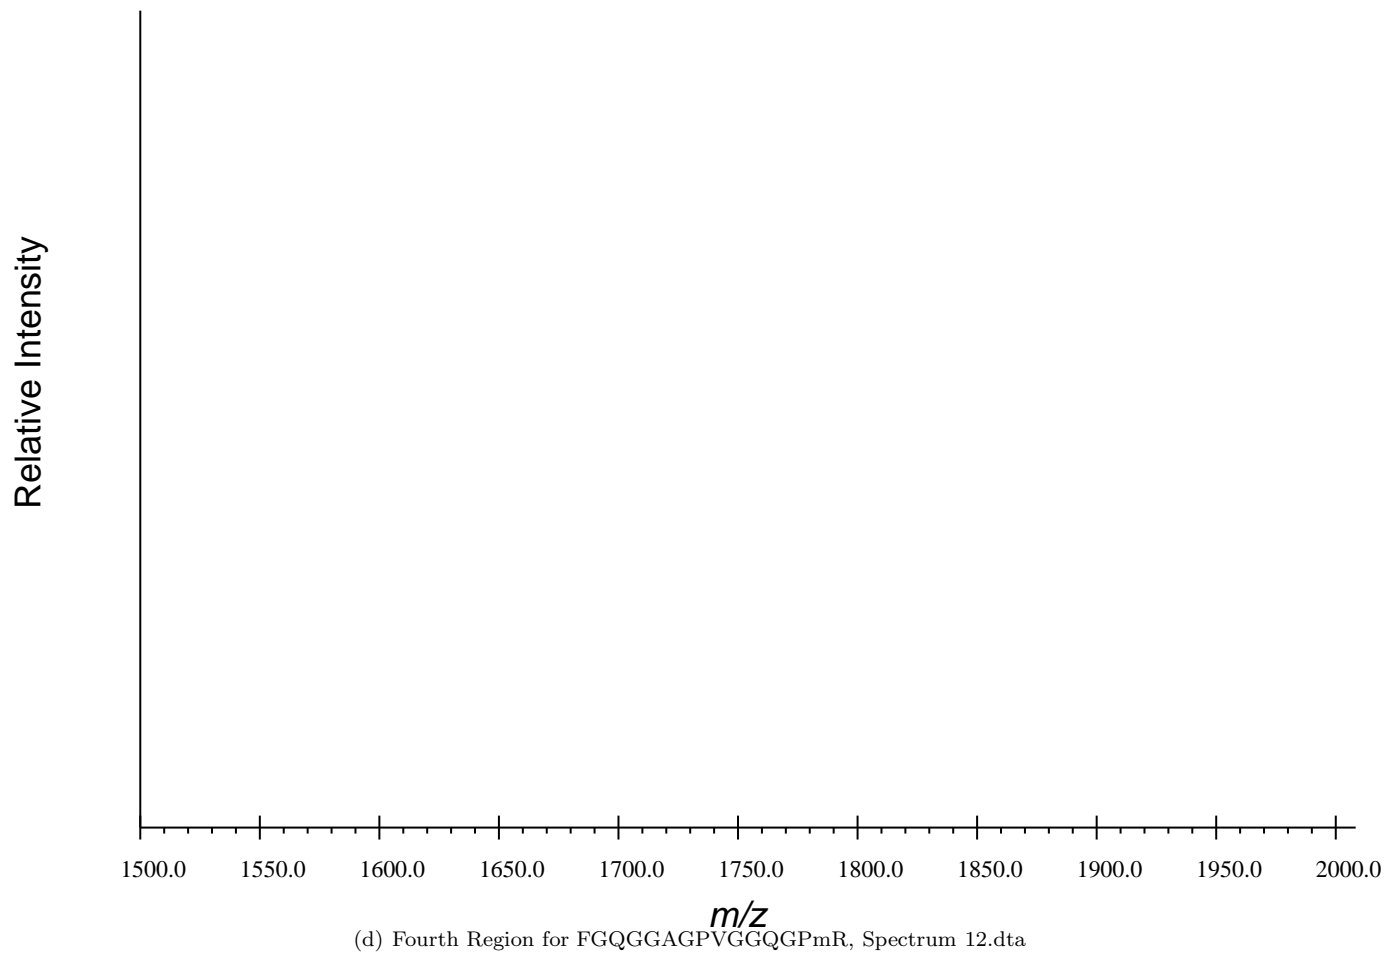

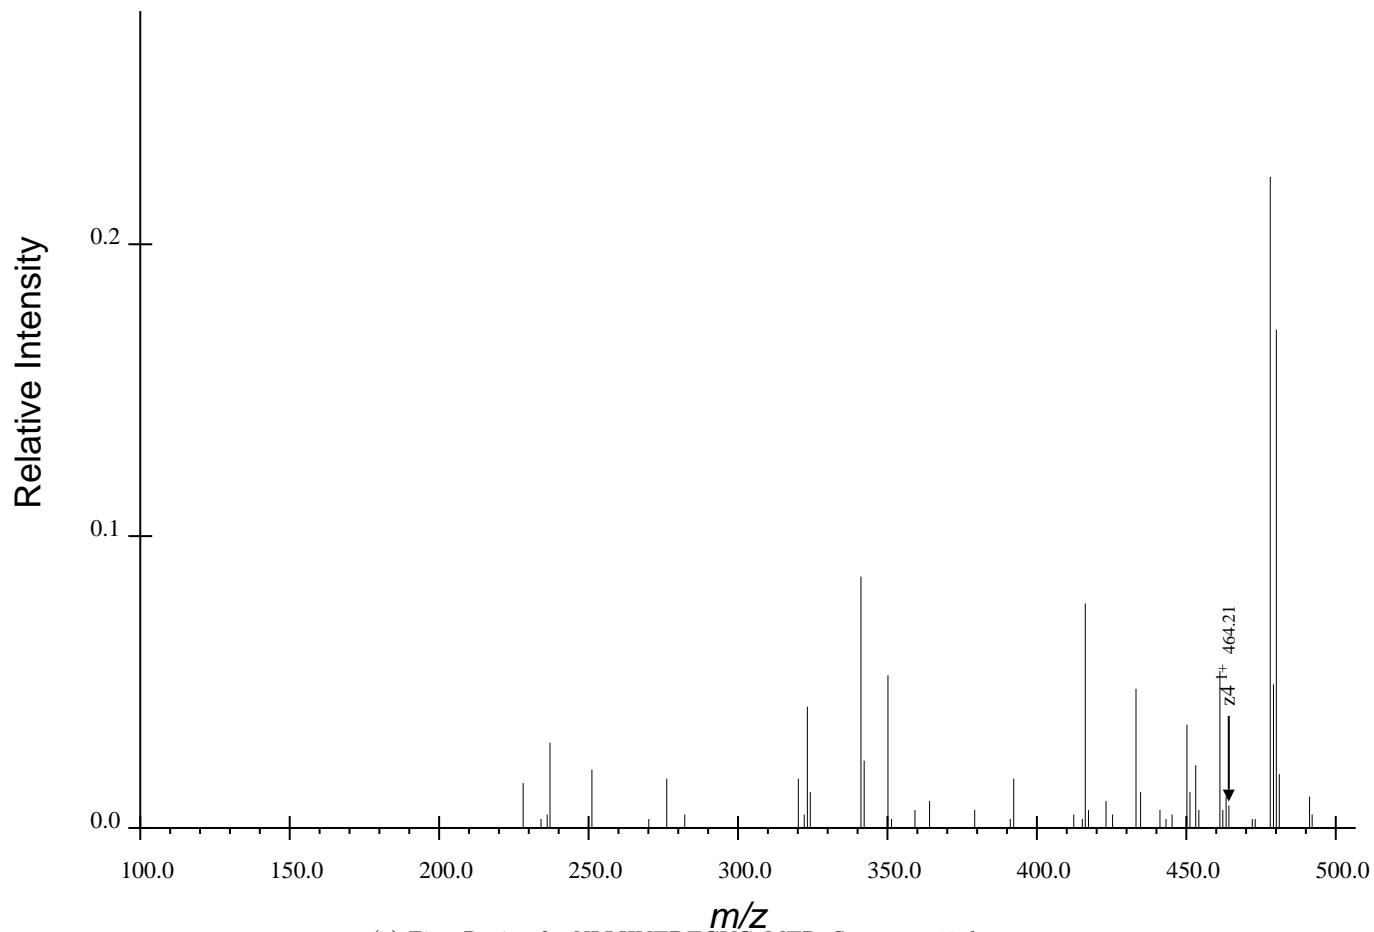

(a) First Region for NLLHVTDGTVGoMTR, Spectrum 13.dta

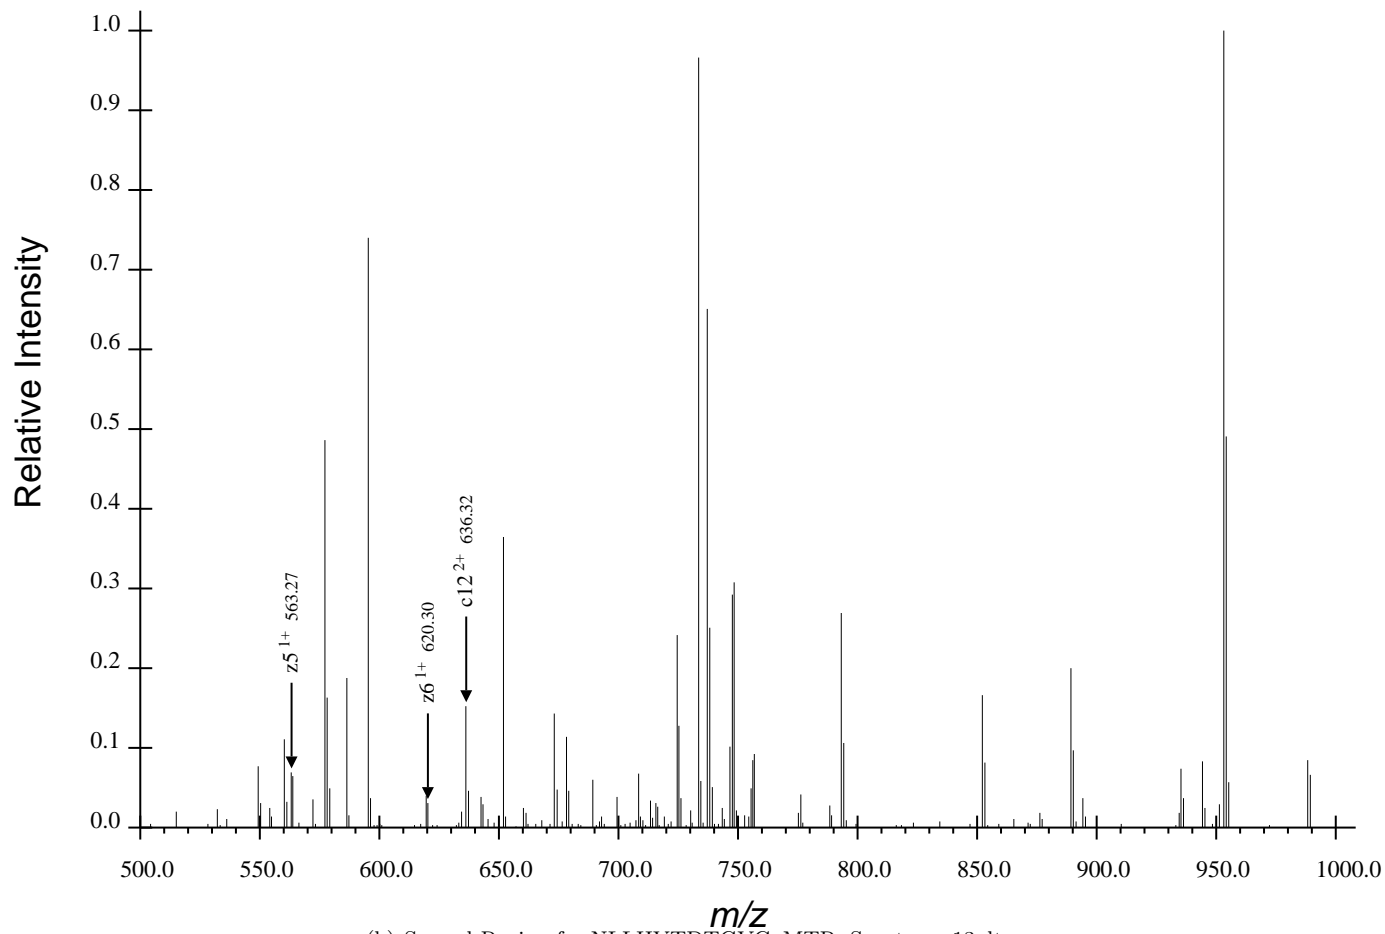

(b) Second Region for NLLHVTDGTVGoMTR, Spectrum 13.dta

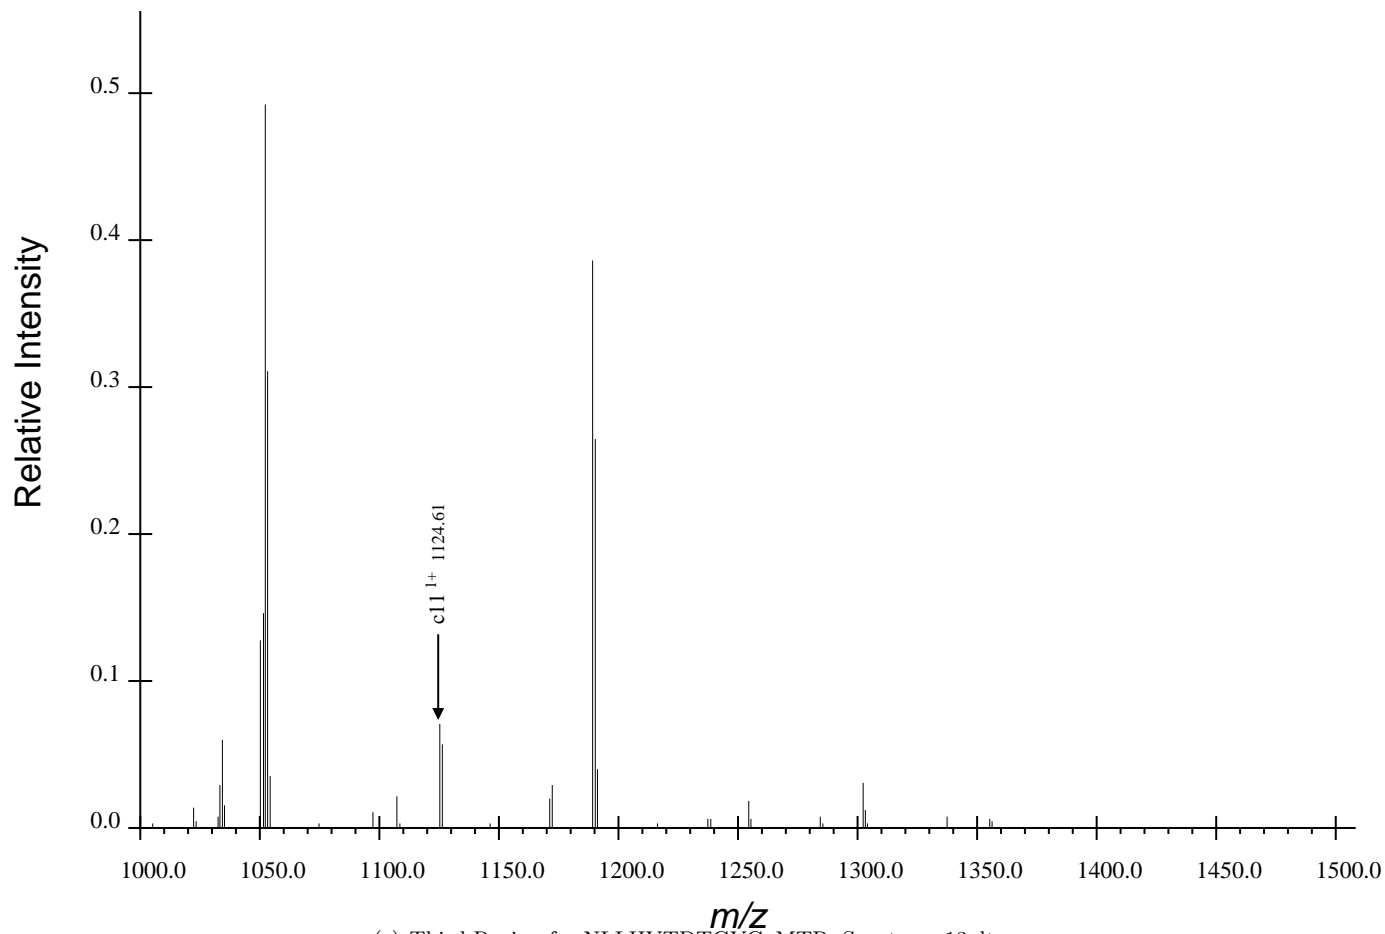

(c) Third Region for NLLHVTDGTGVGoMTR, Spectrum 13.dta

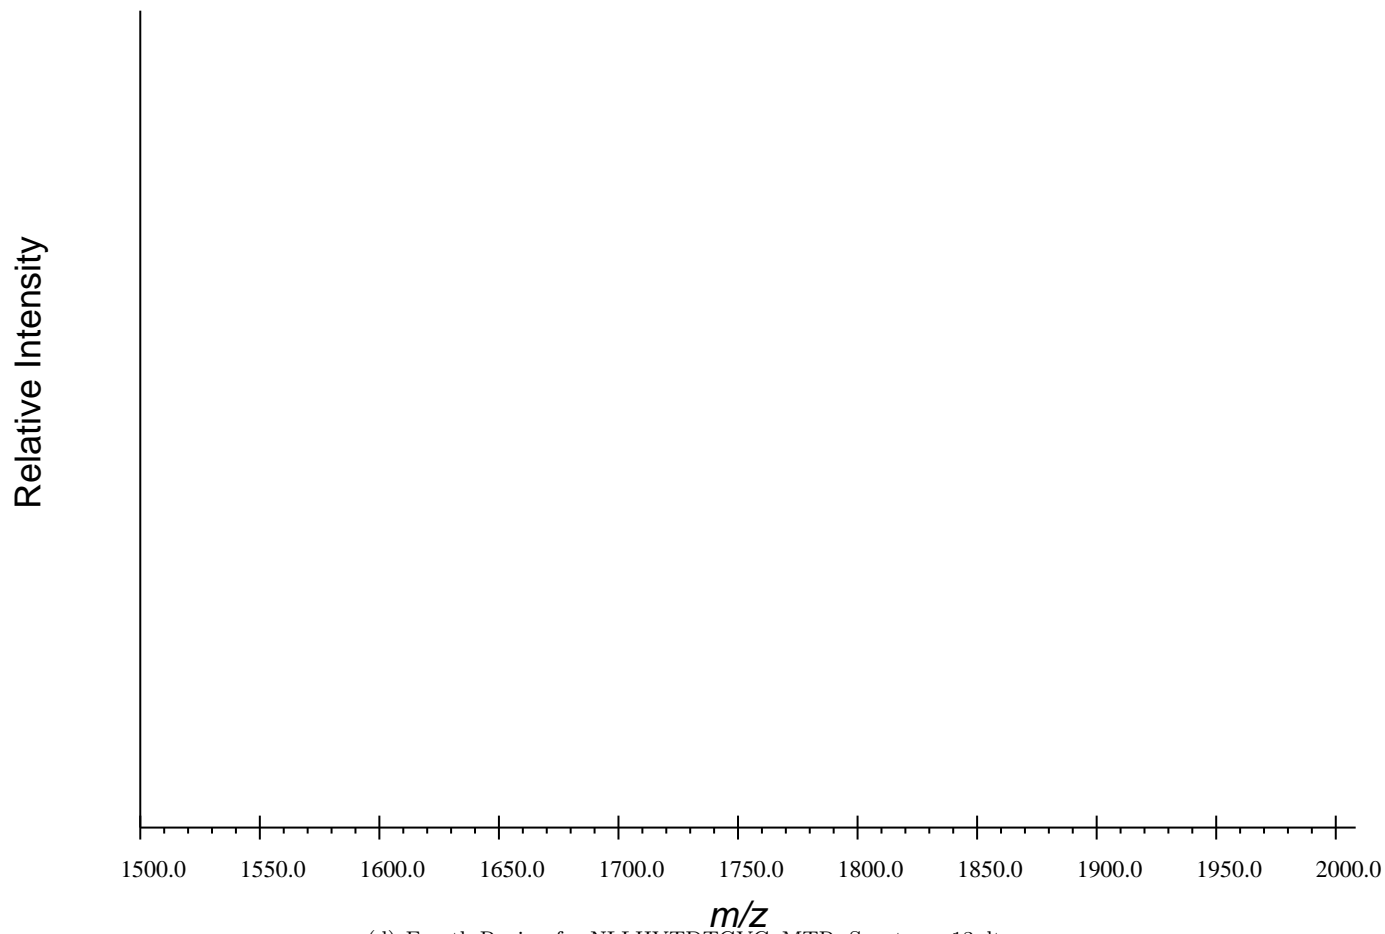

(d) Fourth Region for NLLHVTDGTGVGoMTR, Spectrum 13.dta



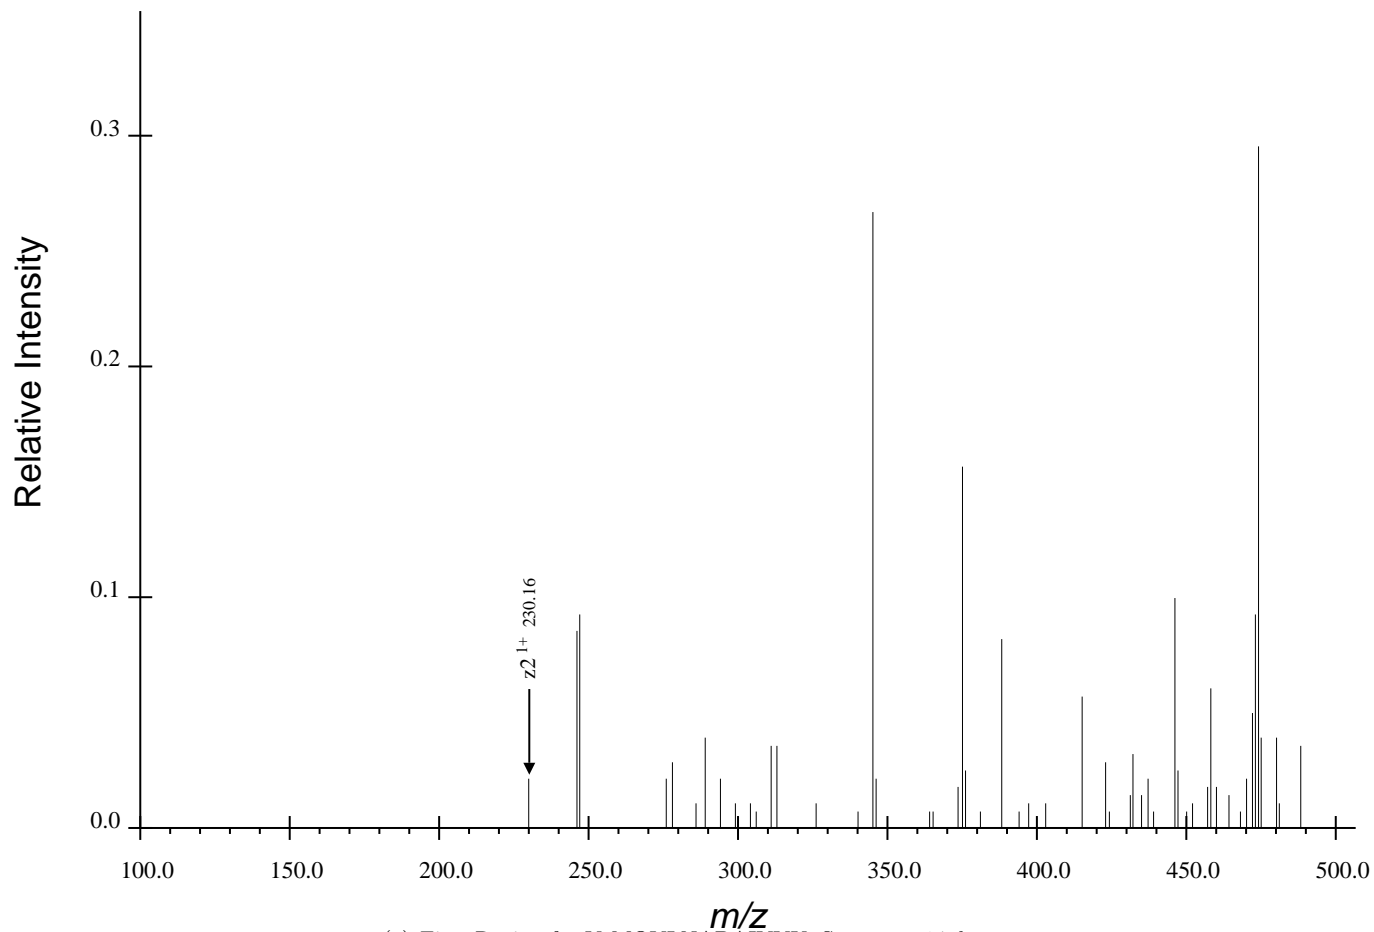

(a) First Region for VoMQVLNADAIVVK, Spectrum 14.dta

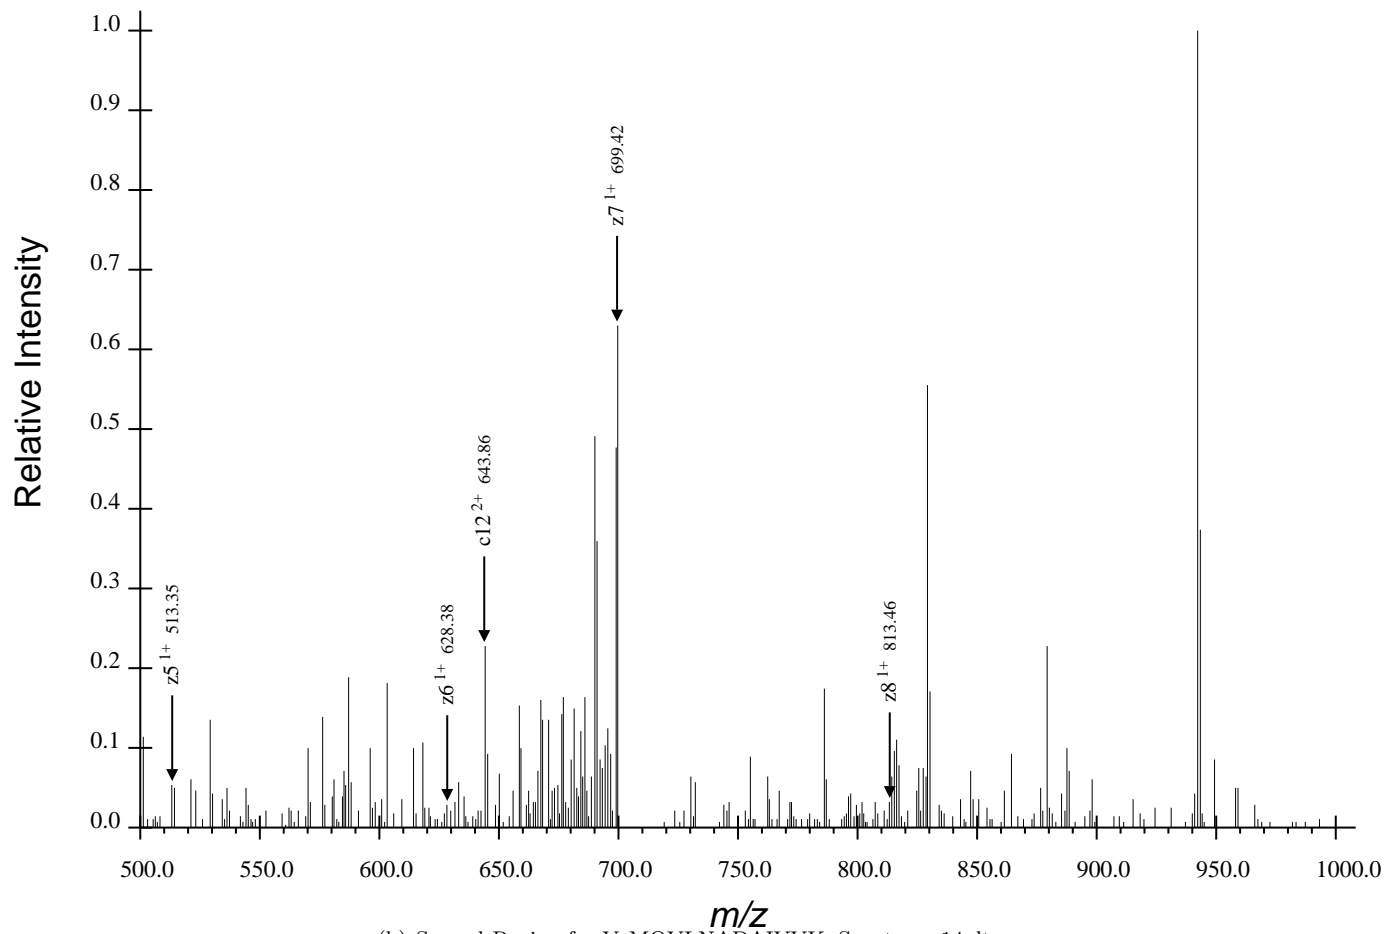

(b) Second Region for VoMQVLNADAIVVK, Spectrum 14.dta

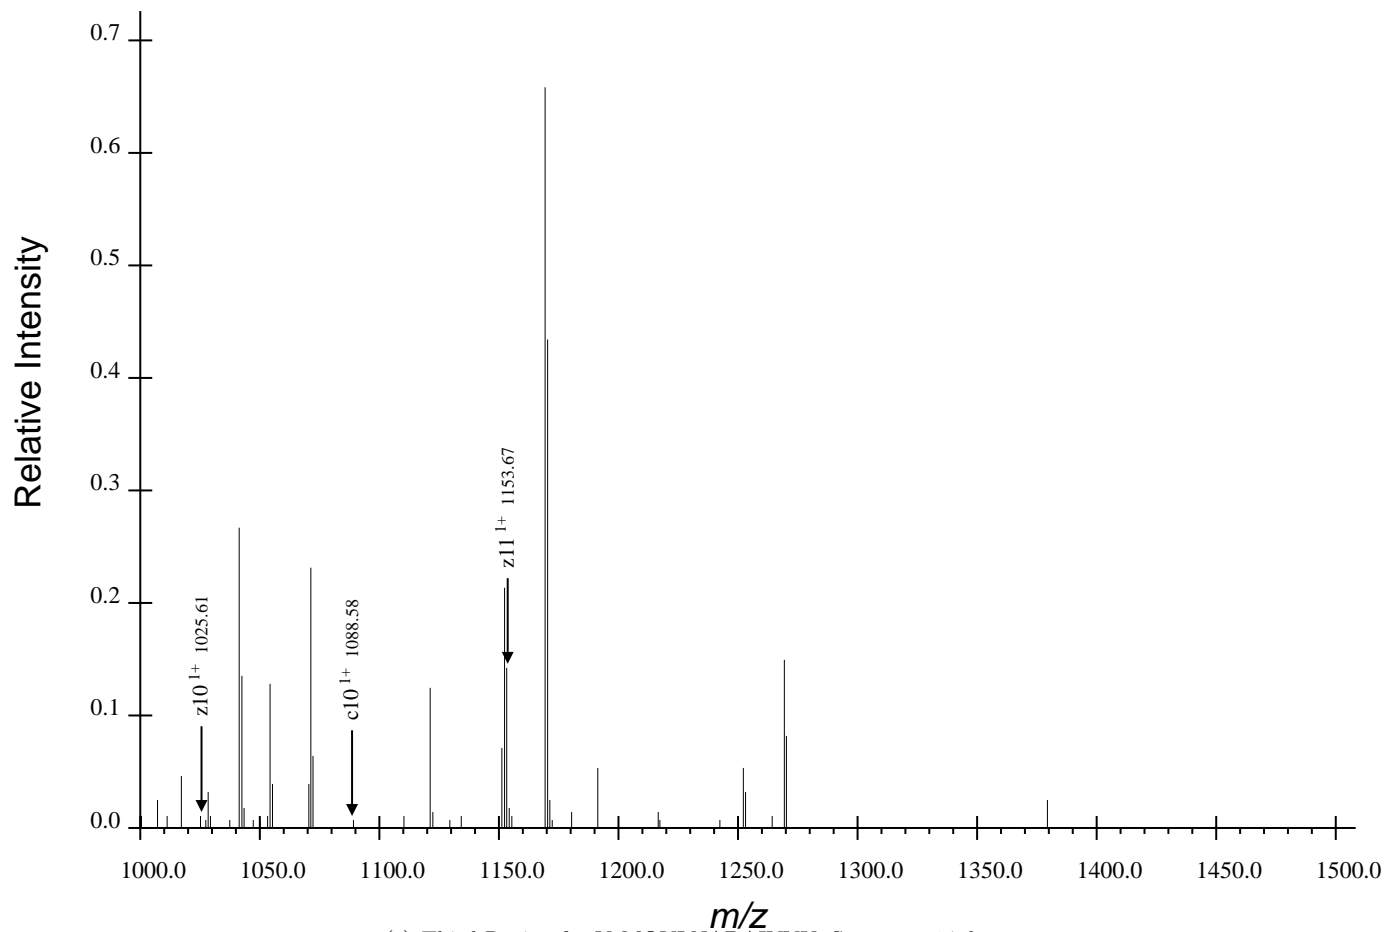

(c) Third Region for VoMQVLNADAIVVK, Spectrum 14.dta

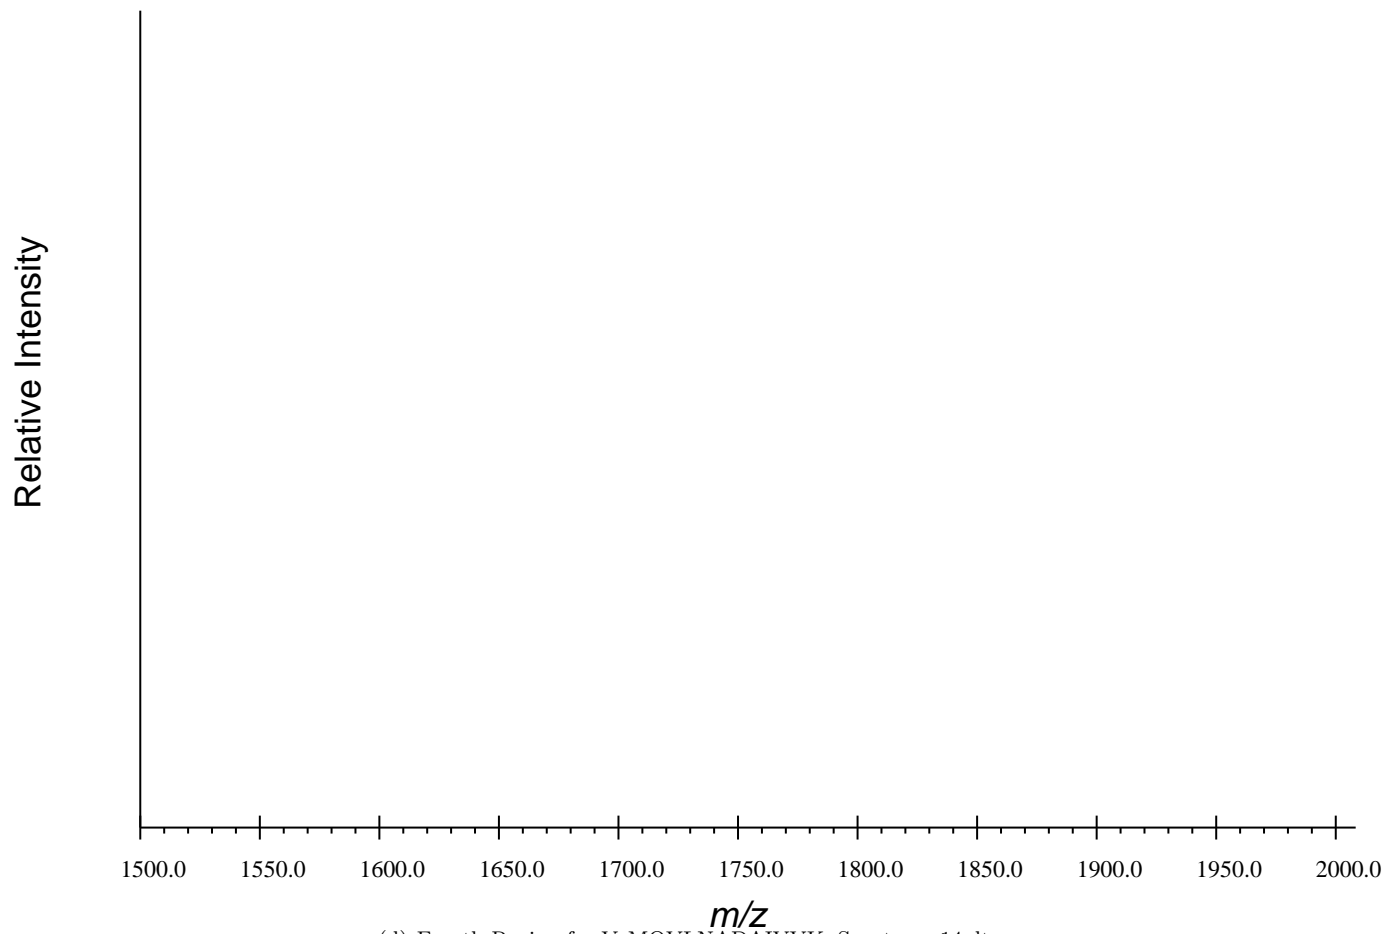

(d) Fourth Region for VoMQVLNADAIVVK, Spectrum 14.dta

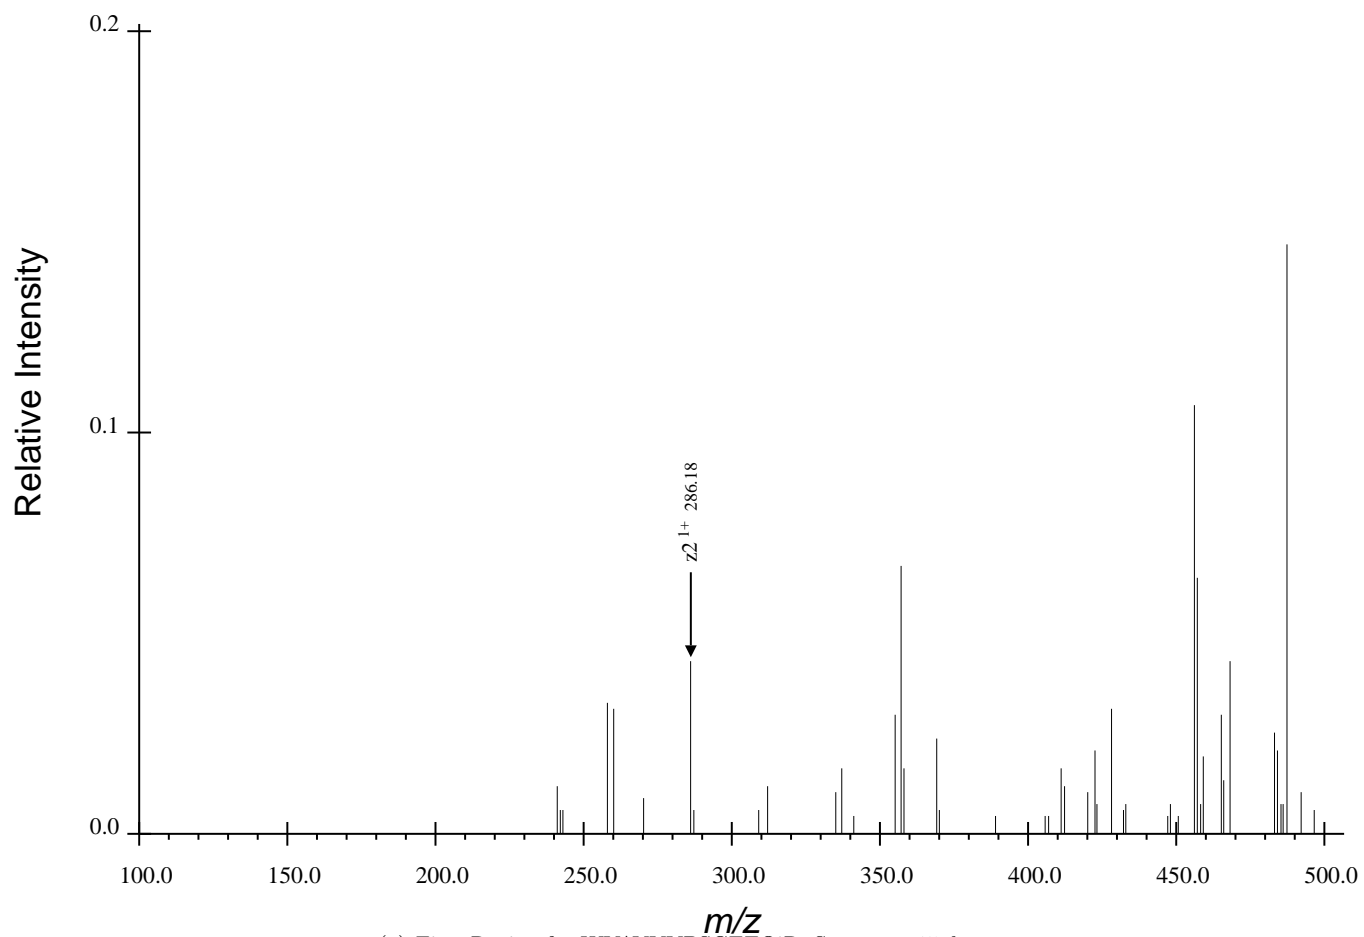

(a) First Region for WWAVVVPSGEEQiR, Spectrum 15.dta

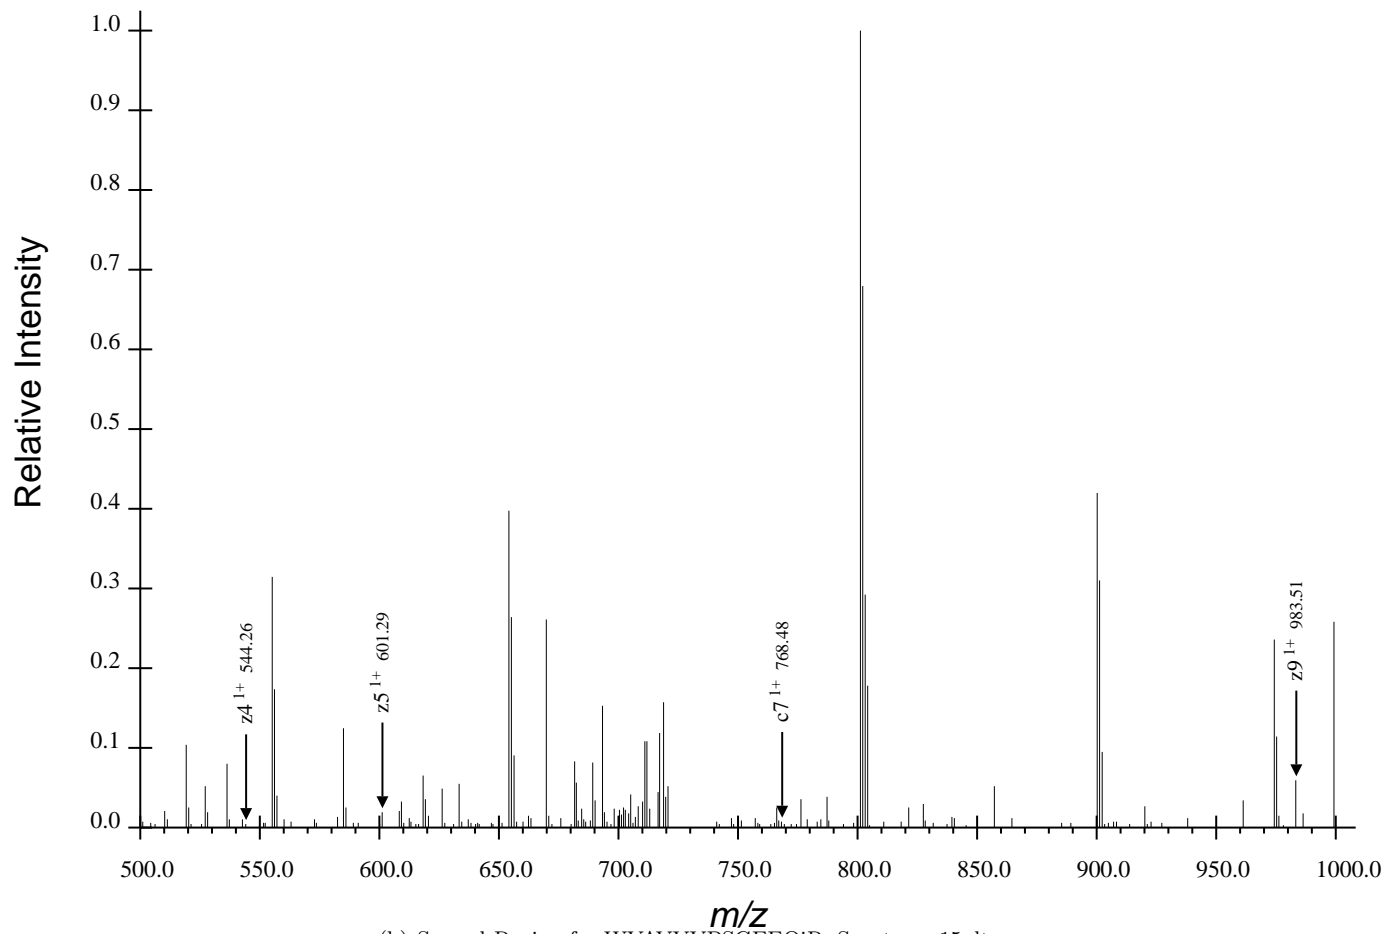

(b) Second Region for WWAVVVPSGEEQiR, Spectrum 15.dta

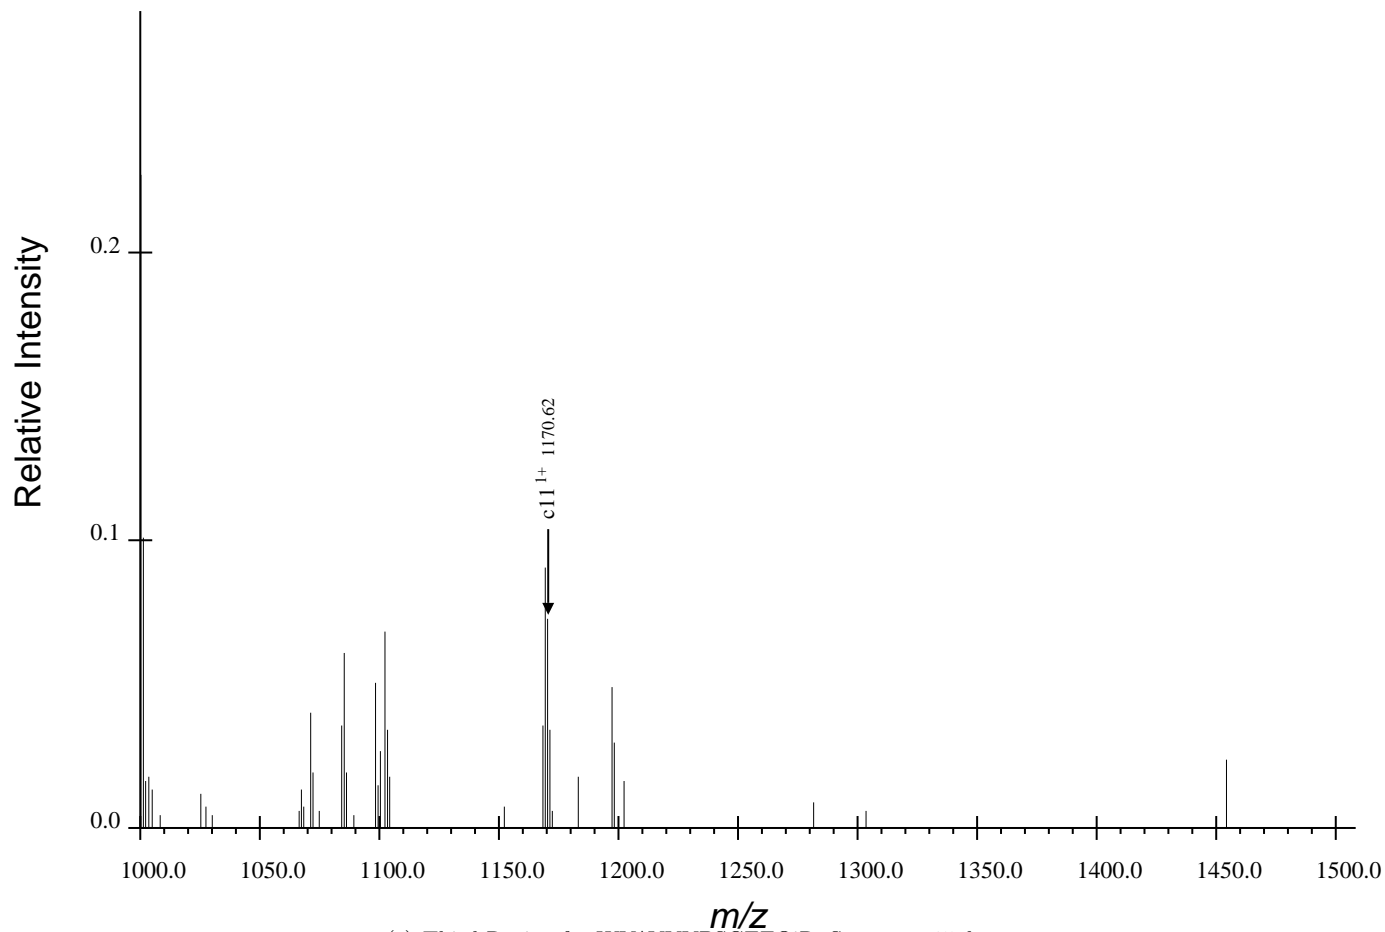

(c) Third Region for WVAVVVPSGEEQiR, Spectrum 15.dta

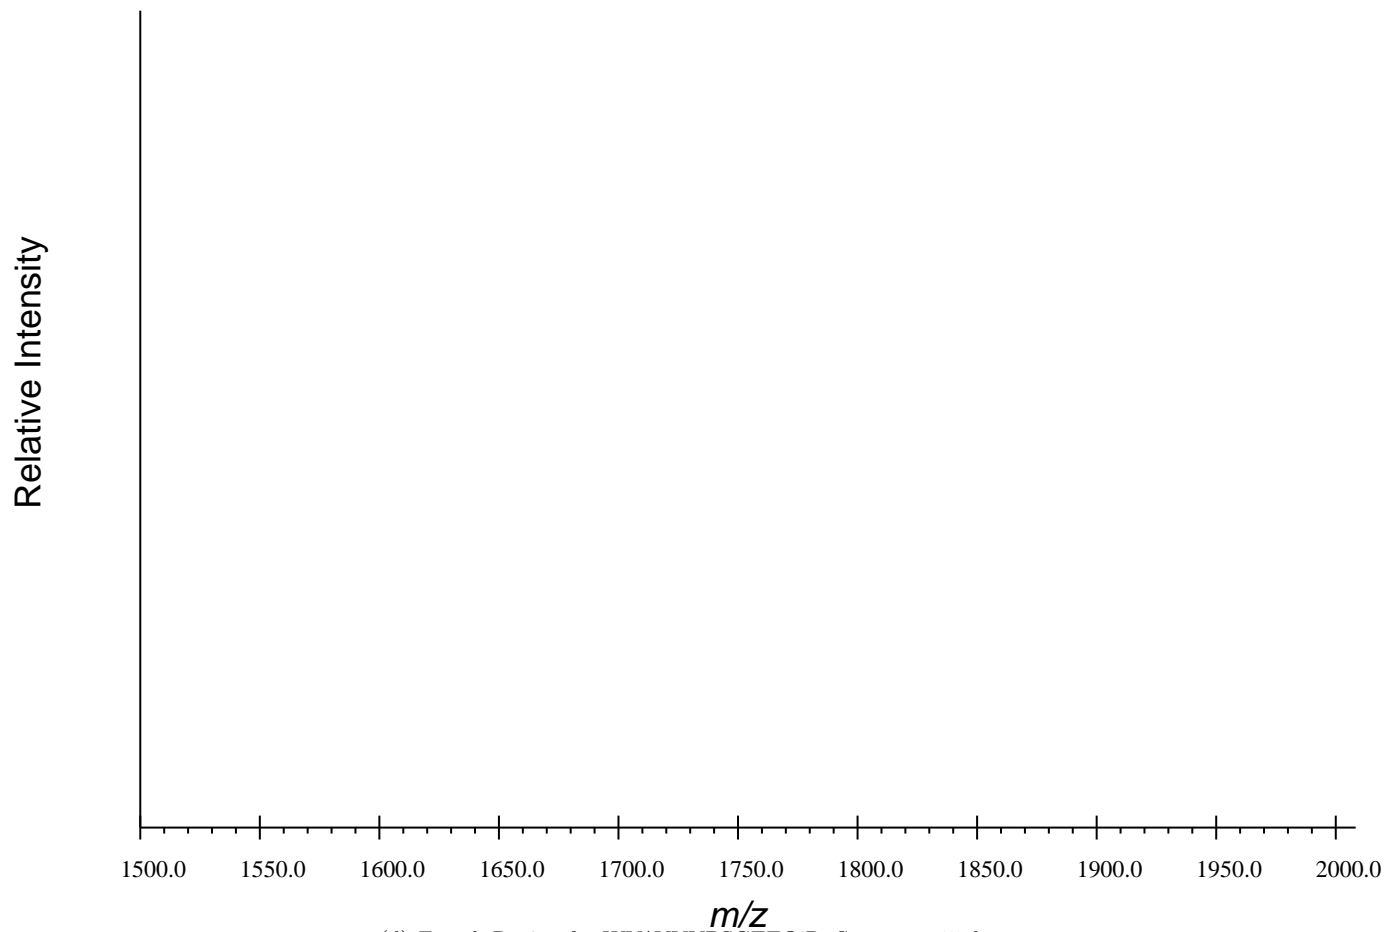

(d) Fourth Region for WVAVVVPSGEEQiR, Spectrum 15.dta

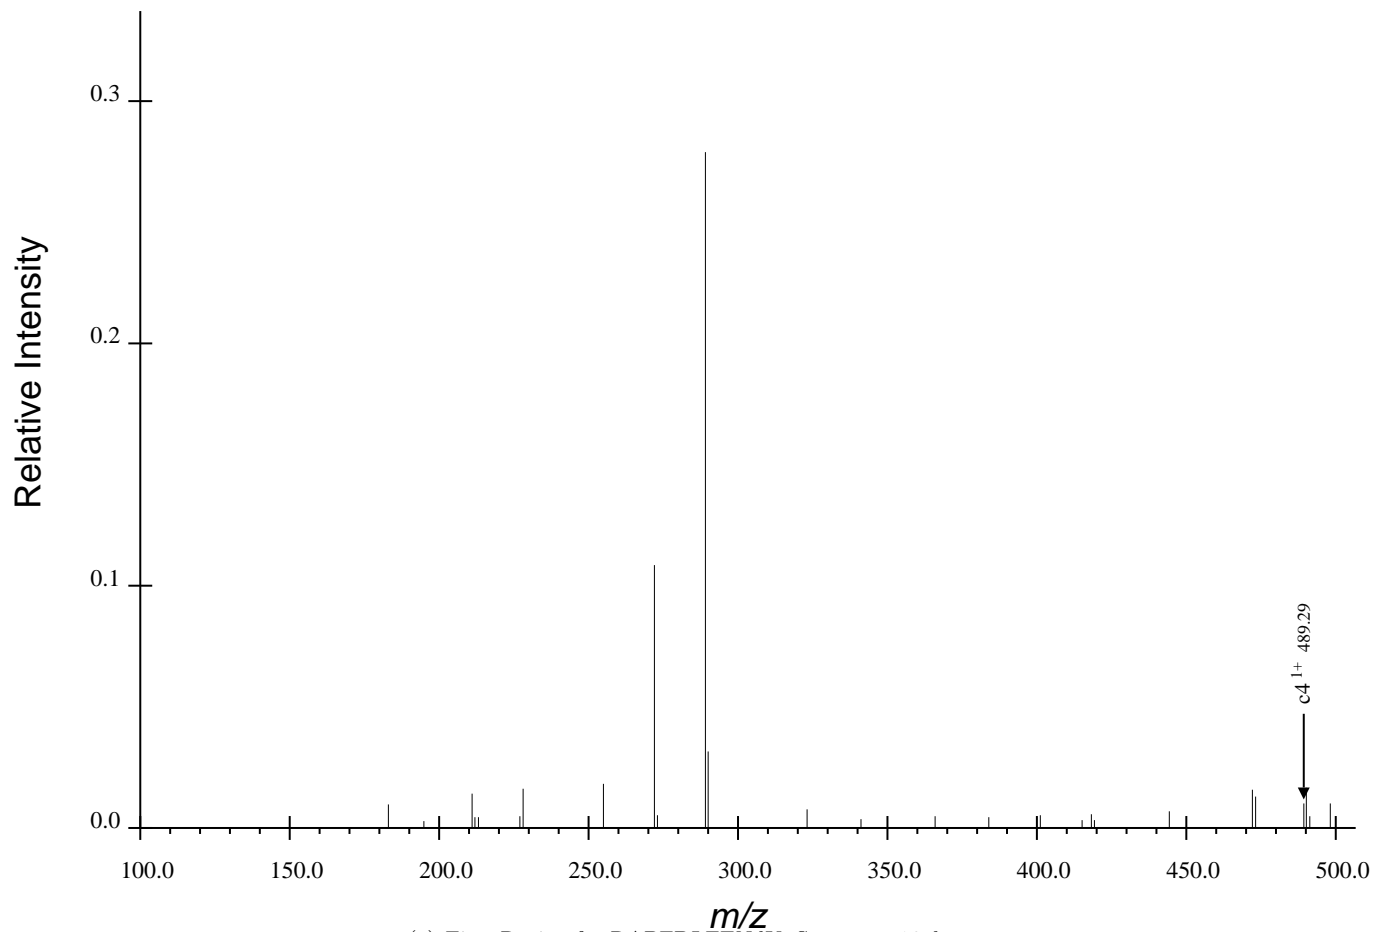

(a) First Region for RAPFDLFENdK, Spectrum 16.dta

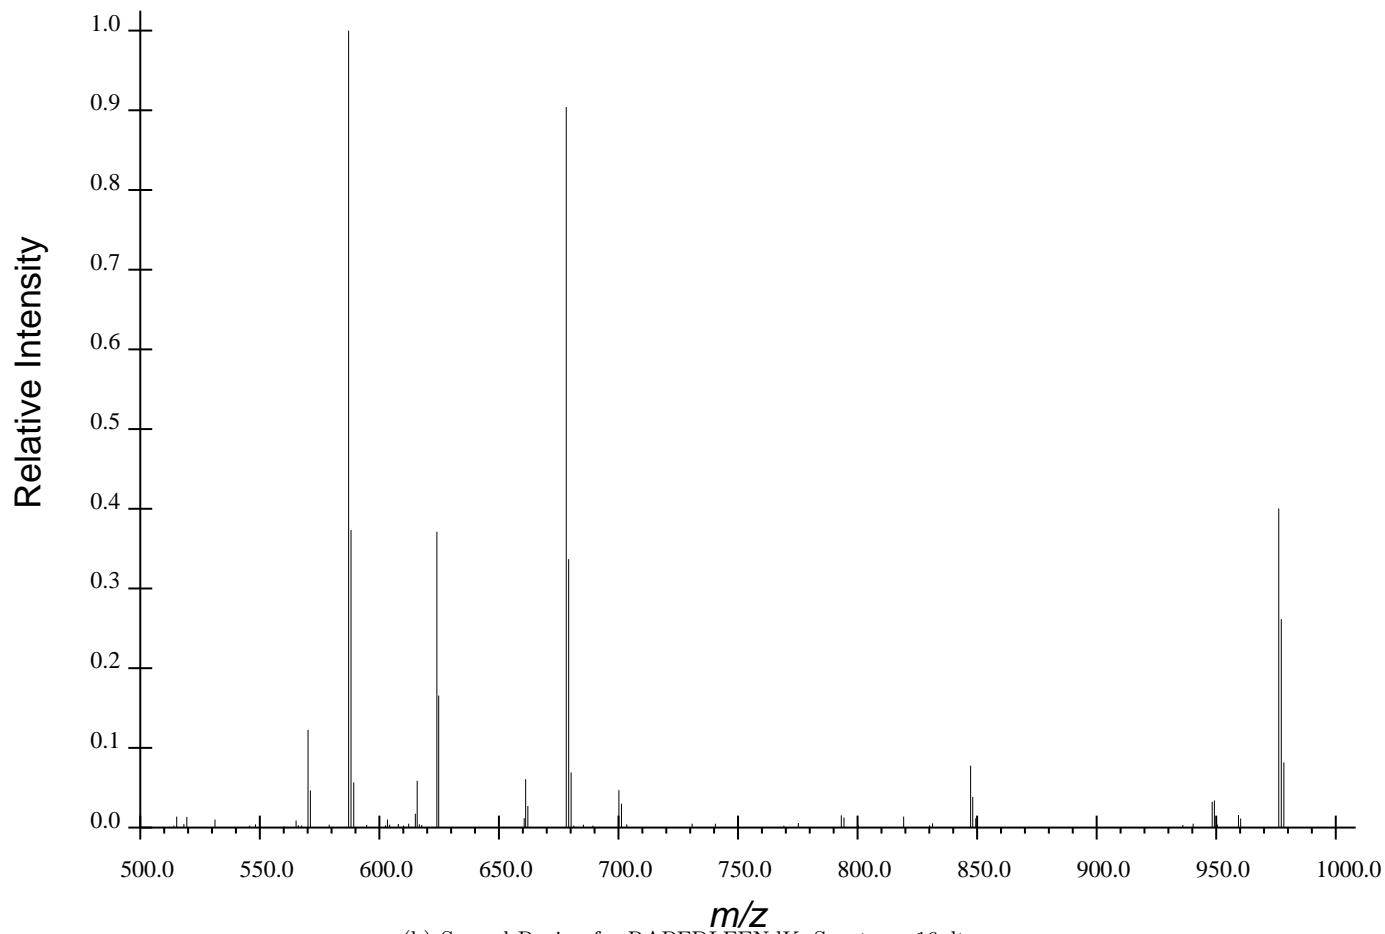

(b) Second Region for RAPFDLFENdK, Spectrum 16.dta

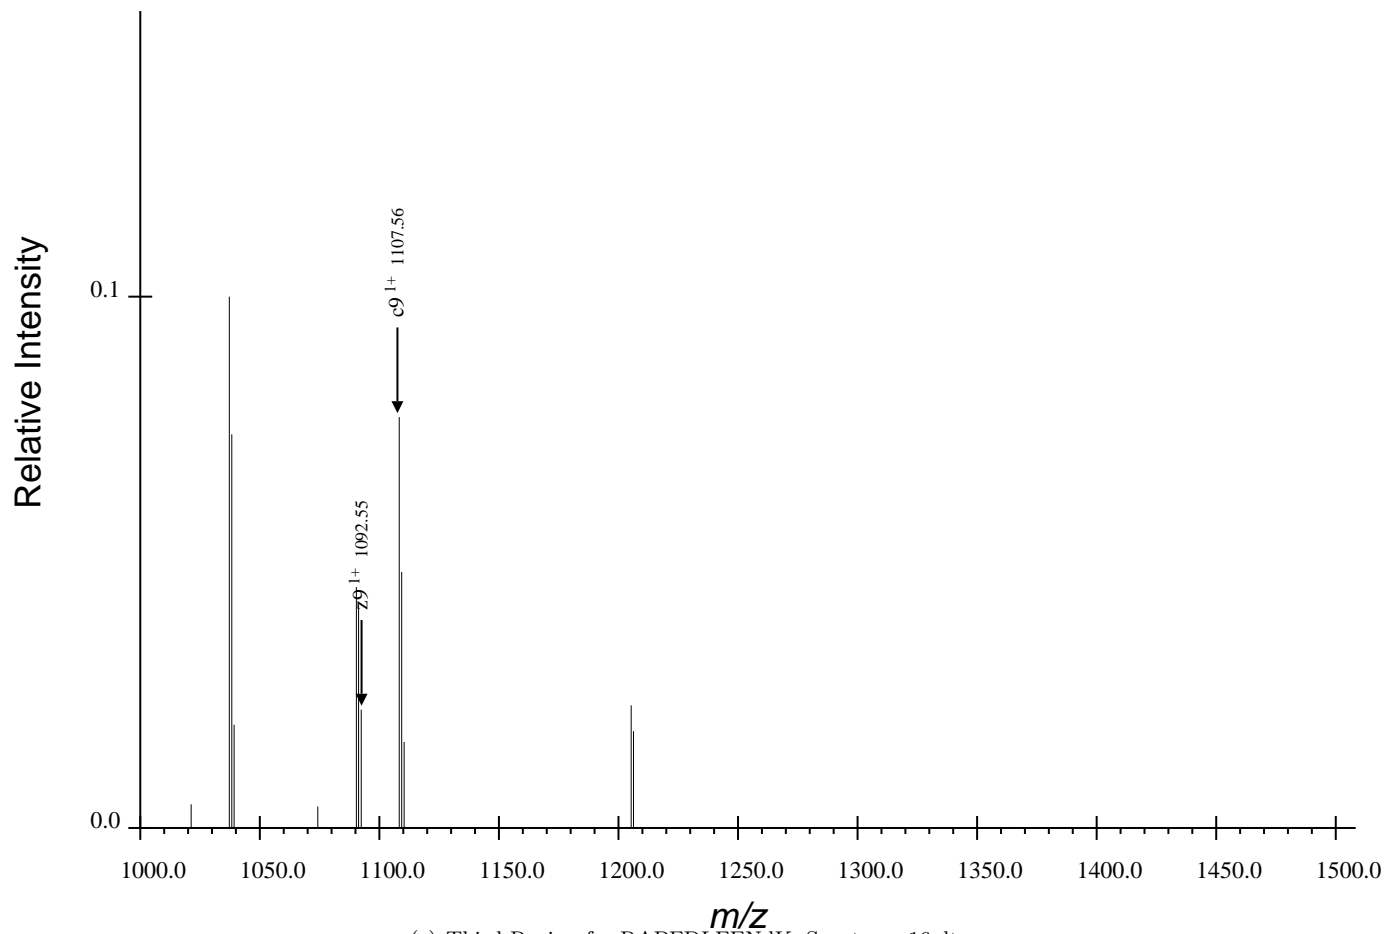

(c) Third Region for RAPFDLFENdK, Spectrum 16.dta

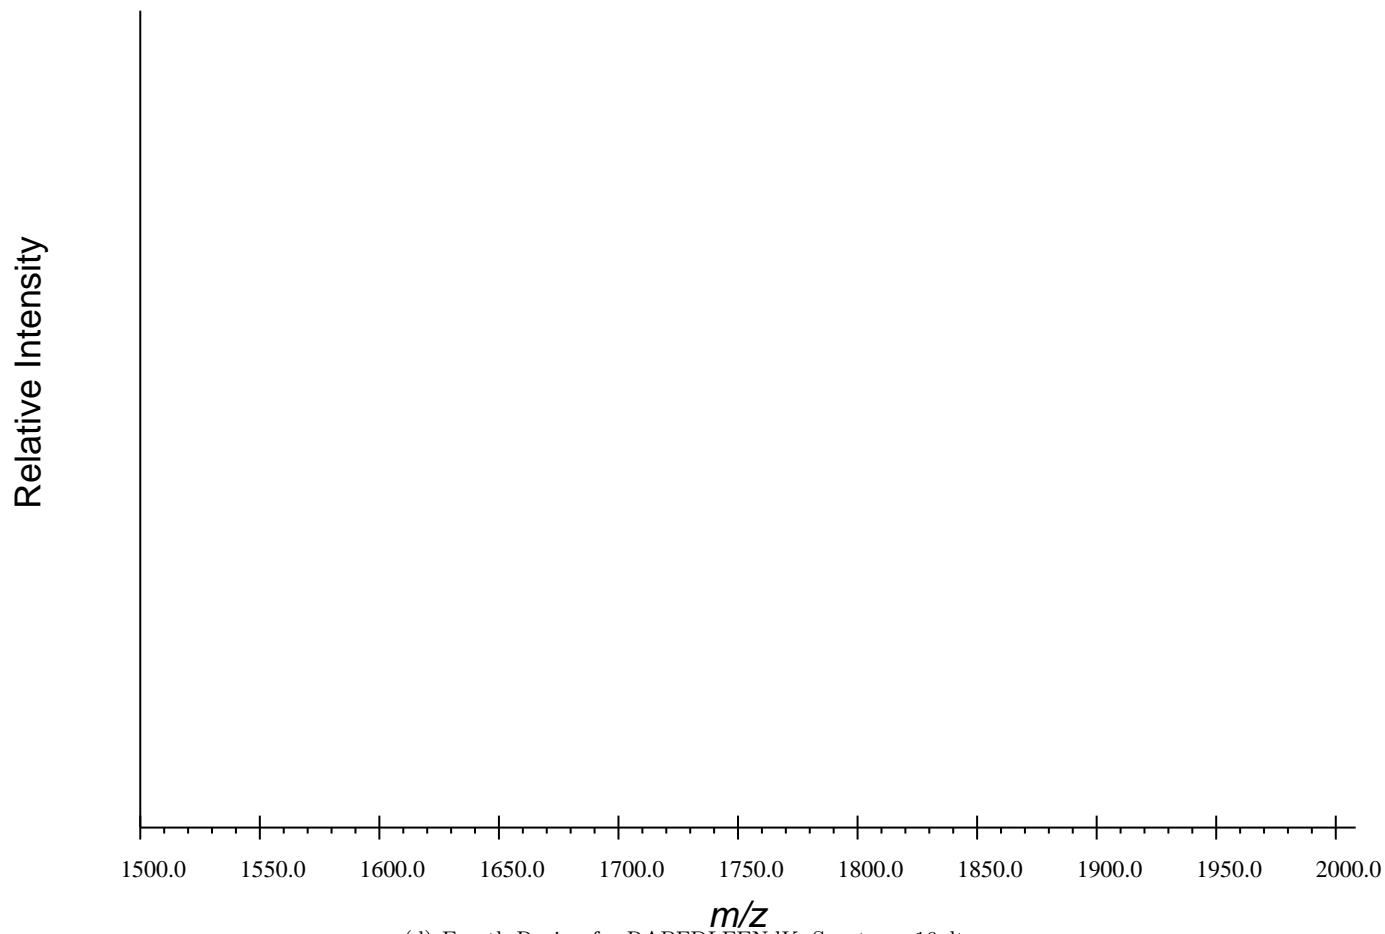

(d) Fourth Region for RAPFDLFENdK, Spectrum 16.dta

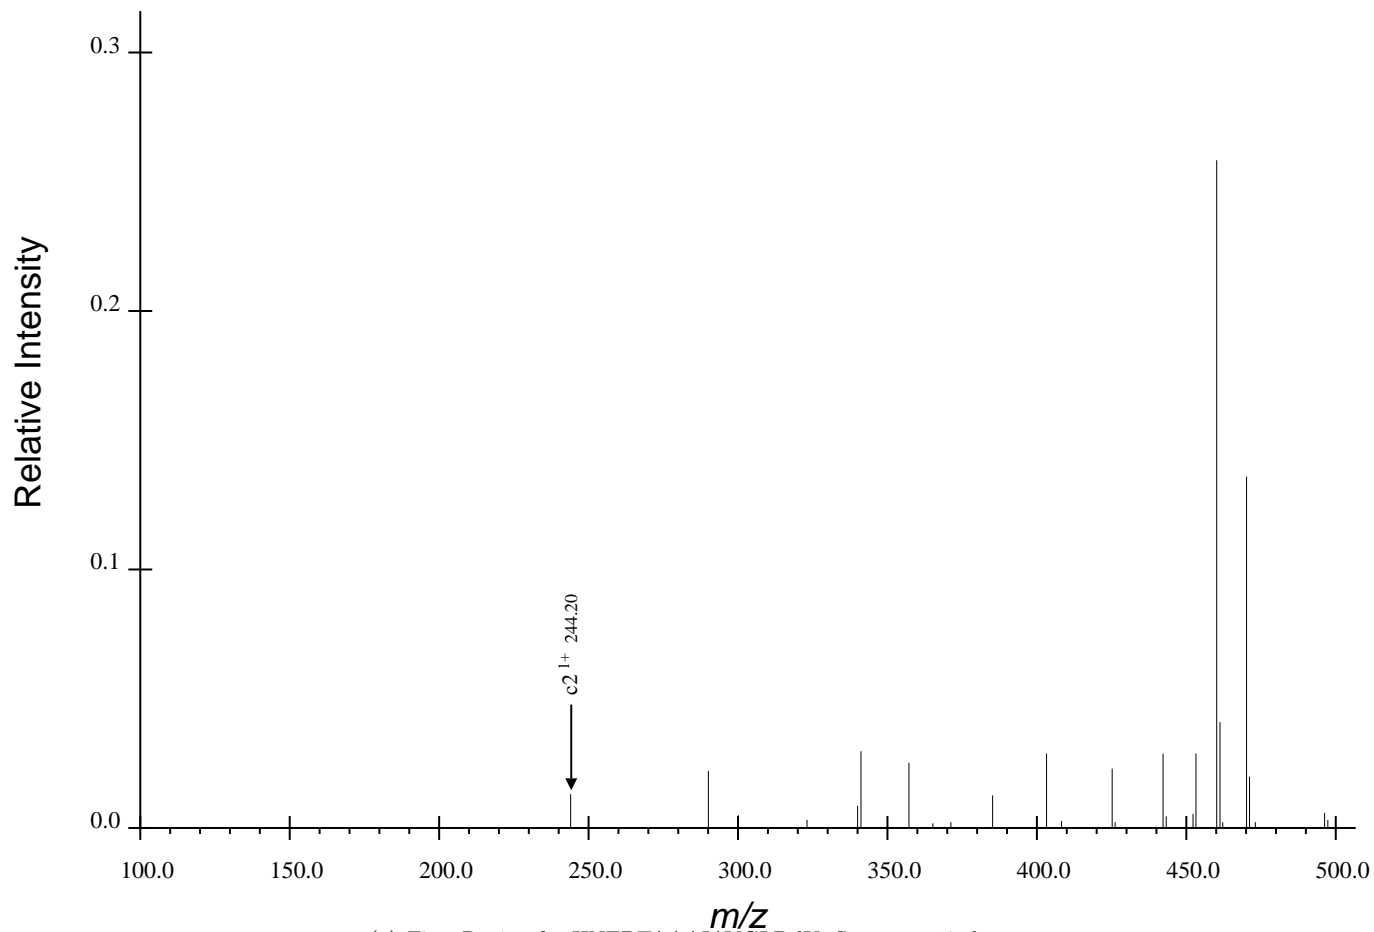

(a) First Region for IINEPTAAAIAYGLDdK, Spectrum 17.dta

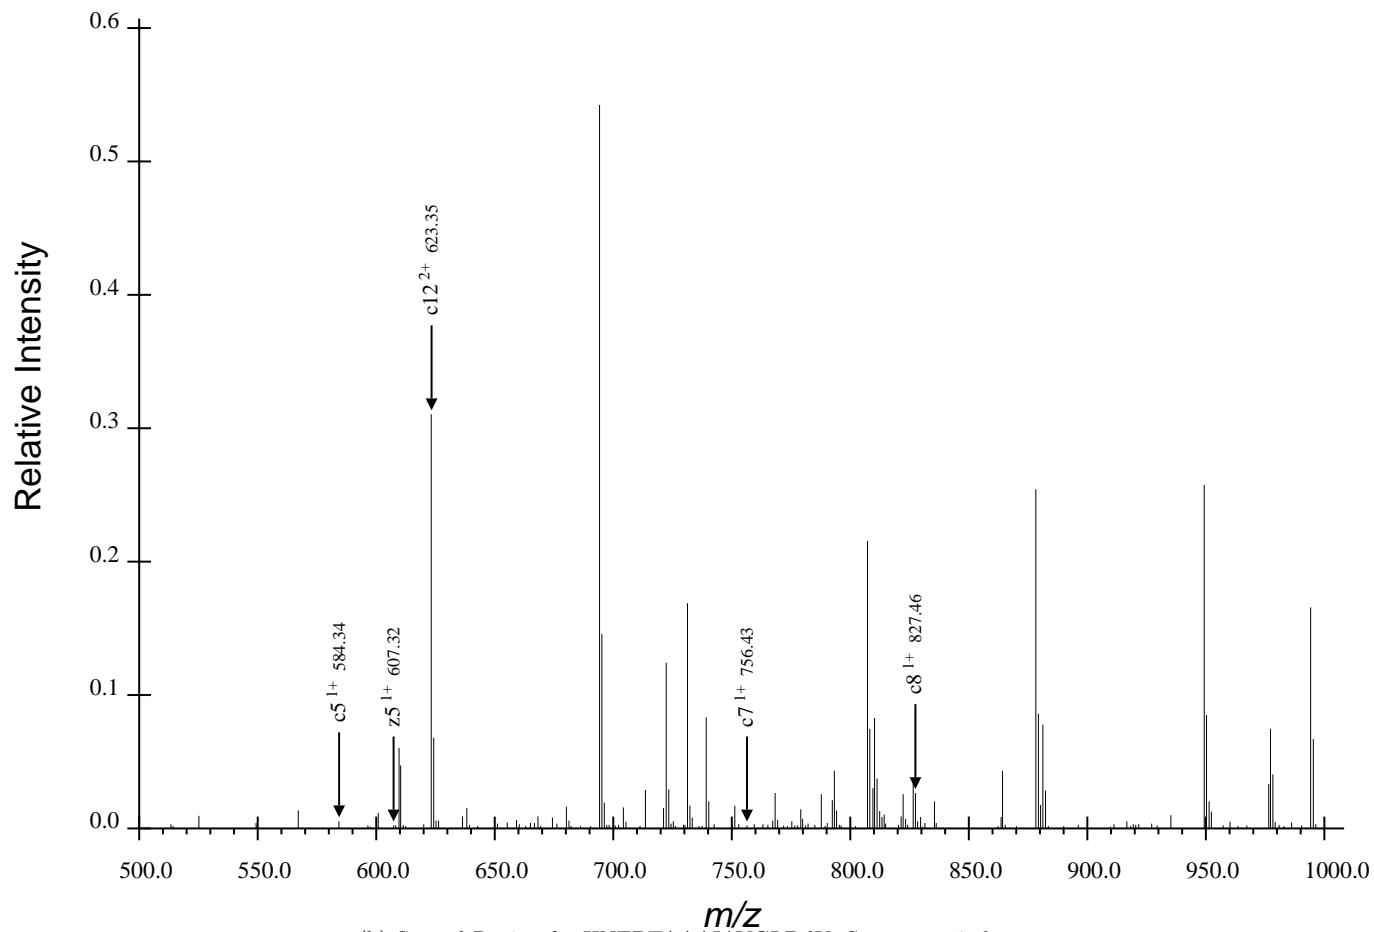

(b) Second Region for IINEPTAAAIAYGLDdK, Spectrum 17.dta

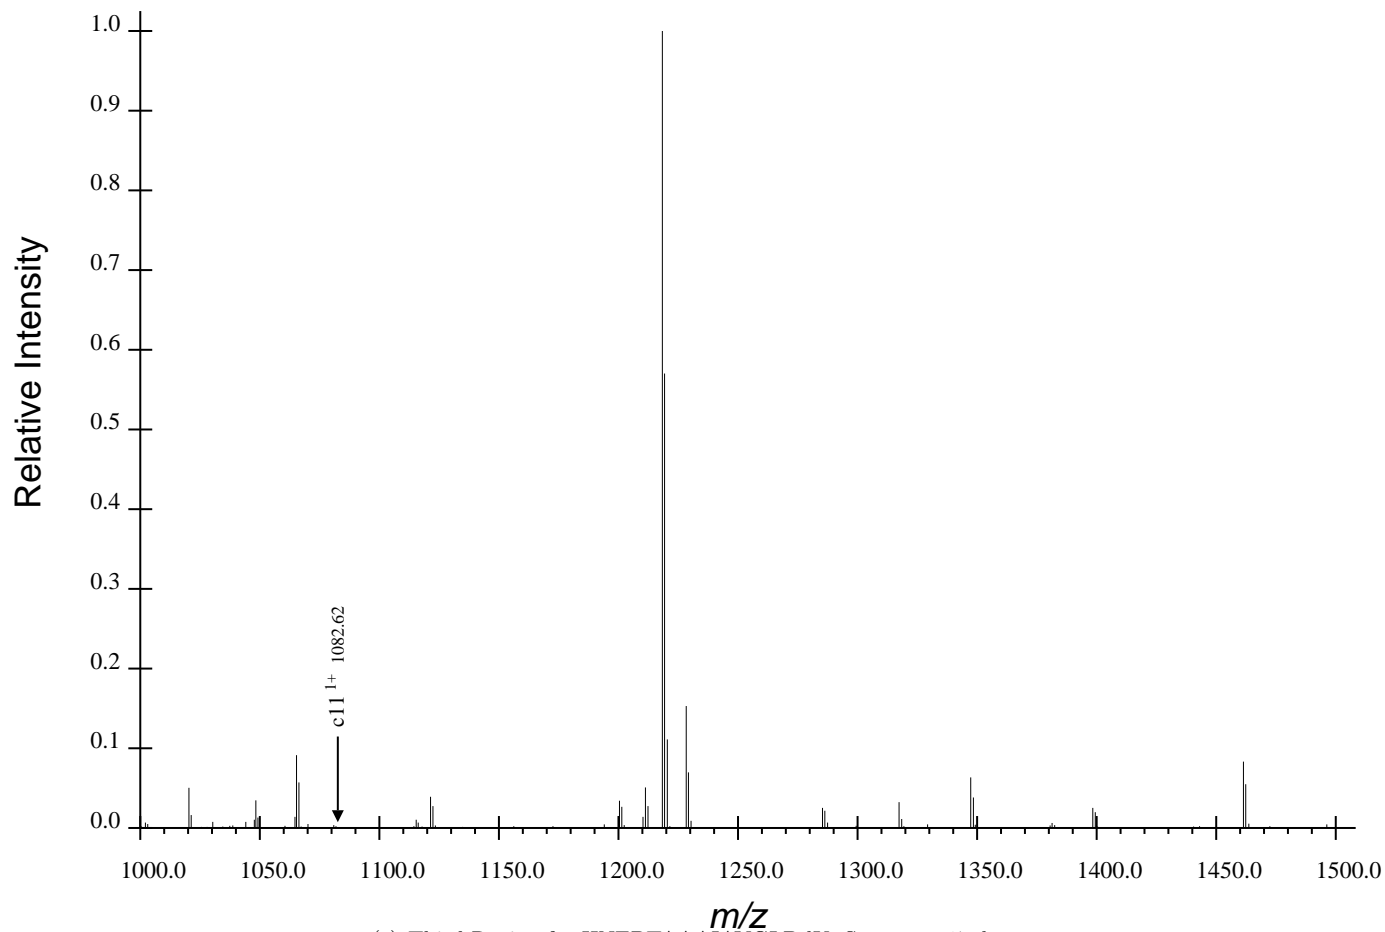

(c) Third Region for IINEPTAAAIAAYGLDdK, Spectrum 17.dta

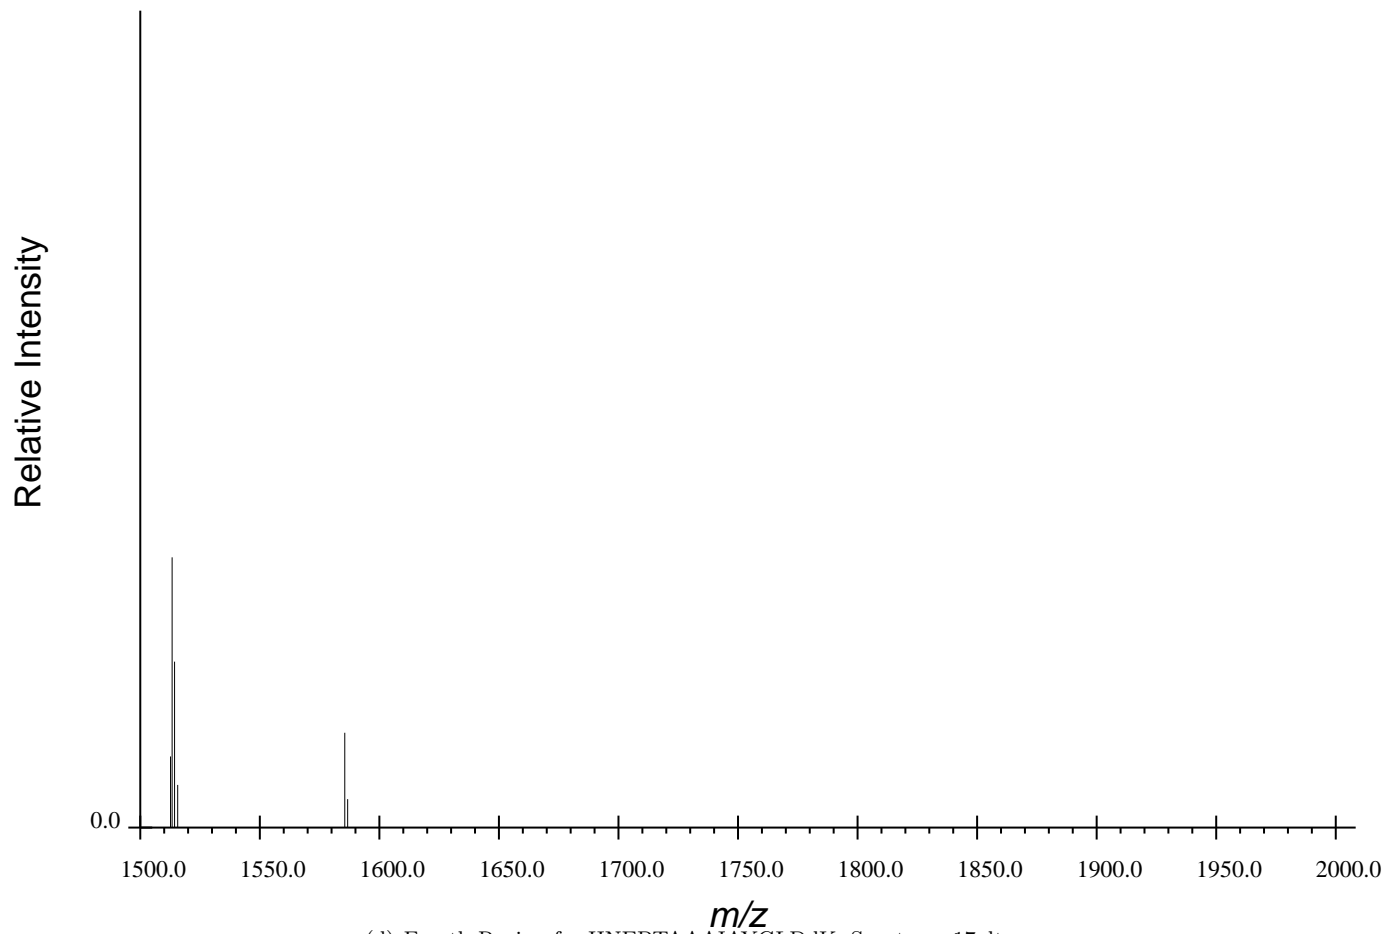

(d) Fourth Region for IINEPTAAAIAAYGLDdK, Spectrum 17.dta



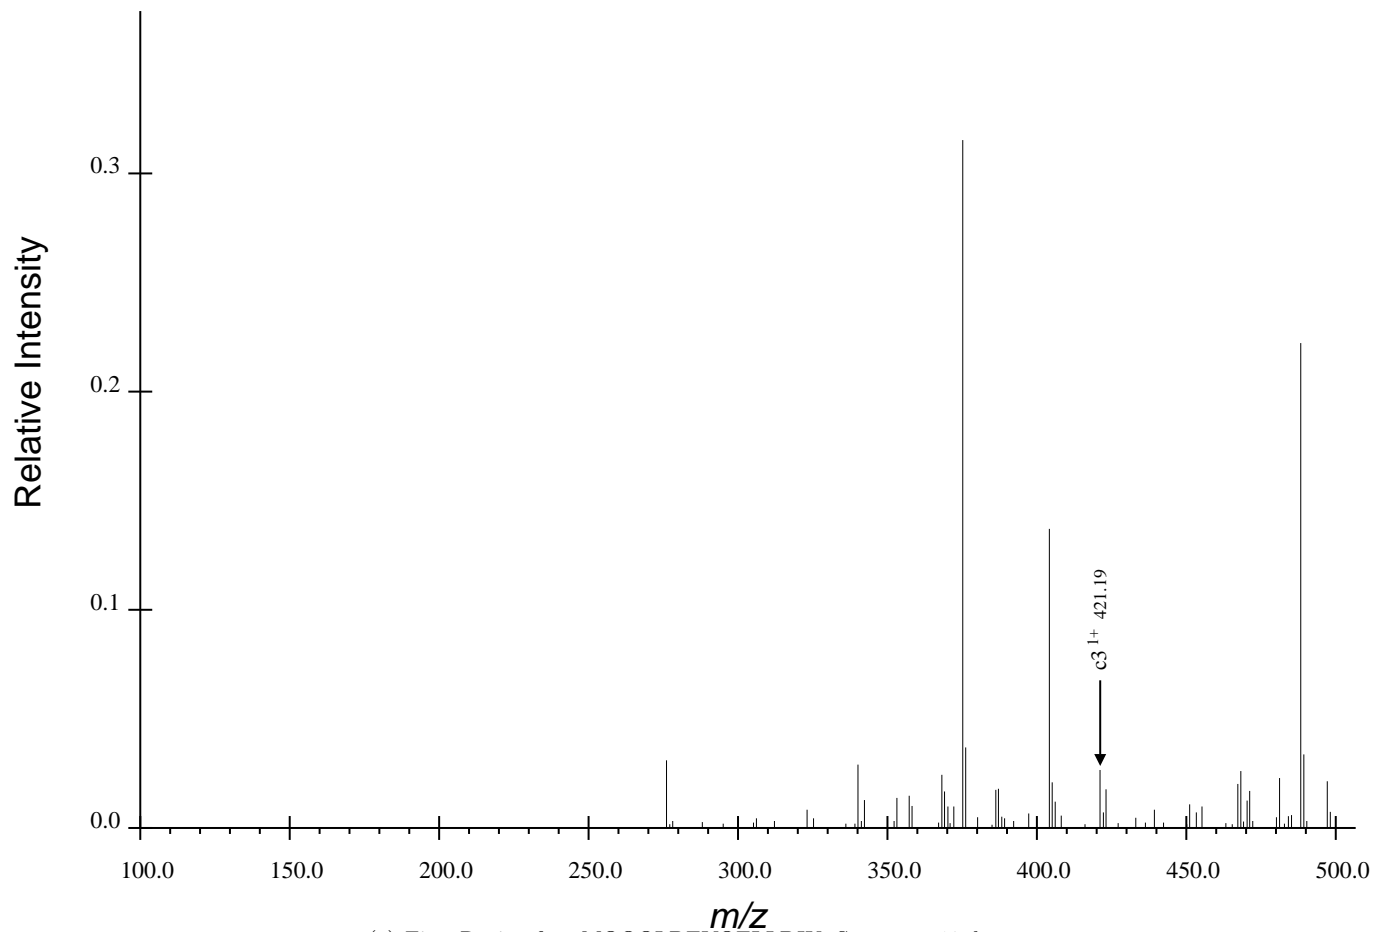

(a) First Region for oMQQLDEYQELLDIK, Spectrum 18.dta

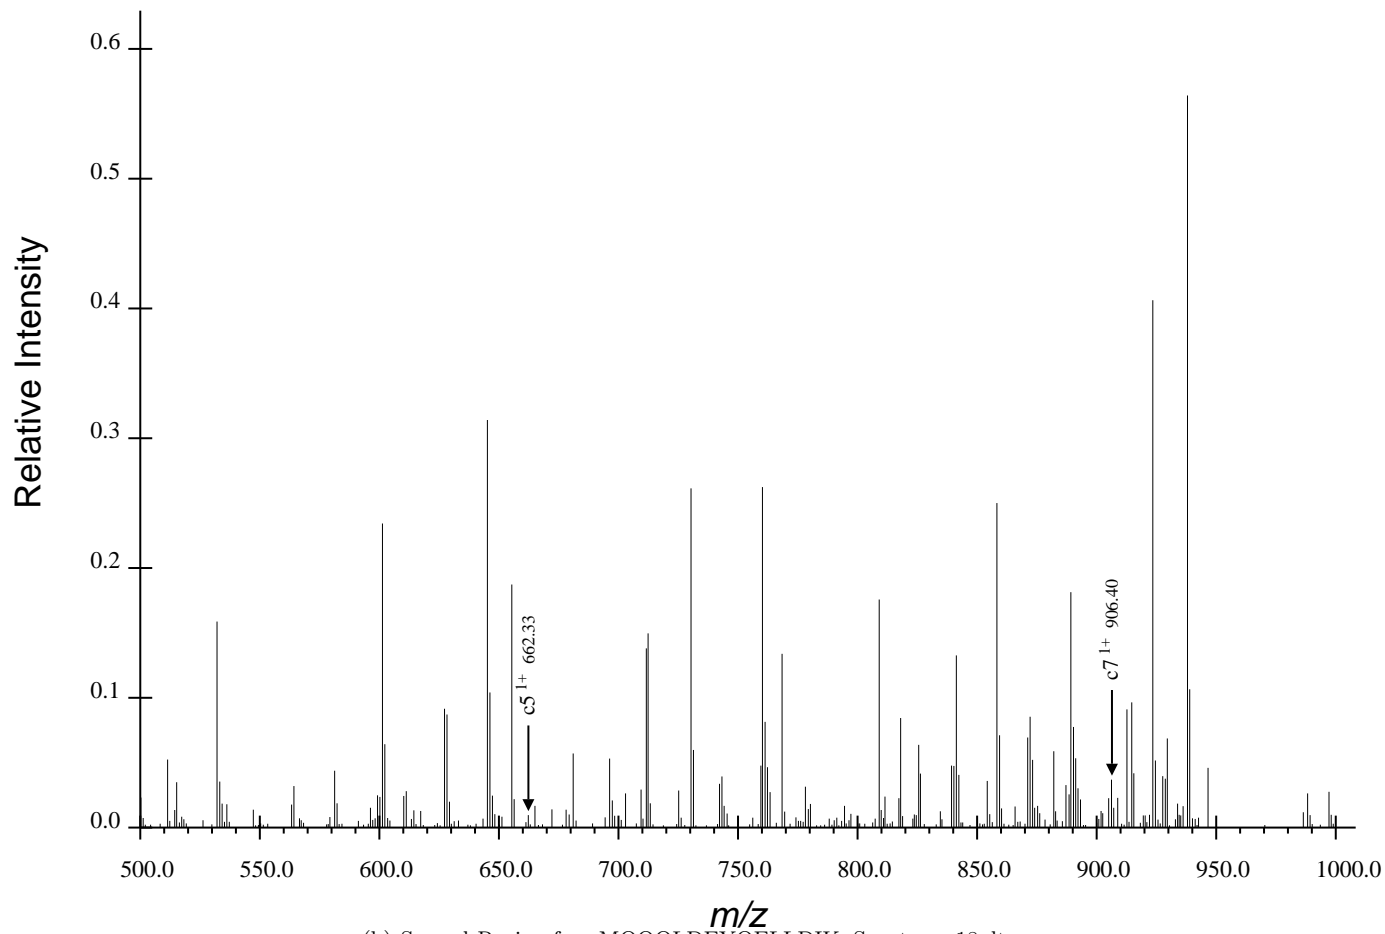

(b) Second Region for oMQQLDEYQELLDIK, Spectrum 18.dta

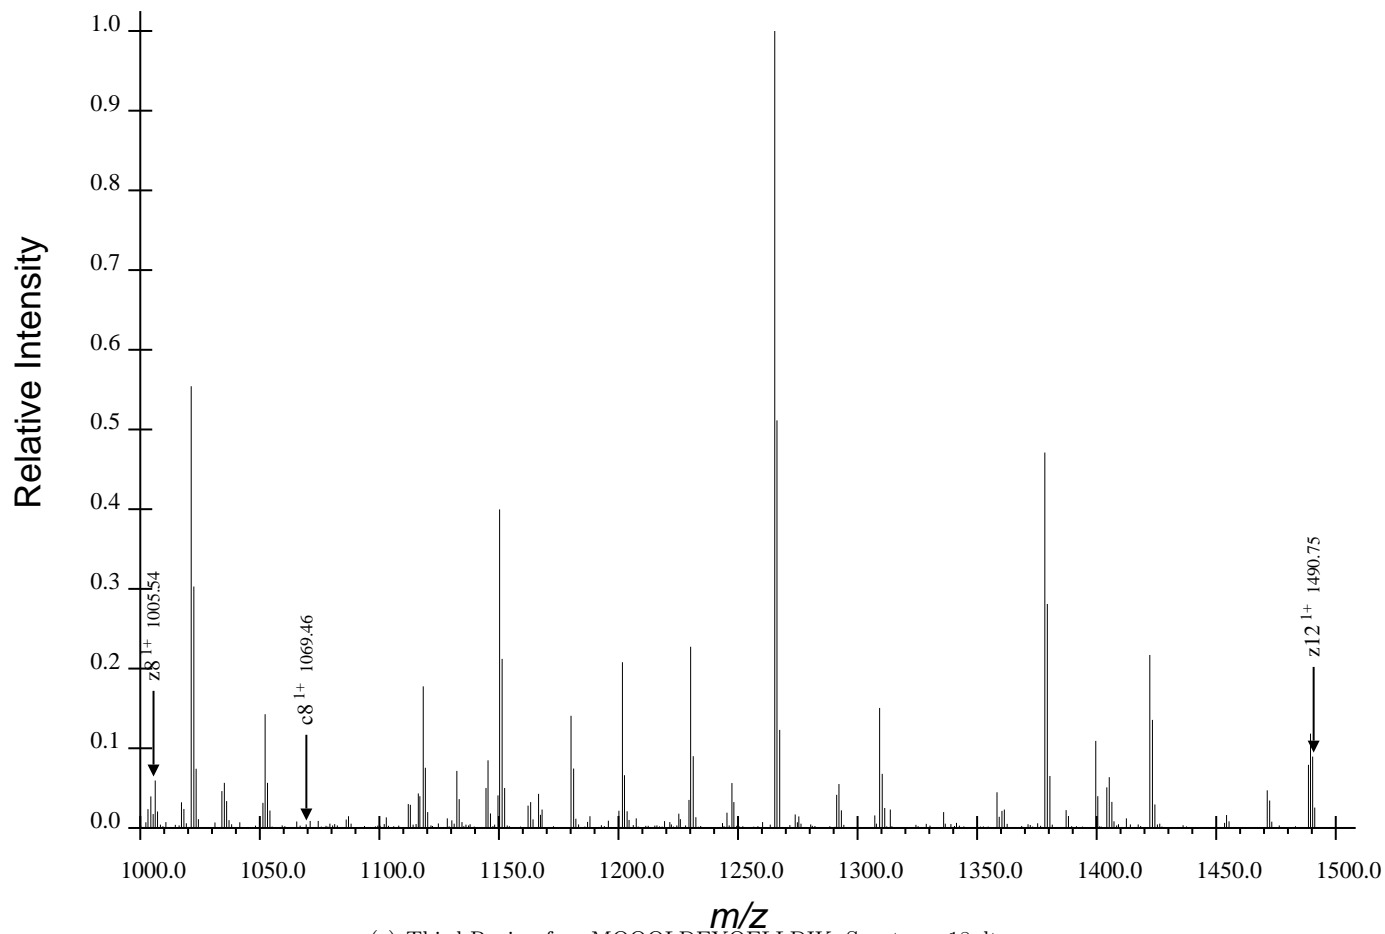

(c) Third Region for oMQQQLDEYQELLDIK, Spectrum 18.dta

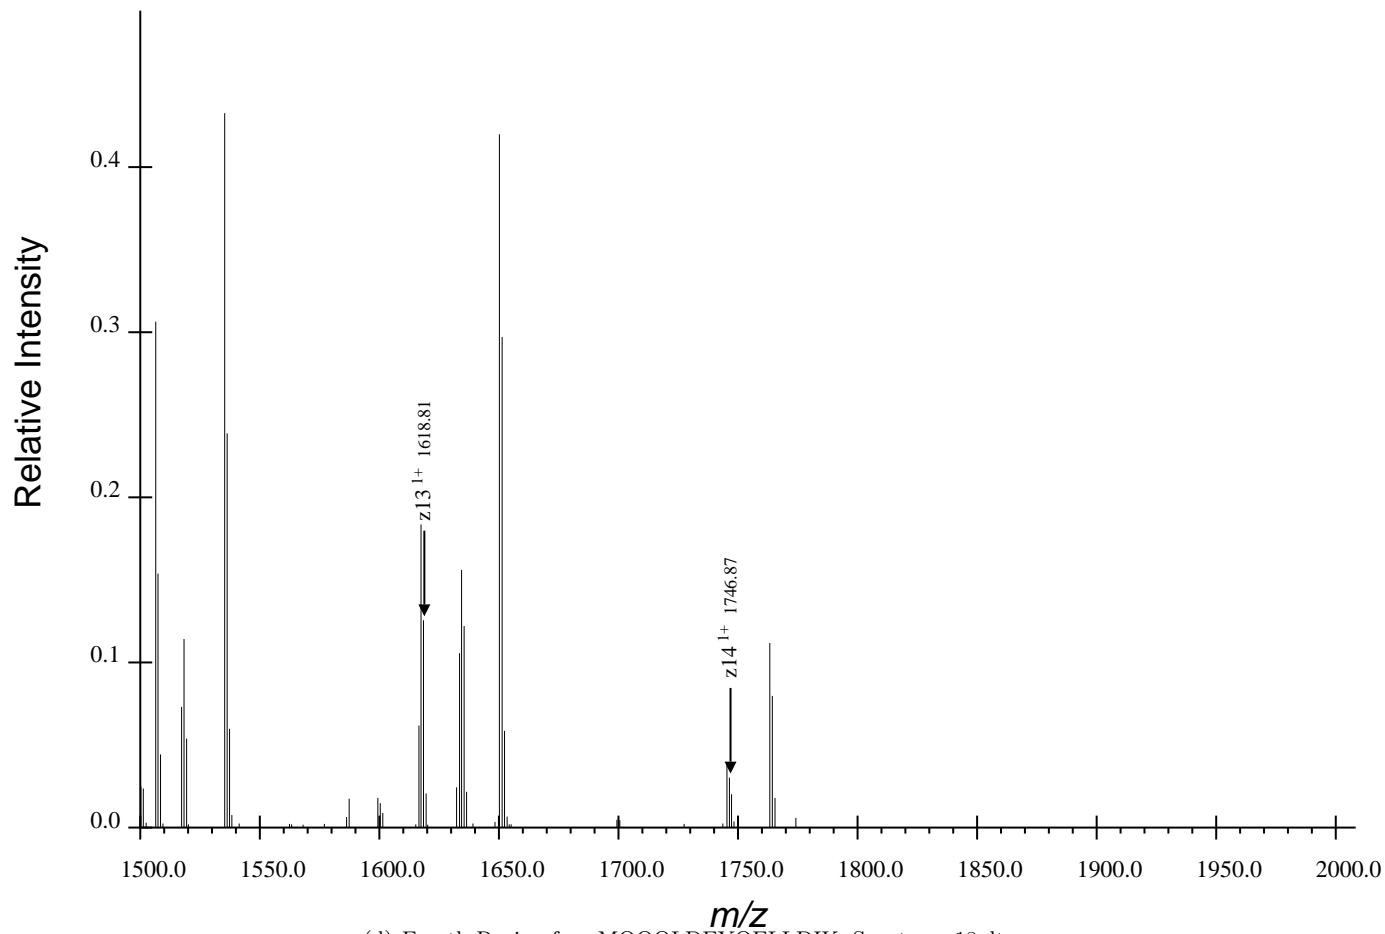

(d) Fourth Region for oMQQQLDEYQELLDIK, Spectrum 18.dta

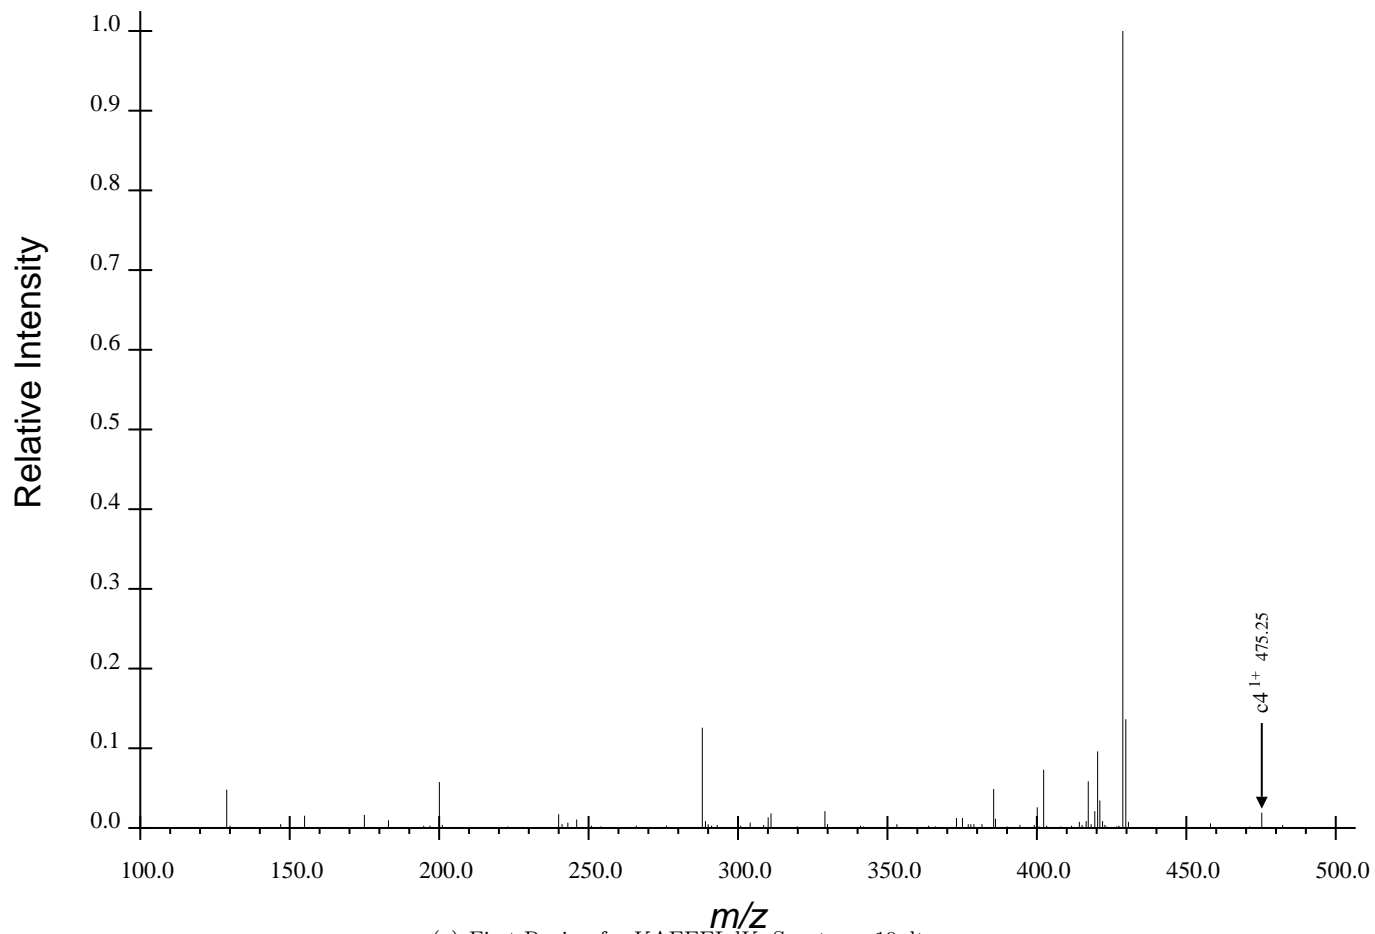

(a) First Region for KAEEELdK, Spectrum 19.dta

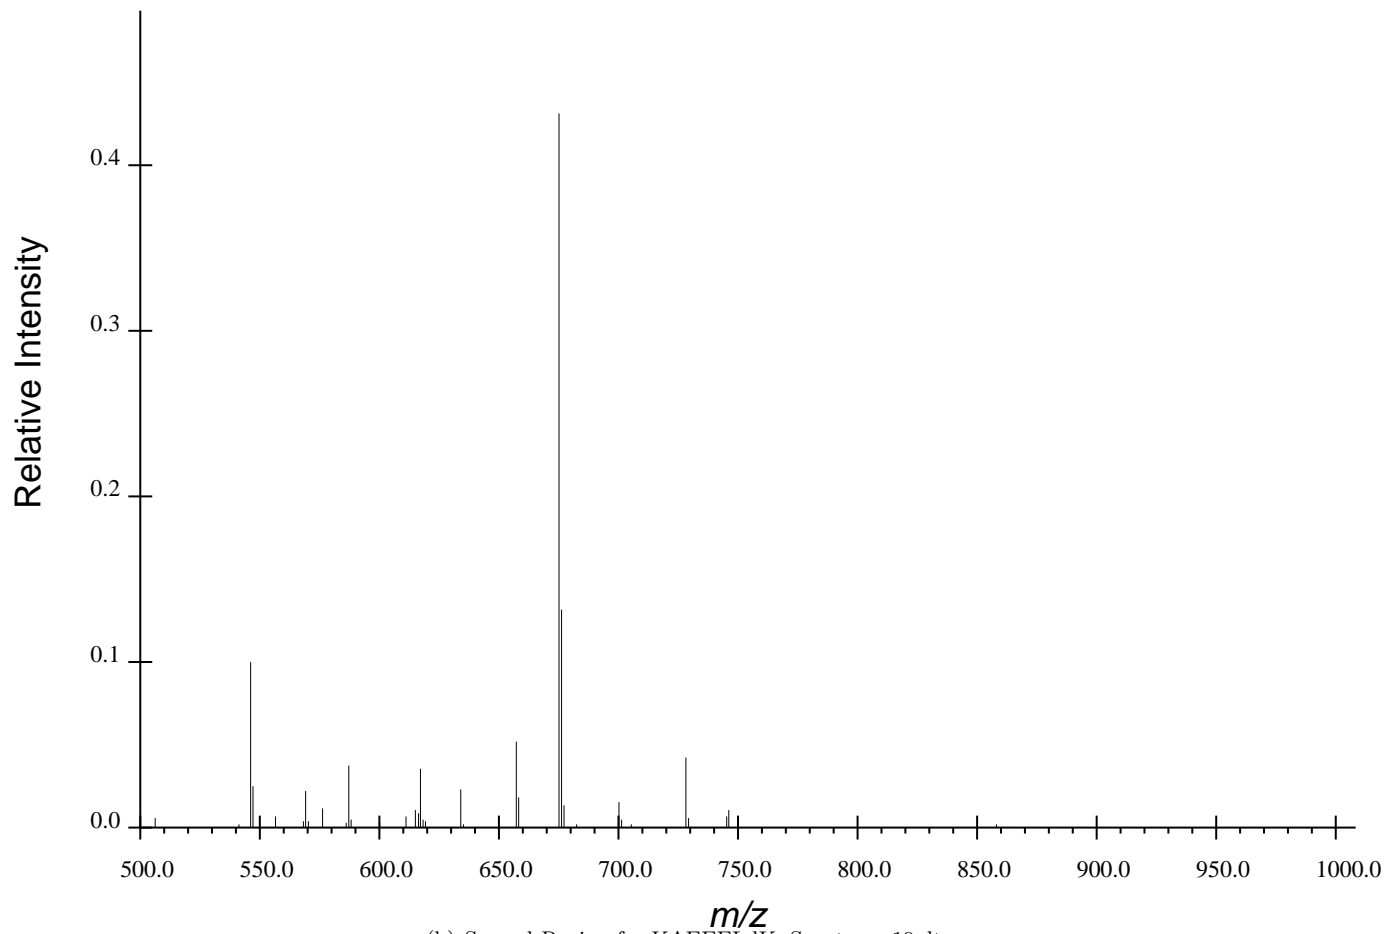

(b) Second Region for KAEEELdK, Spectrum 19.dta

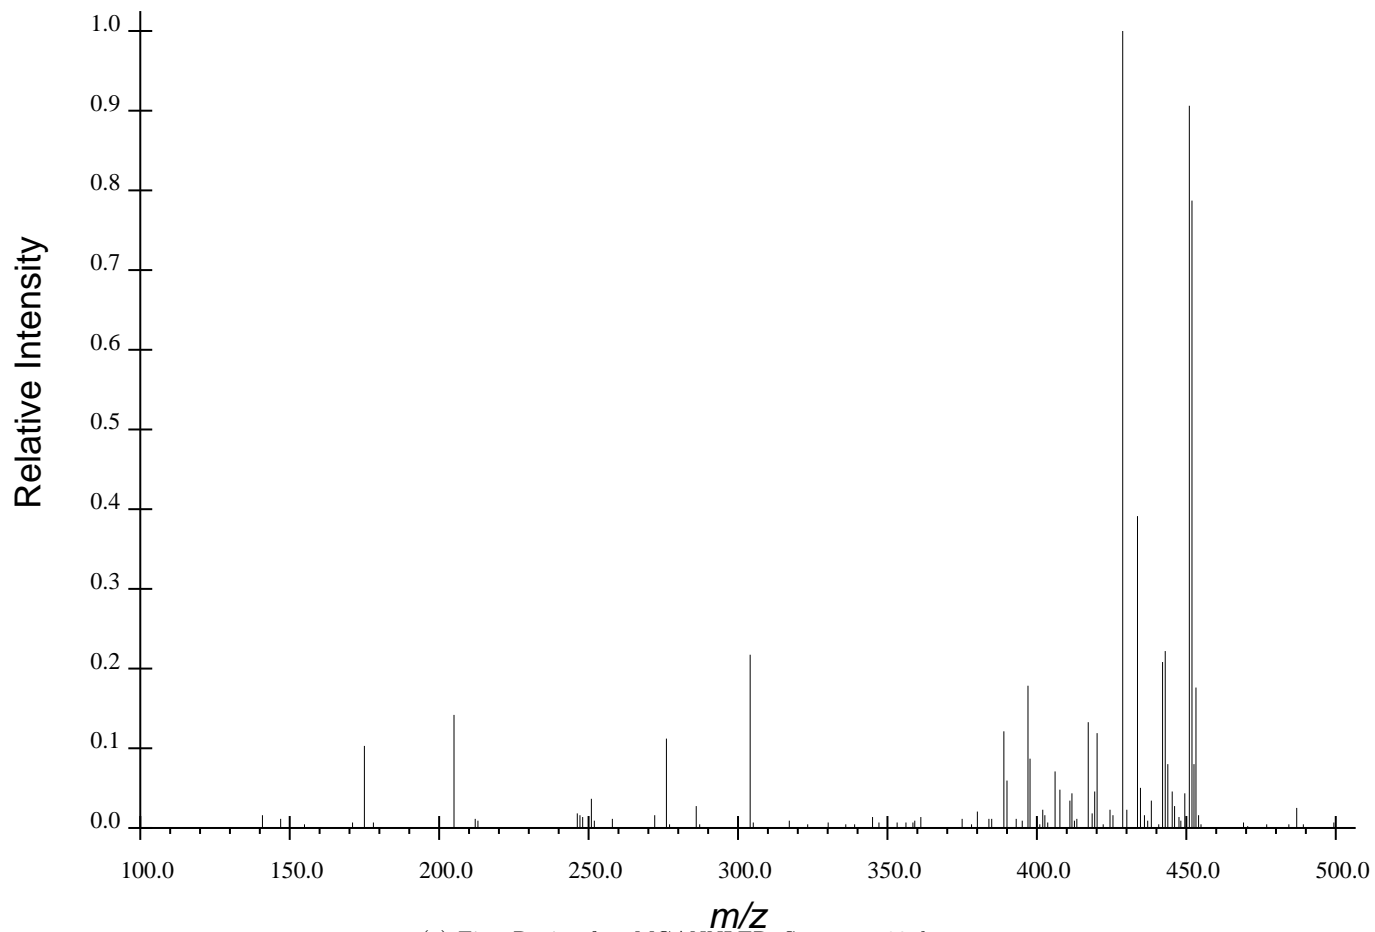

(a) First Region for oMGANNLER, Spectrum 20.dta

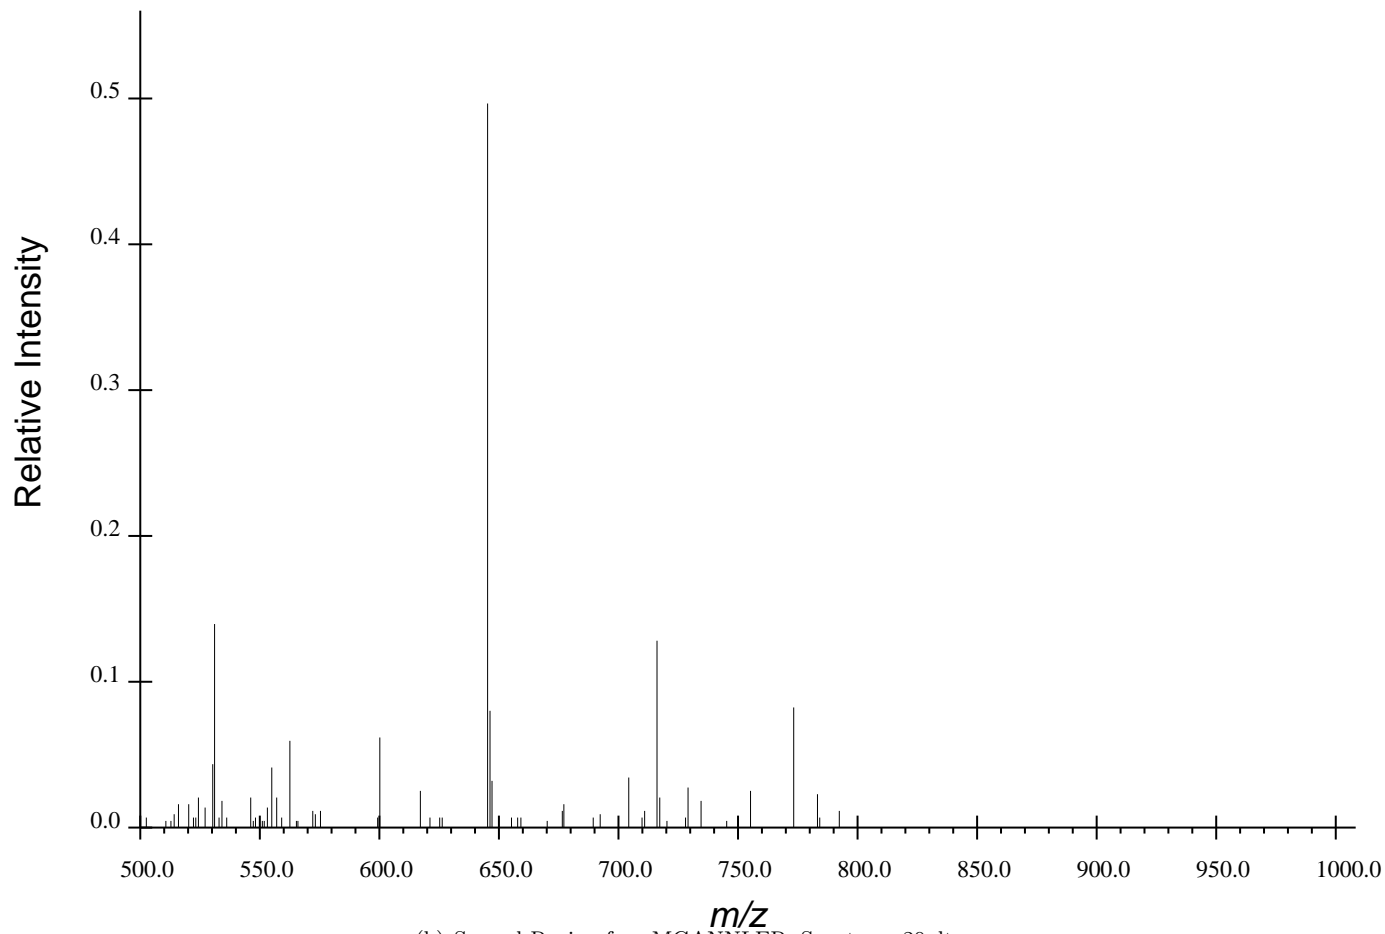

(b) Second Region for oMGANNLER, Spectrum 20.dta

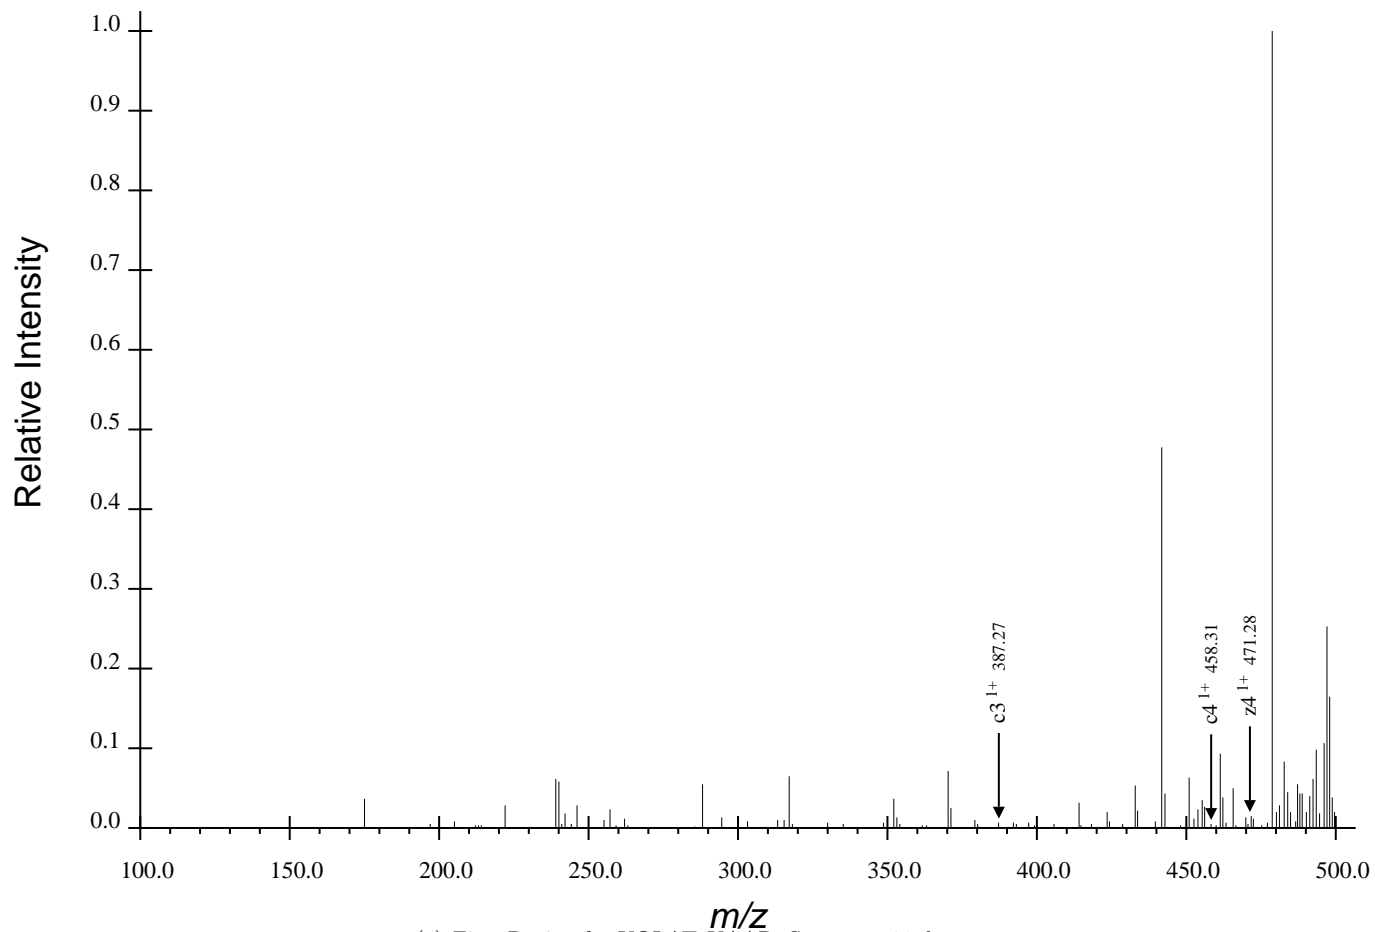

(a) First Region for KQLATaKAAR, Spectrum 21.dta

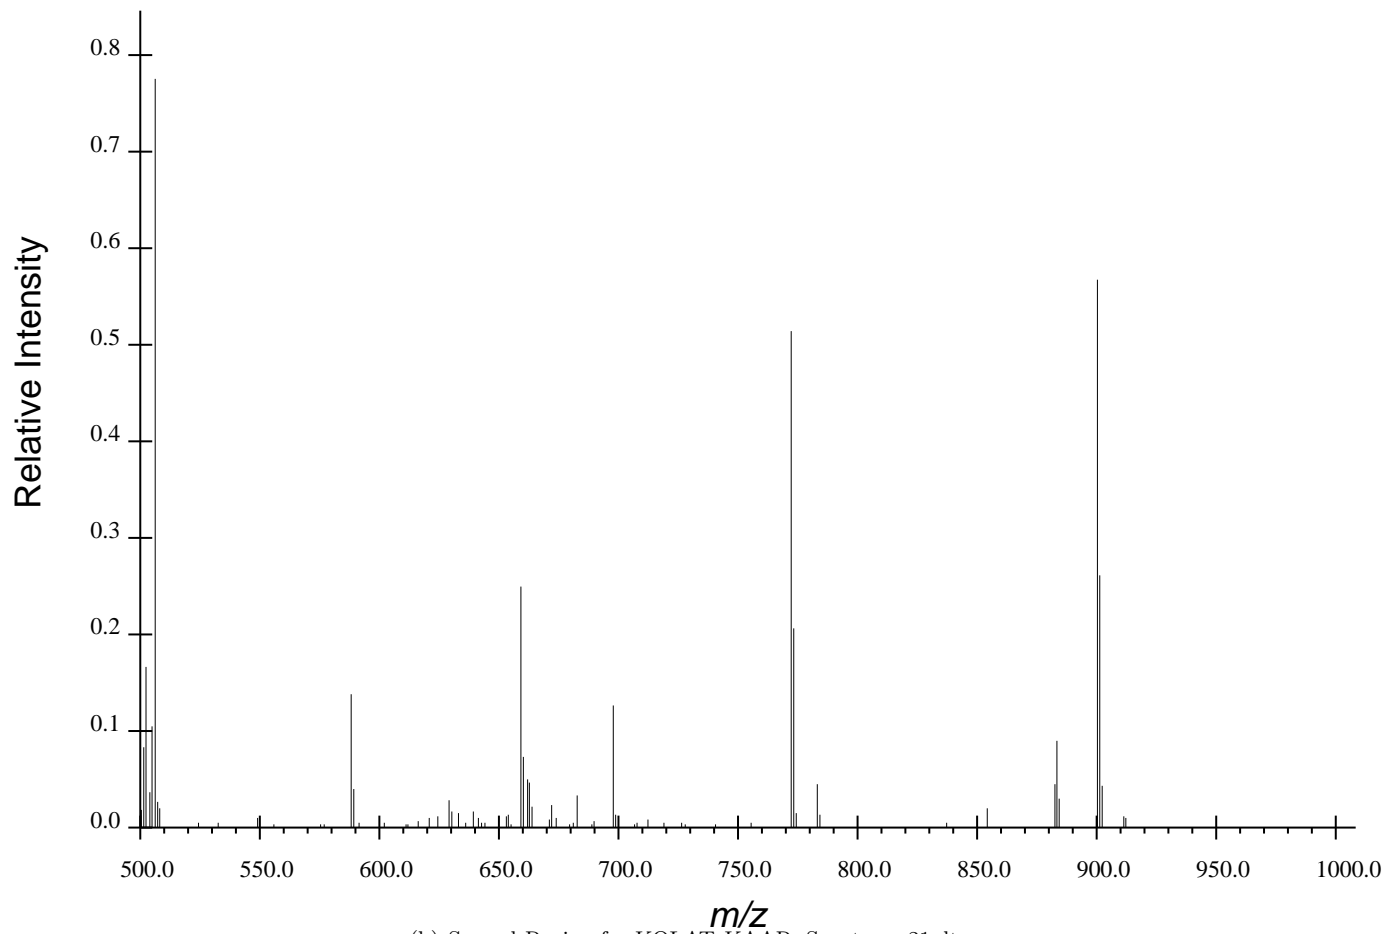

(b) Second Region for KQLATaKAAR, Spectrum 21.dta

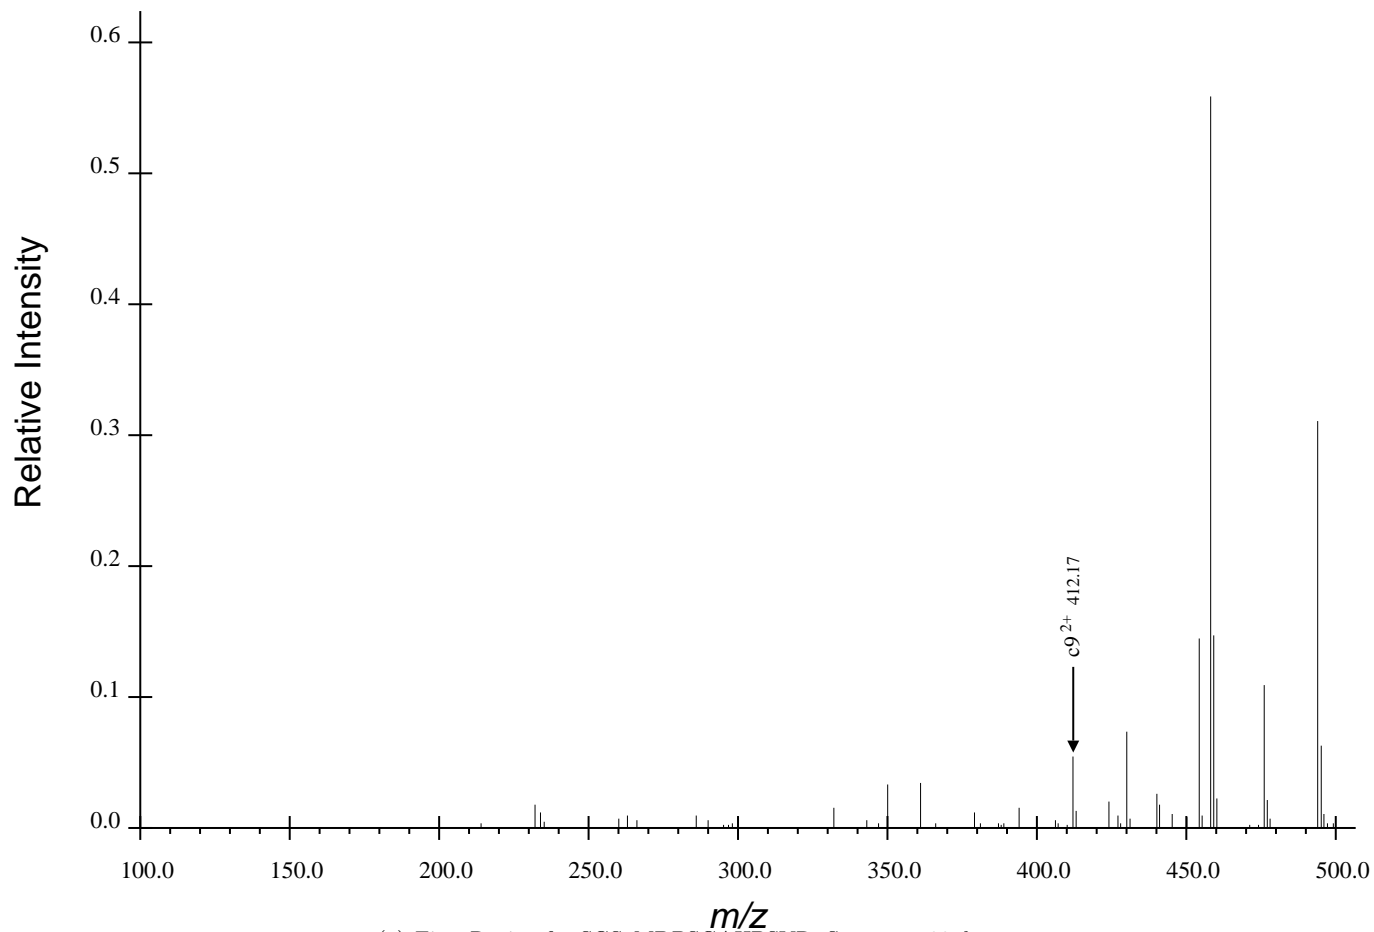

(a) First Region for SGSoMDPSGAHPSVR, Spectrum 22.dta

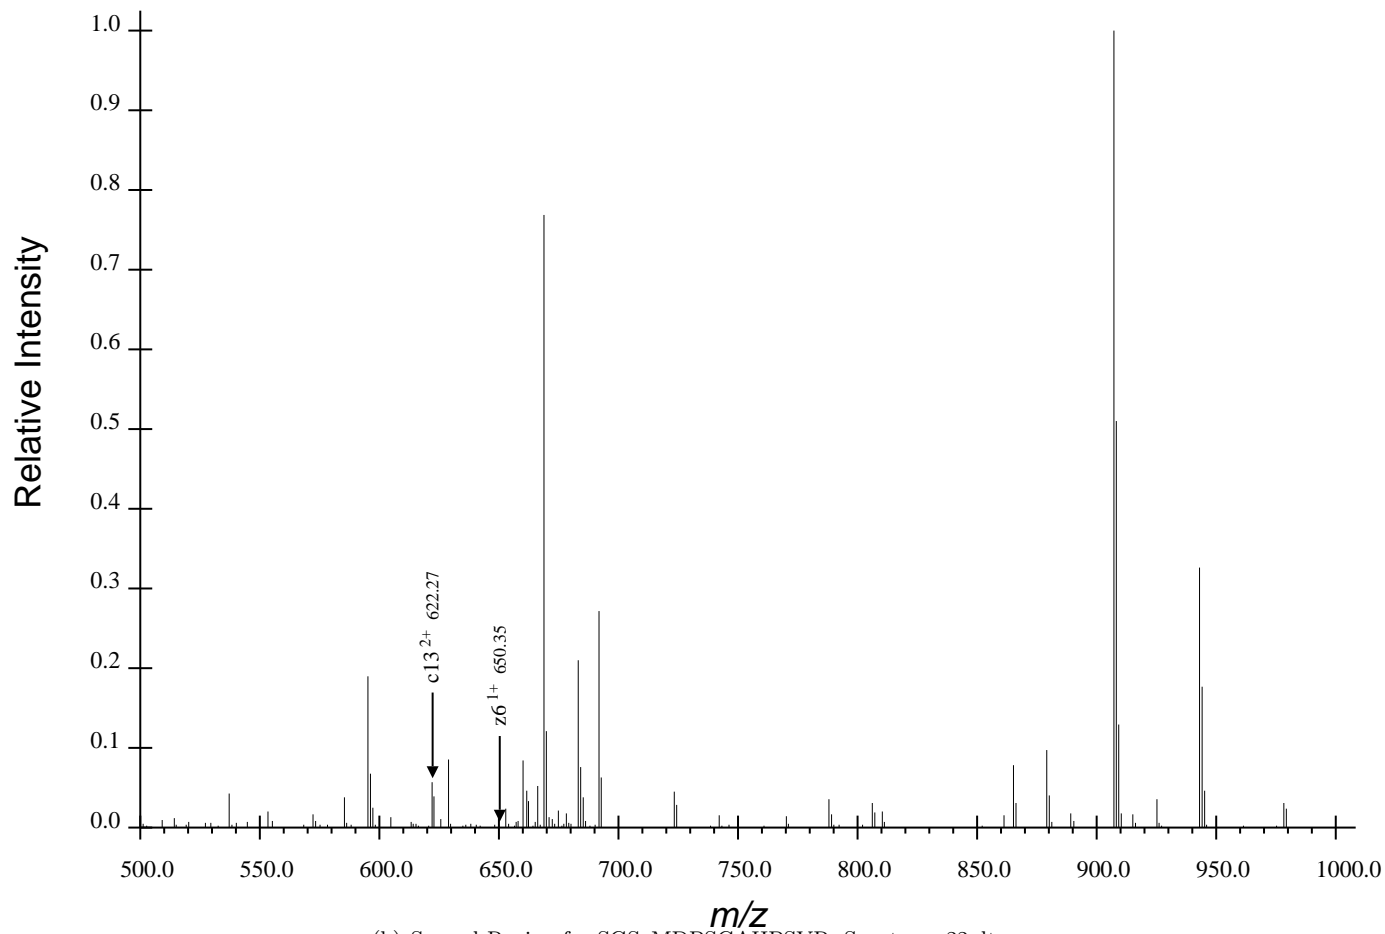

(b) Second Region for SGSoMDPSGAHPSVR, Spectrum 22.dta

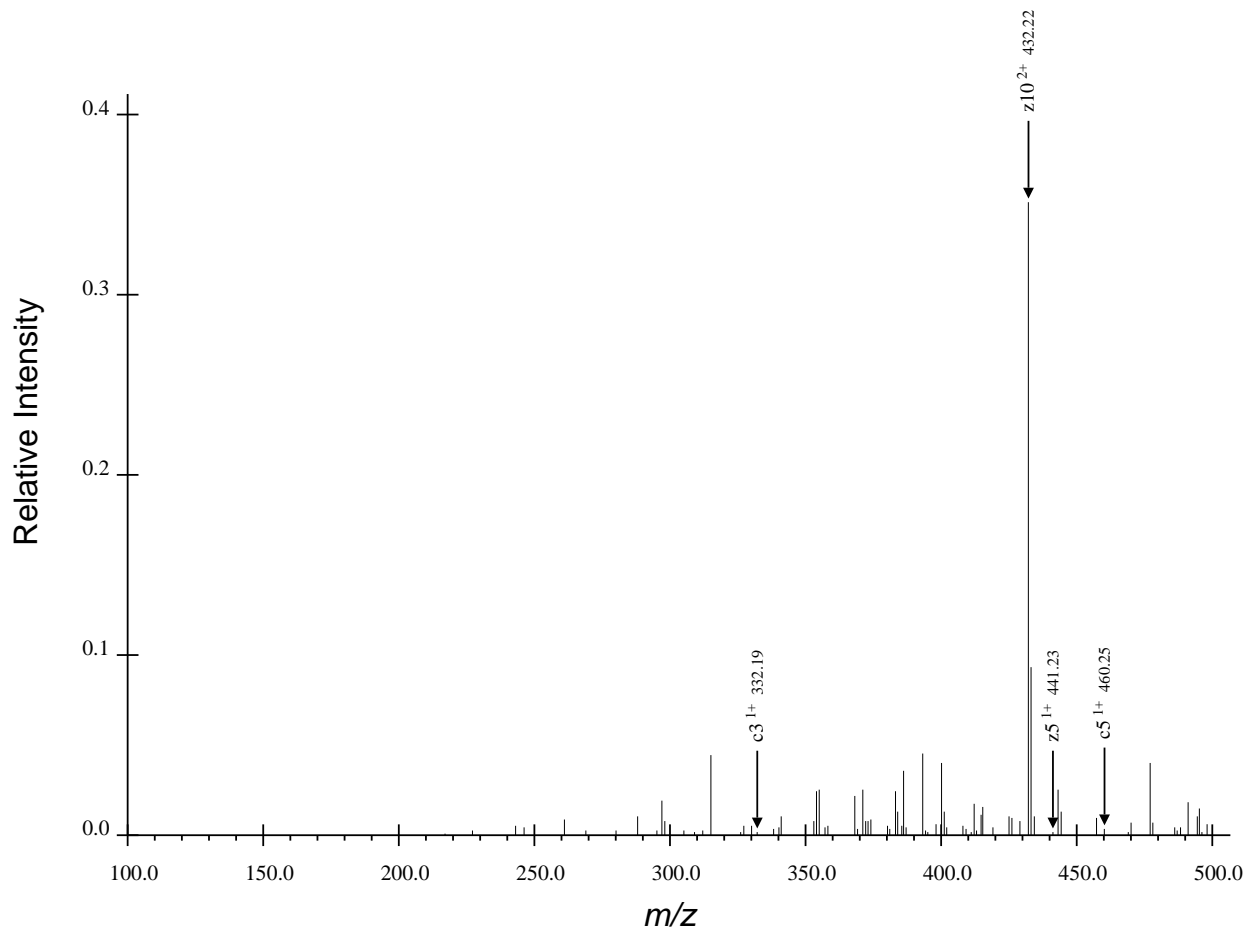

(a) First Region for SVQAGNPGGGPGGmR, Spectrum 23.dta

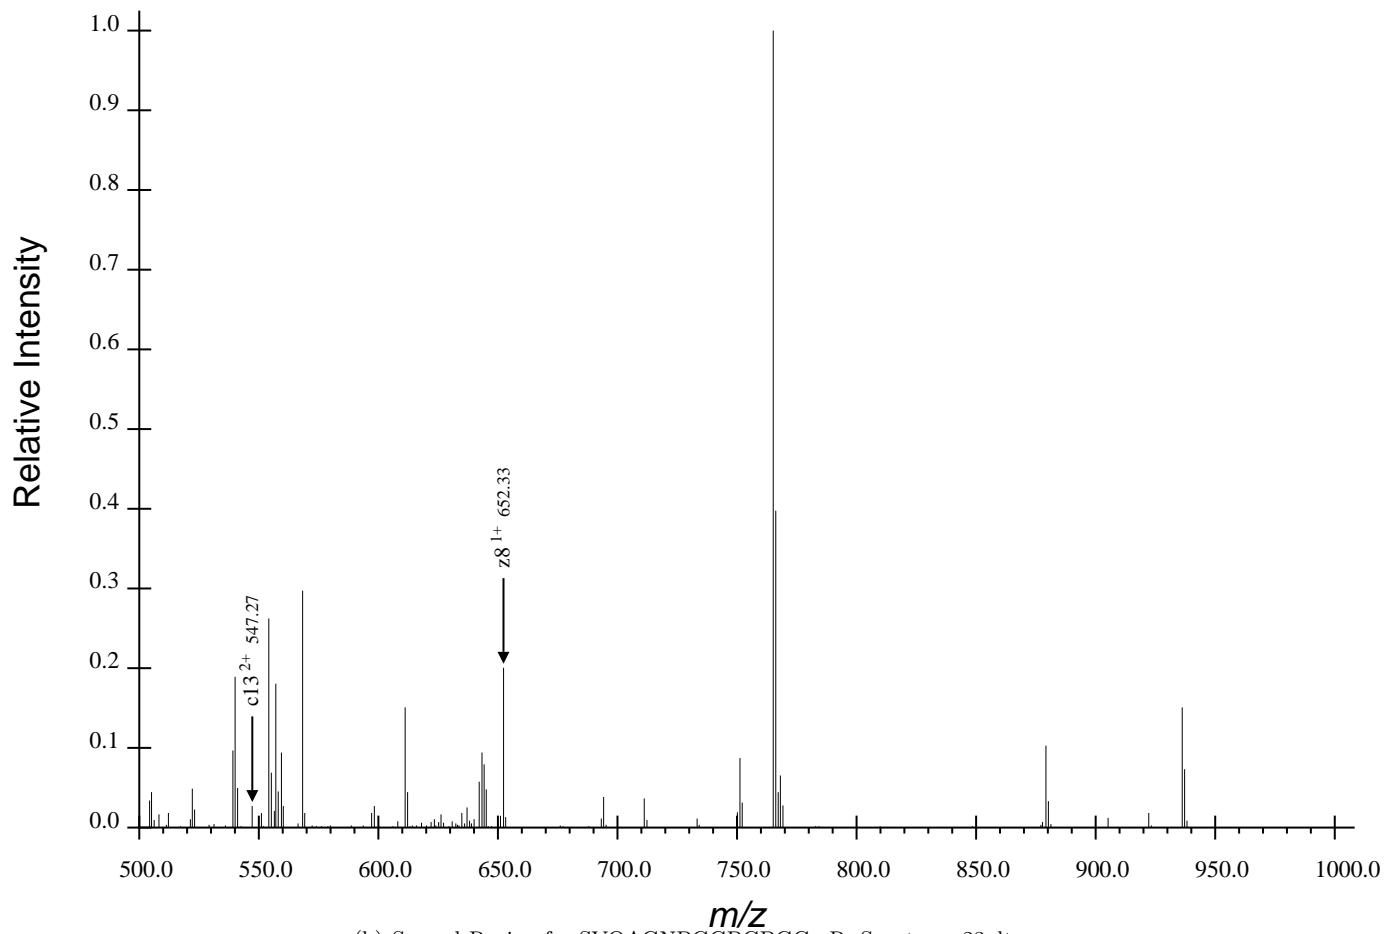

(b) Second Region for SVQAGNPGGGPGGmR, Spectrum 23.dta

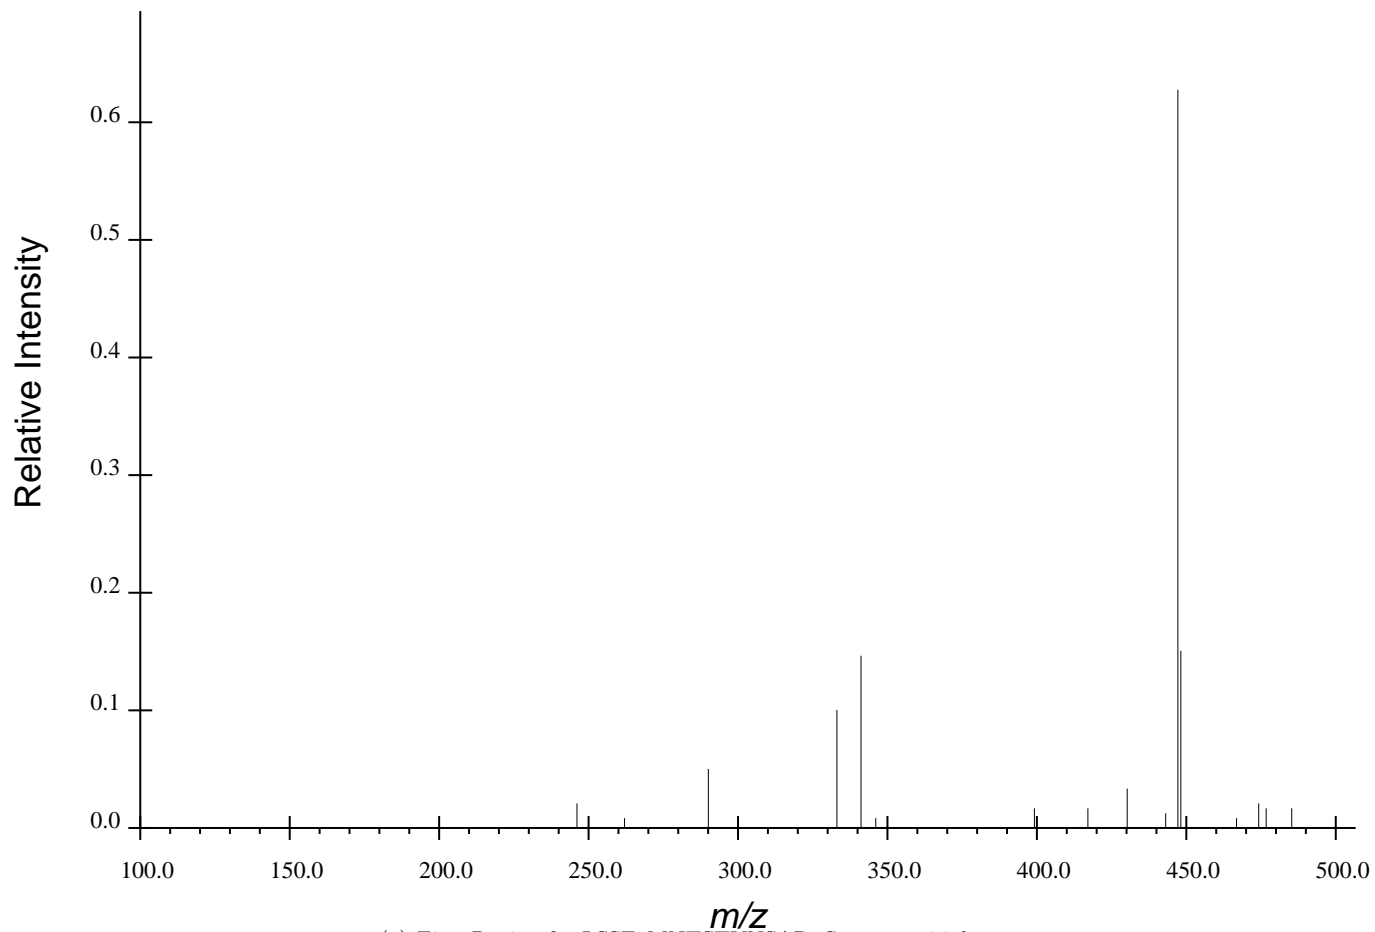

(a) First Region for LSSEoMNTSTVNSAR, Spectrum 24.dta

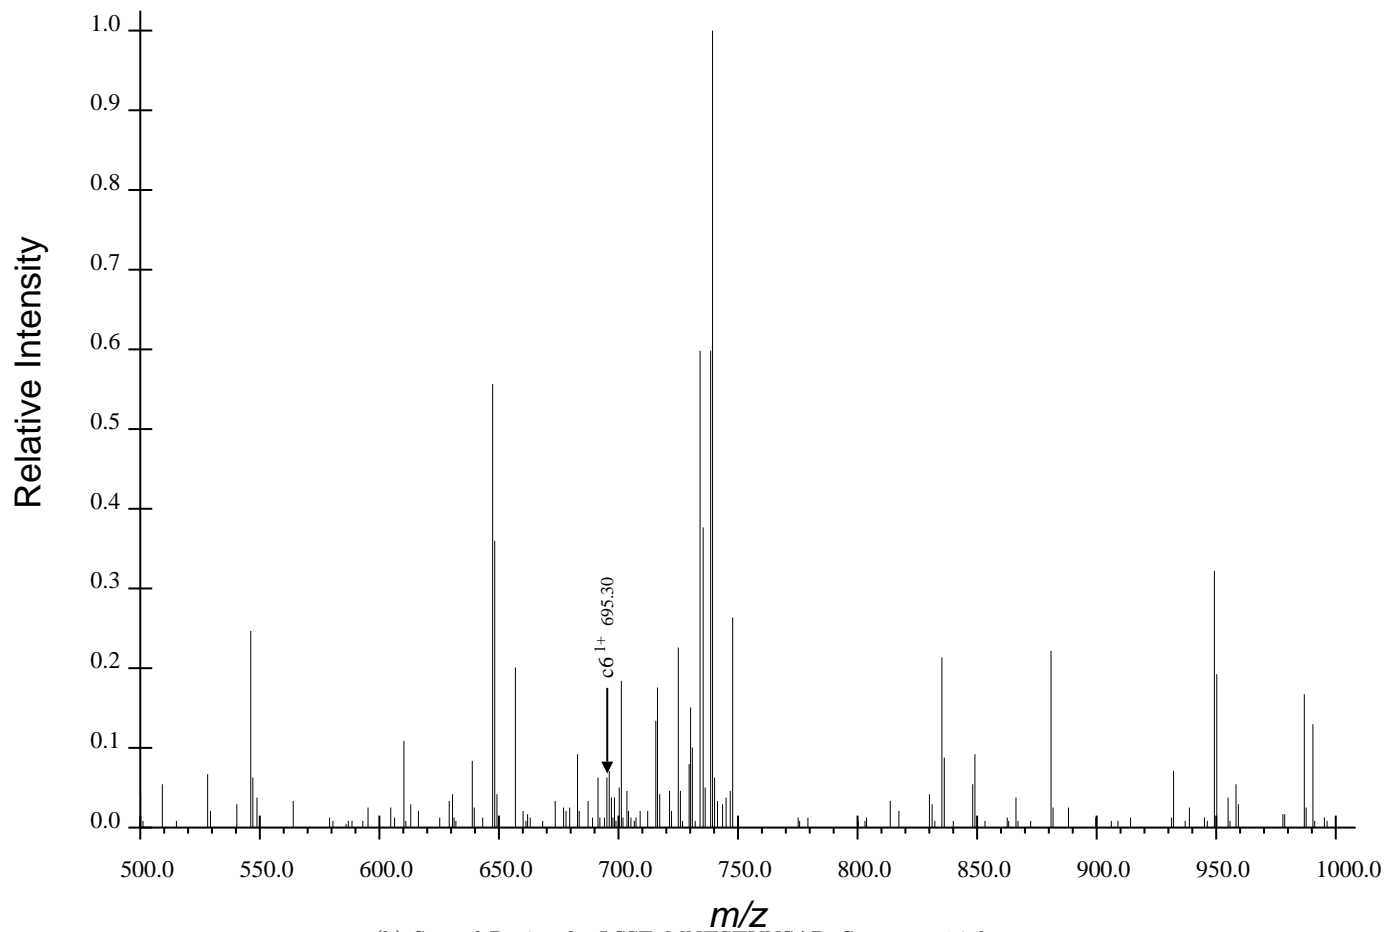

(b) Second Region for LSSEoMNTSTVNSAR, Spectrum 24.dta



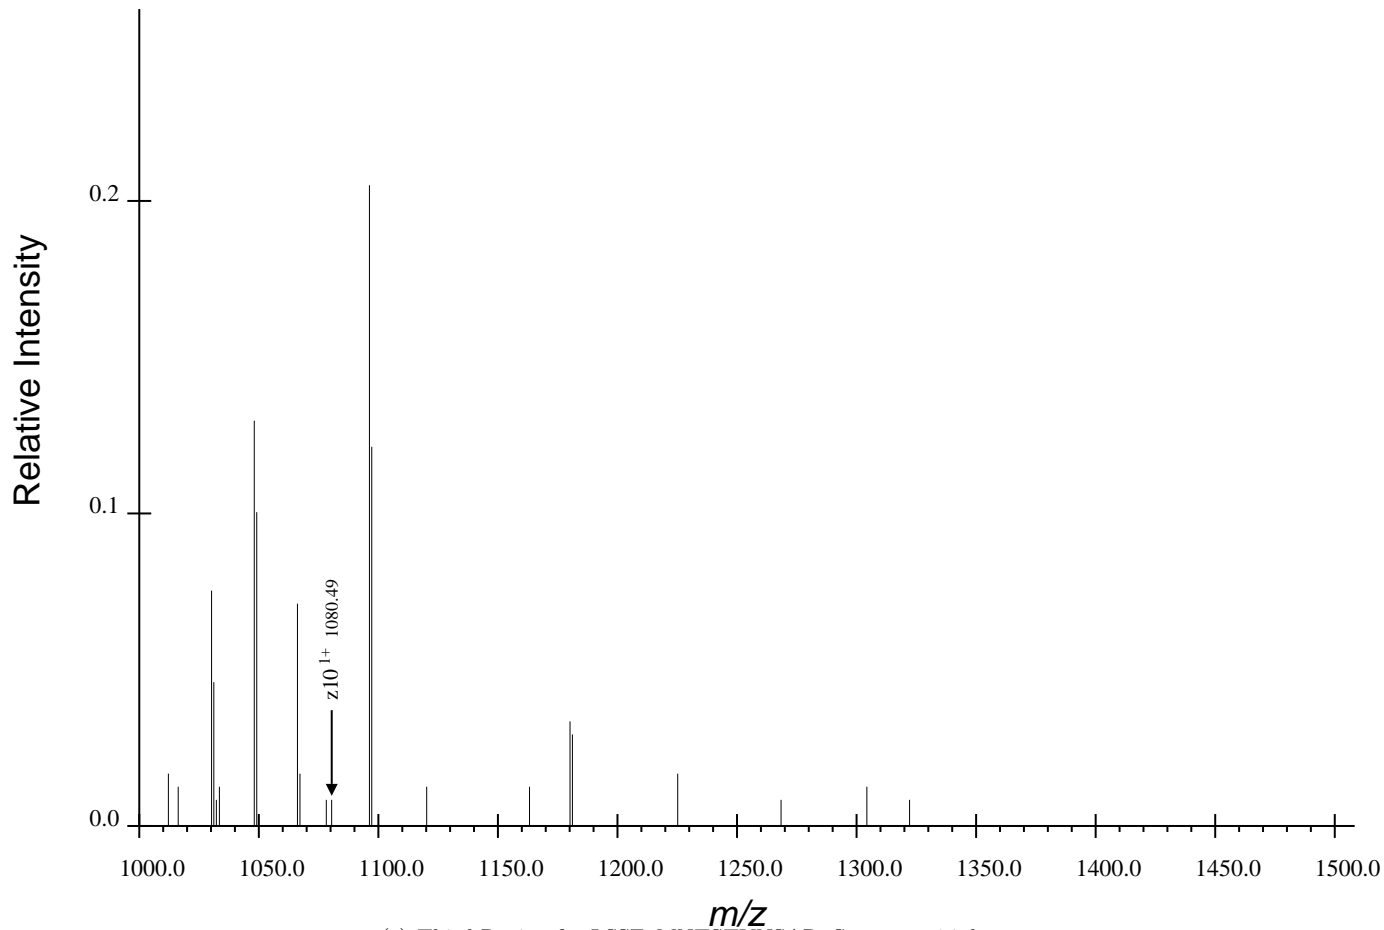

(c) Third Region for LSSEoMNTSTVNSAR, Spectrum 24.dta

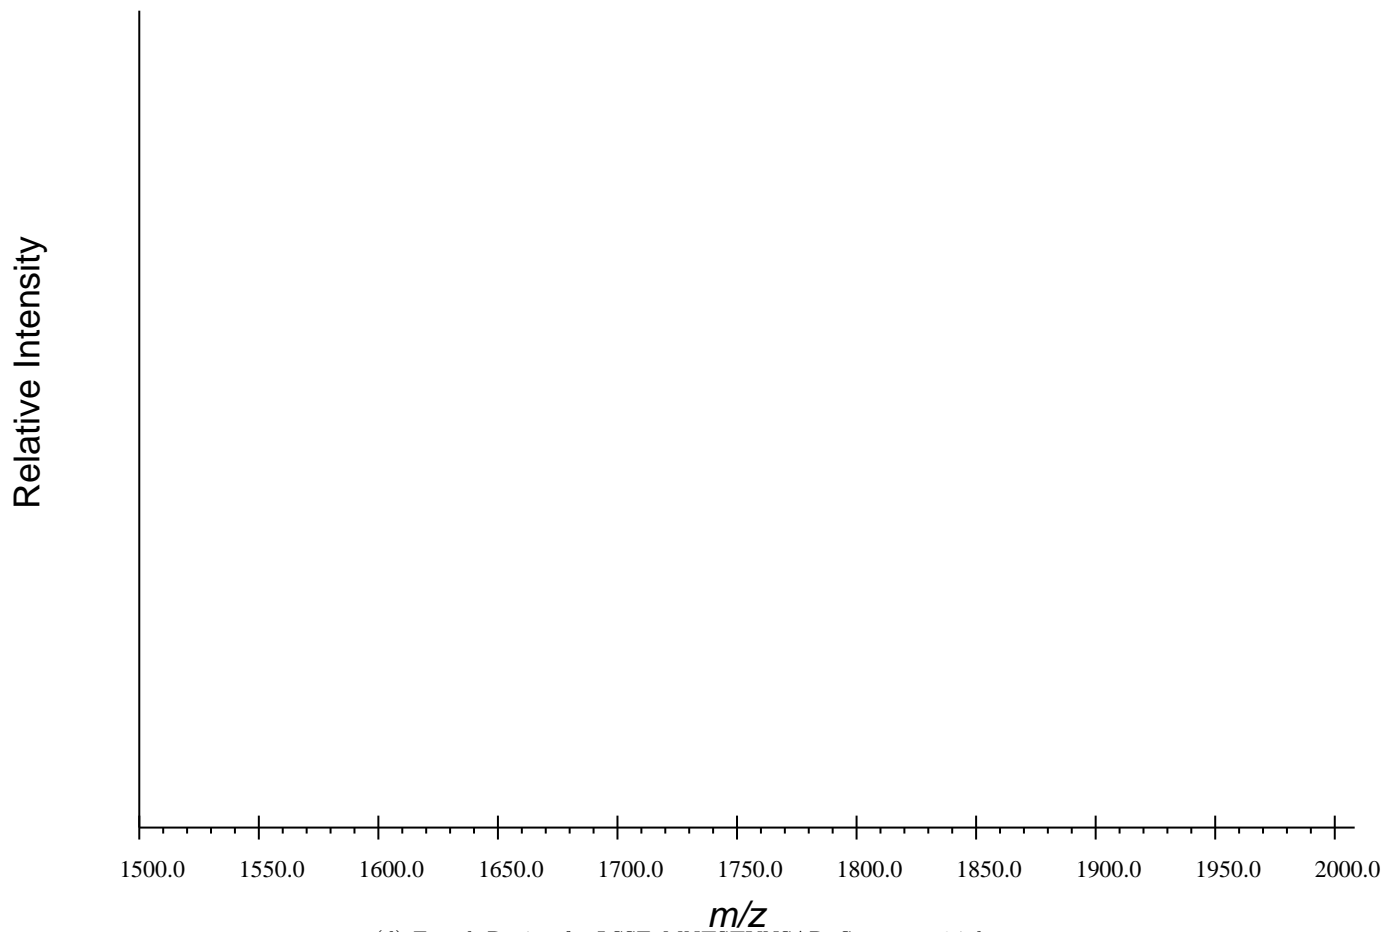

(d) Fourth Region for LSSEoMNTSTVNSAR, Spectrum 24.dta

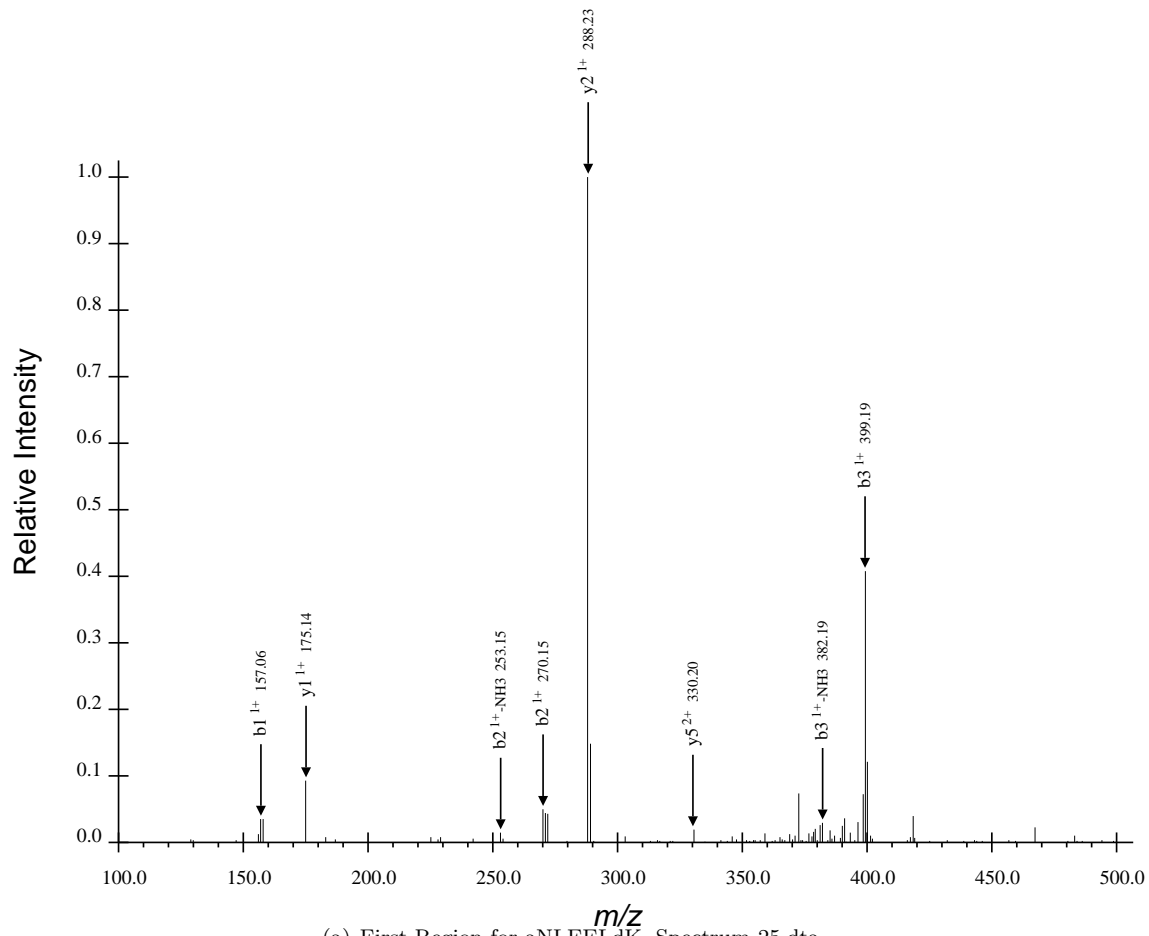

(a) First Region for aNLEELdK, Spectrum 25.dta

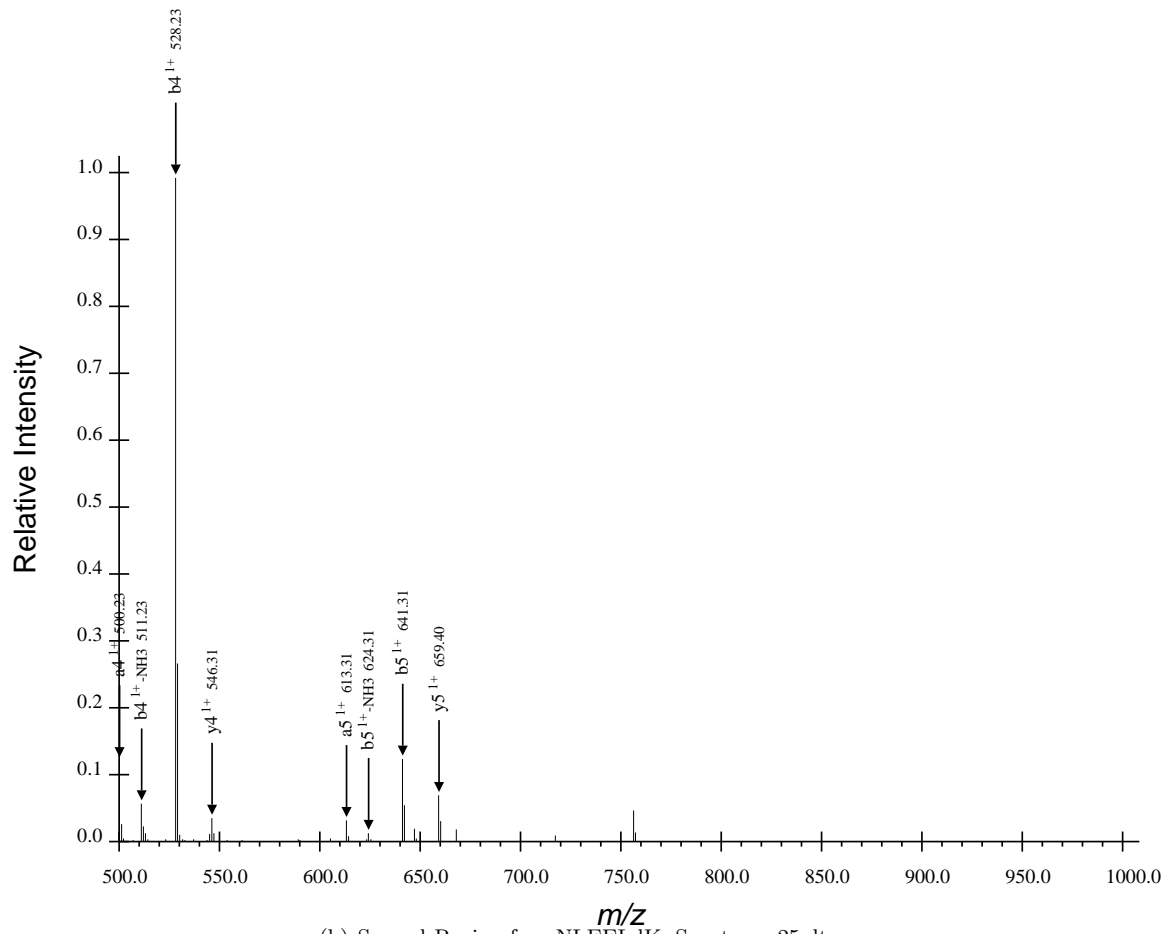

(b) Second Region for aNLEELdK, Spectrum 25.dta

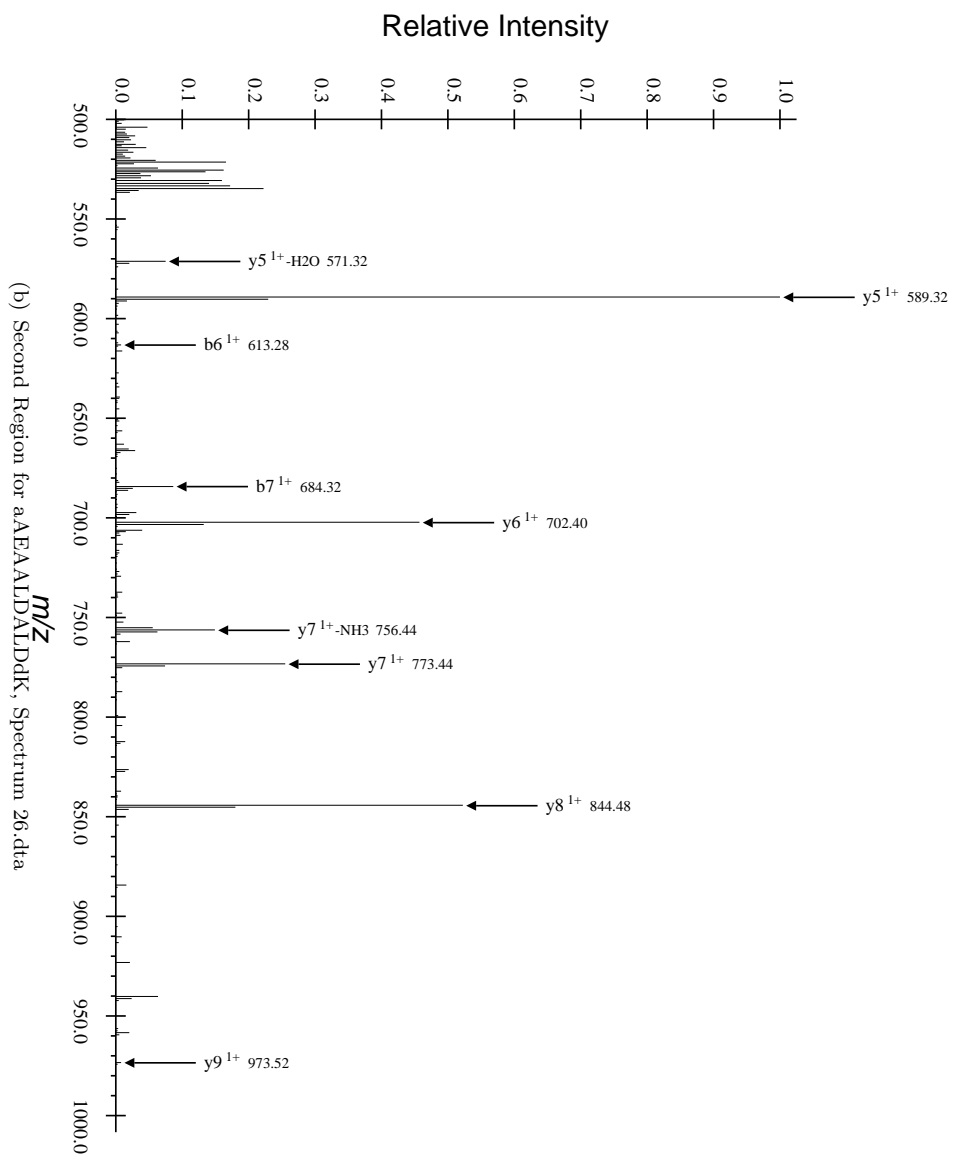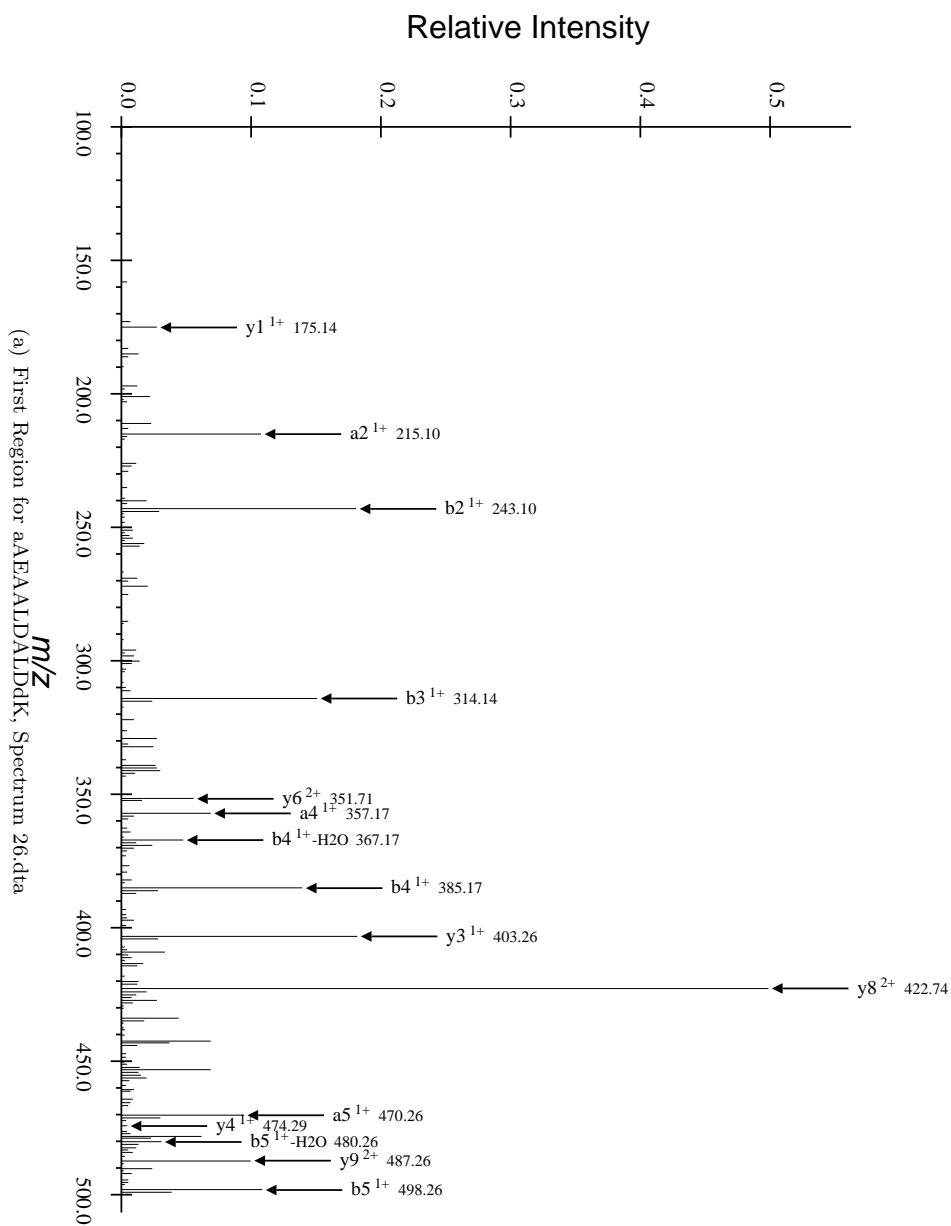

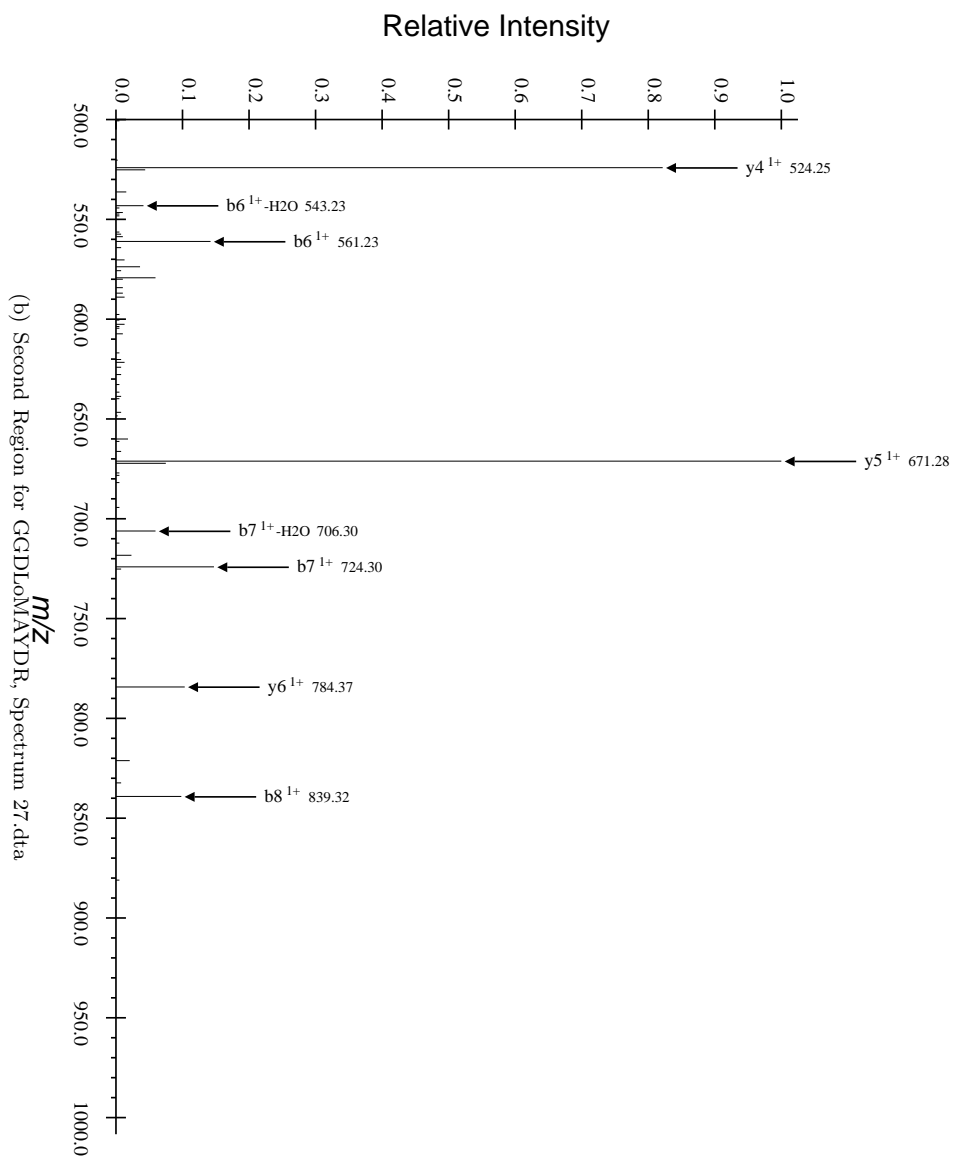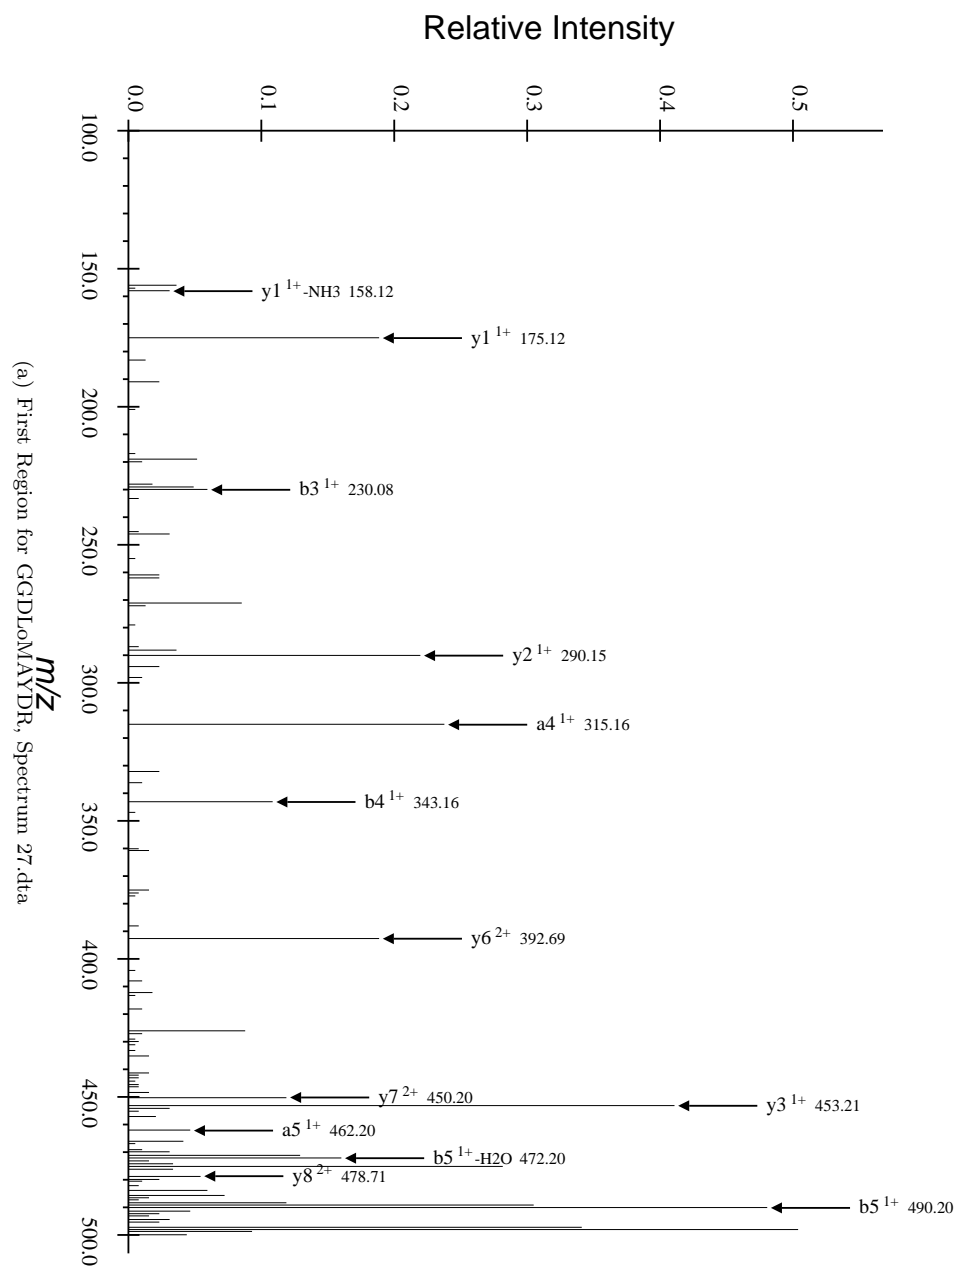

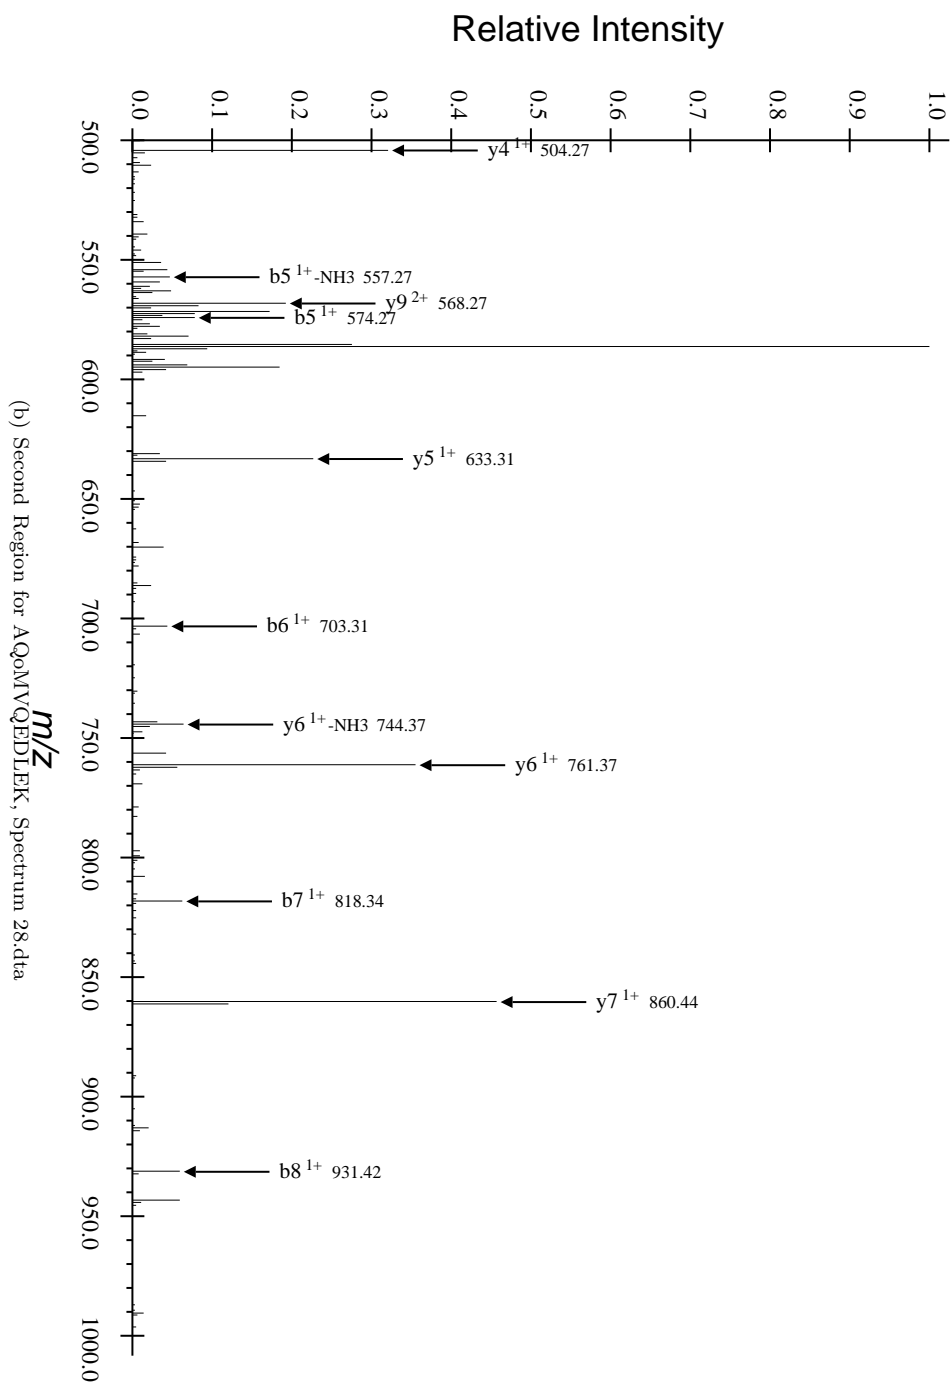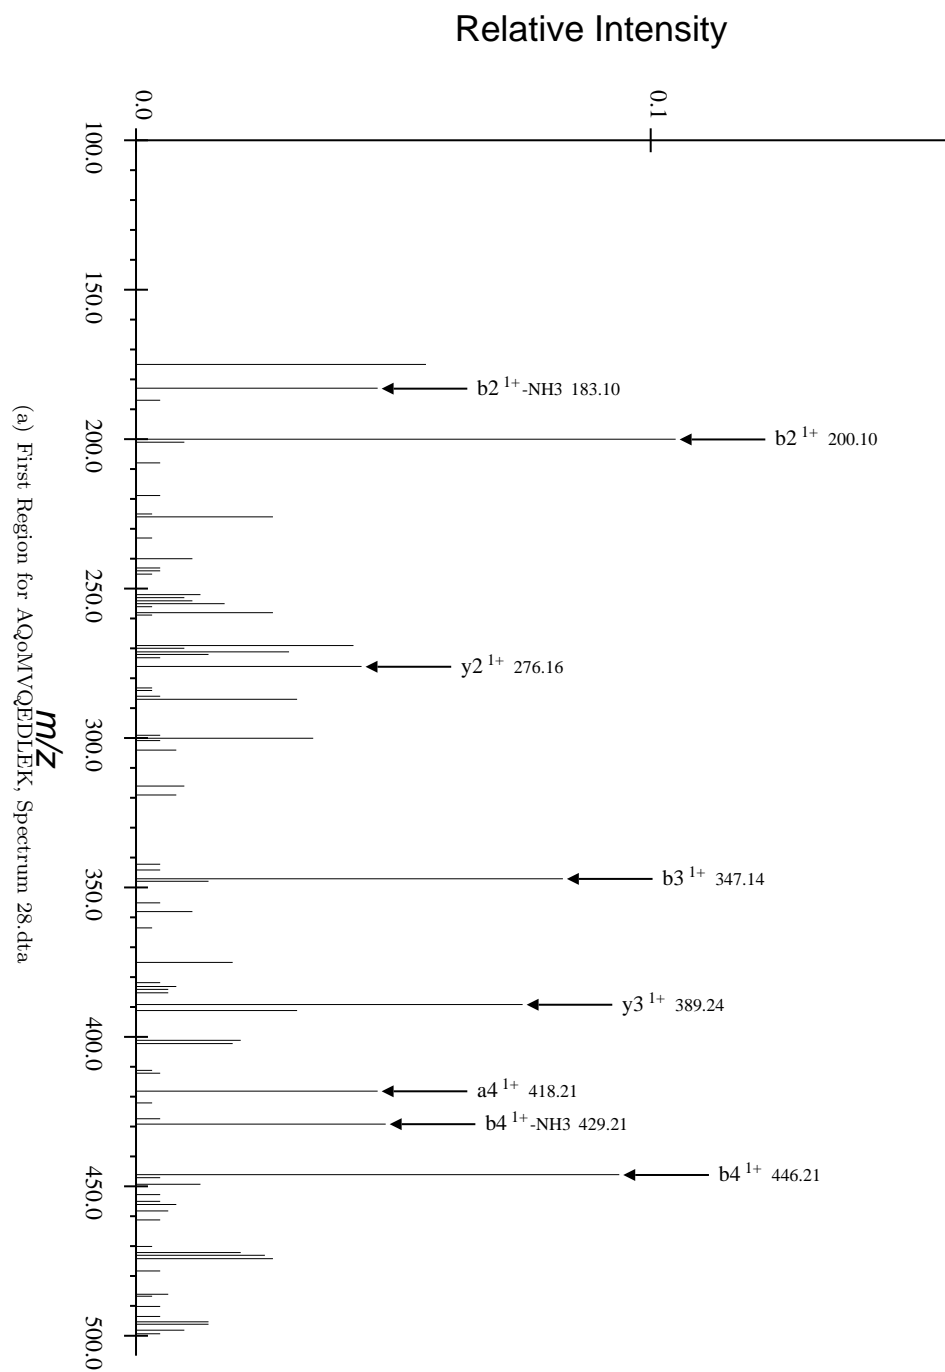

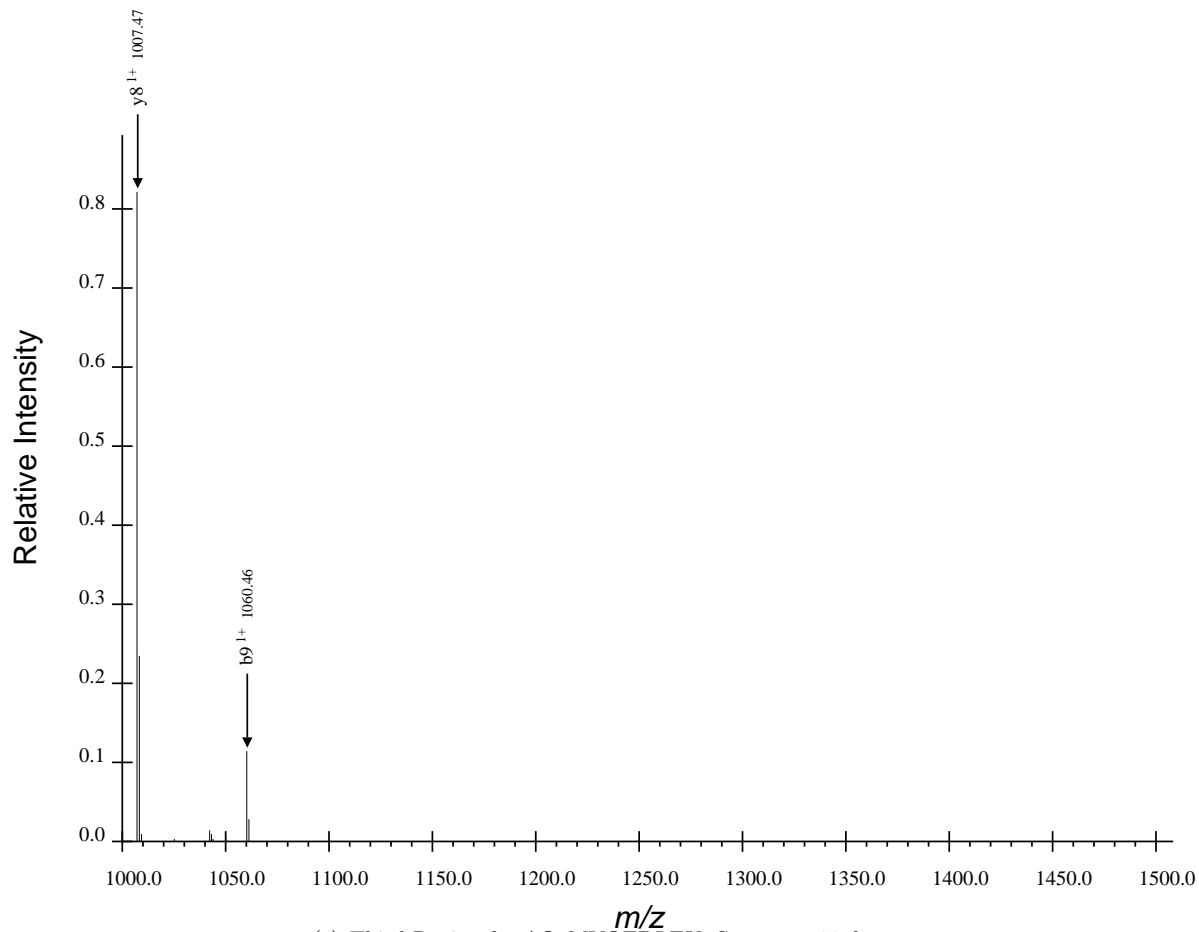

(c) Third Region for AqoMVQEDLEK, Spectrum 28.dta

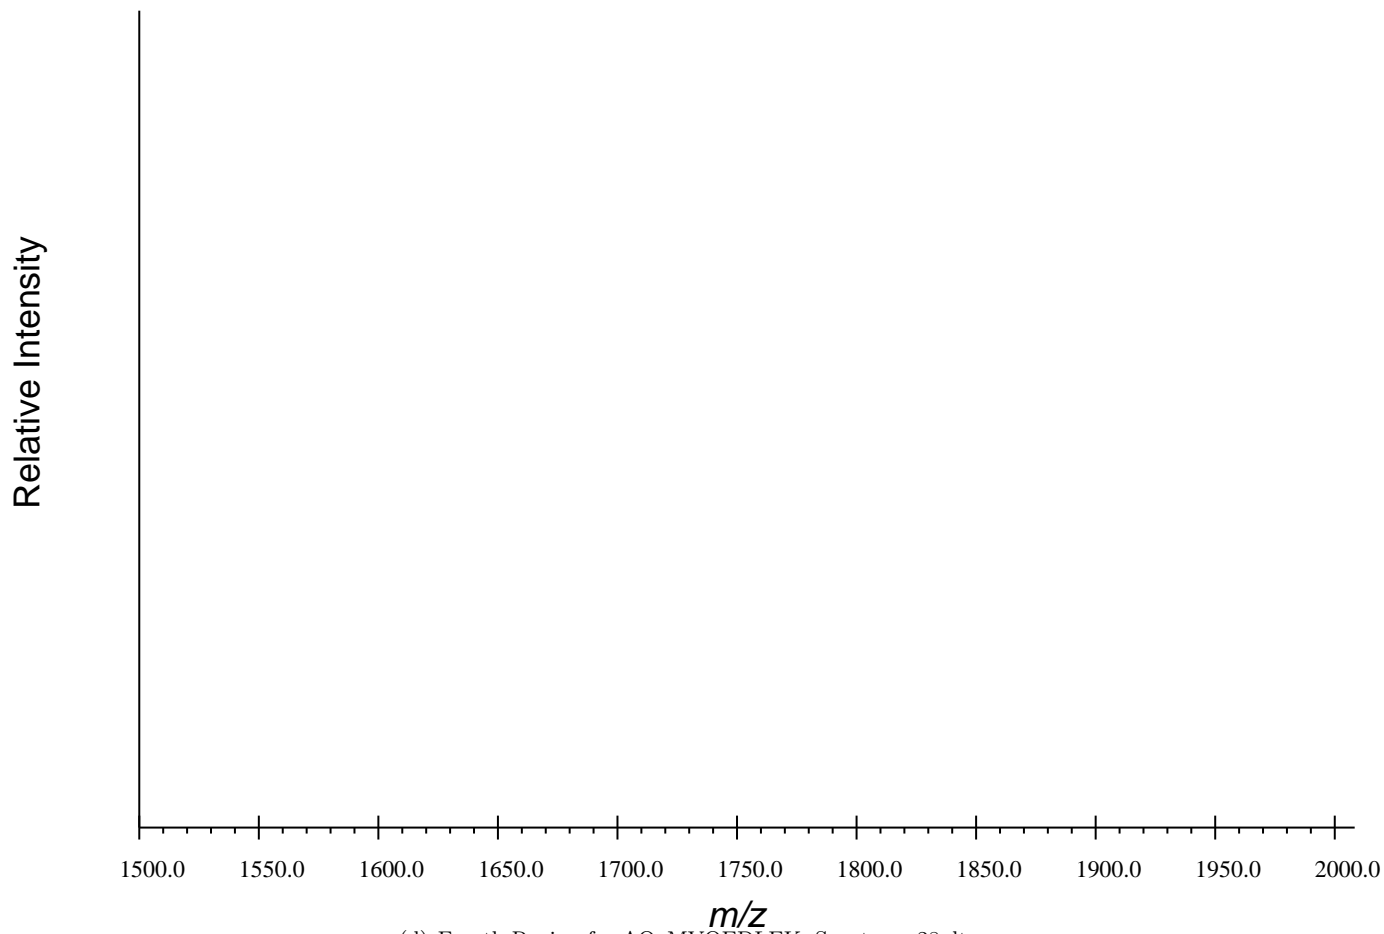

(d) Fourth Region for AqoMVQEDLEK, Spectrum 28.dta

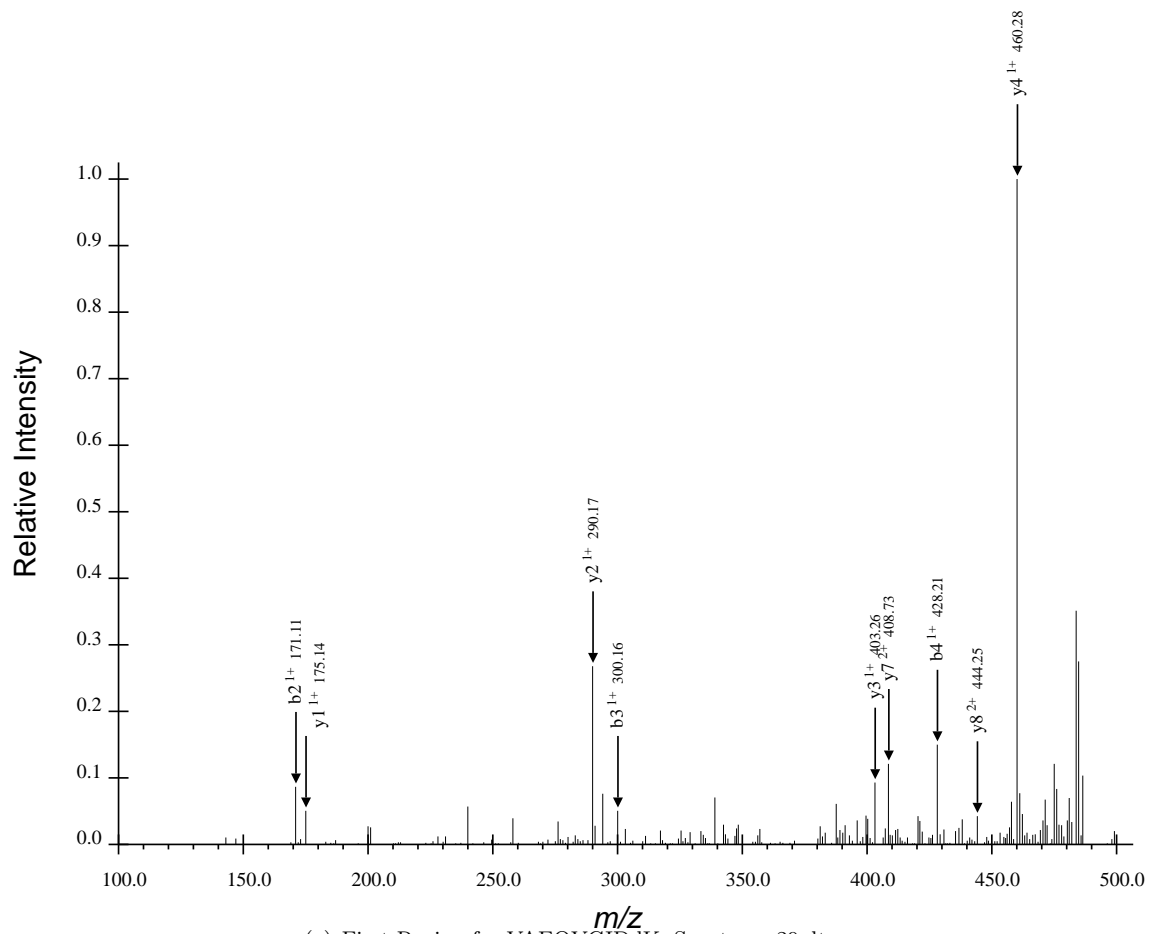

(a) First Region for VAEQVGIDdK, Spectrum 29.dta

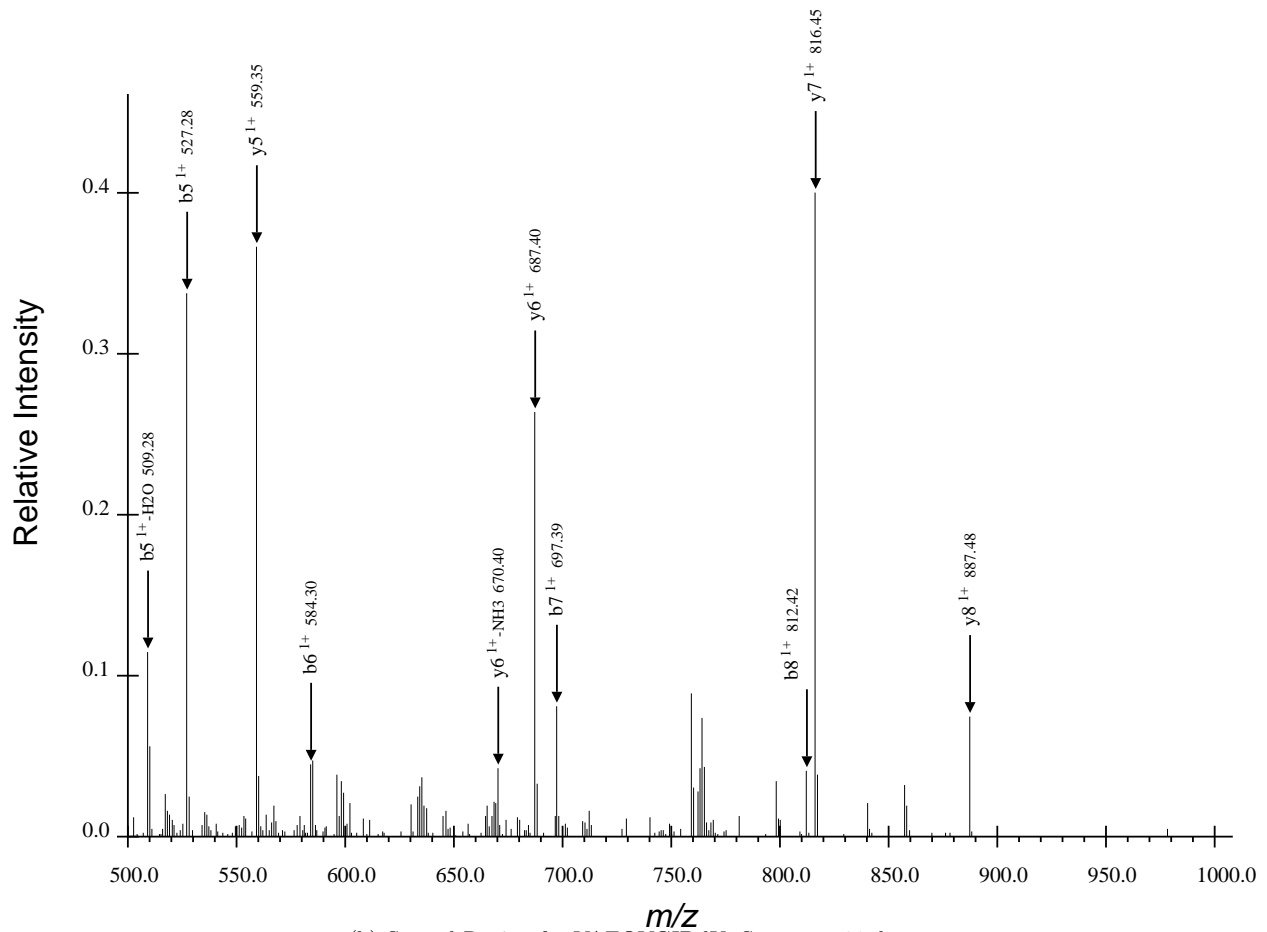

(b) Second Region for VAEQVGIDdK, Spectrum 29.dta

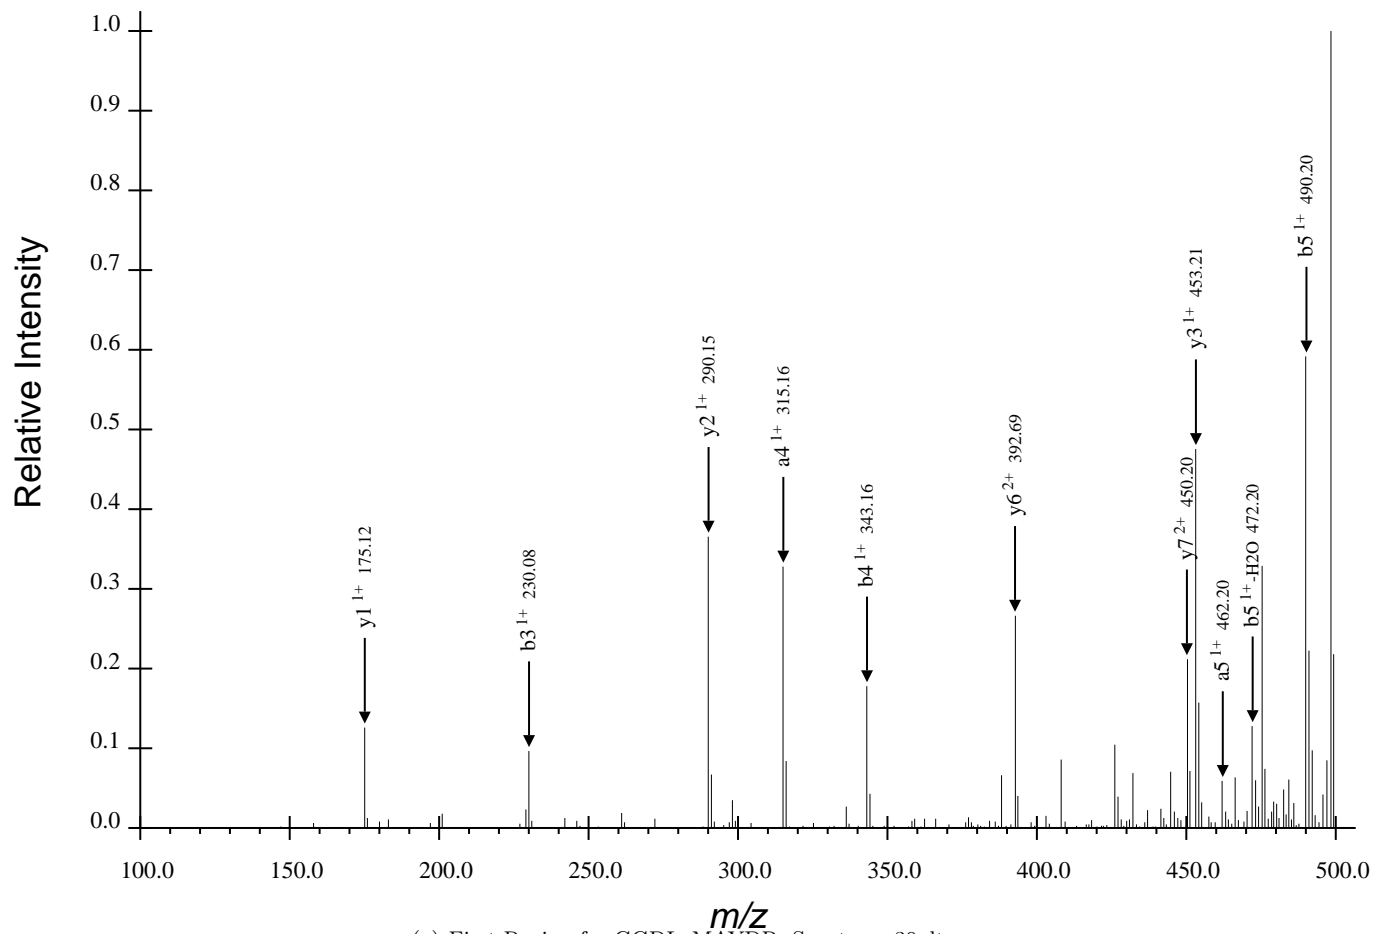

(a) First Region for GGDL0MAYDR, Spectrum 30.dta

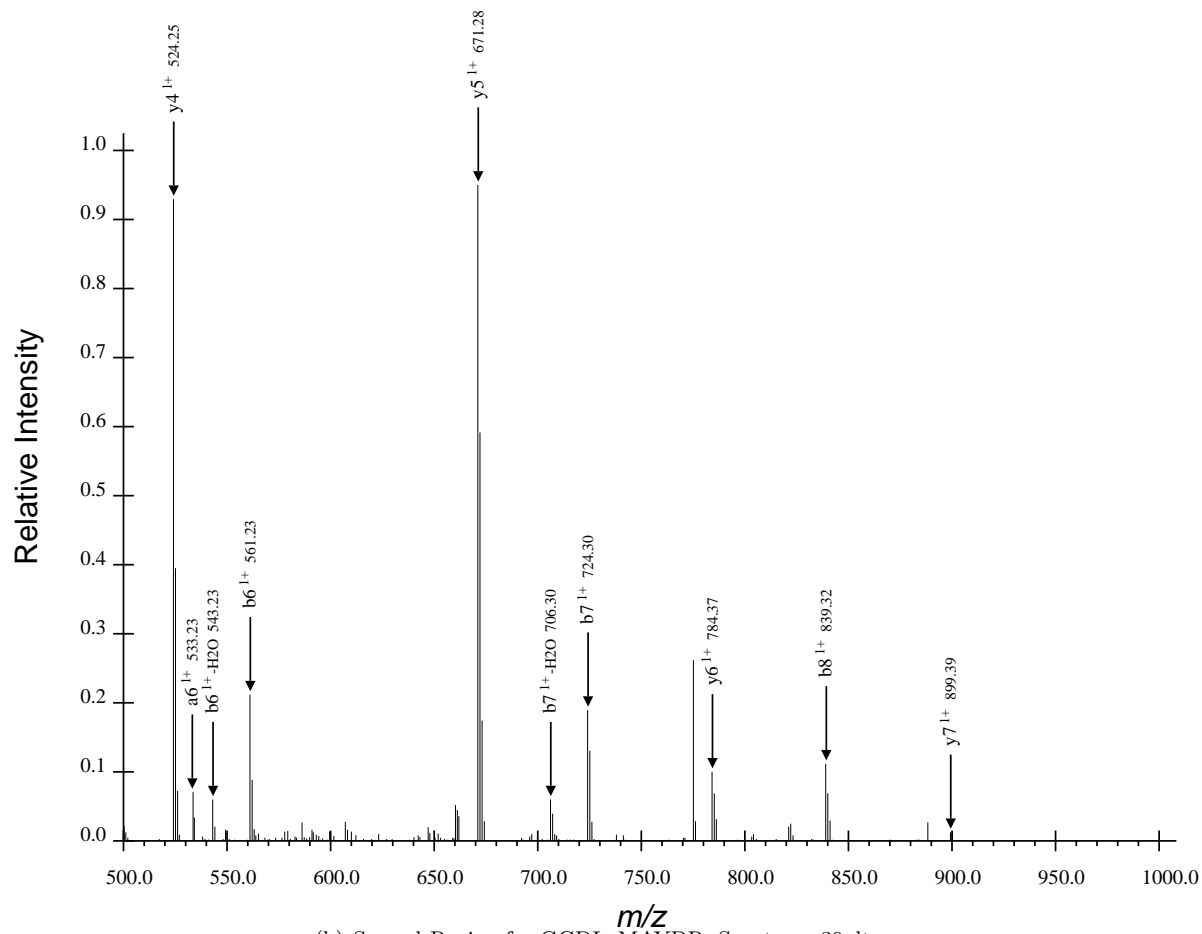

(b) Second Region for GGDL0MAYDR, Spectrum 30.dta



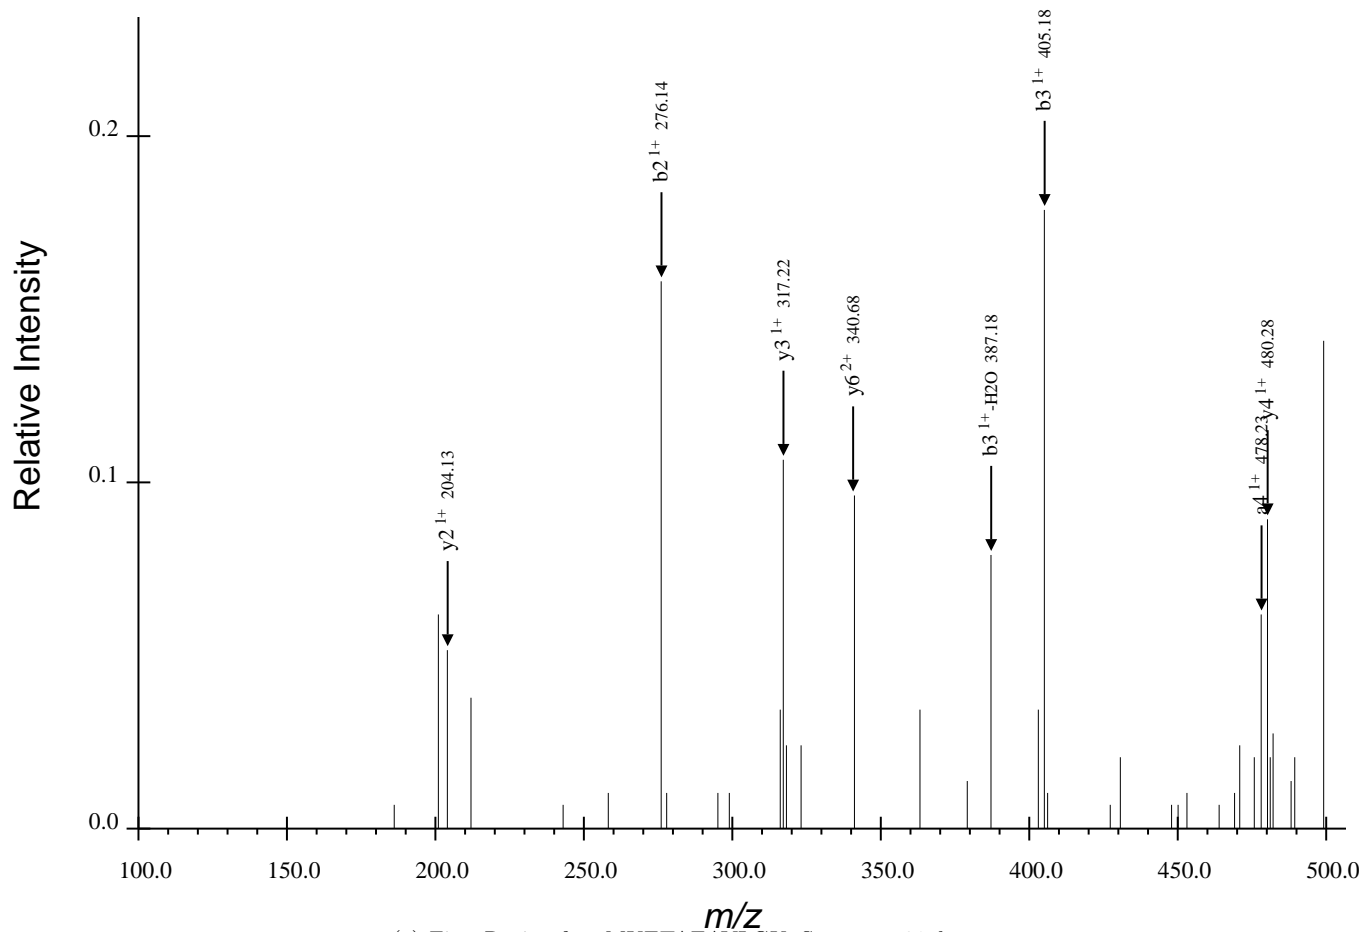

(a) First Region for oMKETAEEAYLGK, Spectrum 31.dta

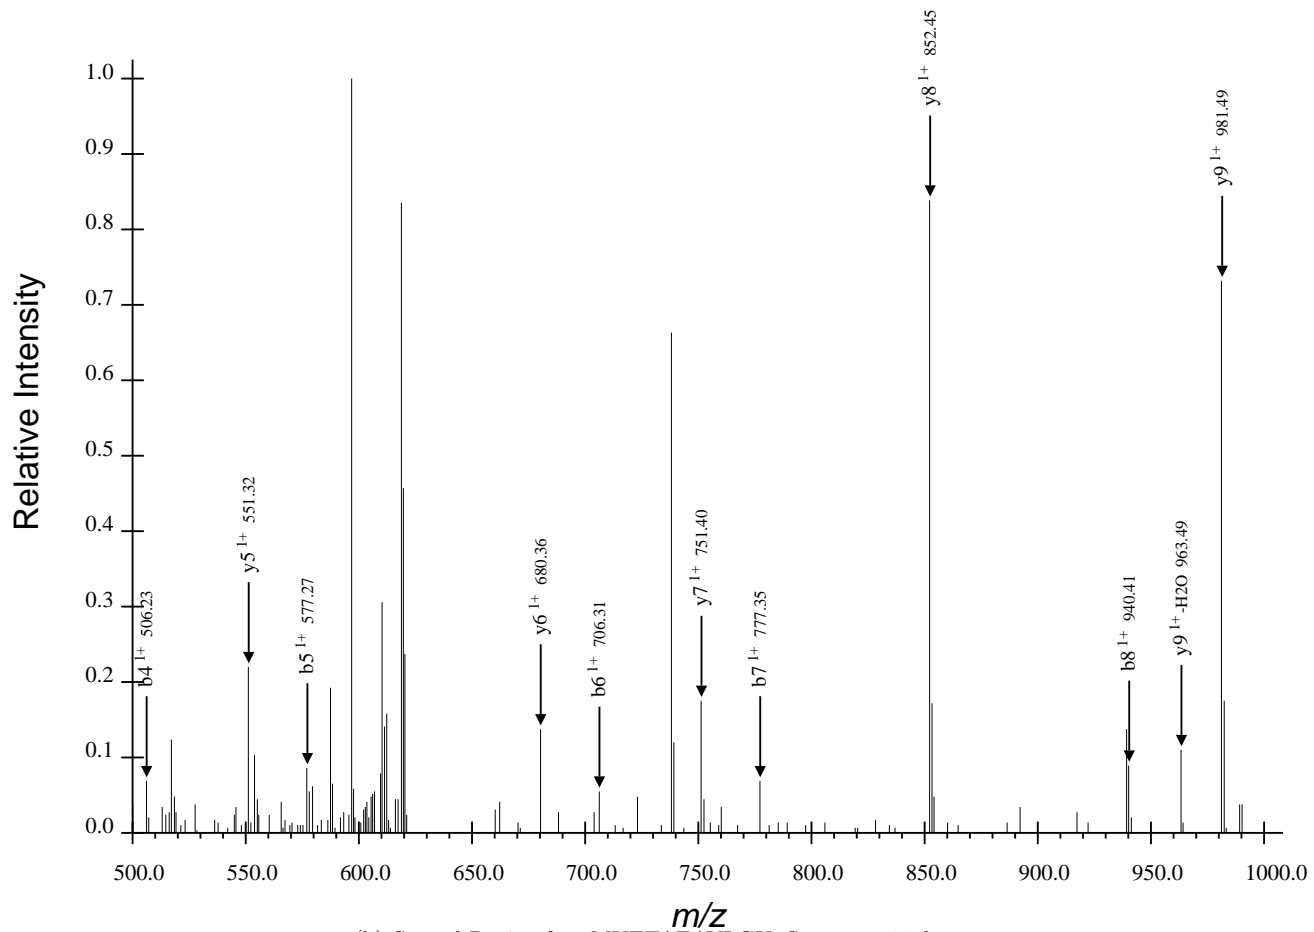

(b) Second Region for oMKETAEEAYLGK, Spectrum 31.dta

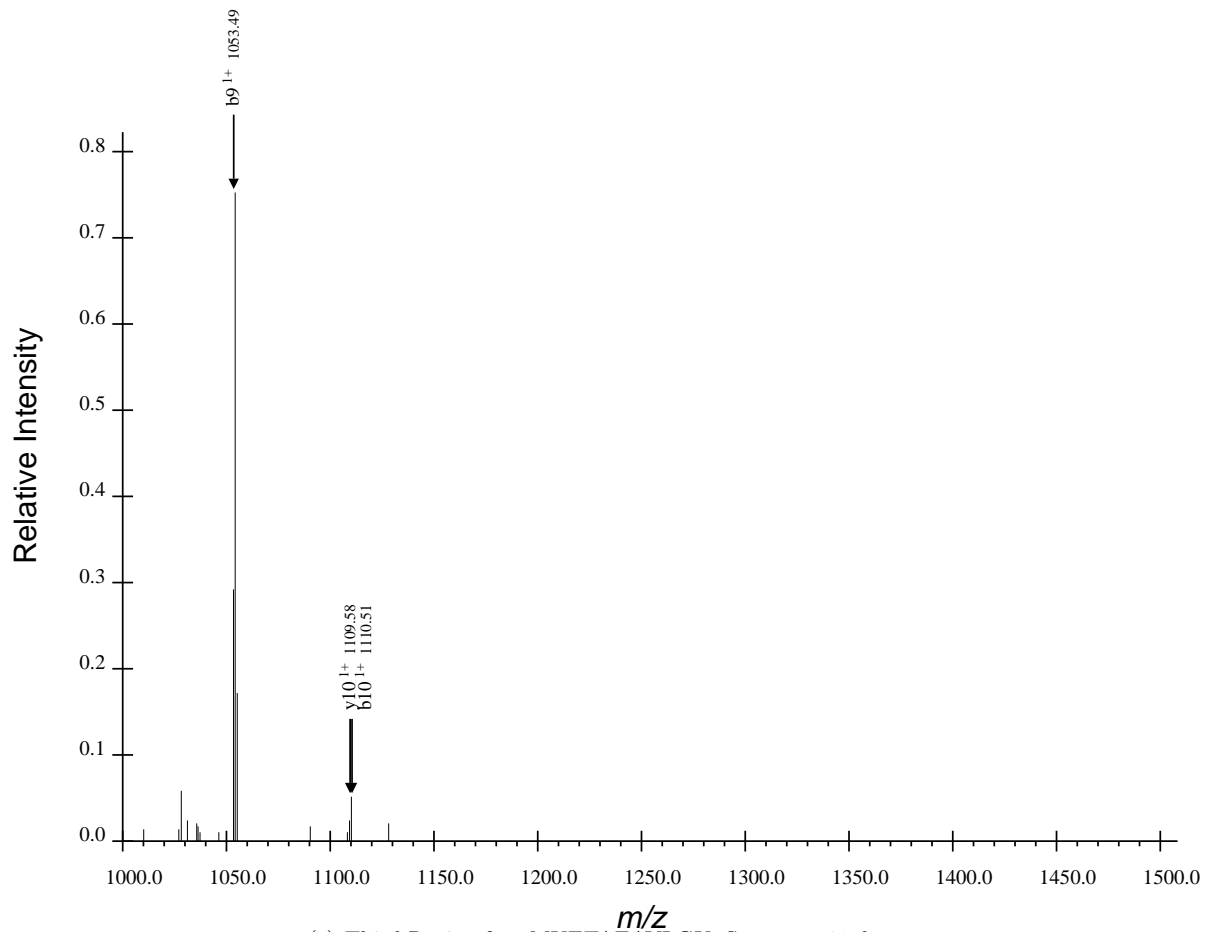

(c) Third Region for oMKETAEEAYLGK, Spectrum 31.dta

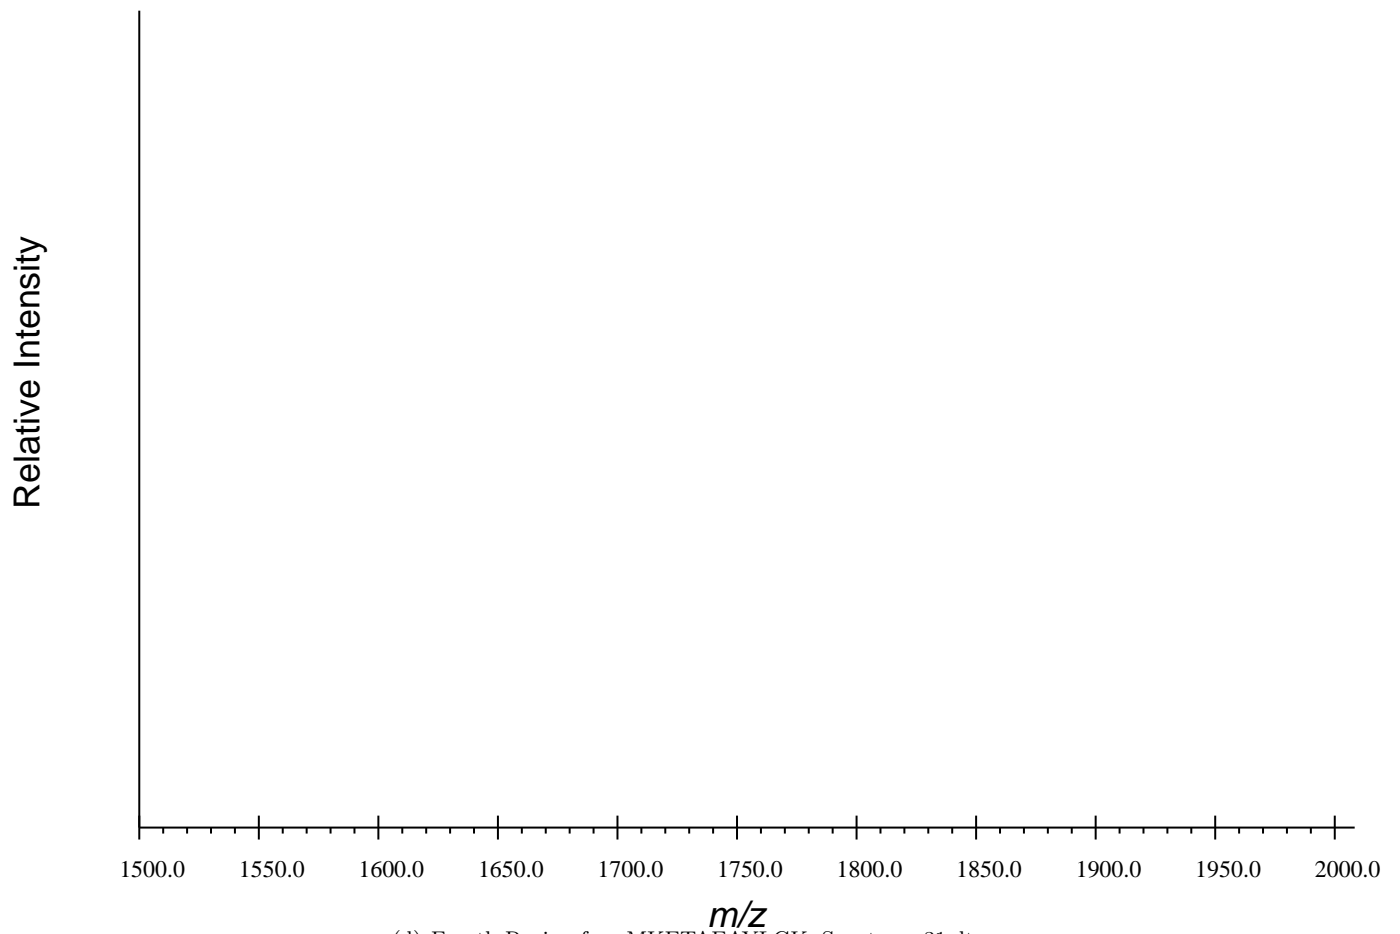

(d) Fourth Region for oMKETAEEAYLGK, Spectrum 31.dta

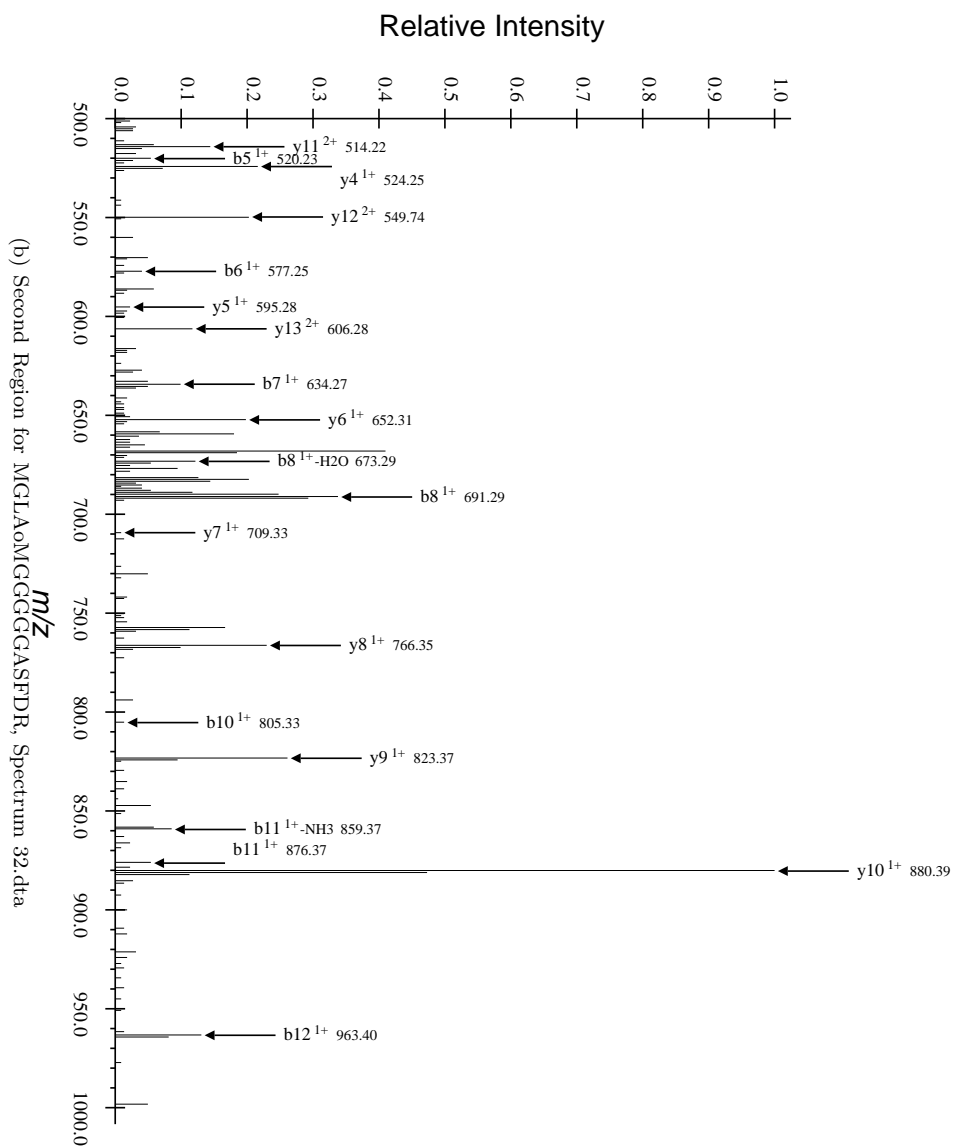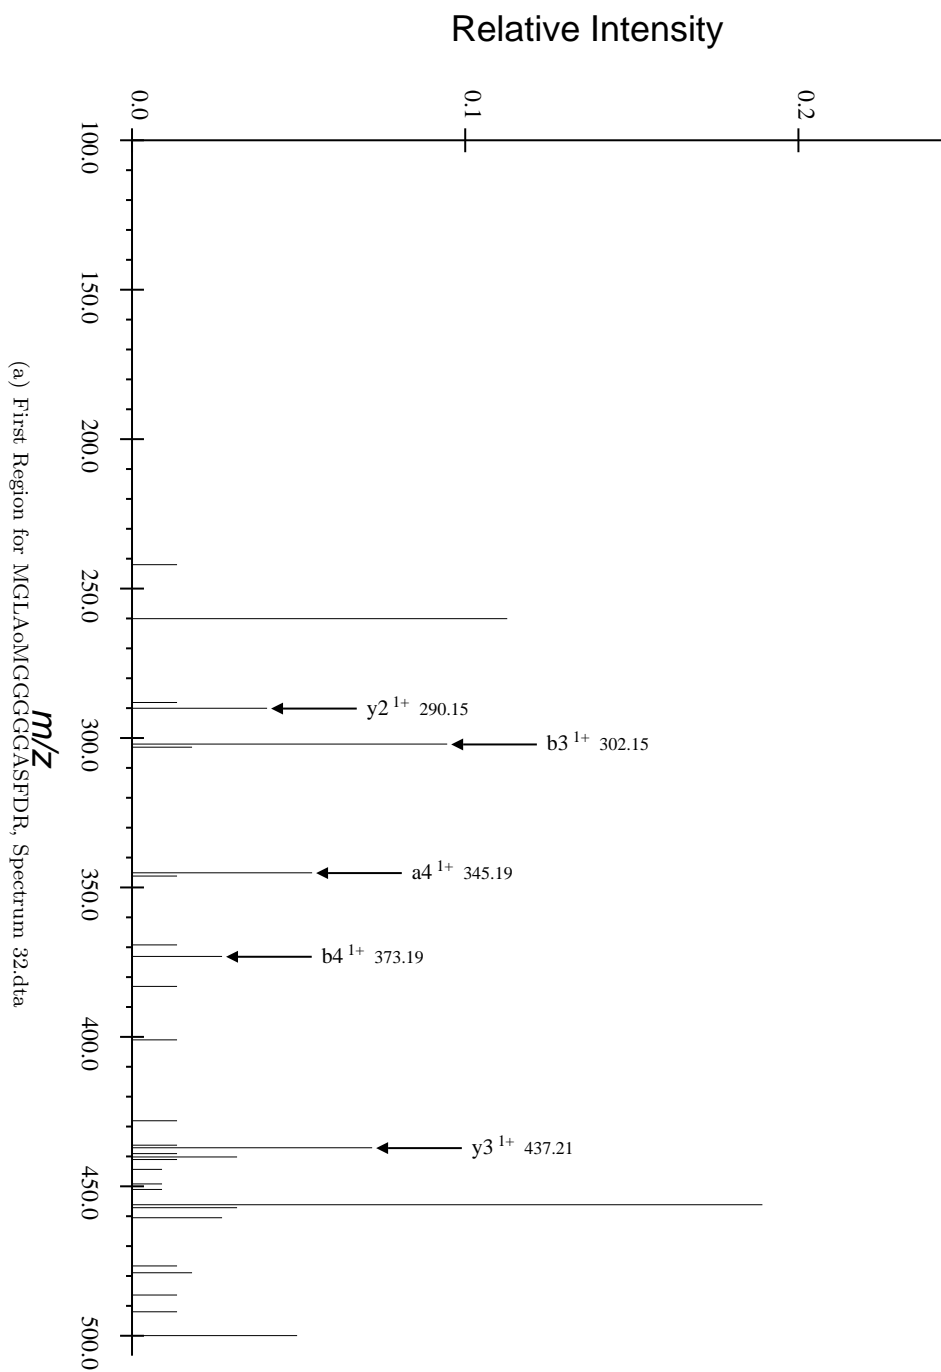

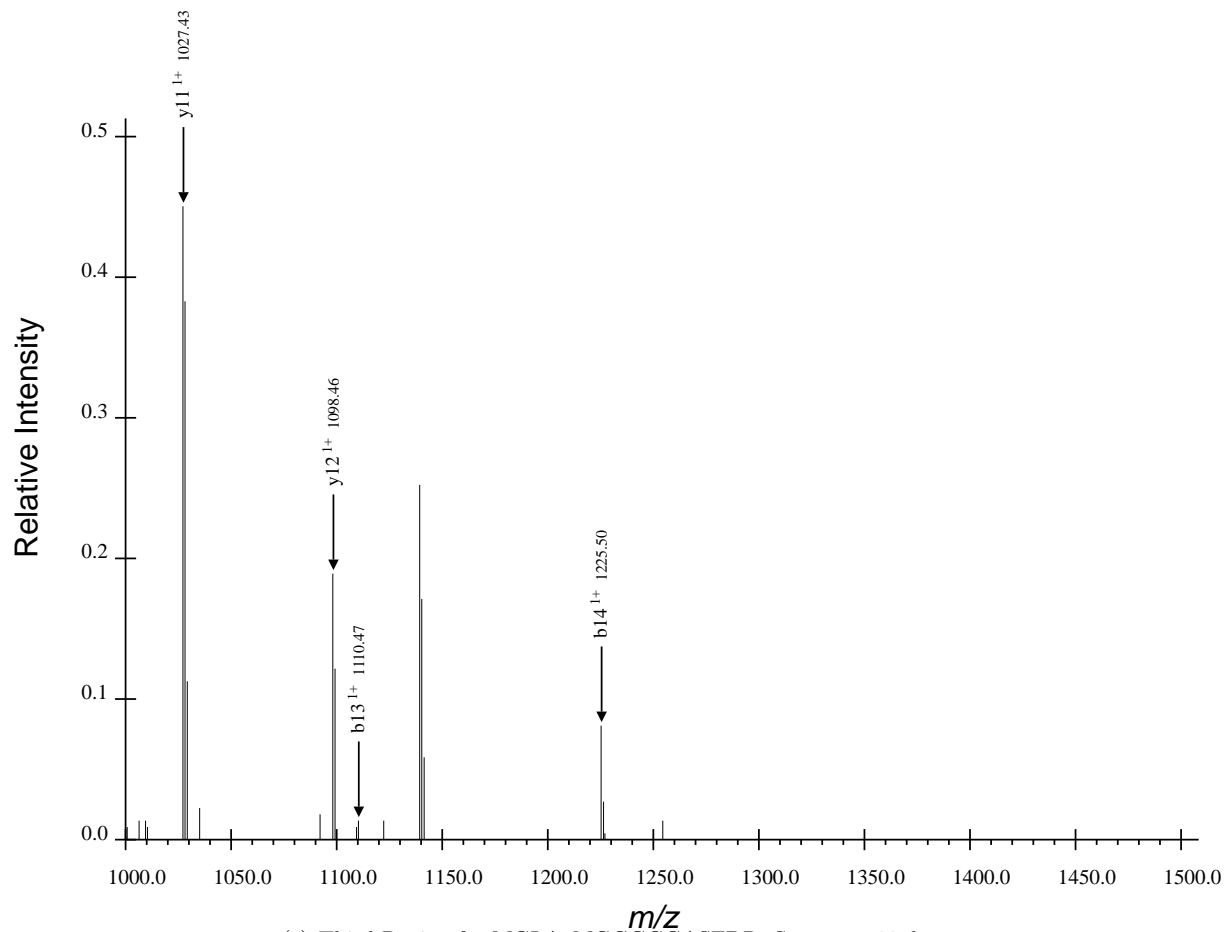

(c) Third Region for MGLAoMGGGGASFDR, Spectrum 32.dta

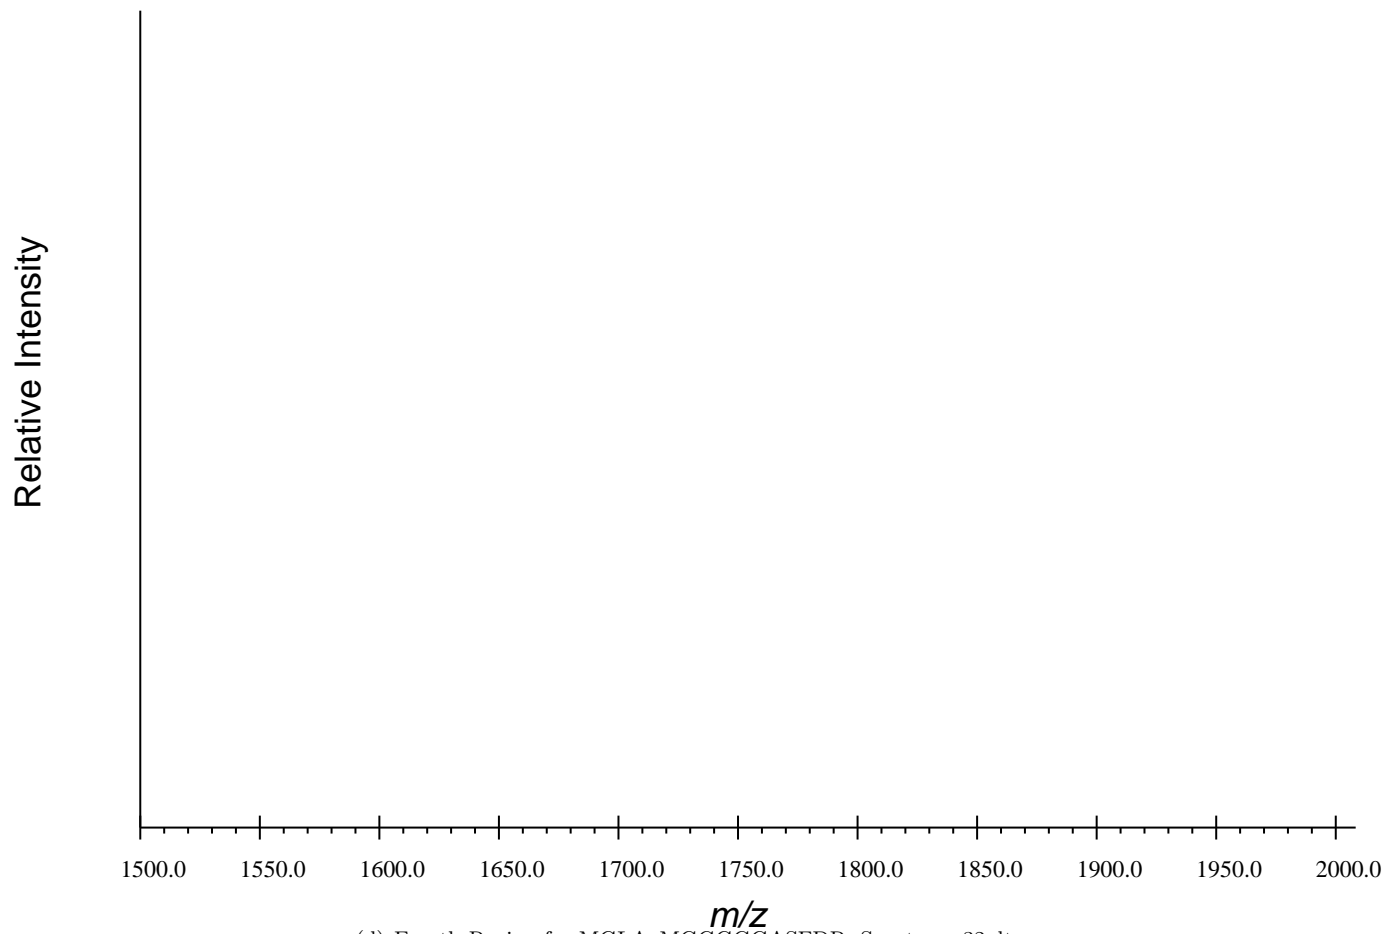

(d) Fourth Region for MGLAoMGGGGASFDR, Spectrum 32.dta

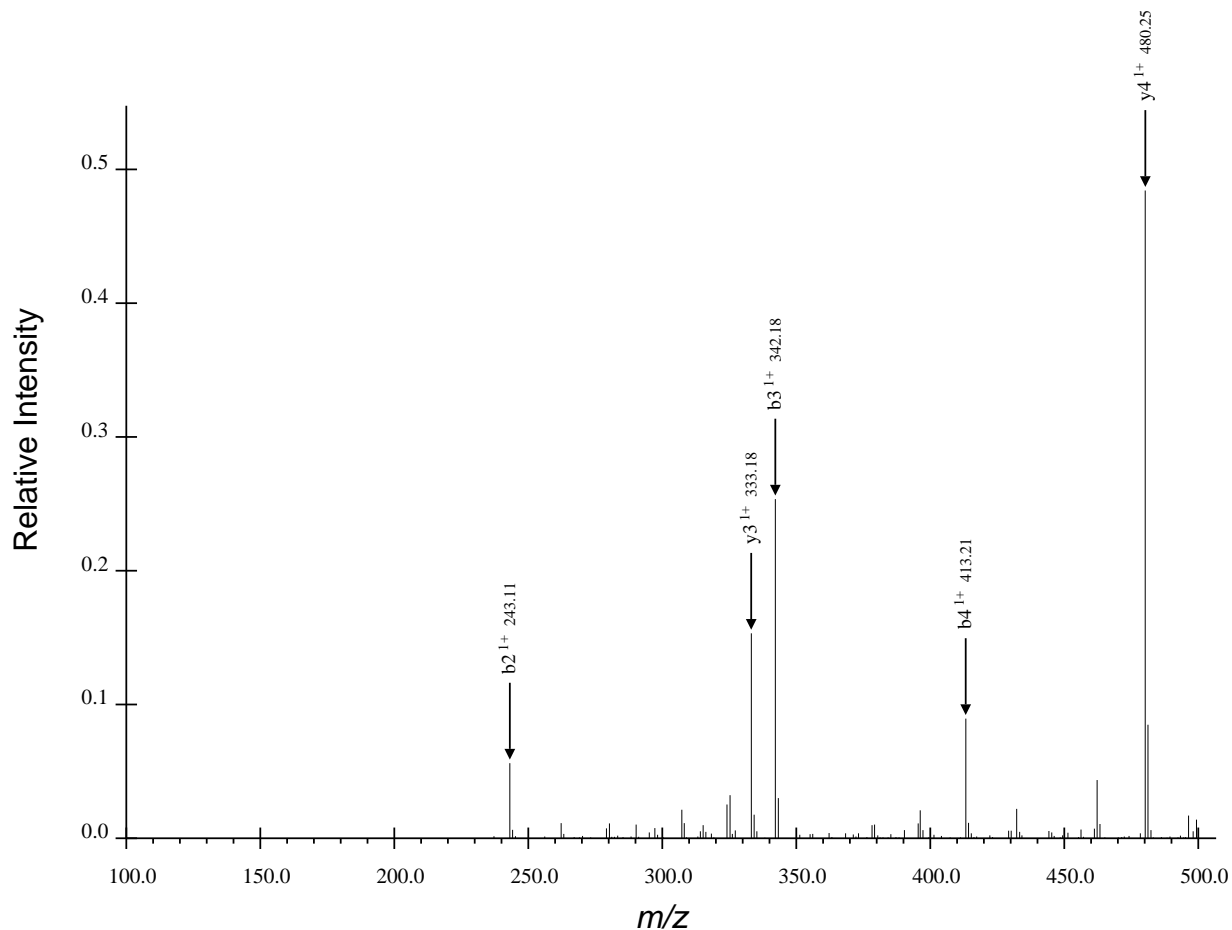

(a) First Region for NQVAoMNPTNTVFDK, Spectrum 33.dta

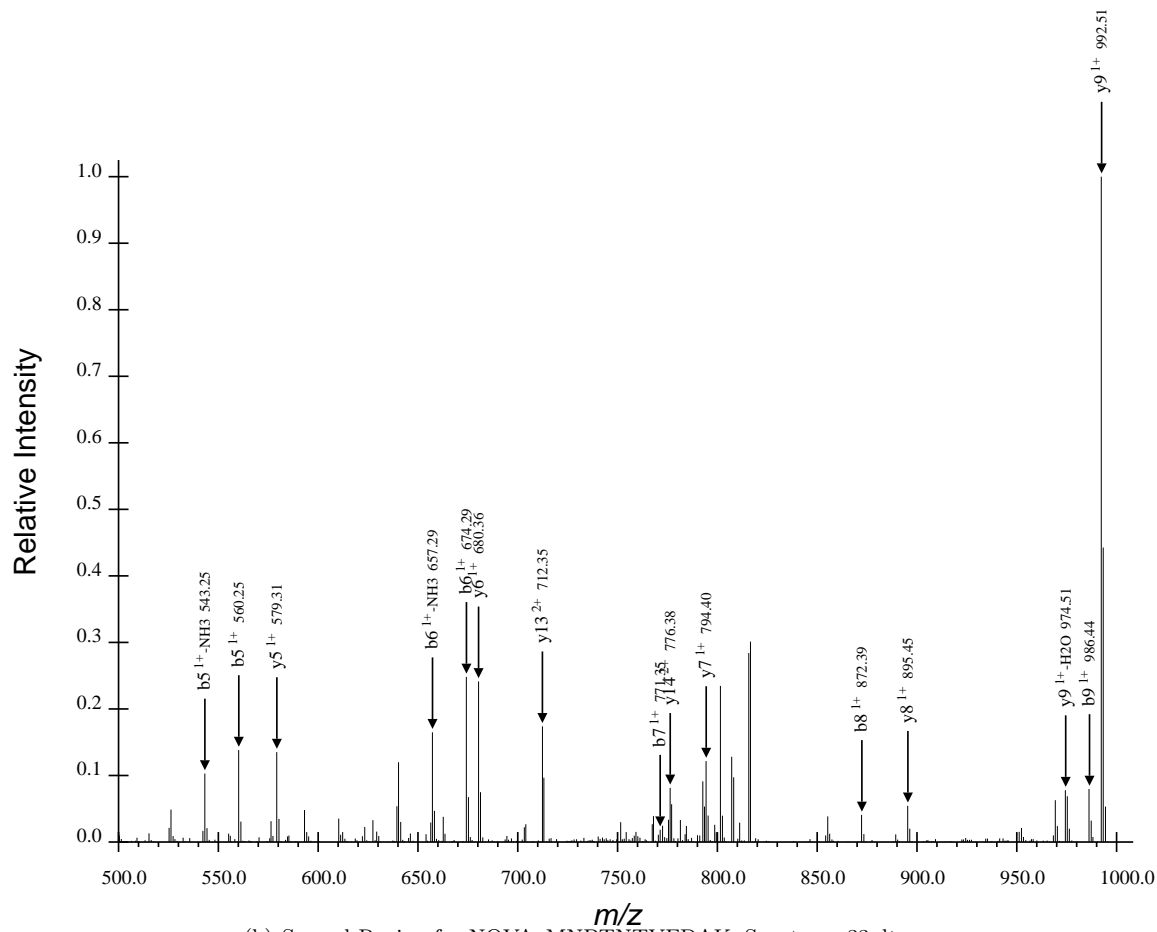

(b) Second Region for NQVAoMNPTNTVFDK, Spectrum 33.dta

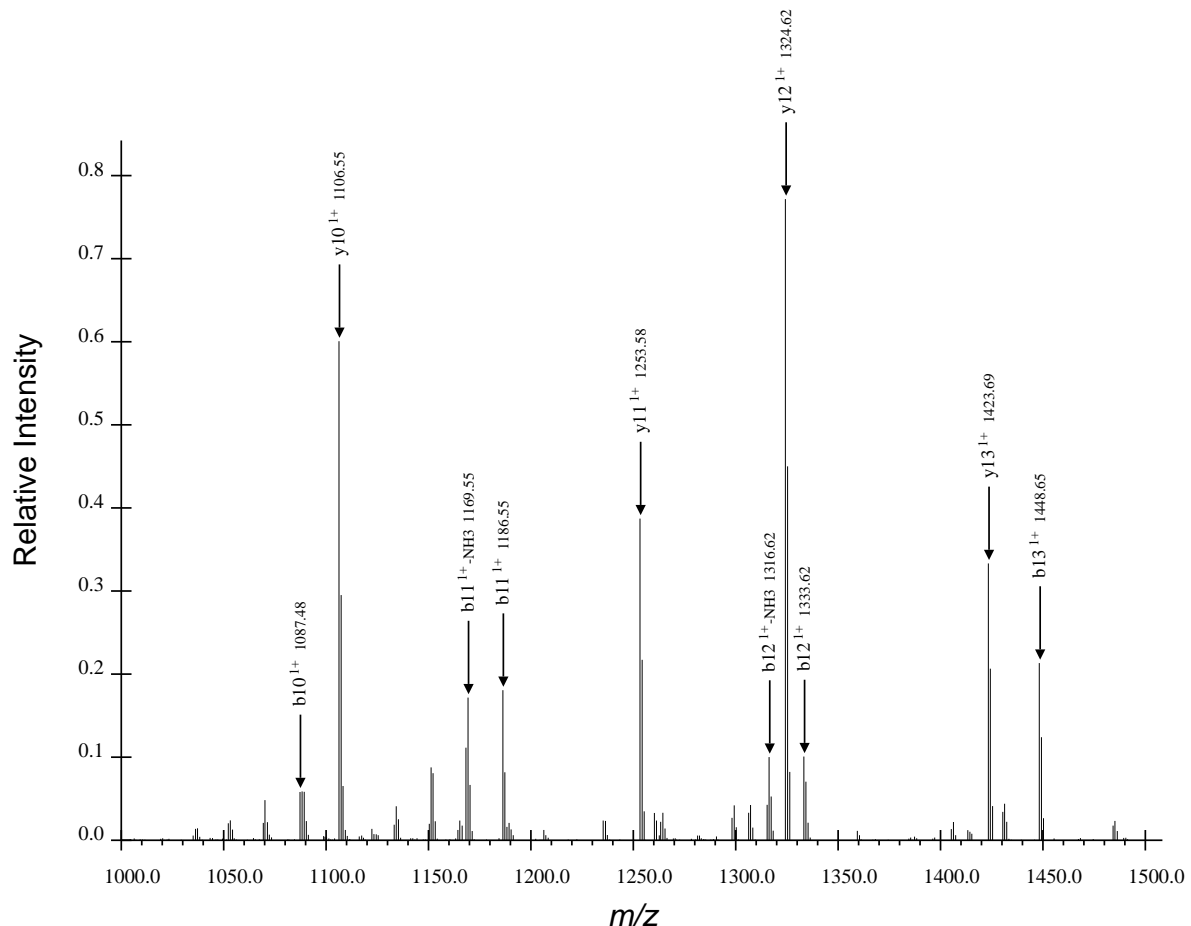

(c) Third Region for NQVAoMNPTNTVFDAK, Spectrum 33.dta

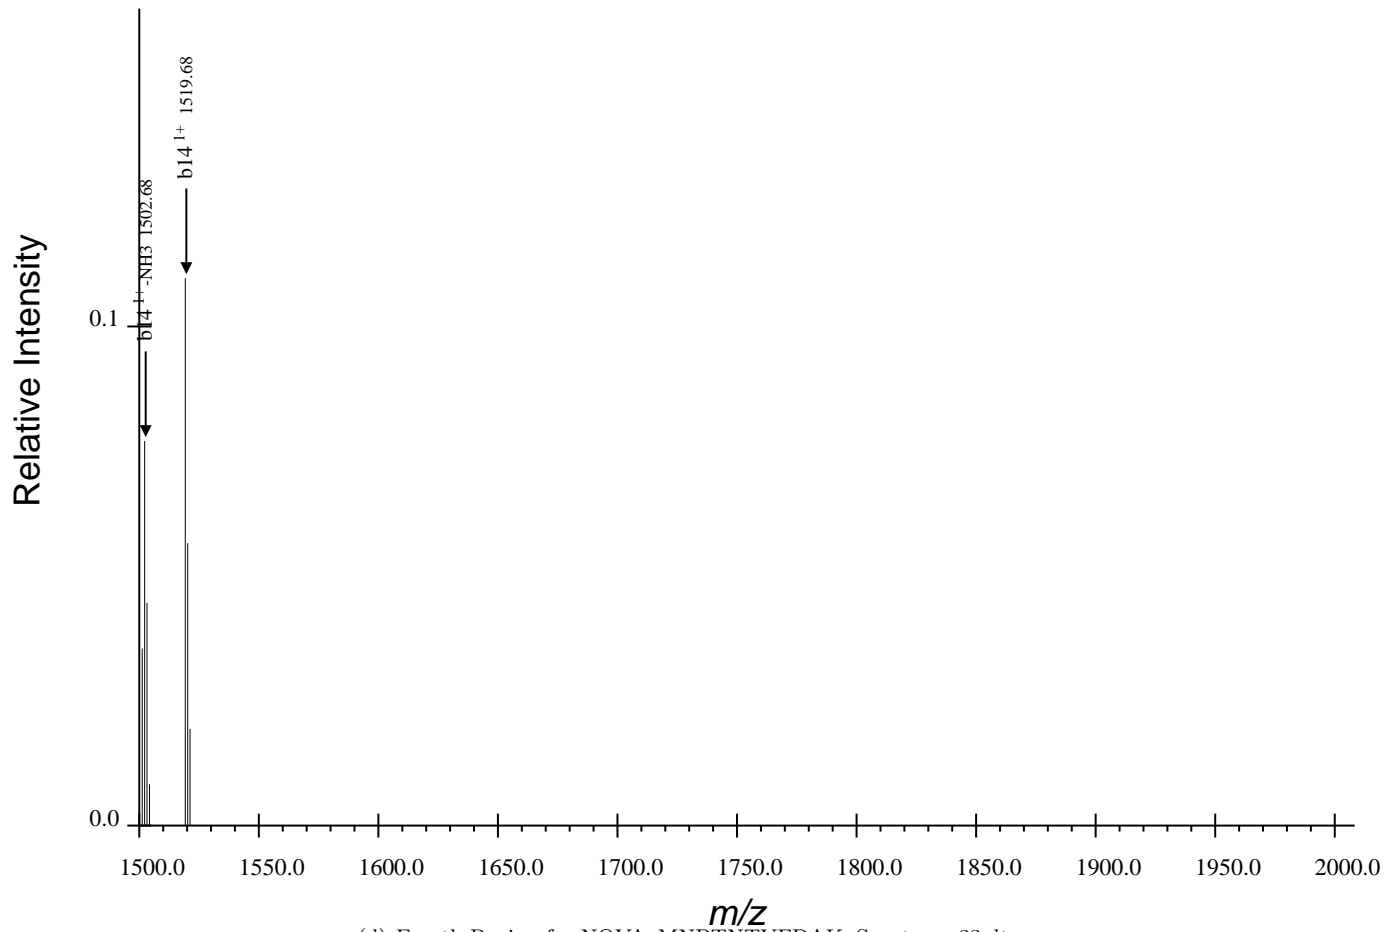

(d) Fourth Region for NQVAoMNPTNTVFDAK, Spectrum 33.dta

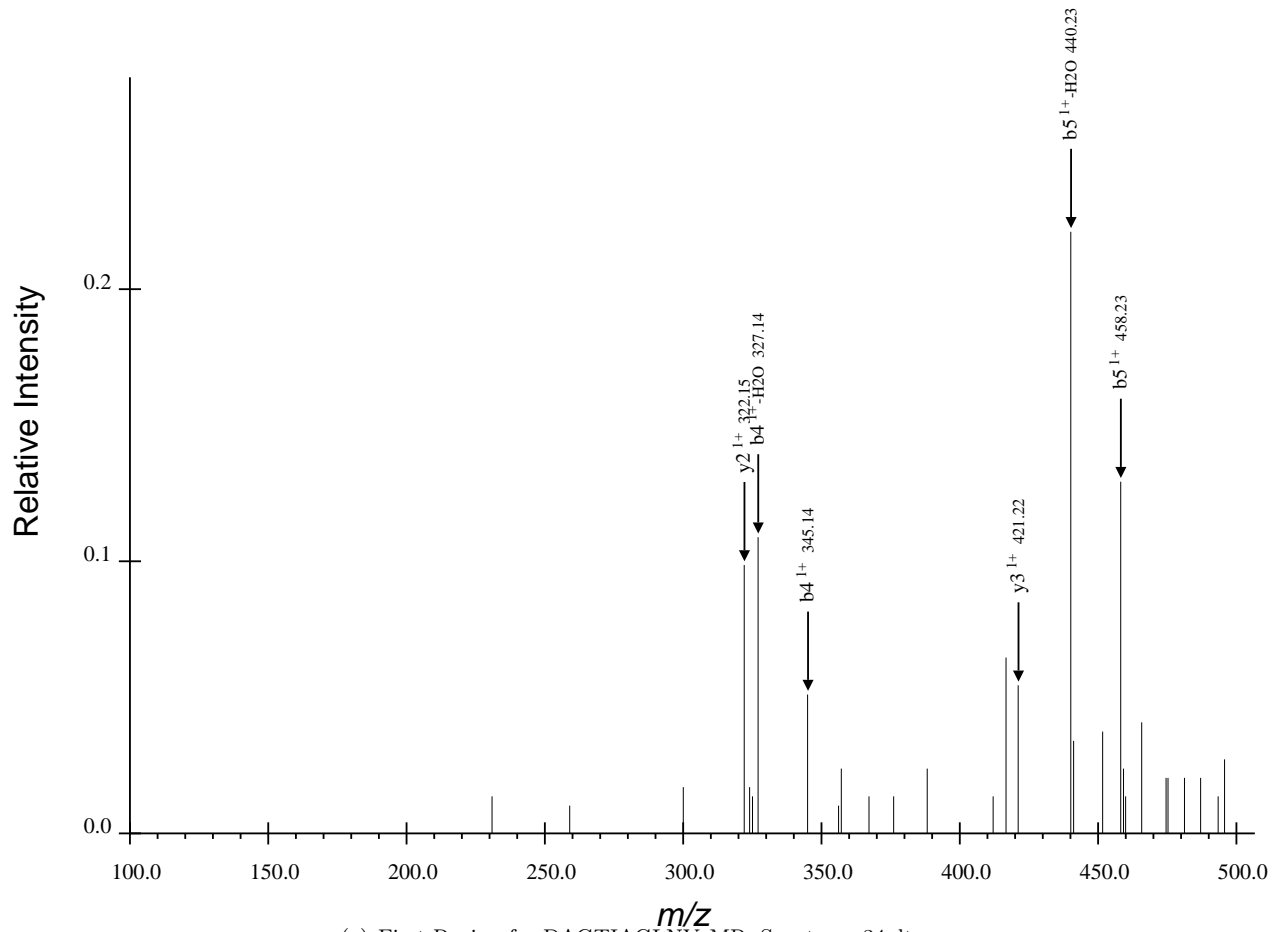

(a) First Region for DAGTIAGLNVoMR, Spectrum 34.dta

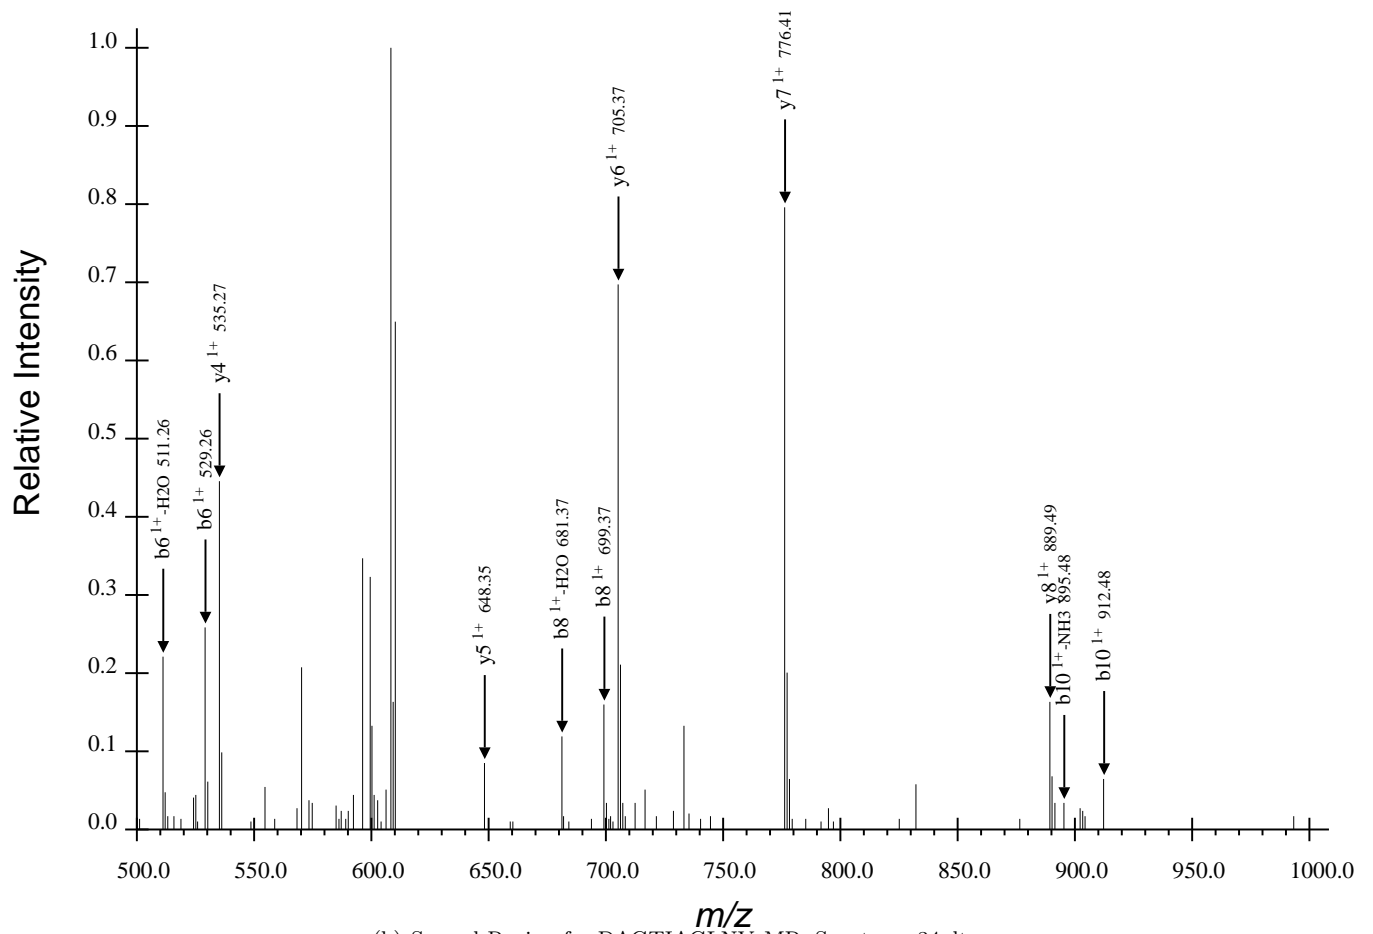

(b) Second Region for DAGTIAGLNVoMR, Spectrum 34.dta

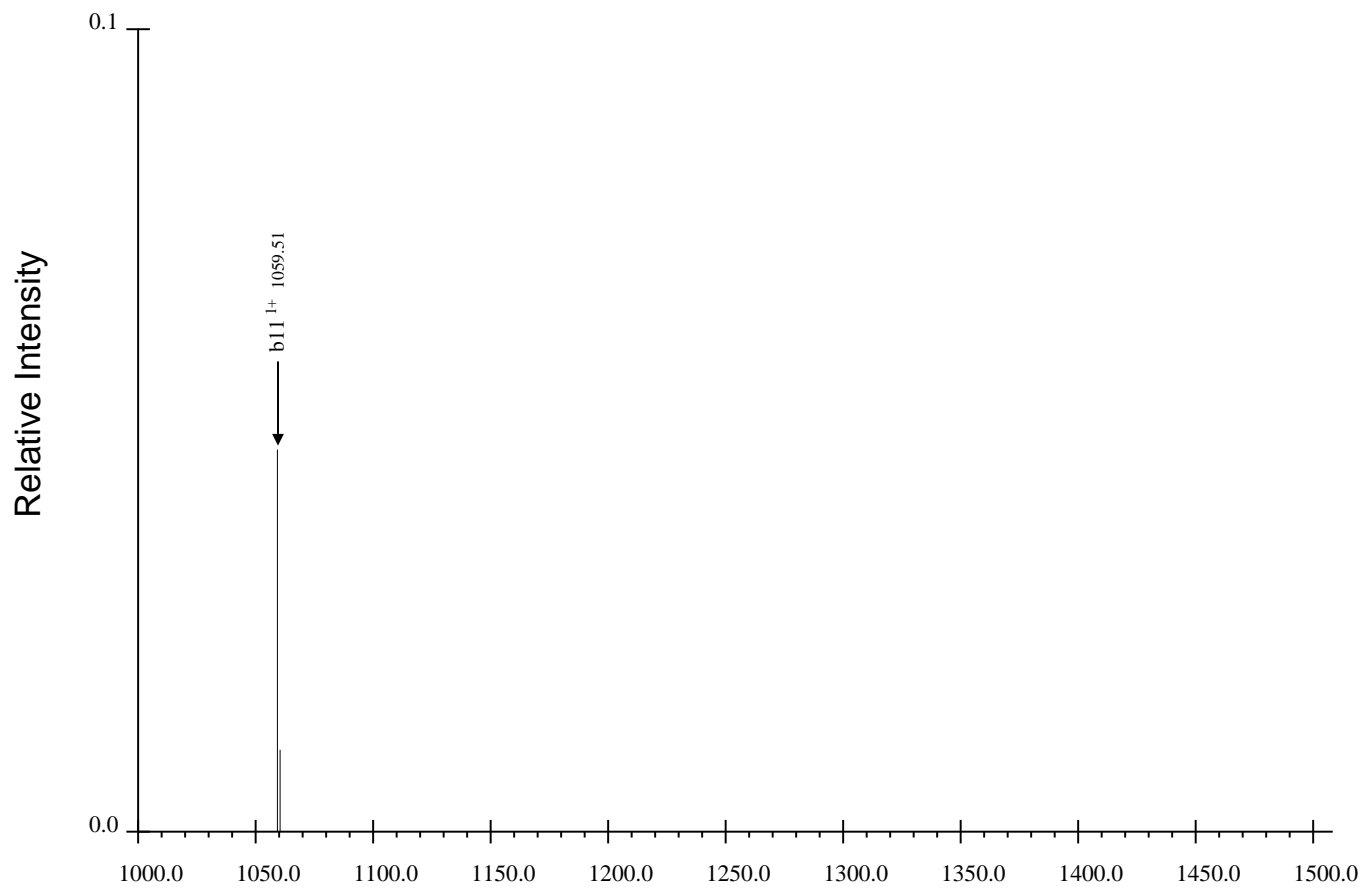

(c) Third Region for DAGTIAGLNVoMR, Spectrum 34.dta

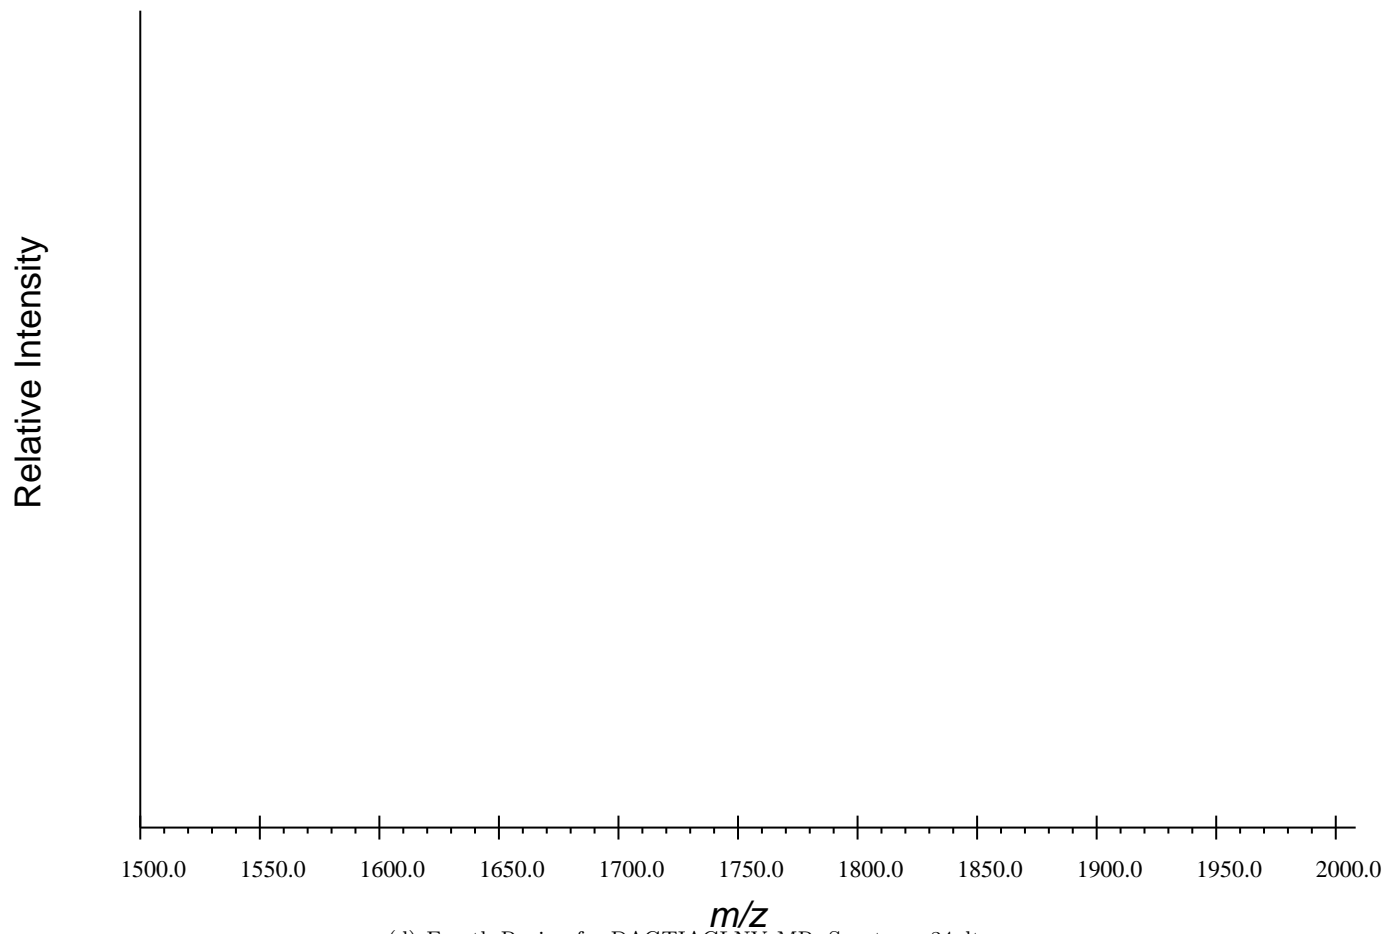

(d) Fourth Region for DAGTIAGLNVoMR, Spectrum 34.dta



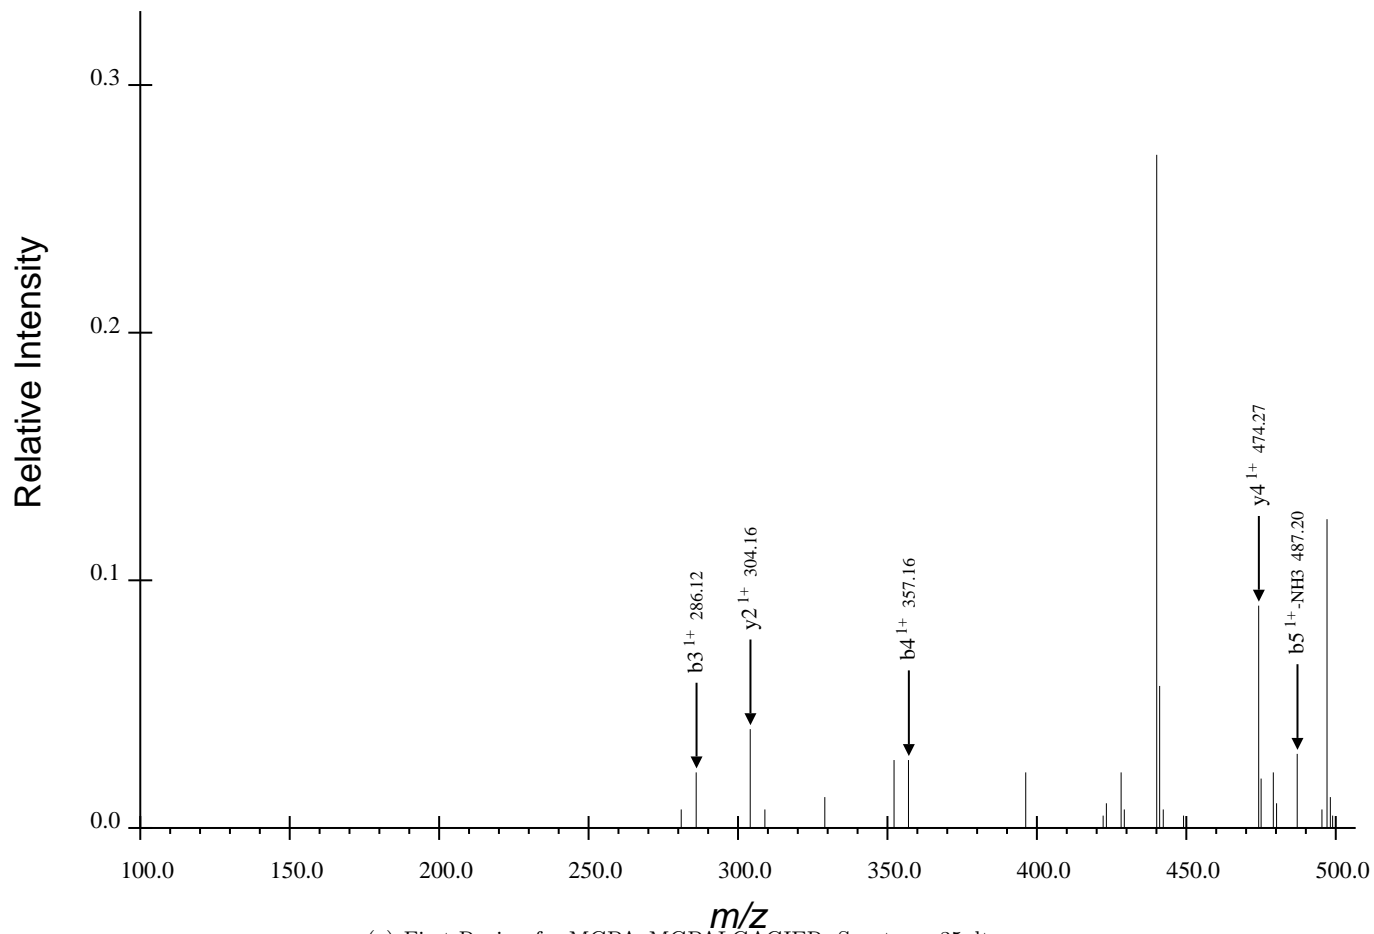

(a) First Region for MGPAoMGPALGAGIER, Spectrum 35.dta

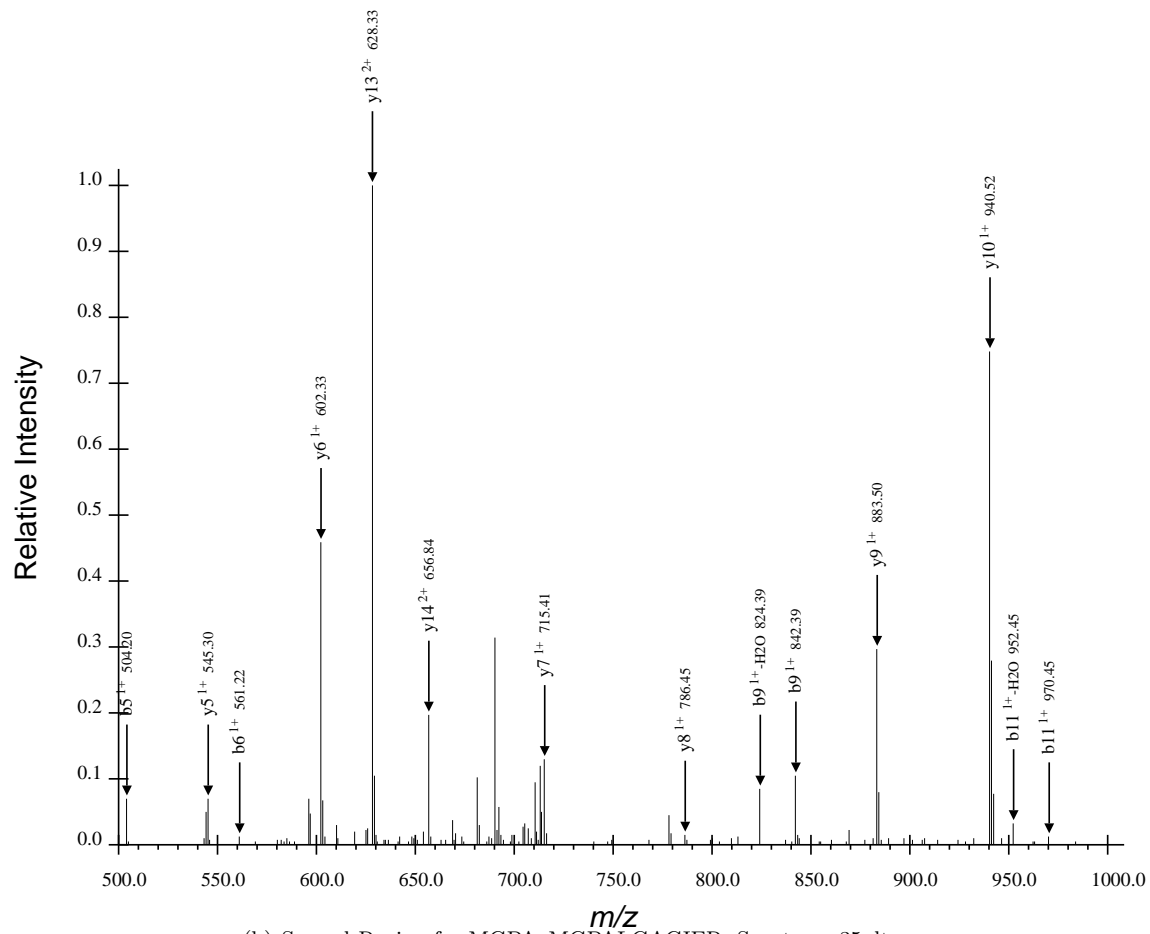

(b) Second Region for MGPAoMGPALGAGIER, Spectrum 35.dta

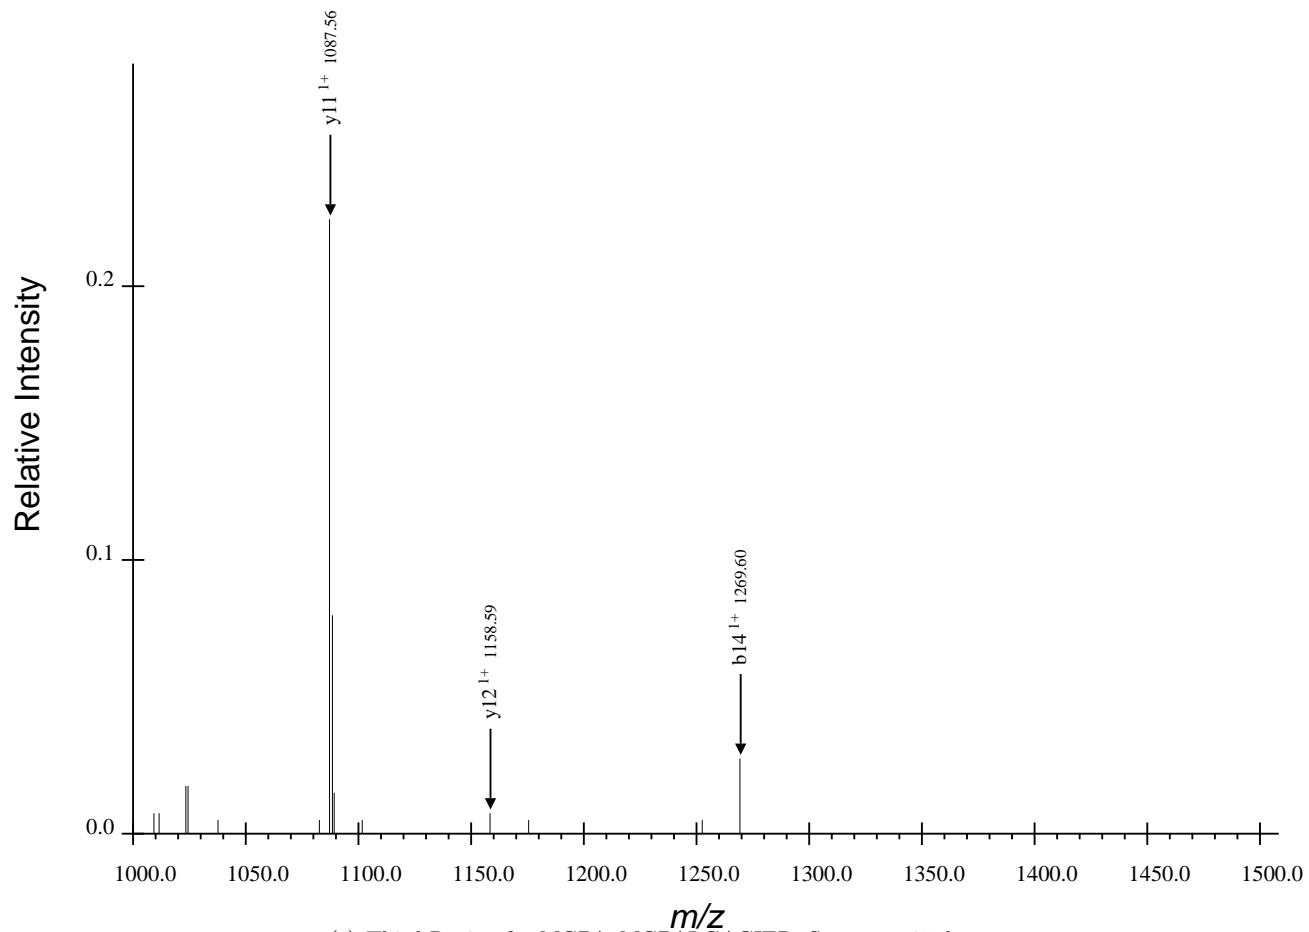

(c) Third Region for MGPAoMGPALGAGIER, Spectrum 35.dta

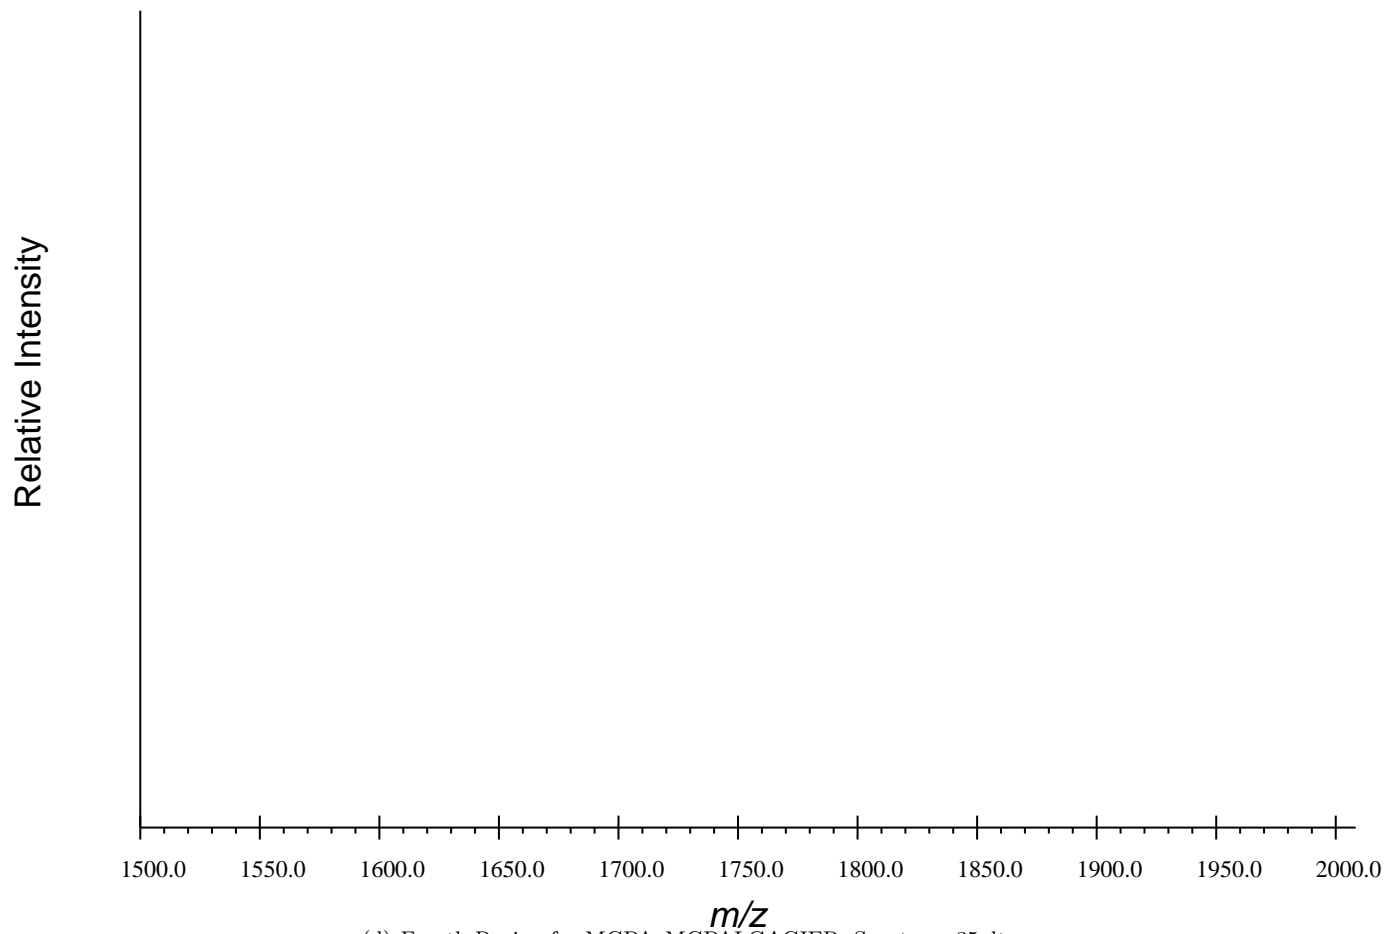

(d) Fourth Region for MGPAoMGPALGAGIER, Spectrum 35.dta

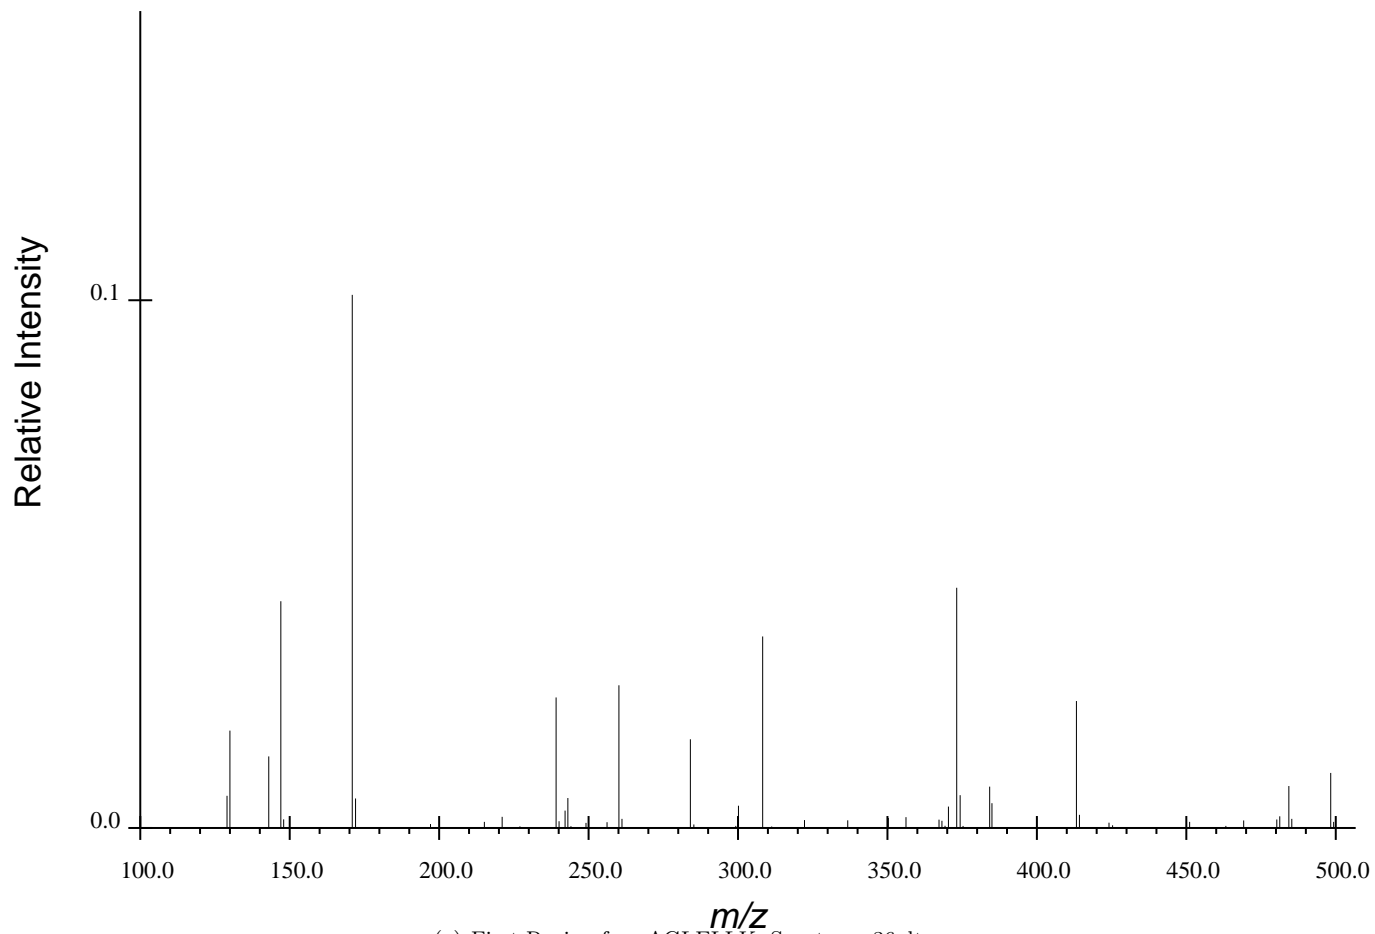

(a) First Region for aAGLELLK, Spectrum 36.dta

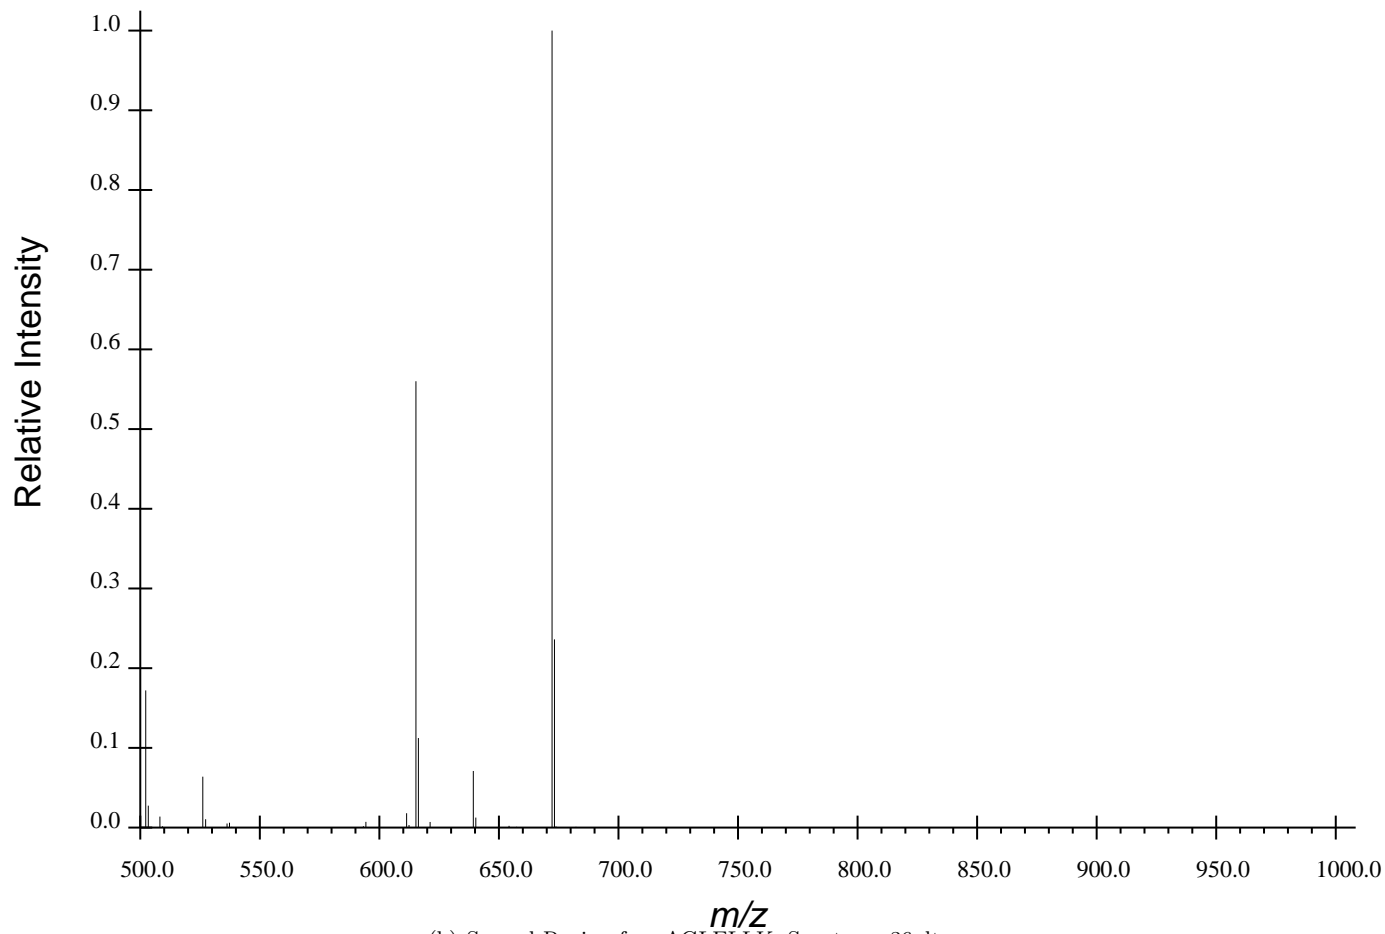

(b) Second Region for aAGLELLK, Spectrum 36.dta

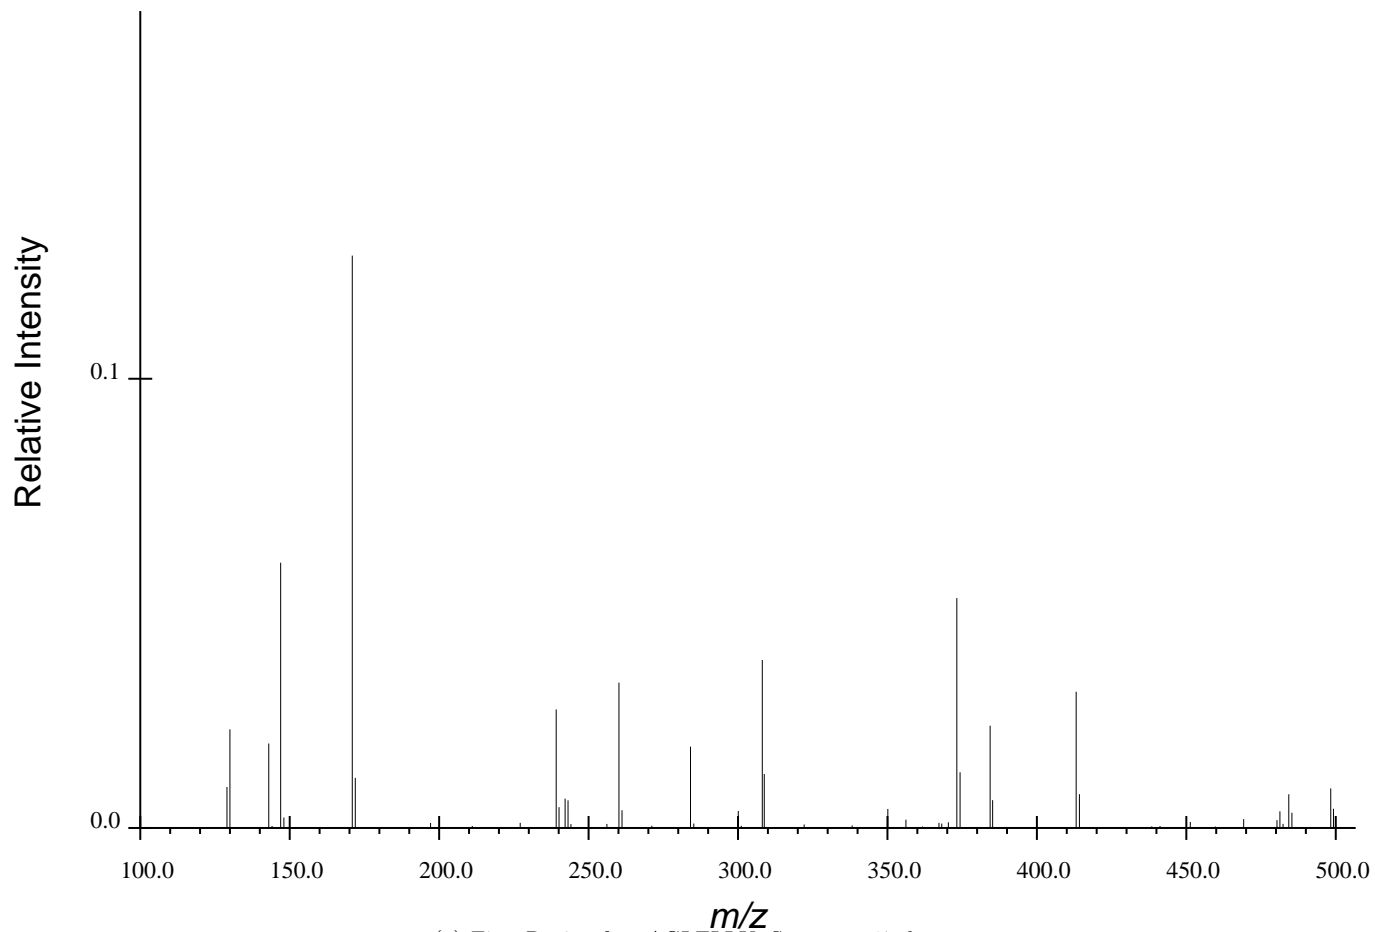

(a) First Region for aAGLELLK, Spectrum 37.dta

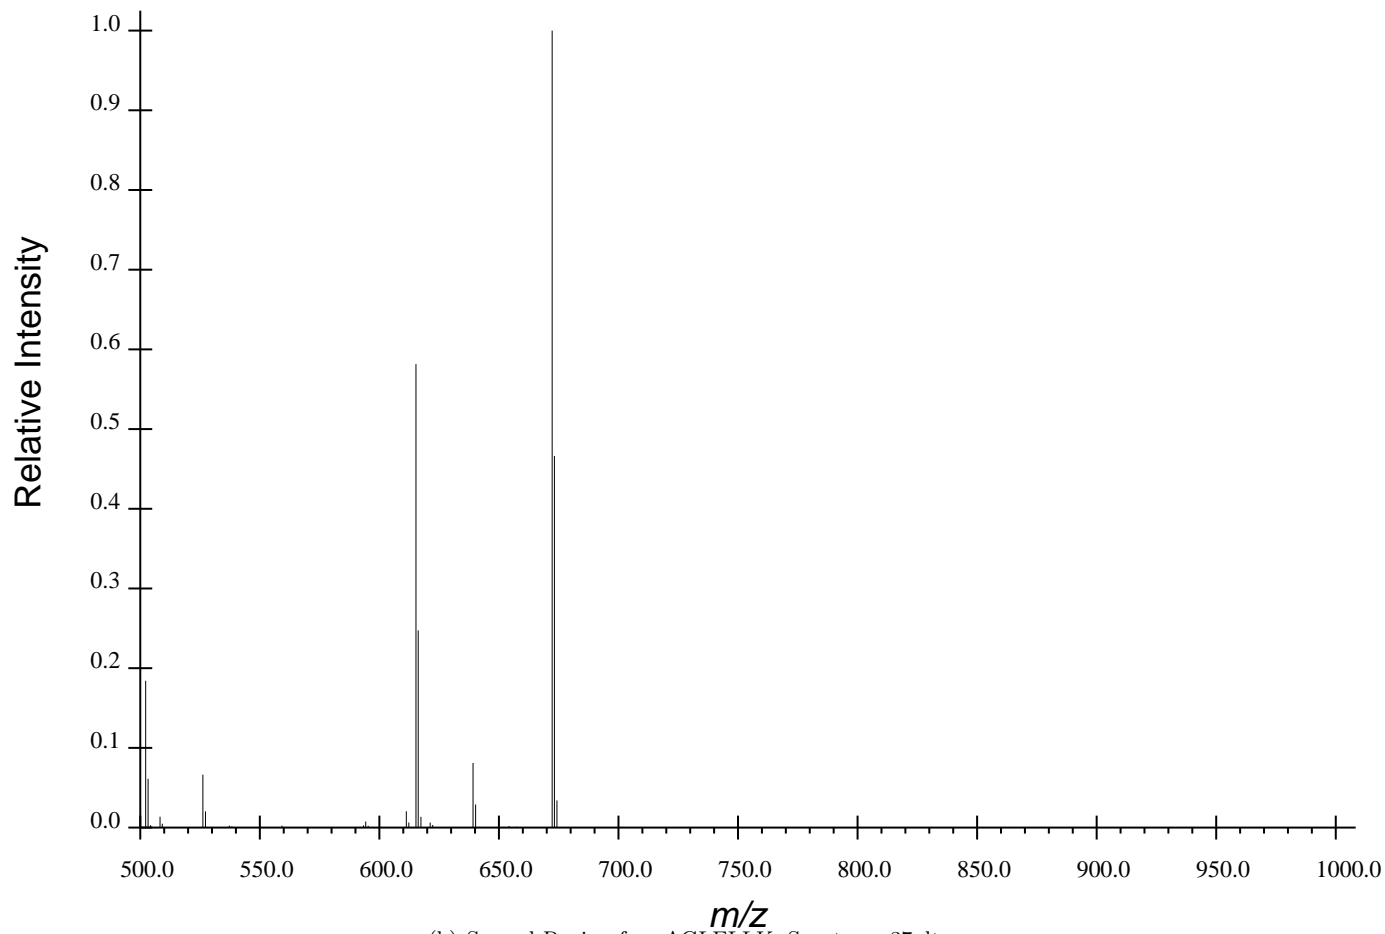

(b) Second Region for aAGLELLK, Spectrum 37.dta

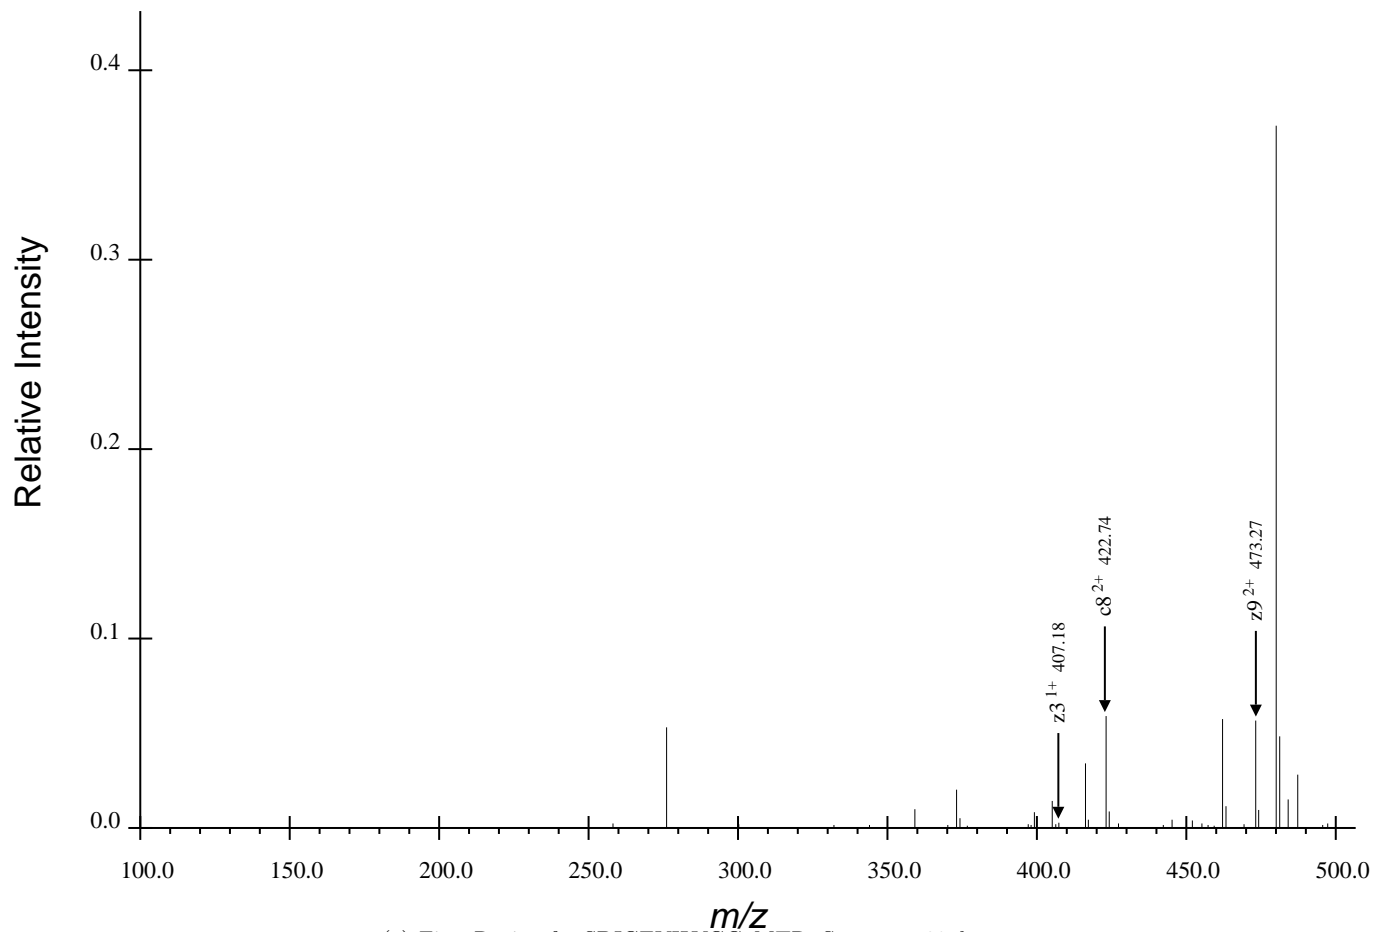

(a) First Region for SDIGEVILVGGOMTR, Spectrum 38.dta

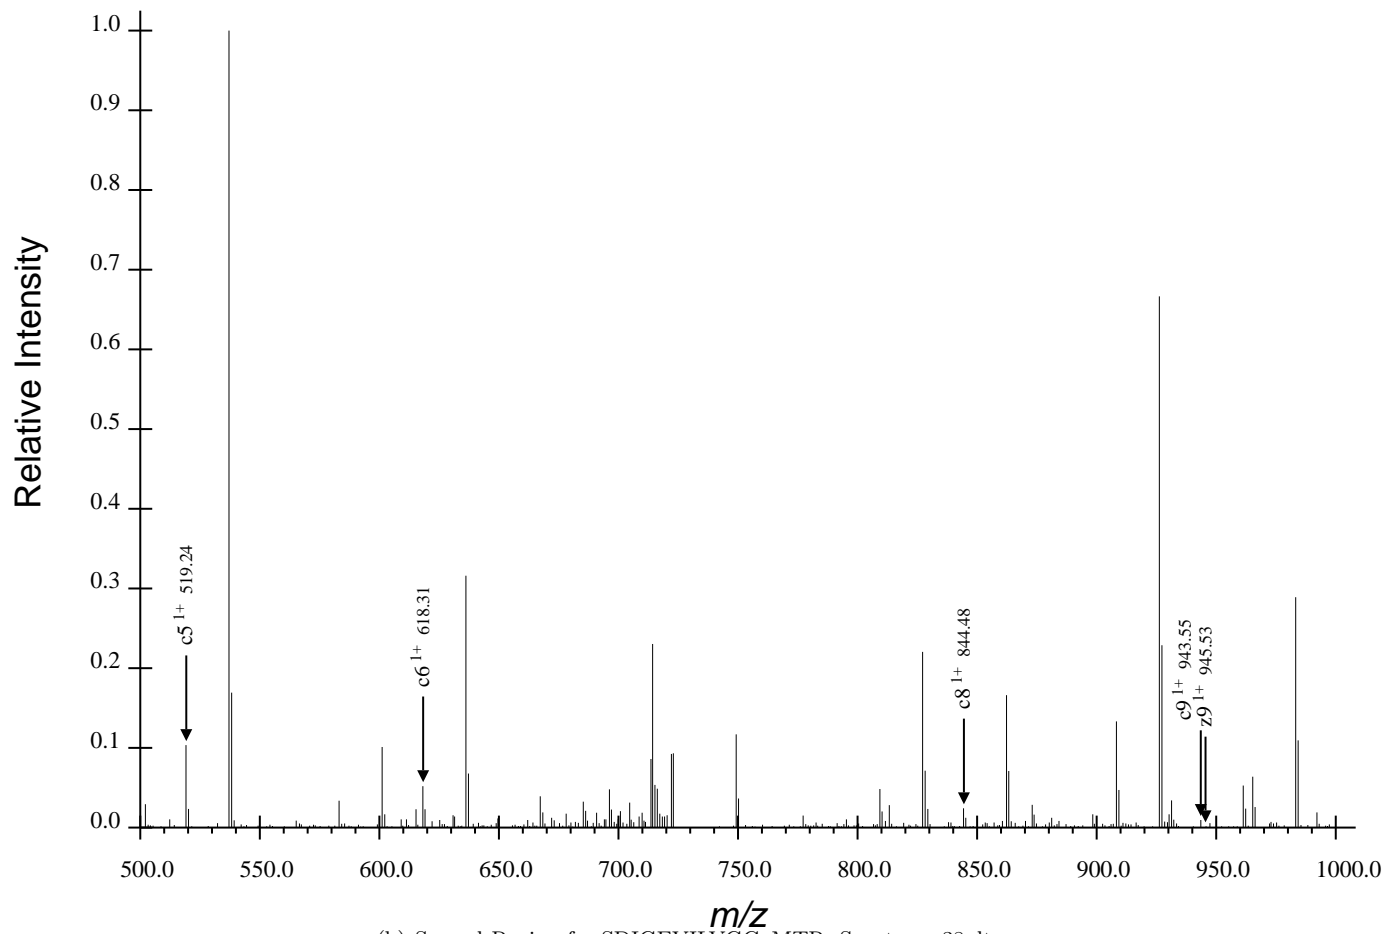

(b) Second Region for SDIGEVILVGGOMTR, Spectrum 38.dta

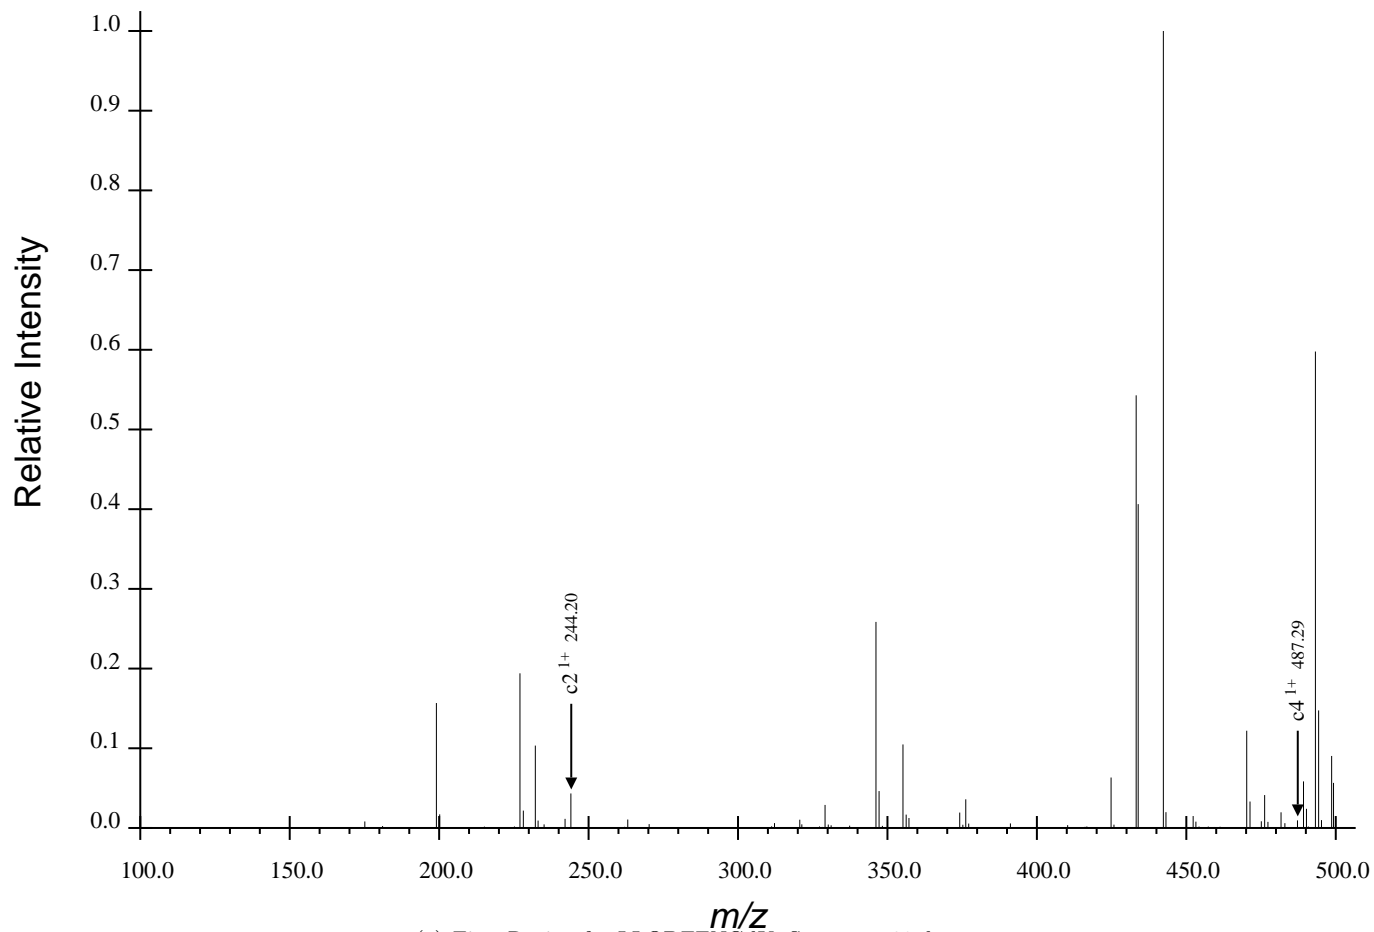

(a) First Region for LLQDFNKGdK, Spectrum 39.dta

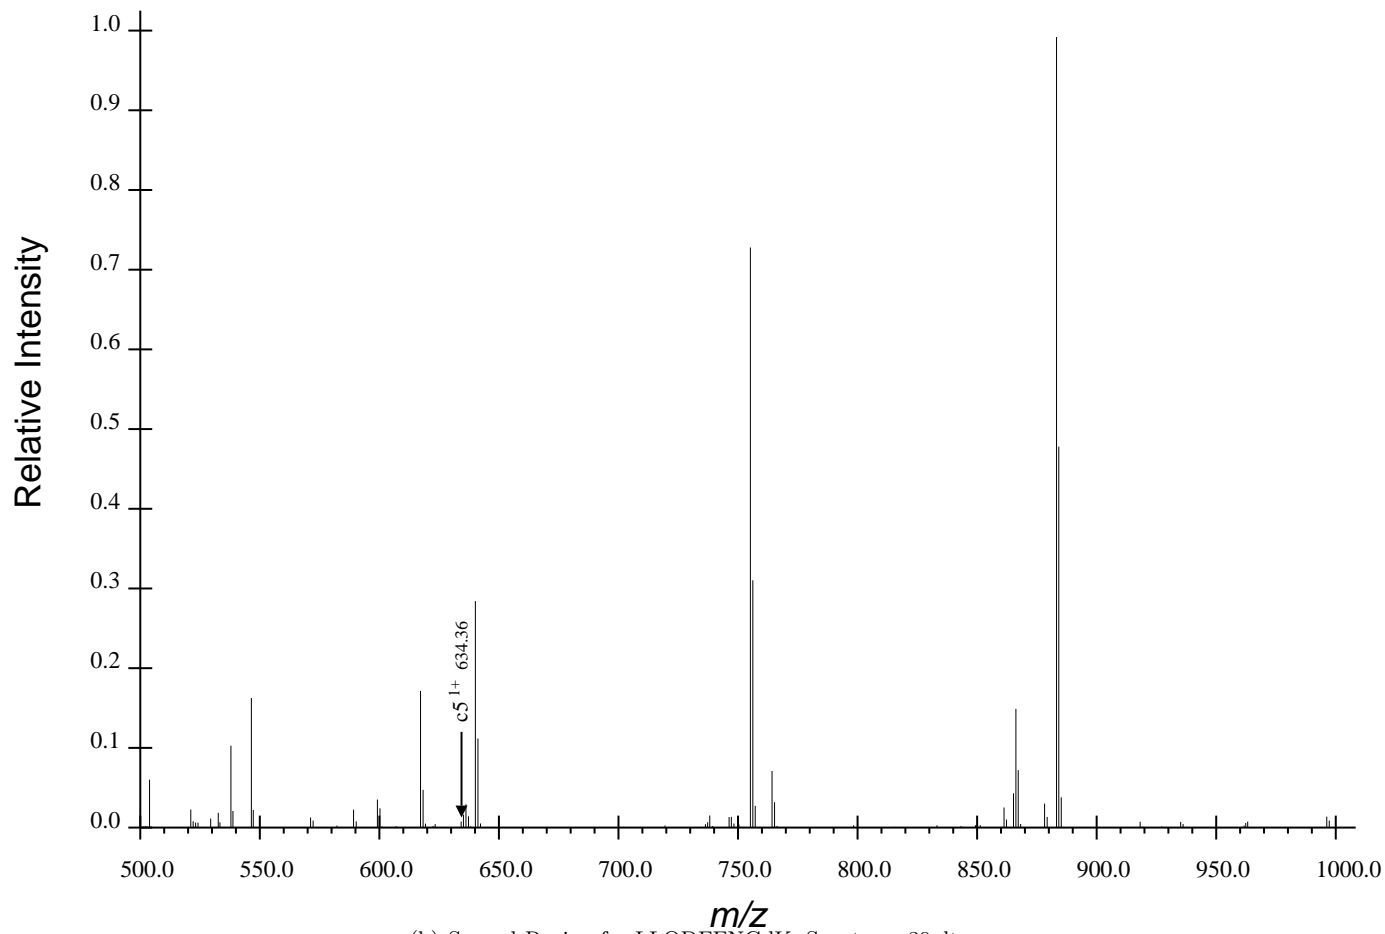

(b) Second Region for LLQDFNKGdK, Spectrum 39.dta

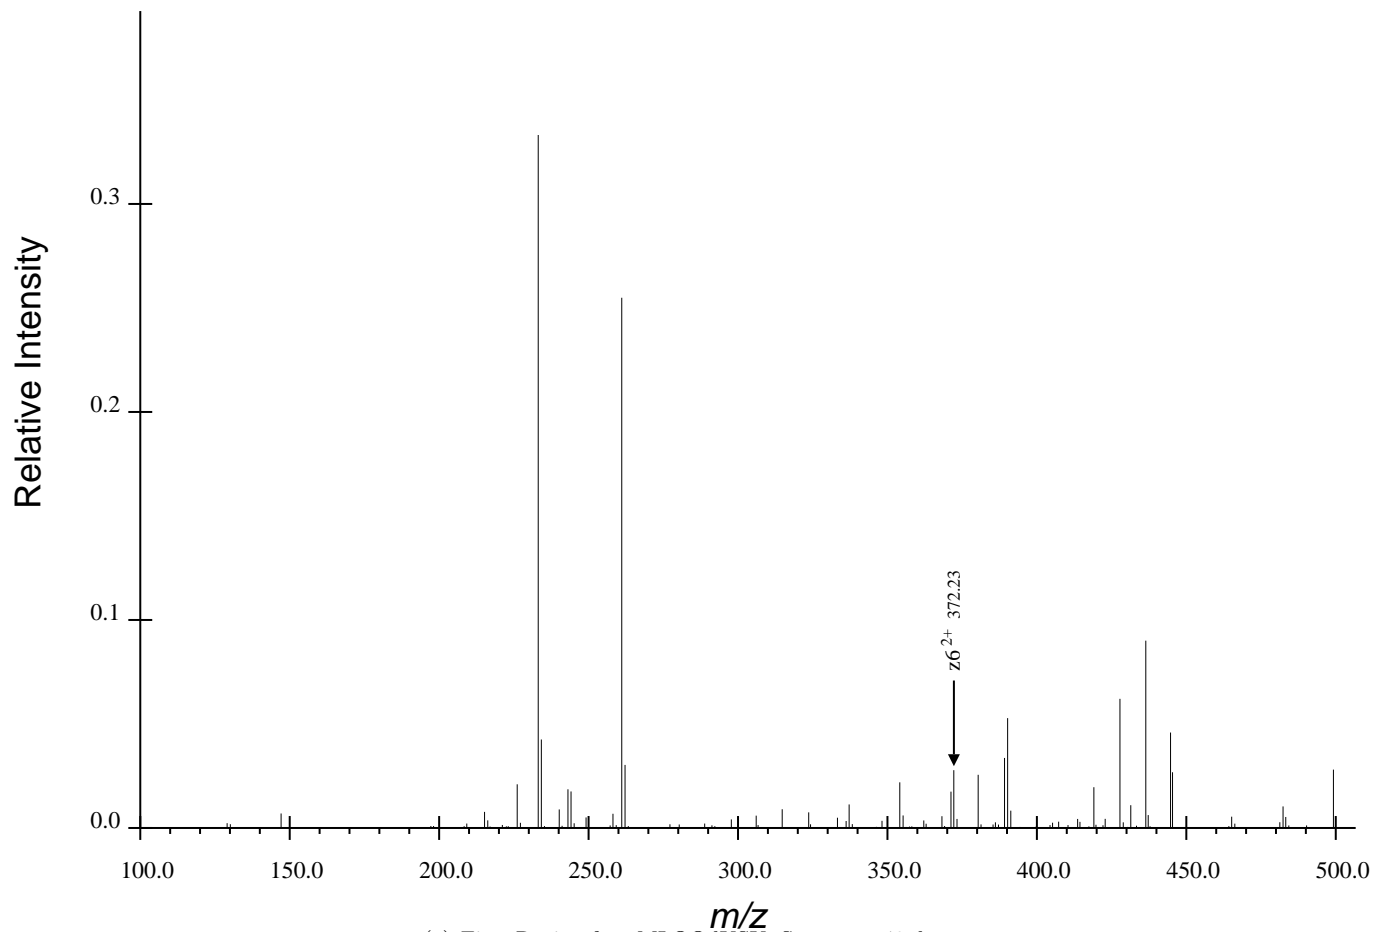

(a) First Region for oMLQQdKSK, Spectrum 40.dta

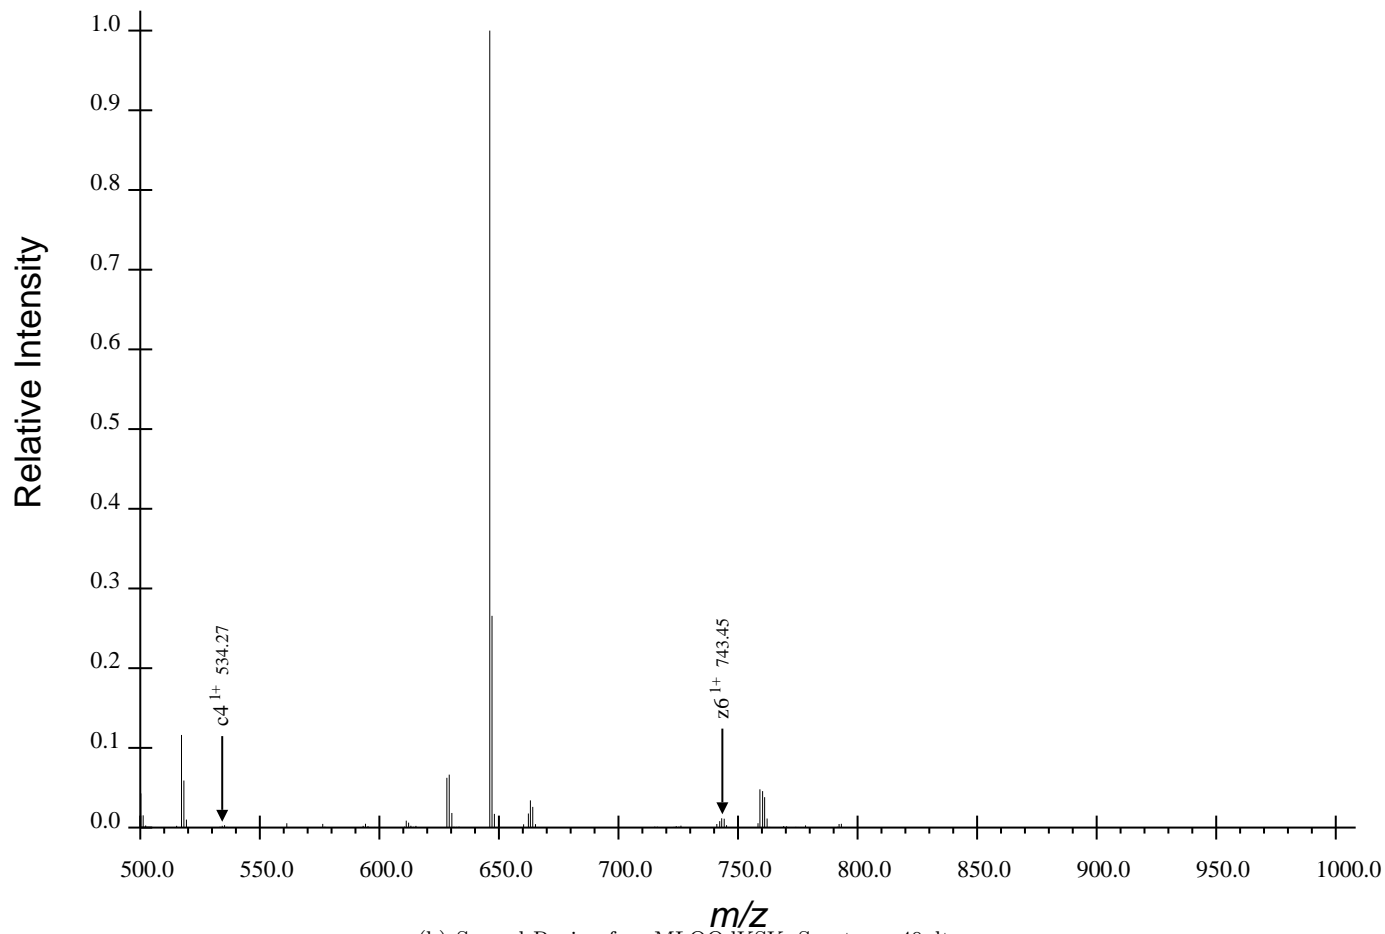

(b) Second Region for oMLQQdKSK, Spectrum 40.dta

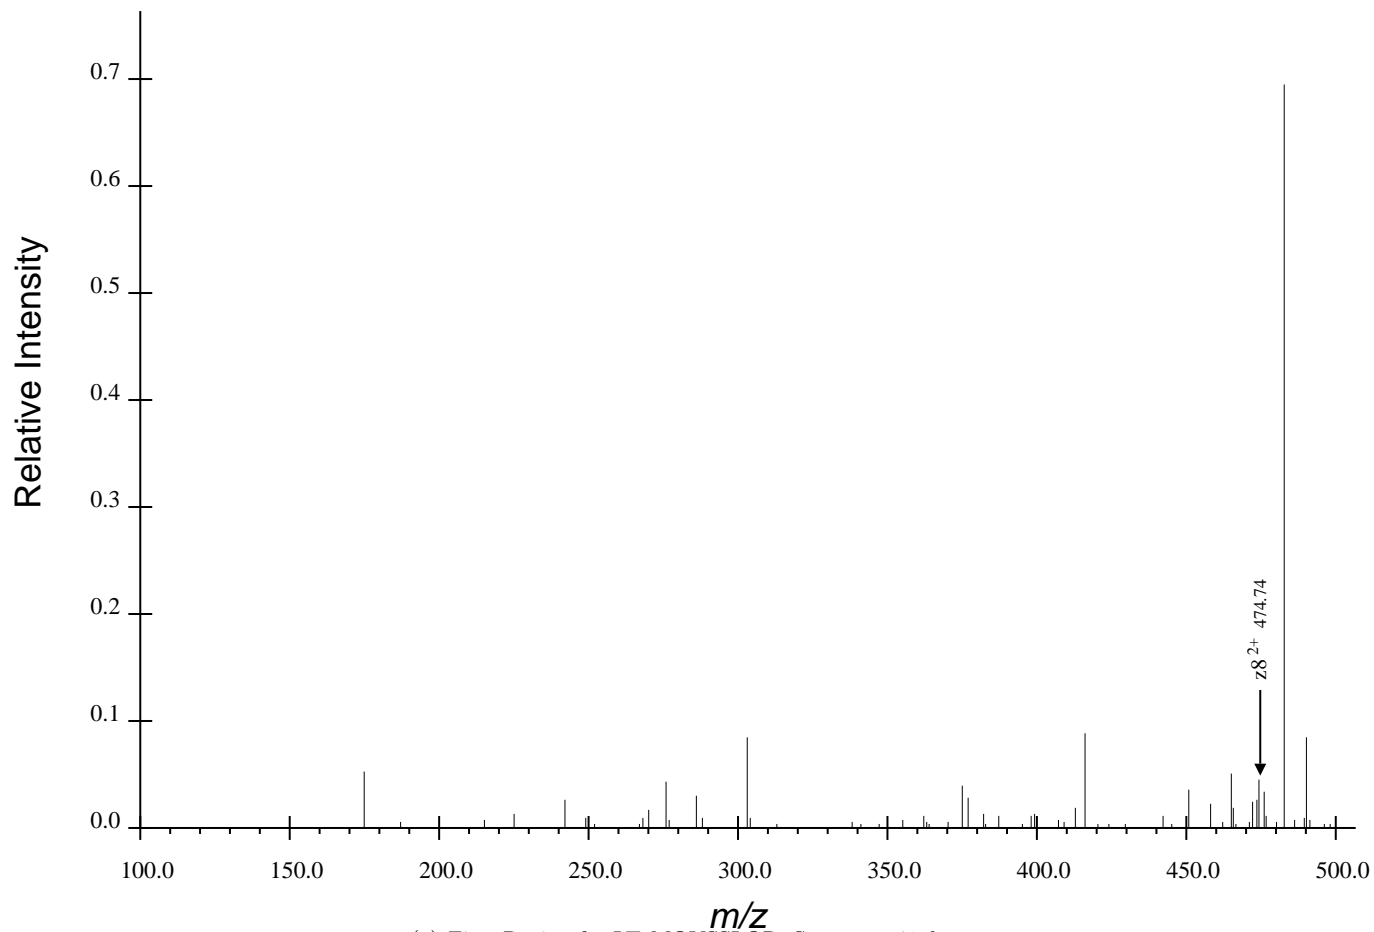

(a) First Region for LToMQVSSLQR, Spectrum 41.dta

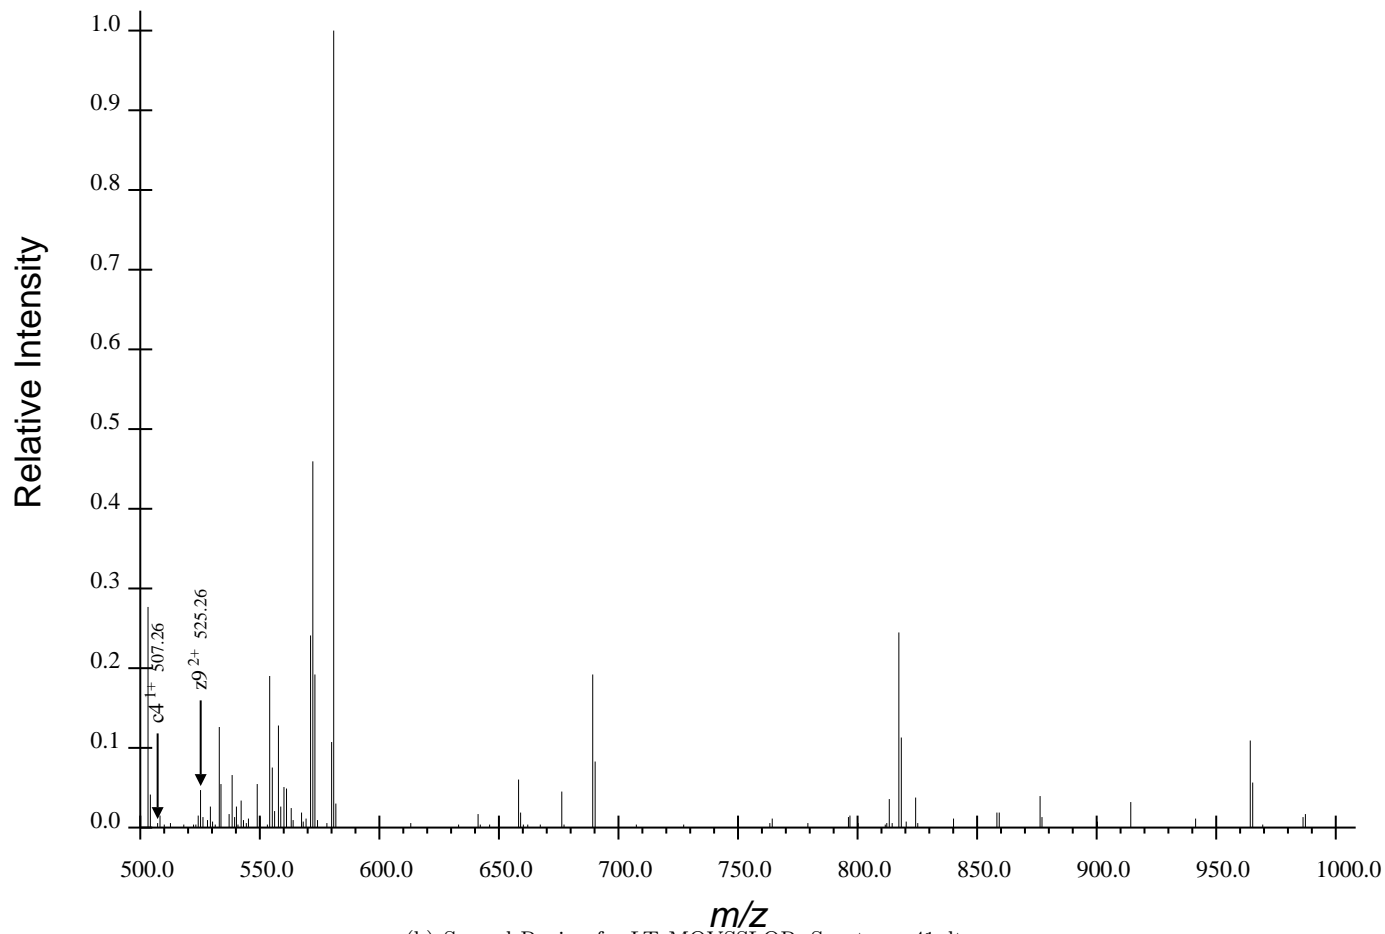

(b) Second Region for LToMQVSSLQR, Spectrum 41.dta



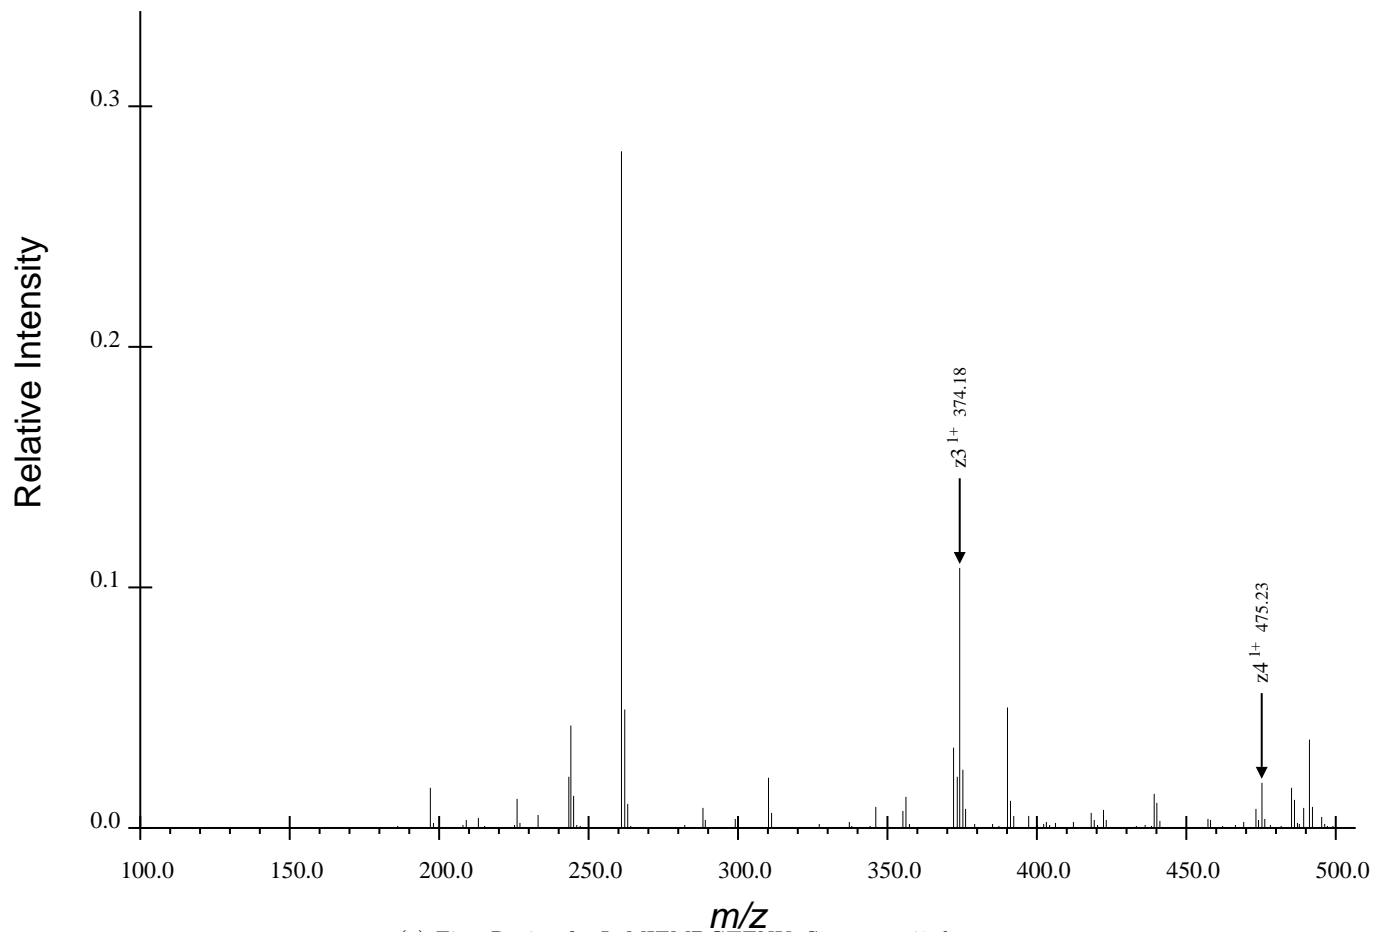

(a) First Region for LoMIEMDGTENK, Spectrum 42.dta

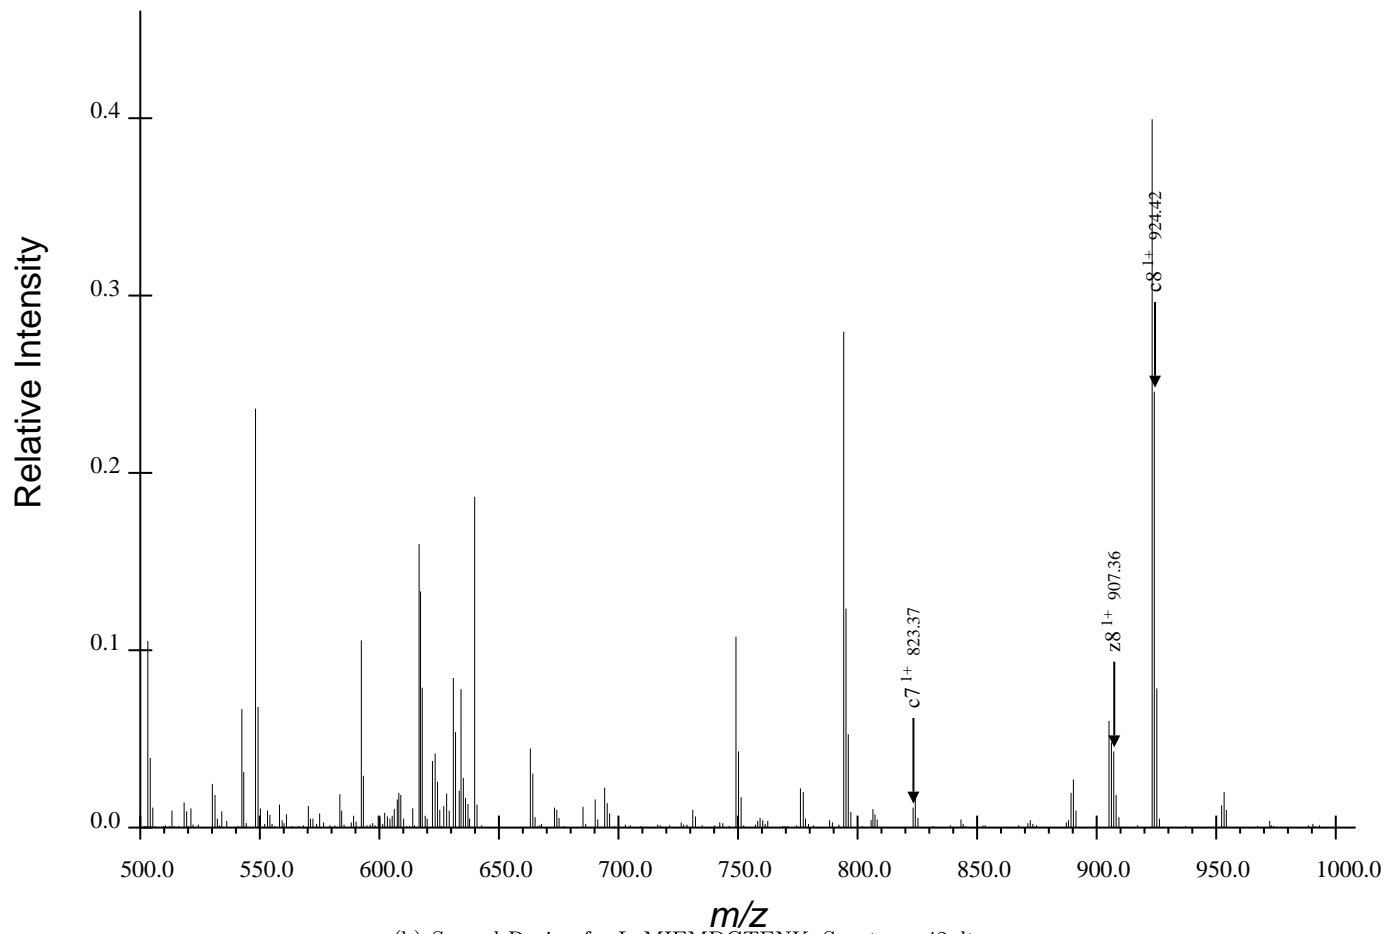

(b) Second Region for LoMIEMDGTENK, Spectrum 42.dta

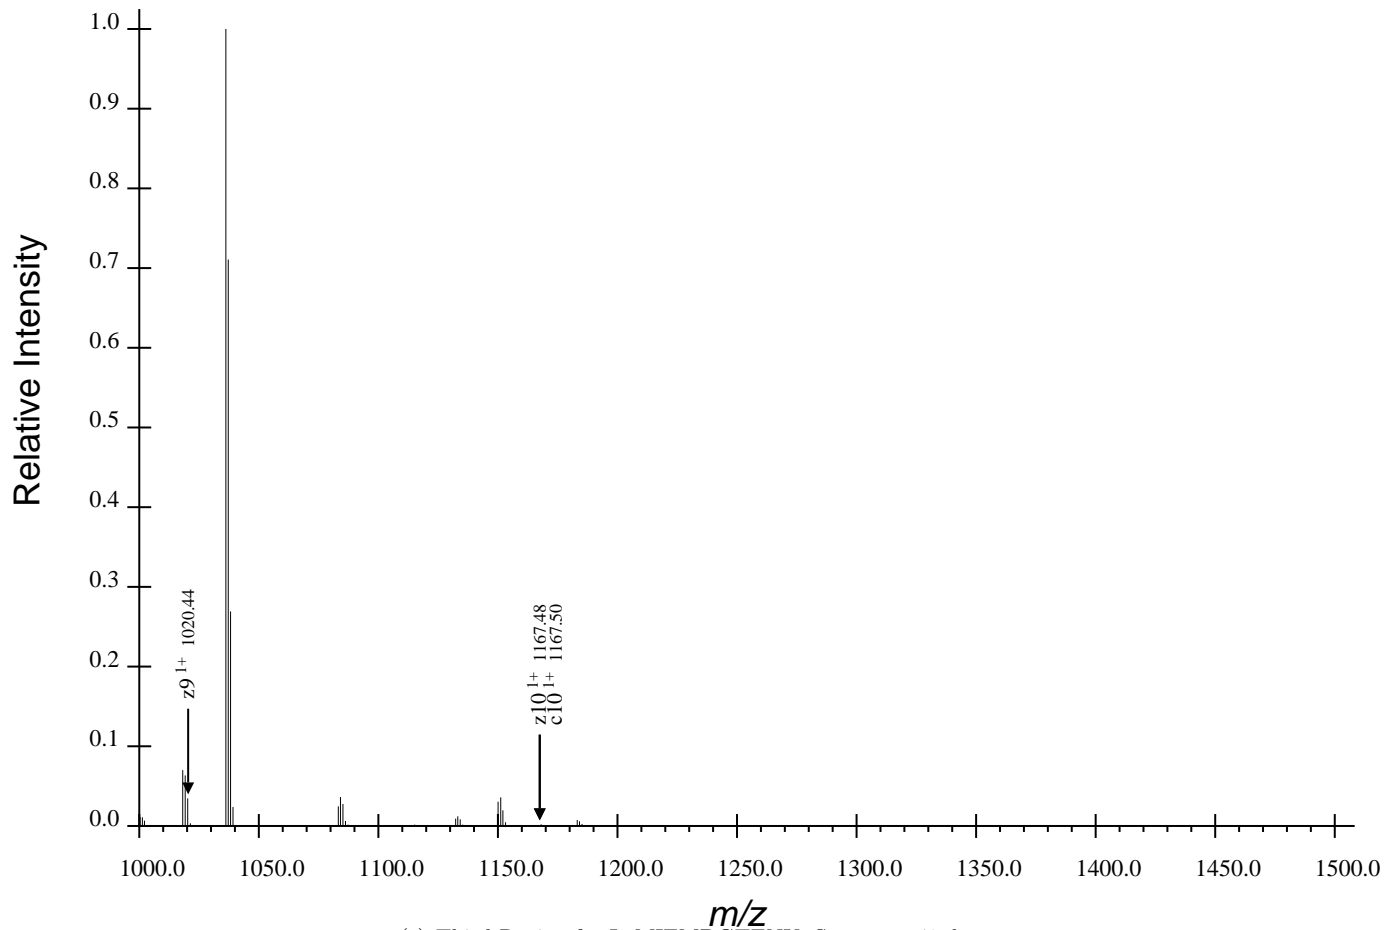

(c) Third Region for LoMIEMDGTENK, Spectrum 42.dta

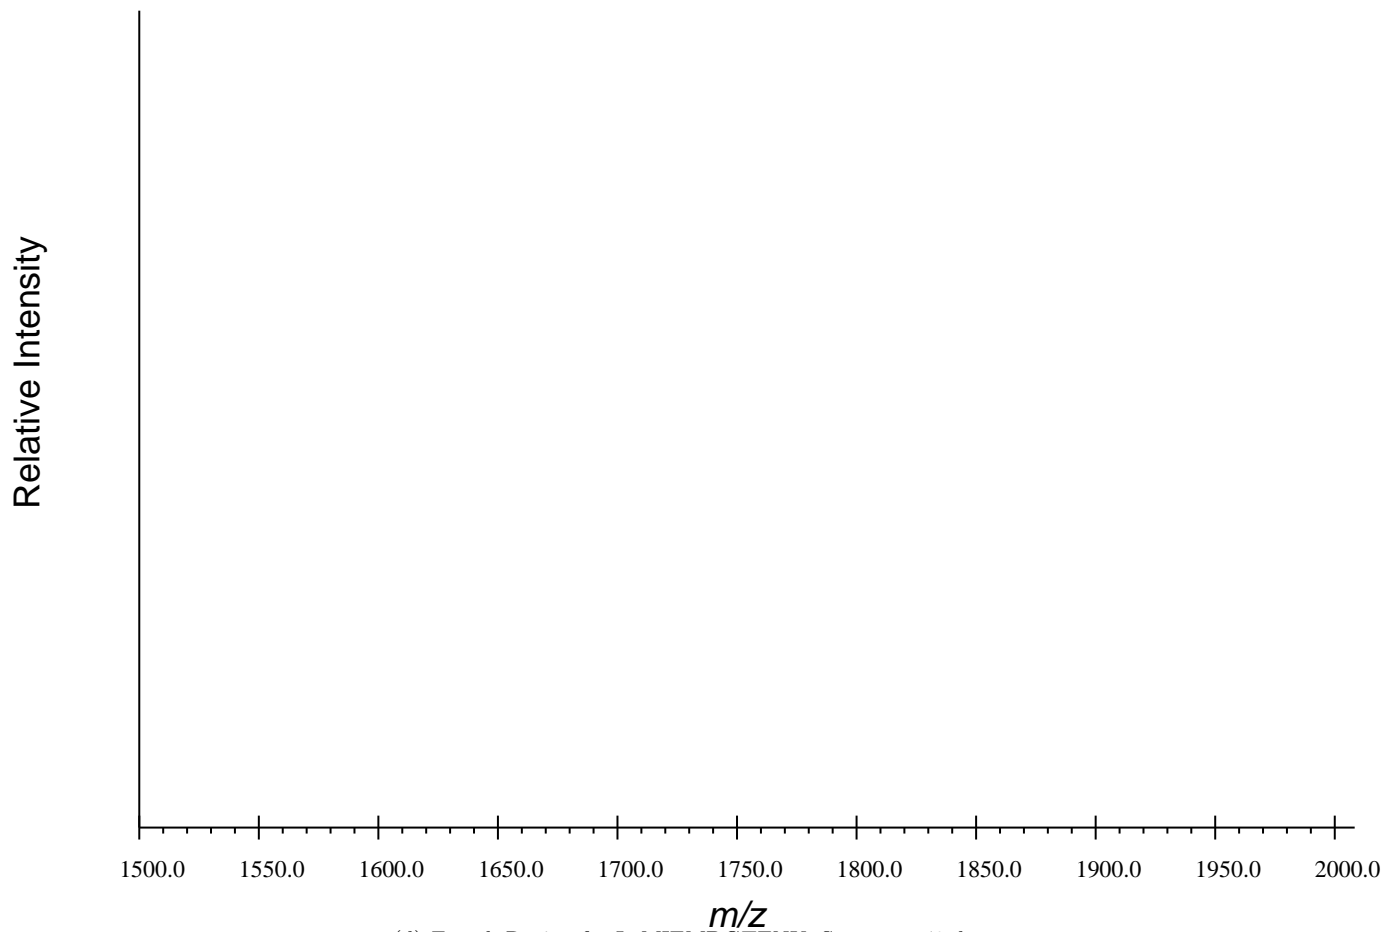

(d) Fourth Region for LoMIEMDGTENK, Spectrum 42.dta

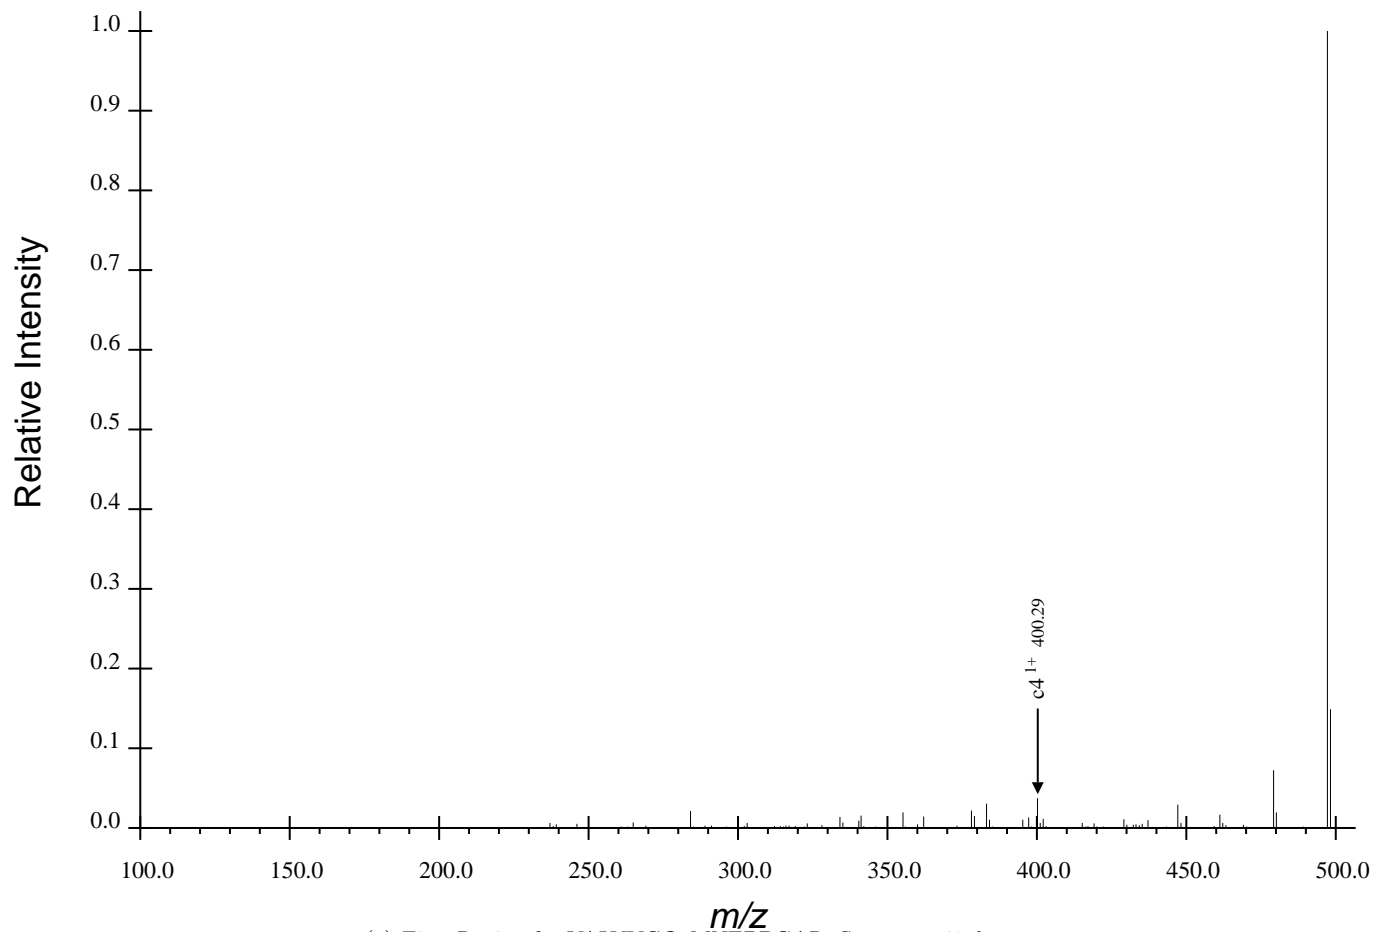

(a) First Region for VALVYGQoMNEPPGAR, Spectrum 43.dta

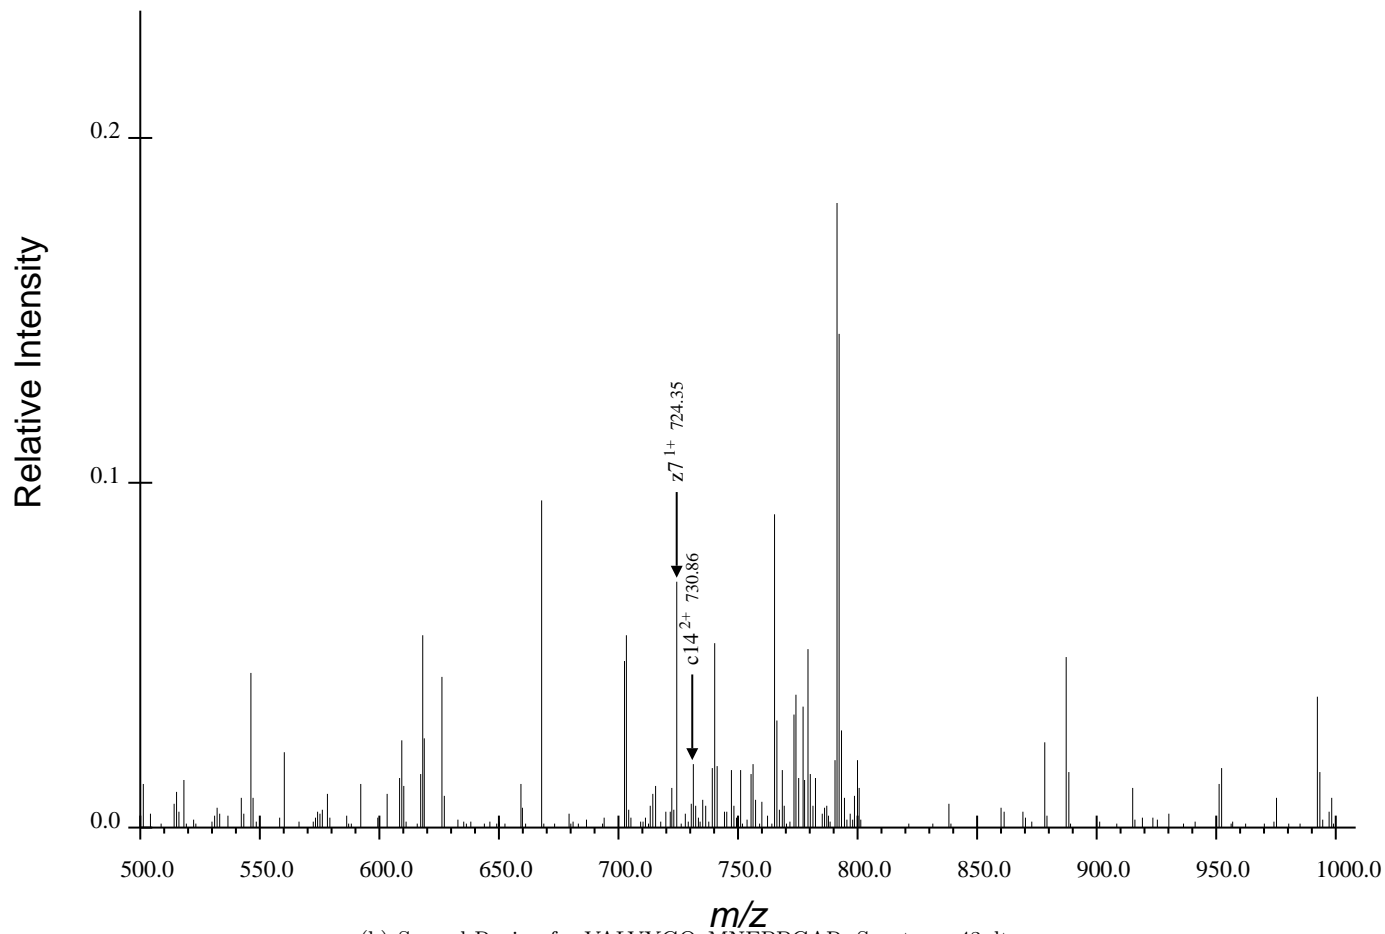

(b) Second Region for VALVYGQoMNEPPGAR, Spectrum 43.dta

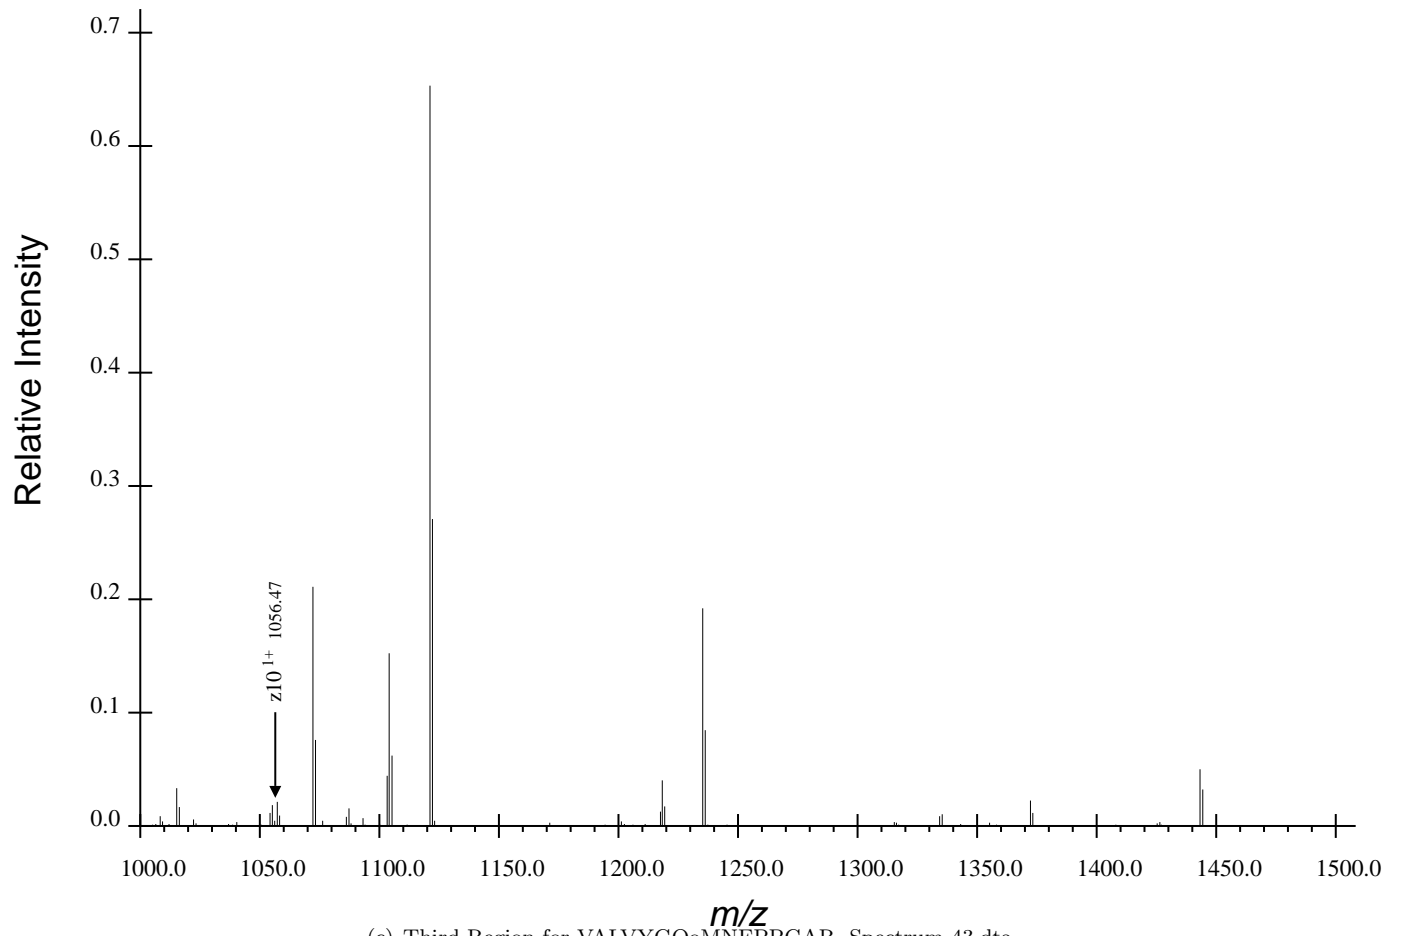

(c) Third Region for VALVYGQoMNEPPGAR, Spectrum 43.dta

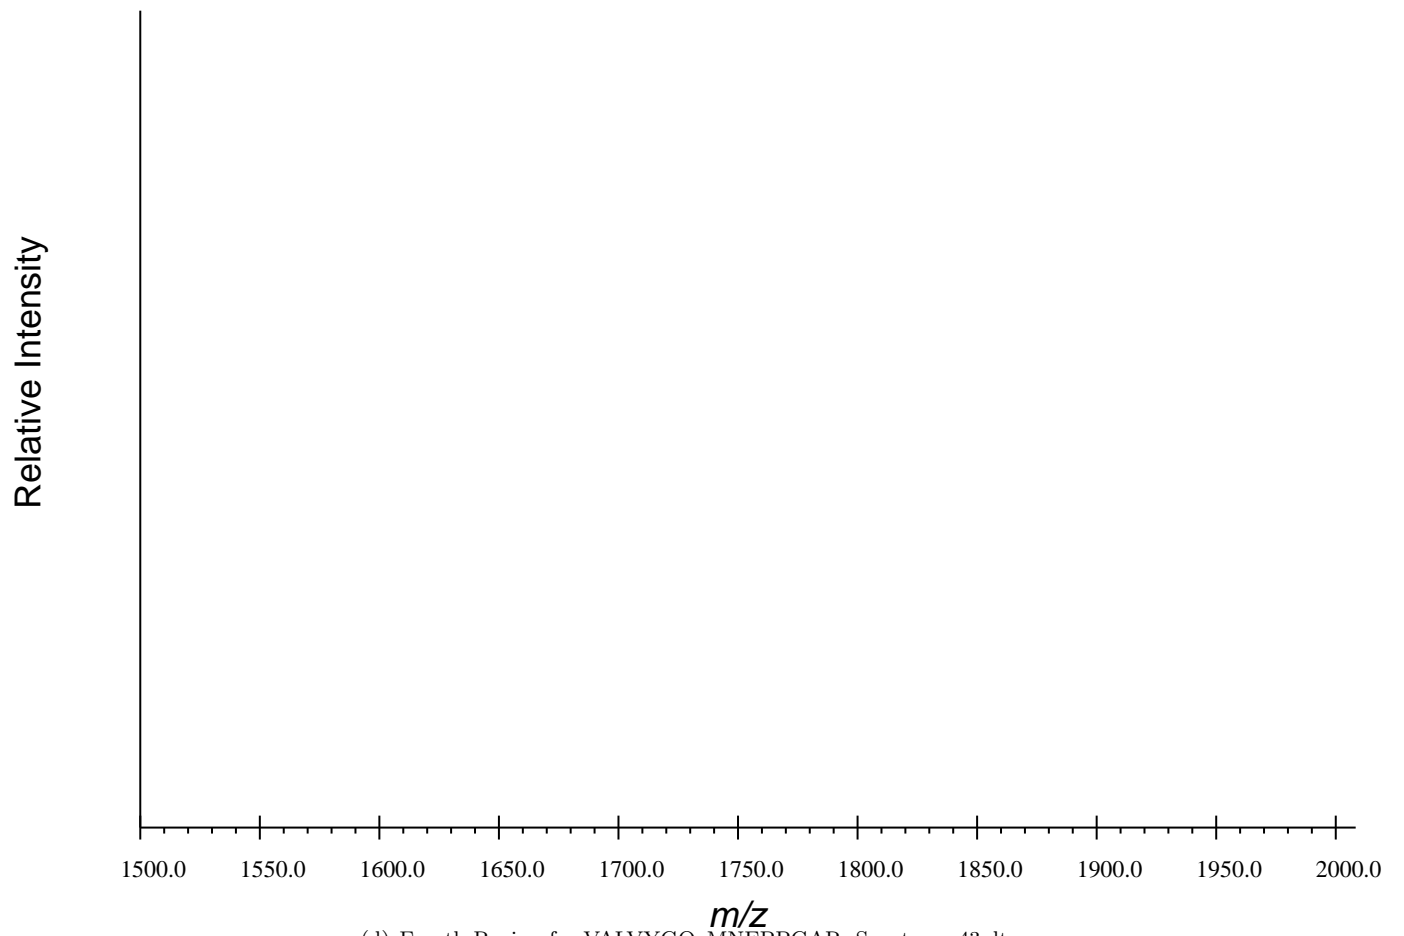

(d) Fourth Region for VALVYGQoMNEPPGAR, Spectrum 43.dta

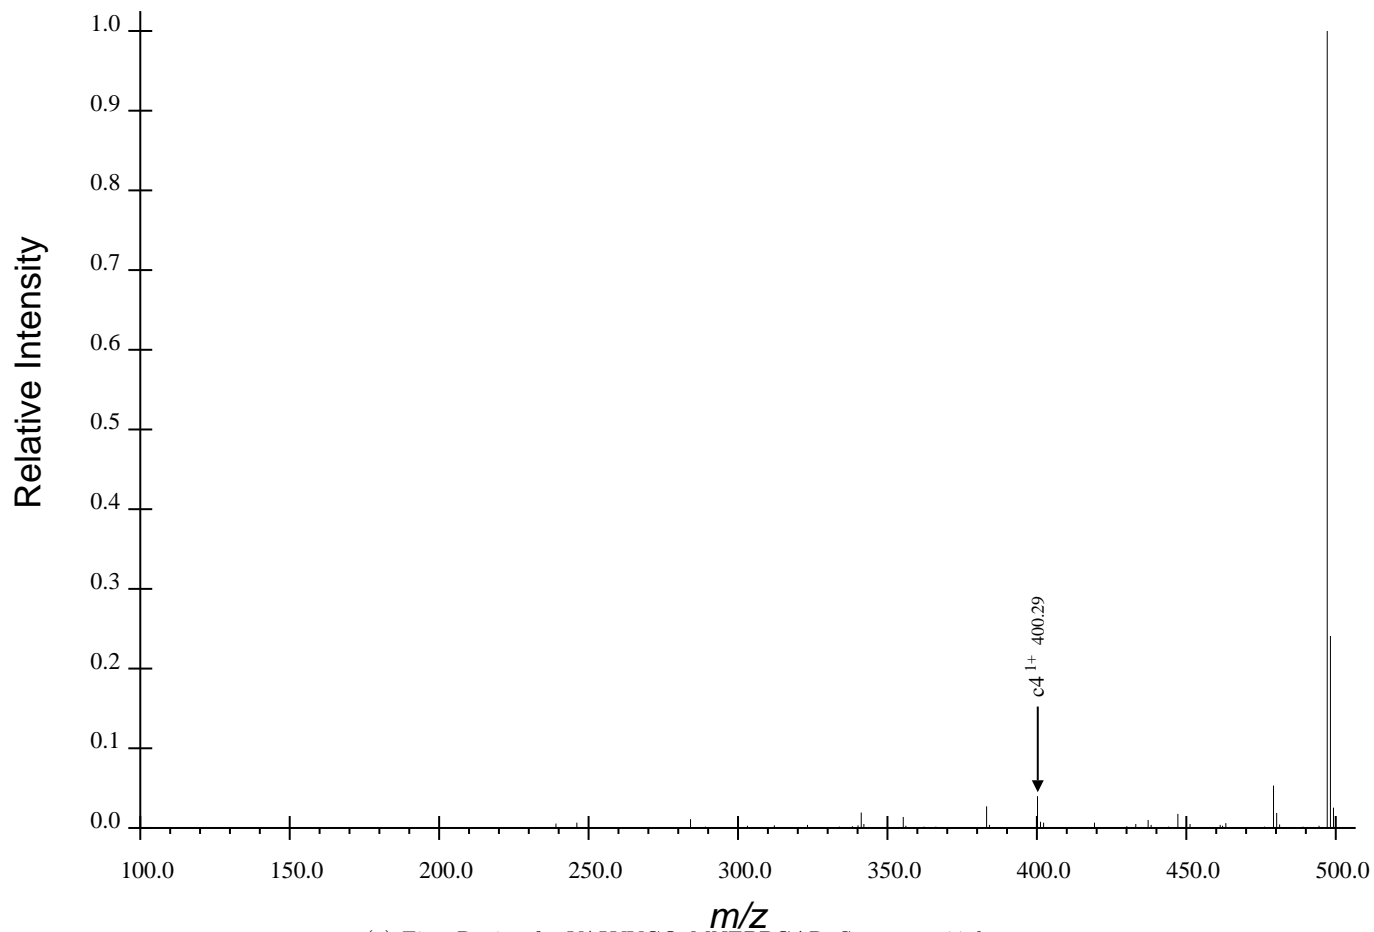

(a) First Region for VALVYGQoMNEPPGAR, Spectrum 44.dta

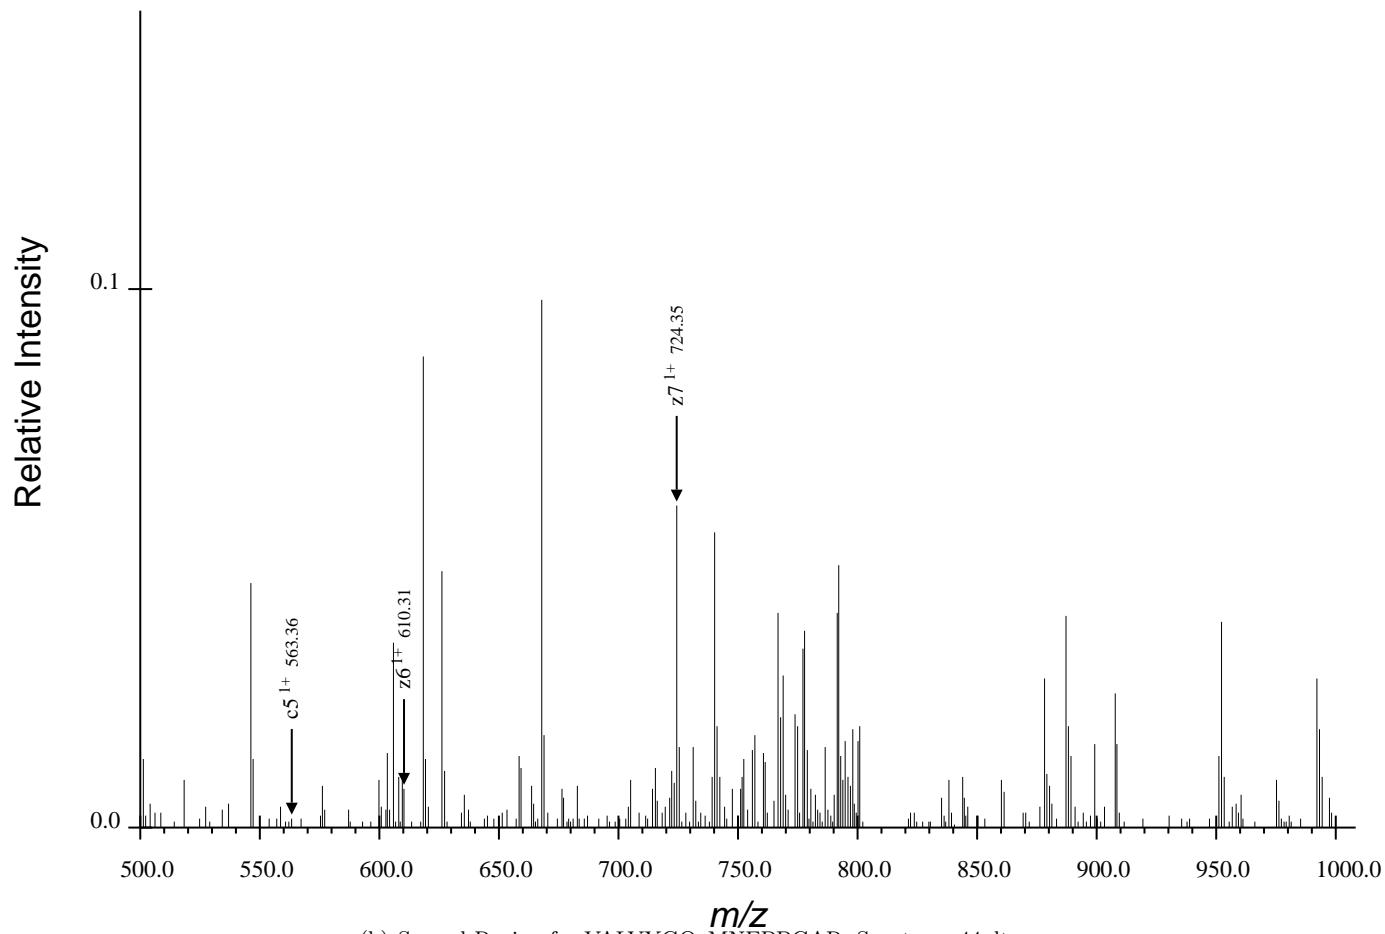

(b) Second Region for VALVYGQoMNEPPGAR, Spectrum 44.dta

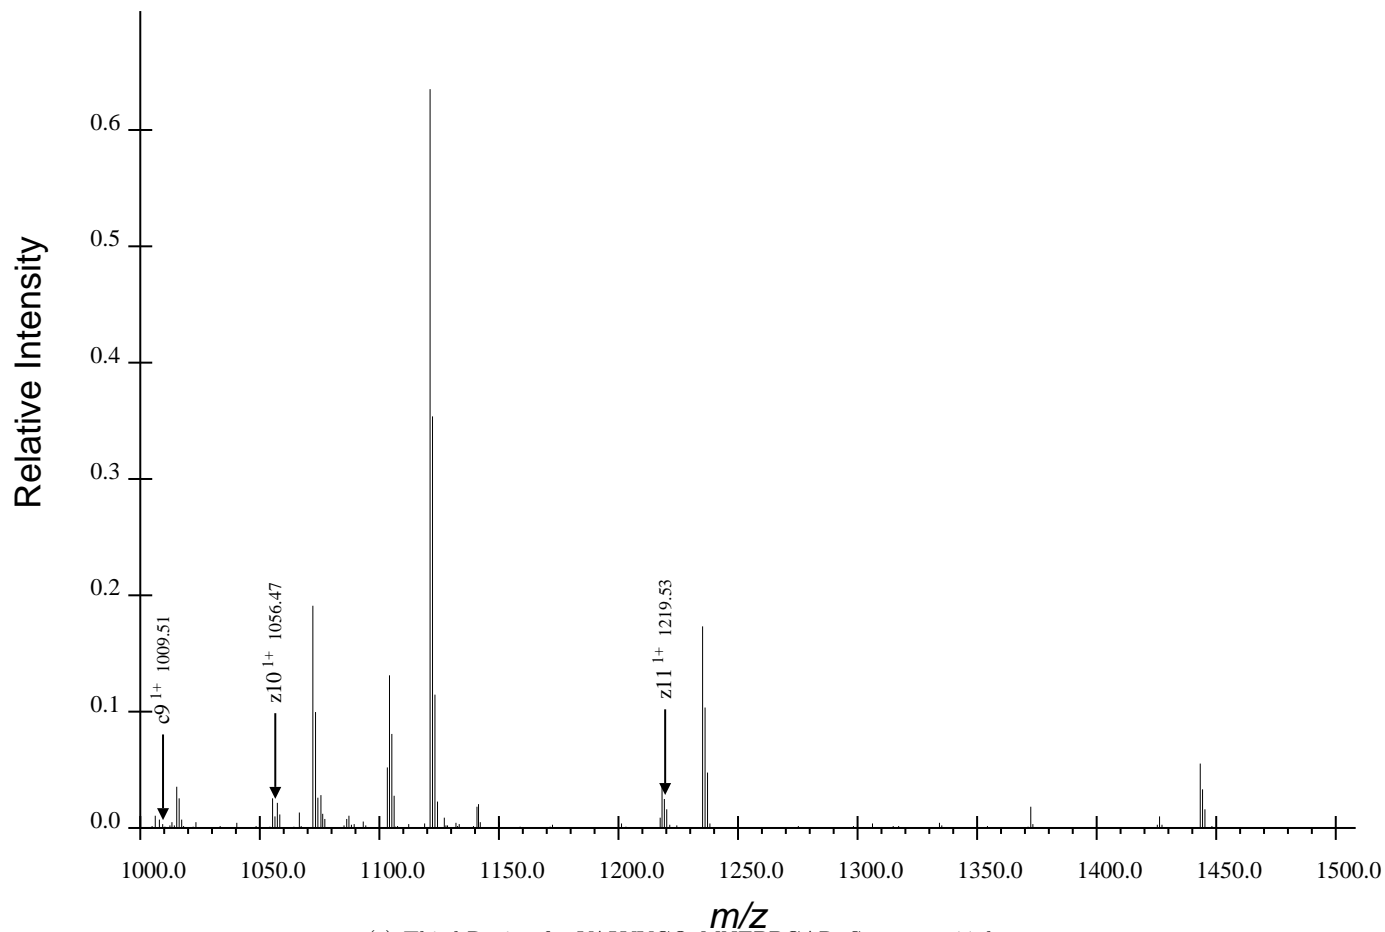

(c) Third Region for VALVYGQoMNEPPGAR, Spectrum 44.dta

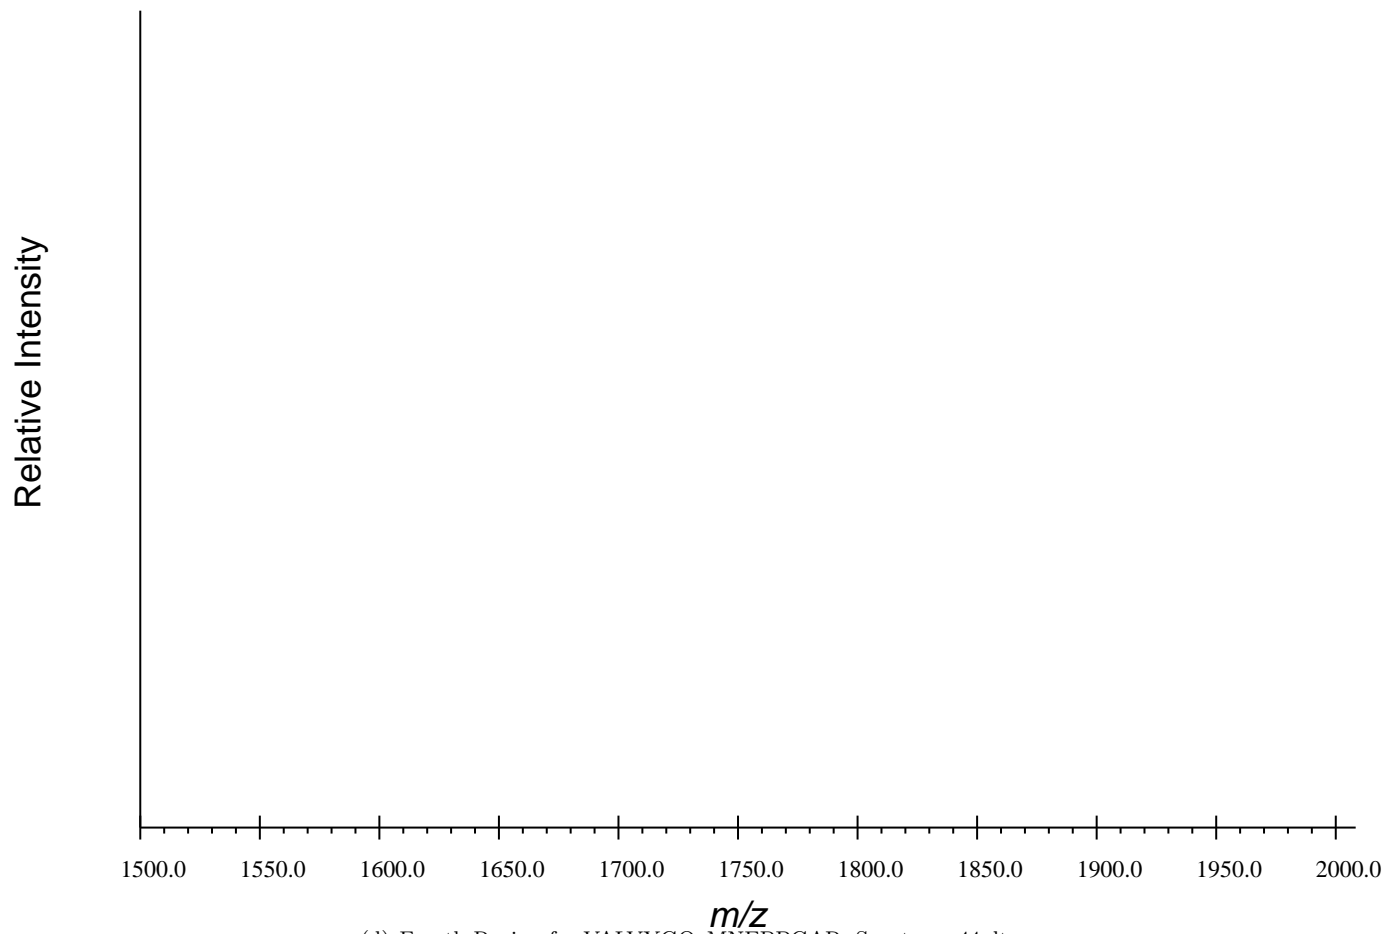

(d) Fourth Region for VALVYGQoMNEPPGAR, Spectrum 44.dta

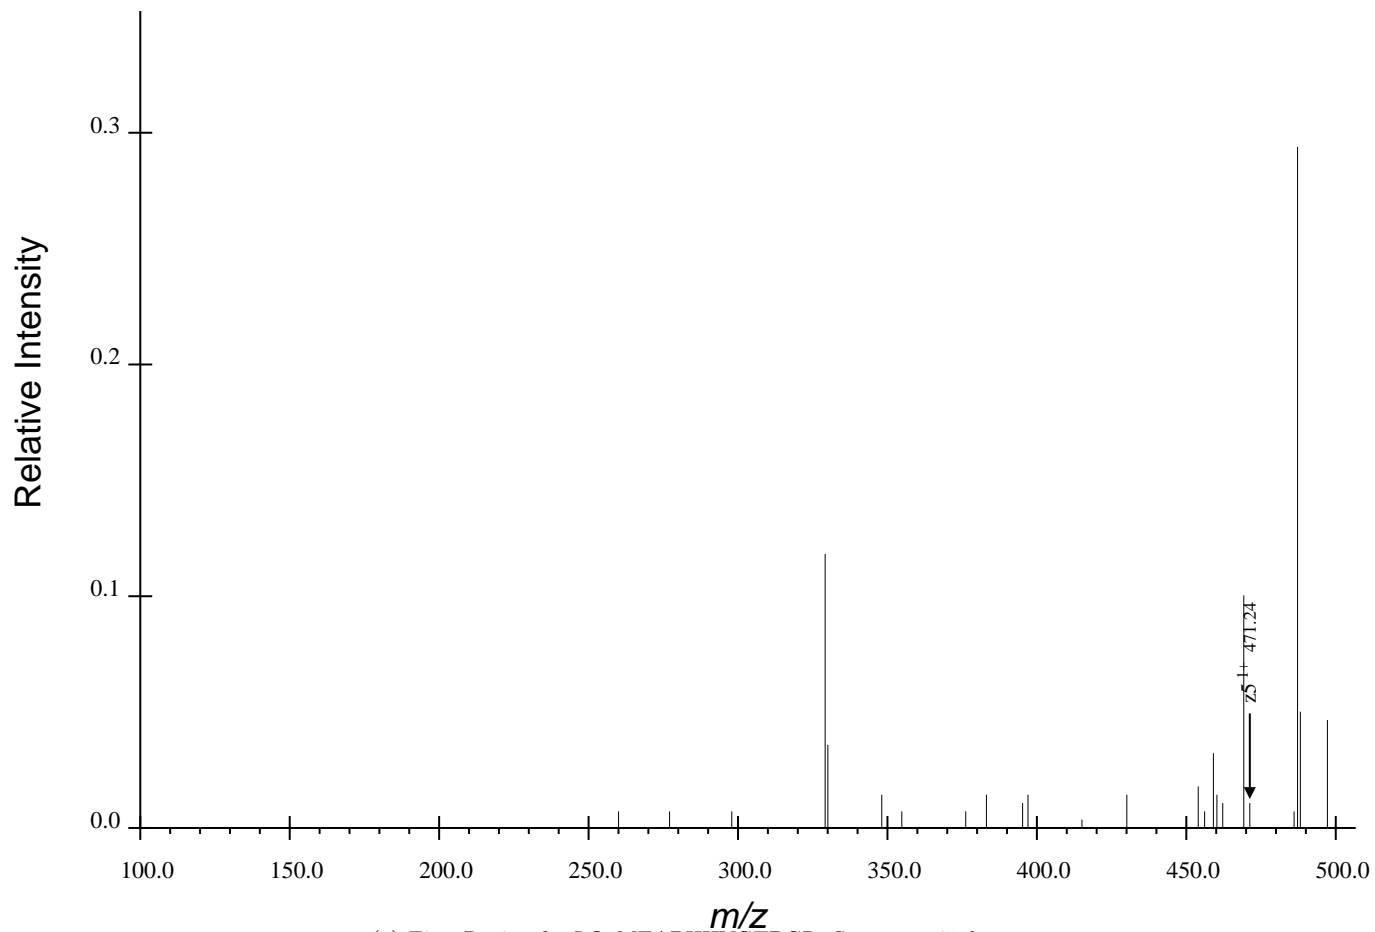

(a) First Region for LQoMEAPHIIVGTPGR, Spectrum 45.dta

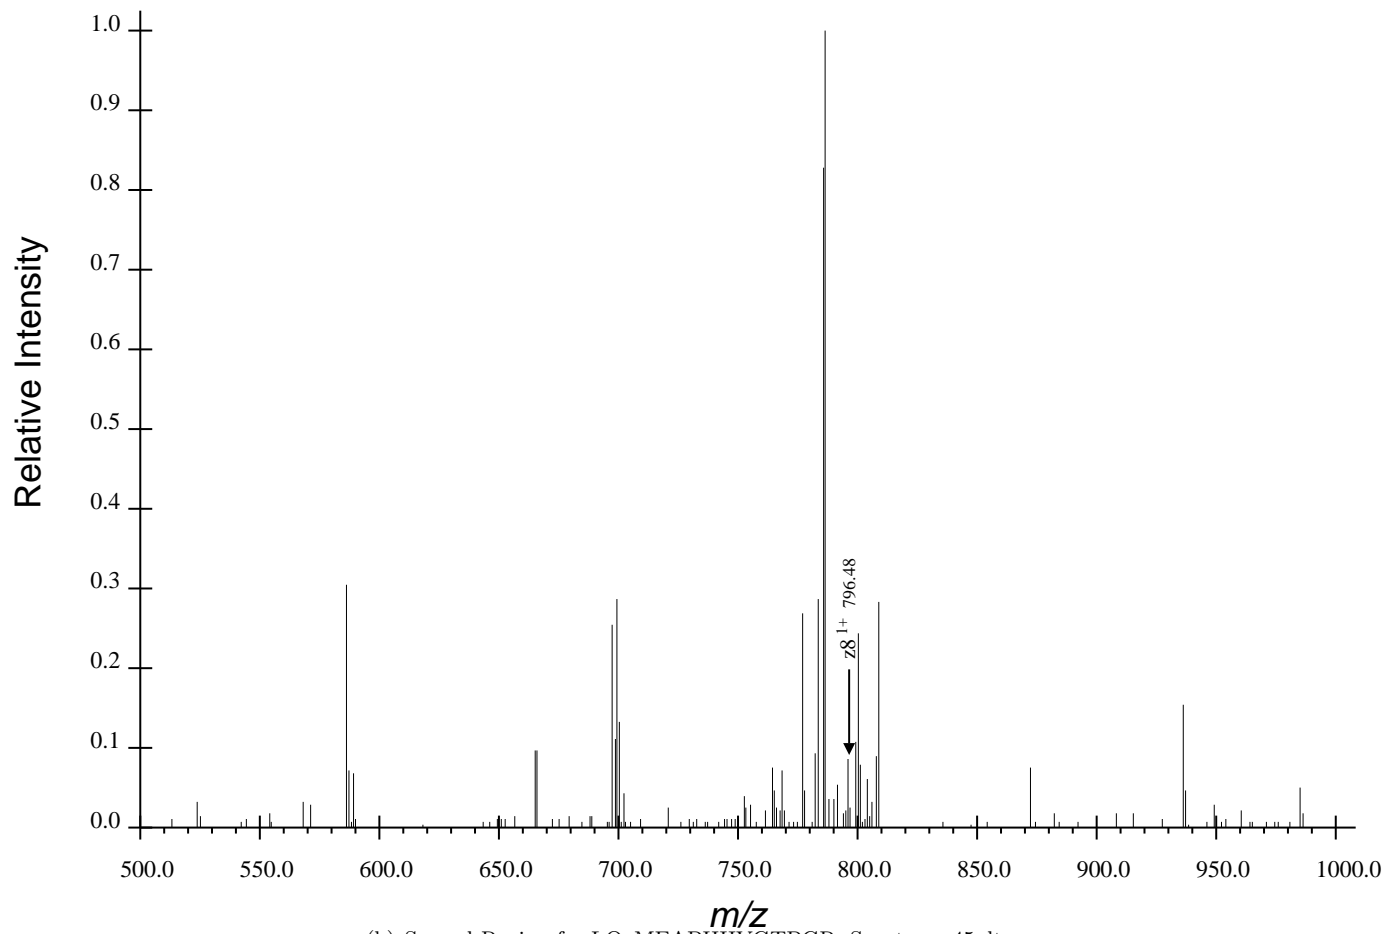

(b) Second Region for LQoMEAPHIIVGTPGR, Spectrum 45.dta

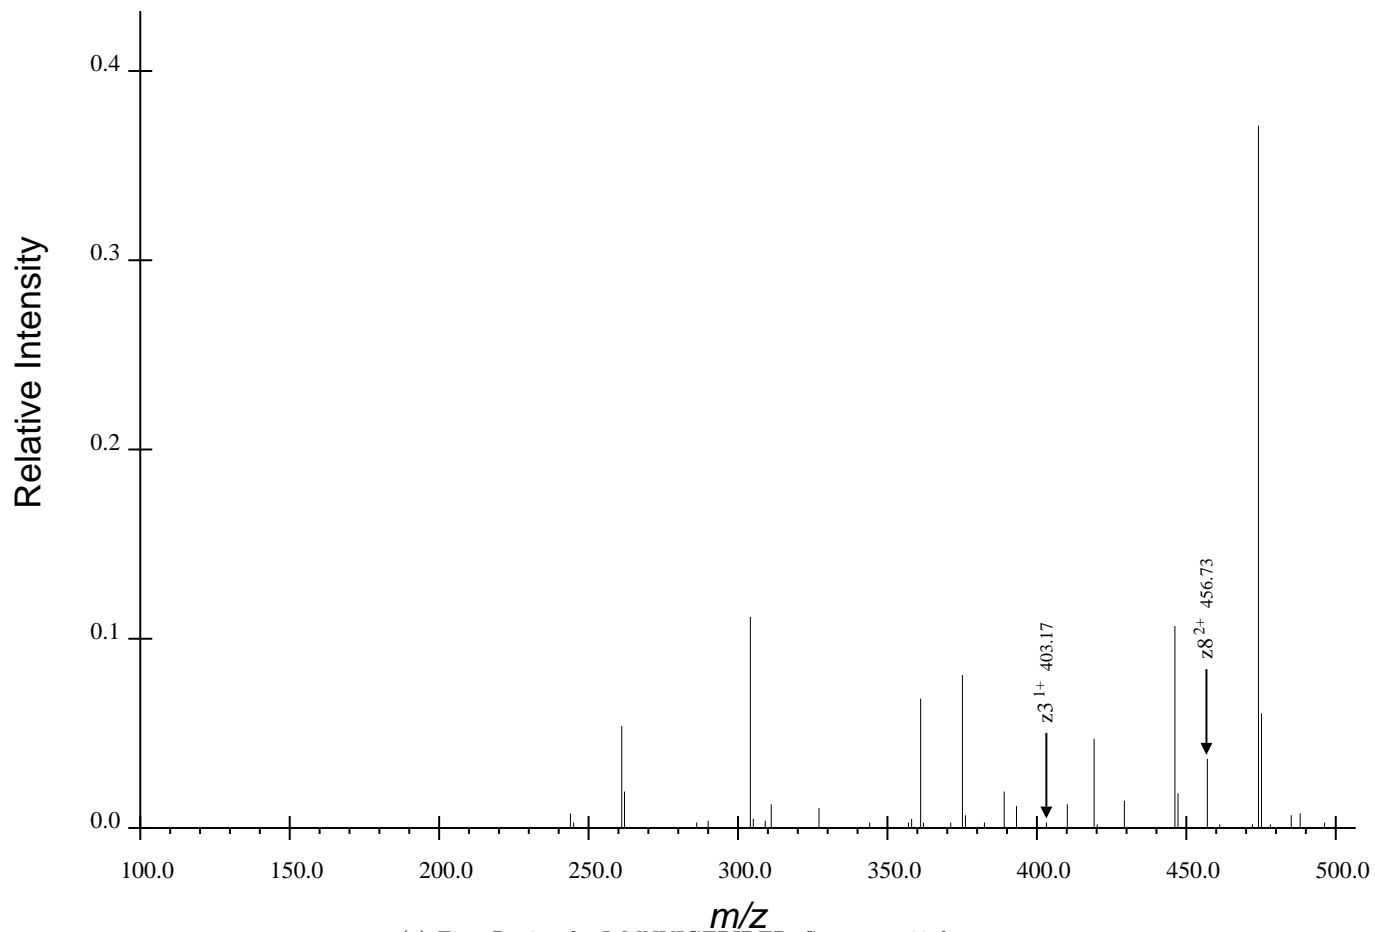

(a) First Region for IoMNVIGEPIDER, Spectrum 46.dta

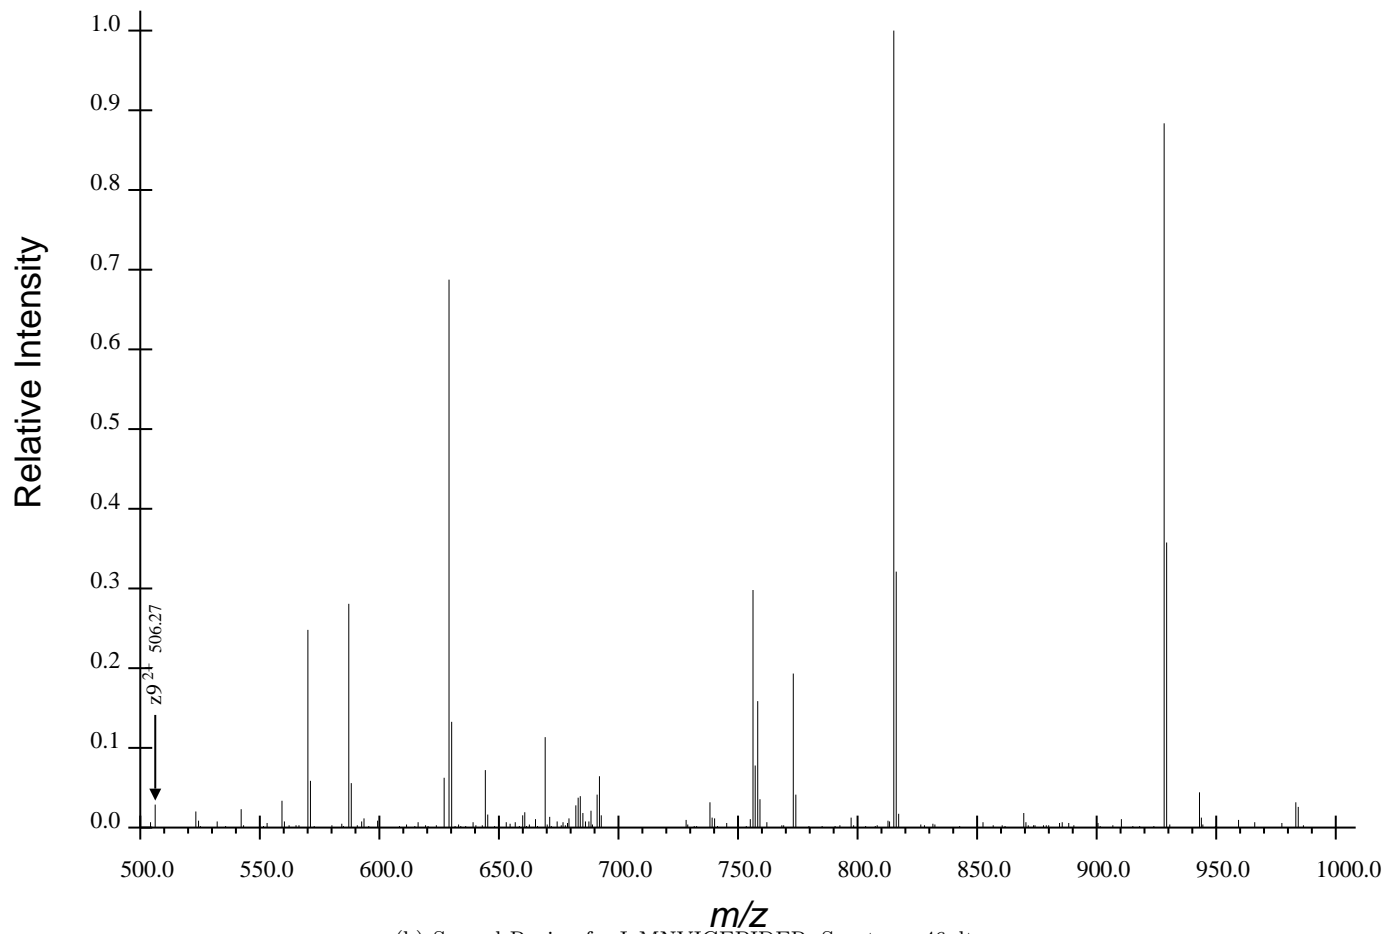

(b) Second Region for IoMNVIGEPIDER, Spectrum 46.dta



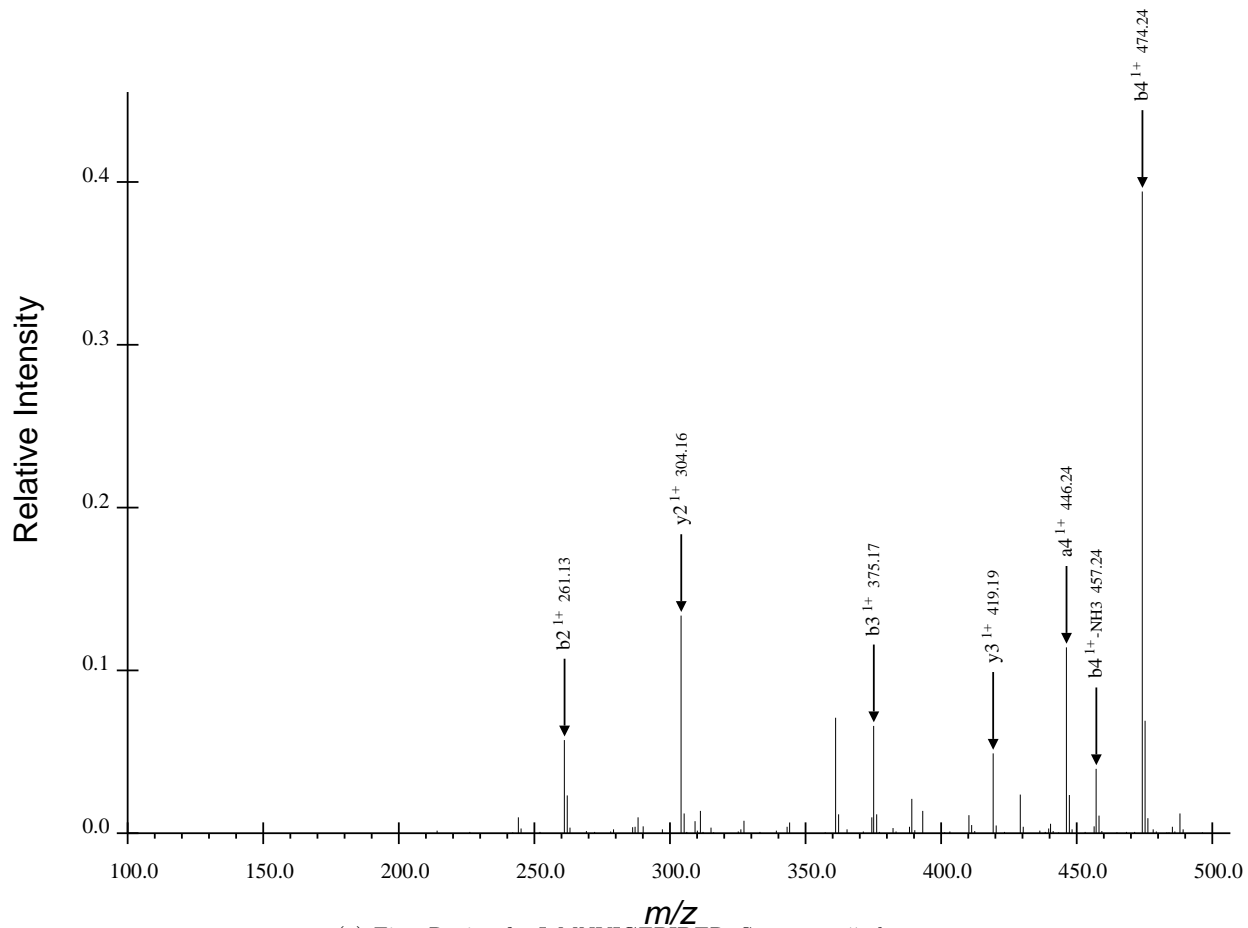

(a) First Region for IoMNVIGEPIDER, Spectrum 47.dta

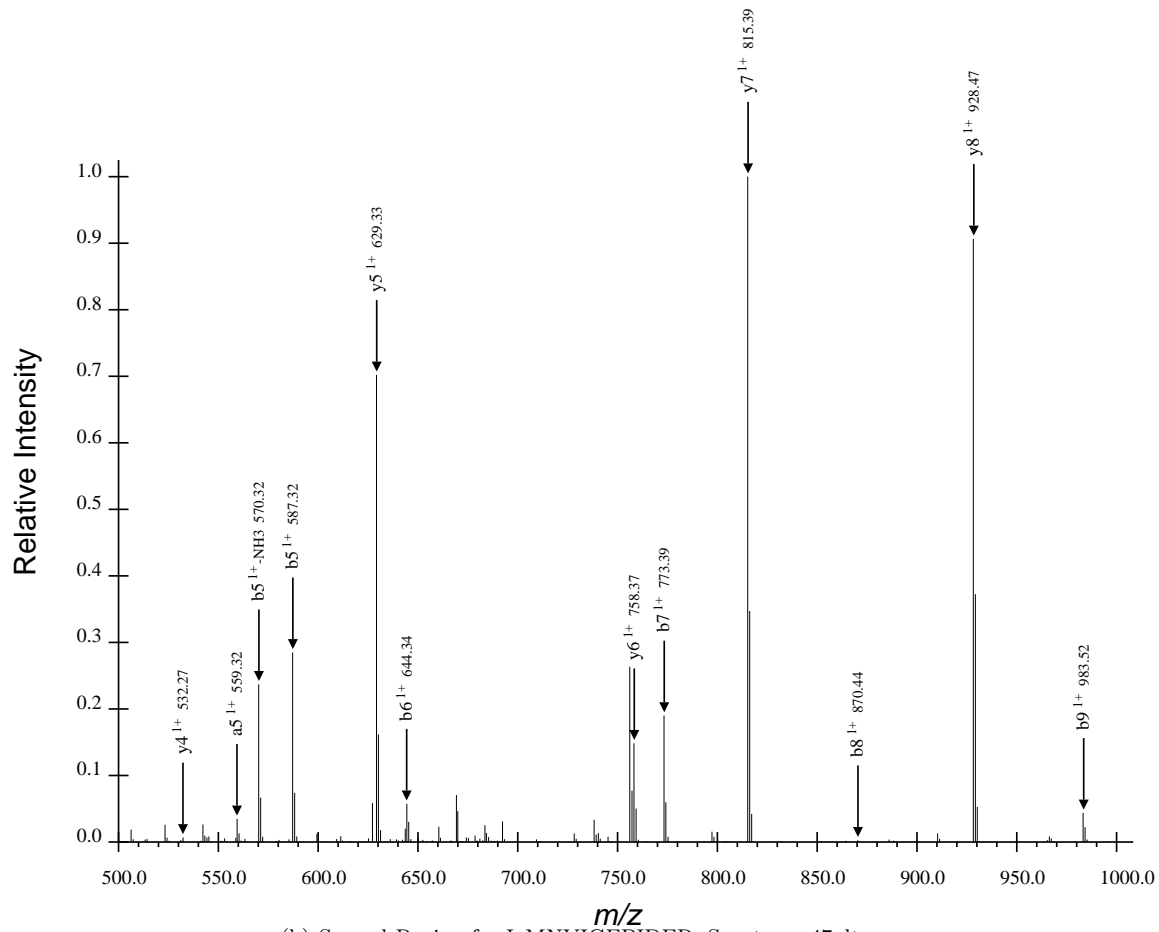

(b) Second Region for IoMNVIGEPIDER, Spectrum 47.dta

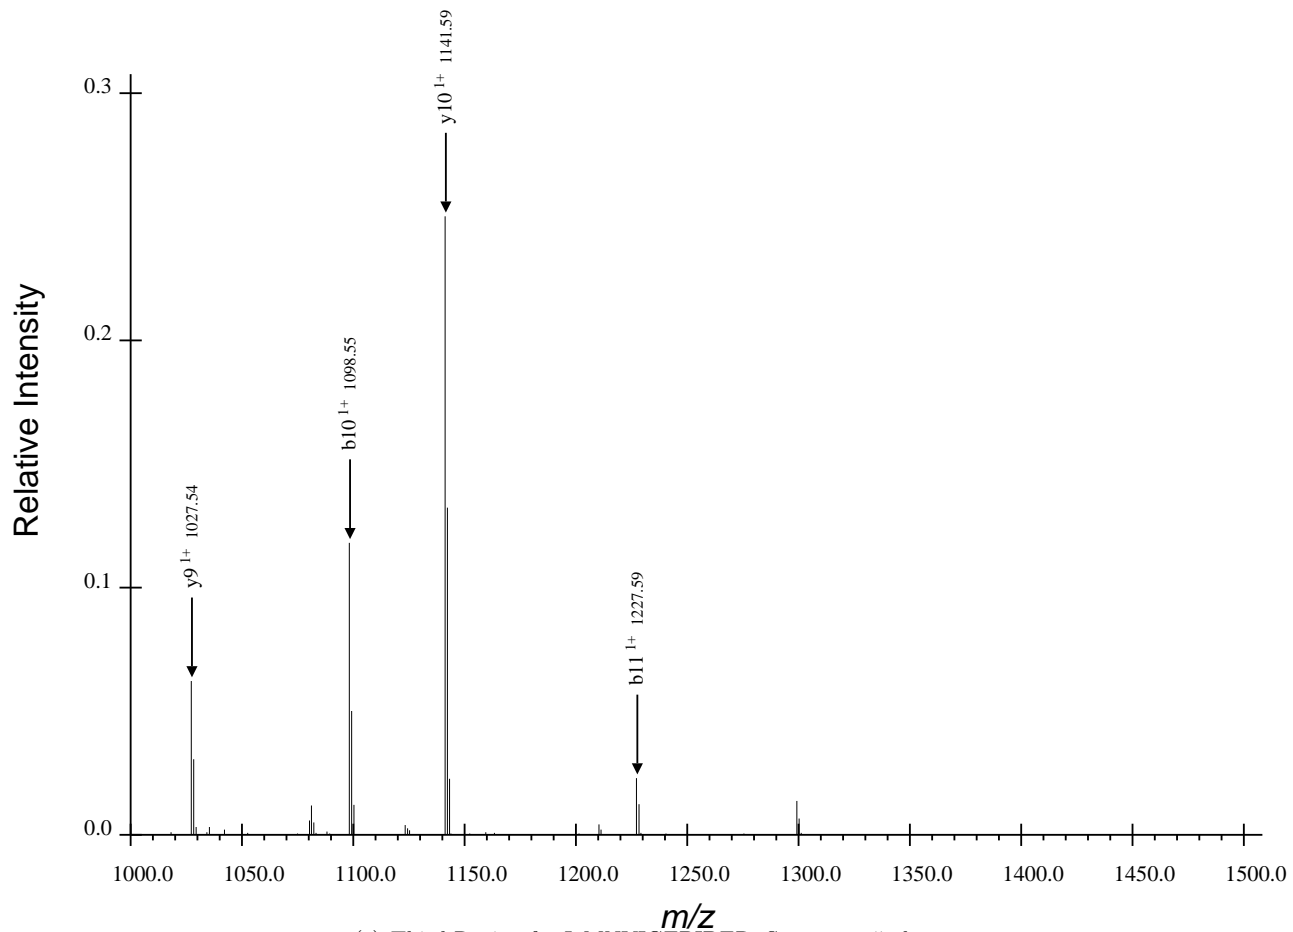

(c) Third Region for IoMNVIGEPIDER, Spectrum 47.dta

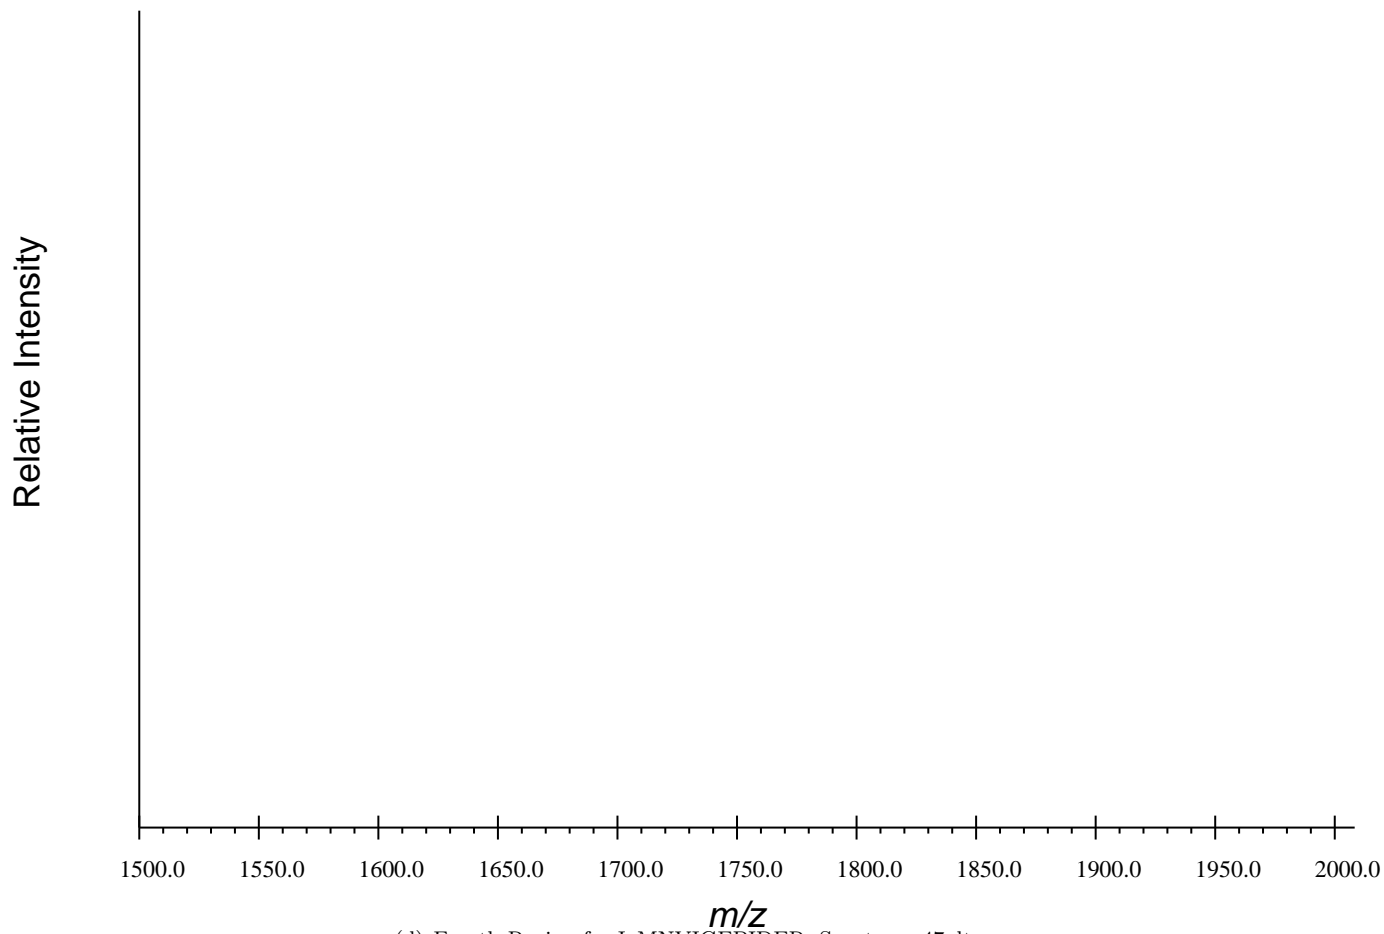

(d) Fourth Region for IoMNVIGEPIDER, Spectrum 47.dta

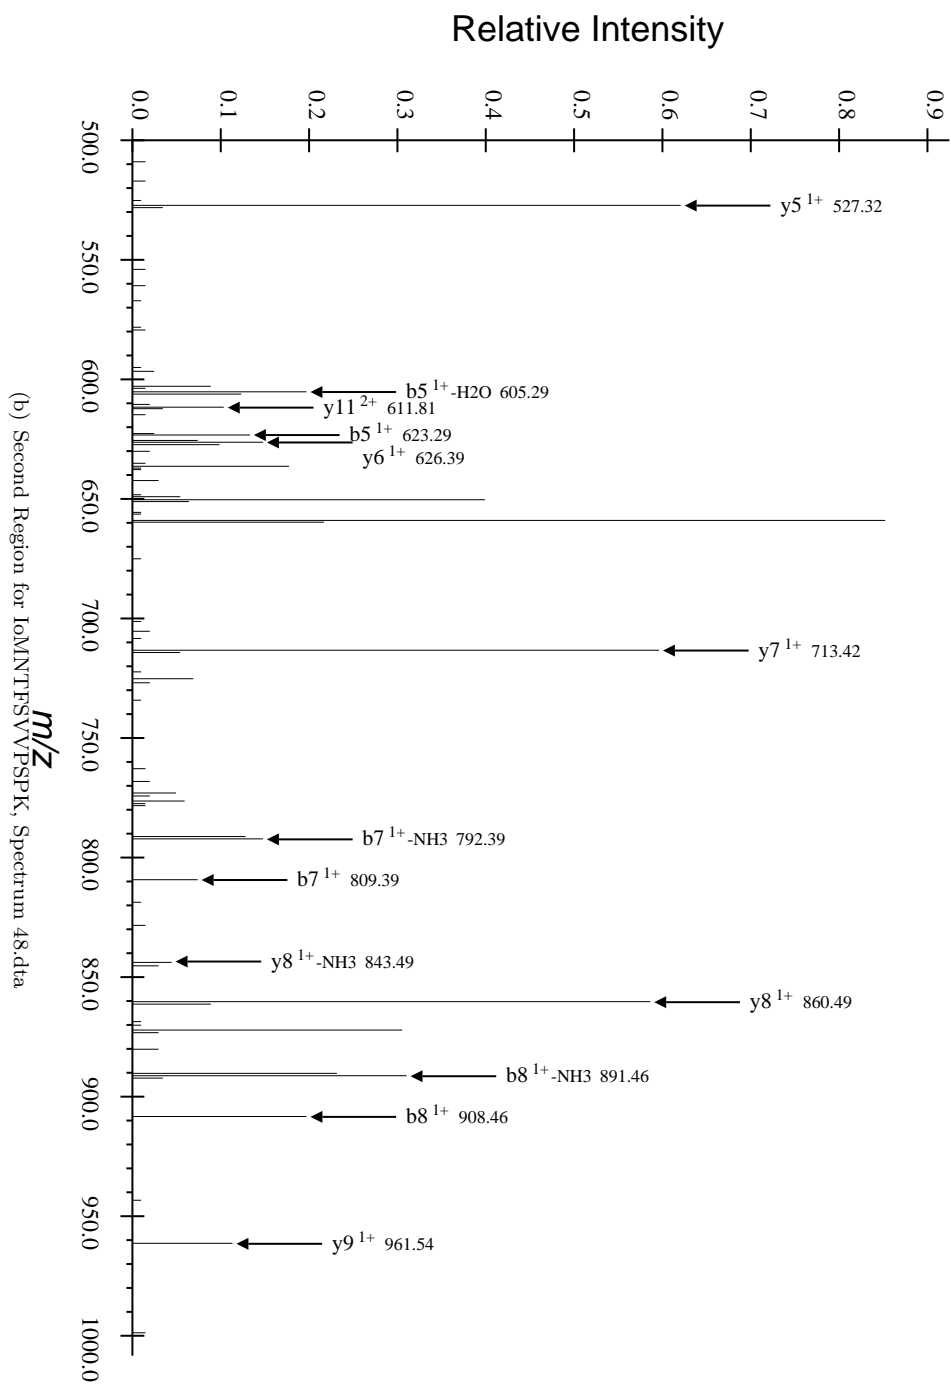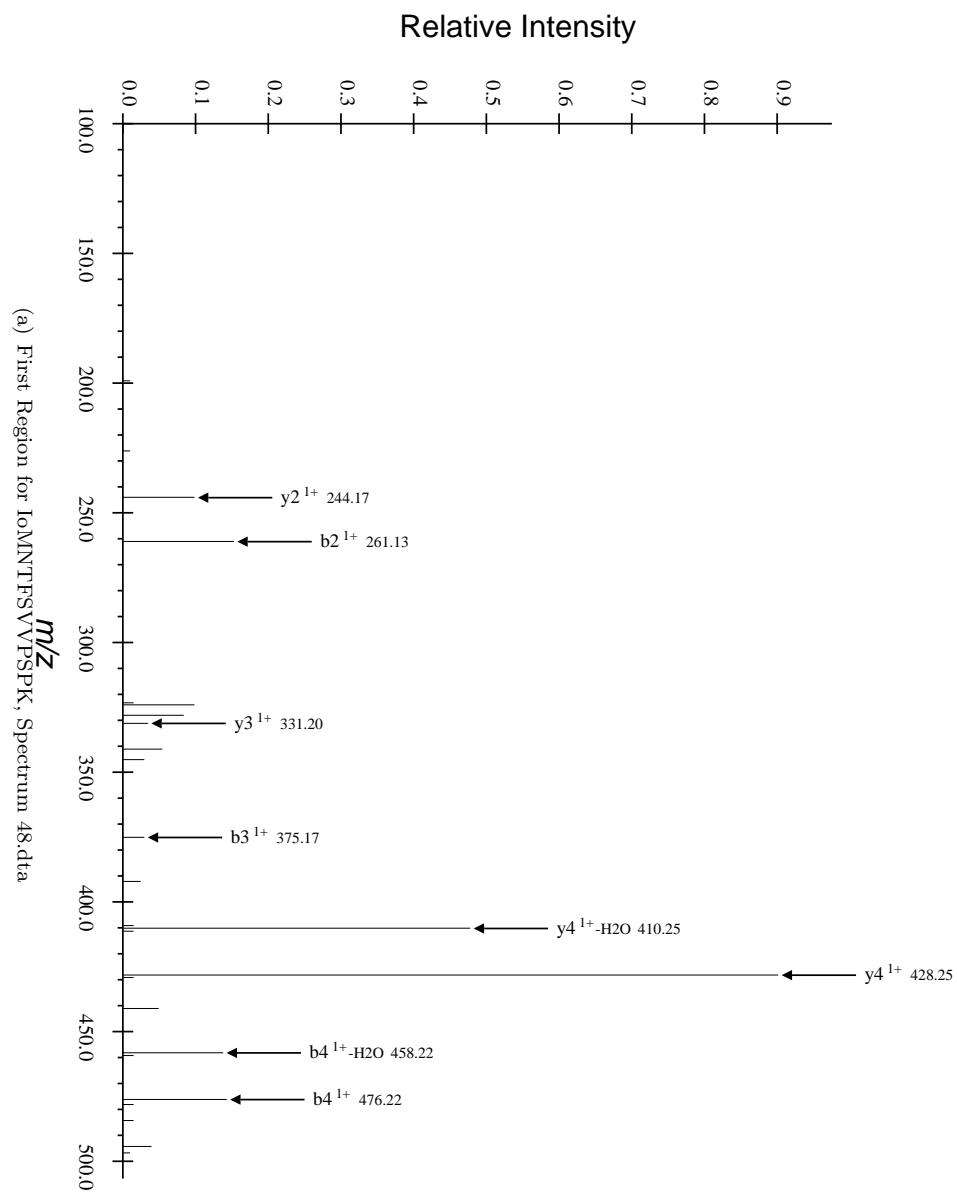

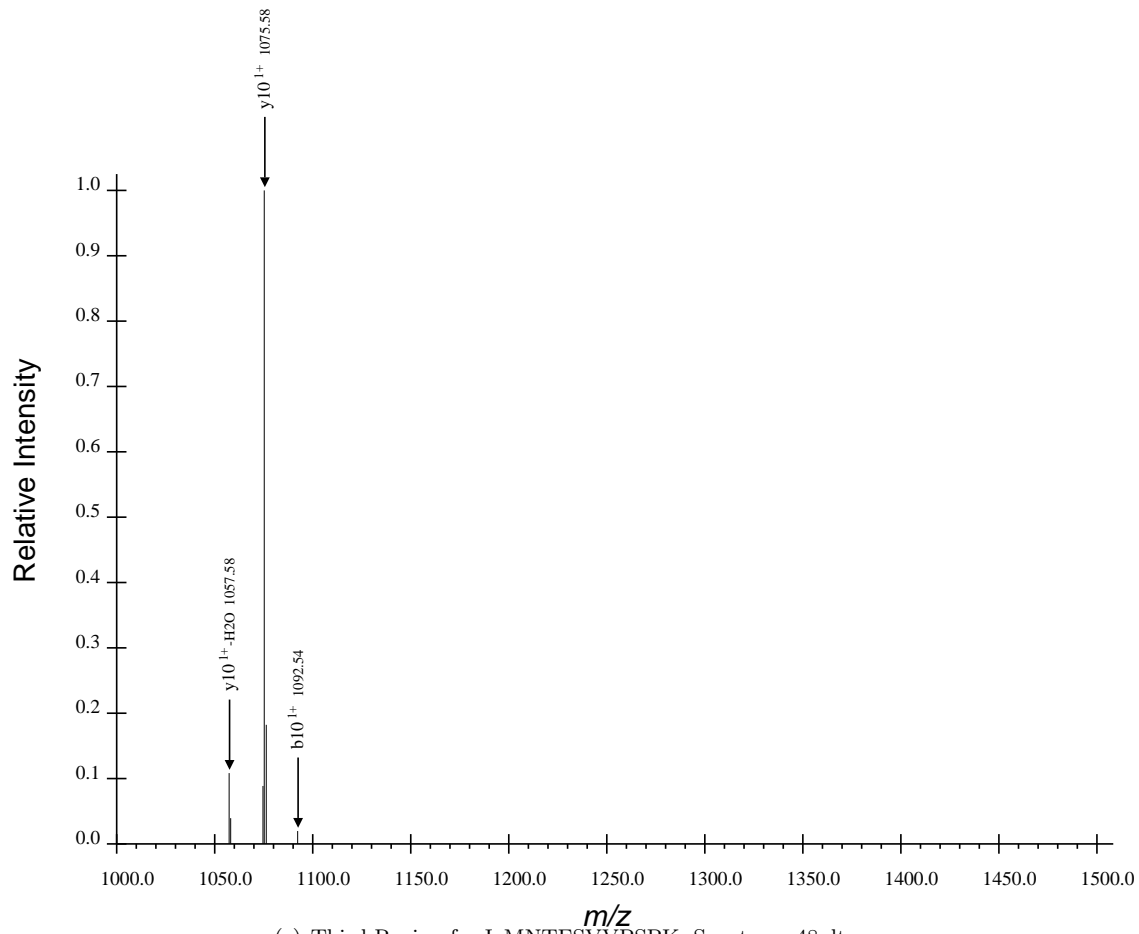

(c) Third Region for IoMNTFSVVPSPK, Spectrum 48.dta

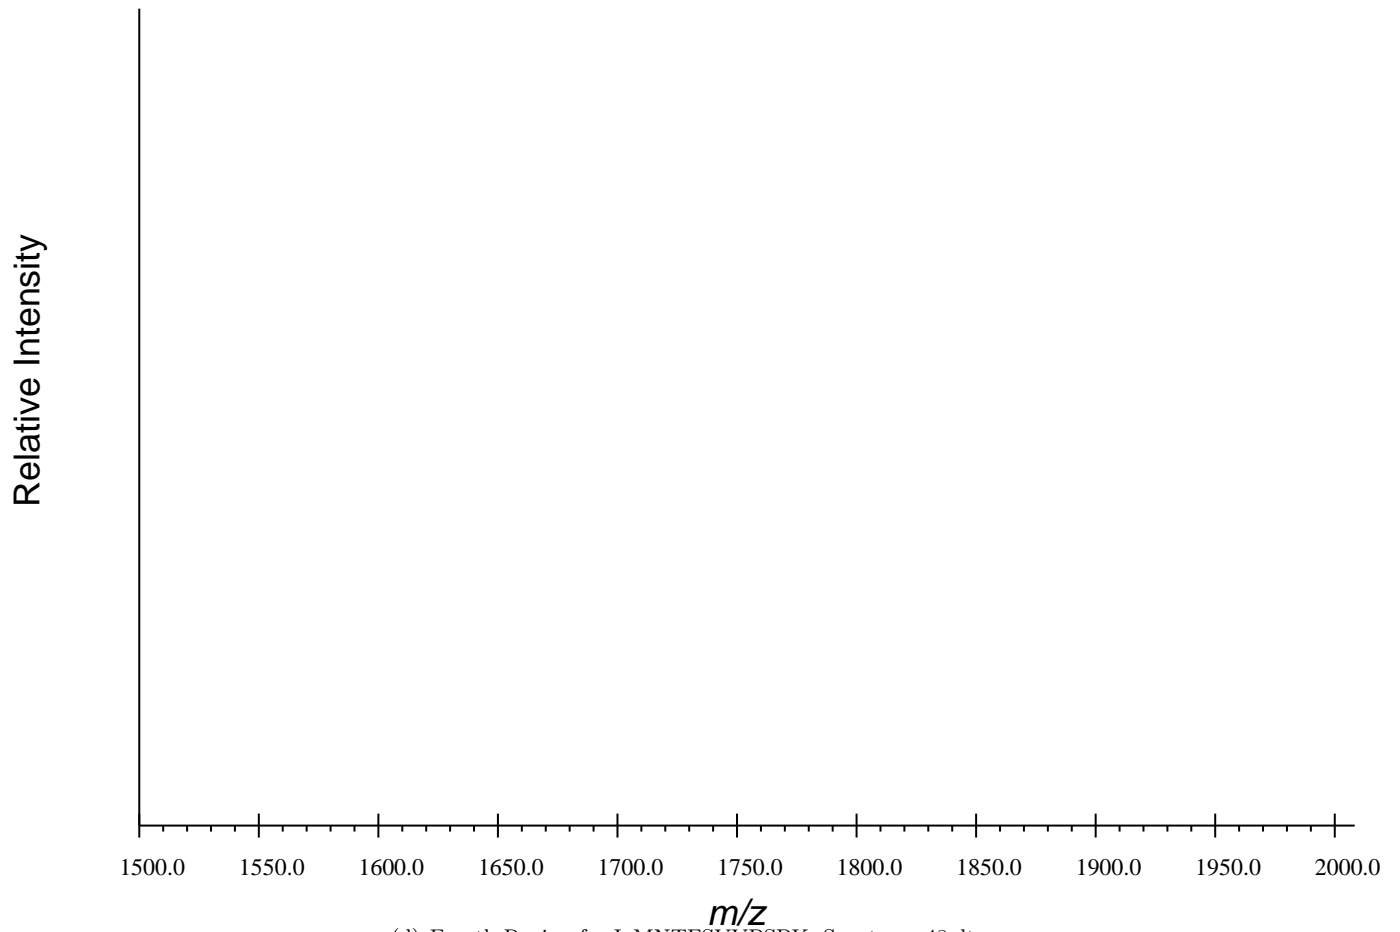

(d) Fourth Region for IoMNTFSVVPSPK, Spectrum 48.dta

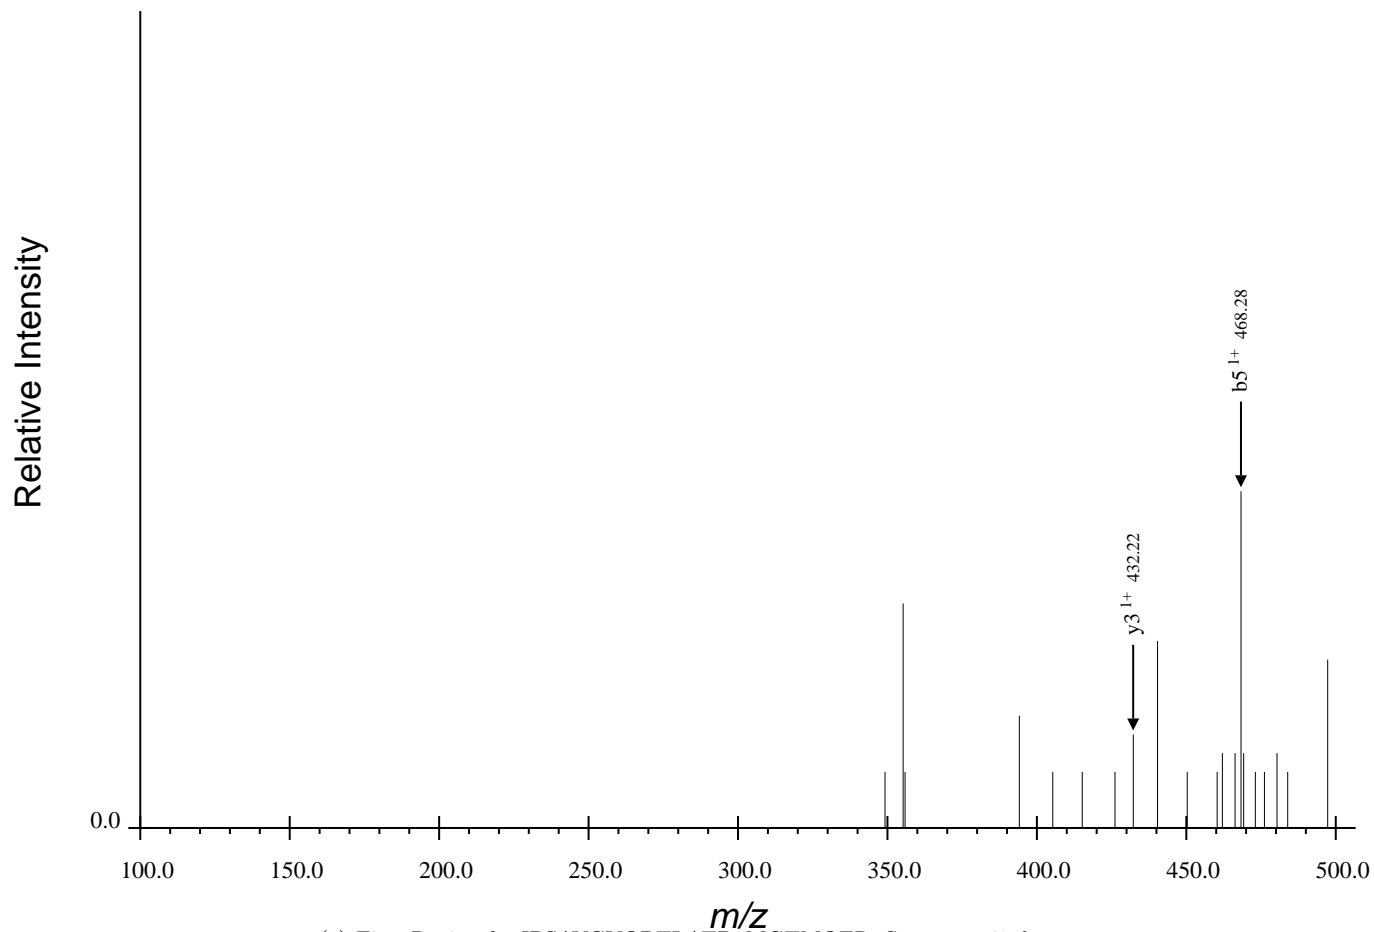

(a) First Region for IP(SAVGY)QPT(LATD)MG(TM)Q(R), Spectrum 49.dta

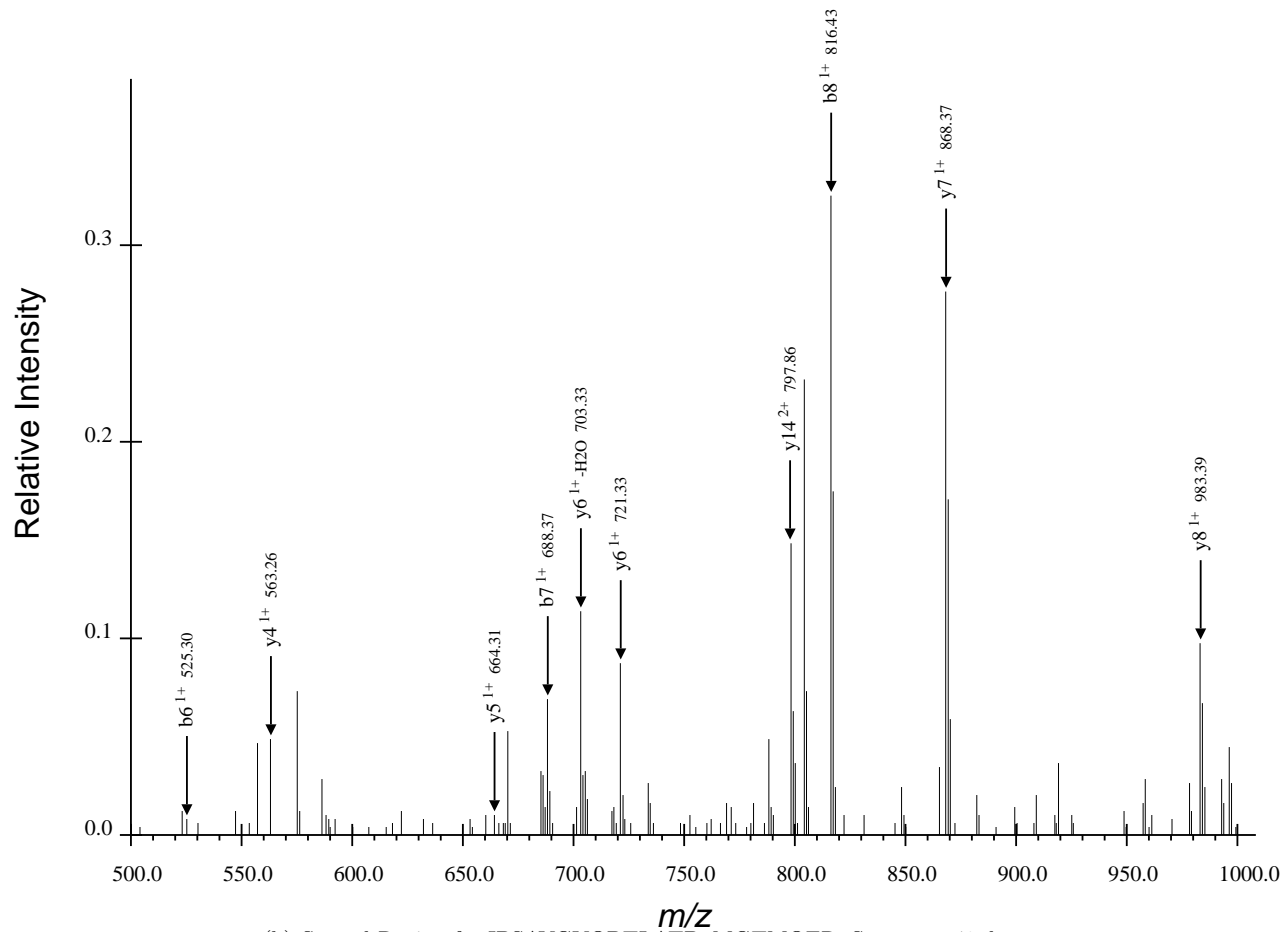

(b) Second Region for IP(SAVGY)QPT(LATD)MG(TM)Q(R), Spectrum 49.dta

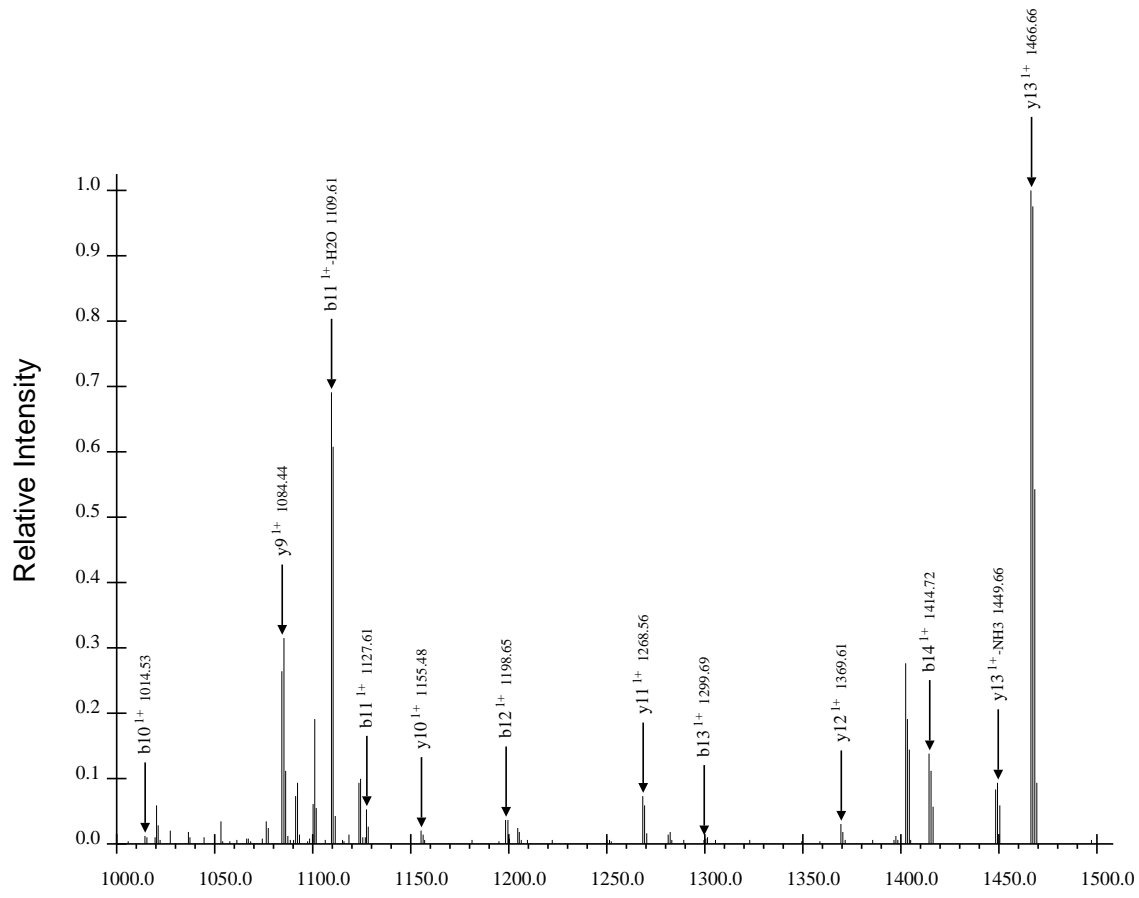

(c) Third Region for IPSAVGYQPTLATDoMGTMQER, Spectrum 49.dta

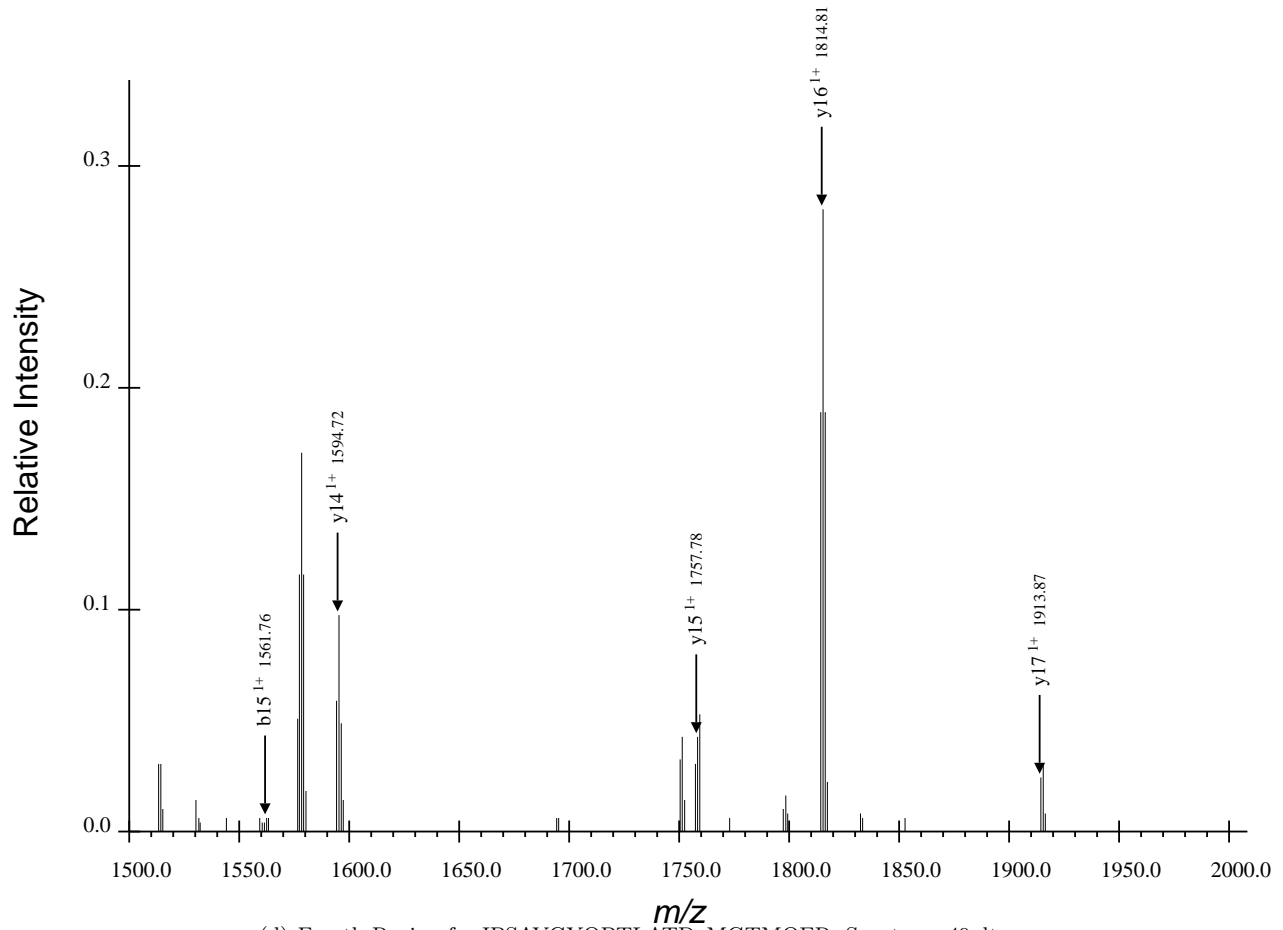

(d) Fourth Region for IPSAVGYQPTLATDoMGTMQER, Spectrum 49.dta

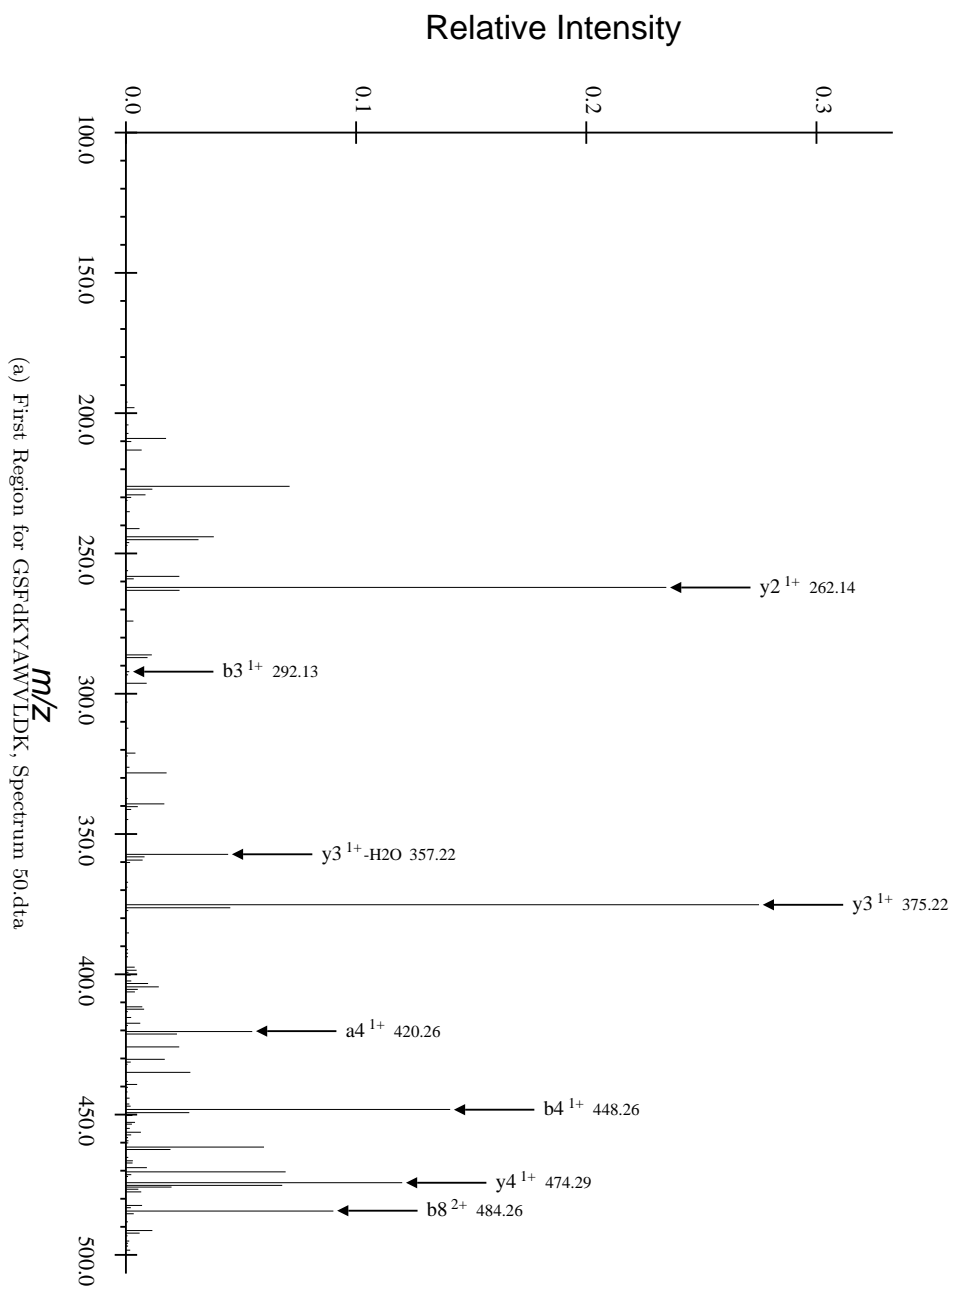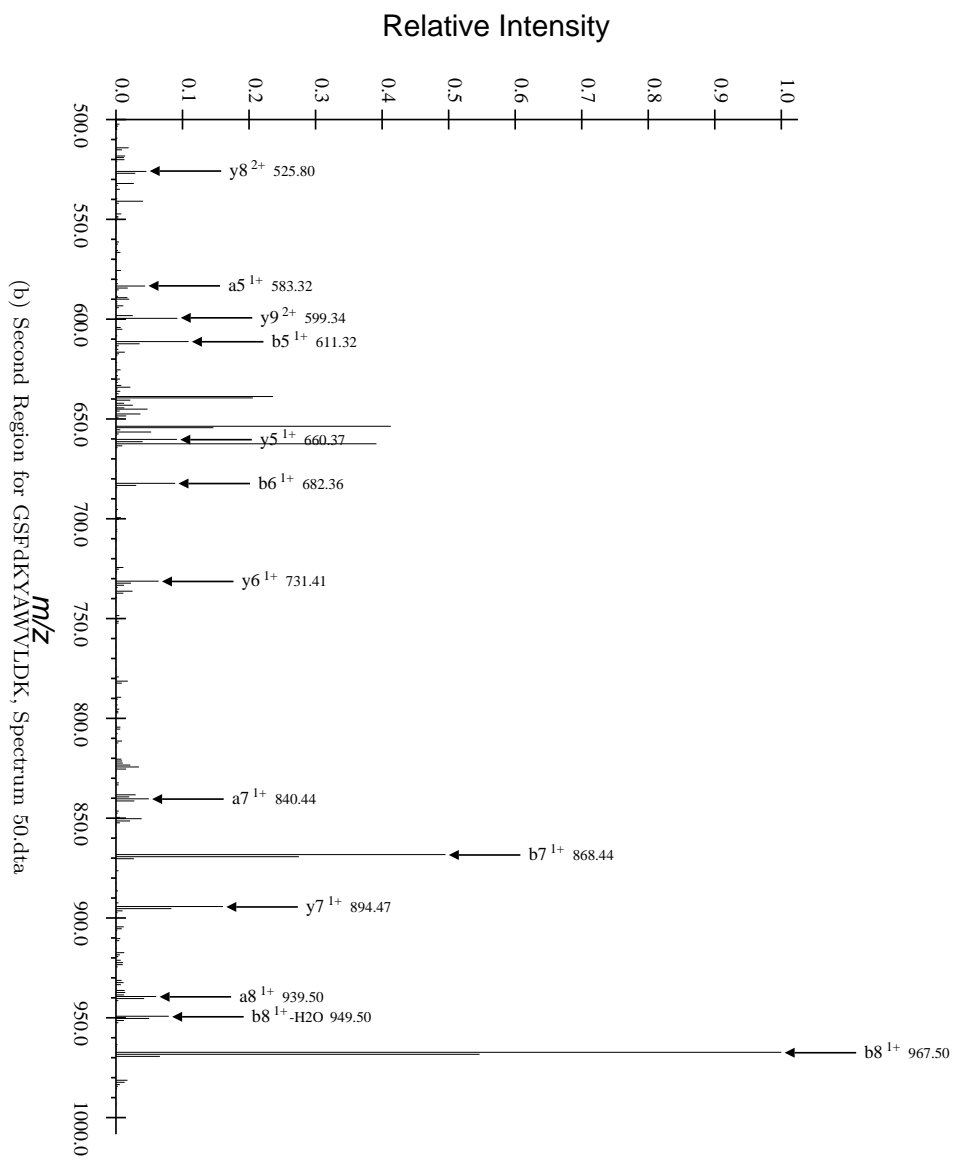

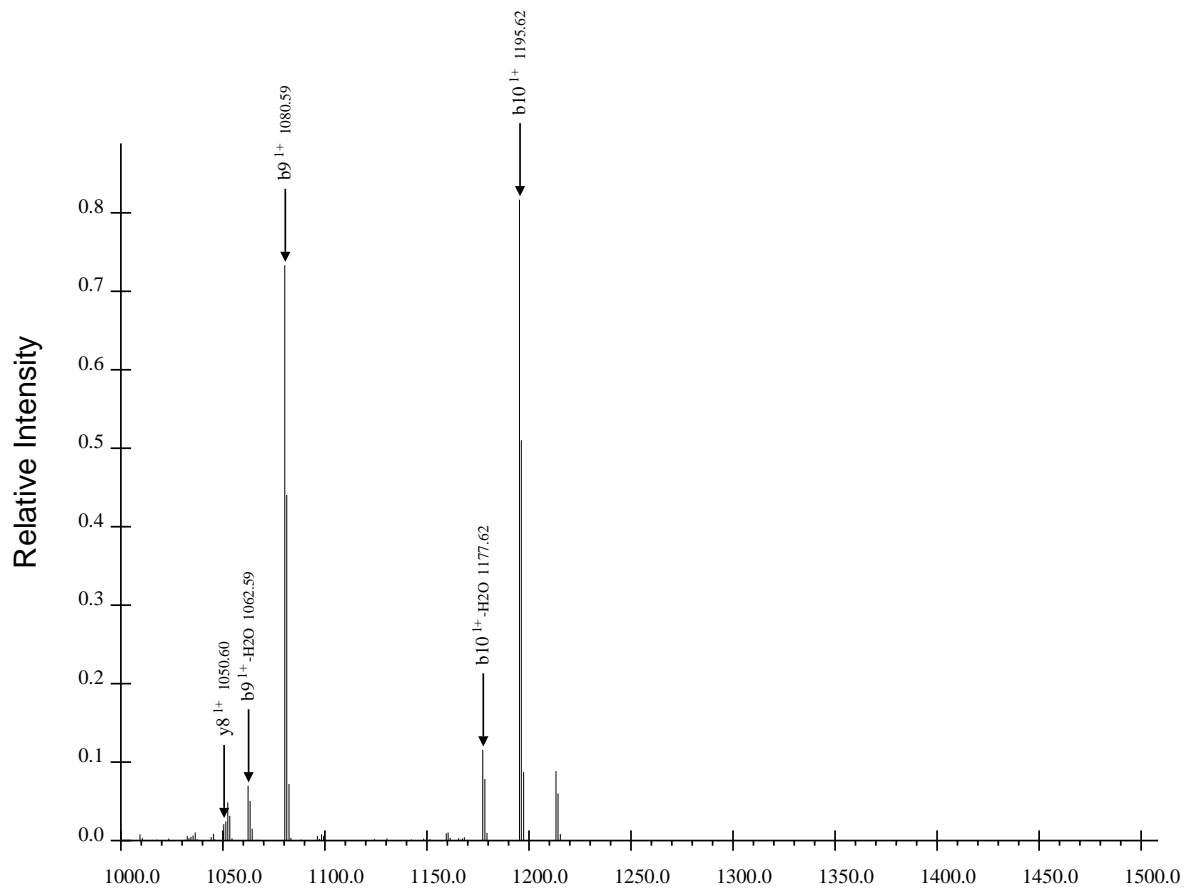

(c) Third Region for GSFdKYAWVLDK, Spectrum 50.dta

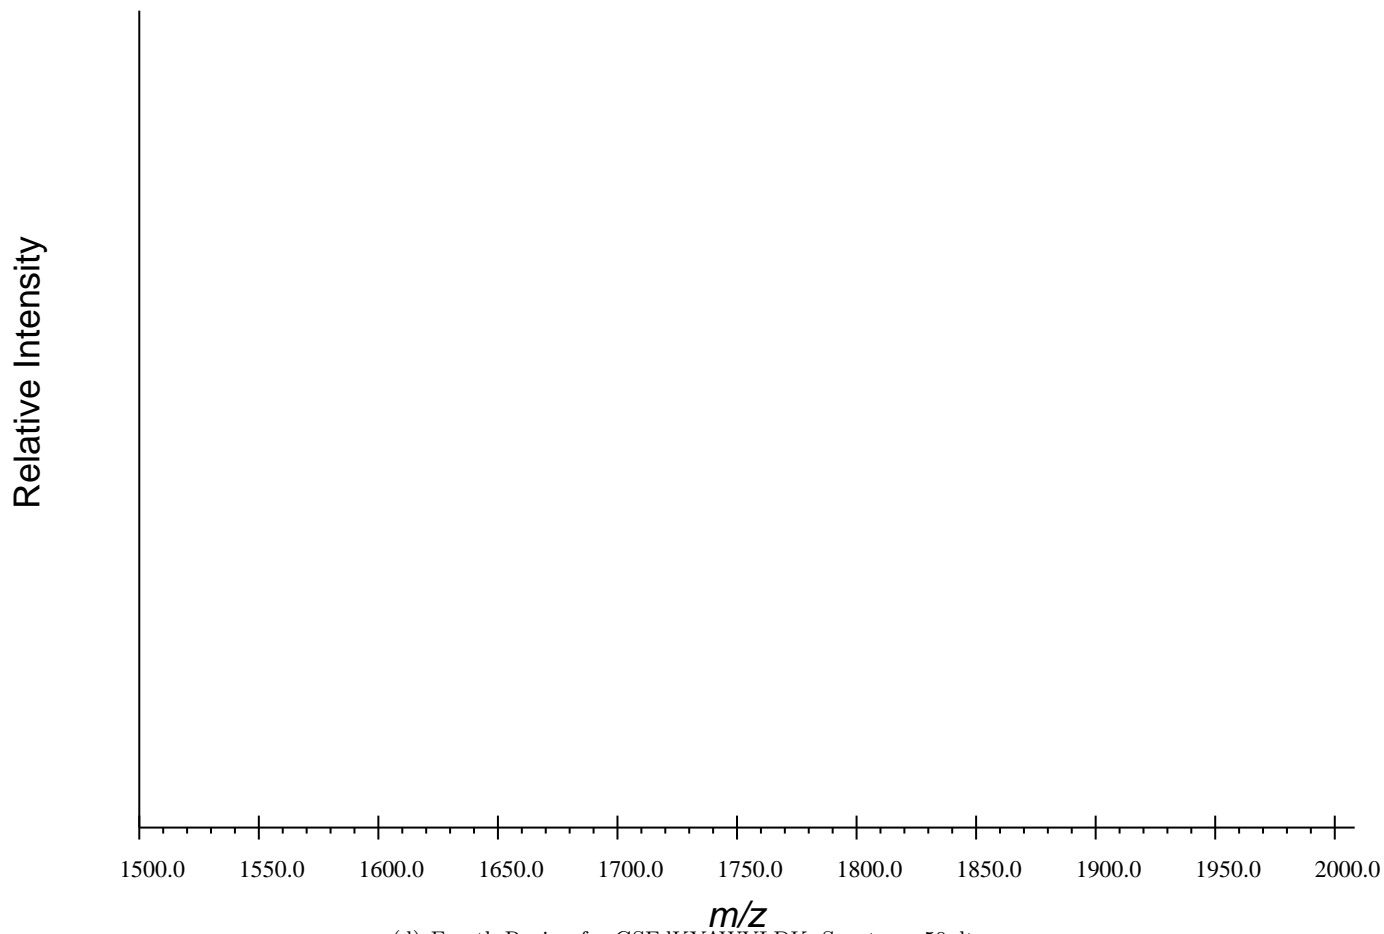

(d) Fourth Region for GSFdKYAWVLDK, Spectrum 50.dta



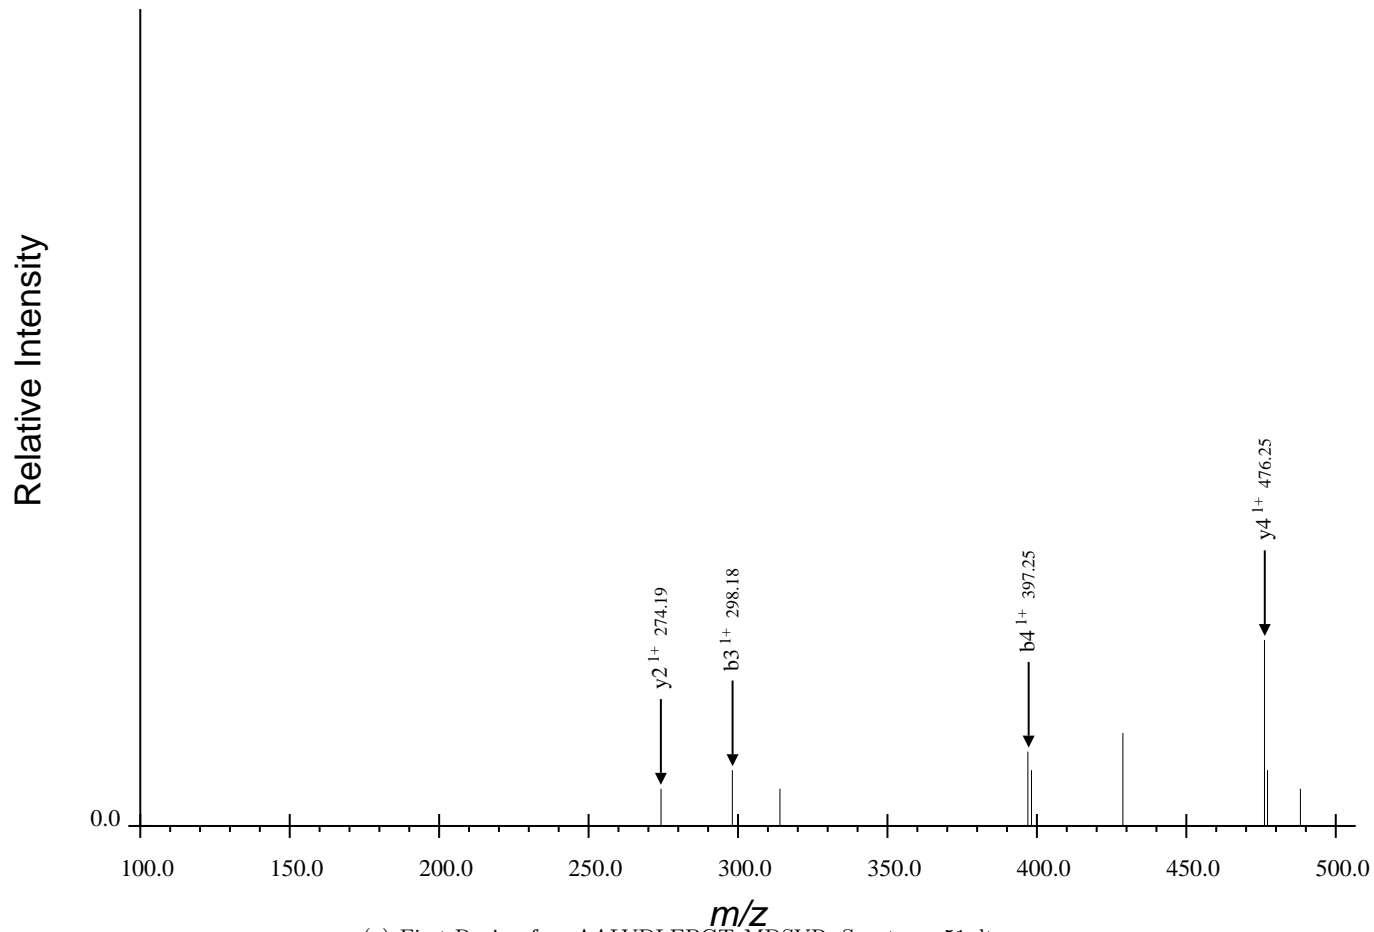

(a) First Region for aAALVDLEPGToMDSVR, Spectrum 51.dta

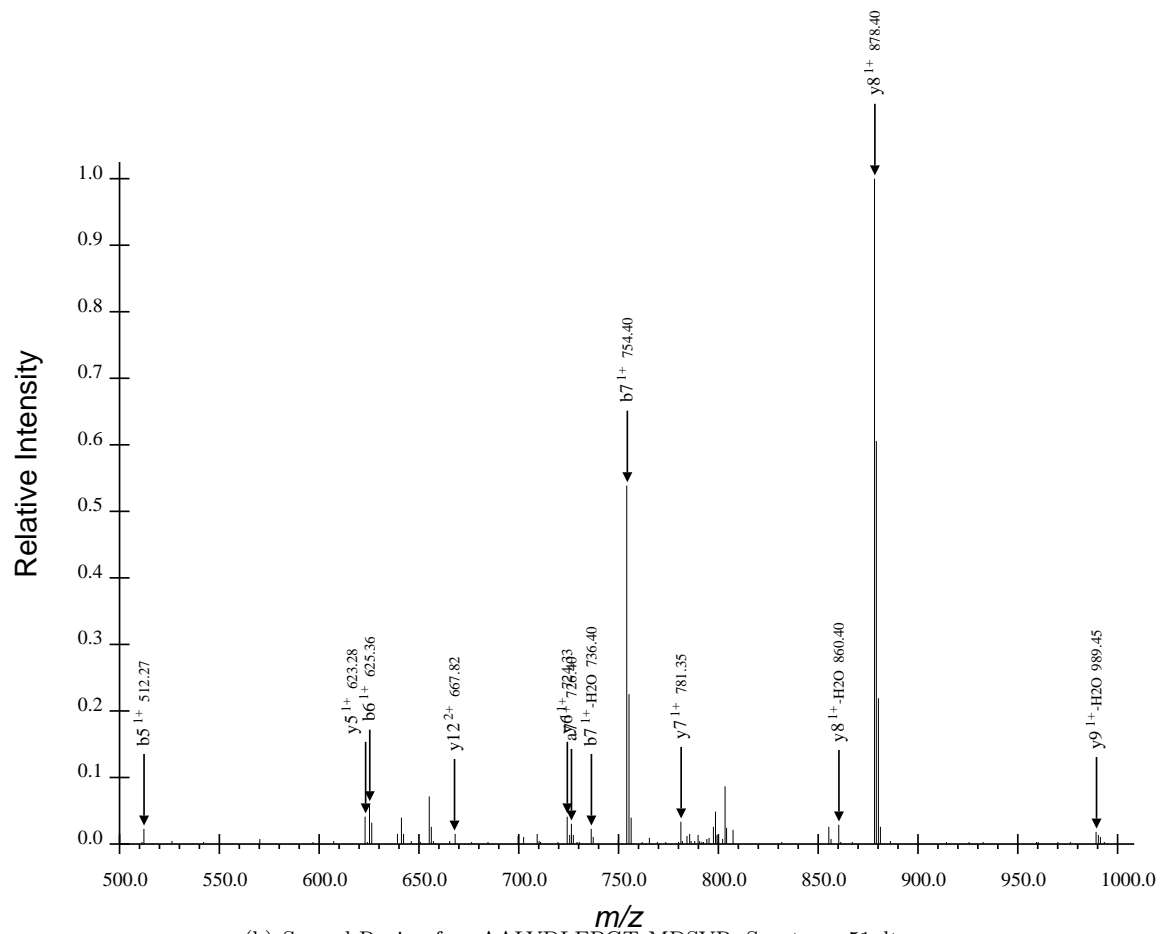

(b) Second Region for aAALVDLEPGToMDSVR, Spectrum 51.dta

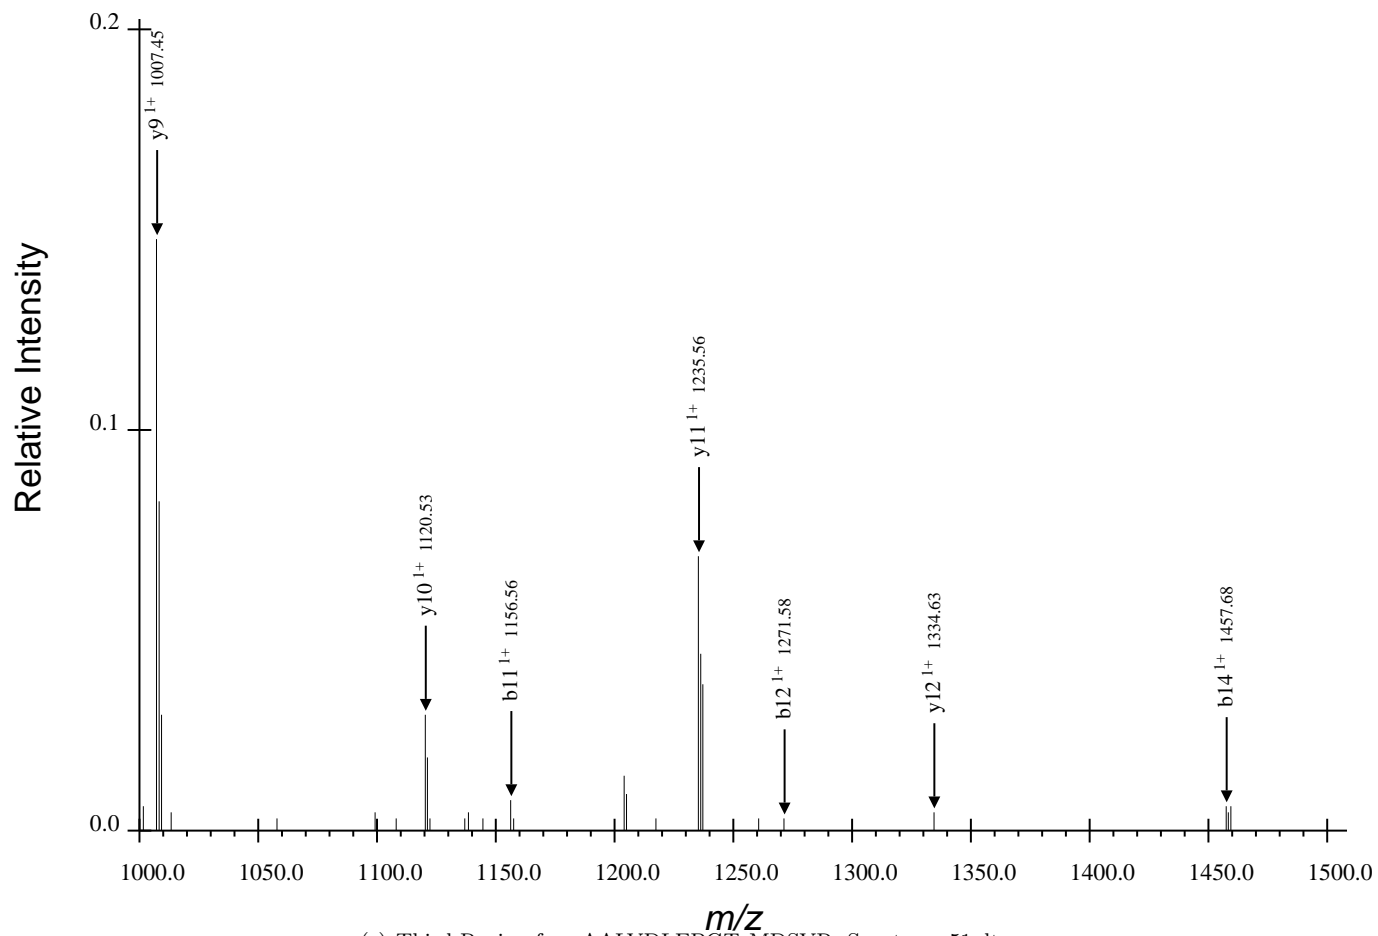

(c) Third Region for aAALVDLEPGToMDSVR, Spectrum 51.dta

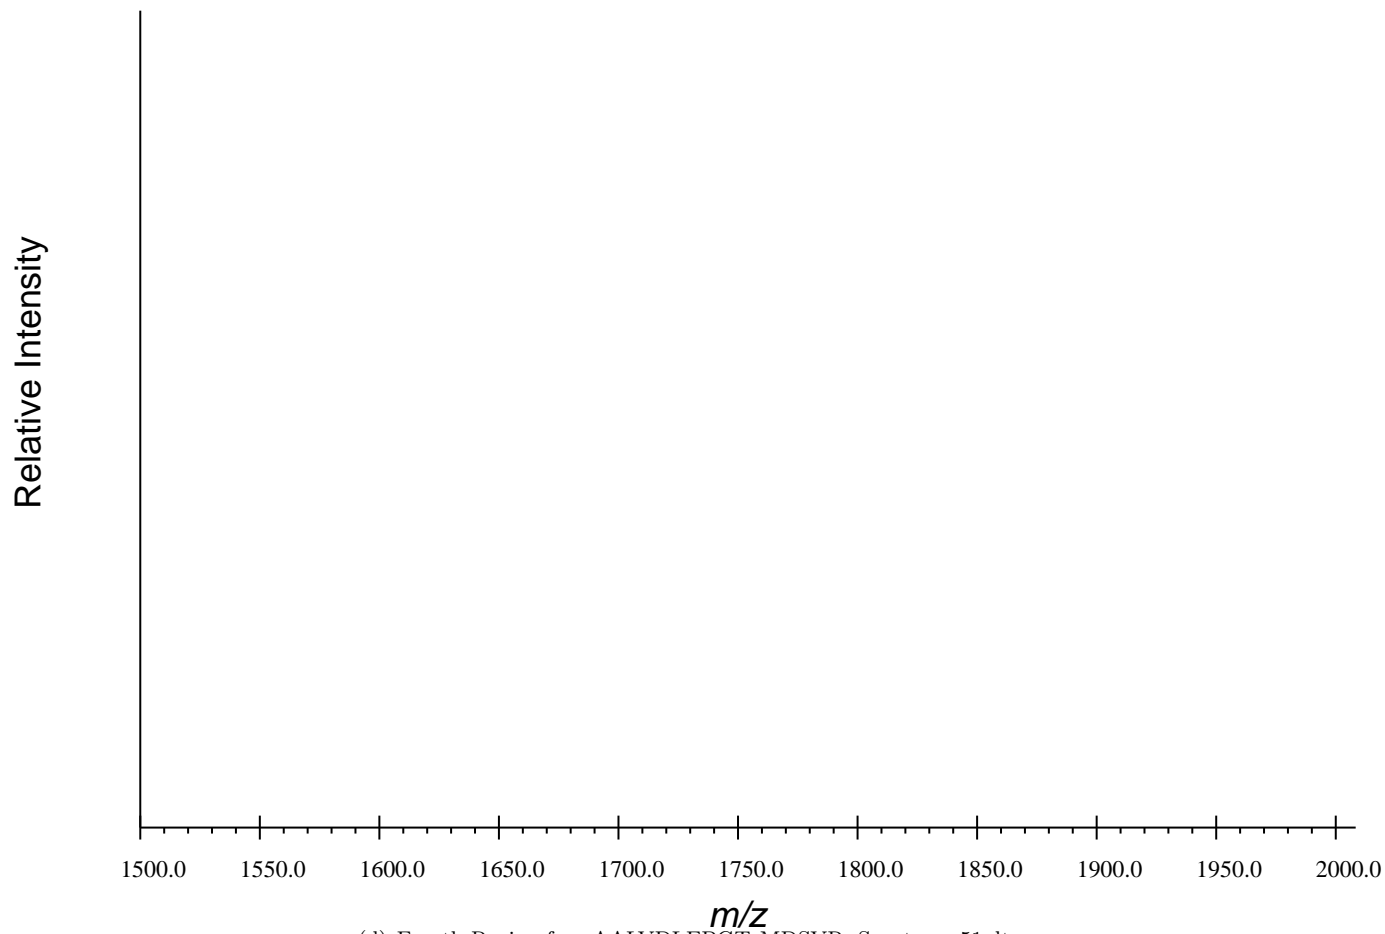

(d) Fourth Region for aAALVDLEPGToMDSVR, Spectrum 51.dta

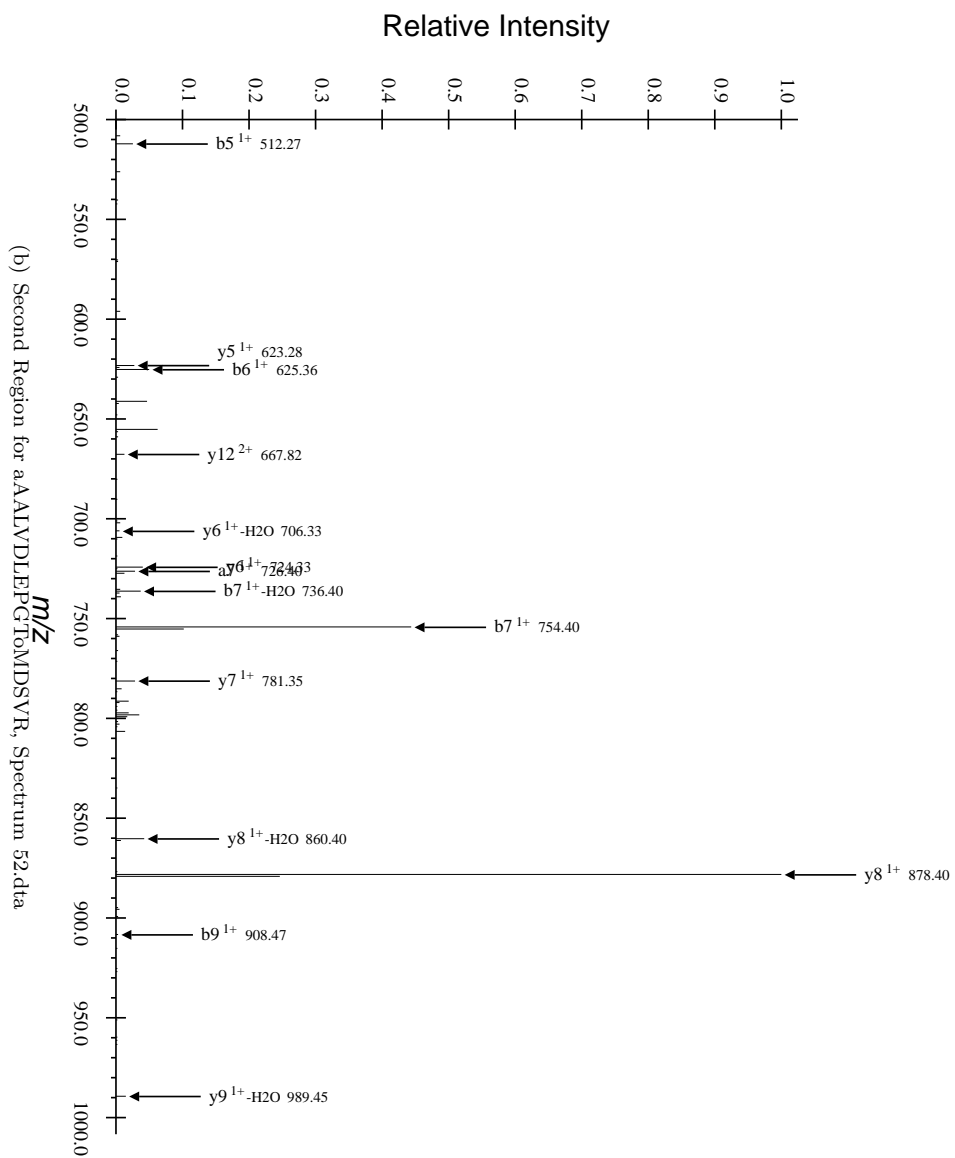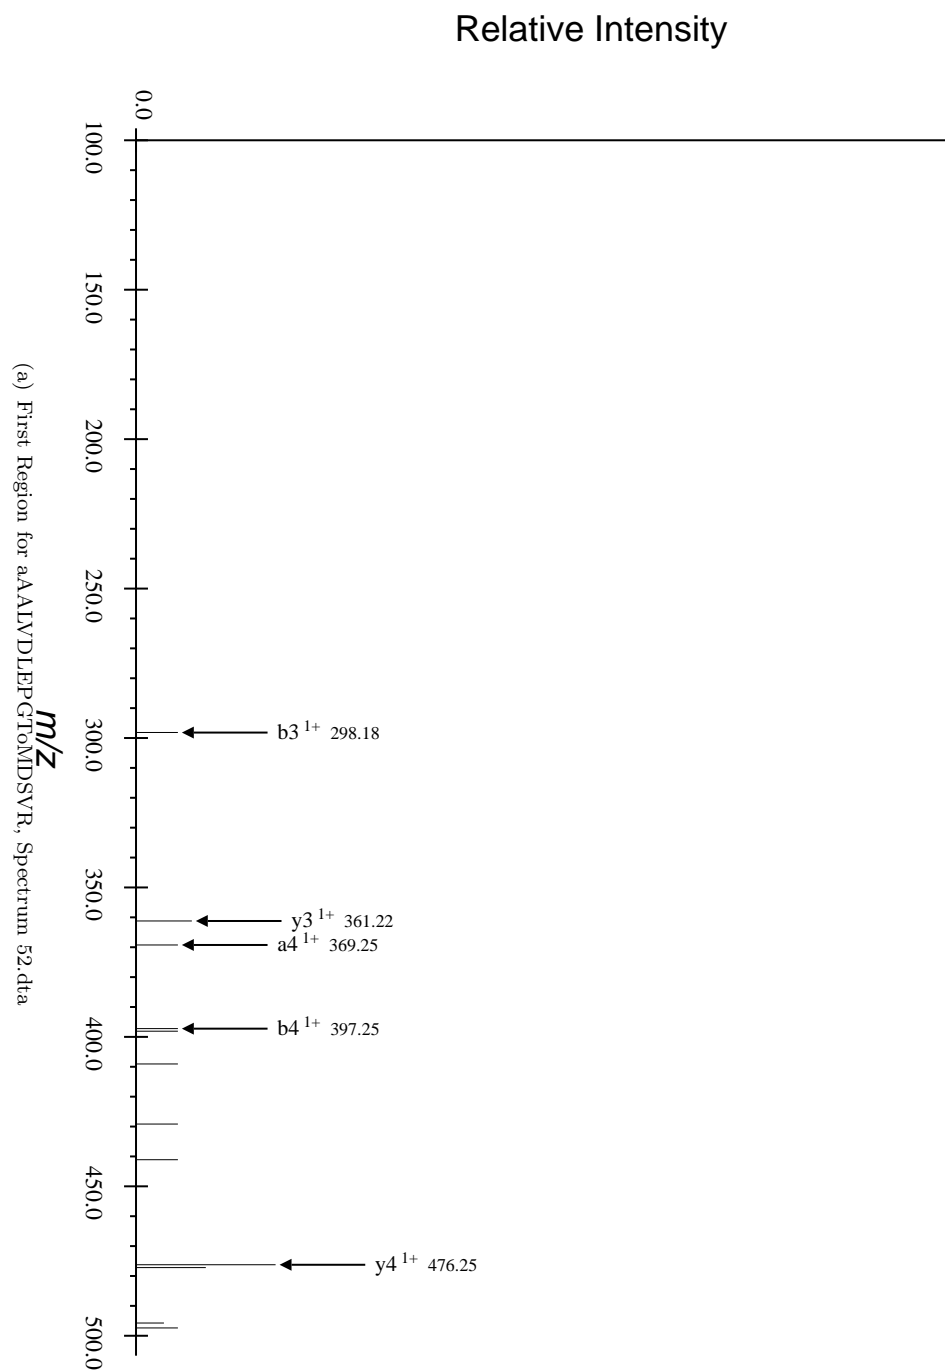

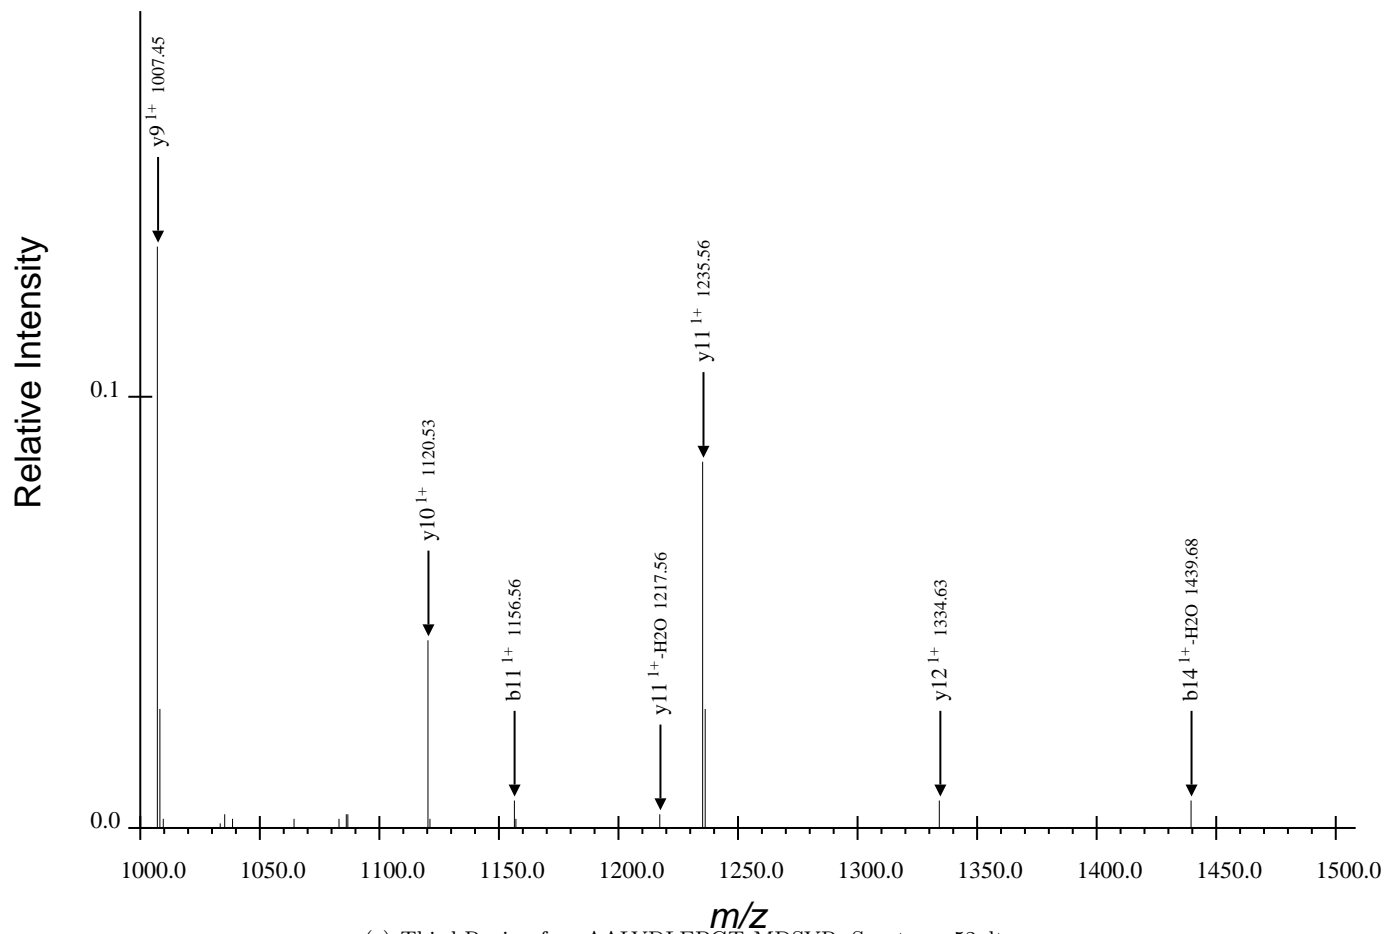

(c) Third Region for aAALVDLEPGToMDSVR, Spectrum 52.dta

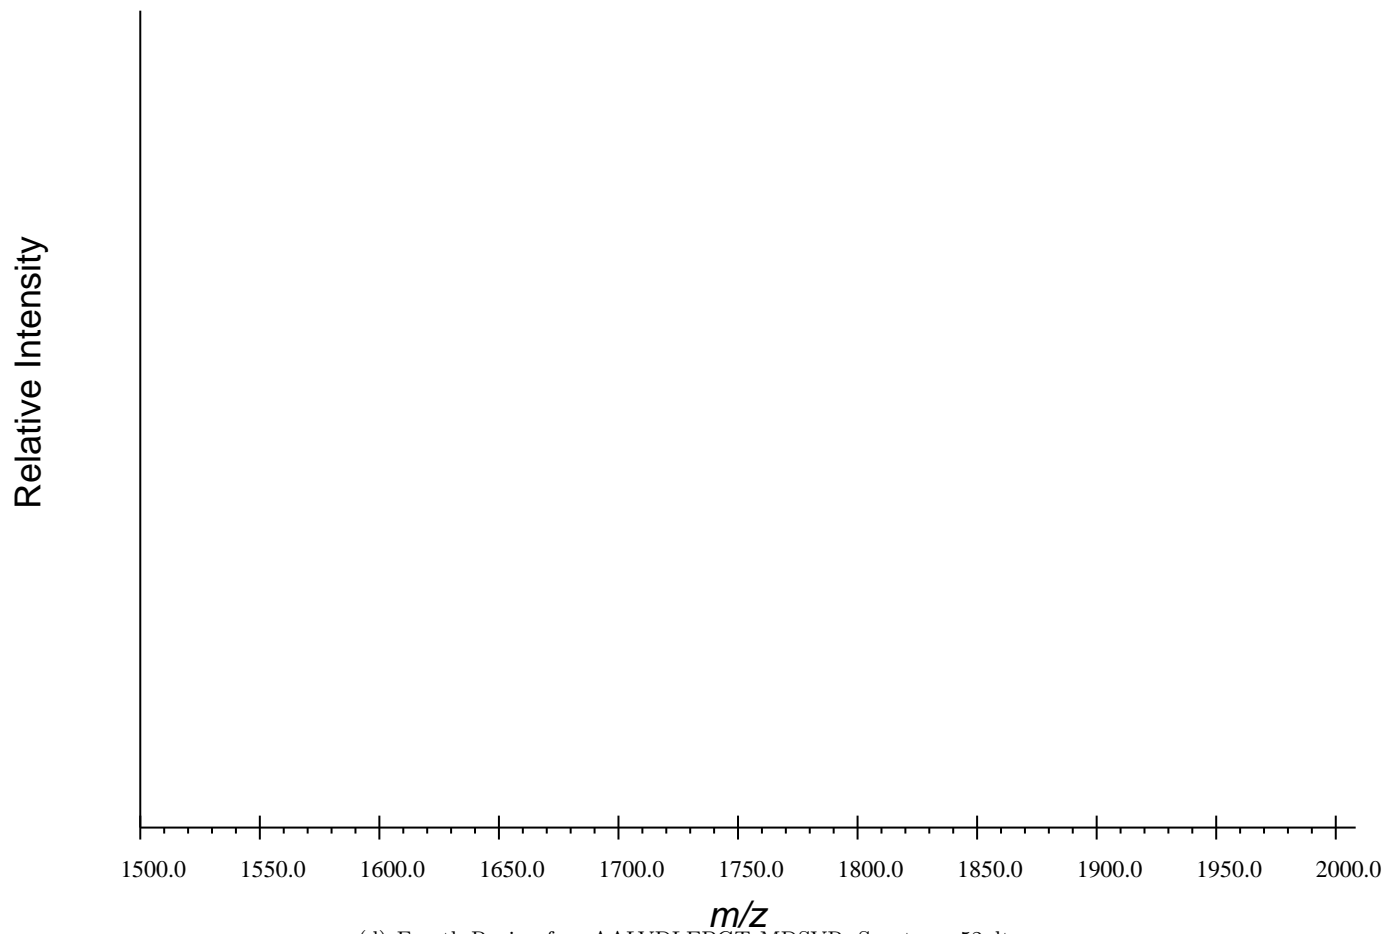

(d) Fourth Region for aAALVDLEPGToMDSVR, Spectrum 52.dta

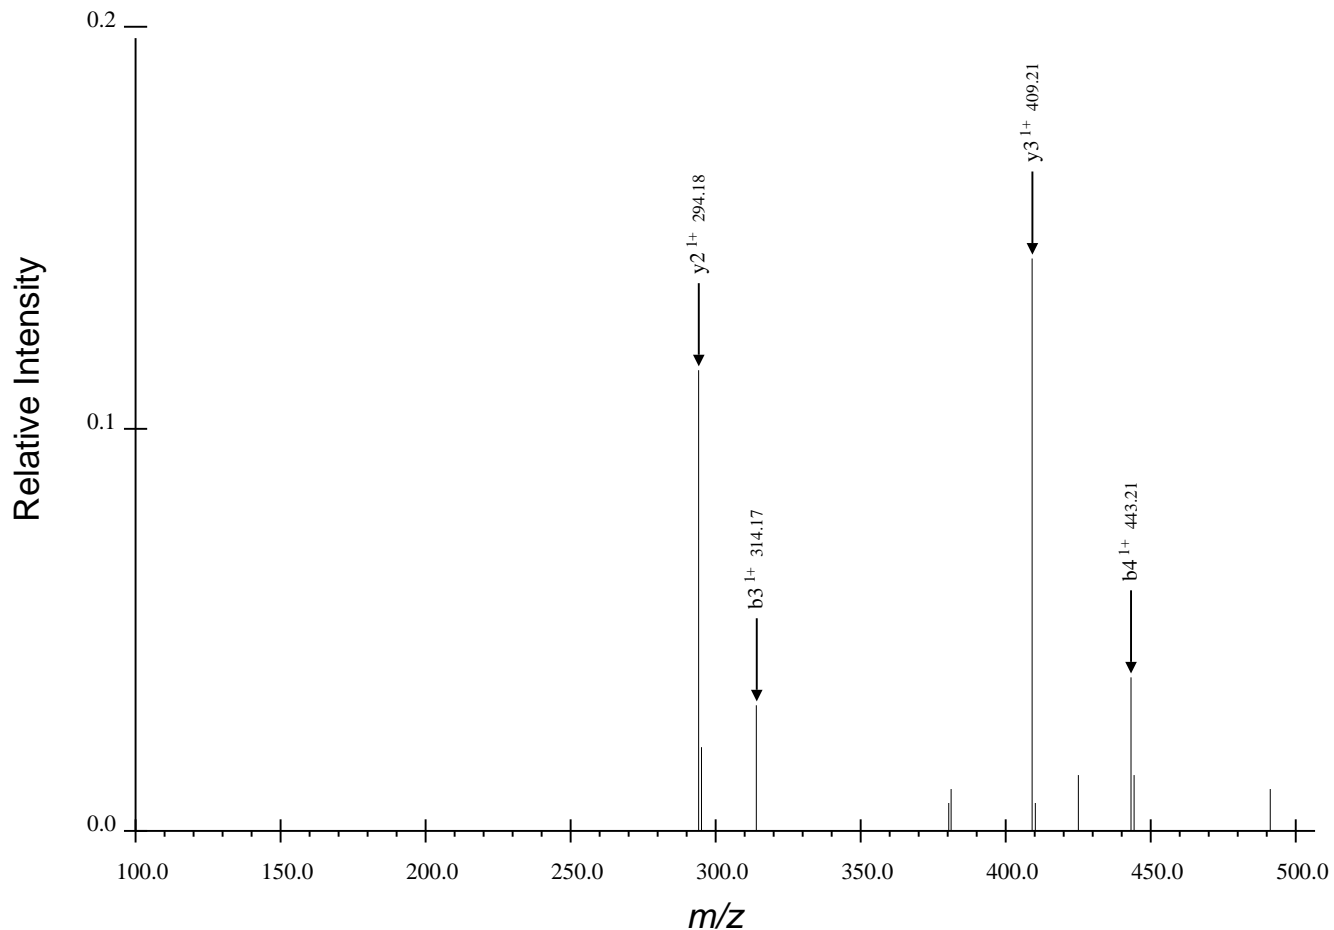

(a) First Region for LEAELGNoMQGLVEDFK, Spectrum 53.dta

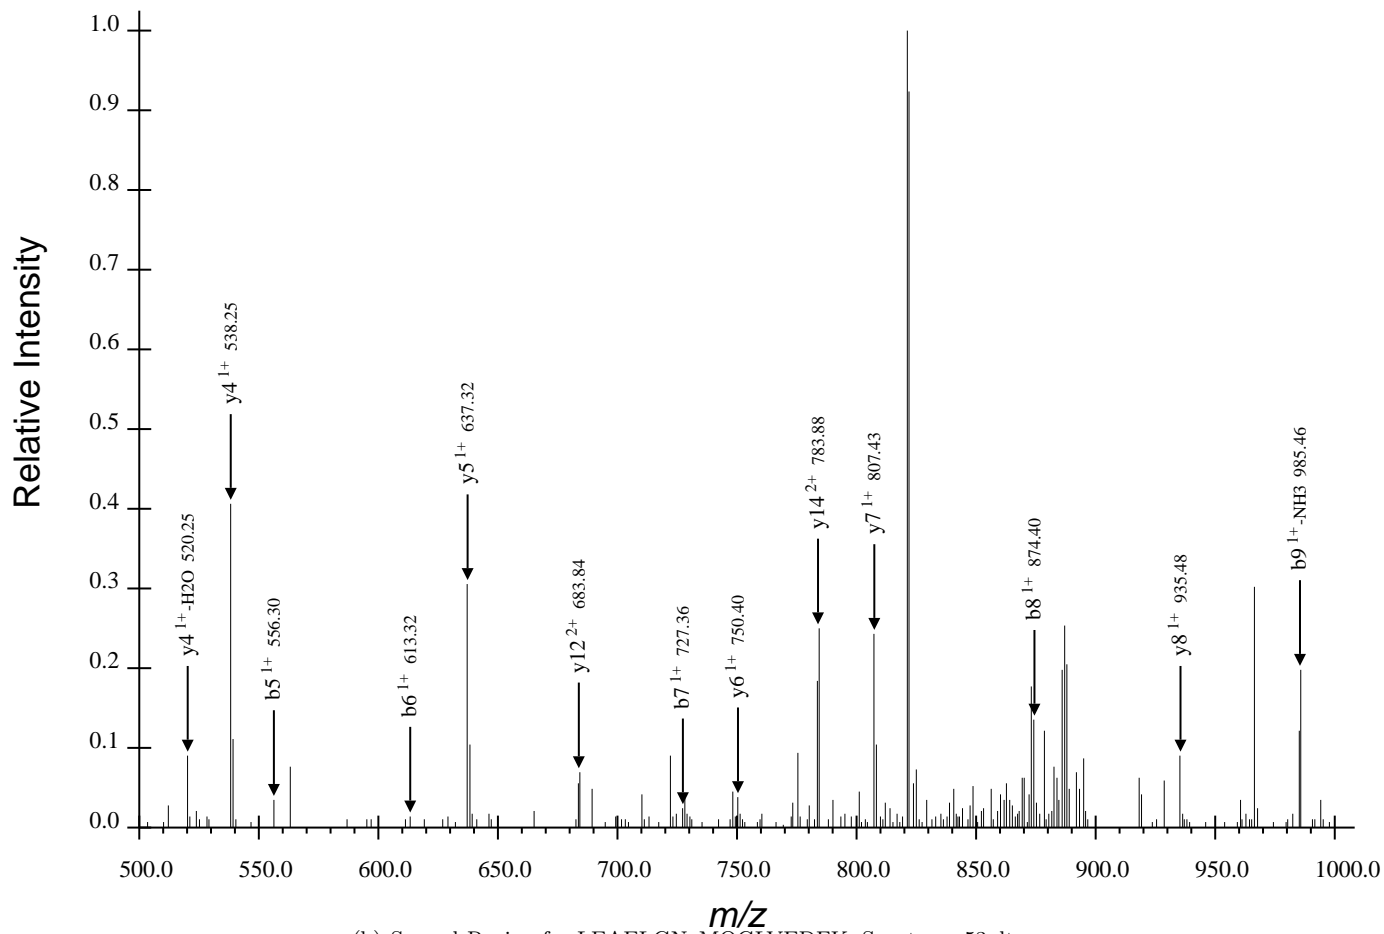

(b) Second Region for LEAELGNoMQGLVEDFK, Spectrum 53.dta

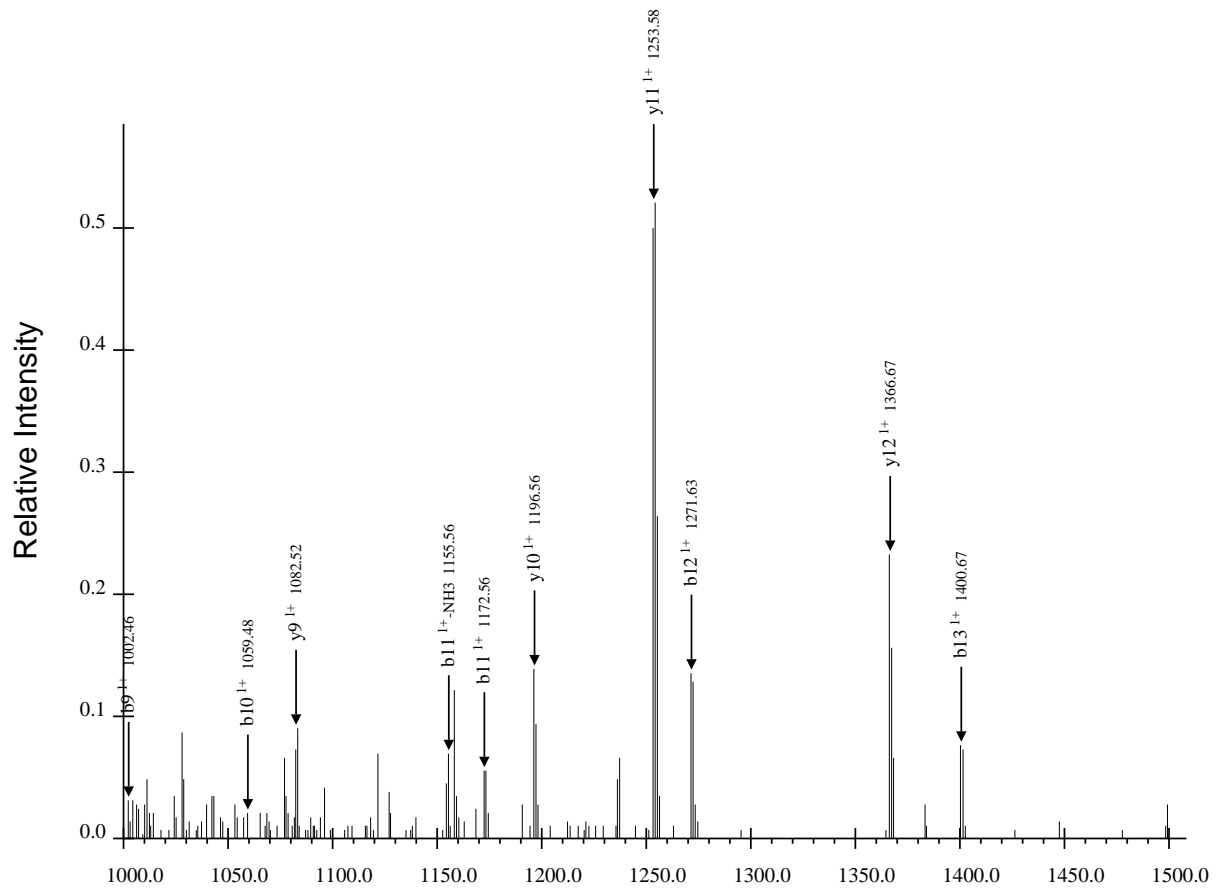

(c) Third Region for LEAELGNoMQGLVEDFK, Spectrum 53.dta

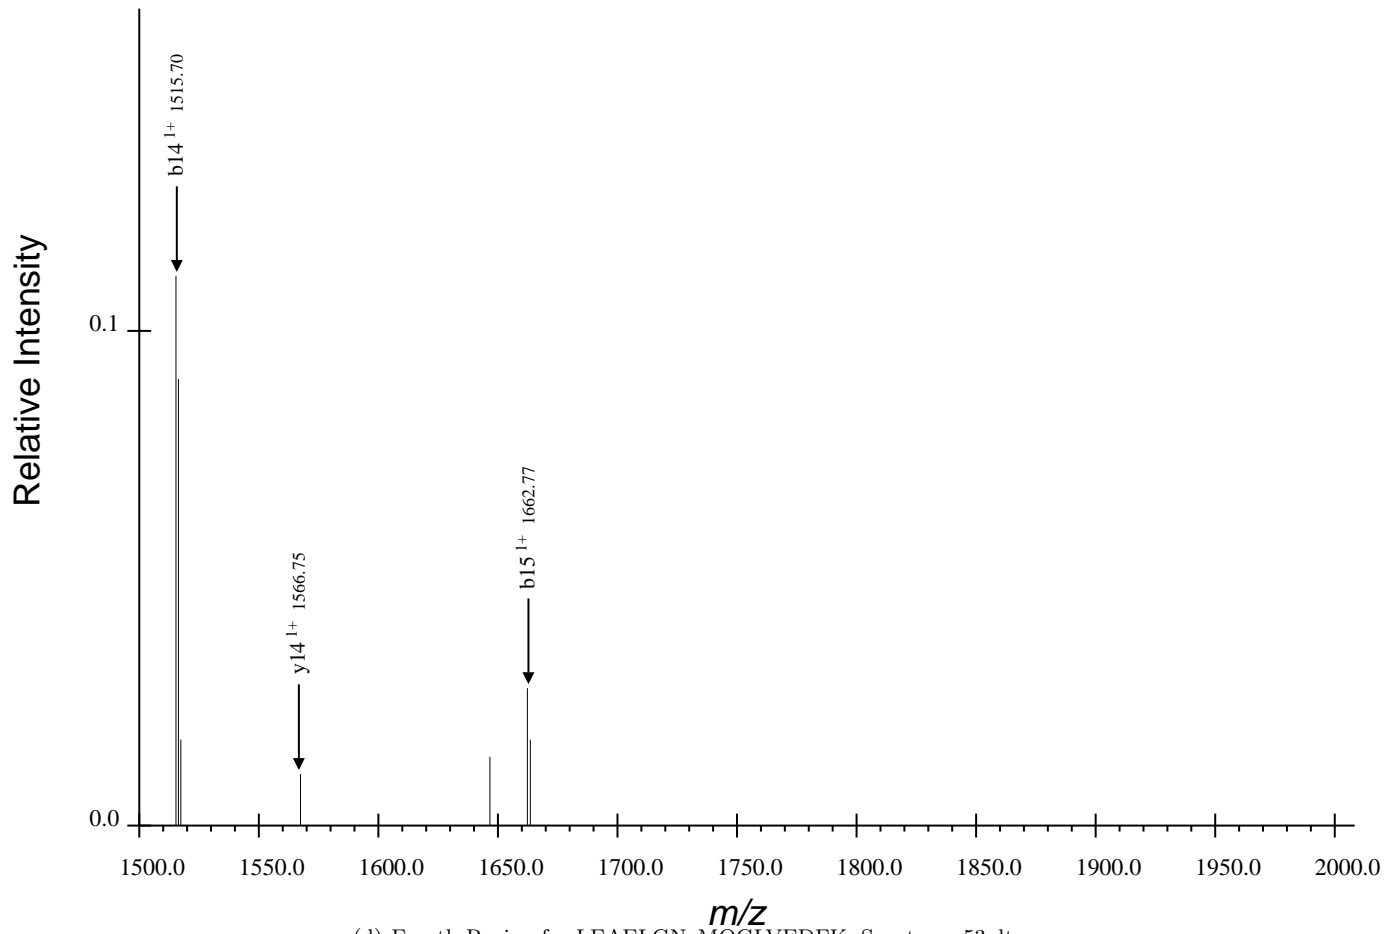

(d) Fourth Region for LEAELGNoMQGLVEDFK, Spectrum 53.dta

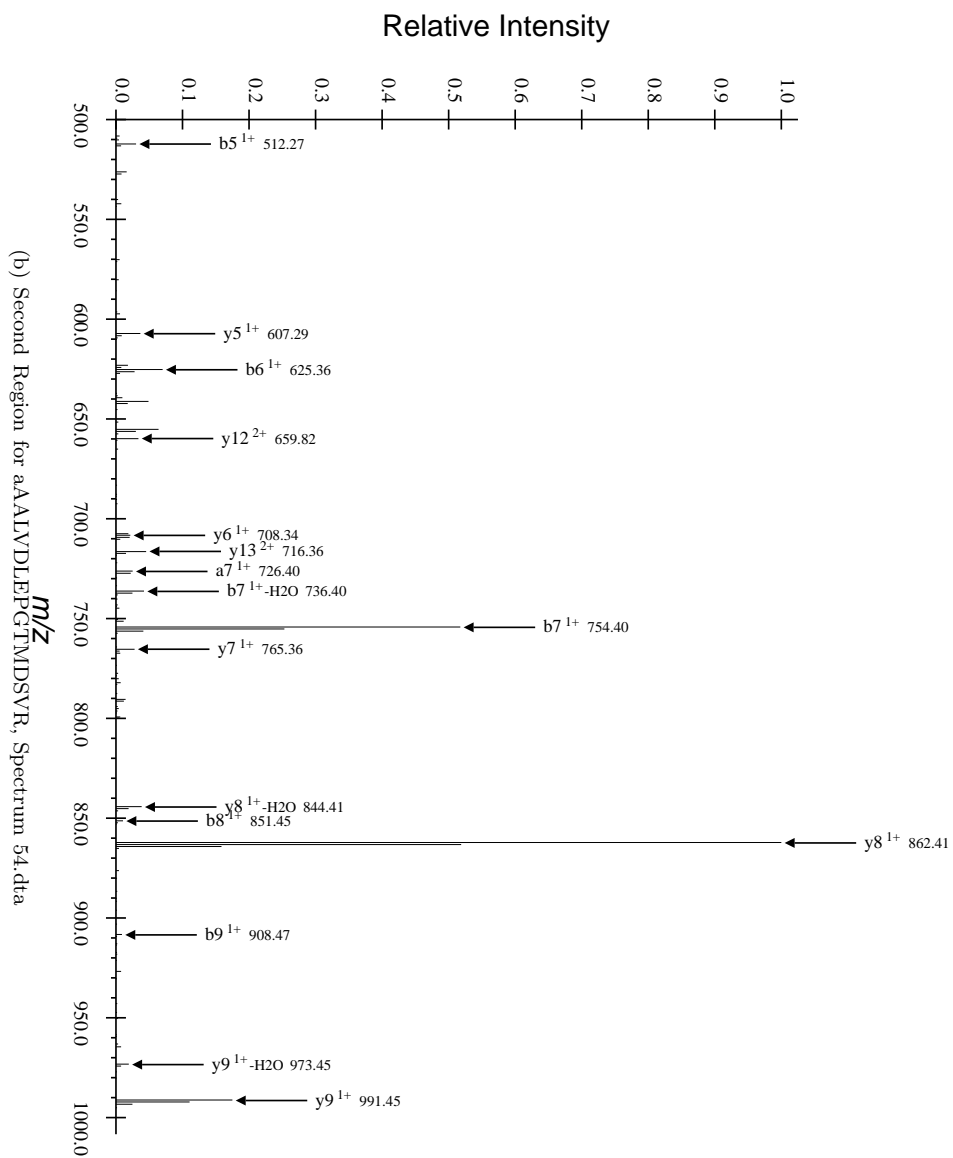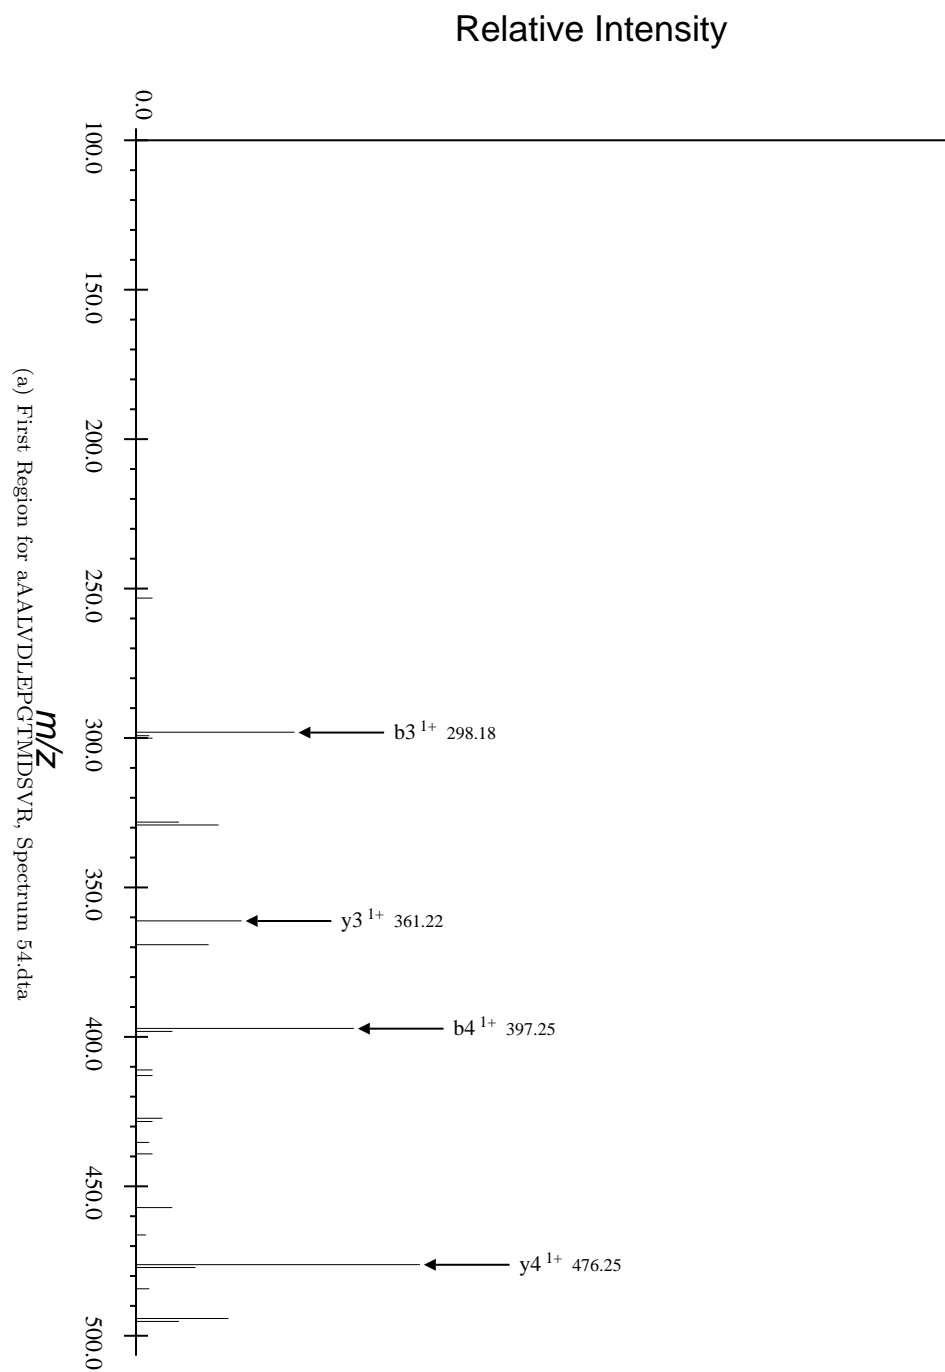

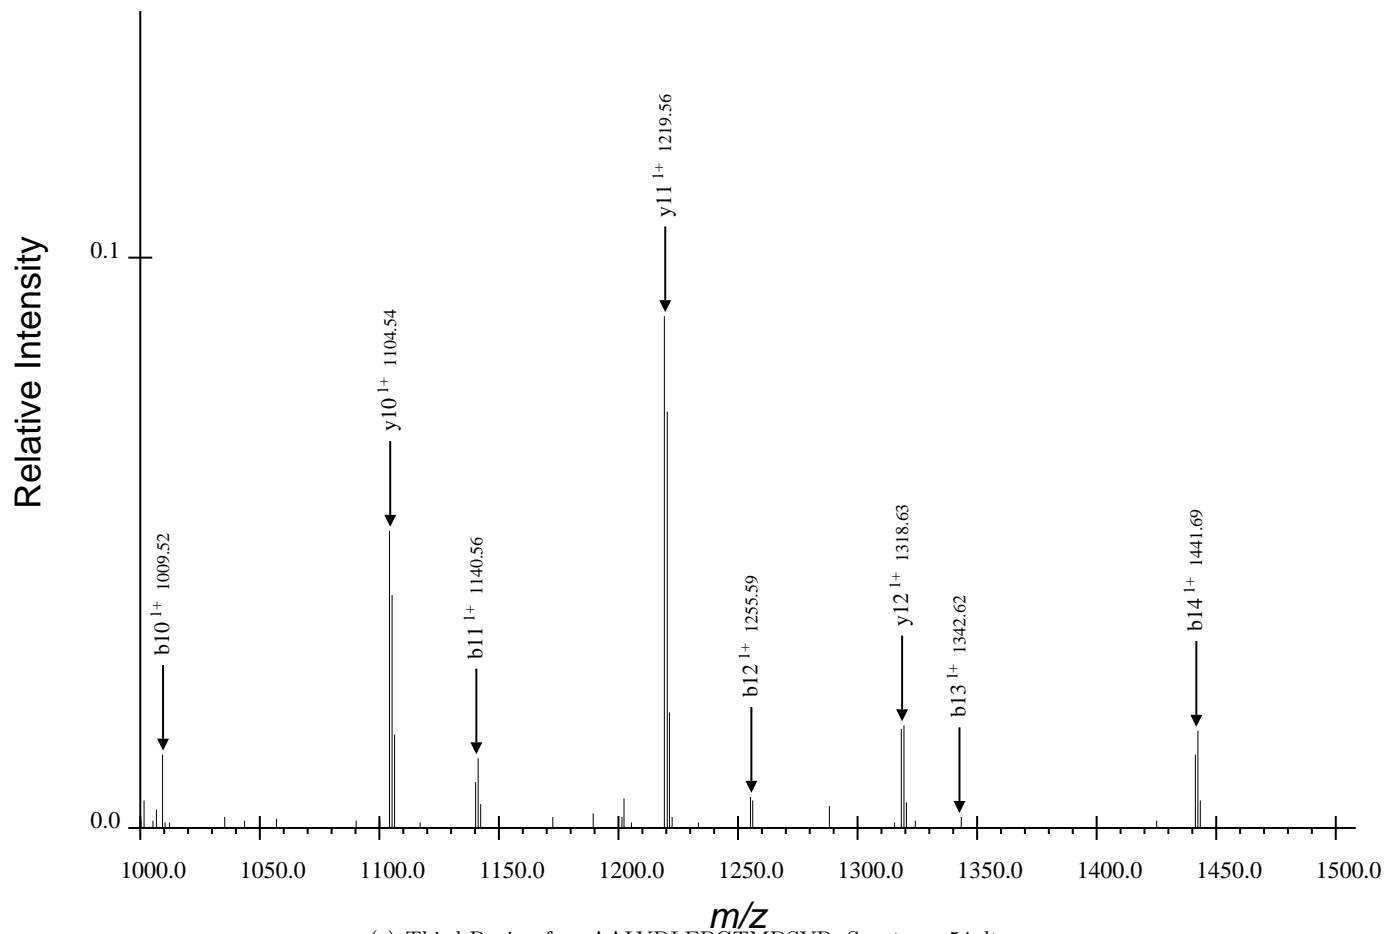

(c) Third Region for aAALVDLEPGTMDSVR, Spectrum 54.dta

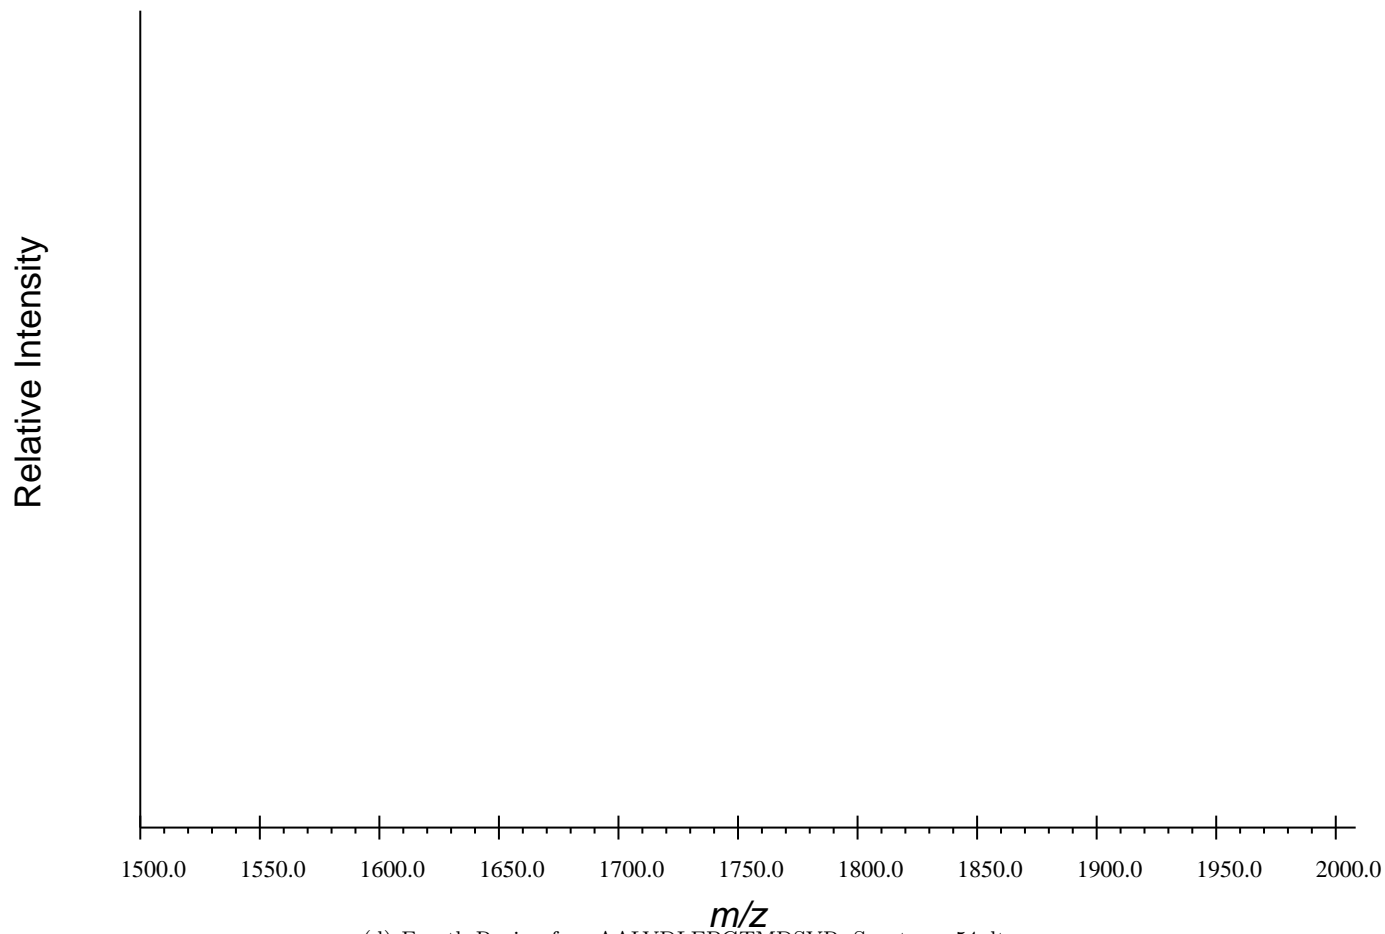

(d) Fourth Region for aAALVDLEPGTMDSVR, Spectrum 54.dta



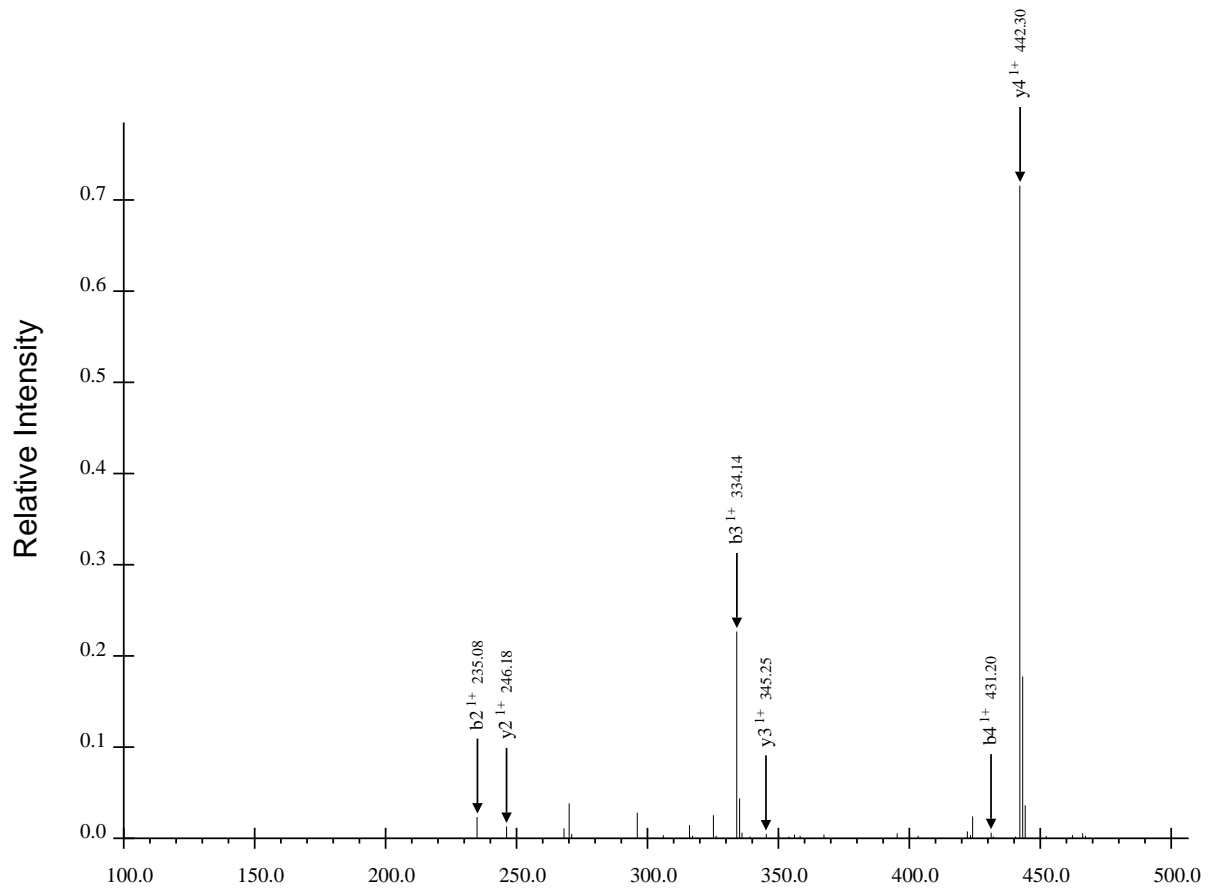

(a) First Region for SoMVPVQVQLDVPVVK, Spectrum 55.dta

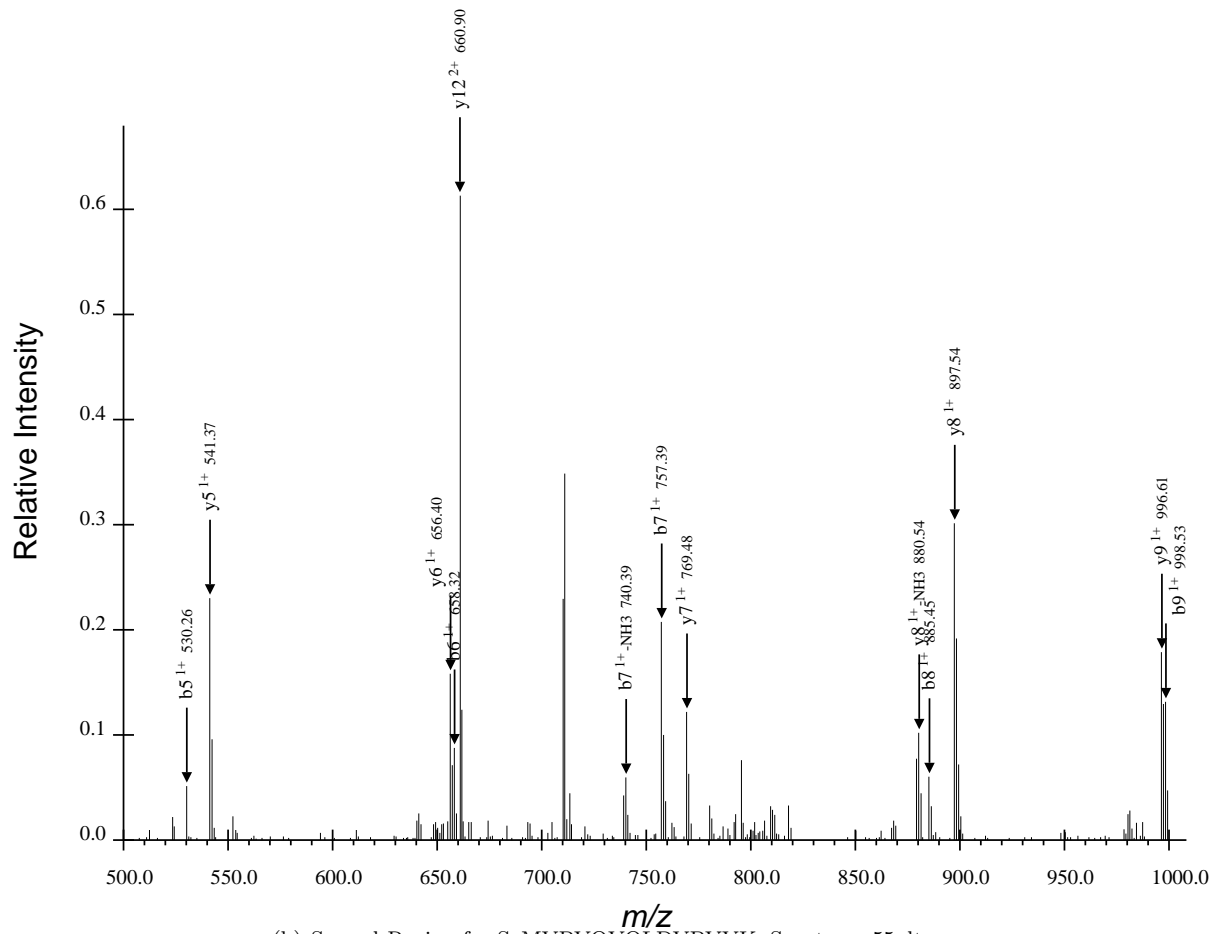

(b) Second Region for SoMVPVQVQLDVPVVK, Spectrum 55.dta

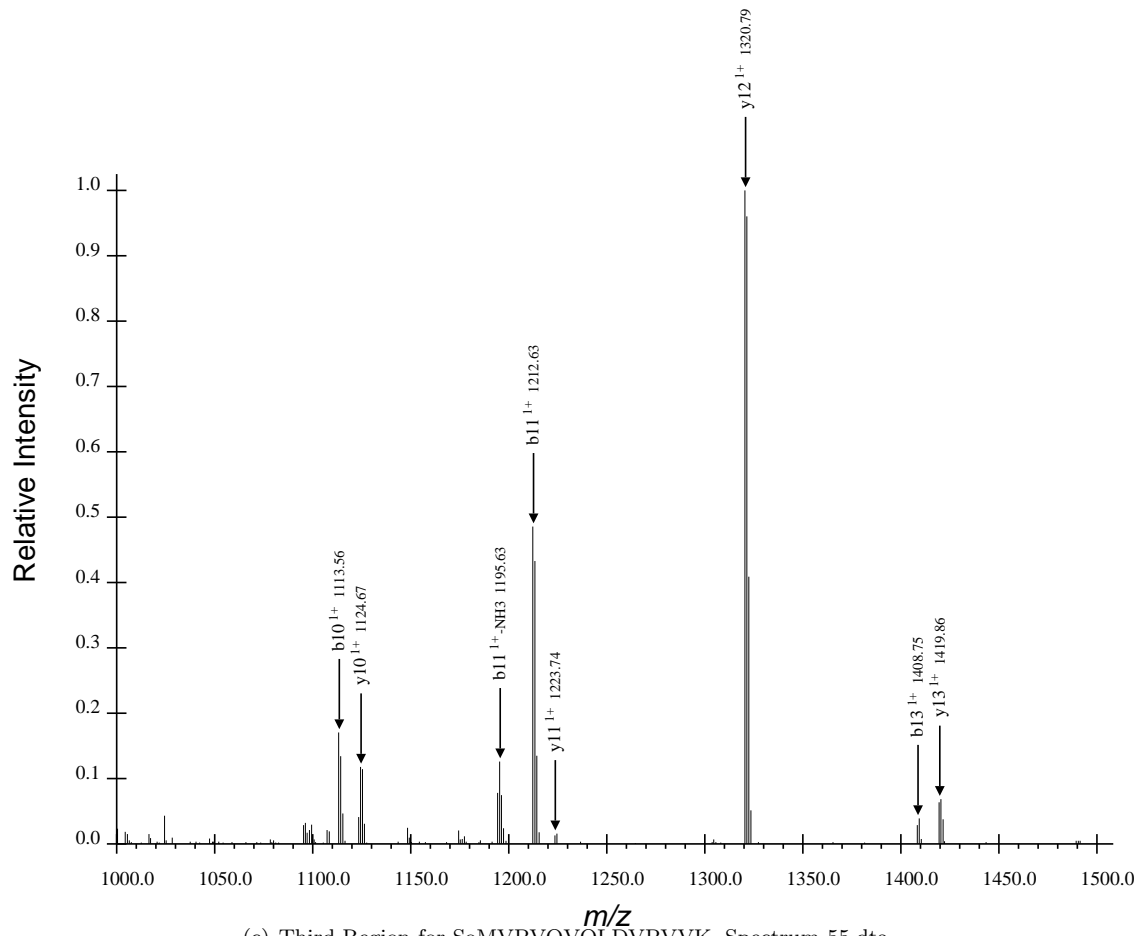

(c) Third Region for SoMVPVQVQLDVPVVK, Spectrum 55.dta

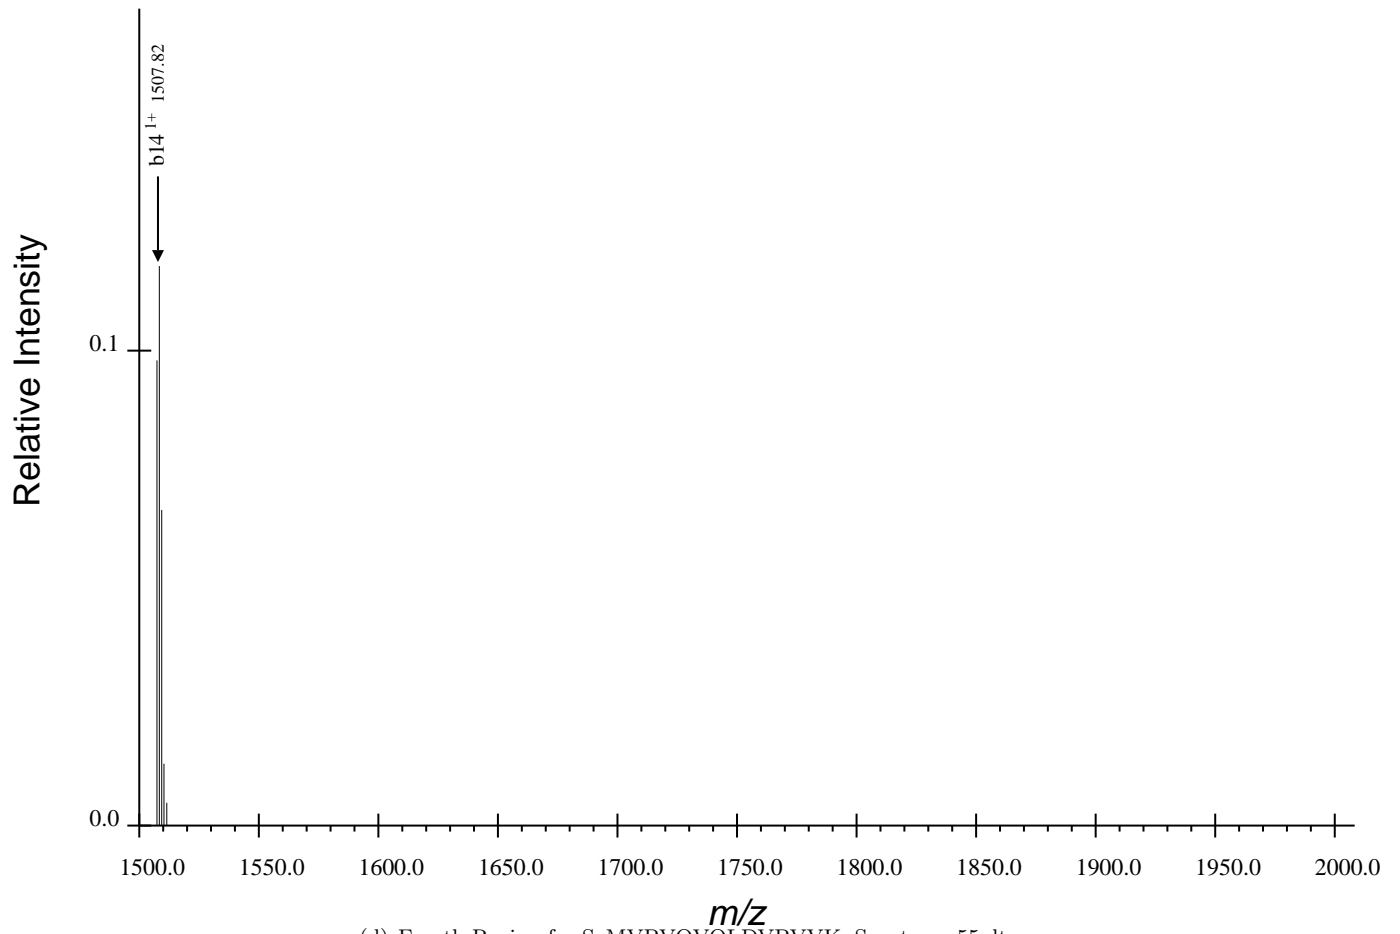

(d) Fourth Region for SoMVPVQVQLDVPVVK, Spectrum 55.dta

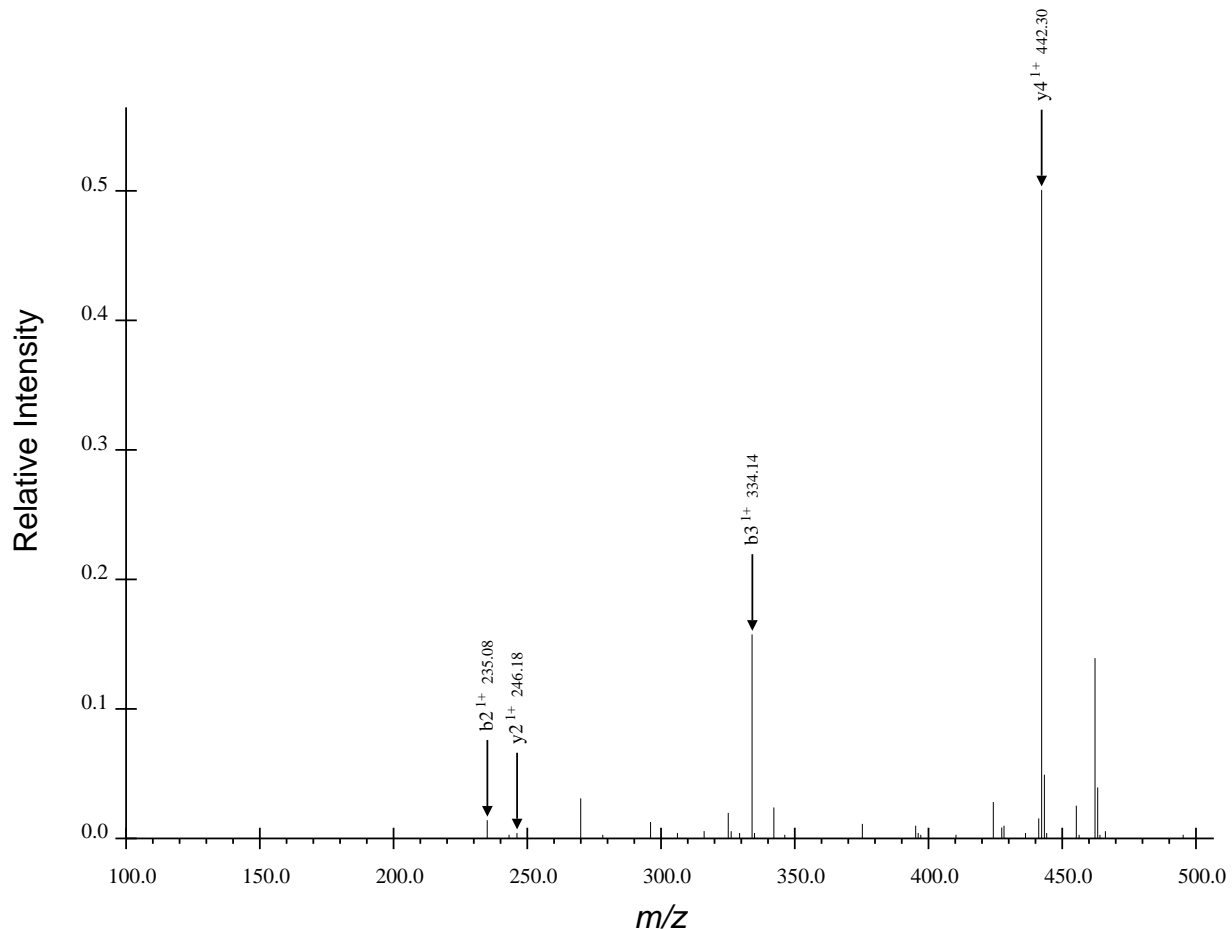

(a) First Region for SoMVPVQVQLDVPVVK, Spectrum 56.dta

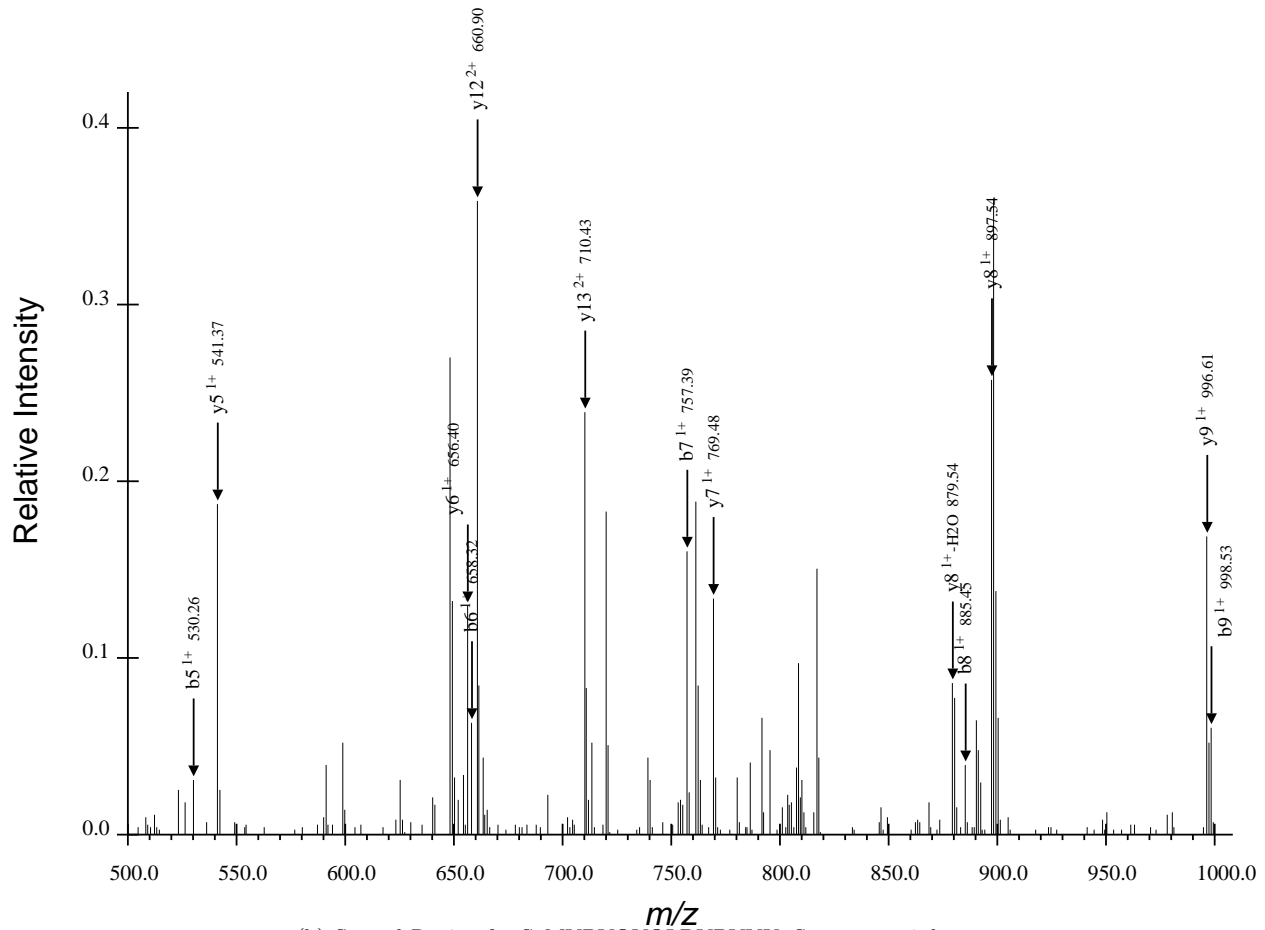

(b) Second Region for SoMVPVQVQLDVPVVK, Spectrum 56.dta

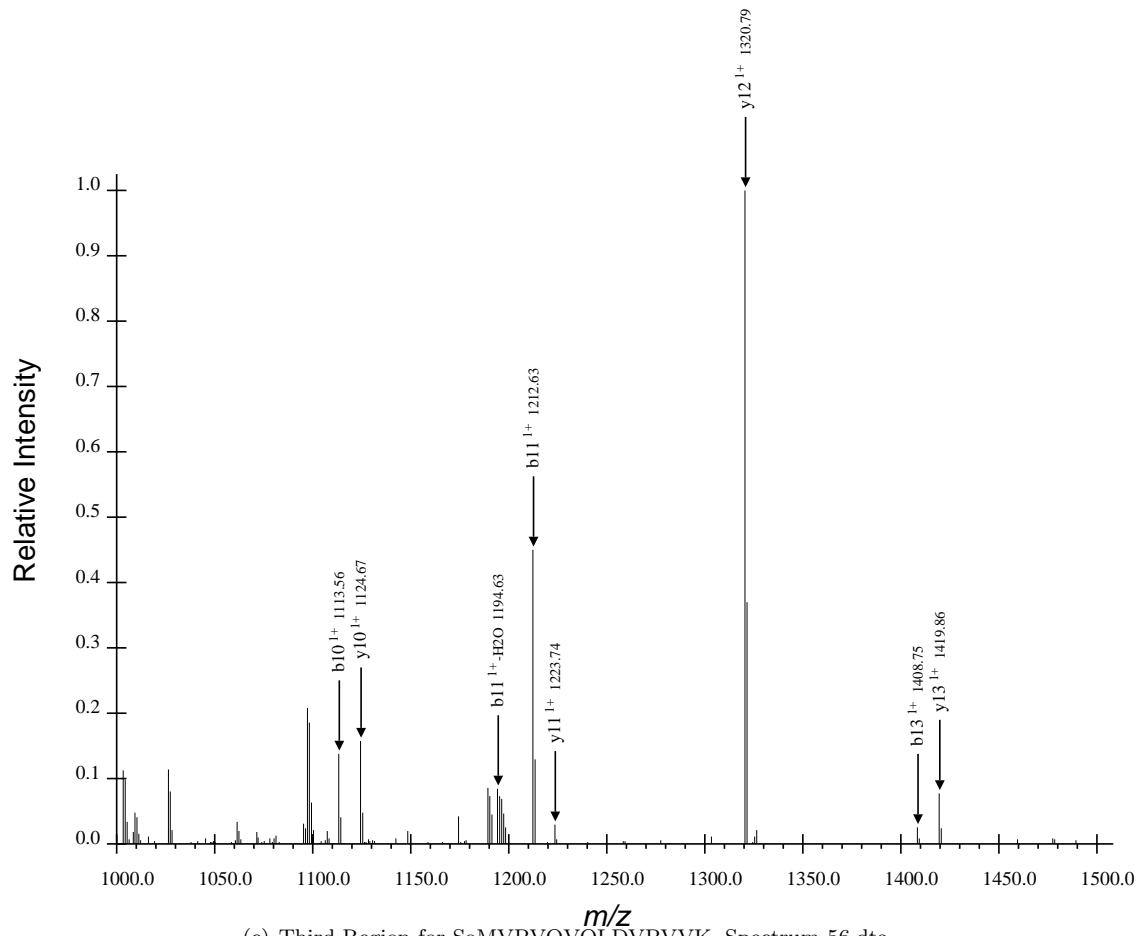

(c) Third Region for SoMVPVQVQLDVPVVK, Spectrum 56.dta

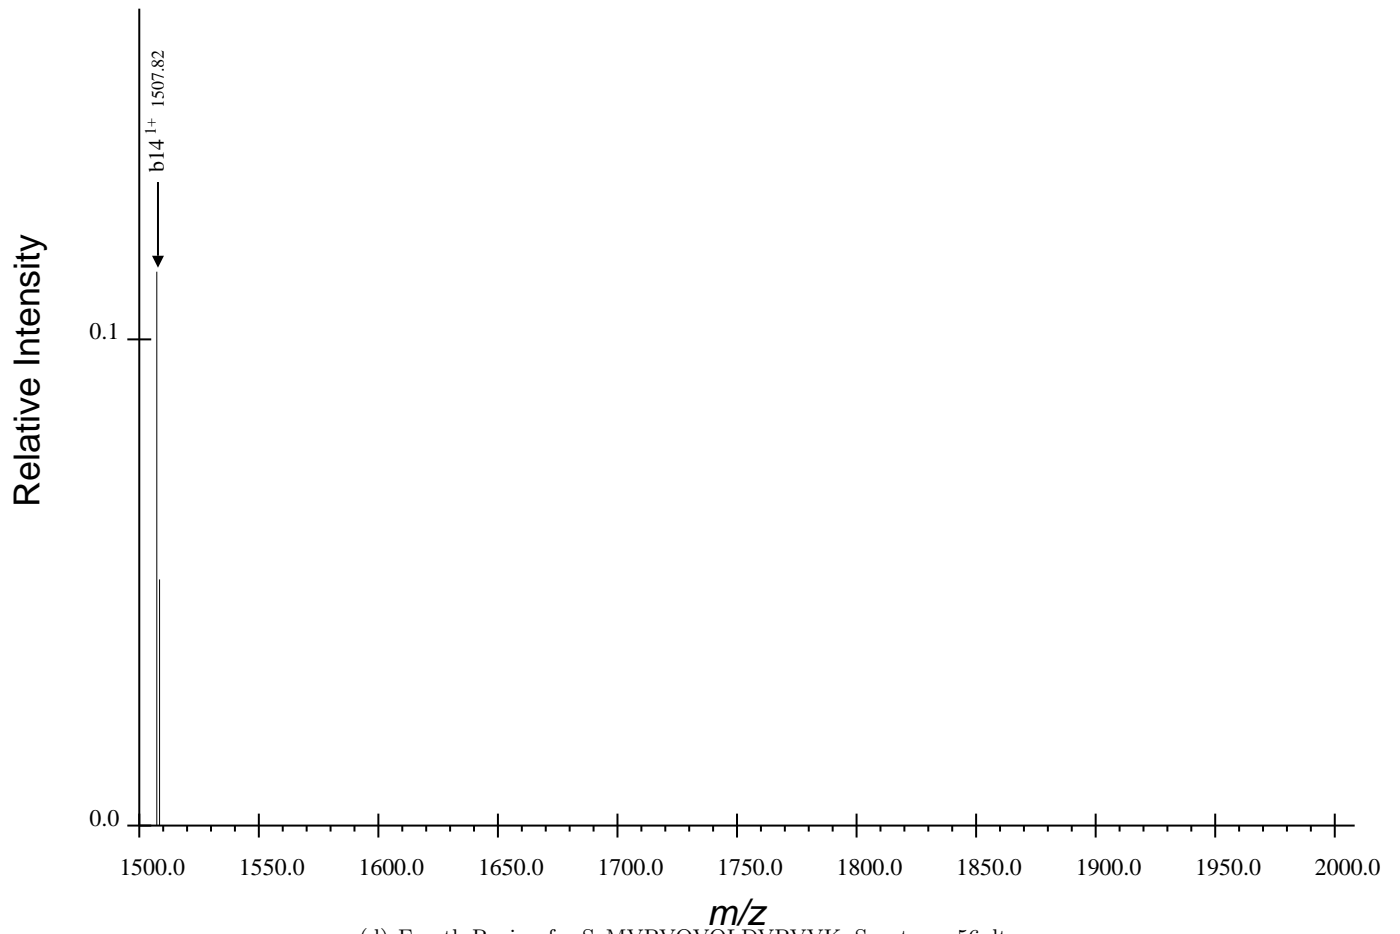

(d) Fourth Region for SoMVPVQVQLDVPVVK, Spectrum 56.dta

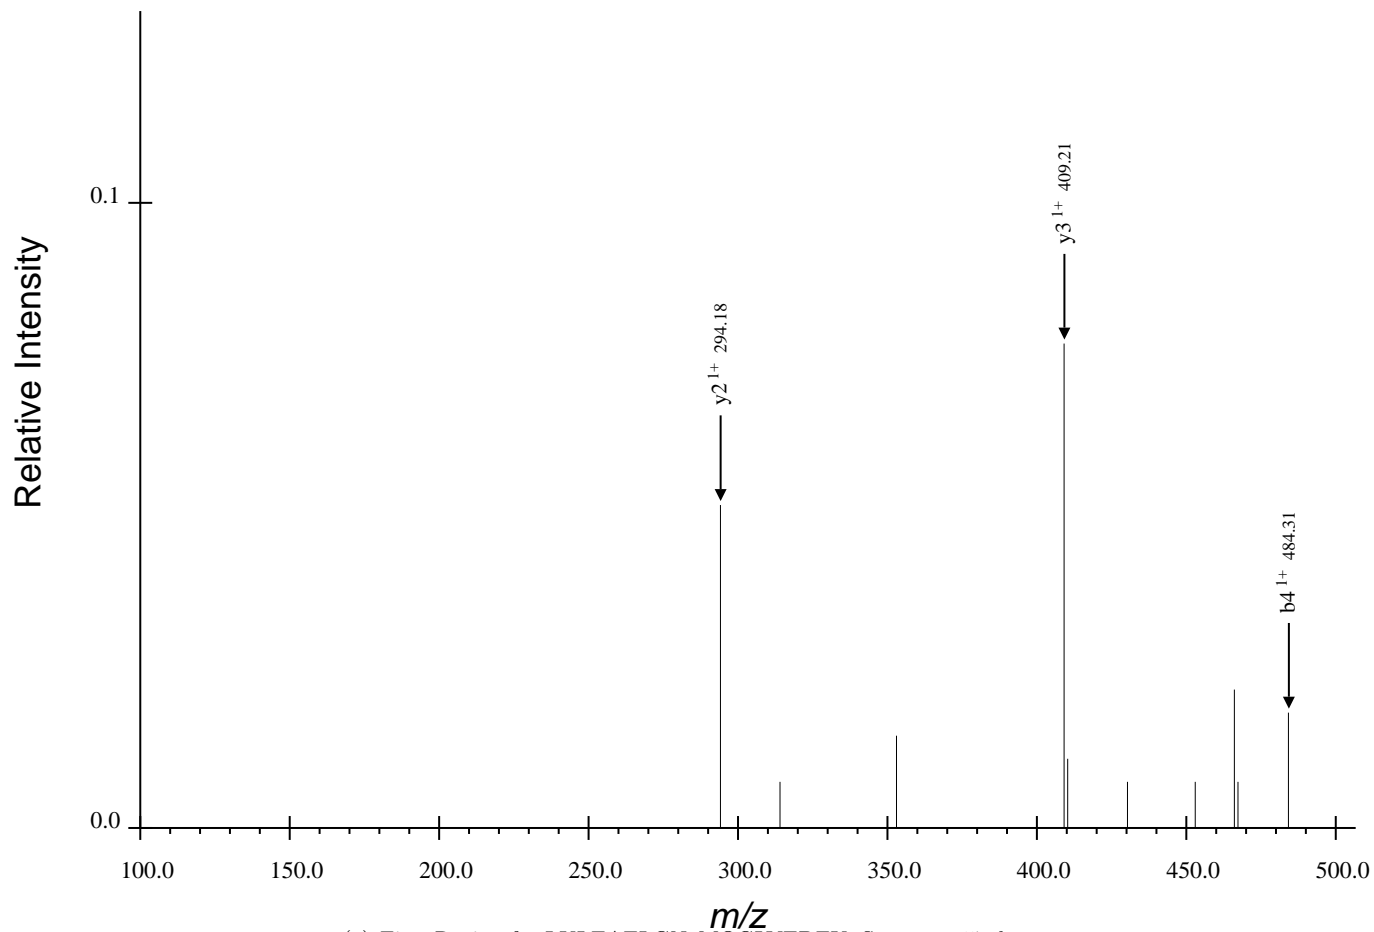

(a) First Region for LKLEAELGNoMQGLVEDFK, Spectrum 57.dta

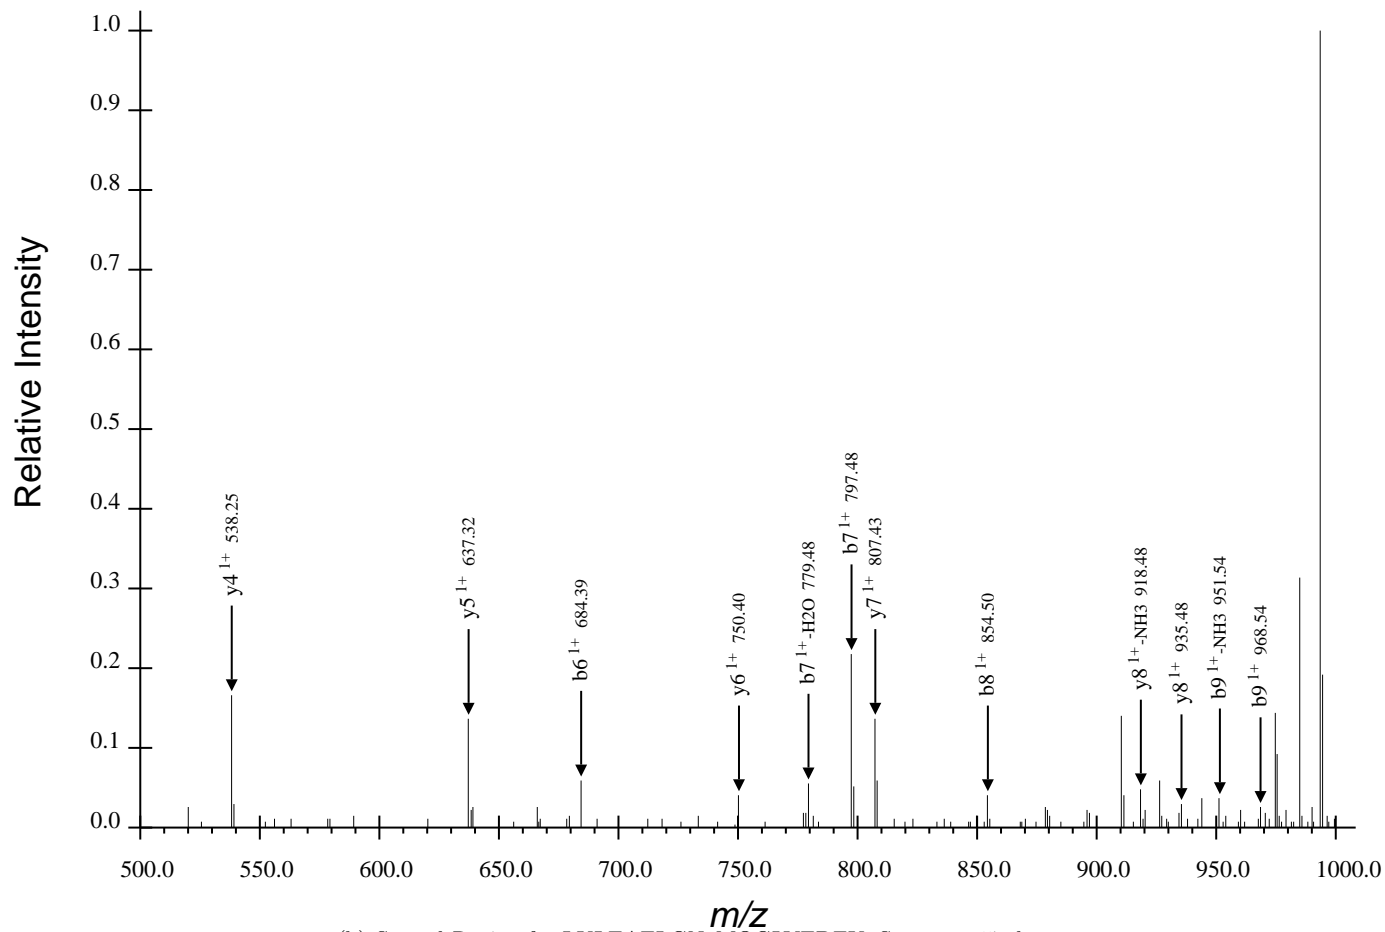

(b) Second Region for LKLEAELGNoMQGLVEDFK, Spectrum 57.dta

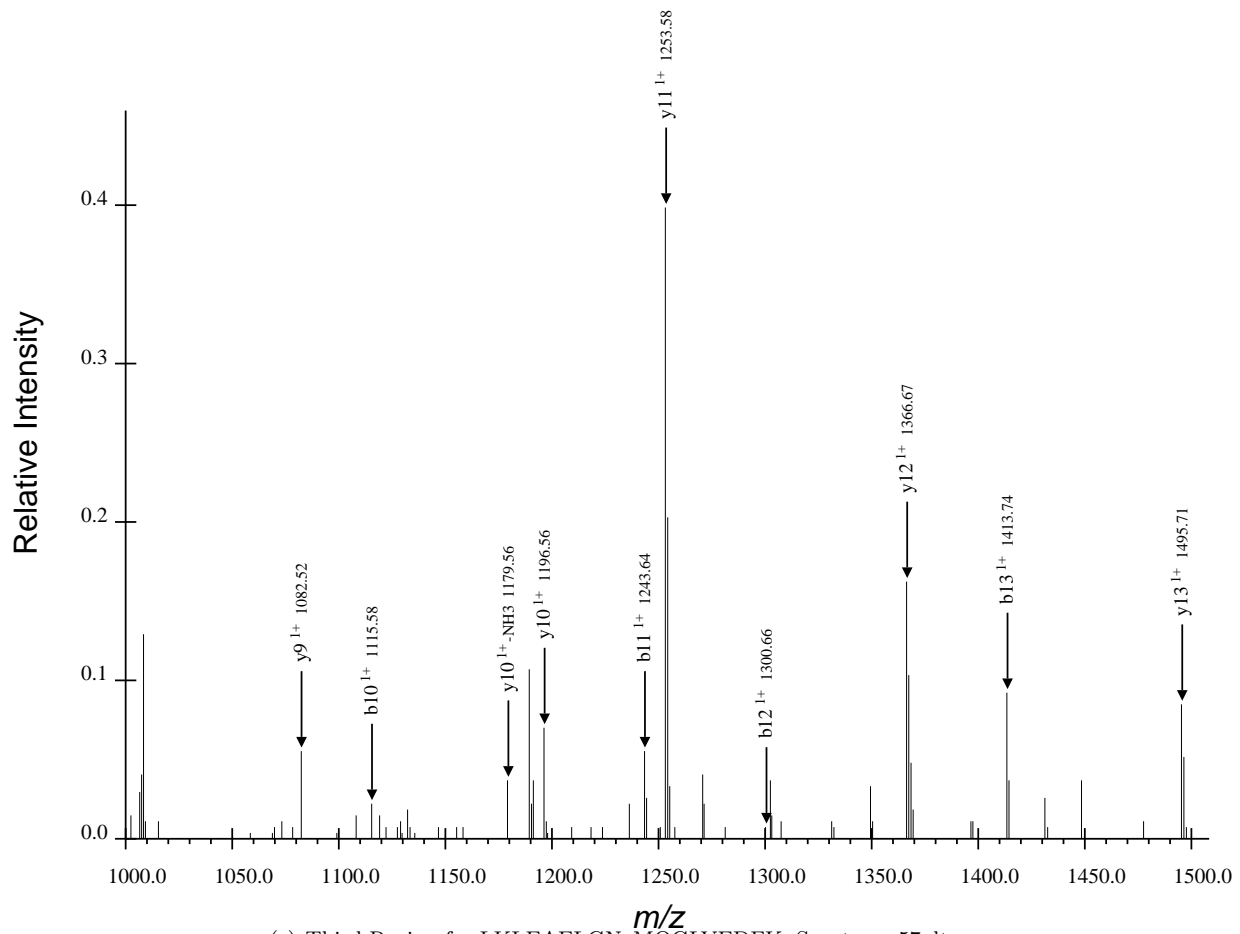

(c) Third Region for LKLEAELGNoMQLVEDFK, Spectrum 57.dta

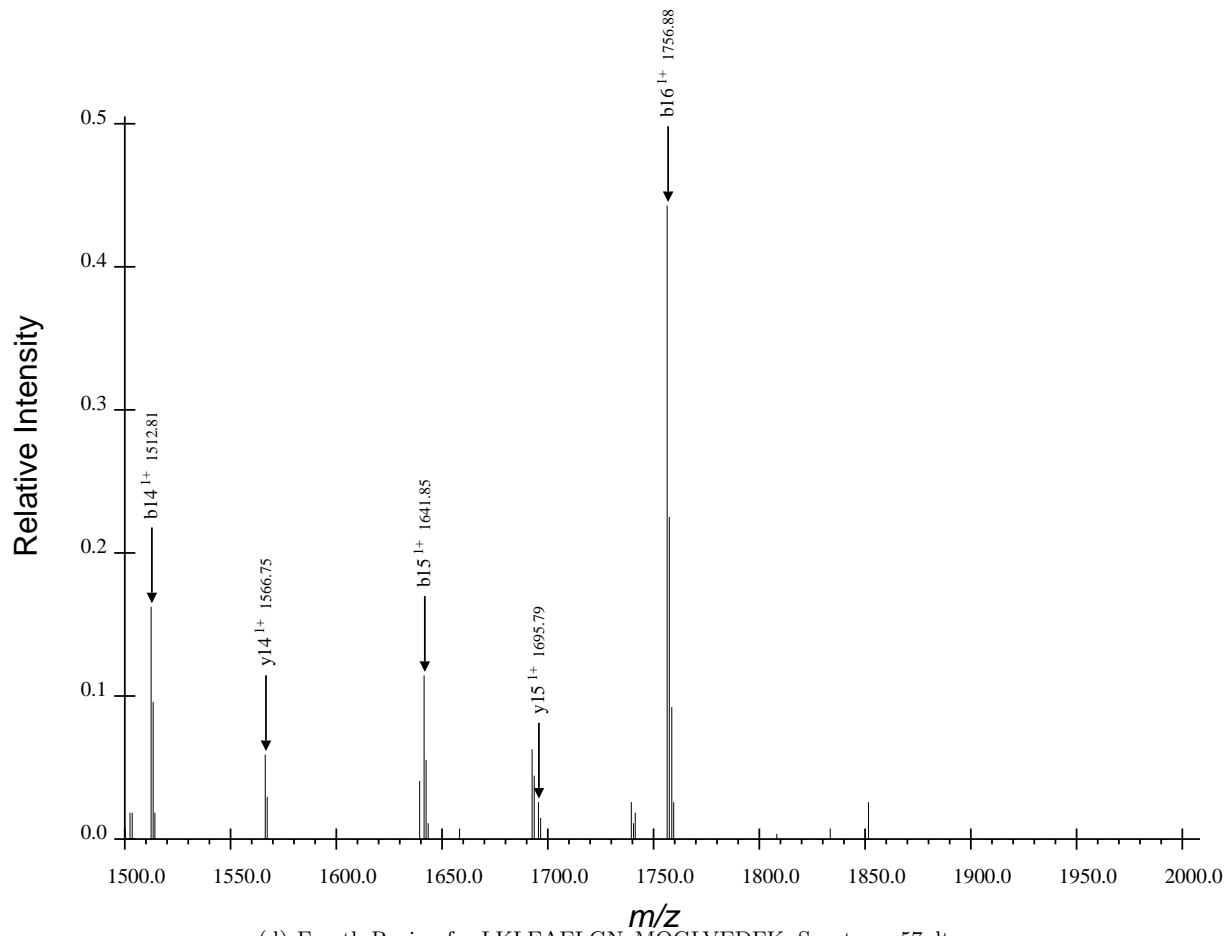

(d) Fourth Region for LKLEAELGNoMQLVEDFK, Spectrum 57.dta

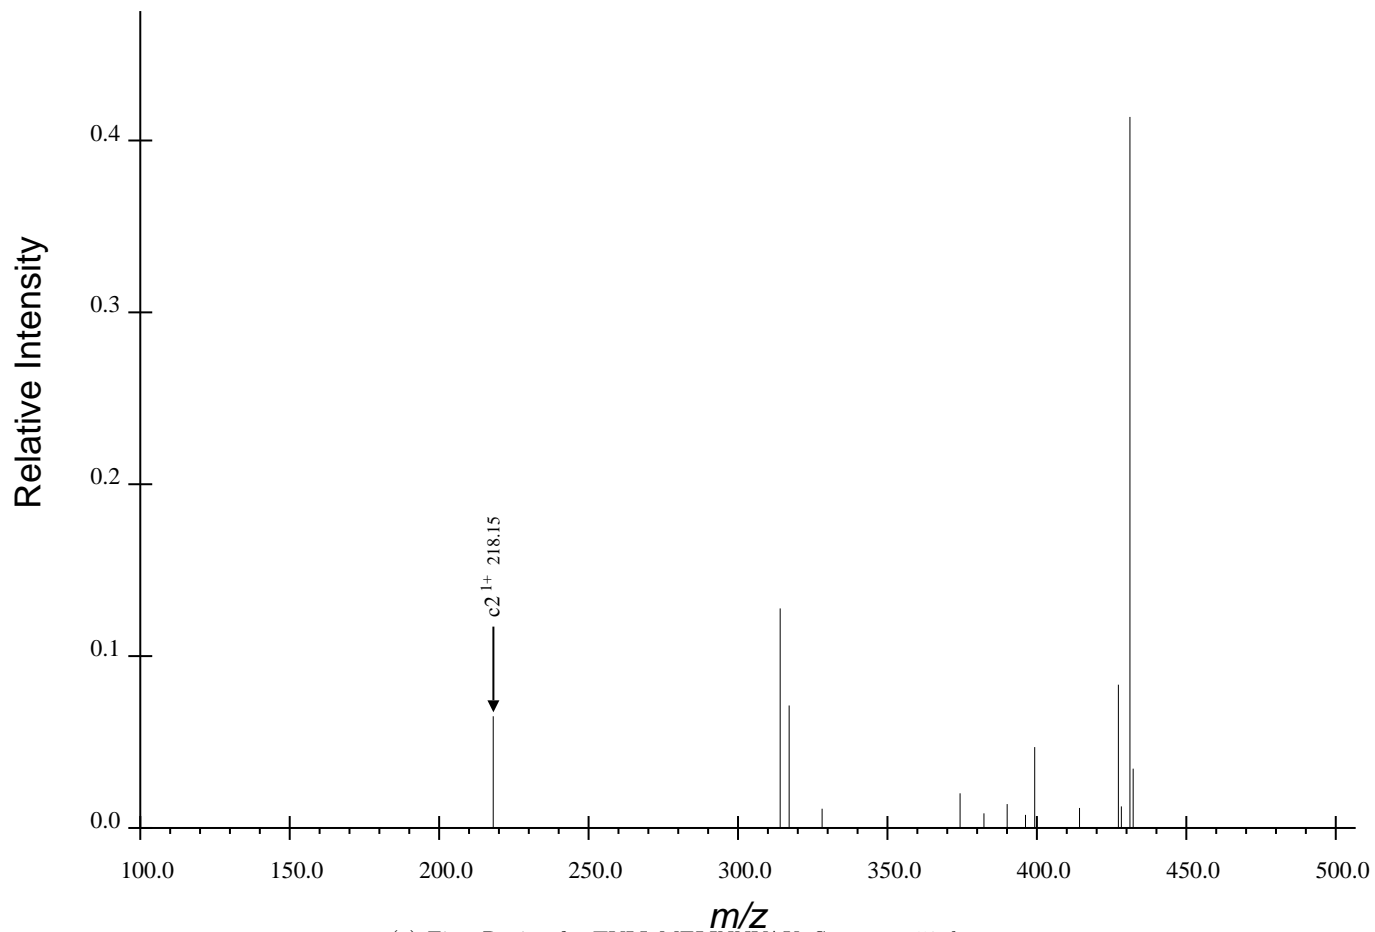

(a) First Region for TVLloMELINNVAK, Spectrum 58.dta

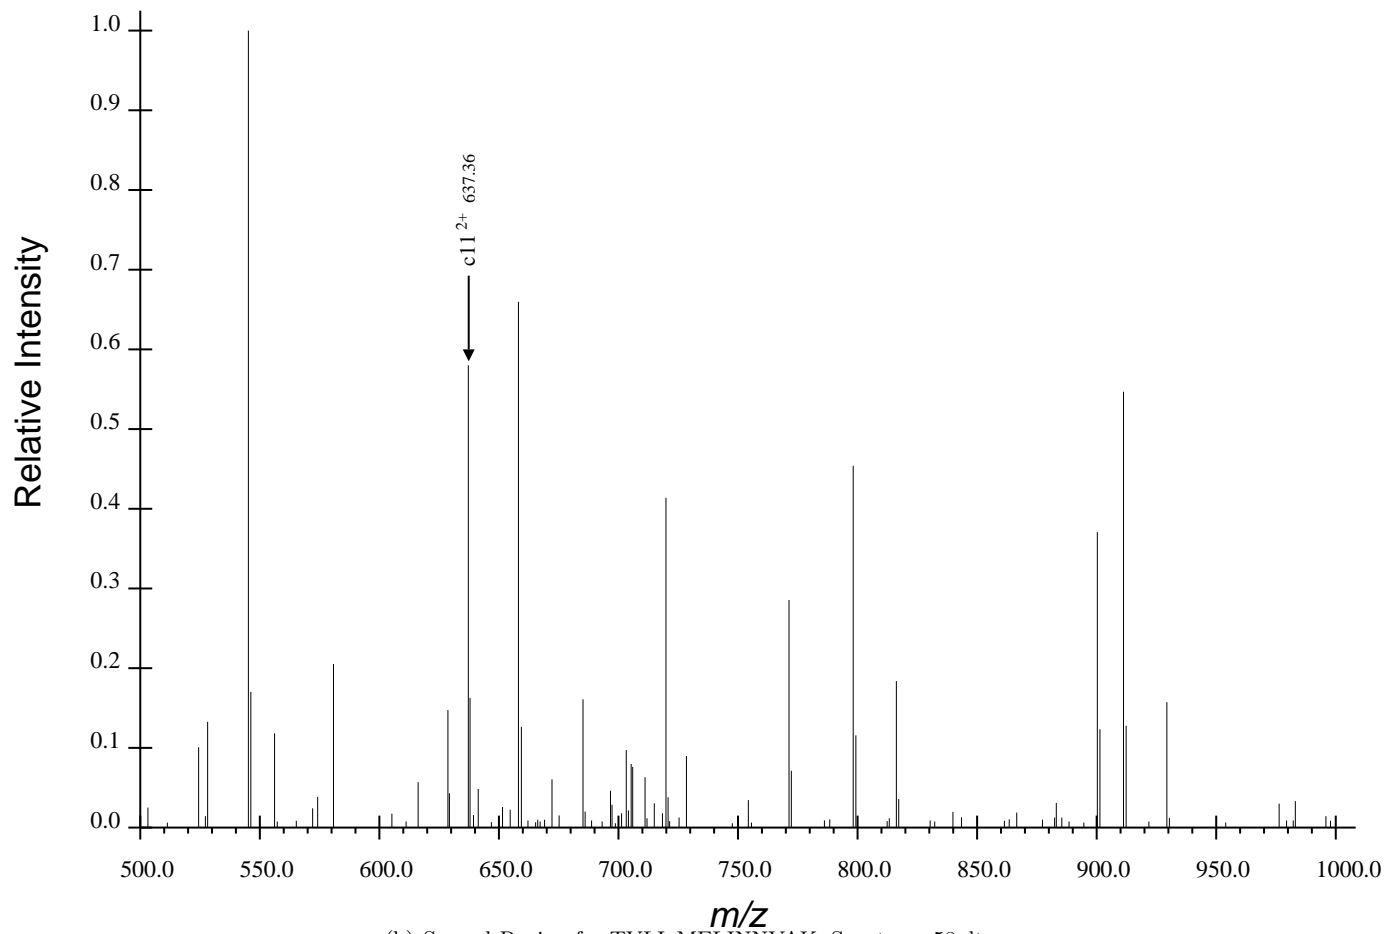

(b) Second Region for TVLloMELINNVAK, Spectrum 58.dta

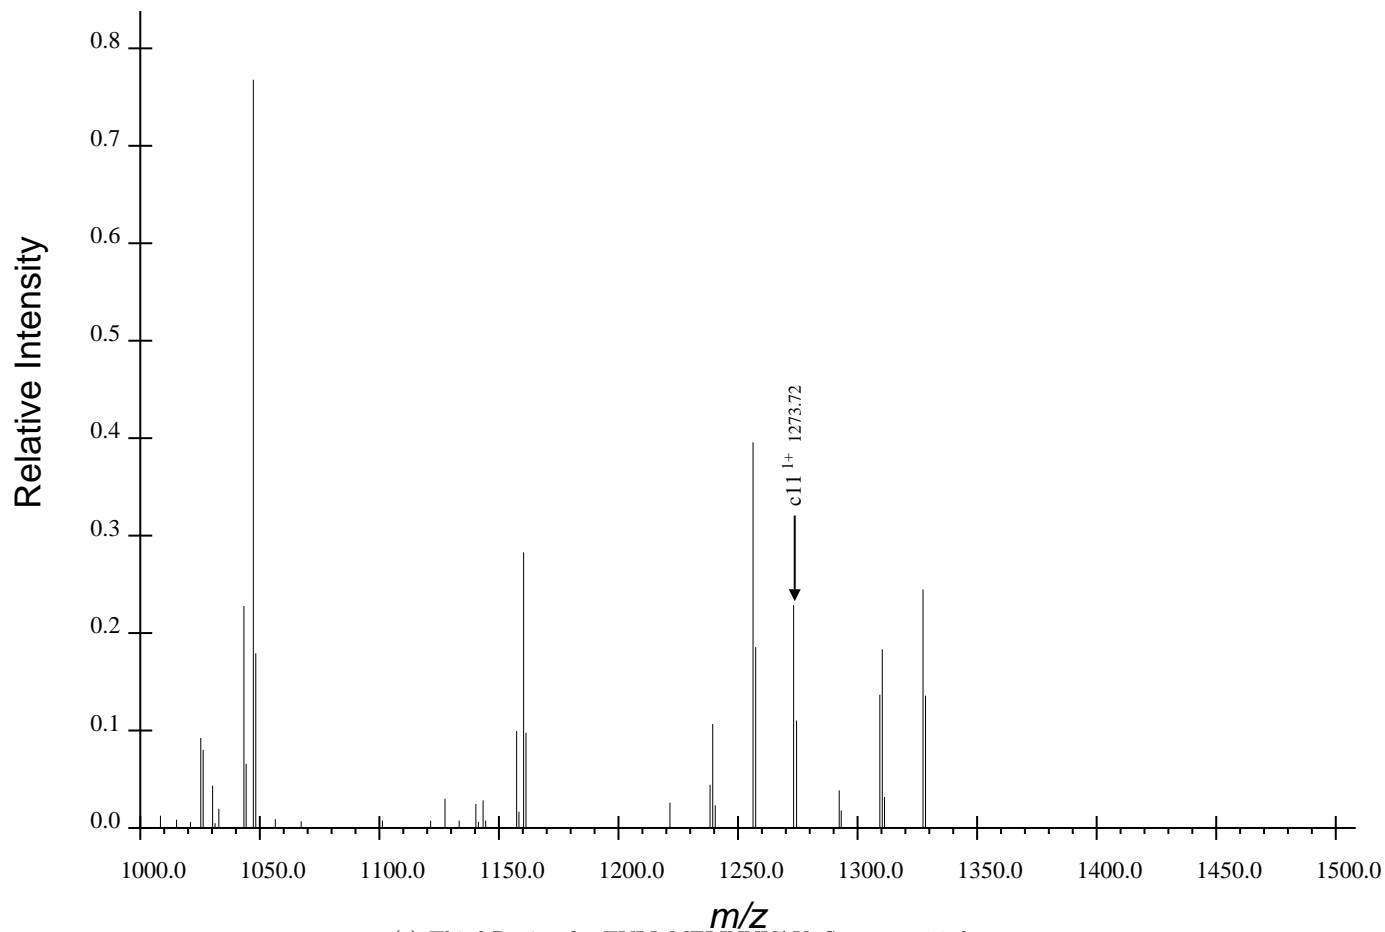

(c) Third Region for TVLIoMELINNVAK, Spectrum 58.dta

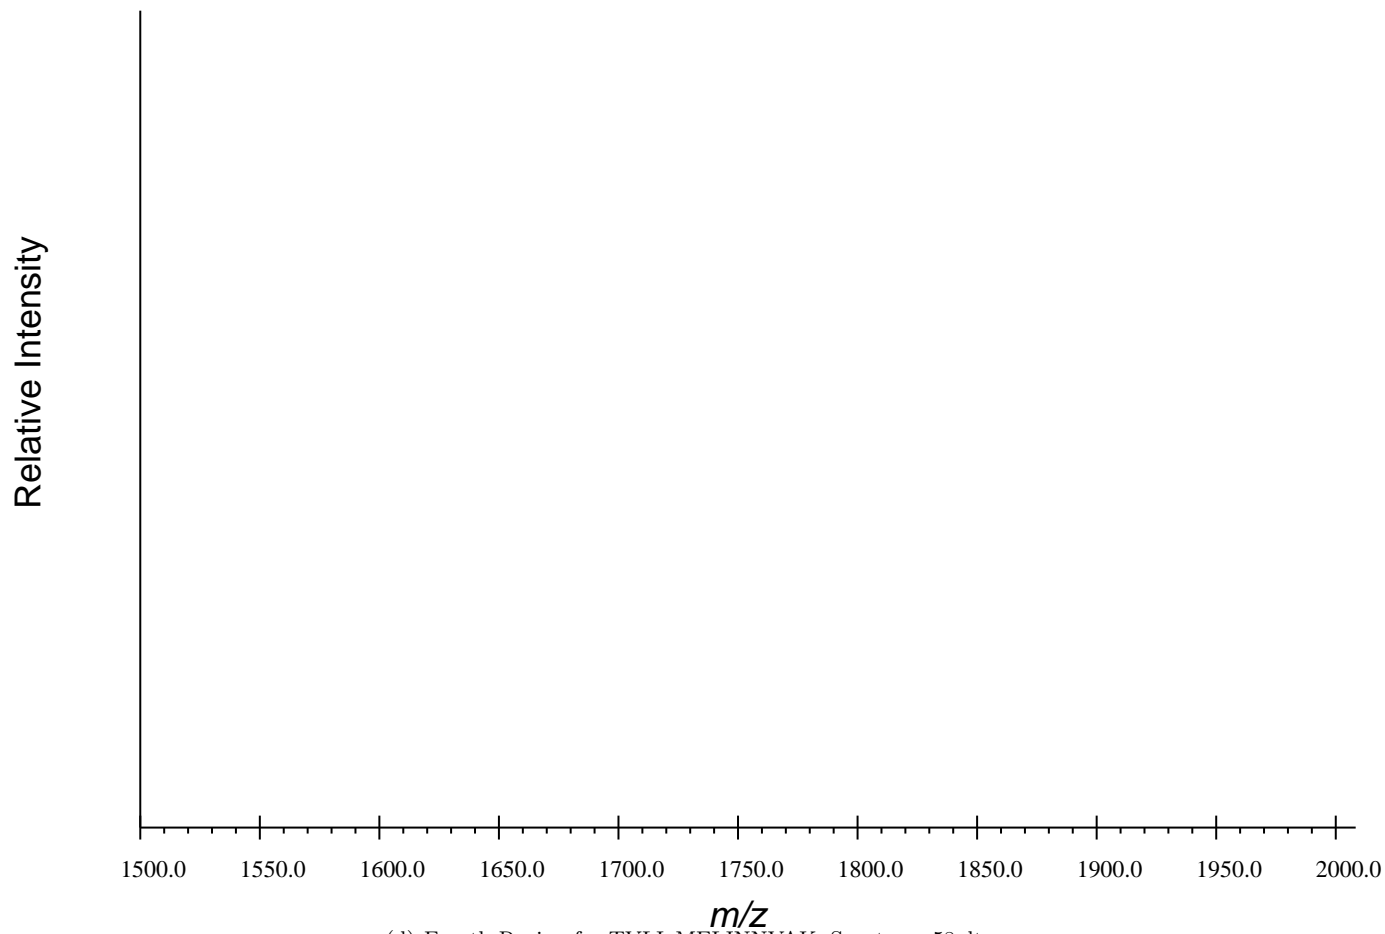

(d) Fourth Region for TVLIoMELINNVAK, Spectrum 58.dta



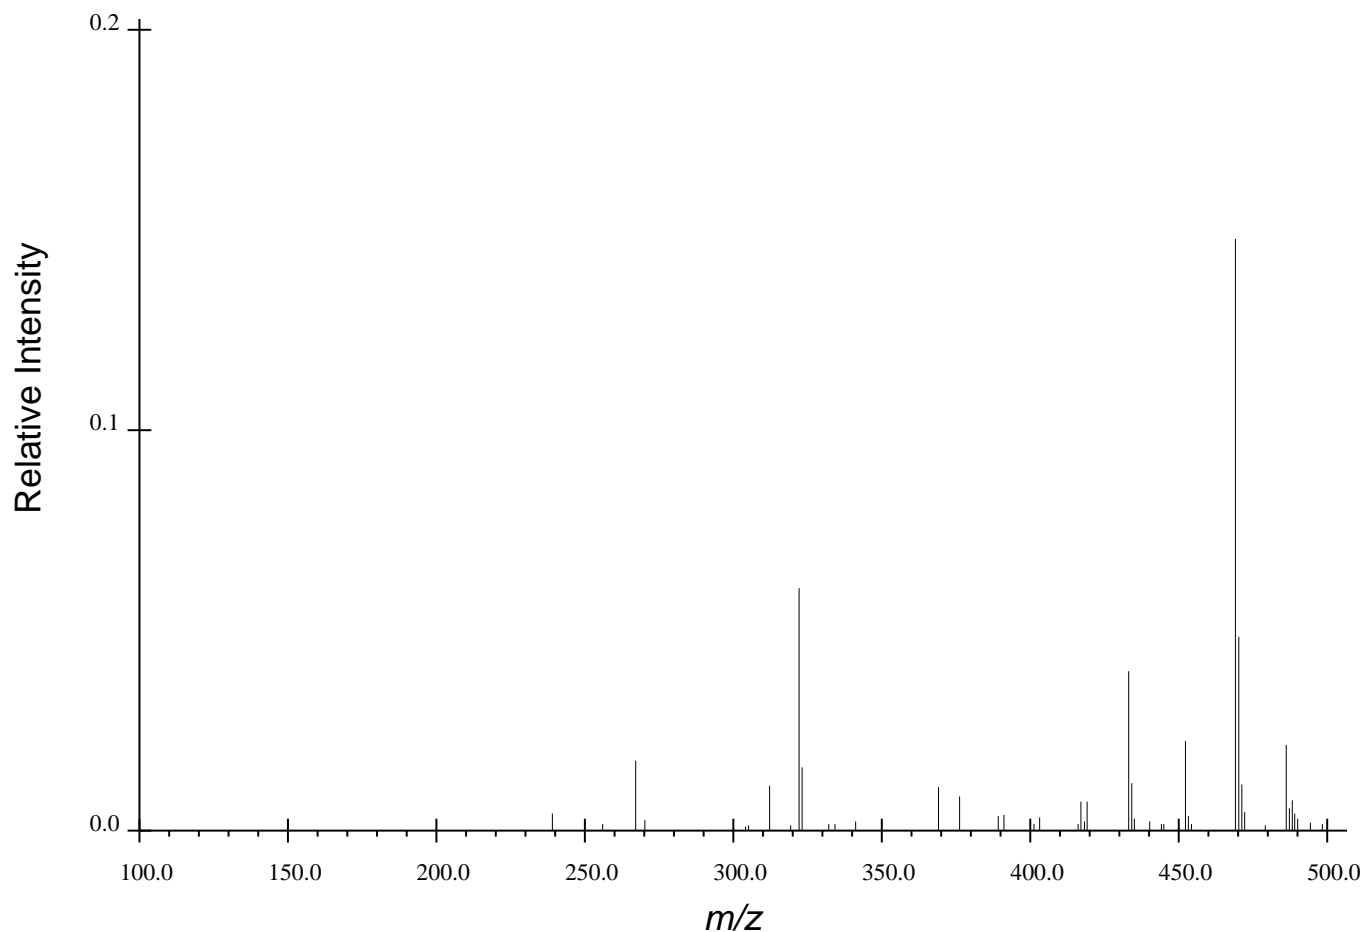

(a) First Region for VVIGoMDVAASEFFR, Spectrum 59.dta

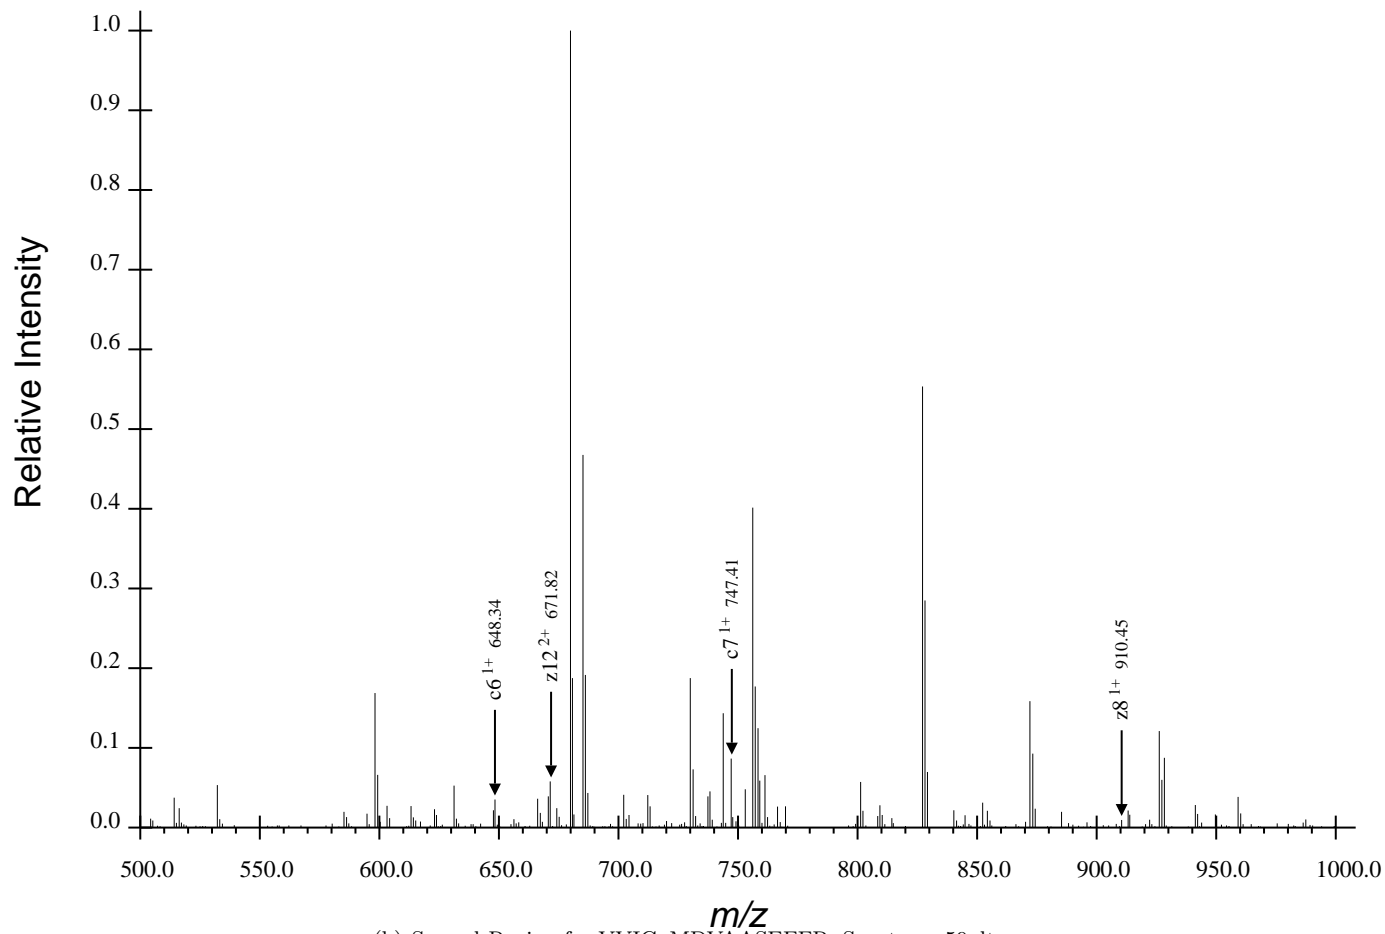

(b) Second Region for VVIGoMDVAASEFFR, Spectrum 59.dta

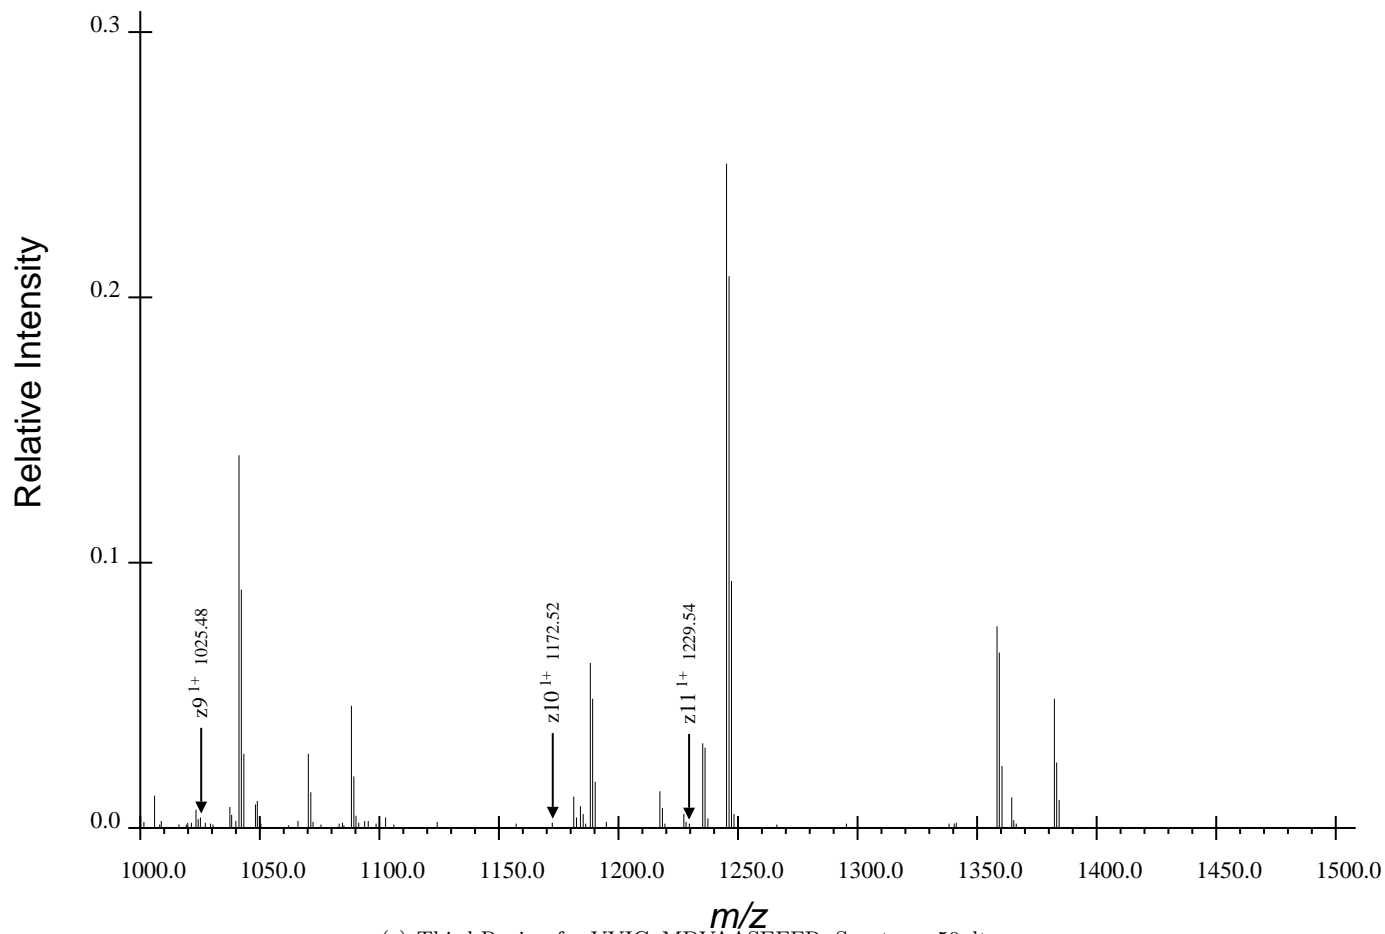

(c) Third Region for VVIGoMDVAASEFFR, Spectrum 59.dta

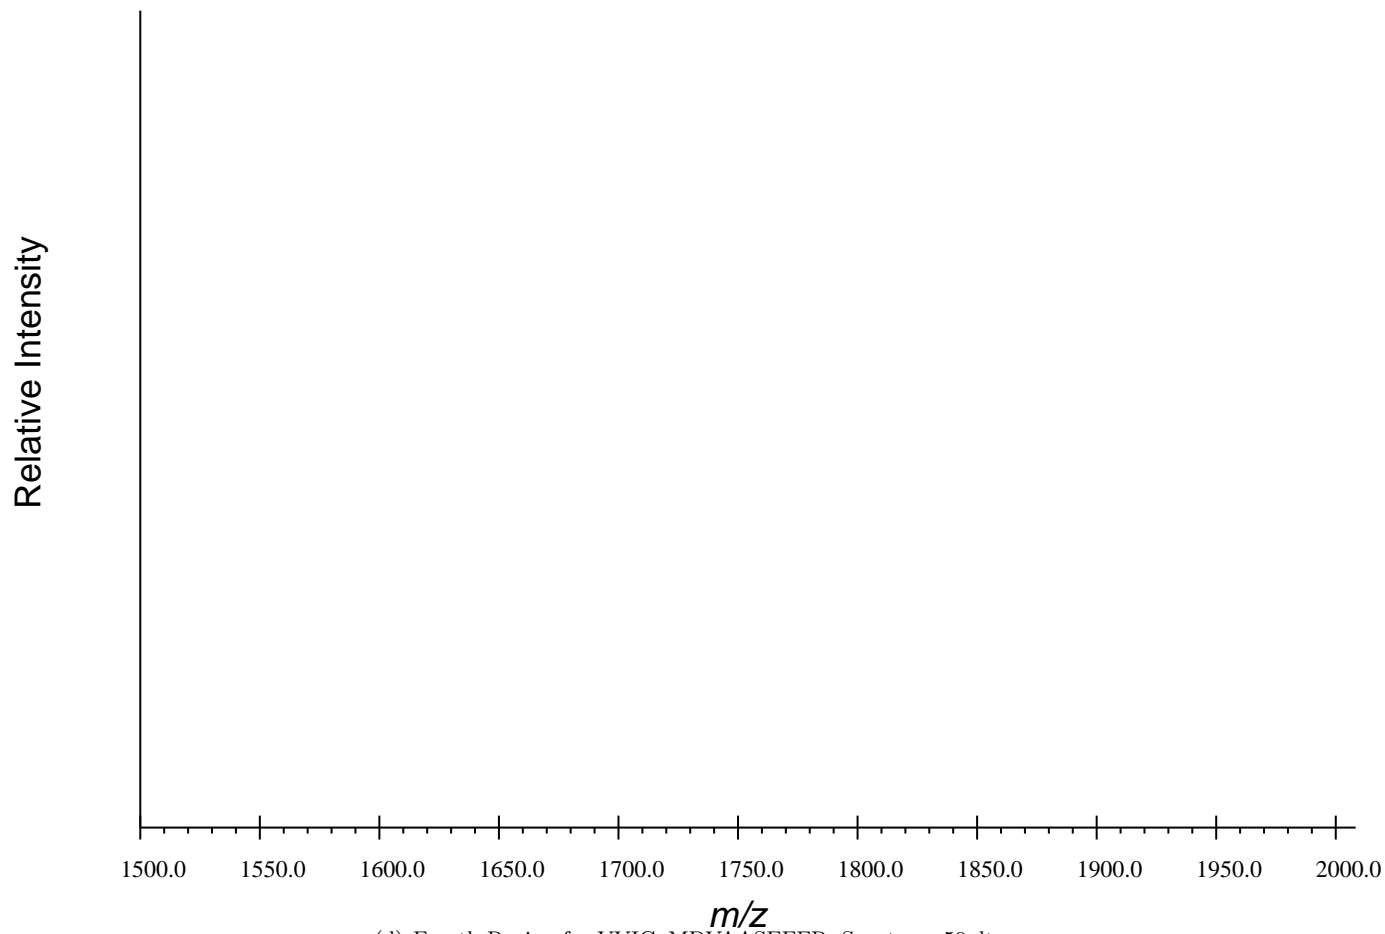

(d) Fourth Region for VVIGoMDVAASEFFR, Spectrum 59.dta

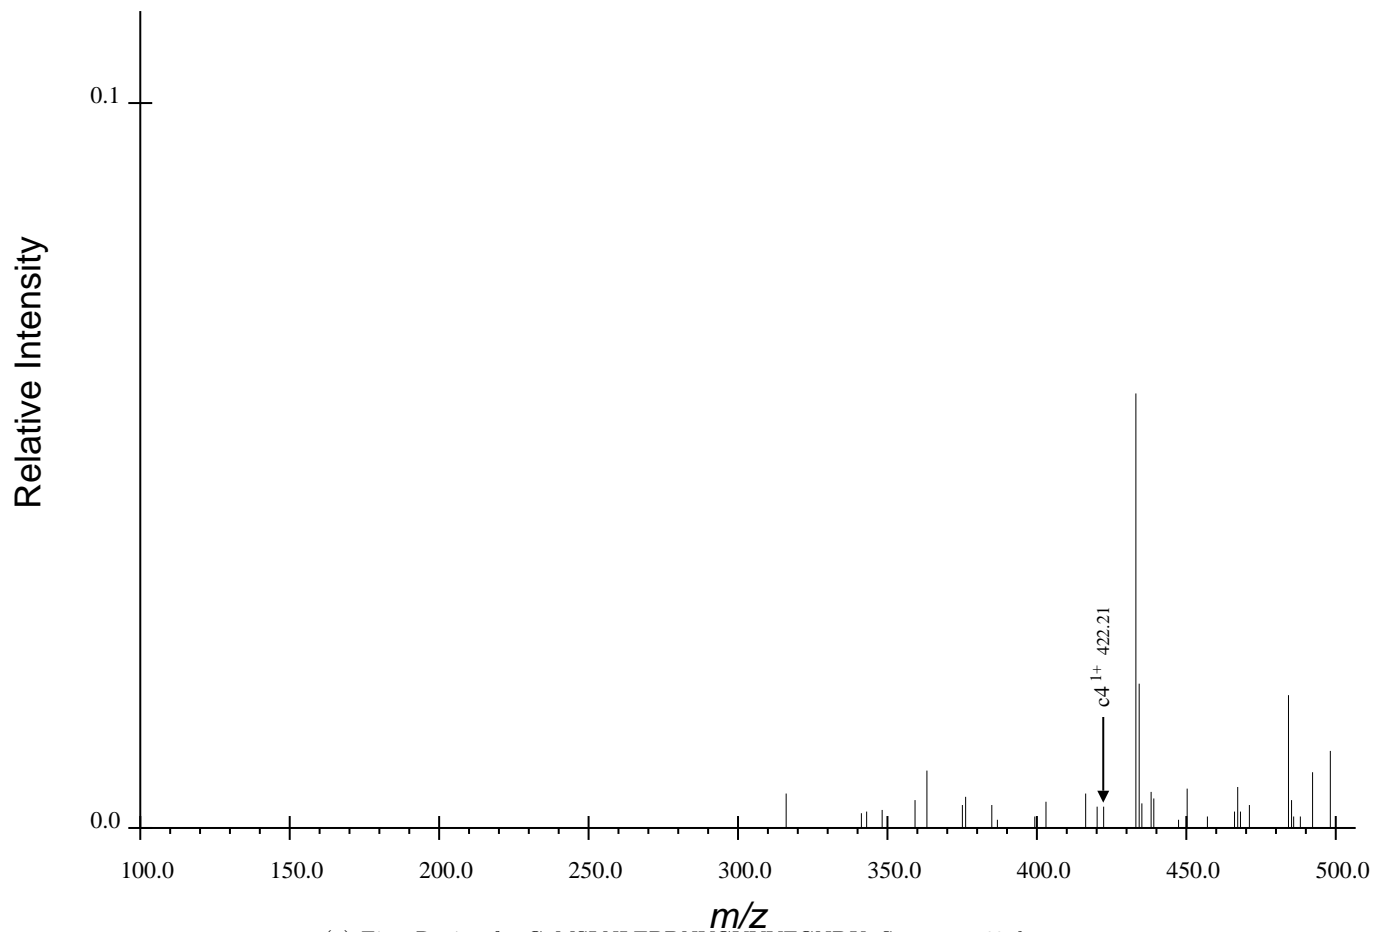

(a) First Region for GoMSLNLEPDNVGVVVFVFGNDK, Spectrum 60.dta

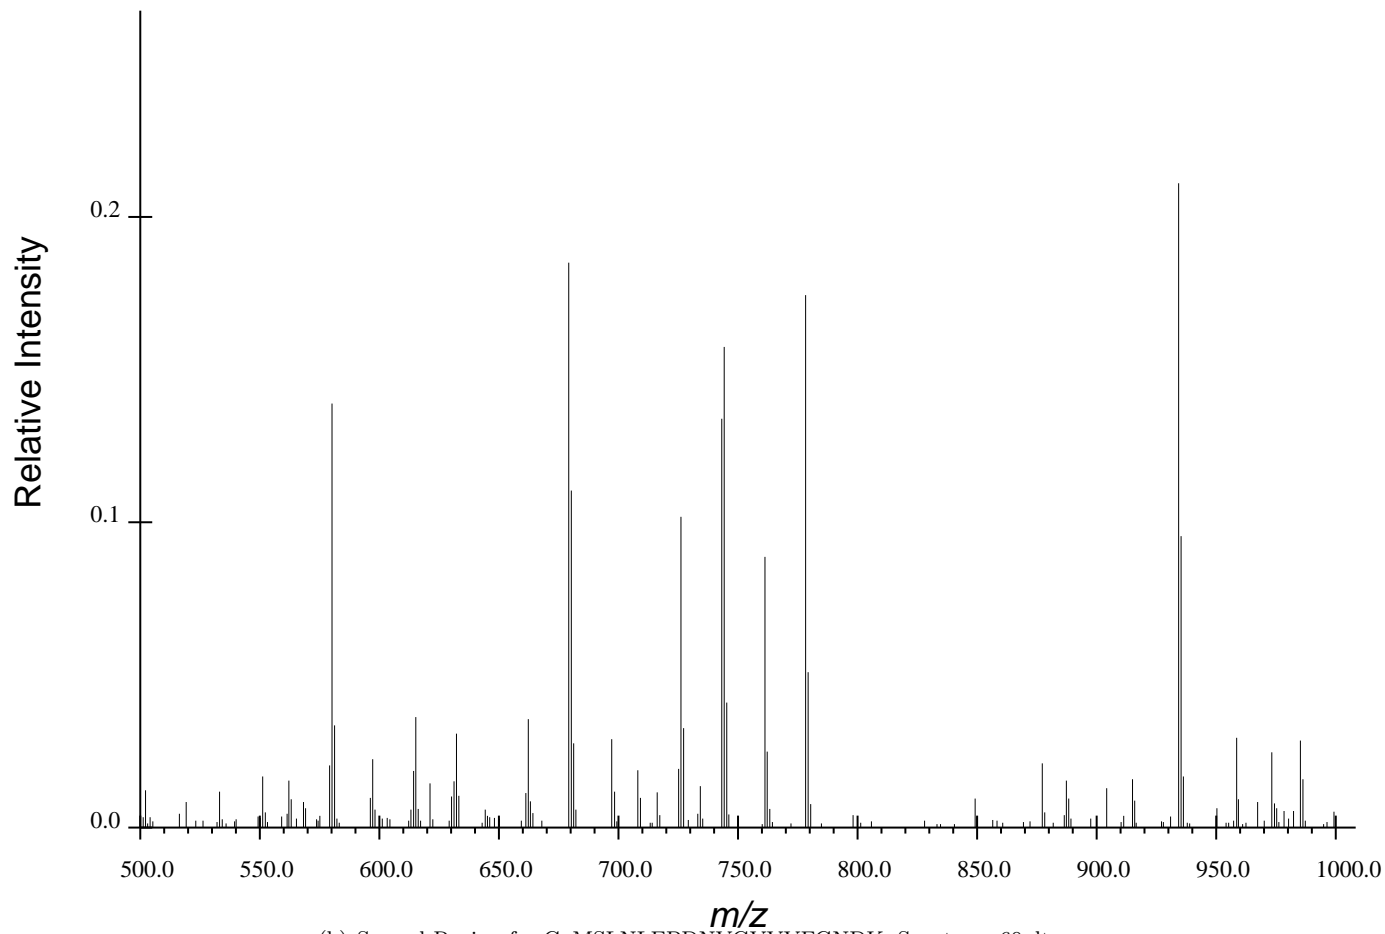

(b) Second Region for GoMSLNLEPDNVGVVVFVFGNDK, Spectrum 60.dta

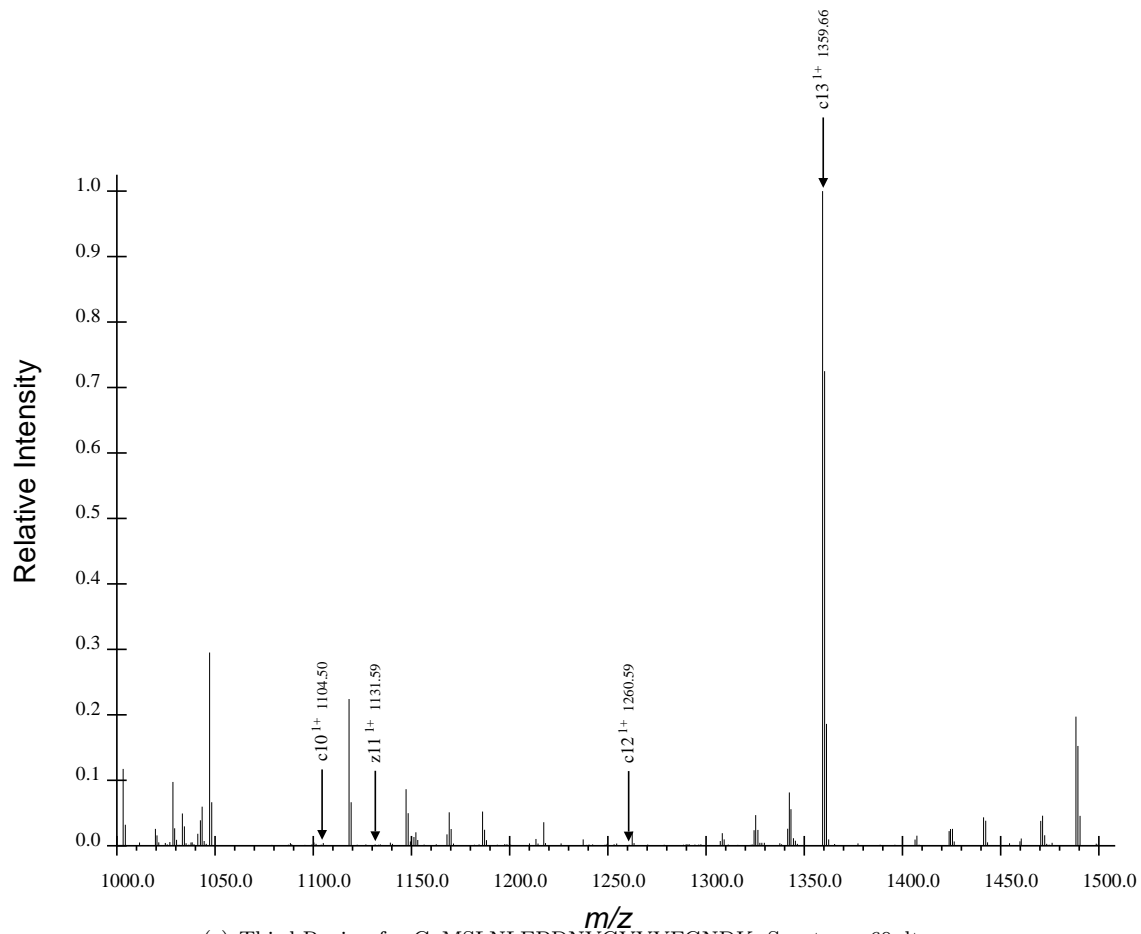

(c) Third Region for GoMSLNLEPDNVGVVVFVFGNDK, Spectrum 60.dta

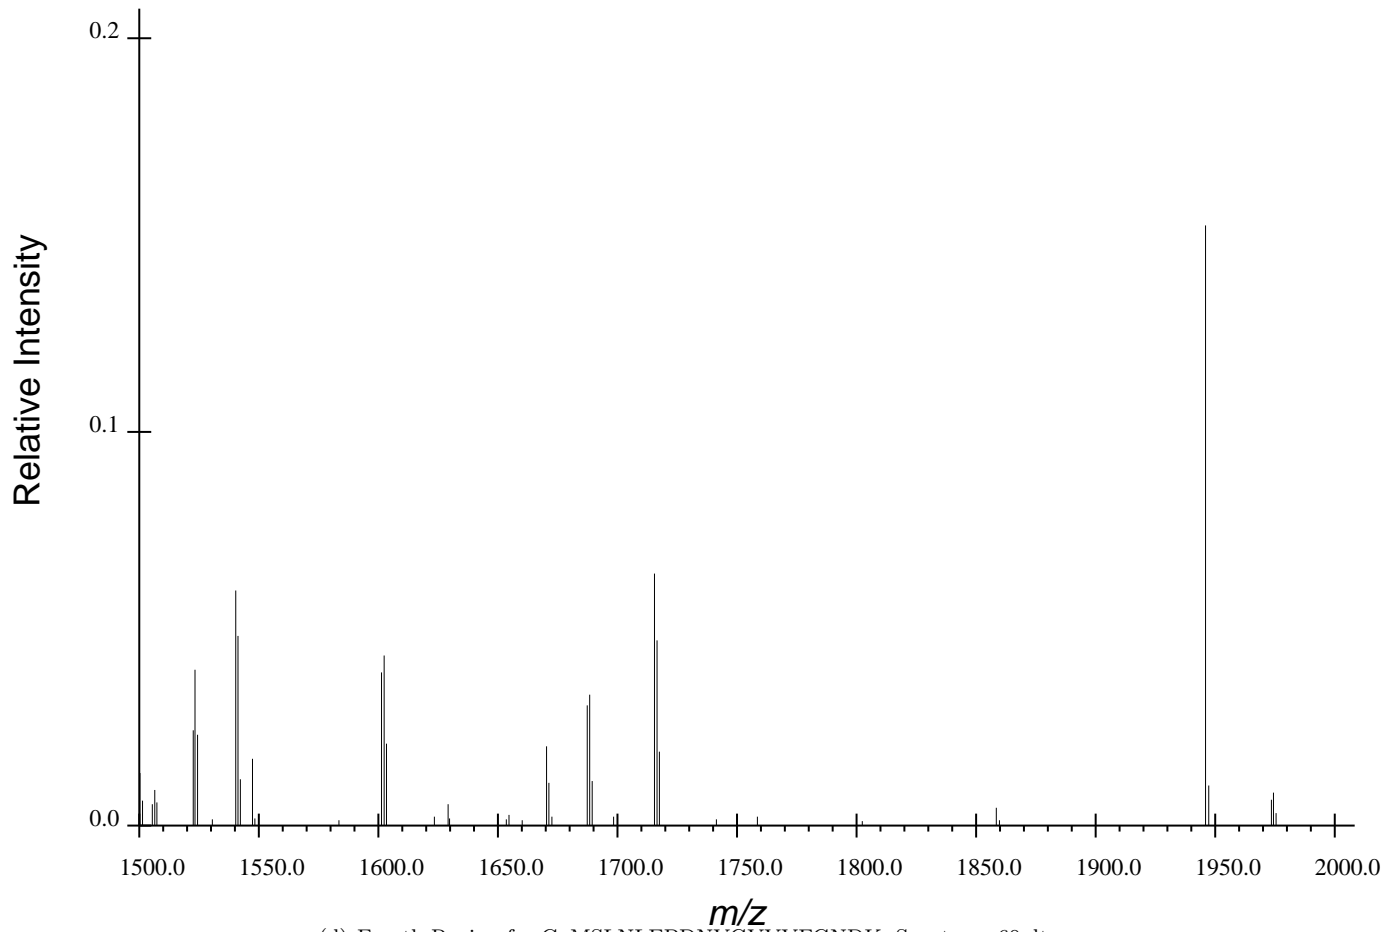

(d) Fourth Region for GoMSLNLEPDNVGVVVFVFGNDK, Spectrum 60.dta

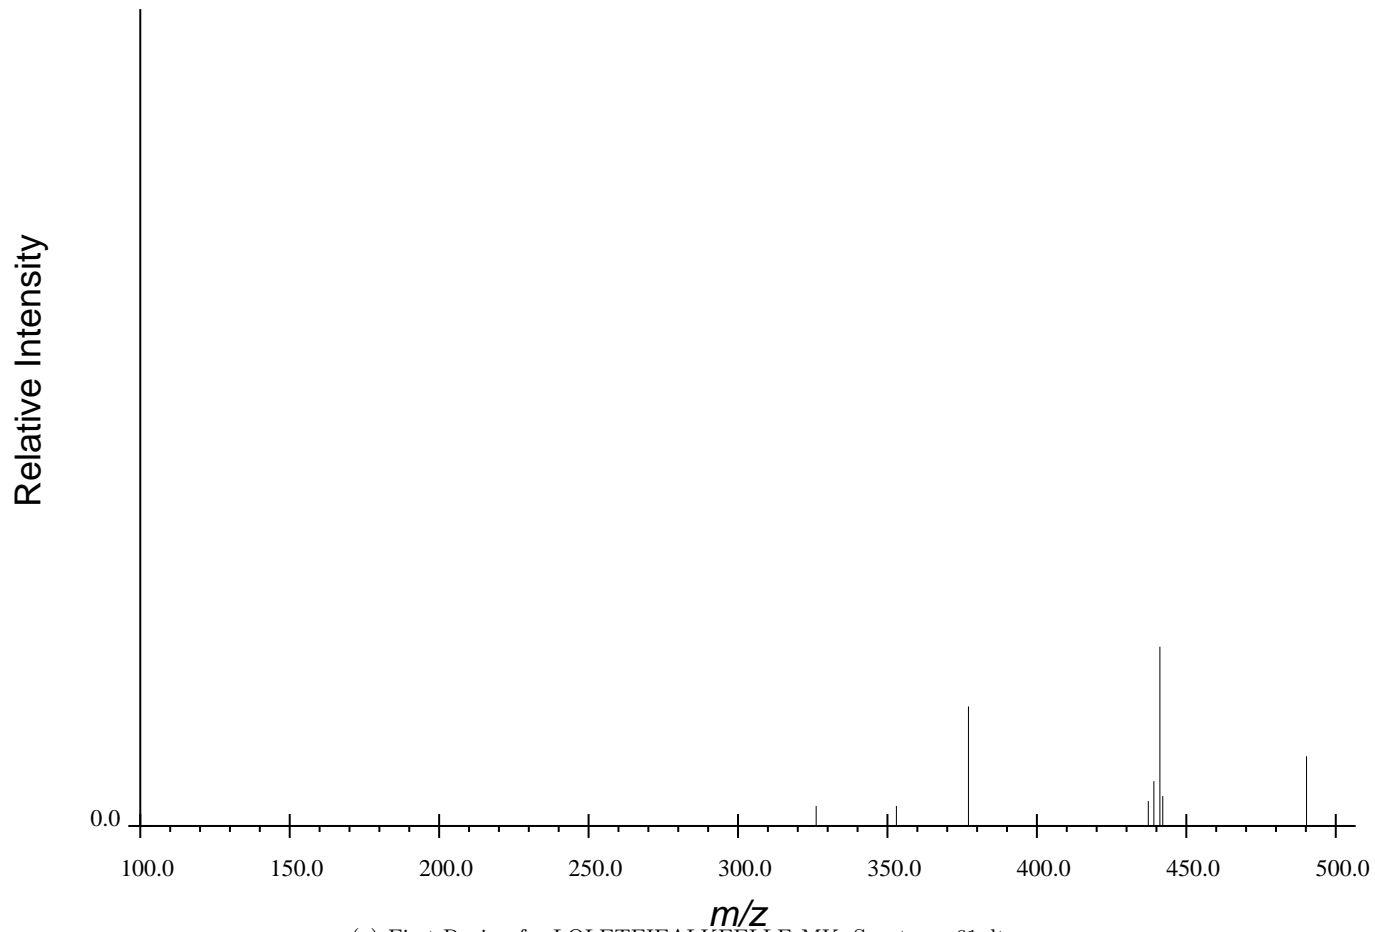

(a) First Region for LQLETEIEALKEELLFoMK, Spectrum 61.dta

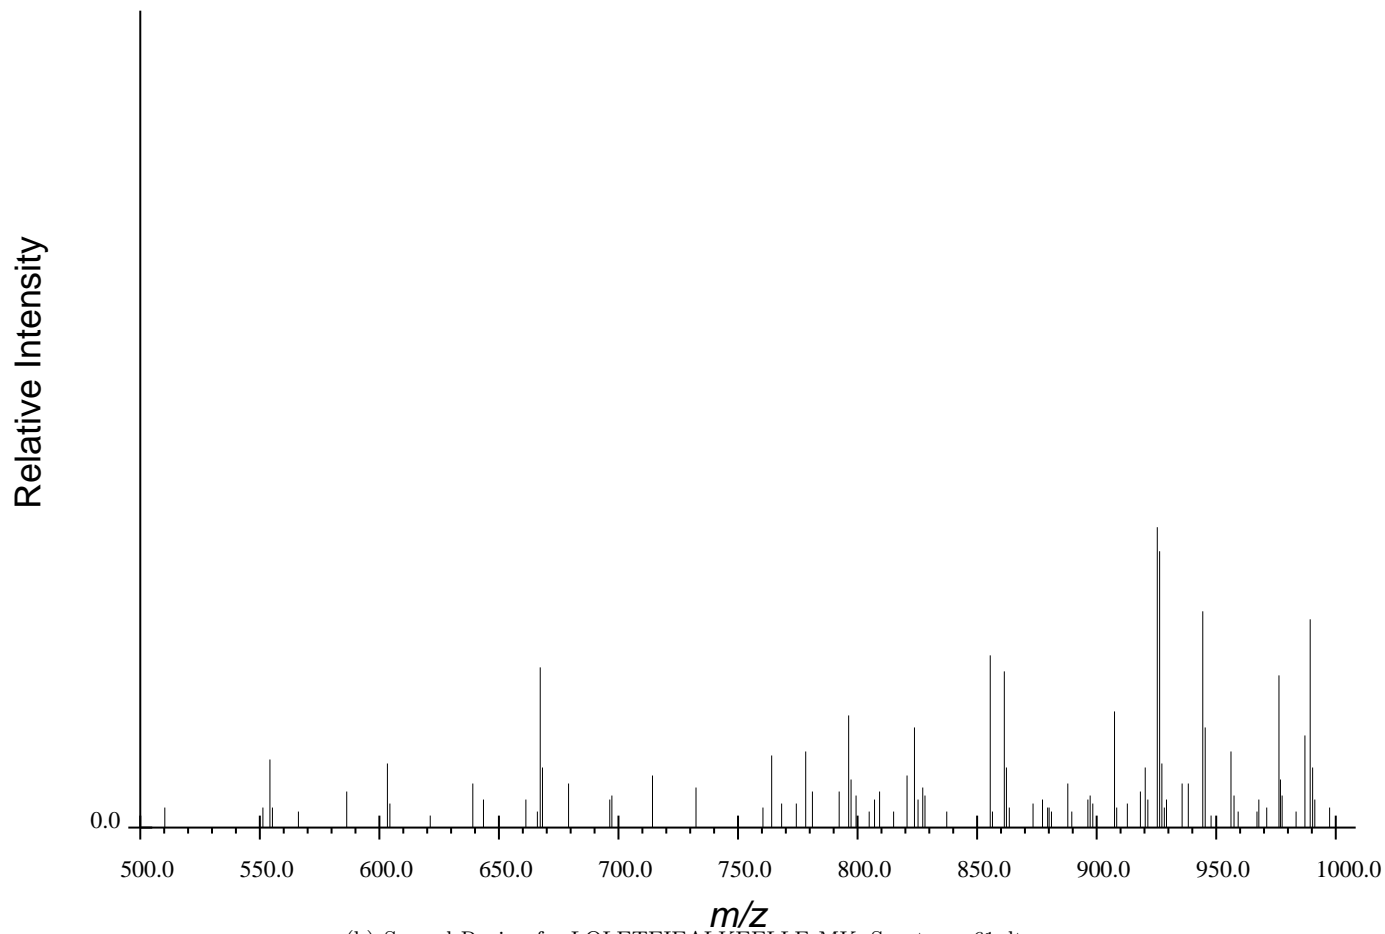

(b) Second Region for LQLETEIEALKEELLFoMK, Spectrum 61.dta

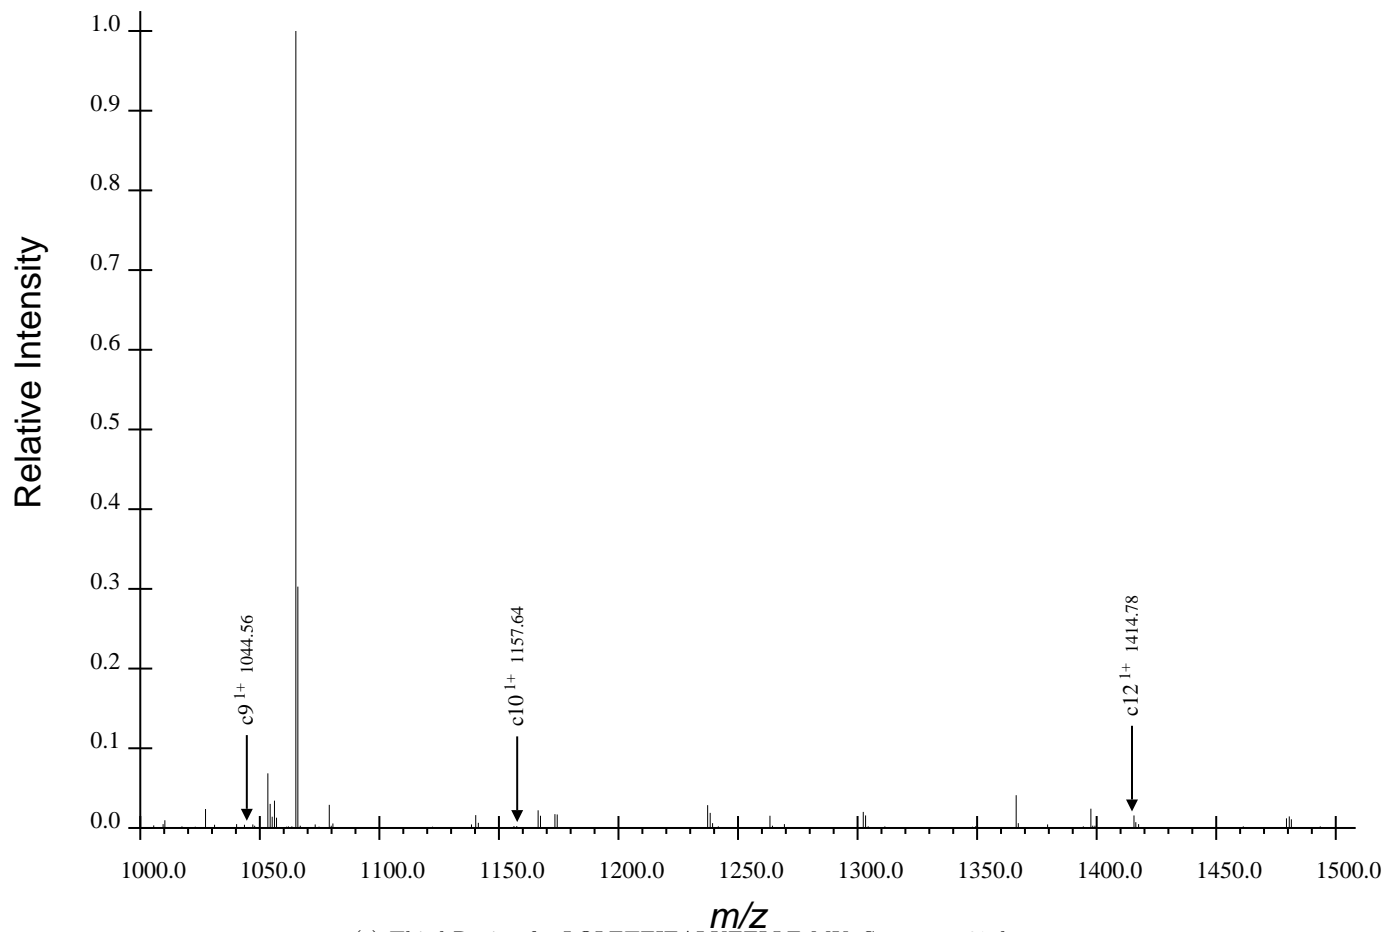

(c) Third Region for LQLETEIEALKEELLFoMK, Spectrum 61.dta

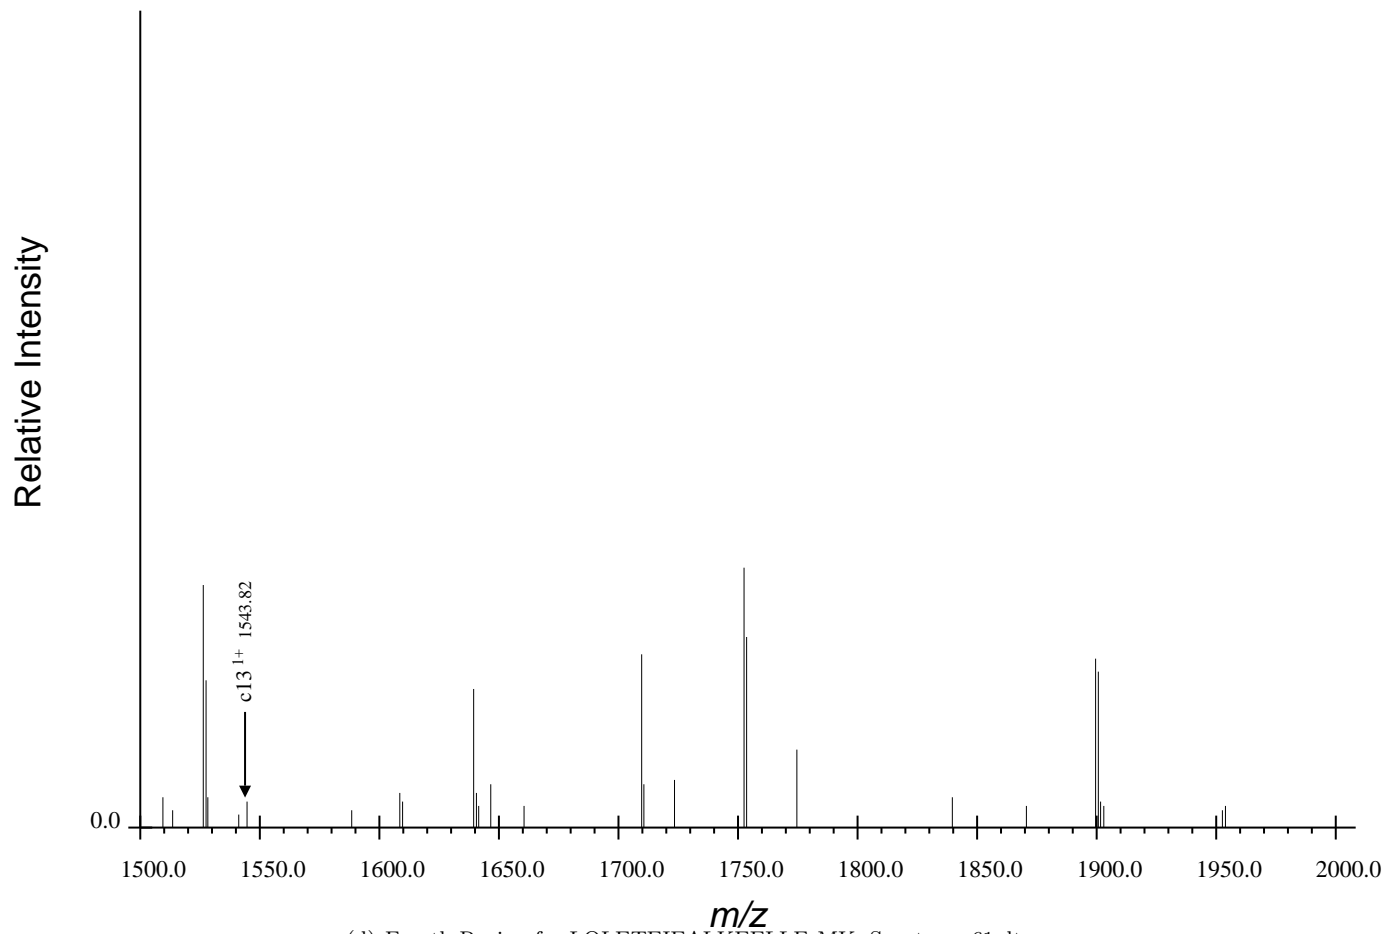

(d) Fourth Region for LQLETEIEALKEELLFoMK, Spectrum 61.dta

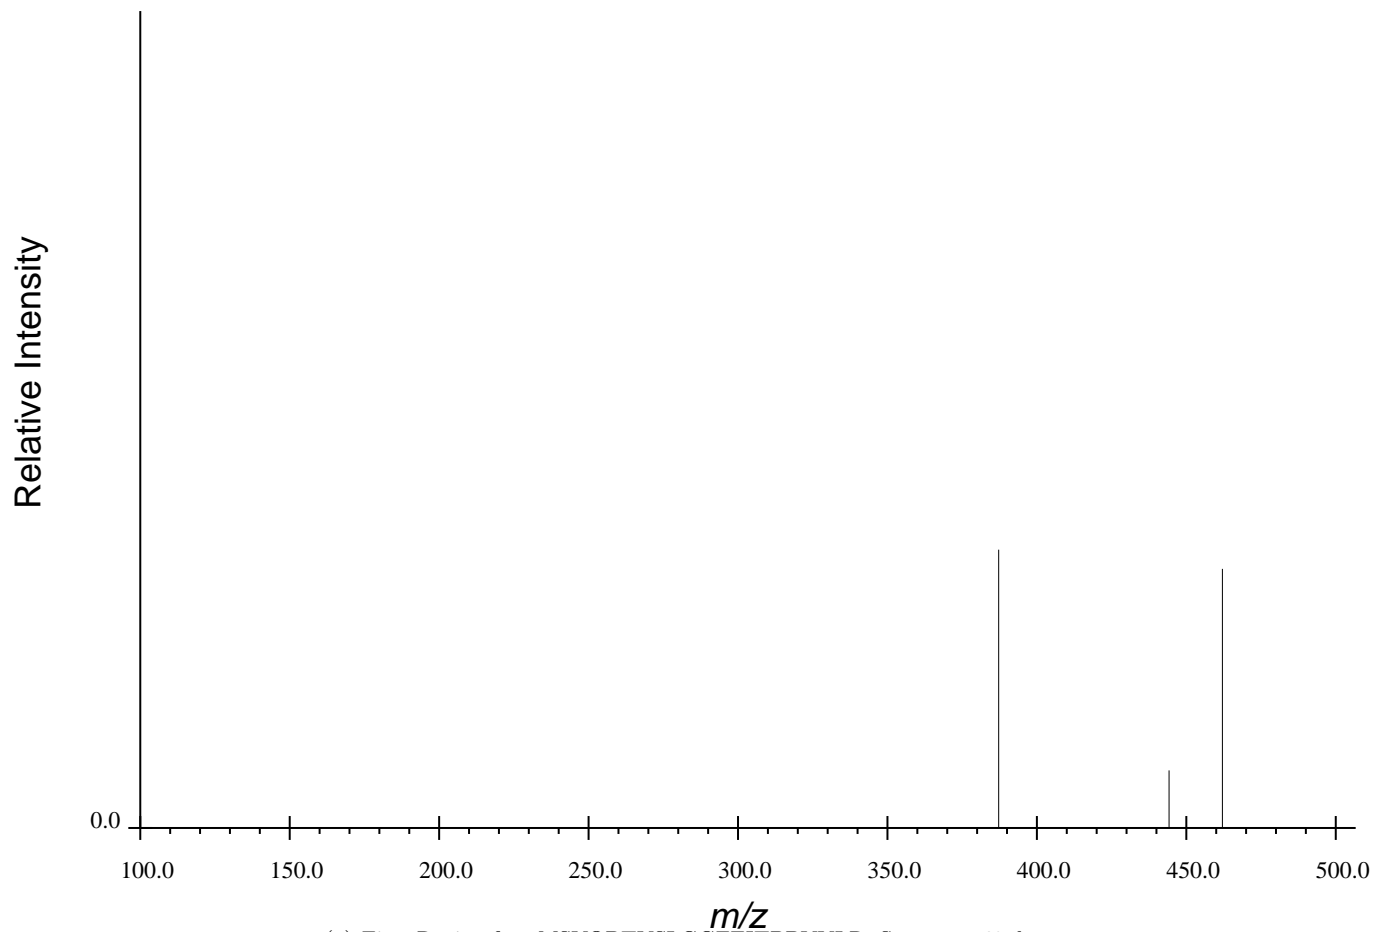

(a) First Region for oMSVQPTVSLGGFEITPPVLR, Spectrum 62.dta

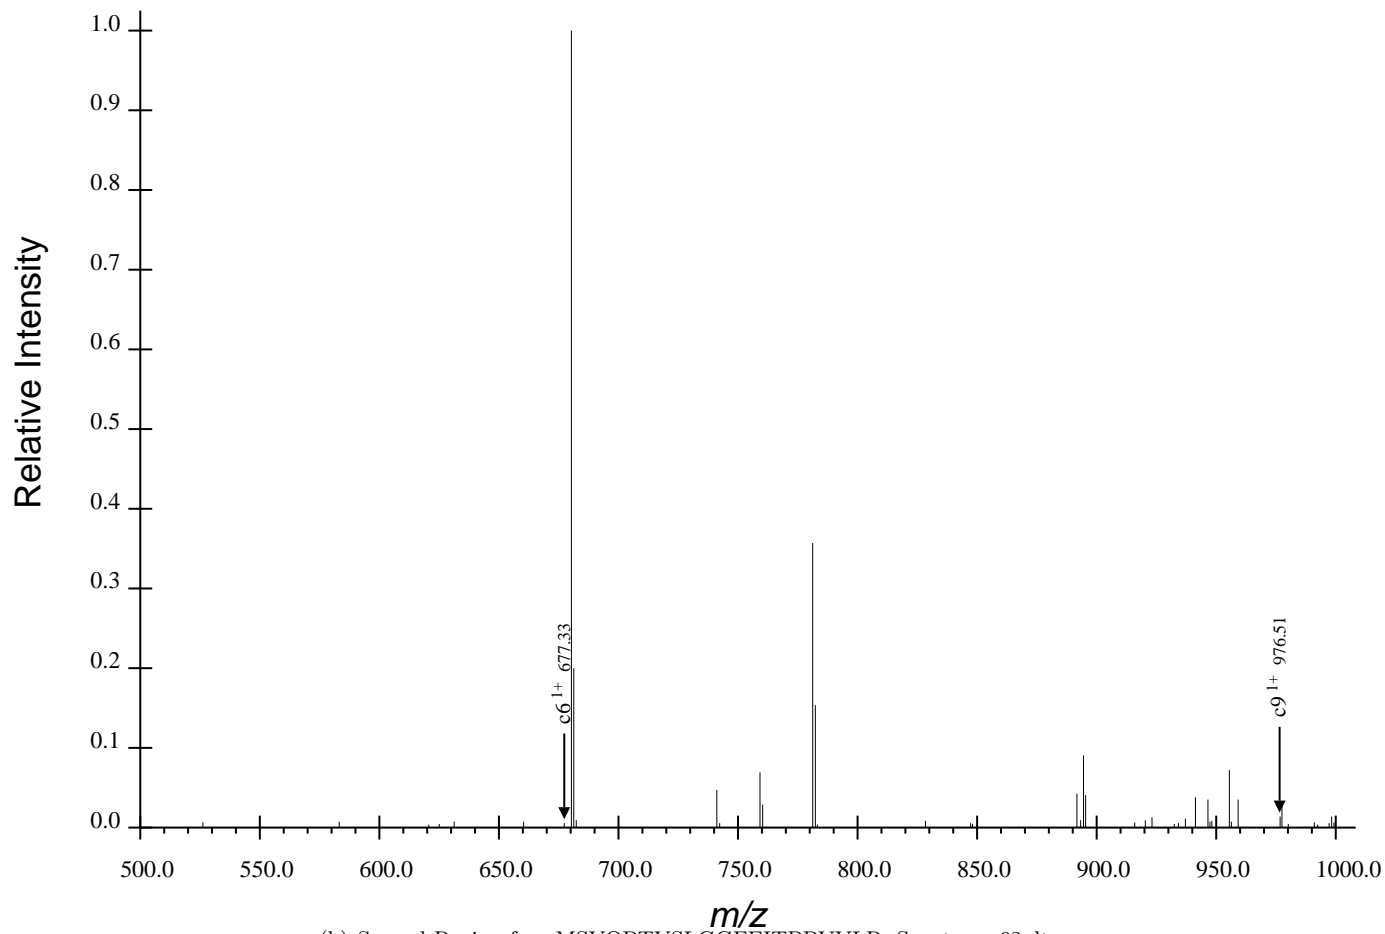

(b) Second Region for oMSVQPTVSLGGFEITPPVLR, Spectrum 62.dta

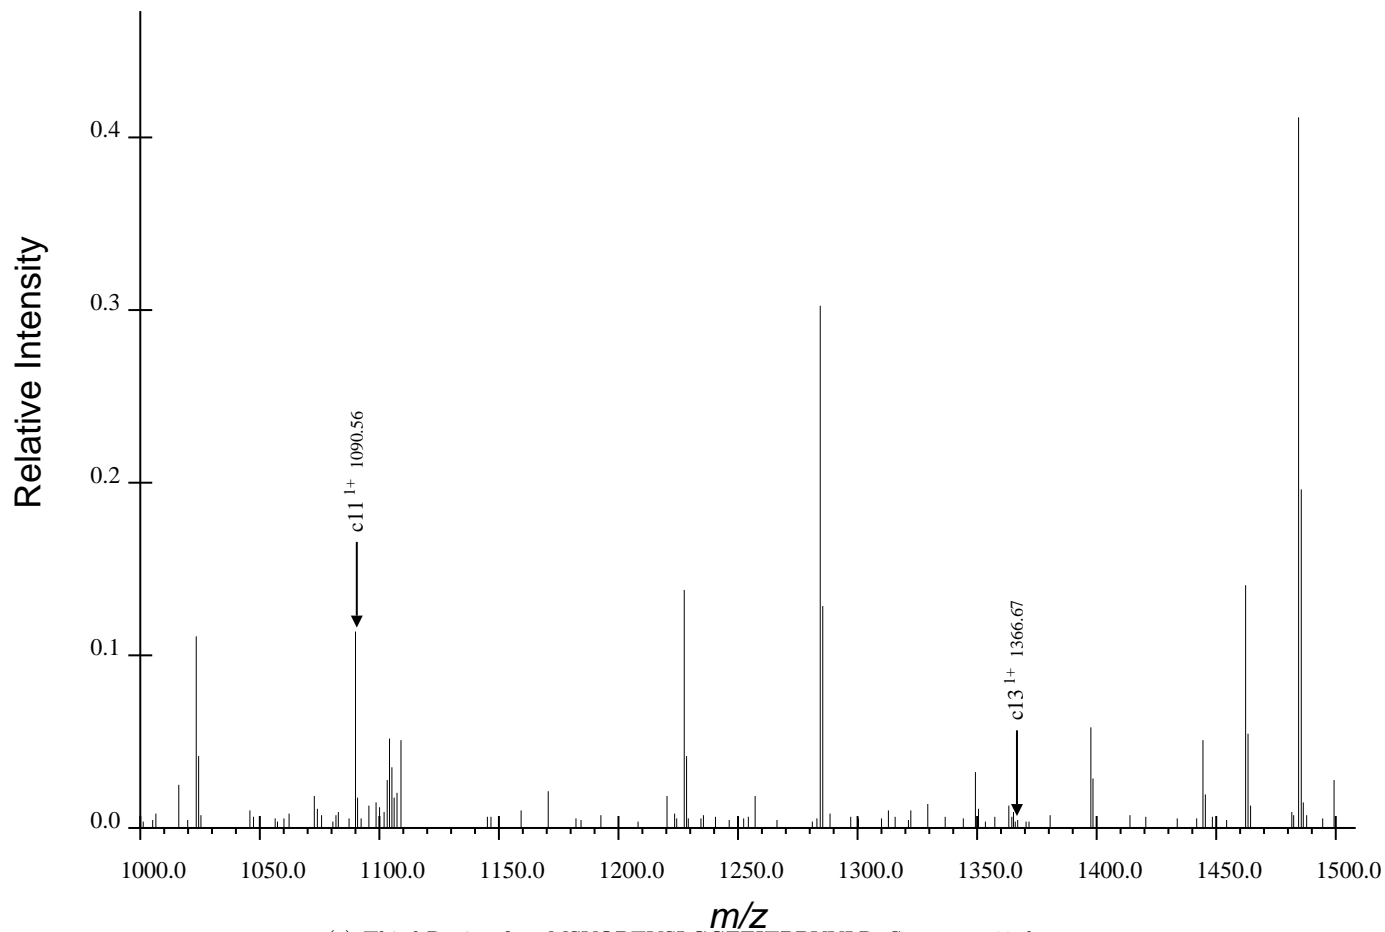

(c) Third Region for oMSVQPTVSLGGFEITPPVLR, Spectrum 62.dta

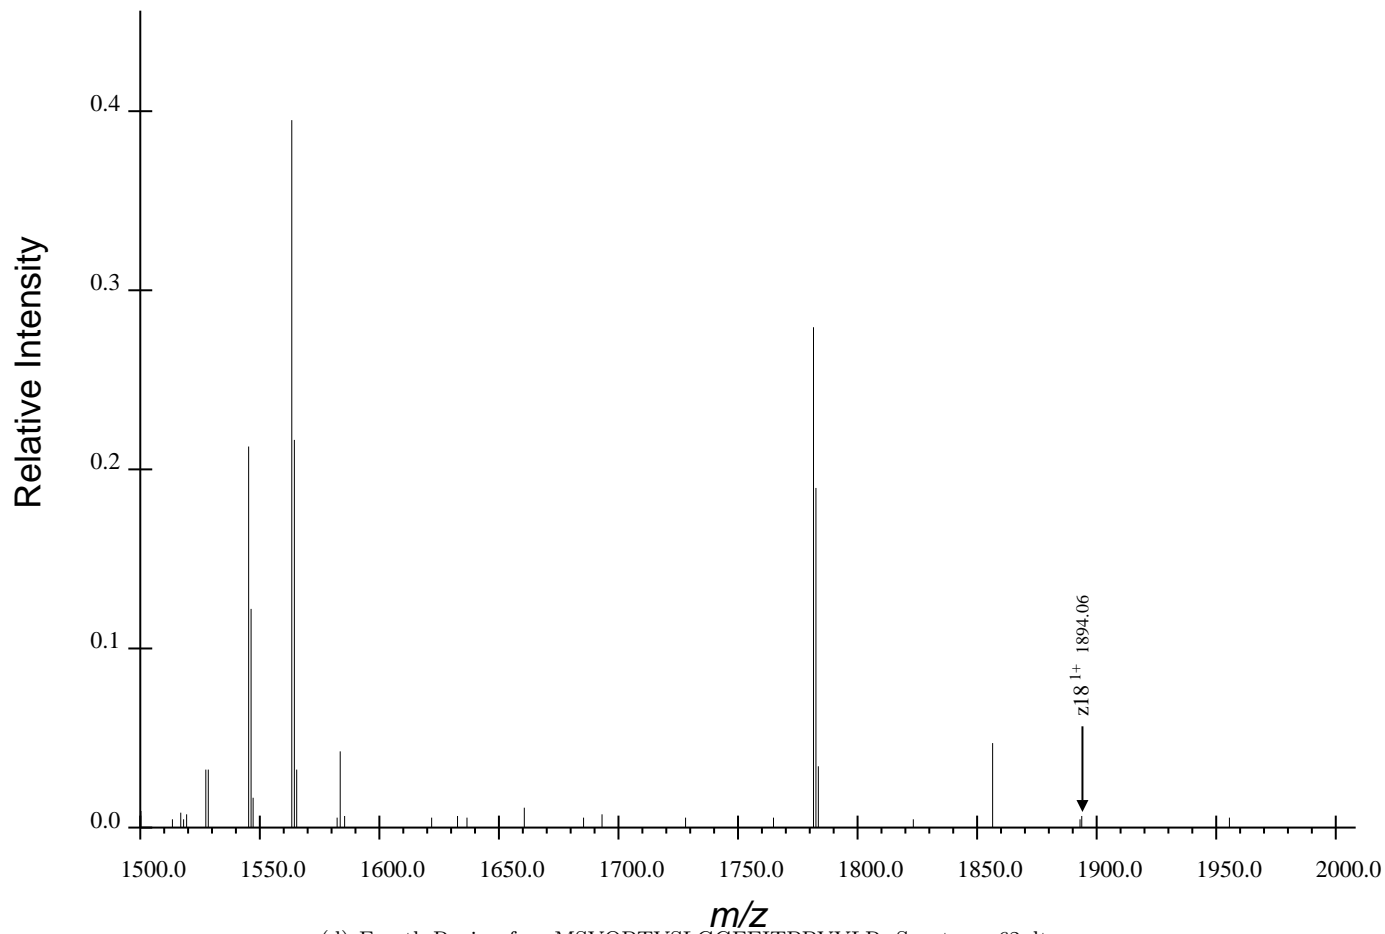

(d) Fourth Region for oMSVQPTVSLGGFEITPPVLR, Spectrum 62.dta



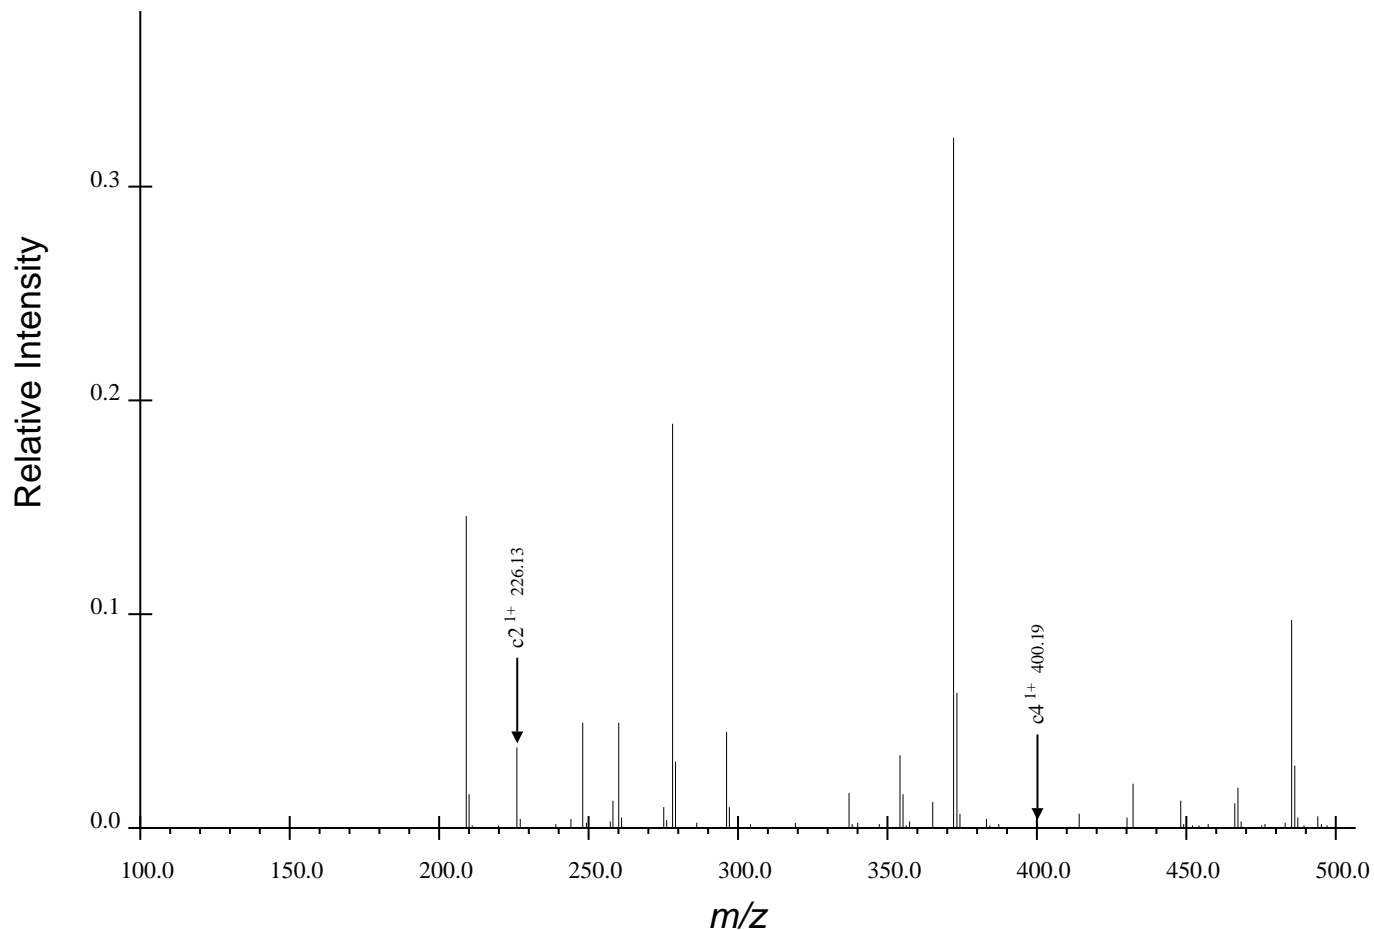

(a) First Region for AHSSoMVGVNLPQK, Spectrum 63.dta

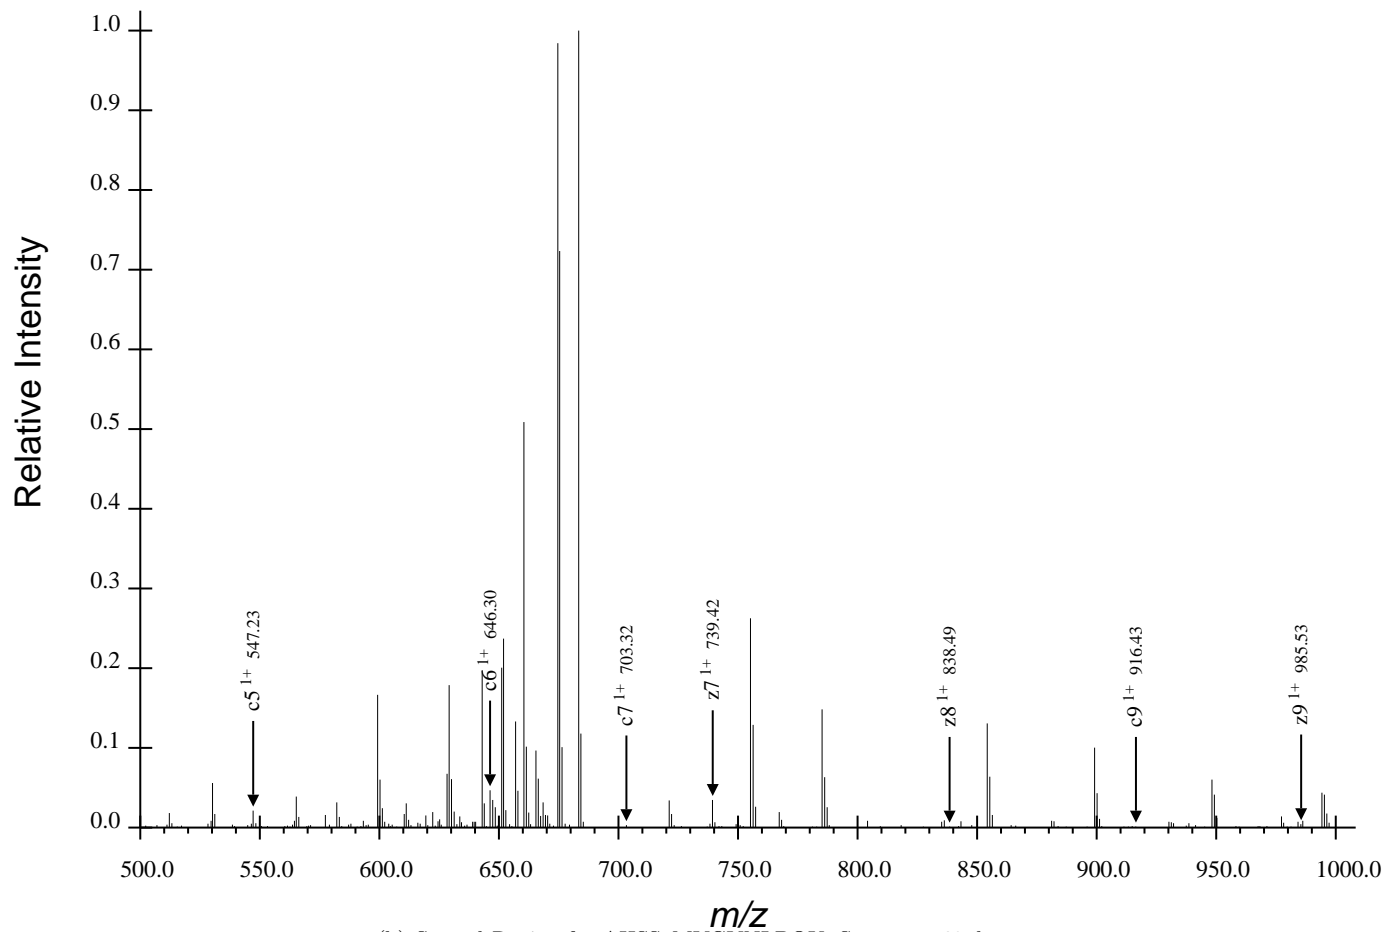

(b) Second Region for AHSSoMVGVNLPQK, Spectrum 63.dta

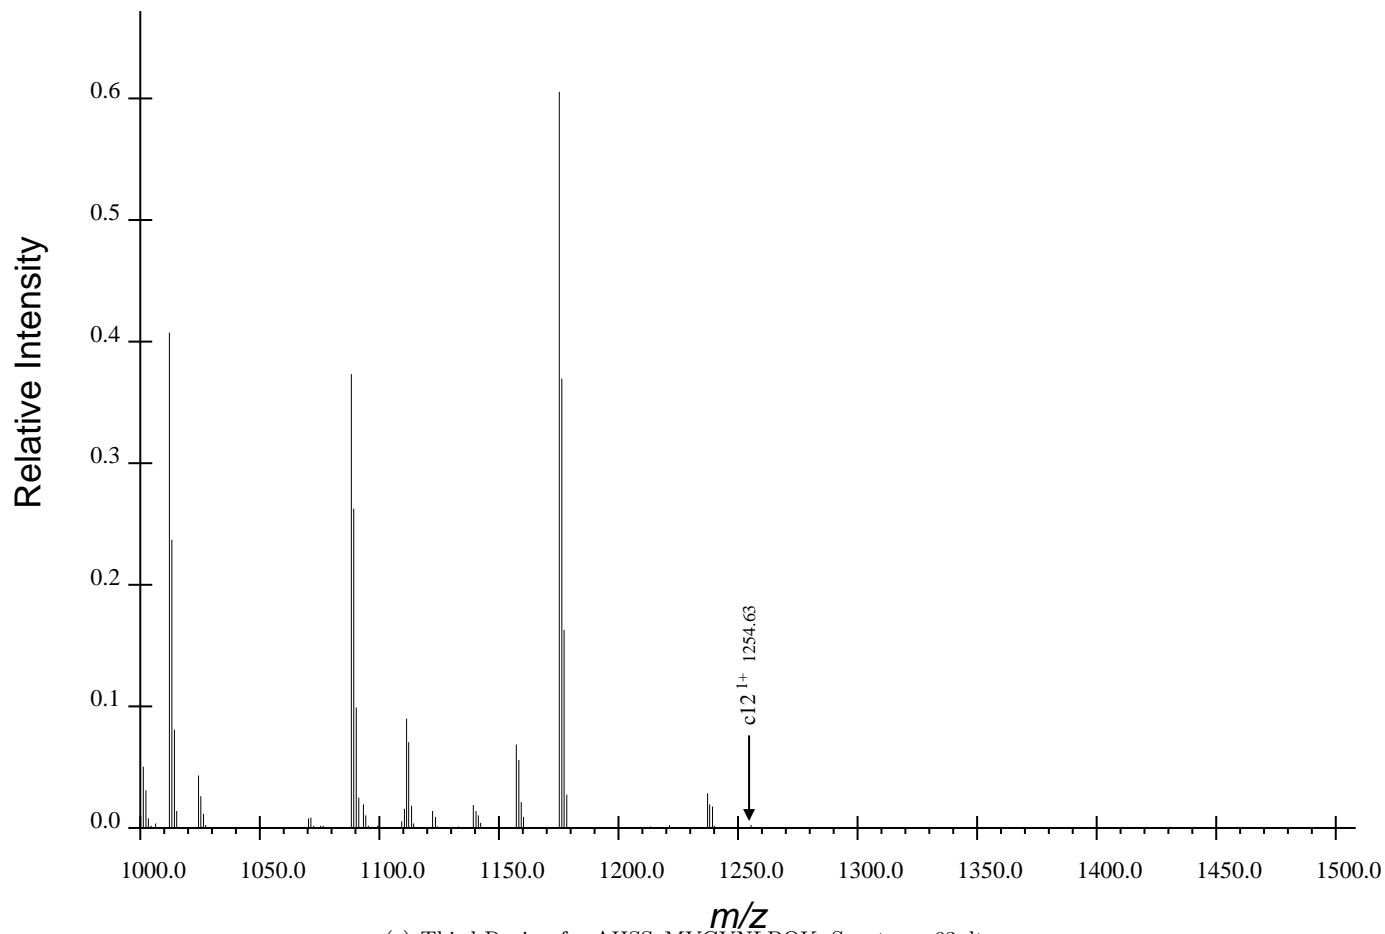

(c) Third Region for AHSSoMVGVNLPQK, Spectrum 63.dta

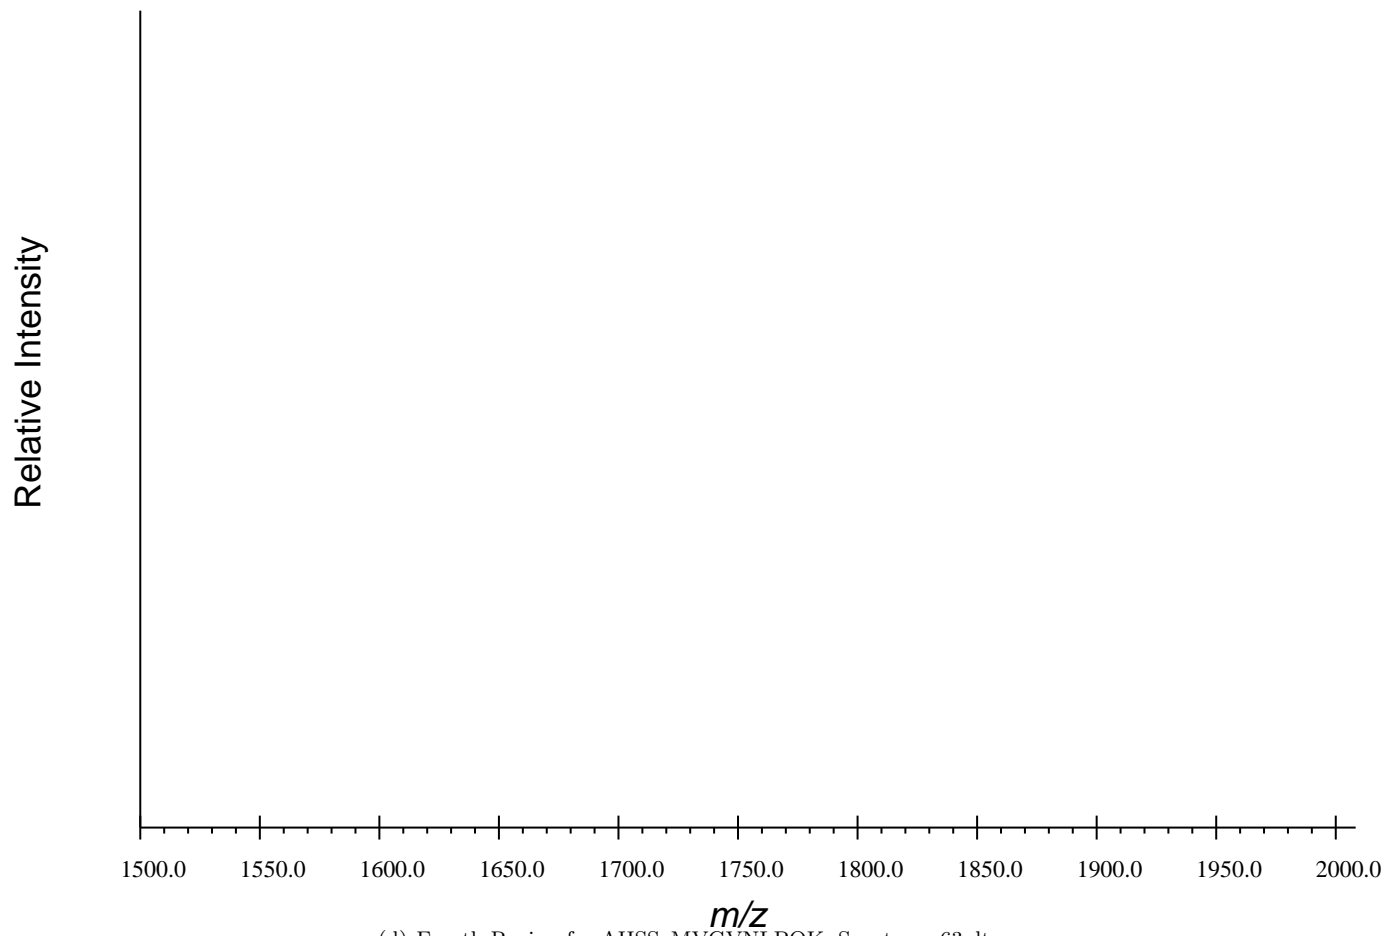

(d) Fourth Region for AHSSoMVGVNLPQK, Spectrum 63.dta

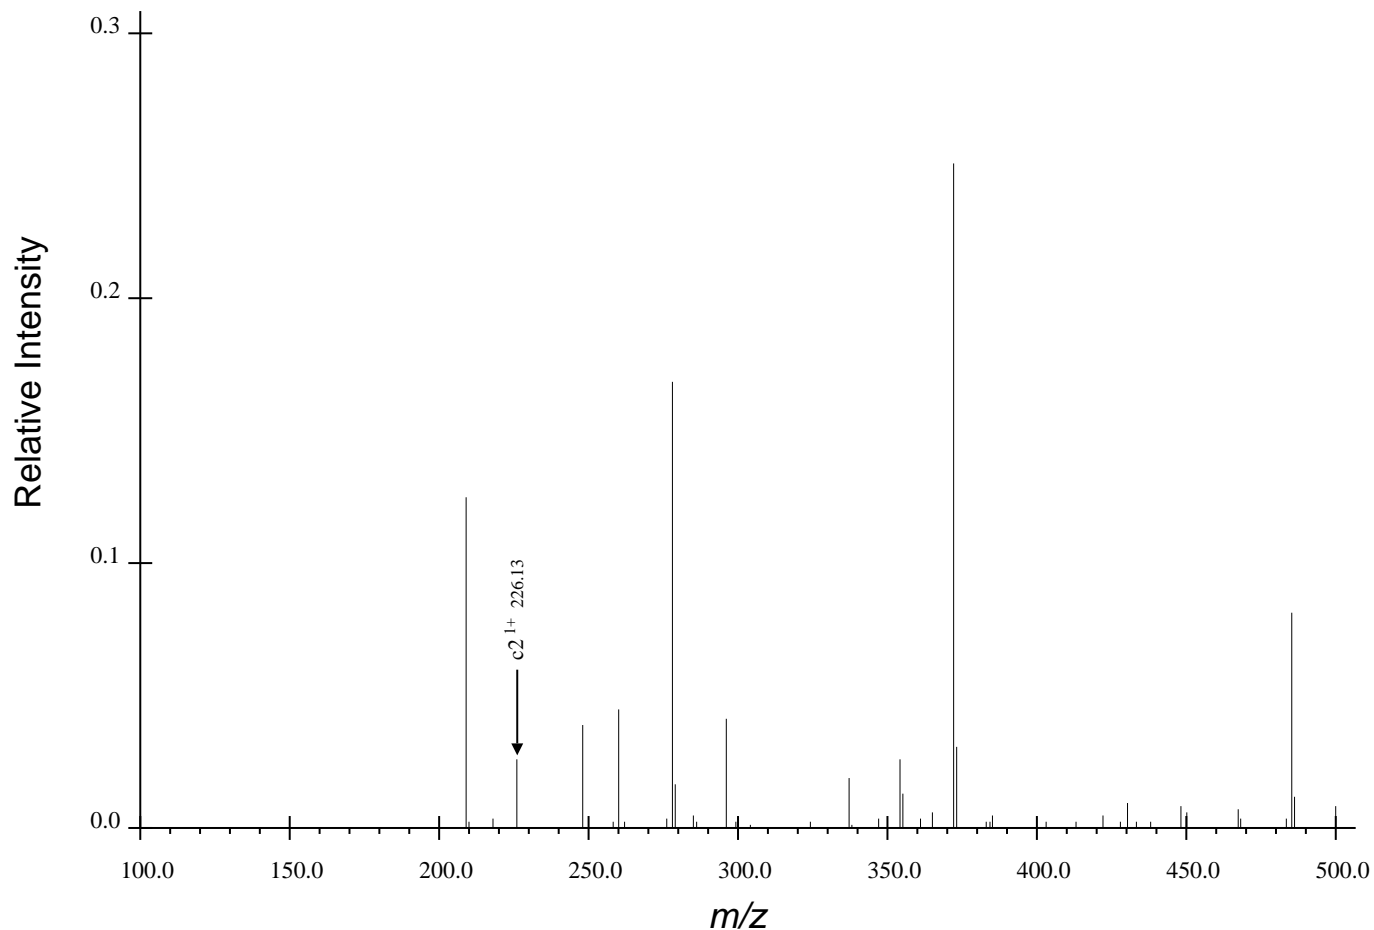

(a) First Region for AHSSoMVGVNLPQK, Spectrum 64.dta

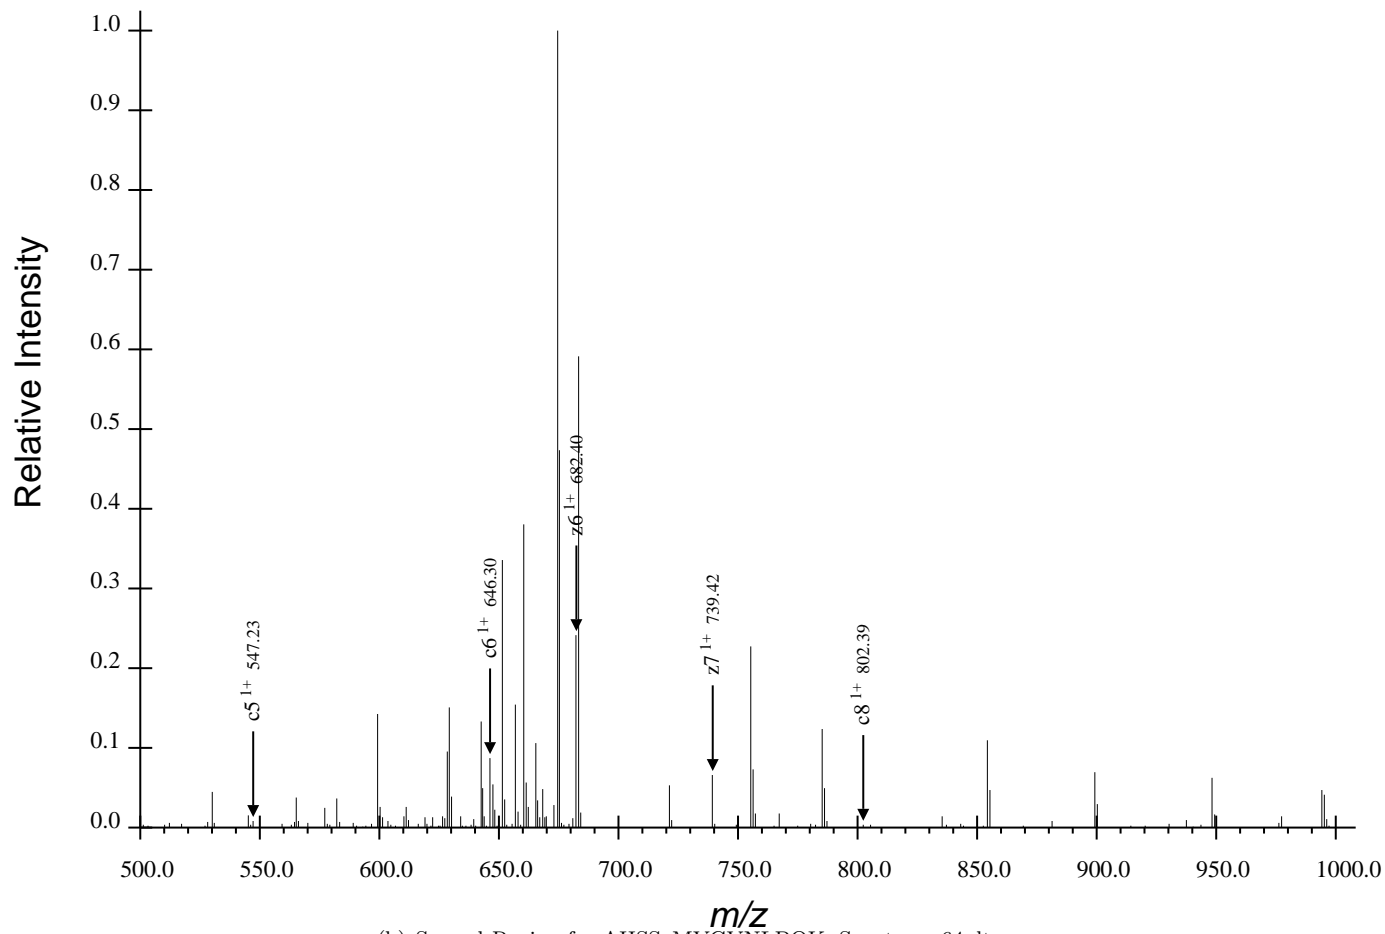

(b) Second Region for AHSSoMVGVNLPQK, Spectrum 64.dta

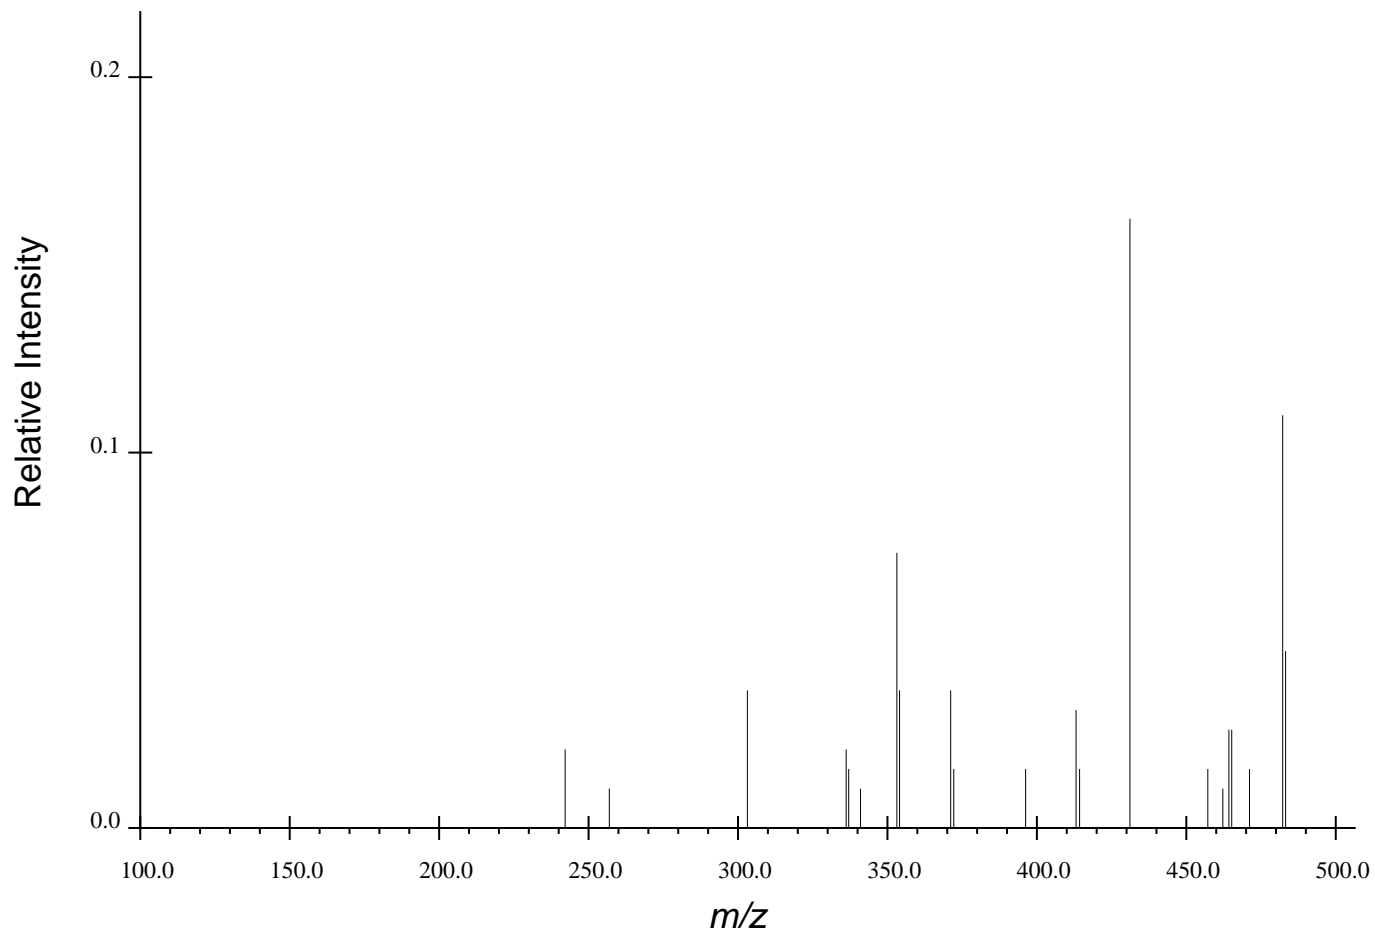

(a) First Region for KLEELELDEQQdK, Spectrum 65.dta

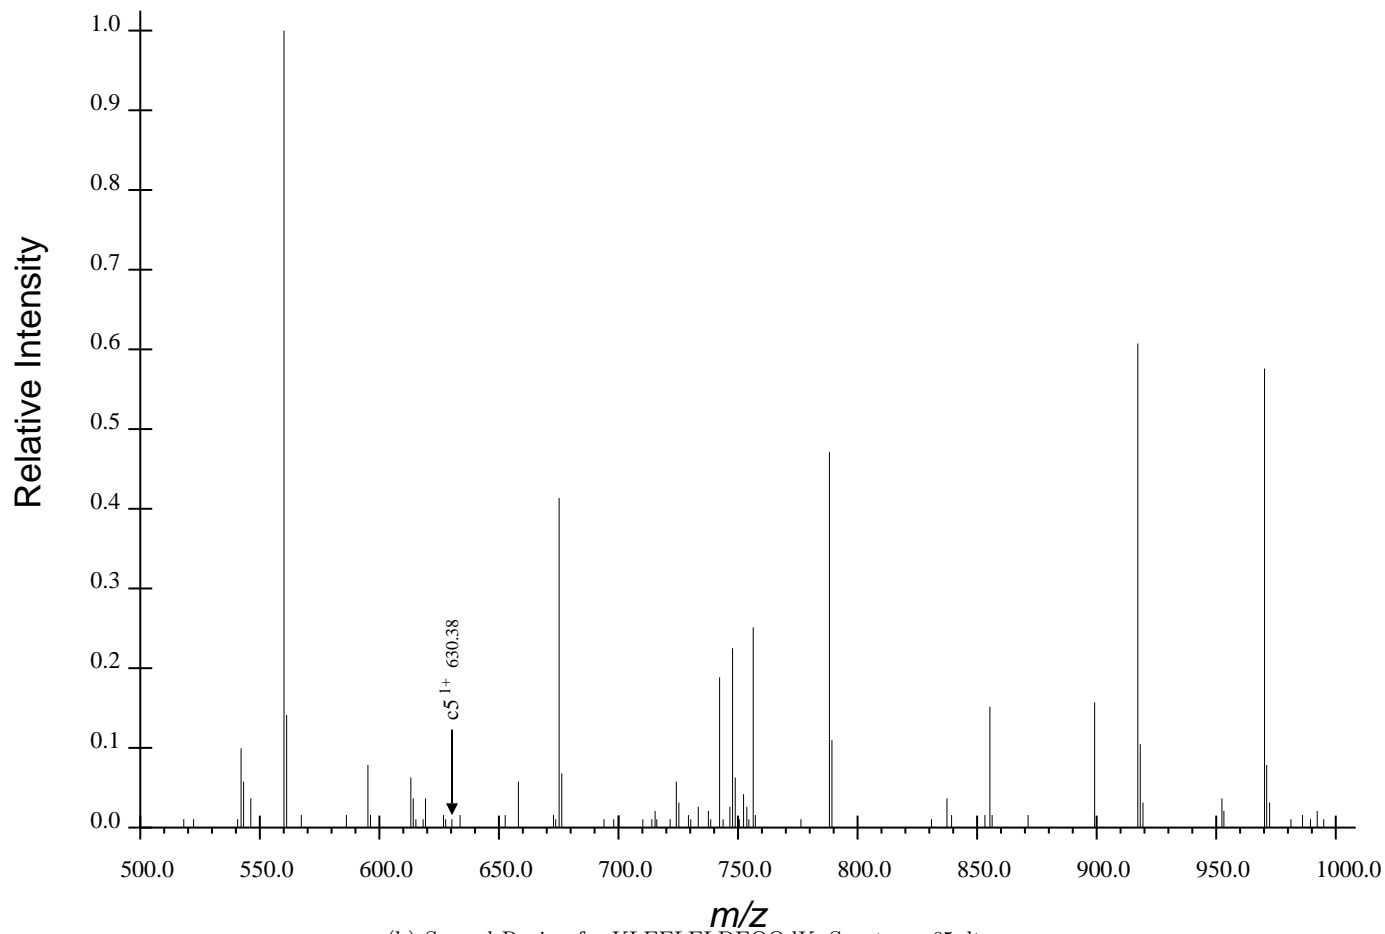

(b) Second Region for KLEELELDEQQdK, Spectrum 65.dta

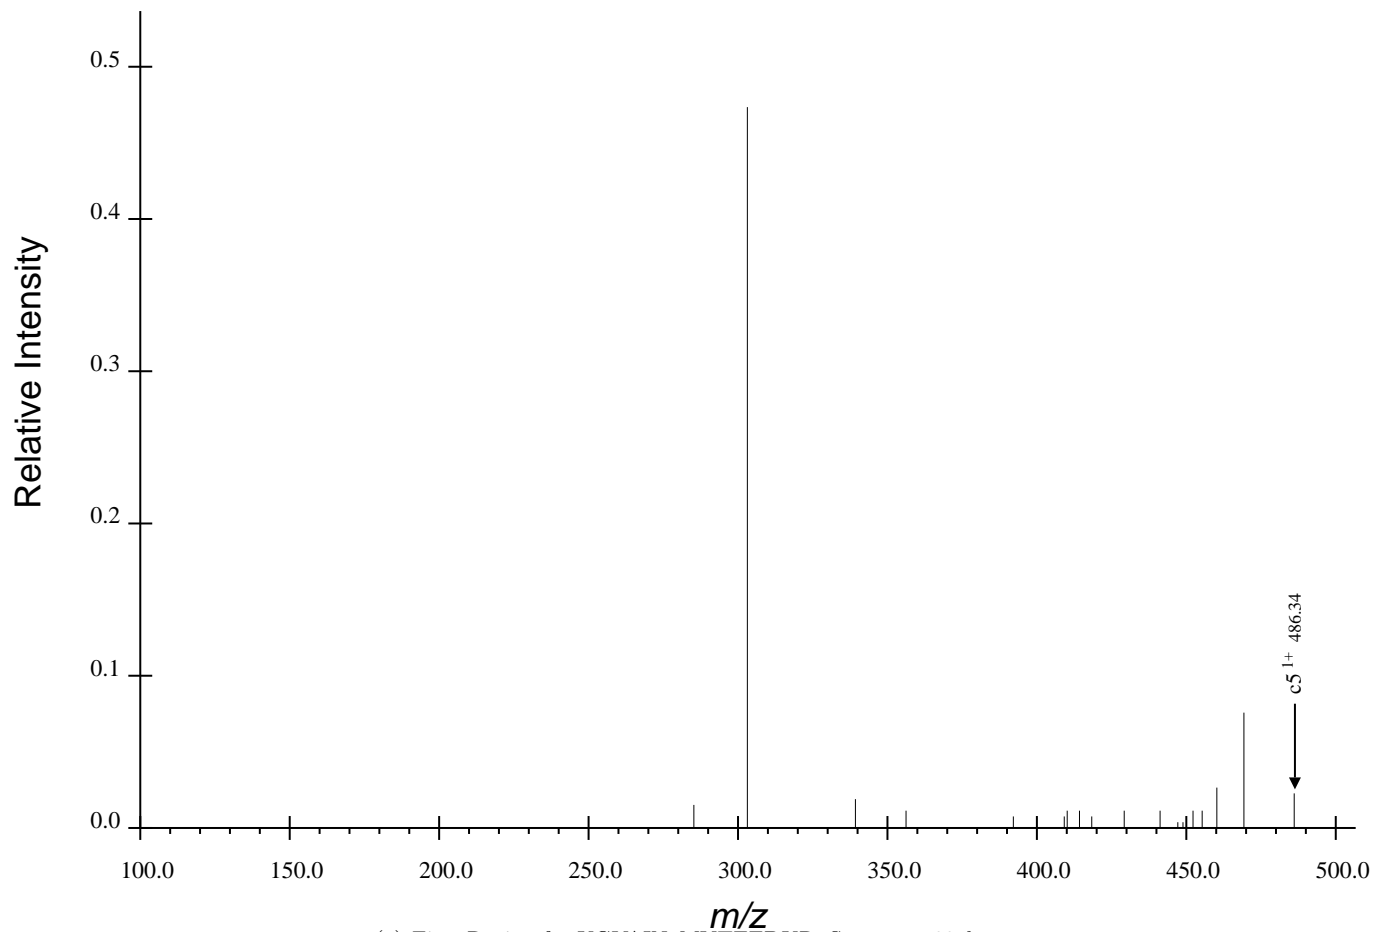

(a) First Region for KGVAINoMVTEEDKR, Spectrum 66.dta

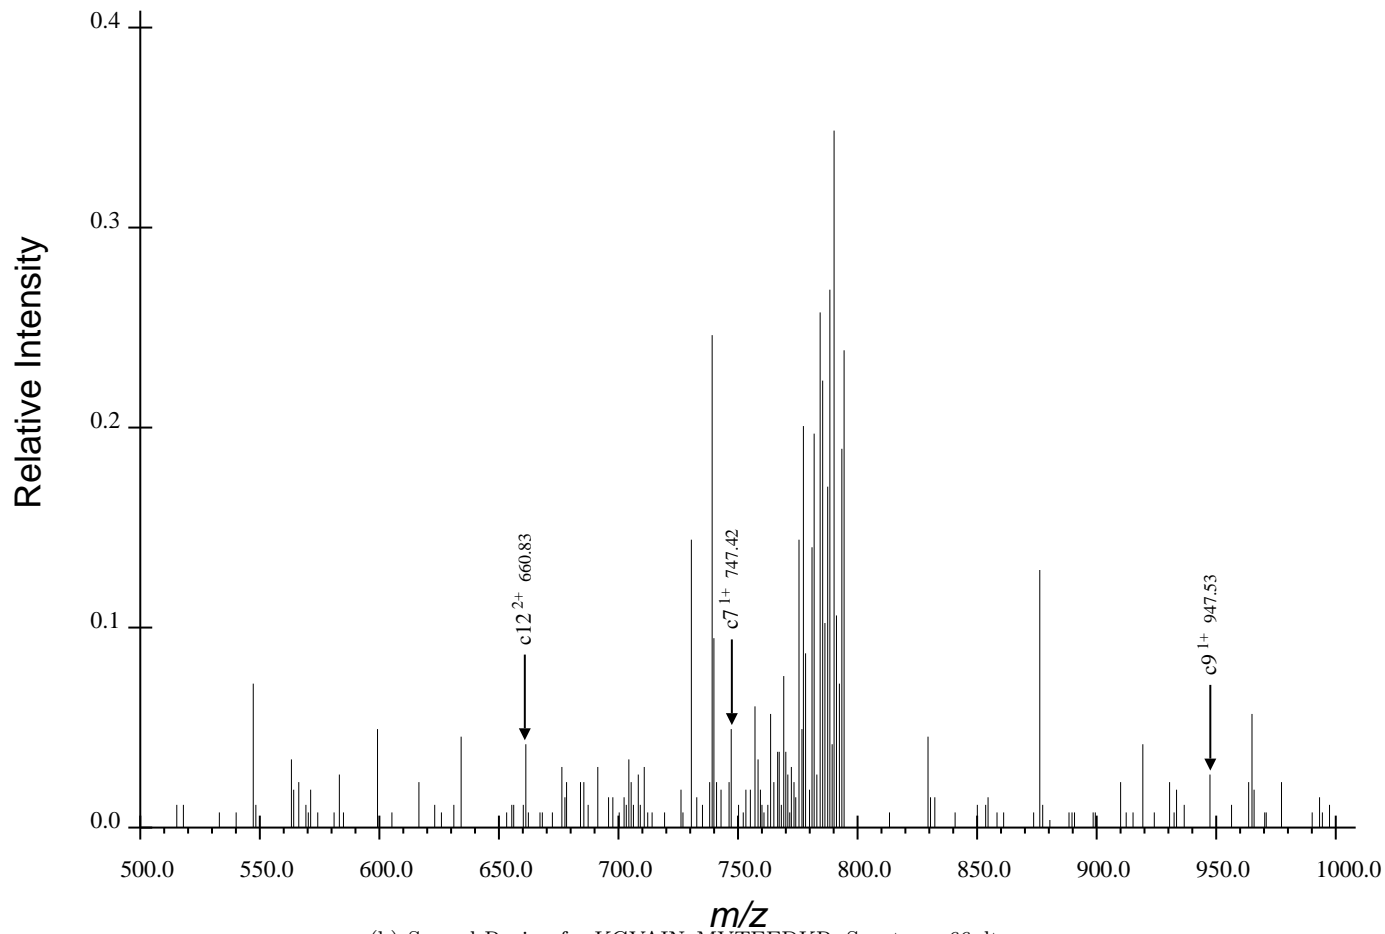

(b) Second Region for KGVAINoMVTEEDKR, Spectrum 66.dta

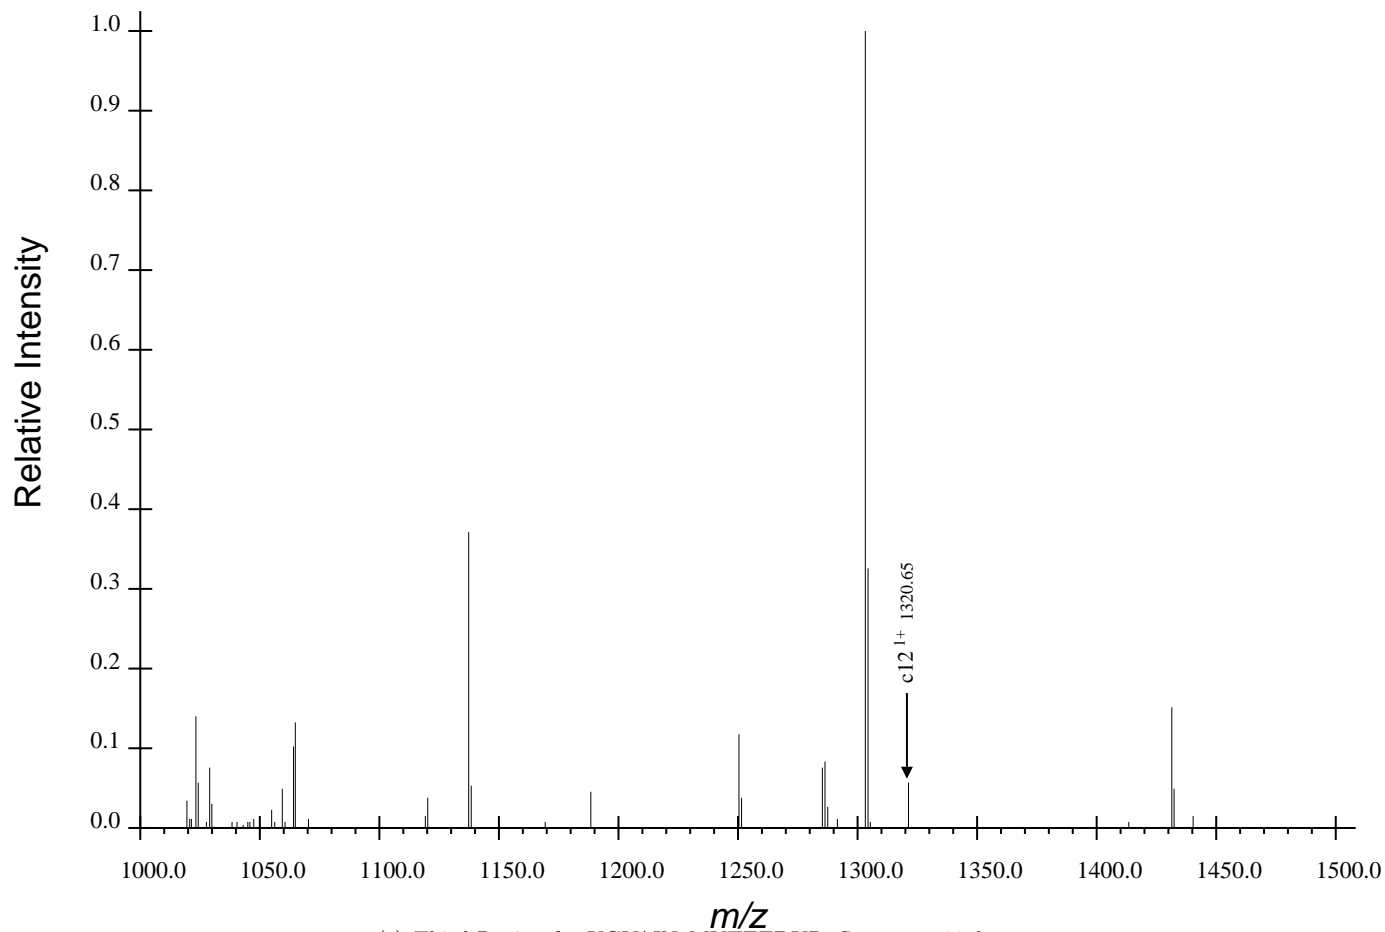

(c) Third Region for KGVAINoMVTEEDKR, Spectrum 66.dta

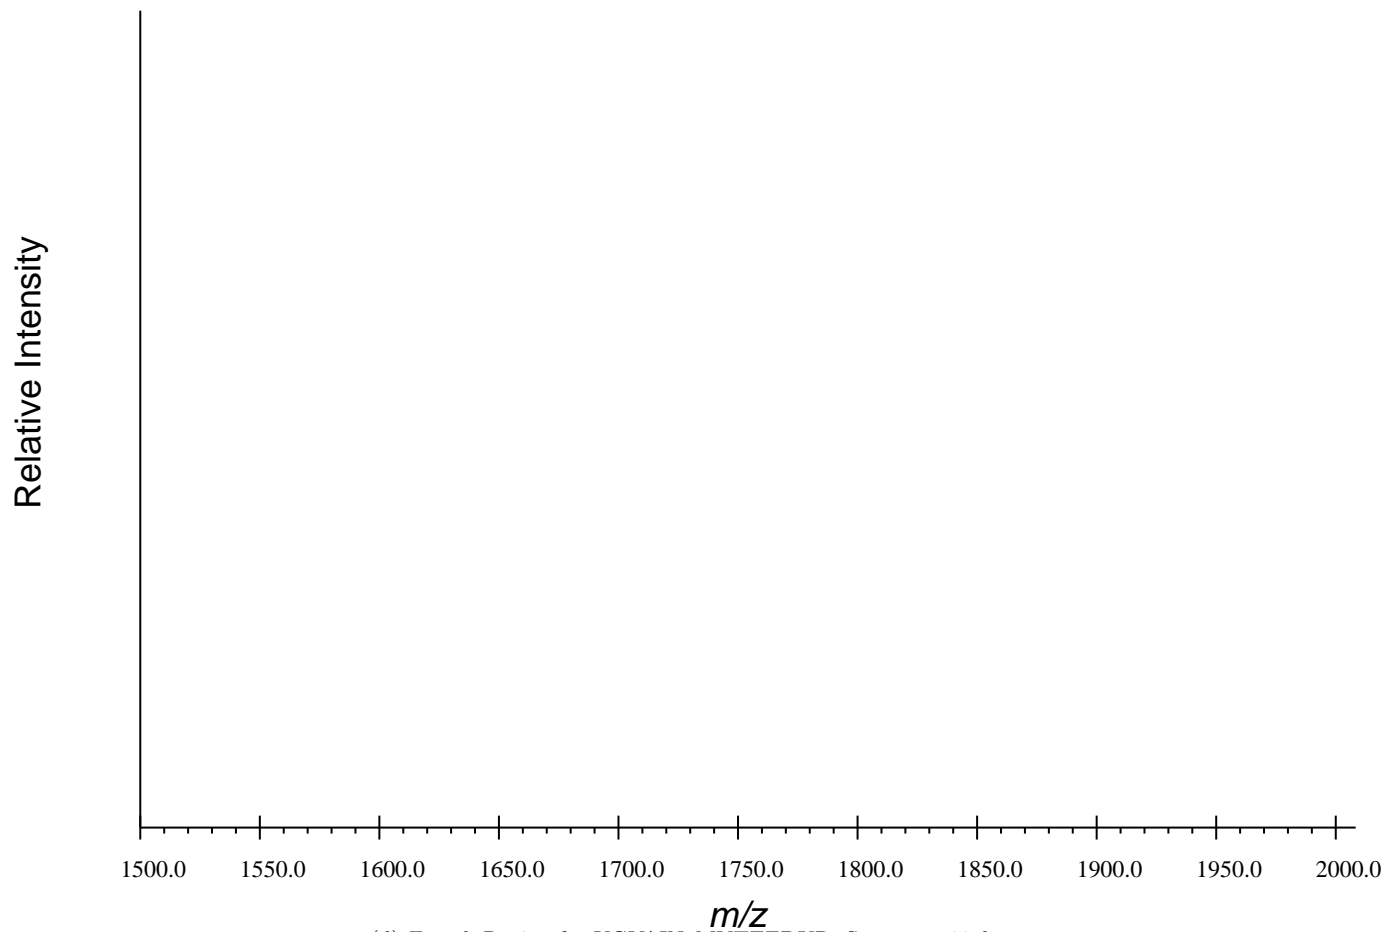

(d) Fourth Region for KGVAINoMVTEEDKR, Spectrum 66.dta

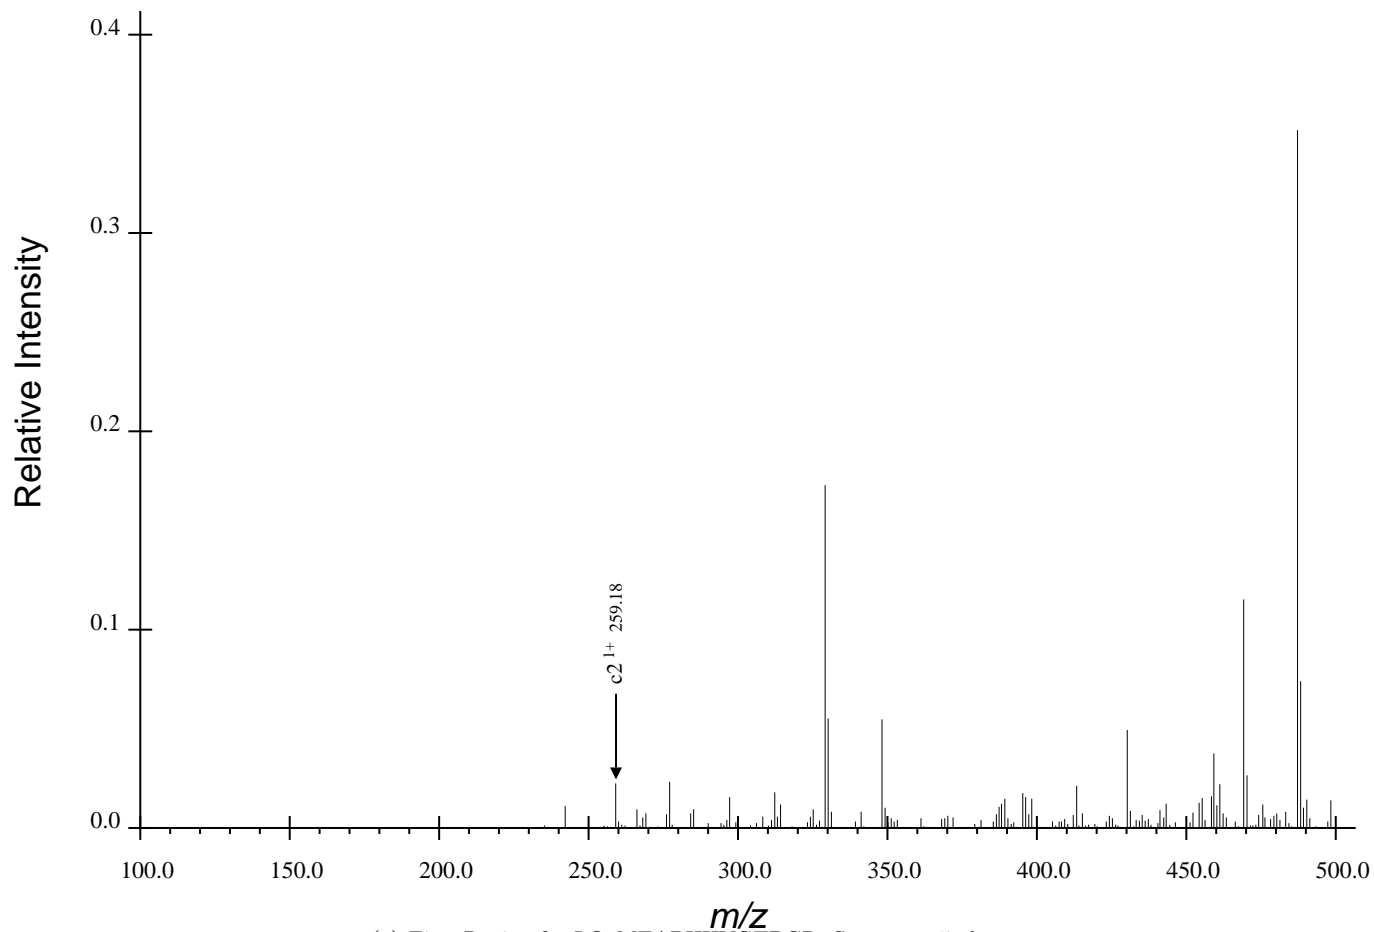

(a) First Region for LQoMEAPHIIVGTPGR, Spectrum 67.dta

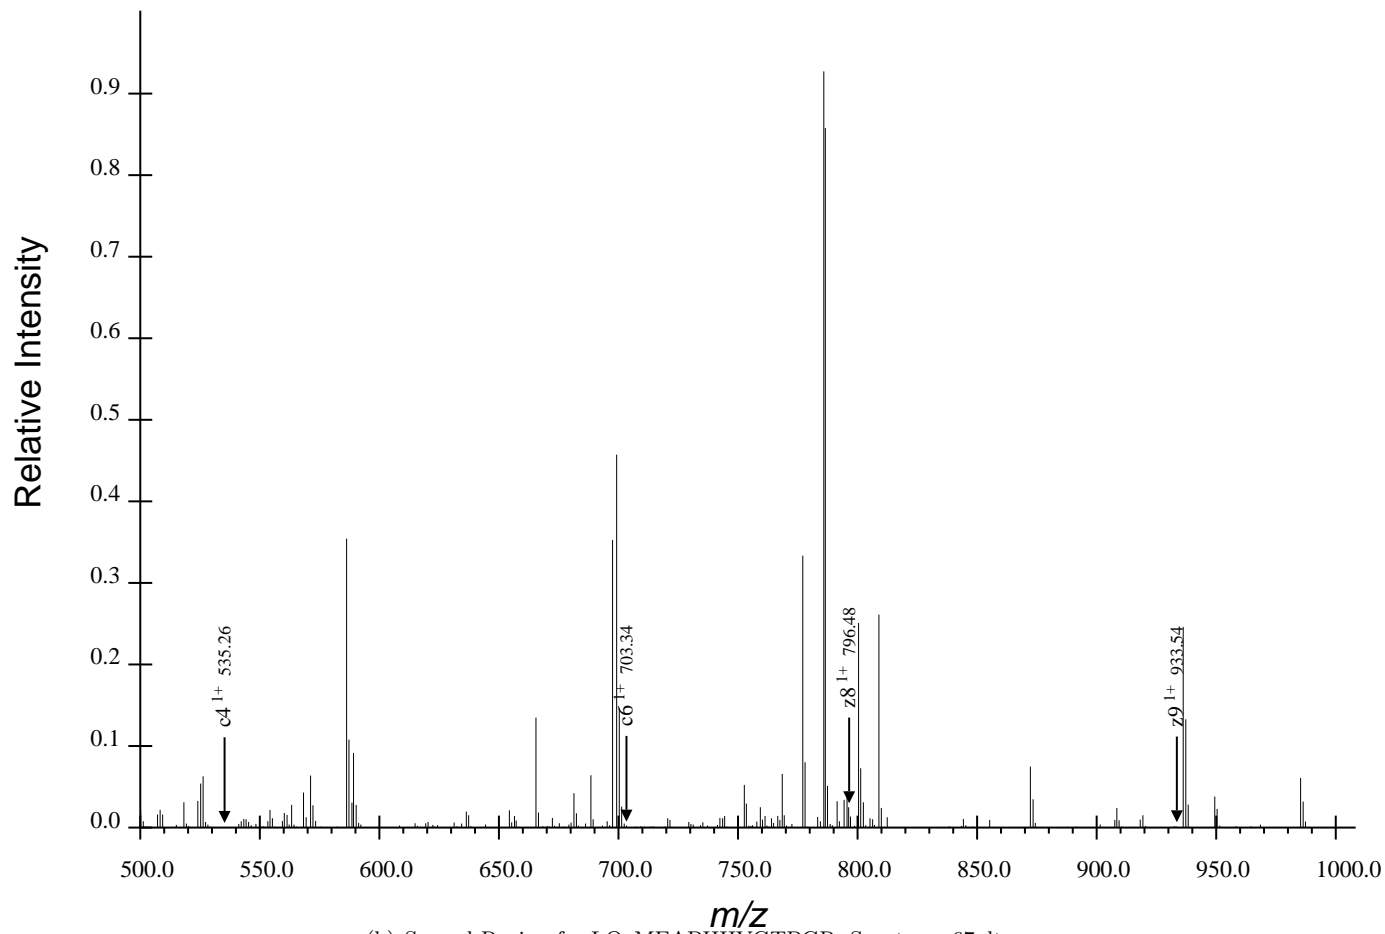

(b) Second Region for LQoMEAPHIIVGTPGR, Spectrum 67.dta

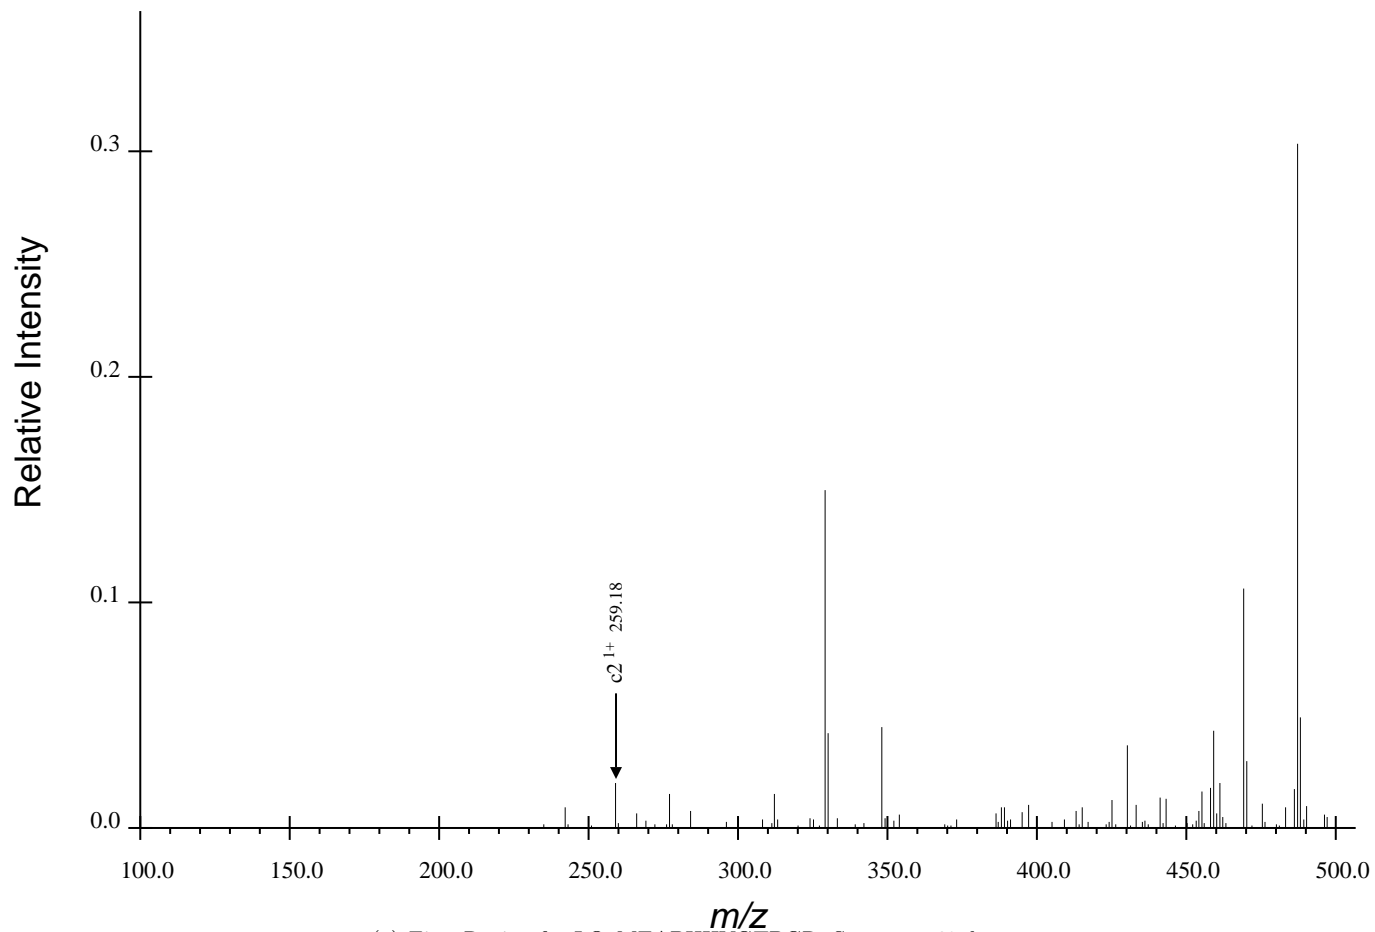

(a) First Region for LQoMEAPHIIVGTPGR, Spectrum 68.dta

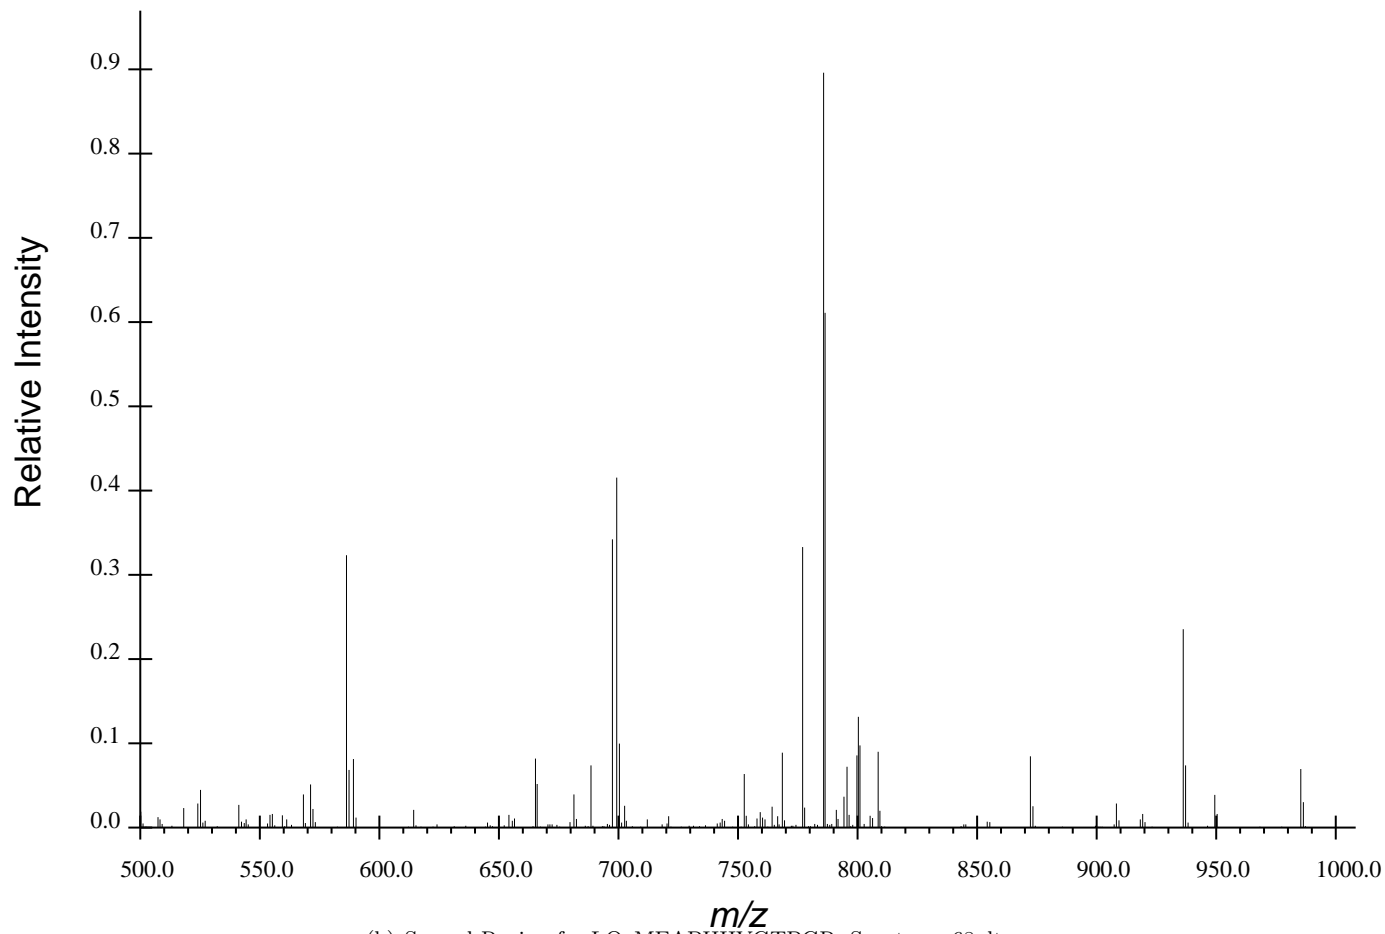

(b) Second Region for LQoMEAPHIIVGTPGR, Spectrum 68.dta



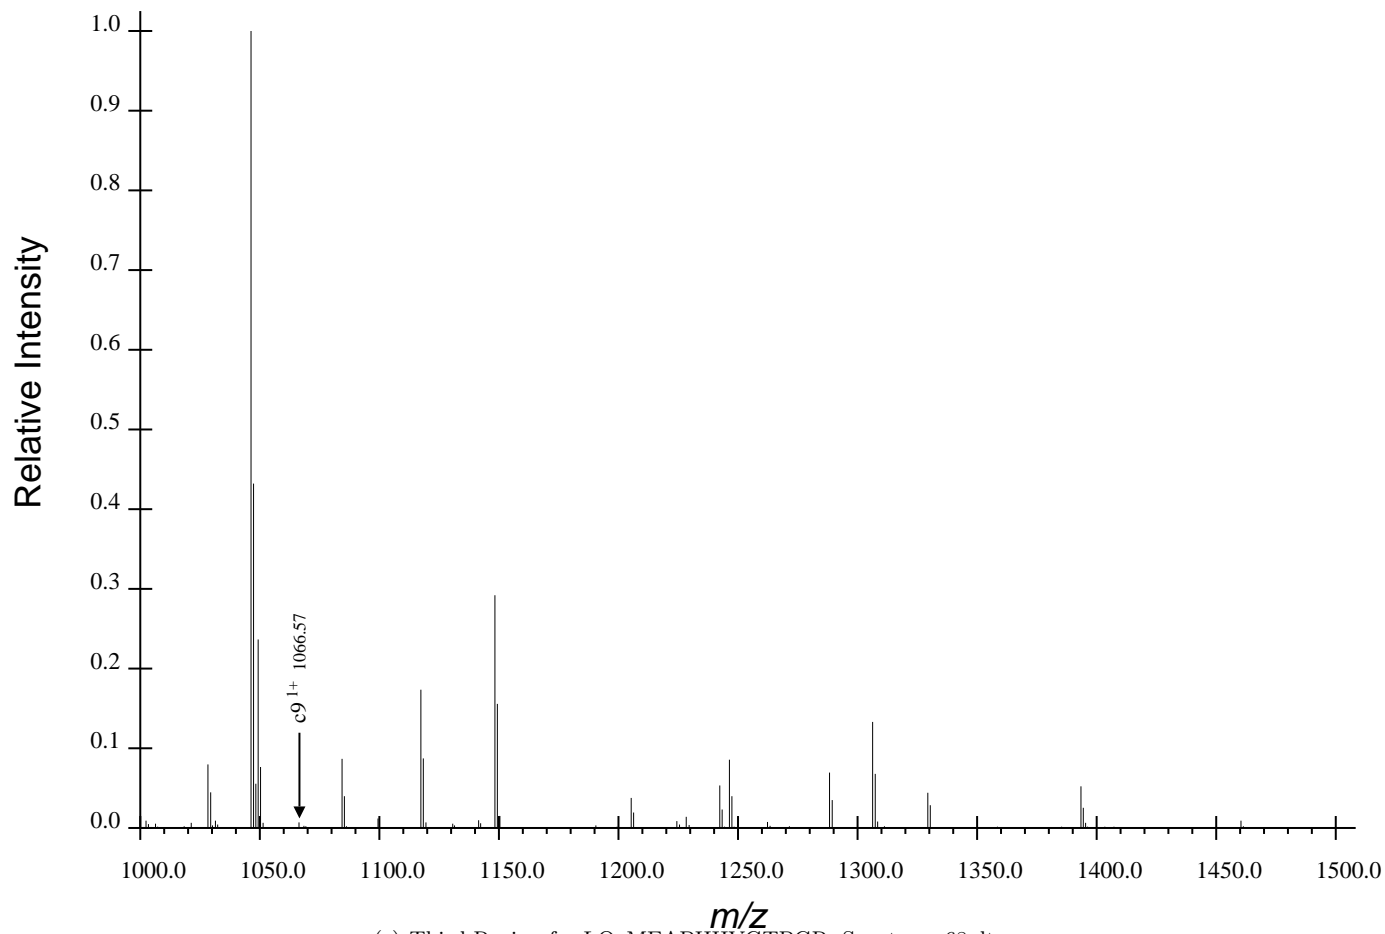

(c) Third Region for LQoMEAPHIIVGTPGR, Spectrum 68.dta

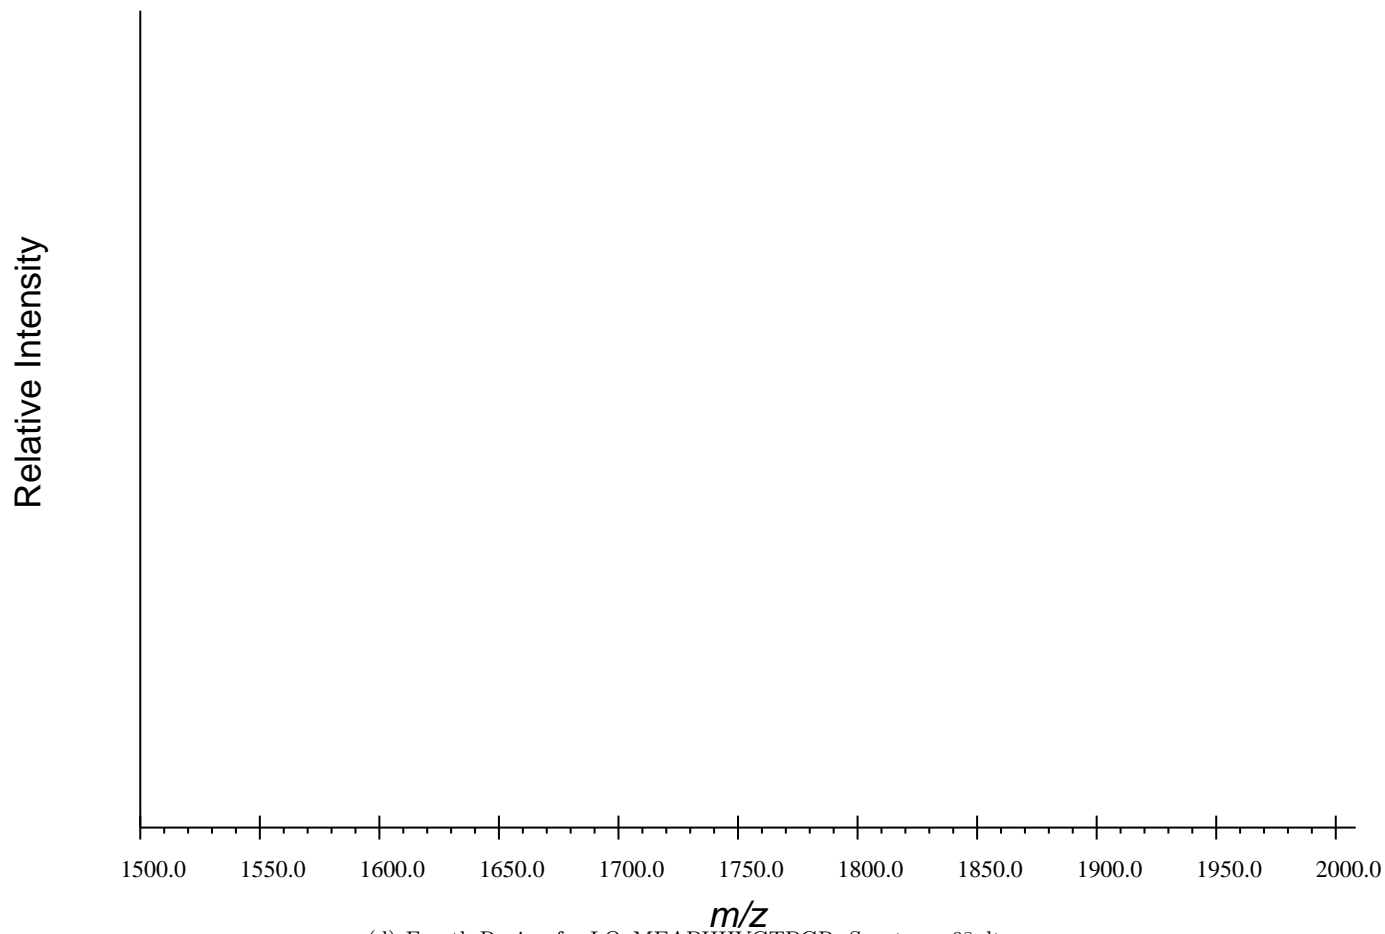

(d) Fourth Region for LQoMEAPHIIVGTPGR, Spectrum 68.dta

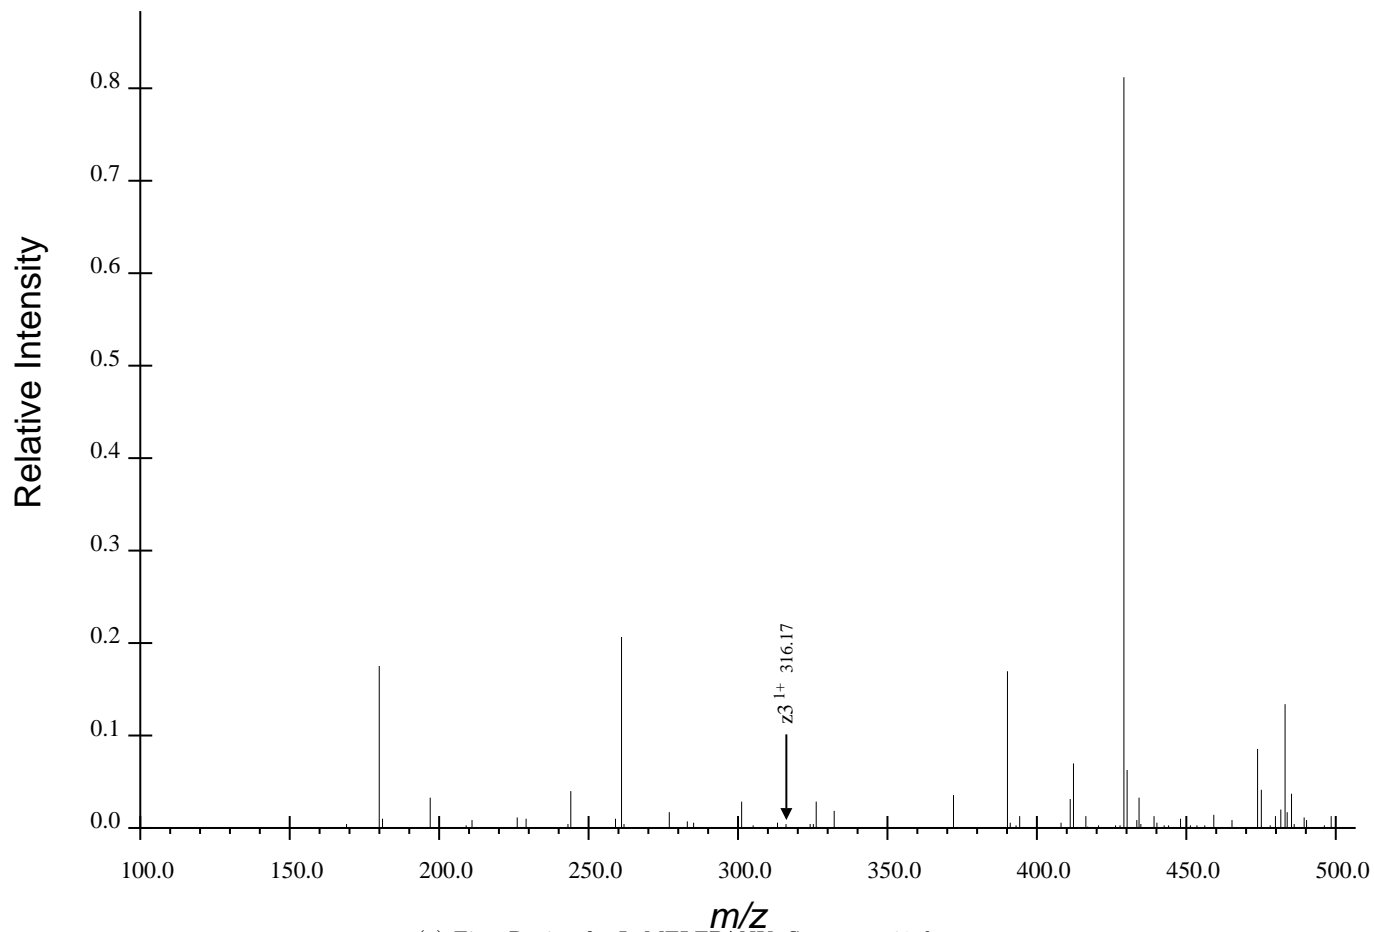

(a) First Region for LoMELFPANK, Spectrum 69.dta

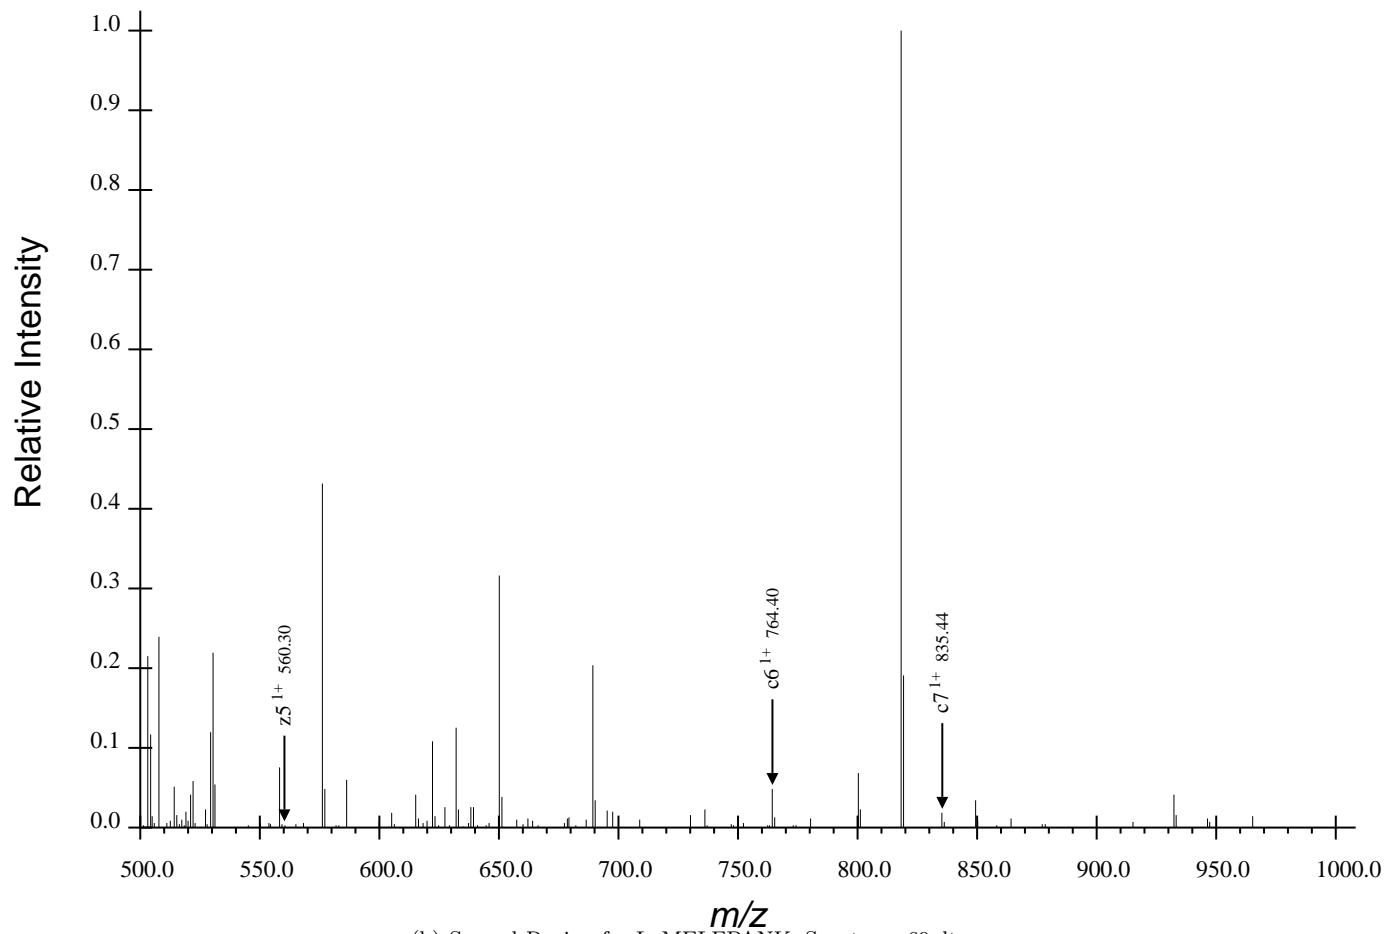

(b) Second Region for LoMELFPANK, Spectrum 69.dta

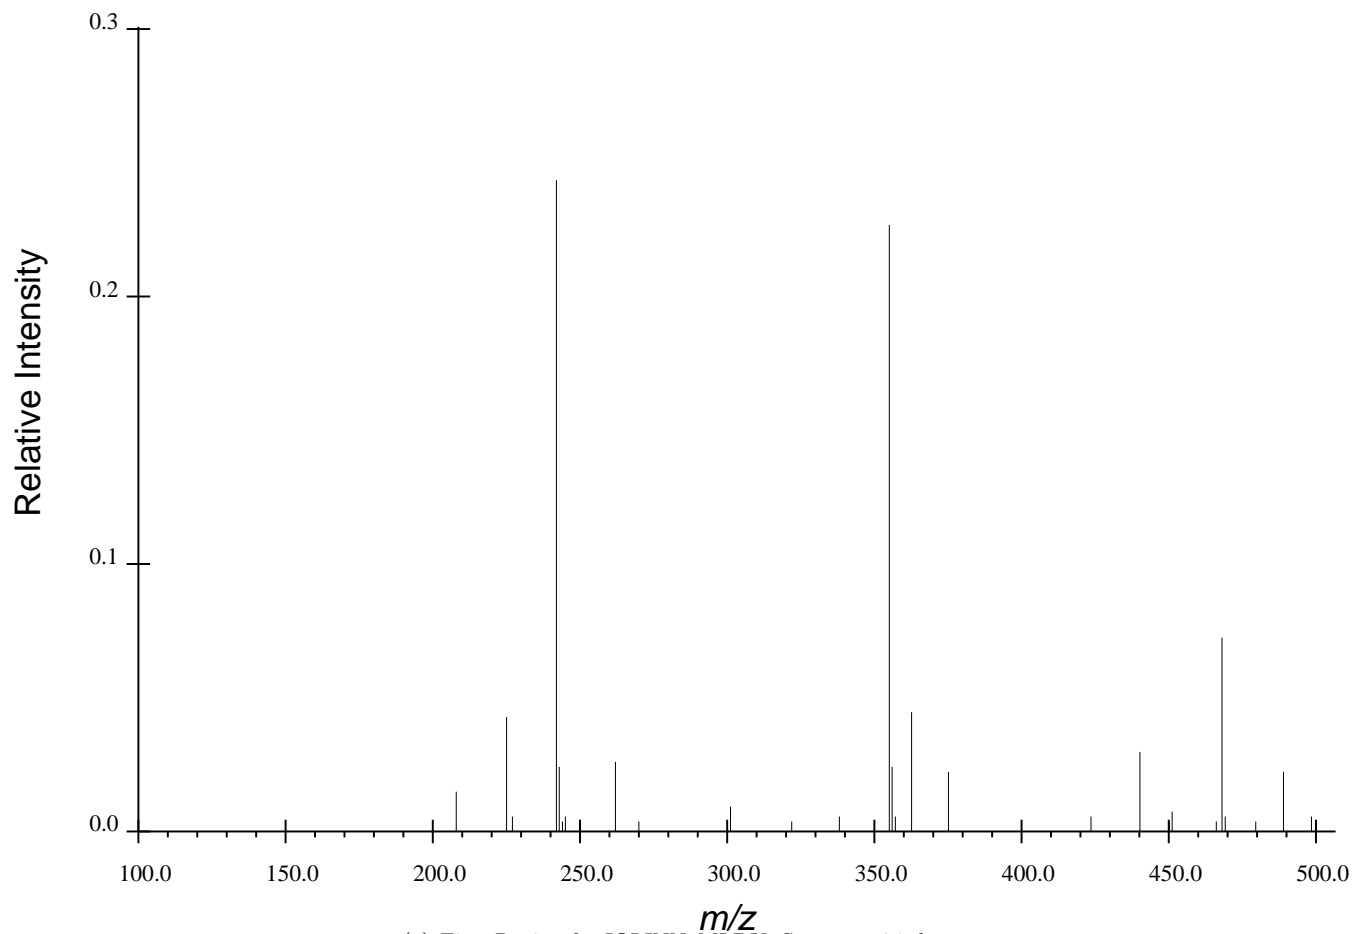

(a) First Region for IQLINNoMLDK, Spectrum 70.dta

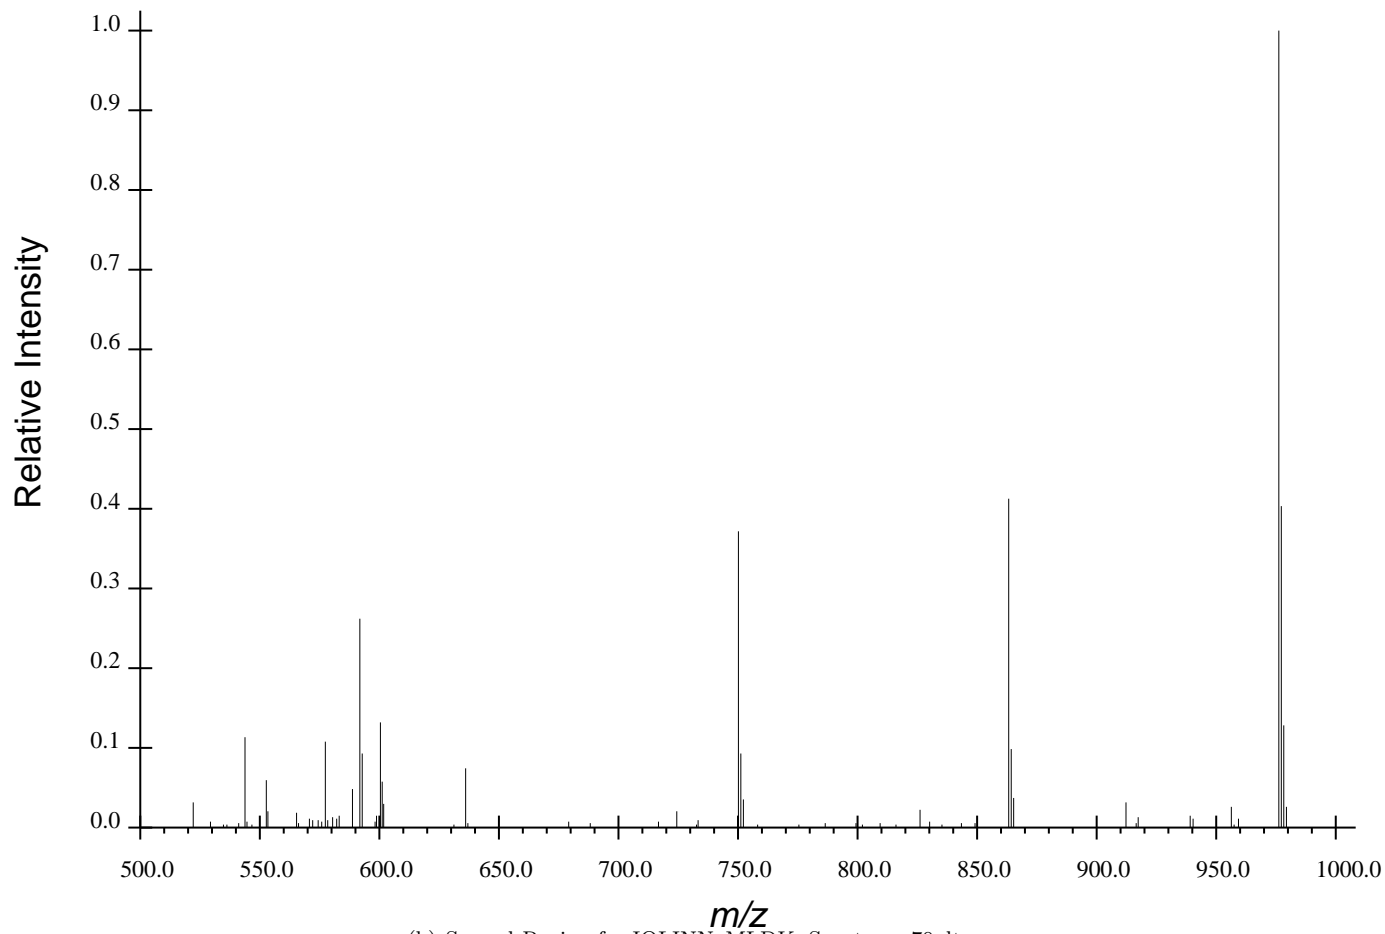

(b) Second Region for IQLINNoMLDK, Spectrum 70.dta

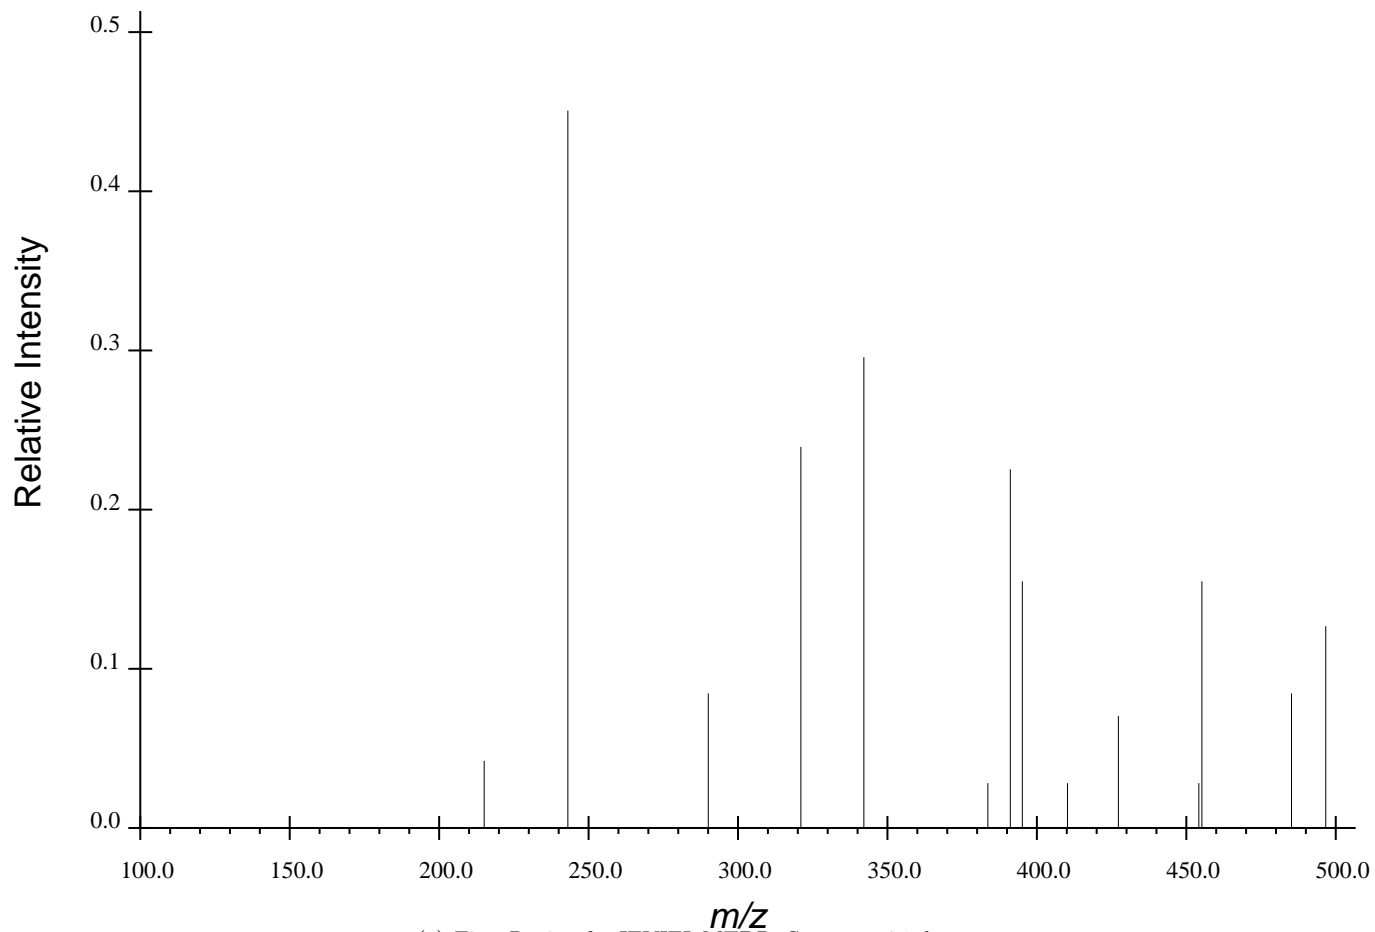

(a) First Region for IEVIEIoMTDR, Spectrum 71.dta

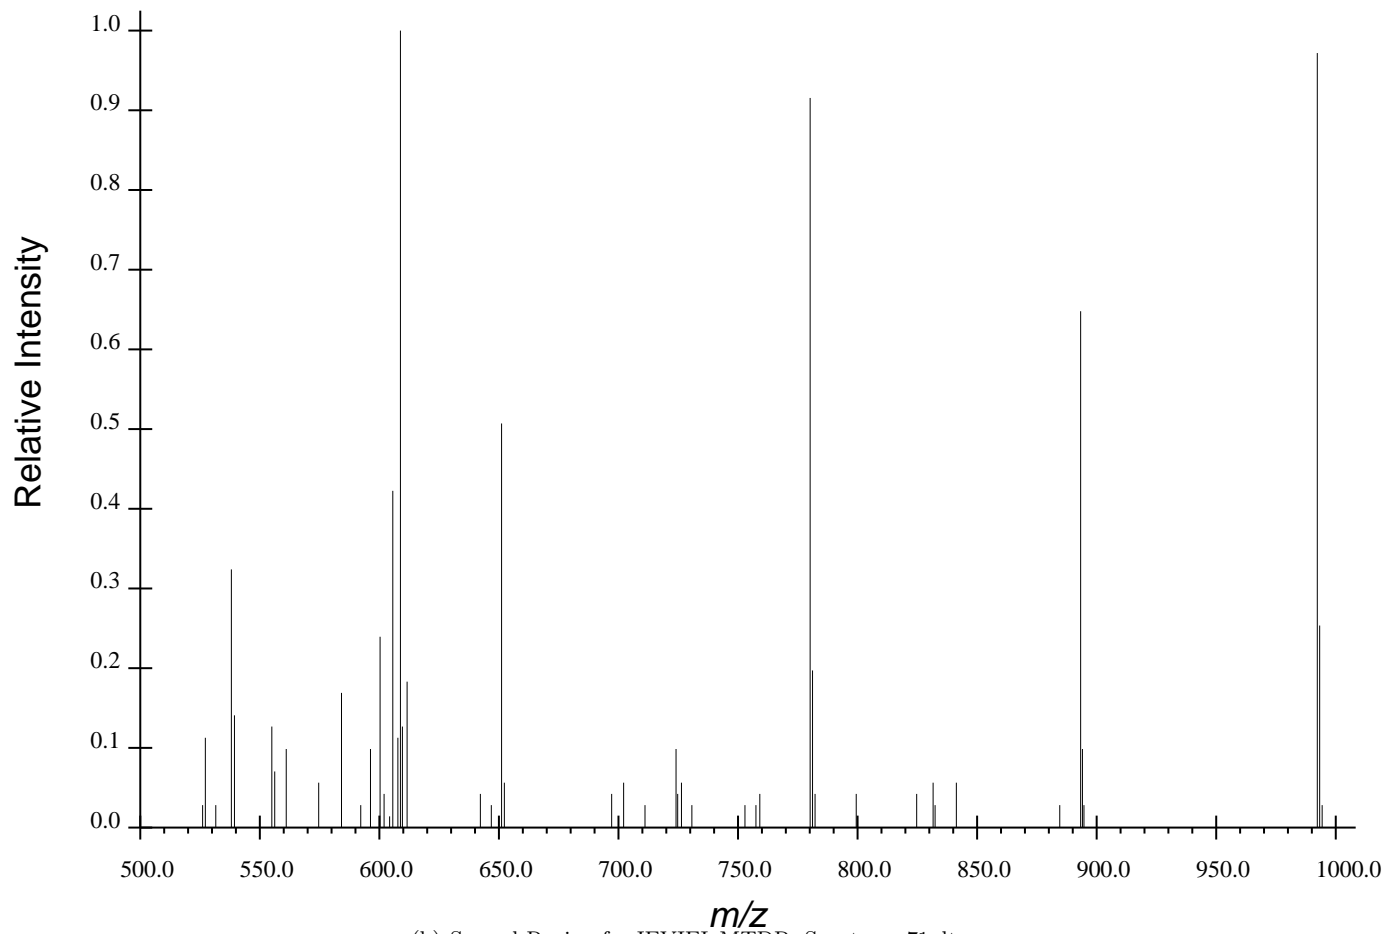

(b) Second Region for IEVIEIoMTDR, Spectrum 71.dta

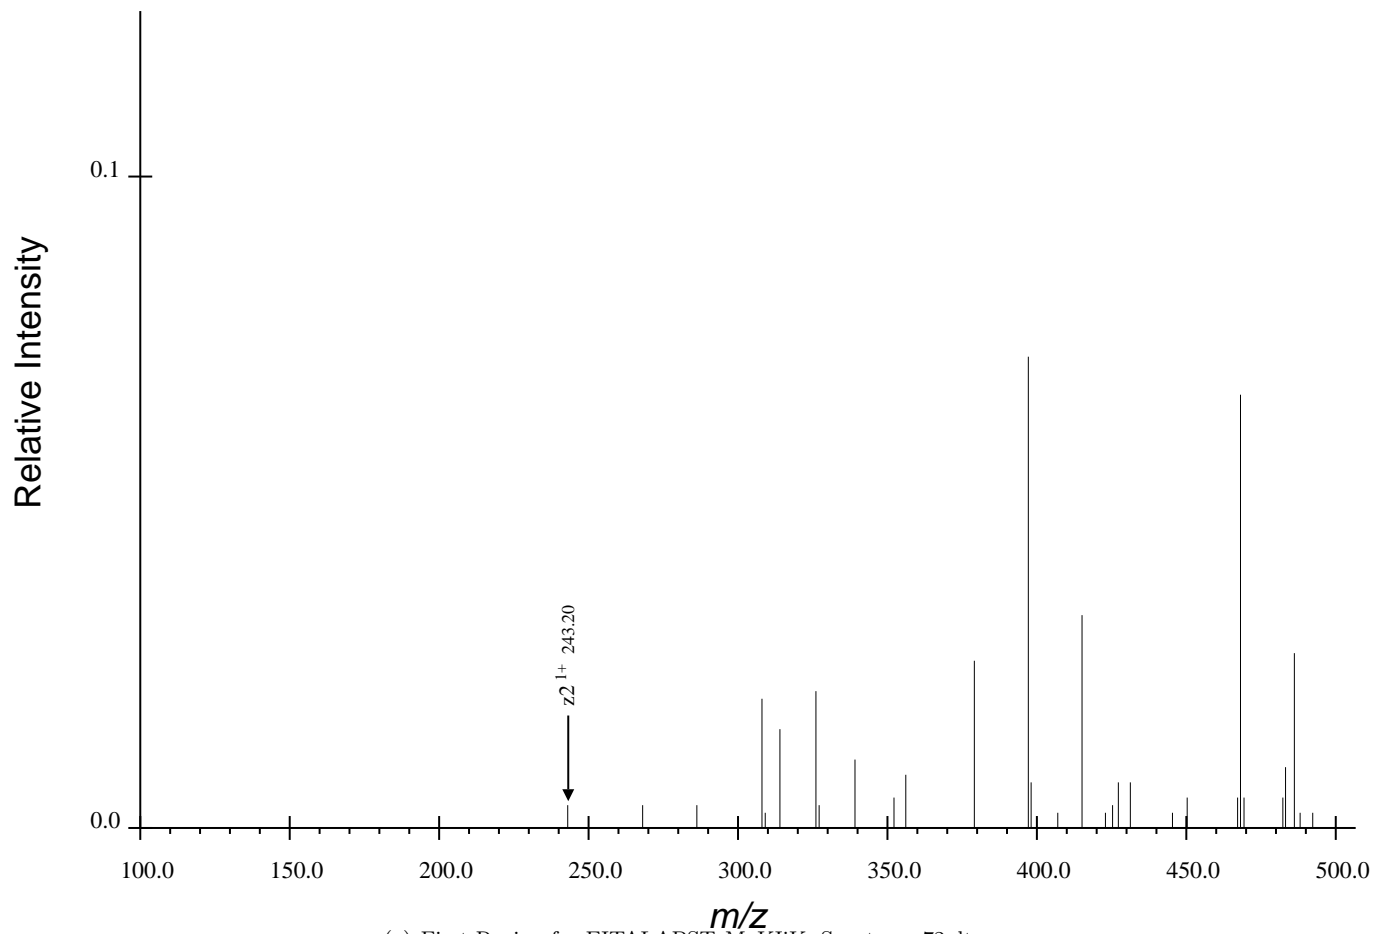

(a) First Region for EITALAPSToMaKliK, Spectrum 72.dta

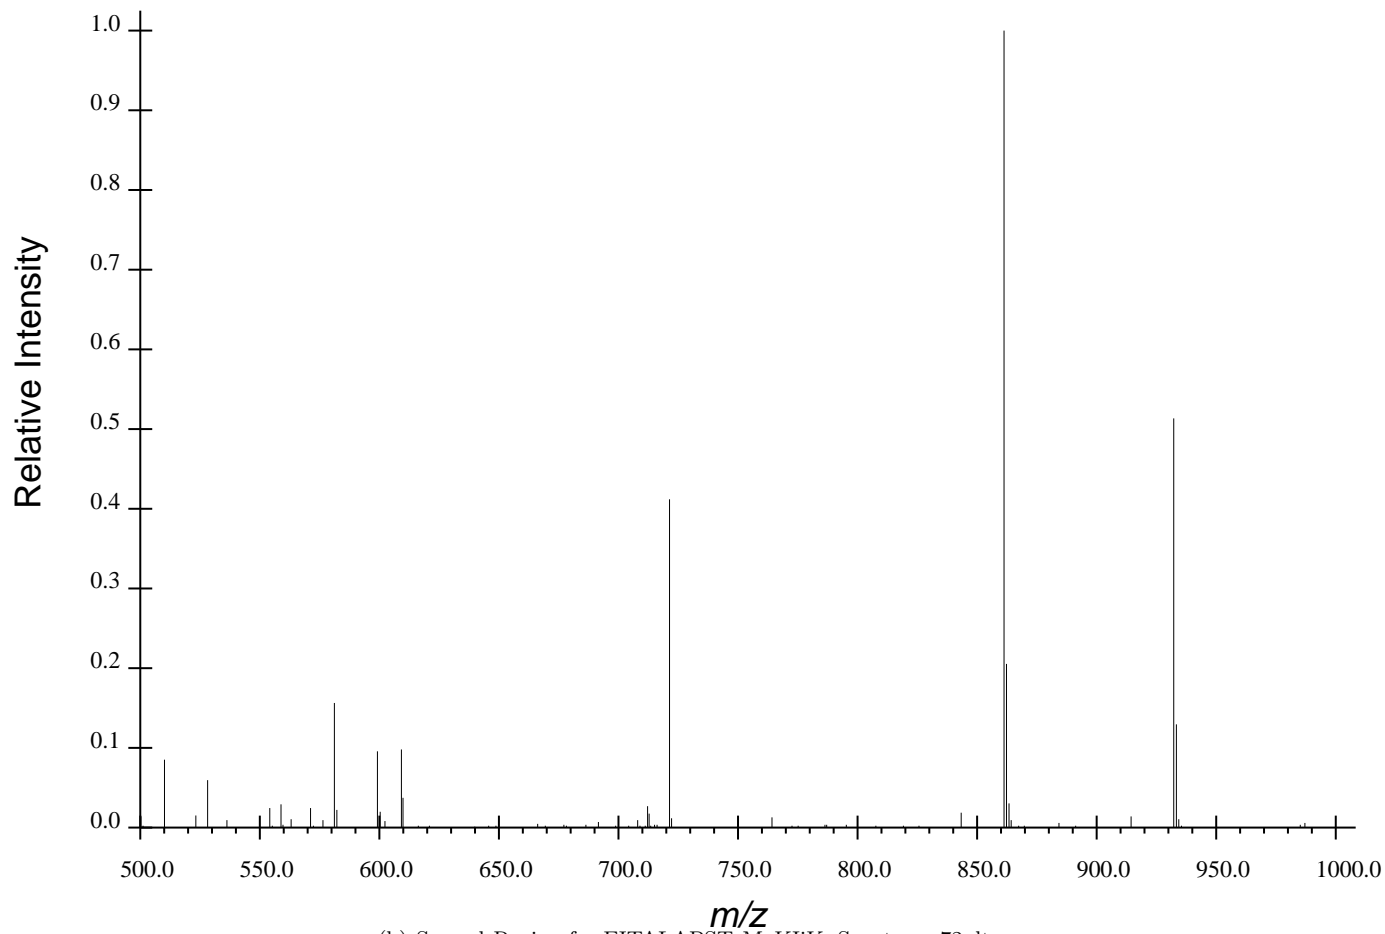

(b) Second Region for EITALAPSToMaKliK, Spectrum 72.dta

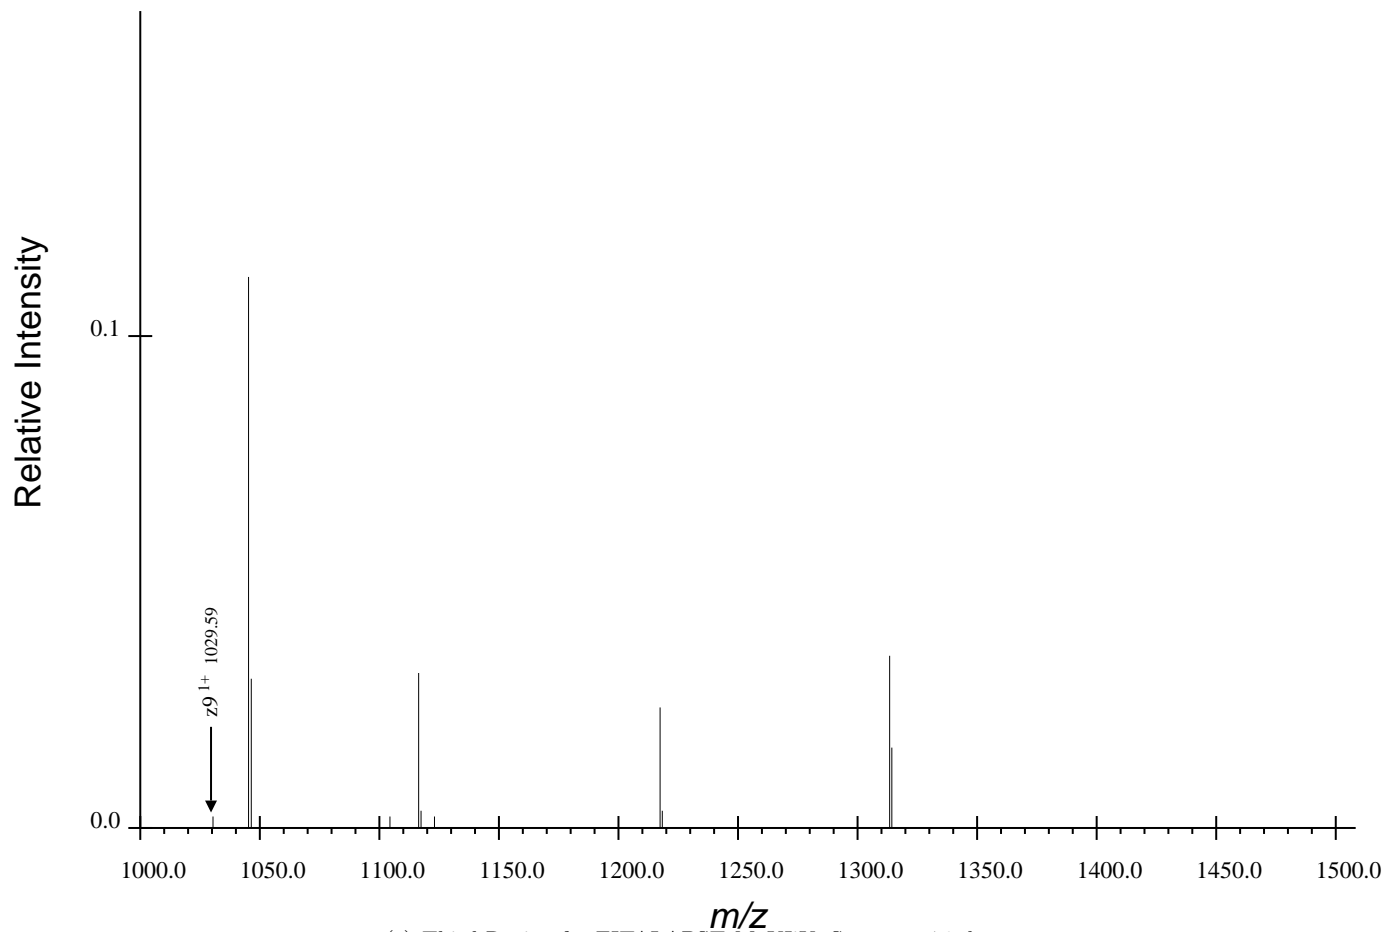

(c) Third Region for EITALAPSToMaKLiK, Spectrum 72.dta

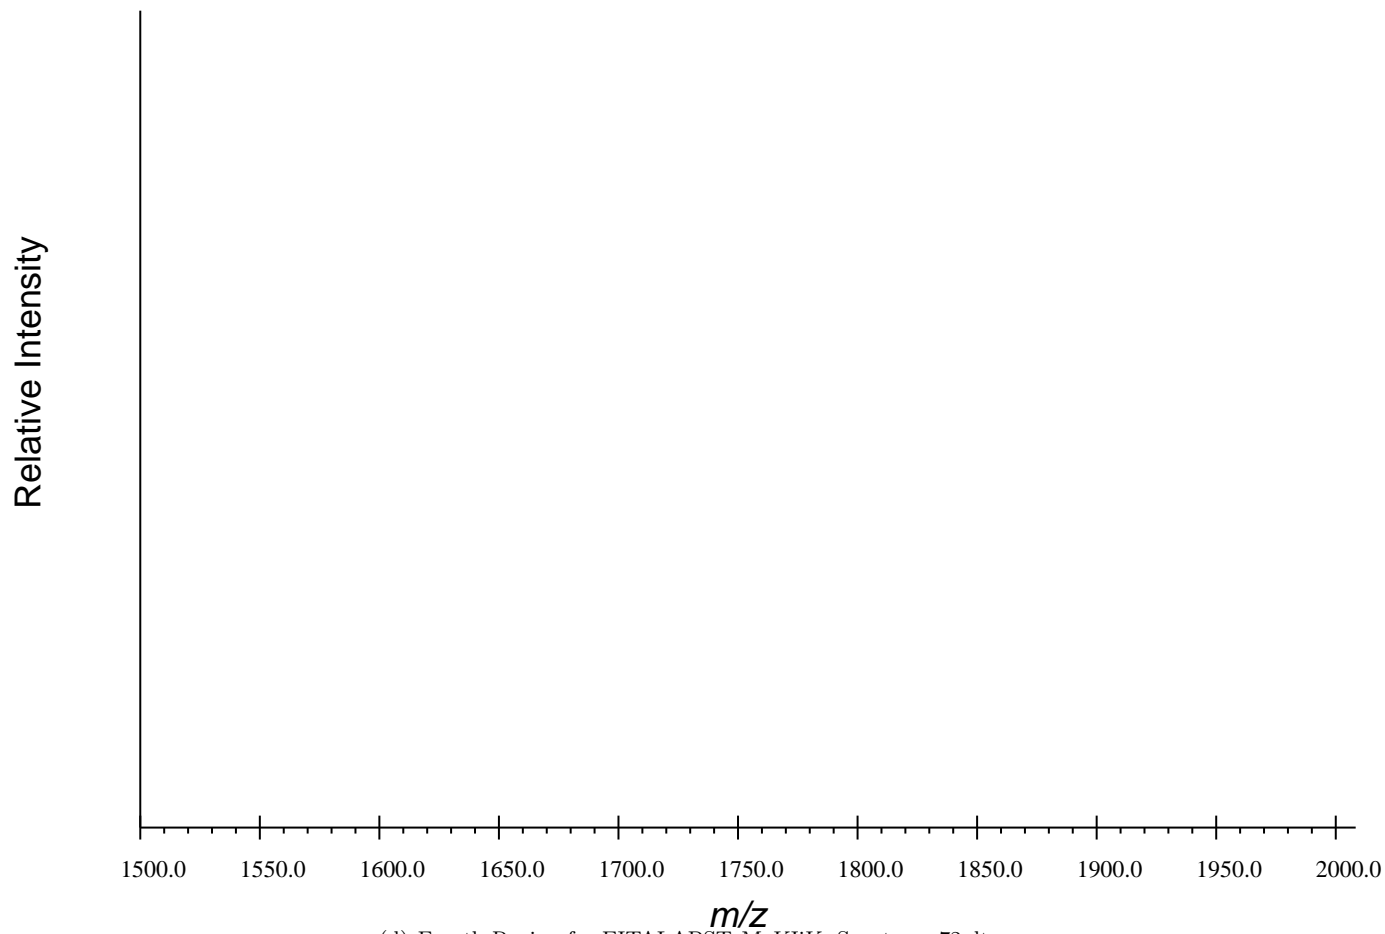

(d) Fourth Region for EITALAPSToMaKLiK, Spectrum 72.dta

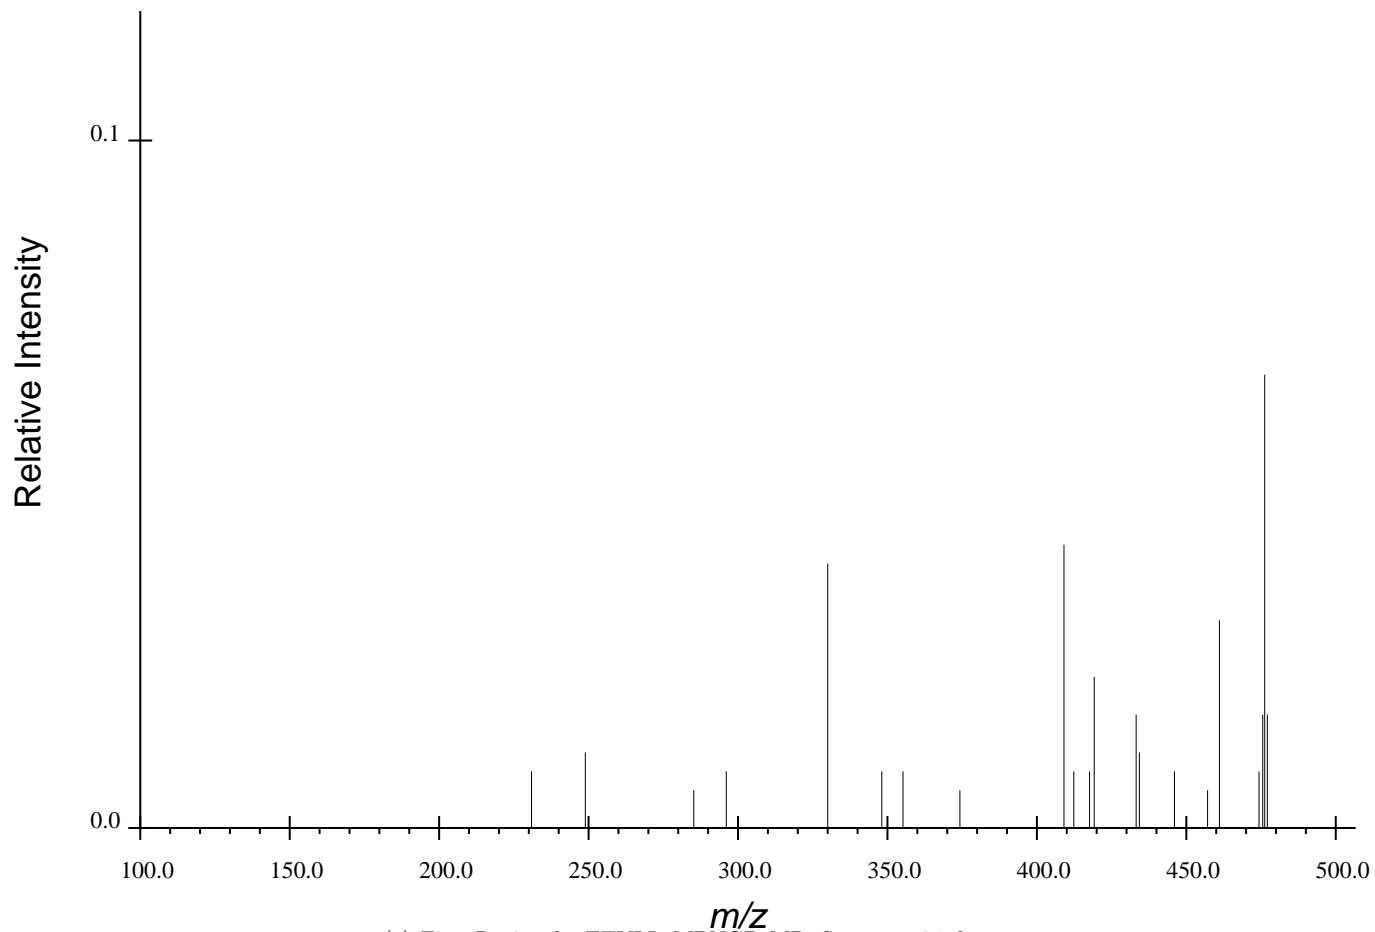

(a) First Region for FTVLLoMPNGPoMR, Spectrum 73.dta

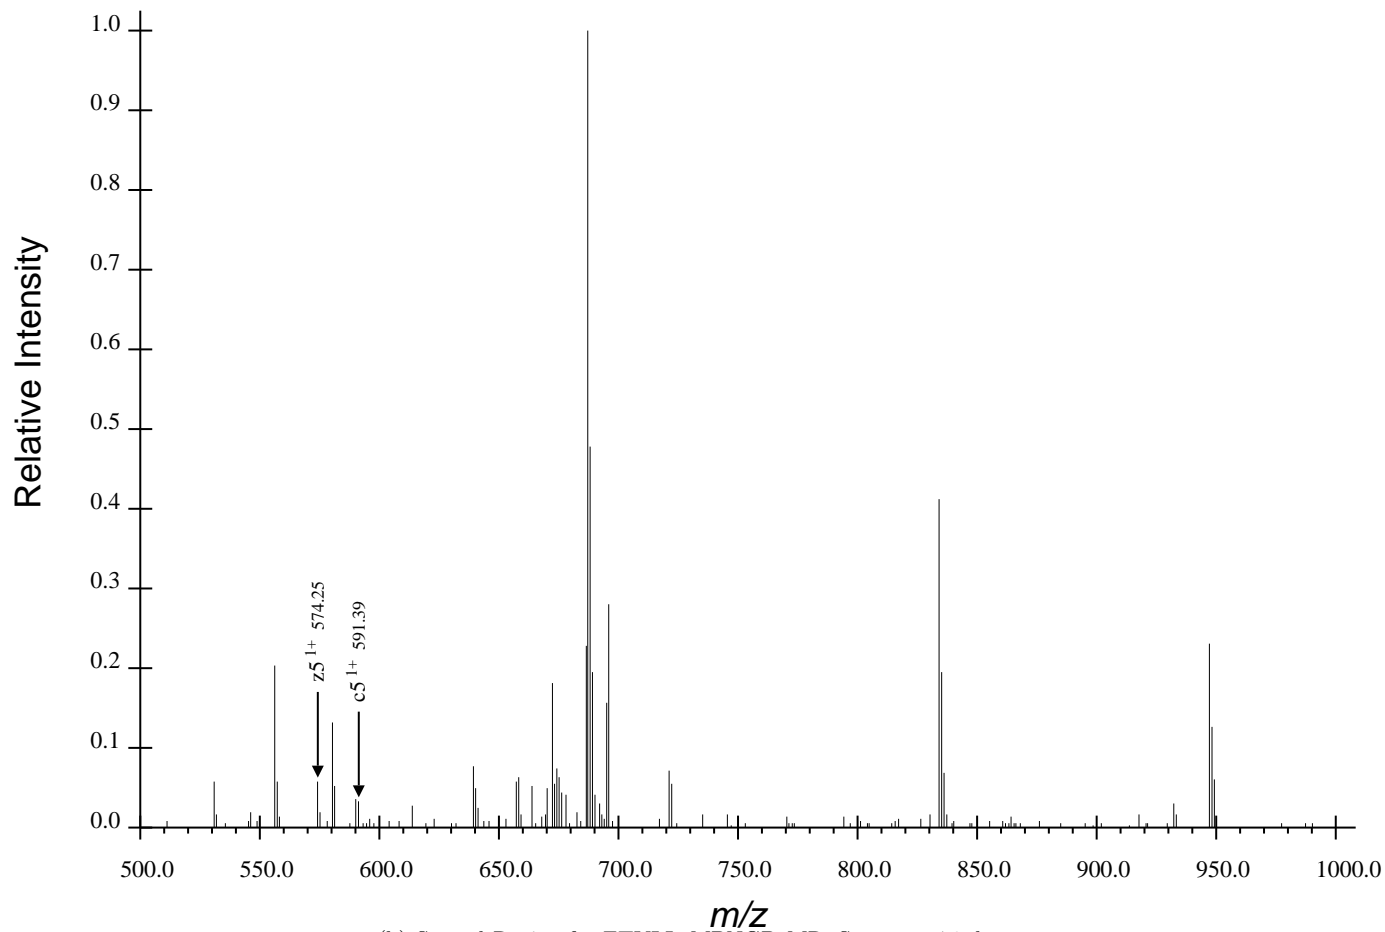

(b) Second Region for FTVLLoMPNGPoMR, Spectrum 73.dta

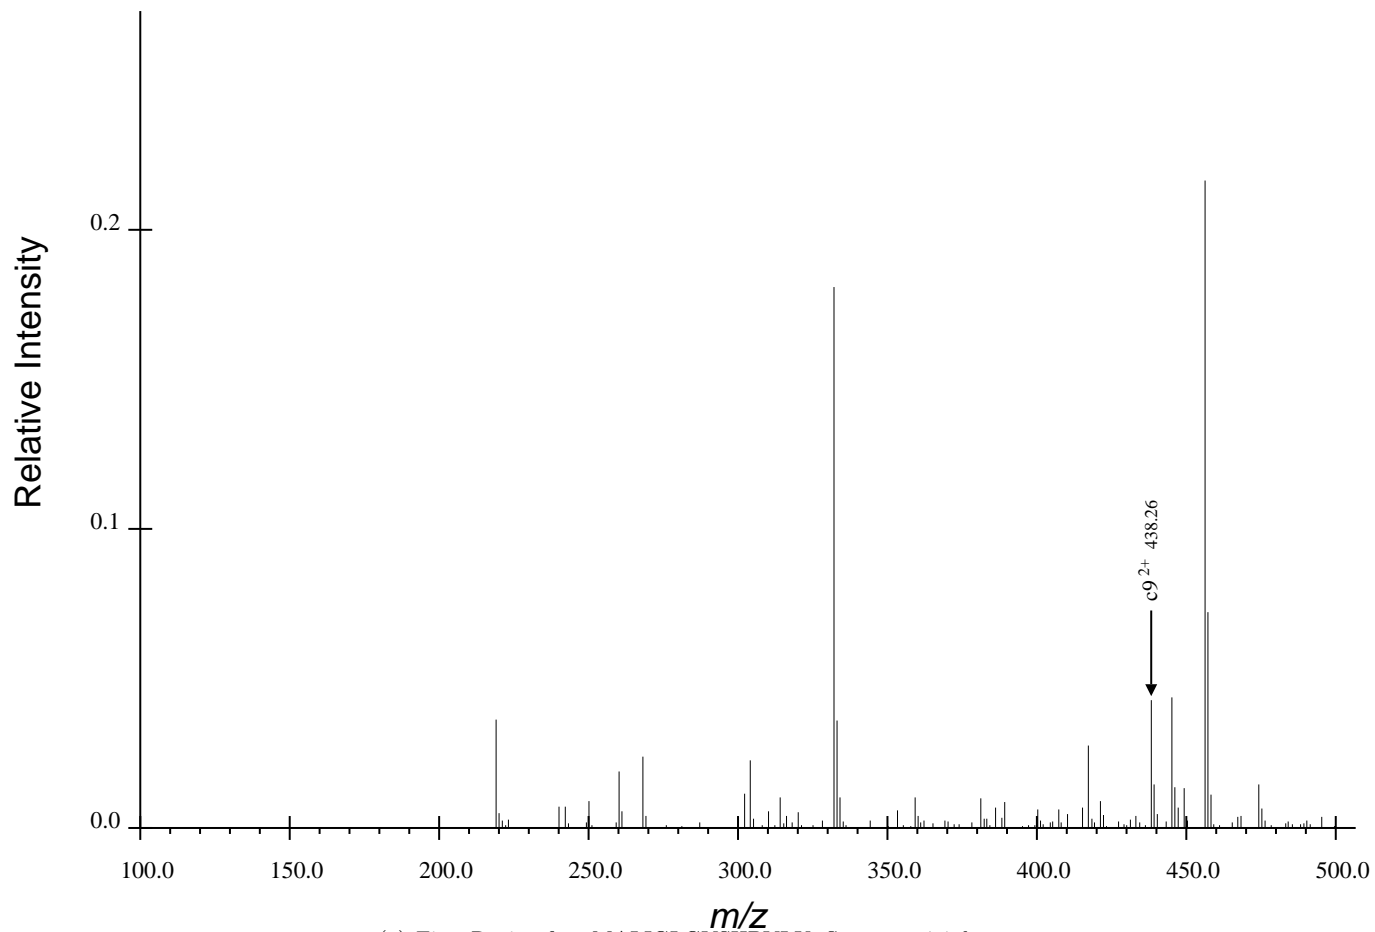

(a) First Region for oMALIGLGVSHPVLK, Spectrum 74.dta

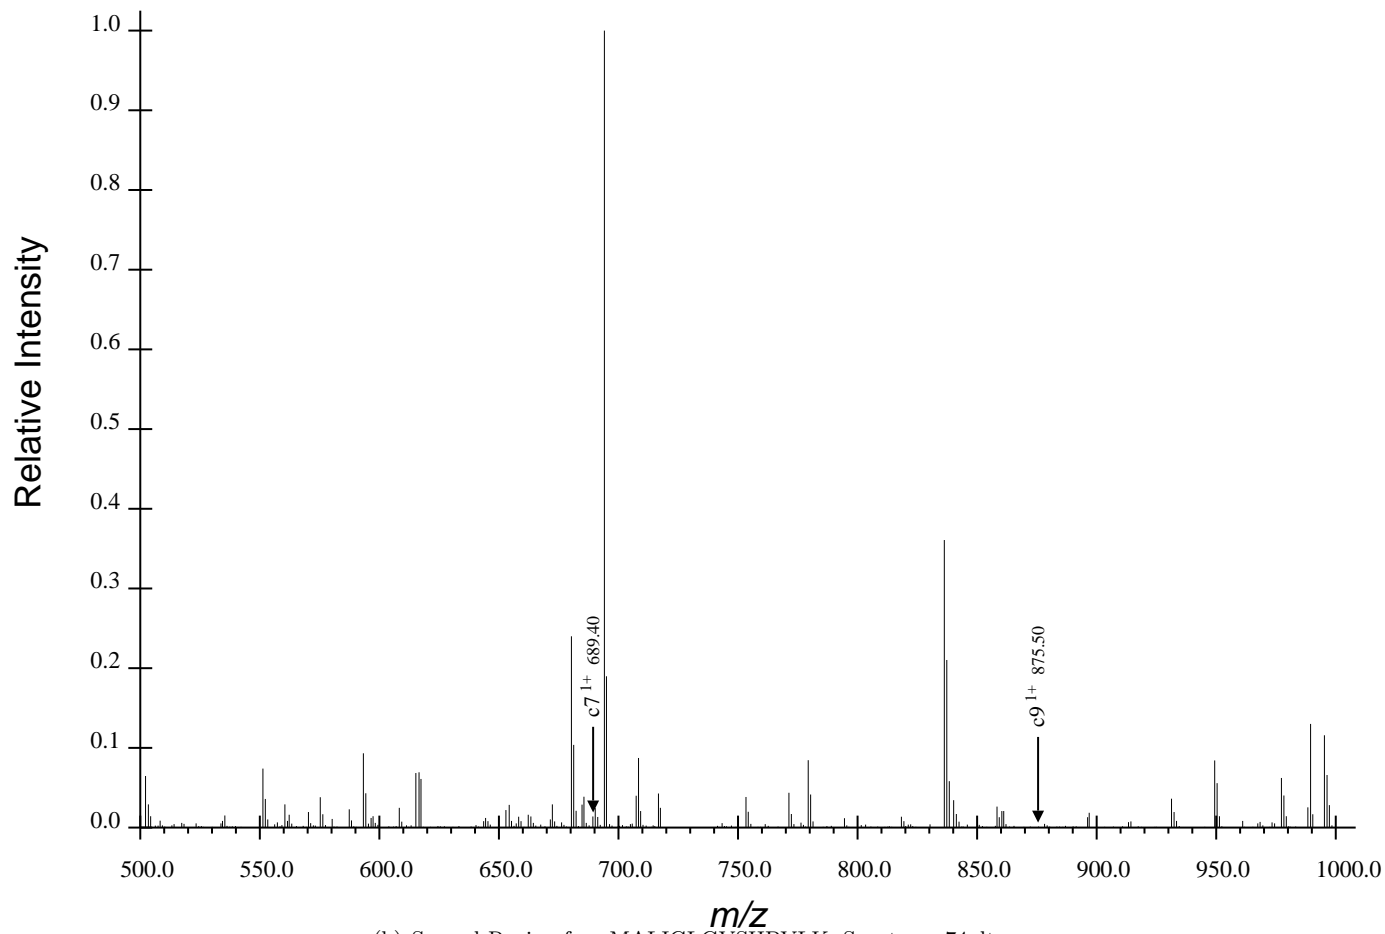

(b) Second Region for oMALIGLGVSHPVLK, Spectrum 74.dta



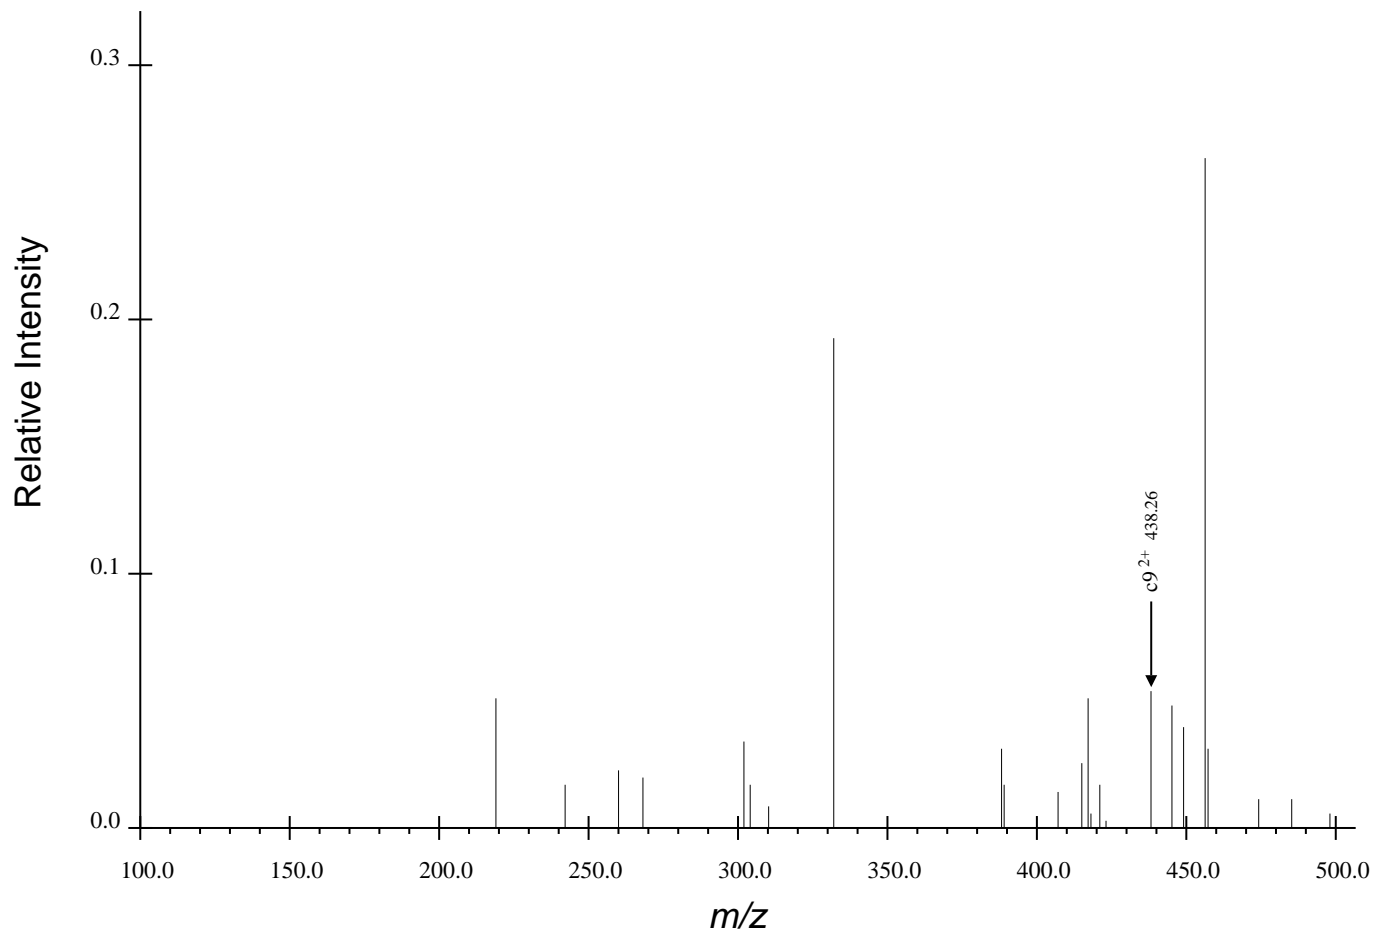

(a) First Region for oMALIGLGVSHPVLK, Spectrum 75.dta

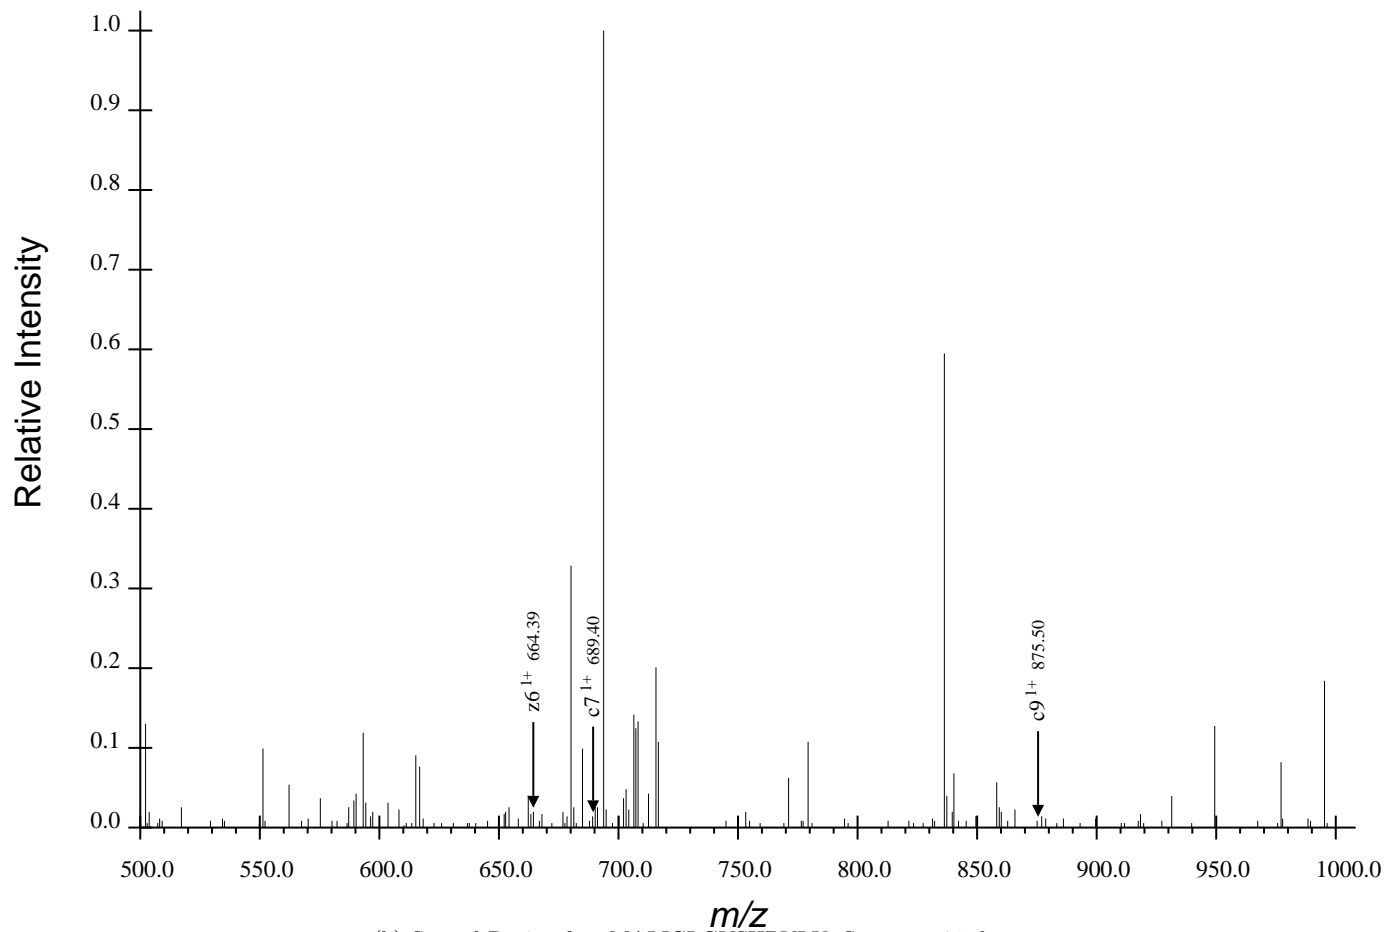

(b) Second Region for oMALIGLGVSHPVLK, Spectrum 75.dta

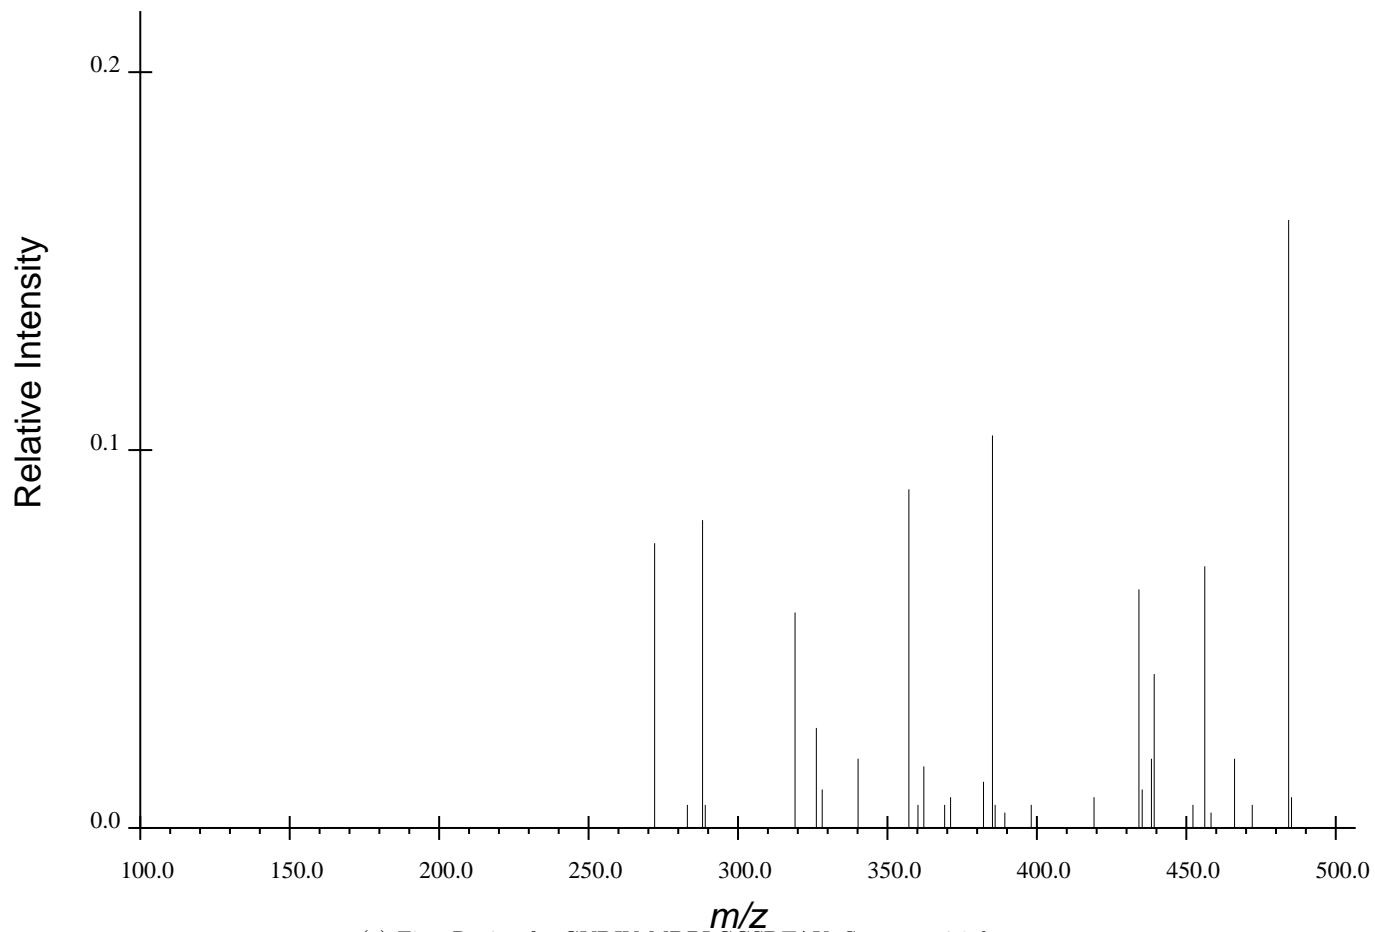

(a) First Region for GVDIVoMDPLGGSDTAK, Spectrum 76.dta

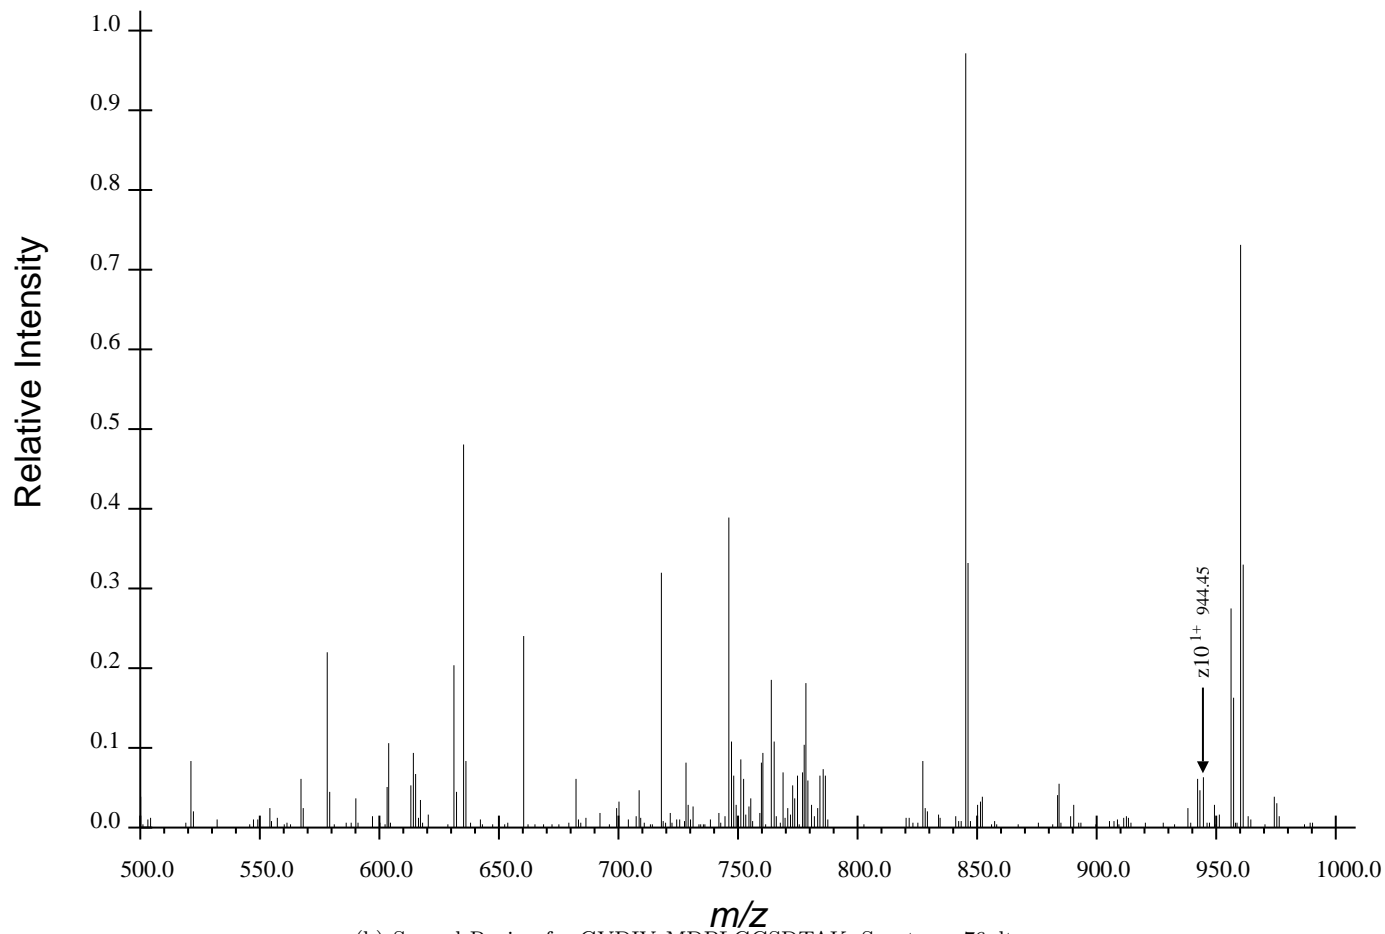

(b) Second Region for GVDIVoMDPLGGSDTAK, Spectrum 76.dta

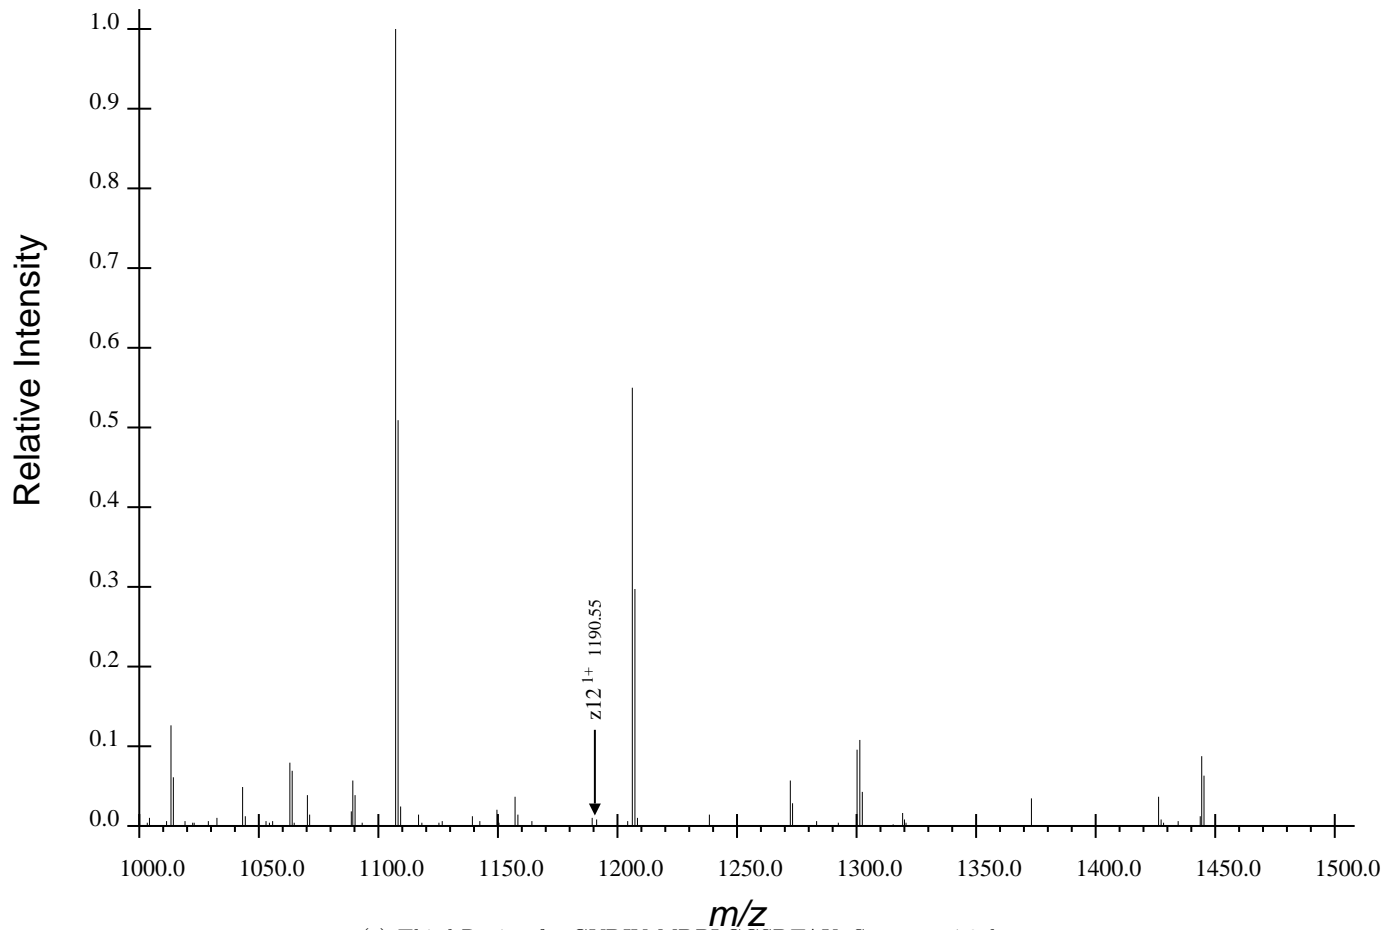

(c) Third Region for GVDIVoMDPLGGSDTAK, Spectrum 76.dta

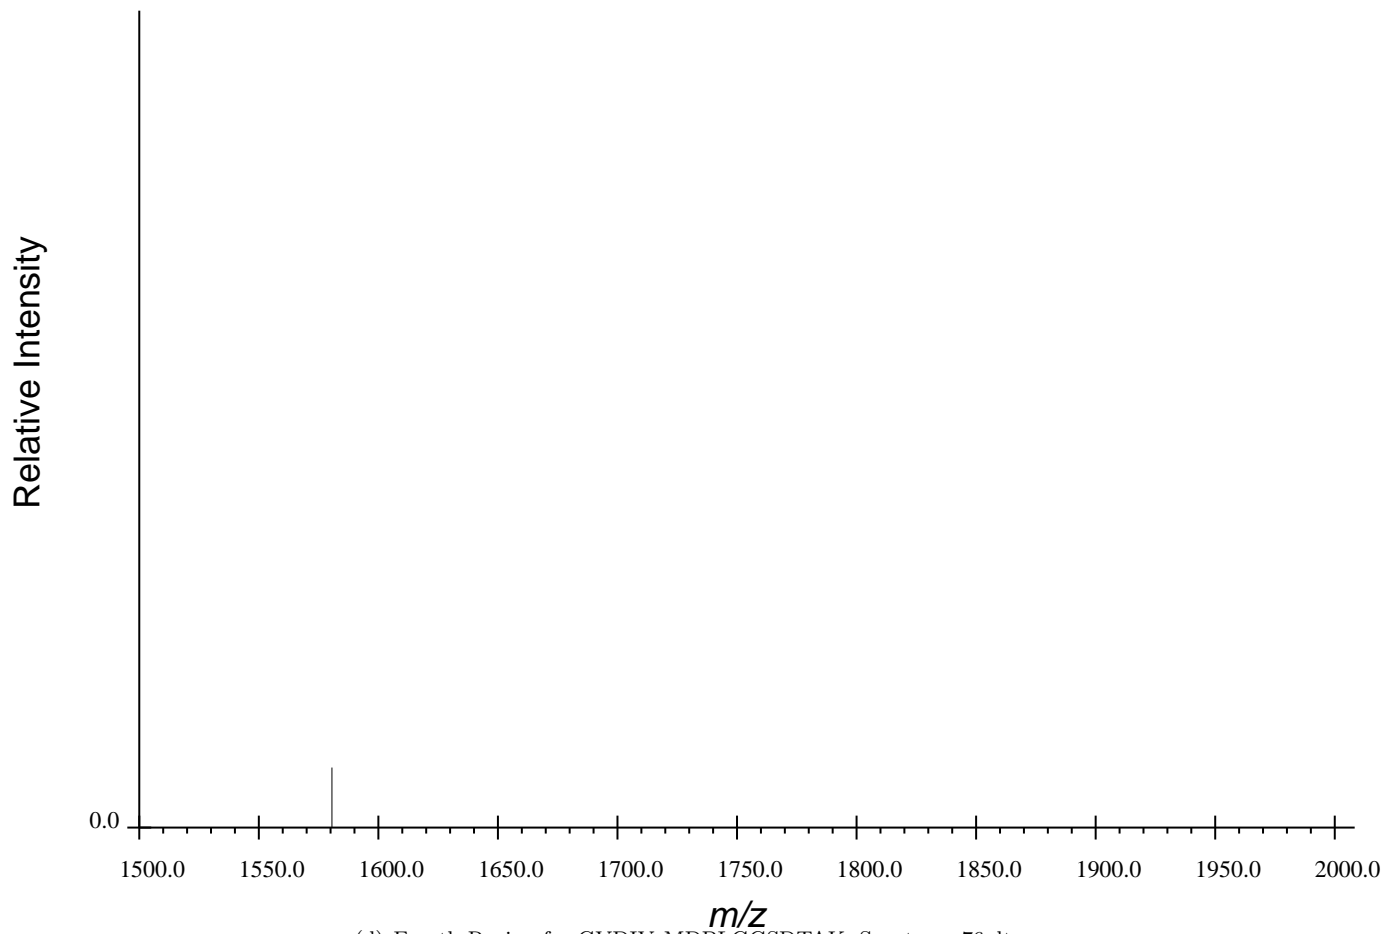

(d) Fourth Region for GVDIVoMDPLGGSDTAK, Spectrum 76.dta

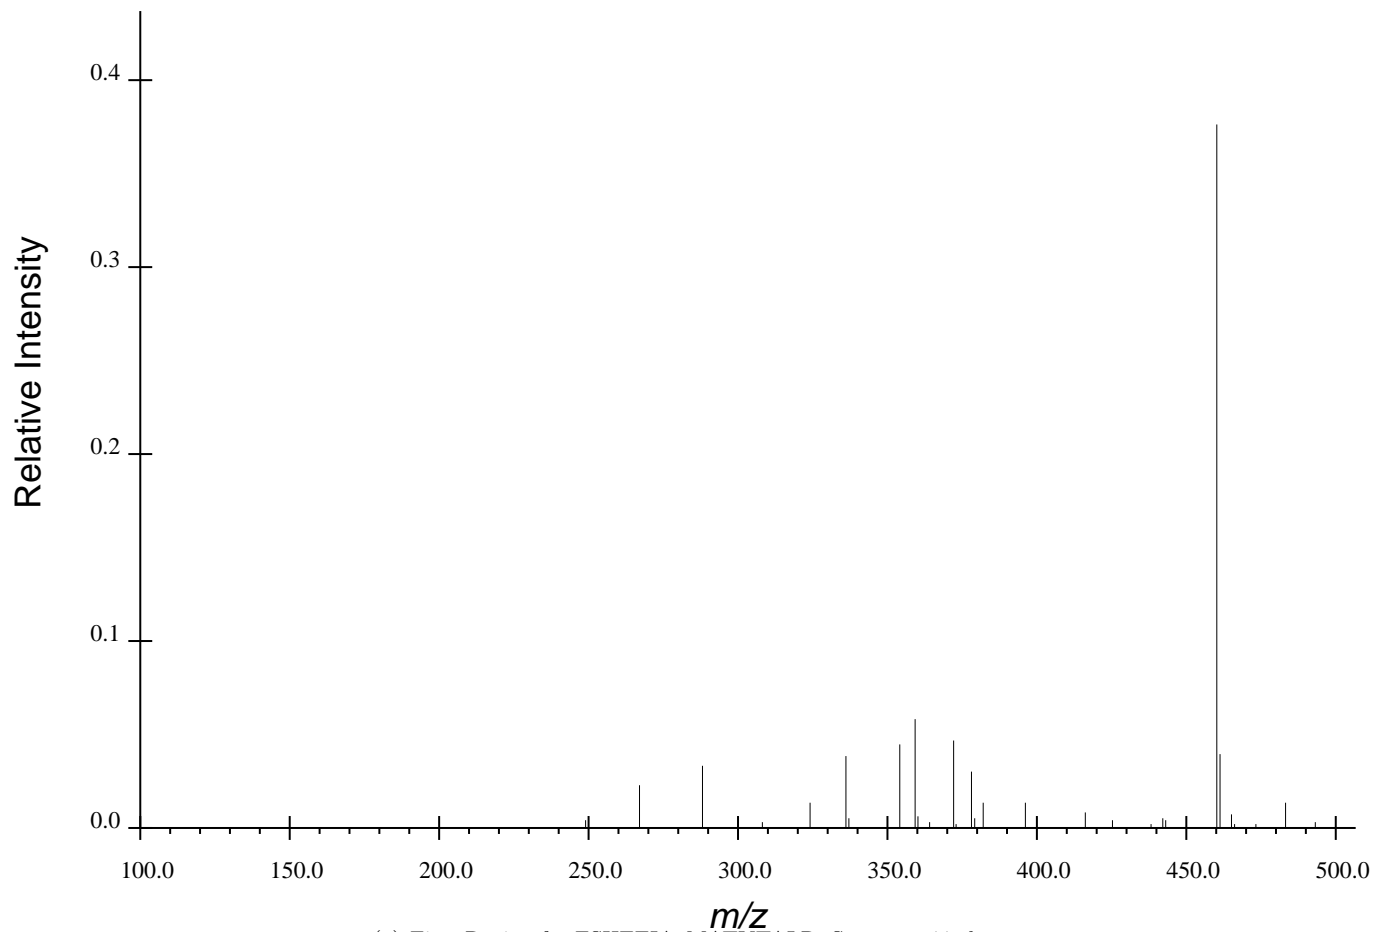

(a) First Region for FSHEEIAoMATVTALR, Spectrum 77.dta

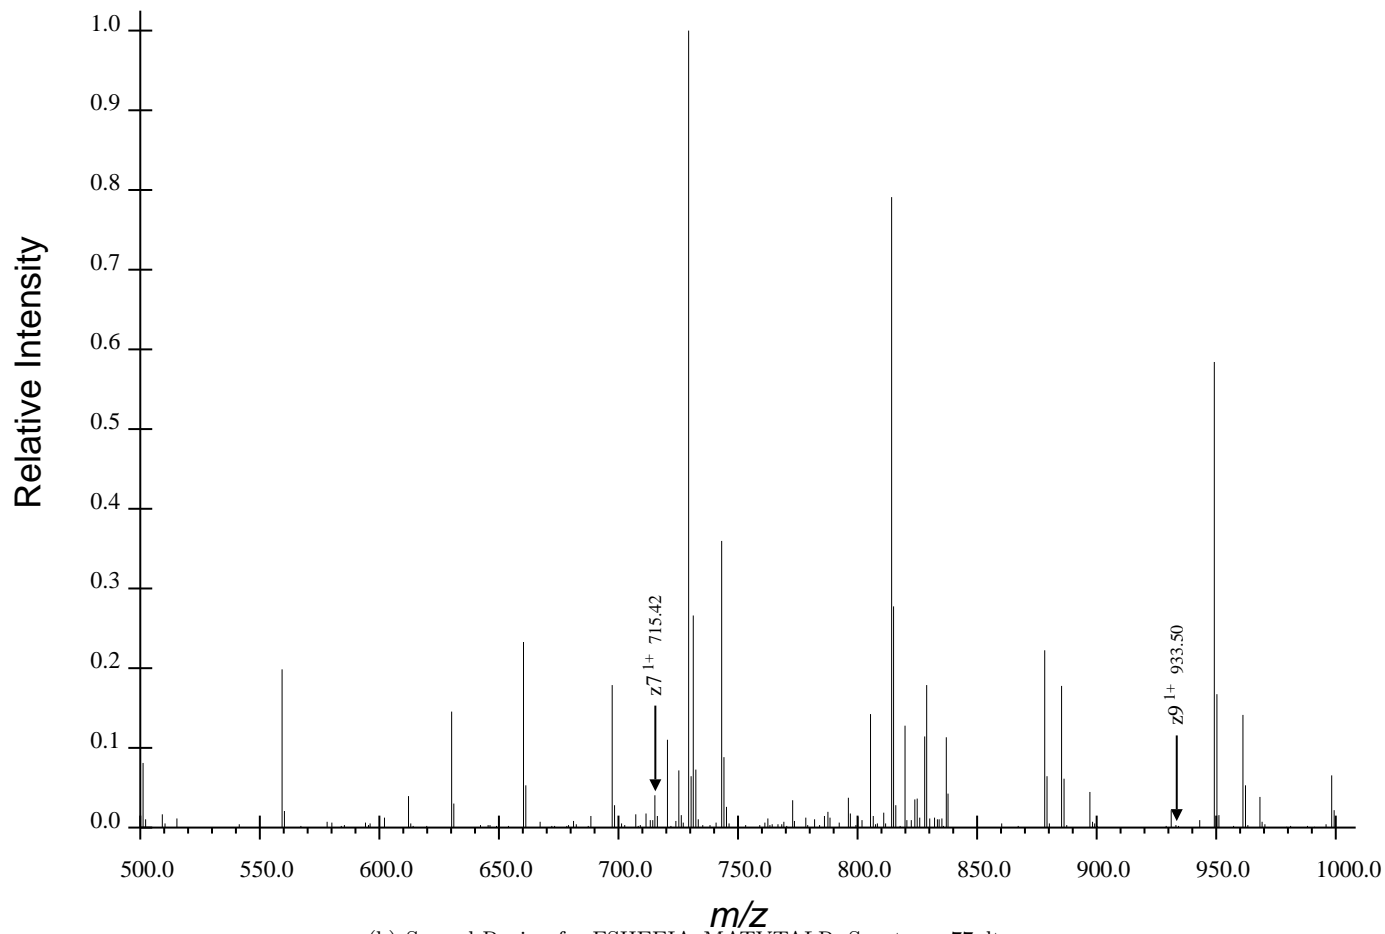

(b) Second Region for FSHEEIAoMATVTALR, Spectrum 77.dta

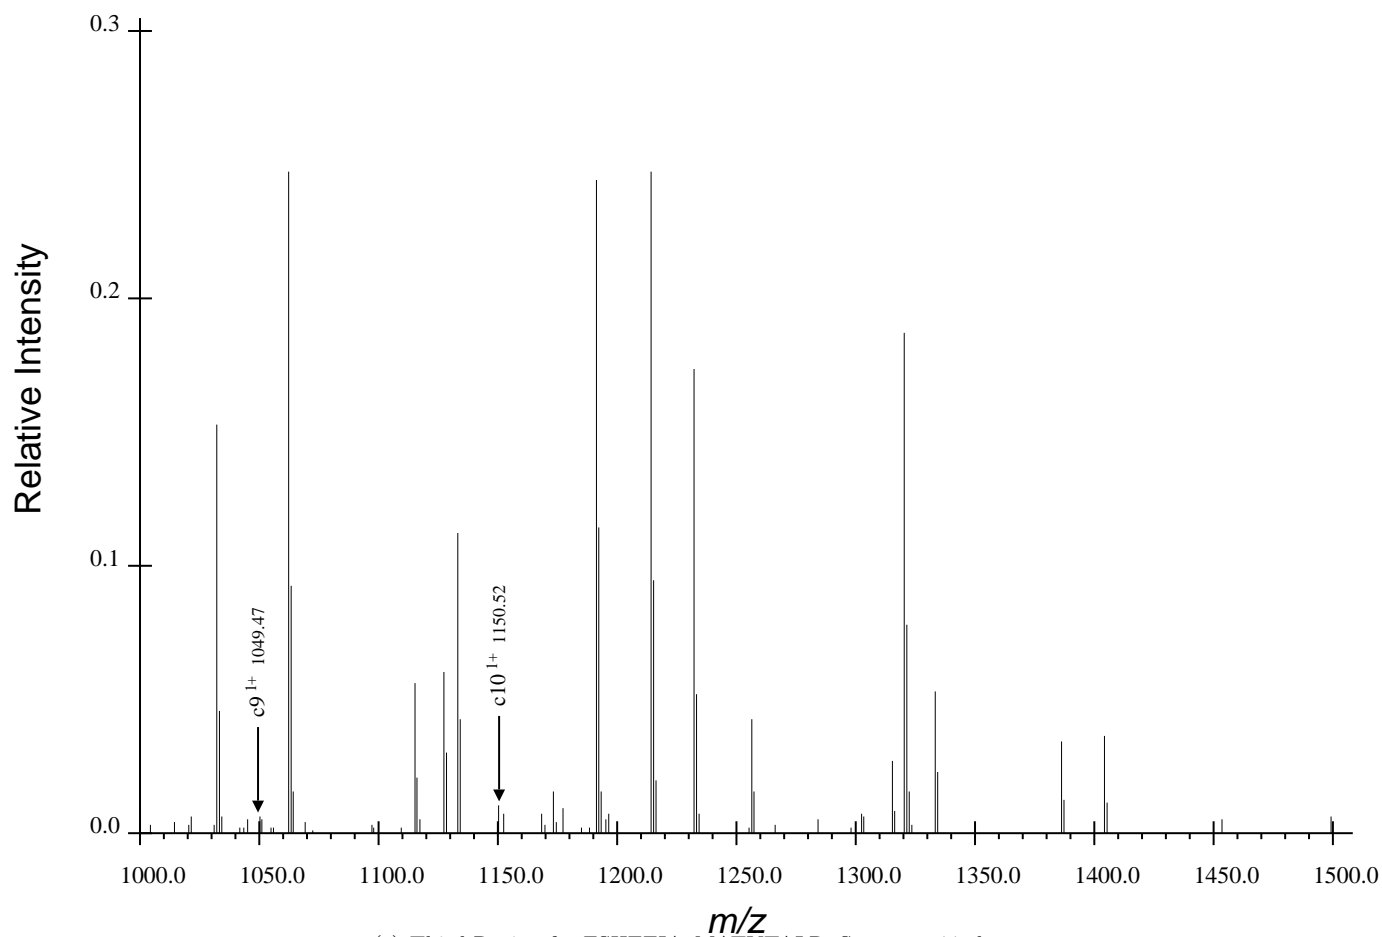

(c) Third Region for FSHEEIAoMATVTALR, Spectrum 77.dta

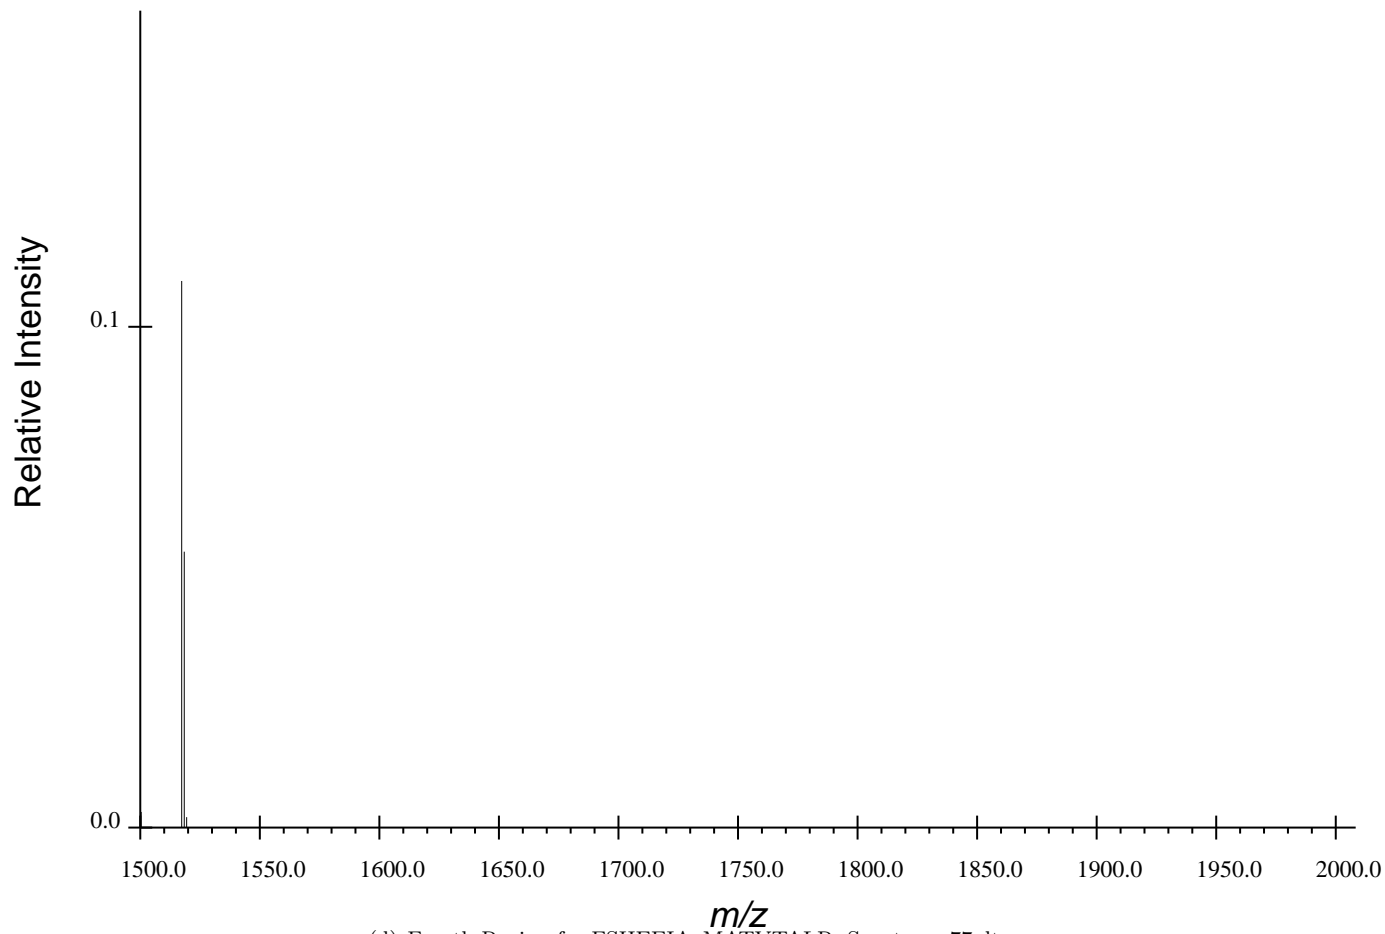

(d) Fourth Region for FSHEEIAoMATVTALR, Spectrum 77.dta

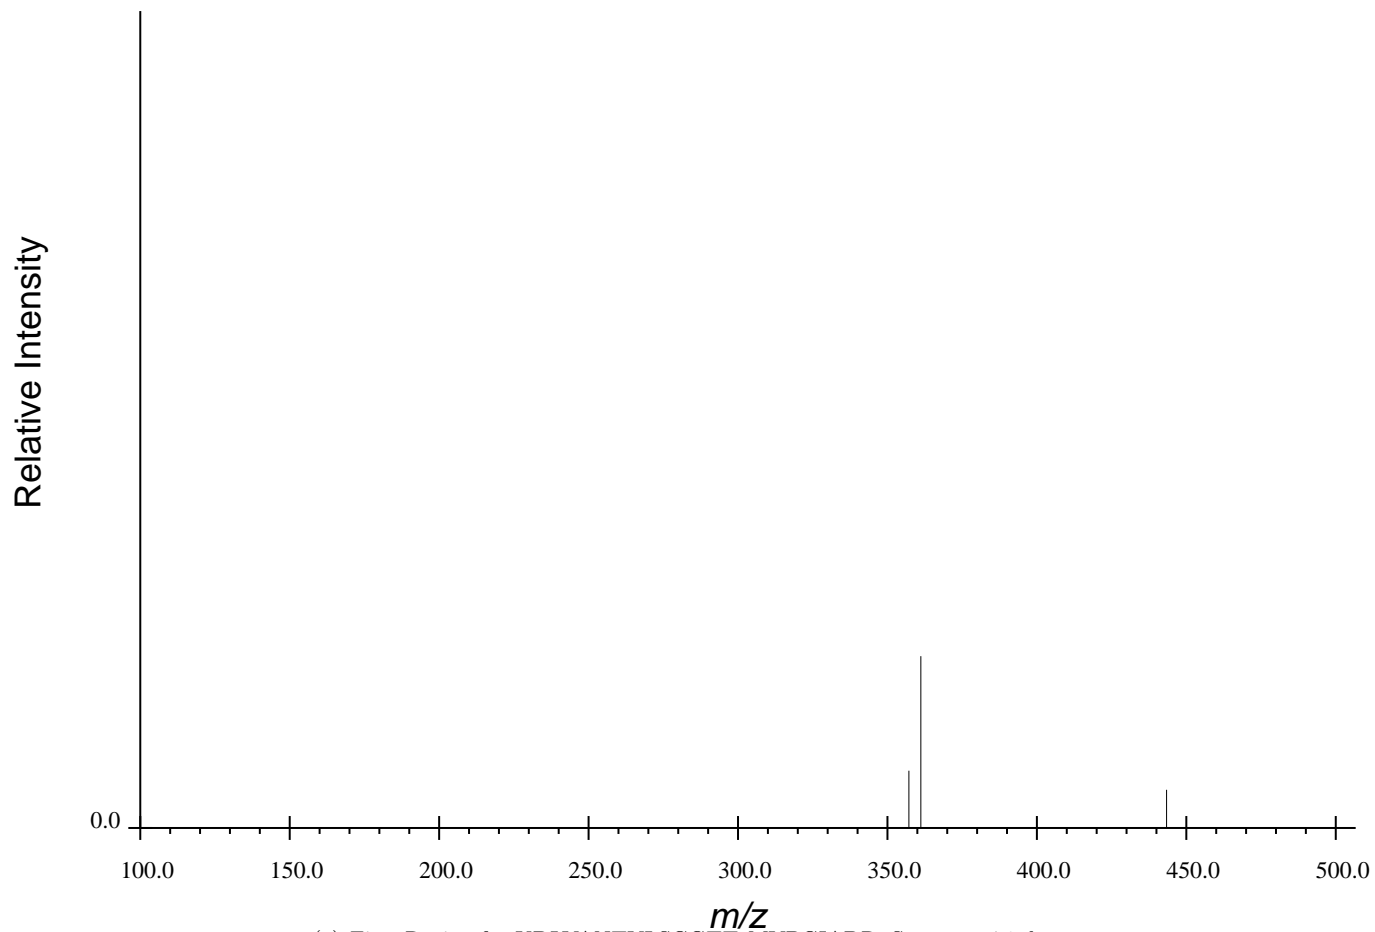

(a) First Region for KDLYANTVLSGGTTToMYPGIADR, Spectrum 78.dta

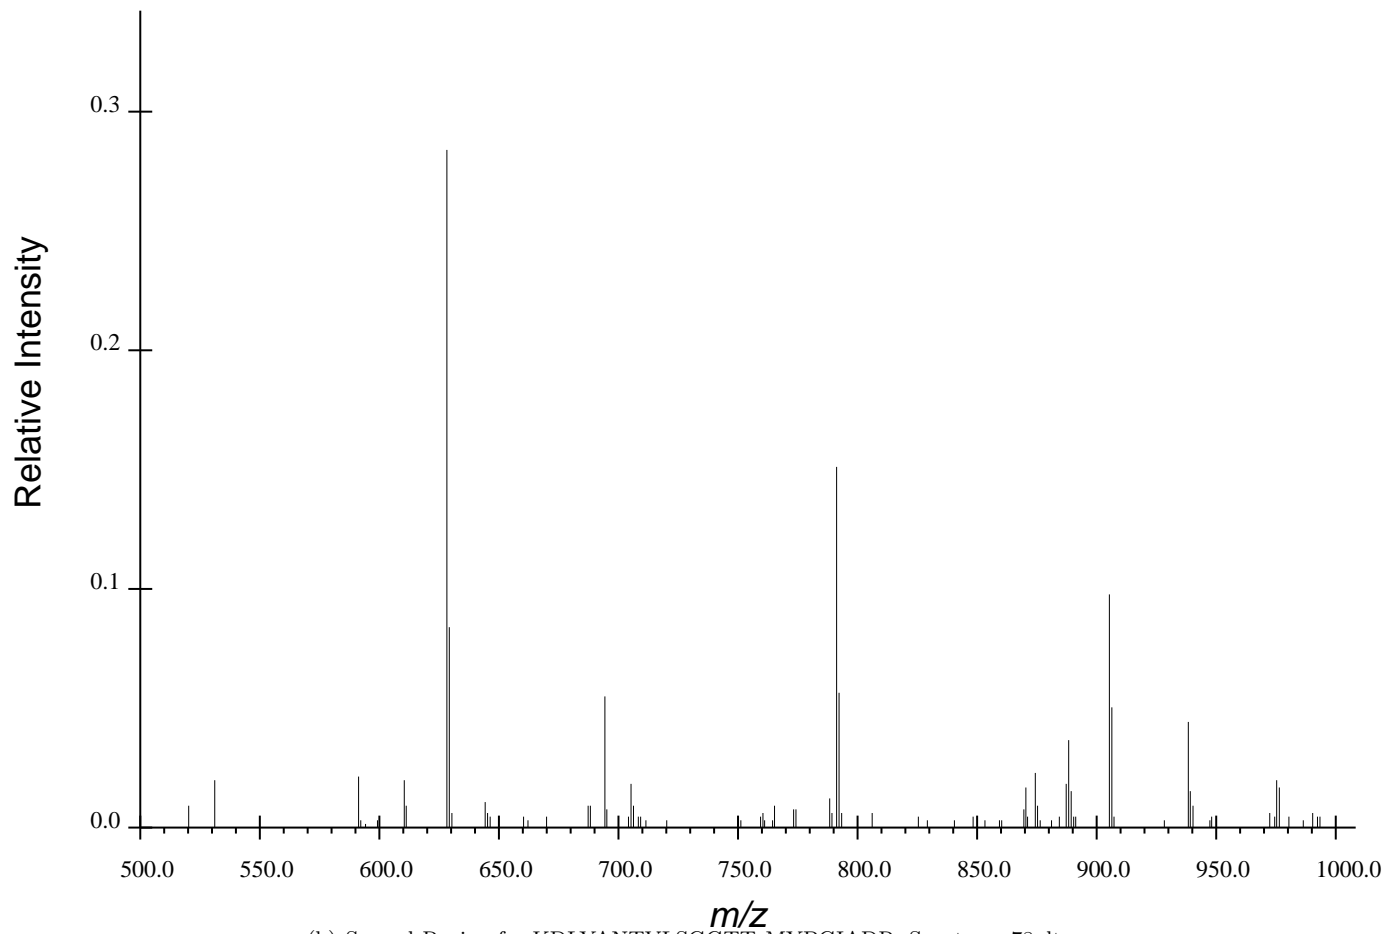

(b) Second Region for KDLYANTVLSGGTTToMYPGIADR, Spectrum 78.dta

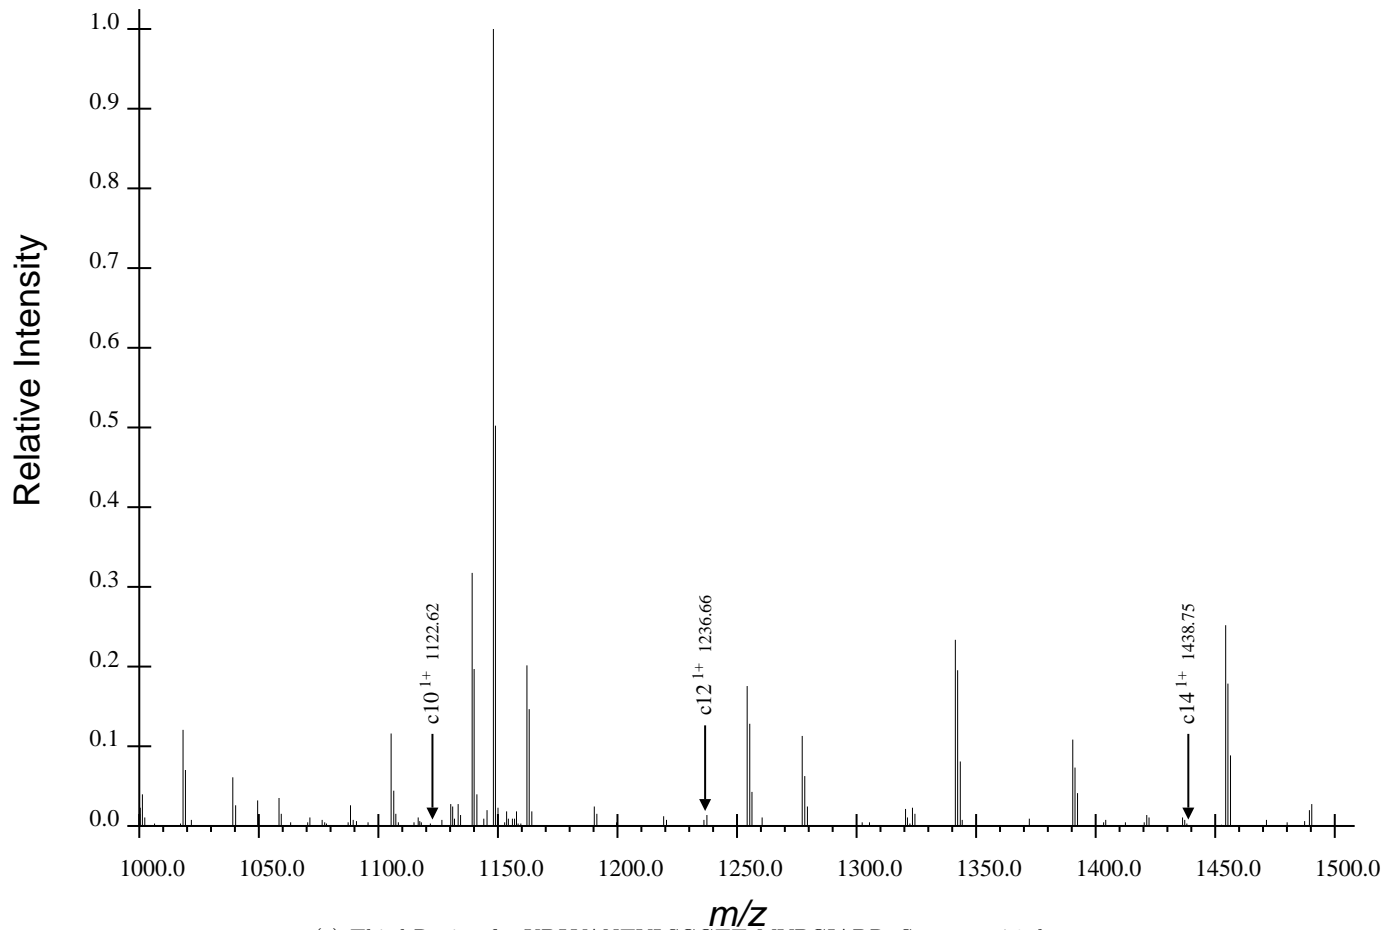

(c) Third Region for KDLYANTVLSGGTToMYPGIADR, Spectrum 78.dta

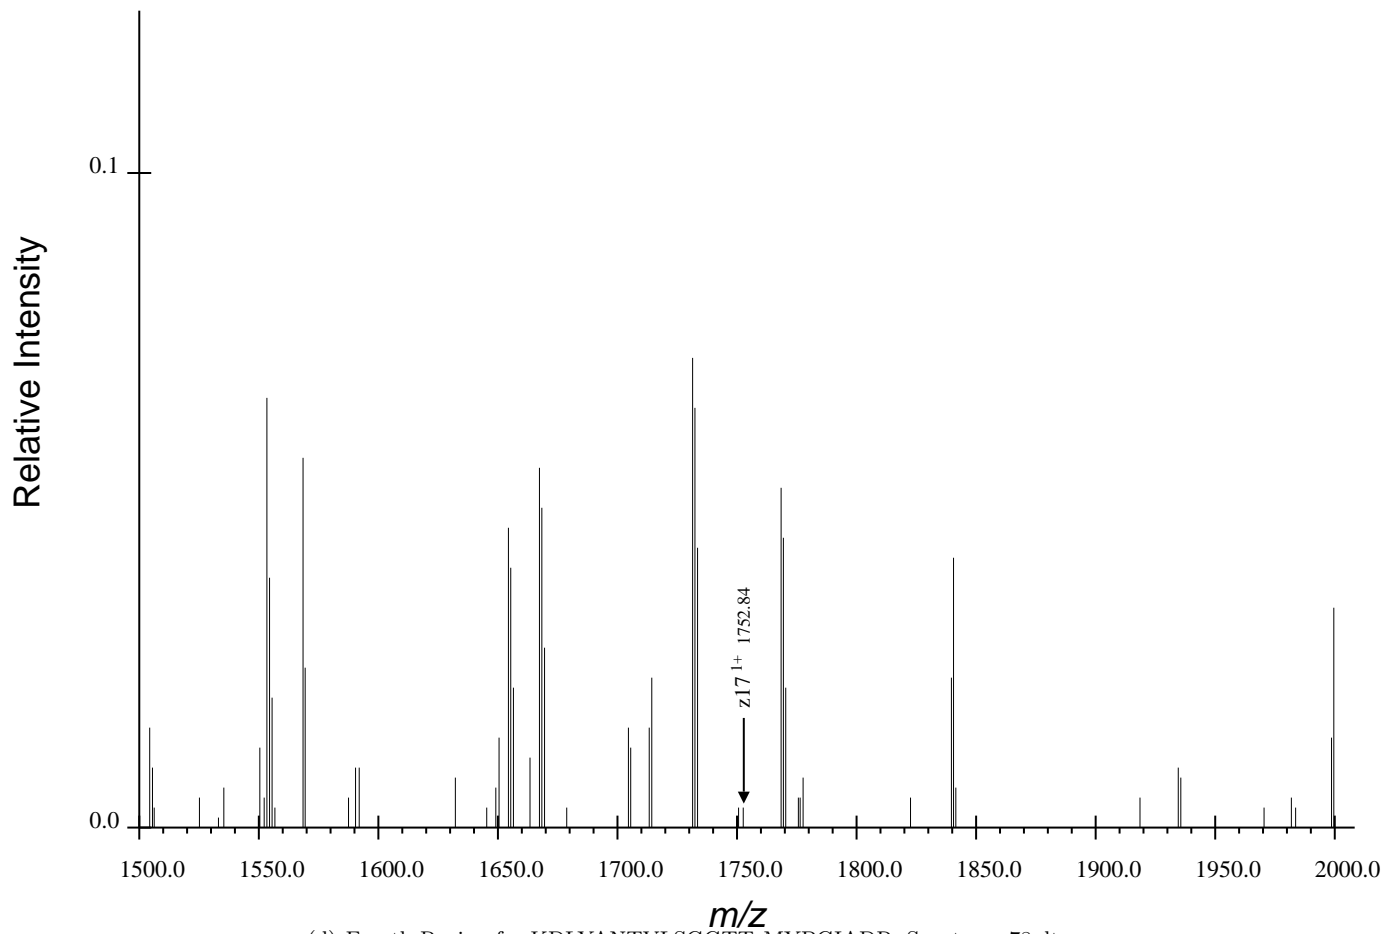

(d) Fourth Region for KDLYANTVLSGGTToMYPGIADR, Spectrum 78.dta

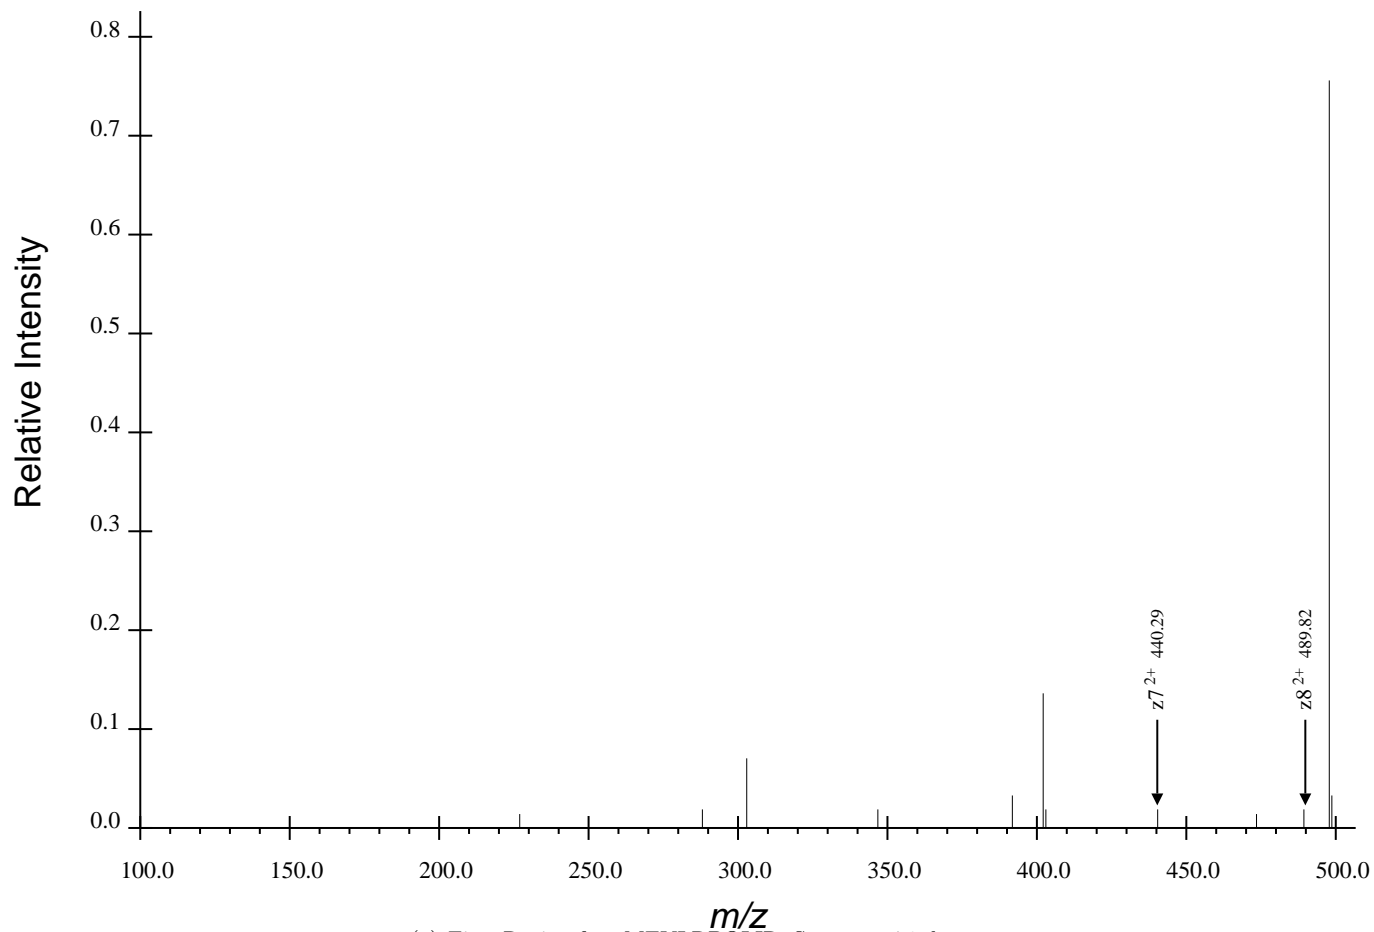

(a) First Region for aMEVLRPQLIR, Spectrum 79.dta

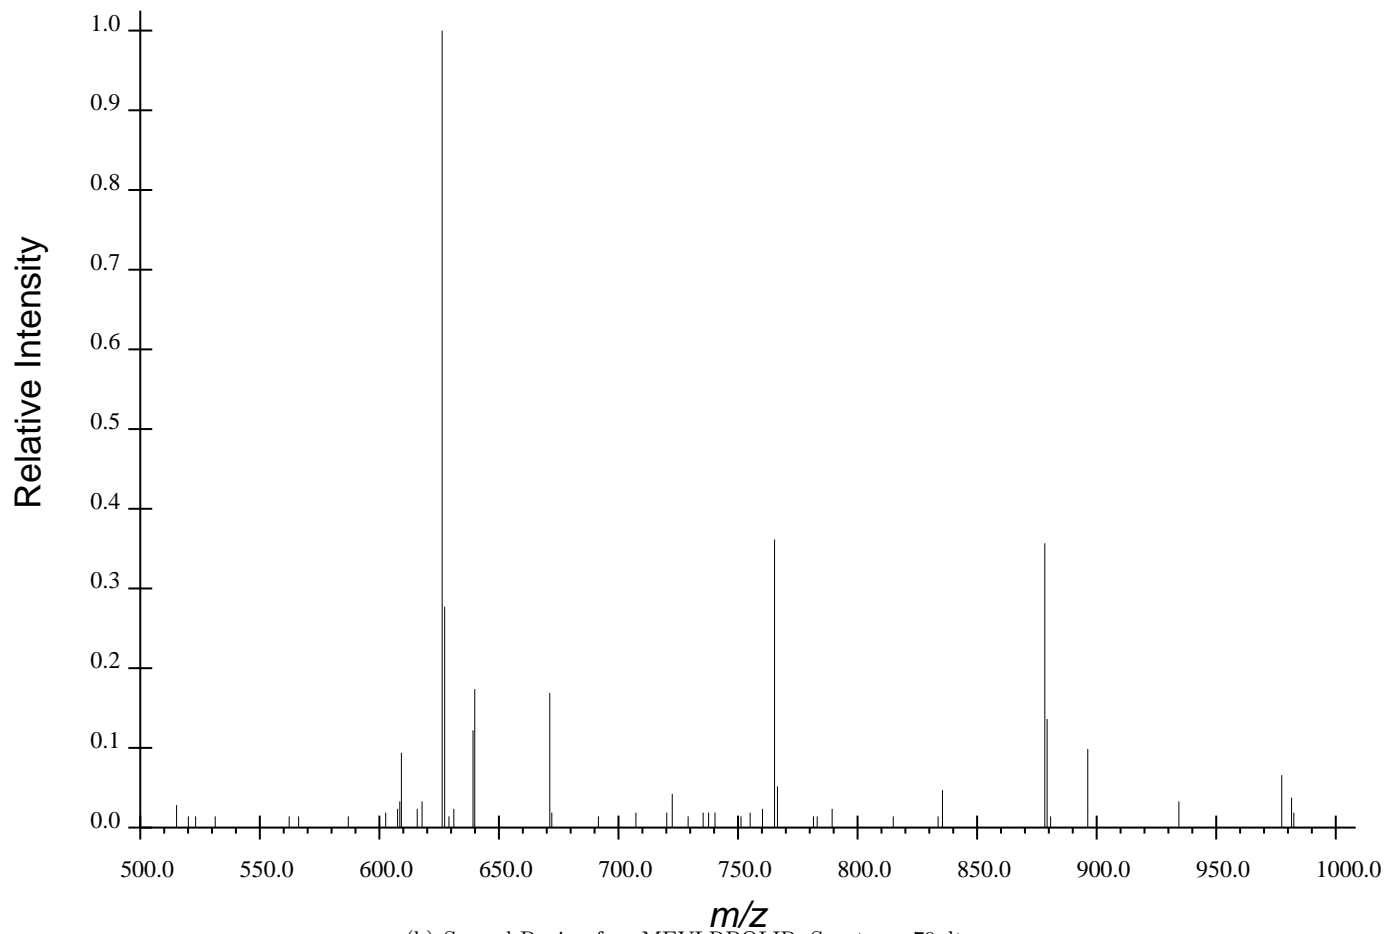

(b) Second Region for aMEVLRPQLIR, Spectrum 79.dta



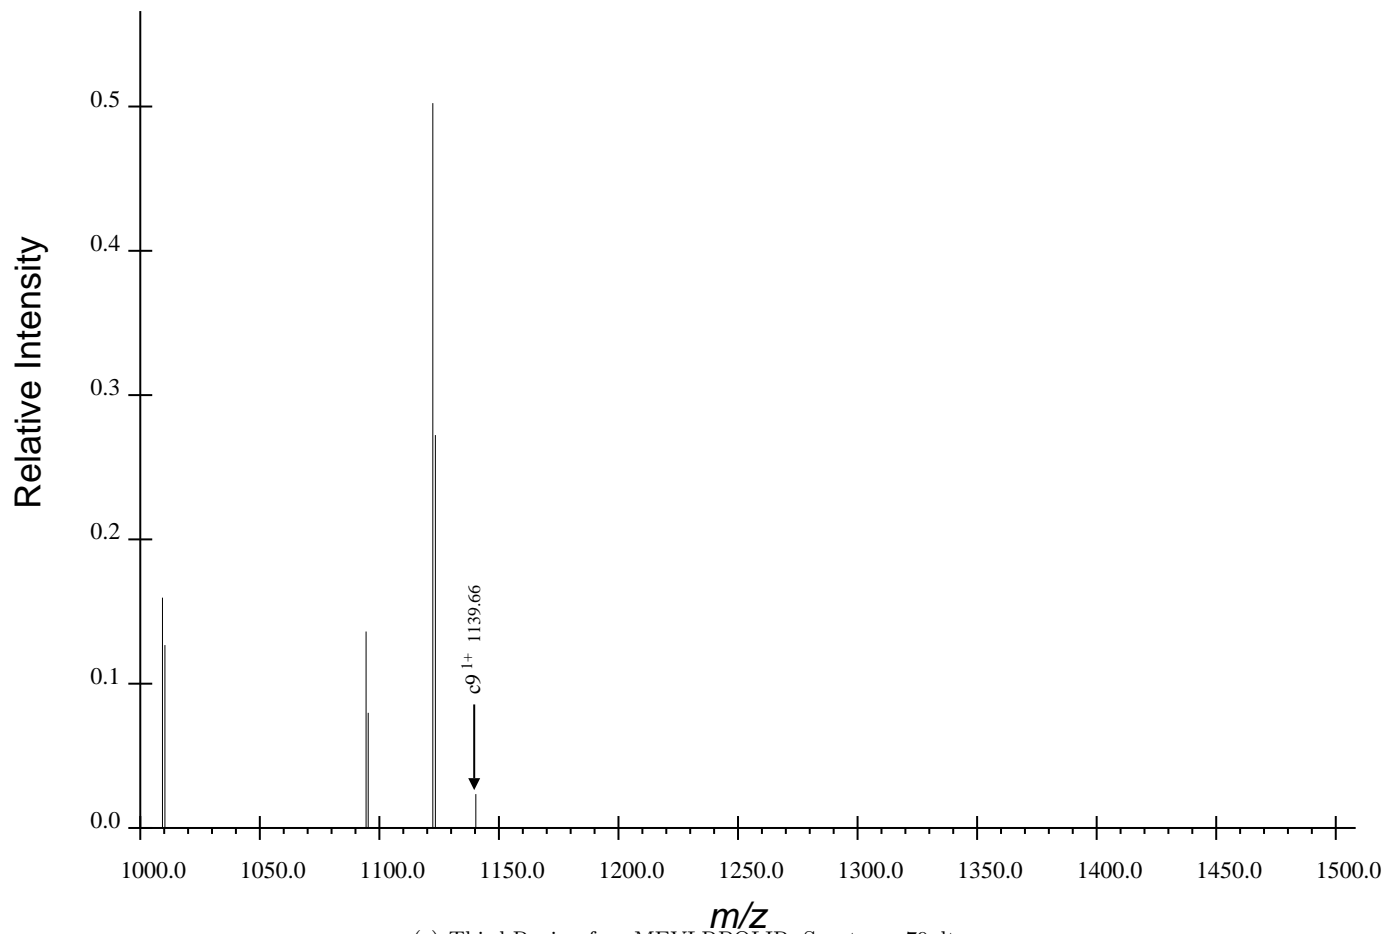

(c) Third Region for aMEVLRPQLIR, Spectrum 79.dta

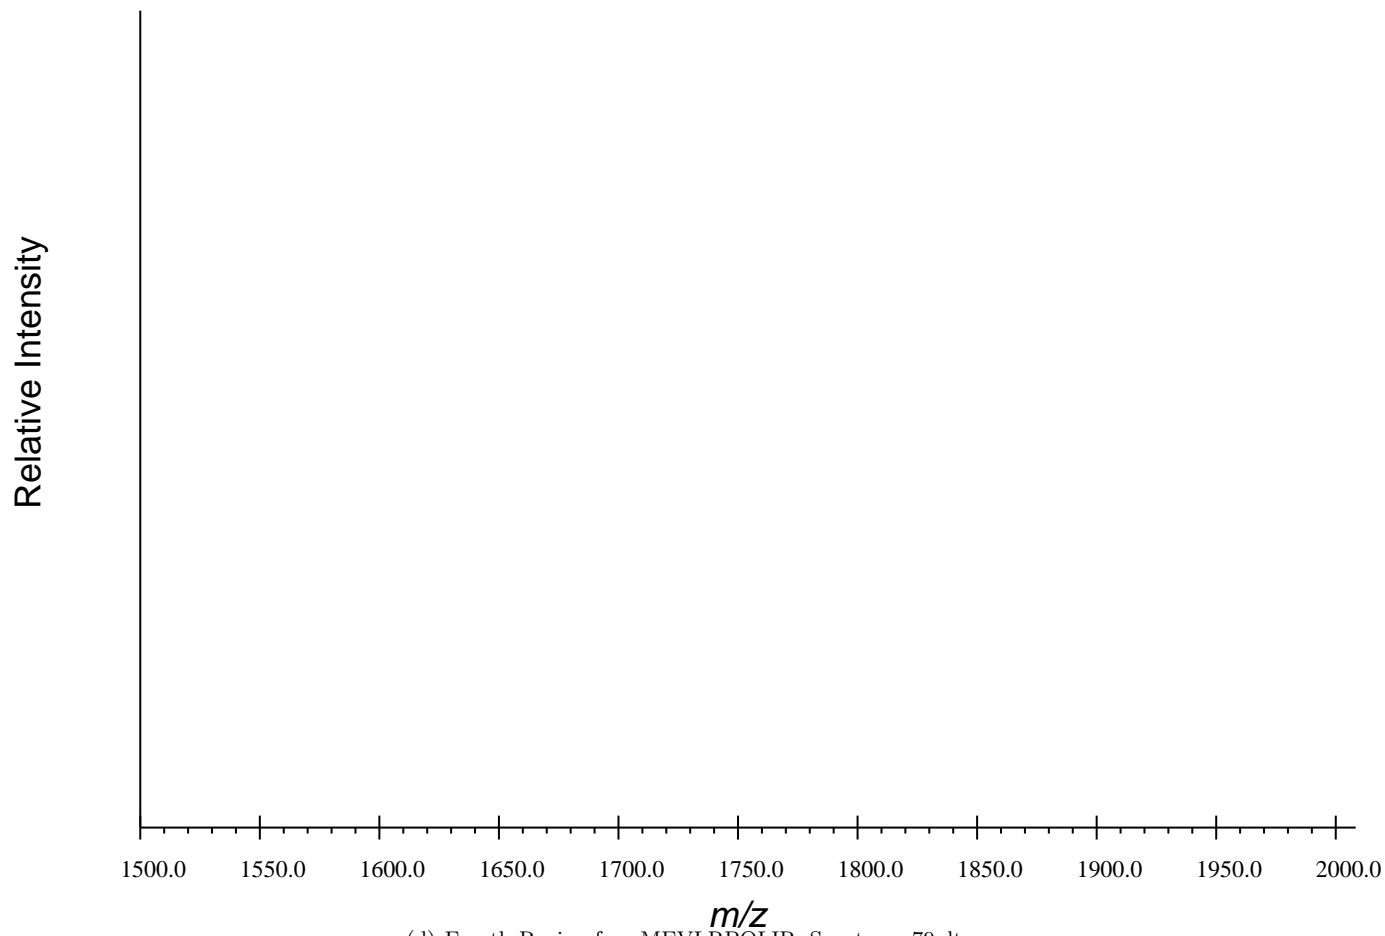

(d) Fourth Region for aMEVLRPQLIR, Spectrum 79.dta

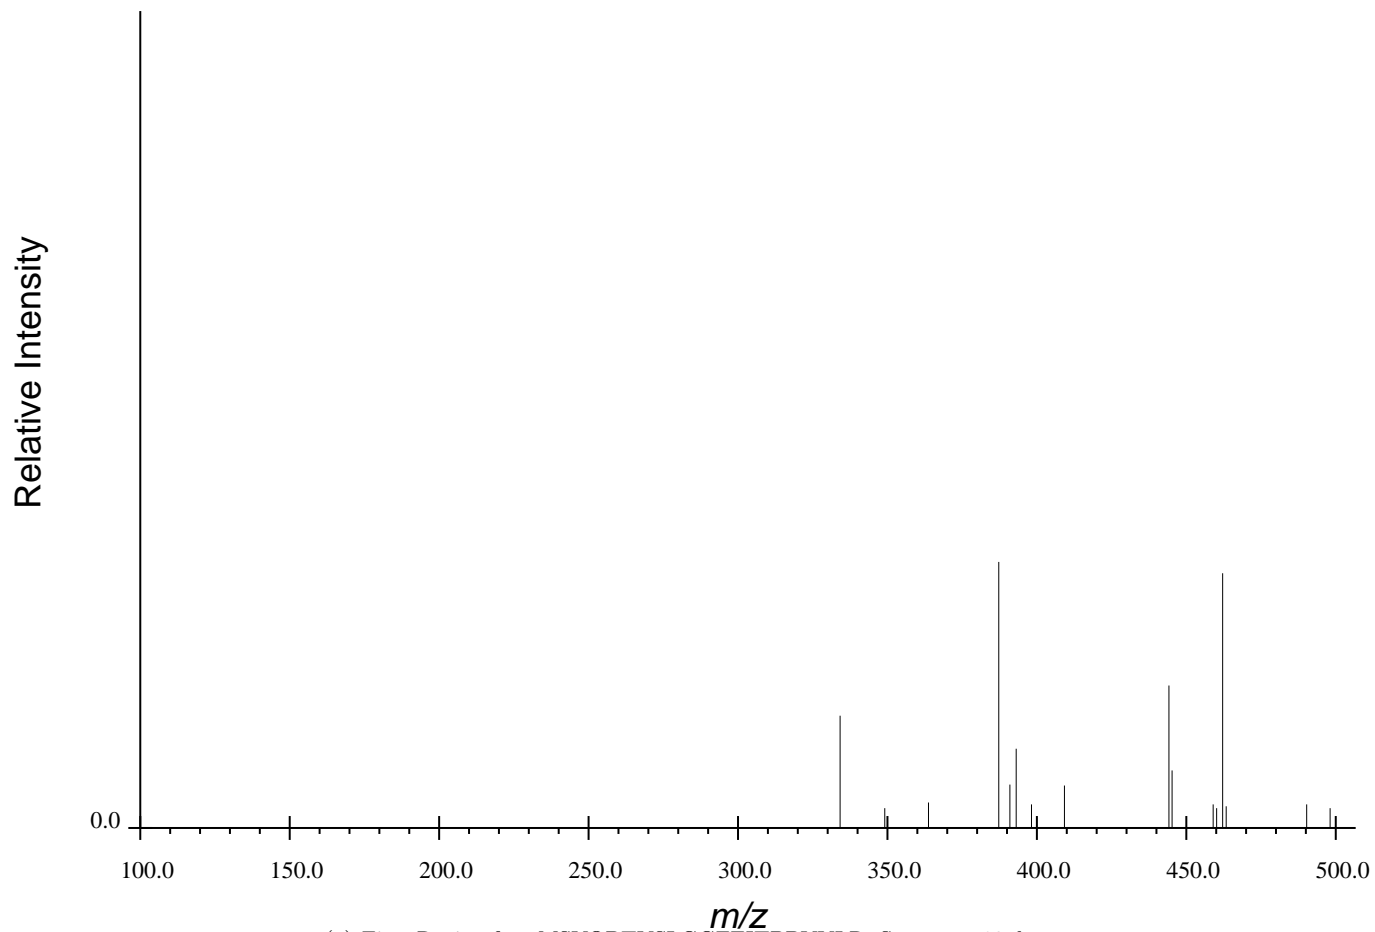

(a) First Region for oMSVQPTVSLGGFEITPPVVL, Spectrum 80.dta

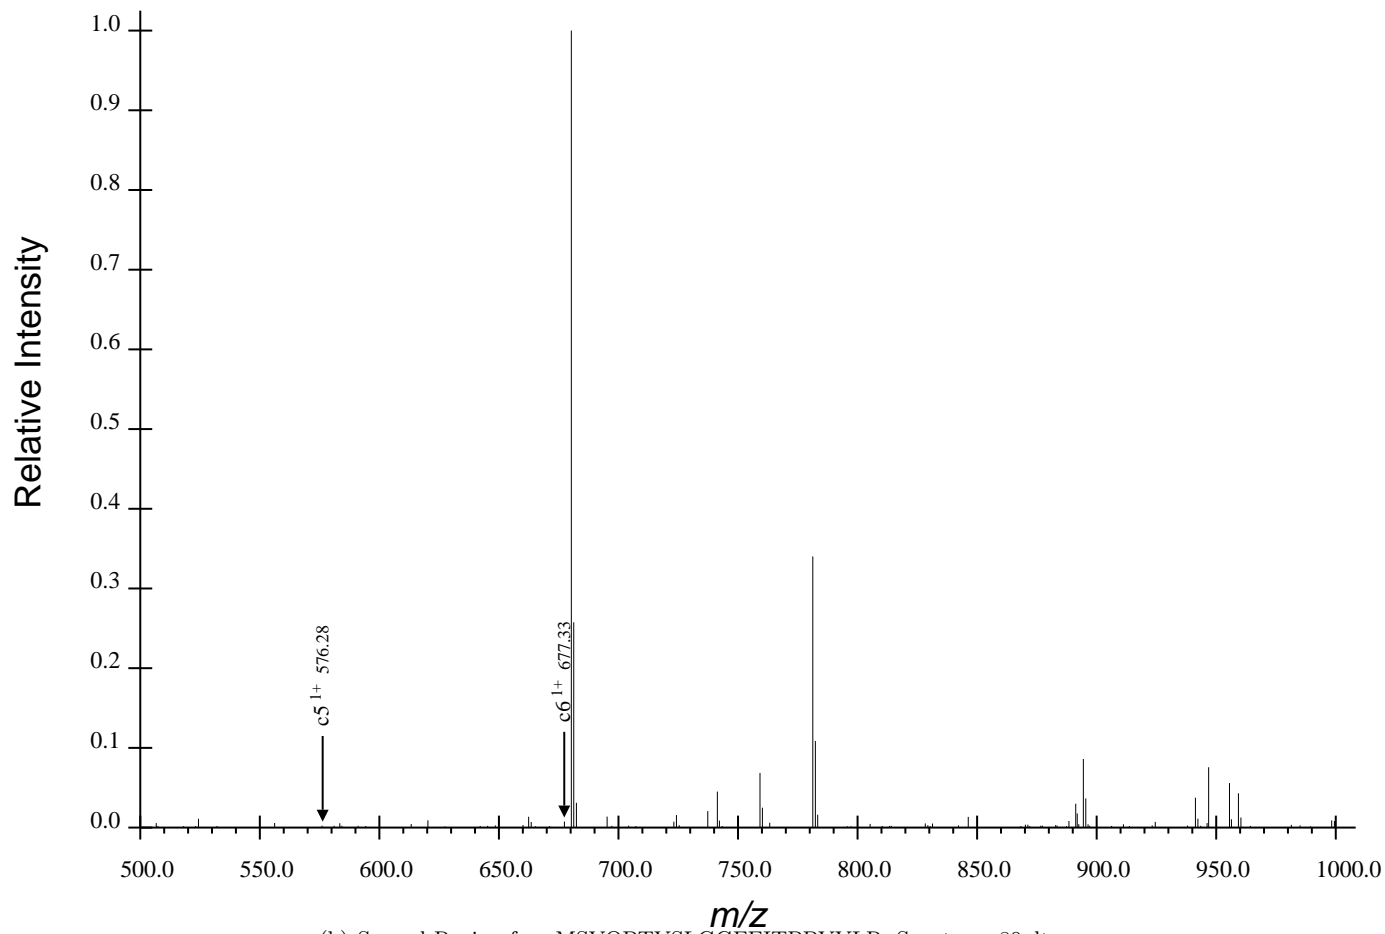

(b) Second Region for oMSVQPTVSLGGFEITPPVVL, Spectrum 80.dta

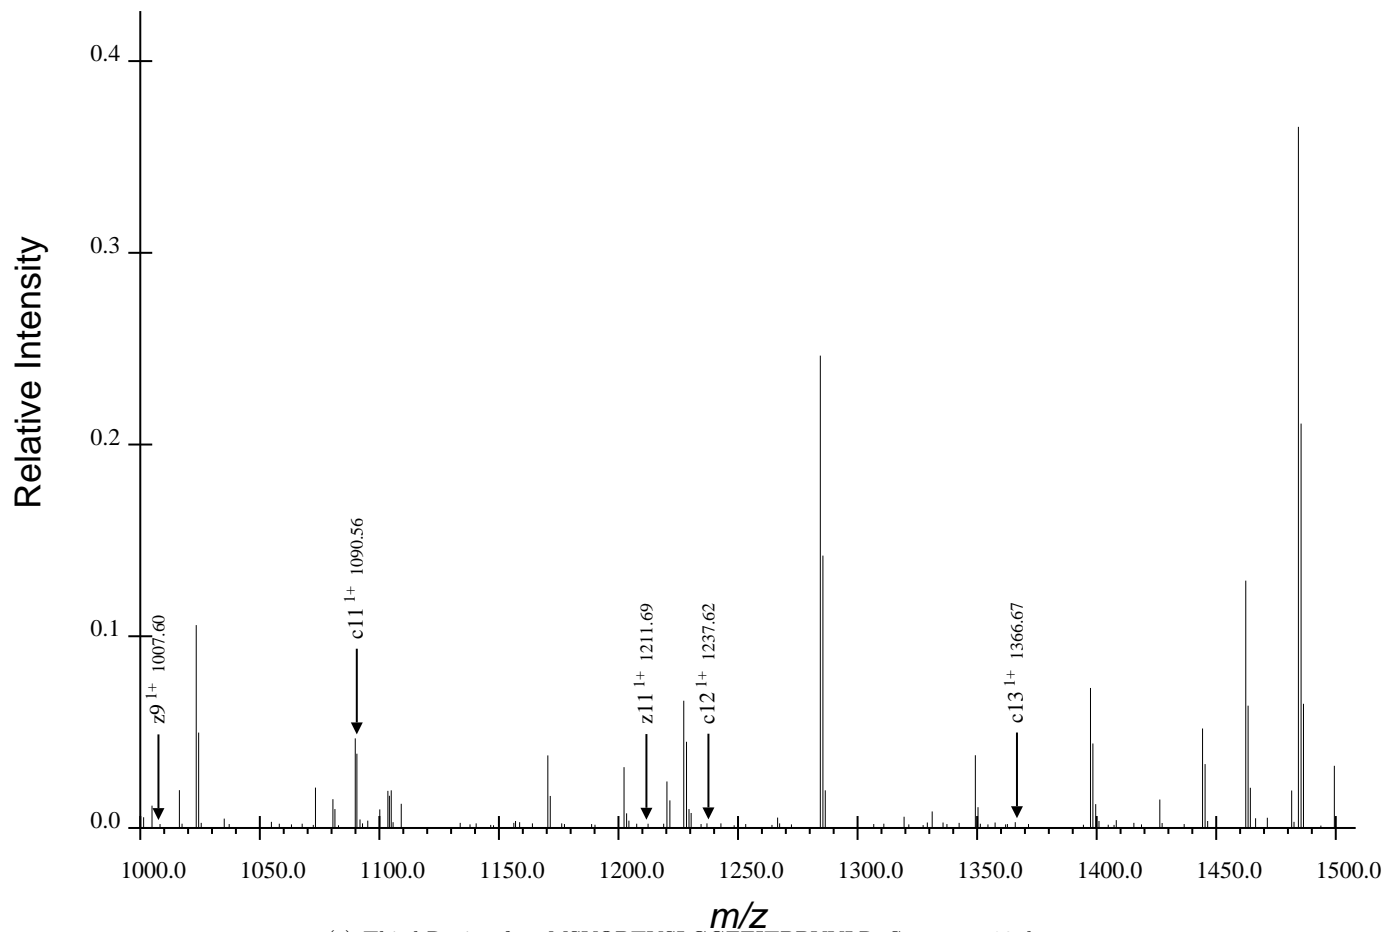

(c) Third Region for oMSVQPTVSLGGFEITPPVLR, Spectrum 80.dta

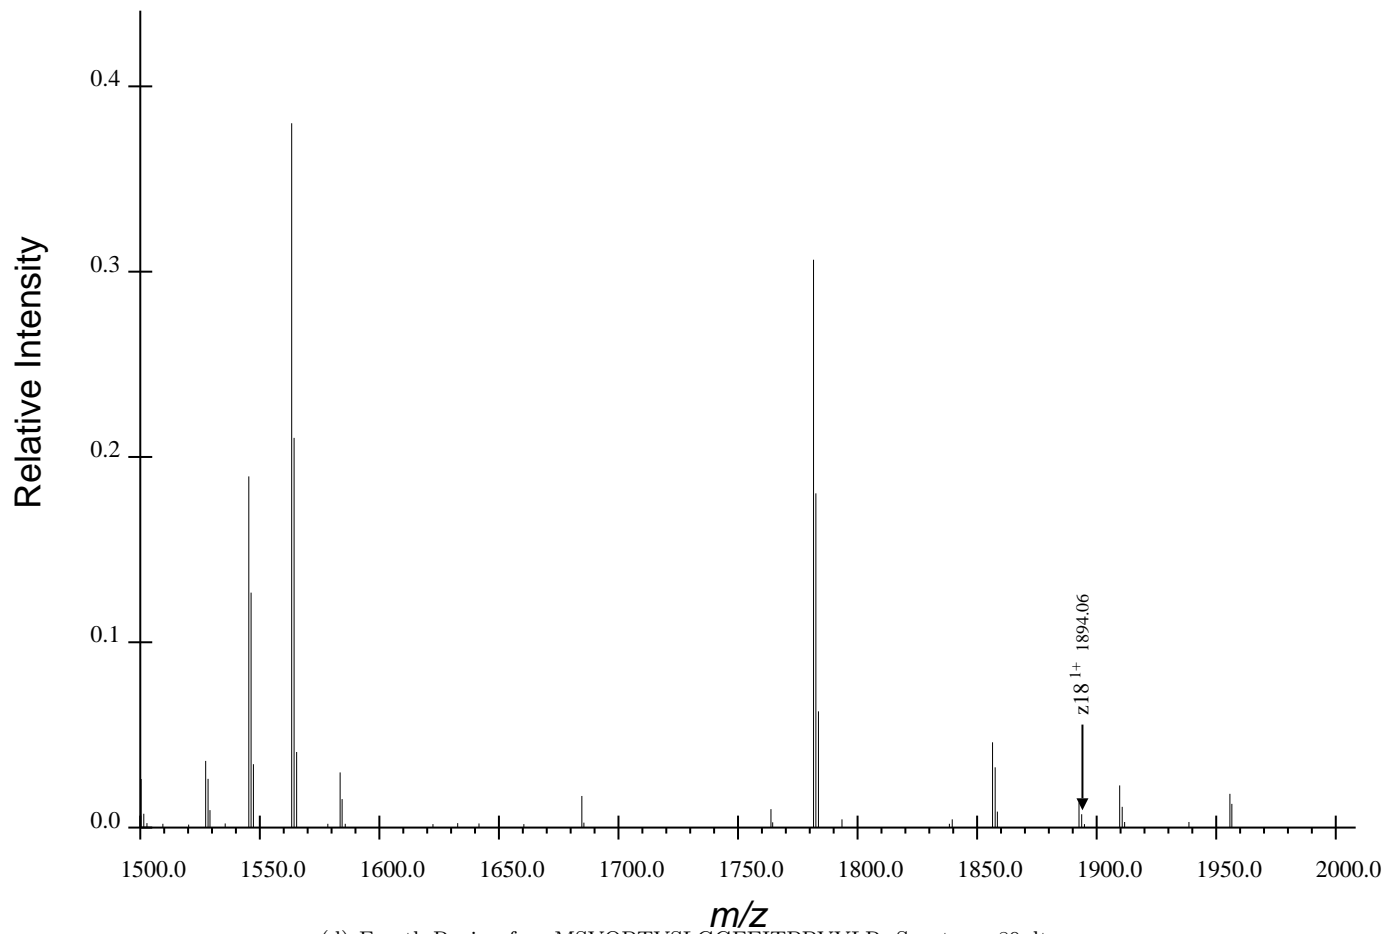

(d) Fourth Region for oMSVQPTVSLGGFEITPPVLR, Spectrum 80.dta

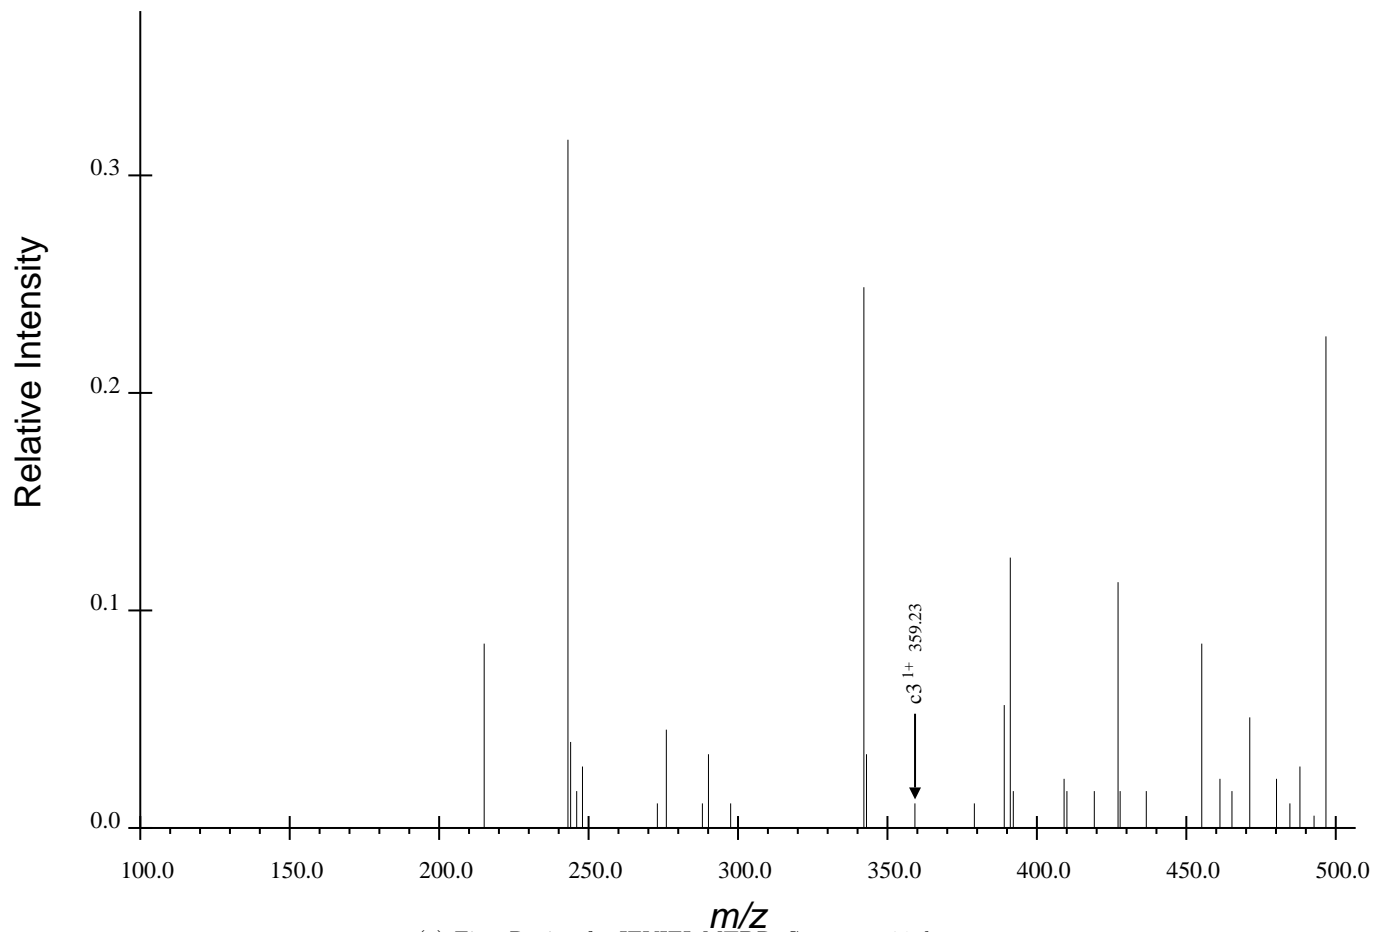

(a) First Region for IEVIEIoMTDR, Spectrum 81.dta

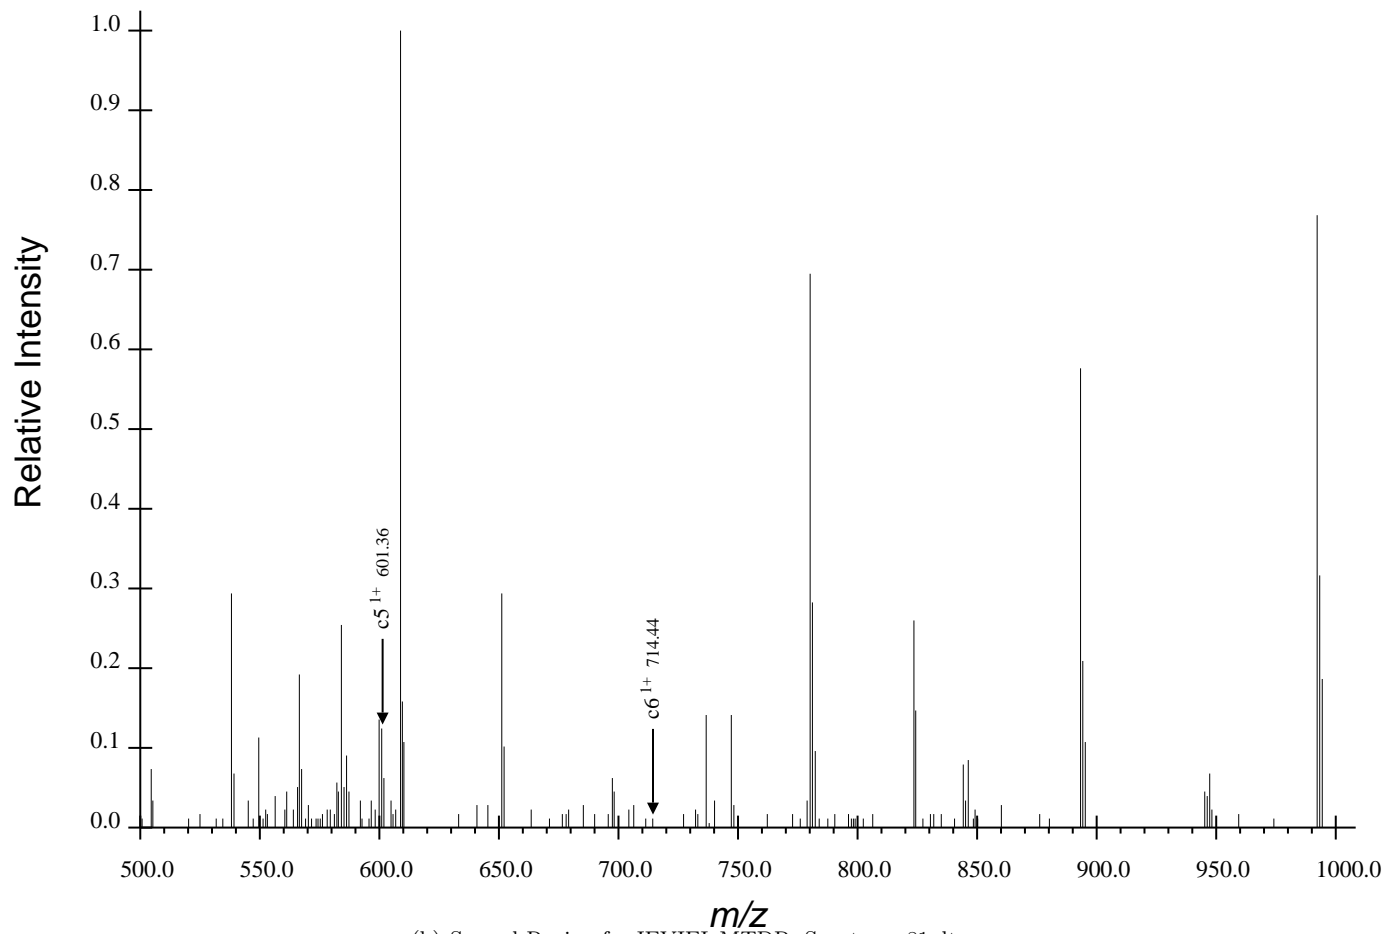

(b) Second Region for IEVIEIoMTDR, Spectrum 81.dta

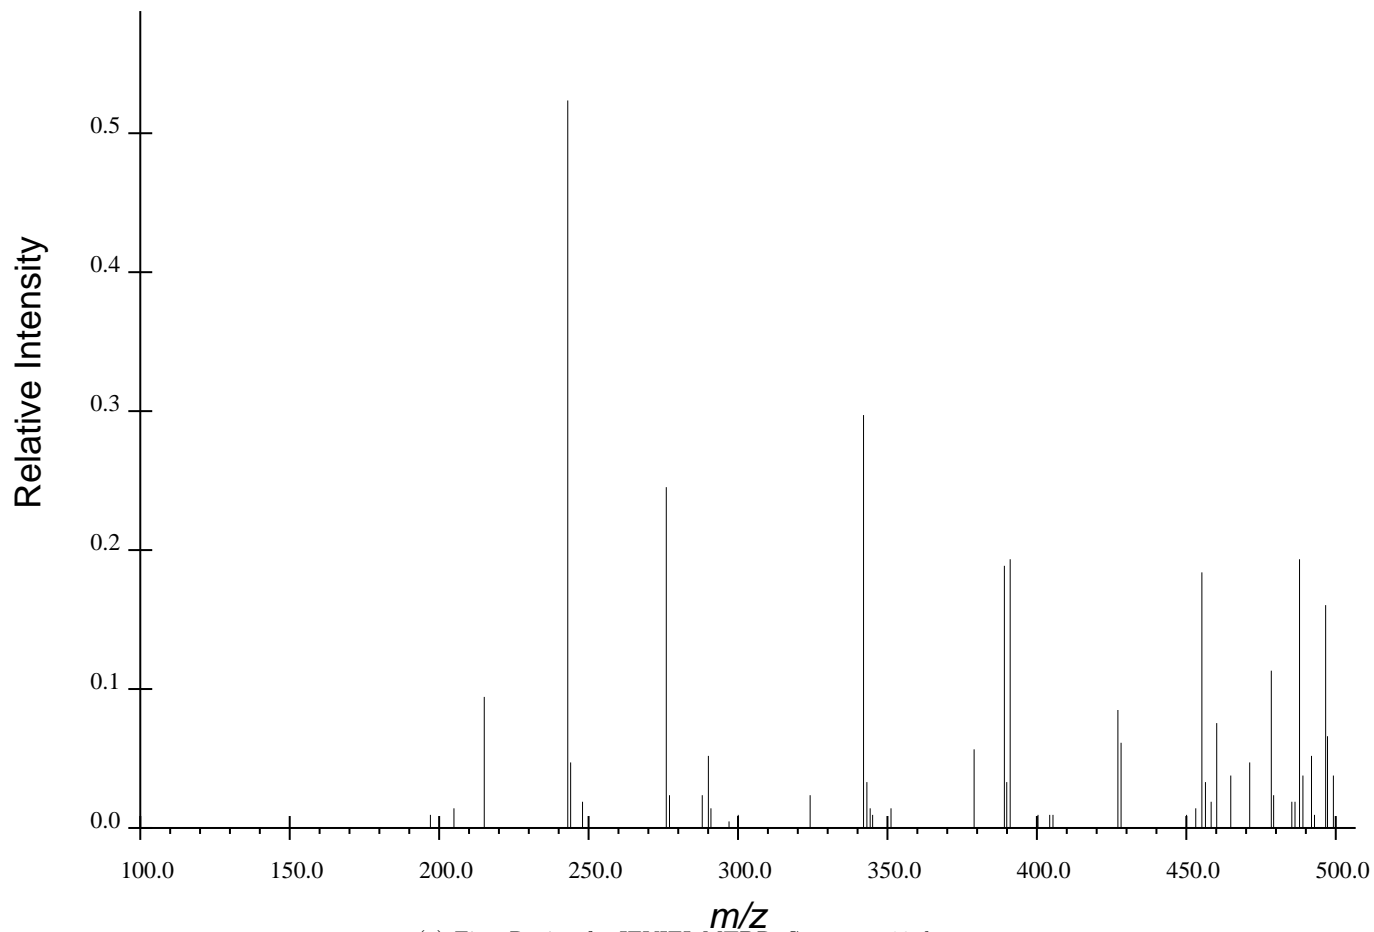

(a) First Region for IEVIEIoMTDR, Spectrum 82.dta

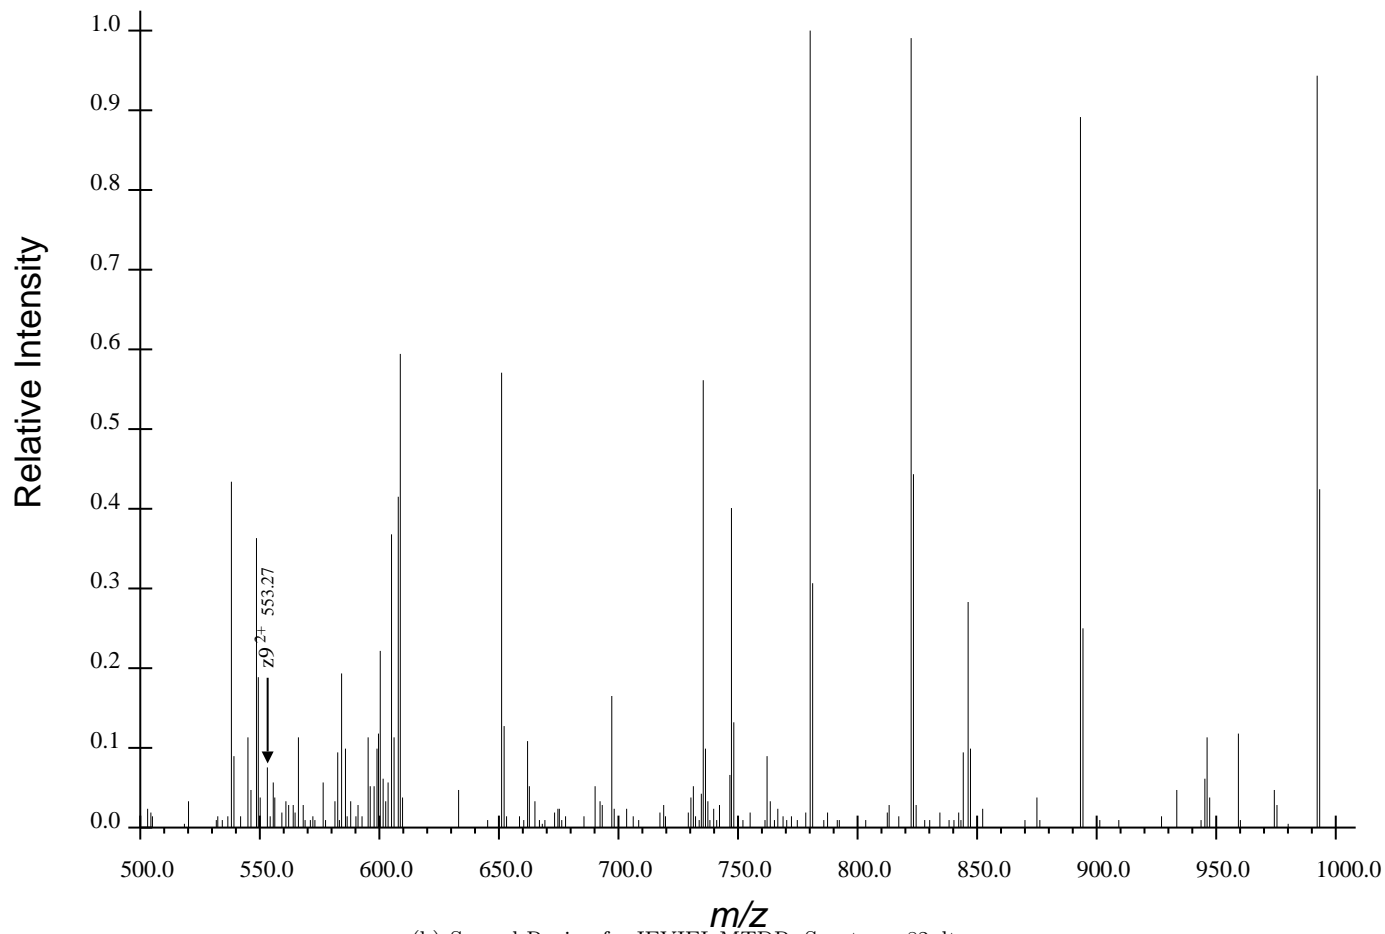

(b) Second Region for IEVIEIoMTDR, Spectrum 82.dta

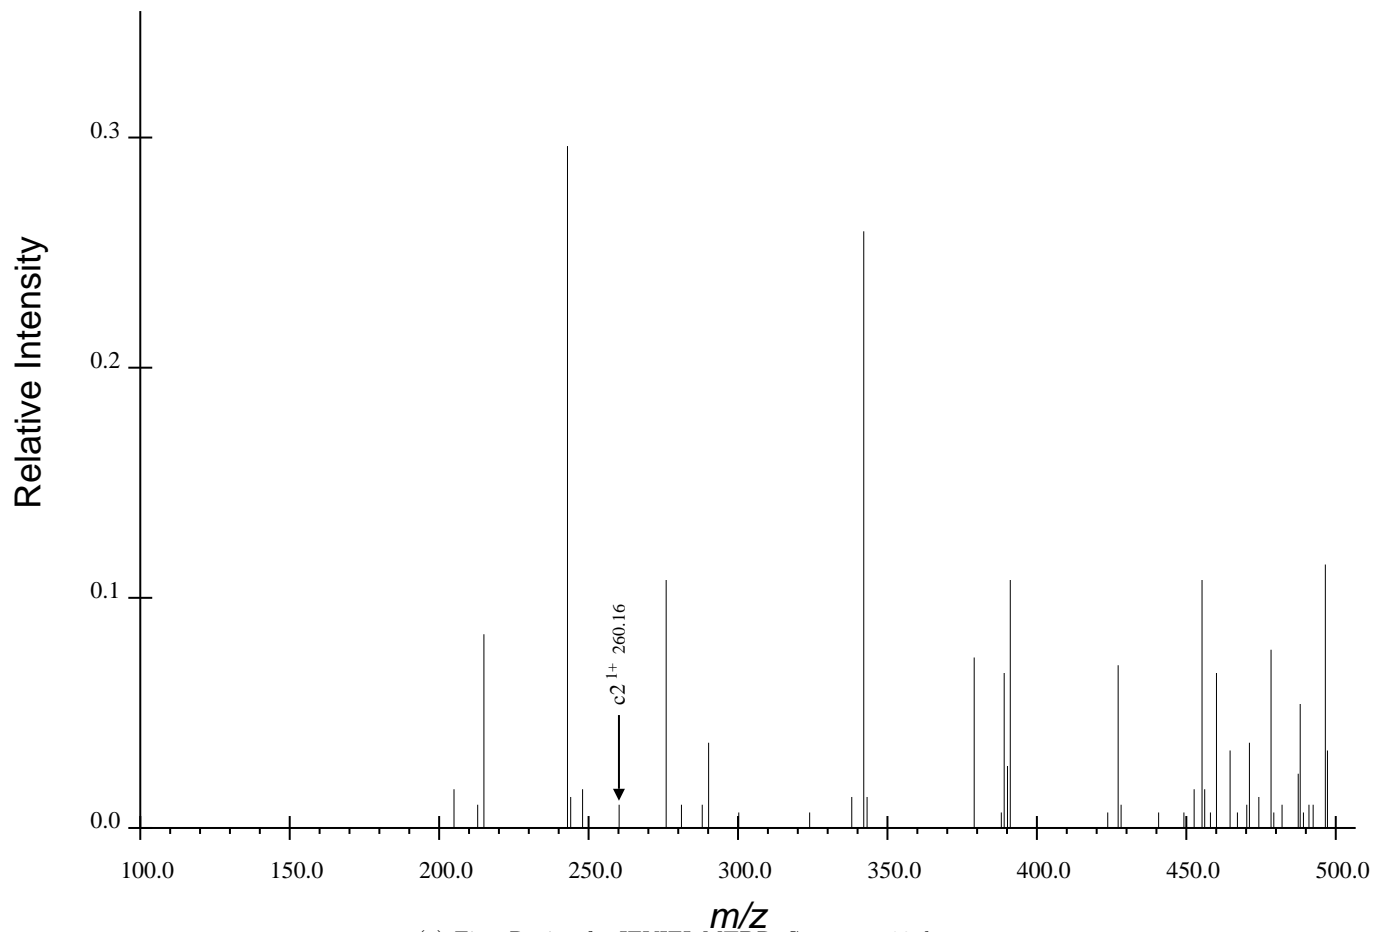

(a) First Region for IEVIEIoMTDR, Spectrum 83.dta

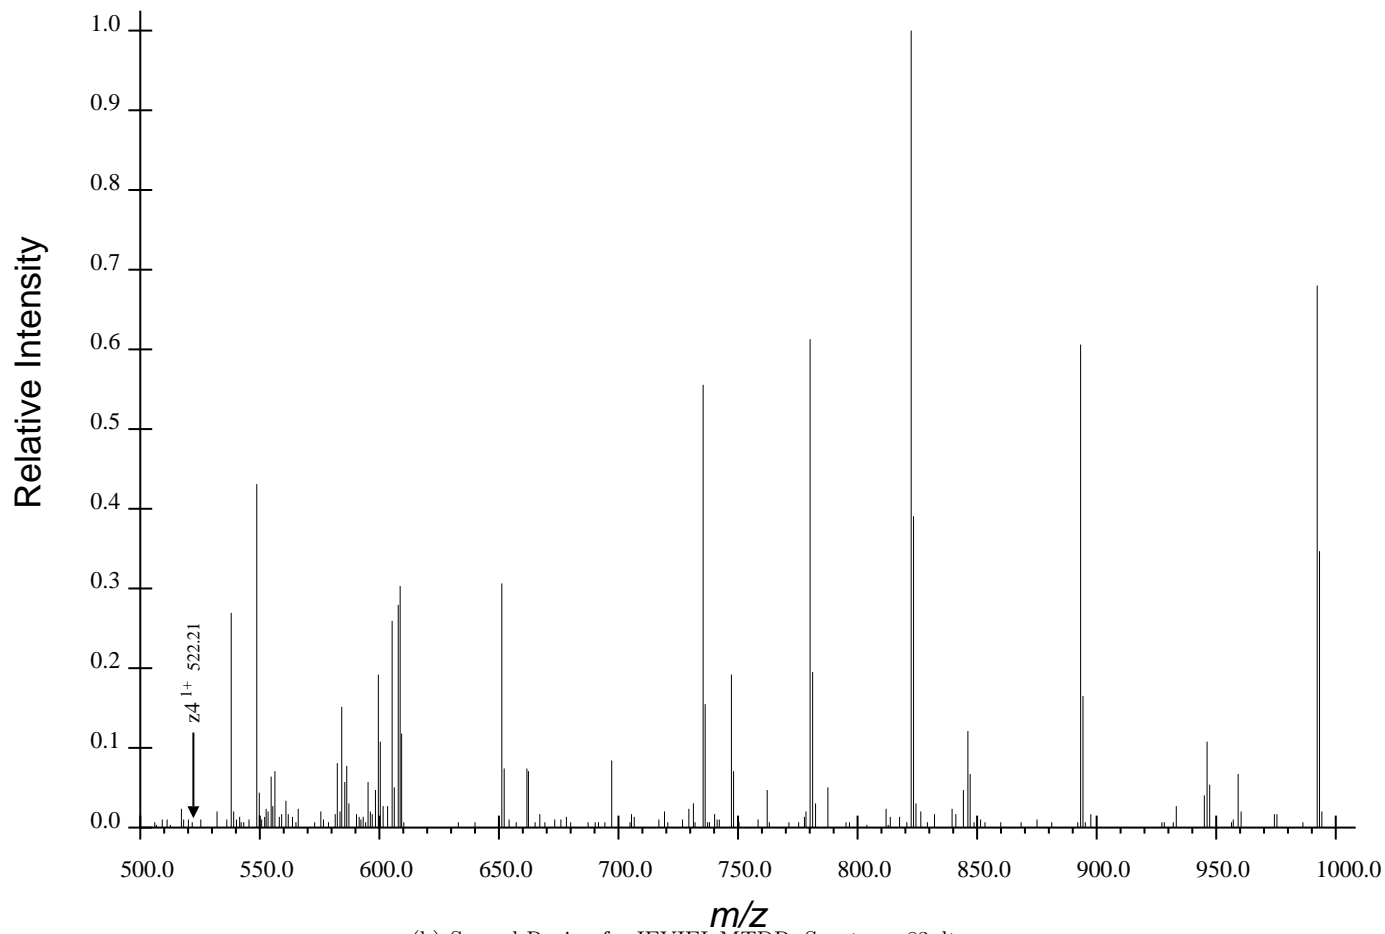

(b) Second Region for IEVIEIoMTDR, Spectrum 83.dta

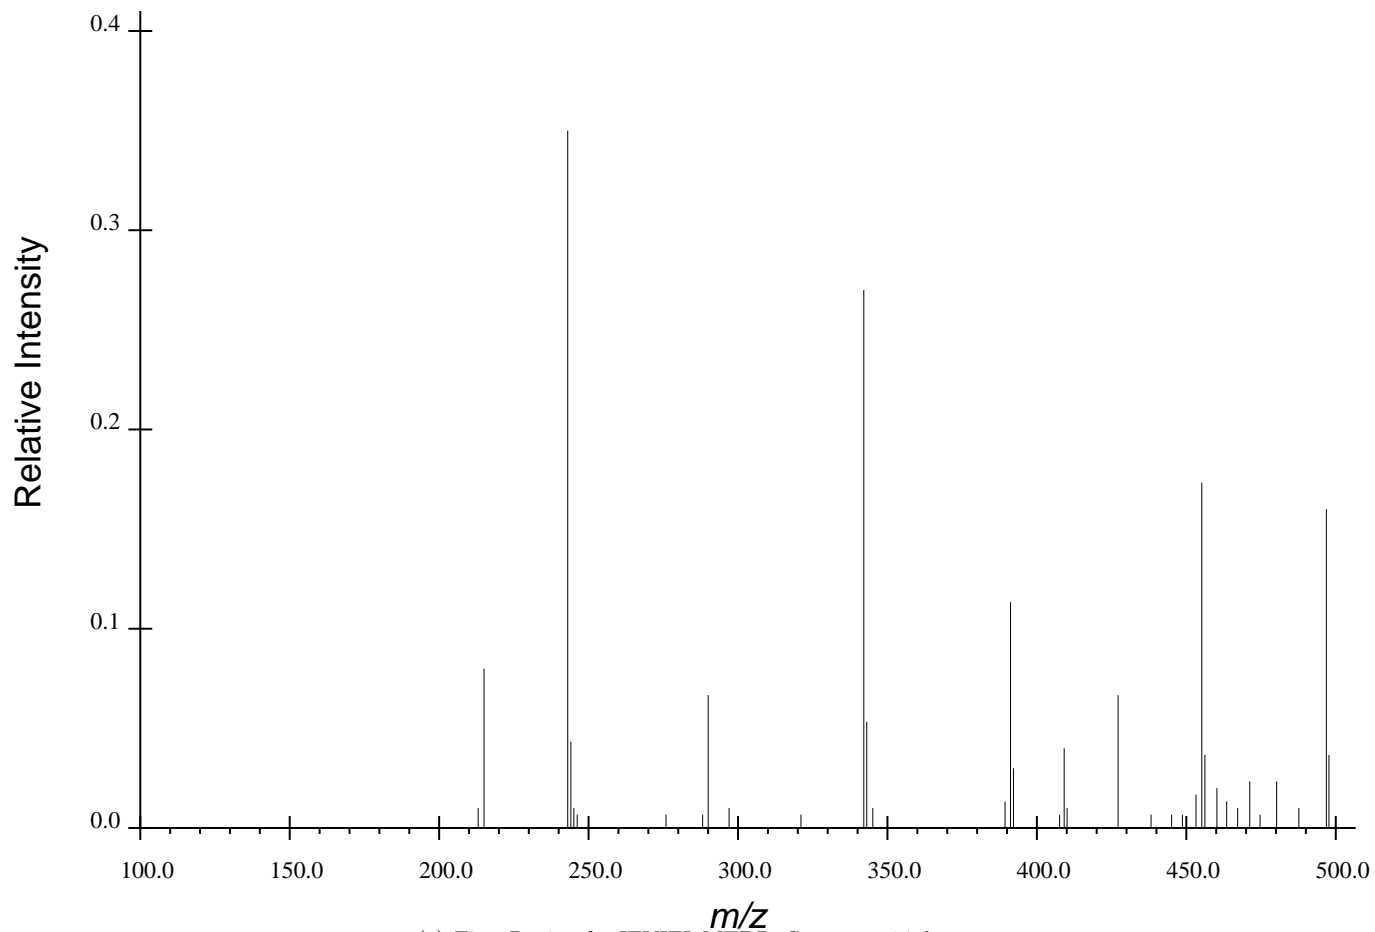

(a) First Region for IEVIEIoMTDR, Spectrum 84.dta

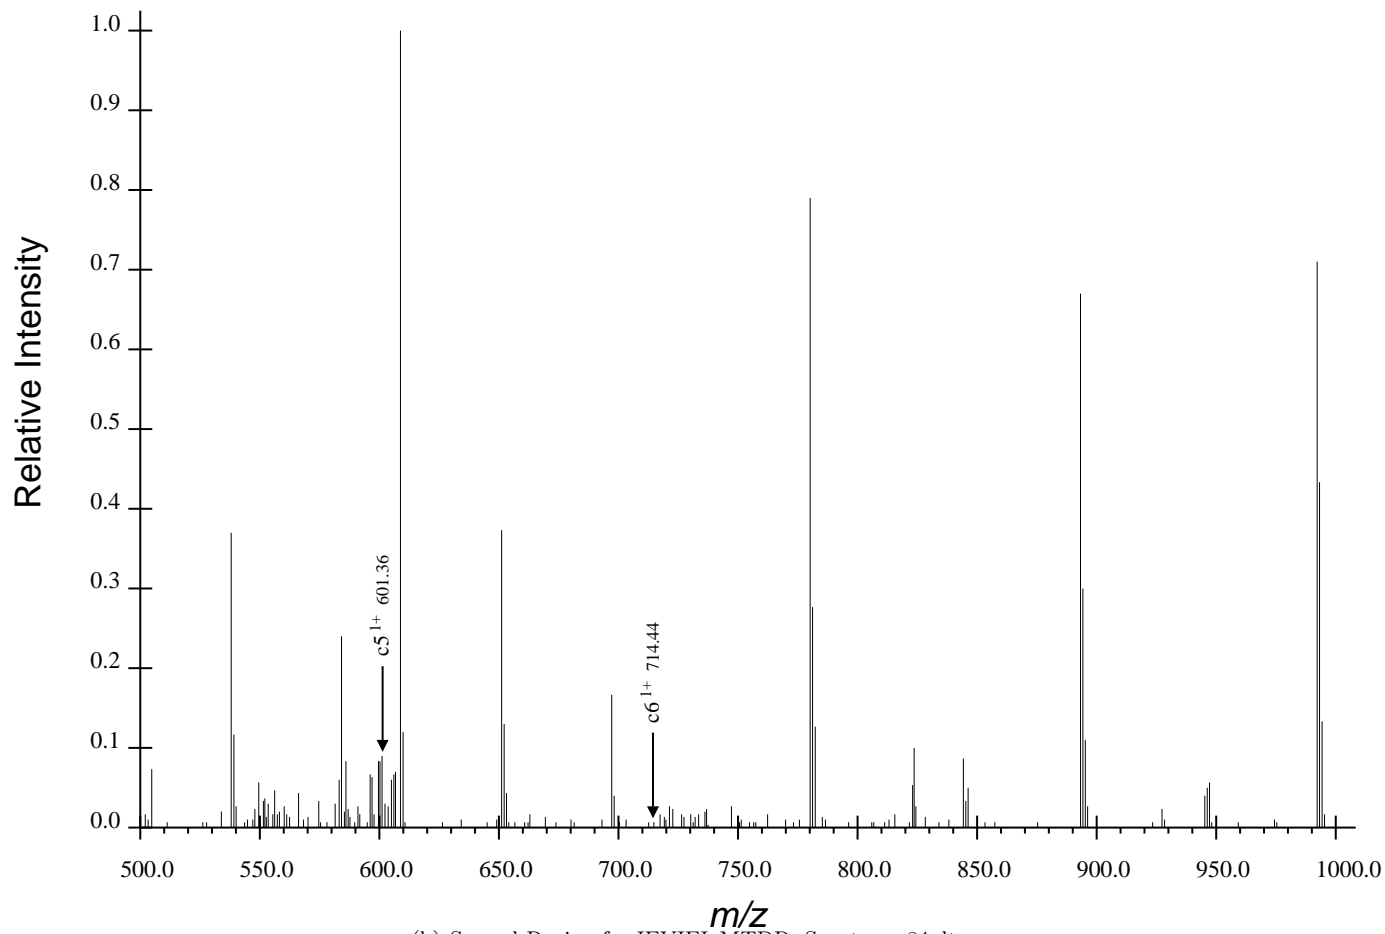

(b) Second Region for IEVIEIoMTDR, Spectrum 84.dta

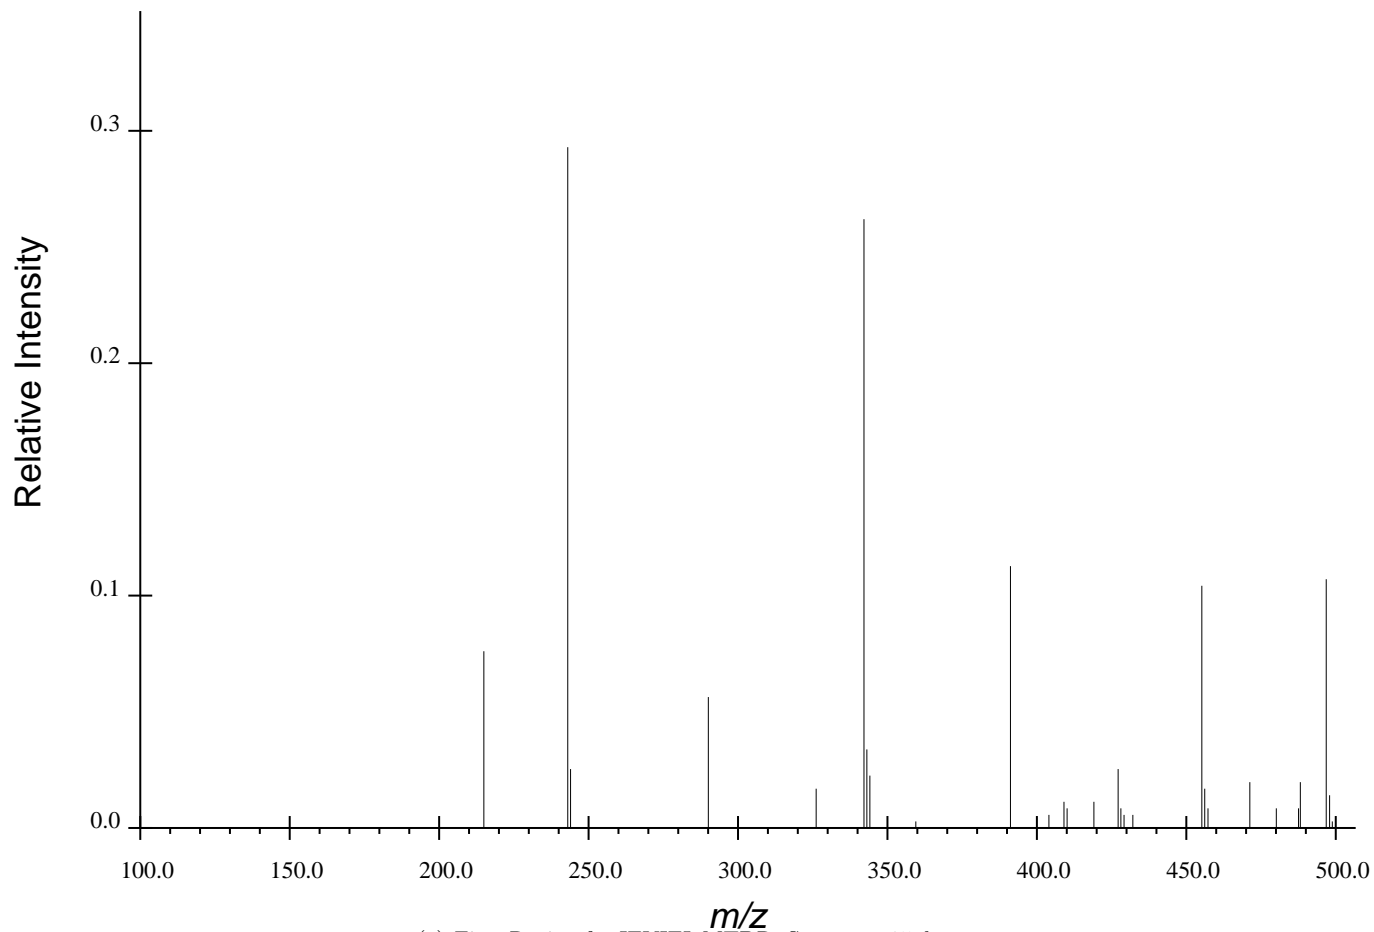

(a) First Region for IEVIEIoMTDR, Spectrum 85.dta

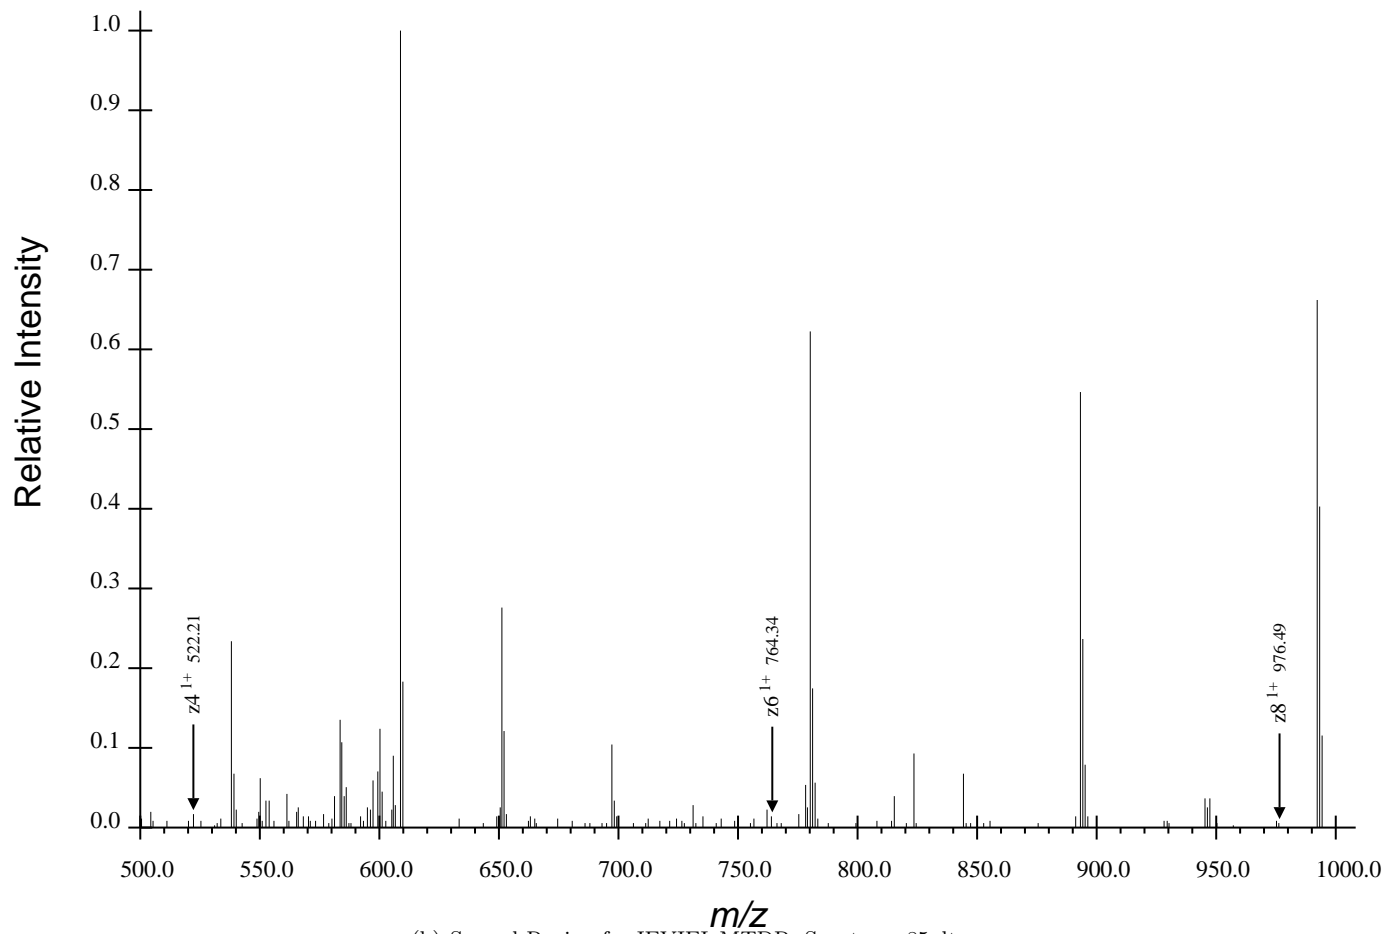

(b) Second Region for IEVIEIoMTDR, Spectrum 85.dta



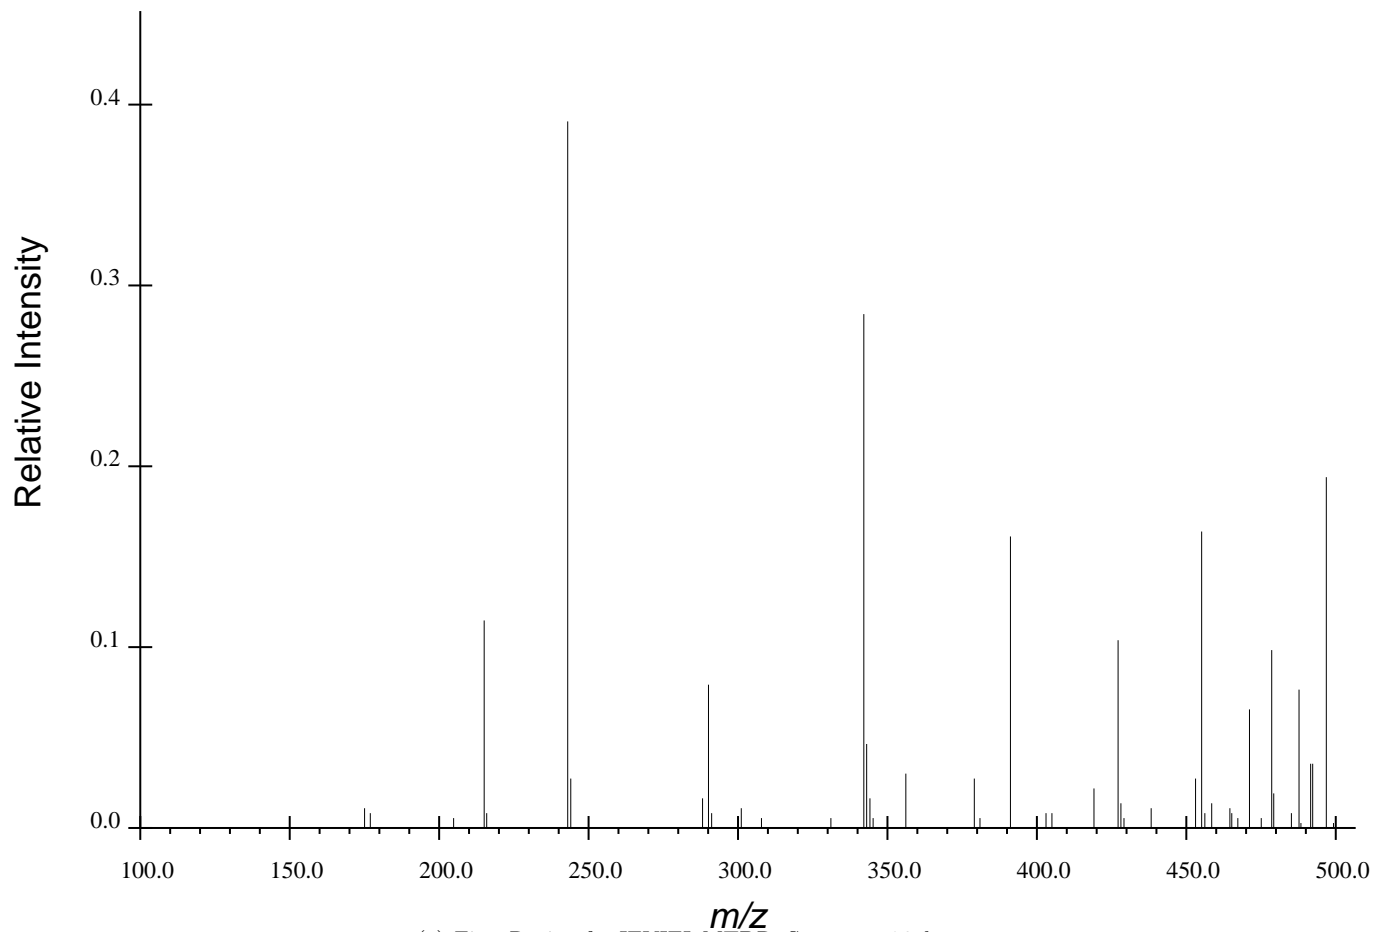

(a) First Region for IEVIEIoMTDR, Spectrum 86.dta

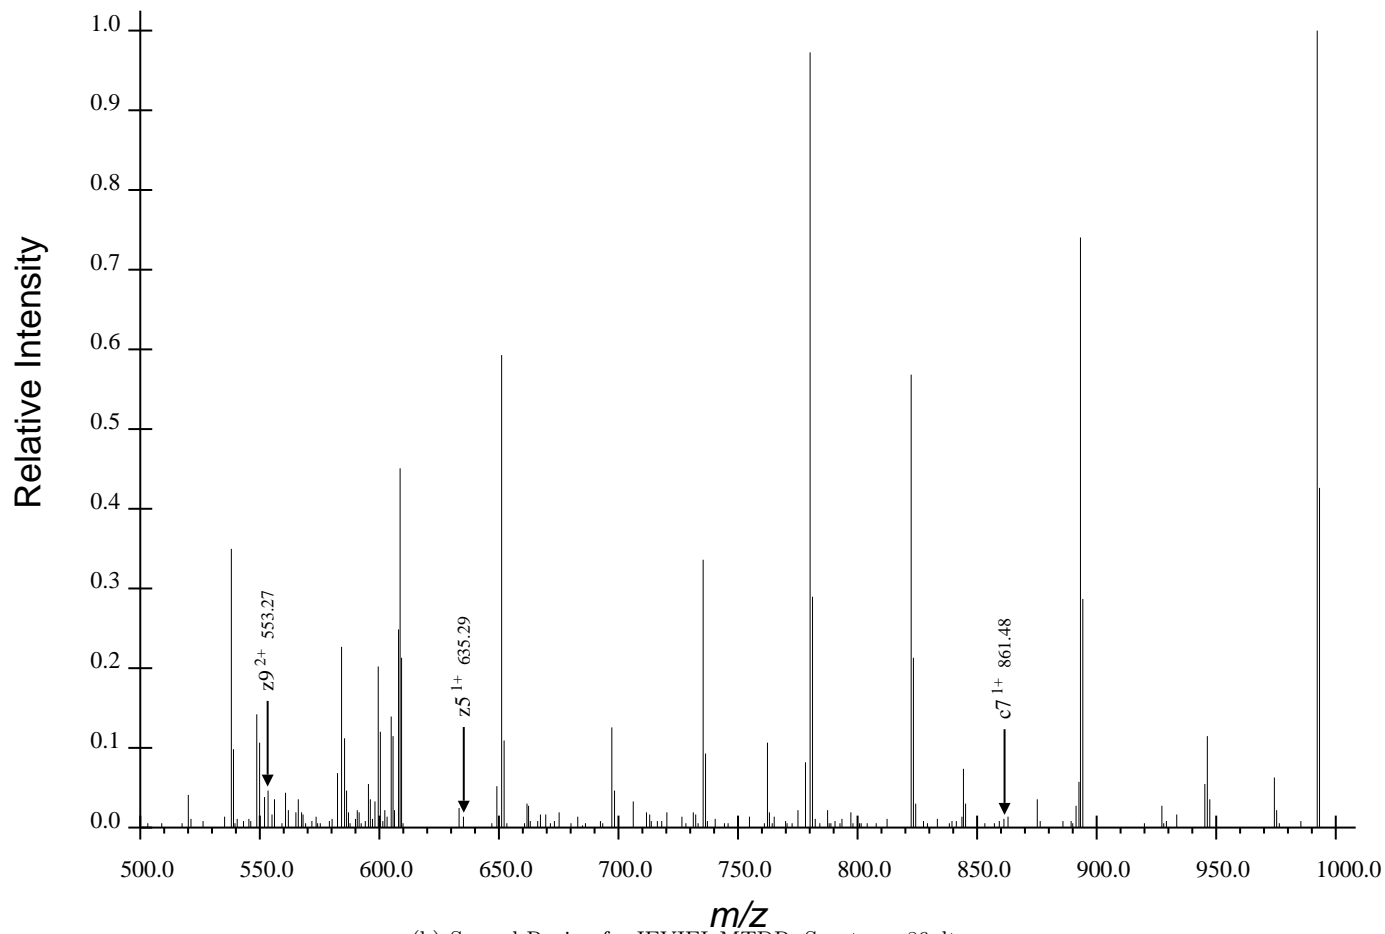

(b) Second Region for IEVIEIoMTDR, Spectrum 86.dta

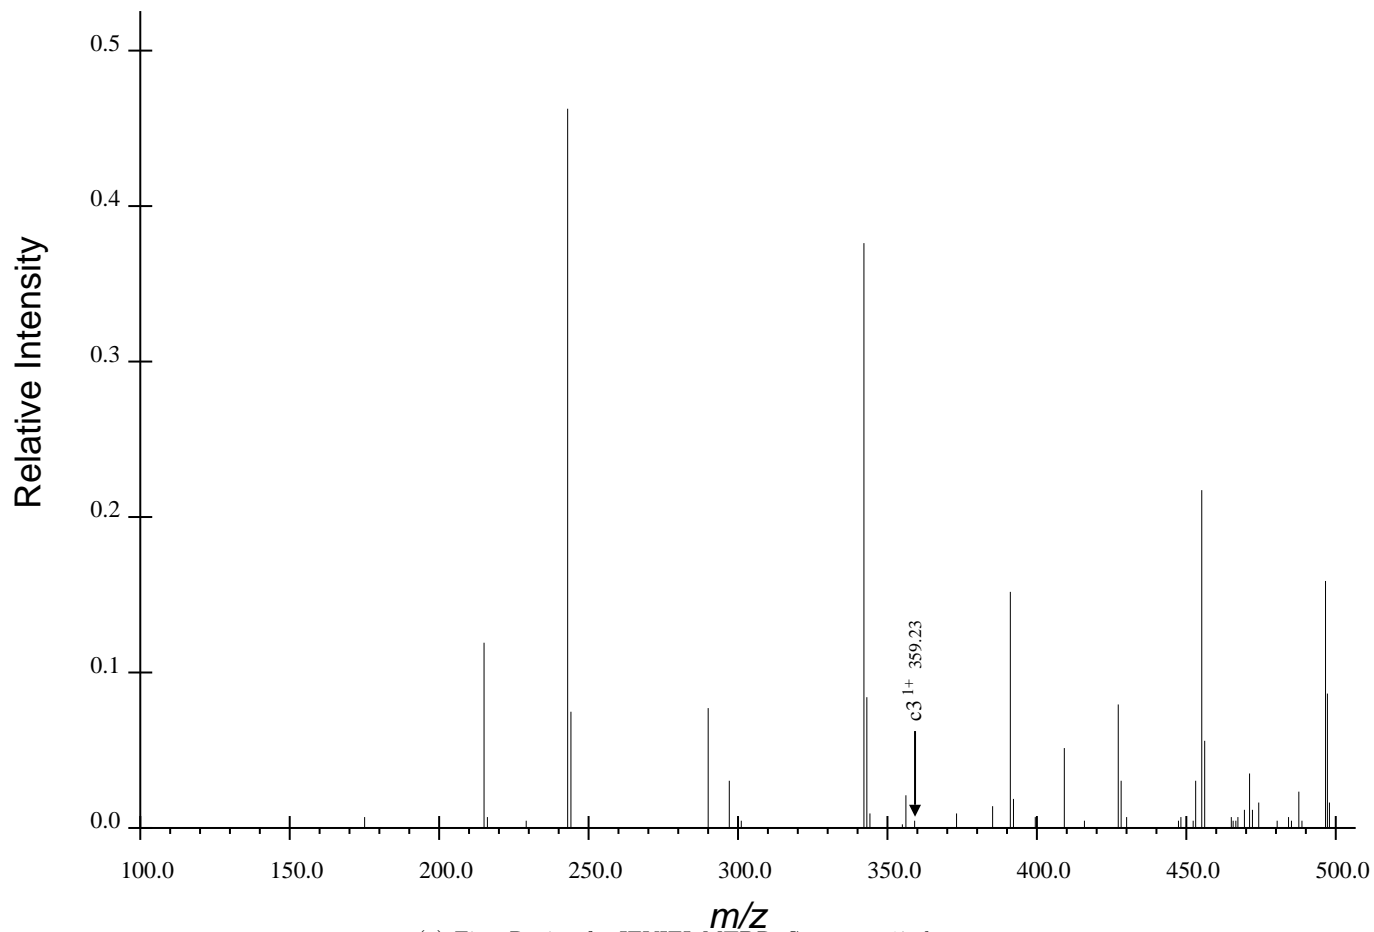

(a) First Region for IEVIEIoMTDR, Spectrum 87.dta

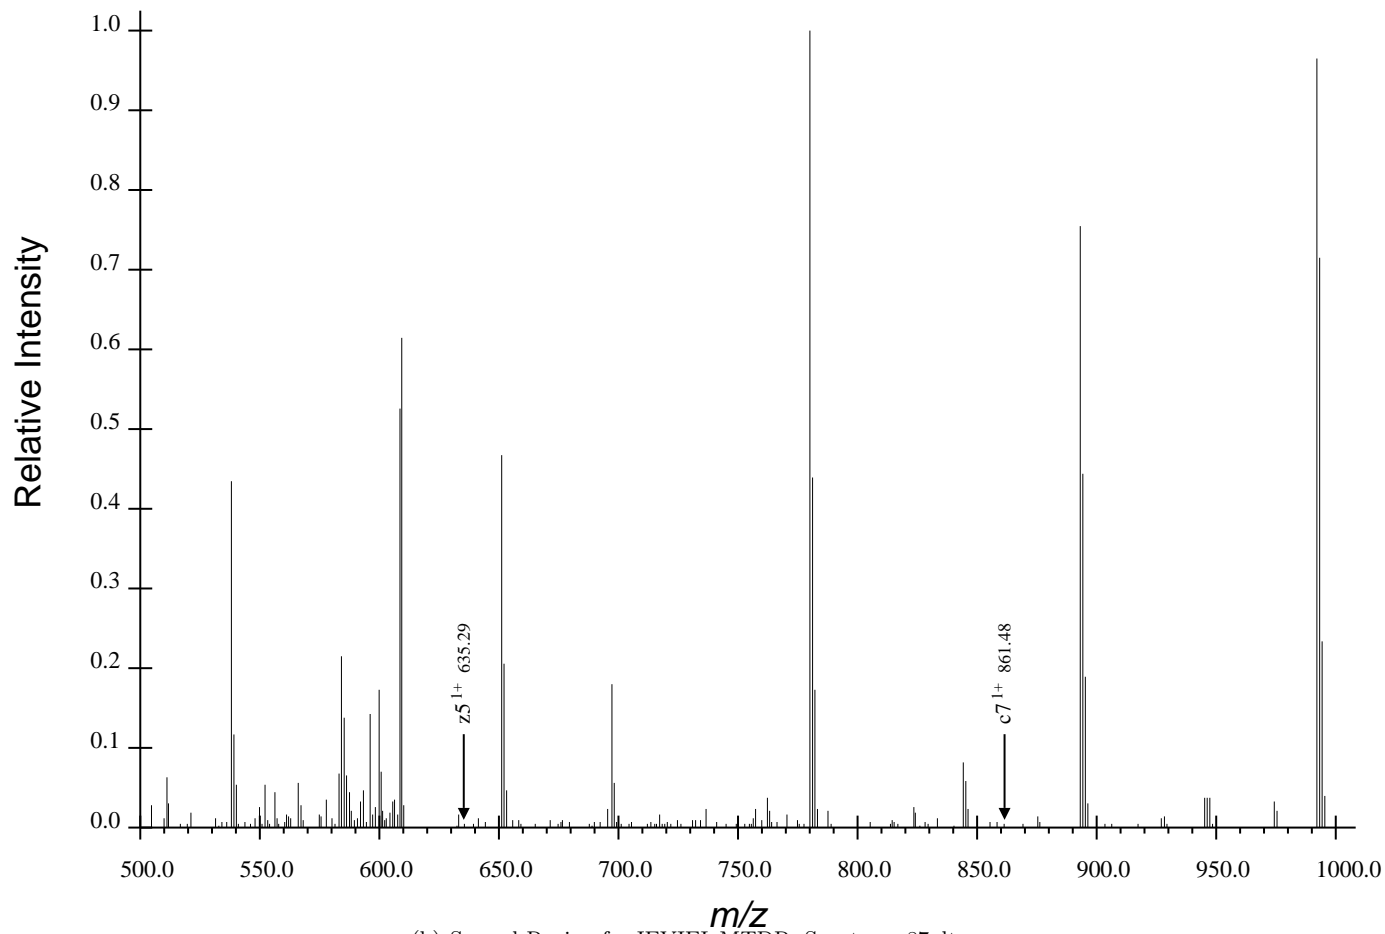

(b) Second Region for IEVIEIoMTDR, Spectrum 87.dta

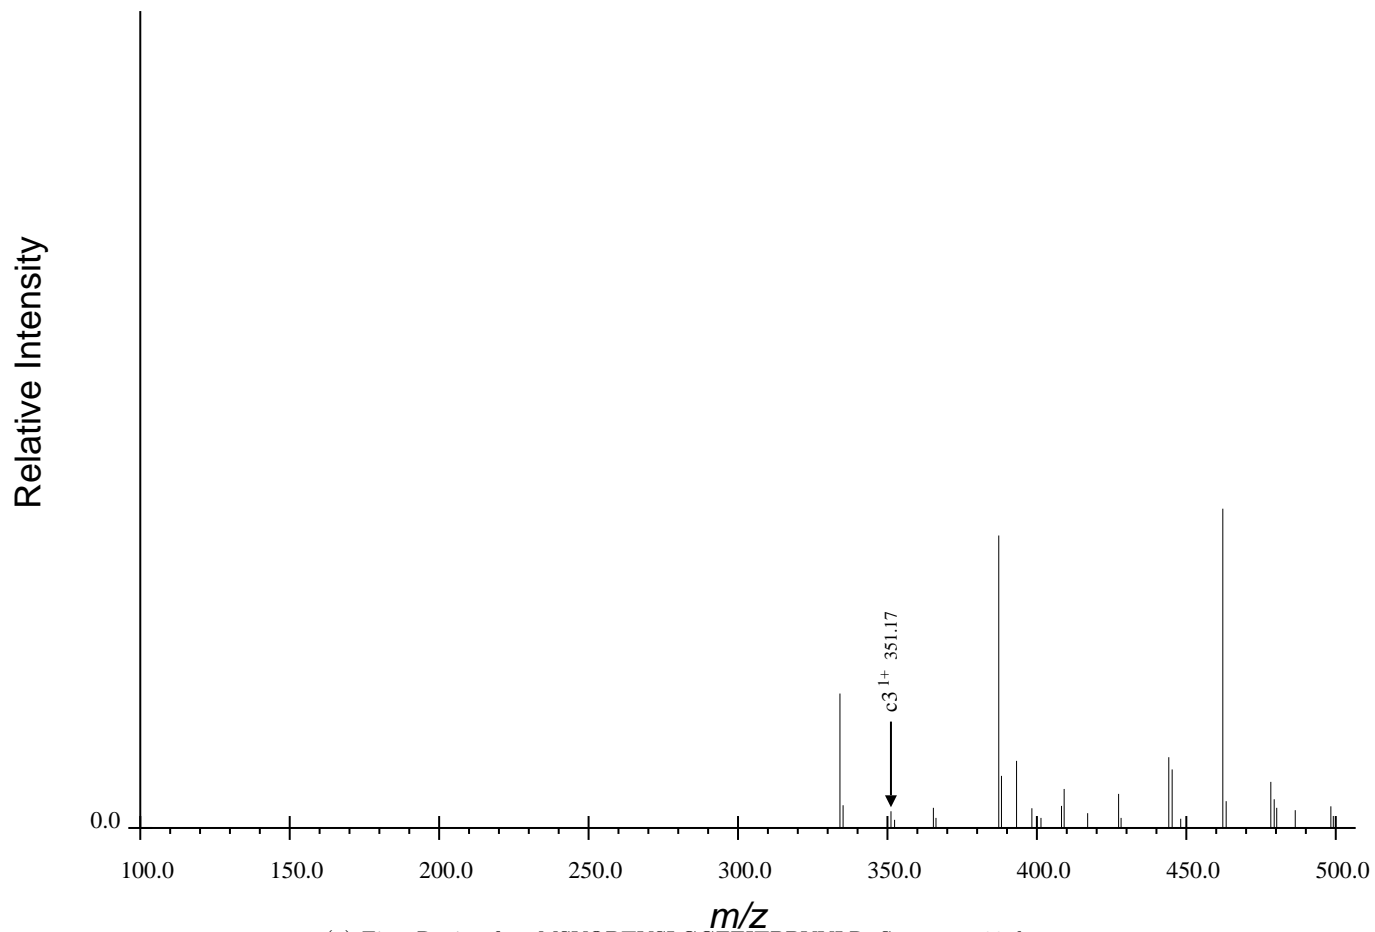

(a) First Region for oMSVQPTVSLGGFEITPPVLR, Spectrum 88.dta

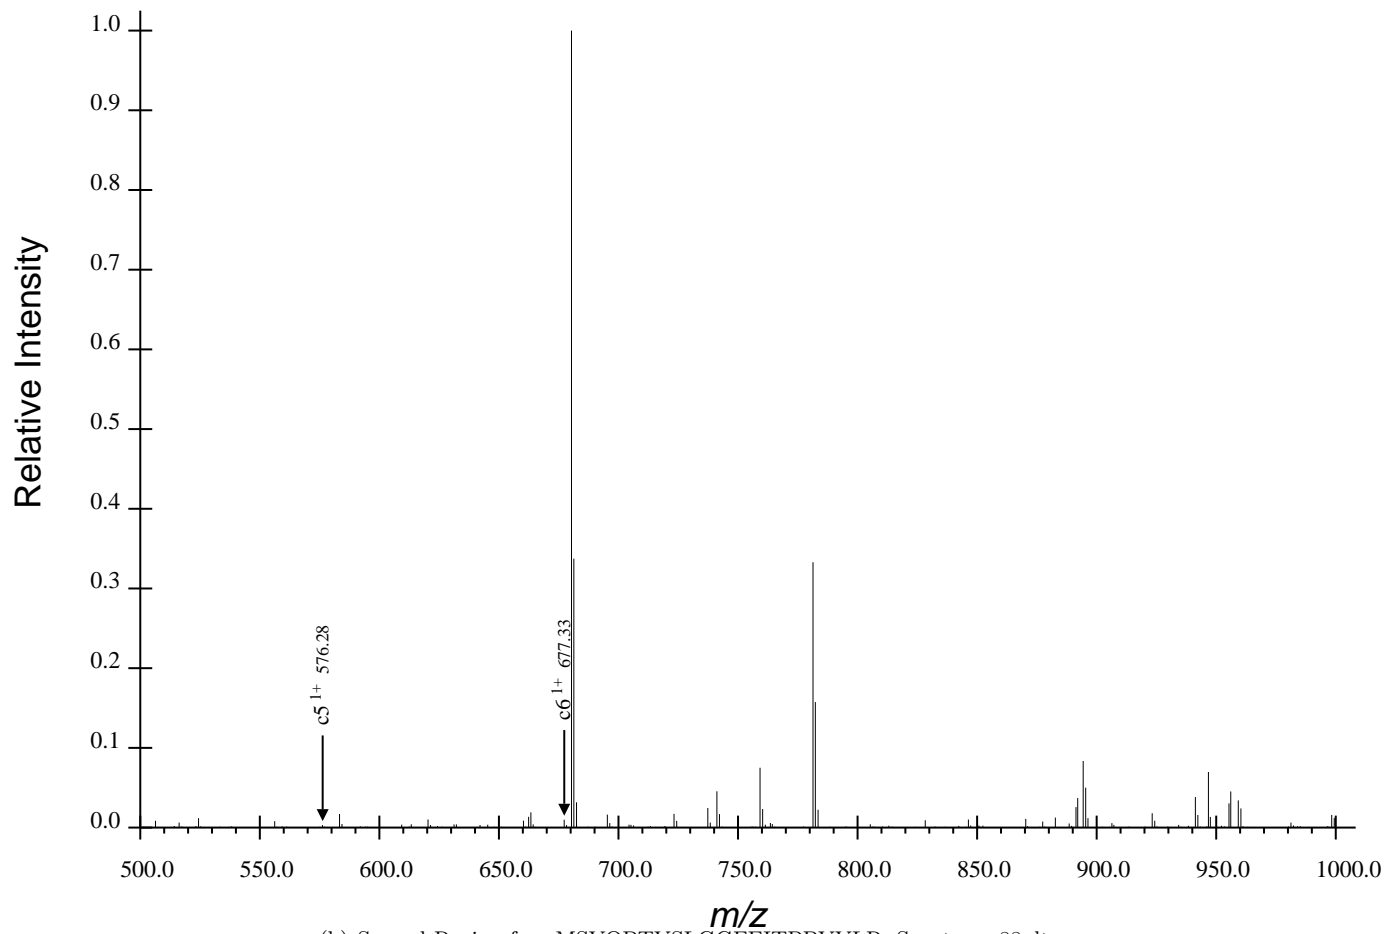

(b) Second Region for oMSVQPTVSLGGFEITPPVLR, Spectrum 88.dta

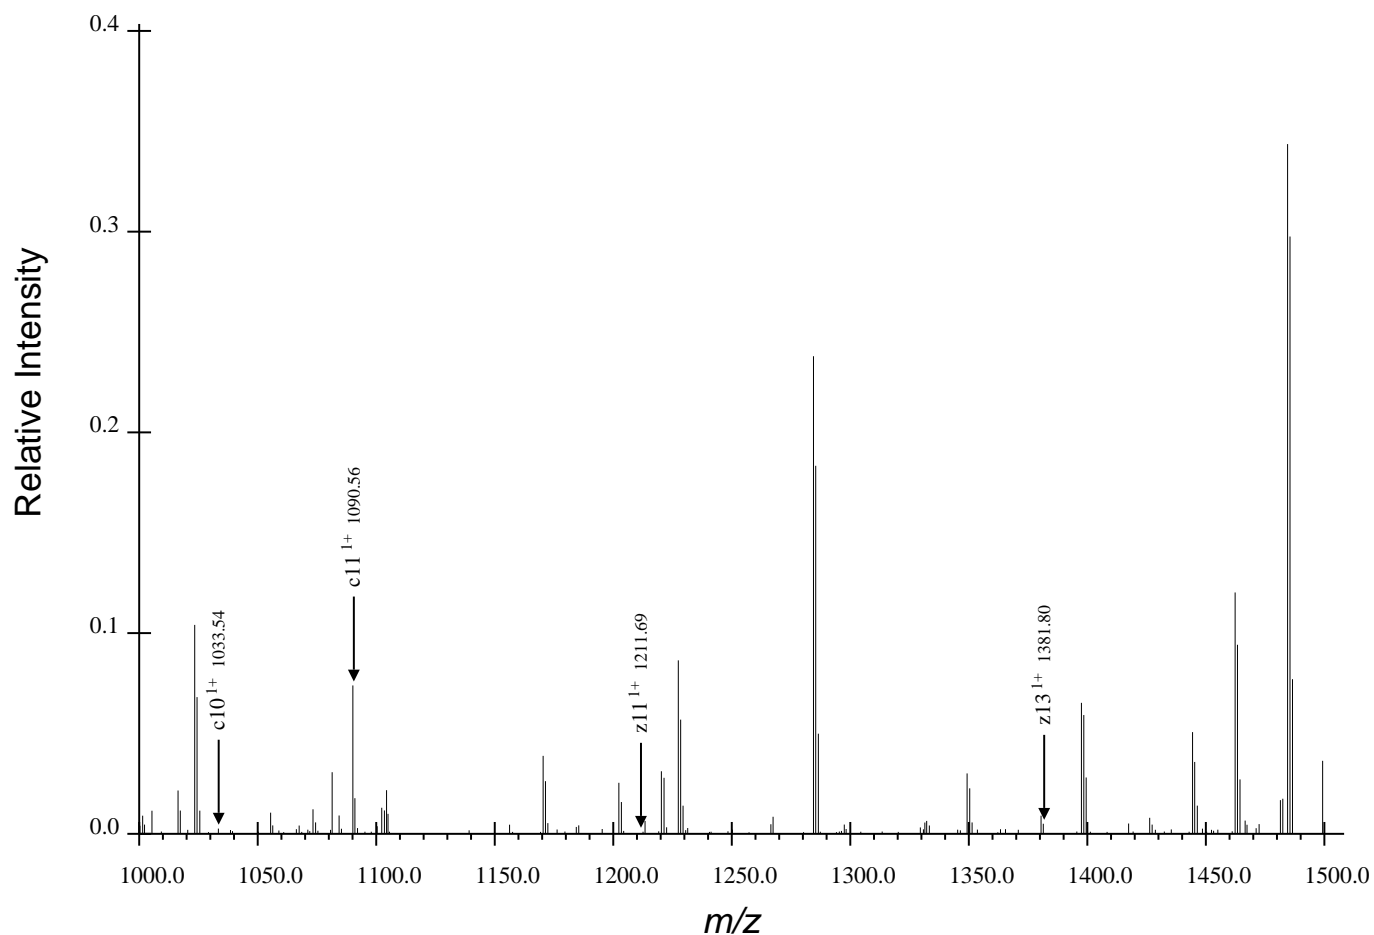

(c) Third Region for oMSVQPTVSLGGFEITPPVLR, Spectrum 88.dta

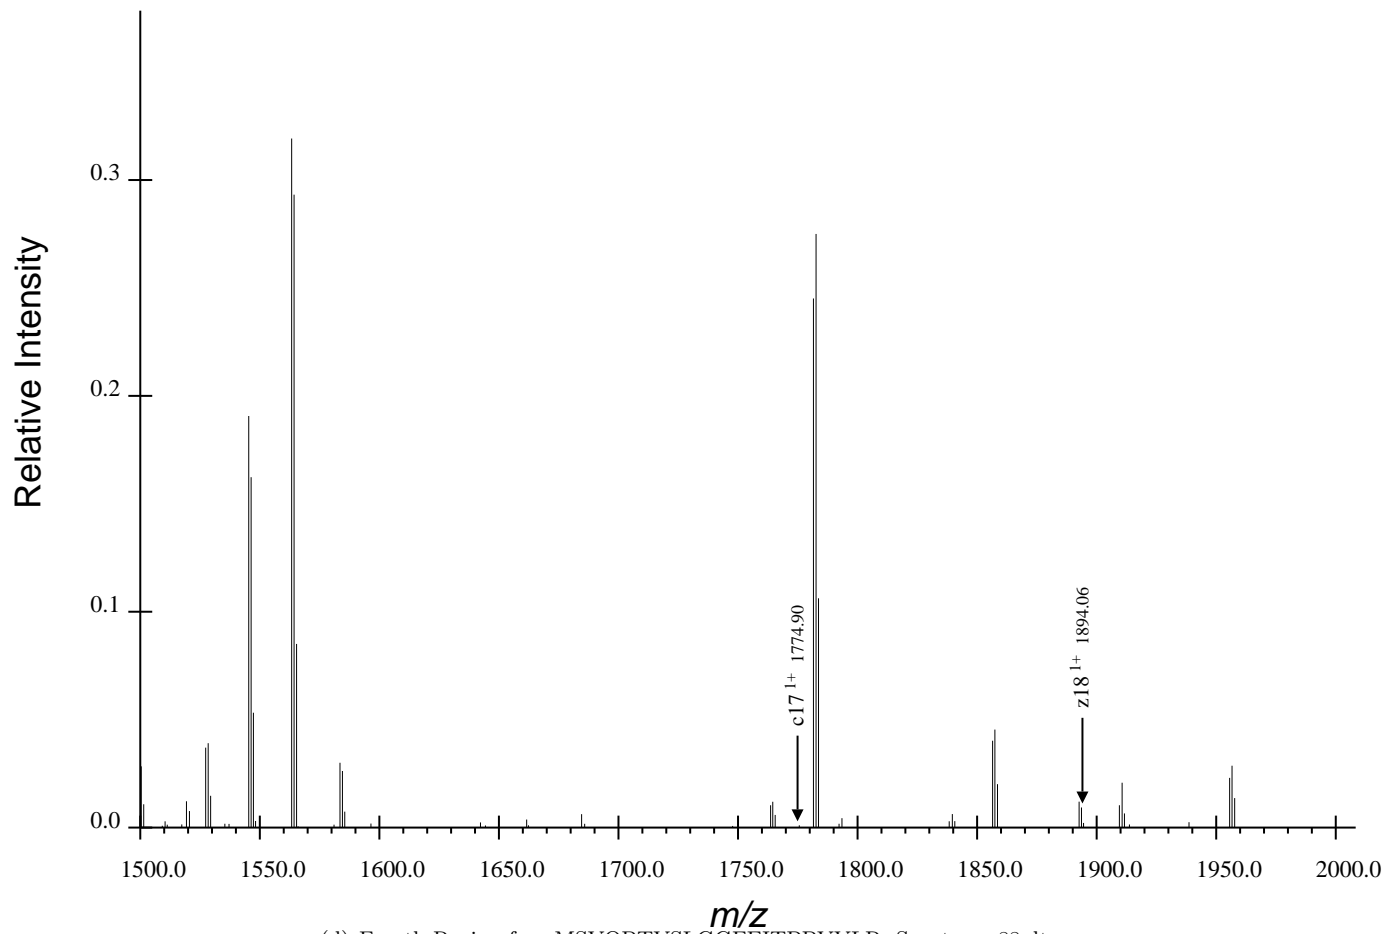

(d) Fourth Region for oMSVQPTVSLGGFEITPPVLR, Spectrum 88.dta

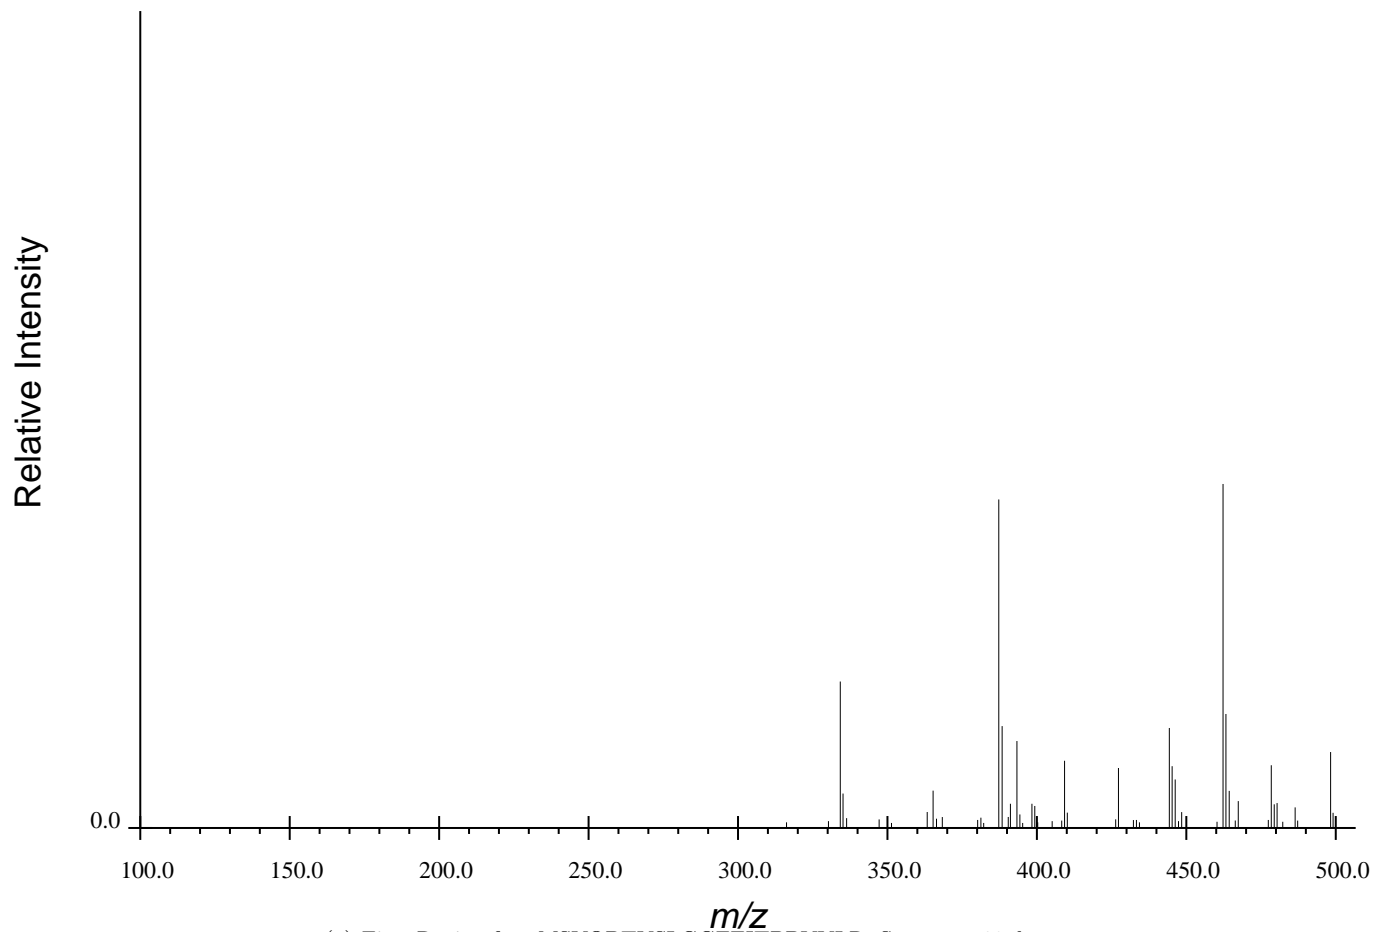

(a) First Region for oMSVQPTVSLGGFEITPPVLR, Spectrum 89.dta

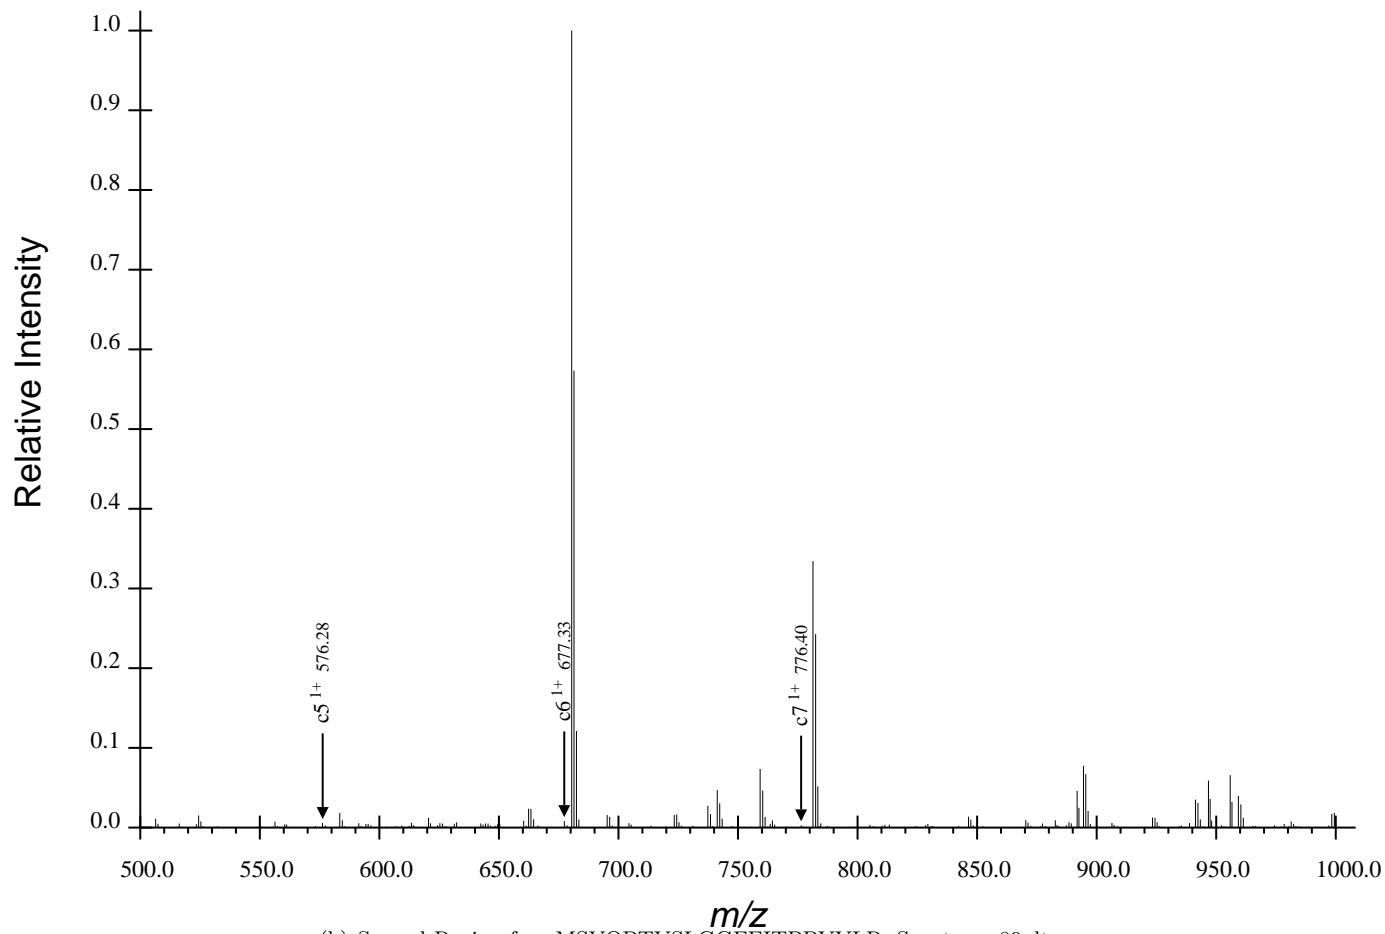

(b) Second Region for oMSVQPTVSLGGFEITPPVLR, Spectrum 89.dta

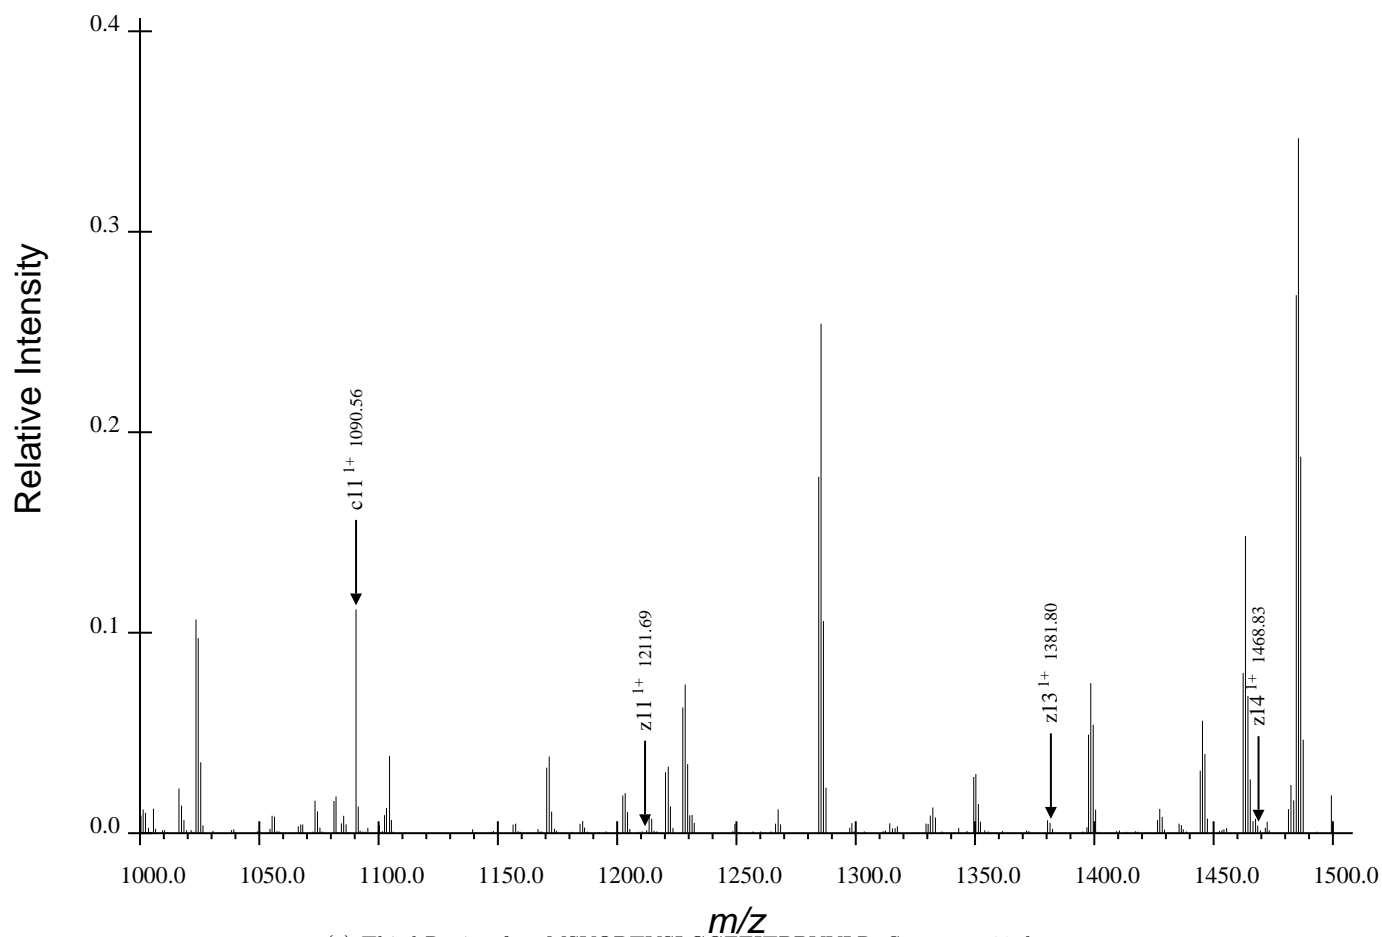

(c) Third Region for oMSVQPTVSLGGFEITPPVVLRL, Spectrum 89.dta

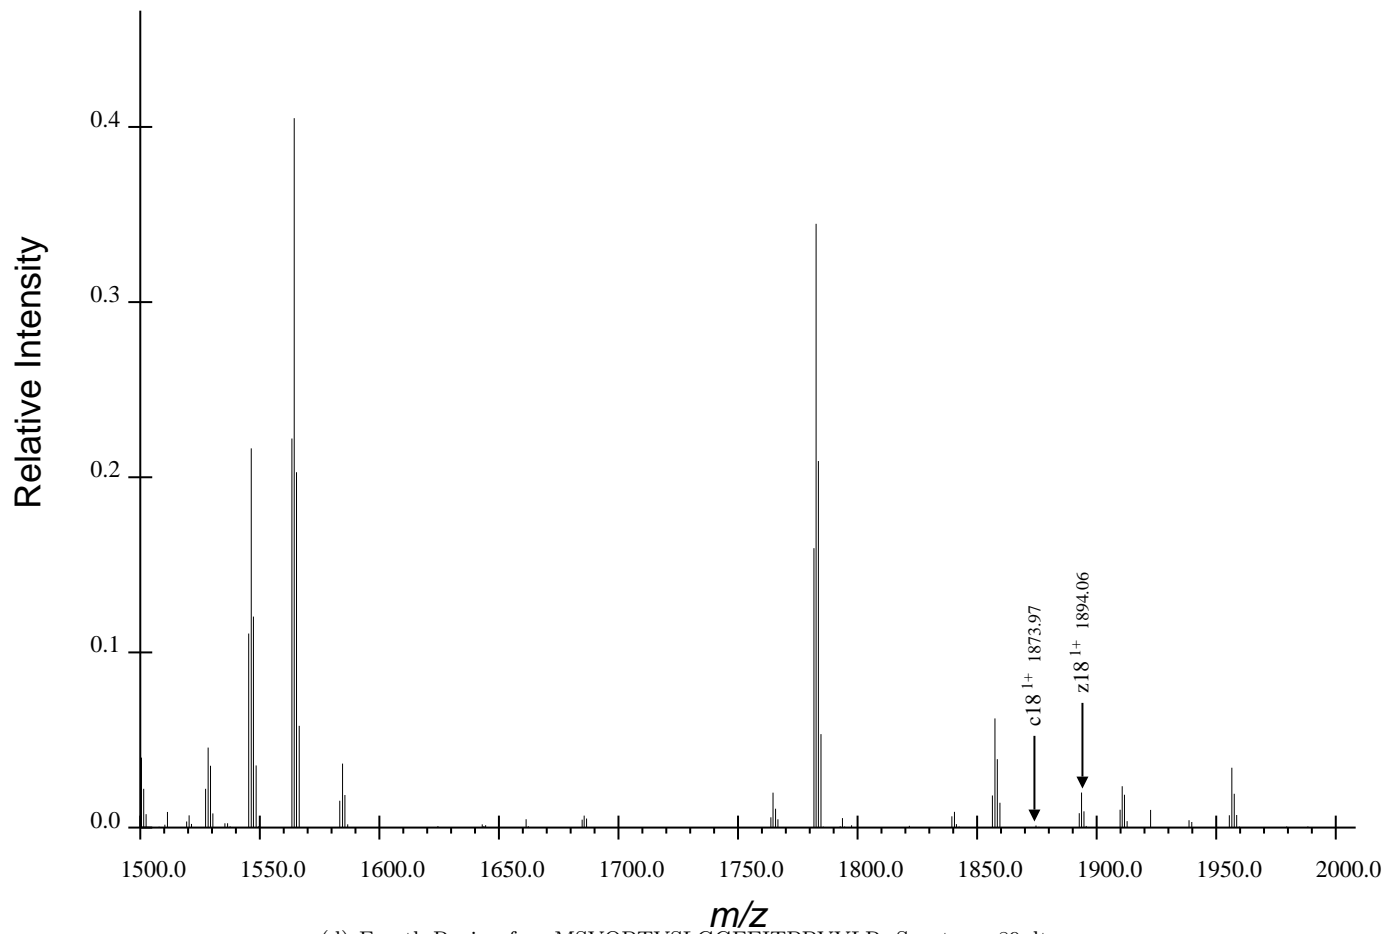

(d) Fourth Region for oMSVQPTVSLGGFEITPPVVLRL, Spectrum 89.dta

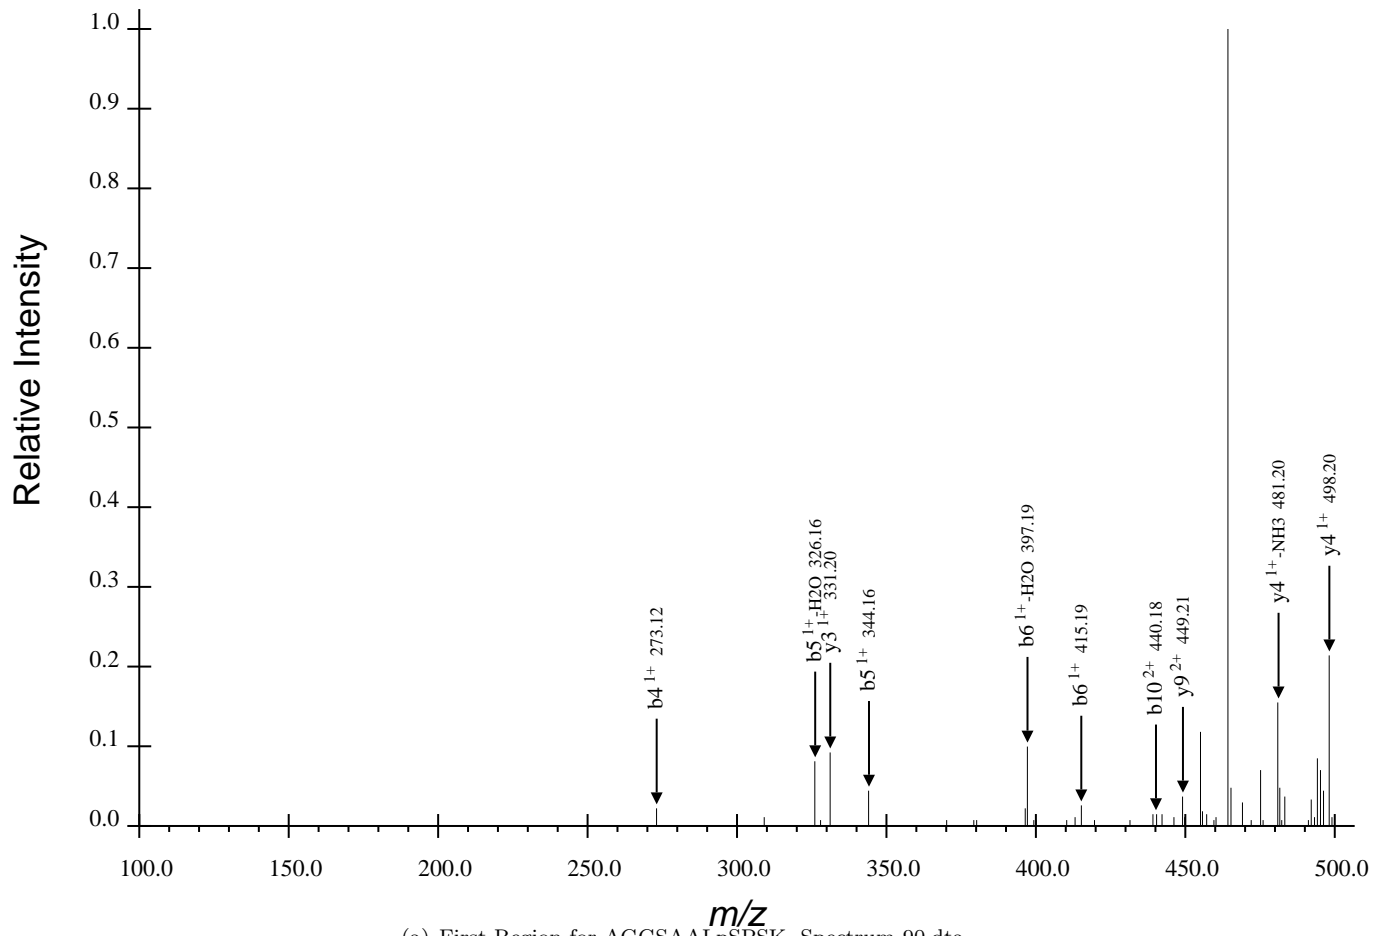

(a) First Region for AGGSAALpSPSK, Spectrum 90.dta

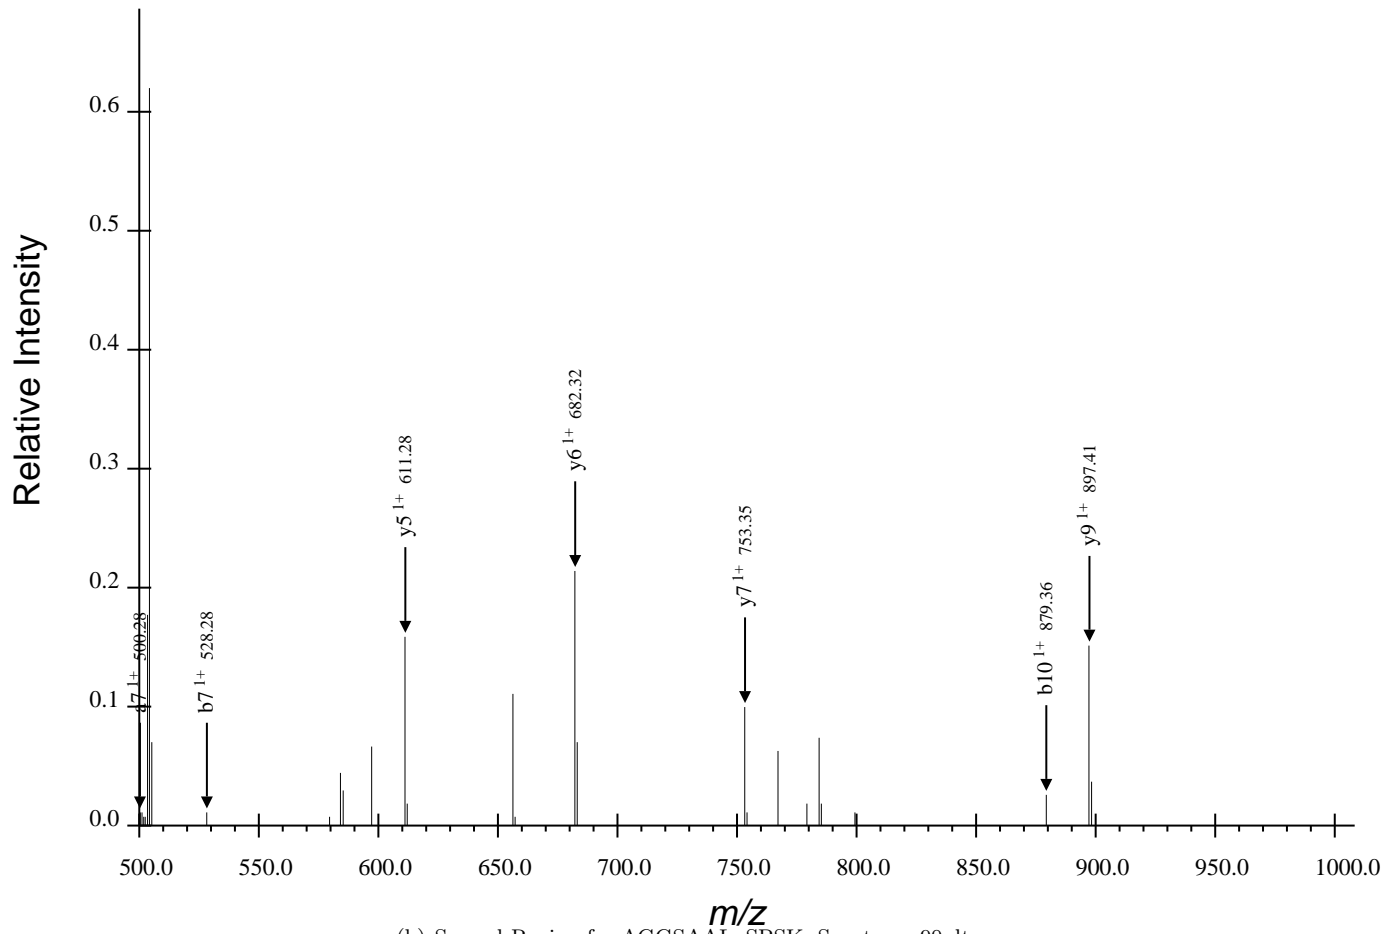

(b) Second Region for AGGSAALpSPSK, Spectrum 90.dta

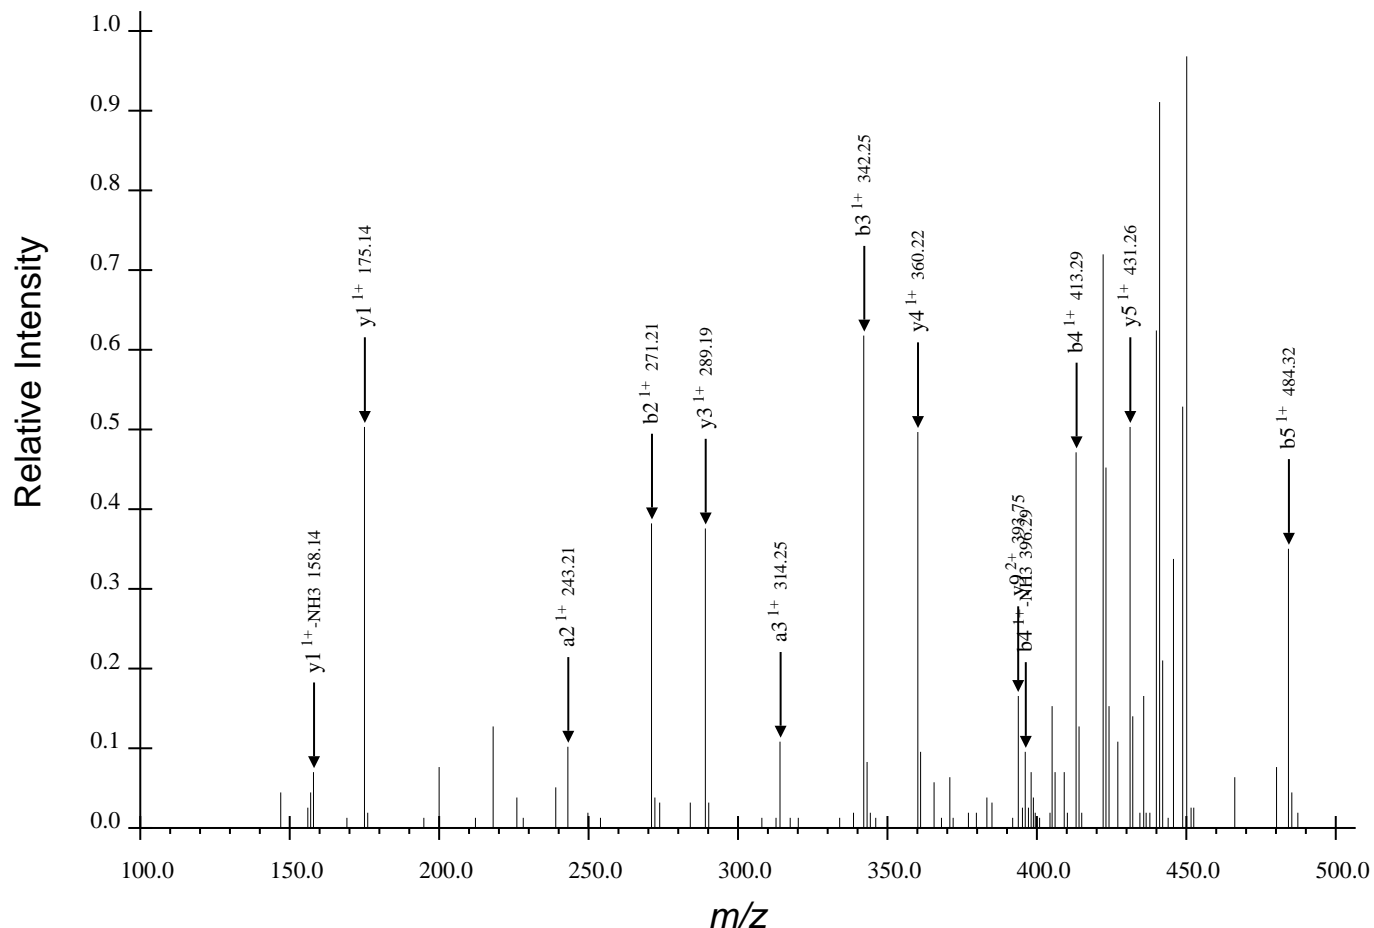

(a) First Region for KmKAAAAAGGdK, Spectrum 91.dta

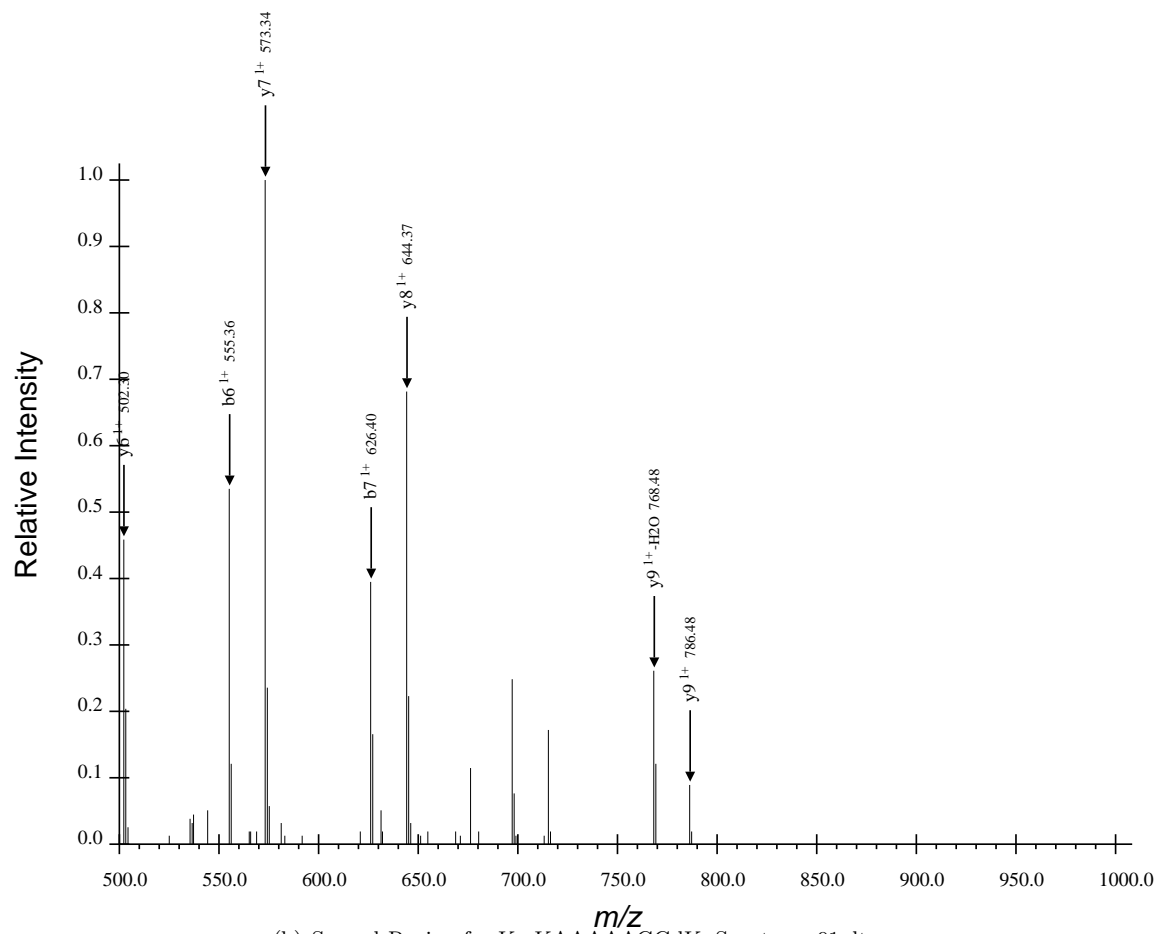

(b) Second Region for KmKAAAAAGGdK, Spectrum 91.dta



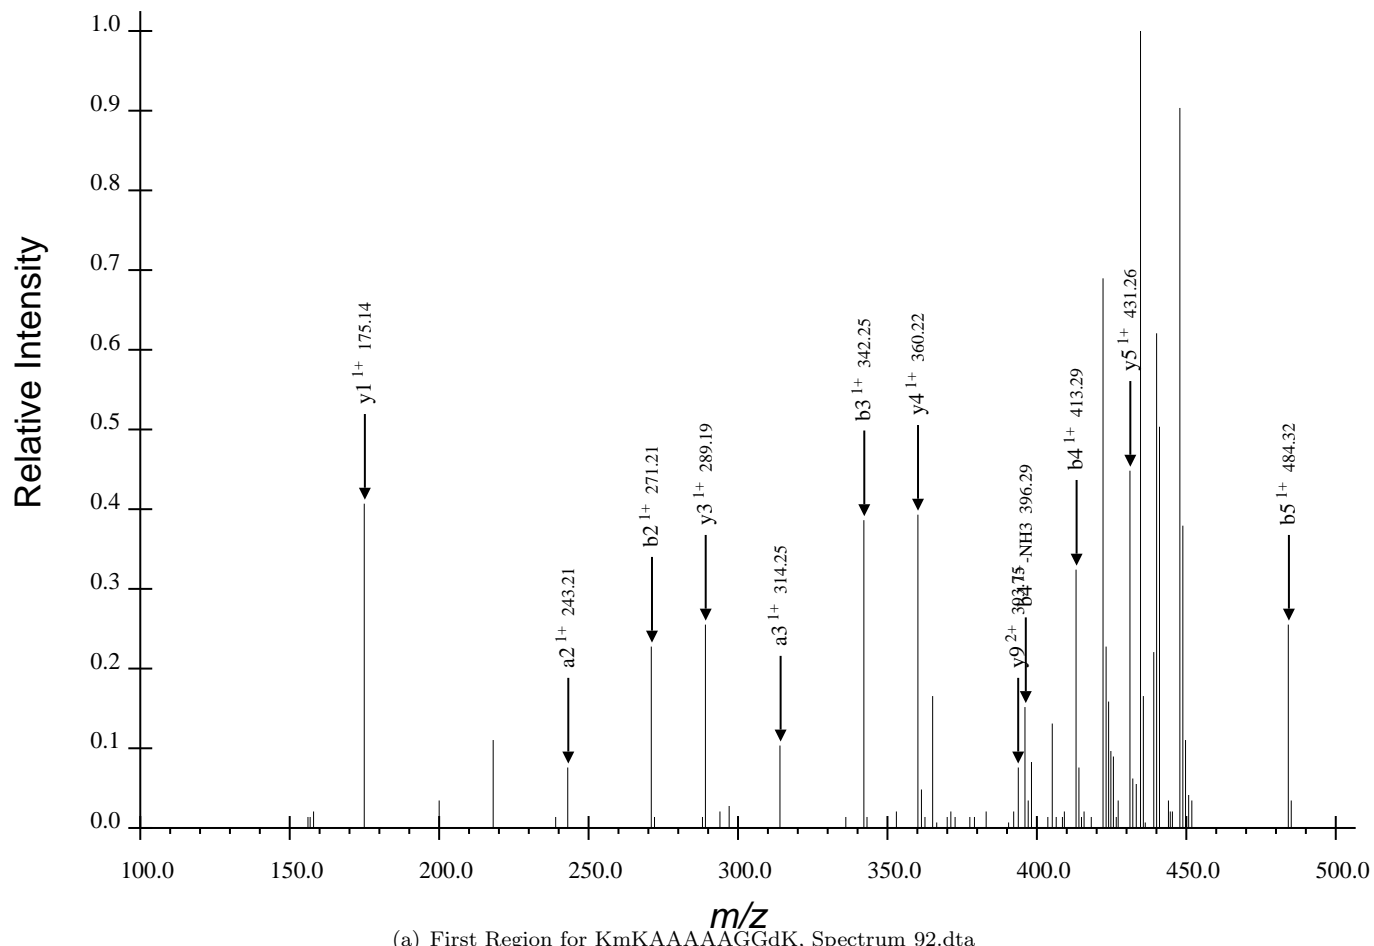

(a) First Region for KmKAAAAAGGdK, Spectrum 92.dta

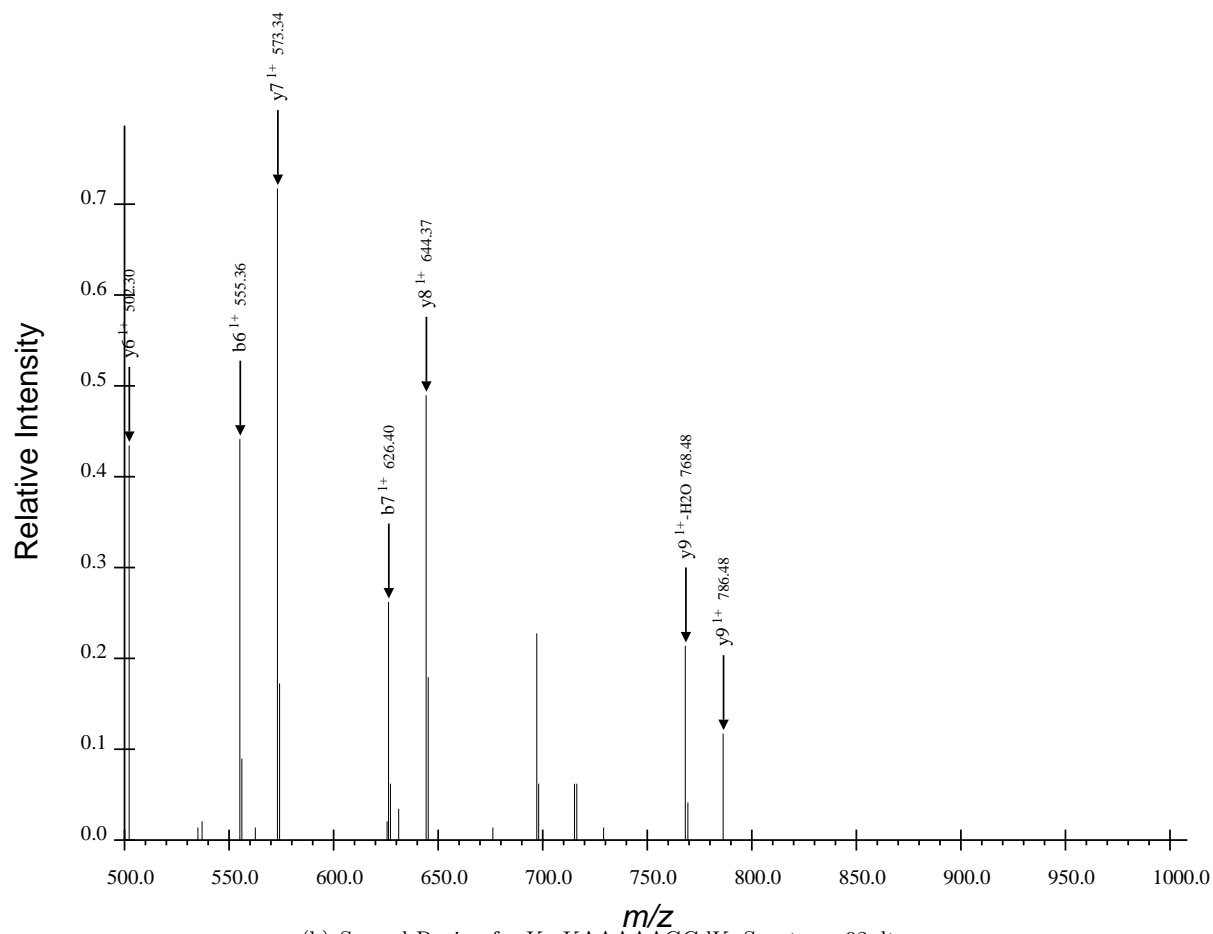

(b) Second Region for KmKAAAAAGGdK, Spectrum 92.dta

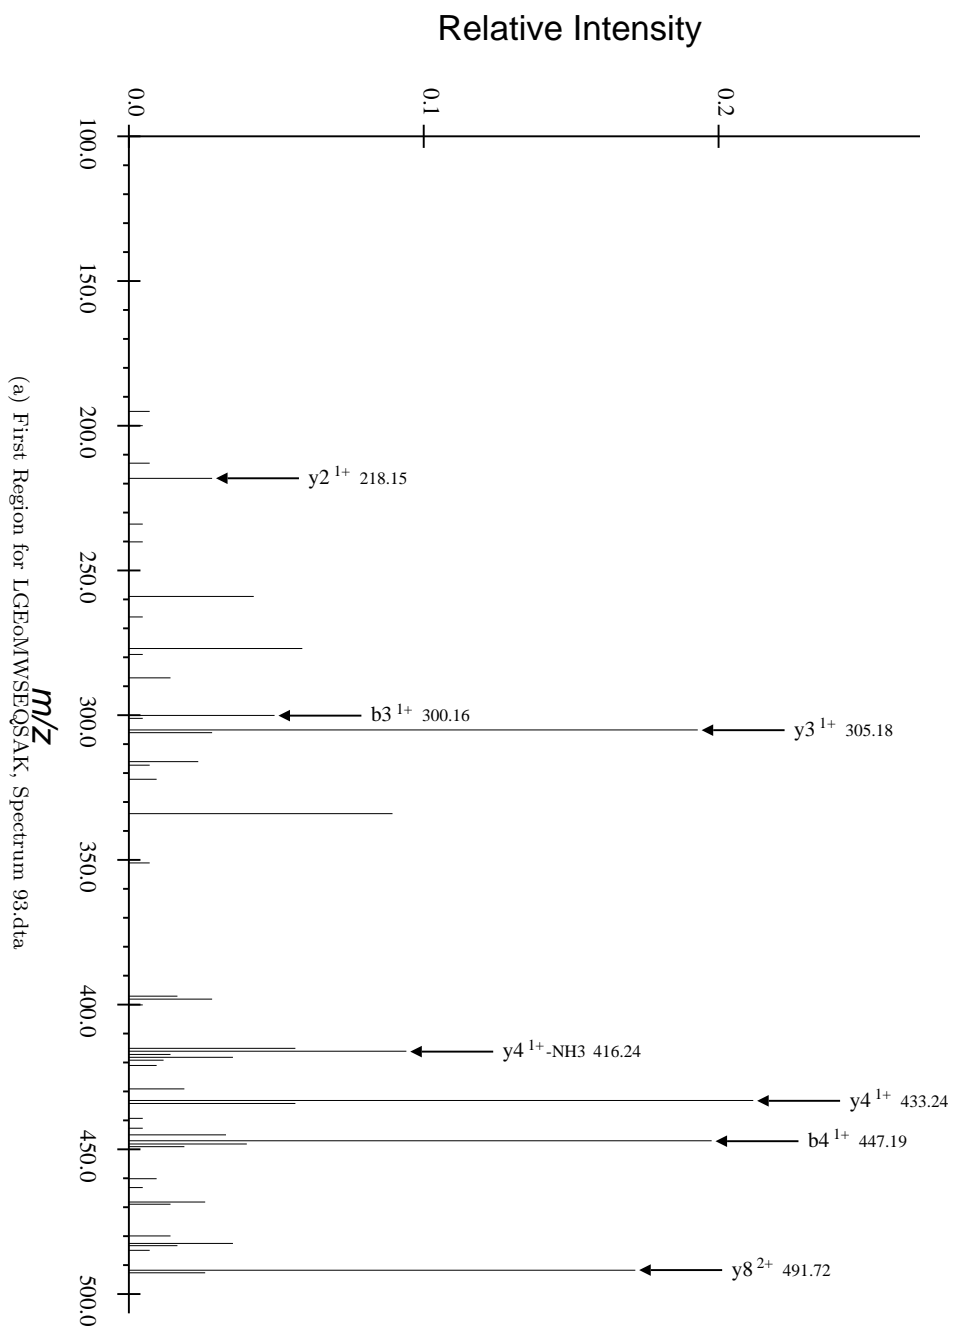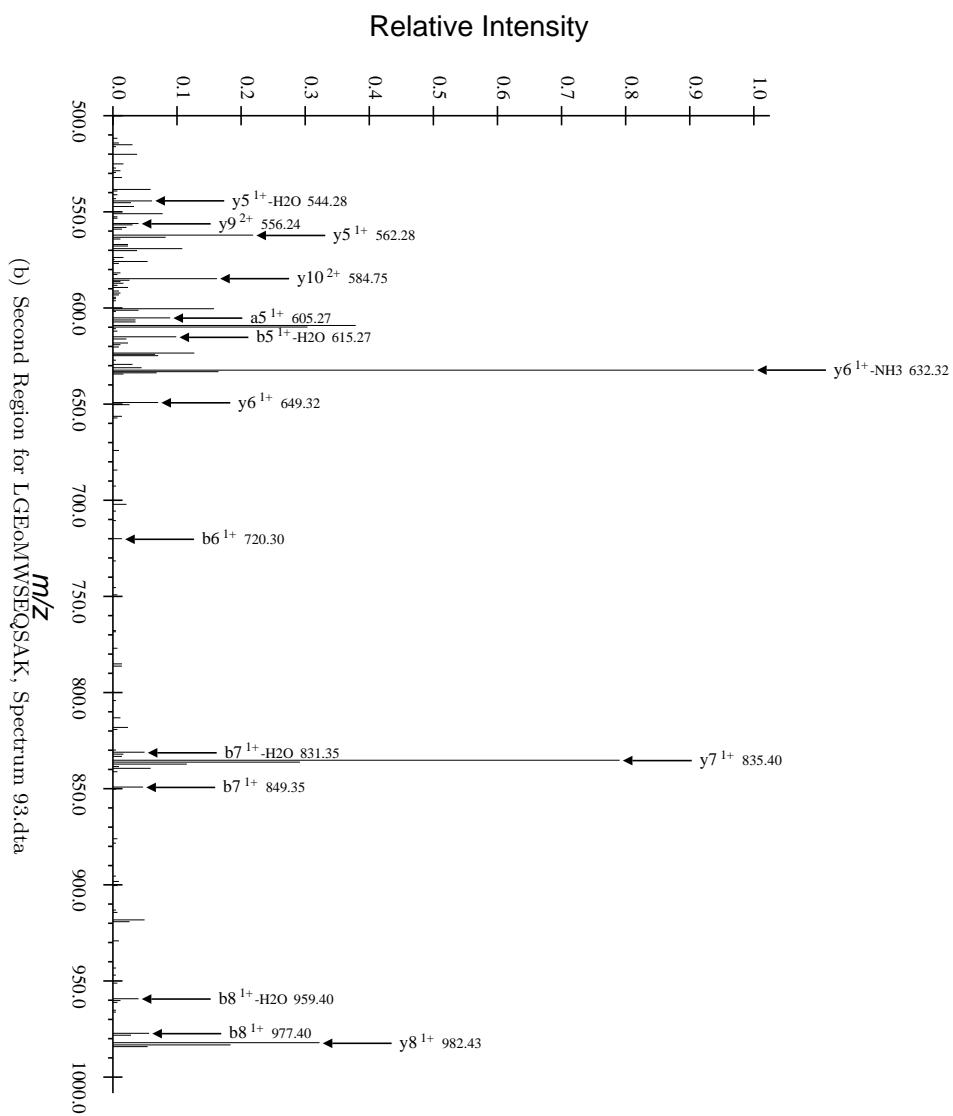

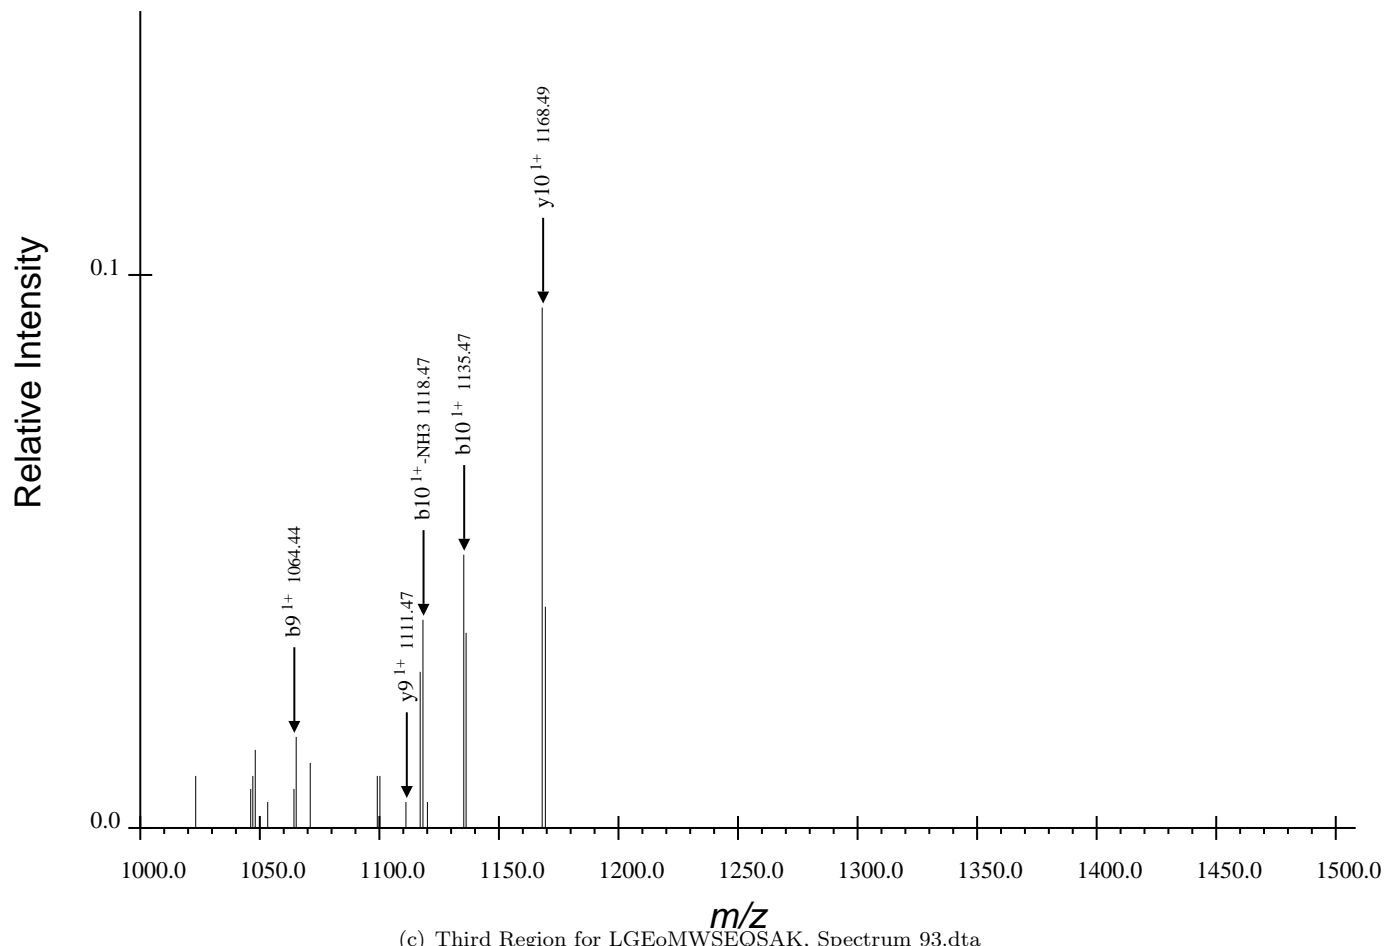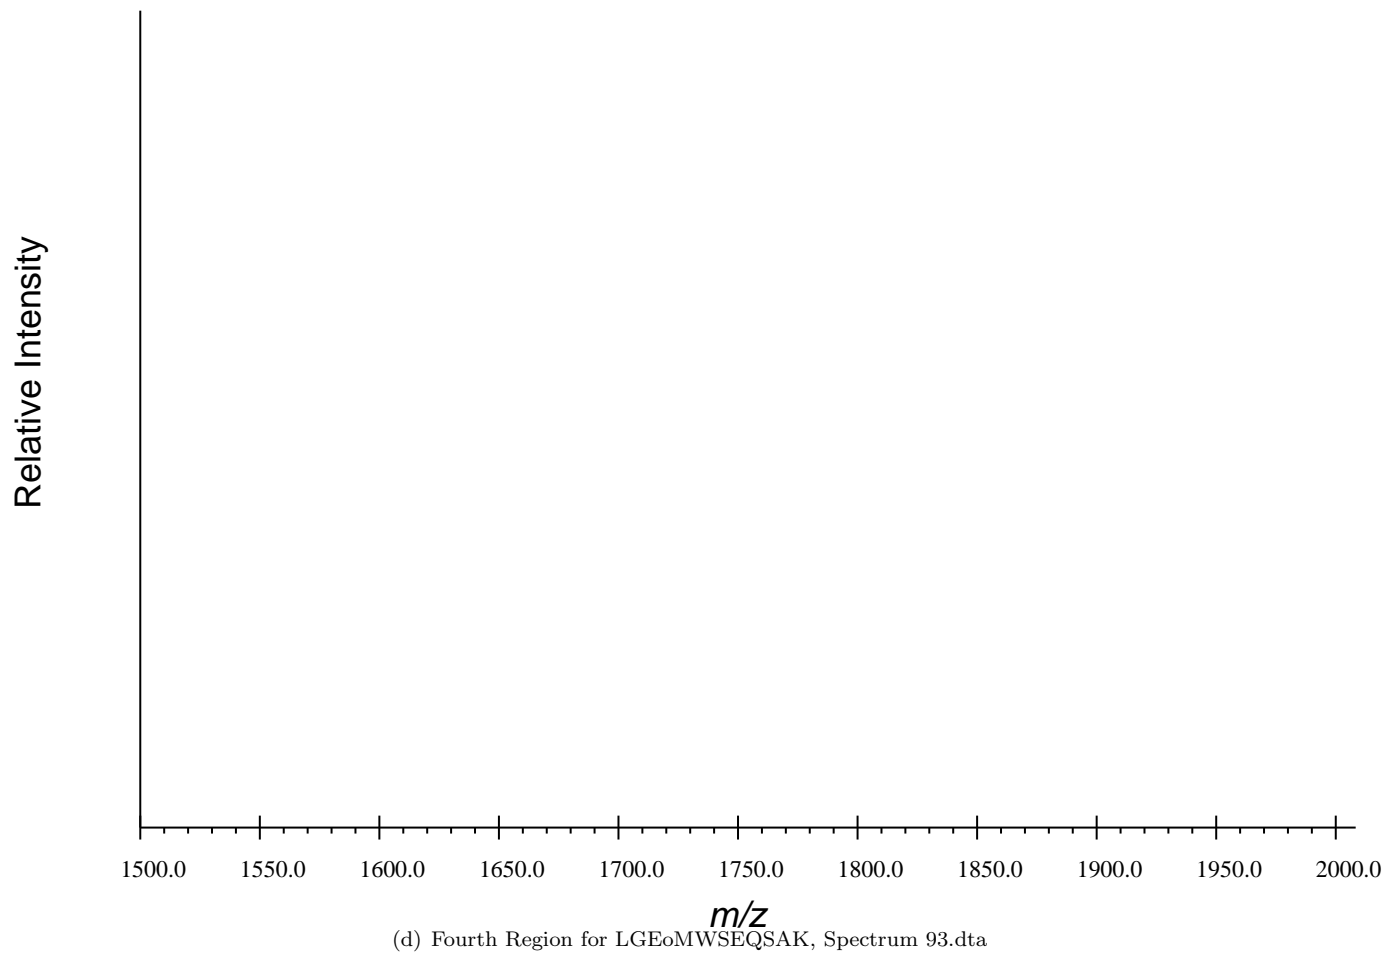

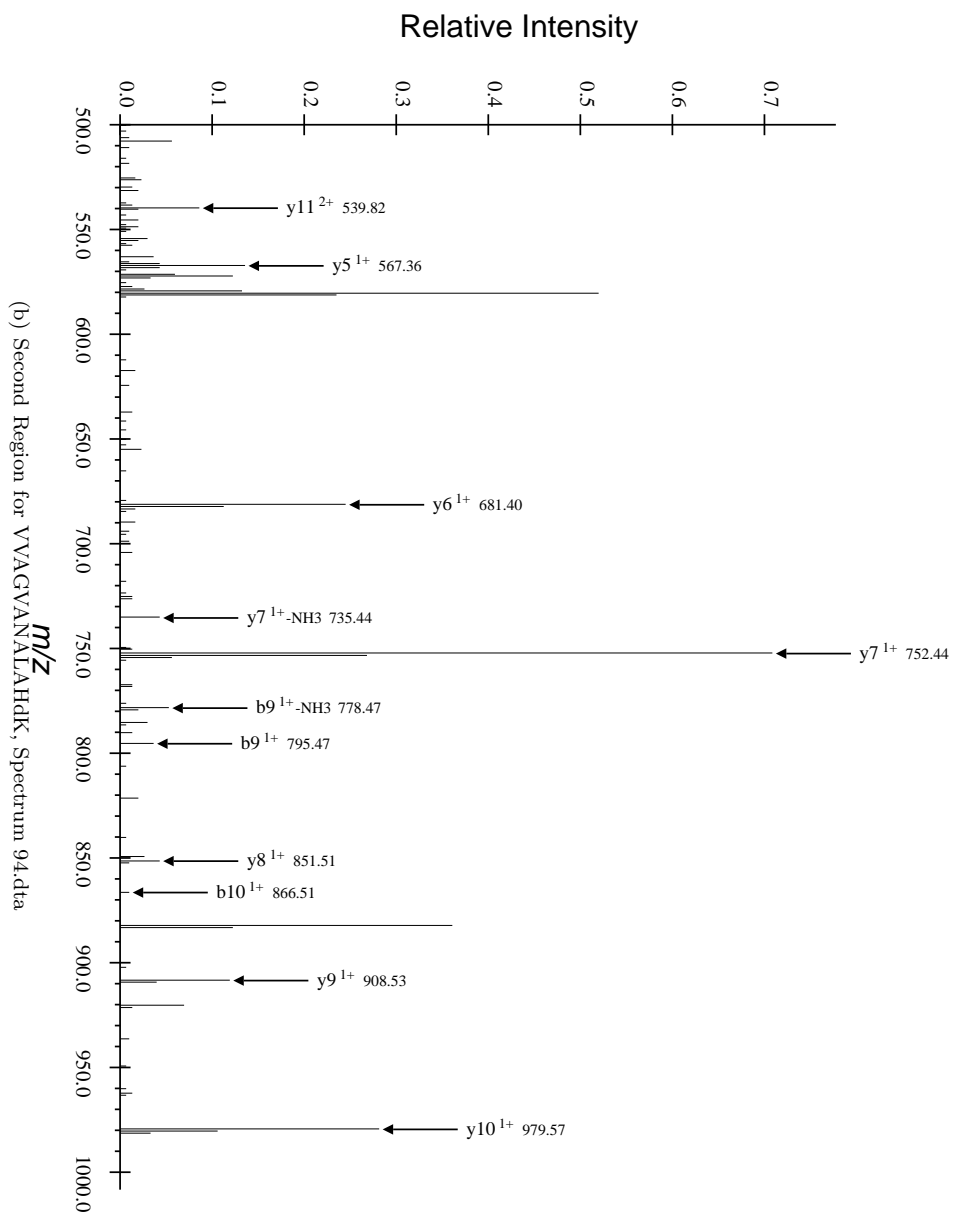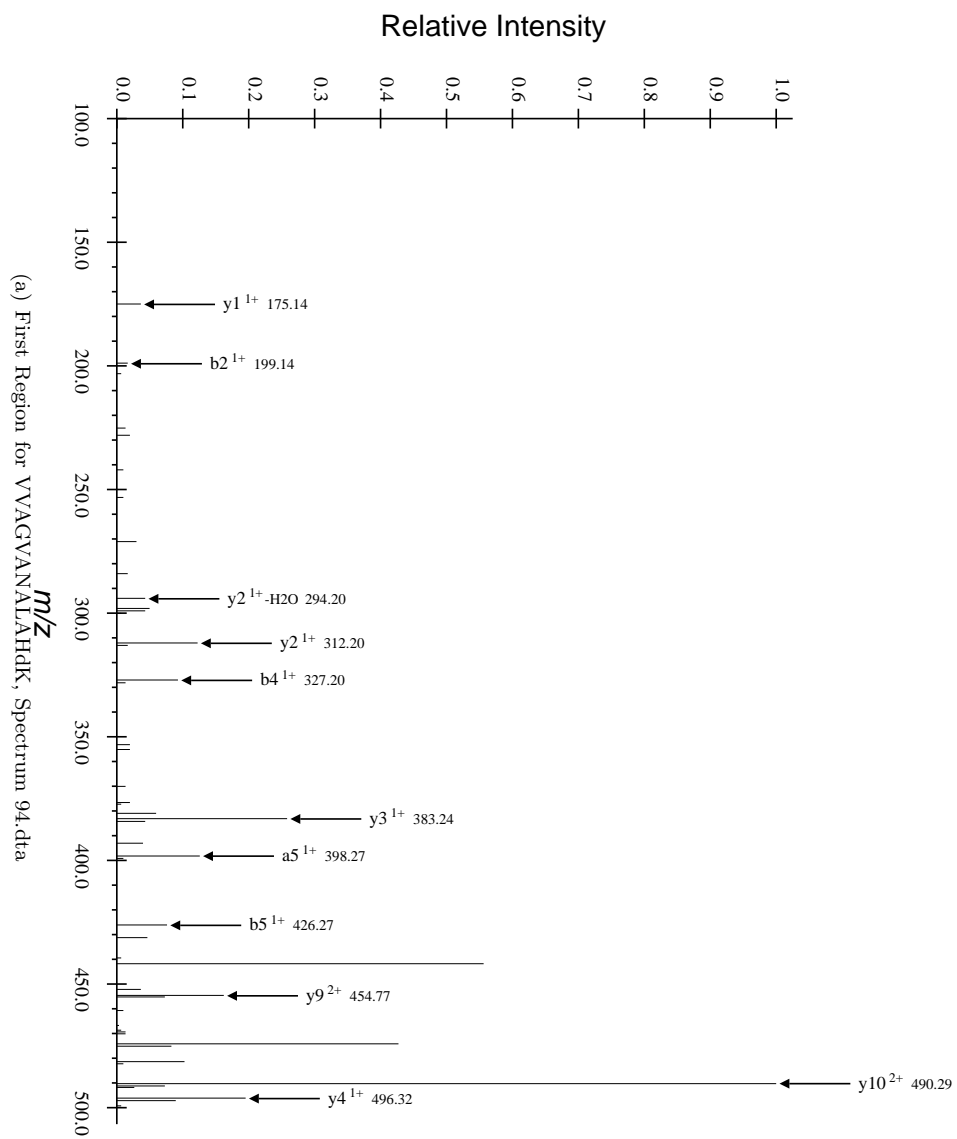

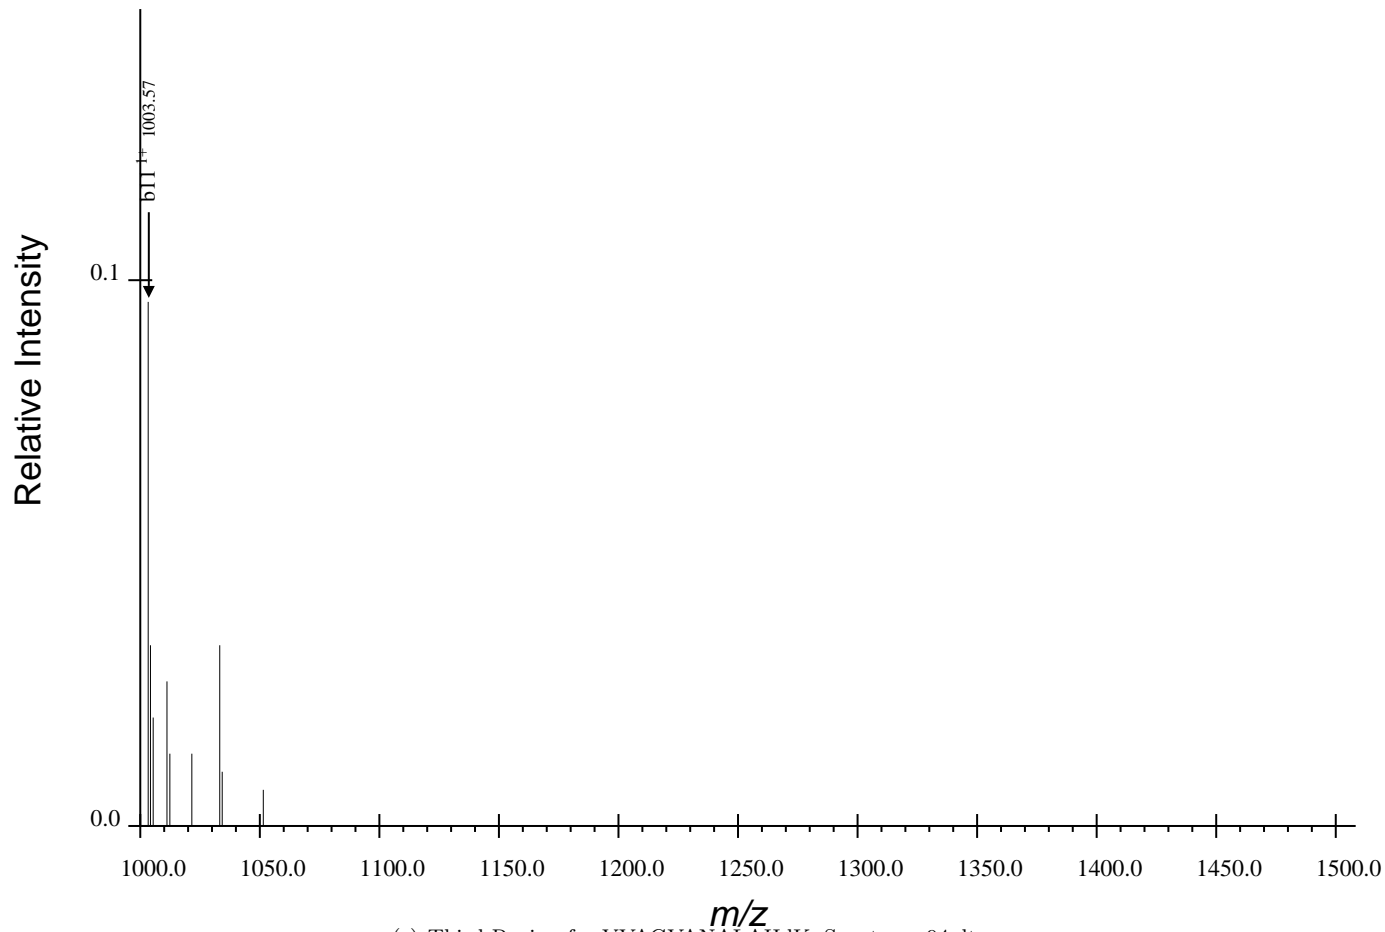

(c) Third Region for VVAGVANALAHdK, Spectrum 94.dta

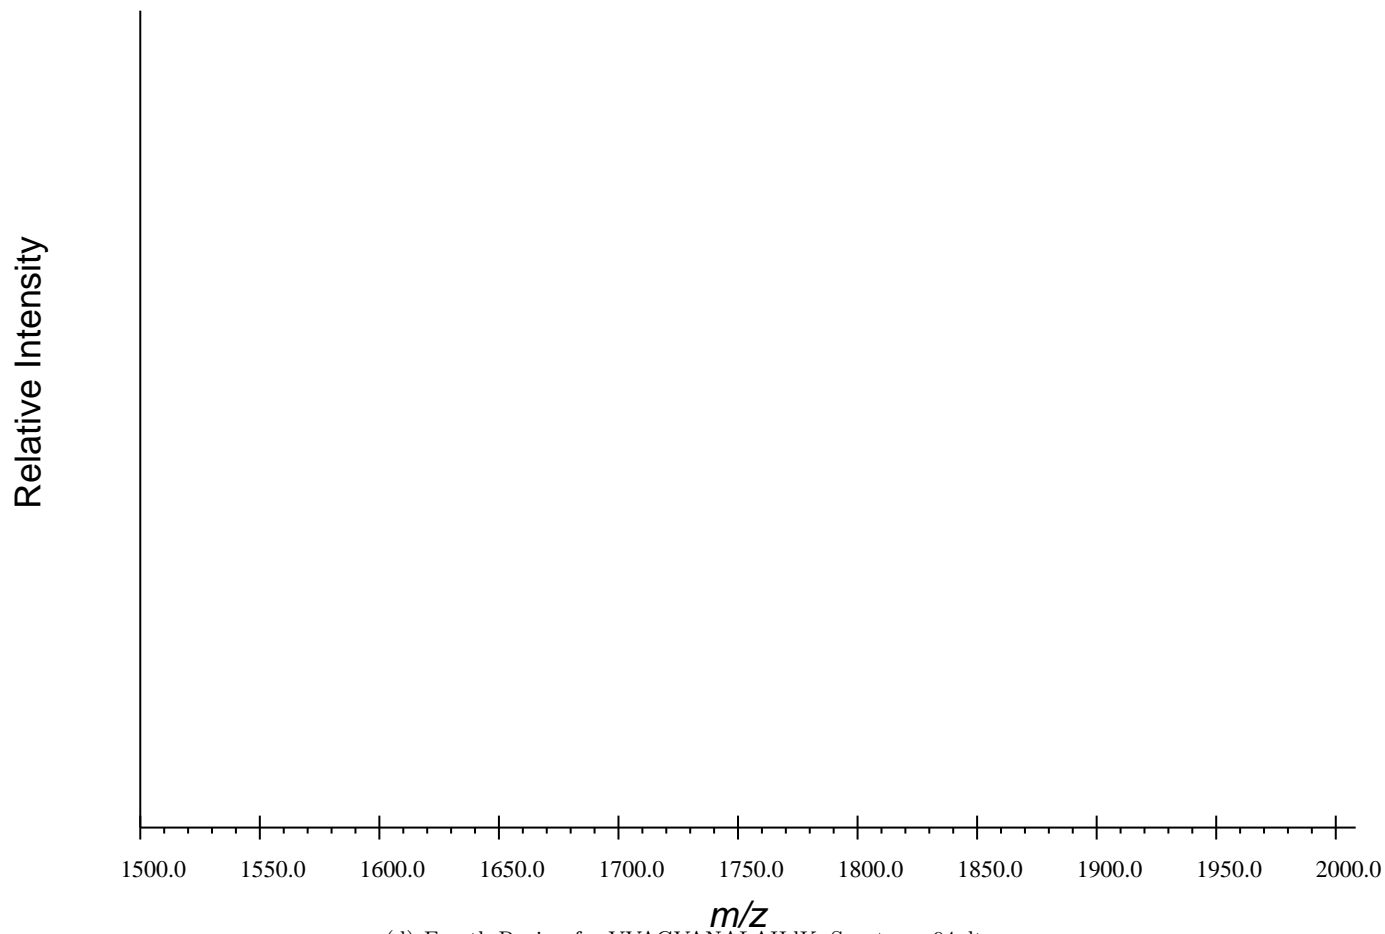

(d) Fourth Region for VVAGVANALAHdK, Spectrum 94.dta

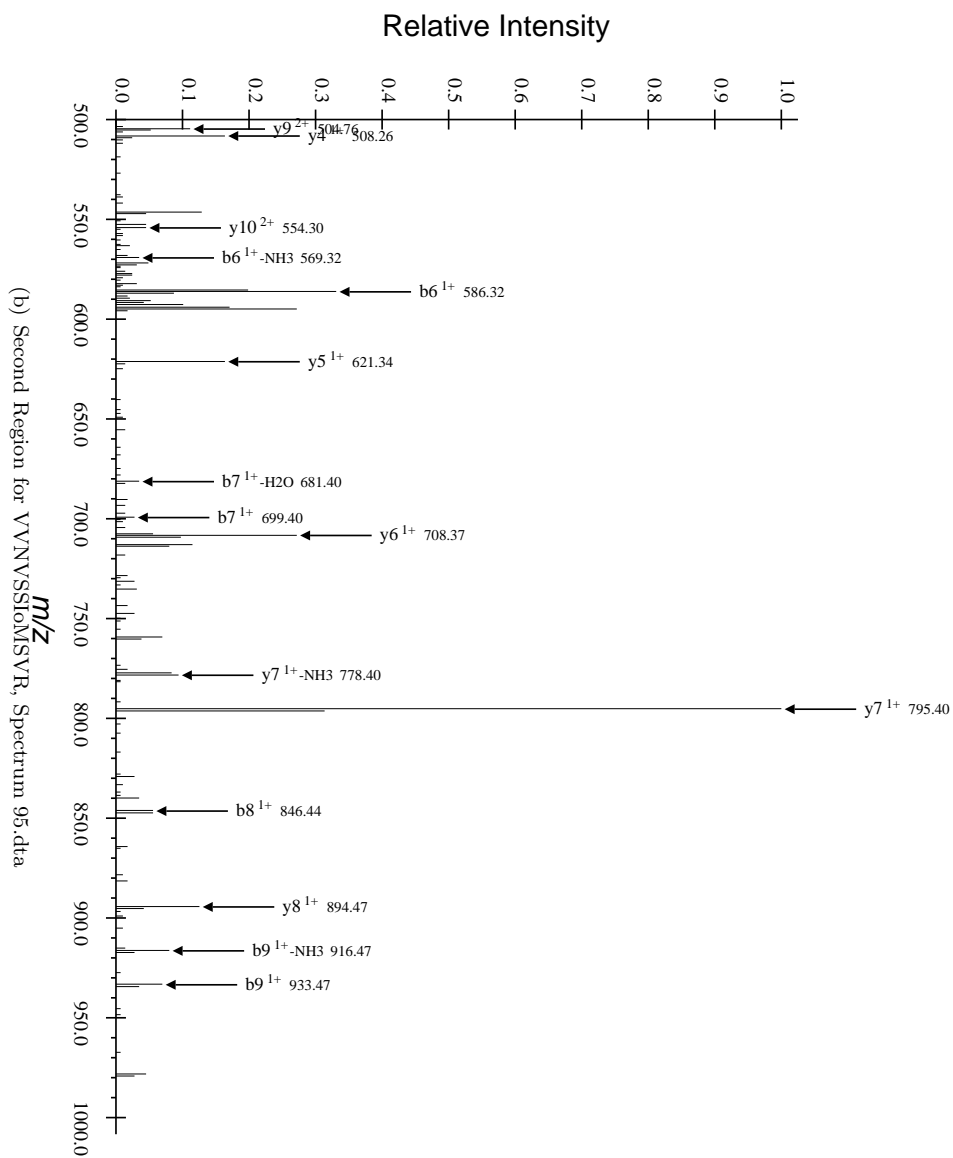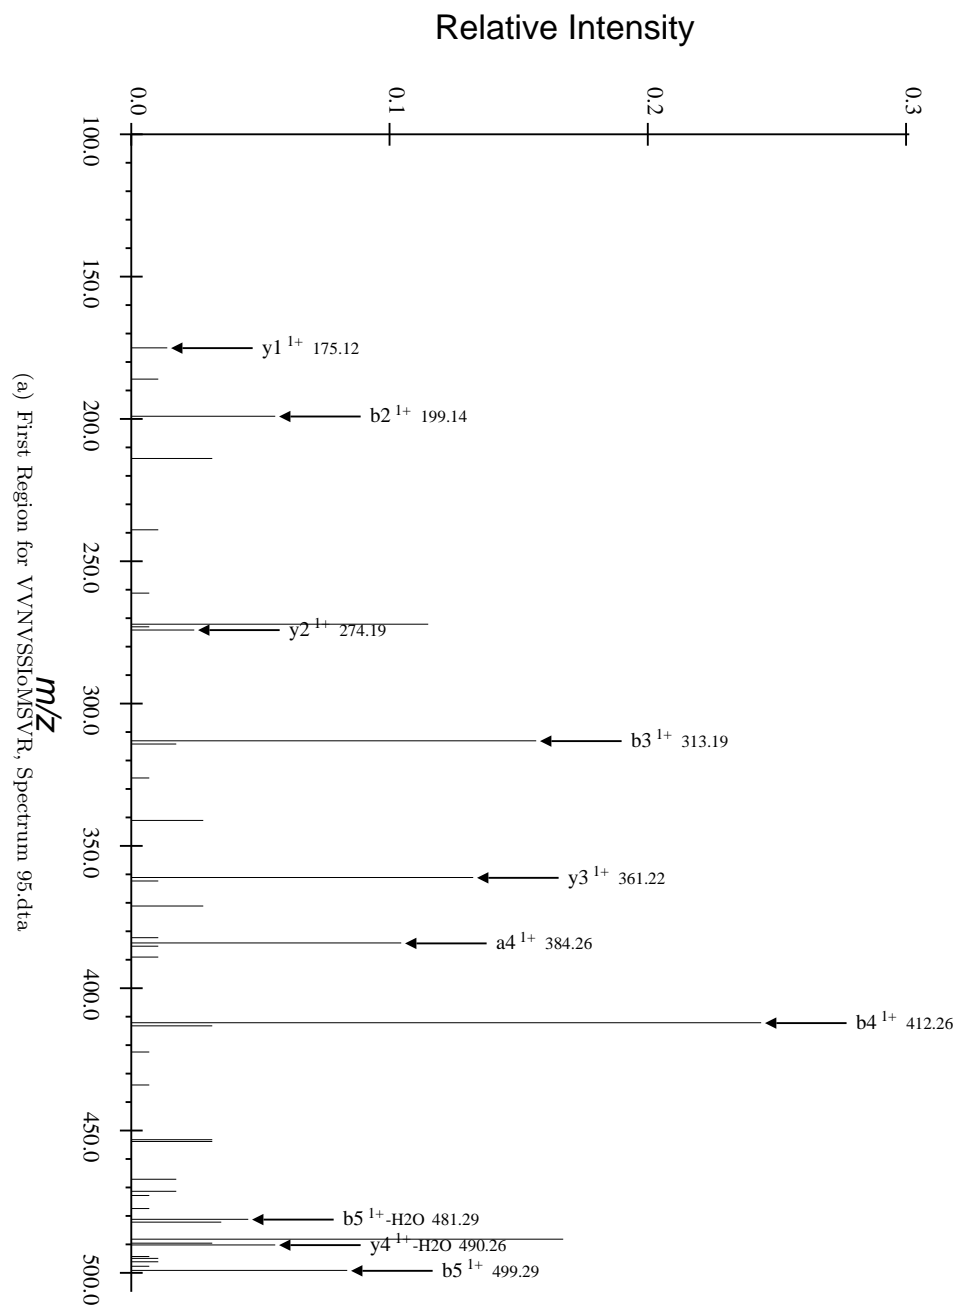

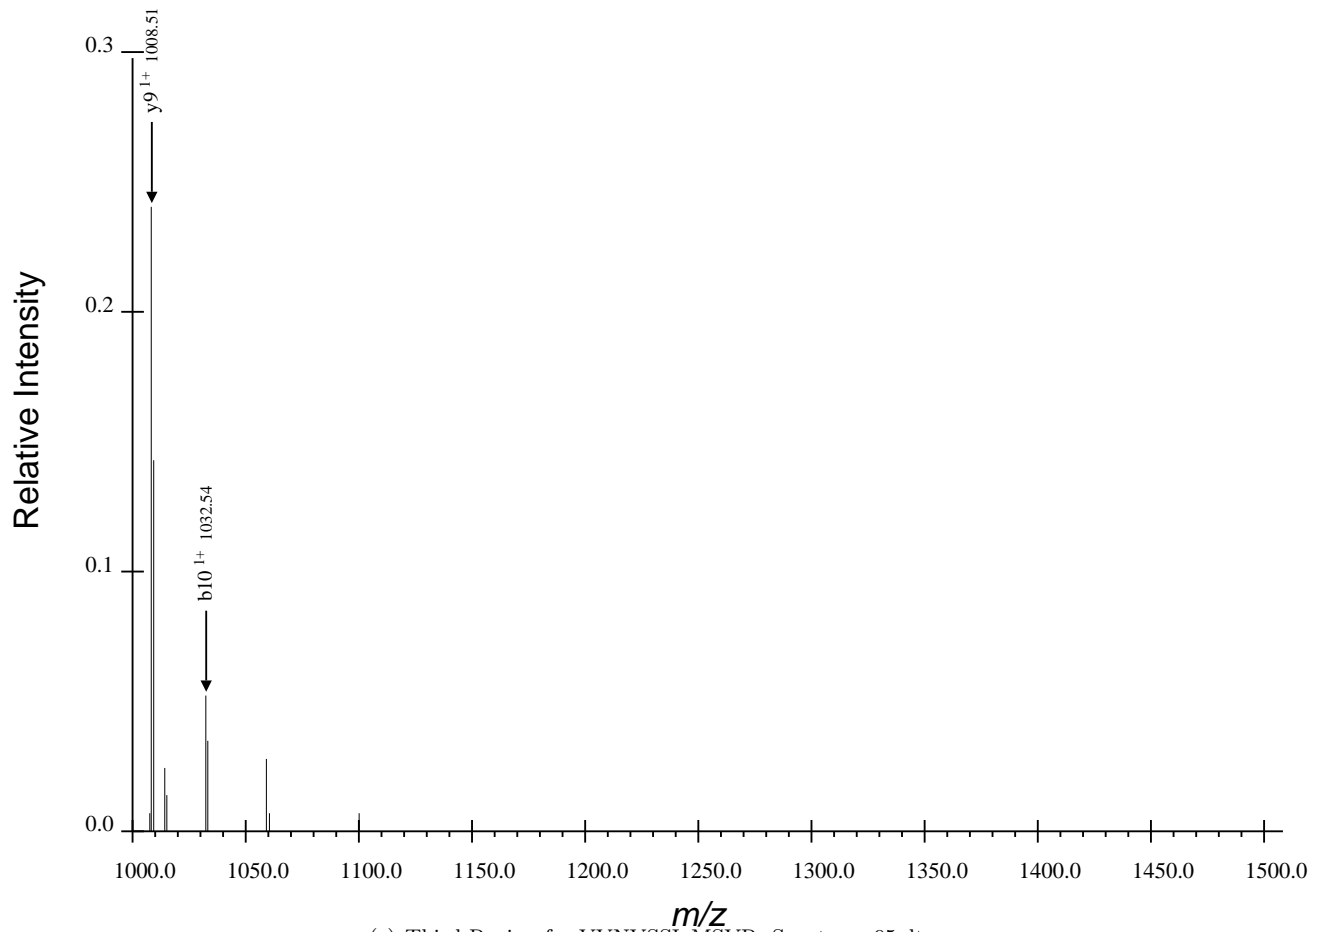

(c) Third Region for VVNVSSIOMSVR, Spectrum 95.dta

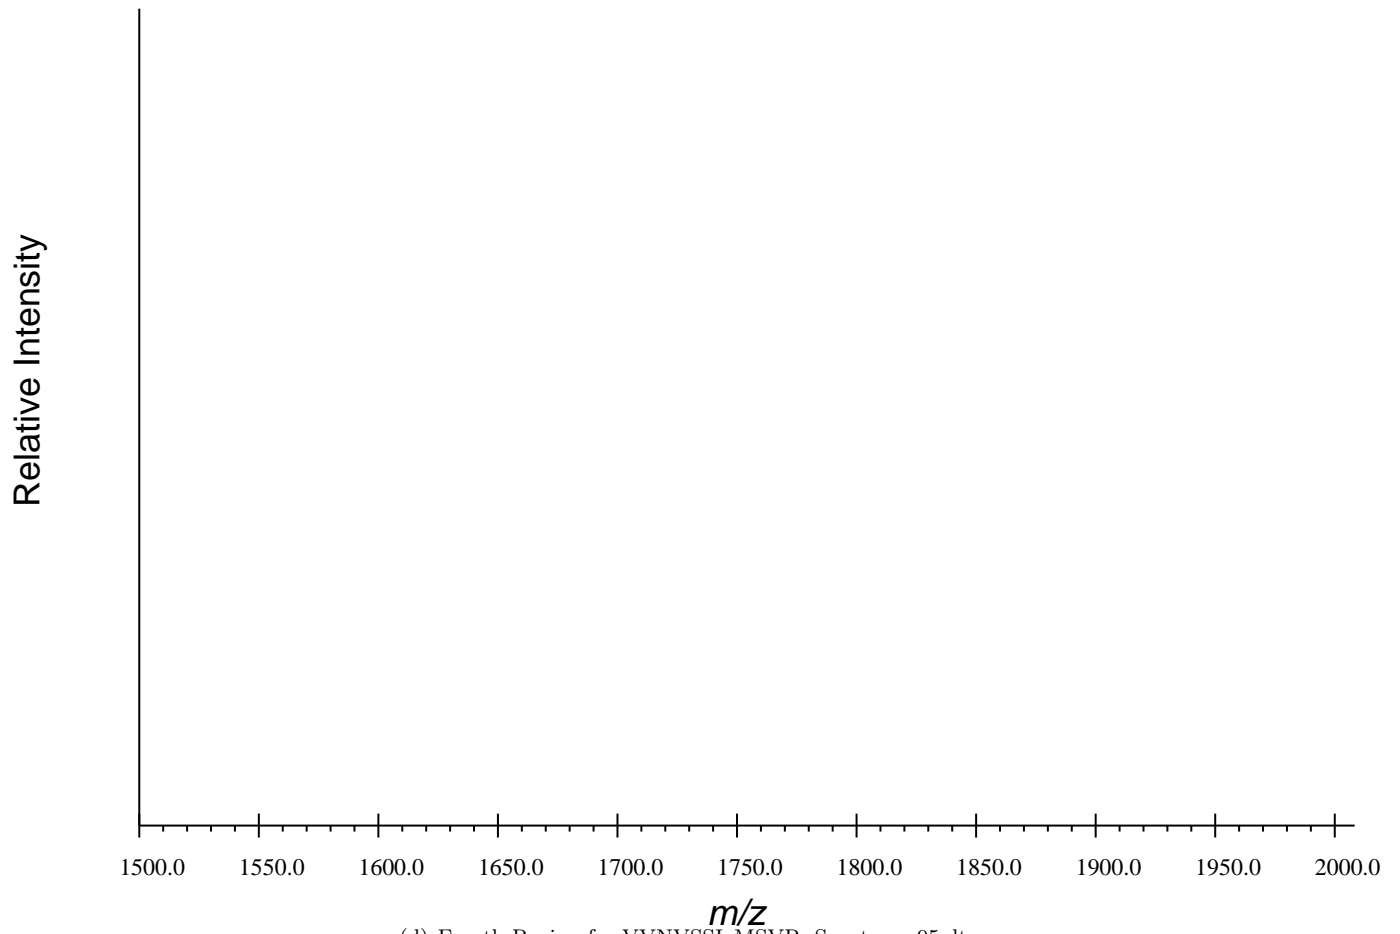

(d) Fourth Region for VVNVSSIOMSVR, Spectrum 95.dta

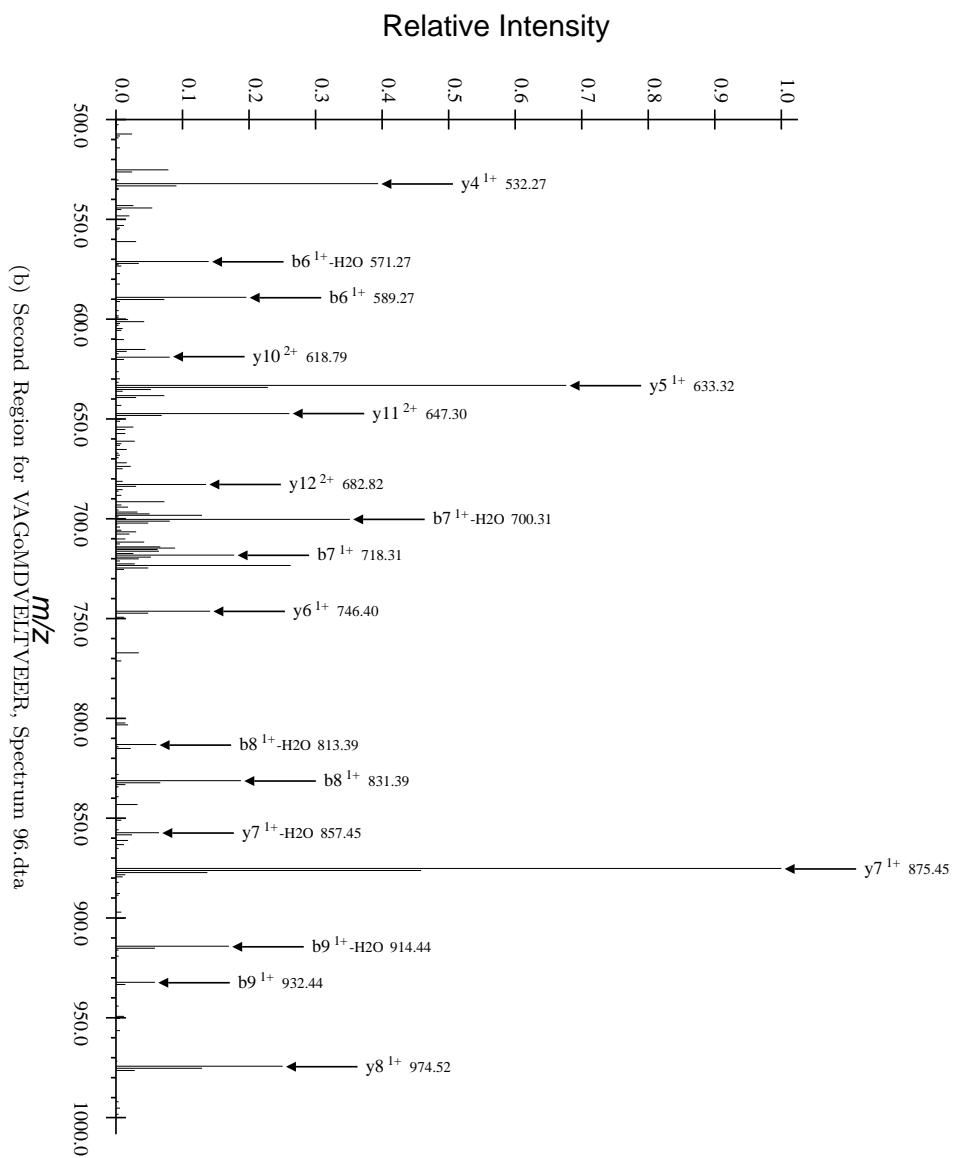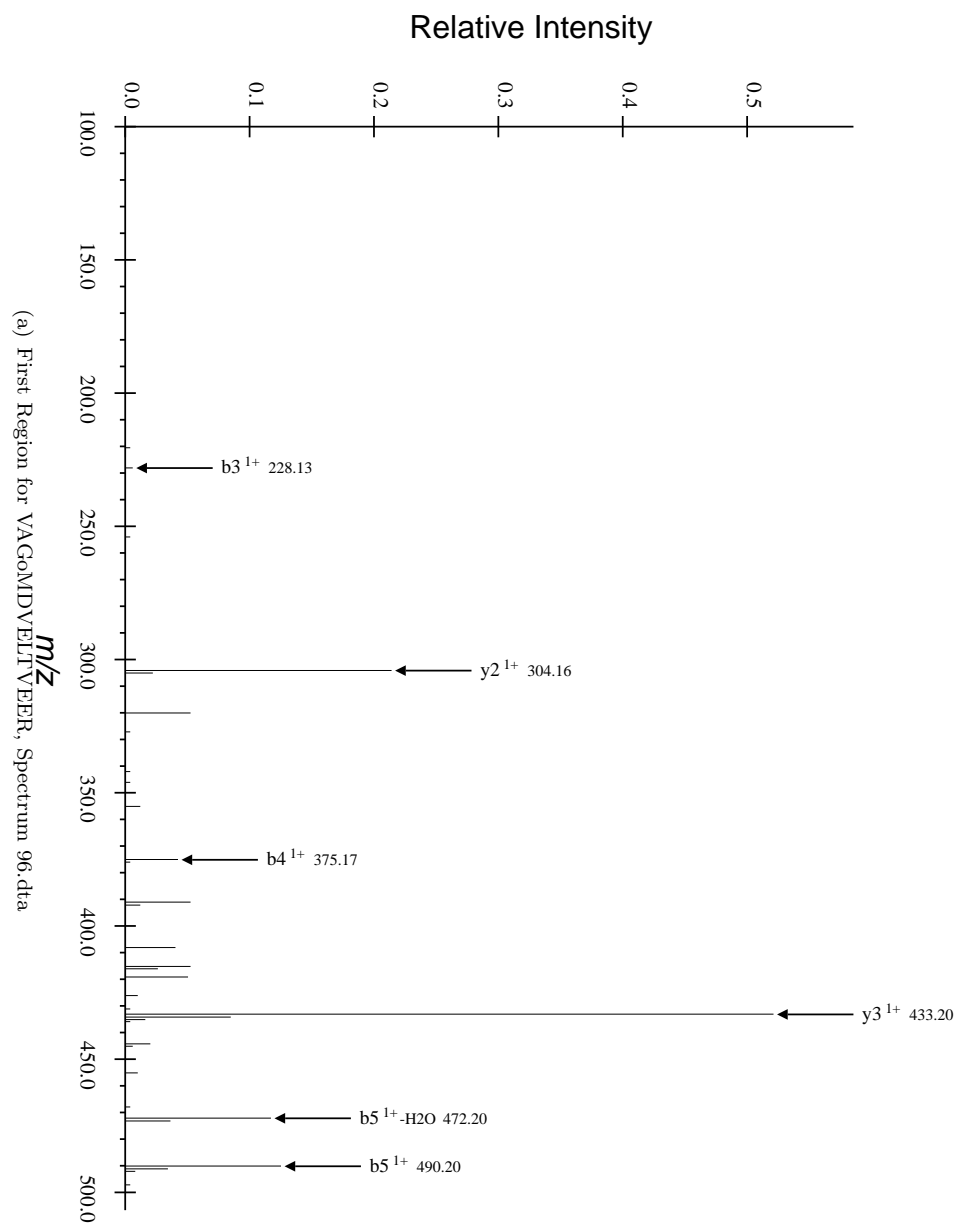



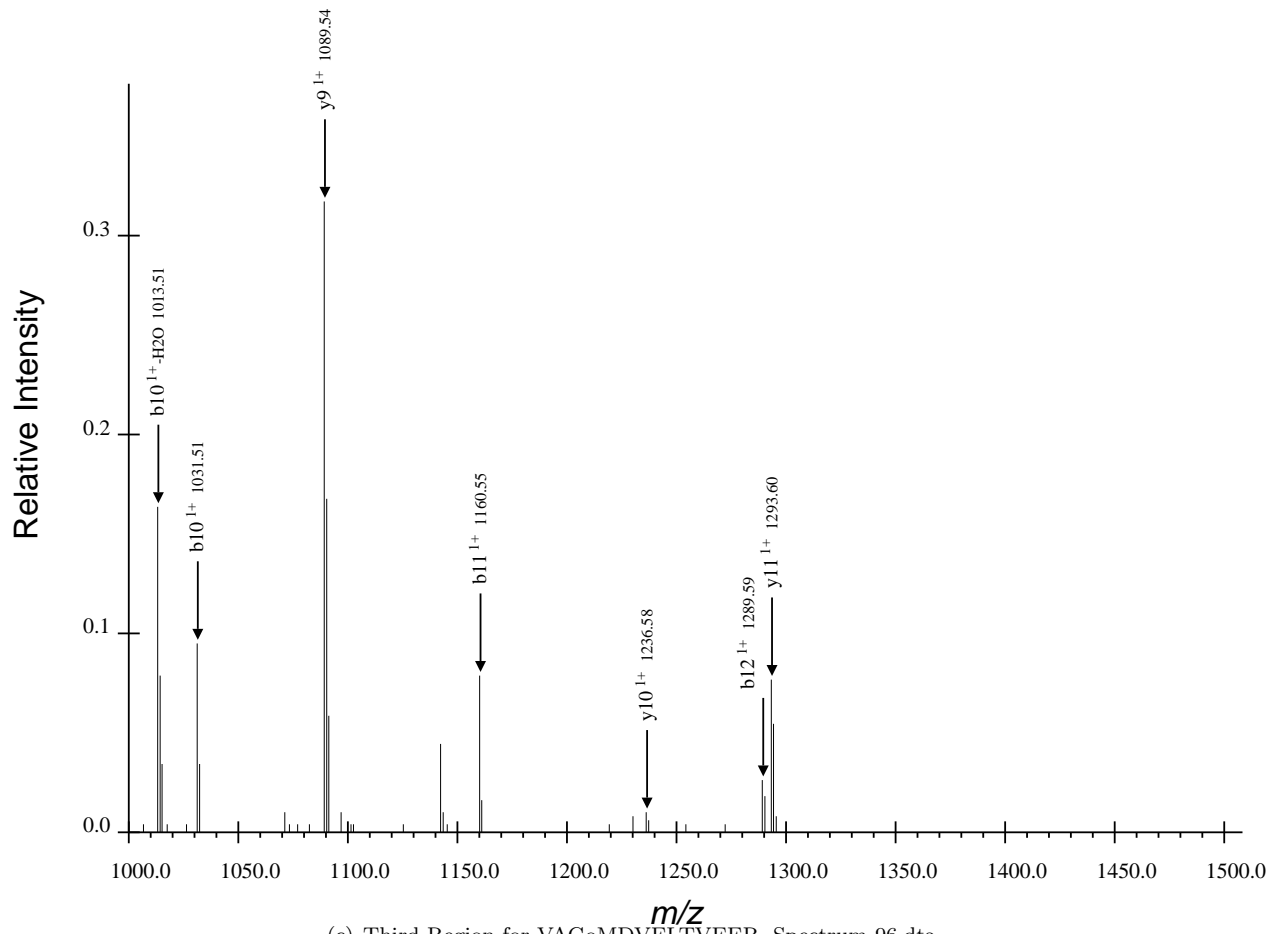

(c) Third Region for VAGoMDVELTVEER, Spectrum 96.dta

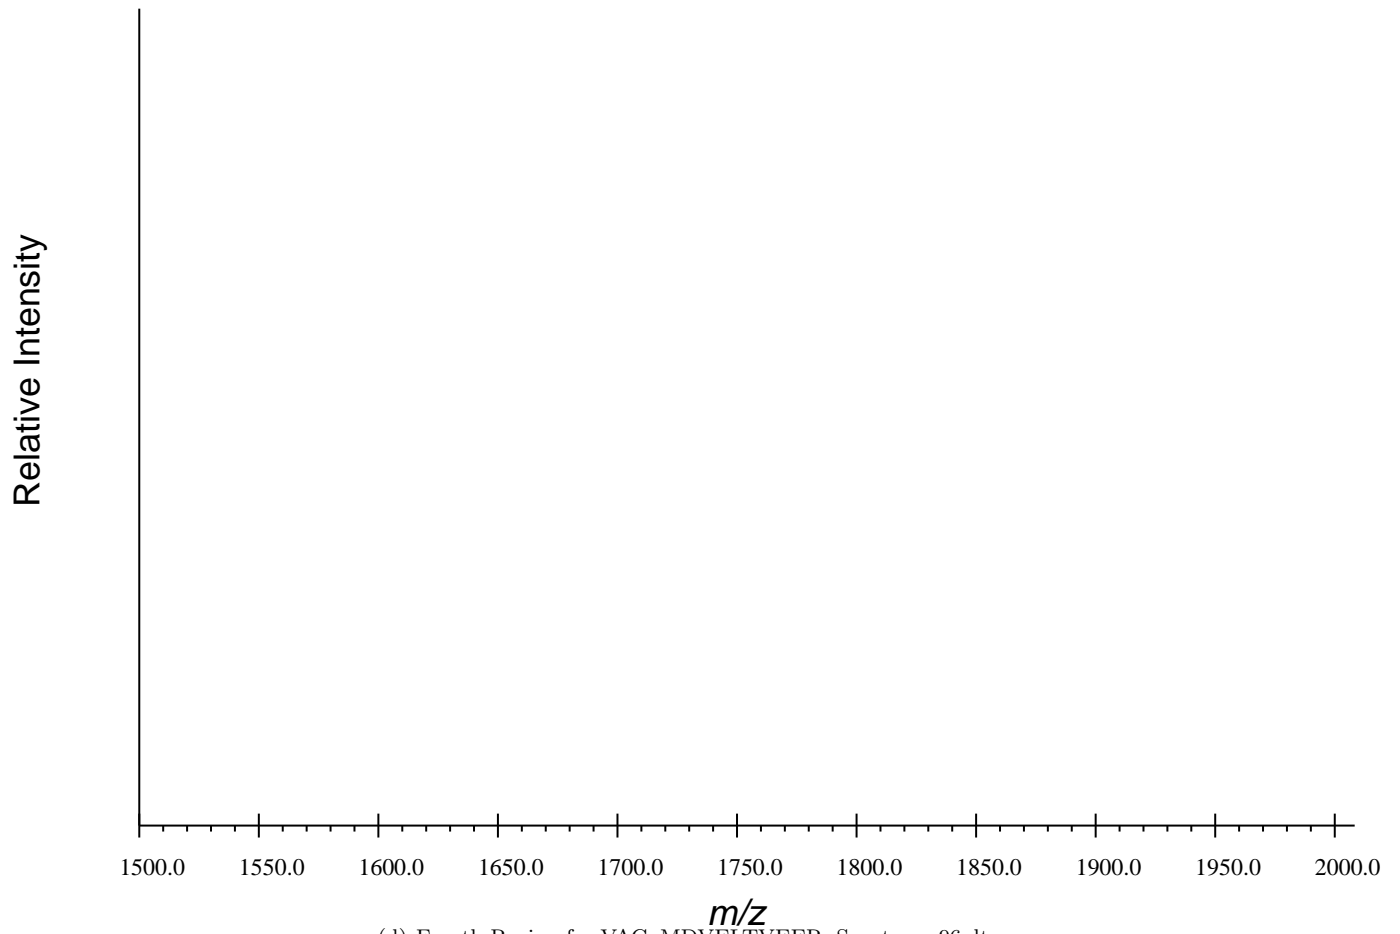

(d) Fourth Region for VAGoMDVELTVEER, Spectrum 96.dta

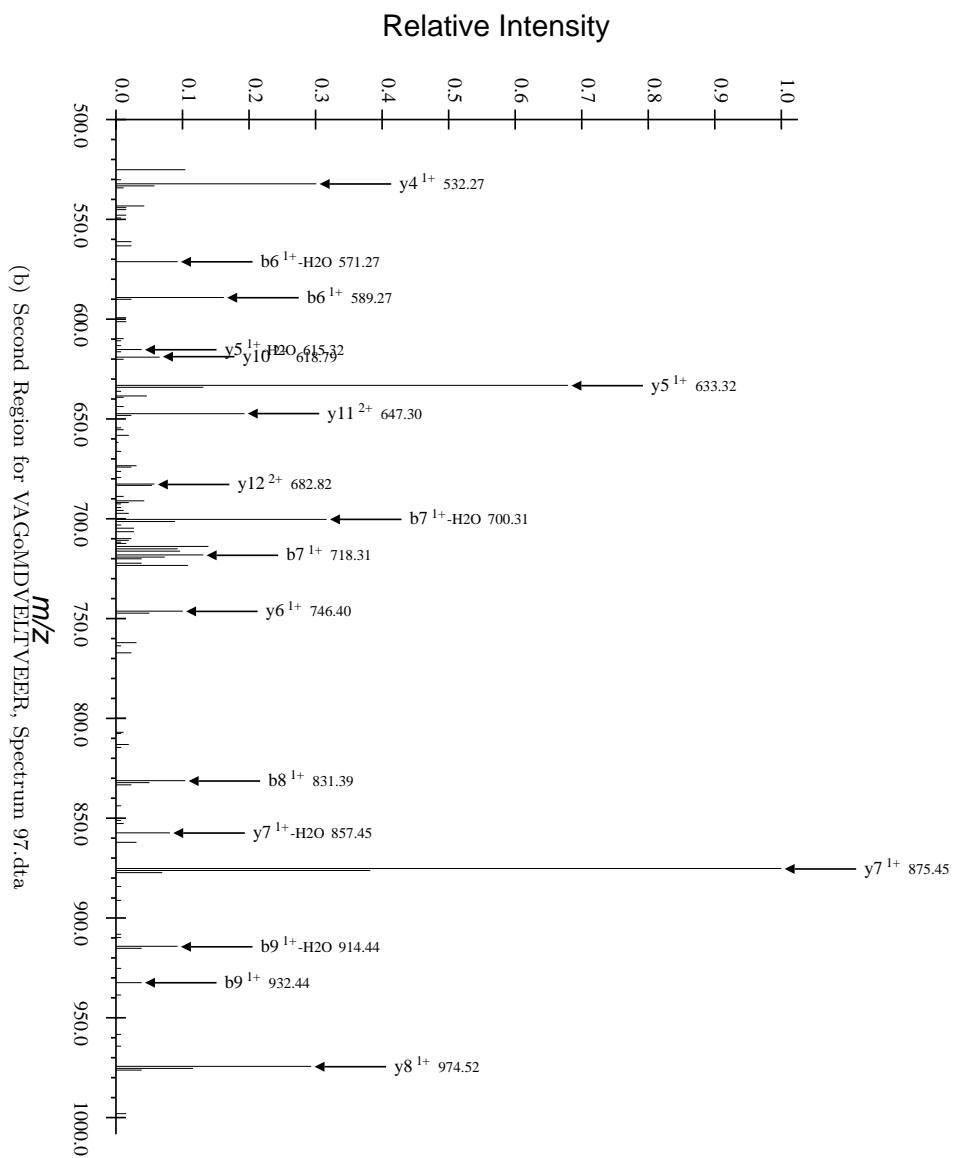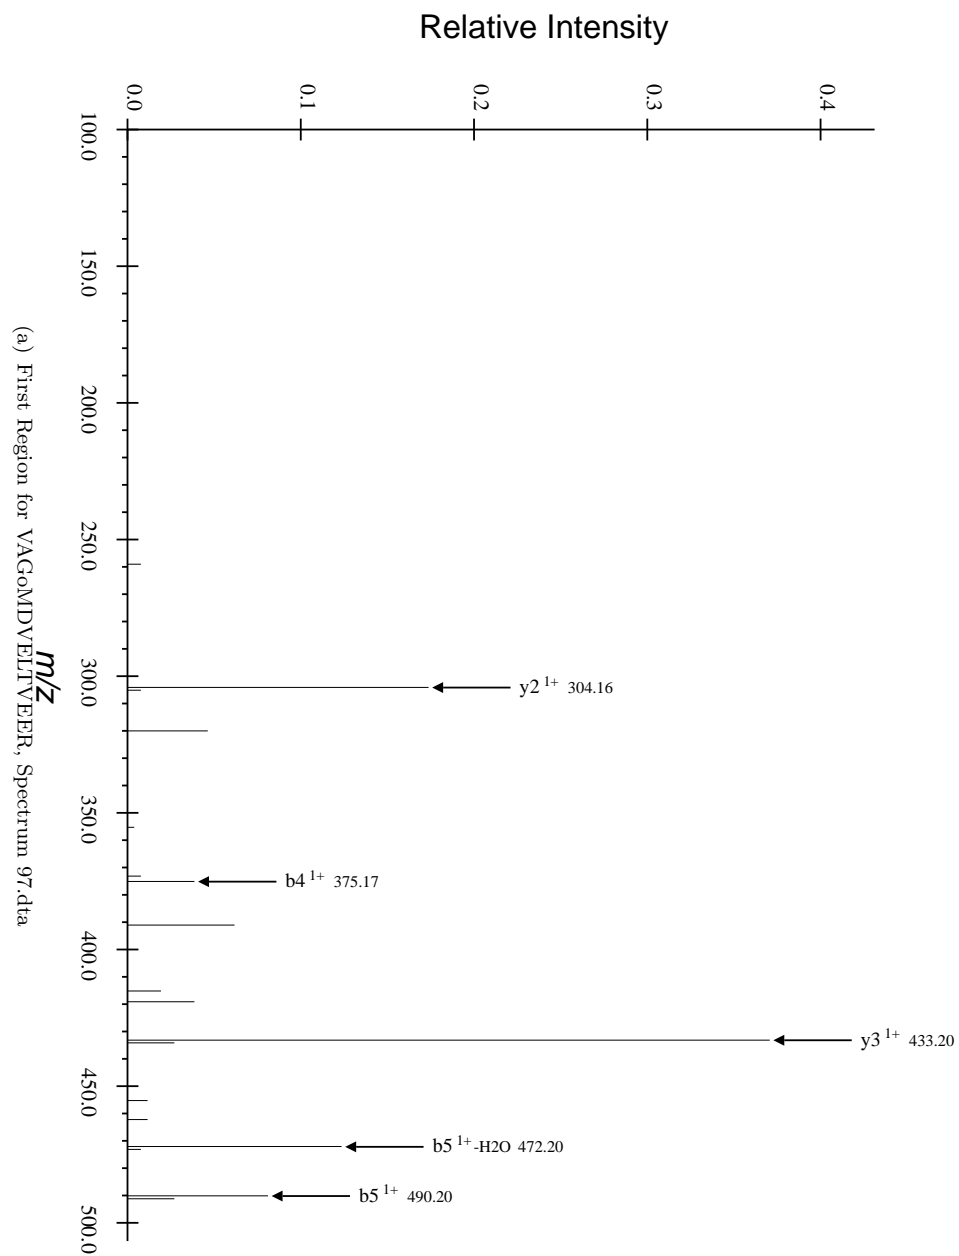

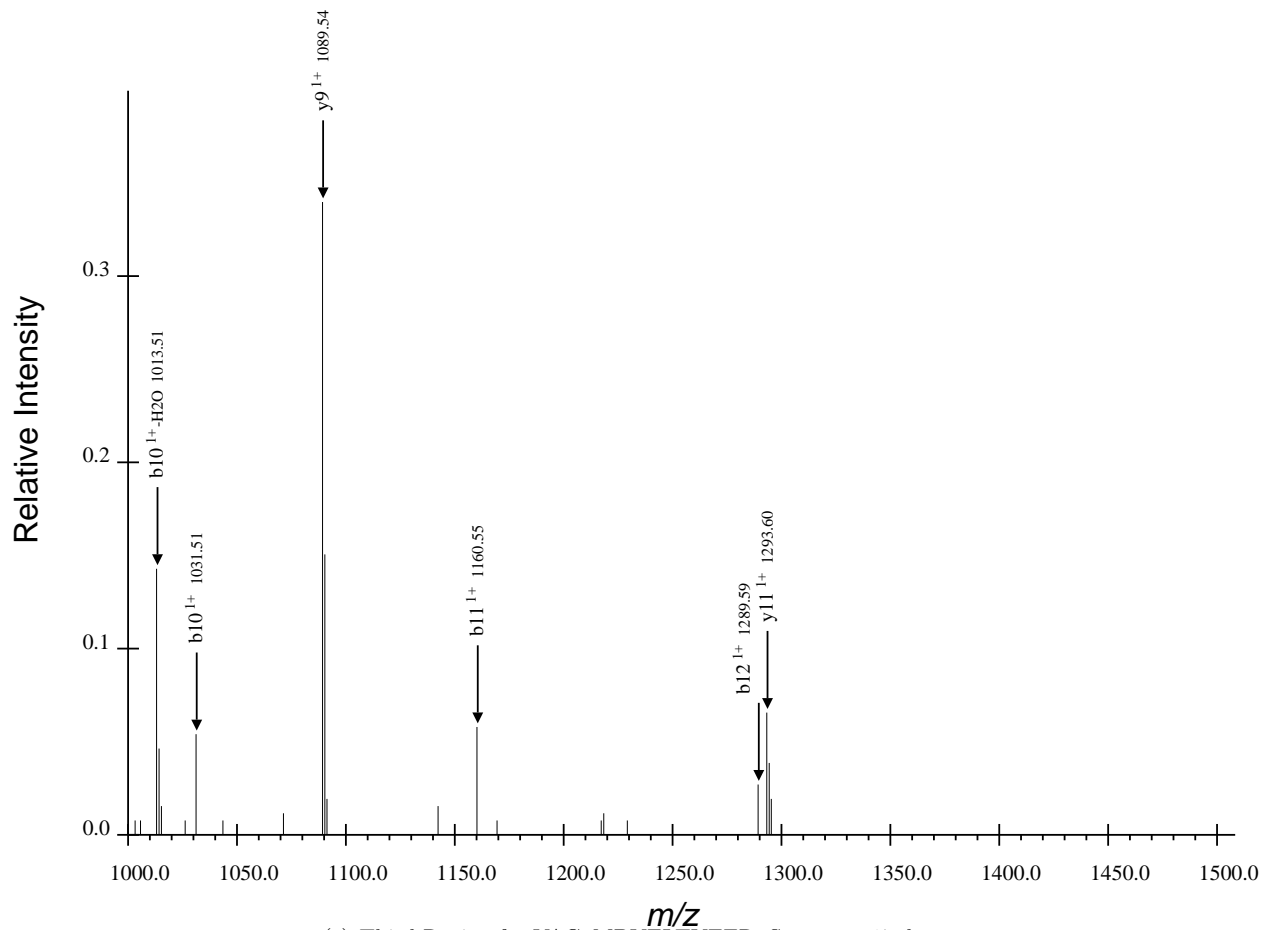

(c) Third Region for VAGoMDVELTVEER, Spectrum 97.dta

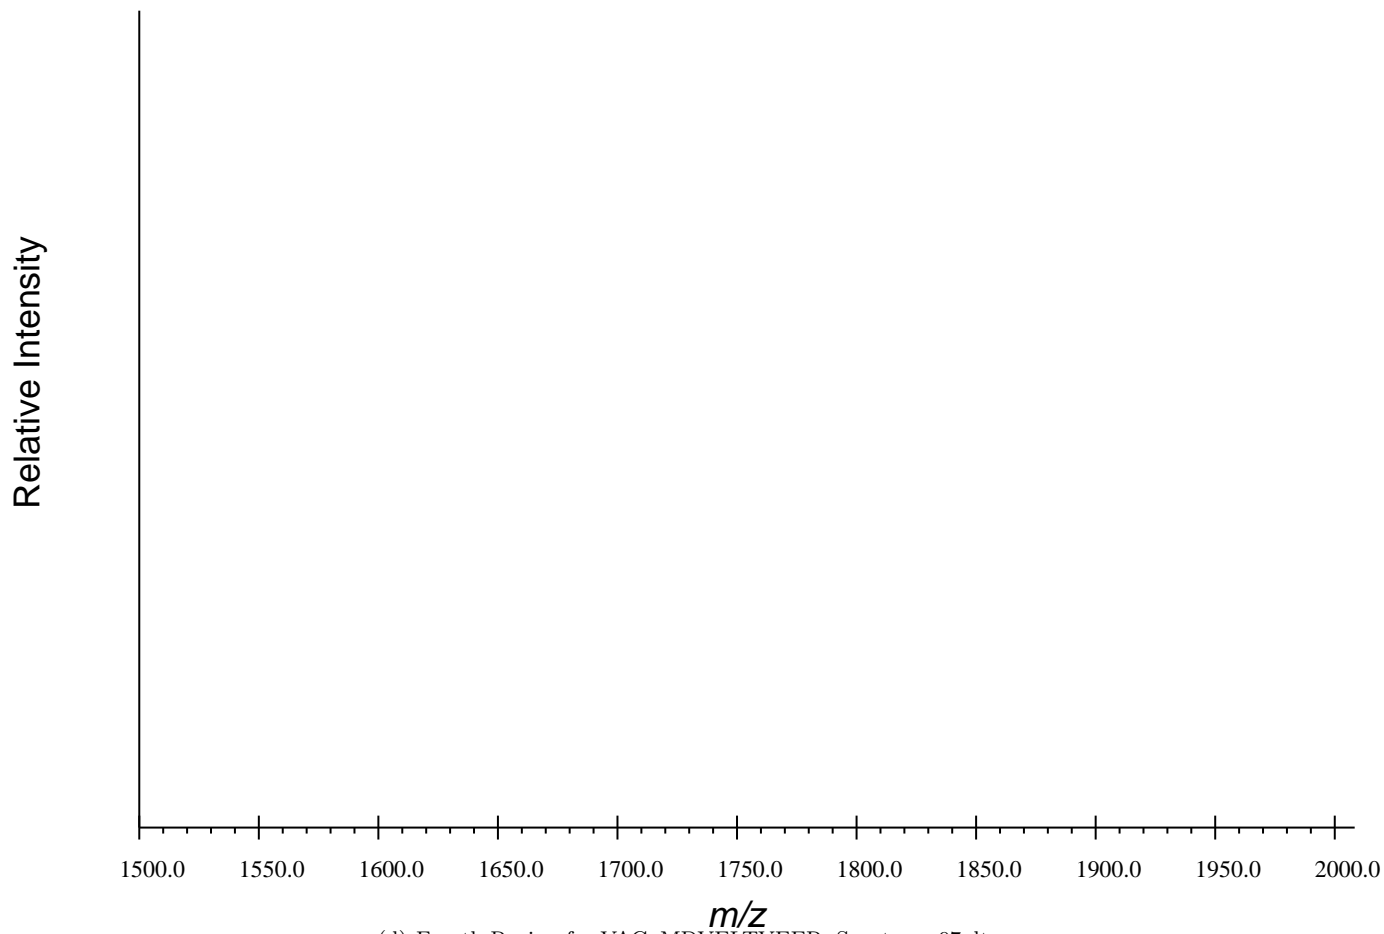

(d) Fourth Region for VAGoMDVELTVEER, Spectrum 97.dta

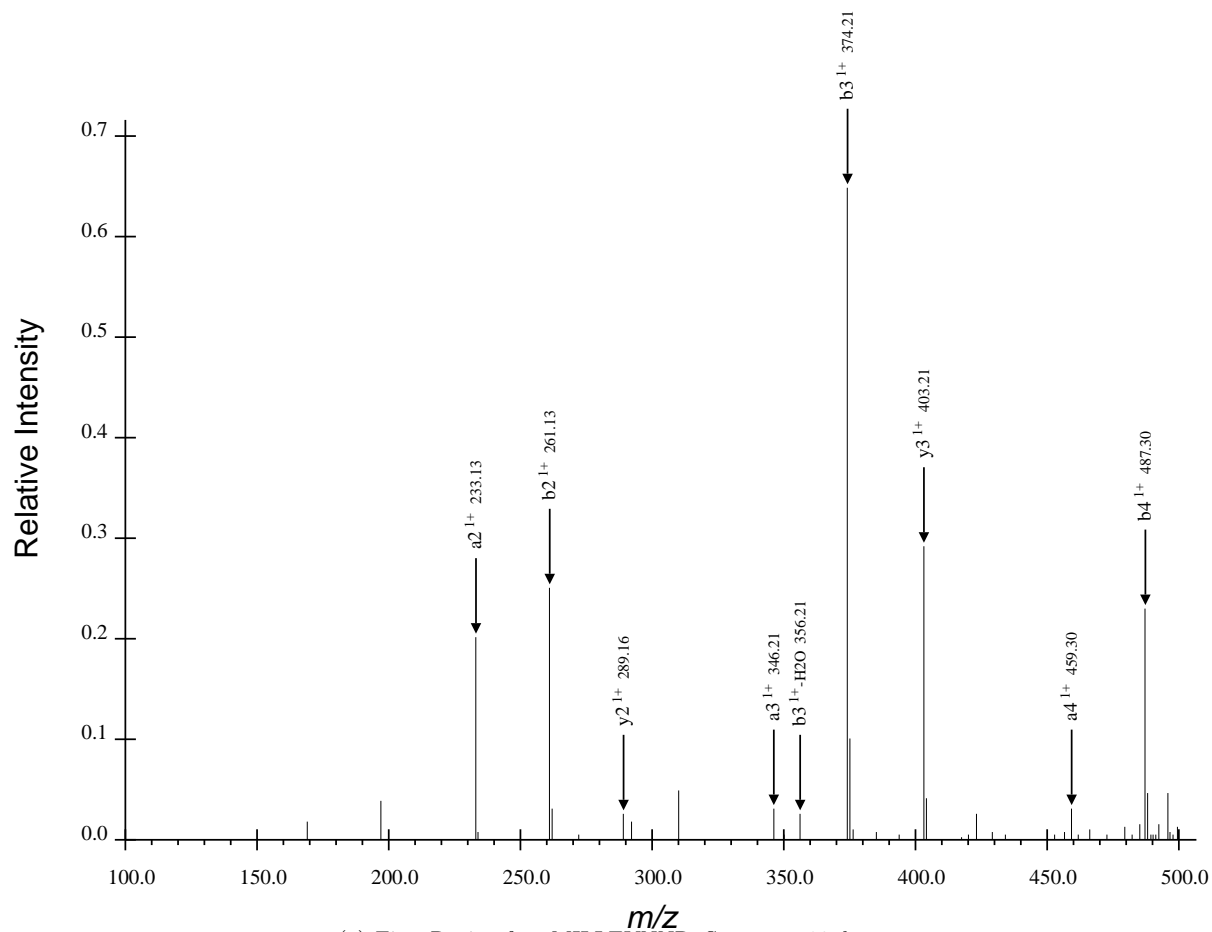

(a) First Region for oMILLEVNRR, Spectrum 98.dta

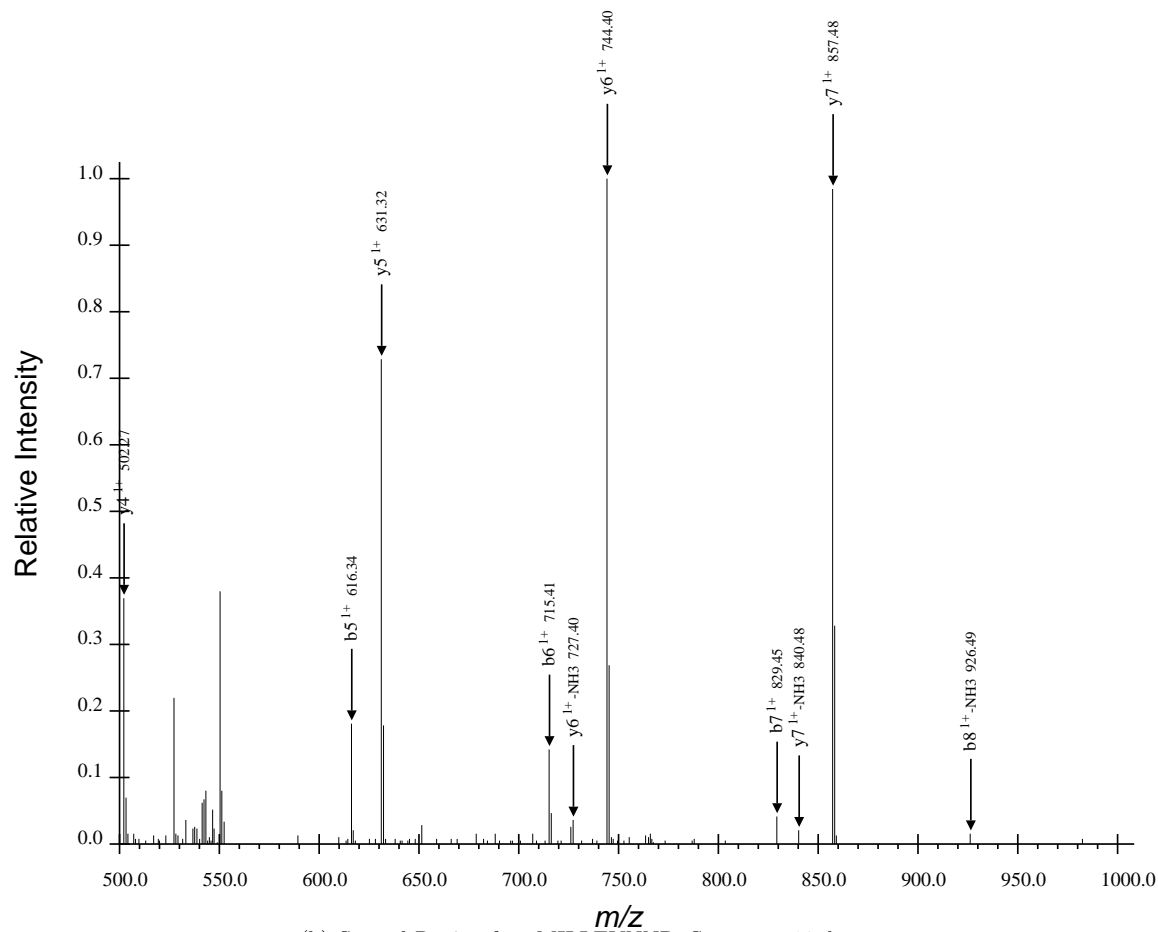

(b) Second Region for oMILLEVNRR, Spectrum 98.dta

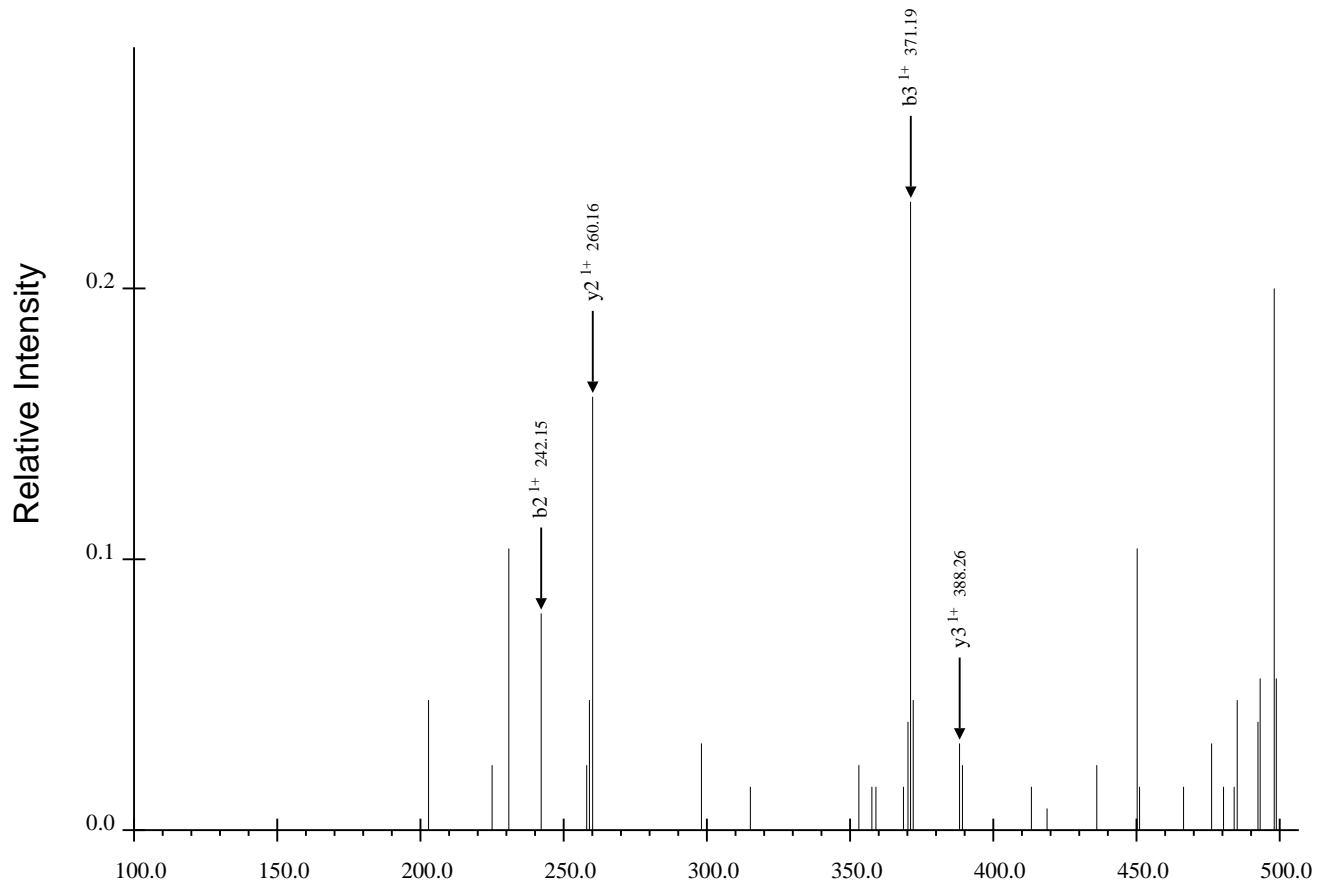

(a) First Region for QLEEEIKAAK, Spectrum 99.dta

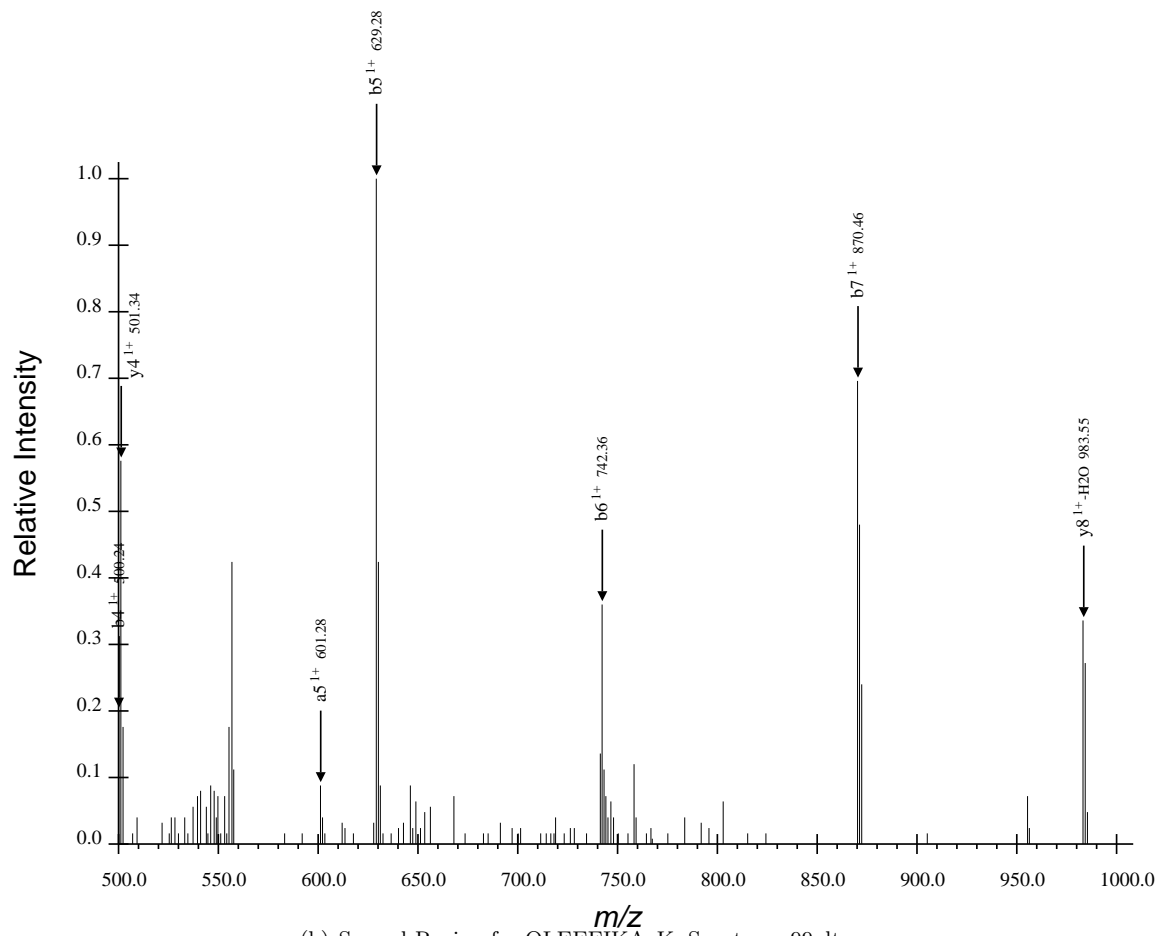

(b) Second Region for QLEEEIKAAK, Spectrum 99.dta

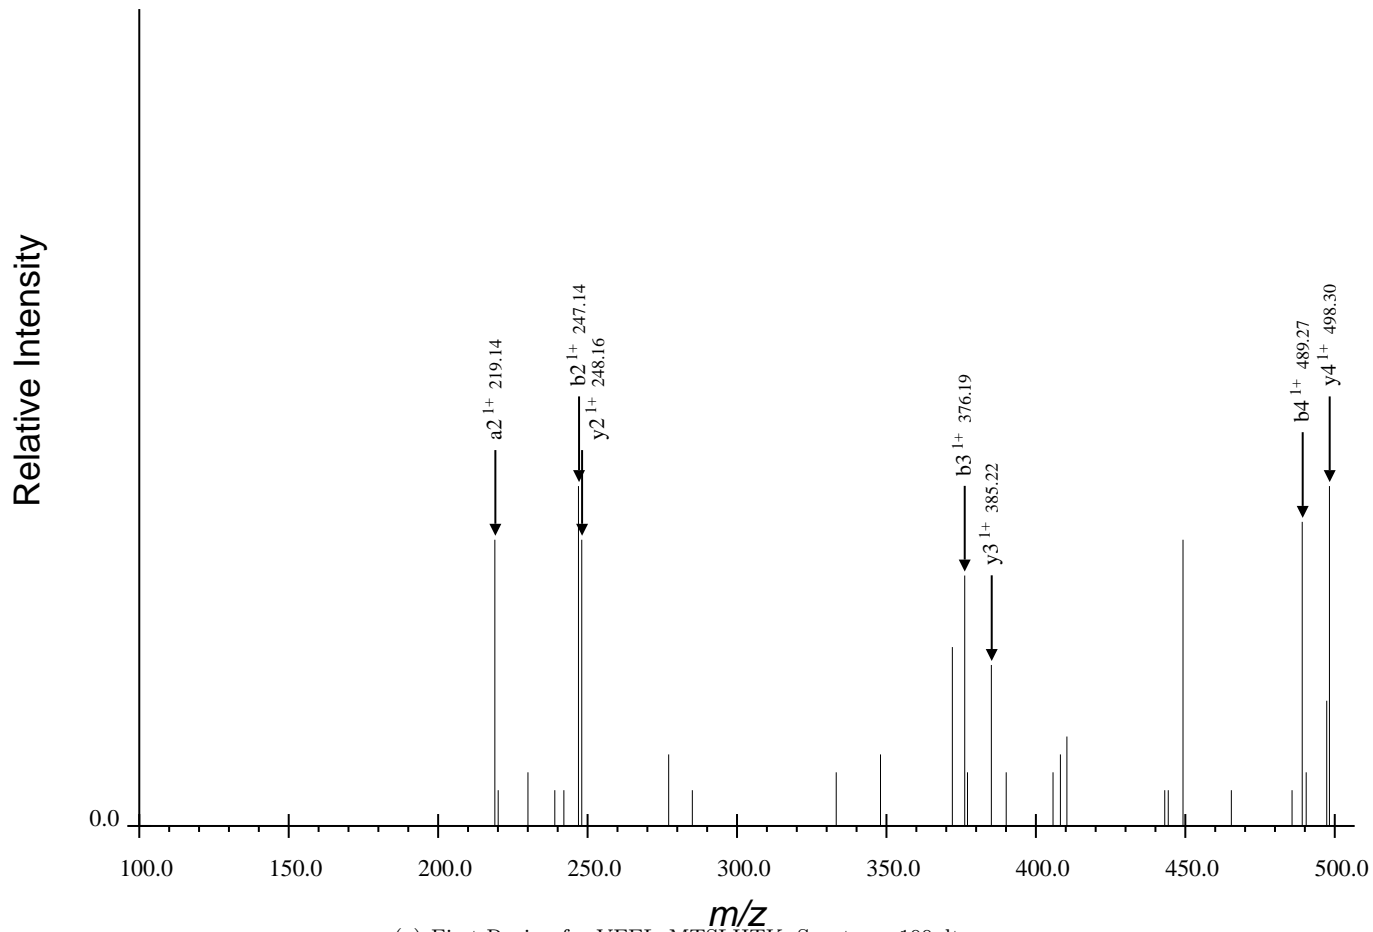

(a) First Region for VFELoMTSLHTK, Spectrum 100.dta

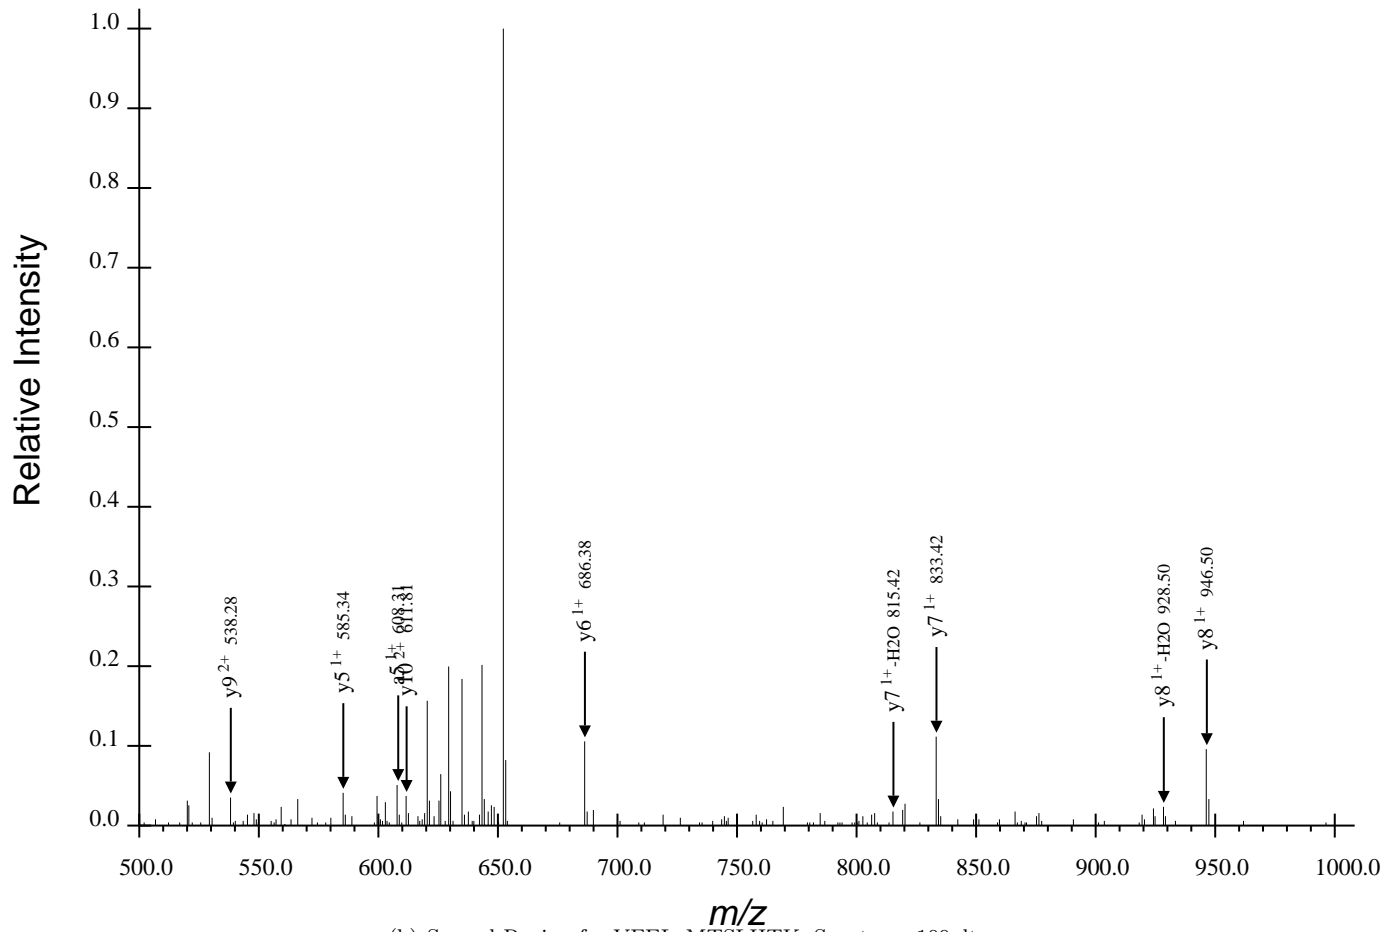

(b) Second Region for VFELoMTSLHTK, Spectrum 100.dta

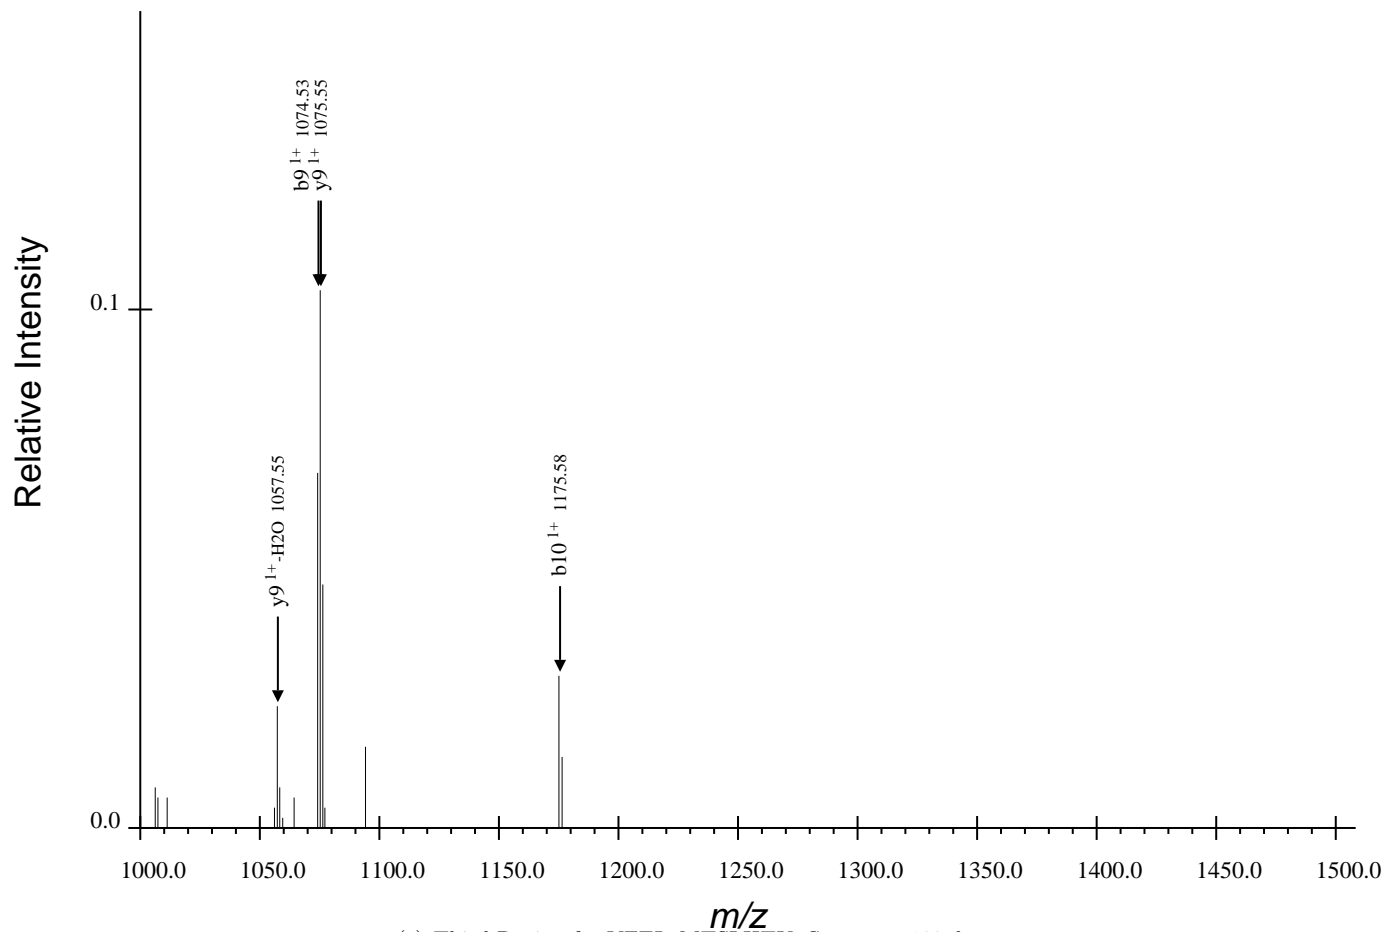

(c) Third Region for VFELoMTSLHTK, Spectrum 100.dta

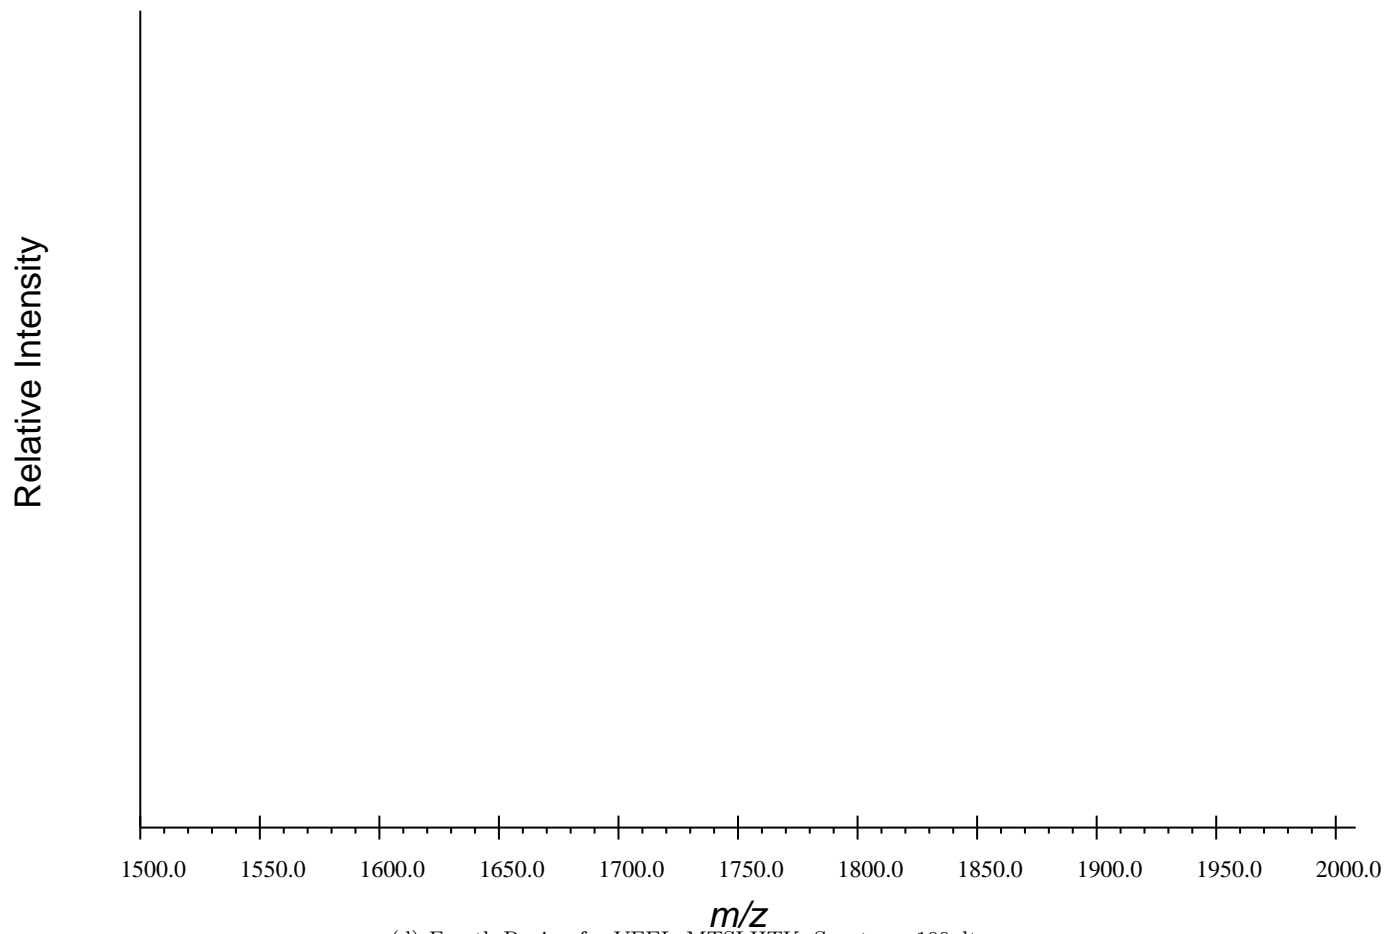

(d) Fourth Region for VFELoMTSLHTK, Spectrum 100.dta

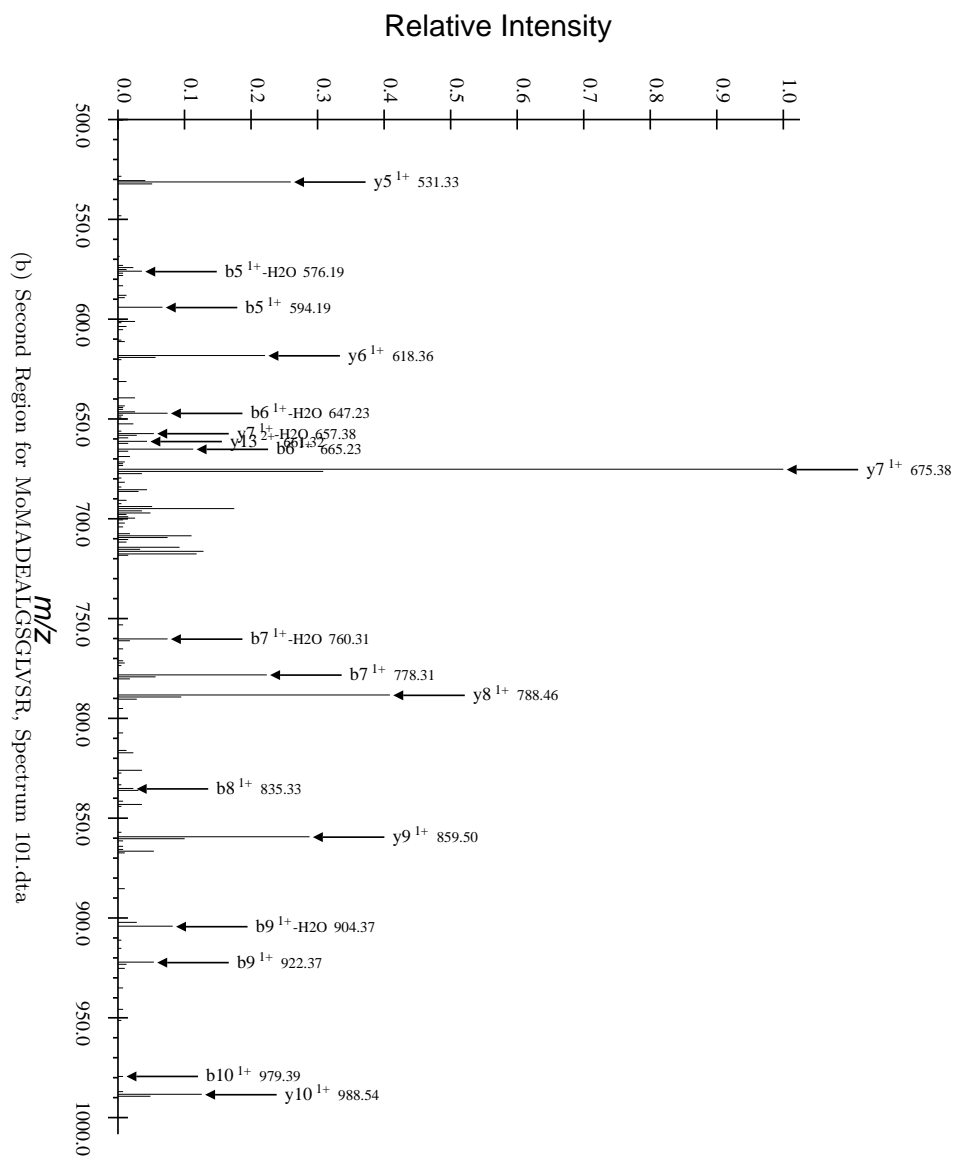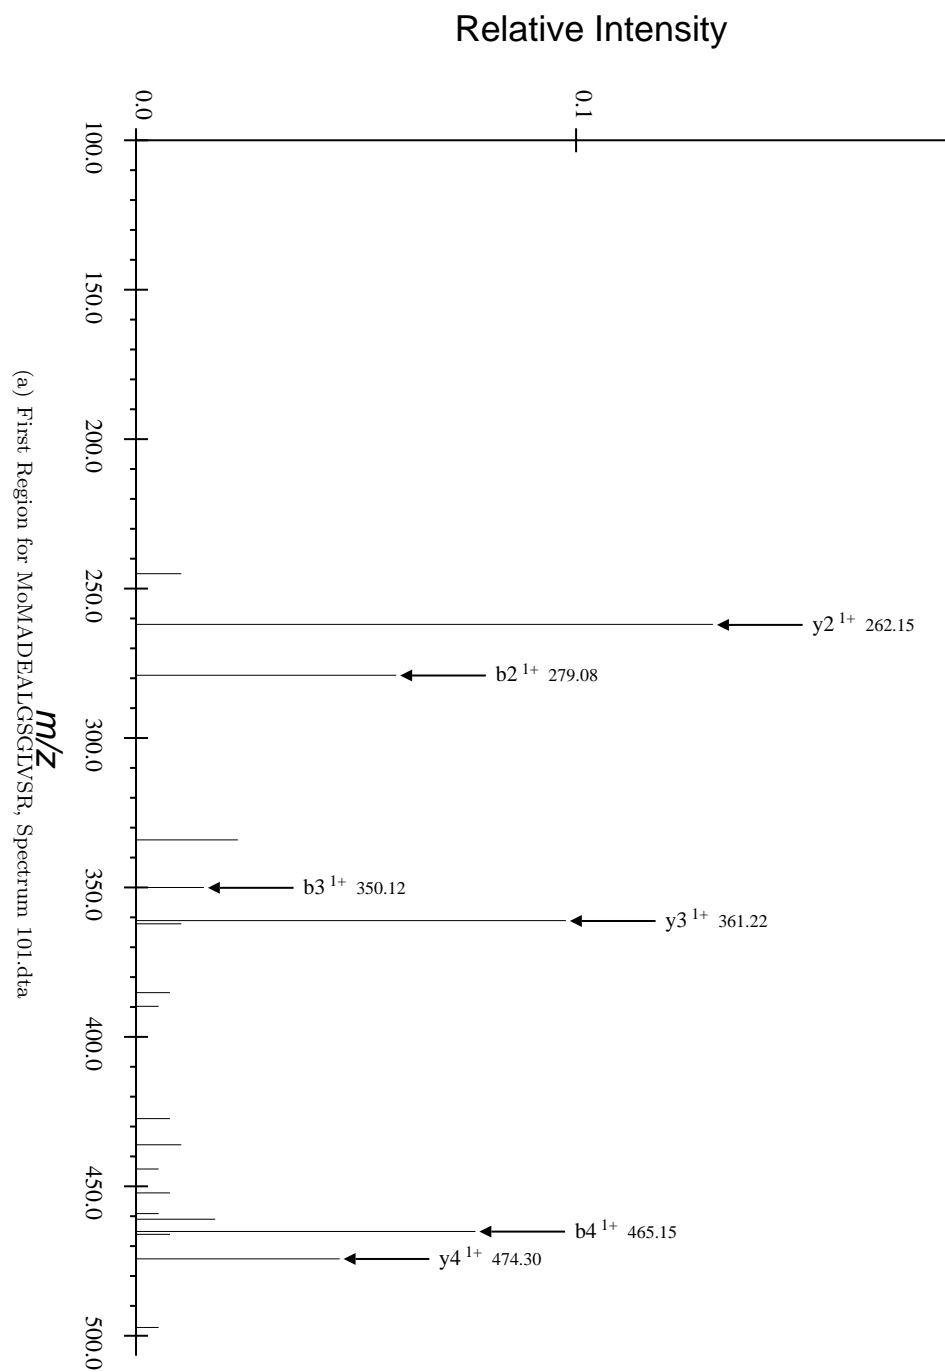



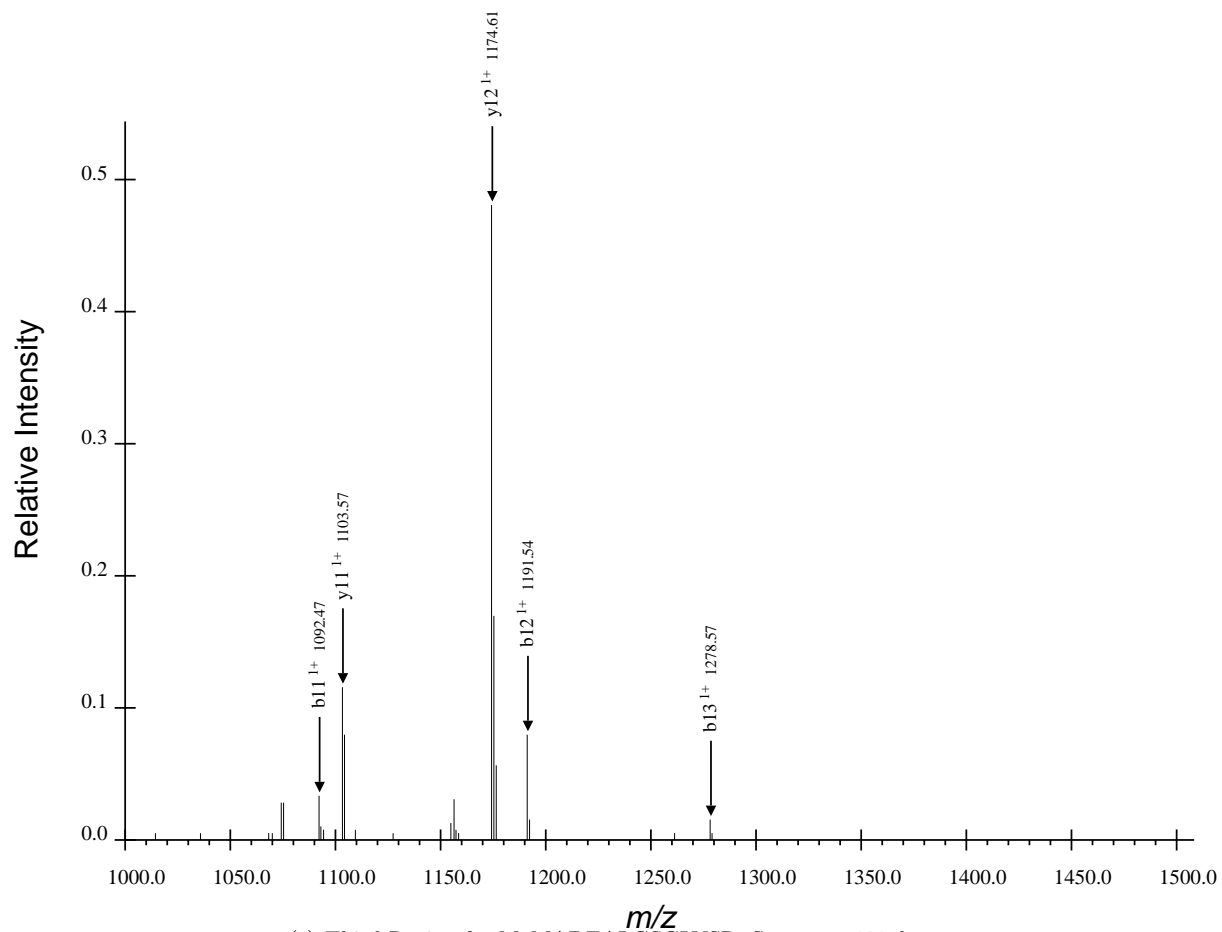

(c) Third Region for MoMADEALGSGVSR, Spectrum 101.dta

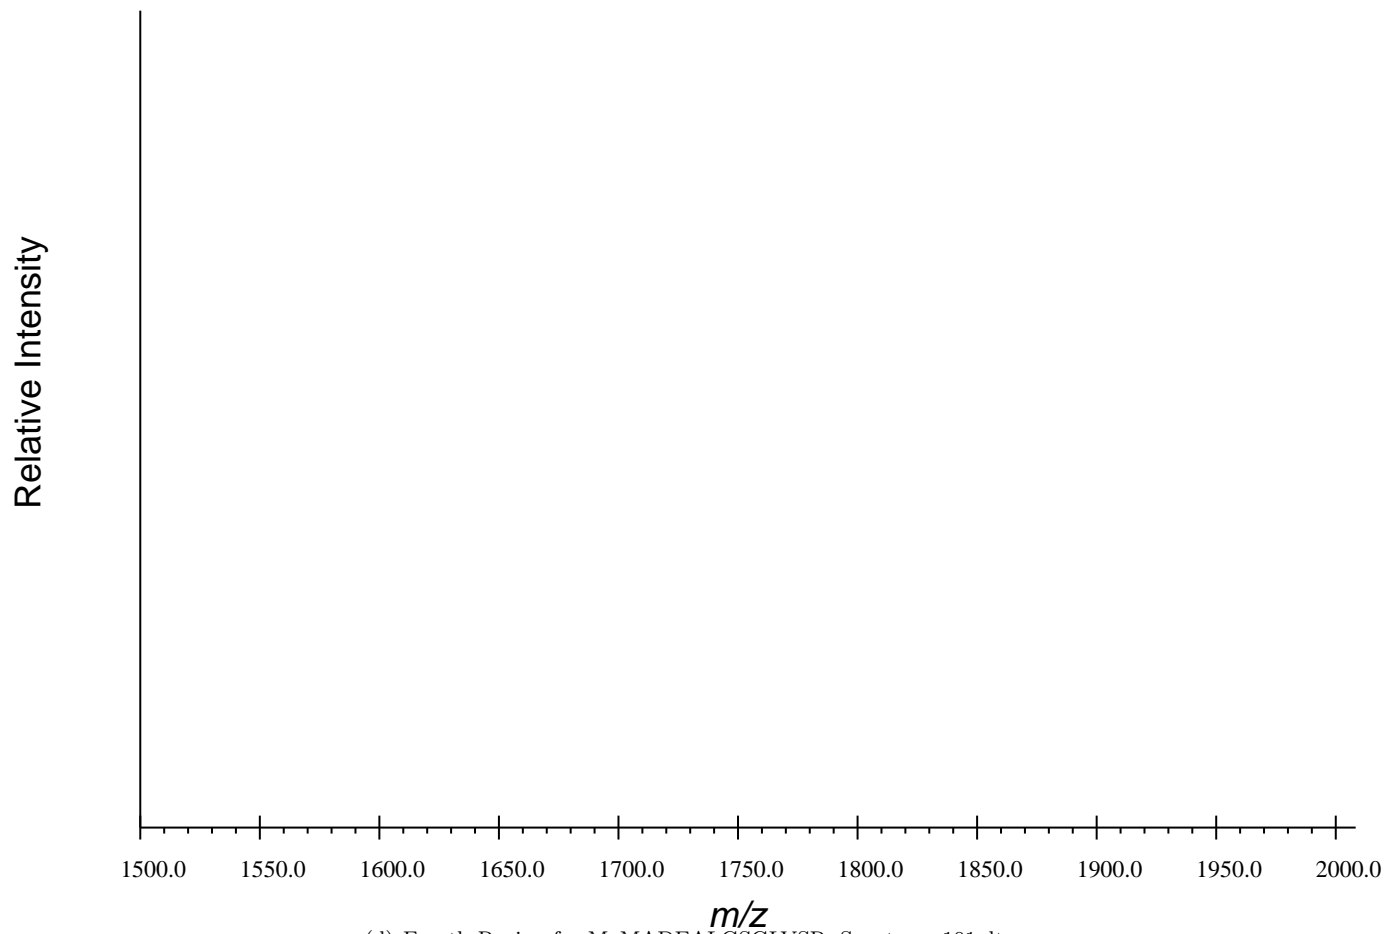

(d) Fourth Region for MoMADEALGSGVSR, Spectrum 101.dta

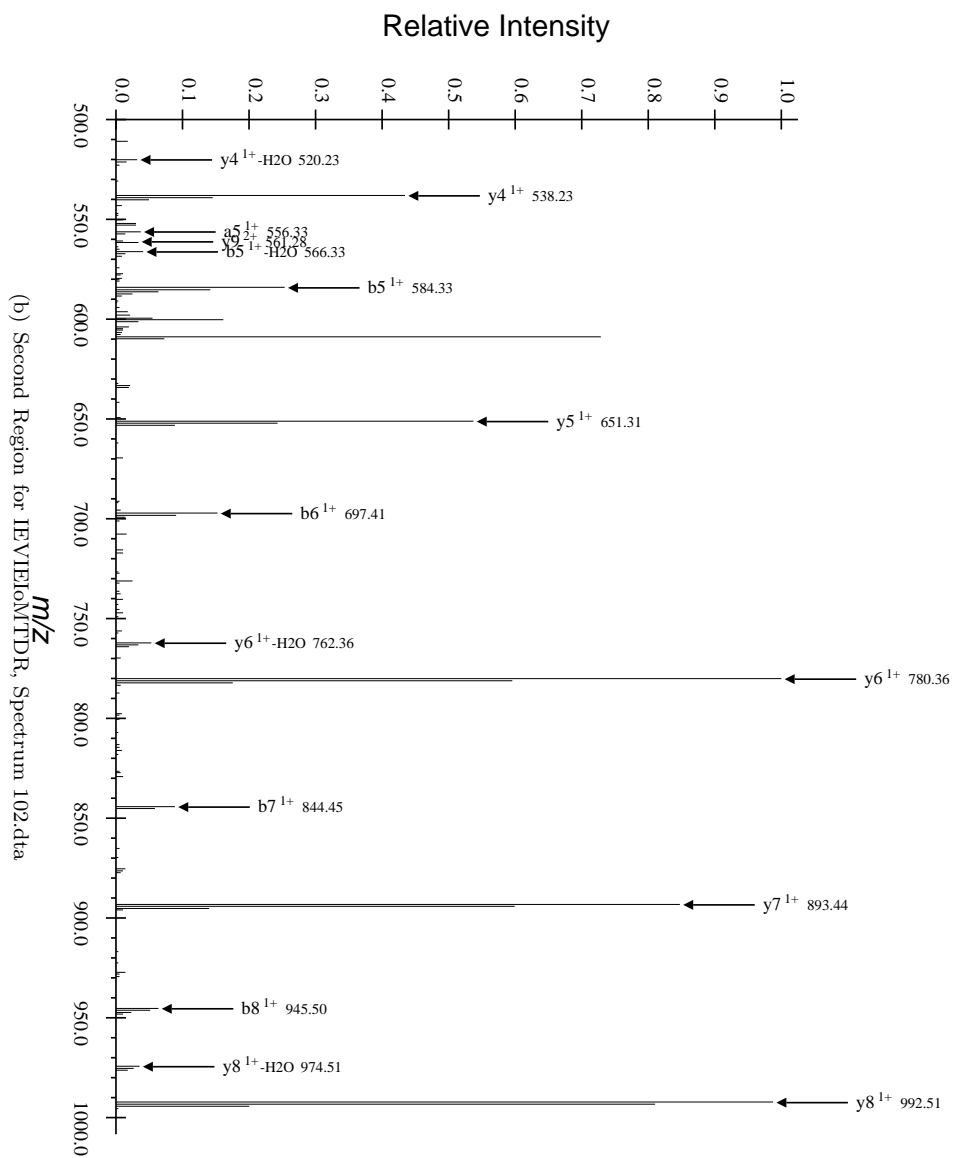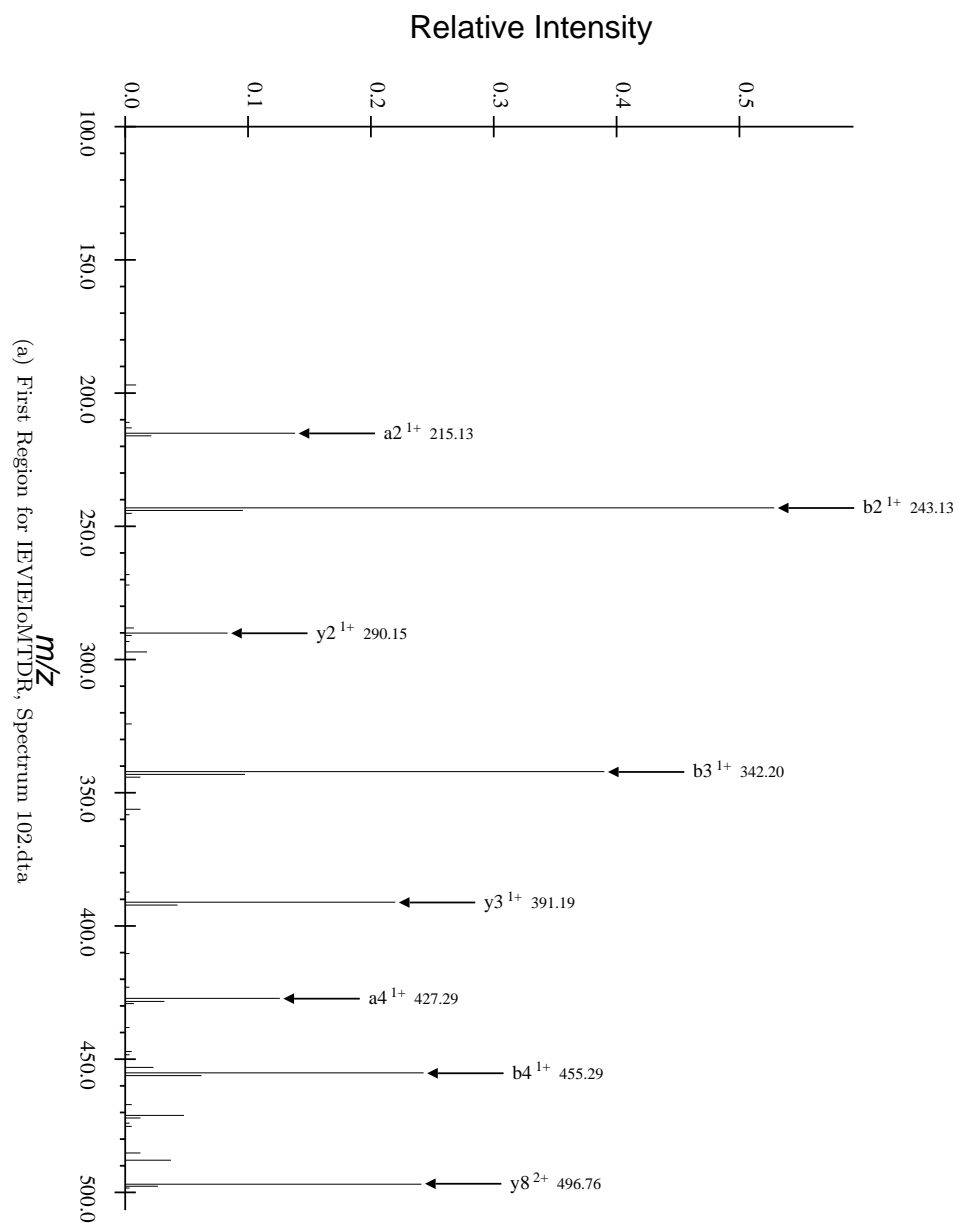

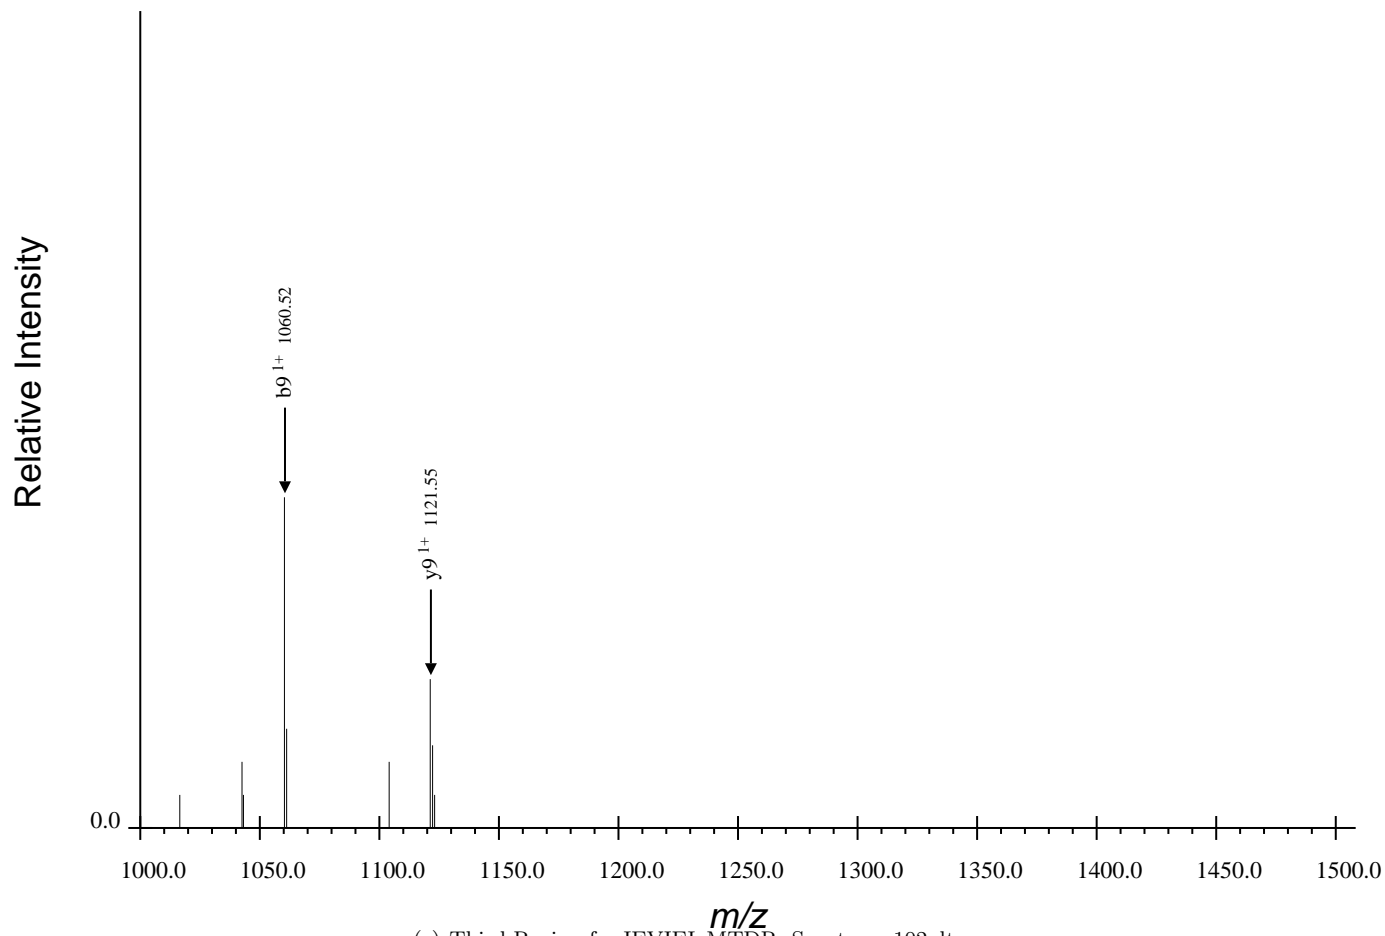

(c) Third Region for IEVIEIoMTDR, Spectrum 102.dta

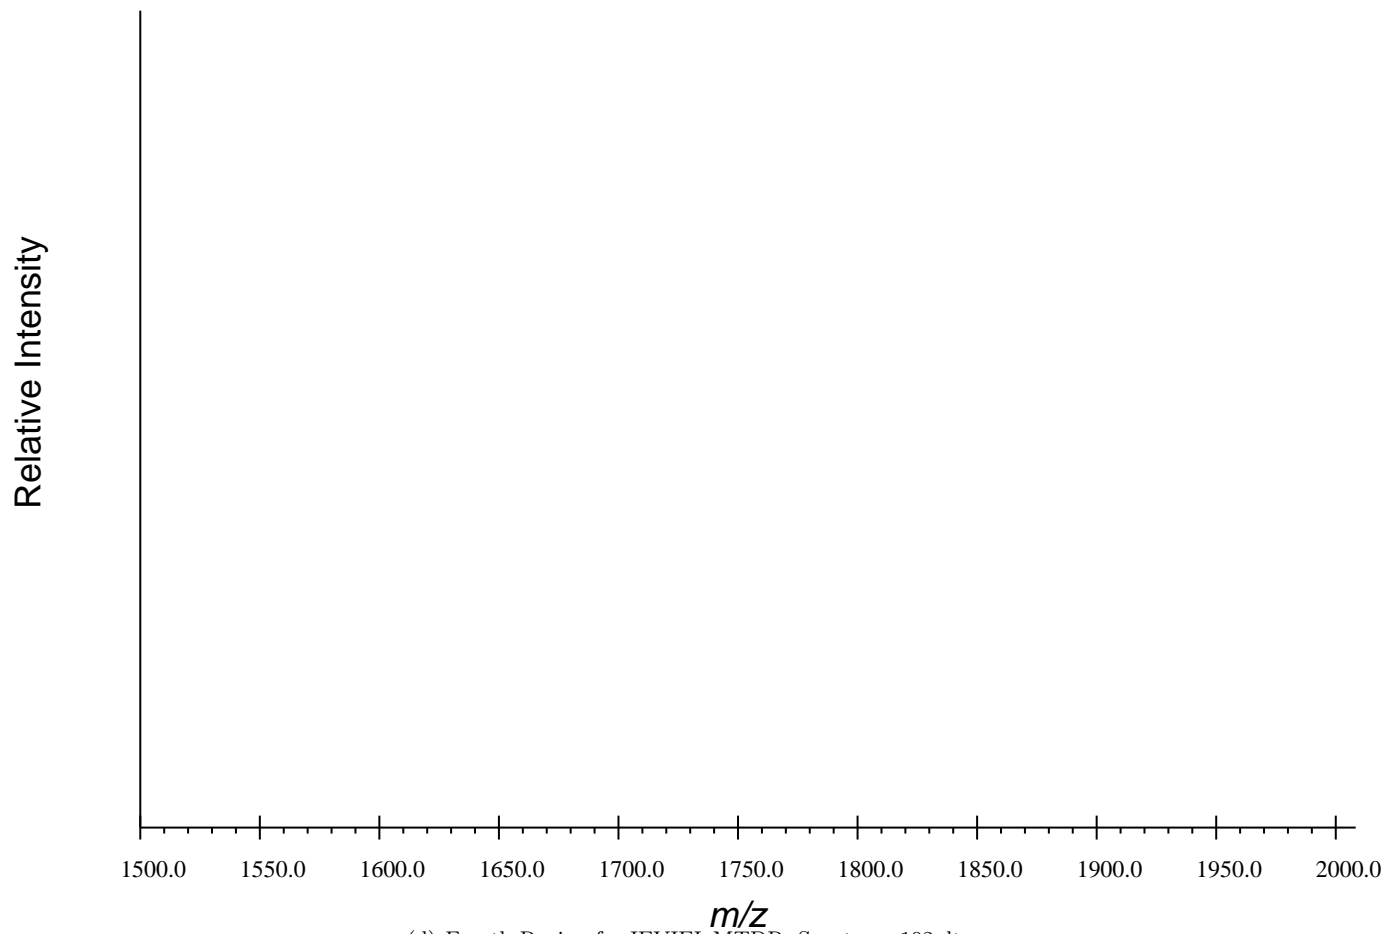

(d) Fourth Region for IEVIEIoMTDR, Spectrum 102.dta

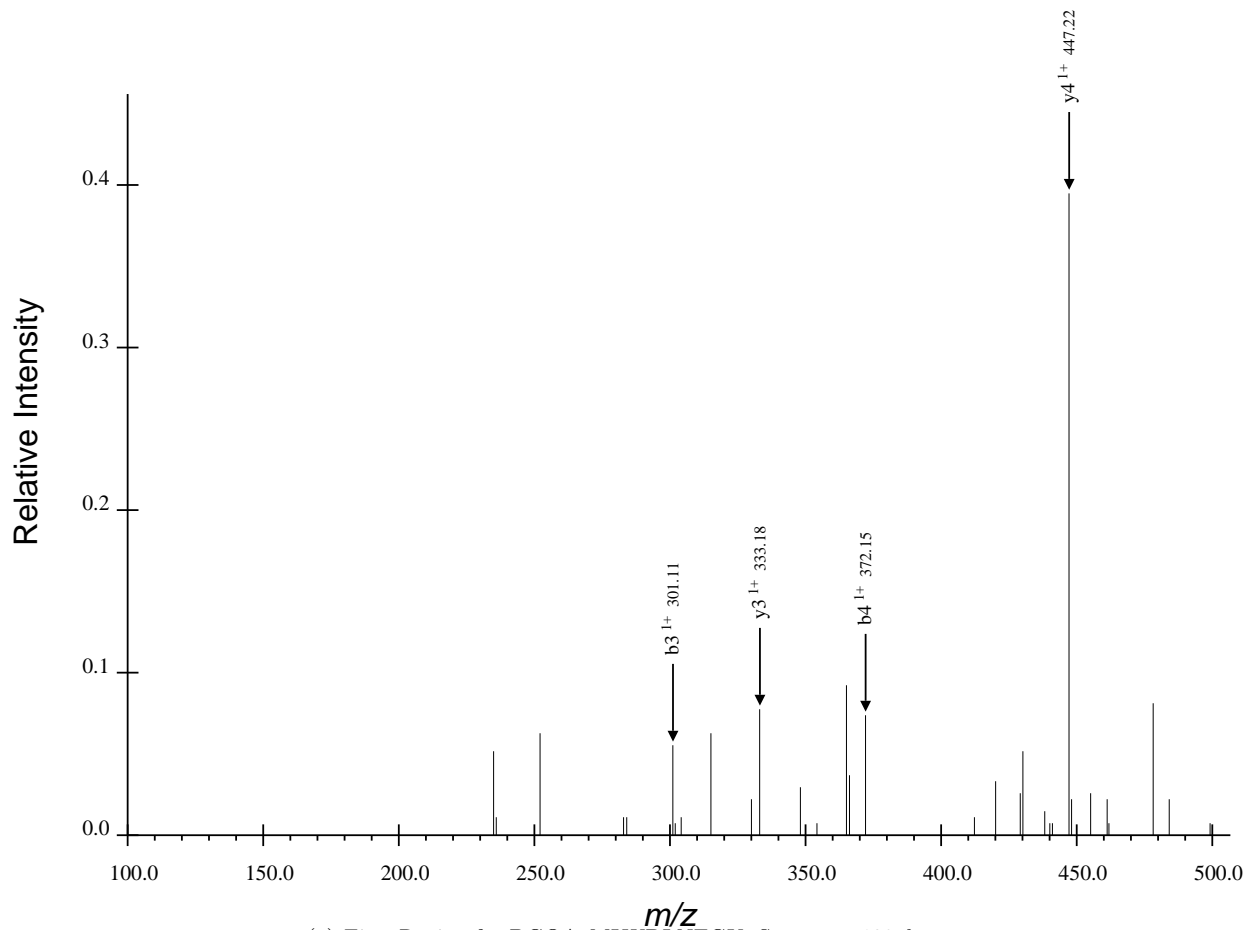

(a) First Region for DGQAoMLWDLNEGK, Spectrum 103.dta

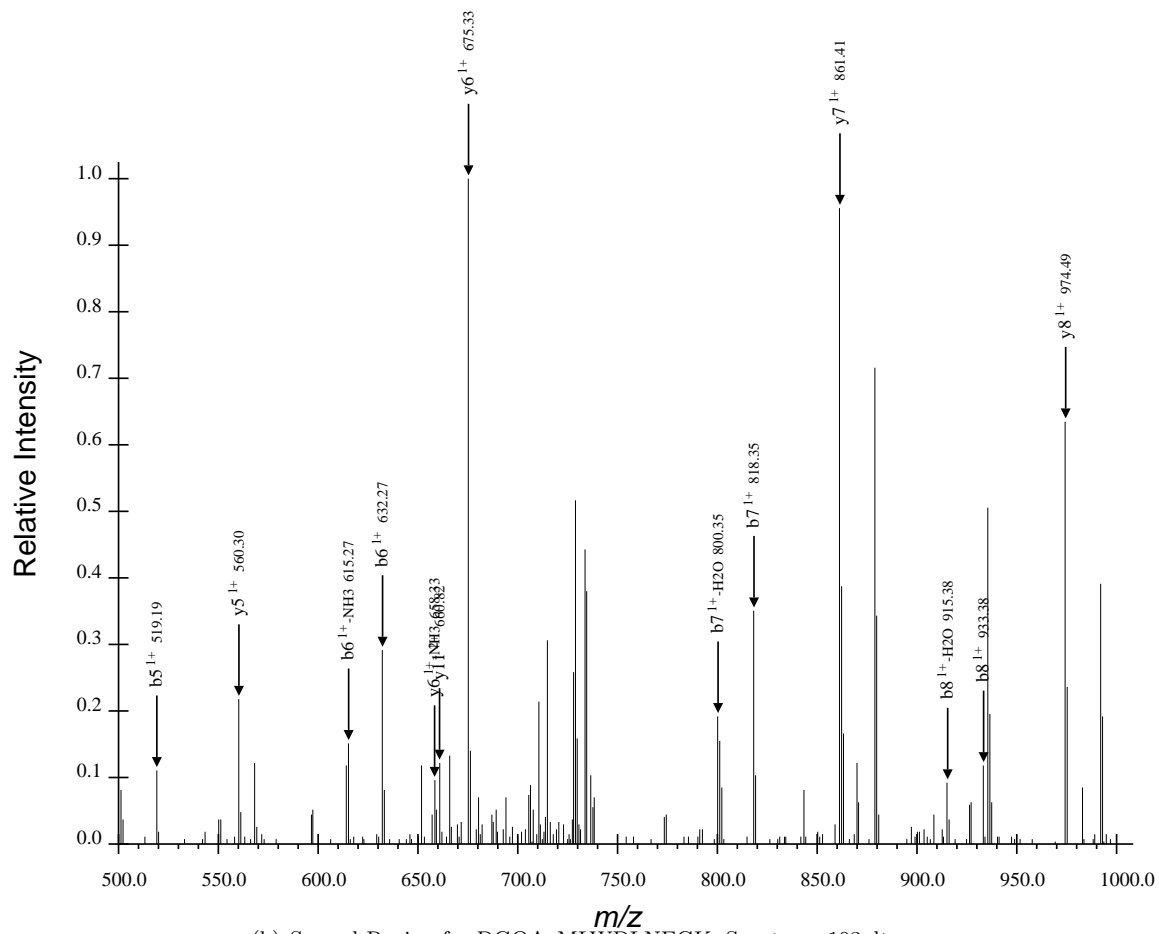

(b) Second Region for DGQAoMLWDLNEGK, Spectrum 103.dta

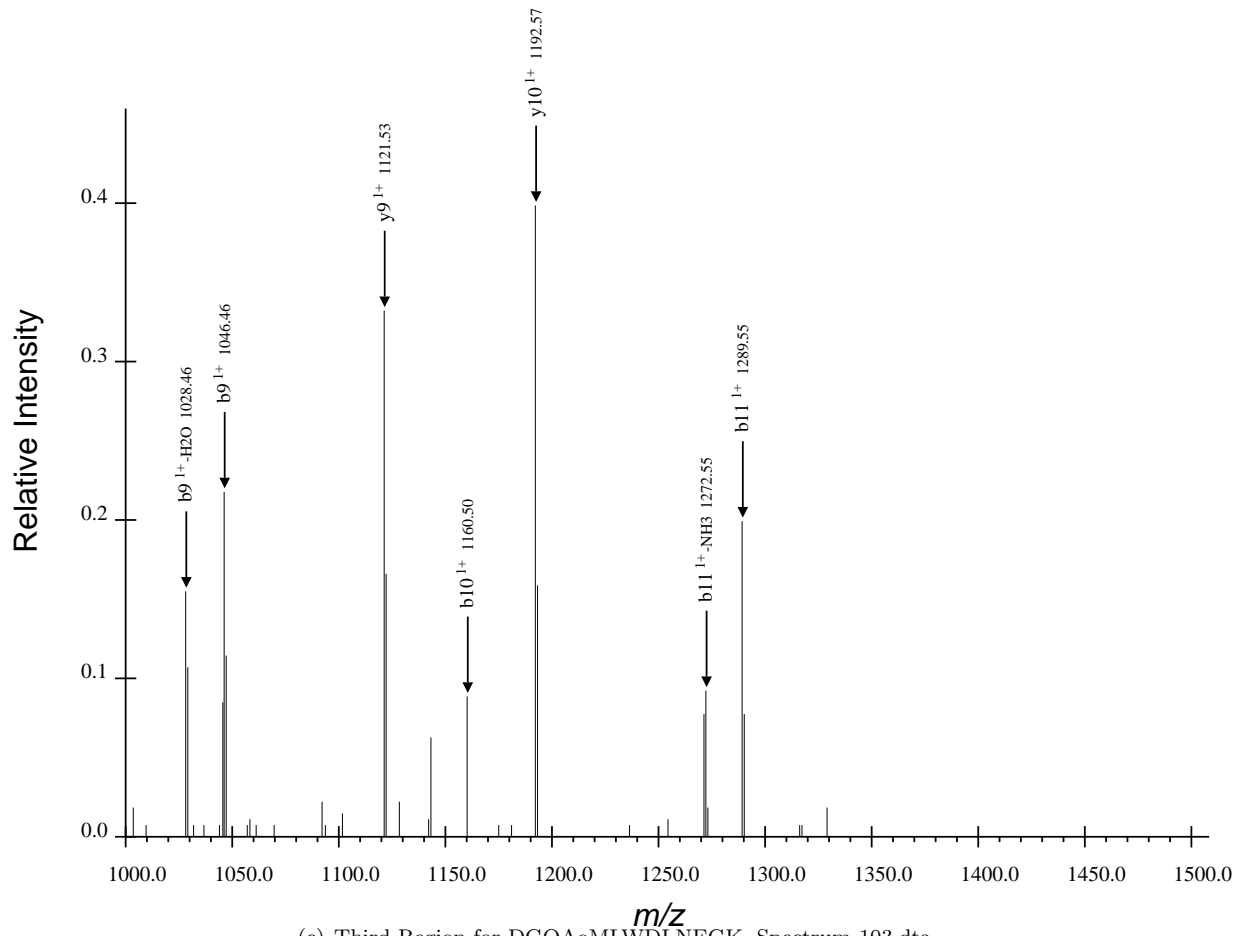

(c) Third Region for DGQAoMLWDLNEGK, Spectrum 103.dta

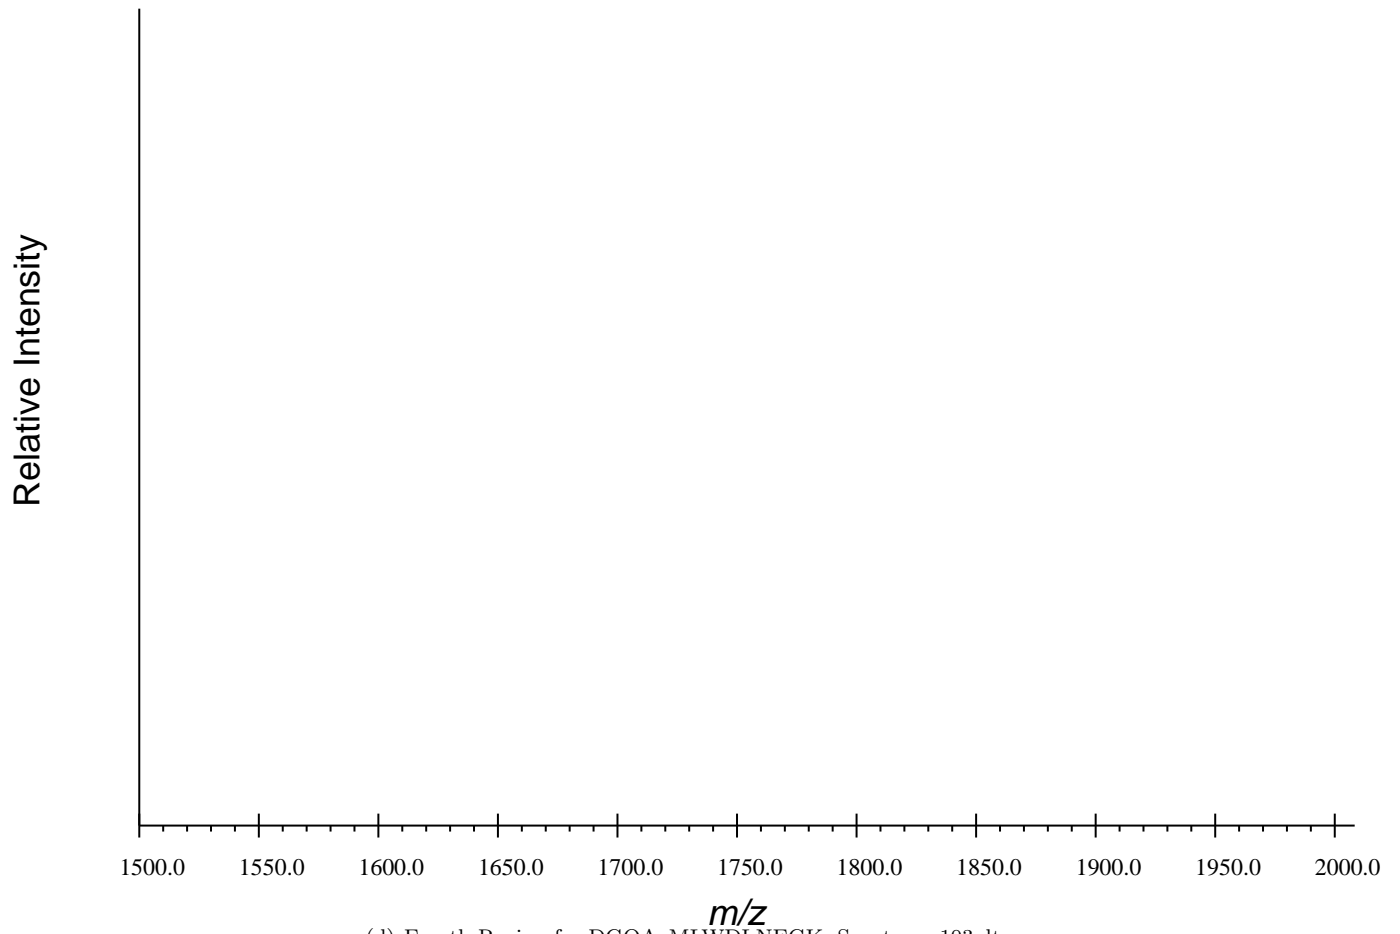

(d) Fourth Region for DGQAoMLWDLNEGK, Spectrum 103.dta

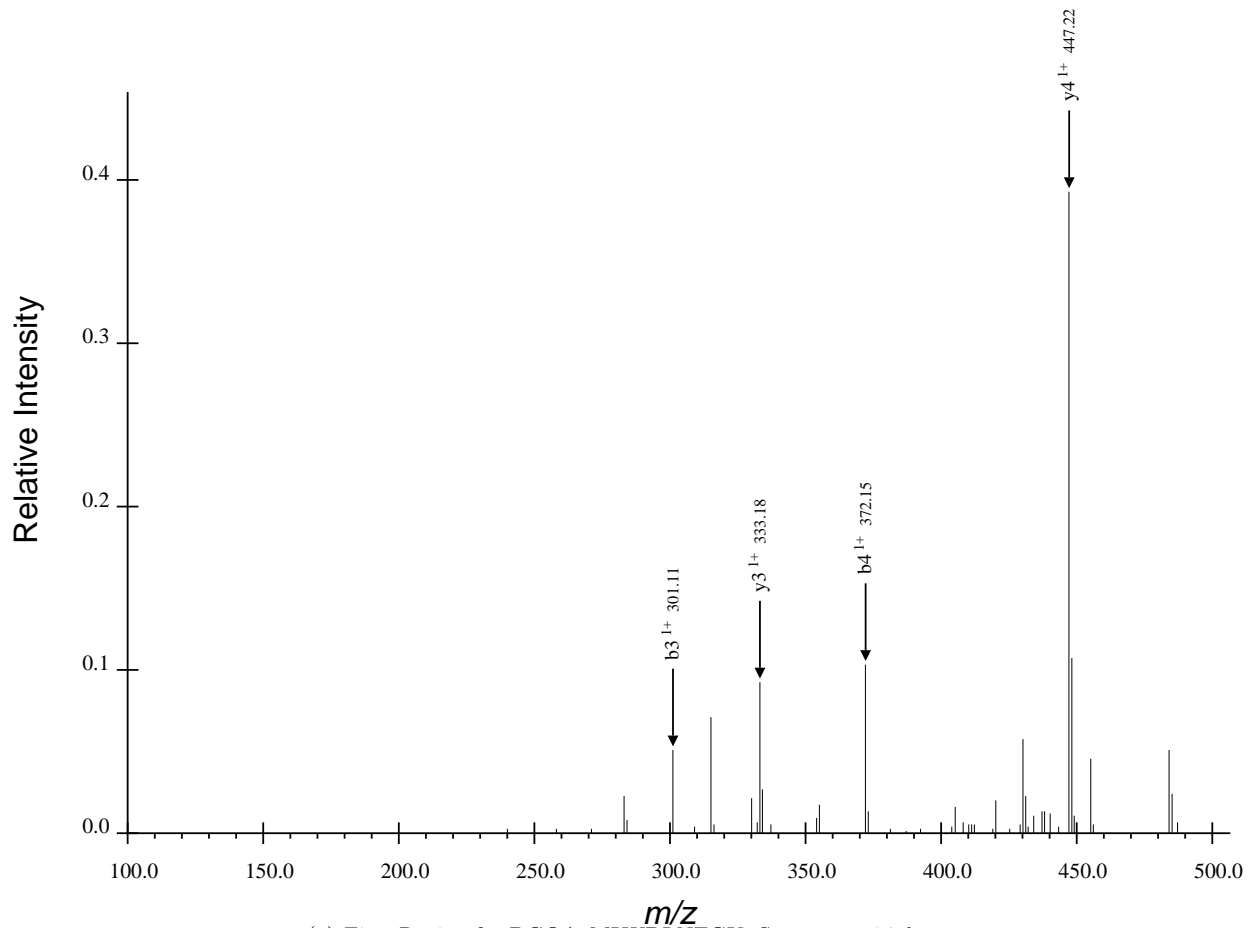

(a) First Region for DGQAoMLWDLNEGK, Spectrum 104.dta

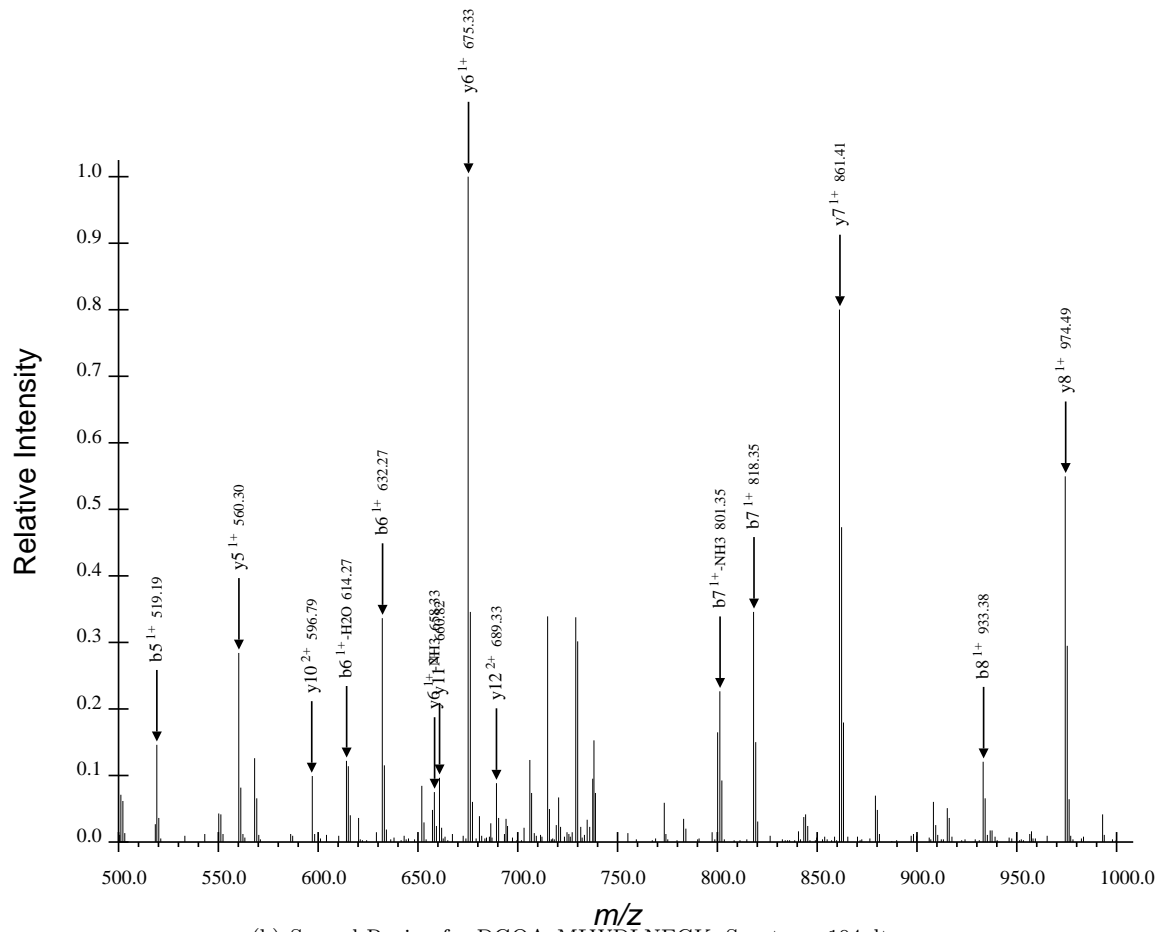

(b) Second Region for DGQAoMLWDLNEGK, Spectrum 104.dta

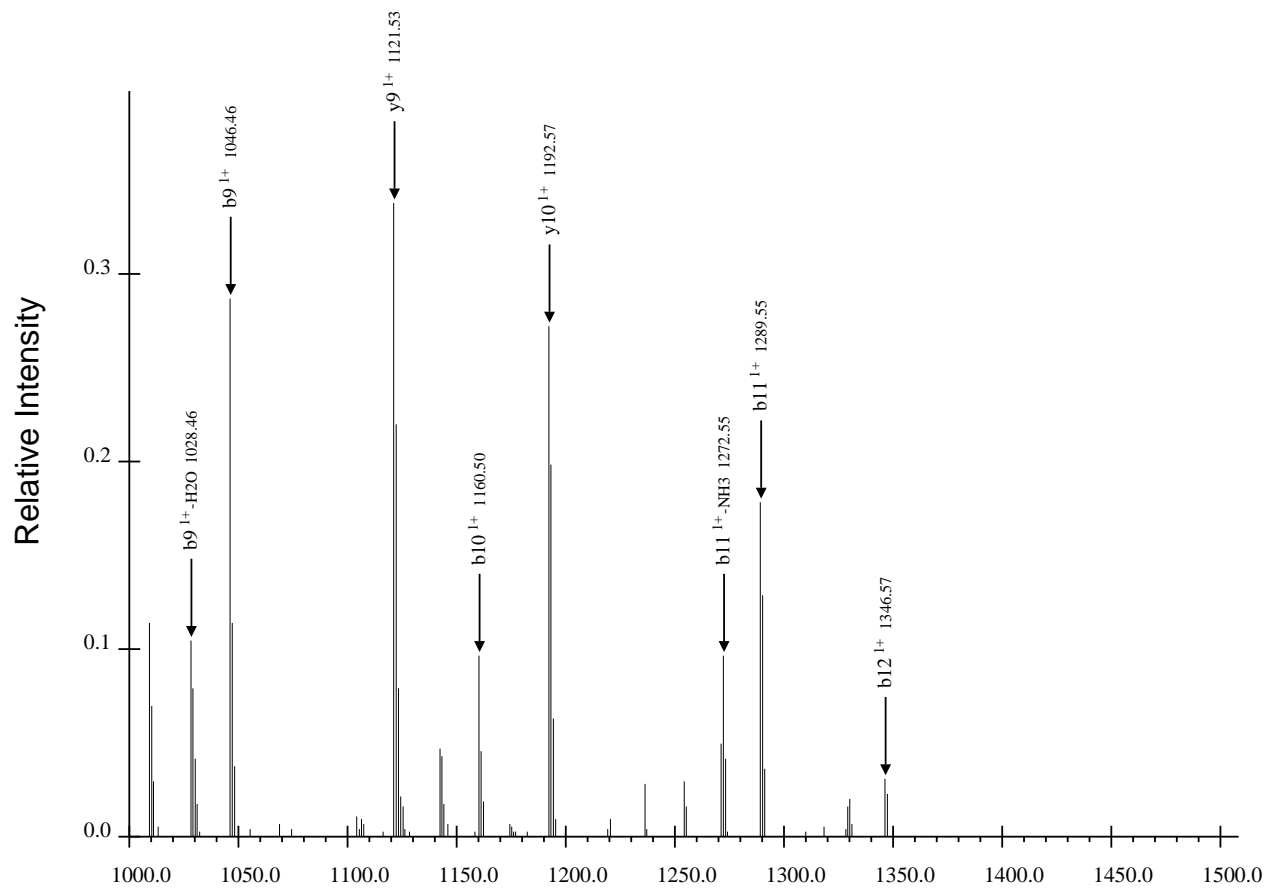

(c) Third Region for DGQAoMLWDLNEGK, Spectrum 104.dta

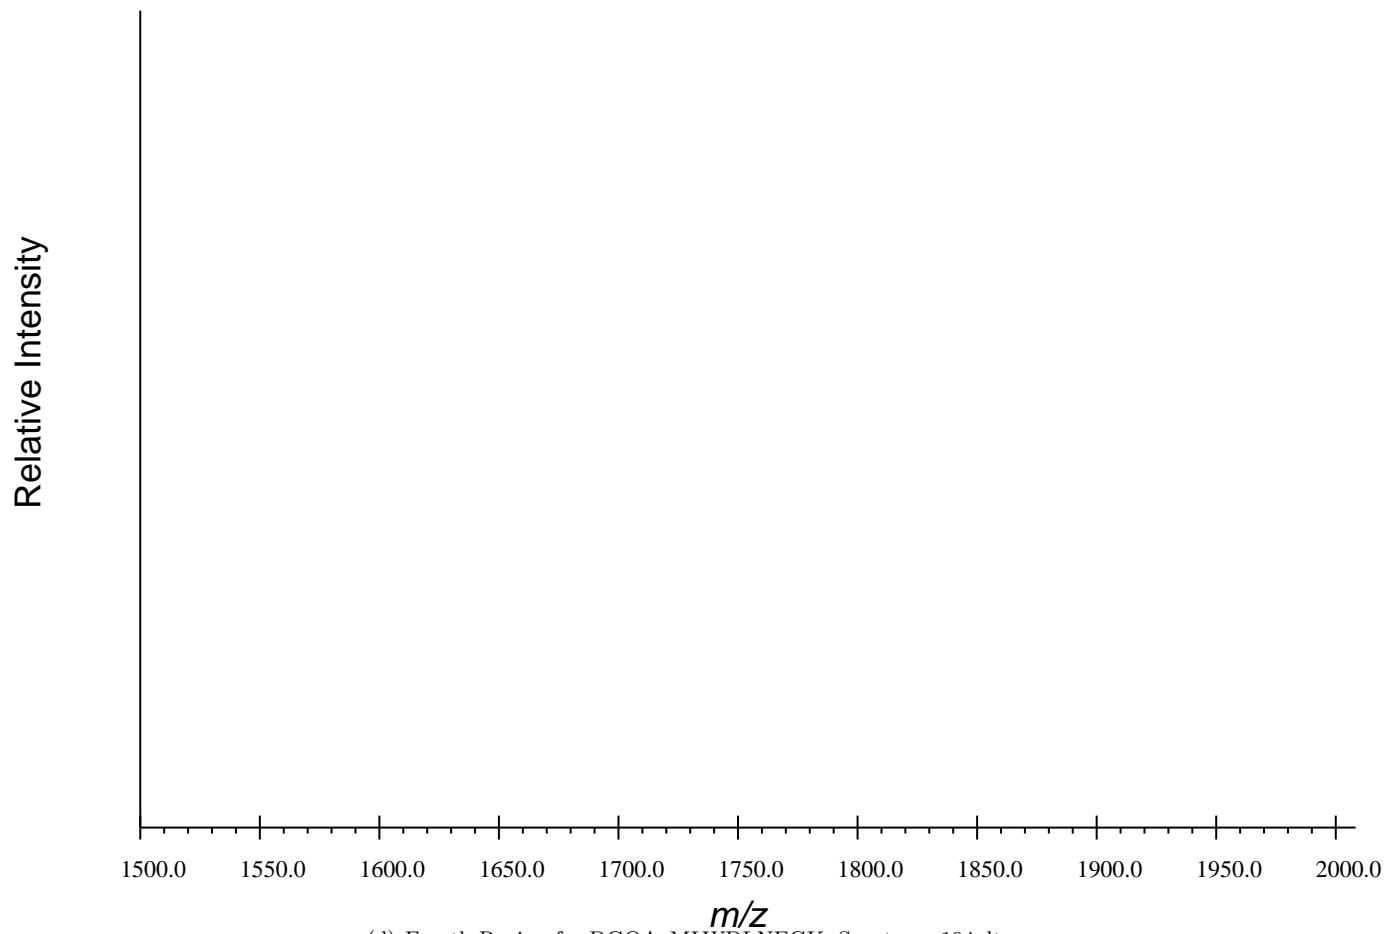

(d) Fourth Region for DGQAoMLWDLNEGK, Spectrum 104.dta

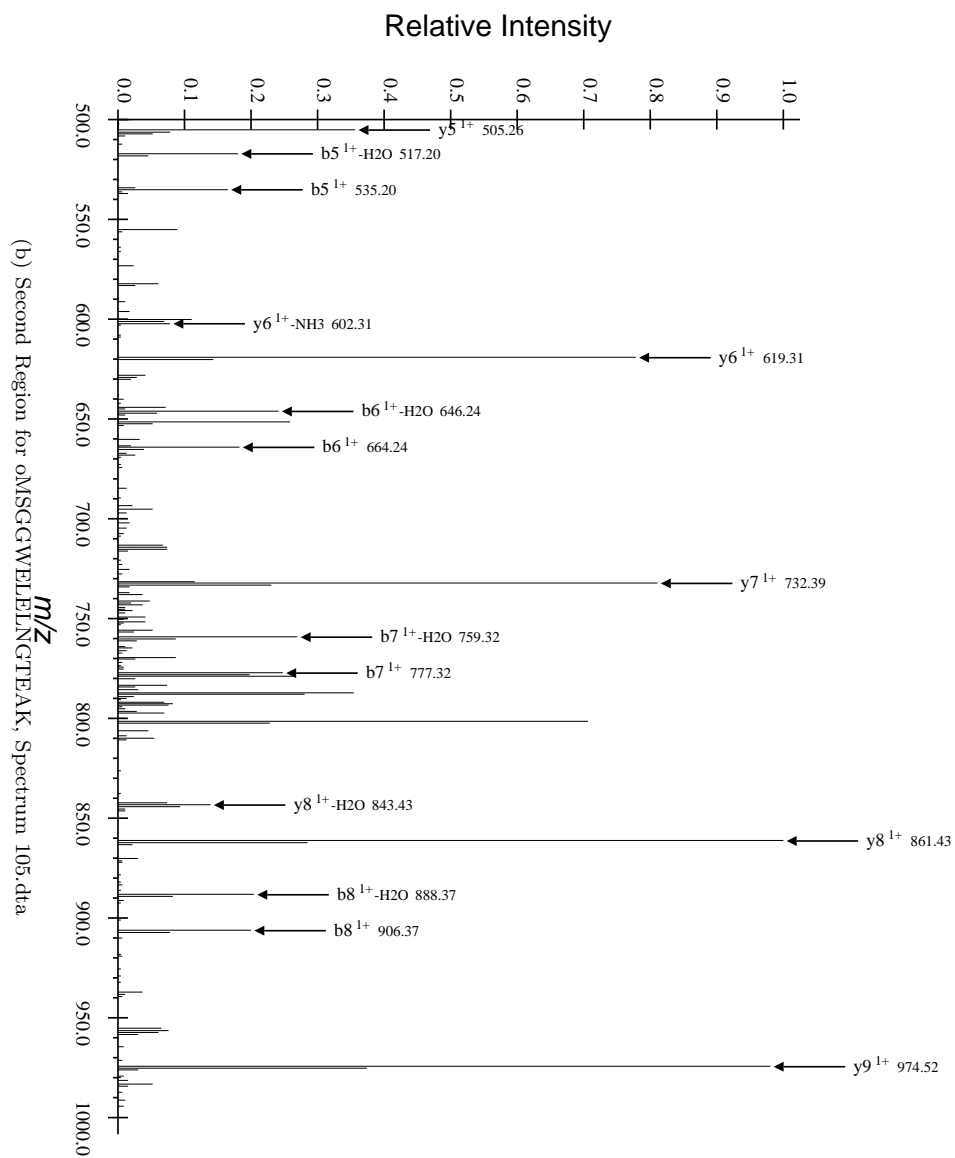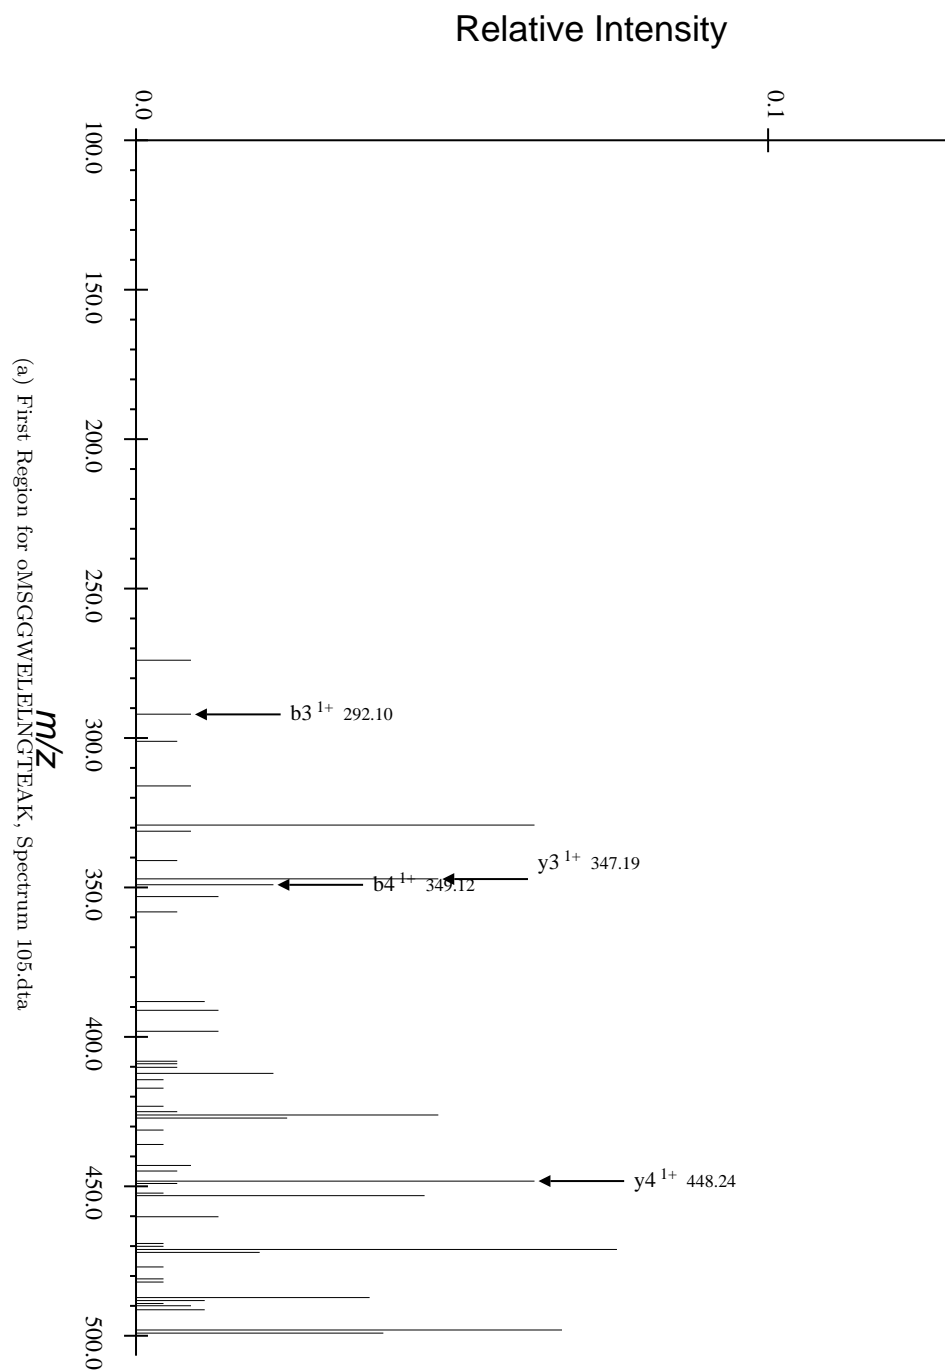



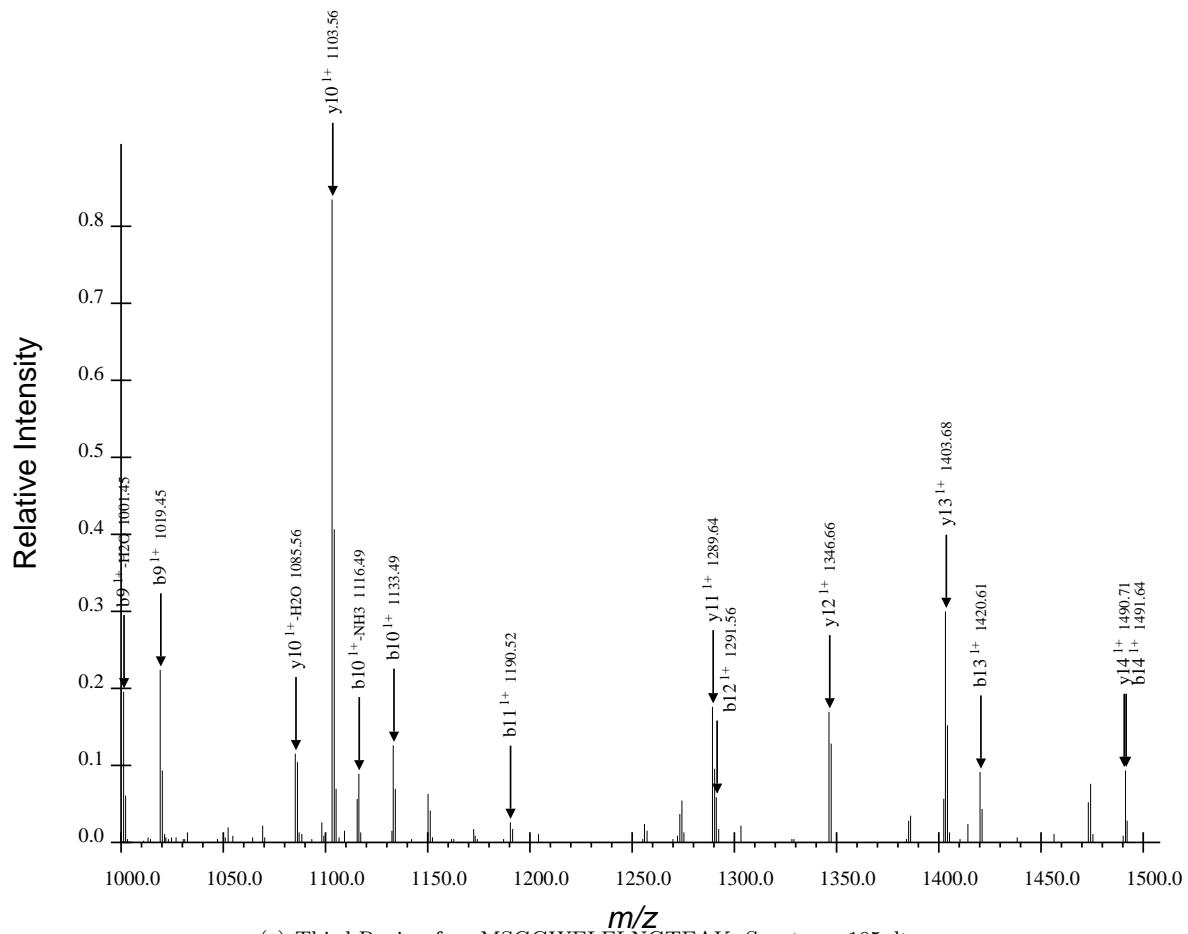

(c) Third Region for oMSGGWELELNNGTEAK, Spectrum 105.dta

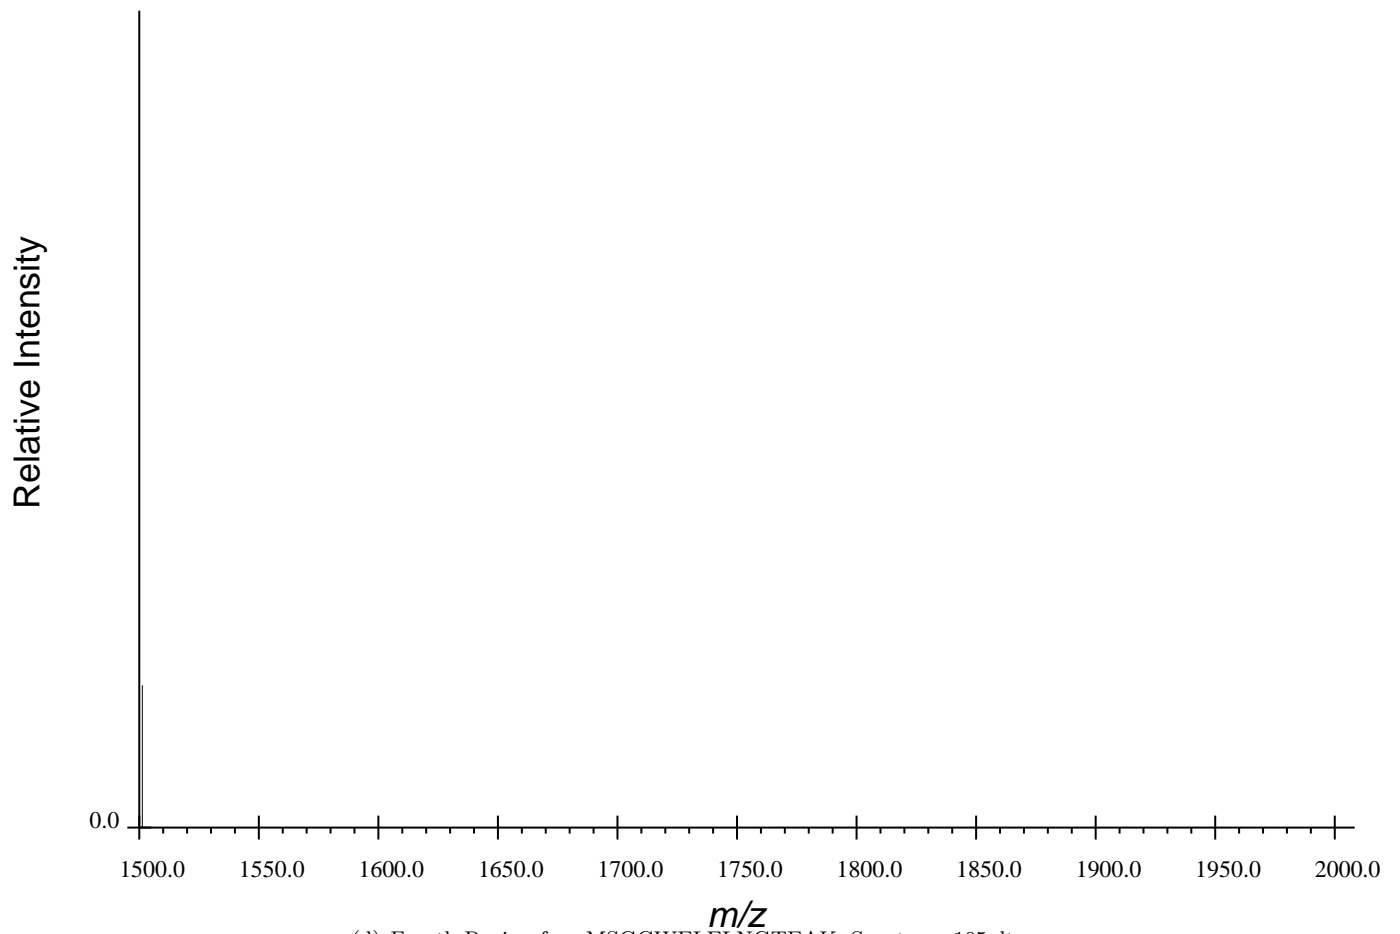

(d) Fourth Region for oMSGGWELELNNGTEAK, Spectrum 105.dta

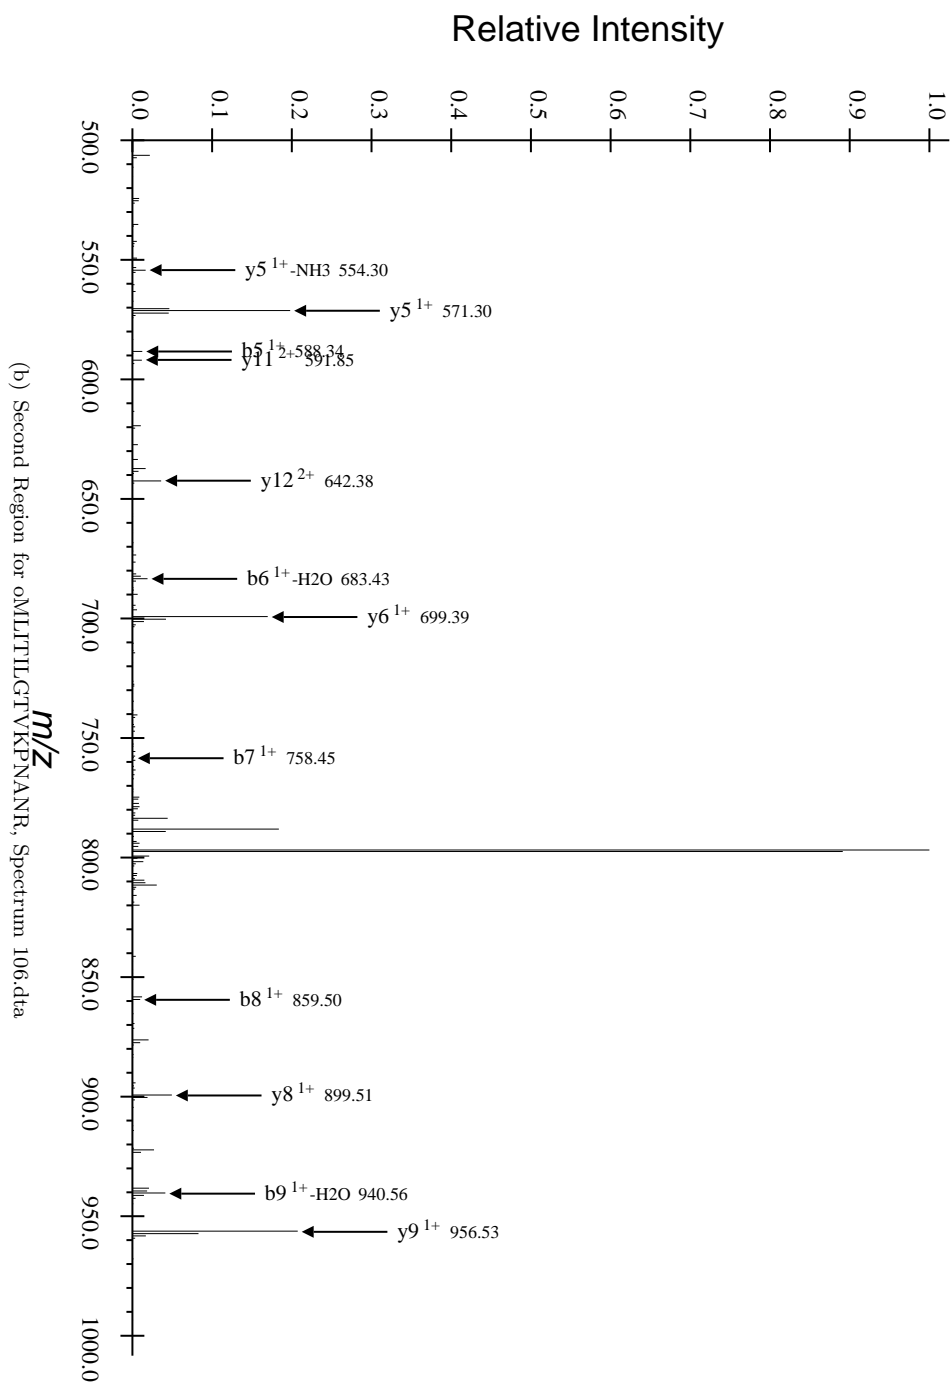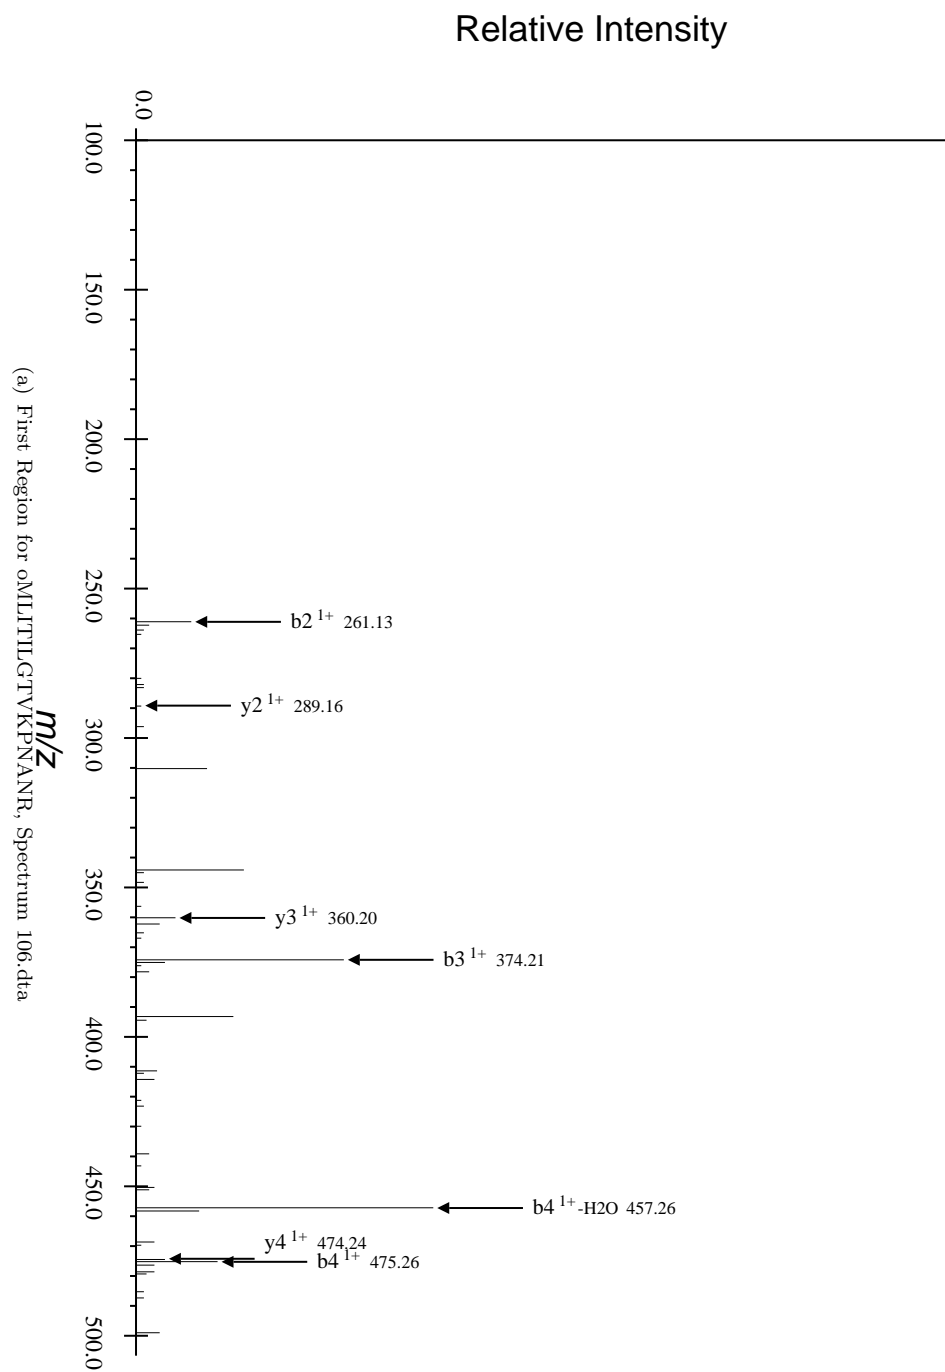

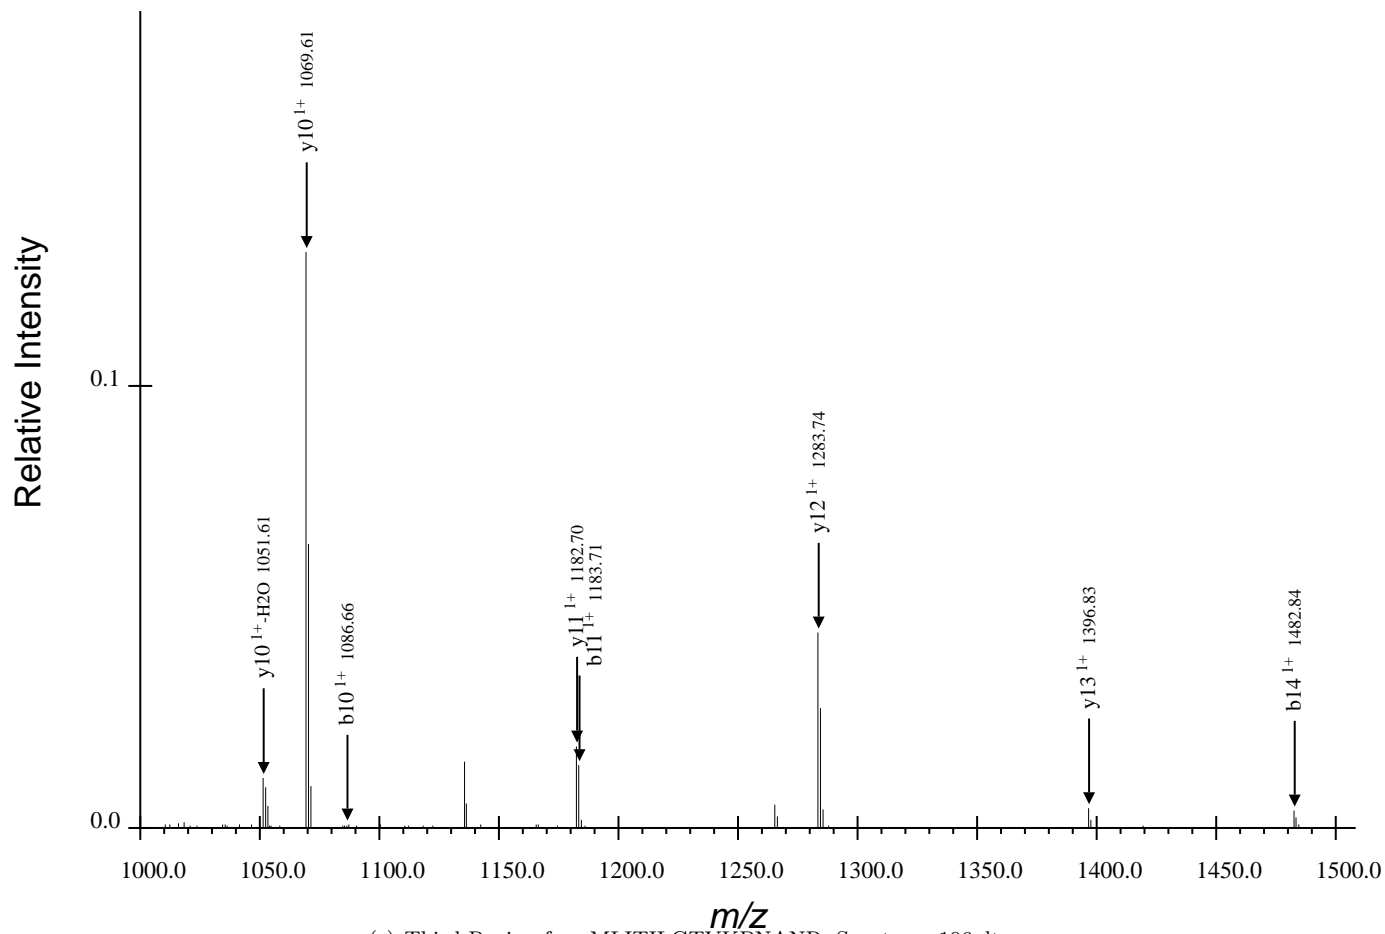

(c) Third Region for oMLITILGTVKPNANR, Spectrum 106.dta

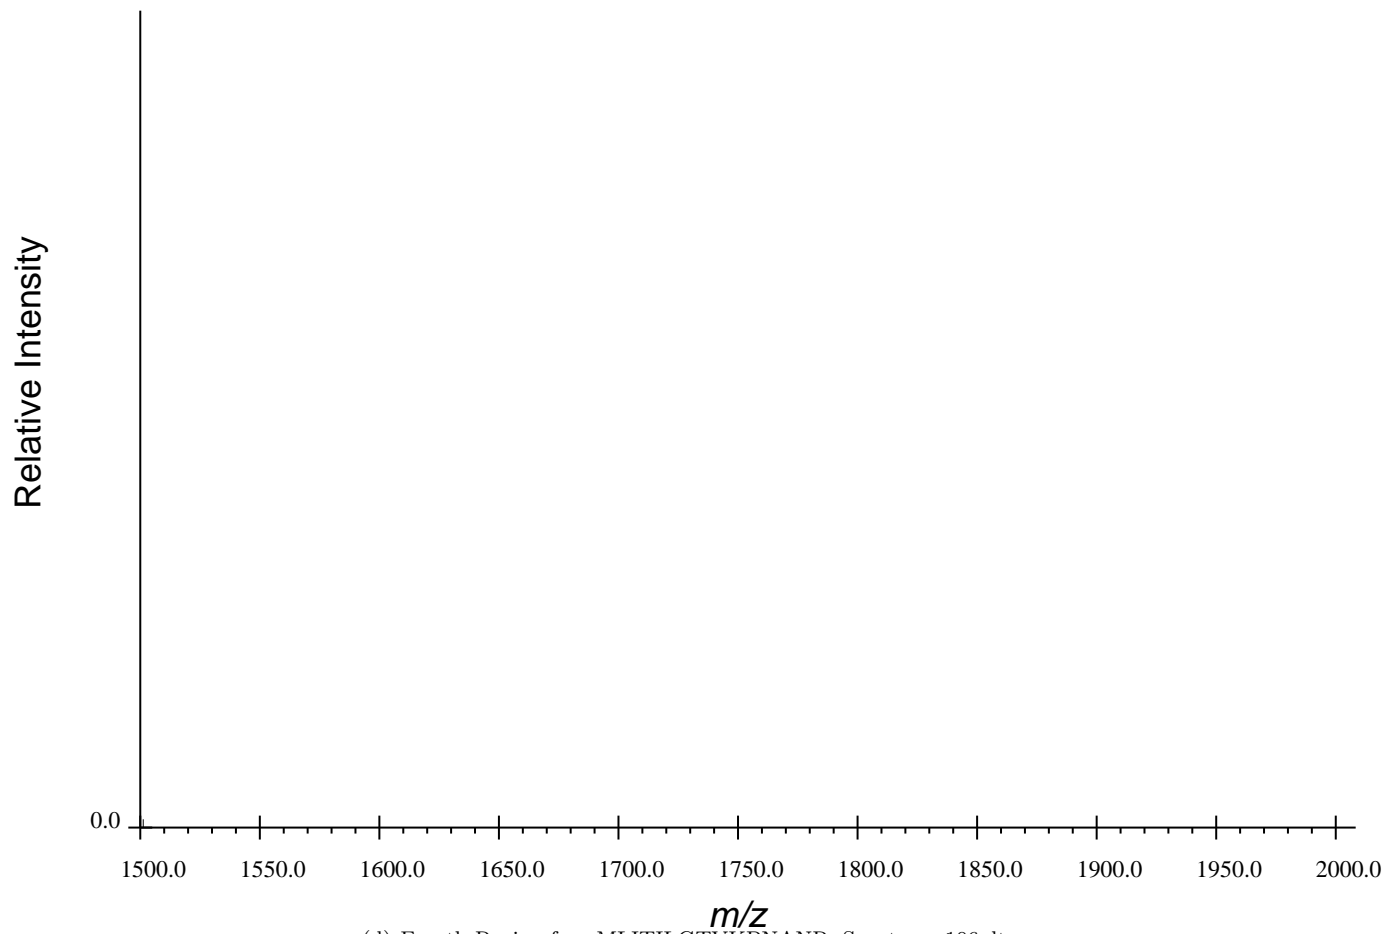

(d) Fourth Region for oMLITILGTVKPNANR, Spectrum 106.dta

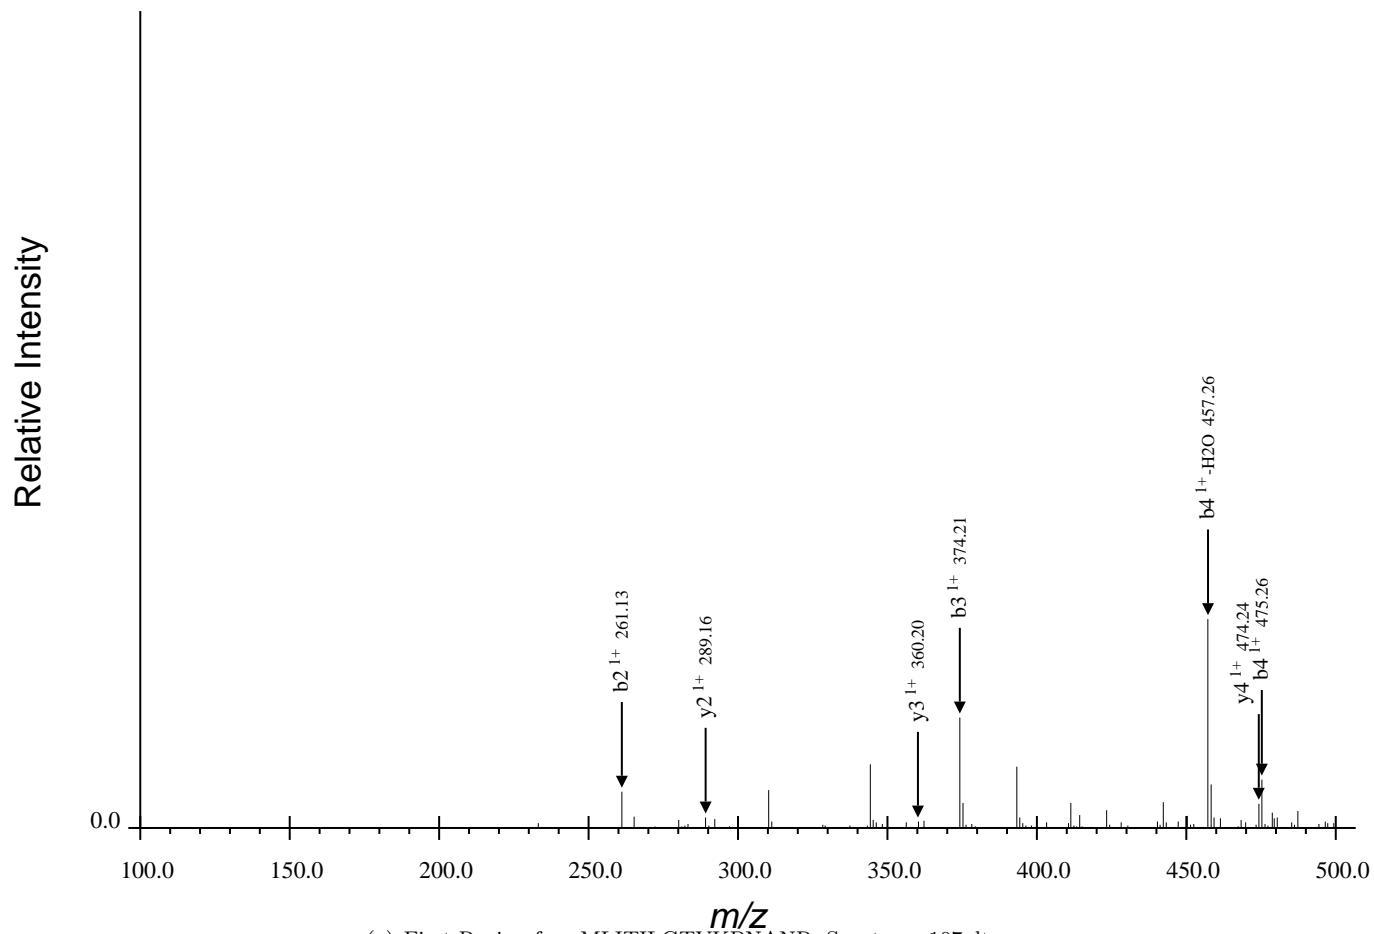

(a) First Region for oMLITILGTVKPNANR, Spectrum 107.dta

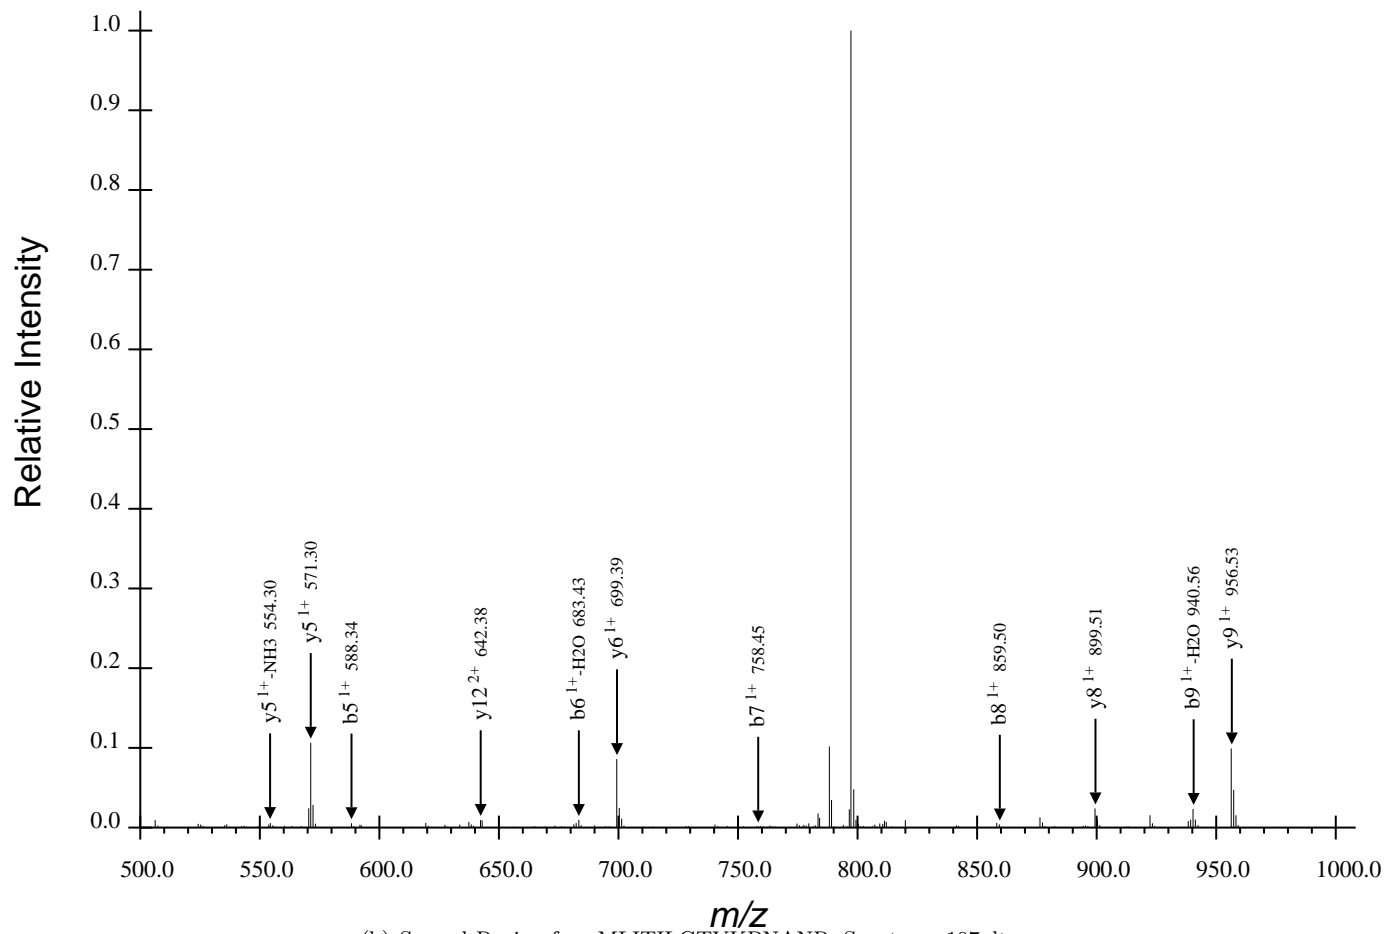

(b) Second Region for oMLITILGTVKPNANR, Spectrum 107.dta

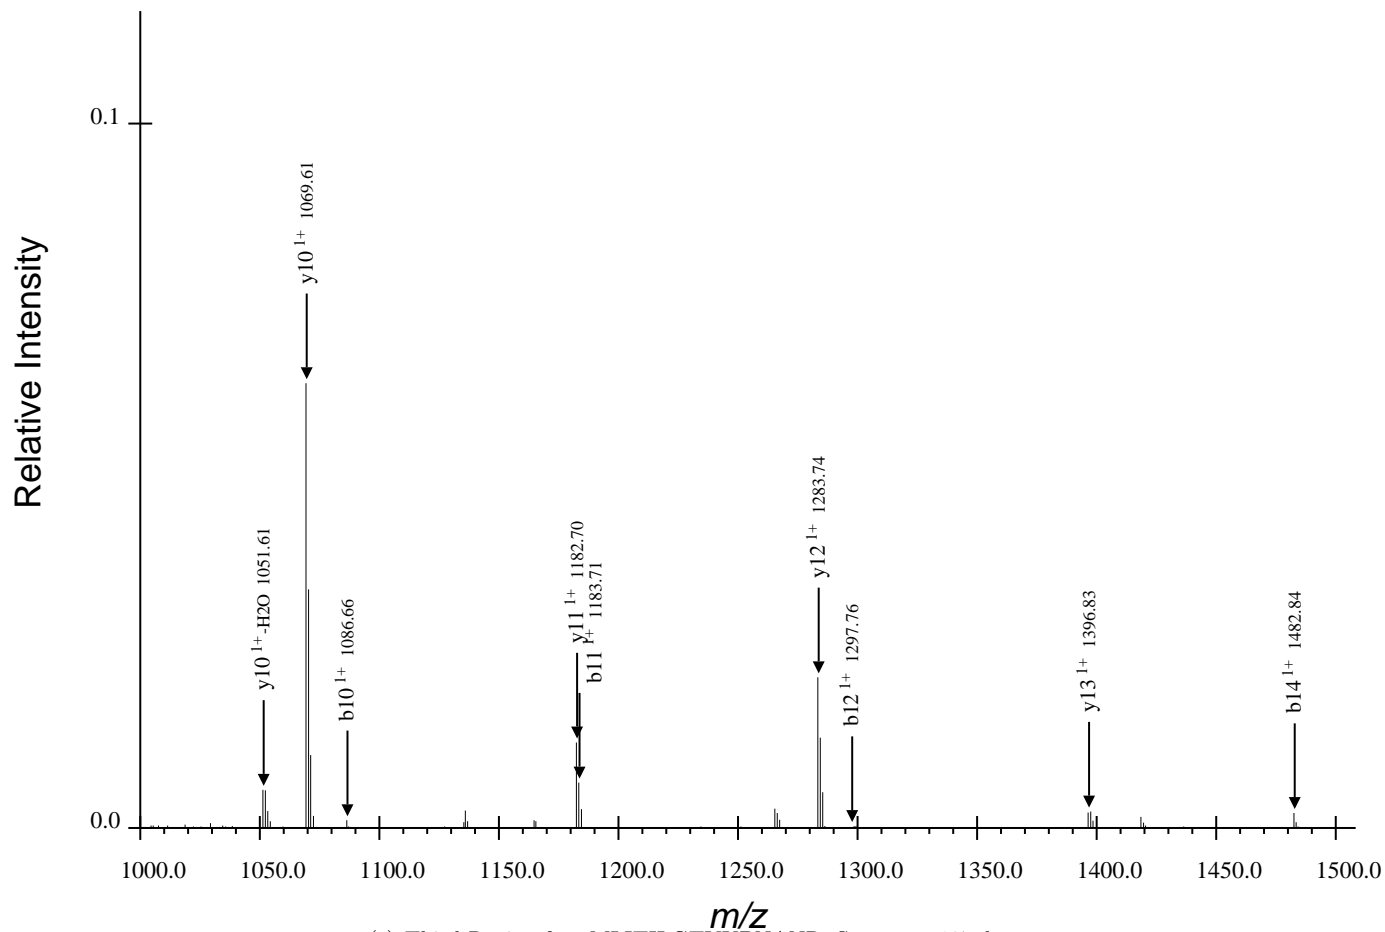

(c) Third Region for oMLITILGTVKPNANR, Spectrum 107.dta

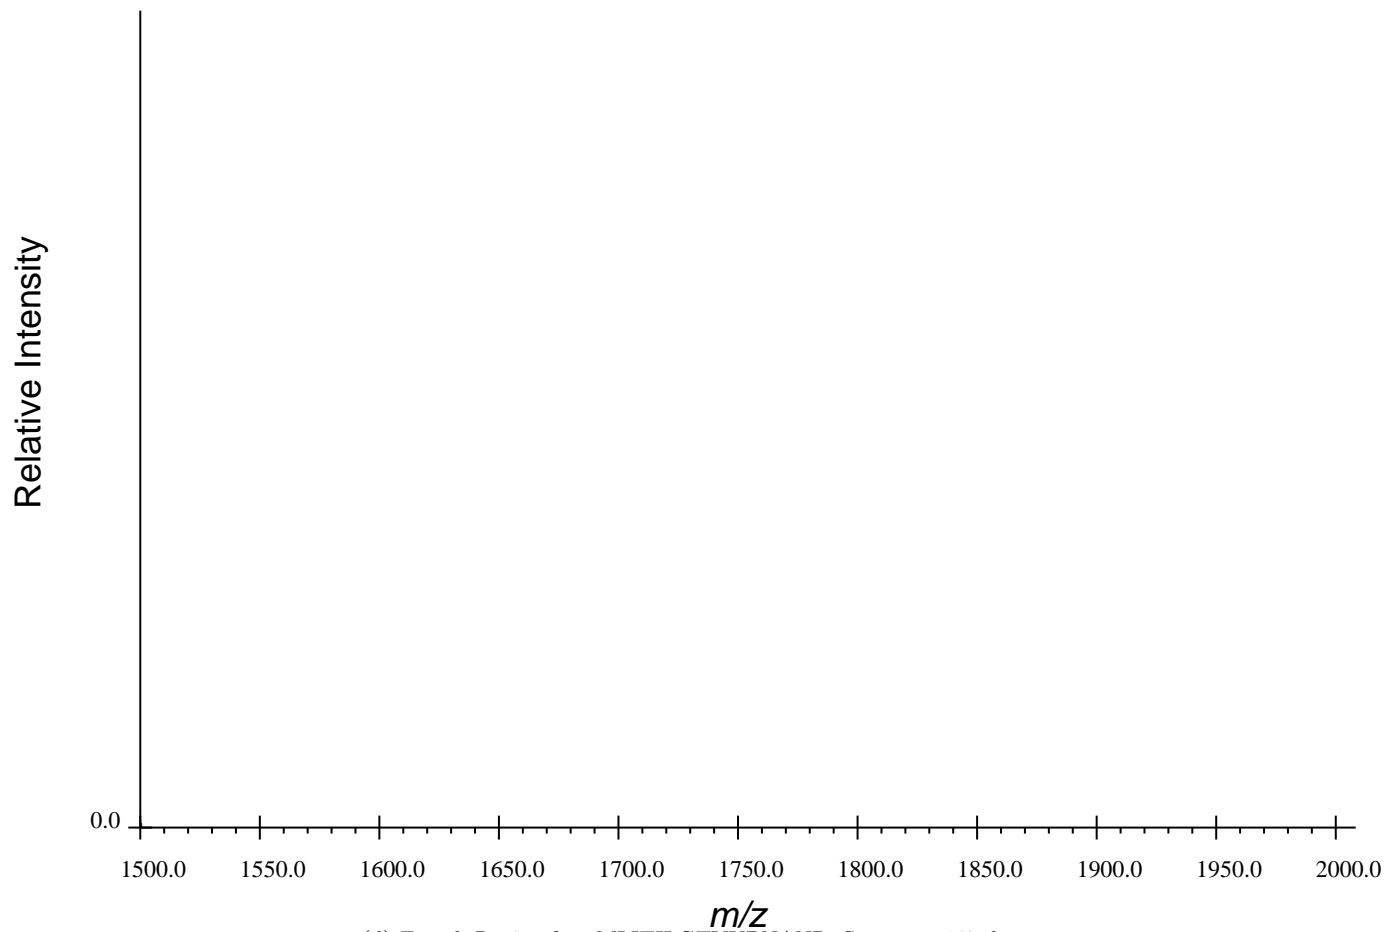

(d) Fourth Region for oMLITILGTVKPNANR, Spectrum 107.dta

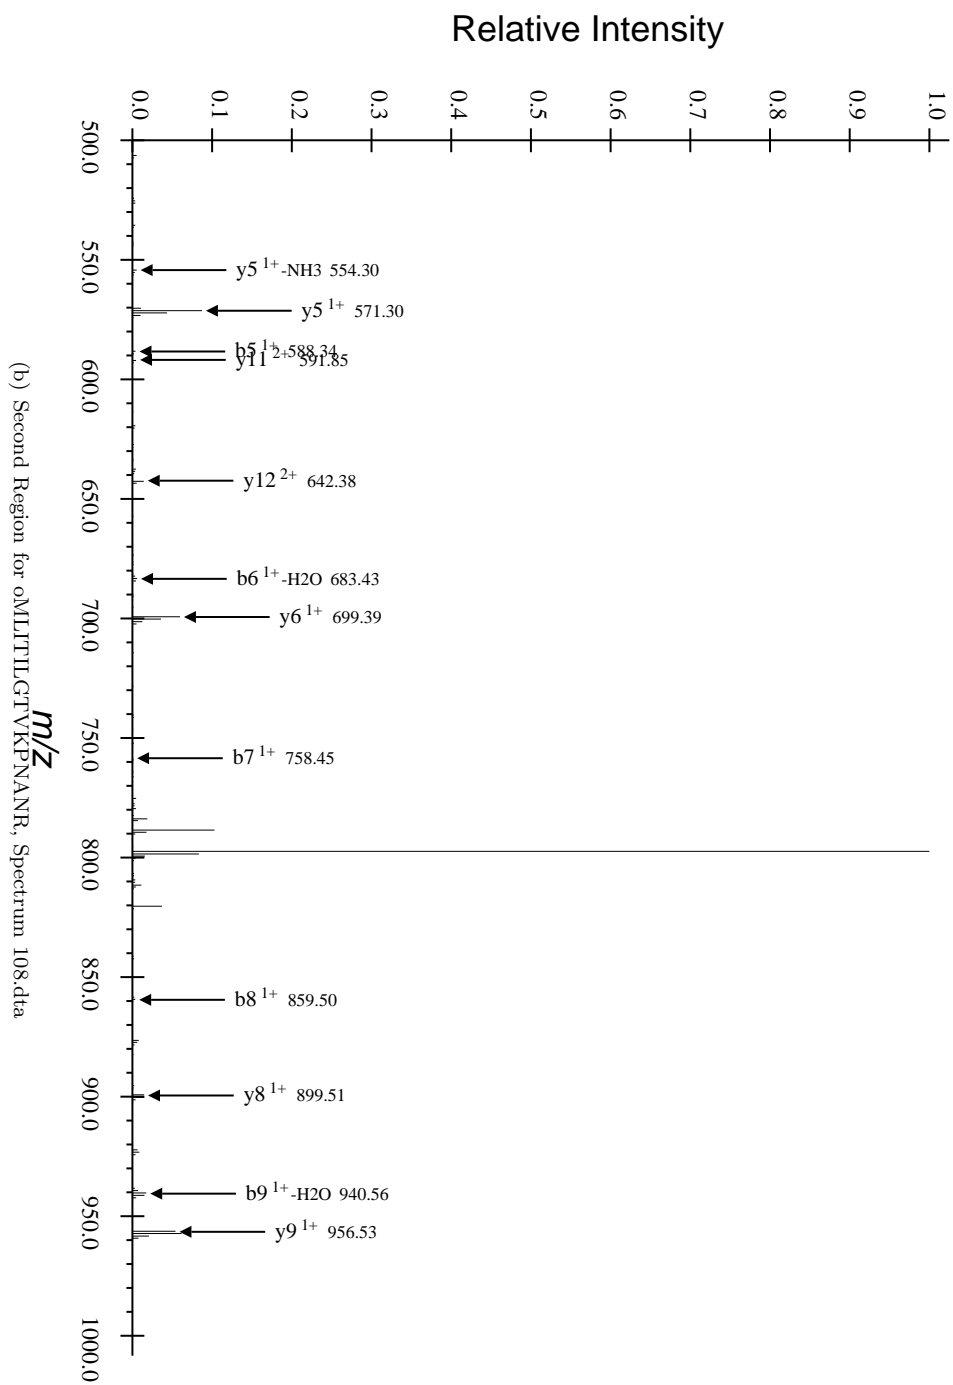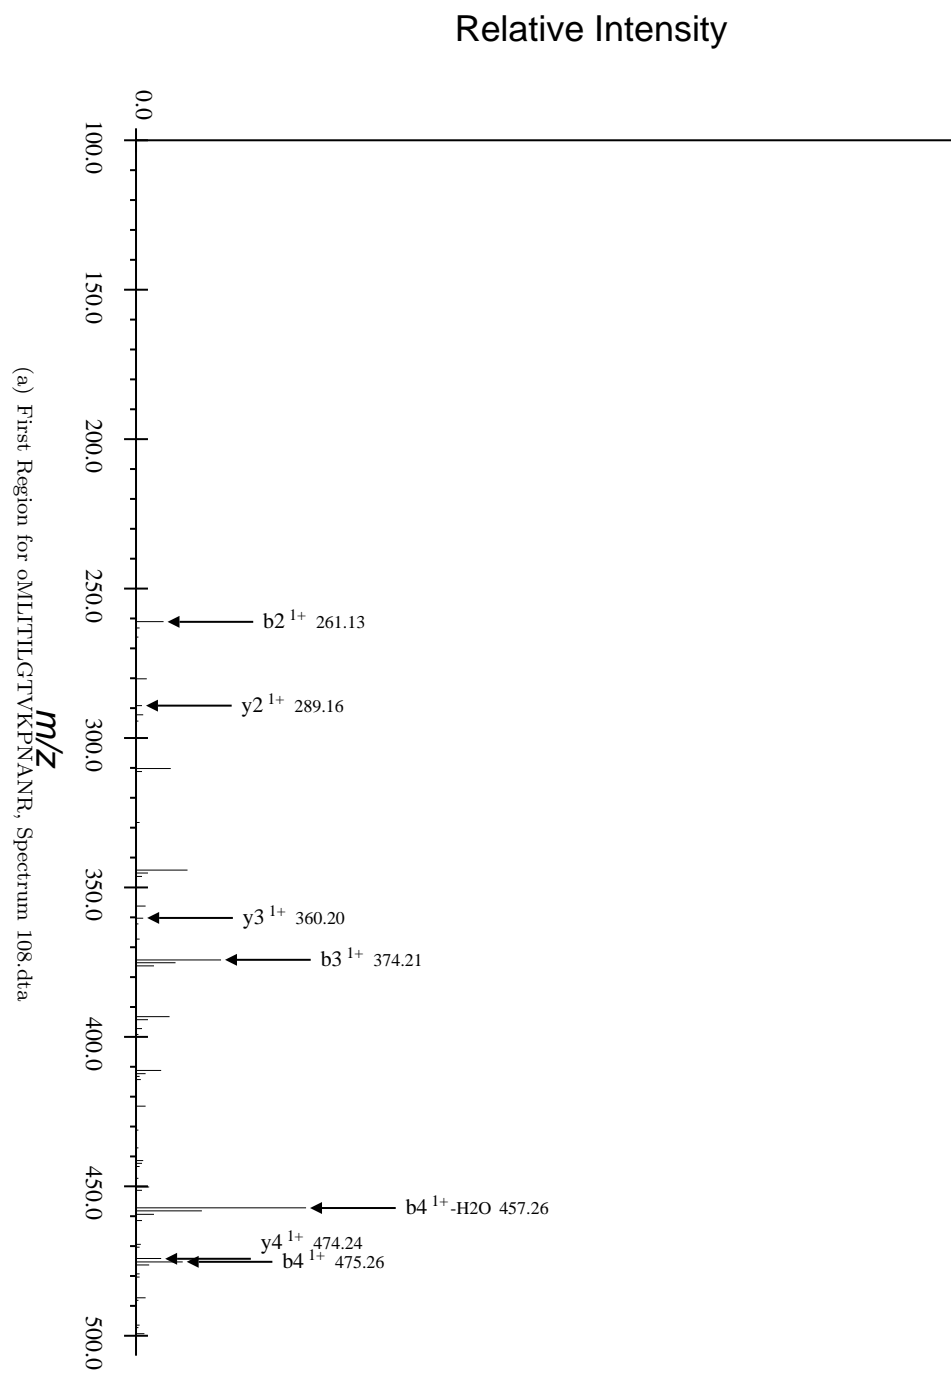

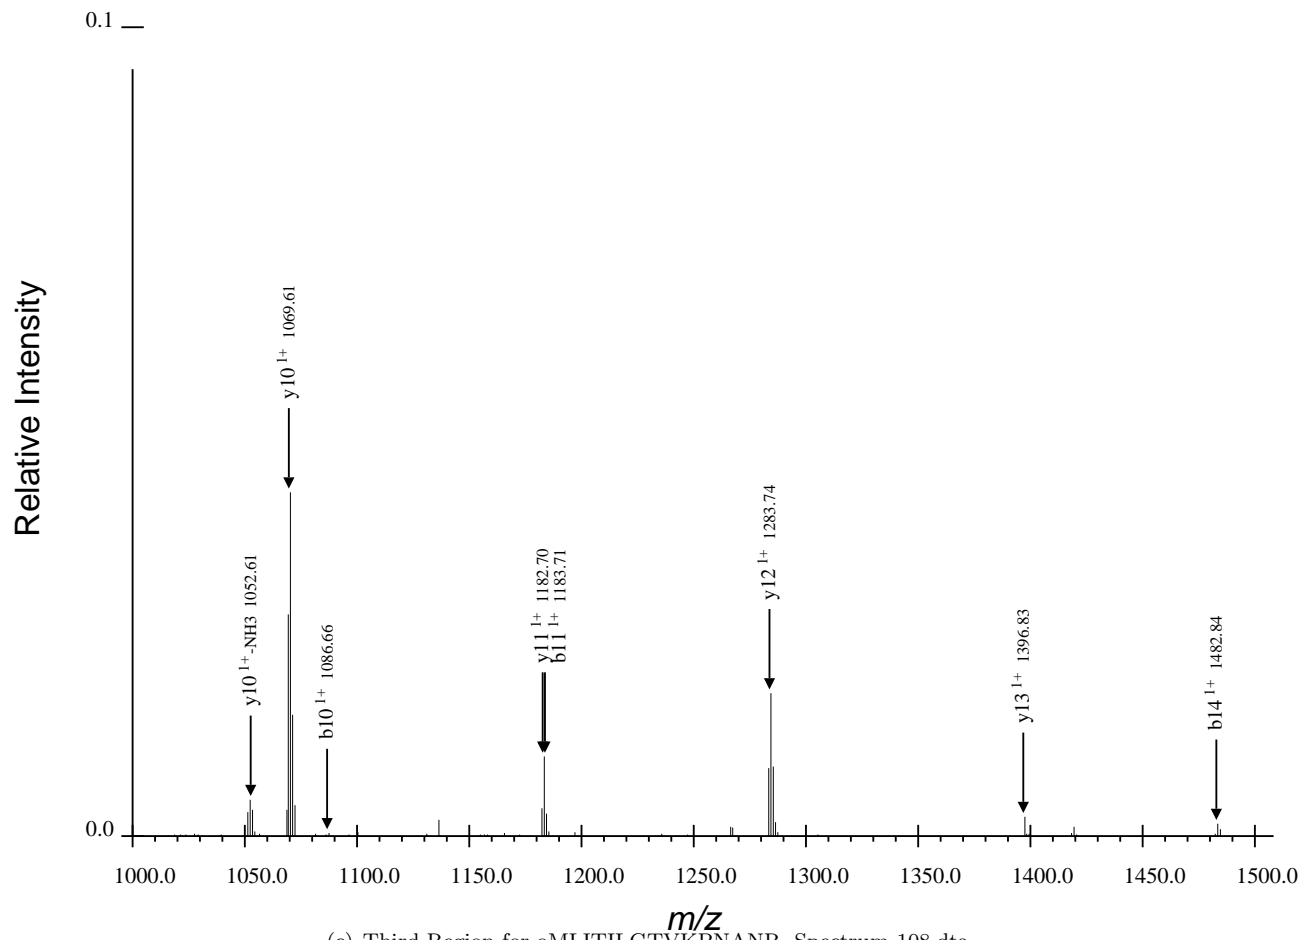

(c) Third Region for oMLITILGTVKPNANR, Spectrum 108.dta

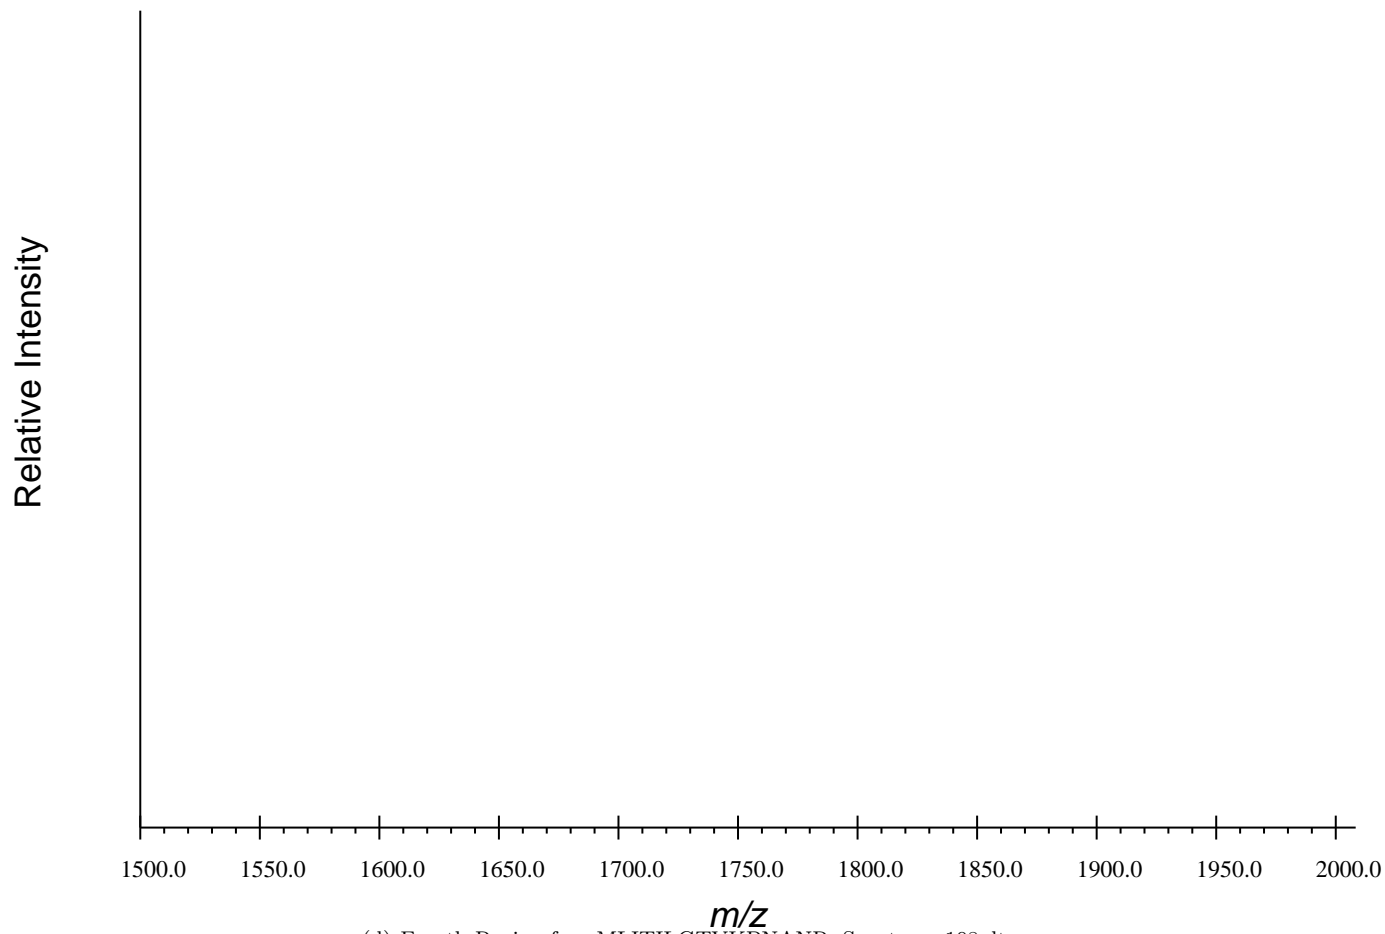

(d) Fourth Region for oMLITILGTVKPNANR, Spectrum 108.dta

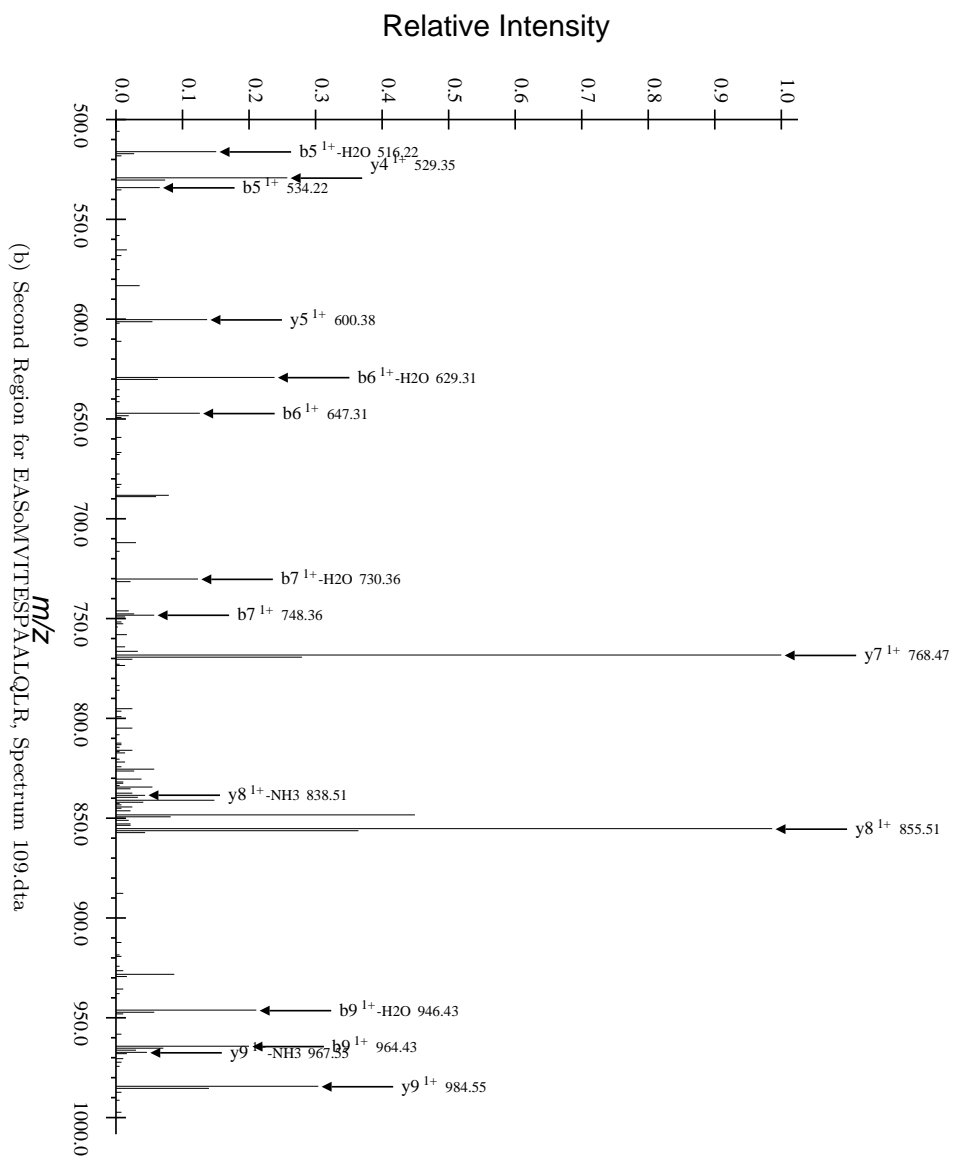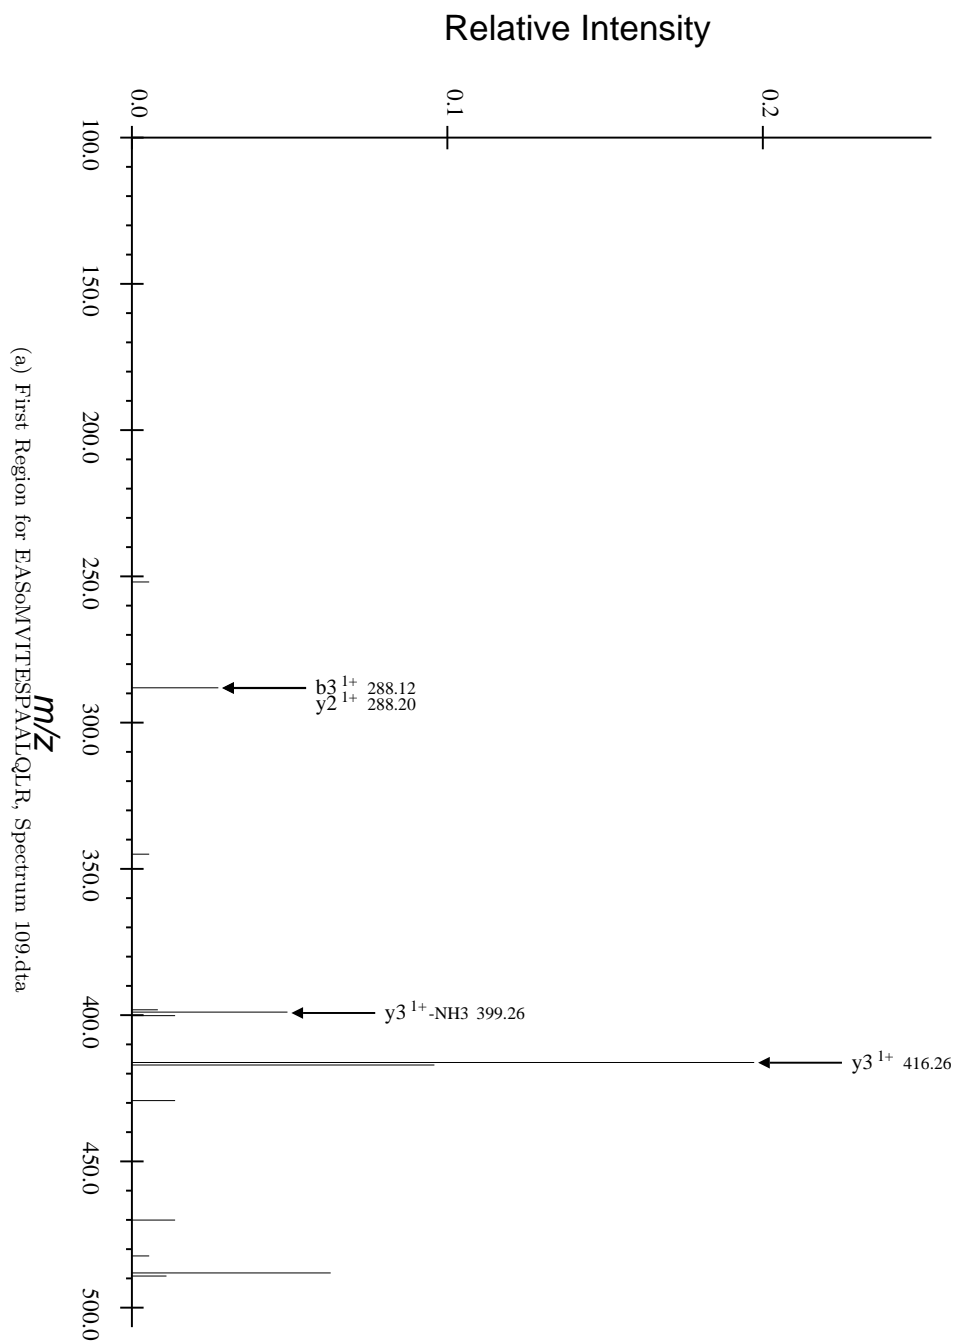



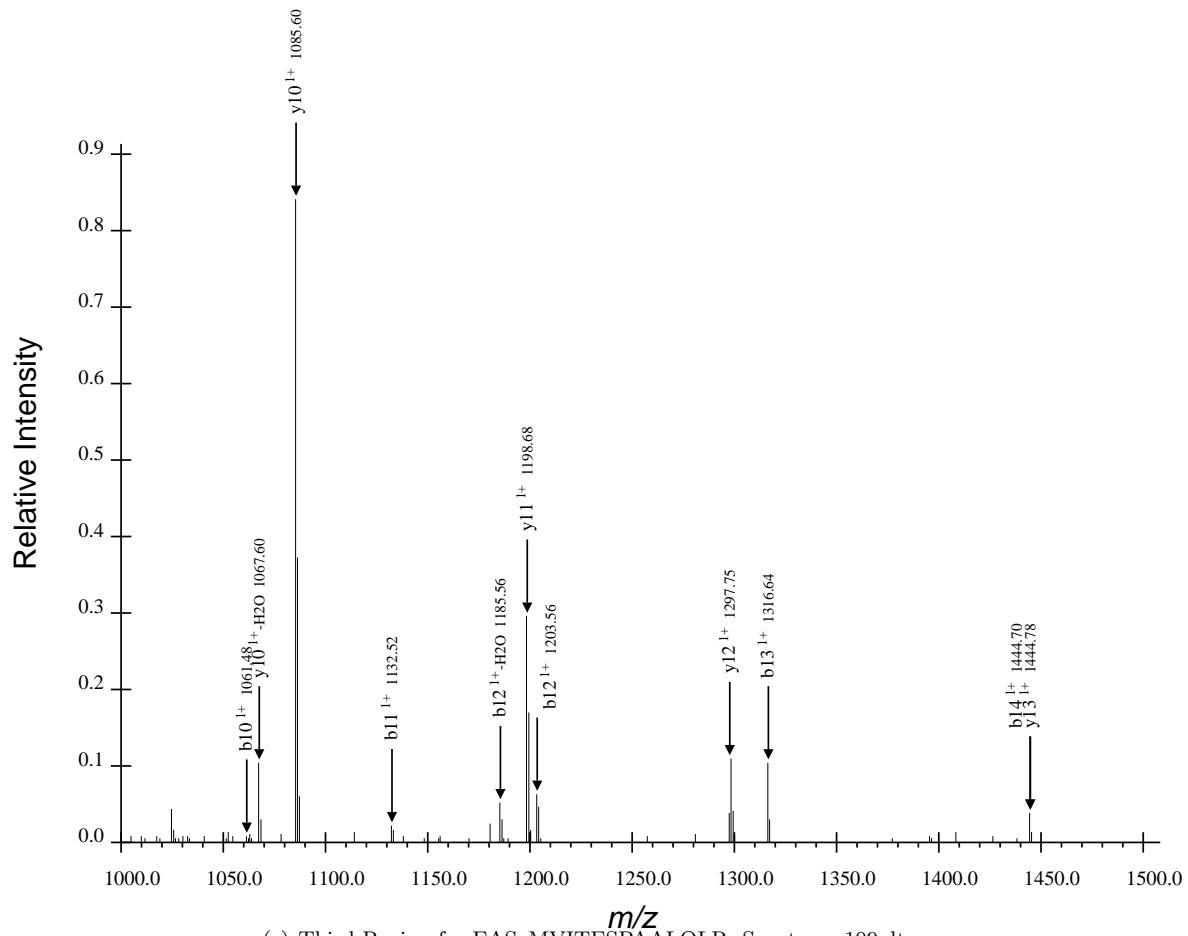

(c) Third Region for EASoMVITESPAALQLR, Spectrum 109.dta

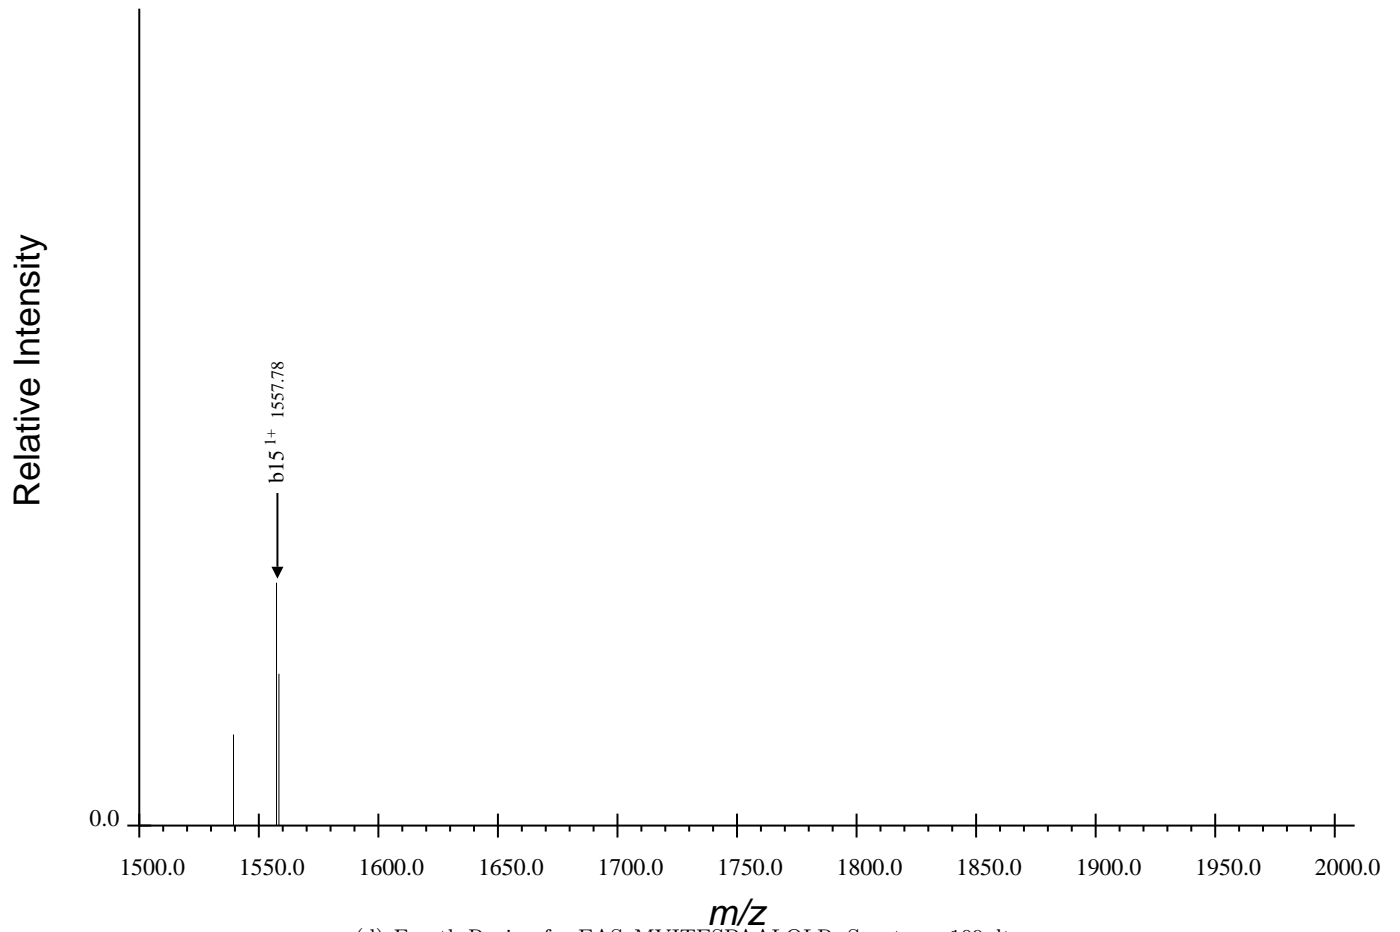

(d) Fourth Region for EASoMVITESPAALQLR, Spectrum 109.dta

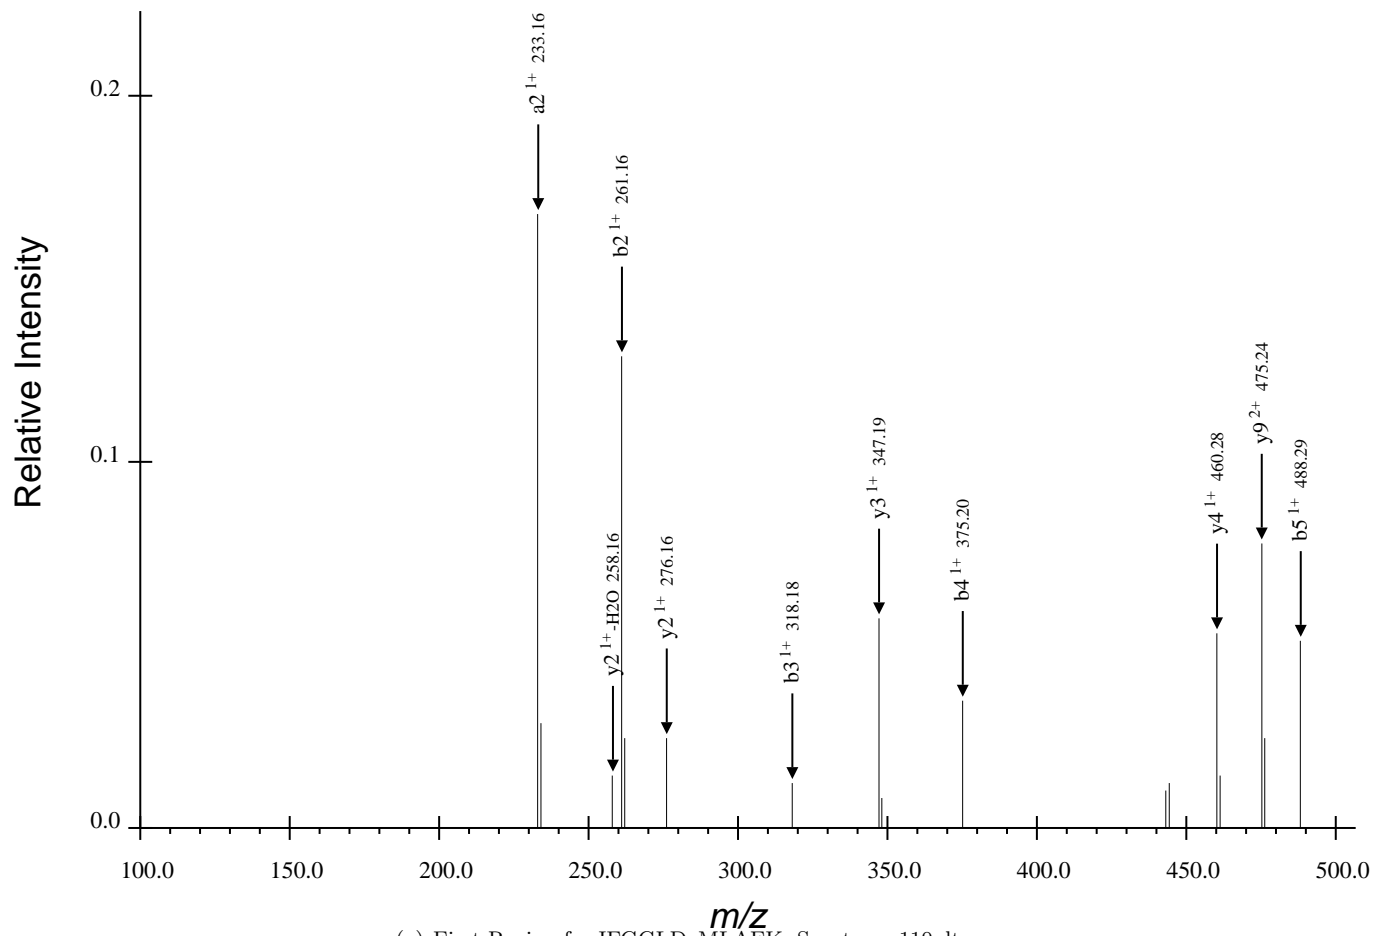

(a) First Region for IFGGLDoMLAEK, Spectrum 110.dta

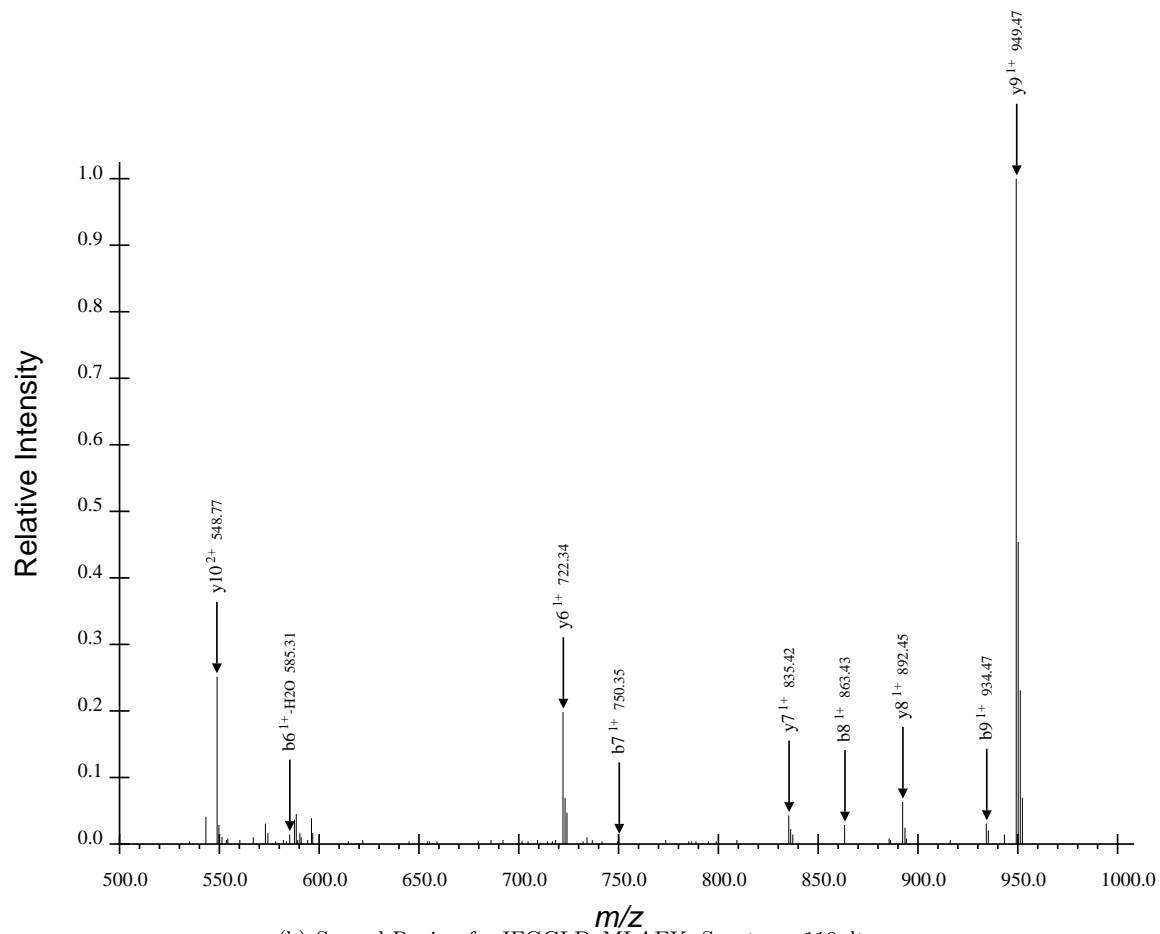

(b) Second Region for IFGGLDoMLAEK, Spectrum 110.dta

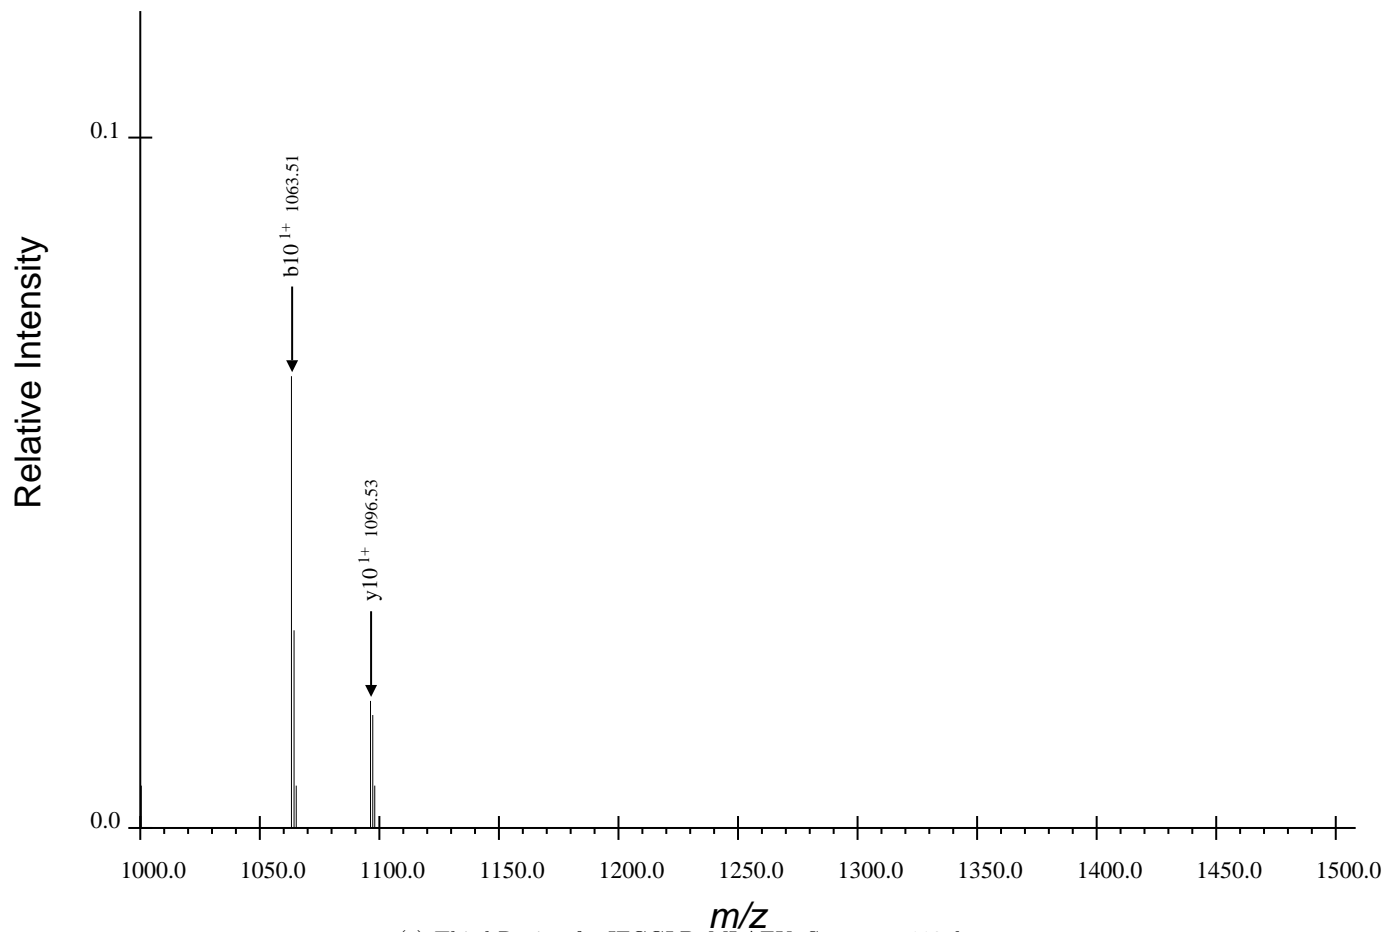

(c) Third Region for IFGGLDoMLAEK, Spectrum 110.dta

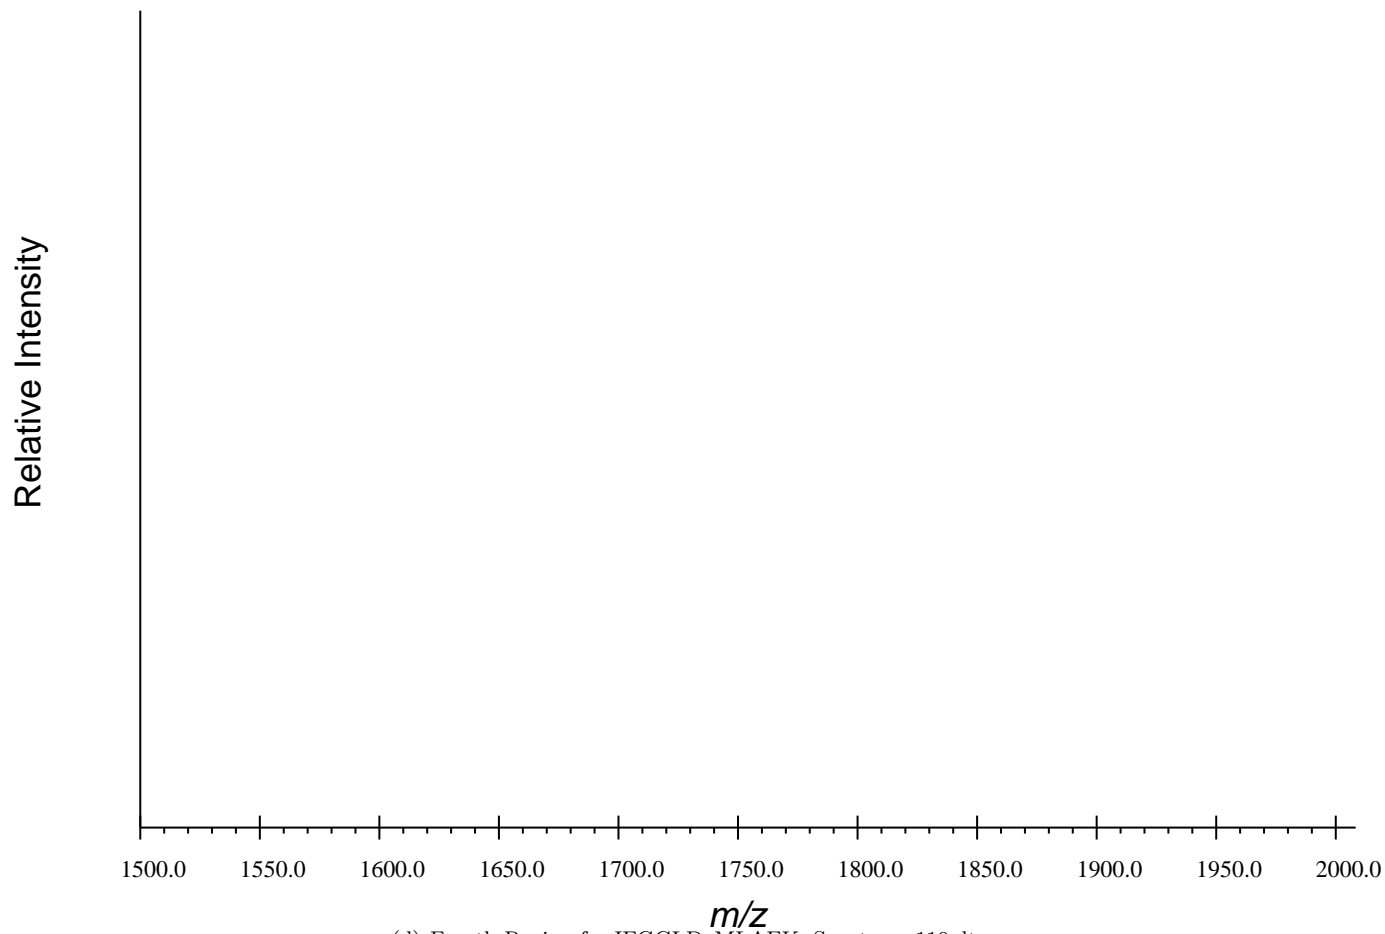

(d) Fourth Region for IFGGLDoMLAEK, Spectrum 110.dta

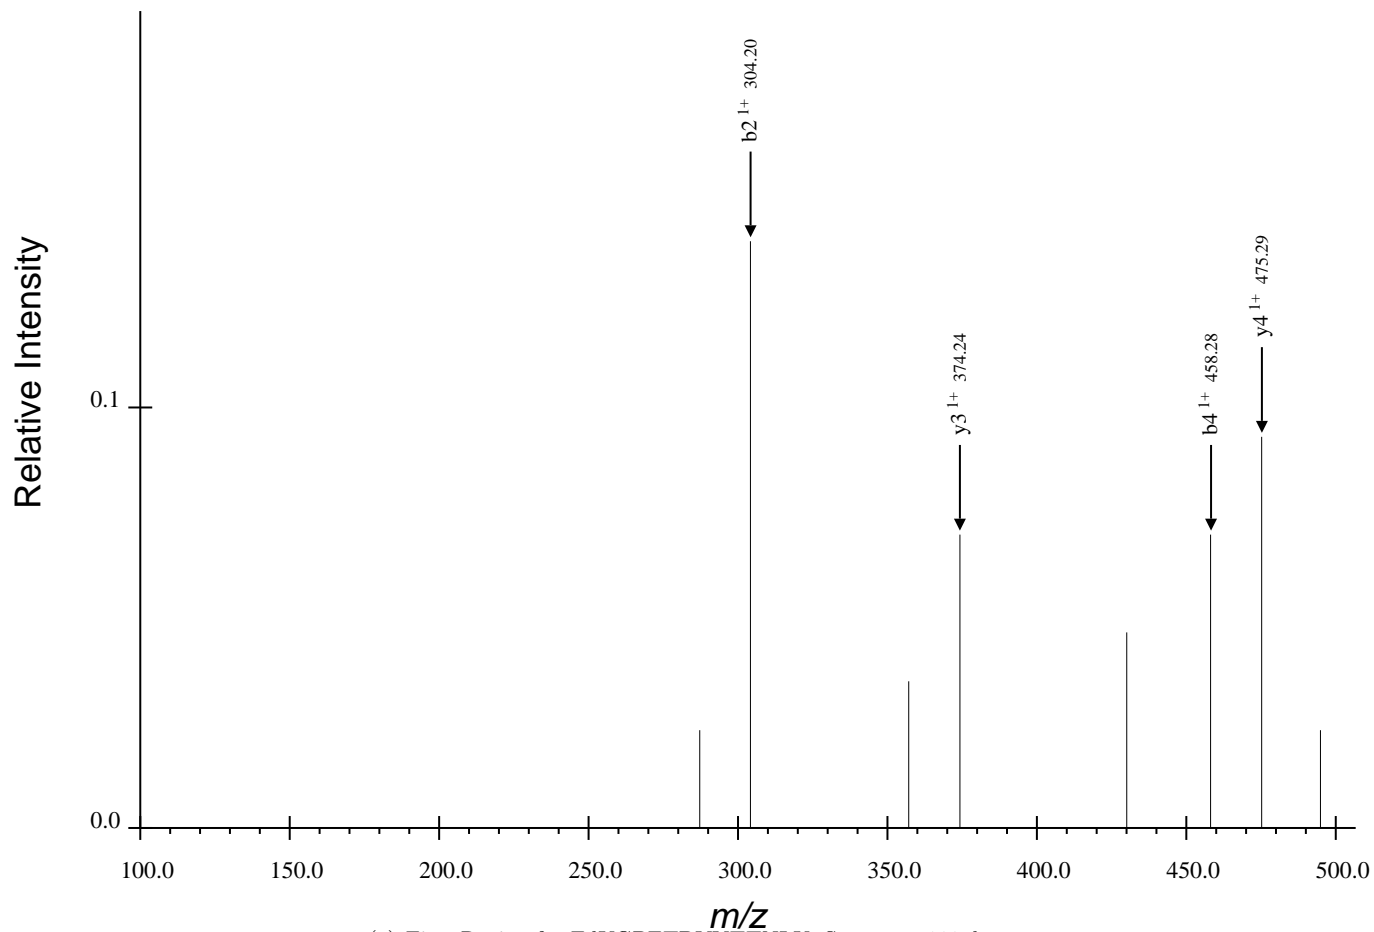

(a) First Region for FdKGPFTDVVTTNLK, Spectrum 111.dta

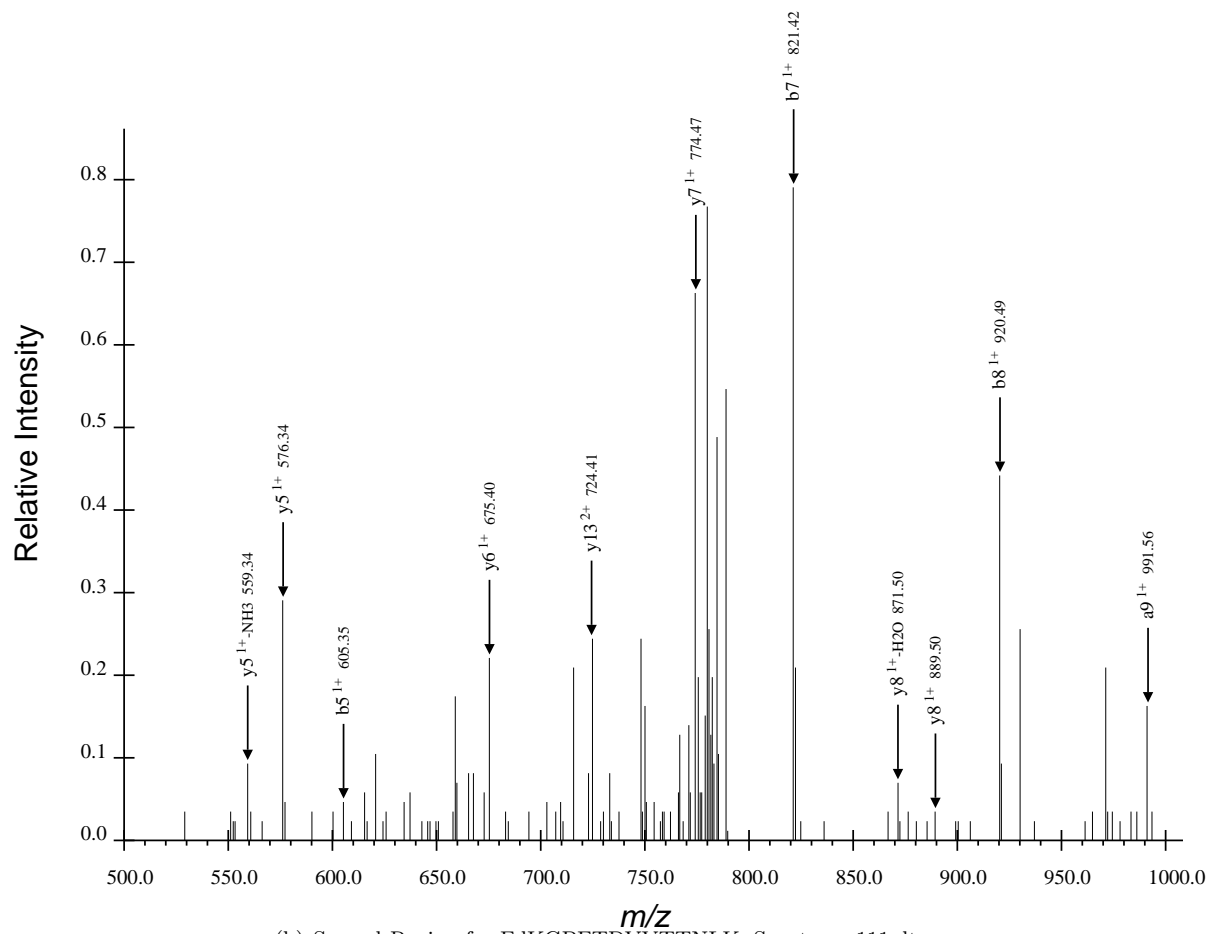

(b) Second Region for FdKGPFTDVVTTNLK, Spectrum 111.dta

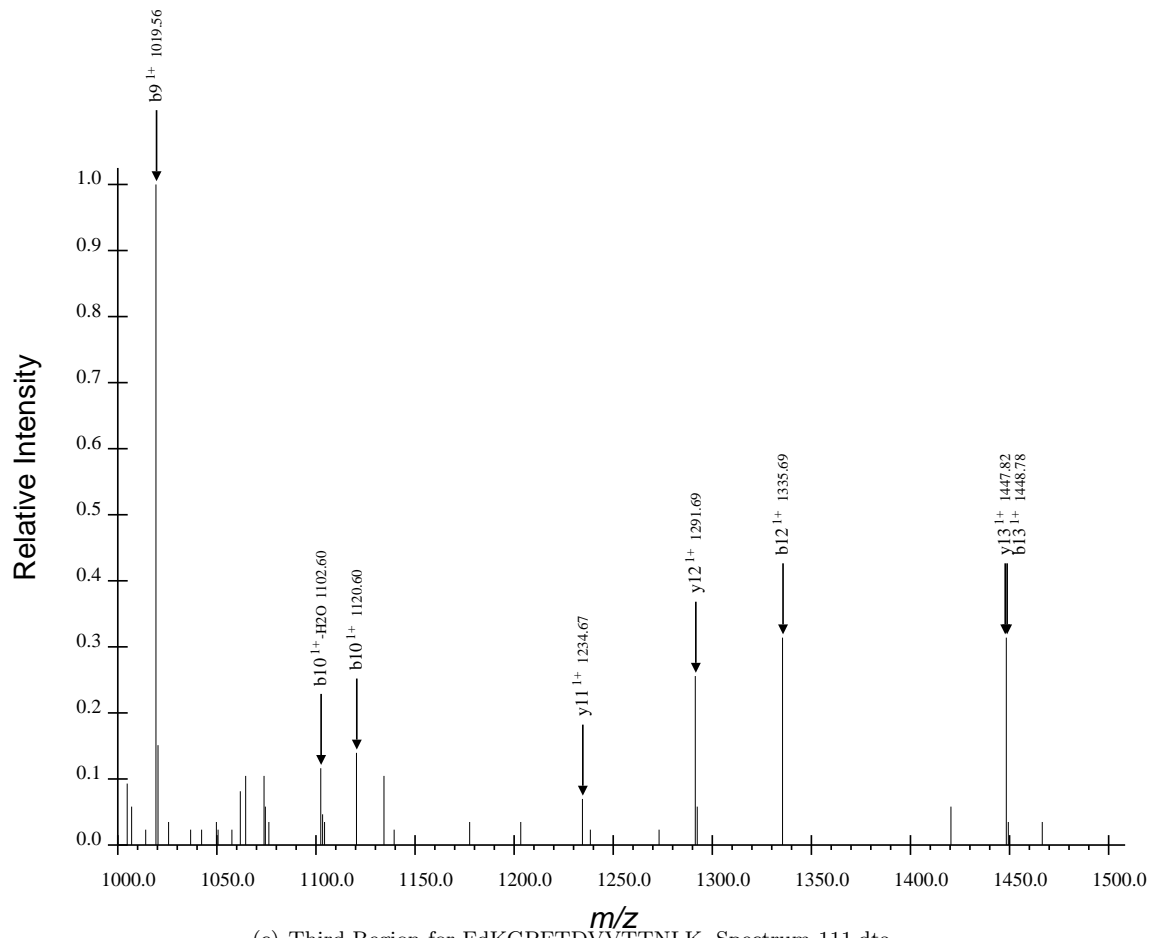

(c) Third Region for FdKGPFTDVVTTNLK, Spectrum 111.dta

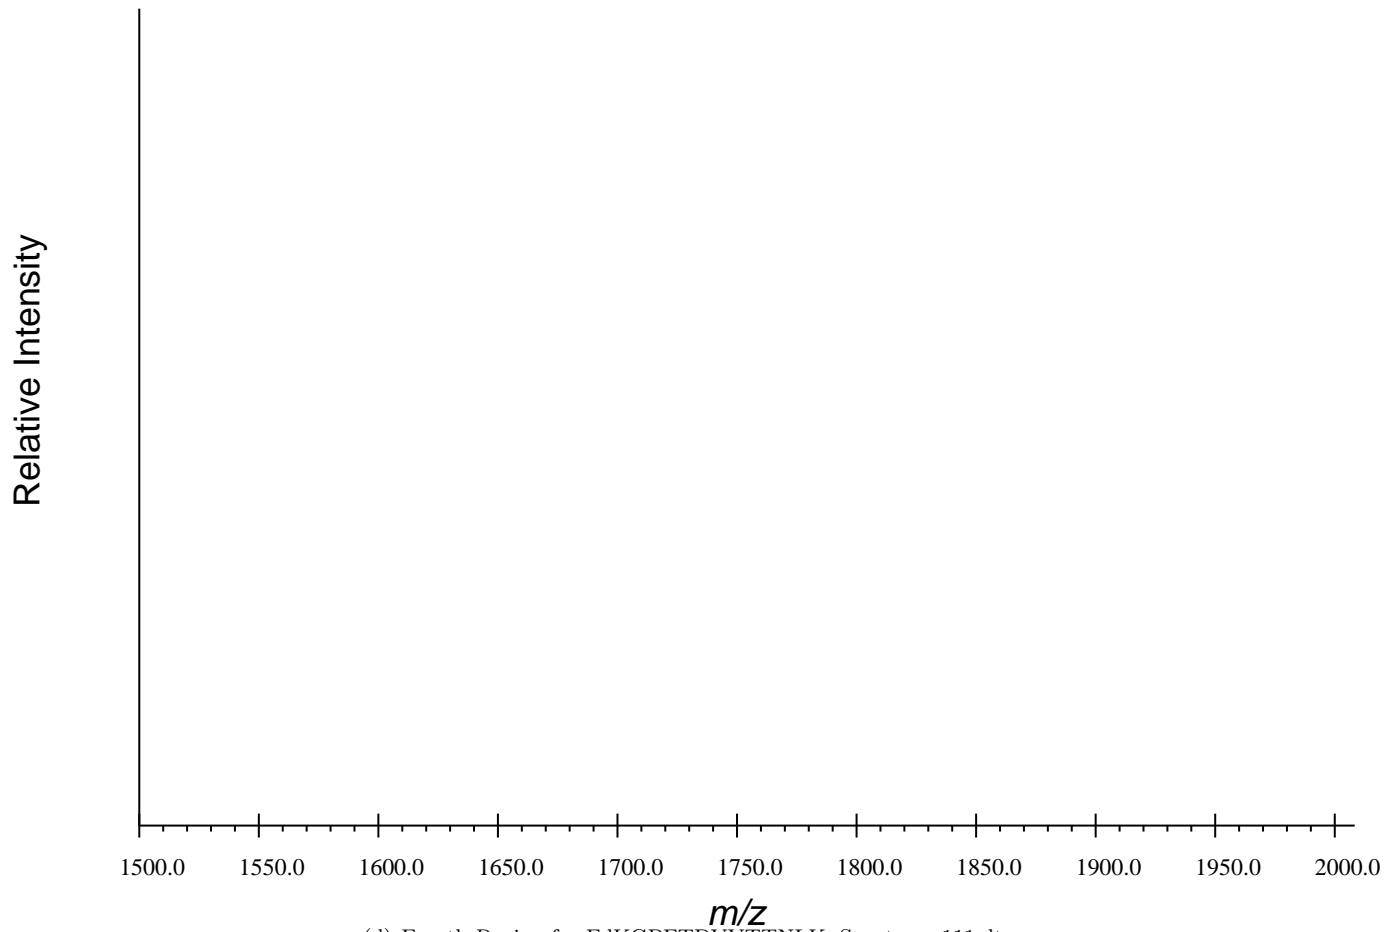

(d) Fourth Region for FdKGPFTDVVTTNLK, Spectrum 111.dta

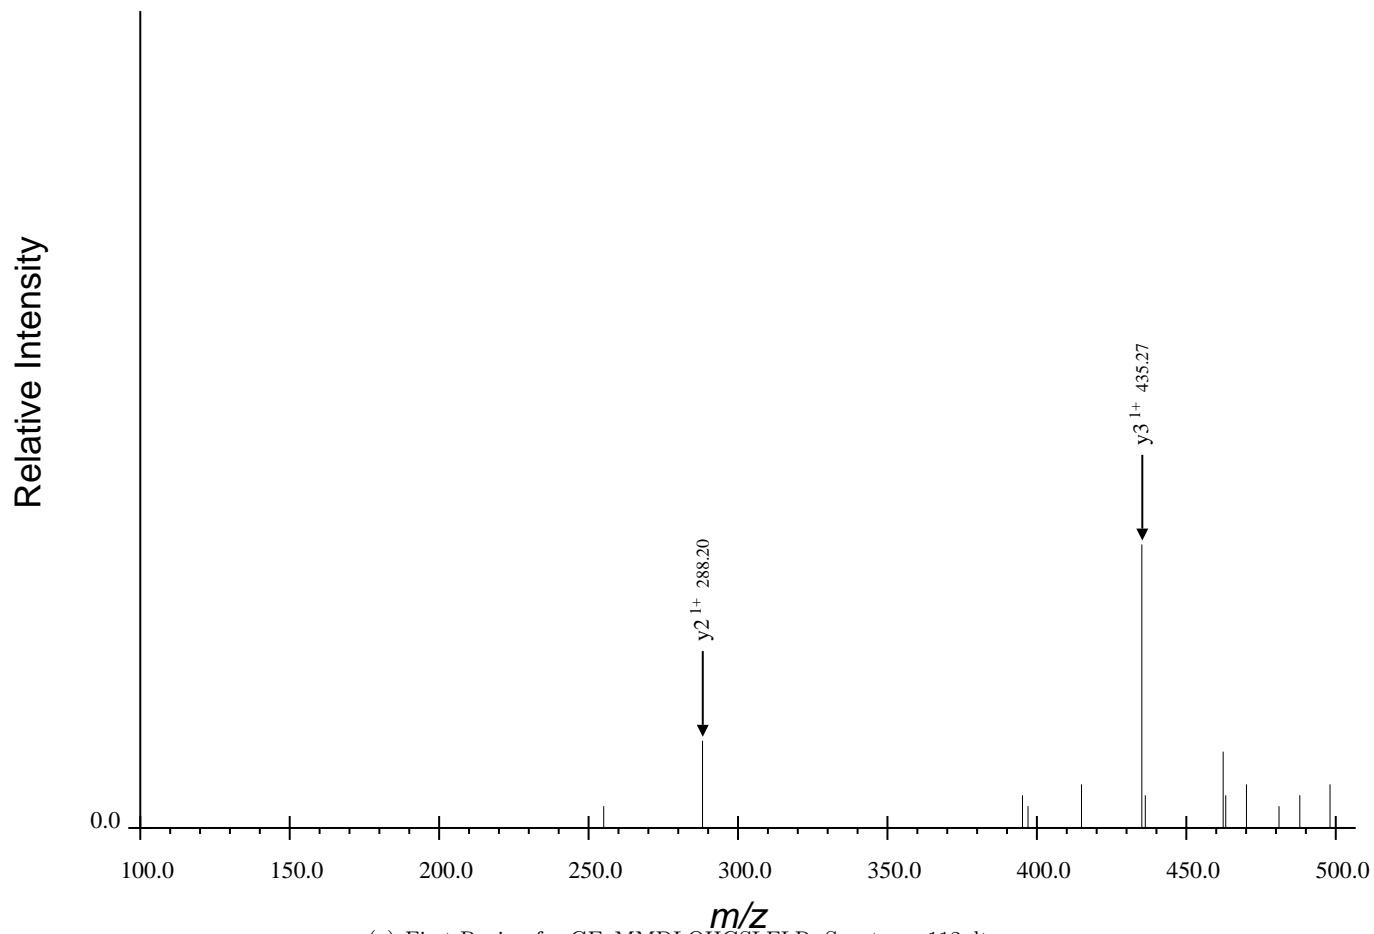

(a) First Region for GEoMMDLQHGSFLR, Spectrum 112.dta

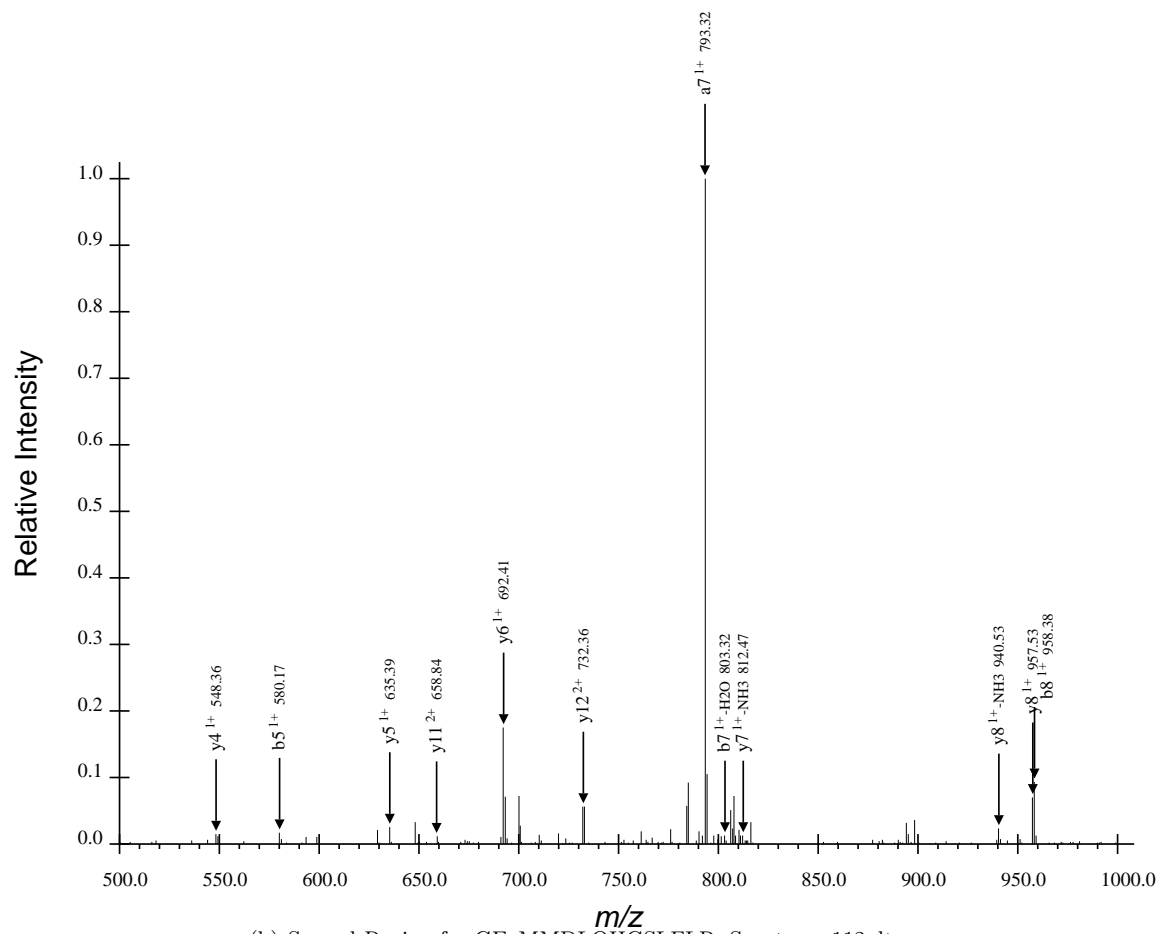

(b) Second Region for GEoMMDLQHGSFLR, Spectrum 112.dta

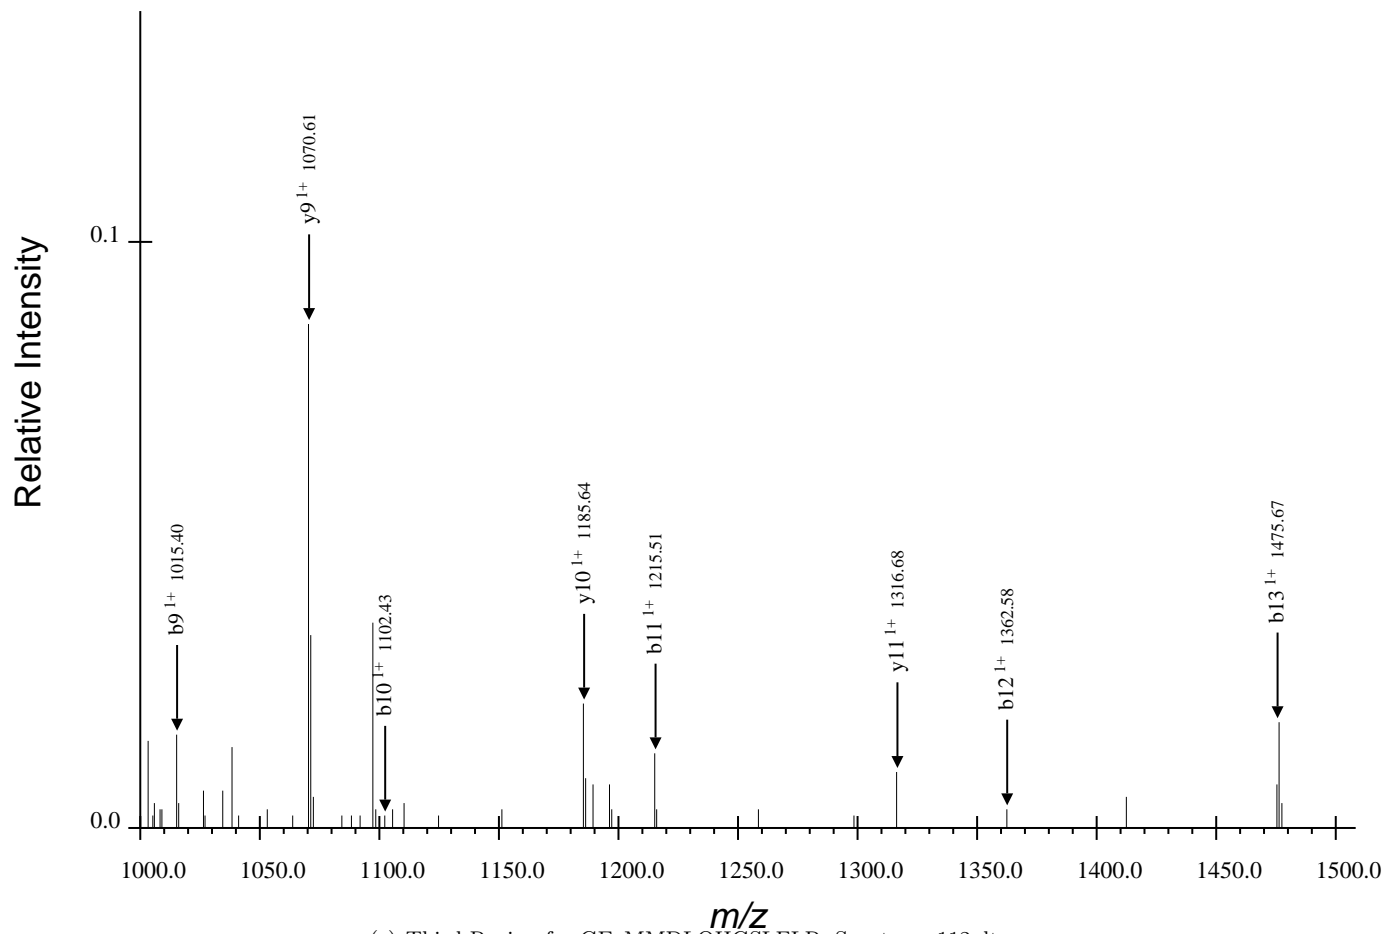

(c) Third Region for G<sub>E</sub>oMMDLQHGSLFLR, Spectrum 112.dta

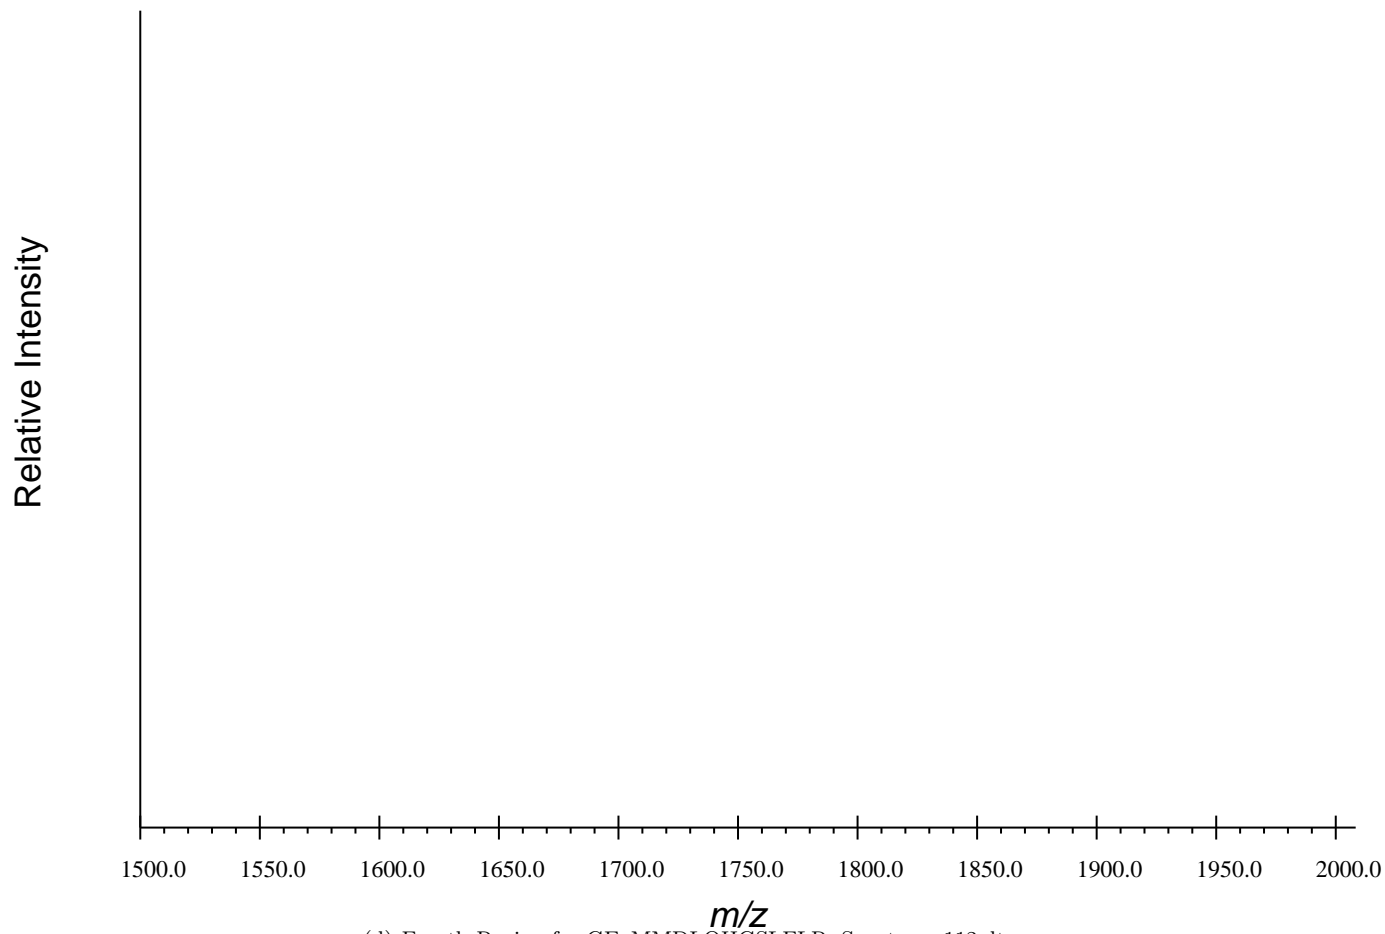

(d) Fourth Region for G<sub>E</sub>oMMDLQHGSLFLR, Spectrum 112.dta

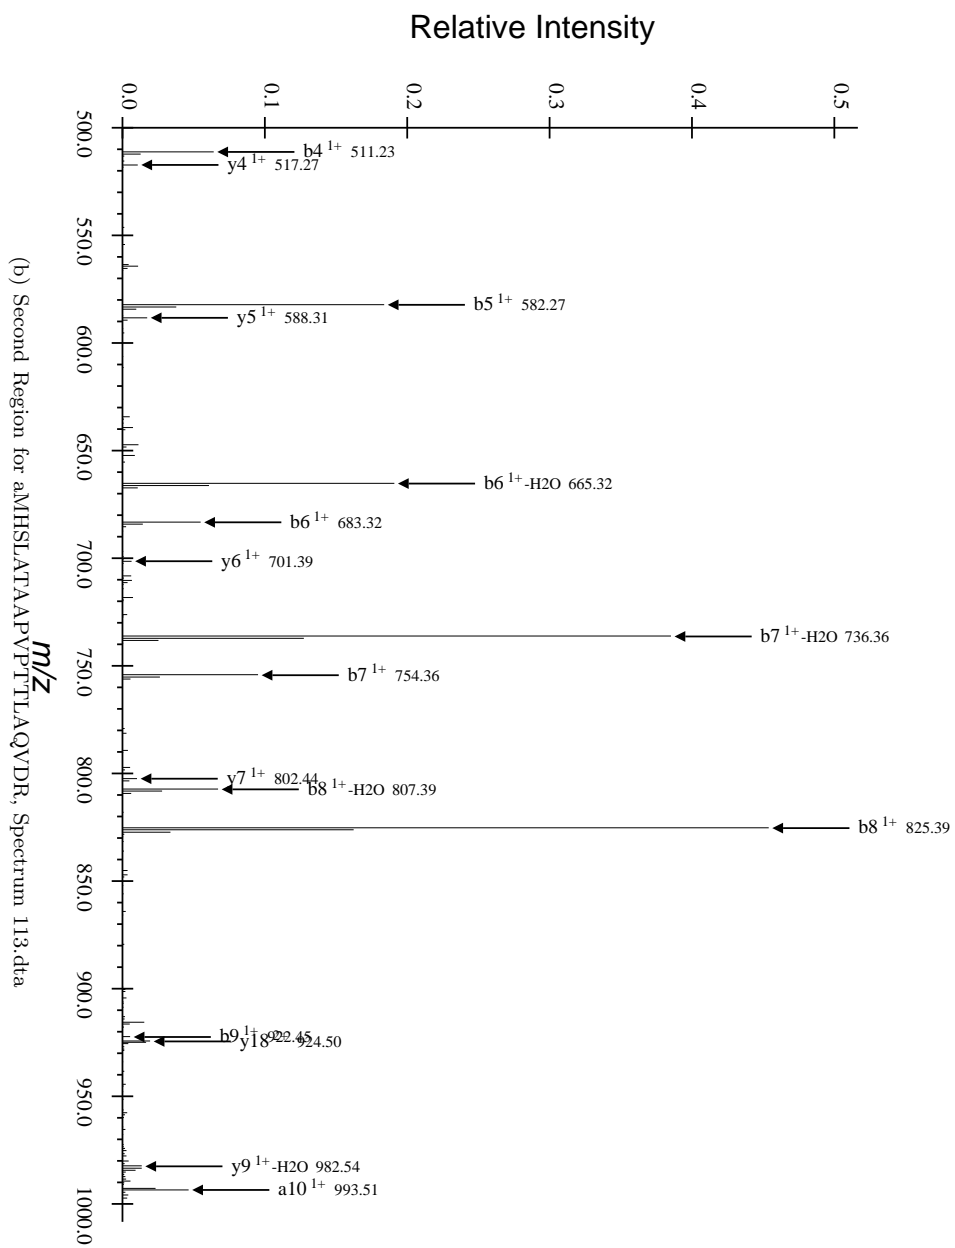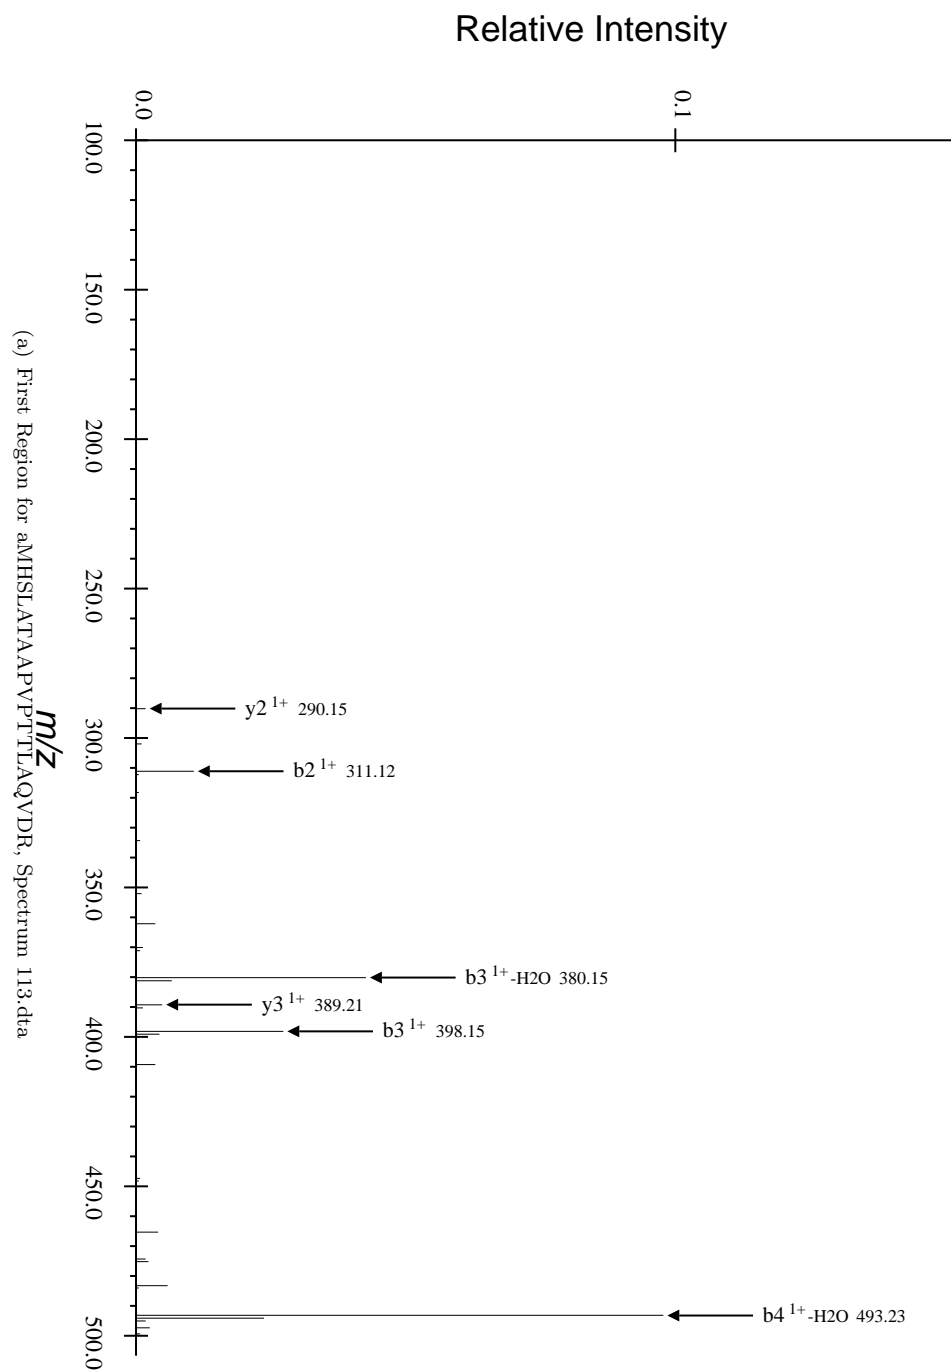



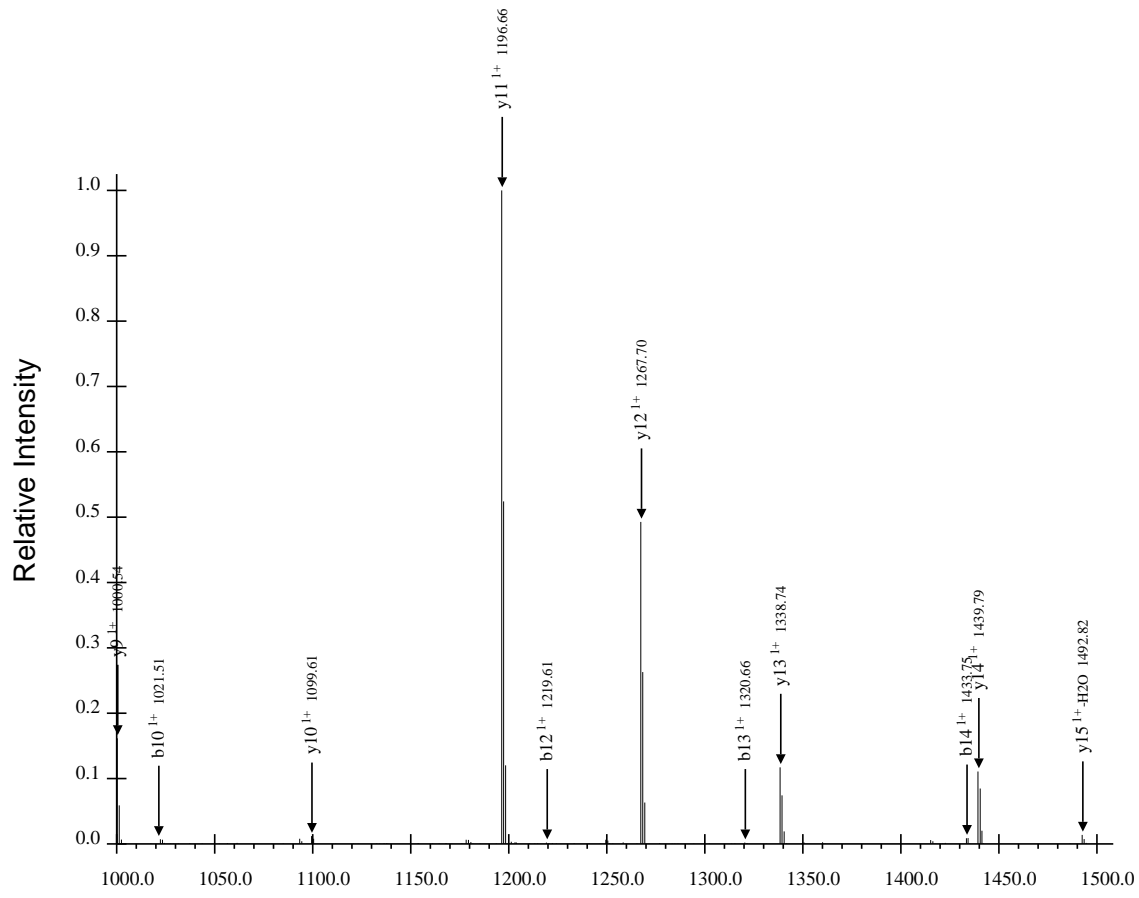

(c) Third Region for aMHS<sub>L</sub>ATAAPVPTTLAQVDR, Spectrum 113.dta

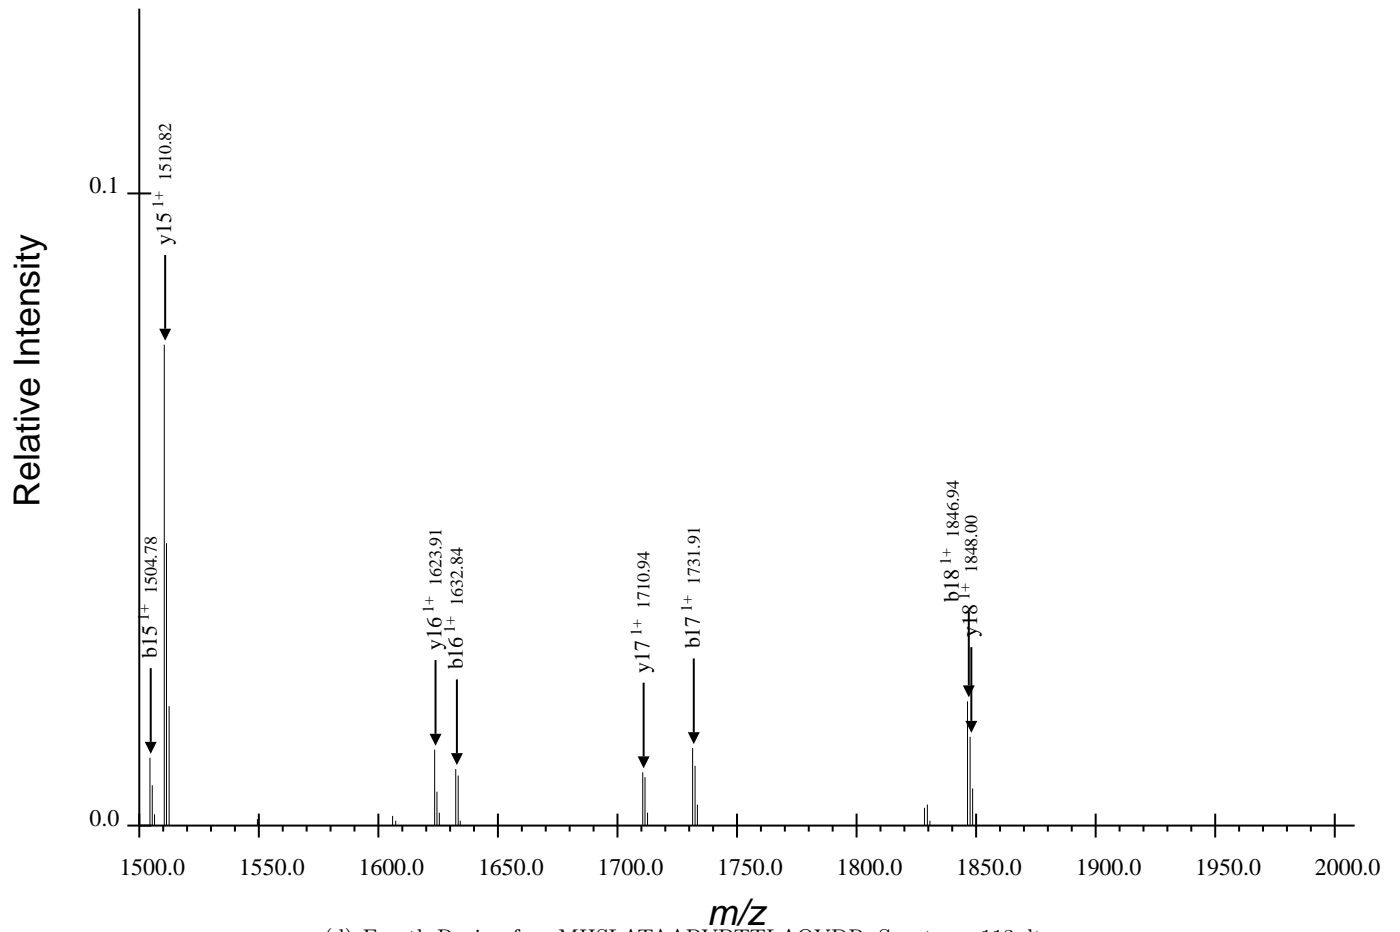

(d) Fourth Region for aMHS<sub>L</sub>ATAAPVPTTLAQVDR, Spectrum 113.dta

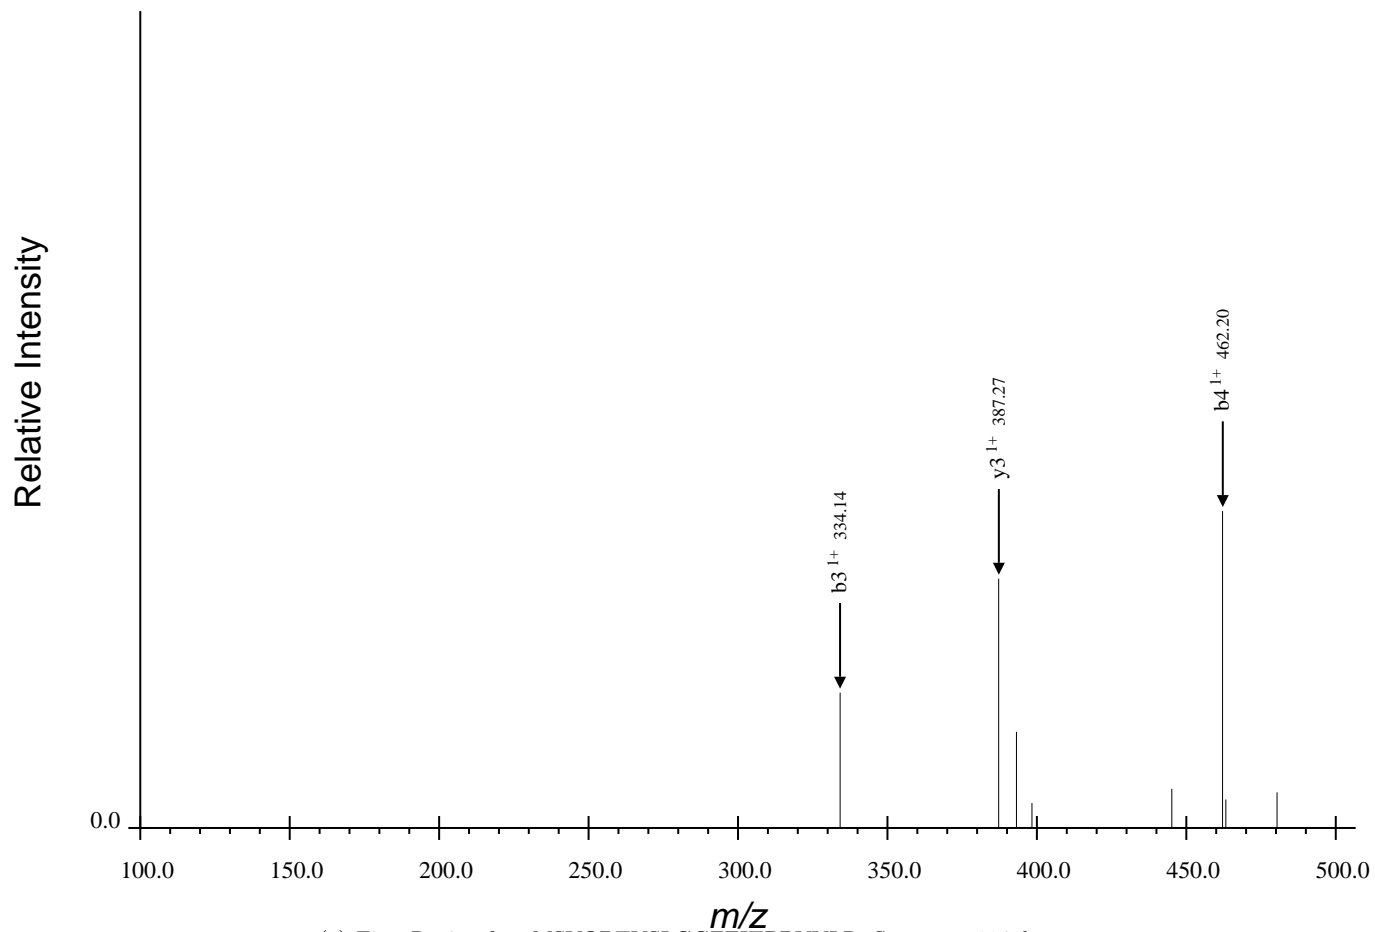

(a) First Region for oMSVQPTVSLGGFEITPPVLR, Spectrum 114.dta

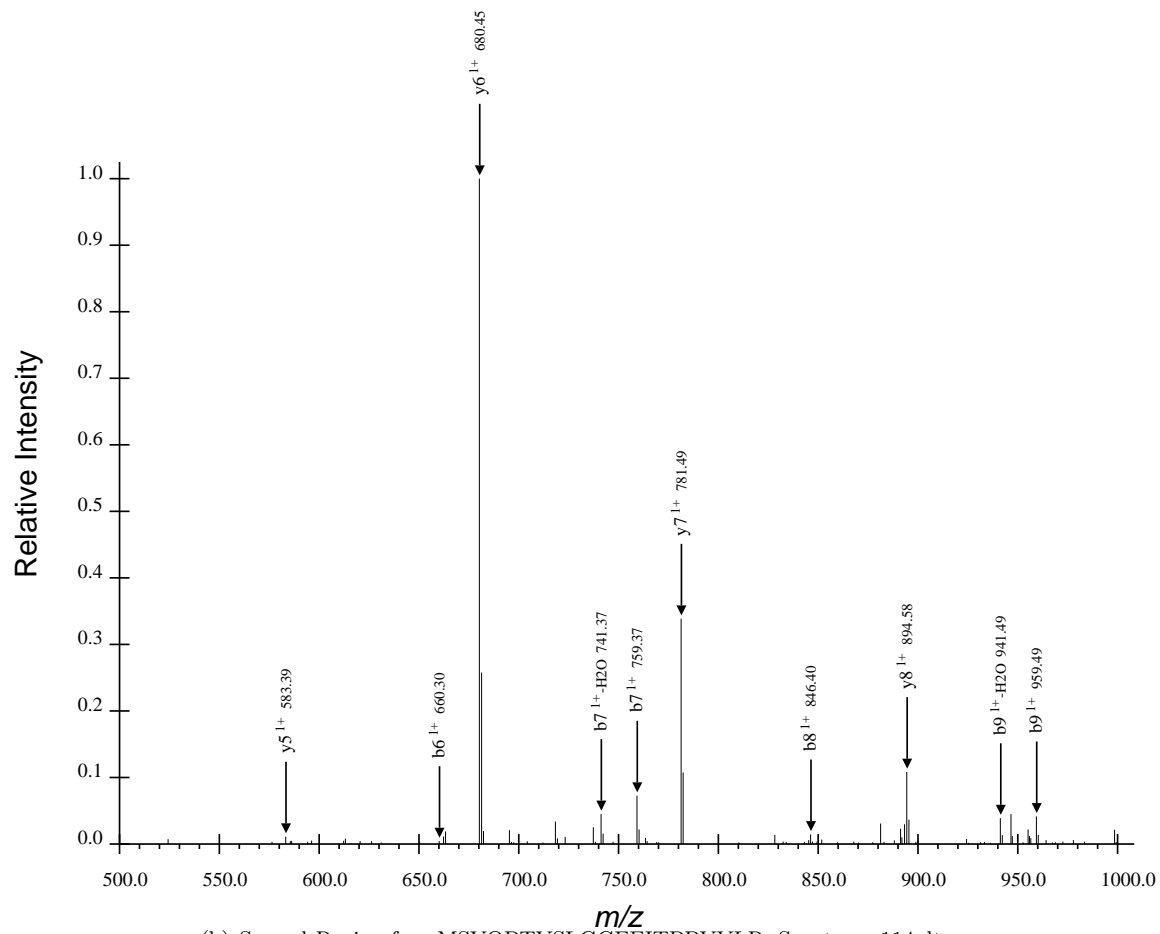

(b) Second Region for oMSVQPTVSLGGFEITPPVLR, Spectrum 114.dta

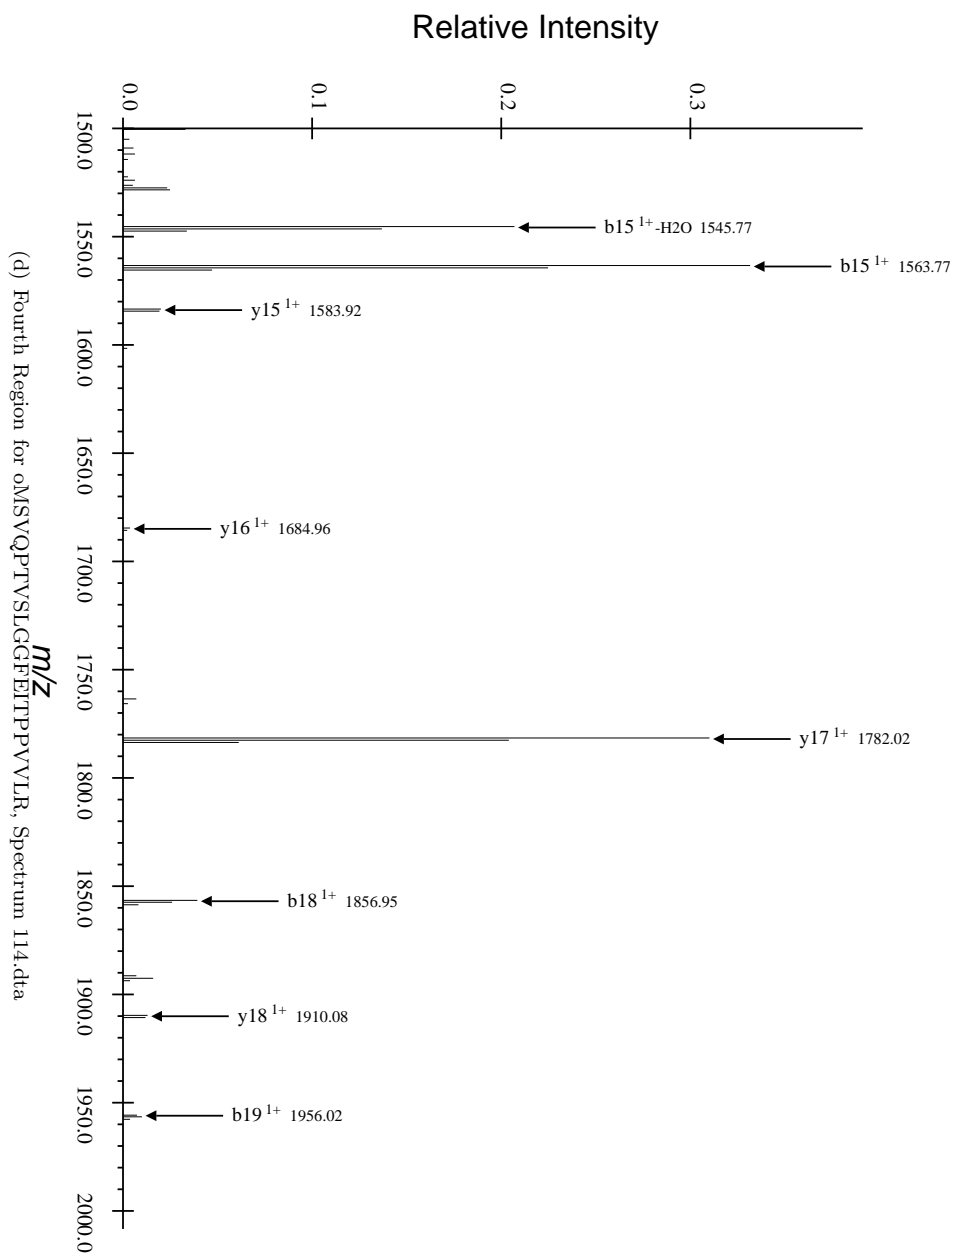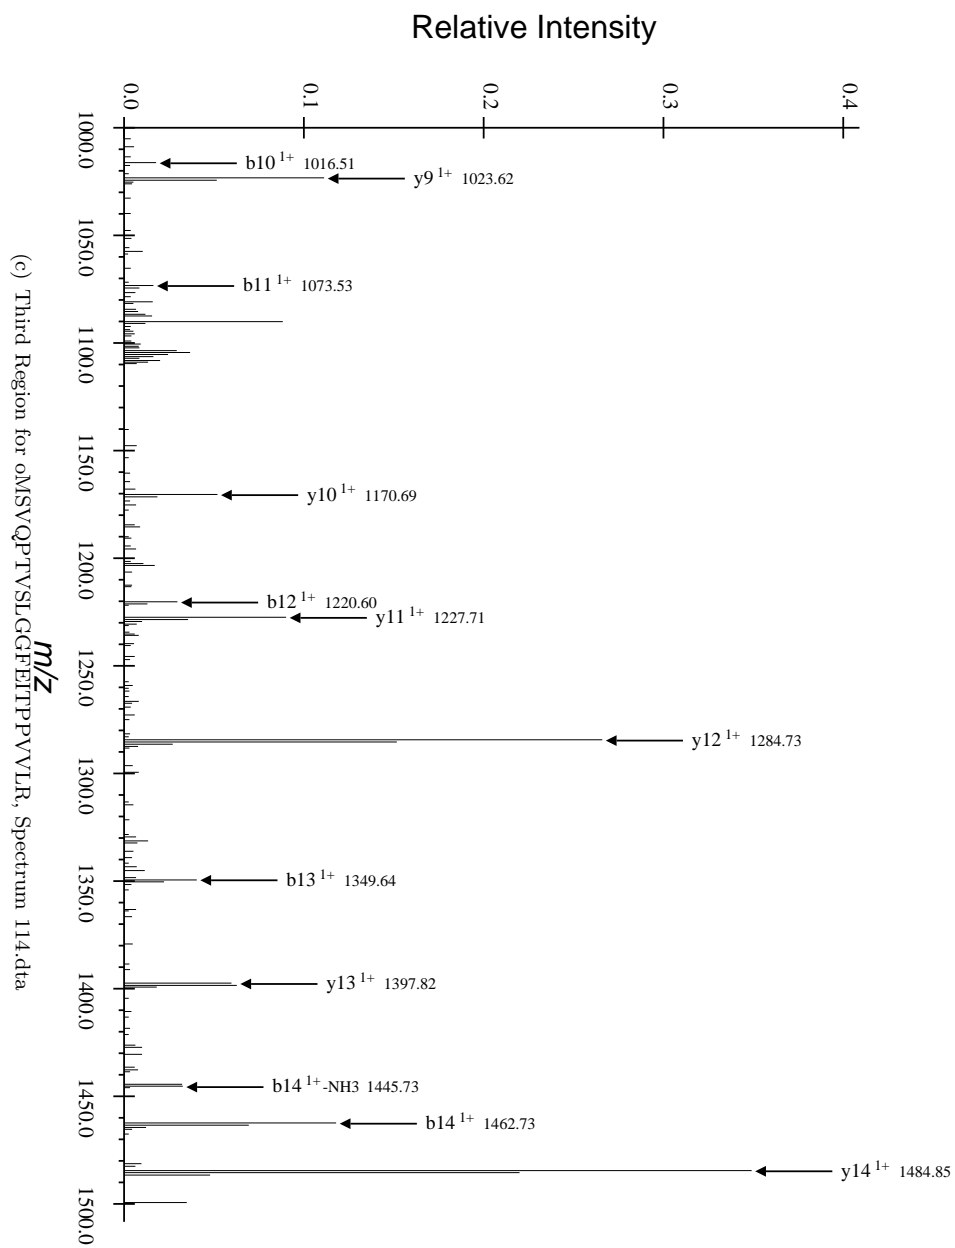

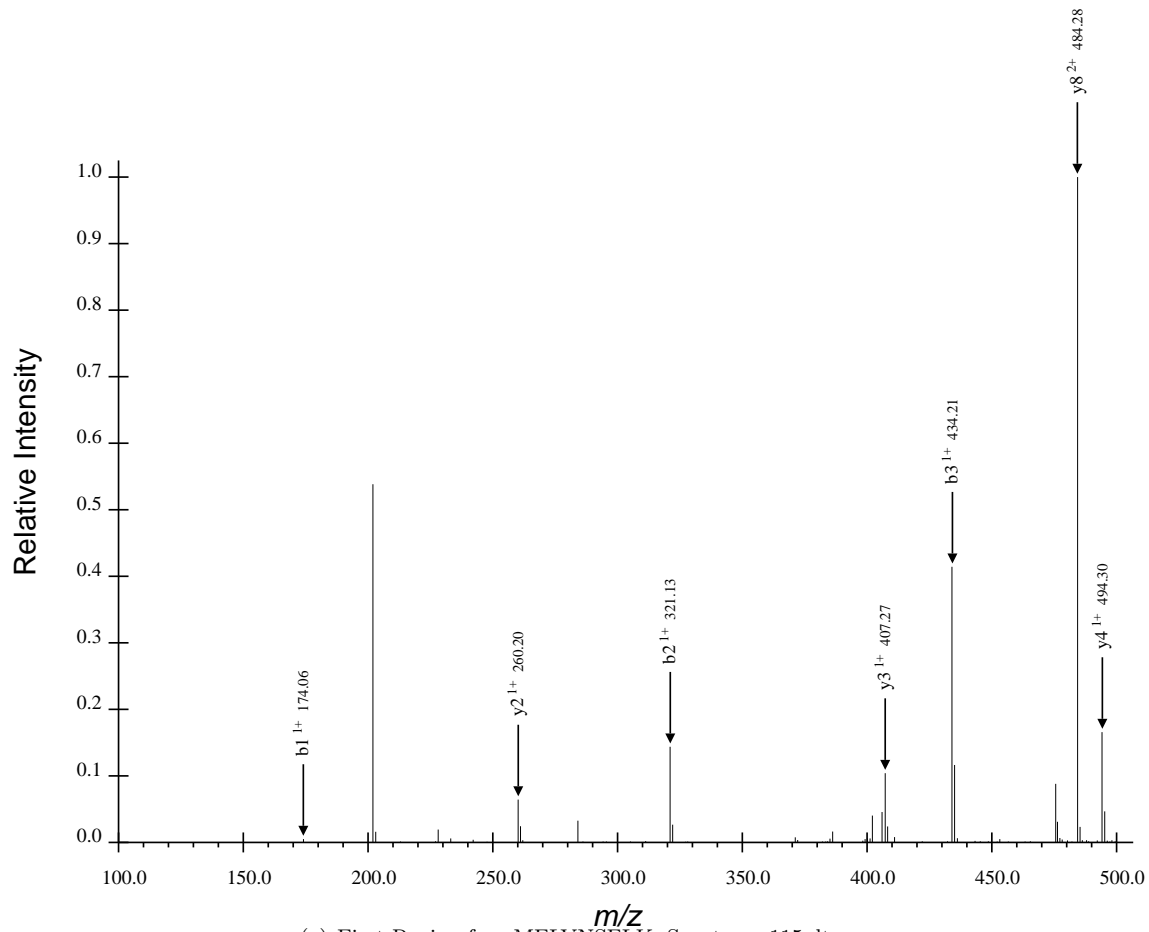

(a) First Region for aMFLVNSFLK, Spectrum 115.dta

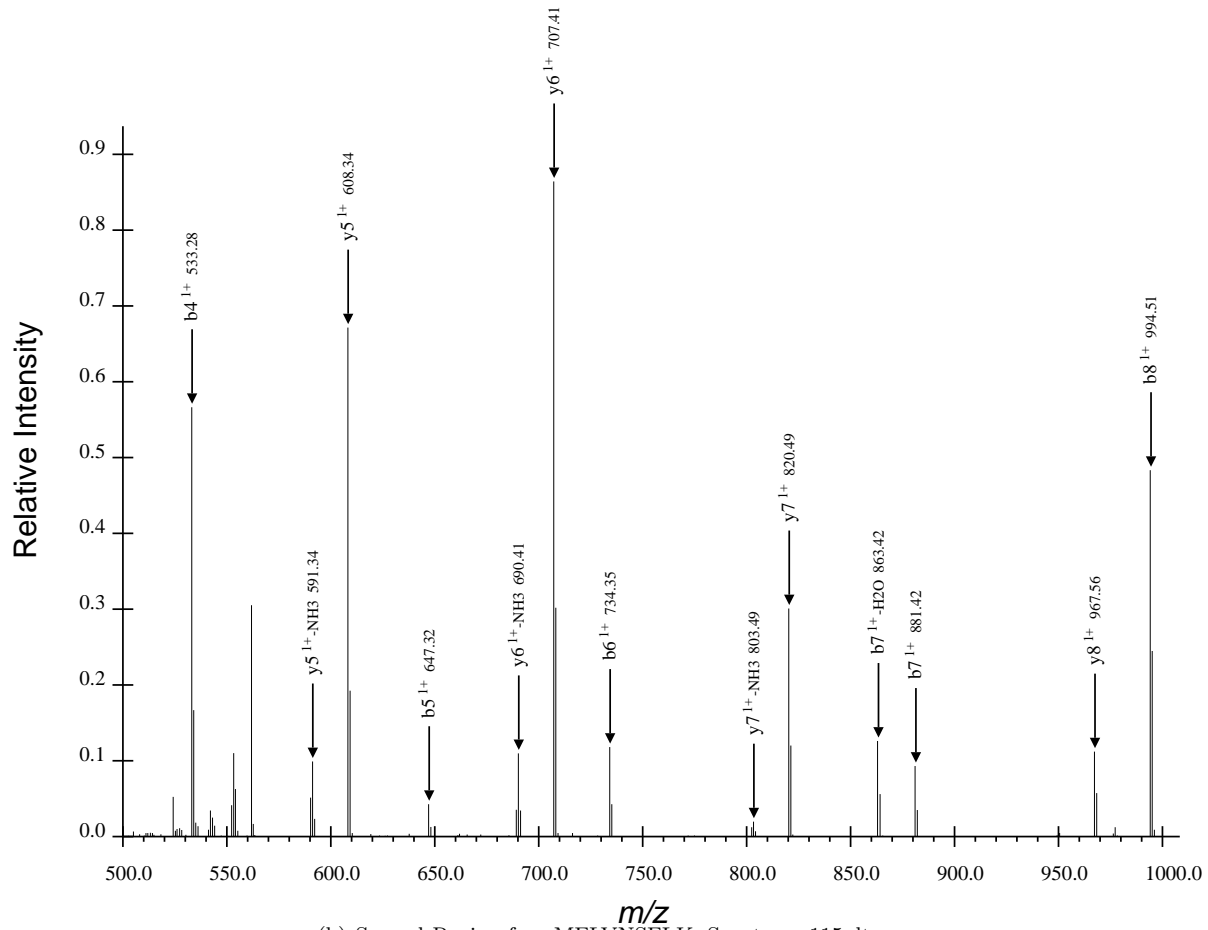

(b) Second Region for aMFLVNSFLK, Spectrum 115.dta

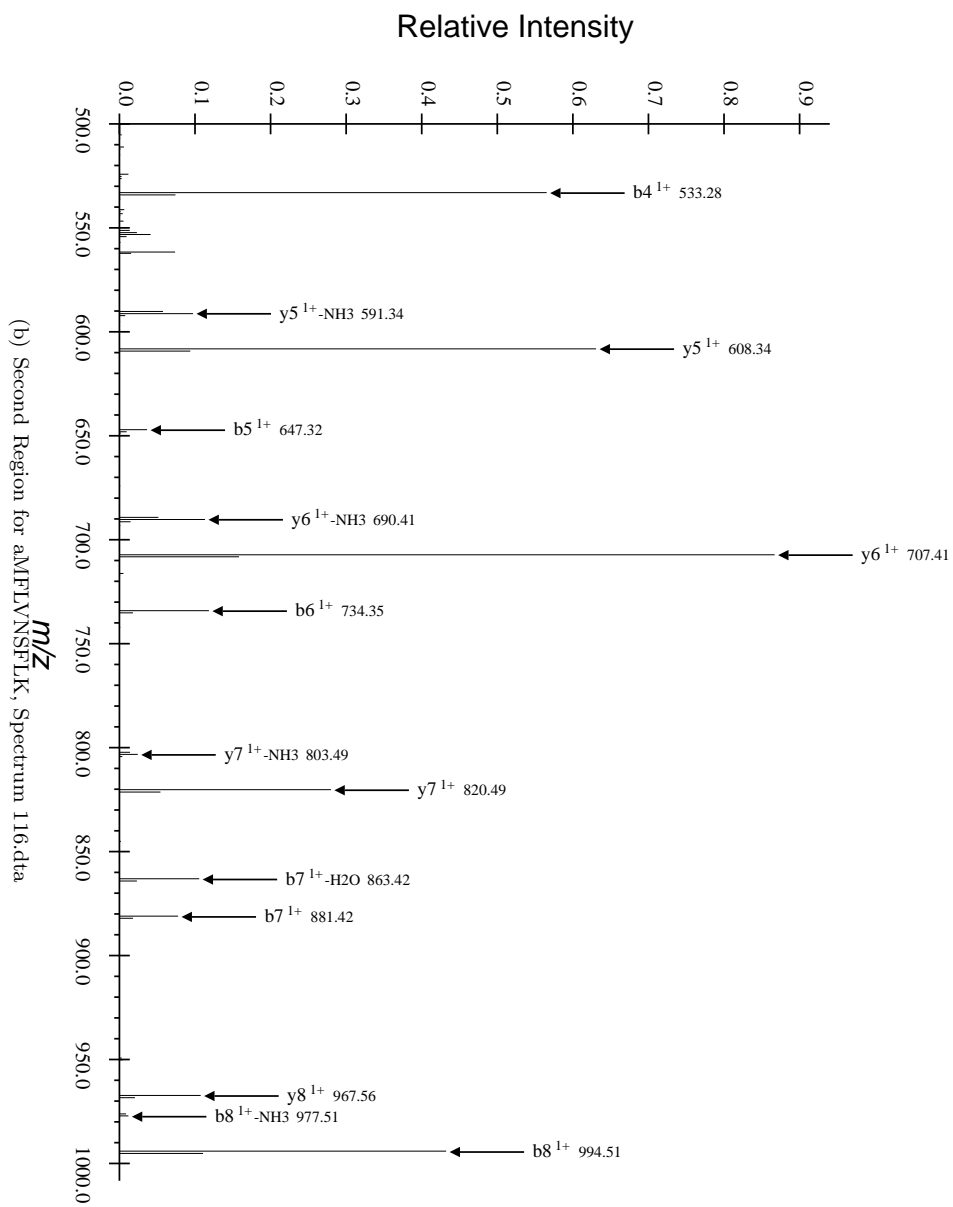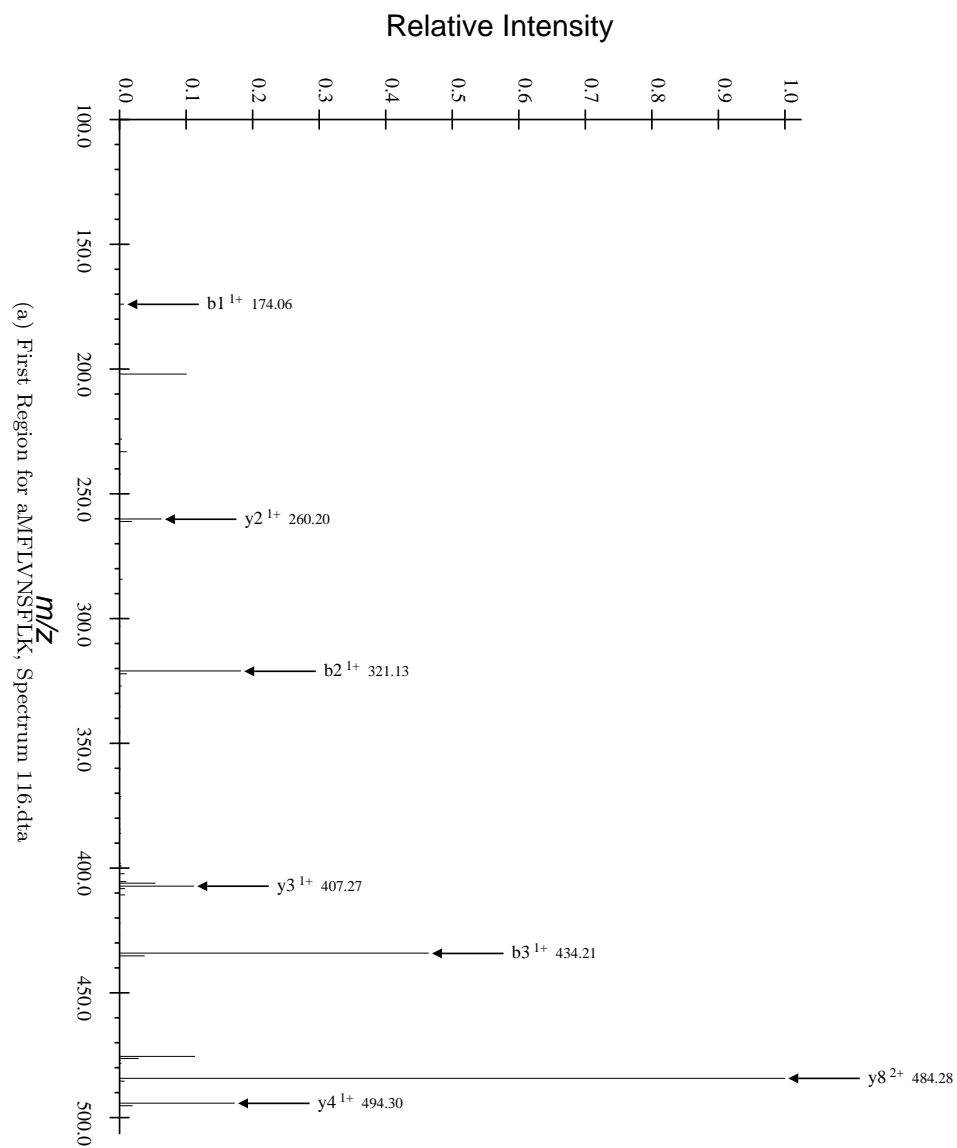

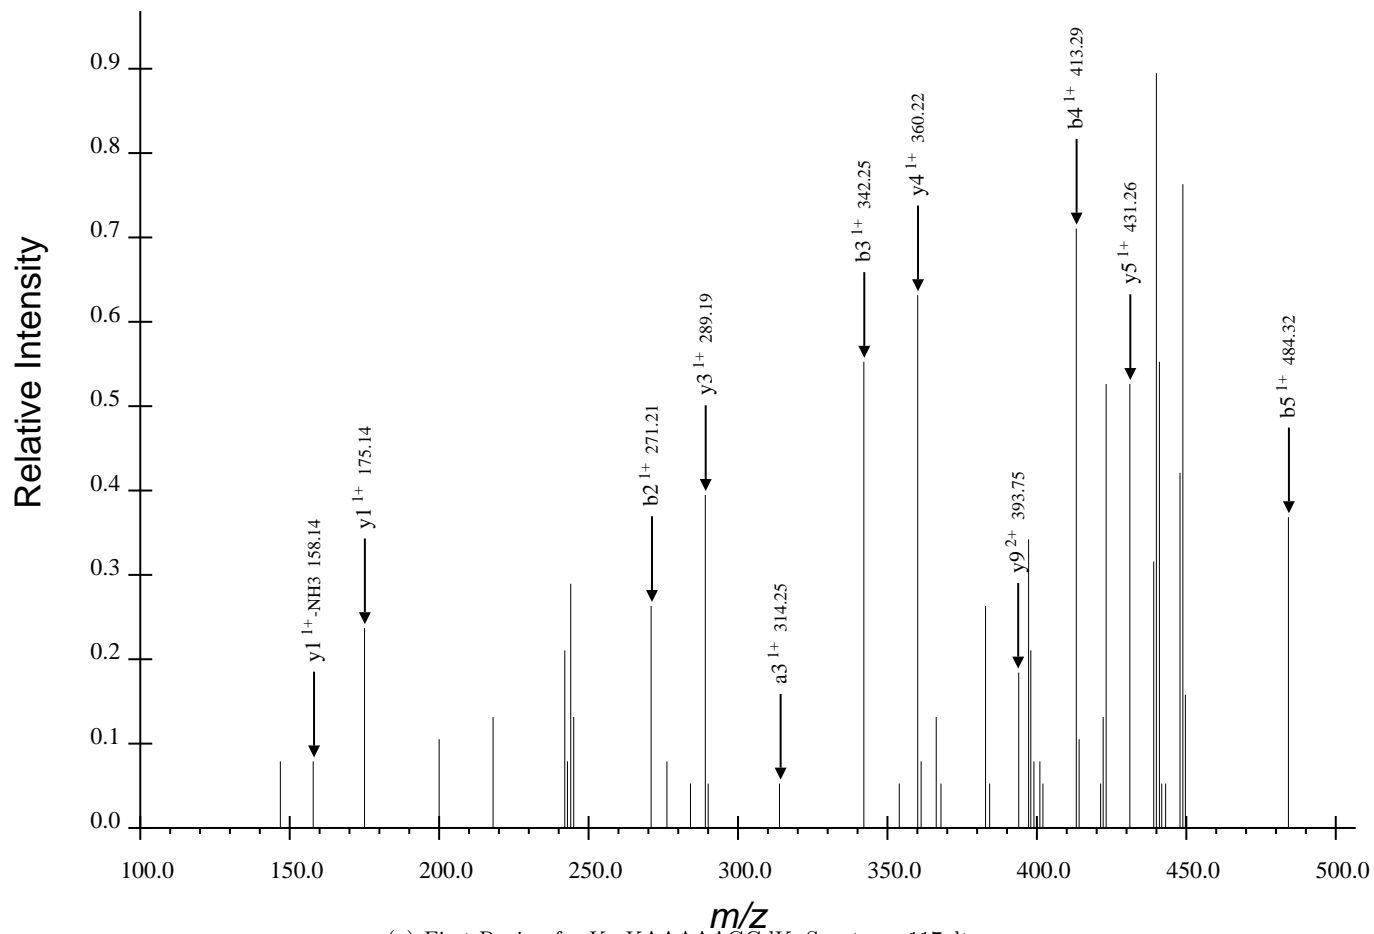

(a) First Region for KmKAAAAAGGdK, Spectrum 117.dta

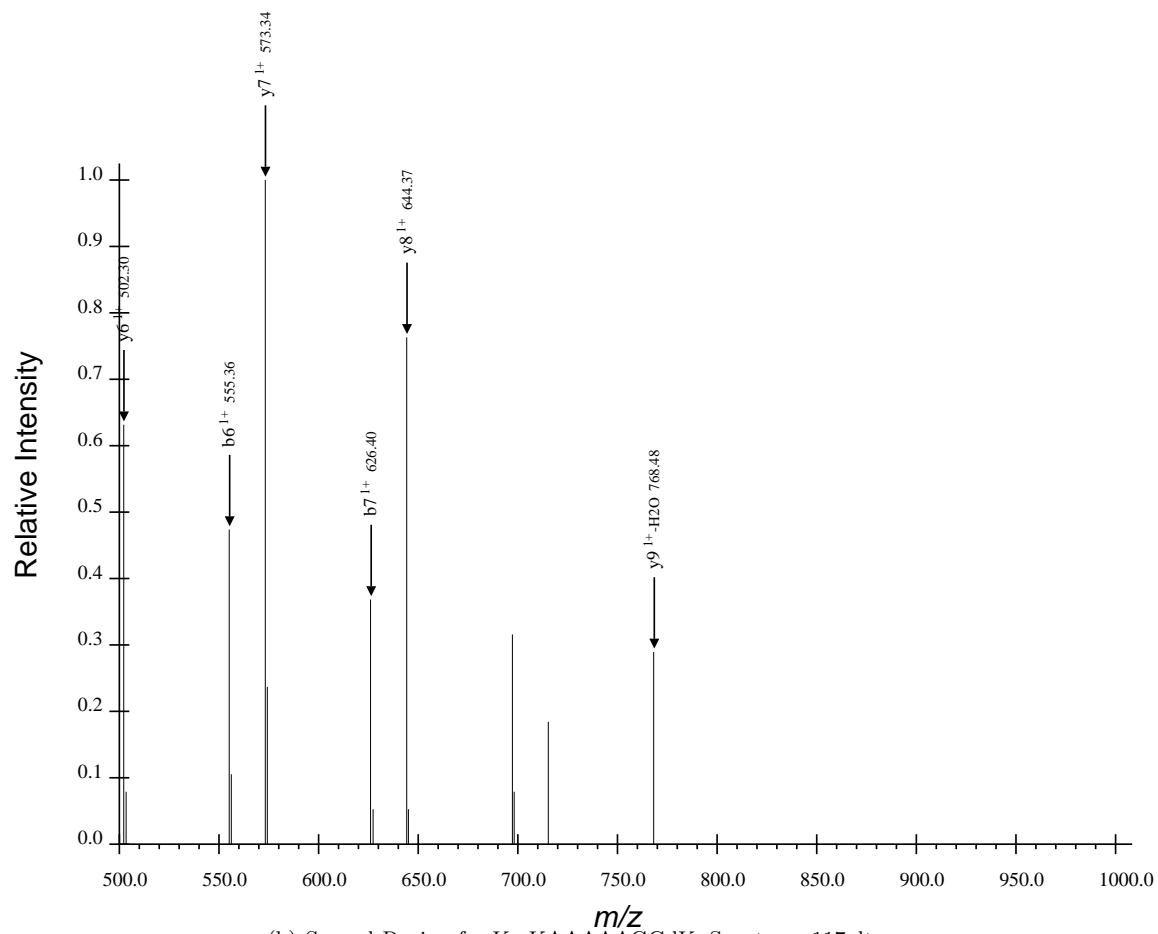

(b) Second Region for KmKAAAAAGGdK, Spectrum 117.dta

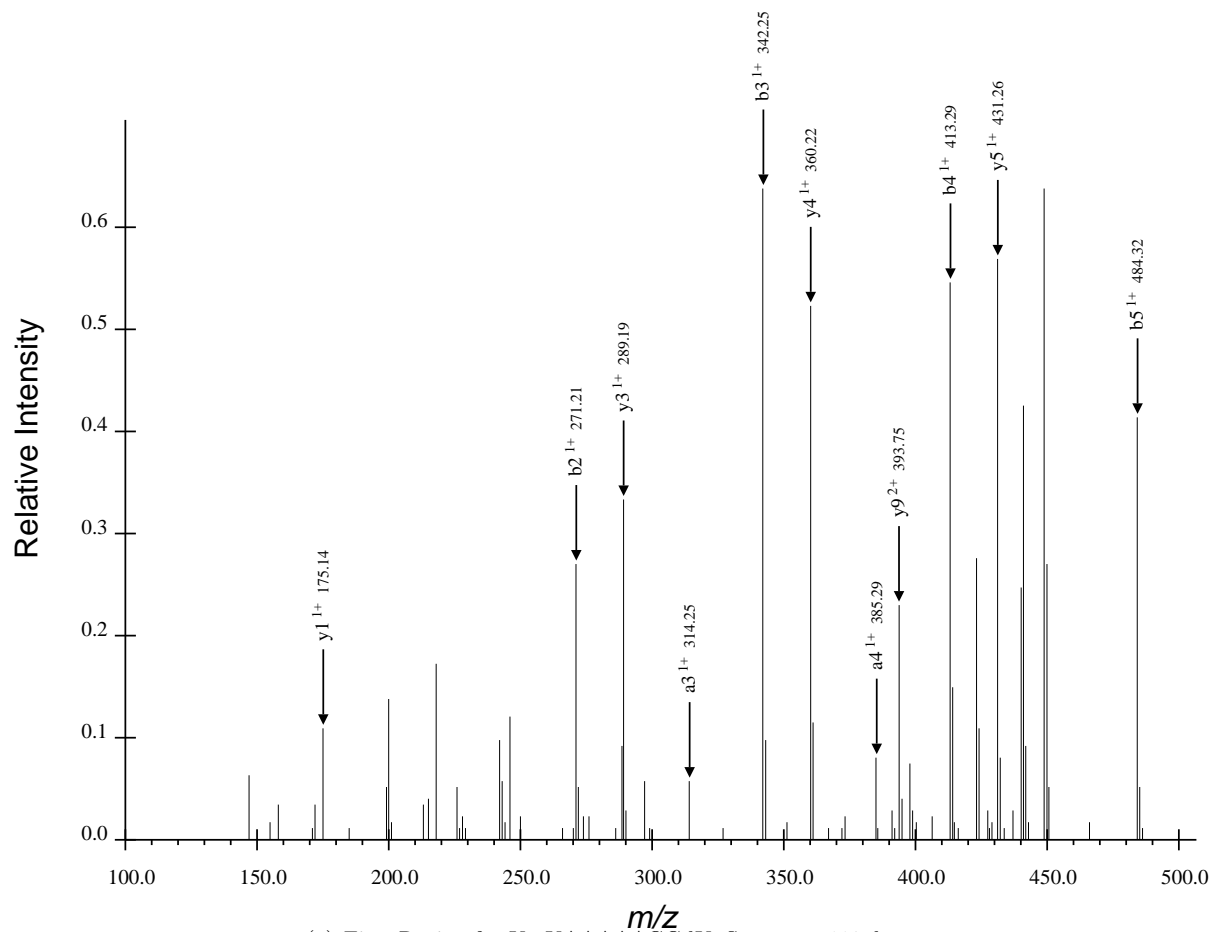

(a) First Region for KmKAAAAAGGdK, Spectrum 118.dta

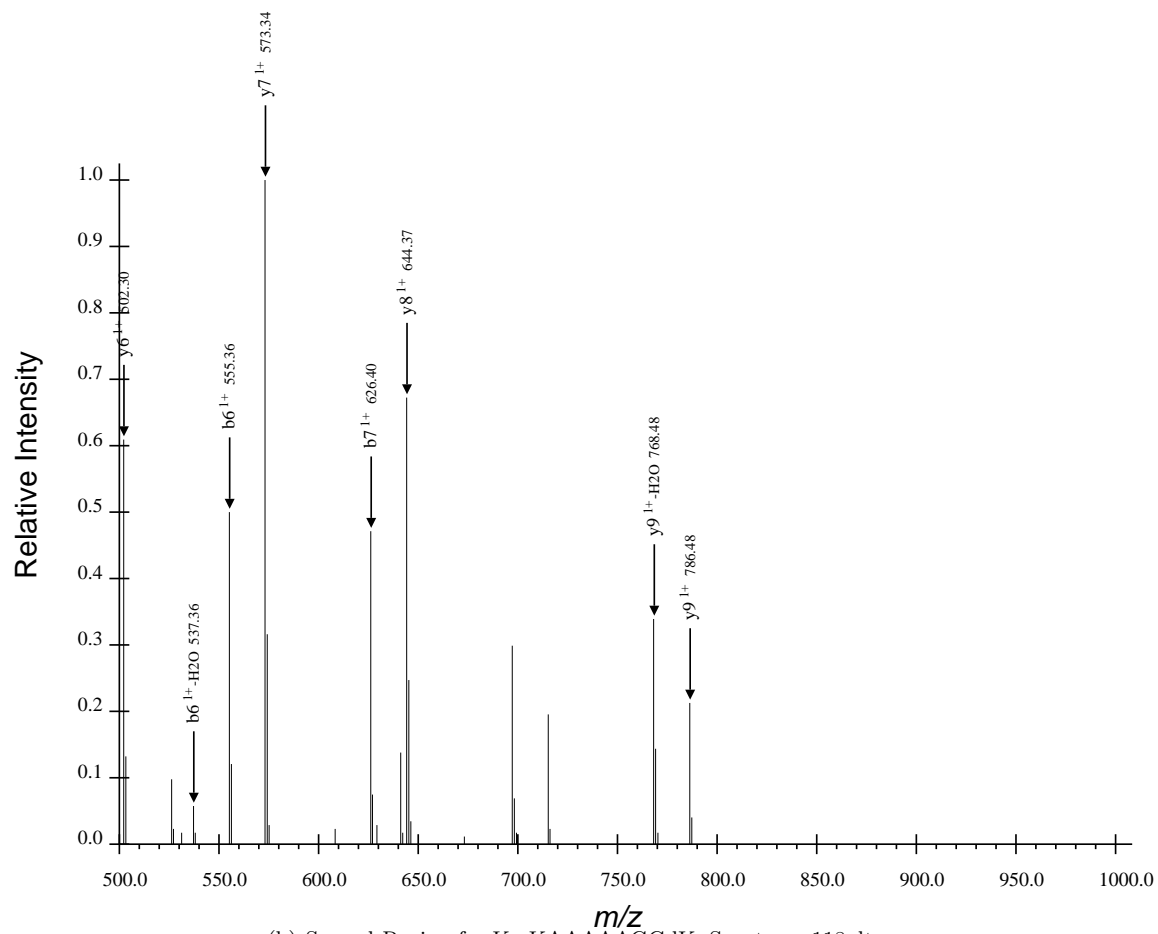

(b) Second Region for KmKAAAAAGGdK, Spectrum 118.dta

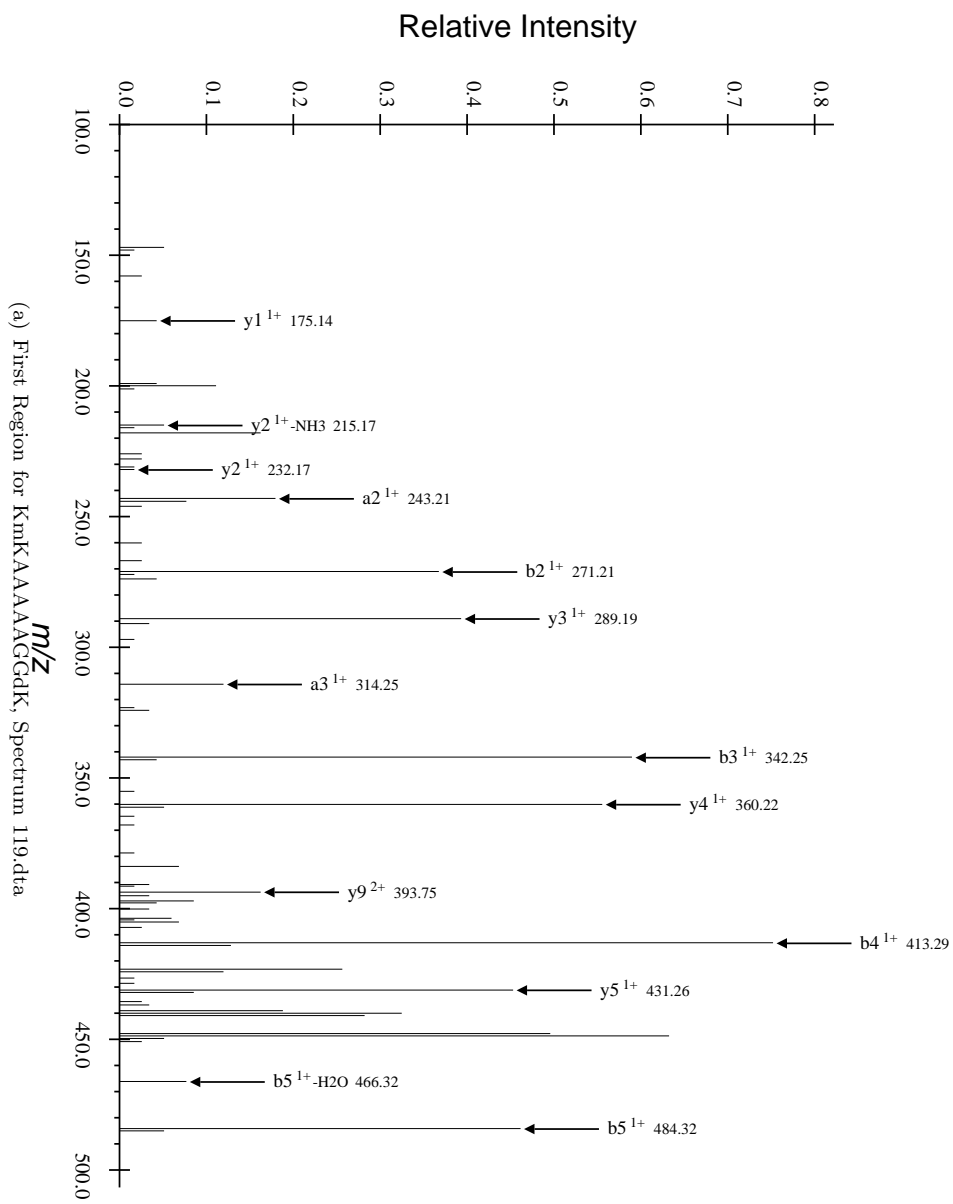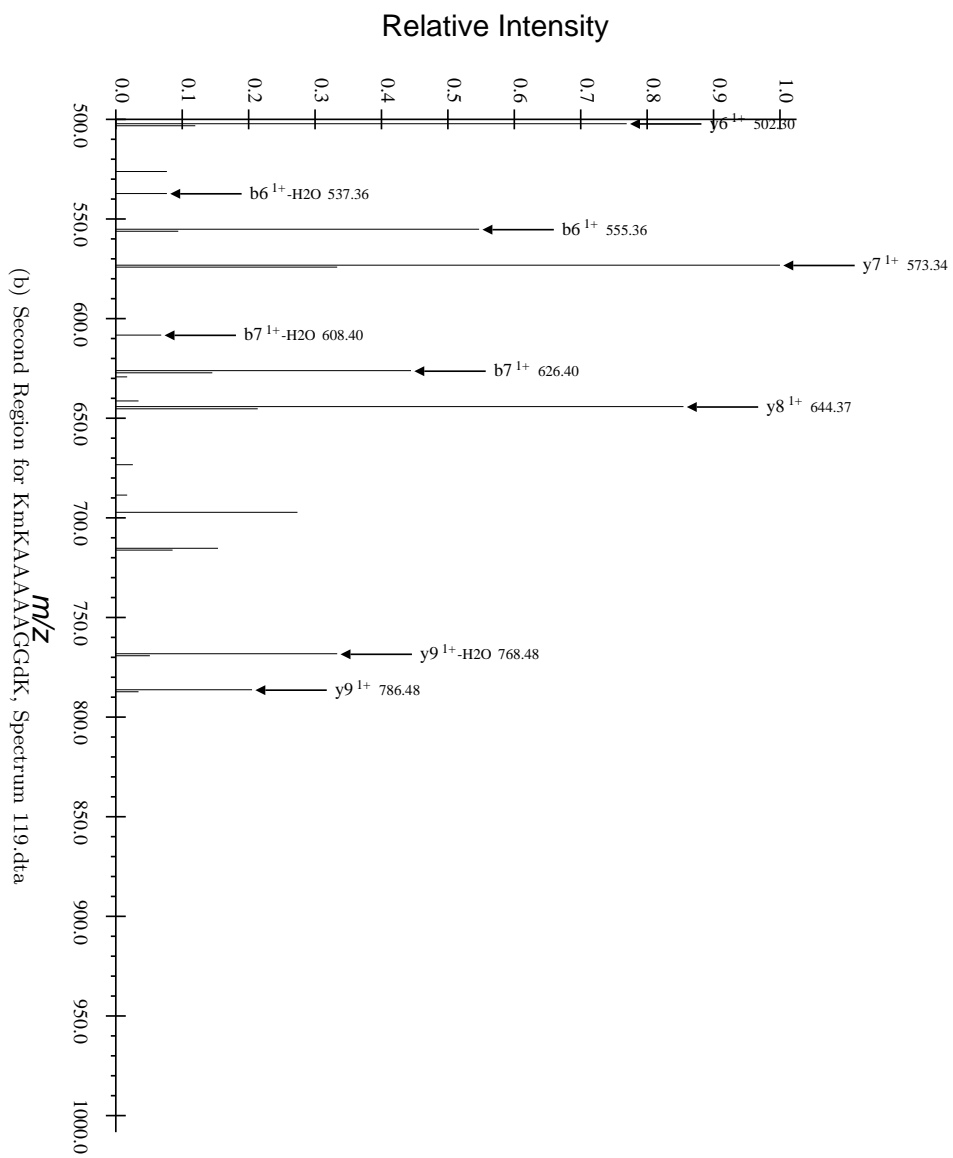



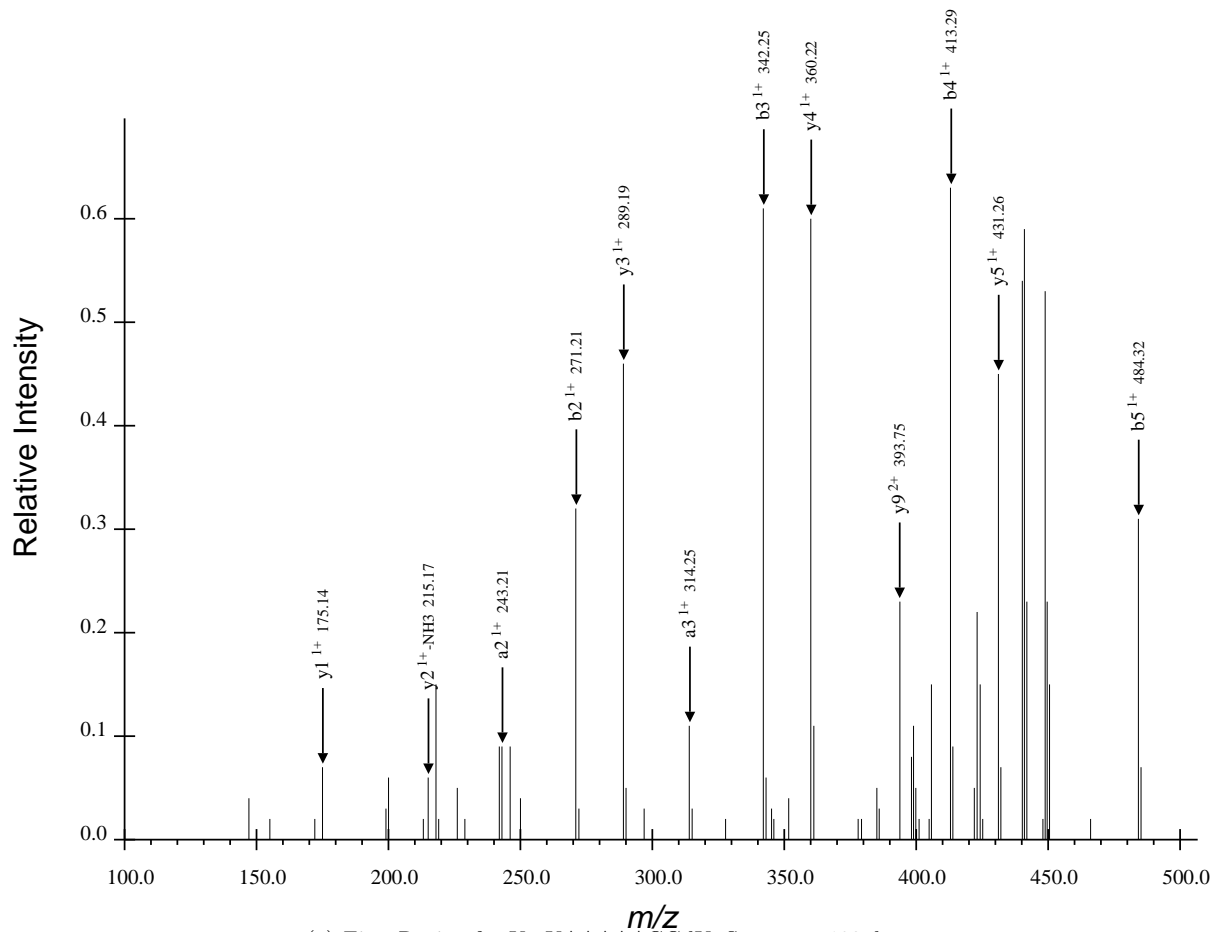

(a) First Region for KmKAAAAAGGdK, Spectrum 120.dta

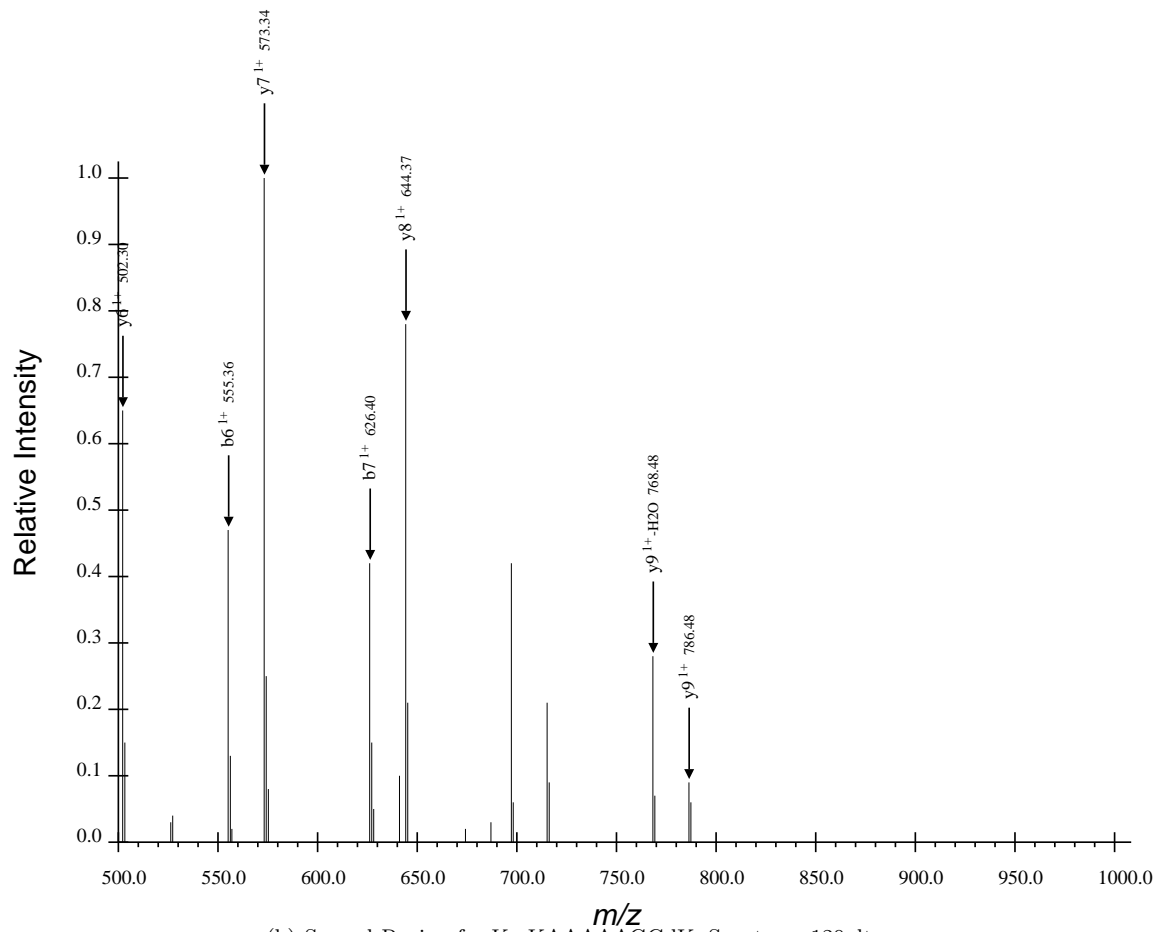

(b) Second Region for KmKAAAAAGGdK, Spectrum 120.dta

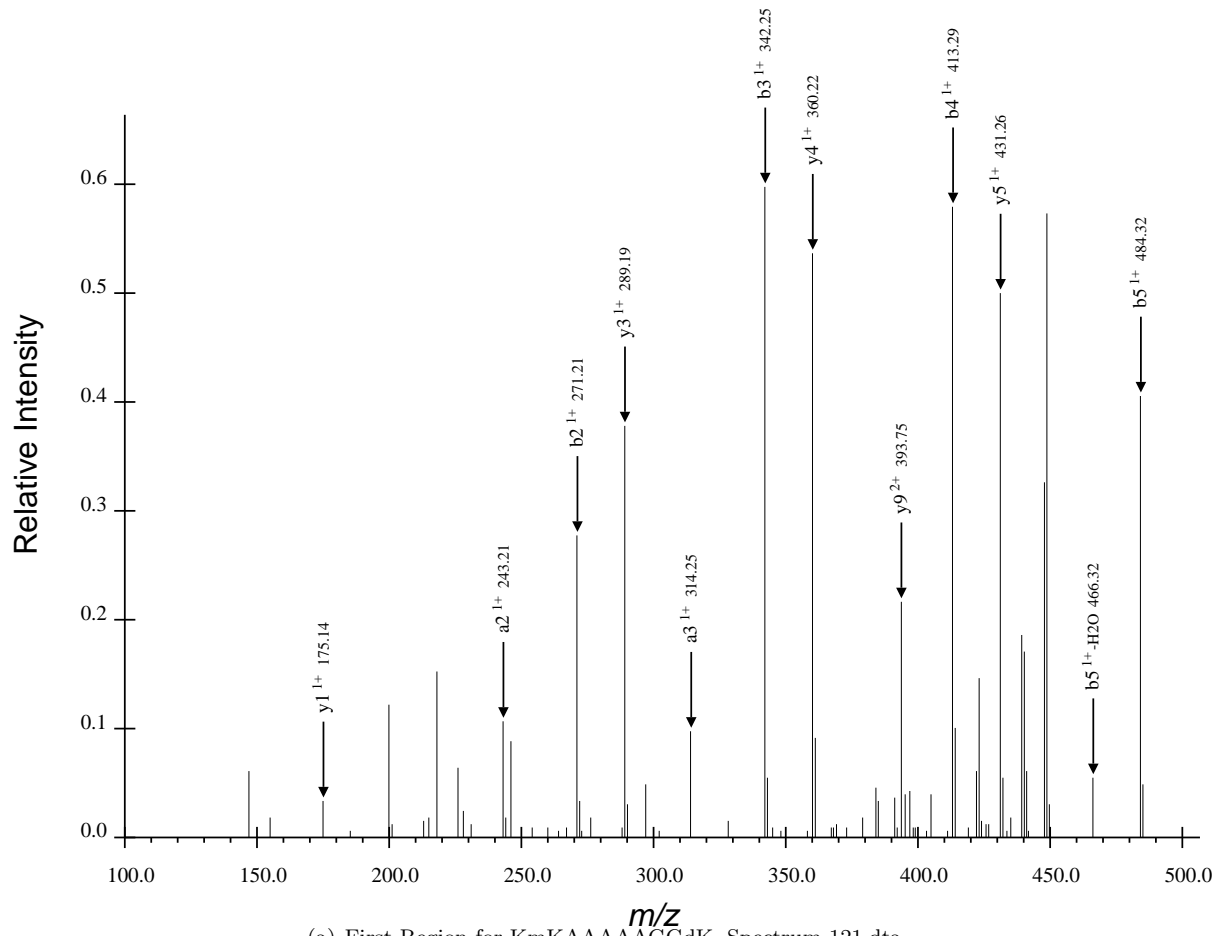

(a) First Region for KmKAAAAAGGdK, Spectrum 121.dta

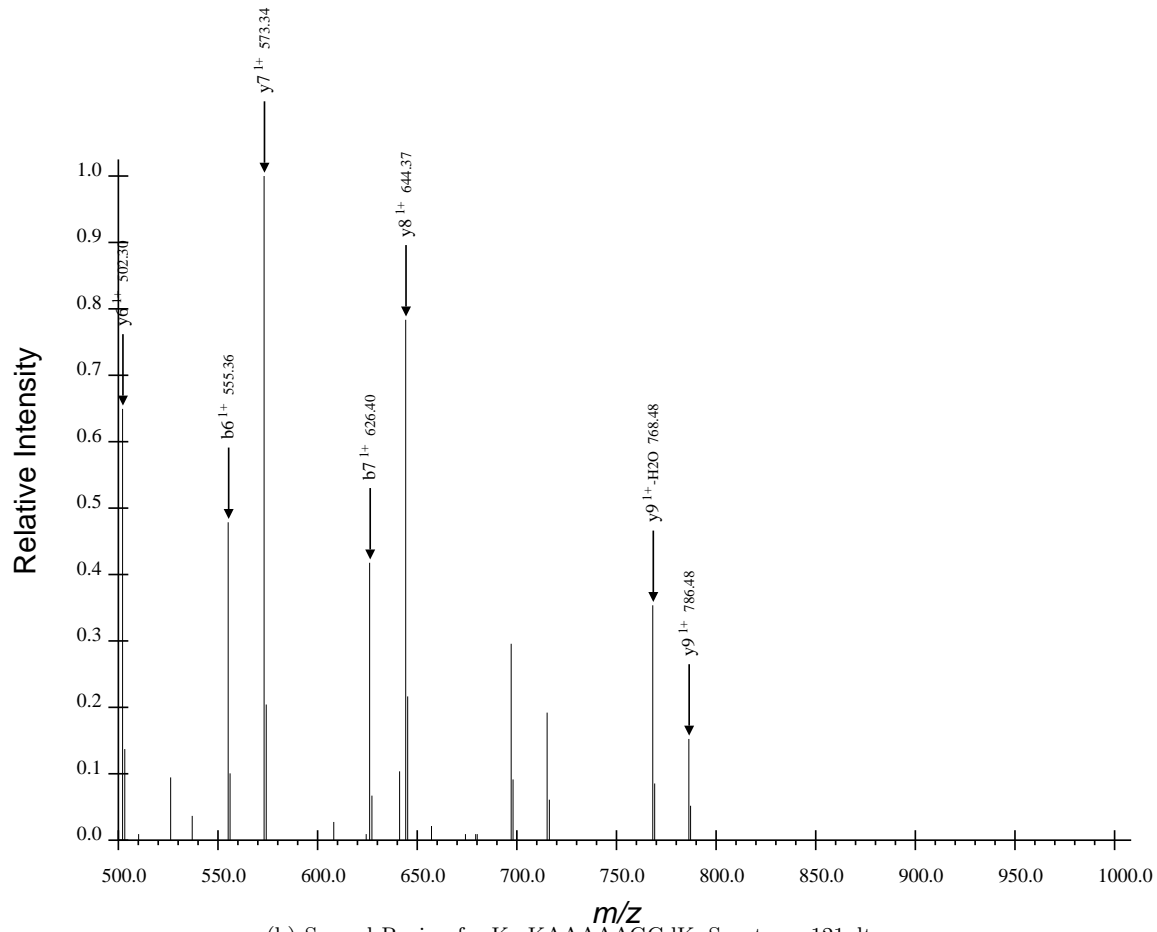

(b) Second Region for KmKAAAAAGGdK, Spectrum 121.dta

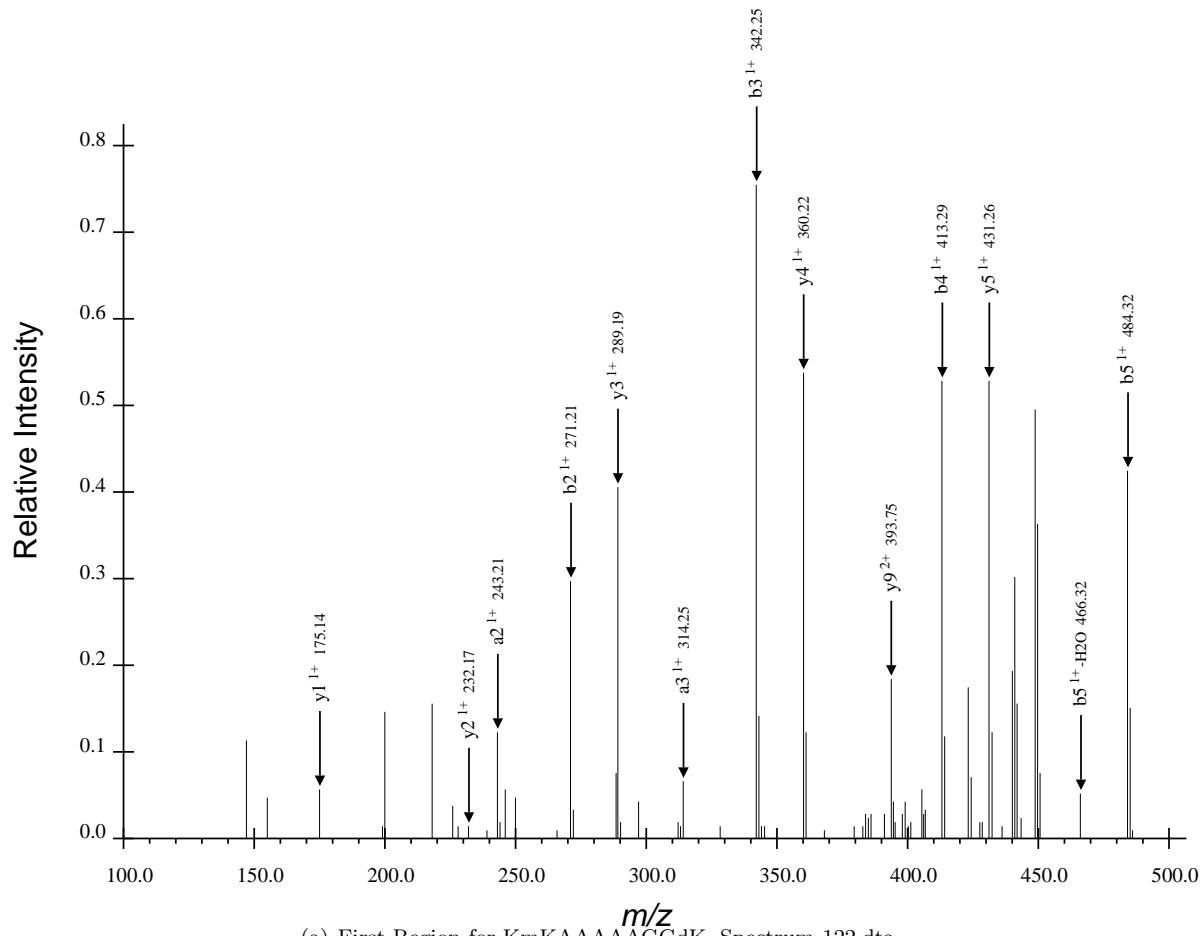

(a) First Region for KmKAAAAAGGdK, Spectrum 122.dta

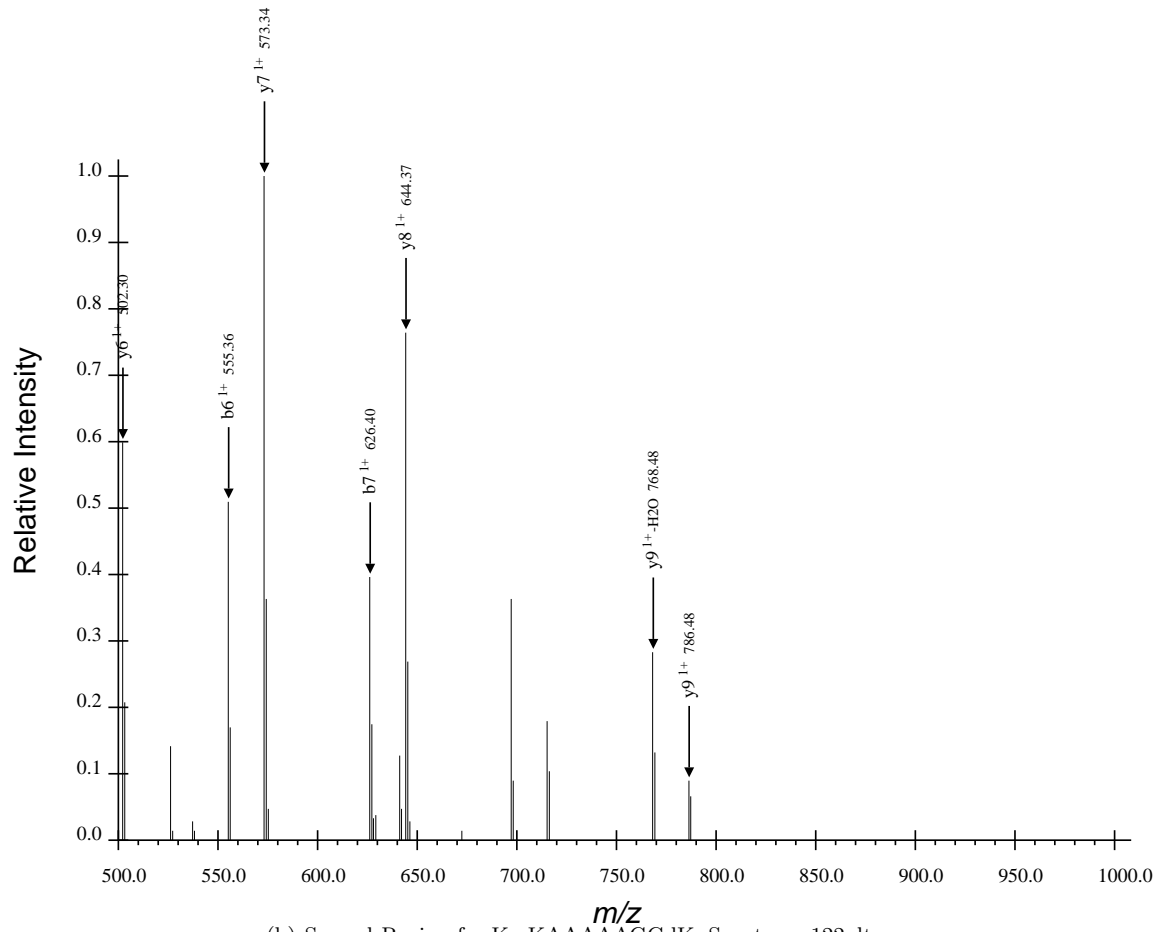

(b) Second Region for KmKAAAAAGGdK, Spectrum 122.dta

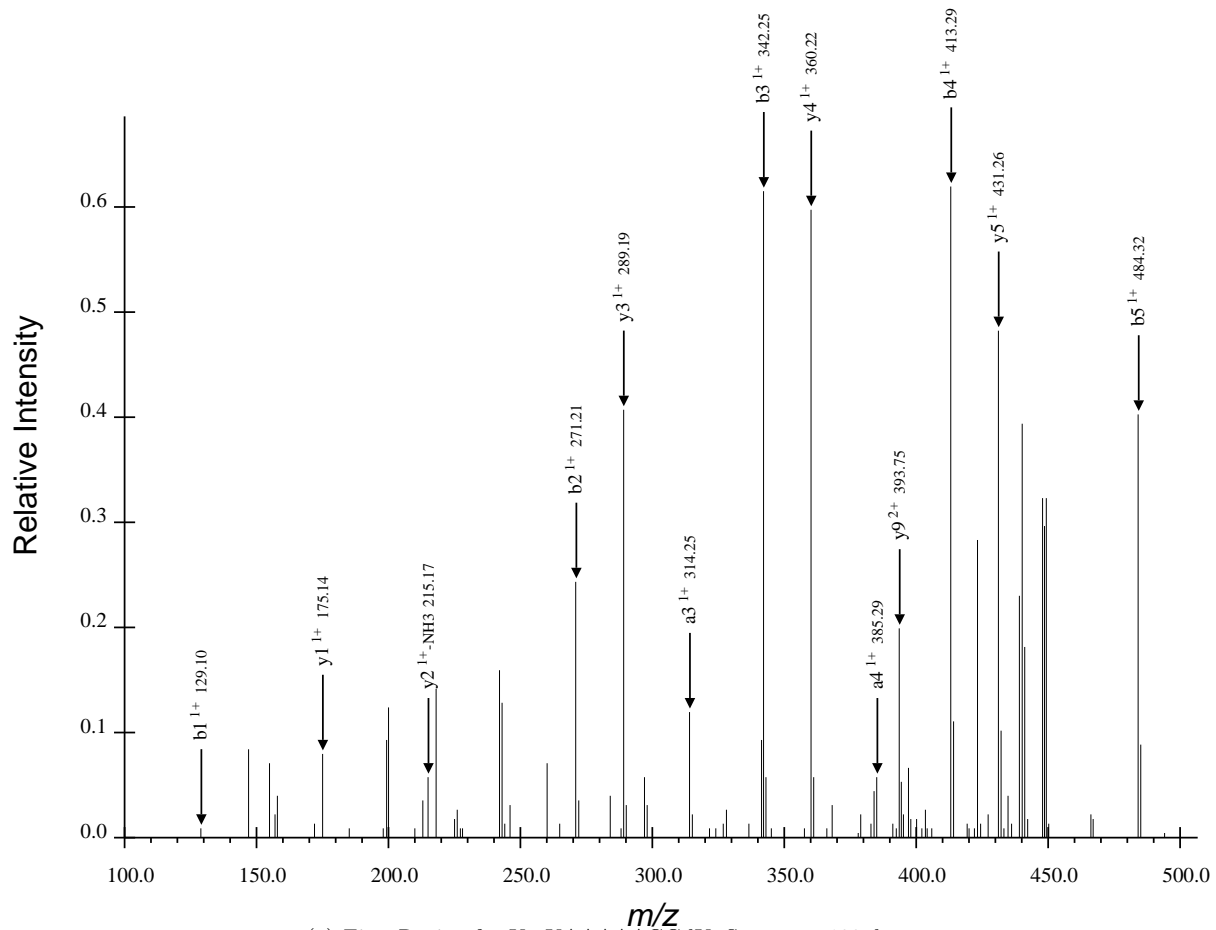

(a) First Region for KmKAAAAAGGdK, Spectrum 123.dta

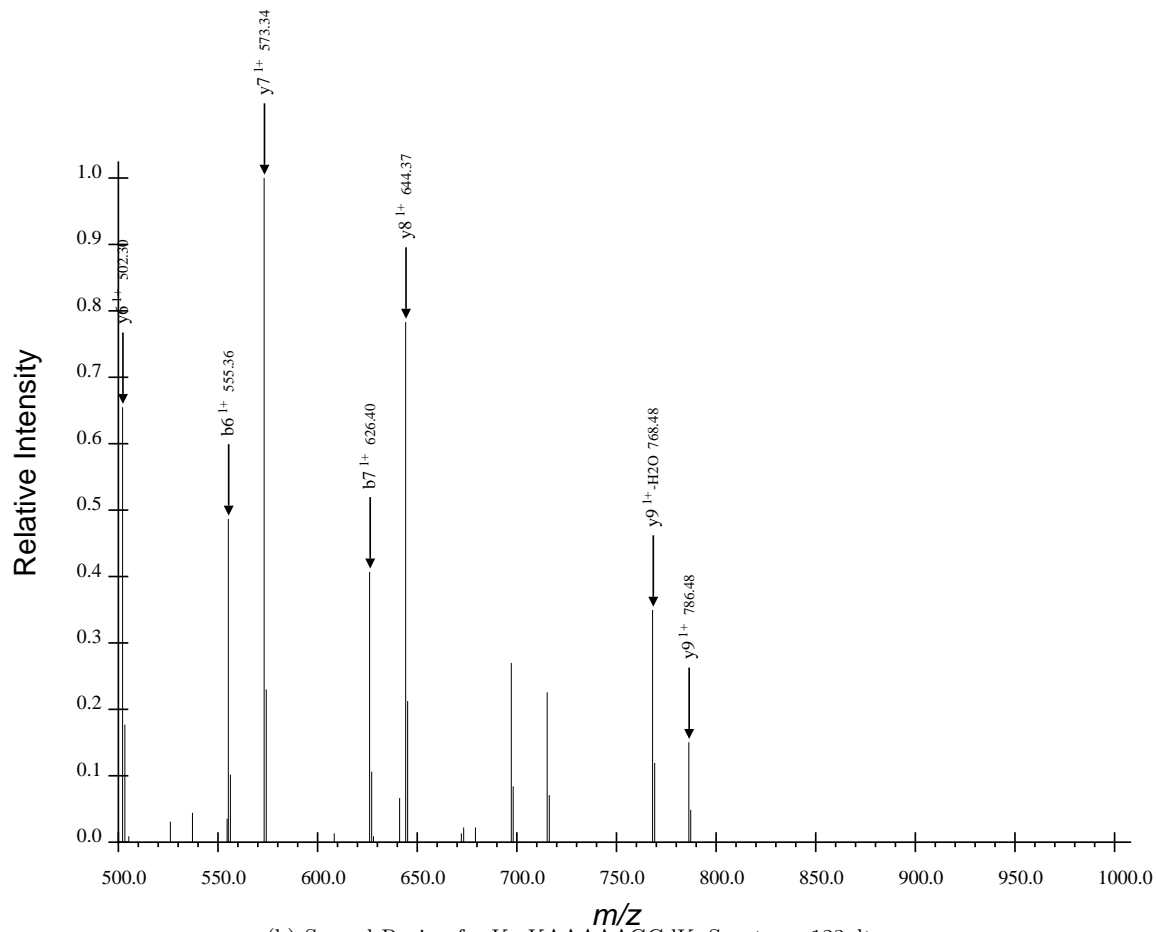

(b) Second Region for KmKAAAAAGGdK, Spectrum 123.dta

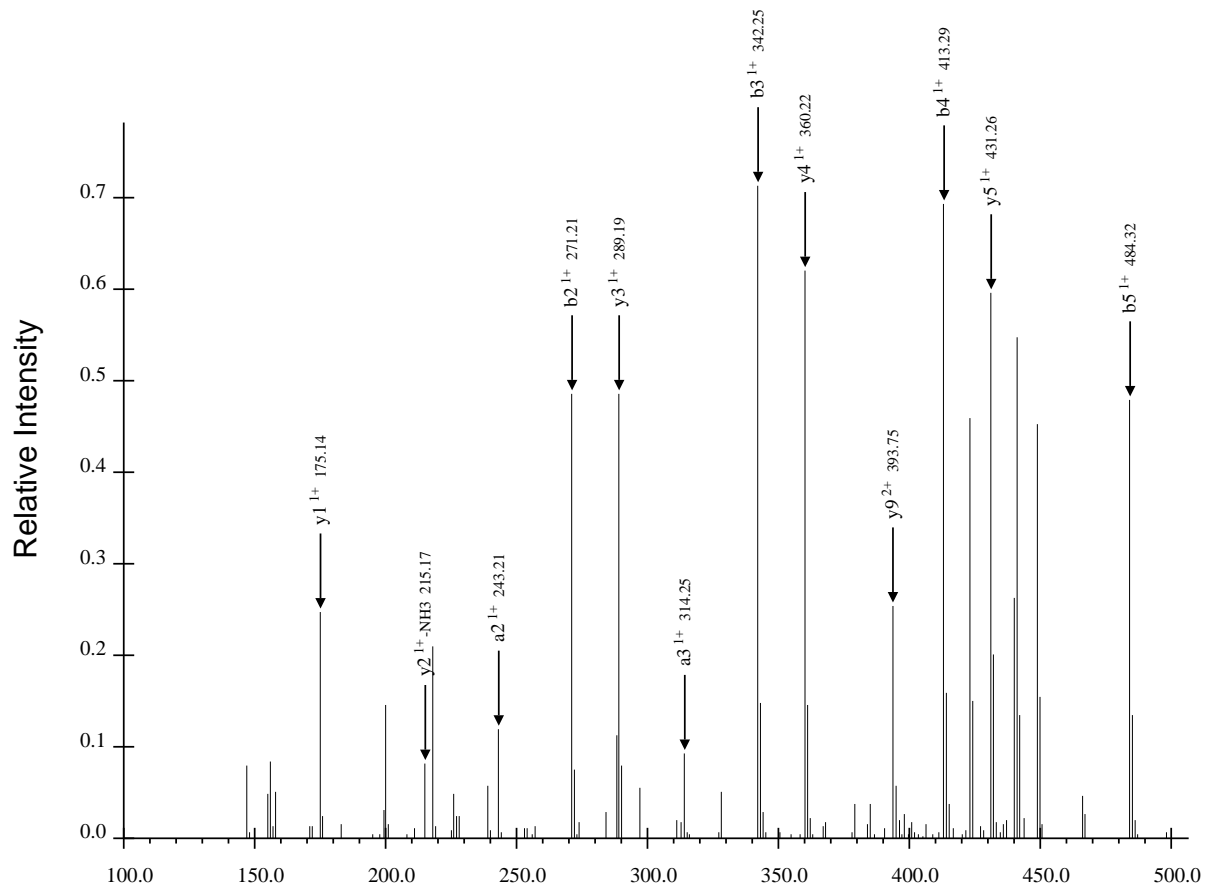

(a) First Region for KmKAAAAAGGdK, Spectrum 124.dta

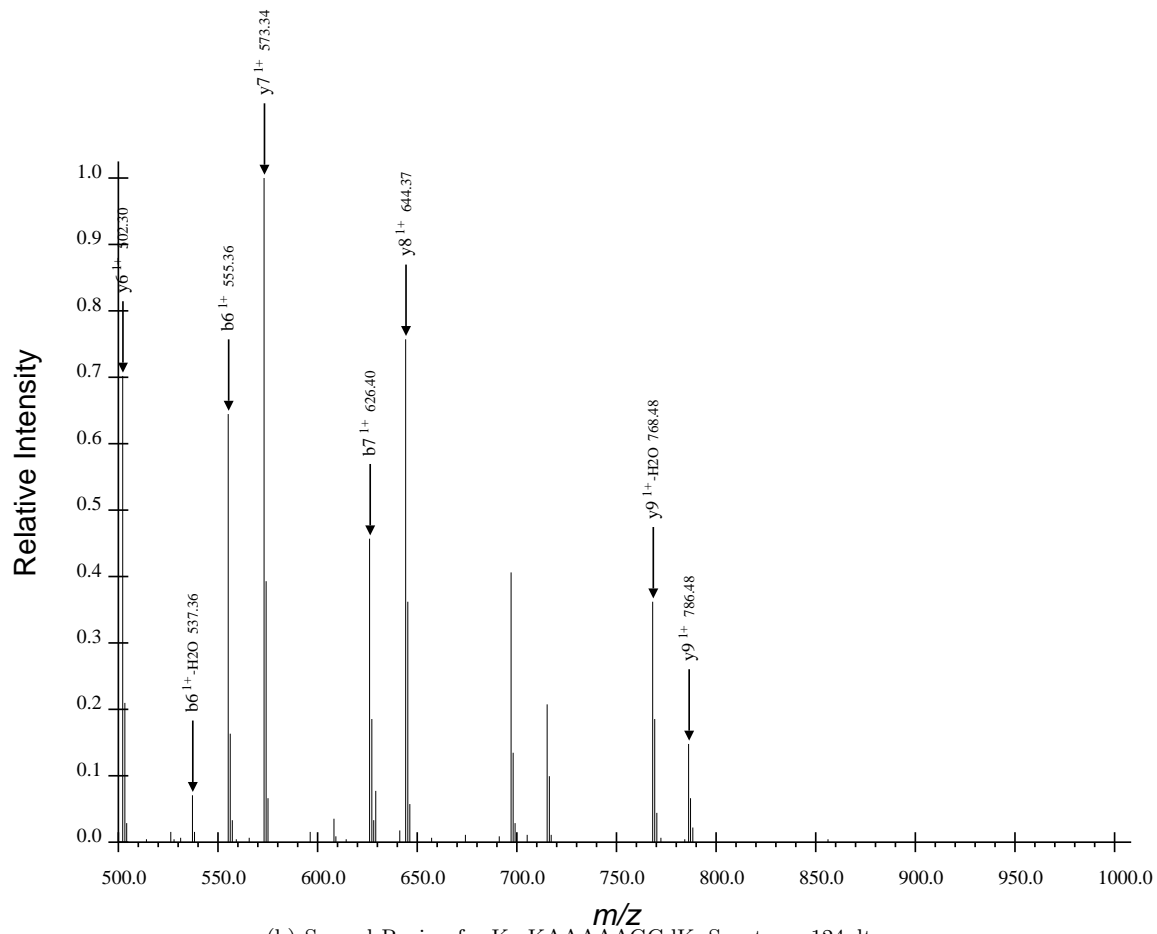

(b) Second Region for KmKAAAAAGGdK, Spectrum 124.dta

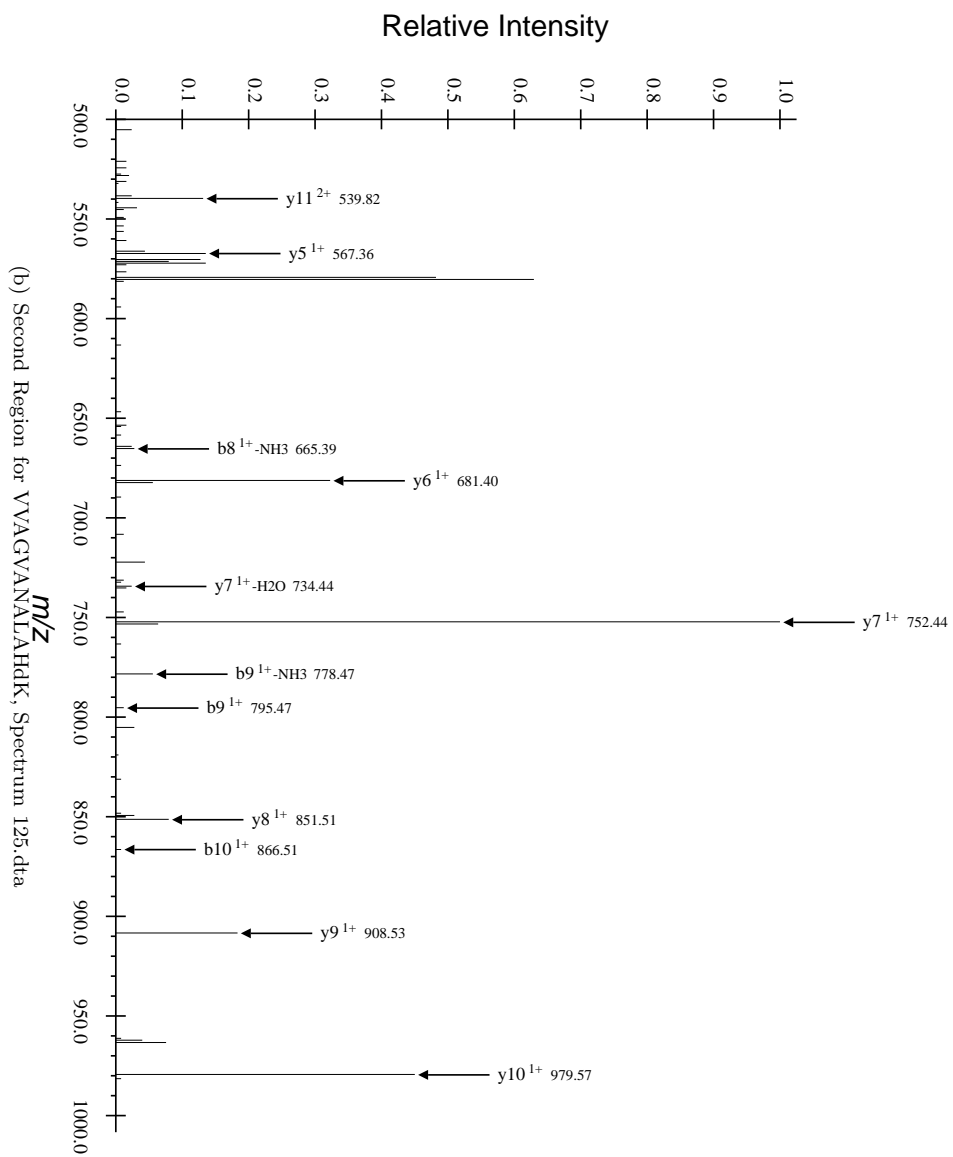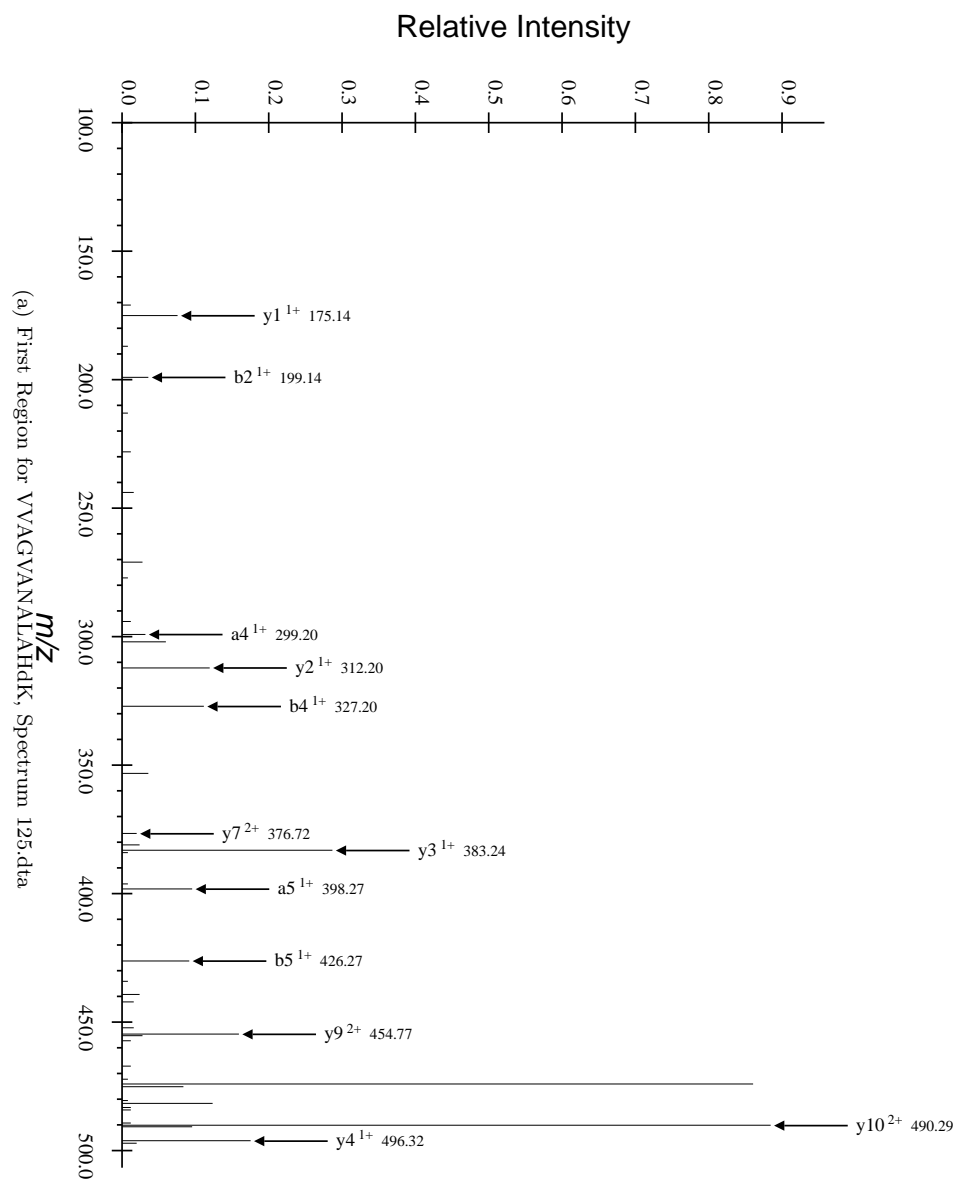

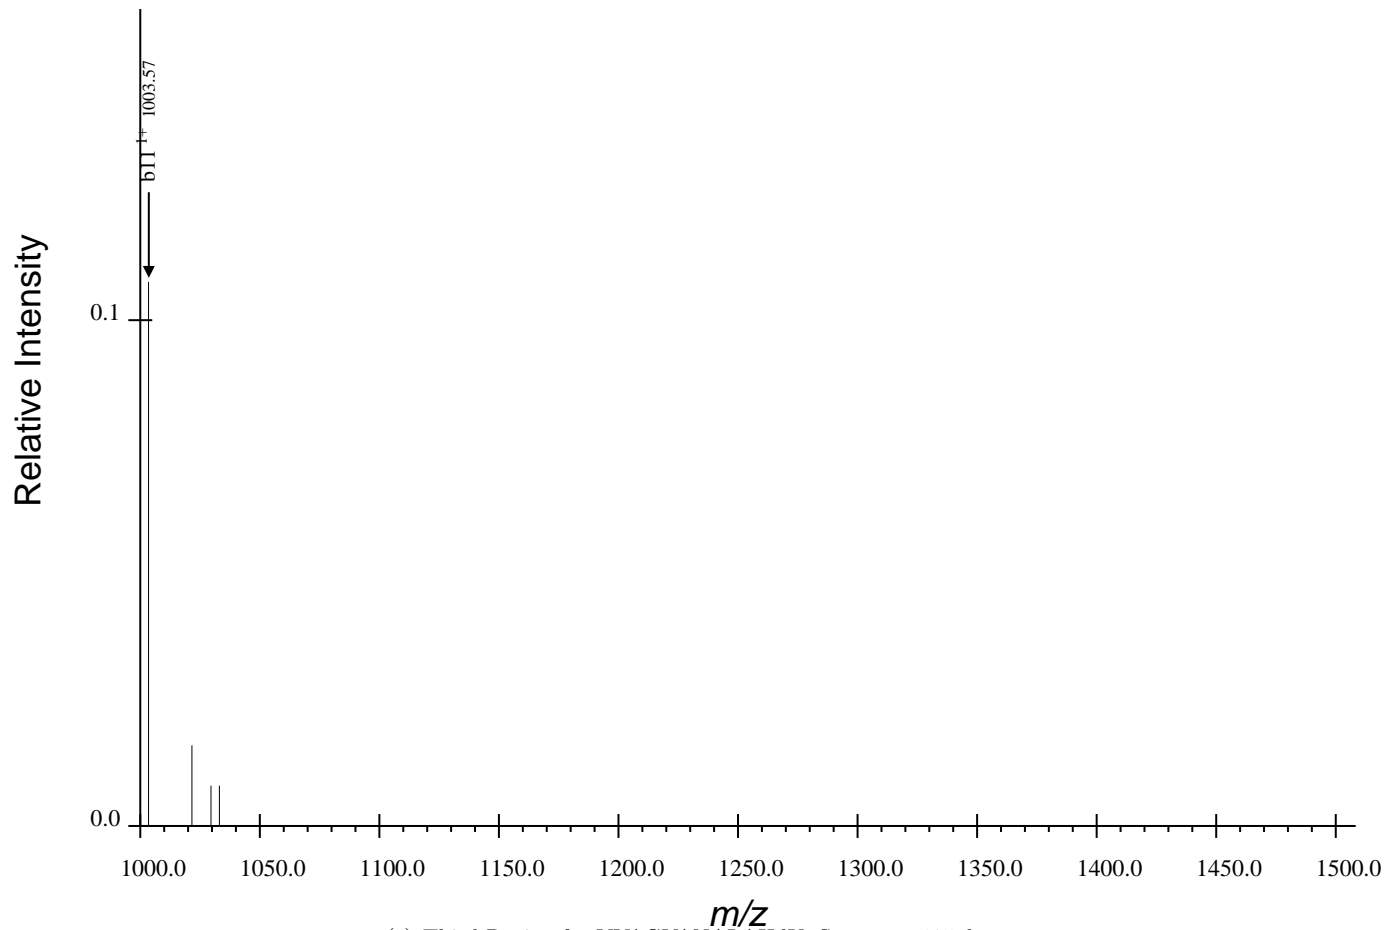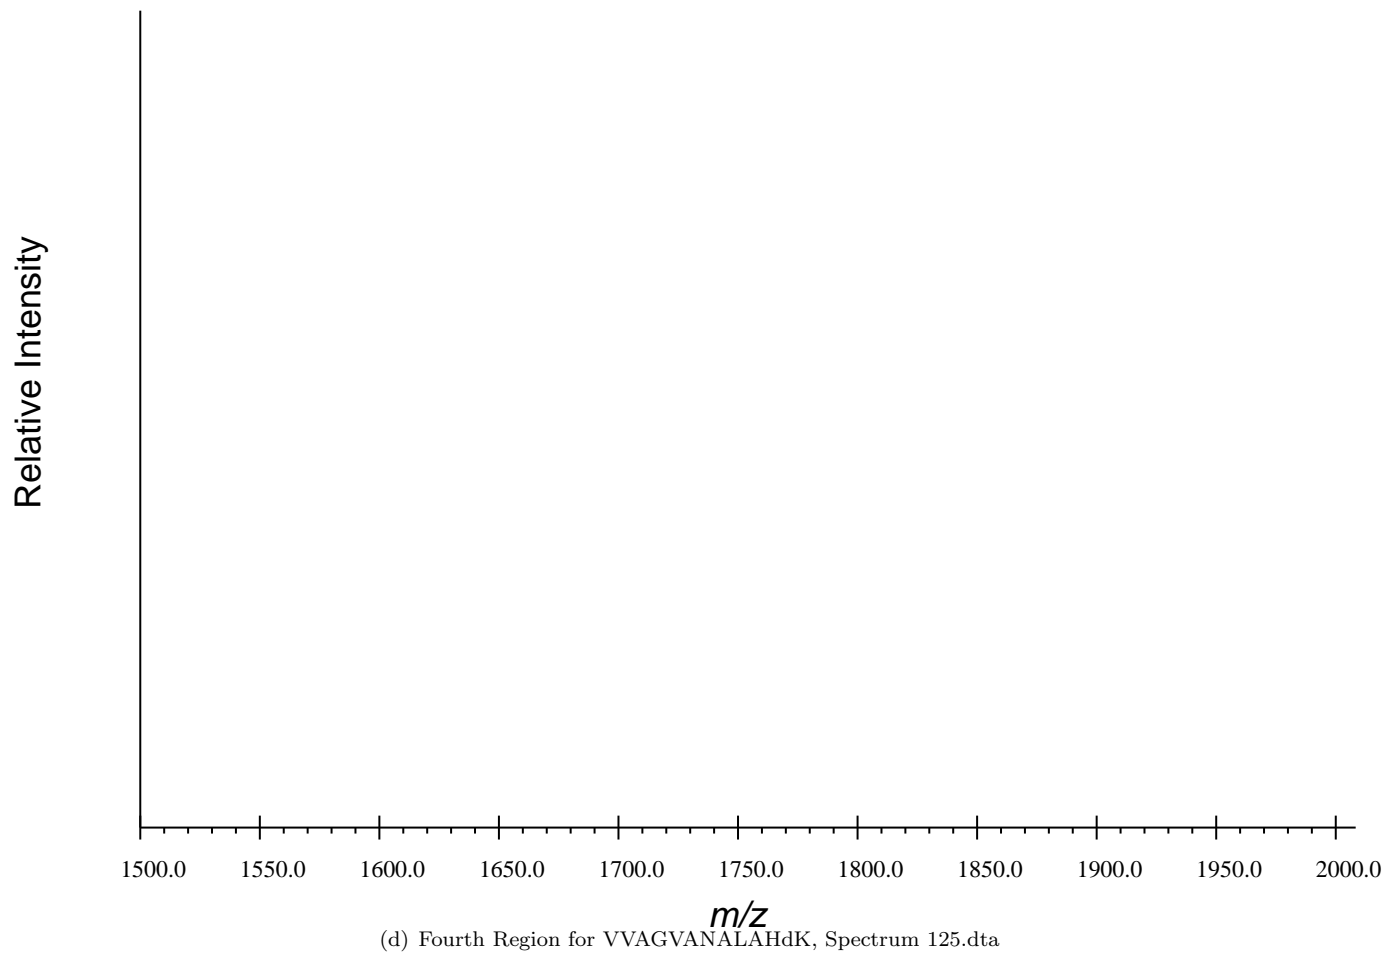

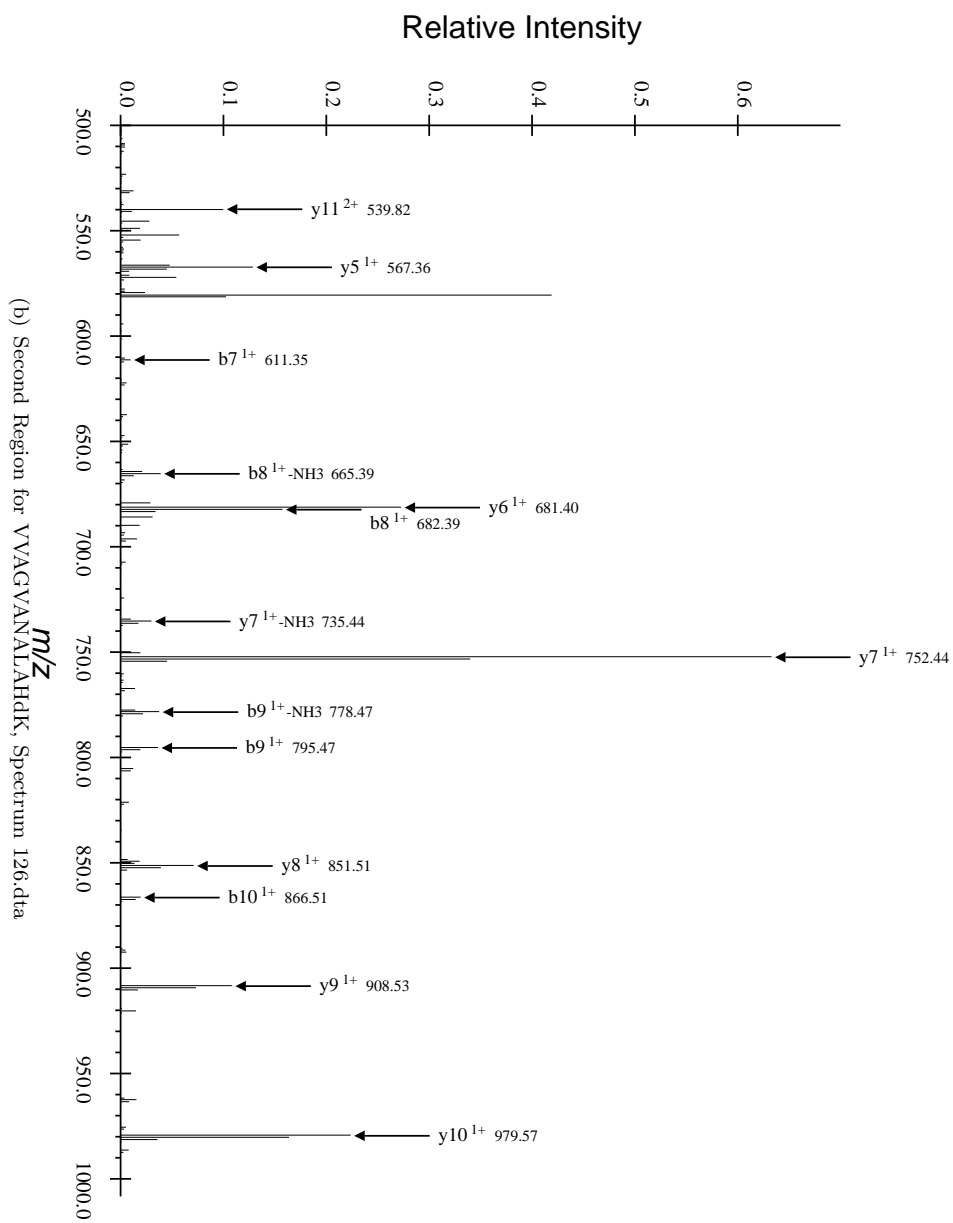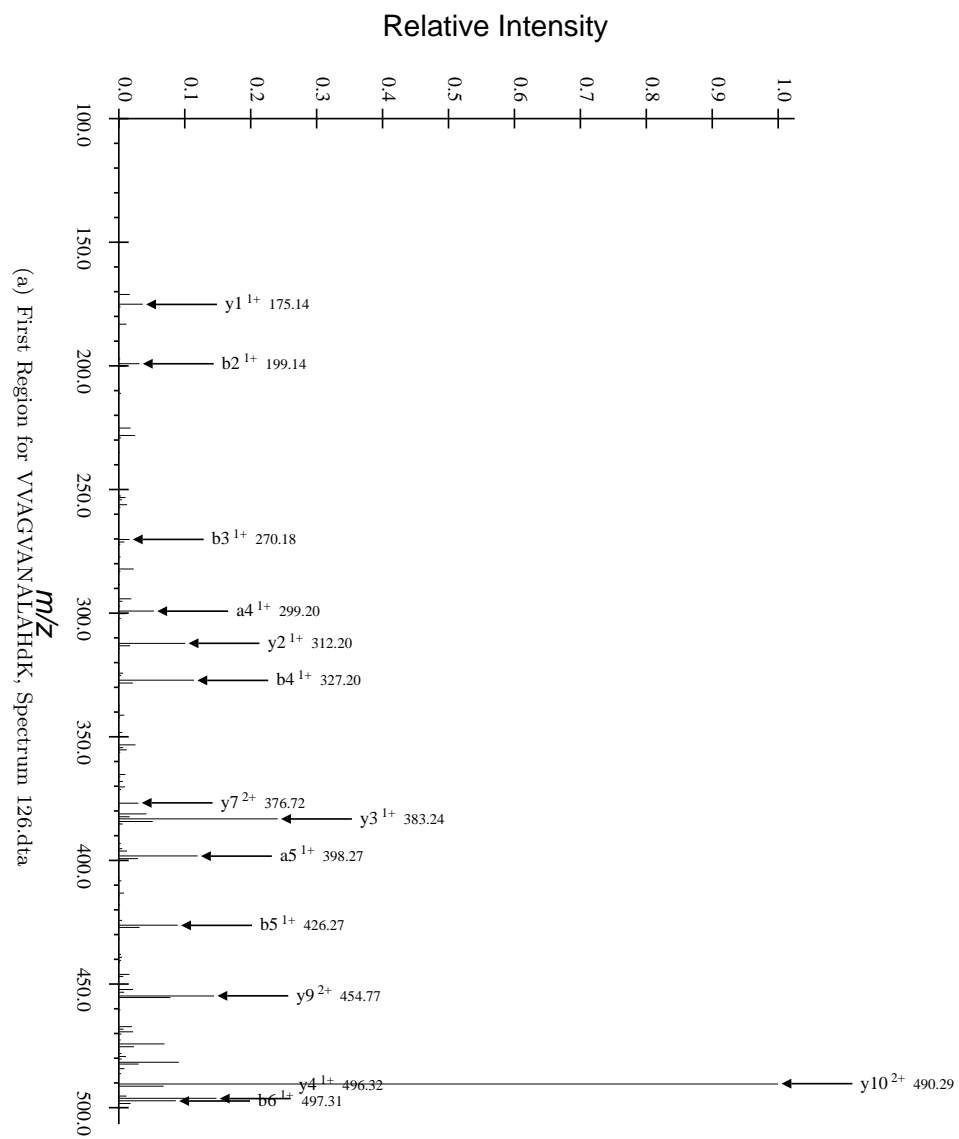



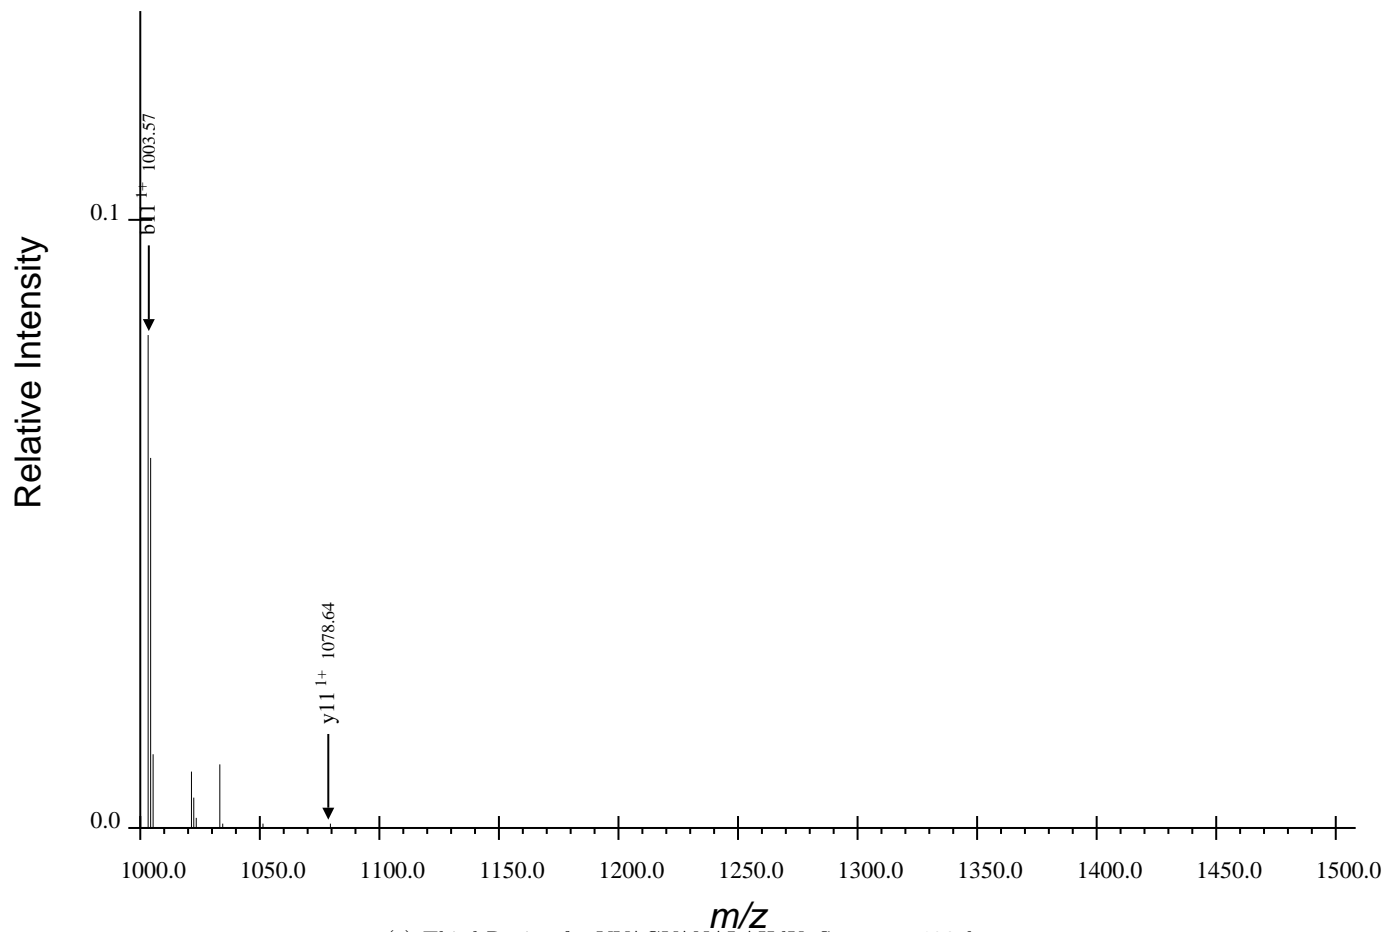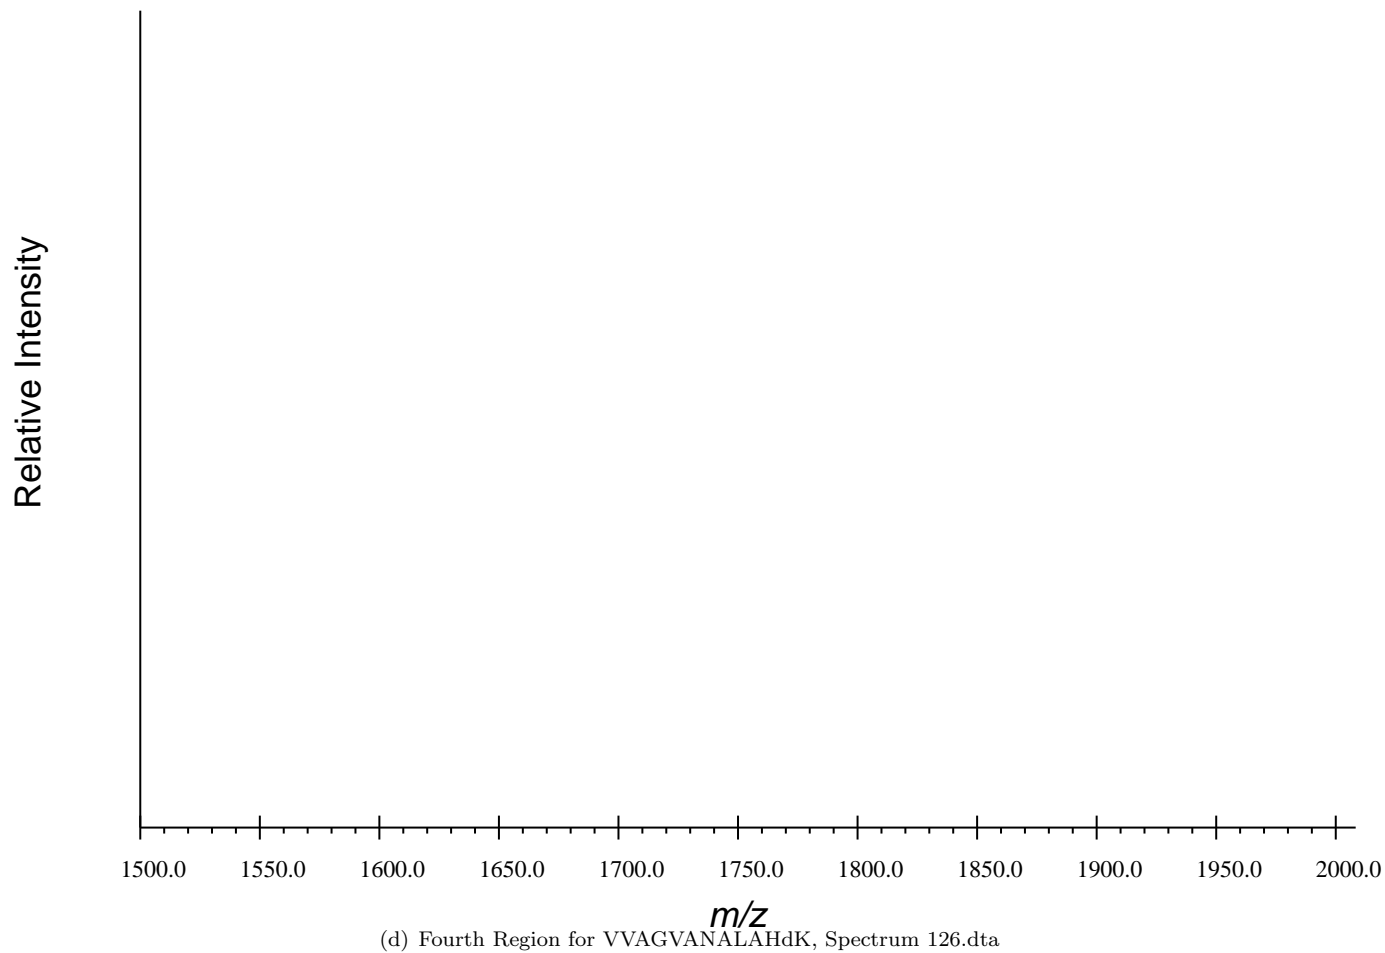

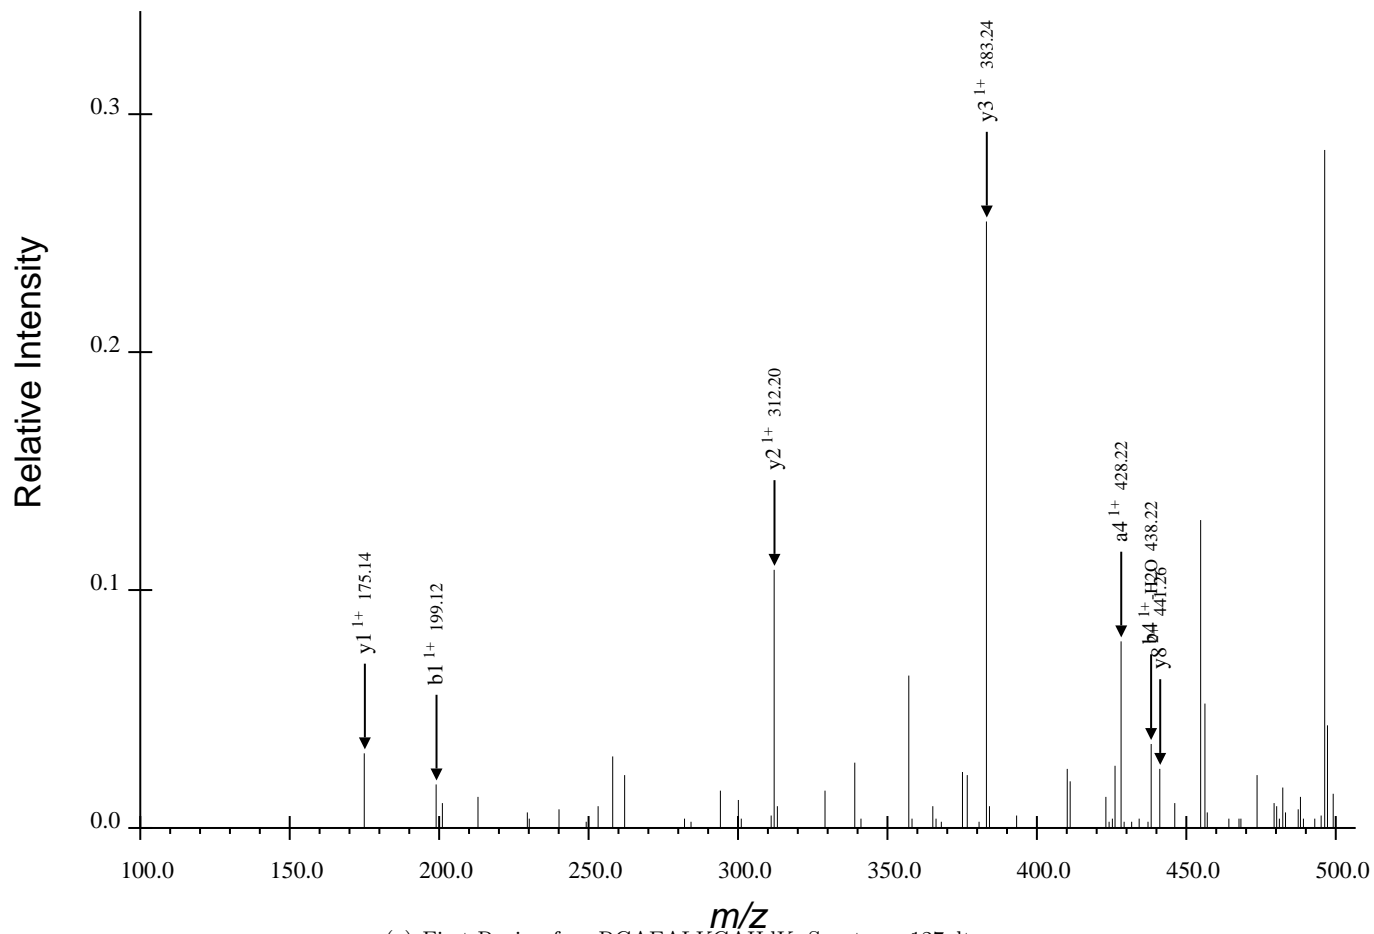

(a) First Region for aRGAEALKGAdK, Spectrum 127.dta

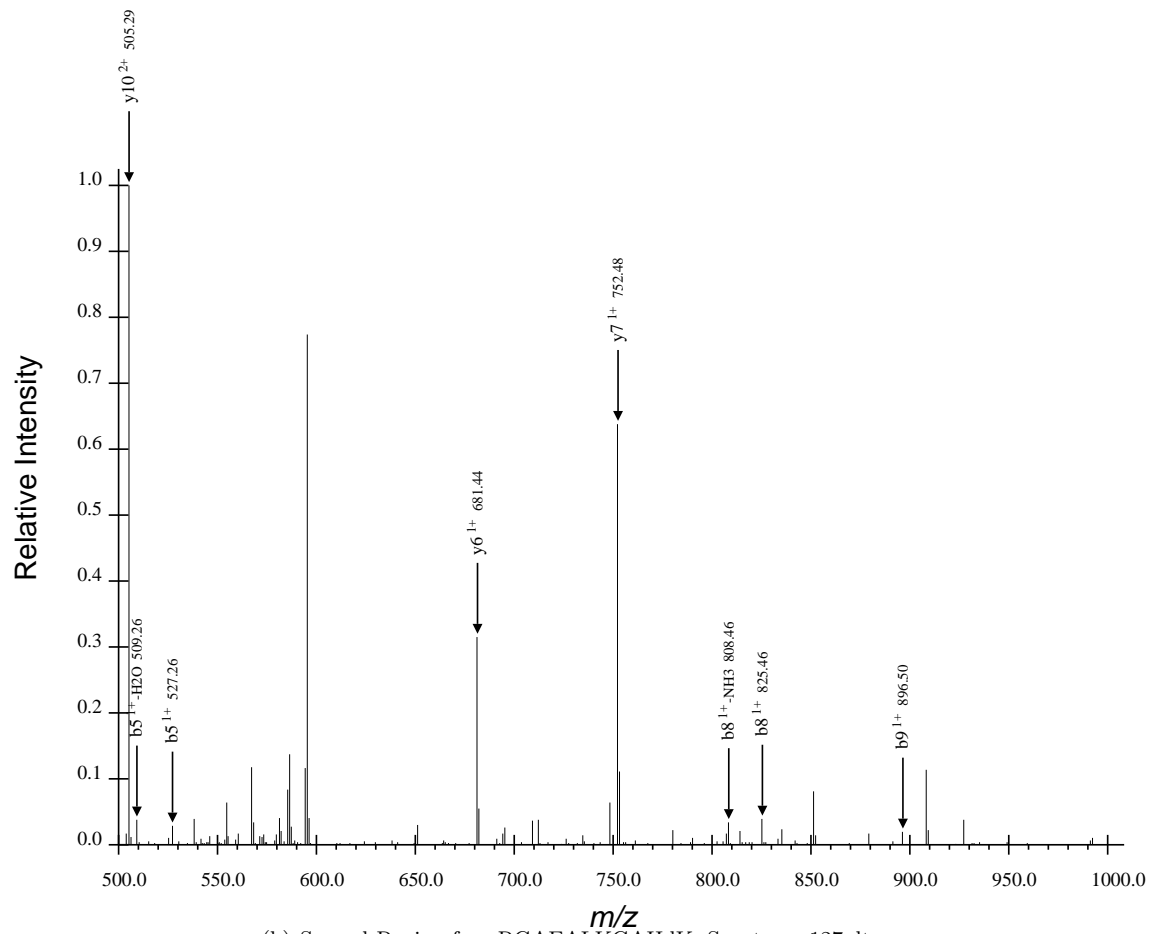

(b) Second Region for aRGAEALKGAdK, Spectrum 127.dta

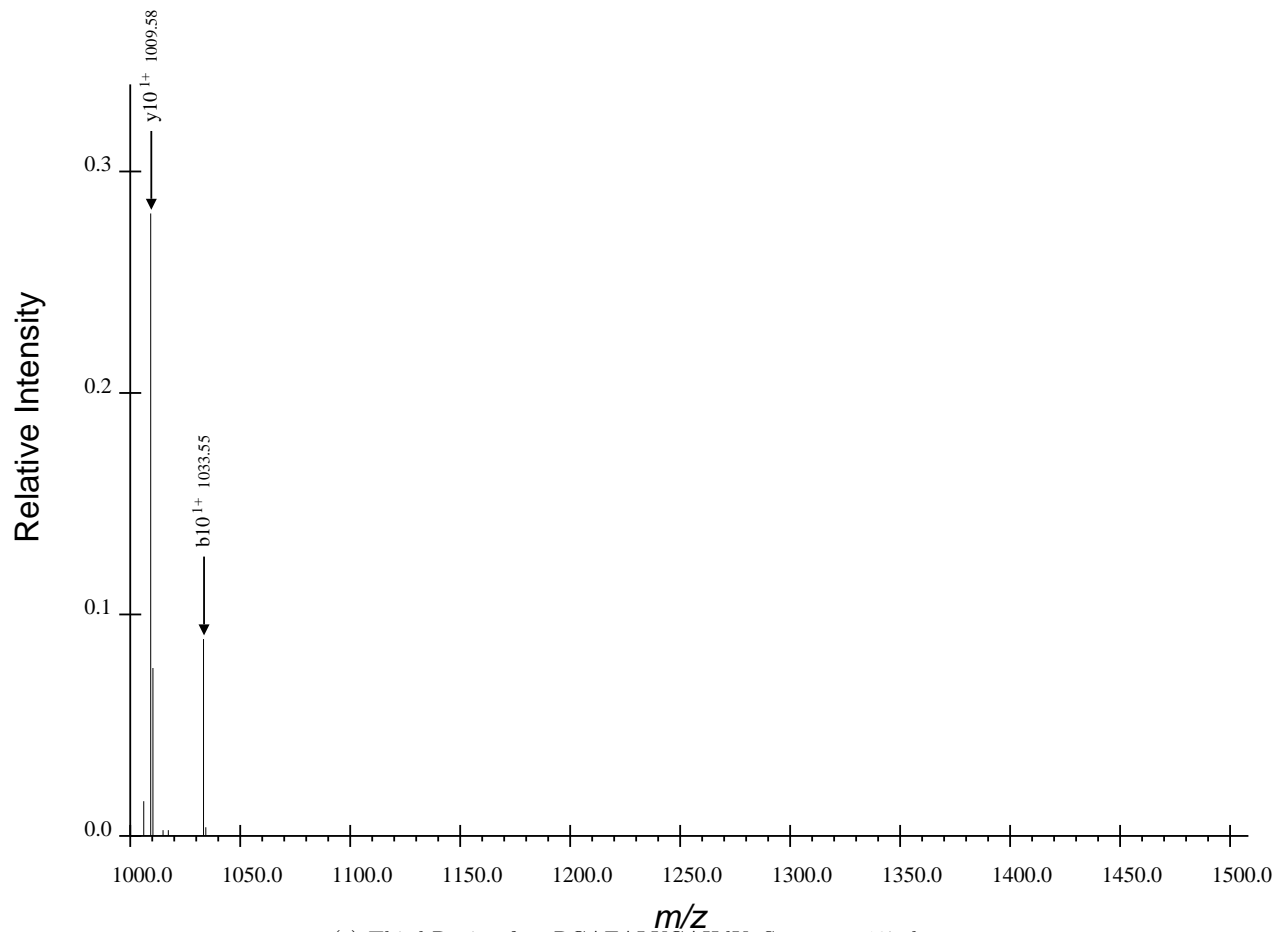

(c) Third Region for aRGAEALKGAHdK, Spectrum 127.dta

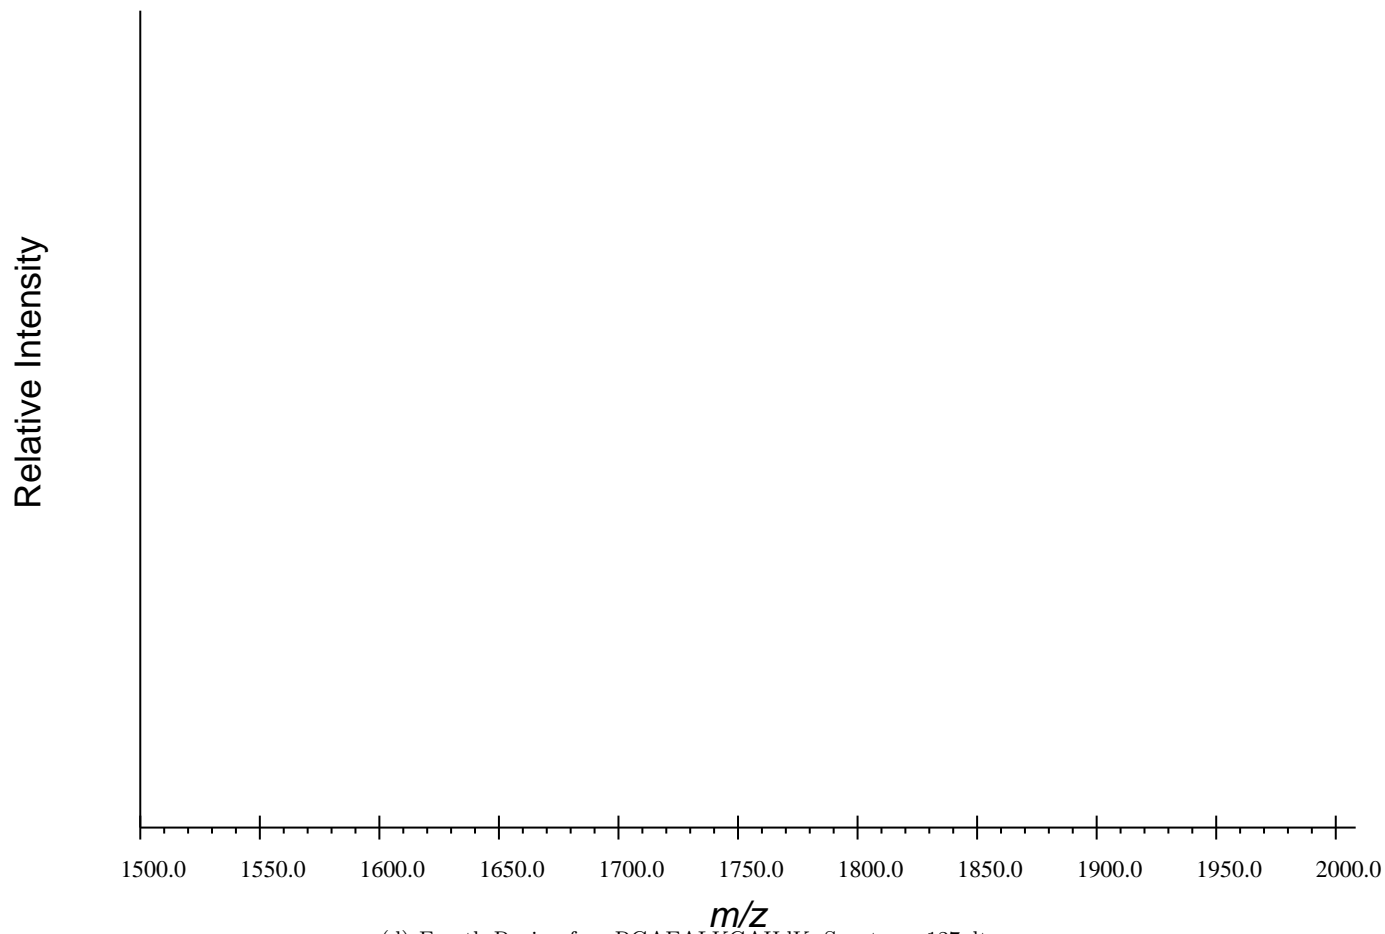

(d) Fourth Region for aRGAEALKGAHdK, Spectrum 127.dta

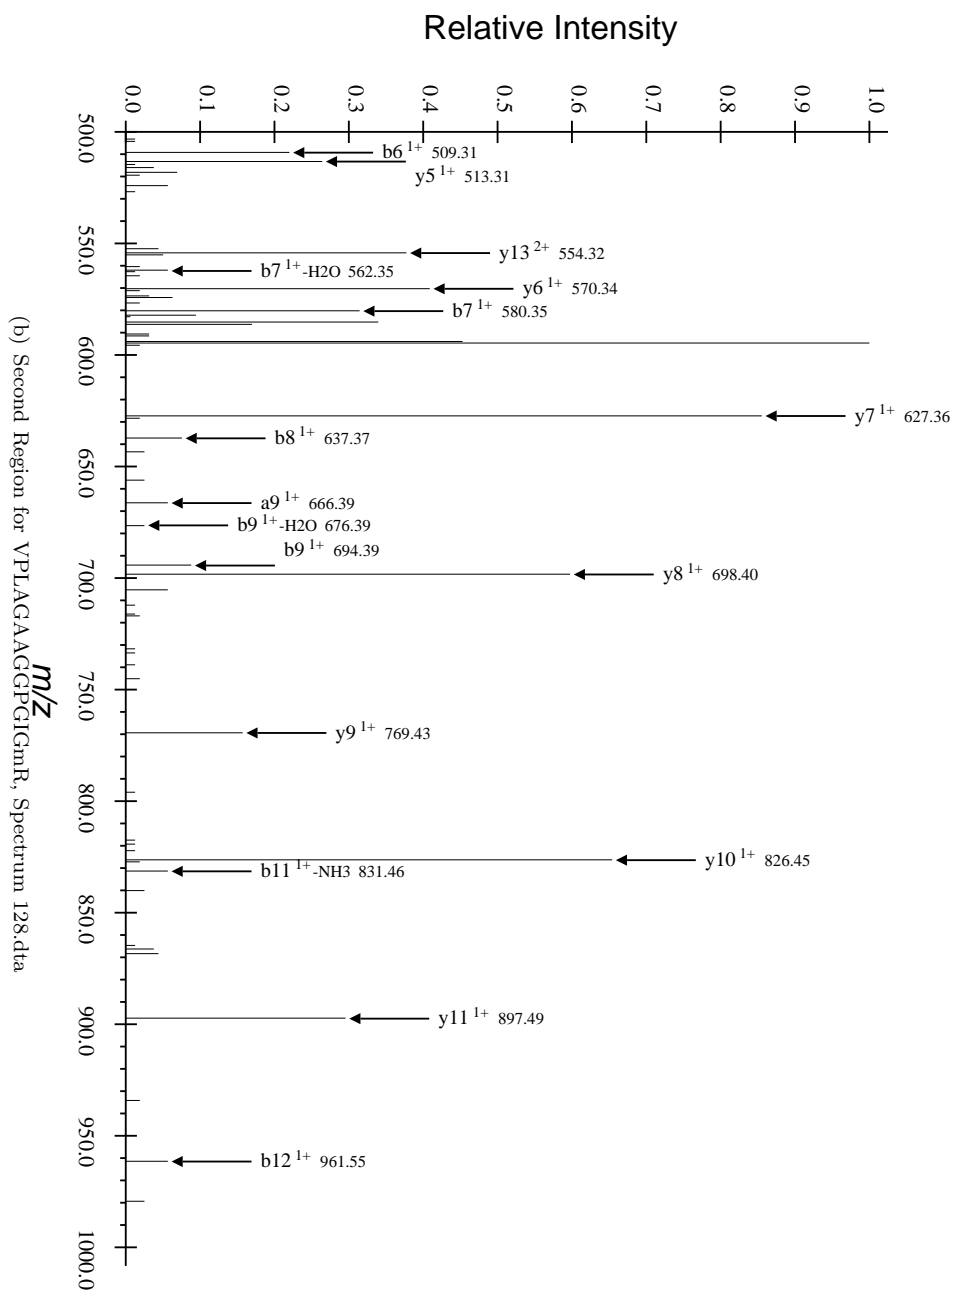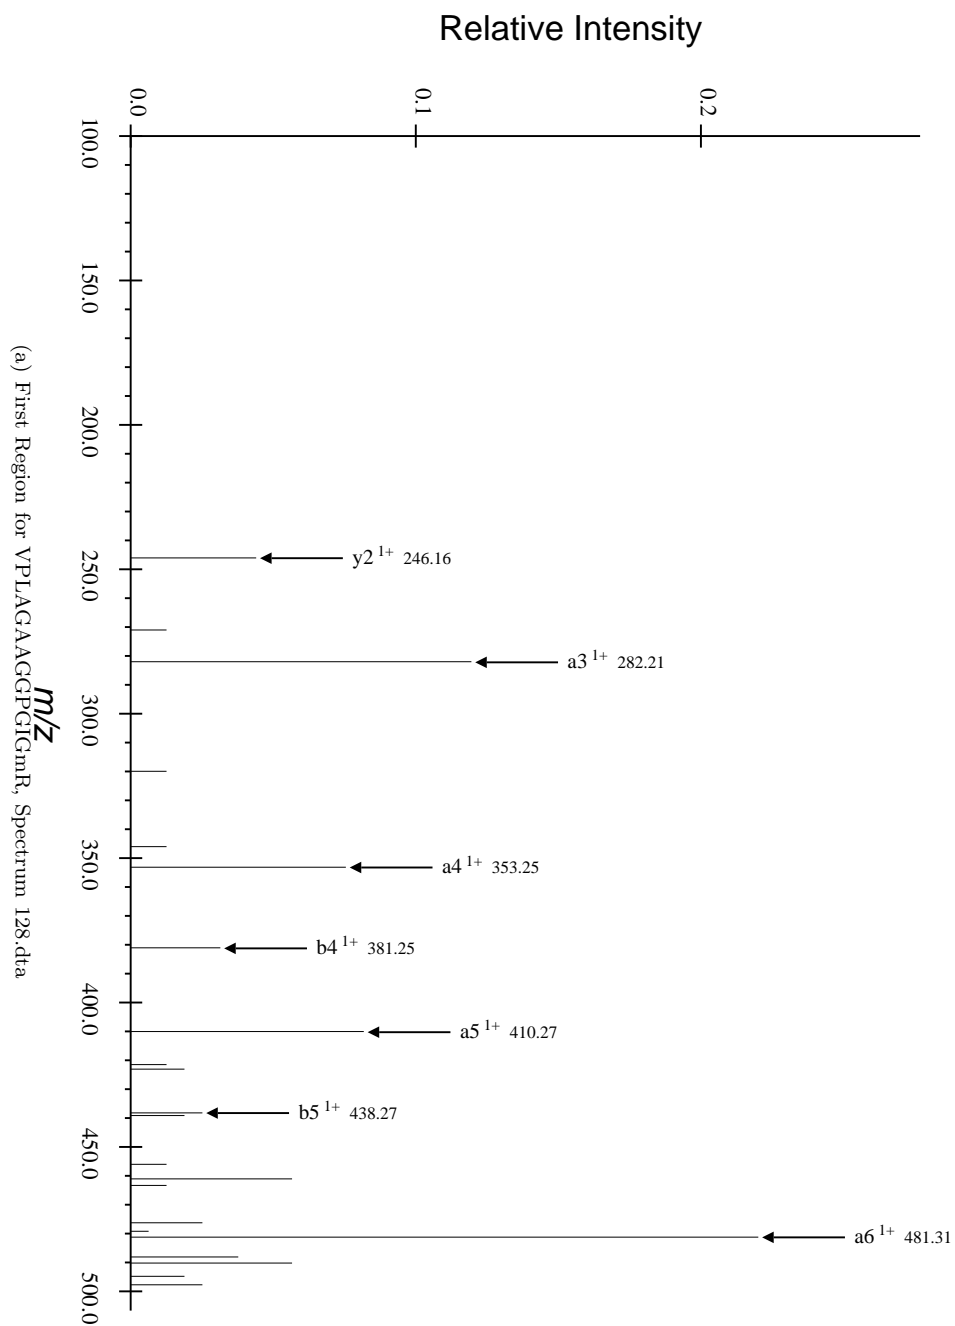

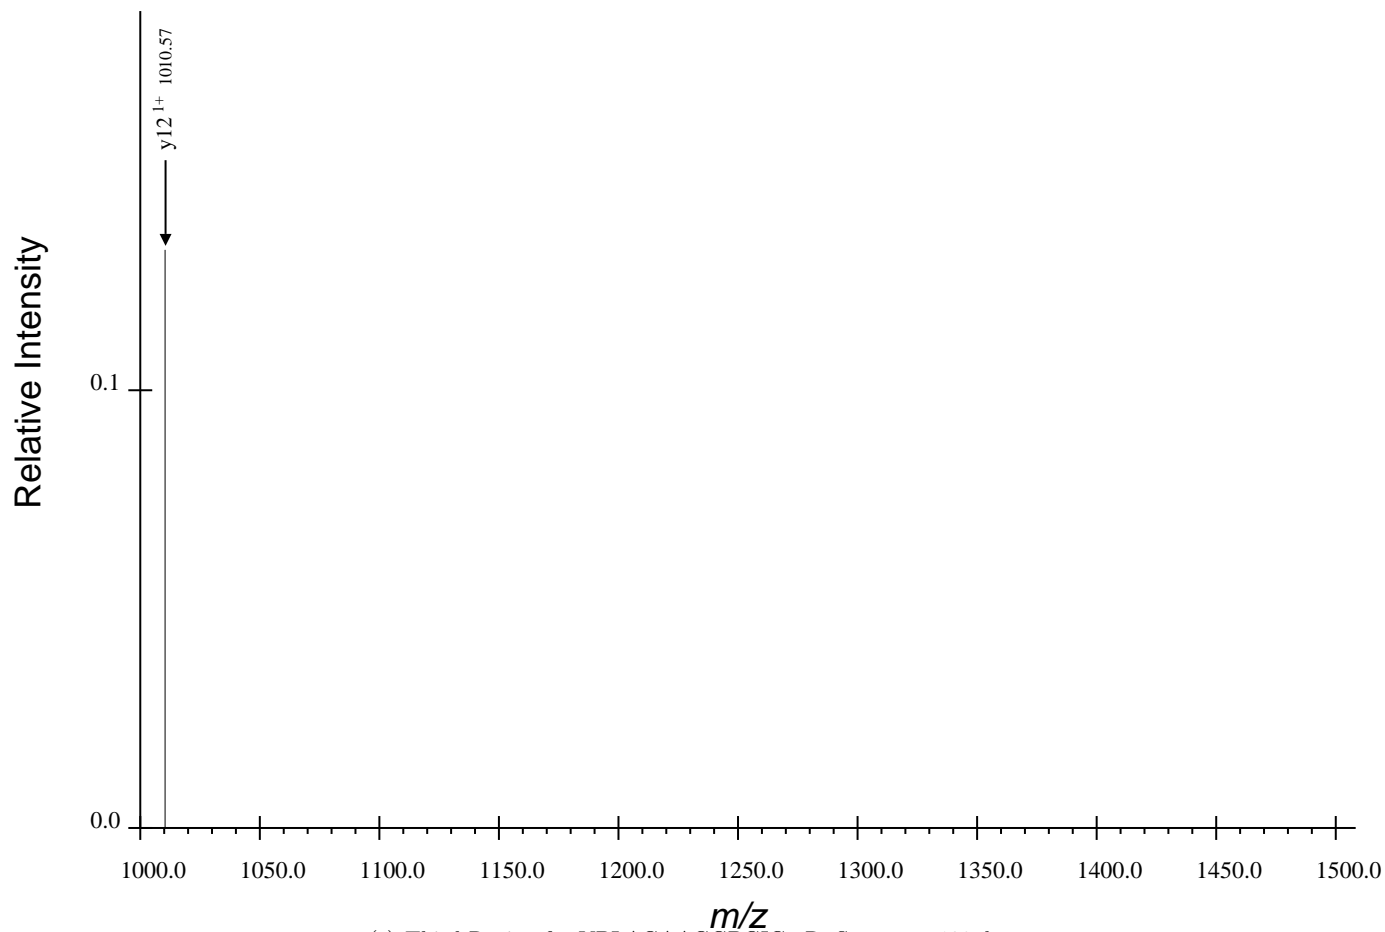

(c) Third Region for VPLAGAAGGPGIGmR, Spectrum 128.dta

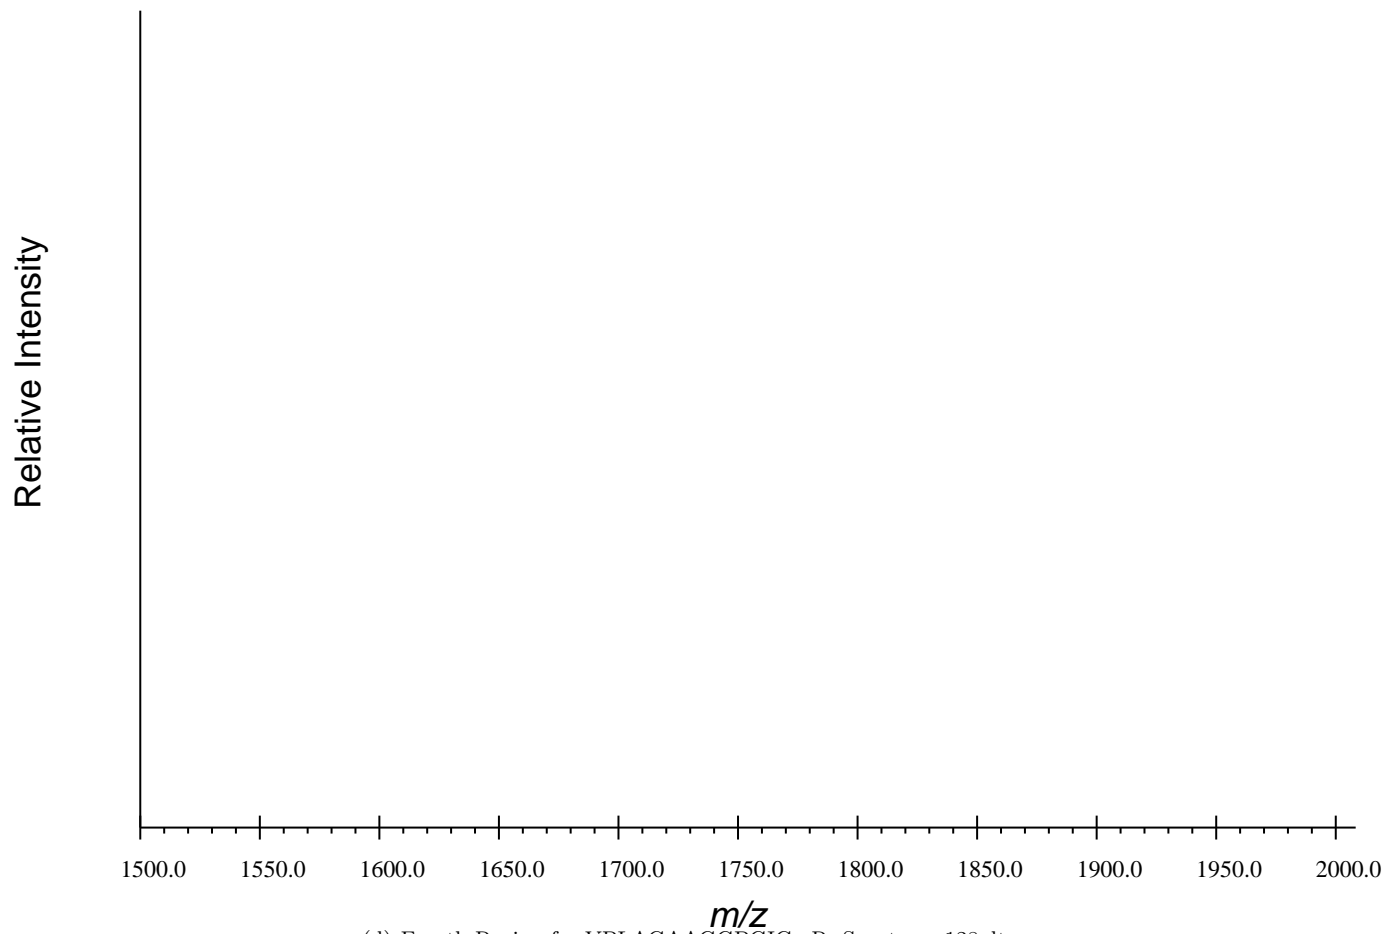

(d) Fourth Region for VPLAGAAGGPGIGmR, Spectrum 128.dta

(b) Second Region for VIVEPPDAGAGVAVoMIK, Spectrum 129.dta

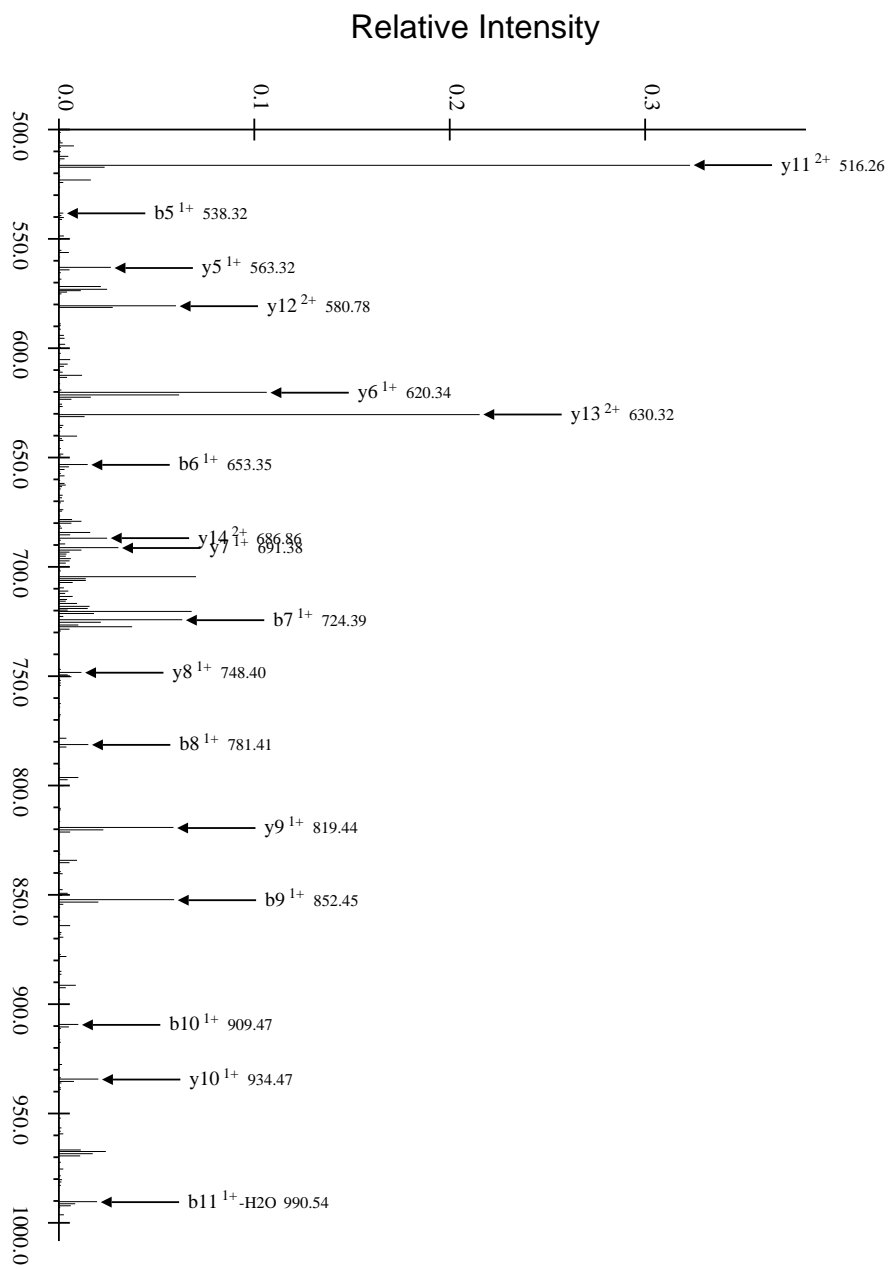

(a) First Region for VIVEPPDAGAGVAVoMIK, Spectrum 129.dta

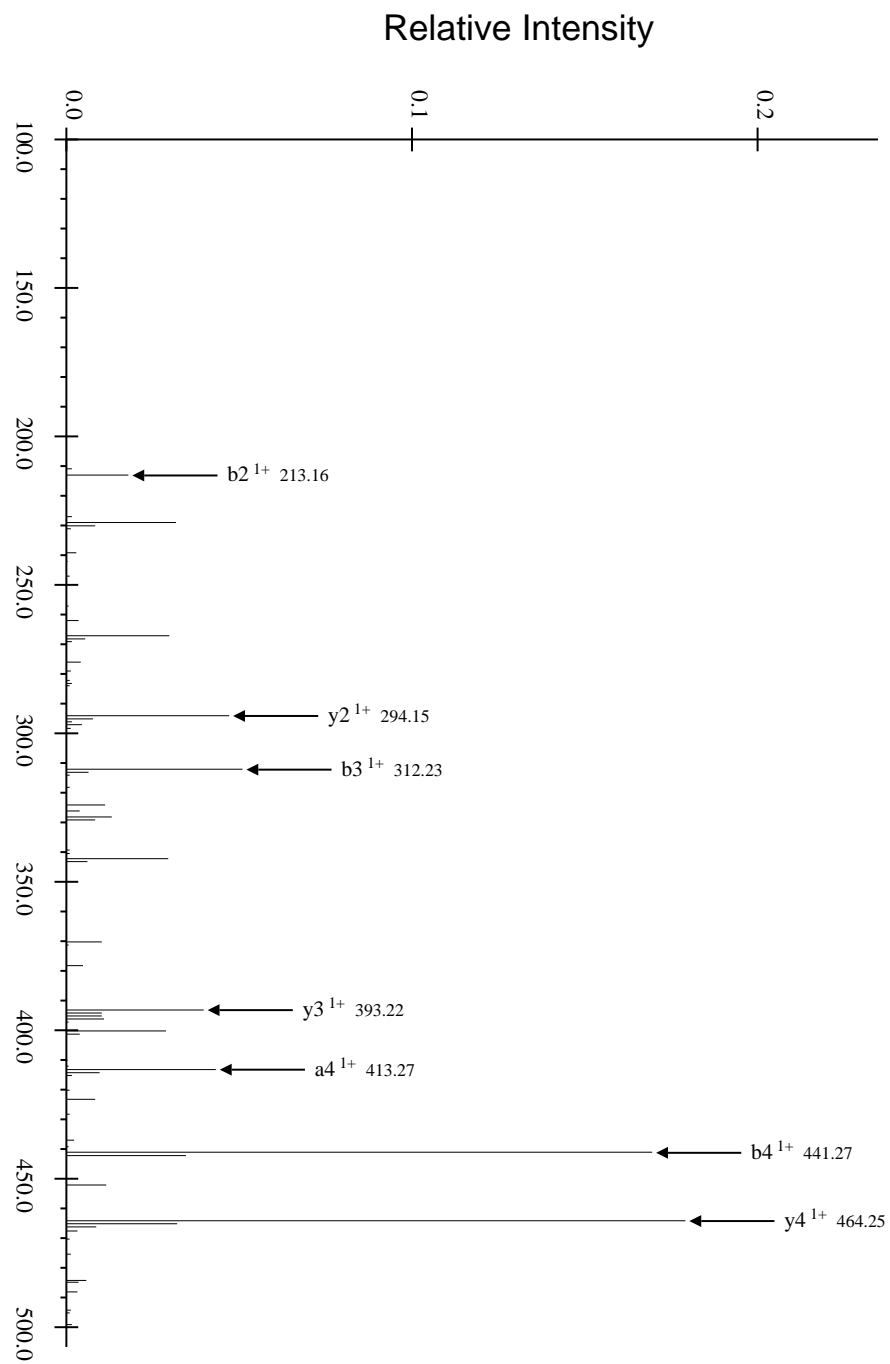

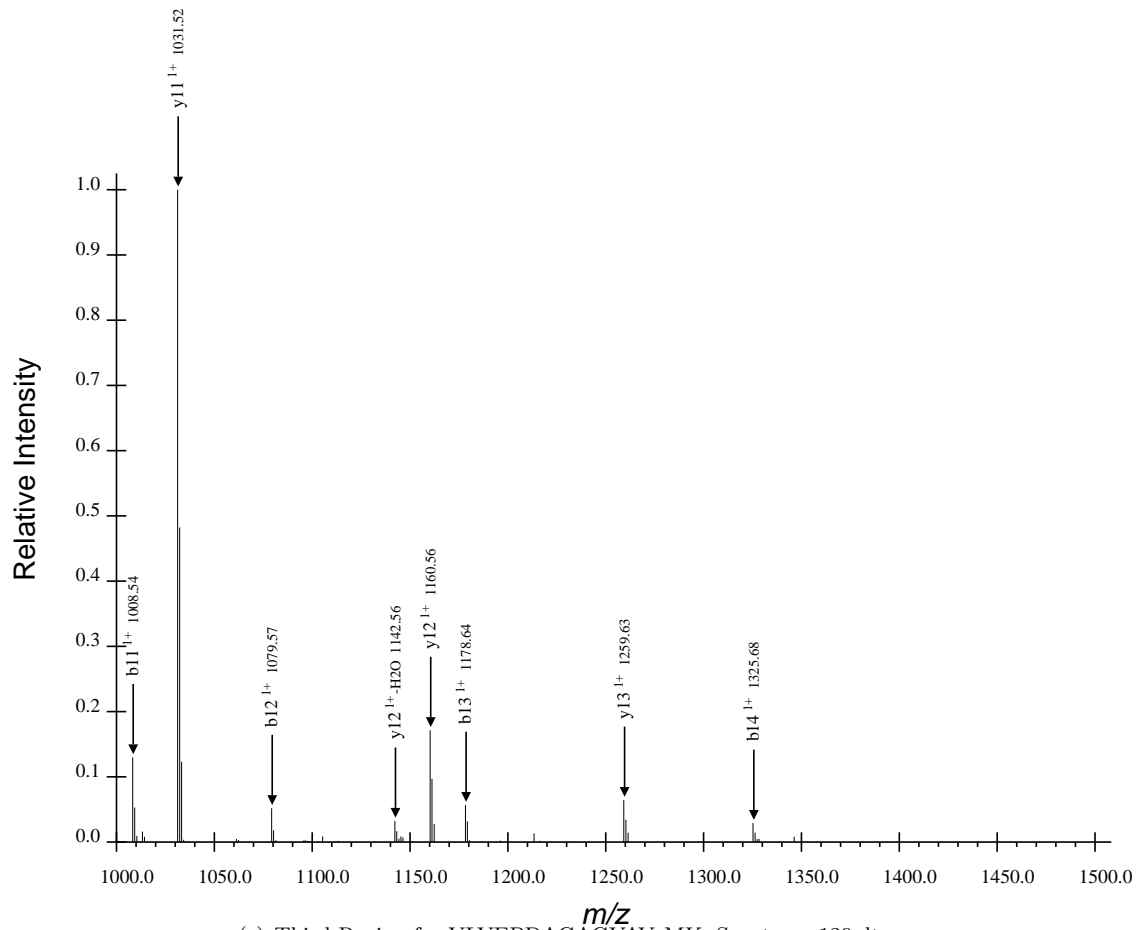

(c) Third Region for VLVEPDAGAGVAVoMK, Spectrum 129.dta

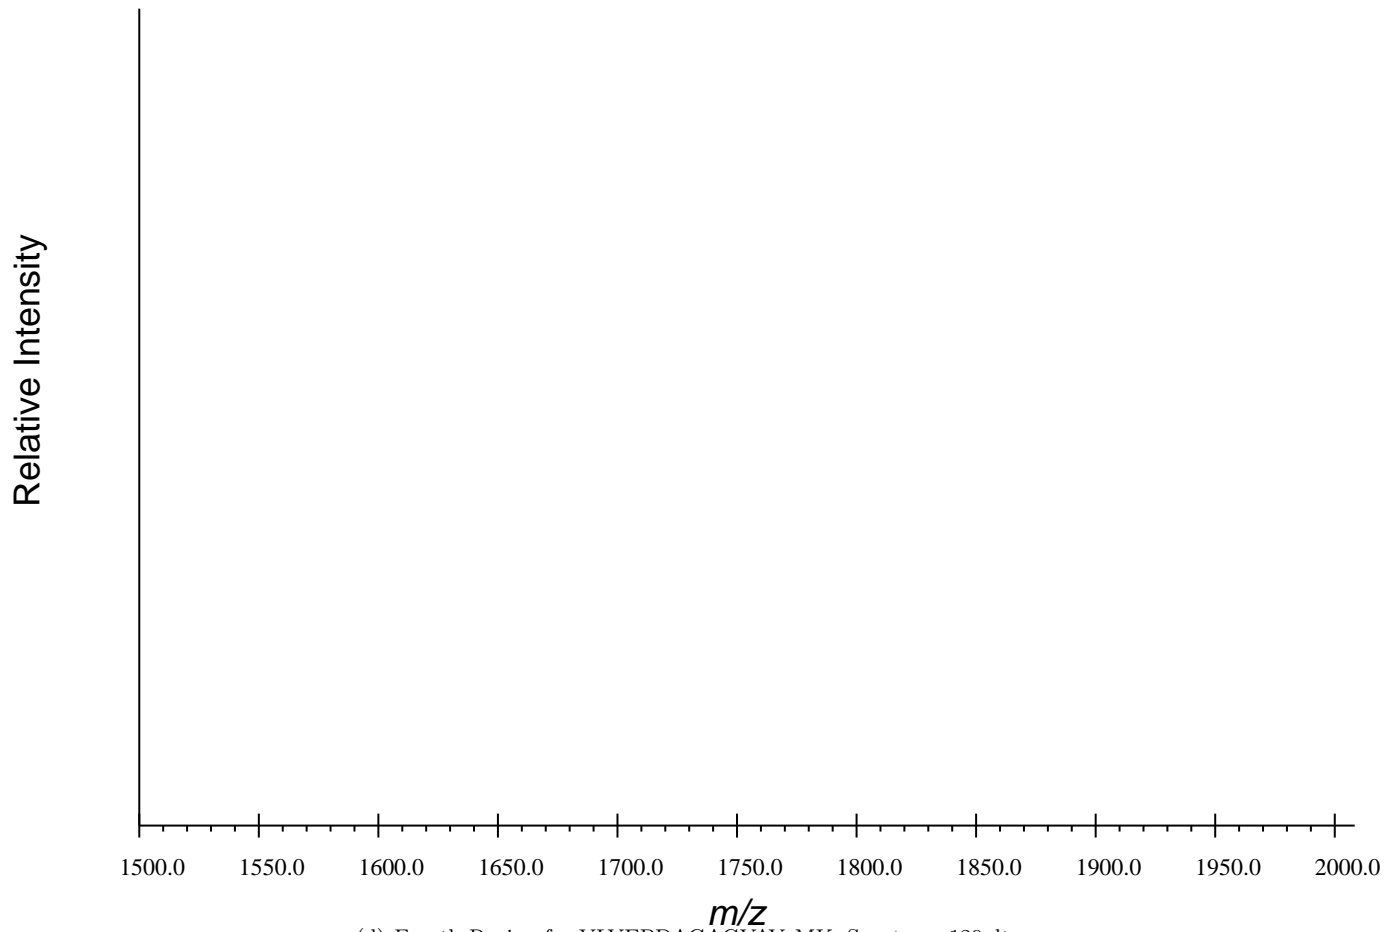

(d) Fourth Region for VLVEPDAGAGVAVoMK, Spectrum 129.dta

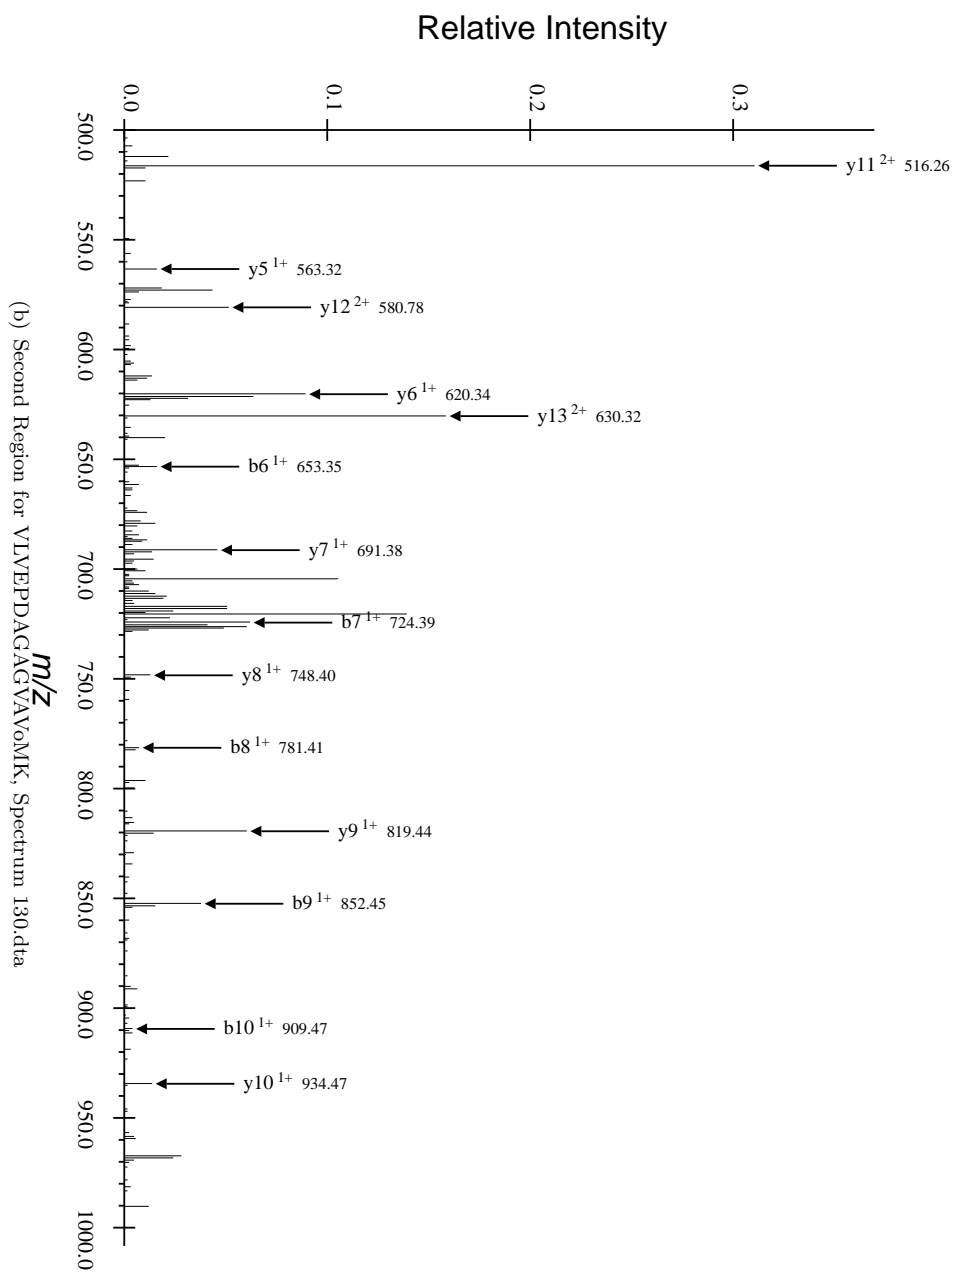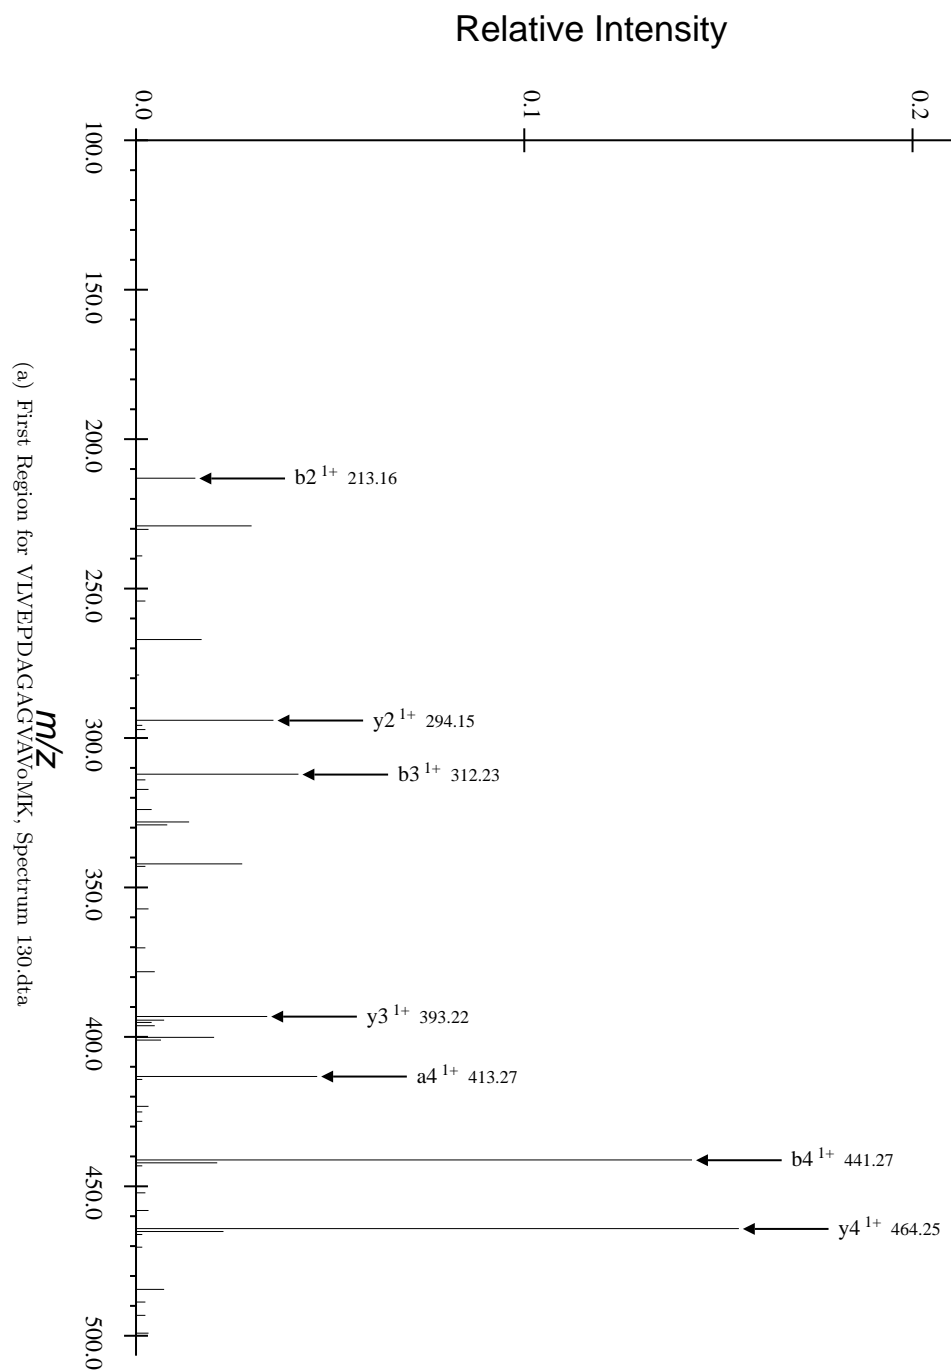



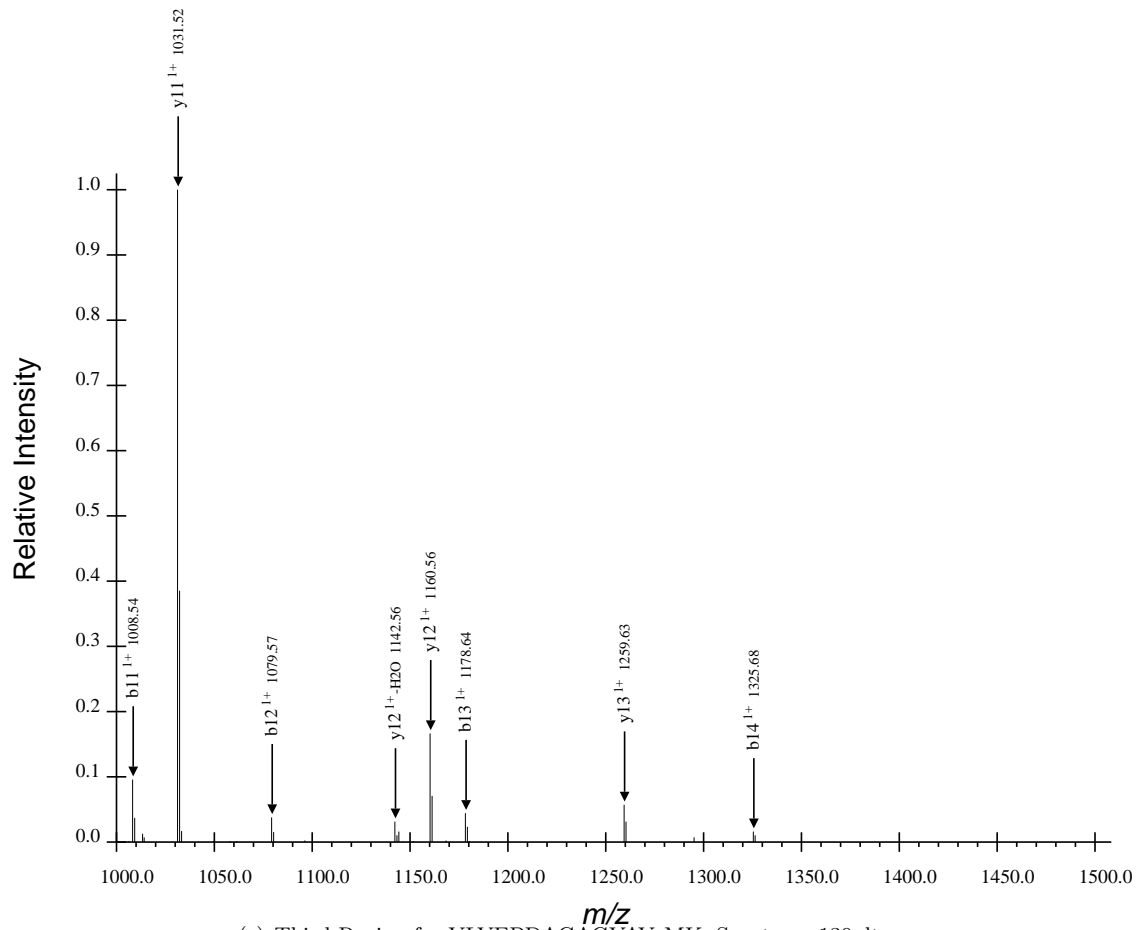

(c) Third Region for VLVEPDAGAGVAVoMK, Spectrum 130.dta

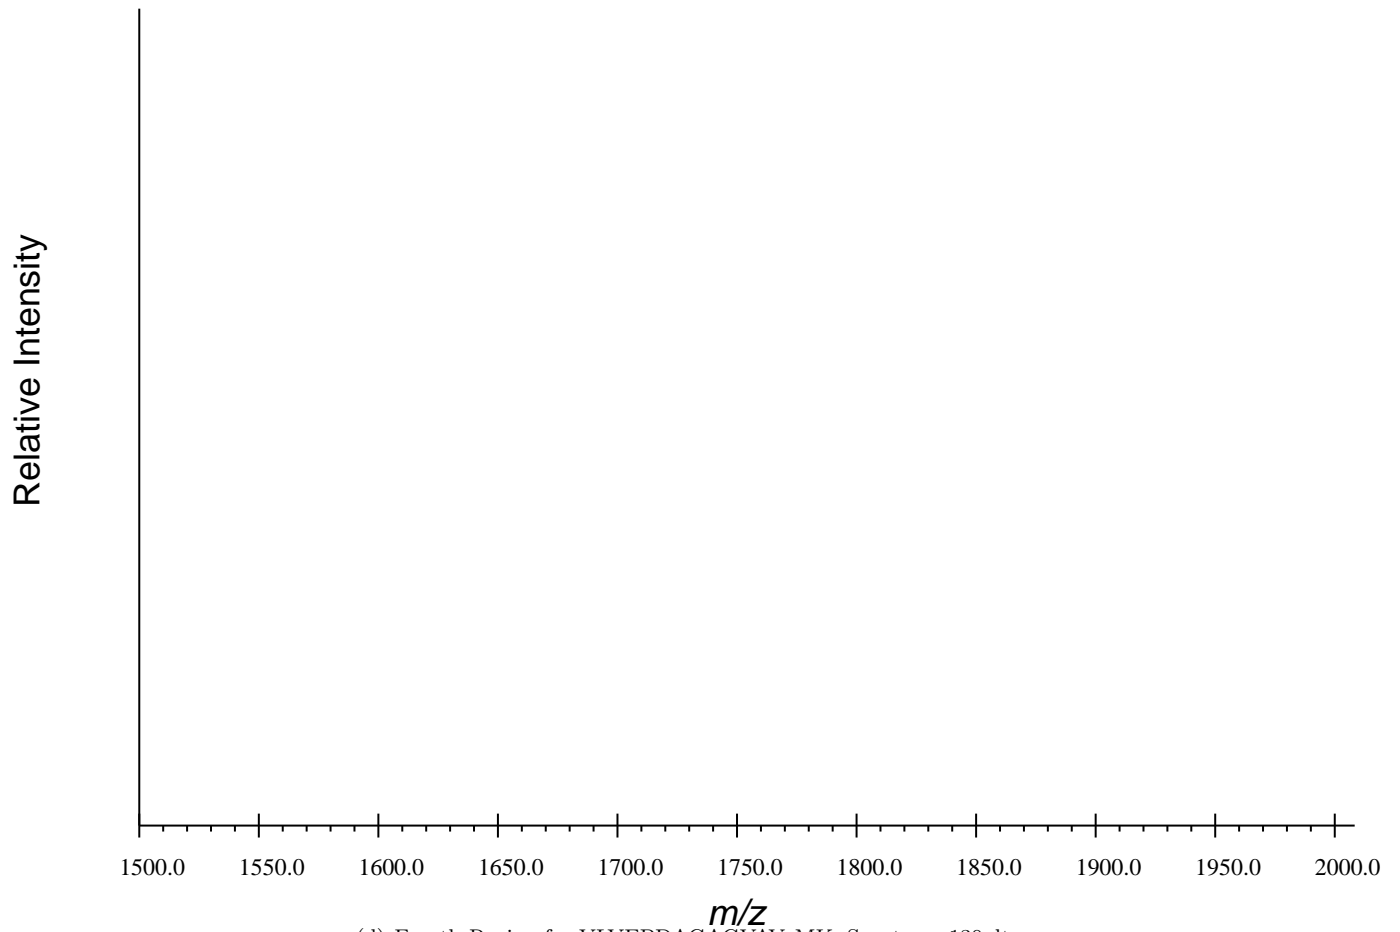

(d) Fourth Region for VLVEPDAGAGVAVoMK, Spectrum 130.dta

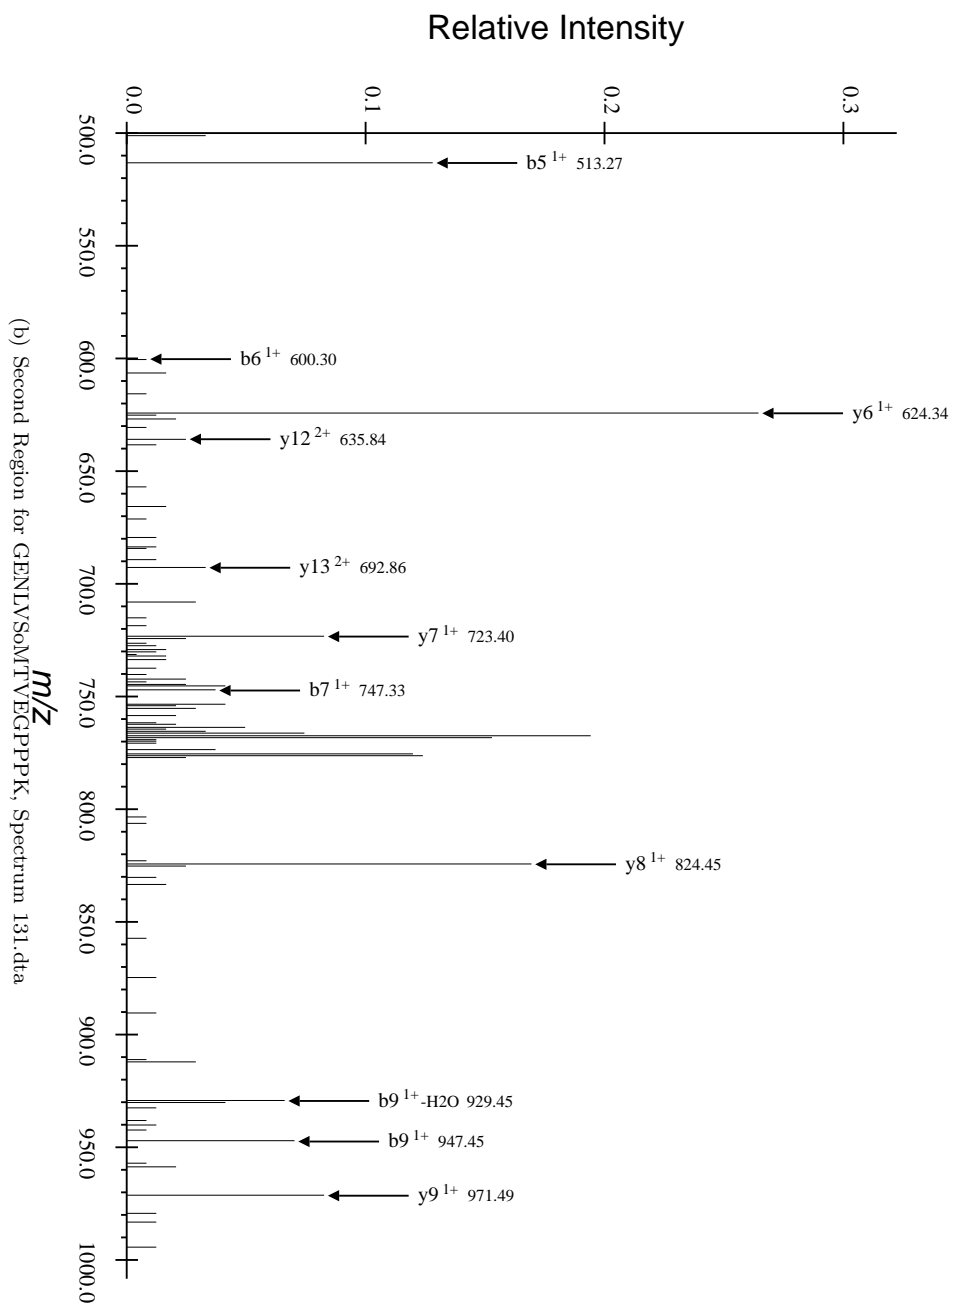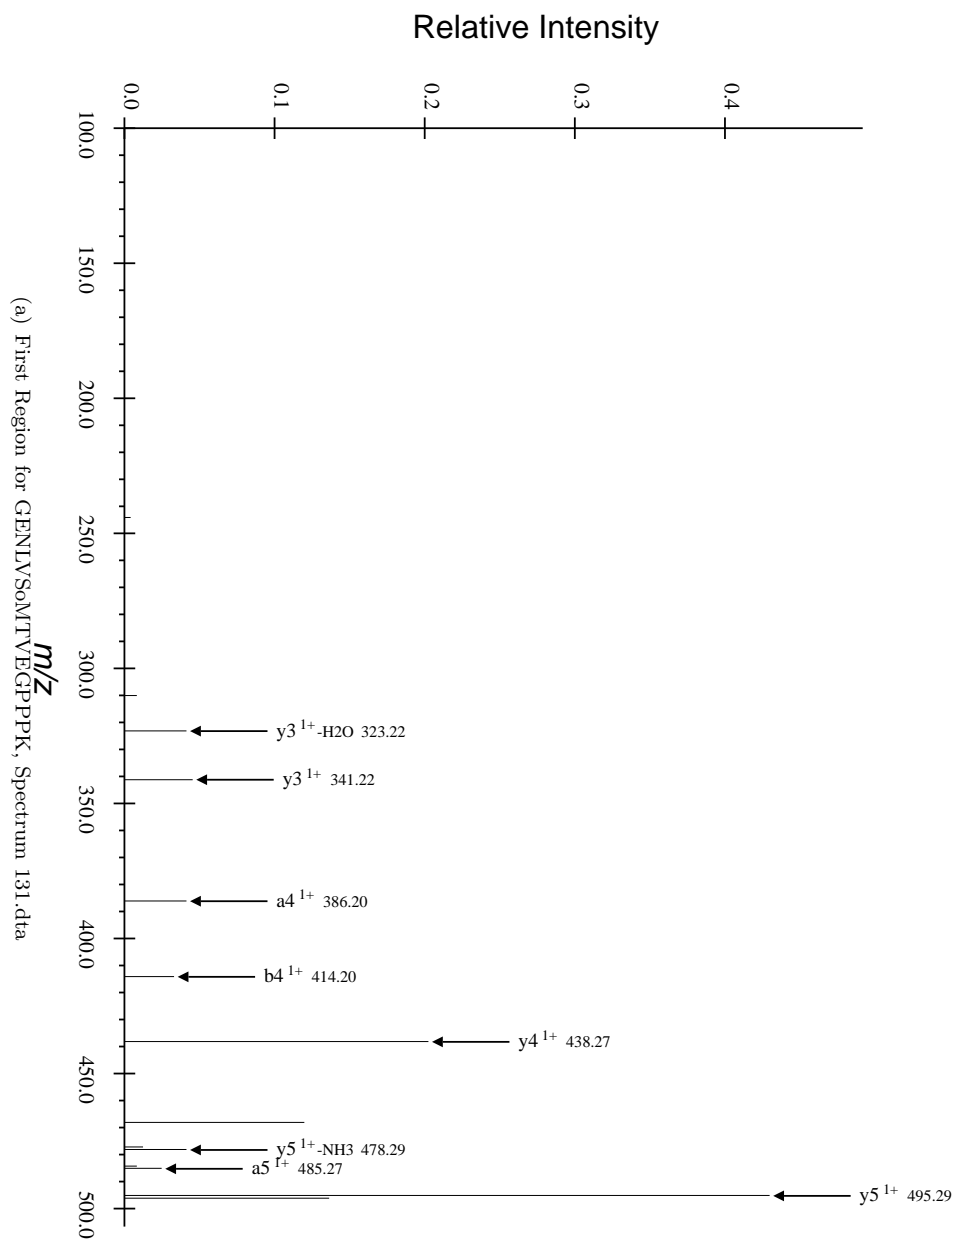

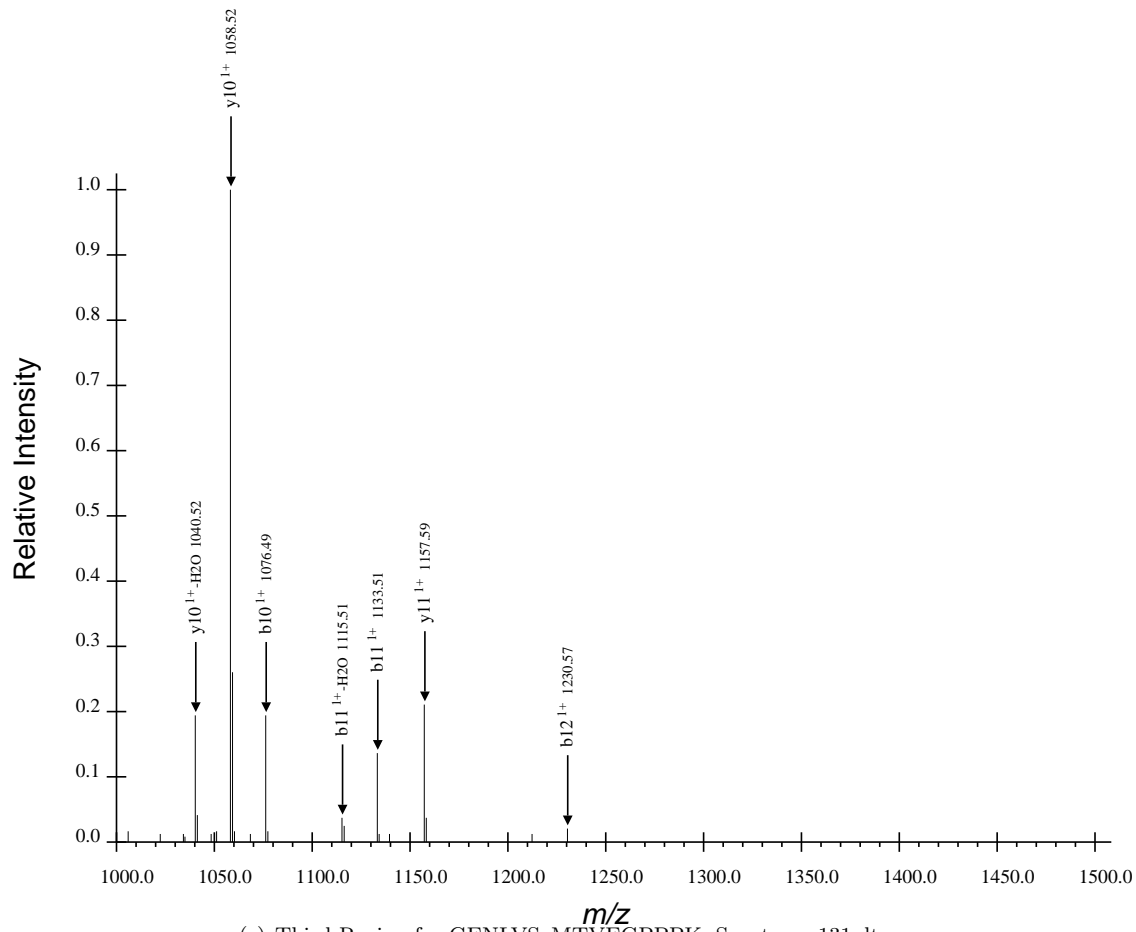

(c) Third Region for GENLVSoMTVEGPPPK, Spectrum 131.dta

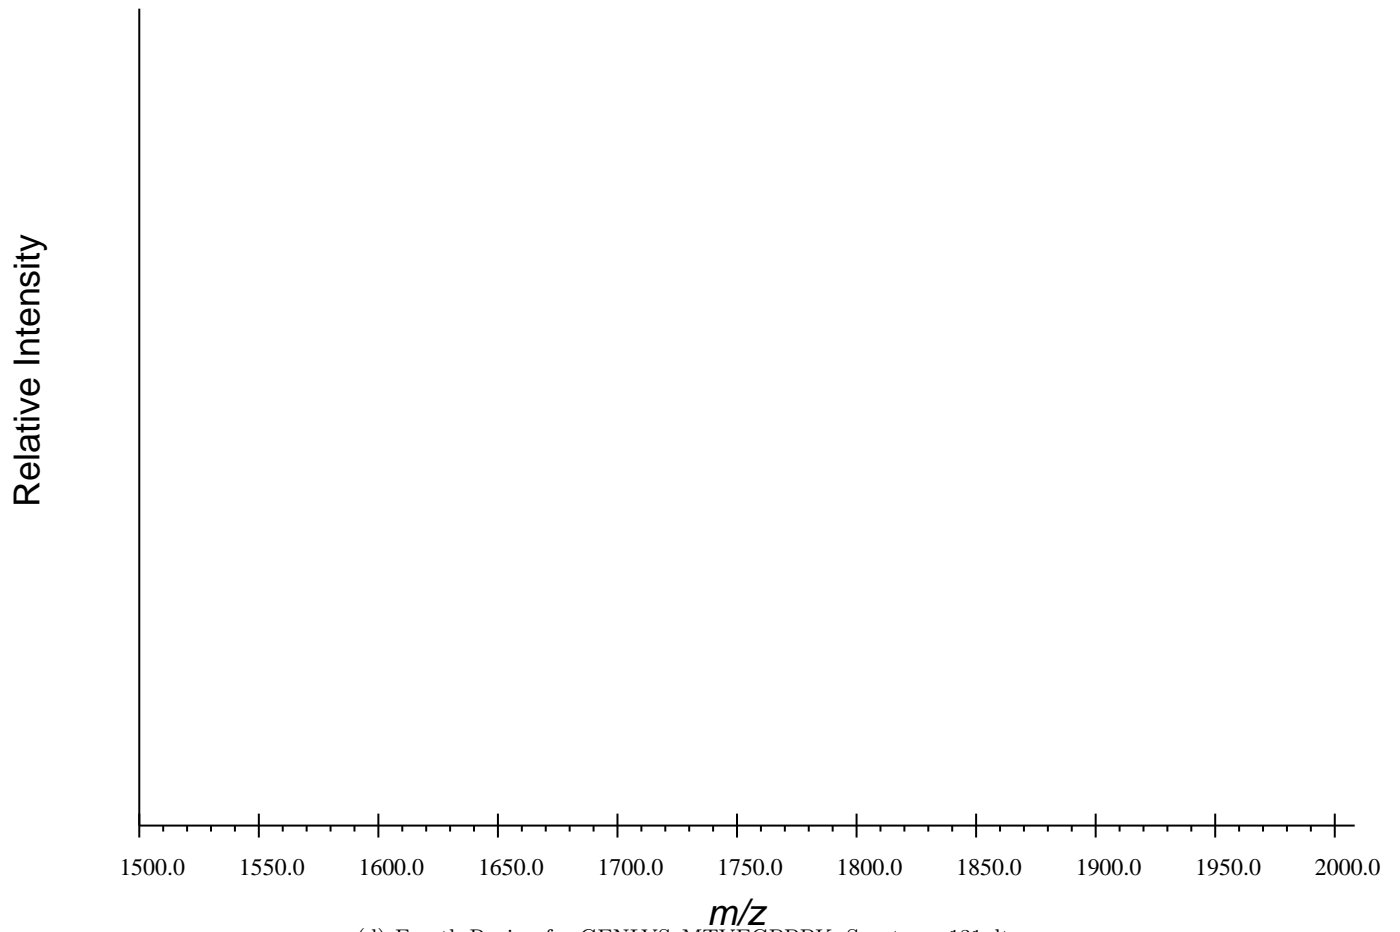

(d) Fourth Region for GENLVSoMTVEGPPPK, Spectrum 131.dta

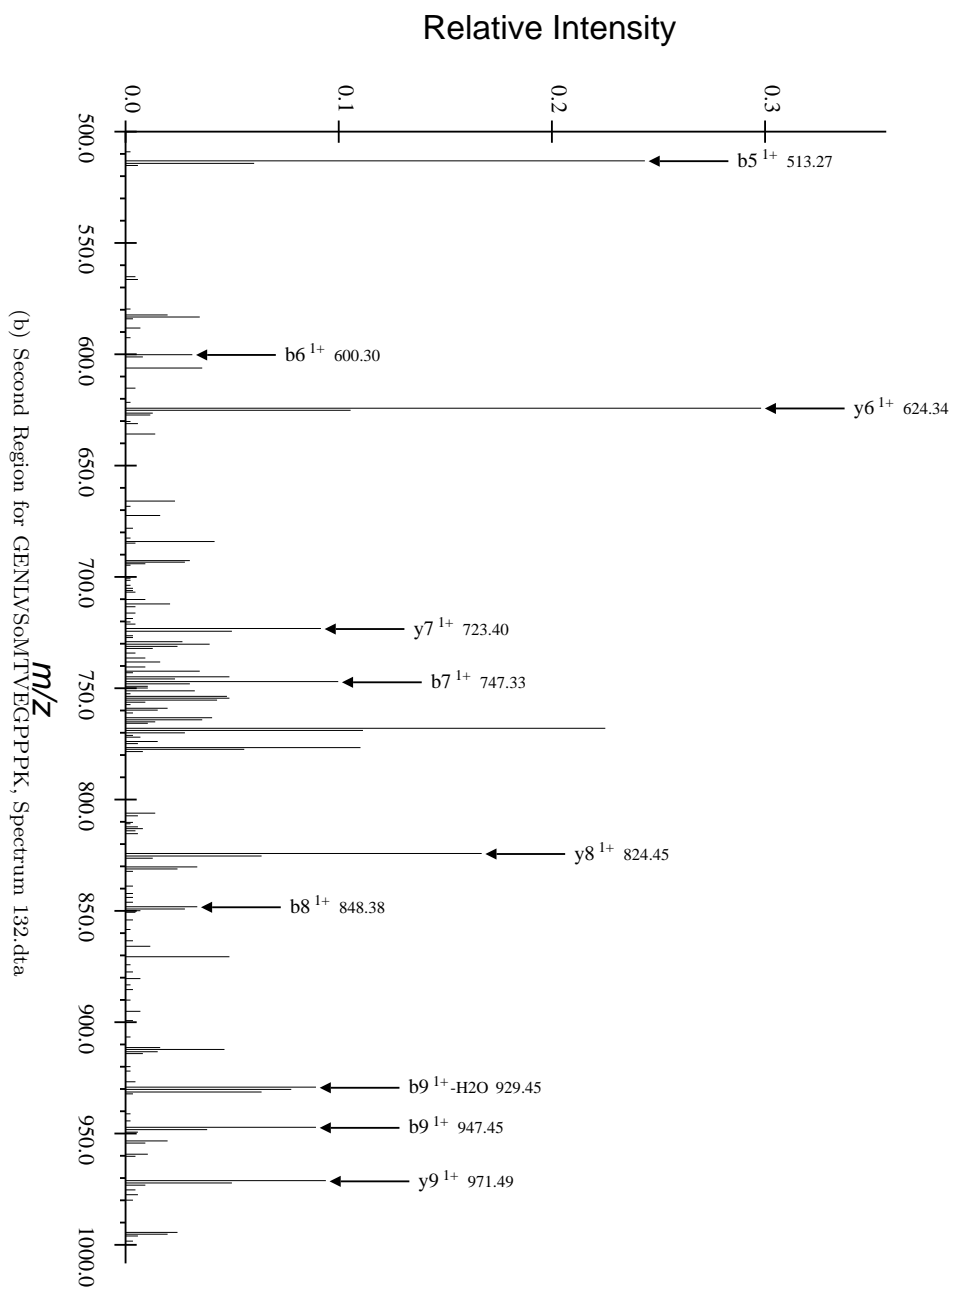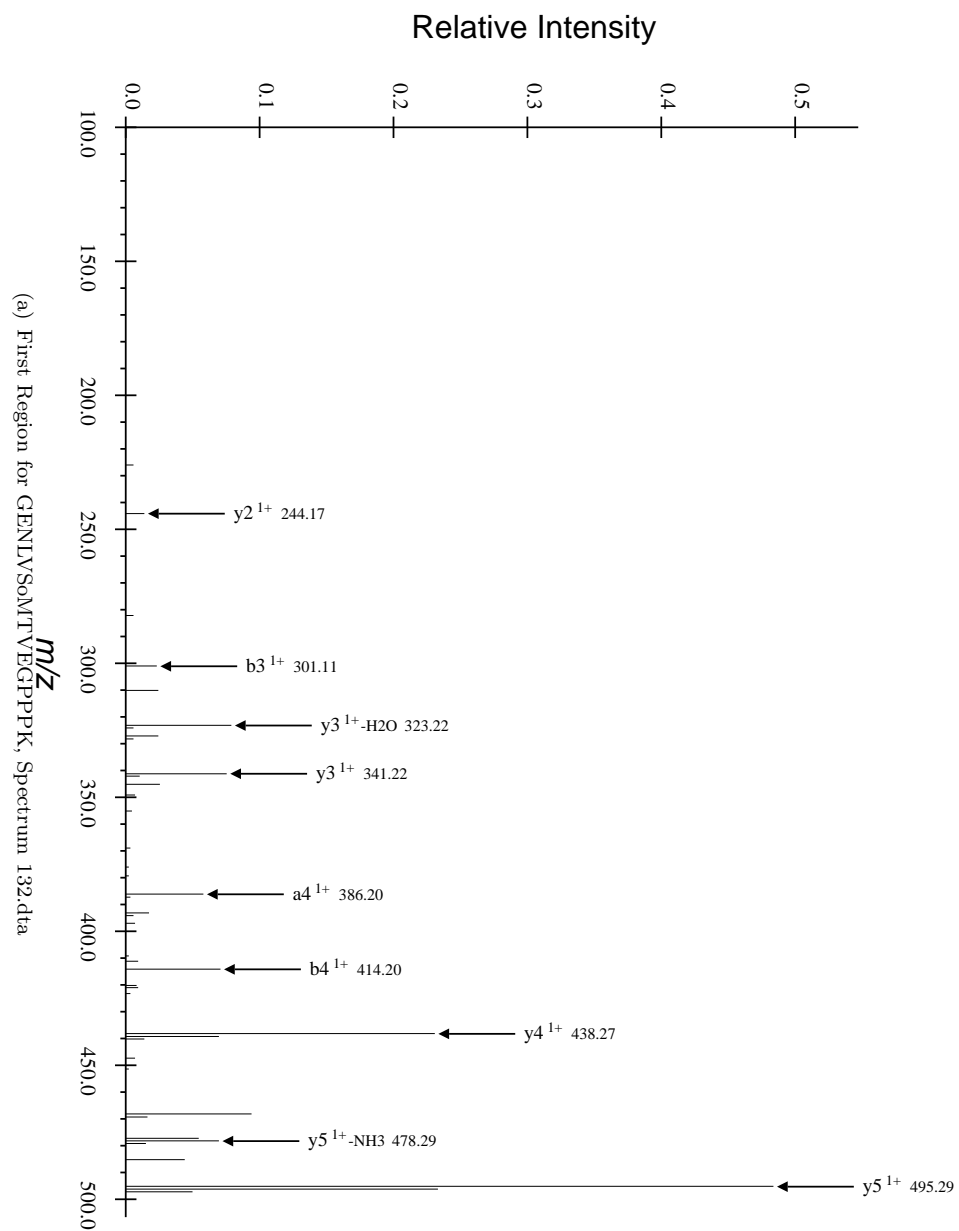

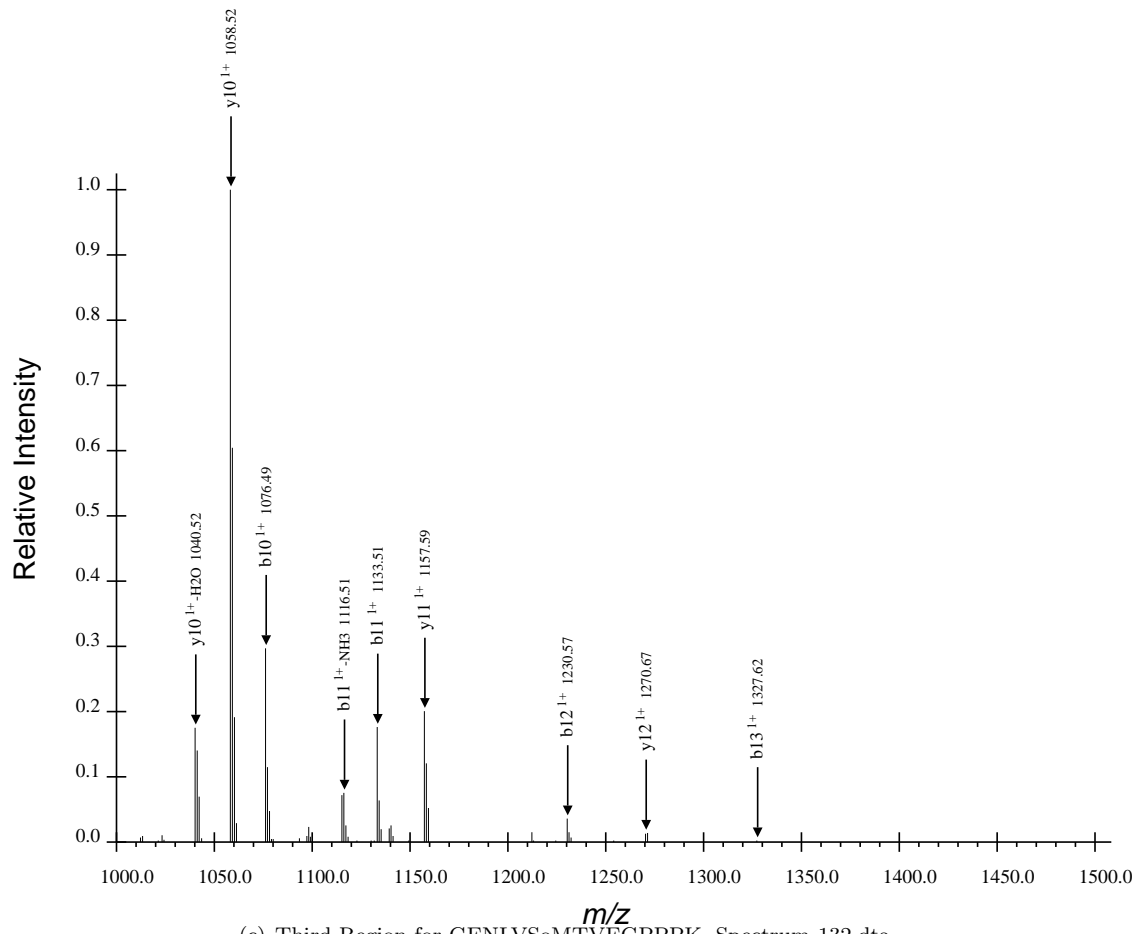

(c) Third Region for GENLVSoMTVEGPPPK, Spectrum 132.dta

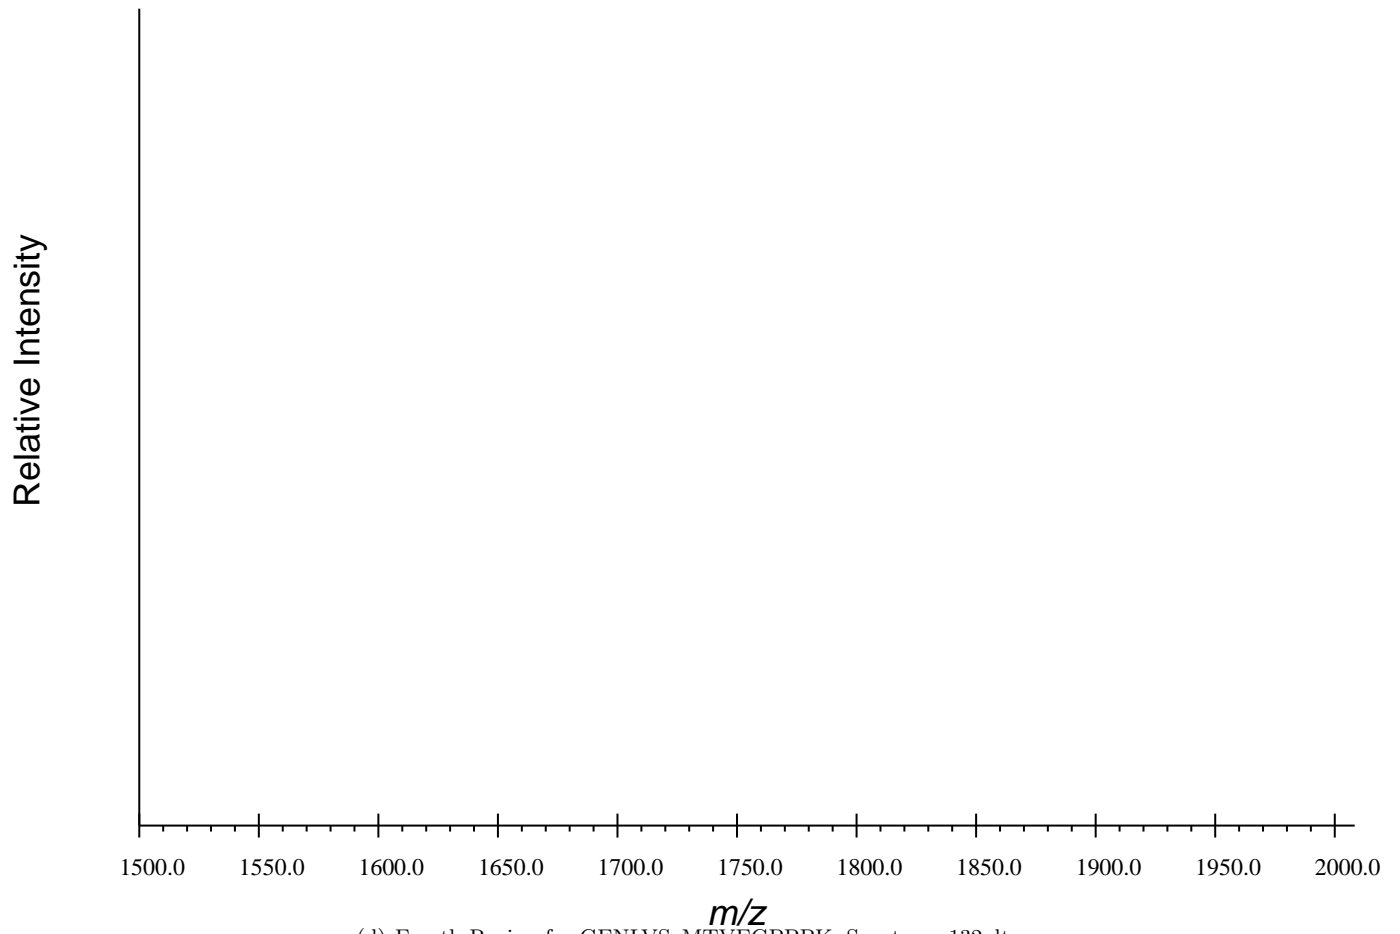

(d) Fourth Region for GENLVSoMTVEGPPPK, Spectrum 132.dta

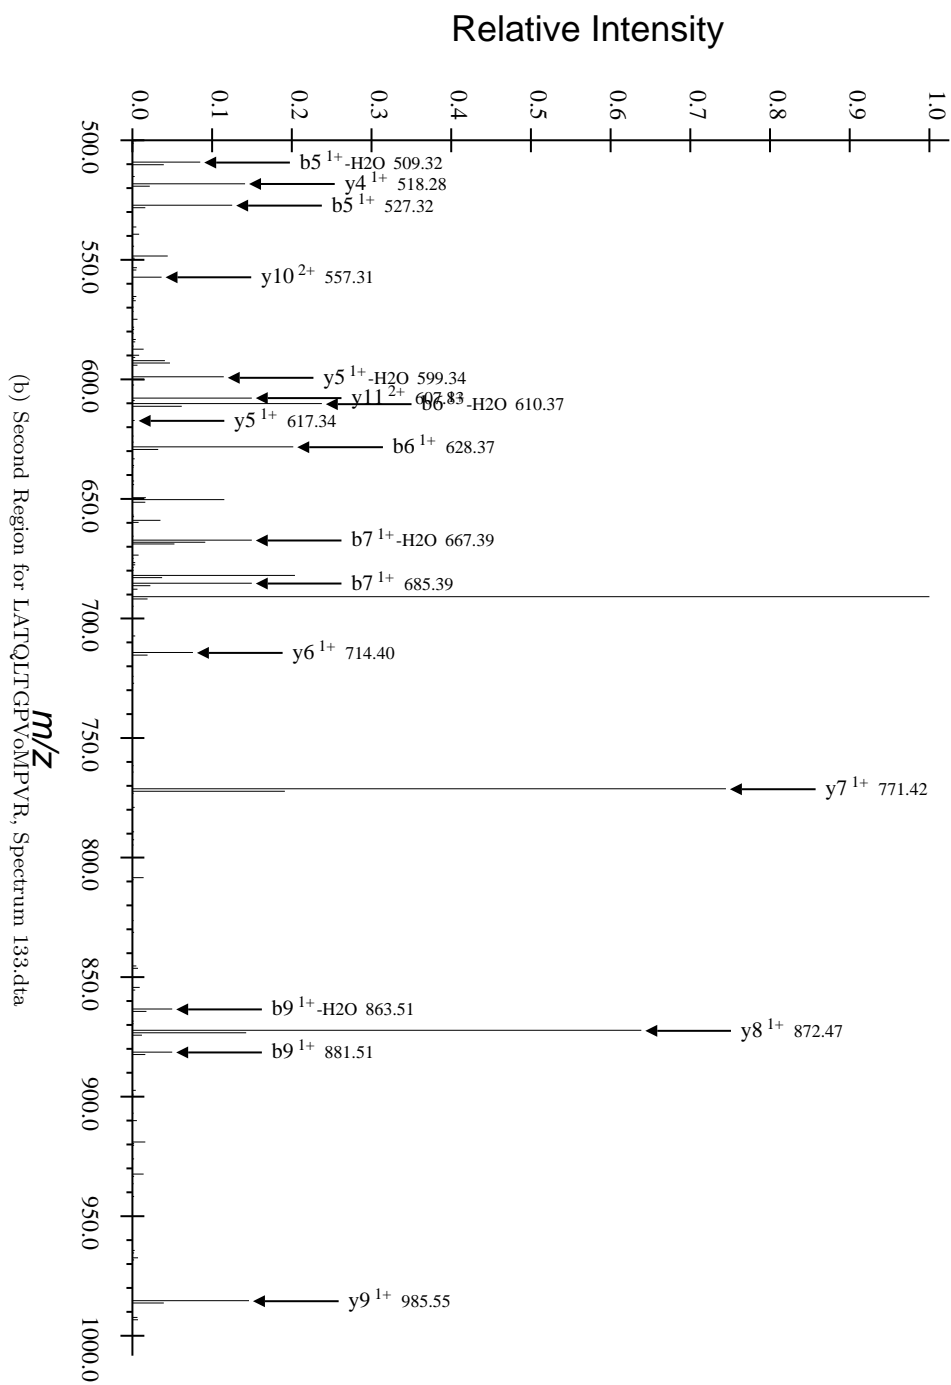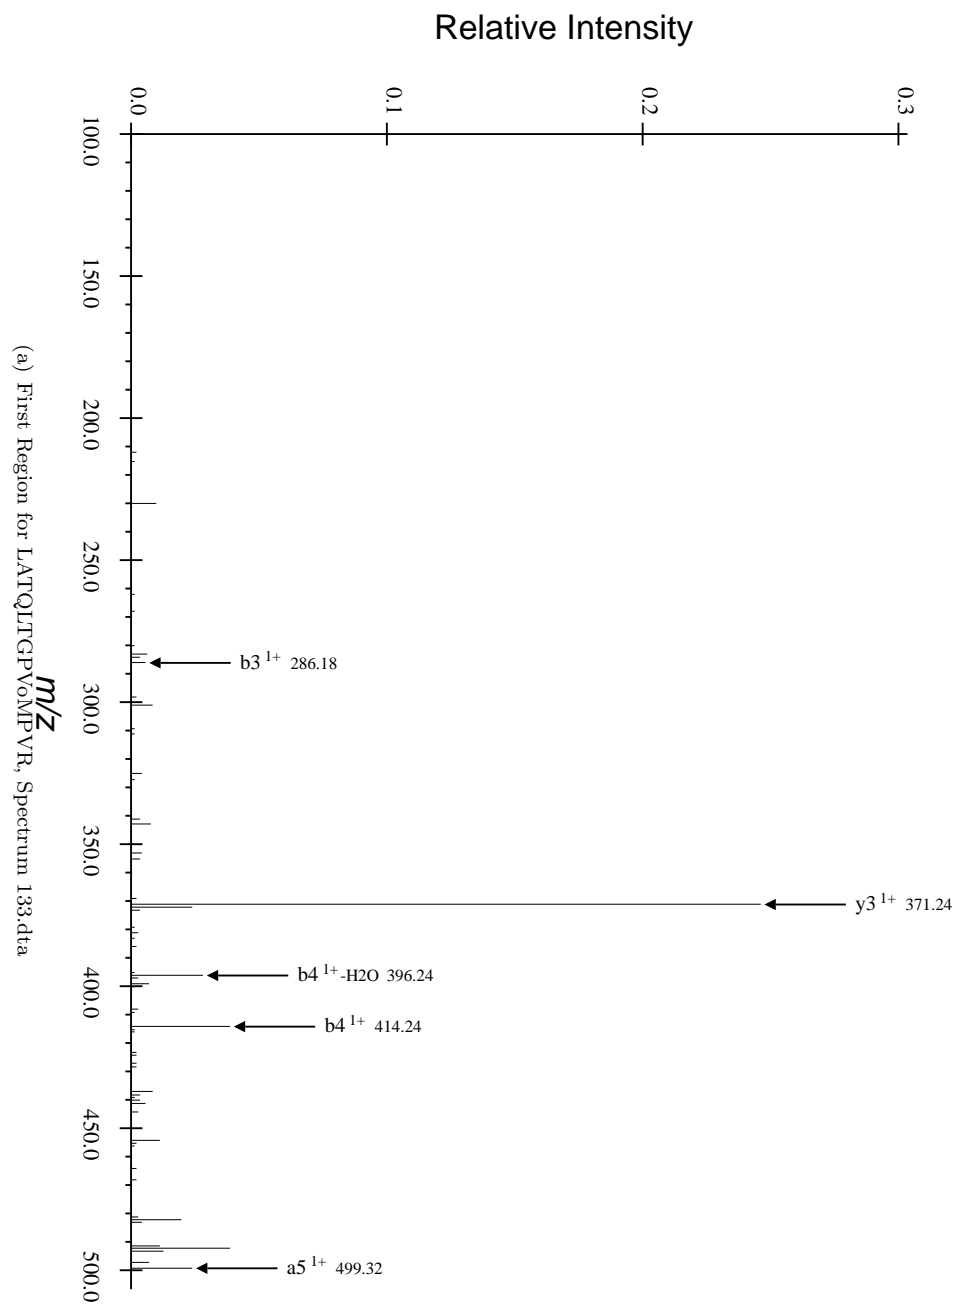

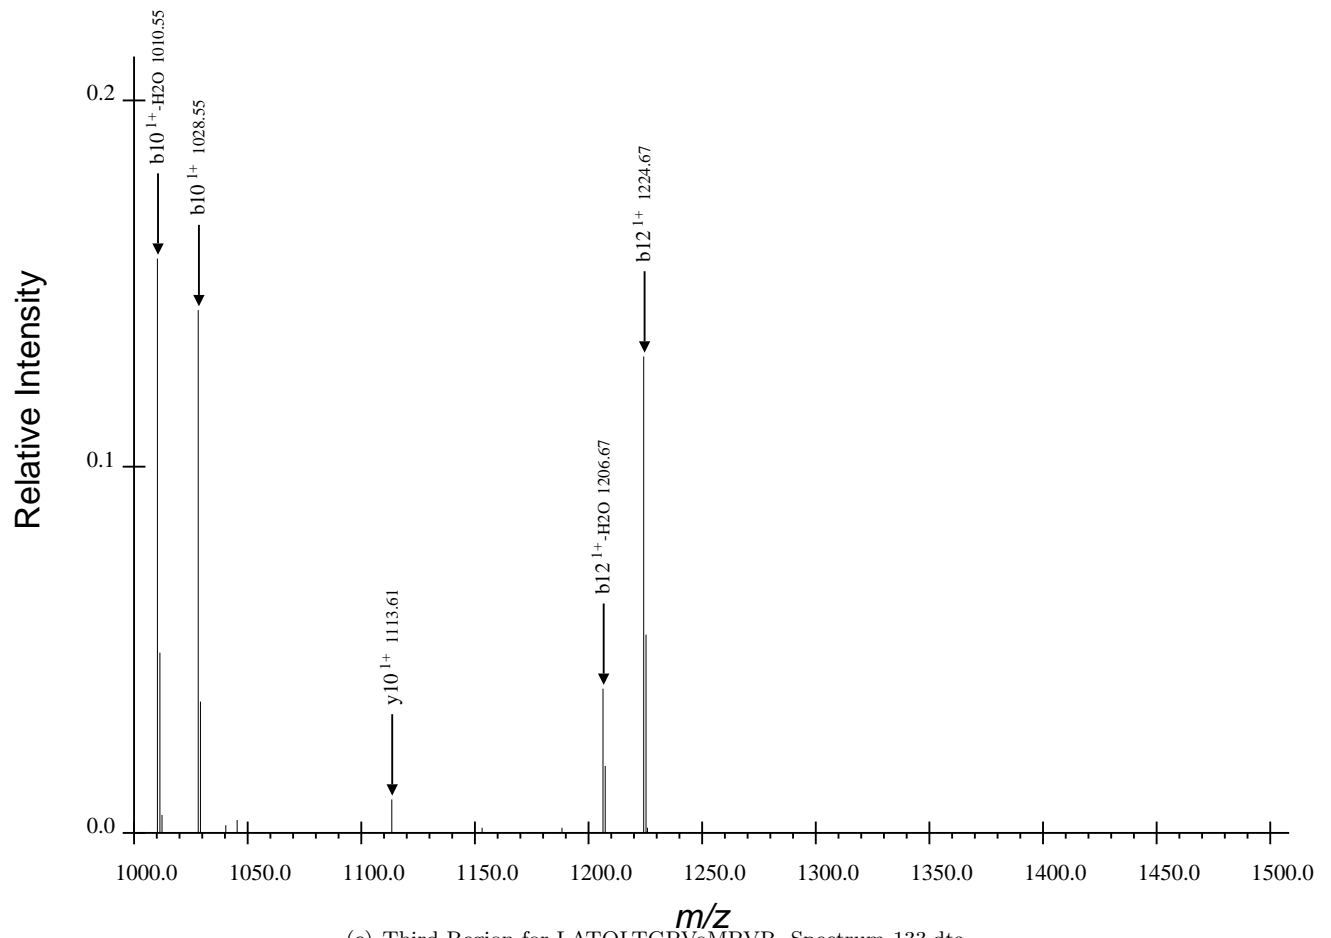

(c) Third Region for LATQLTGPVoMPVR, Spectrum 133.dta

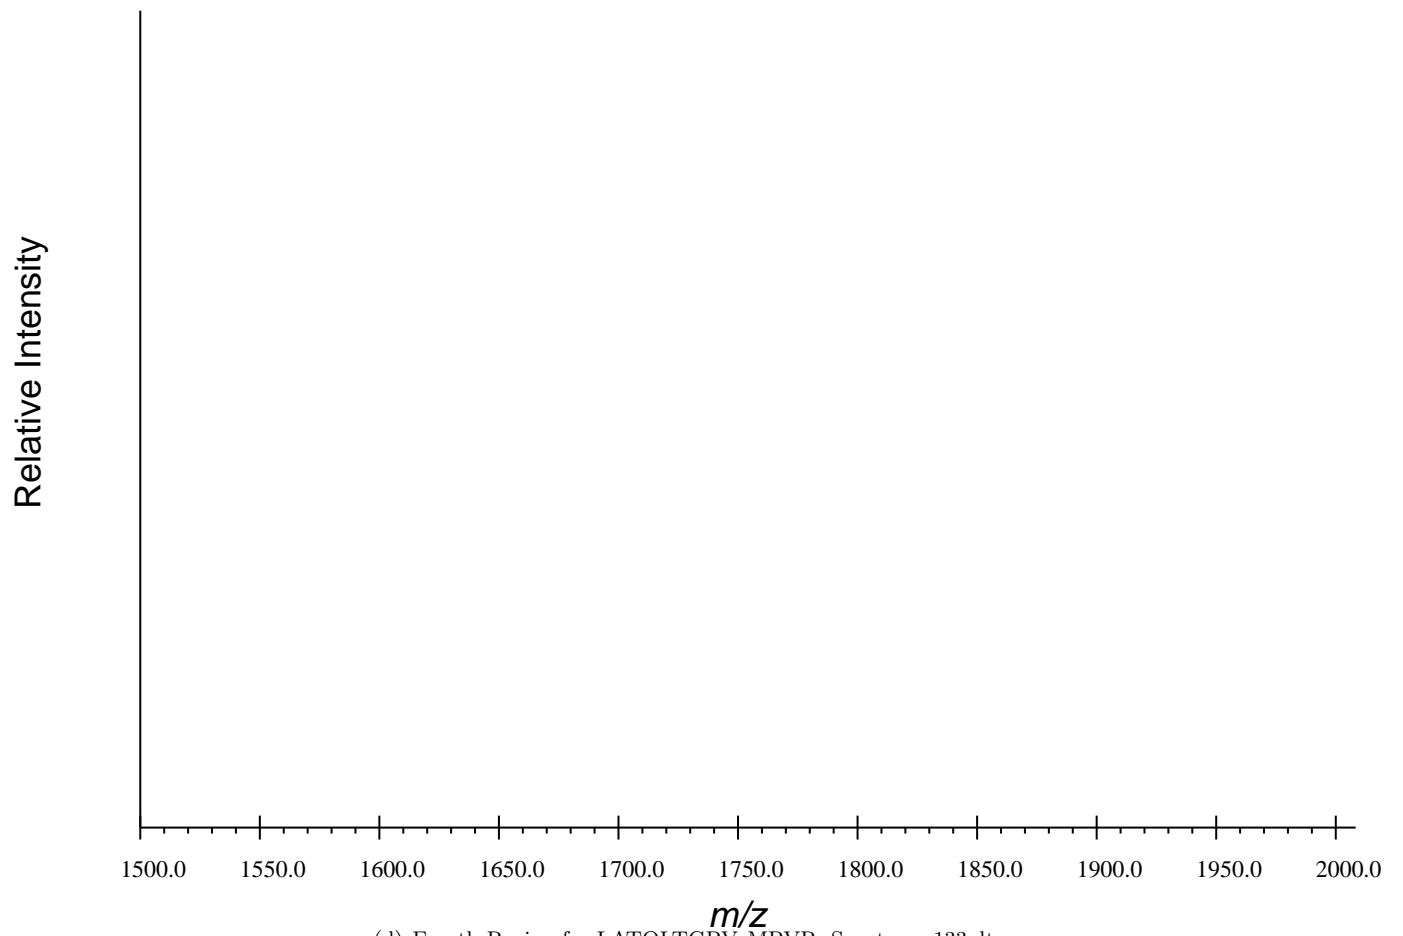

(d) Fourth Region for LATQLTGPVoMPVR, Spectrum 133.dta

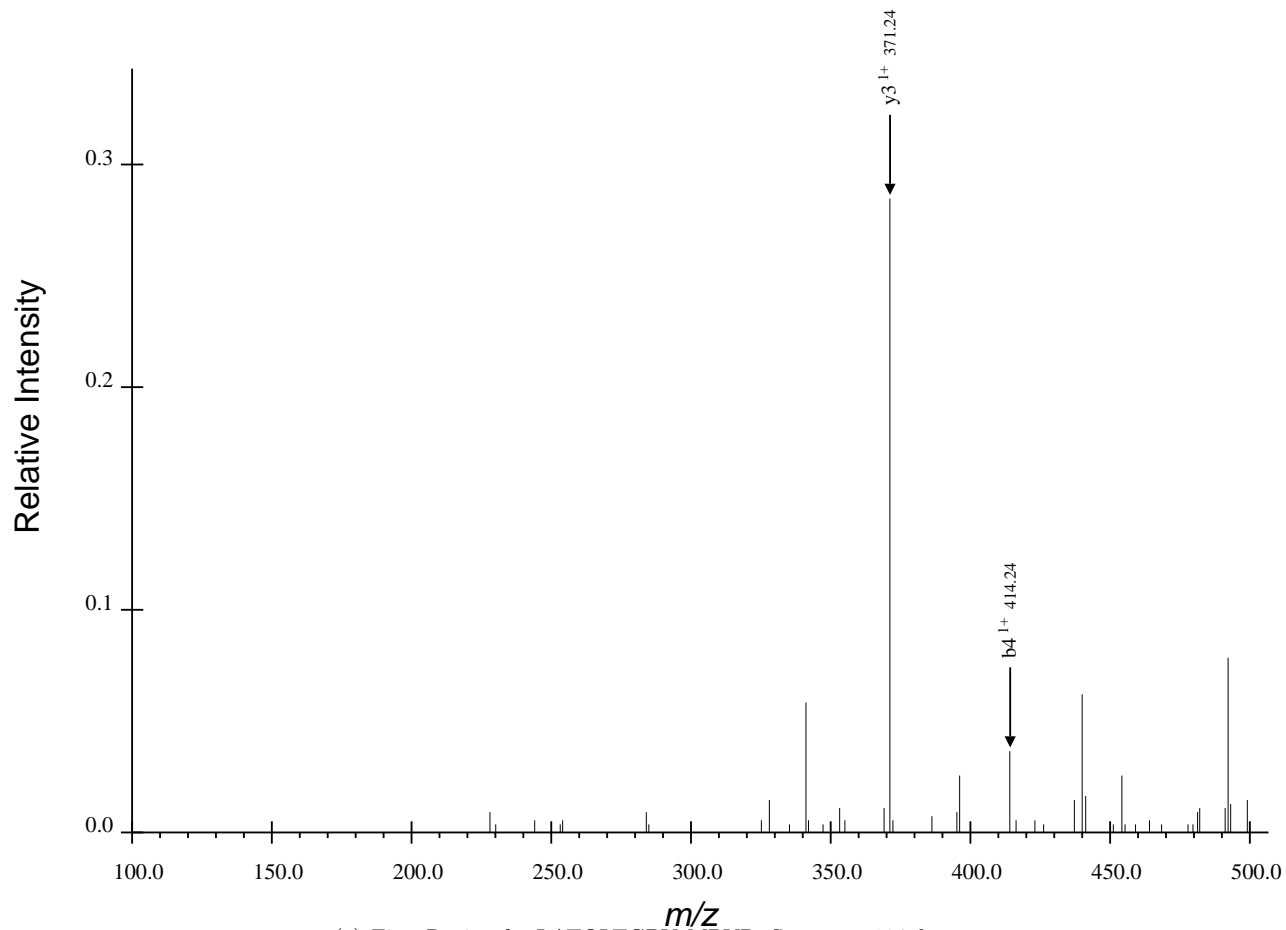

(a) First Region for LATQLTGPVoMPVR, Spectrum 134.dta

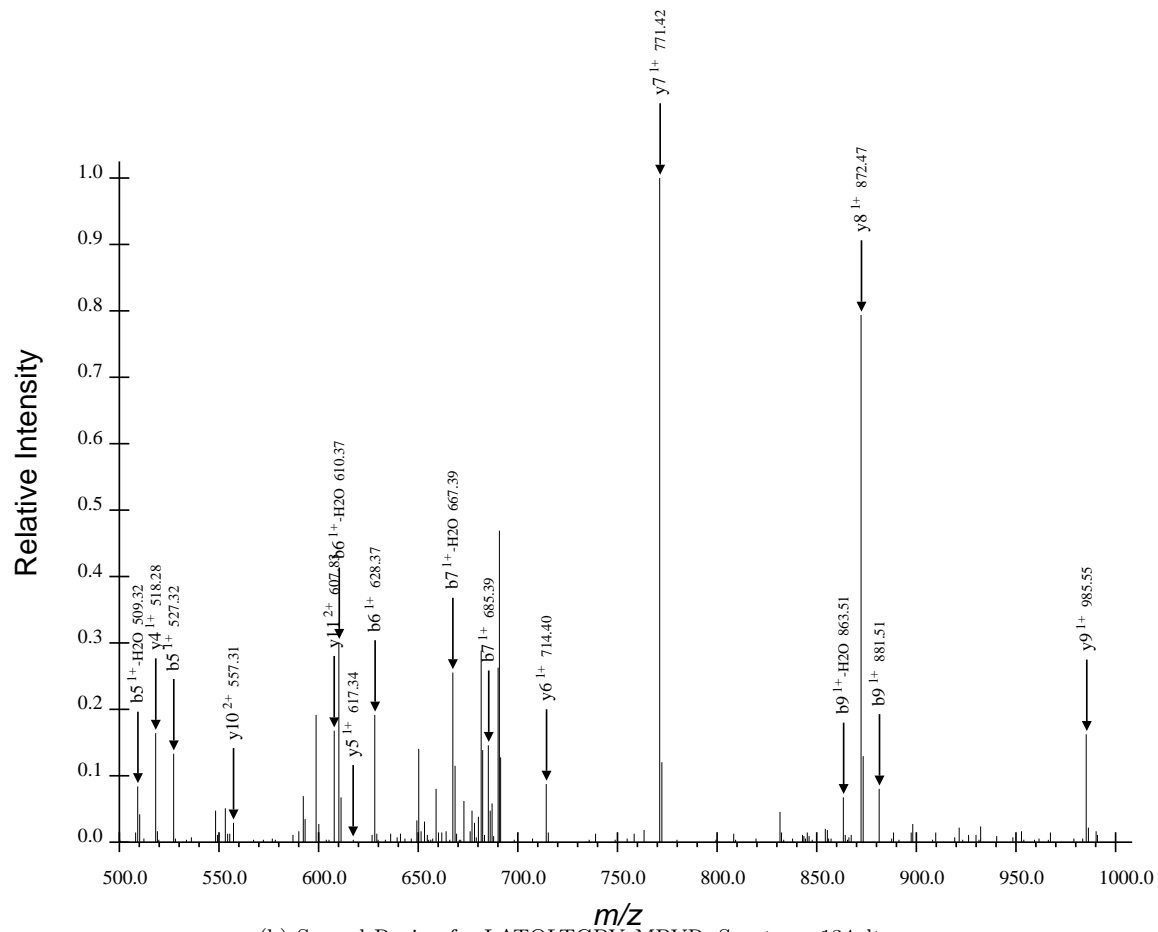

(b) Second Region for LATQLTGPVoMPVR, Spectrum 134.dta



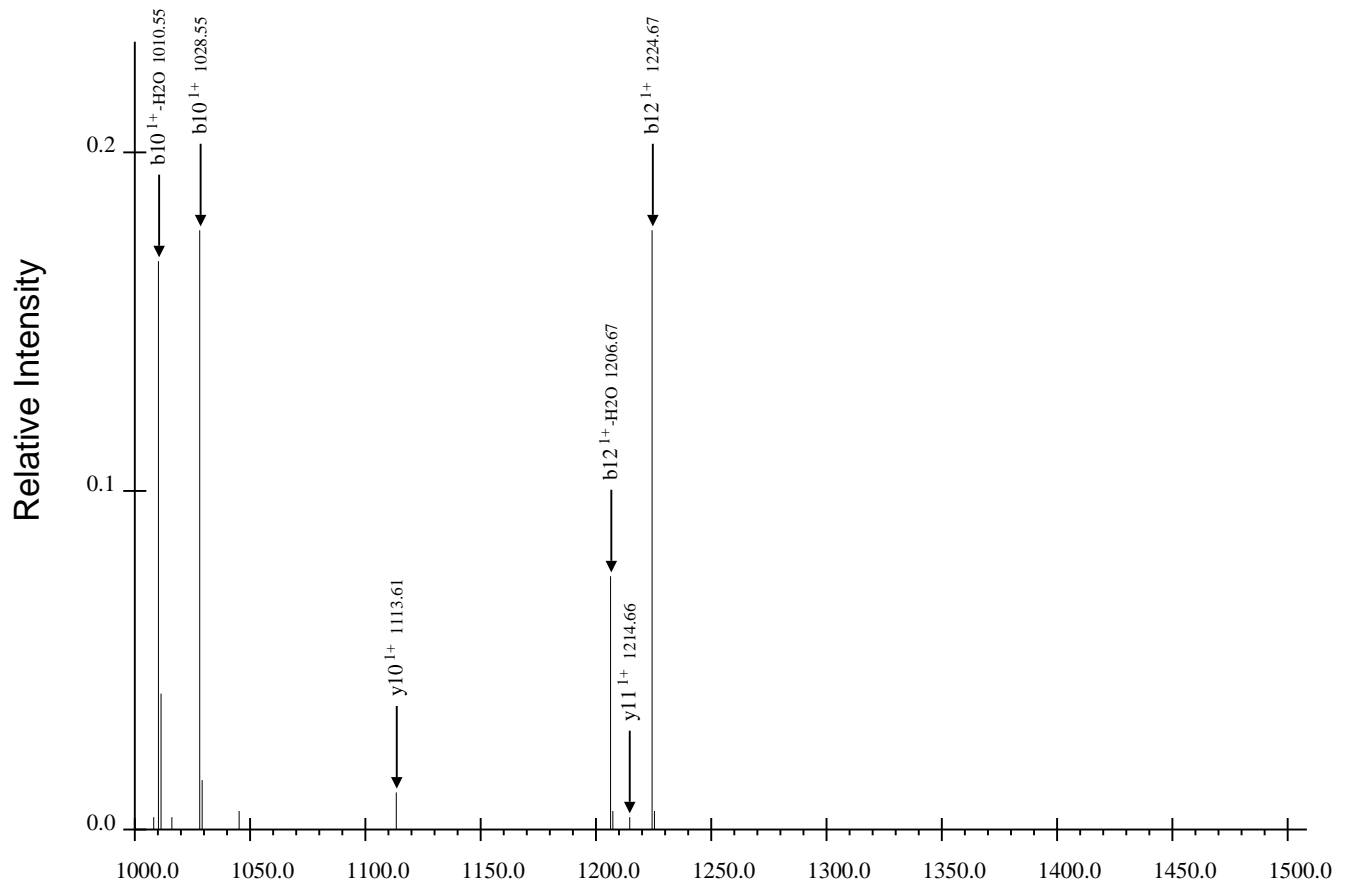

(c) Third Region for LATQLTGPVoMPVR, Spectrum 134.dta

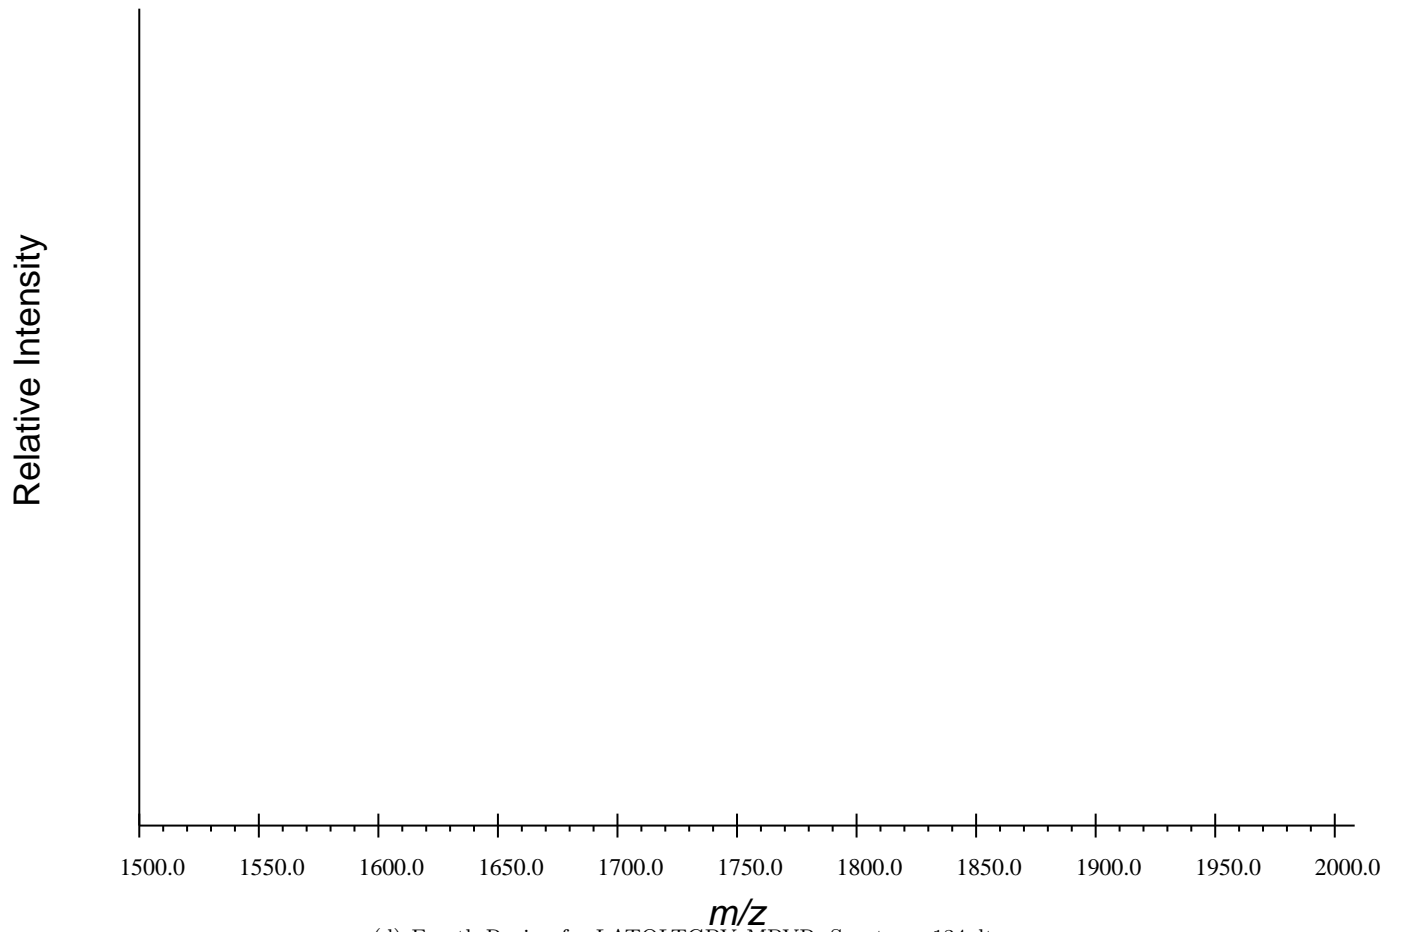

(d) Fourth Region for LATQLTGPVoMPVR, Spectrum 134.dta

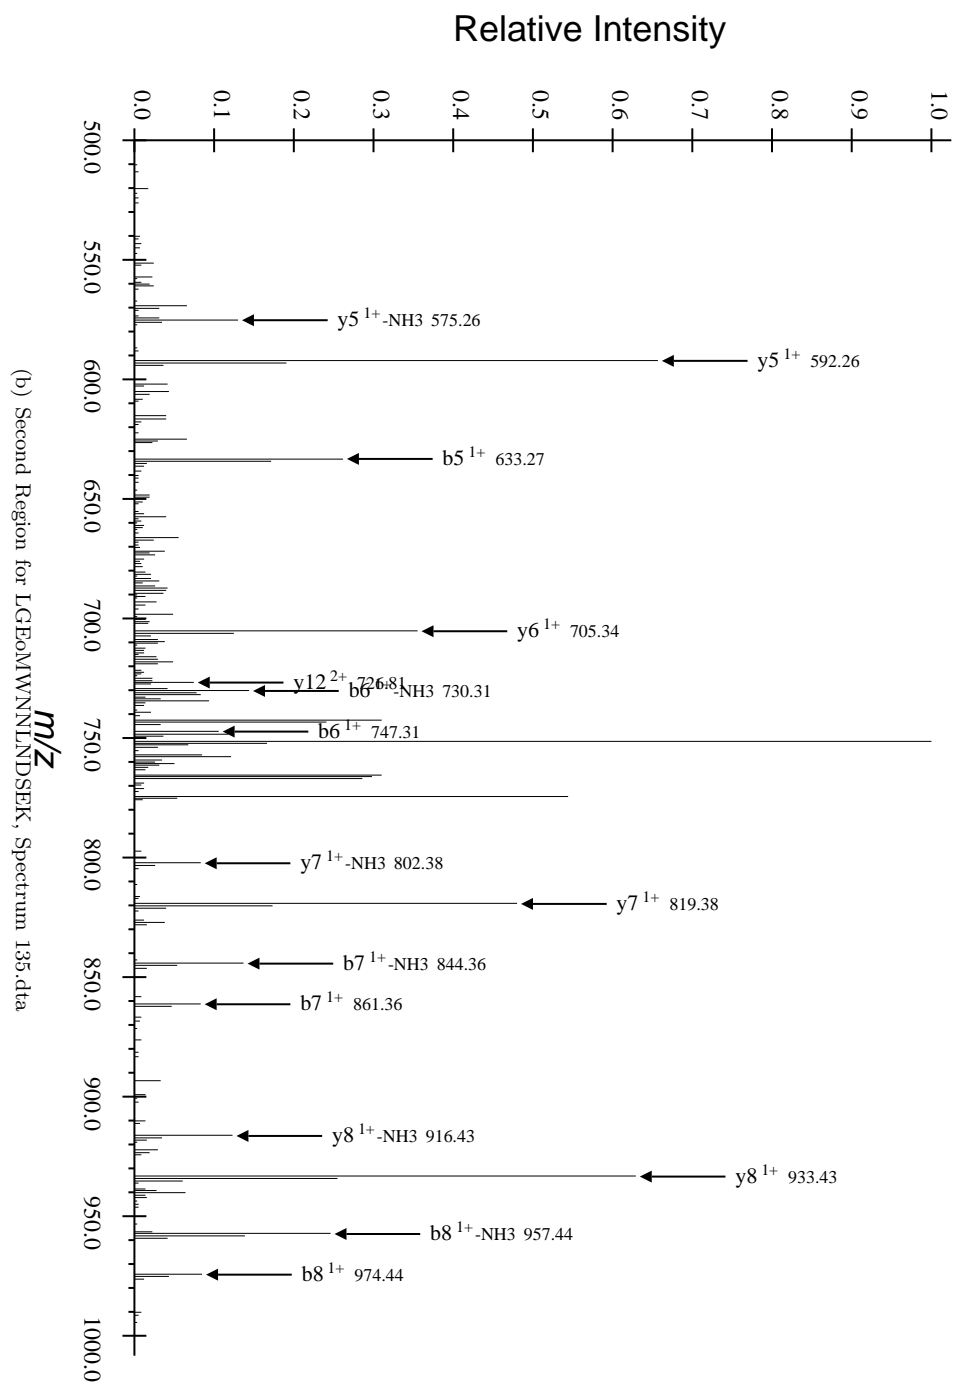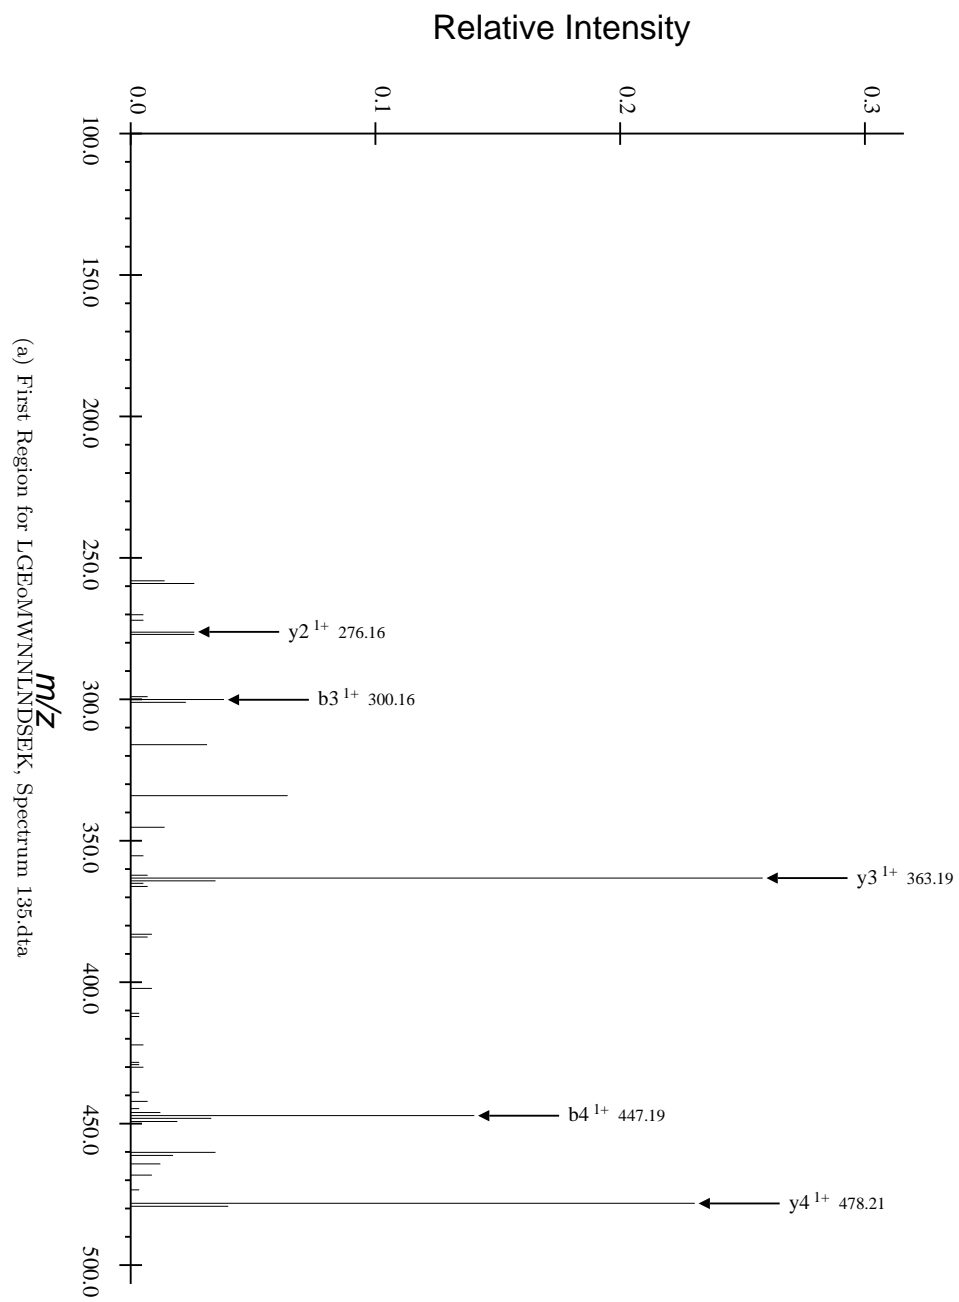

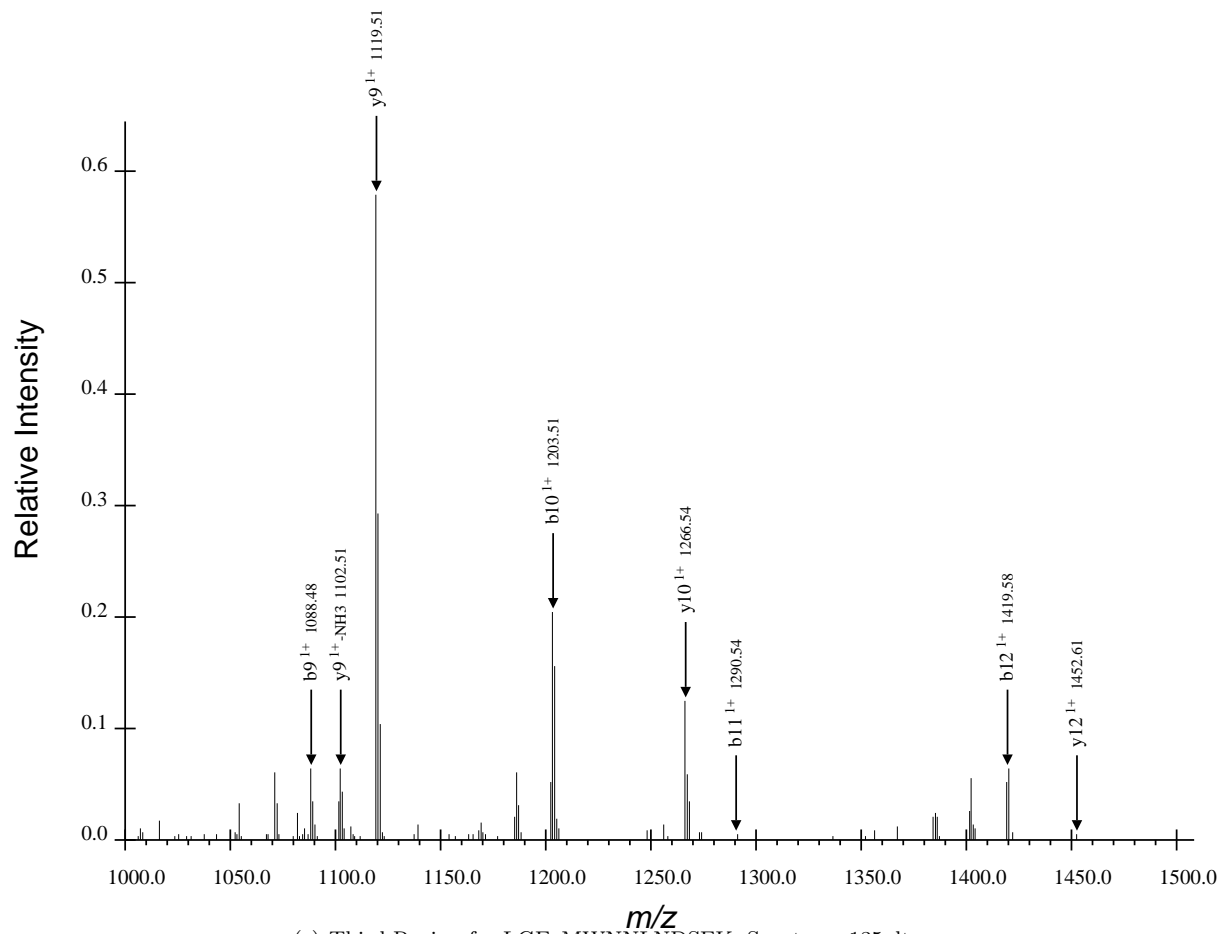

(c) Third Region for LGEoMWNNLNDSEK, Spectrum 135.dta

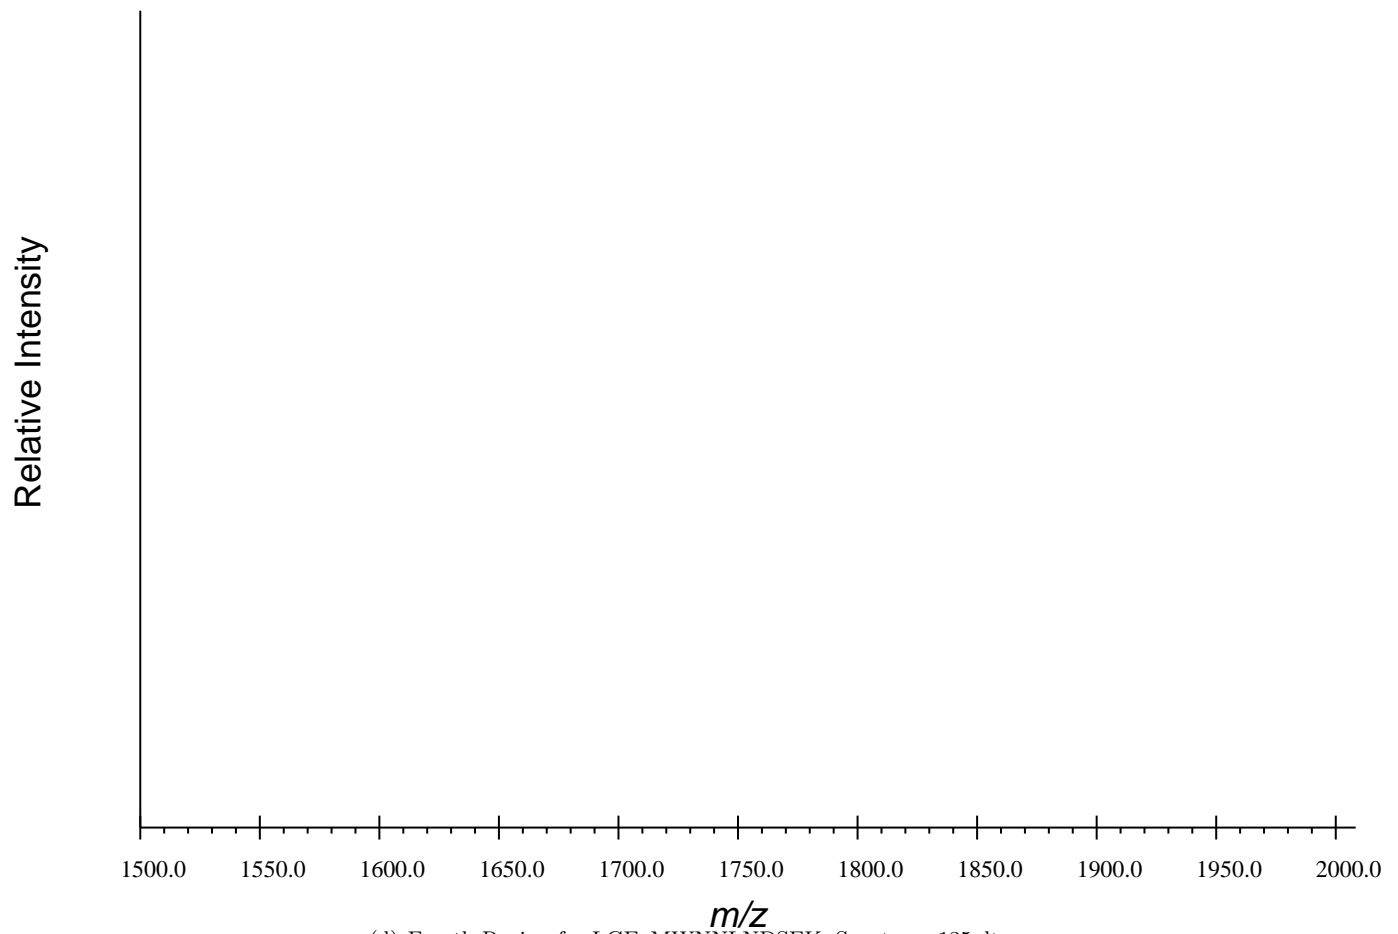

(d) Fourth Region for LGEoMWNNLNDSEK, Spectrum 135.dta

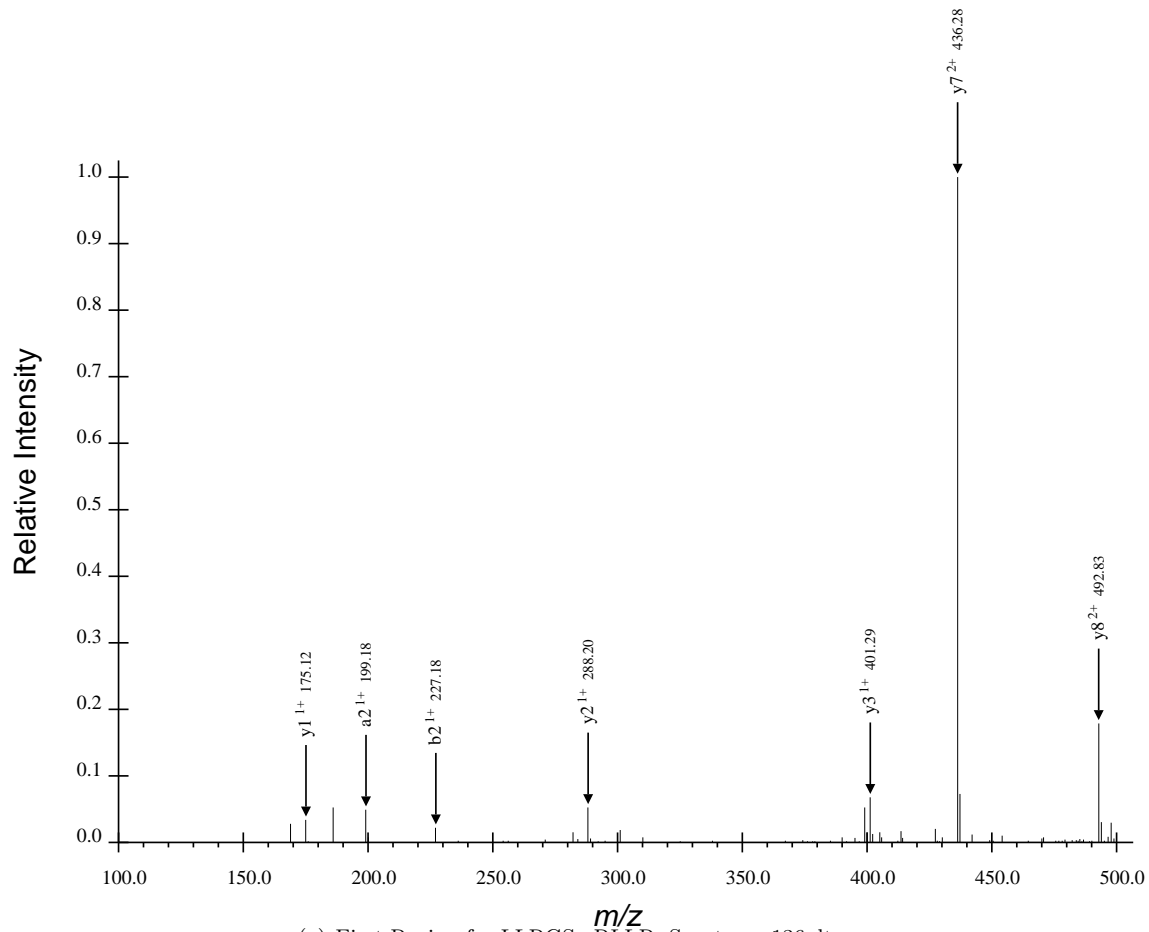

(a) First Region for LLRGSmRLLR, Spectrum 136.dta

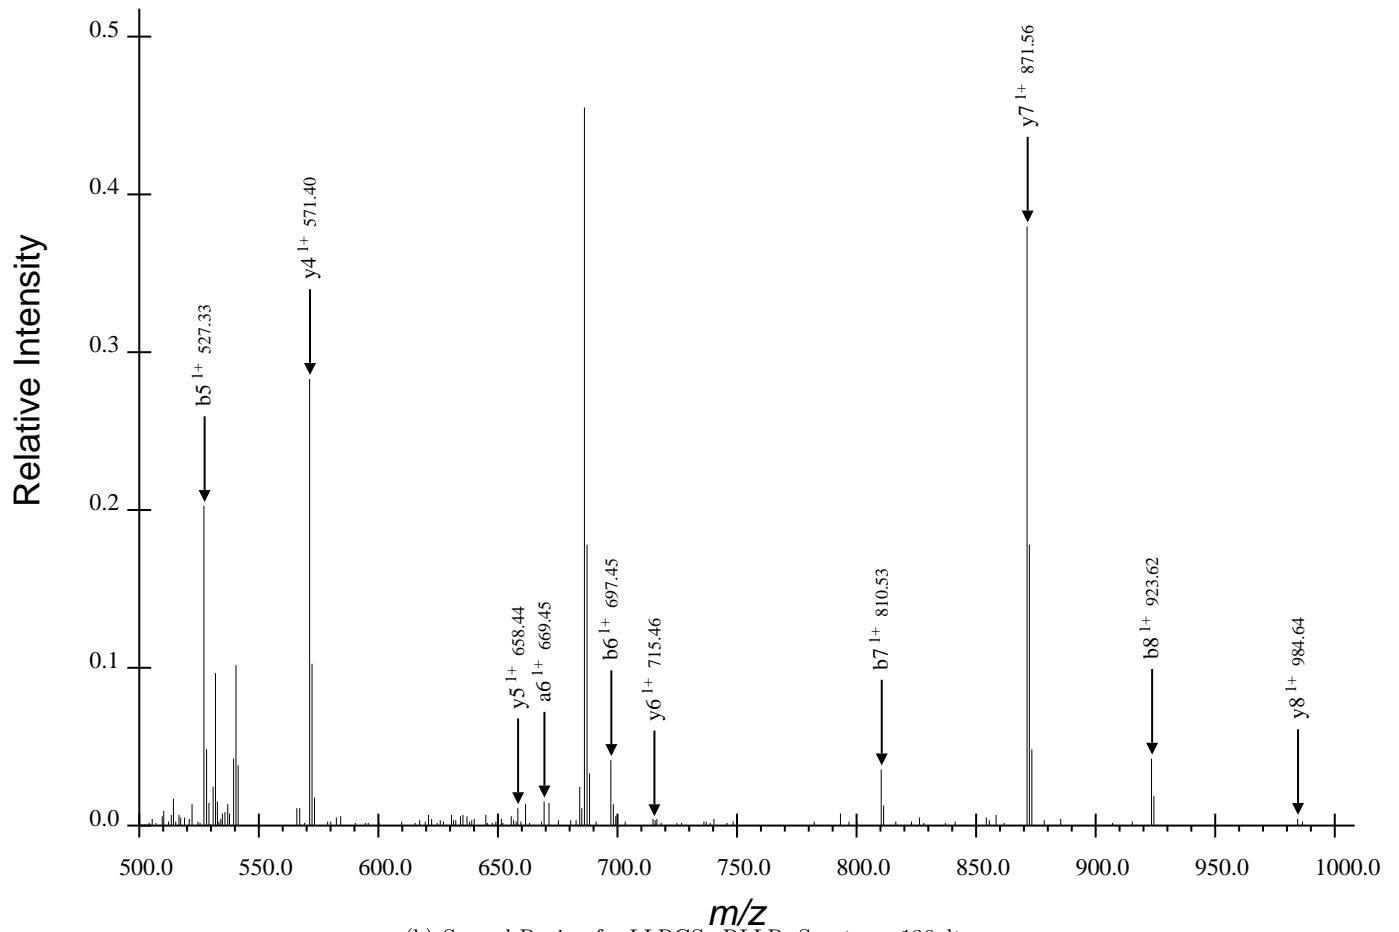

(b) Second Region for LLRGSmRLLR, Spectrum 136.dta

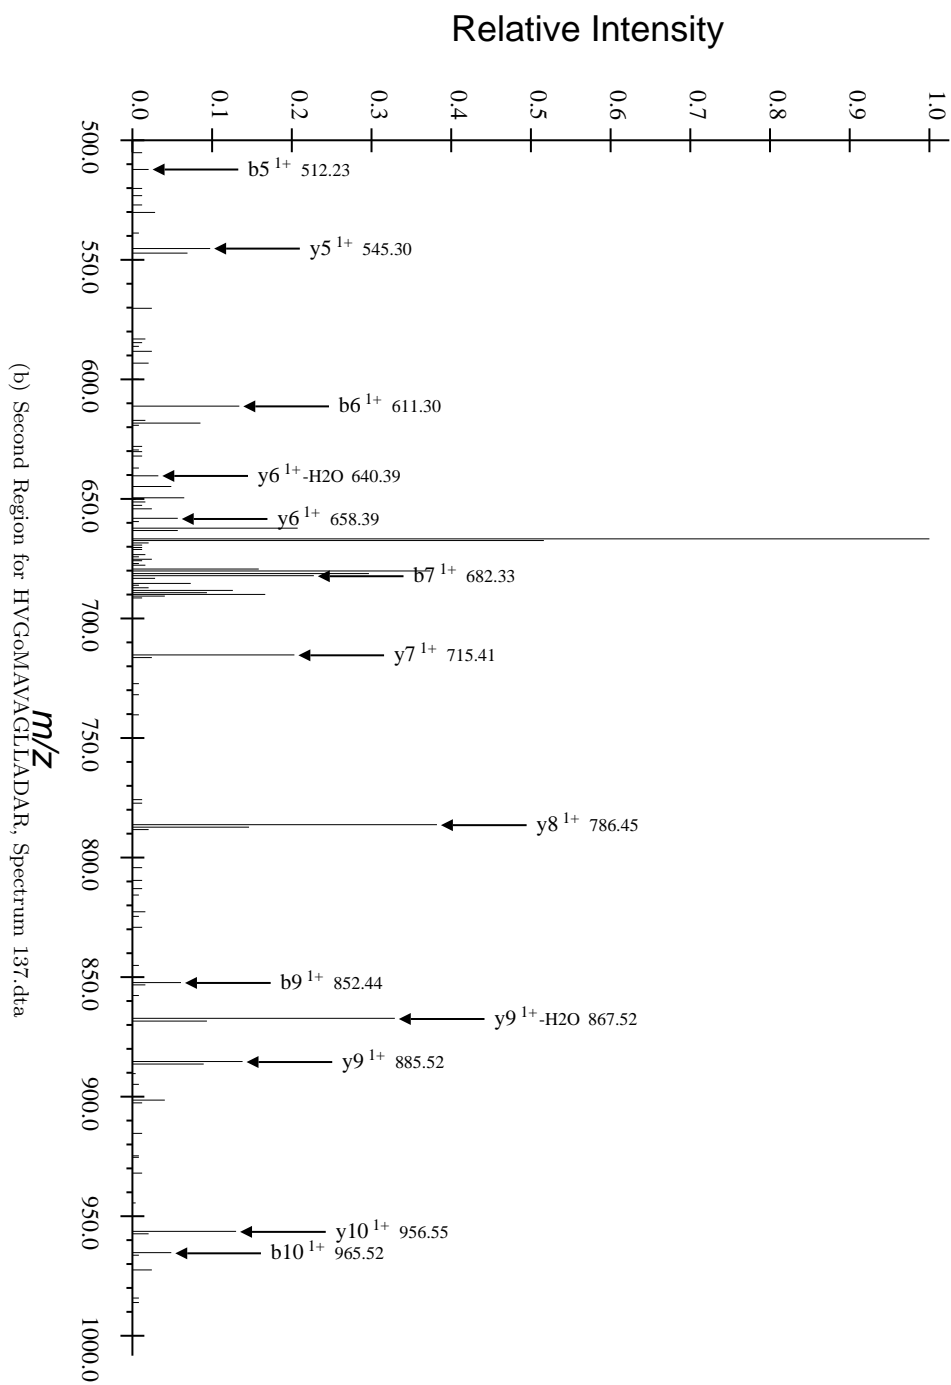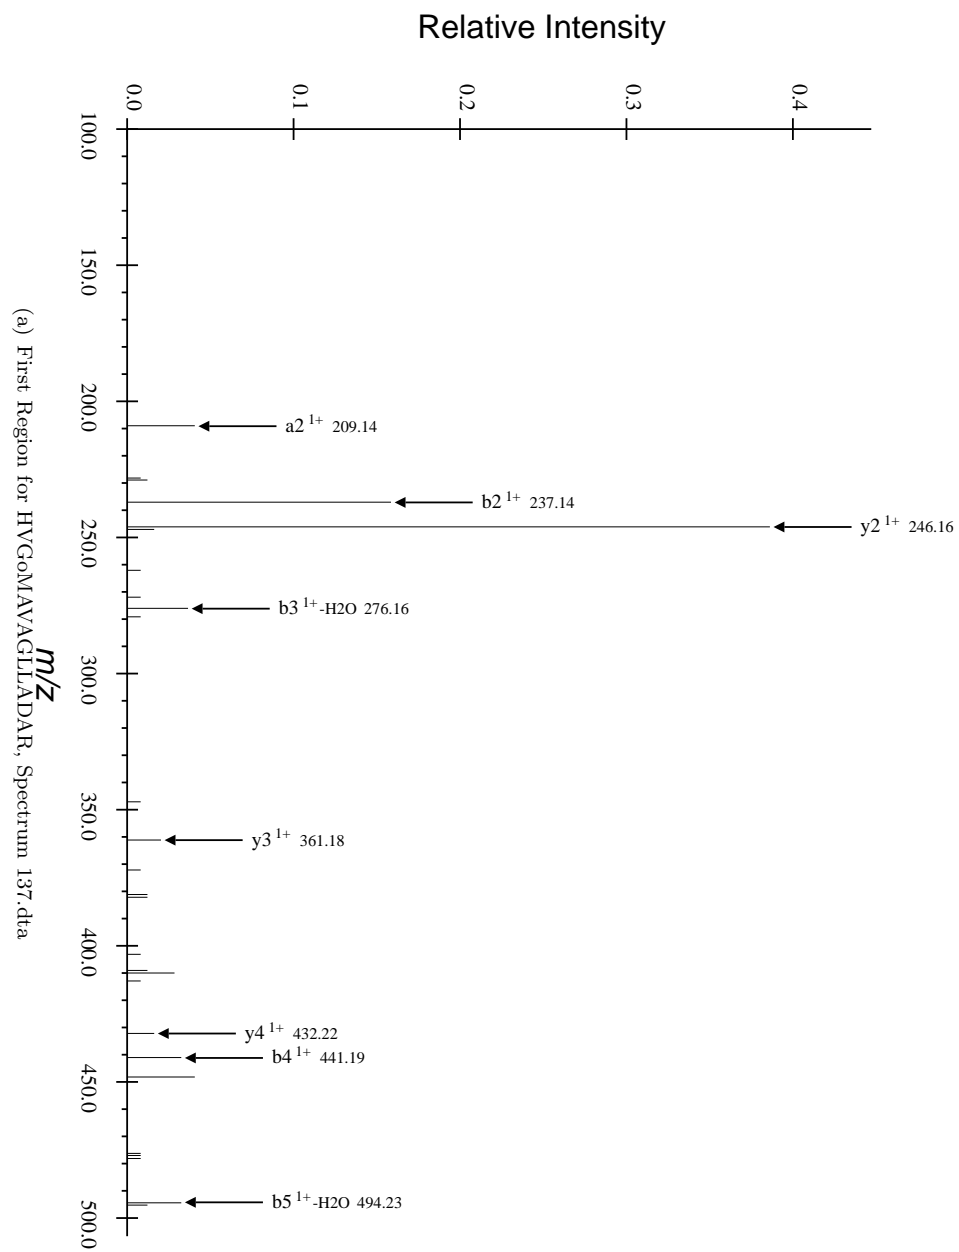

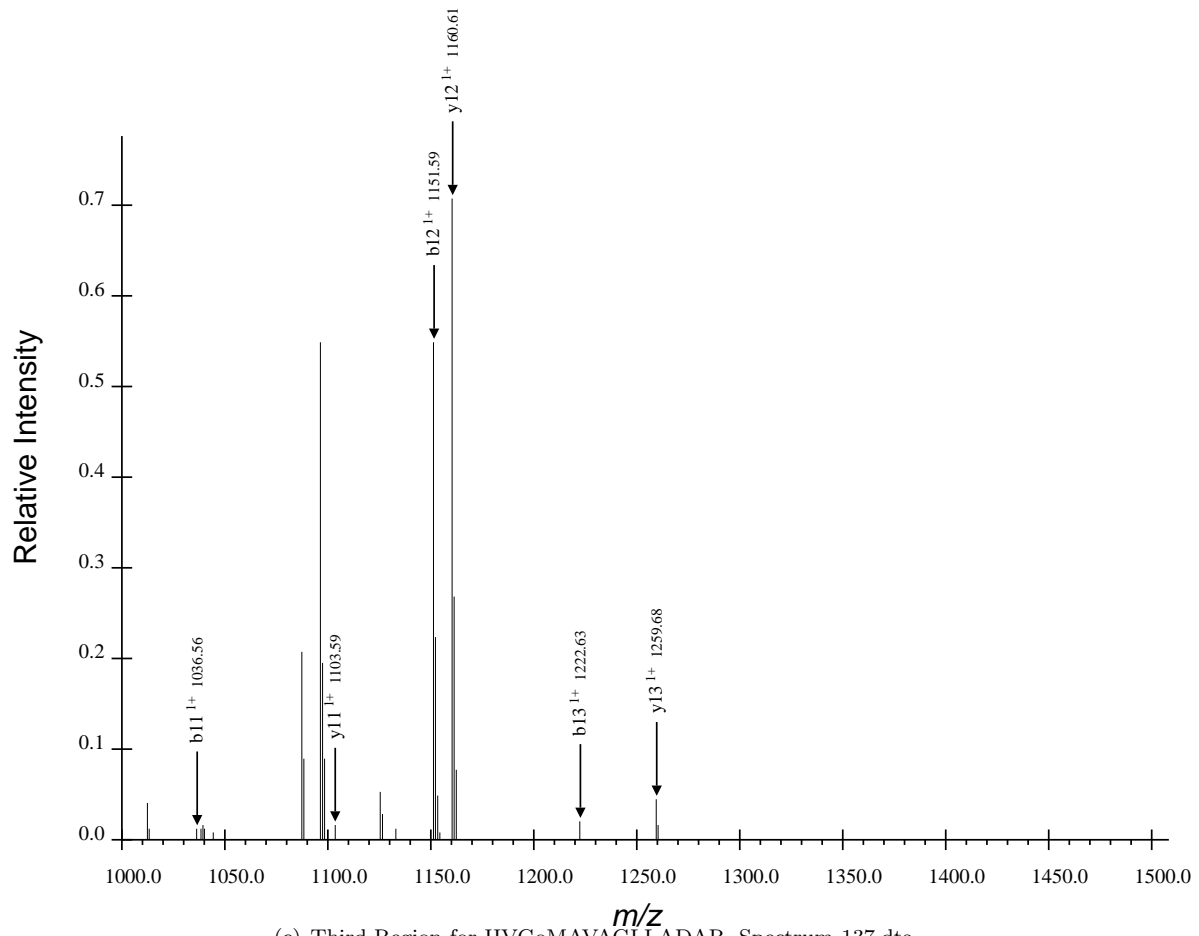

(c) Third Region for HVGoMAVAGLLADAR, Spectrum 137.dta

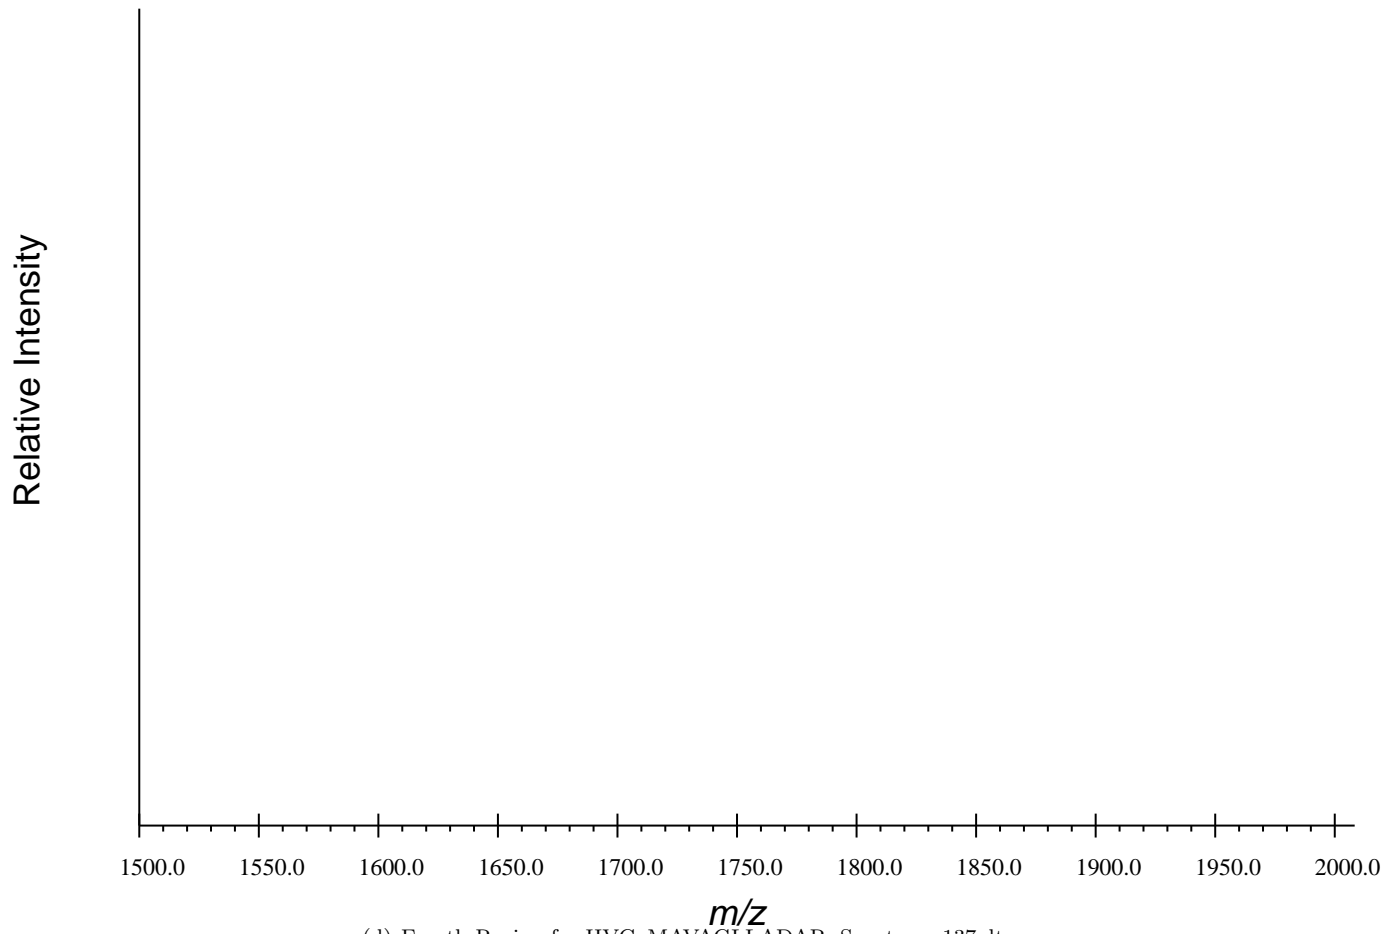

(d) Fourth Region for HVGoMAVAGLLADAR, Spectrum 137.dta

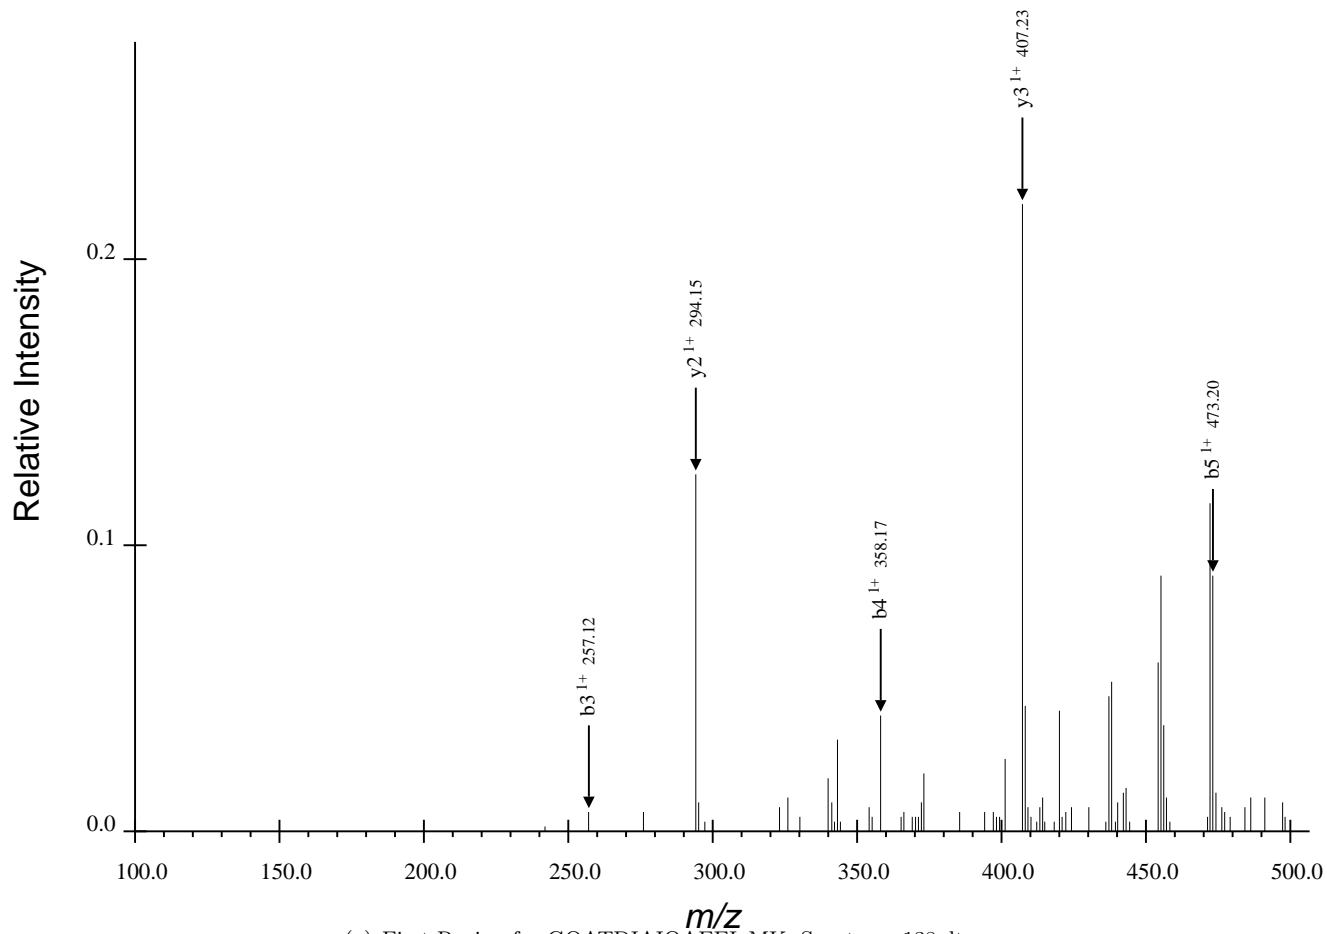

(a) First Region for GQATDIAIQAEElMK, Spectrum 138.dta

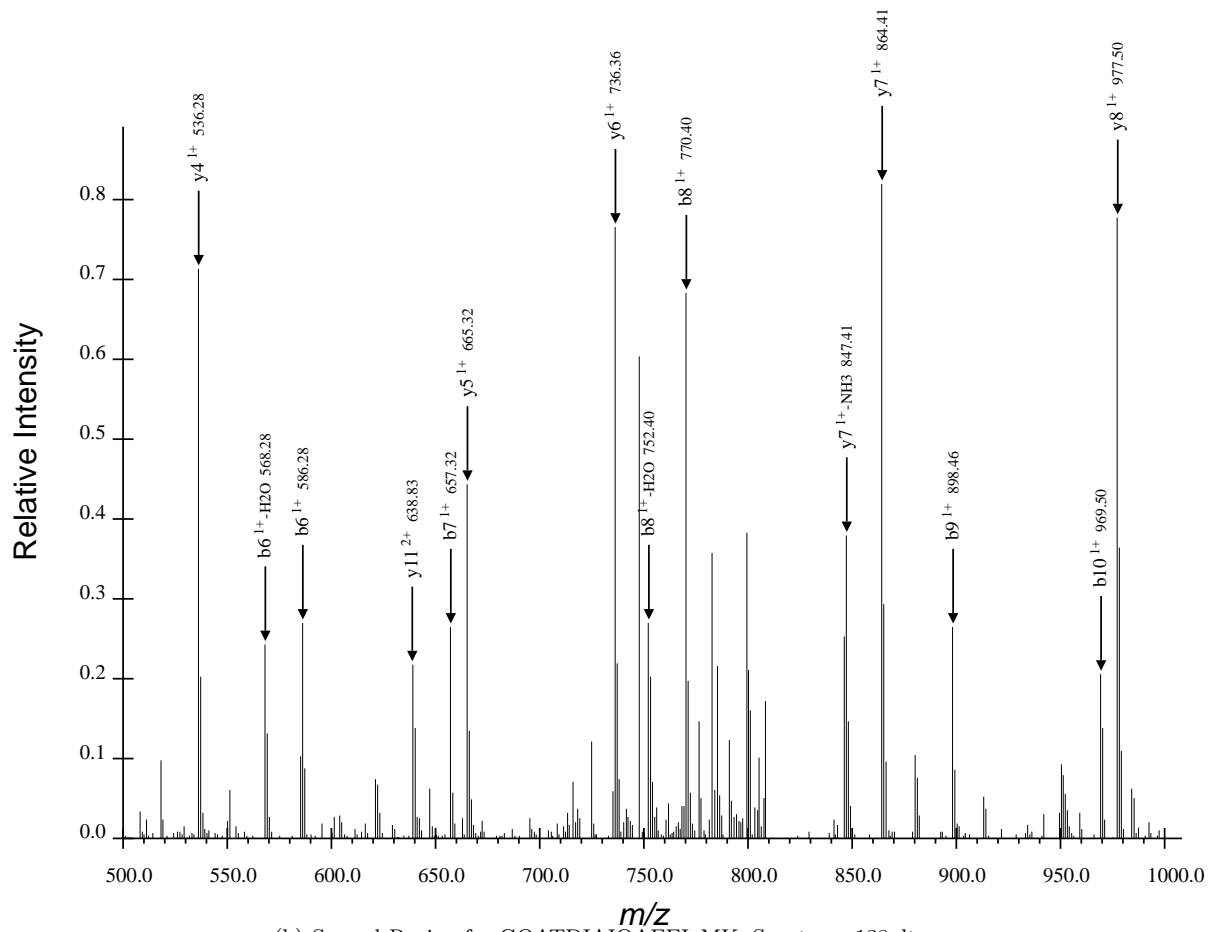

(b) Second Region for GQATDIAIQAEElMK, Spectrum 138.dta

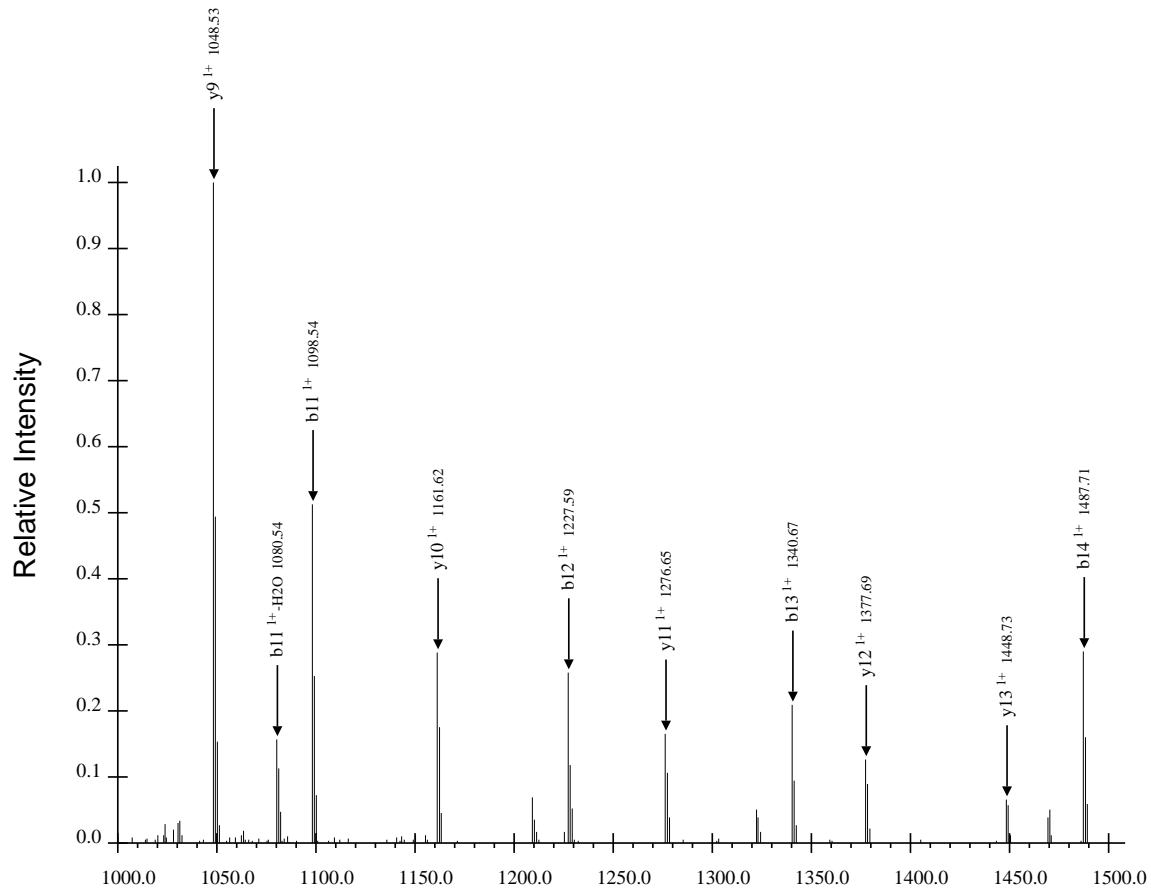

(c) Third Region for GQATDIAIQAEElOMK, Spectrum 138.dta

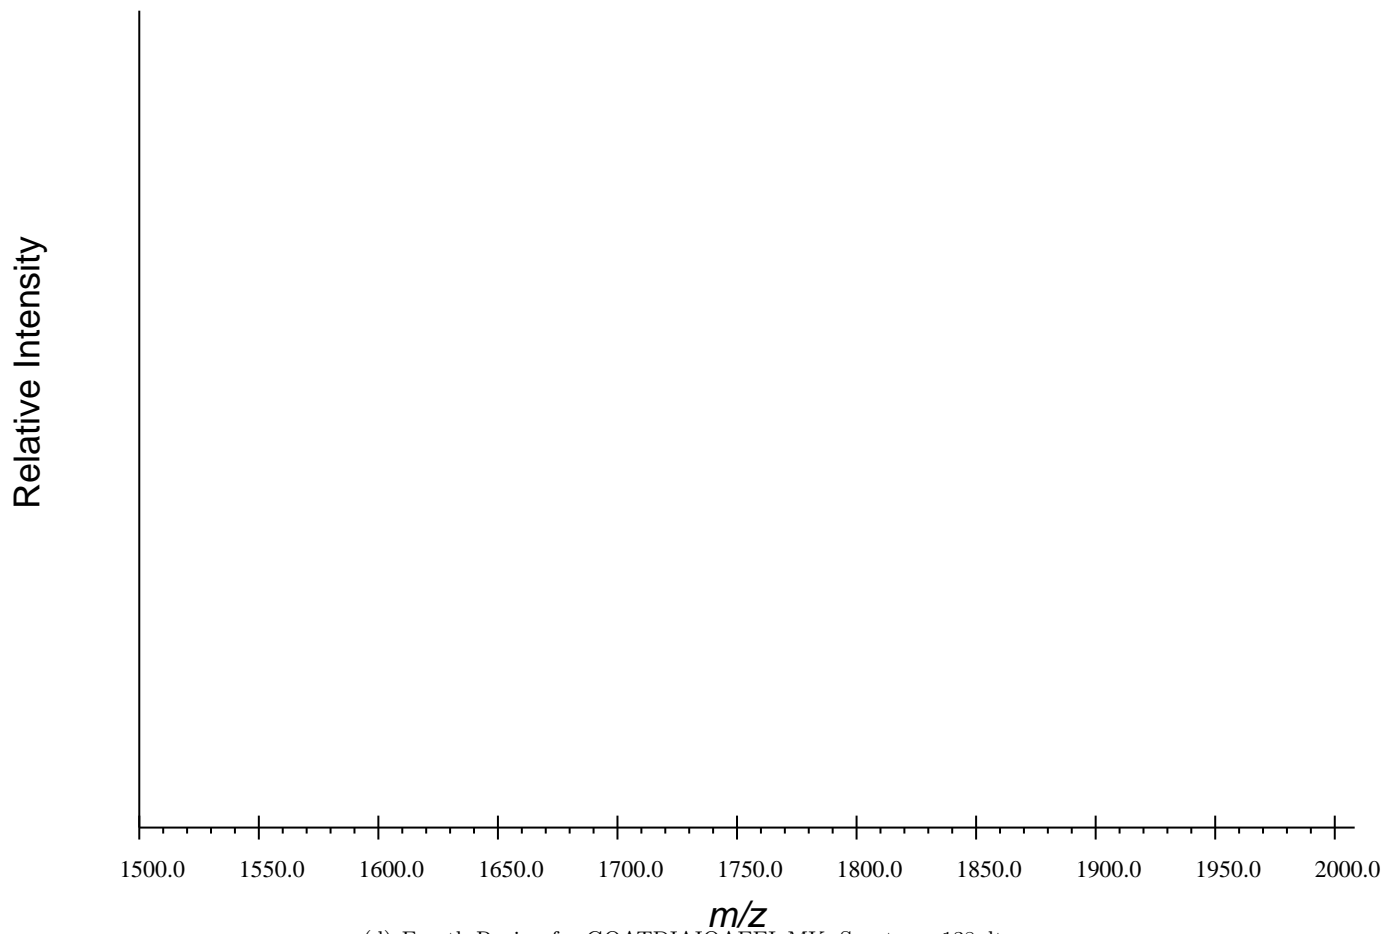

(d) Fourth Region for GQATDIAIQAEElOMK, Spectrum 138.dta



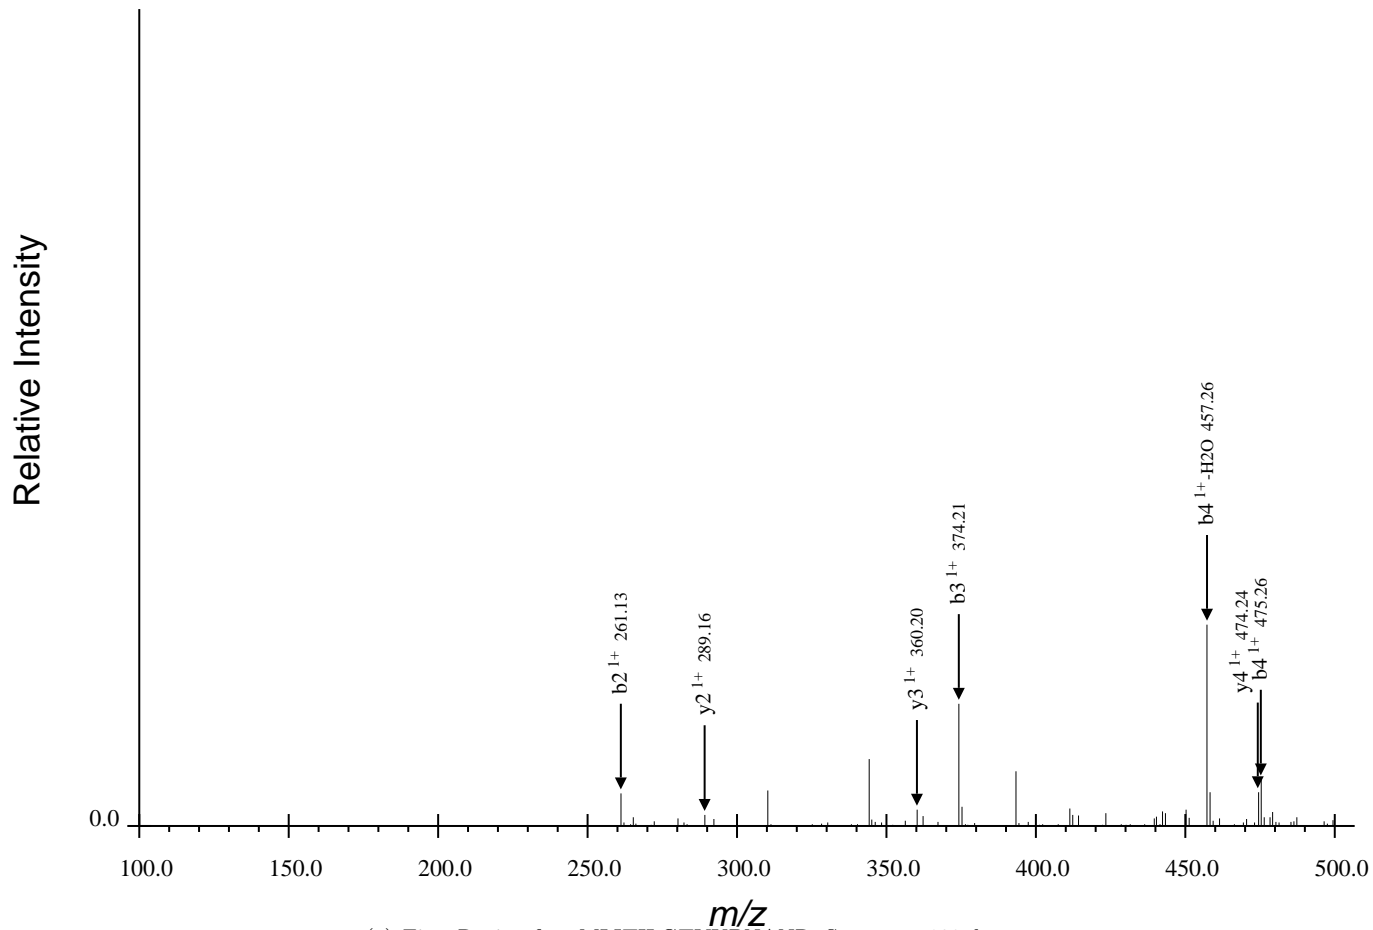

(a) First Region for oMLITILGTVKPNANR, Spectrum 139.dta

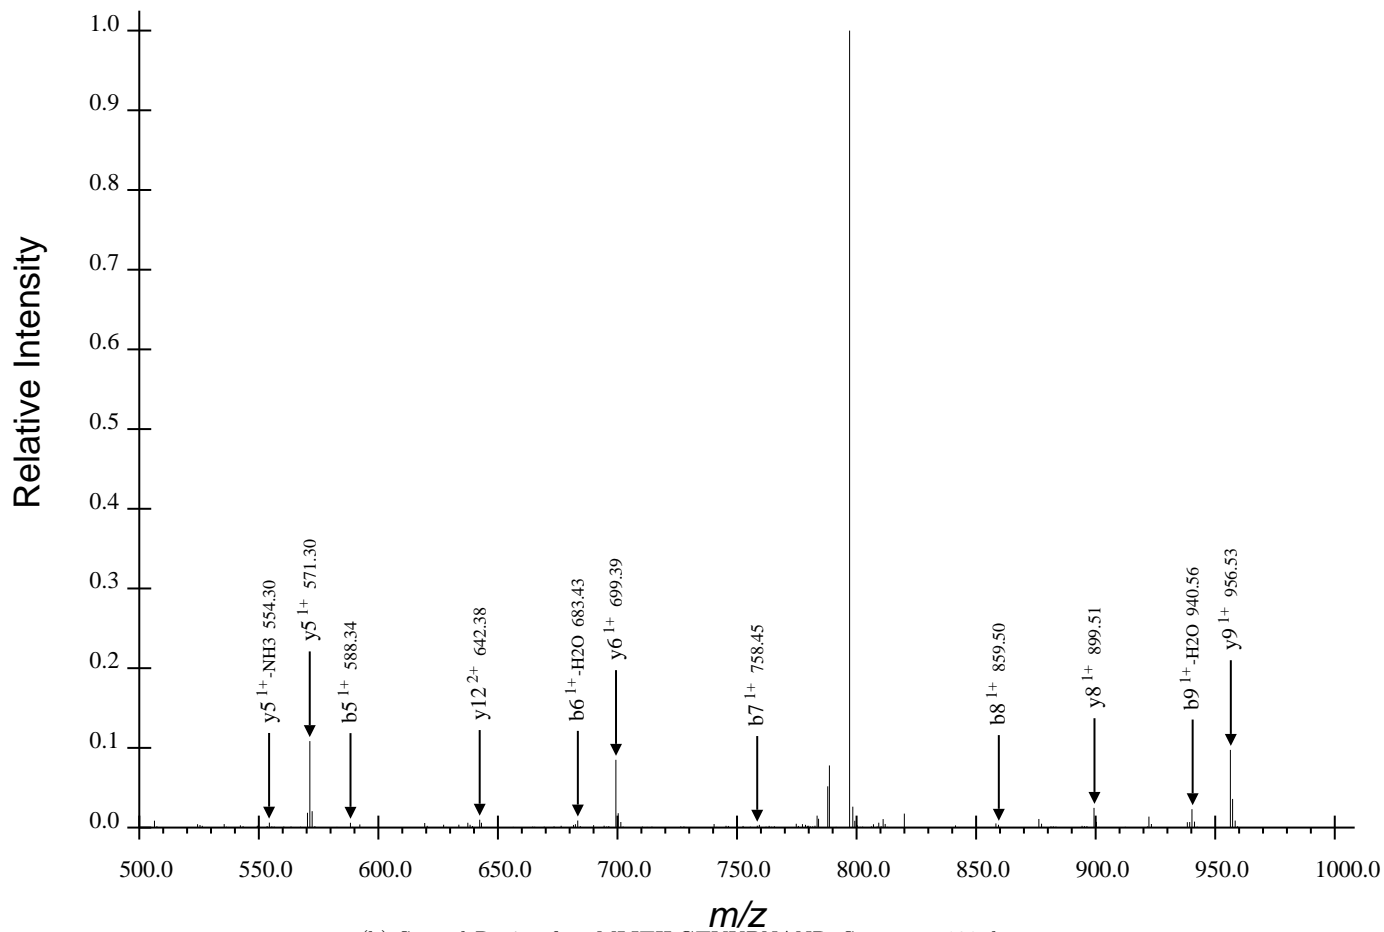

(b) Second Region for oMLITILGTVKPNANR, Spectrum 139.dta

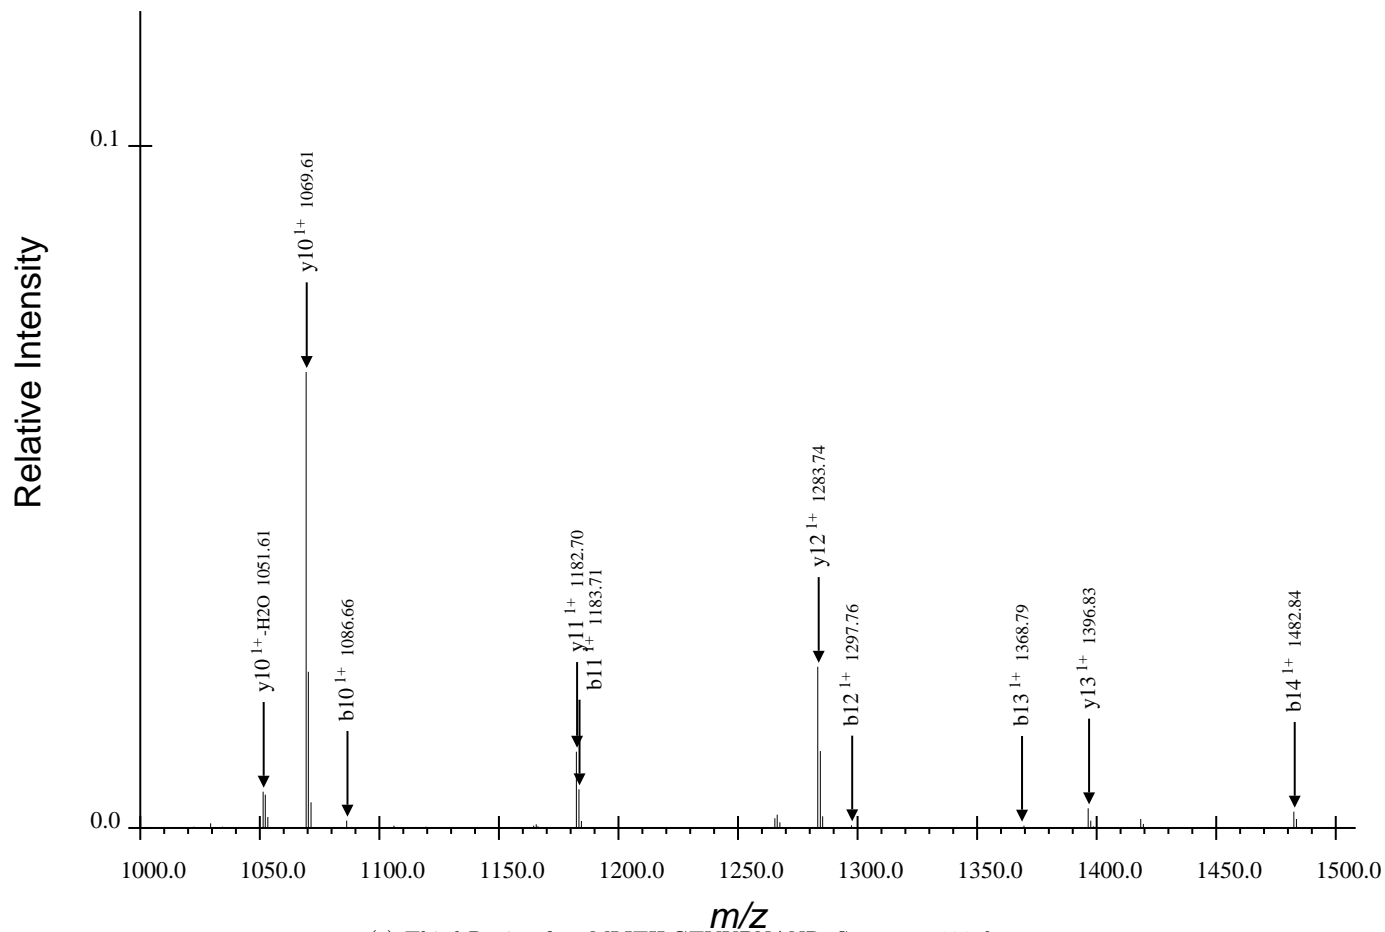

(c) Third Region for oMLITILGTVKPNANR, Spectrum 139.dta

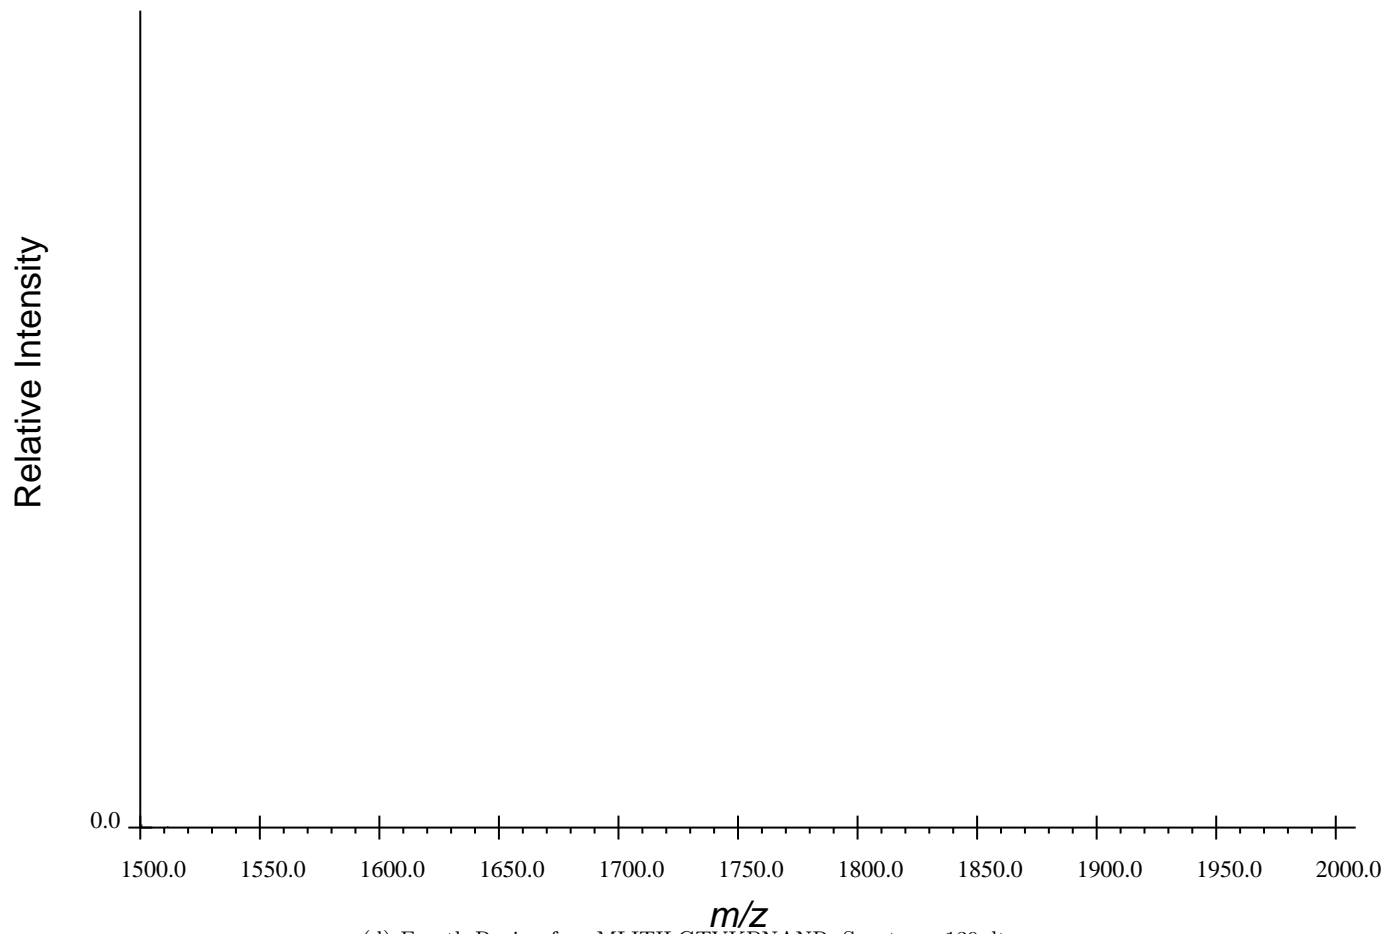

(d) Fourth Region for oMLITILGTVKPNANR, Spectrum 139.dta

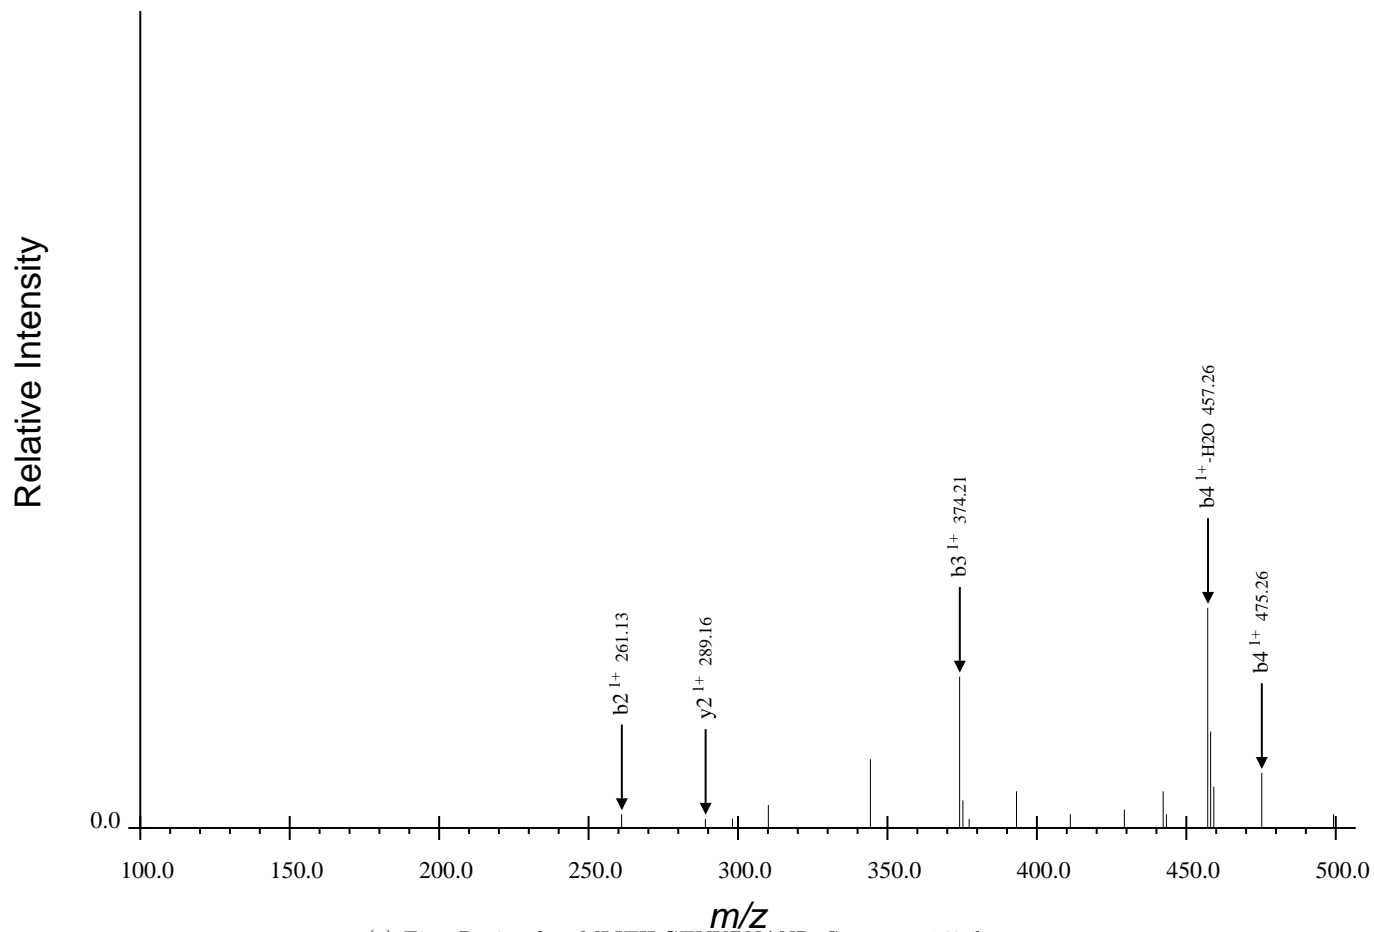

(a) First Region for oMLITILGTVKPNANR, Spectrum 140.dta

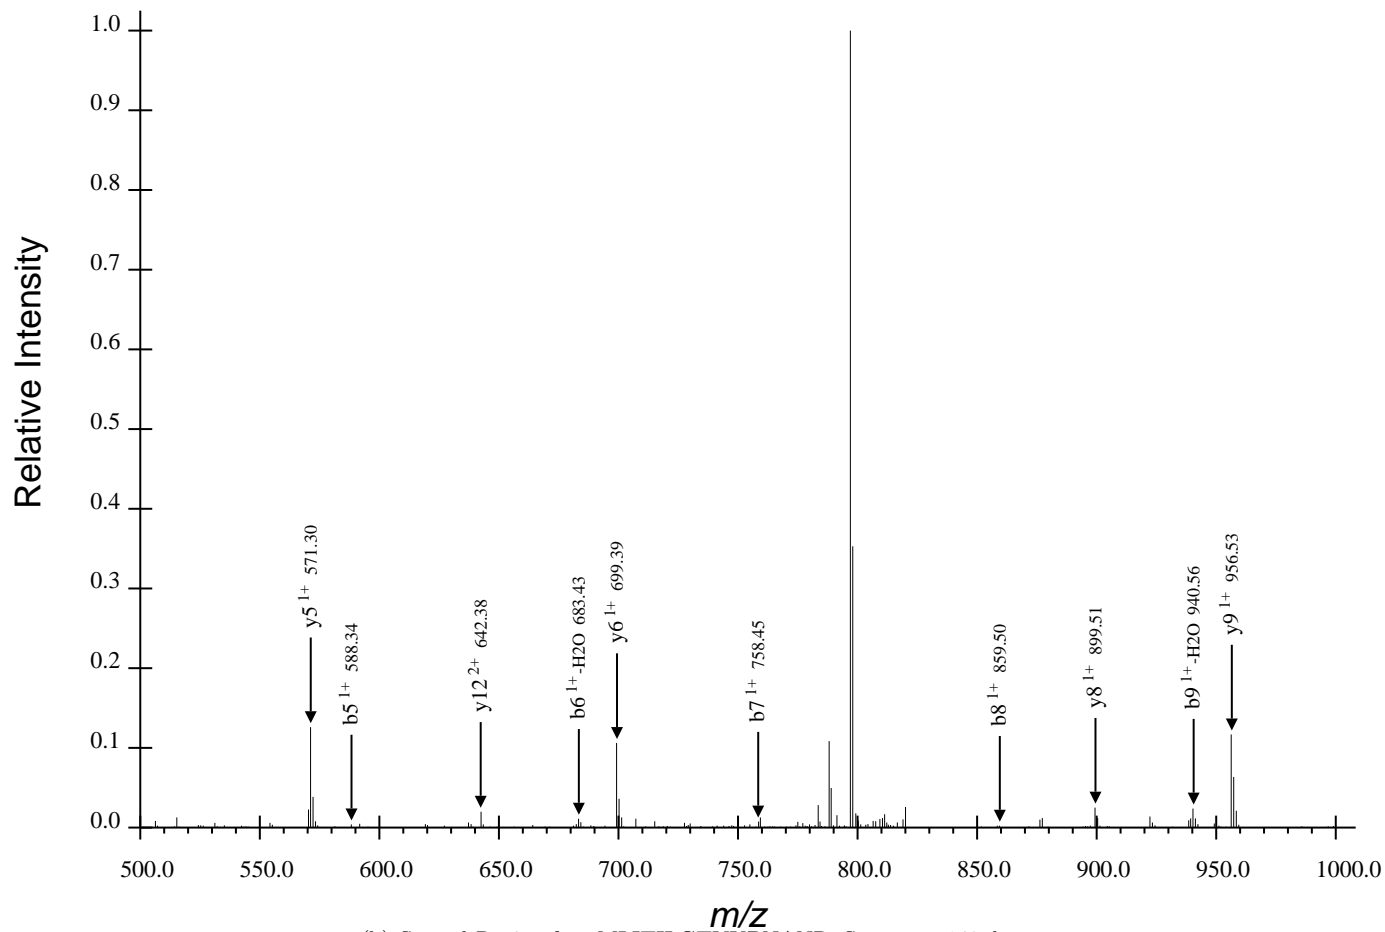

(b) Second Region for oMLITILGTVKPNANR, Spectrum 140.dta

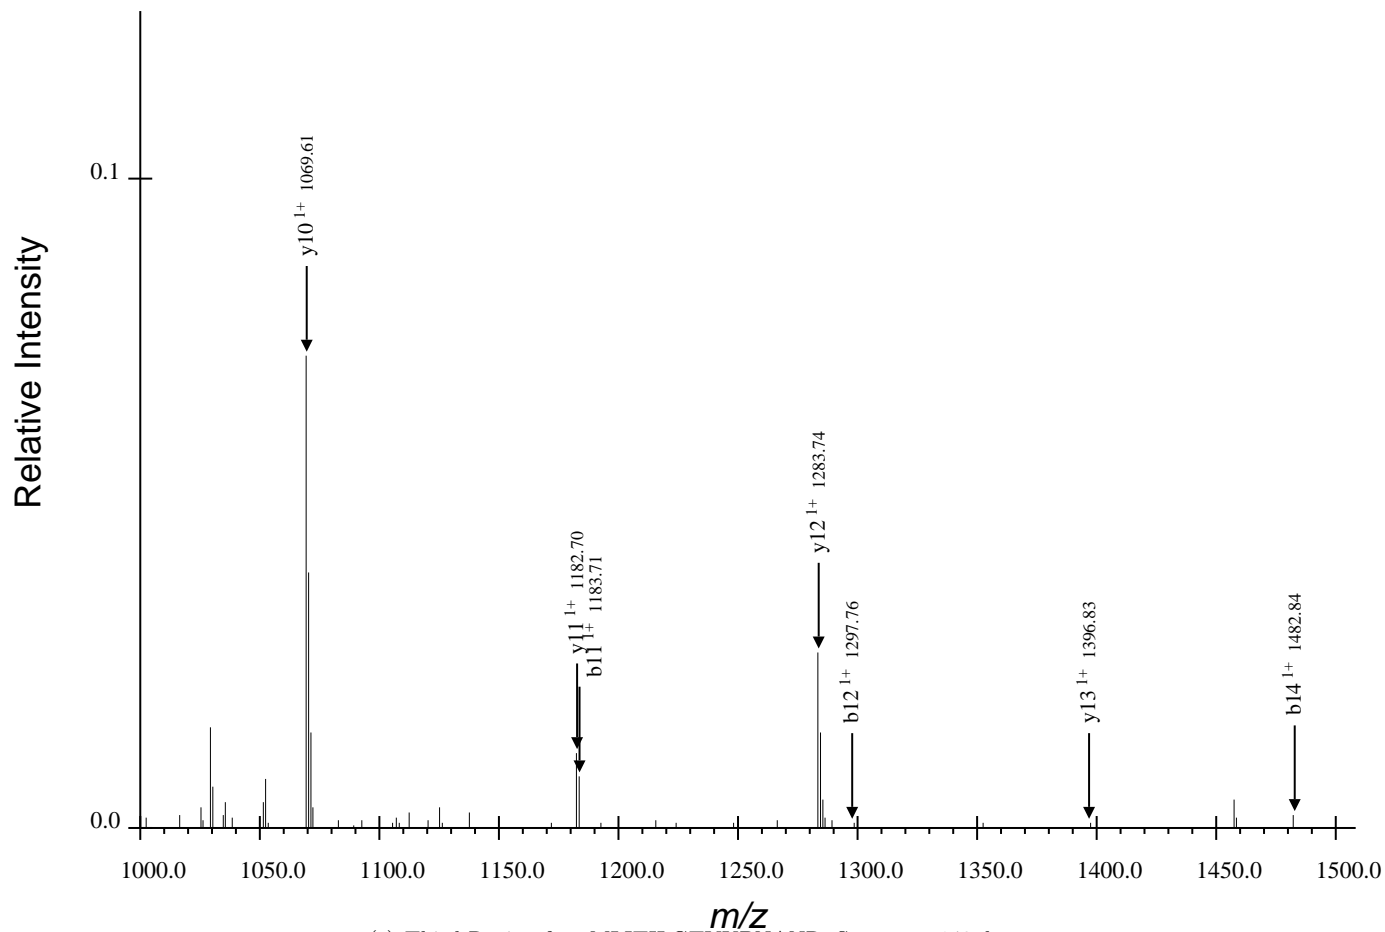

(c) Third Region for oMLITILGTVKPNANR, Spectrum 140.dta

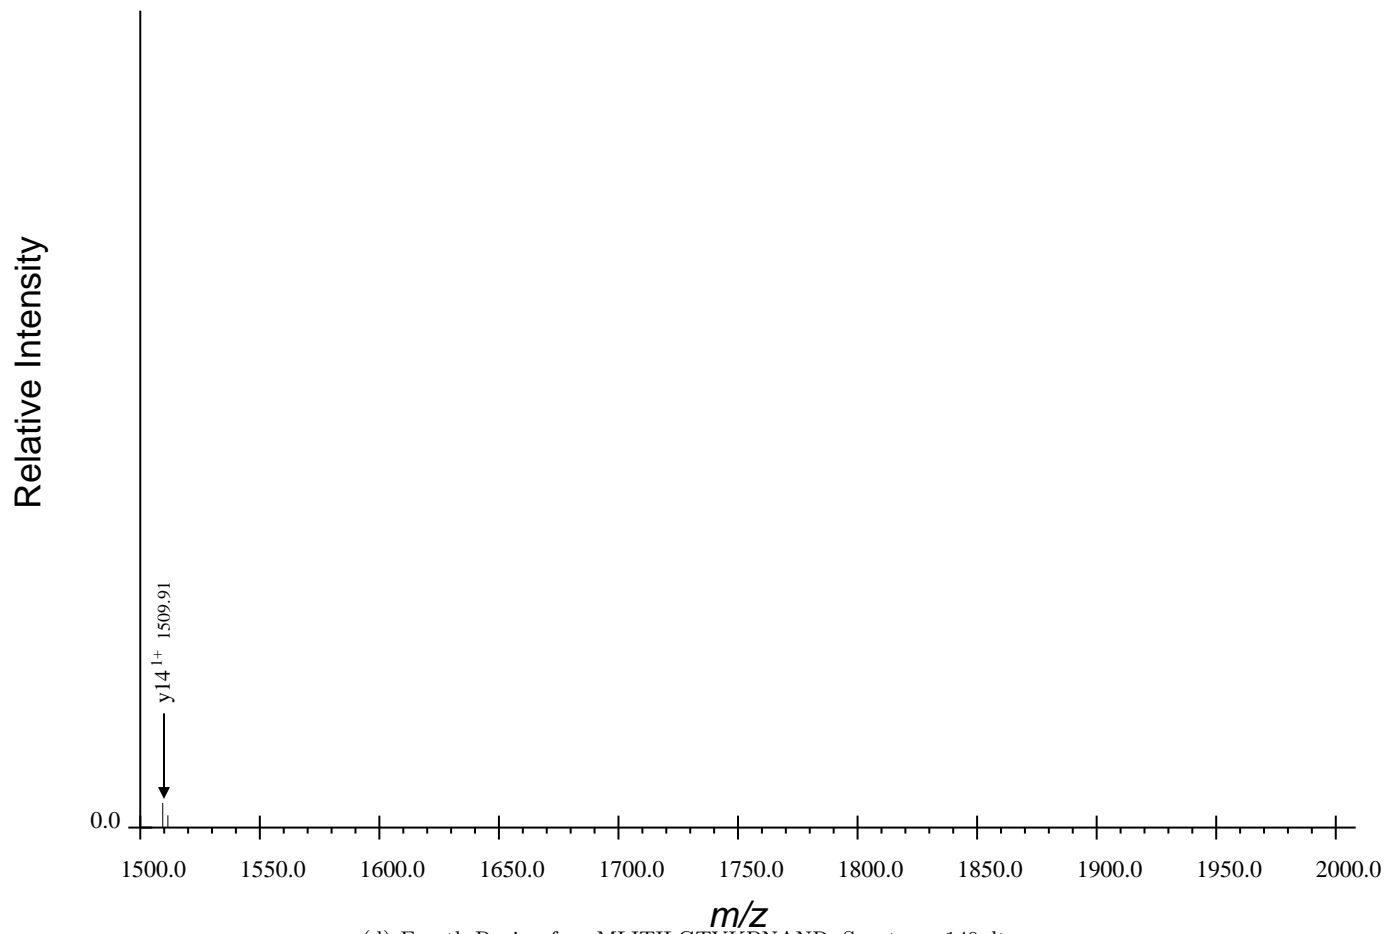

(d) Fourth Region for oMLITILGTVKPNANR, Spectrum 140.dta

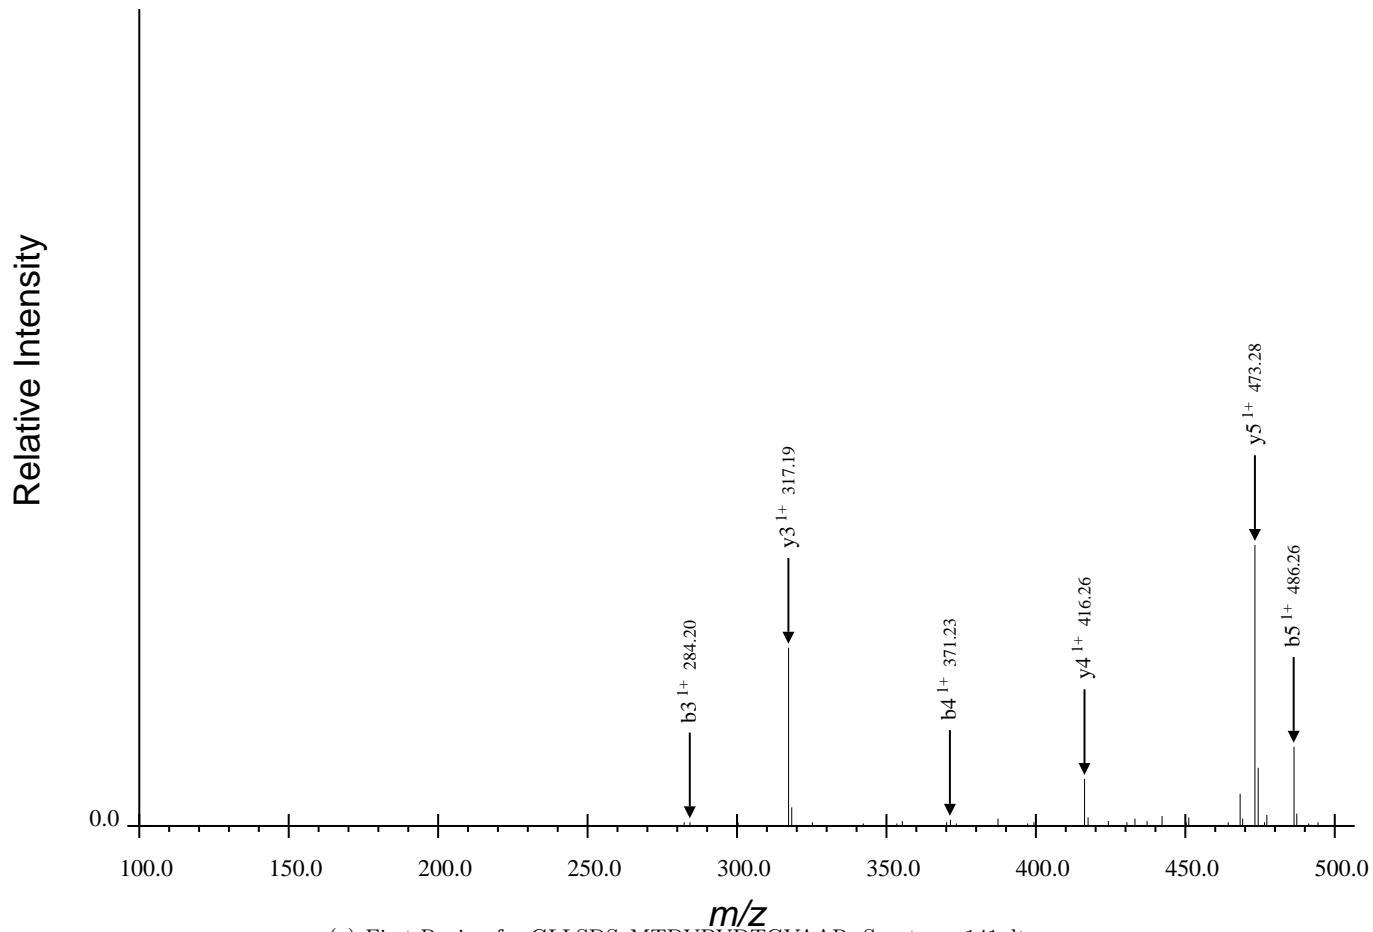

(a) First Region for GLLSDSoMTDVPVDTGVAAR, Spectrum 141.dta

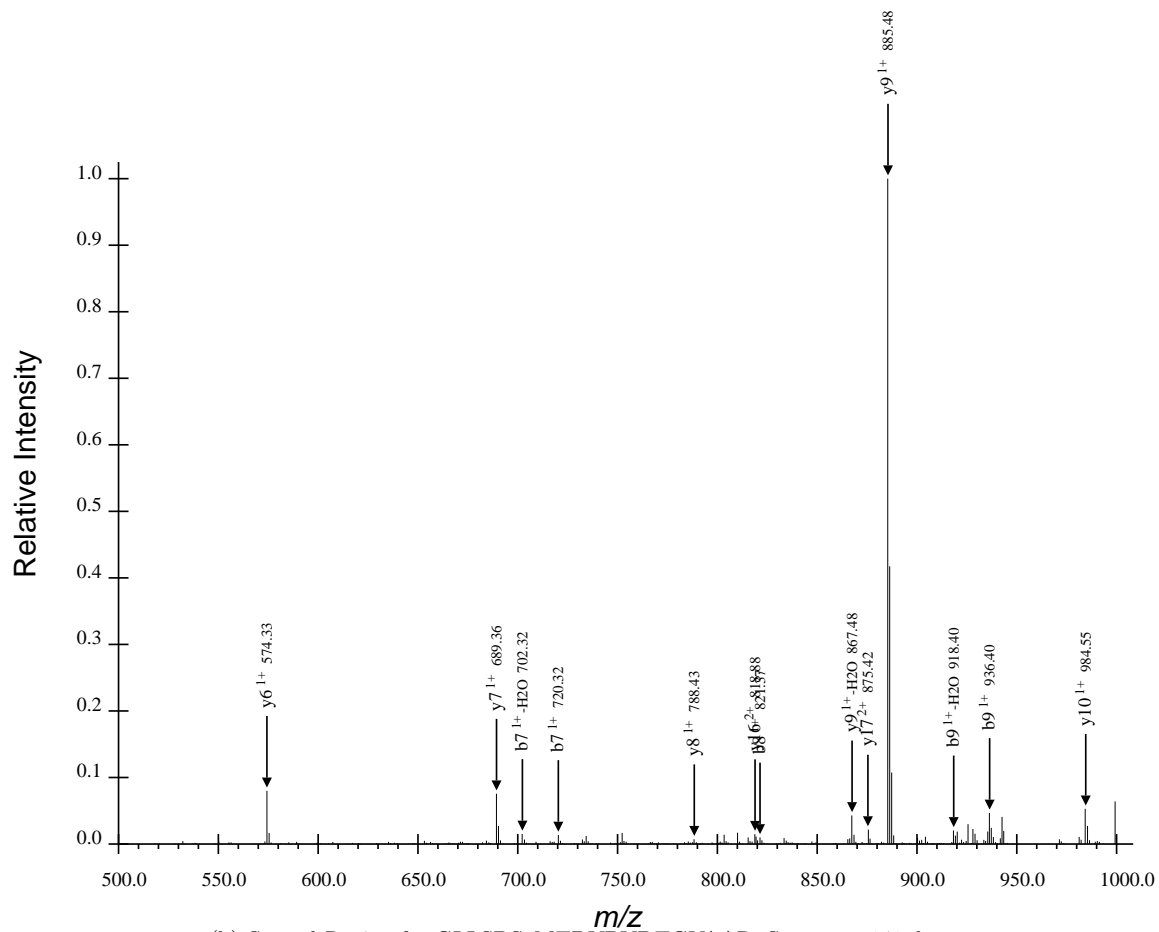

(b) Second Region for GLLSDSoMTDVPVDTGVAAR, Spectrum 141.dta

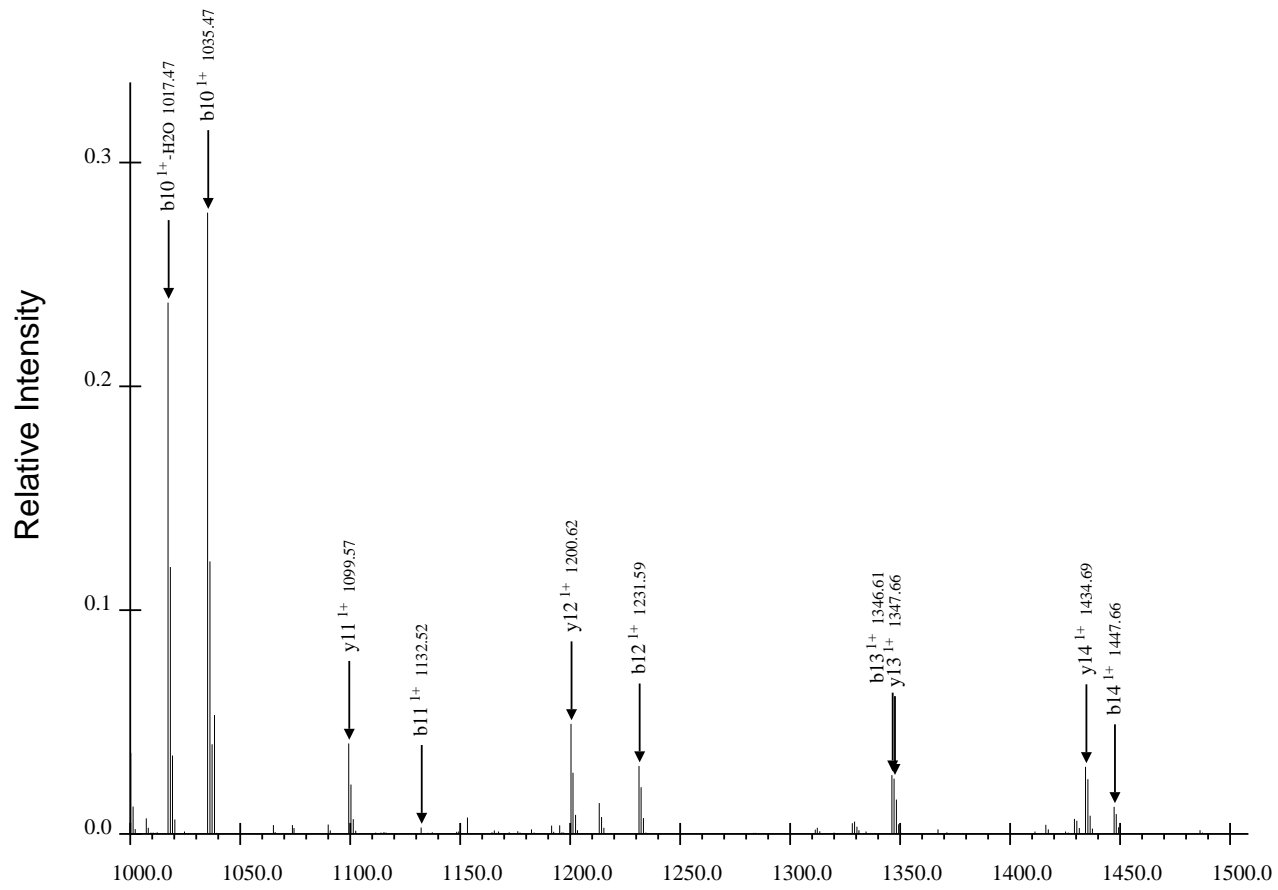

(c) Third Region for GLLSDSoMTDVPVDTGVAAR, Spectrum 141.dta

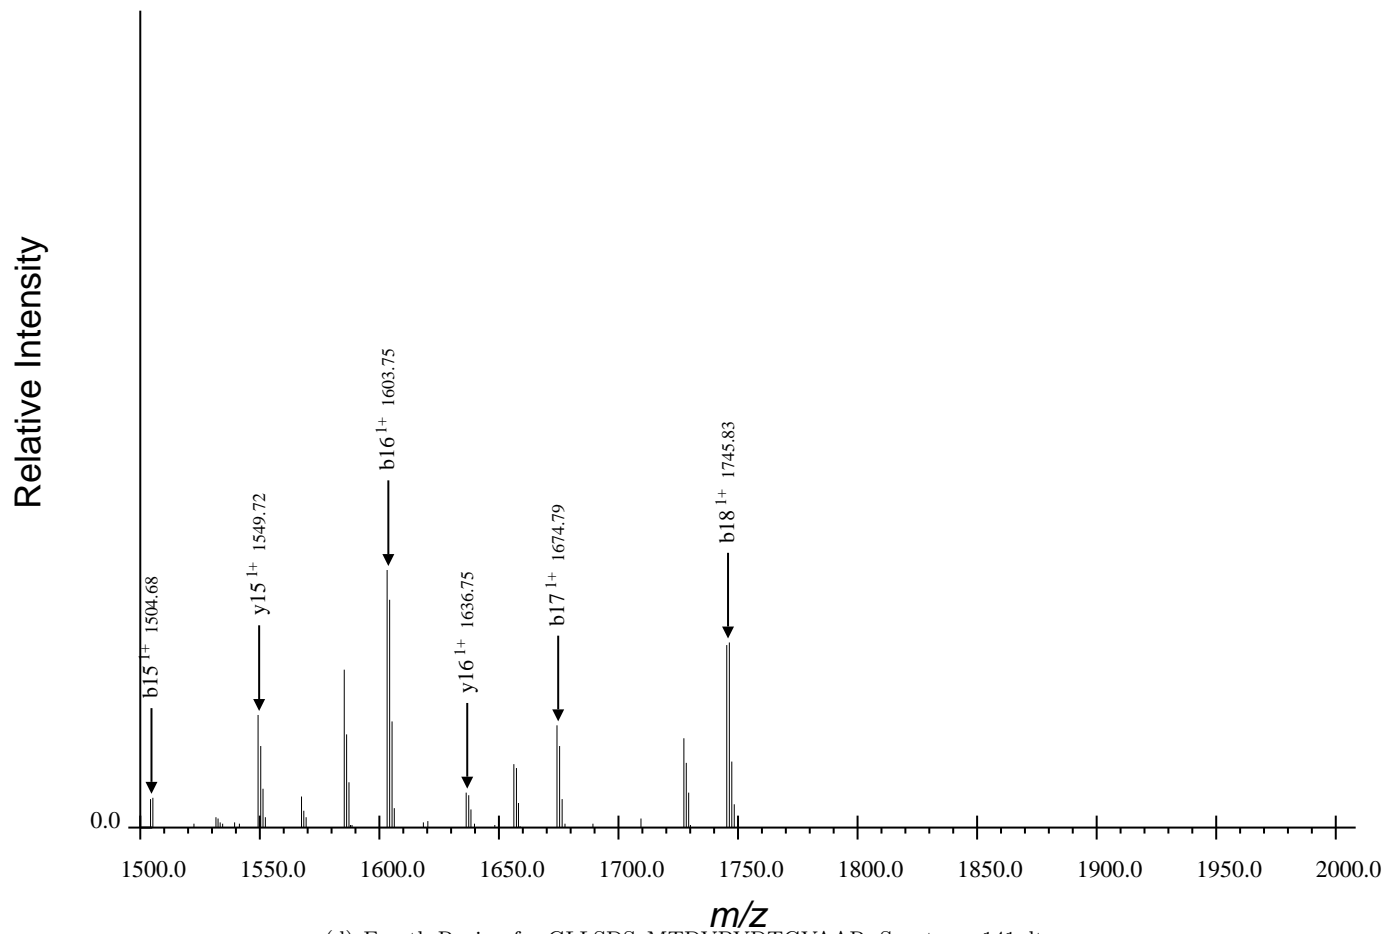

(d) Fourth Region for GLLSDSoMTDVPVDTGVAAR, Spectrum 141.dta

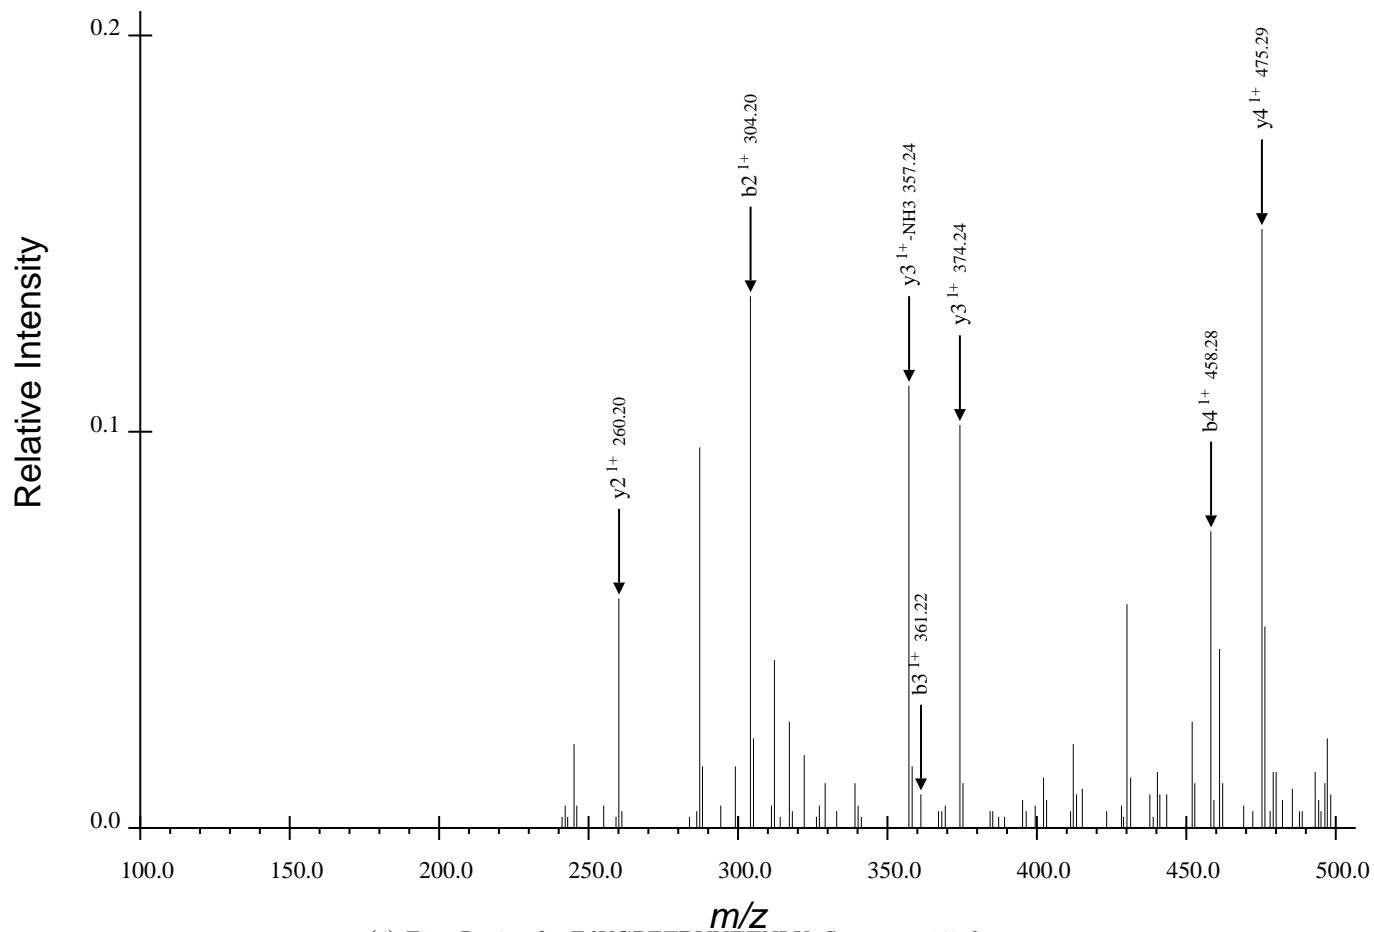

(a) First Region for FdKGPFTDVTTLNK, Spectrum 142.dta

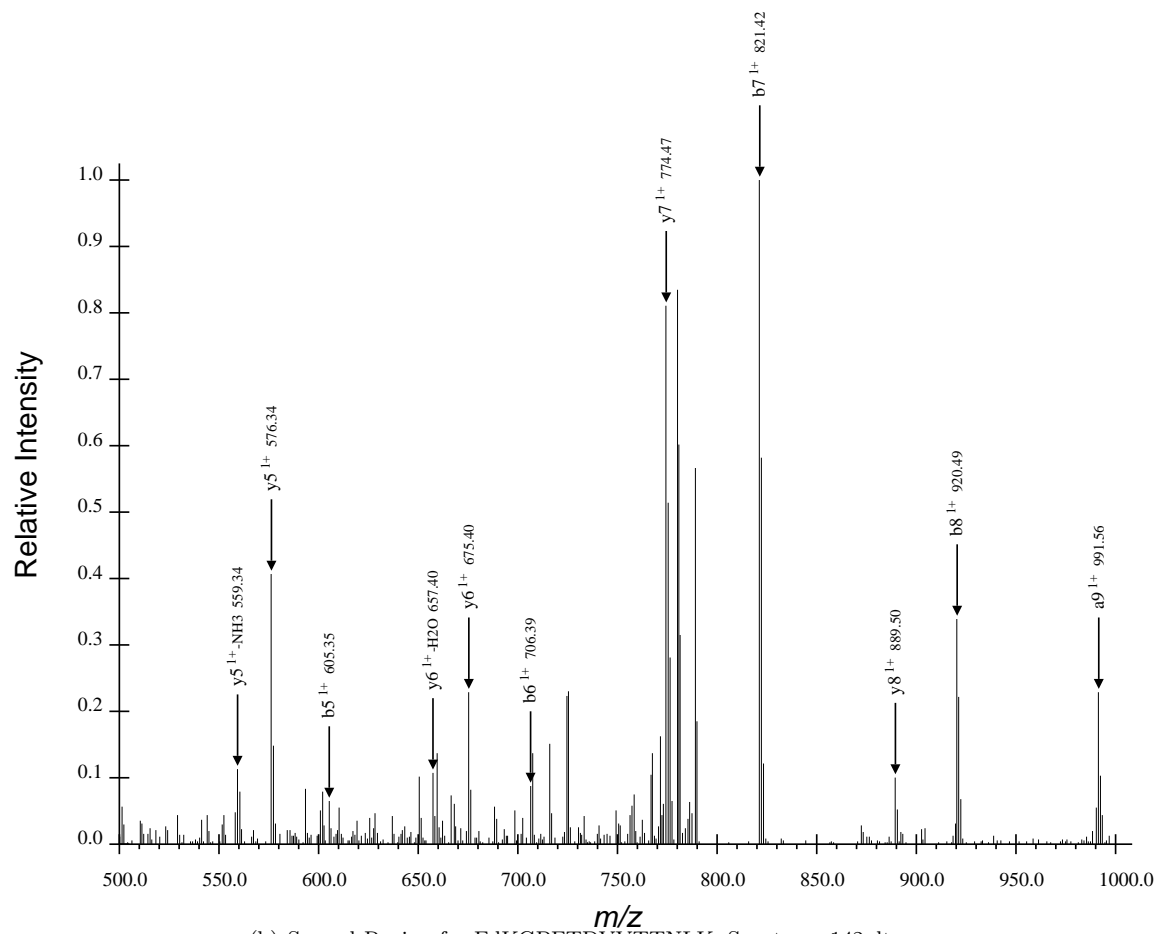

(b) Second Region for FdKGPFTDVTTLNK, Spectrum 142.dta

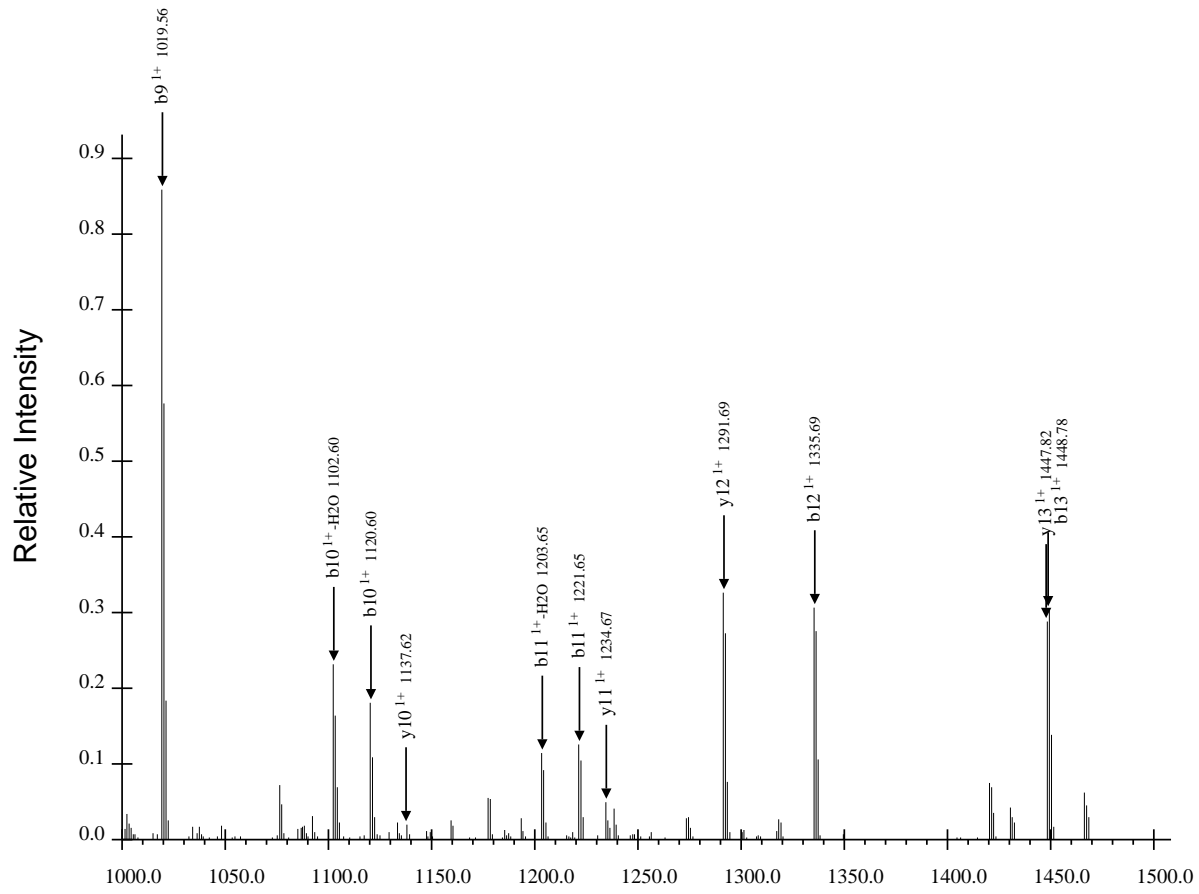

(c) Third Region for FdKGPFTDVVTTNLK, Spectrum 142.dta

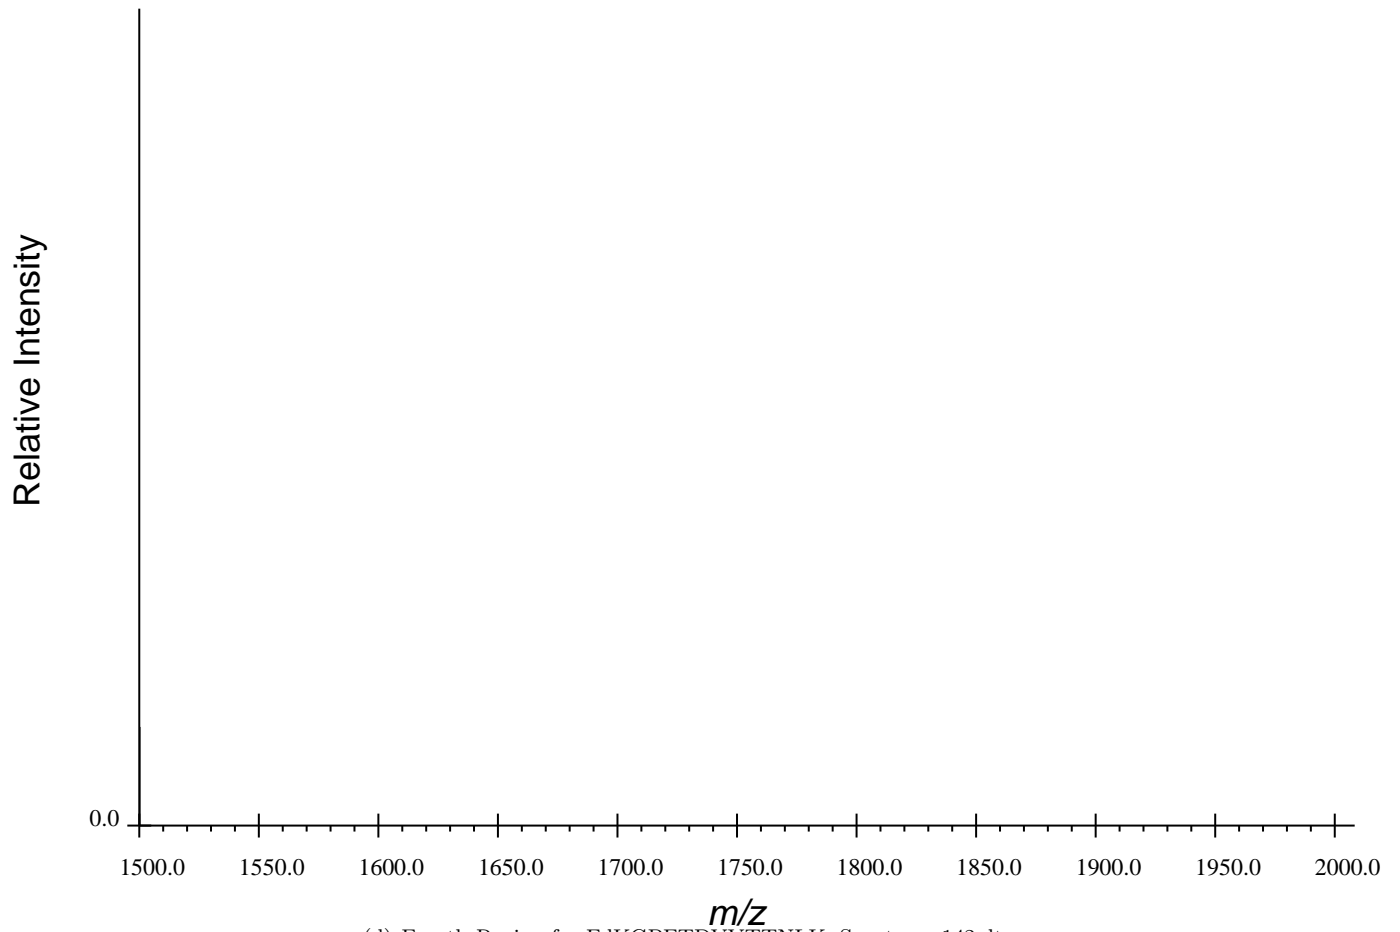

(d) Fourth Region for FdKGPFTDVVTTNLK, Spectrum 142.dta



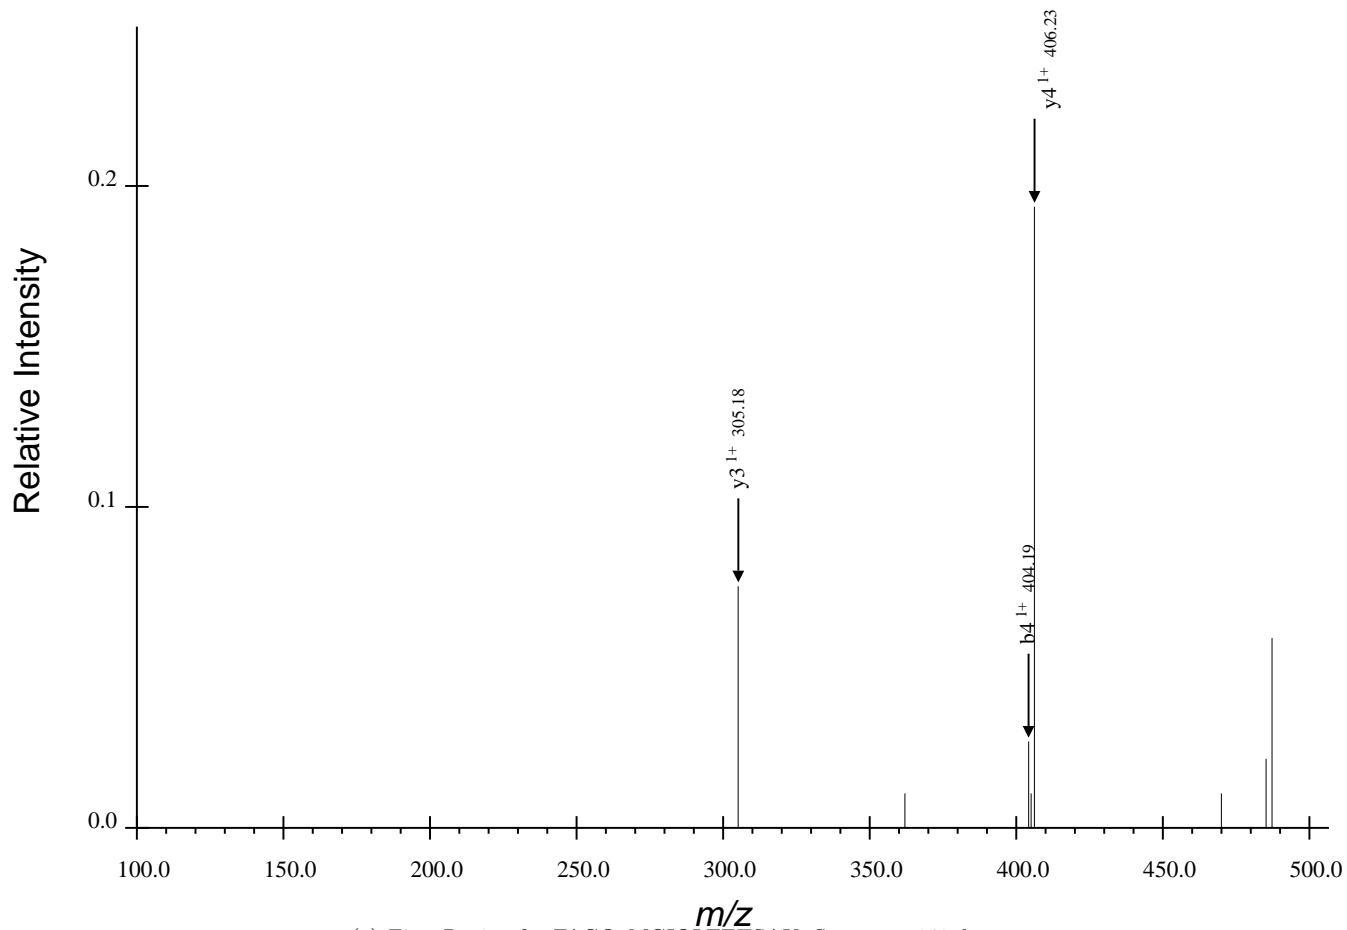

(a) First Region for FAGQoMGIQLFETSAK, Spectrum 143.dta

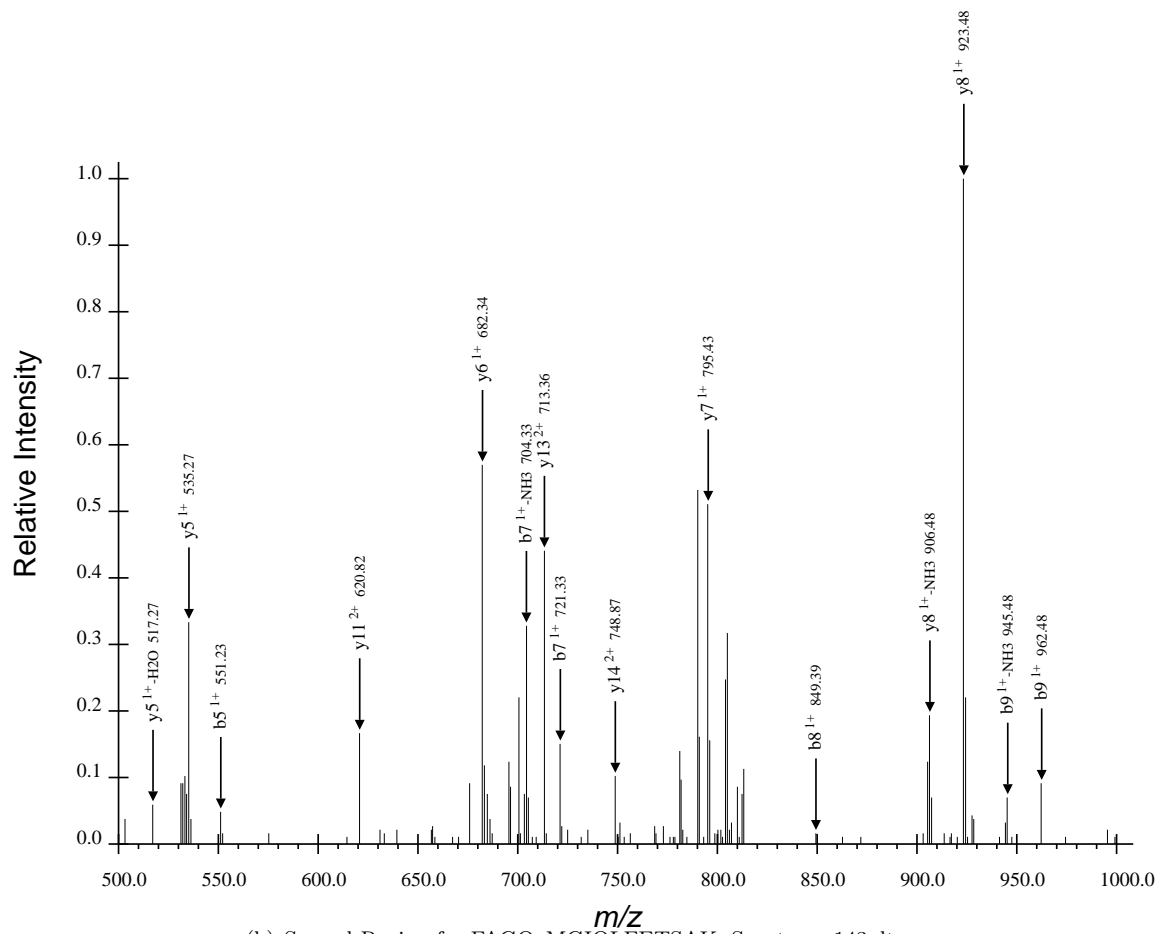

(b) Second Region for FAGQoMGIQLFETSAK, Spectrum 143.dta

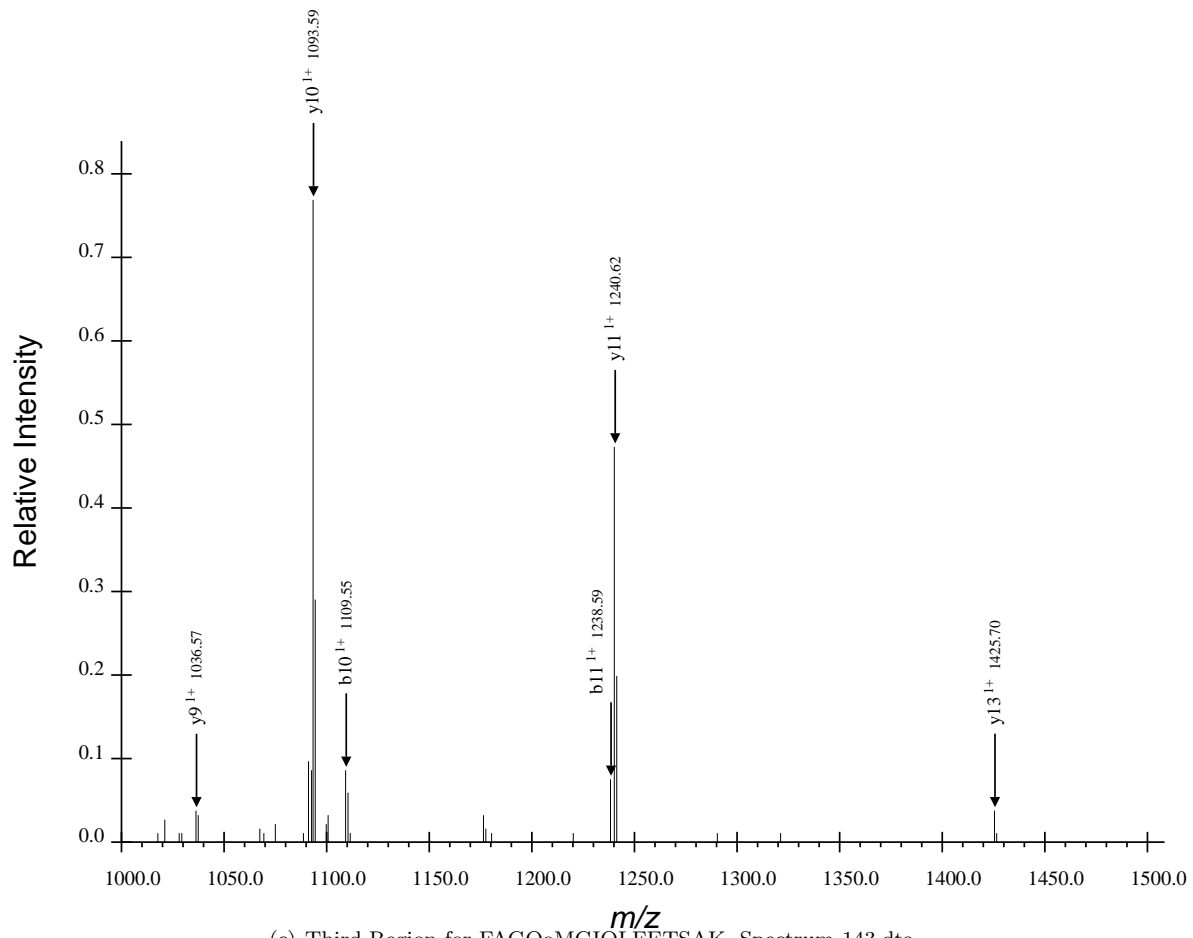

(c) Third Region for FAGQoMGIQLFETSAK, Spectrum 143.dta

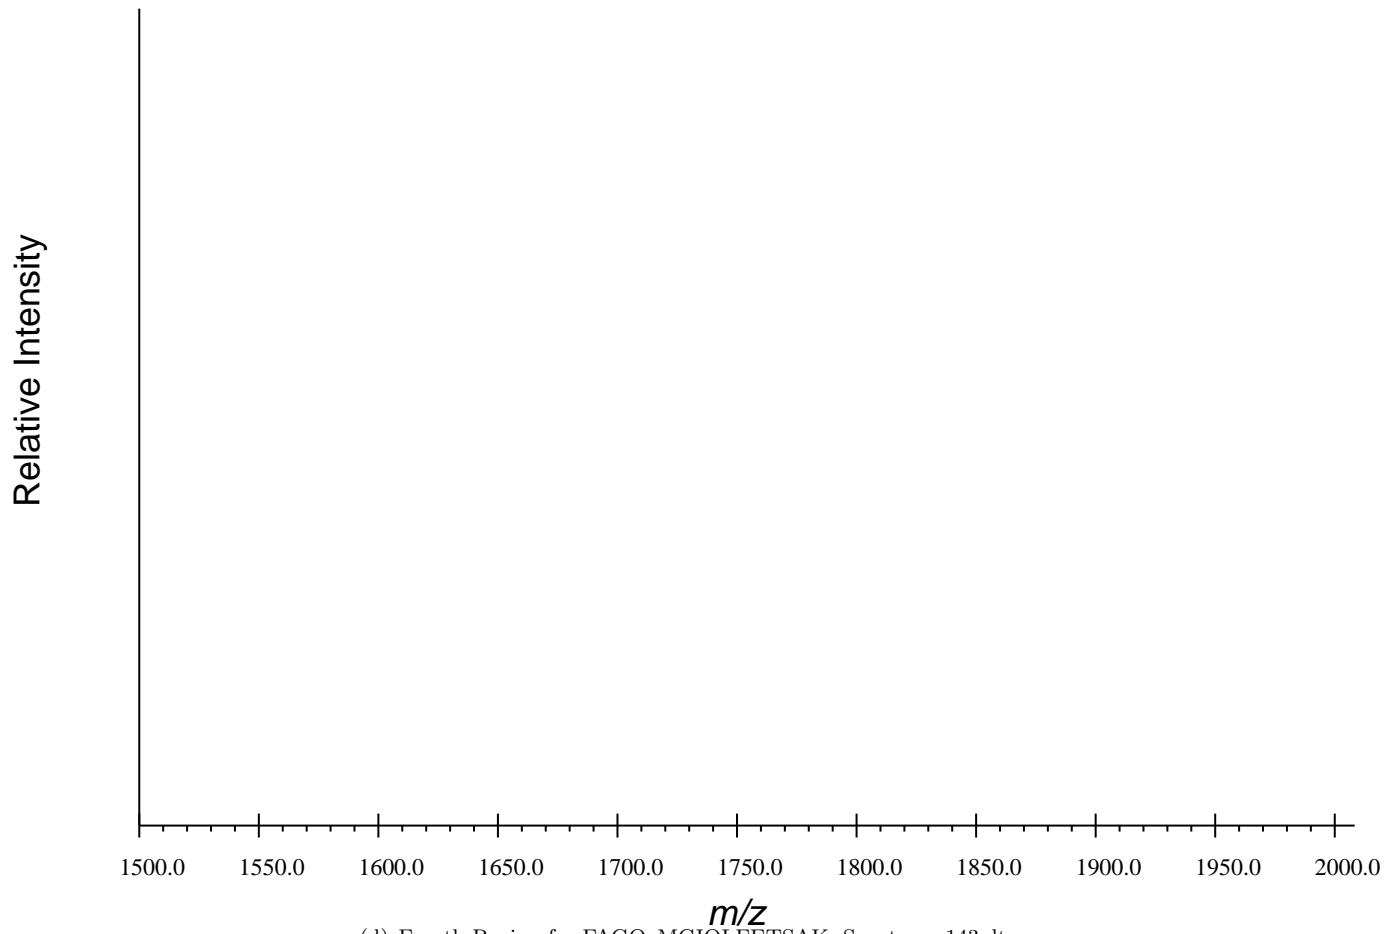

(d) Fourth Region for FAGQoMGIQLFETSAK, Spectrum 143.dta

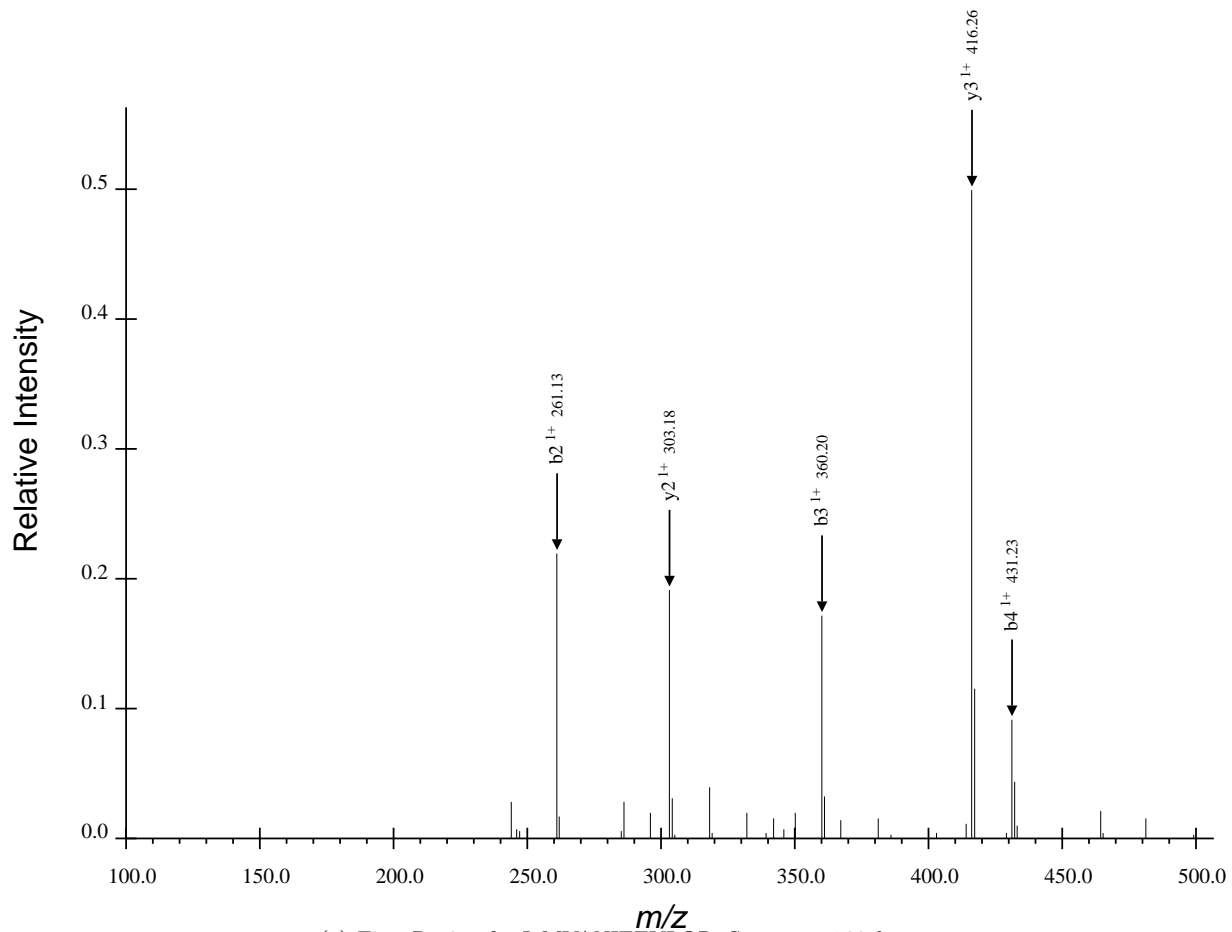

(a) First Region for IoMVANIEEVLQR, Spectrum 144.dta

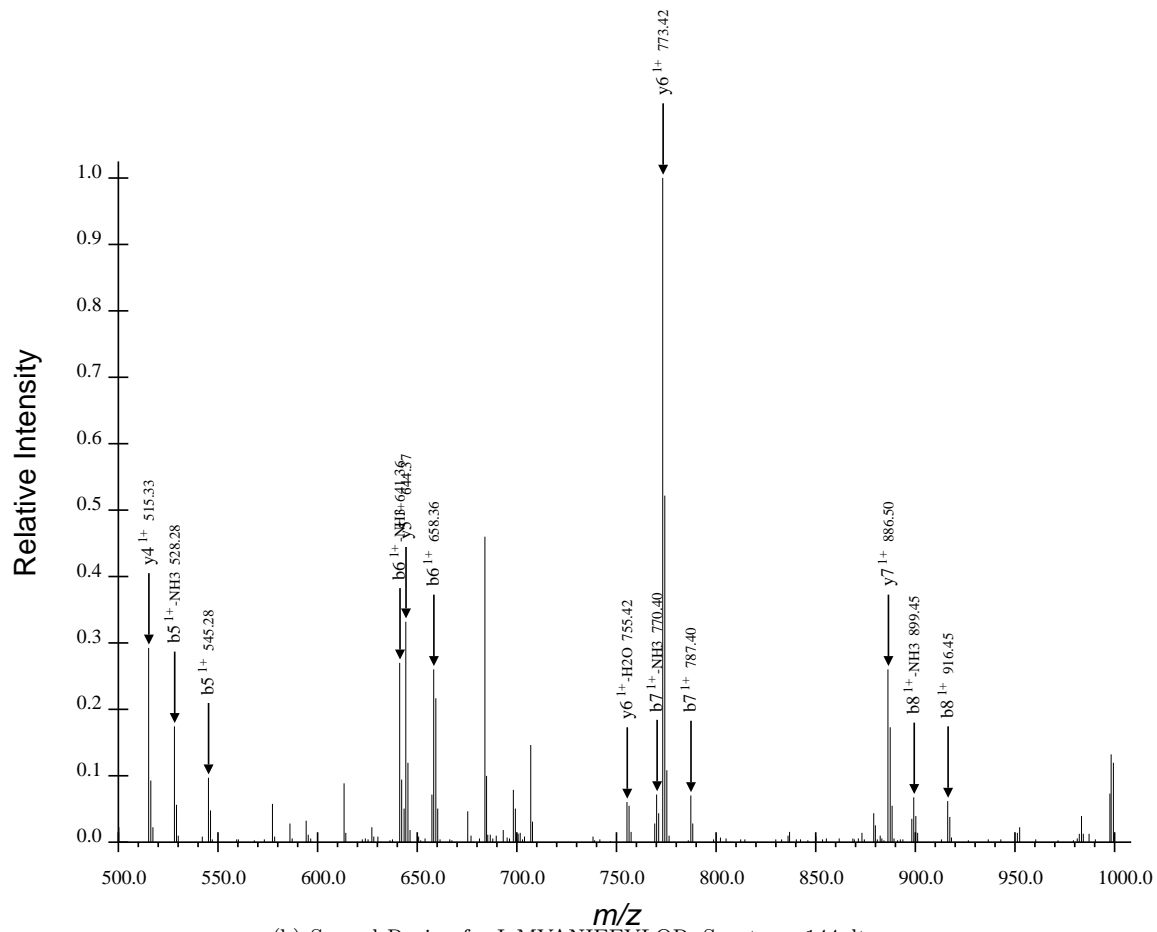

(b) Second Region for IoMVANIEEVLQR, Spectrum 144.dta

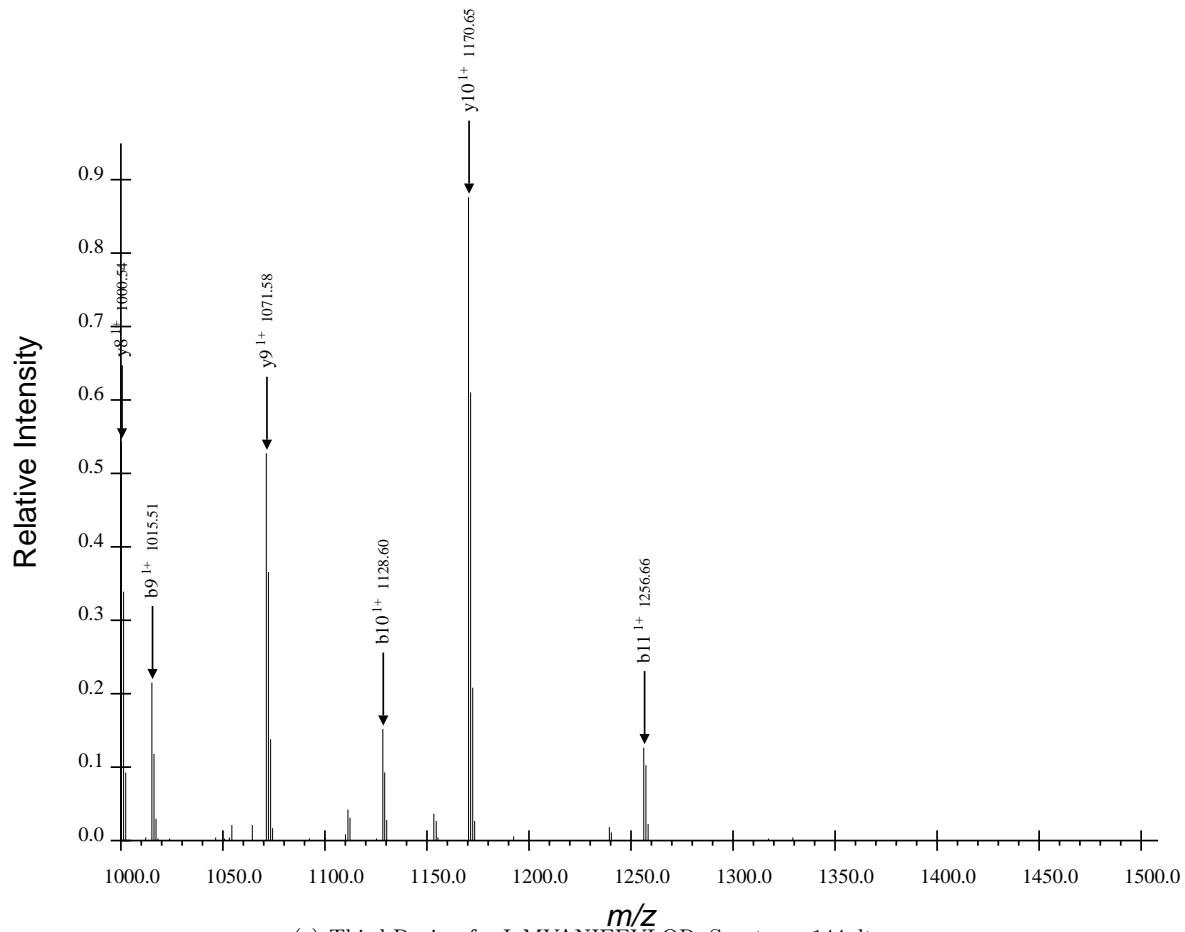

(c) Third Region for IoMVANIEEVLQR, Spectrum 144.dta

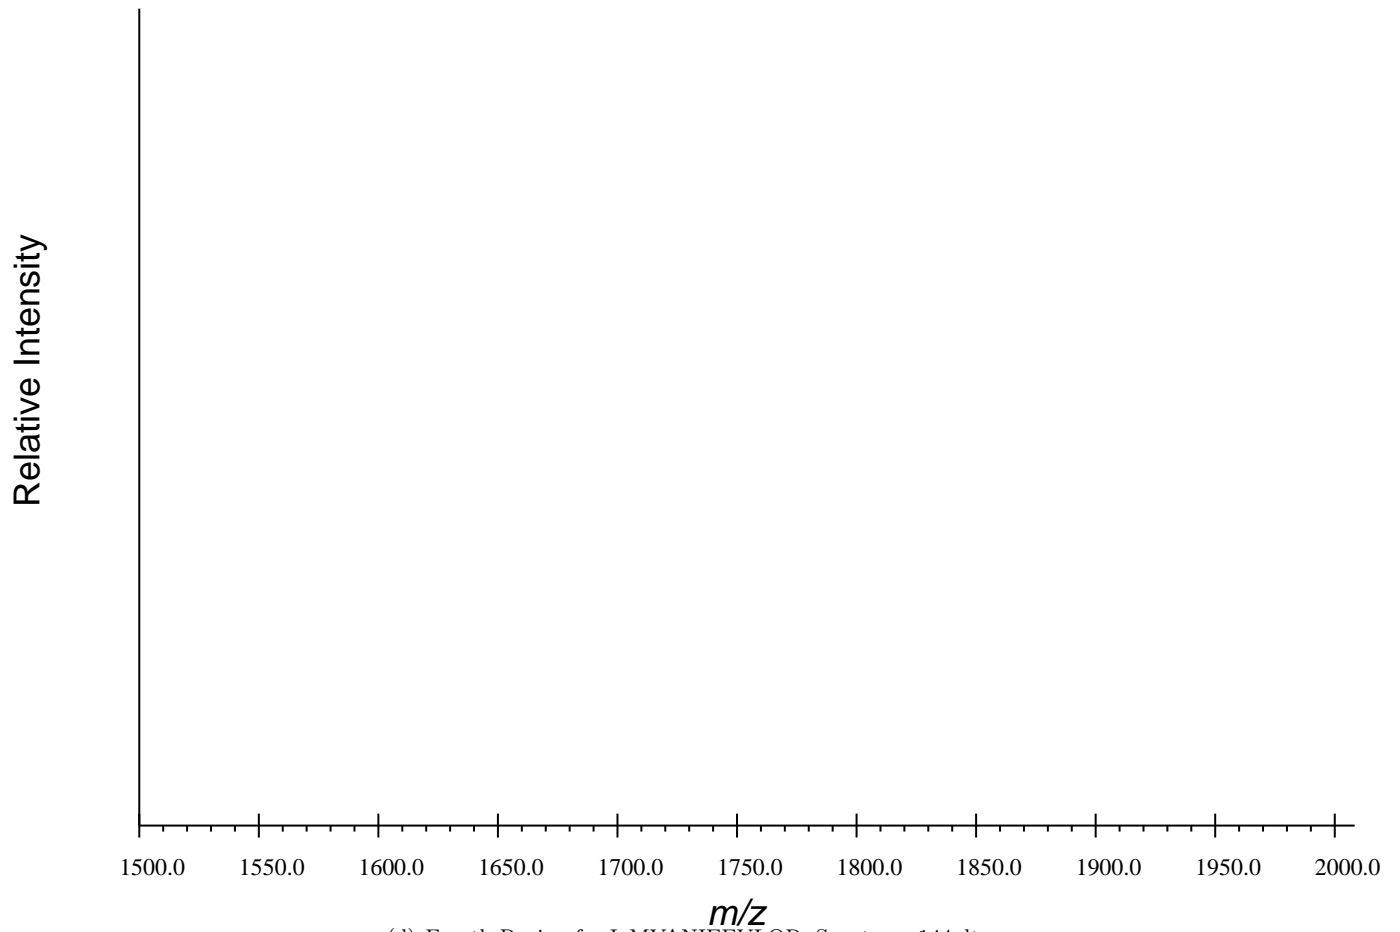

(d) Fourth Region for IoMVANIEEVLQR, Spectrum 144.dta

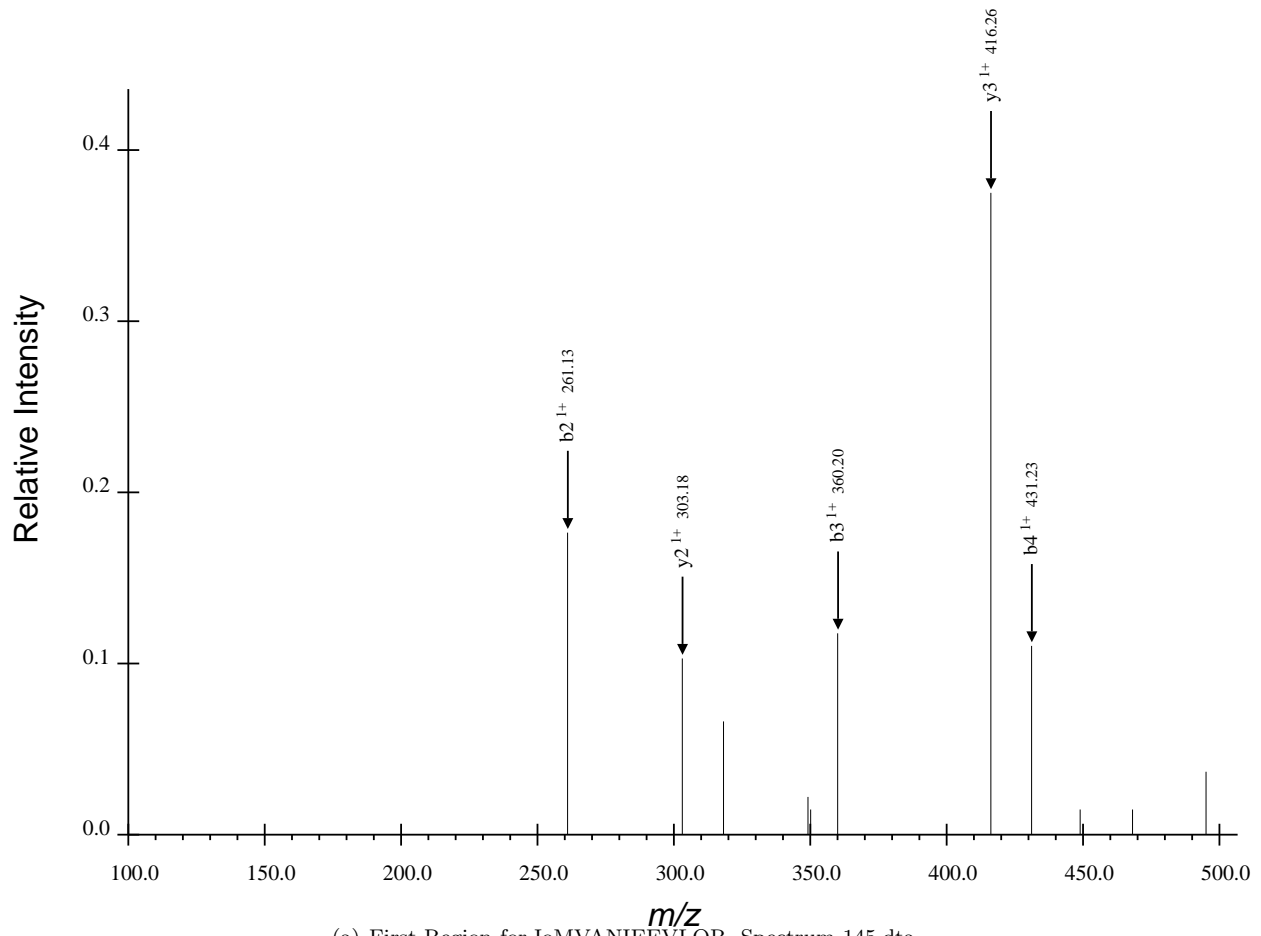

(a) First Region for IoMVANIEEVLRQ, Spectrum 145.dta

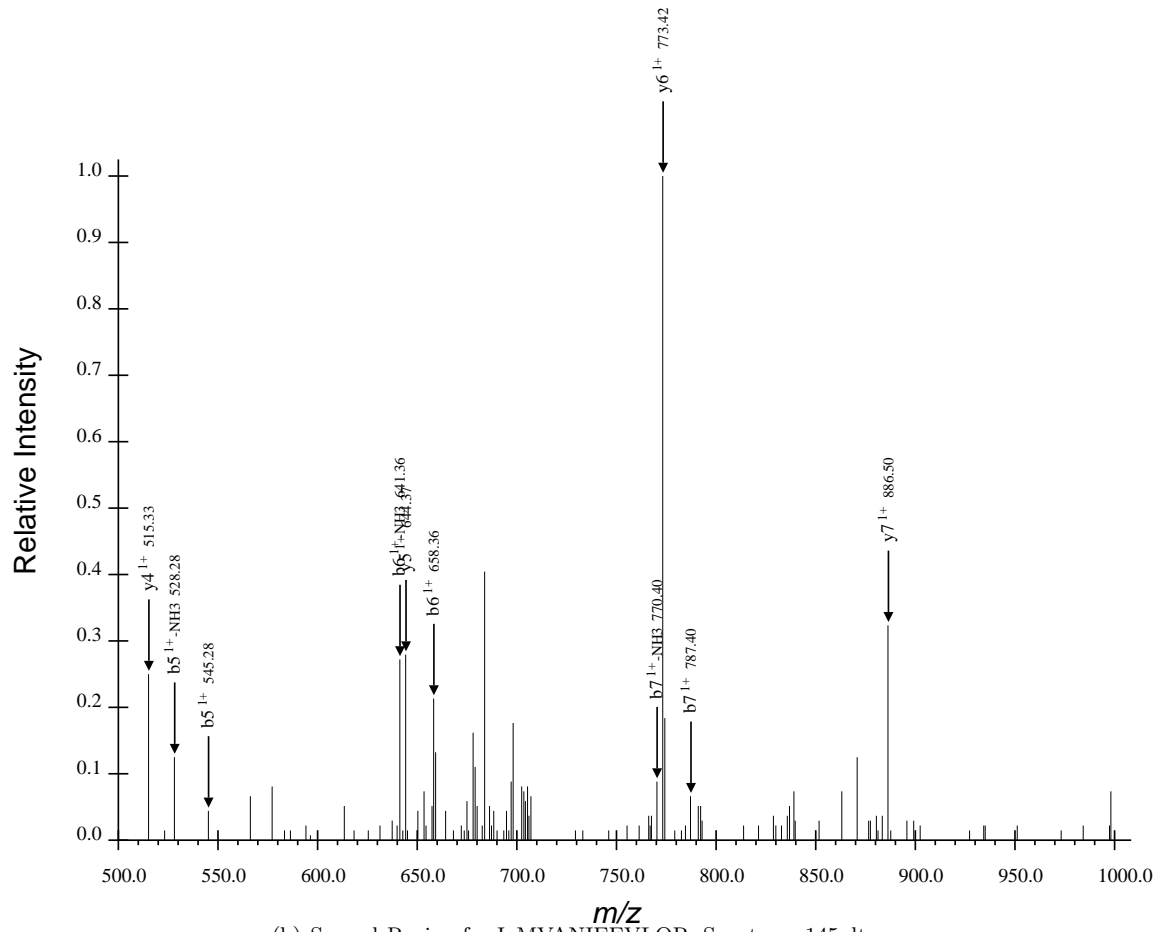

(b) Second Region for IoMVANIEEVLRQ, Spectrum 145.dta

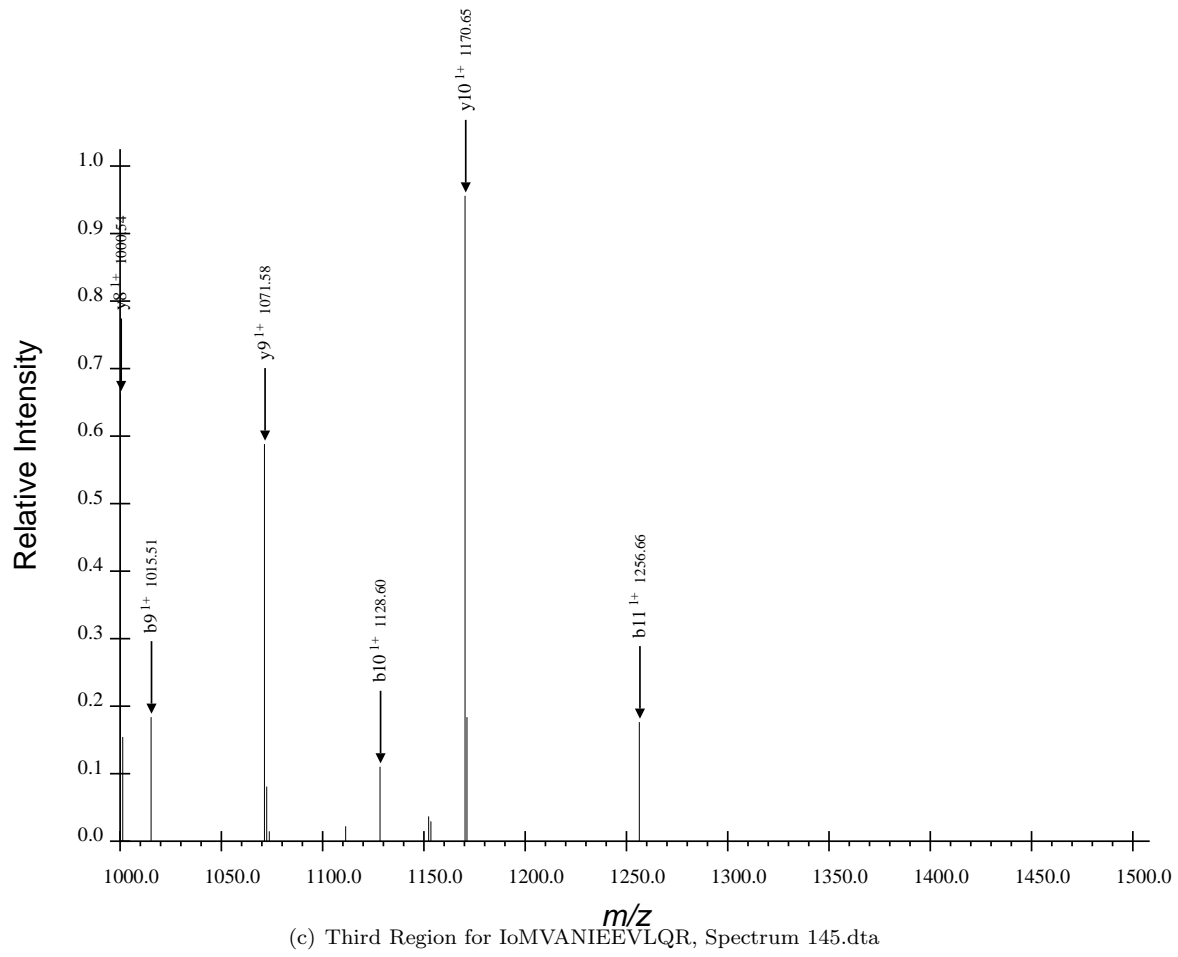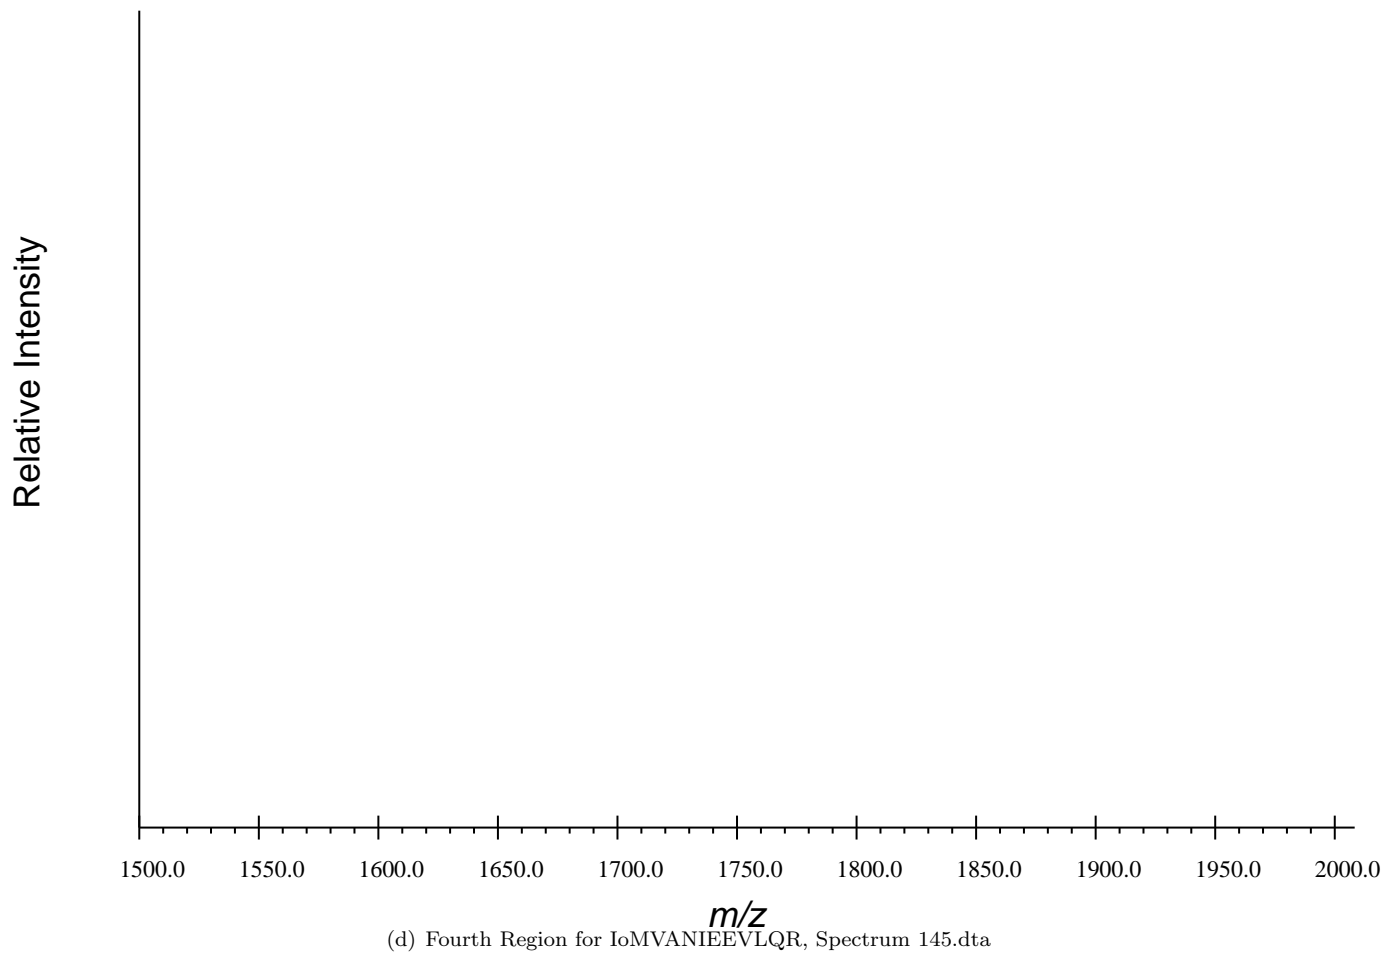

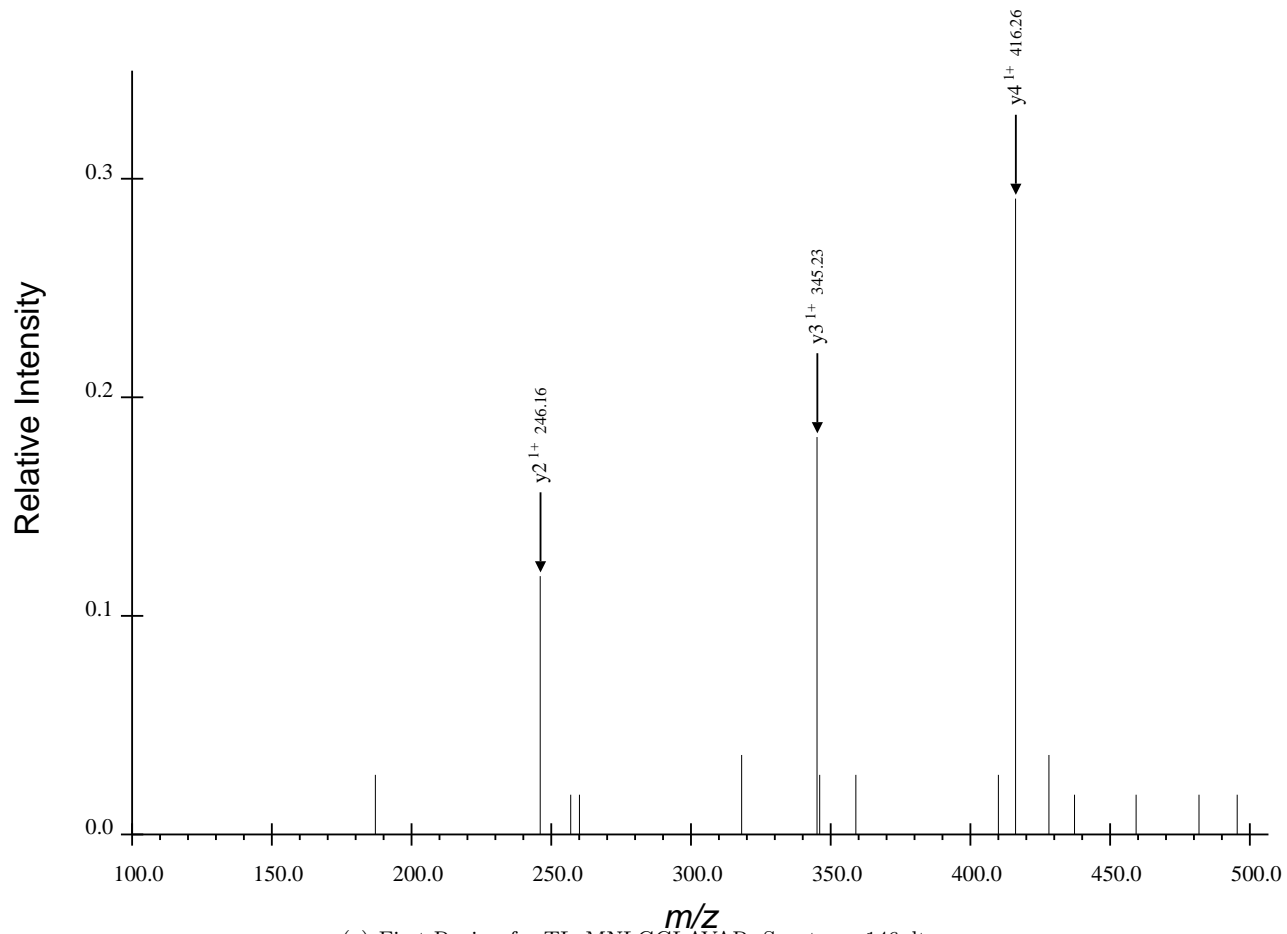

(a) First Region for TLoMNLGGLAVAR, Spectrum 146.dta

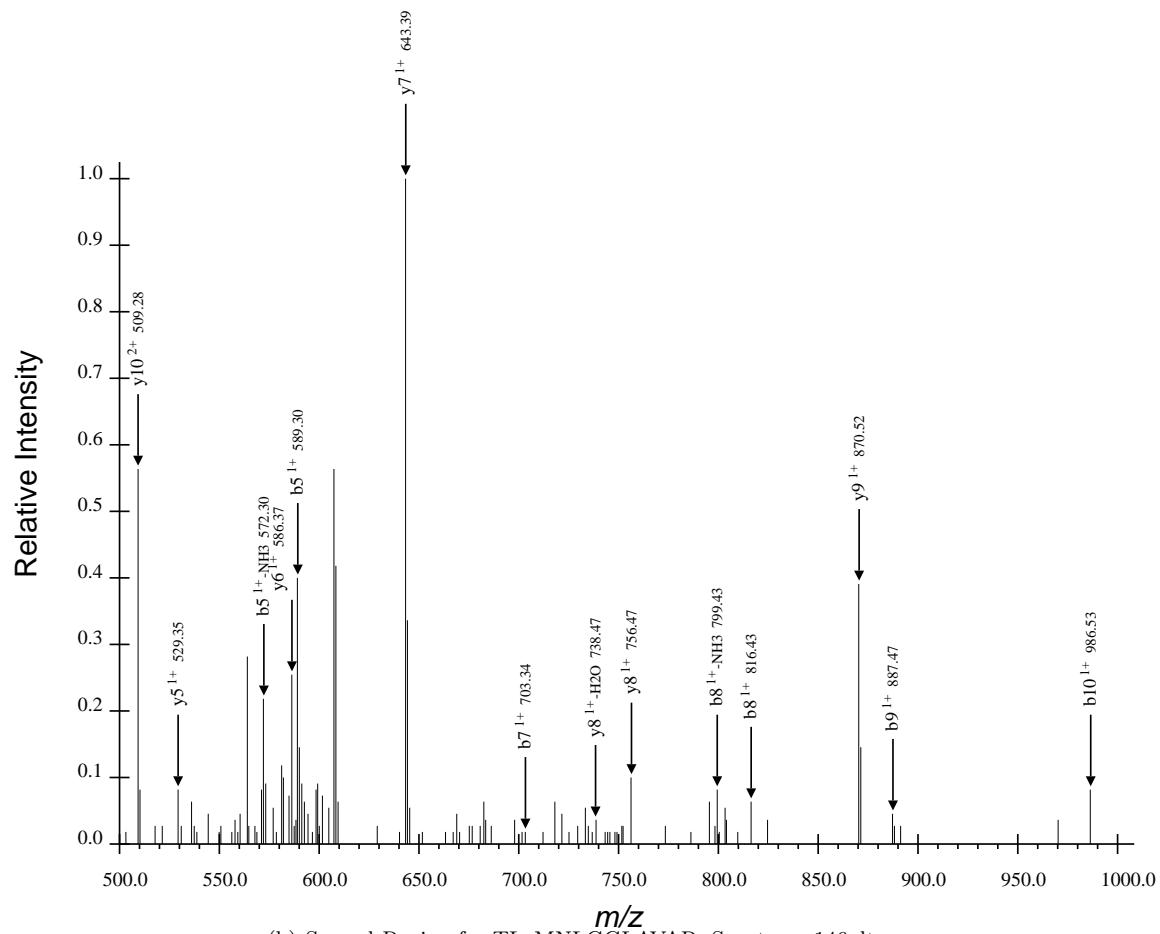

(b) Second Region for TLoMNLGGLAVAR, Spectrum 146.dta

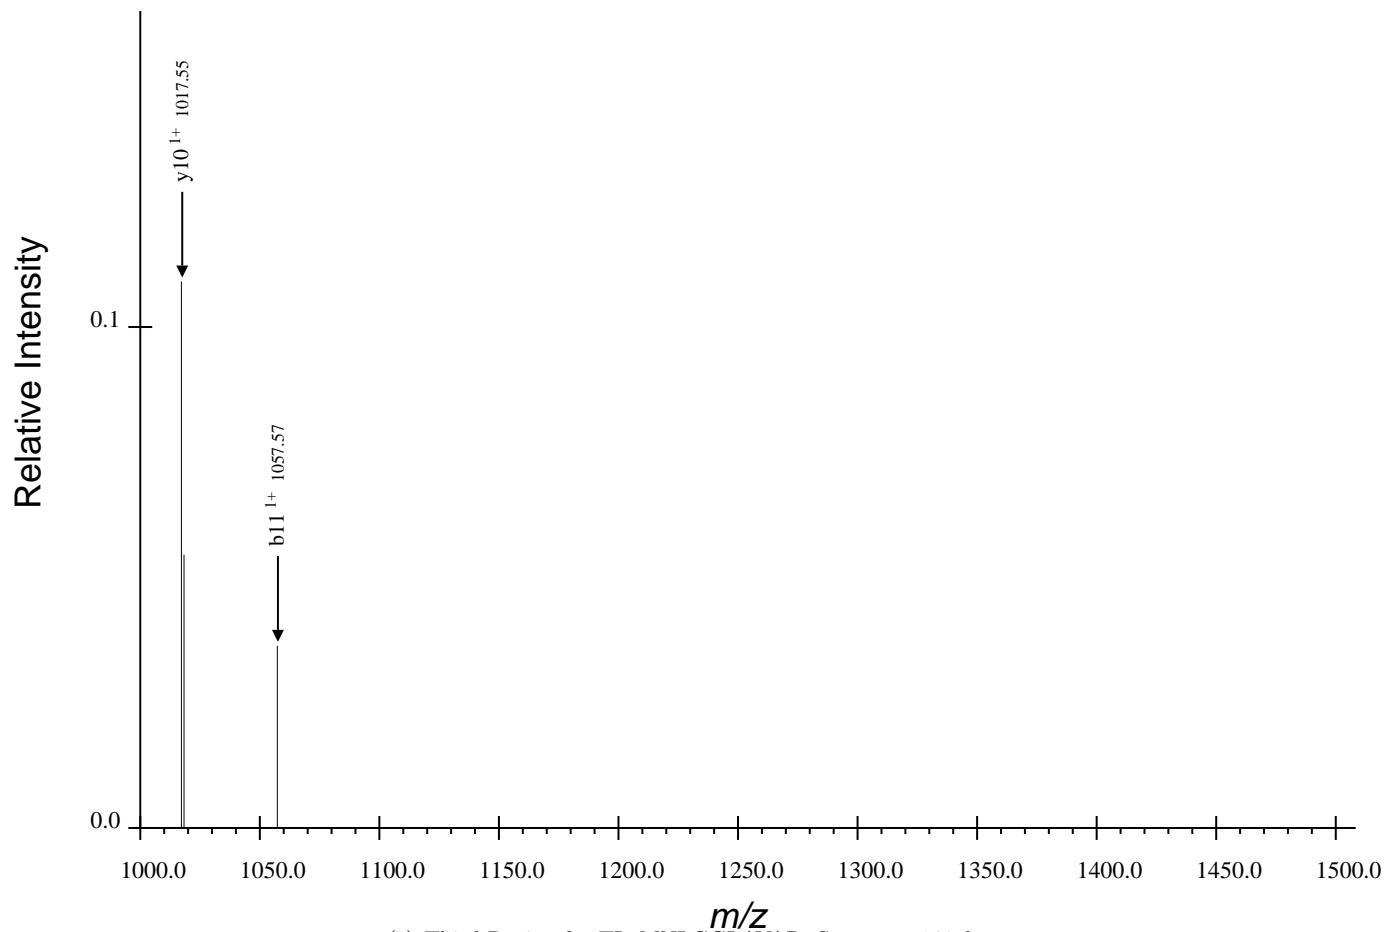

(c) Third Region for TLoMNLGGLAVAR, Spectrum 146.dta

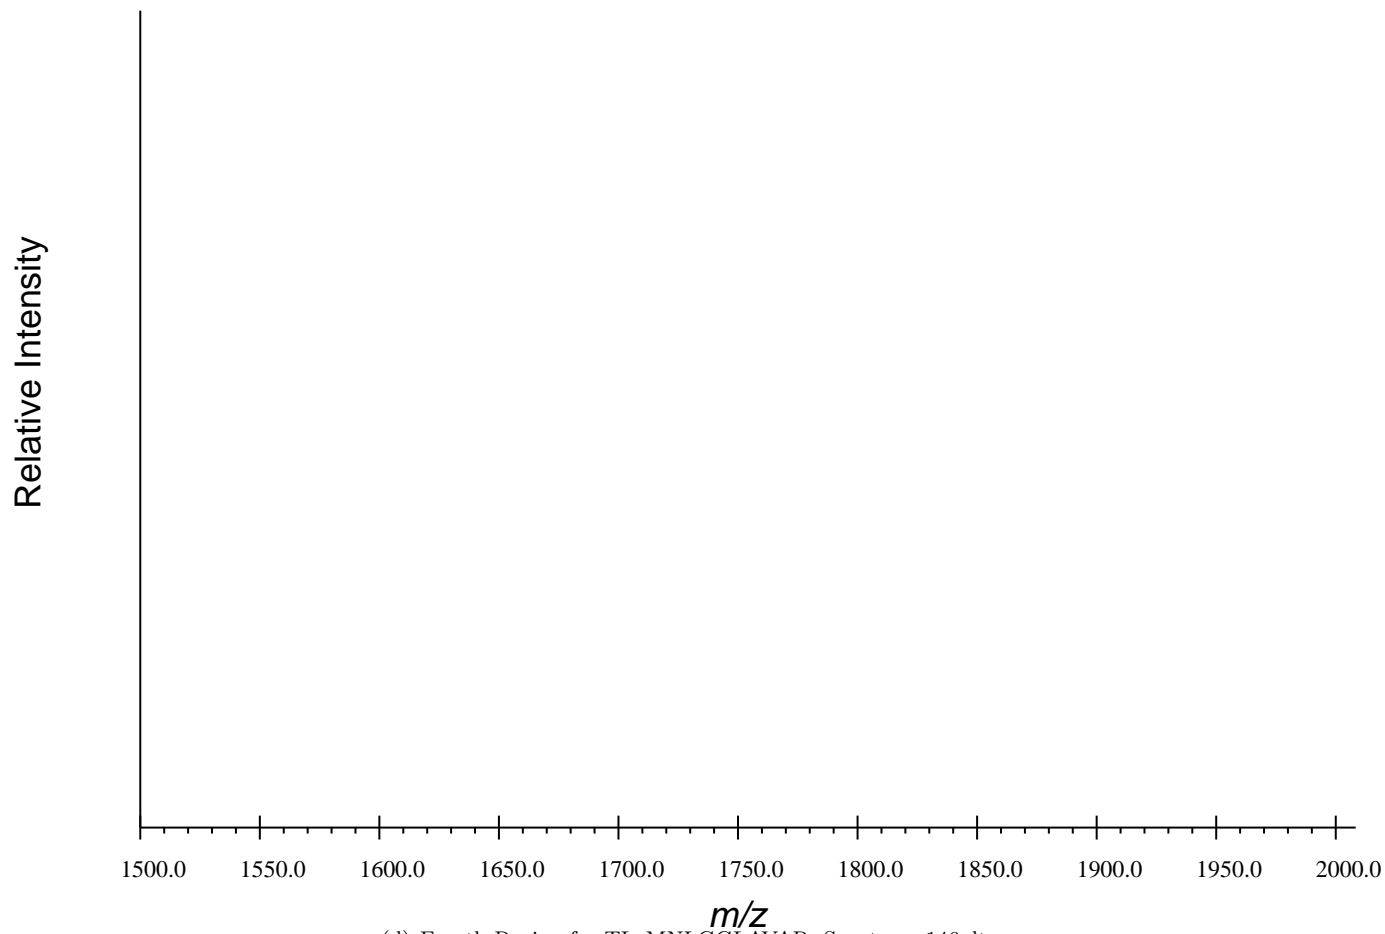

(d) Fourth Region for TLoMNLGGLAVAR, Spectrum 146.dta



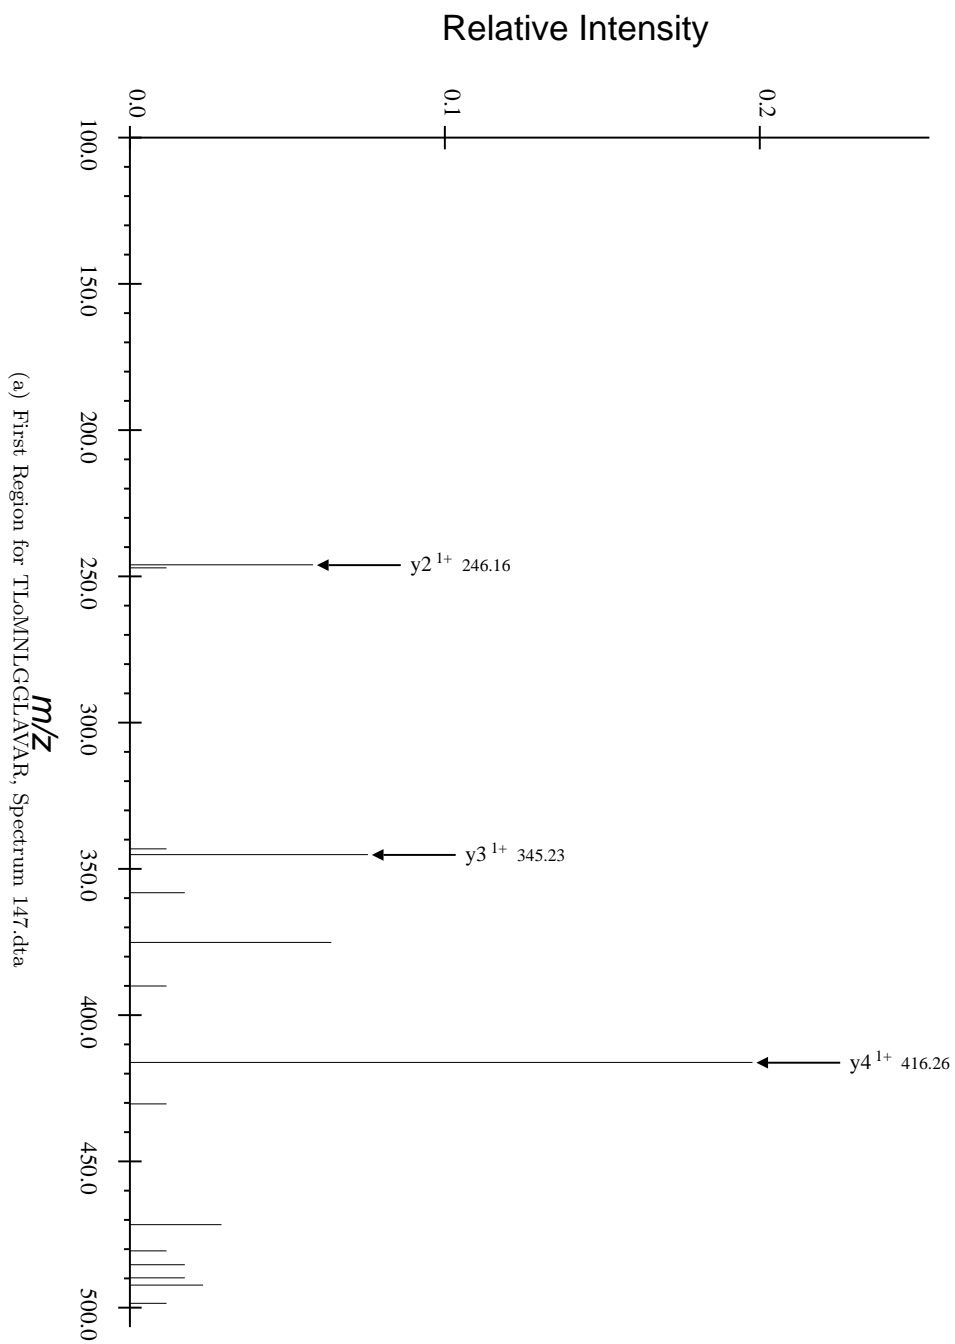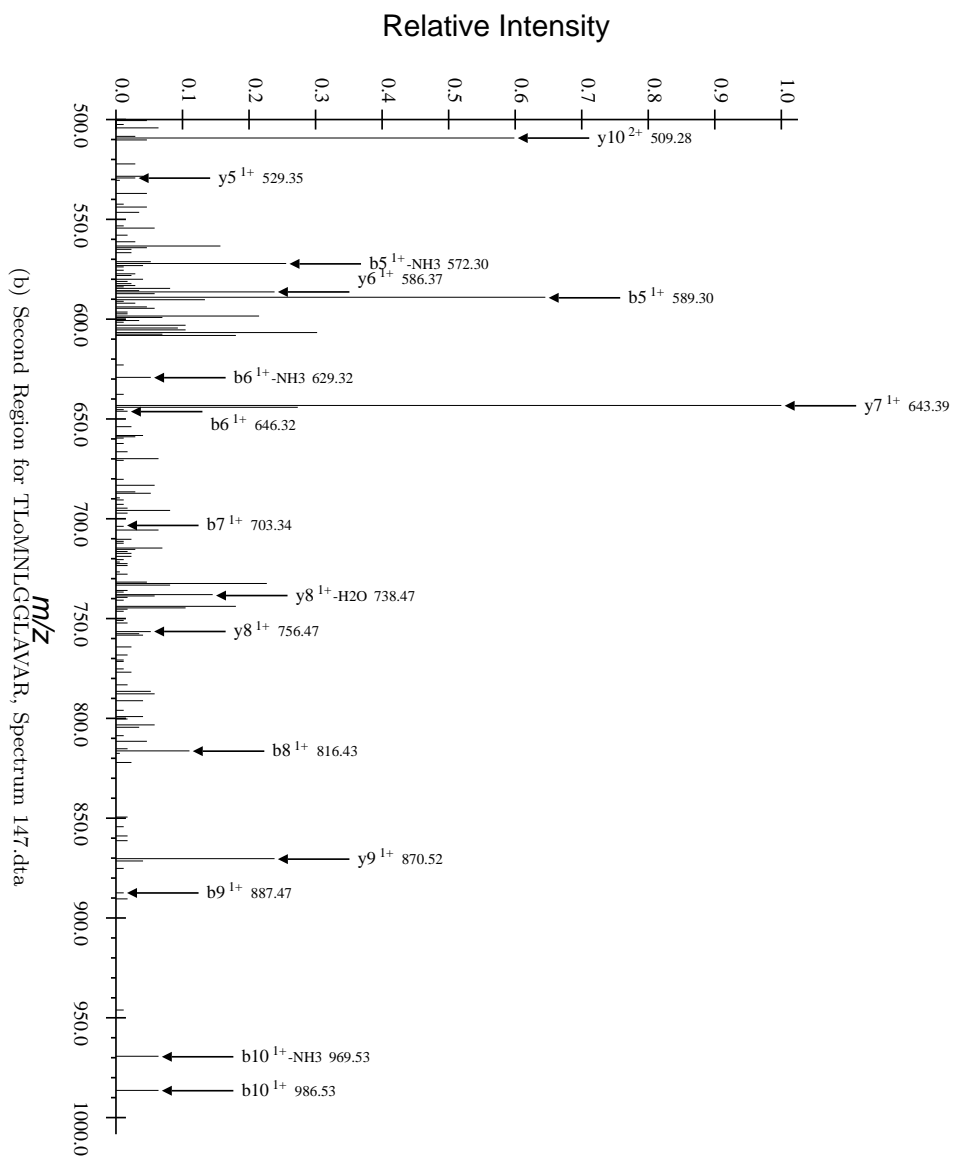

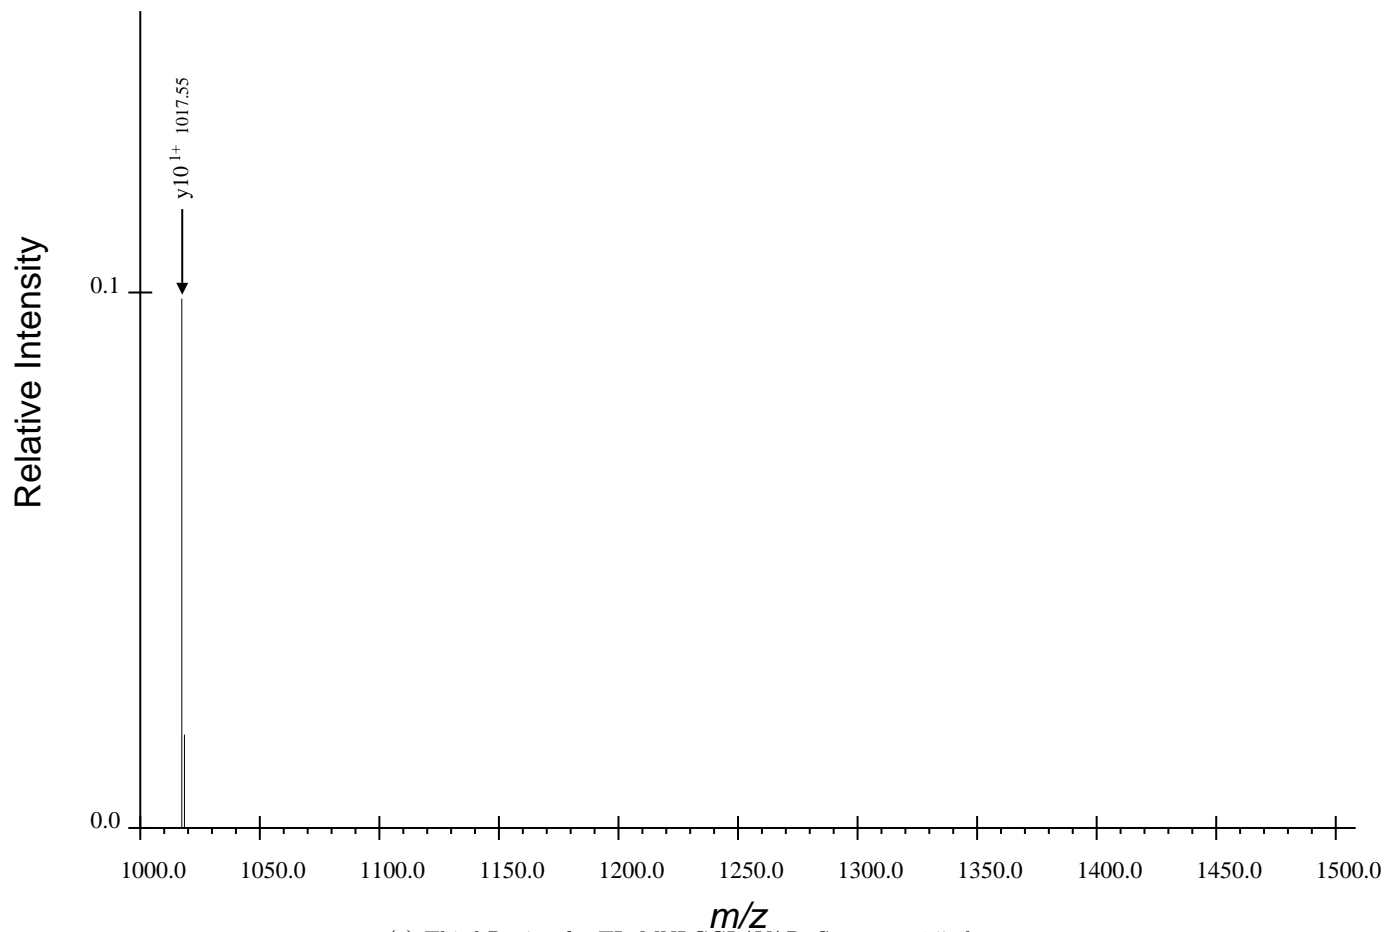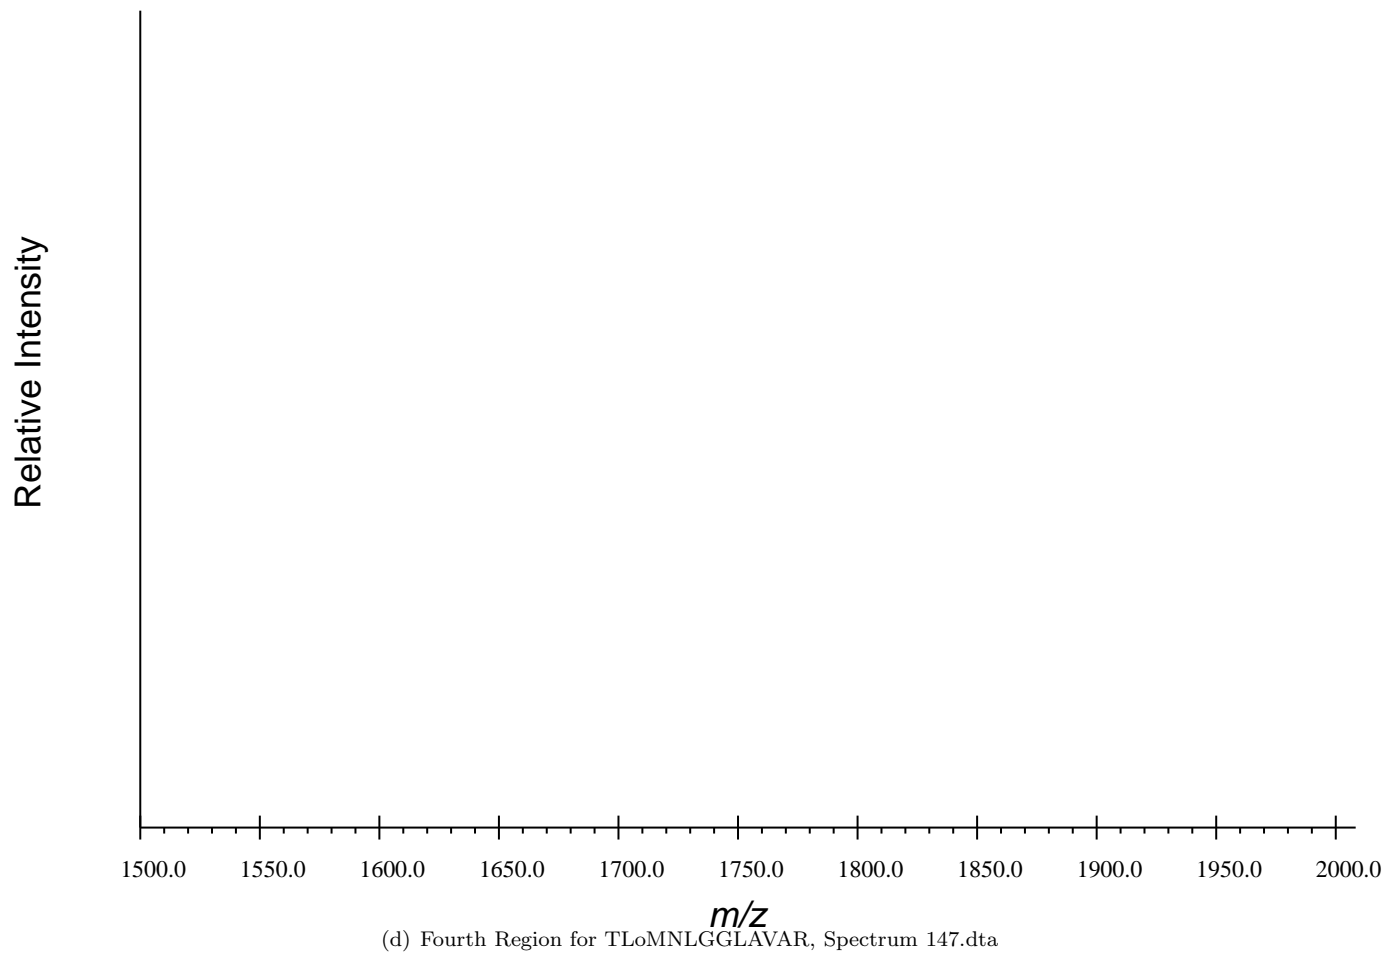

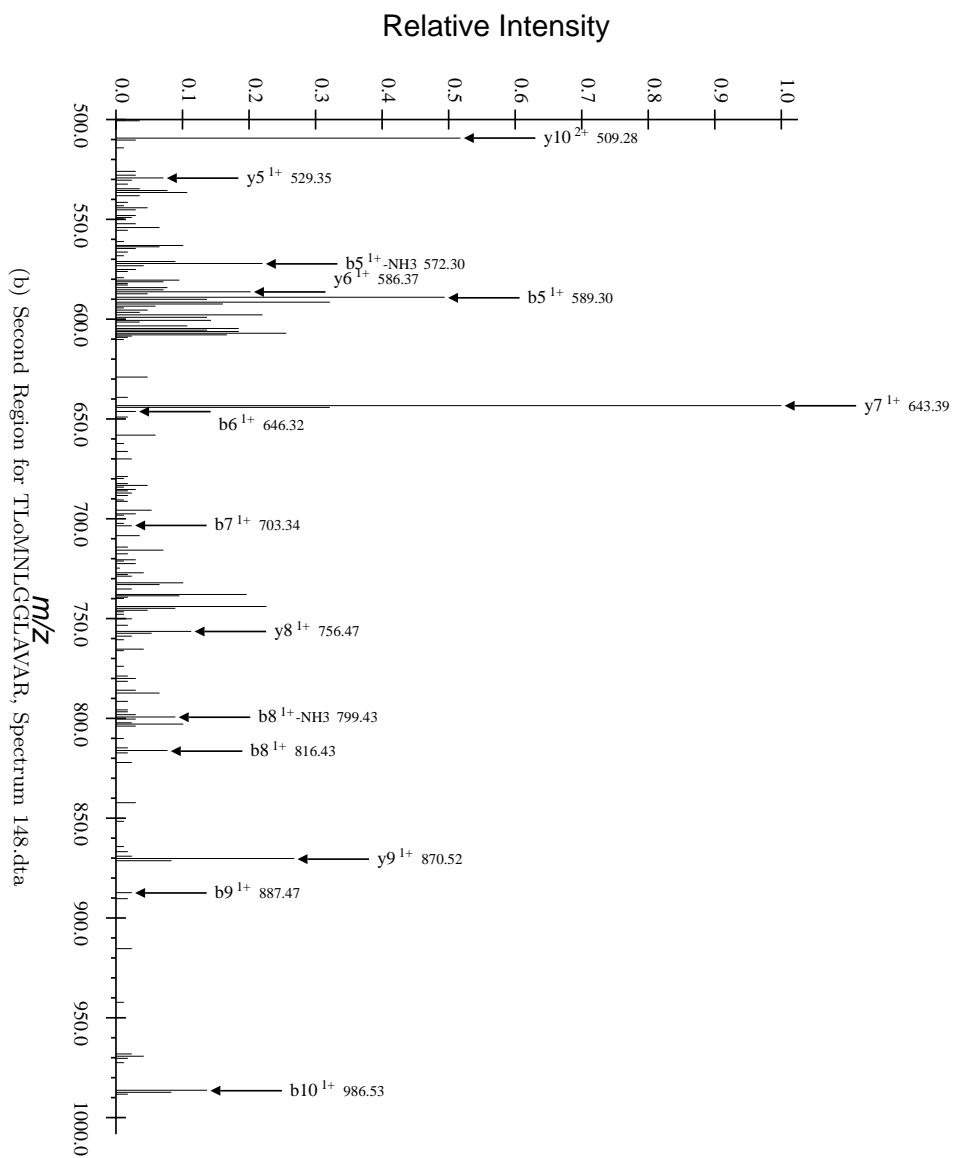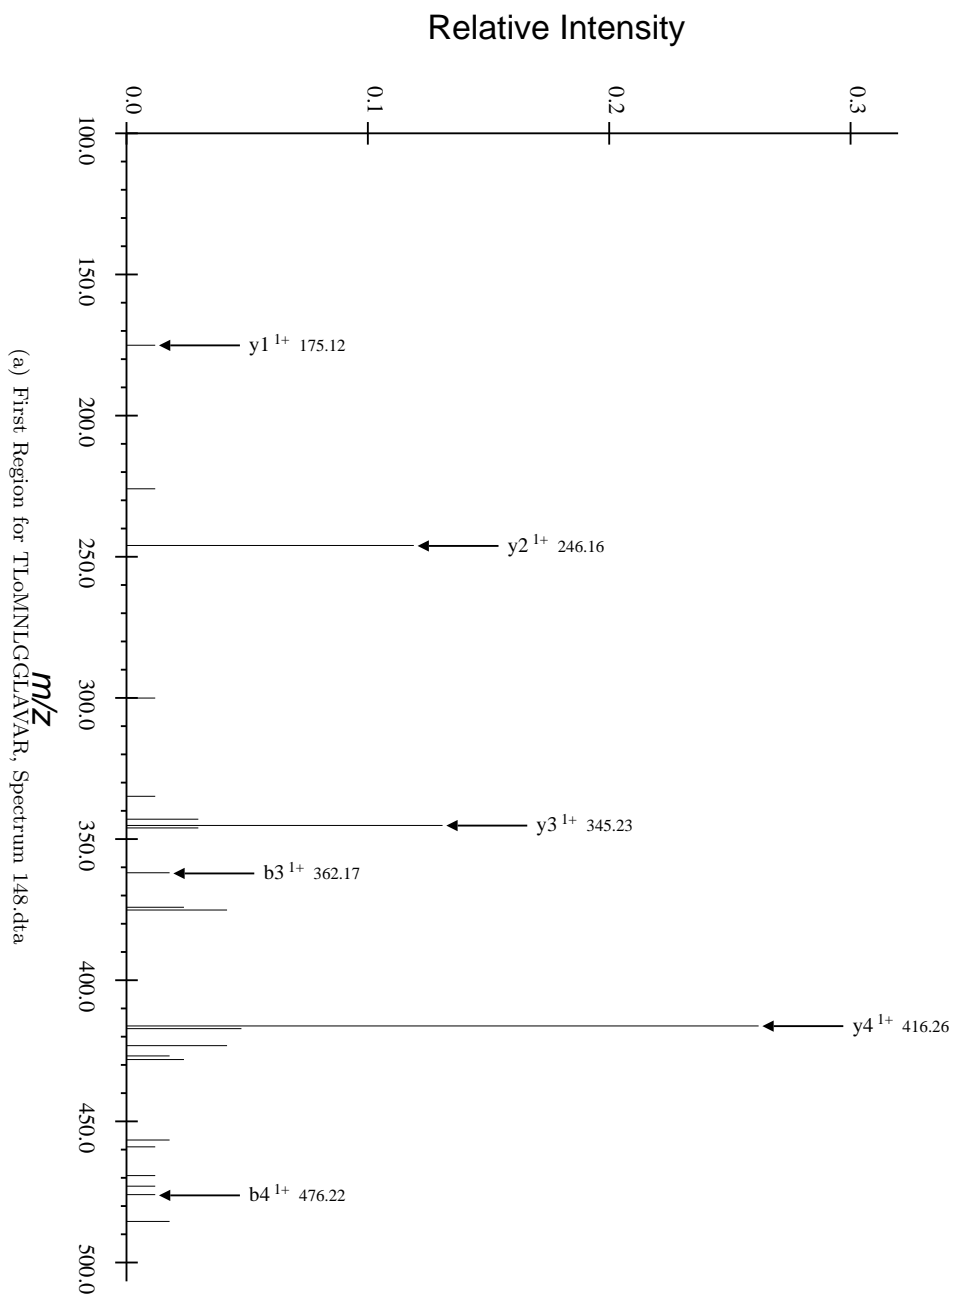

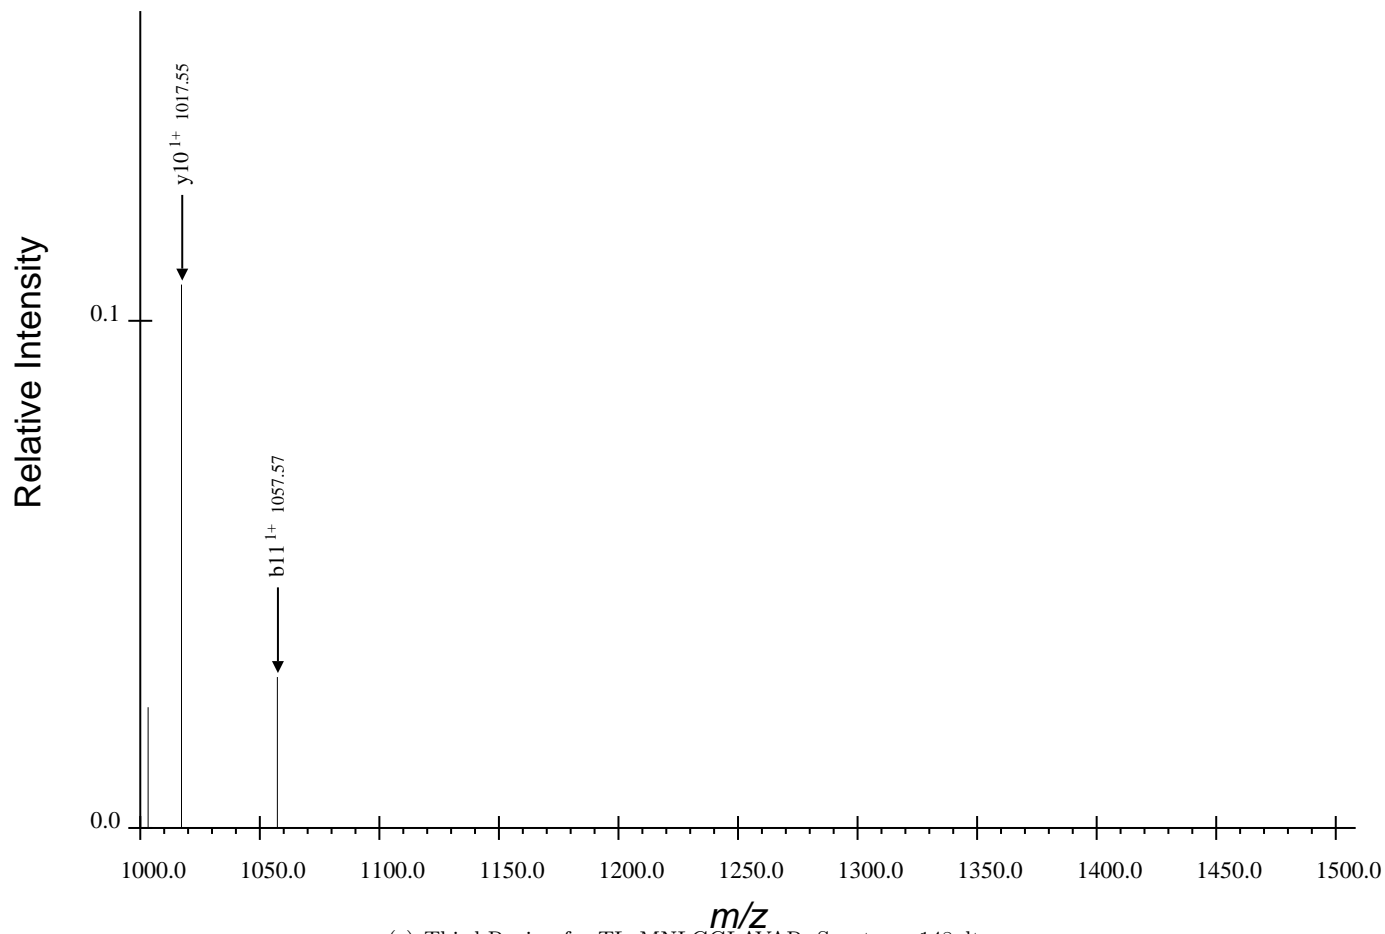

(c) Third Region for TLoMNLGGLAVAR, Spectrum 148.dta

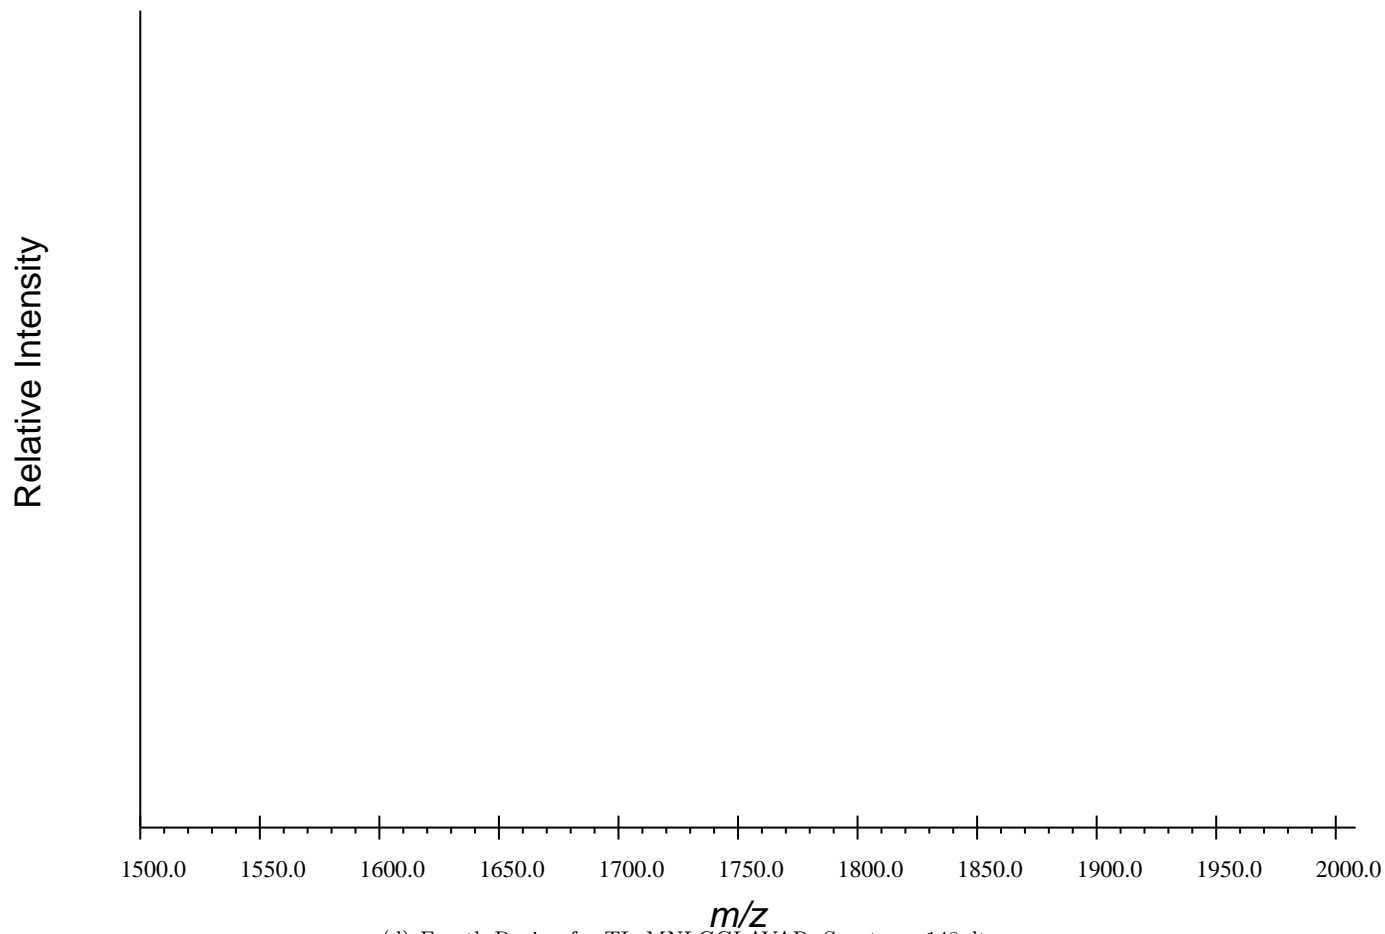

(d) Fourth Region for TLoMNLGGLAVAR, Spectrum 148.dta

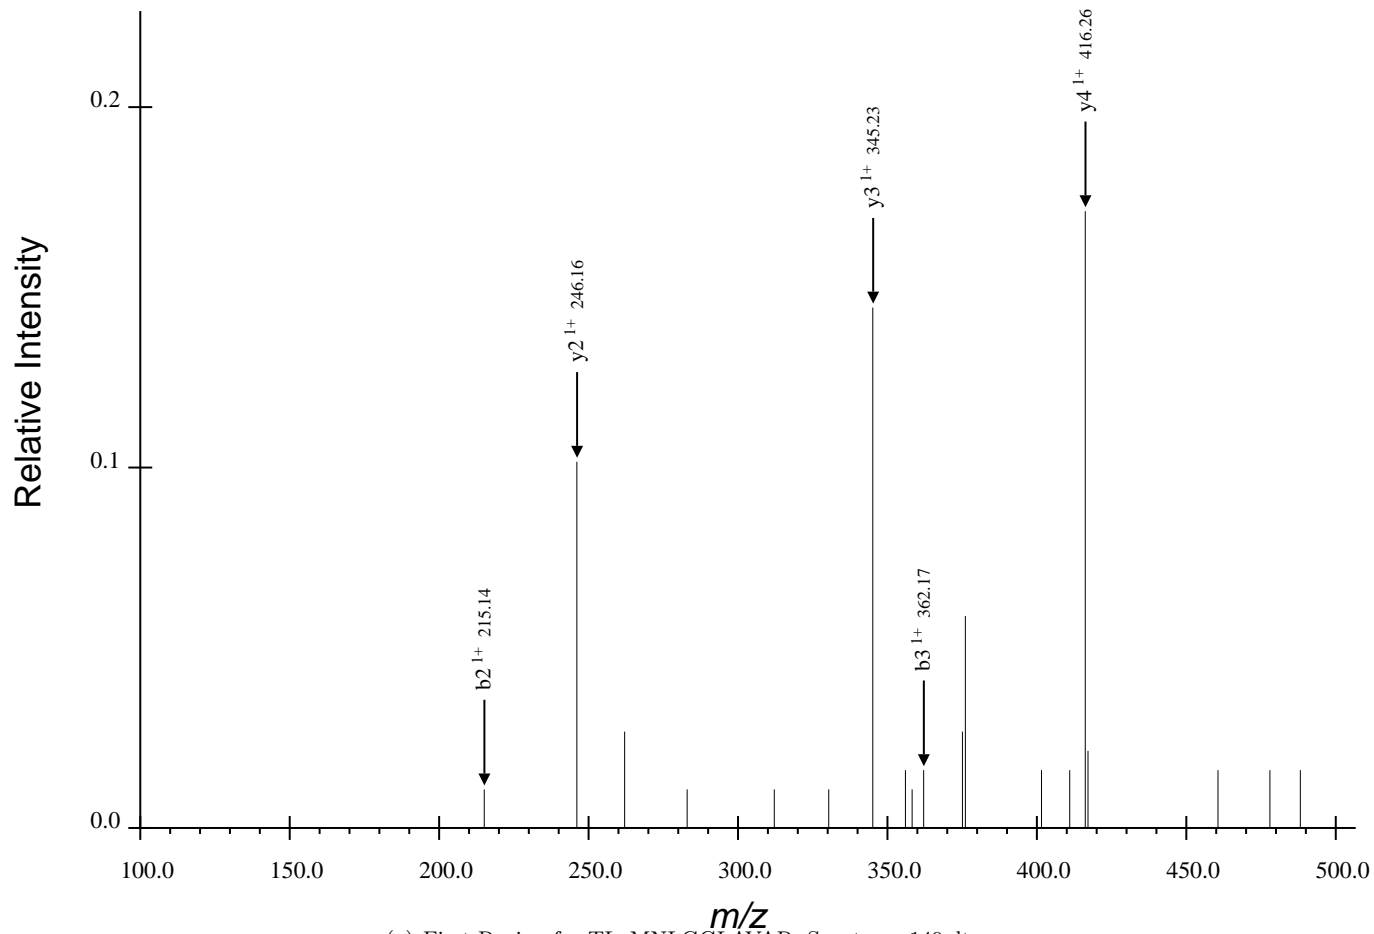

(a) First Region for TLoMNLGGLAVAR, Spectrum 149.dta

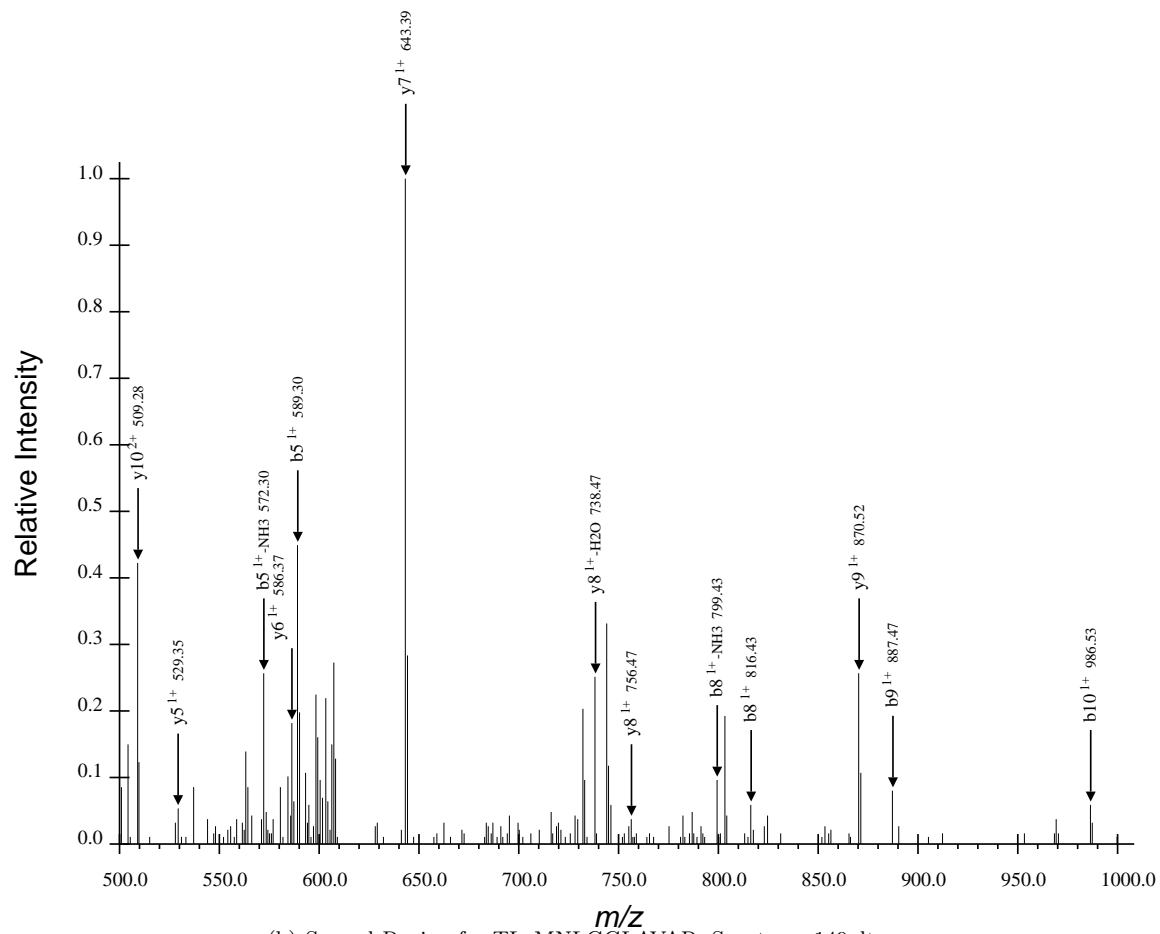

(b) Second Region for TLoMNLGGLAVAR, Spectrum 149.dta

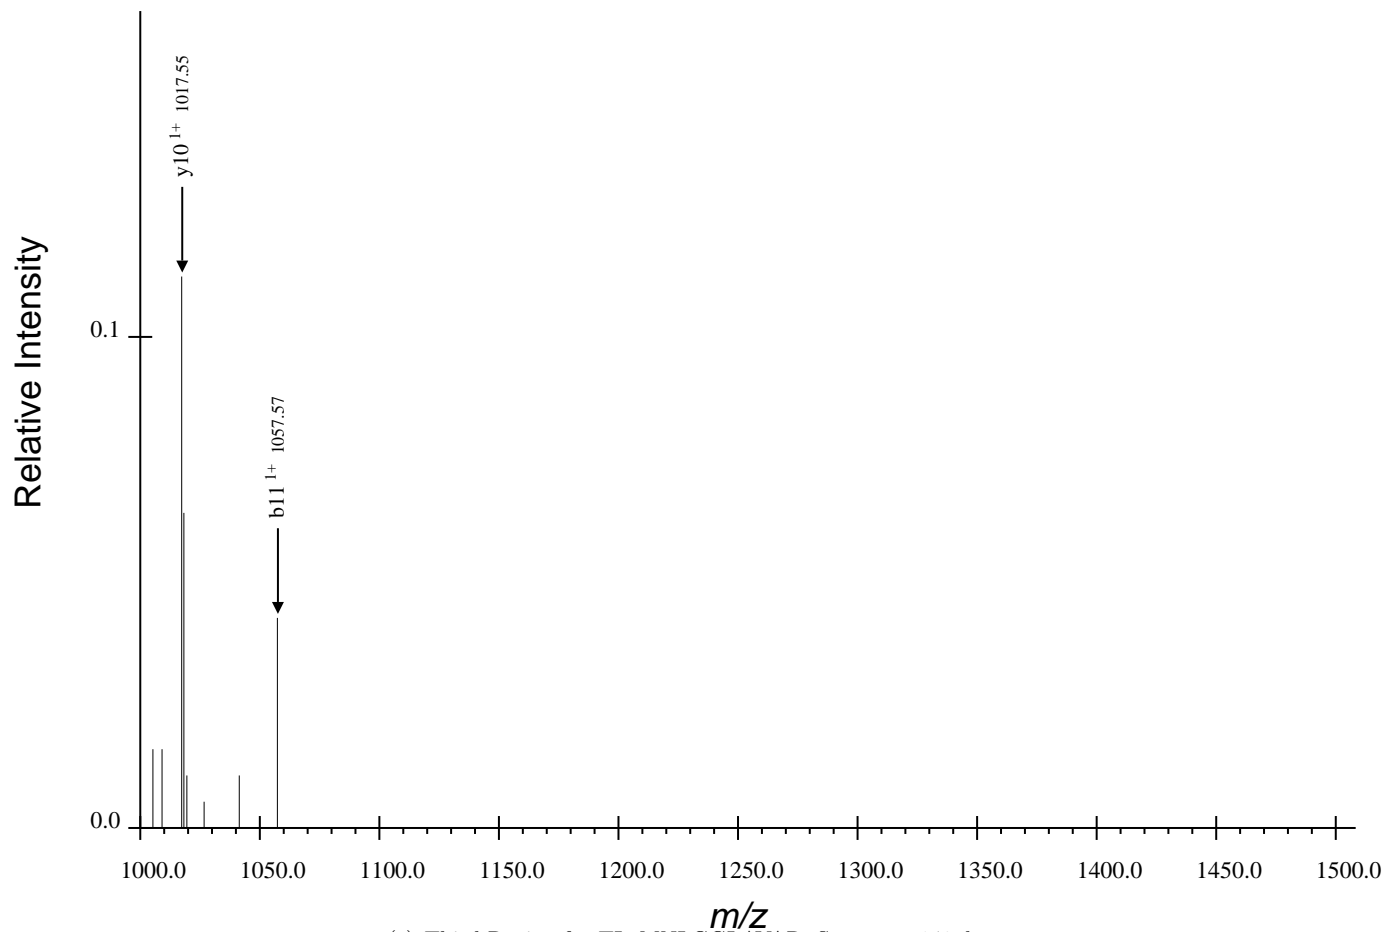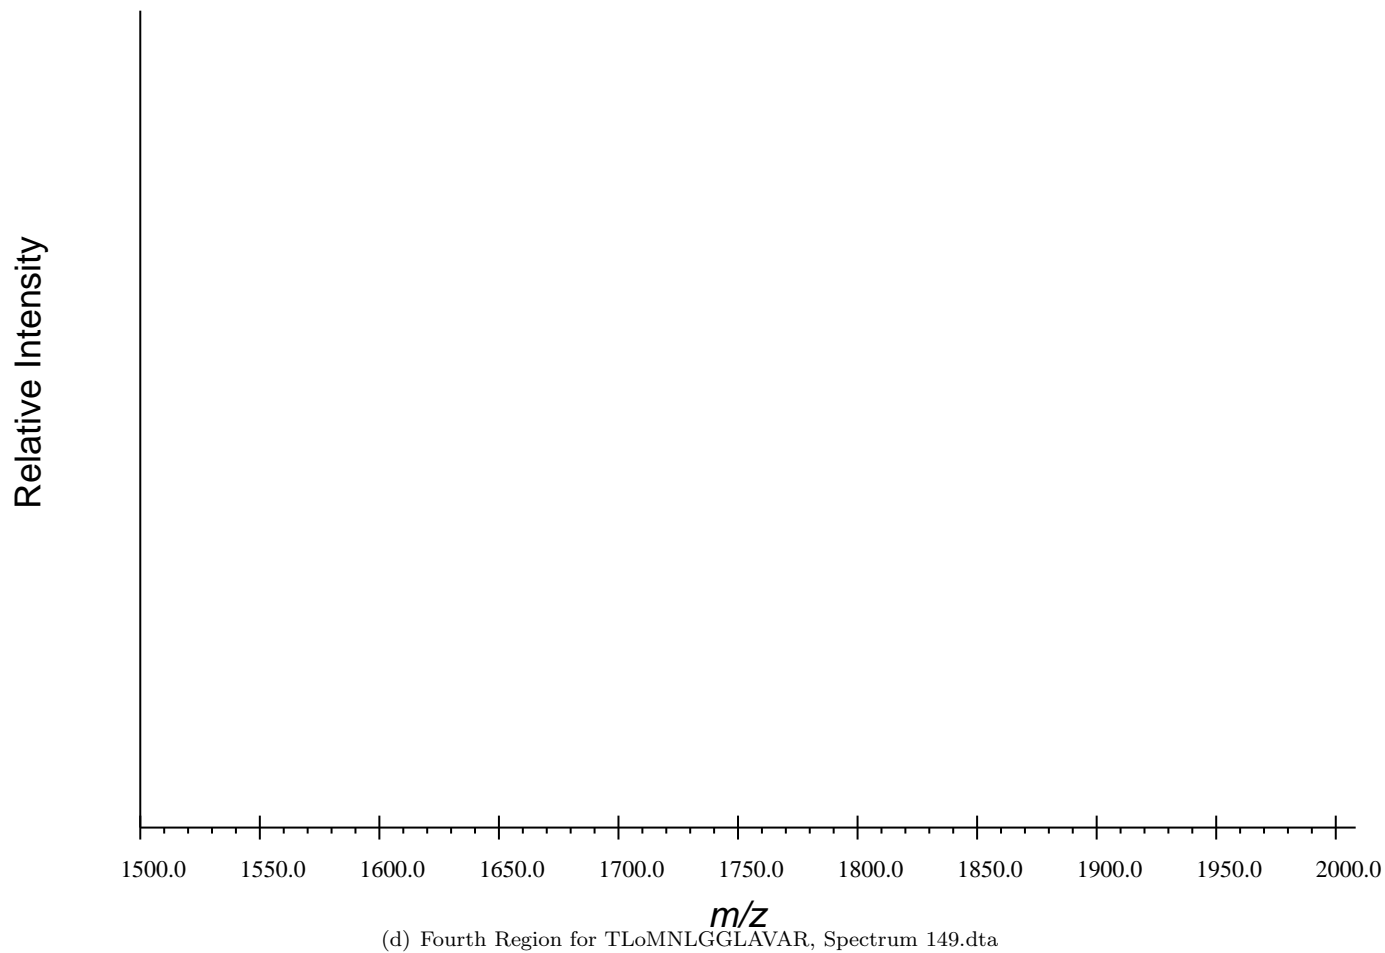

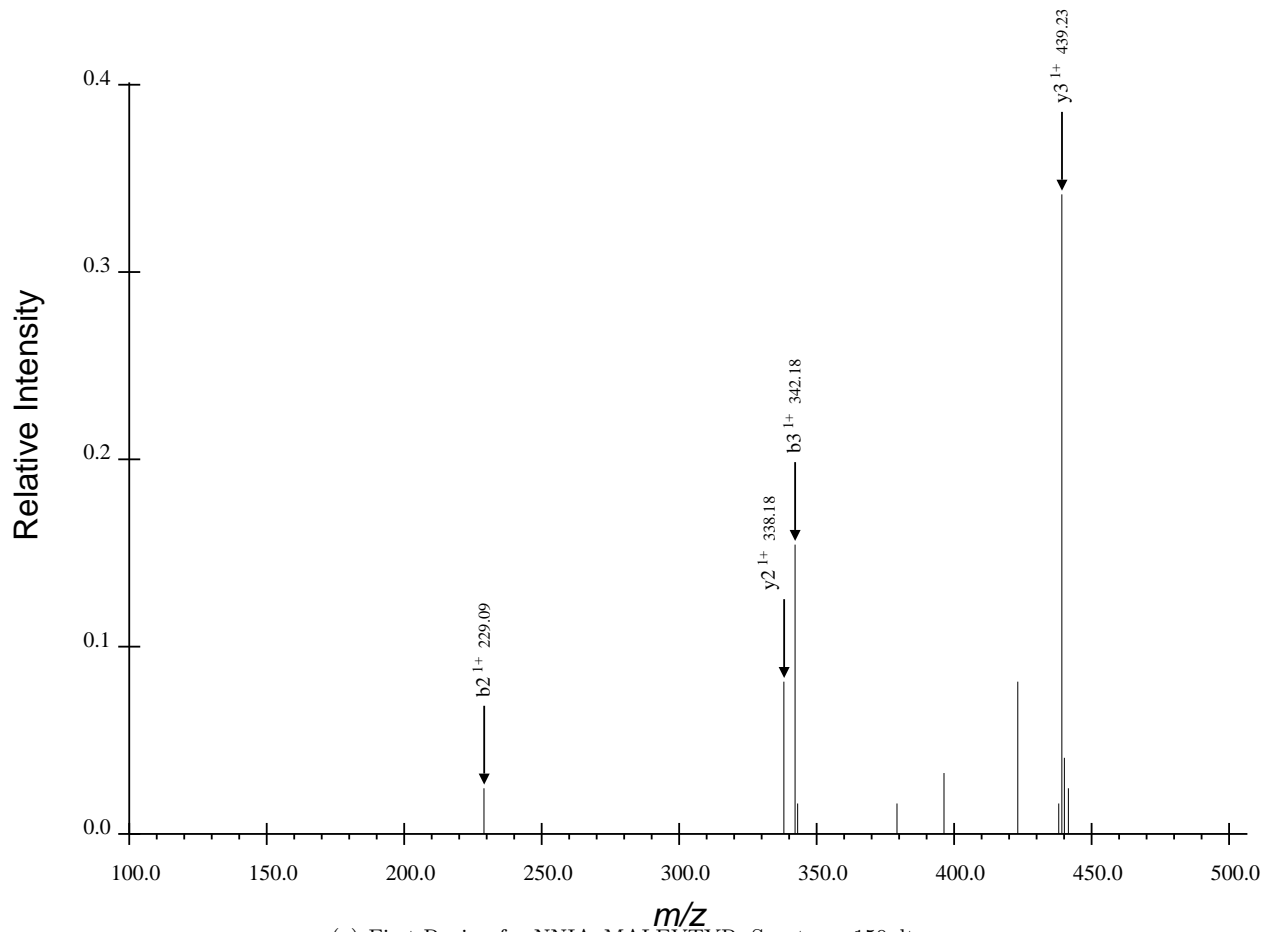

(a) First Region for NNIAoMALEVITYR, Spectrum 150.dta

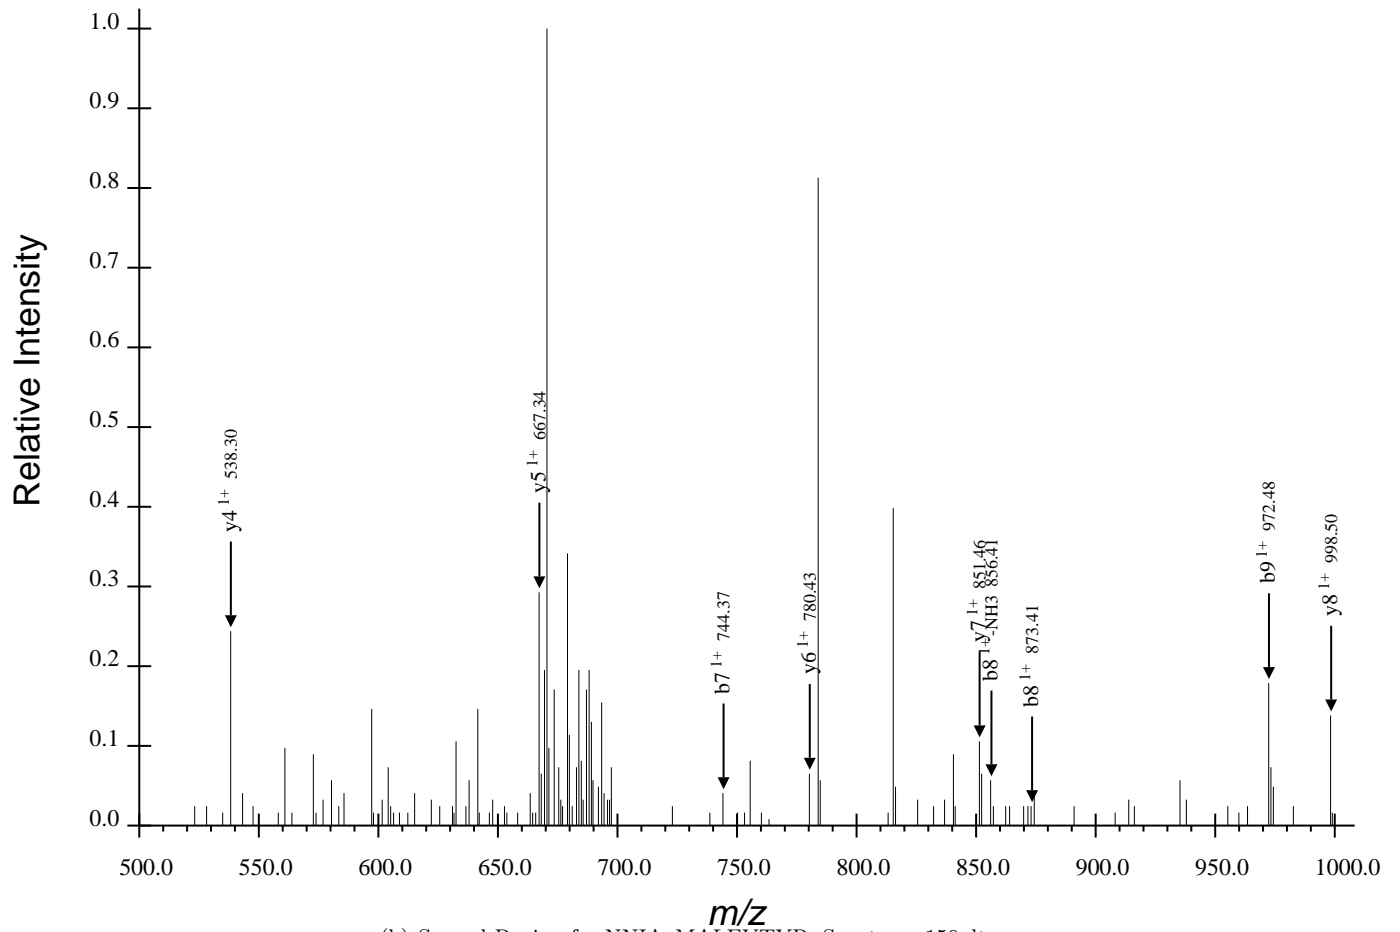

(b) Second Region for NNIAoMALEVITYR, Spectrum 150.dta

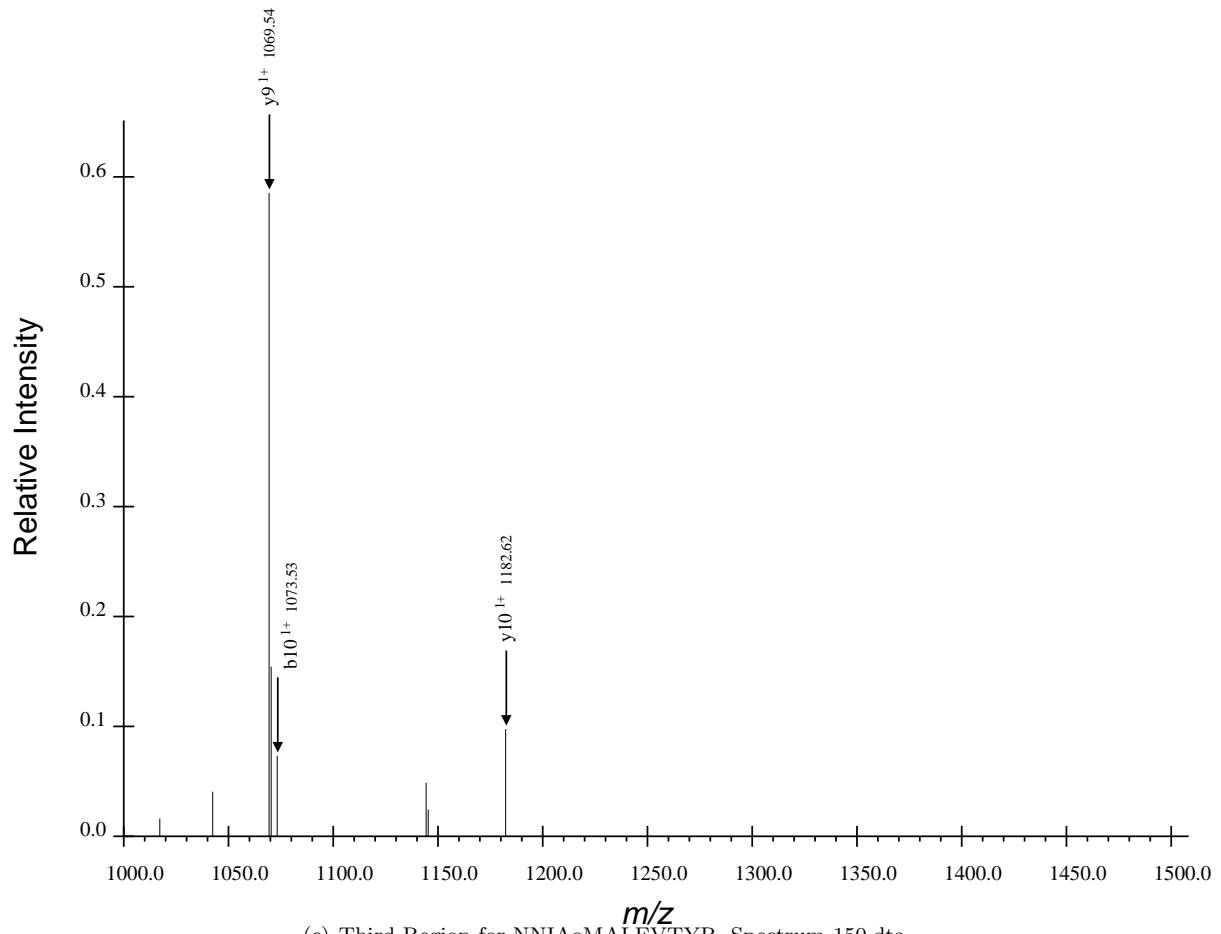

(c) Third Region for NNIAoMALEVITYR, Spectrum 150.dta

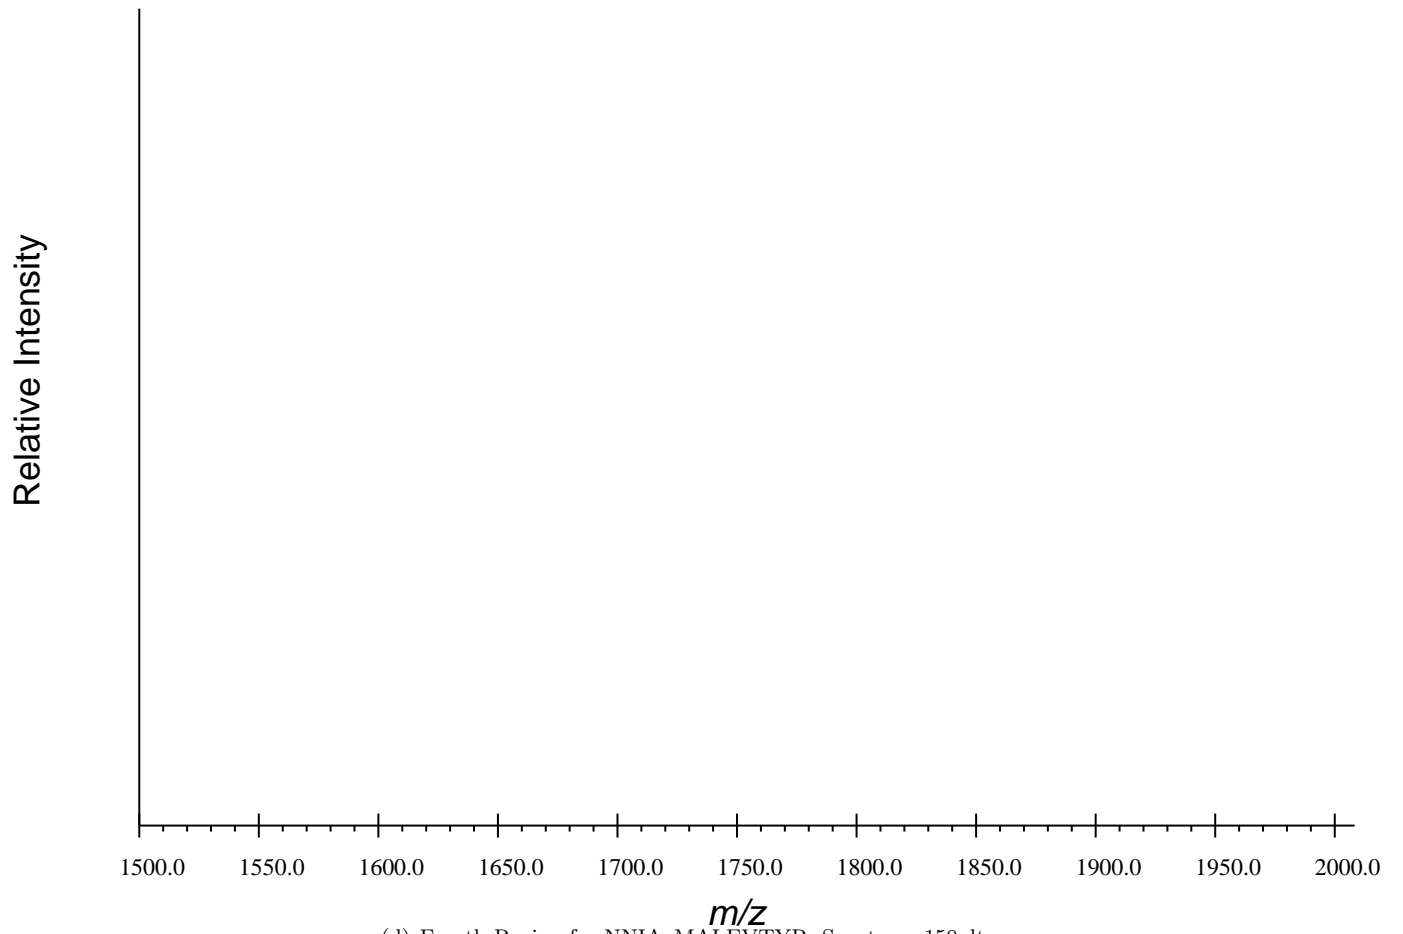

(d) Fourth Region for NNIAoMALEVITYR, Spectrum 150.dta



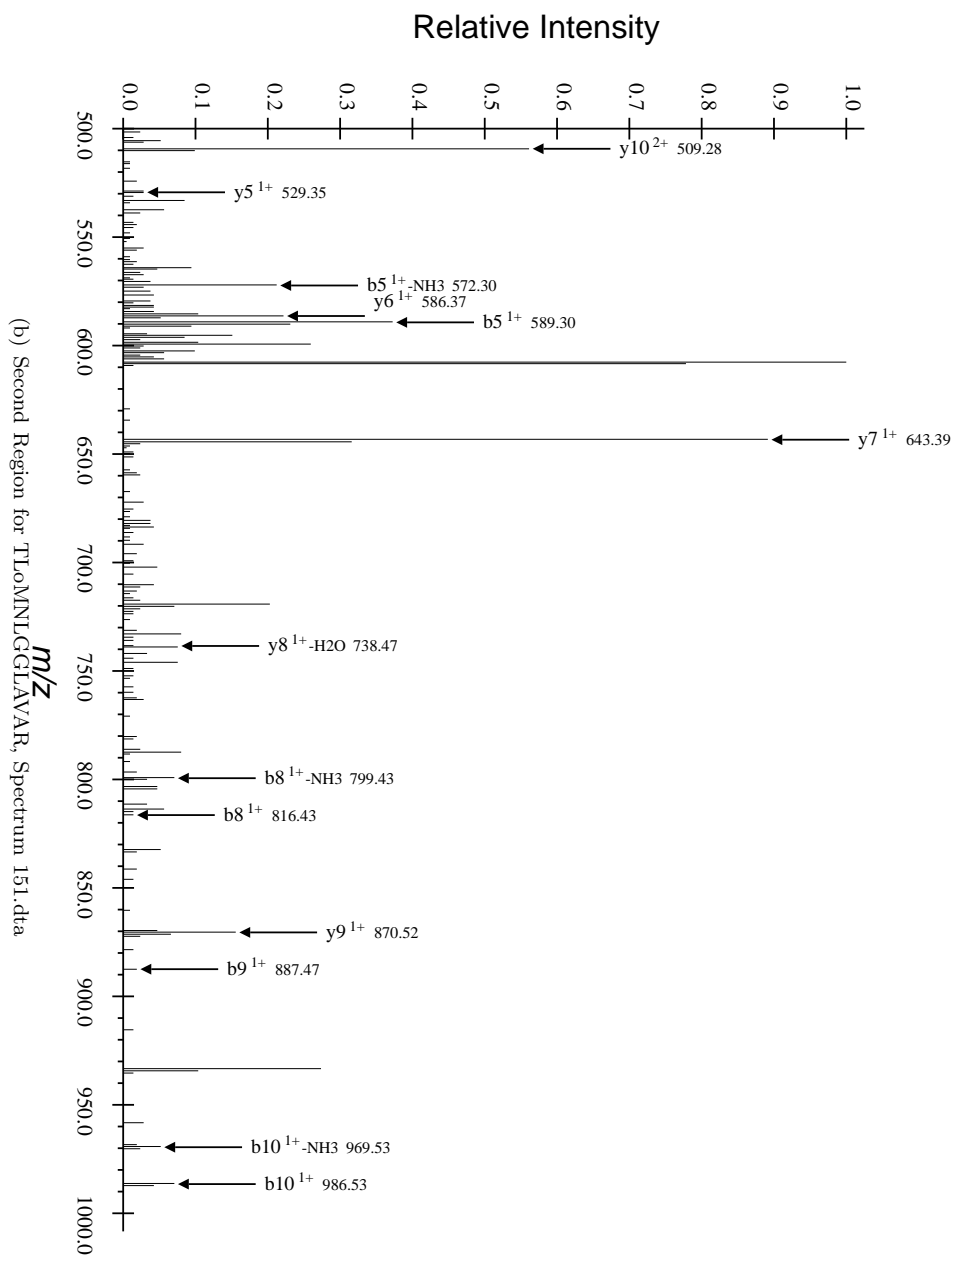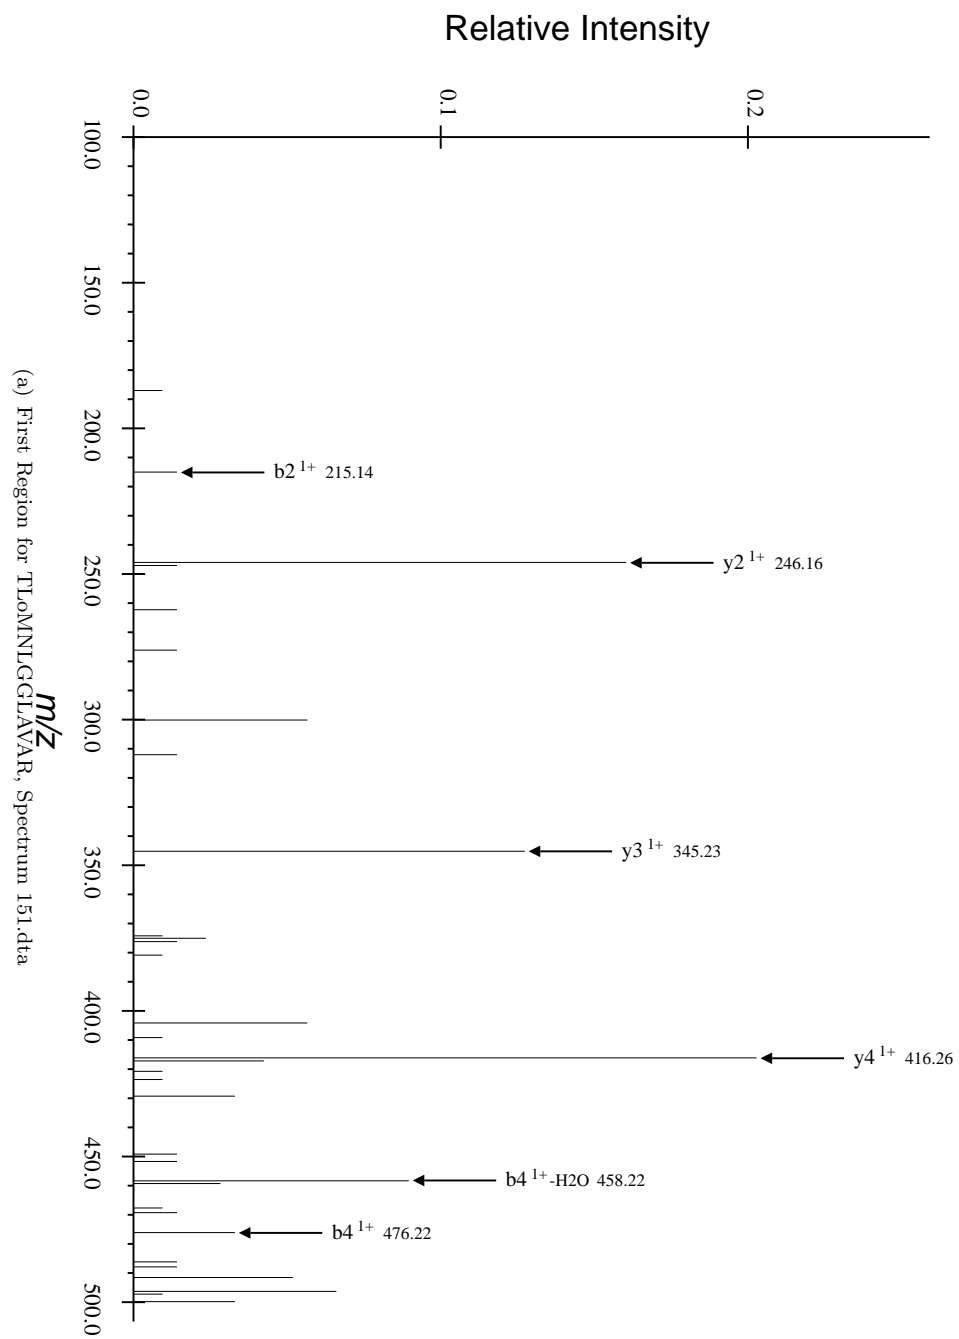

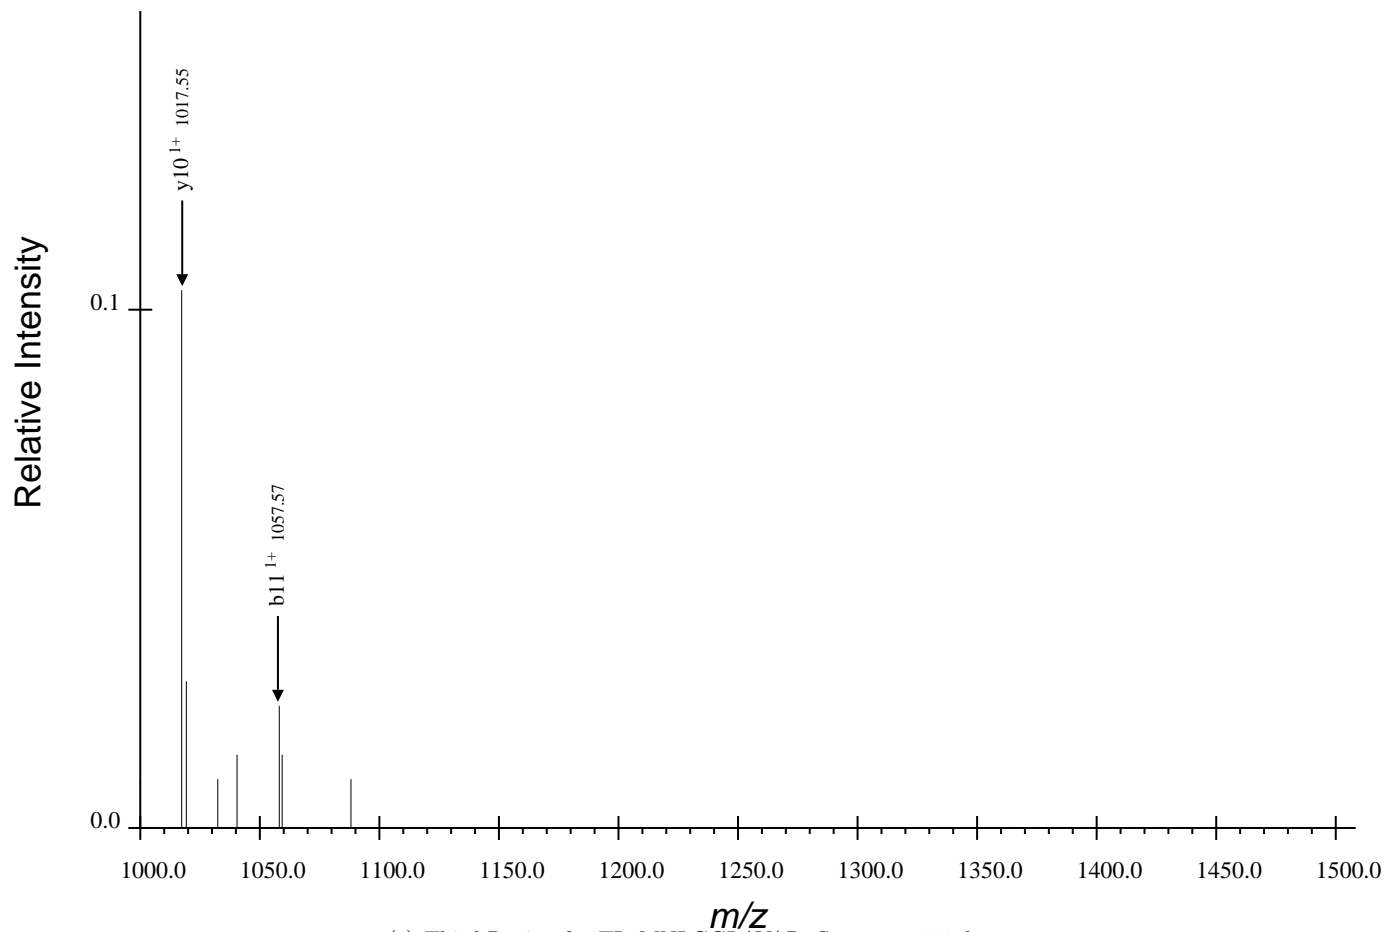

(c) Third Region for TLoMNLGGLAVAR, Spectrum 151.dta

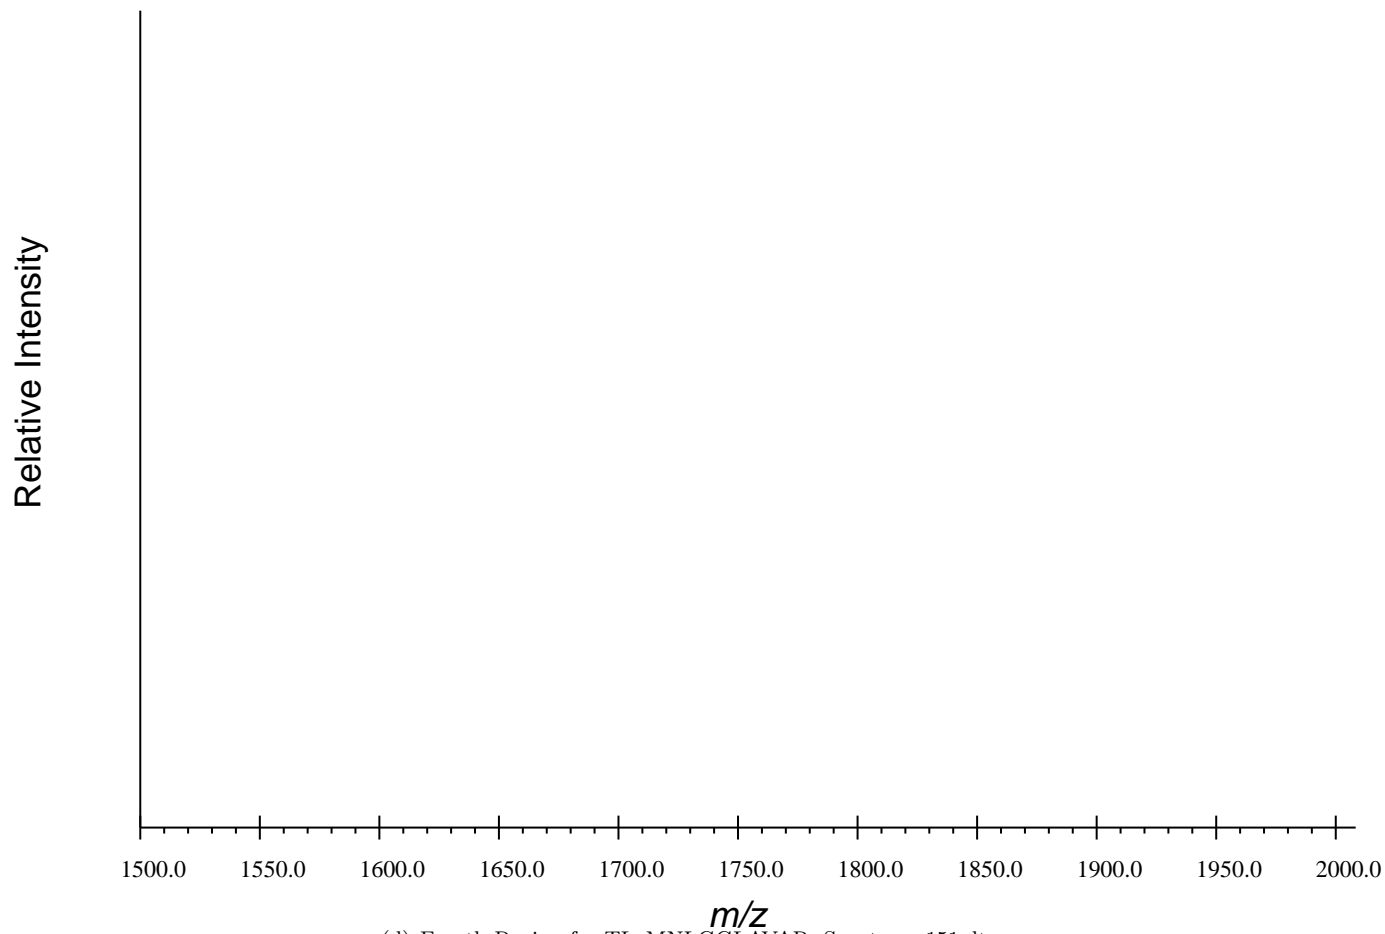

(d) Fourth Region for TLoMNLGGLAVAR, Spectrum 151.dta

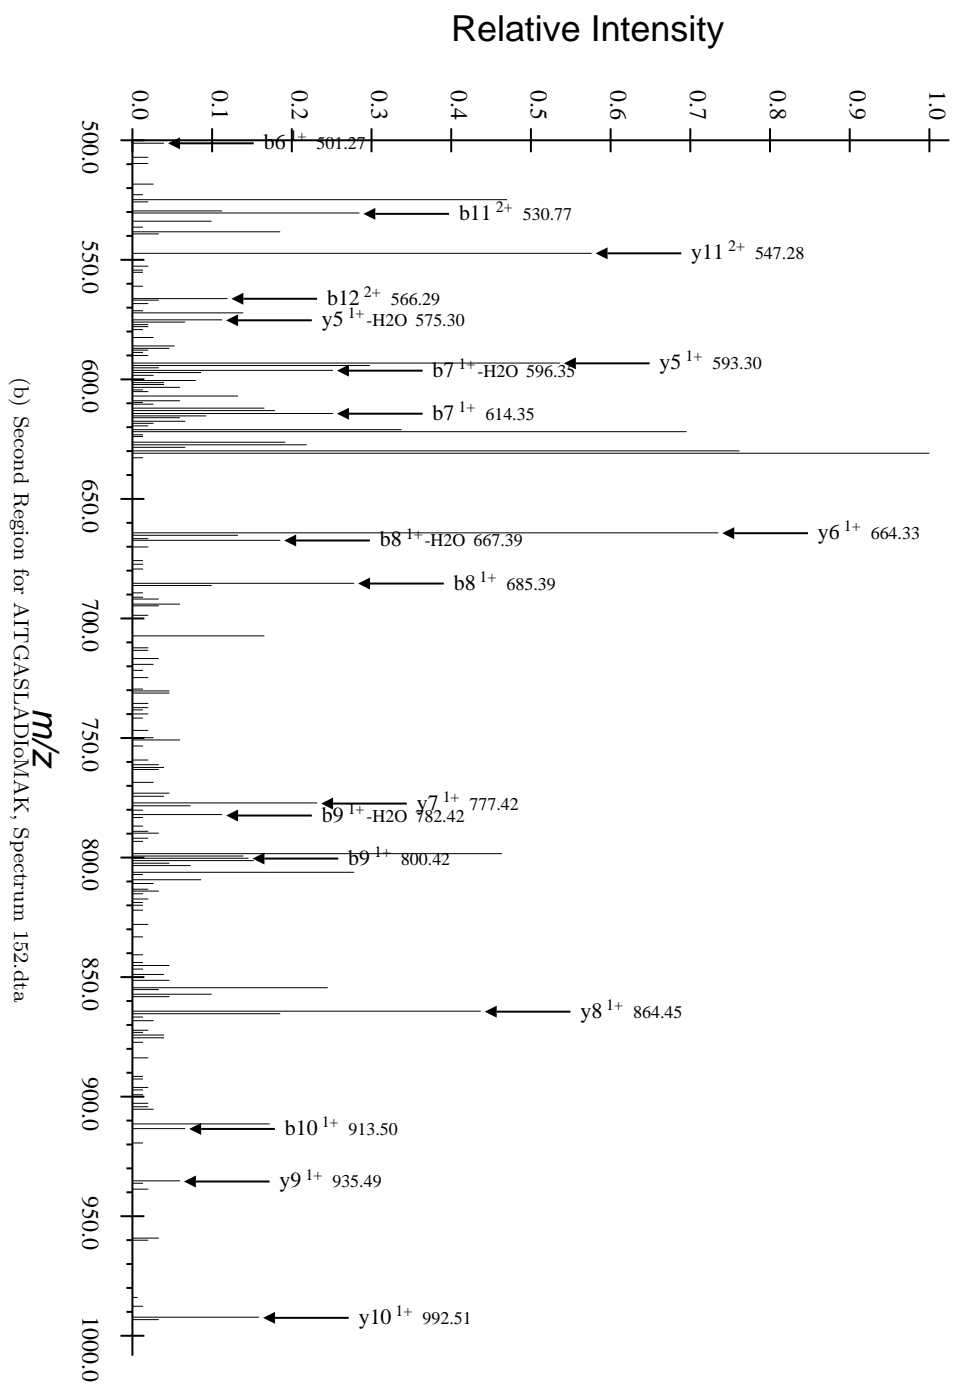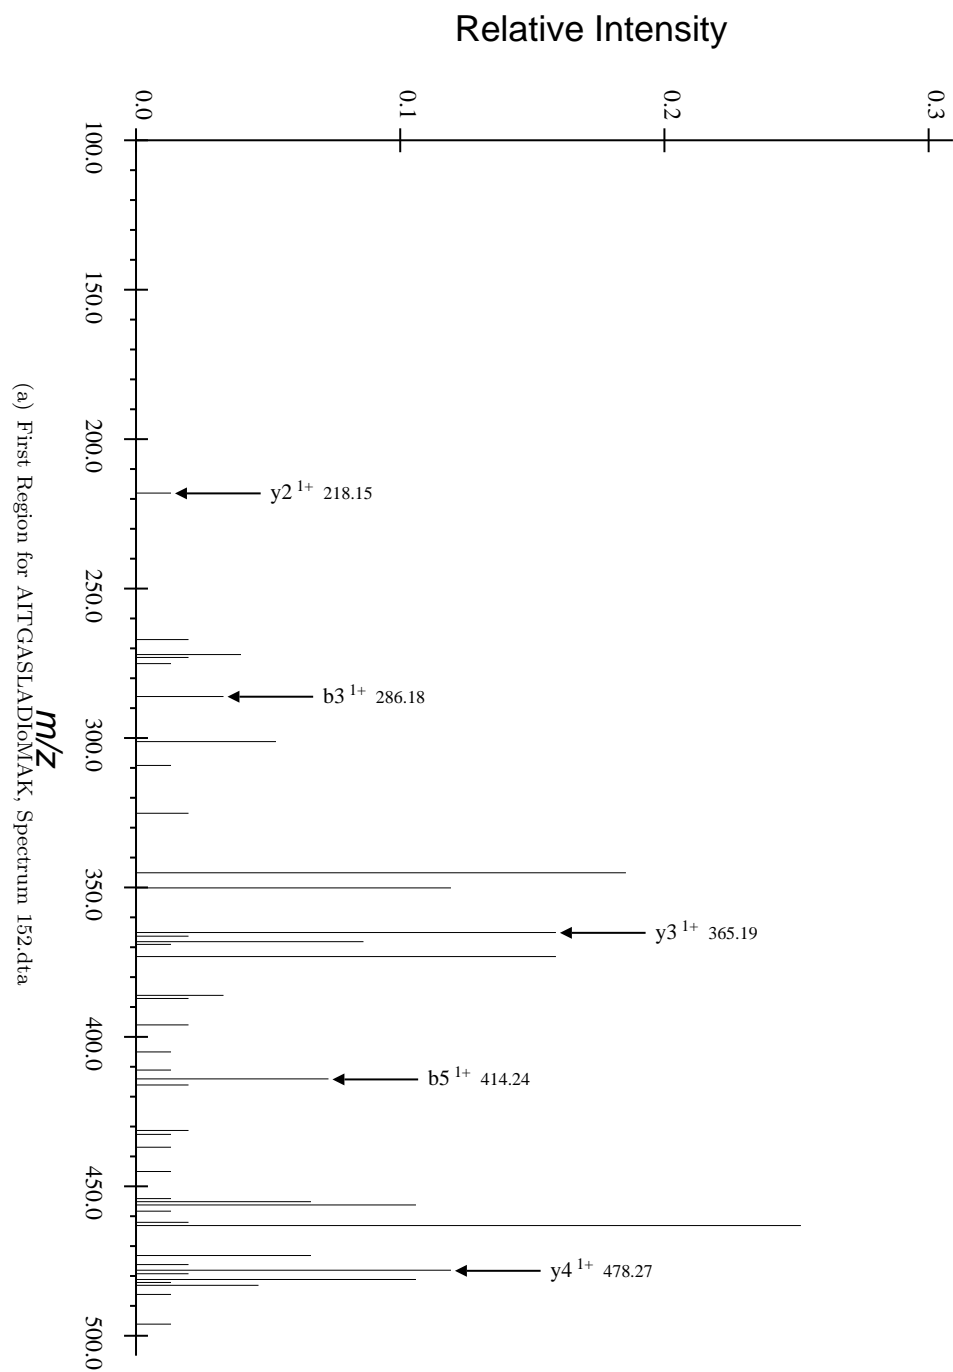

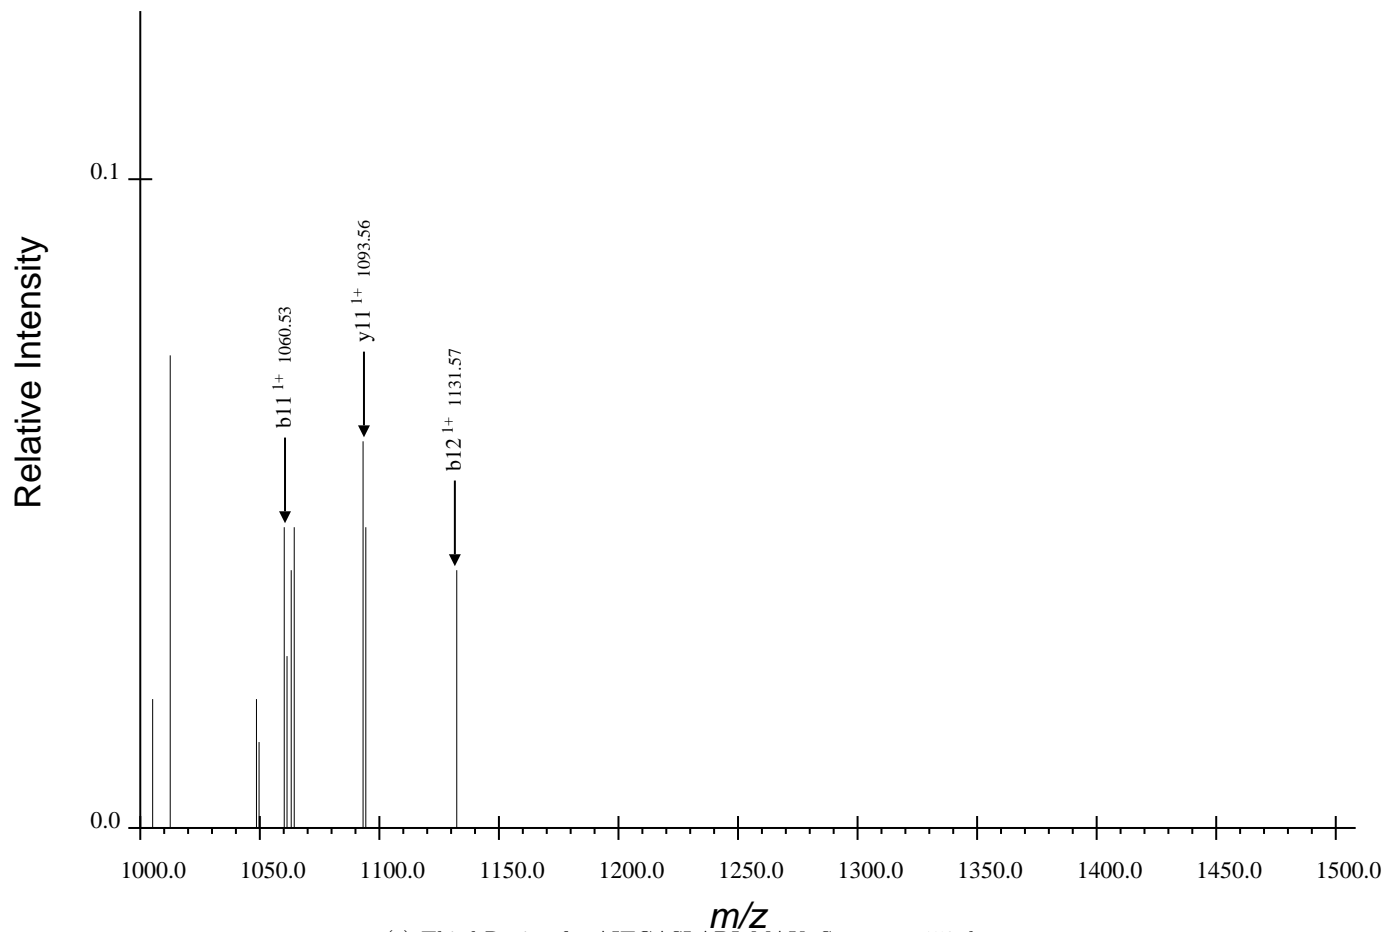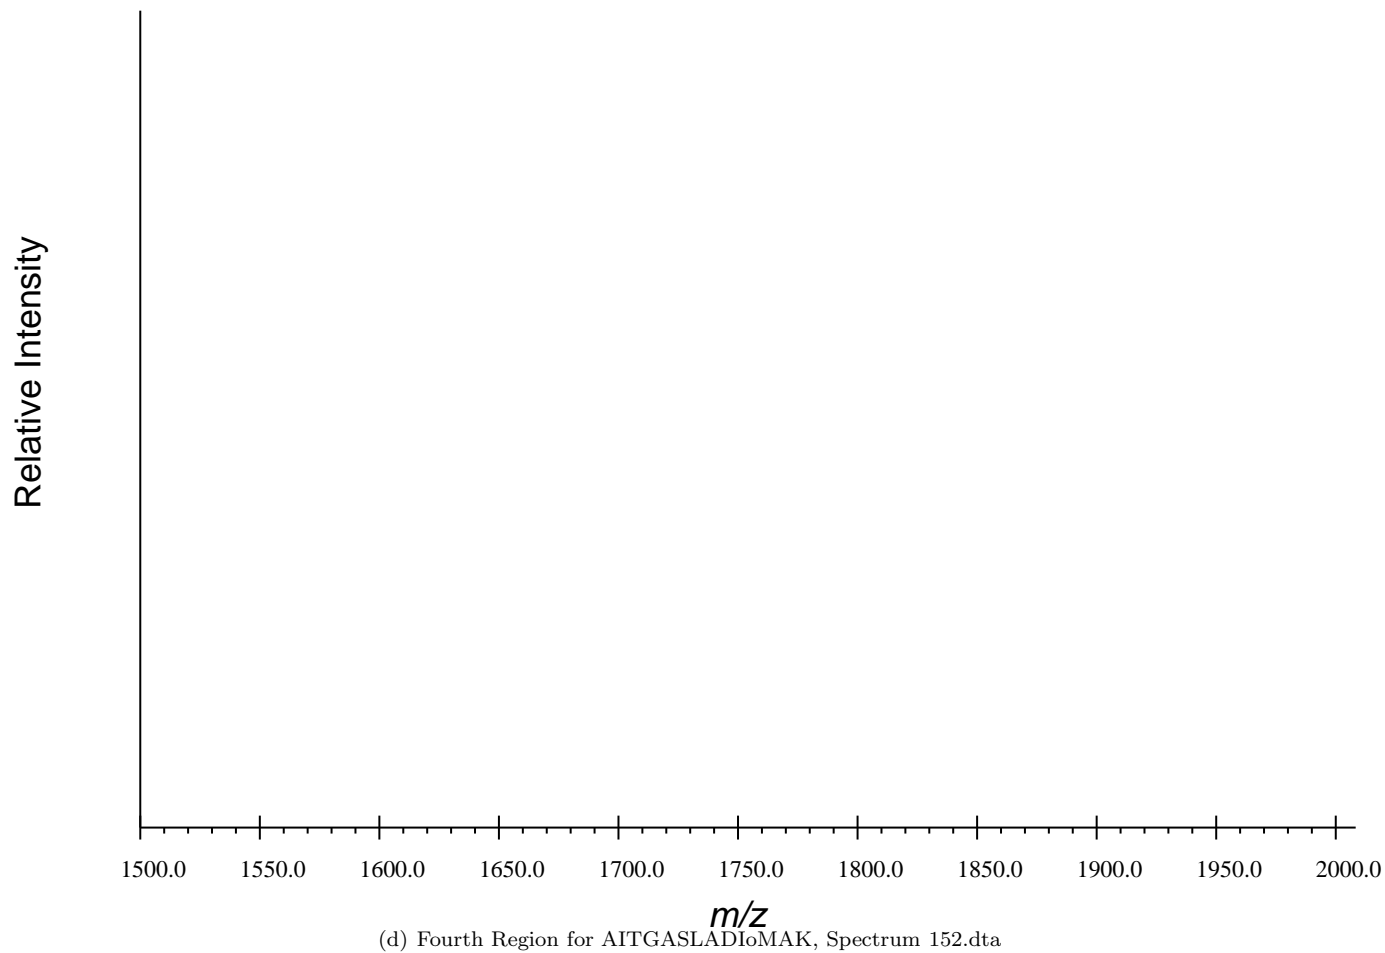

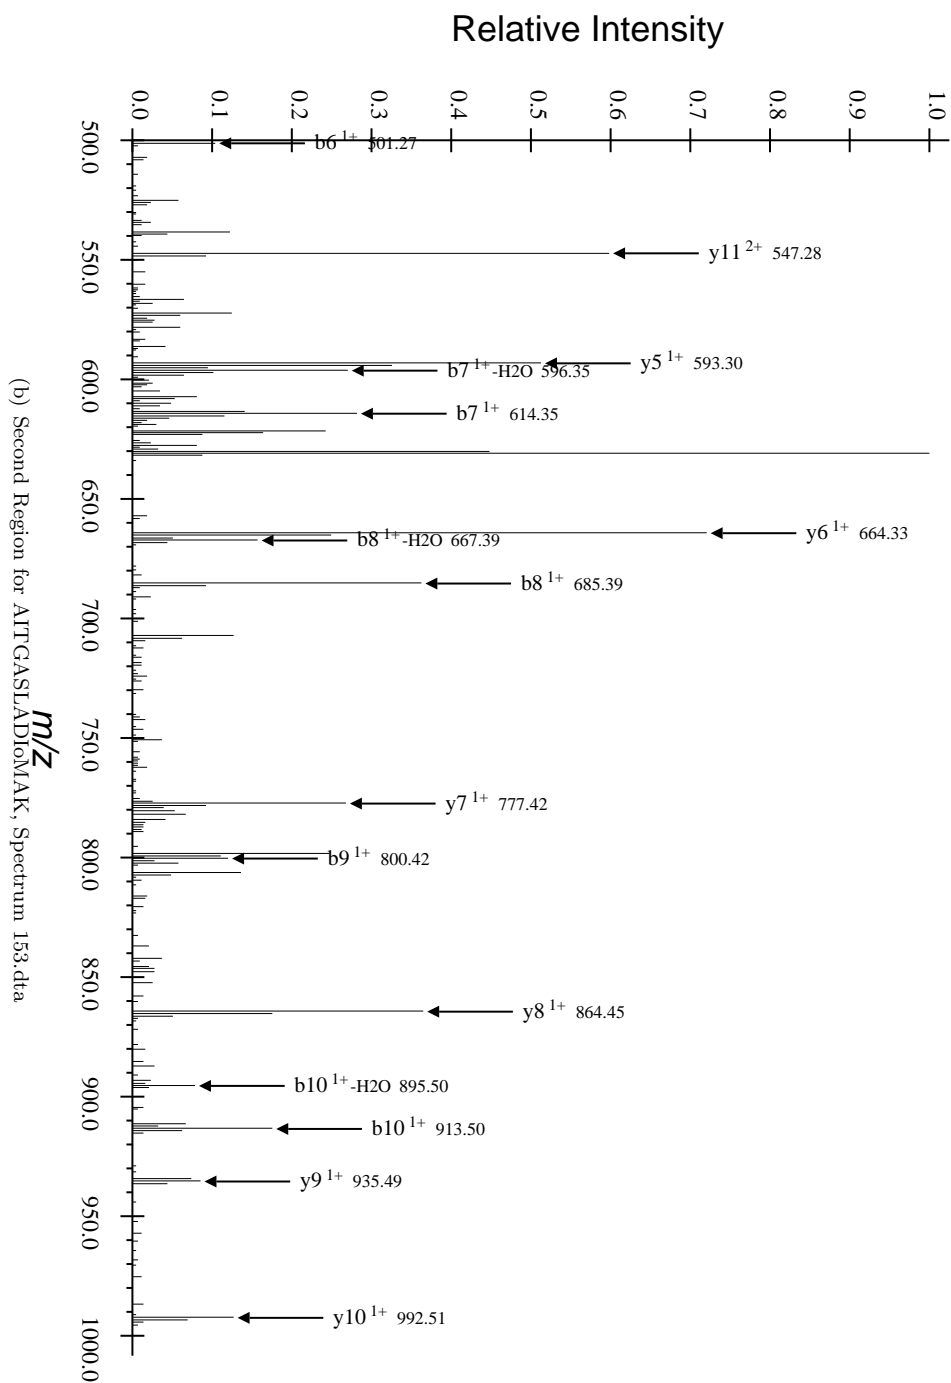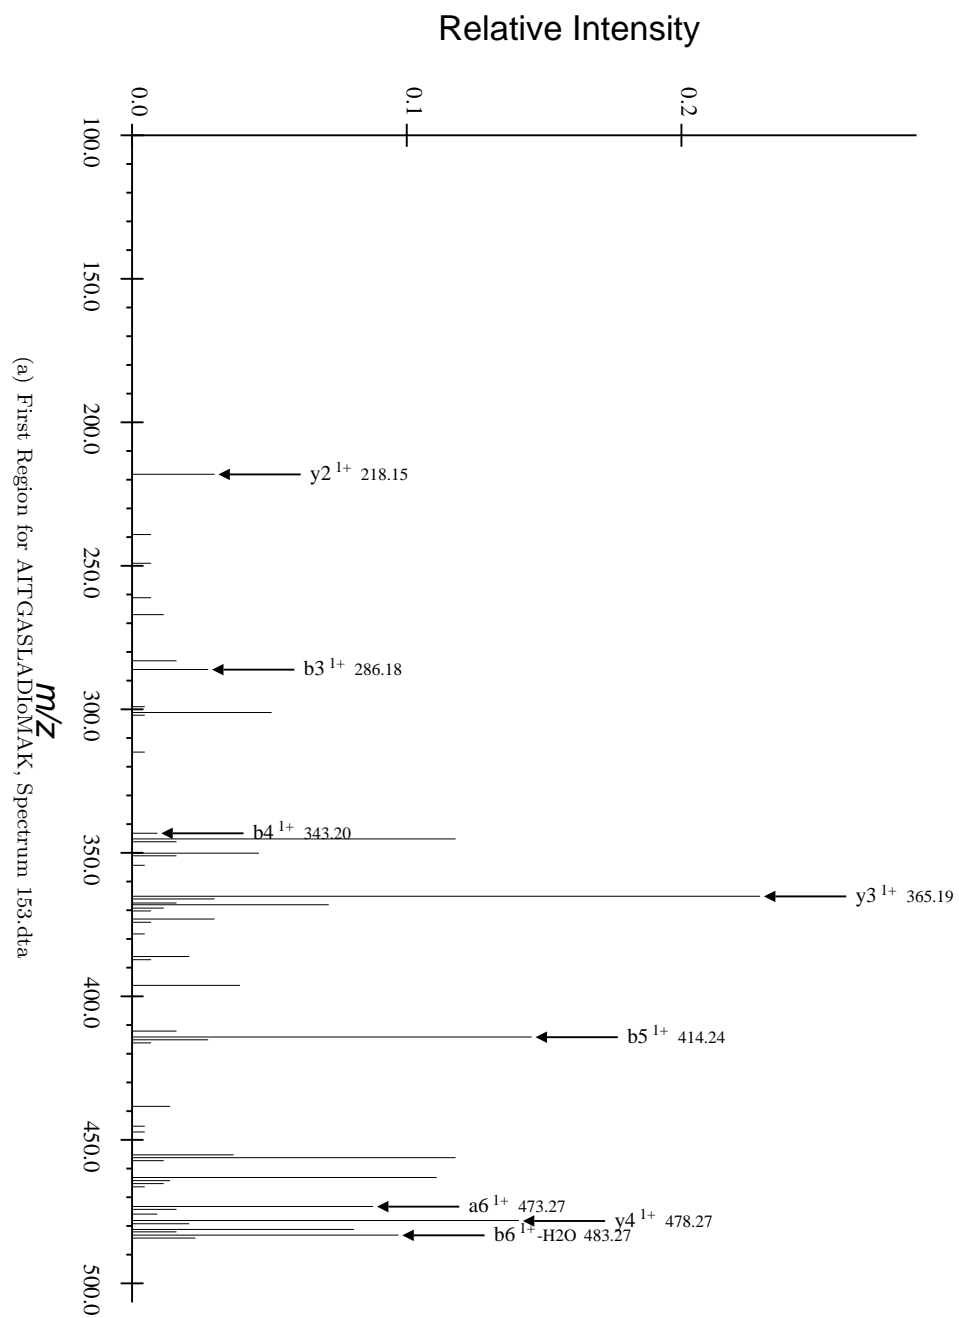

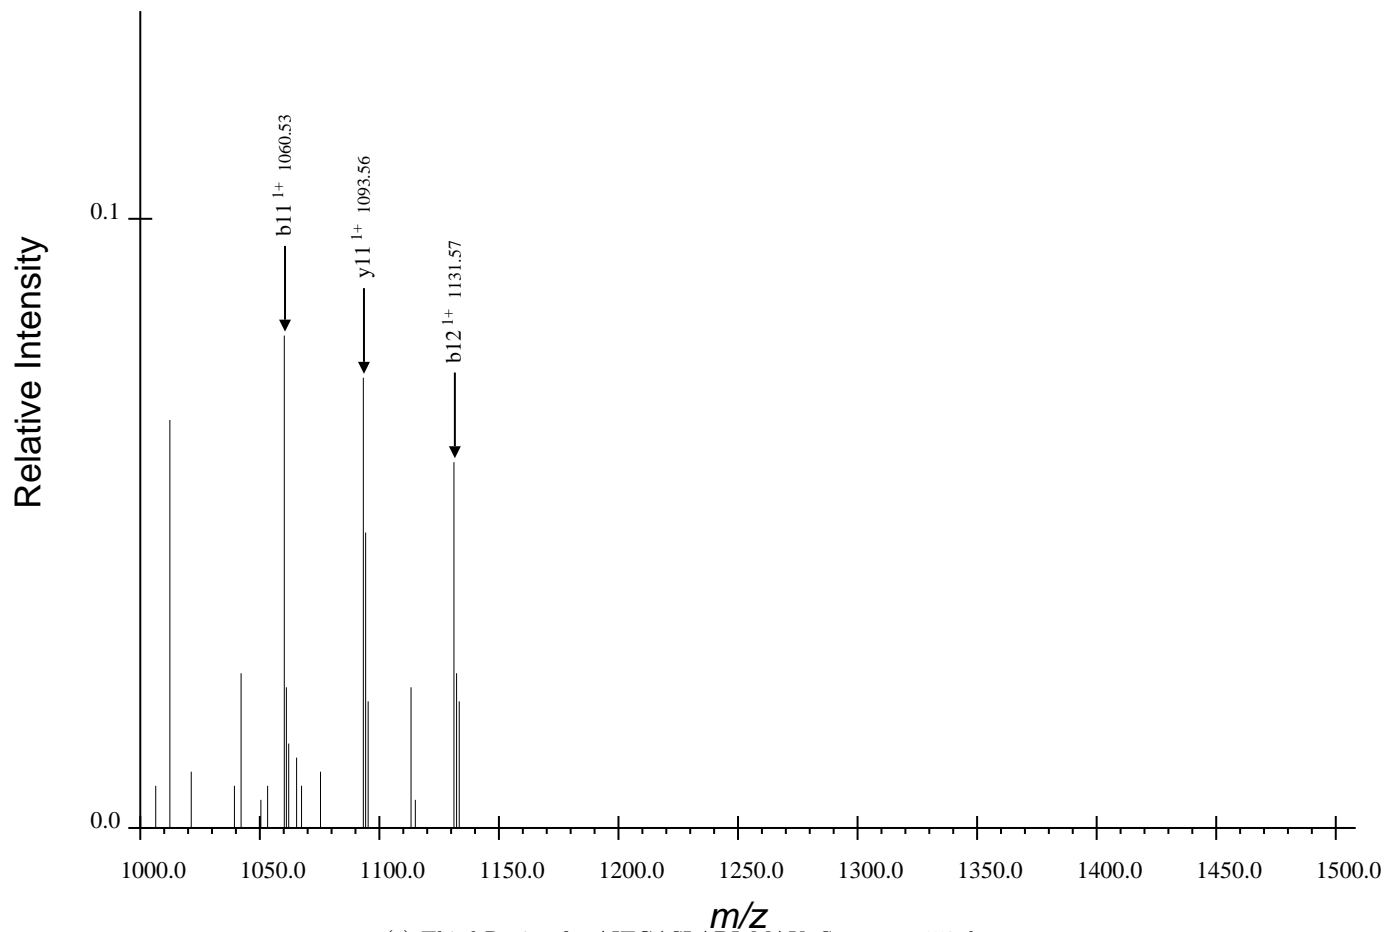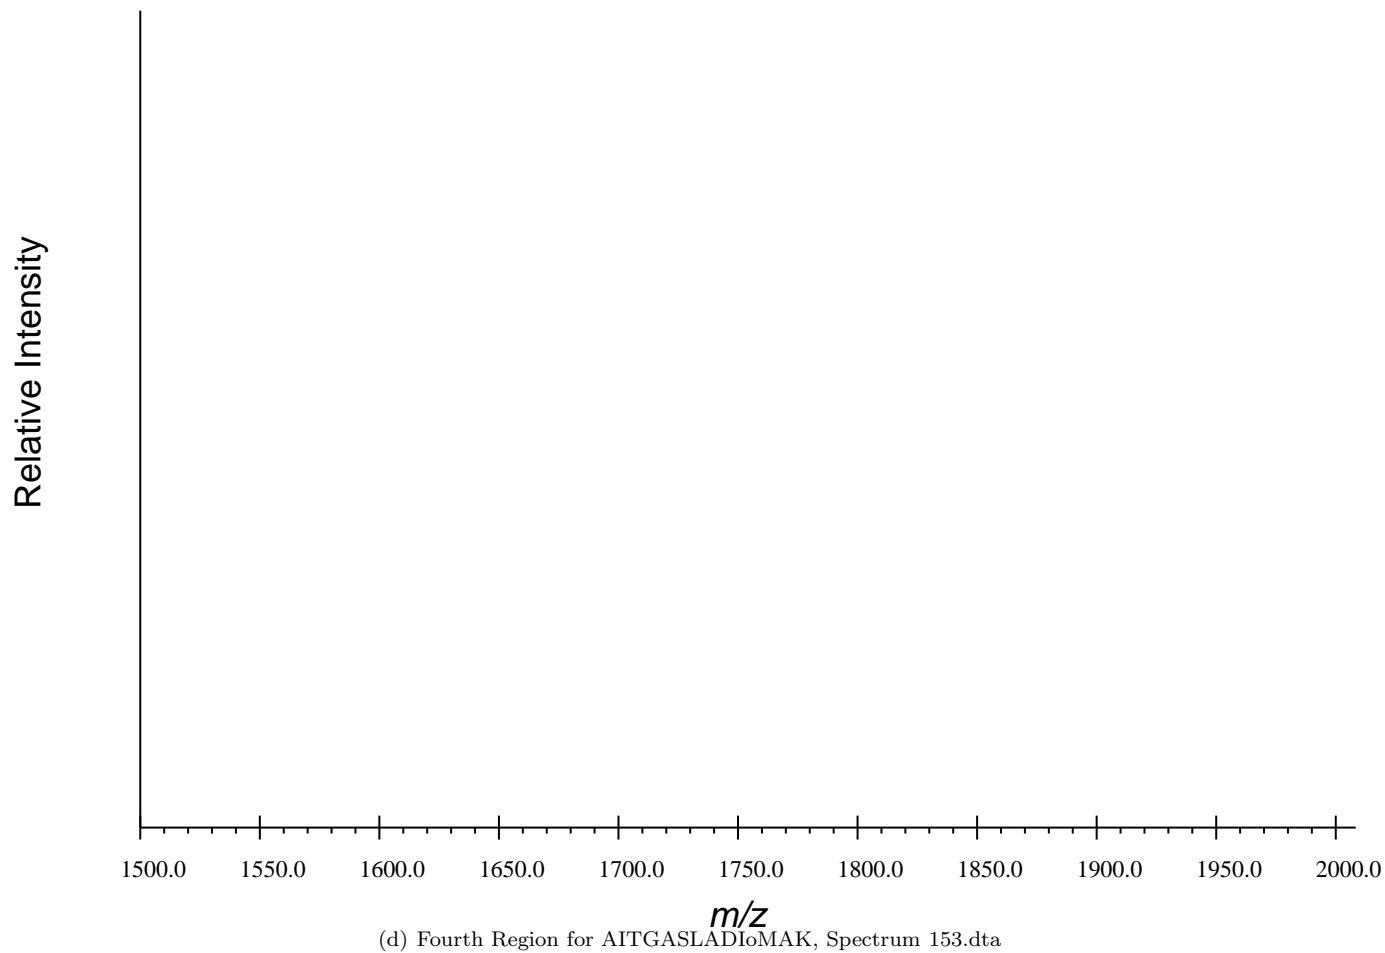

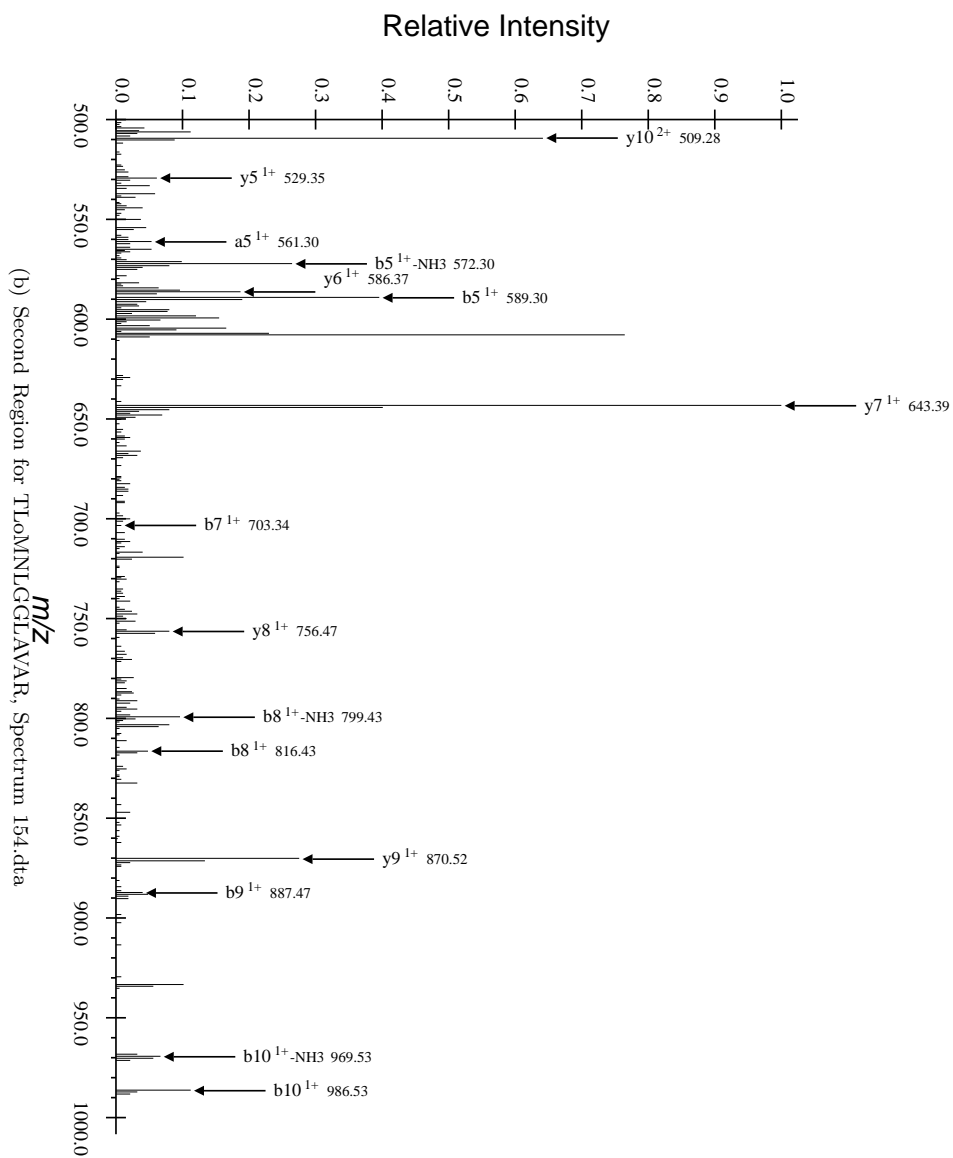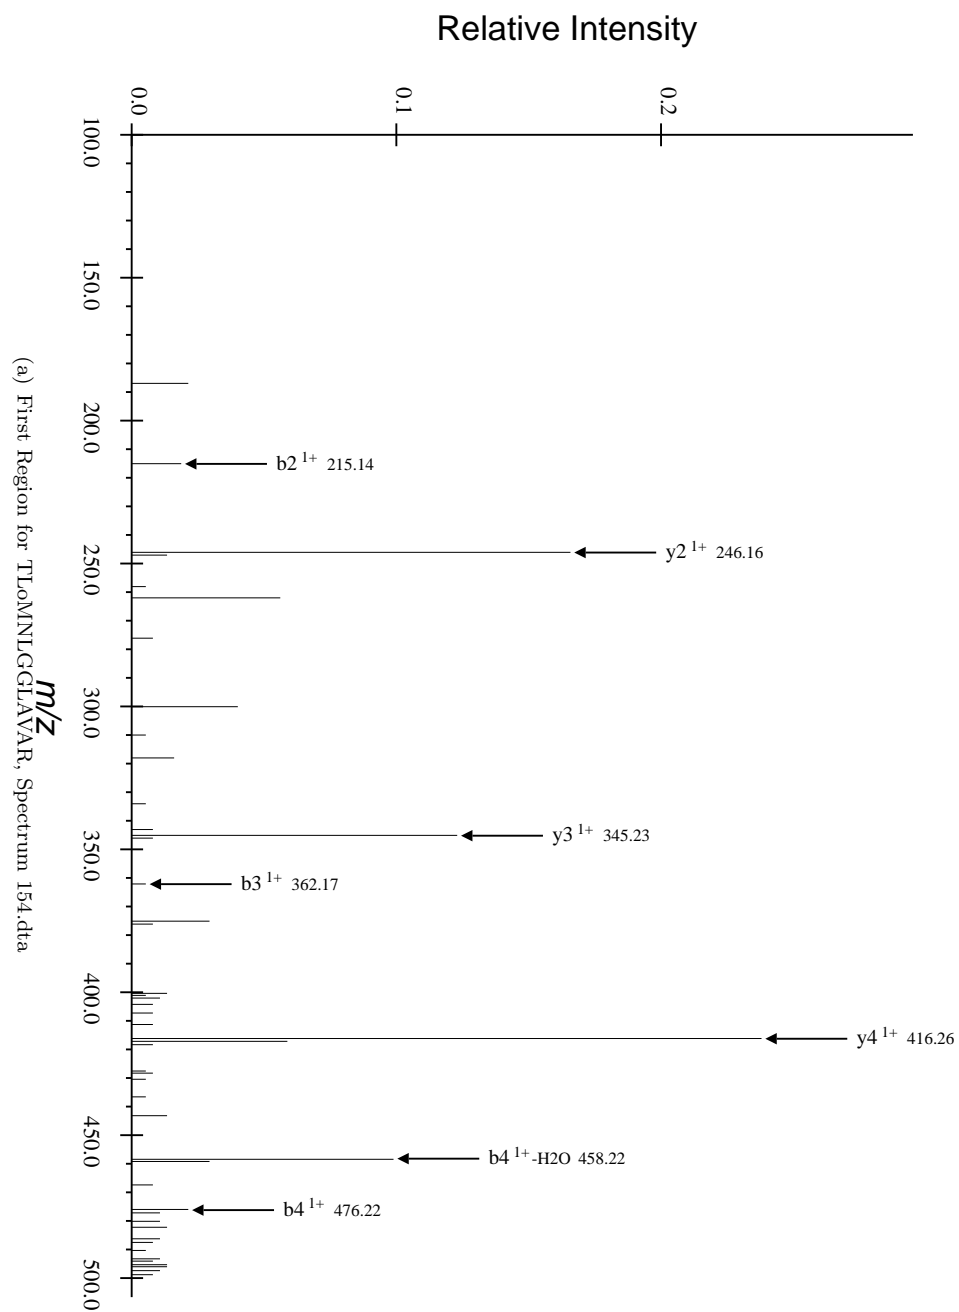

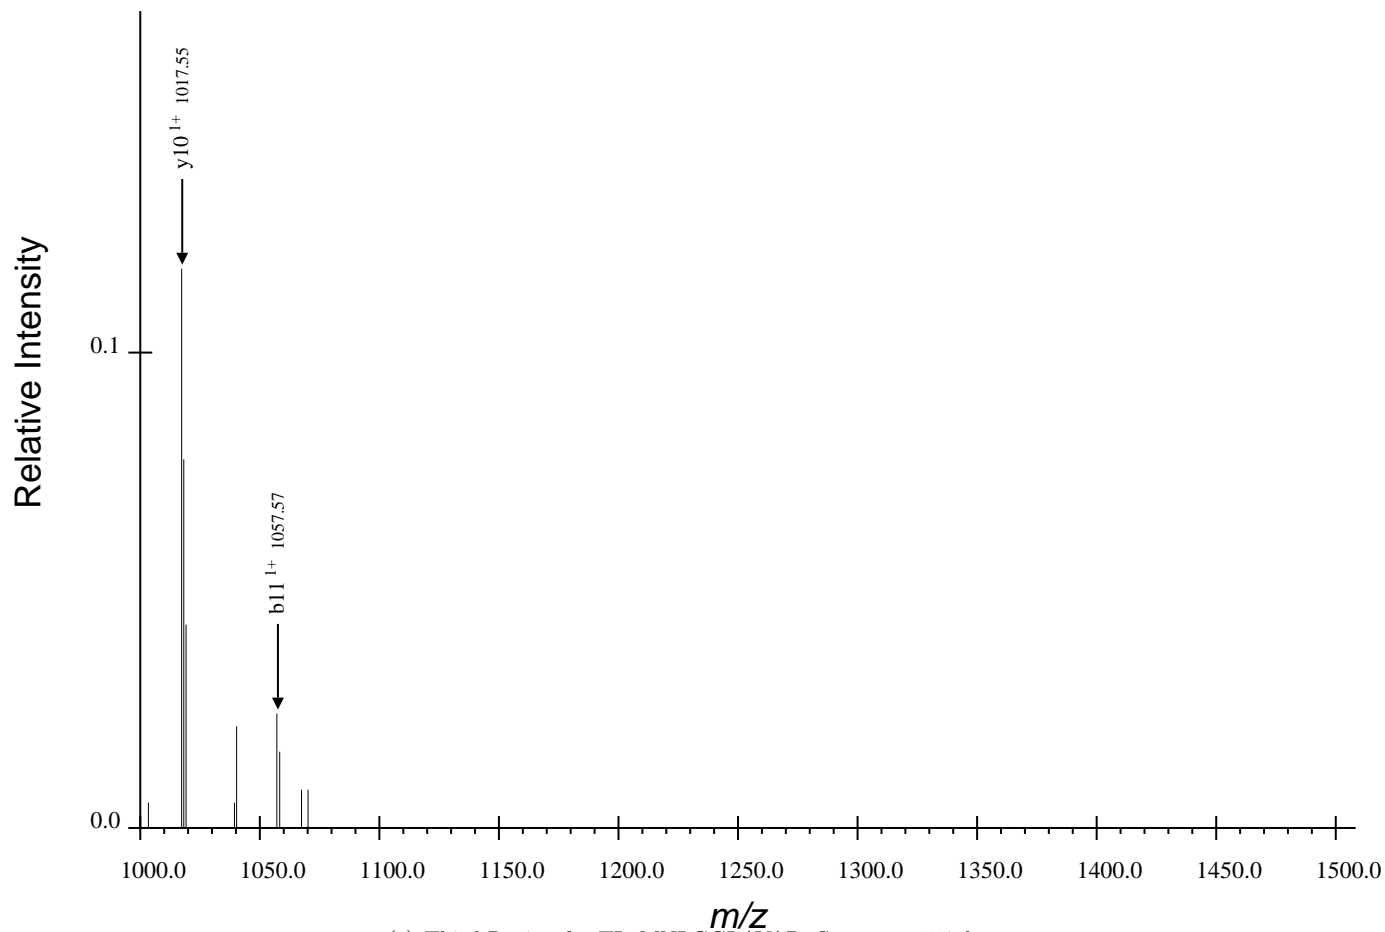

(c) Third Region for TLoMNLGGLAVAR, Spectrum 154.dta

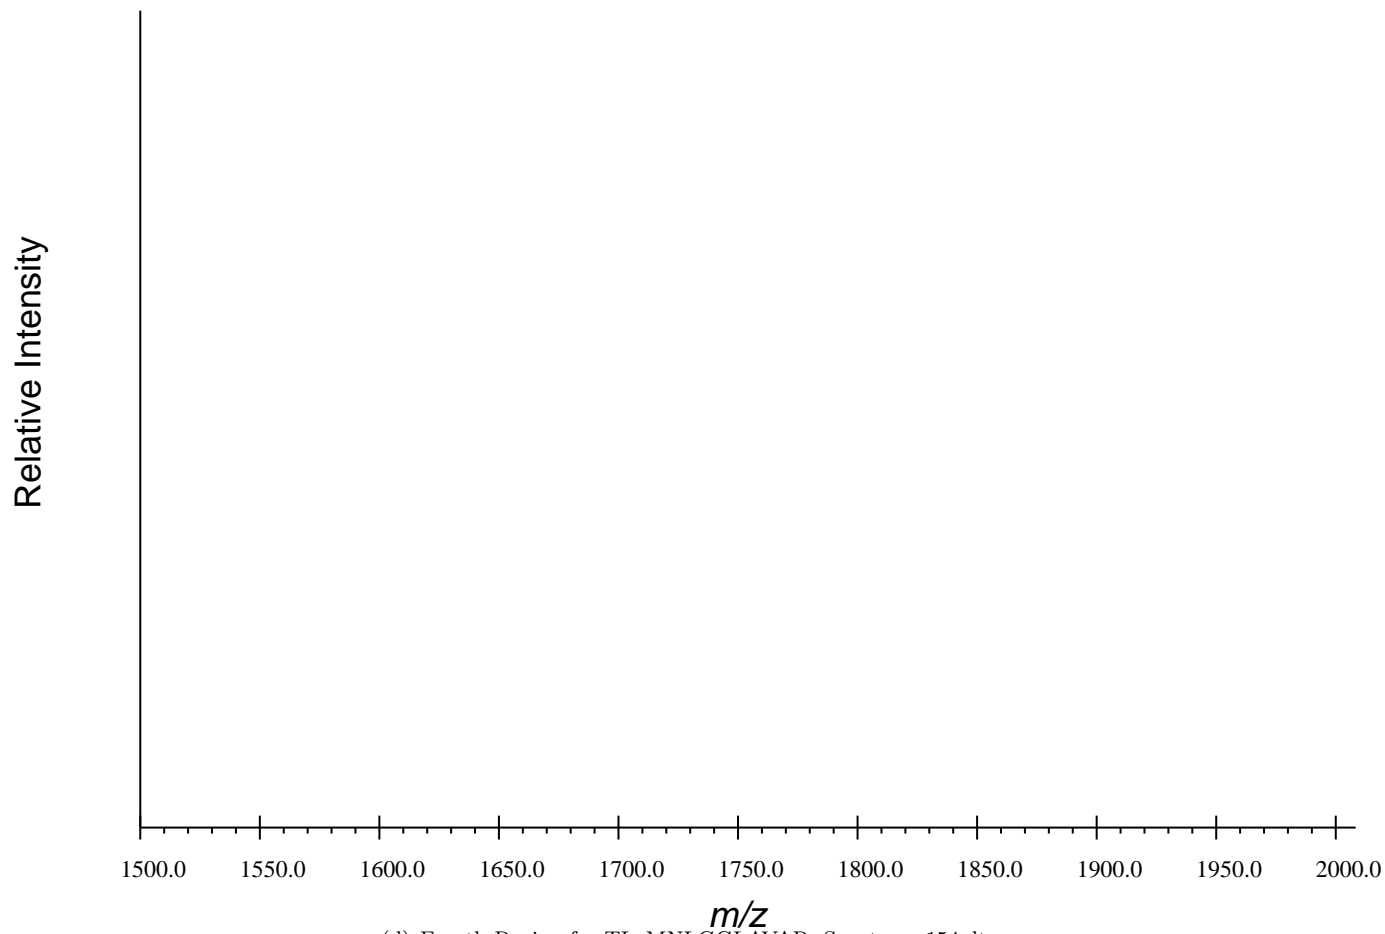

(d) Fourth Region for TLoMNLGGLAVAR, Spectrum 154.dta



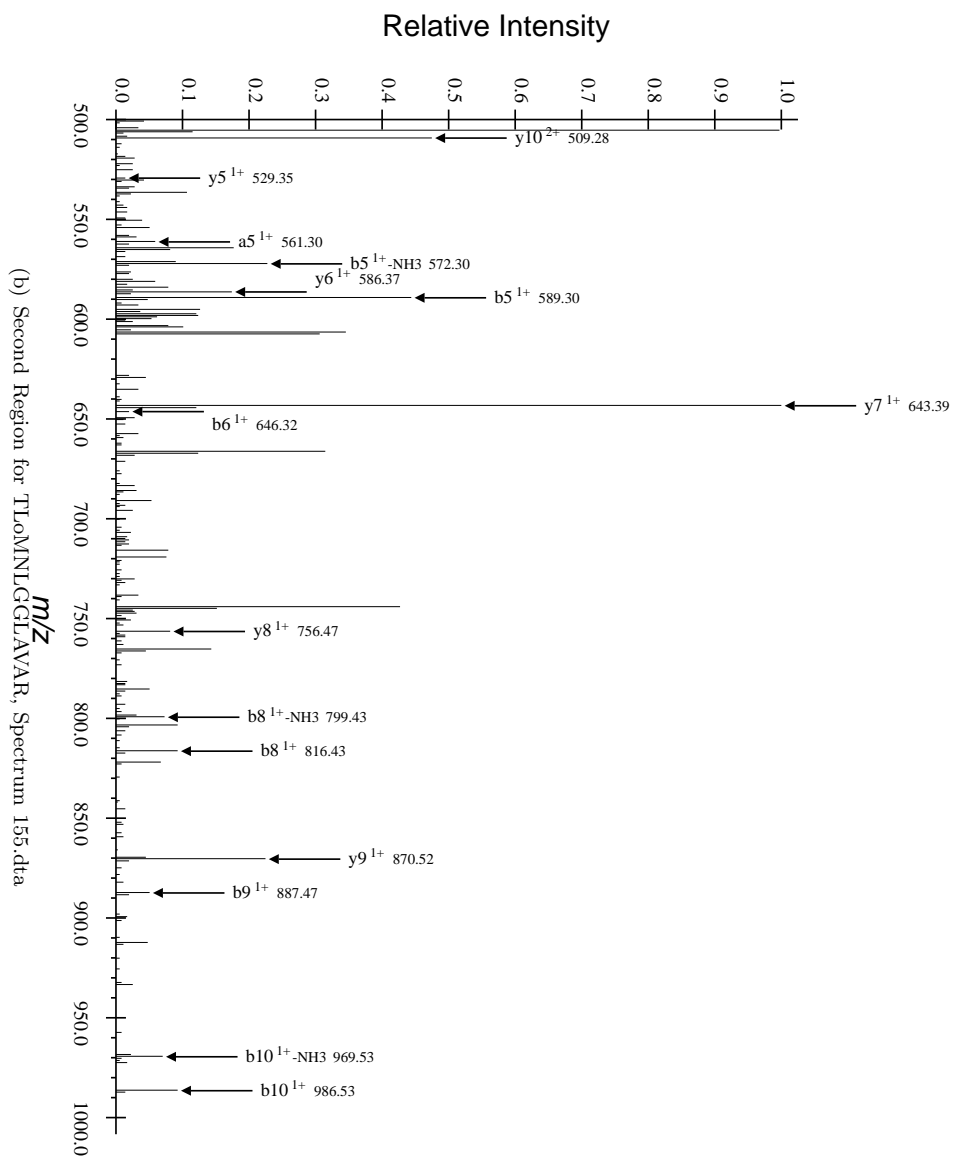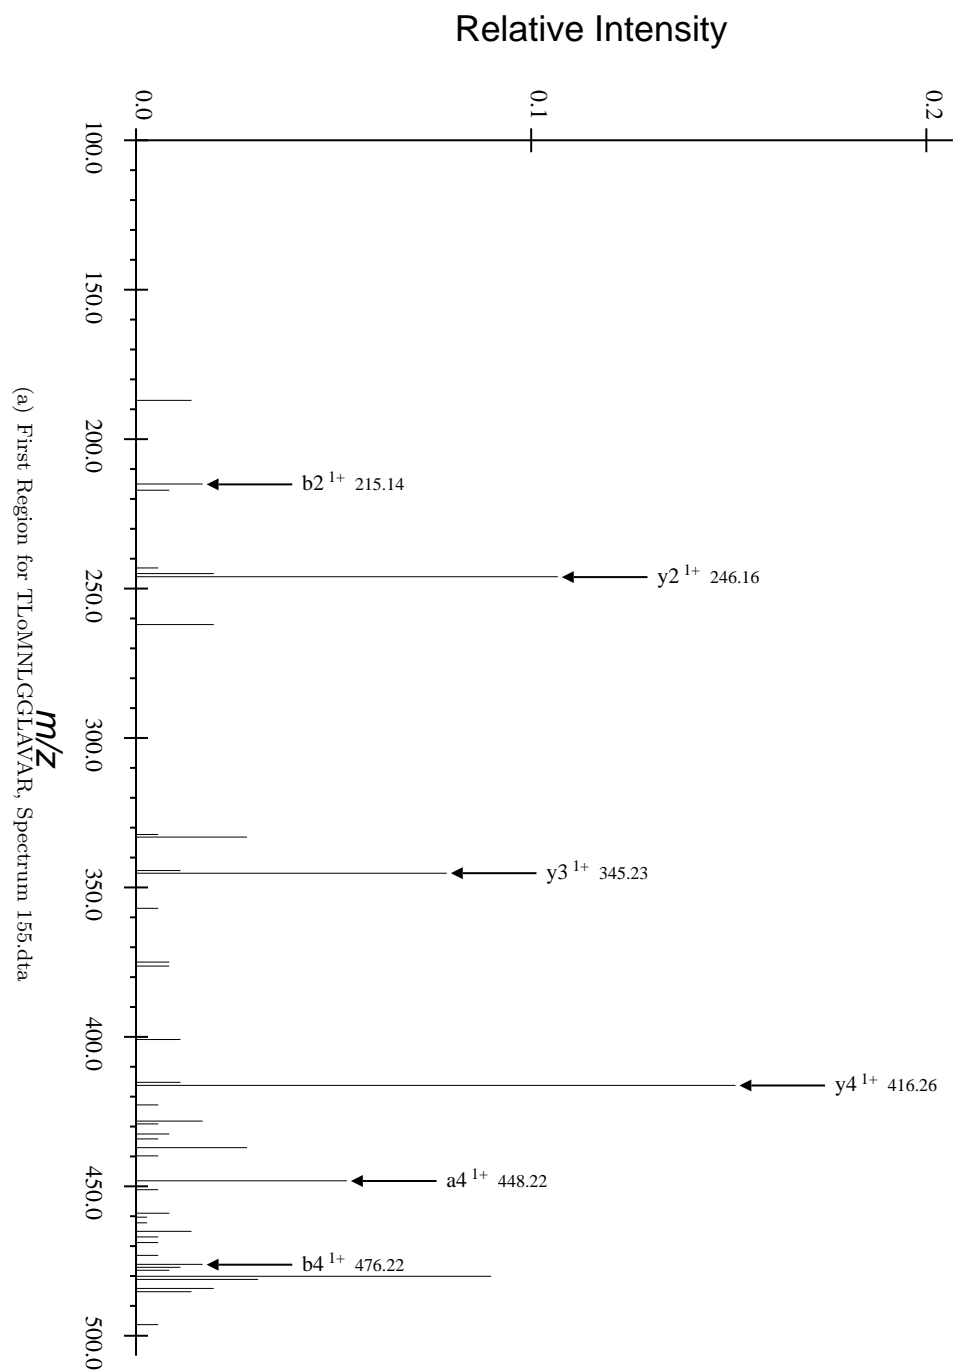

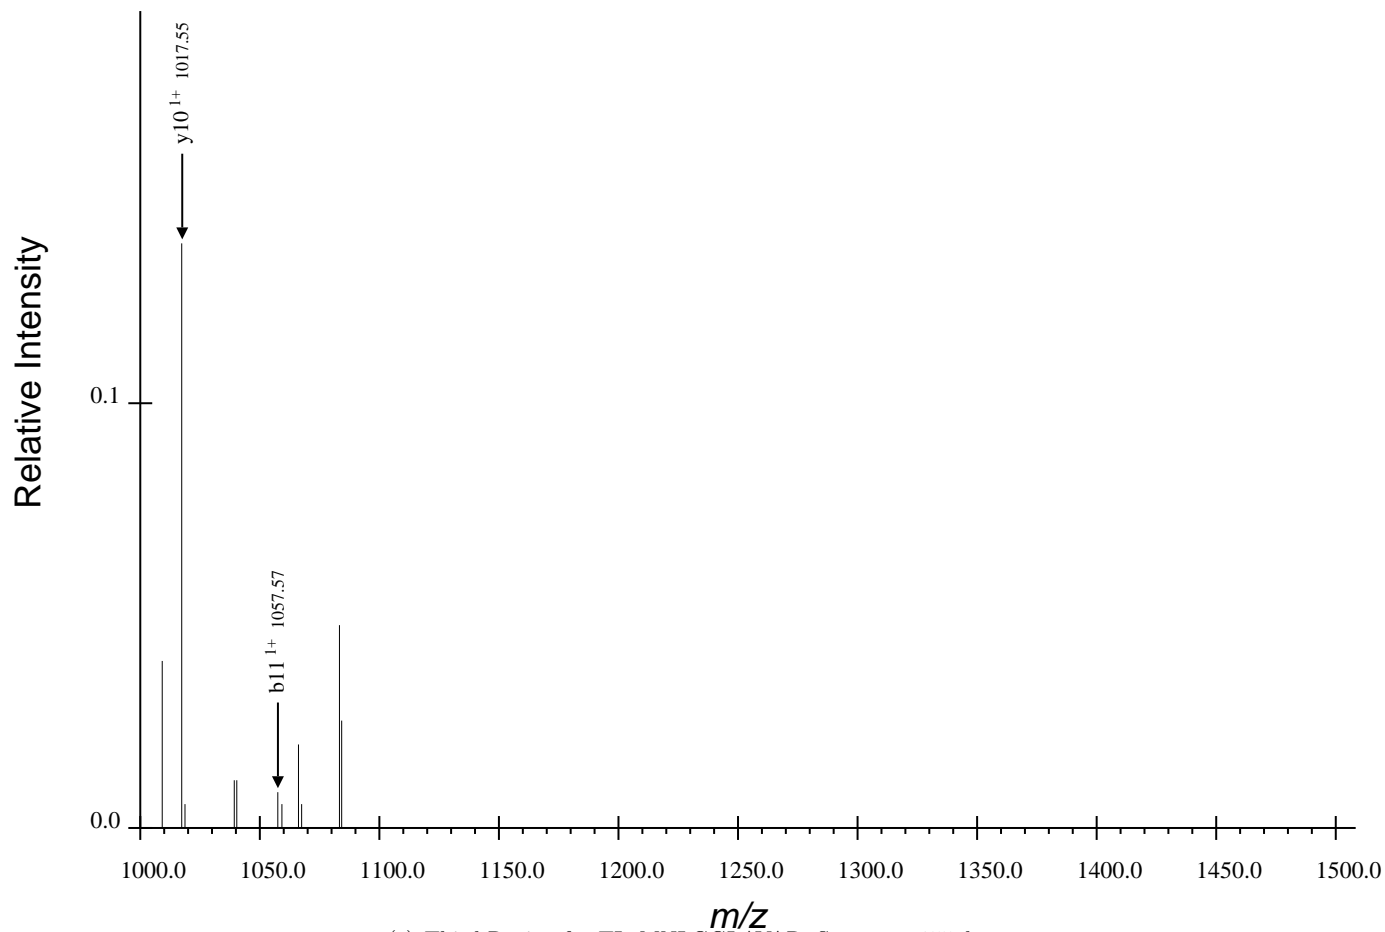

(c) Third Region for TLoMNLGGLAVAR, Spectrum 155.dta

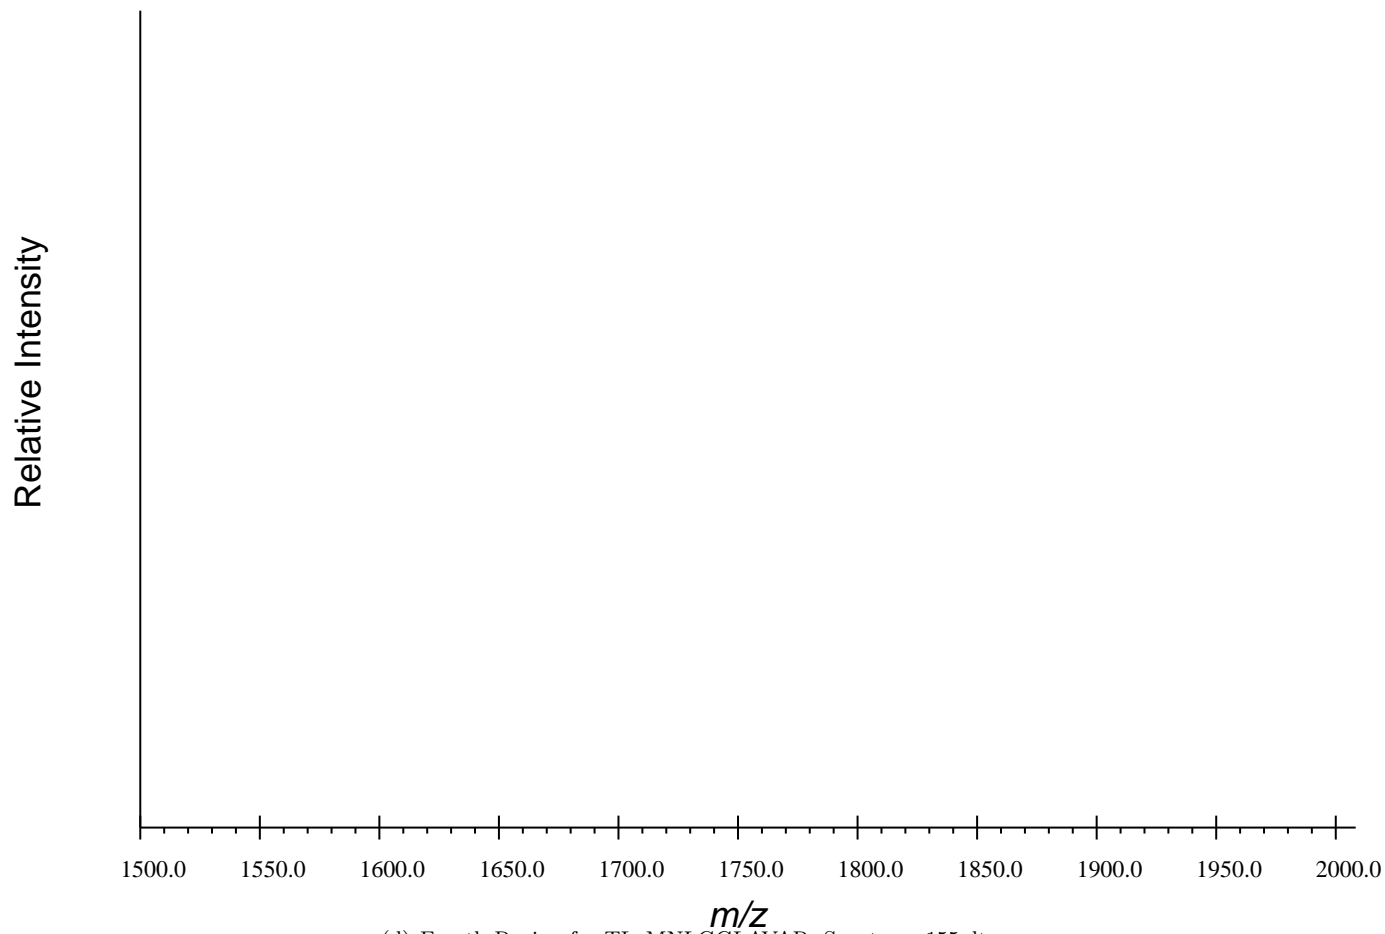

(d) Fourth Region for TLoMNLGGLAVAR, Spectrum 155.dta

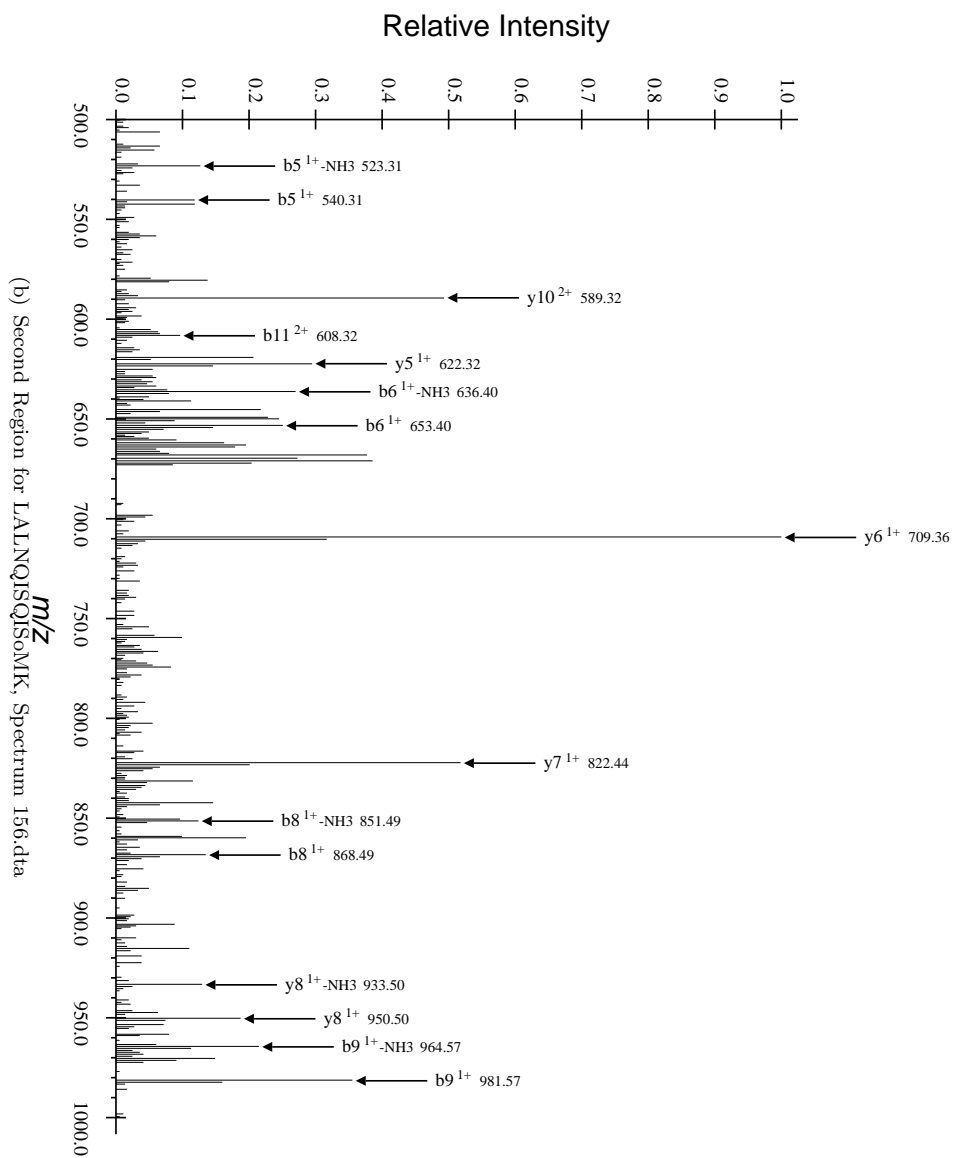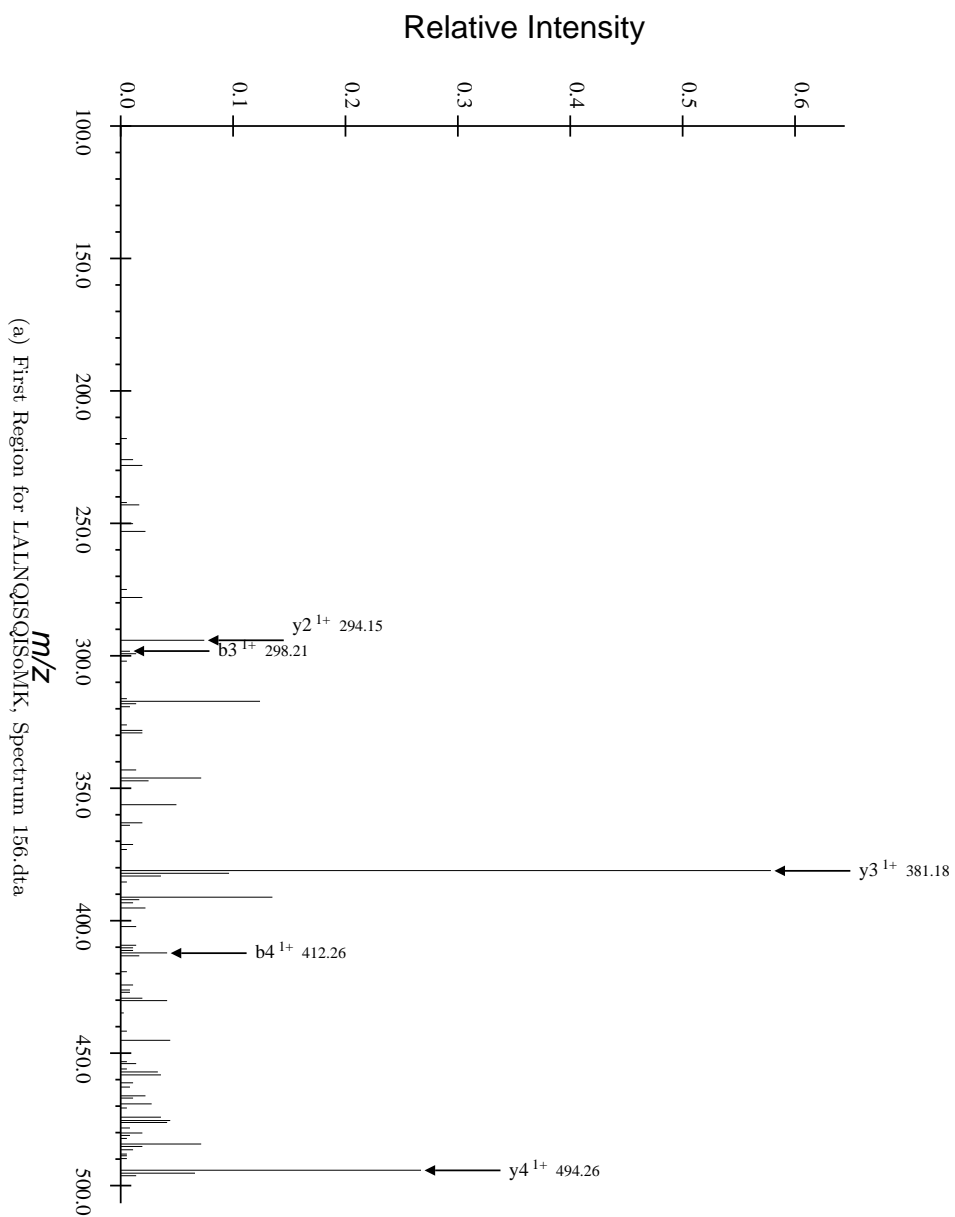

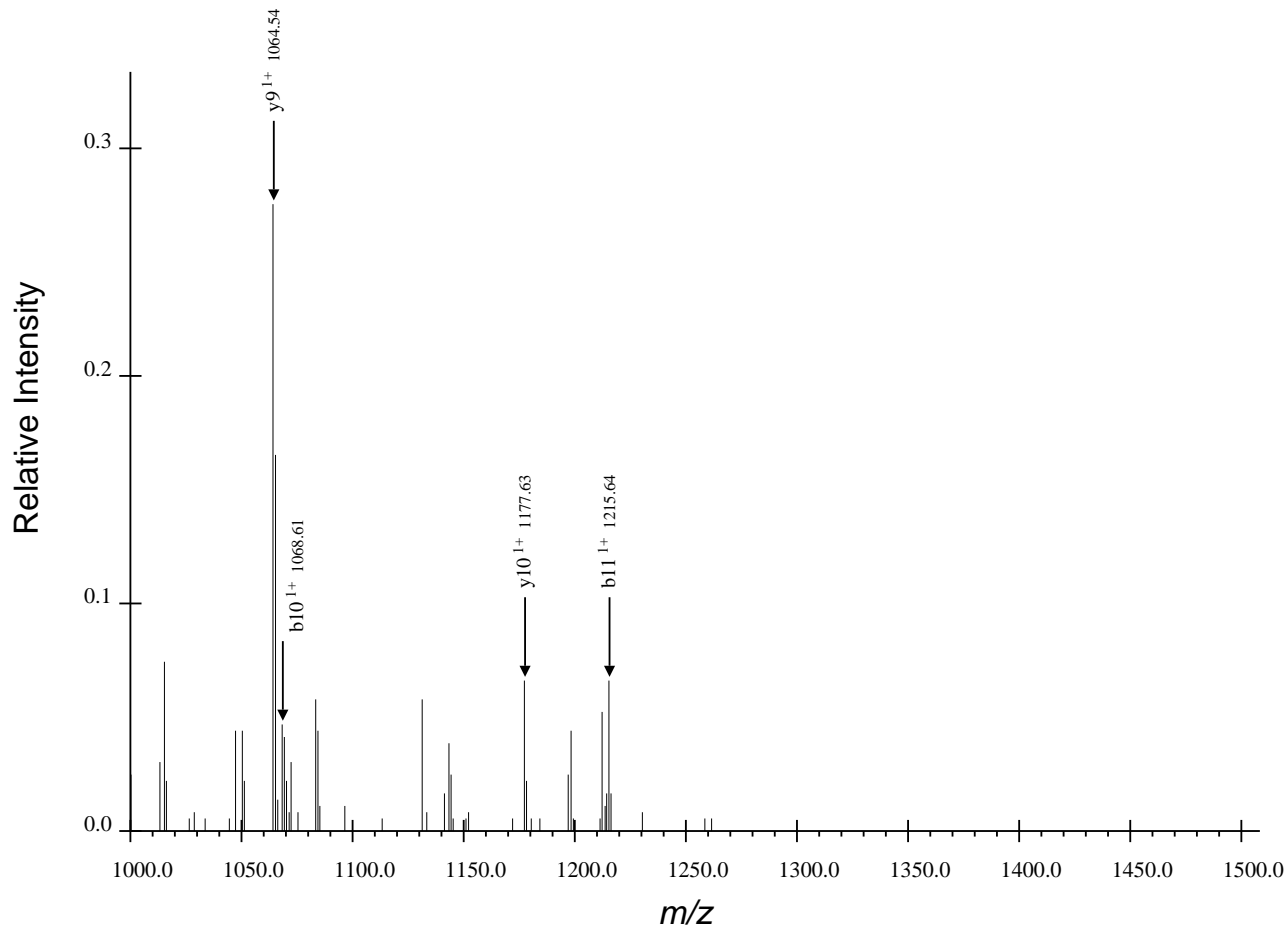

(c) Third Region for LALNQISQISoMK, Spectrum 156.dta

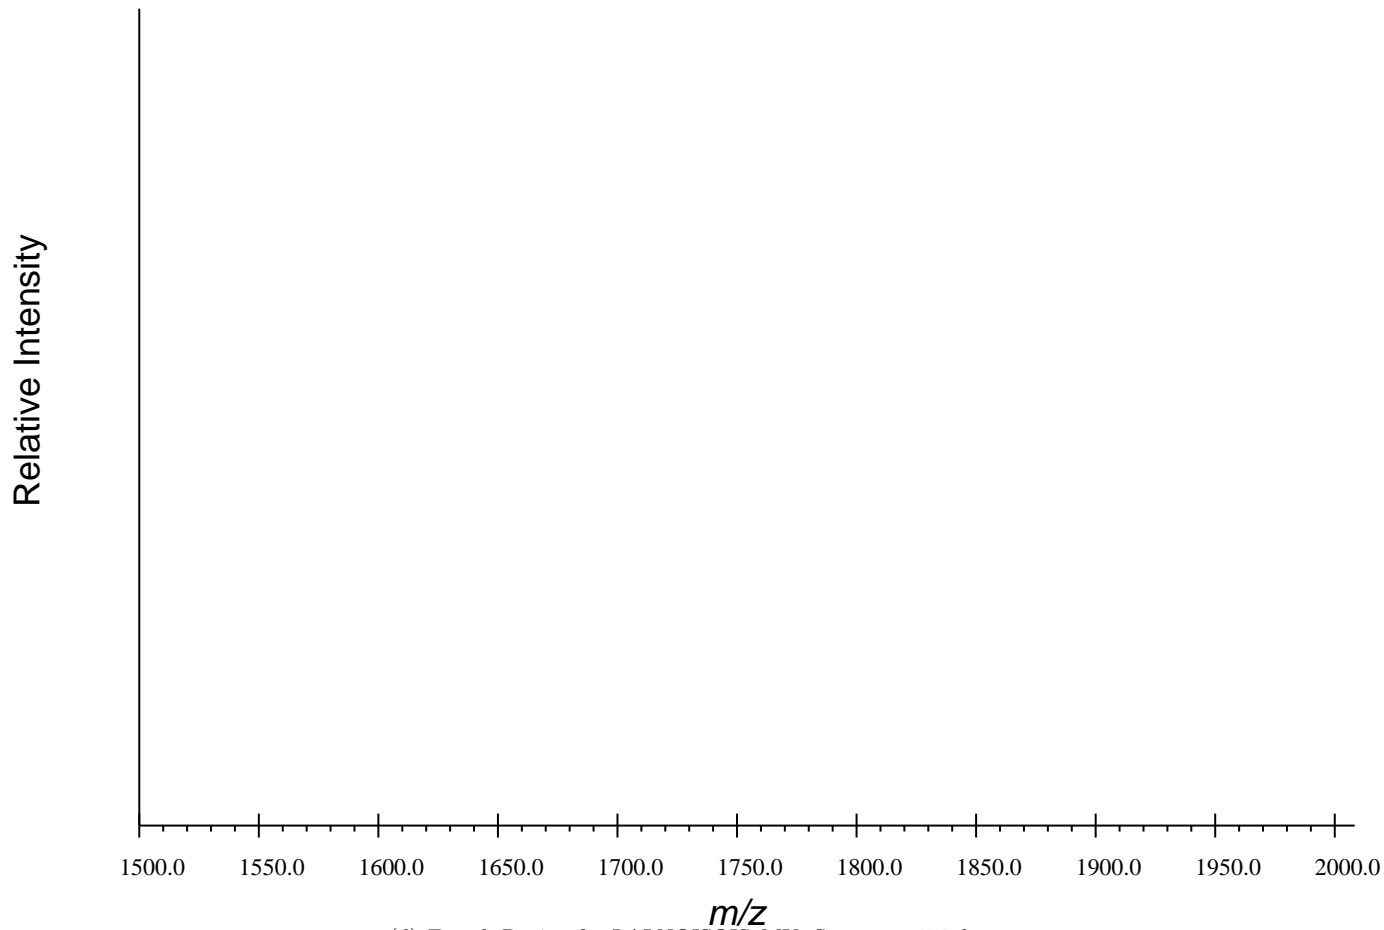

(d) Fourth Region for LALNQISQISoMK, Spectrum 156.dta

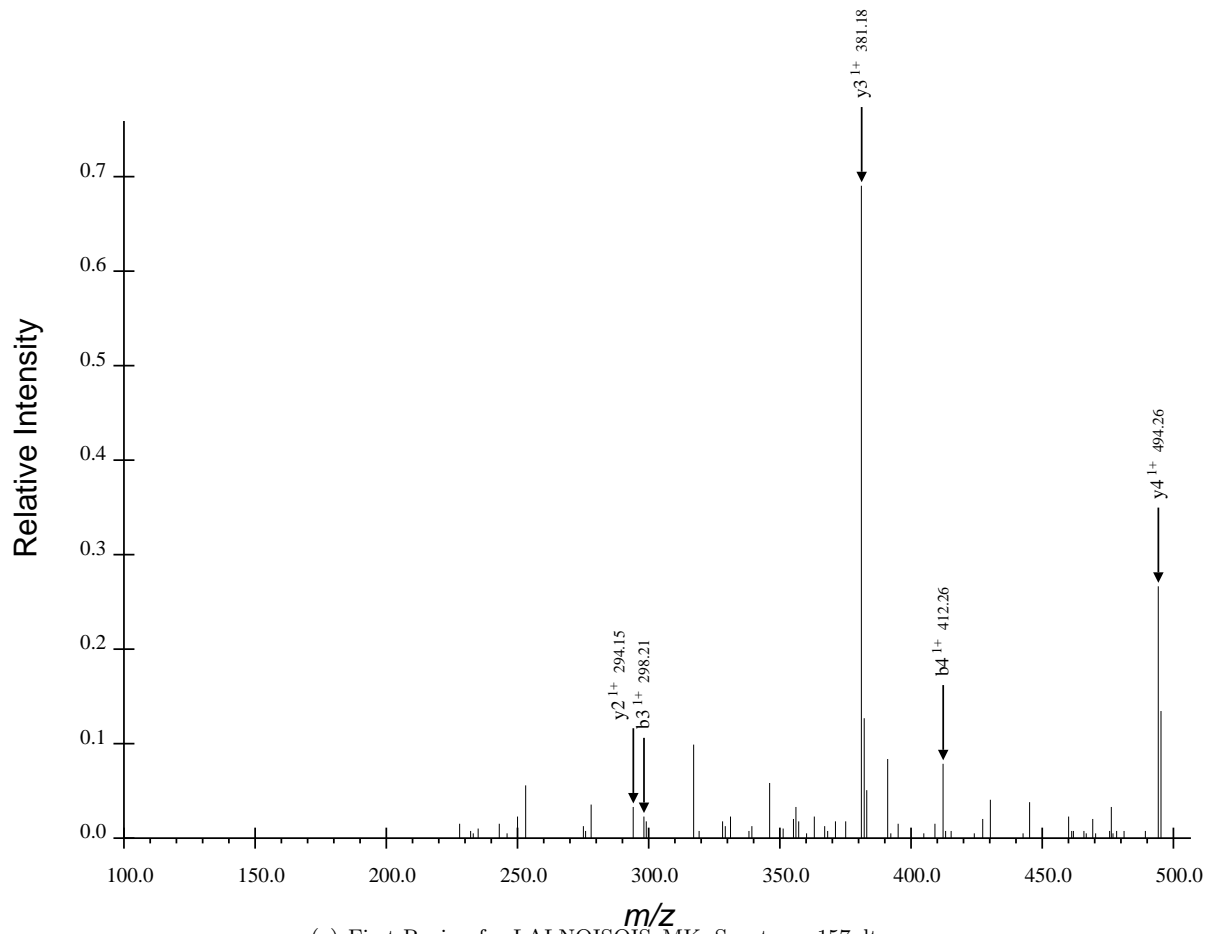

(a) First Region for LALNQISQISoMK, Spectrum 157.dta

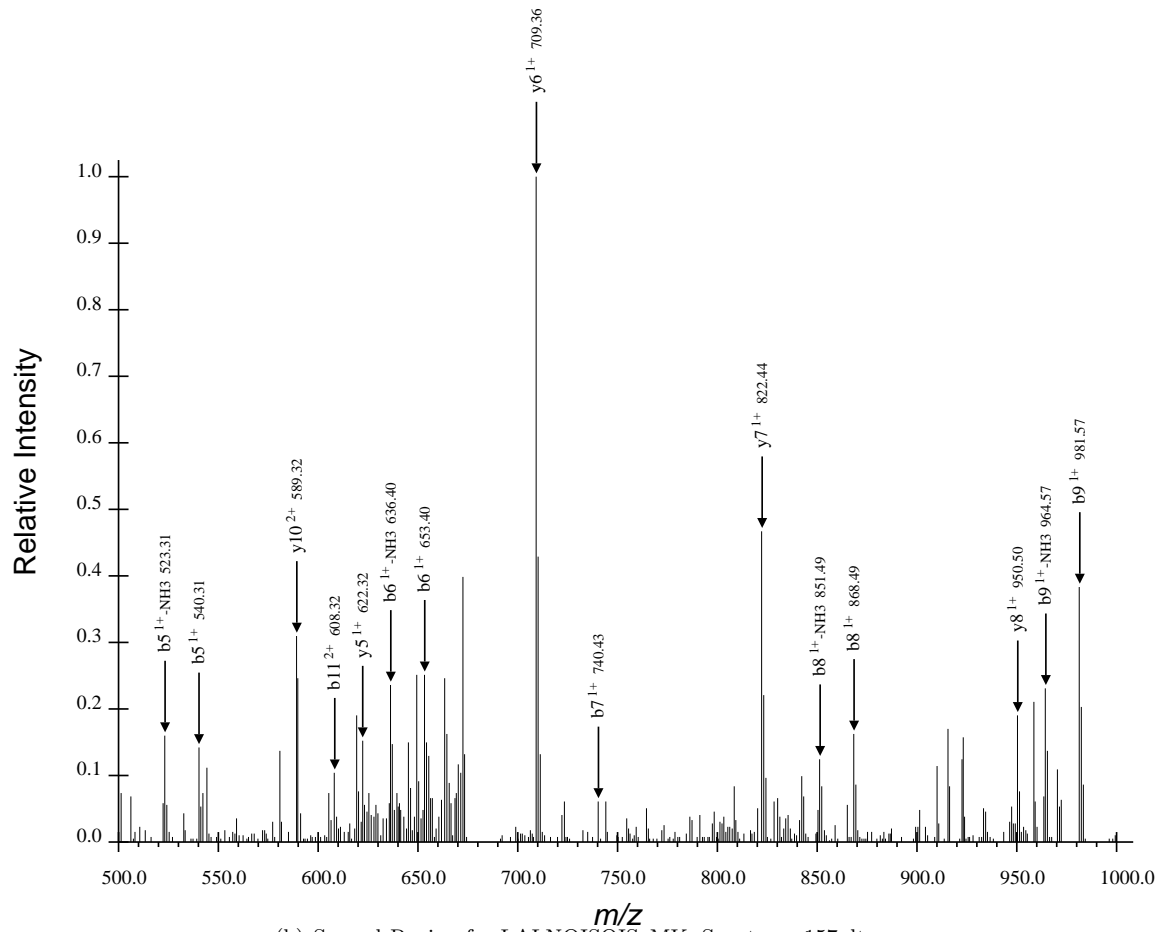

(b) Second Region for LALNQISQISoMK, Spectrum 157.dta

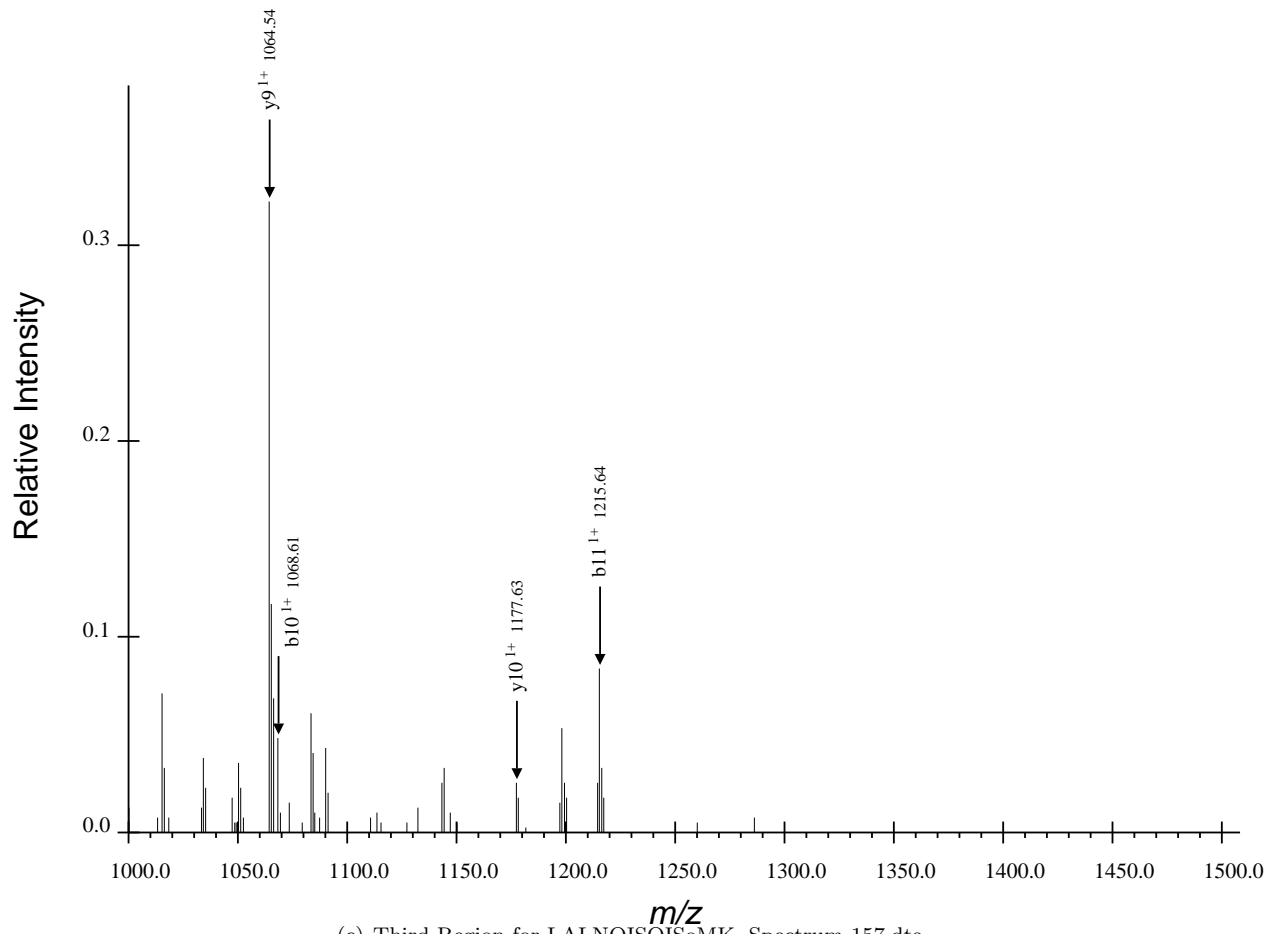

(c) Third Region for LALNQISQISoMK, Spectrum 157.dta

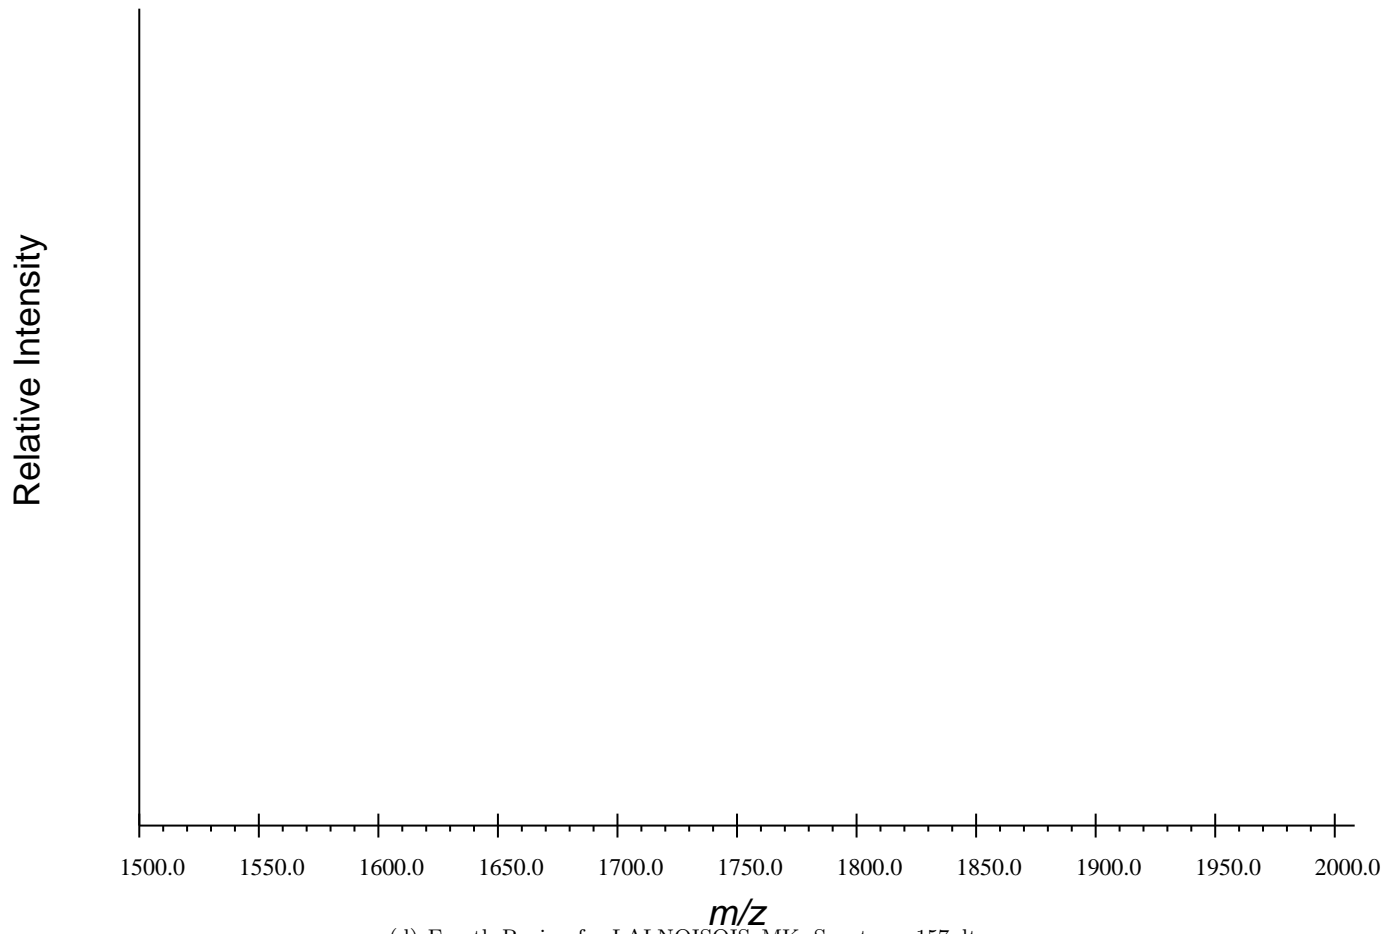

(d) Fourth Region for LALNQISQISoMK, Spectrum 157.dta

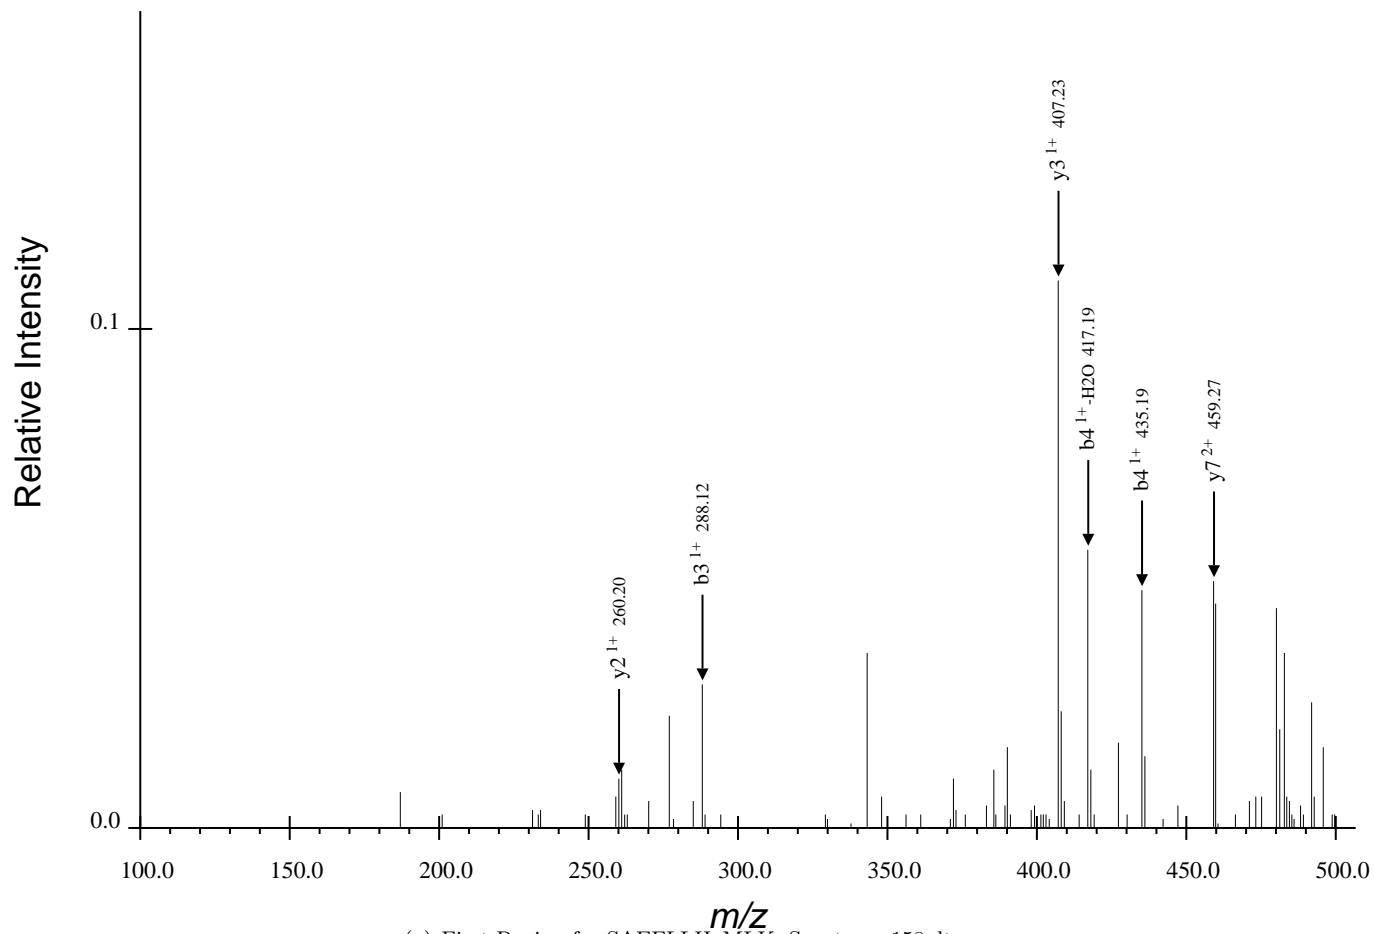

(a) First Region for SAEFLHhMLK, Spectrum 158.dta

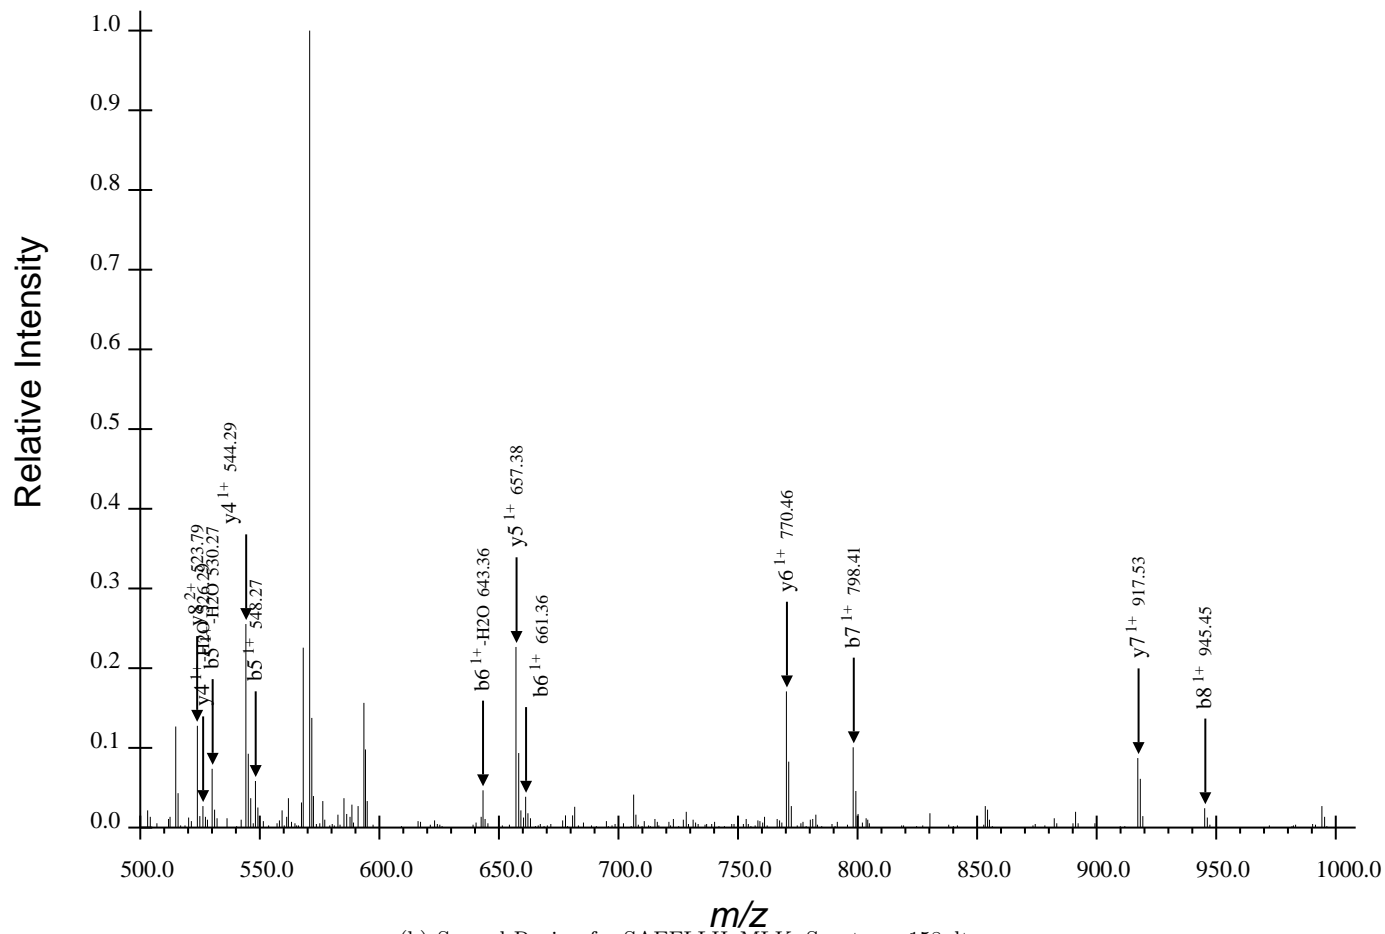

(b) Second Region for SAEFLHhMLK, Spectrum 158.dta

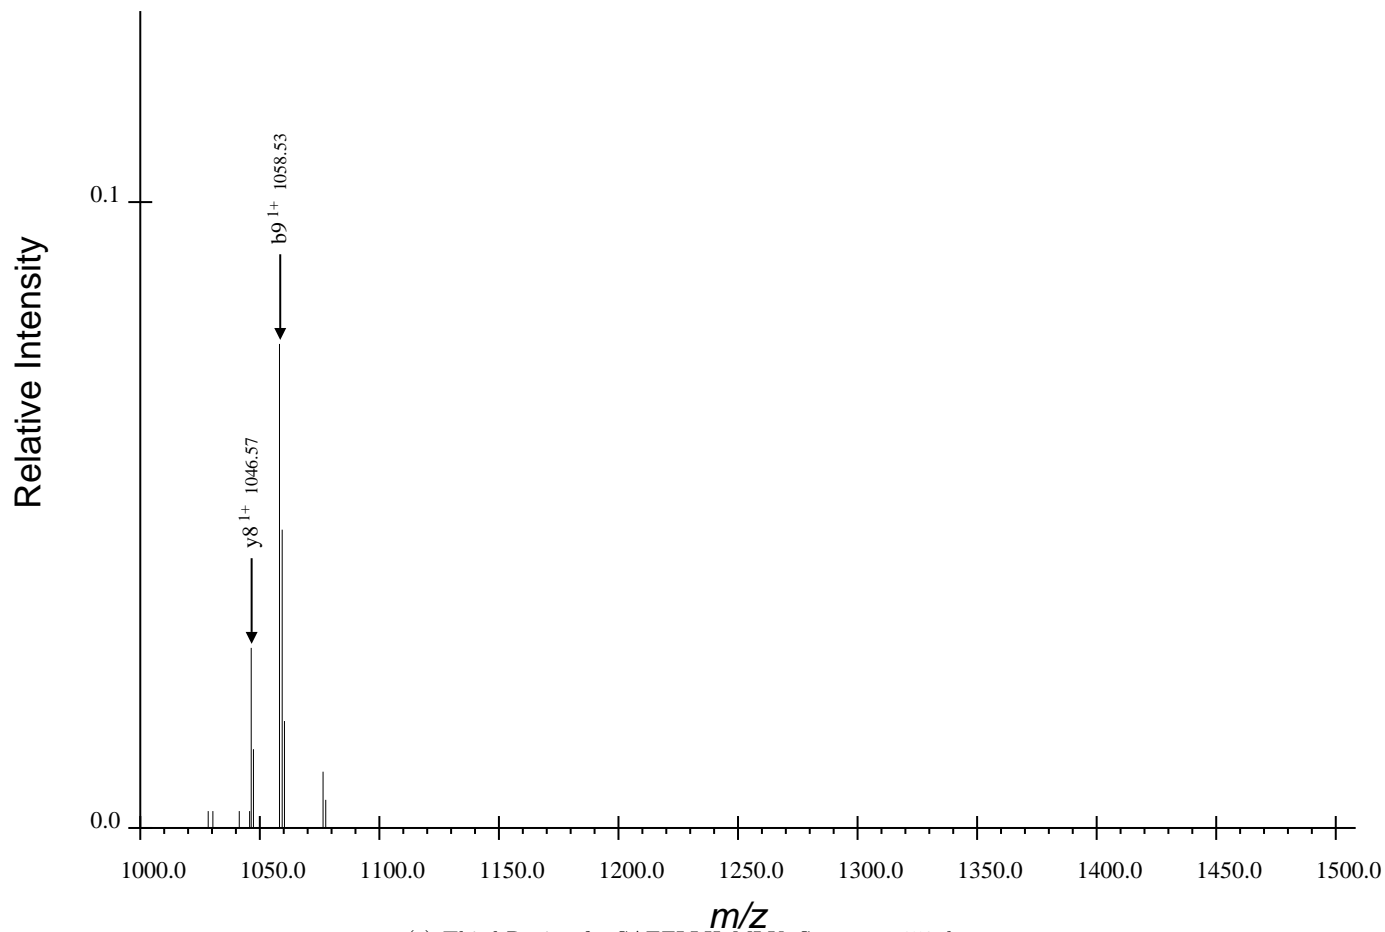

(c) Third Region for SAEFLLHoMLK, Spectrum 158.dta

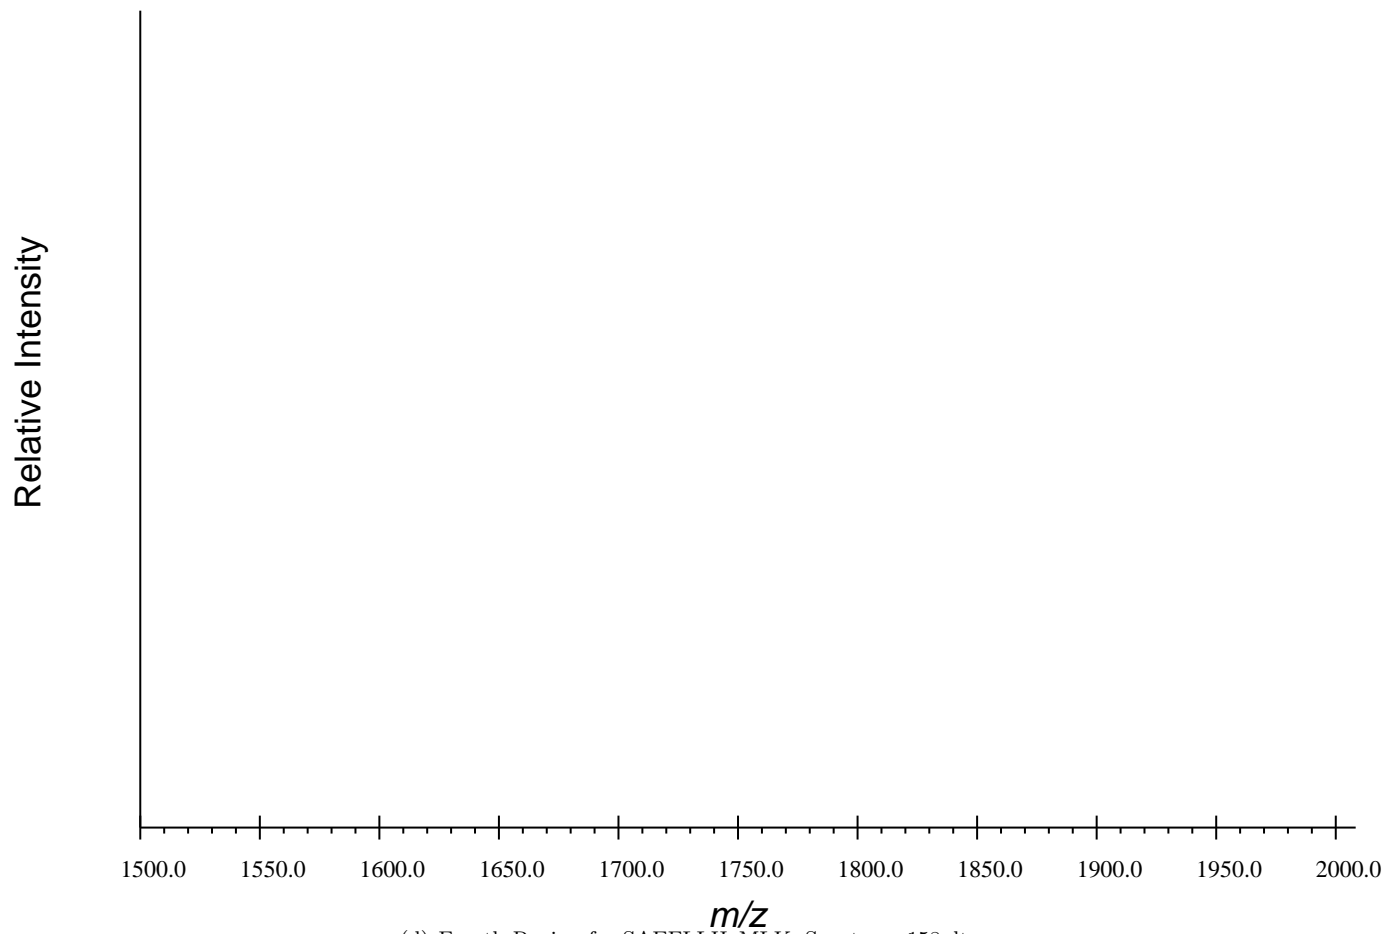

(d) Fourth Region for SAEFLLHoMLK, Spectrum 158.dta



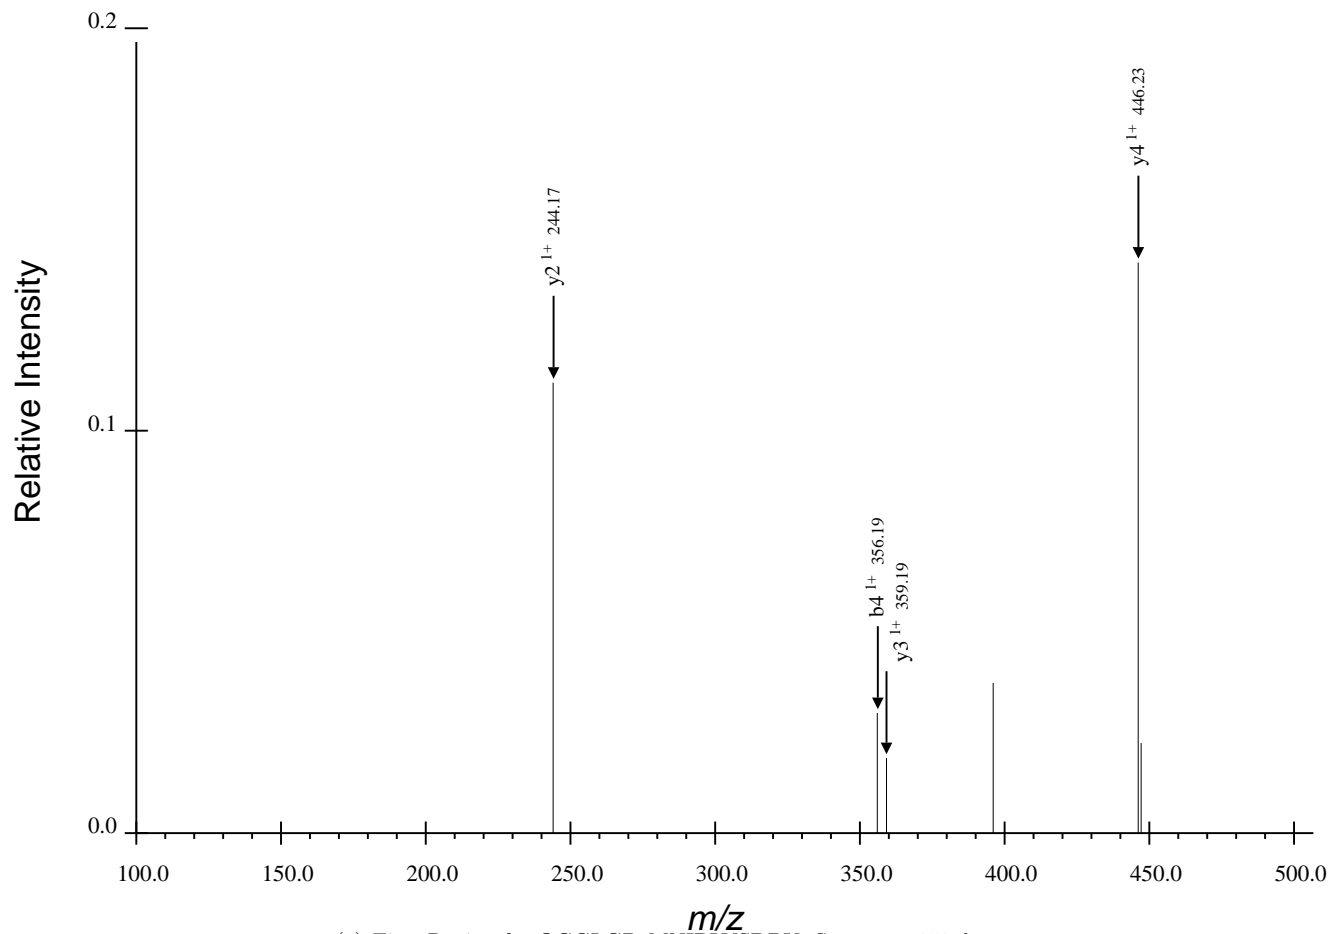

(a) First Region for QGGLGPoMNIPLVSDPK, Spectrum 159.dta

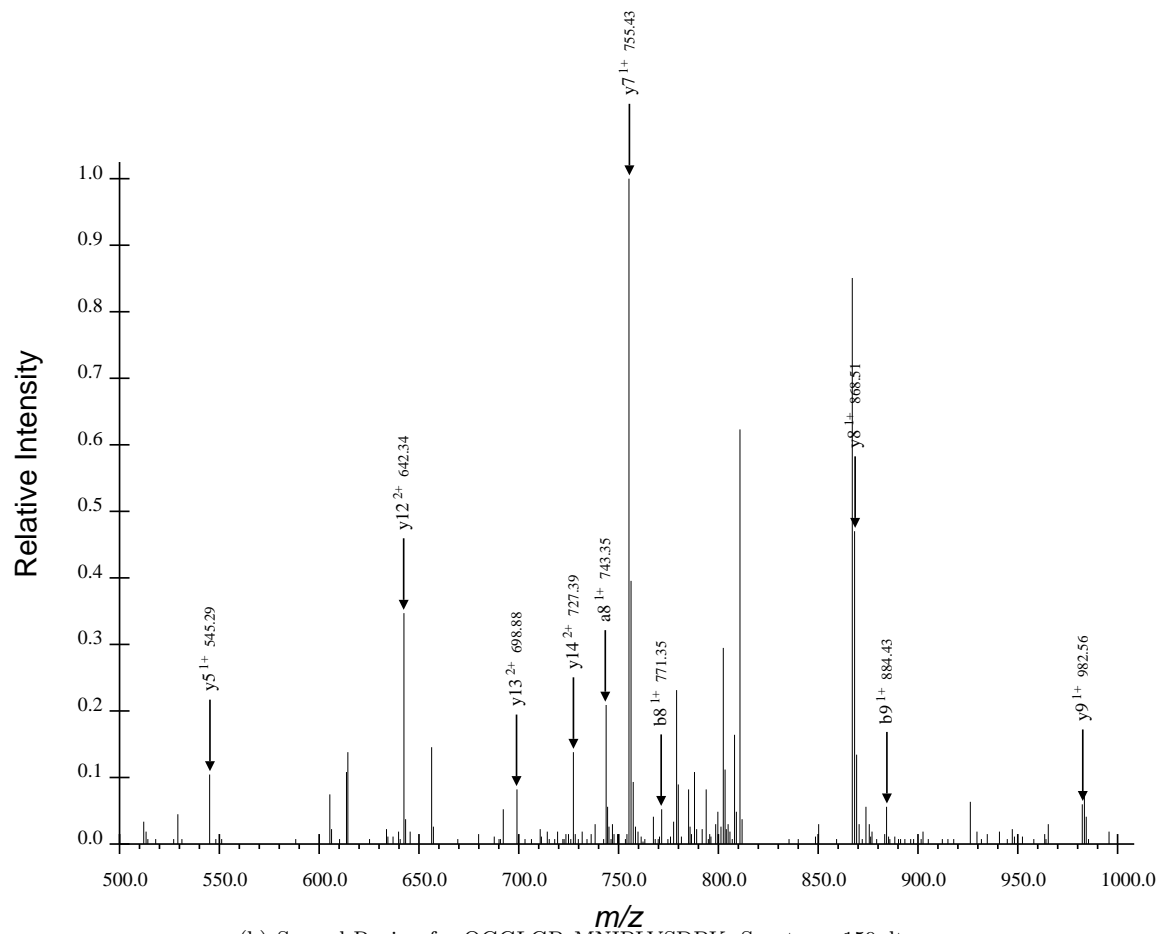

(b) Second Region for QGGLGPoMNIPLVSDPK, Spectrum 159.dta

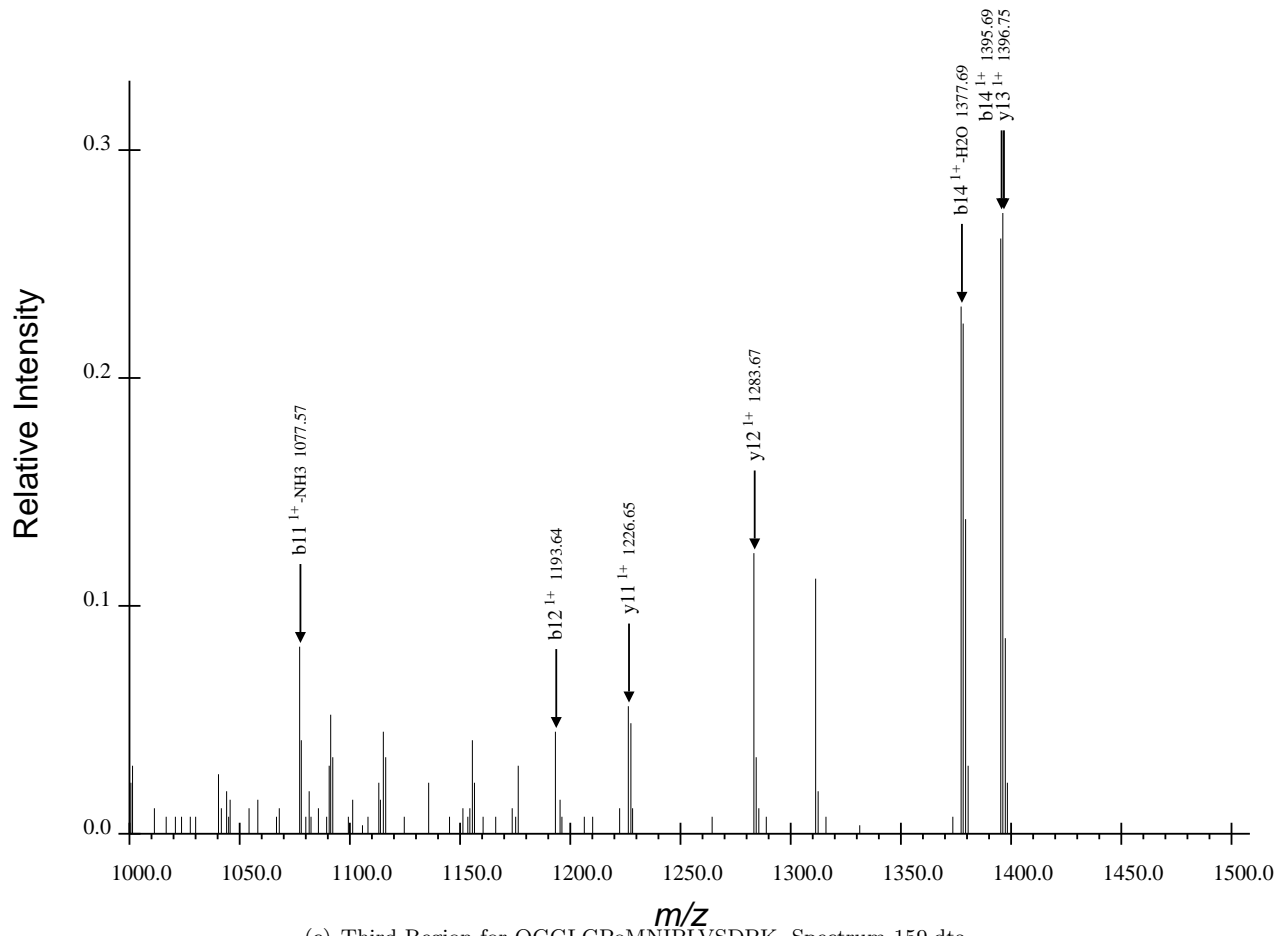

(c) Third Region for QGGLGPoMNIPLVSDPK, Spectrum 159.dta

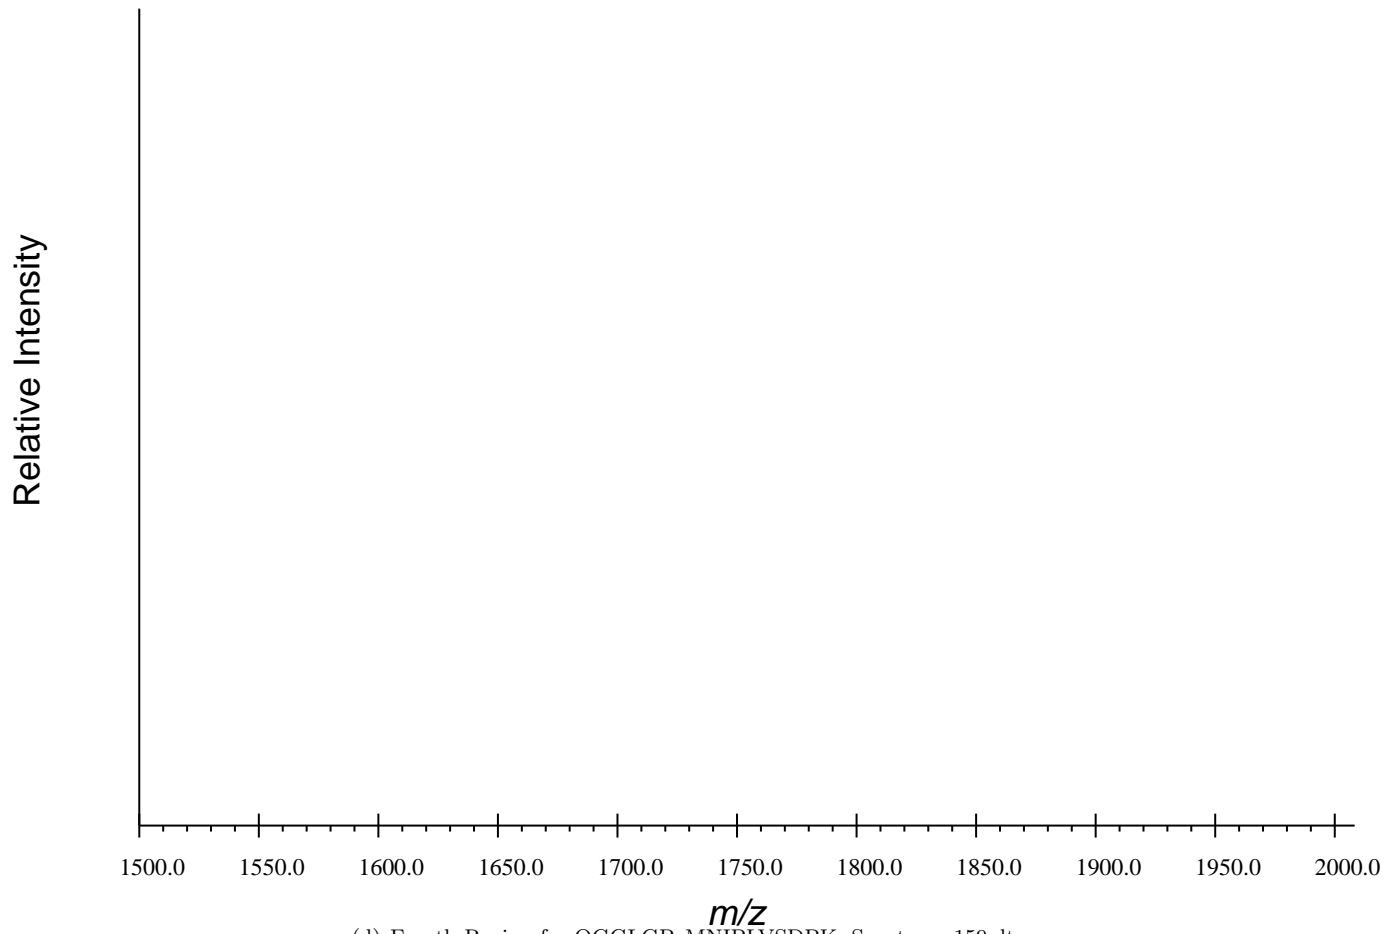

(d) Fourth Region for QGGLGPoMNIPLVSDPK, Spectrum 159.dta

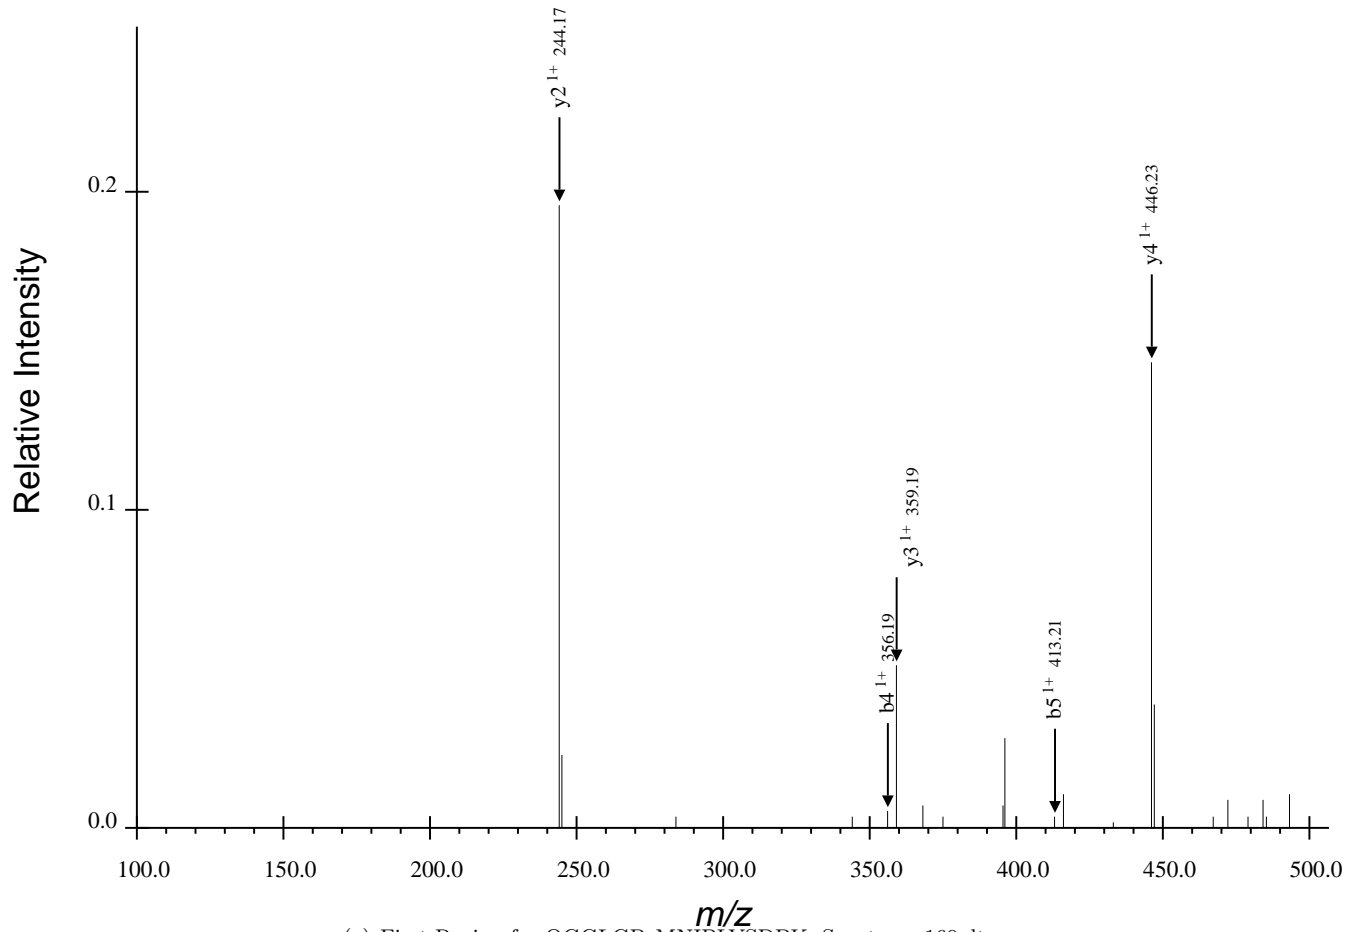

(a) First Region for QGGLGPoMNIPLVSDPK, Spectrum 160.dta

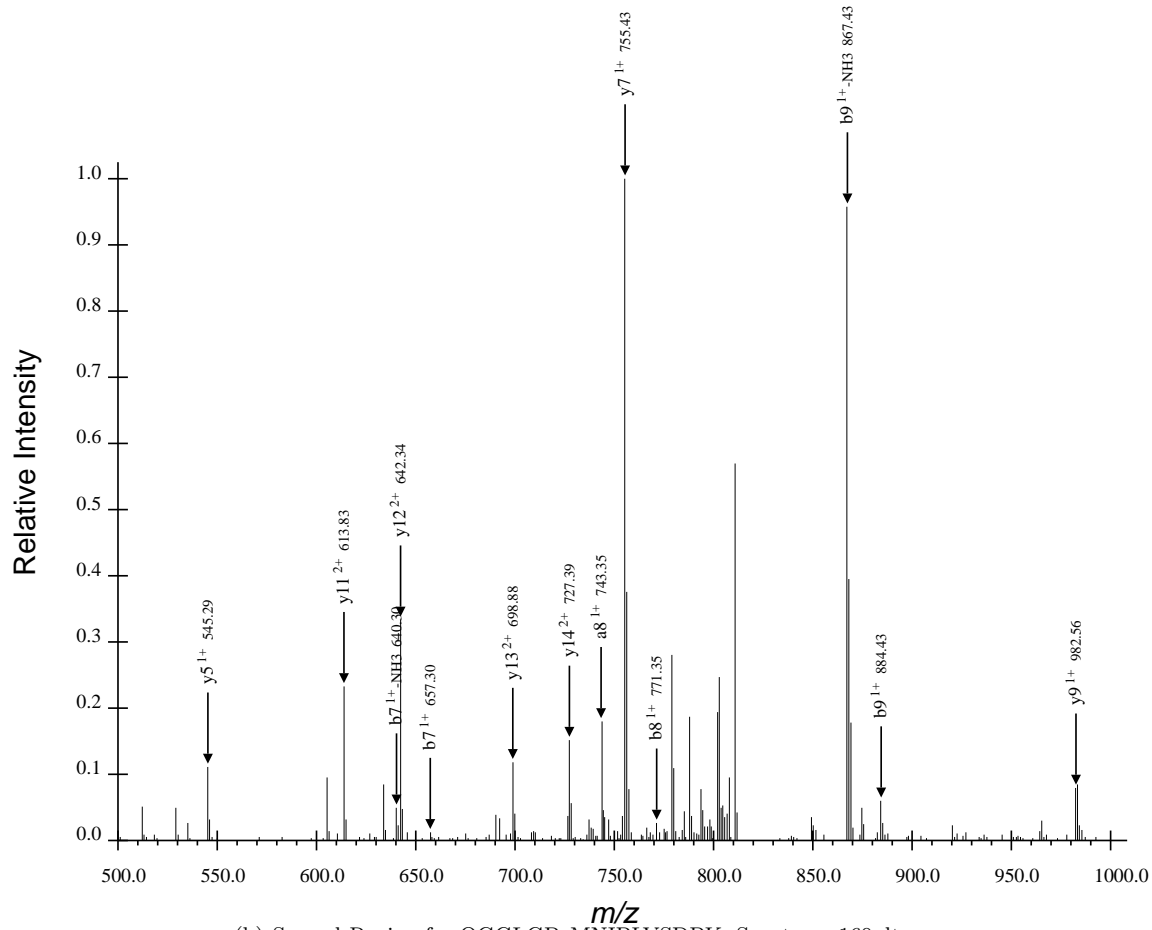

(b) Second Region for QGGLGPoMNIPLVSDPK, Spectrum 160.dta

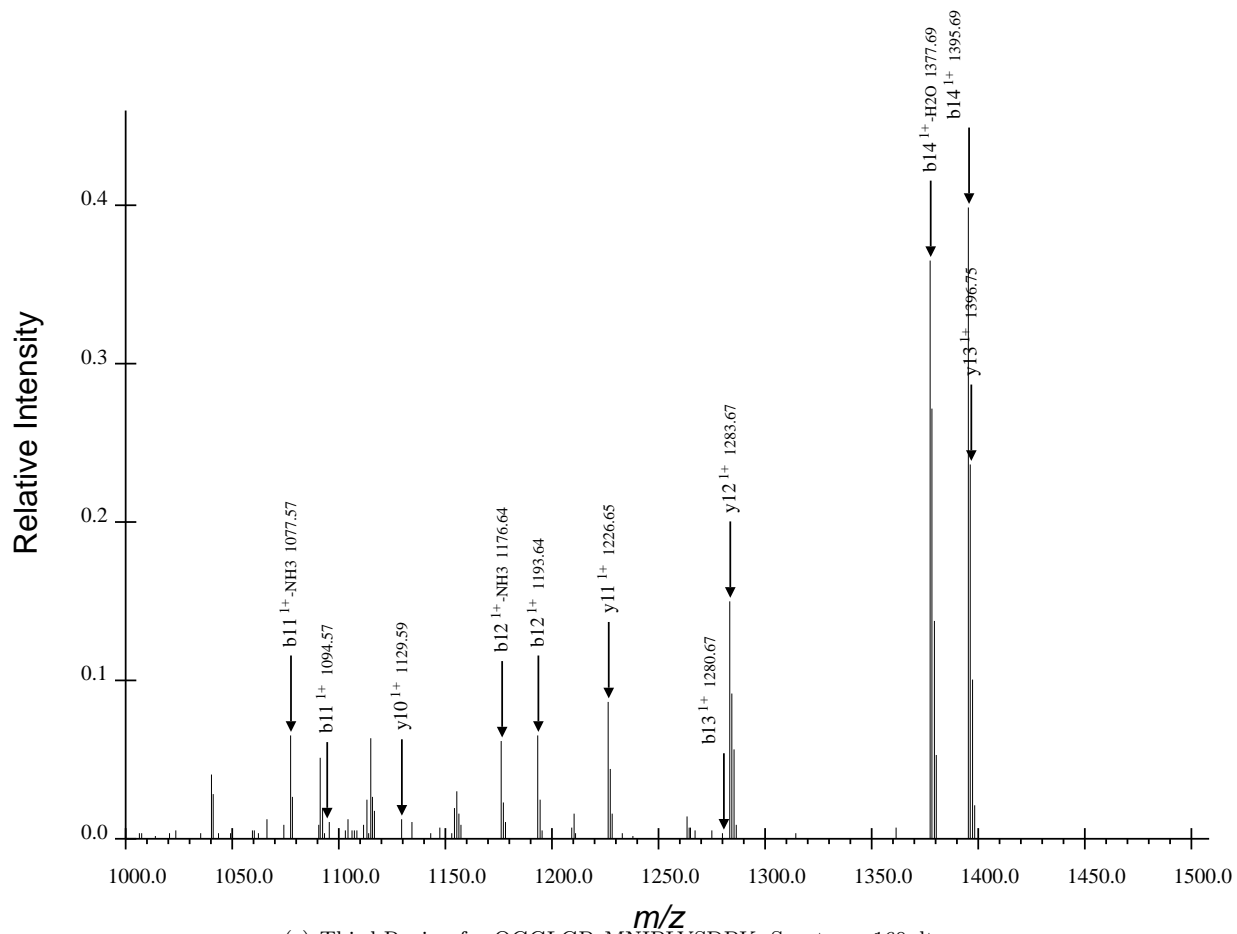

(c) Third Region for QGGLGPoMNIPLVSDPK, Spectrum 160.dta

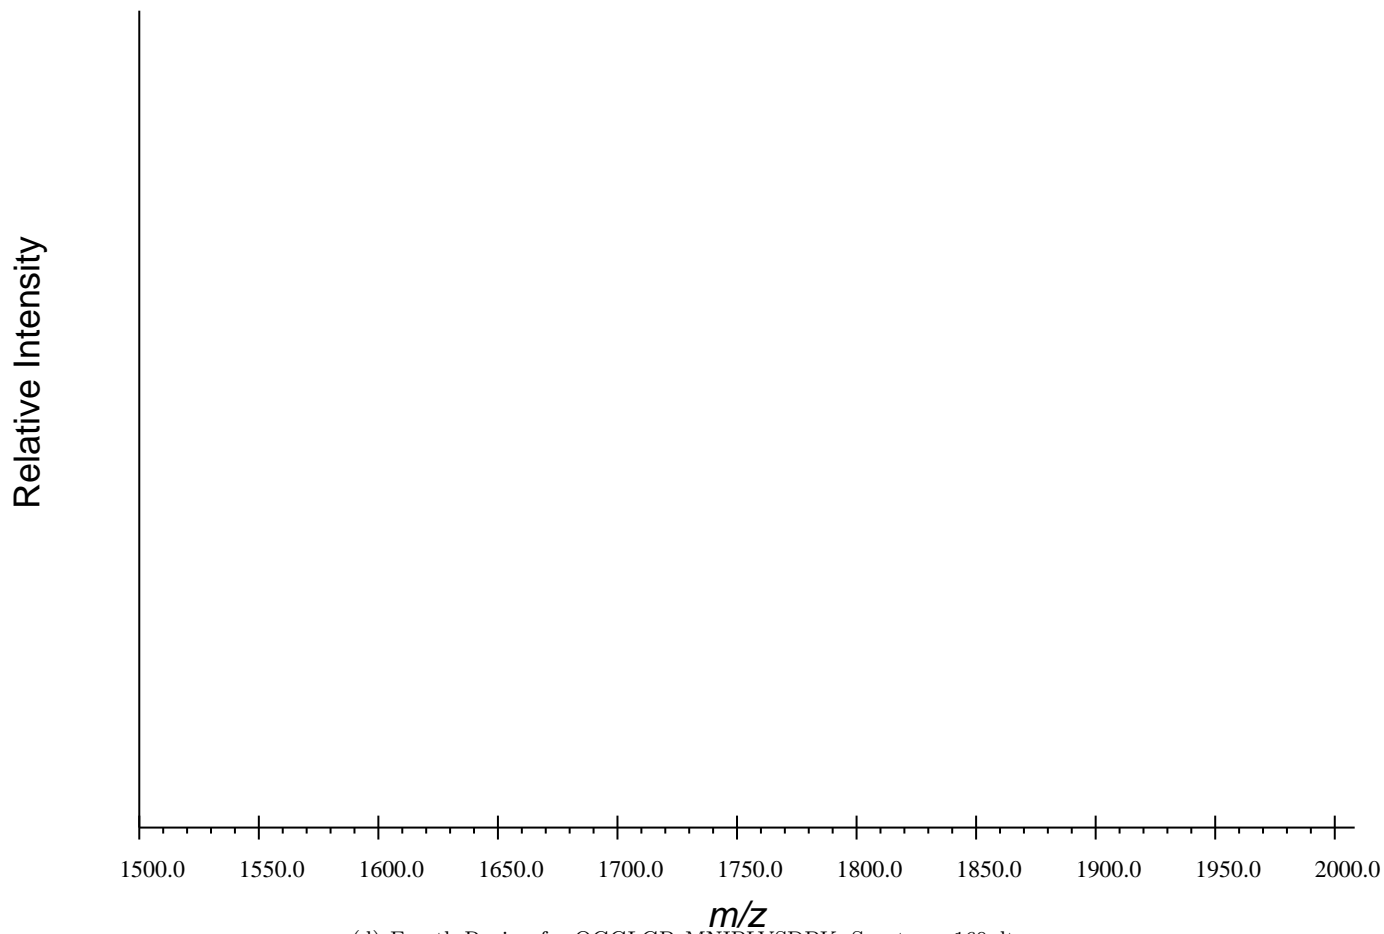

(d) Fourth Region for QGGLGPoMNIPLVSDPK, Spectrum 160.dta

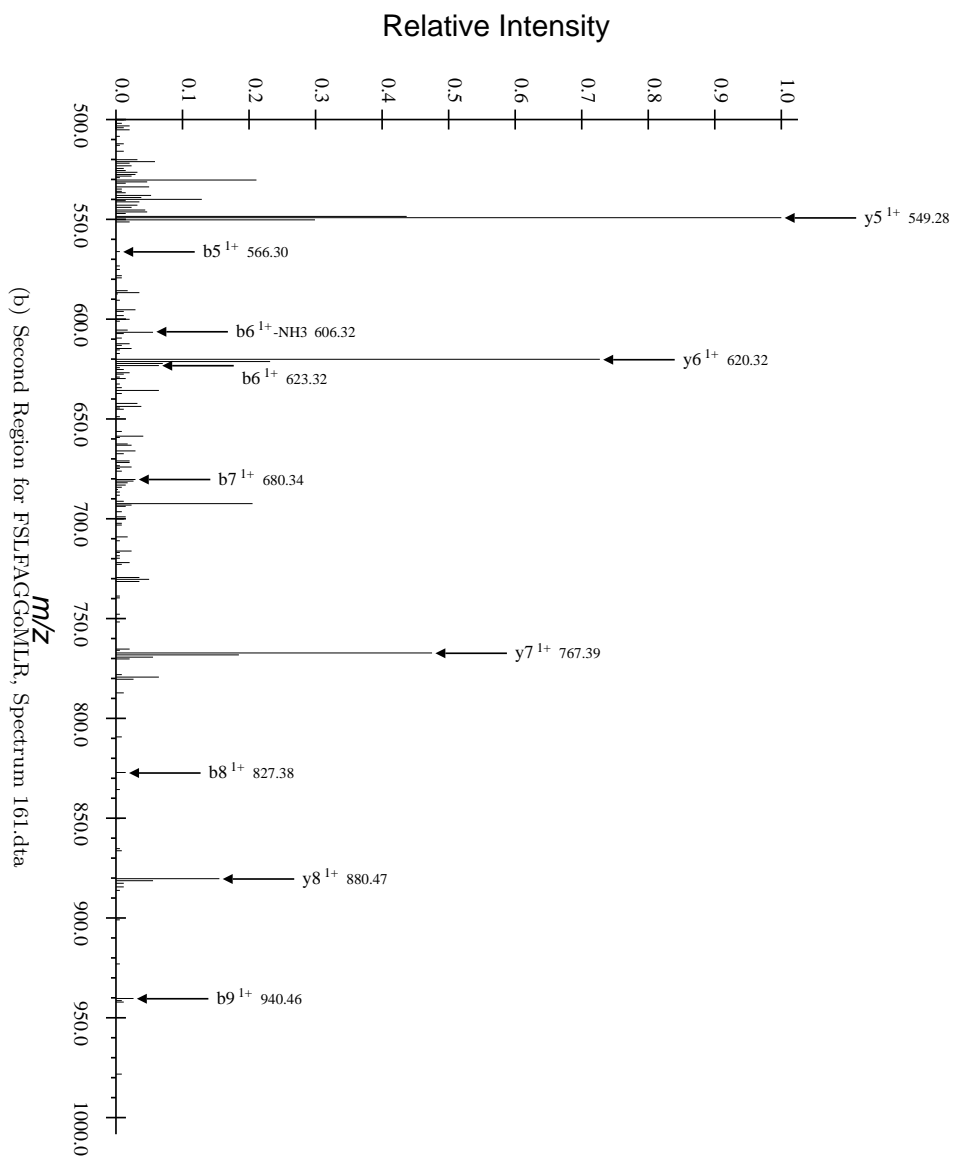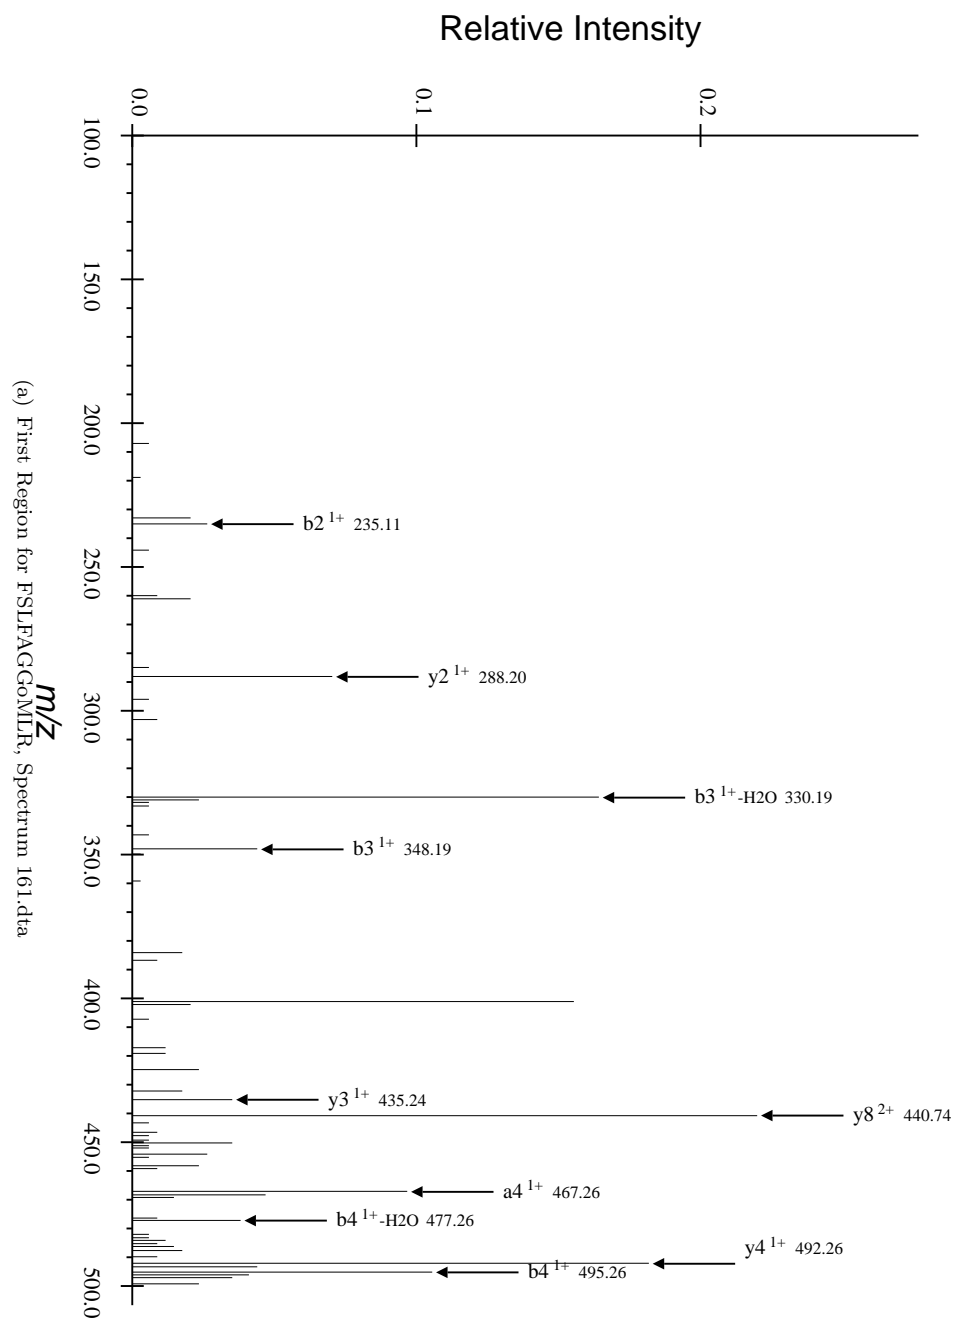

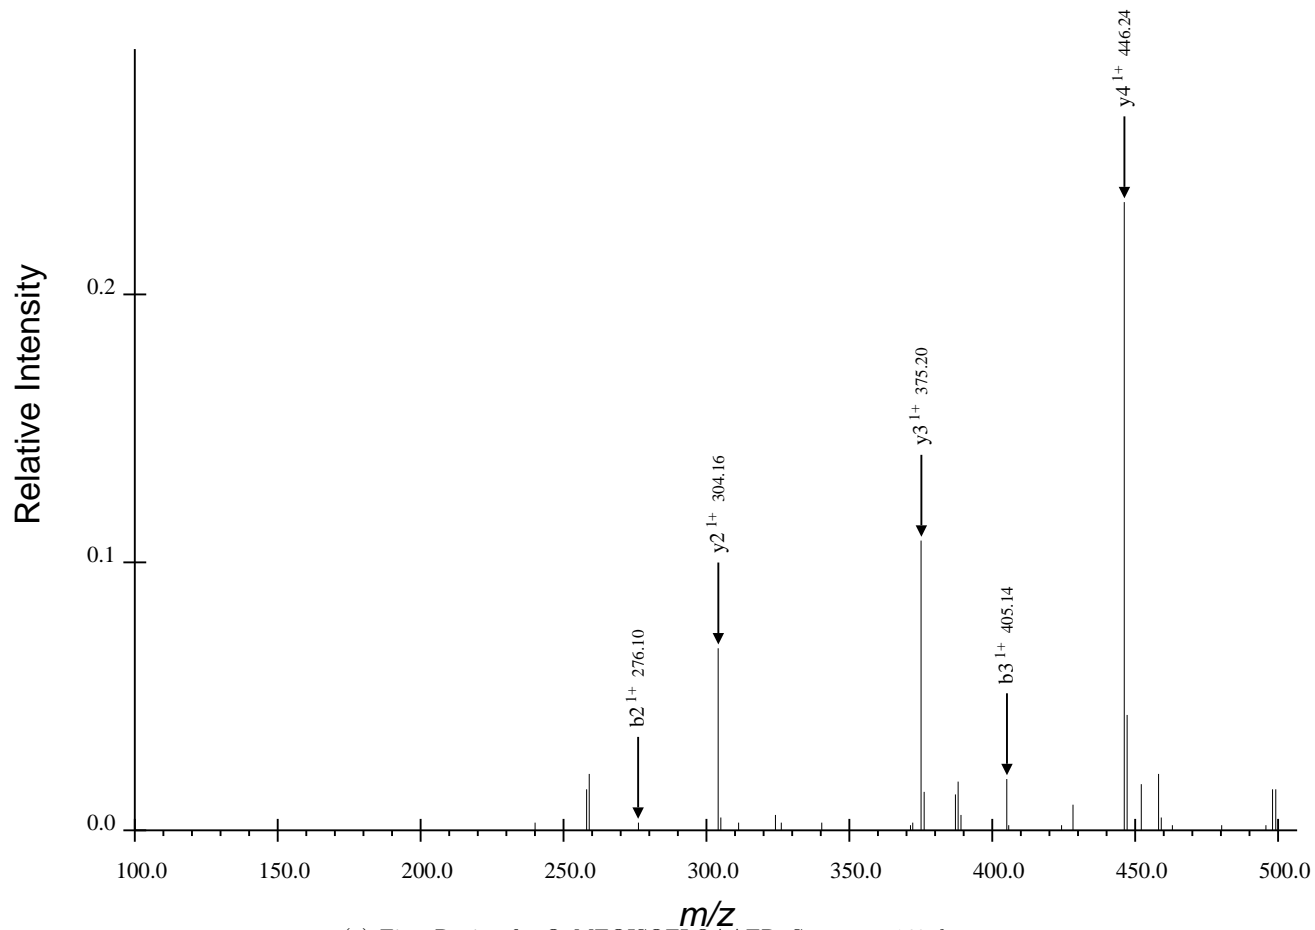

(a) First Region for QoMEQISQFLQAAER, Spectrum 162.dta

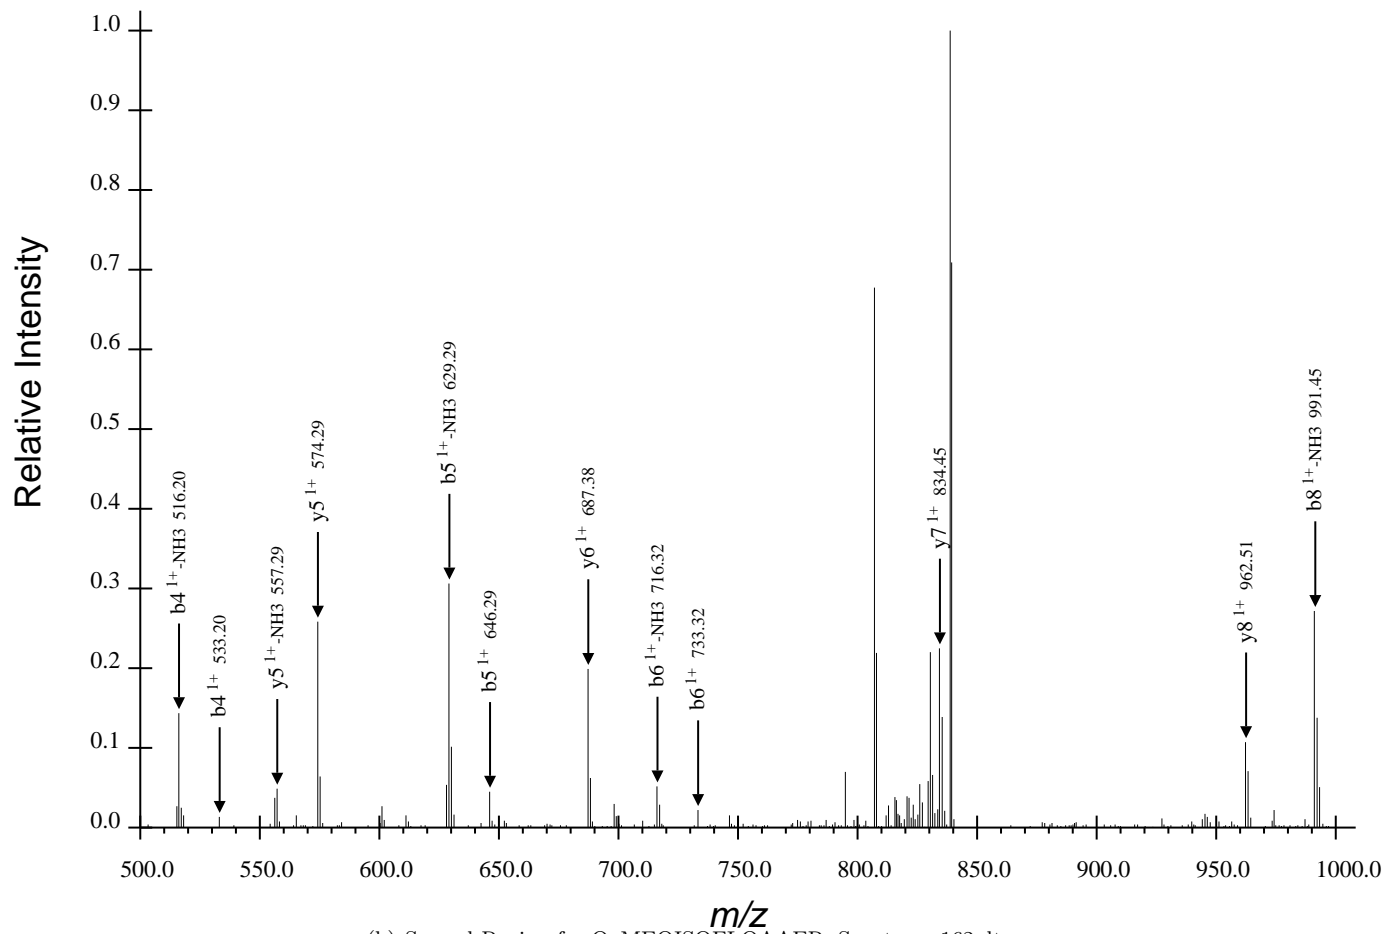

(b) Second Region for QoMEQISQFLQAAER, Spectrum 162.dta

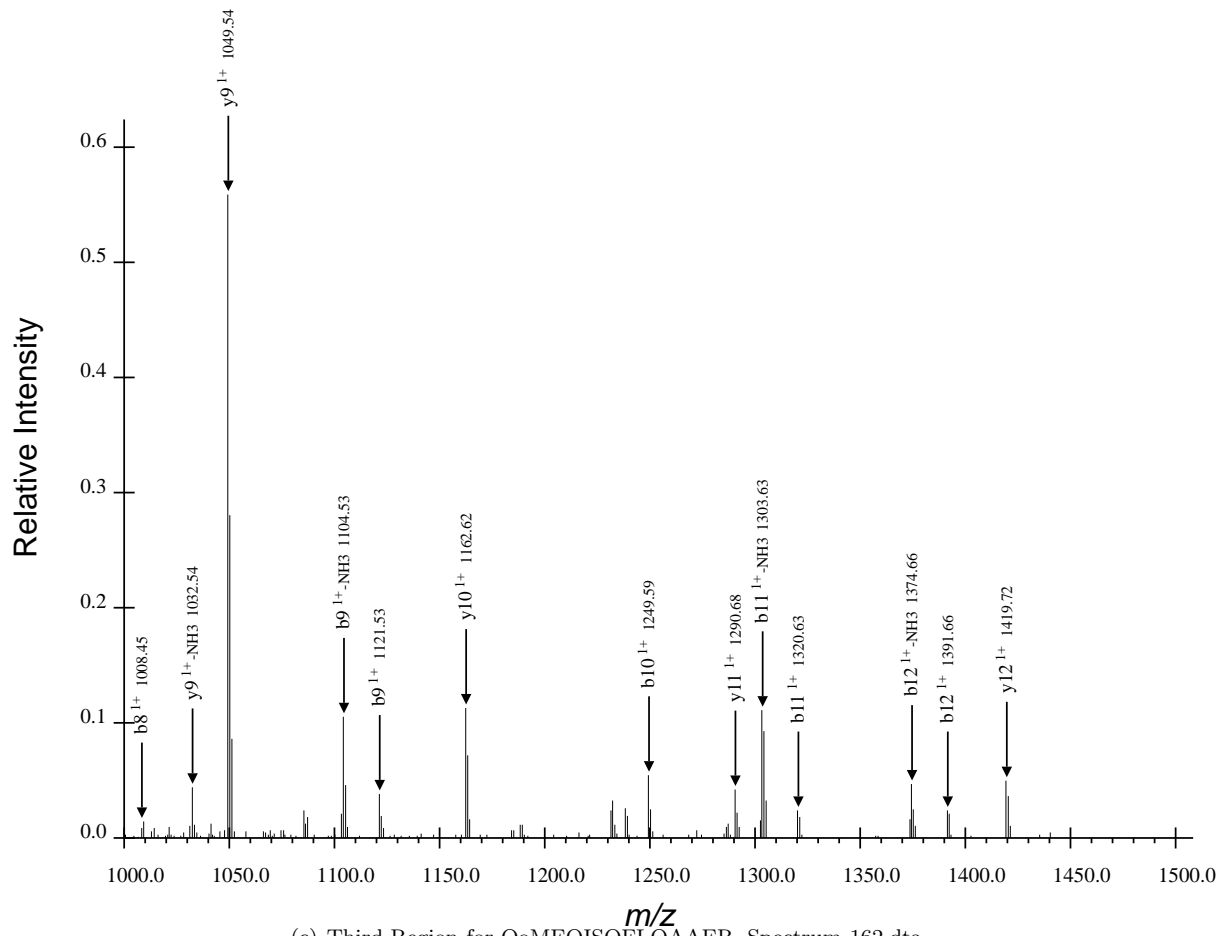

(c) Third Region for QoMEQISQFLQAAER, Spectrum 162.dta

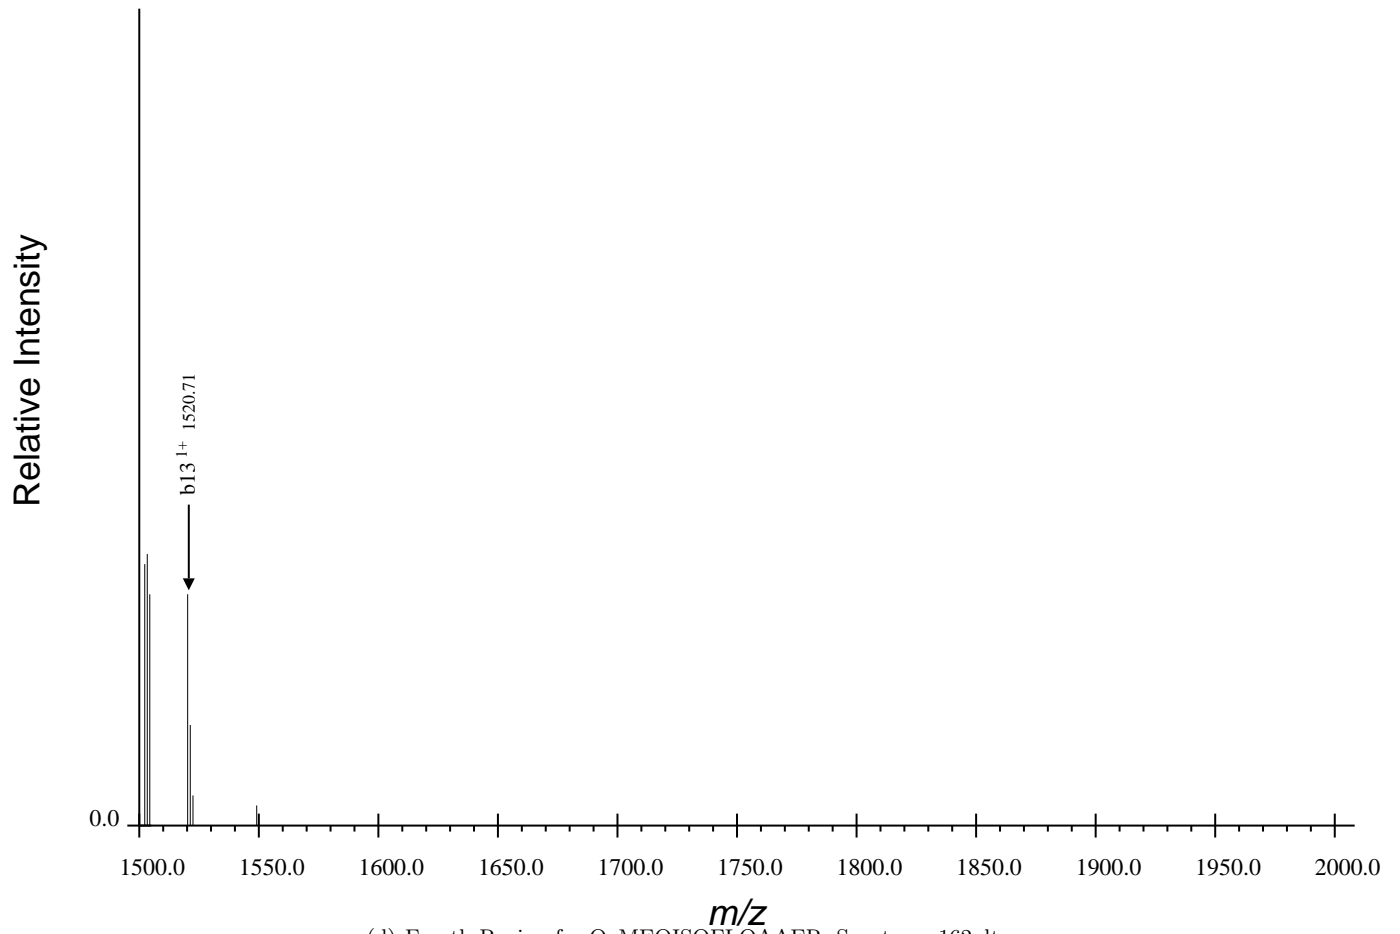

(d) Fourth Region for QoMEQISQFLQAAER, Spectrum 162.dta

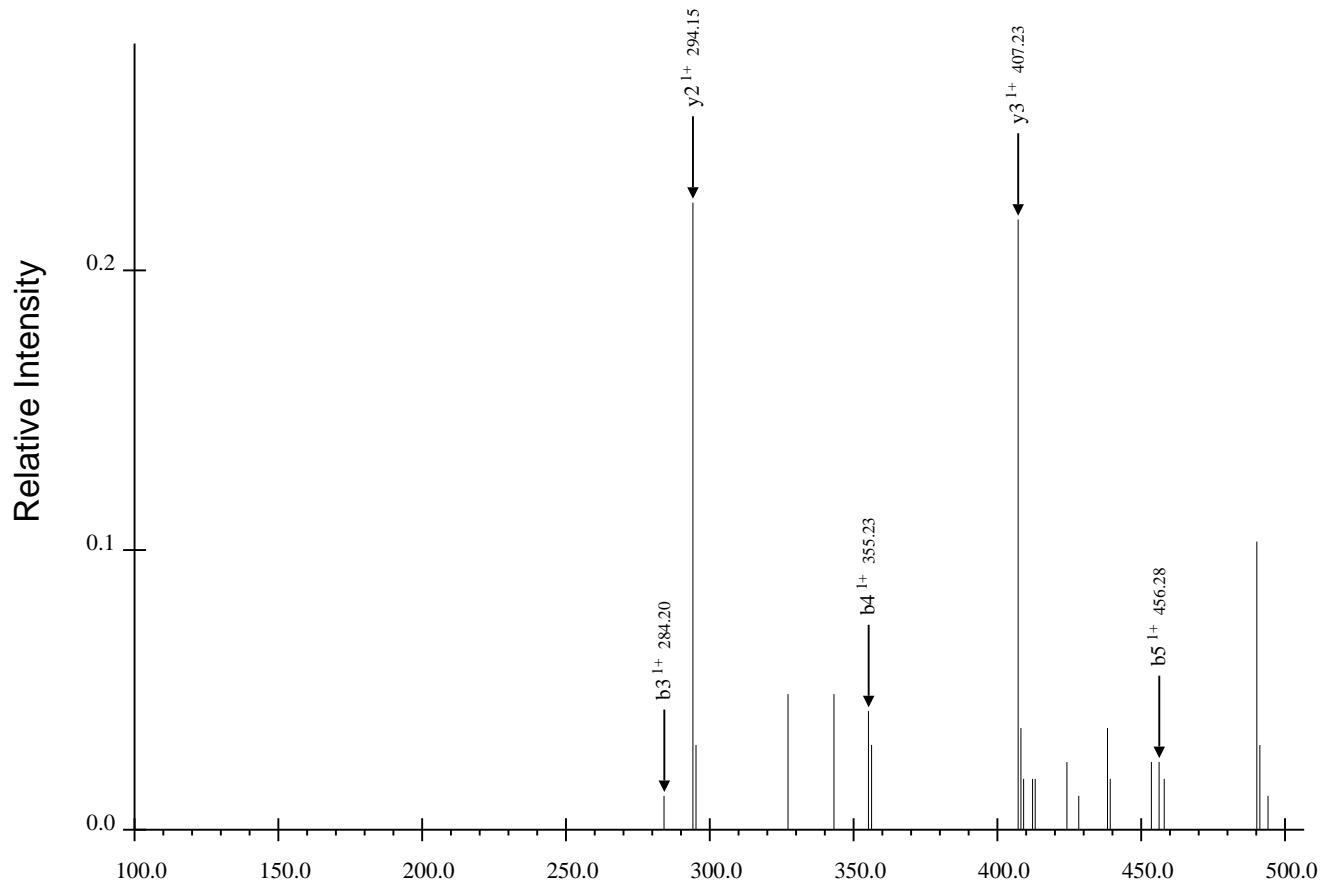

(a) First Region for IIGATDSSGELoMFLoMK, Spectrum 163.dta

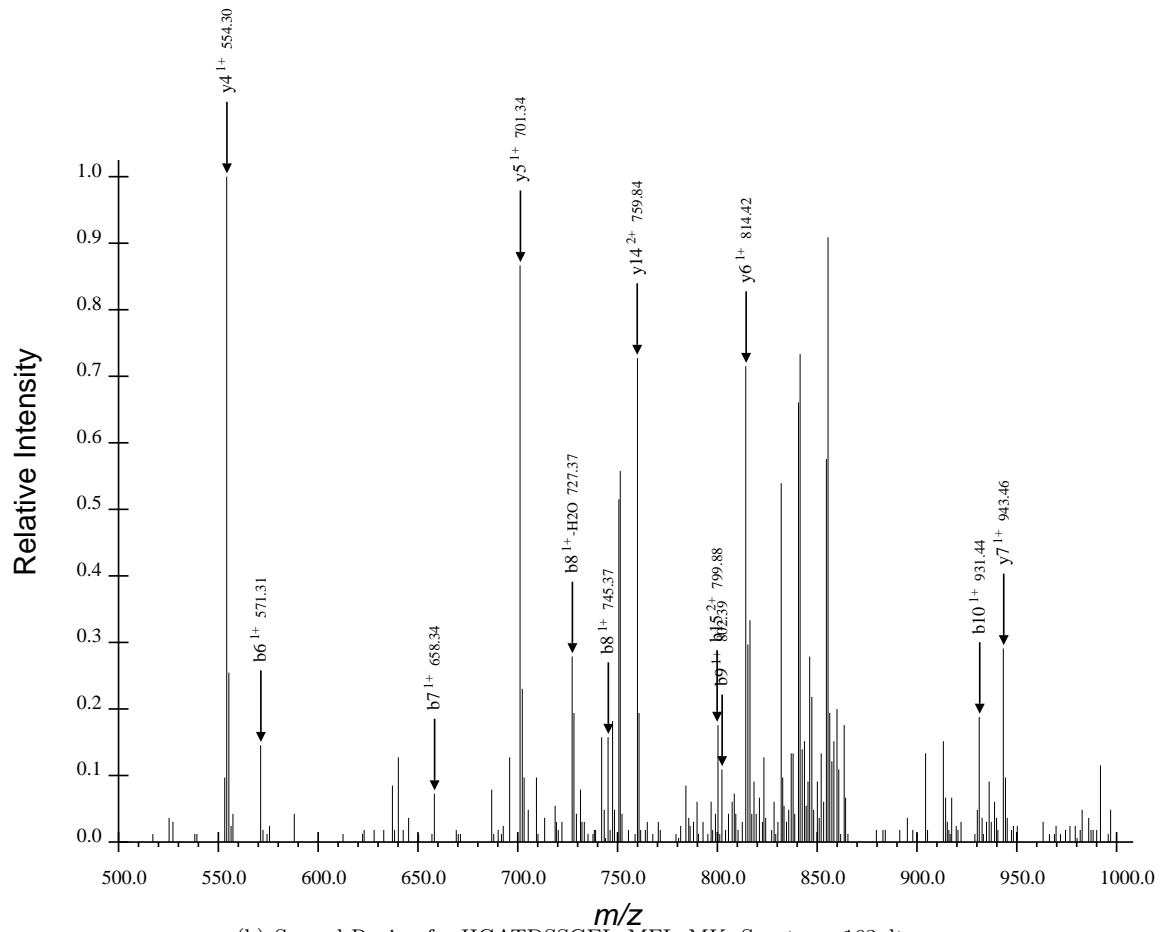

(b) Second Region for IIGATDSSGELoMFLoMK, Spectrum 163.dta



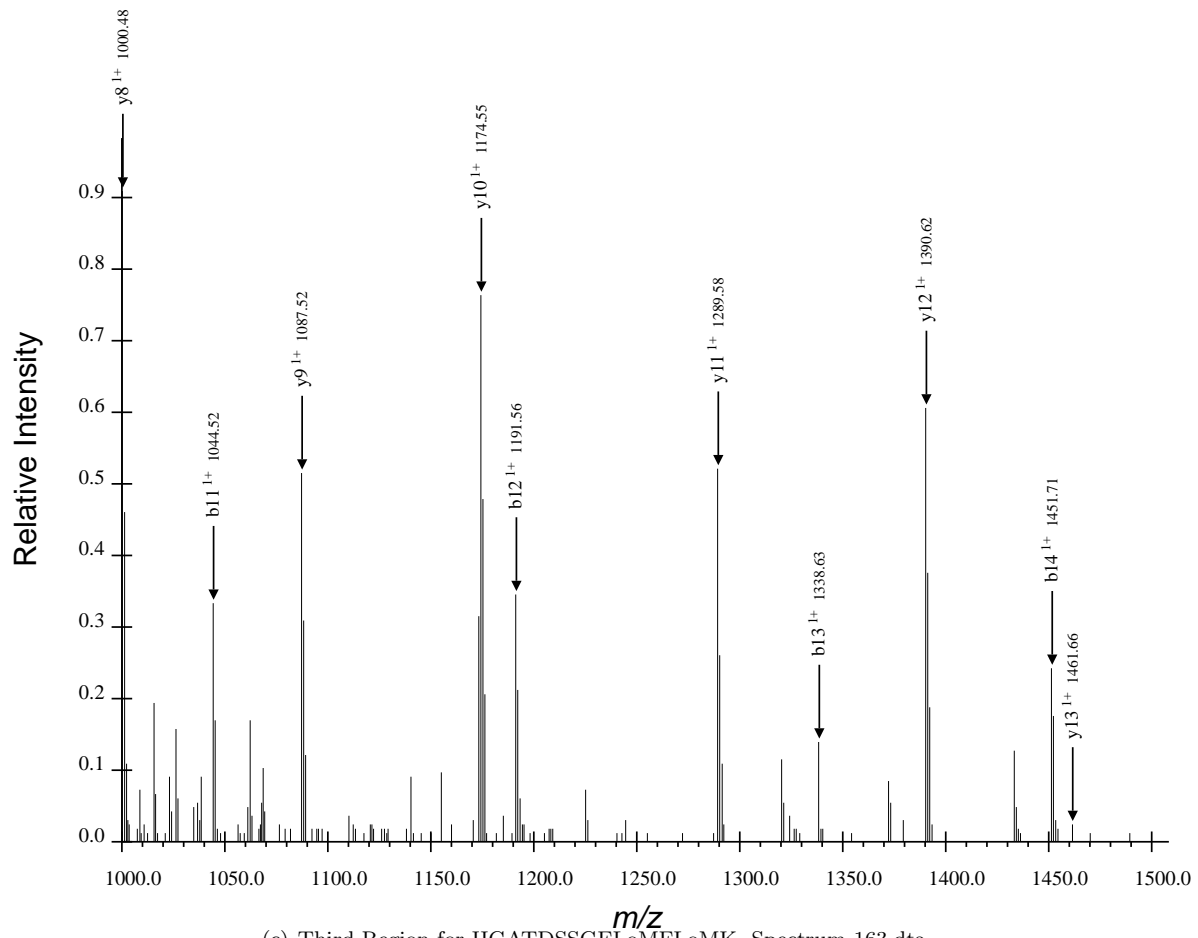

(c) Third Region for IIGATDSSGELoMFLoMK, Spectrum 163.dta

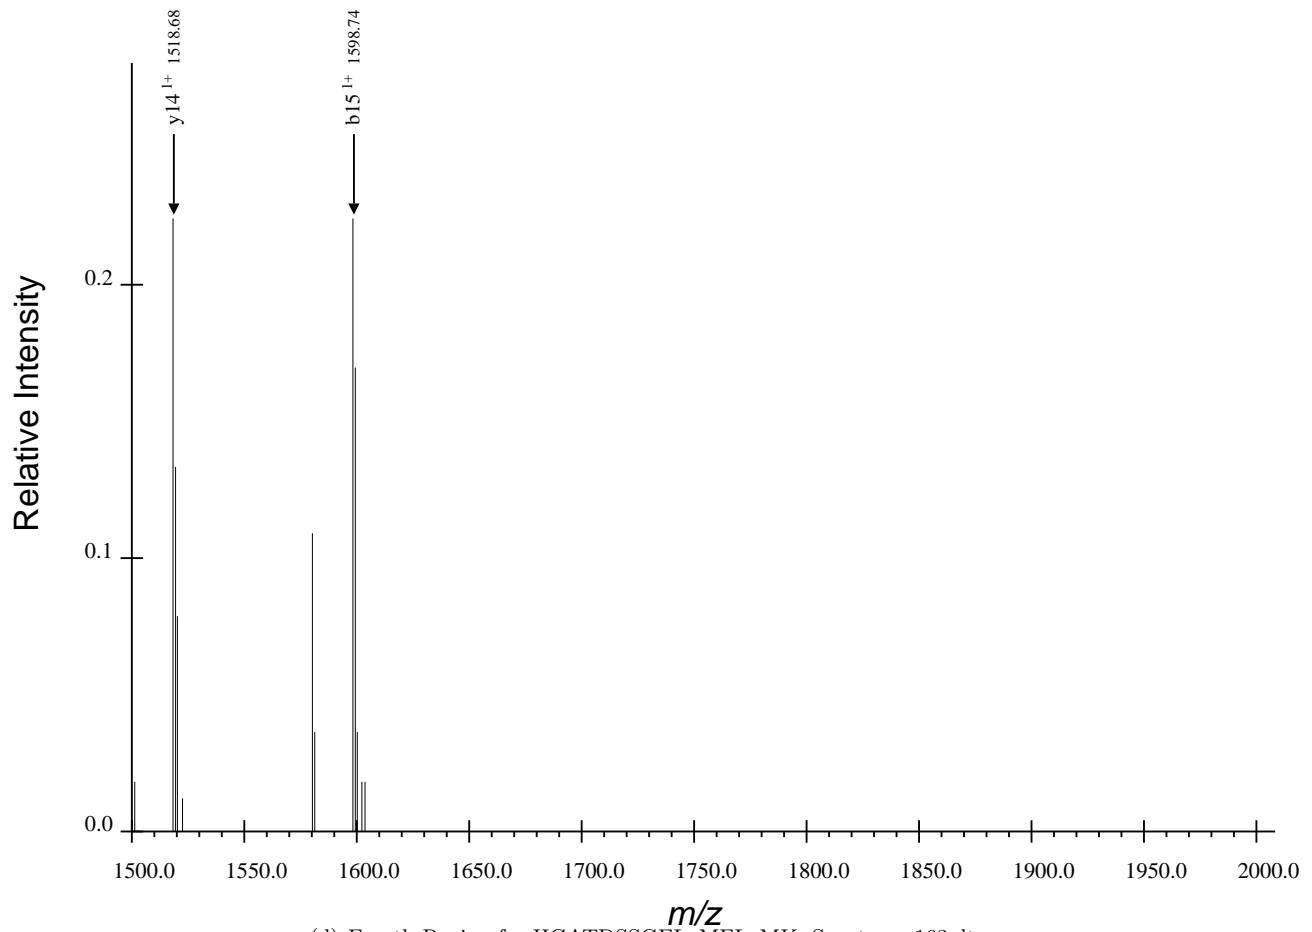

(d) Fourth Region for IIGATDSSGELoMFLoMK, Spectrum 163.dta

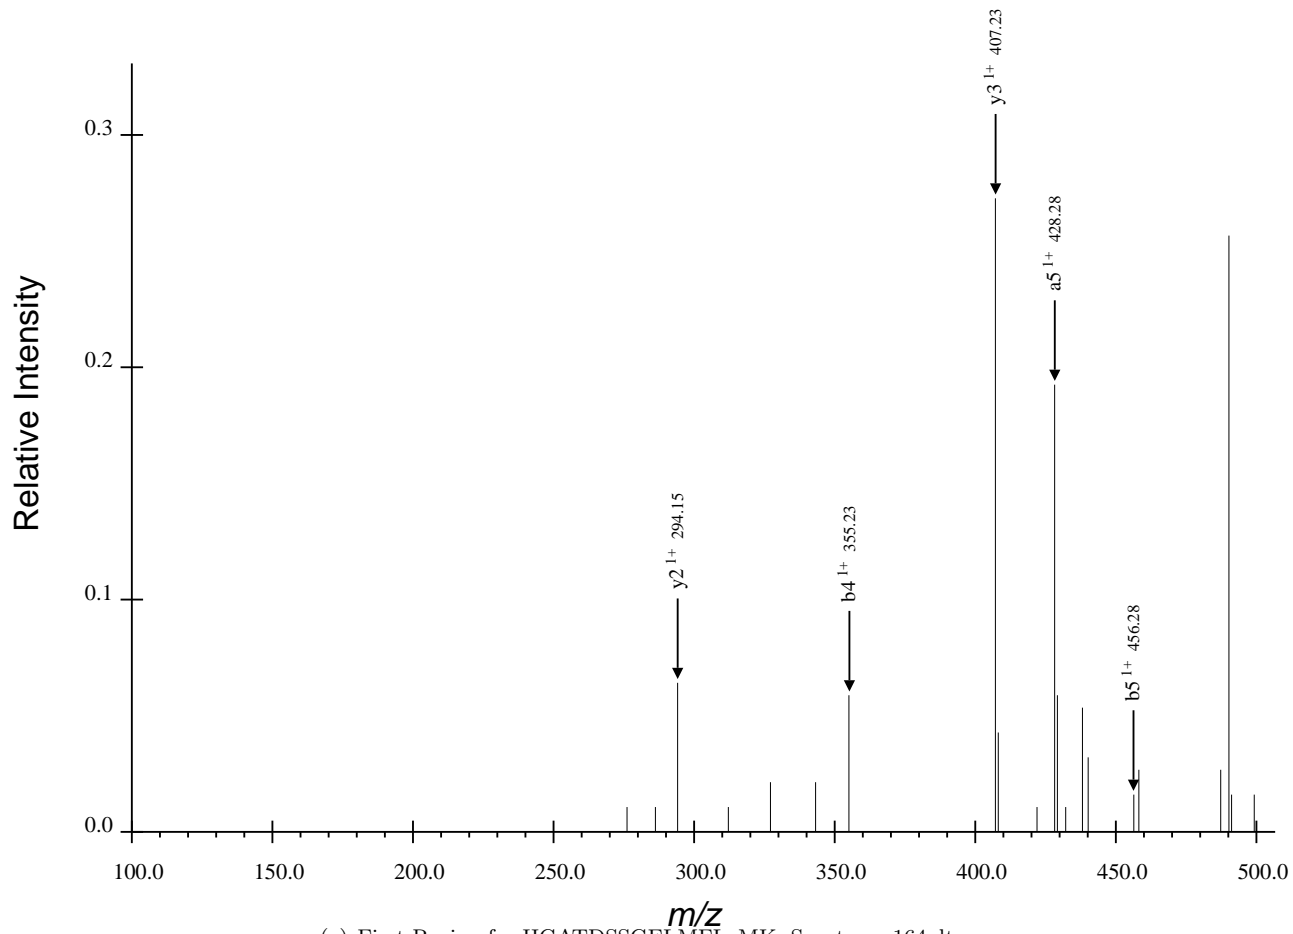

(a) First Region for IIGATDSSGELMFLoMK, Spectrum 164.dta

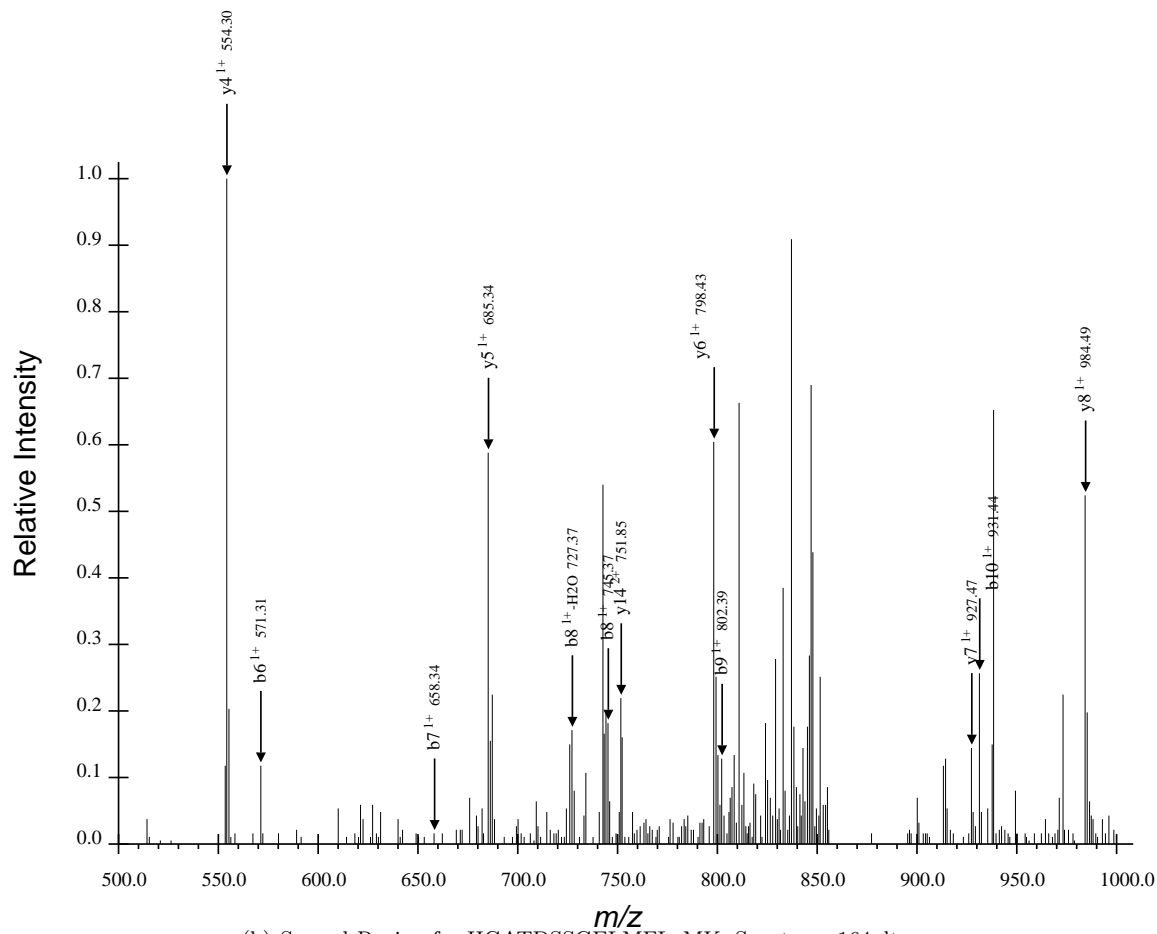

(b) Second Region for IIGATDSSGELMFLoMK, Spectrum 164.dta

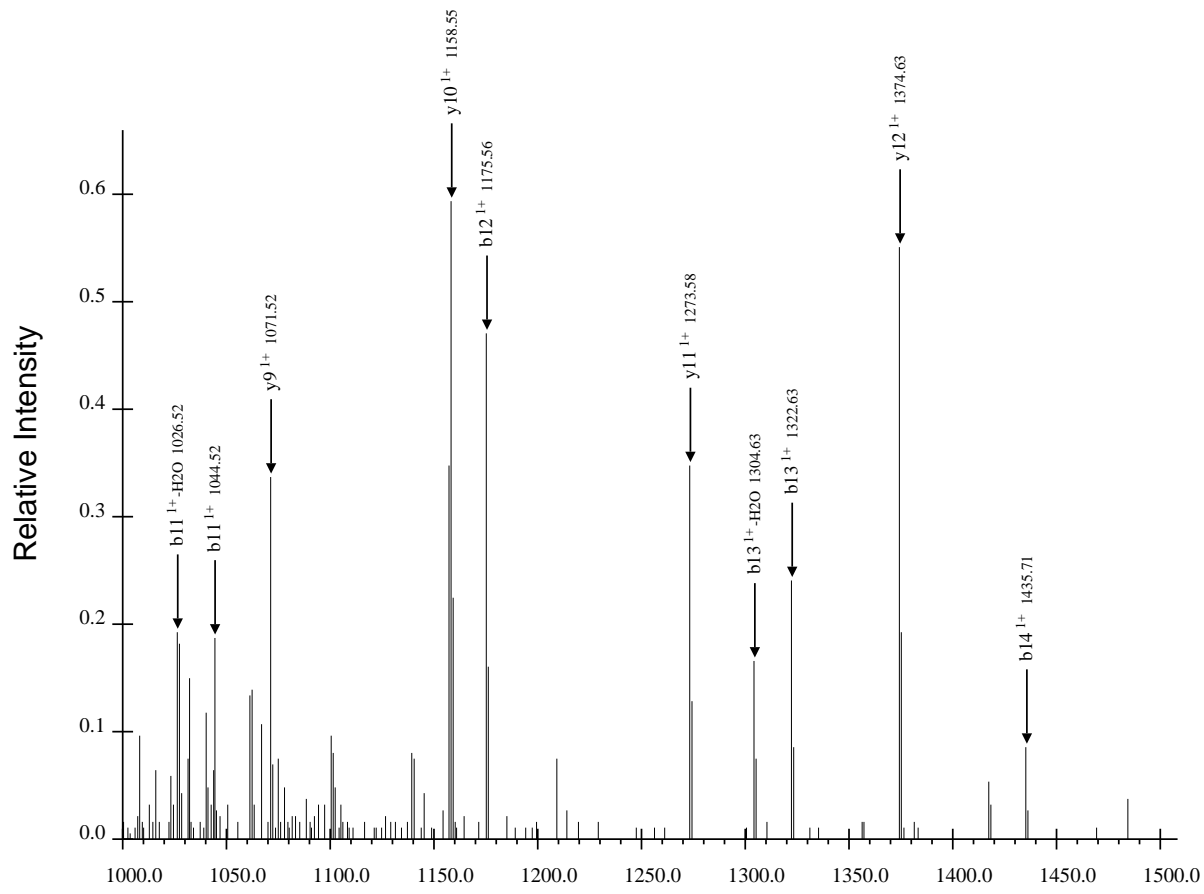

(c) Third Region for IIGATDSSGELMFLoMK, Spectrum 164.dta

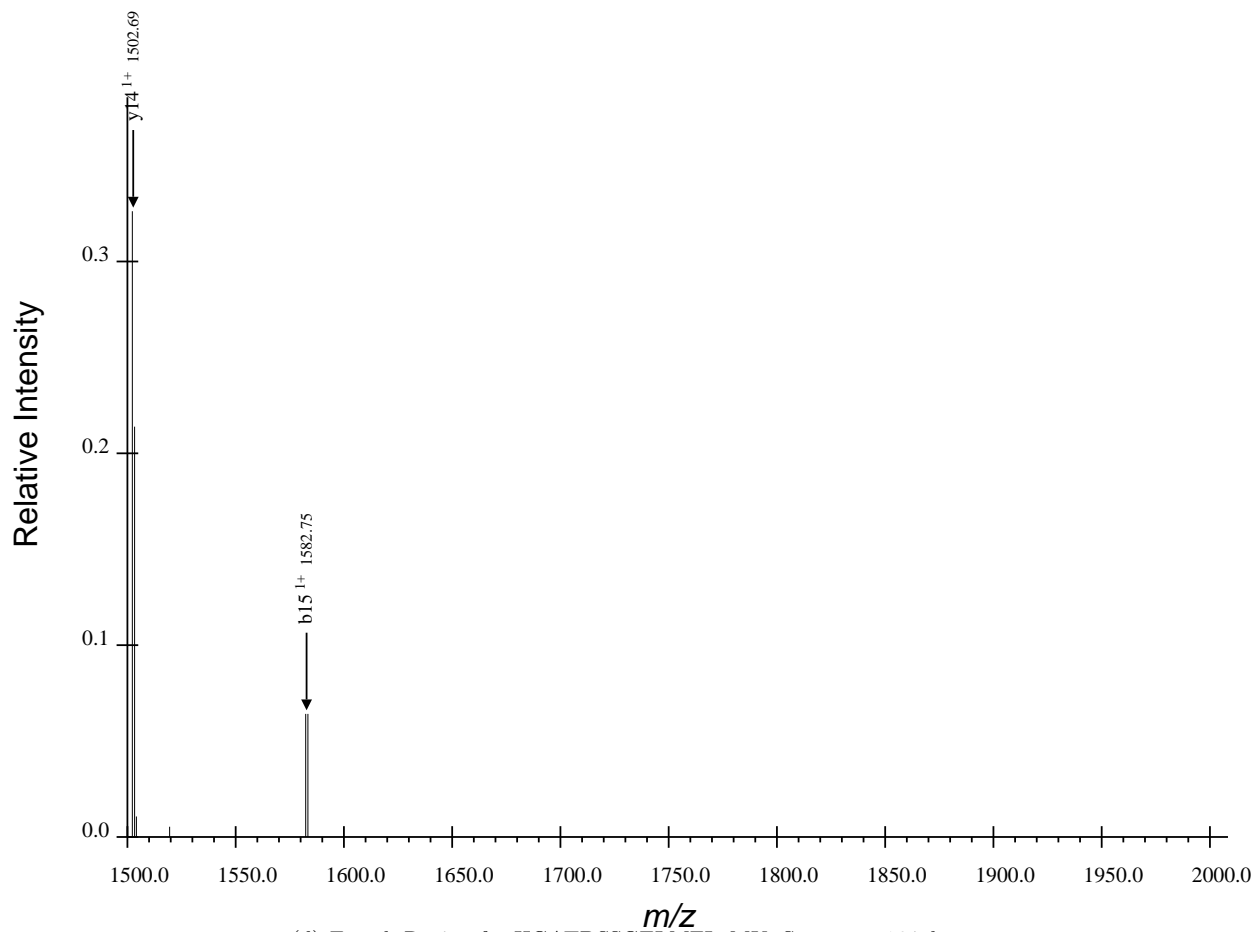

(d) Fourth Region for IIGATDSSGELMFLoMK, Spectrum 164.dta

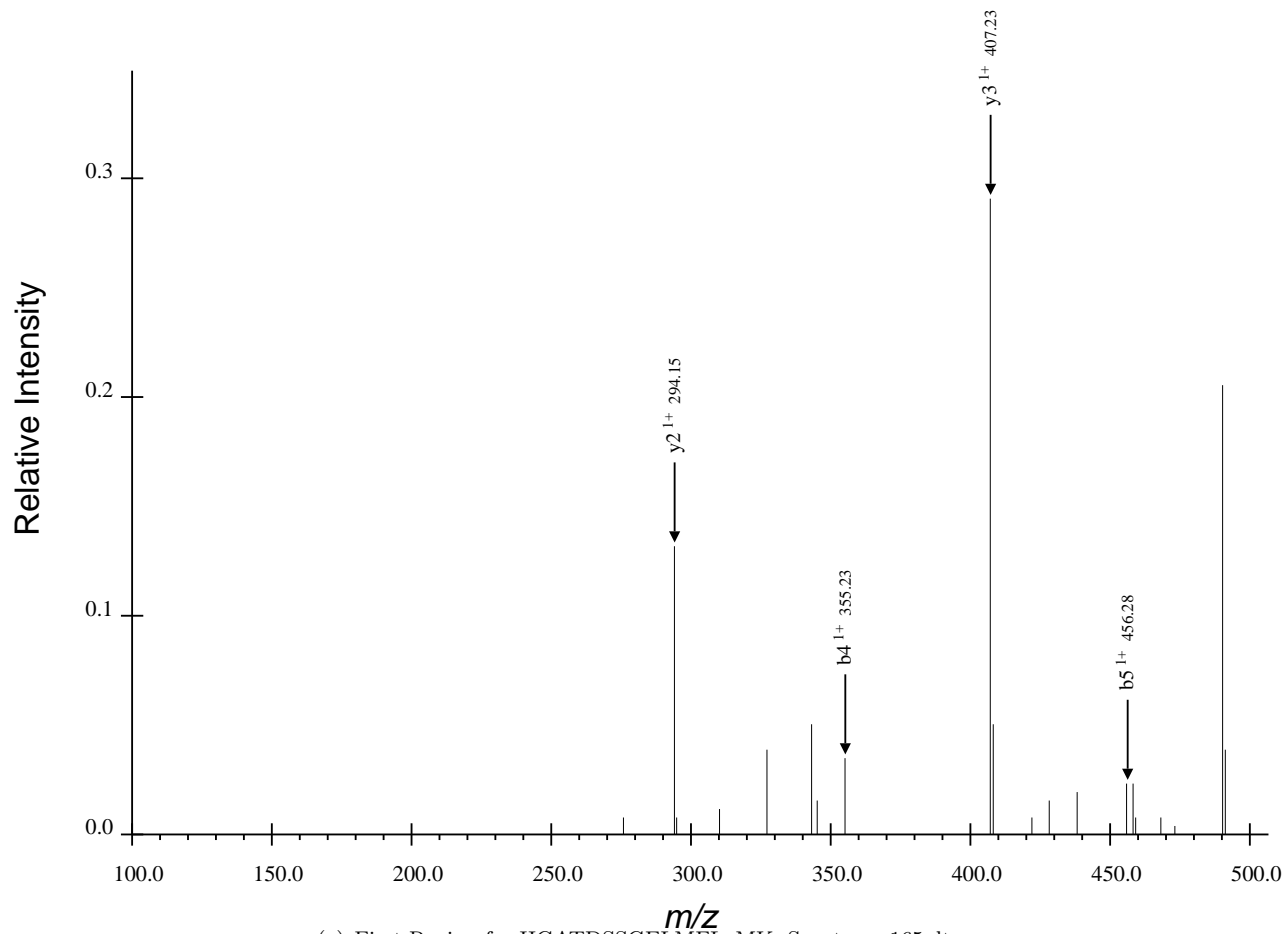

(a) First Region for IIGATDSSGELMFLoMK, Spectrum 165.dta

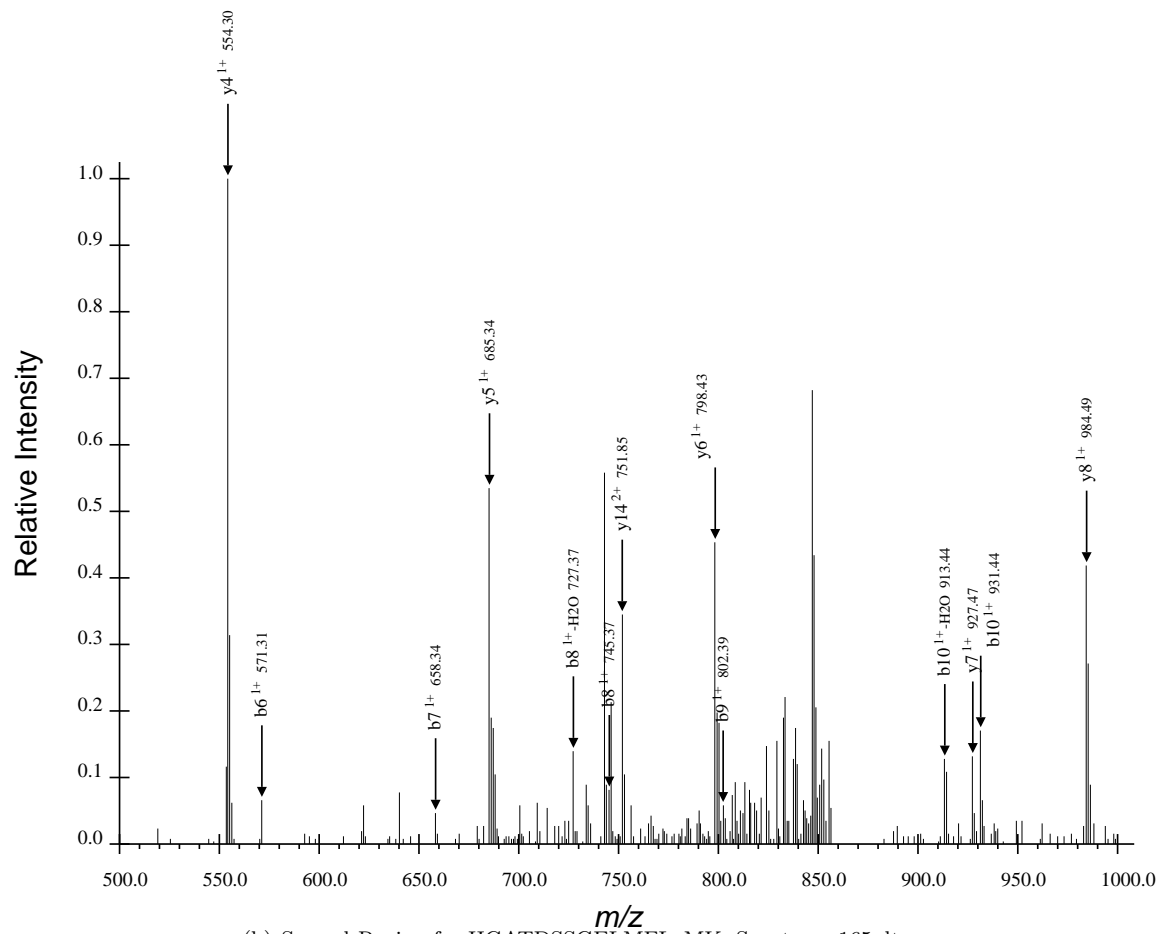

(b) Second Region for IIGATDSSGELMFLoMK, Spectrum 165.dta

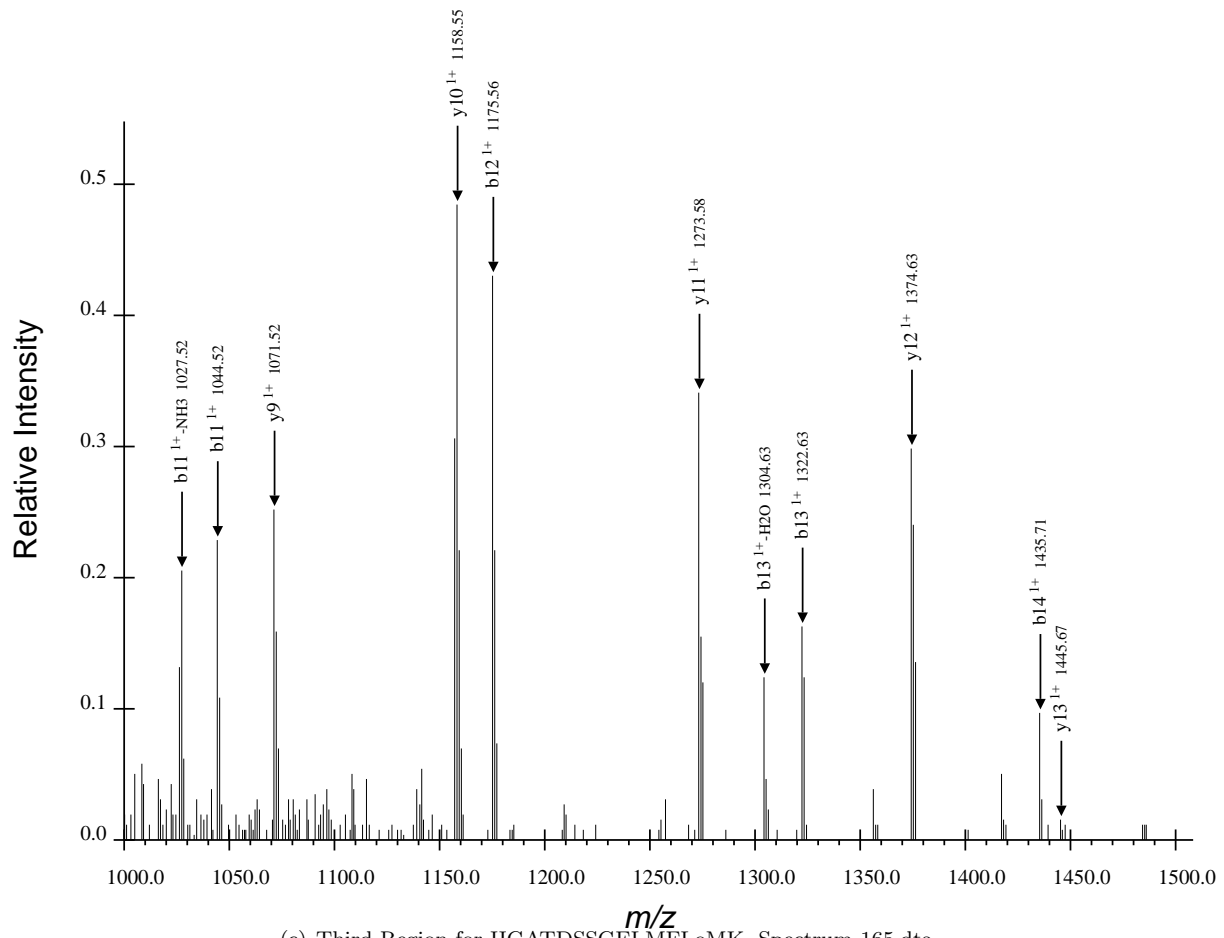

(c) Third Region for IIGATDSSGELMFLoMK, Spectrum 165.dta

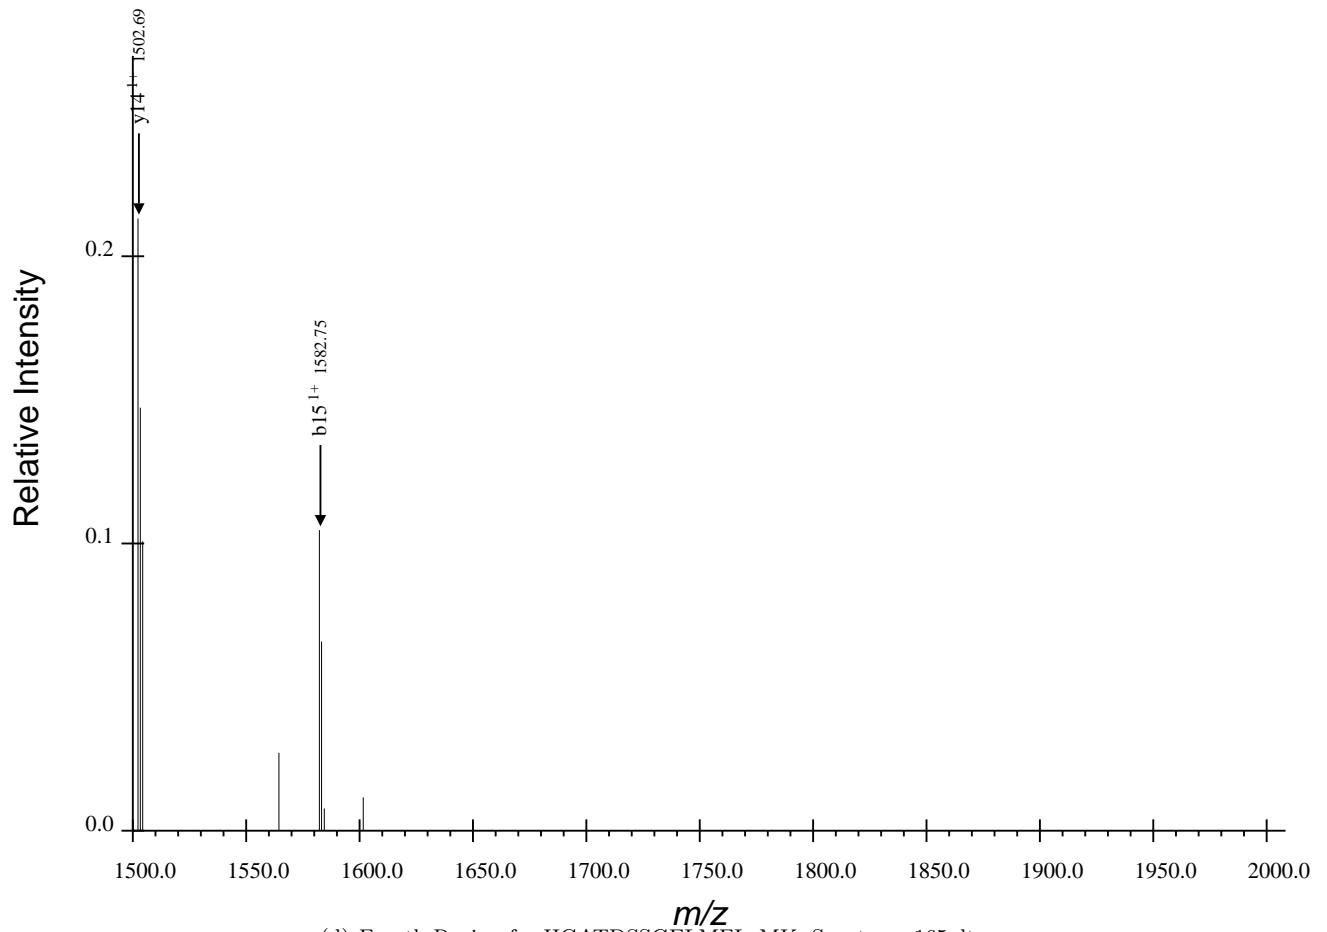

(d) Fourth Region for IIGATDSSGELMFLoMK, Spectrum 165.dta

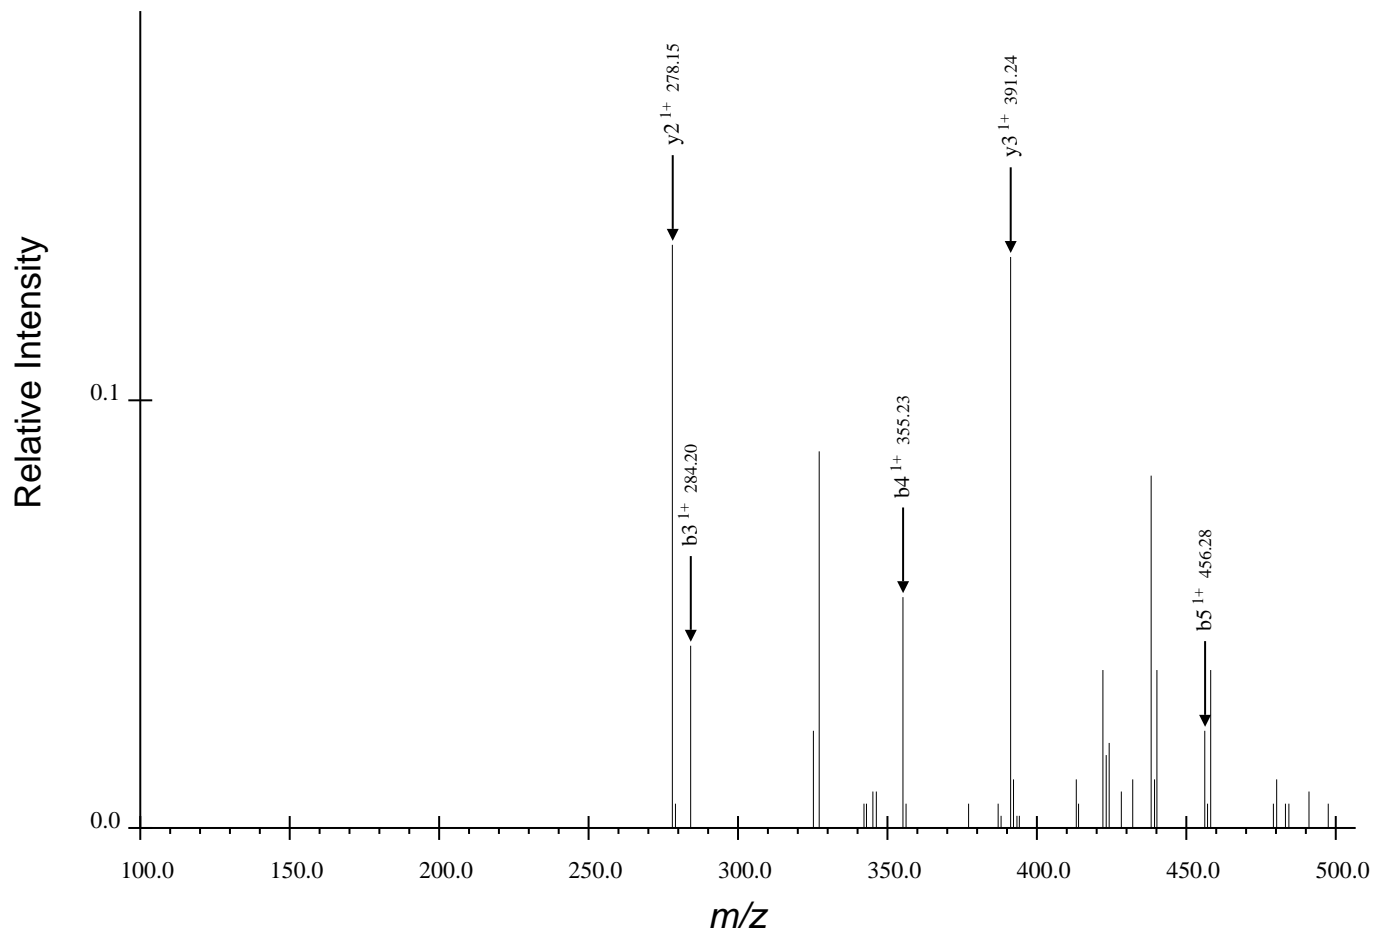

(a) First Region for IIGATDSSGELoMFLMK, Spectrum 166.dta

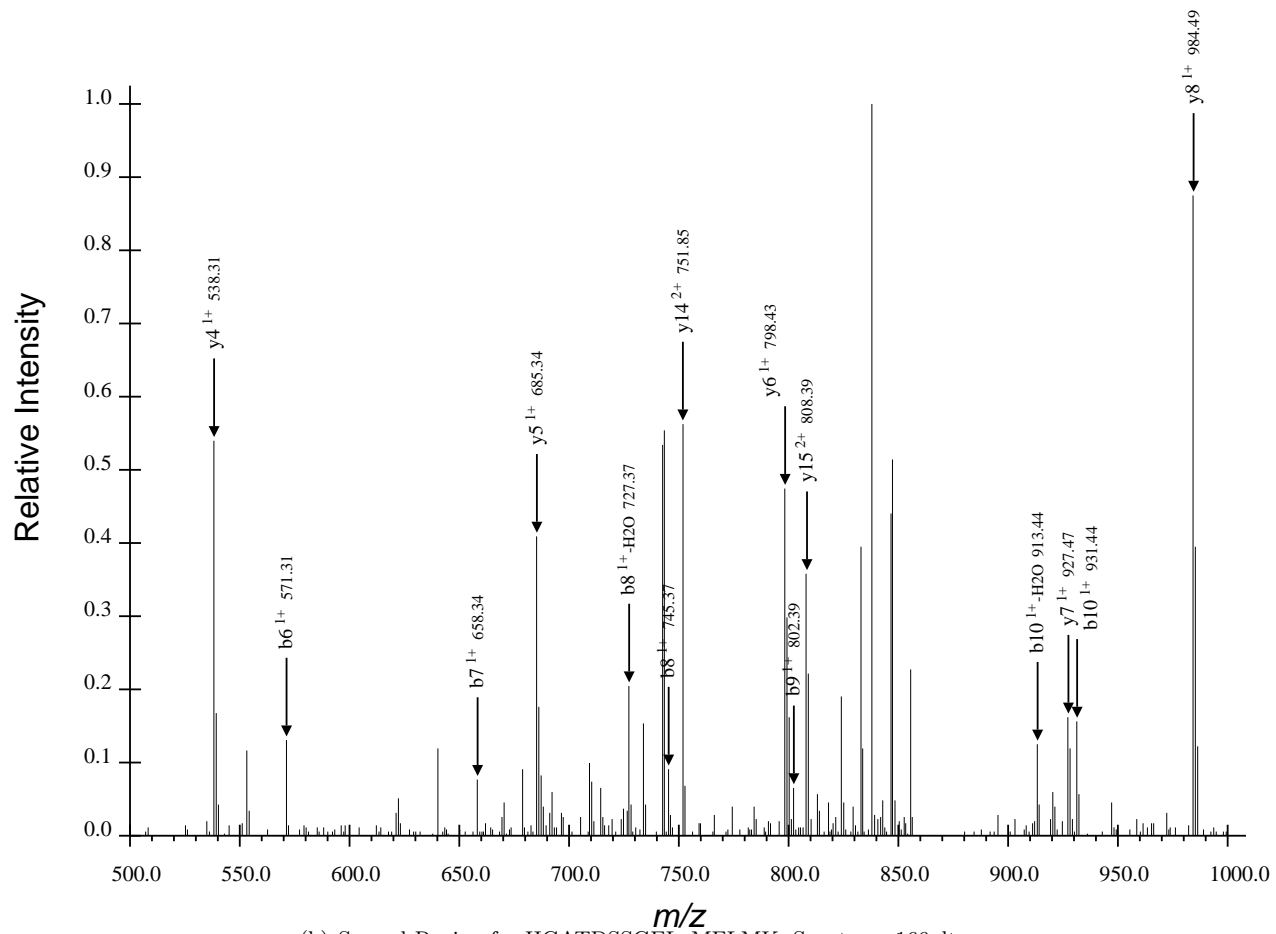

(b) Second Region for IIGATDSSGELoMFLMK, Spectrum 166.dta

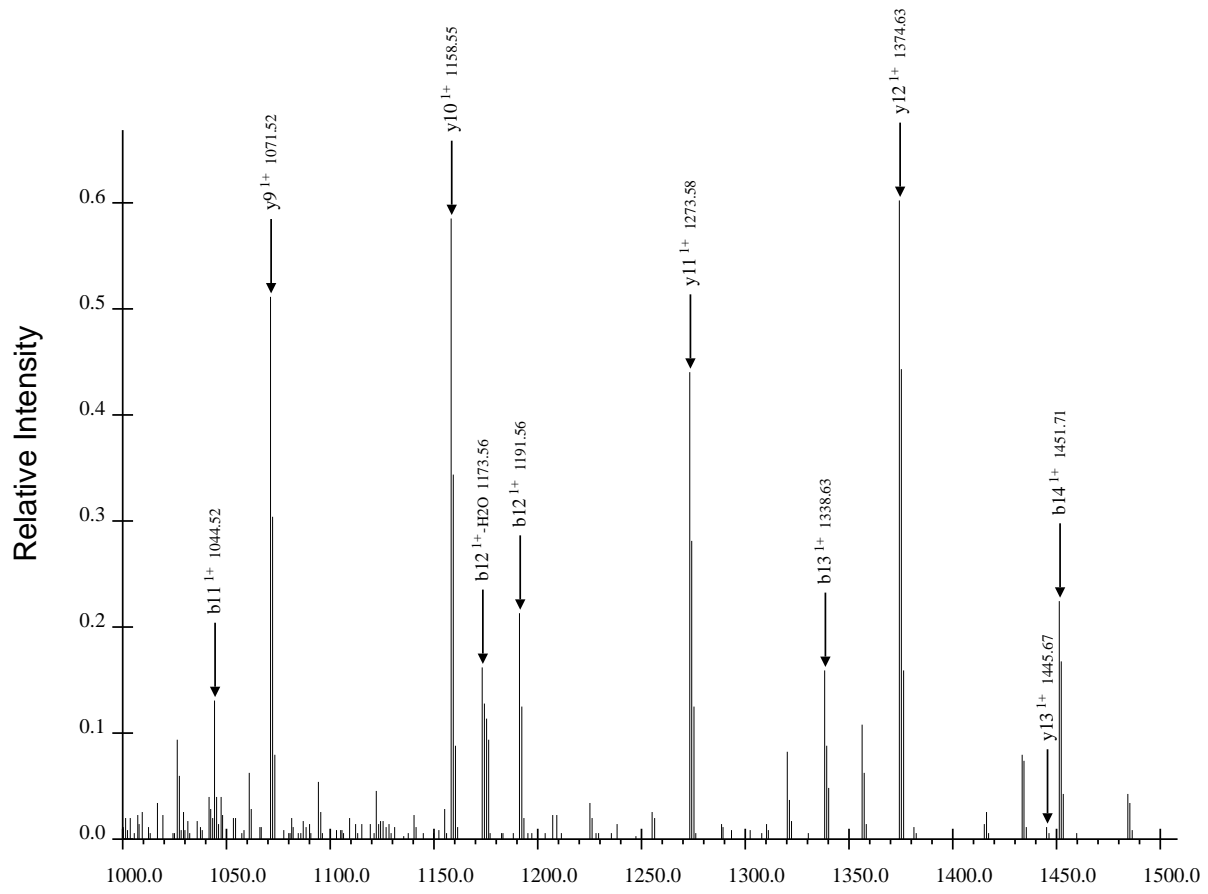

(c) Third Region for IIGATDSSGELoMFLMK, Spectrum 166.dta

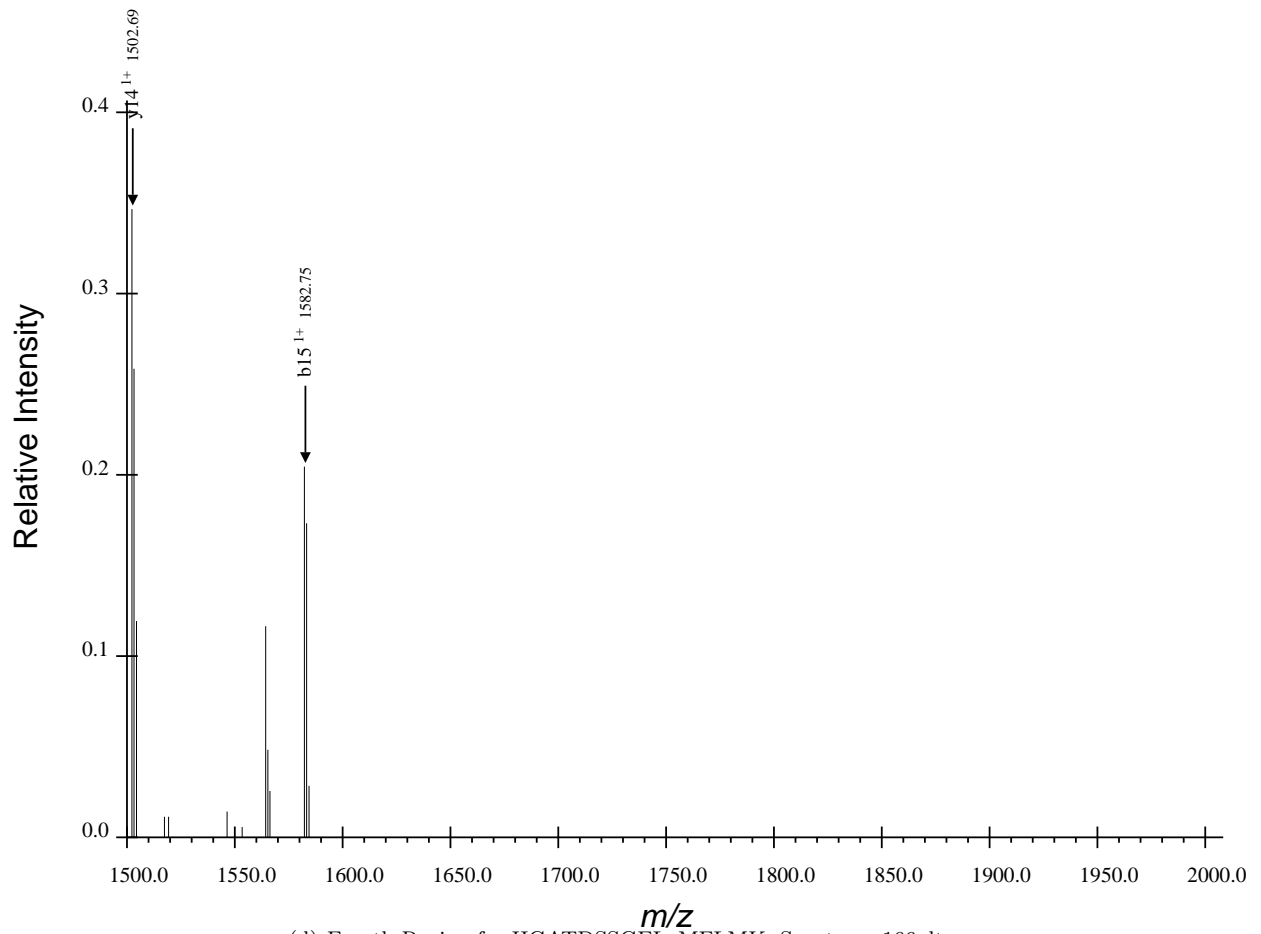

(d) Fourth Region for IIGATDSSGELoMFLMK, Spectrum 166.dta

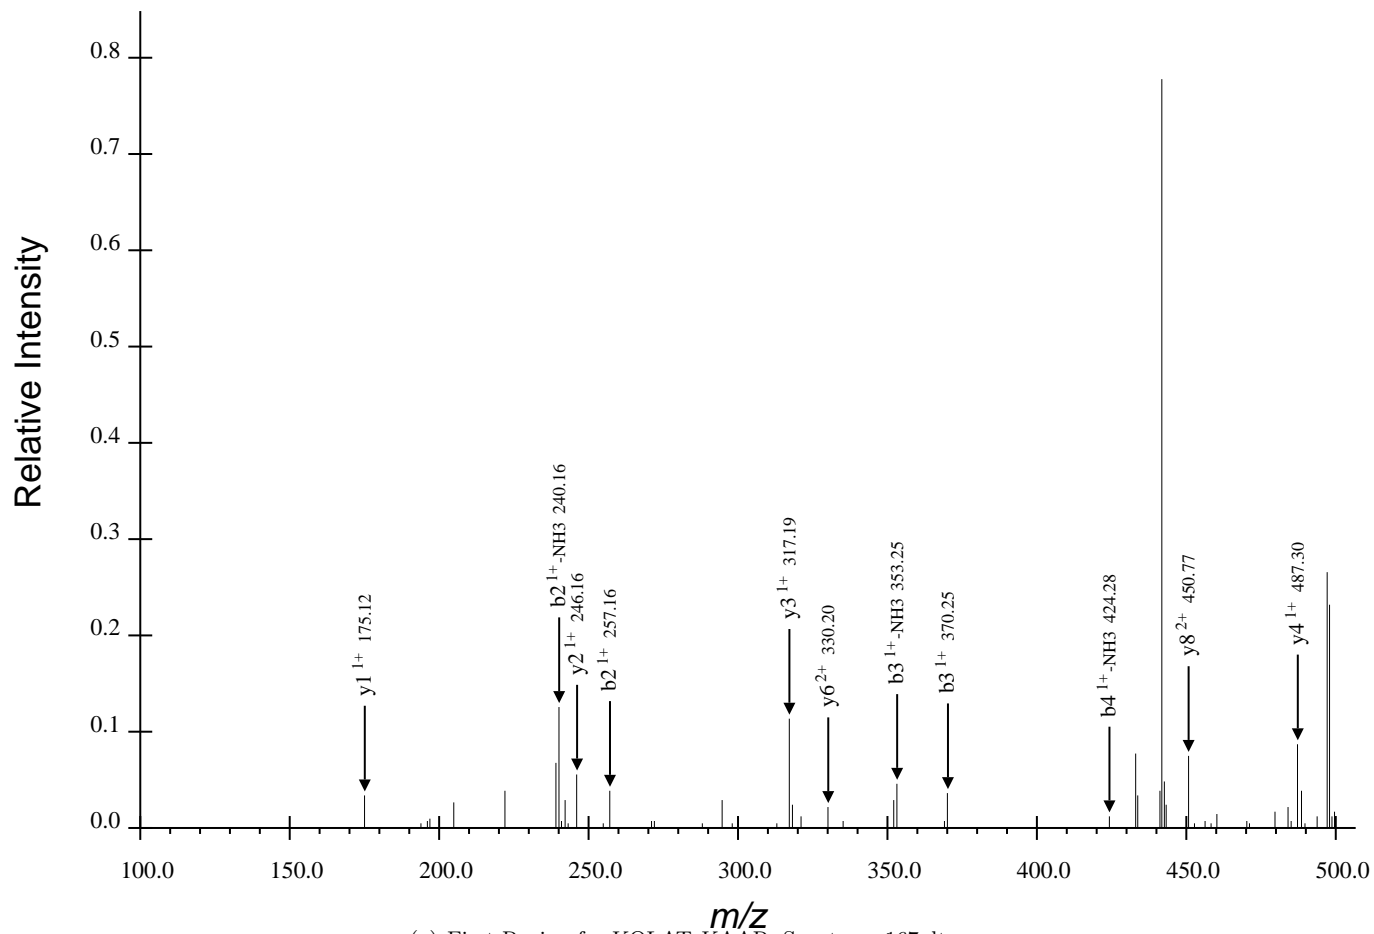

(a) First Region for KQLATaKAAR, Spectrum 167.dta

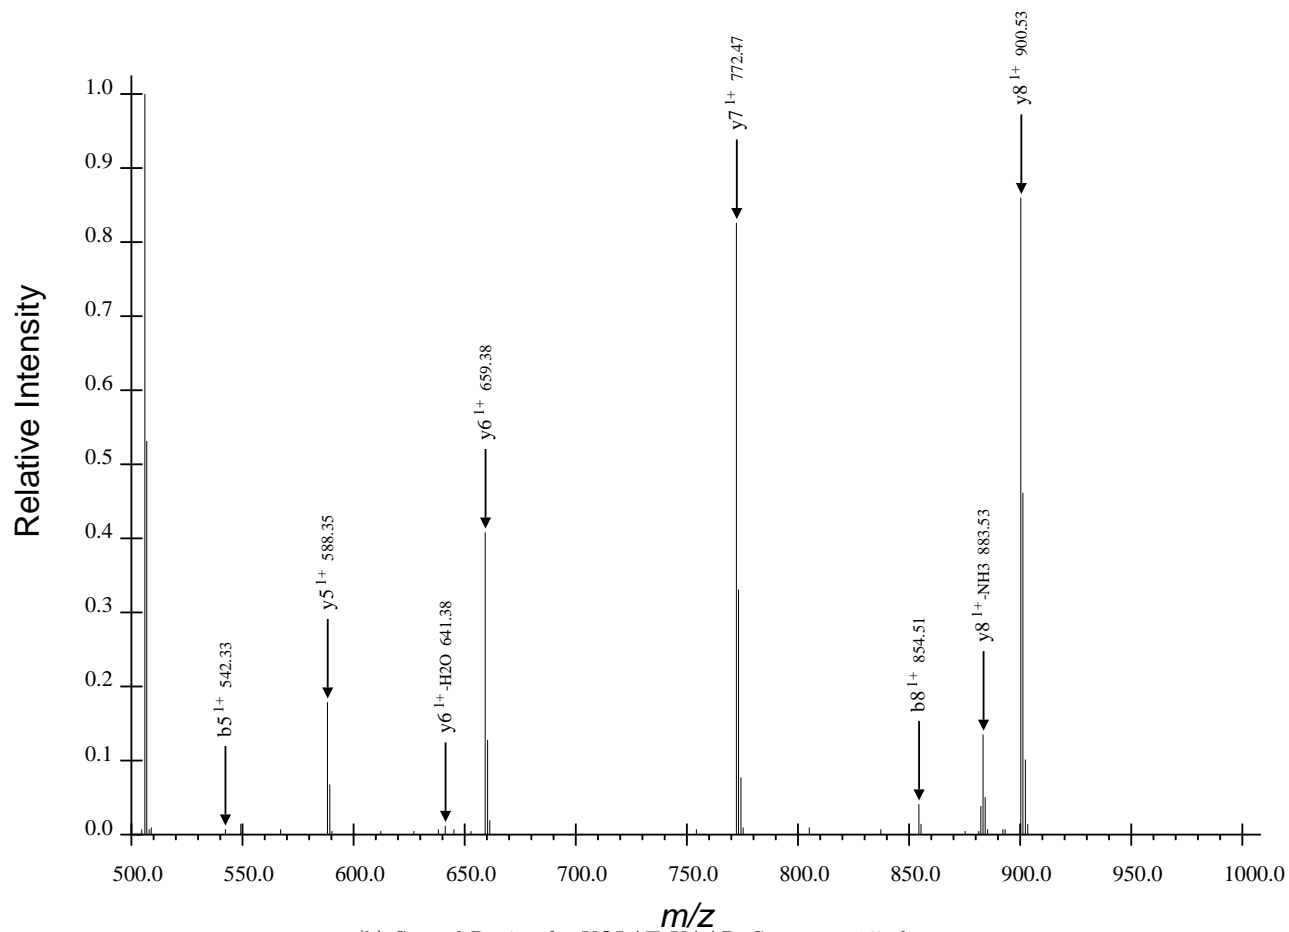

(b) Second Region for KQLATaKAAR, Spectrum 167.dta



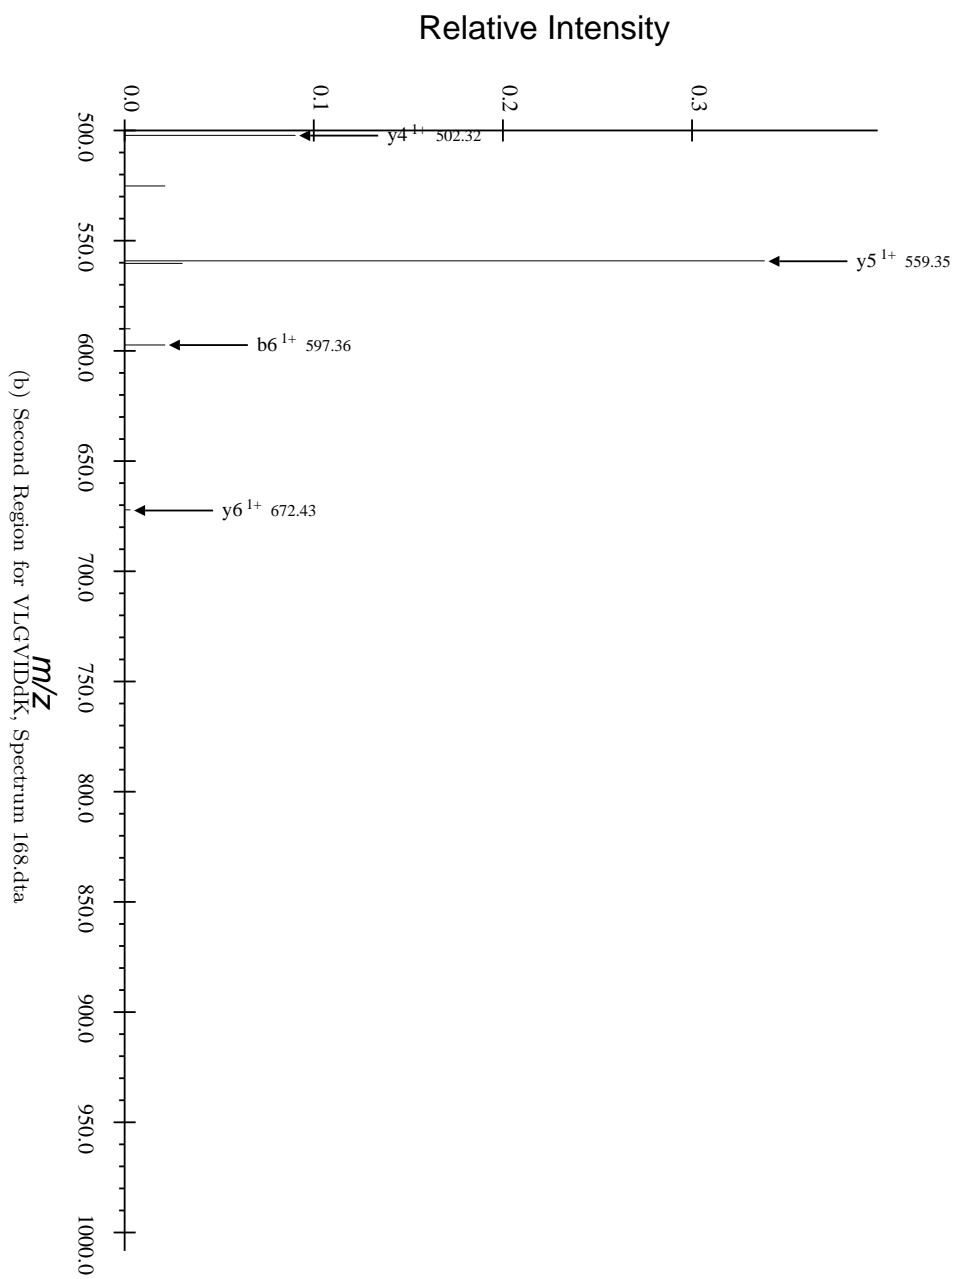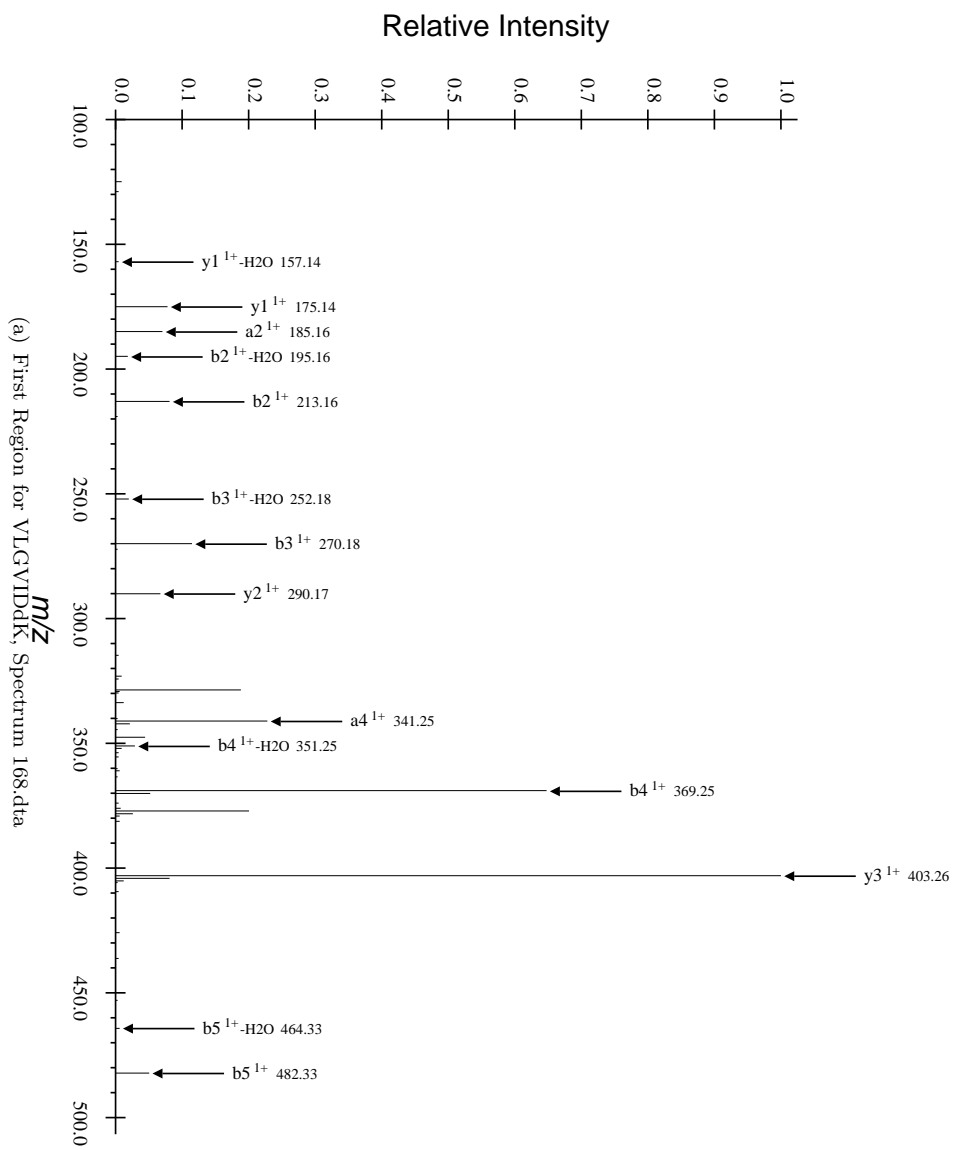

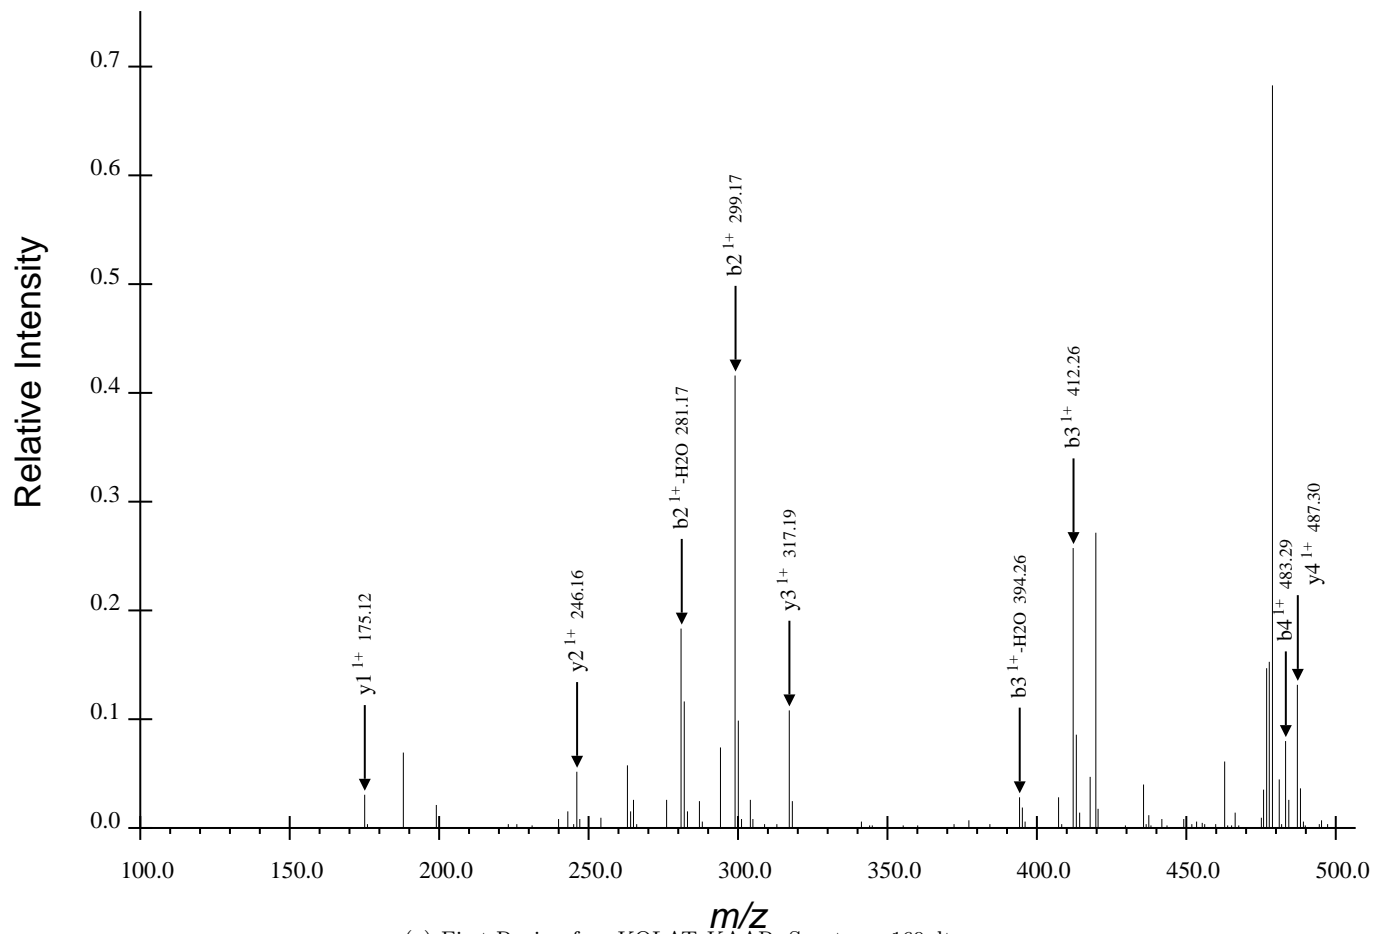

(a) First Region for aQQLATAKAAR, Spectrum 169.dta

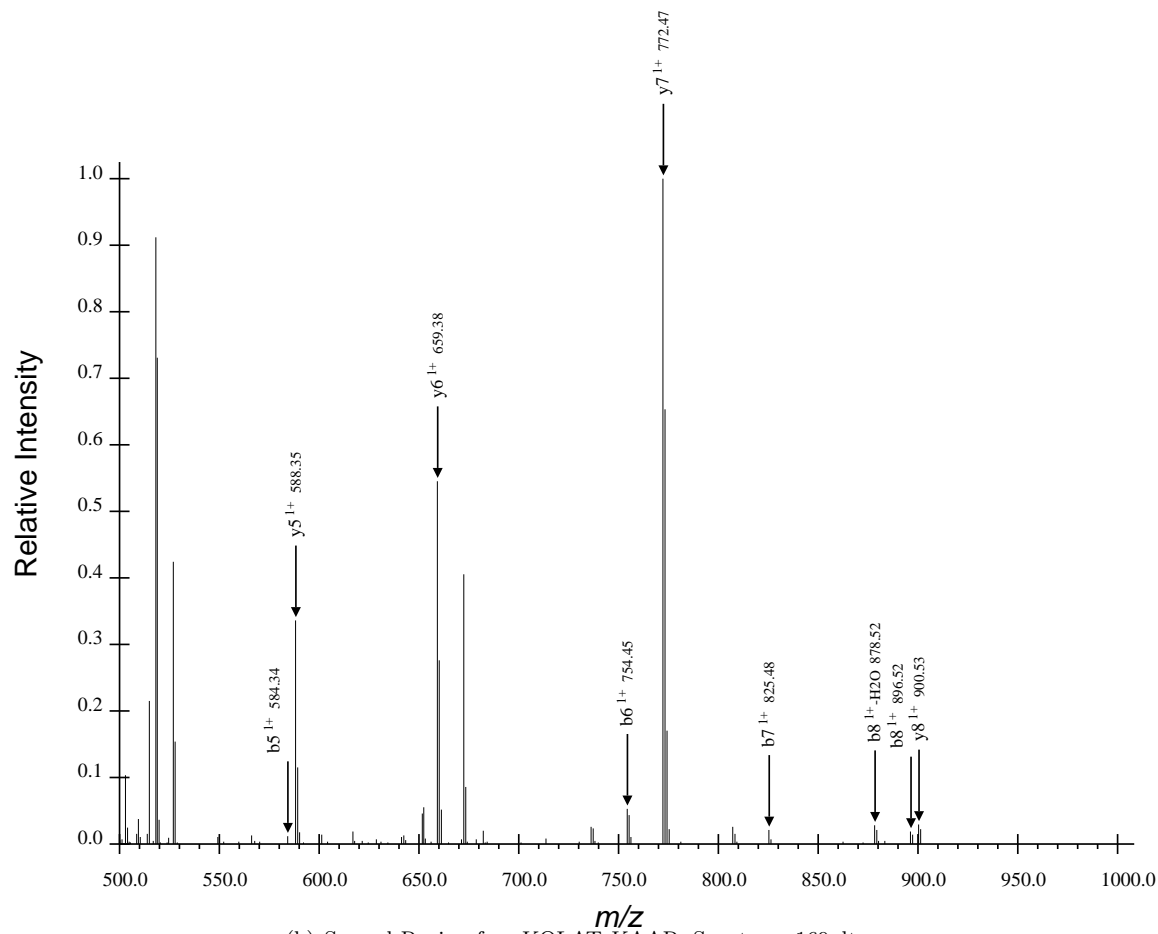

(b) Second Region for aQQLATAKAAR, Spectrum 169.dta

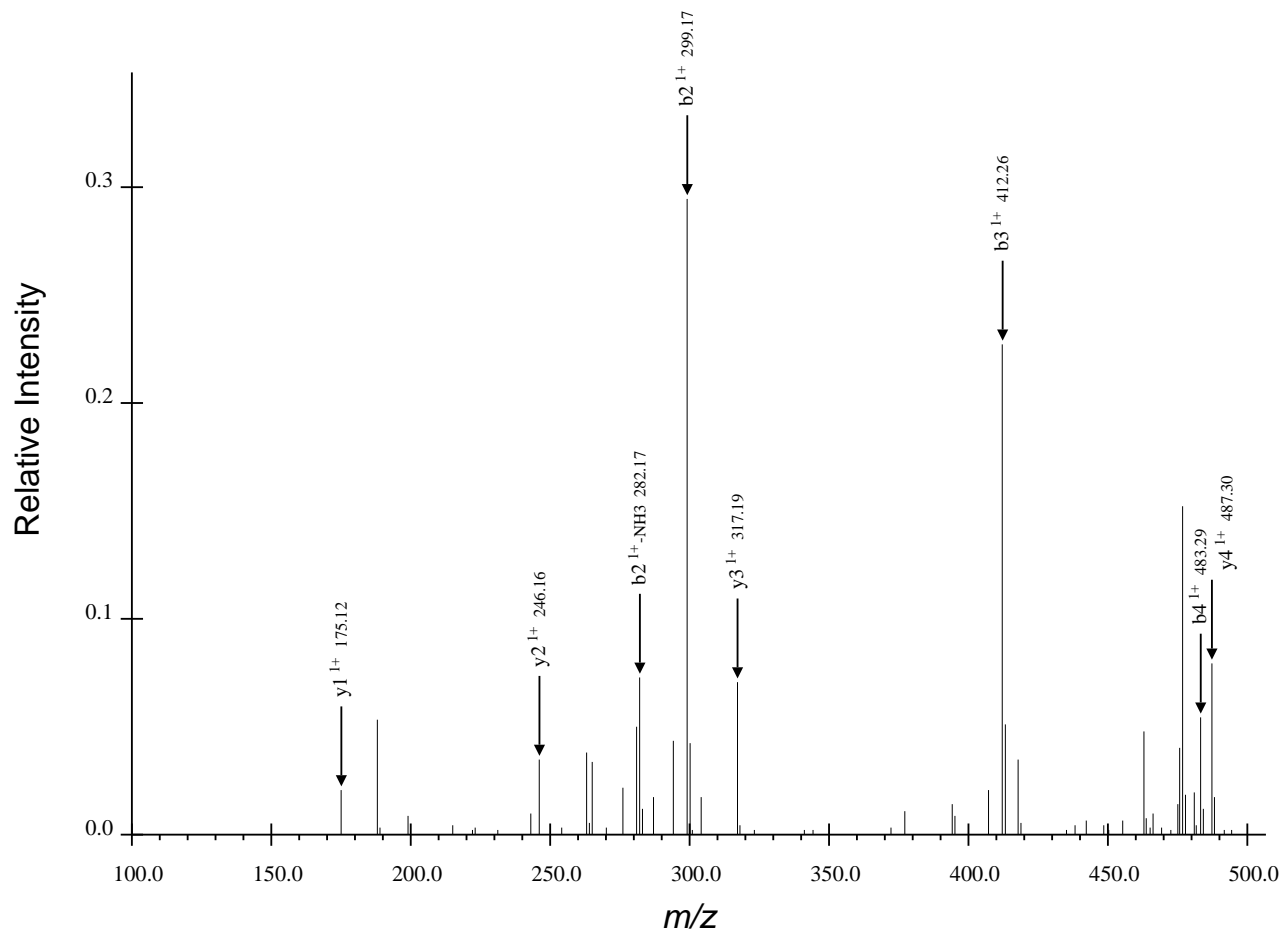

(a) First Region for aKQLATaKAAR, Spectrum 170.dta

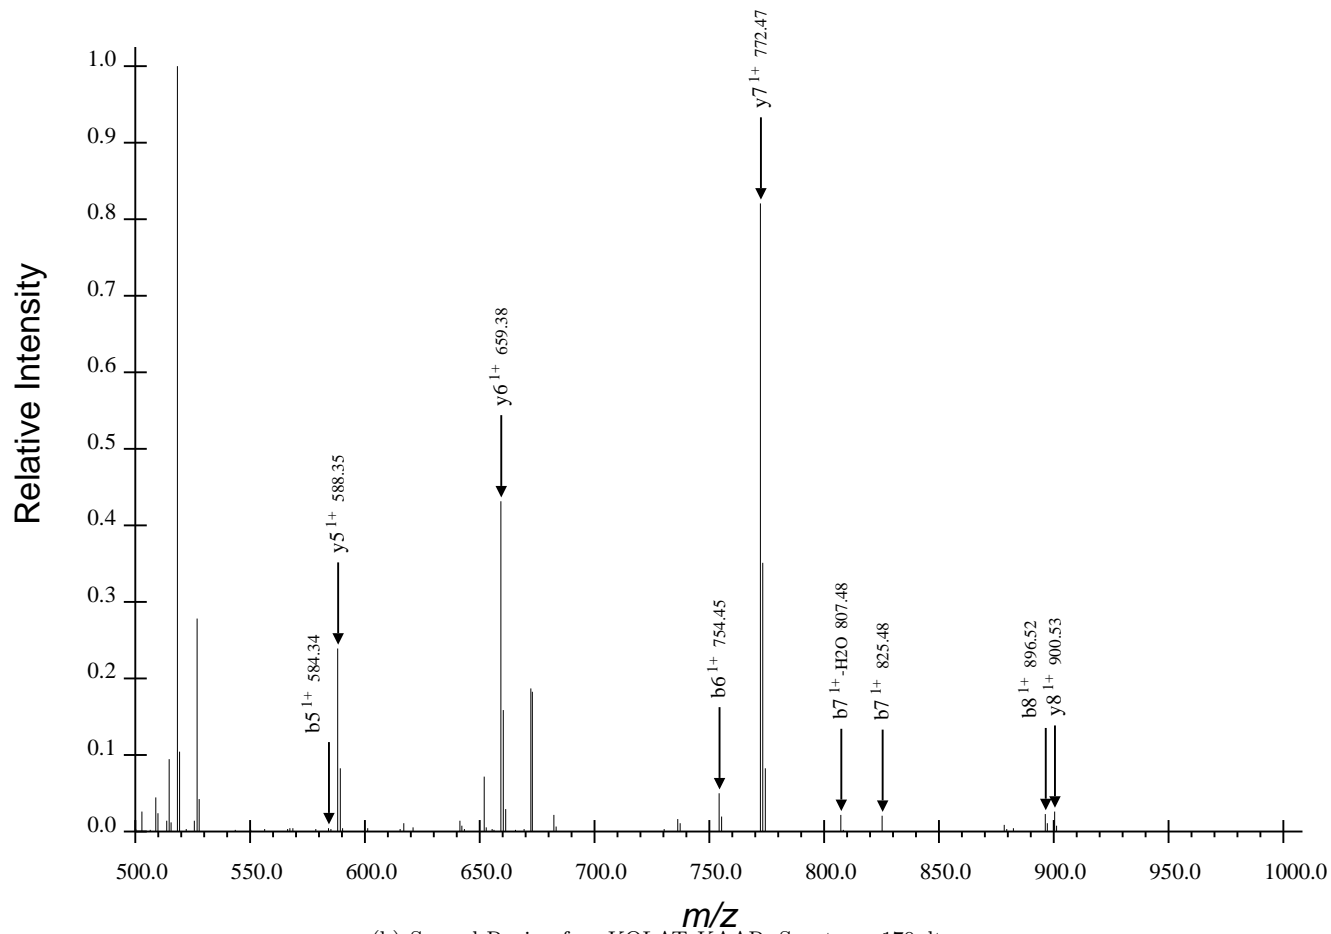

(b) Second Region for aKQLATaKAAR, Spectrum 170.dta

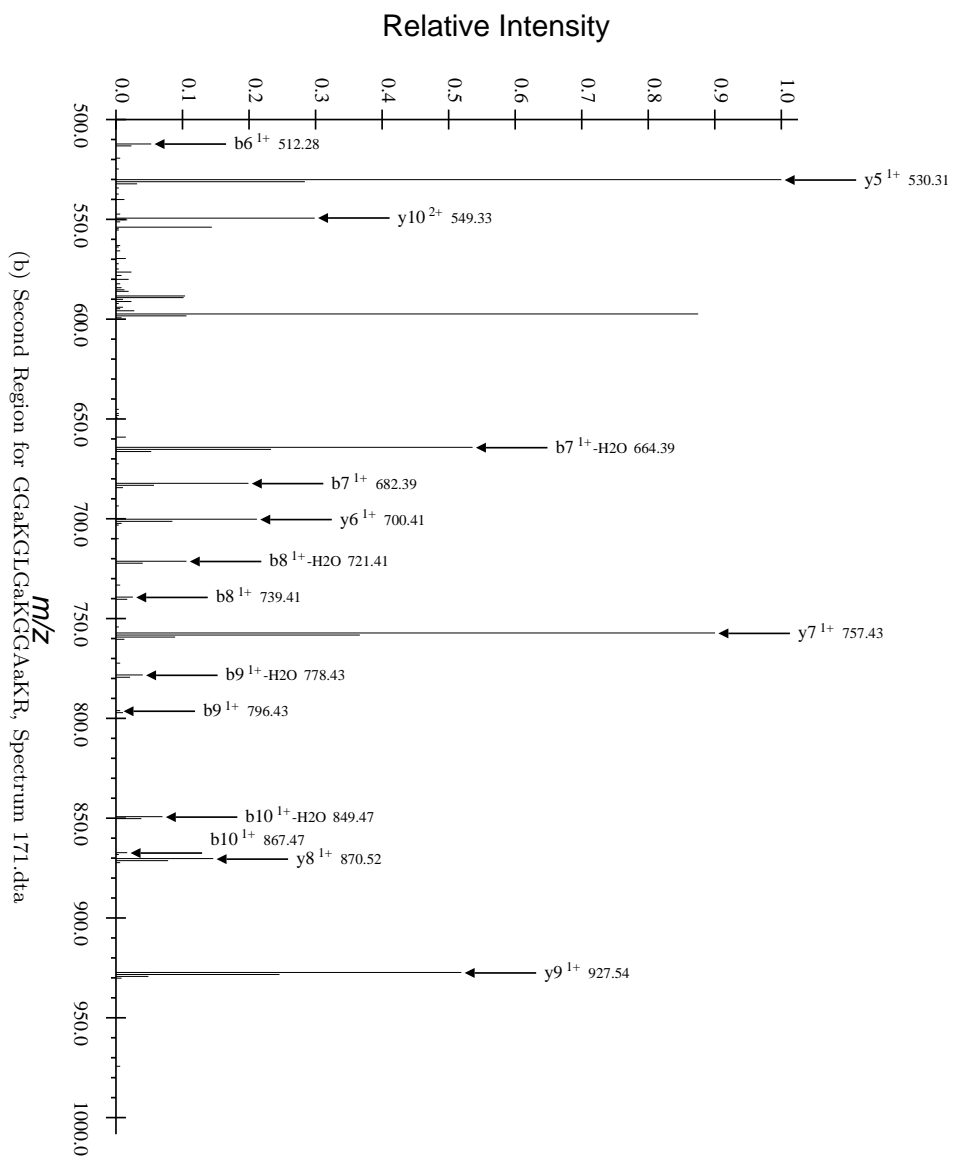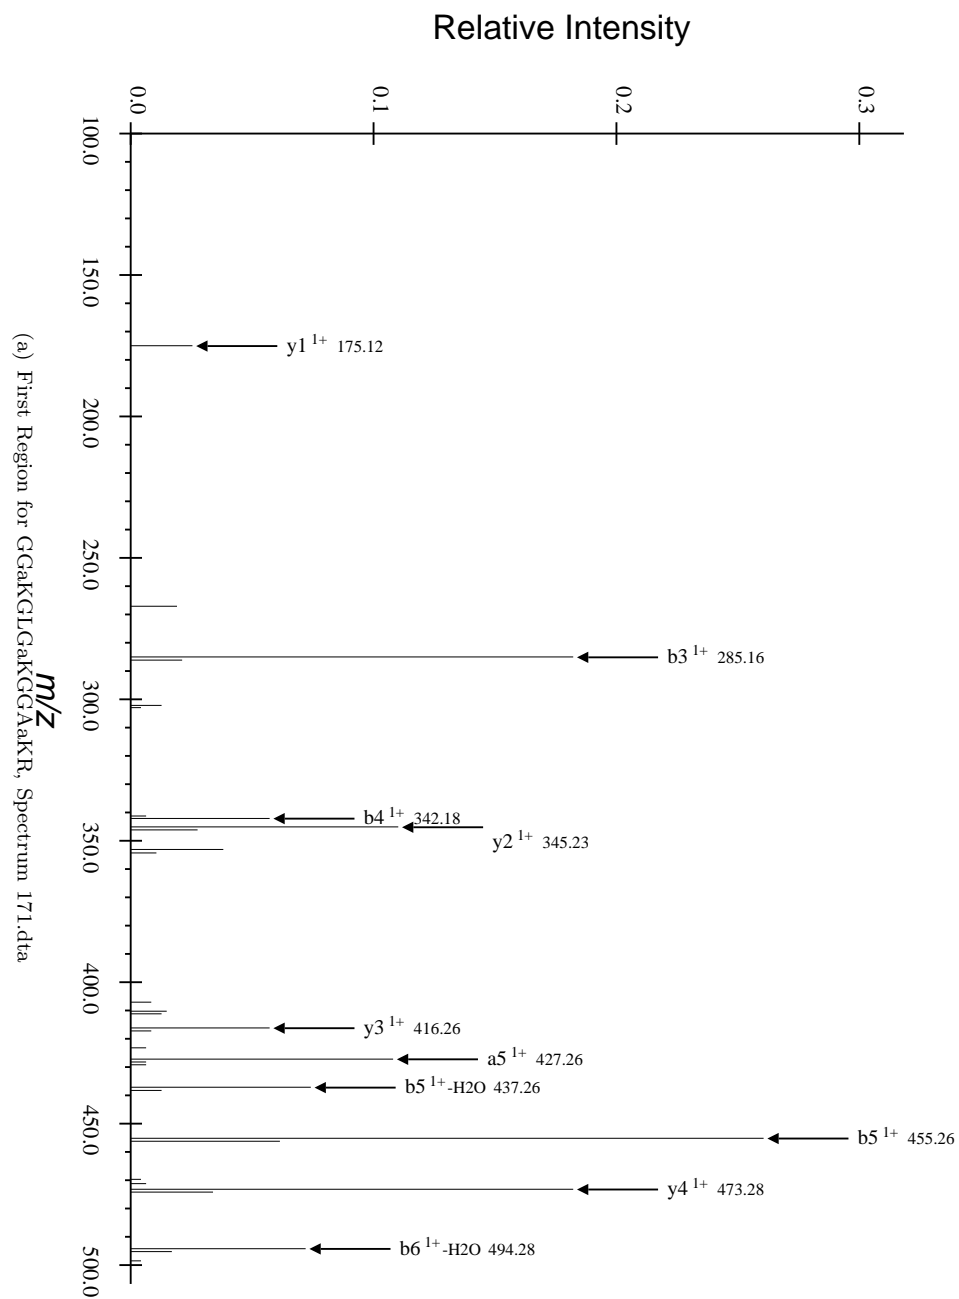

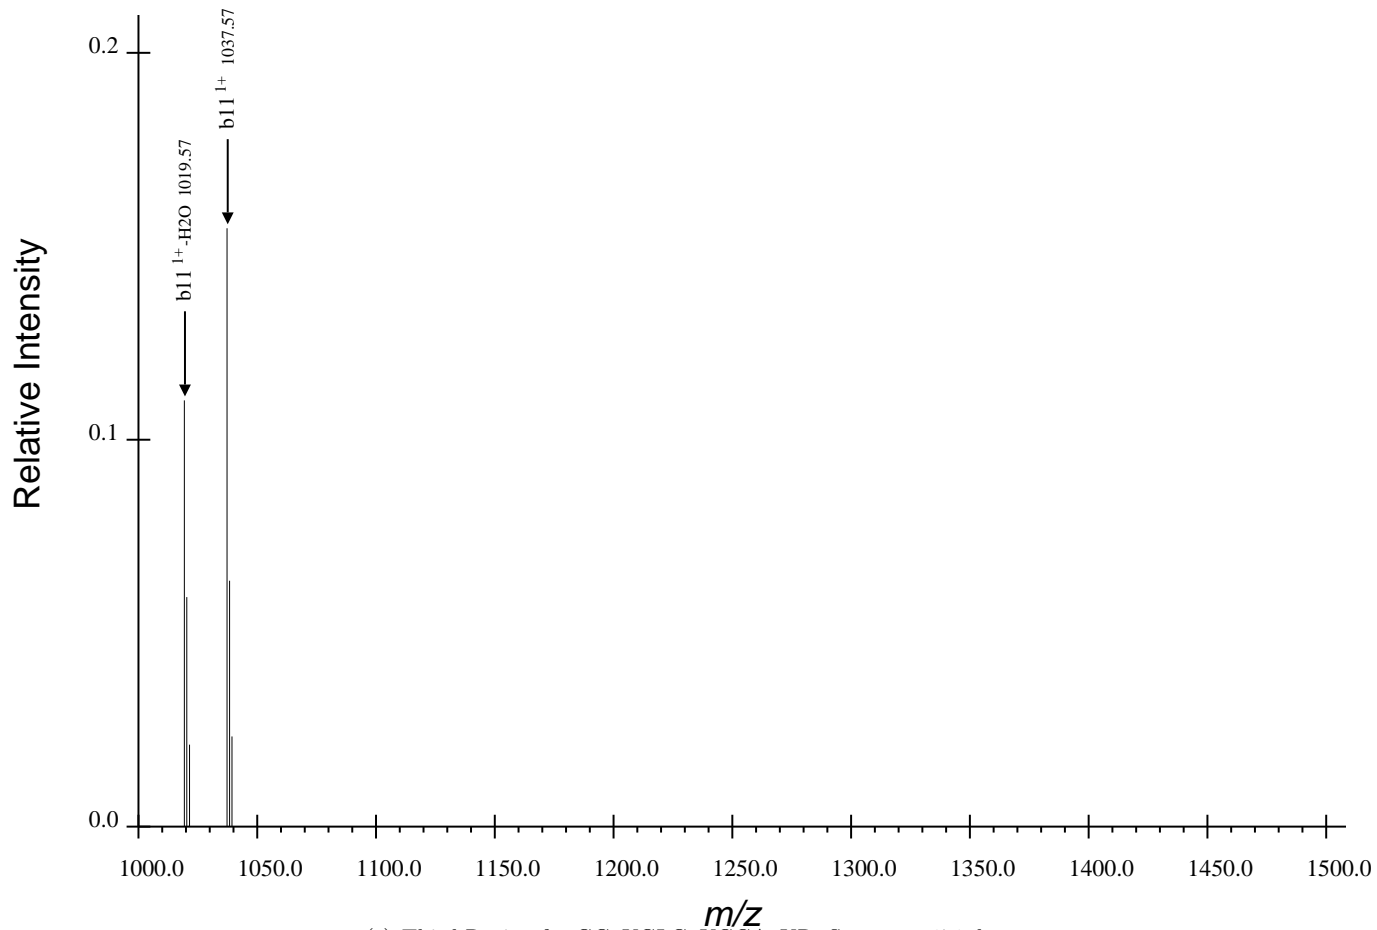

(c) Third Region for GGaKGLGaKGGaKR, Spectrum 171.dta

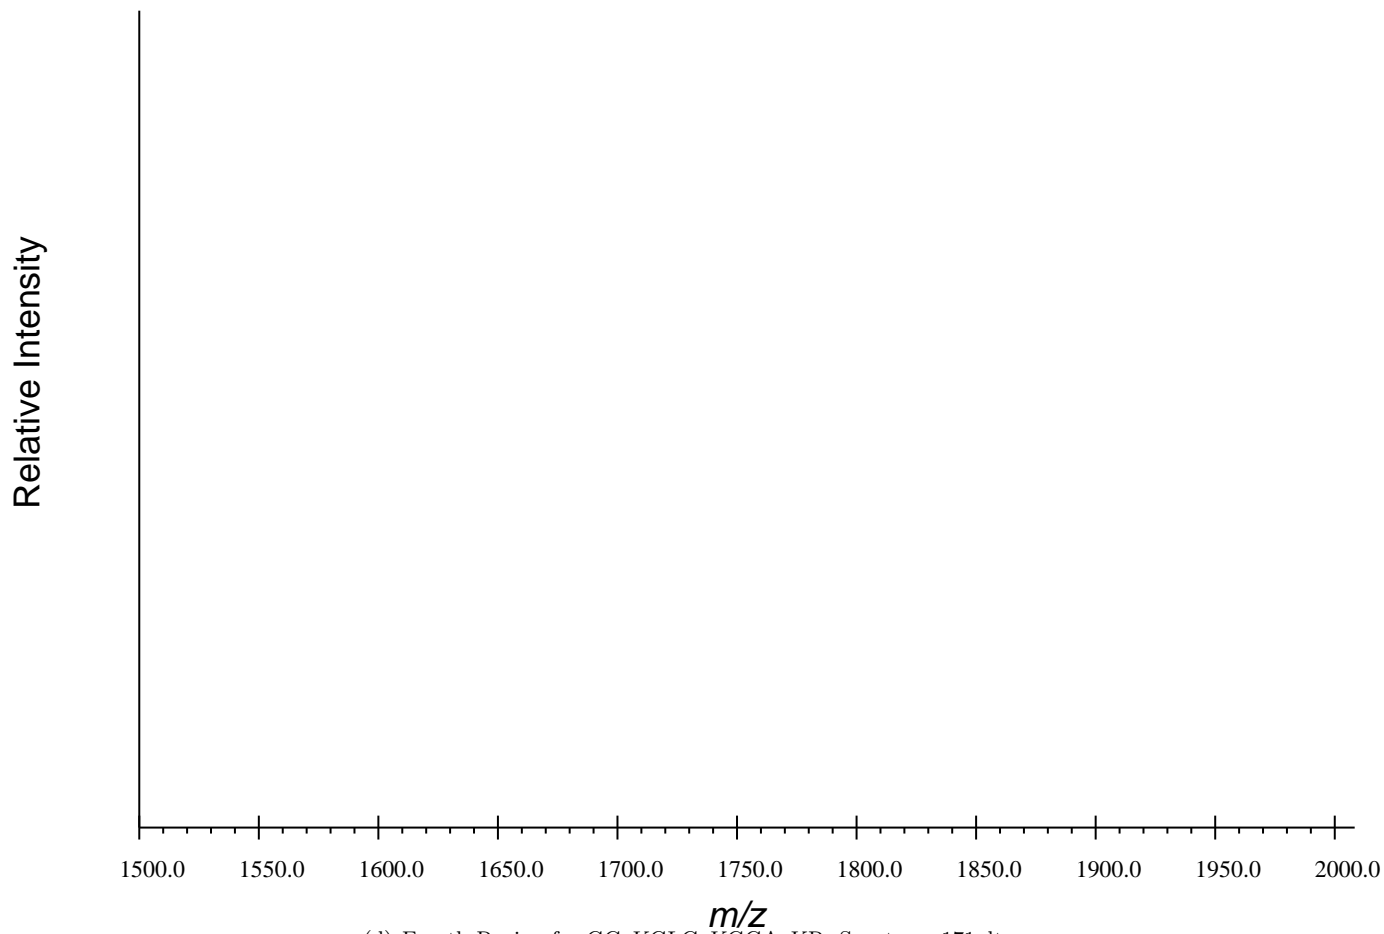

(d) Fourth Region for GGaKGLGaKGGaKR, Spectrum 171.dta

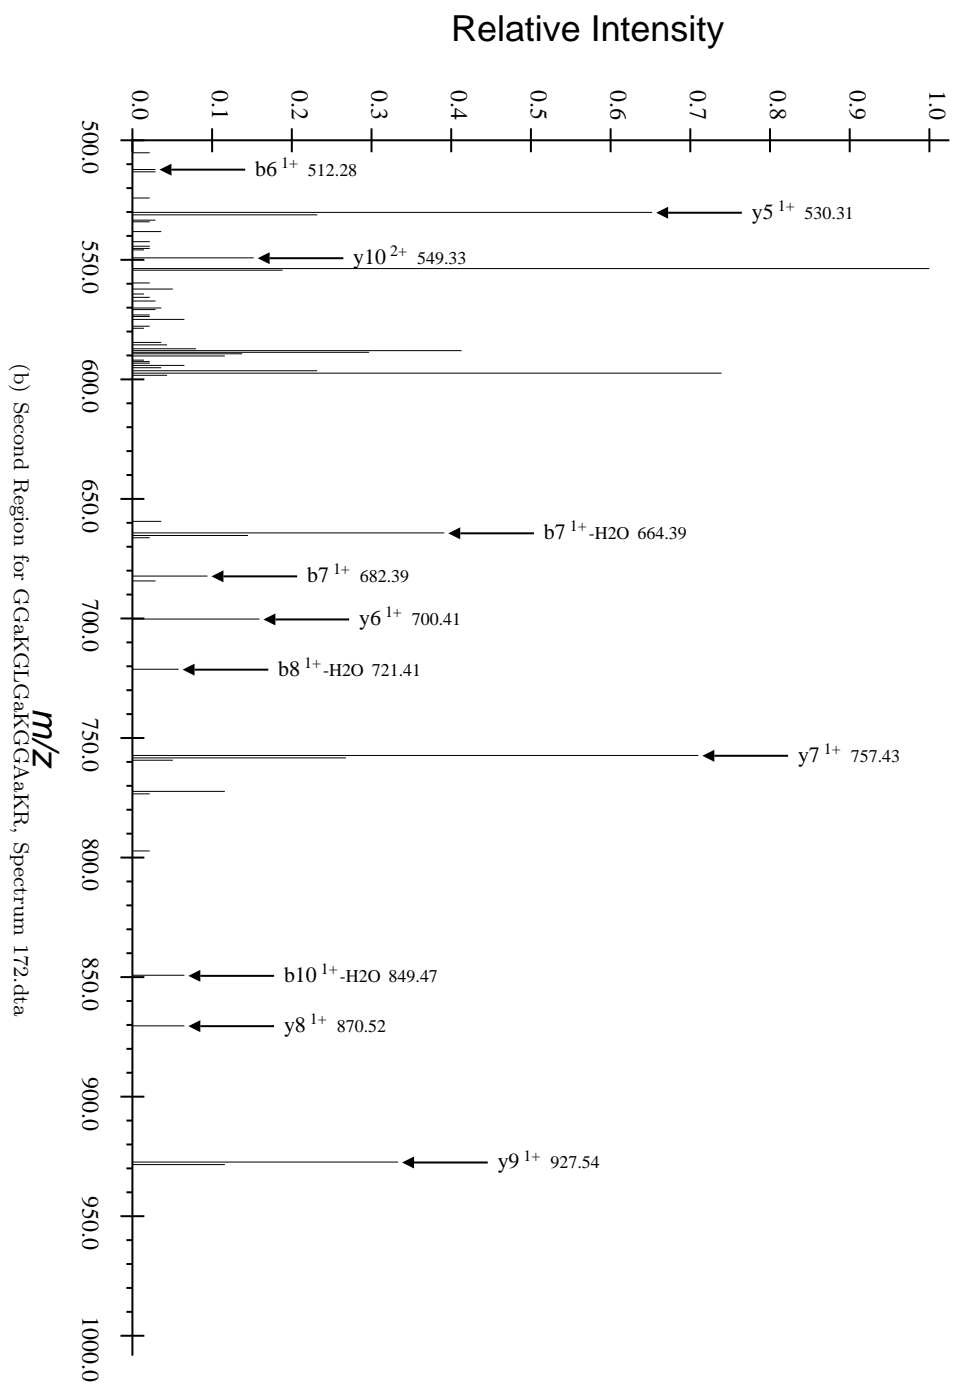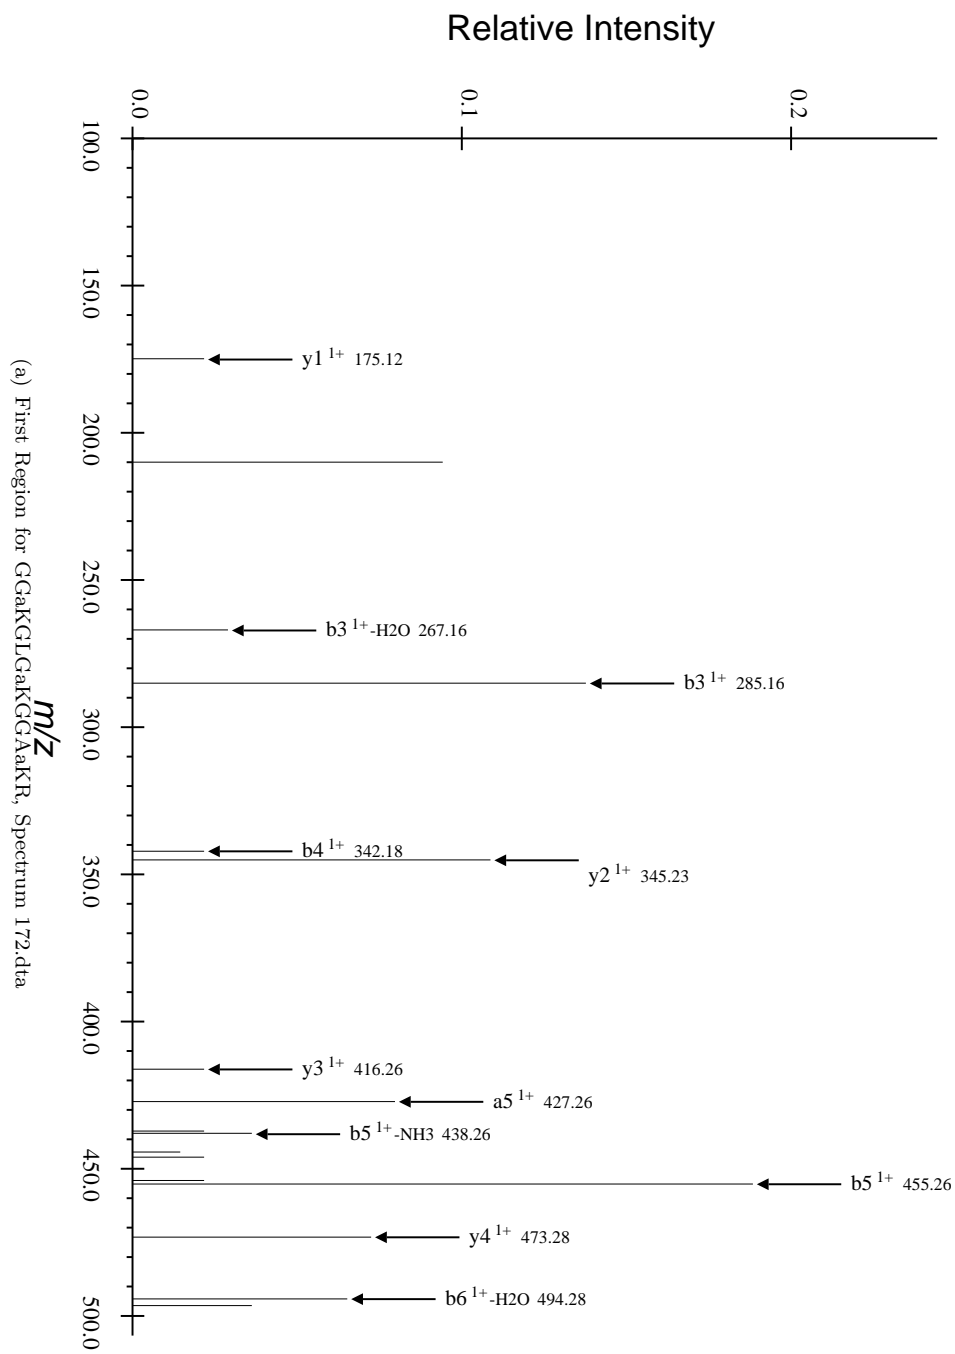

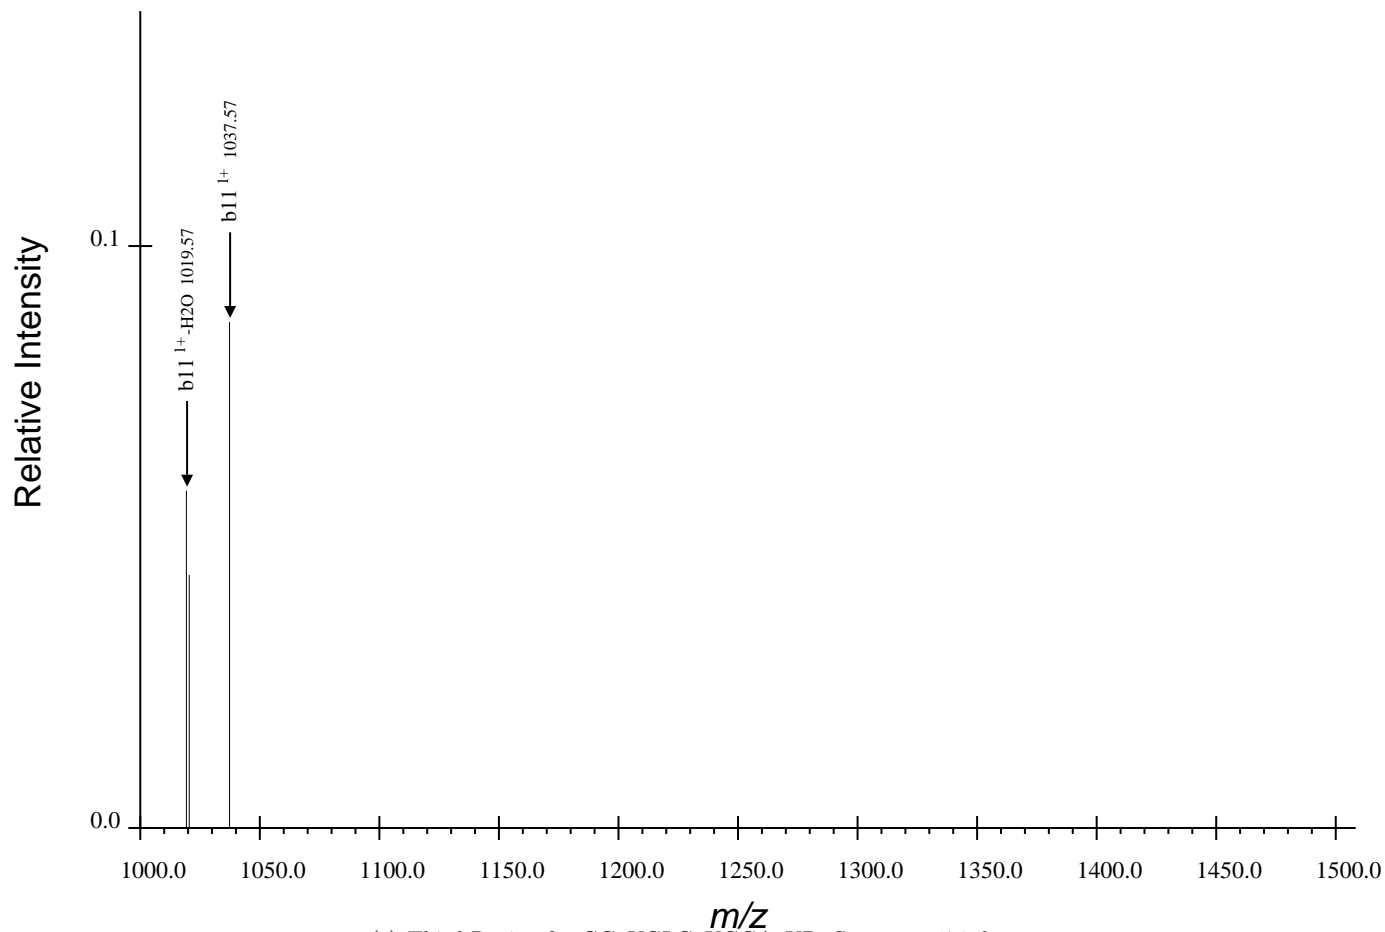

(c) Third Region for GGaKGLGaKGGAAaKR, Spectrum 172.dta

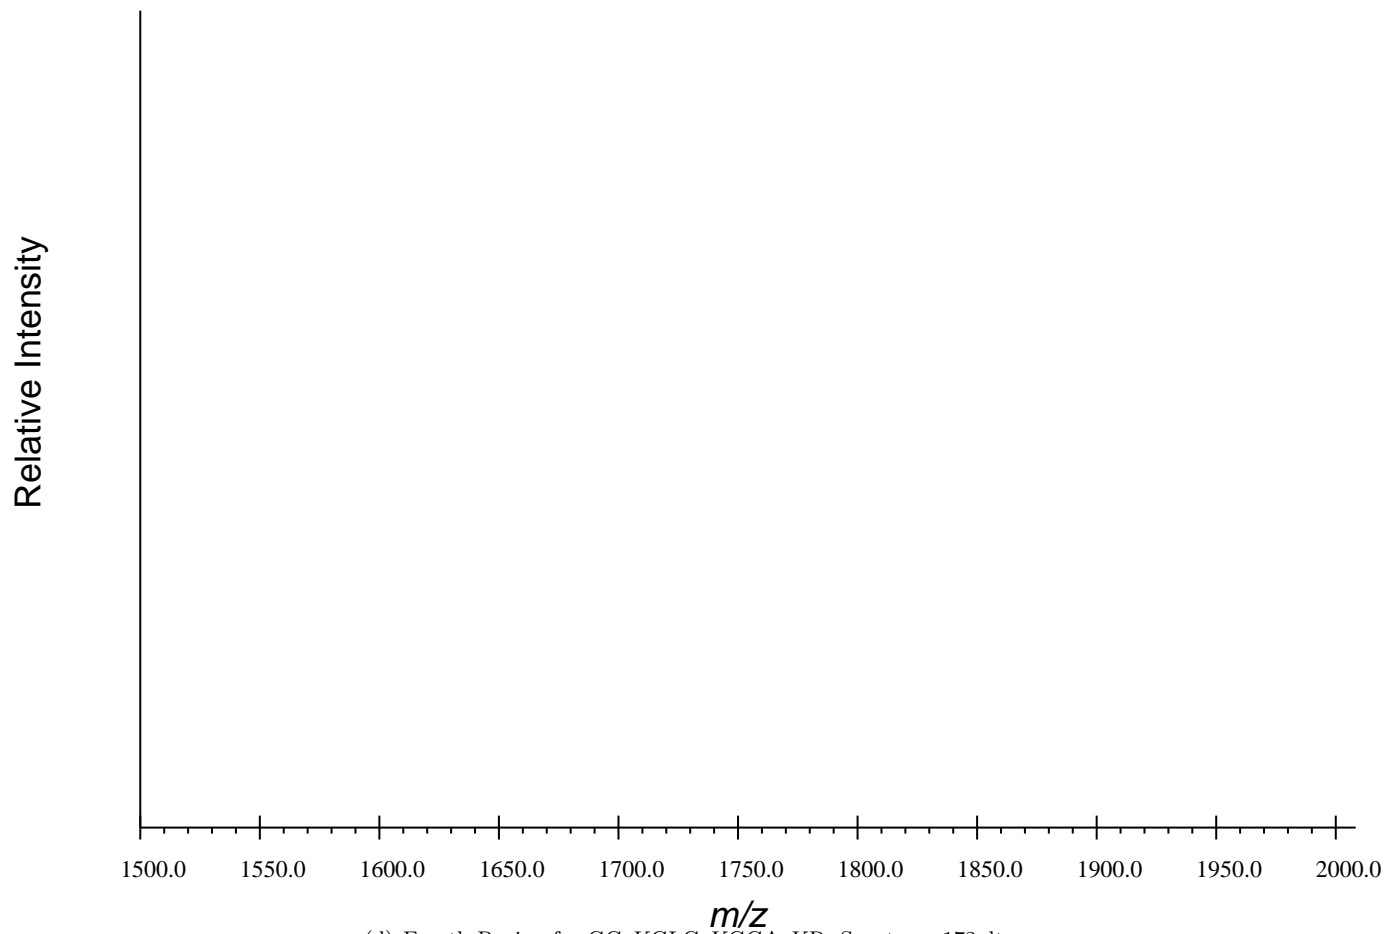

(d) Fourth Region for GGaKGLGaKGGAAaKR, Spectrum 172.dta

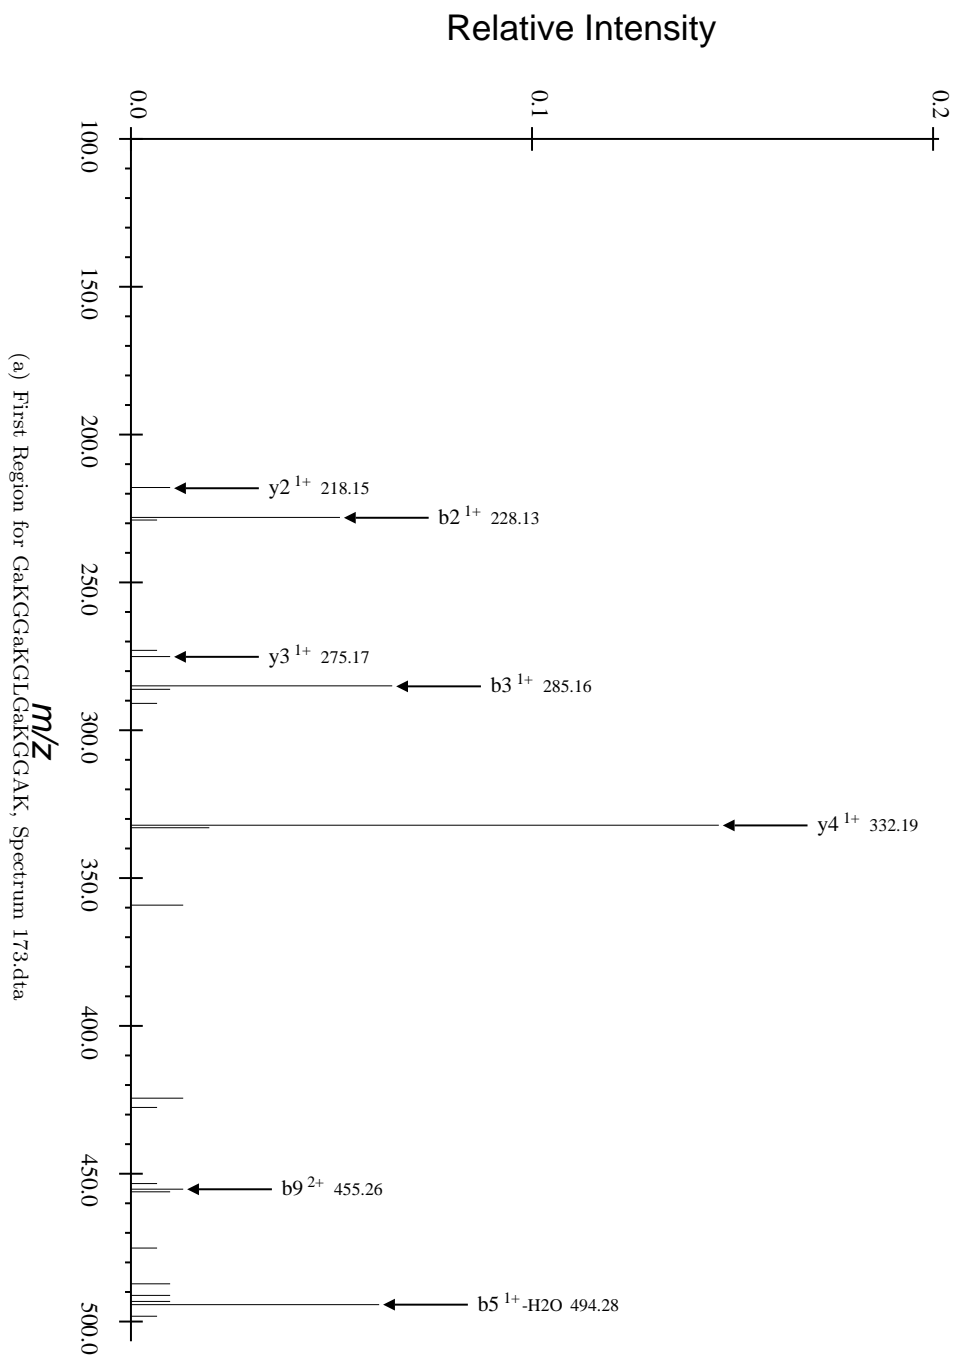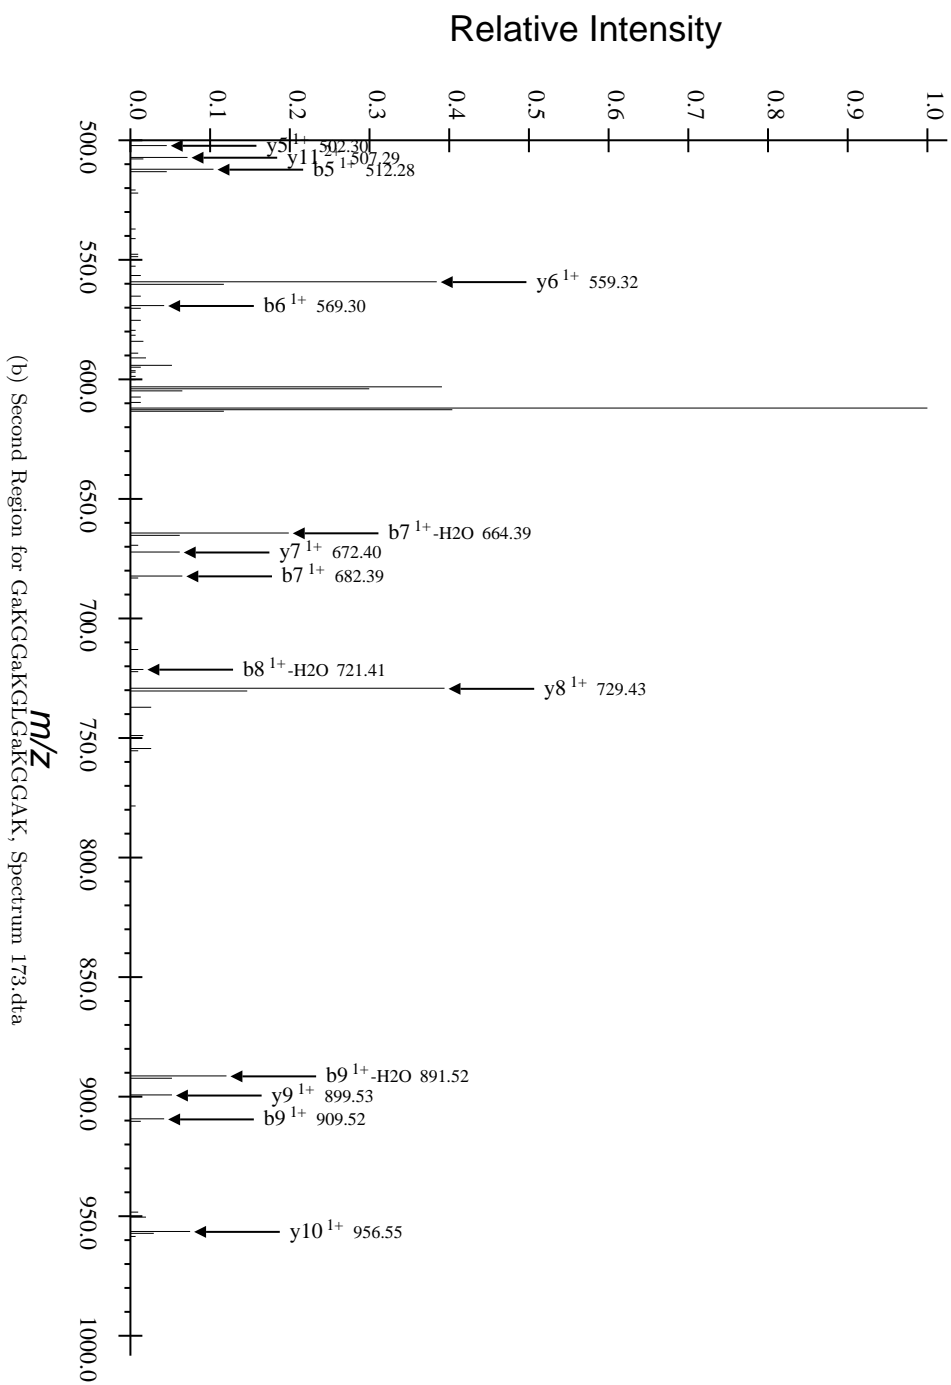



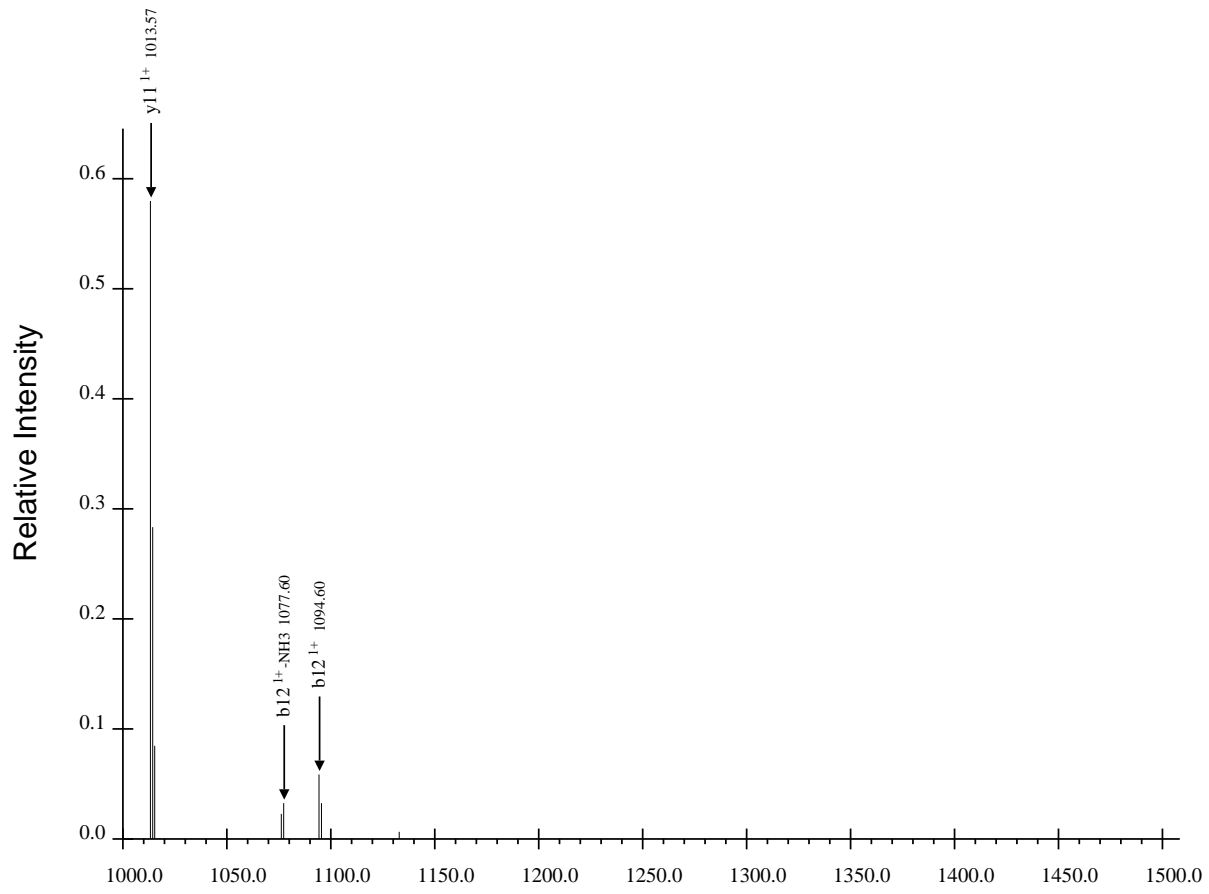

(c) Third Region for GaKGGaKGLGaKGGAK, Spectrum 173.dta

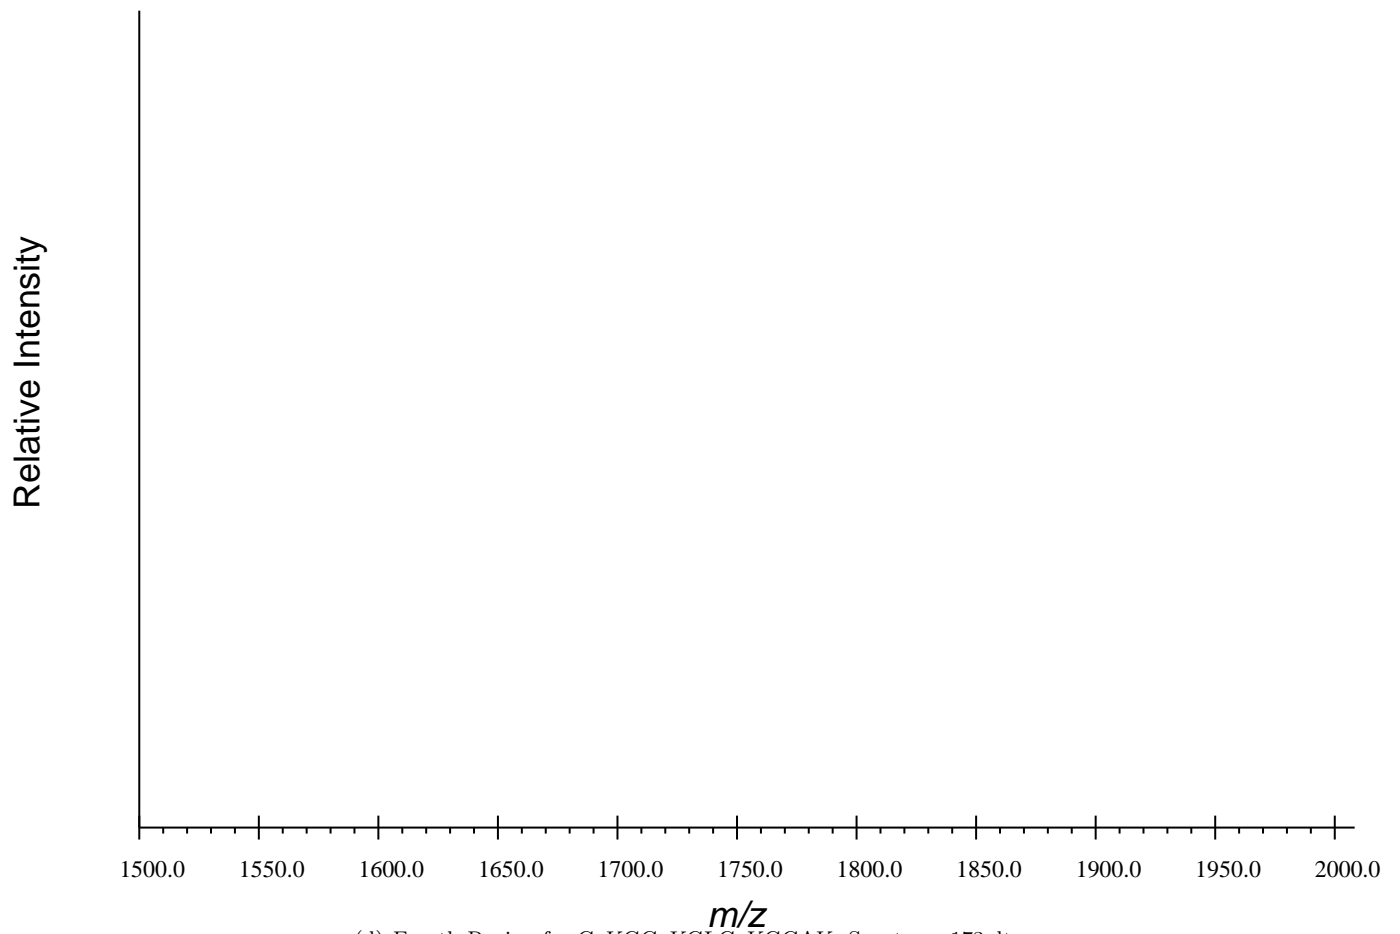

(d) Fourth Region for GaKGGaKGLGaKGGAK, Spectrum 173.dta

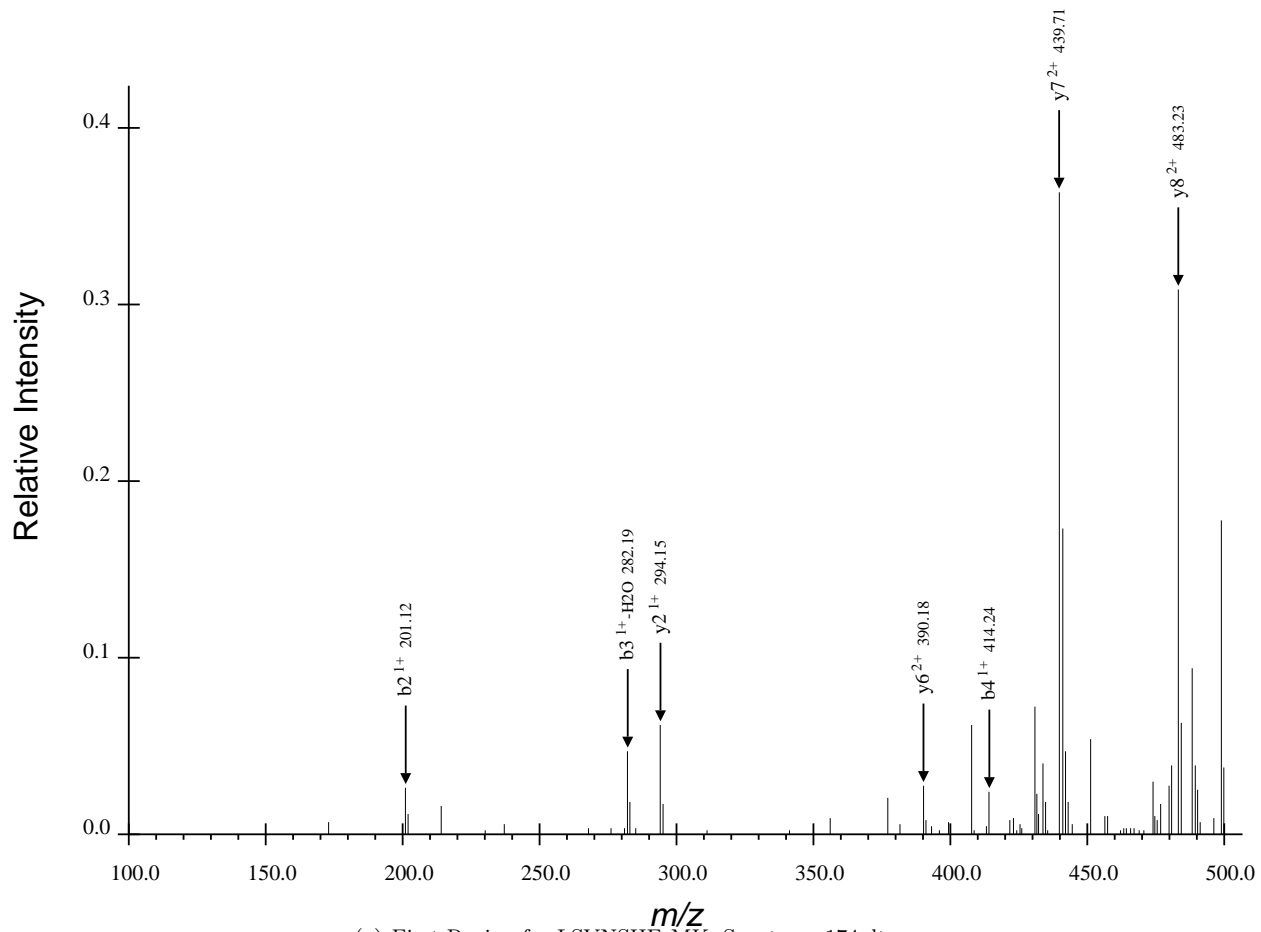

(a) First Region for LSVNSHFoMK, Spectrum 174.dta

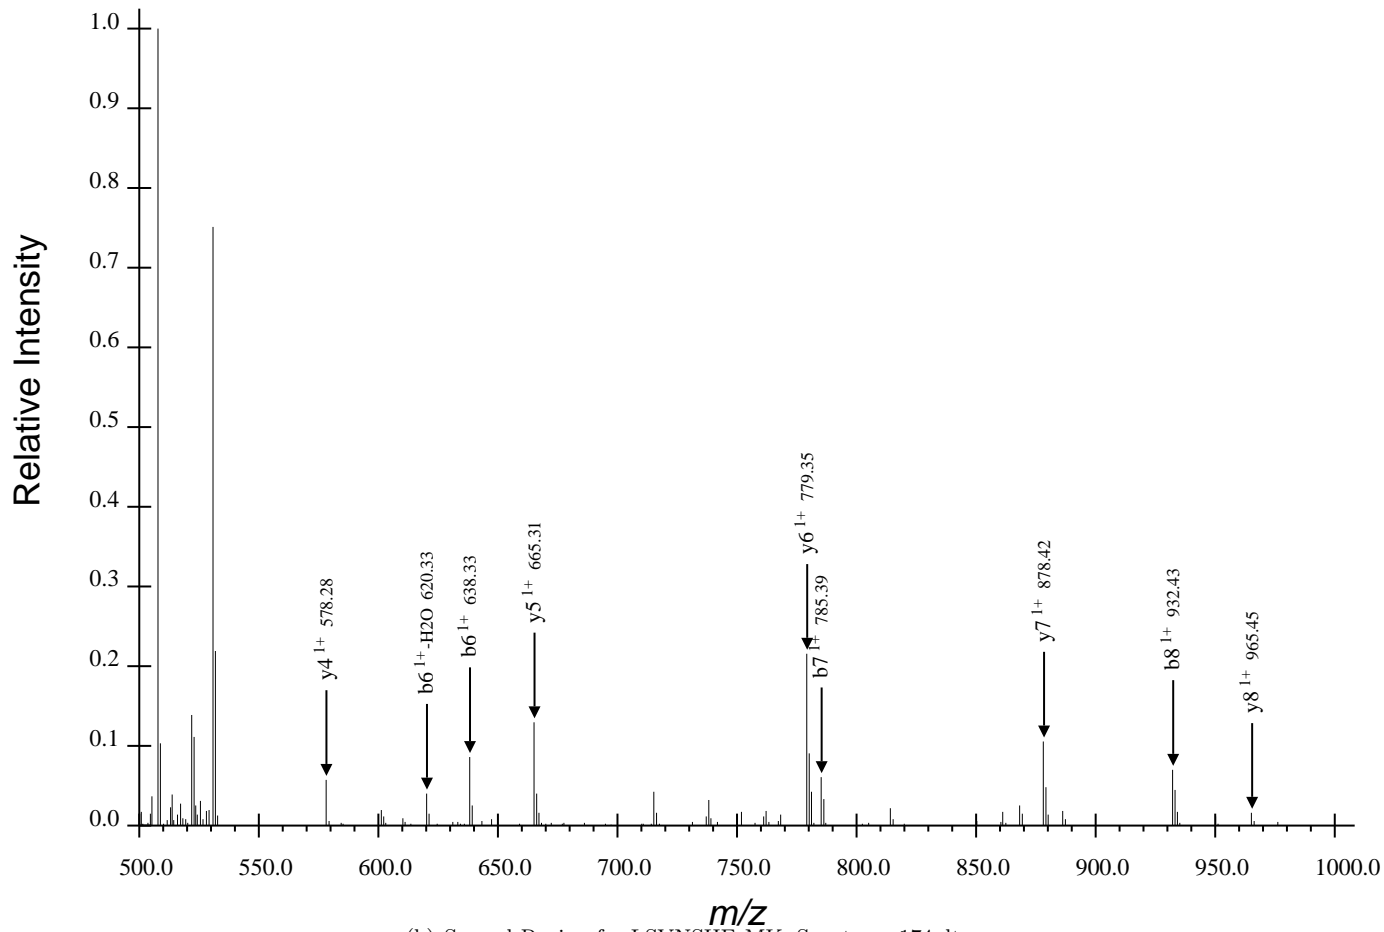

(b) Second Region for LSVNSHFoMK, Spectrum 174.dta

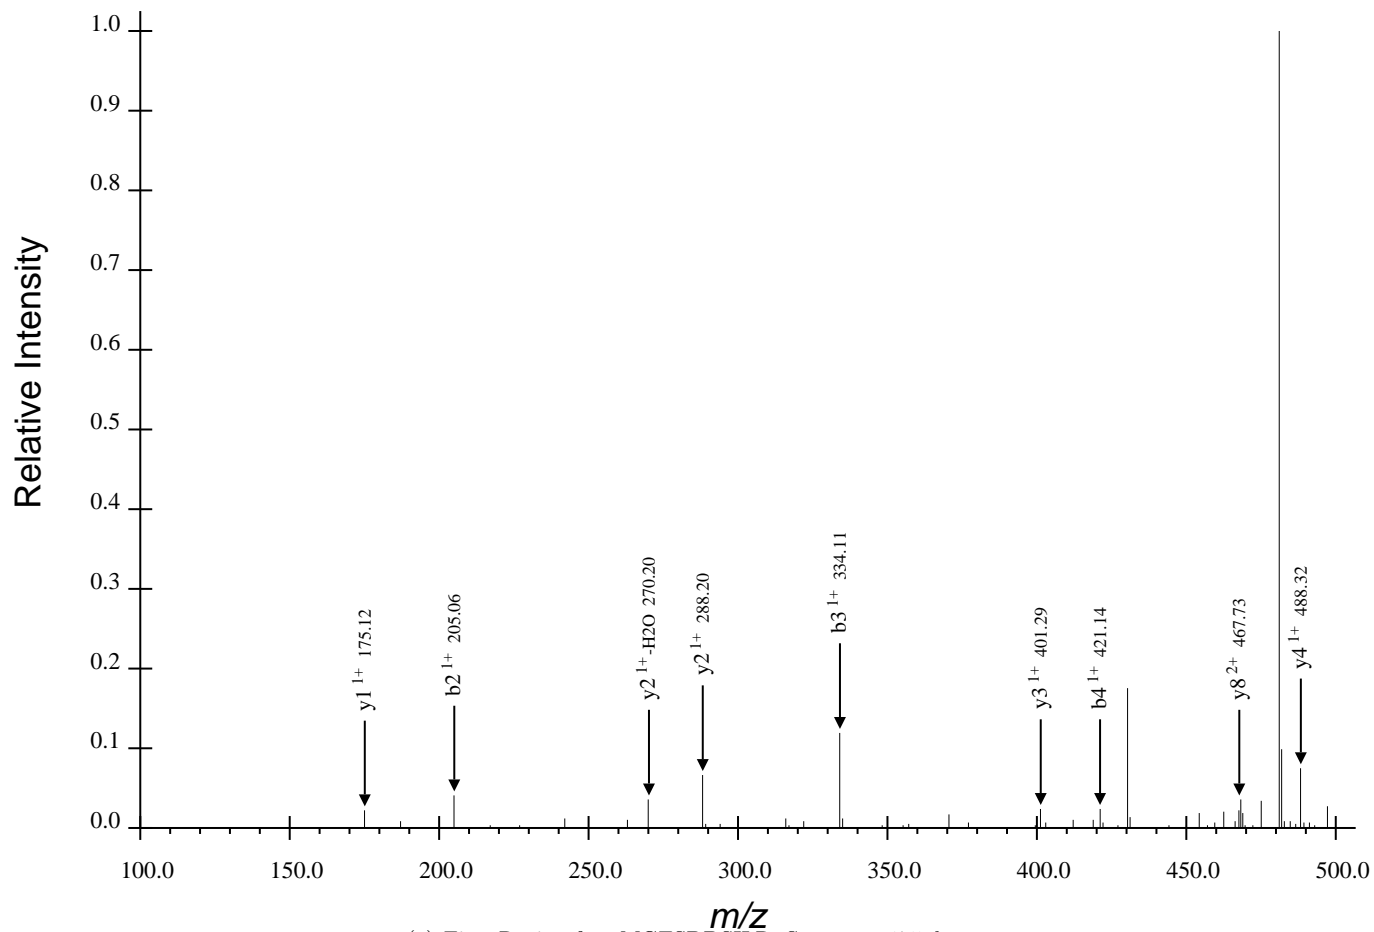

(a) First Region for oMGESDDSLR, Spectrum 175.dta

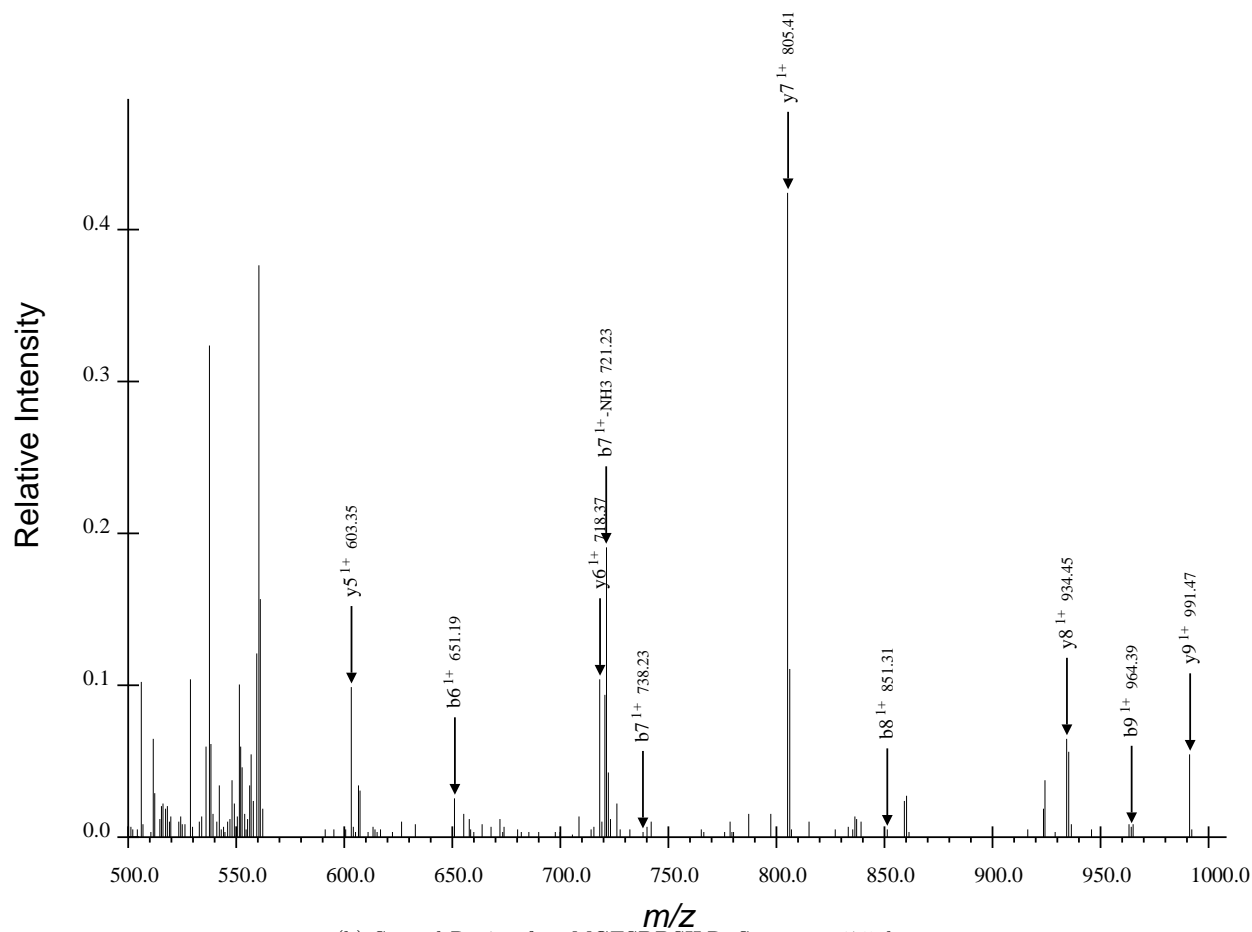

(b) Second Region for oMGESDDSLR, Spectrum 175.dta

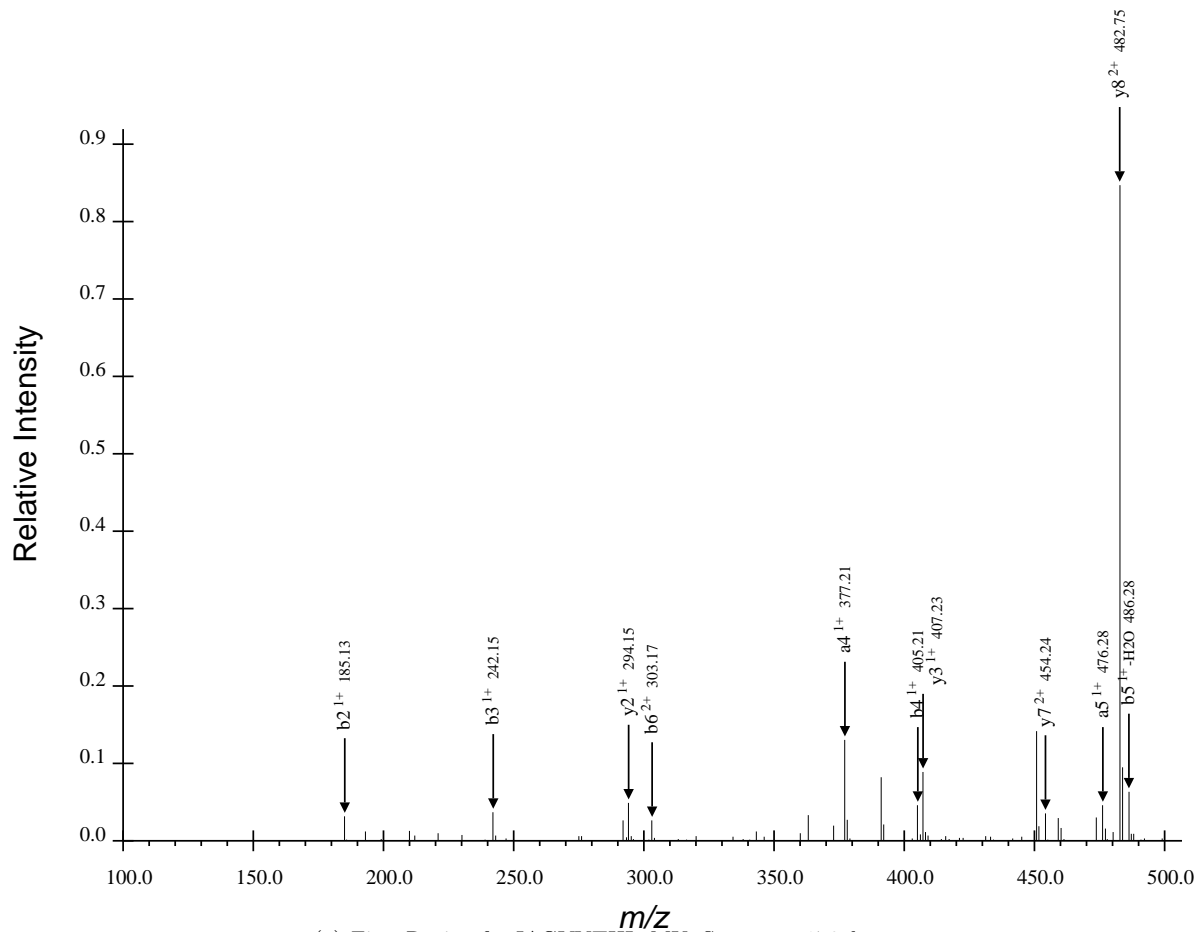

(a) First Region for IAGYVTHLoMK, Spectrum 176.dta

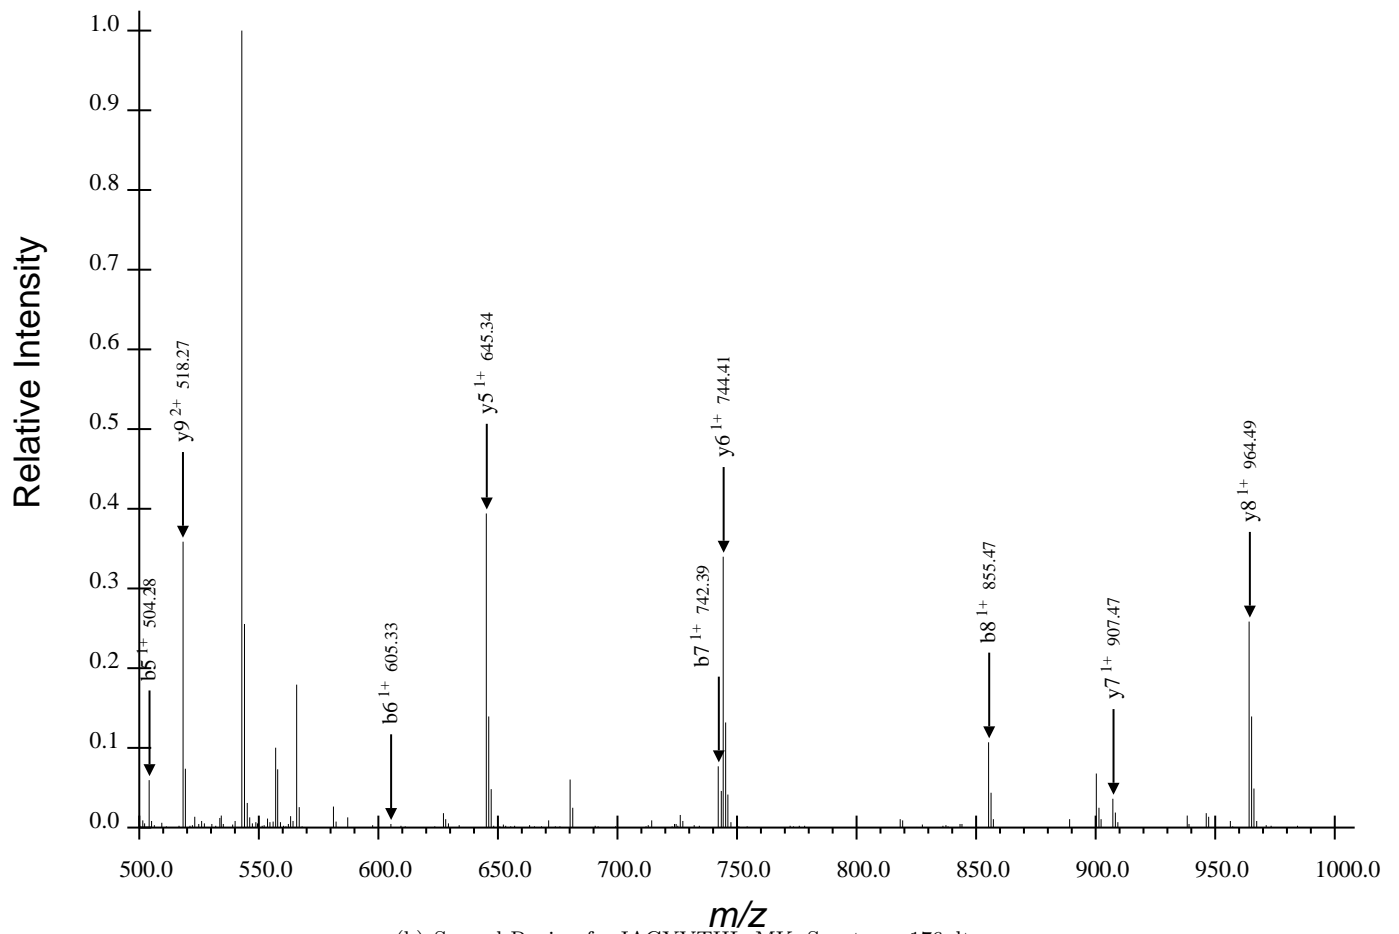

(b) Second Region for IAGYVTHLoMK, Spectrum 176.dta

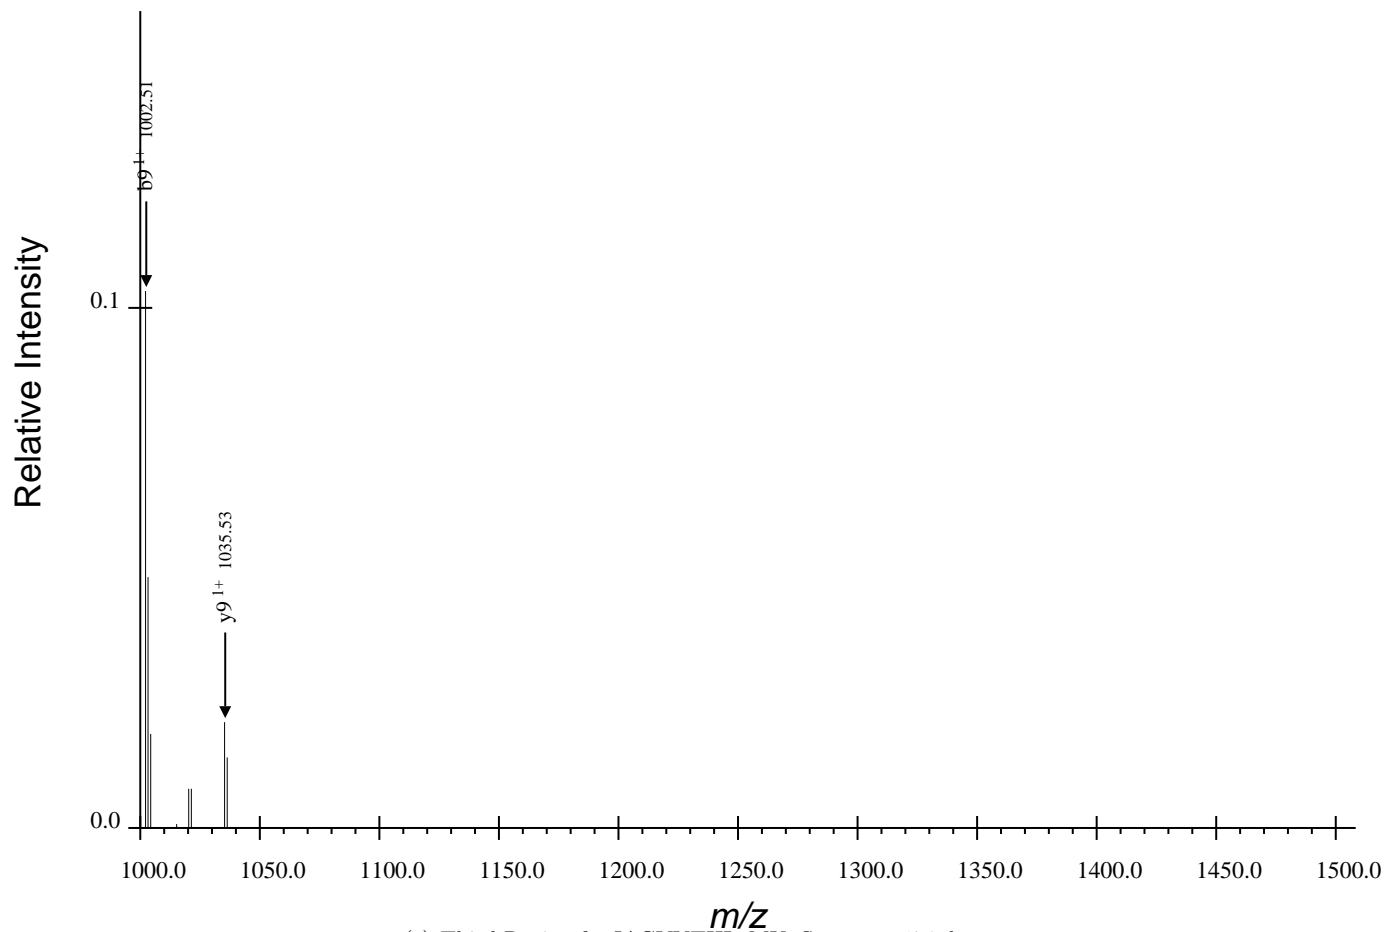

(c) Third Region for IAGYVTHLoMK, Spectrum 176.dta

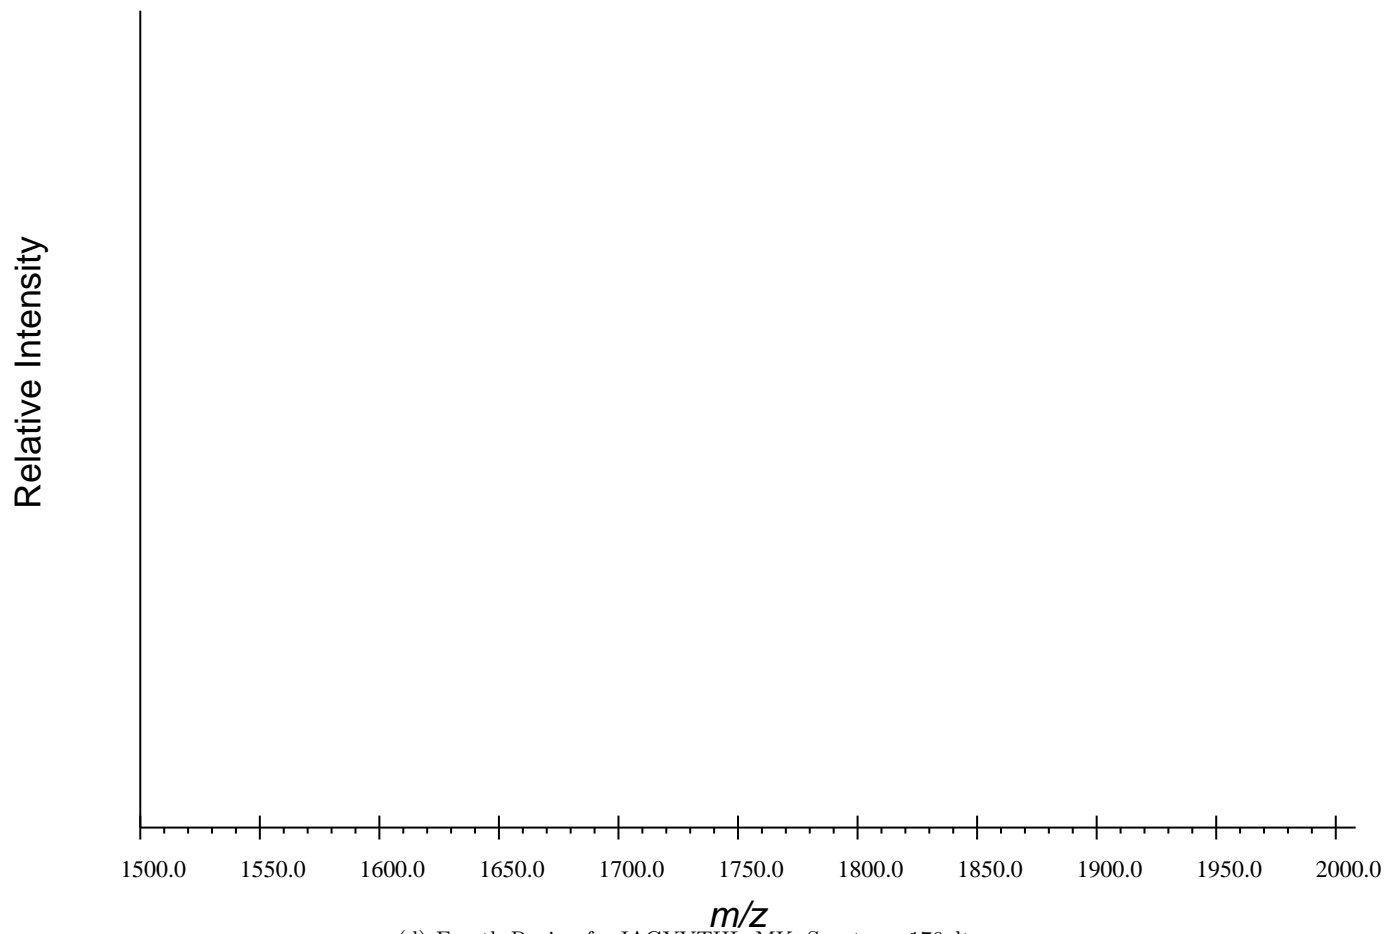

(d) Fourth Region for IAGYVTHLoMK, Spectrum 176.dta

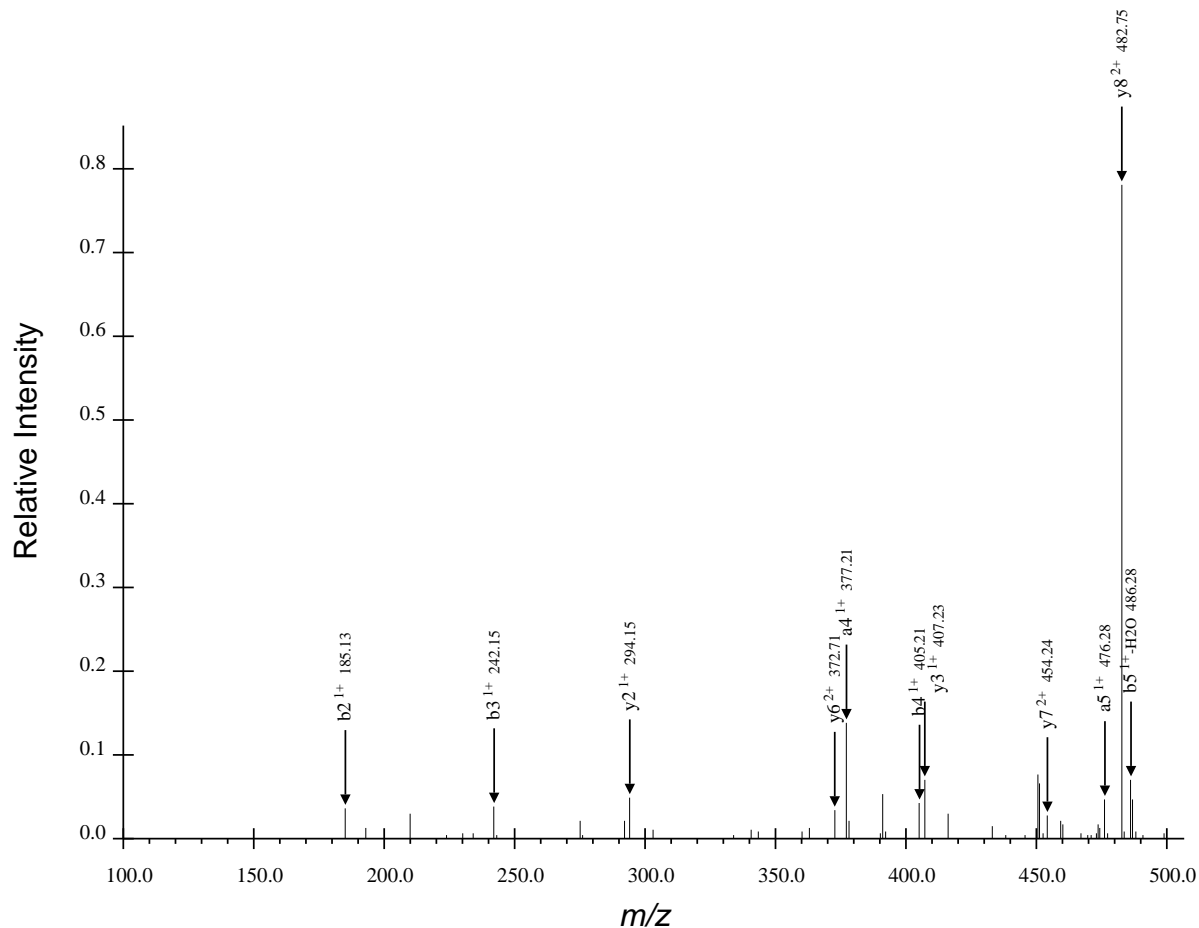

(a) First Region for IAGYVTHLoMK, Spectrum 177.dta

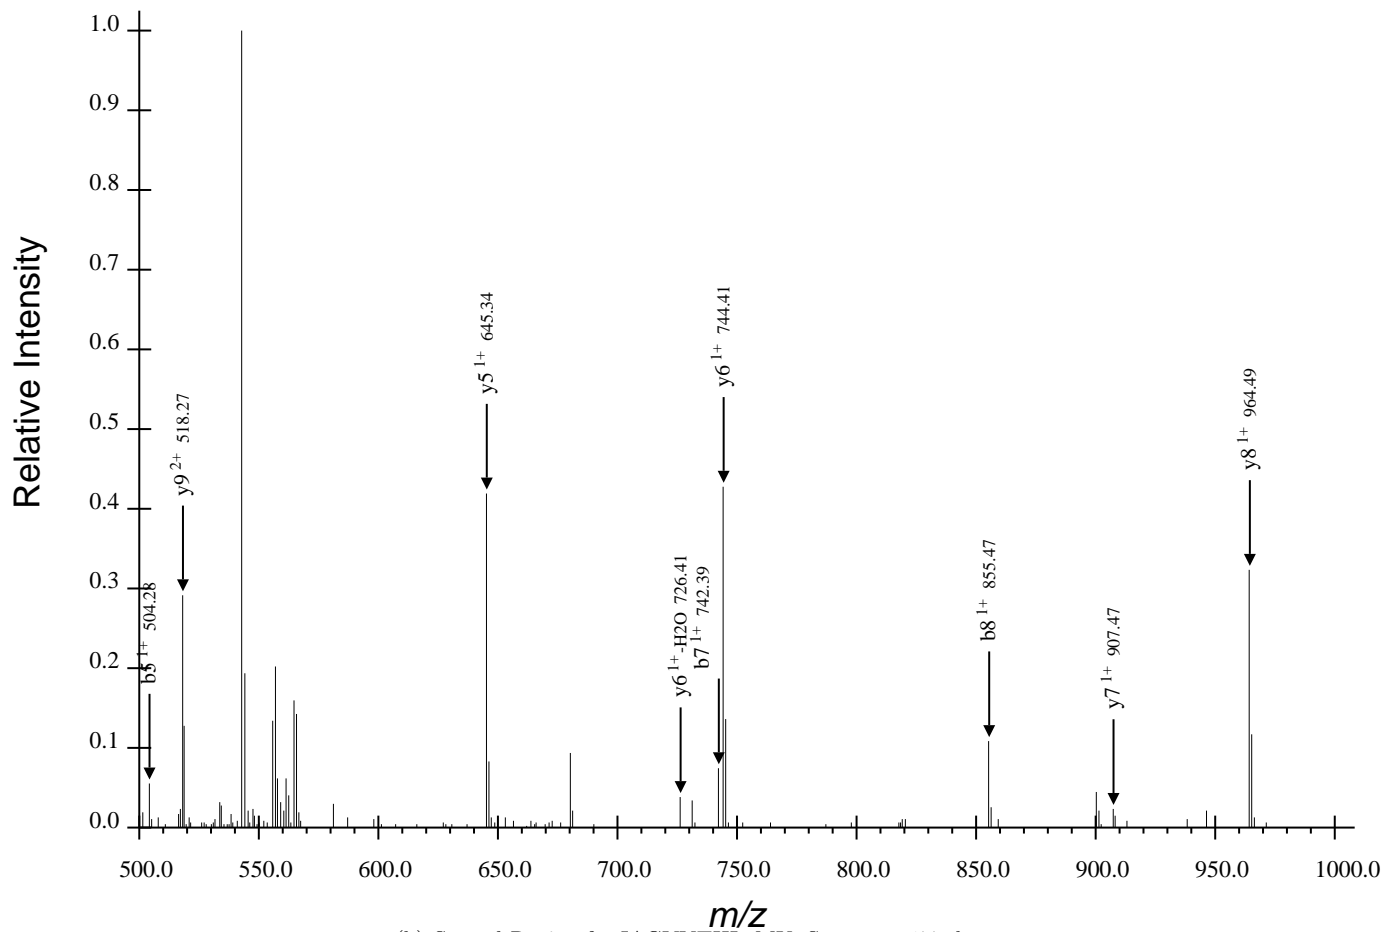

(b) Second Region for IAGYVTHLoMK, Spectrum 177.dta

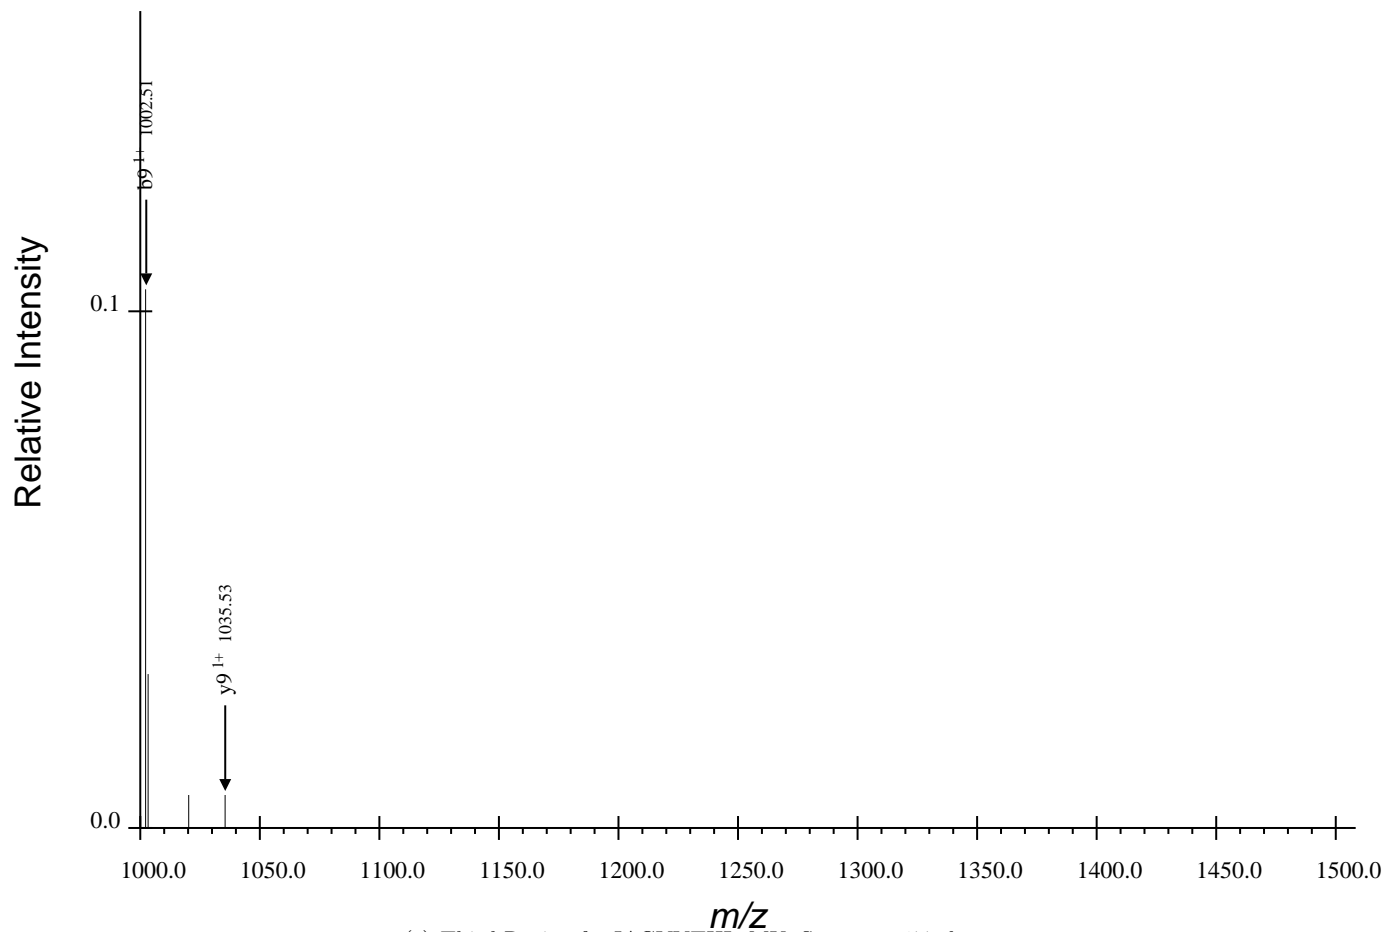

(c) Third Region for IAGYVTHLoMK, Spectrum 177.dta

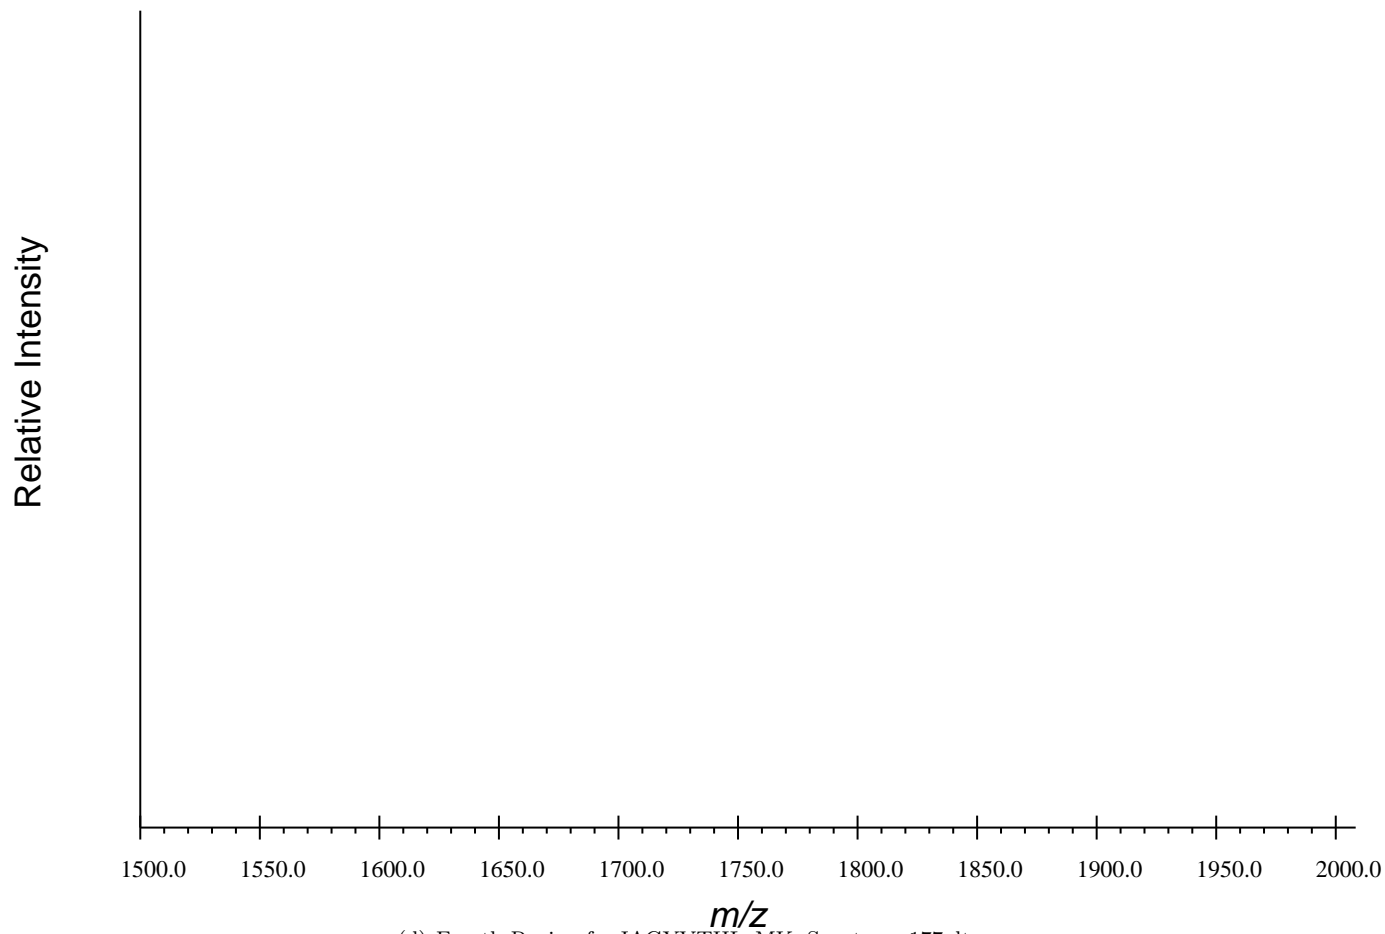

(d) Fourth Region for IAGYVTHLoMK, Spectrum 177.dta

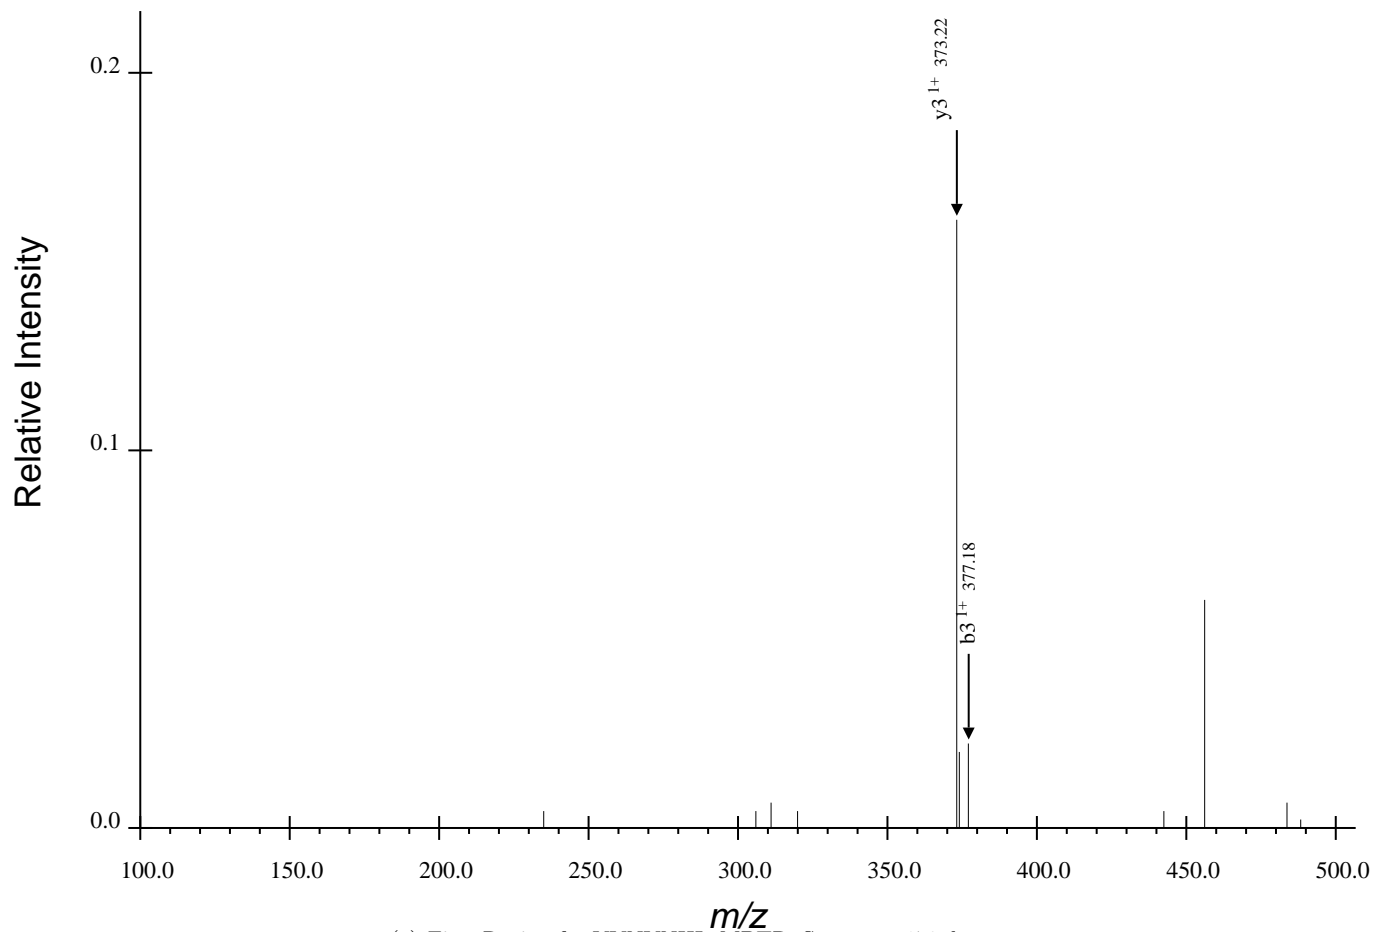

(a) First Region for VYNYNHLoMPTR, Spectrum 178.dta

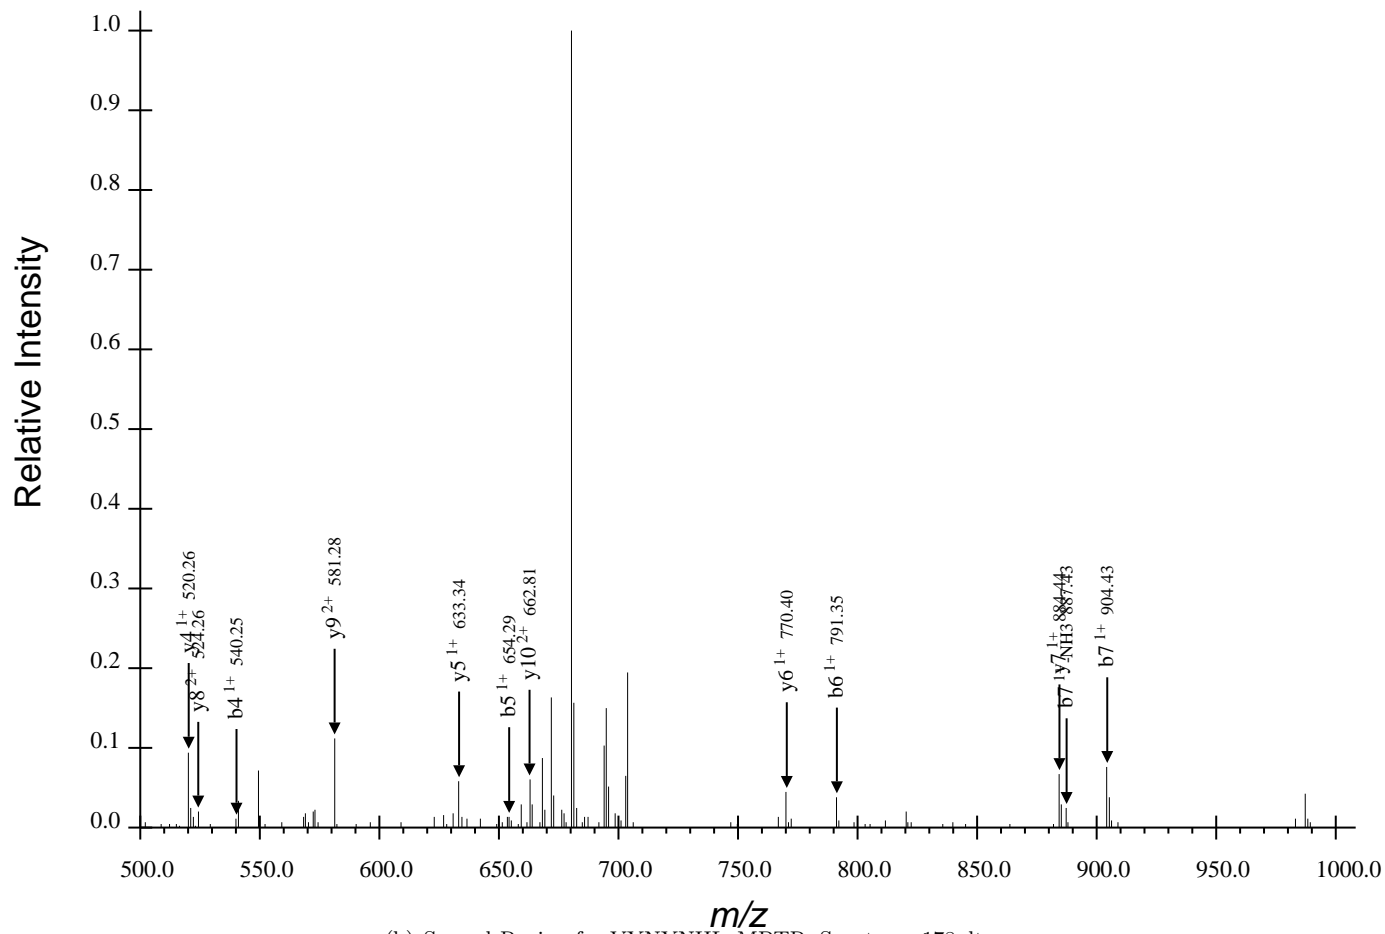

(b) Second Region for VYNYNHLoMPTR, Spectrum 178.dta



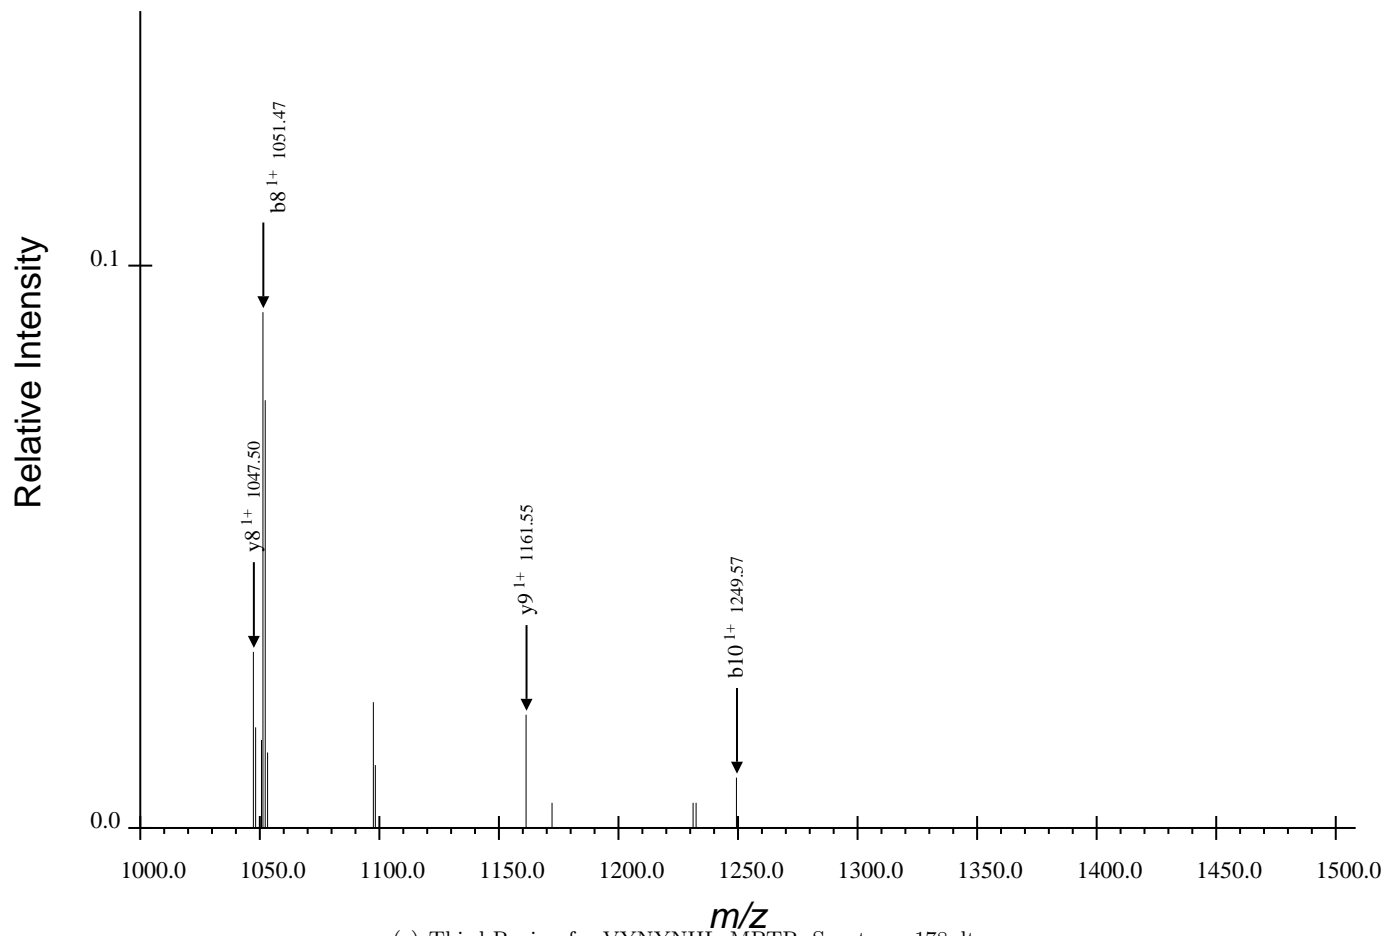

(c) Third Region for VYNYNHLoMPTR, Spectrum 178.dta

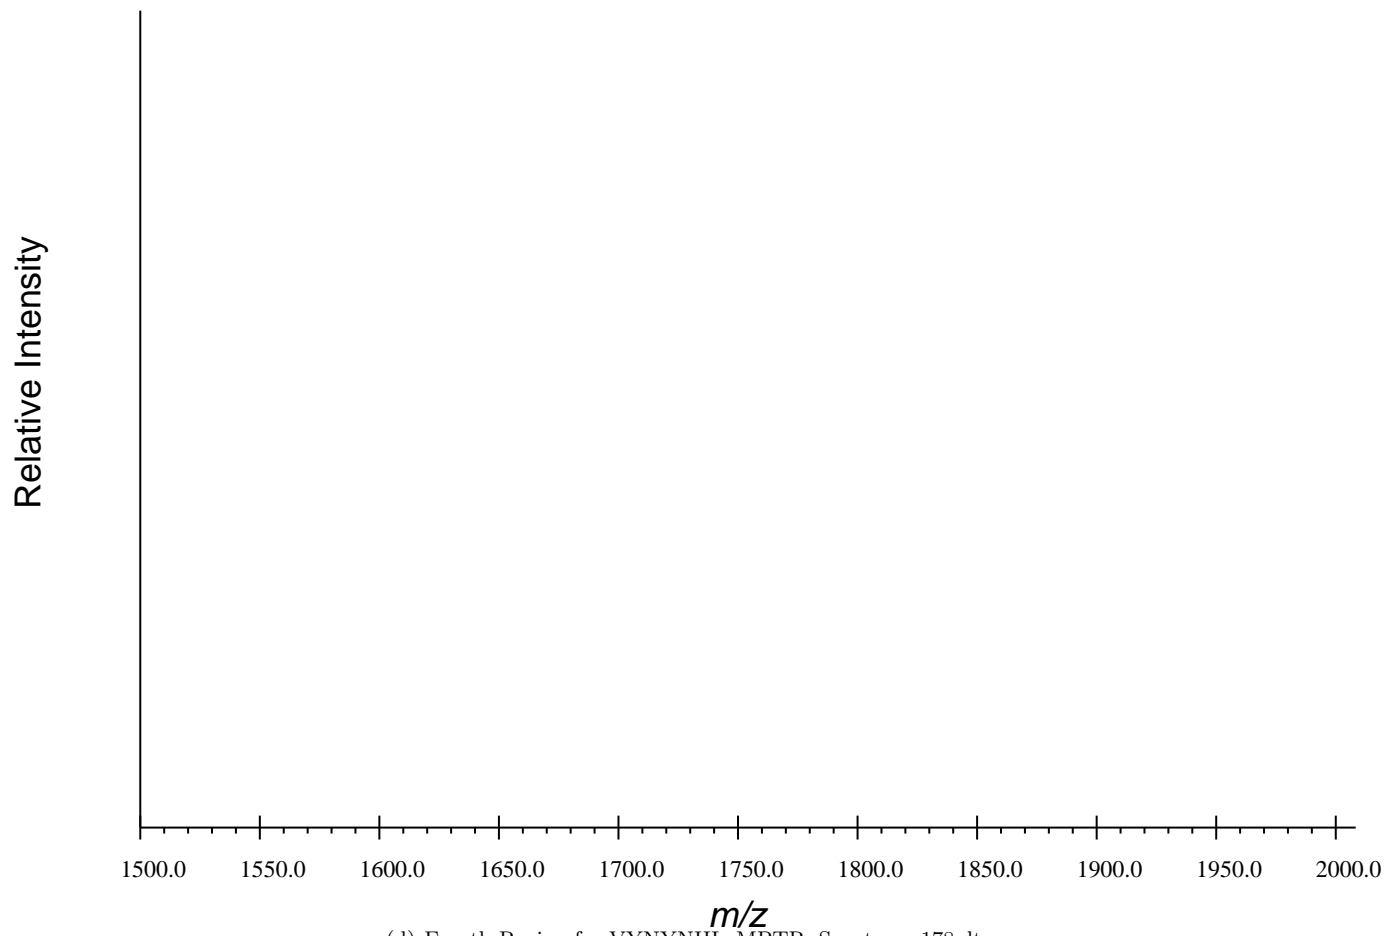

(d) Fourth Region for VYNYNHLoMPTR, Spectrum 178.dta

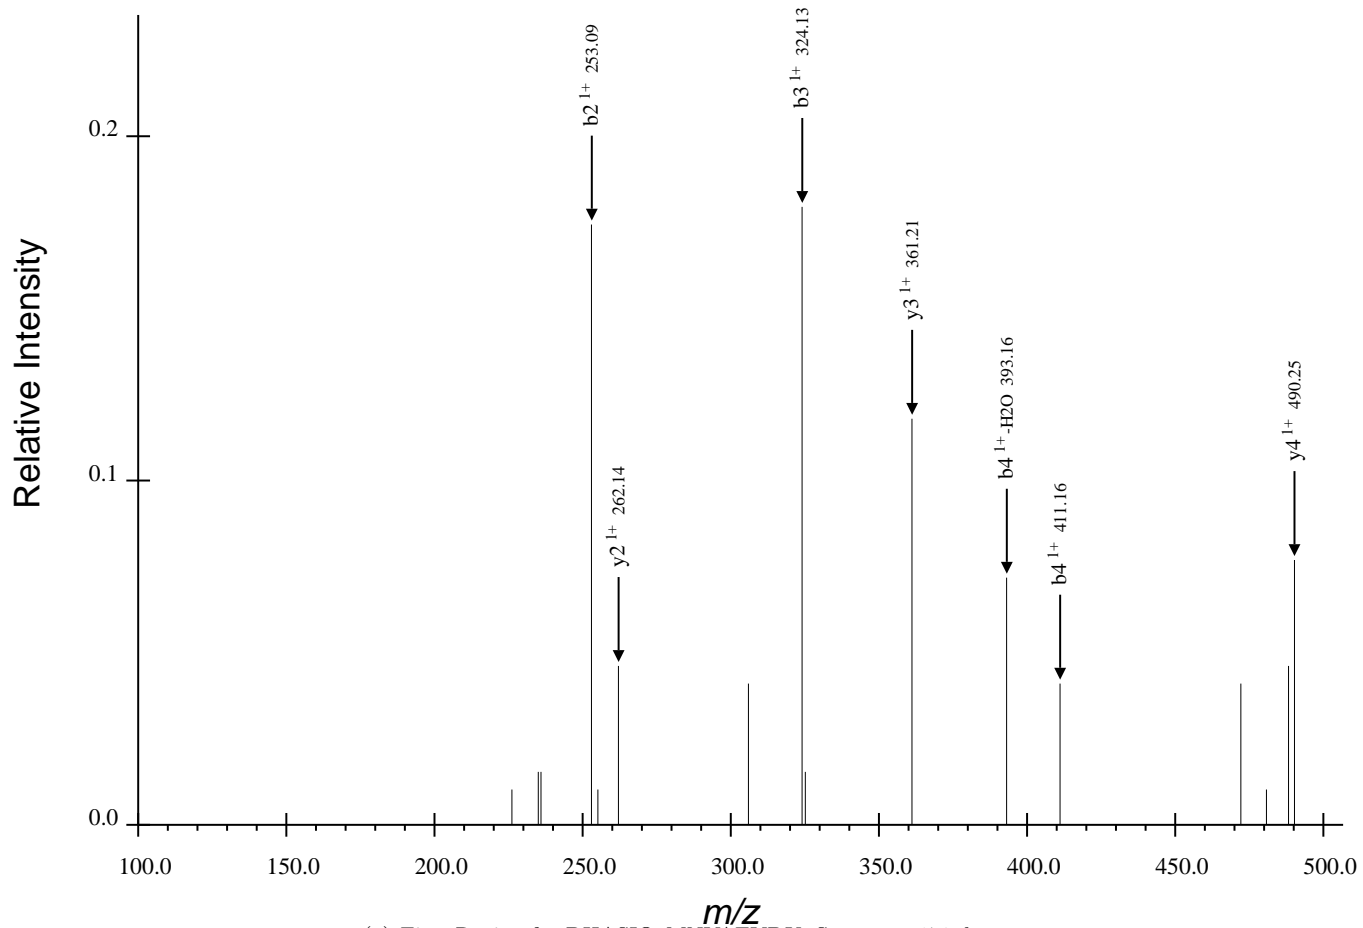

(a) First Region for DHASIQoMNVAEVDK, Spectrum 179.dta

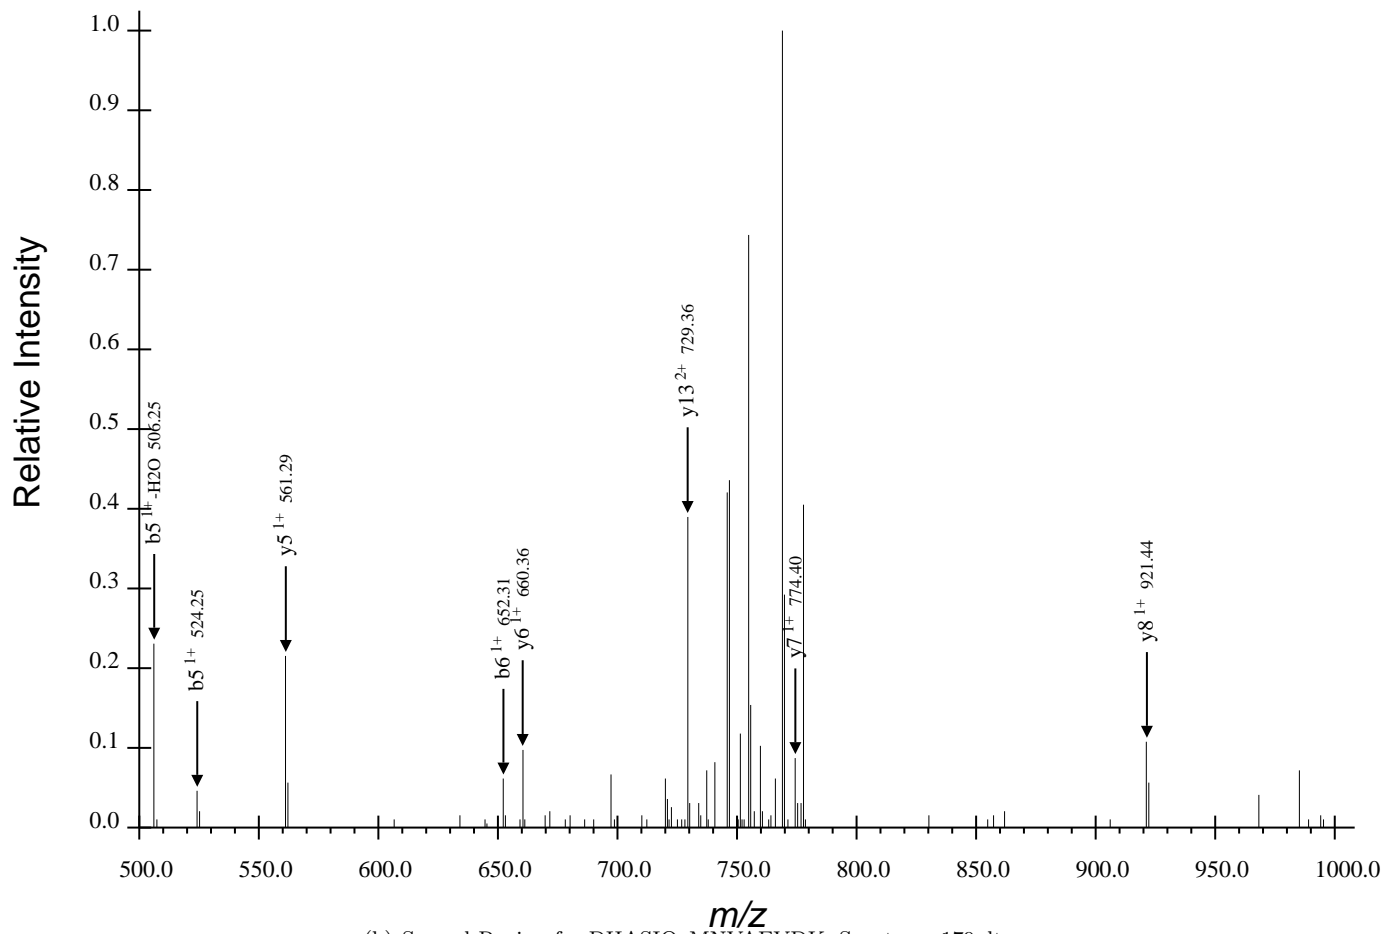

(b) Second Region for DHASIQoMNVAEVDK, Spectrum 179.dta

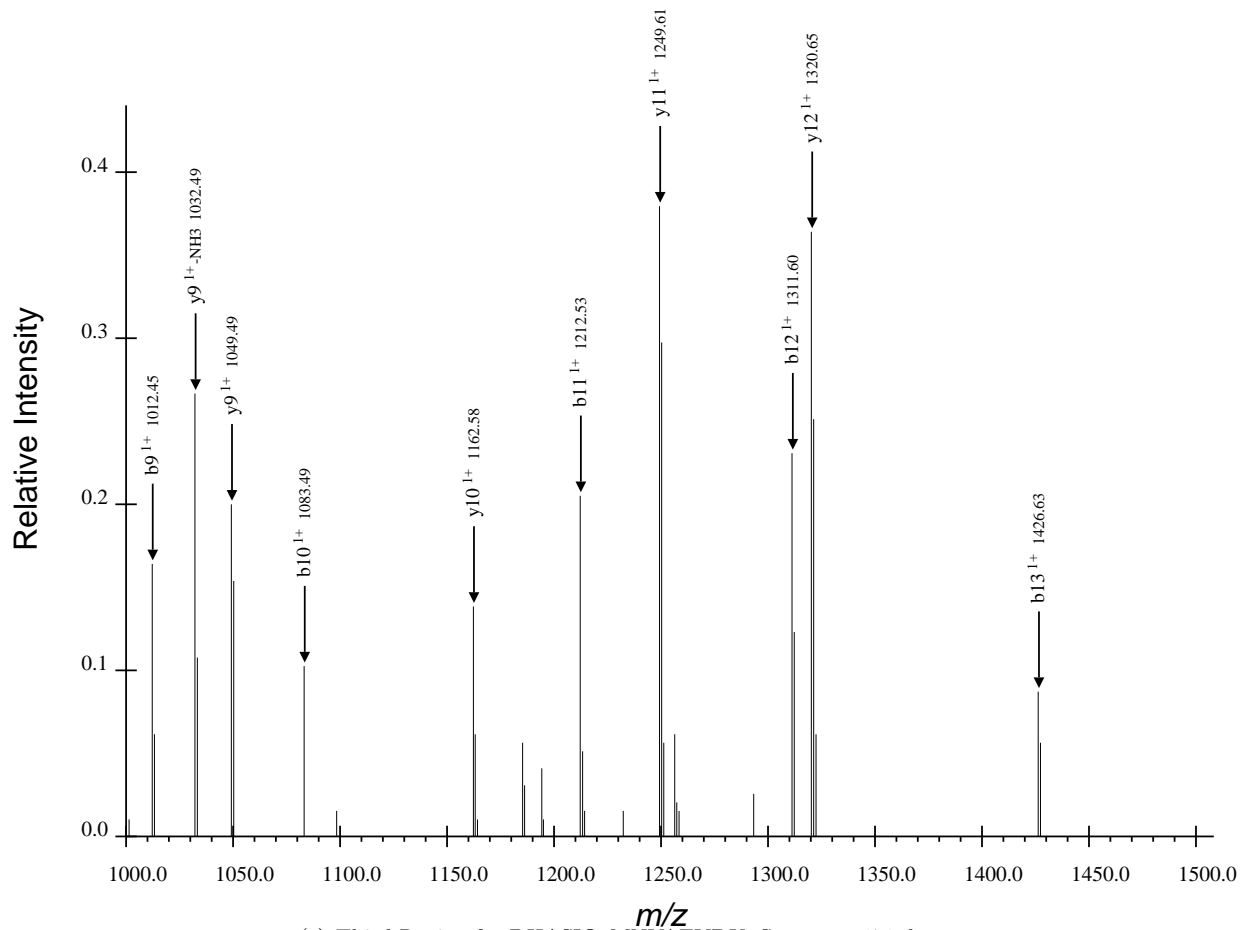

(c) Third Region for DHASIQoMNVAEVDK, Spectrum 179.dta

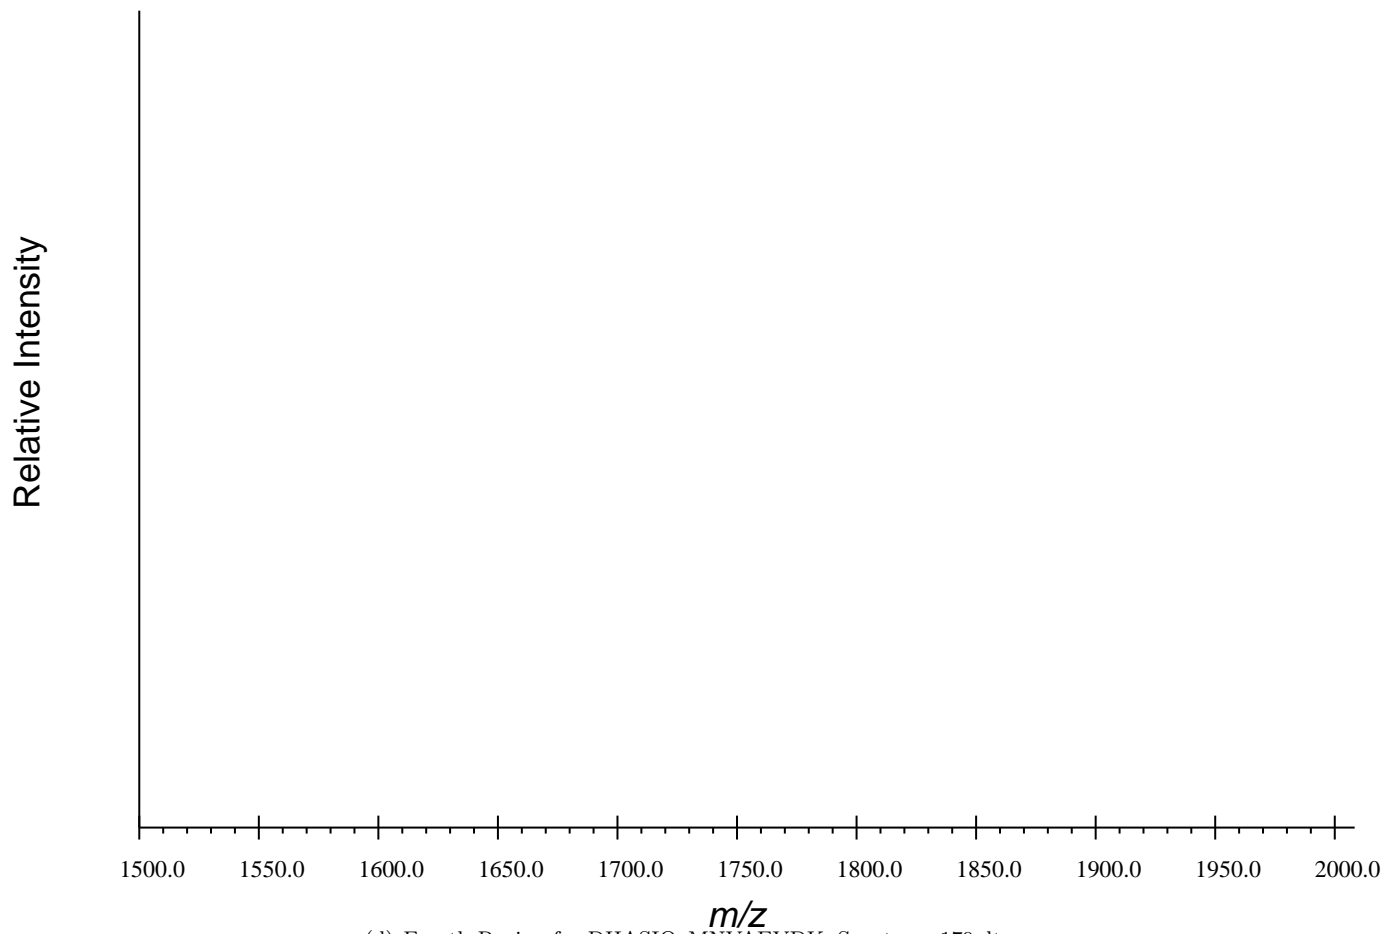

(d) Fourth Region for DHASIQoMNVAEVDK, Spectrum 179.dta

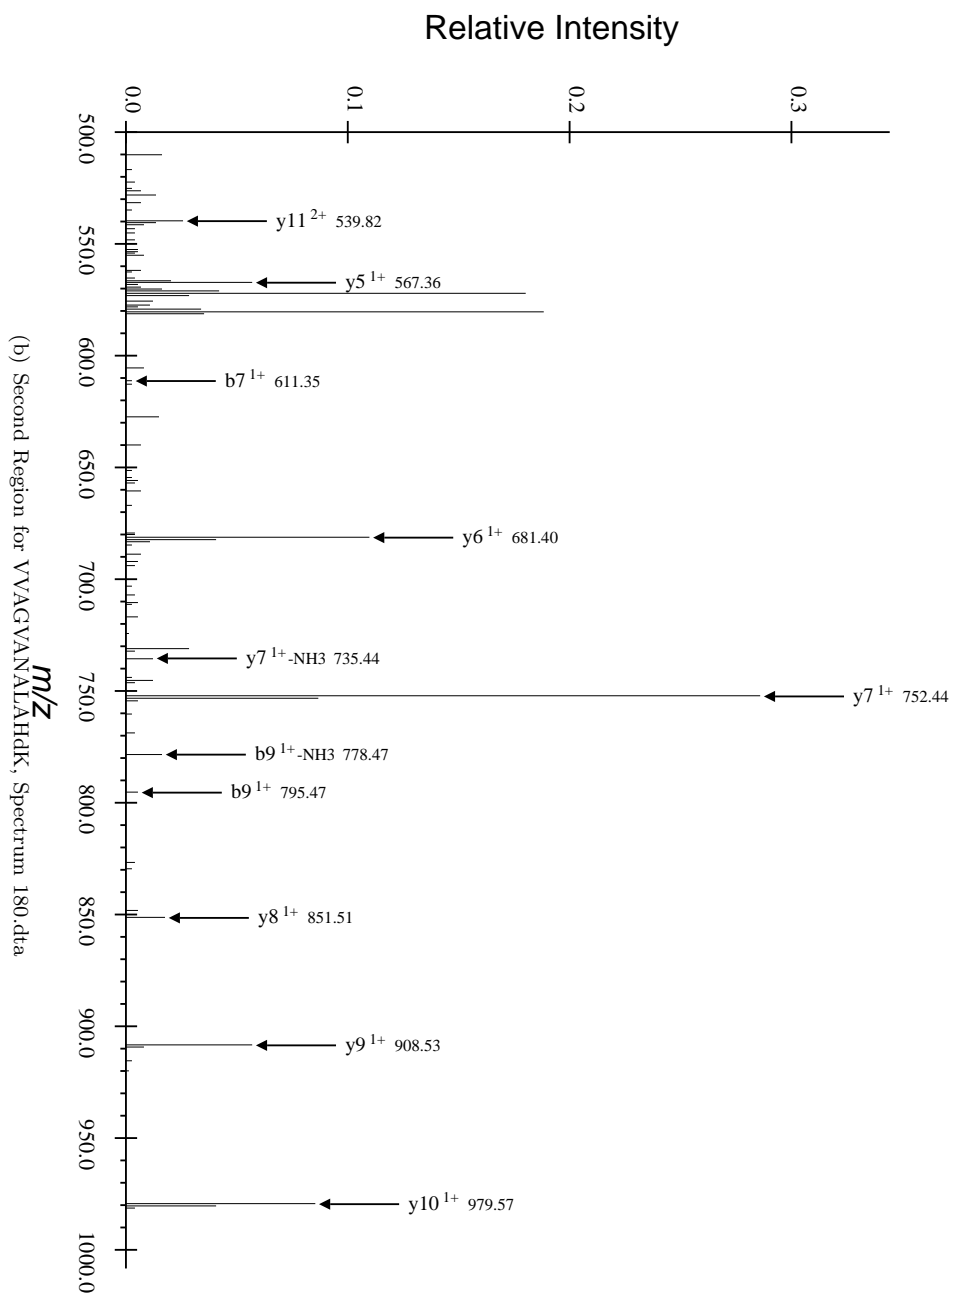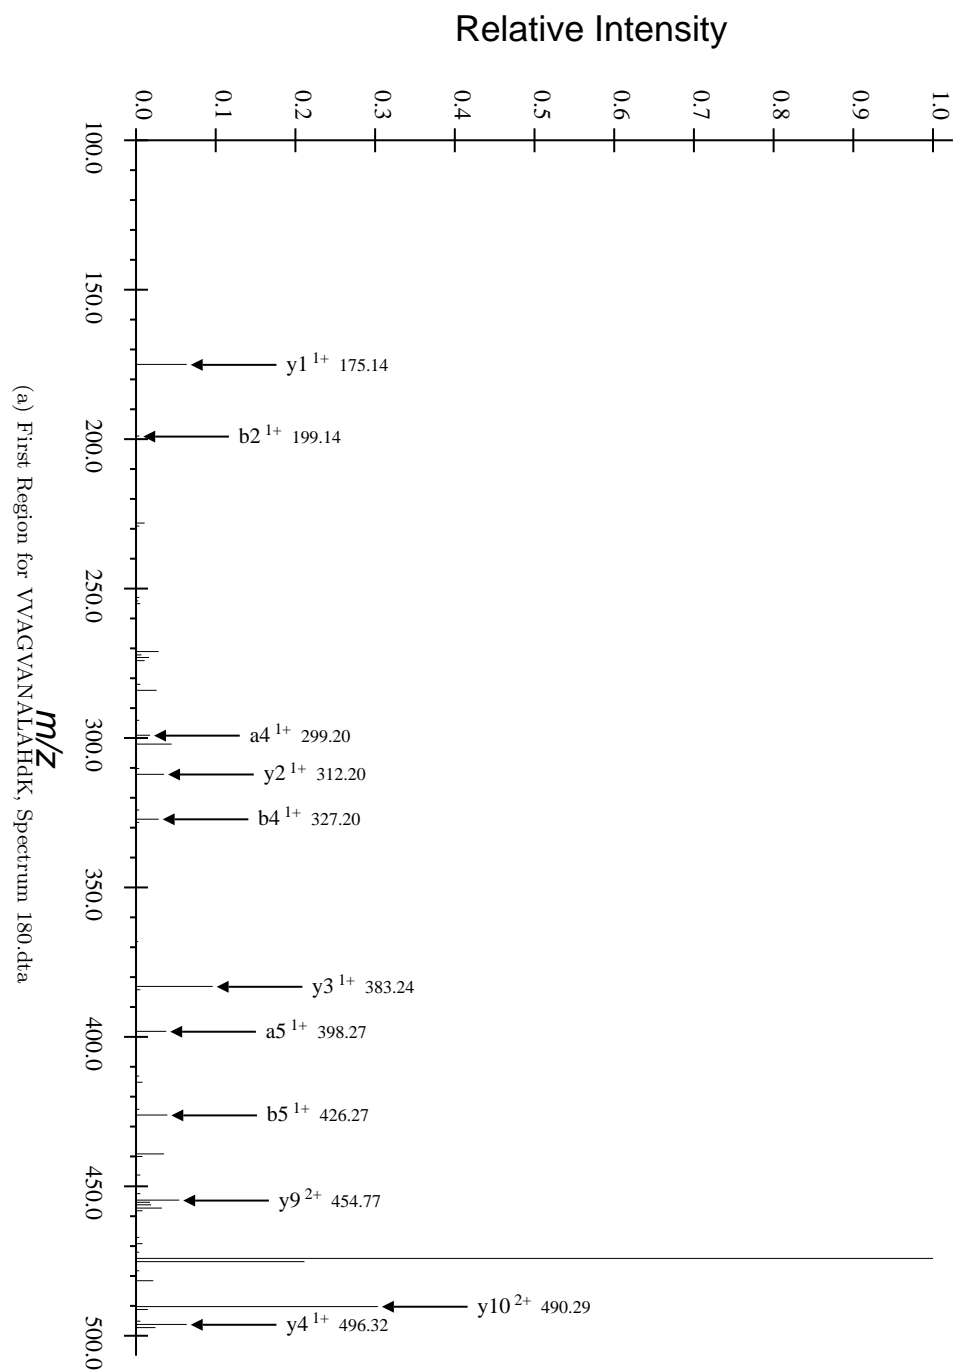

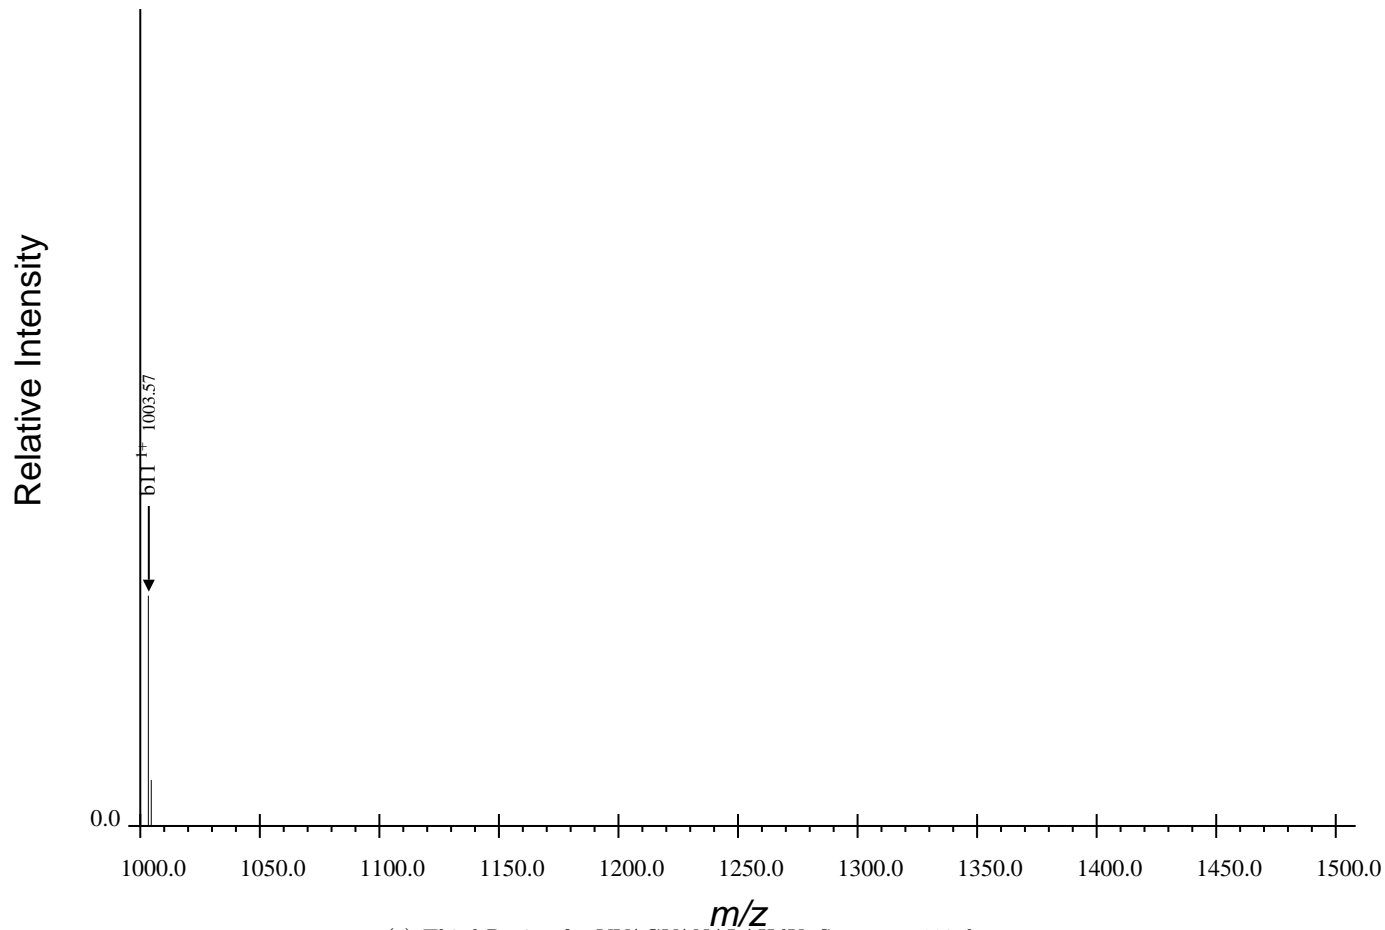

(c) Third Region for VVAGVANALAHdK, Spectrum 180.dta

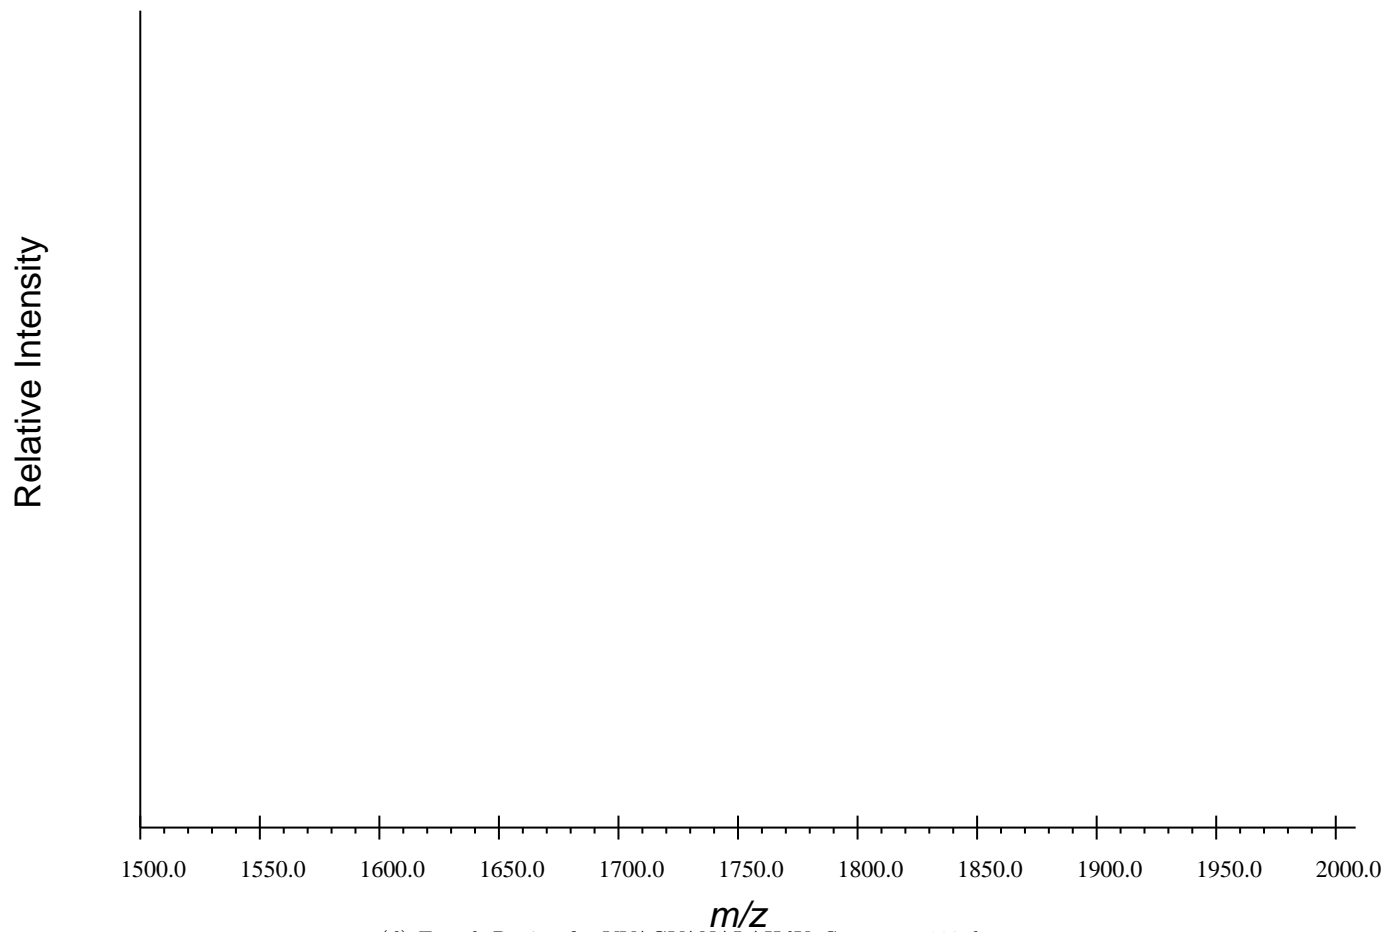

(d) Fourth Region for VVAGVANALAHdK, Spectrum 180.dta

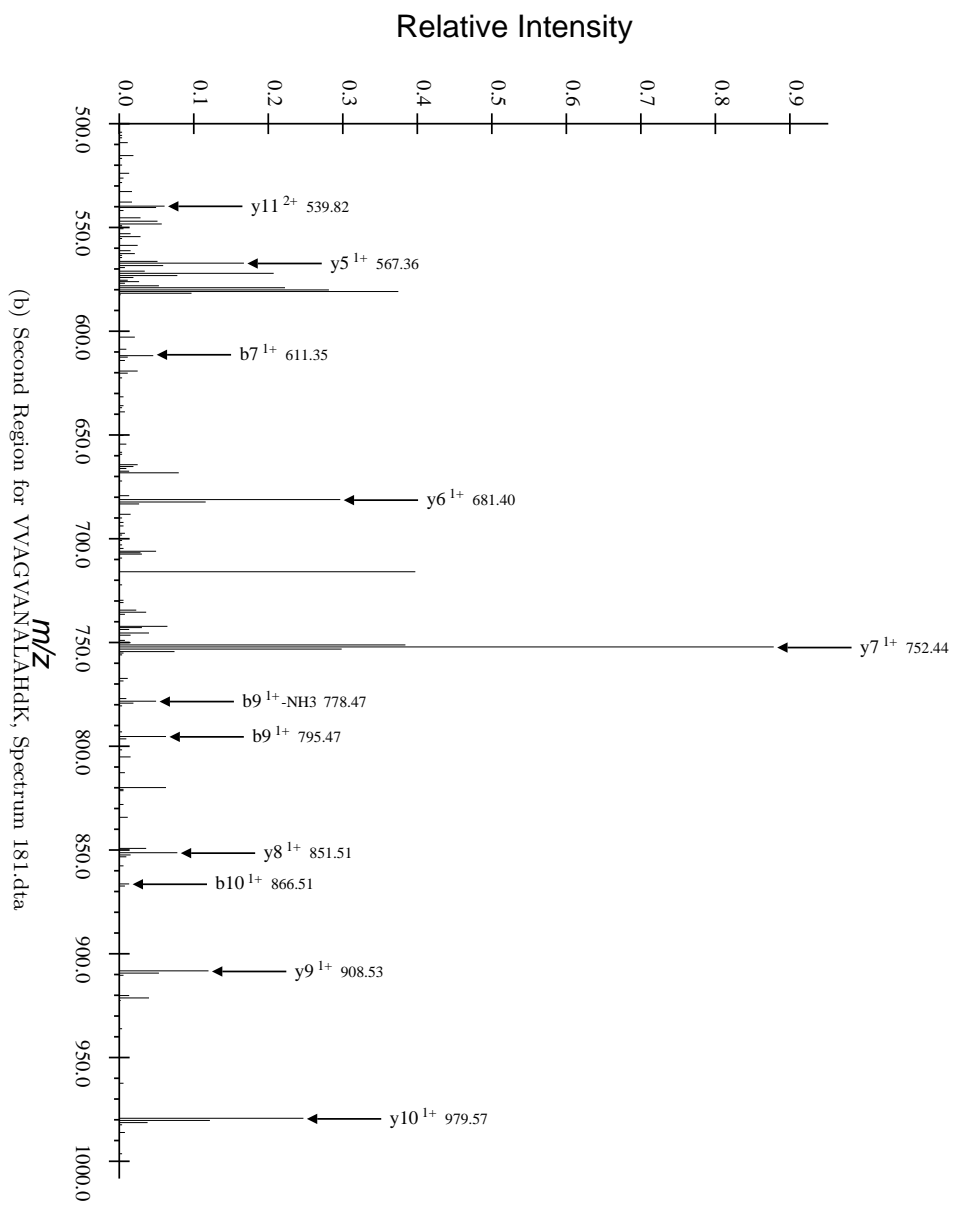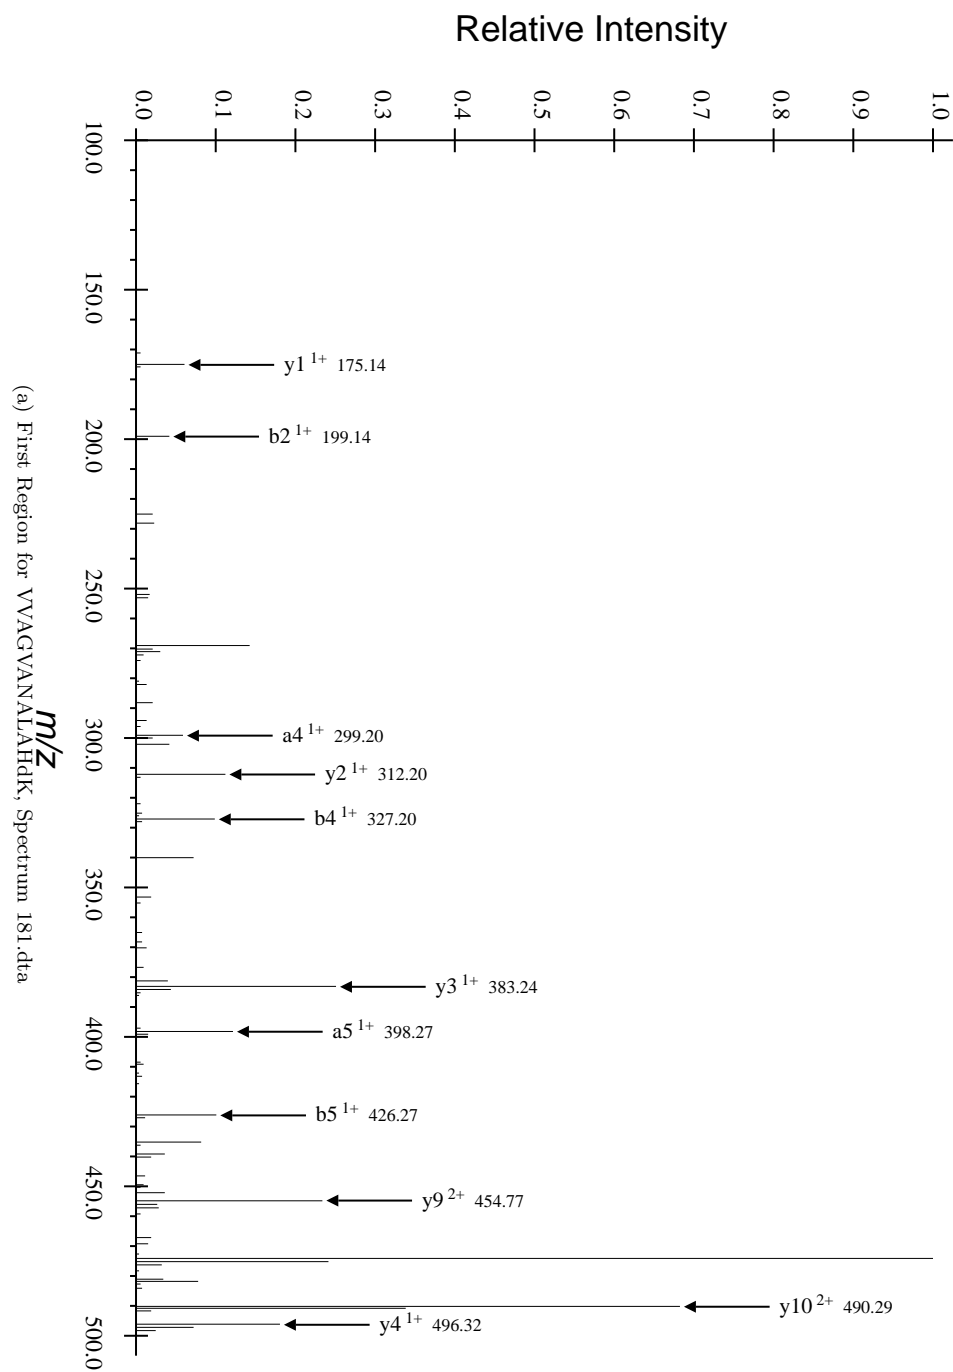

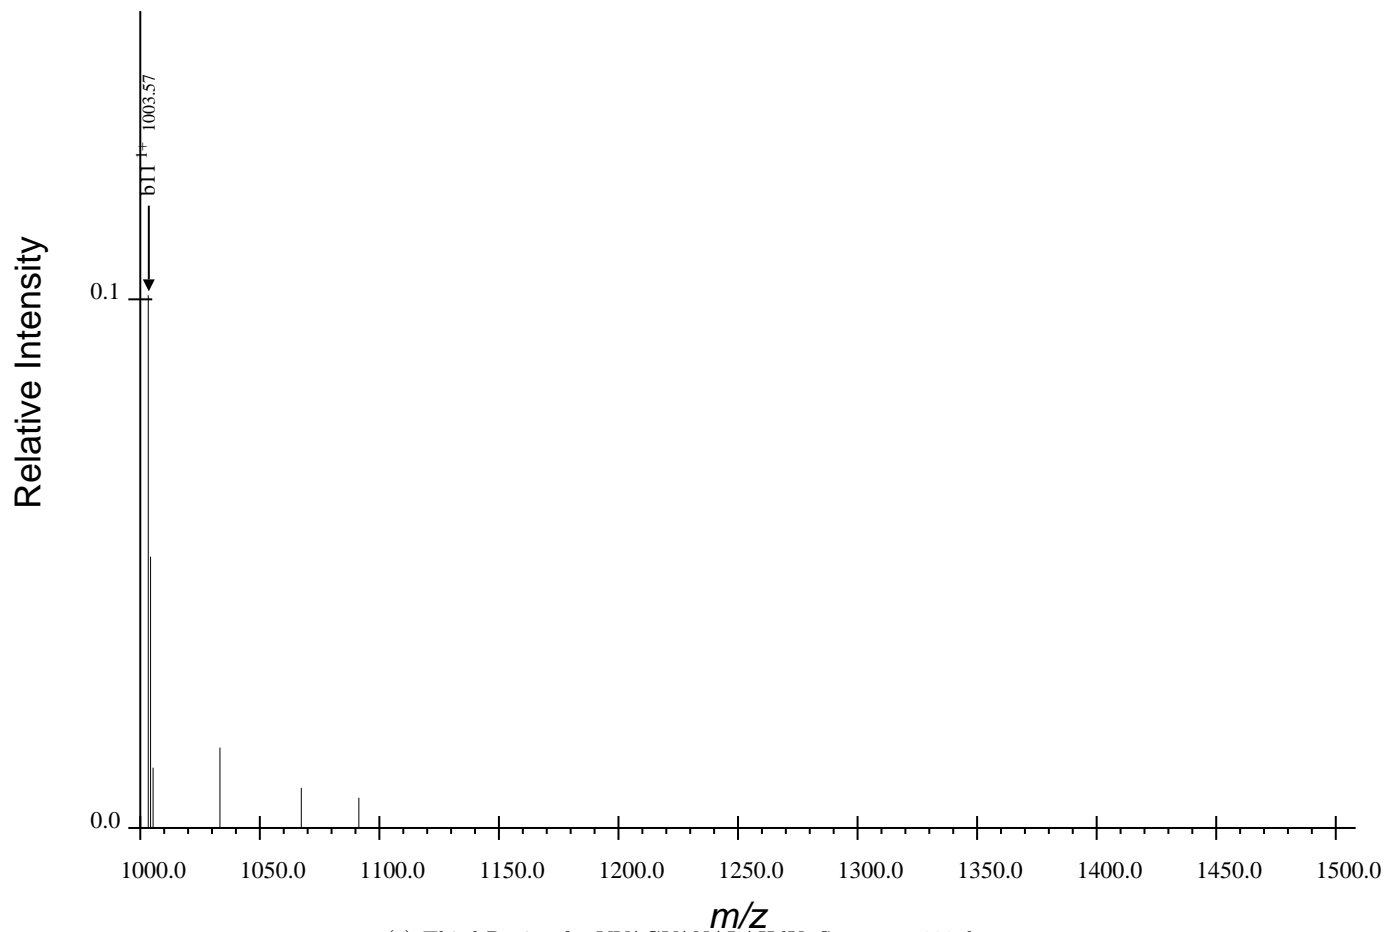

(c) Third Region for VVAGVANALAHdK, Spectrum 181.dta

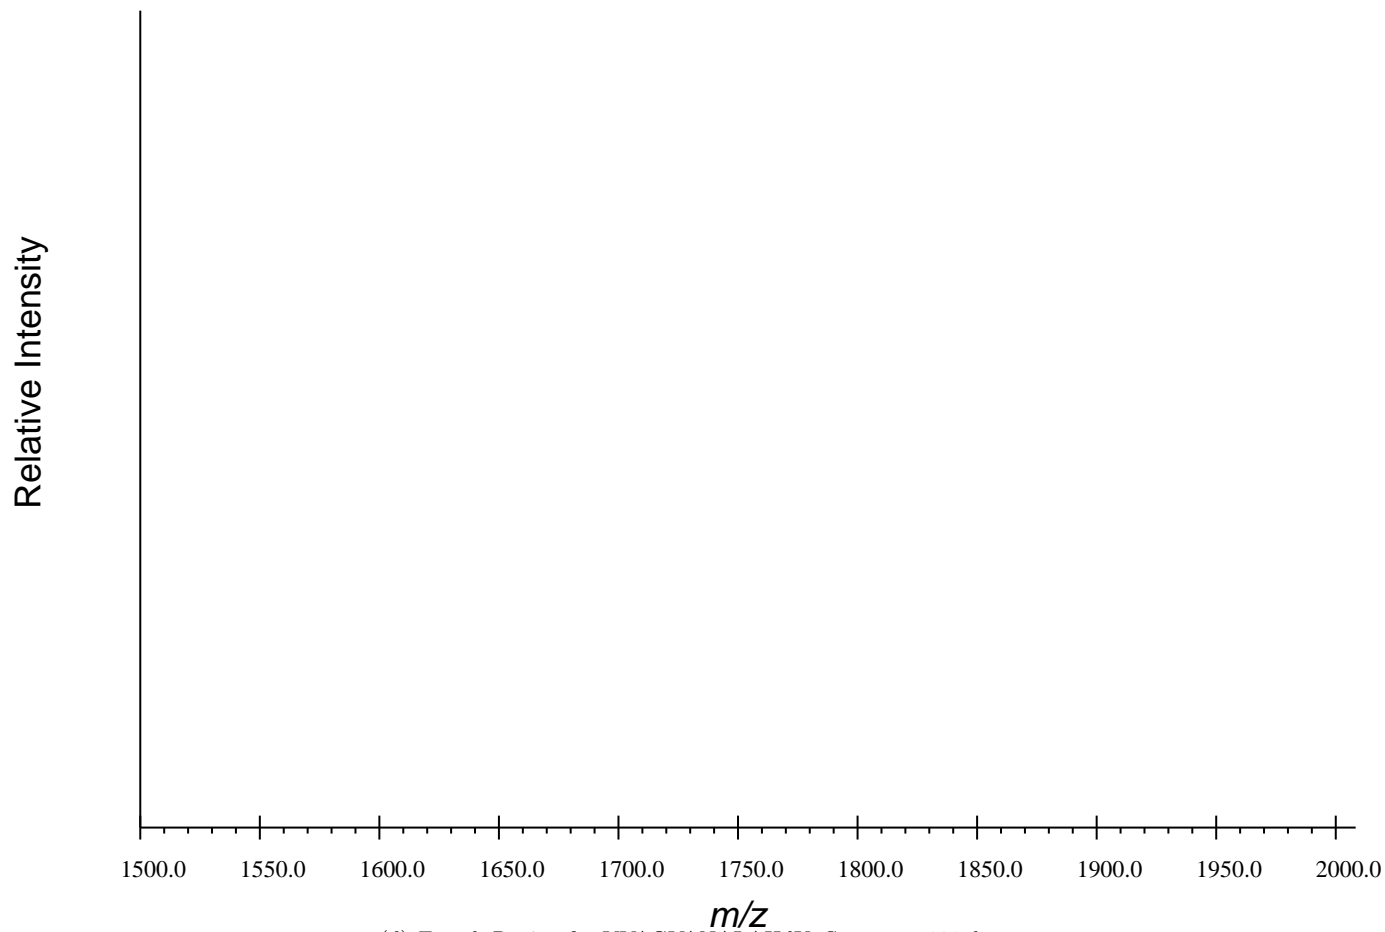

(d) Fourth Region for VVAGVANALAHdK, Spectrum 181.dta

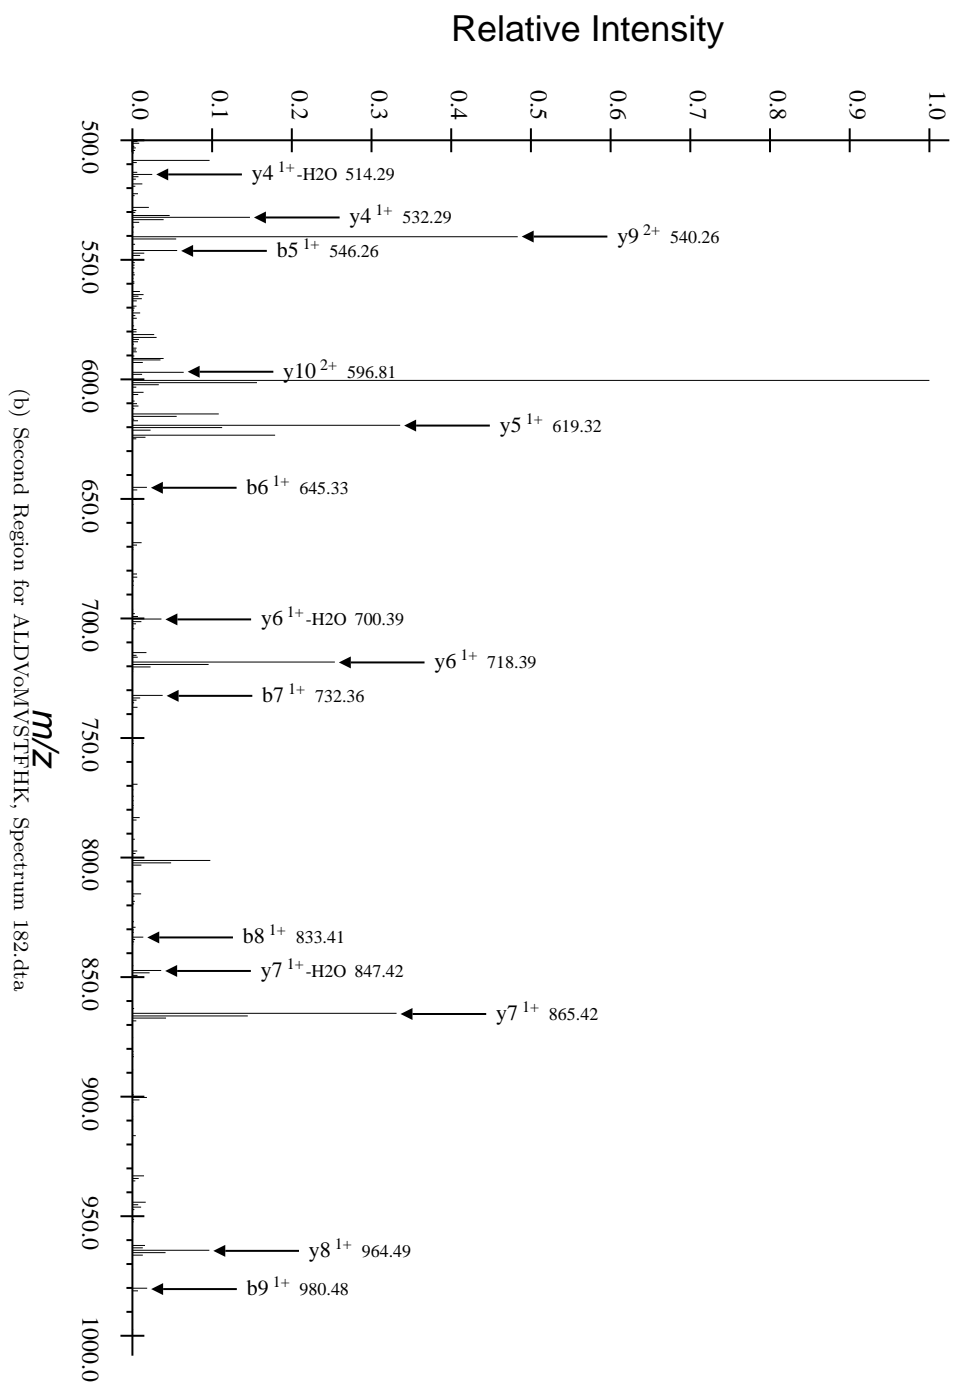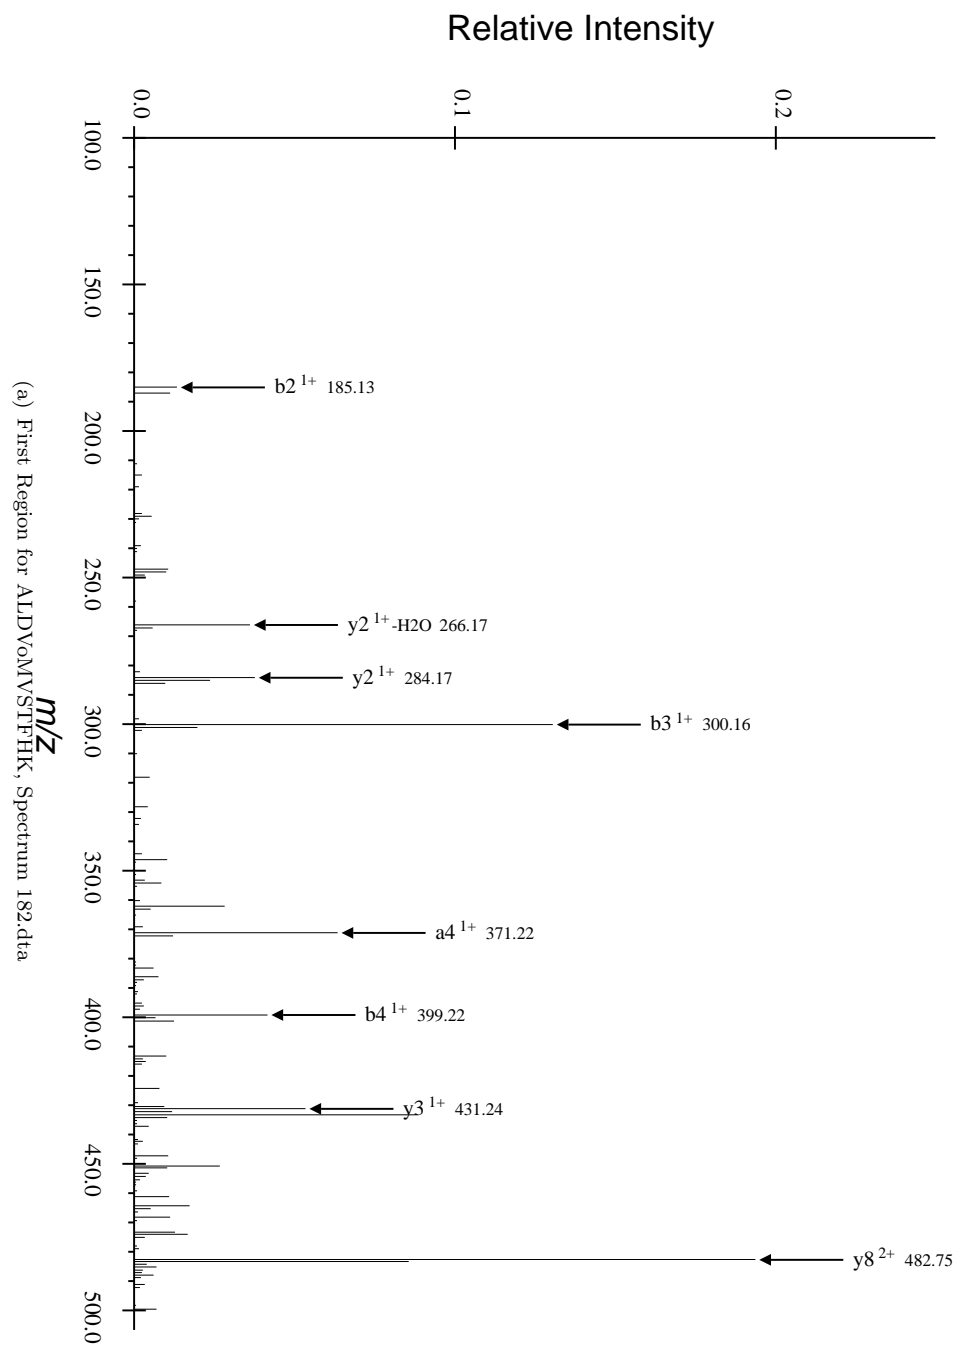



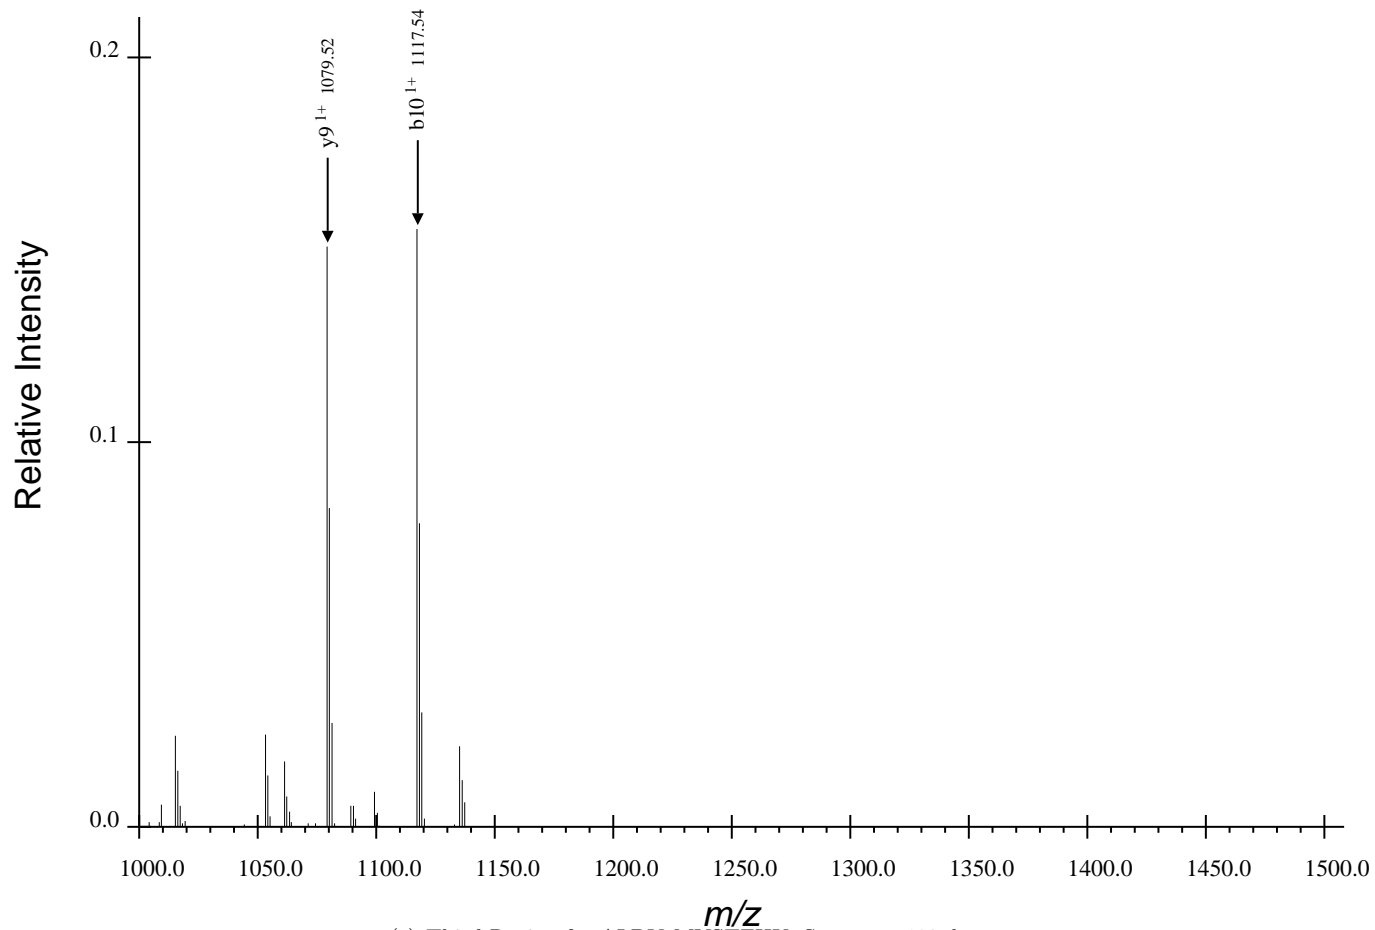

(c) Third Region for ALDVoMVSTFHK, Spectrum 182.dta

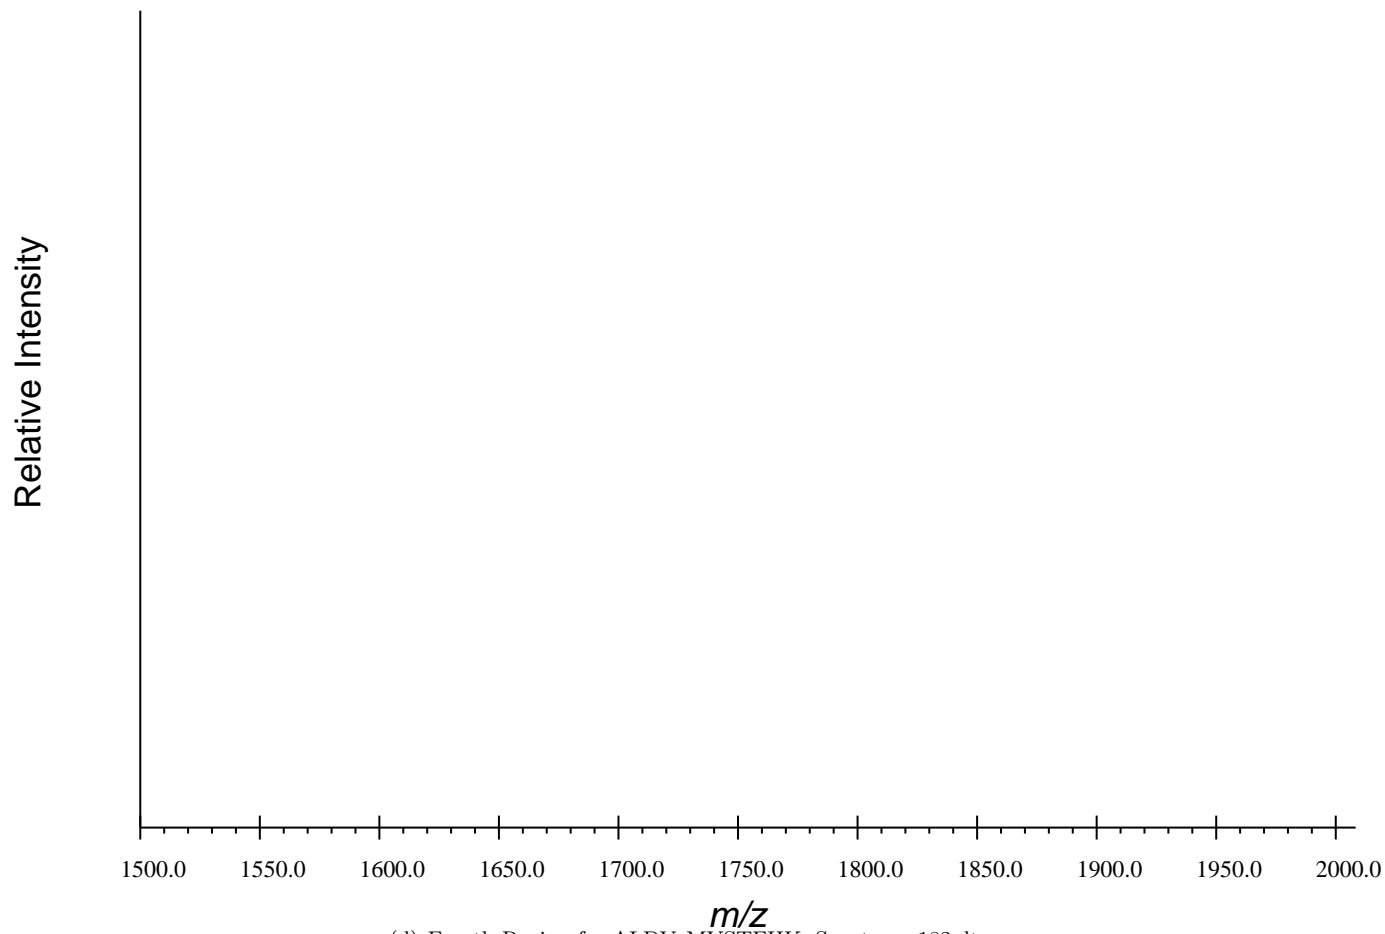

(d) Fourth Region for ALDVoMVSTFHK, Spectrum 182.dta

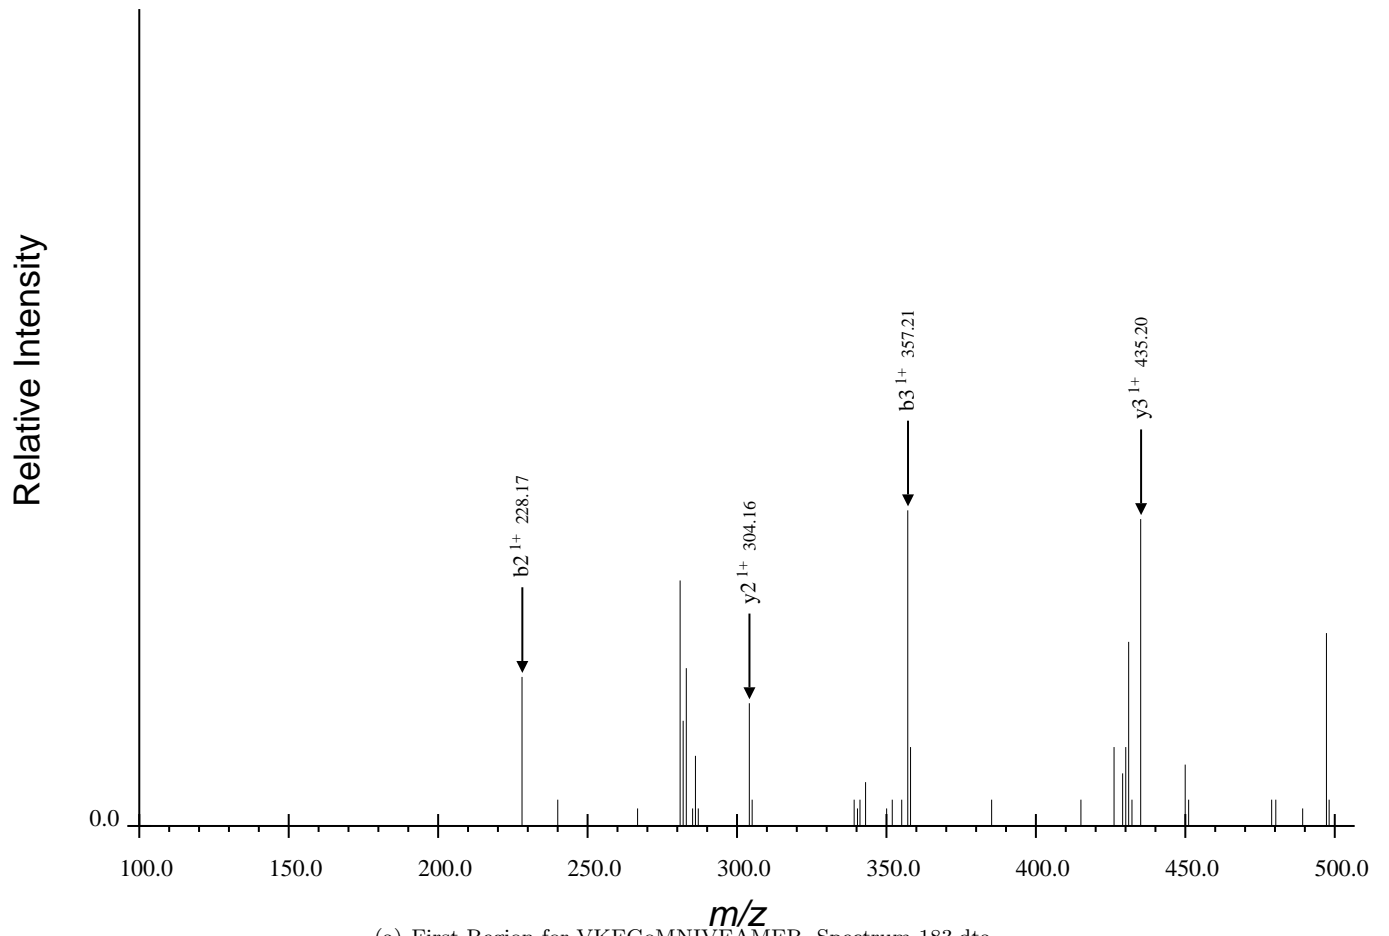

(a) First Region for VKEGoMNIVEAMER, Spectrum 183.dta

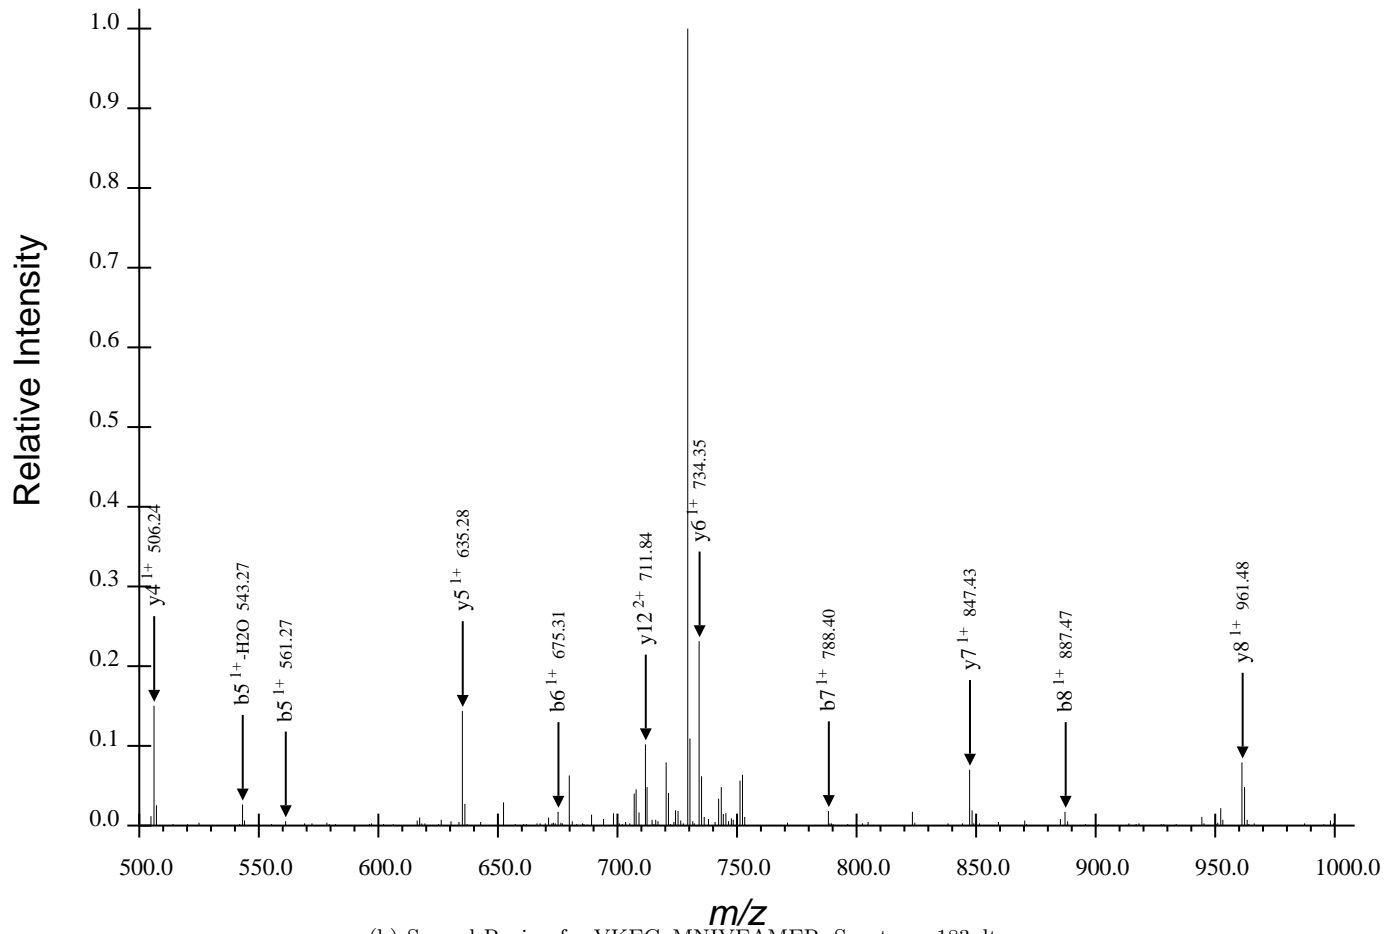

(b) Second Region for VKEGoMNIVEAMER, Spectrum 183.dta

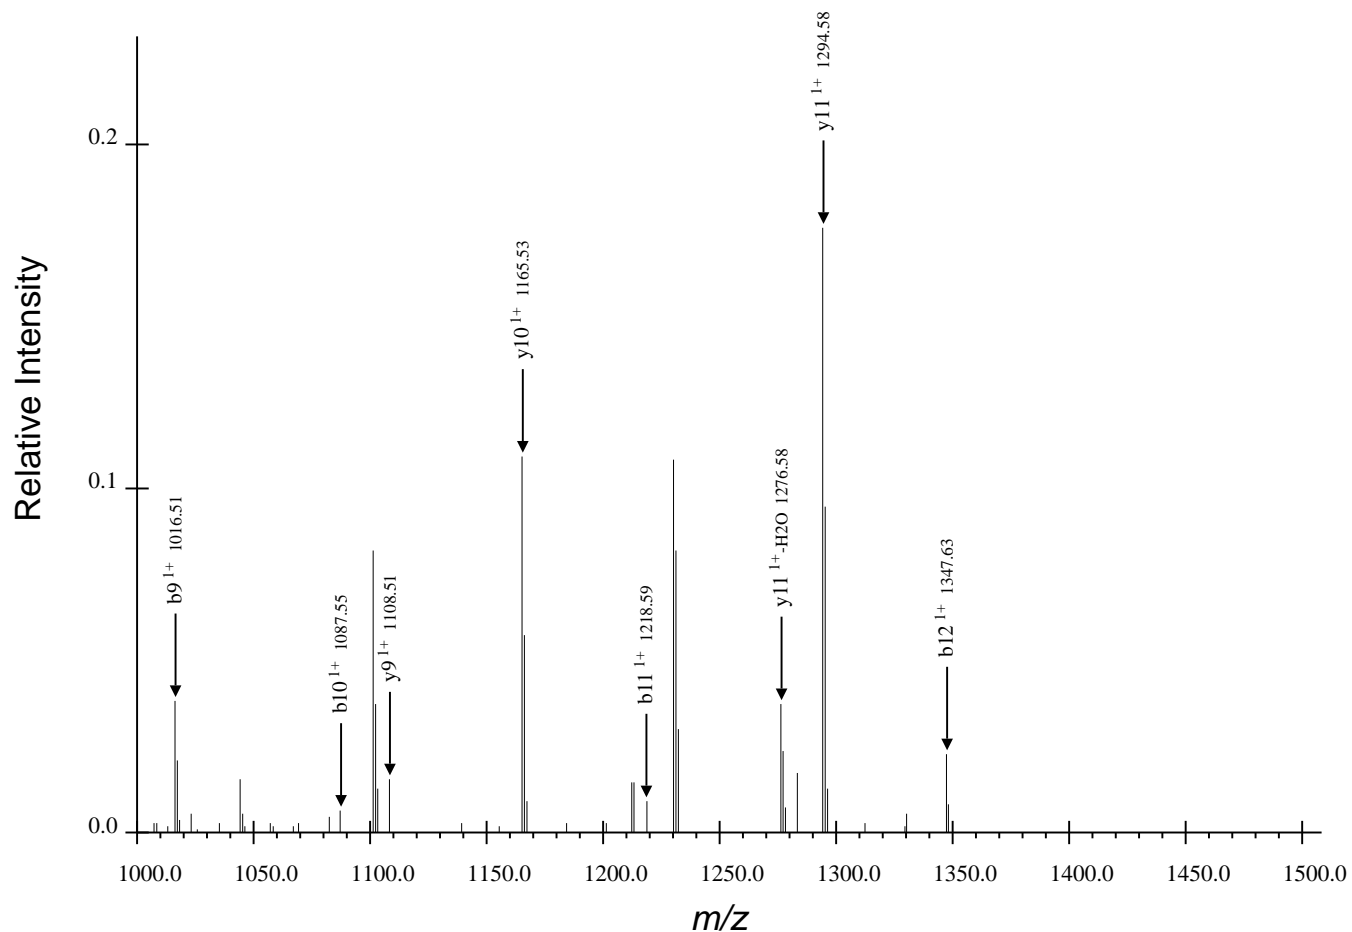

(c) Third Region for VKEGoMNIVEAMER, Spectrum 183.dta

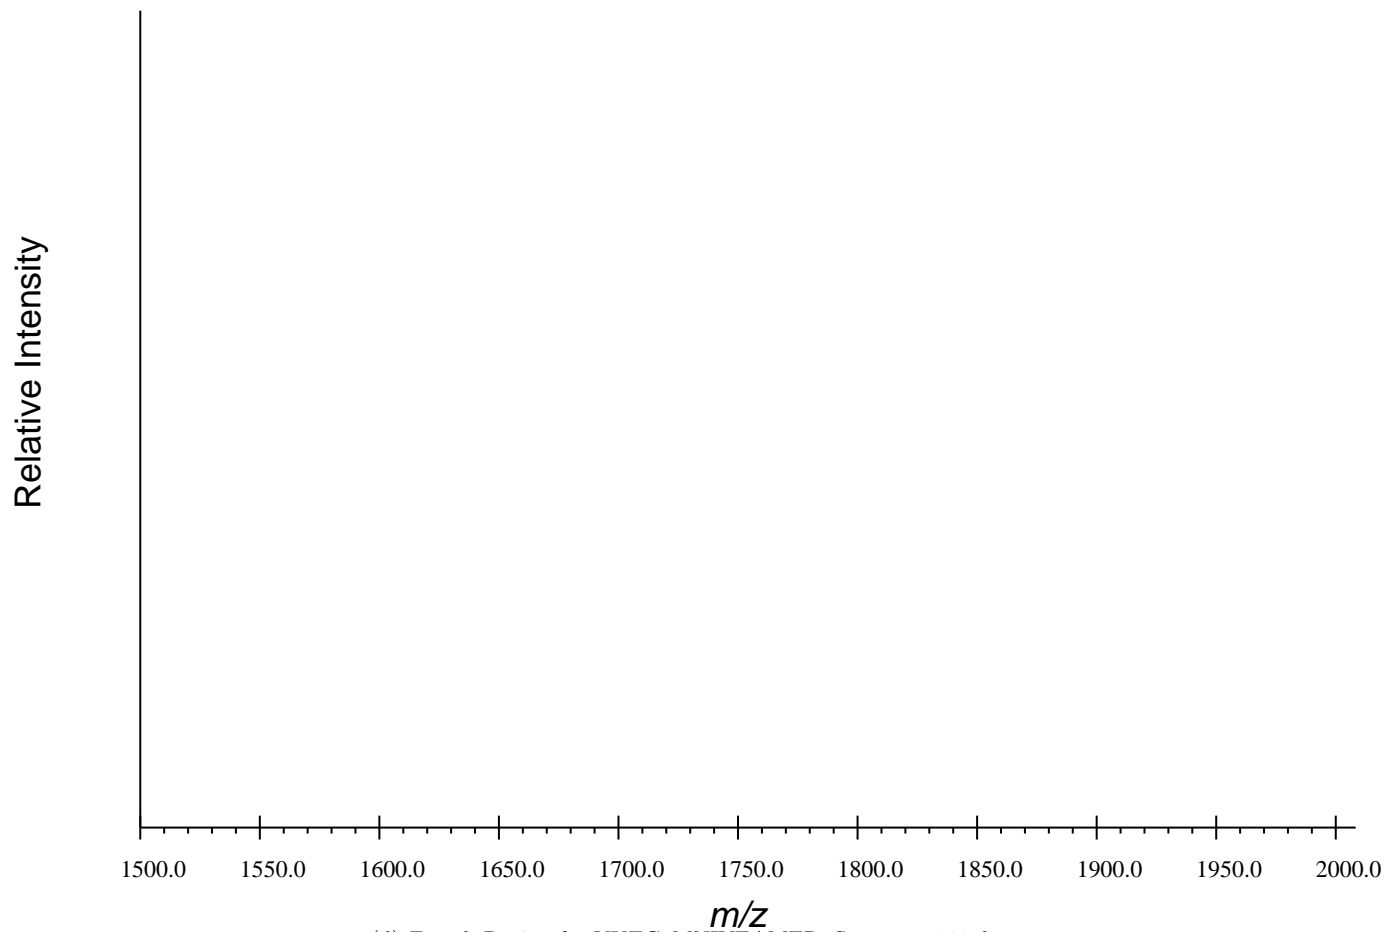

(d) Fourth Region for VKEGoMNIVEAMER, Spectrum 183.dta

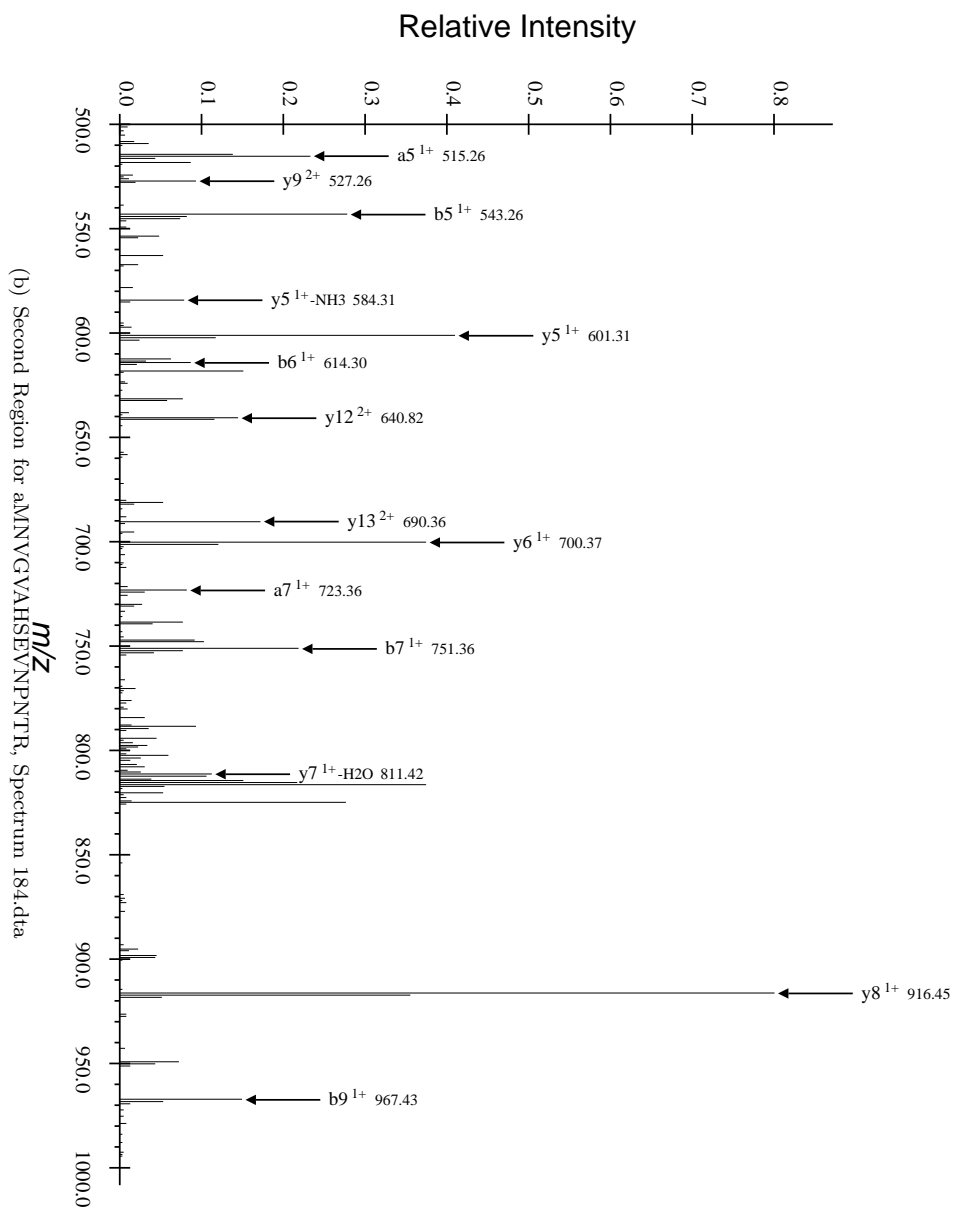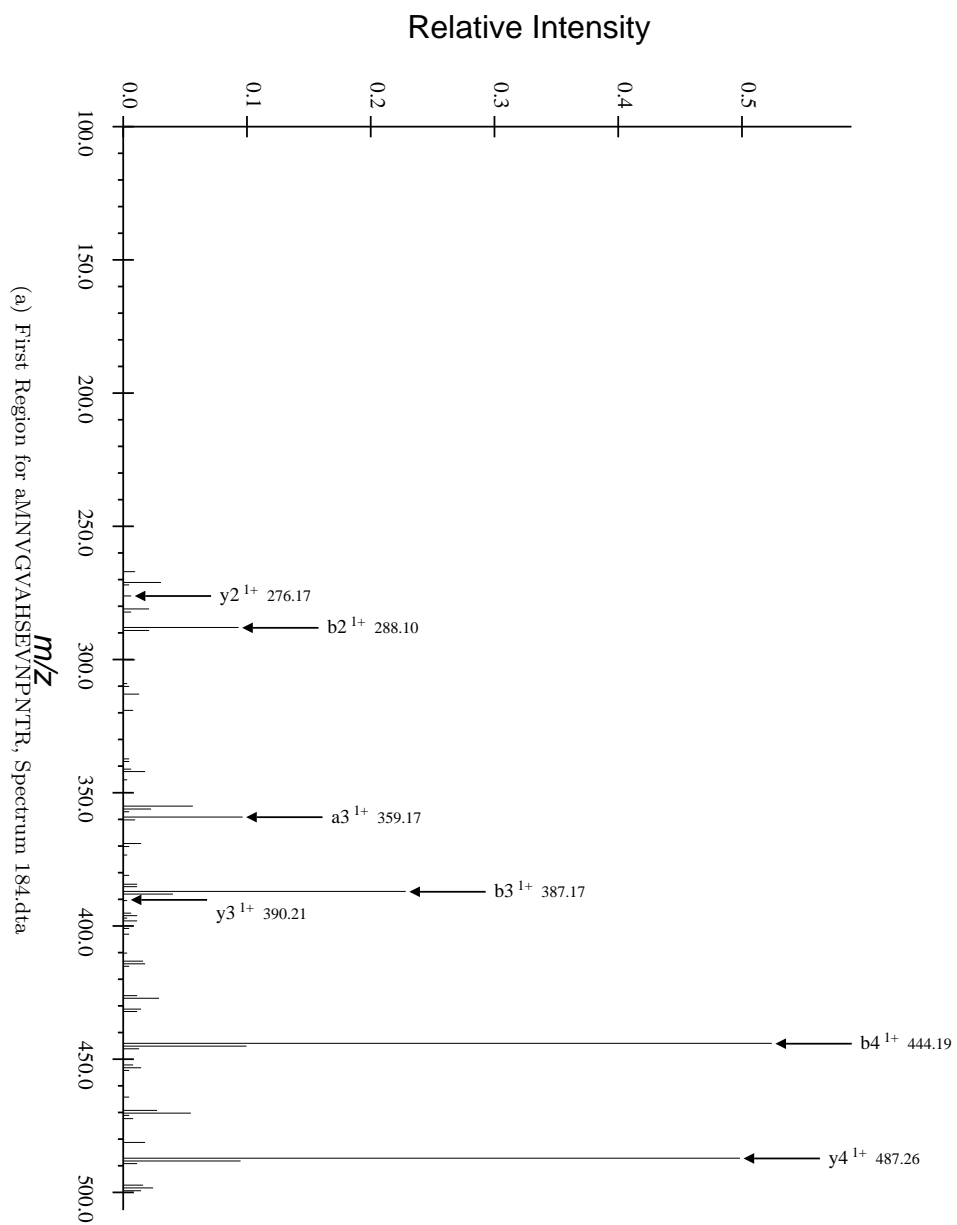

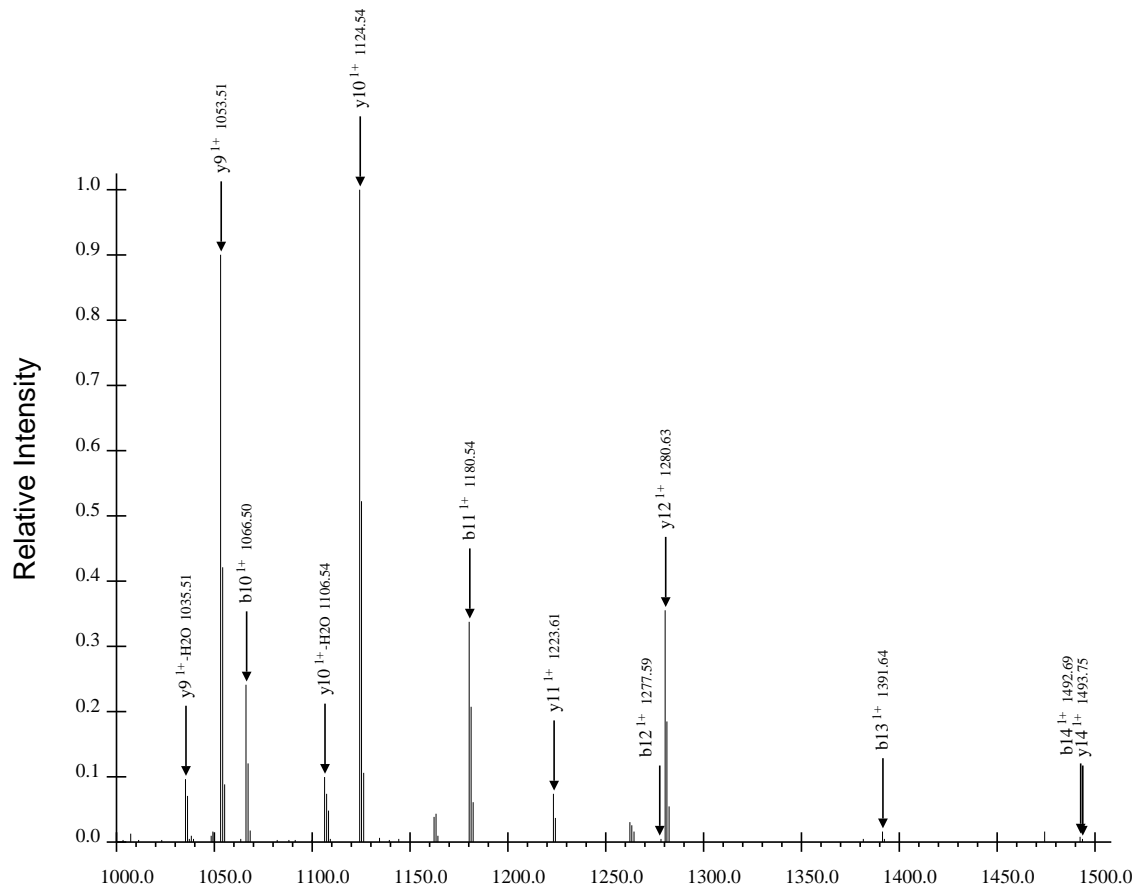

(c) Third Region for aMNVGVAHSEVNPNTNTR, Spectrum 184.dta

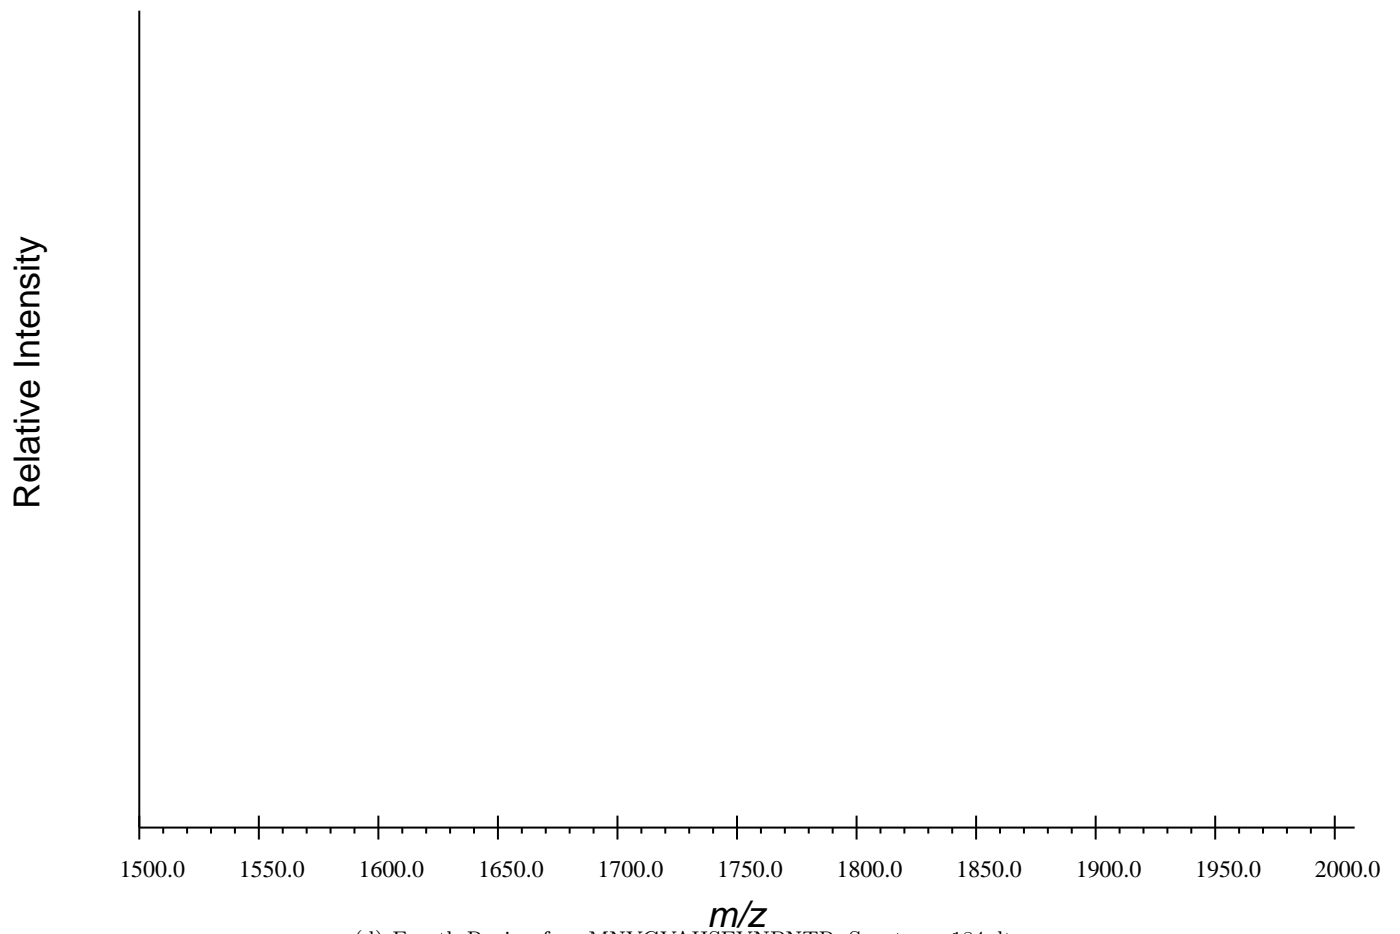

(d) Fourth Region for aMNVGVAHSEVNPNTNTR, Spectrum 184.dta

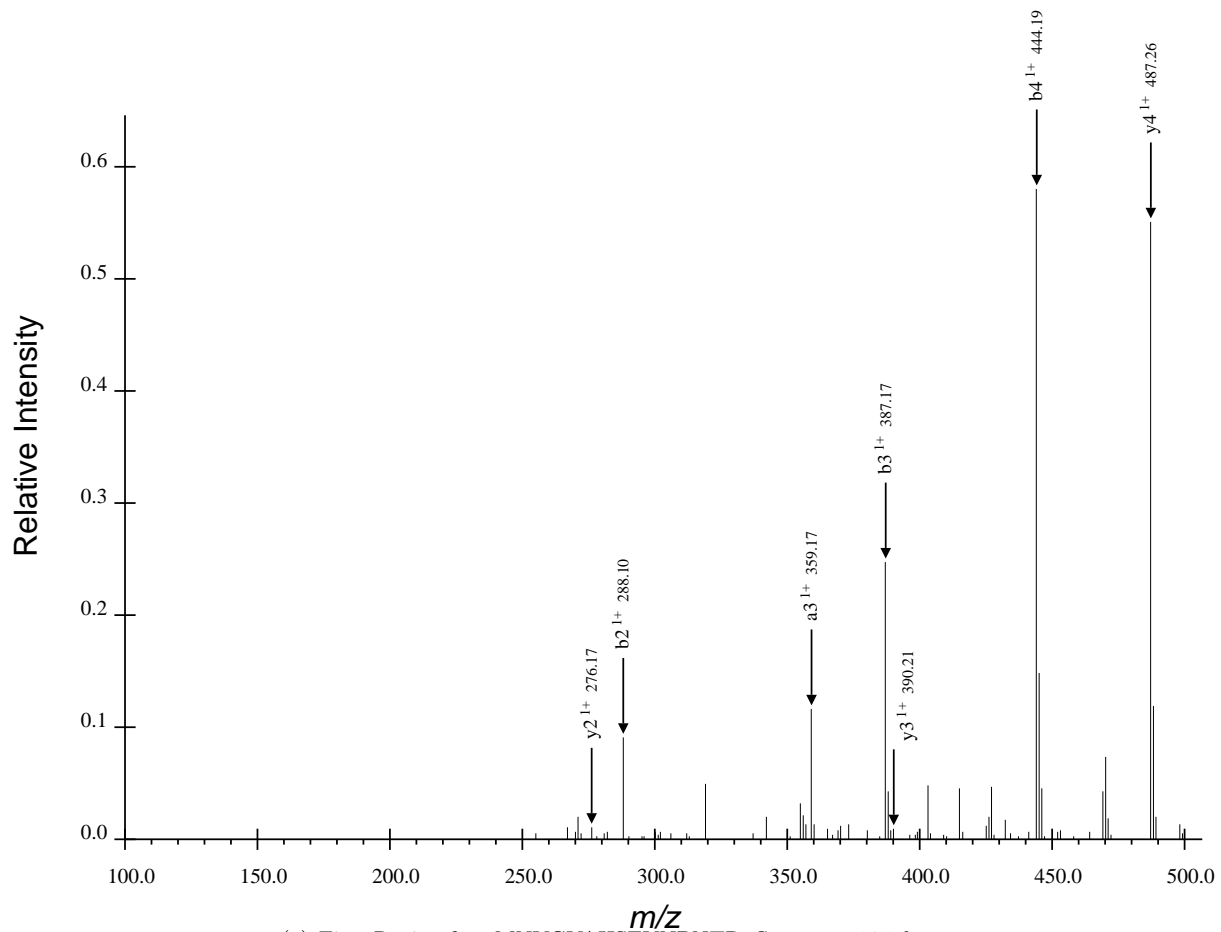

(a) First Region for aMNVGVAHSEVNPNT, Spectrum 185.dta

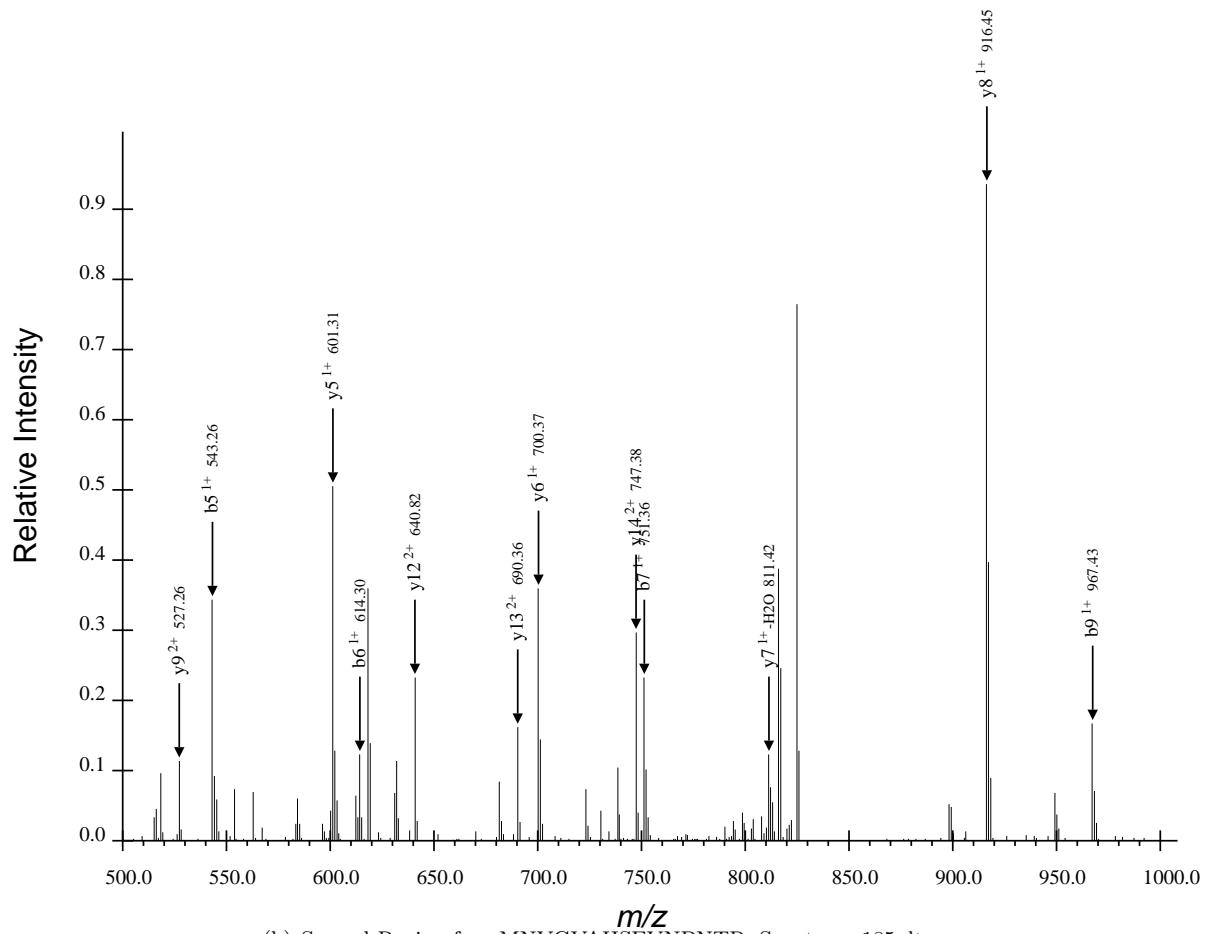

(b) Second Region for aMNVGVAHSEVNPNT, Spectrum 185.dta

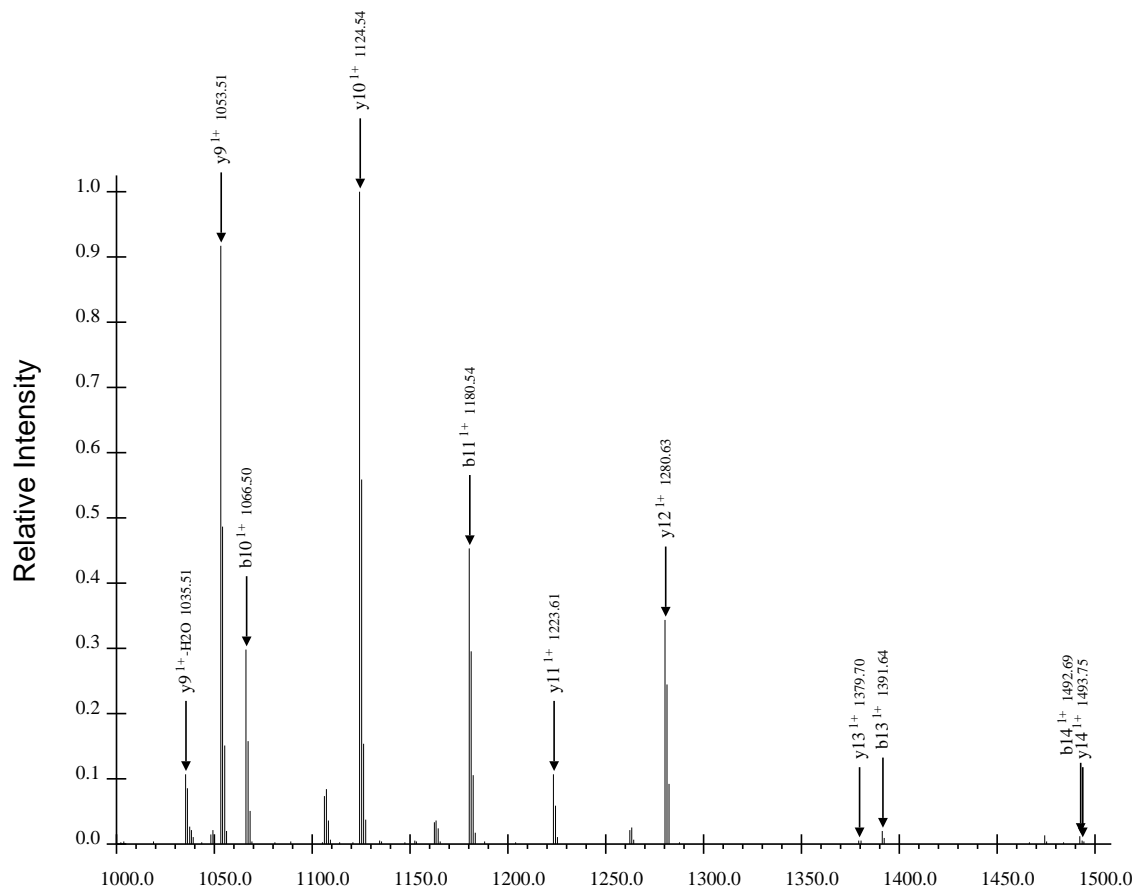

(c) Third Region for aMNVGVAHSEVNPNTNTR, Spectrum 185.dta

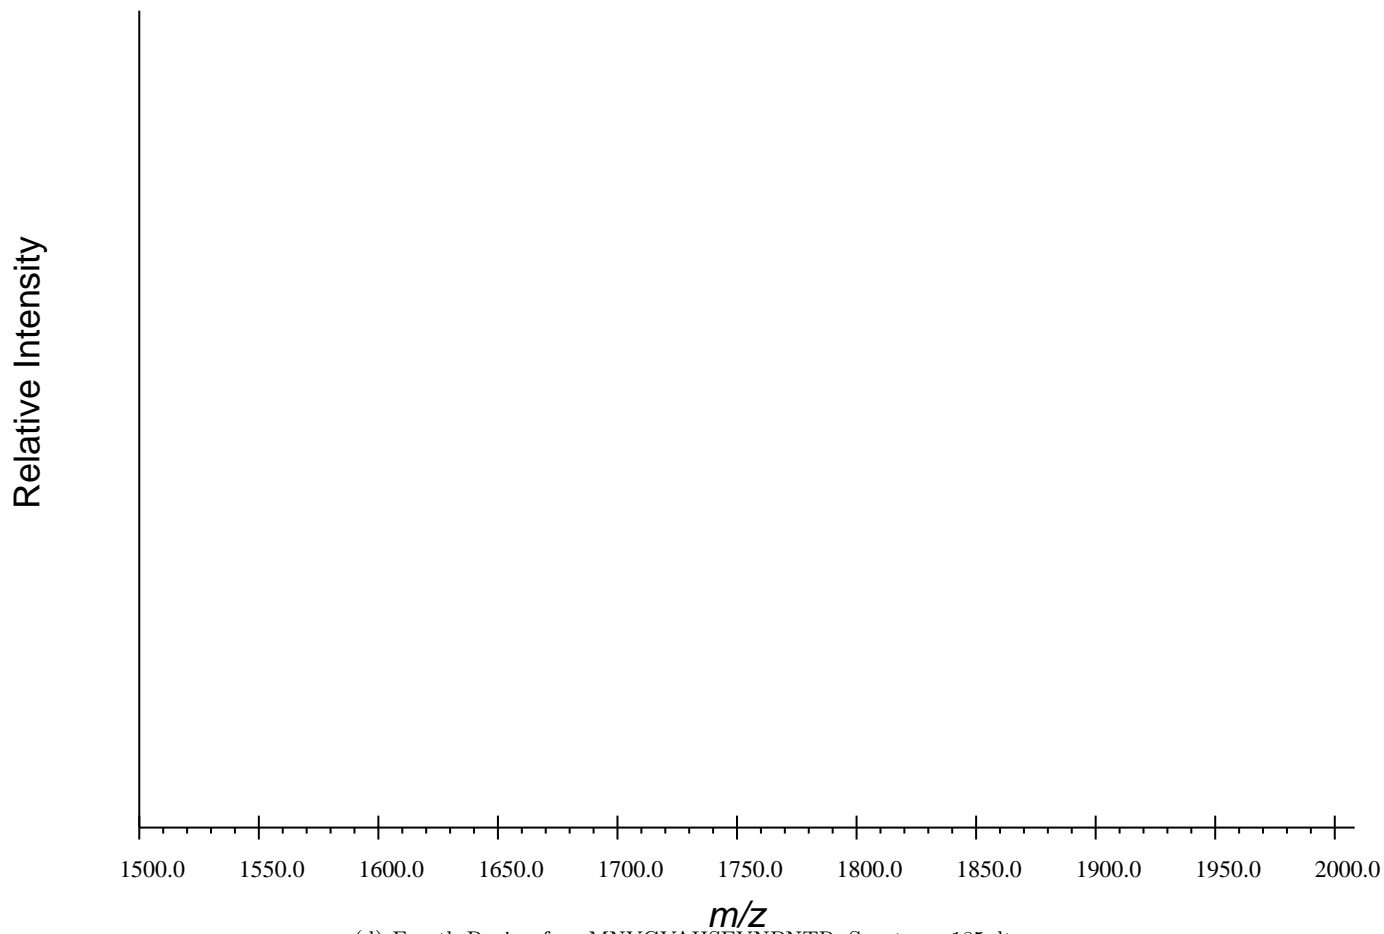

(d) Fourth Region for aMNVGVAHSEVNPNTNTR, Spectrum 185.dta

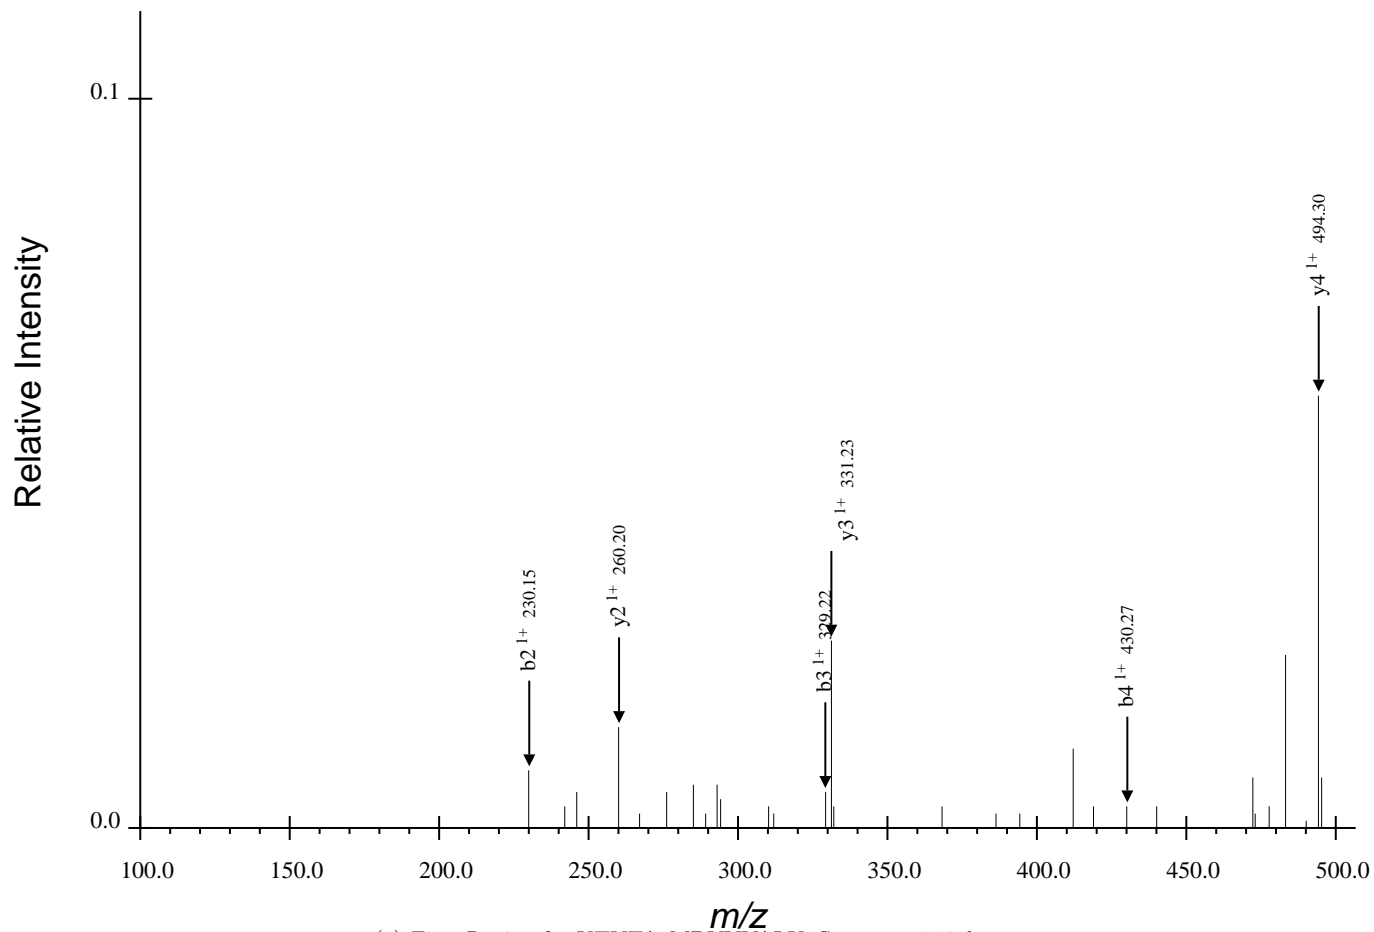

(a) First Region for KTVTAAoMDVVYALK, Spectrum 186.dta

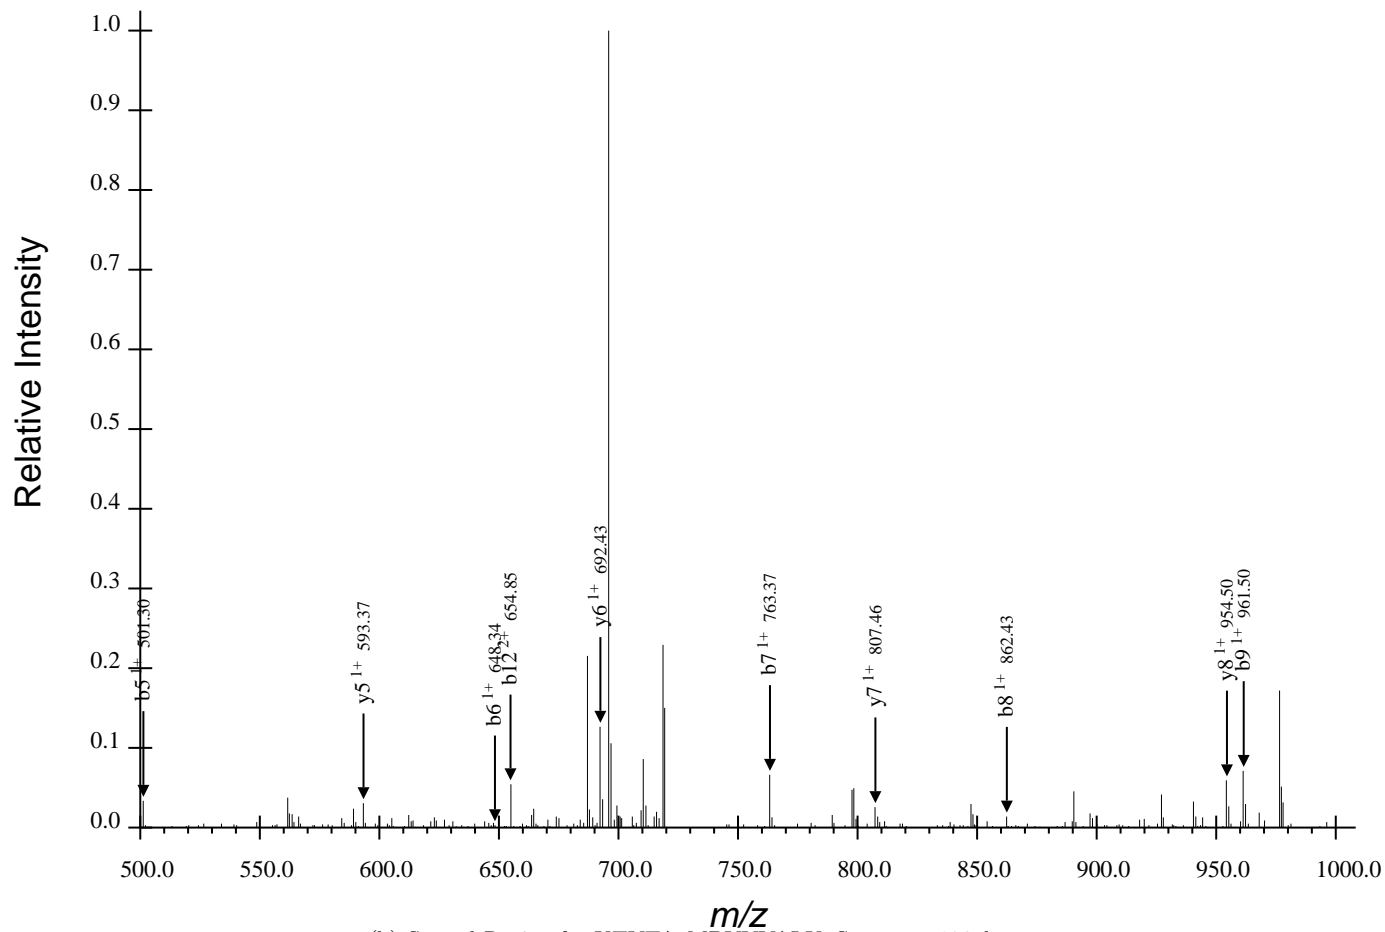

(b) Second Region for KTVTAAoMDVVYALK, Spectrum 186.dta



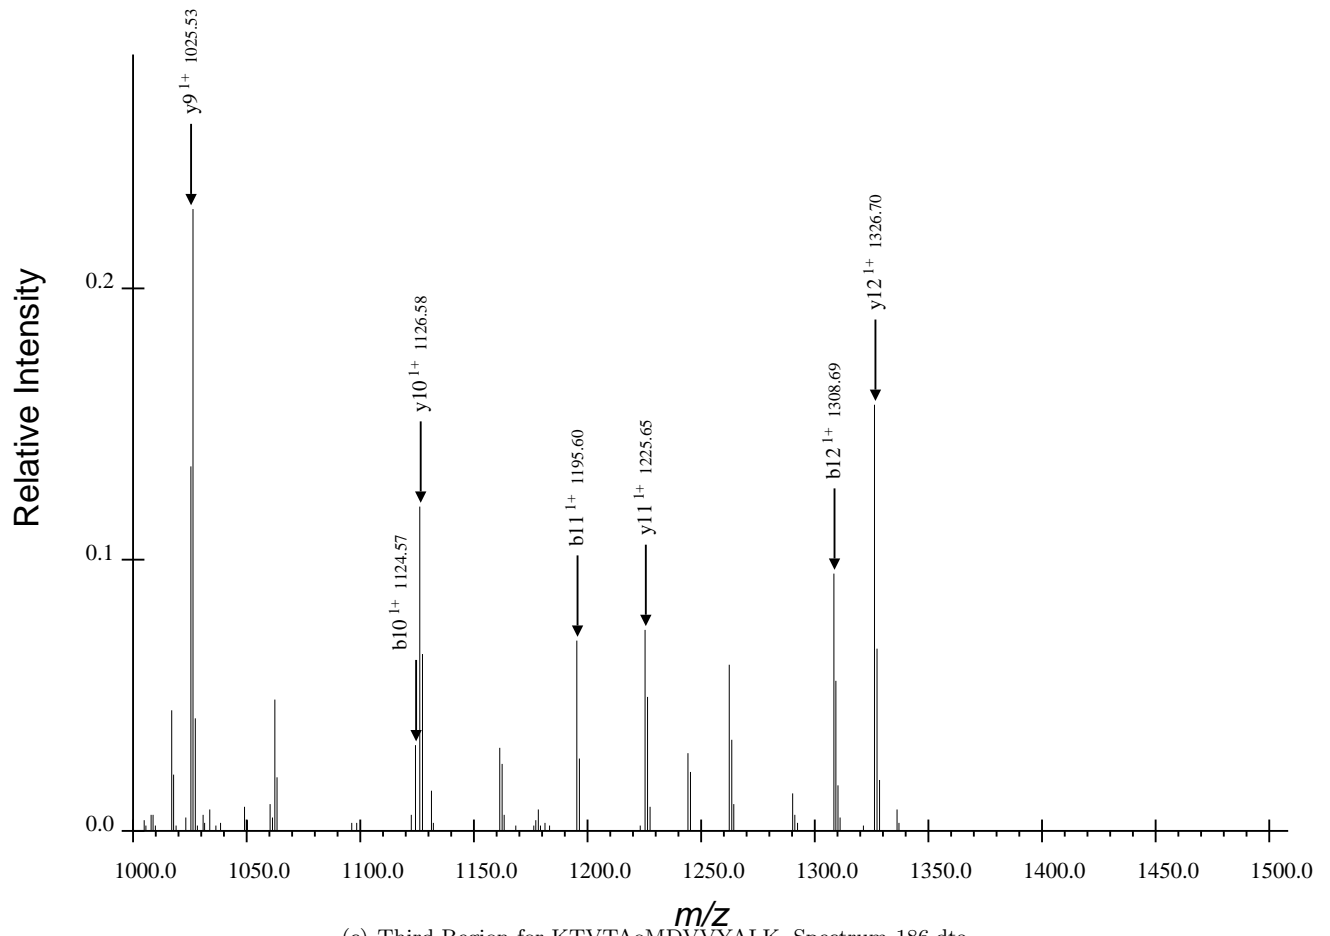

(c) Third Region for KTVTAAoMDVVYALK, Spectrum 186.dta

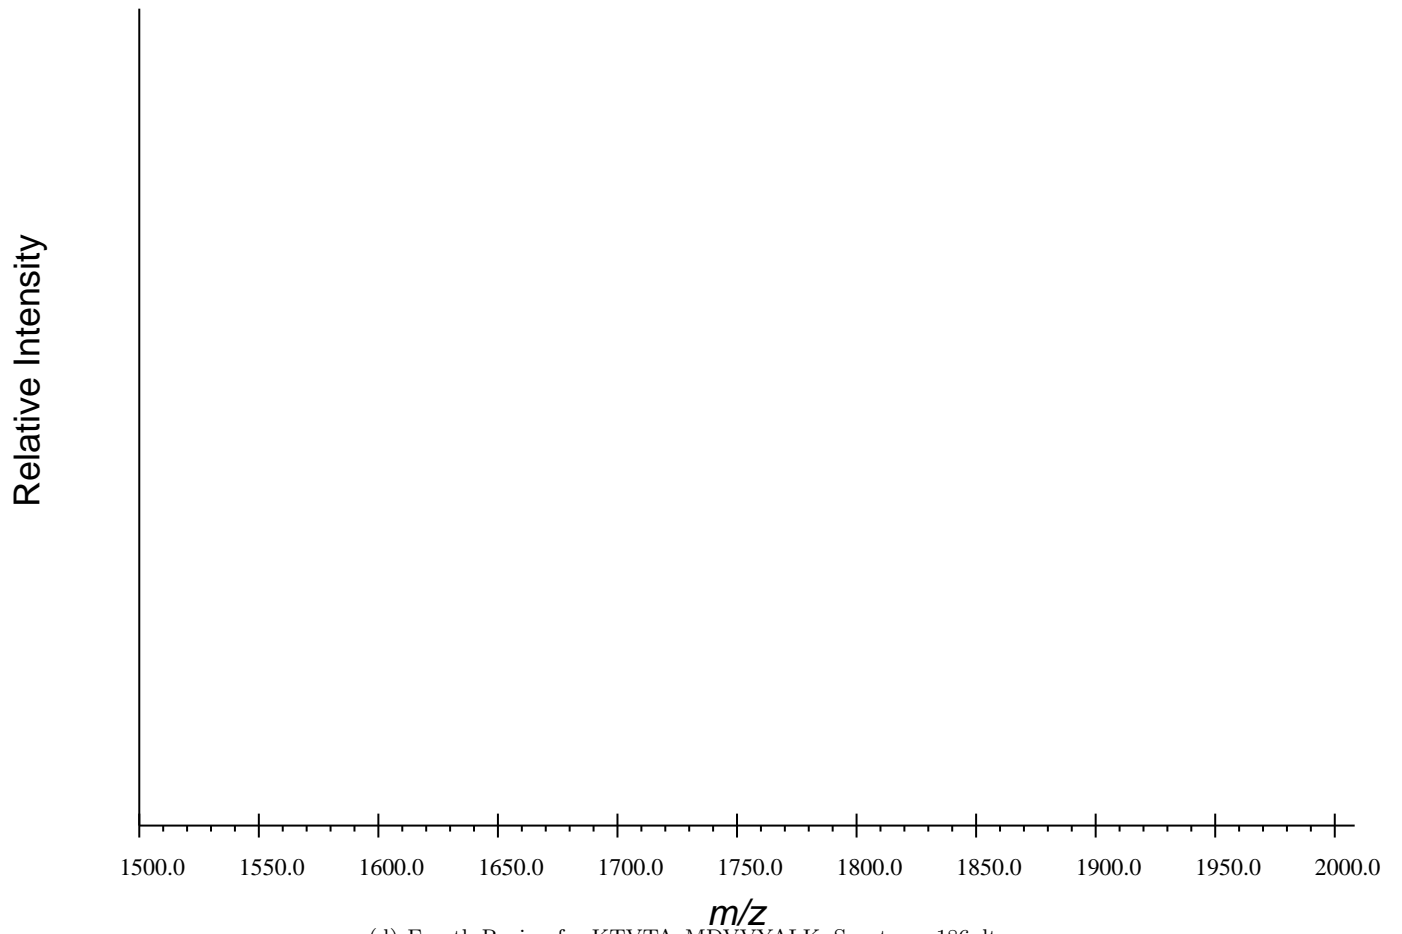

(d) Fourth Region for KTVTAAoMDVVYALK, Spectrum 186.dta

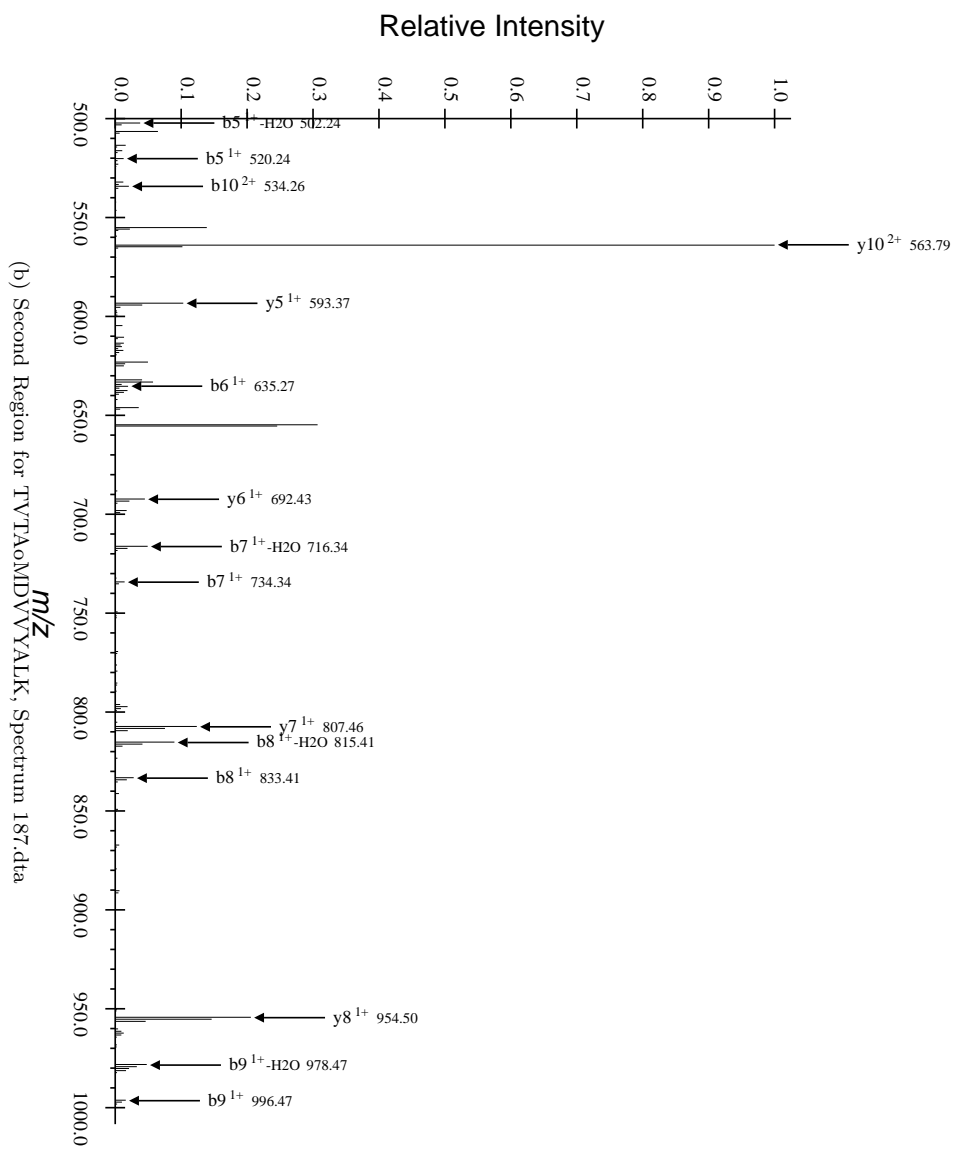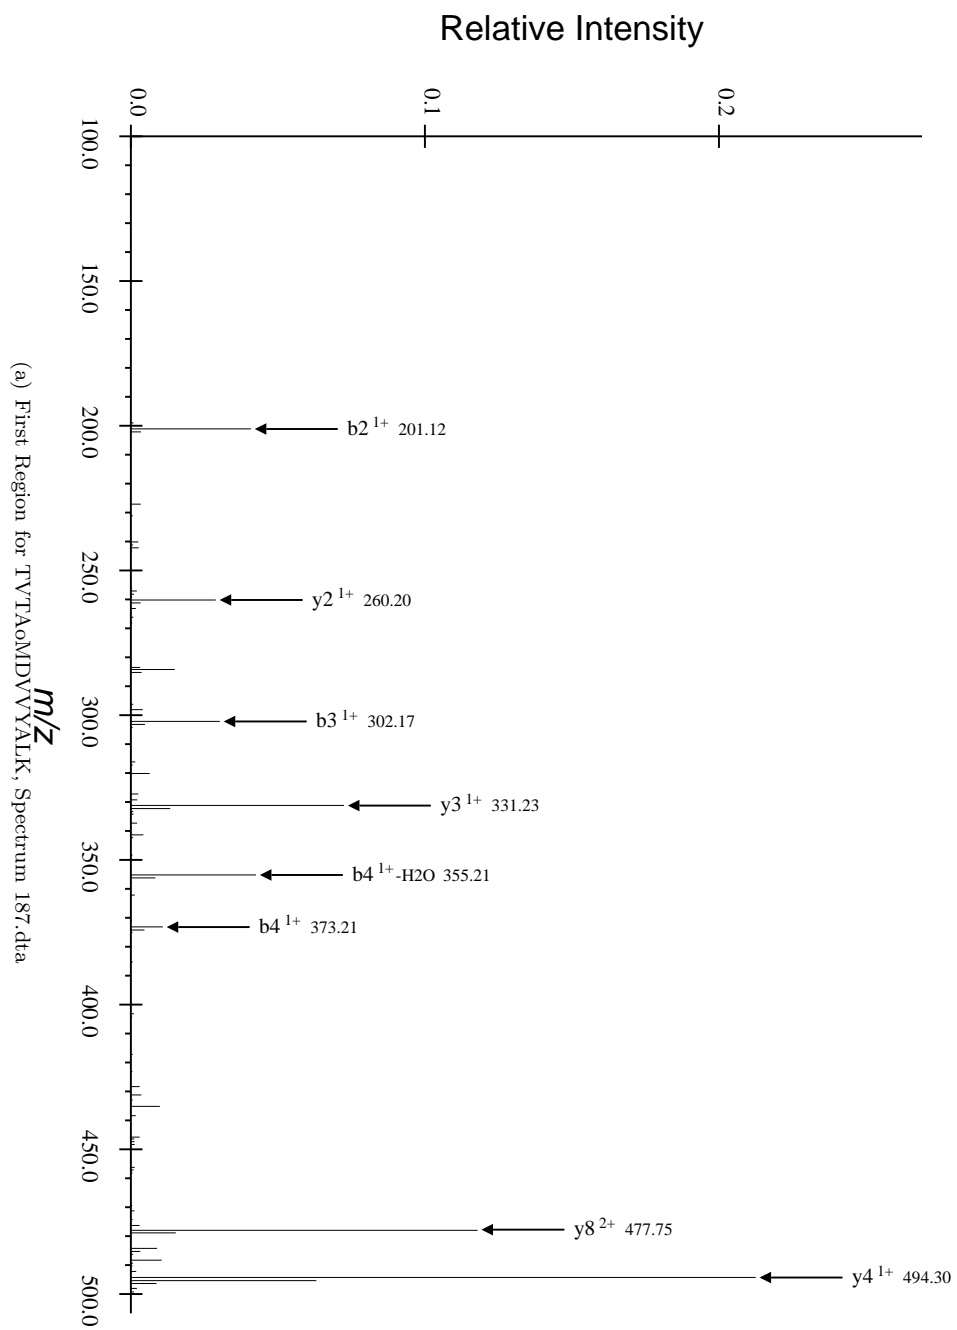

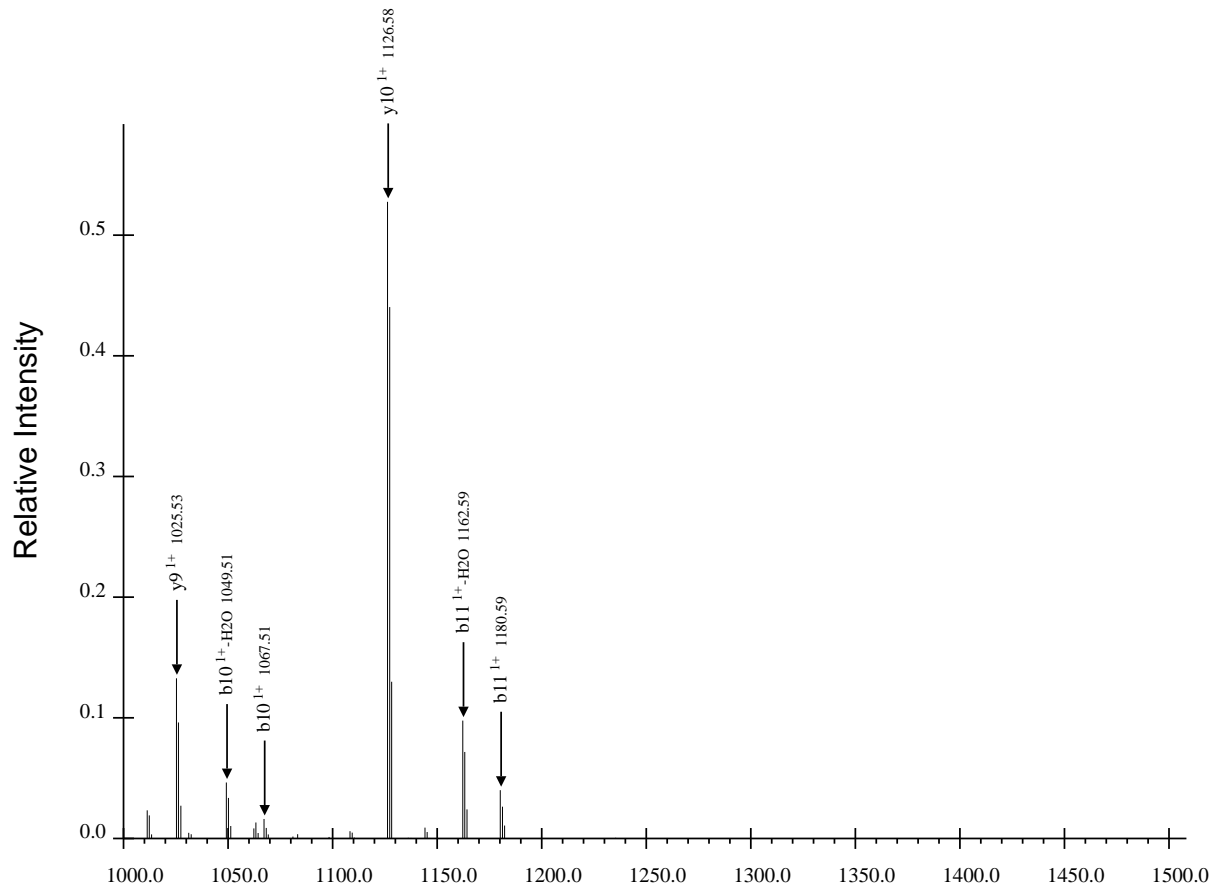

(c) Third Region for TVTAoMDVVYALK, Spectrum 187.dta

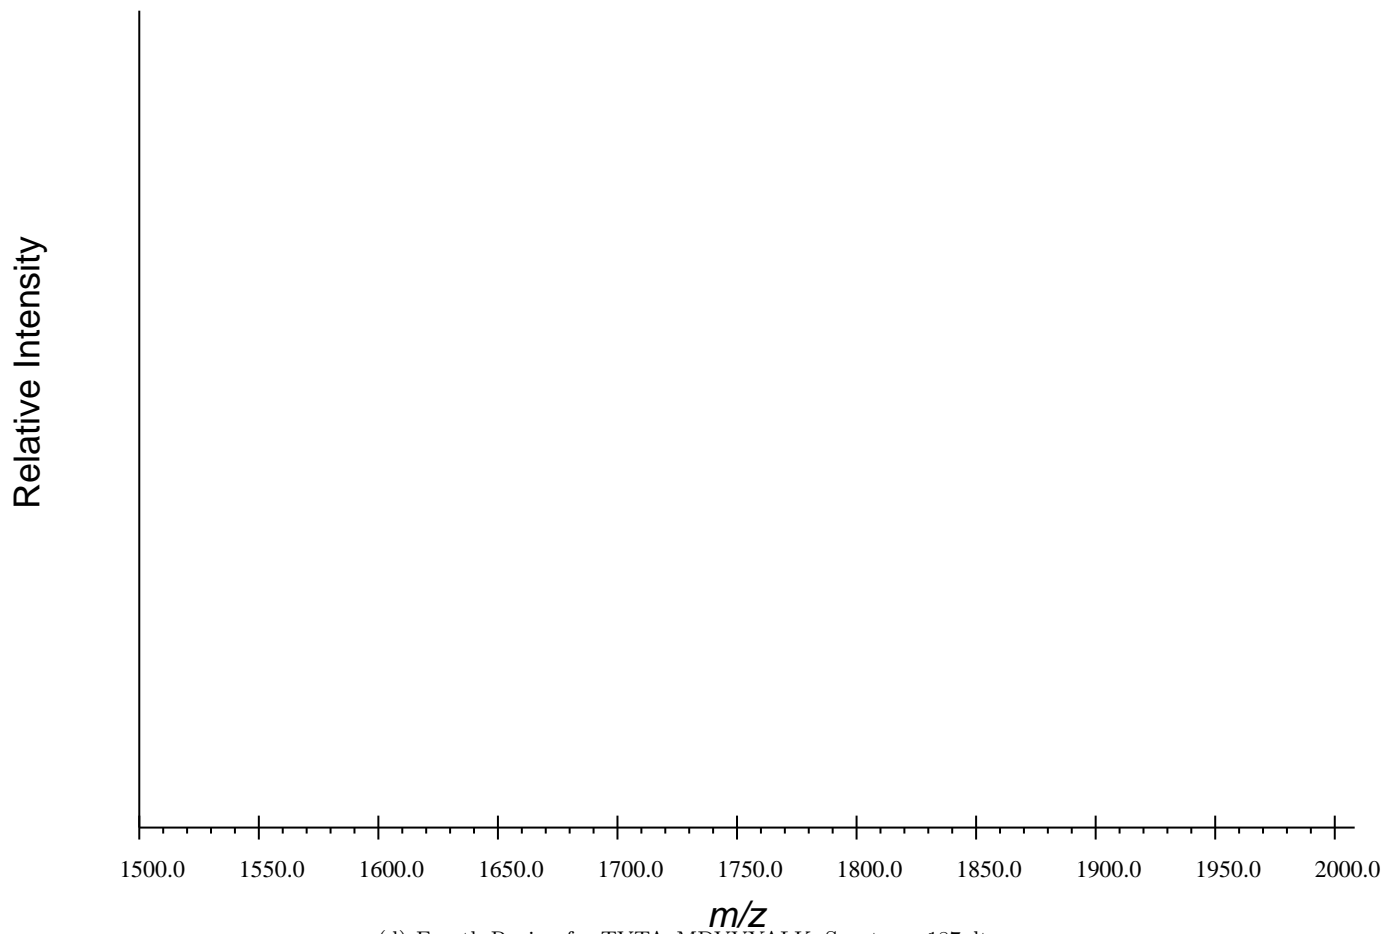

(d) Fourth Region for TVTAoMDVVYALK, Spectrum 187.dta

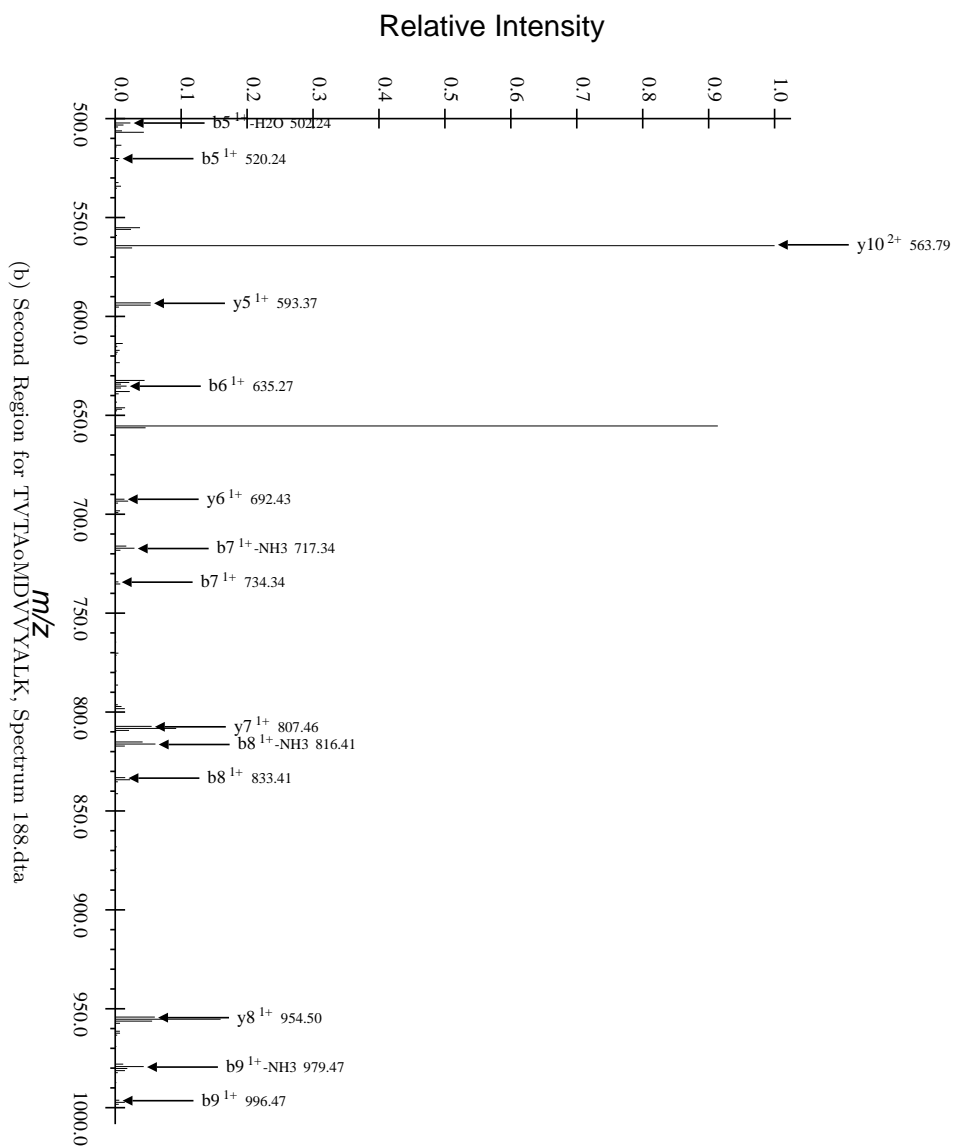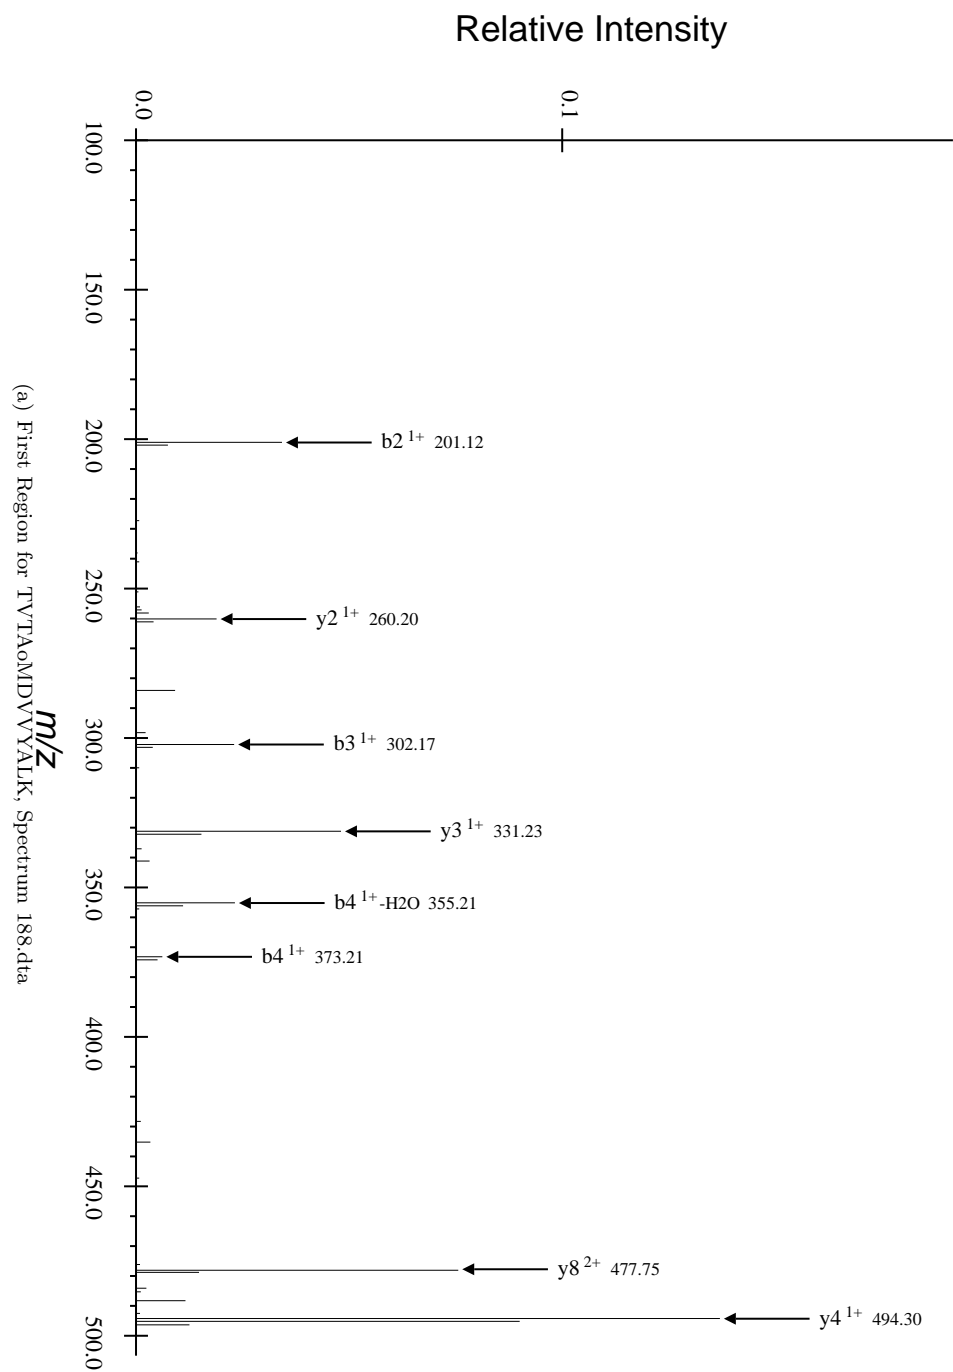

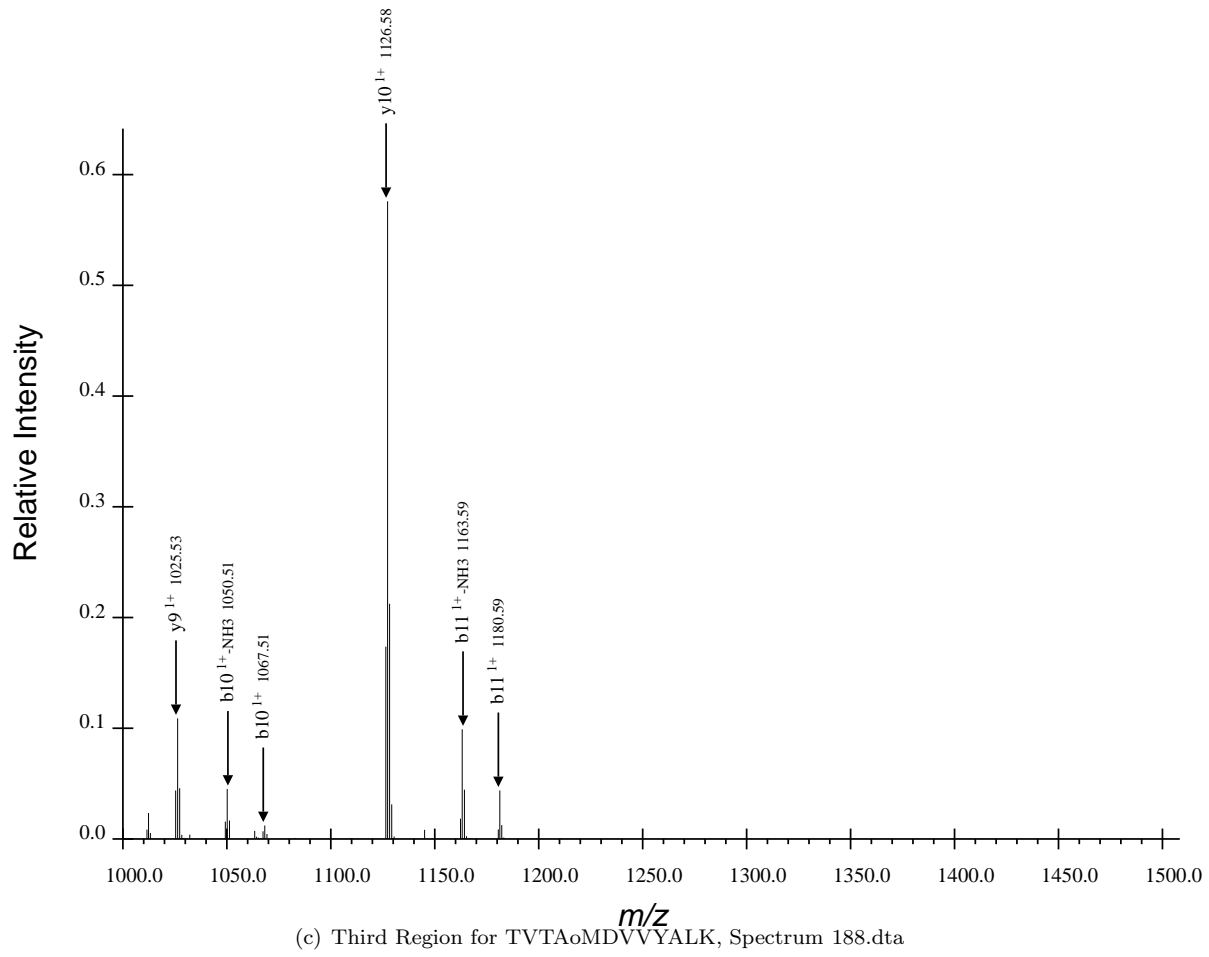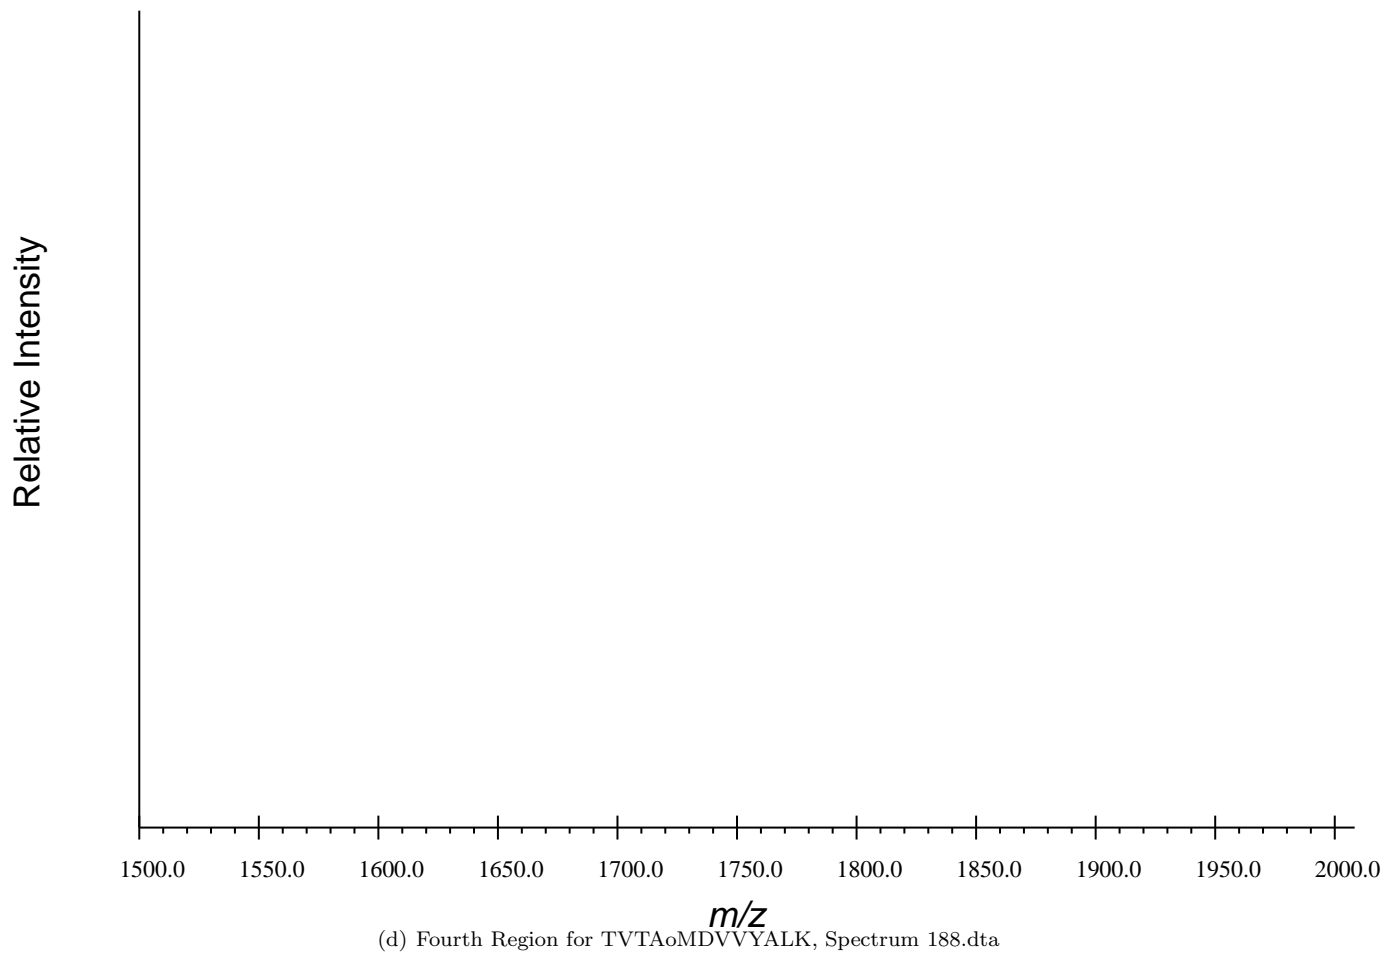

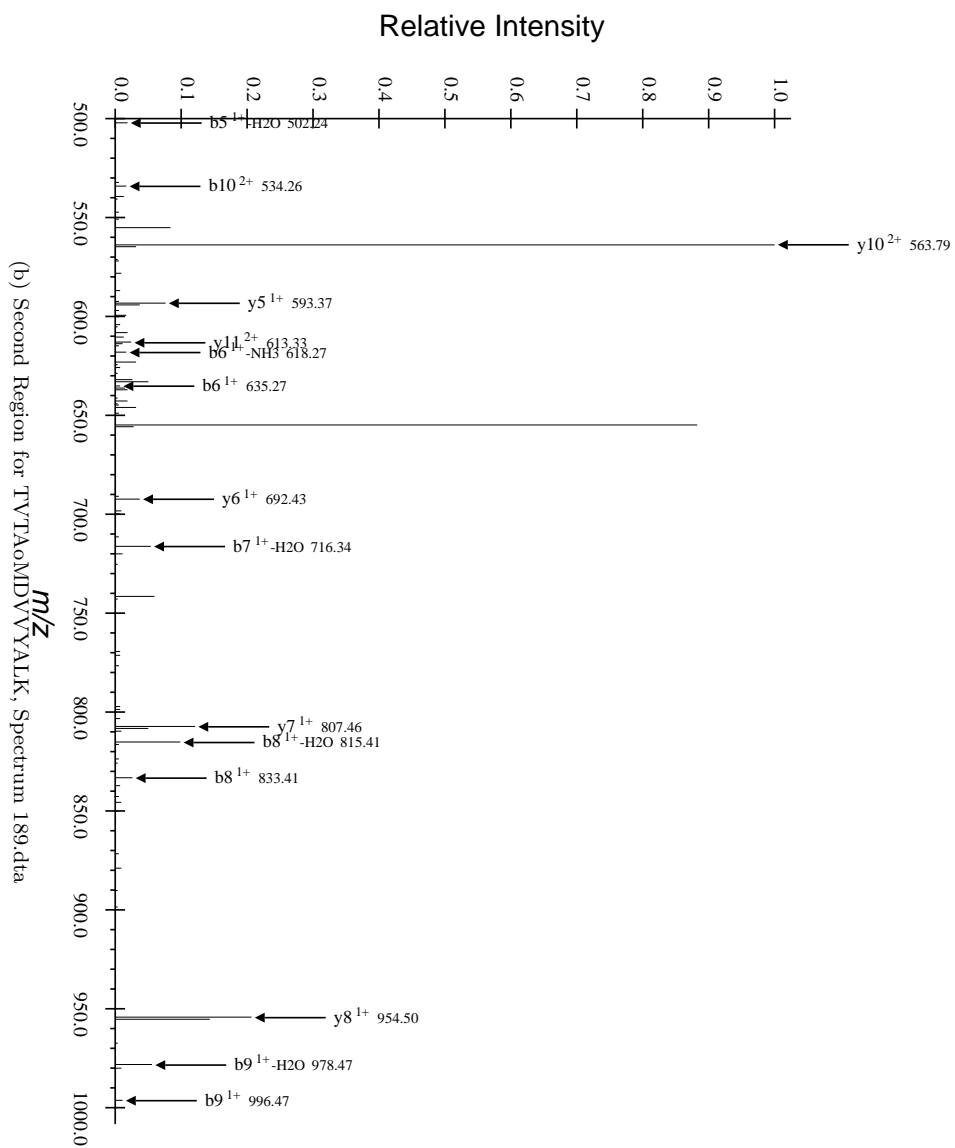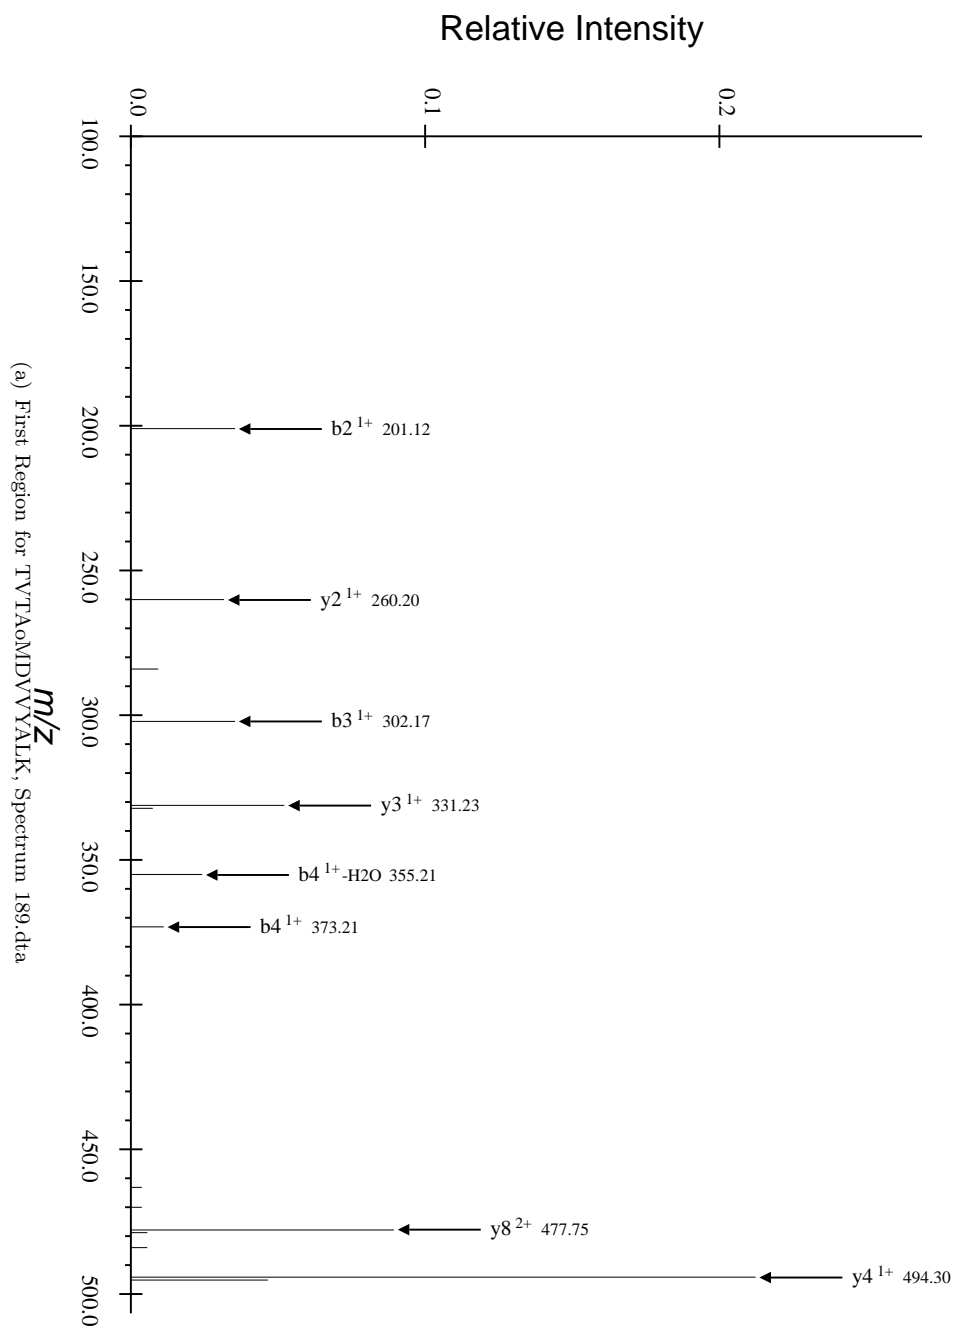

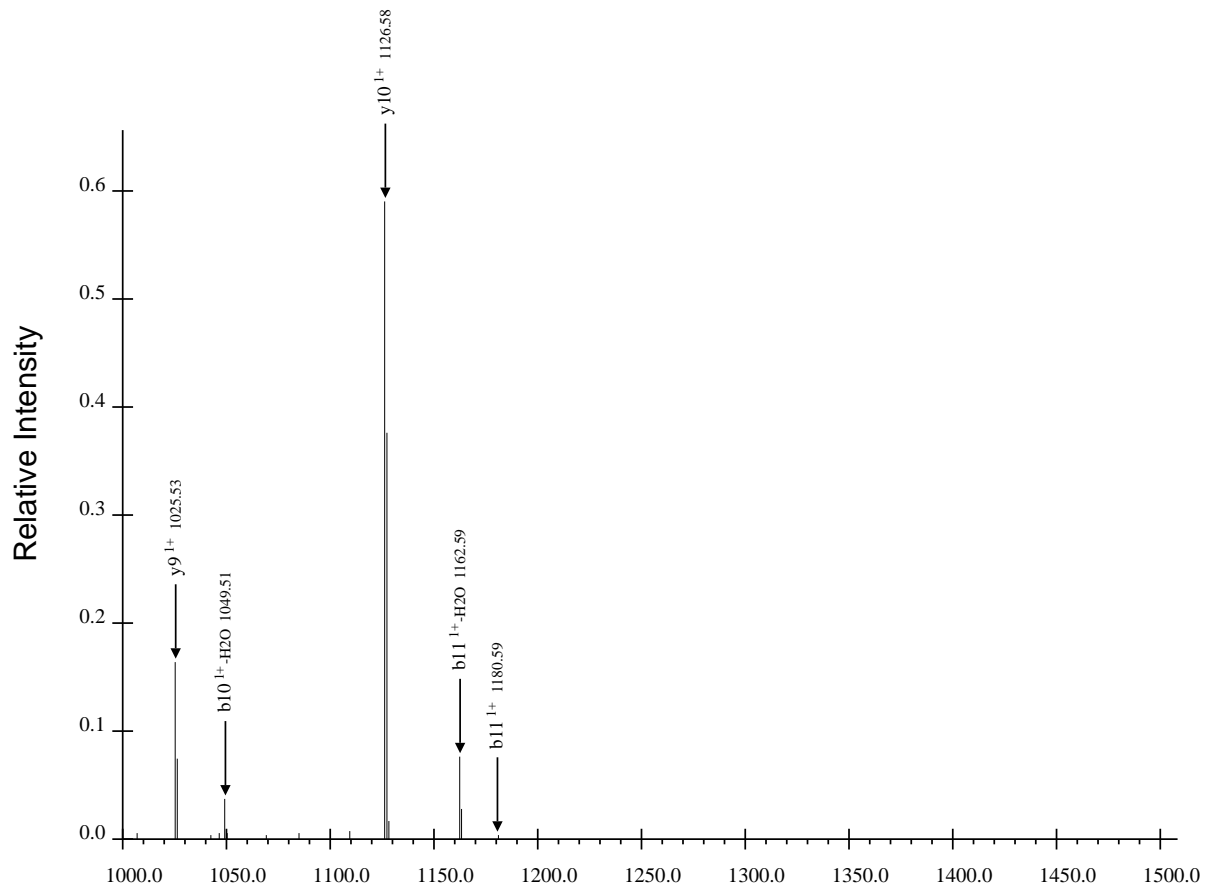

(c) Third Region for TVTAoMDVVYALK, Spectrum 189.dta

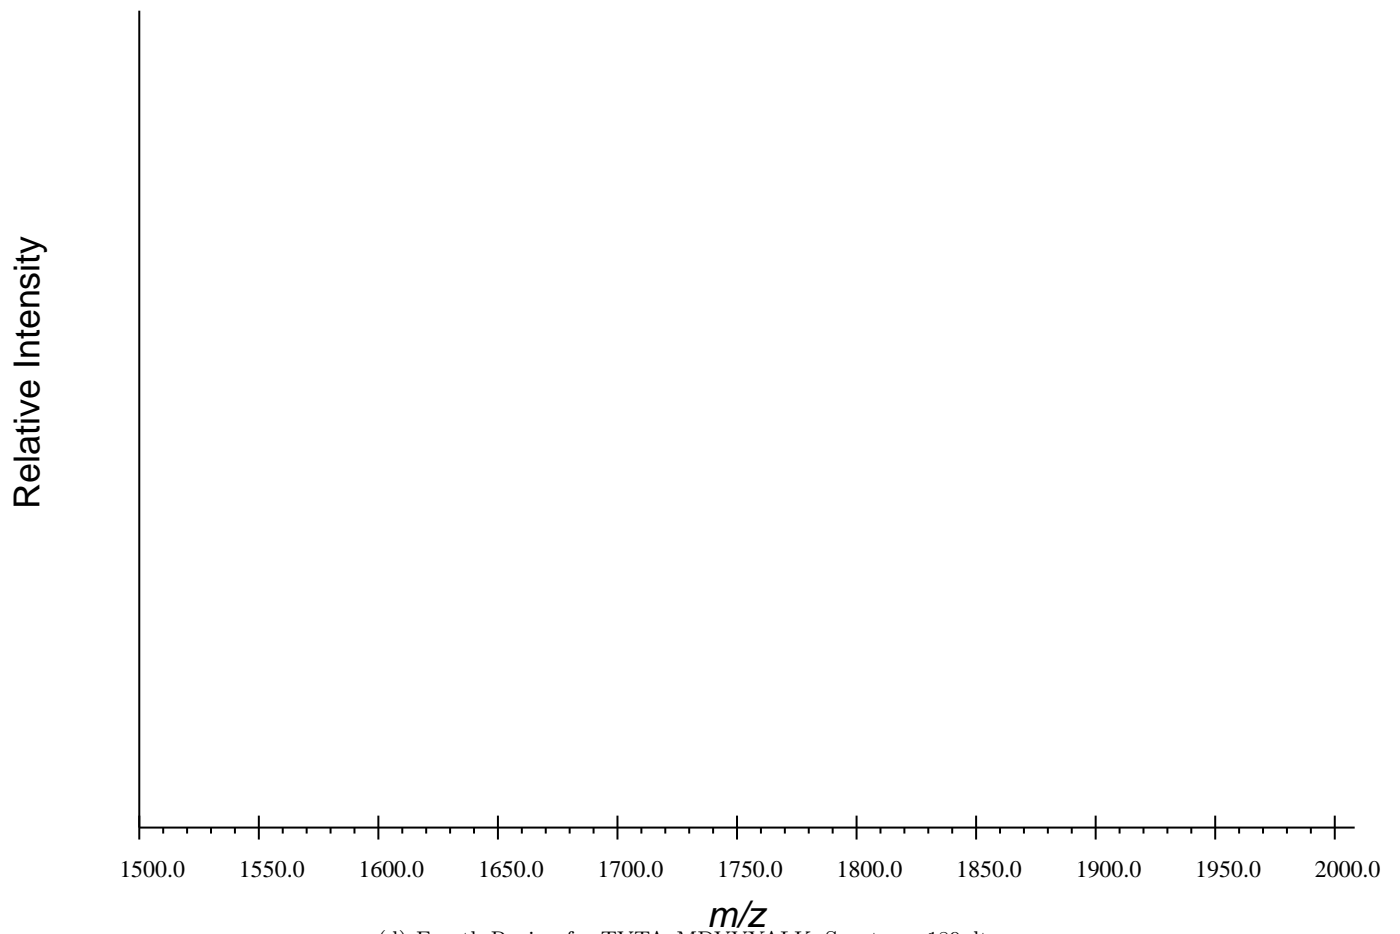

(d) Fourth Region for TVTAoMDVVYALK, Spectrum 189.dta

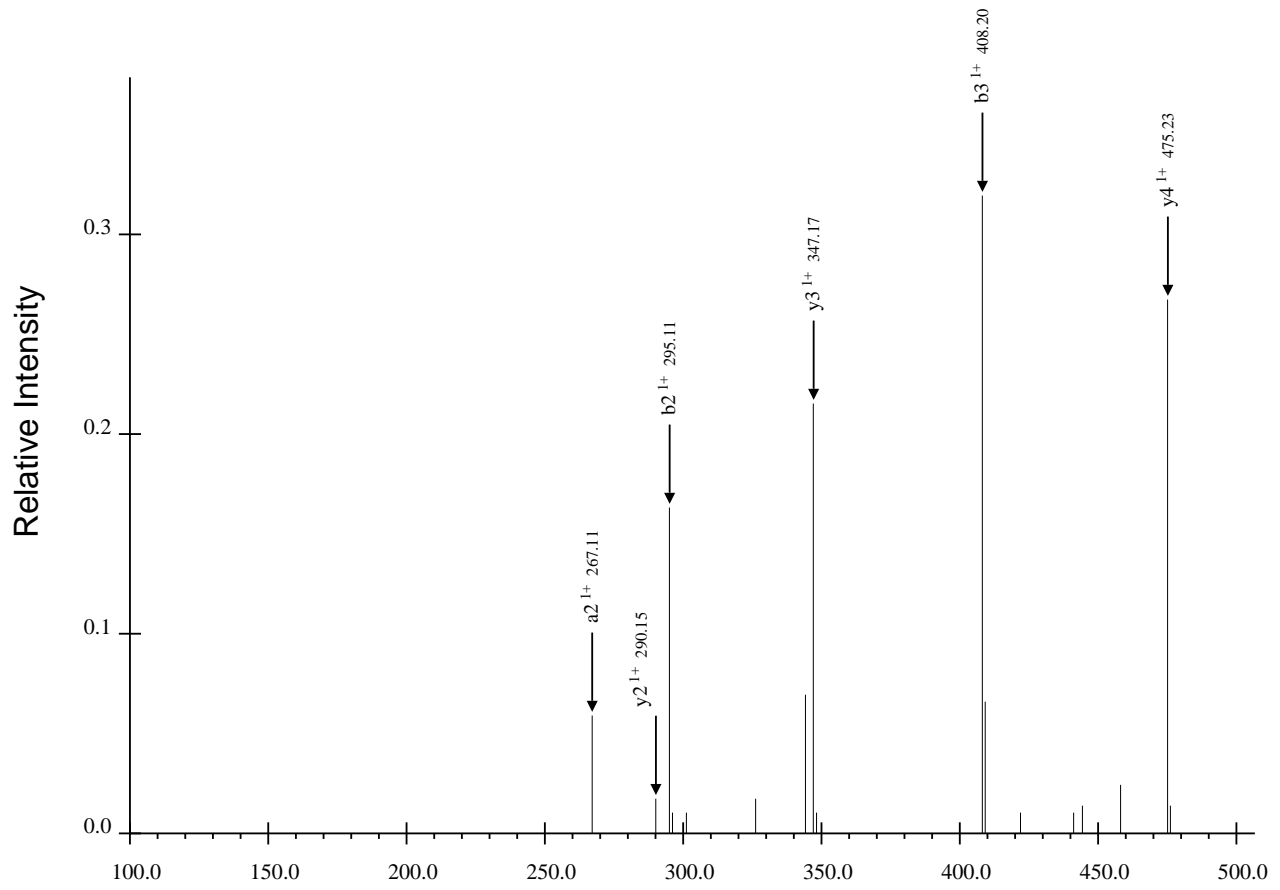

(a) First Region for oMFLQYYLNEQGDR, Spectrum 190.dta

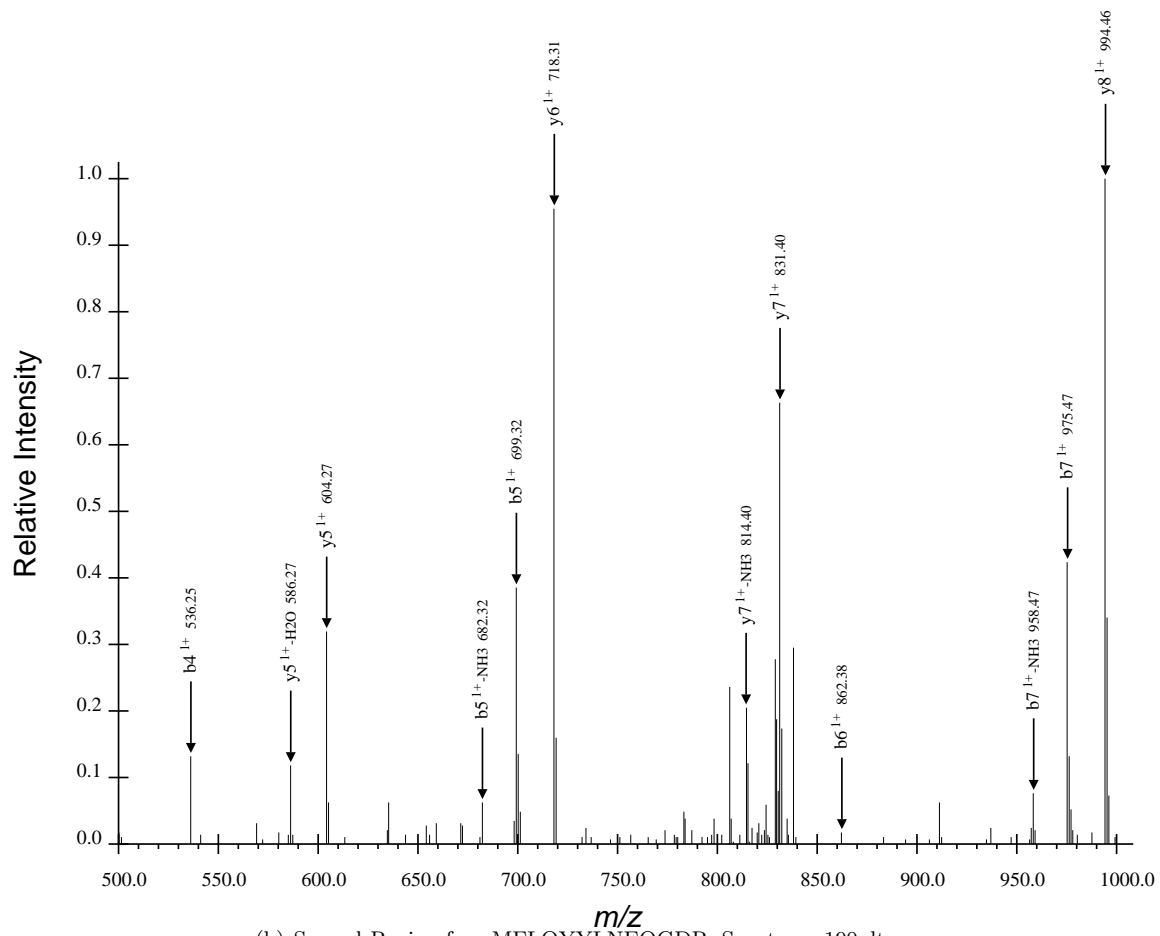

(b) Second Region for oMFLQYYLNEQGDR, Spectrum 190.dta



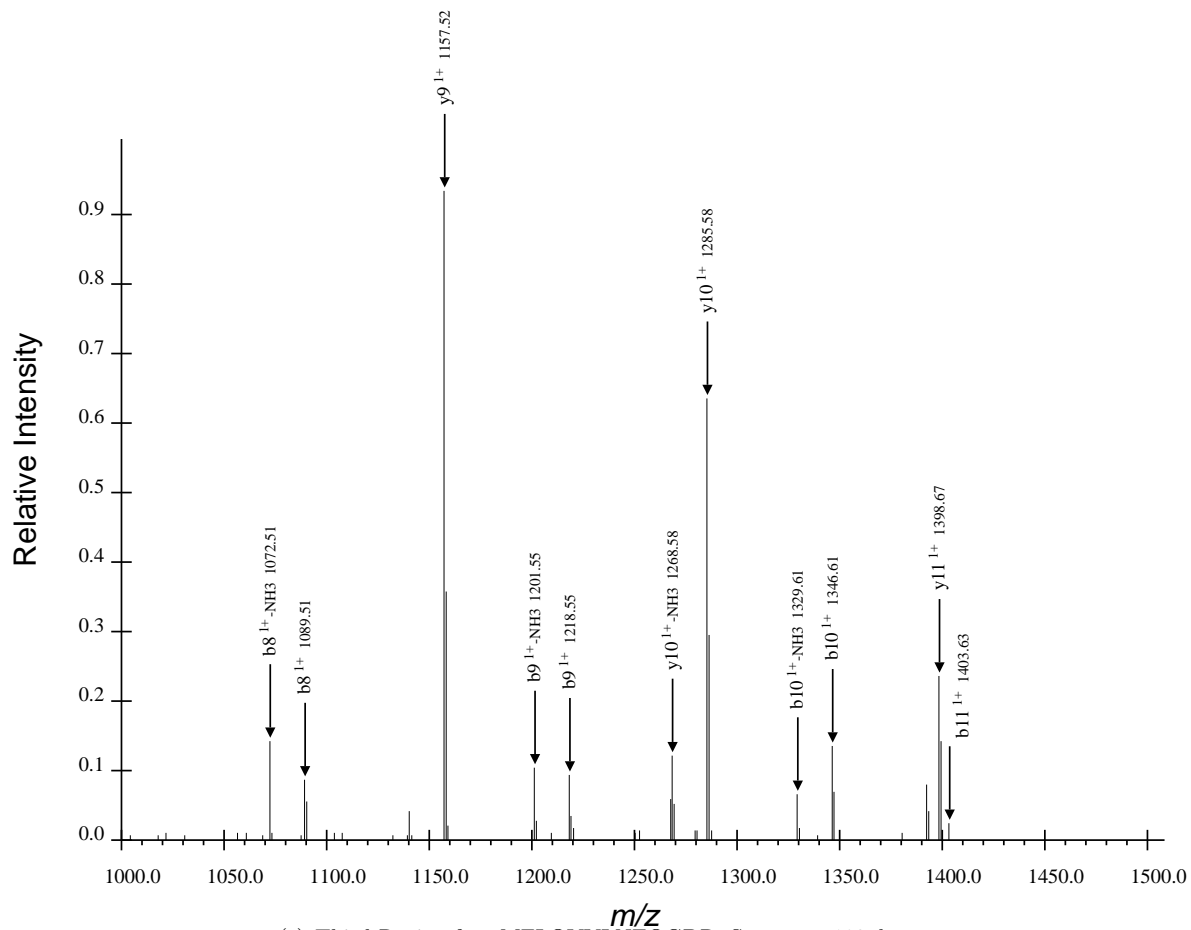

(c) Third Region for oMFLQYYLNEQGDR, Spectrum 190.dta

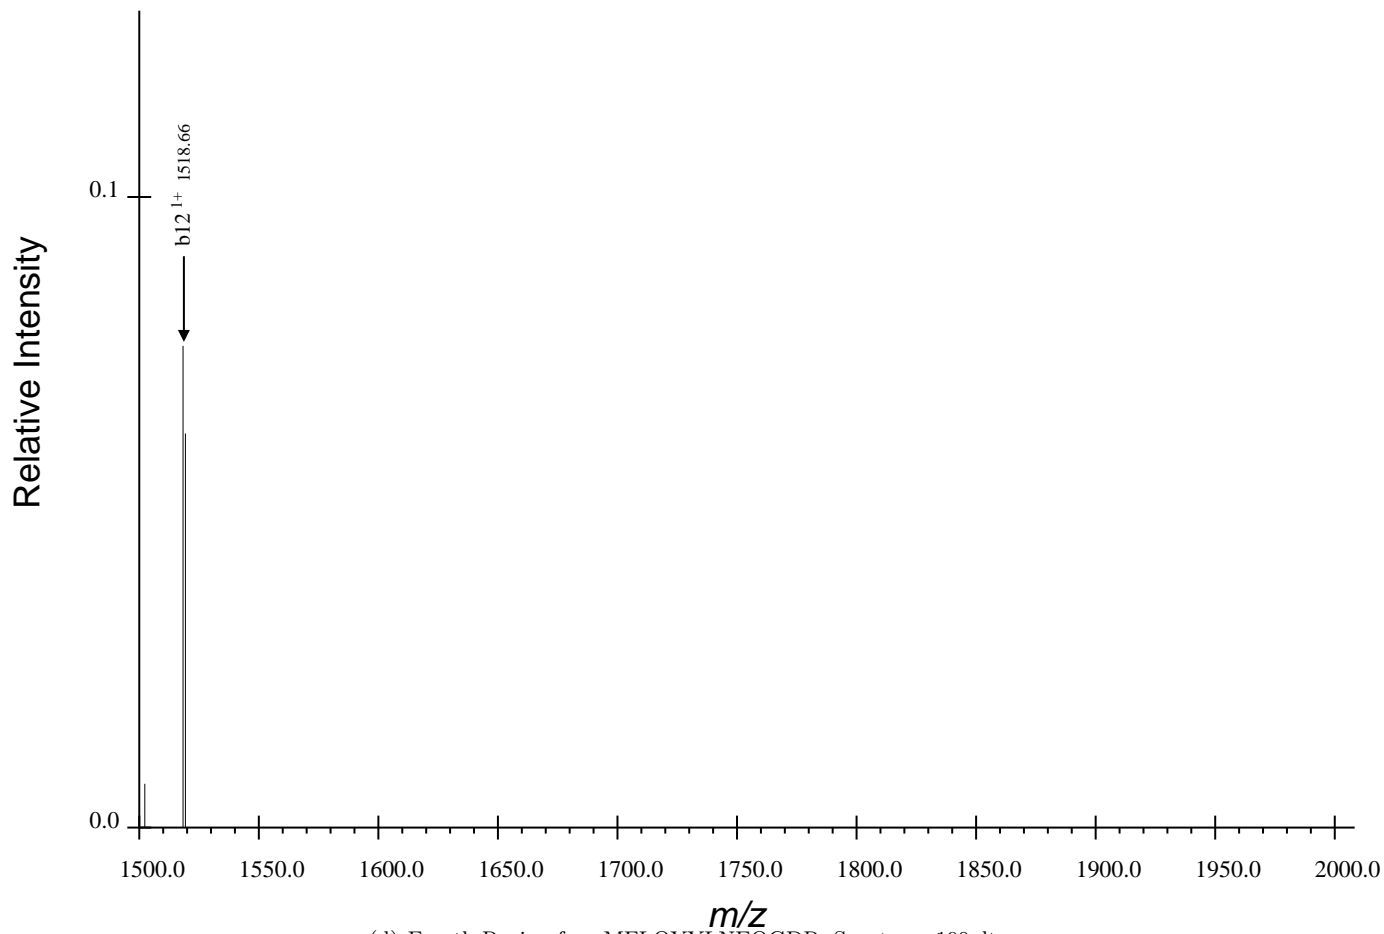

(d) Fourth Region for oMFLQYYLNEQGDR, Spectrum 190.dta

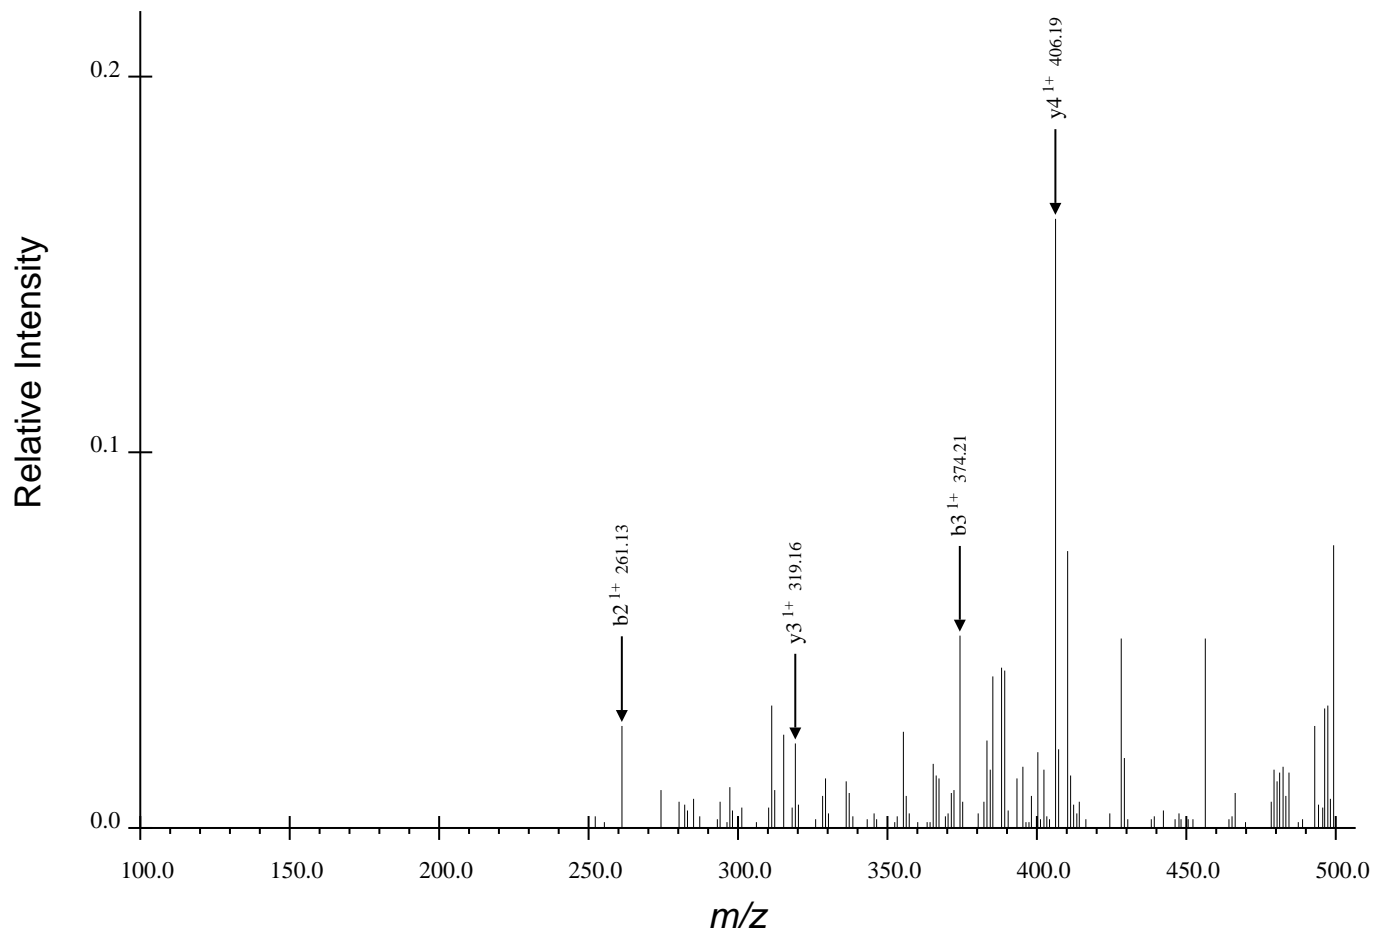

(a) First Region for IoMLKGDNITLLQSVSN, Spectrum 191.dta

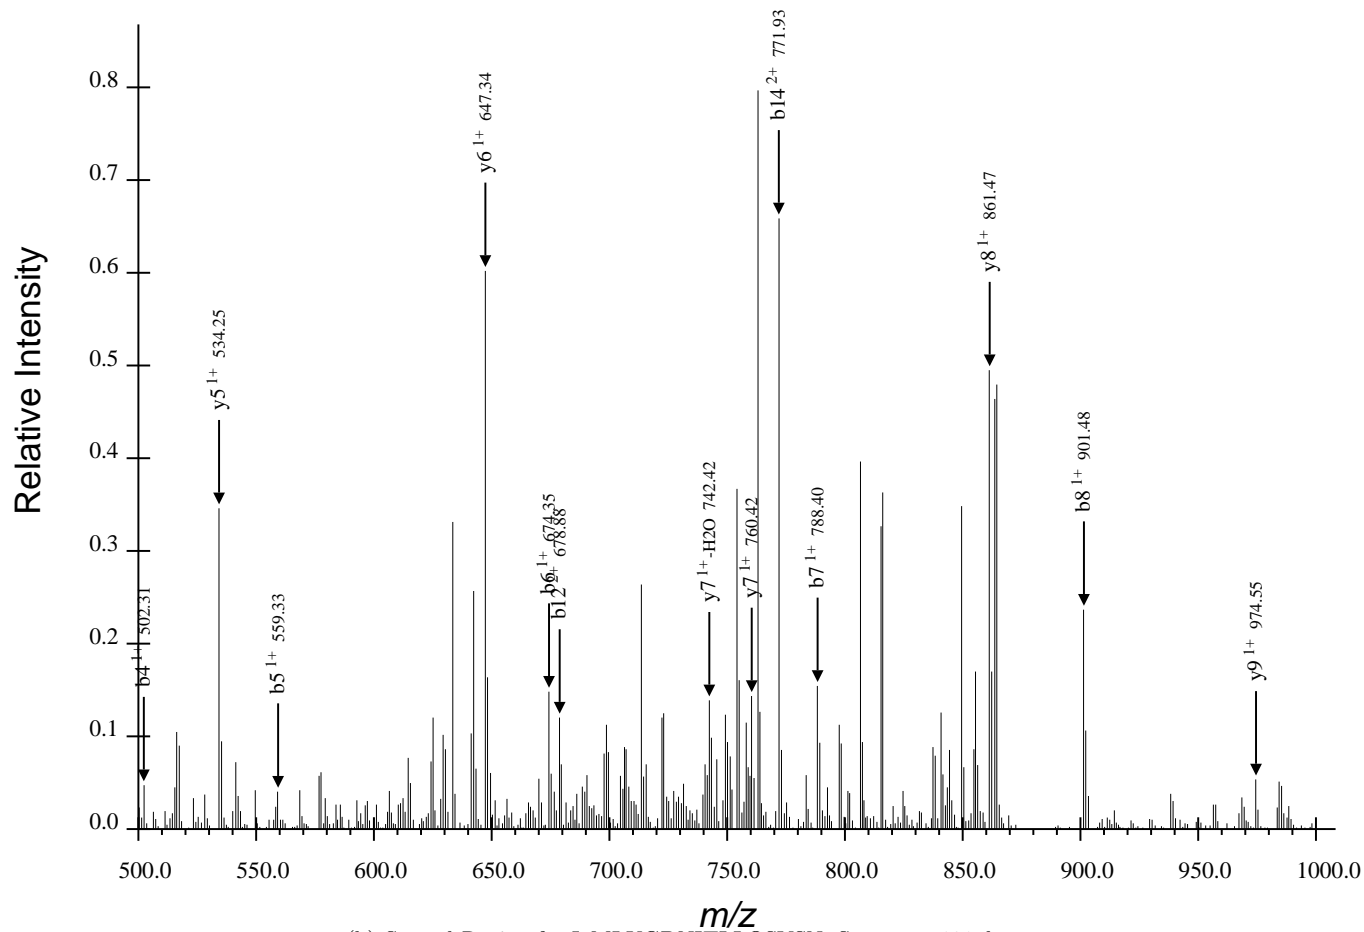

(b) Second Region for IoMLKGDNITLLQSVSN, Spectrum 191.dta

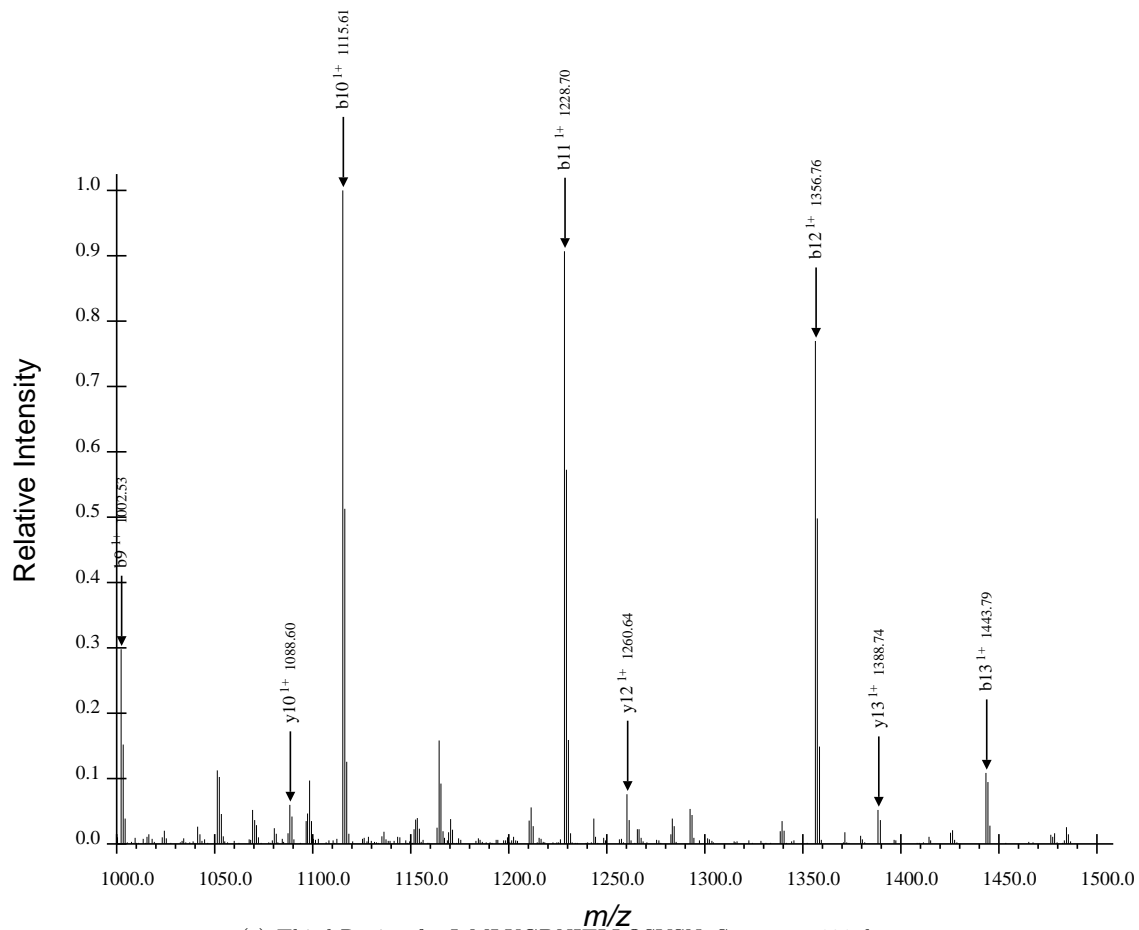

(c) Third Region for IoMLKGDNITLLQSVSN, Spectrum 191.dta

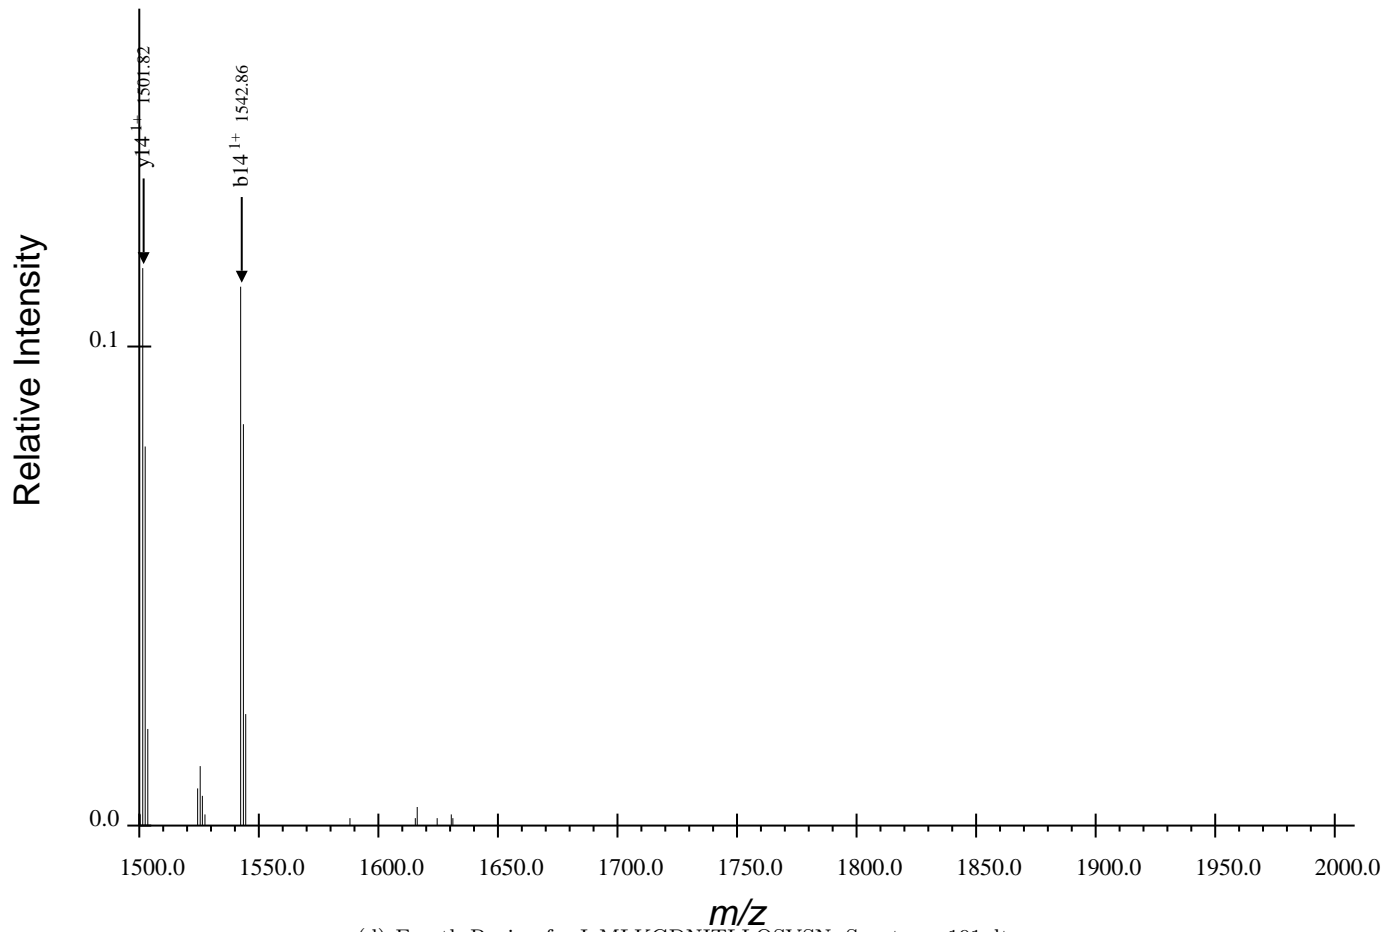

(d) Fourth Region for IoMLKGDNITLLQSVSN, Spectrum 191.dta

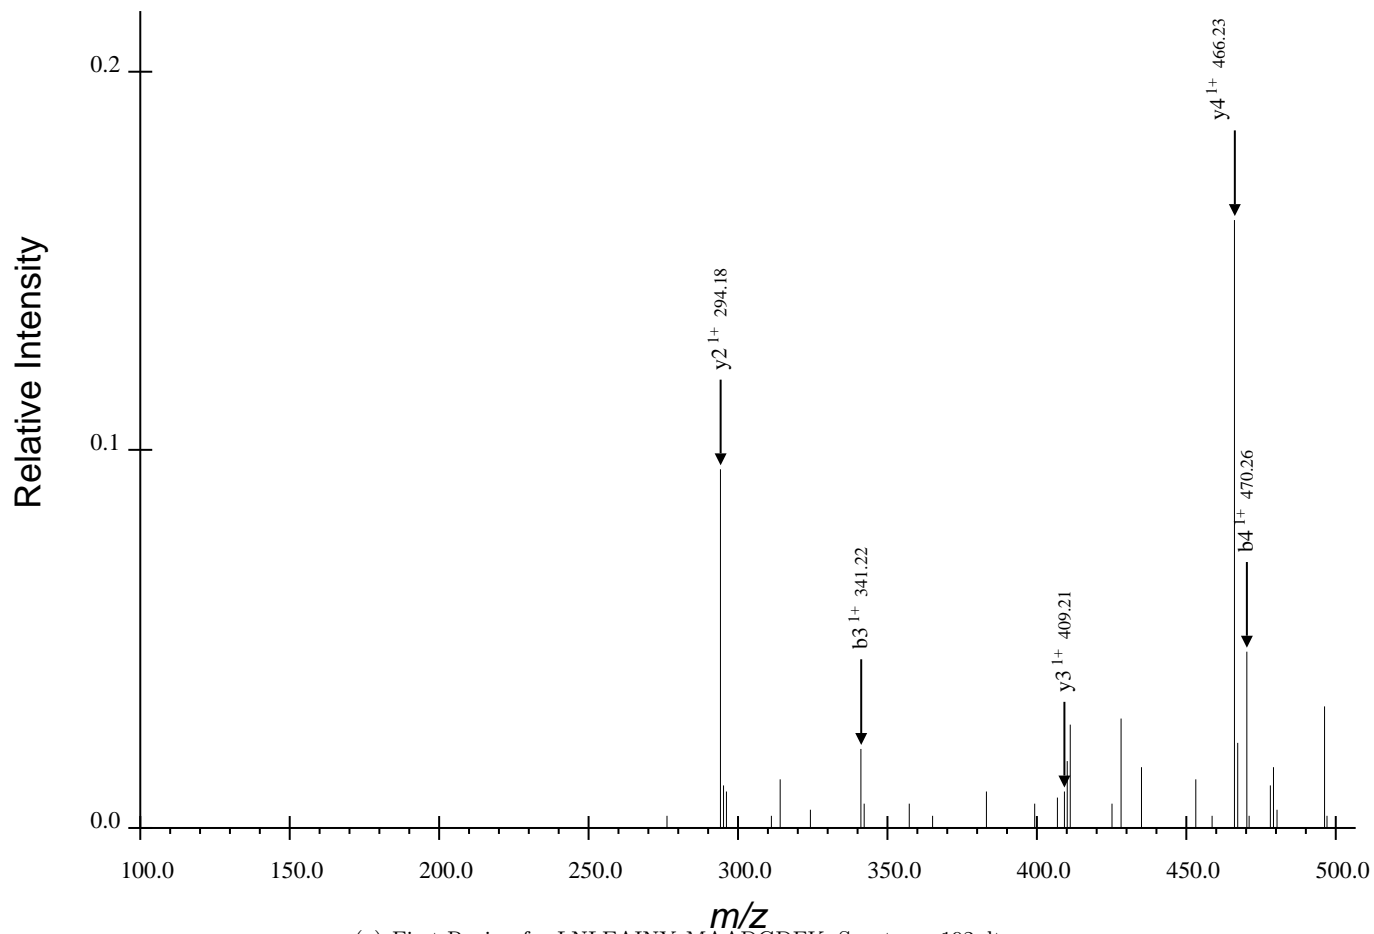

(a) First Region for LNLEAINYoMAADGDFK, Spectrum 192.dta

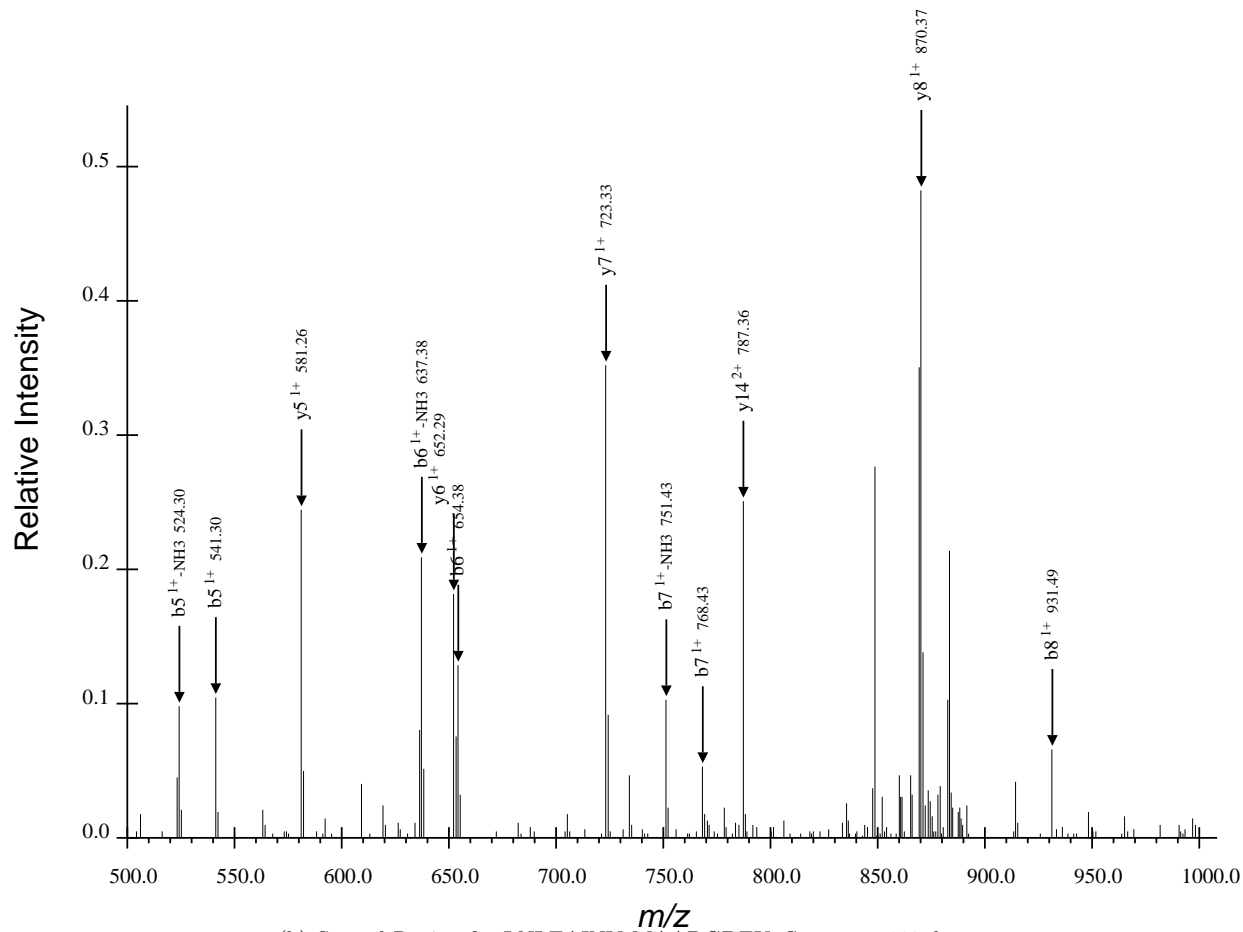

(b) Second Region for LNLEAINYoMAADGDFK, Spectrum 192.dta

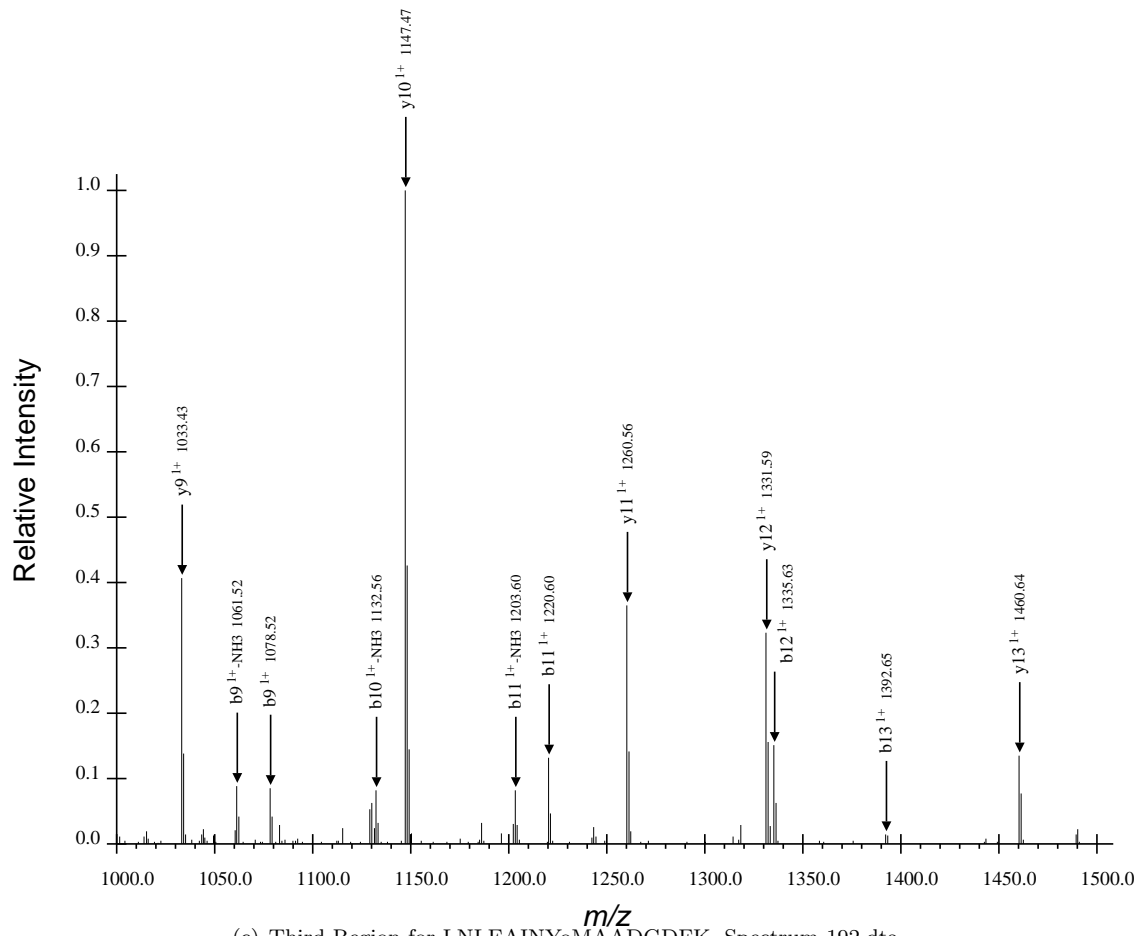

(c) Third Region for LNLEAINYoMAADGDFK, Spectrum 192.dta

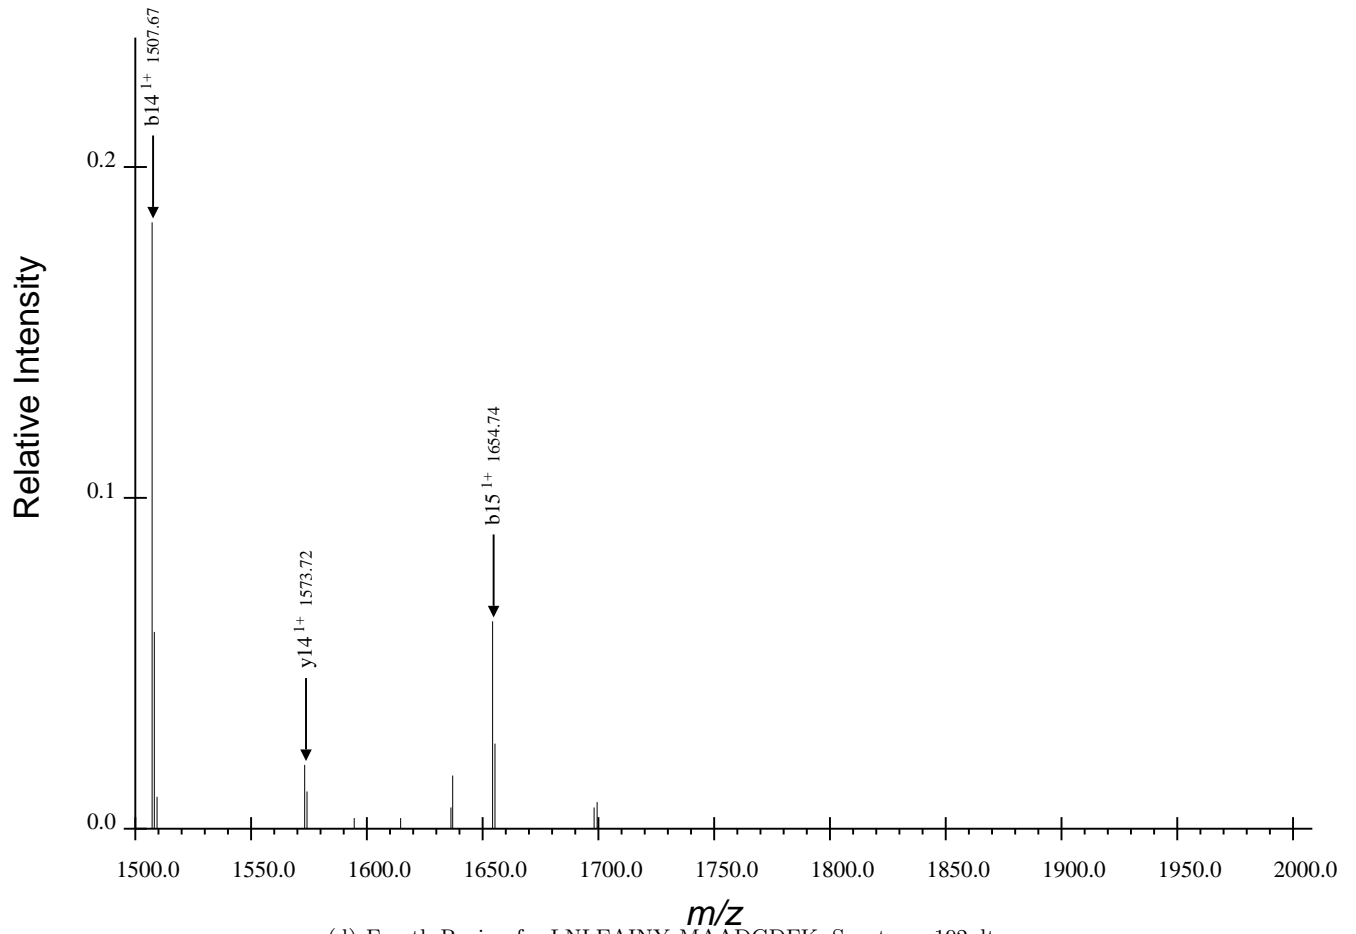

(d) Fourth Region for LNLEAINYoMAADGDFK, Spectrum 192.dta

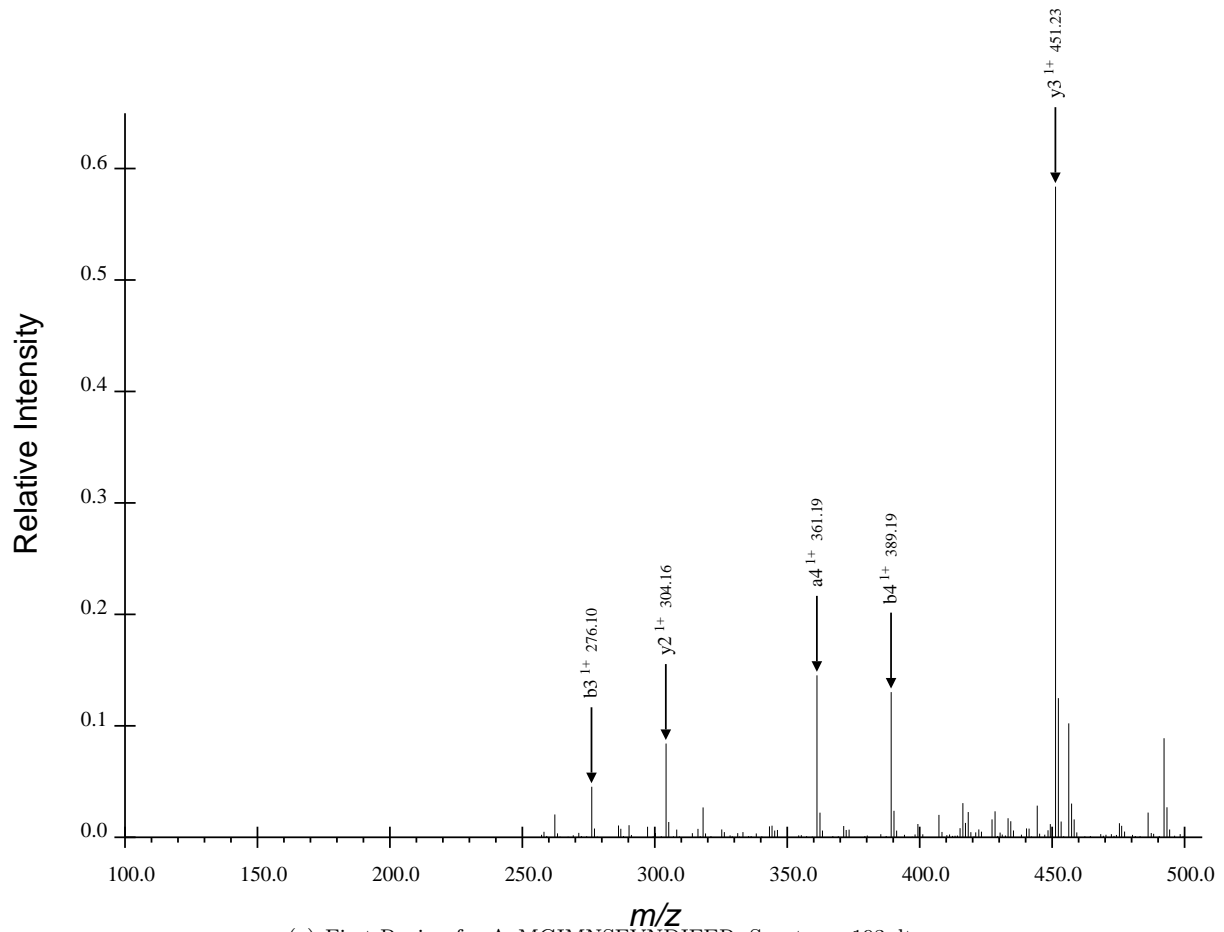

(a) First Region for AoMGIMNSFVNDIFER, Spectrum 193.dta

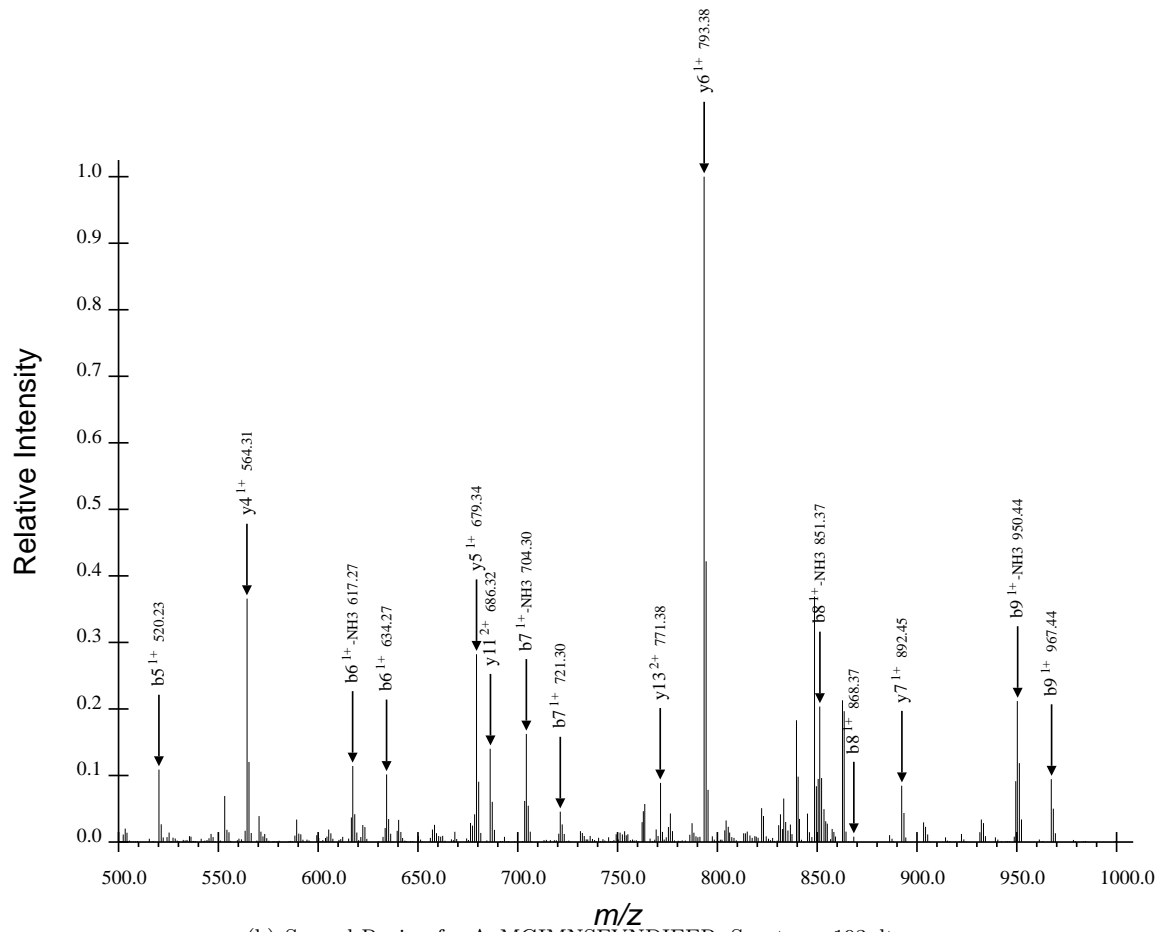

(b) Second Region for AoMGIMNSFVNDIFER, Spectrum 193.dta

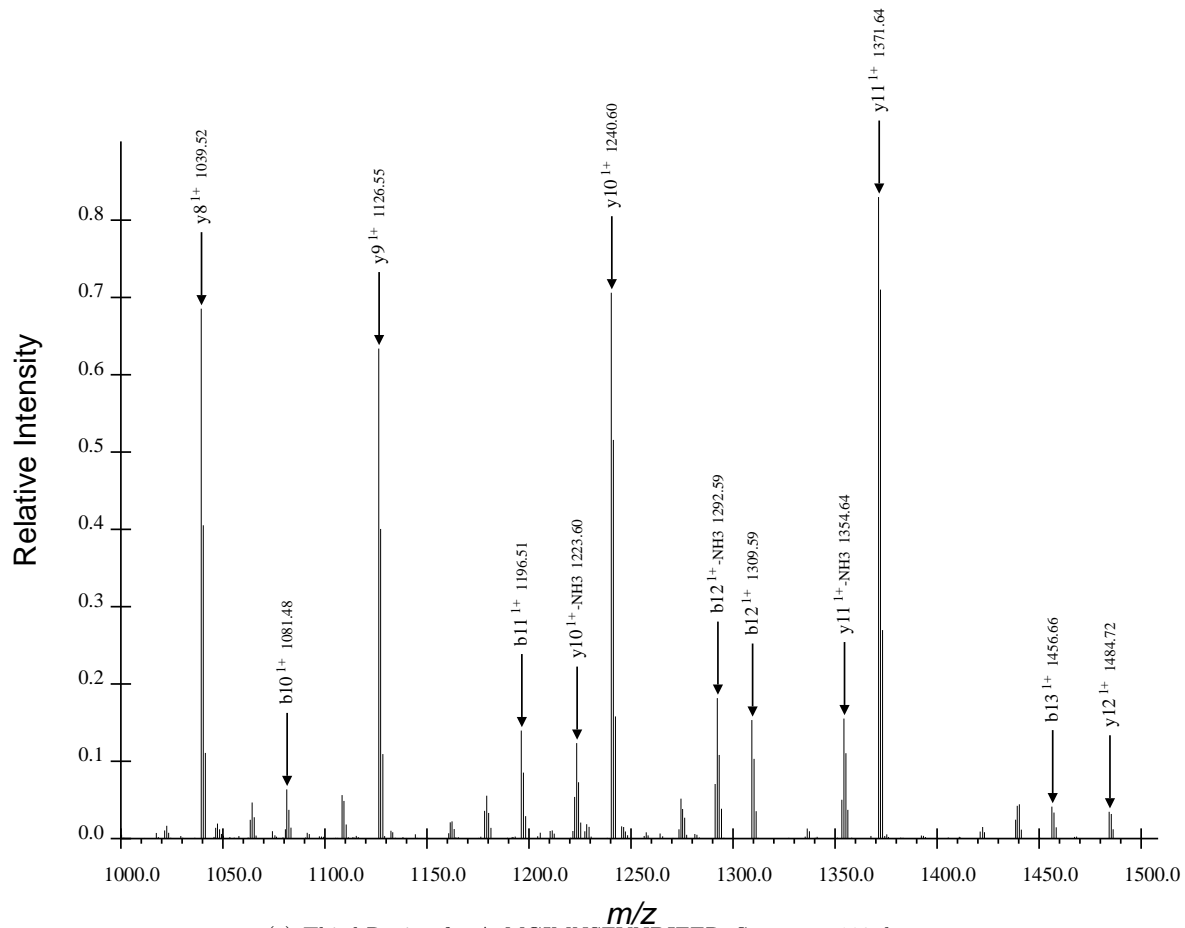

(c) Third Region for AoMGIMNSFVNDIFER, Spectrum 193.dta

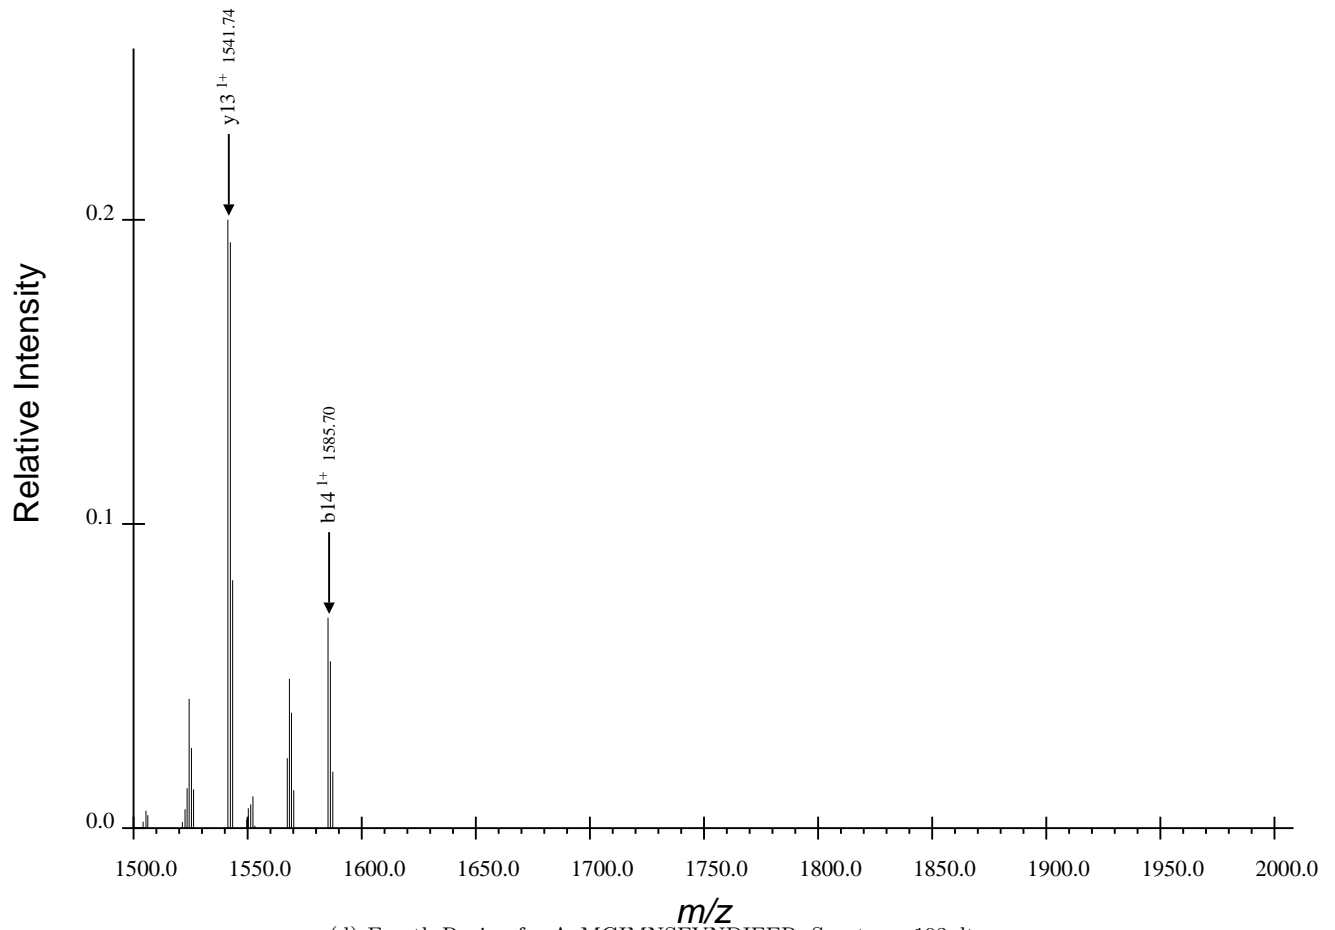

(d) Fourth Region for AoMGIMNSFVNDIFER, Spectrum 193.dta

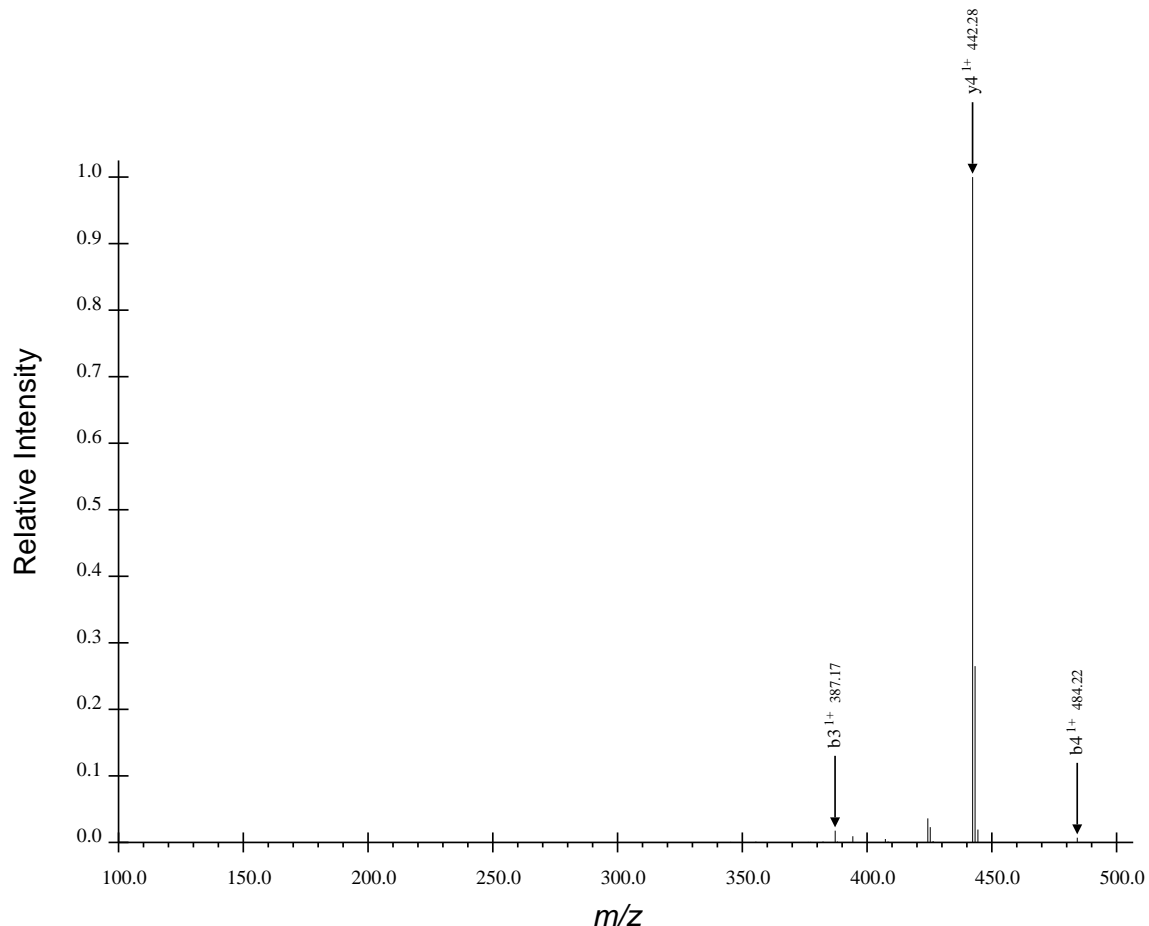

(a) First Region for aMVNPTVFFDIAVDGEPLGR, Spectrum 194.dta

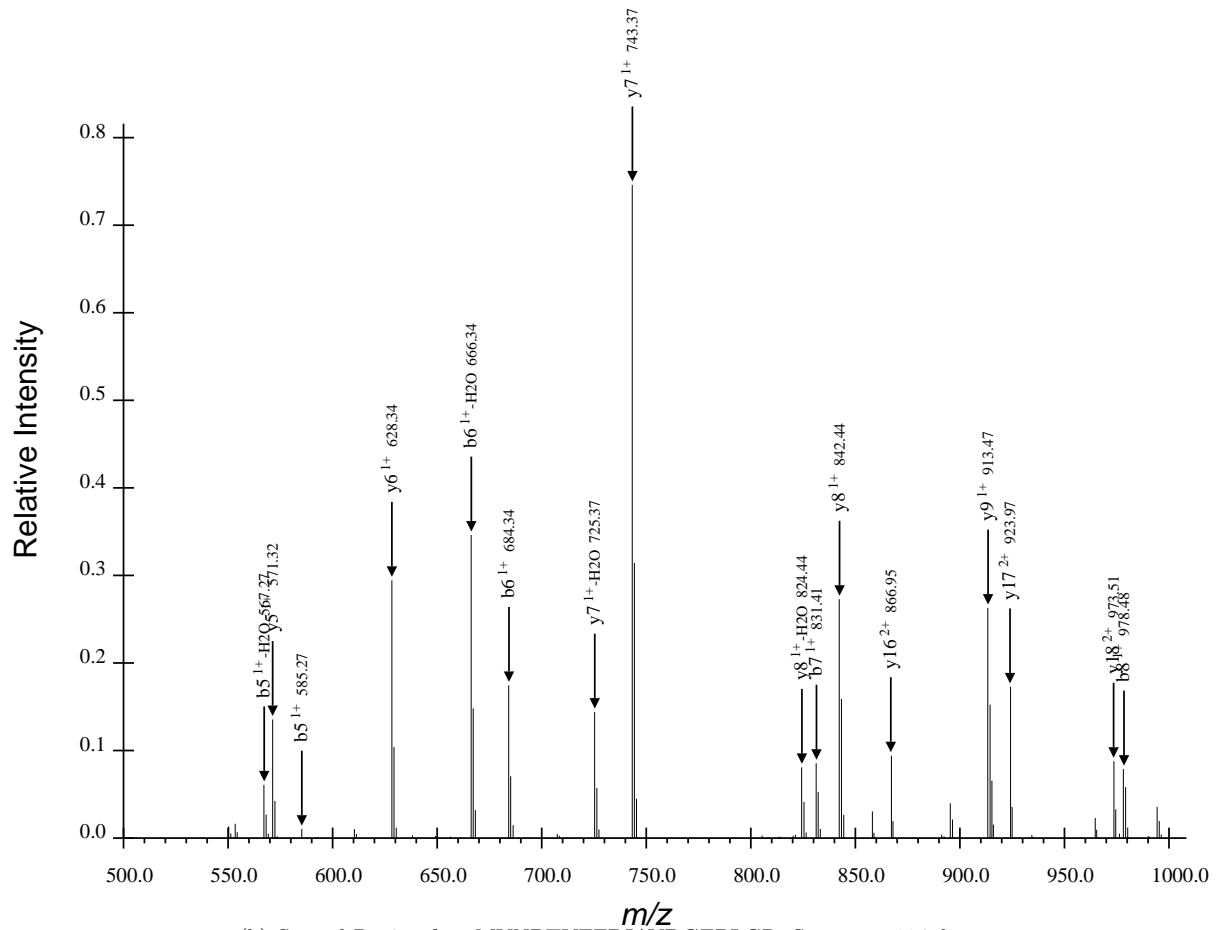

(b) Second Region for aMVNPTVFFDIAVDGEPLGR, Spectrum 194.dta



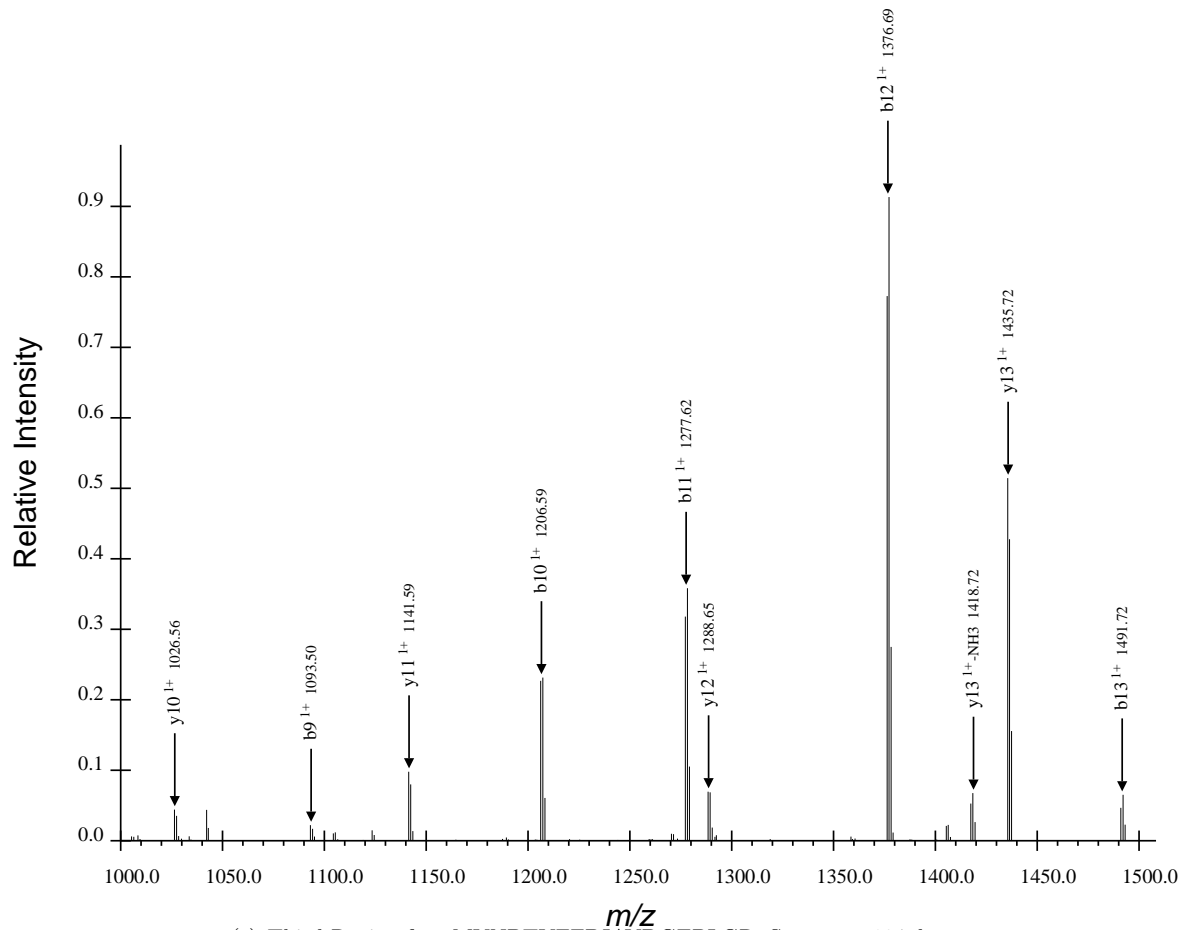

(c) Third Region for aMVNPTVFFDIAVDGEPLGR, Spectrum 194.dta

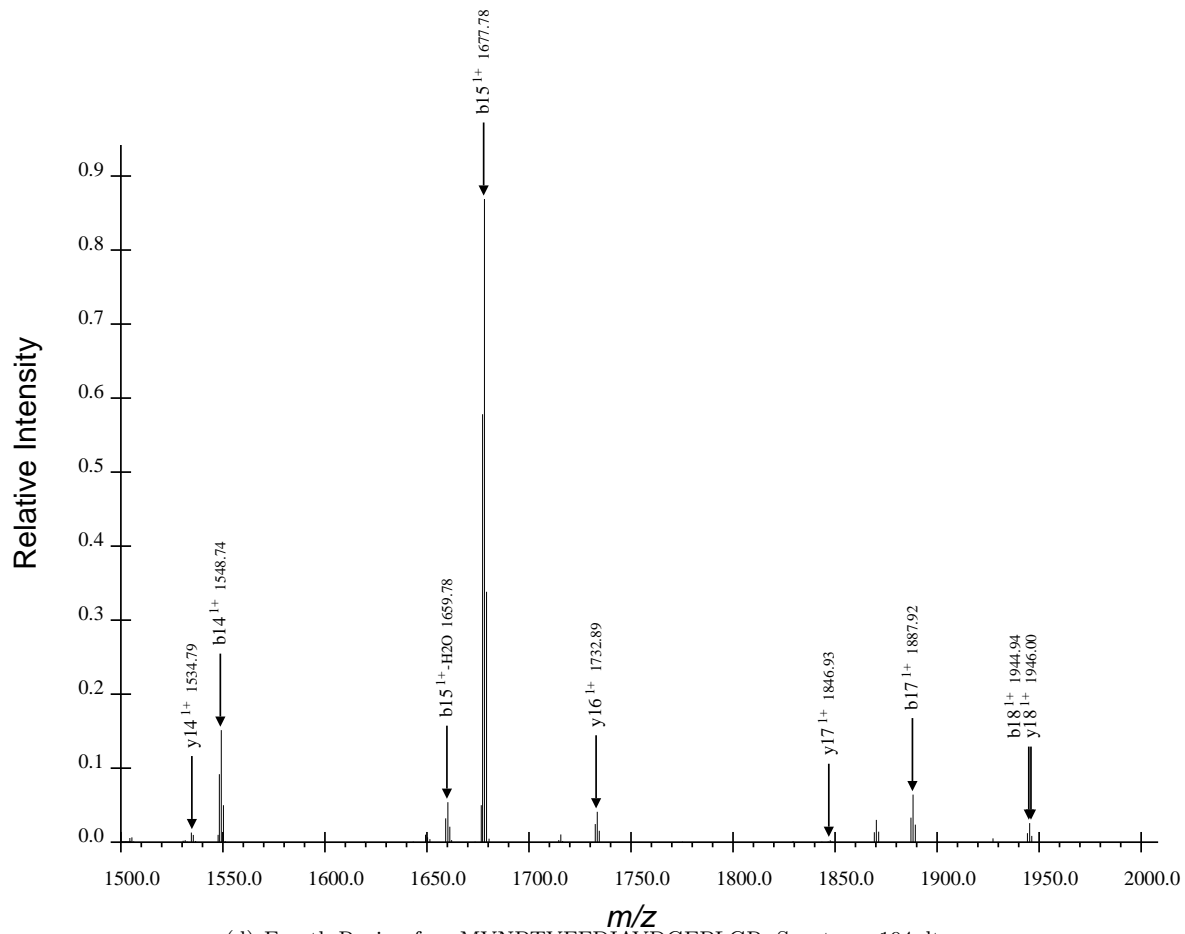

(d) Fourth Region for aMVNPTVFFDIAVDGEPLGR, Spectrum 194.dta

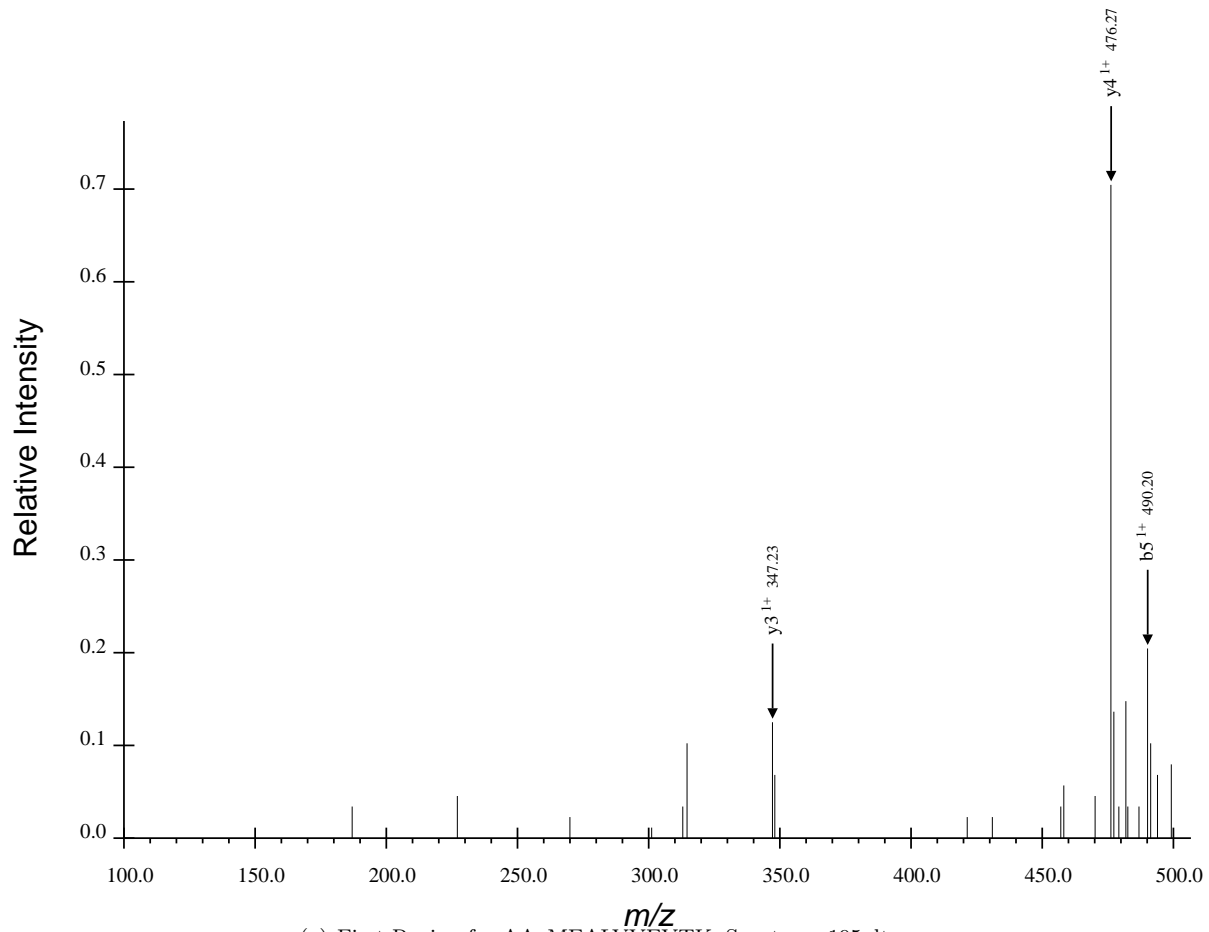

(a) First Region for AAoMEALVVEVTK, Spectrum 195.dta

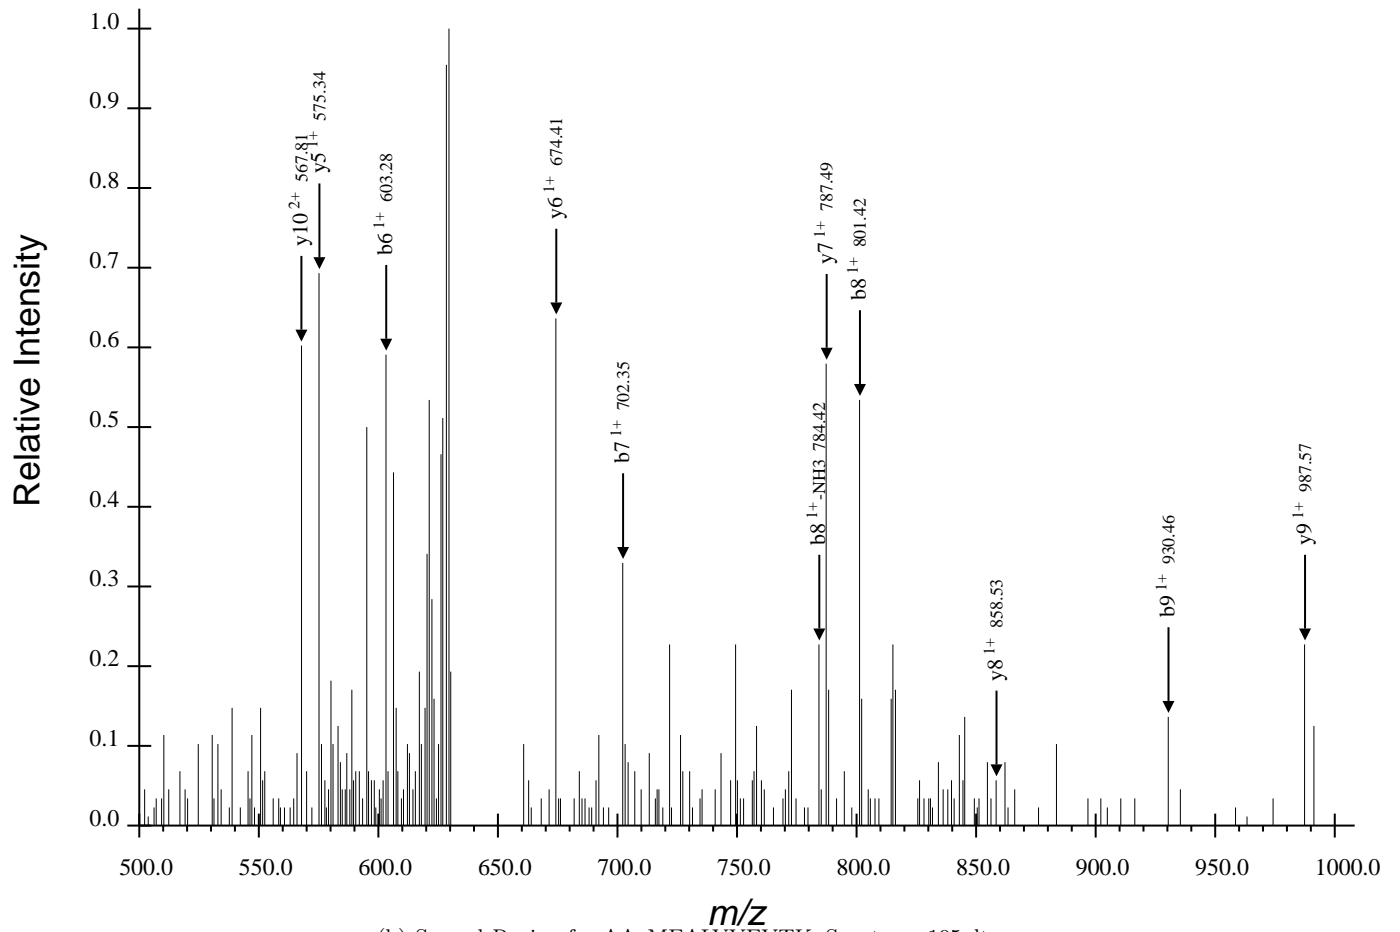

(b) Second Region for AAoMEALVVEVTK, Spectrum 195.dta

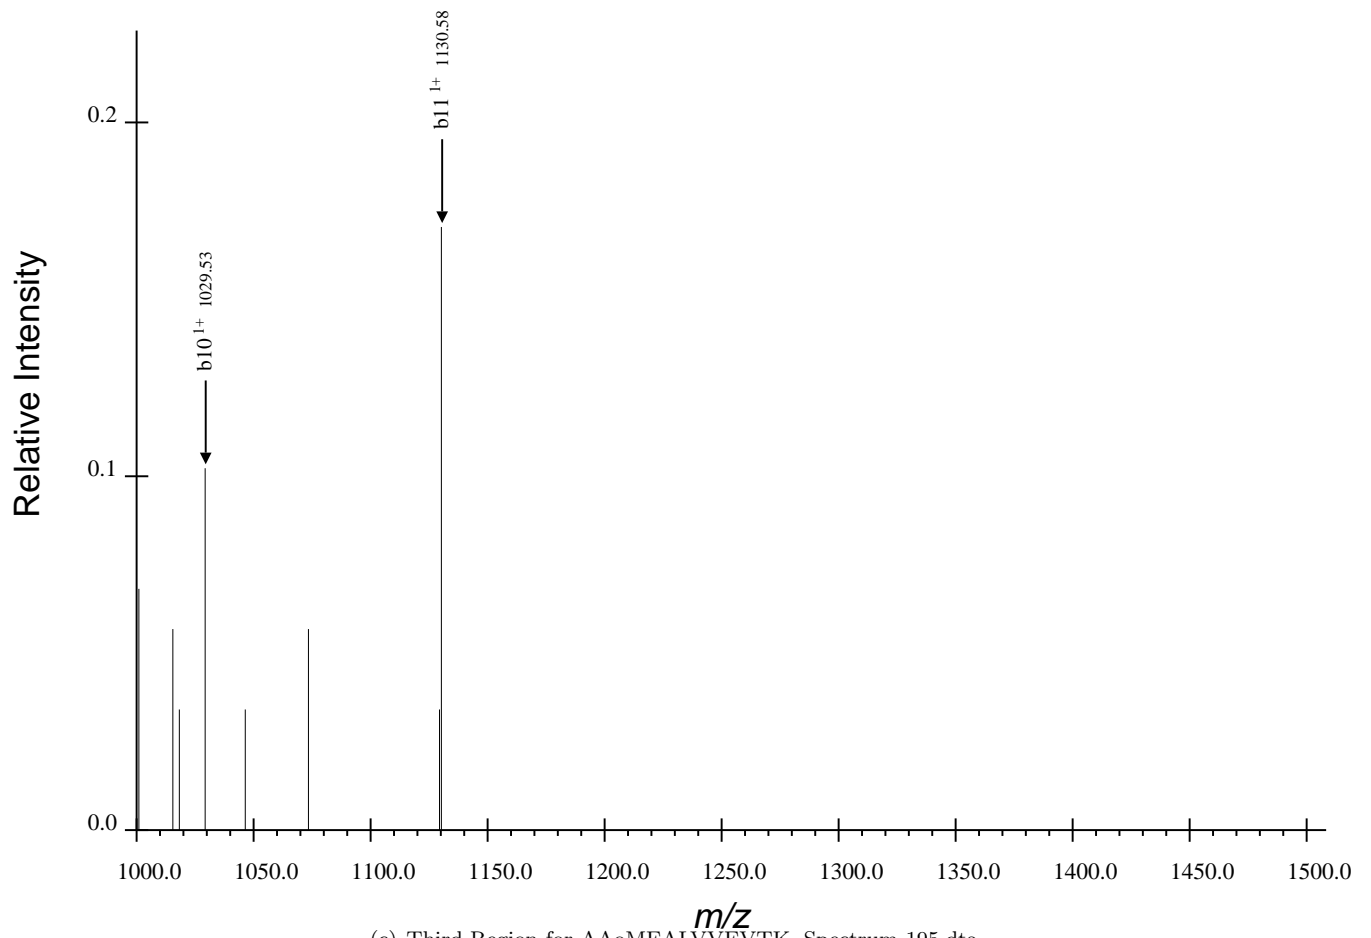

(c) Third Region for AAoMEALVVEVTK, Spectrum 195.dta

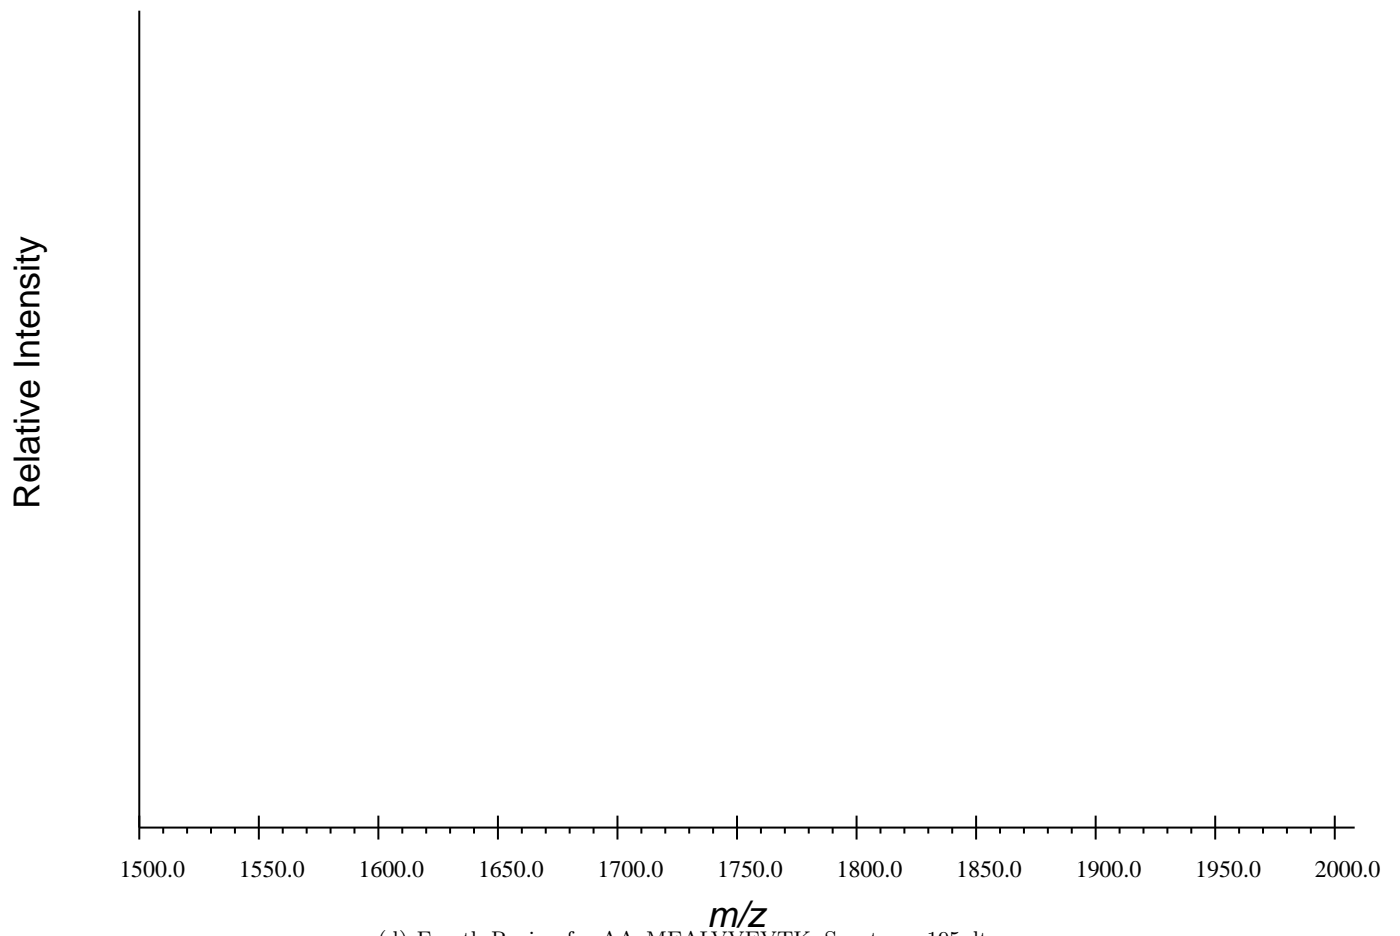

(d) Fourth Region for AAoMEALVVEVTK, Spectrum 195.dta

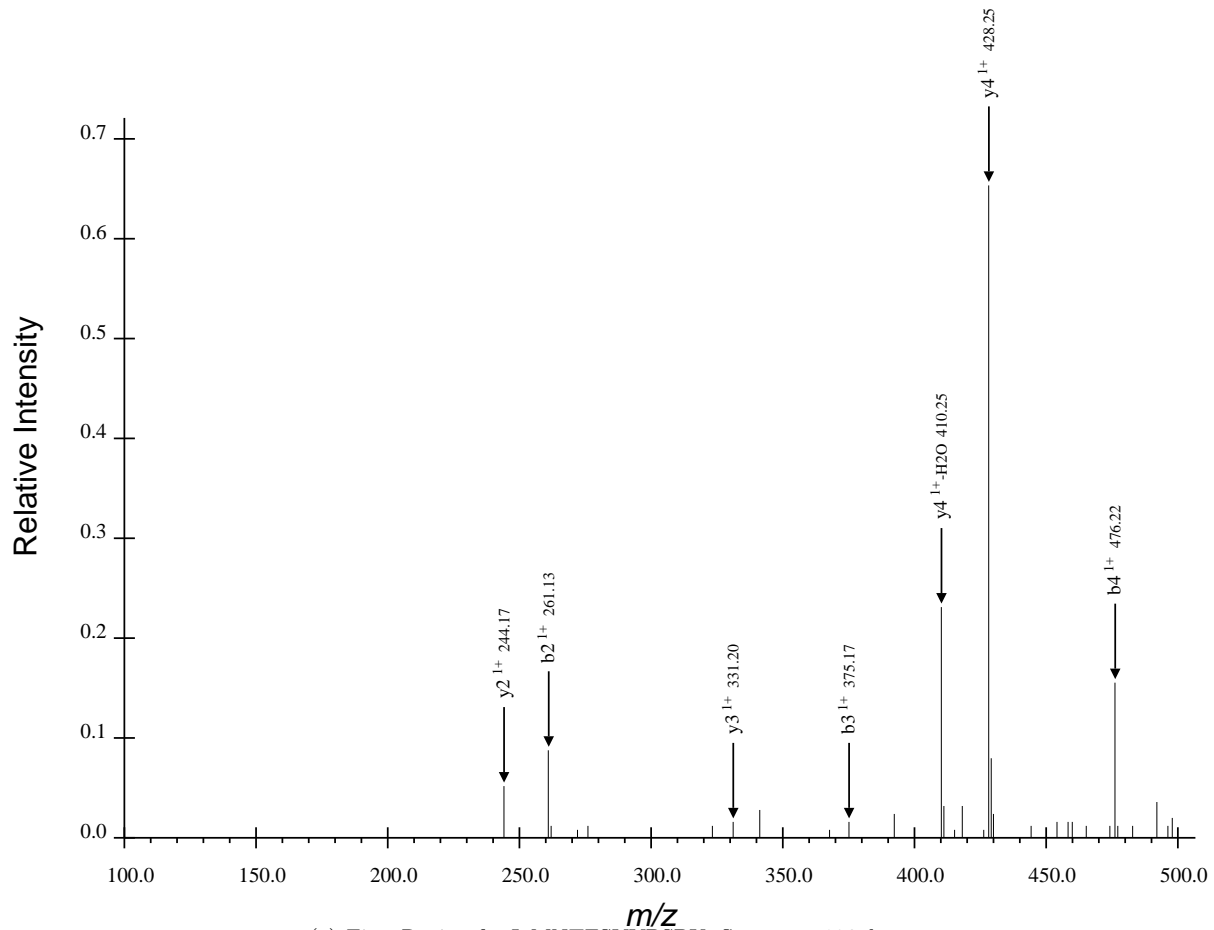

(a) First Region for IoMNTFSVVSPK, Spectrum 196.dta

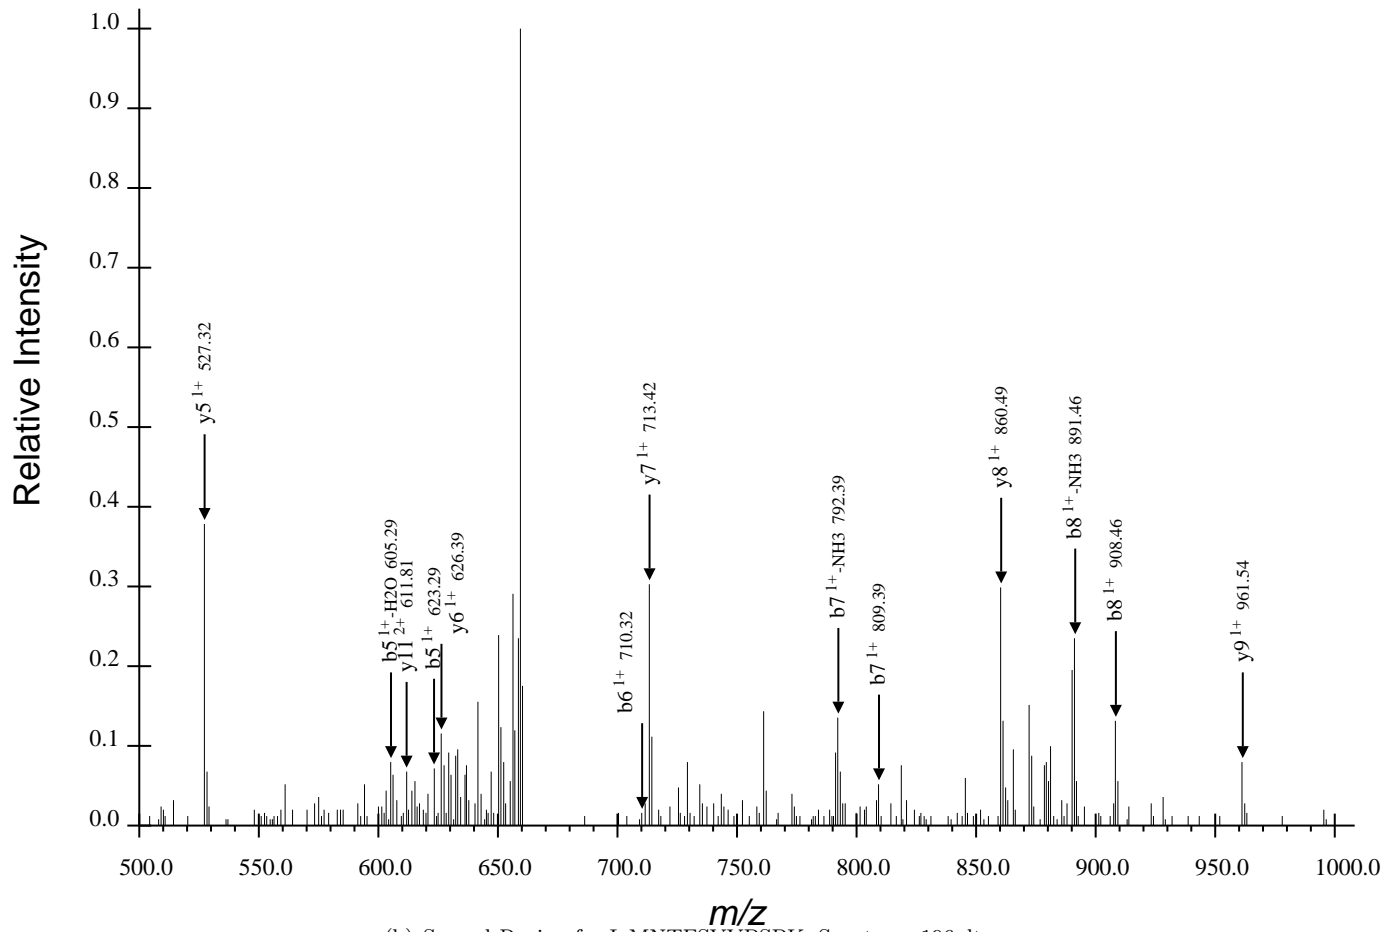

(b) Second Region for IoMNTFSVVSPK, Spectrum 196.dta

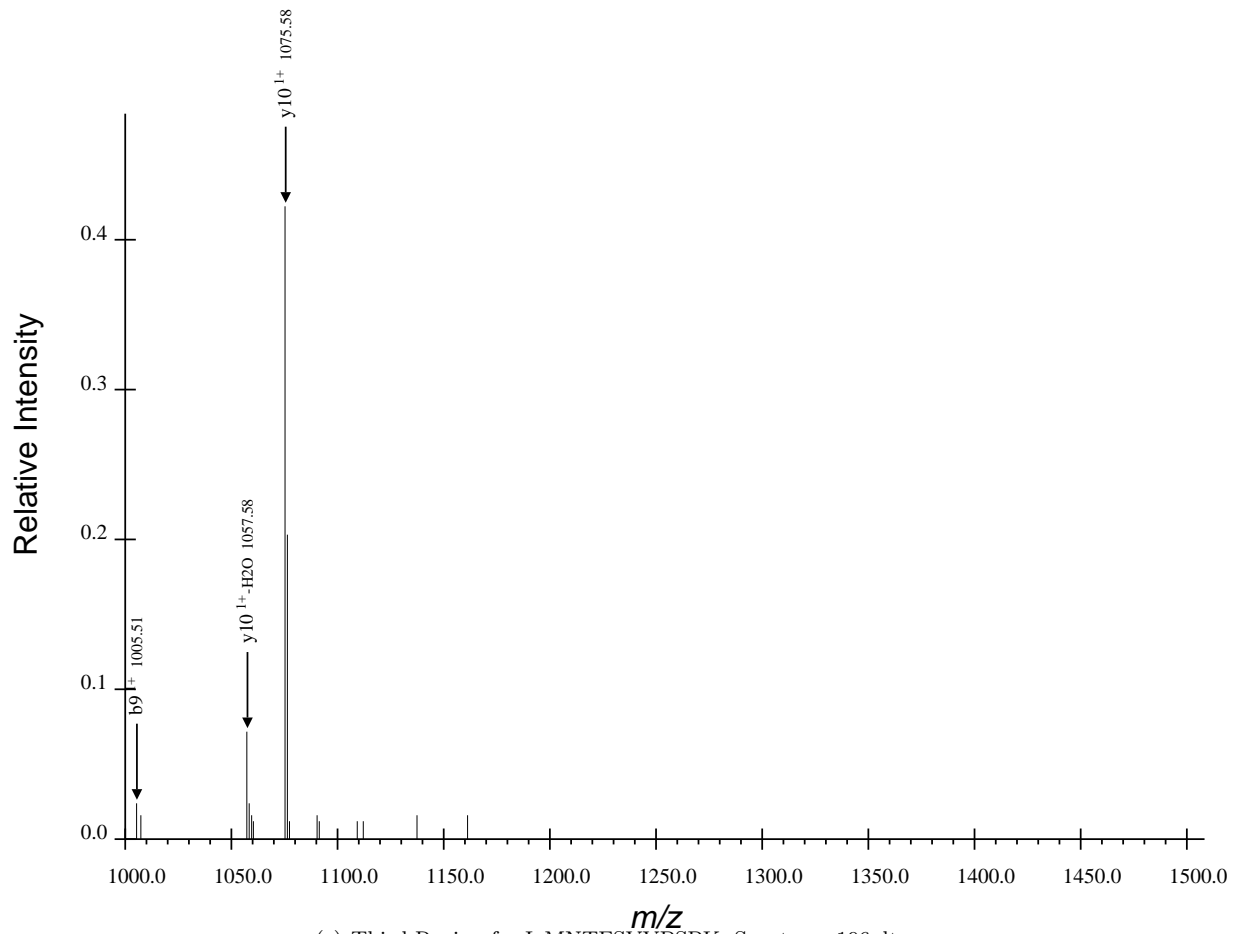

(c) Third Region for IoMNTFSVVPSPK, Spectrum 196.dta

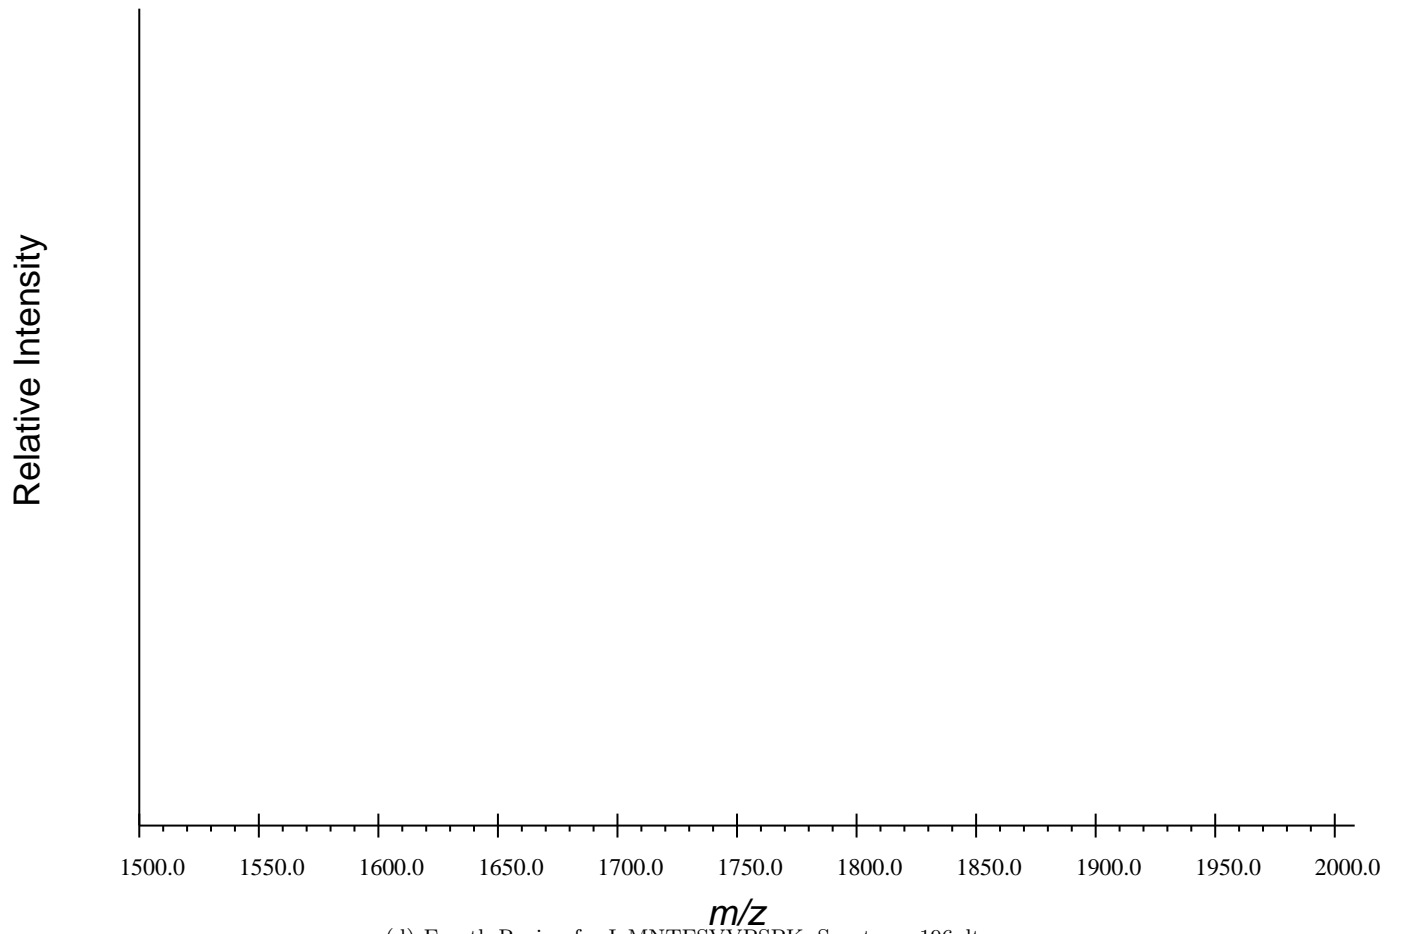

(d) Fourth Region for IoMNTFSVVPSPK, Spectrum 196.dta

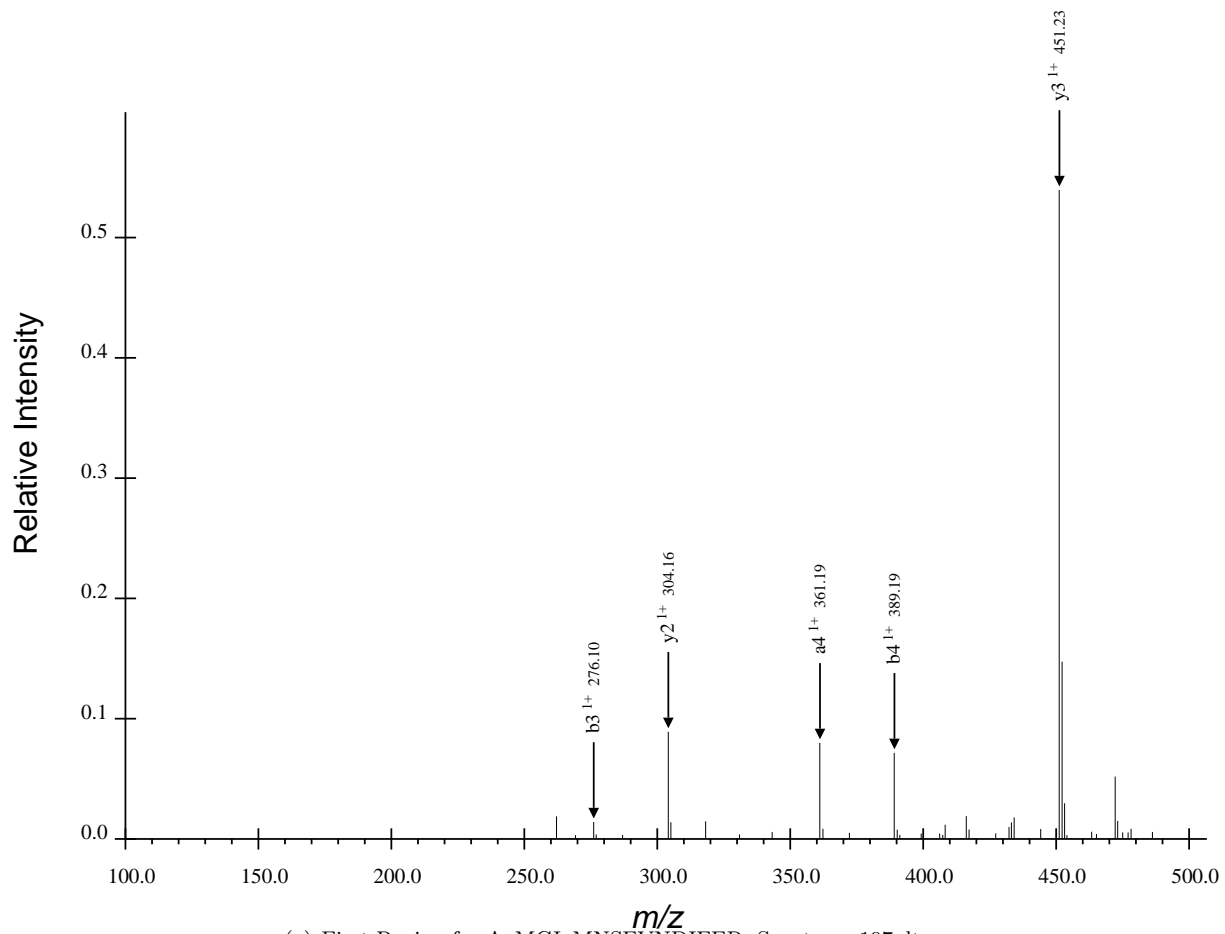

(a) First Region for AoMGIoMNSFVNDIFER, Spectrum 197.dta

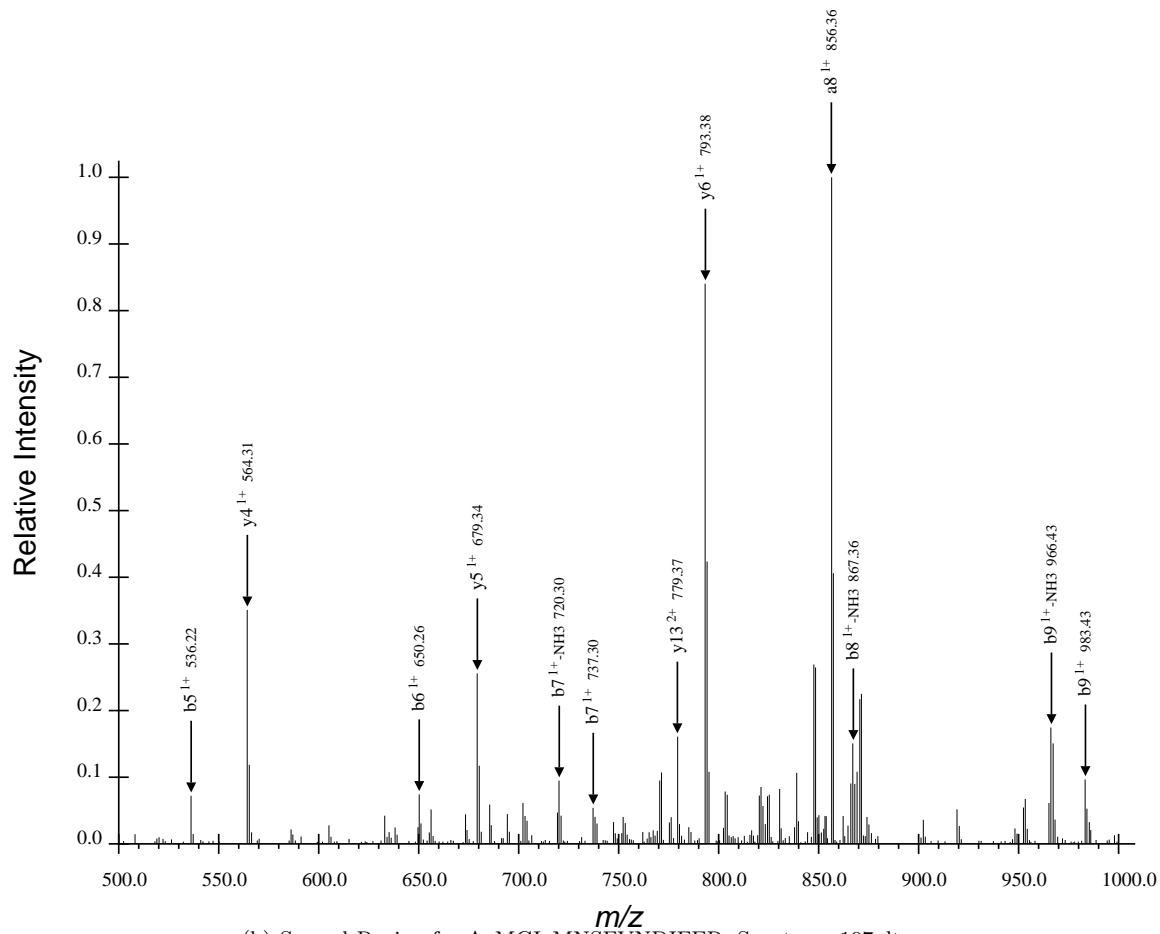

(b) Second Region for AoMGIoMNSFVNDIFER, Spectrum 197.dta

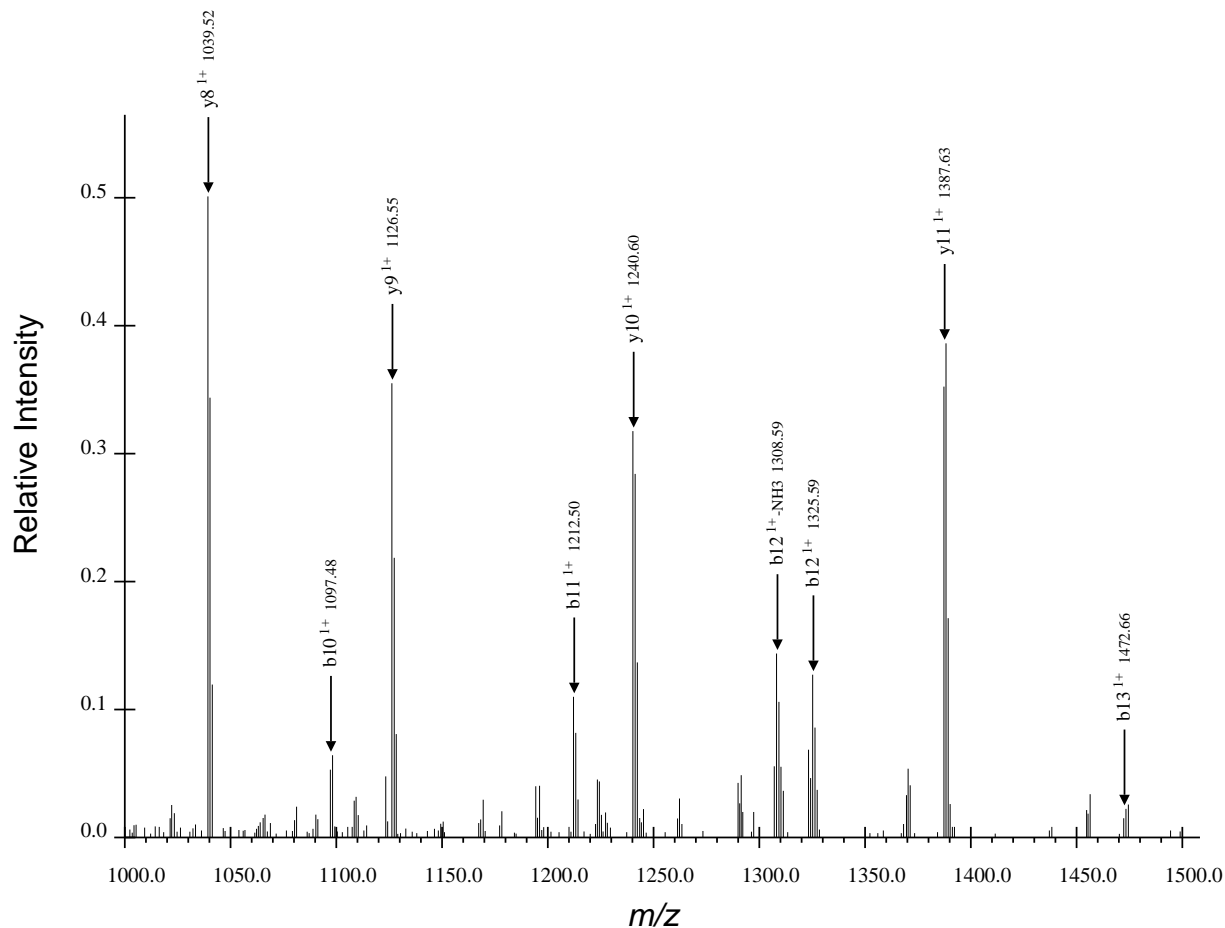

(c) Third Region for AoMGIoMNSFVNDIFER, Spectrum 197.dta

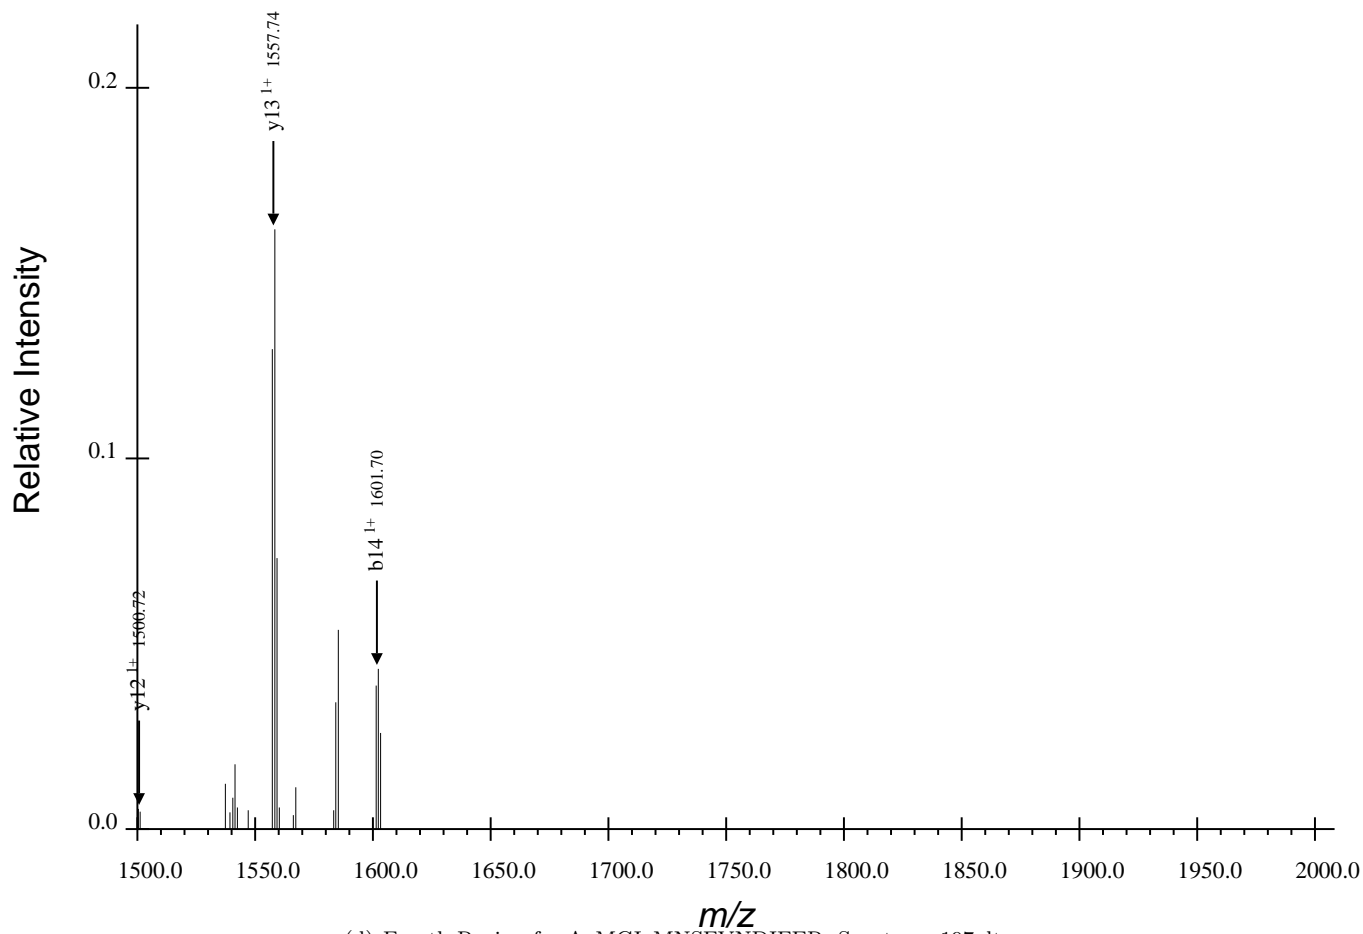

(d) Fourth Region for AoMGIoMNSFVNDIFER, Spectrum 197.dta

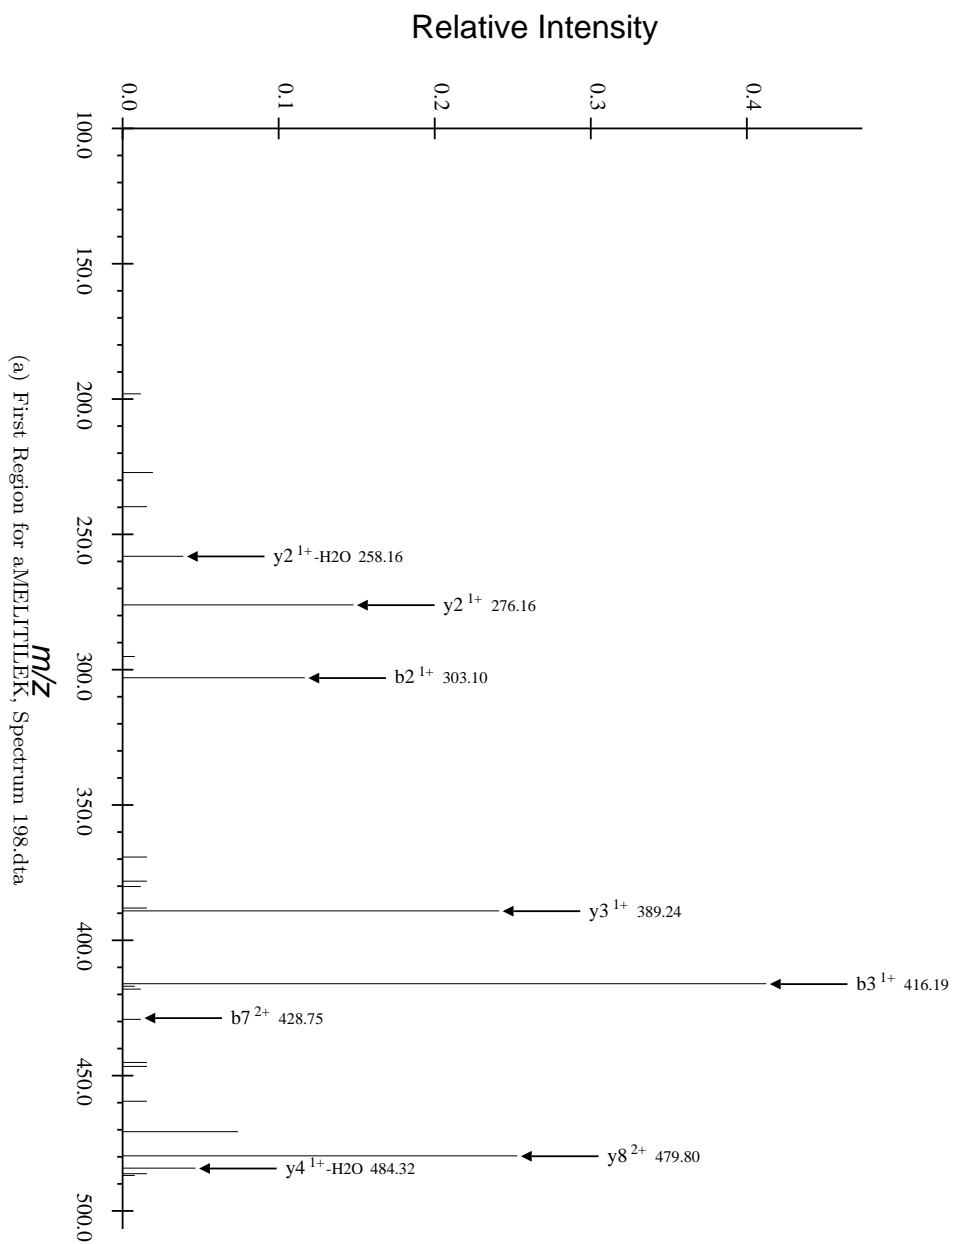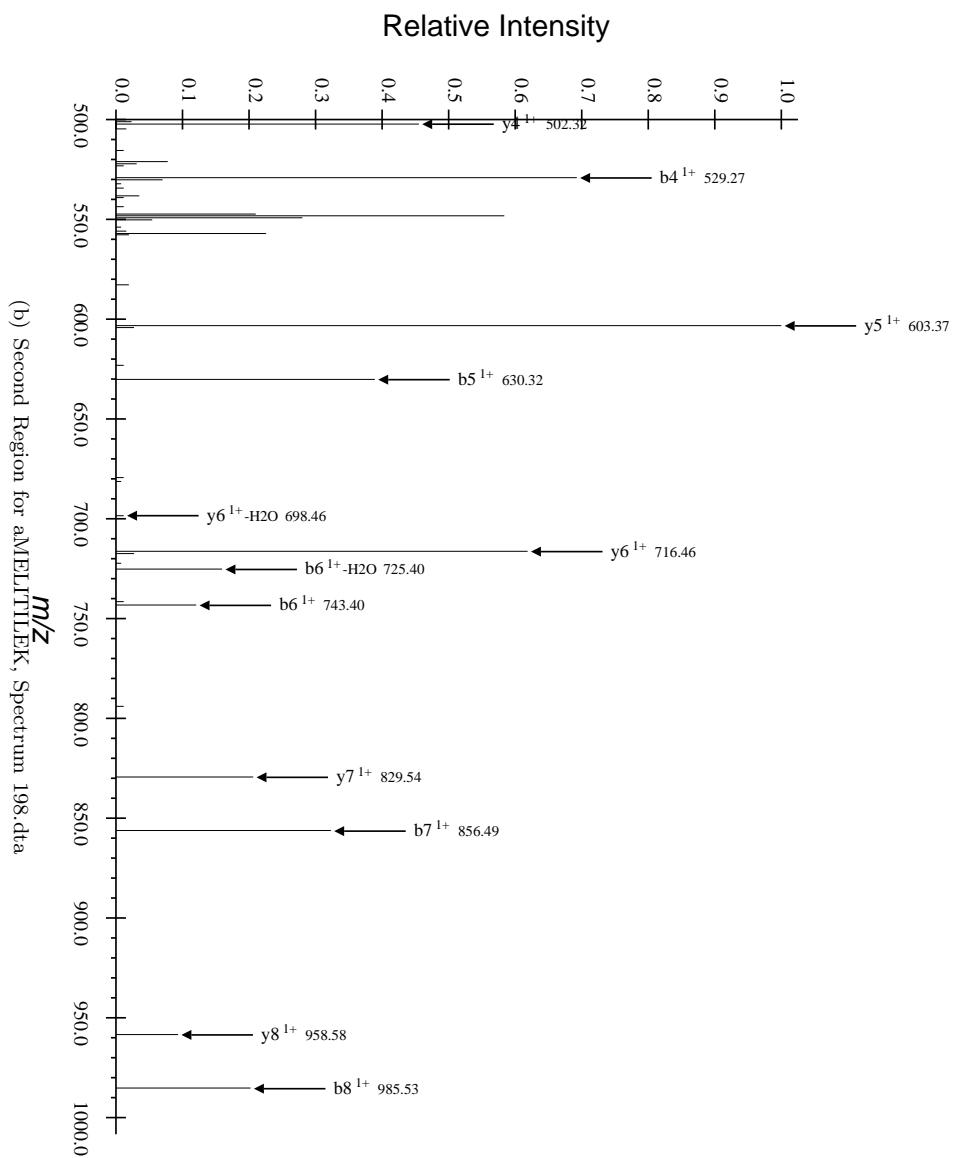



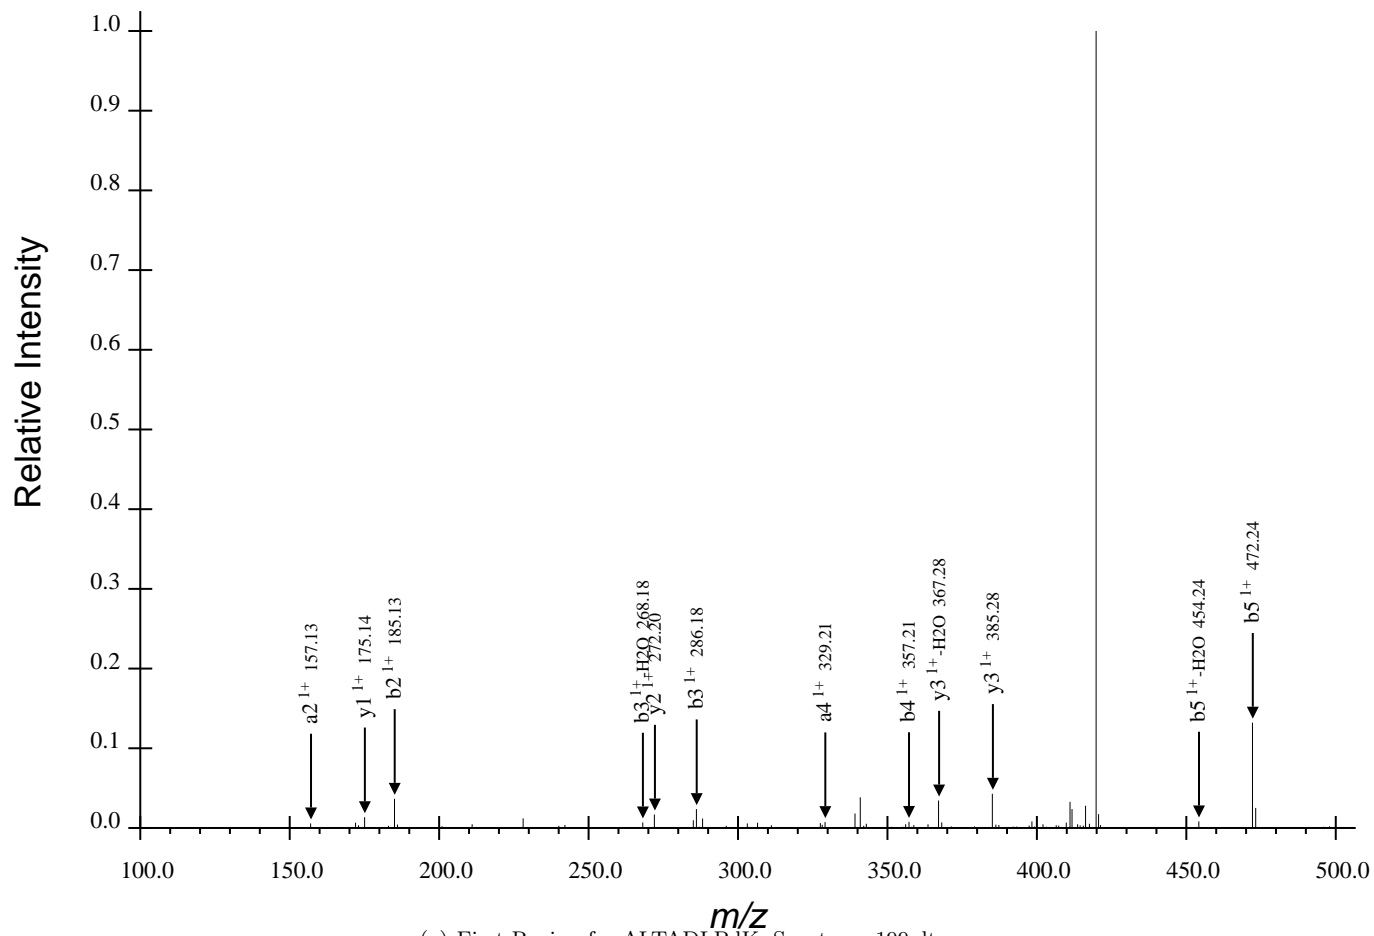

(a) First Region for ALTADLPdK, Spectrum 199.dta

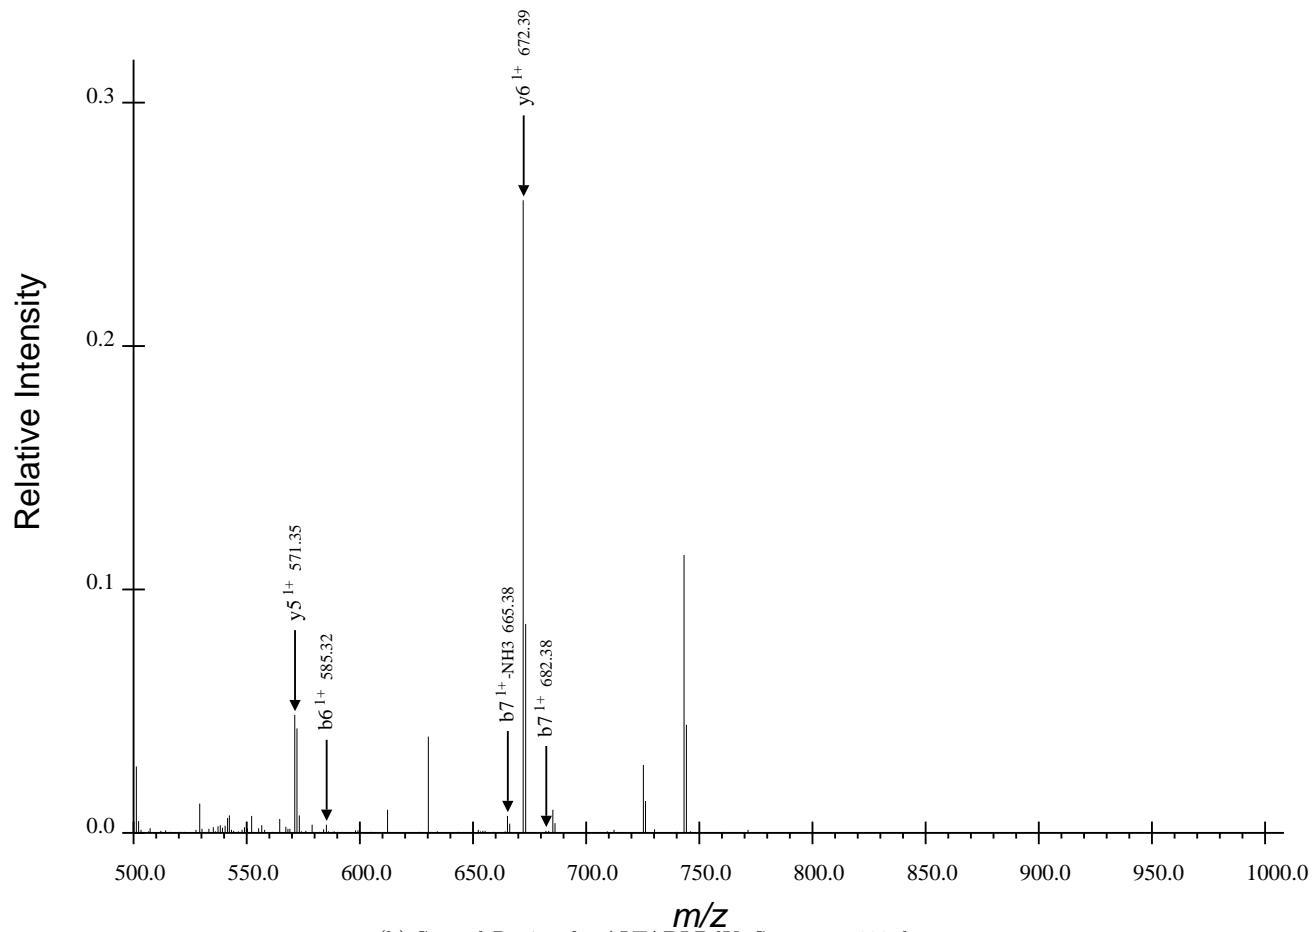

(b) Second Region for ALTADLPdK, Spectrum 199.dta

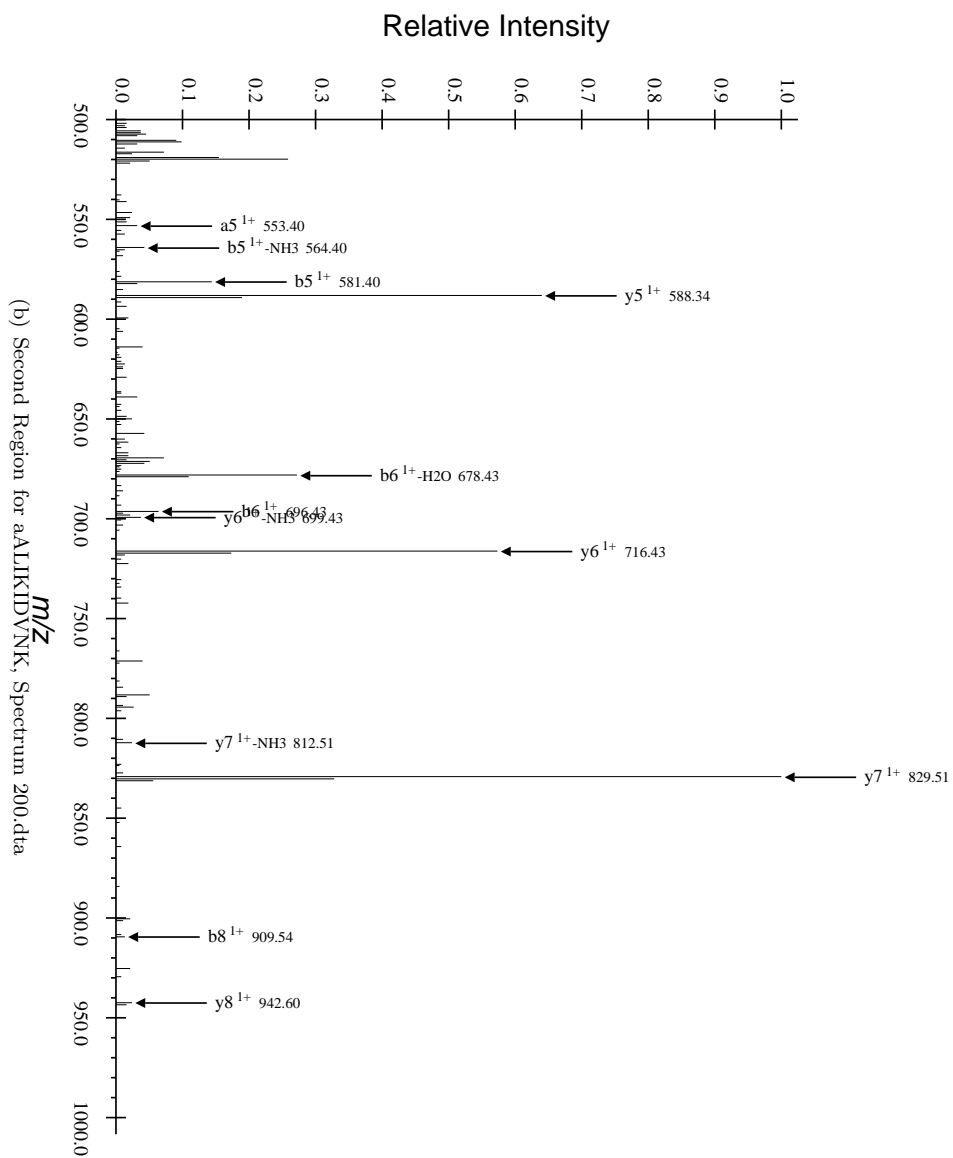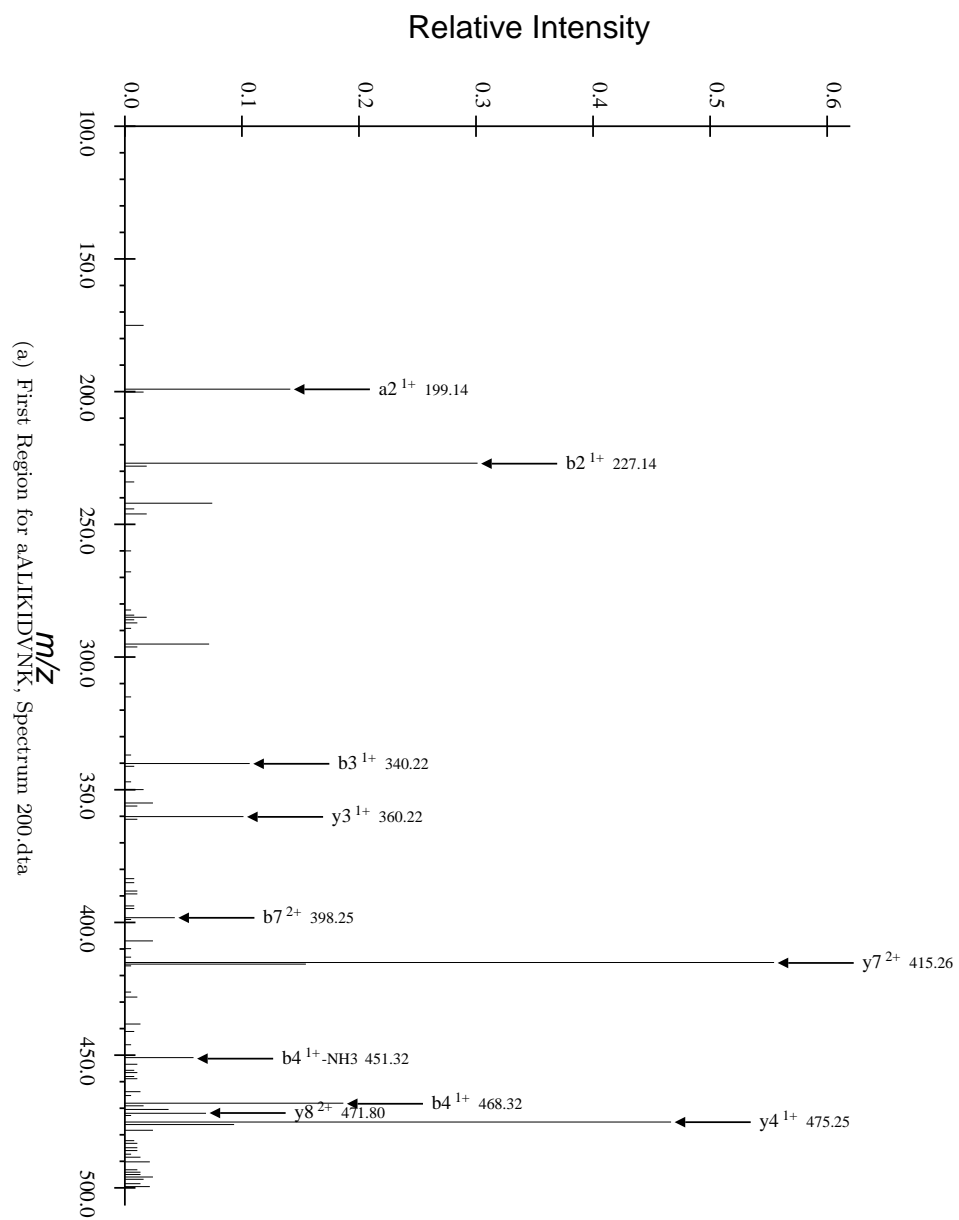

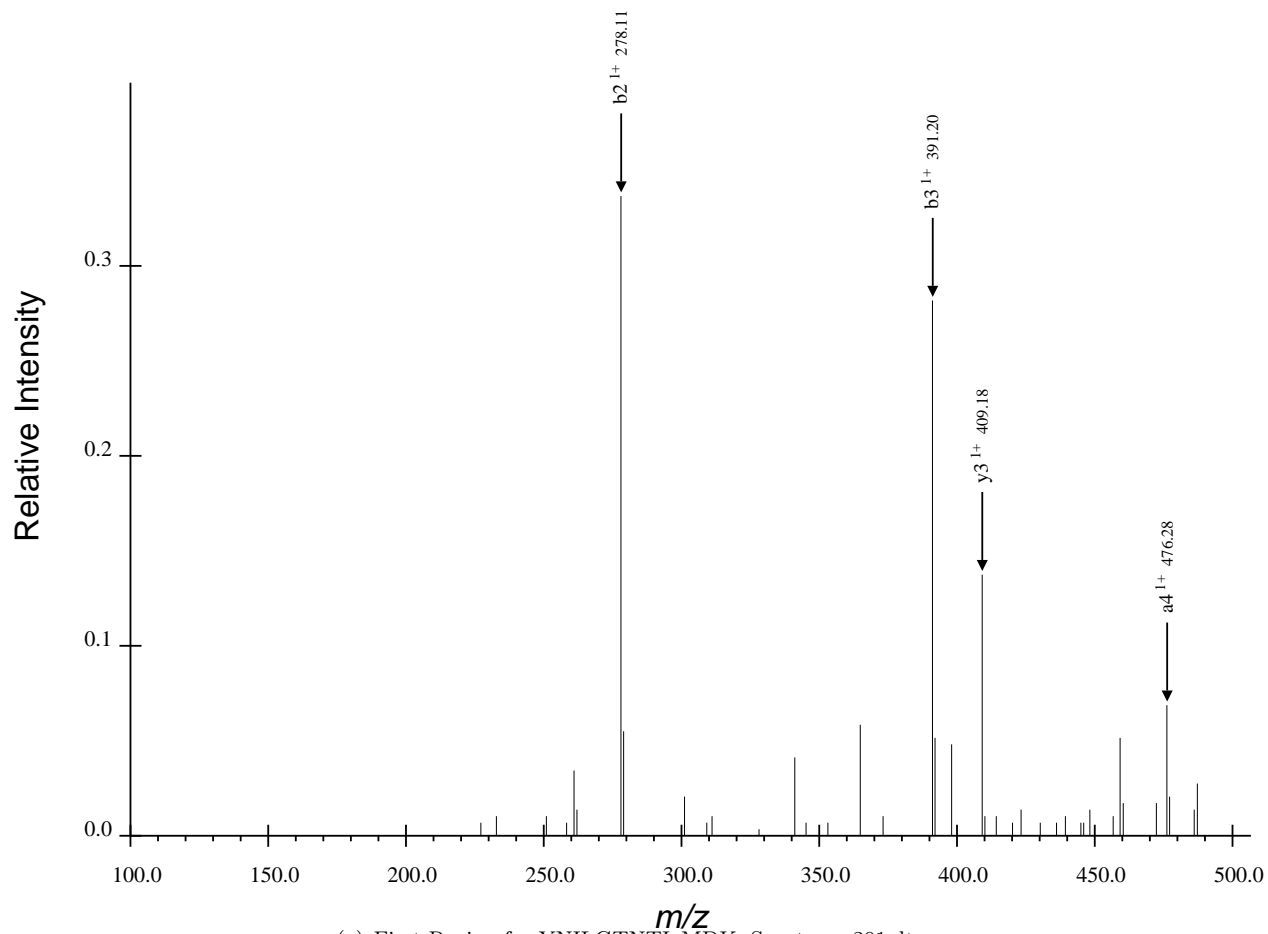

(a) First Region for YNILGTNTIoMDK, Spectrum 201.dta

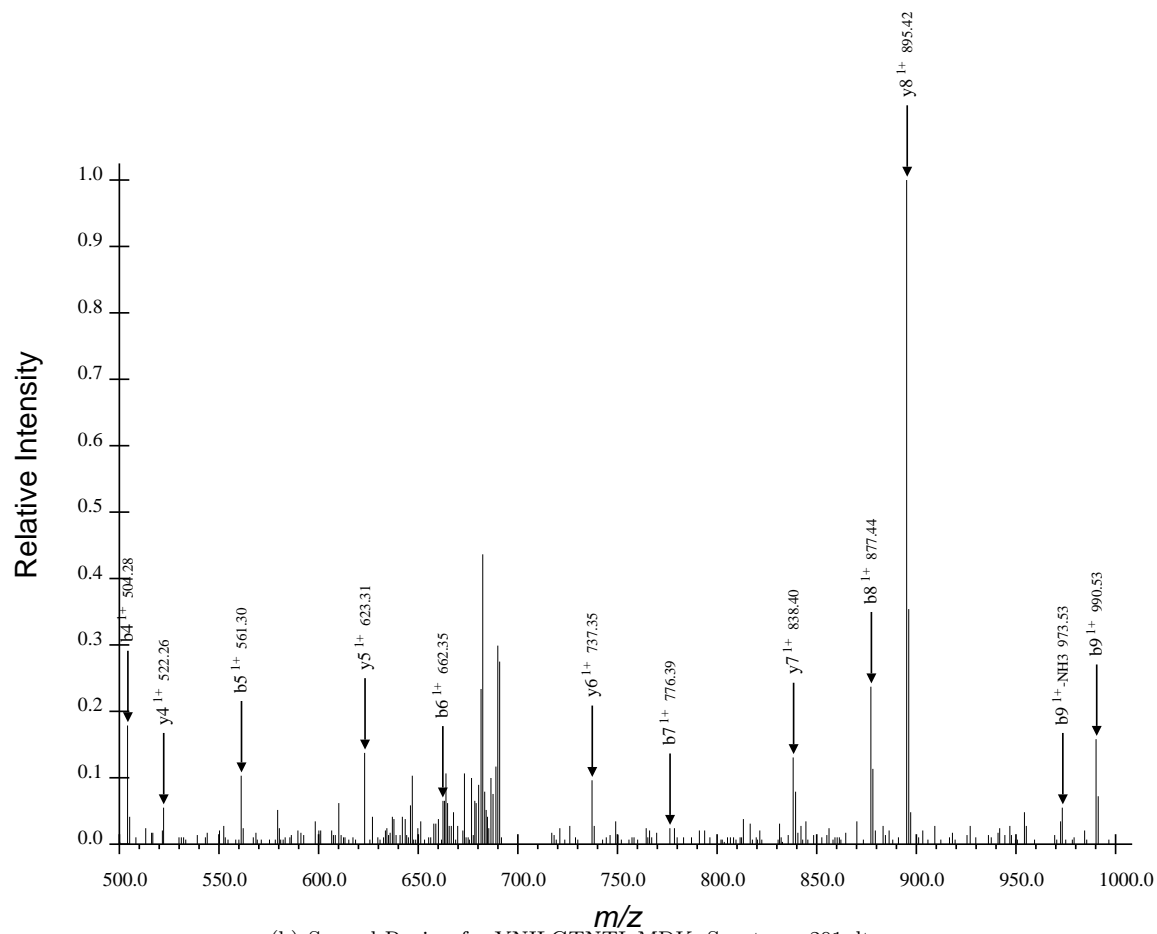

(b) Second Region for YNILGTNTIoMDK, Spectrum 201.dta

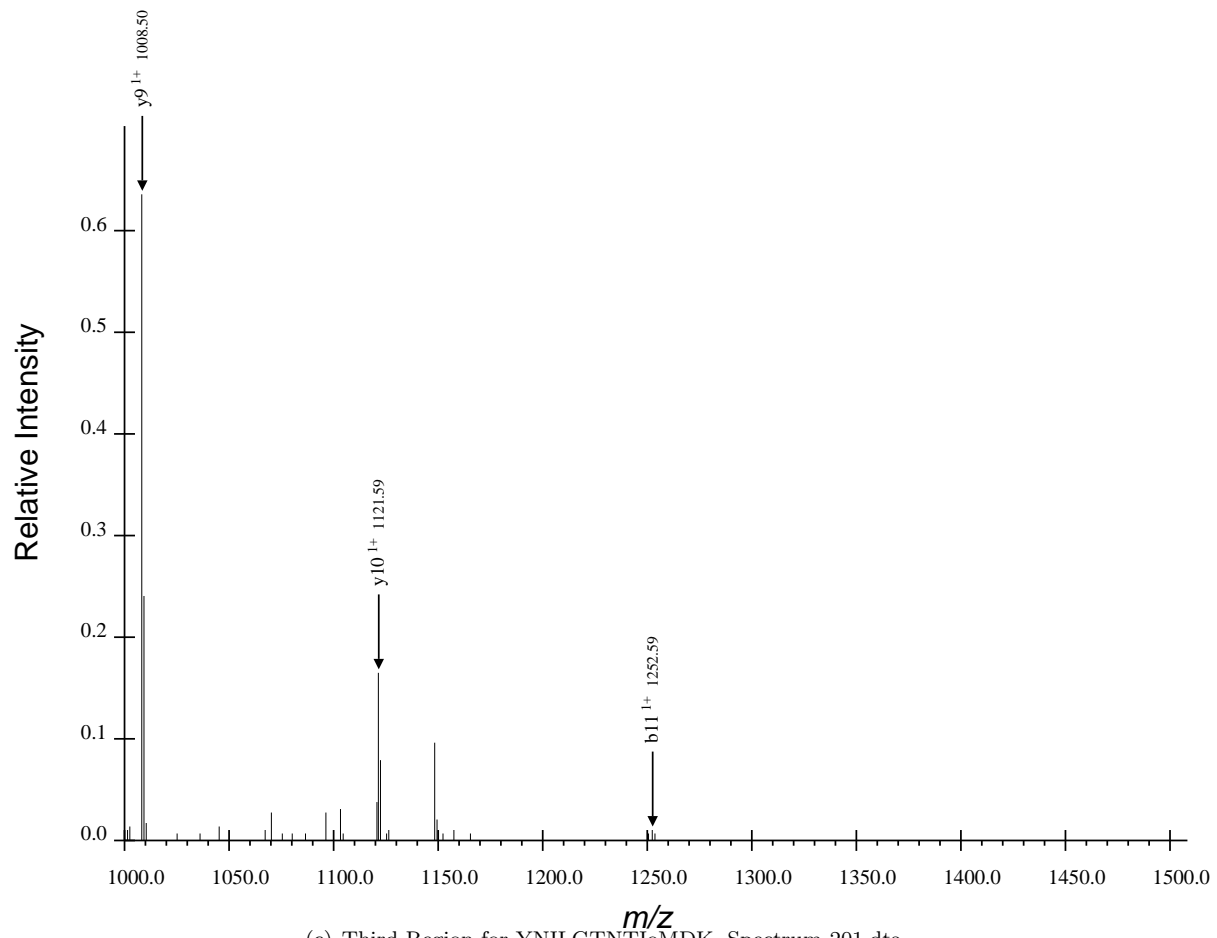

(c) Third Region for YNILGTNTIoMDK, Spectrum 201.dta

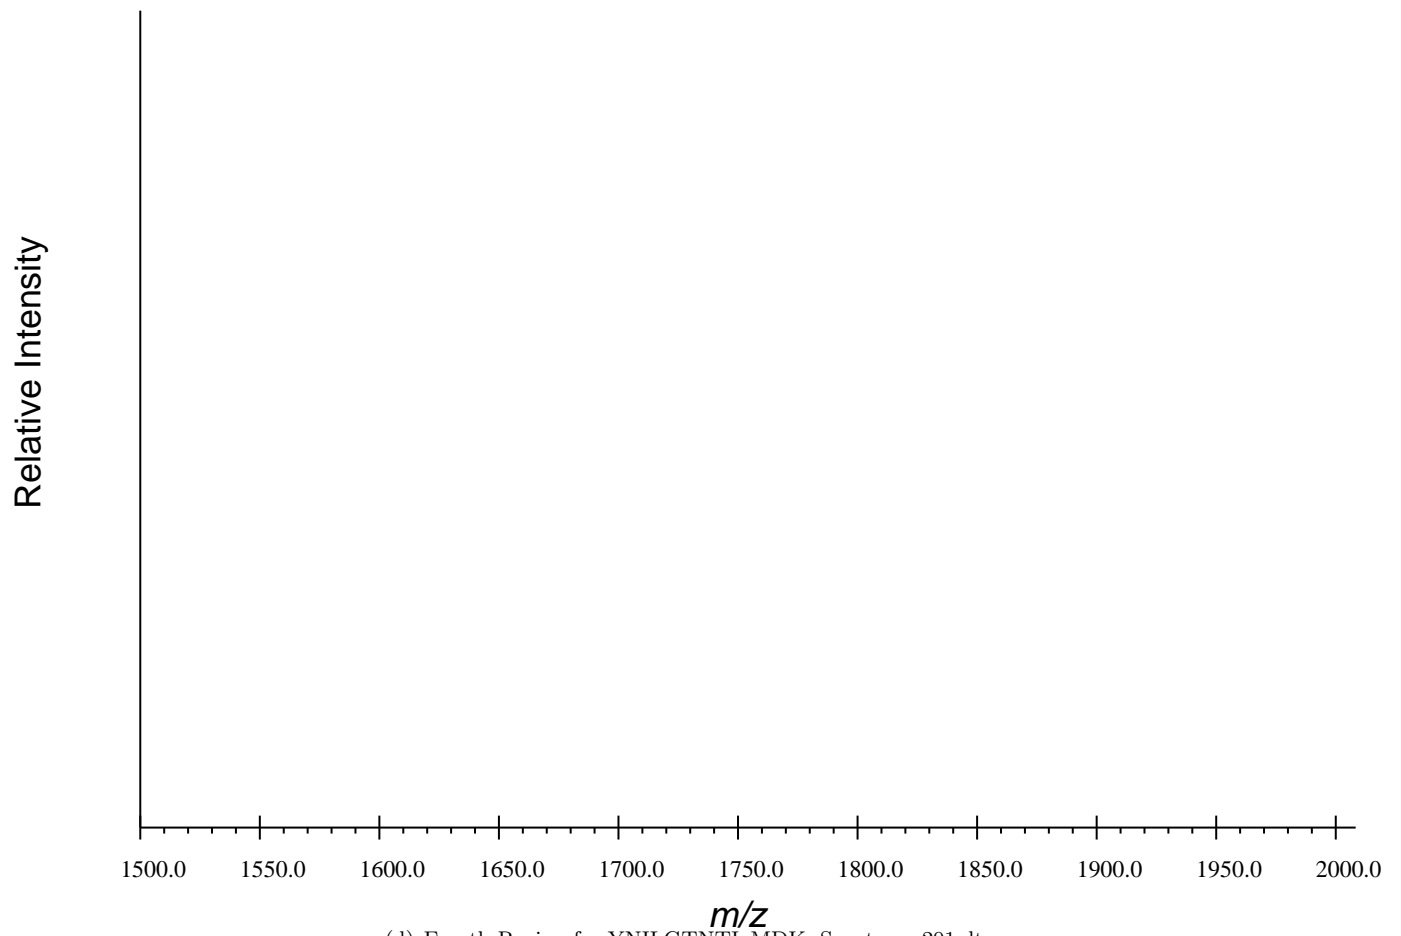

(d) Fourth Region for YNILGTNTIoMDK, Spectrum 201.dta

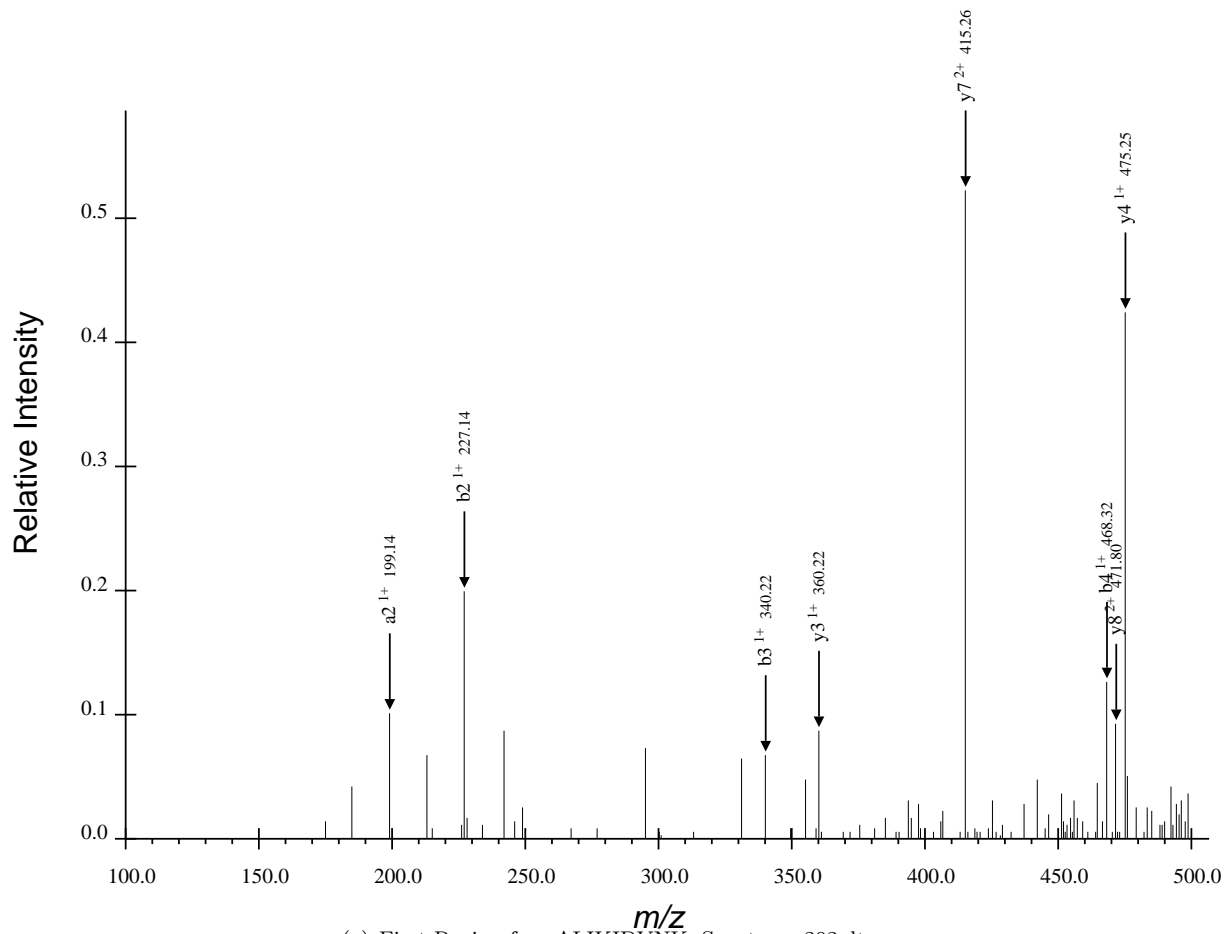

(a) First Region for aALIKIDV NK, Spectrum 202.dta

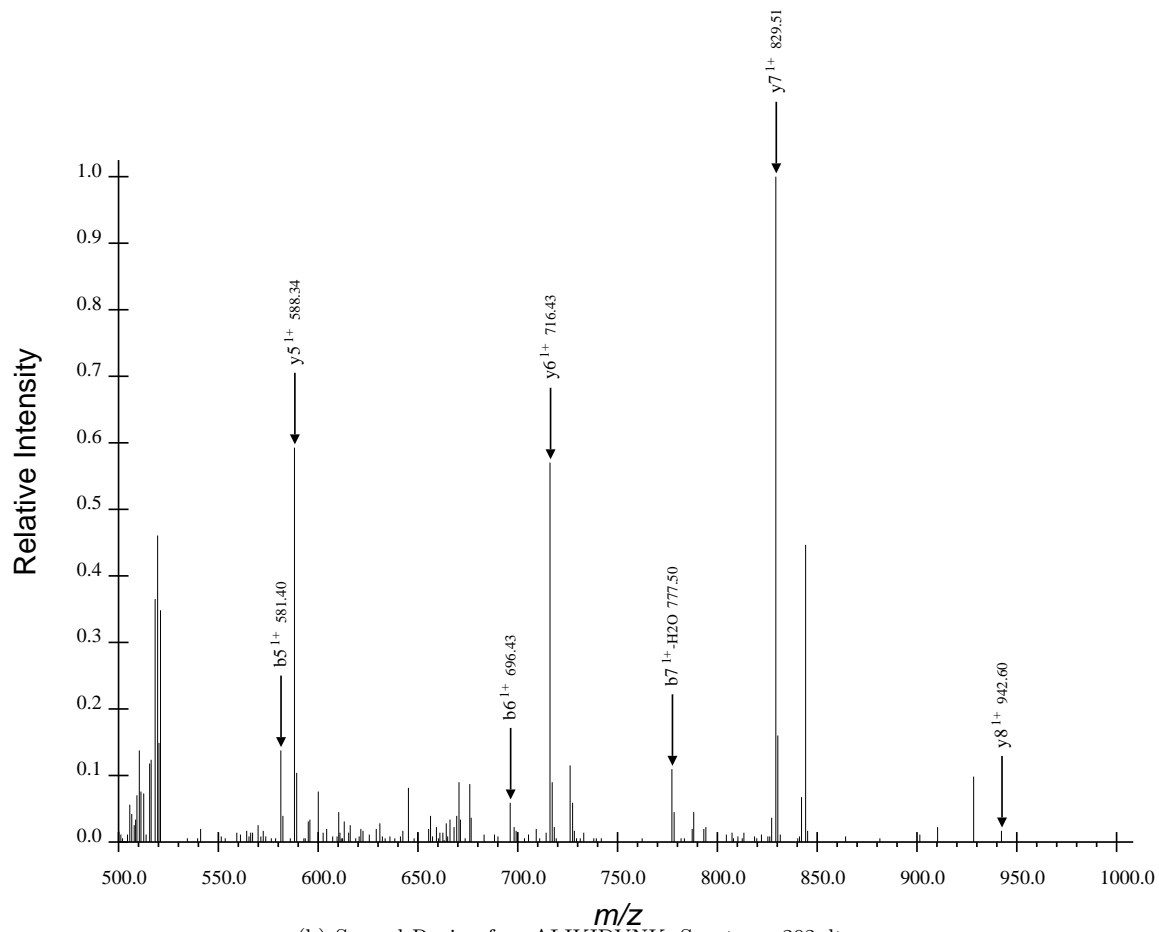

(b) Second Region for aALIKIDV NK, Spectrum 202.dta

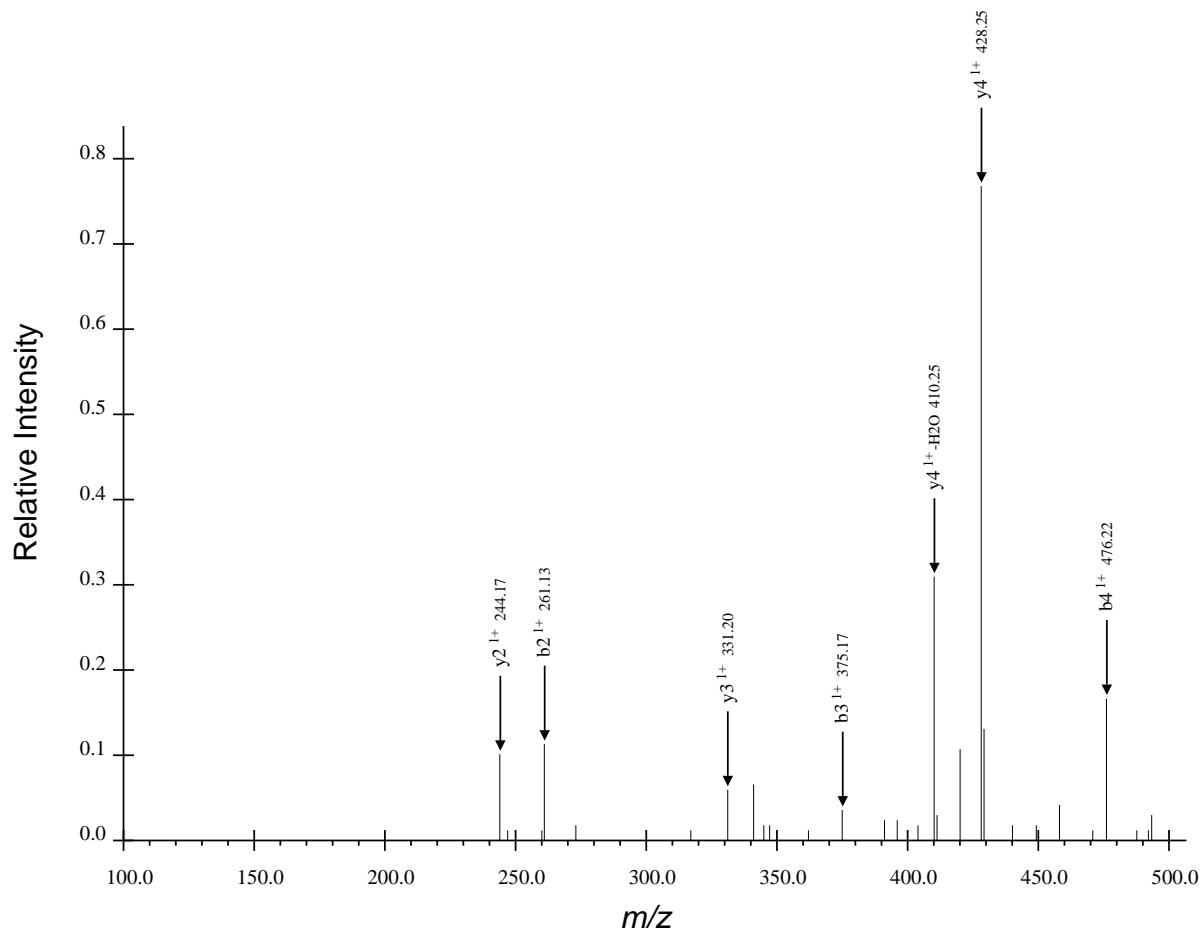

(a) First Region for IoMNTFSVVPSPK, Spectrum 203.dta

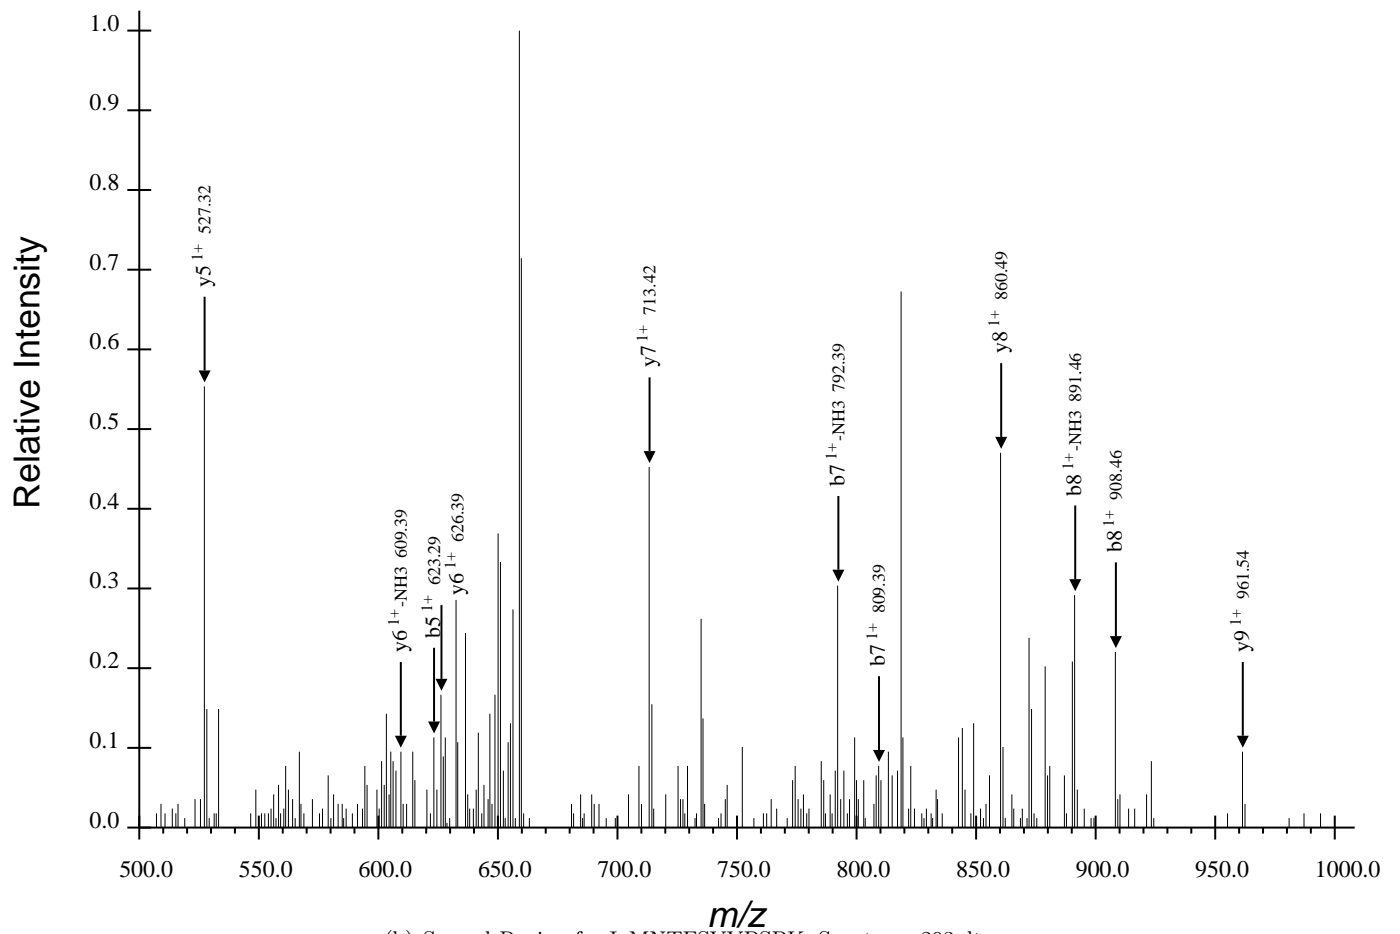

(b) Second Region for IoMNTFSVVPSPK, Spectrum 203.dta

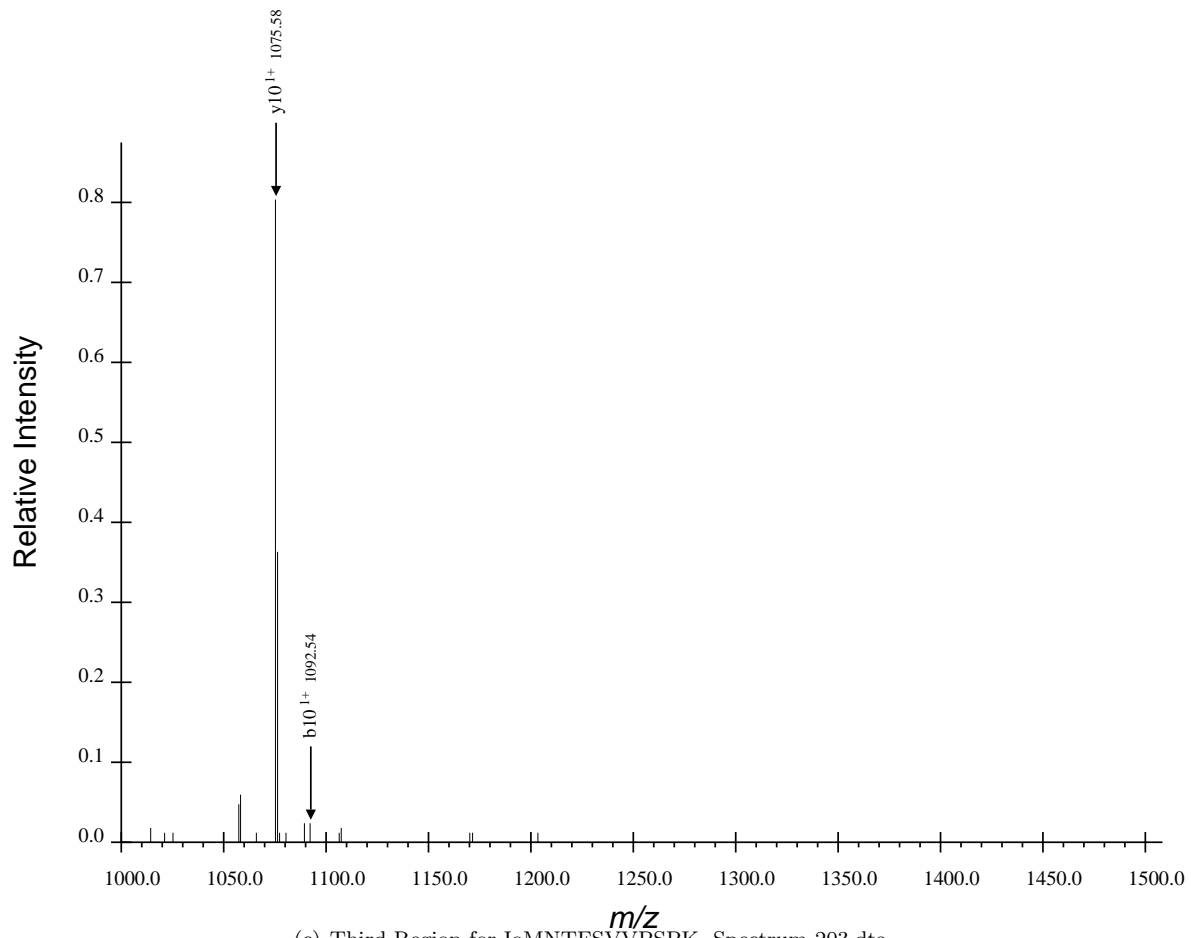

(c) Third Region for IoMNTFSVVVPSPK, Spectrum 203.dta

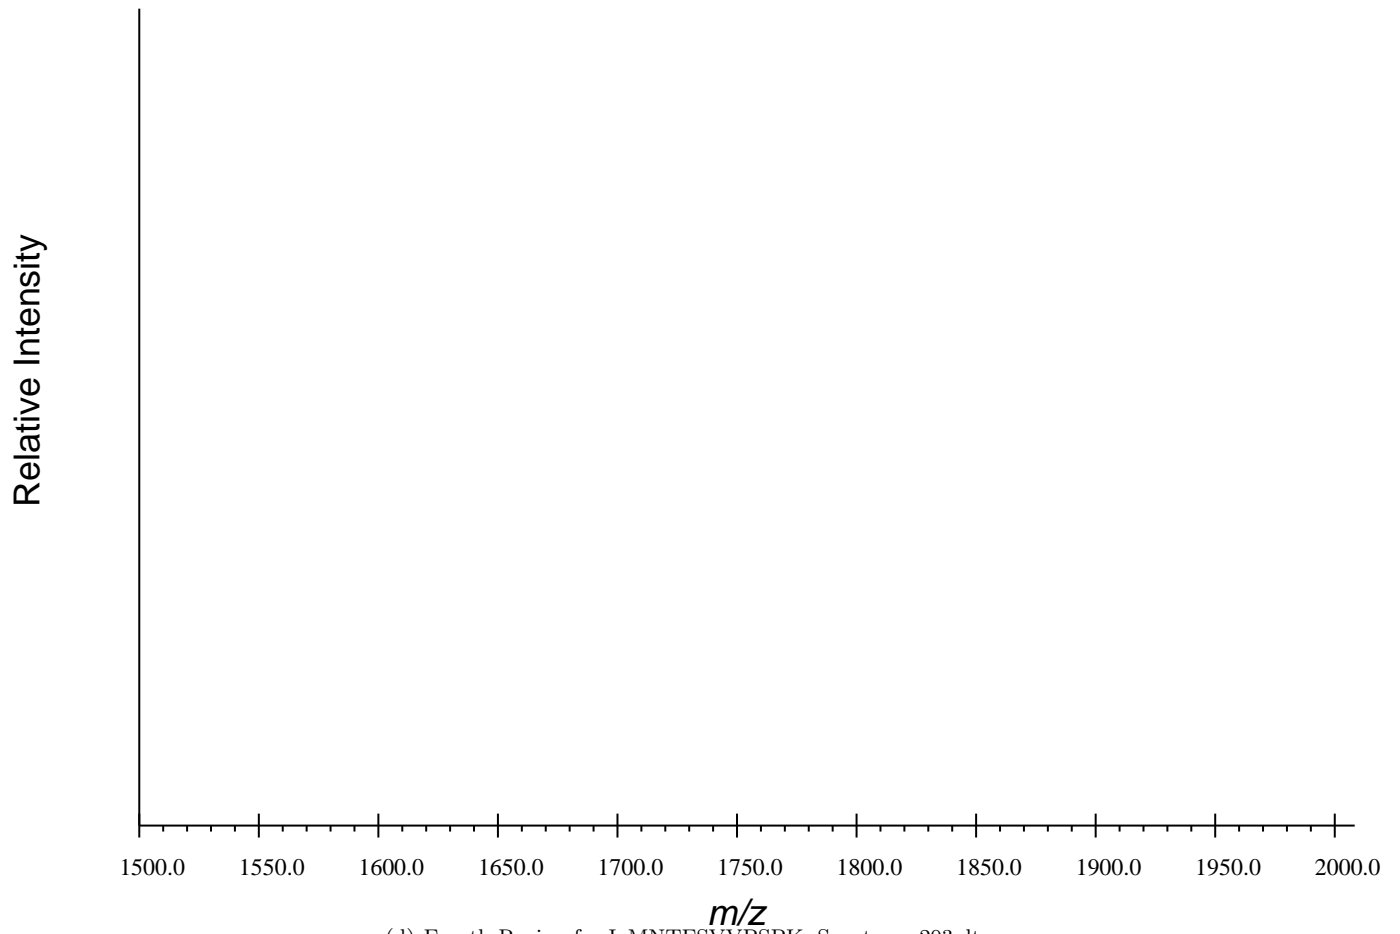

(d) Fourth Region for IoMNTFSVVVPSPK, Spectrum 203.dta

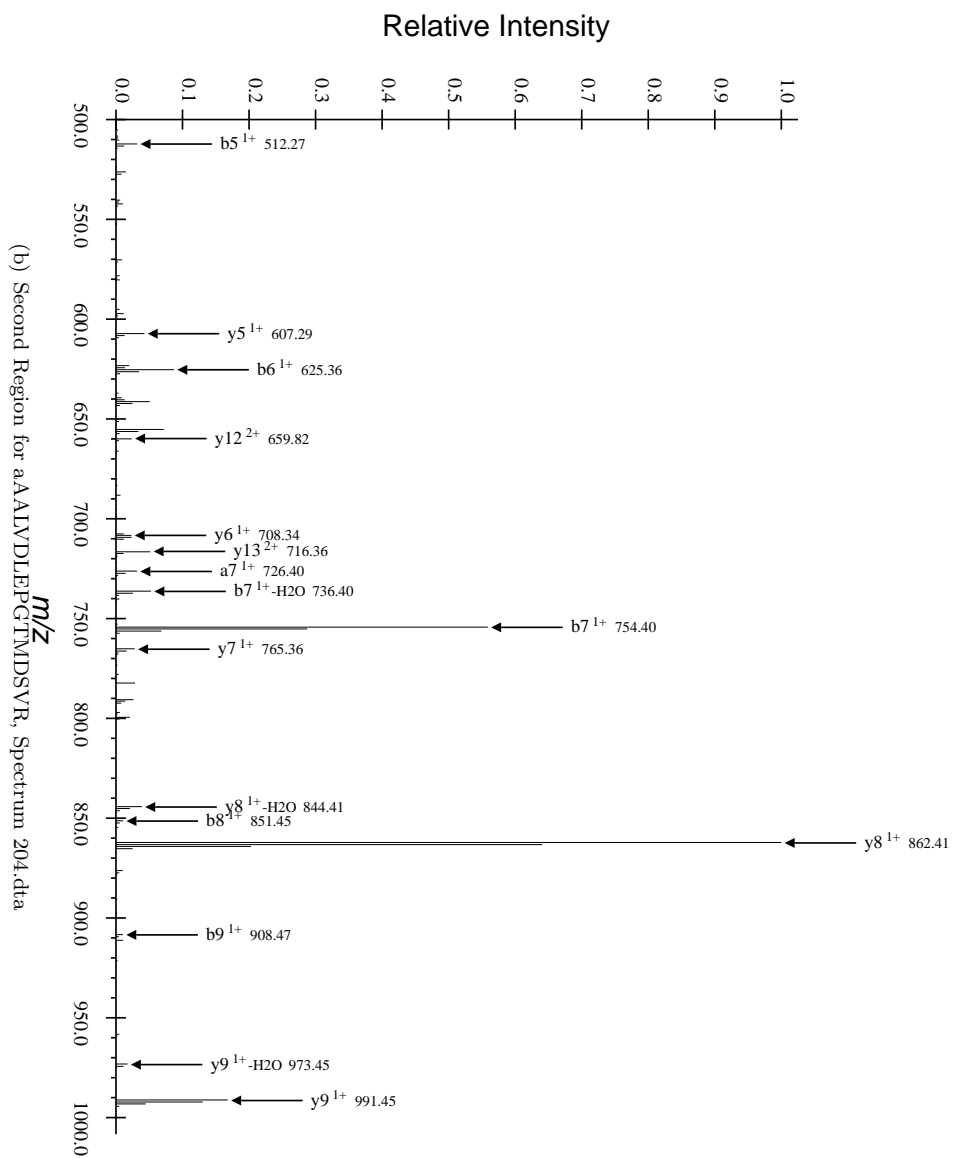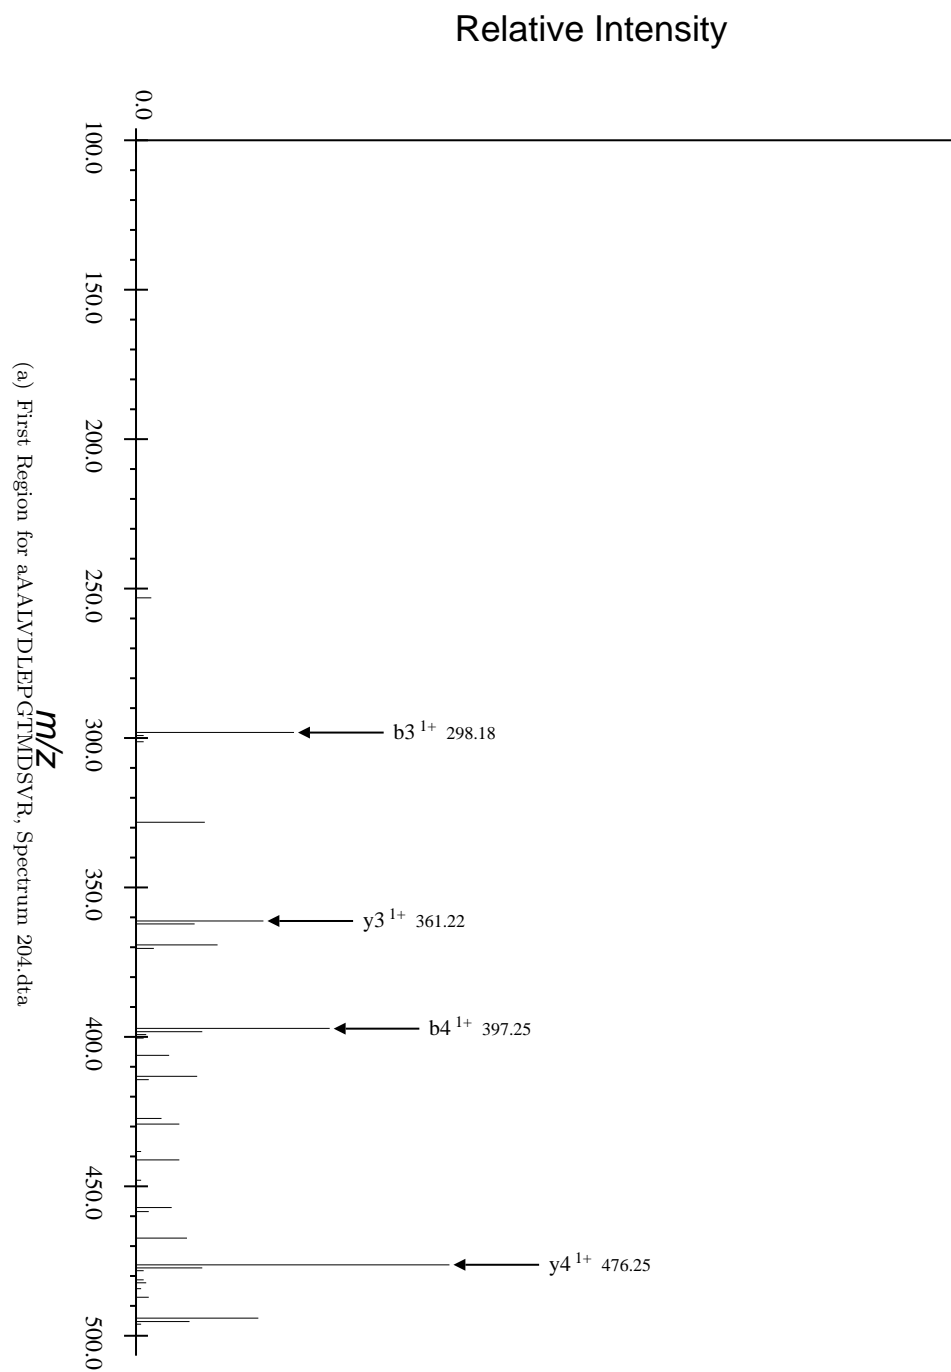



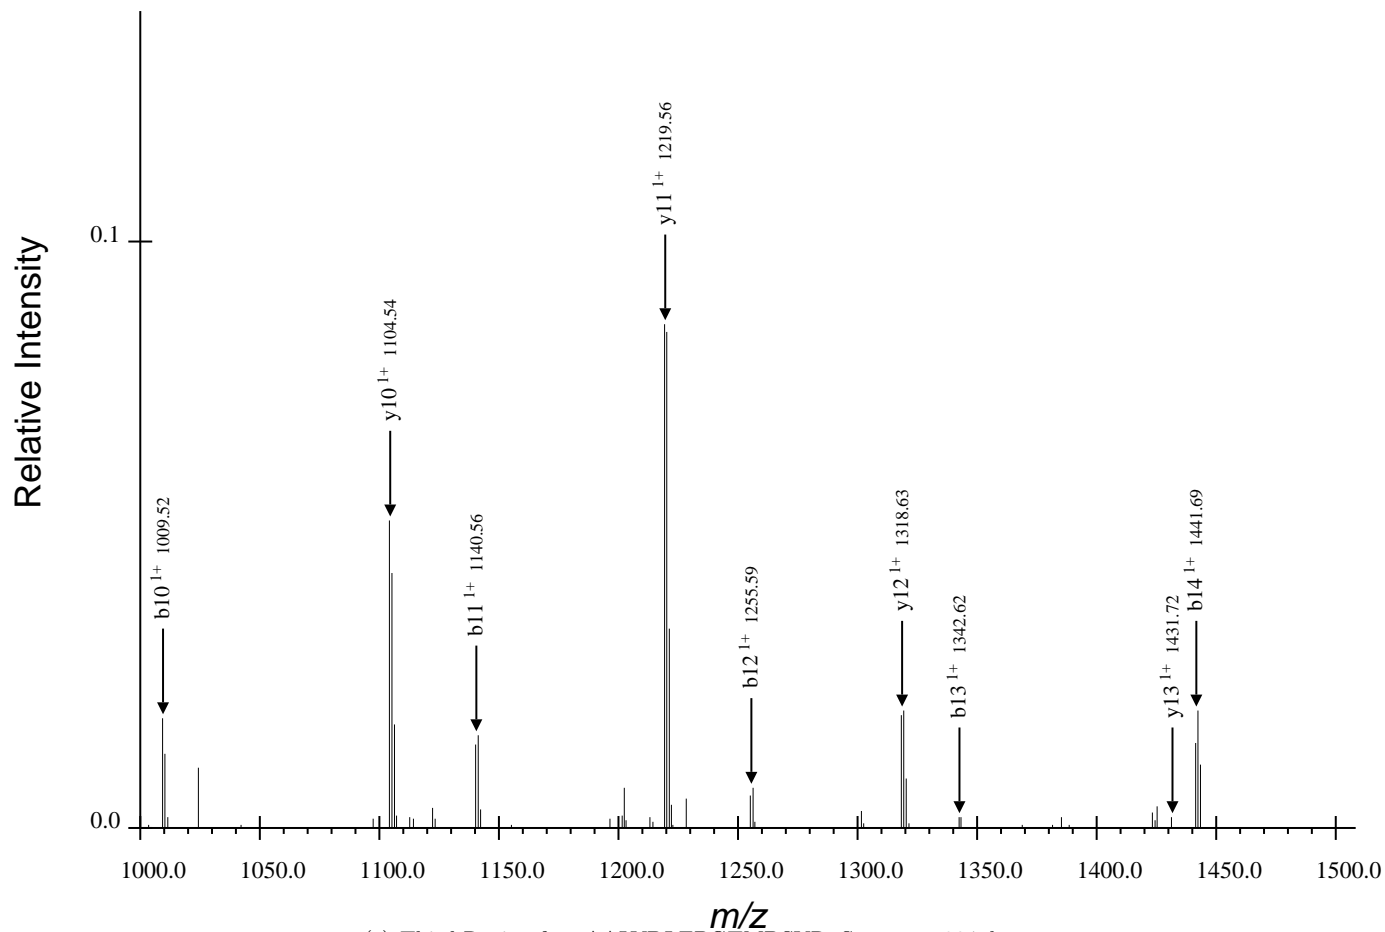

(c) Third Region for aALVDLEPGTMDSVR, Spectrum 204.dta

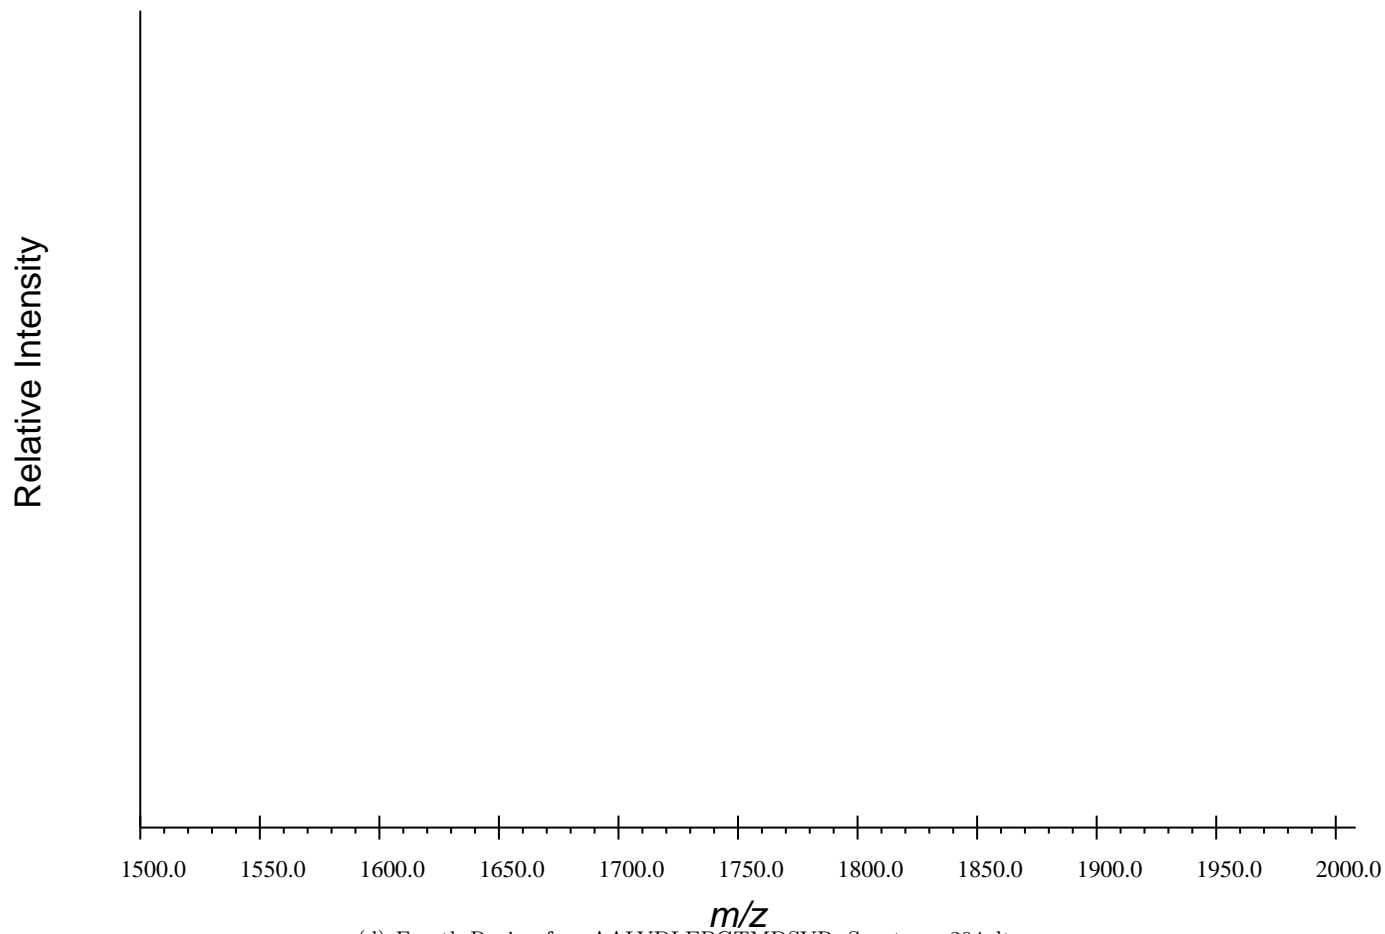

(d) Fourth Region for aALVDLEPGTMDSVR, Spectrum 204.dta

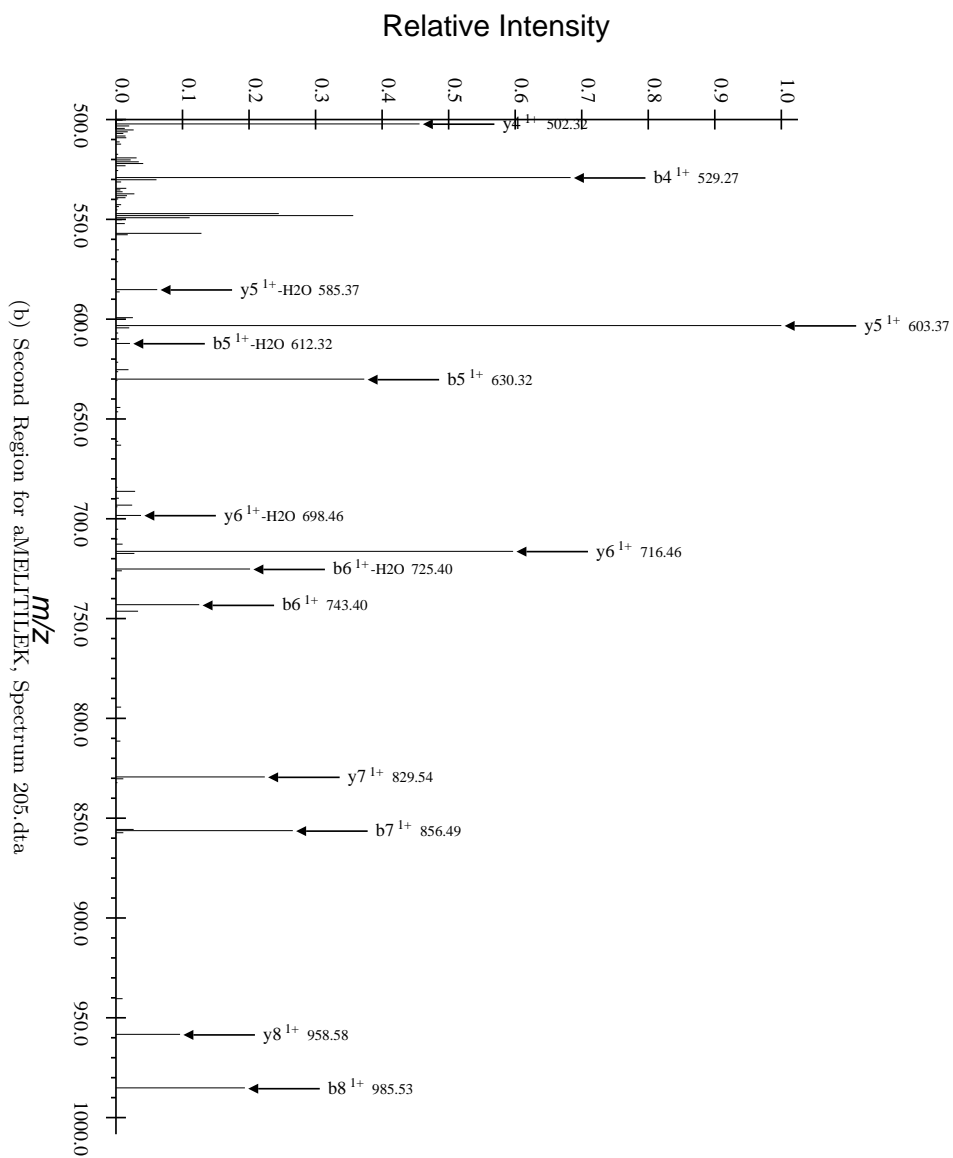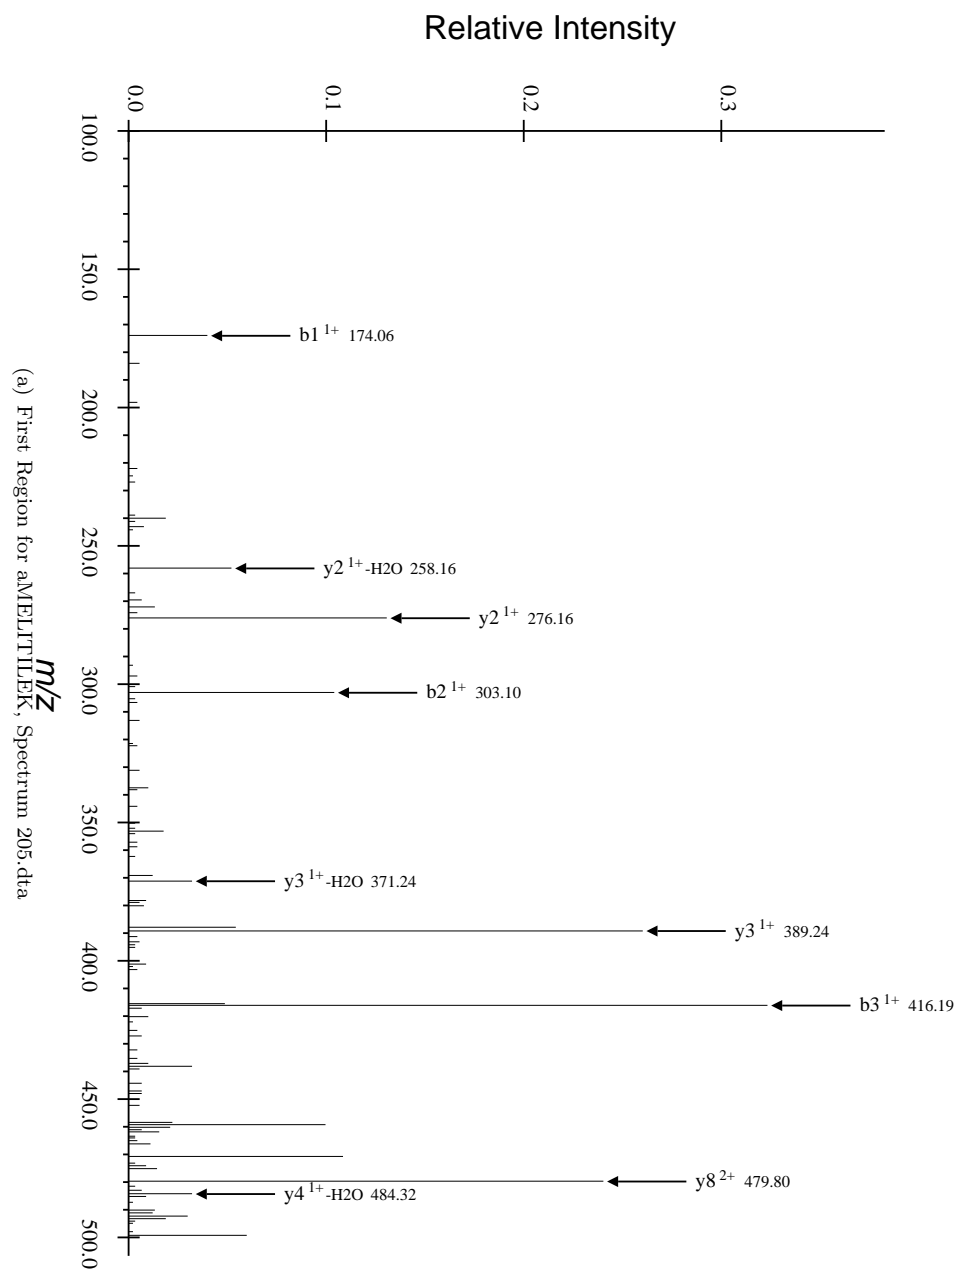

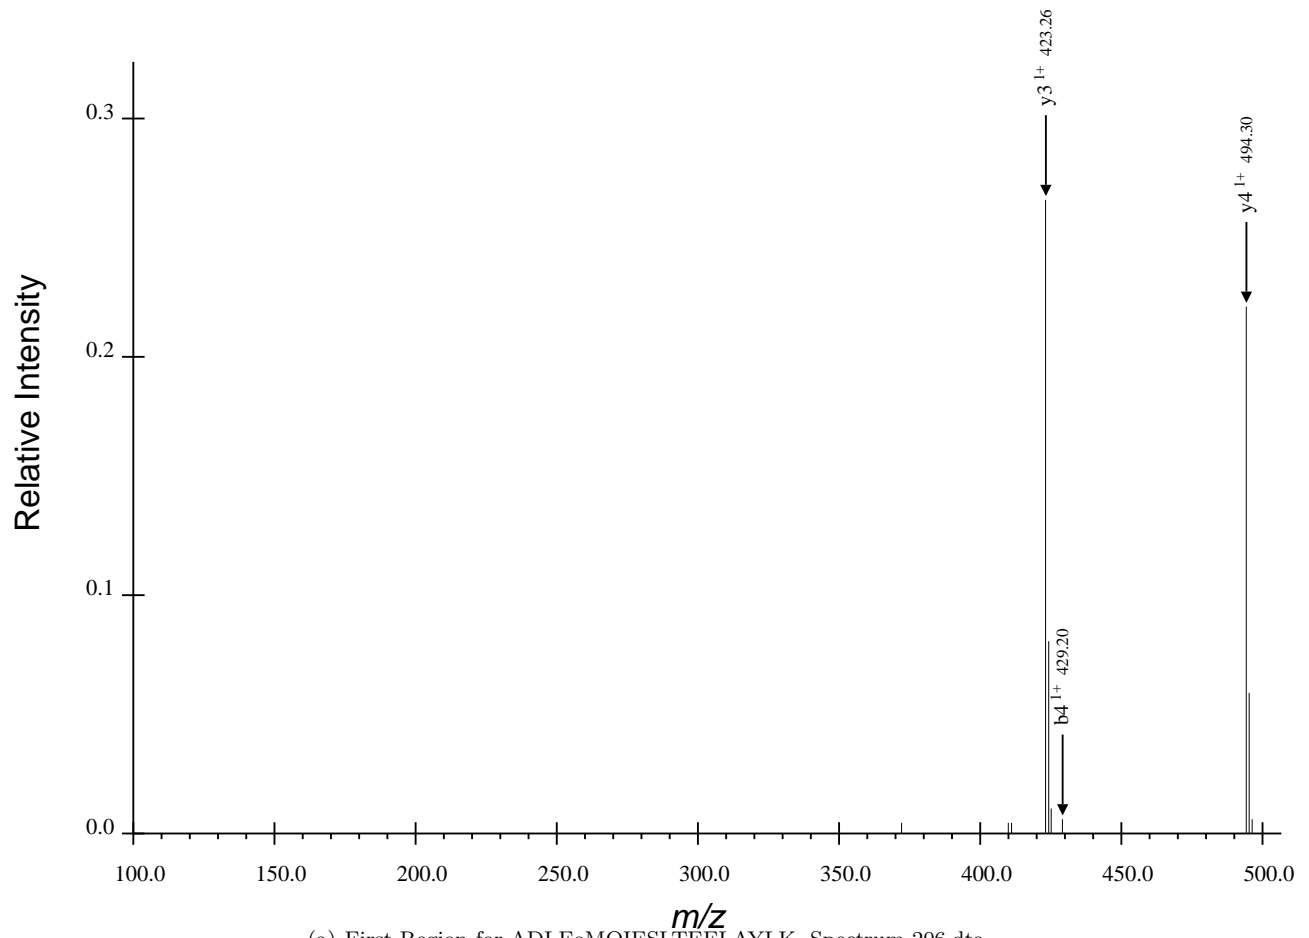

(a) First Region for ADLEoMQIESLTEELAYLK, Spectrum 206.dta

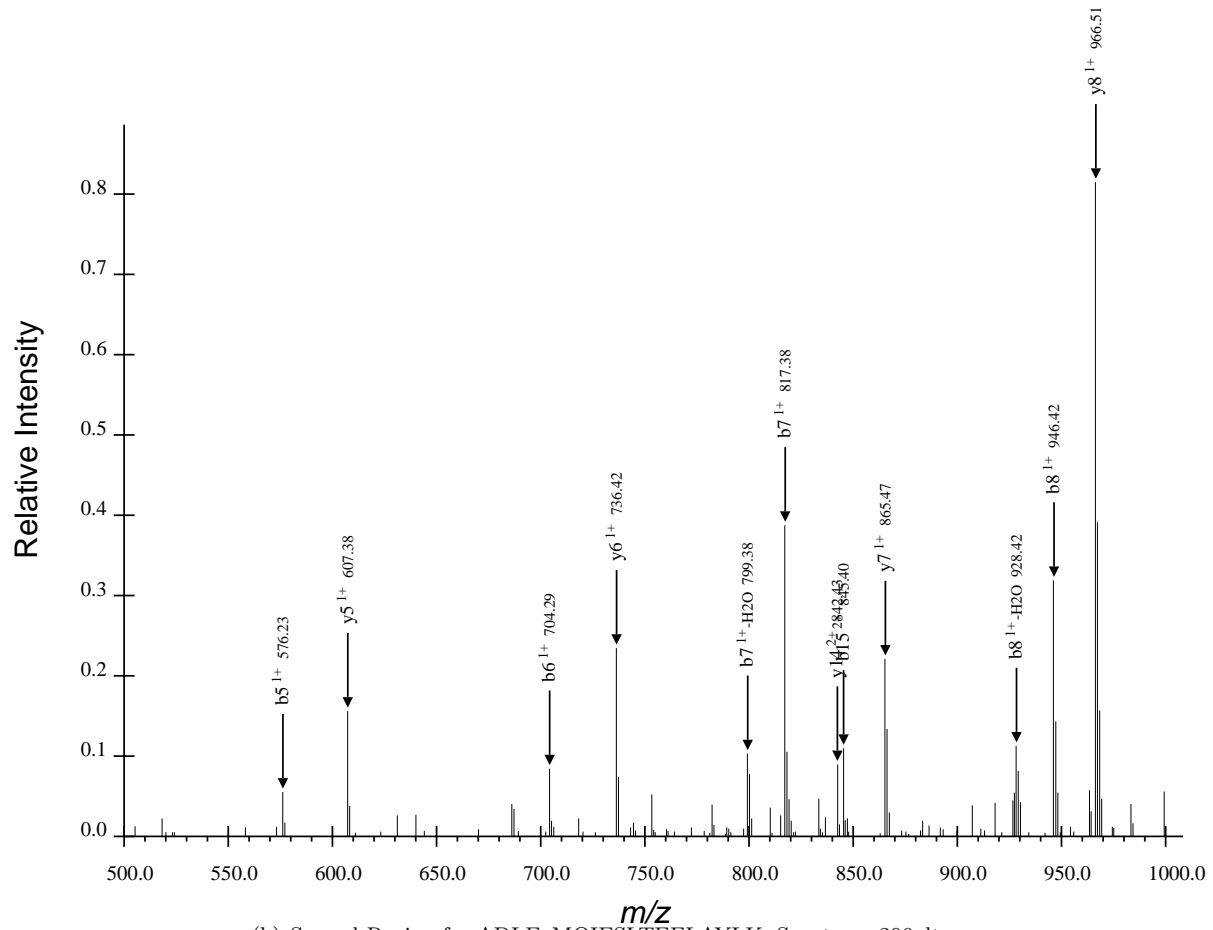

(b) Second Region for ADLEoMQIESLTEELAYLK, Spectrum 206.dta

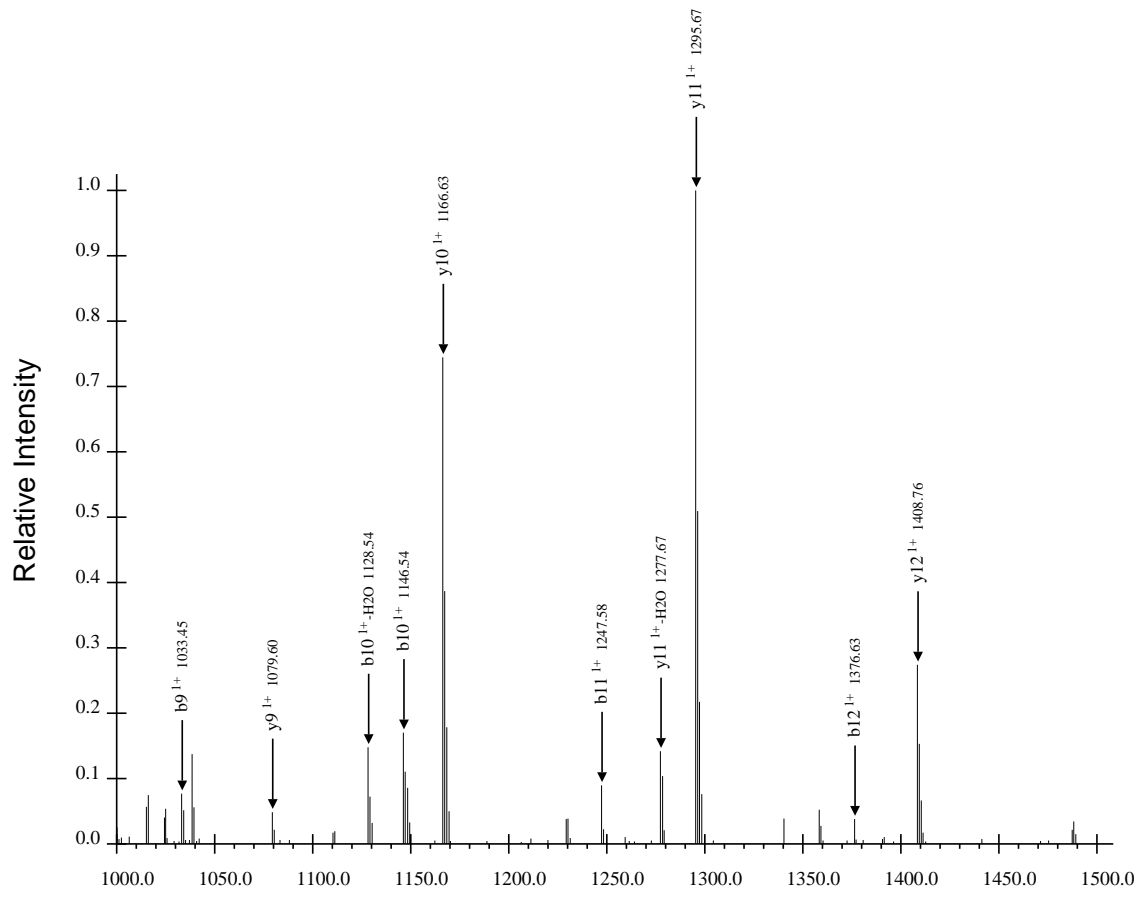

(c) Third Region for ADLEoMQIESLTEELAYLK, Spectrum 206.dta

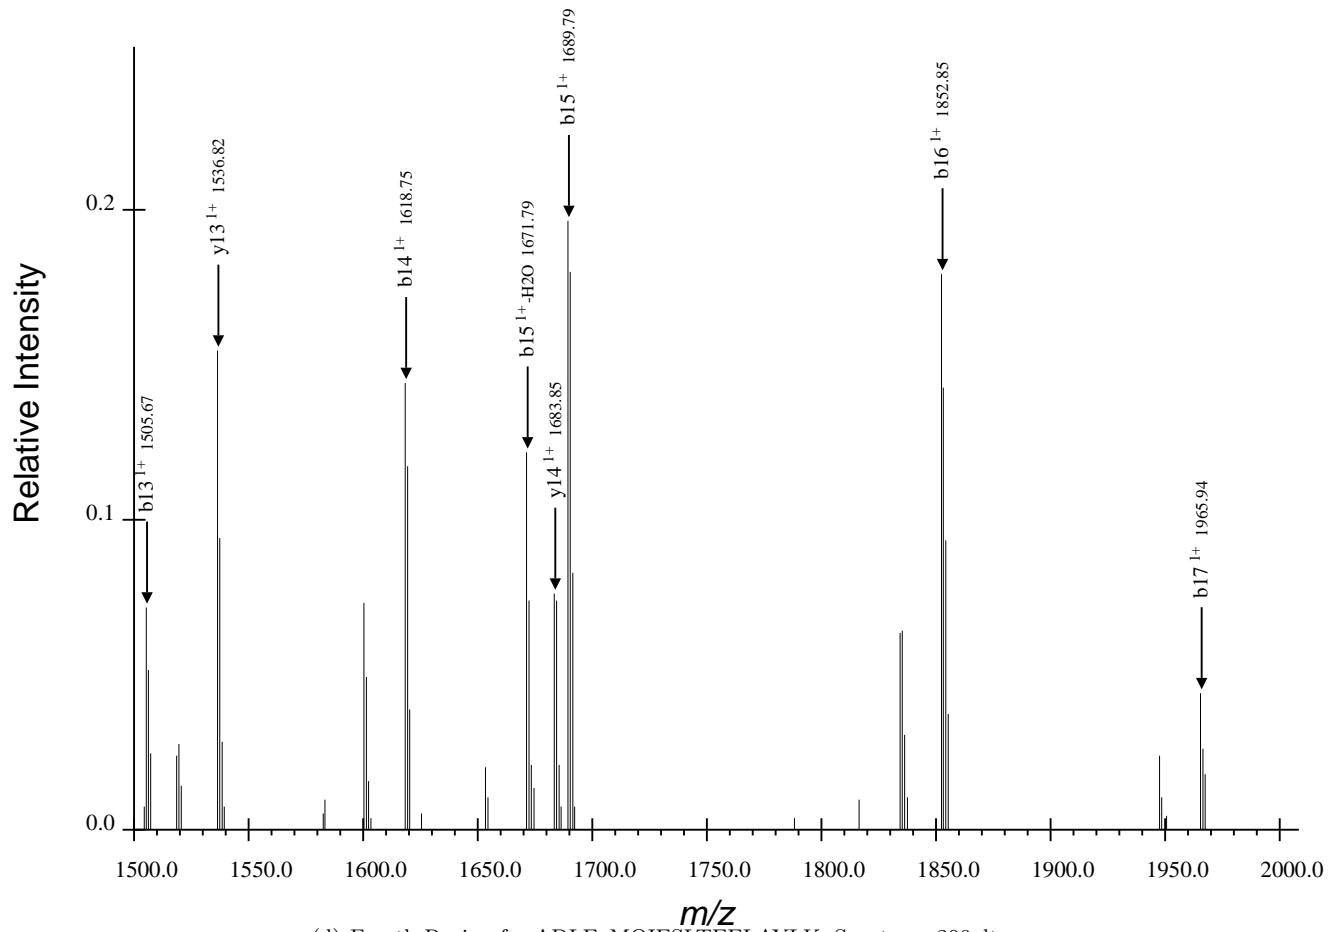

(d) Fourth Region for ADLEoMQIESLTEELAYLK, Spectrum 206.dta

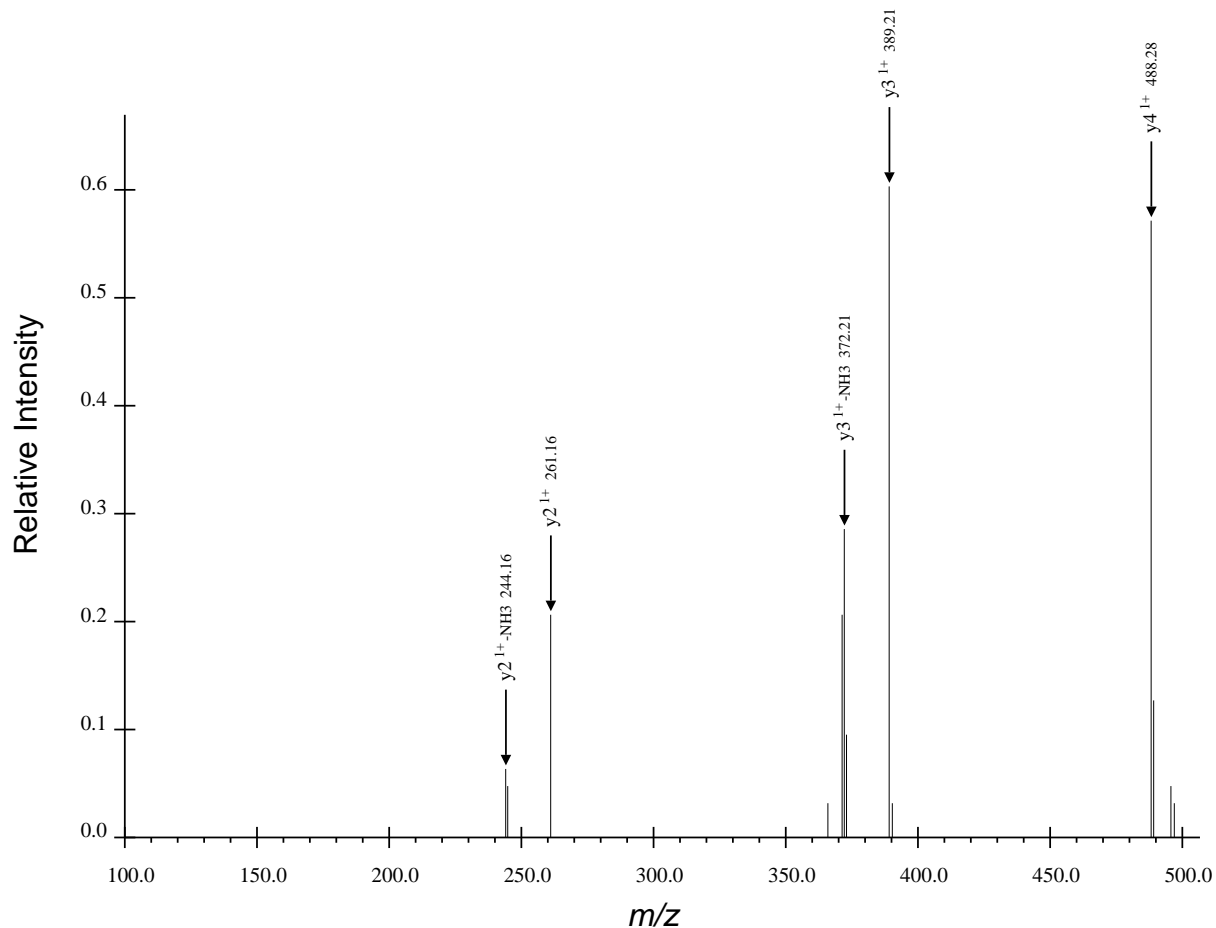

(a) First Region for EVDEQoMLNVQNK, Spectrum 207.dta

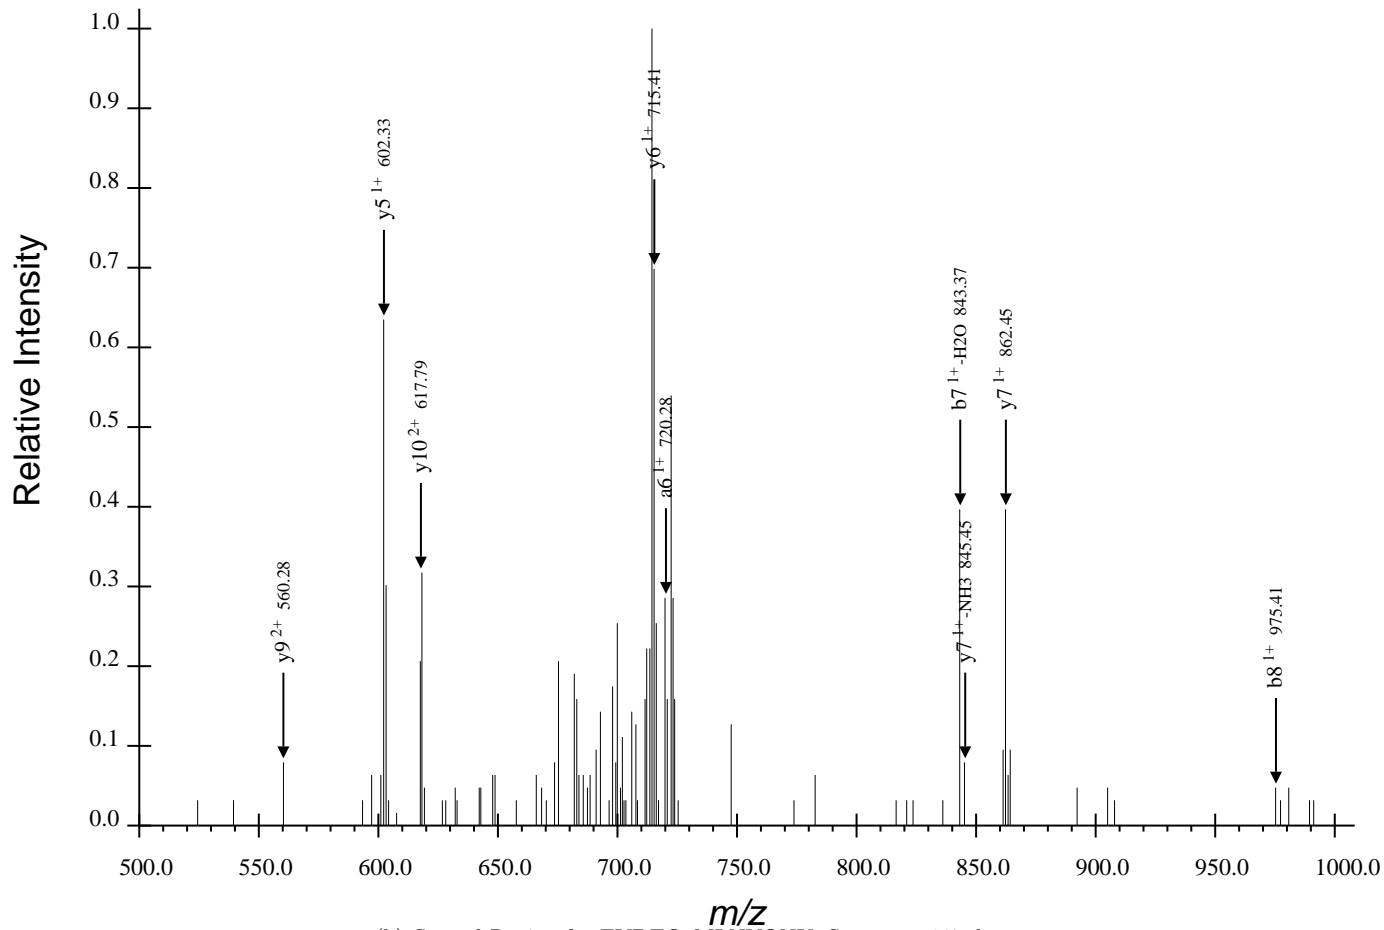

(b) Second Region for EVDEQoMLNVQNK, Spectrum 207.dta

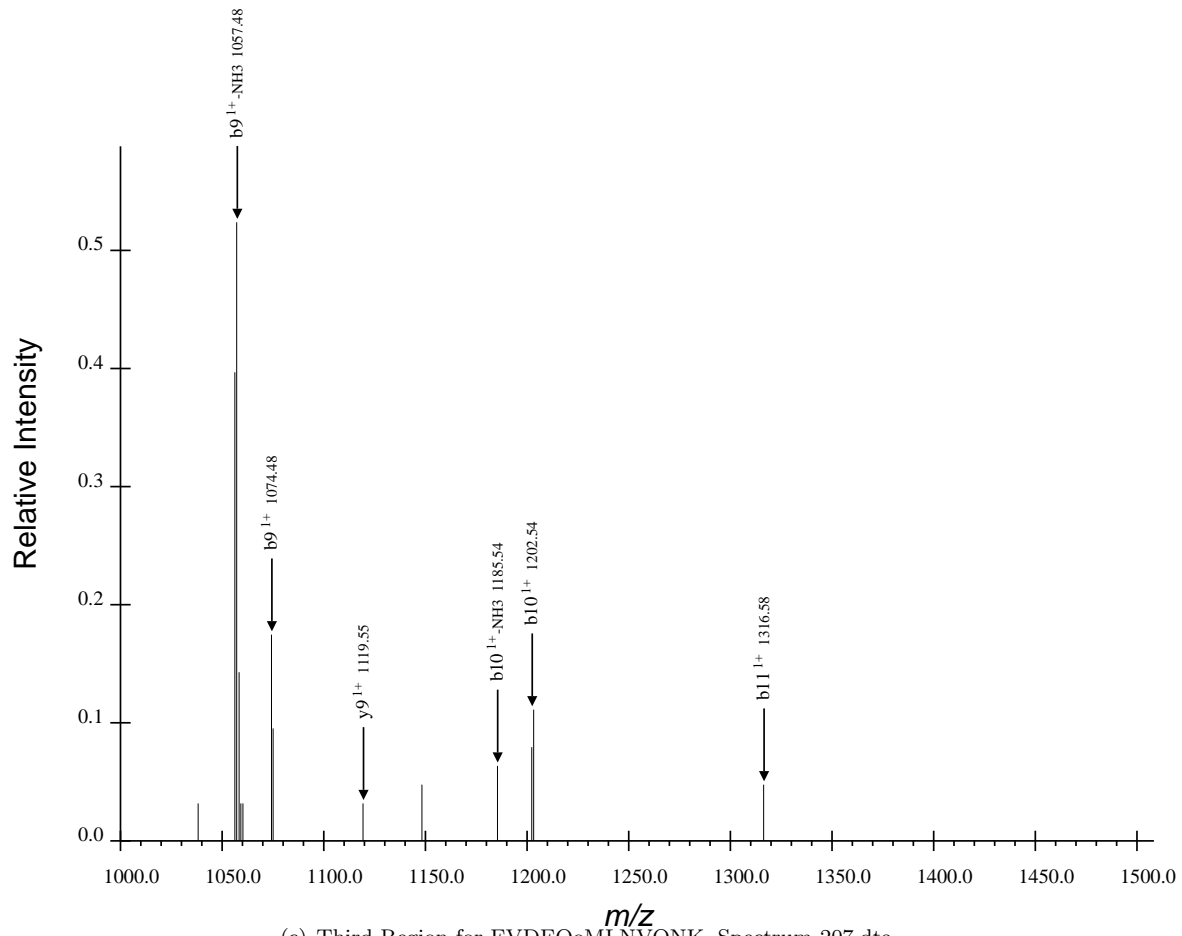

(c) Third Region for EVDEQoMLNVQNK, Spectrum 207.dta

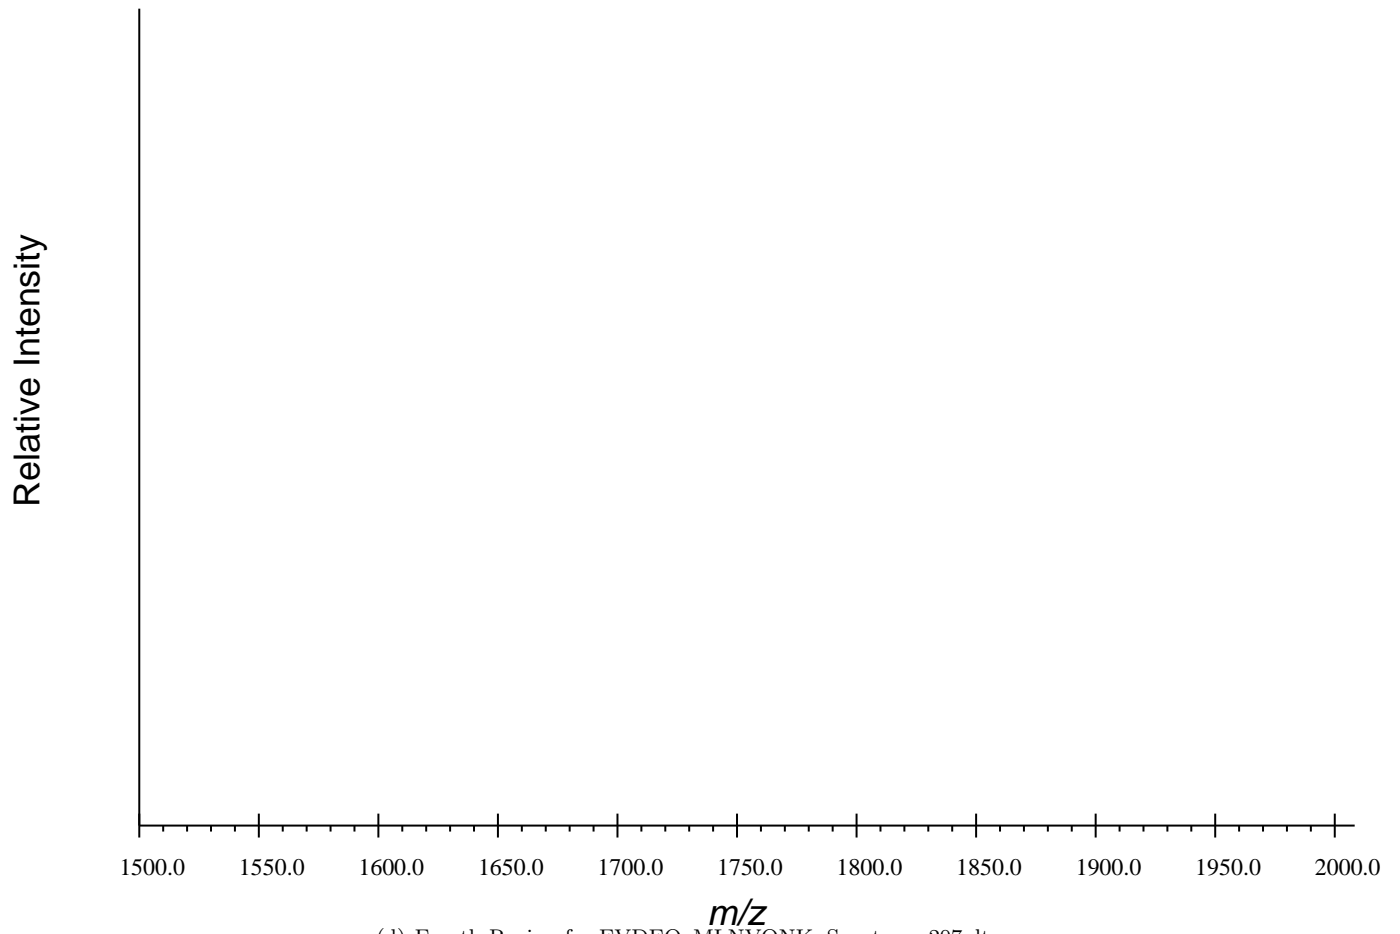

(d) Fourth Region for EVDEQoMLNVQNK, Spectrum 207.dta

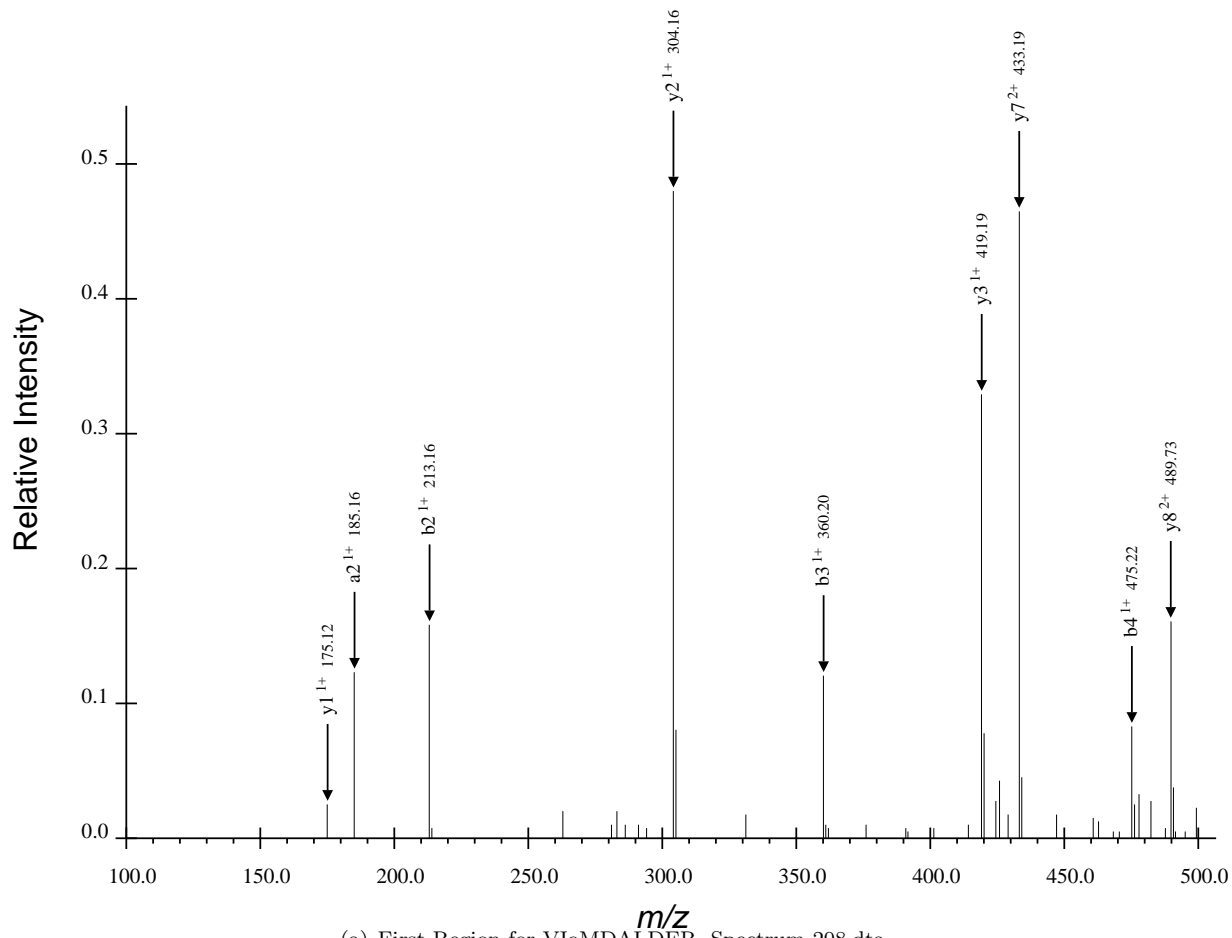

(a) First Region for VIoMDALDER, Spectrum 208.dta

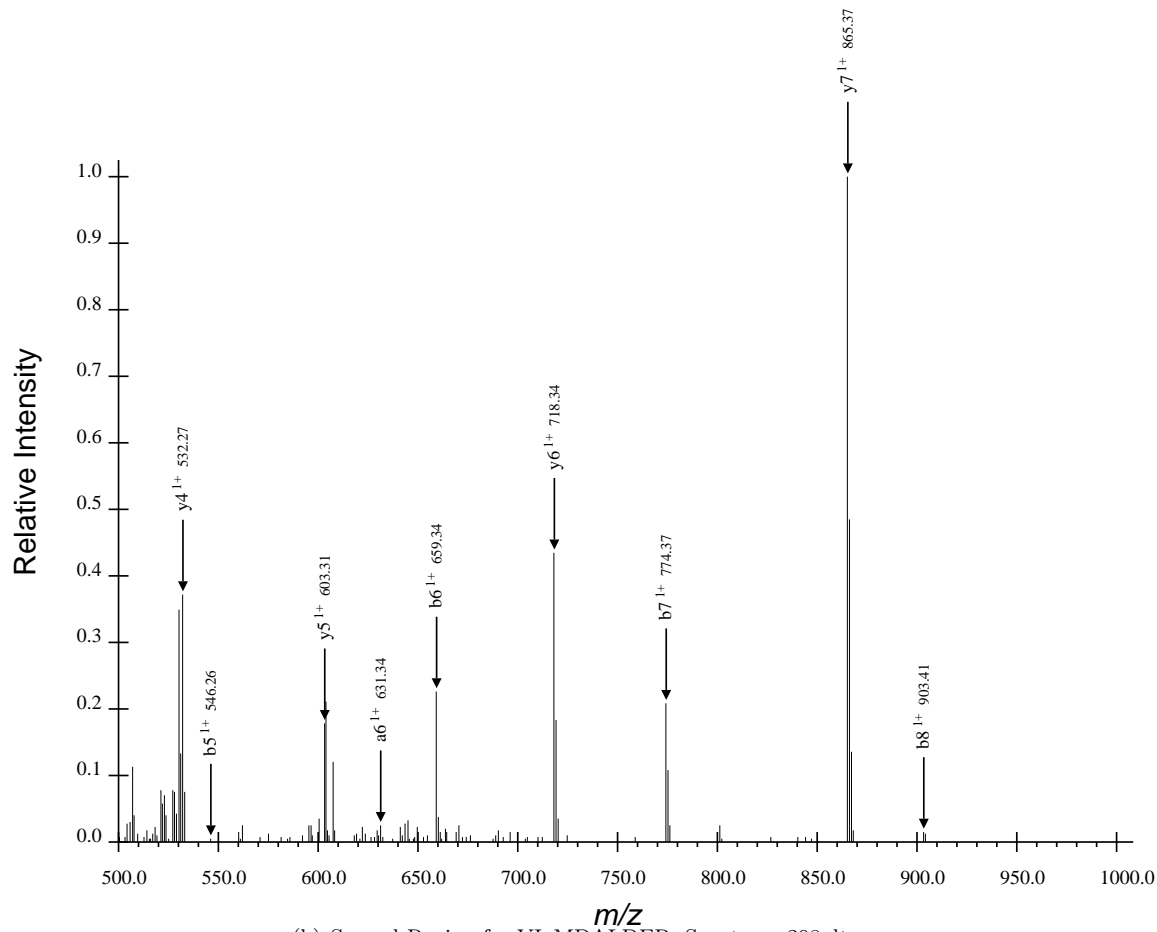

(b) Second Region for VIoMDALDER, Spectrum 208.dta

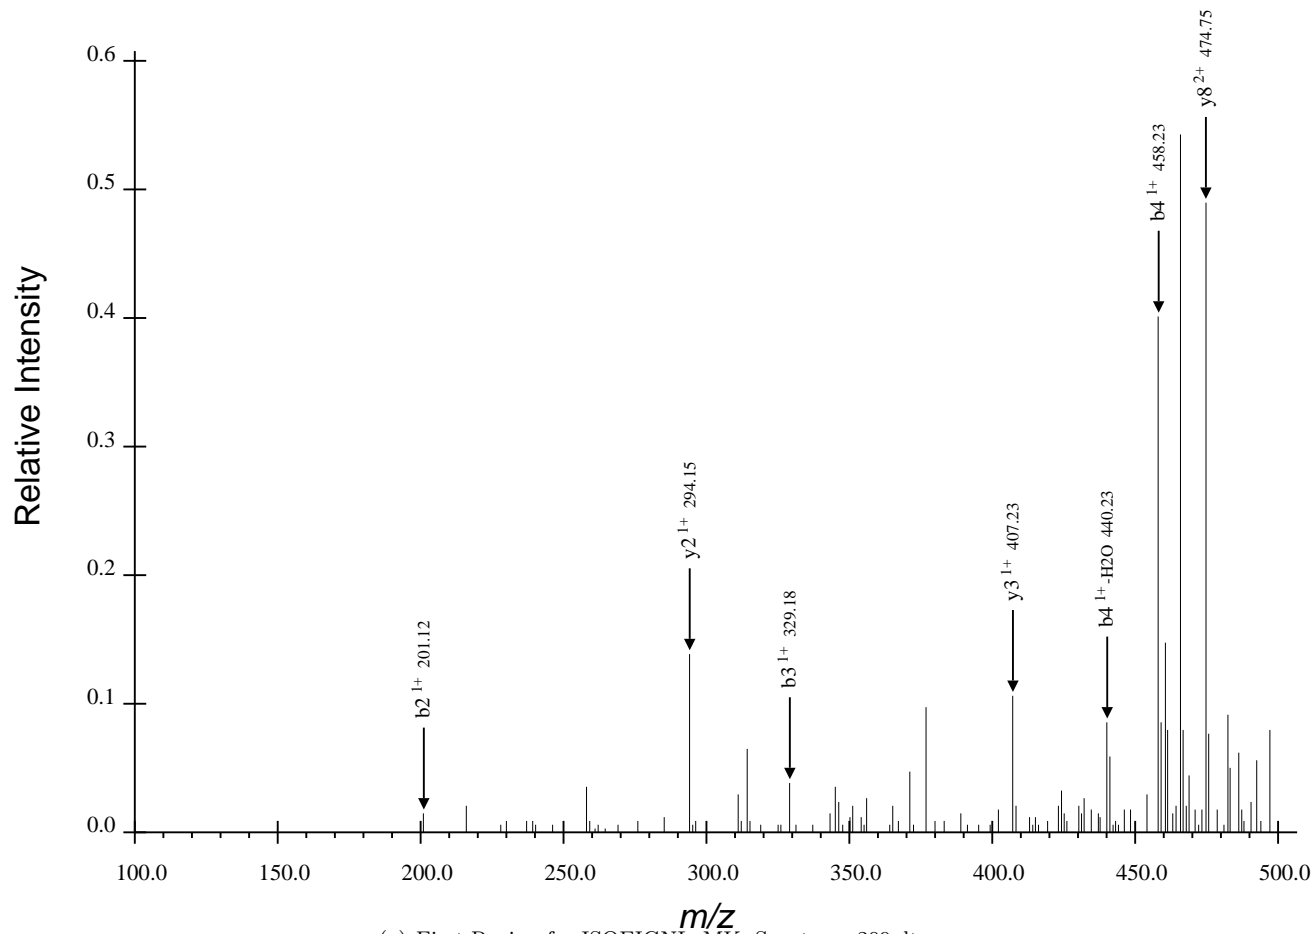

(a) First Region for ISQEIGNLoMK, Spectrum 209.dta

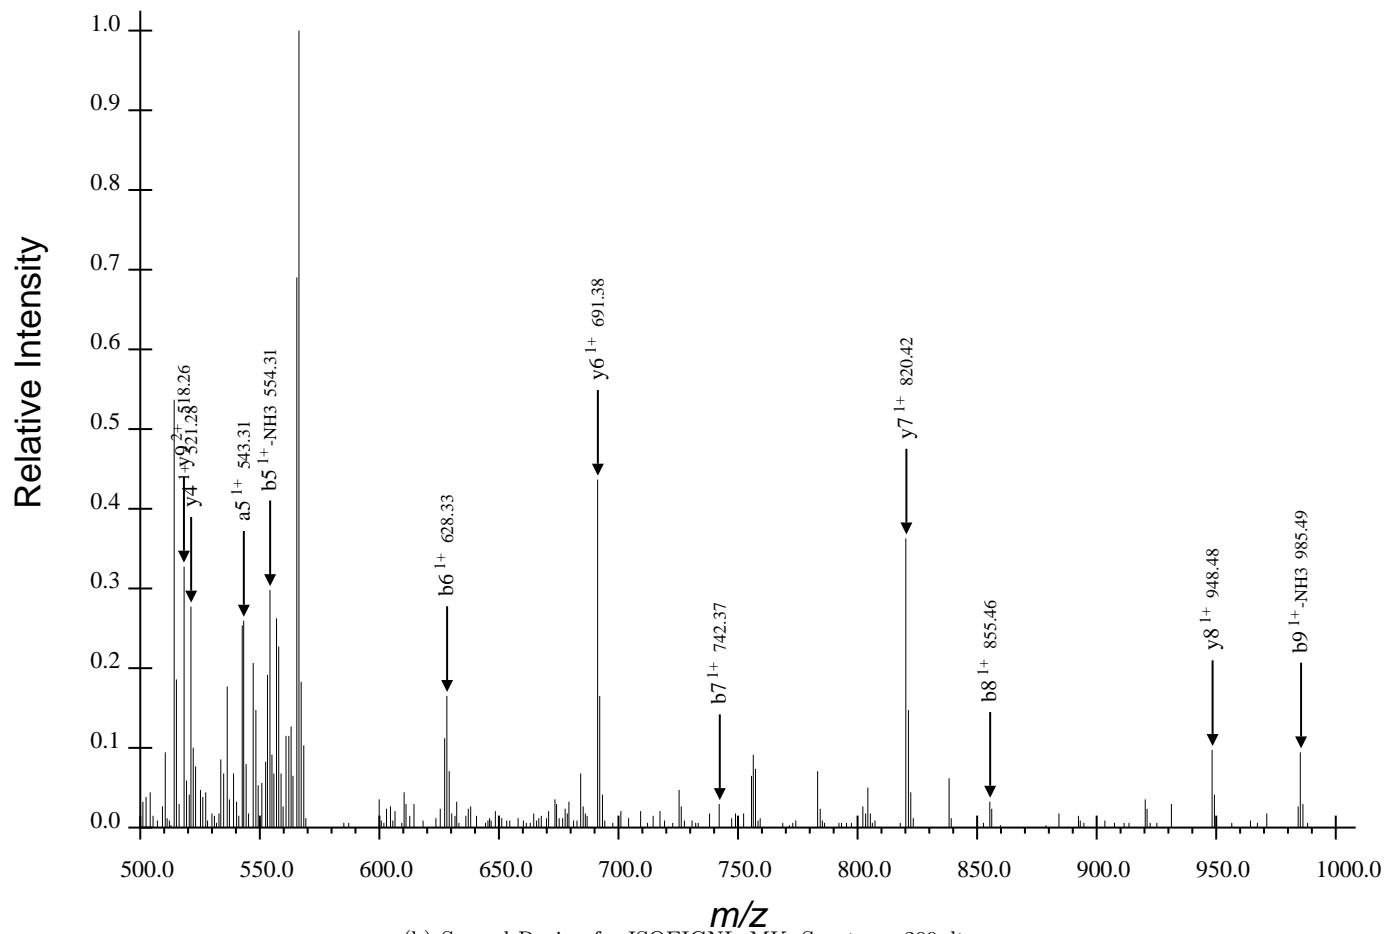

(b) Second Region for ISQEIGNLoMK, Spectrum 209.dta



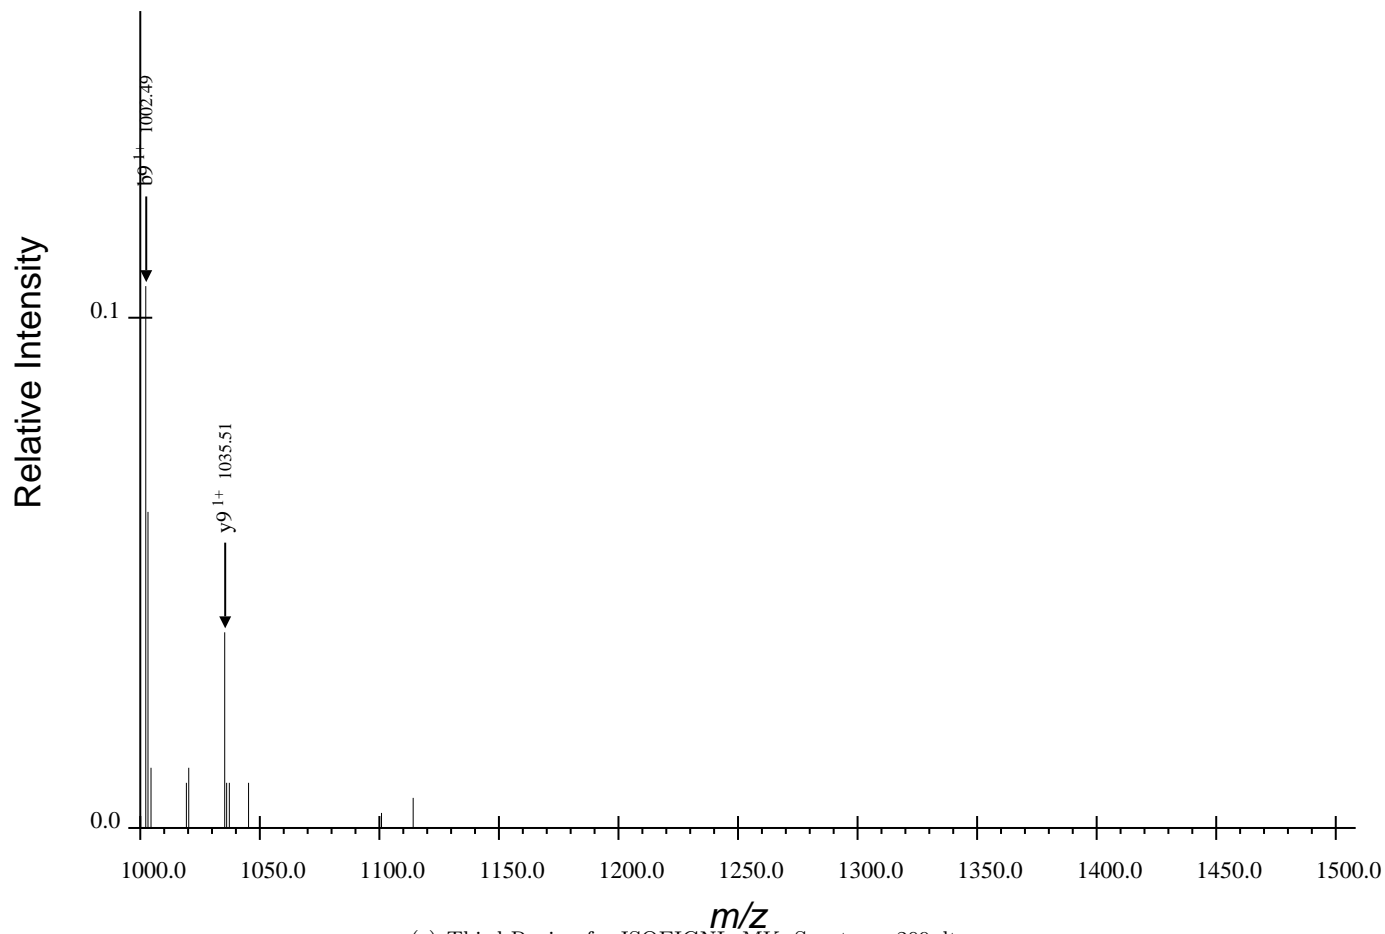

(c) Third Region for ISQEIGNLoMK, Spectrum 209.dta

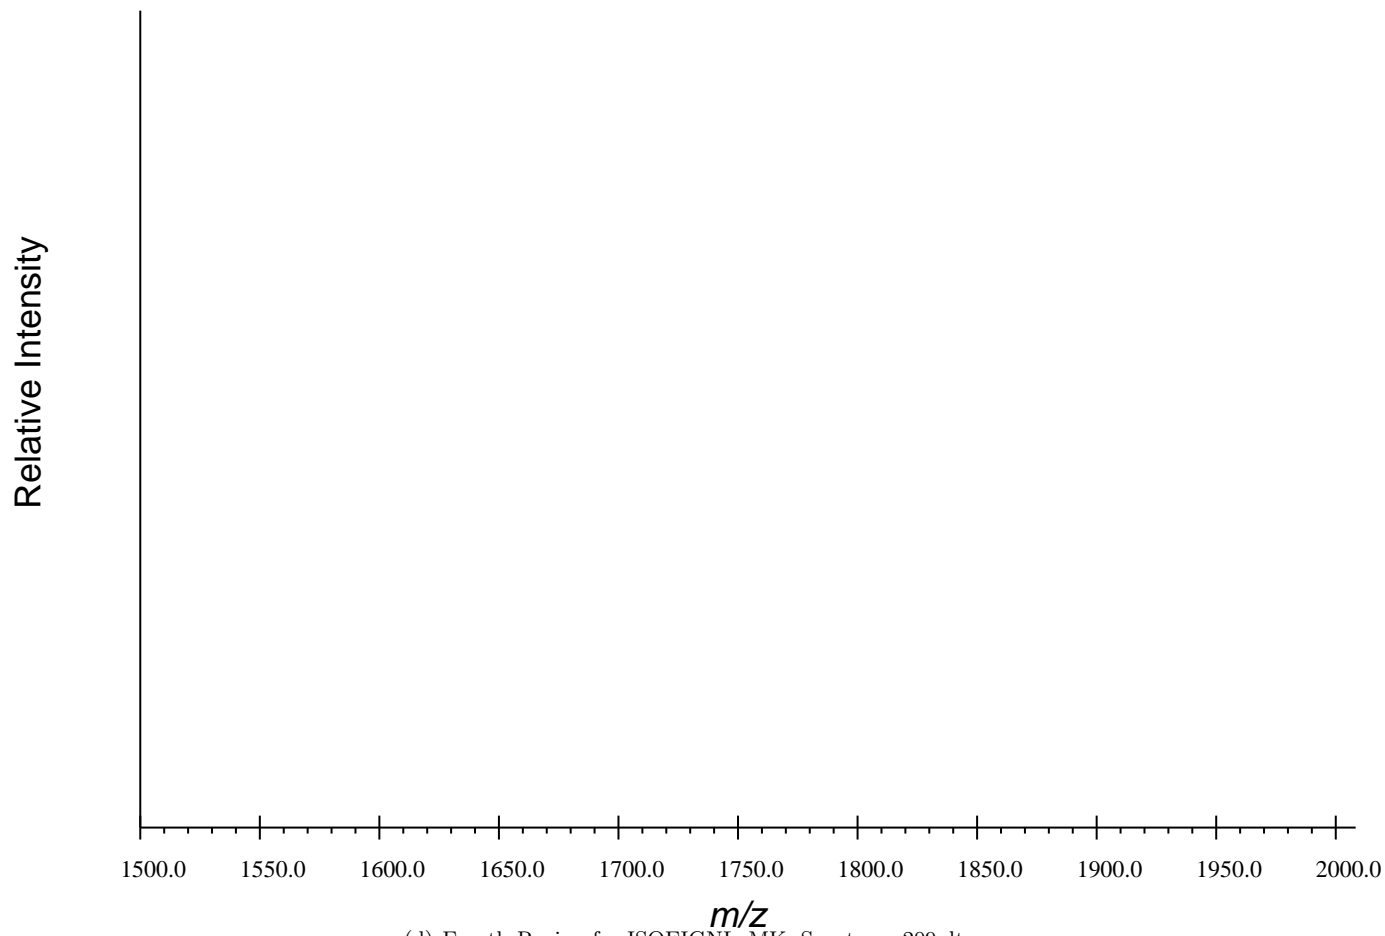

(d) Fourth Region for ISQEIGNLoMK, Spectrum 209.dta

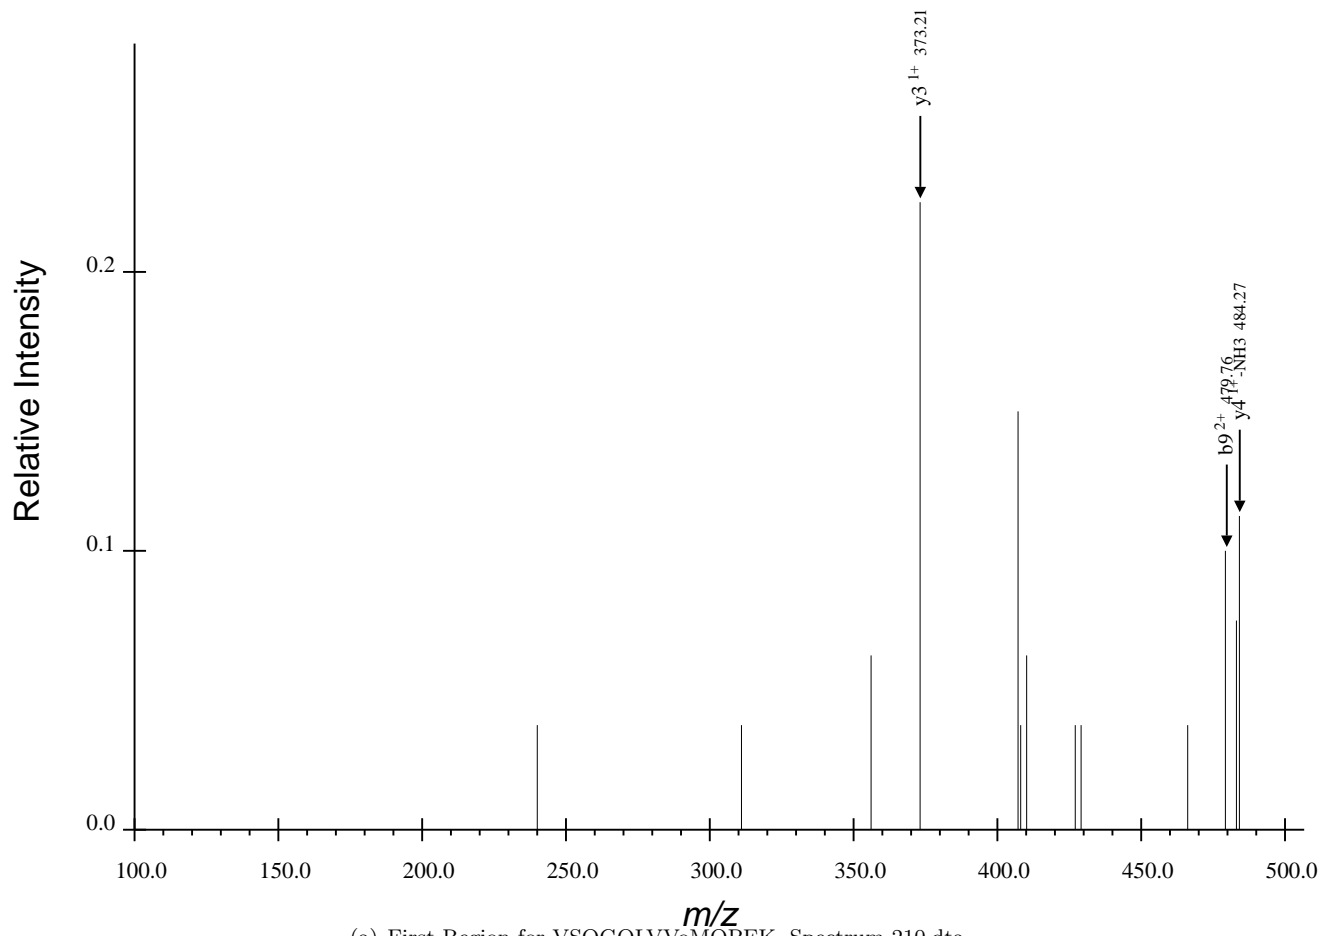

(a) First Region for VSQGQLVVoMQPEK, Spectrum 210.dta

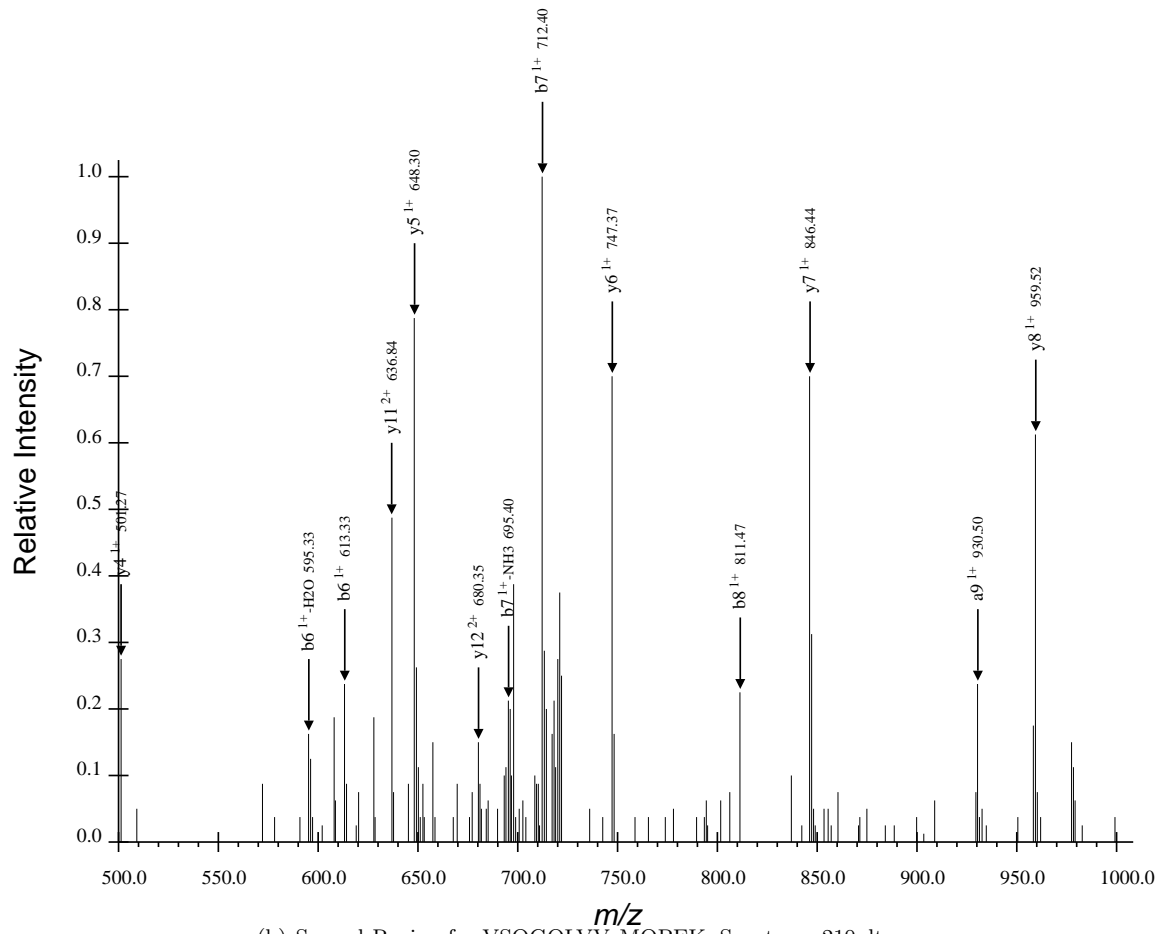

(b) Second Region for VSQGQLVVoMQPEK, Spectrum 210.dta

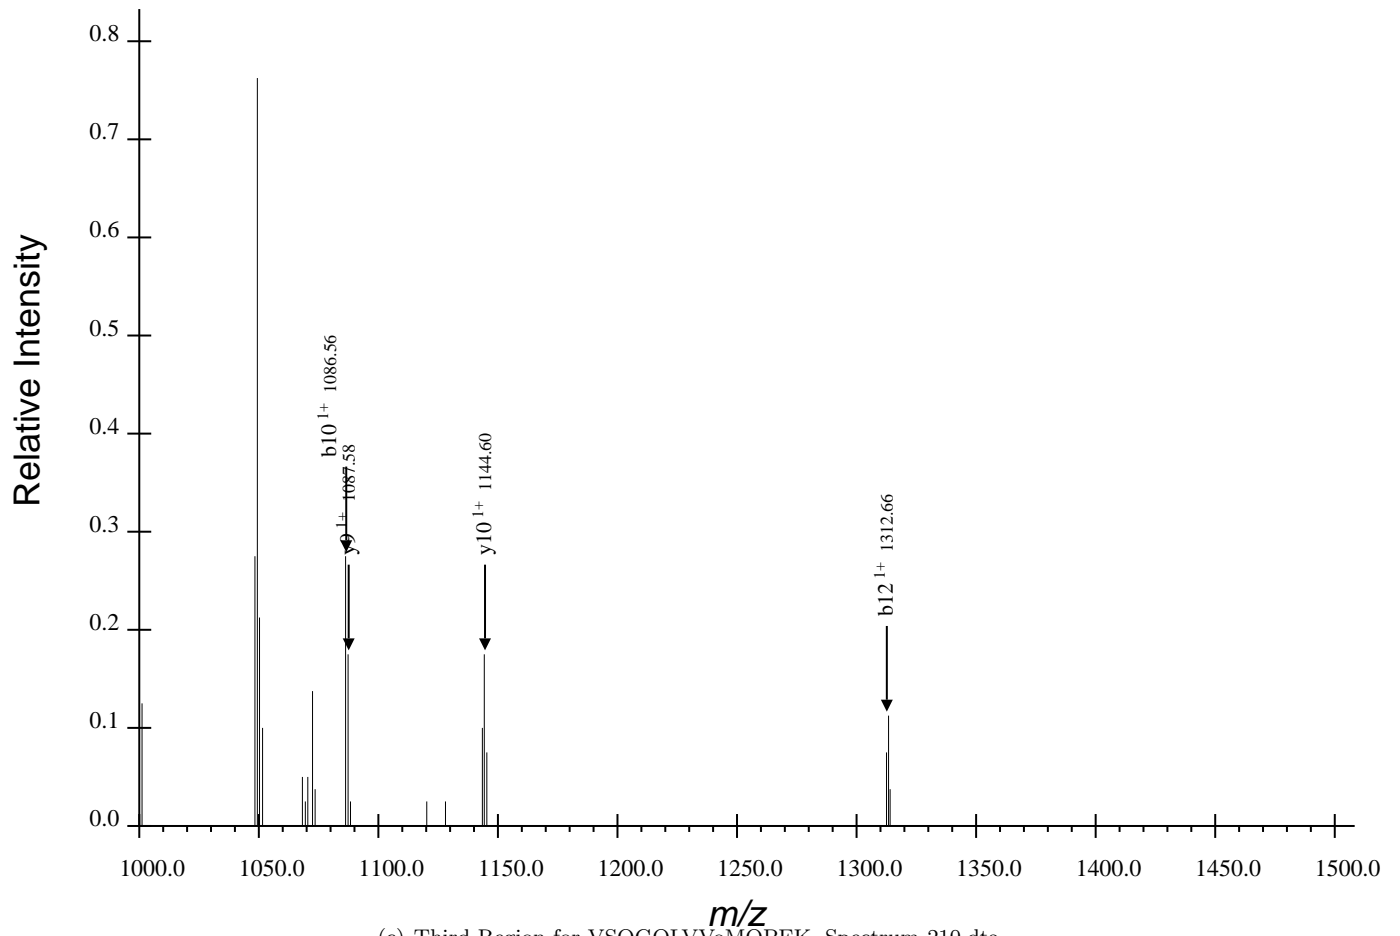

(c) Third Region for VSQGQLVVoMQPEK, Spectrum 210.dta

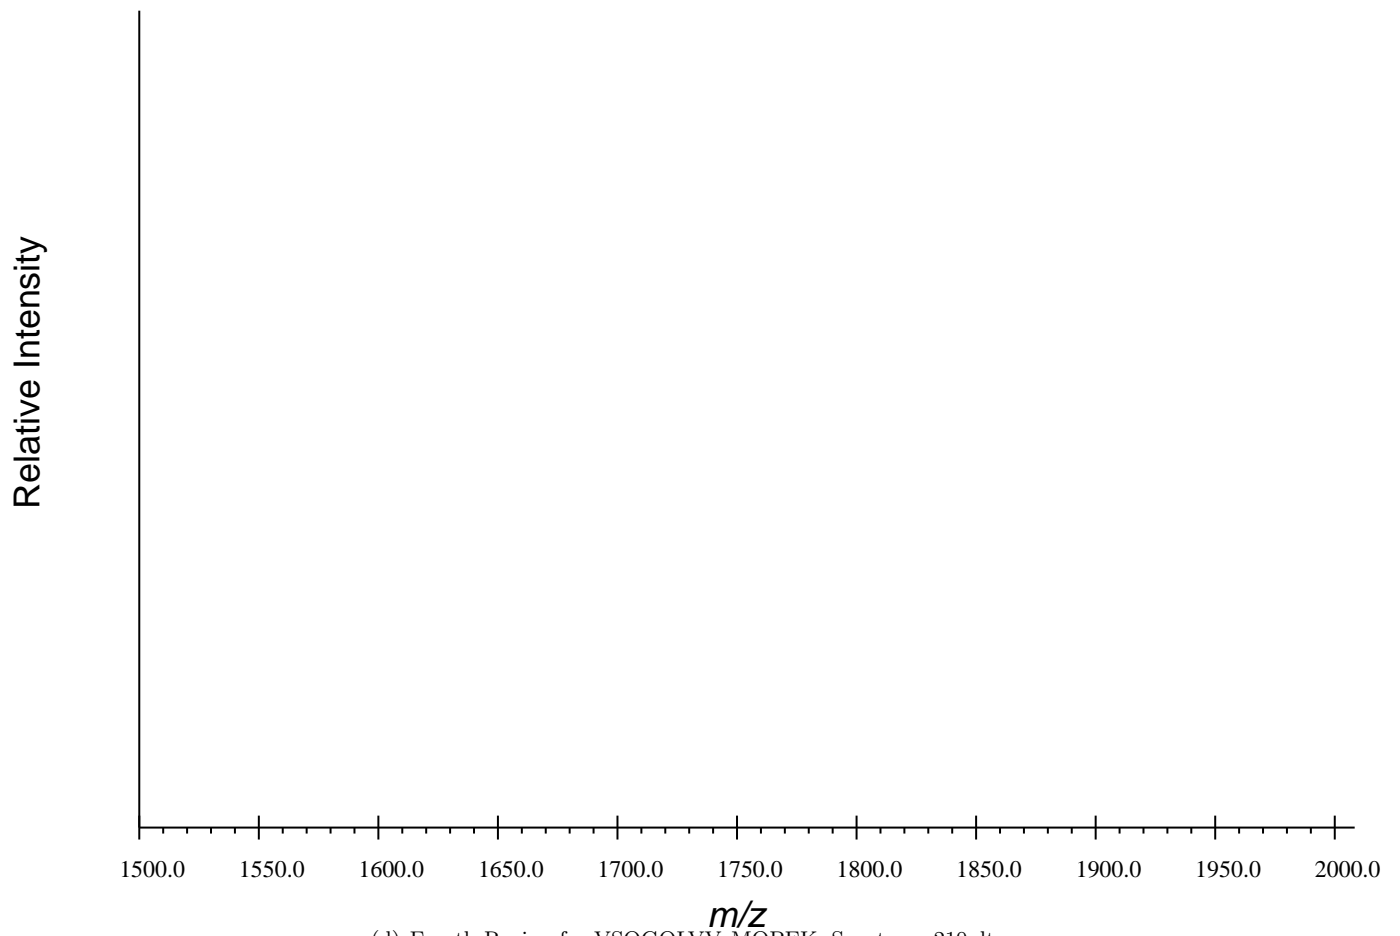

(d) Fourth Region for VSQGQLVVoMQPEK, Spectrum 210.dta

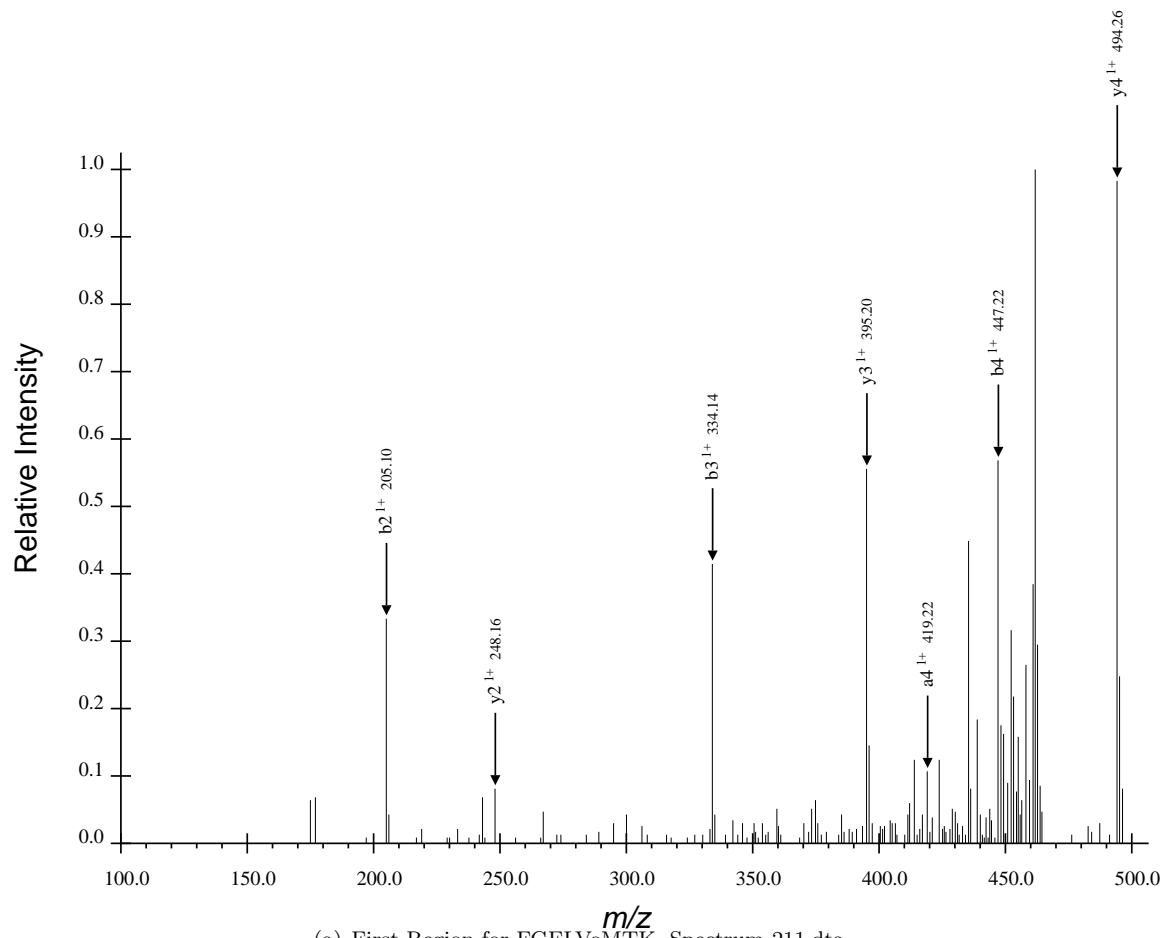

(a) First Region for FGELVoMTK, Spectrum 211.dta

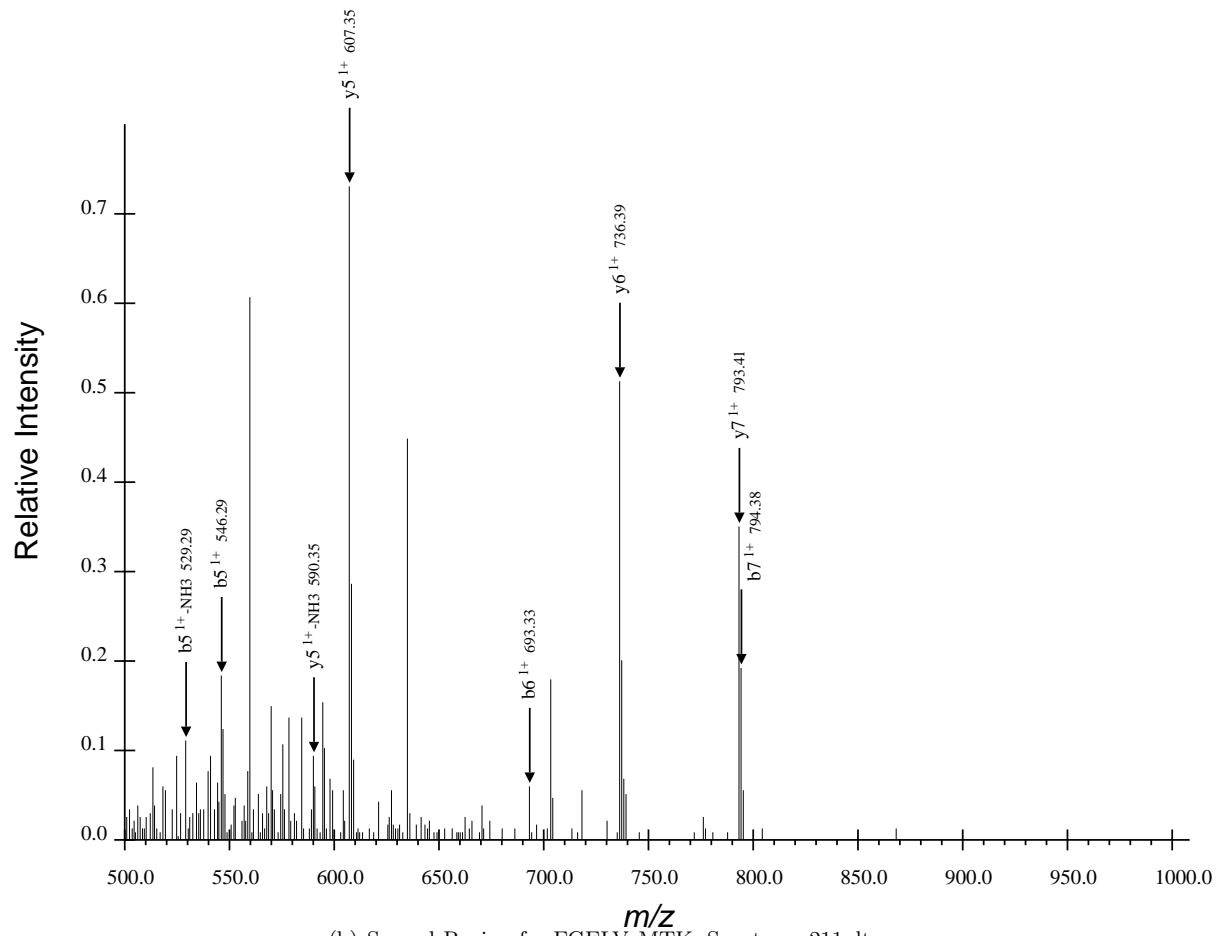

(b) Second Region for FGELVoMTK, Spectrum 211.dta

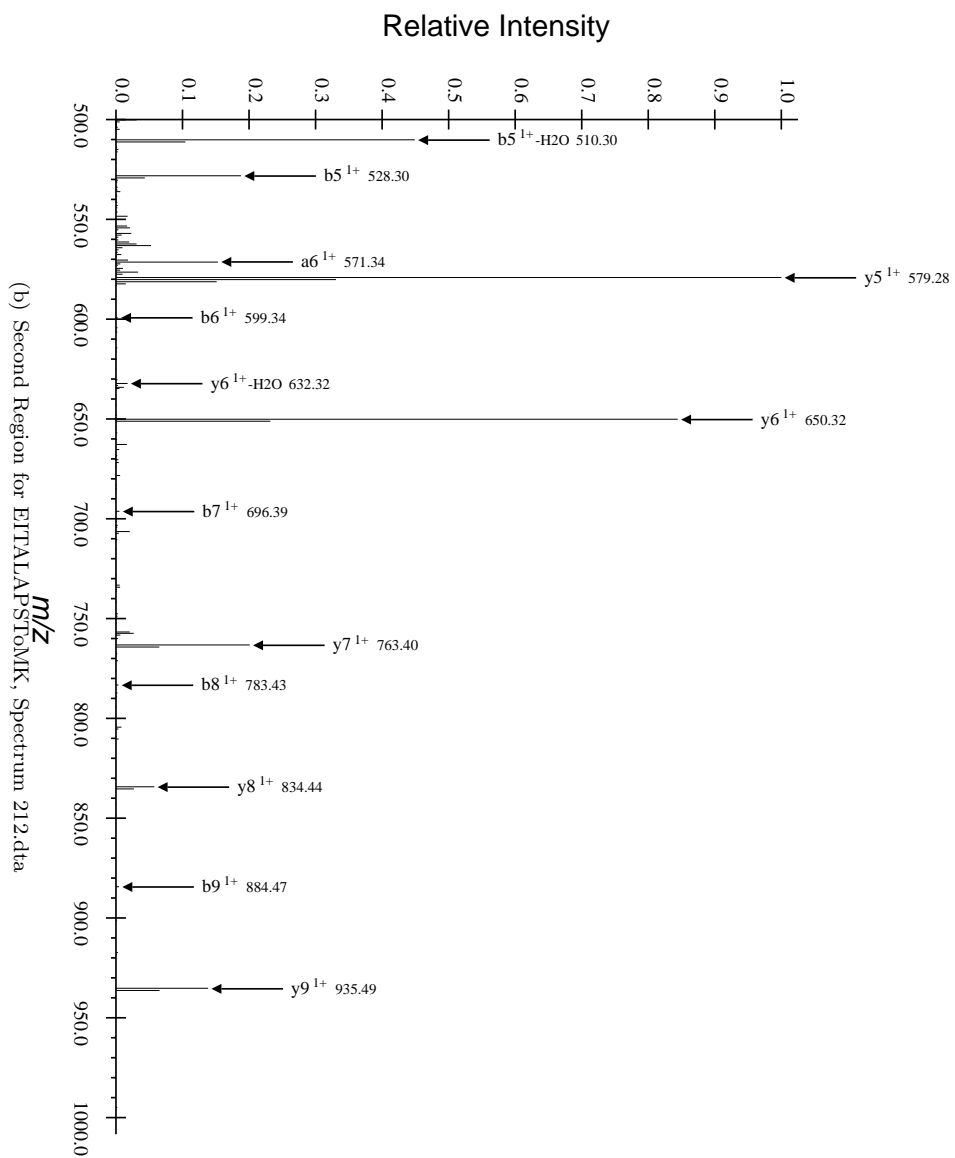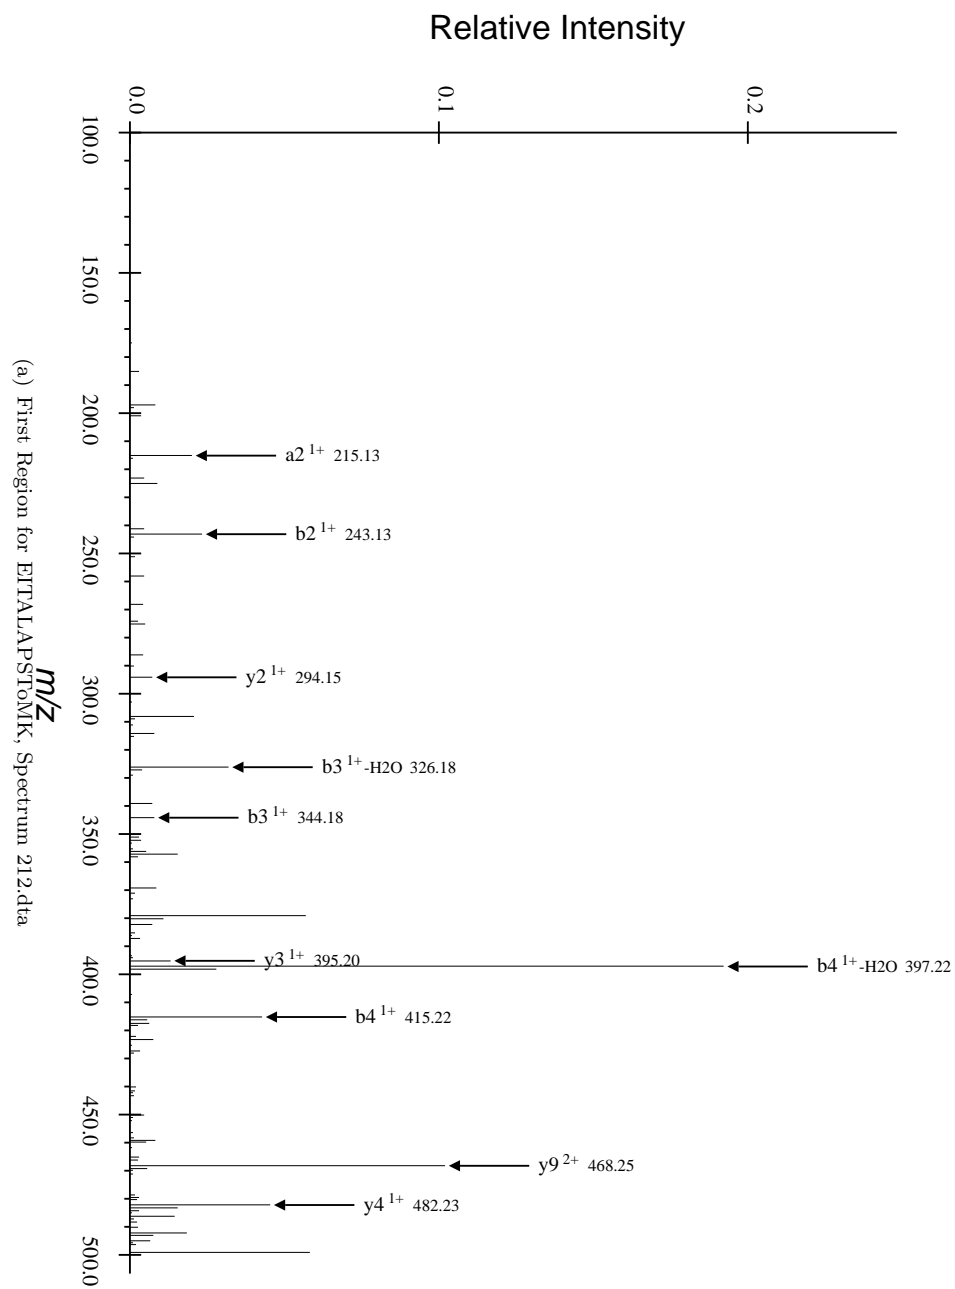

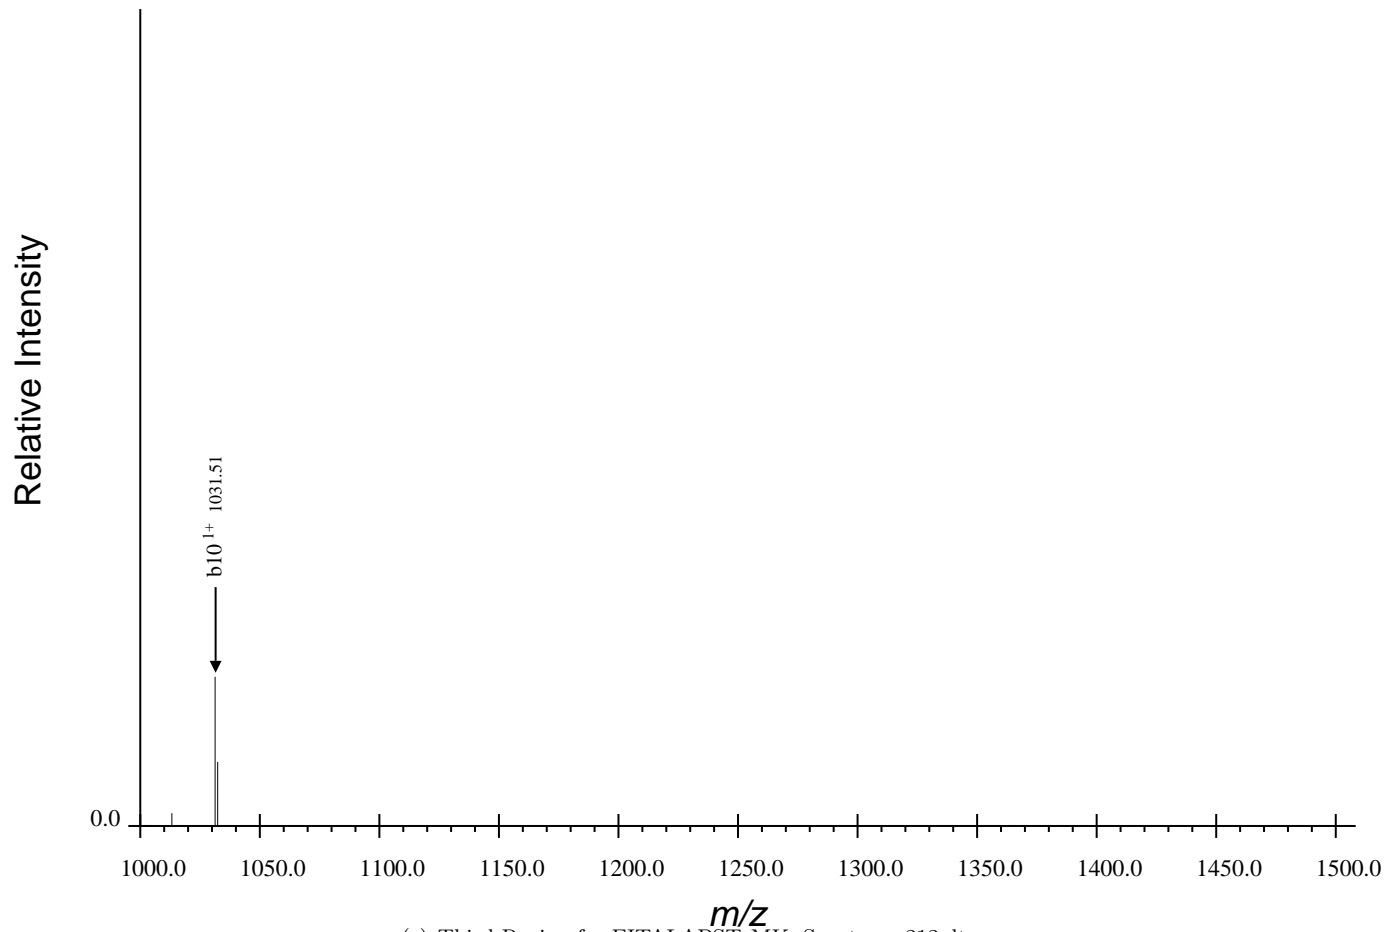

(c) Third Region for EITALAPSToMK, Spectrum 212.dta

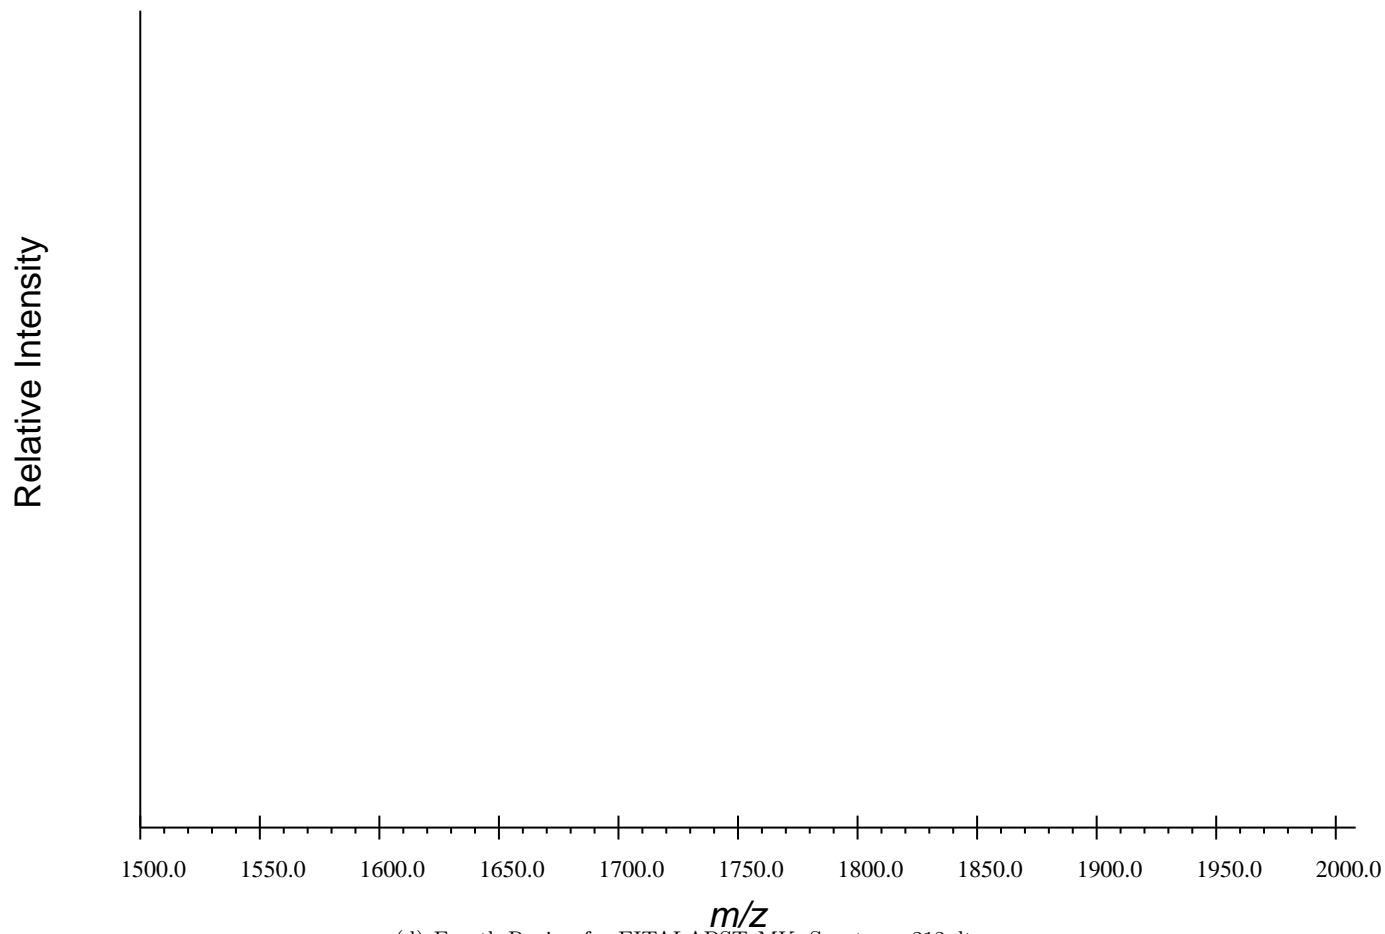

(d) Fourth Region for EITALAPSToMK, Spectrum 212.dta

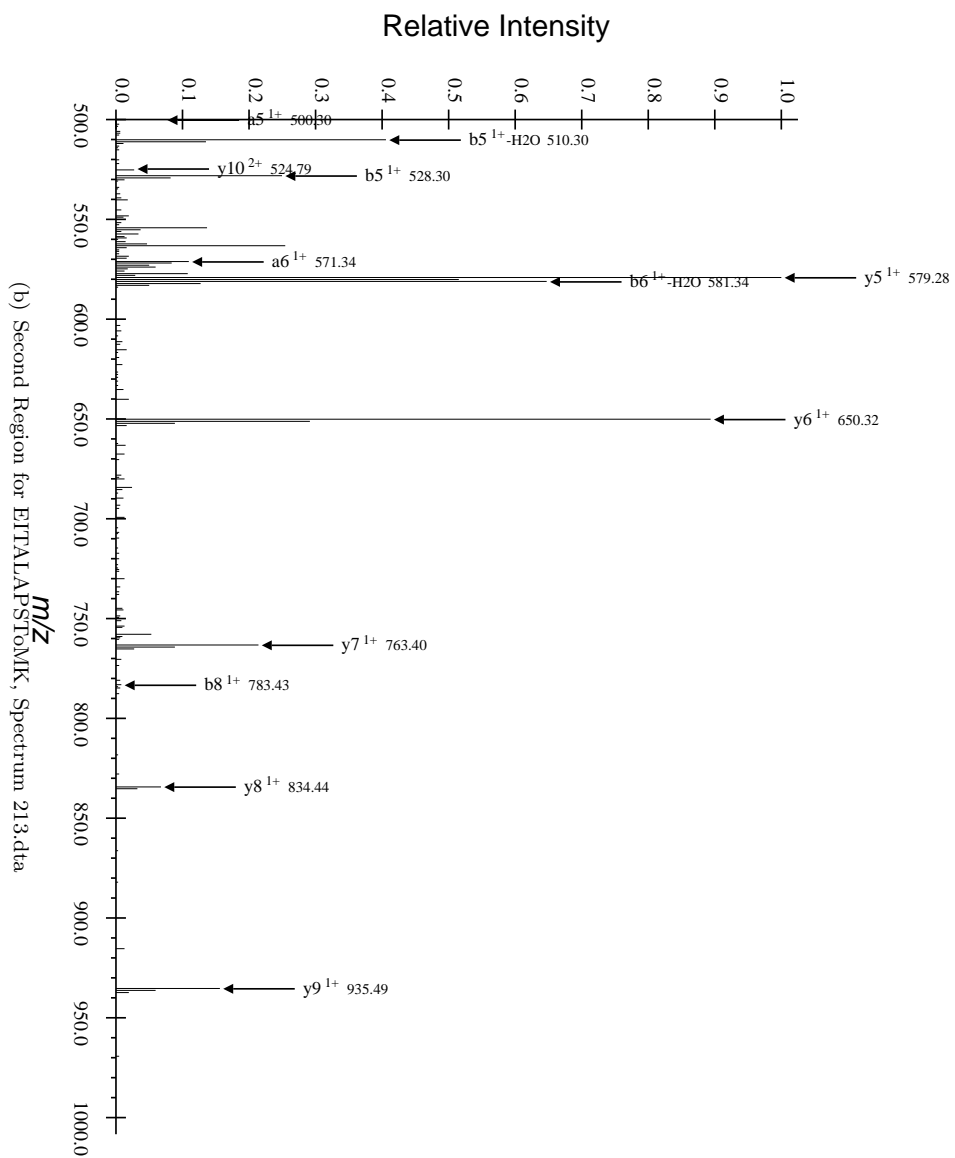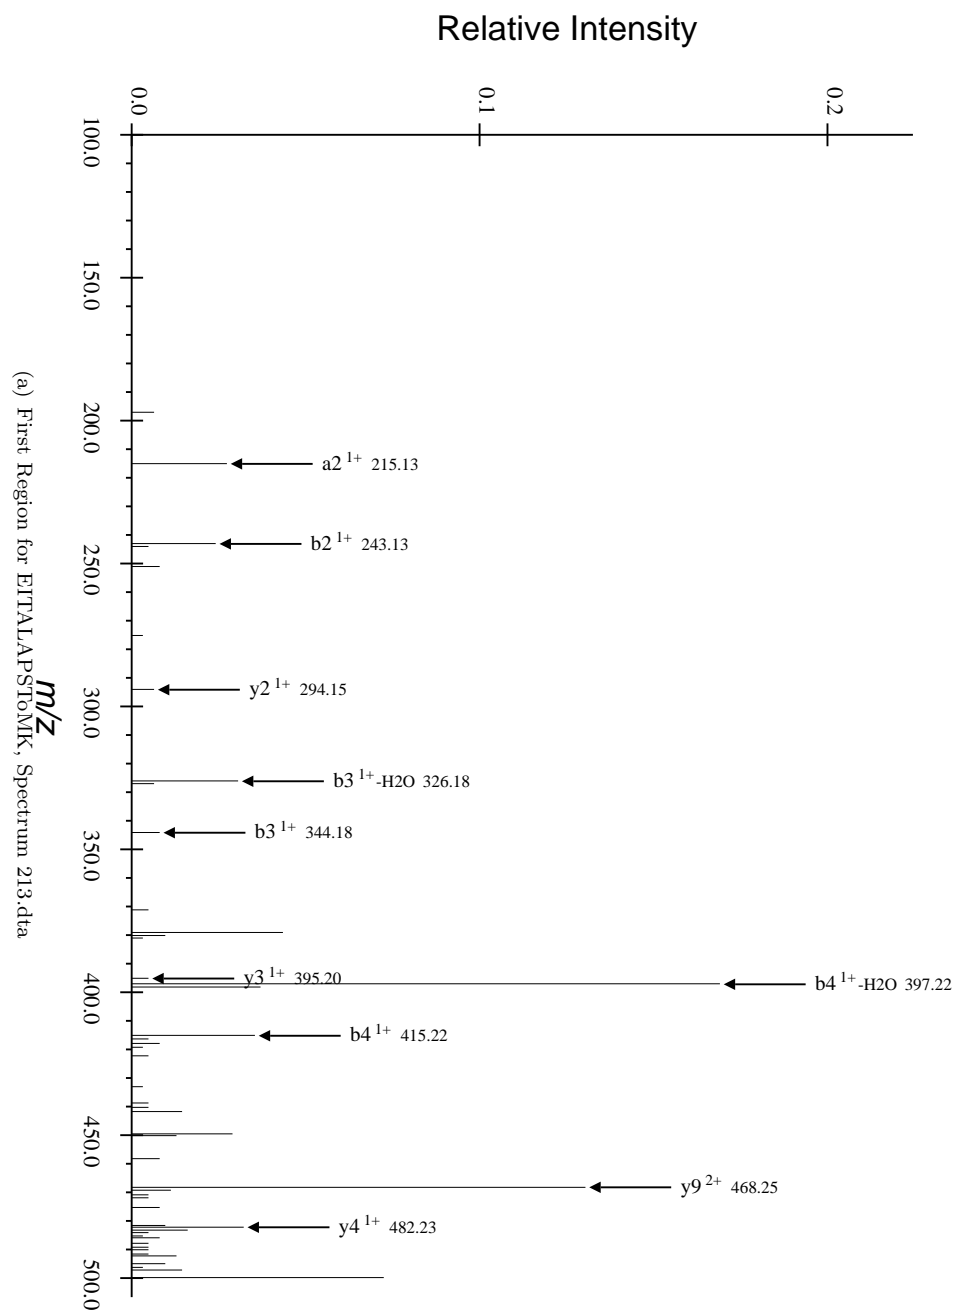

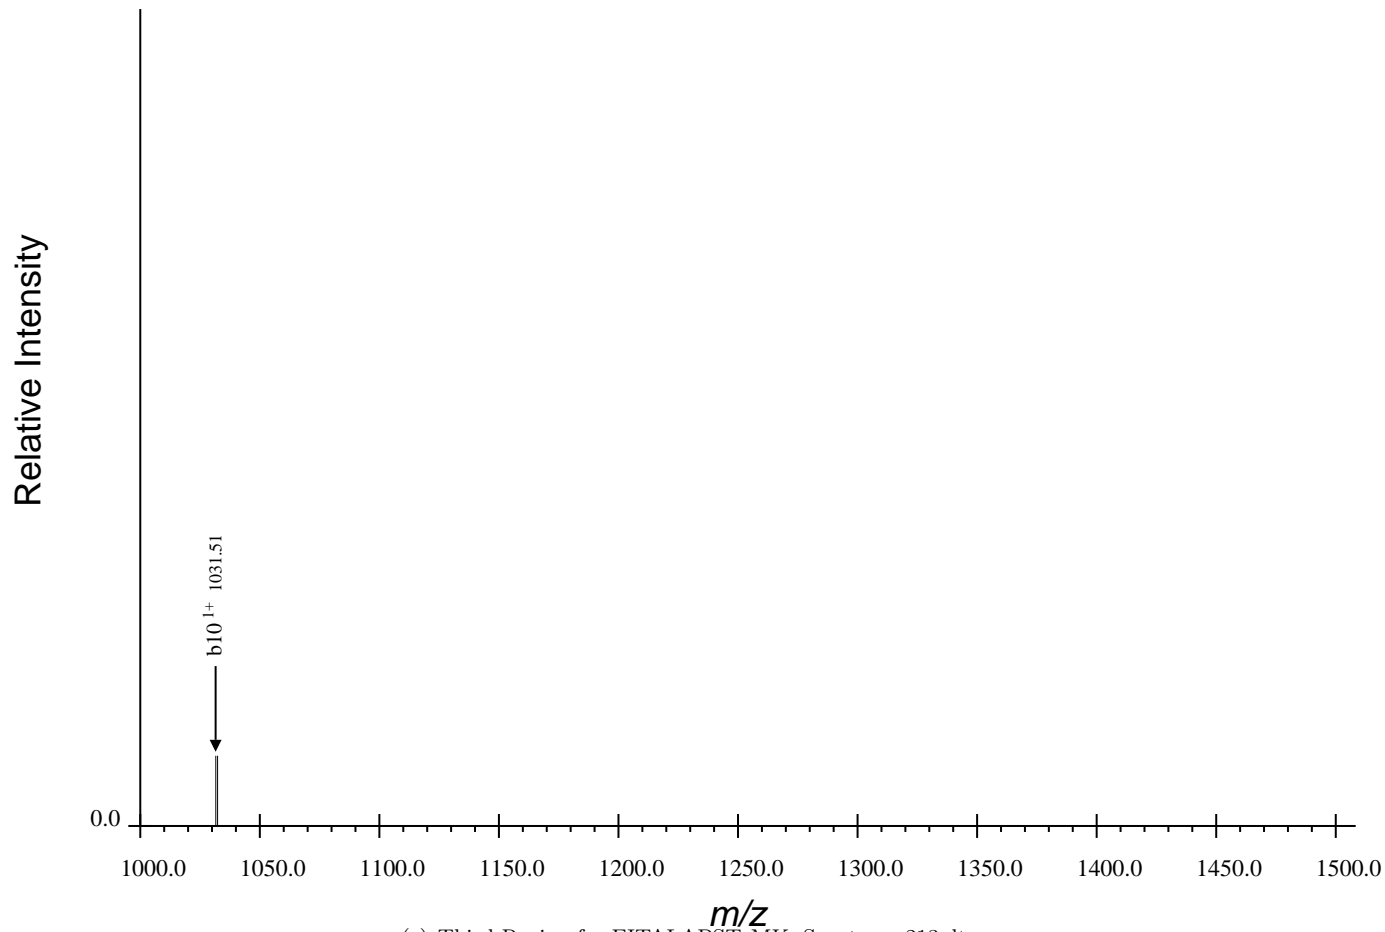

(c) Third Region for EITALAPSToMK, Spectrum 213.dta

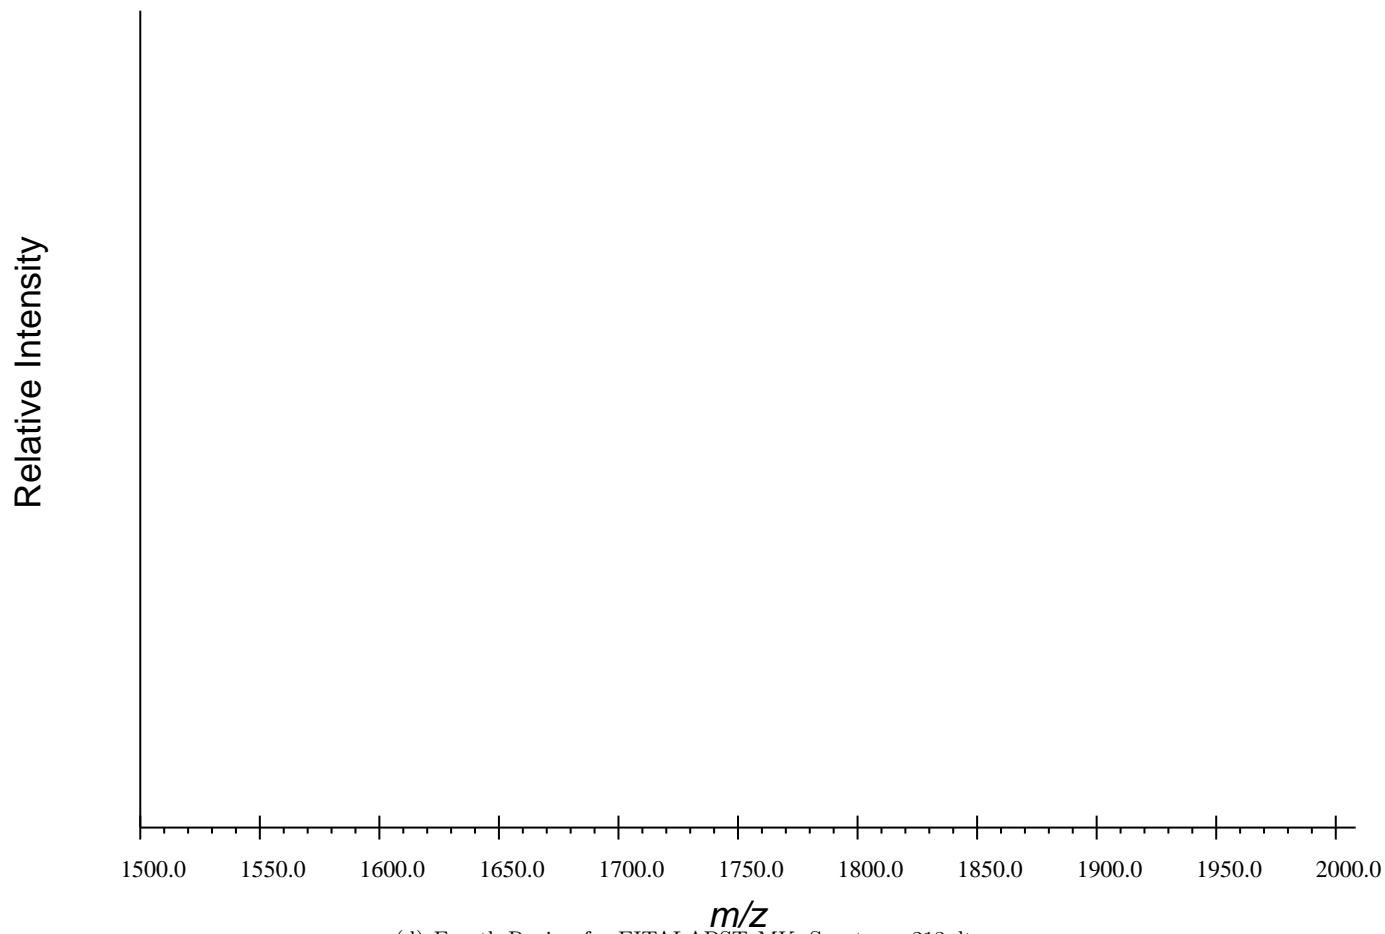

(d) Fourth Region for EITALAPSToMK, Spectrum 213.dta



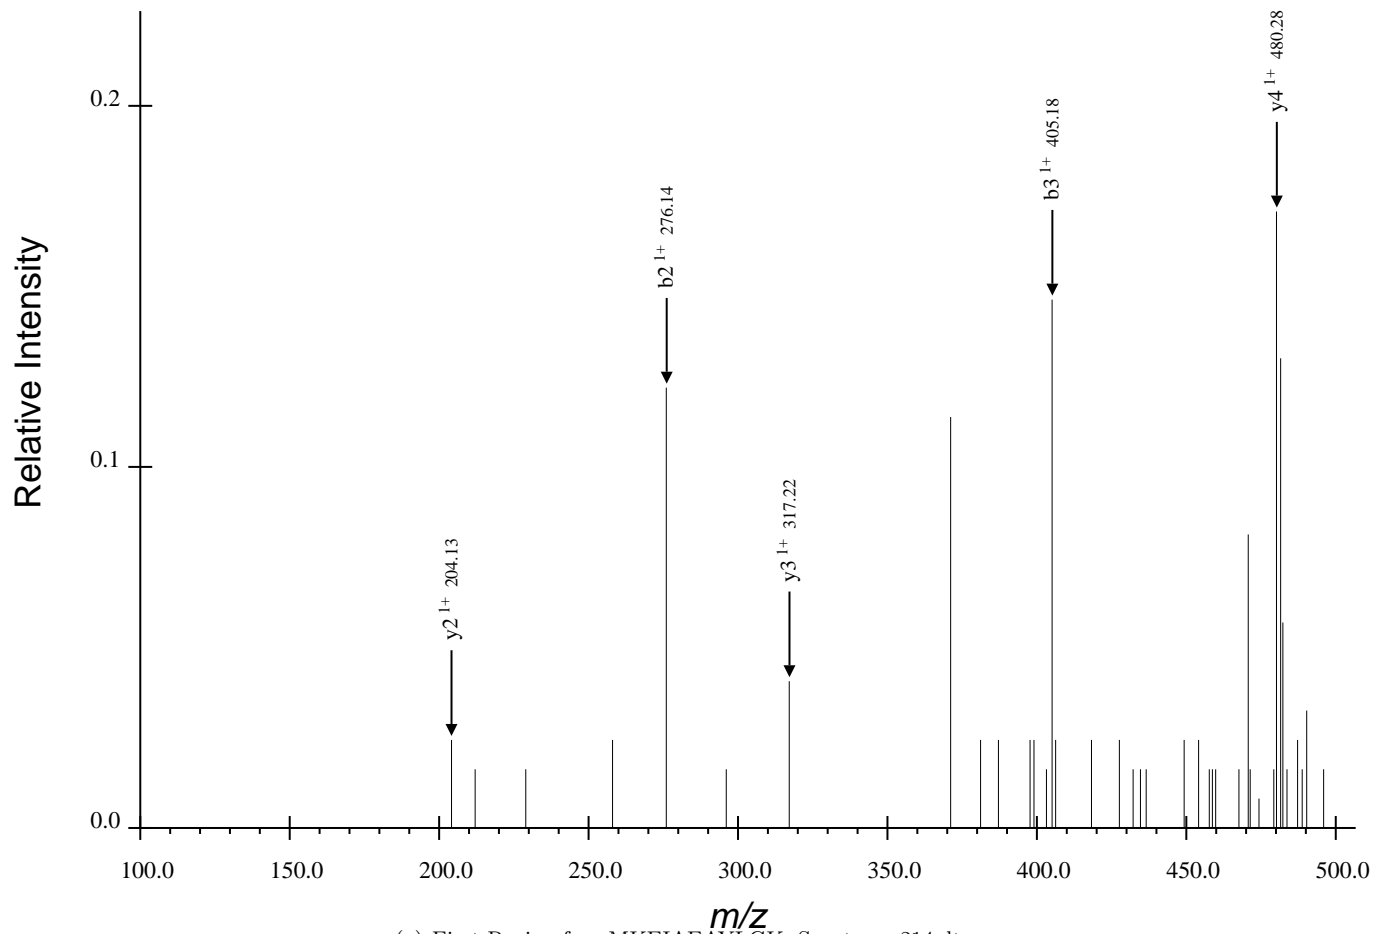

(a) First Region for oMKEIAEAYLGK, Spectrum 214.dta

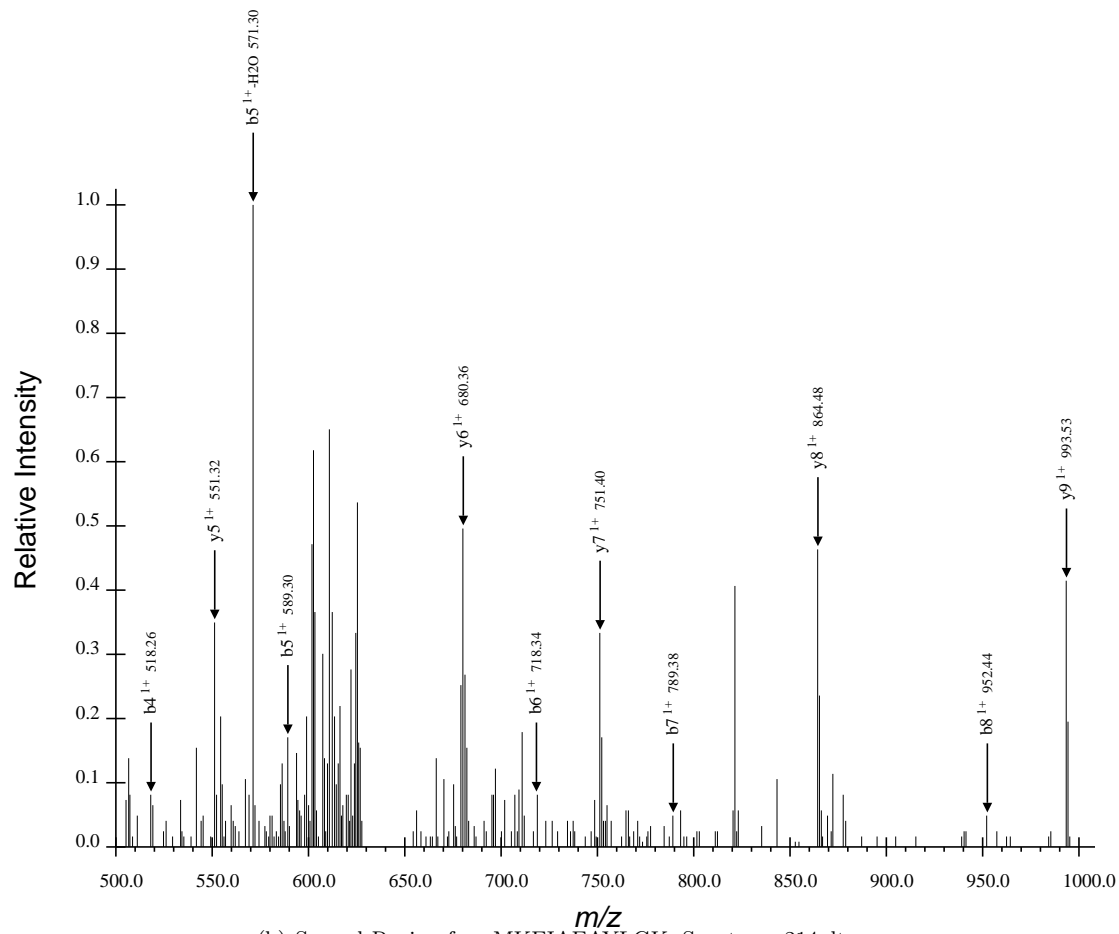

(b) Second Region for oMKEIAEAYLGK, Spectrum 214.dta

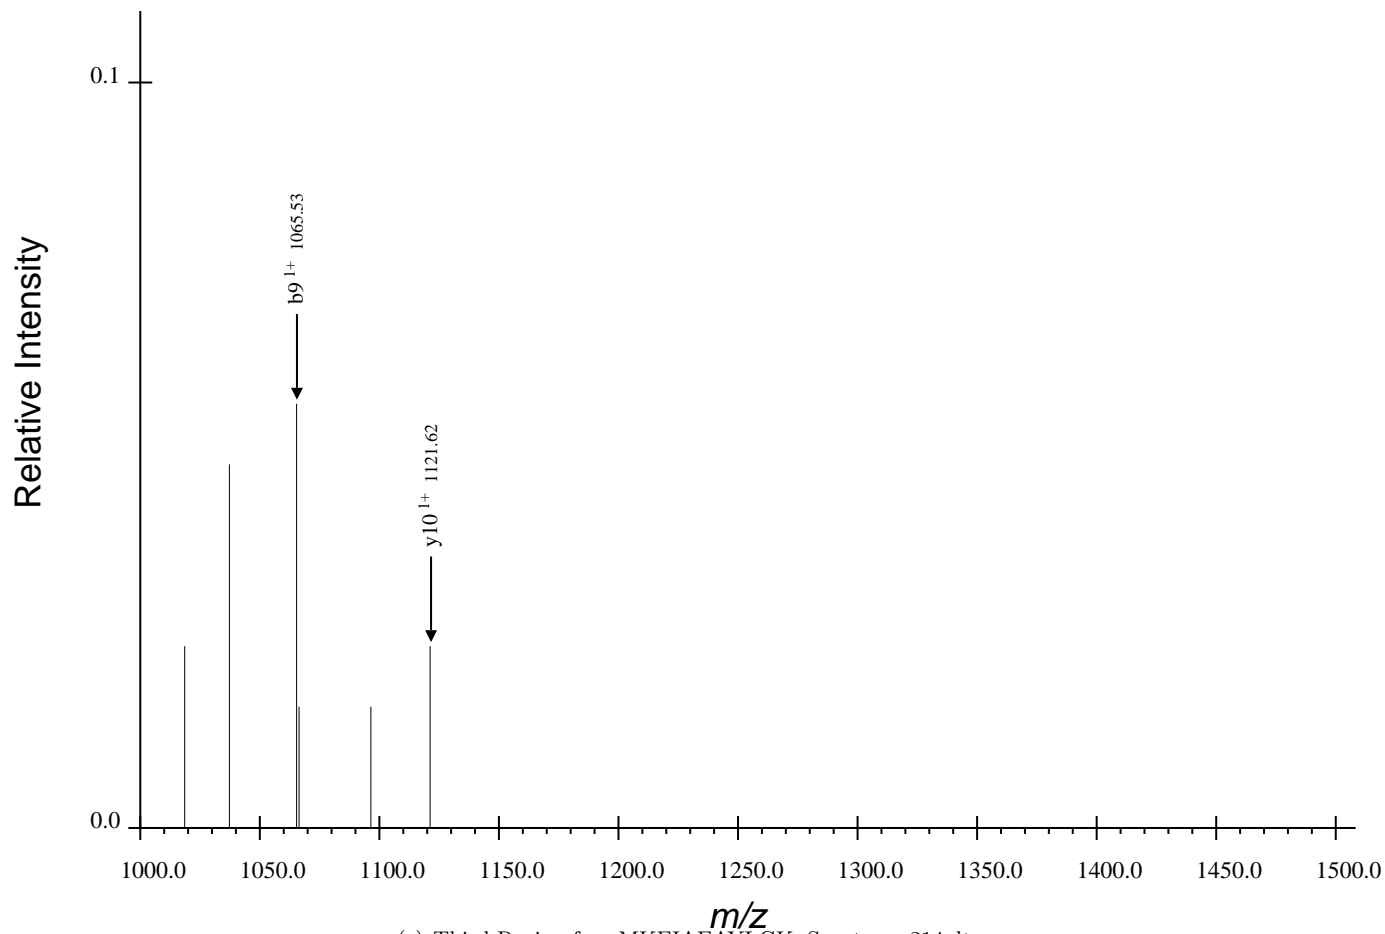

(c) Third Region for oMKEIAEAYLGK, Spectrum 214.dta

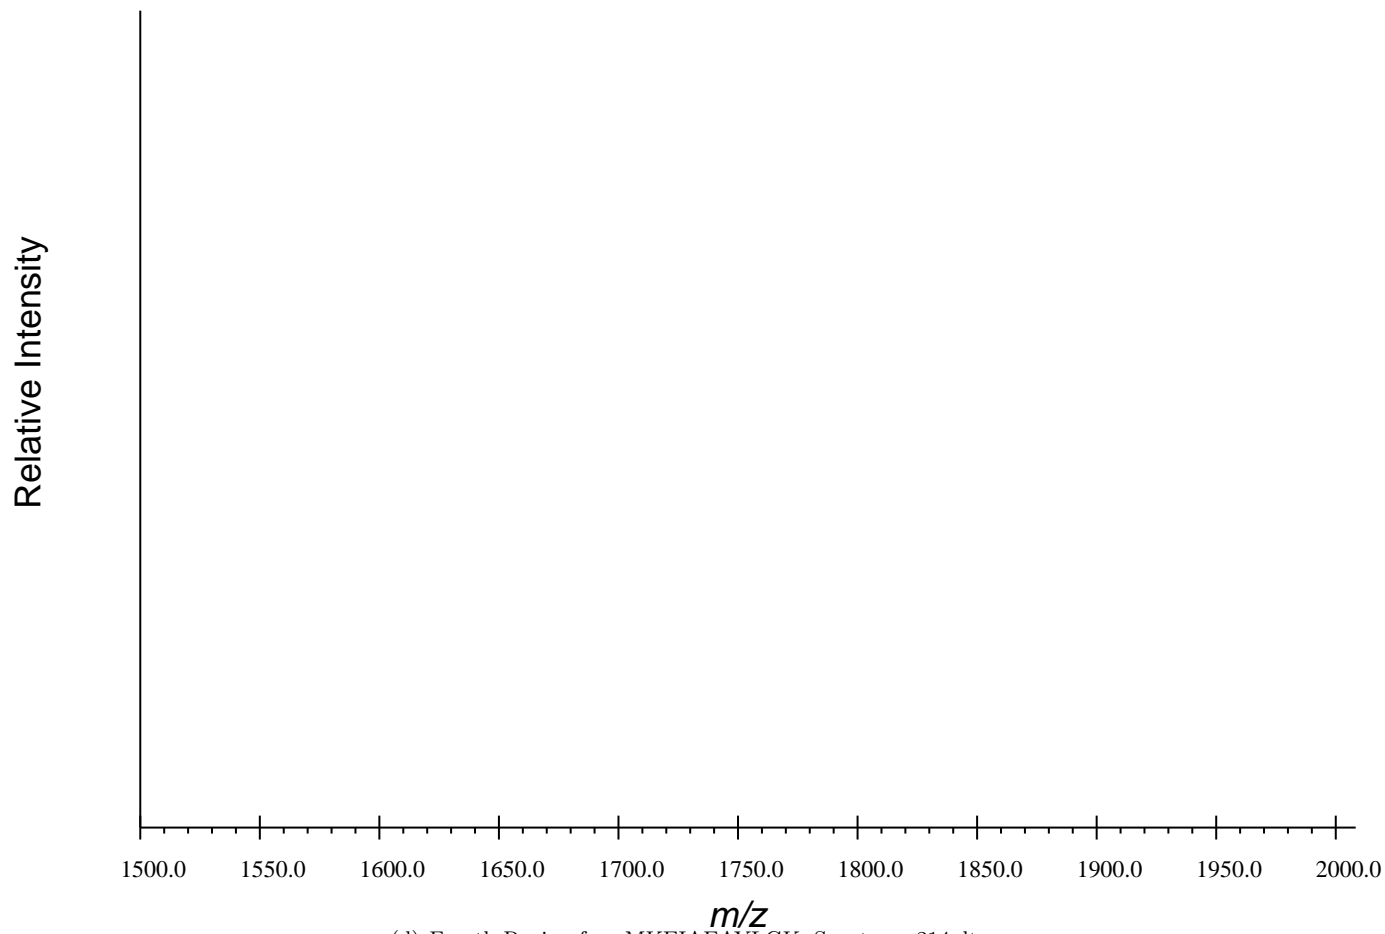

(d) Fourth Region for oMKEIAEAYLGK, Spectrum 214.dta

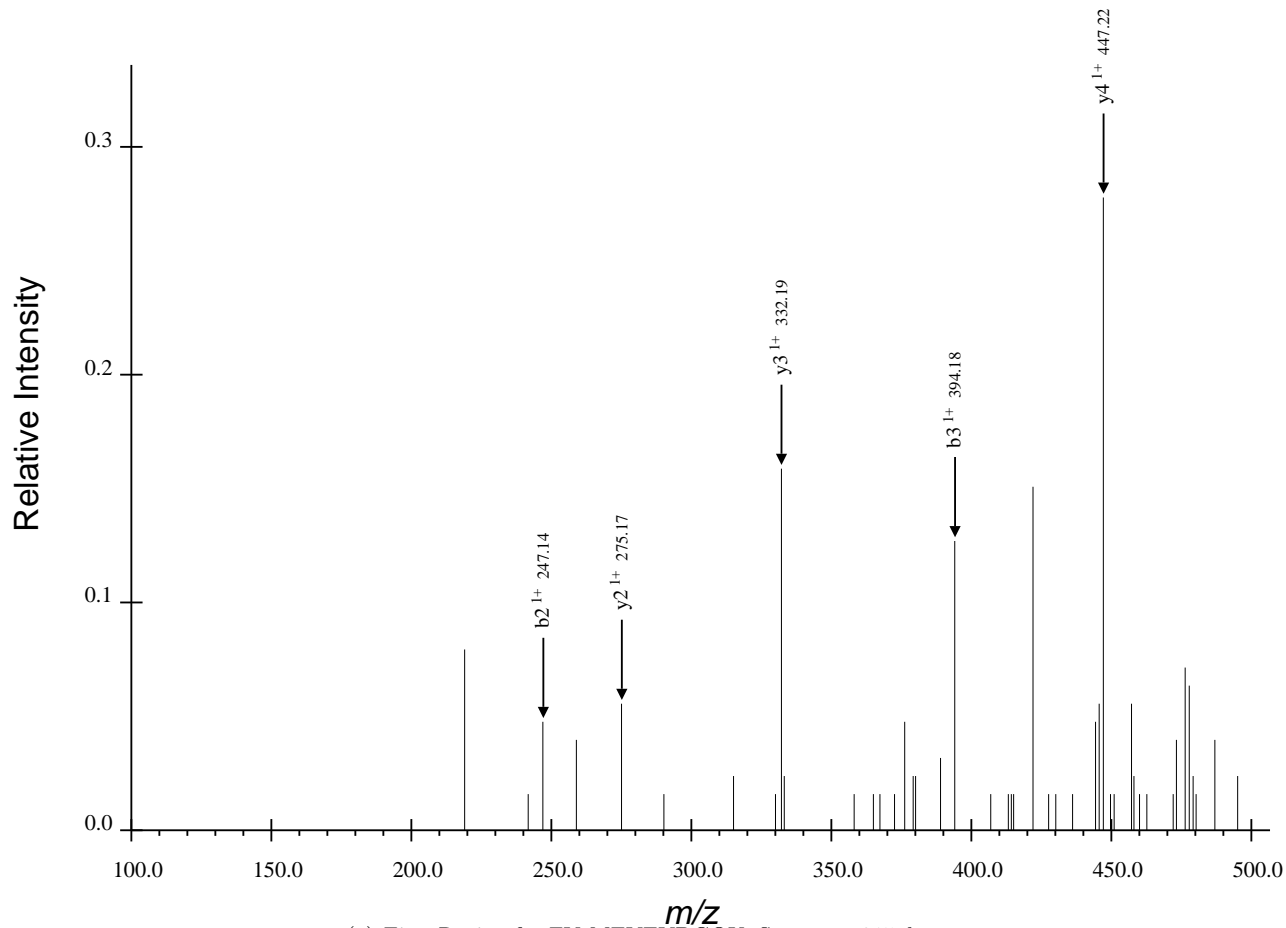

(a) First Region for FVoMEVEVDGQK, Spectrum 215.dta

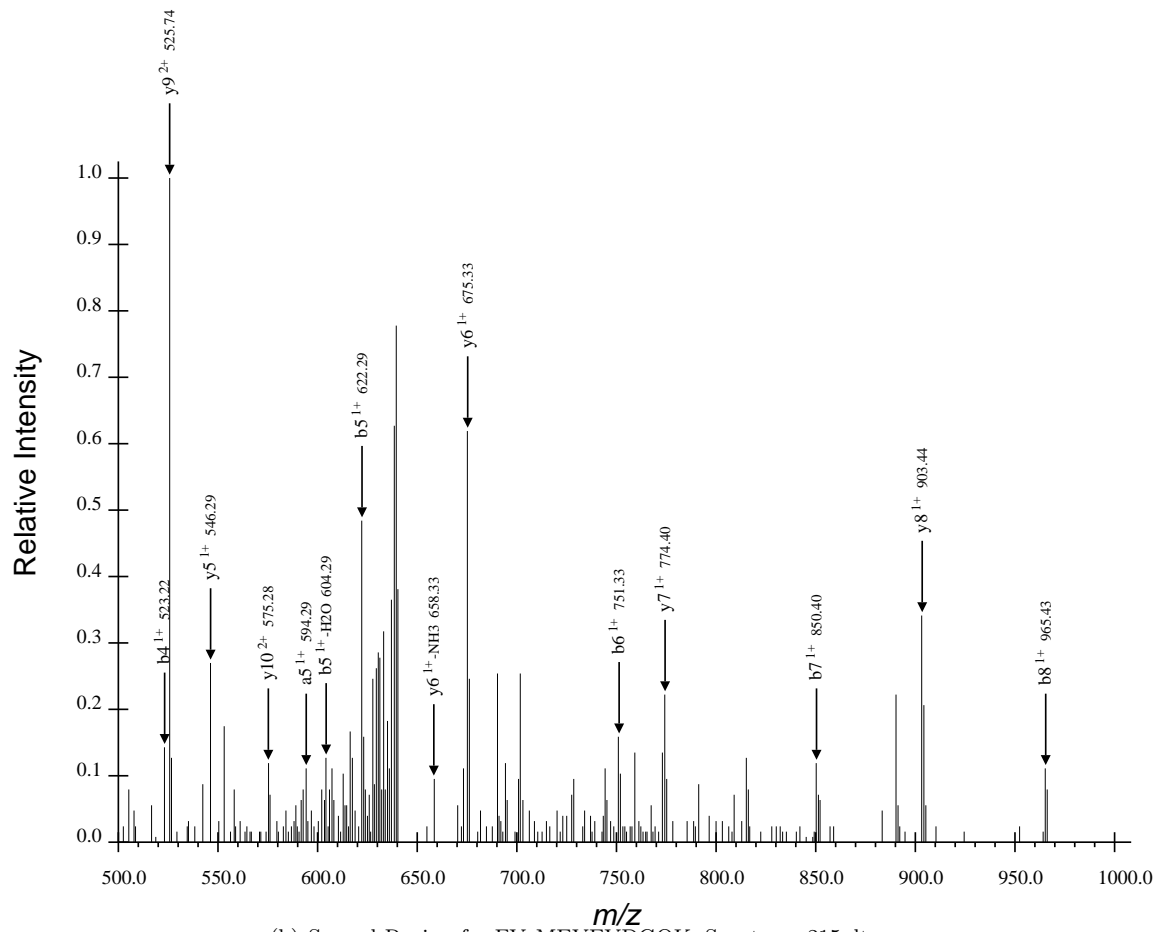

(b) Second Region for FVoMEVEVDGQK, Spectrum 215.dta

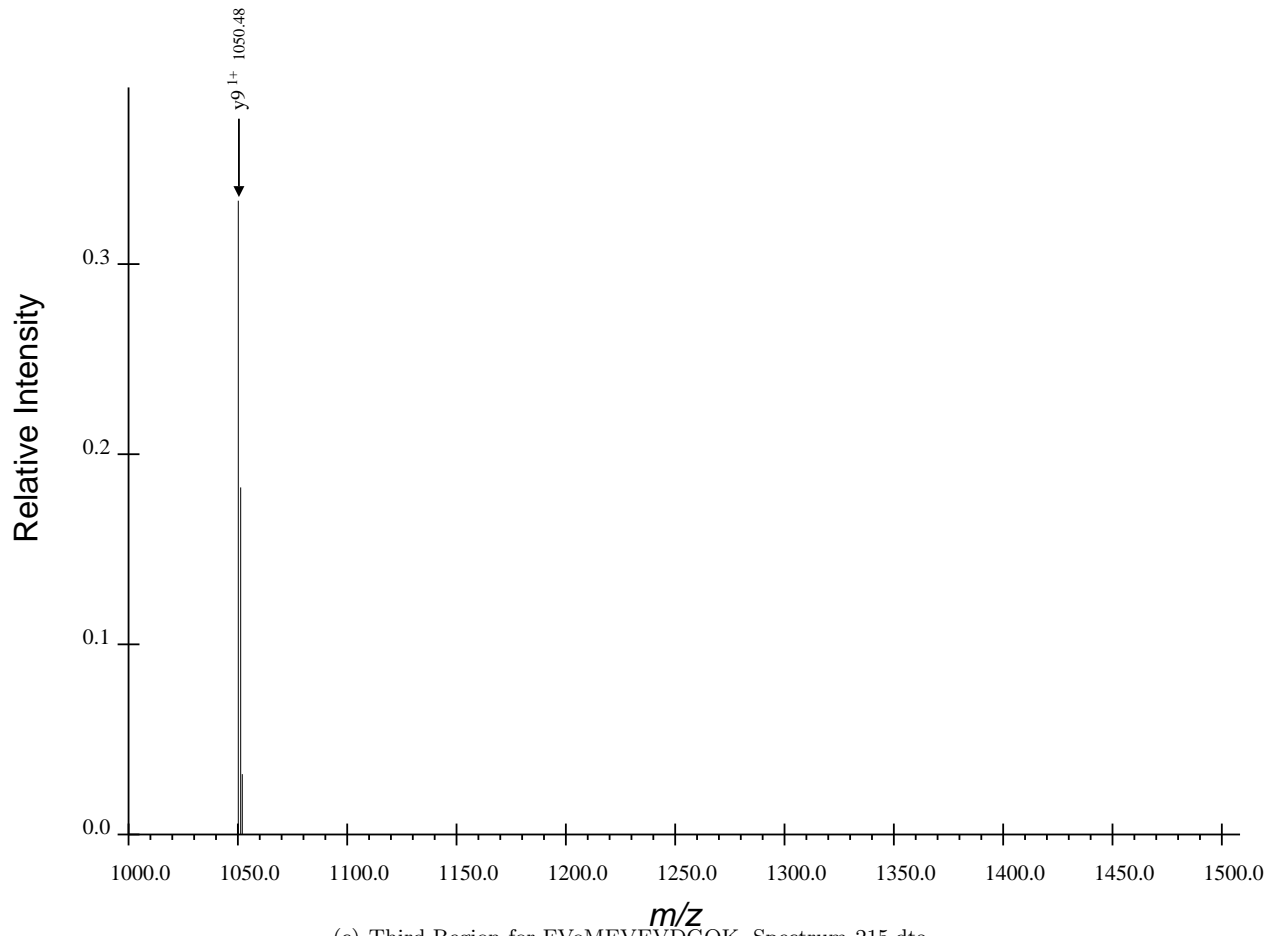

(c) Third Region for FVoMEVEVDGQK, Spectrum 215.dta

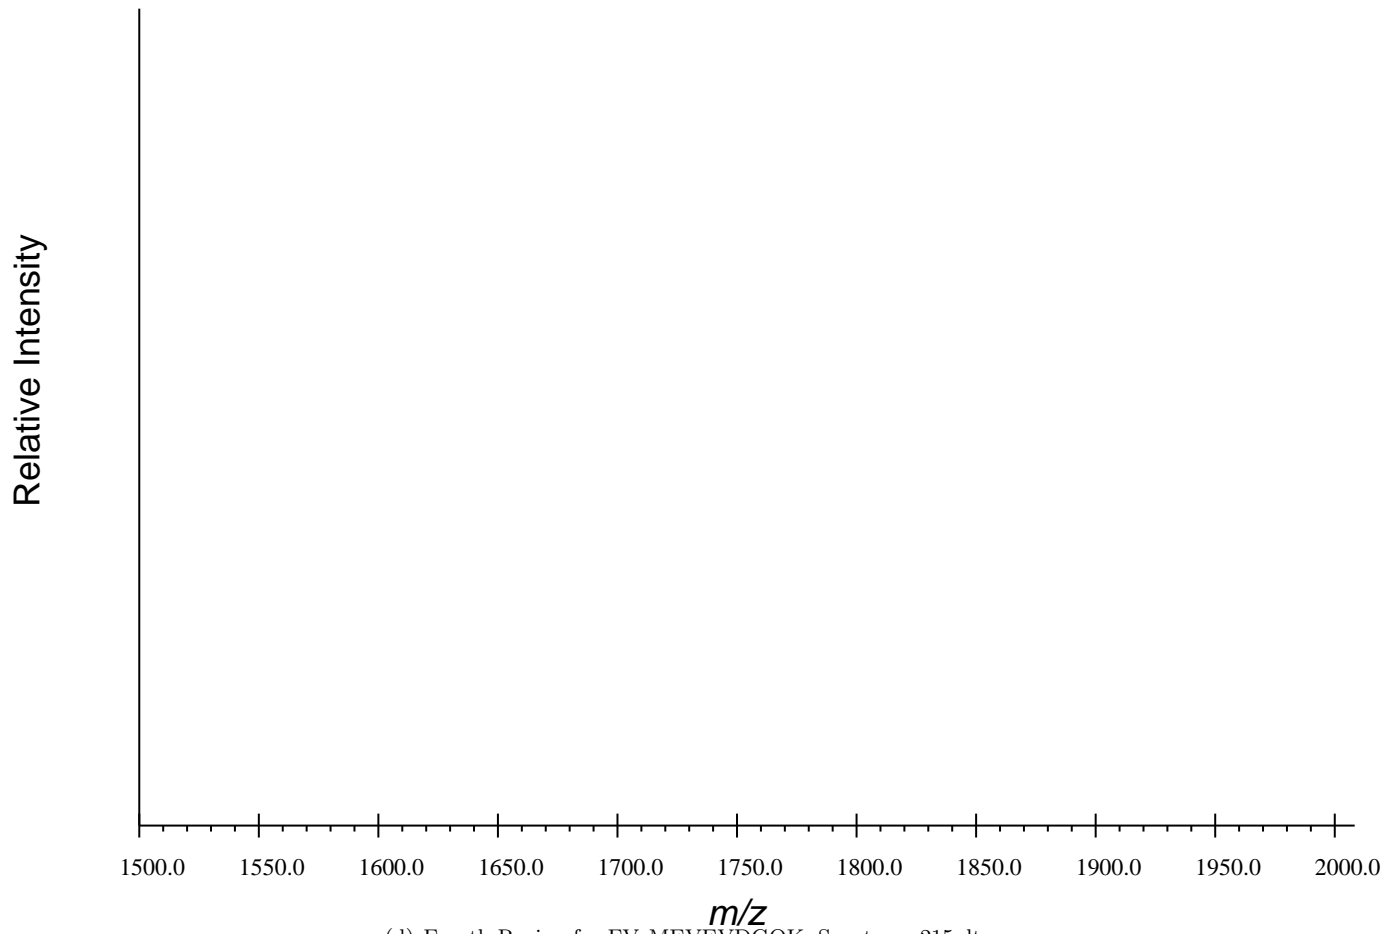

(d) Fourth Region for FVoMEVEVDGQK, Spectrum 215.dta

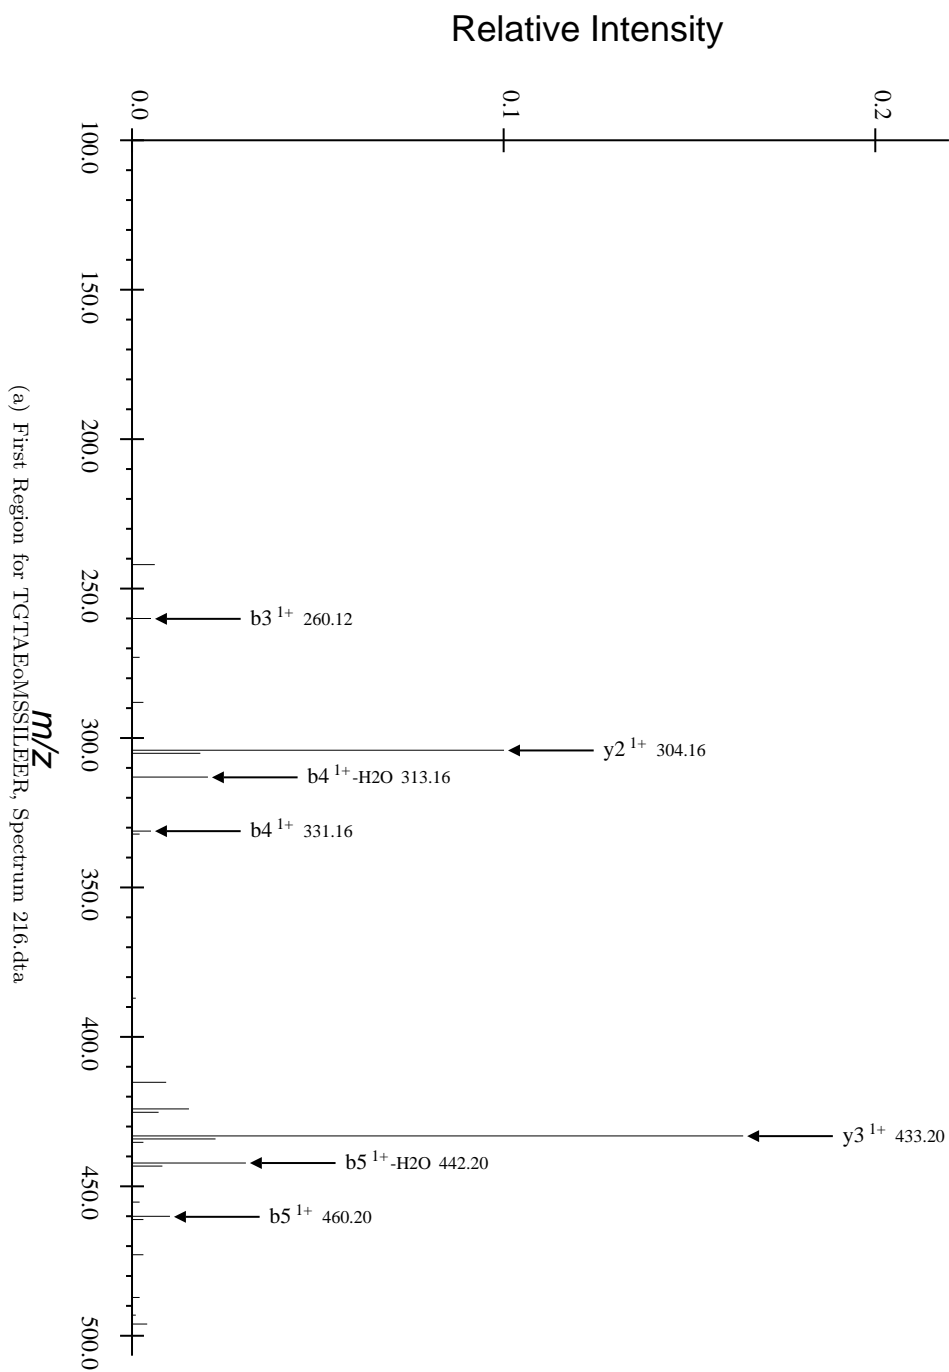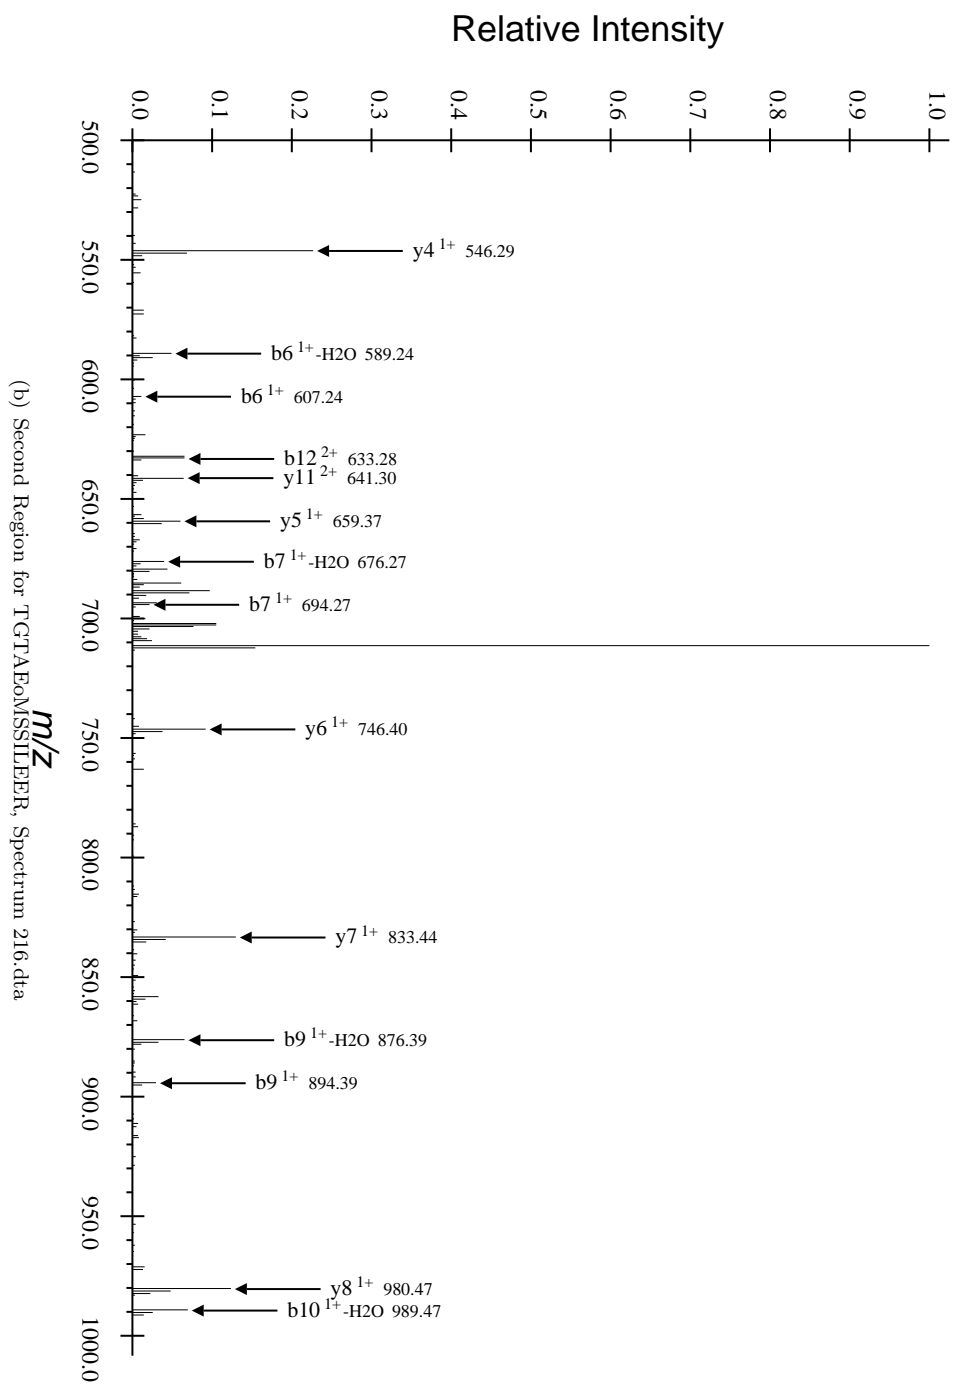

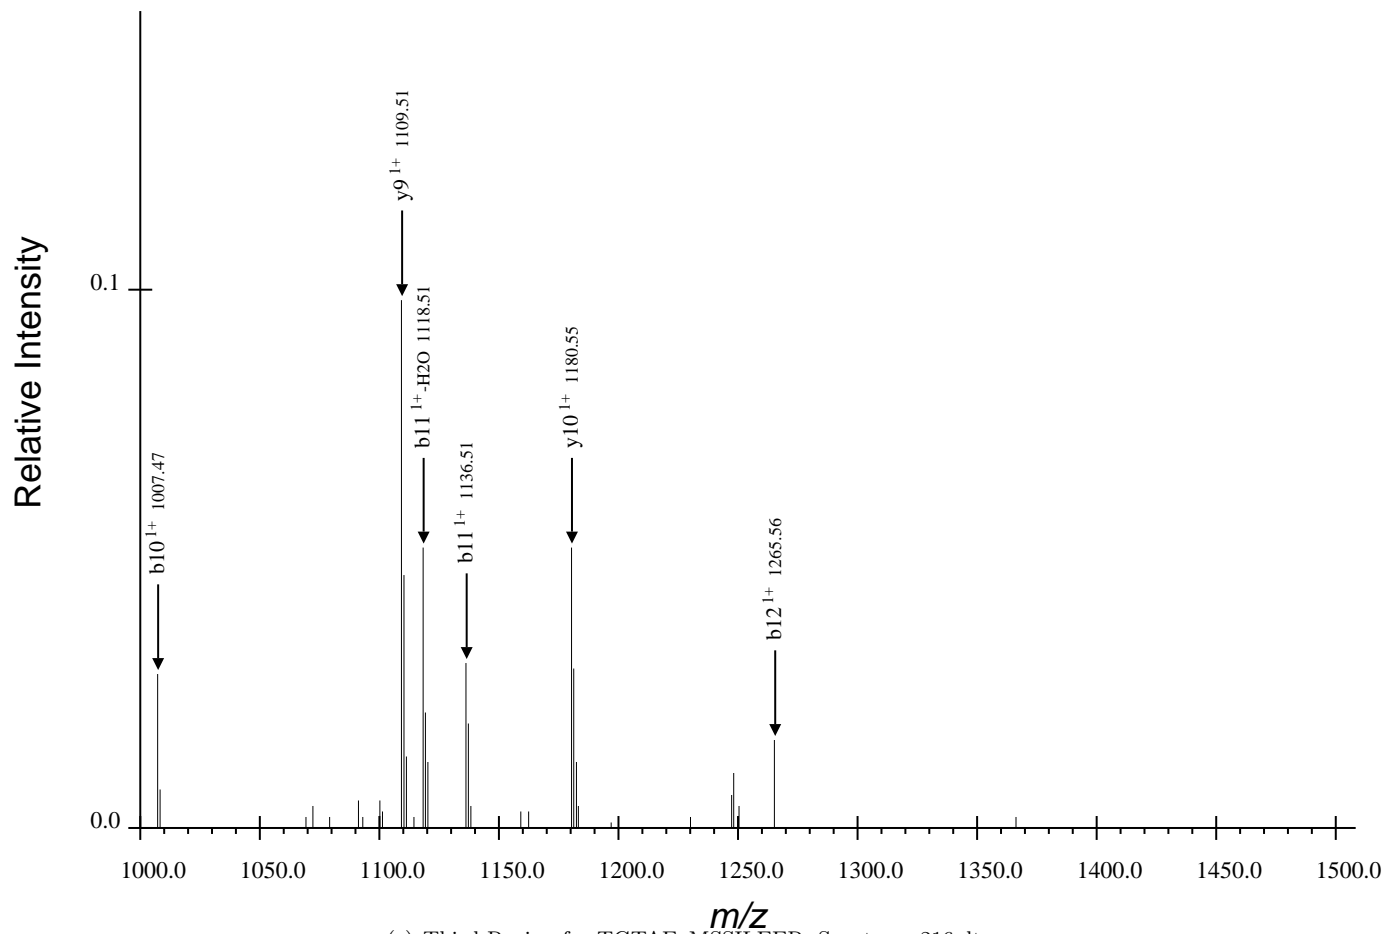

(c) Third Region for TGTAEoMSSILEER, Spectrum 216.dta

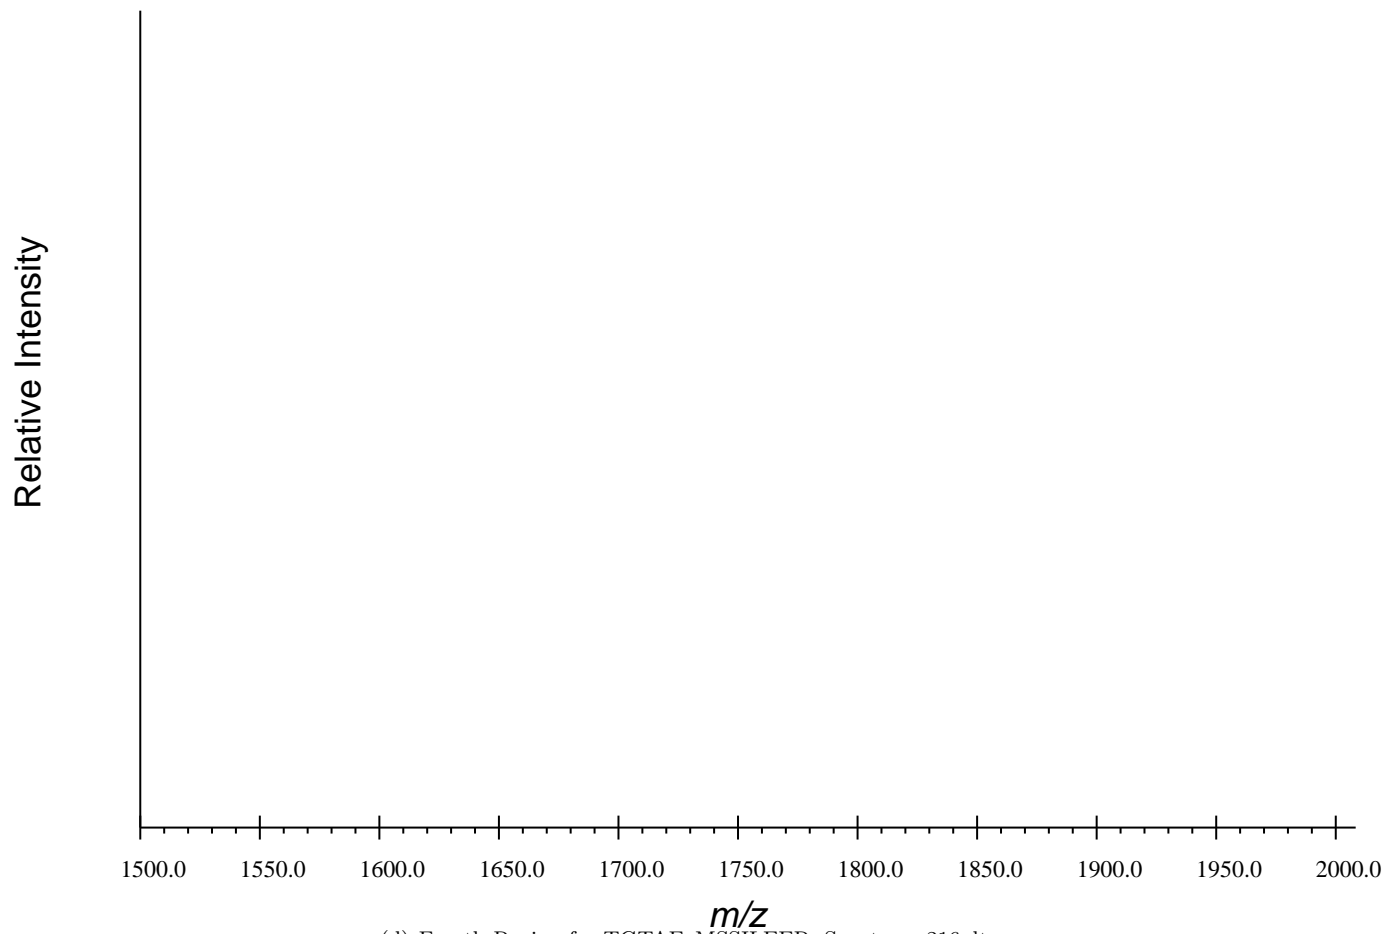

(d) Fourth Region for TGTAEoMSSILEER, Spectrum 216.dta

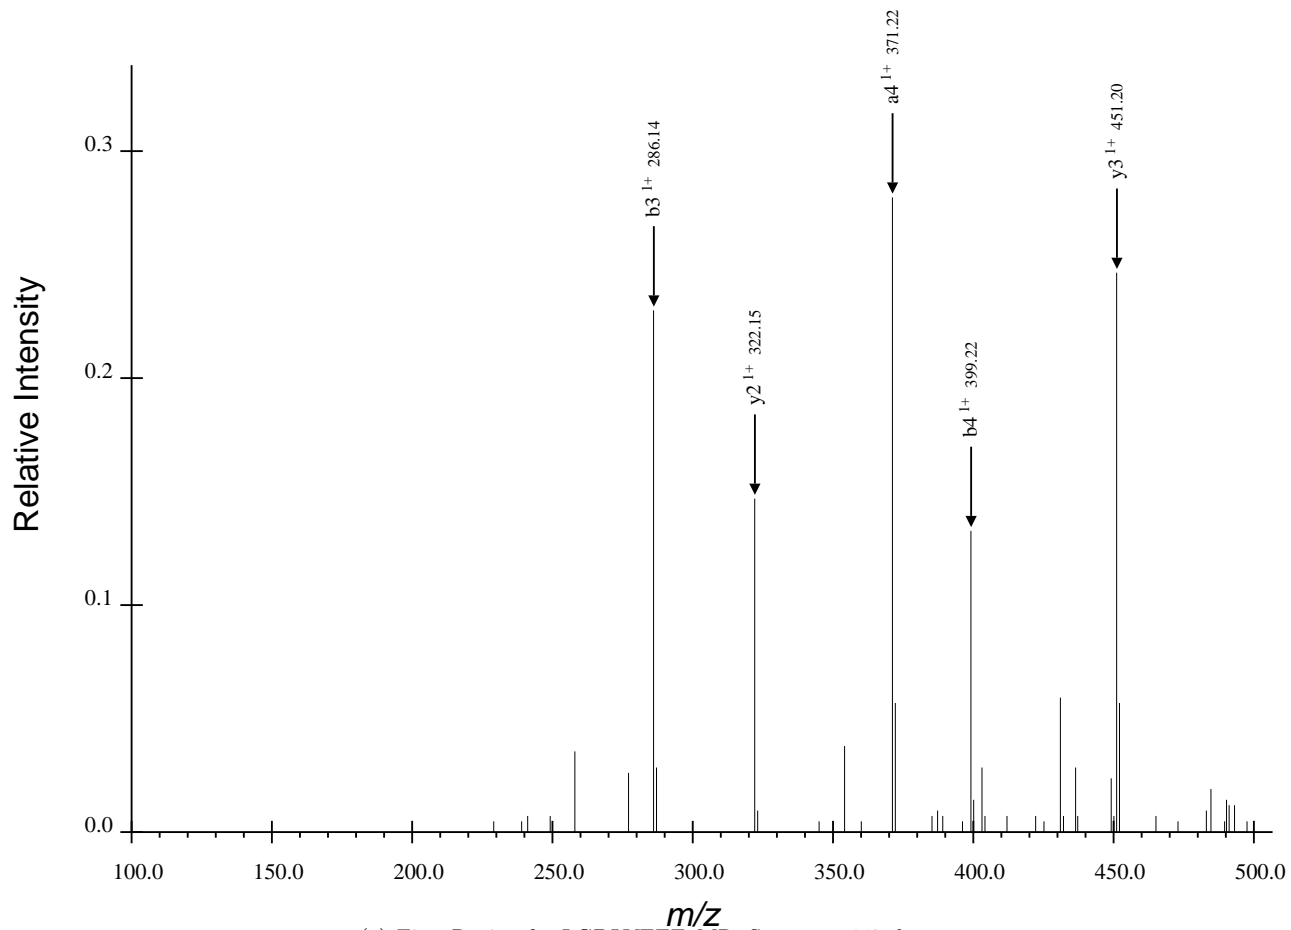

(a) First Region for LGDLYEEEoMR, Spectrum 217.dta

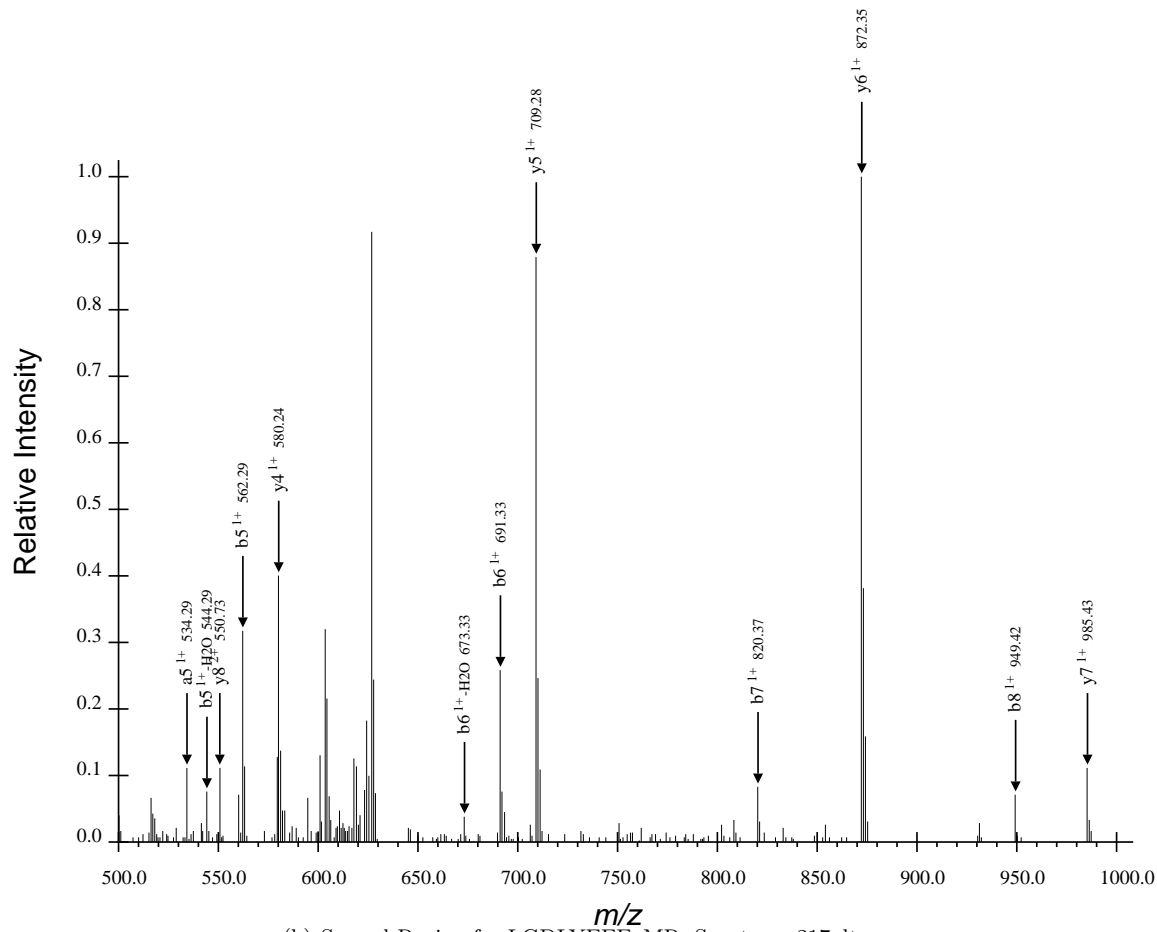

(b) Second Region for LGDLYEEEoMR, Spectrum 217.dta

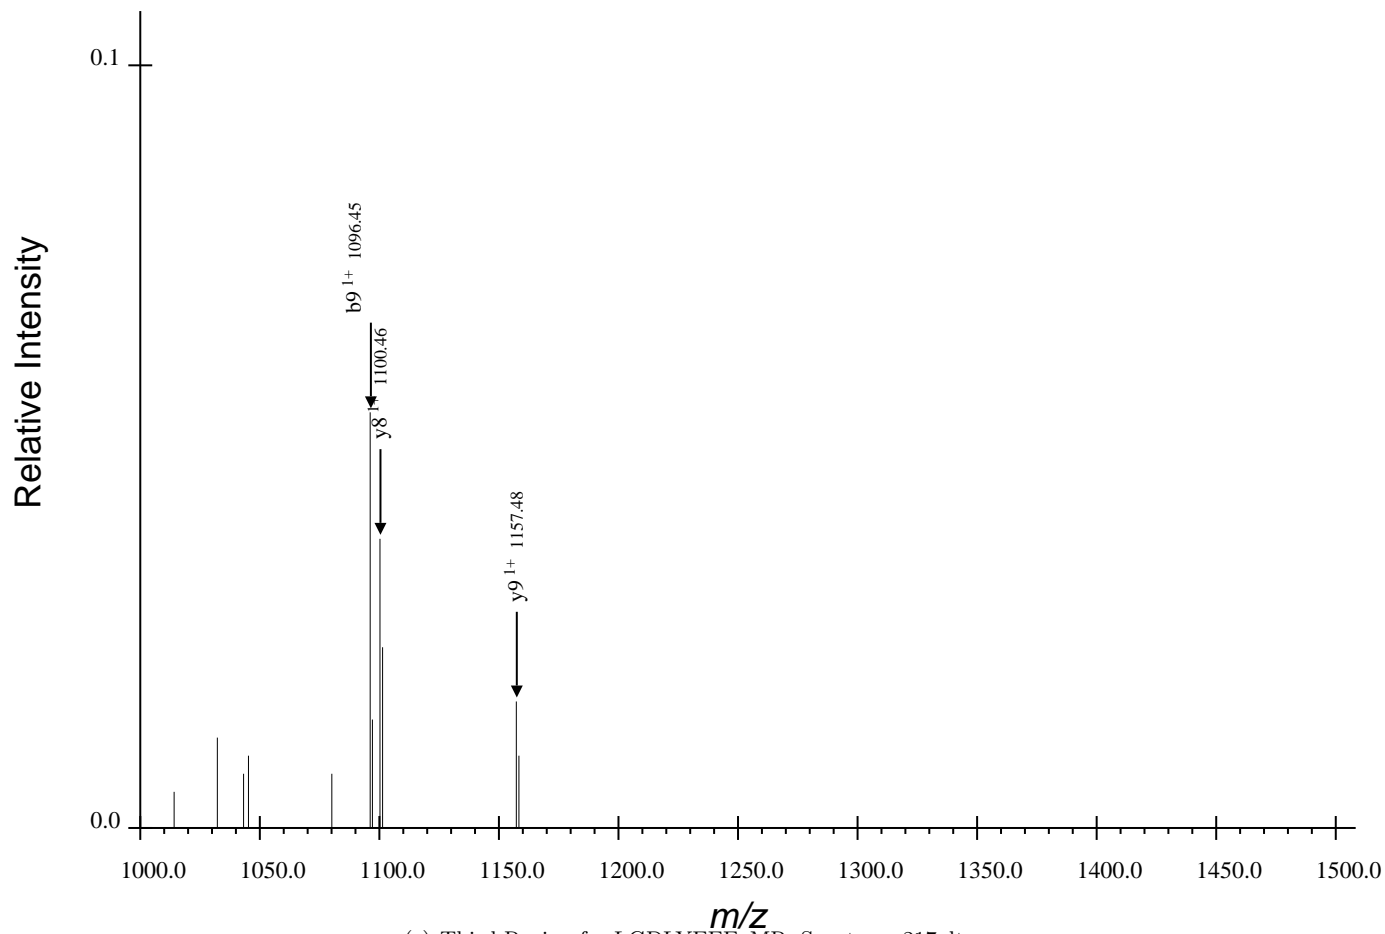

(c) Third Region for LGDLYEEEoMR, Spectrum 217.dta

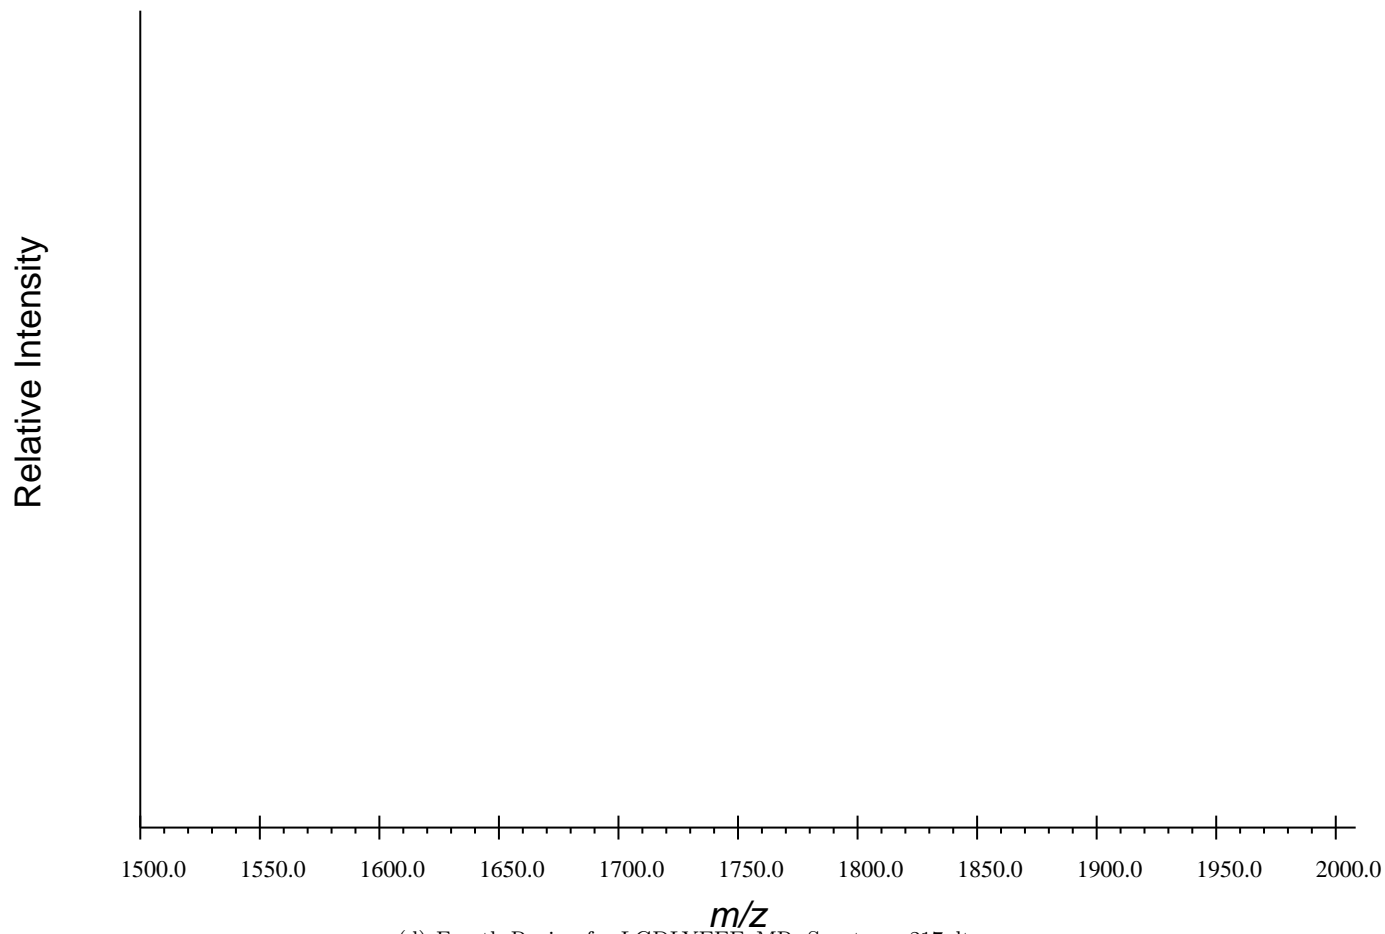

(d) Fourth Region for LGDLYEEEoMR, Spectrum 217.dta



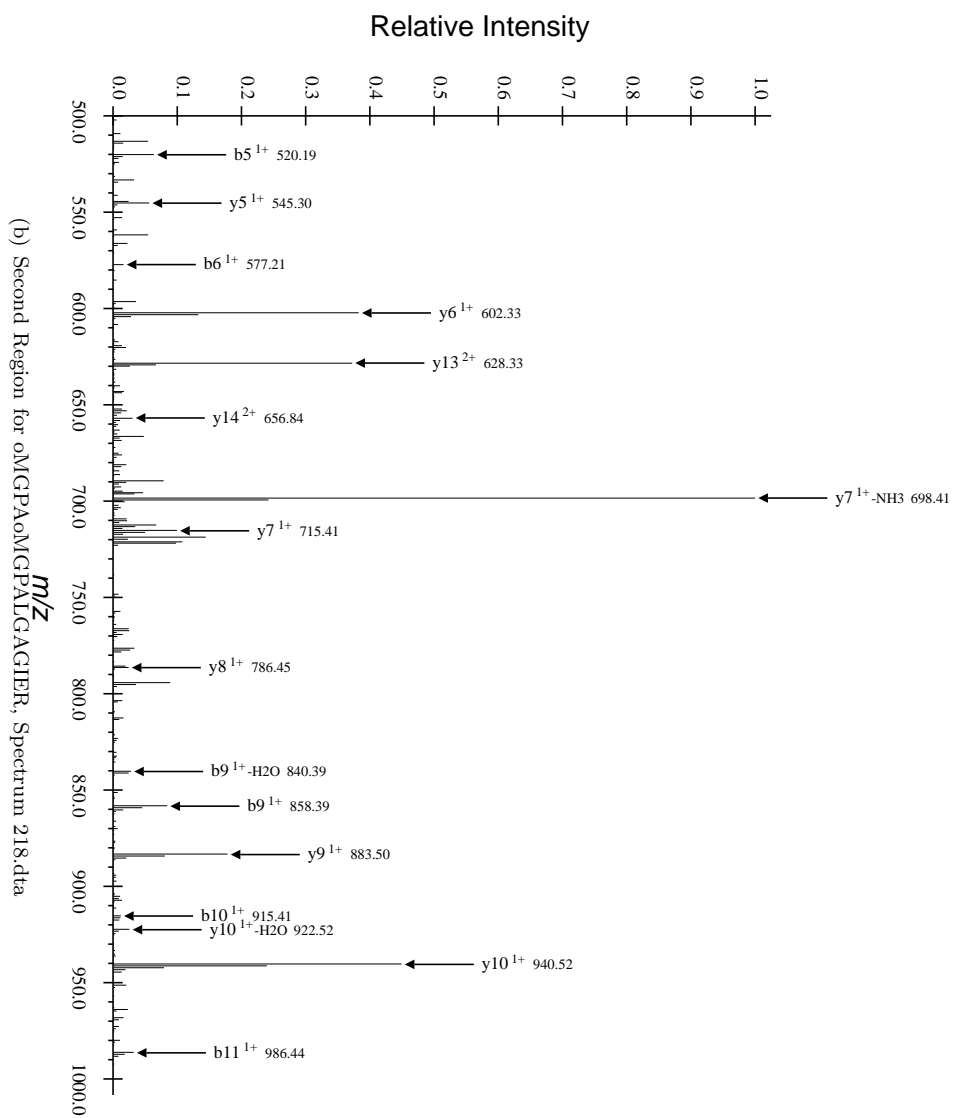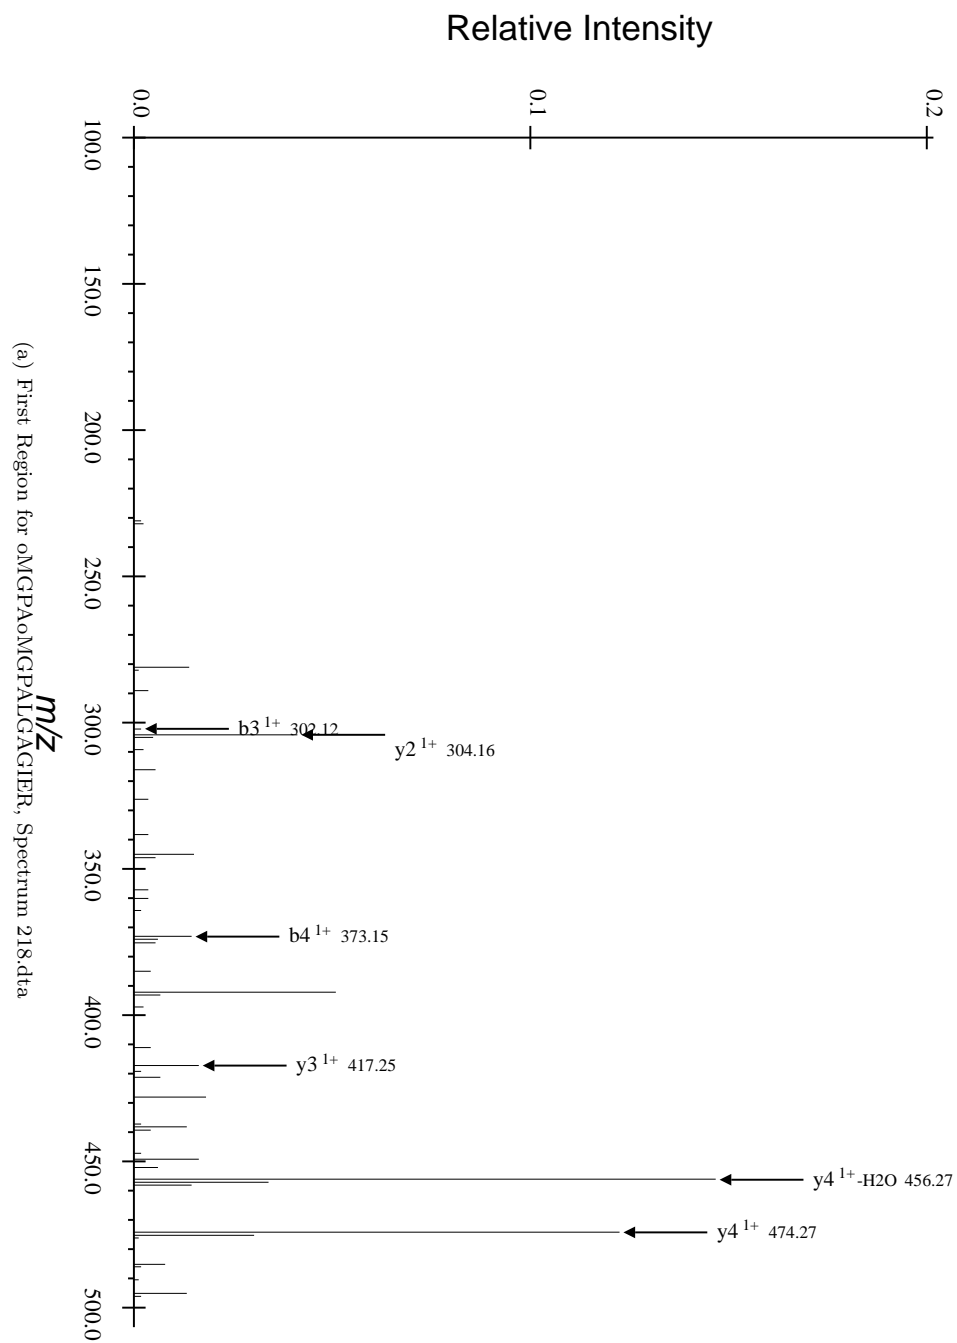

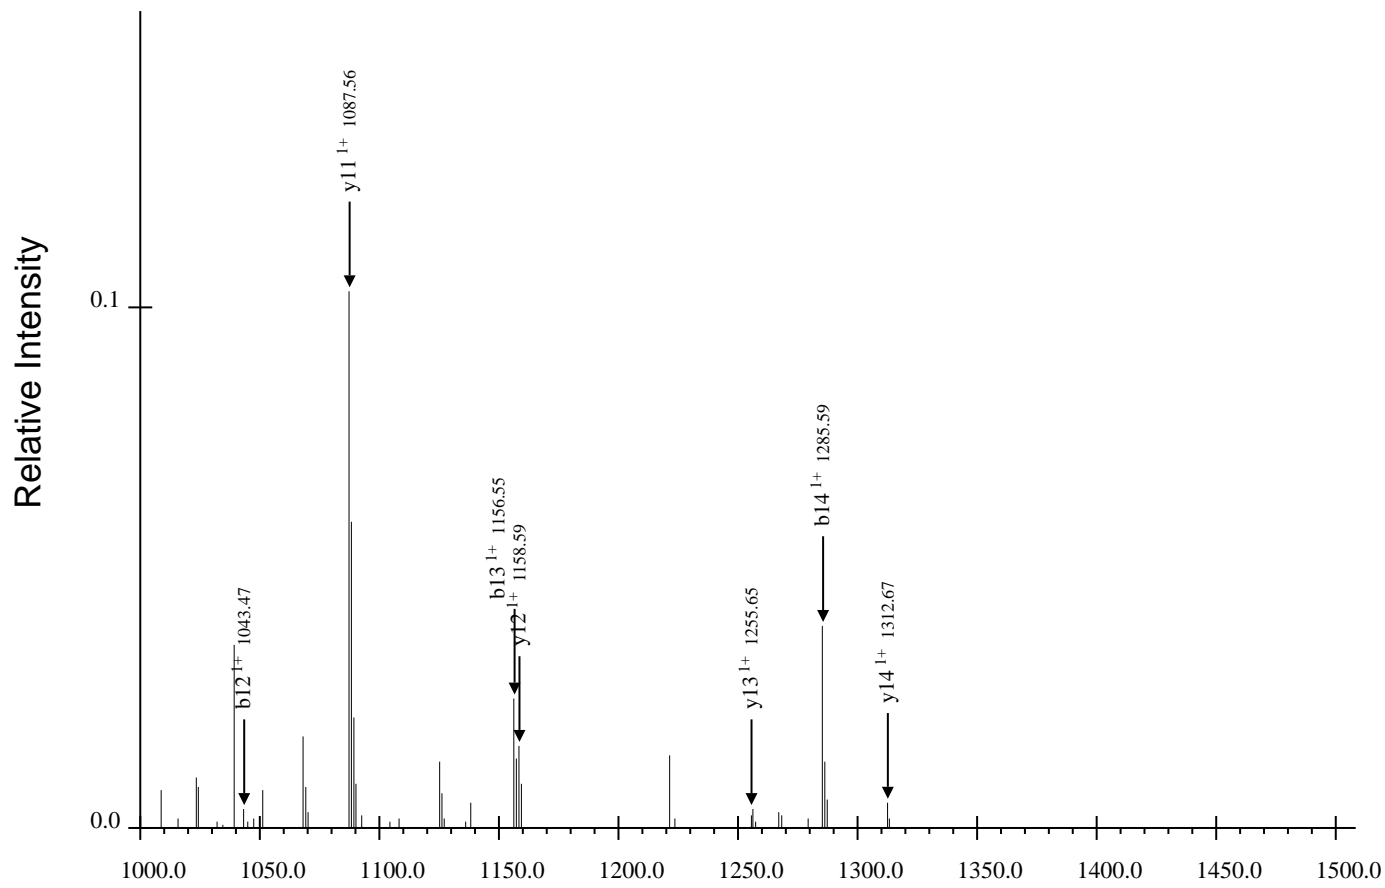

(c) Third Region for oMGPAoMGPALGAGIER, Spectrum 218.dta

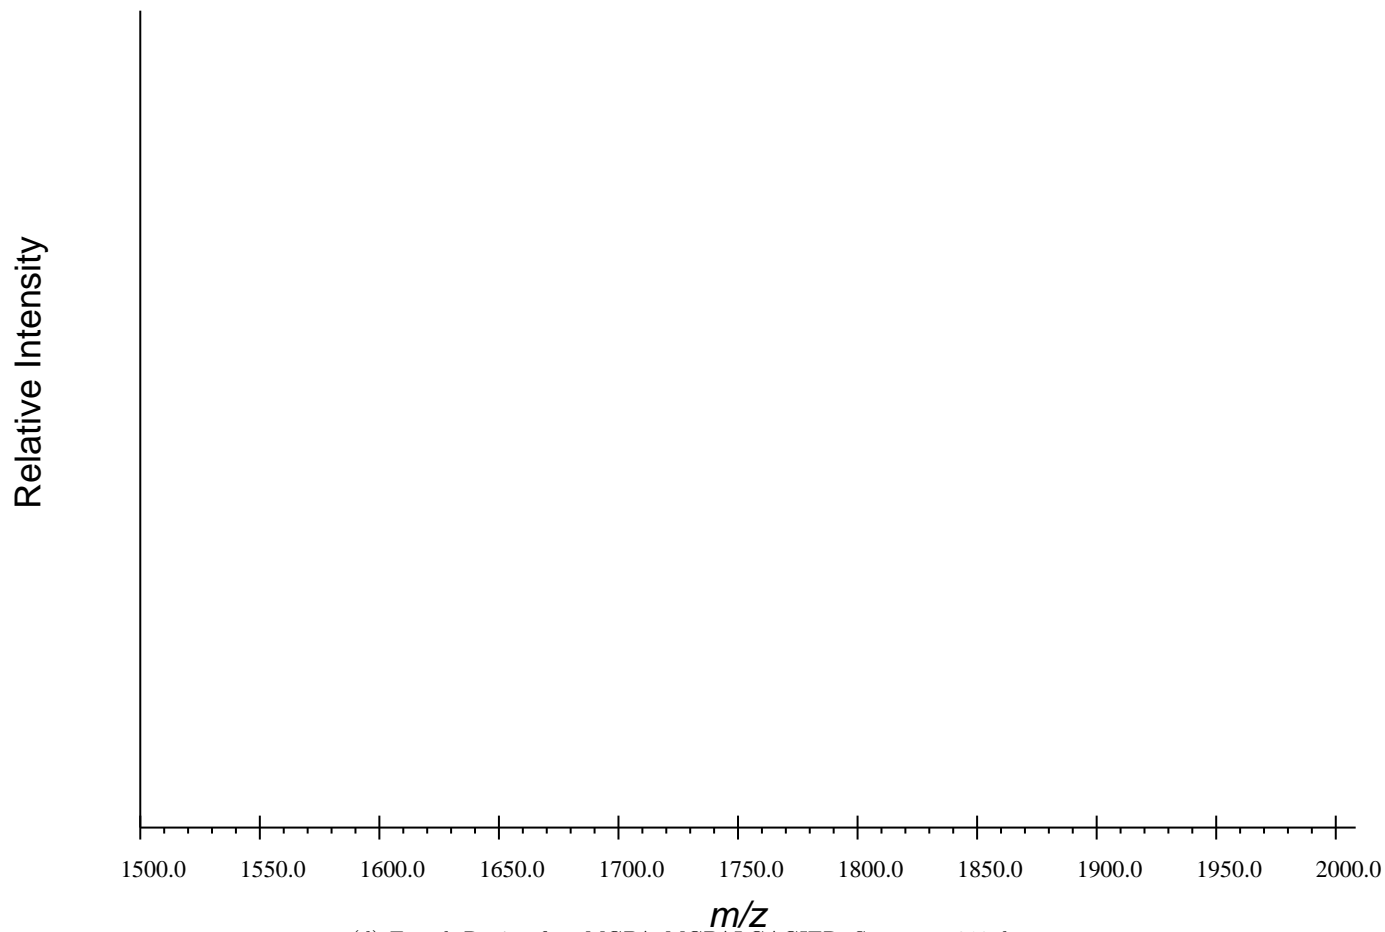

(d) Fourth Region for oMGPAoMGPALGAGIER, Spectrum 218.dta

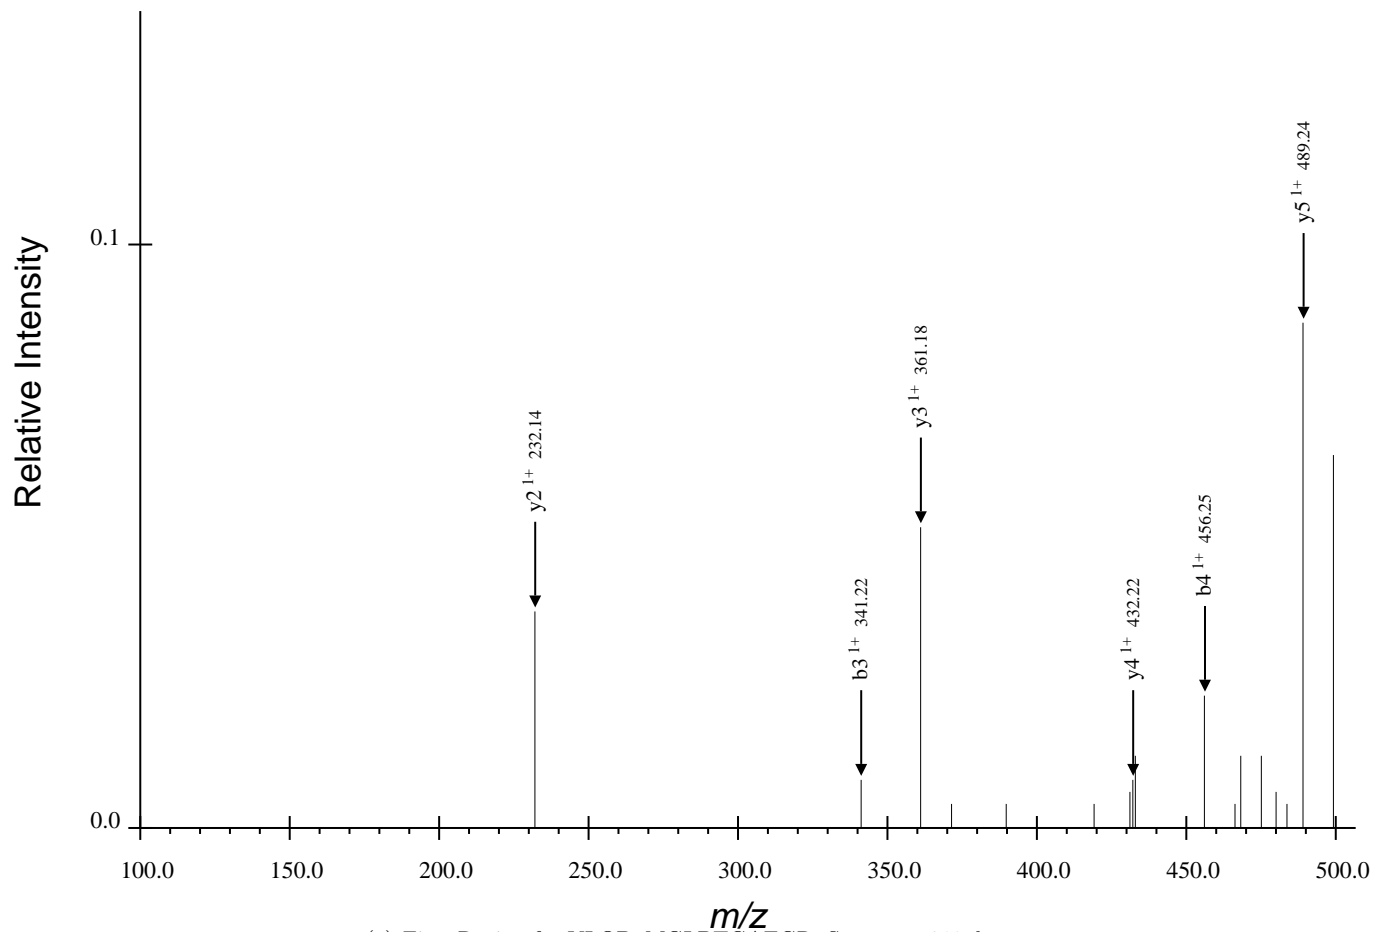

(a) First Region for VLQDoMGLPTGAEGR, Spectrum 219.dta

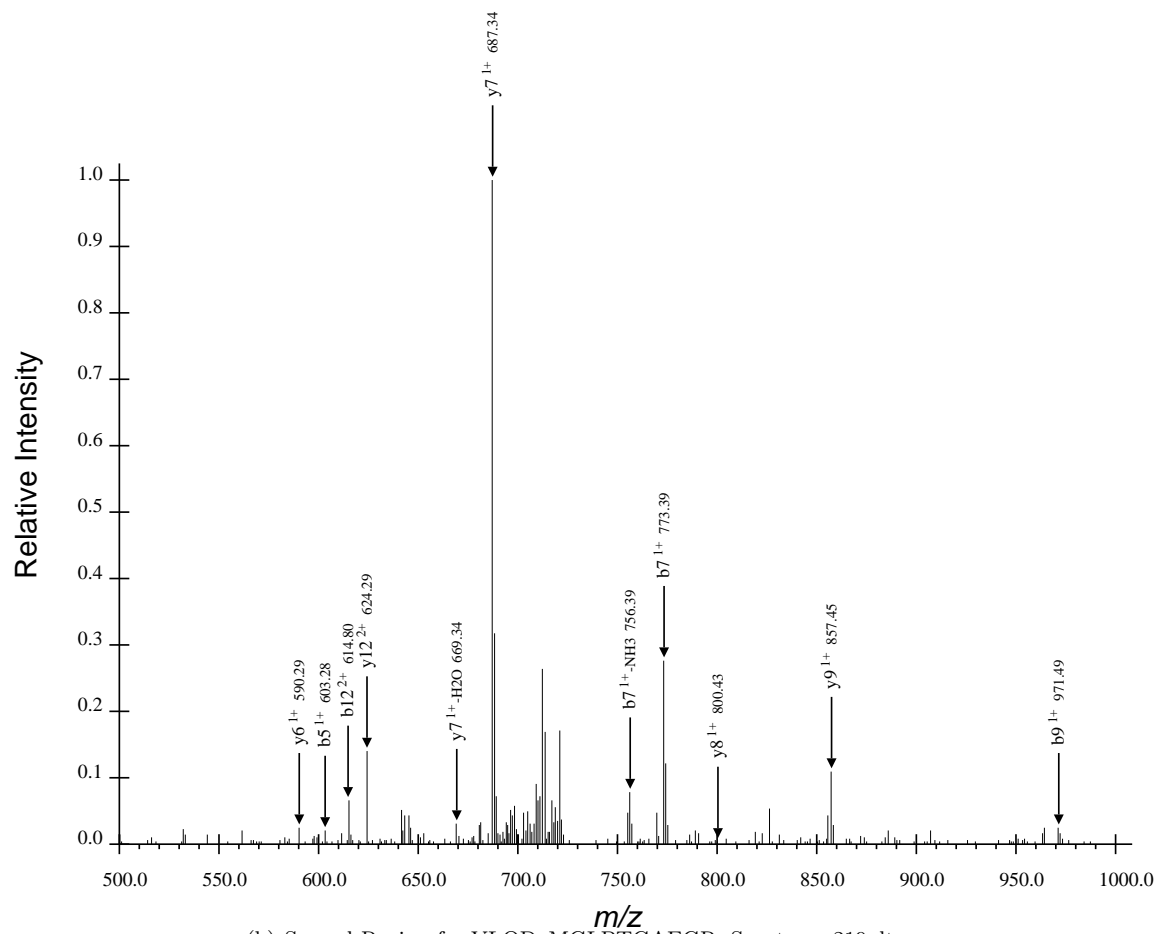

(b) Second Region for VLQDoMGLPTGAEGR, Spectrum 219.dta

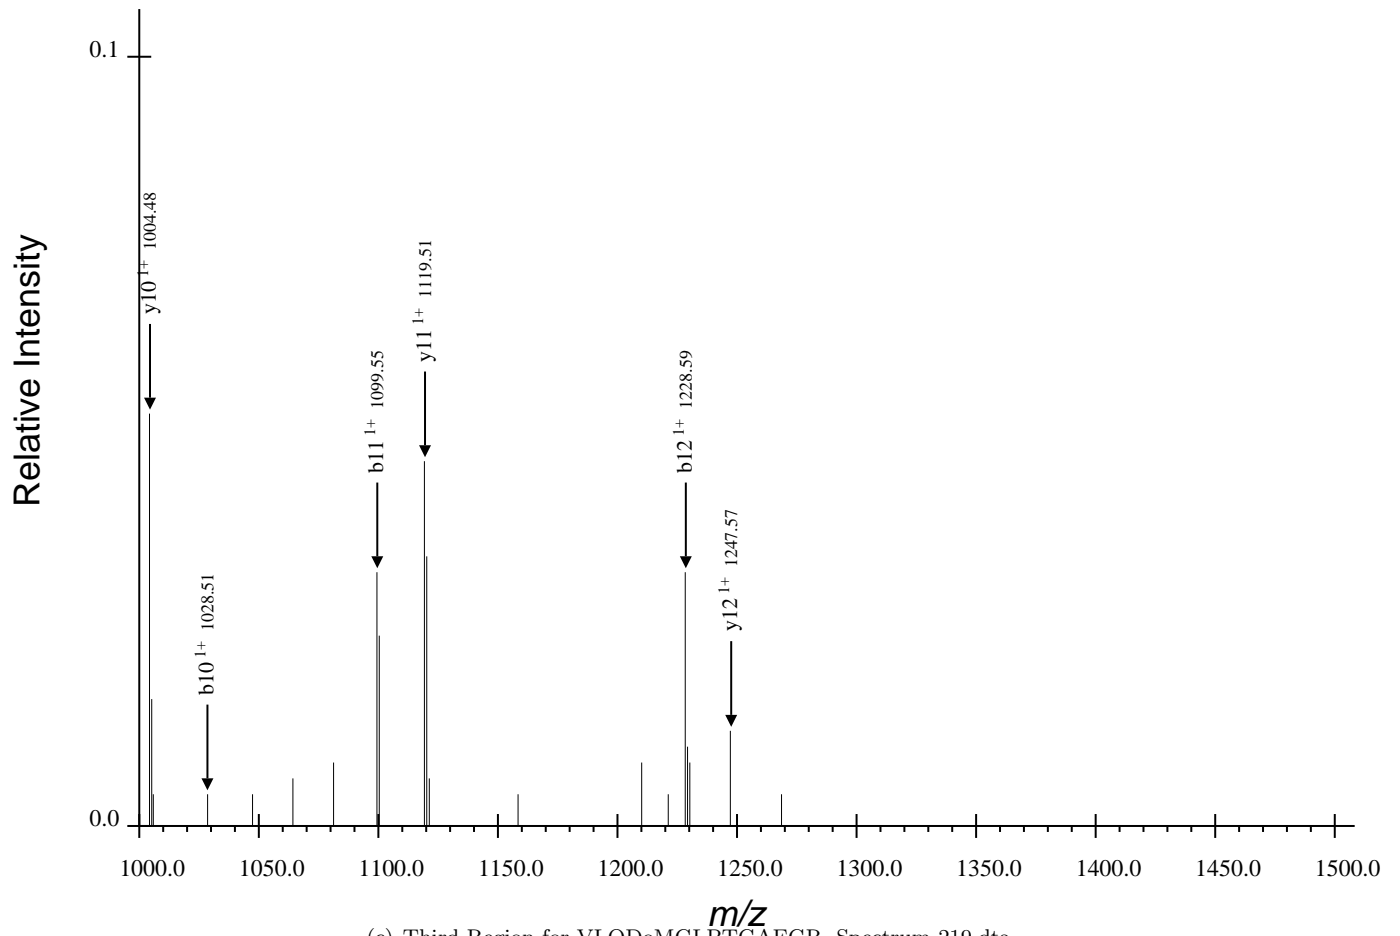

(c) Third Region for VLQDoMGLPTGAEGR, Spectrum 219.dta

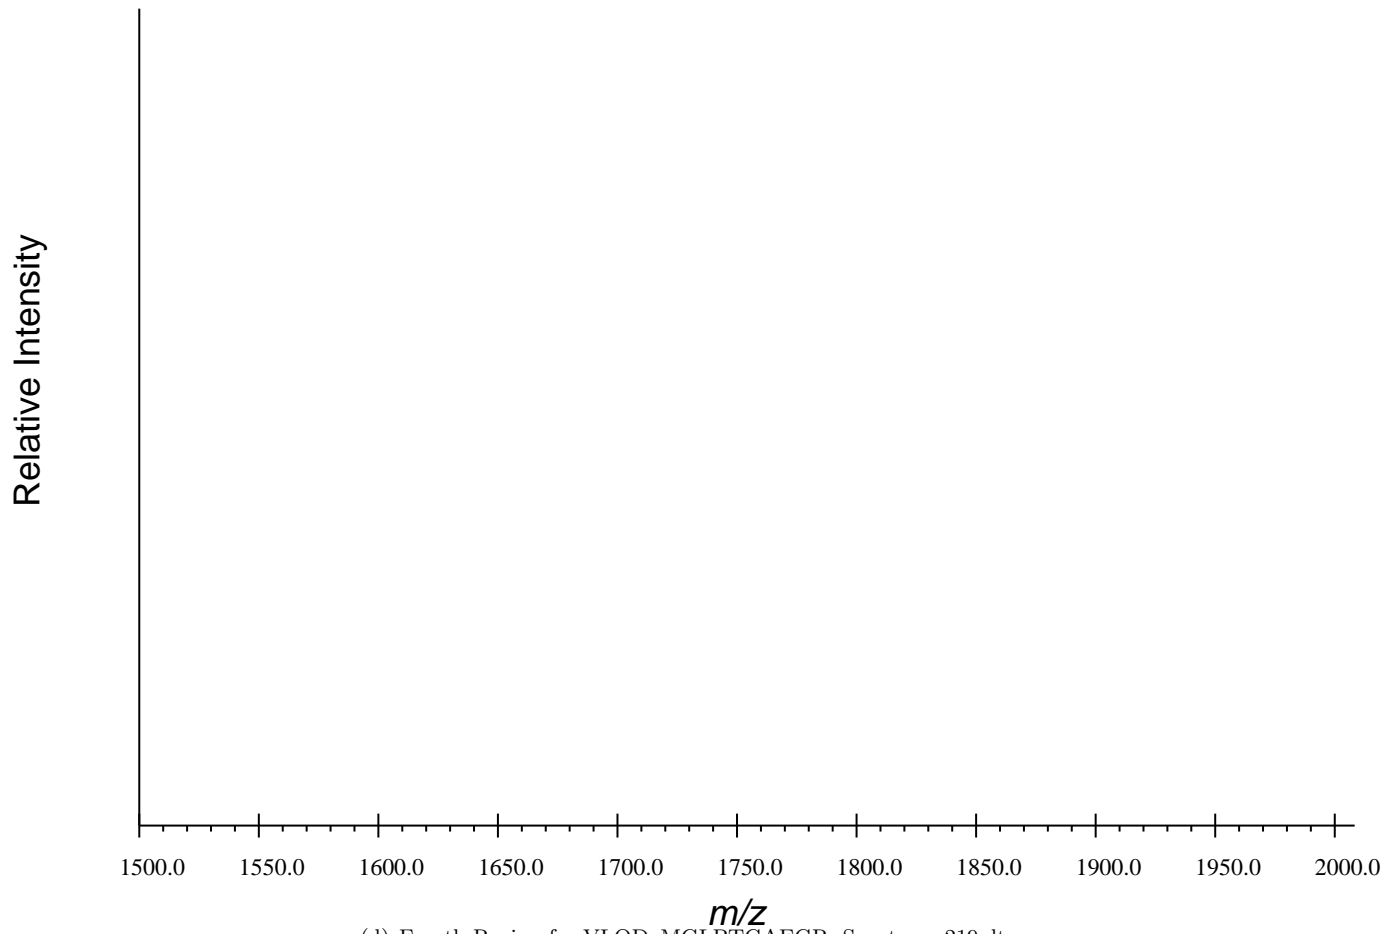

(d) Fourth Region for VLQDoMGLPTGAEGR, Spectrum 219.dta

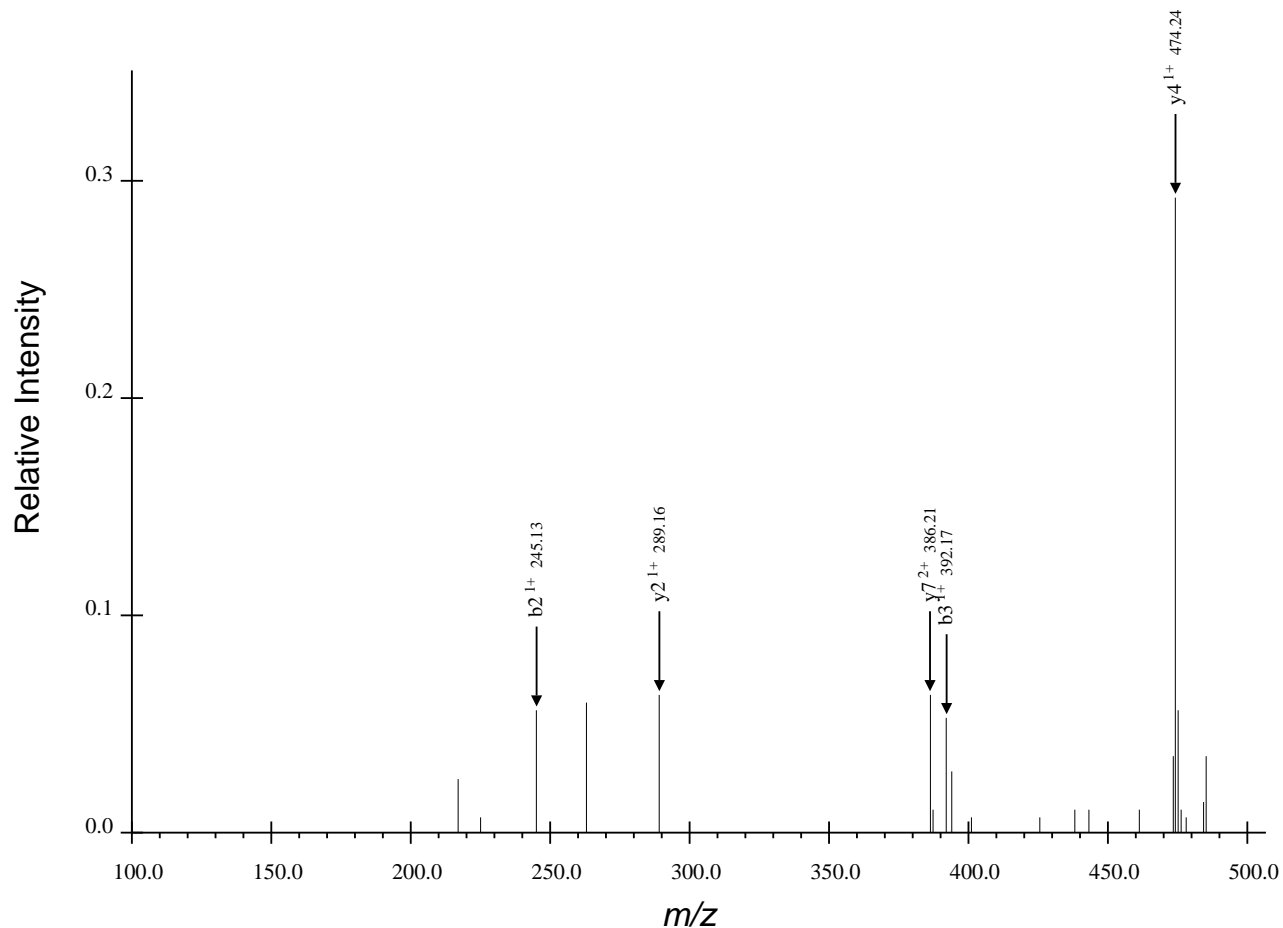

(a) First Region for LMoMDPLSGQNR, Spectrum 220.dta

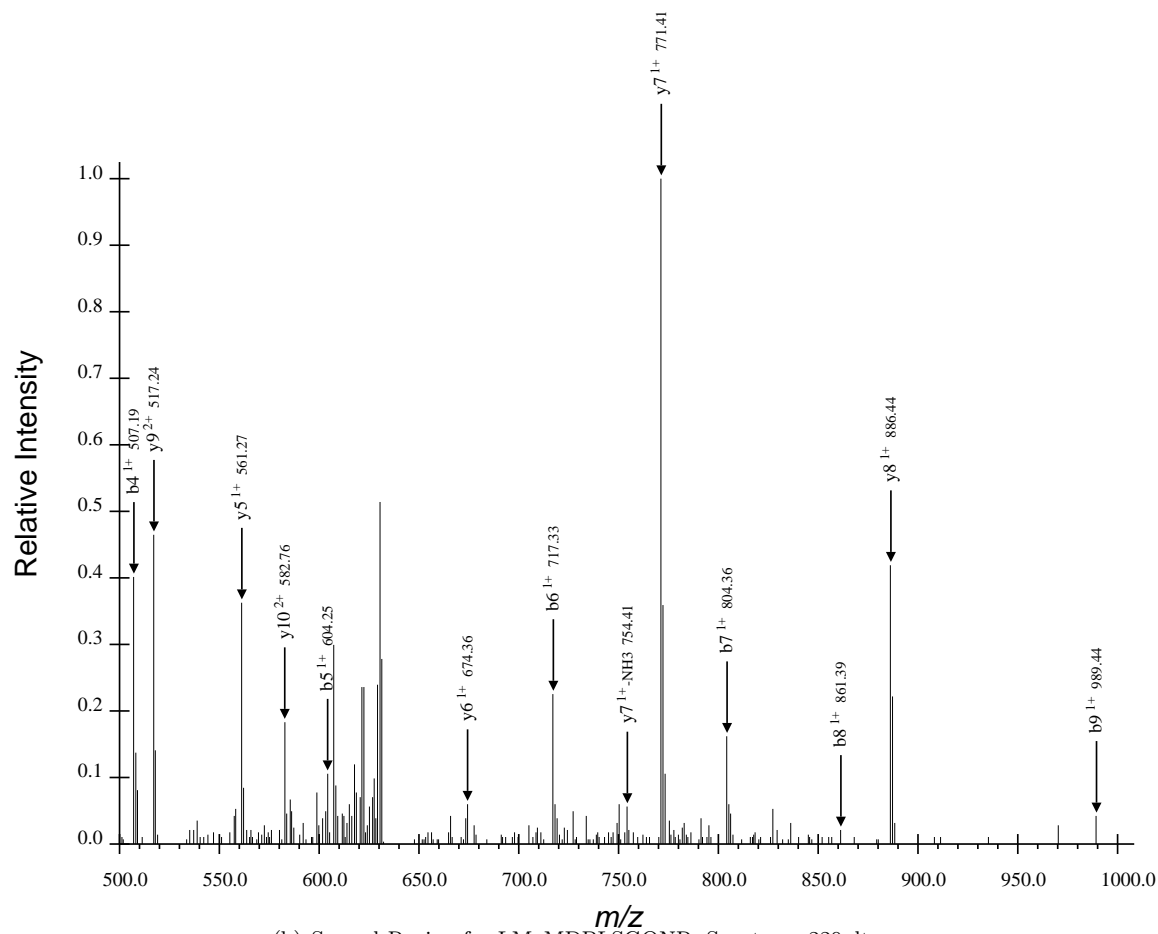

(b) Second Region for LMoMDPLSGQNR, Spectrum 220.dta

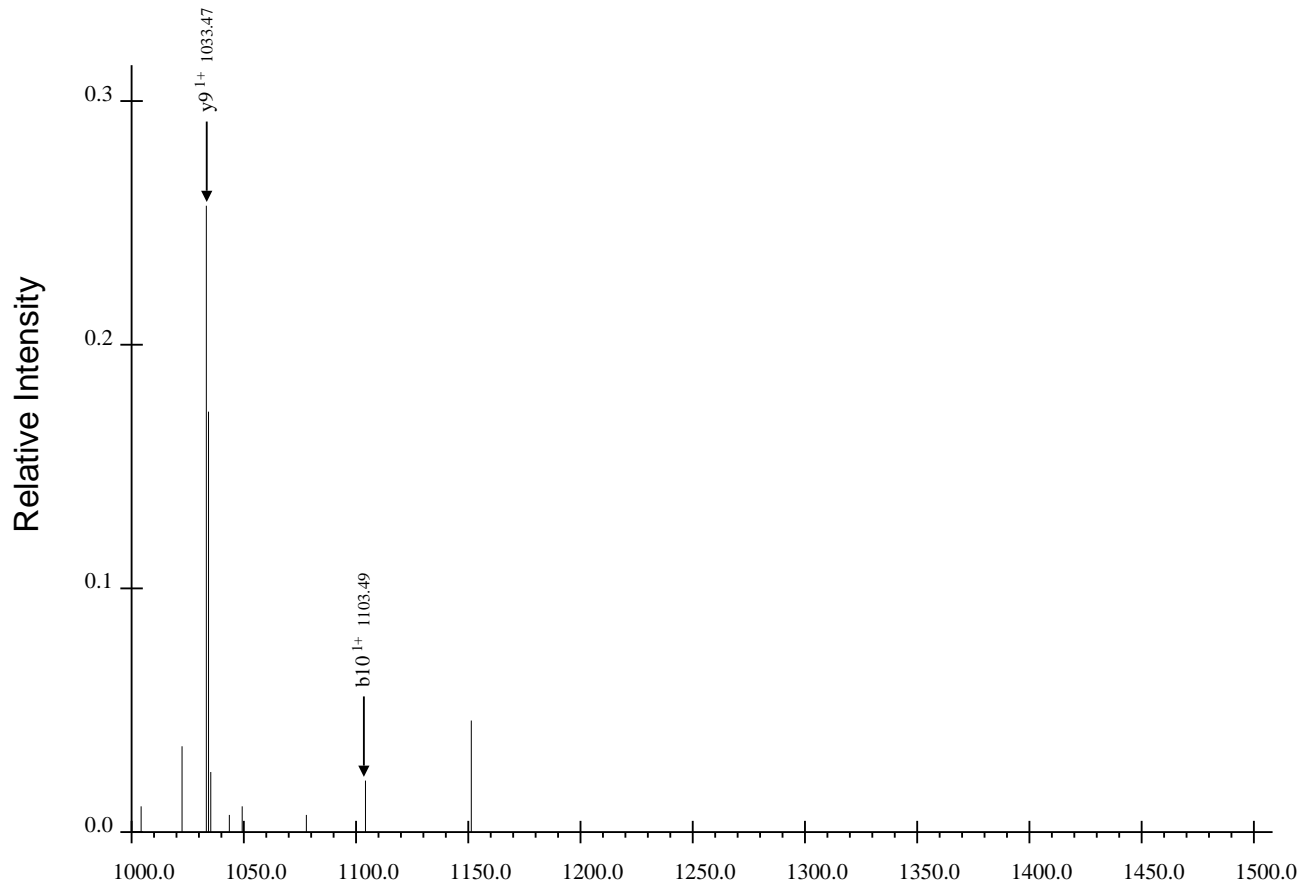

(c) Third Region for LMoMDPLSGQNR, Spectrum 220.dta

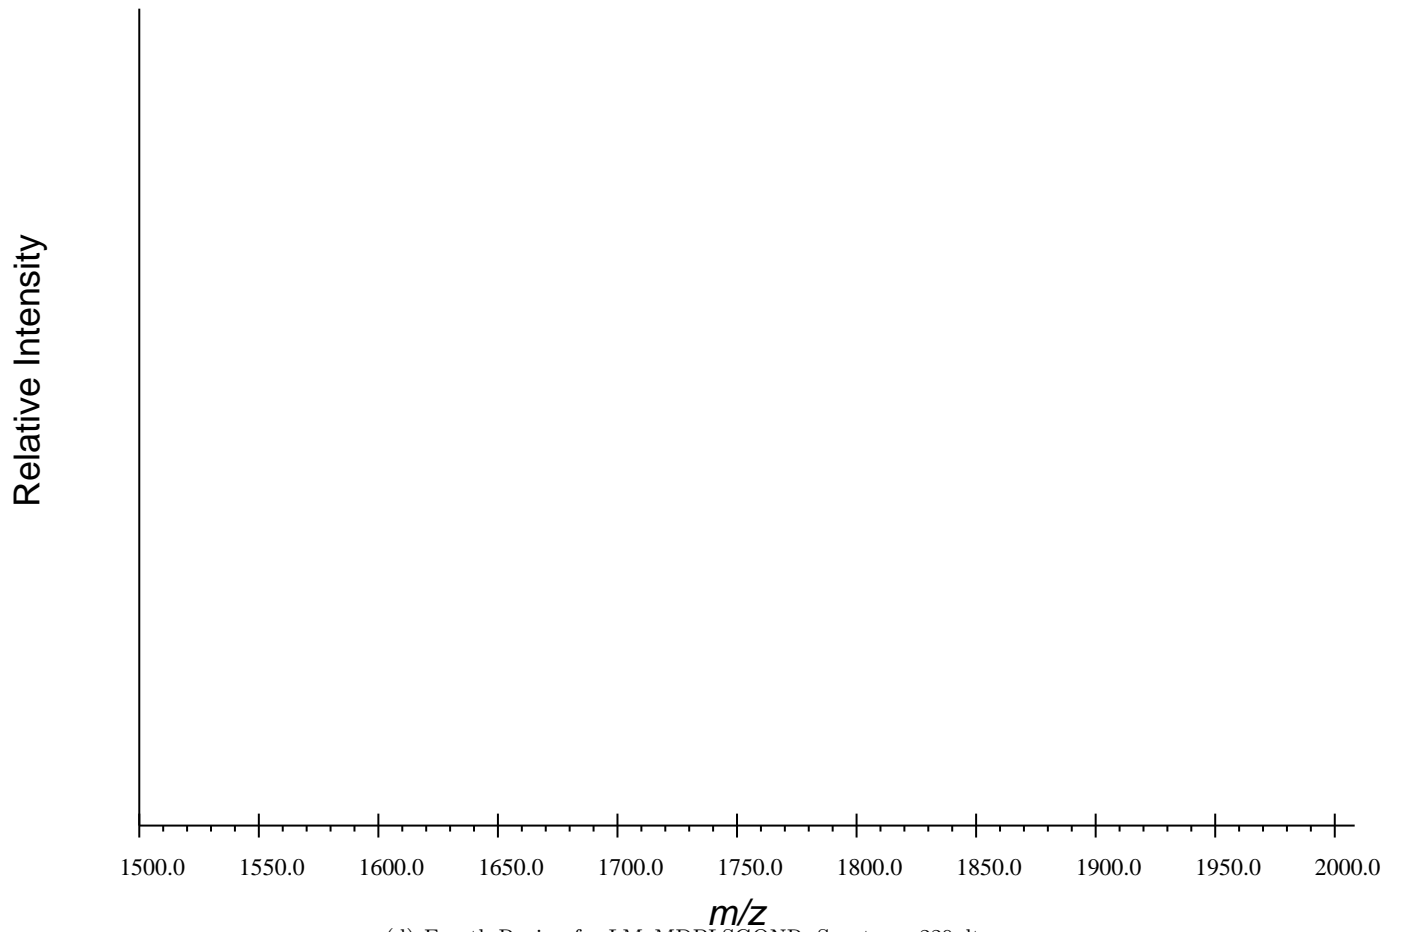

(d) Fourth Region for LMoMDPLSGQNR, Spectrum 220.dta

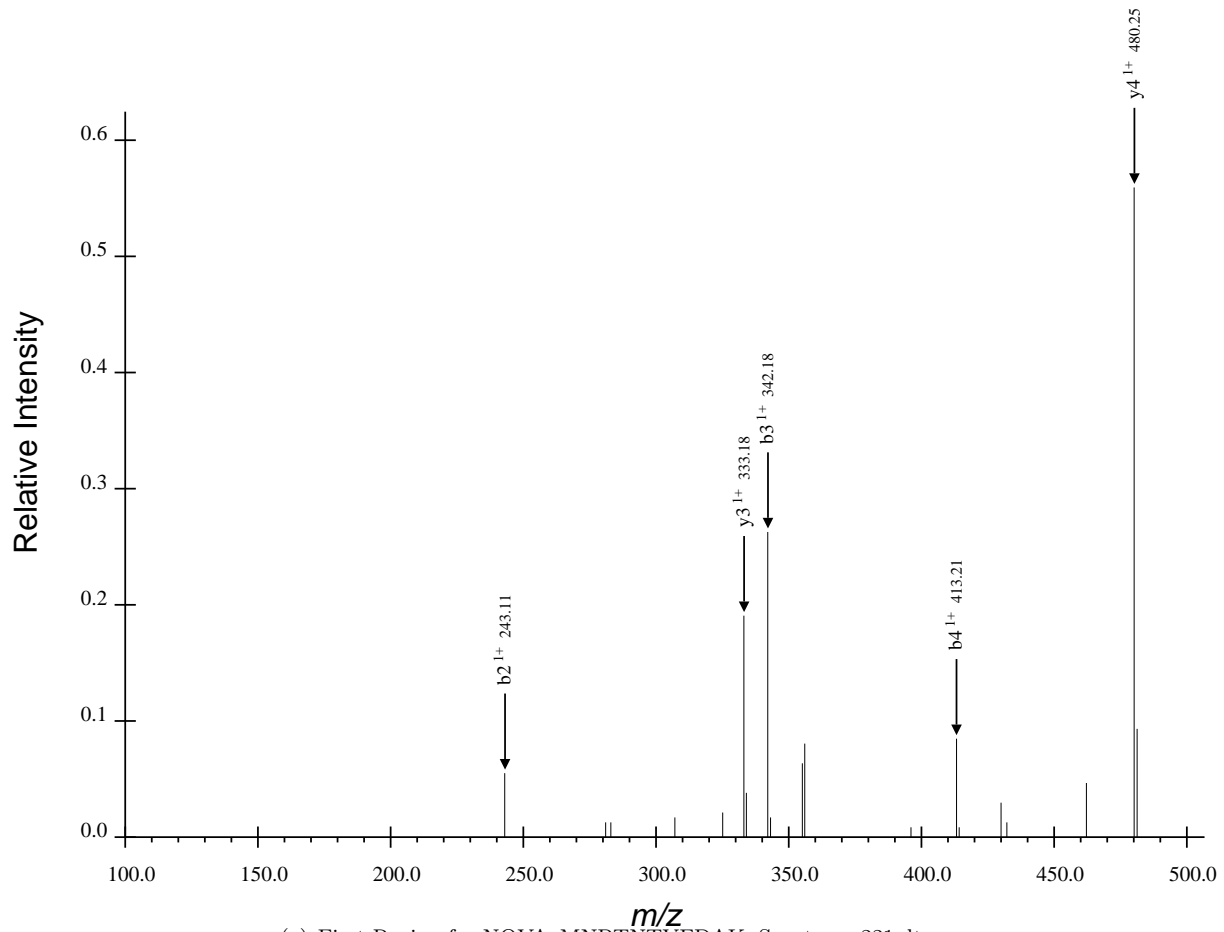

(a) First Region for NQVAoMNPNTNTVFDK, Spectrum 221.dta

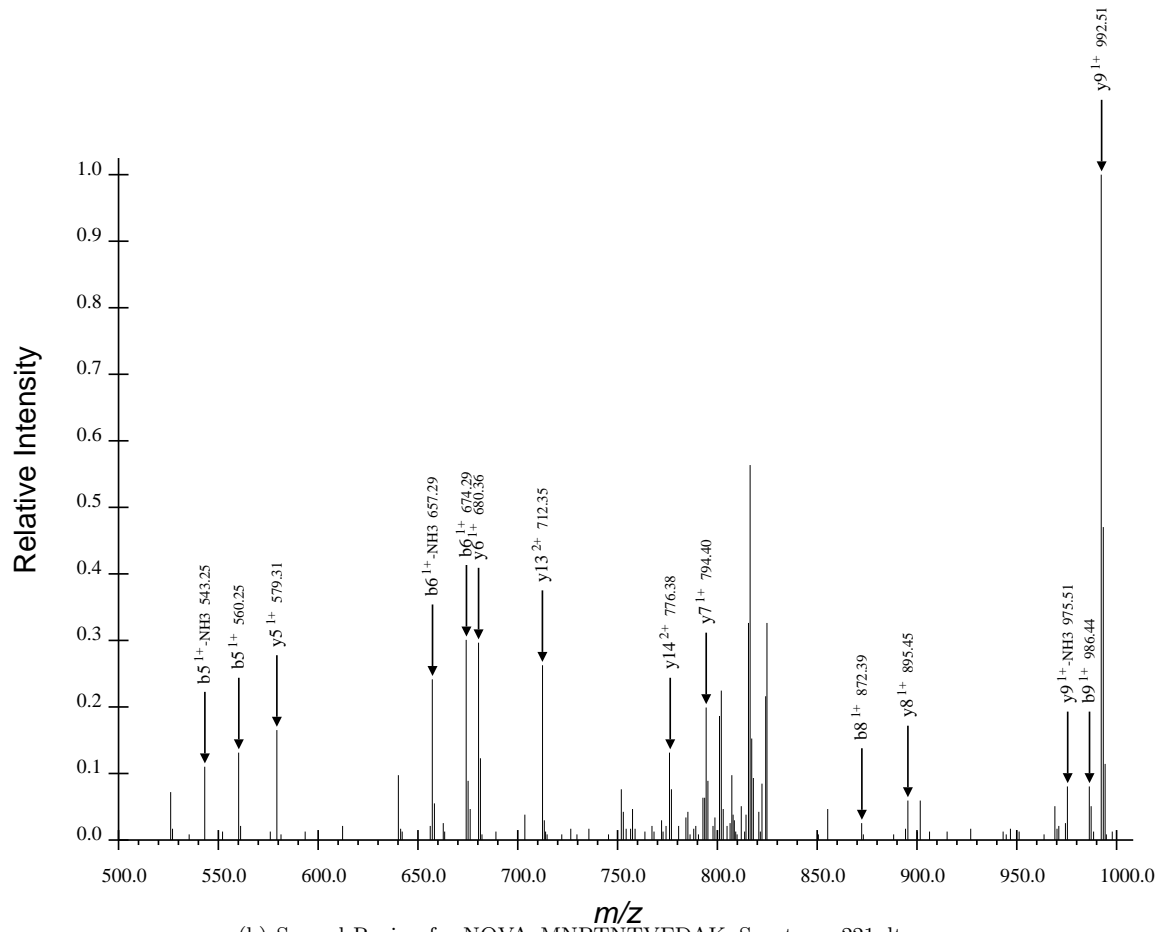

(b) Second Region for NQVAoMNPNTNTVFDK, Spectrum 221.dta

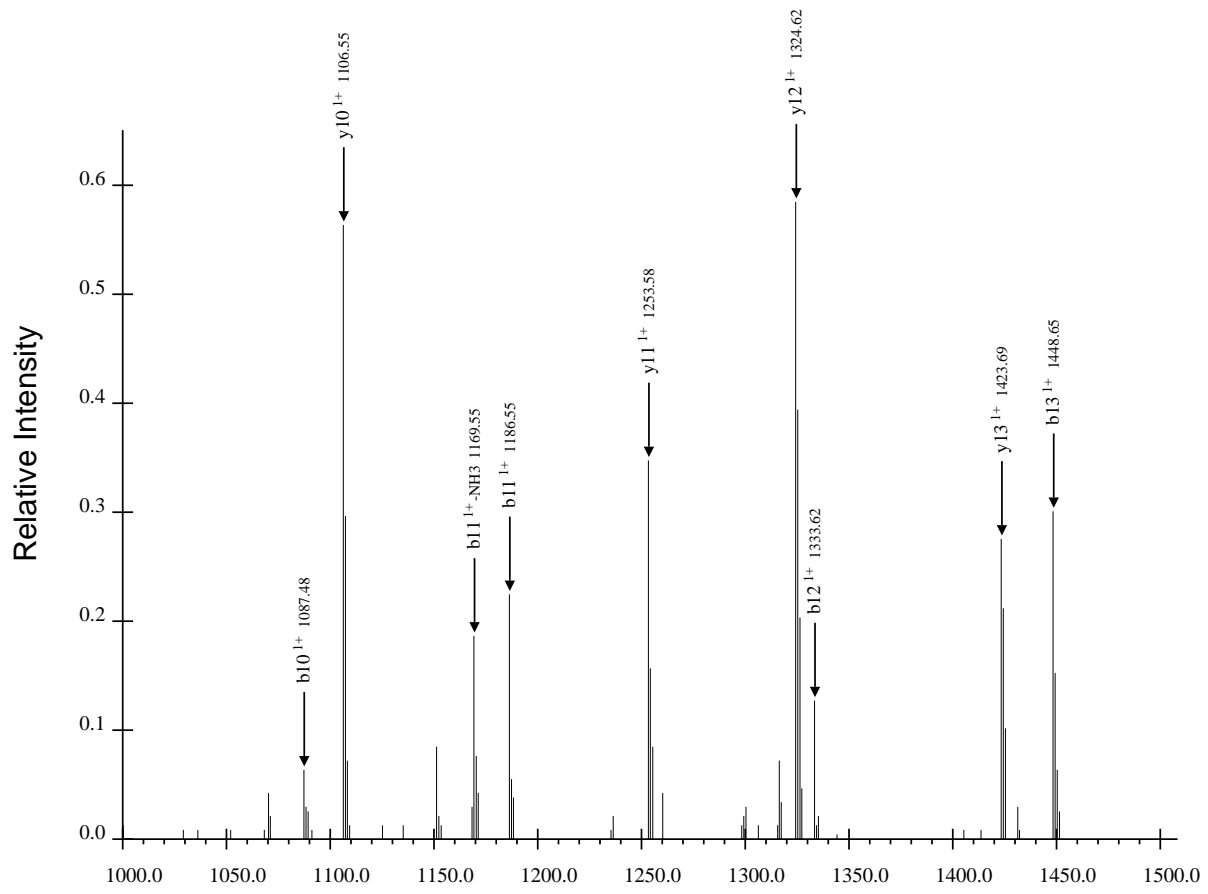

(c) Third Region for NQVAoMNPTNTVFDK, Spectrum 221.dta

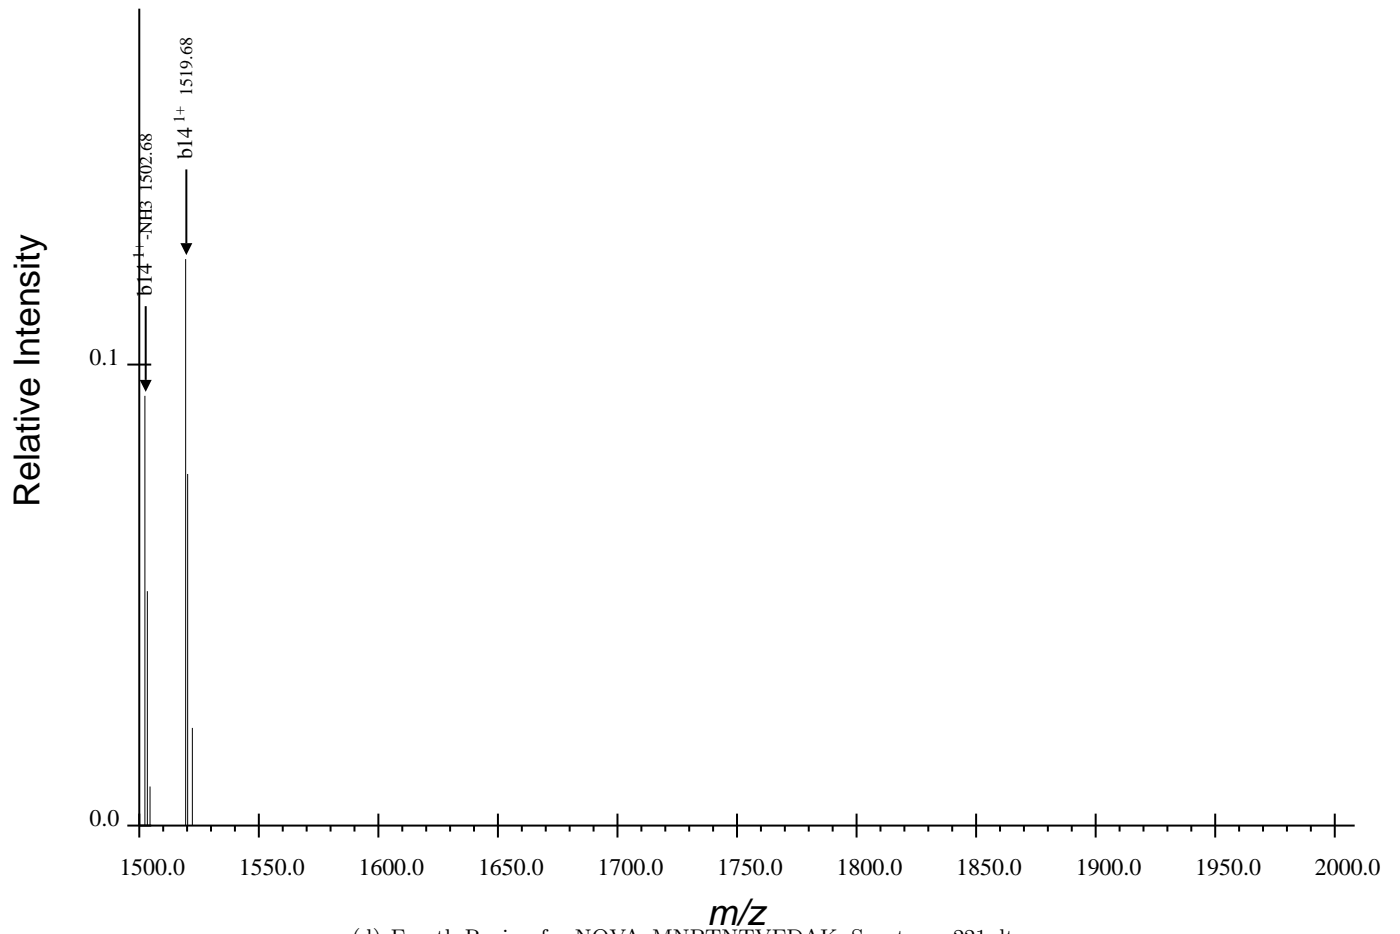

(d) Fourth Region for NQVAoMNPTNTVFDK, Spectrum 221.dta



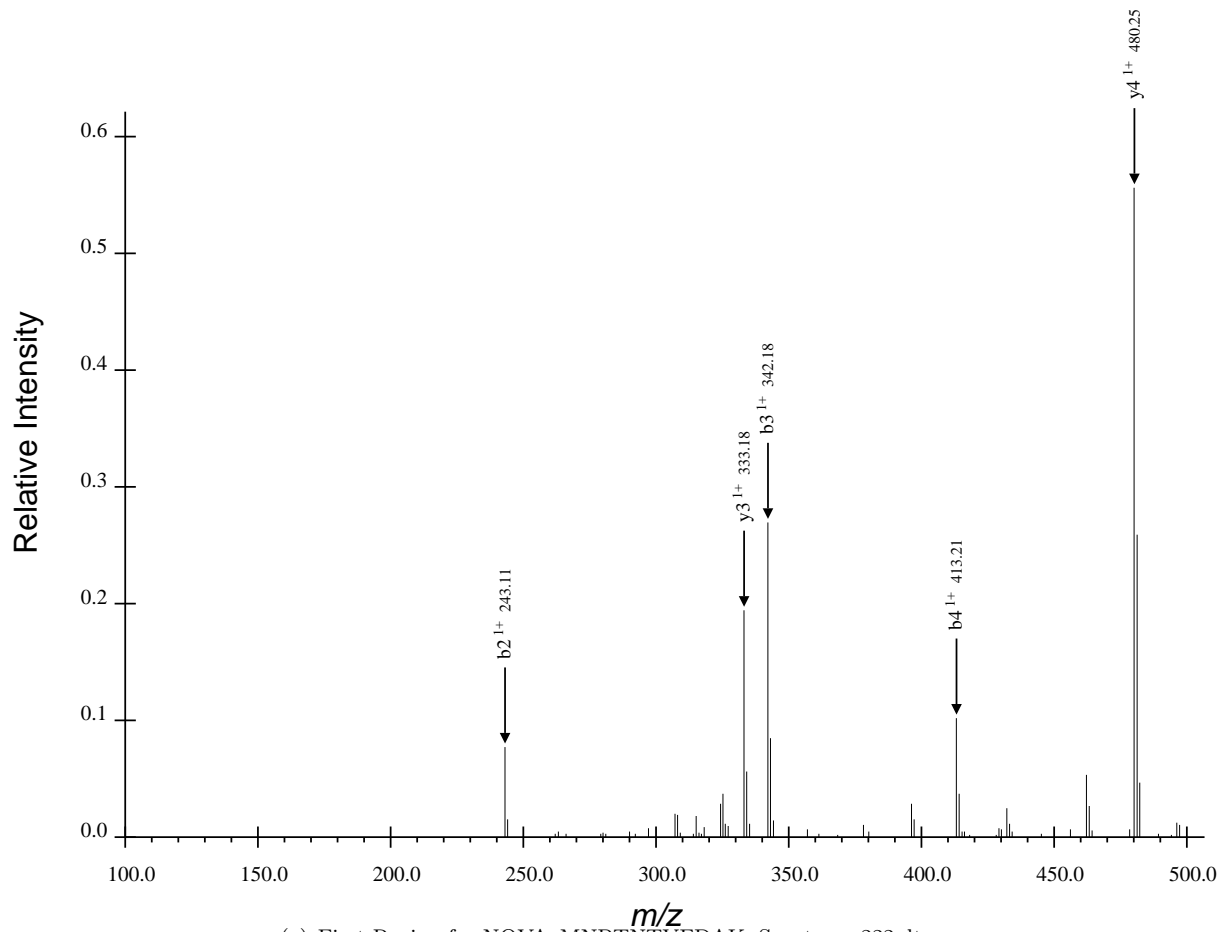

(a) First Region for NQVAoMNPTNTVFDK, Spectrum 222.dta

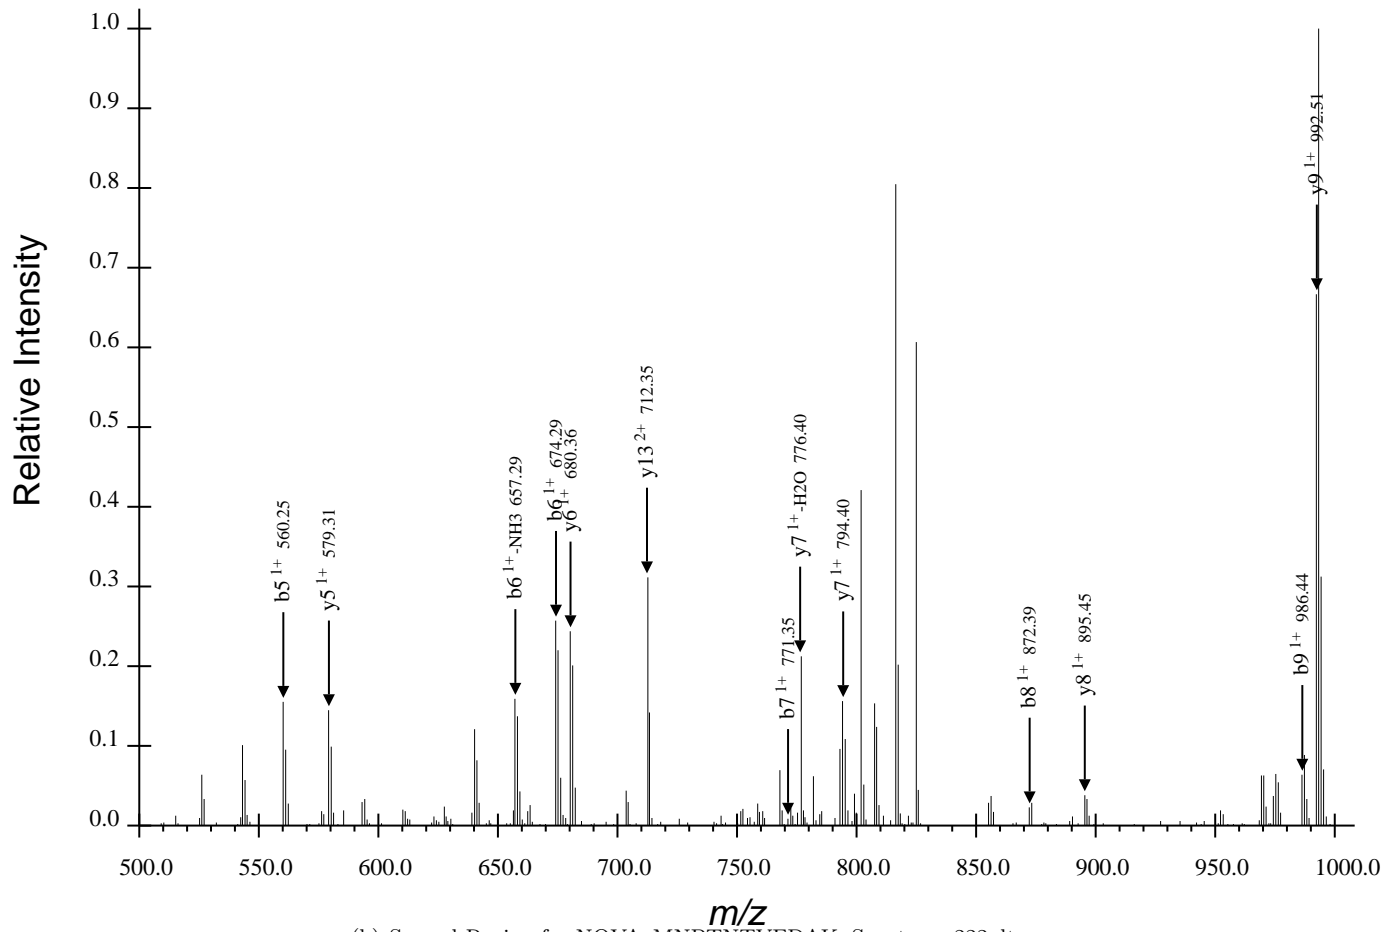

(b) Second Region for NQVAoMNPTNTVFDK, Spectrum 222.dta

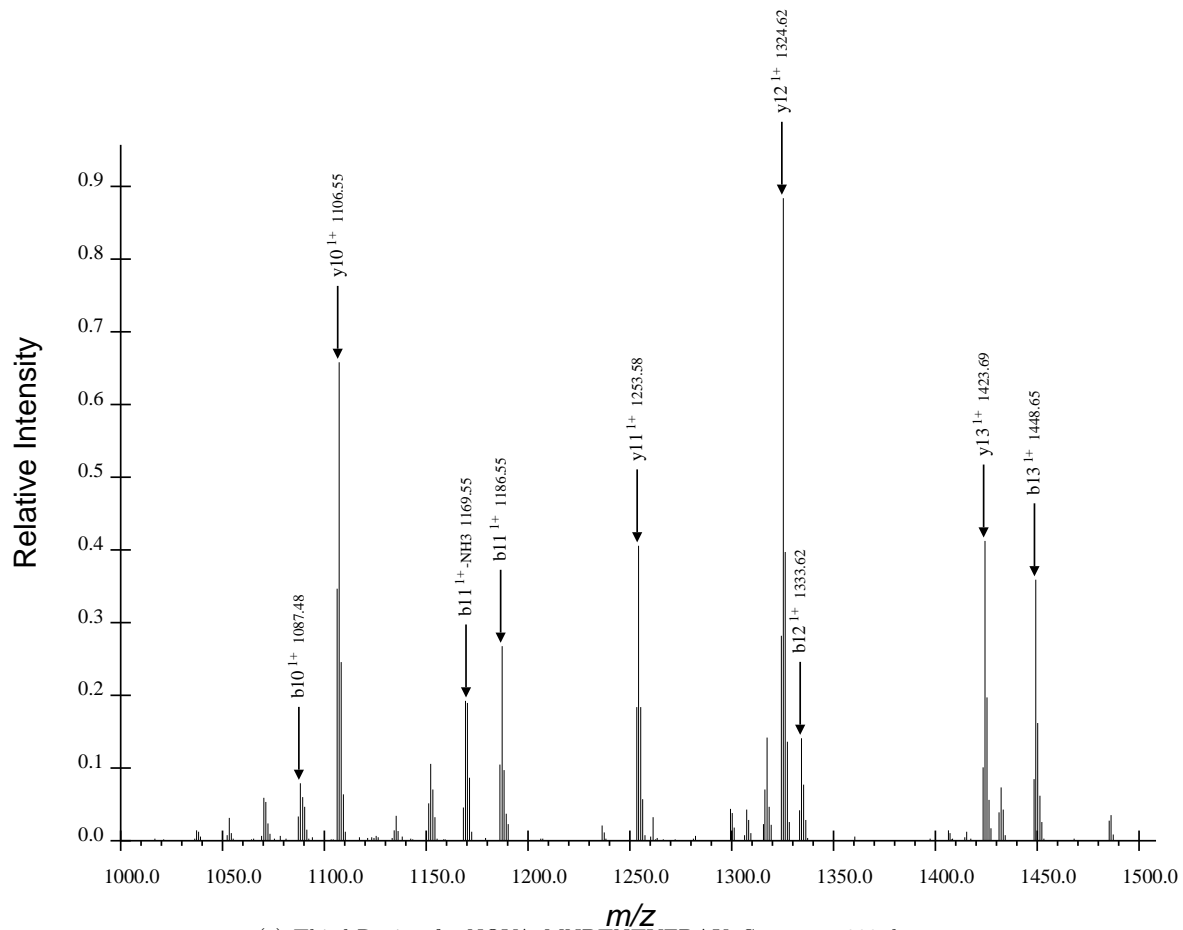

(c) Third Region for NQVAoMNPTNTVFDAK, Spectrum 222.dta

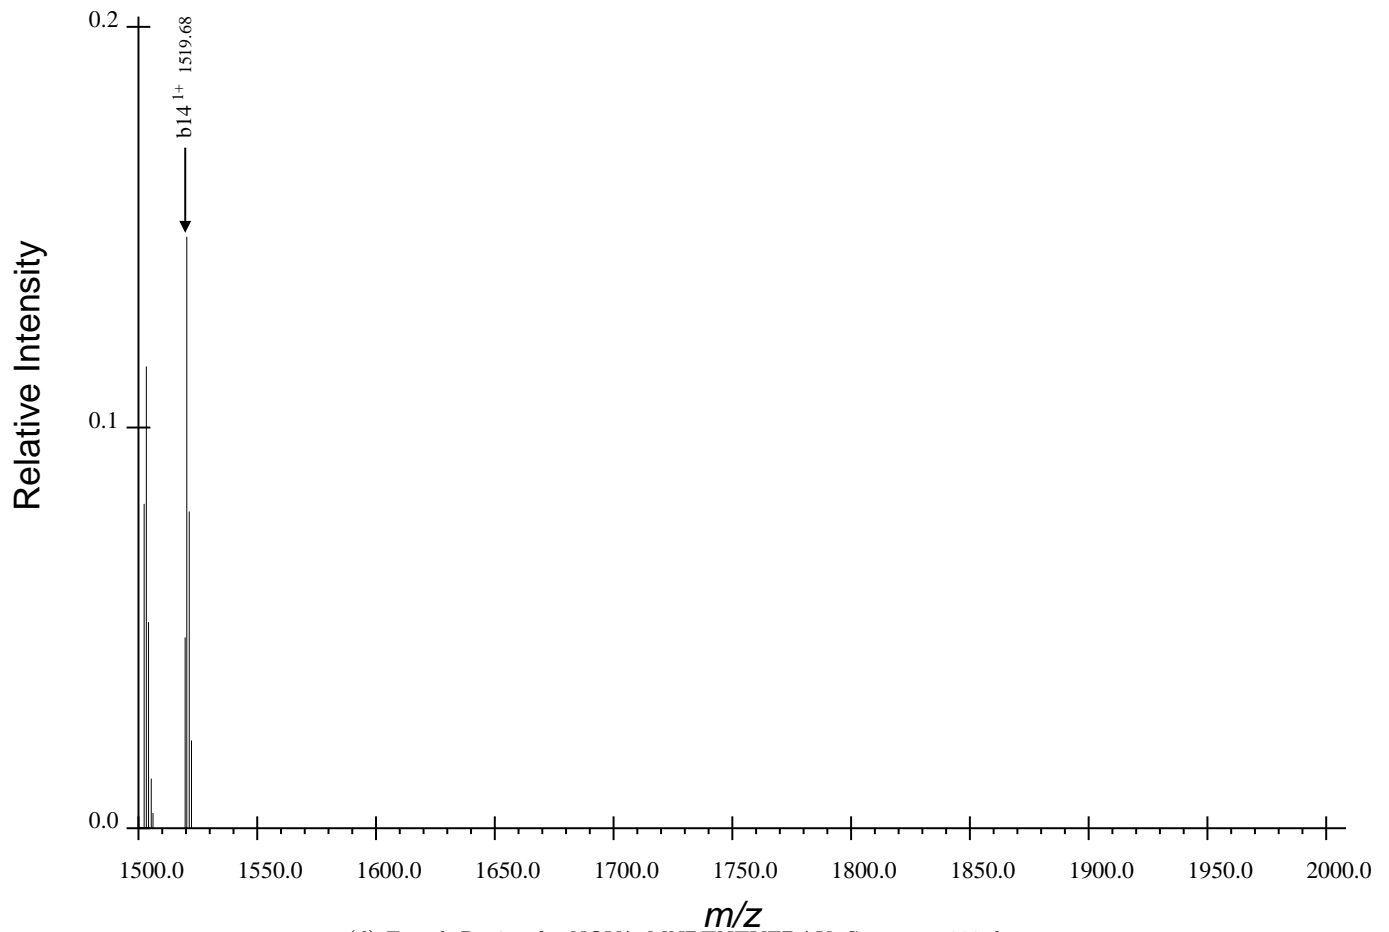

(d) Fourth Region for NQVAoMNPTNTVFDAK, Spectrum 222.dta

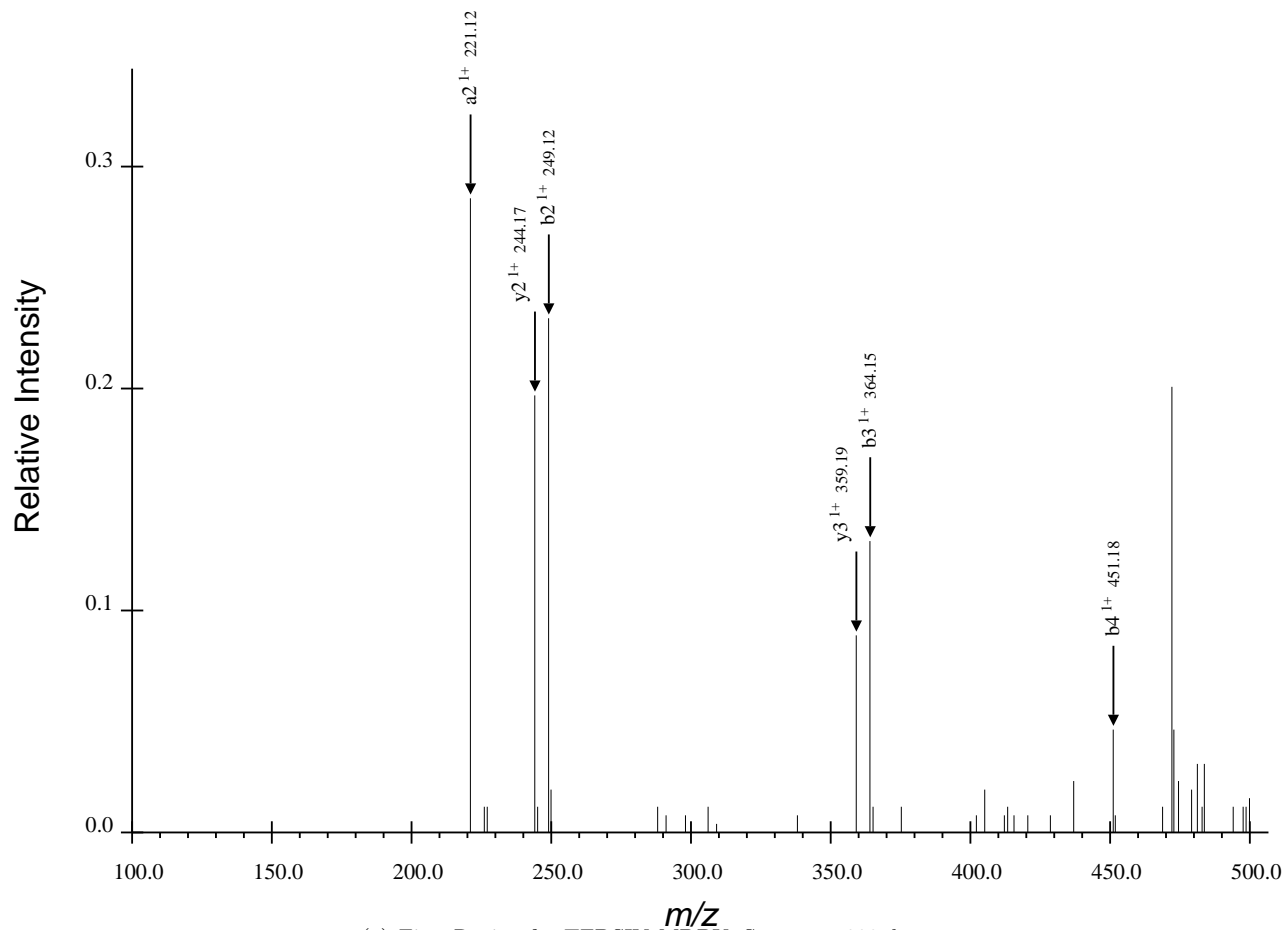

(a) First Region for TFDSIVoMDPK, Spectrum 223.dta

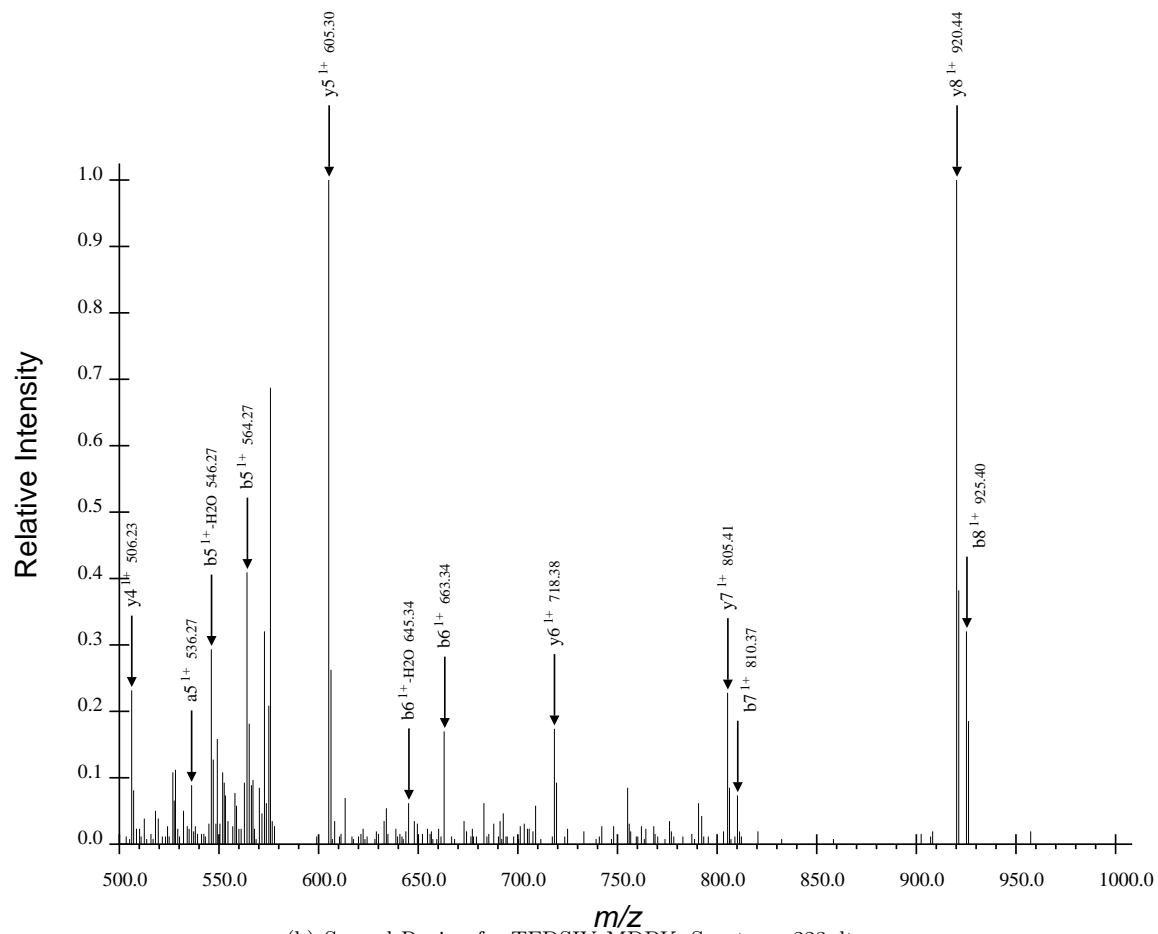

(b) Second Region for TFDSIVoMDPK, Spectrum 223.dta

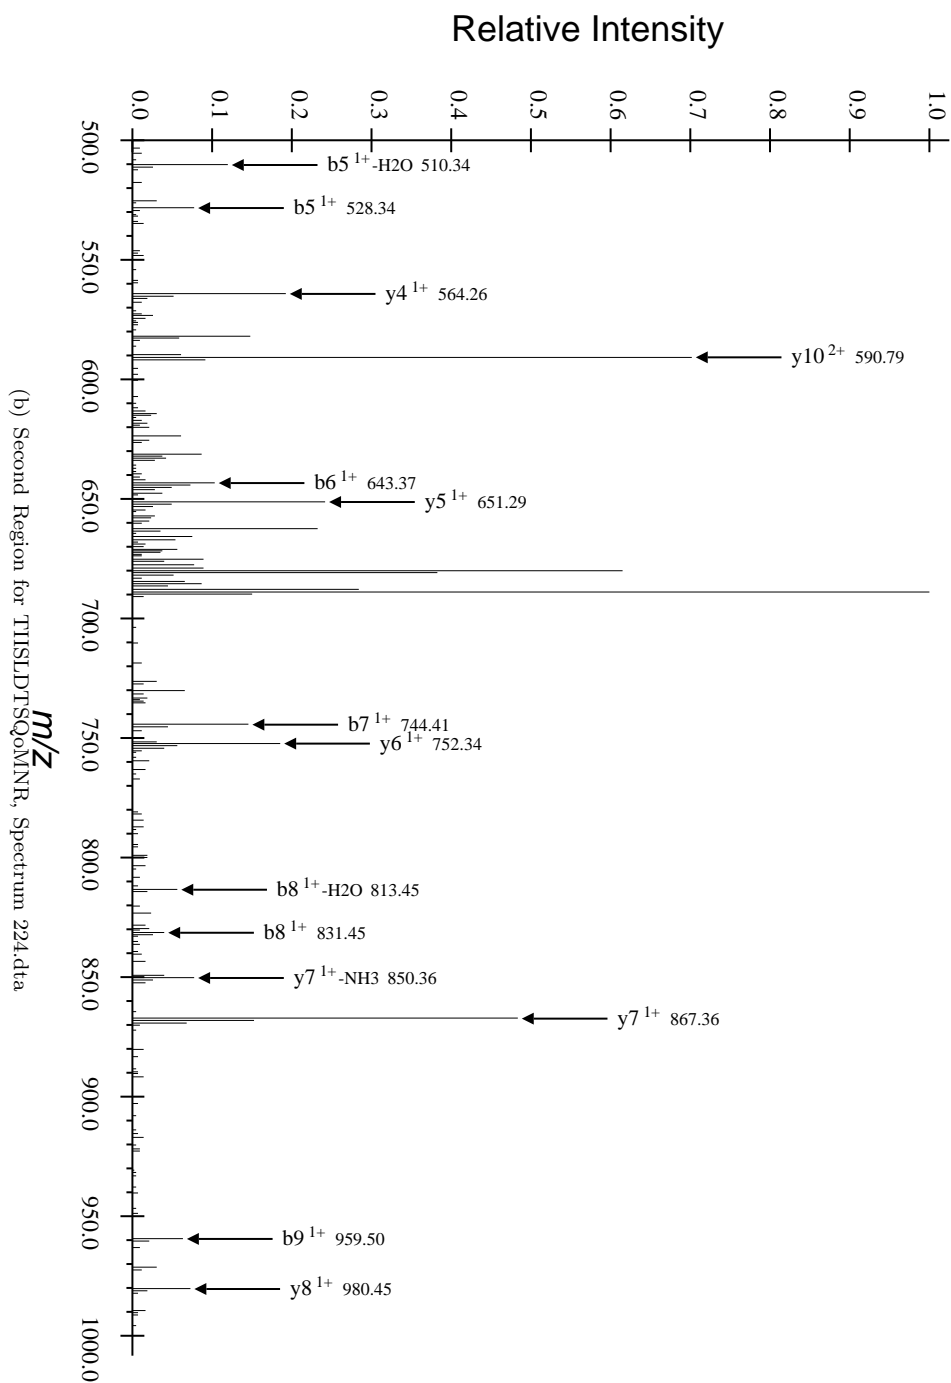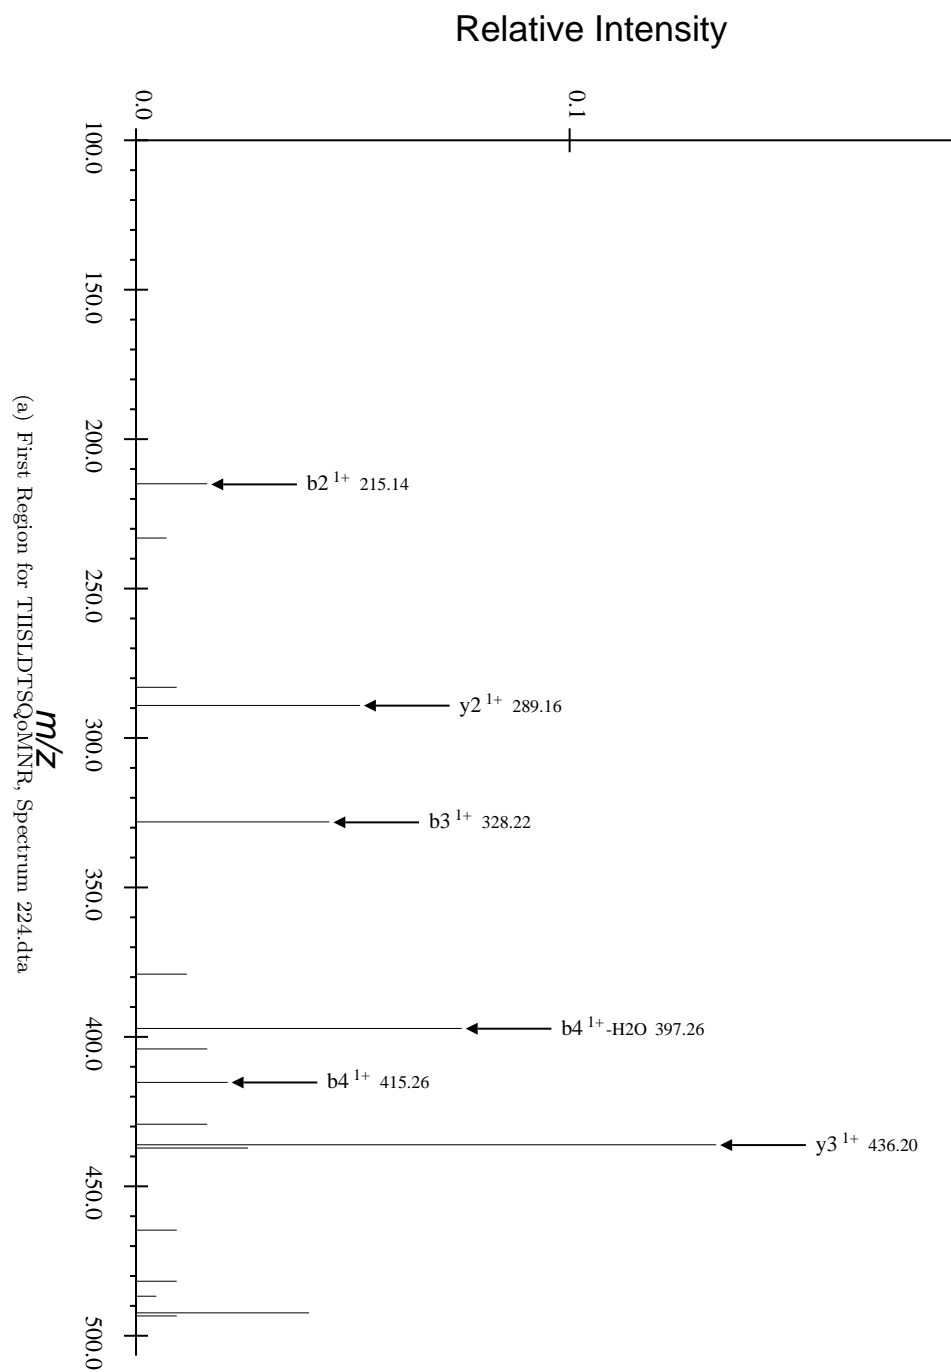

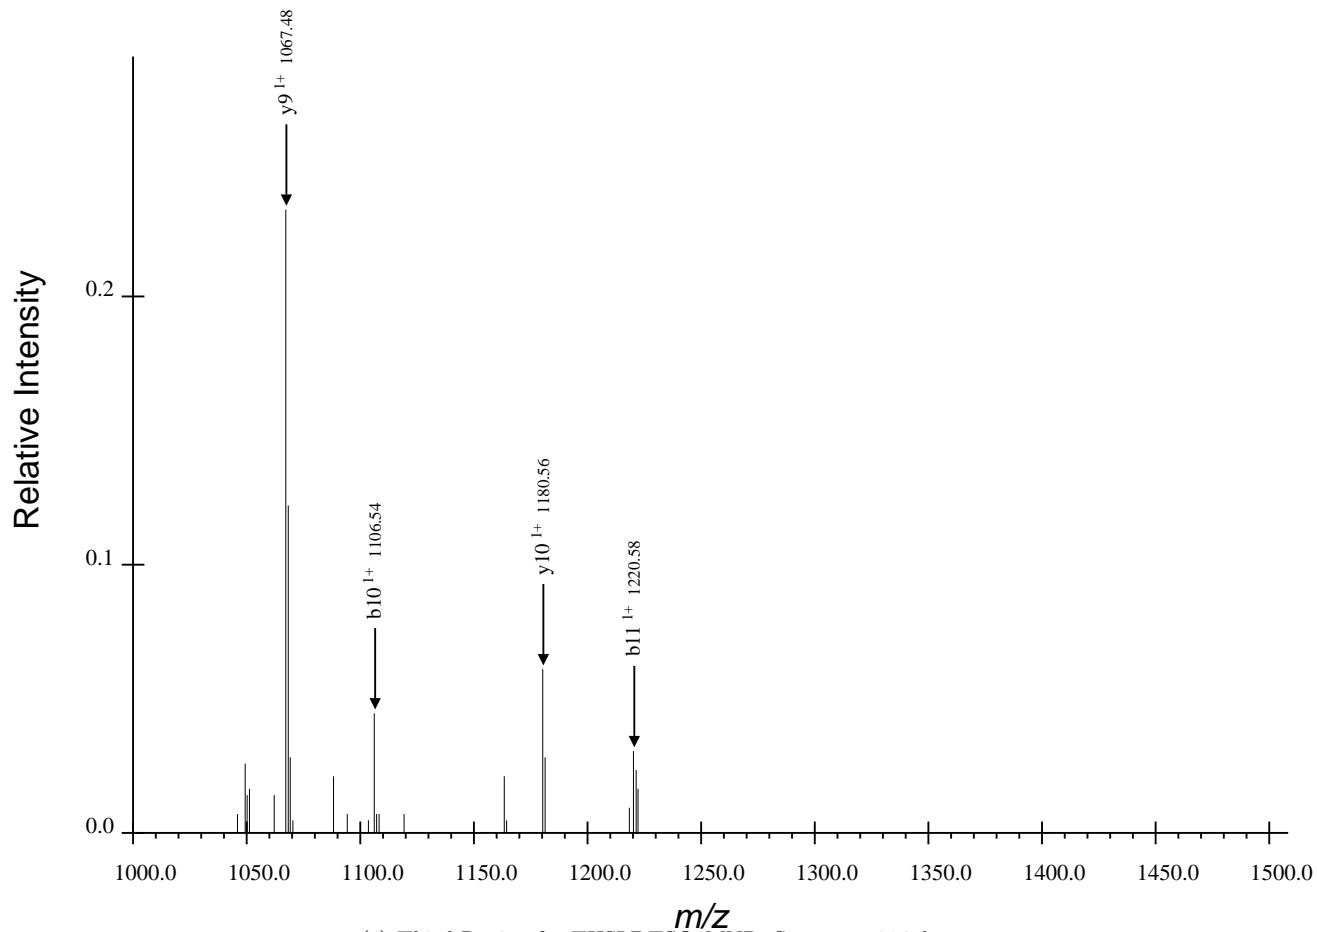

(c) Third Region for TIISLDTSQoMNR, Spectrum 224.dta

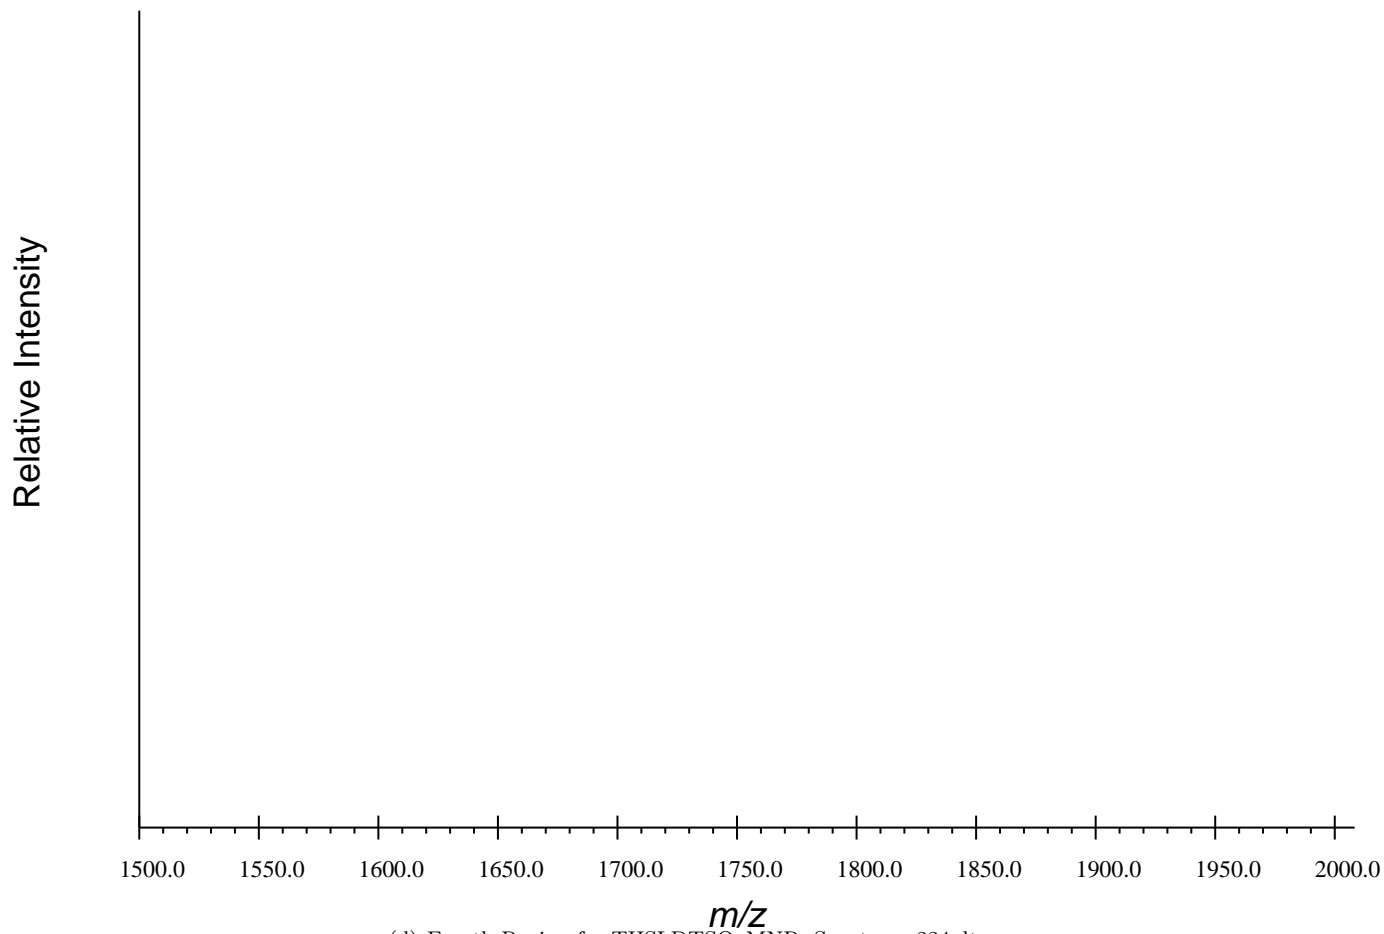

(d) Fourth Region for TIISLDTSQoMNR, Spectrum 224.dta

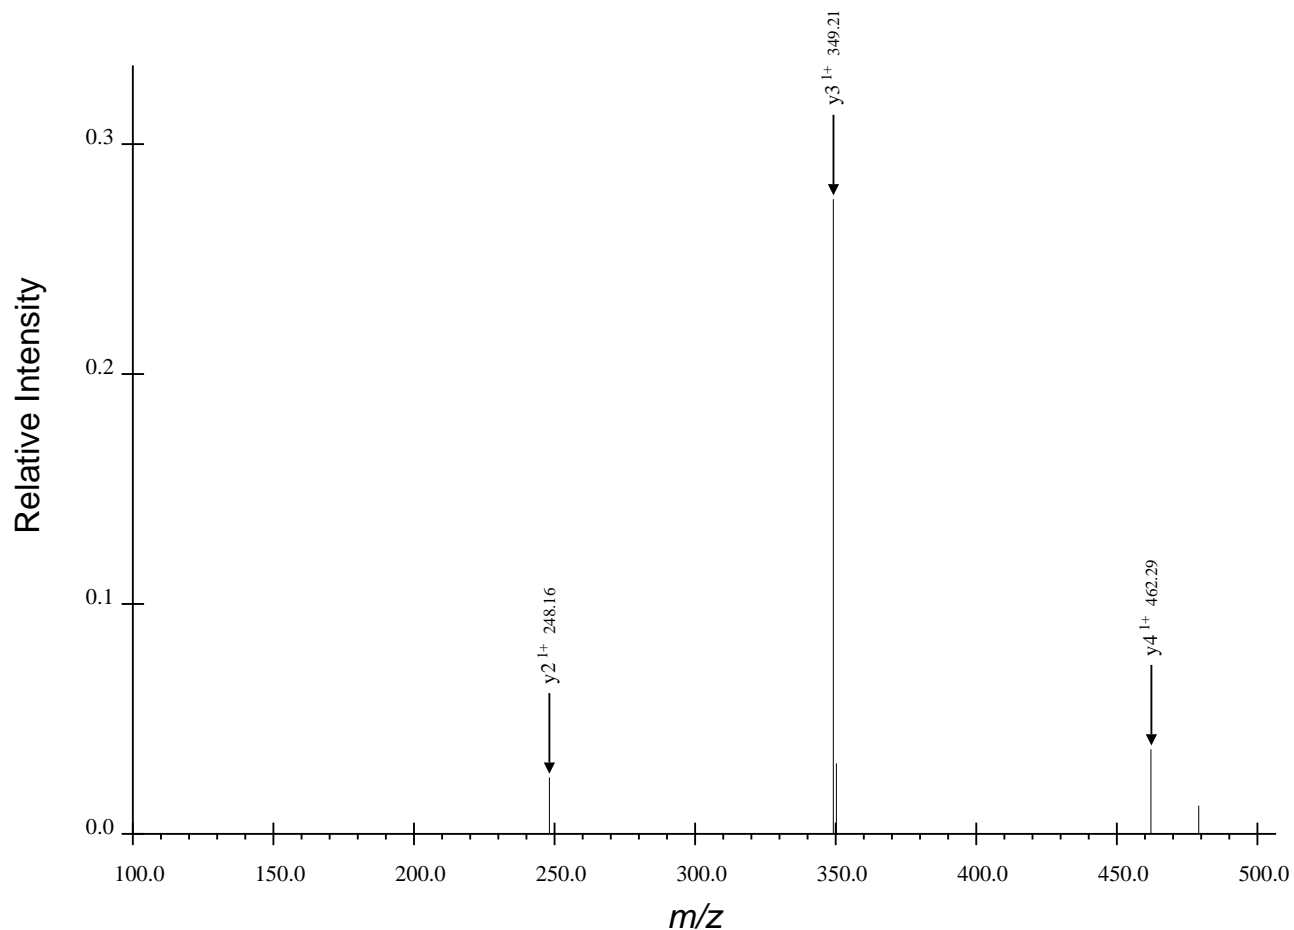

(a) First Region for GSToMEEELNITTK, Spectrum 225.dta

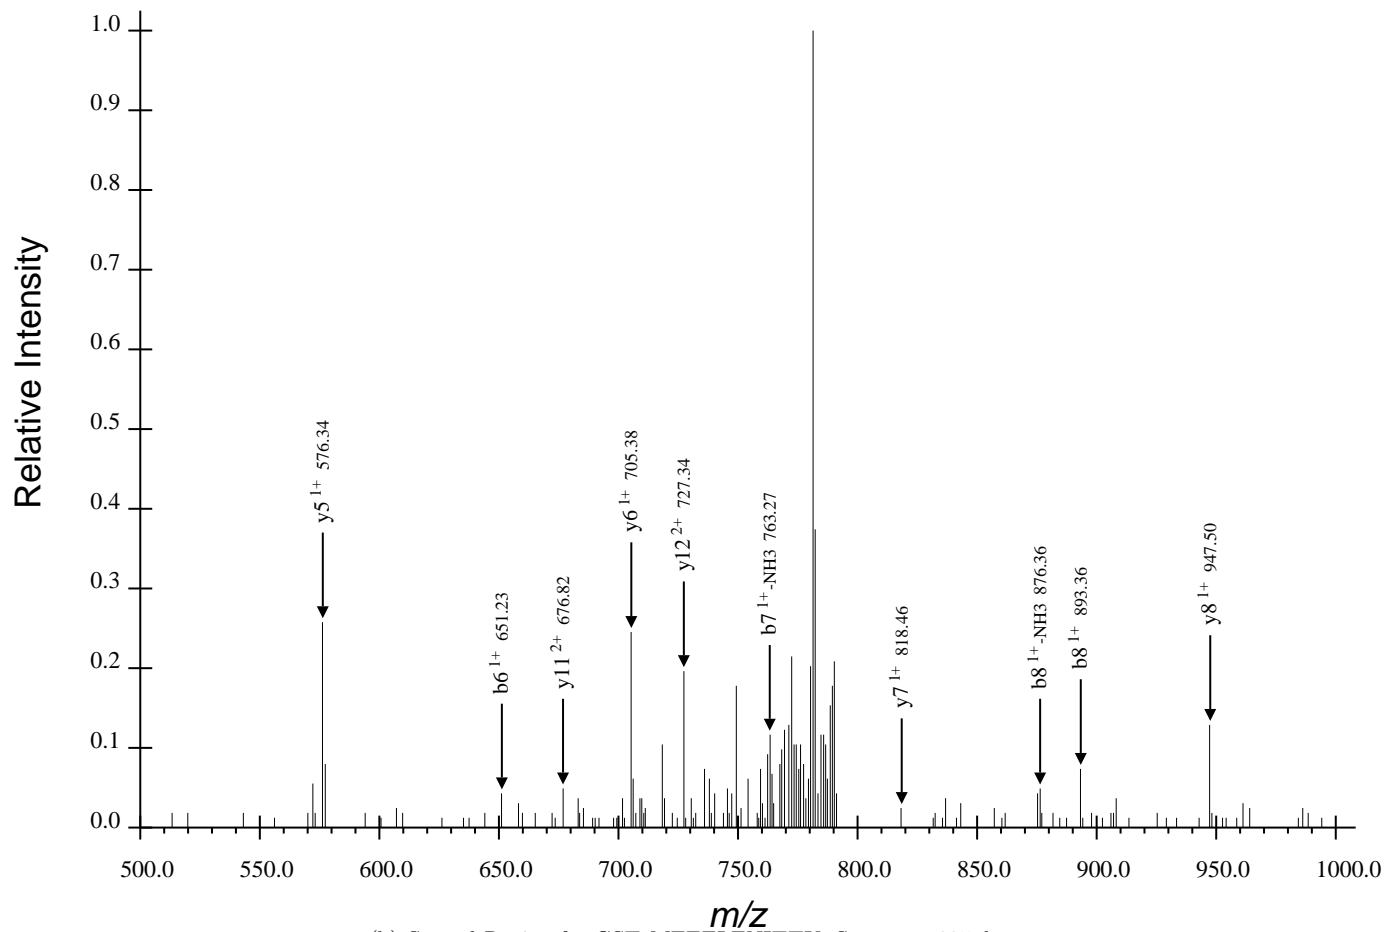

(b) Second Region for GSToMEEELNITTK, Spectrum 225.dta

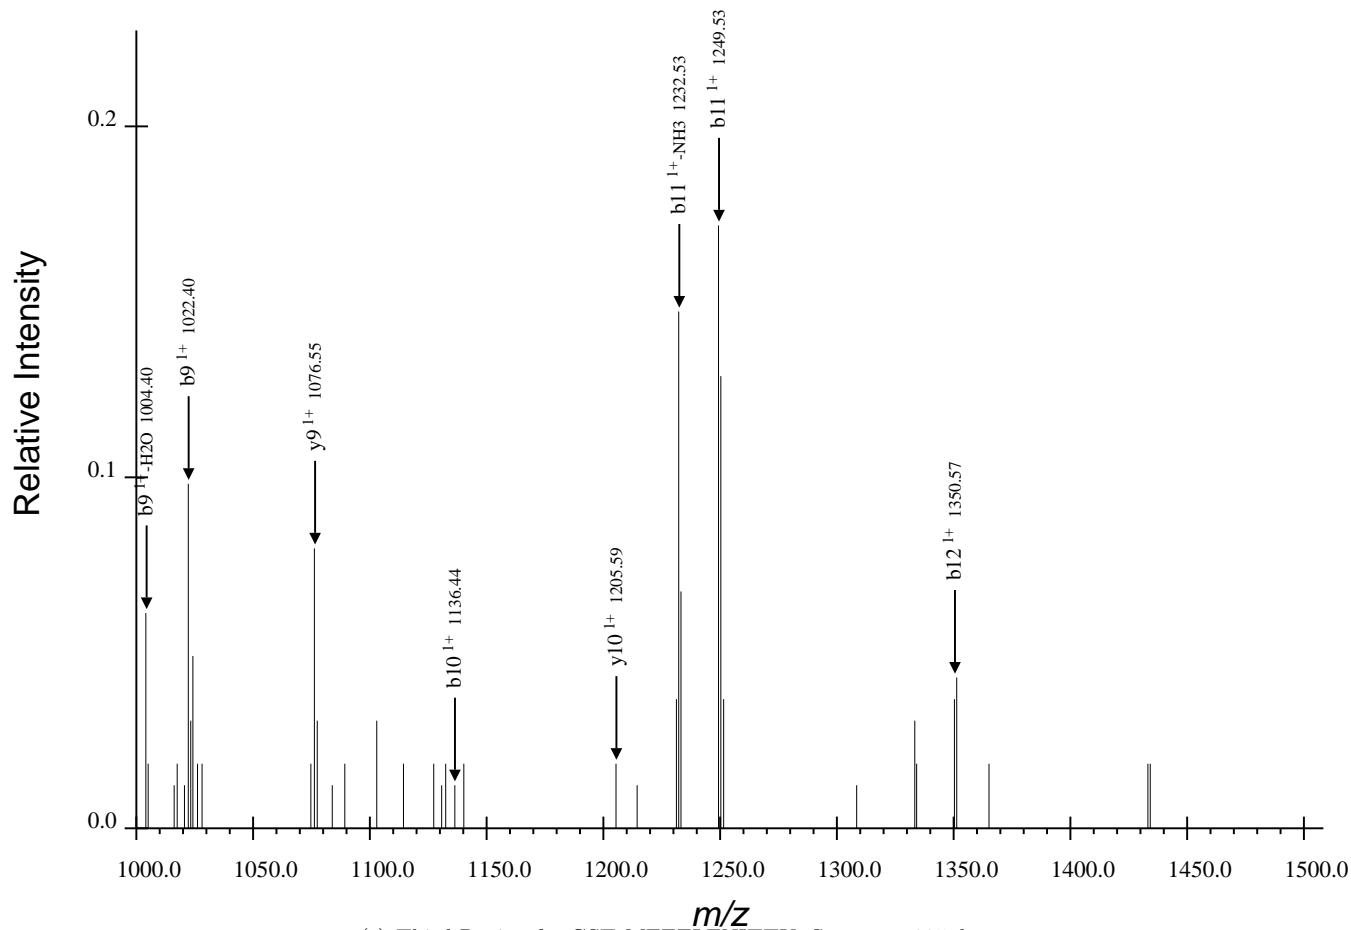

(c) Third Region for GSToMEEELENIITTK, Spectrum 225.dta

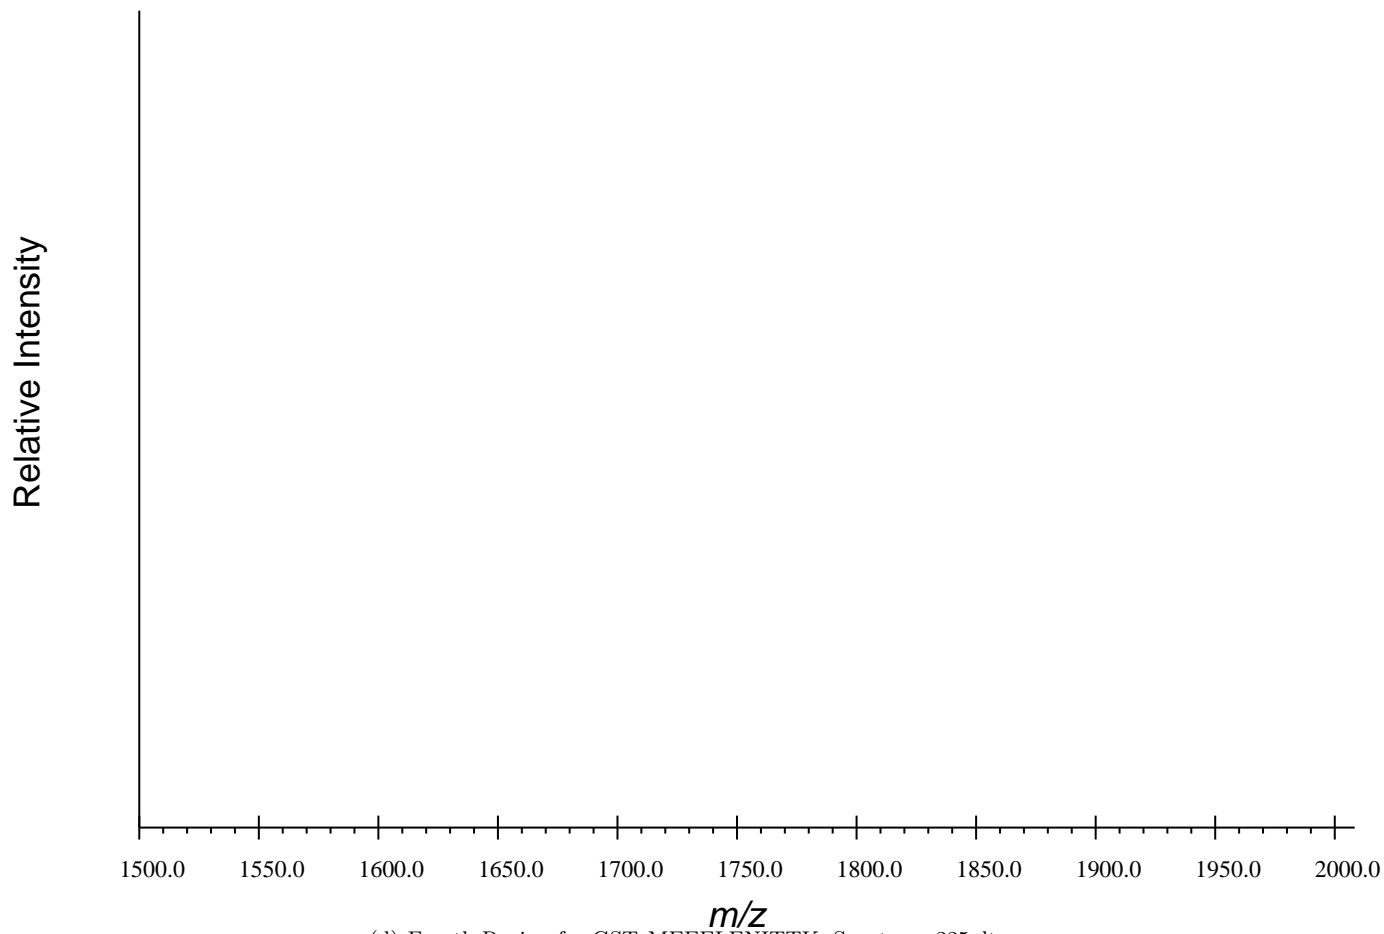

(d) Fourth Region for GSToMEEELENIITTK, Spectrum 225.dta

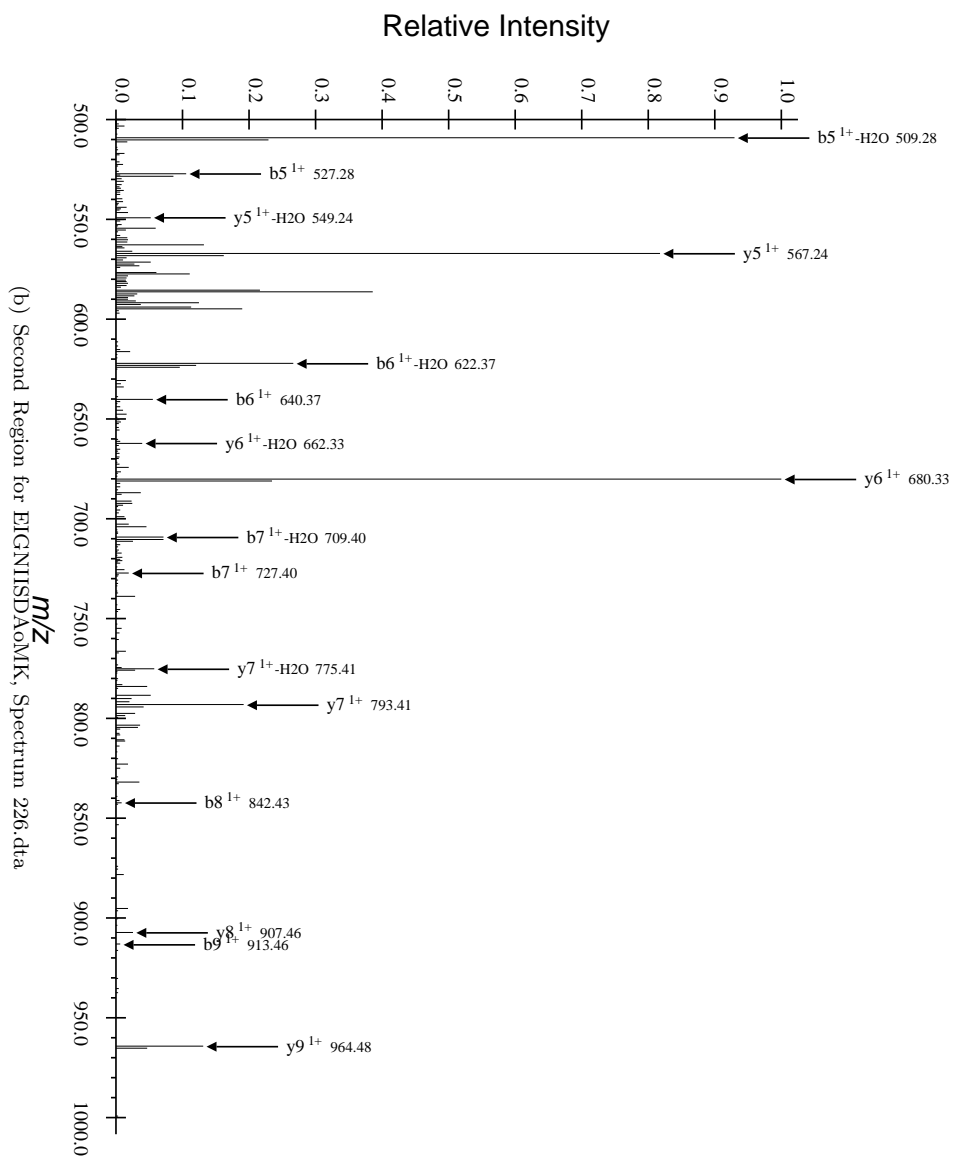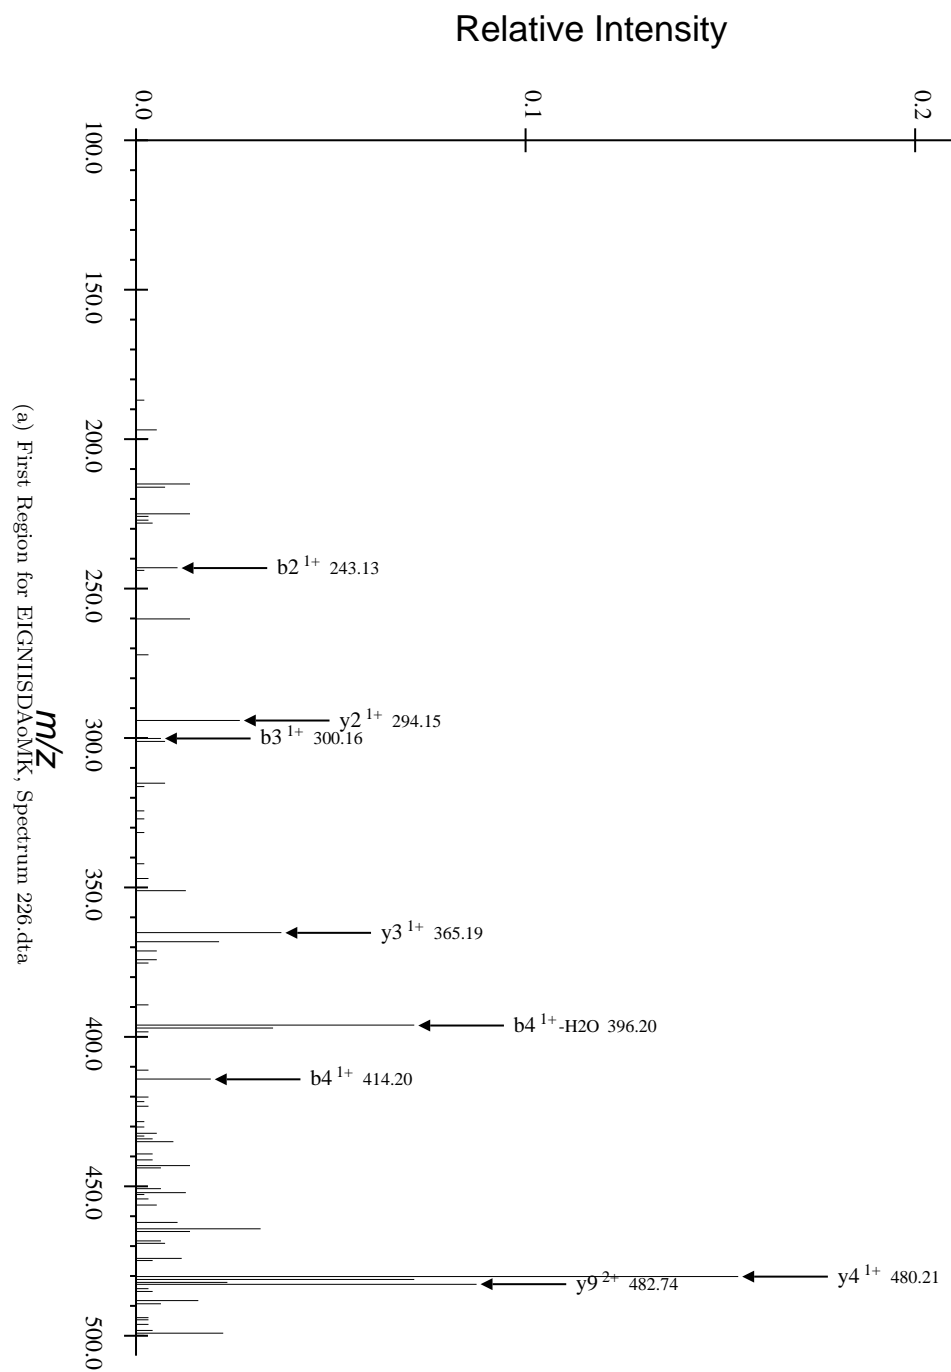



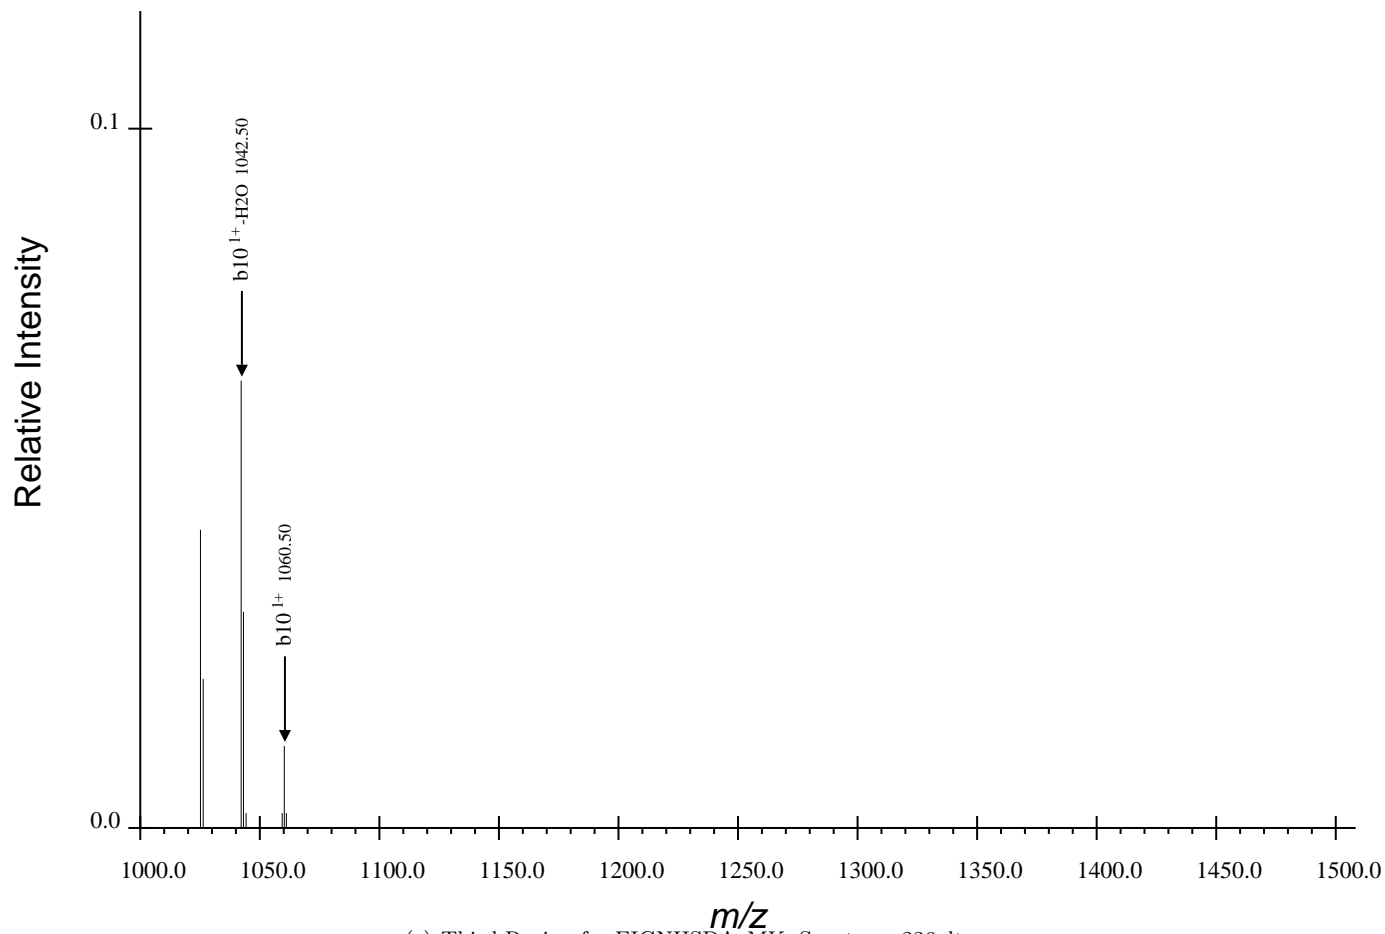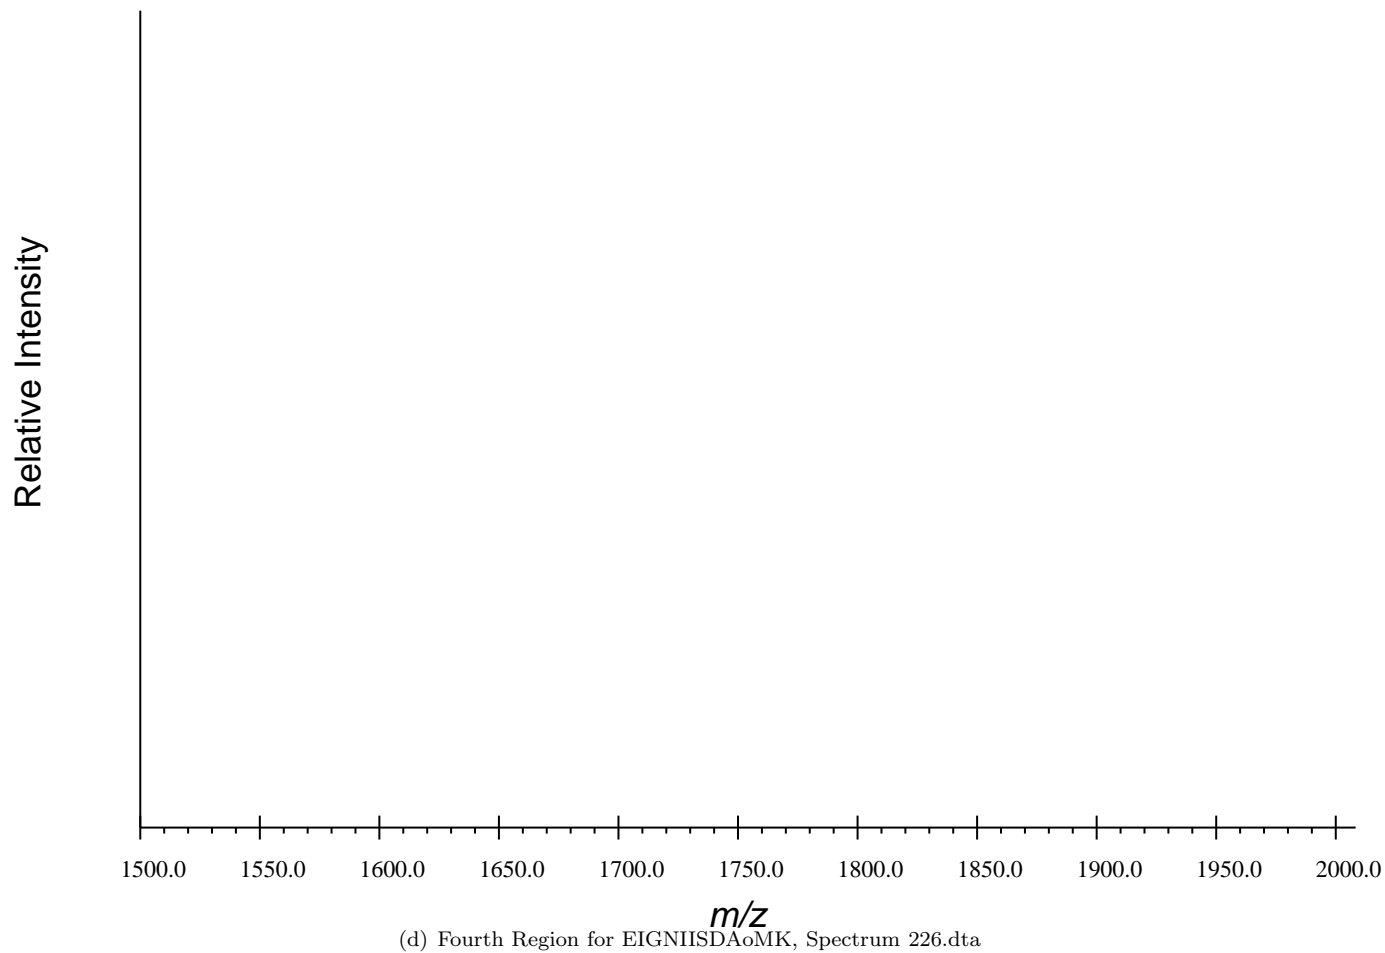

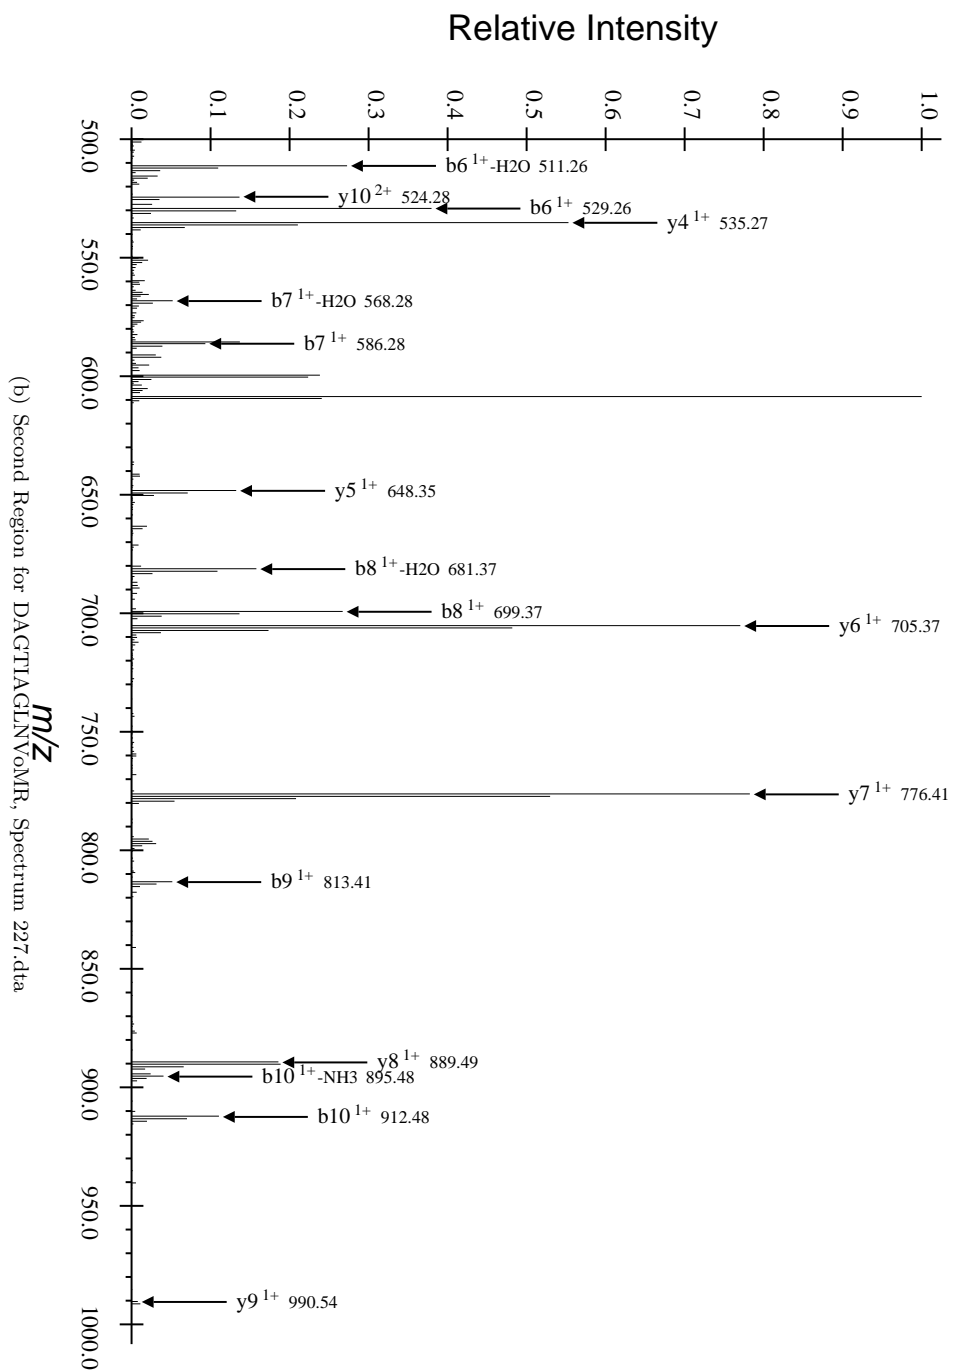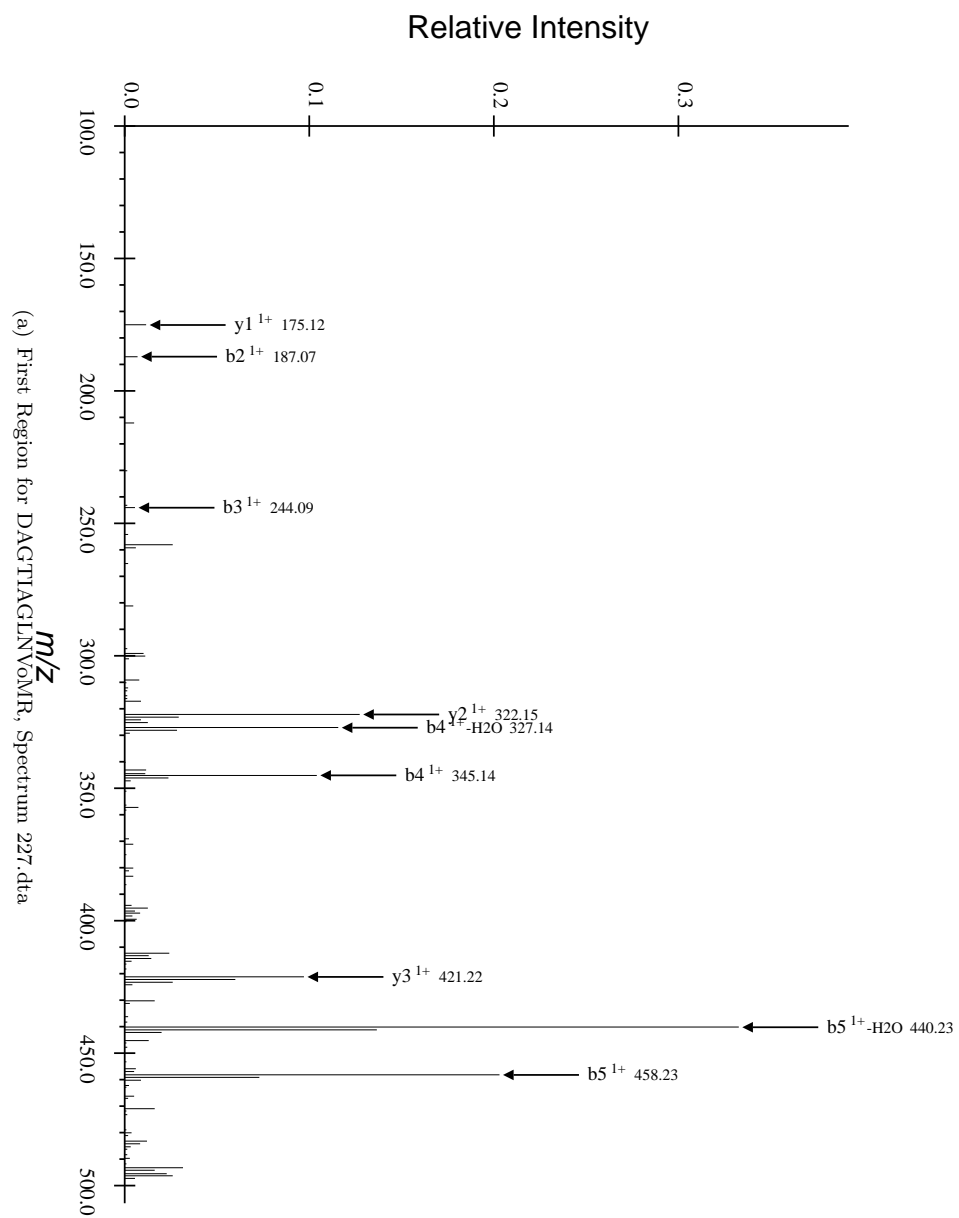

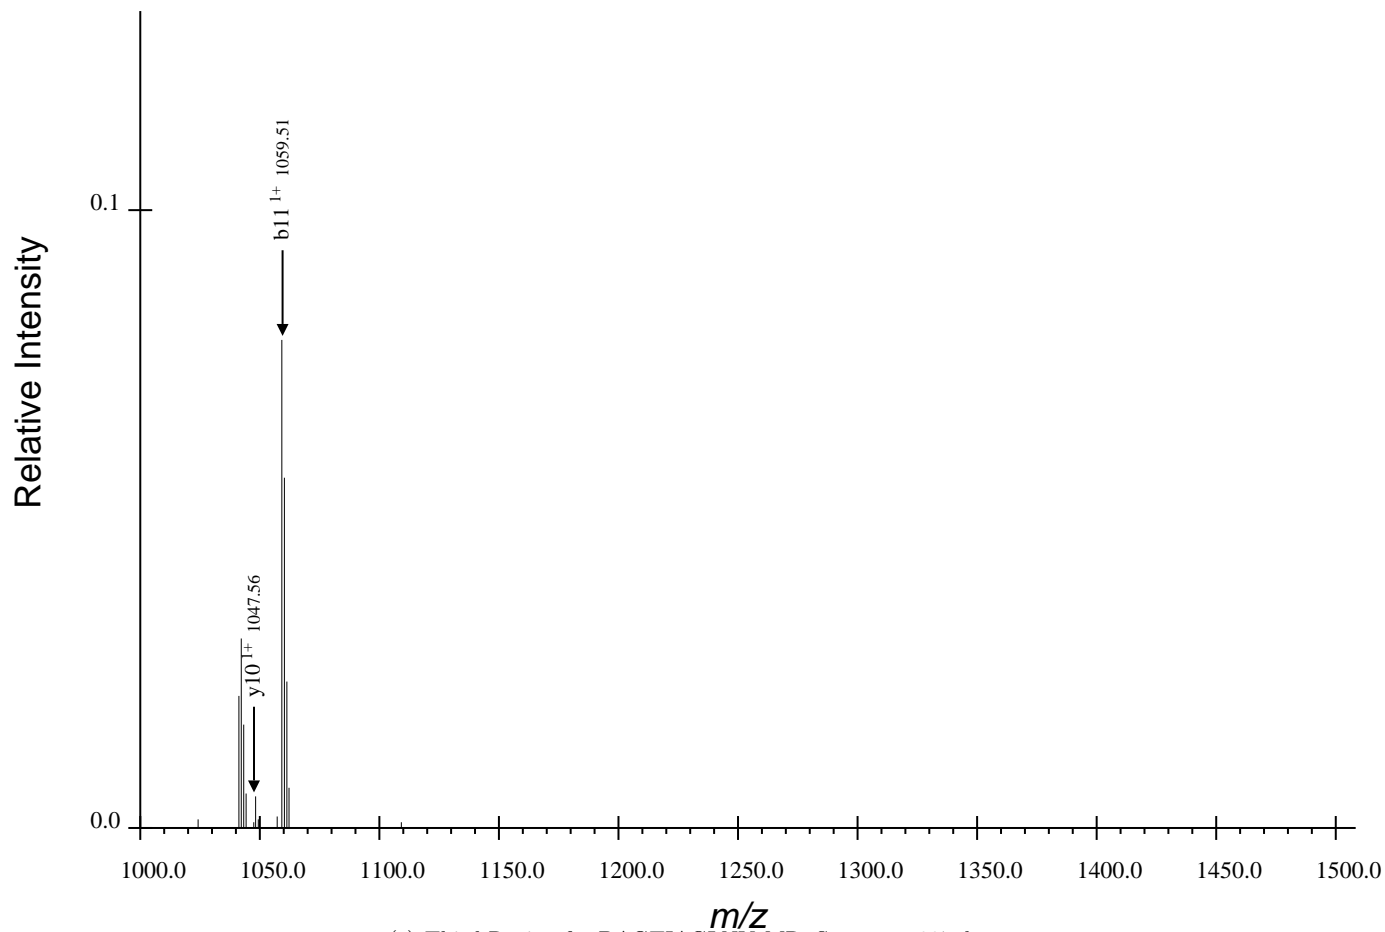

(c) Third Region for DAGTIAGLNV0MR, Spectrum 227.dta

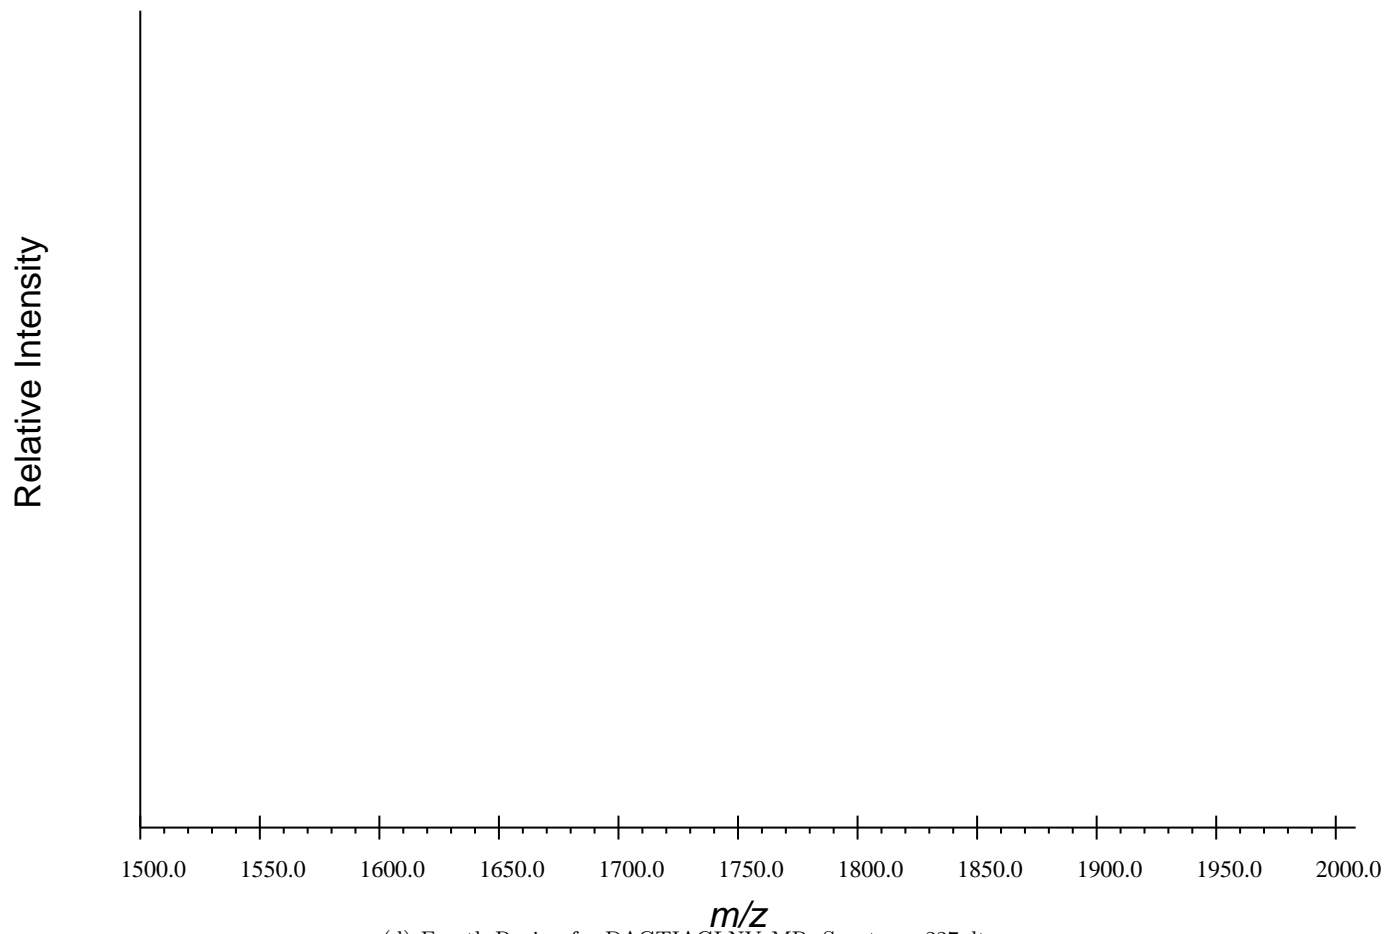

(d) Fourth Region for DAGTIAGLNV0MR, Spectrum 227.dta

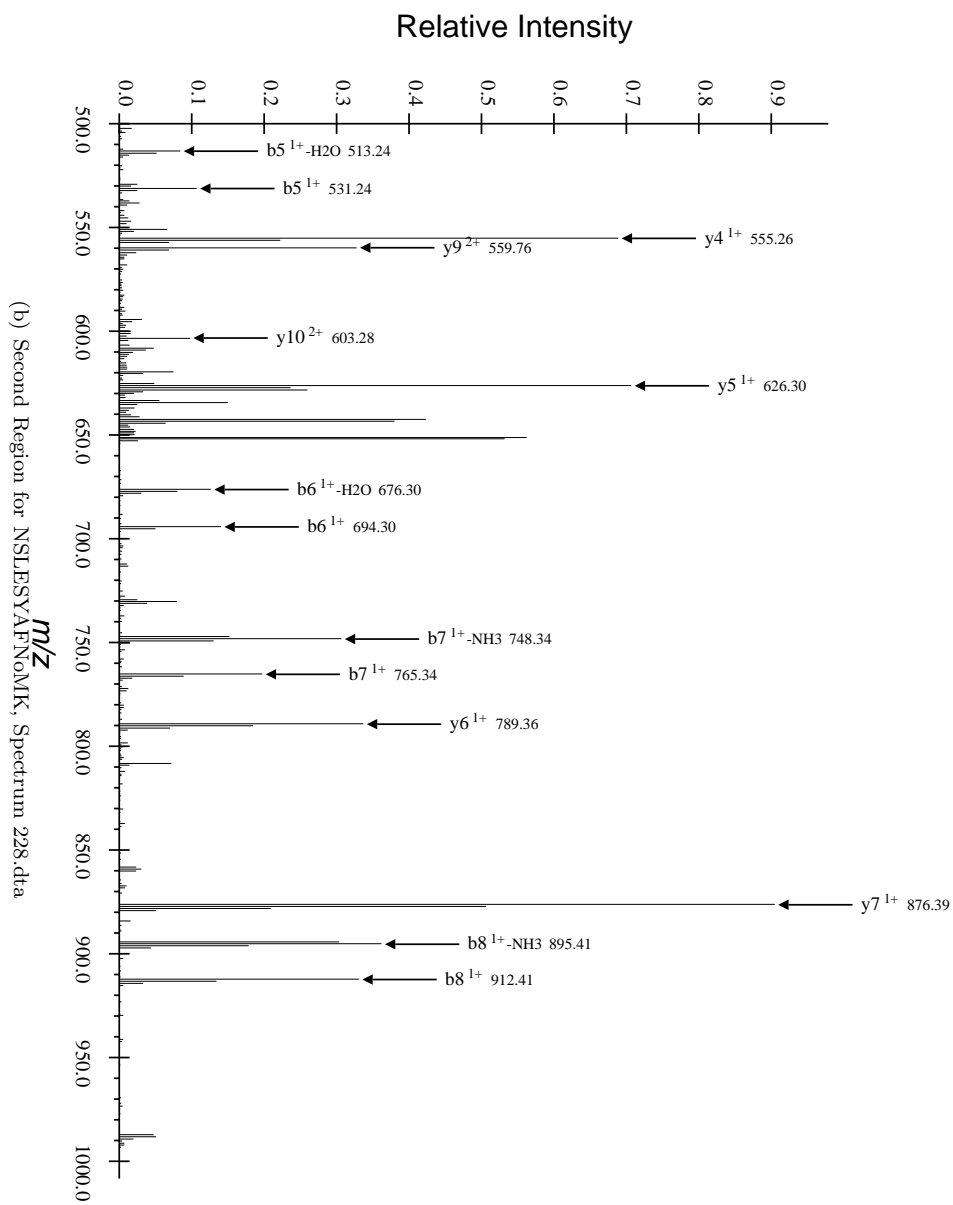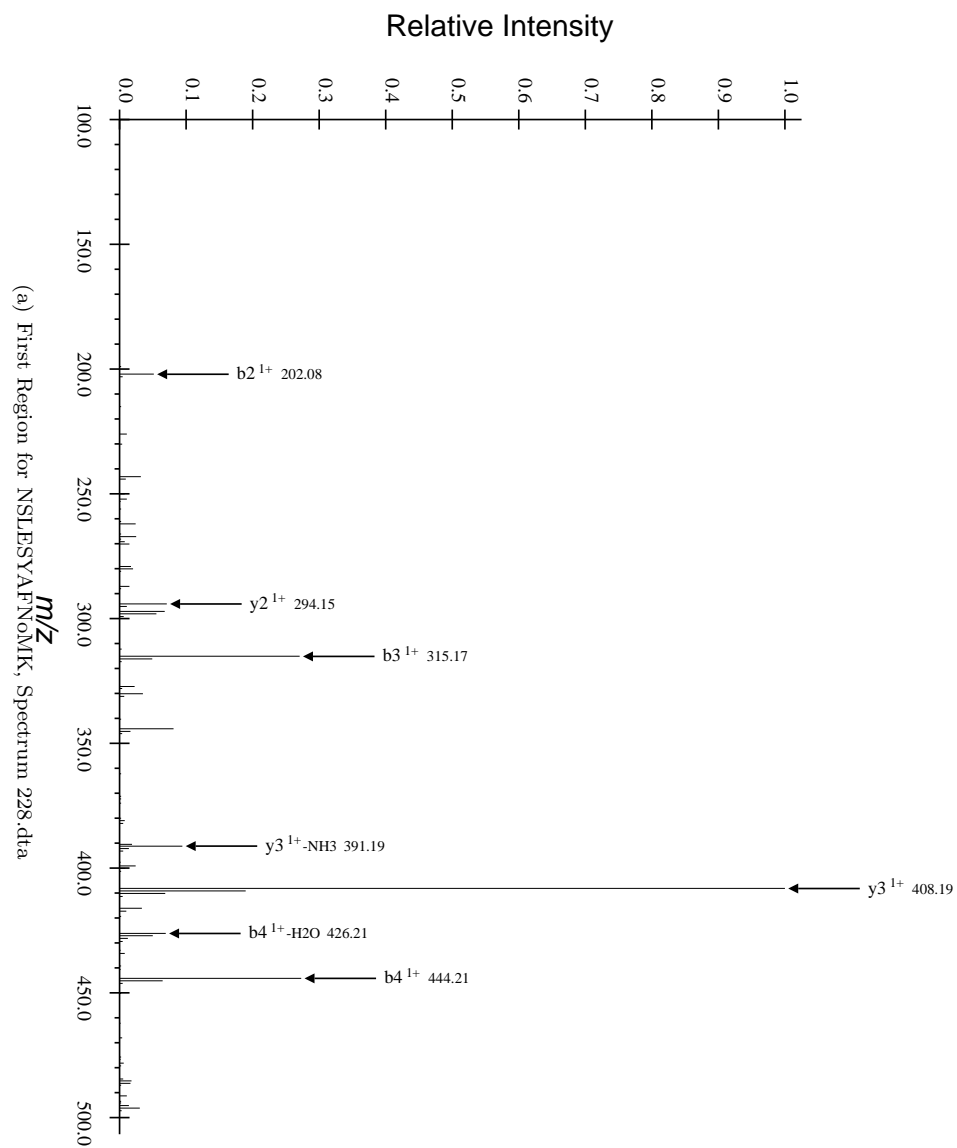

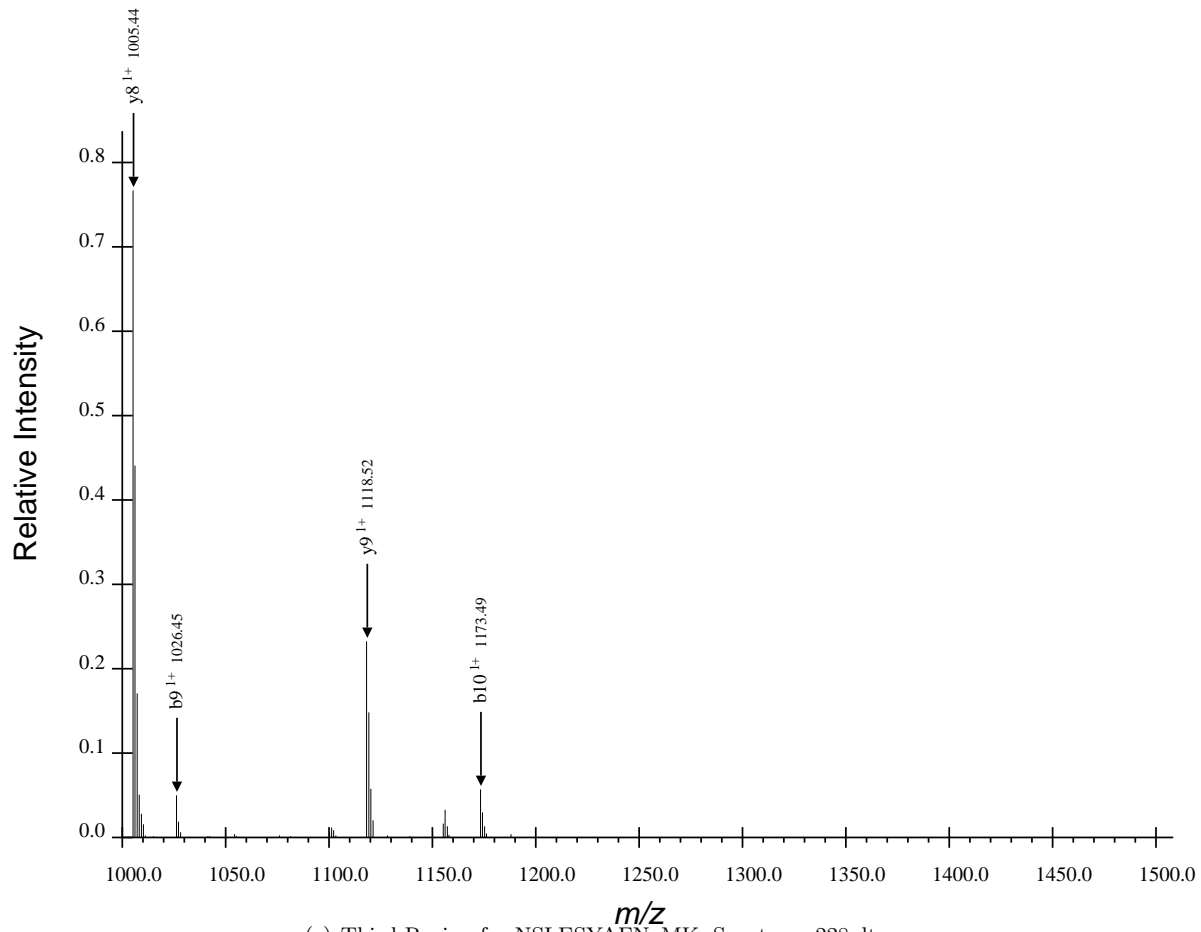

(c) Third Region for NSLESYAFNoMK, Spectrum 228.dta

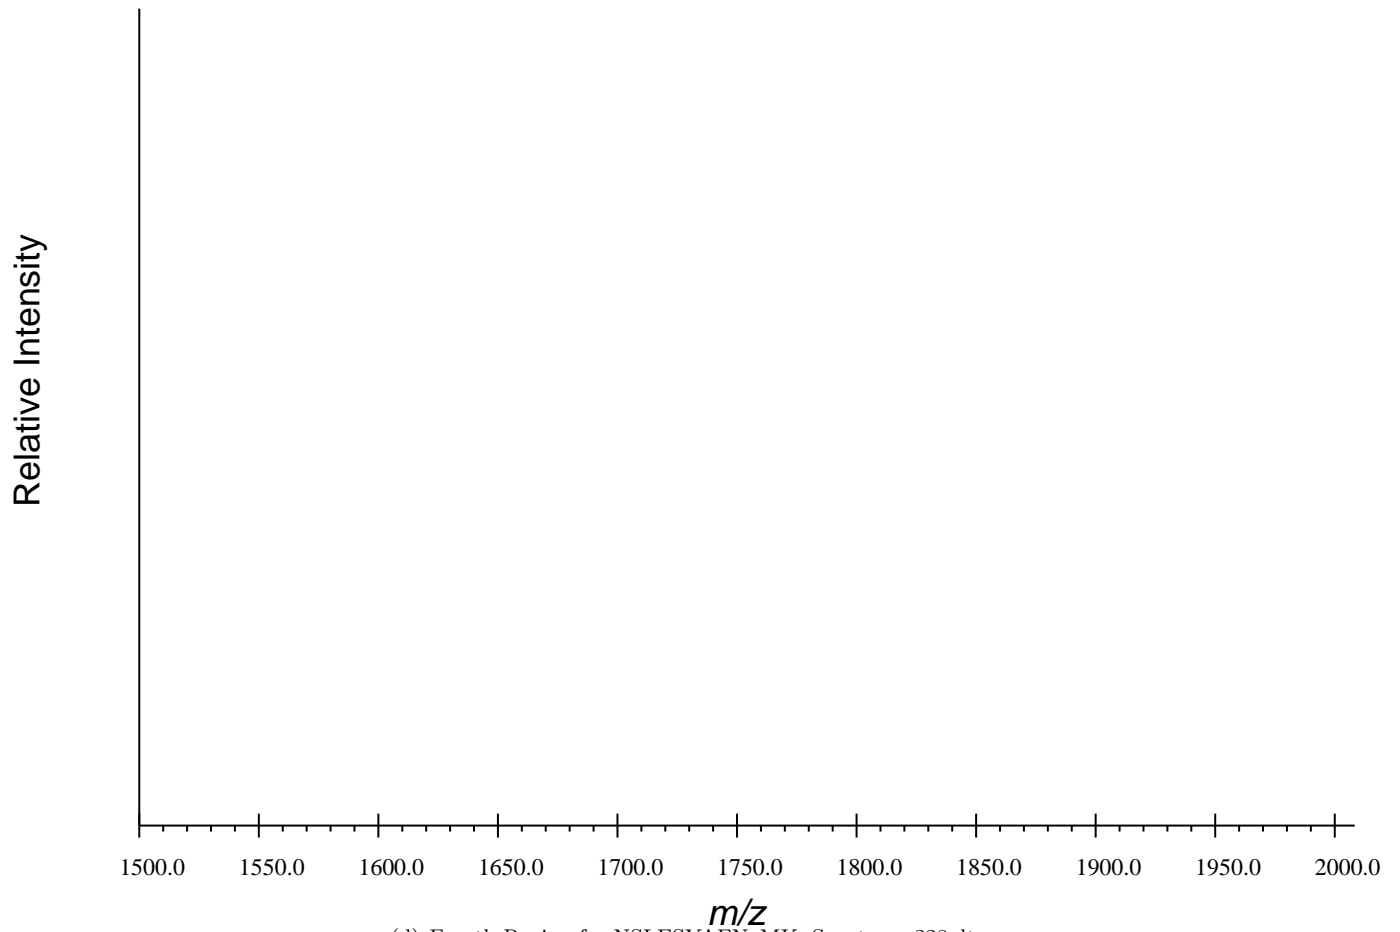

(d) Fourth Region for NSLESYAFNoMK, Spectrum 228.dta

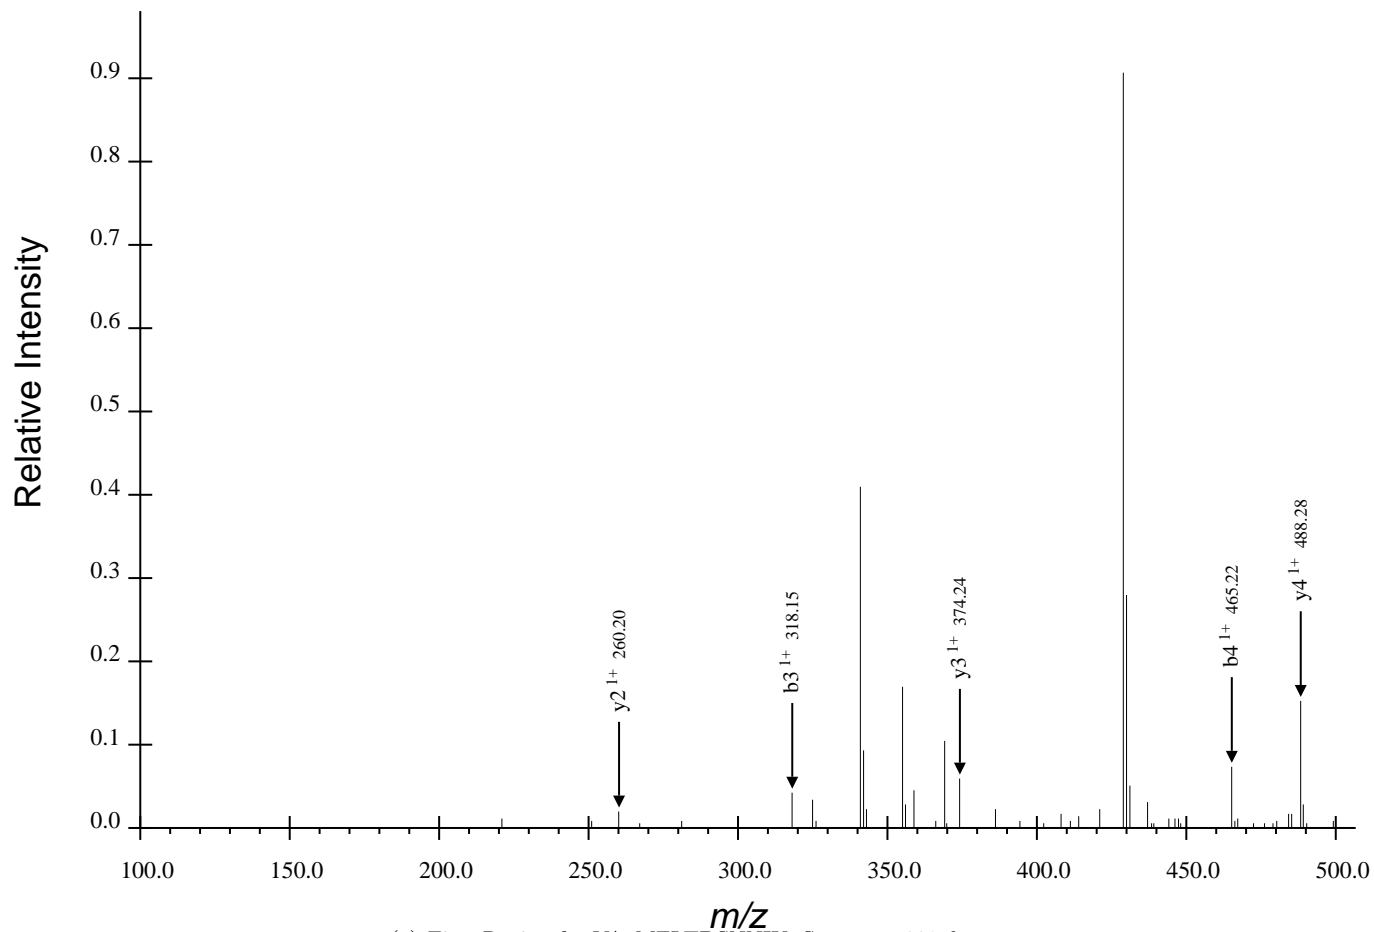

(a) First Region for VAoMFLTDSNNIK, Spectrum 229.dta

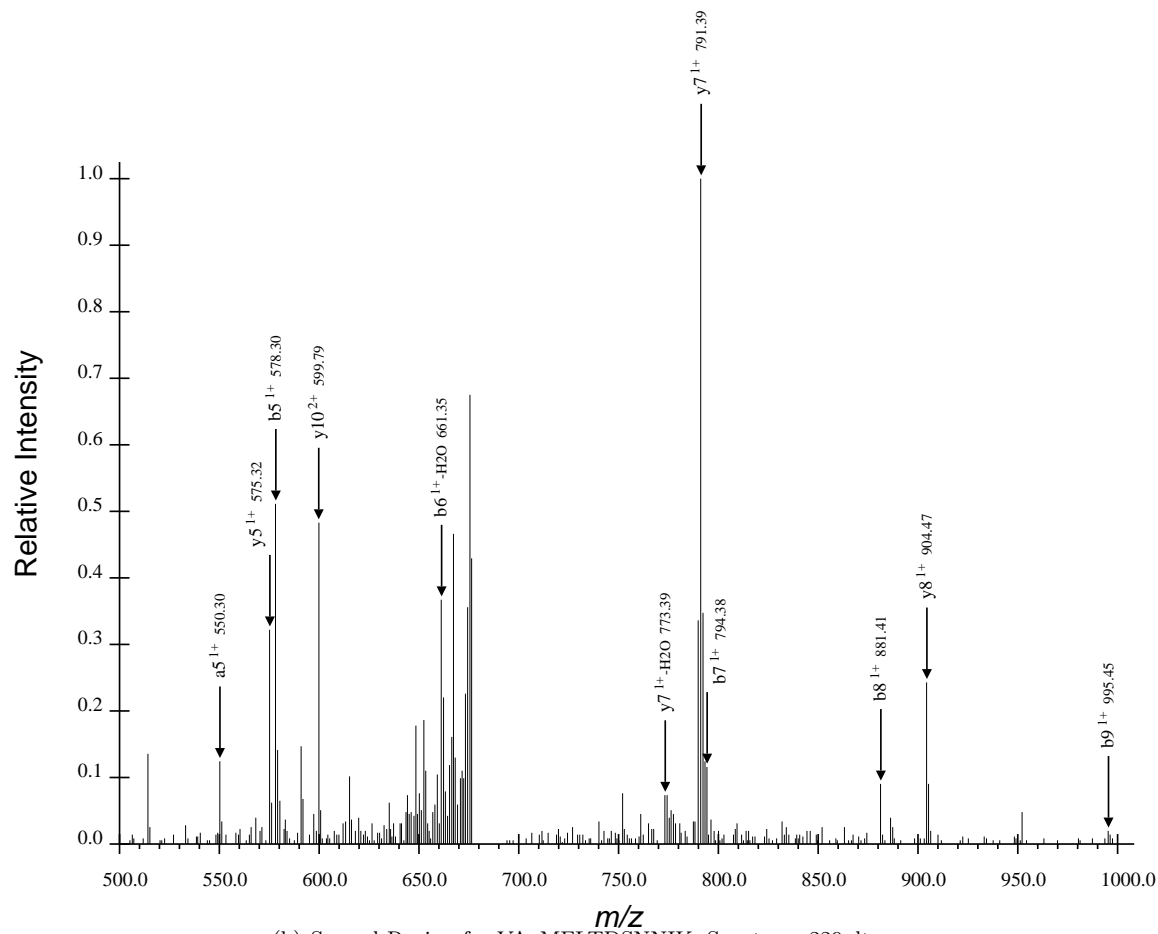

(b) Second Region for VAoMFLTDSNNIK, Spectrum 229.dta

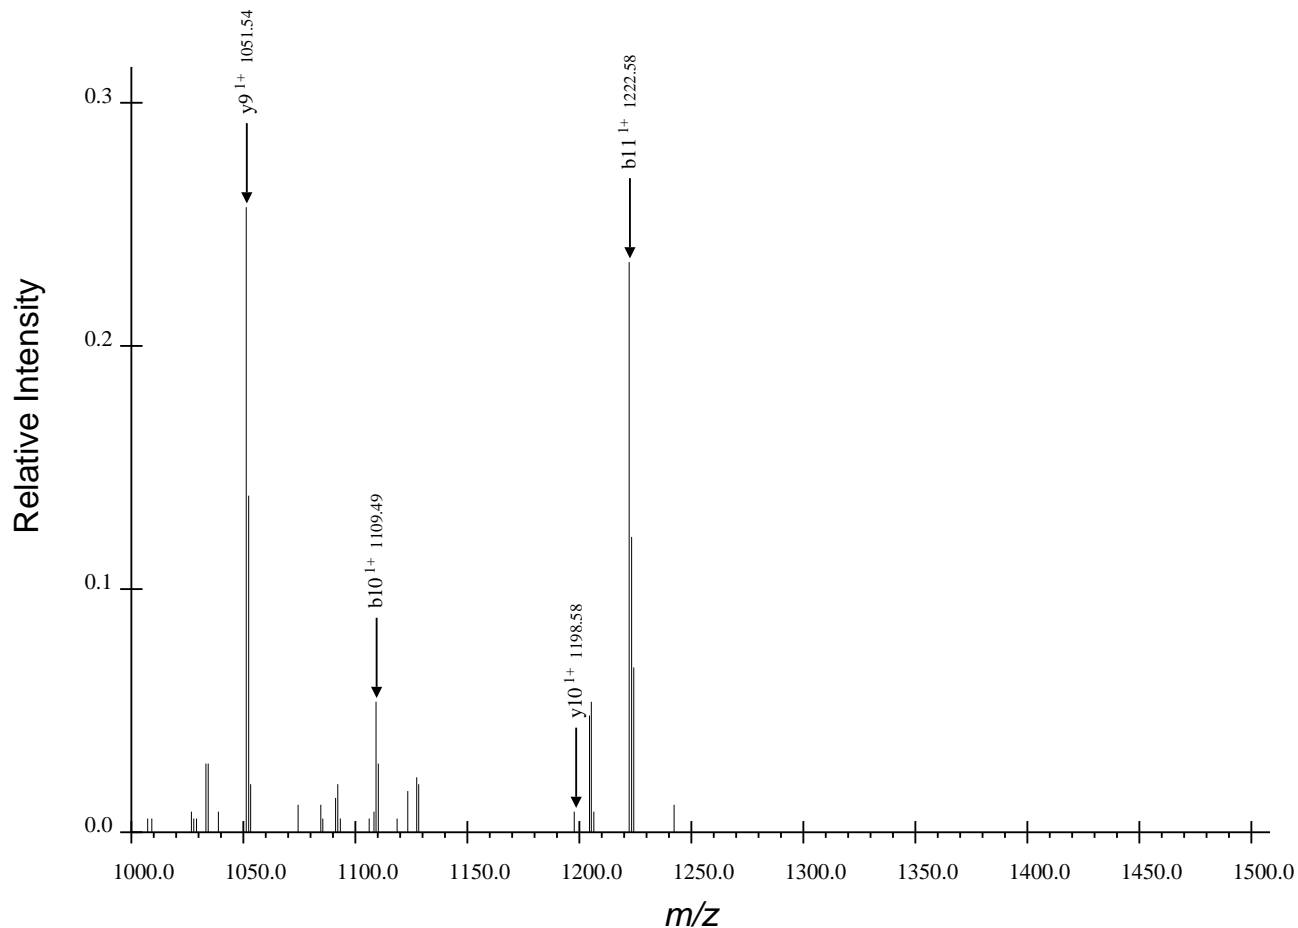

(c) Third Region for VAoMFLTDSNNIK, Spectrum 229.dta

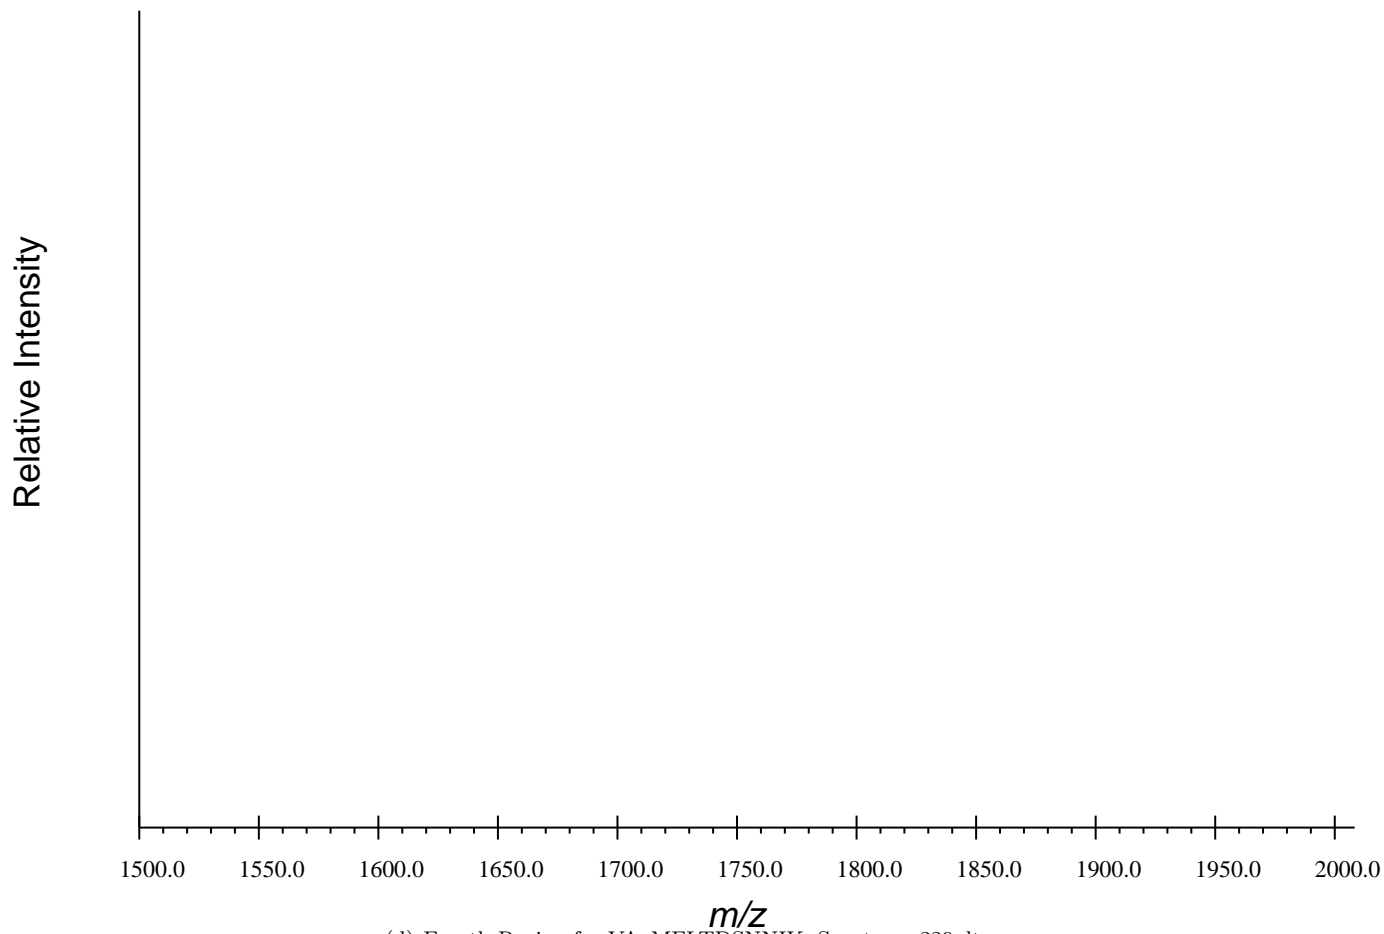

(d) Fourth Region for VAoMFLTDSNNIK, Spectrum 229.dta

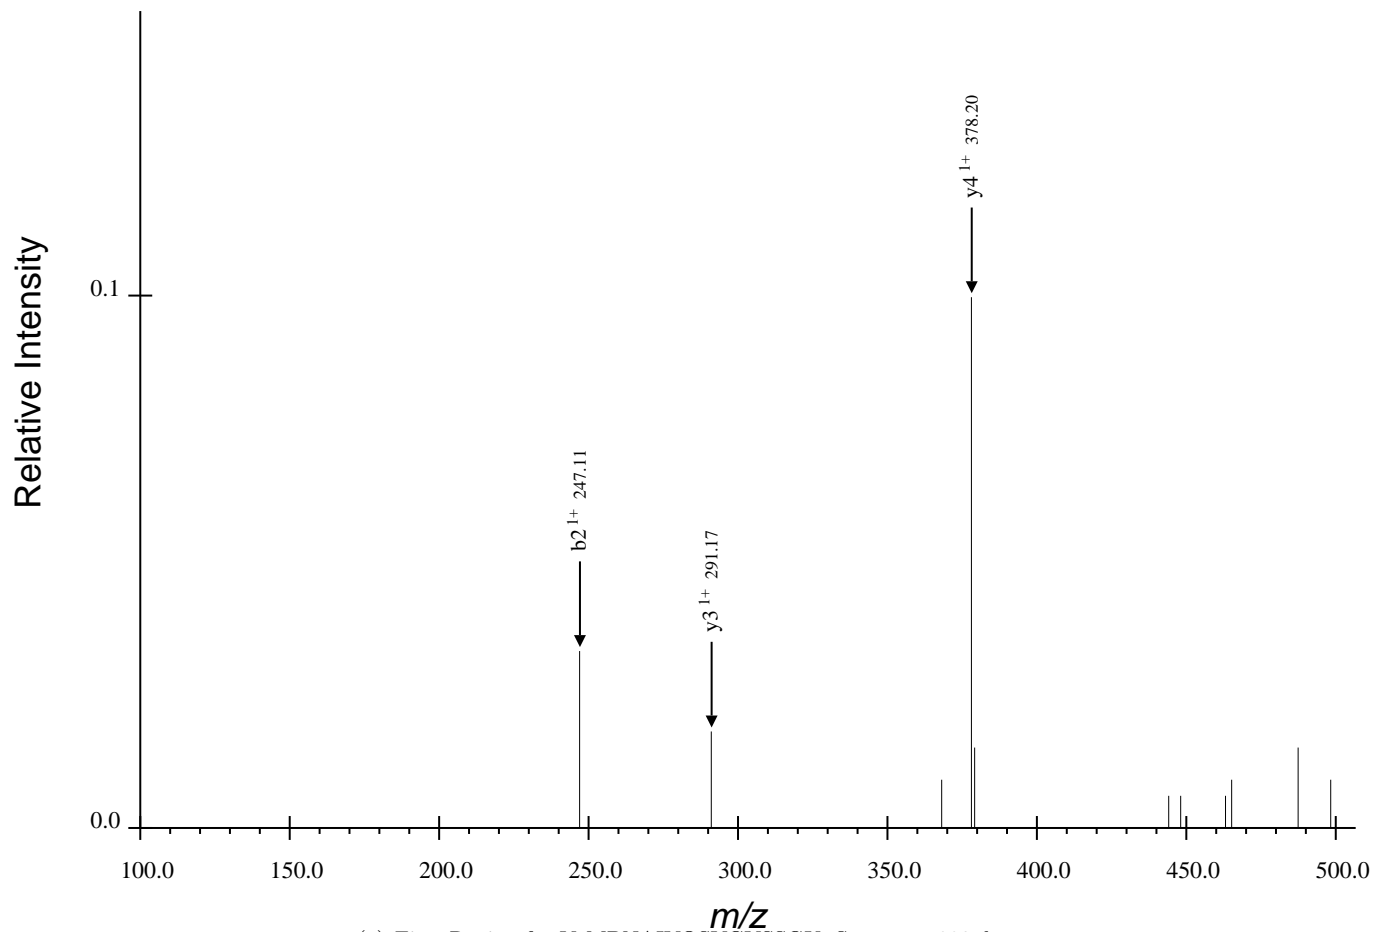

(a) First Region for VoMPNAIVQSVG VSSGK, Spectrum 230.dta

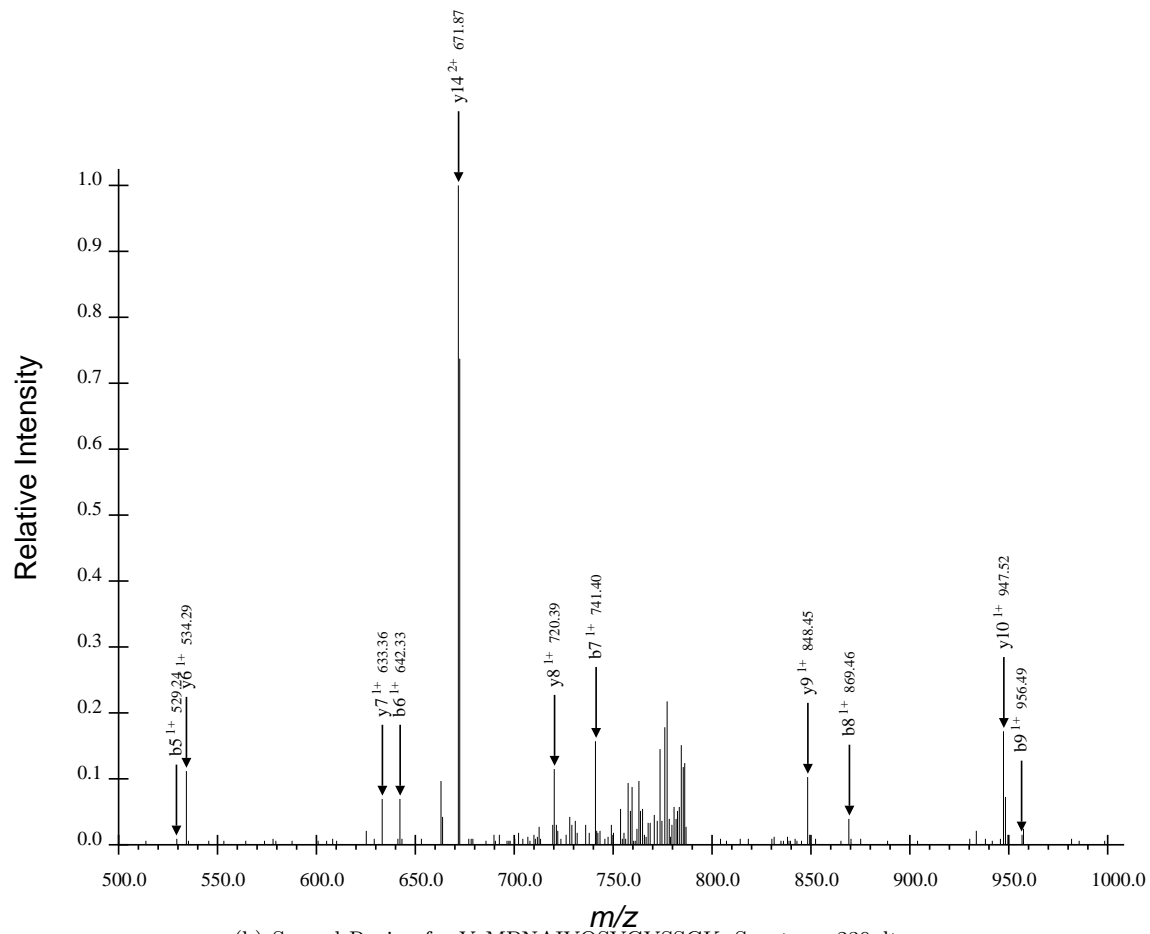

(b) Second Region for VoMPNAIVQSVG VSSGK, Spectrum 230.dta



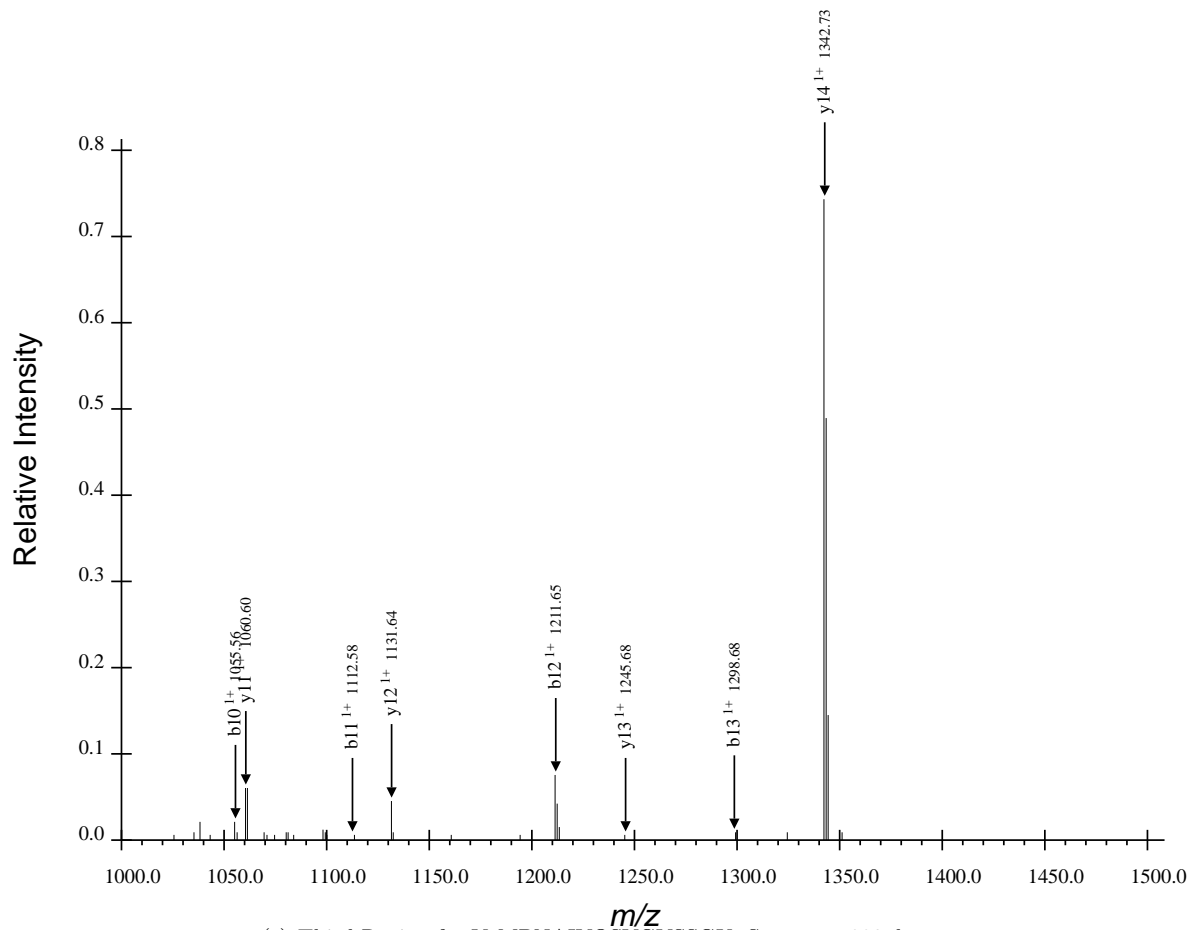

(c) Third Region for VoMPNAIVQSVGVSSGK, Spectrum 230.dta

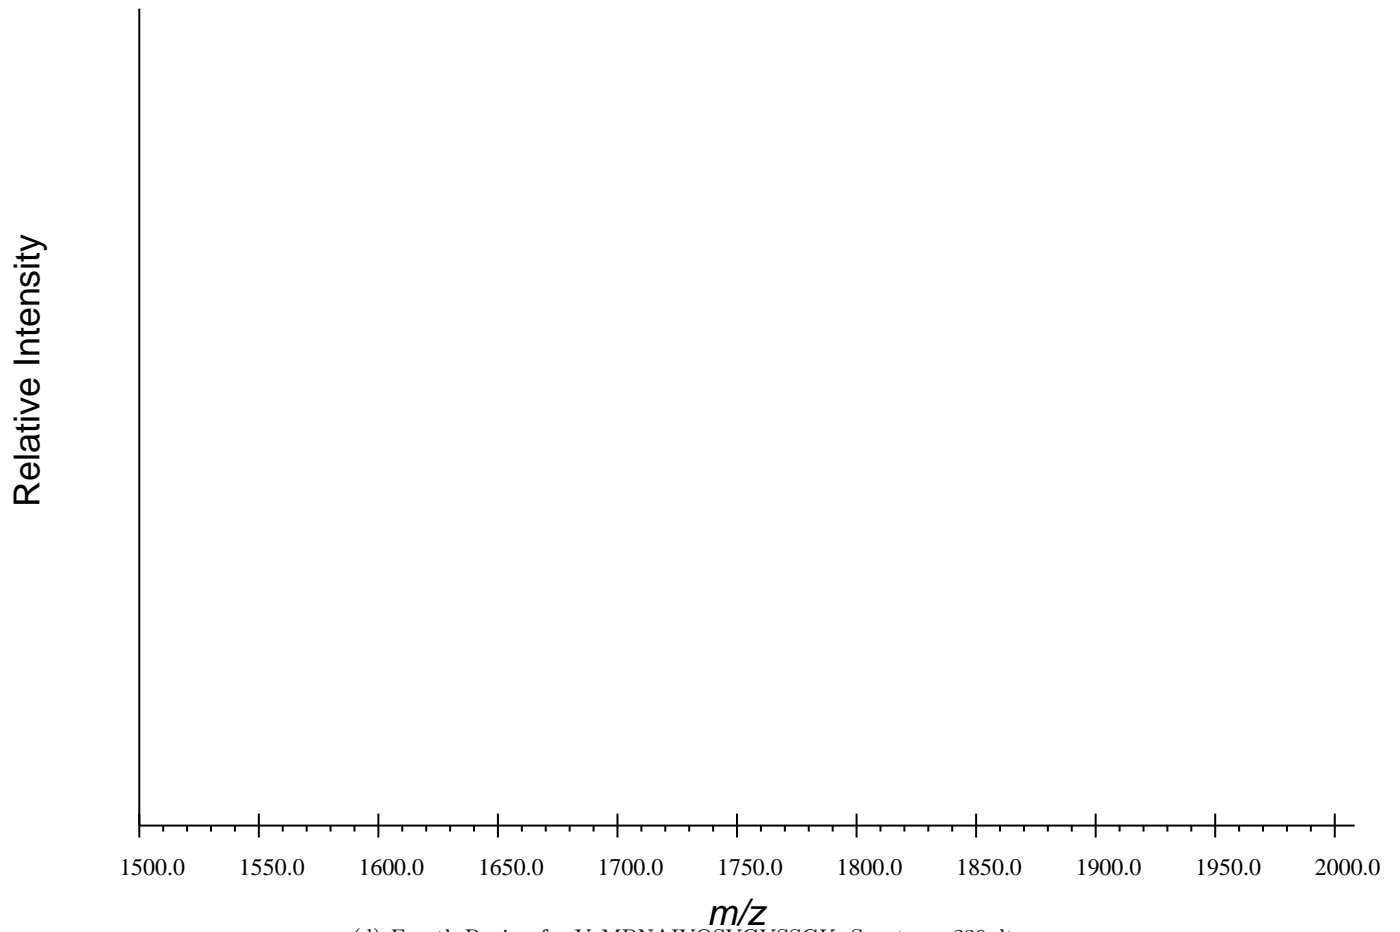

(d) Fourth Region for VoMPNAIVQSVGVSSGK, Spectrum 230.dta

(b) Second Region for EAQMVQAEFEAAAEITR, Spectrum 231.dta

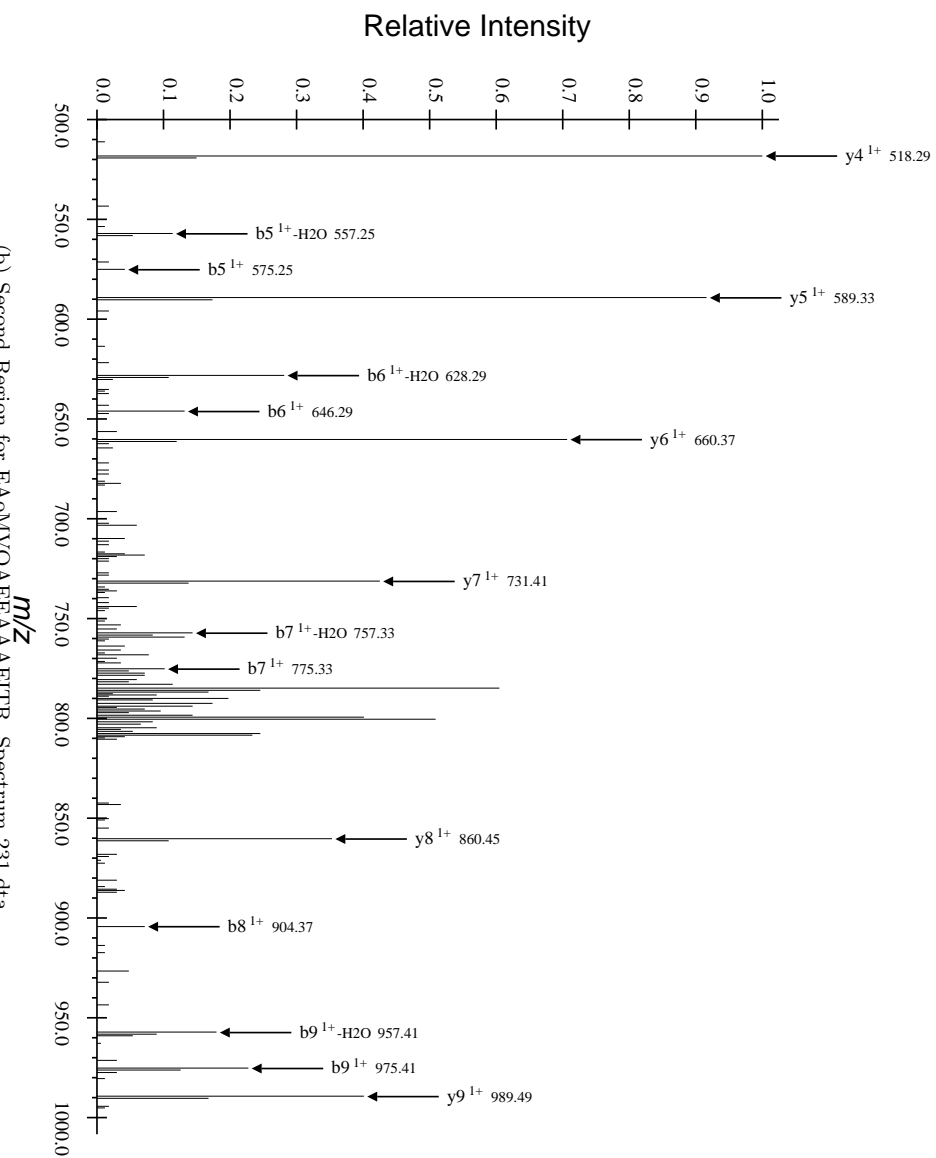

(a) First Region for EAQMVQAEFEAAAEITR, Spectrum 231.dta

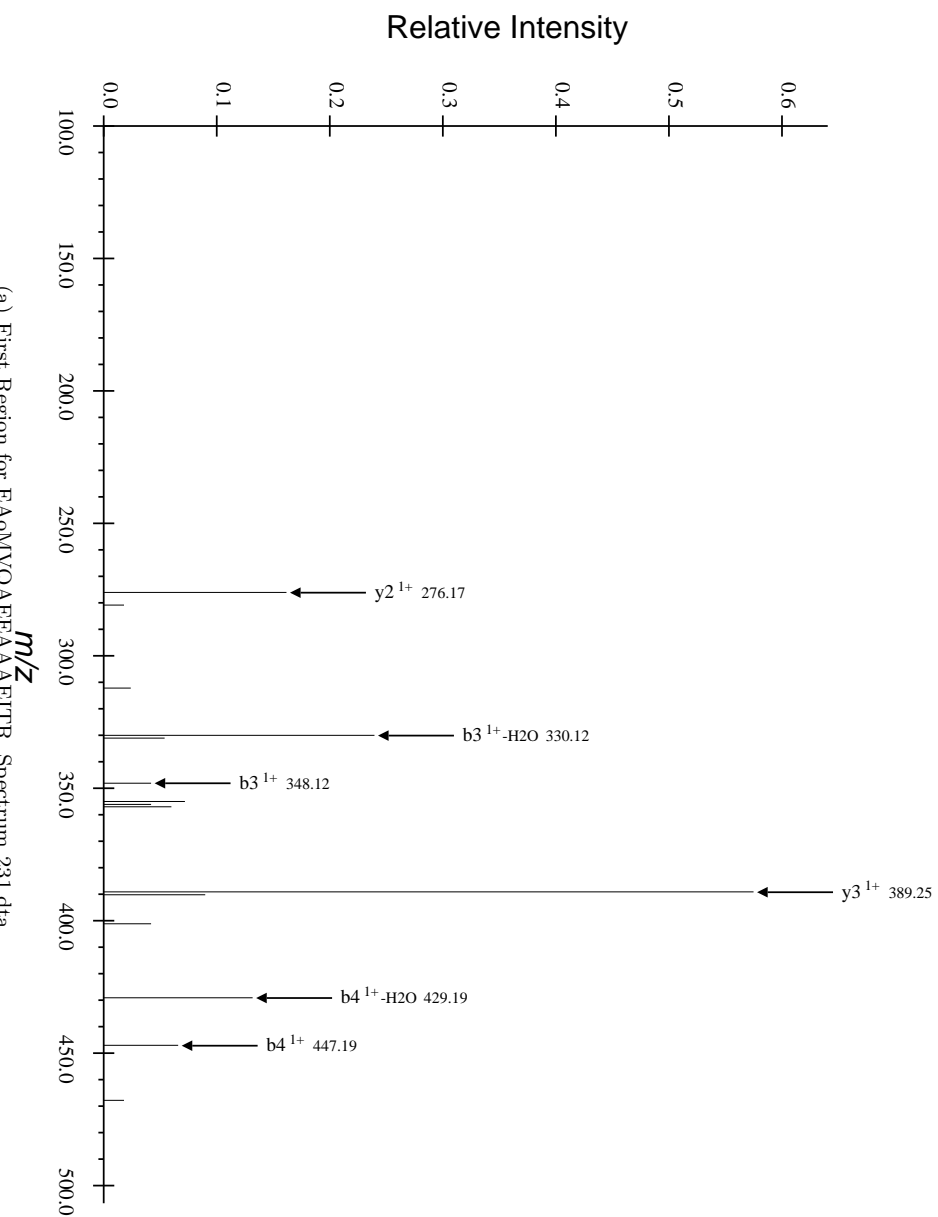

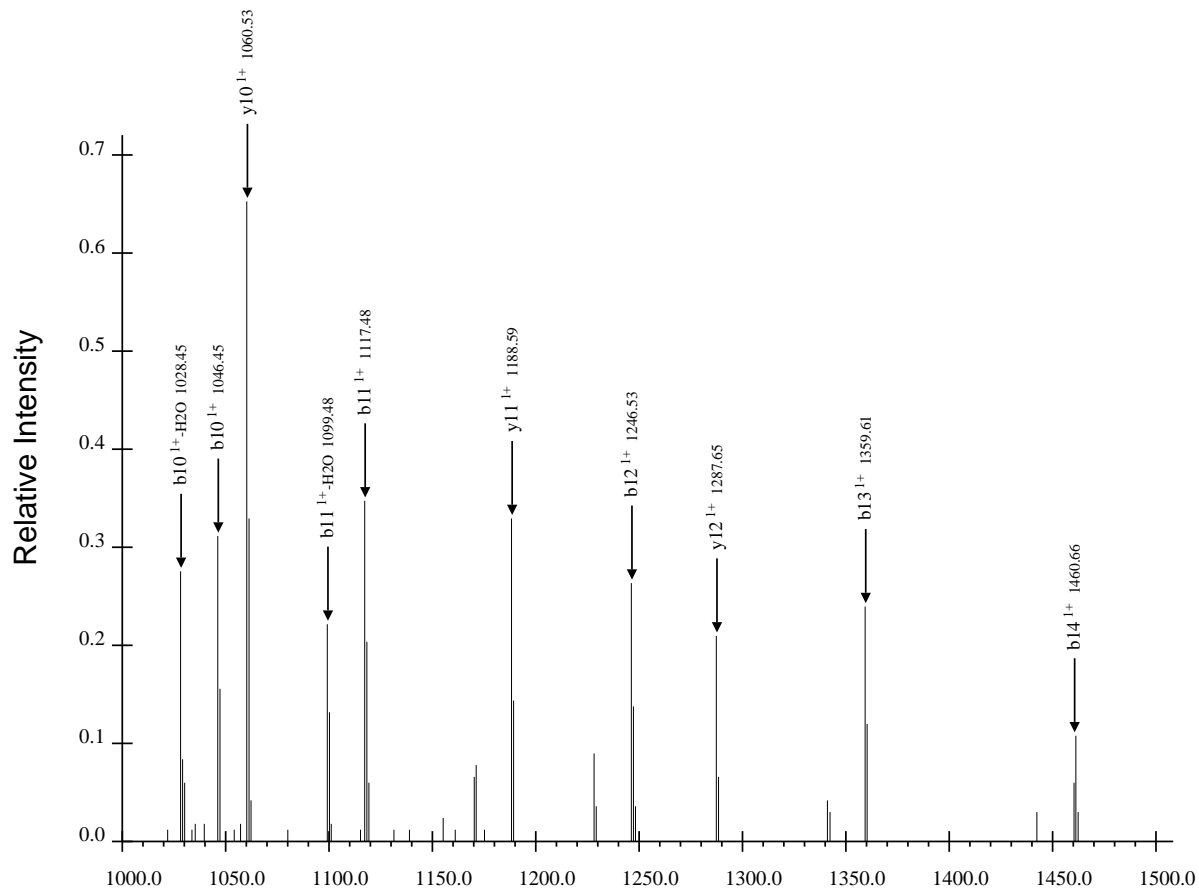

(c) Third Region for EAoMVQAEEAAAETR, Spectrum 231.dta

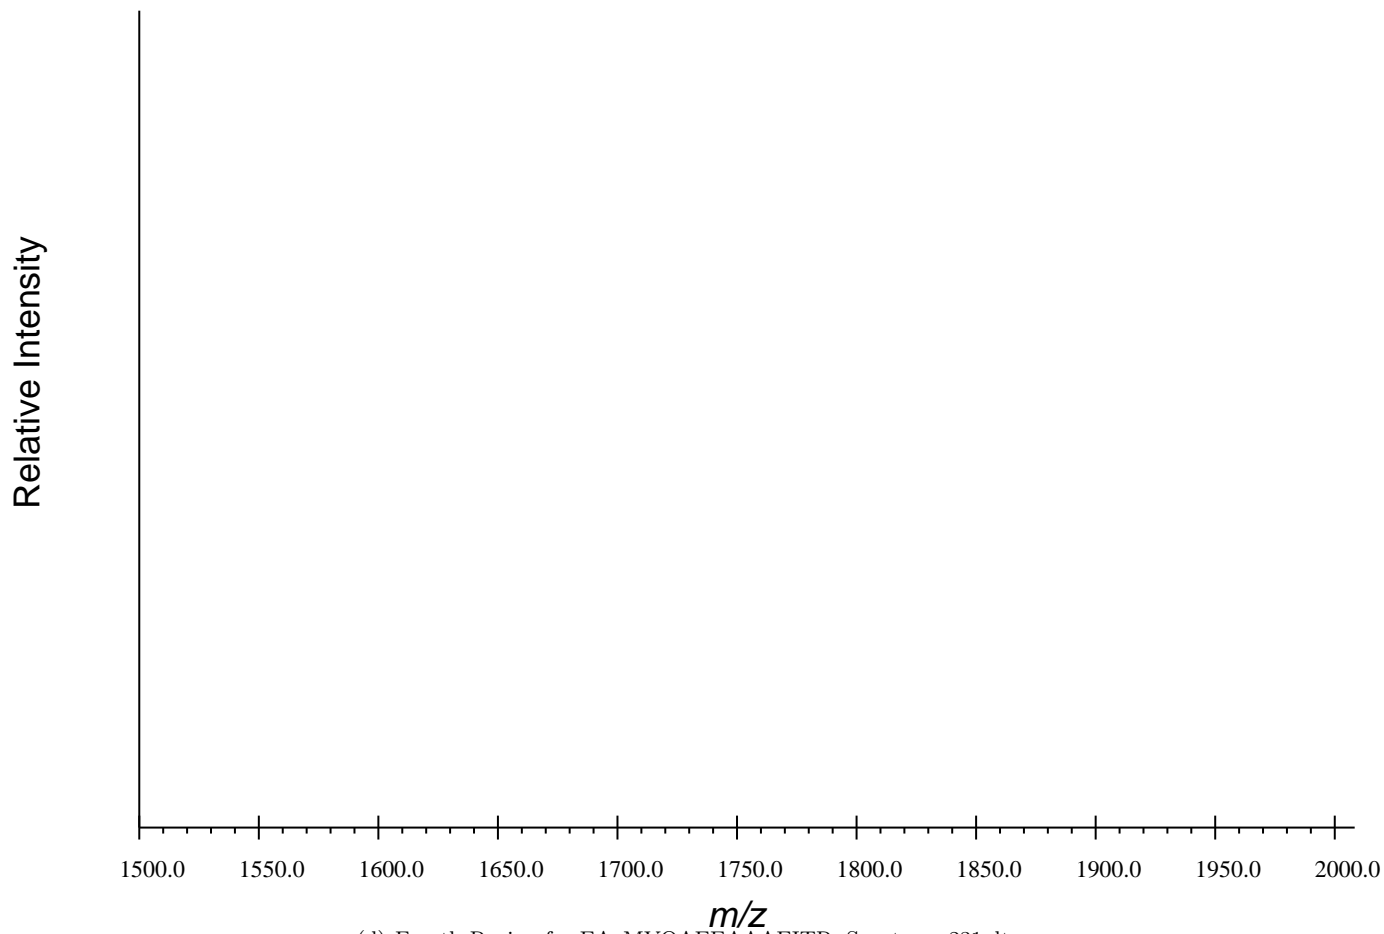

(d) Fourth Region for EAoMVQAEEAAAETR, Spectrum 231.dta

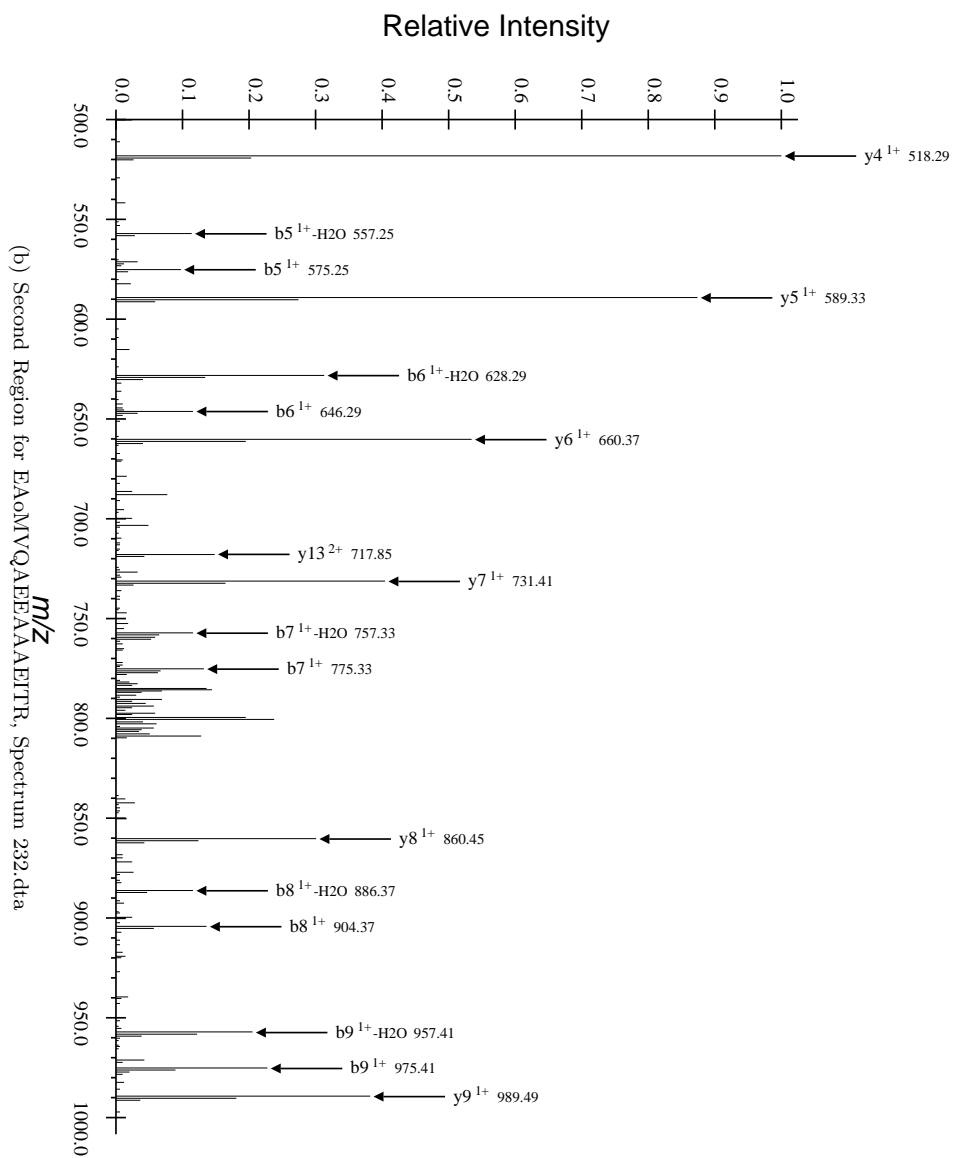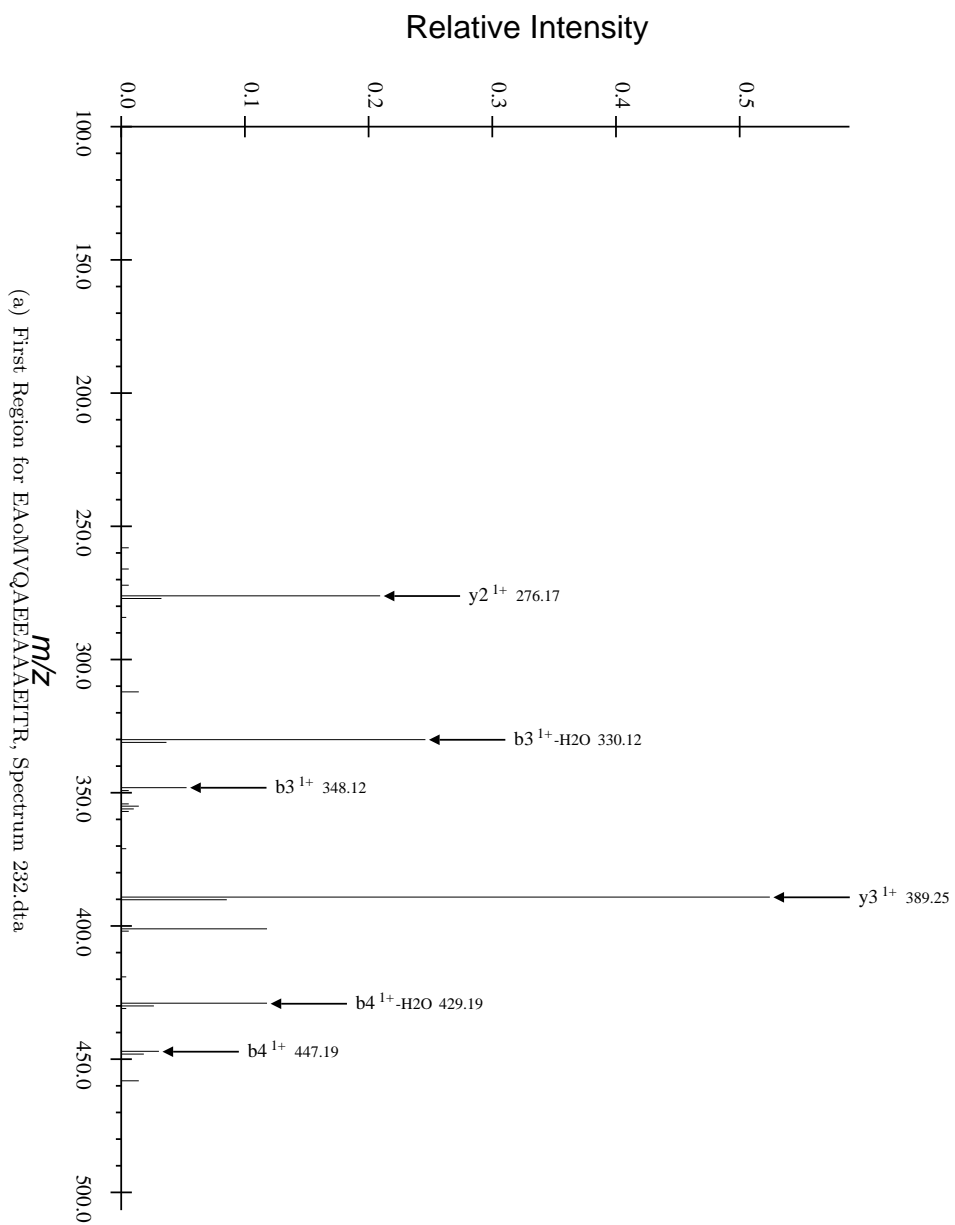

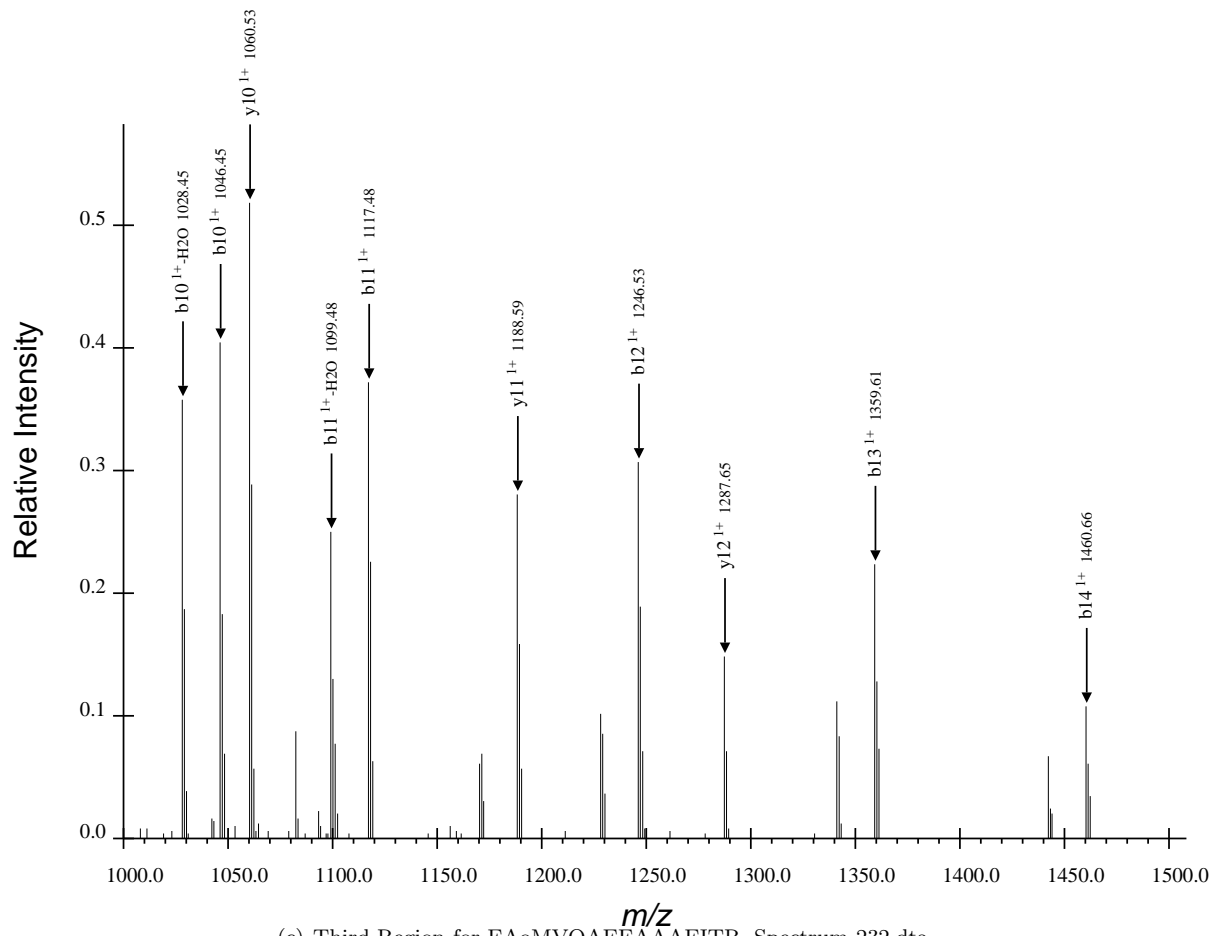

(c) Third Region for EAoMVQAEEAAAETIR, Spectrum 232.dta

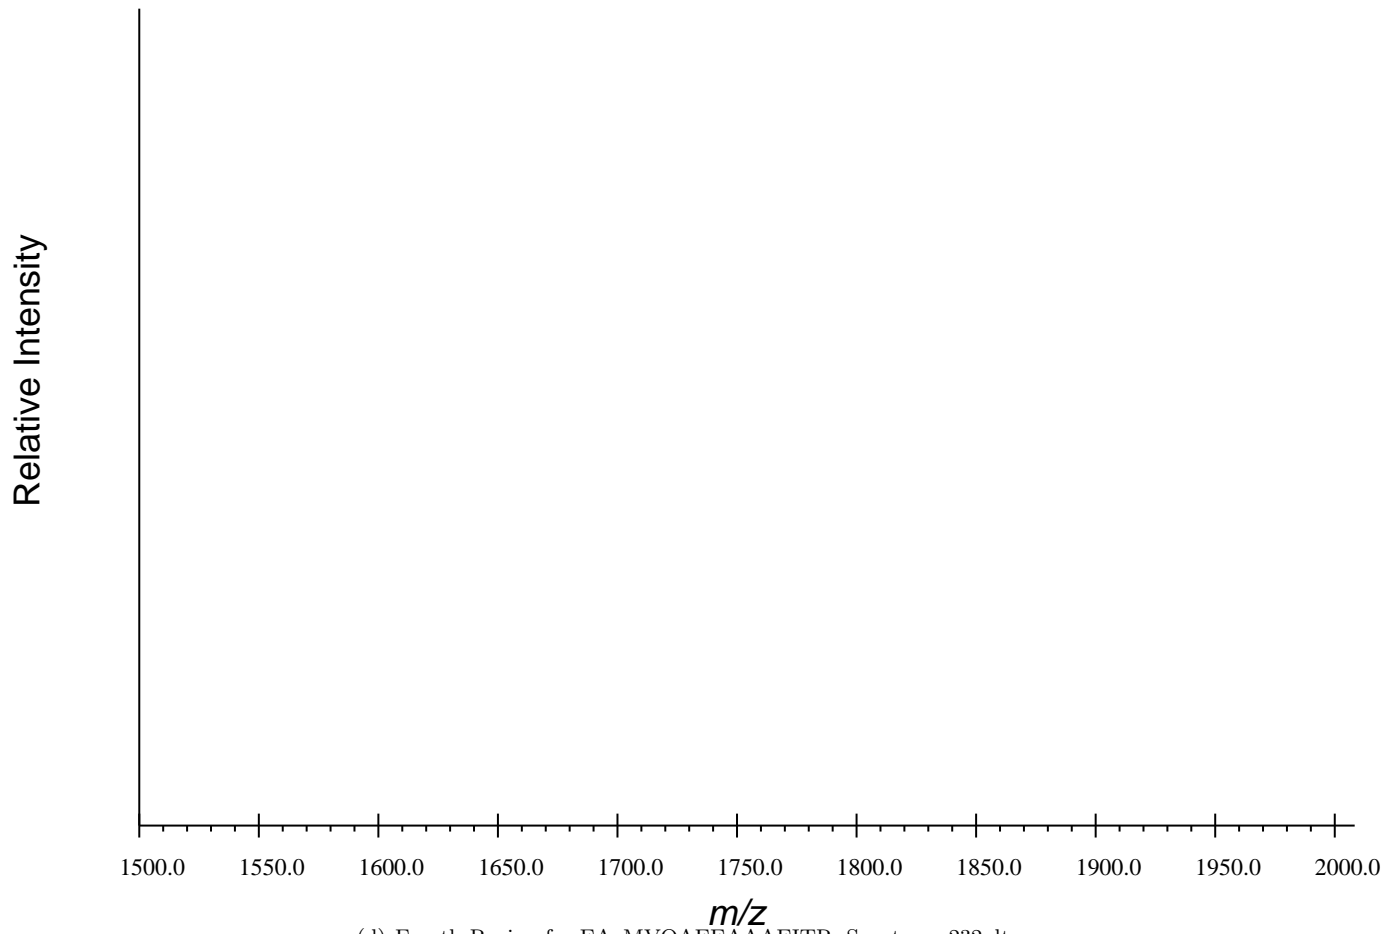

(d) Fourth Region for EAoMVQAEEAAAETIR, Spectrum 232.dta

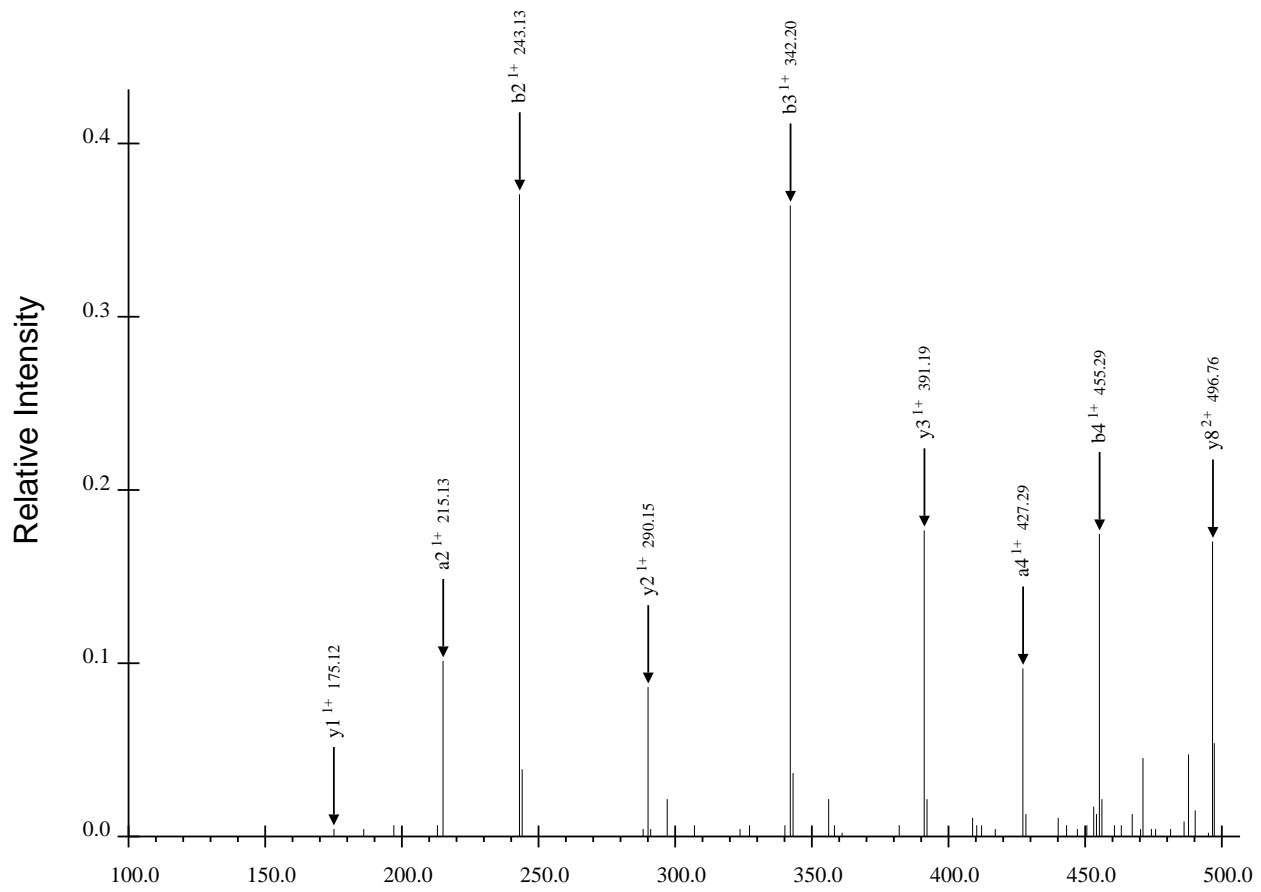

(a) First Region for IEVIEIoMTDR, Spectrum 233.dta

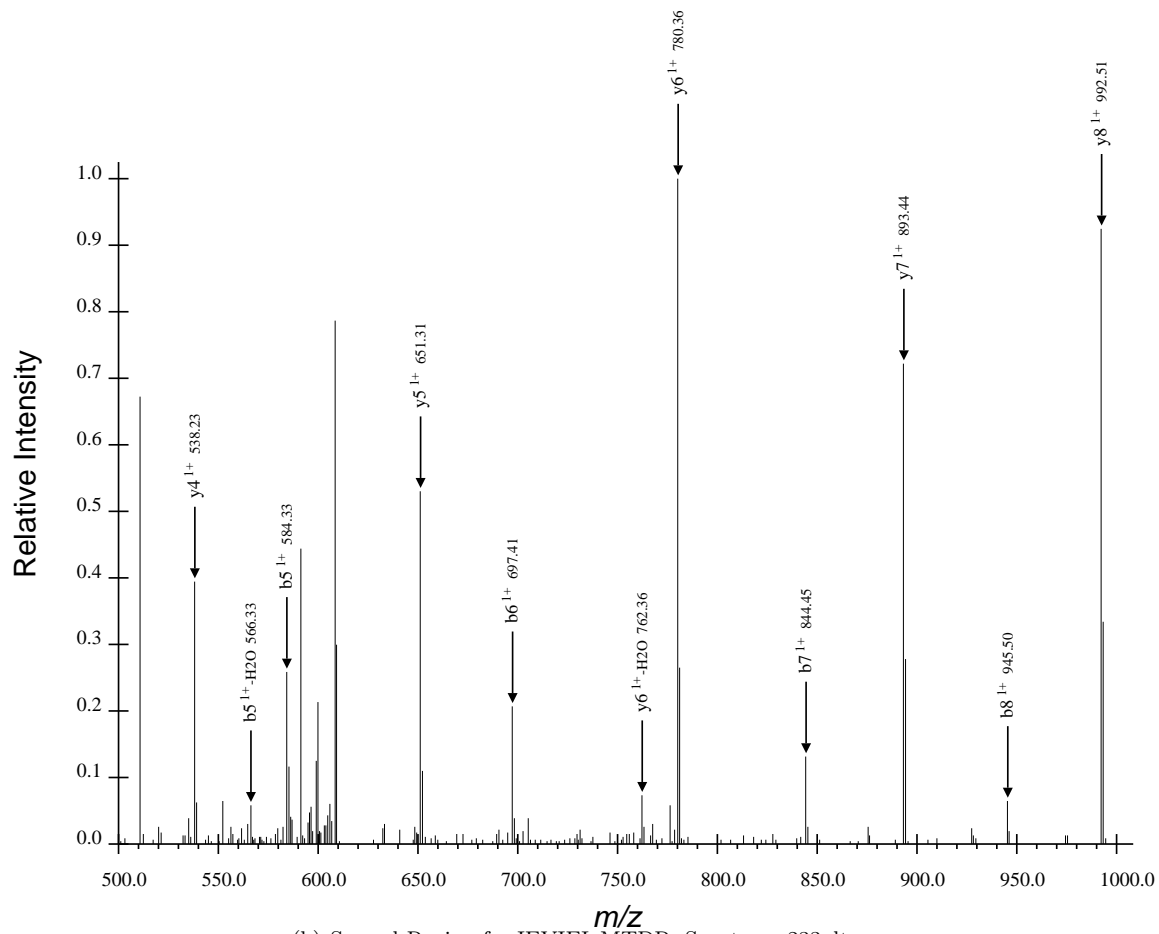

(b) Second Region for IEVIEIoMTDR, Spectrum 233.dta

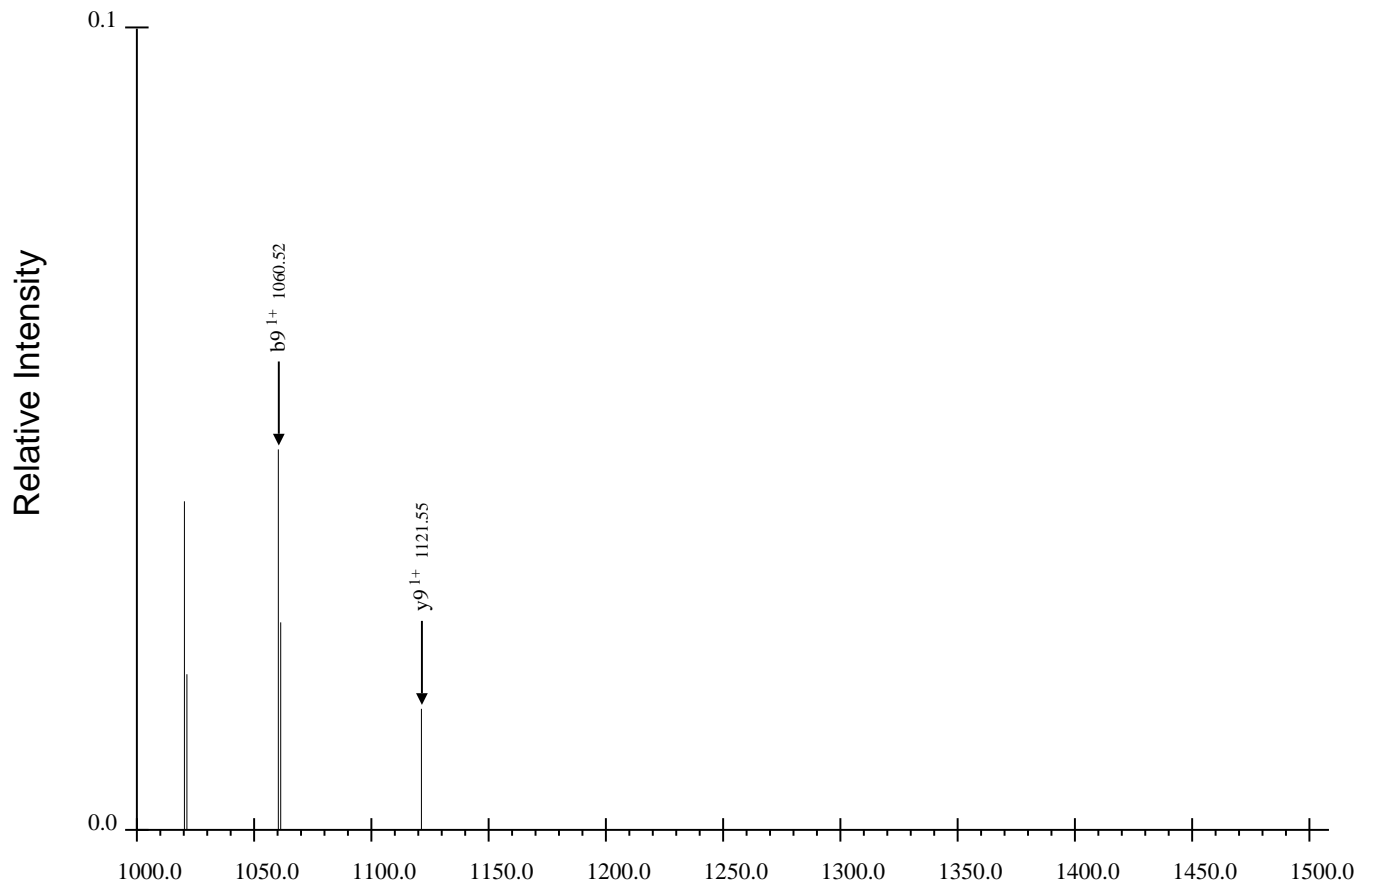

(c) Third Region for IEVIEIoMTDR, Spectrum 233.dta

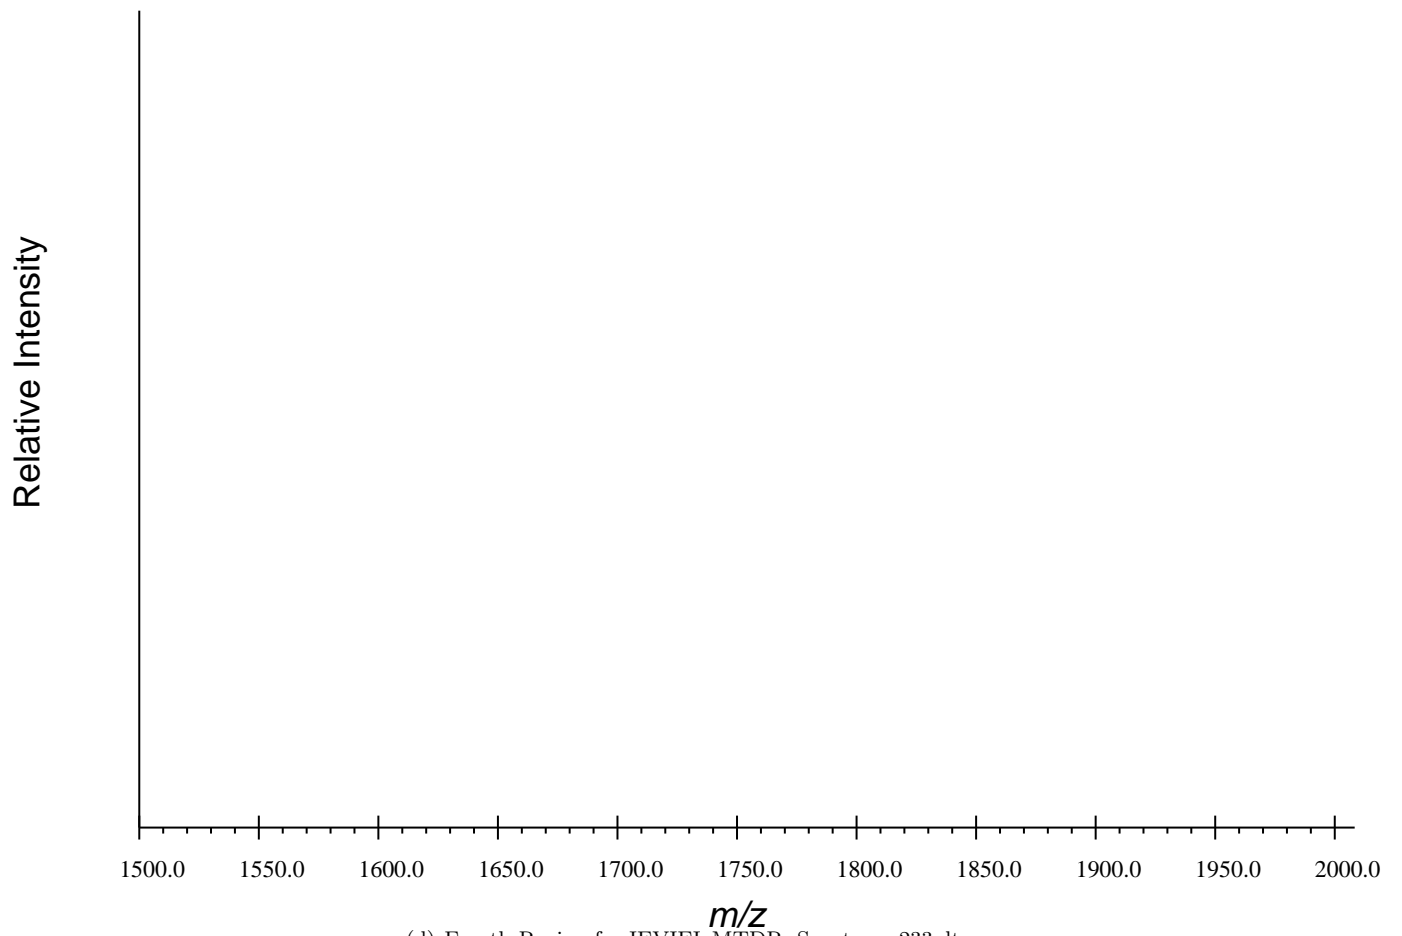

(d) Fourth Region for IEVIEIoMTDR, Spectrum 233.dta

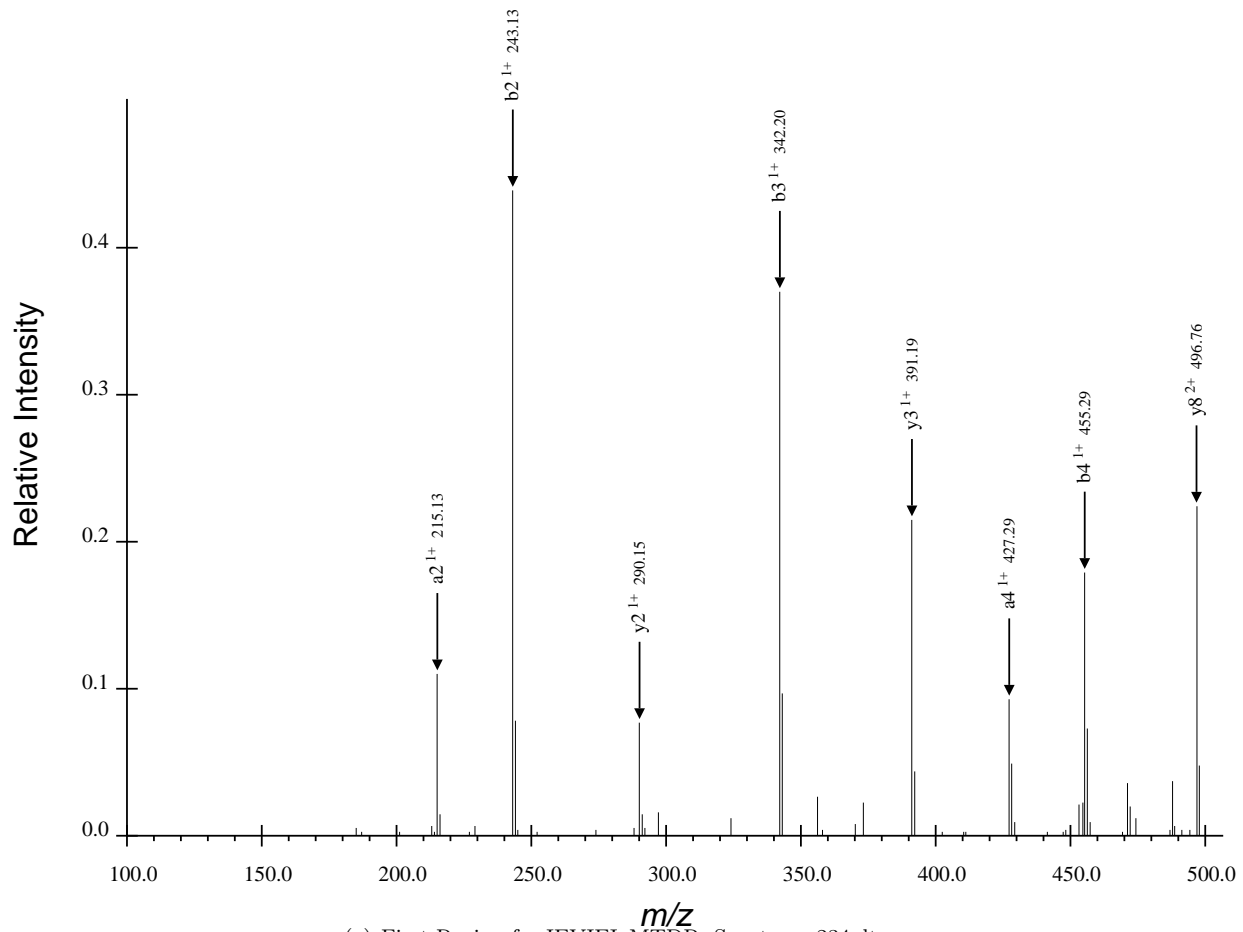

(a) First Region for IEVIEIoMTDR, Spectrum 234.dta

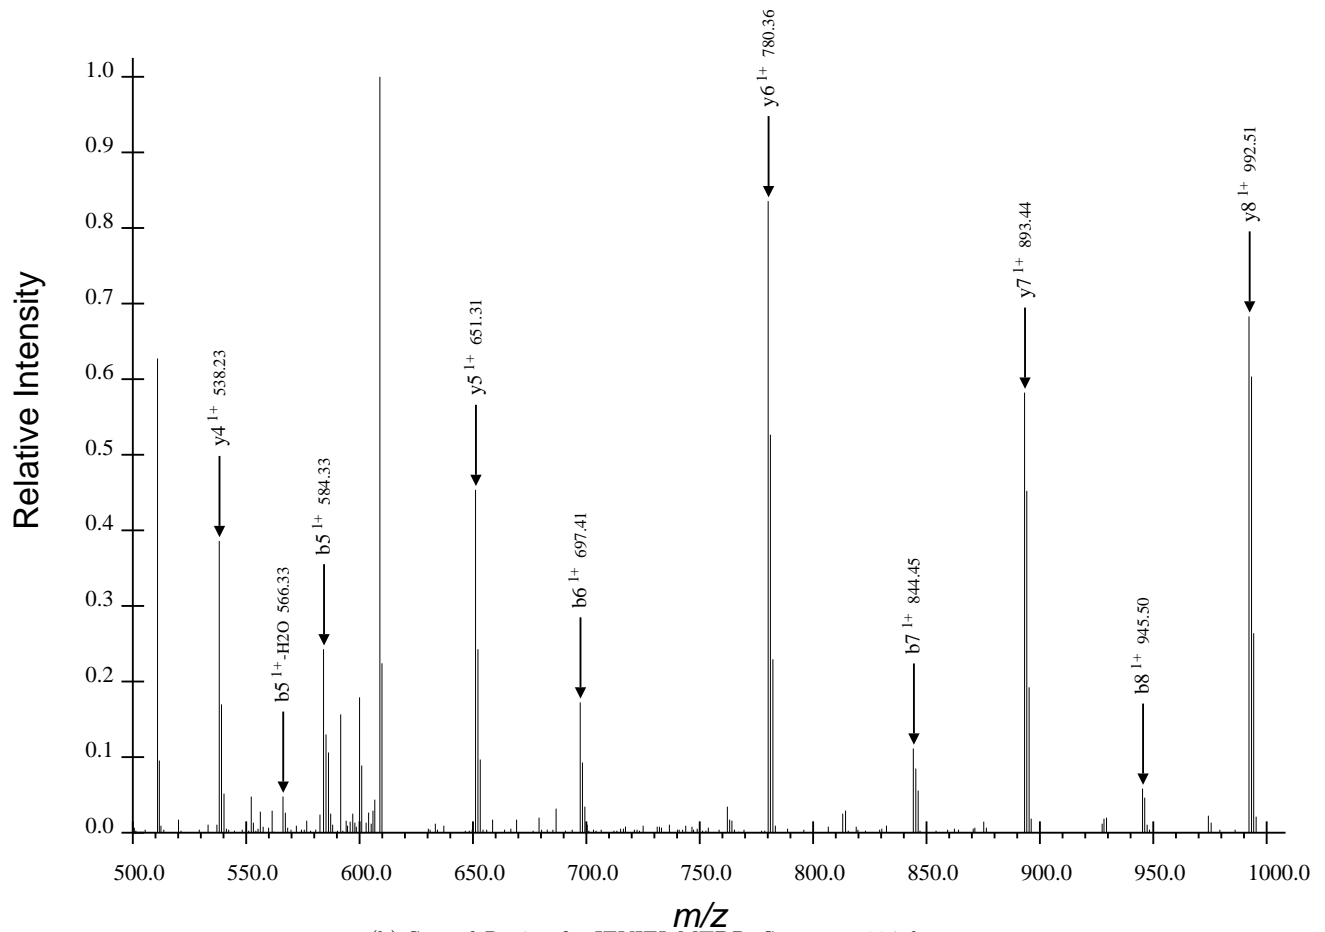

(b) Second Region for IEVIEIoMTDR, Spectrum 234.dta



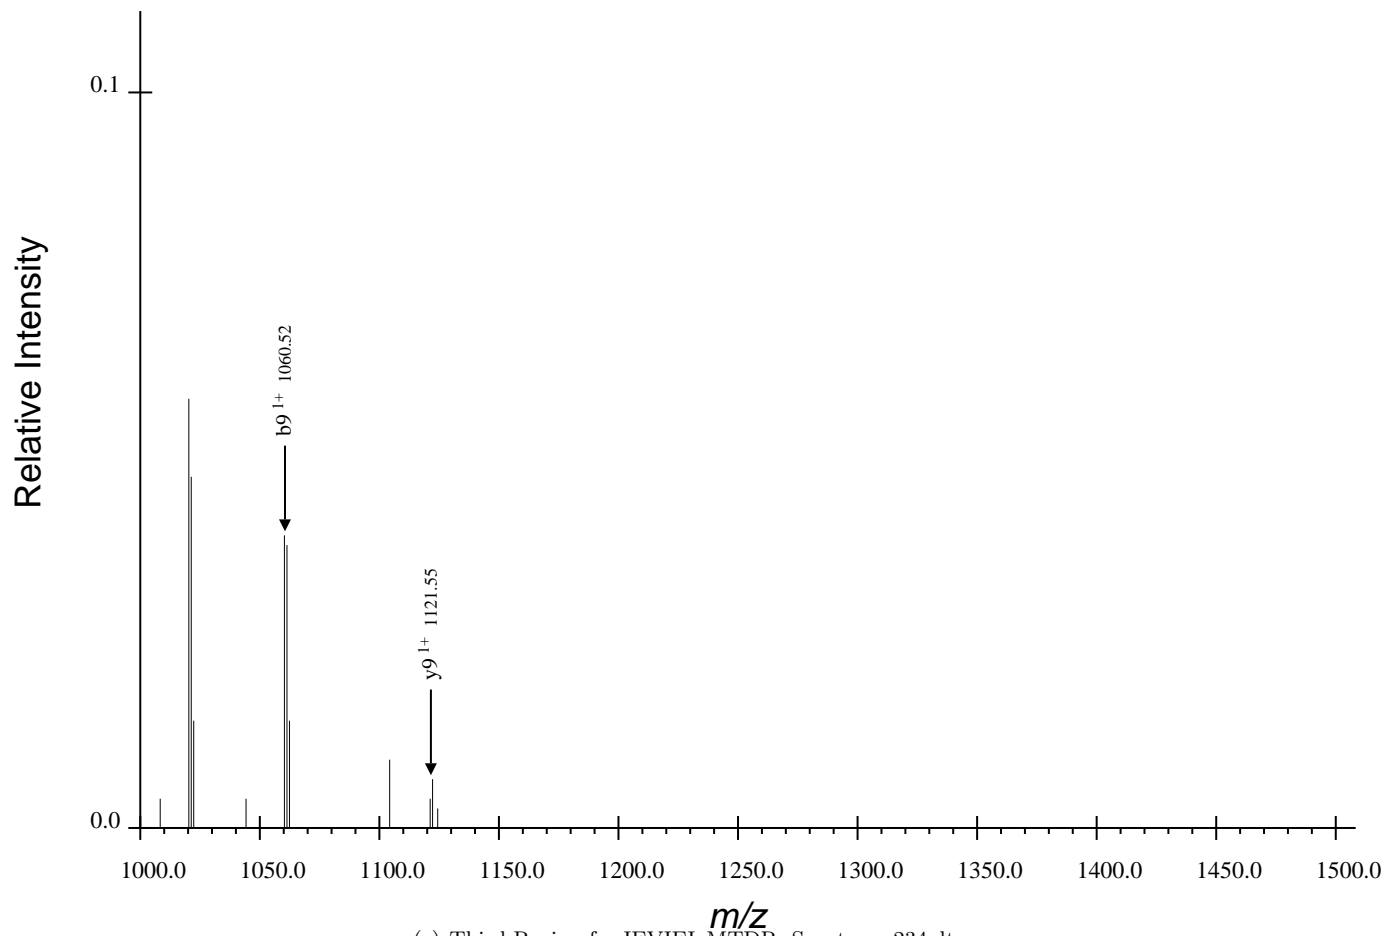

(c) Third Region for IEVIEIoMTDR, Spectrum 234.dta

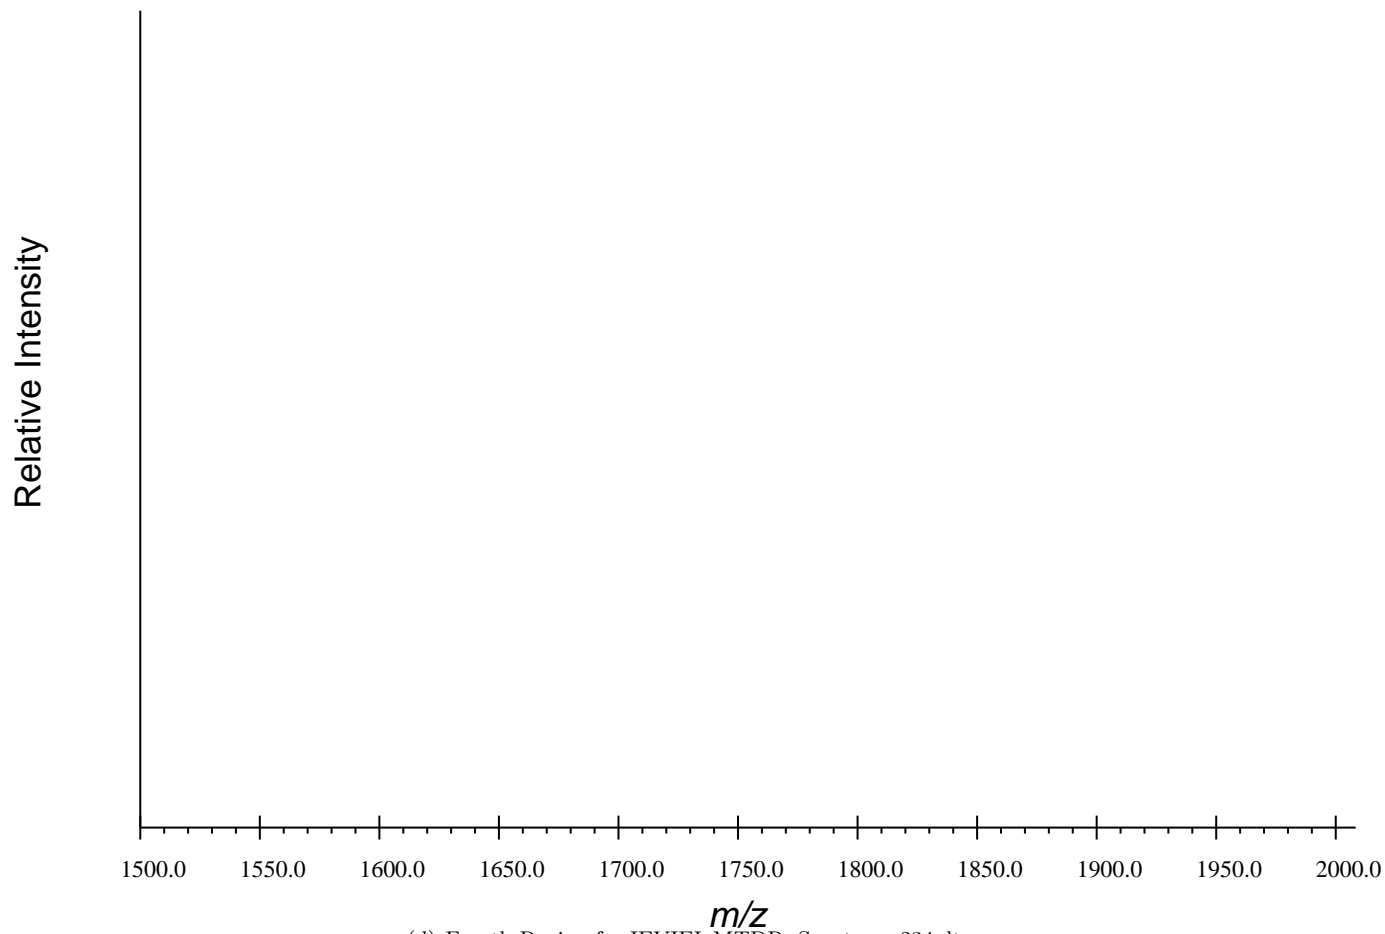

(d) Fourth Region for IEVIEIoMTDR, Spectrum 234.dta

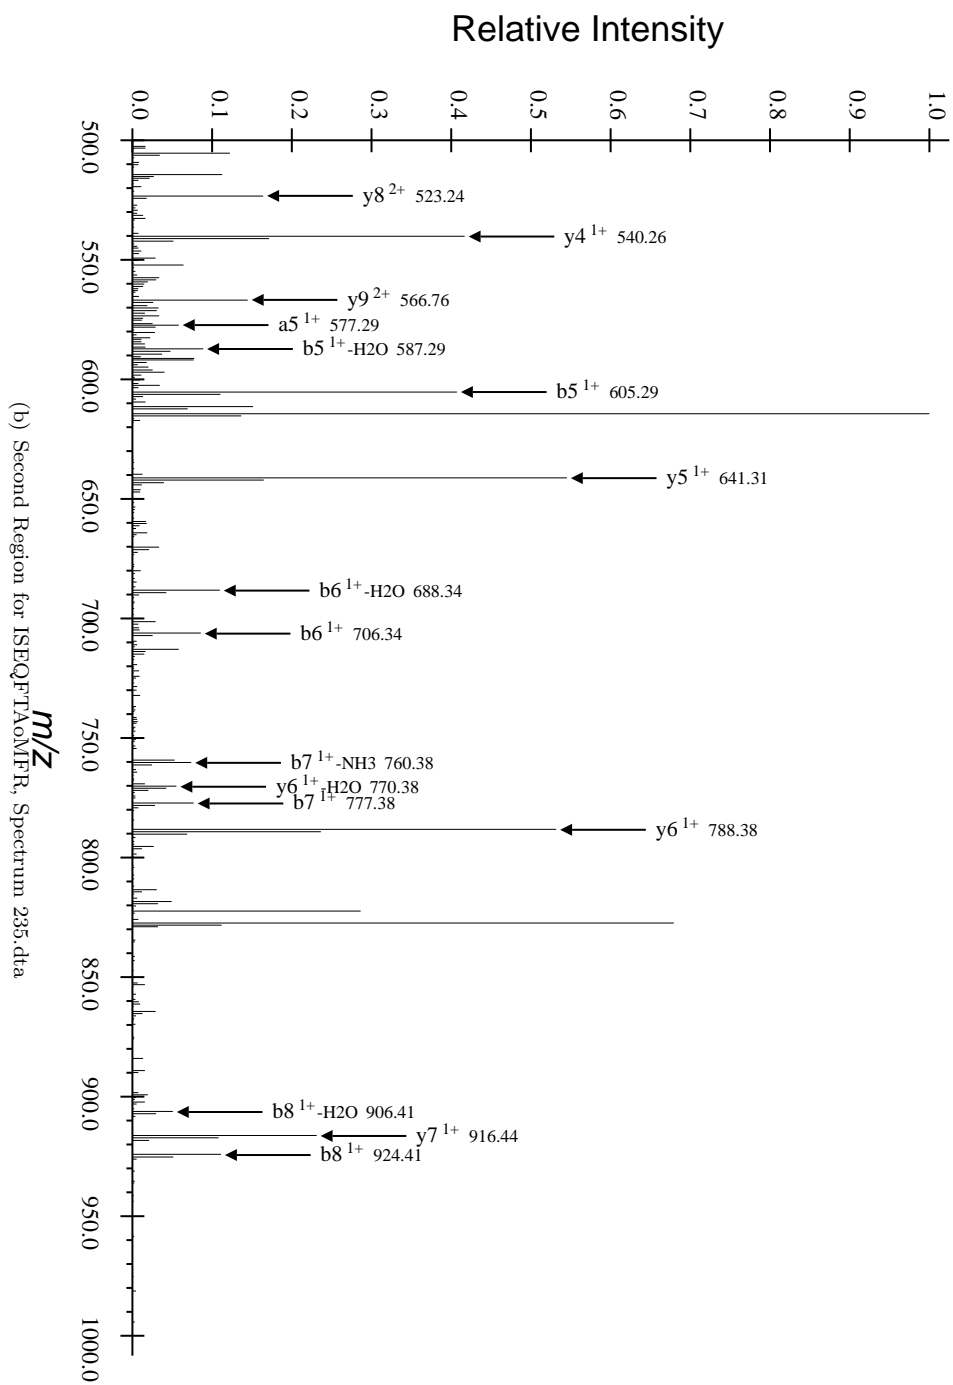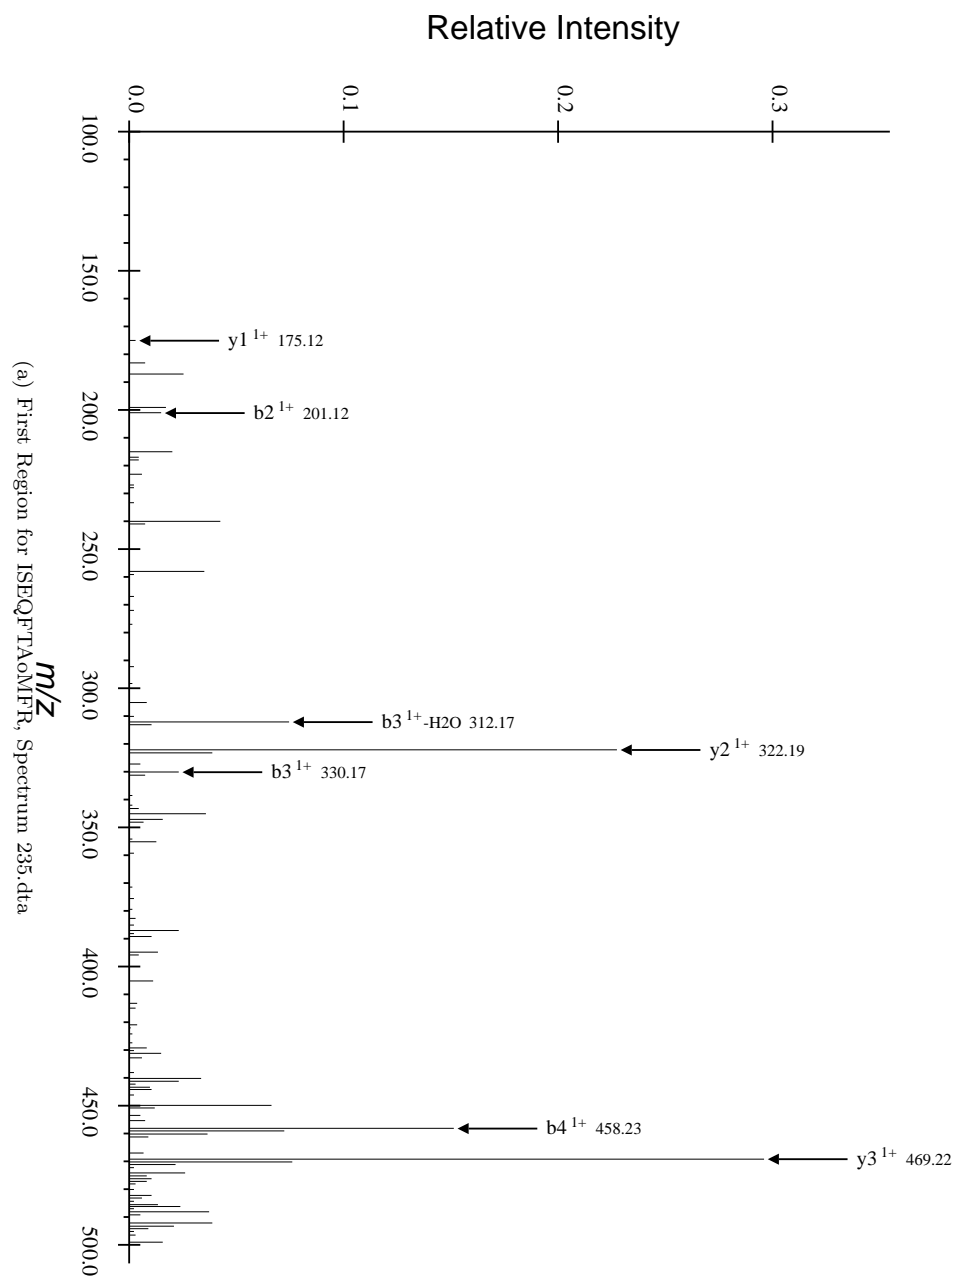

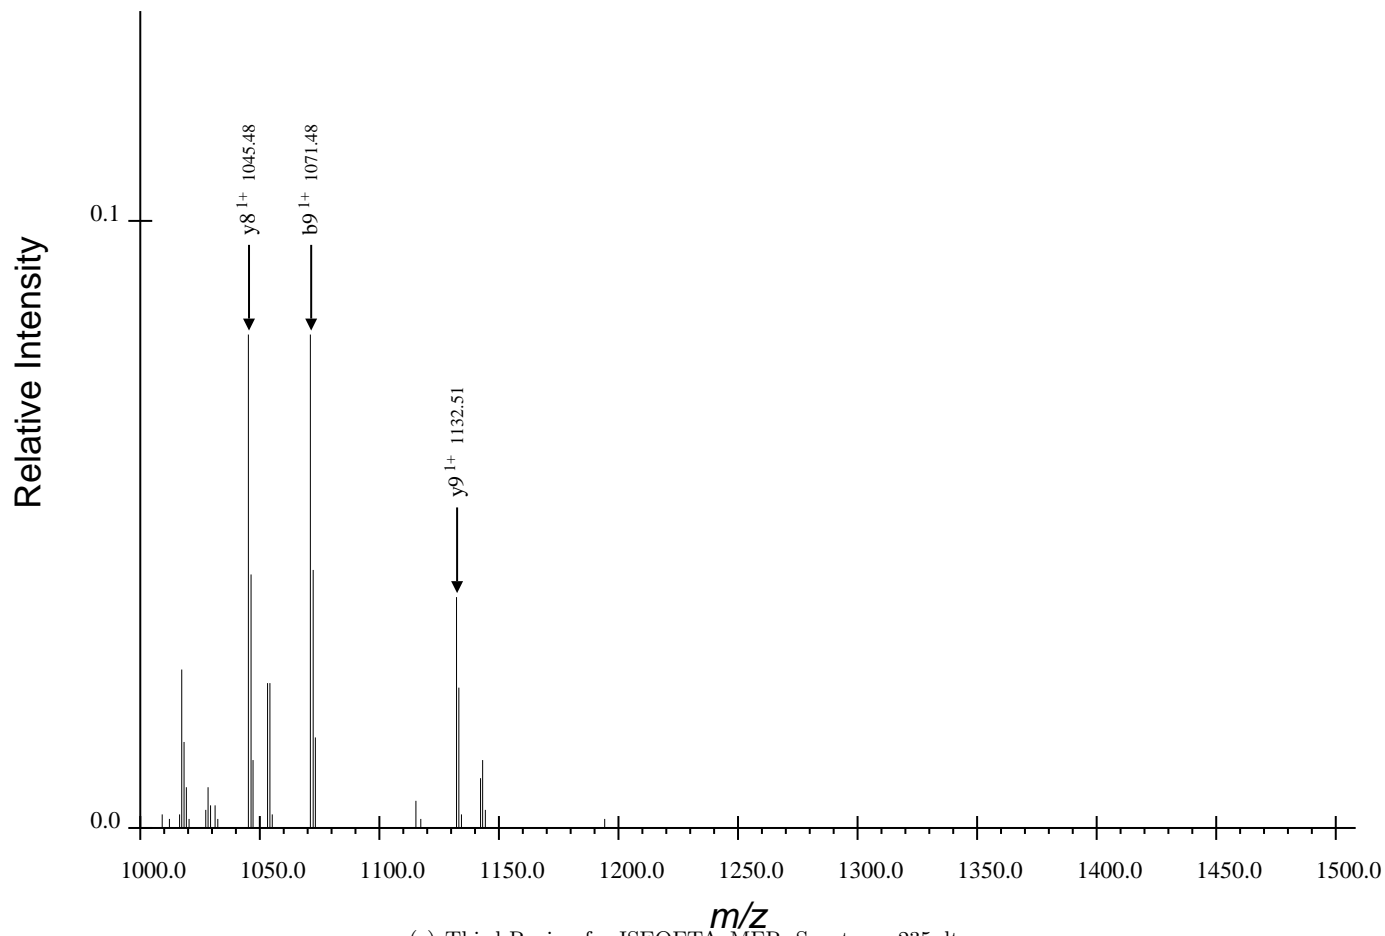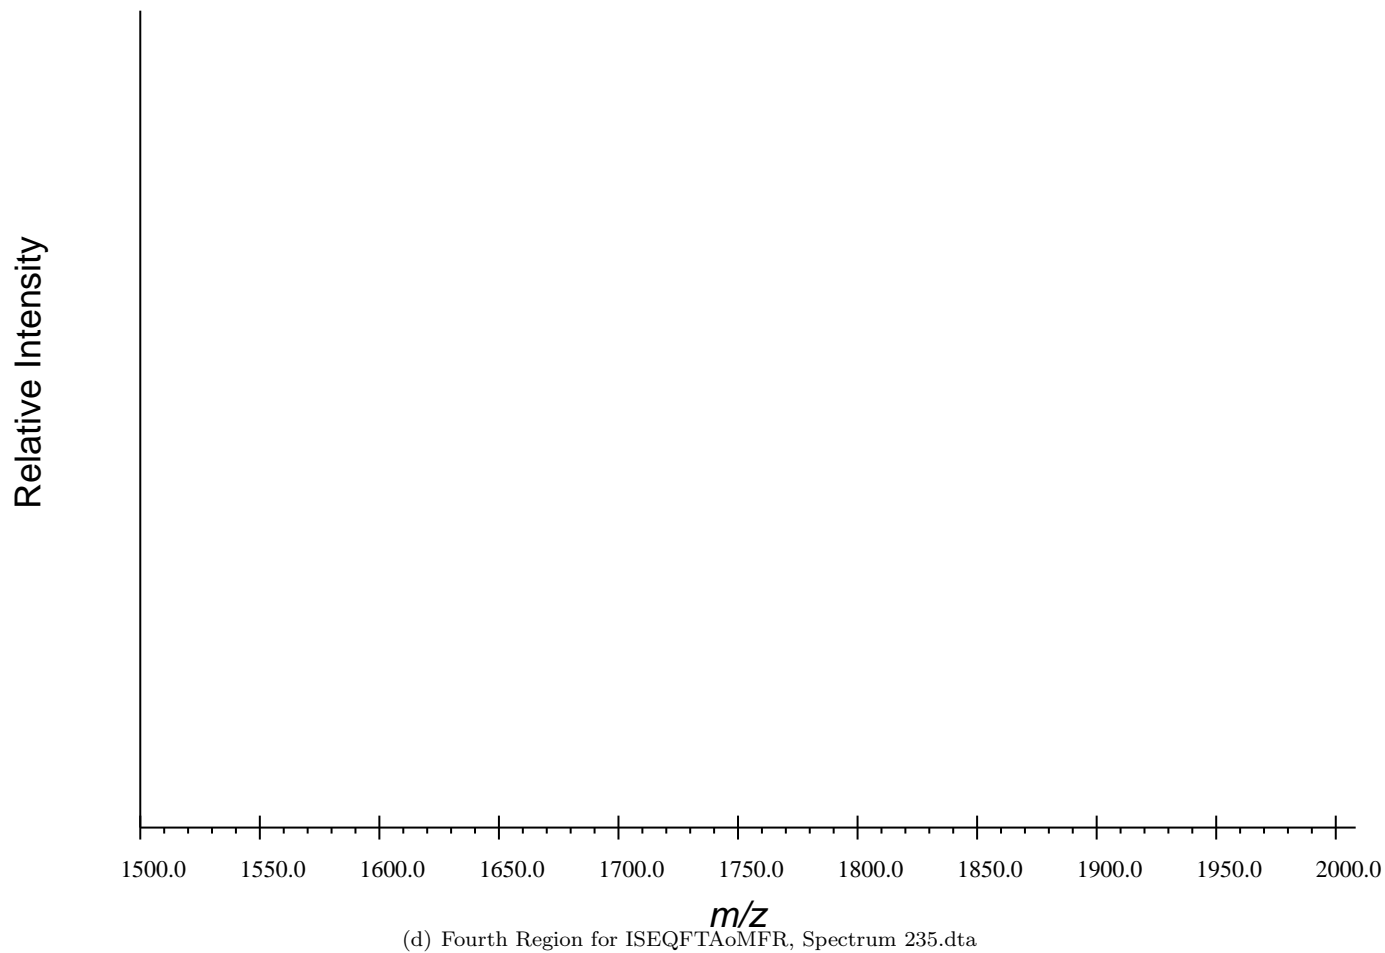

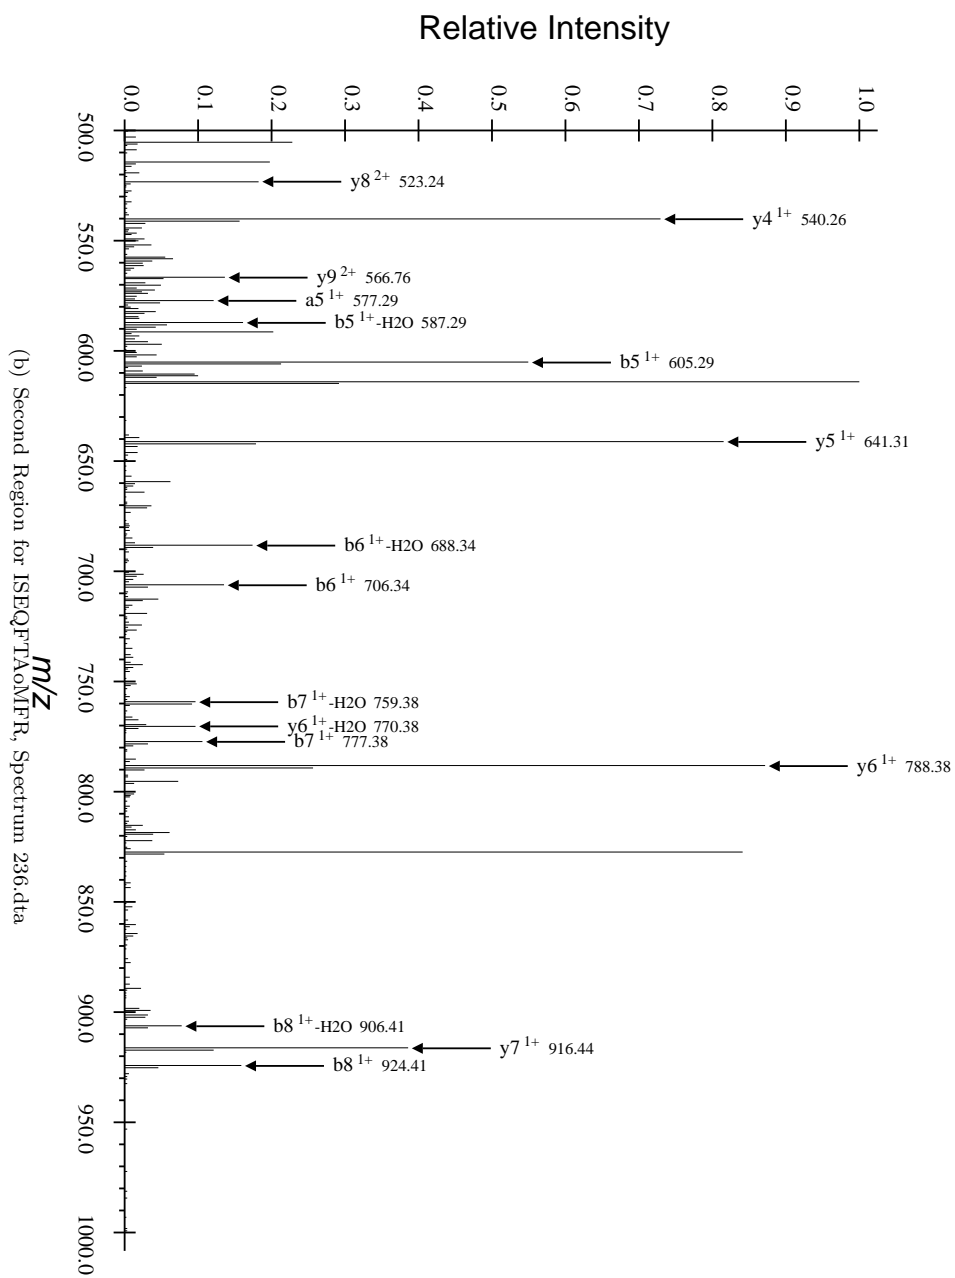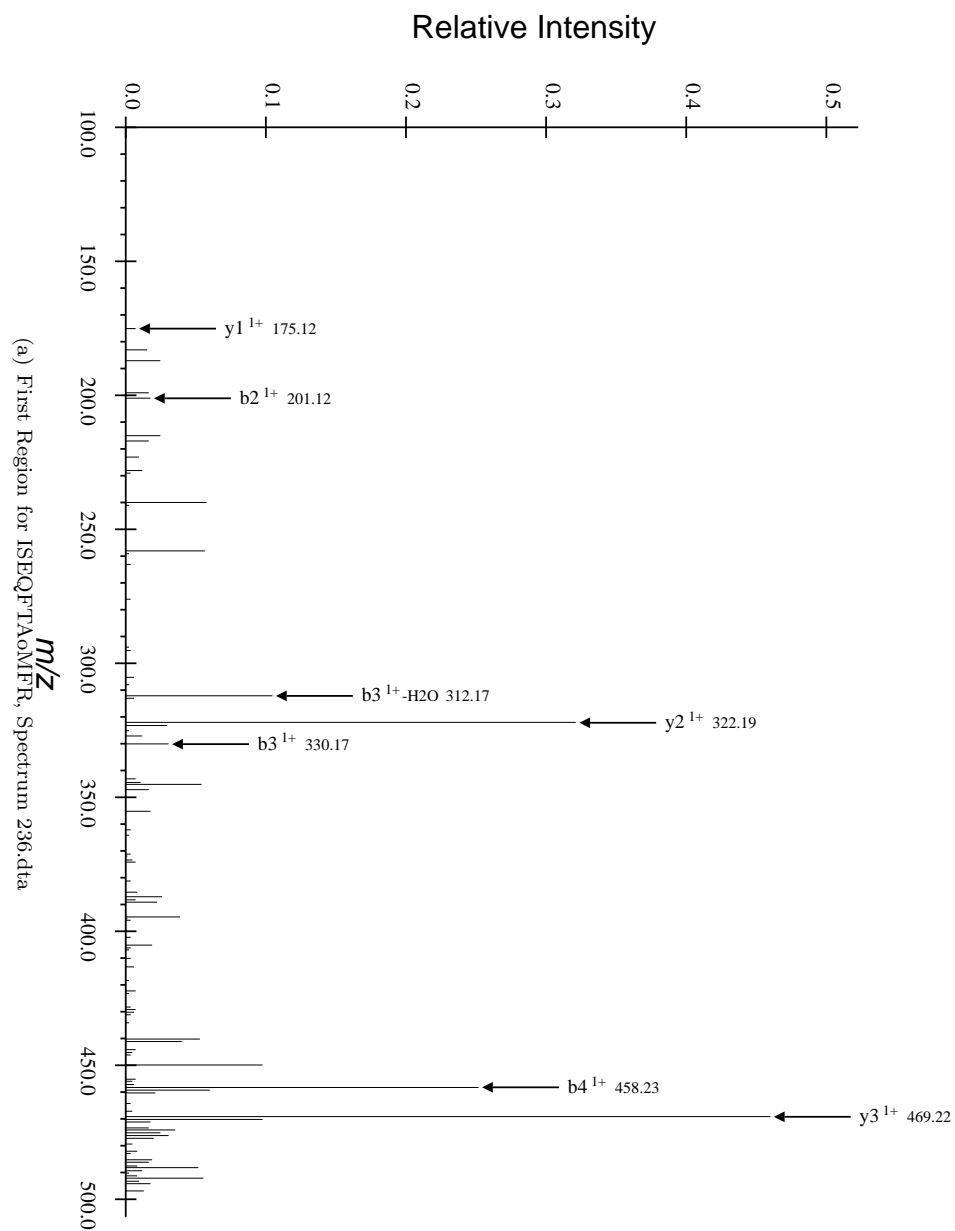

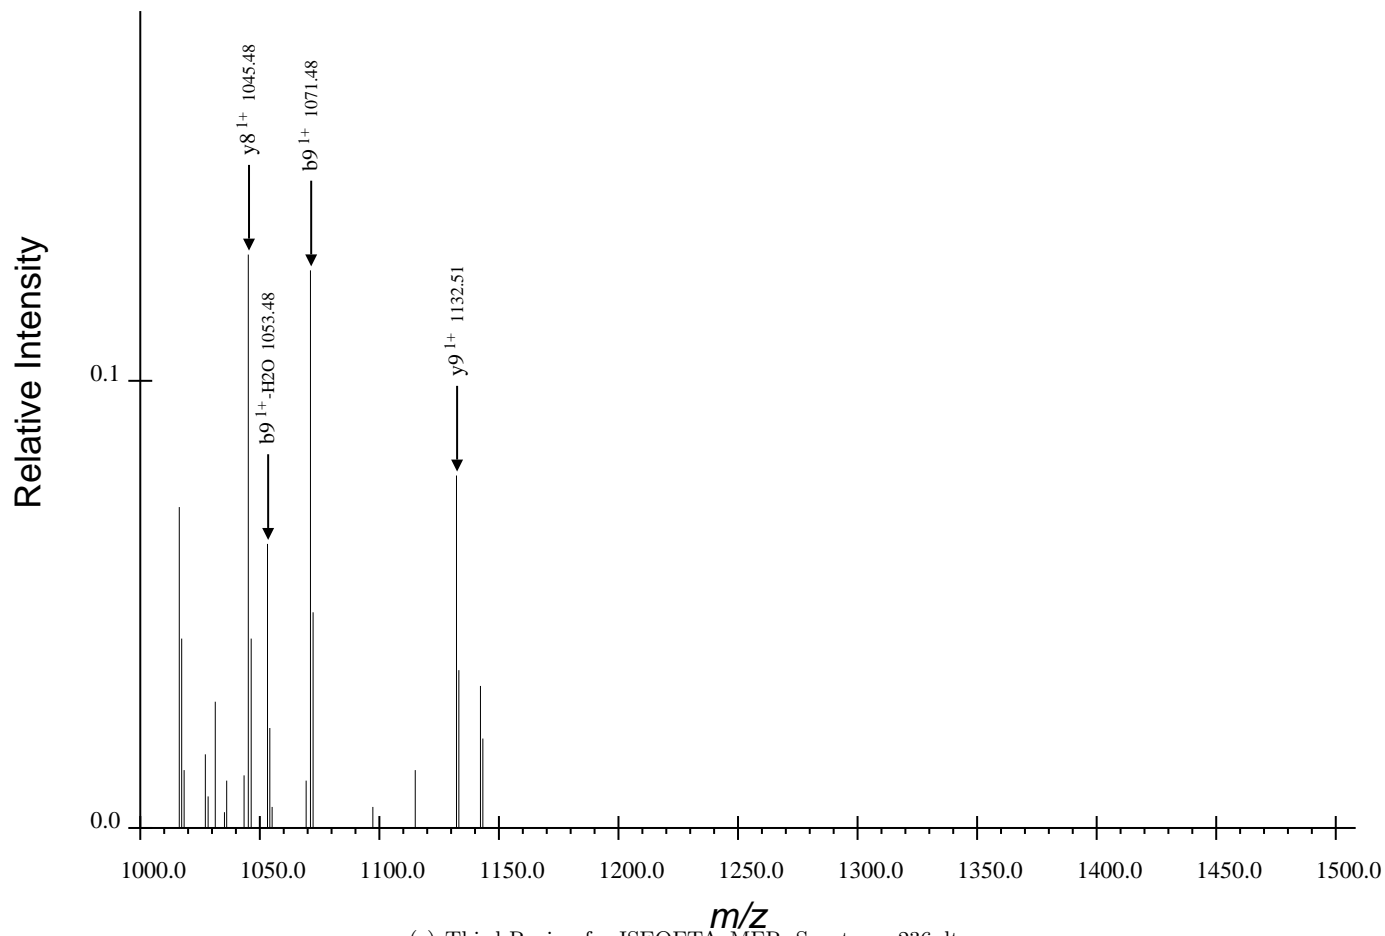

(c) Third Region for ISEQFTAoMFR, Spectrum 236.dta

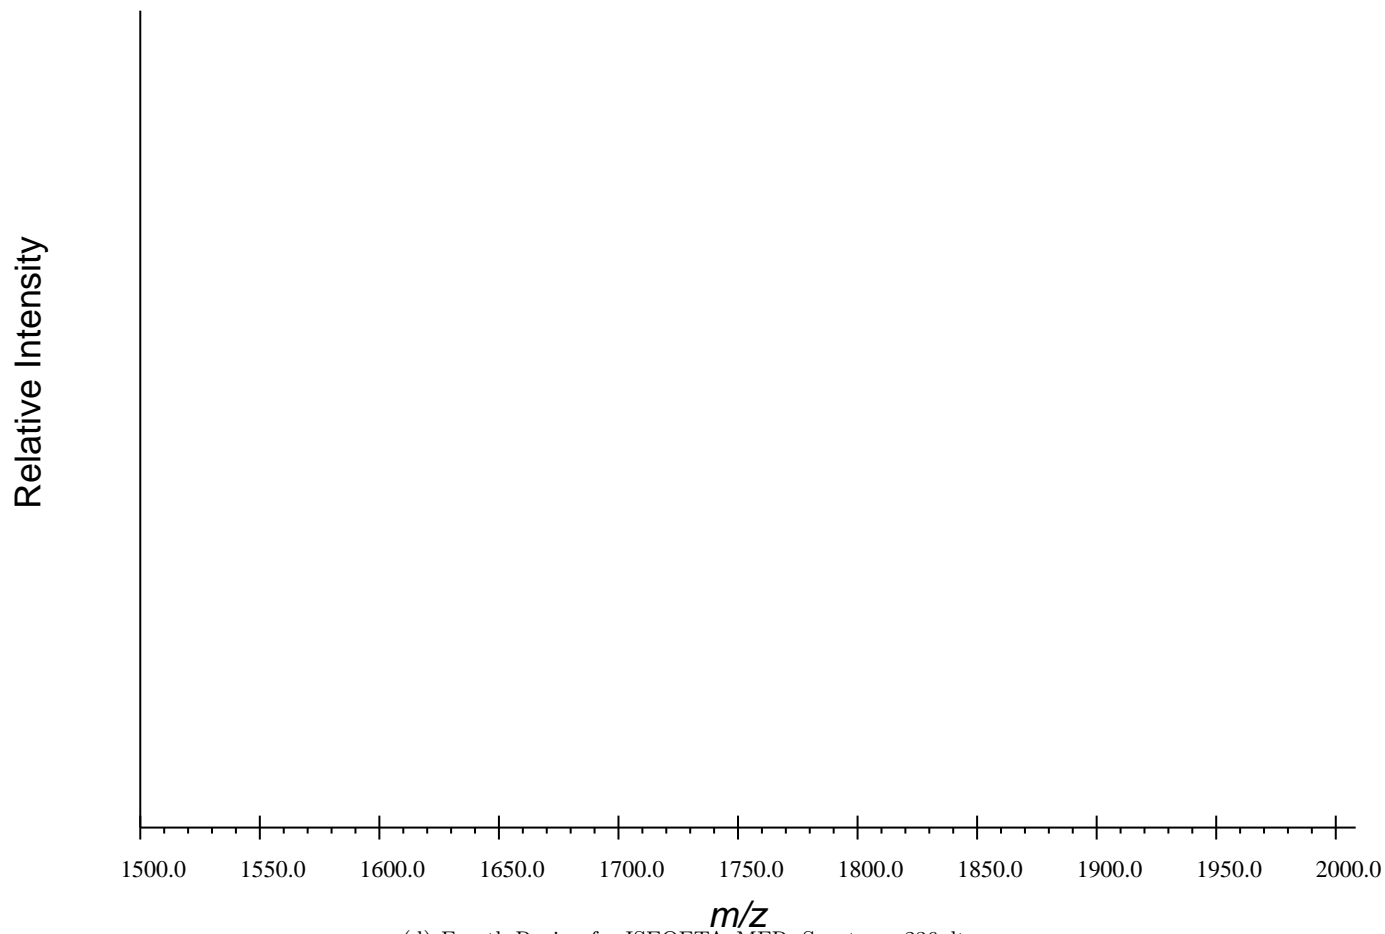

(d) Fourth Region for ISEQFTAoMFR, Spectrum 236.dta

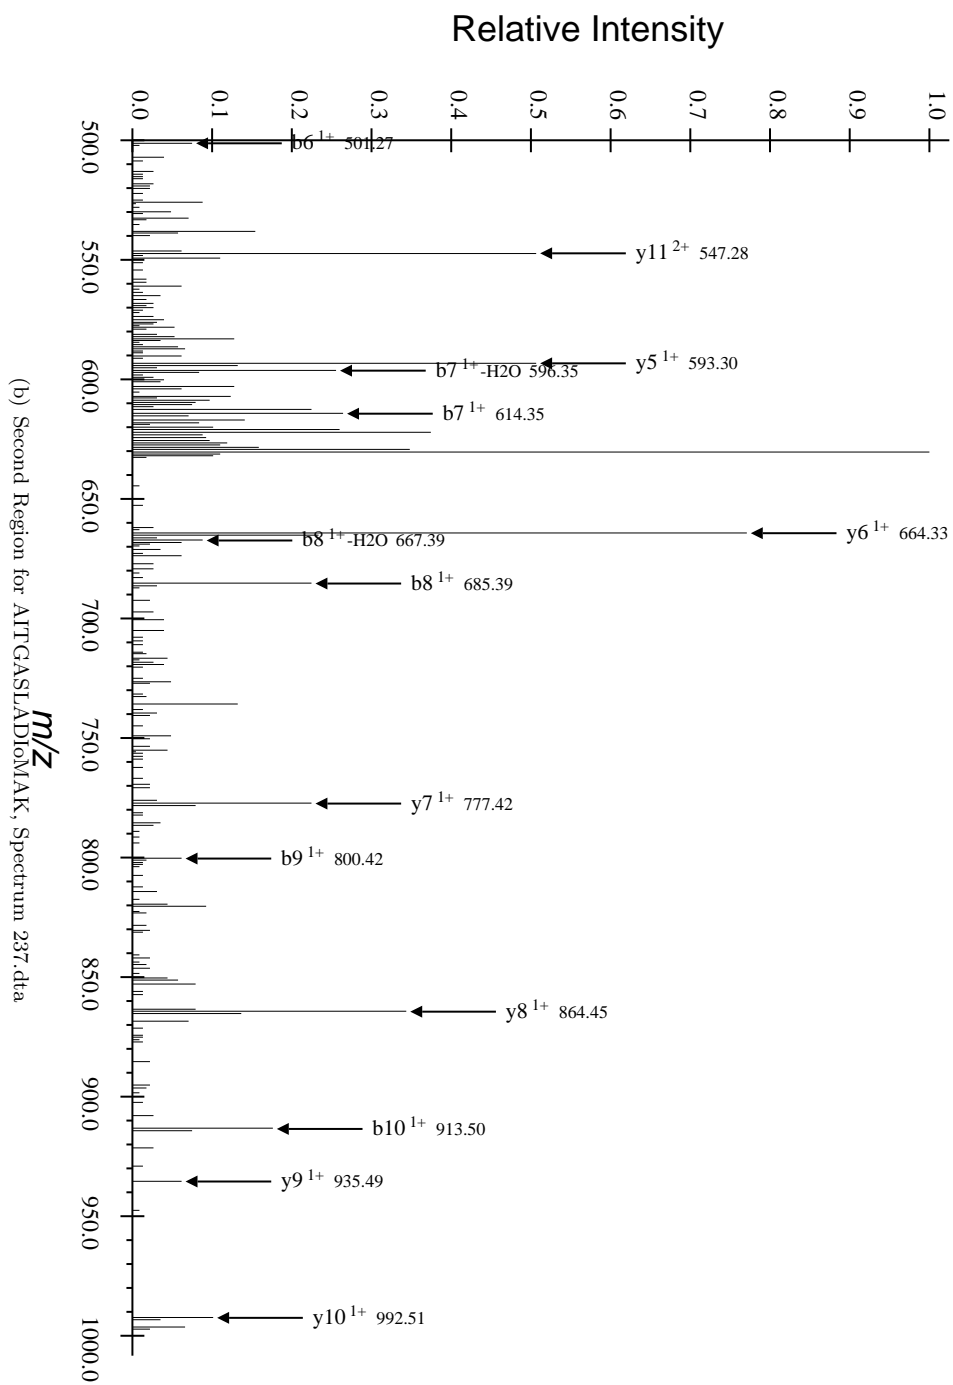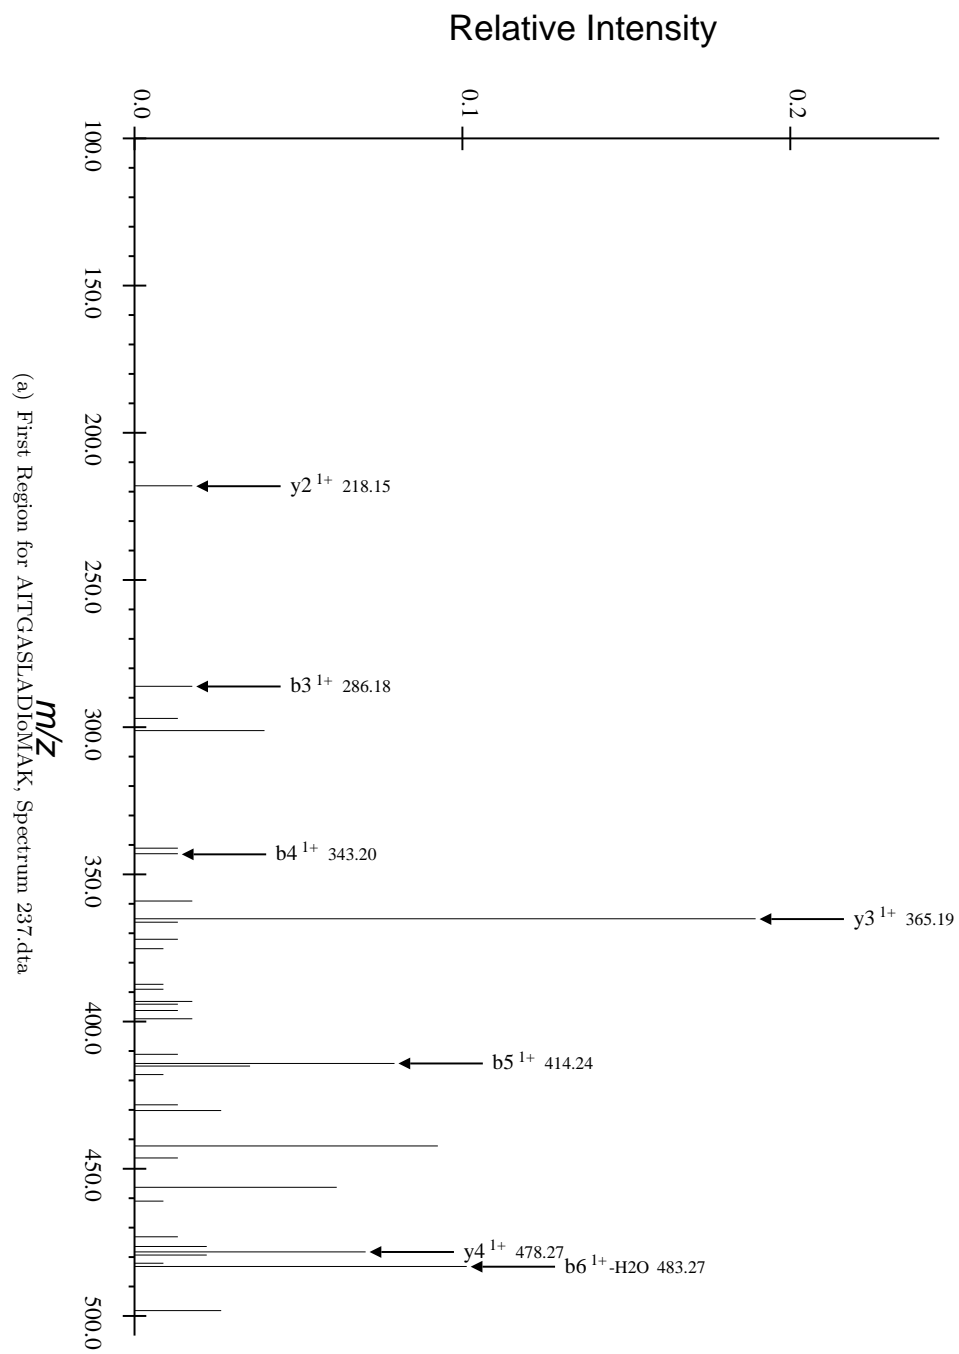

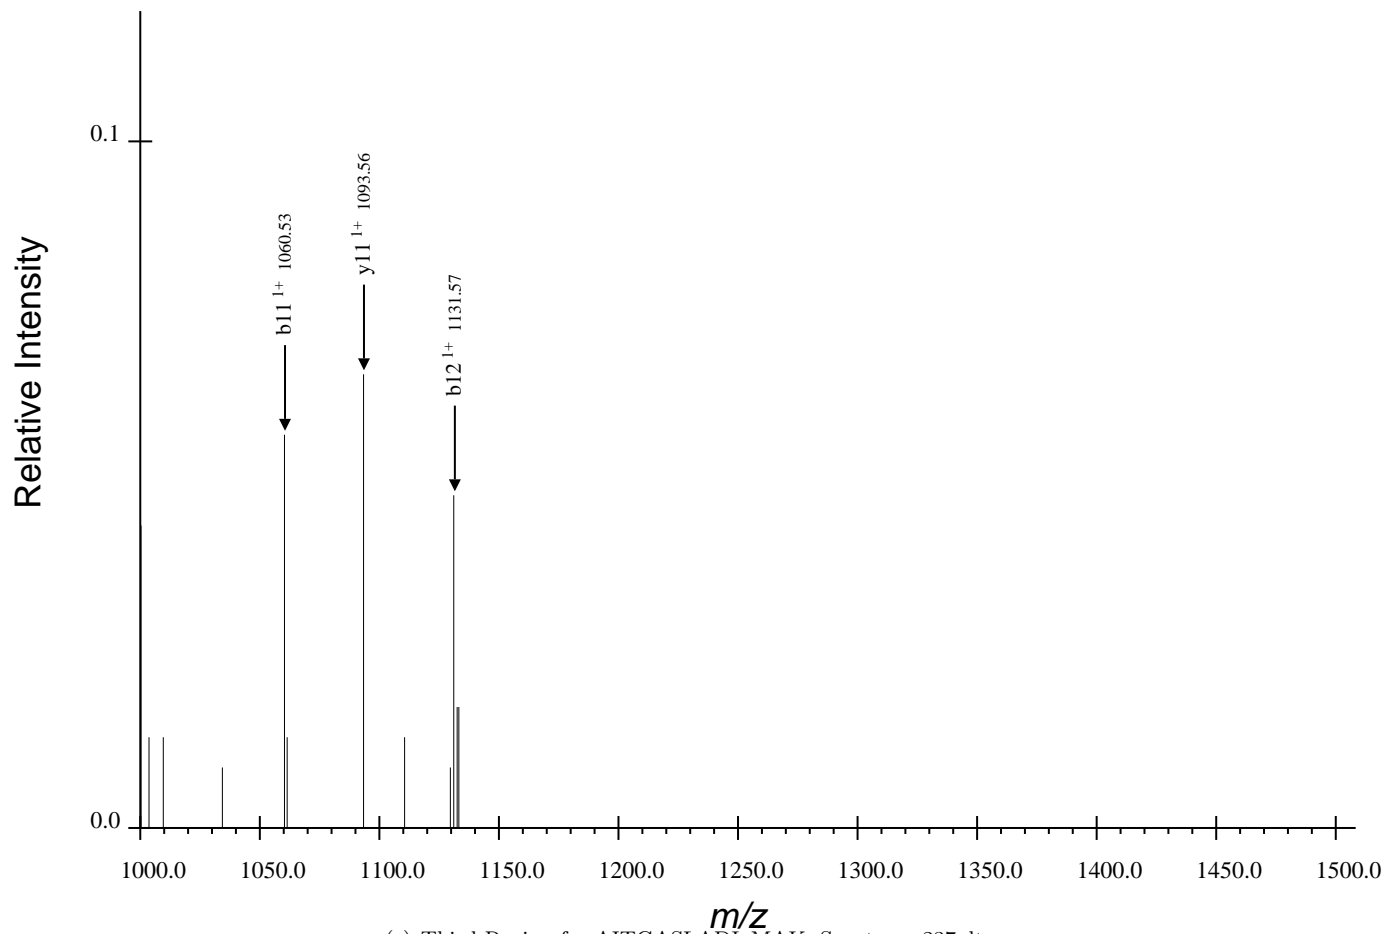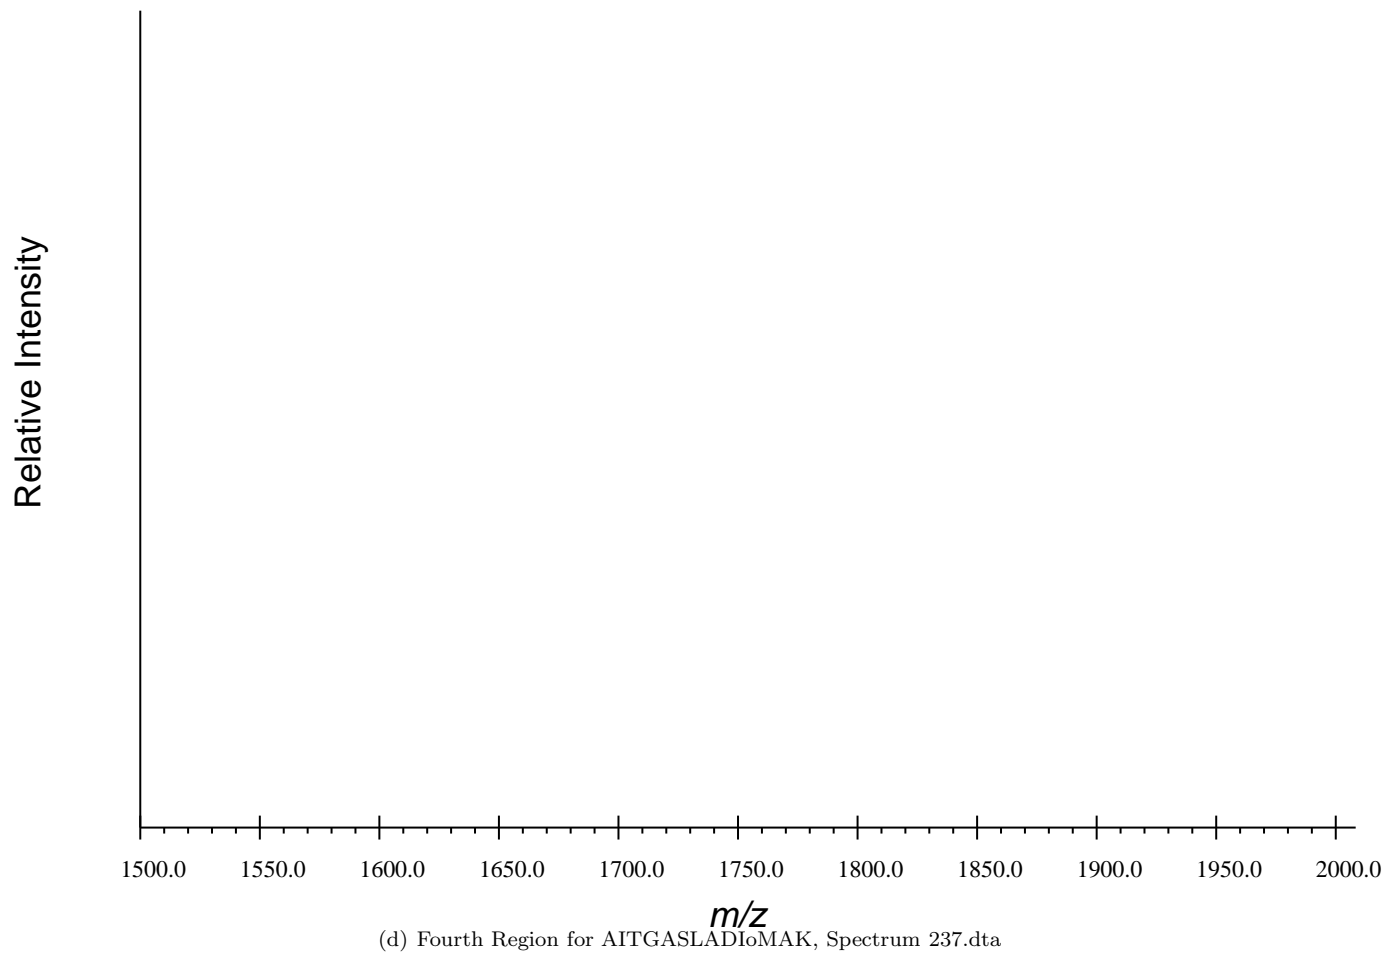

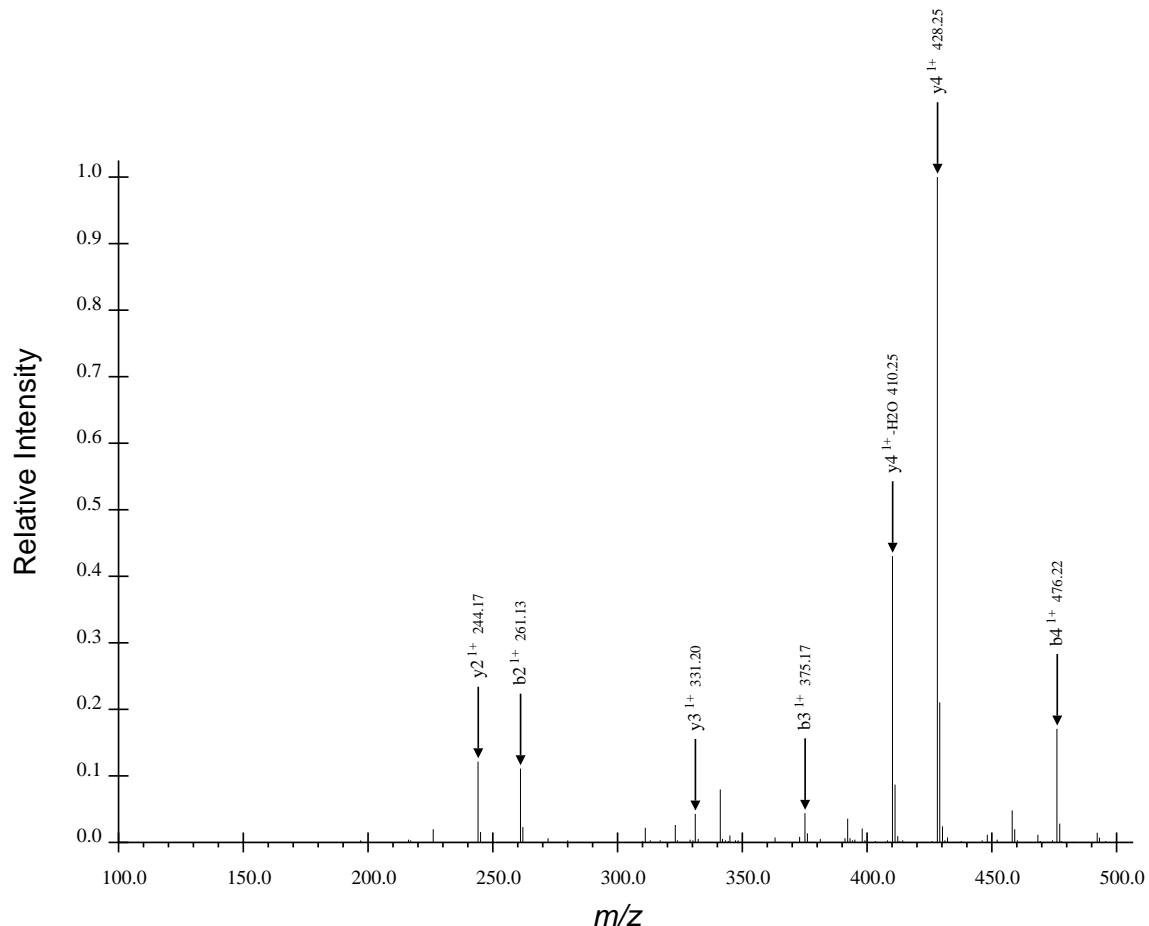

(a) First Region for IoMNTFSVVPSPK, Spectrum 238.dta

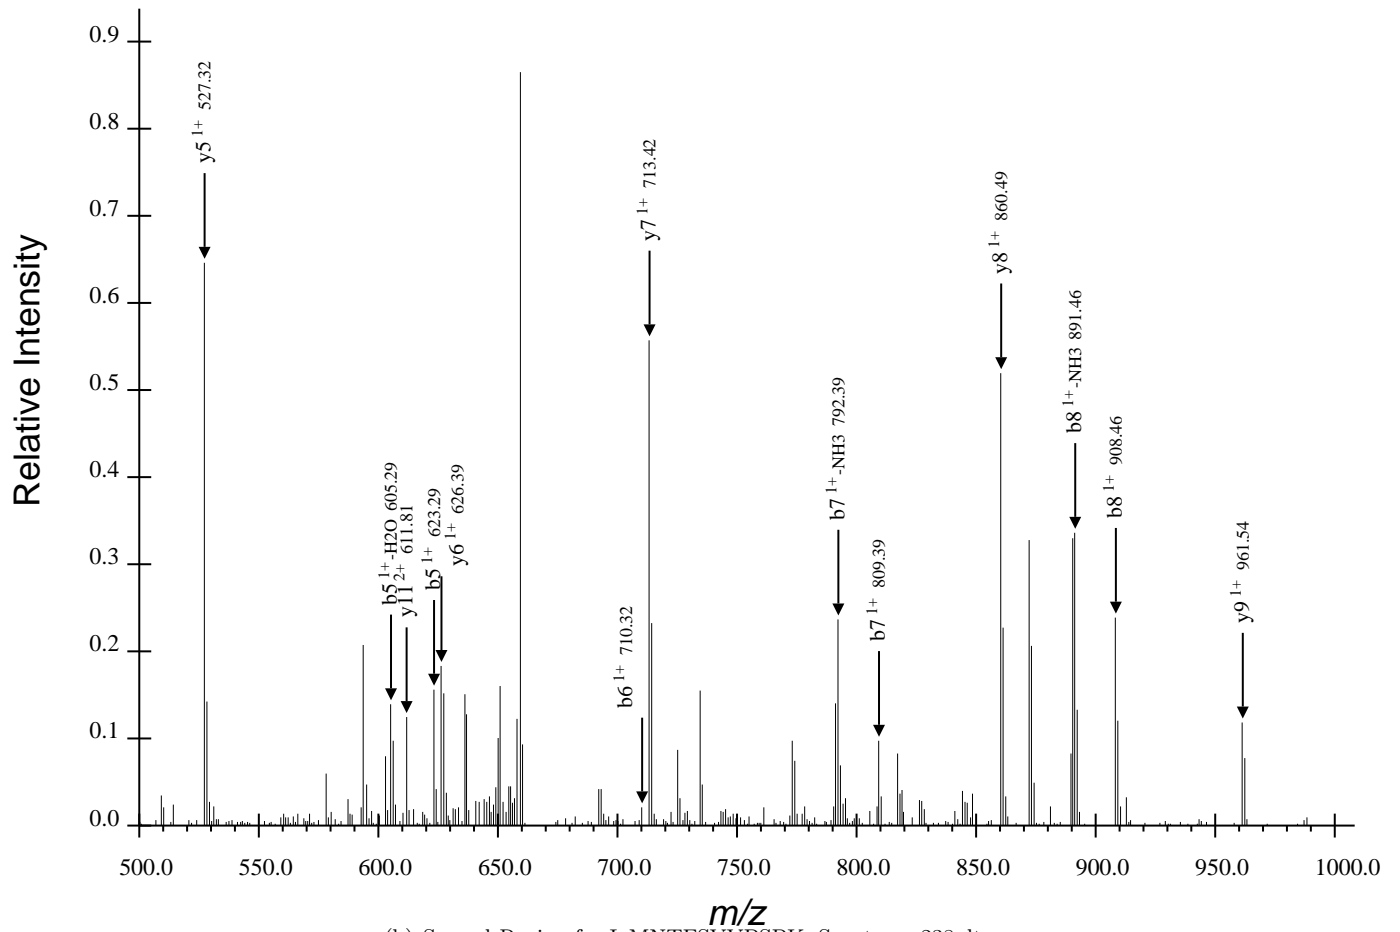

(b) Second Region for IoMNTFSVVPSPK, Spectrum 238.dta



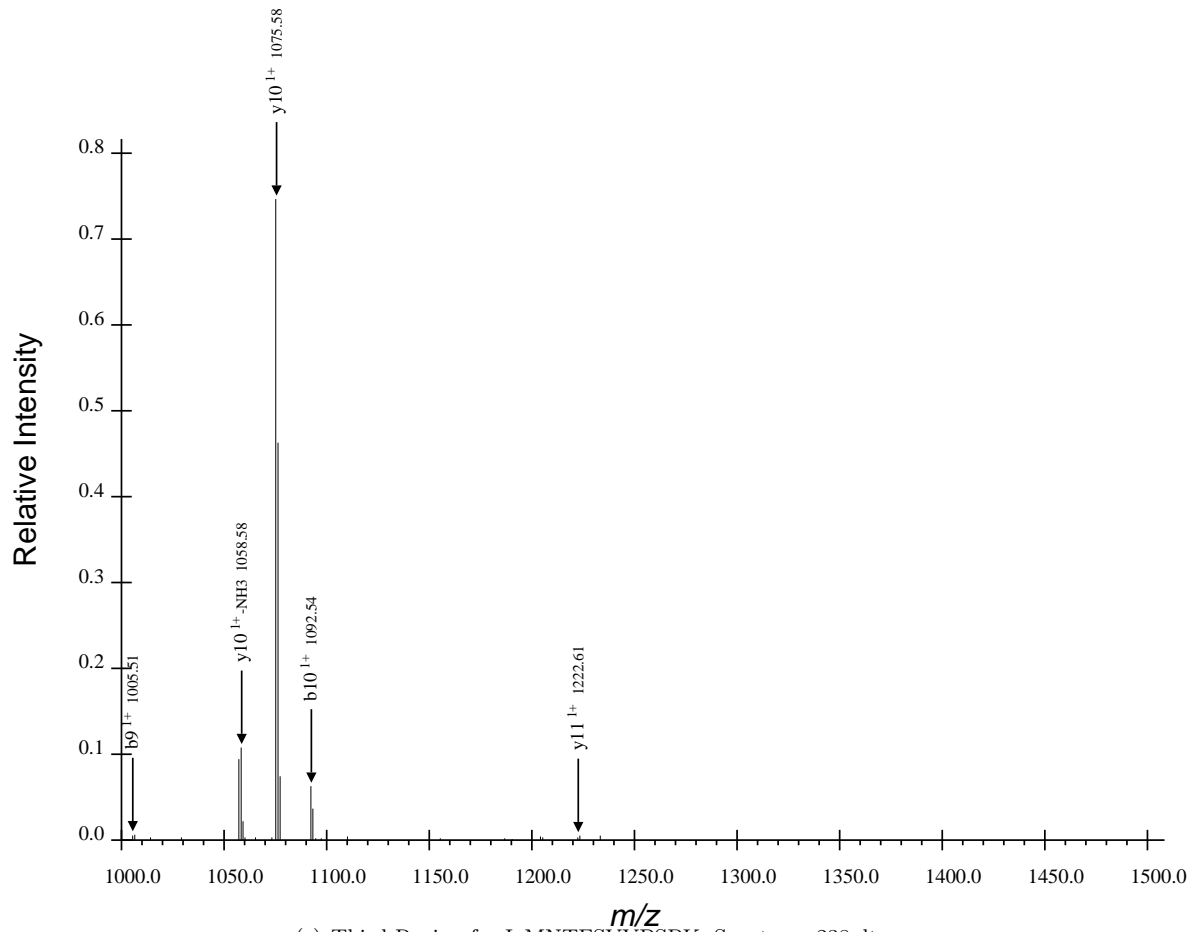

(c) Third Region for IoMNTFSVVPSPK, Spectrum 238.dta

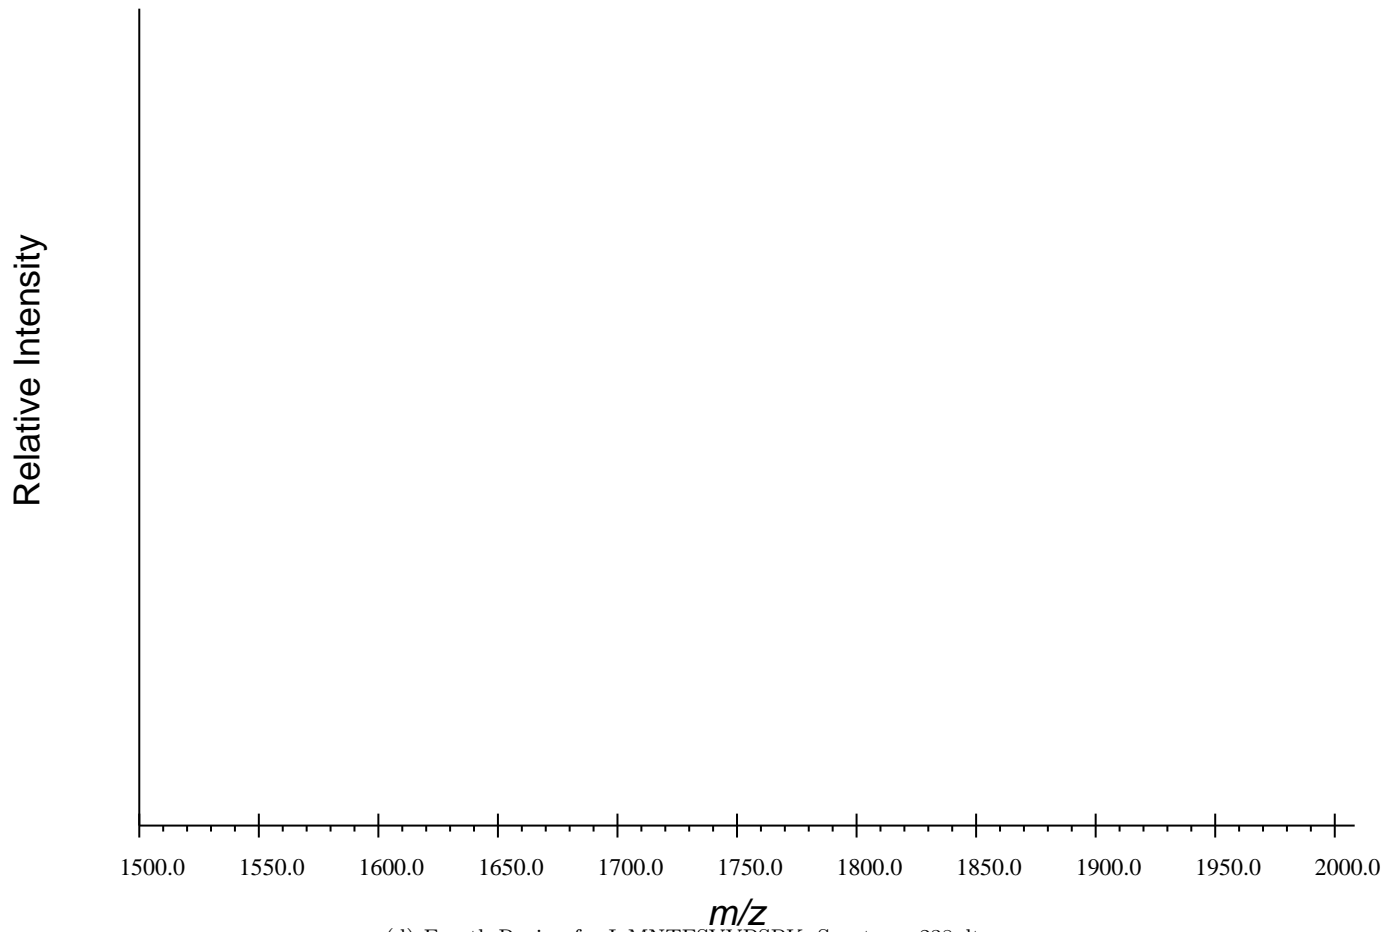

(d) Fourth Region for IoMNTFSVVPSPK, Spectrum 238.dta

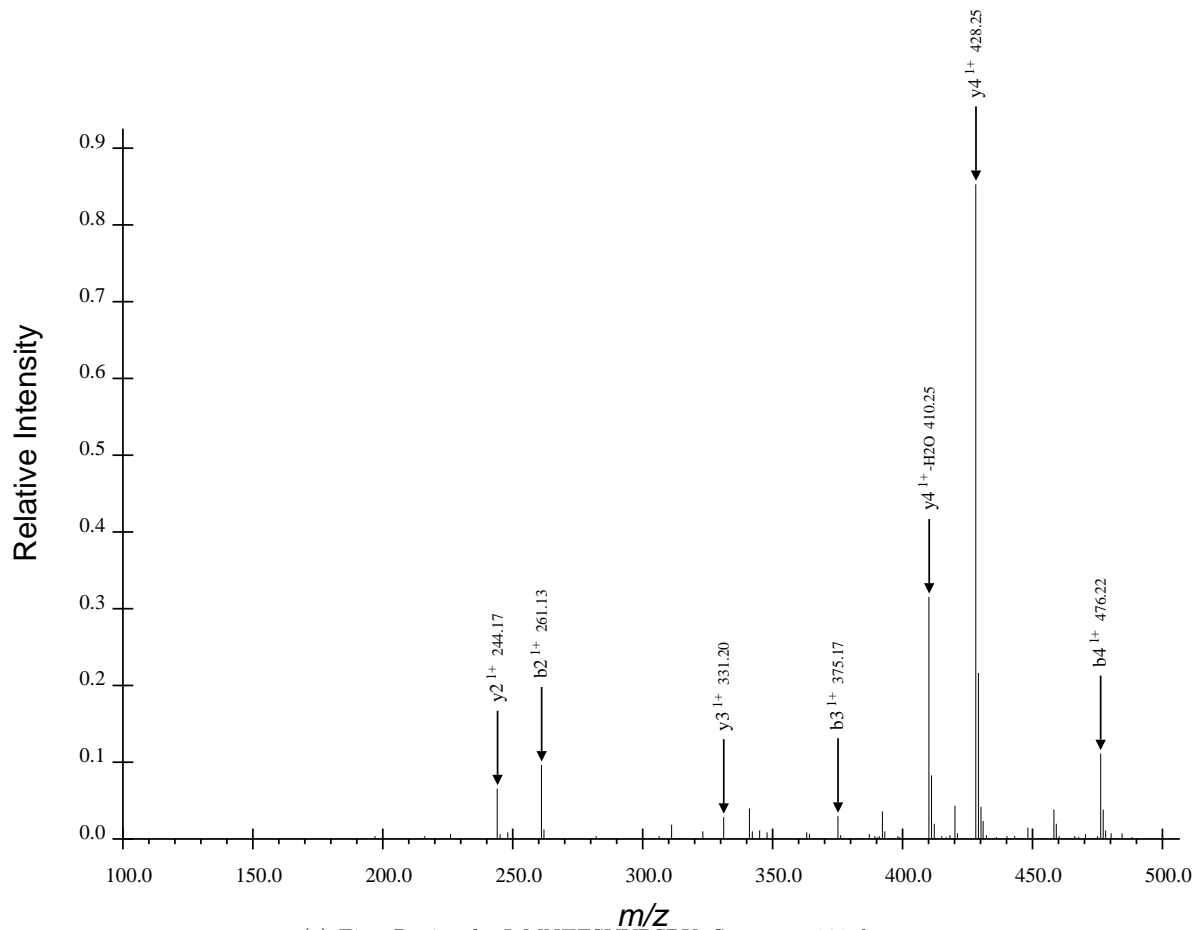

(a) First Region for IoMNTFSVVPSPK, Spectrum 239.dta

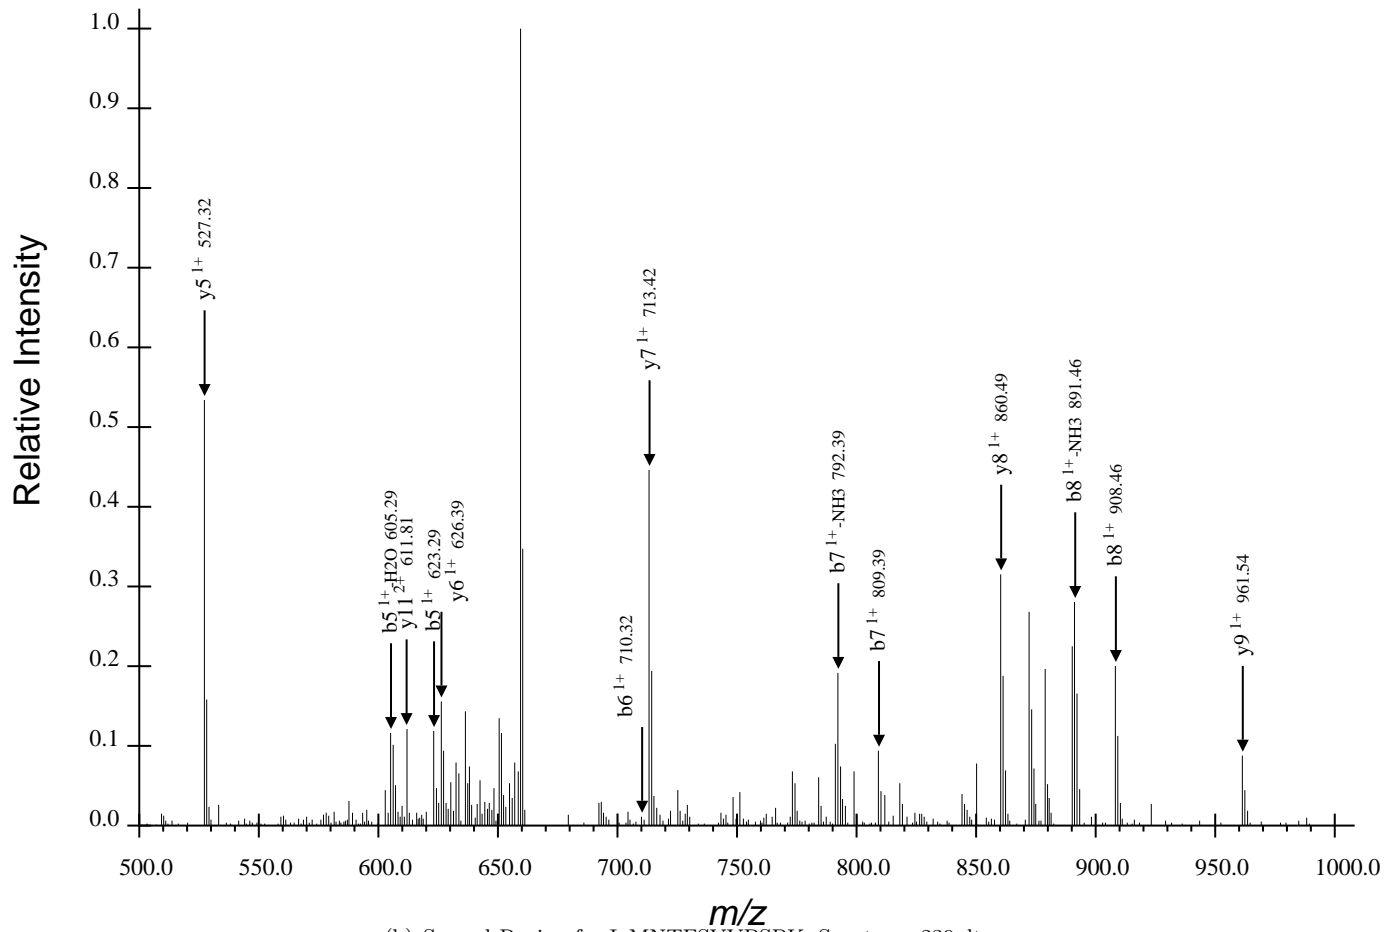

(b) Second Region for IoMNTFSVVPSPK, Spectrum 239.dta

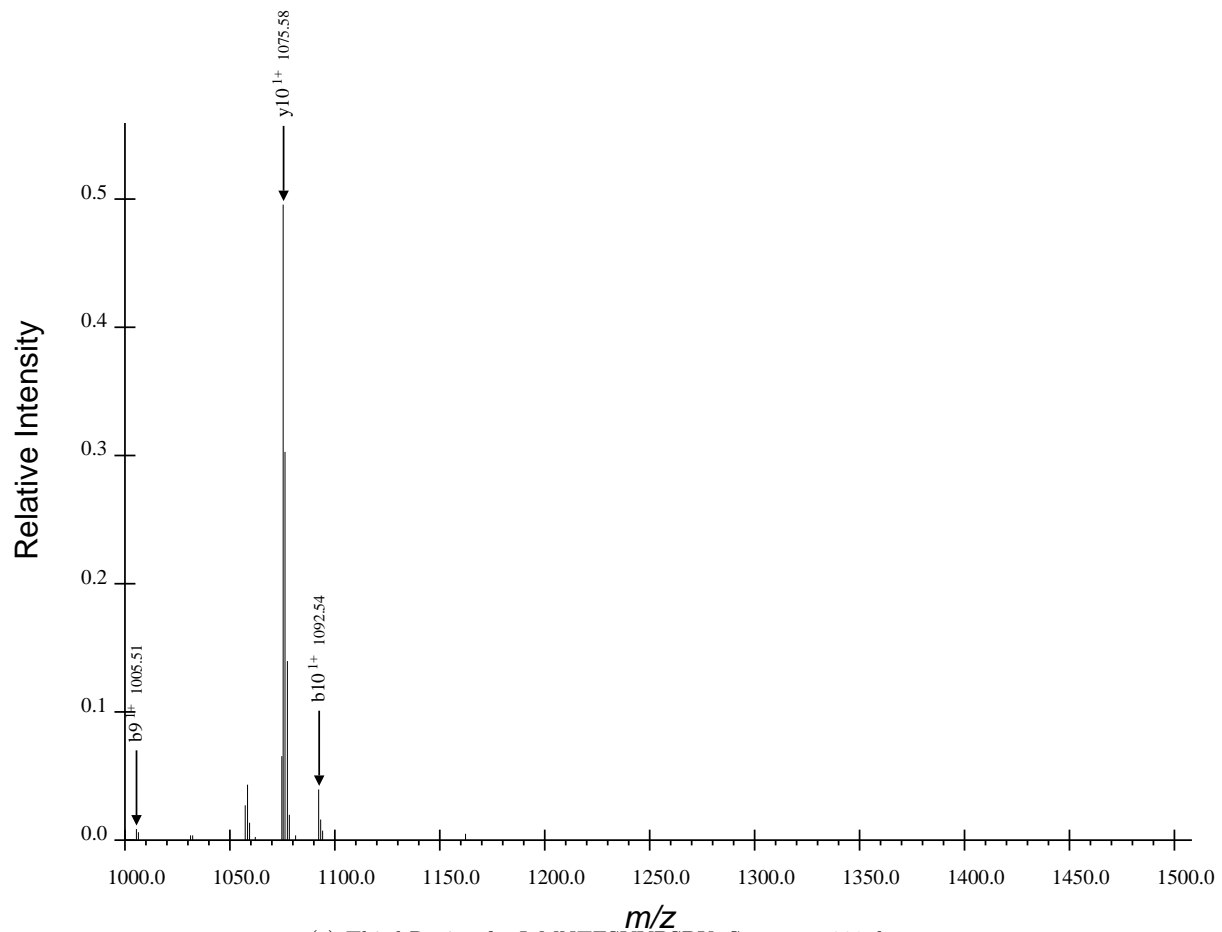

(c) Third Region for IoMNTFSVVVPSPK, Spectrum 239.dta

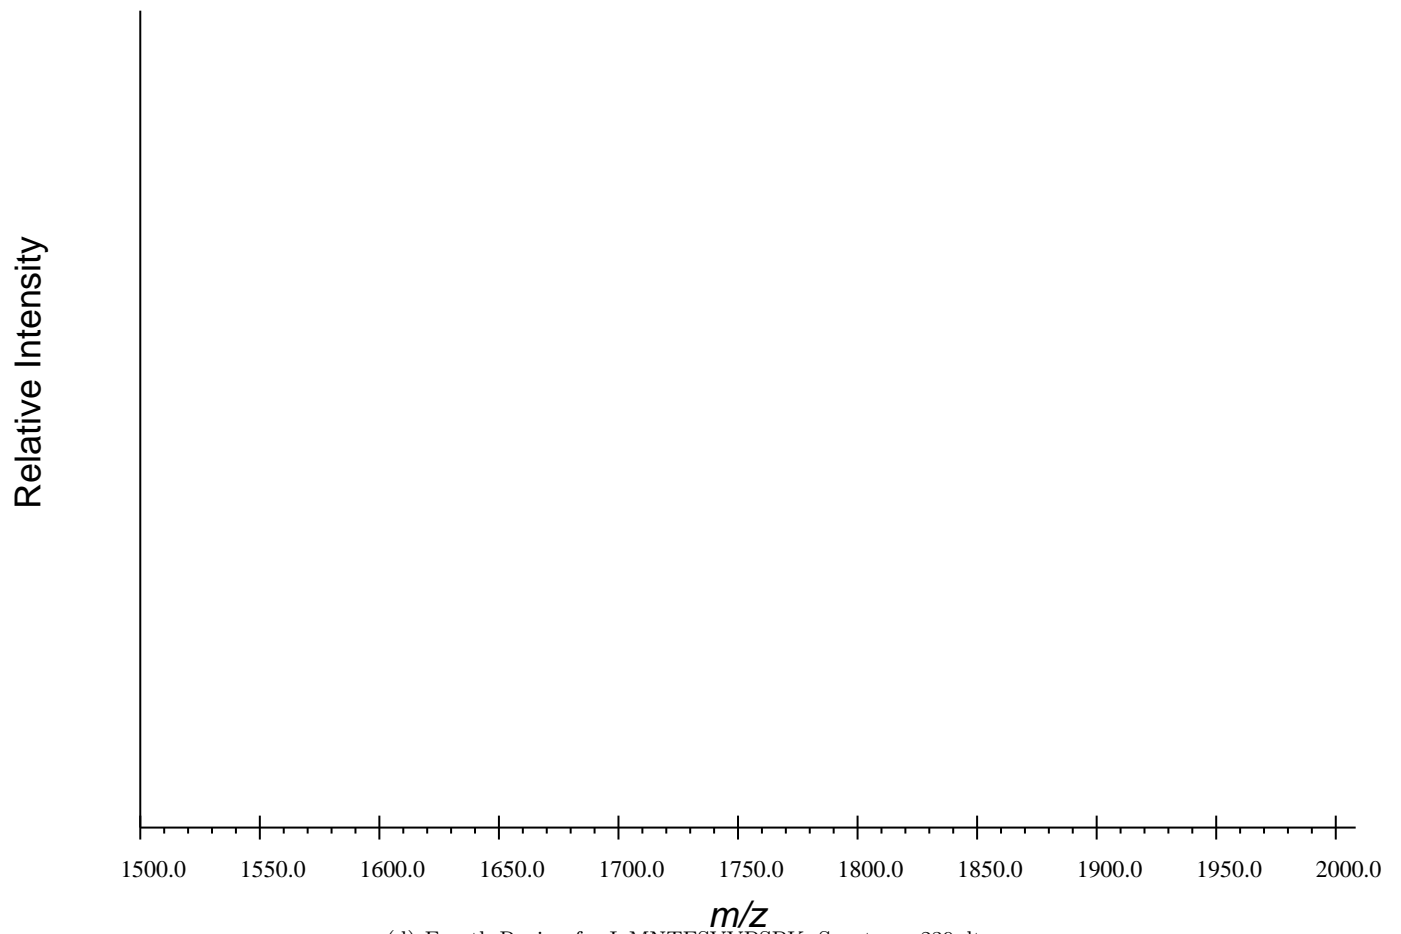

(d) Fourth Region for IoMNTFSVVVPSPK, Spectrum 239.dta

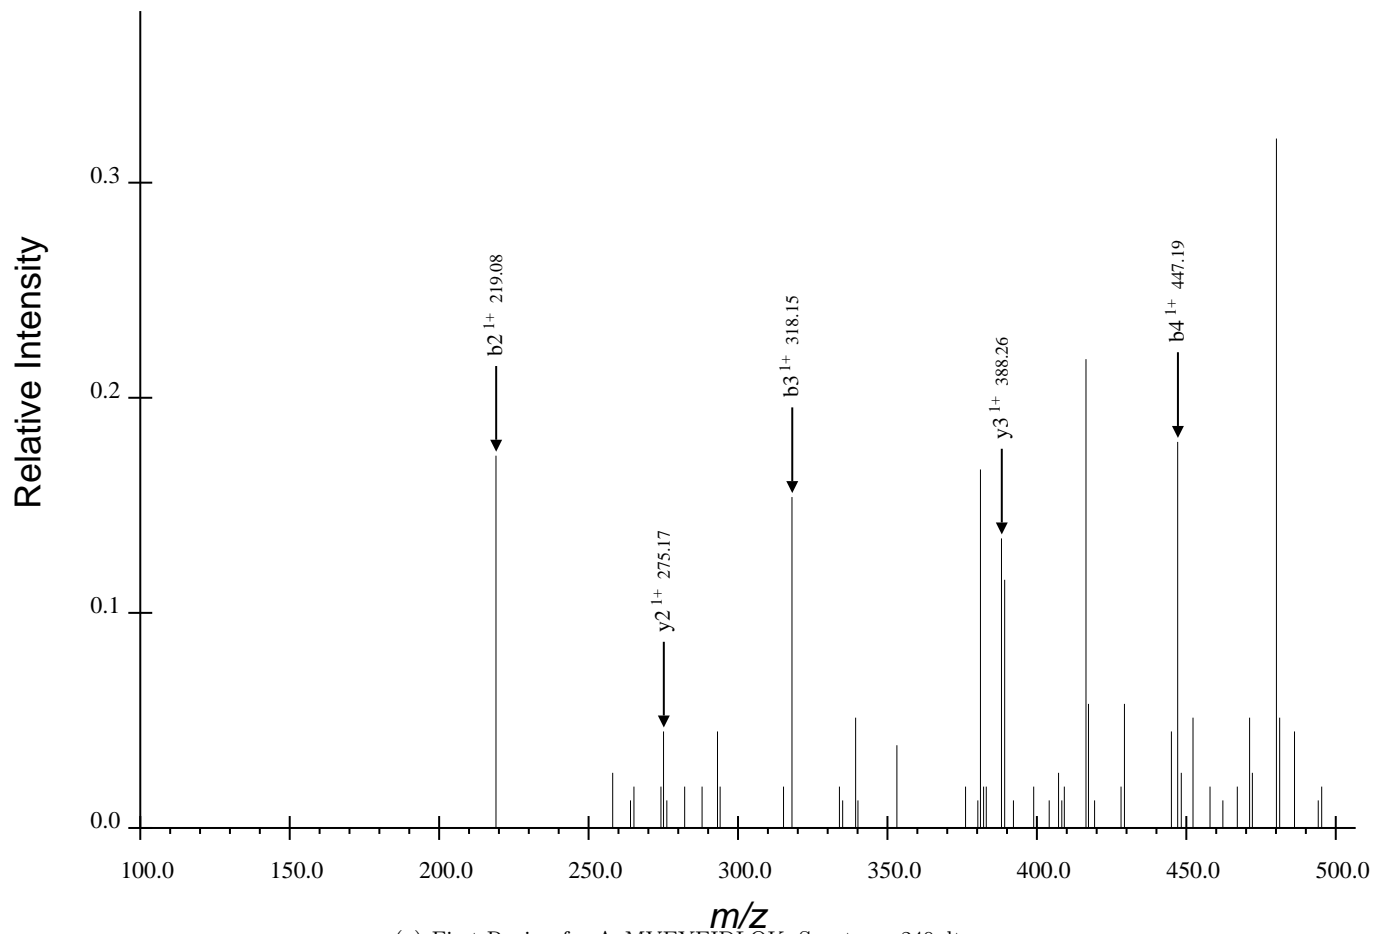

(a) First Region for AoMVEYEIDLQK, Spectrum 240.dta

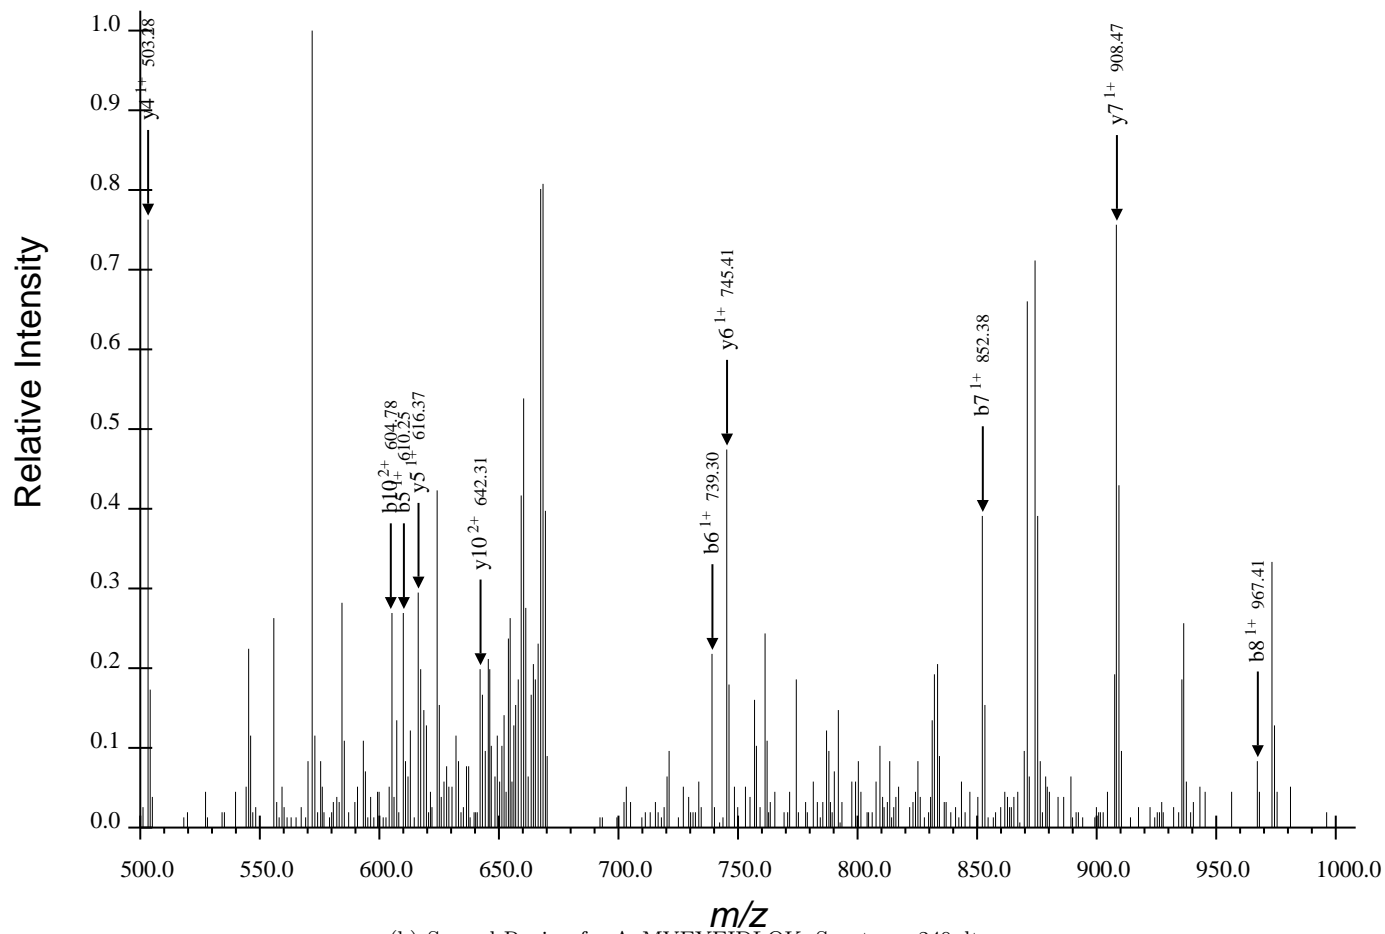

(b) Second Region for AoMVEYEIDLQK, Spectrum 240.dta

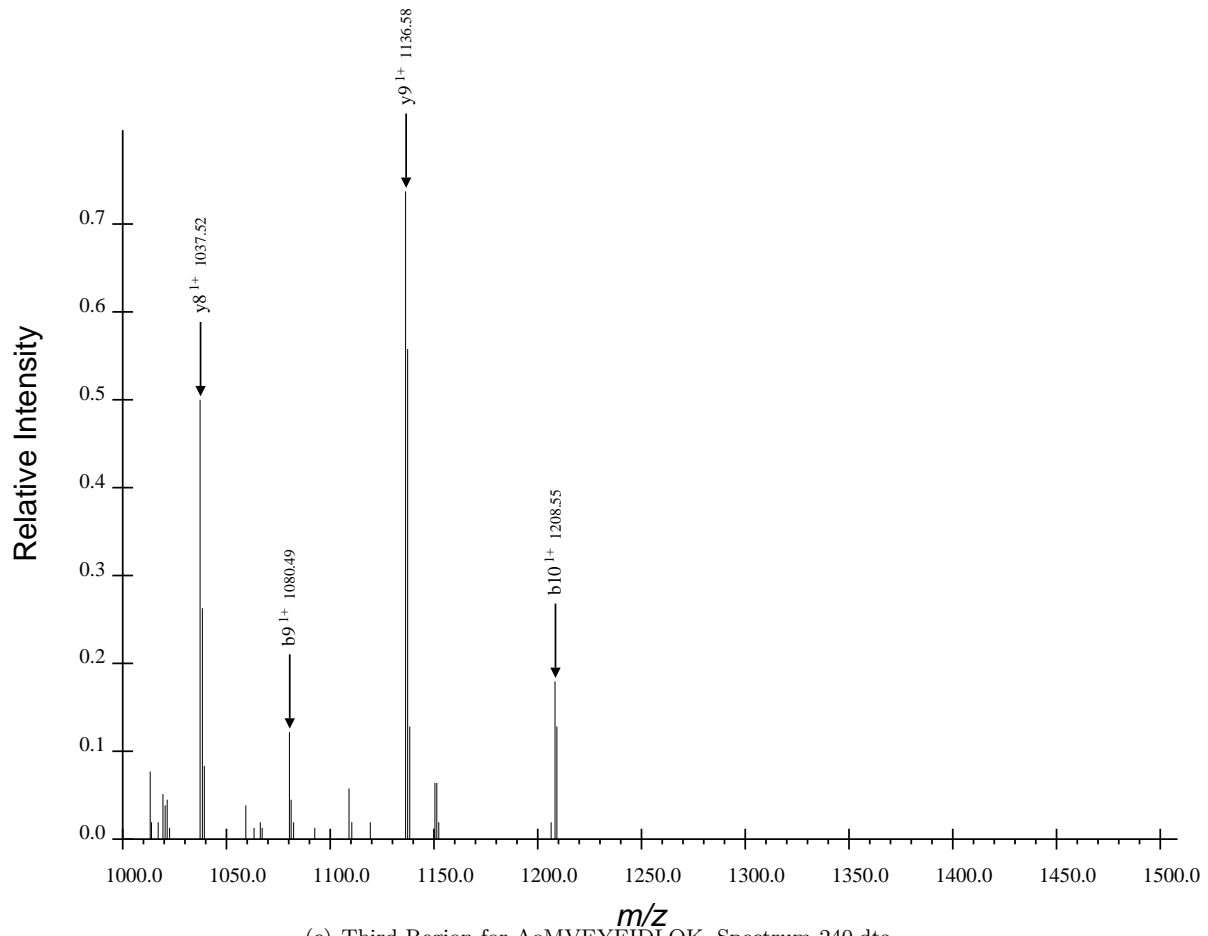

(c) Third Region for AoMVEYEIDLQK, Spectrum 240.dta

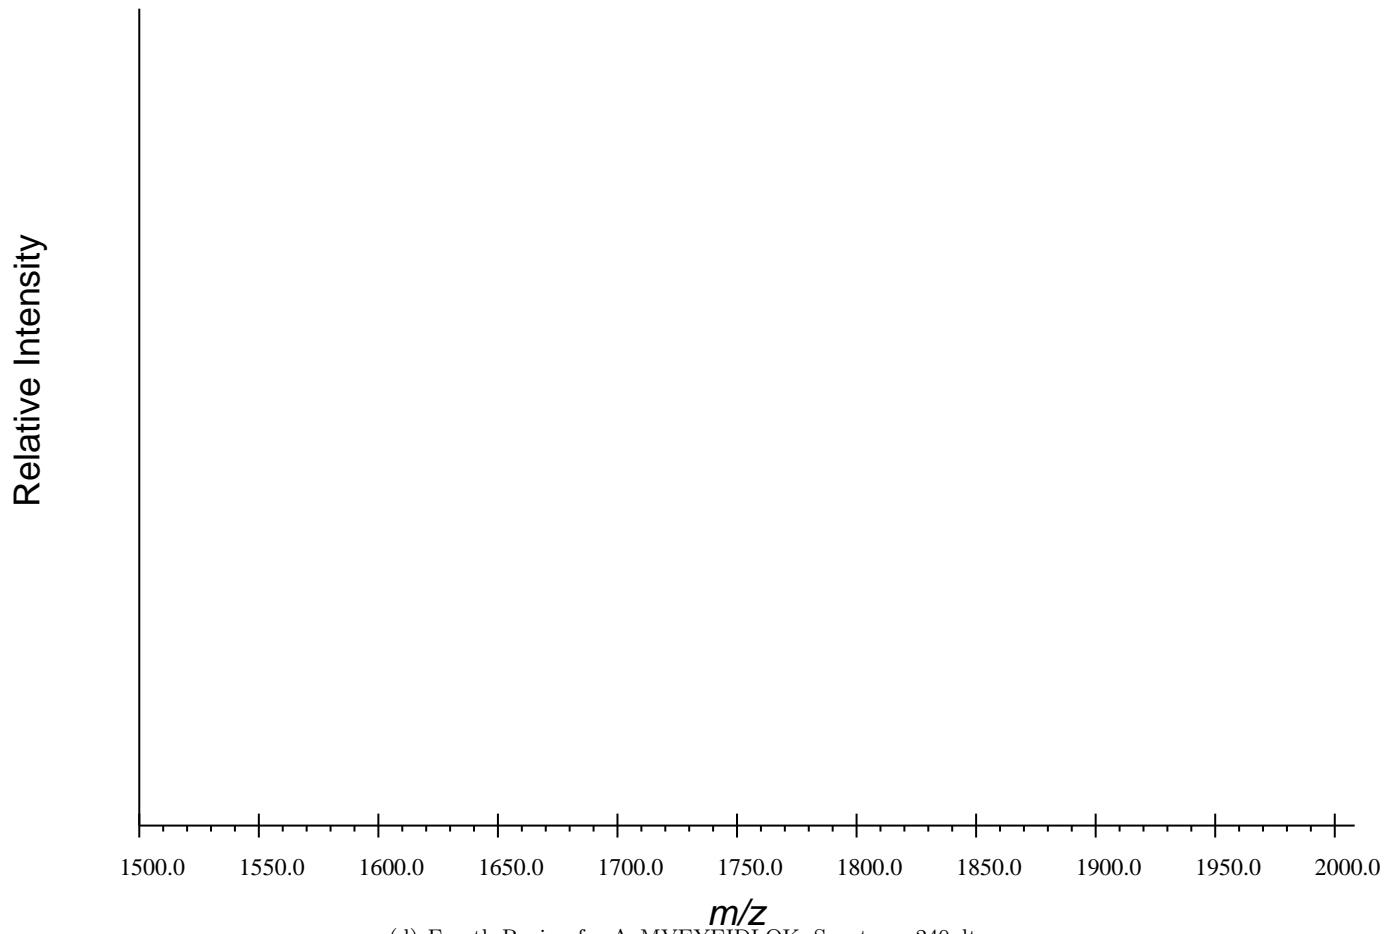

(d) Fourth Region for AoMVEYEIDLQK, Spectrum 240.dta

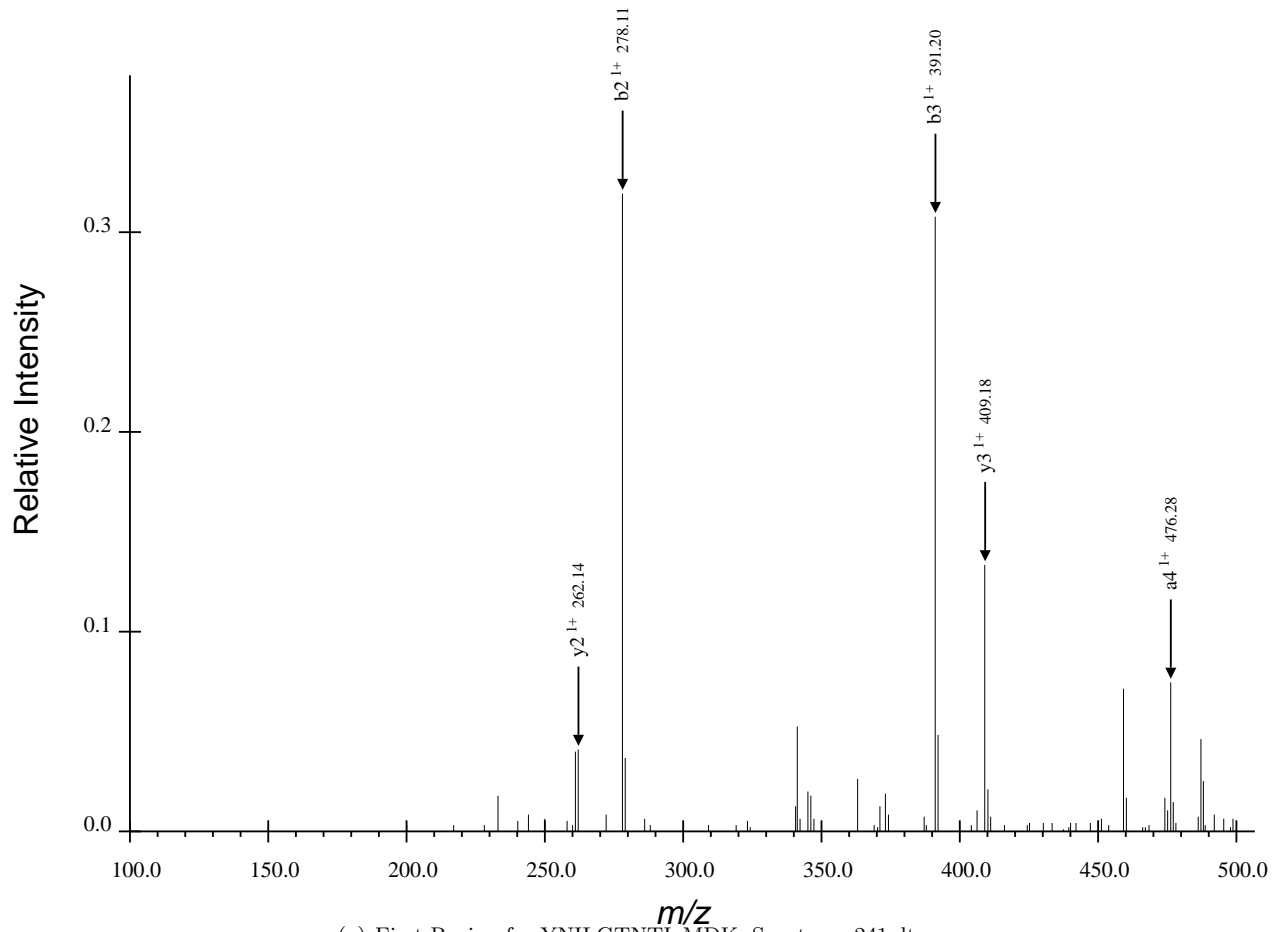

(a) First Region for YNILGTNTIoMDK, Spectrum 241.dta

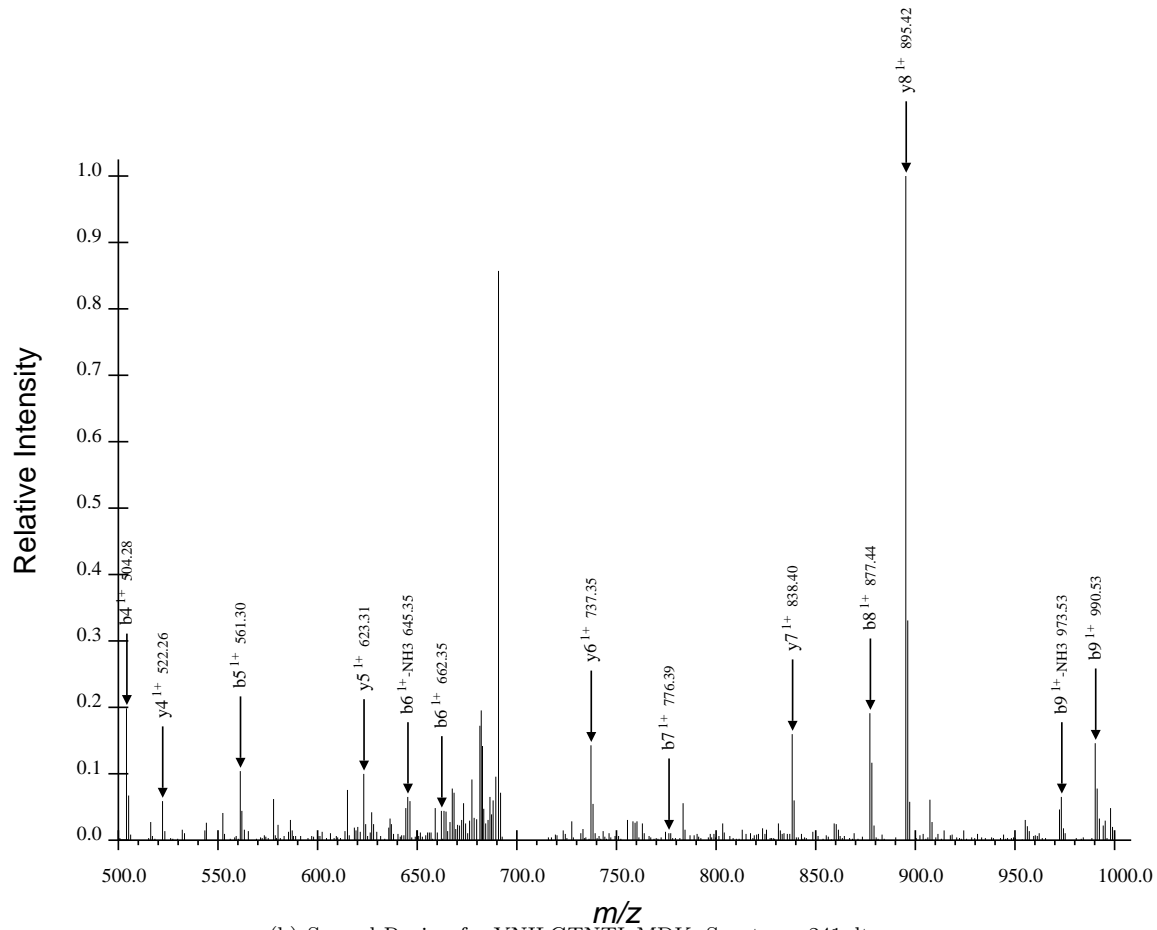

(b) Second Region for YNILGTNTIoMDK, Spectrum 241.dta

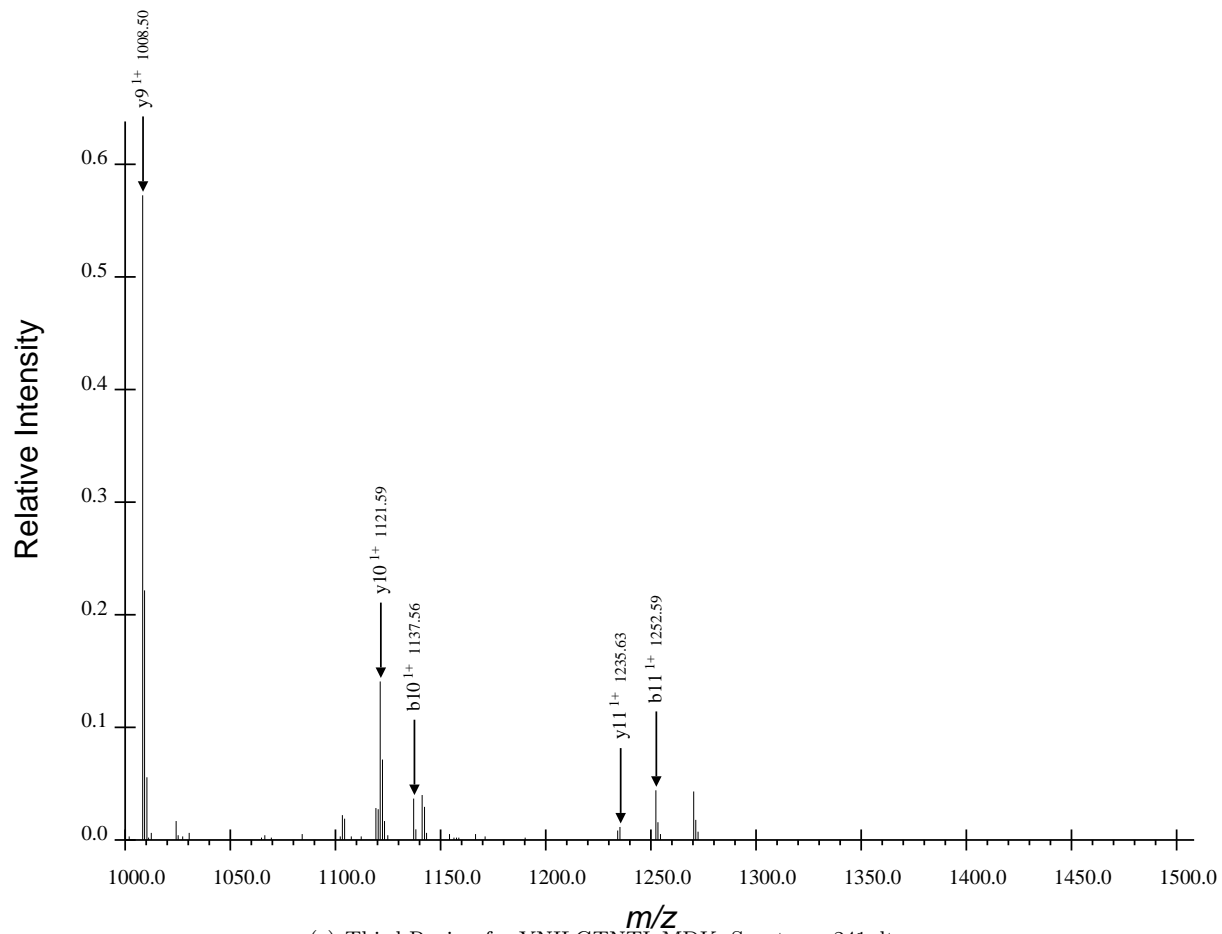

(c) Third Region for YNILGTNTIoMDK, Spectrum 241.dta

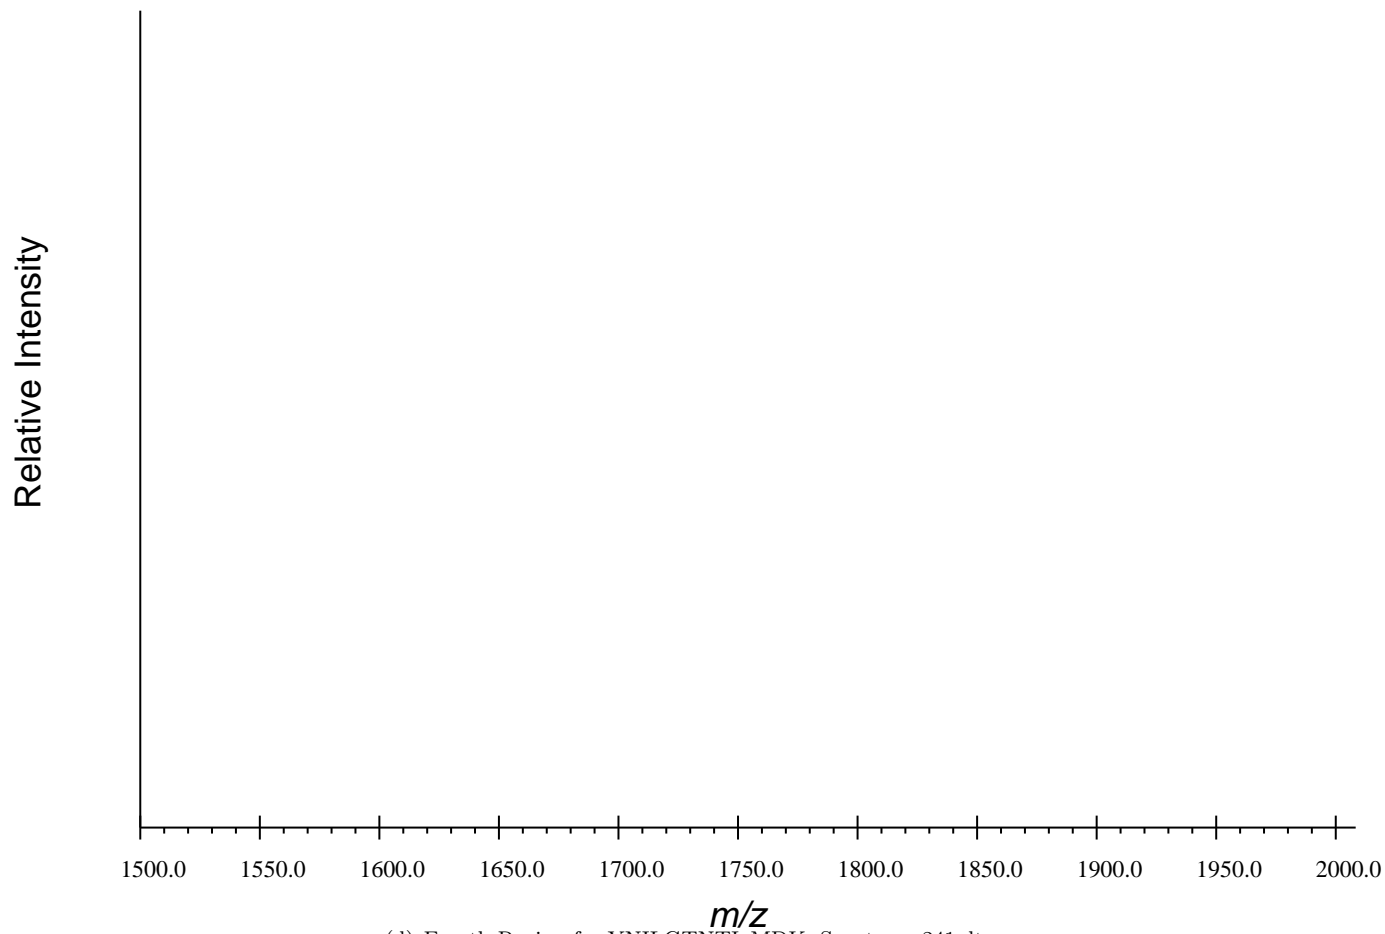

(d) Fourth Region for YNILGTNTIoMDK, Spectrum 241.dta

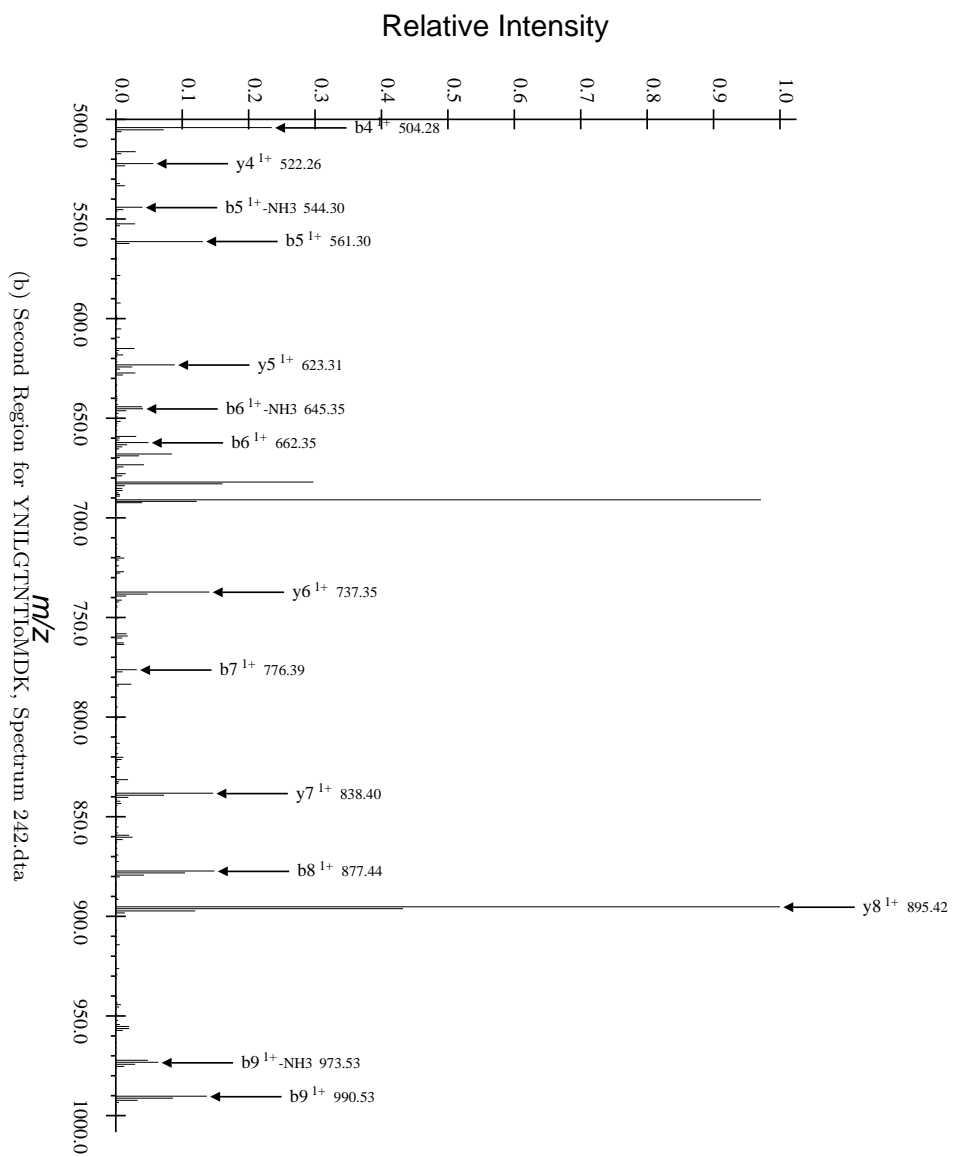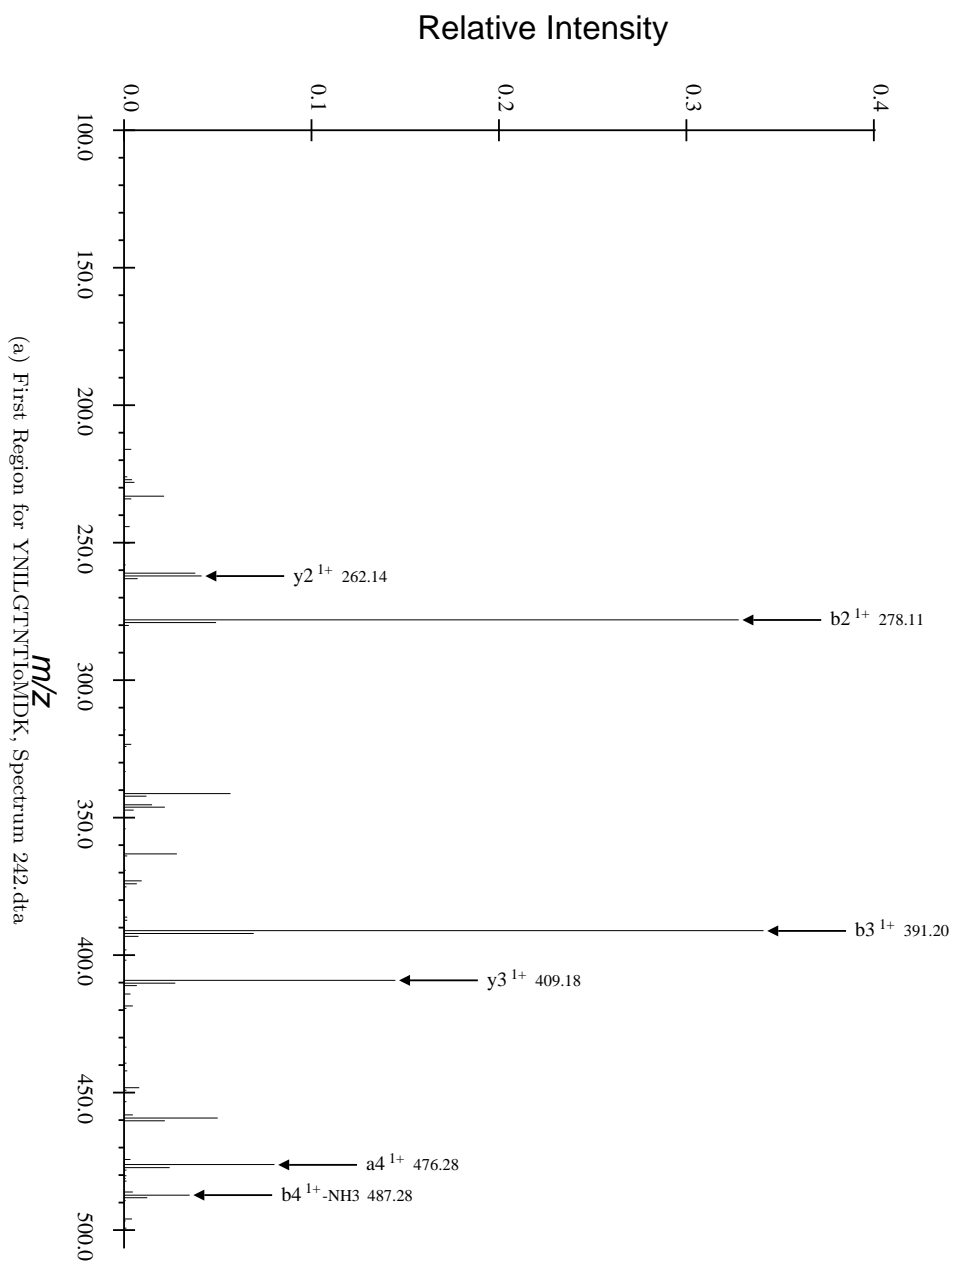



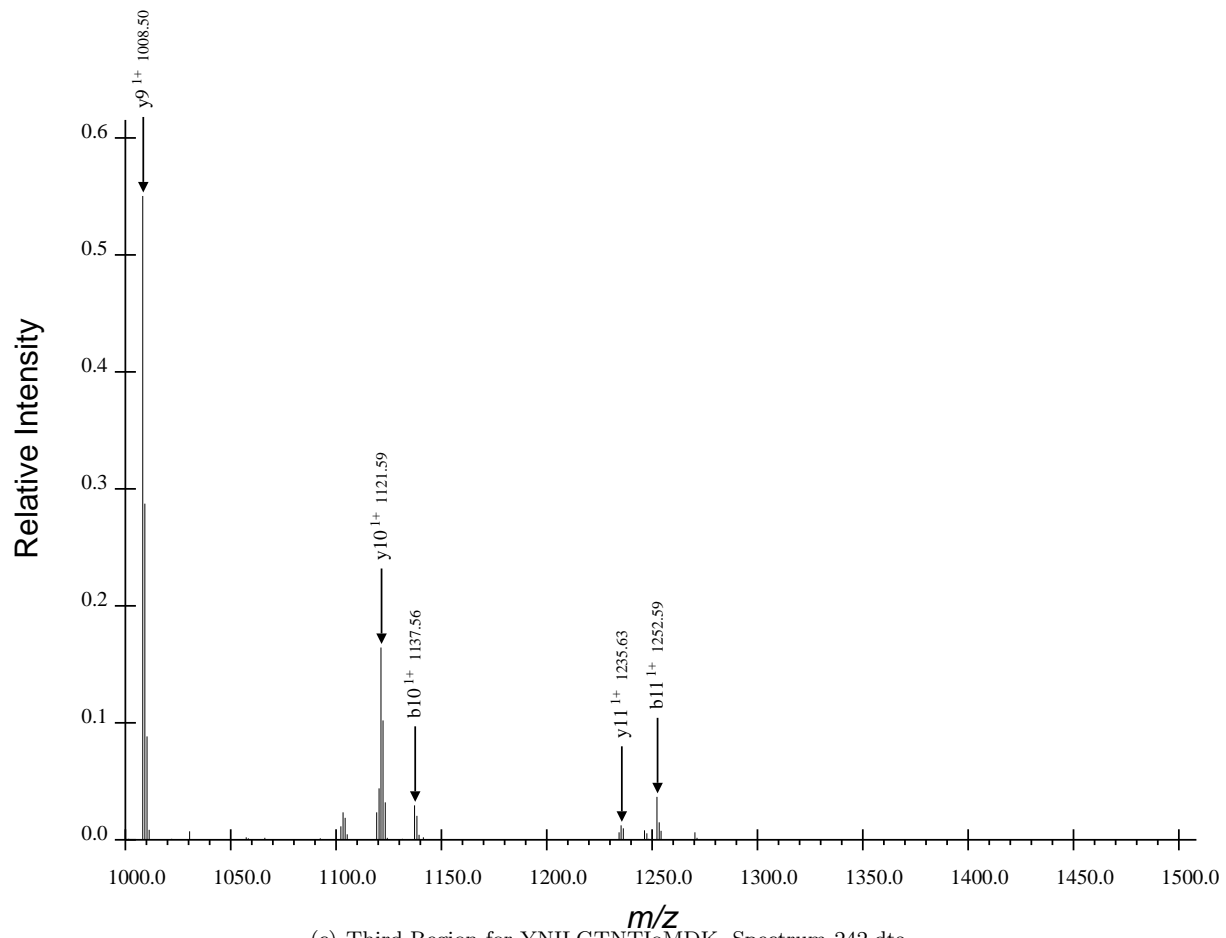

(c) Third Region for YNILGTNTIoMDK, Spectrum 242.dta

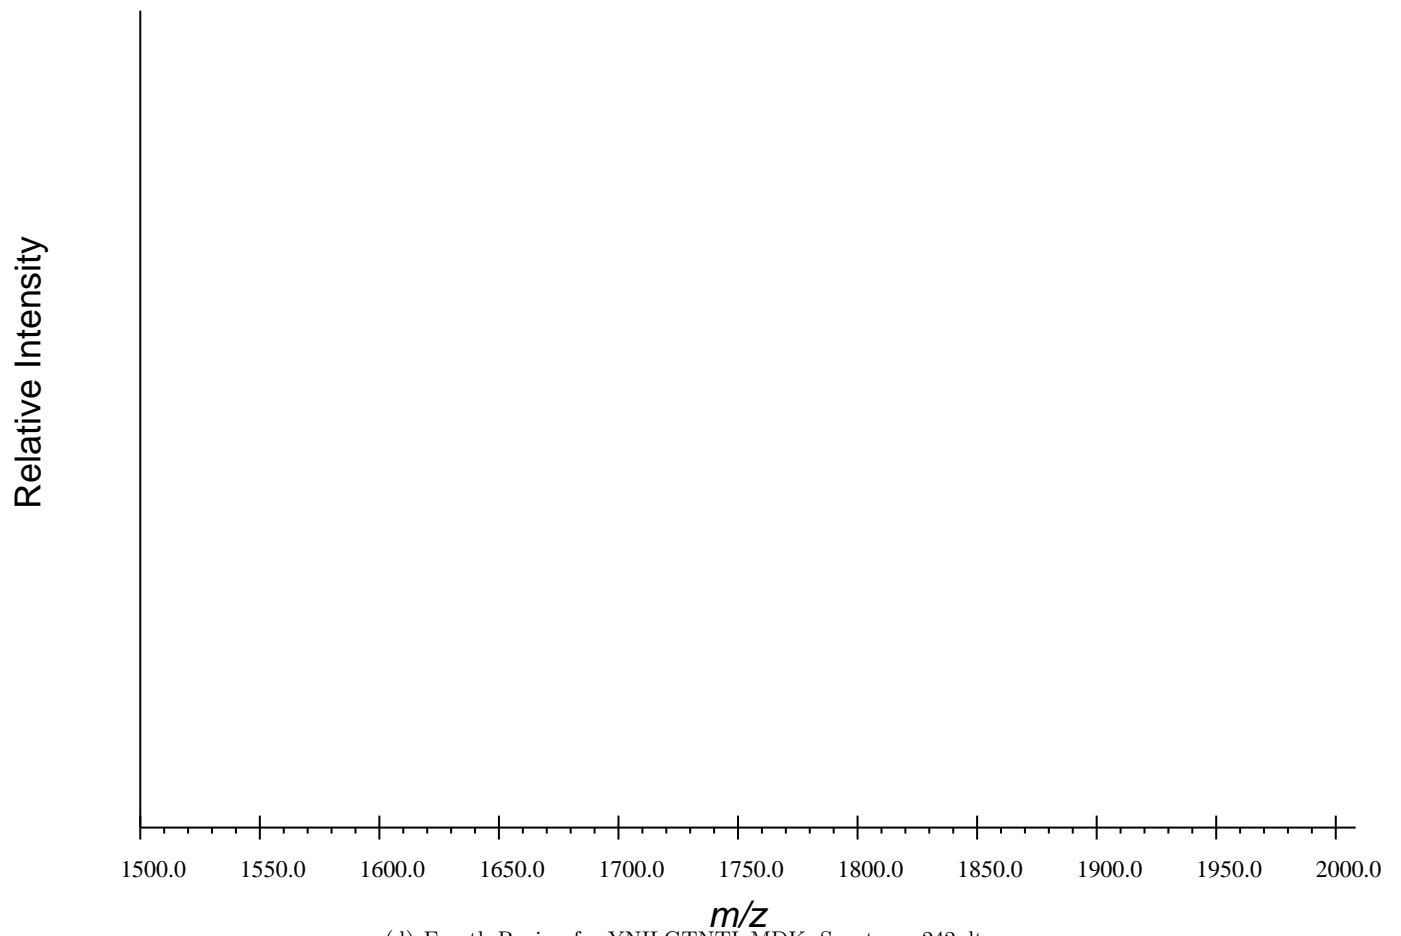

(d) Fourth Region for YNILGTNTIoMDK, Spectrum 242.dta

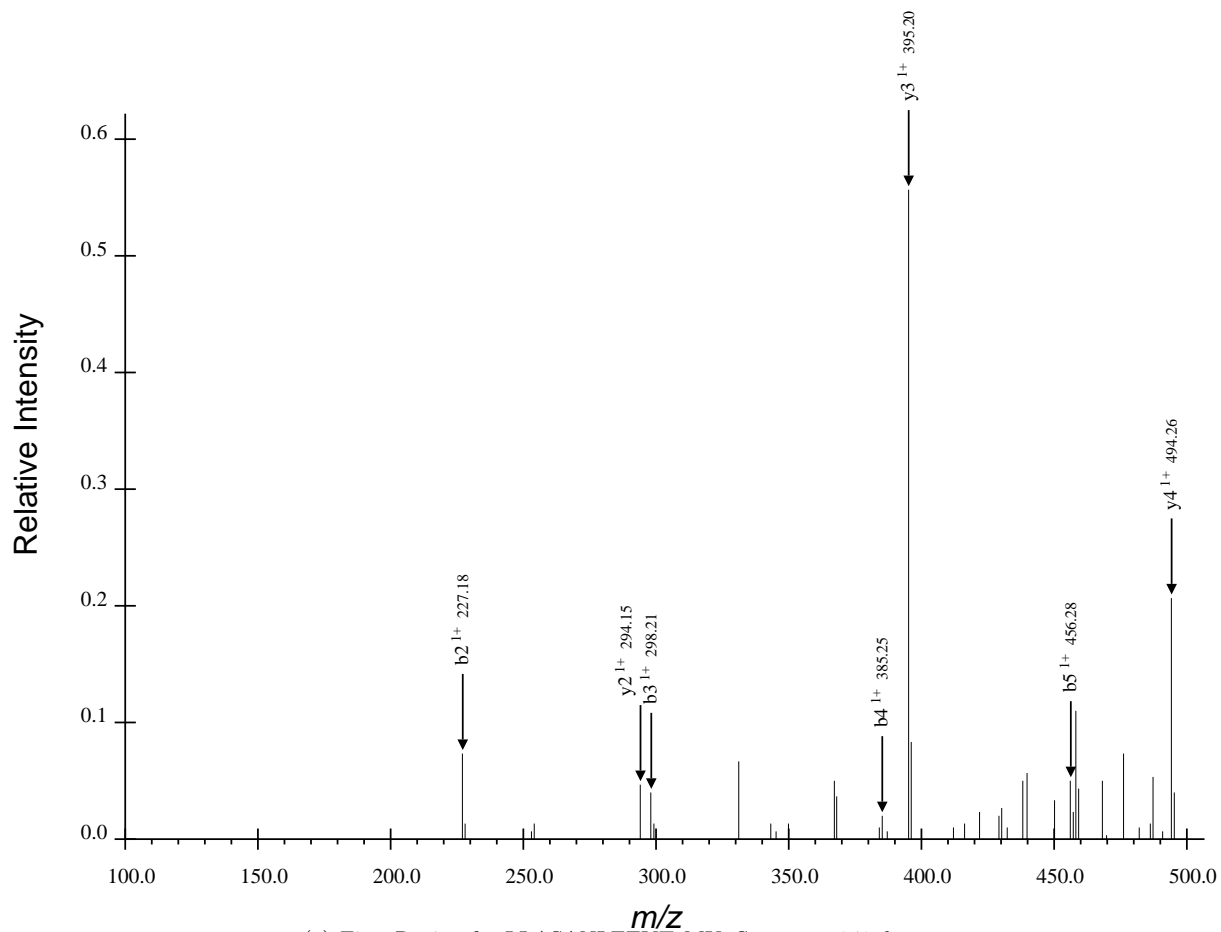

(a) First Region for LLASANLEEVToMK, Spectrum 243.dta

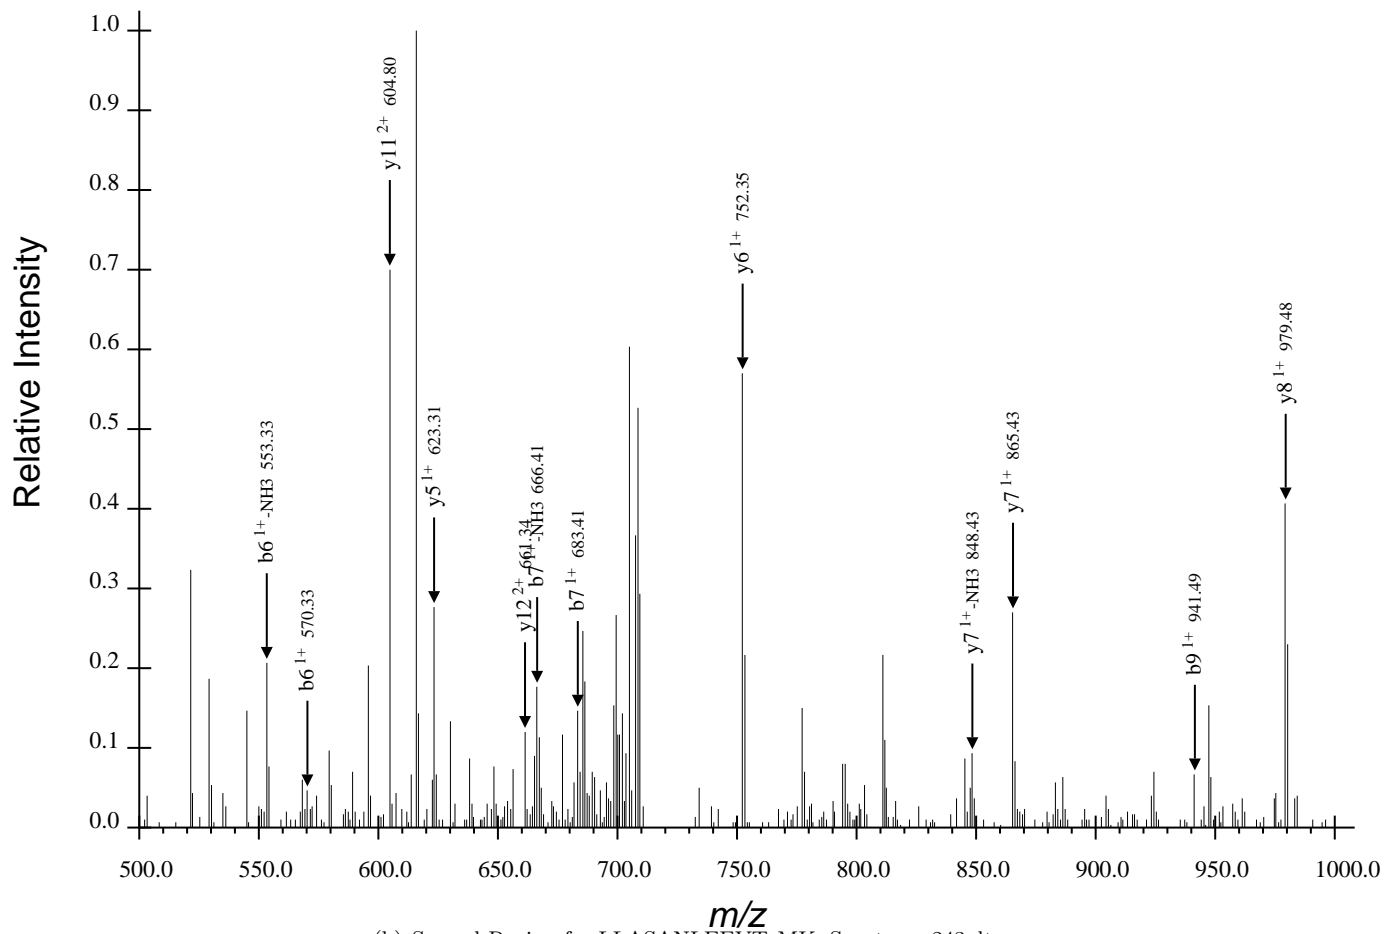

(b) Second Region for LLASANLEEVToMK, Spectrum 243.dta

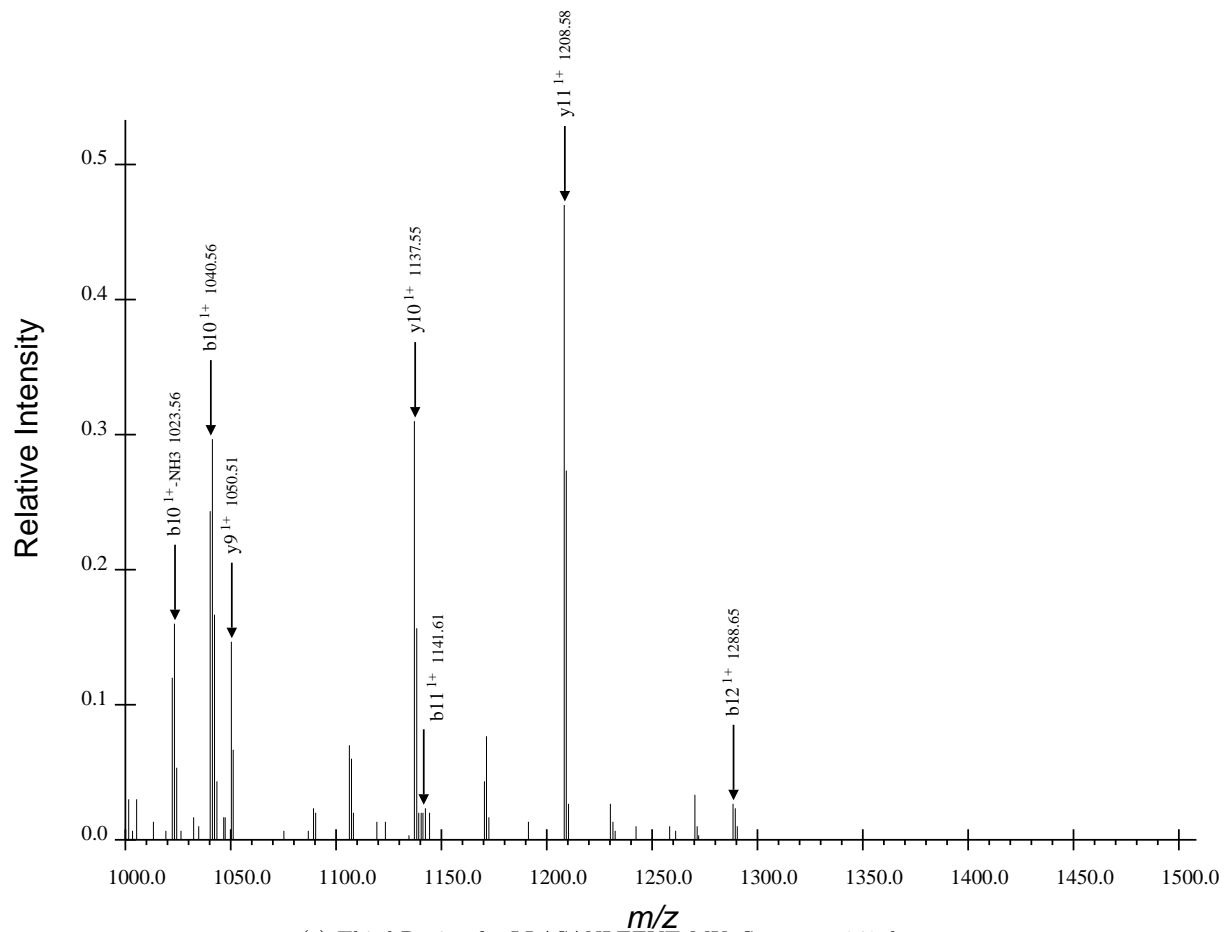

(c) Third Region for LLASANLEEVToMK, Spectrum 243.dta

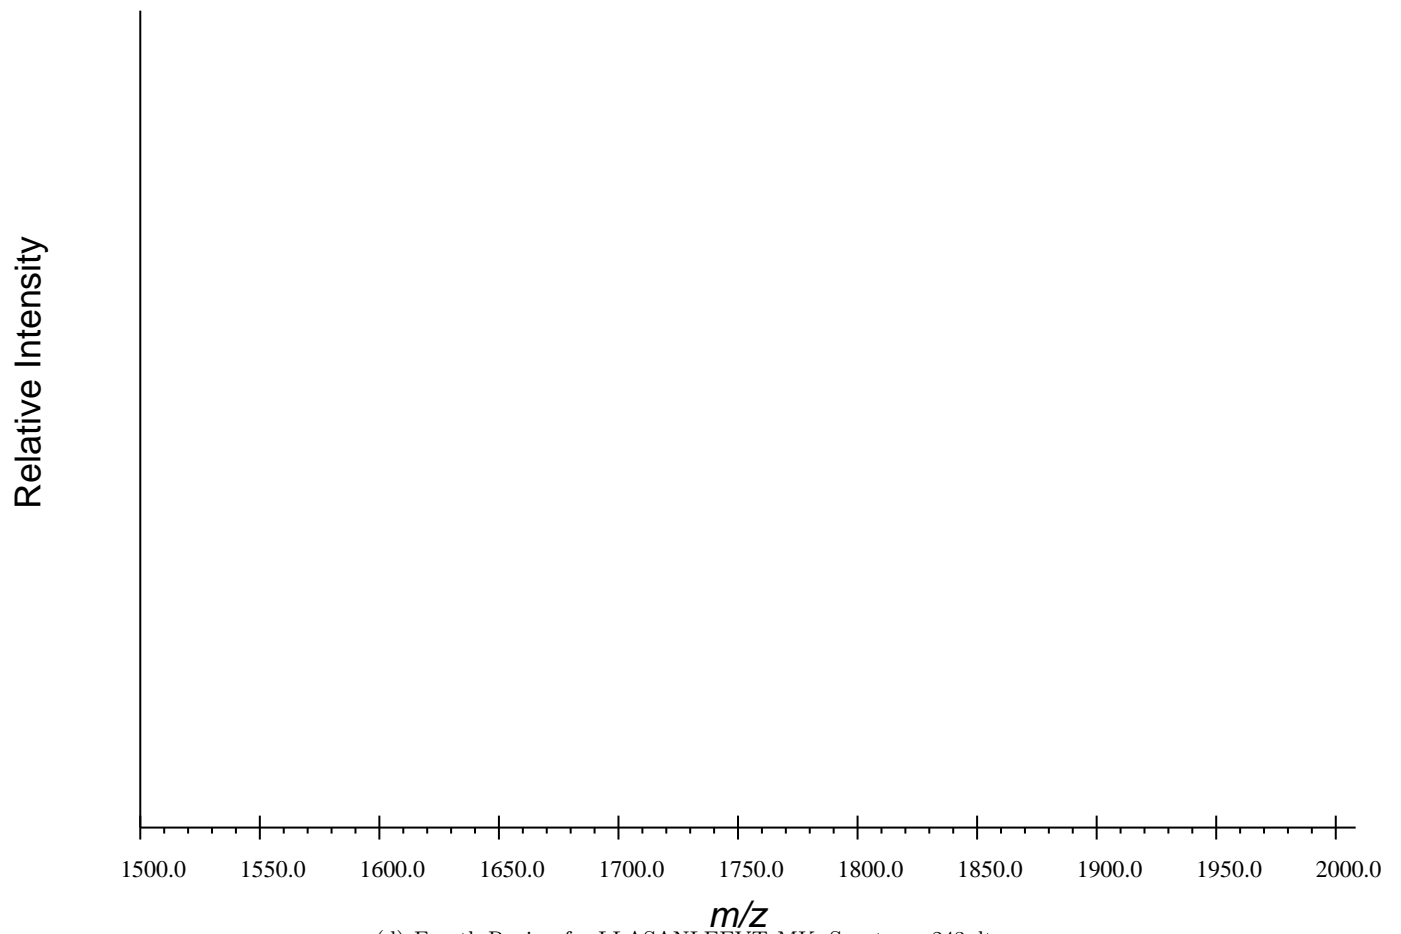

(d) Fourth Region for LLASANLEEVToMK, Spectrum 243.dta

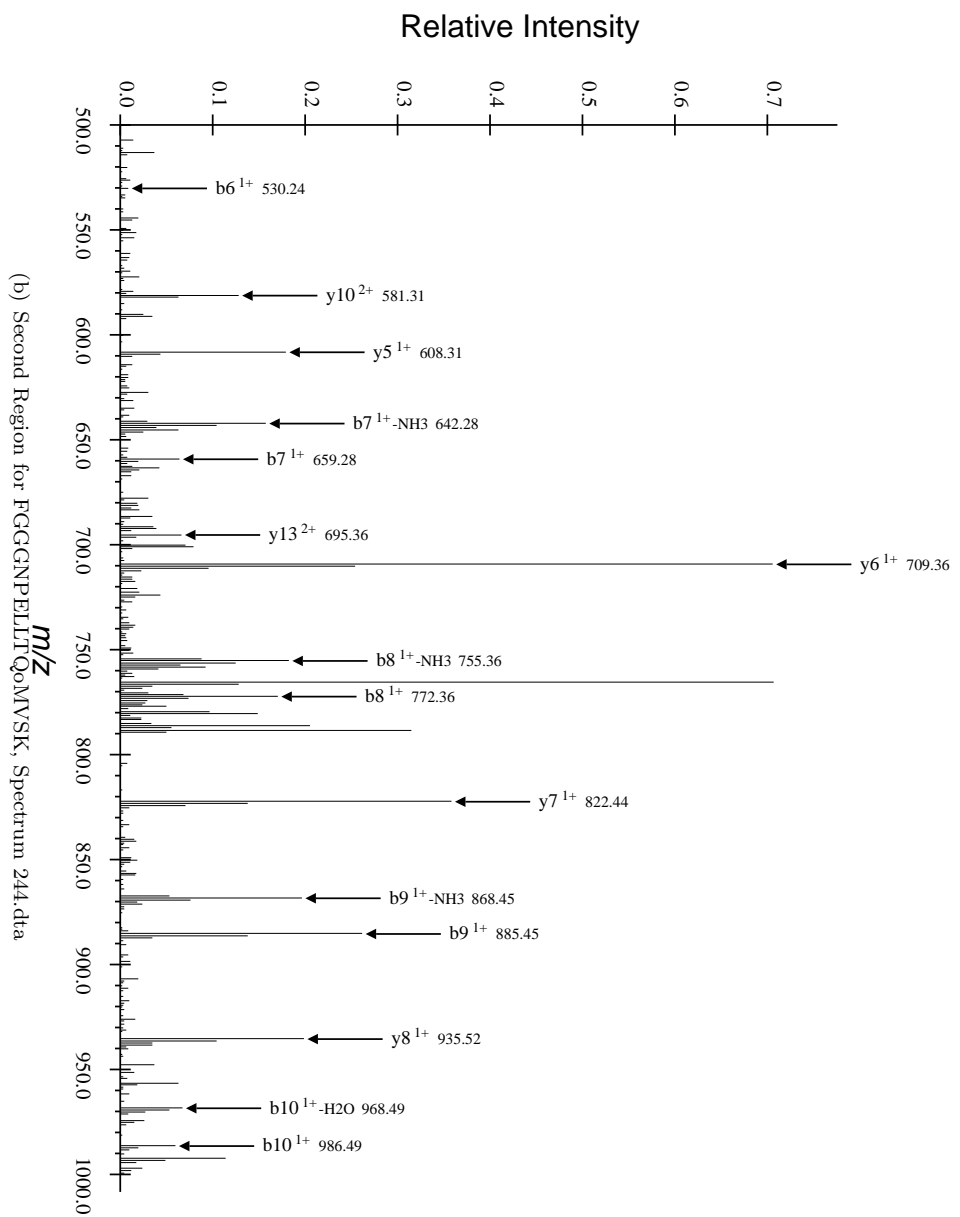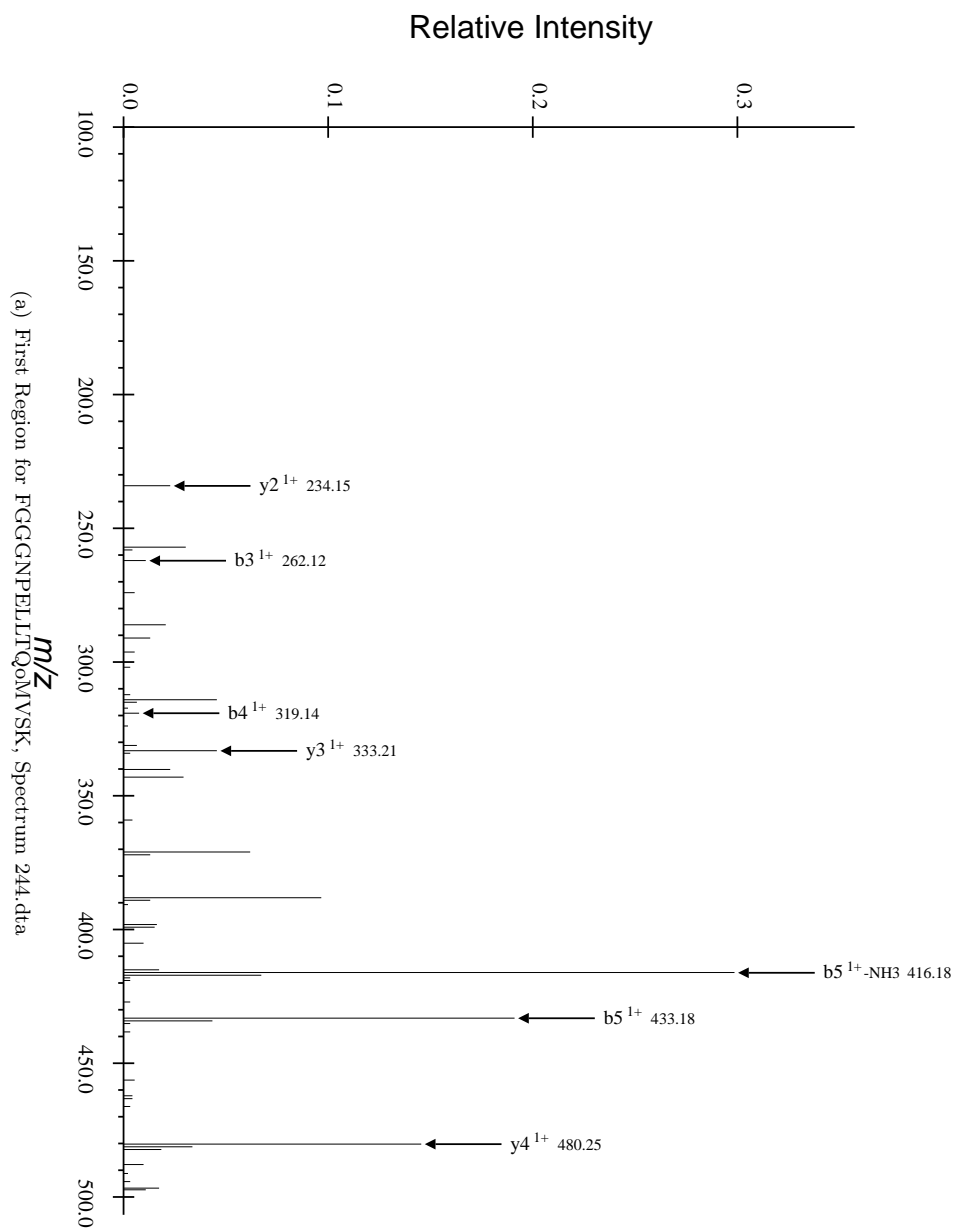

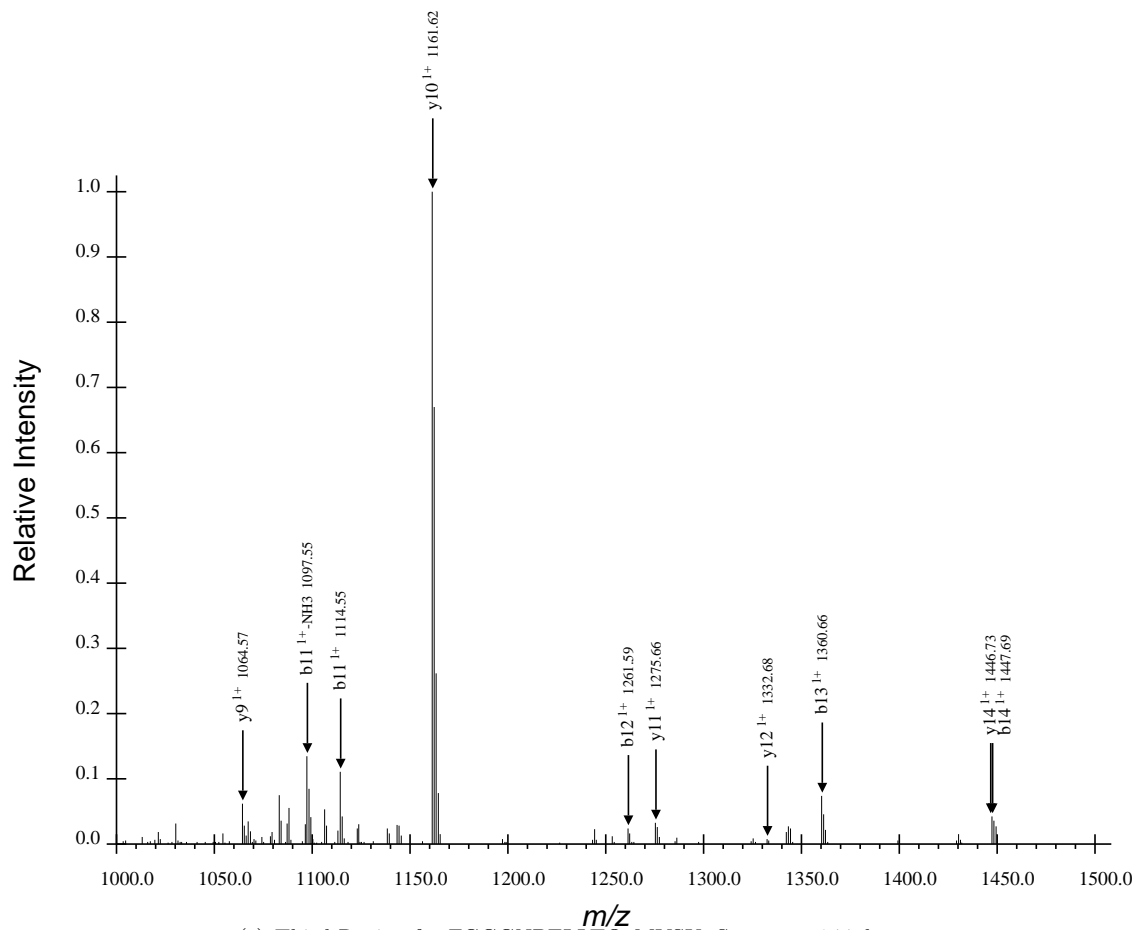

(c) Third Region for FGGGNPELLTQoMVSK, Spectrum 244.dta

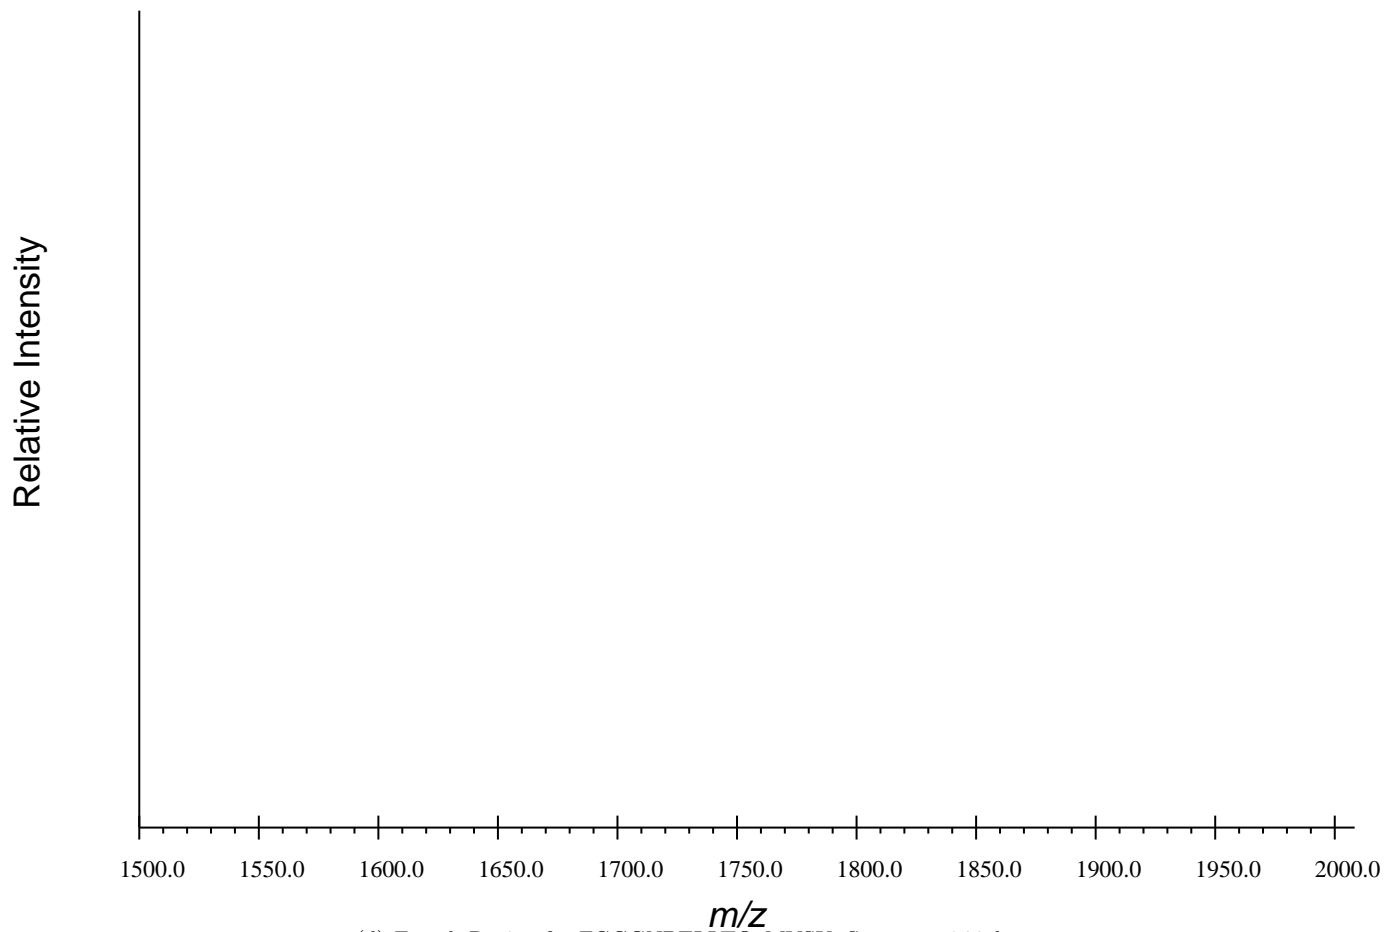

(d) Fourth Region for FGGGNPELLTQoMVSK, Spectrum 244.dta

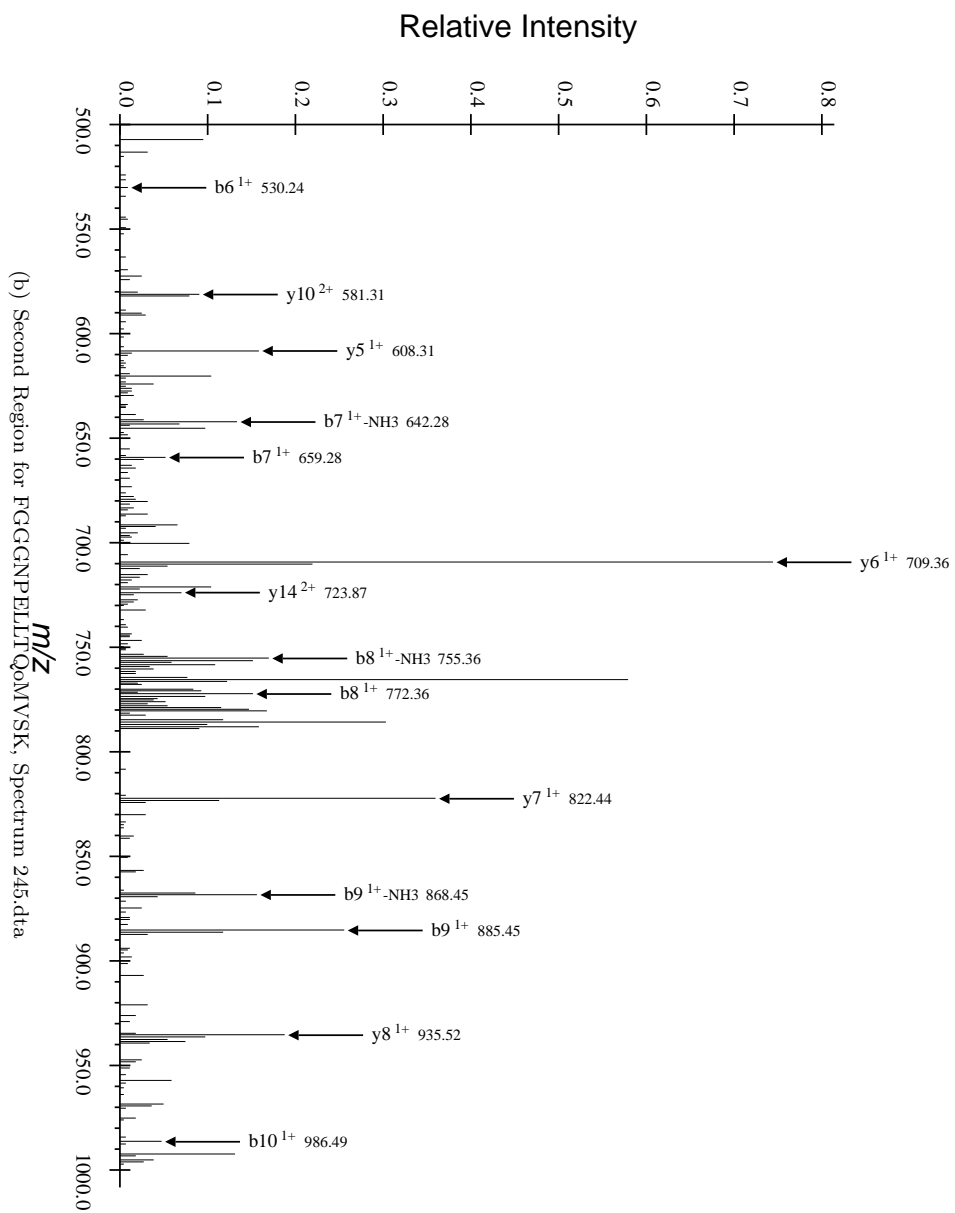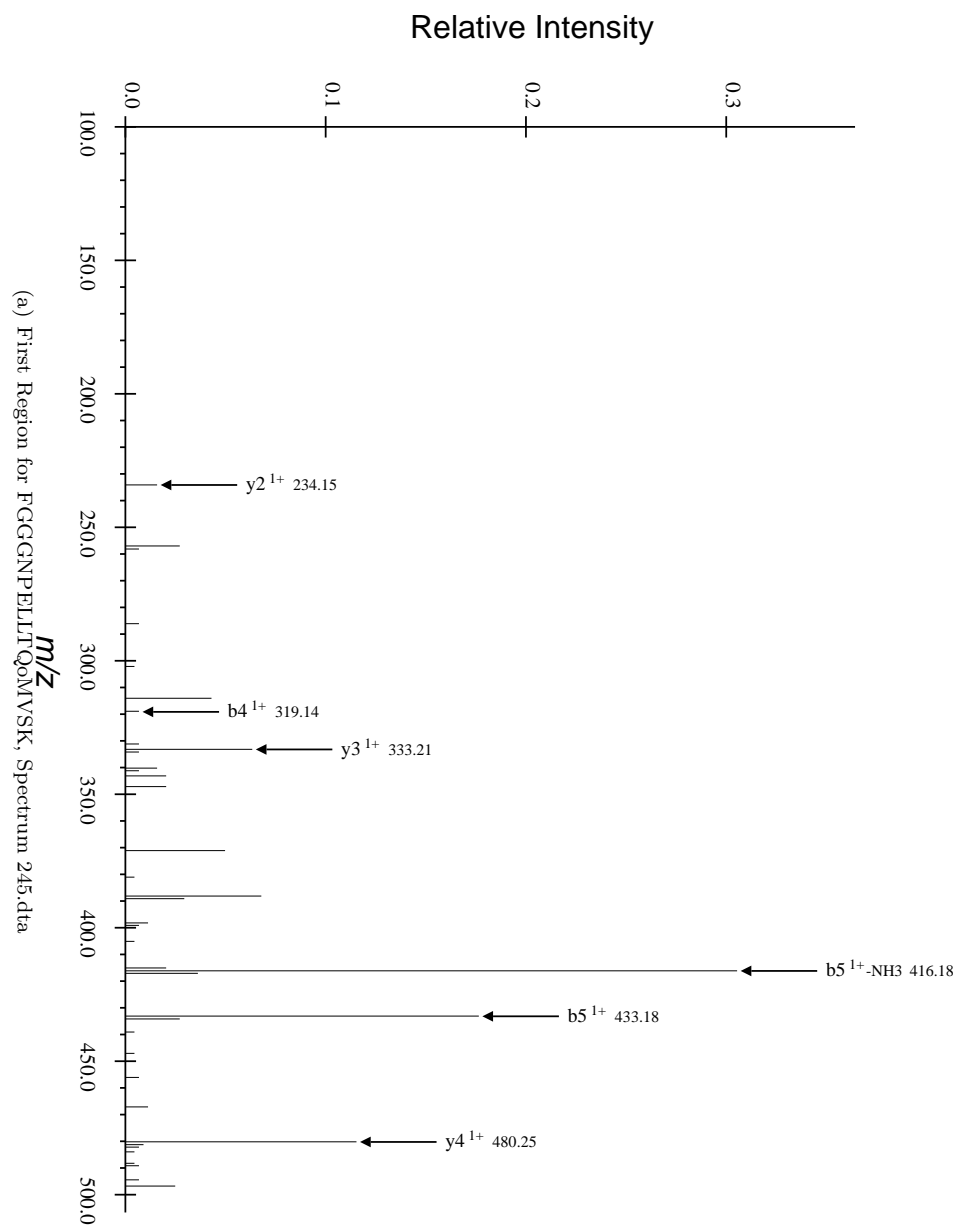

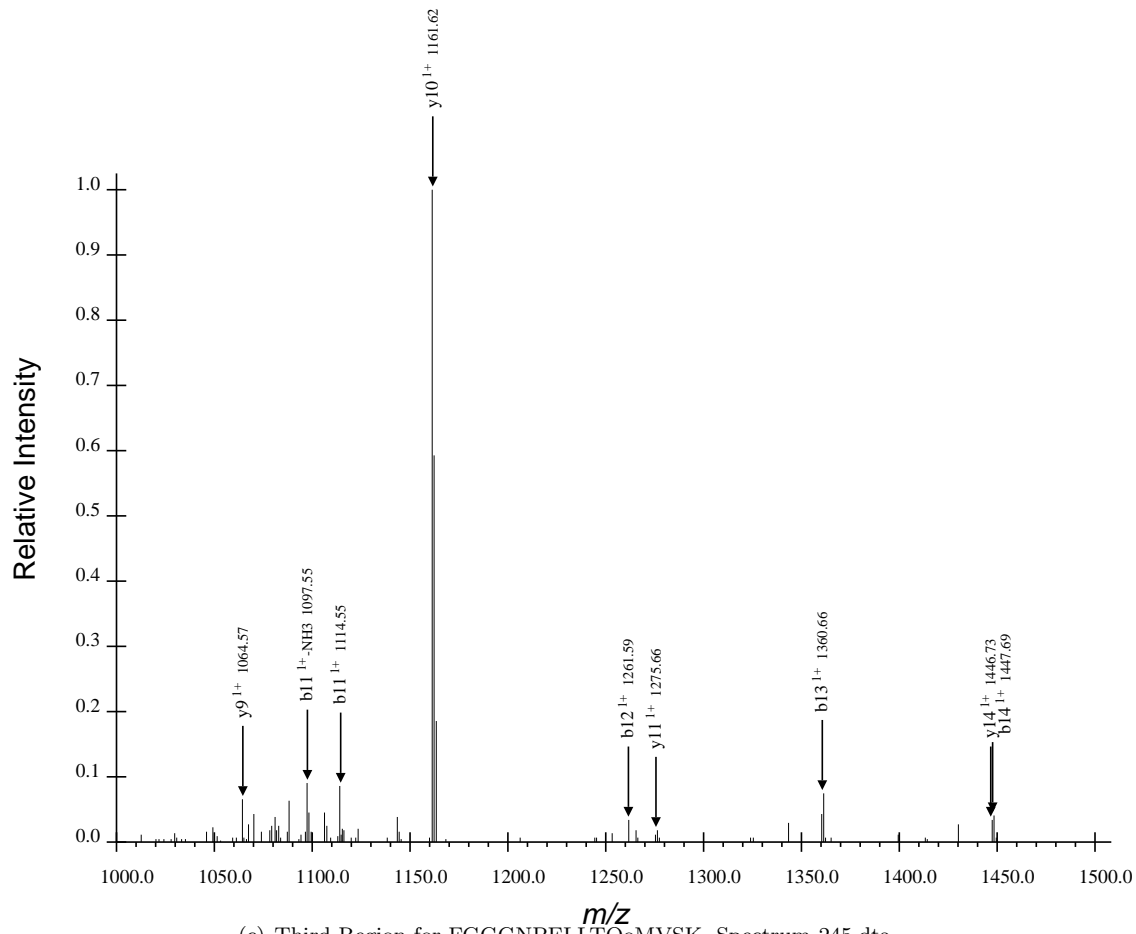

(c) Third Region for FGGGNPELLTQoMVSK, Spectrum 245.dta

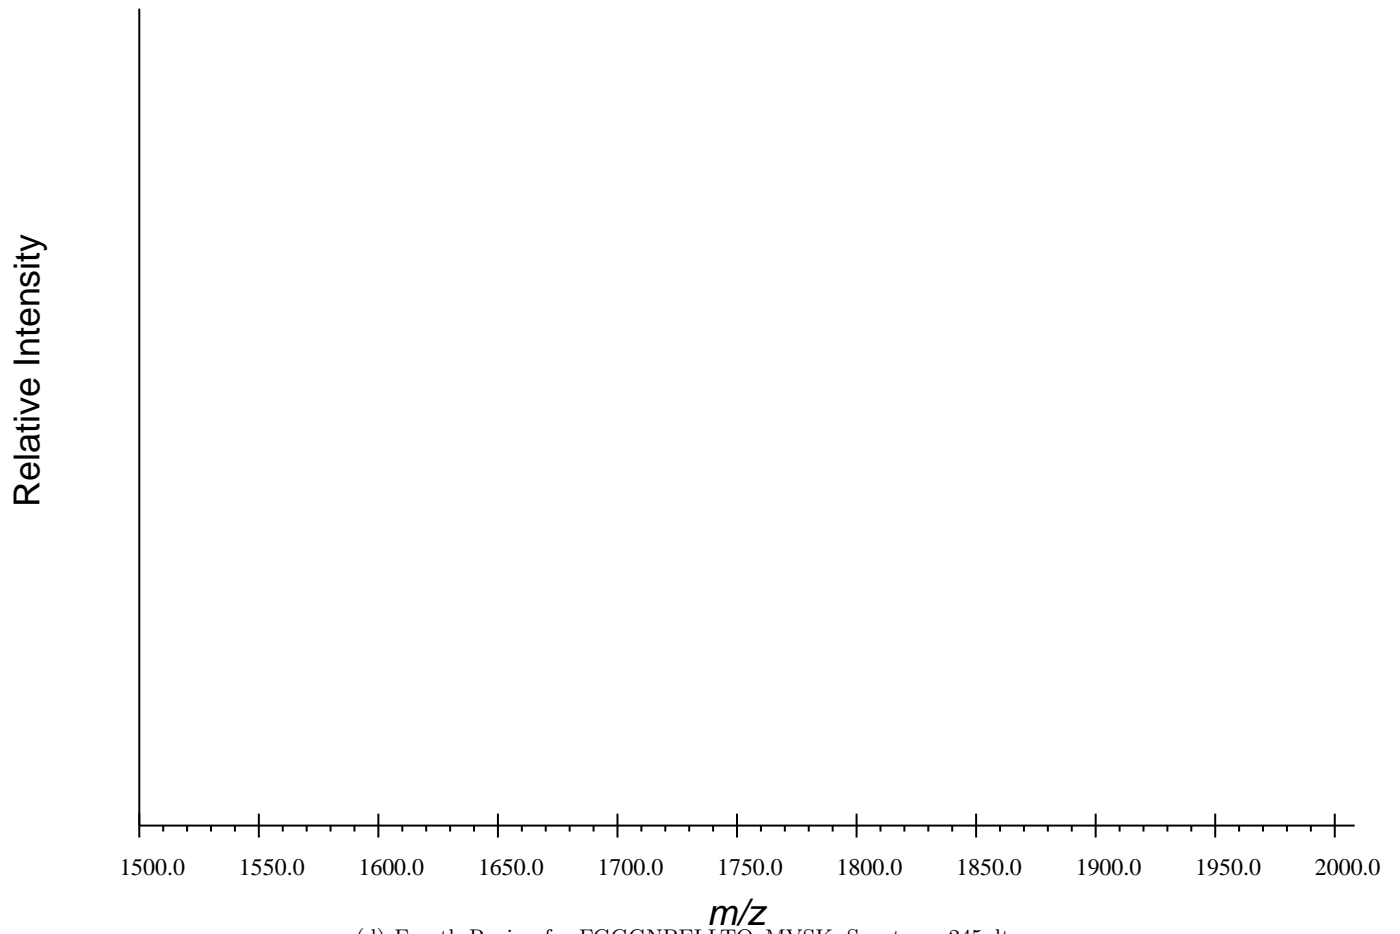

(d) Fourth Region for FGGGNPELLTQoMVSK, Spectrum 245.dta

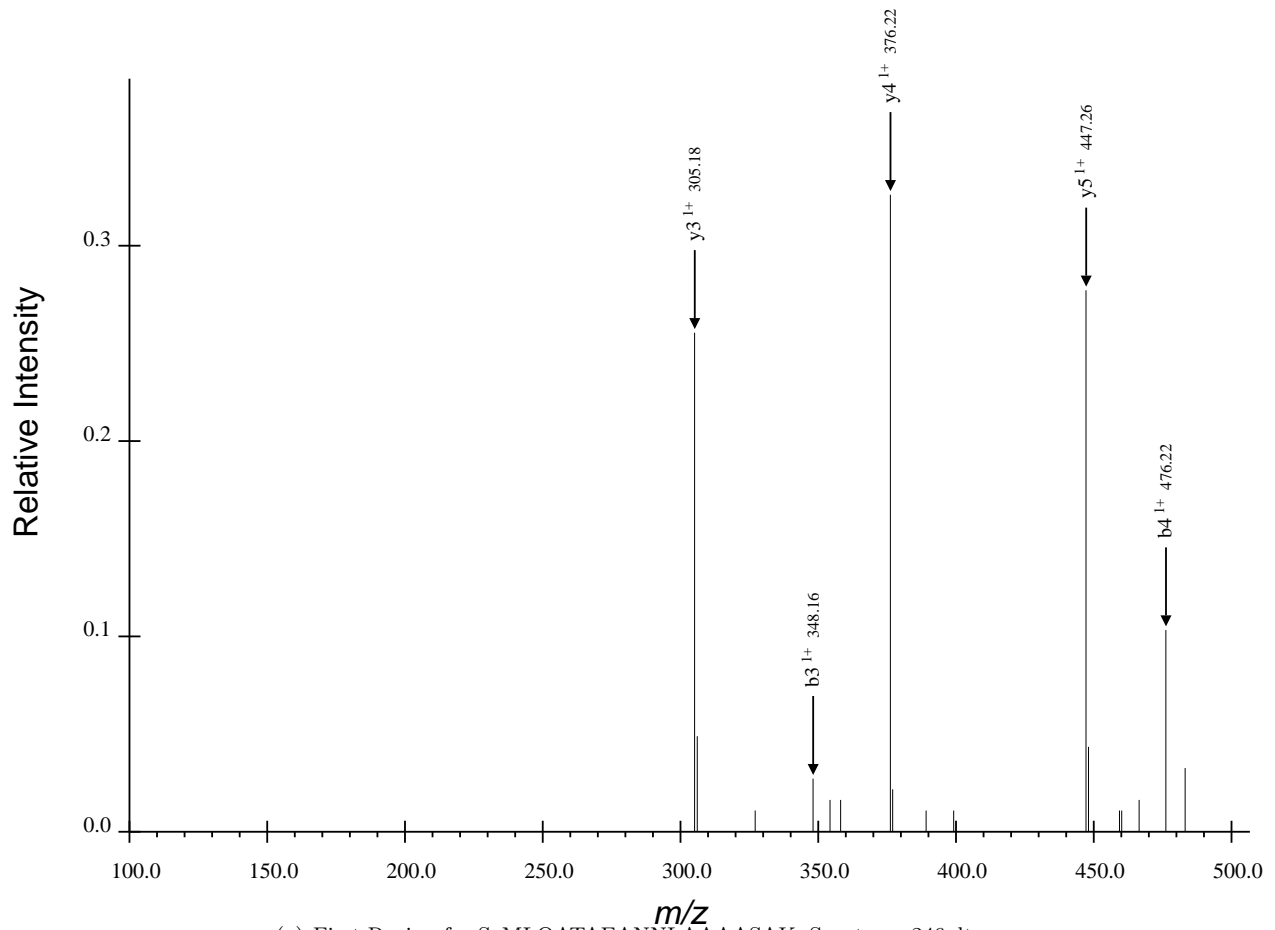

(a) First Region for SoMLQATAEANNLAAAASAK, Spectrum 246.dta

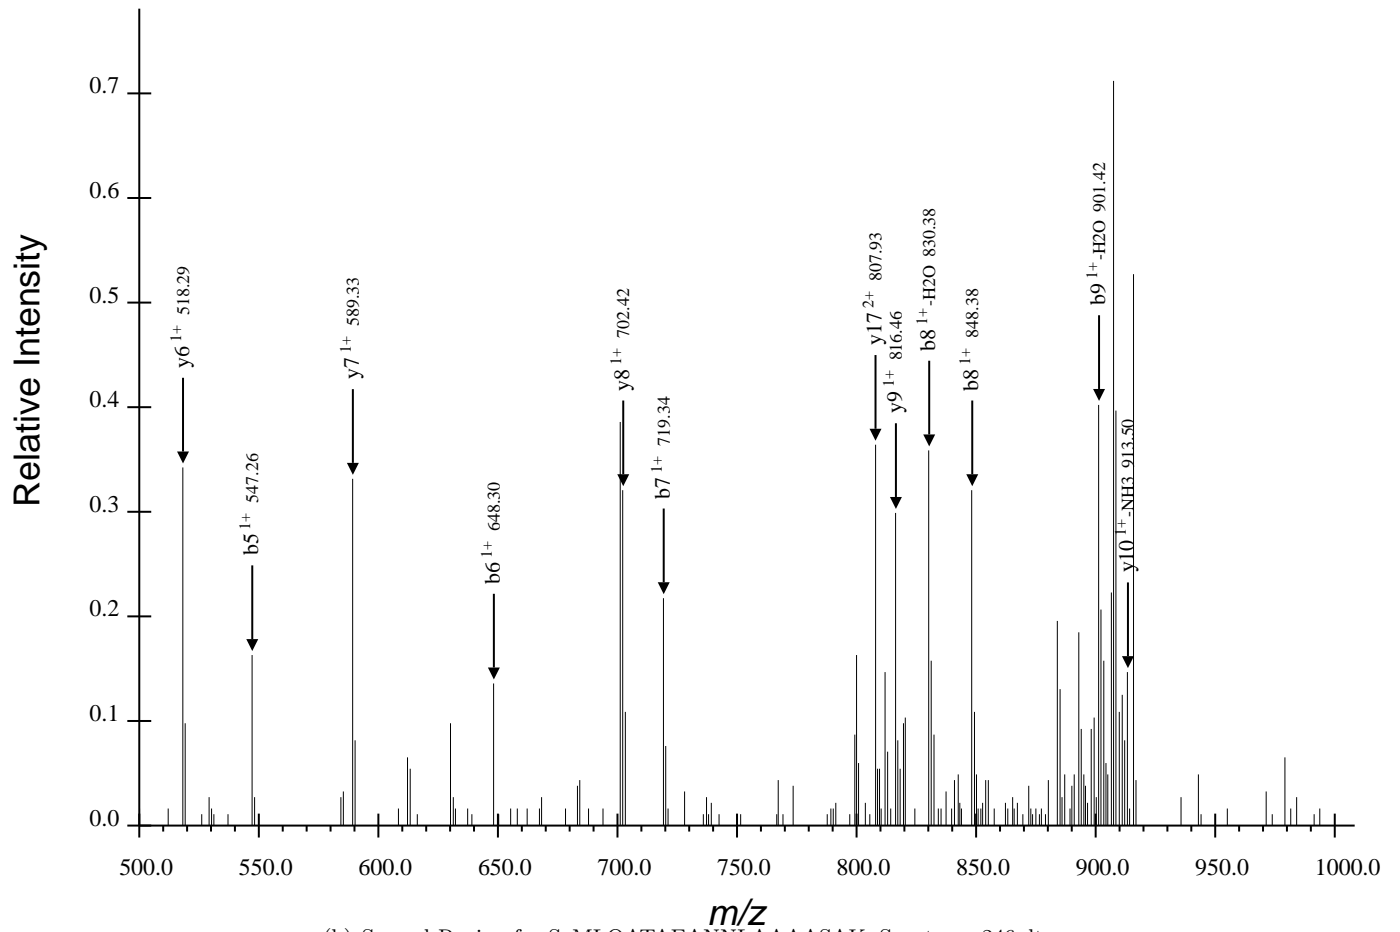

(b) Second Region for SoMLQATAEANNLAAAASAK, Spectrum 246.dta



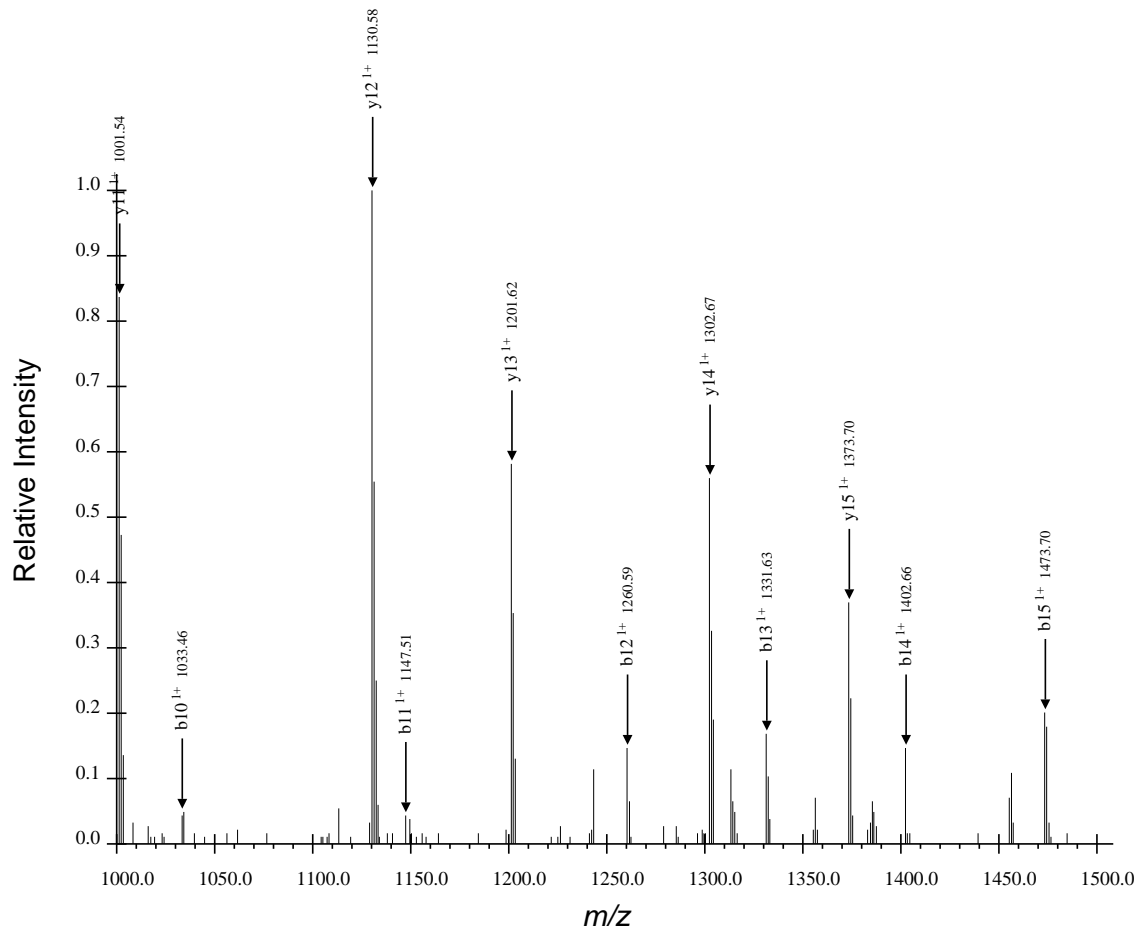

(c) Third Region for SoMLQATAEANNLAAAASAK, Spectrum 246.dta

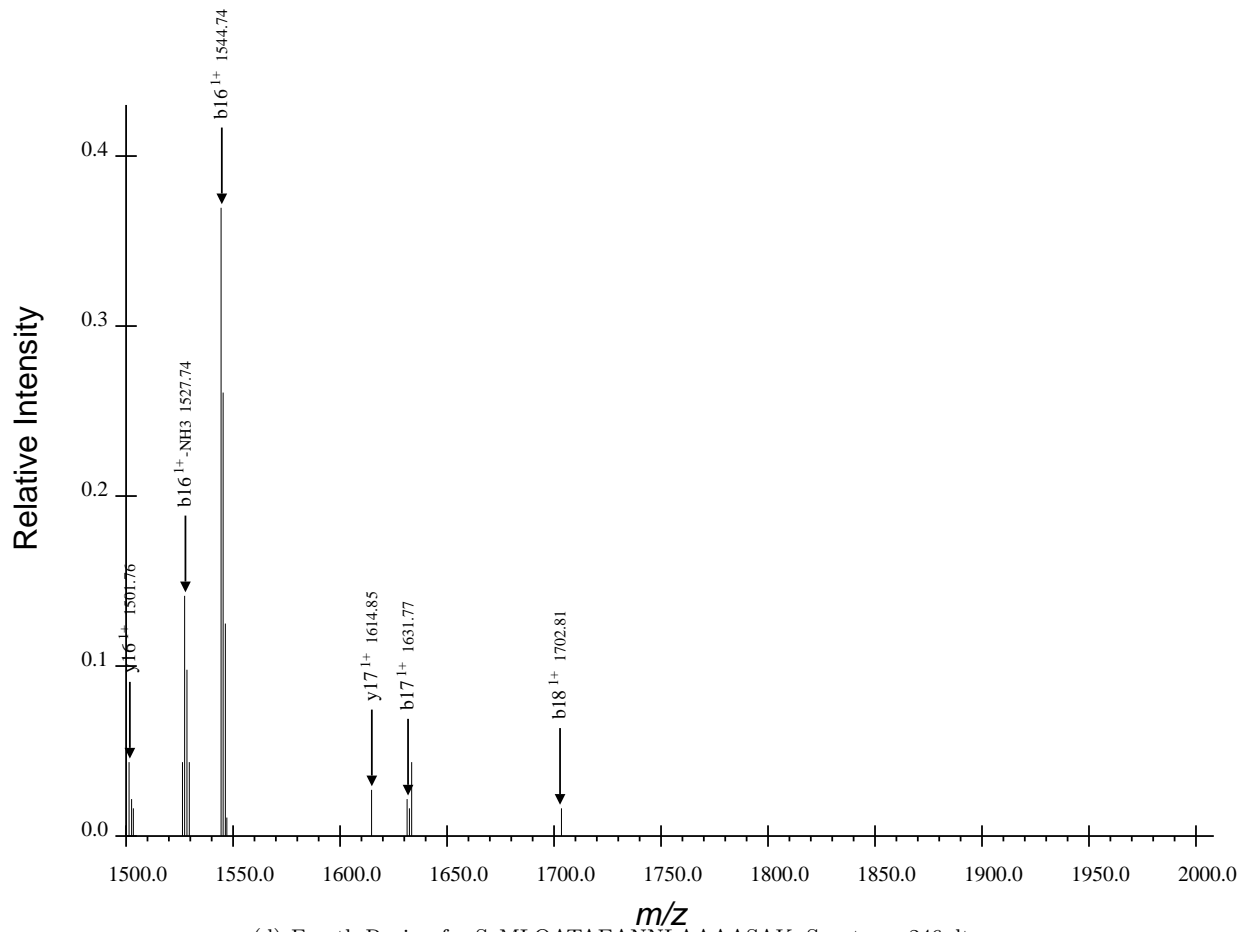

(d) Fourth Region for SoMLQATAEANNLAAAASAK, Spectrum 246.dta

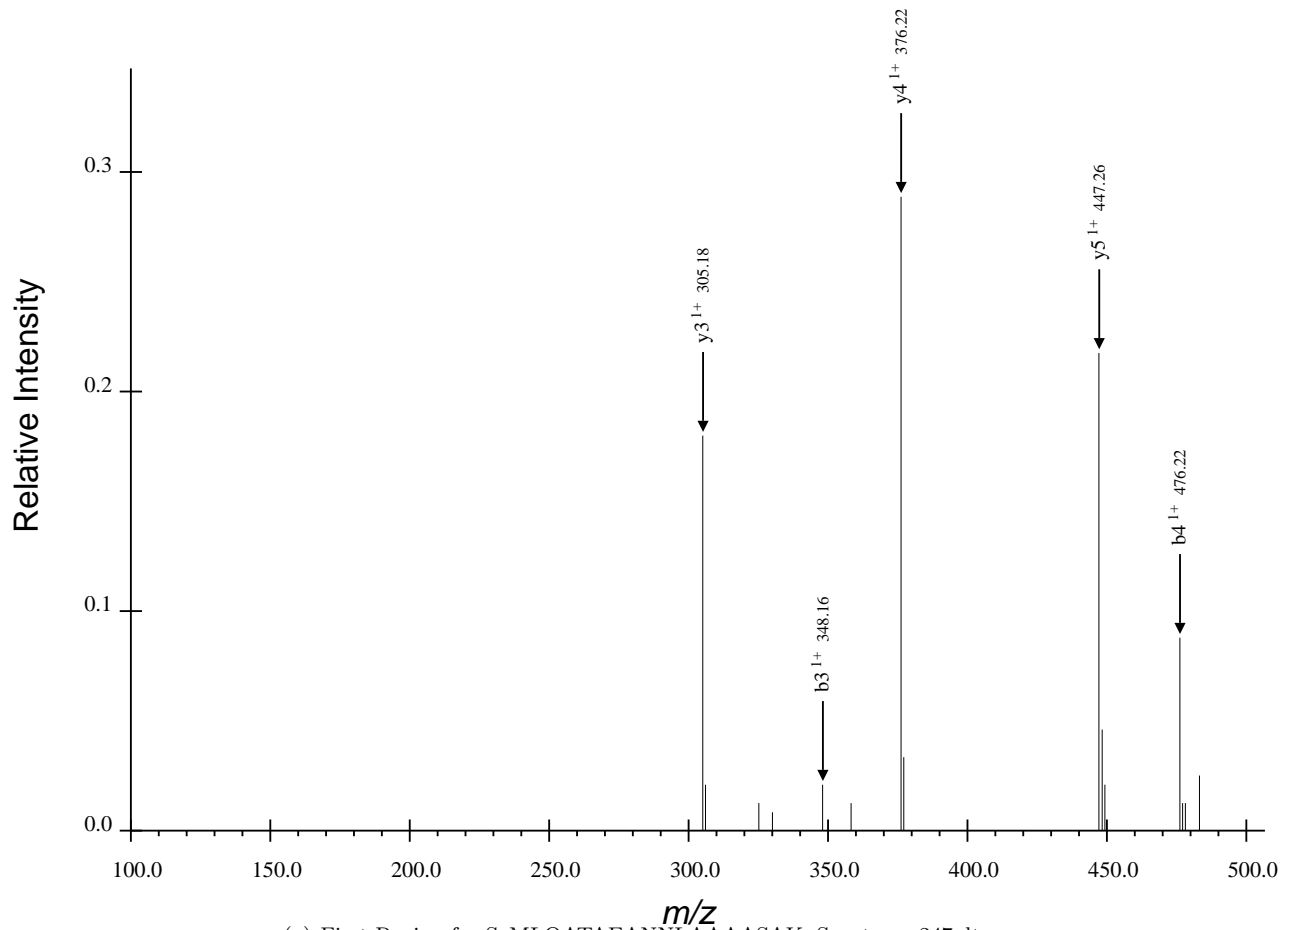

(a) First Region for SoMLQATAEANNLAAAASAK, Spectrum 247.dta

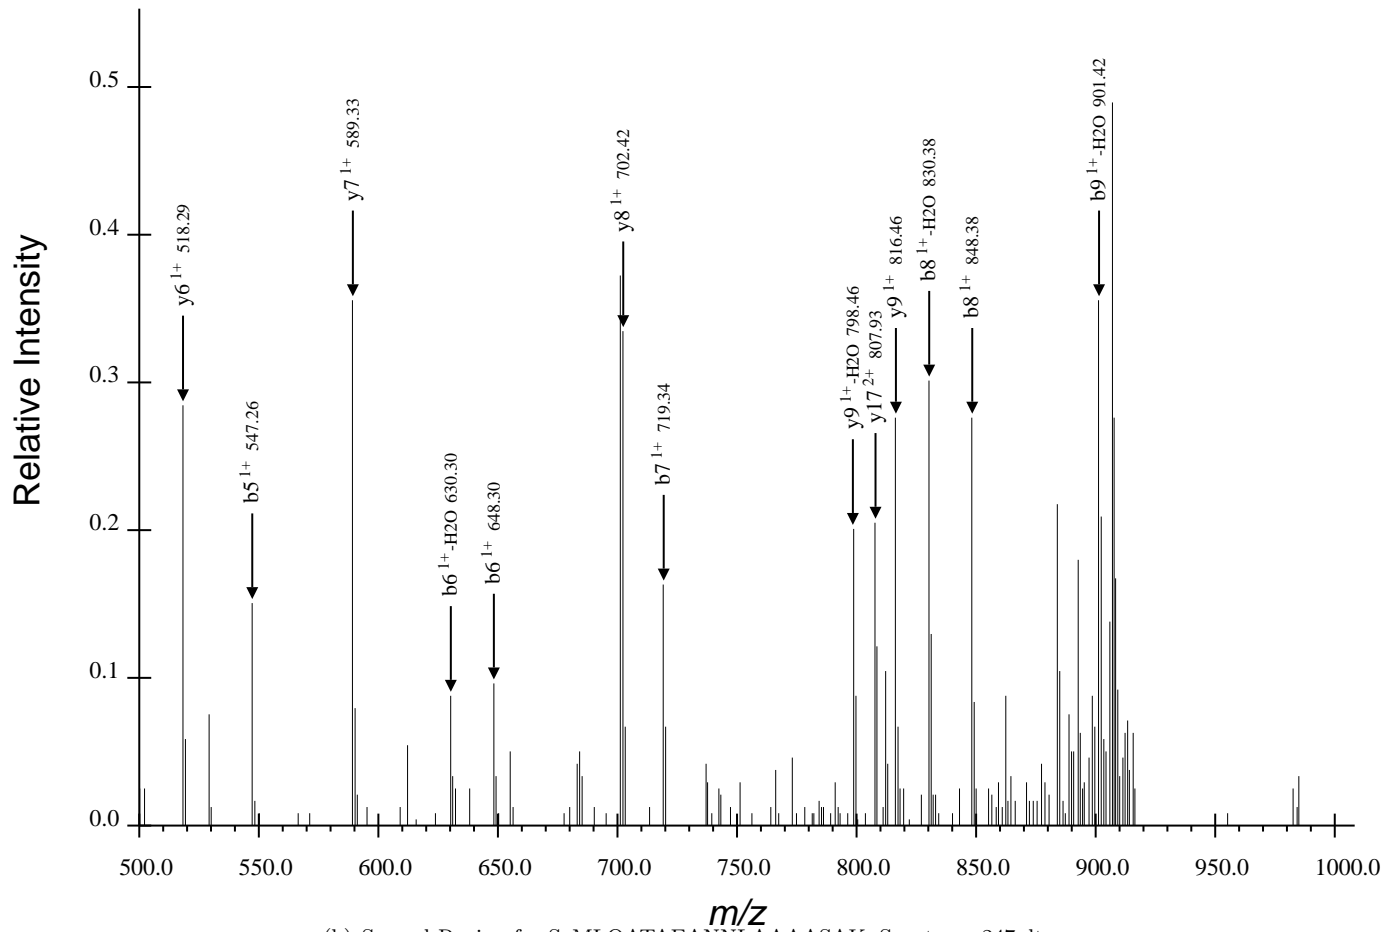

(b) Second Region for SoMLQATAEANNLAAAASAK, Spectrum 247.dta

(d) Fourth Region for SoMILQATAEANNLAAAASAK, Spectrum 247.dta

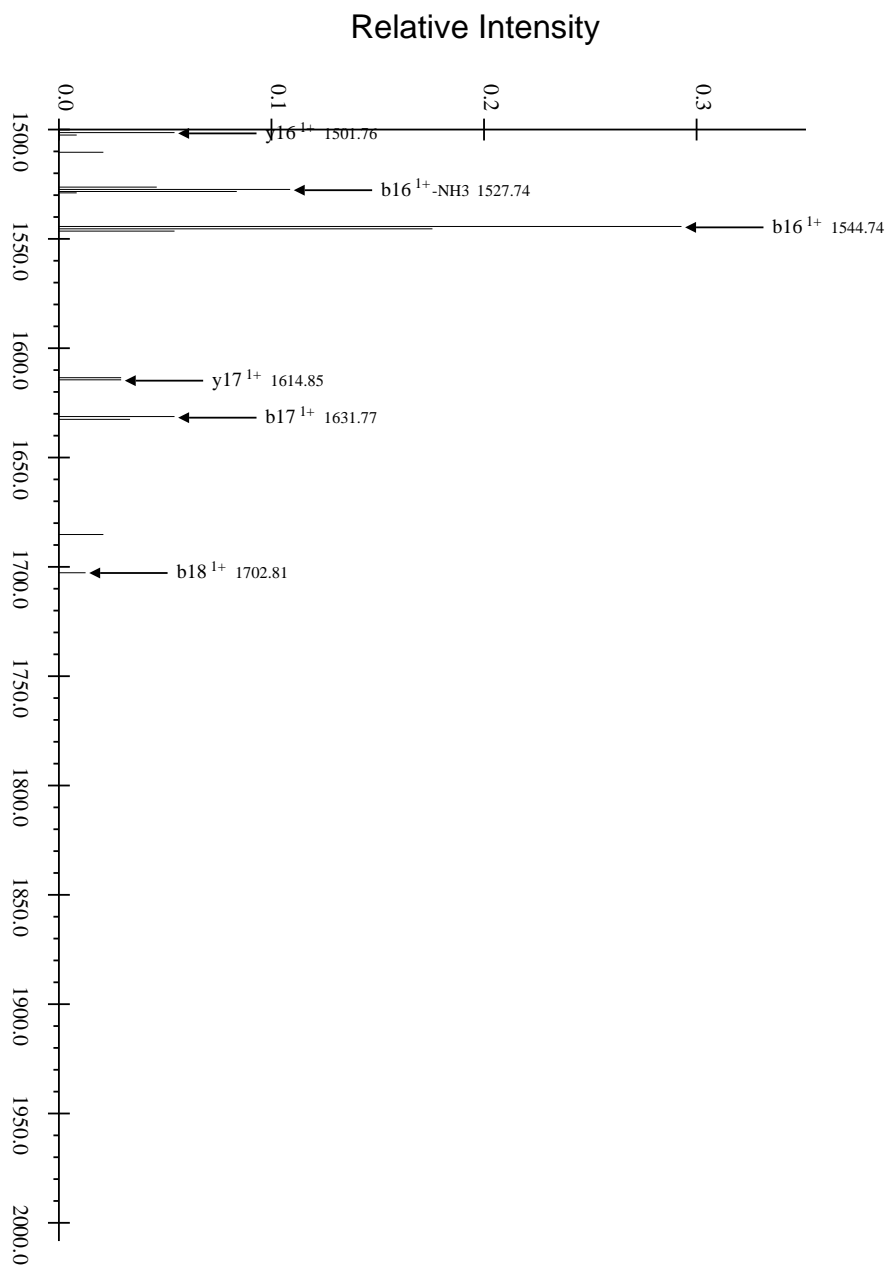

(c) Third Region for SoMILQATAEANNLAAAASAK, Spectrum 247.dta

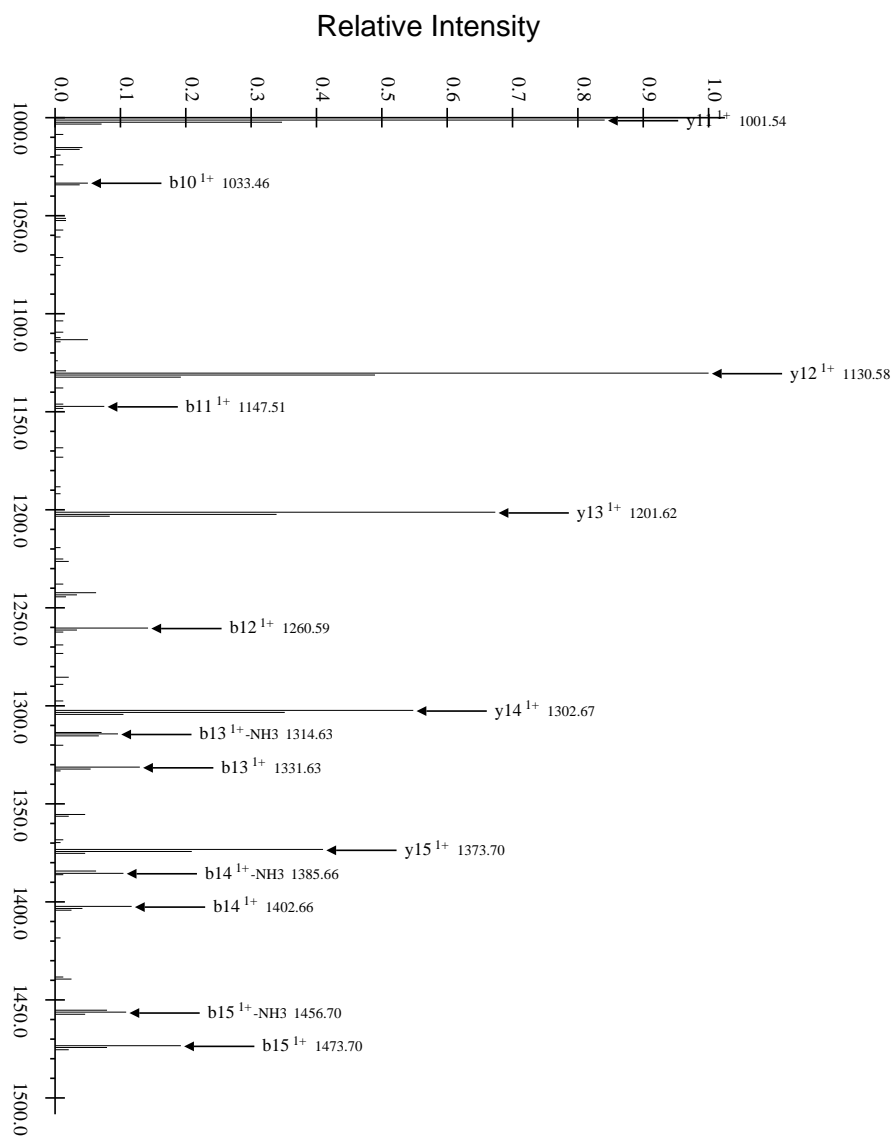

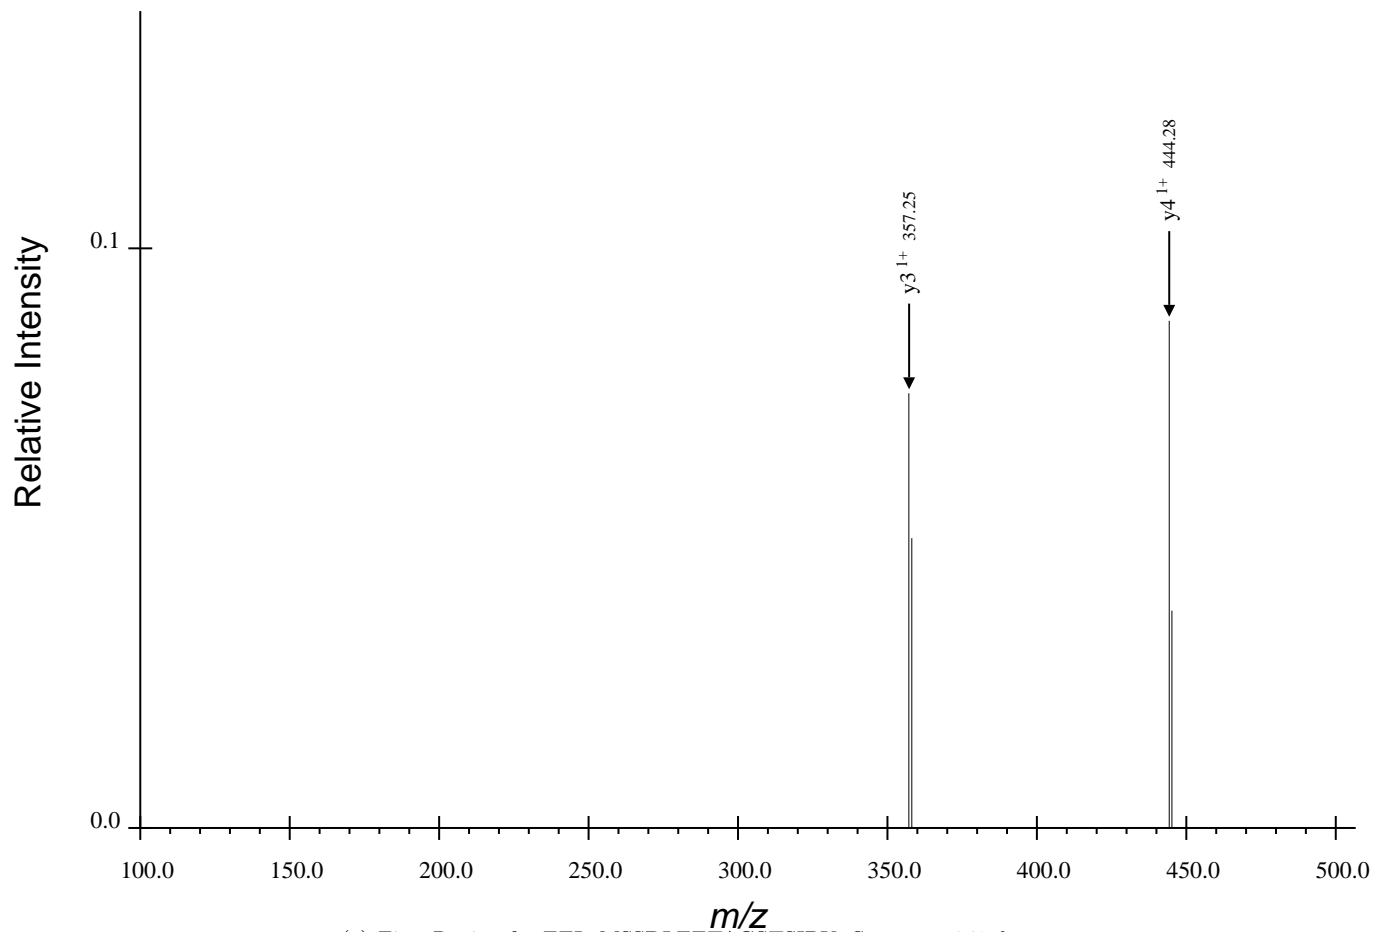

(a) First Region for EELoMSSDLEETAGSTSIPK, Spectrum 248.dta

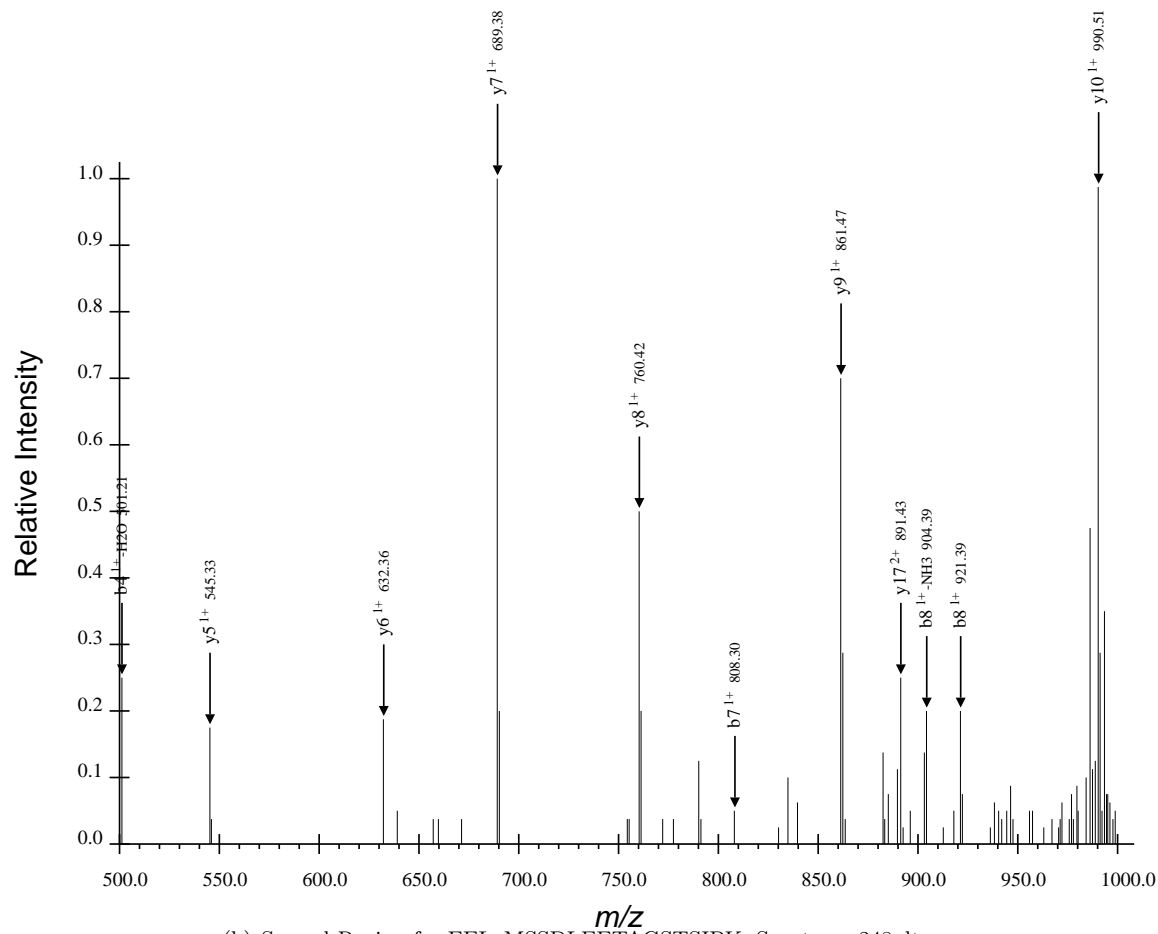

(b) Second Region for EELoMSSDLEETAGSTSIPK, Spectrum 248.dta

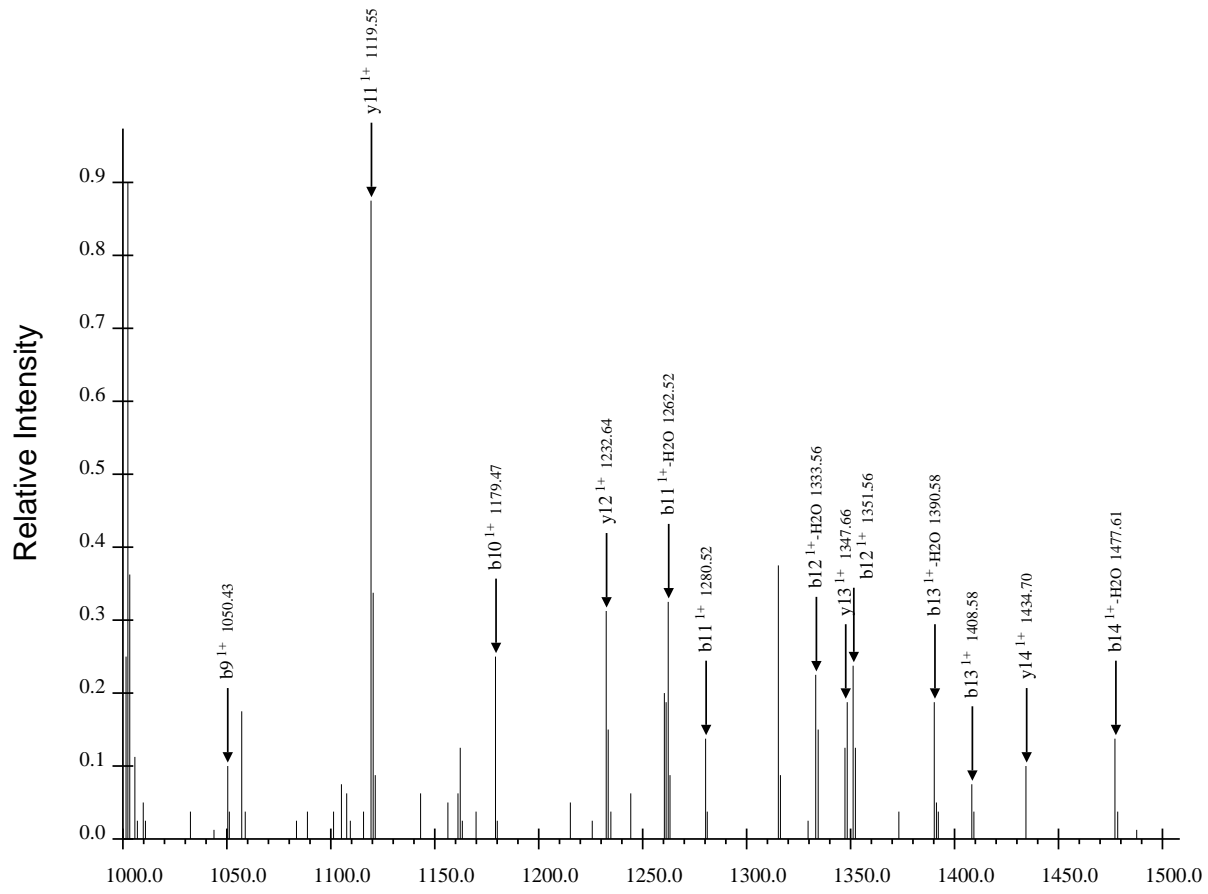

(c) Third Region for EELoMSSDLEETAGSTSIPK, Spectrum 248.dta

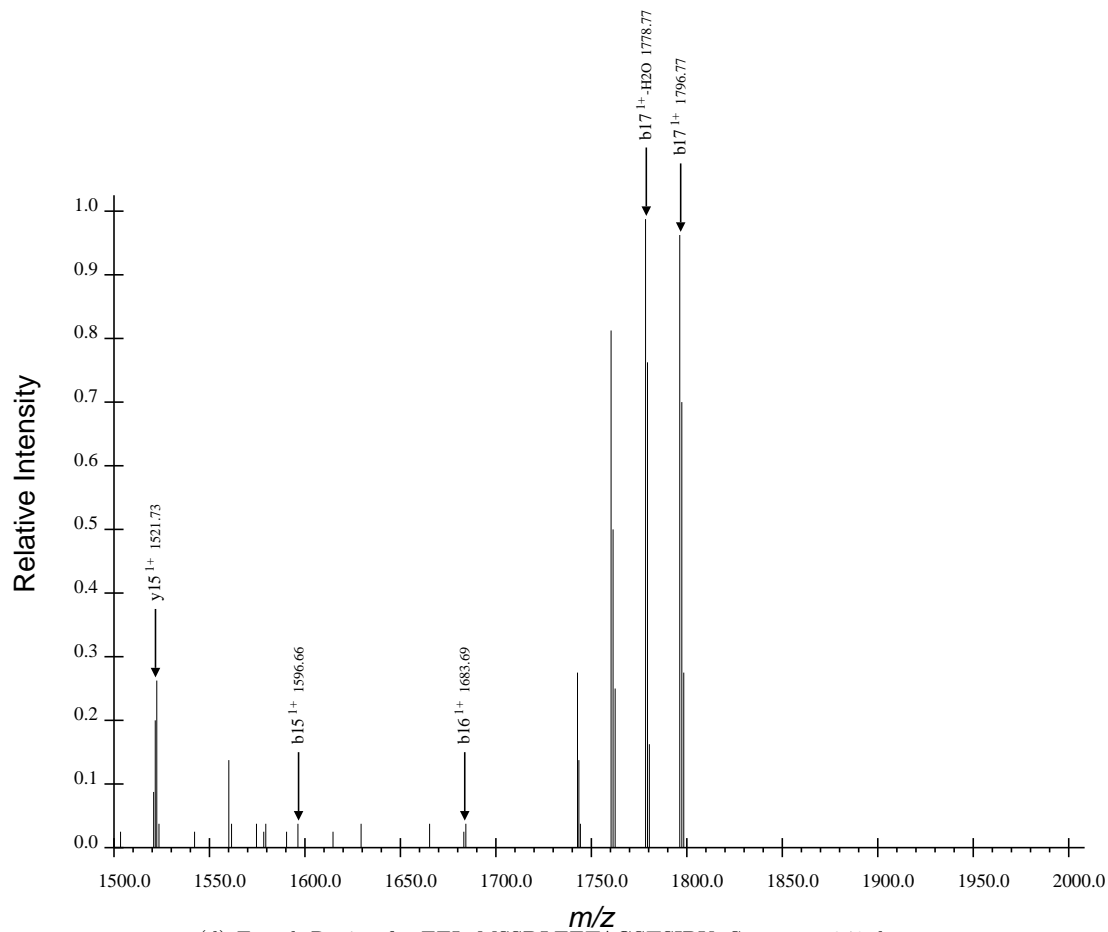

(d) Fourth Region for EELoMSSDLEETAGSTSIPK, Spectrum 248.dta

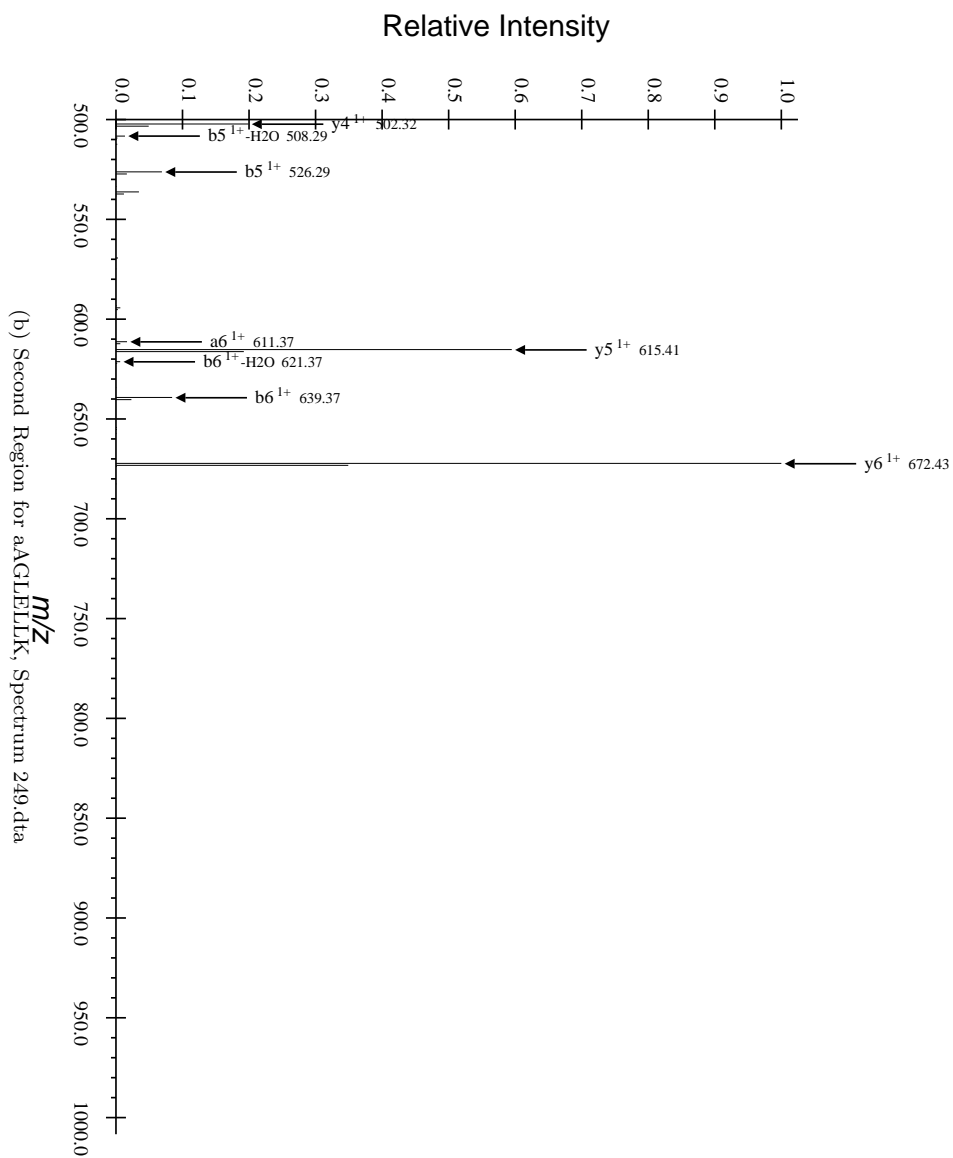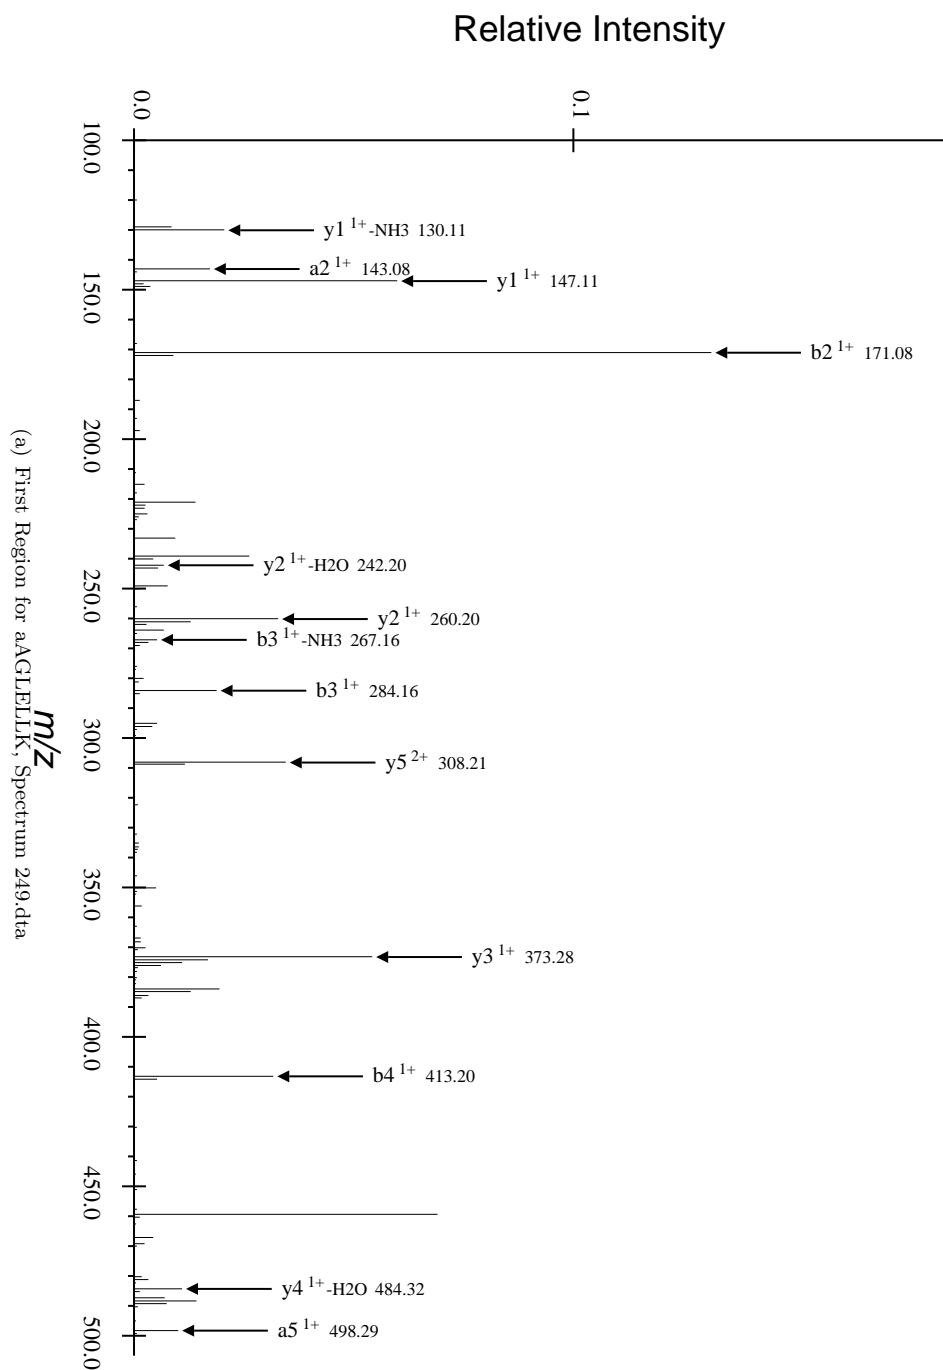

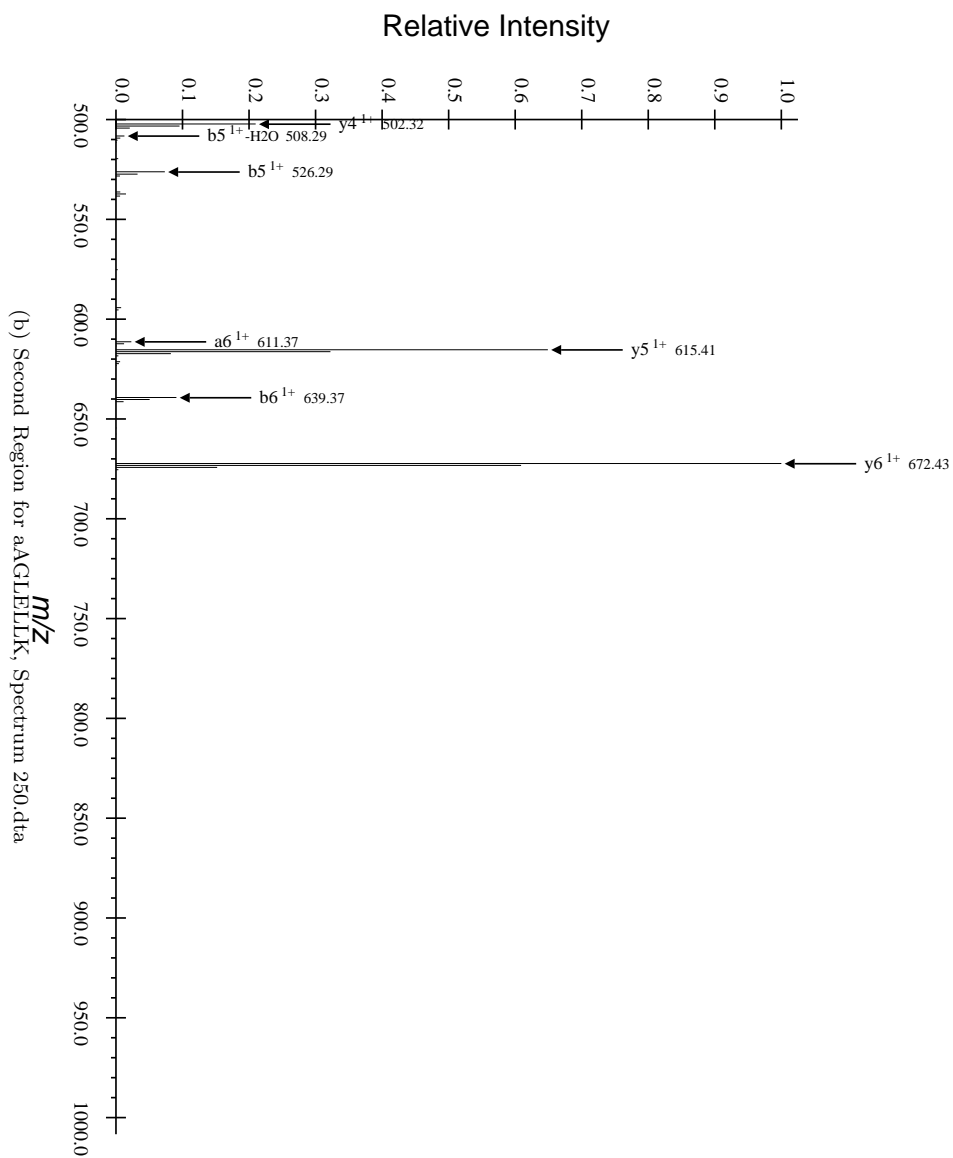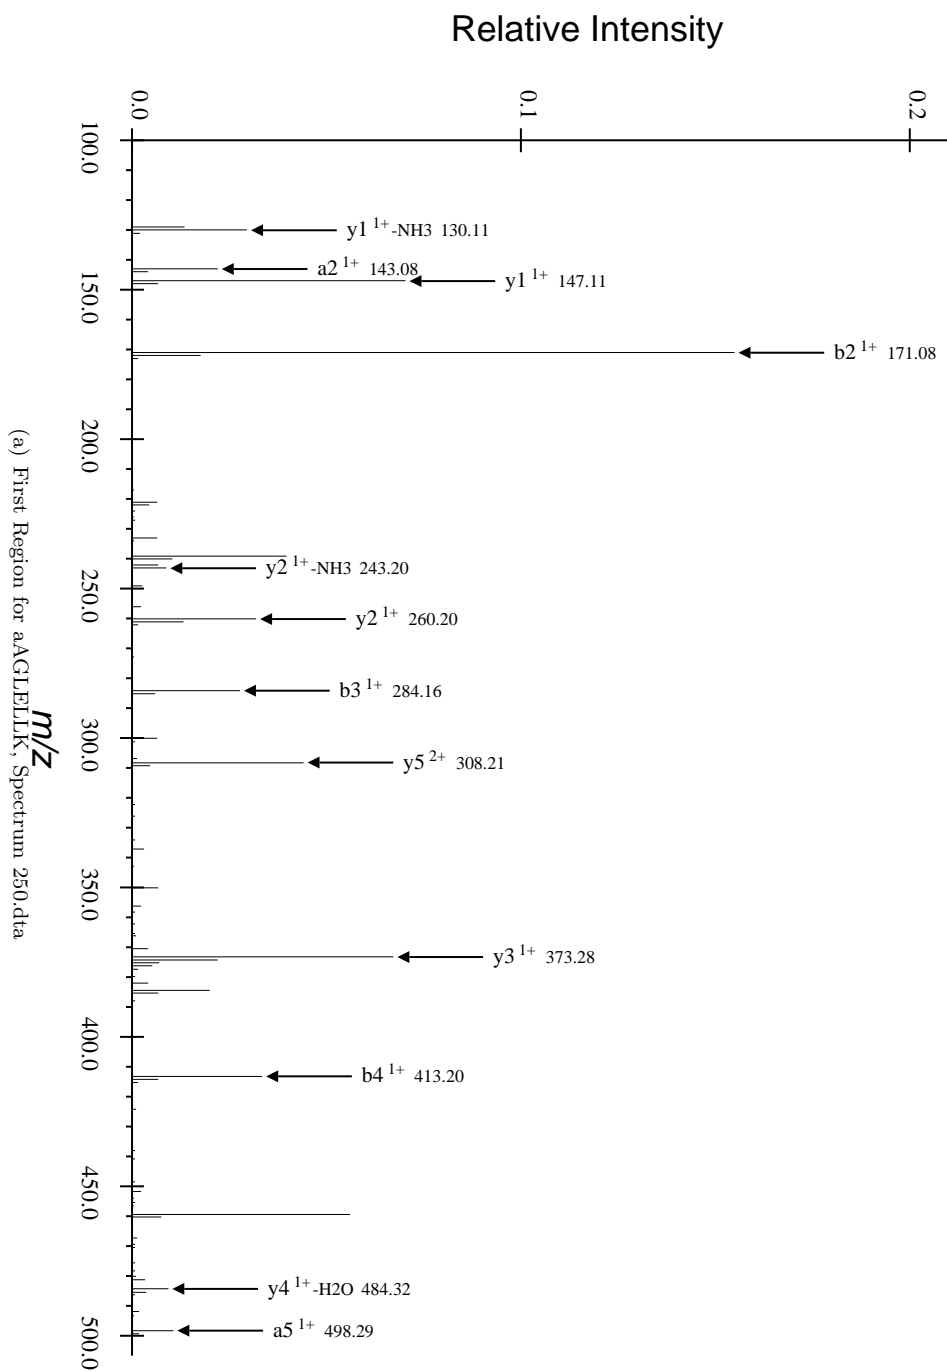

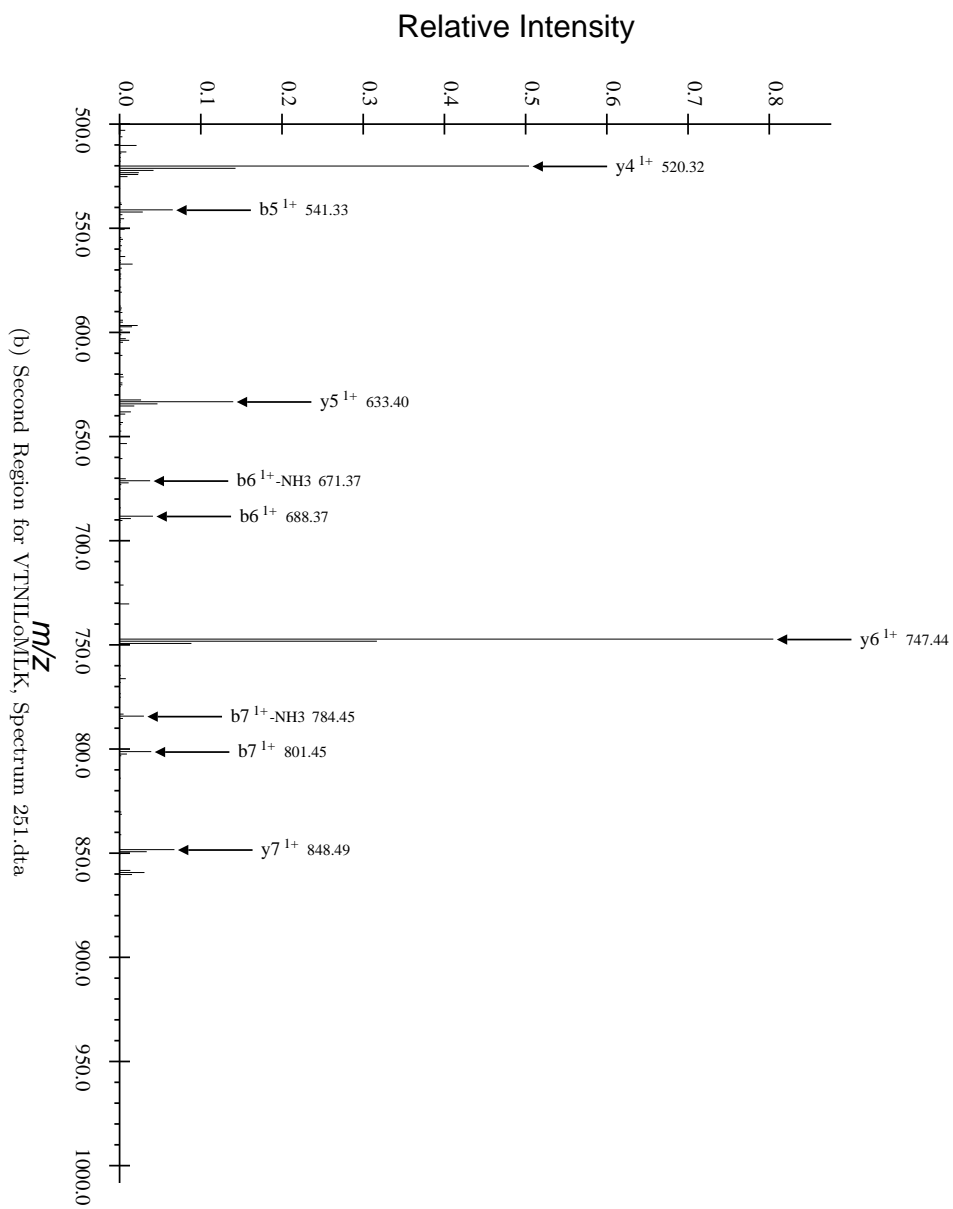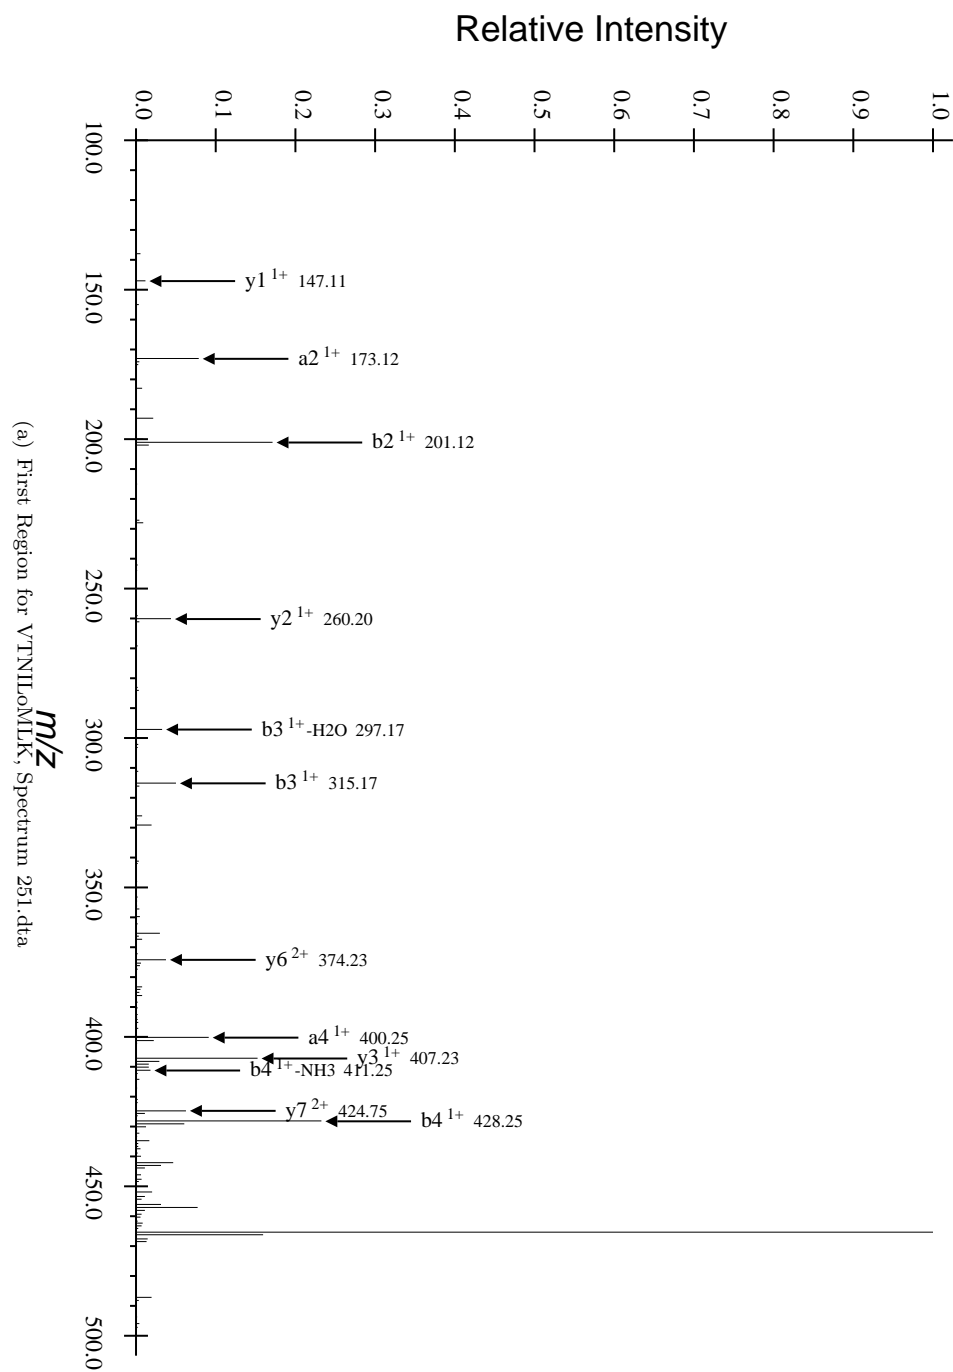



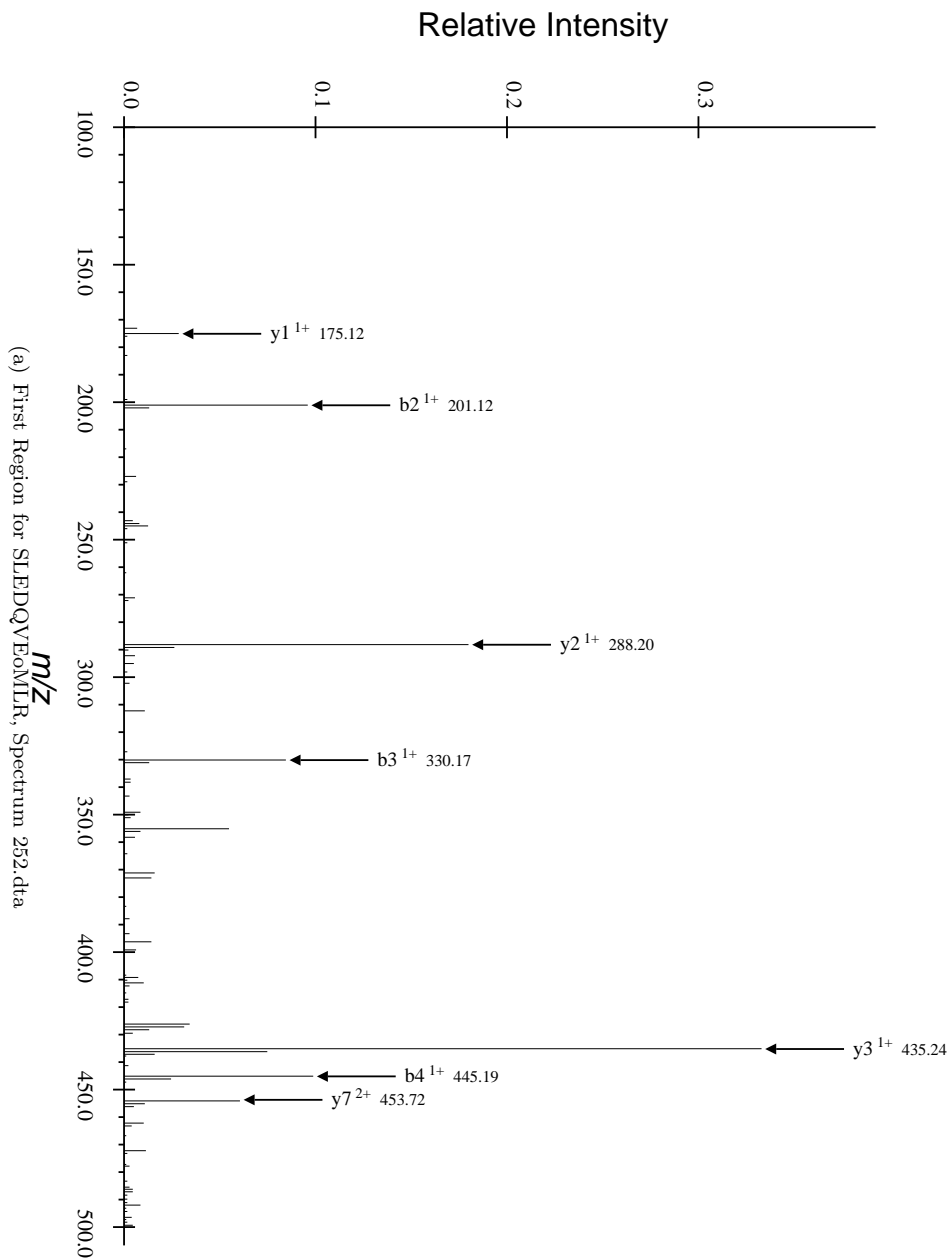

(a) First Region for SLEDDQVEoMLR, Spectrum 252.dta

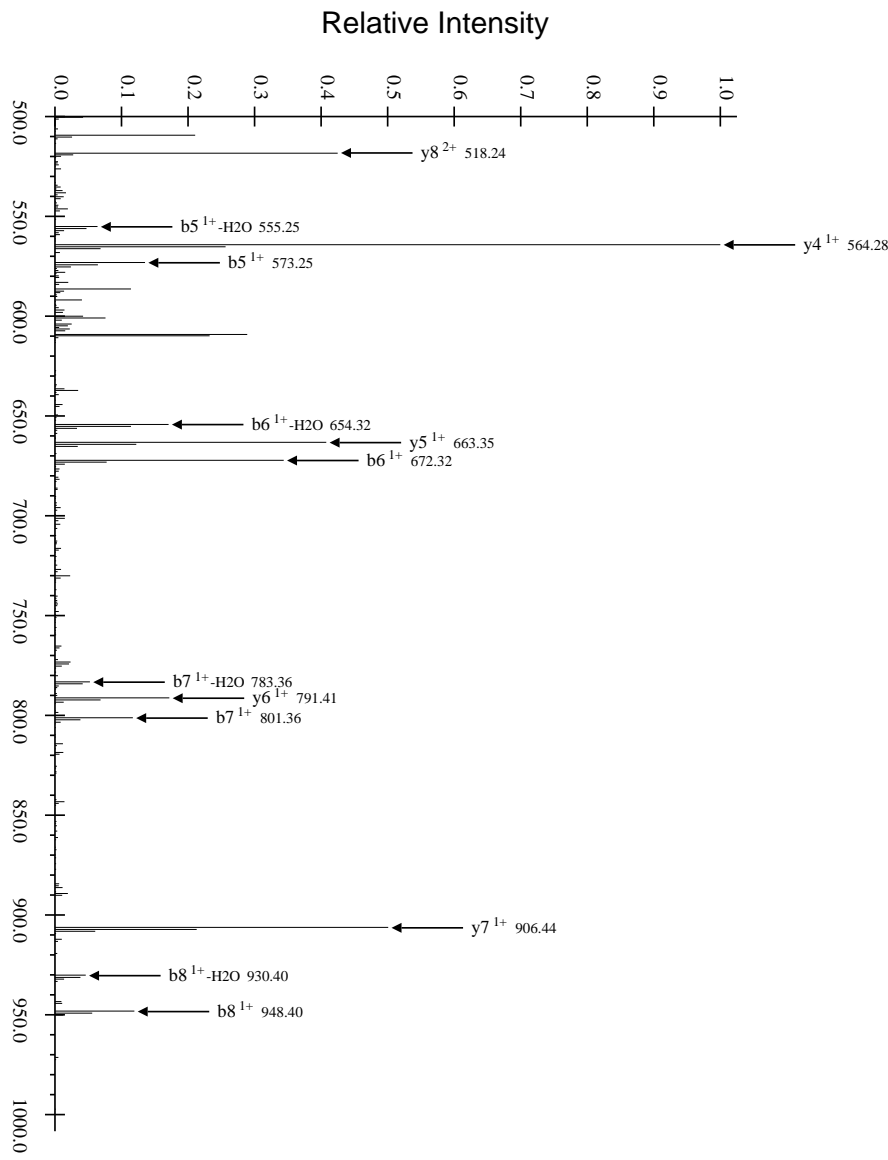

(b) Second Region for SLEDDQVEoMLR, Spectrum 252.dta

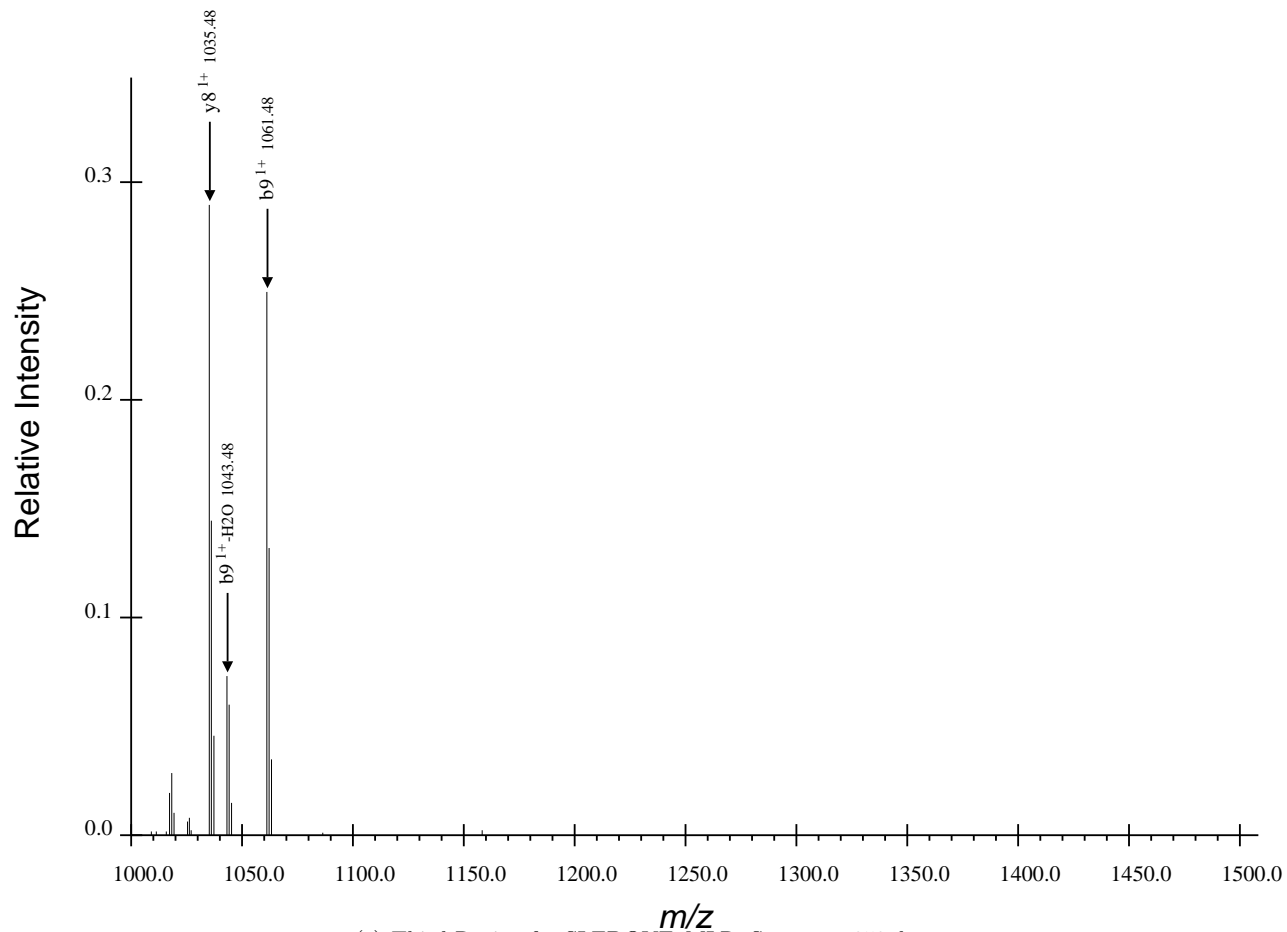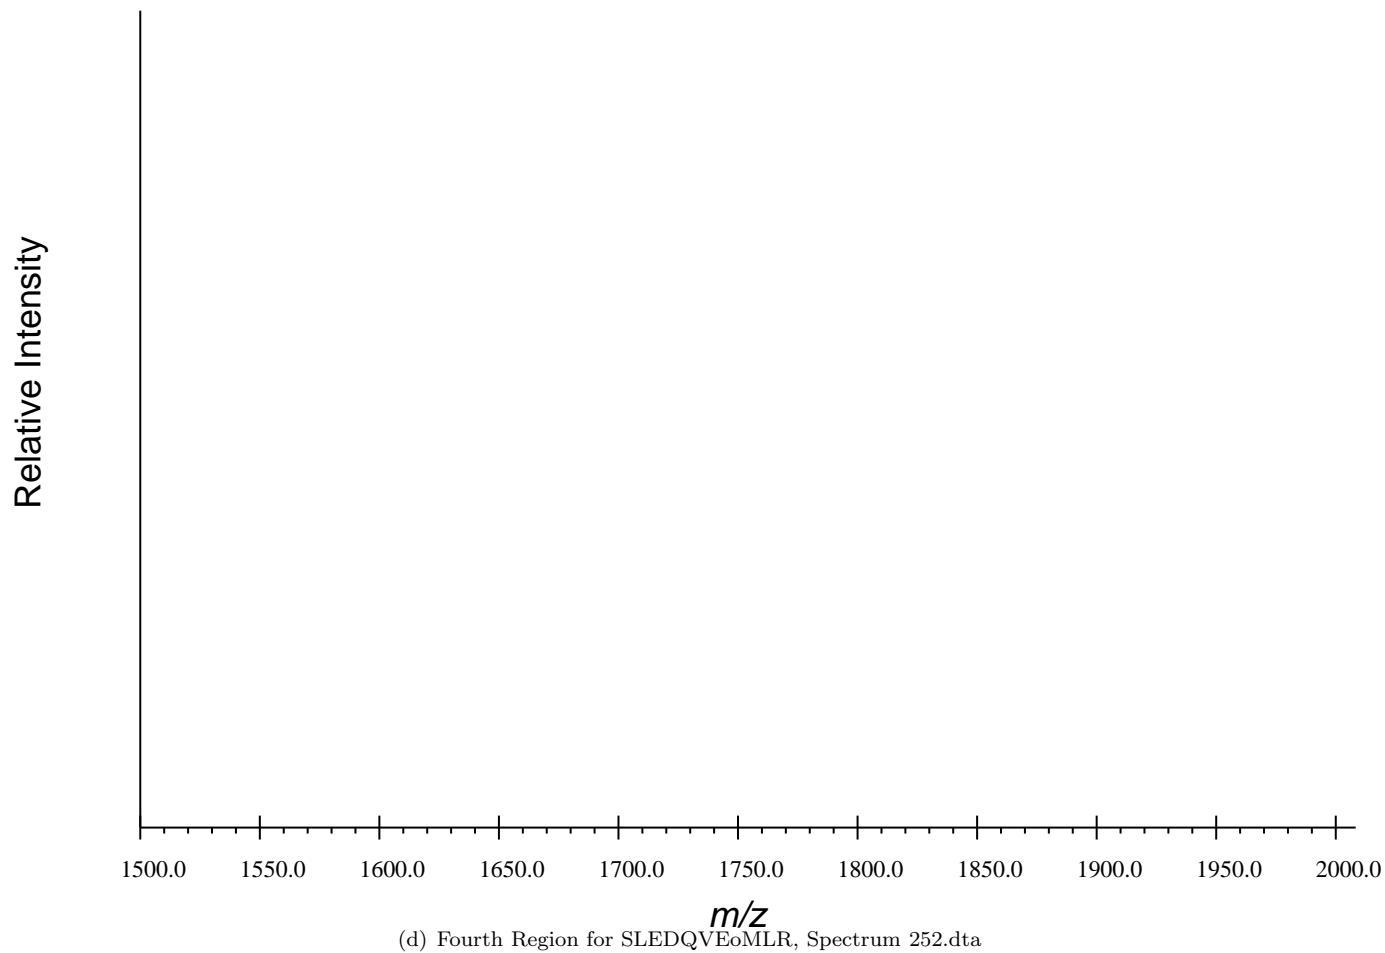

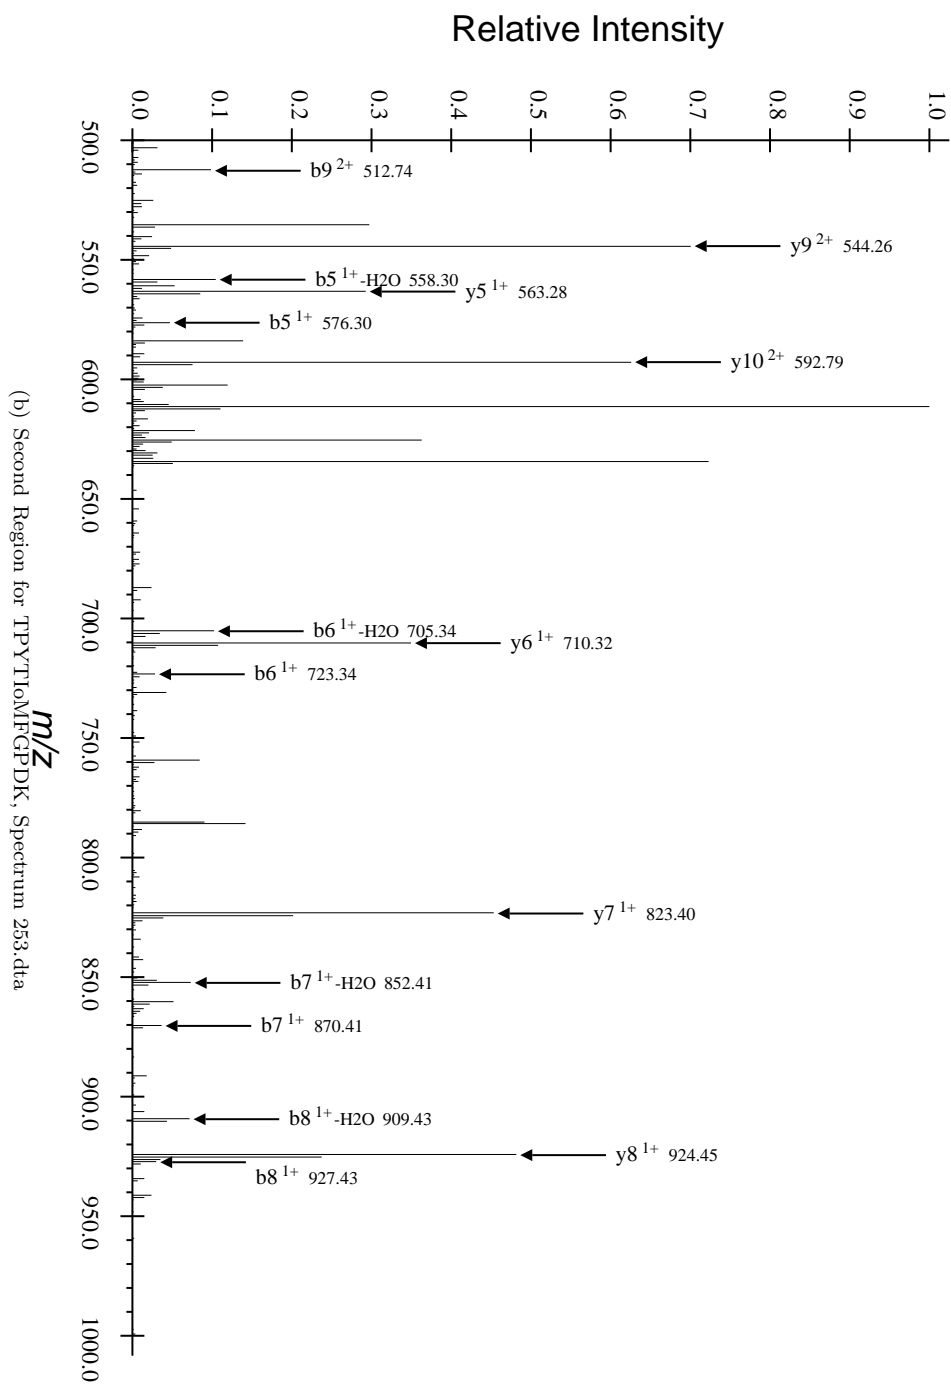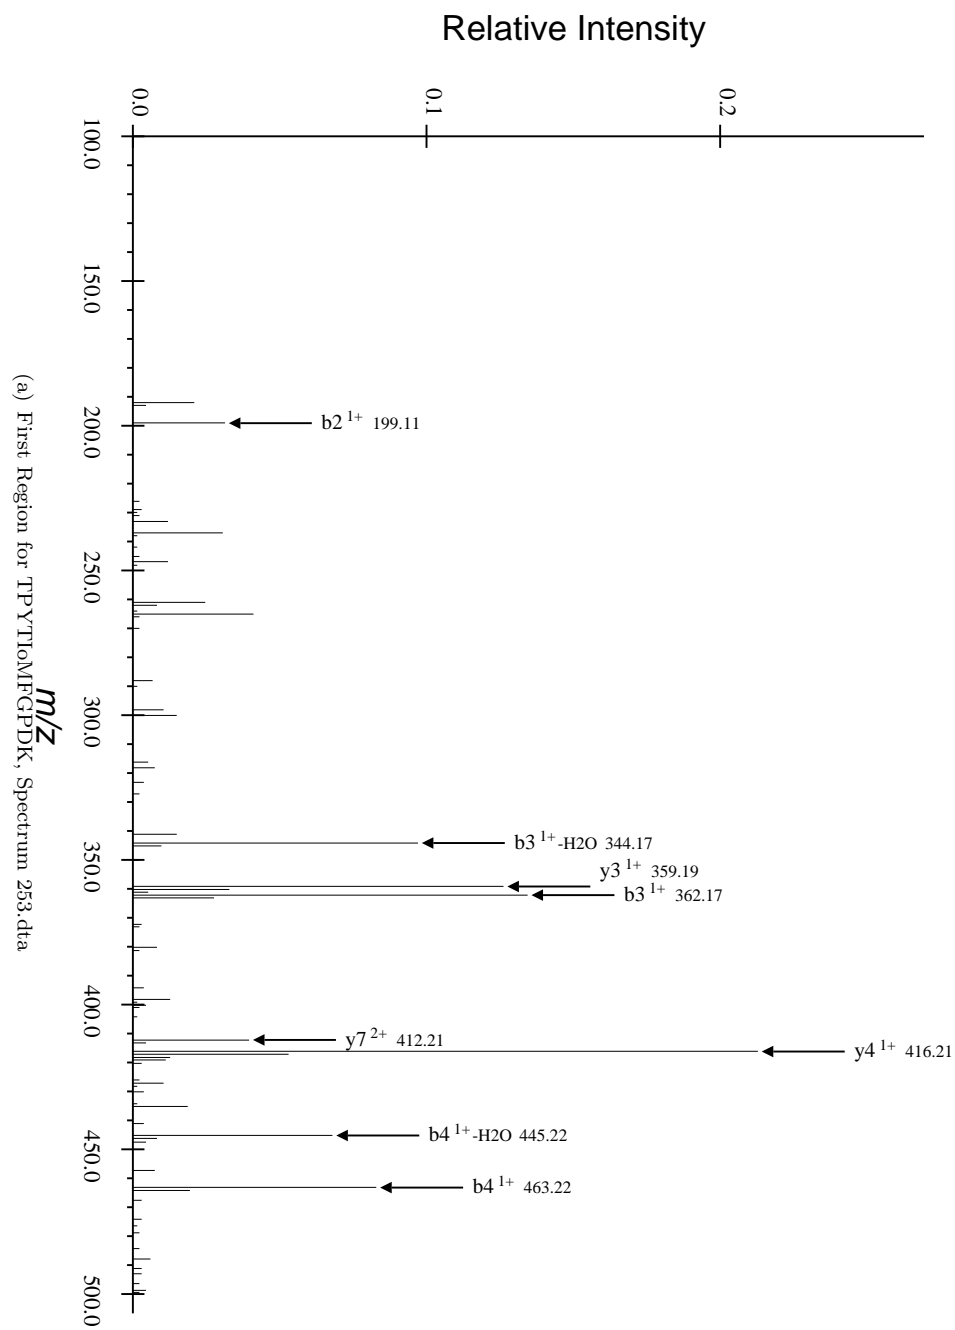

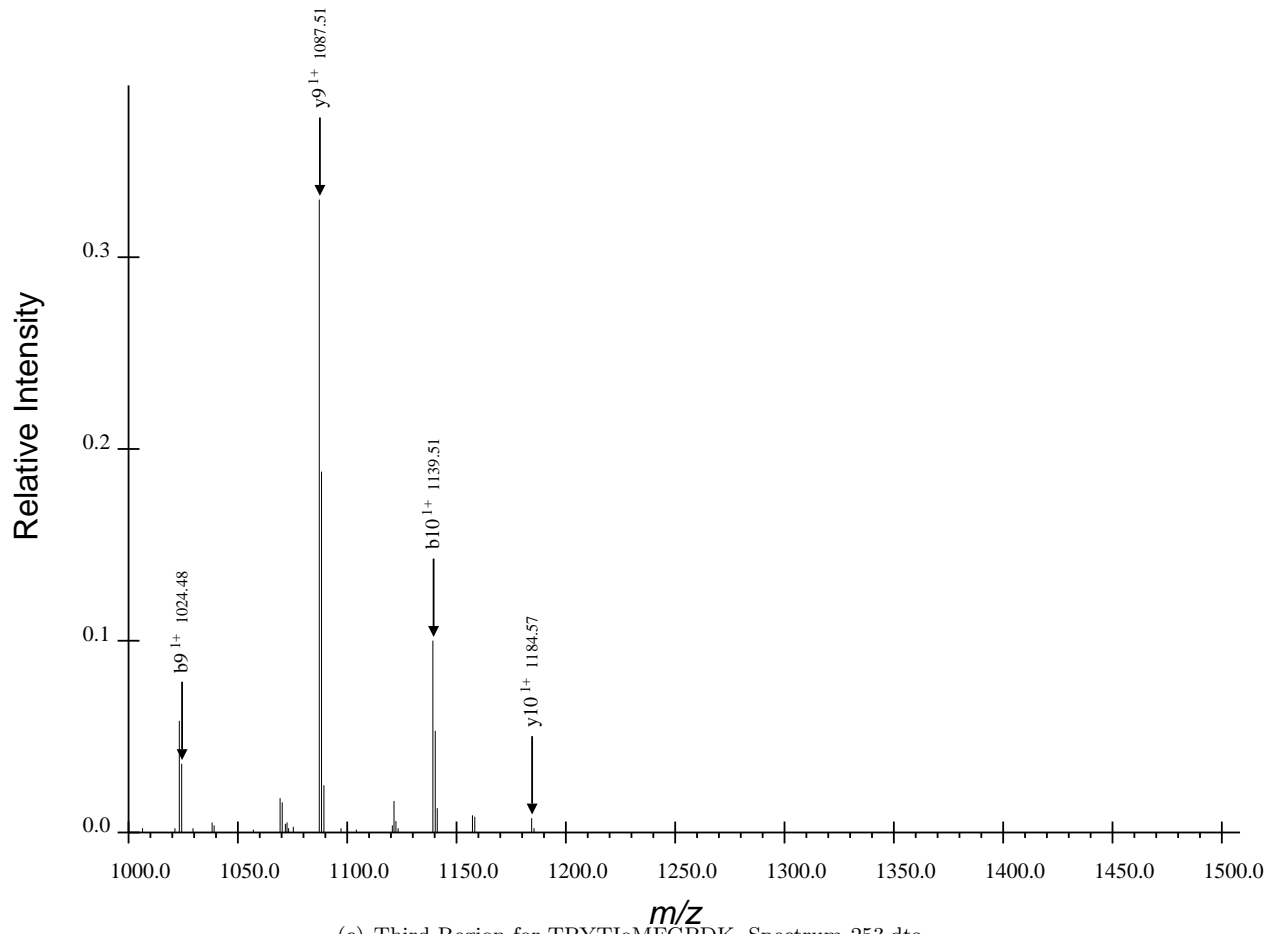

(c) Third Region for TPYTIoMFGPDK, Spectrum 253.dta

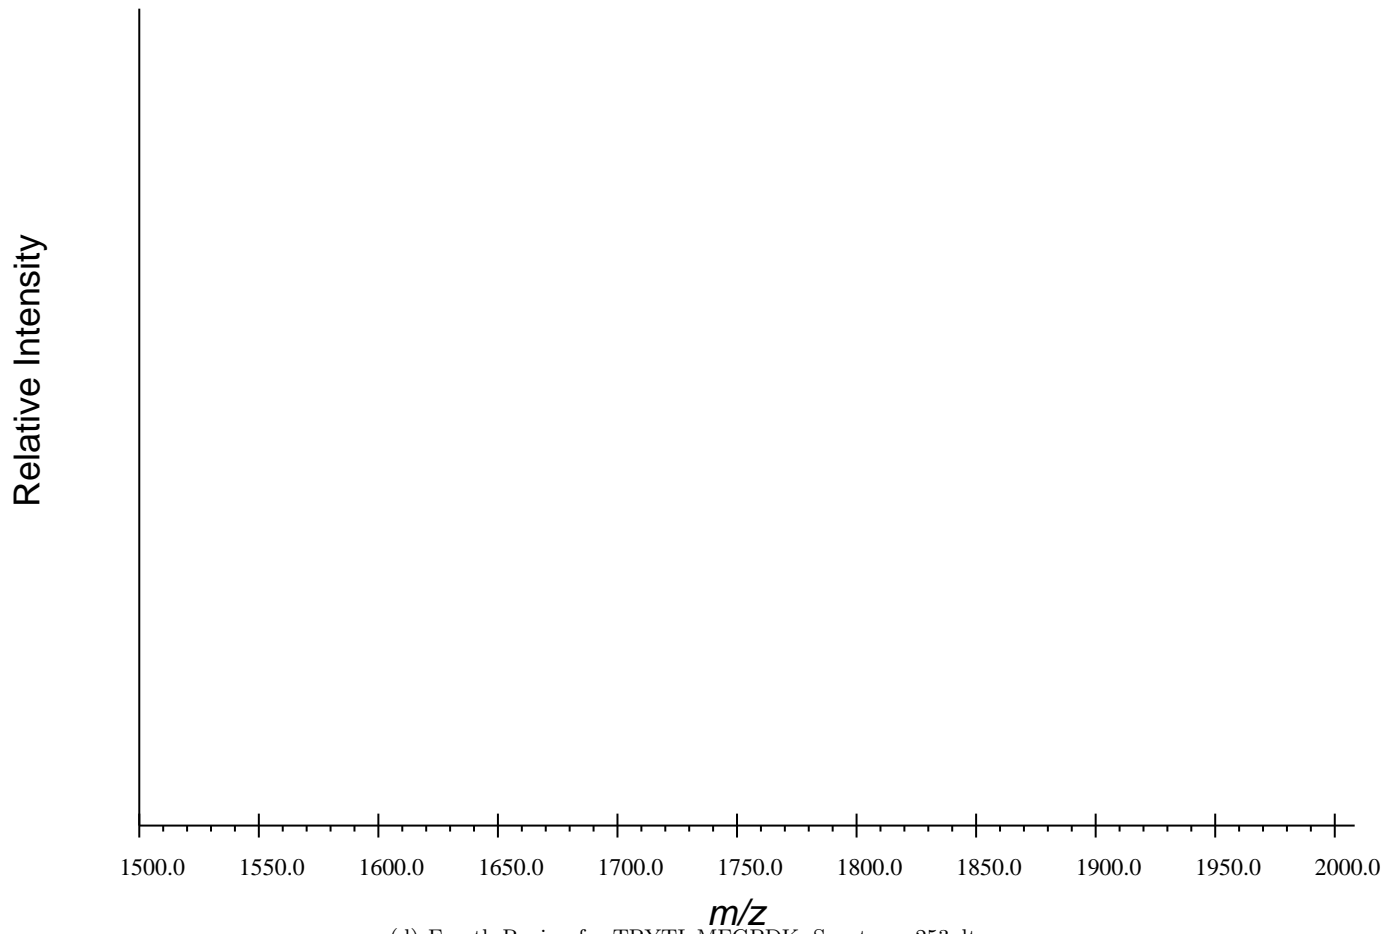

(d) Fourth Region for TPYTIoMFGPDK, Spectrum 253.dta

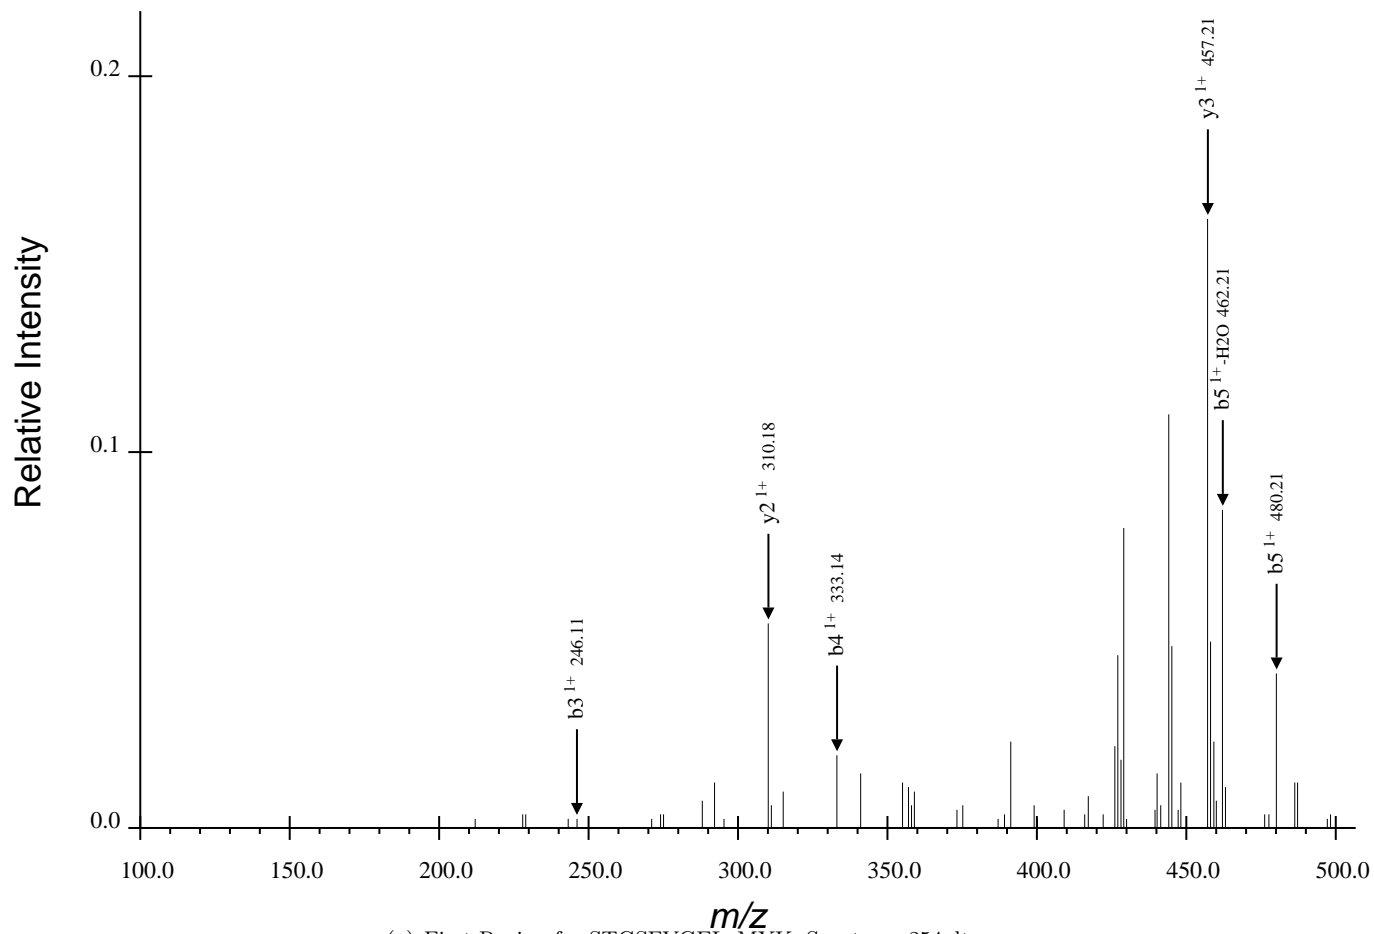

(a) First Region for STGSFVGELoMYK, Spectrum 254.dta

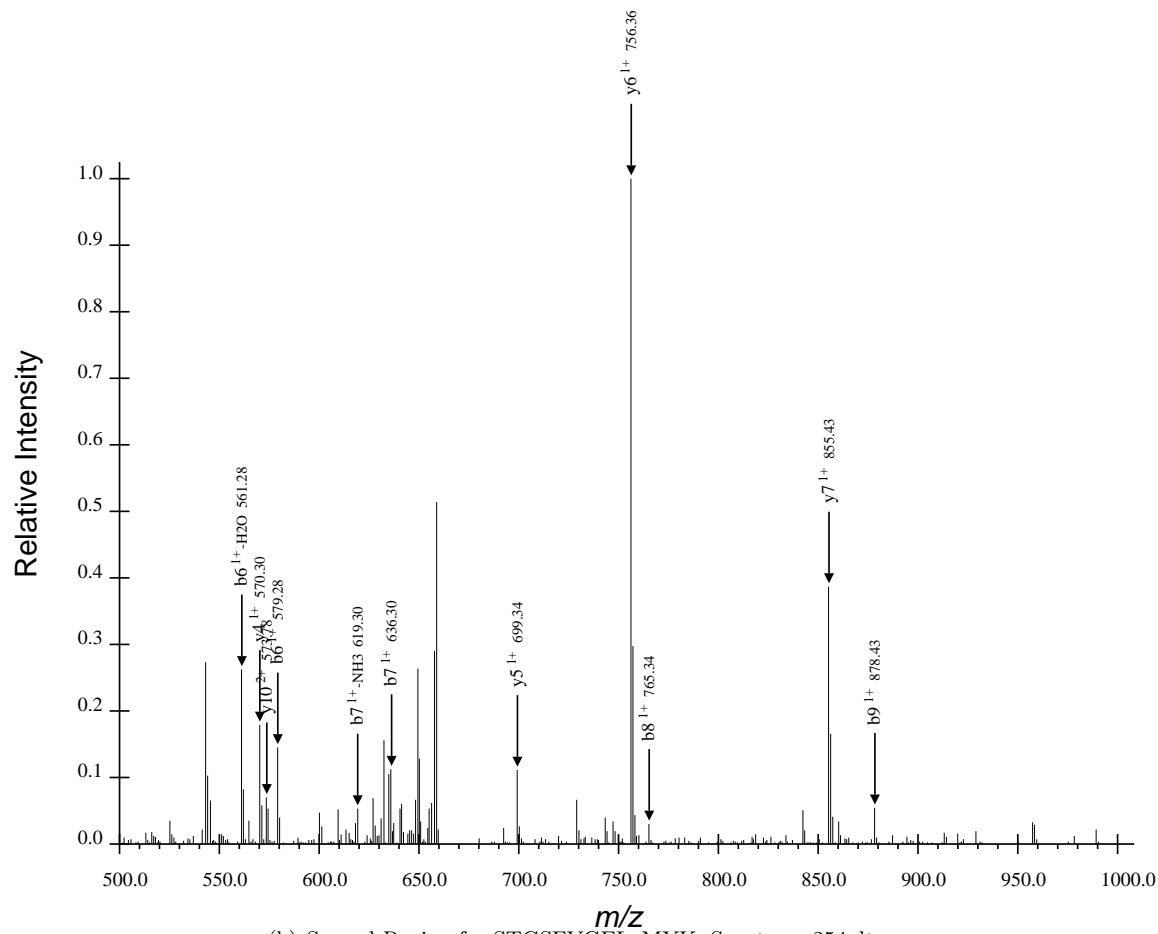

(b) Second Region for STGSFVGELoMYK, Spectrum 254.dta

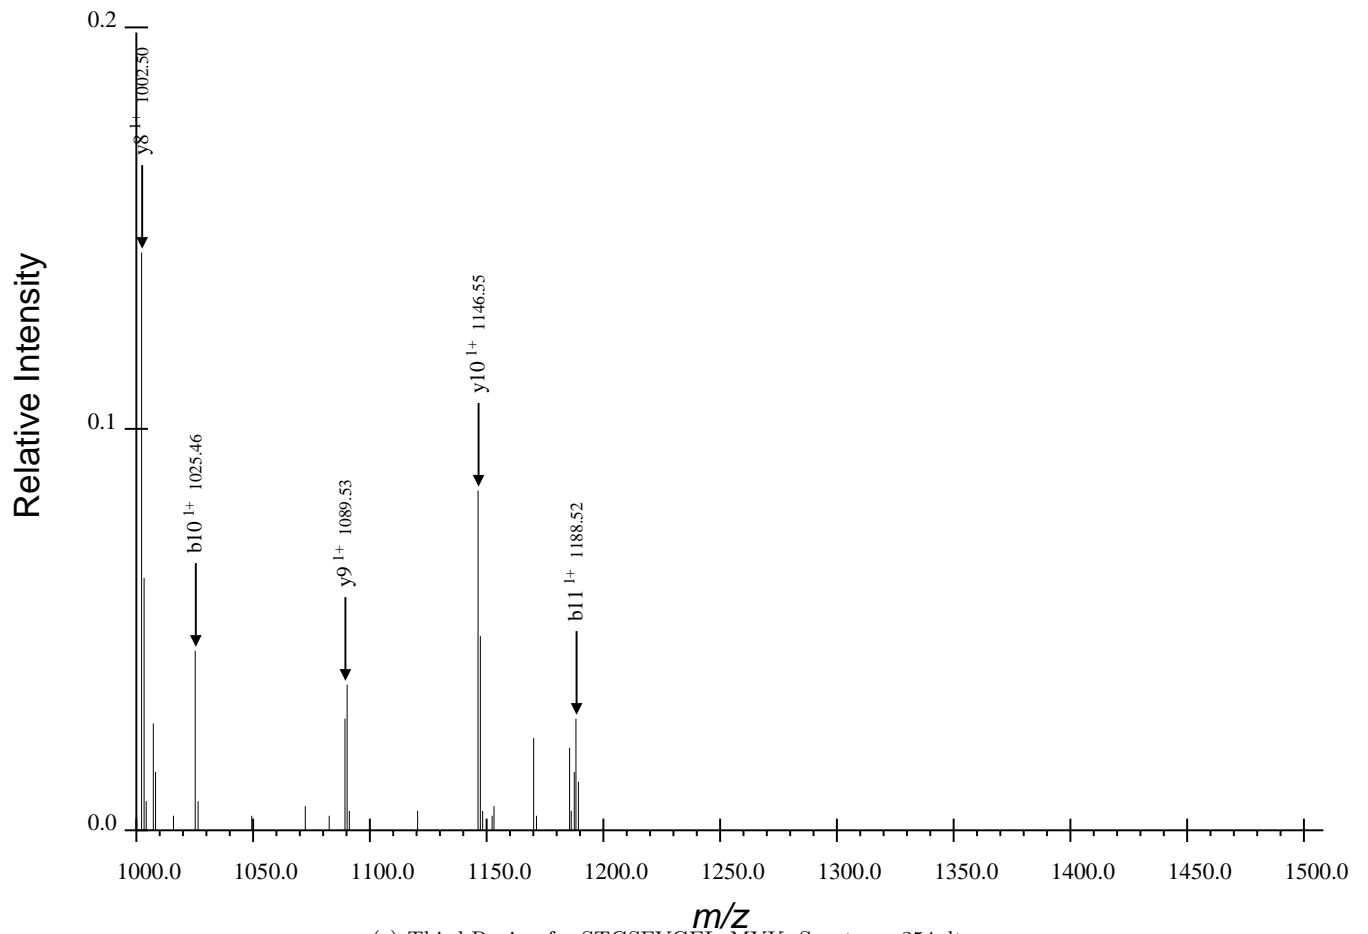

(c) Third Region for STGSFVGELoMYK, Spectrum 254.dta

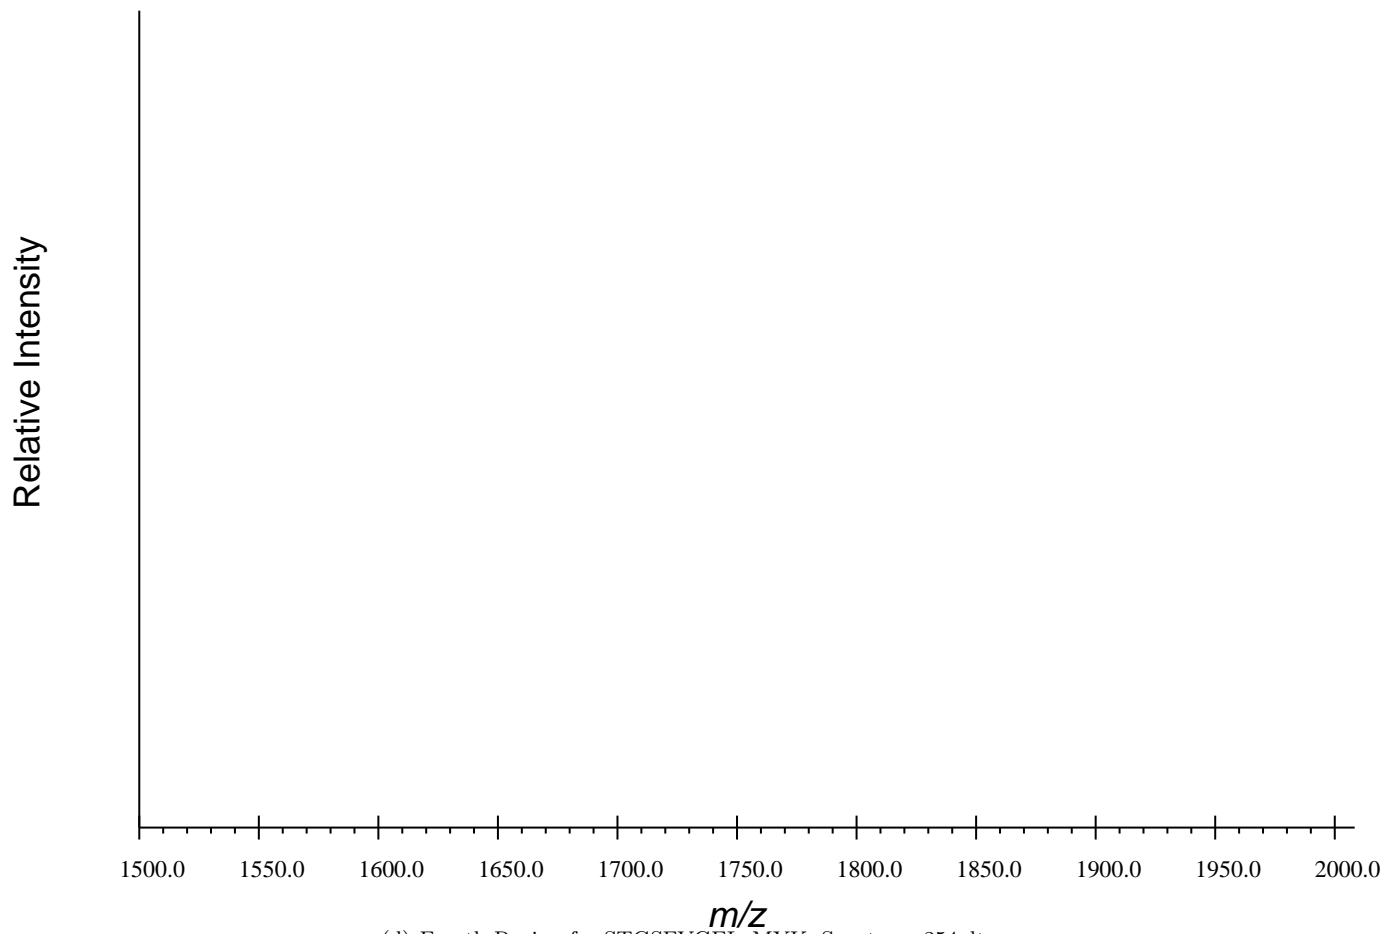

(d) Fourth Region for STGSFVGELoMYK, Spectrum 254.dta

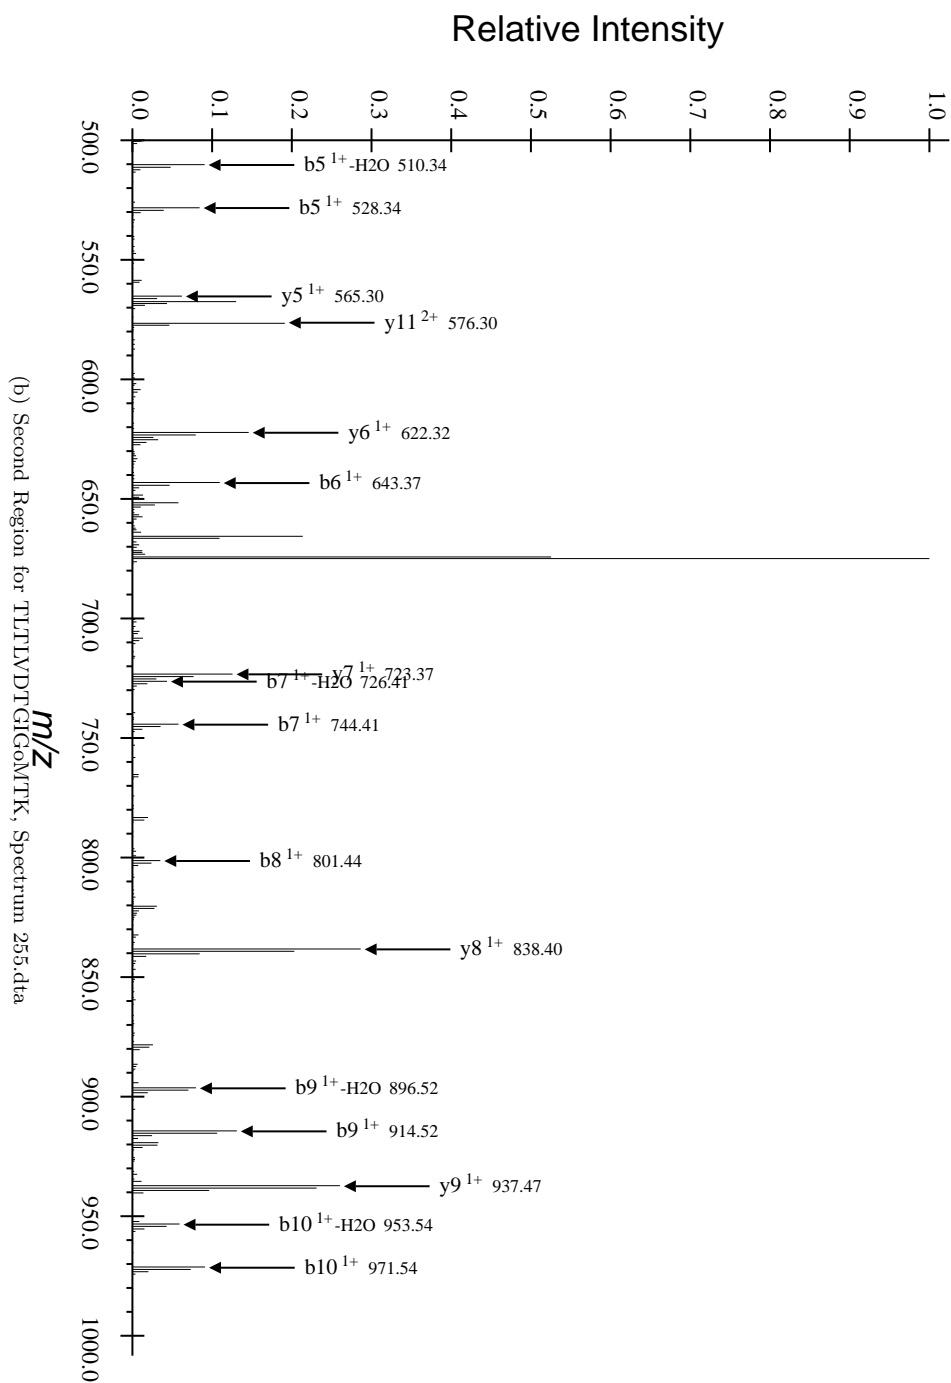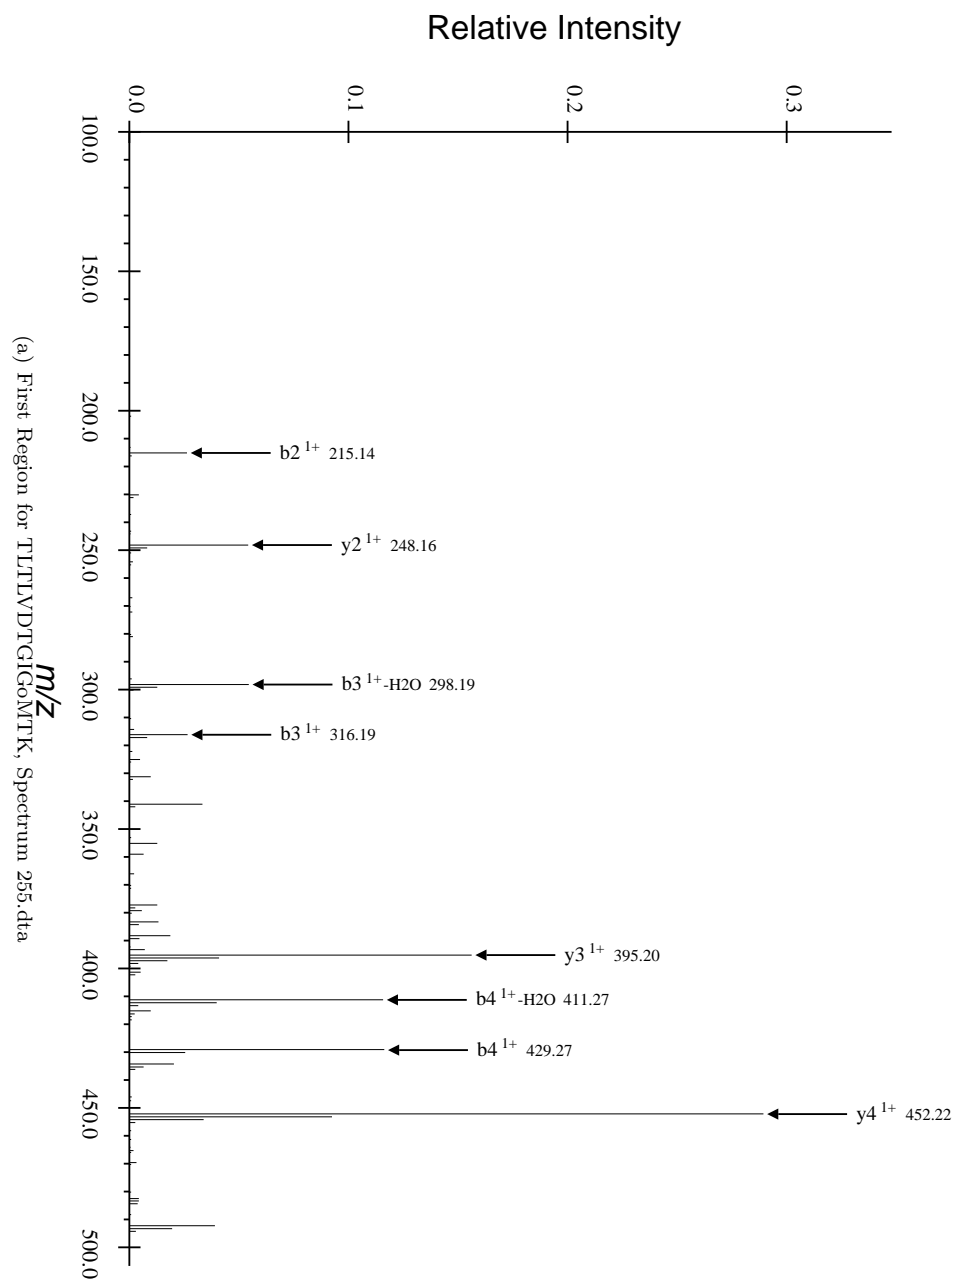

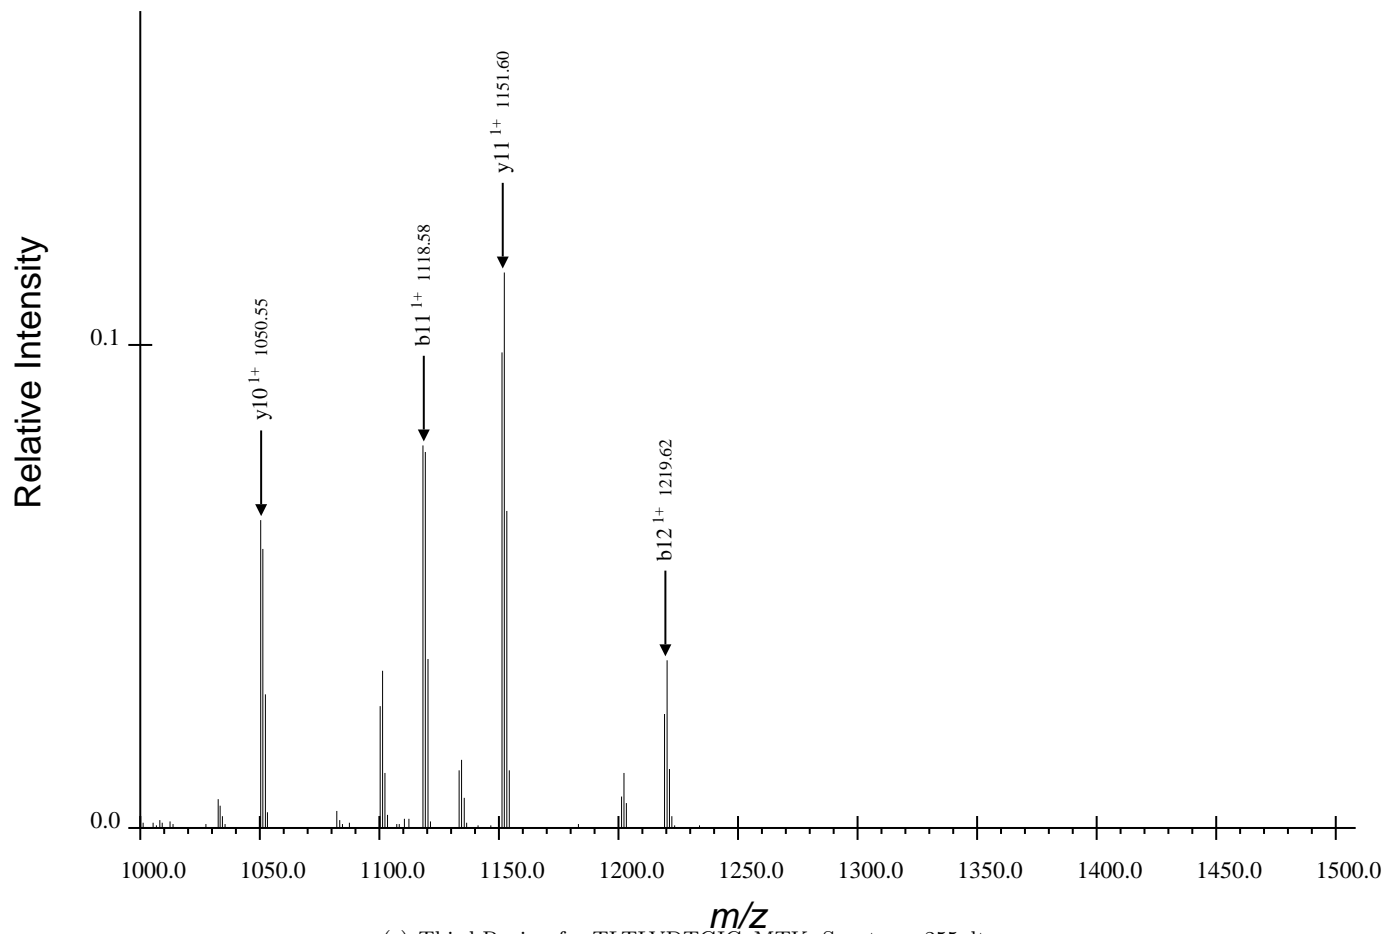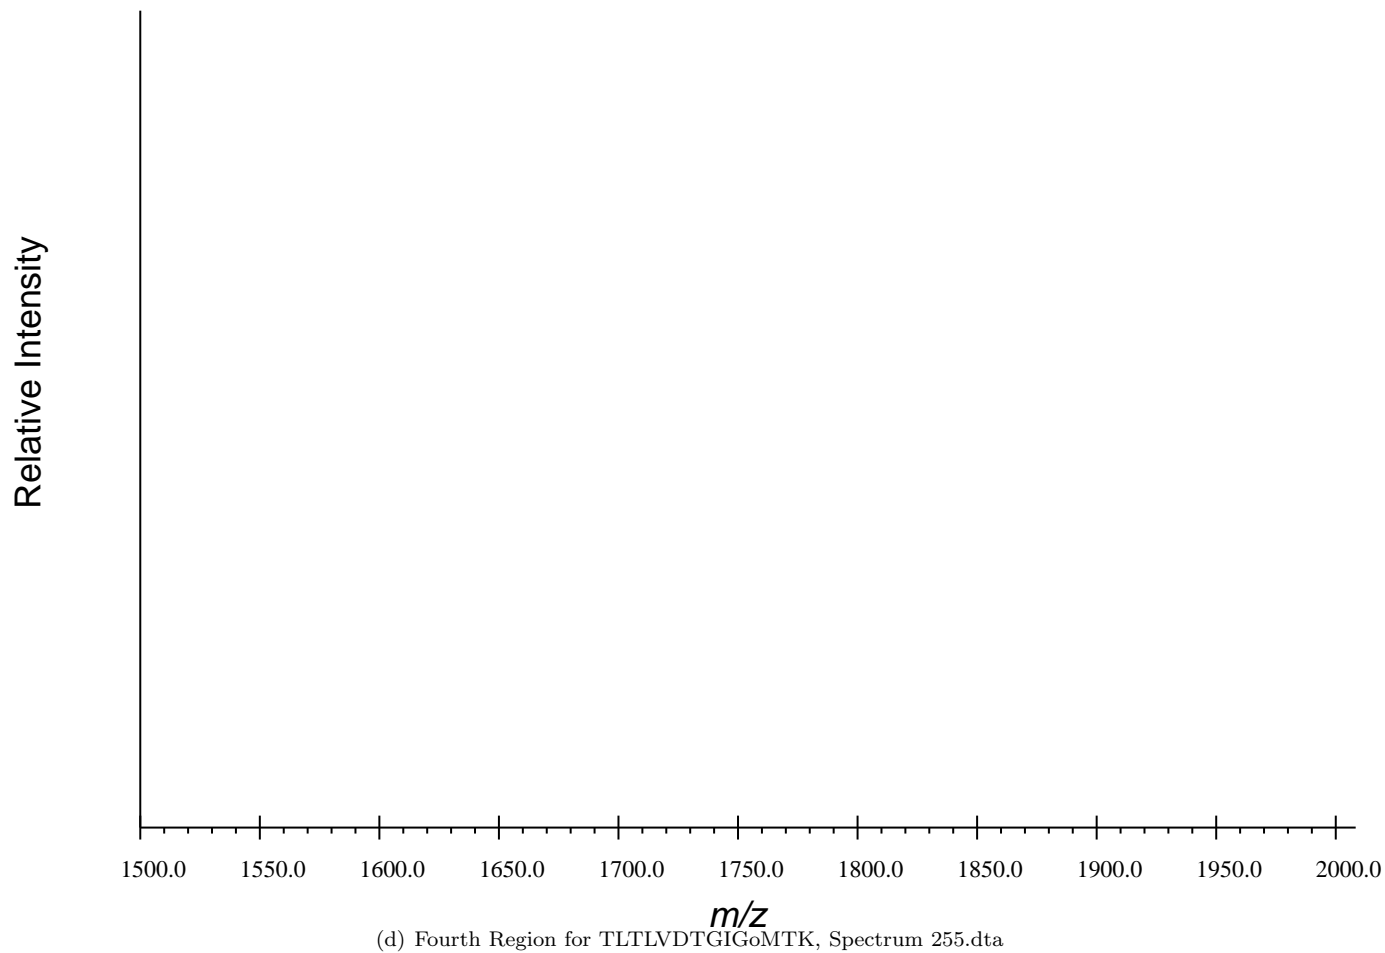



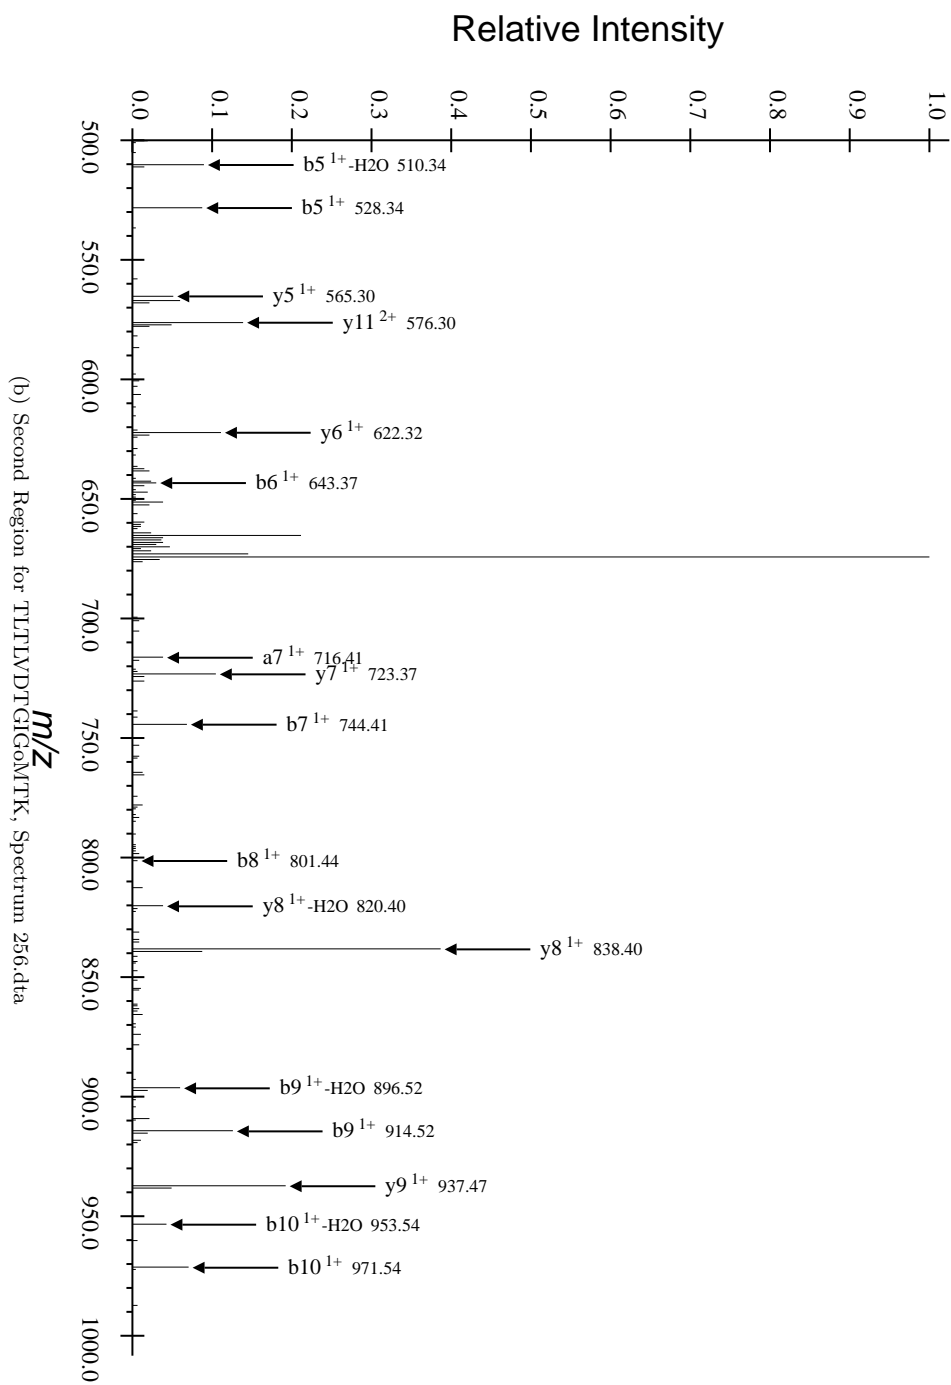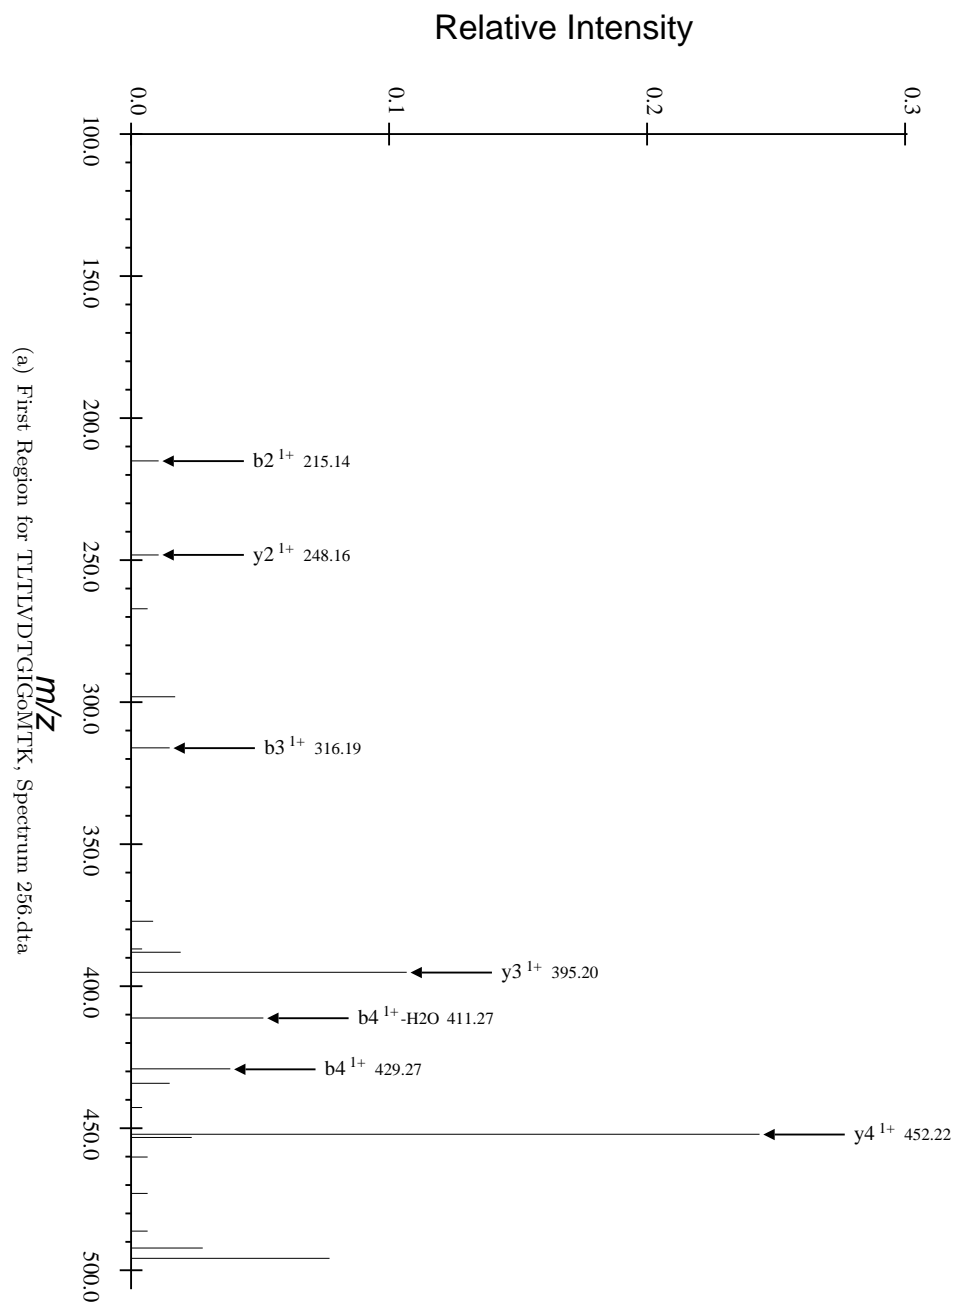

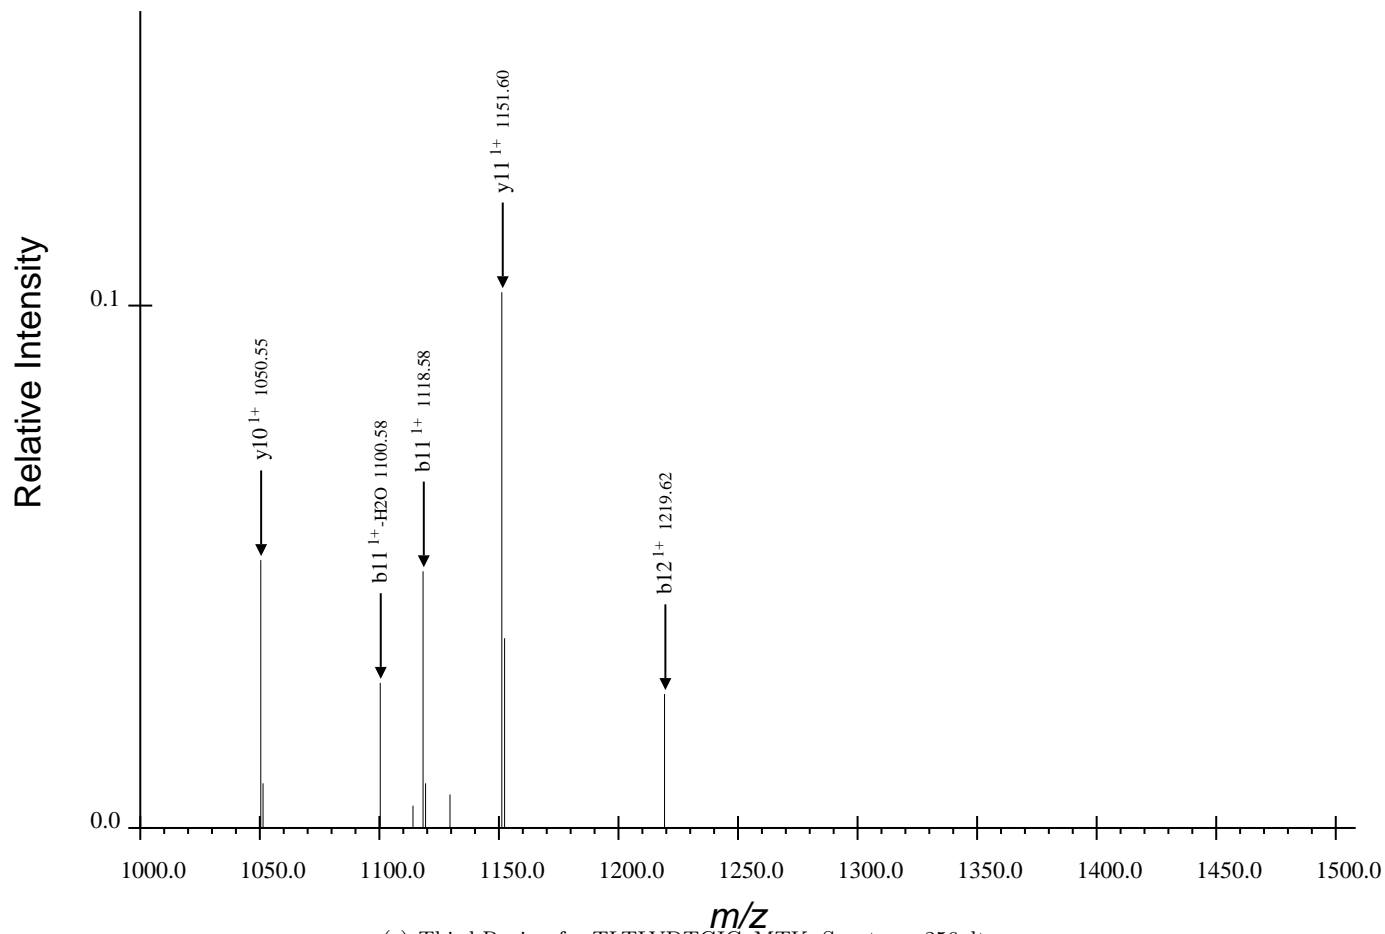

(c) Third Region for TLTLVDTGIGoMTK, Spectrum 256.dta

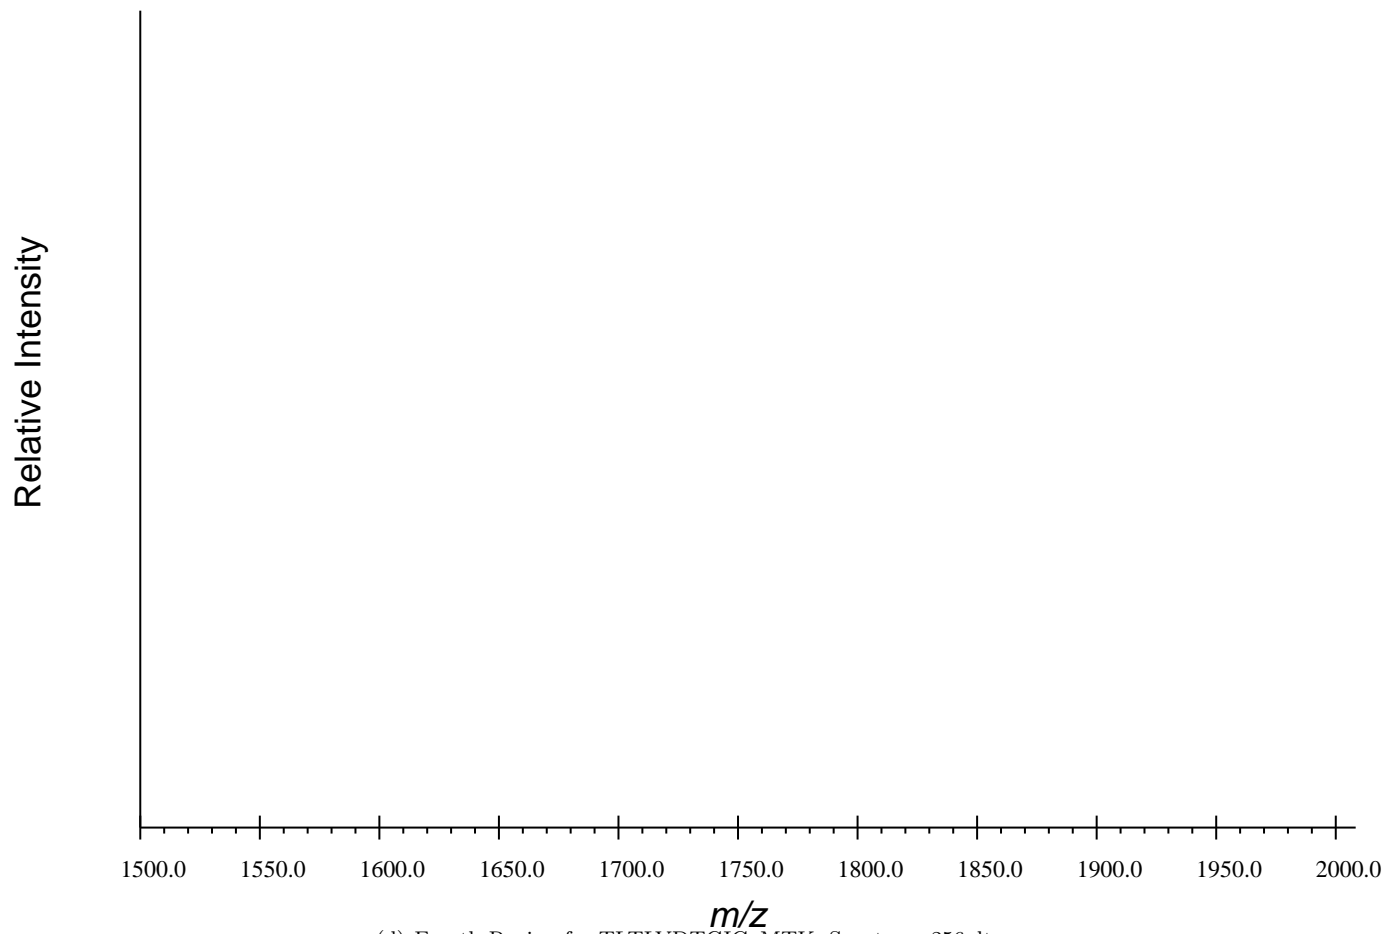

(d) Fourth Region for TLTLVDTGIGoMTK, Spectrum 256.dta

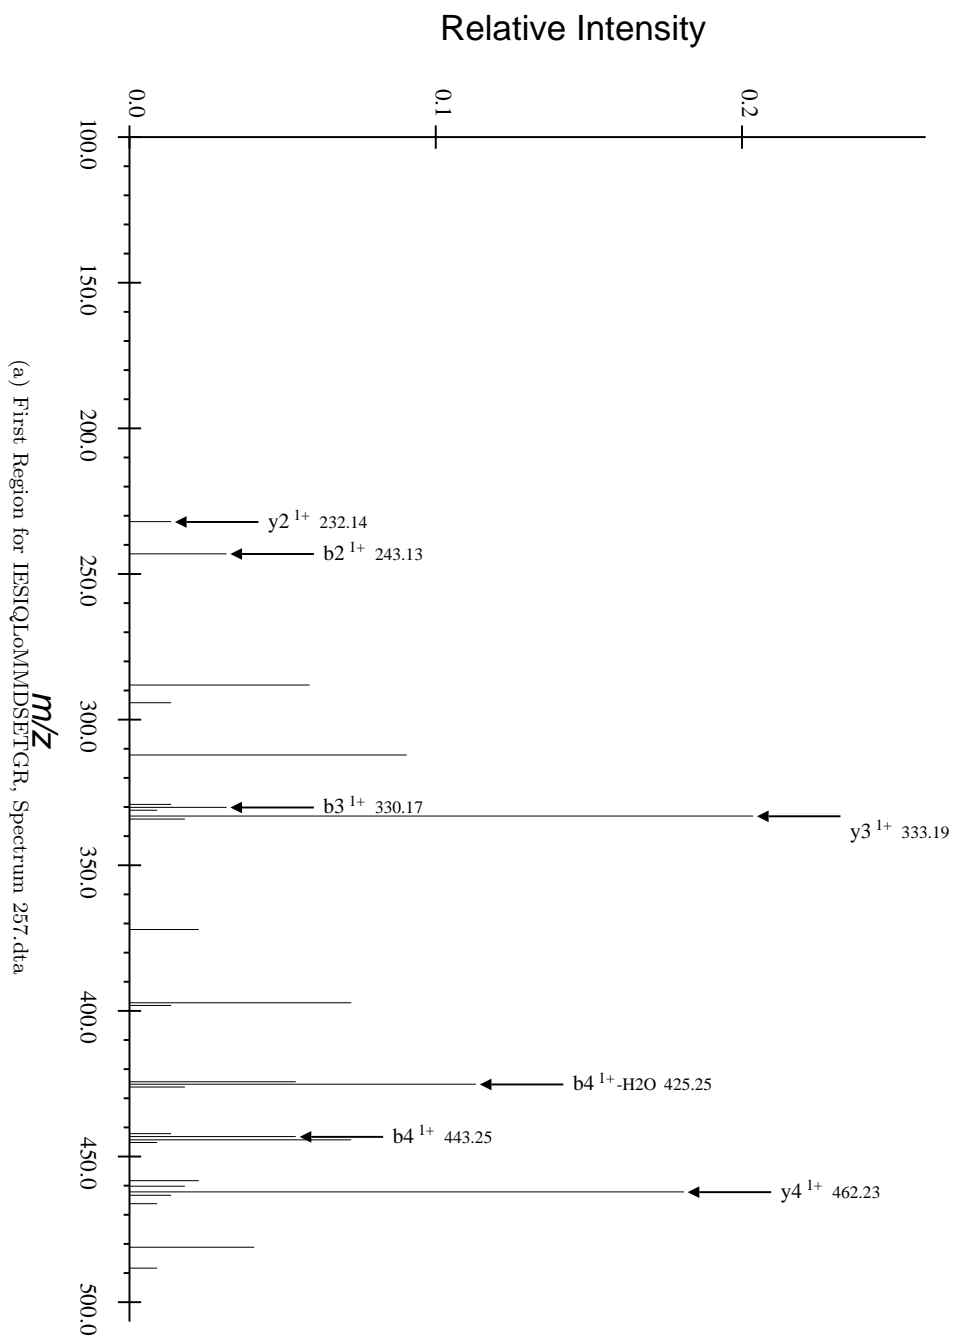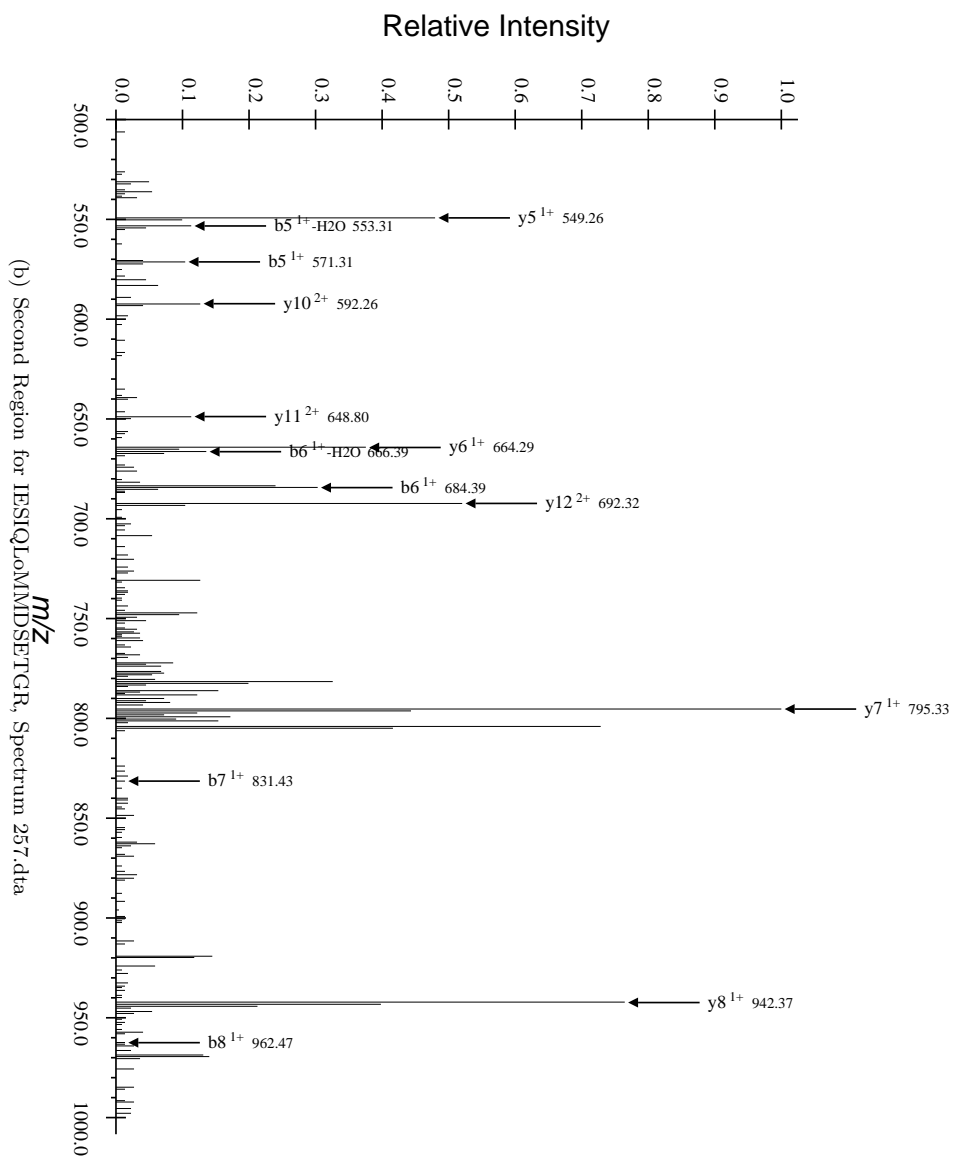

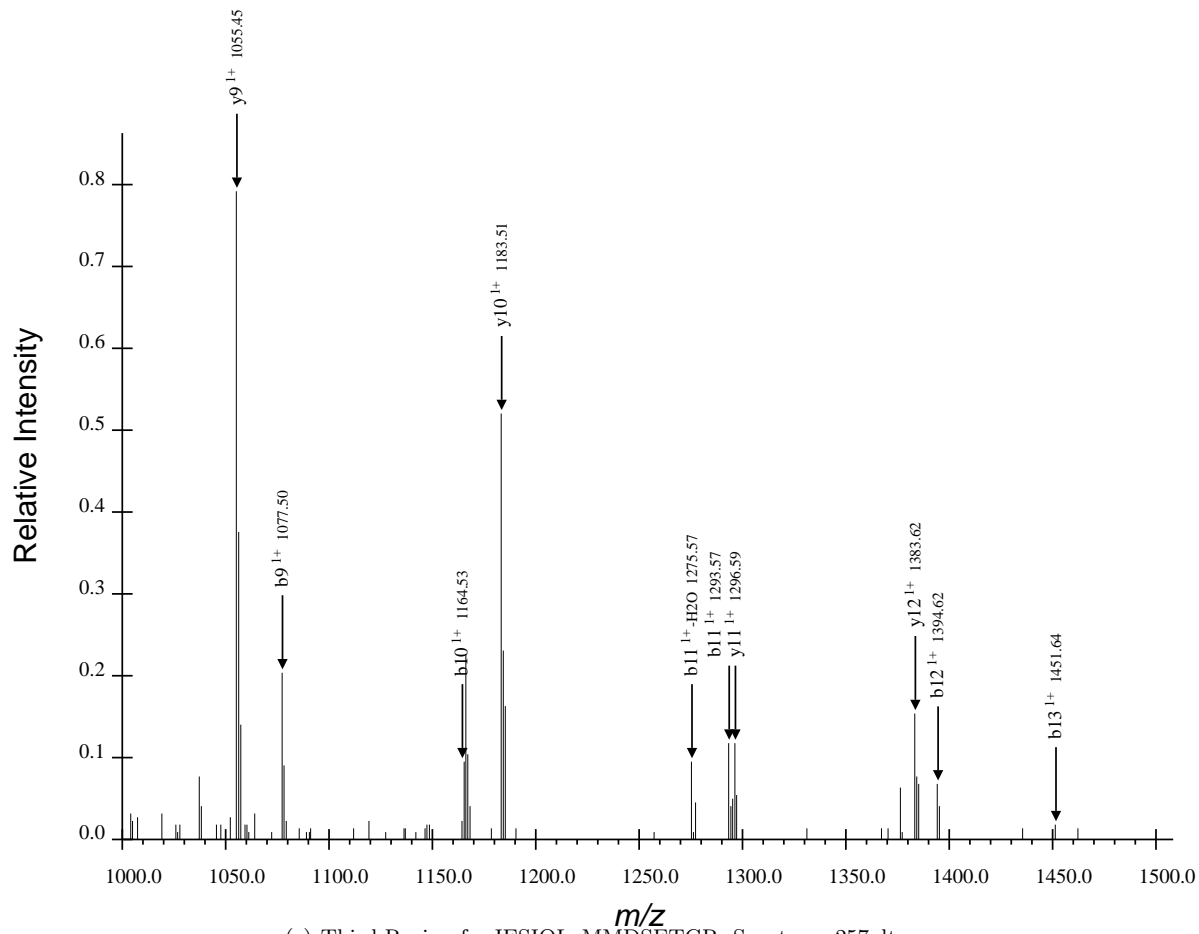

(c) Third Region for IESIQLoMMDSETGR, Spectrum 257.dta

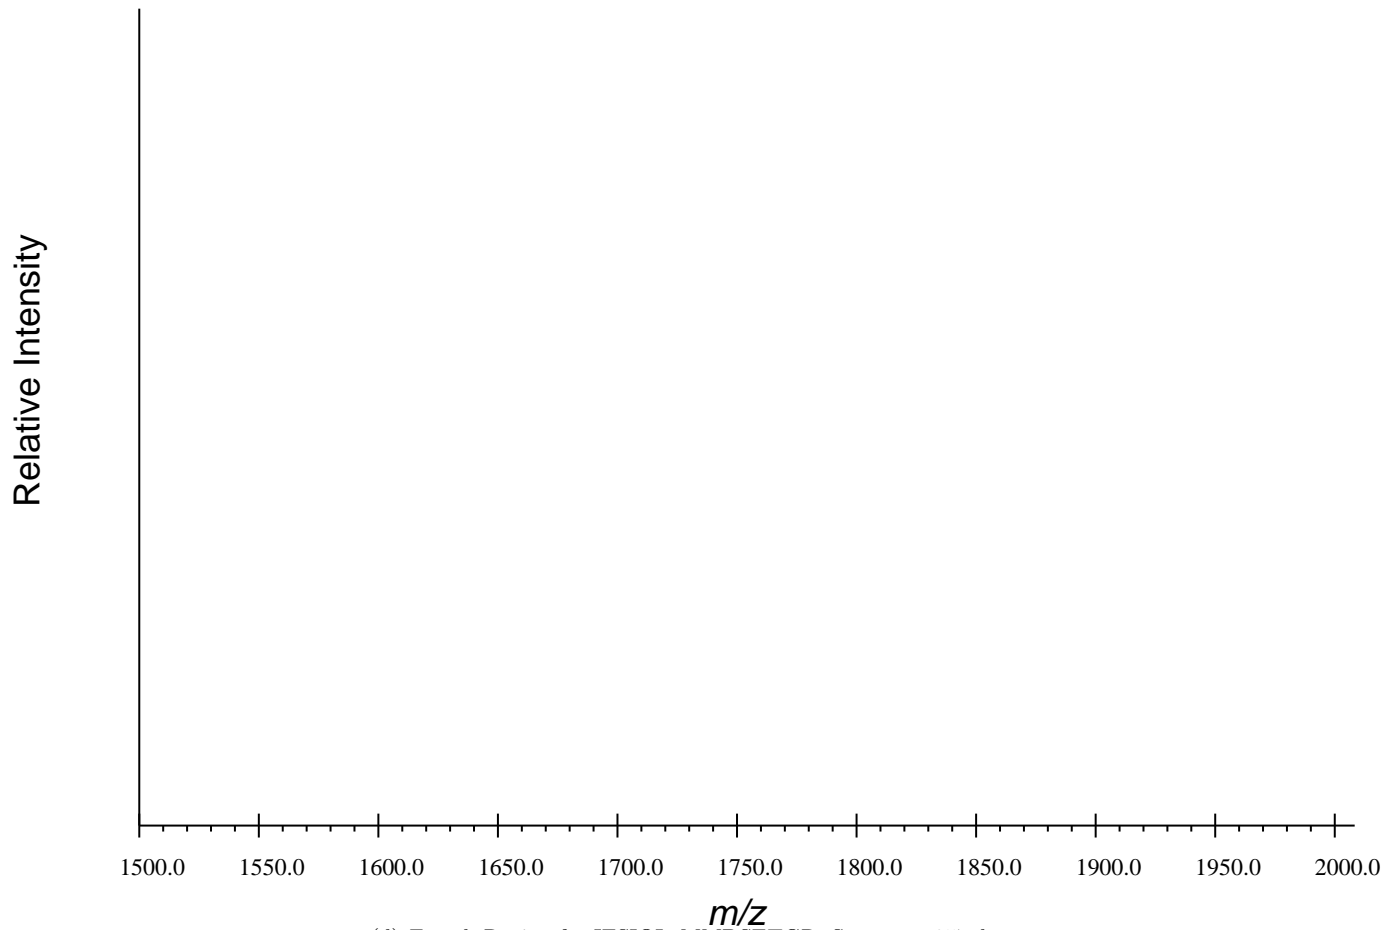

(d) Fourth Region for IESIQLoMMDSETGR, Spectrum 257.dta

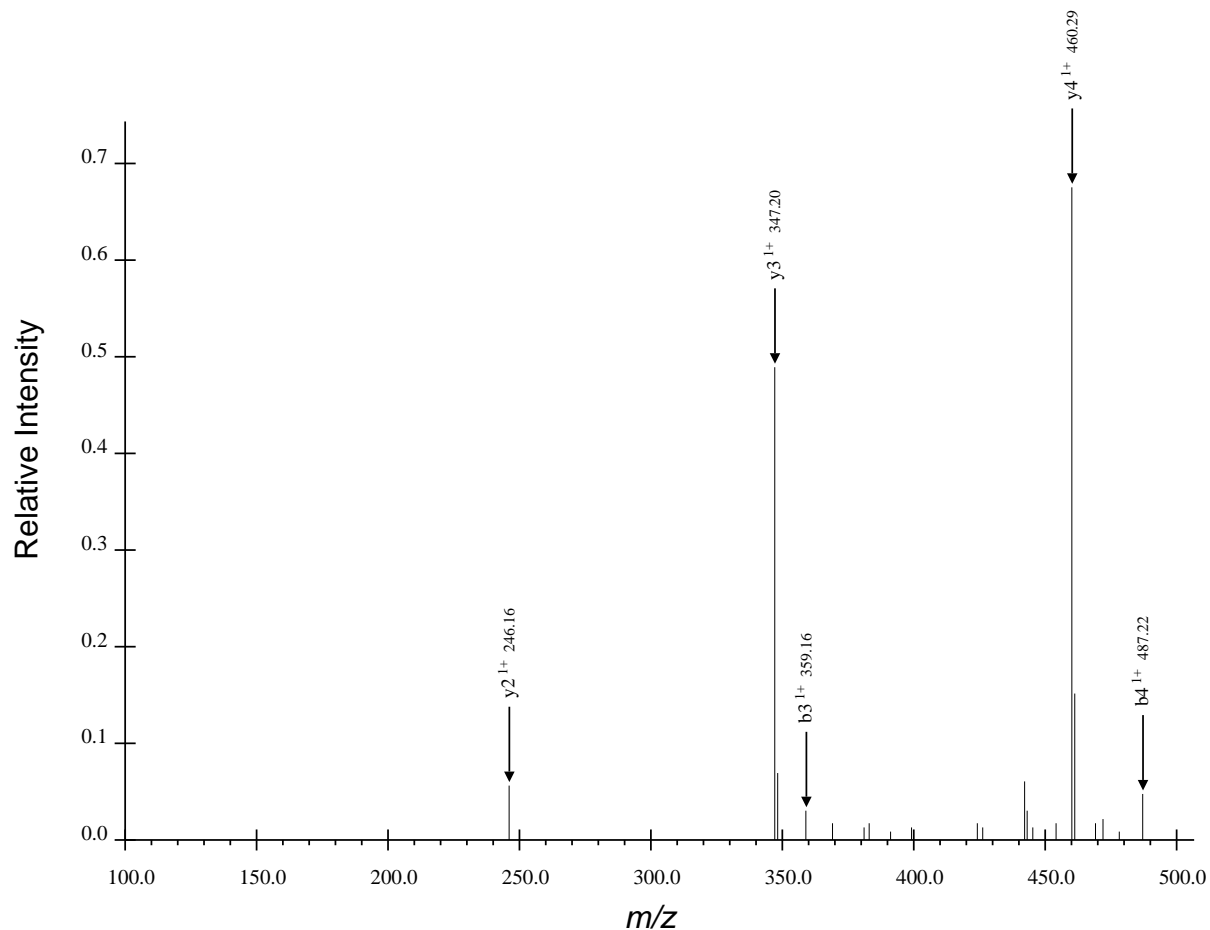

(a) First Region for TQEQLALEoMAELTAR, Spectrum 258.dta

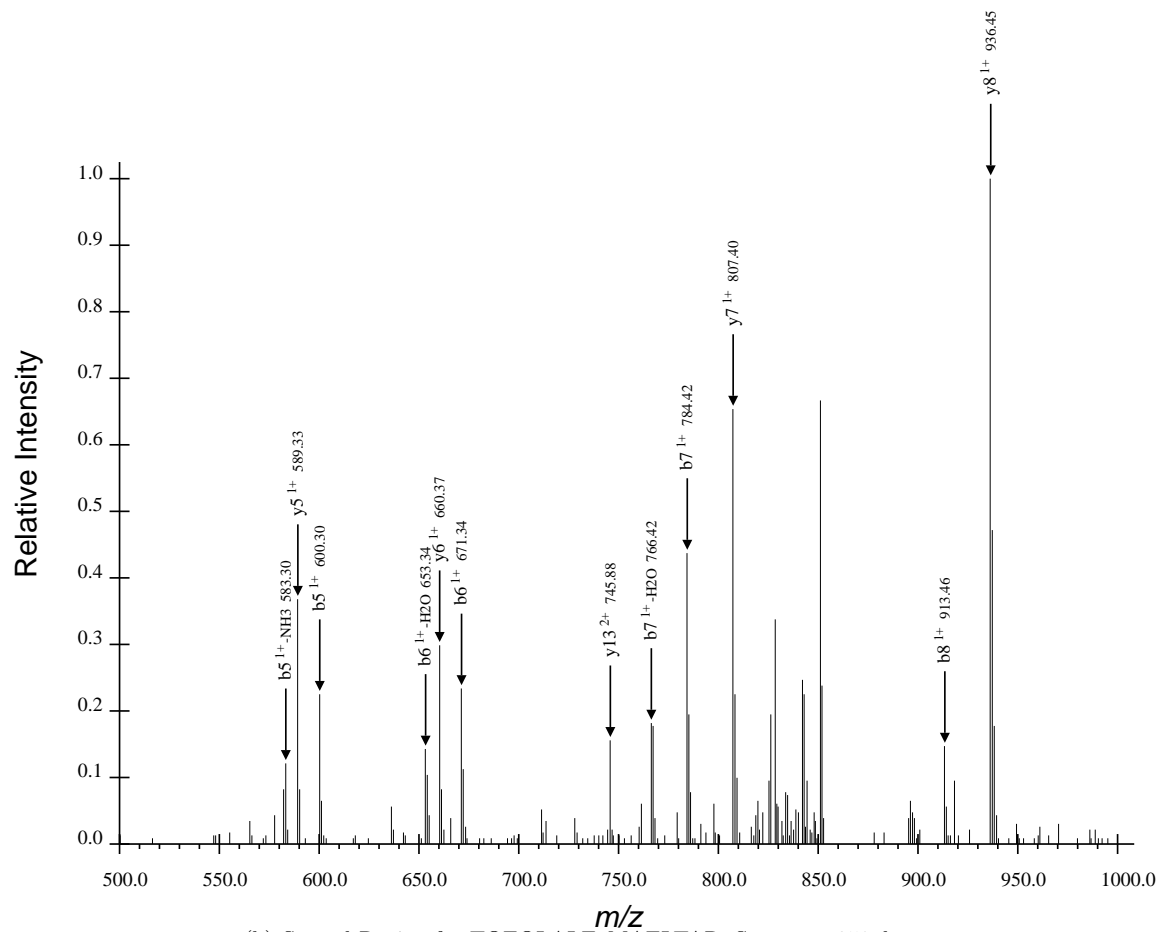

(b) Second Region for TQEQLALEoMAELTAR, Spectrum 258.dta

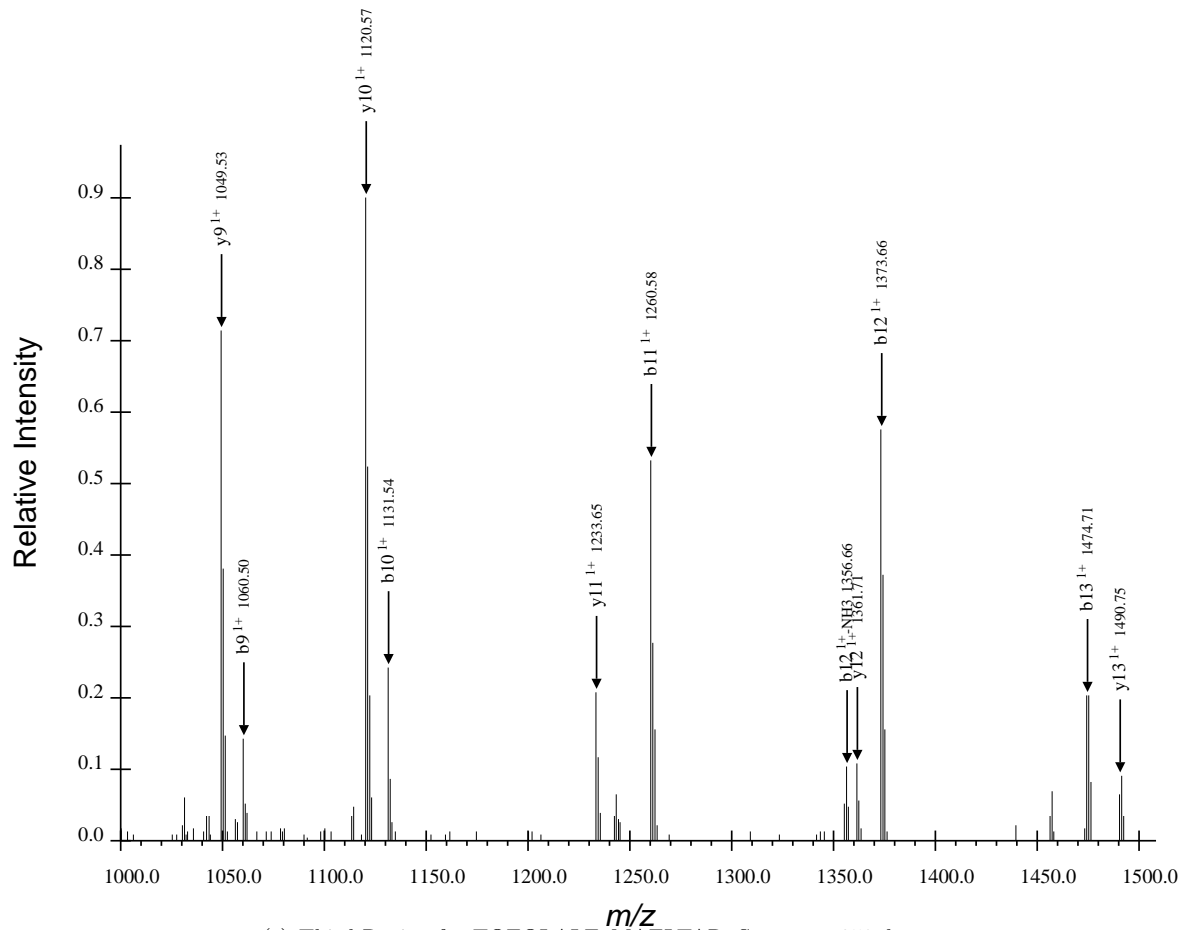

(c) Third Region for TQEQLALEoMAELTAR, Spectrum 258.dta

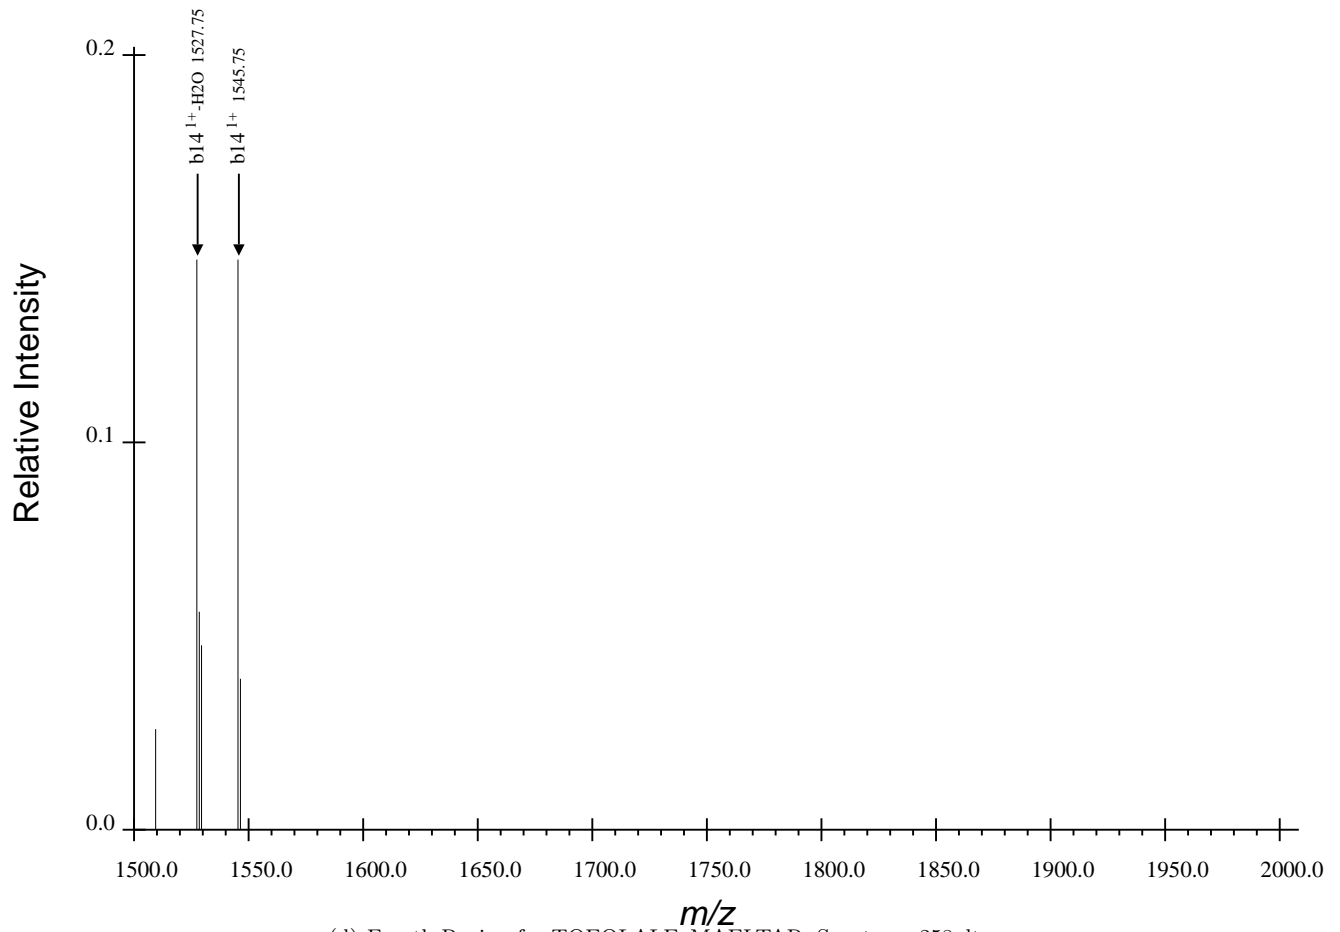

(d) Fourth Region for TQEQLALEoMAELTAR, Spectrum 258.dta

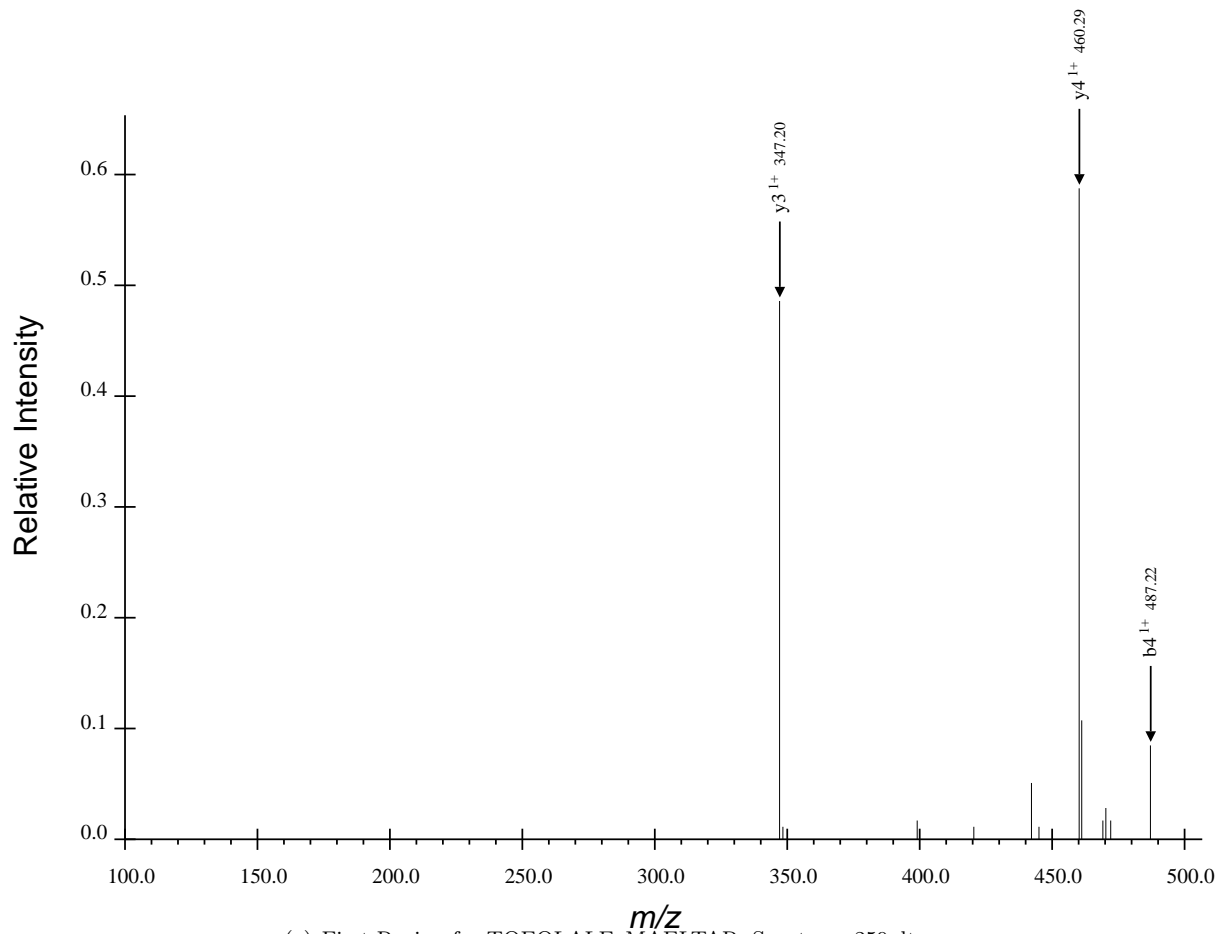

(a) First Region for TQEQLALEoMAELTAR, Spectrum 259.dta

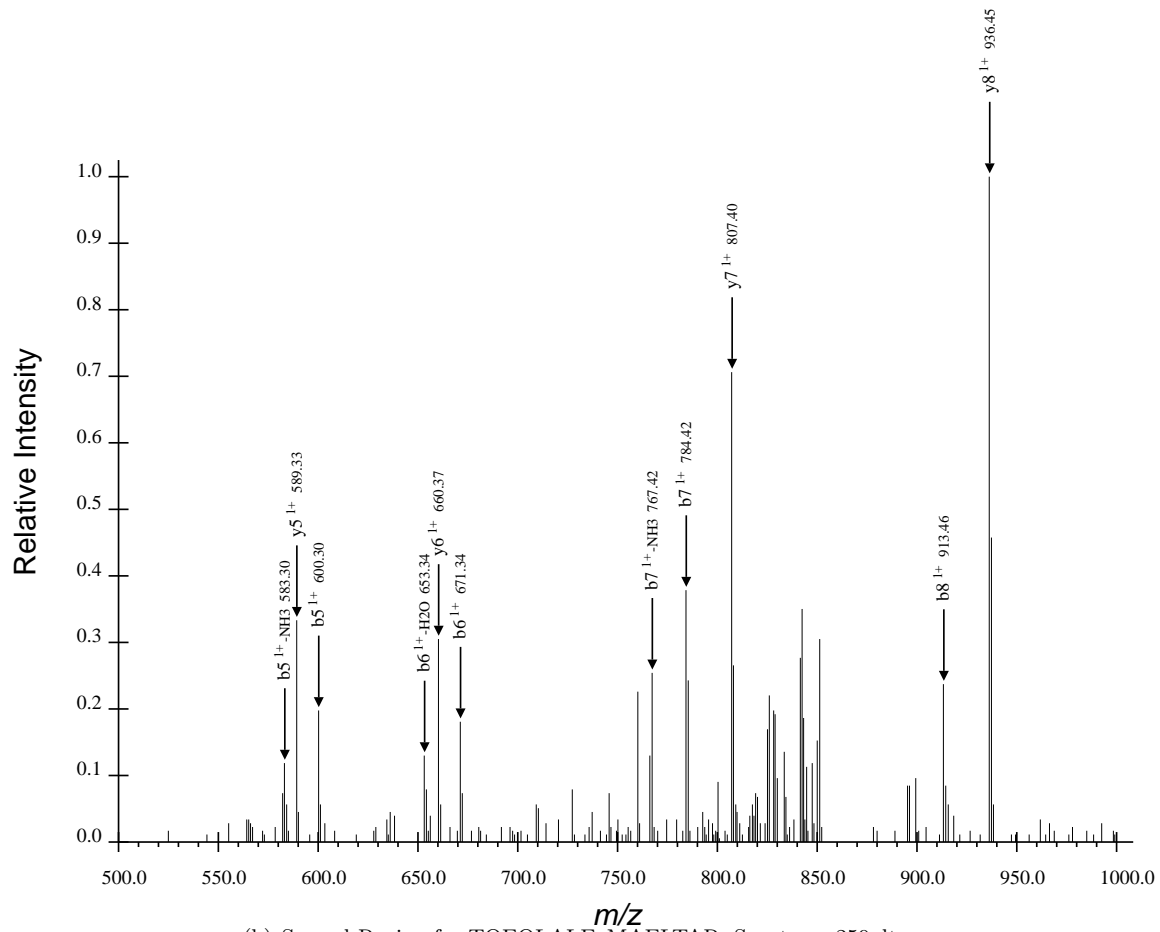

(b) Second Region for TQEQLALEoMAELTAR, Spectrum 259.dta

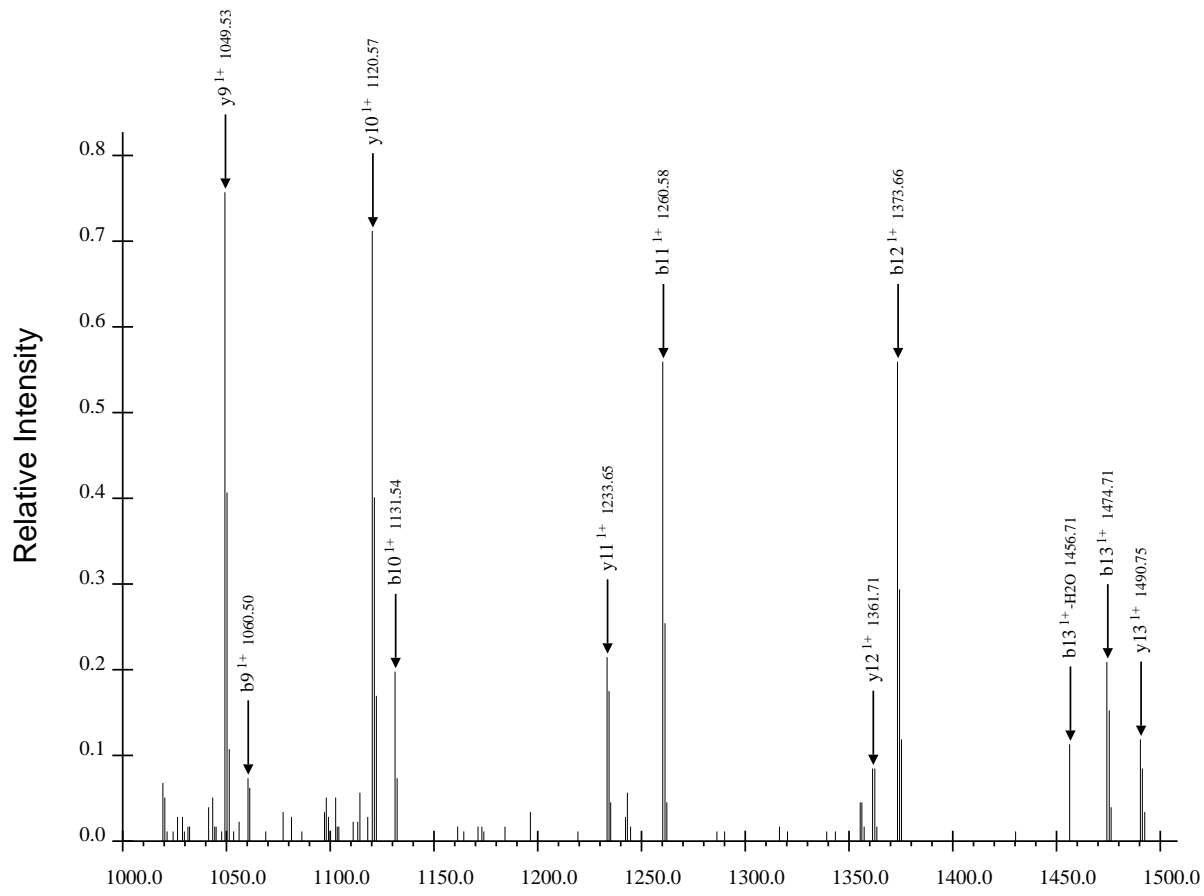

(c) Third Region for TQEQLALEoMAELTAR, Spectrum 259.dta

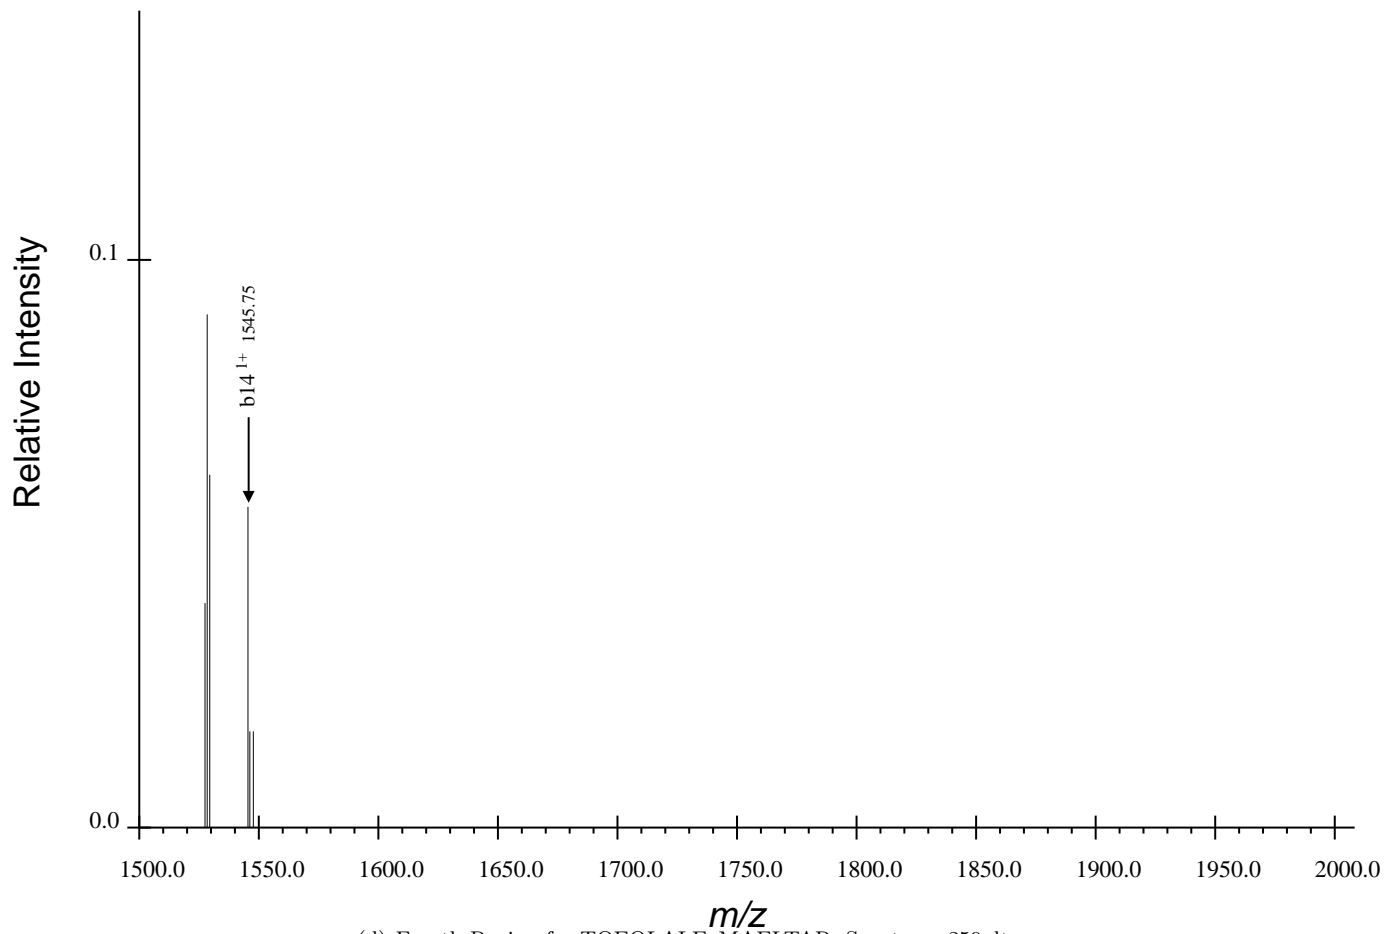

(d) Fourth Region for TQEQLALEoMAELTAR, Spectrum 259.dta



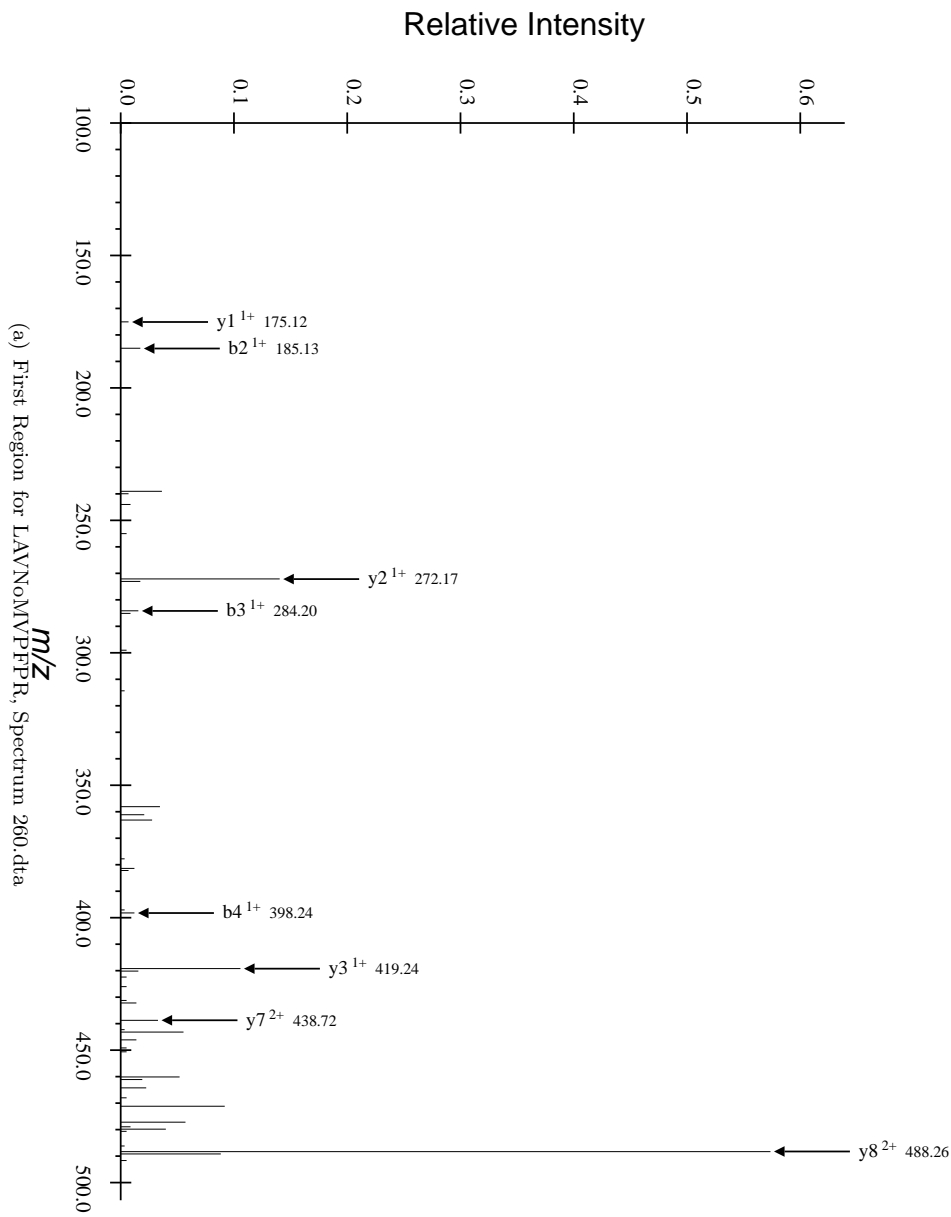

(a) First Region for LAVNoMIVPFPR, Spectrum 260.dta

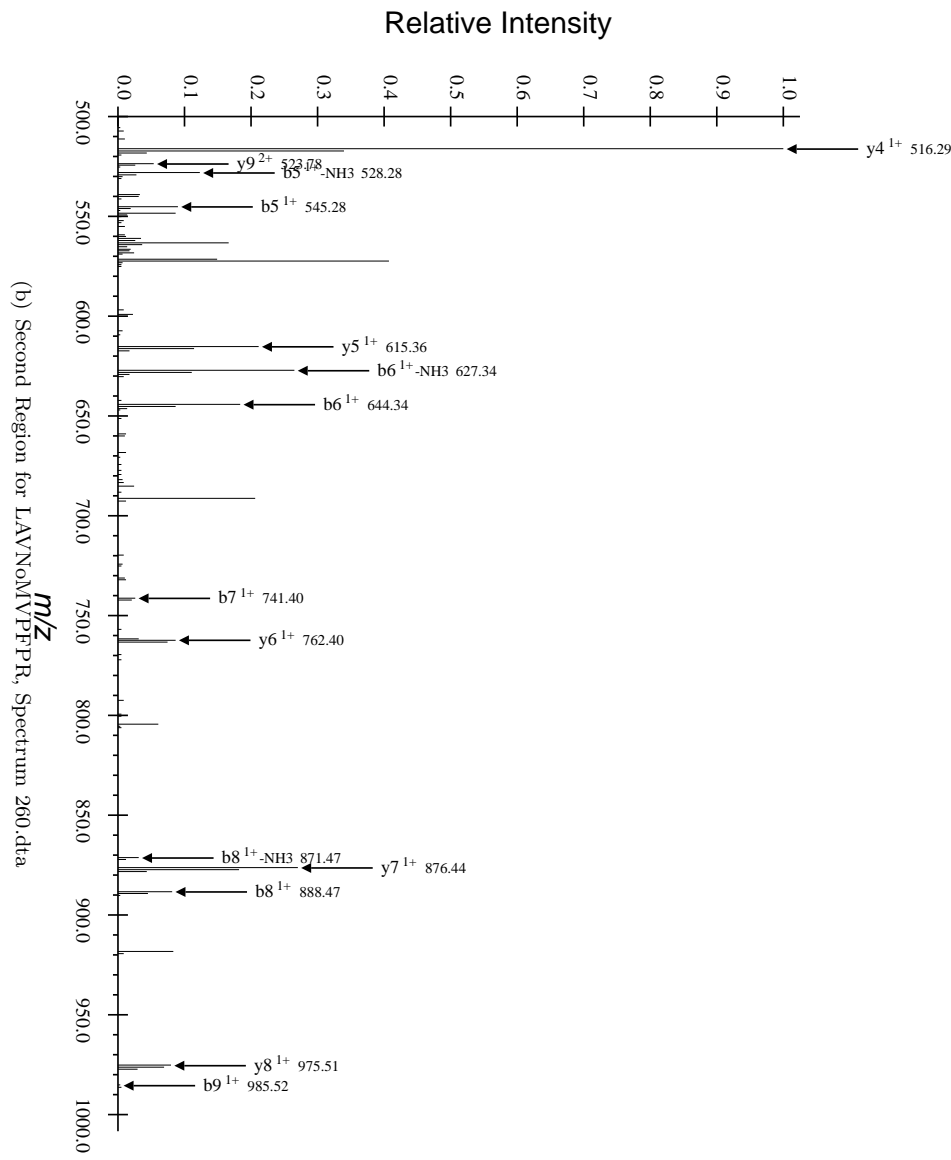

(b) Second Region for LAVNoMIVPFPR, Spectrum 260.dta

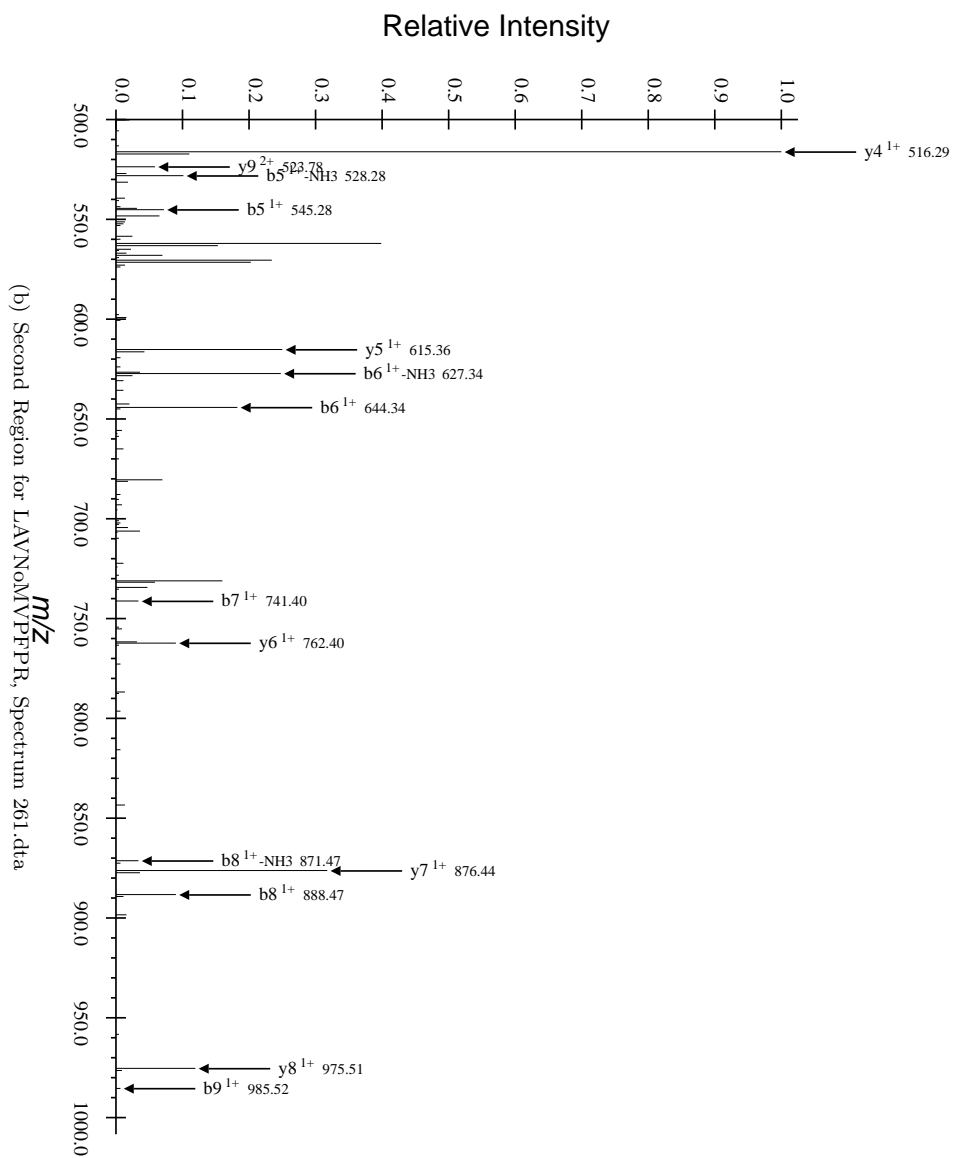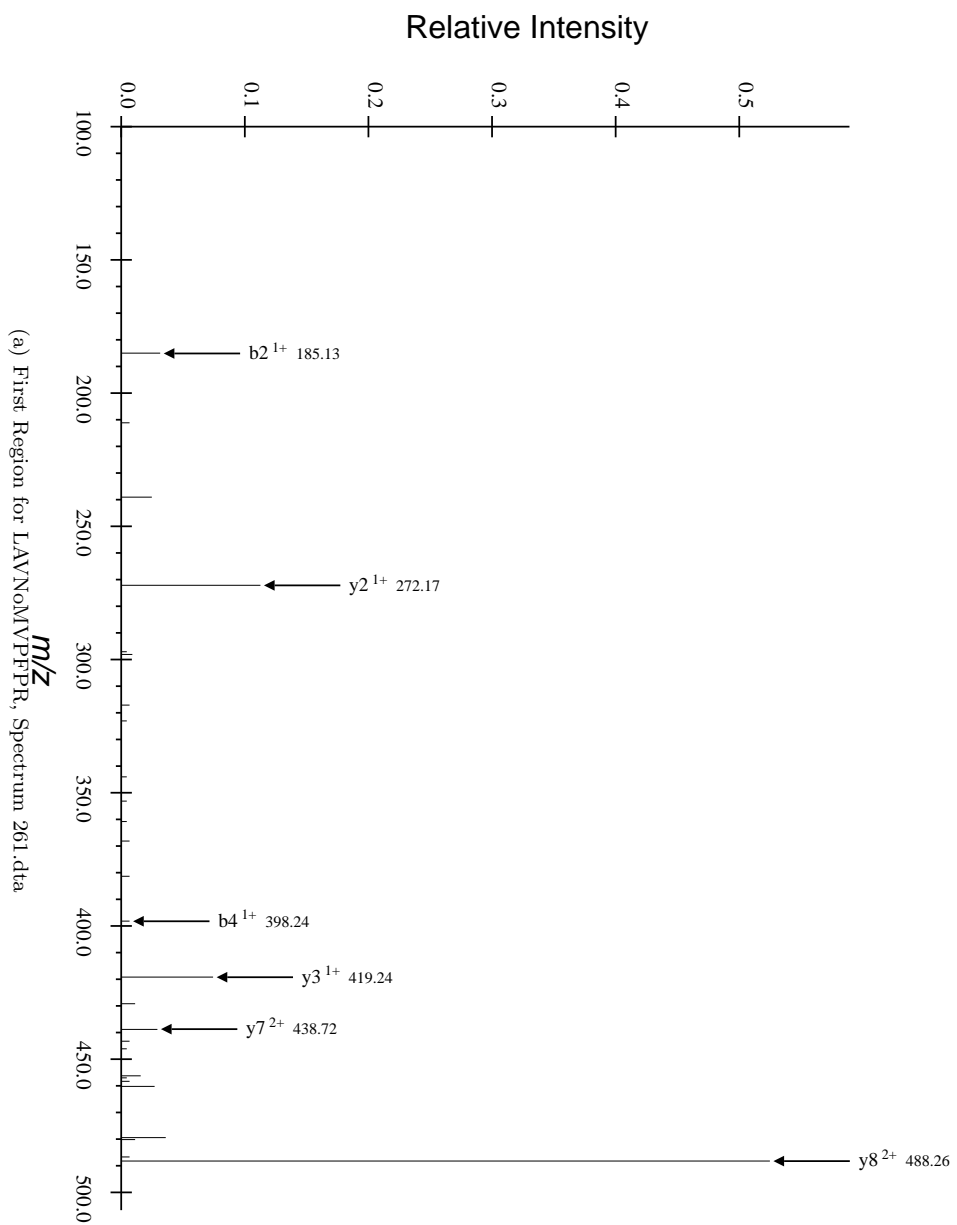

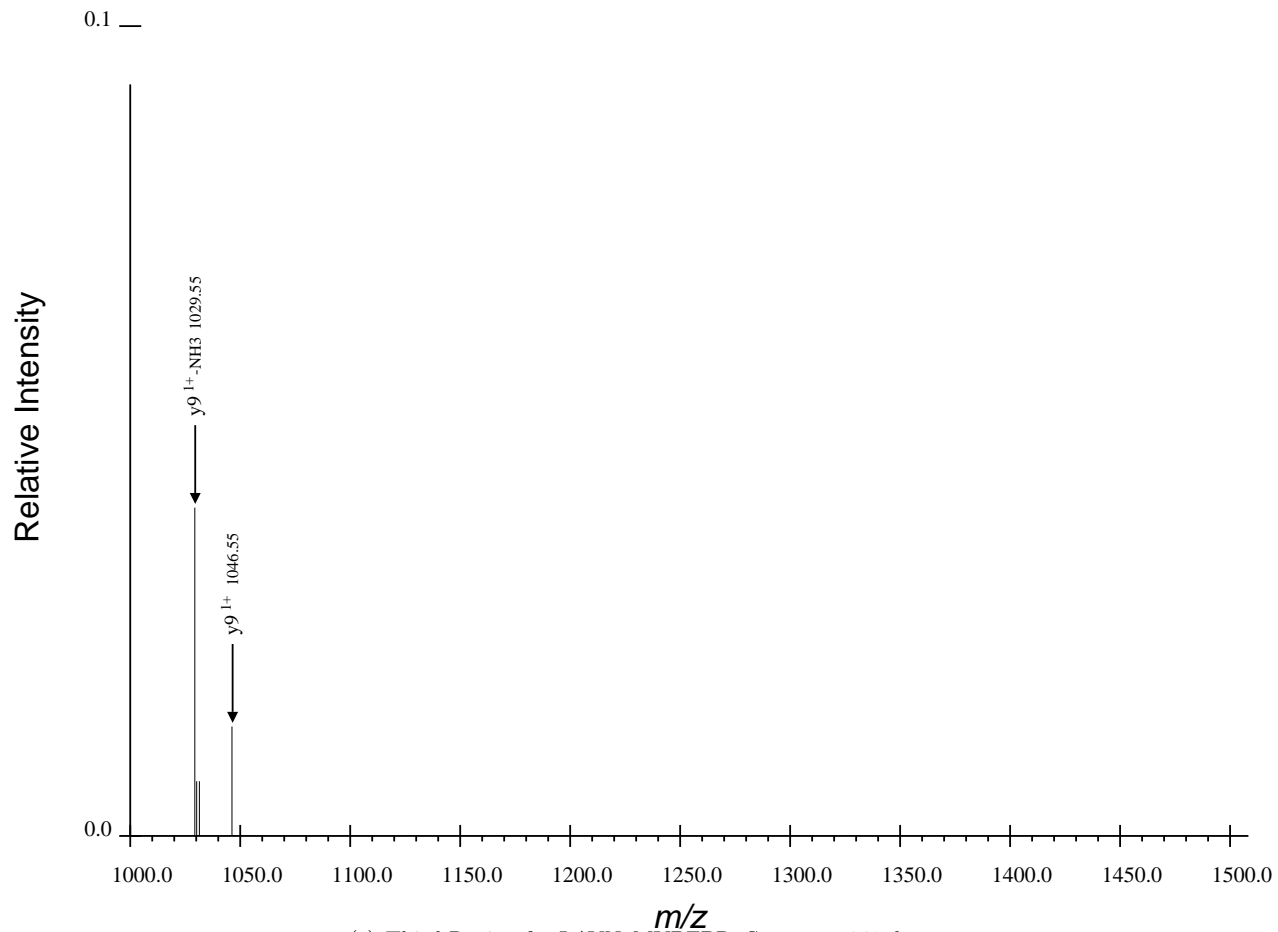

(c) Third Region for LAVNoMVPFPR, Spectrum 261.dta

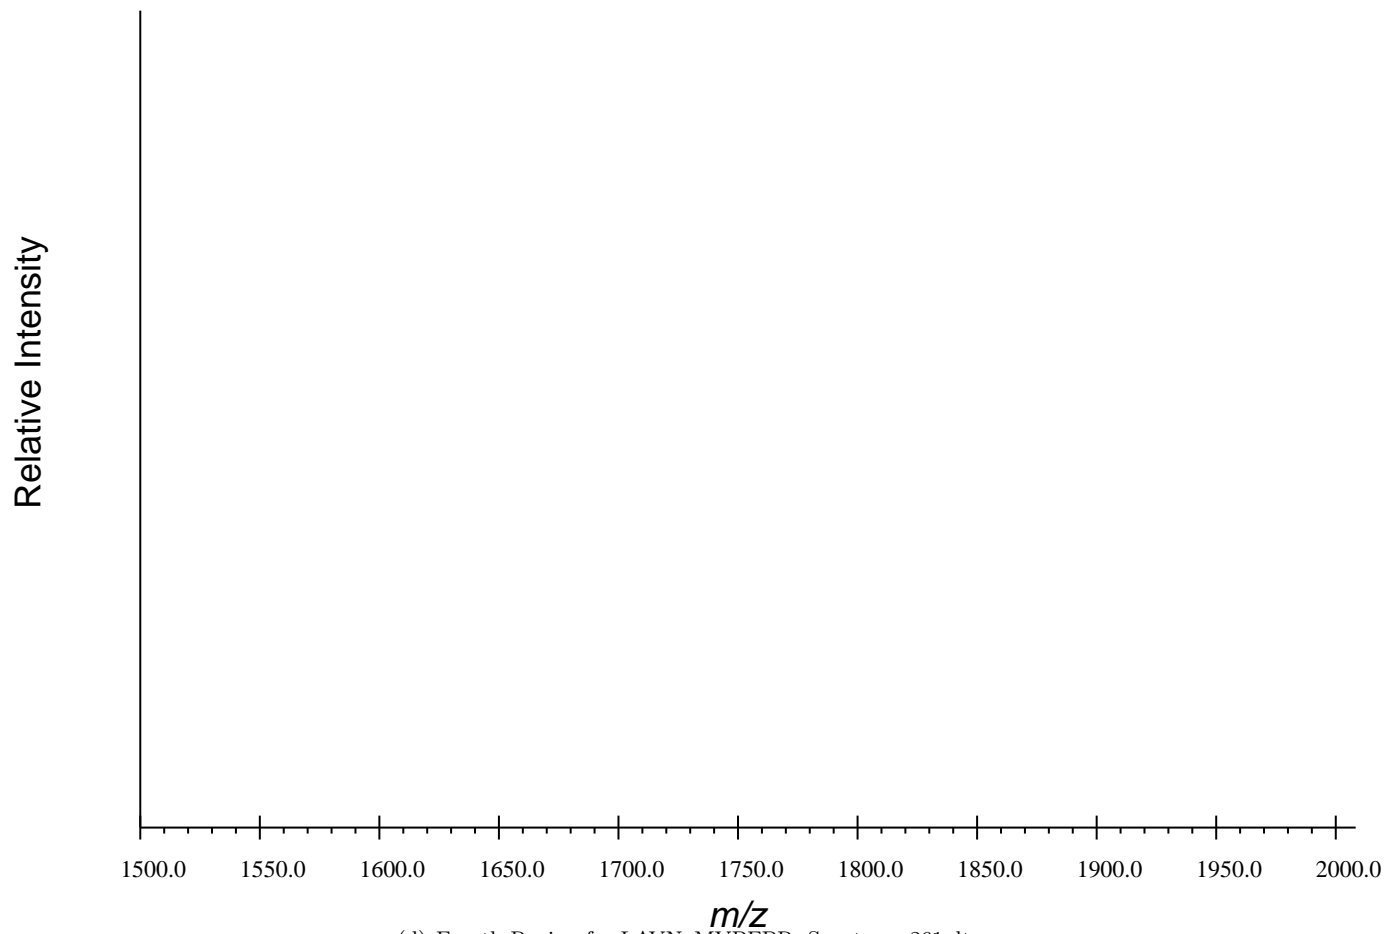

(d) Fourth Region for LAVNoMVPFPR, Spectrum 261.dta

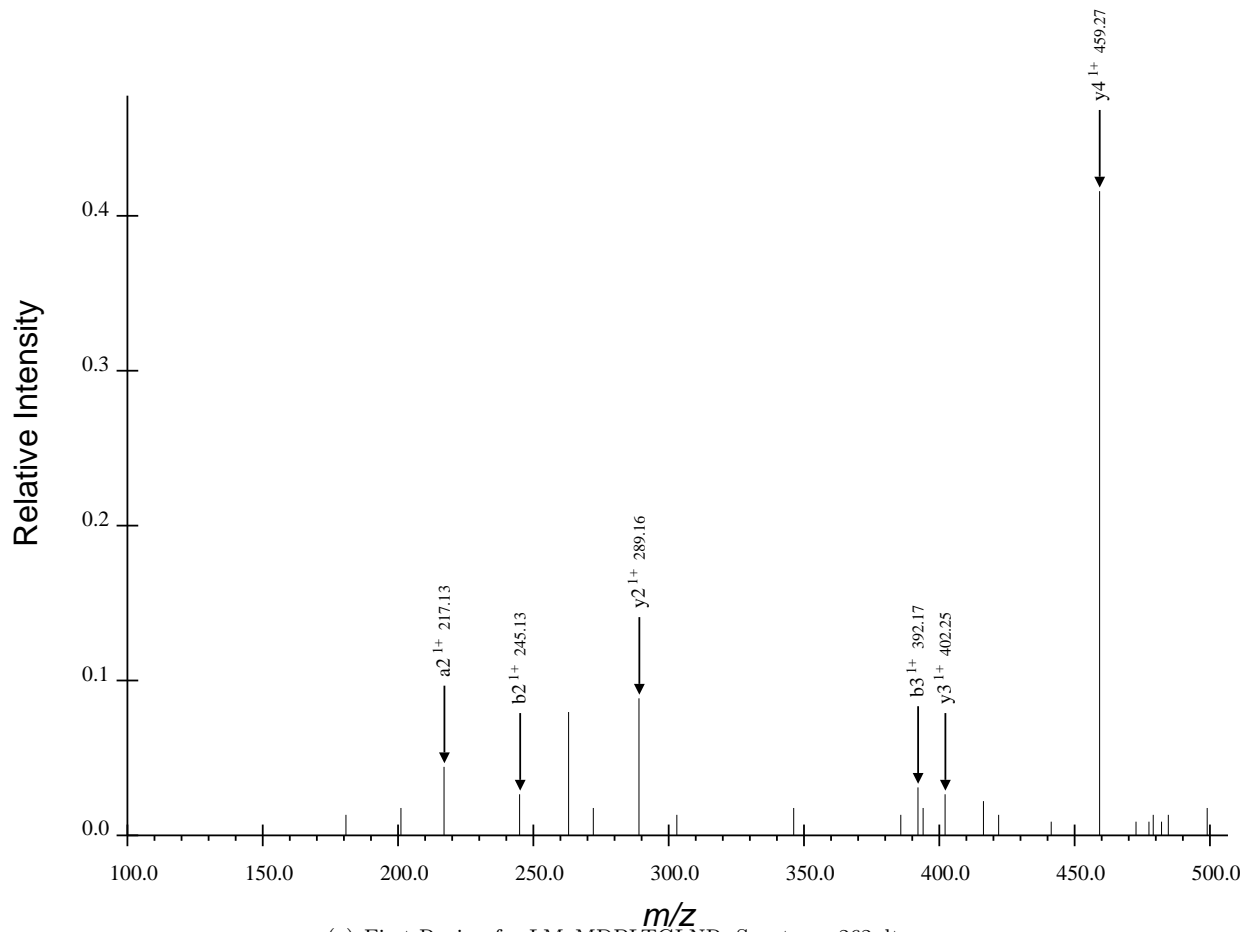

(a) First Region for LMoMDPLTGLNR, Spectrum 262.dta

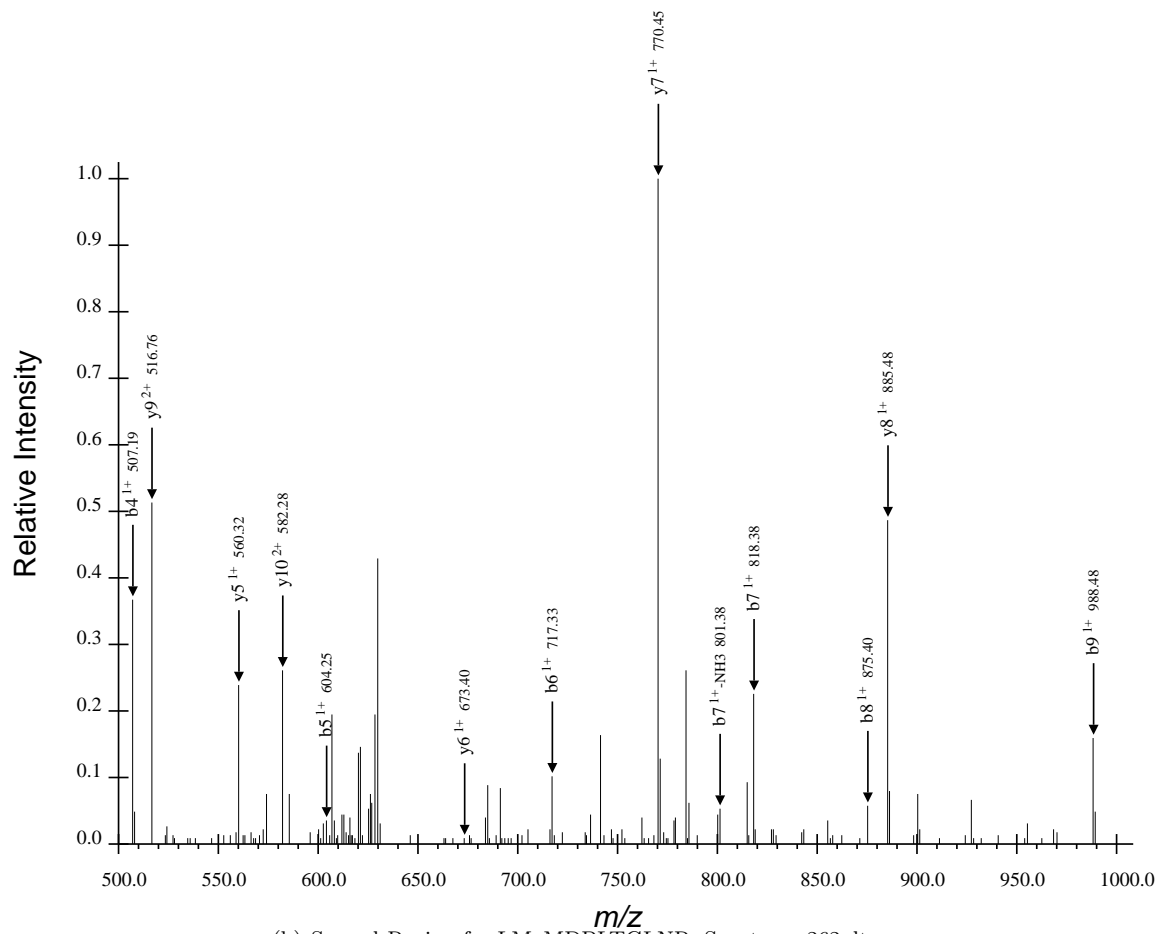

(b) Second Region for LMoMDPLTGLNR, Spectrum 262.dta

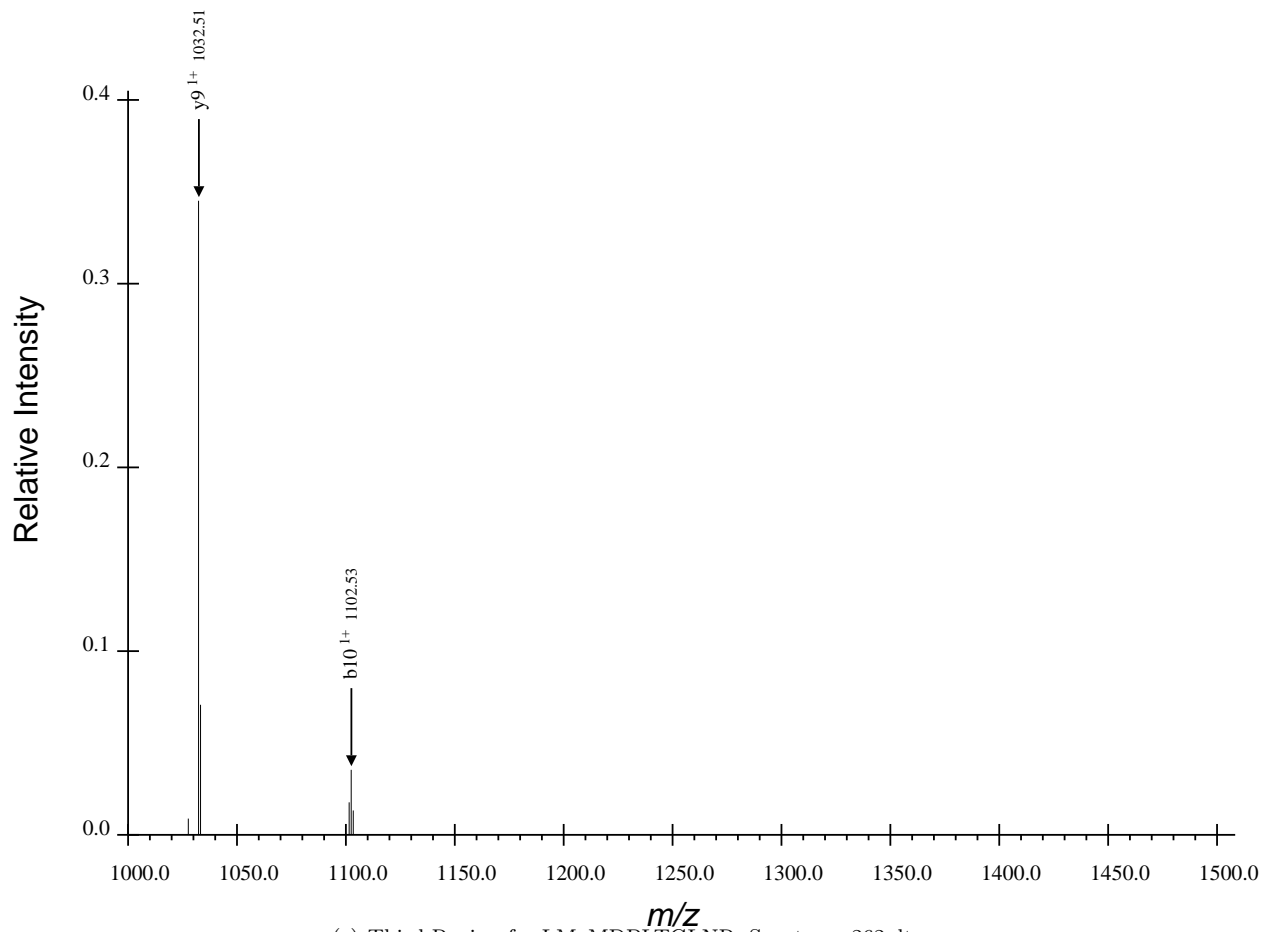

(c) Third Region for LMoMDPLTGLNR, Spectrum 262.dta

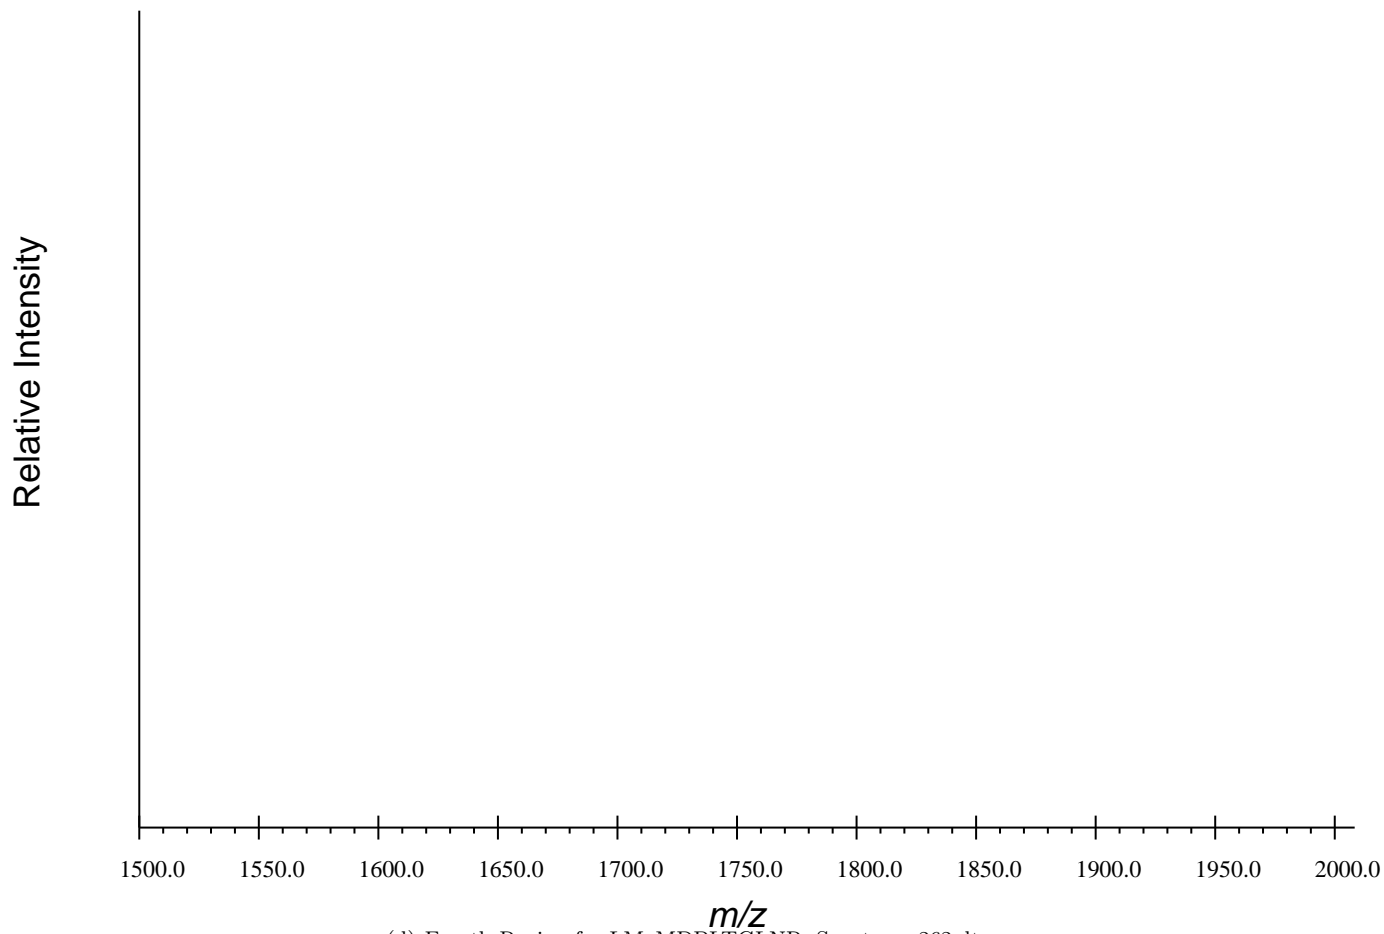

(d) Fourth Region for LMoMDPLTGLNR, Spectrum 262.dta

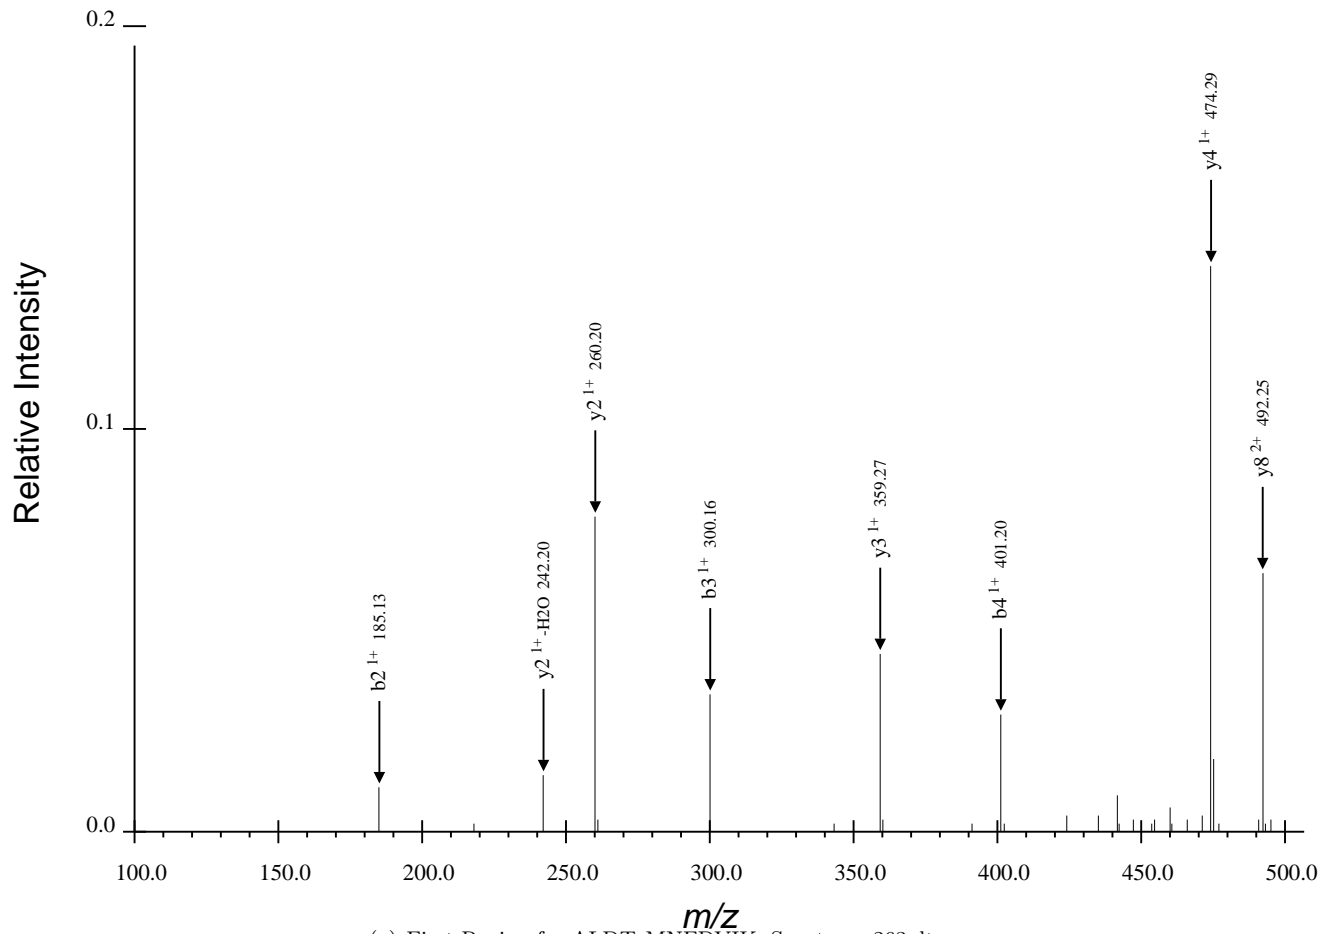

(a) First Region for ALDToMNFDDVIK, Spectrum 263.dta

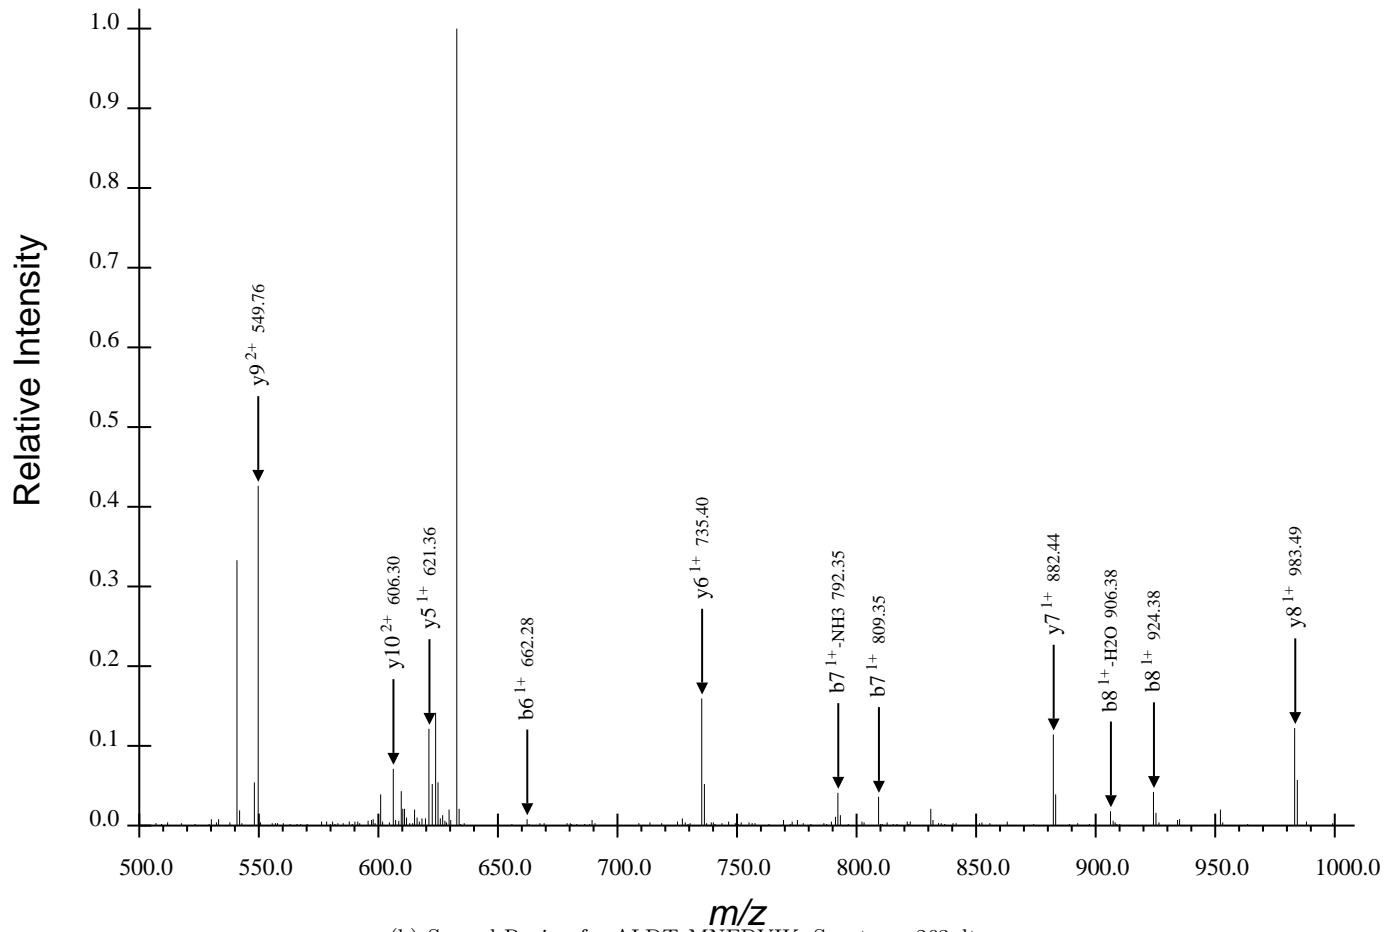

(b) Second Region for ALDToMNFDDVIK, Spectrum 263.dta

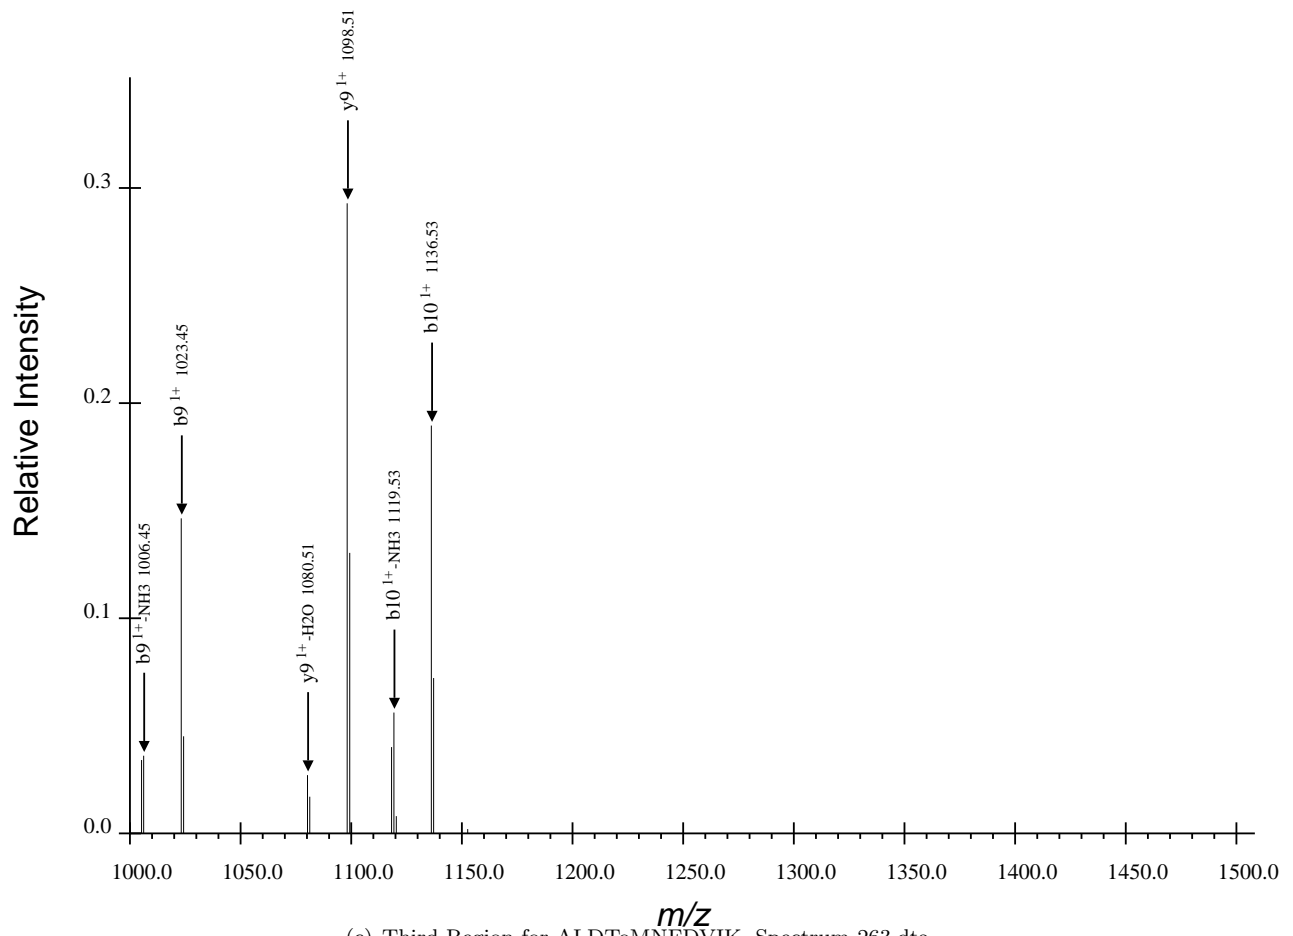

(c) Third Region for ALDToMNFDFVIK, Spectrum 263.dta

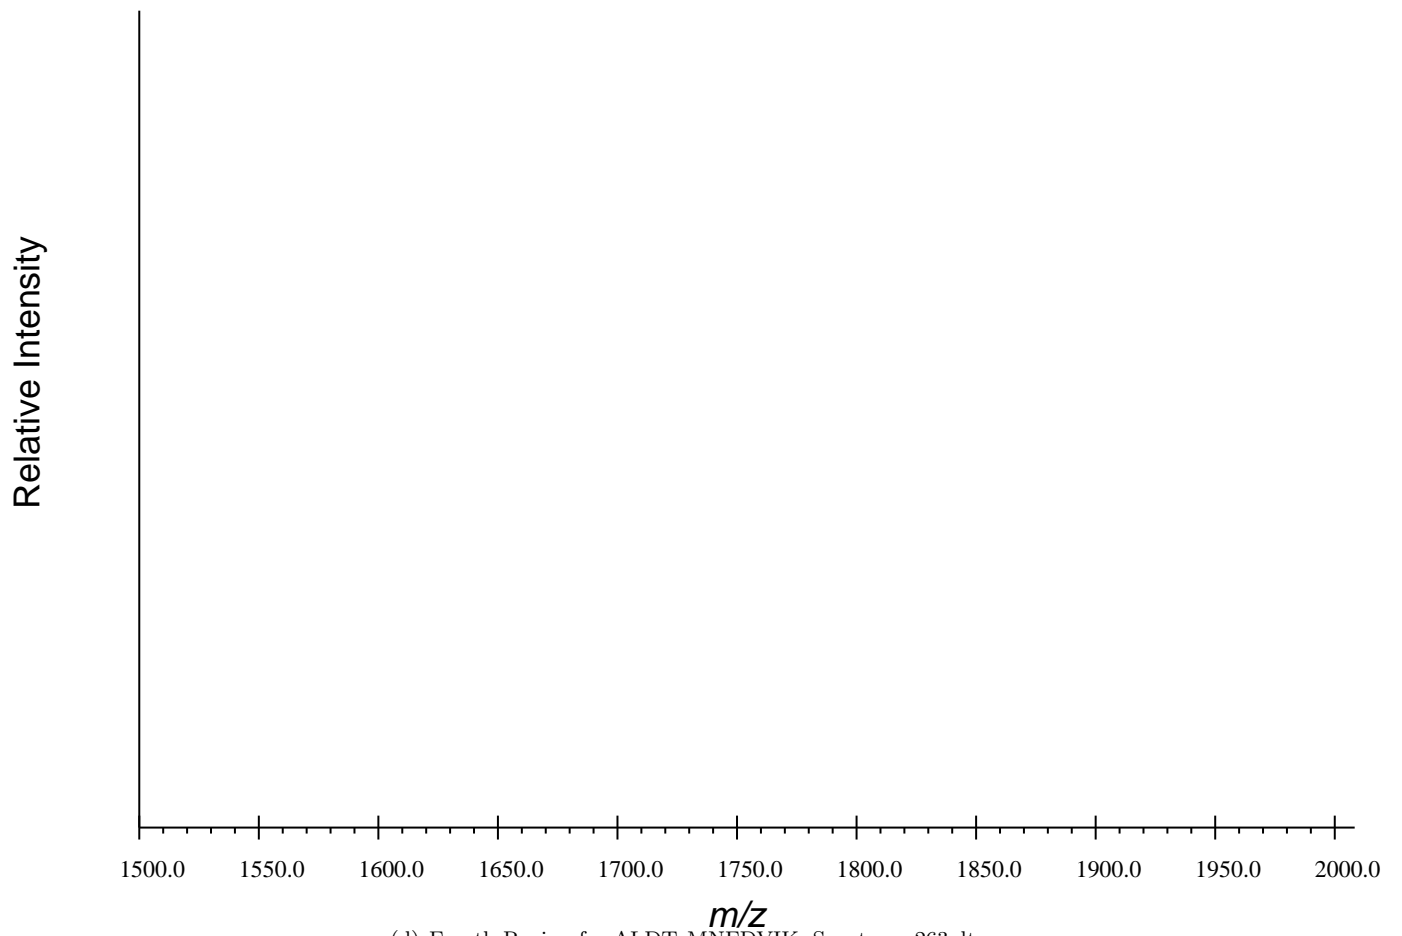

(d) Fourth Region for ALDToMNFDFVIK, Spectrum 263.dta

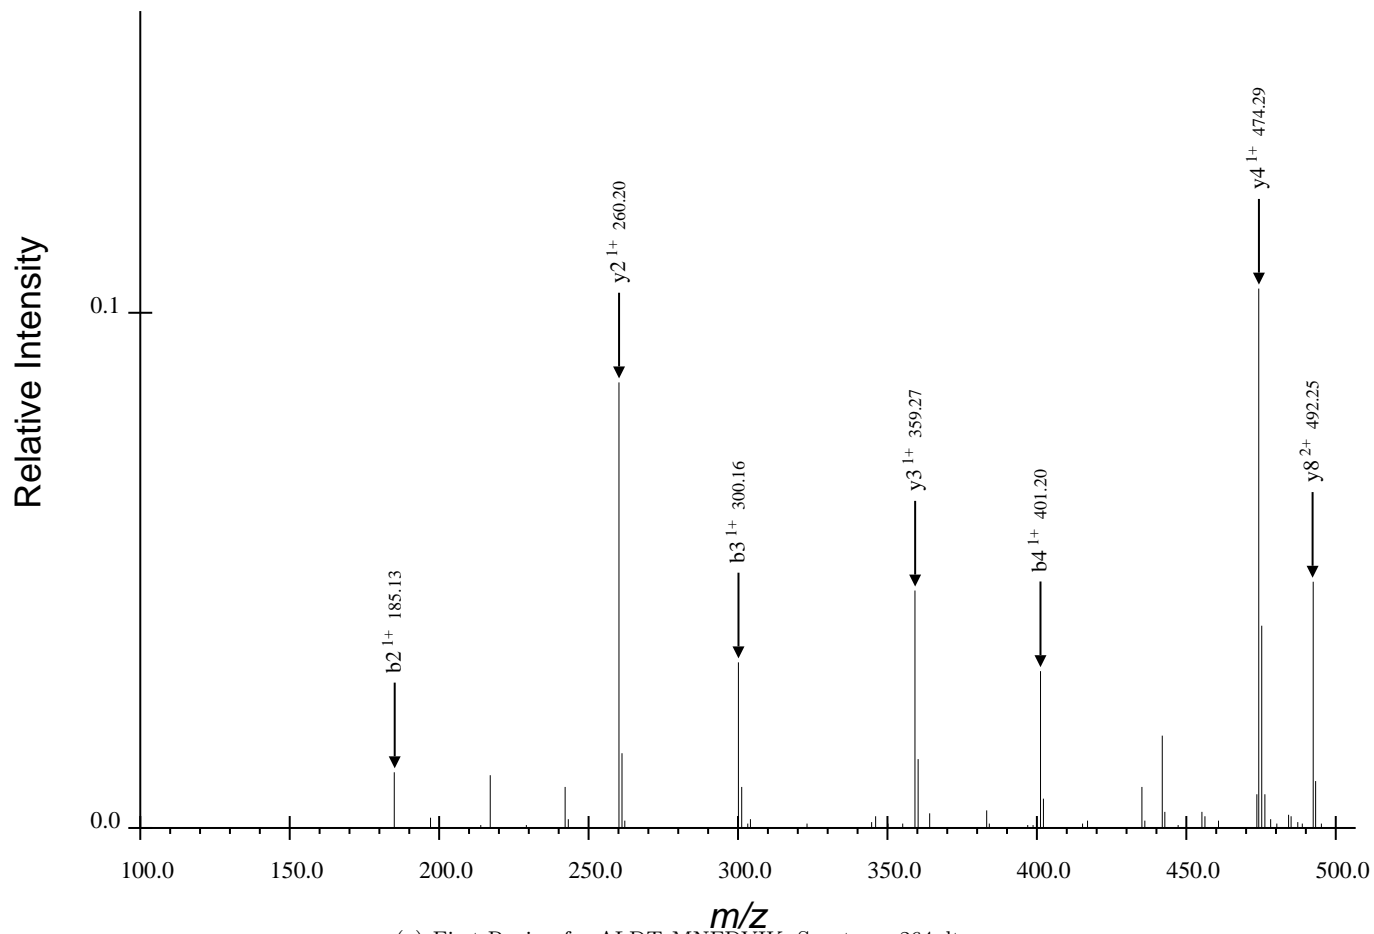

(a) First Region for ALDToMNFDFVIK, Spectrum 264.dta

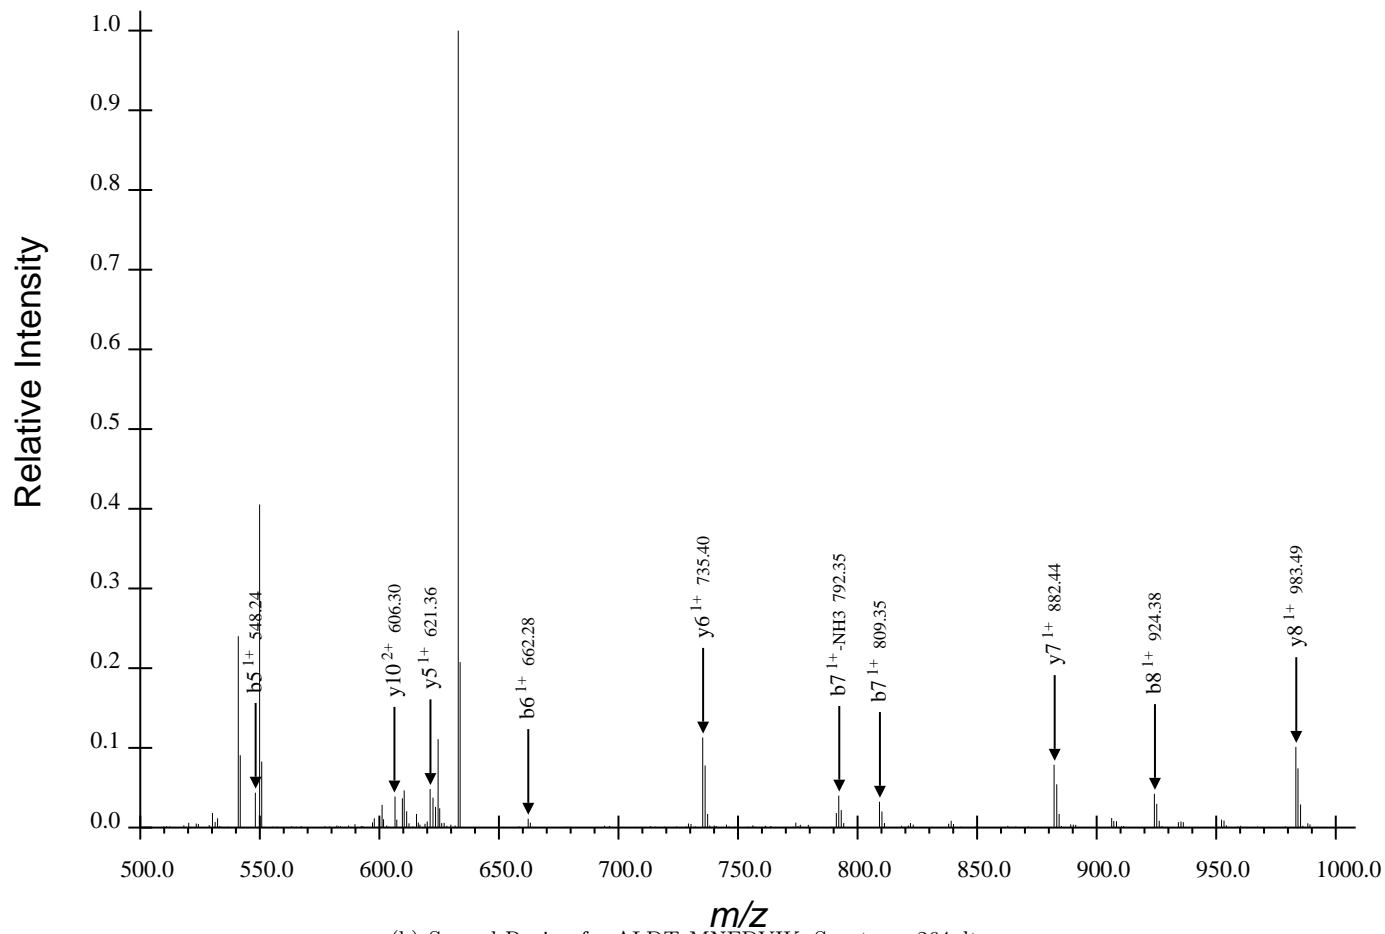

(b) Second Region for ALDToMNFDFVIK, Spectrum 264.dta



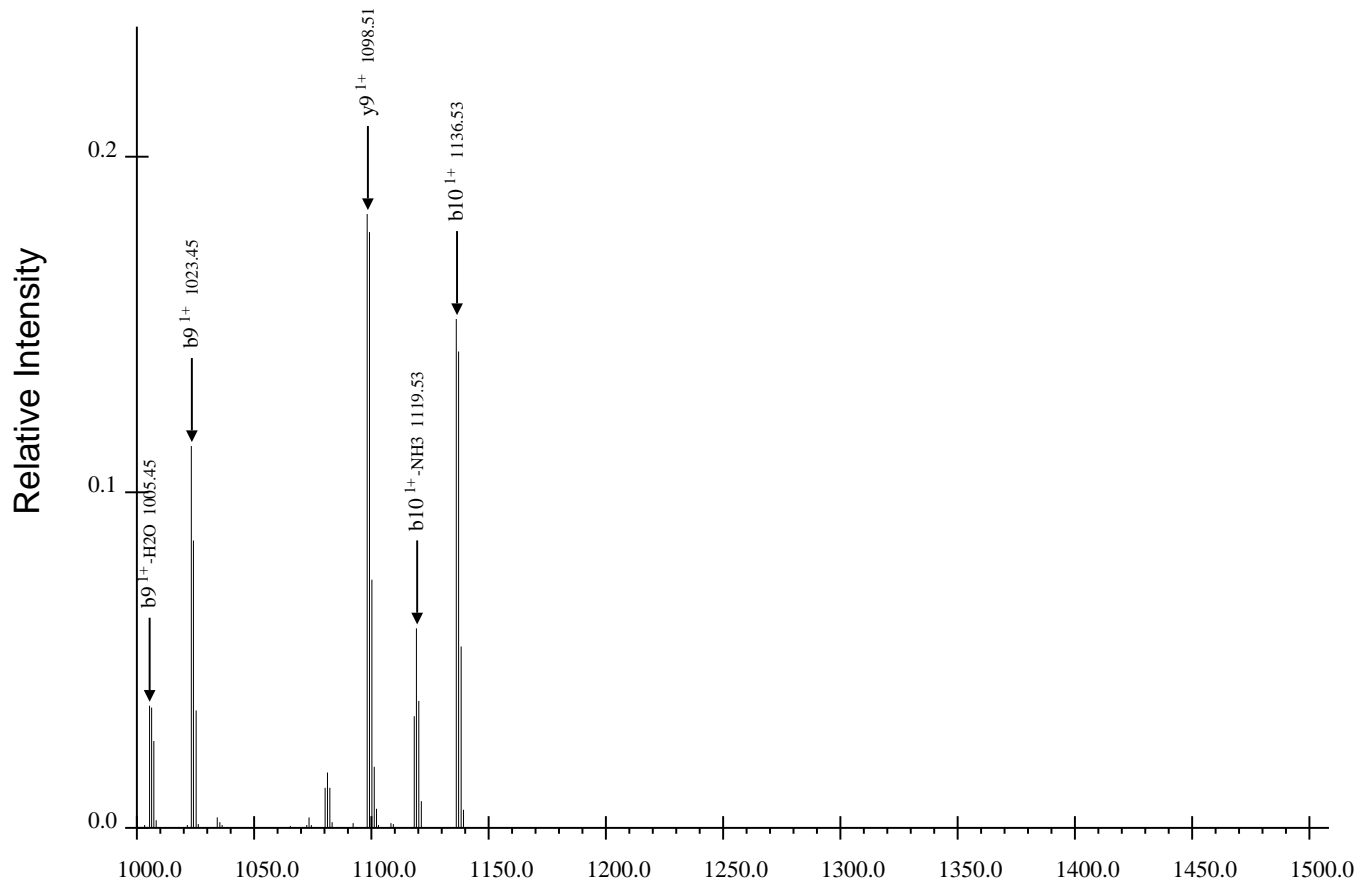

(c) Third Region for ALDToMNFdVIK, Spectrum 264.dta

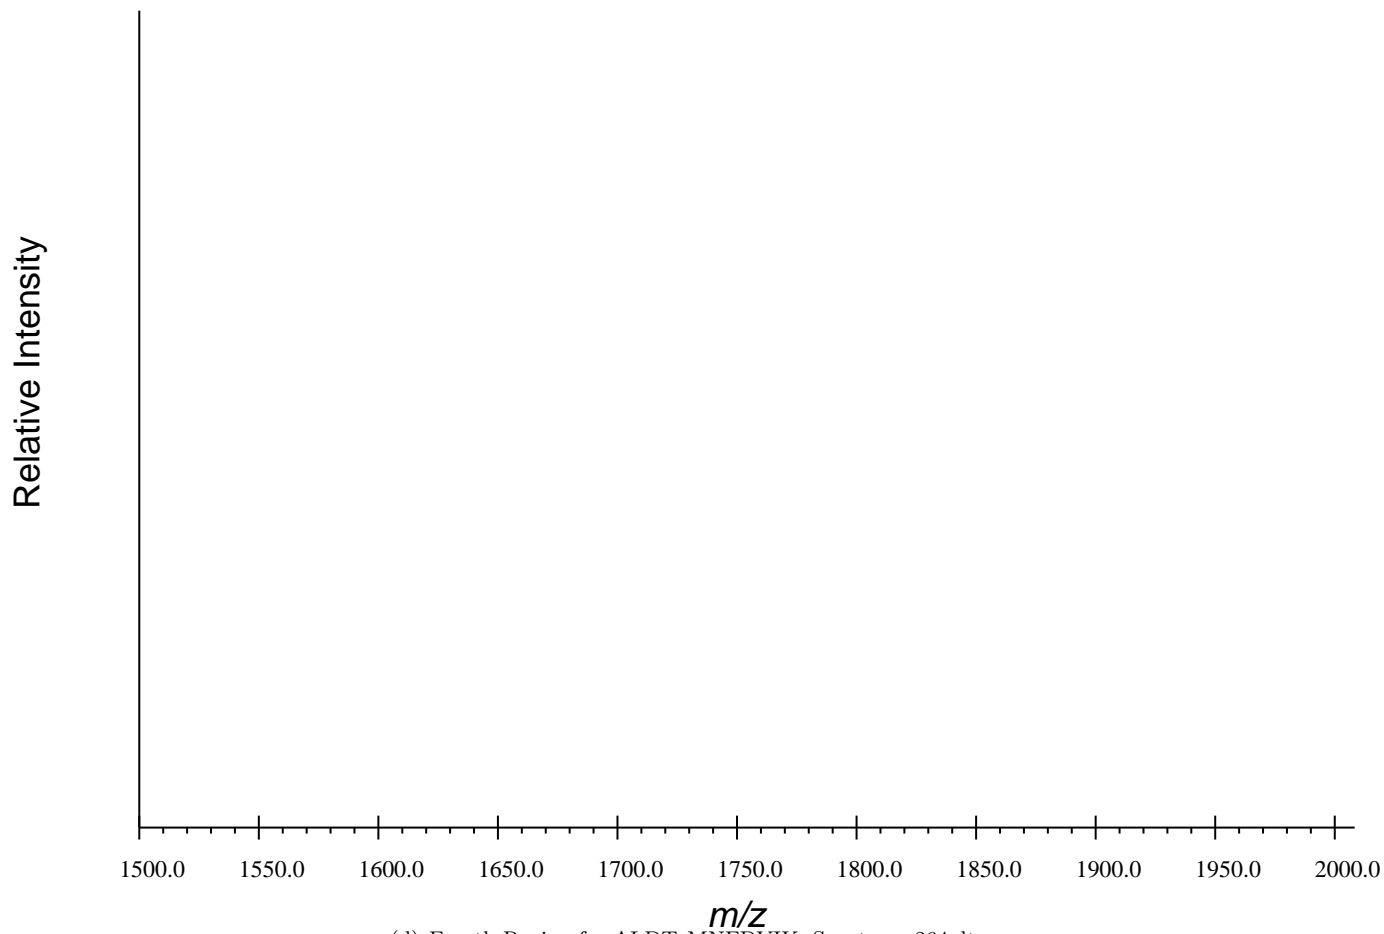

(d) Fourth Region for ALDToMNFdVIK, Spectrum 264.dta

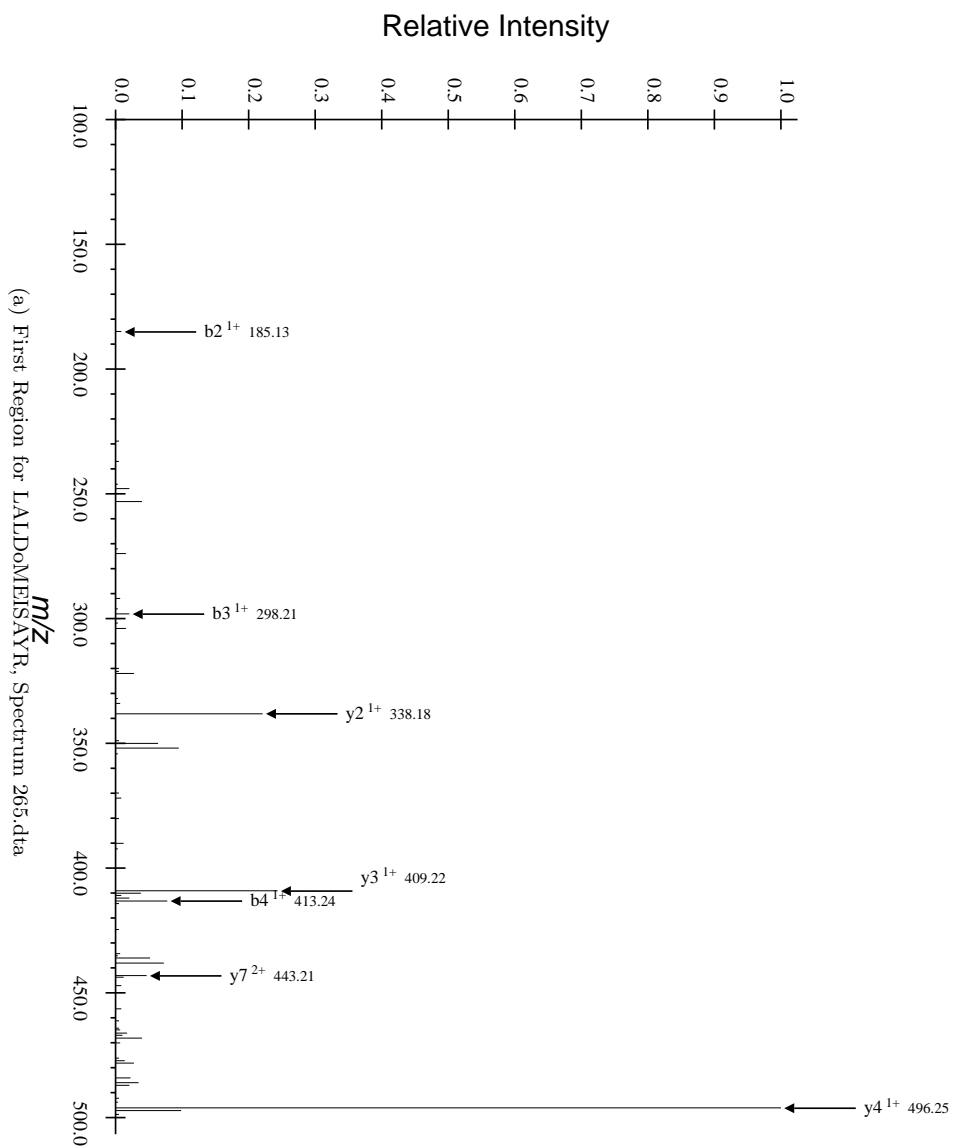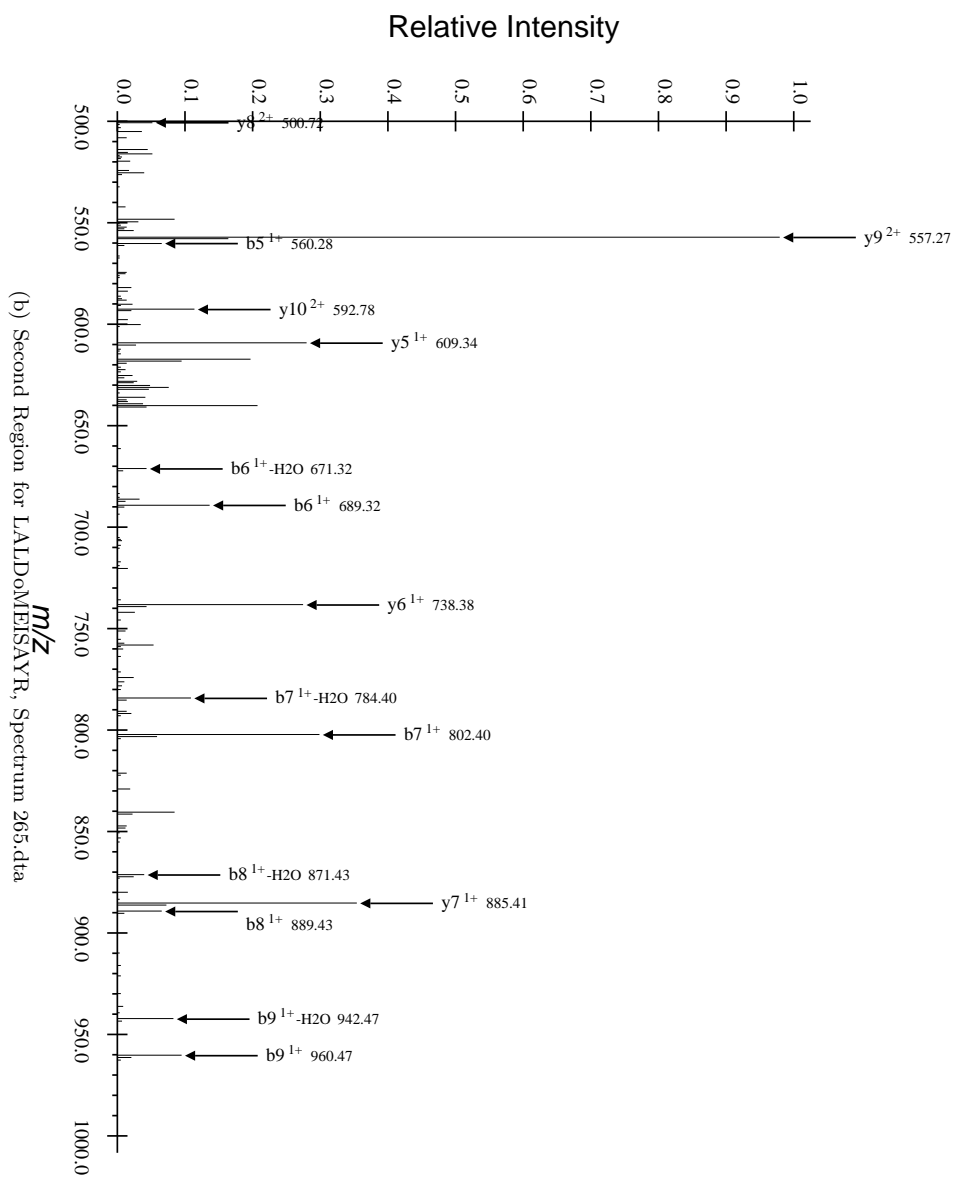

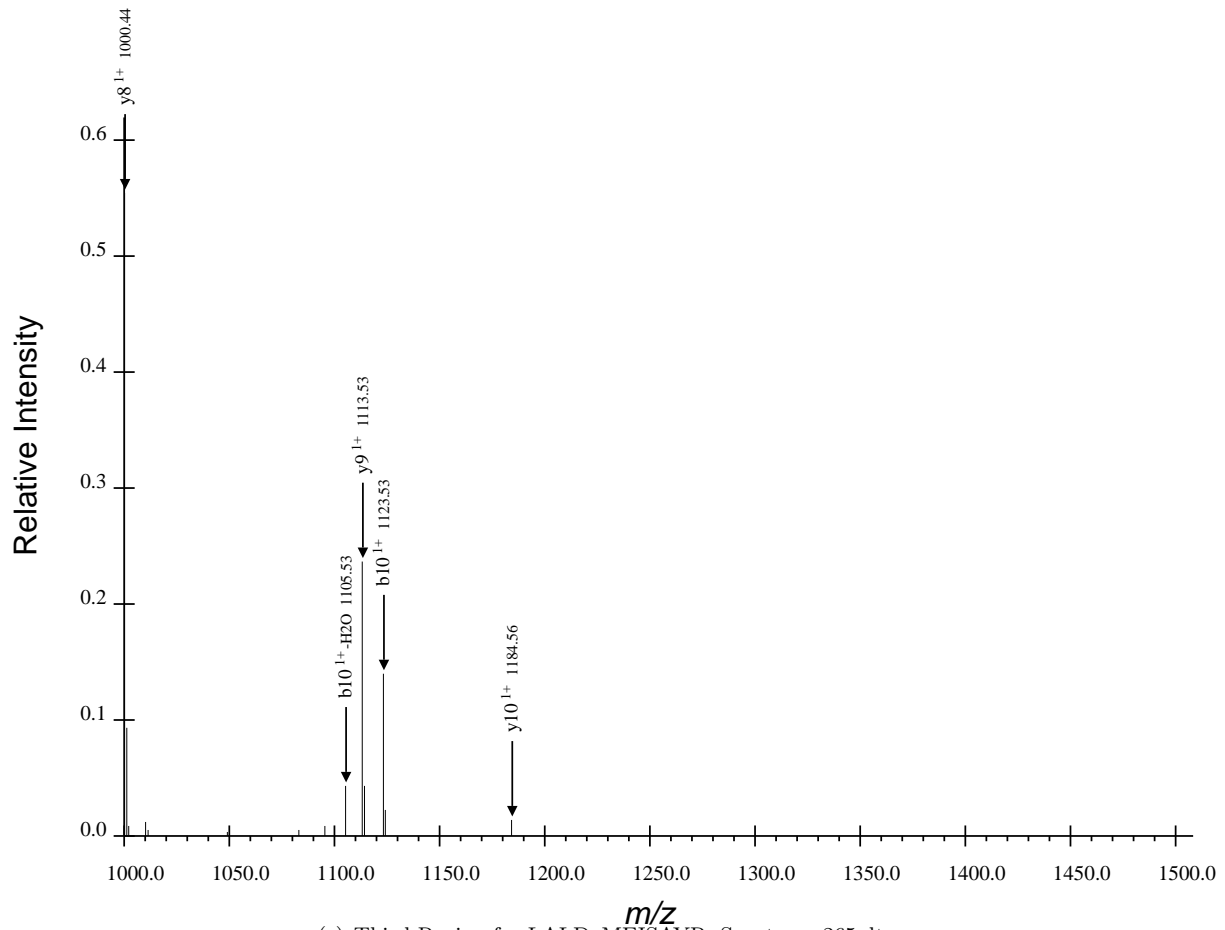

(c) Third Region for LALDoMEISAYR, Spectrum 265.dta

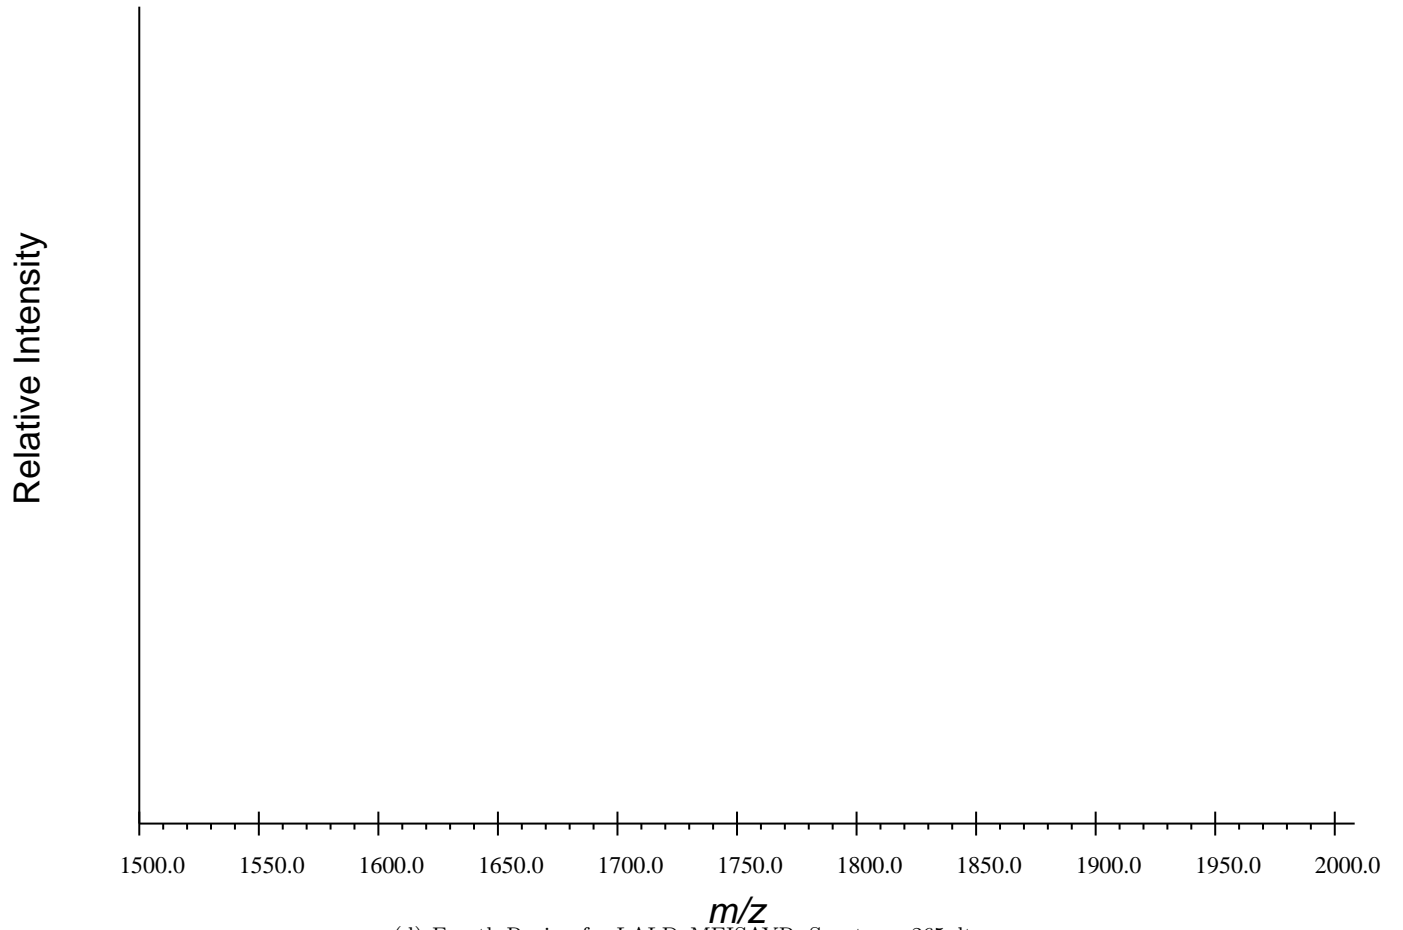

(d) Fourth Region for LALDoMEISAYR, Spectrum 265.dta

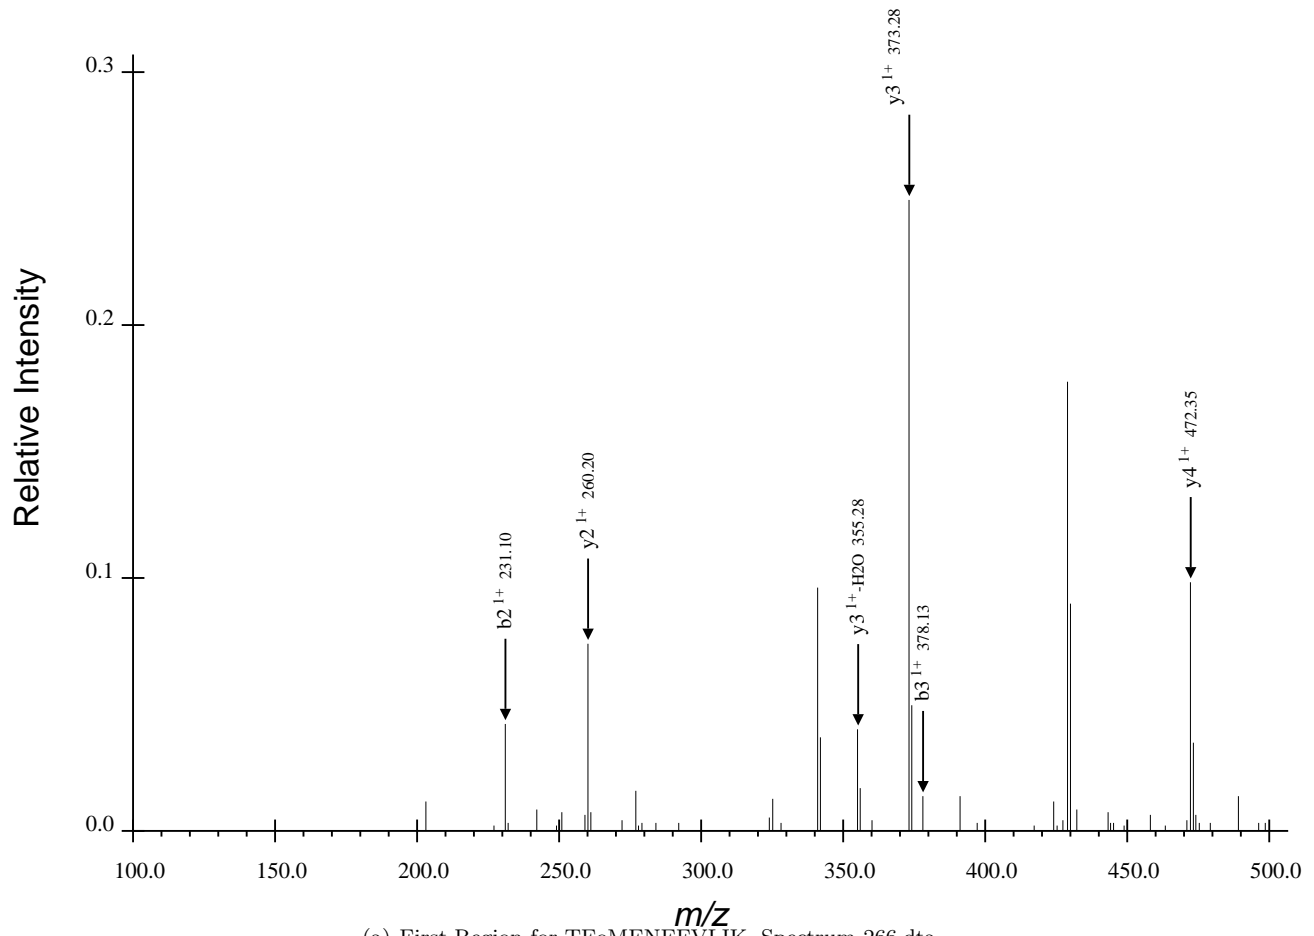

(a) First Region for TEoMENEFLIK, Spectrum 266.dta

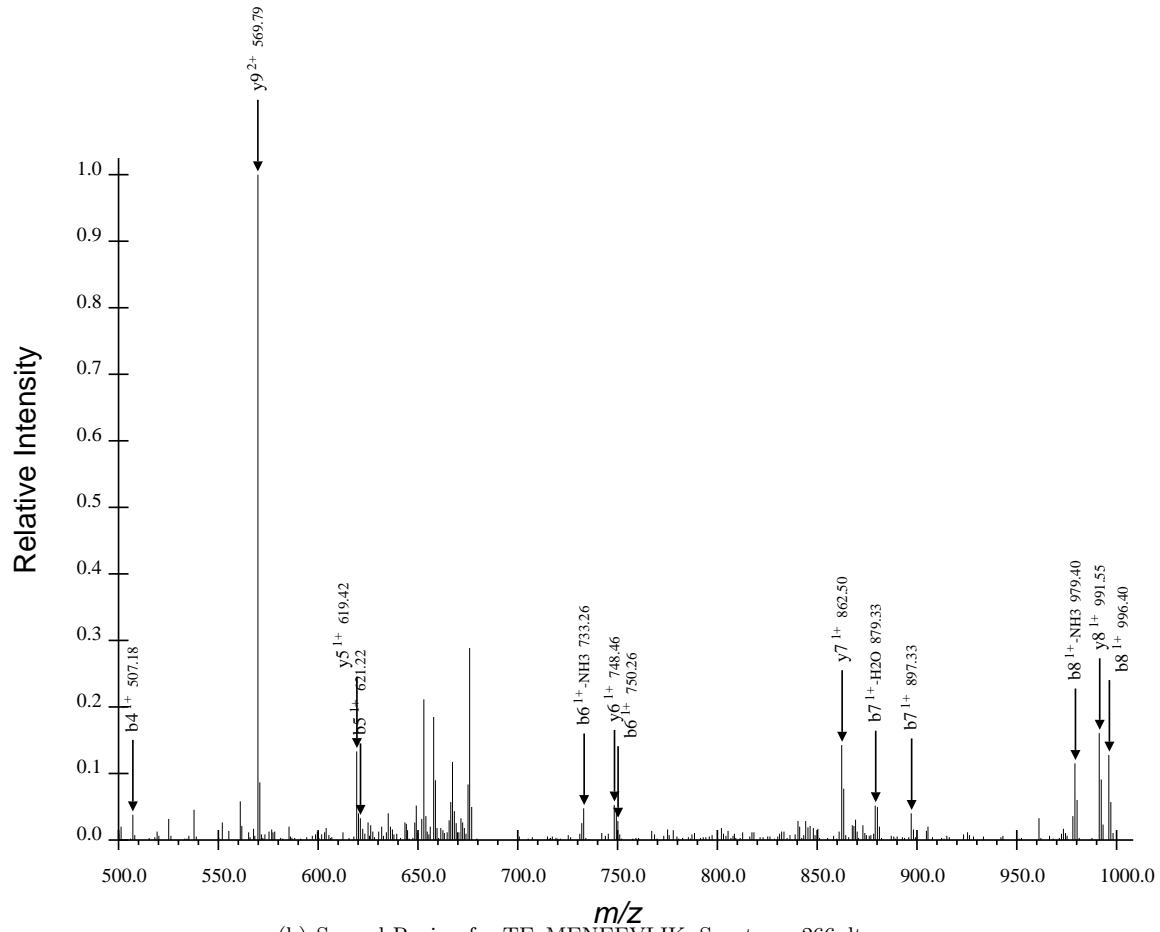

(b) Second Region for TEoMENEFLIK, Spectrum 266.dta

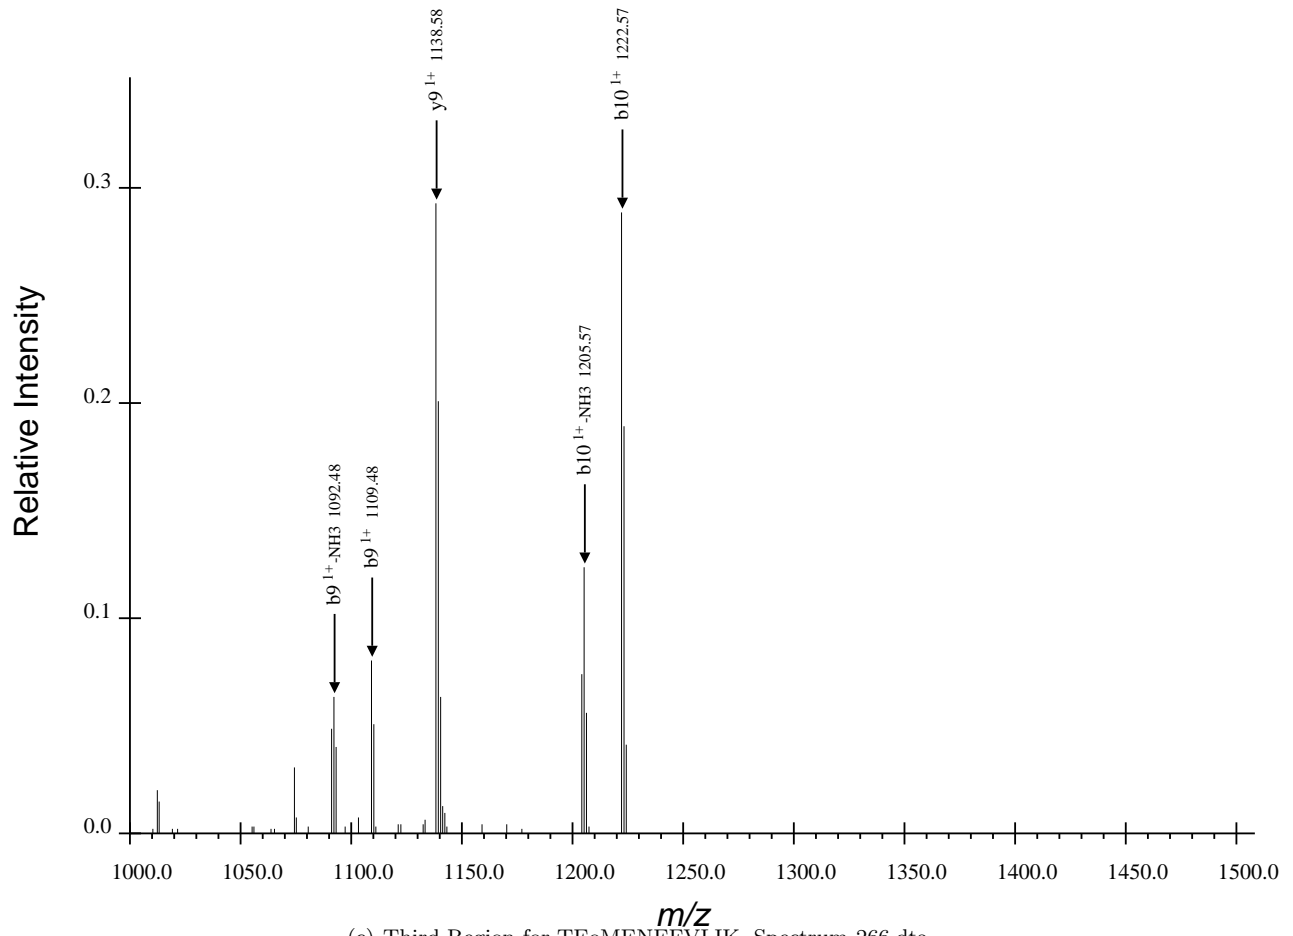

(c) Third Region for TEoMENEFLIK, Spectrum 266.dta

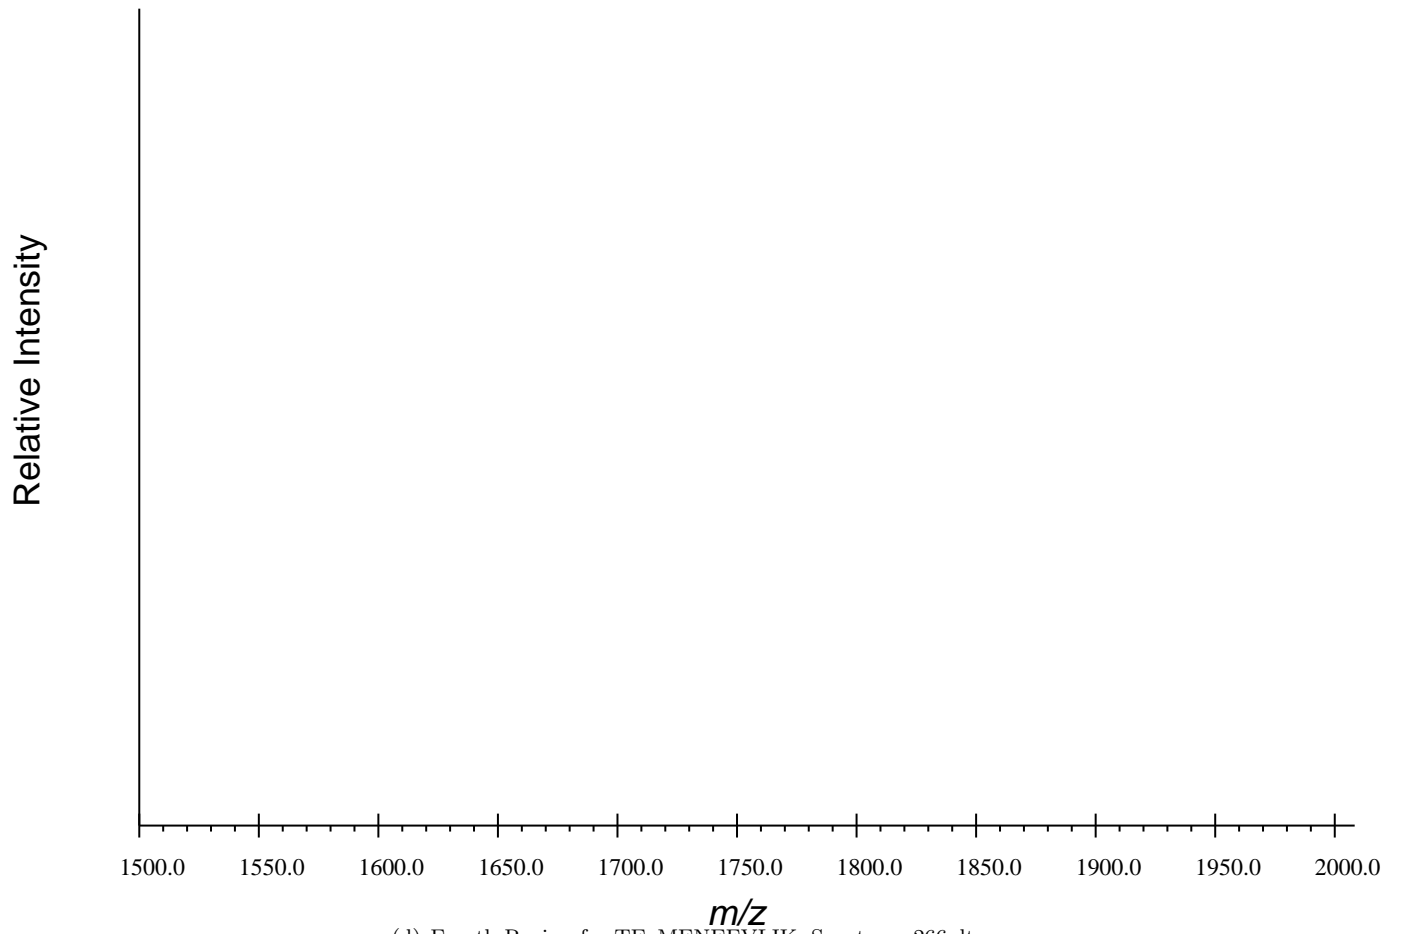

(d) Fourth Region for TEoMENEFLIK, Spectrum 266.dta

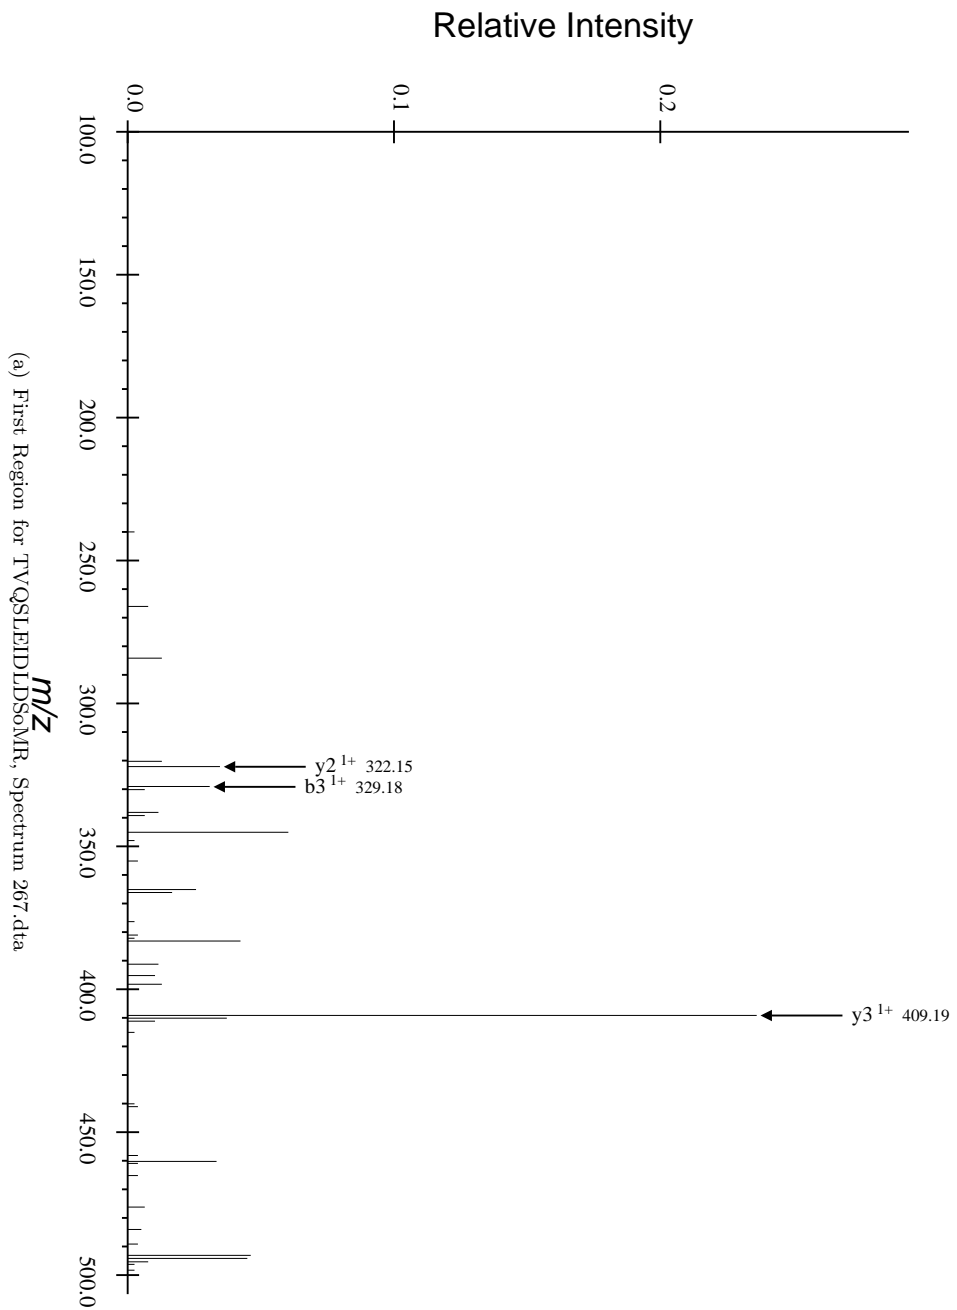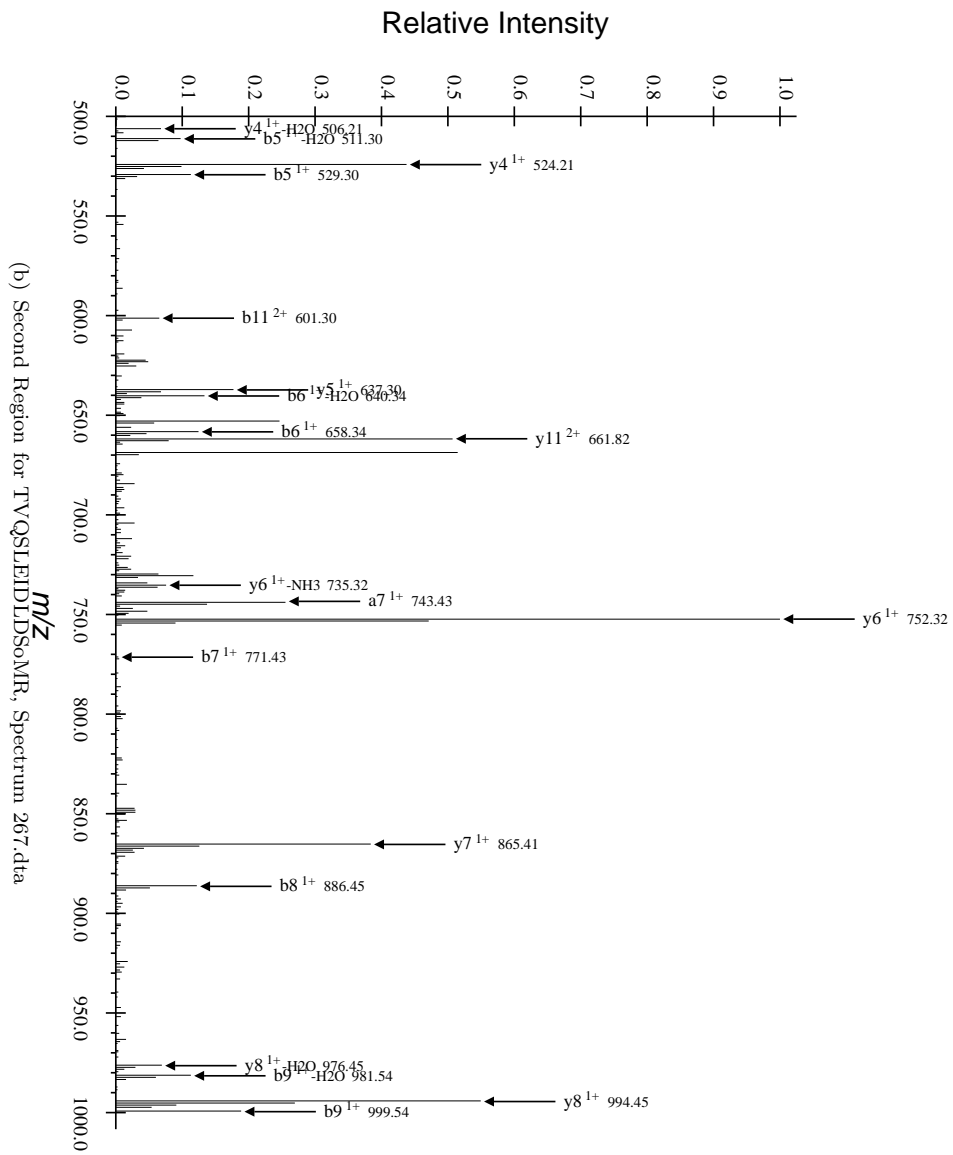

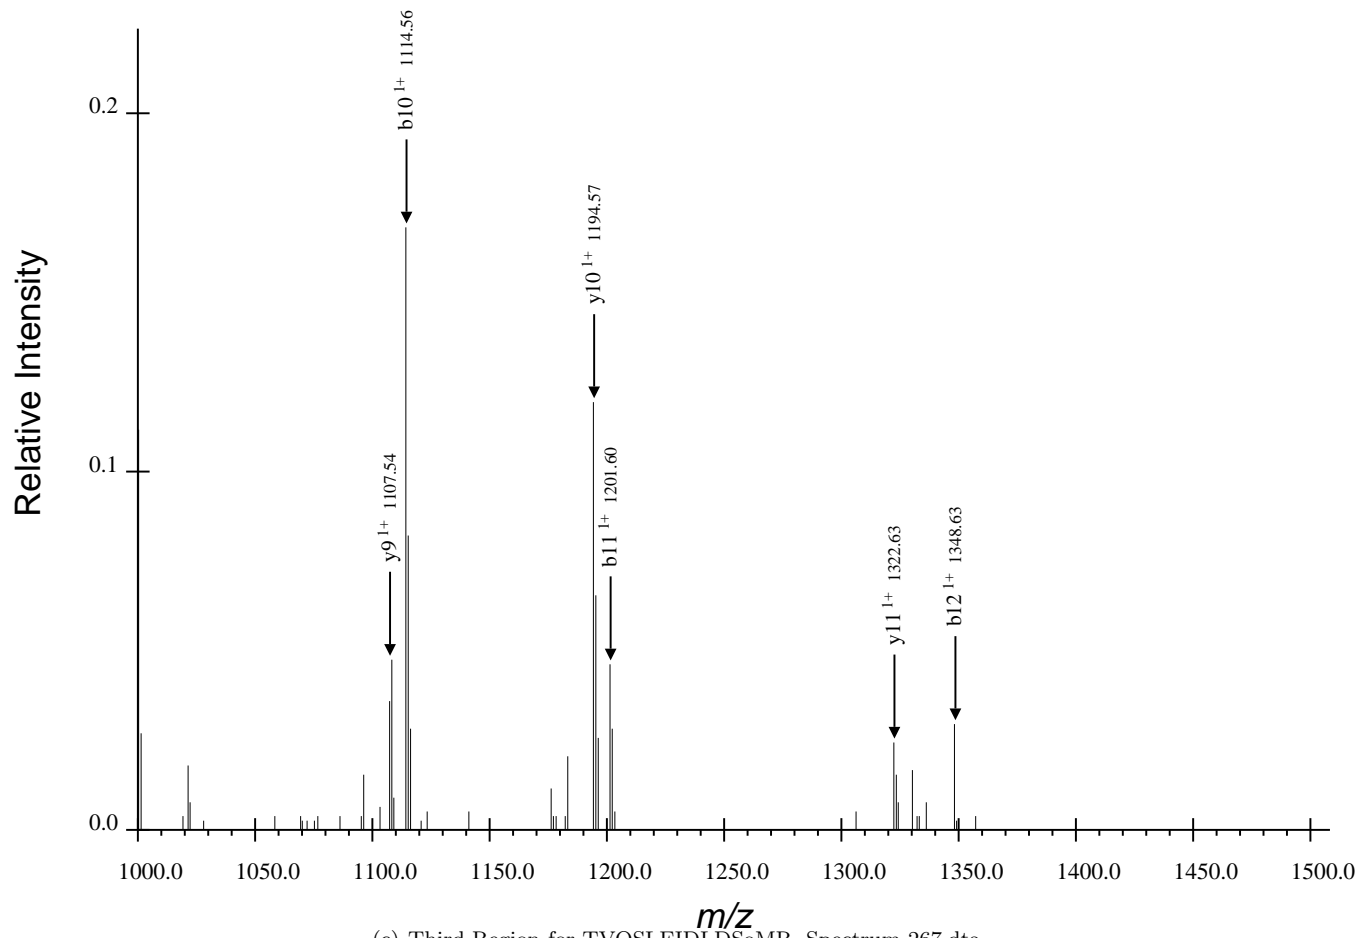

(c) Third Region for TVQSLEIDLDSMR, Spectrum 267.dta

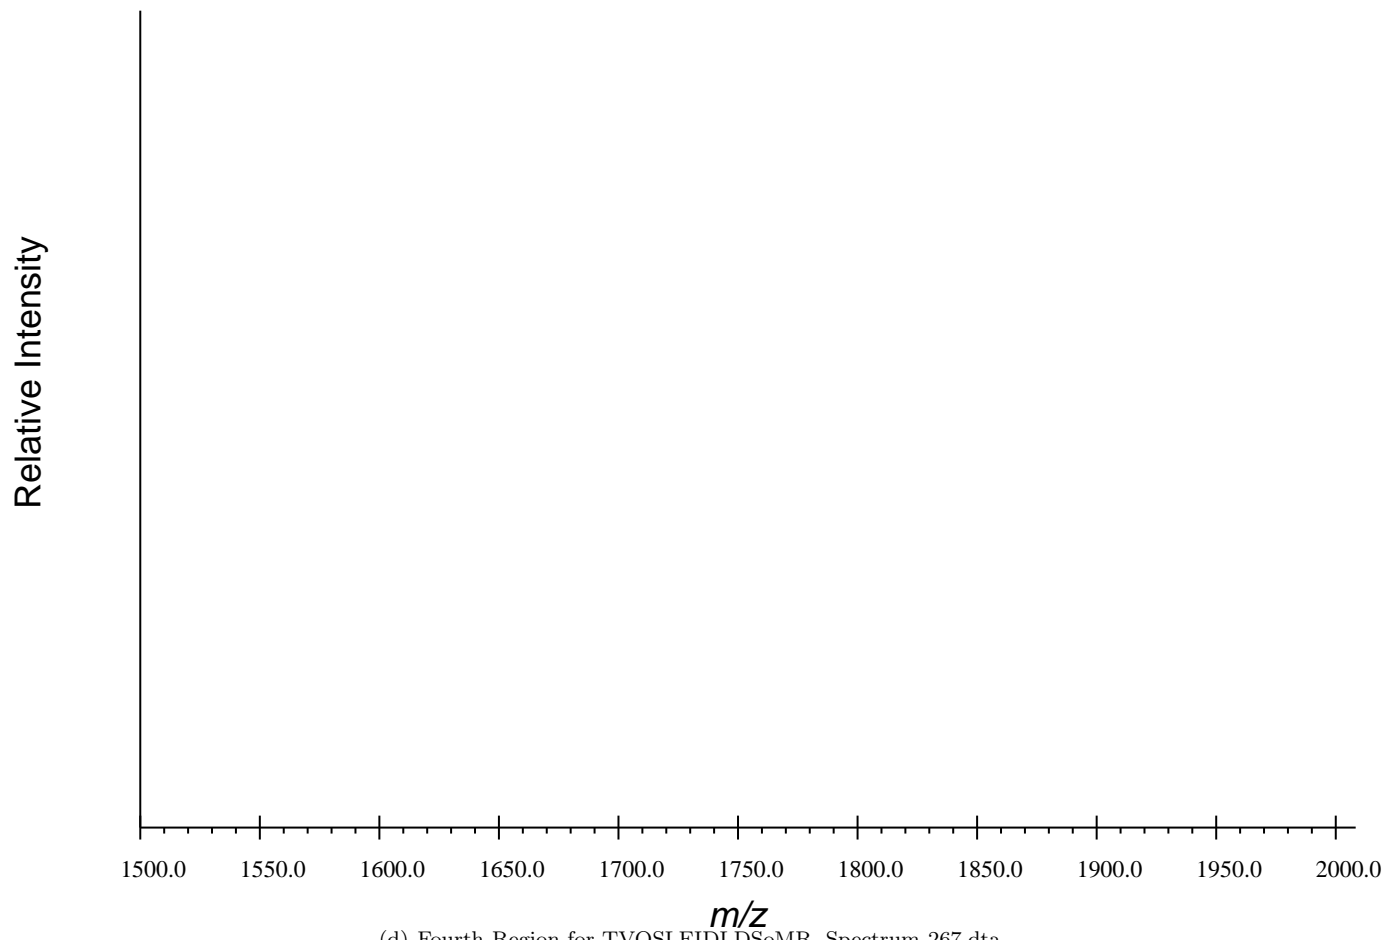

(d) Fourth Region for TVQSLEIDLDSMR, Spectrum 267.dta

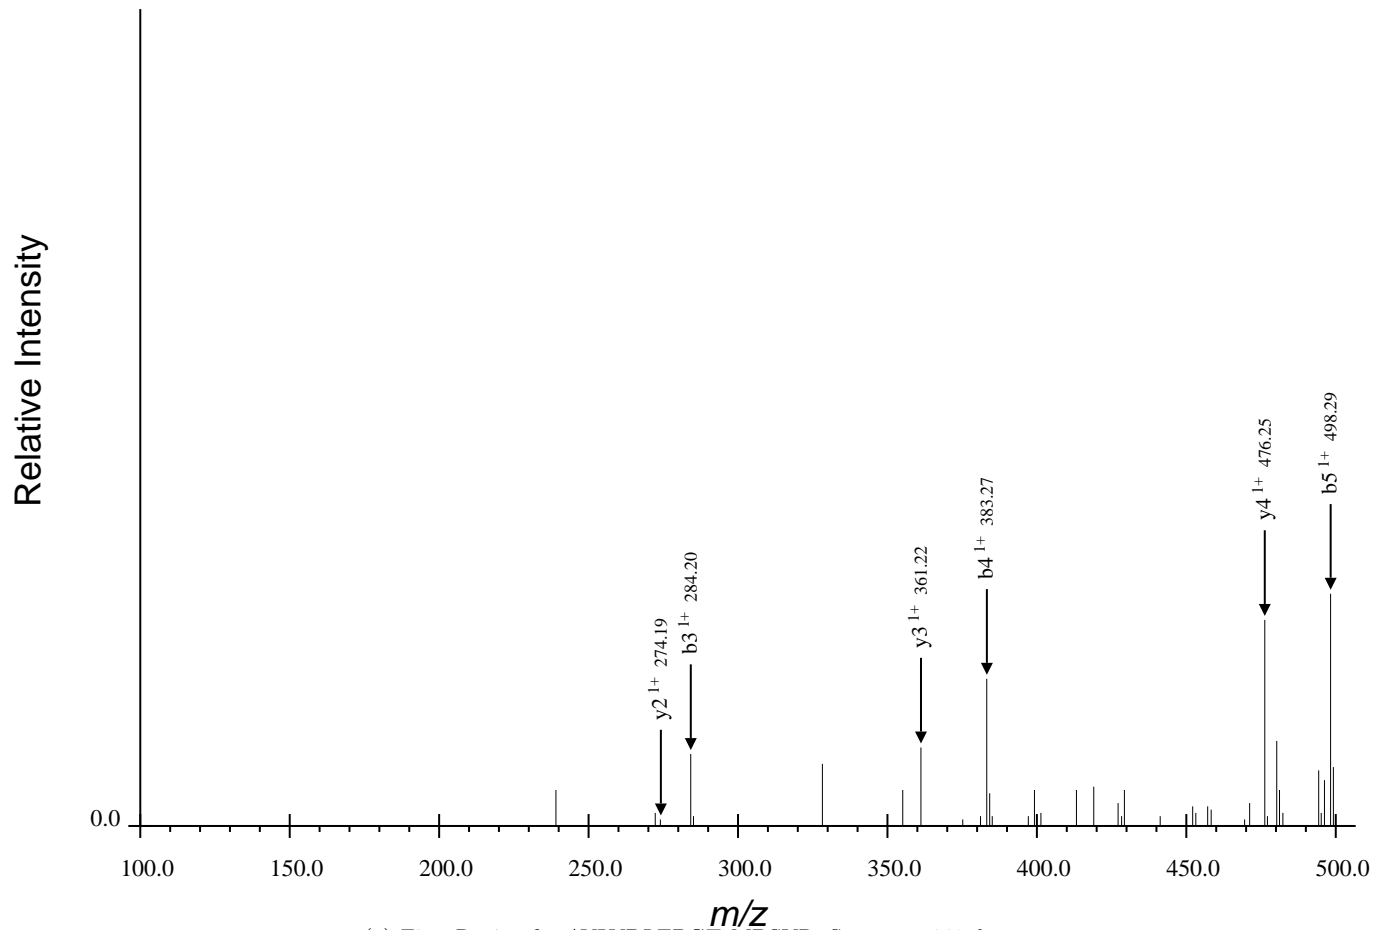

(a) First Region for AVLDLEPGToMDSVR, Spectrum 268.dta

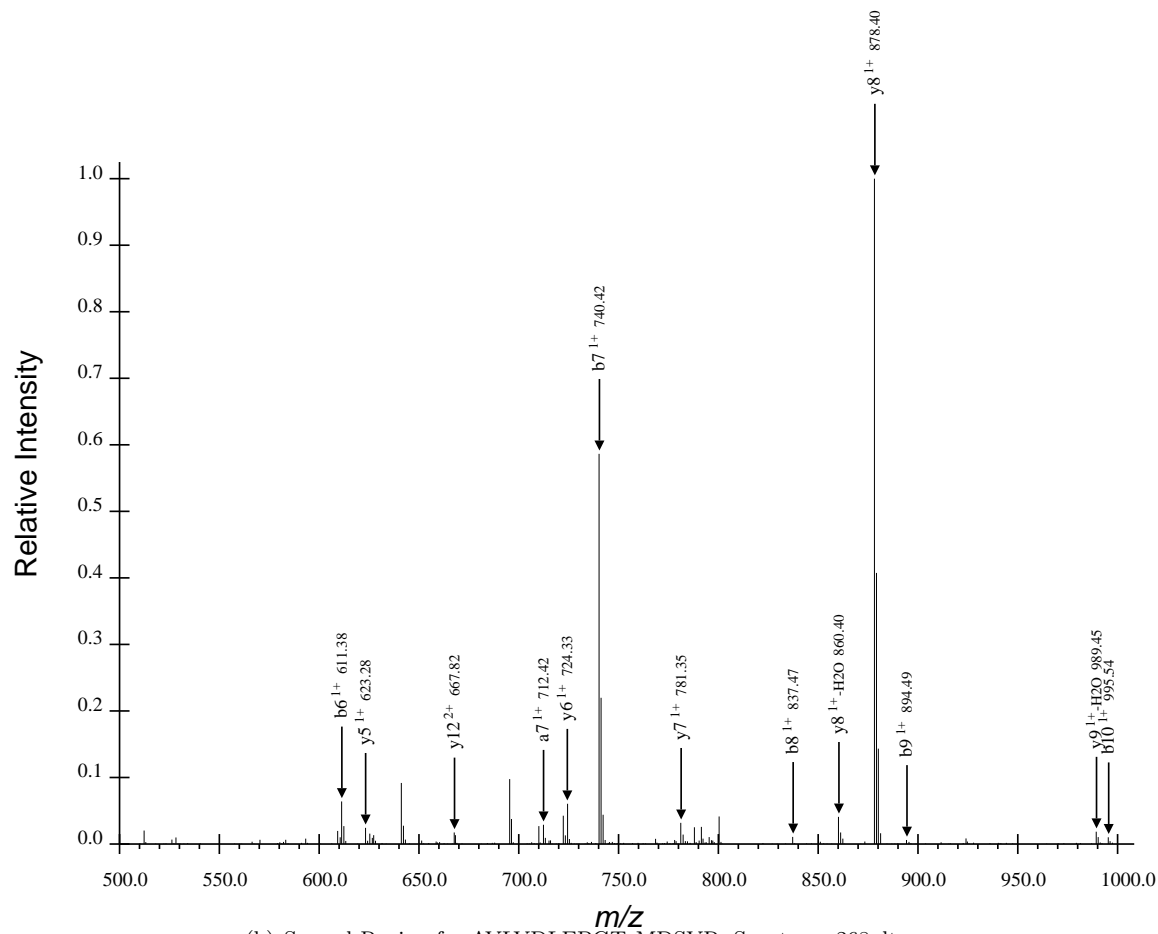

(b) Second Region for AVLDLEPGToMDSVR, Spectrum 268.dta



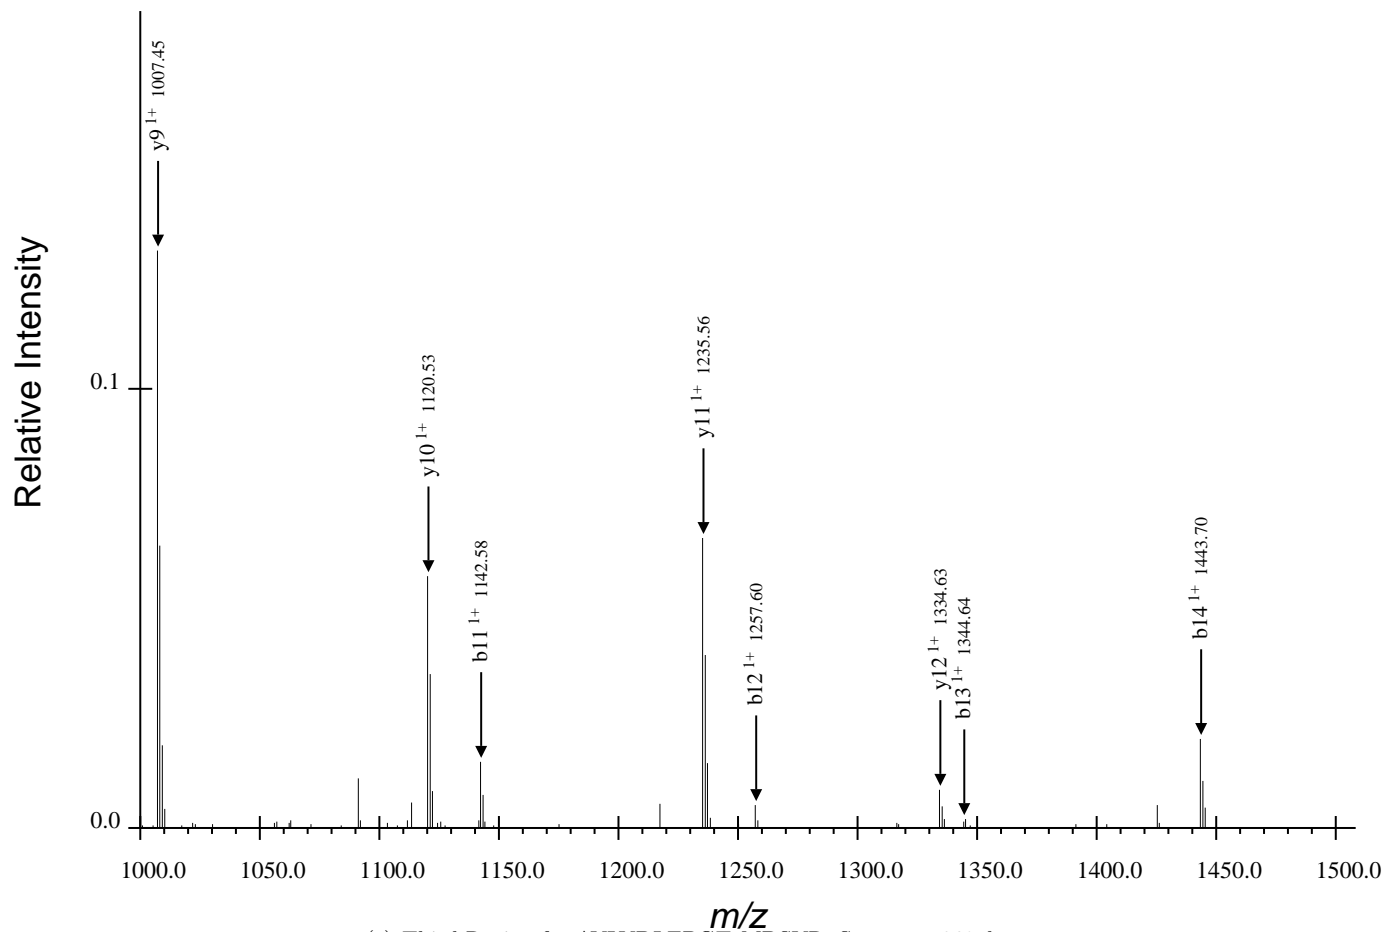

(c) Third Region for AVLVDLEPGToMDSVR, Spectrum 268.dta

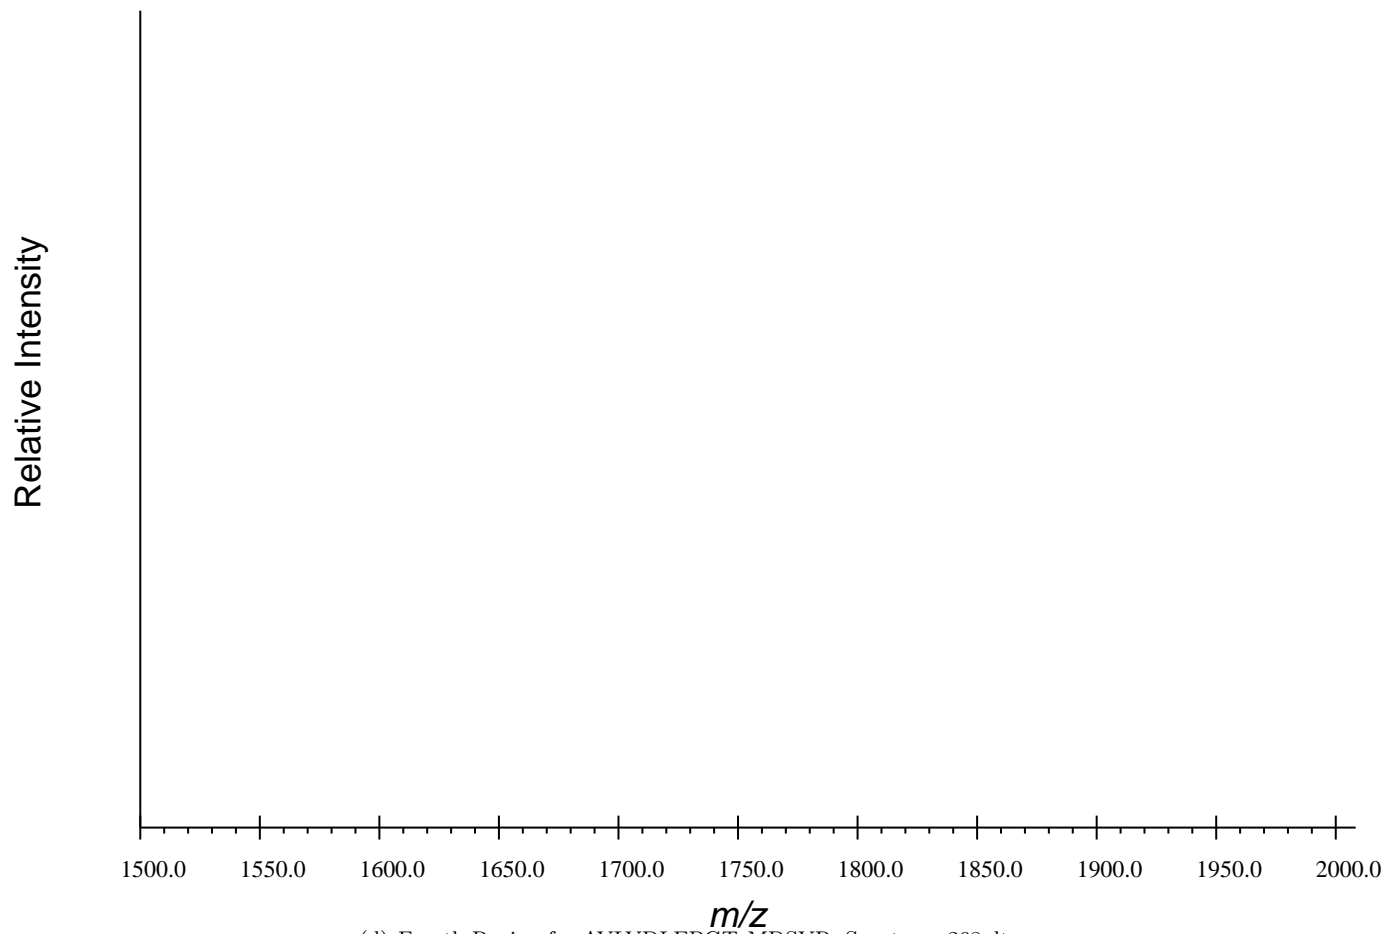

(d) Fourth Region for AVLVDLEPGToMDSVR, Spectrum 268.dta

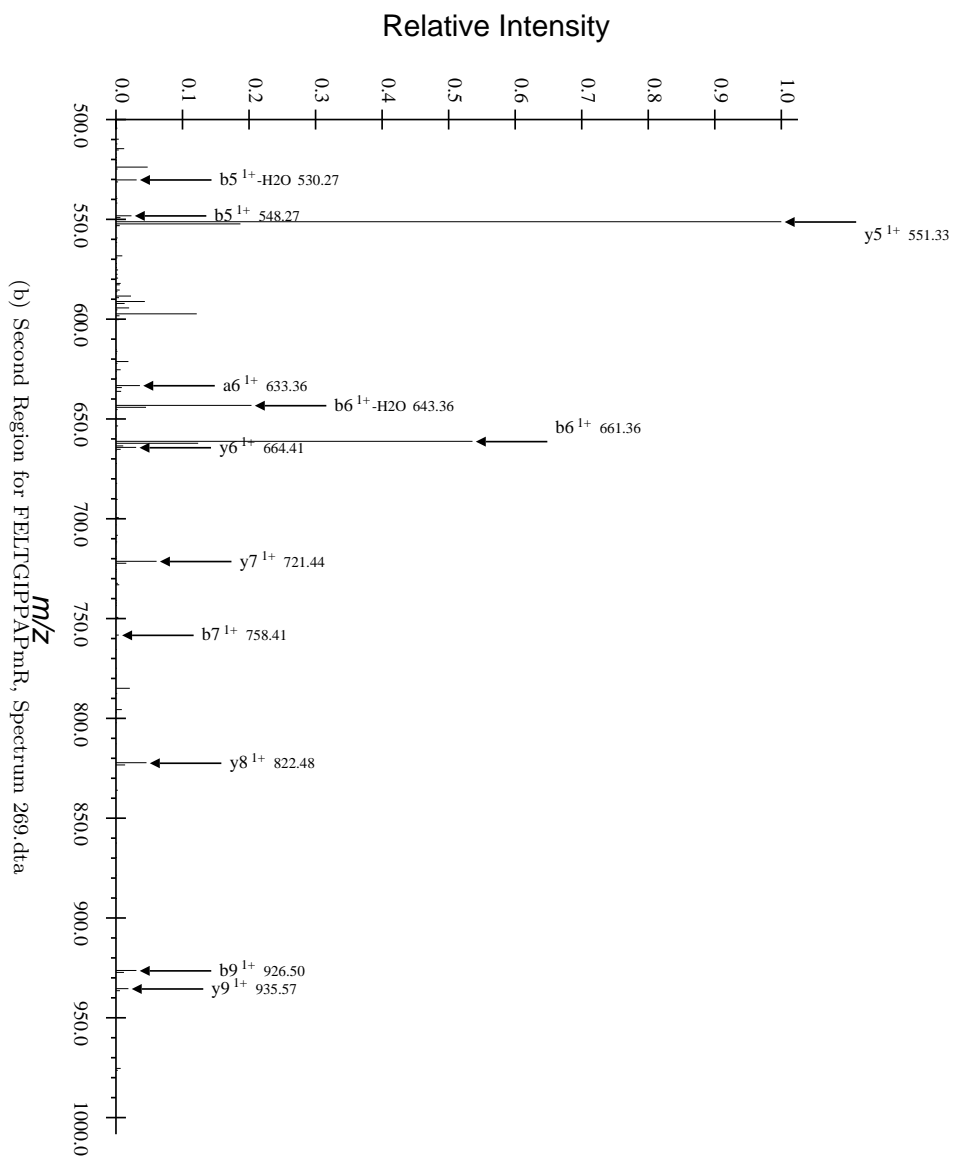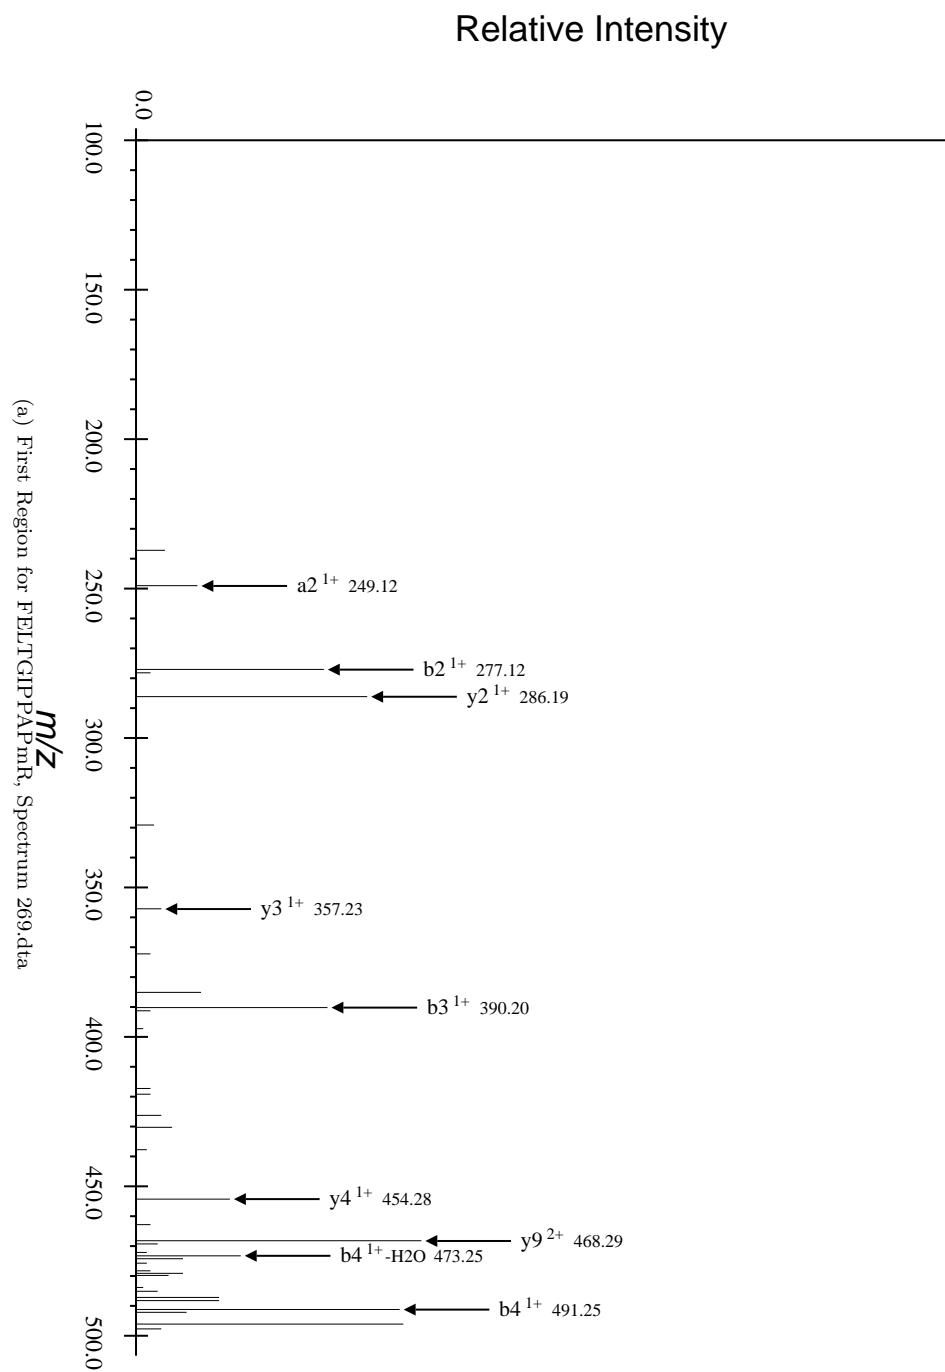

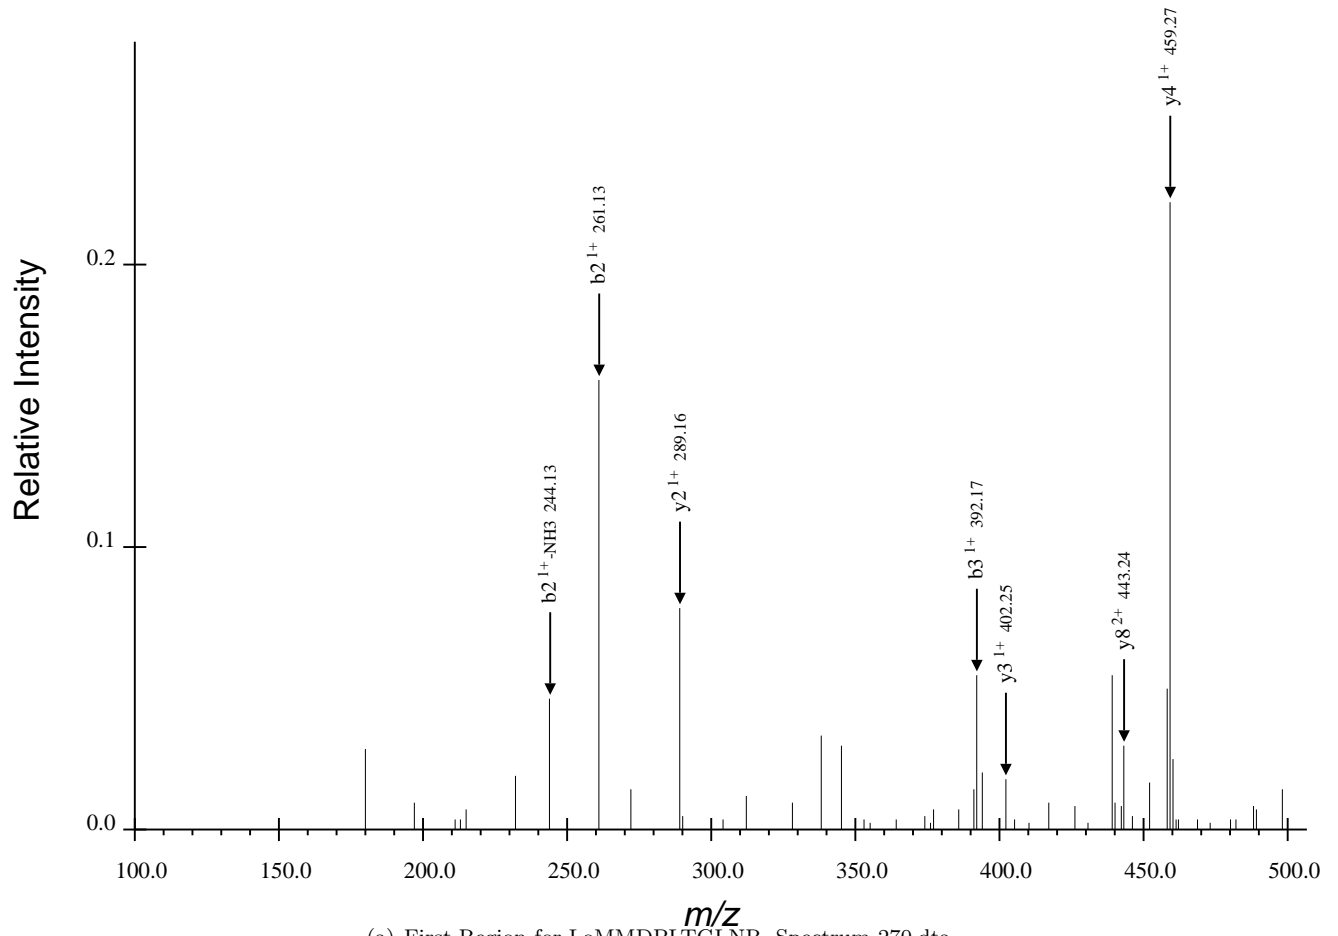

(a) First Region for LoMMDPLTGLNR, Spectrum 270.dta

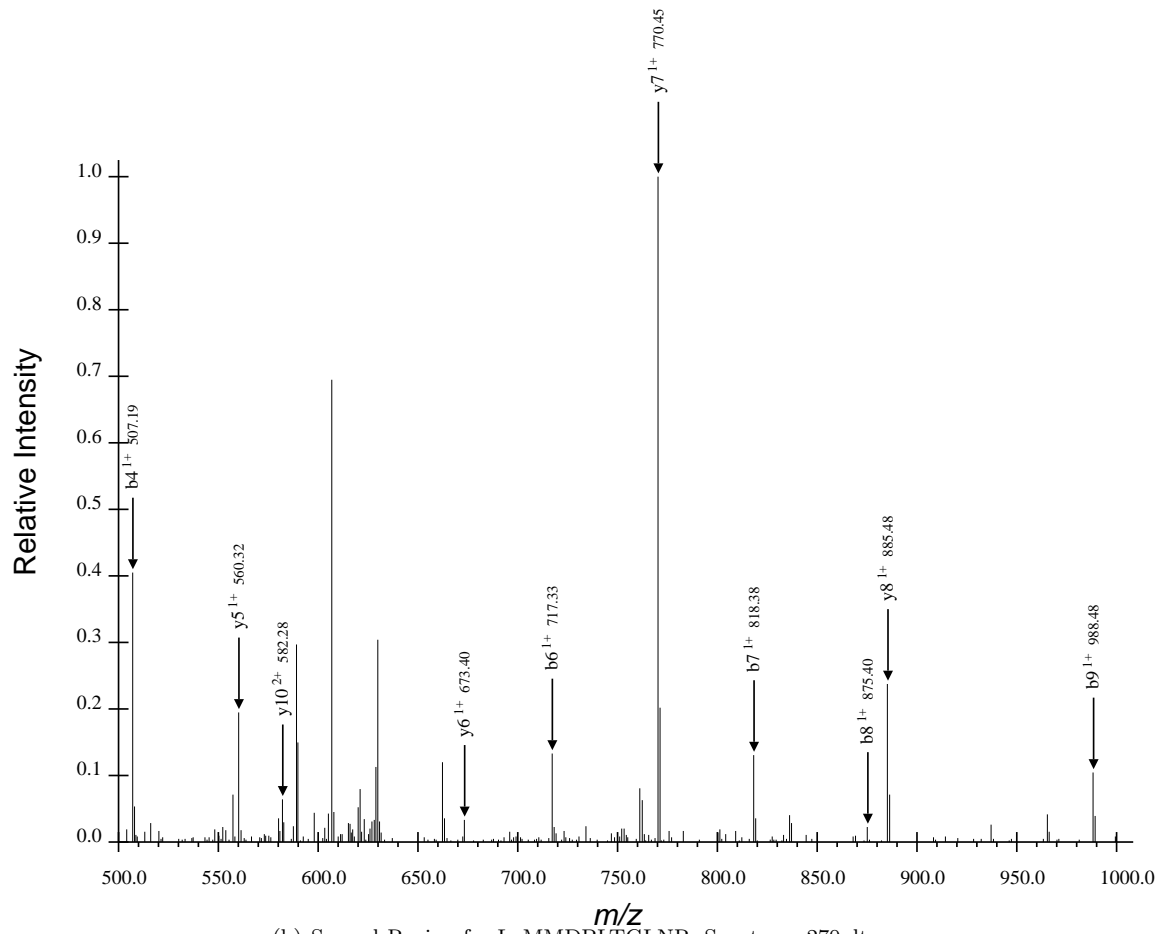

(b) Second Region for LoMMDPLTGLNR, Spectrum 270.dta

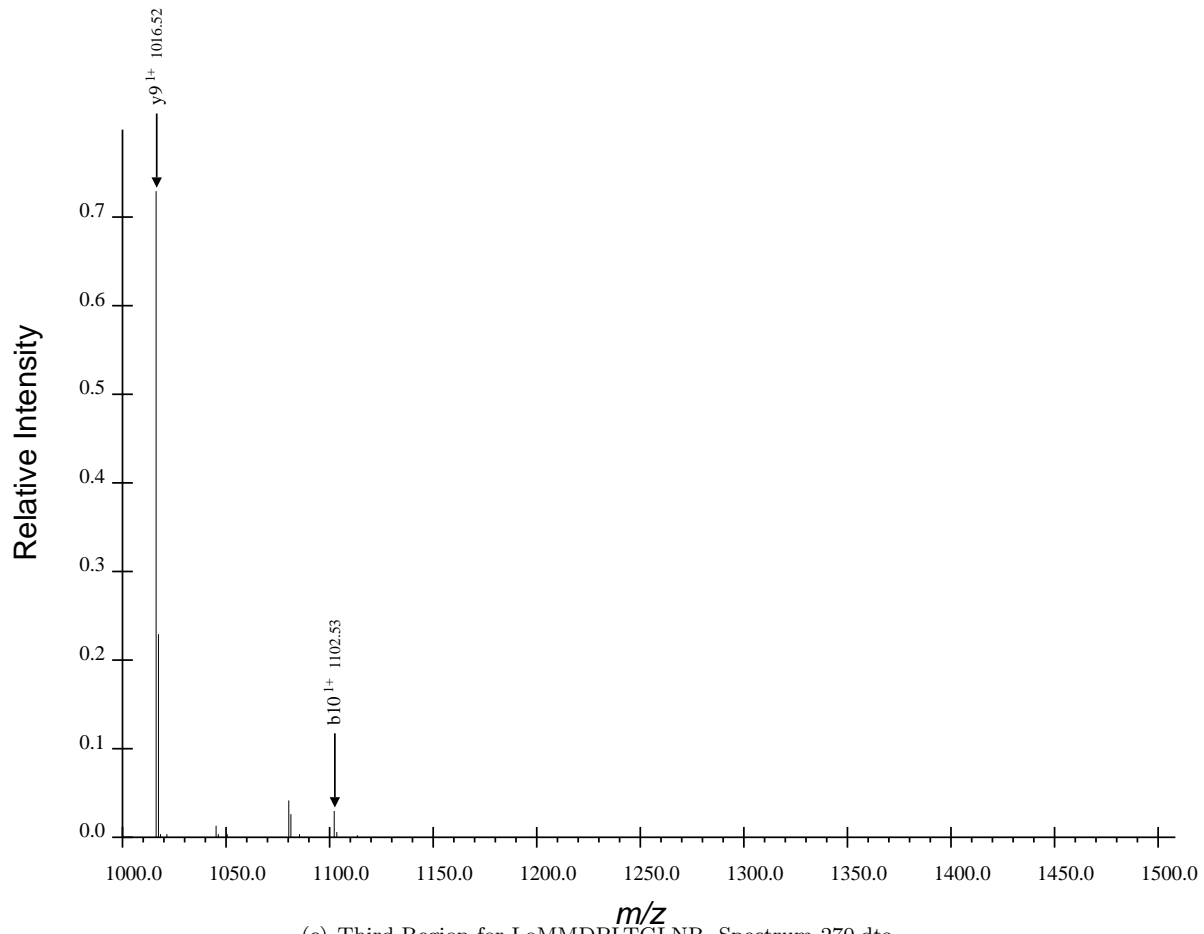

(c) Third Region for LoMMDPLTGLNR, Spectrum 270.dta

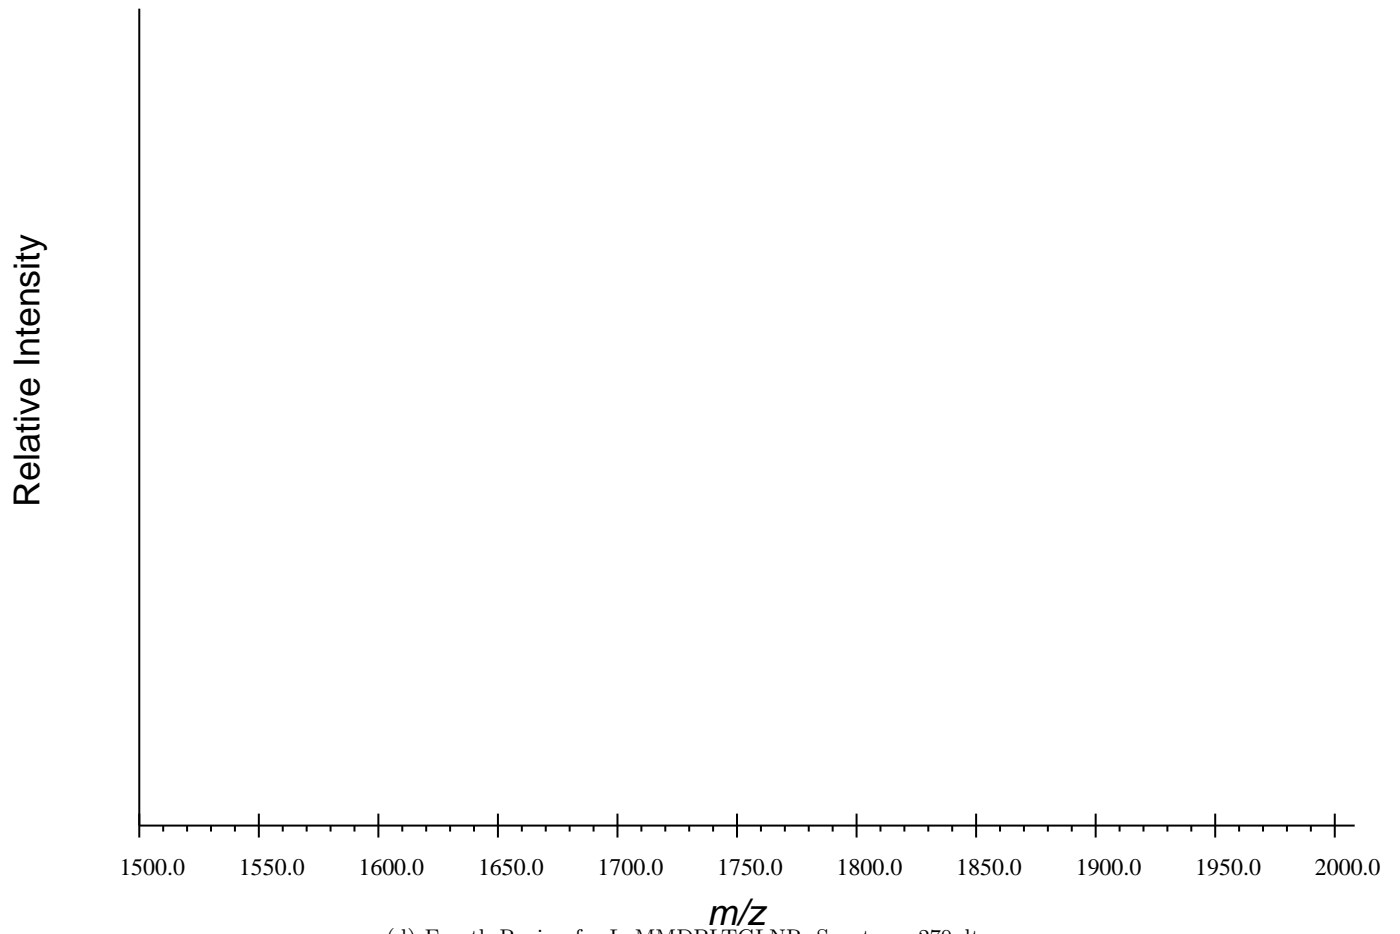

(d) Fourth Region for LoMMDPLTGLNR, Spectrum 270.dta

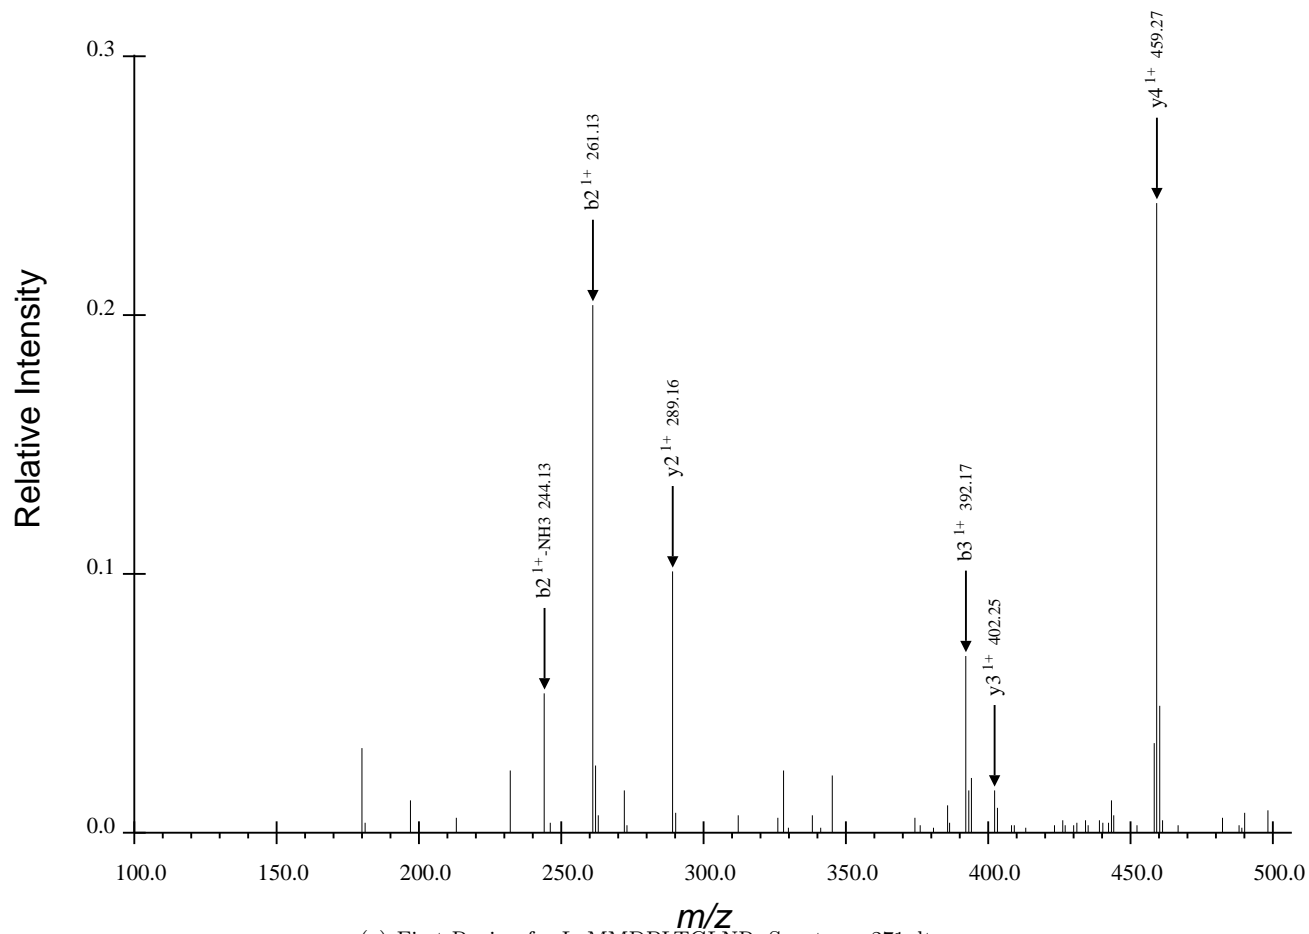

(a) First Region for LoMMDPLTGLNR, Spectrum 271.dta

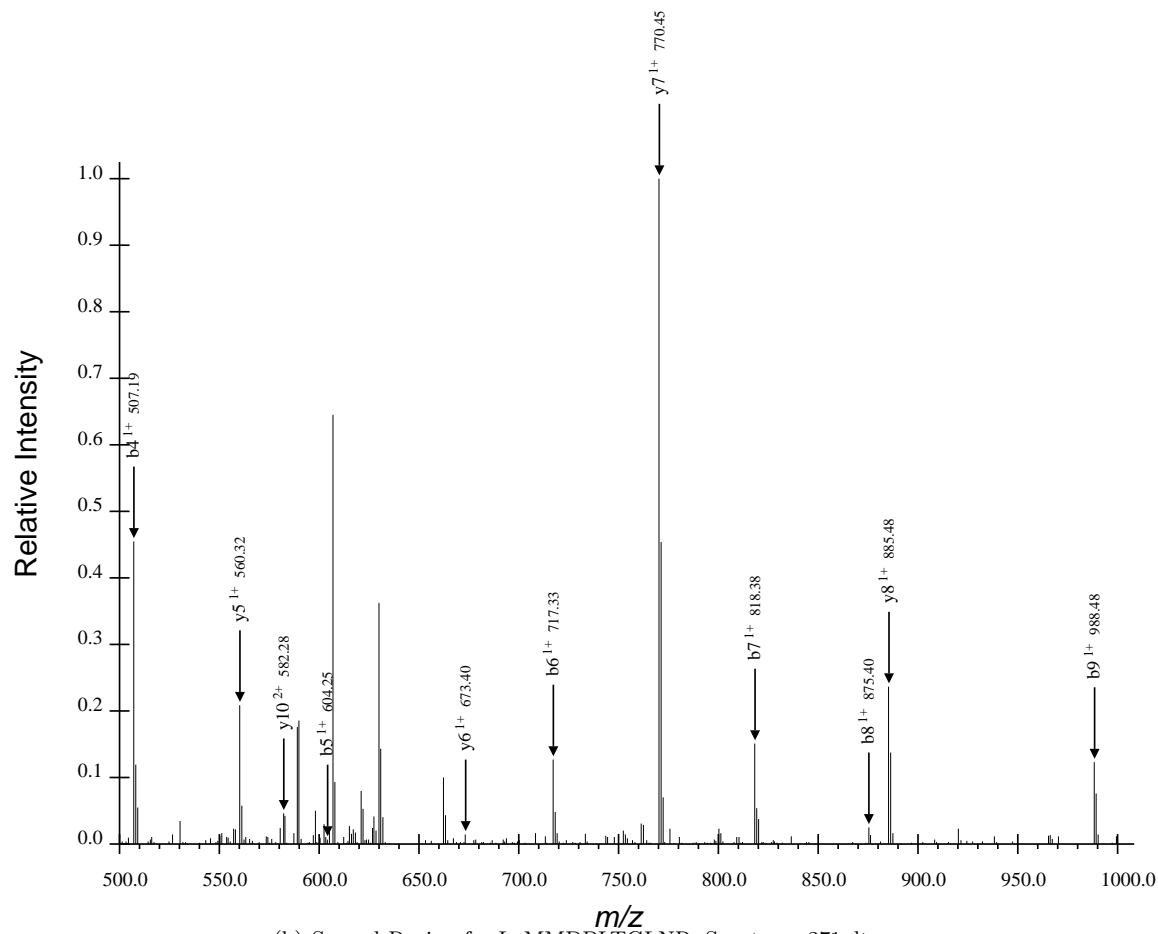

(b) Second Region for LoMMDPLTGLNR, Spectrum 271.dta

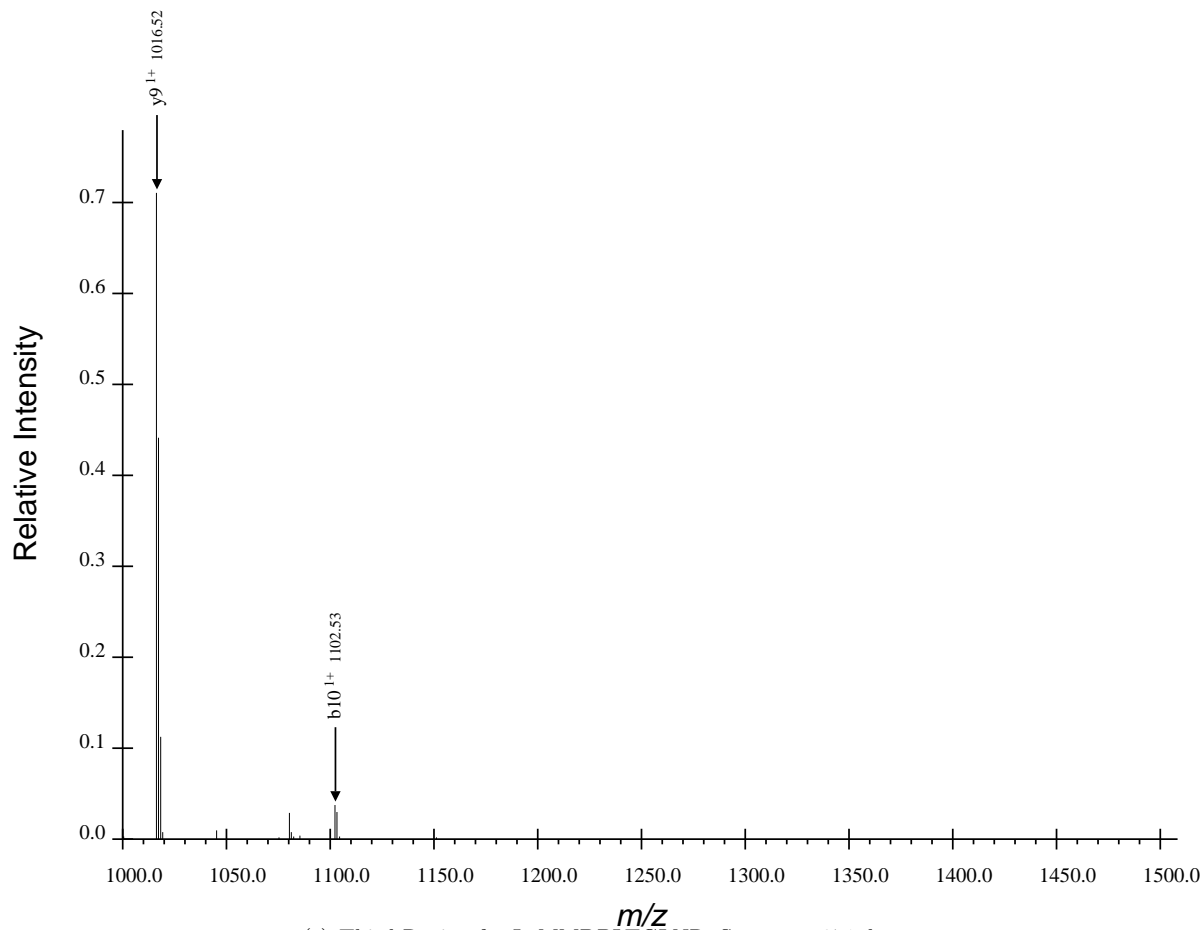

(c) Third Region for LoMMDPLTGLNR, Spectrum 271.dta

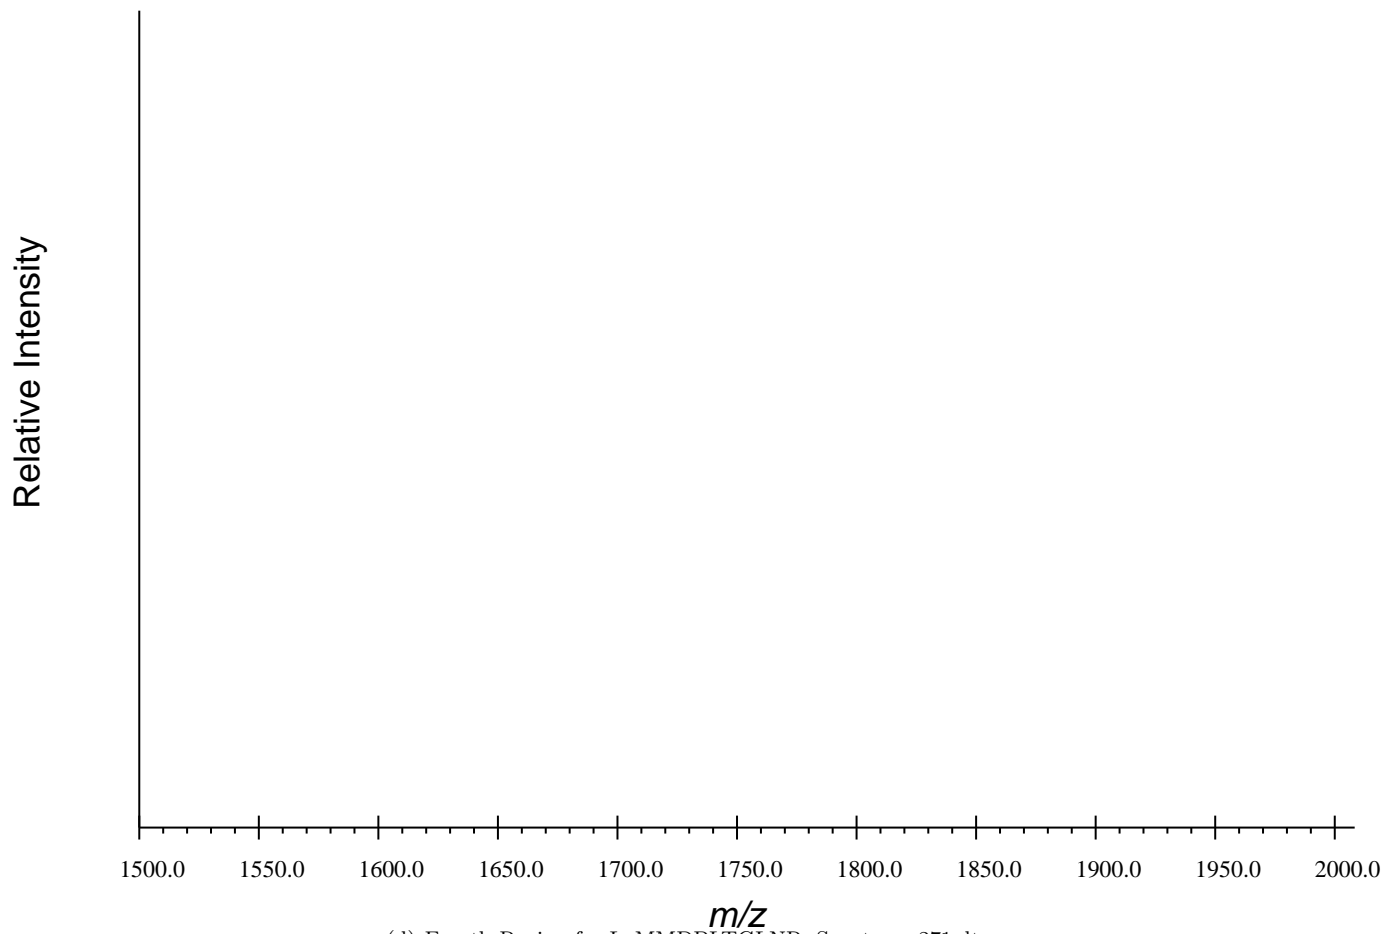

(d) Fourth Region for LoMMDPLTGLNR, Spectrum 271.dta

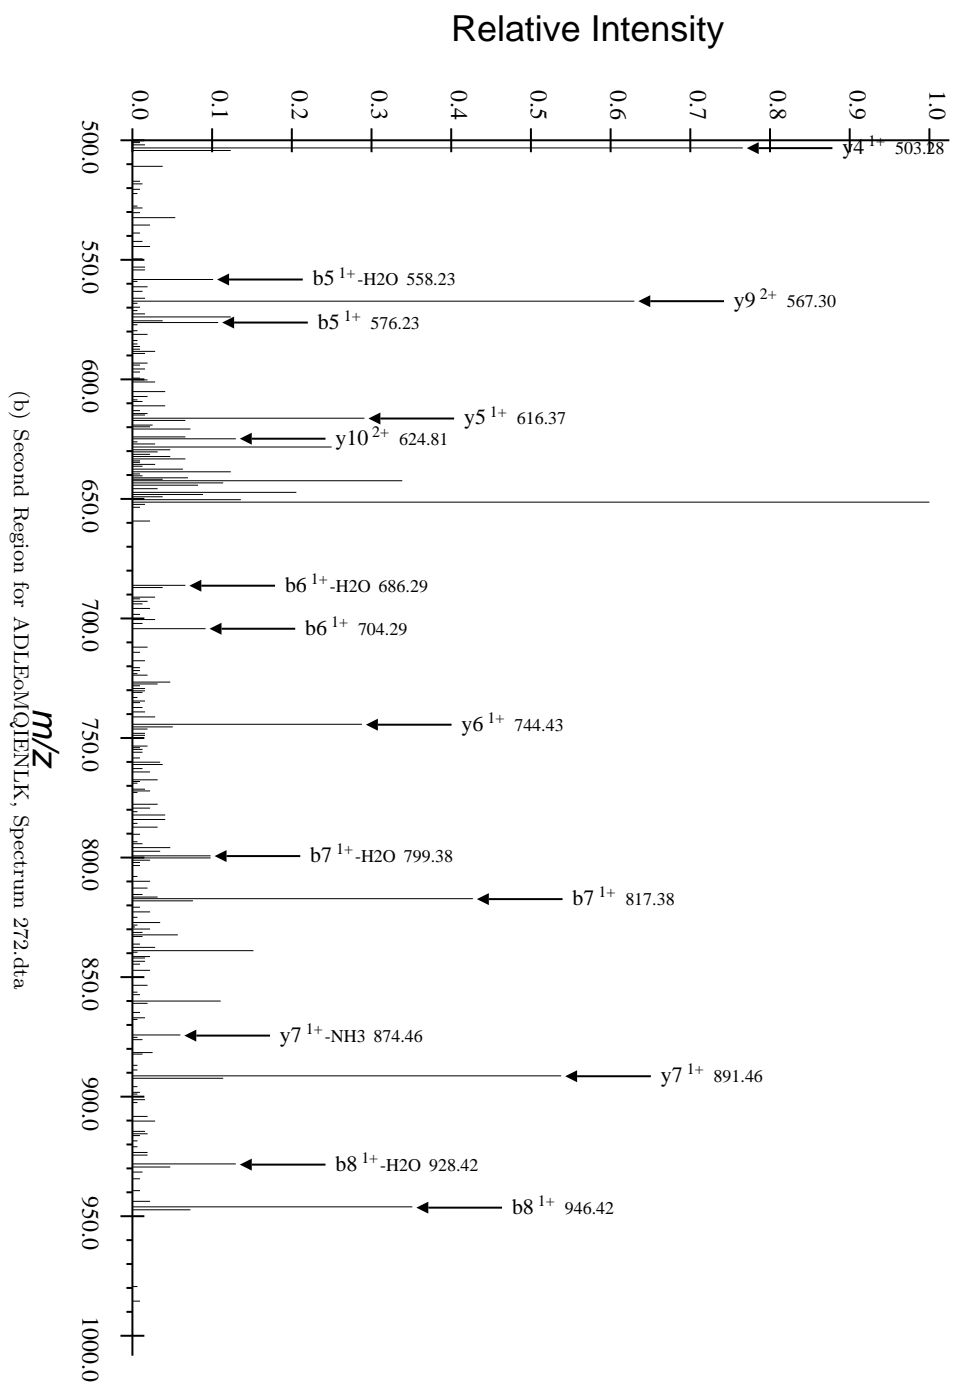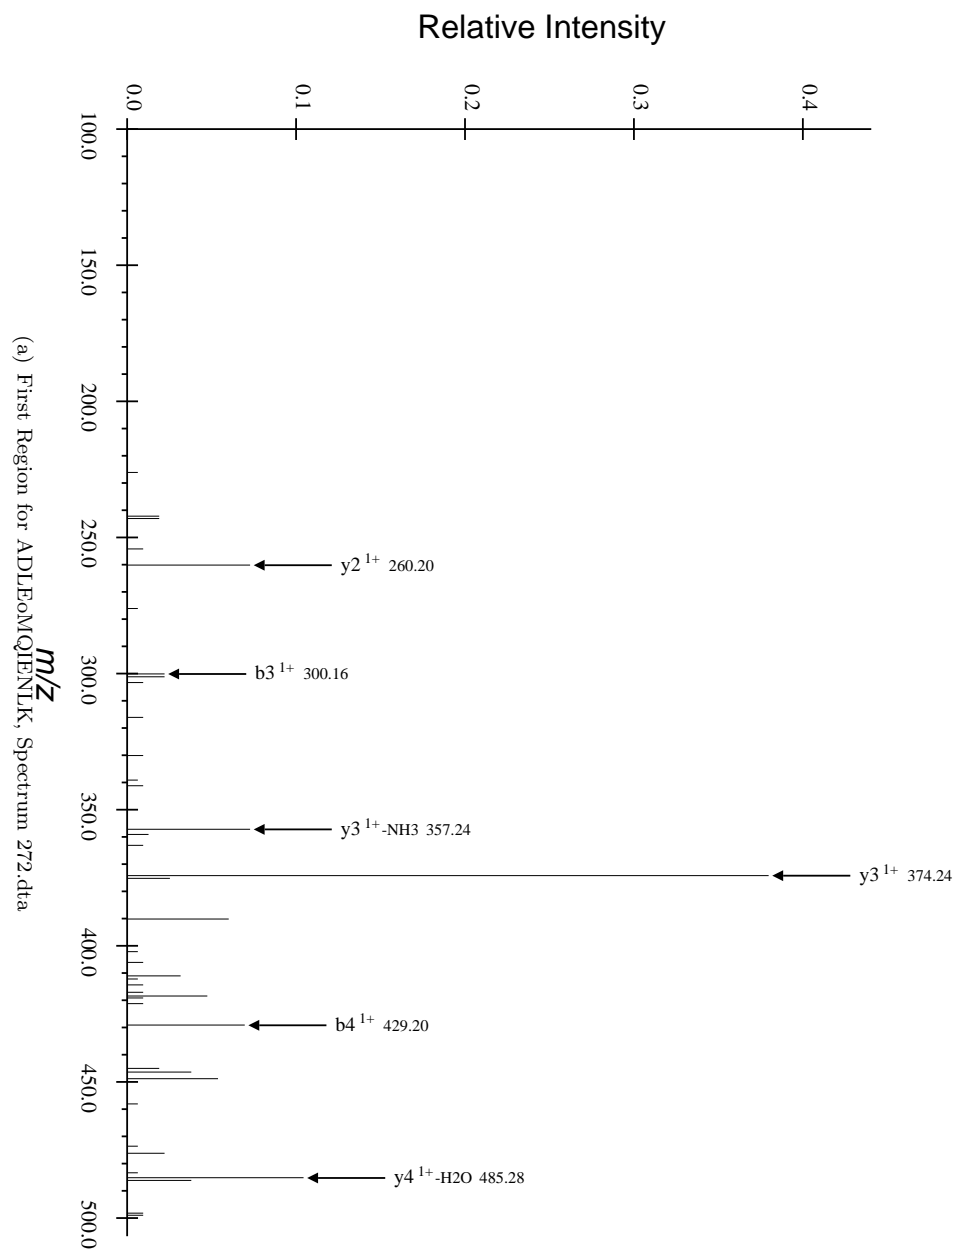

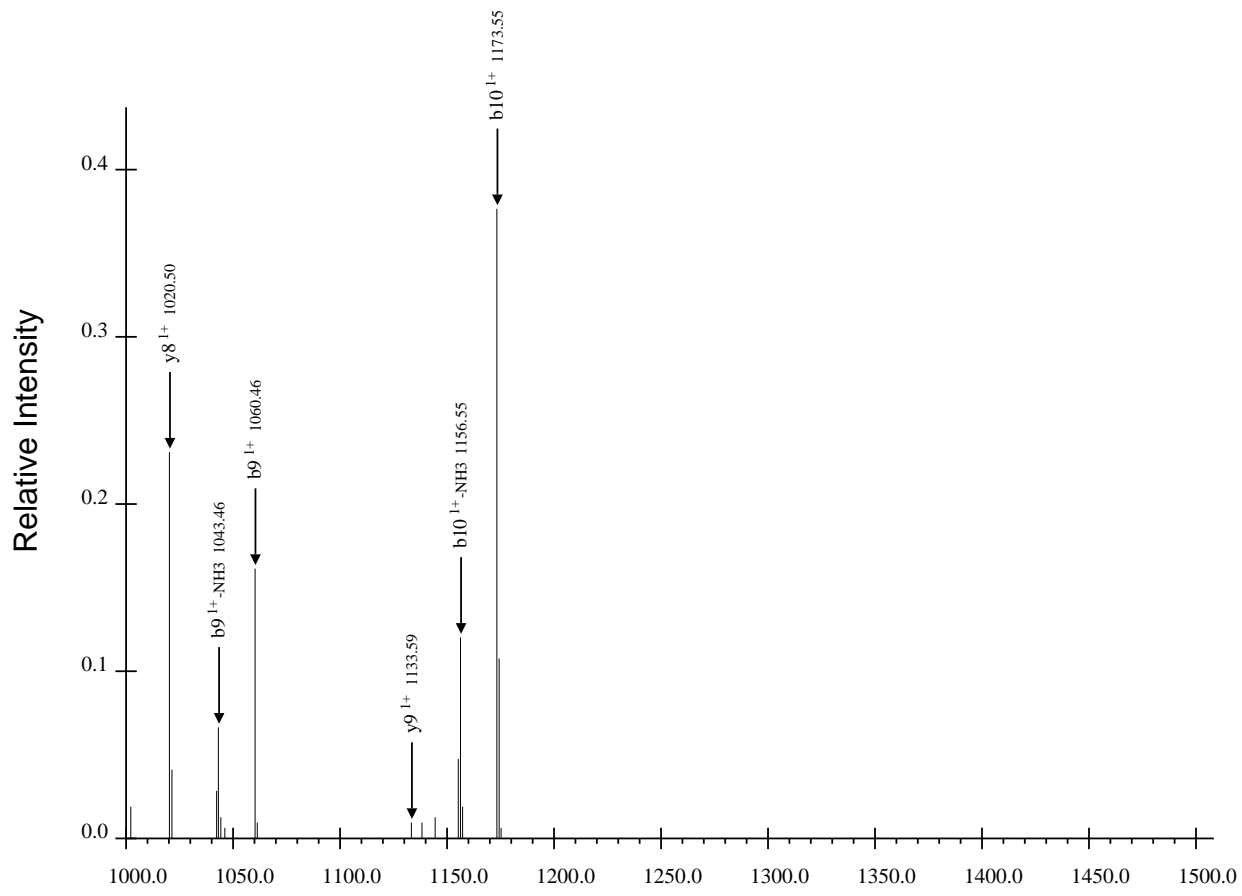

(c) Third Region for ADLEoMQIENLK, Spectrum 272.dta

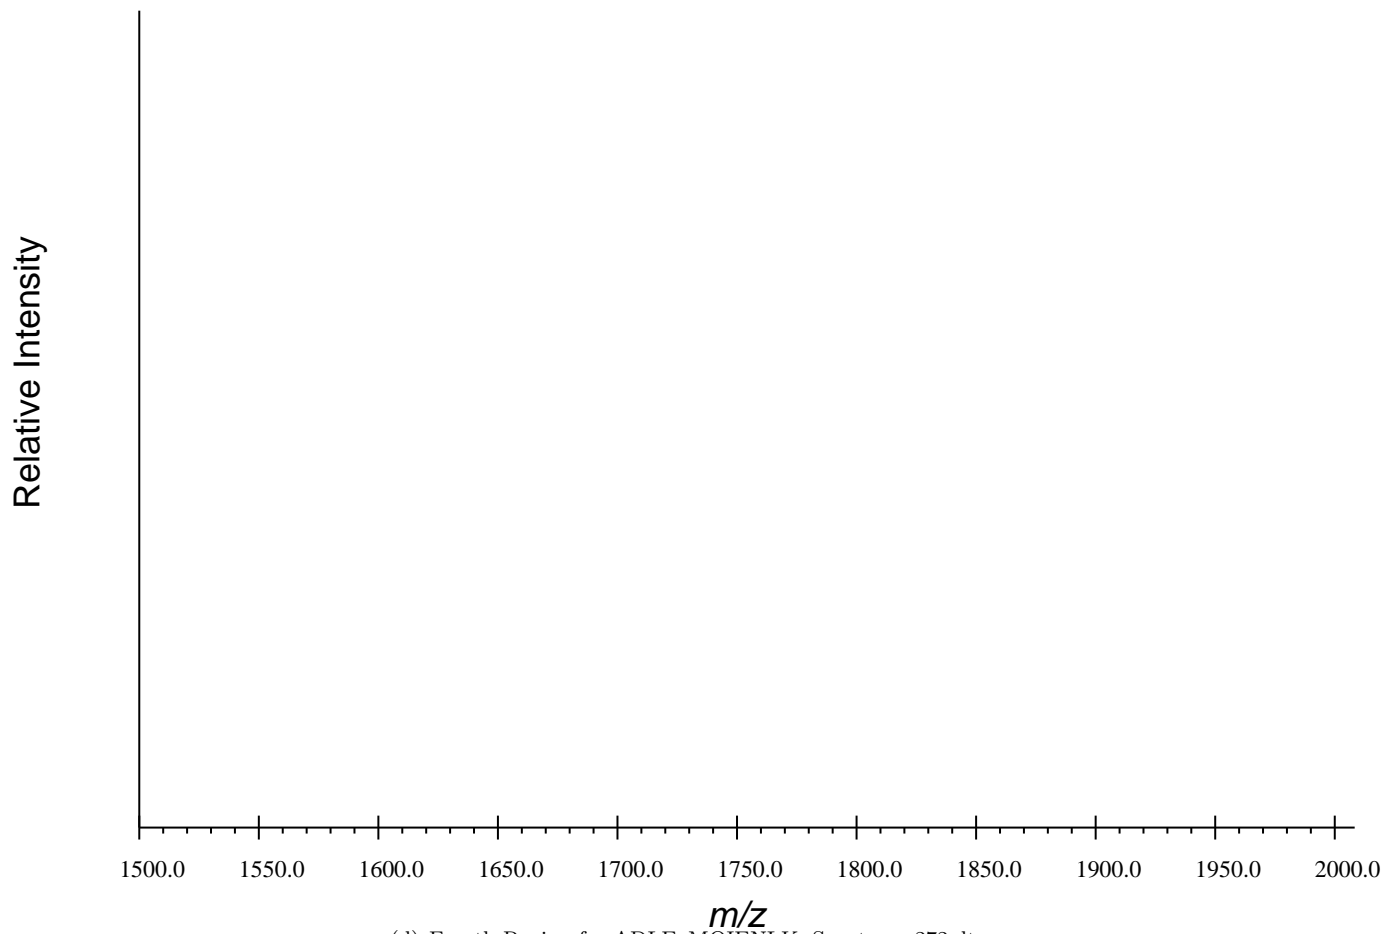

(d) Fourth Region for ADLEoMQIENLK, Spectrum 272.dta



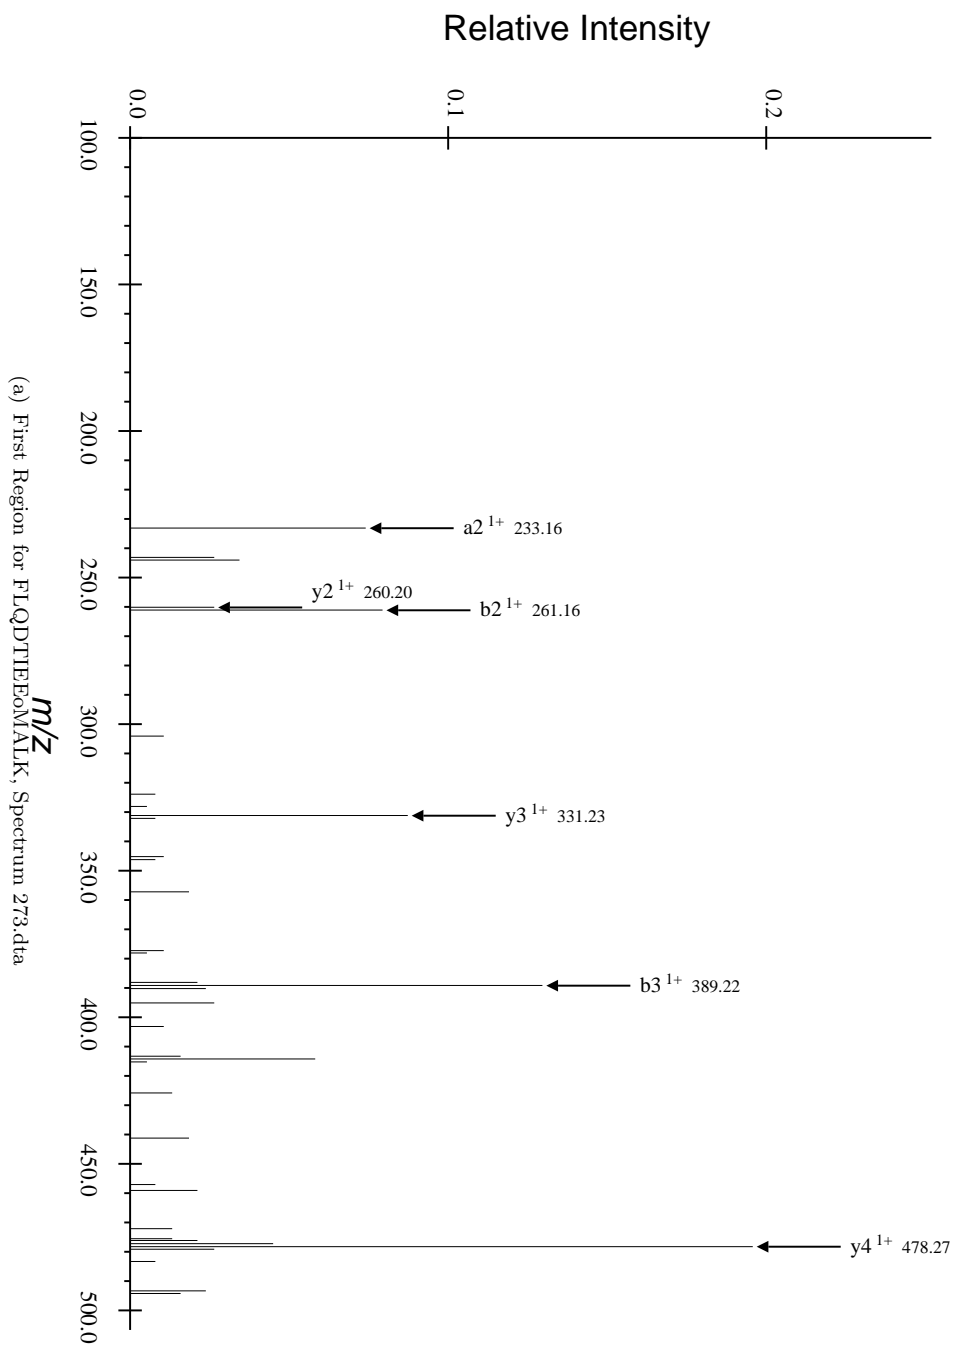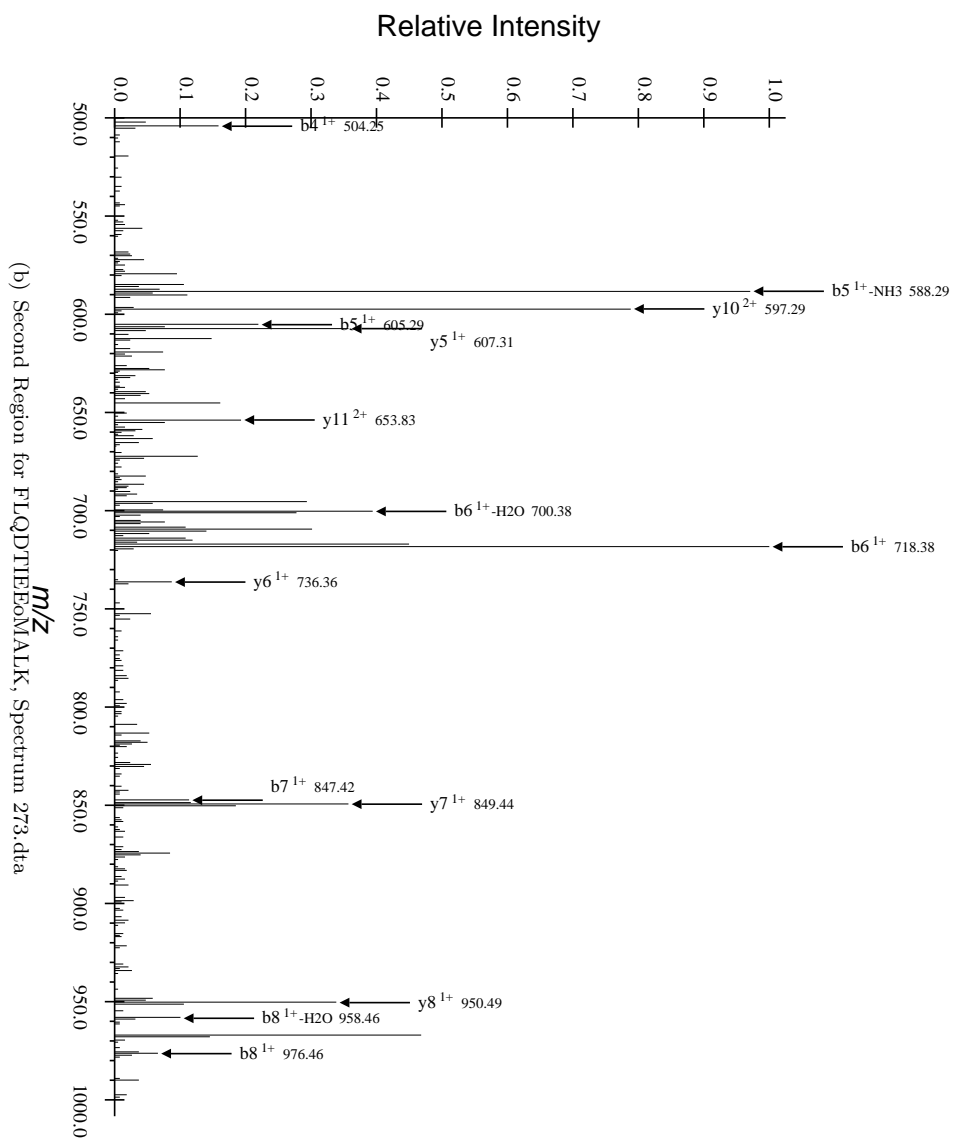

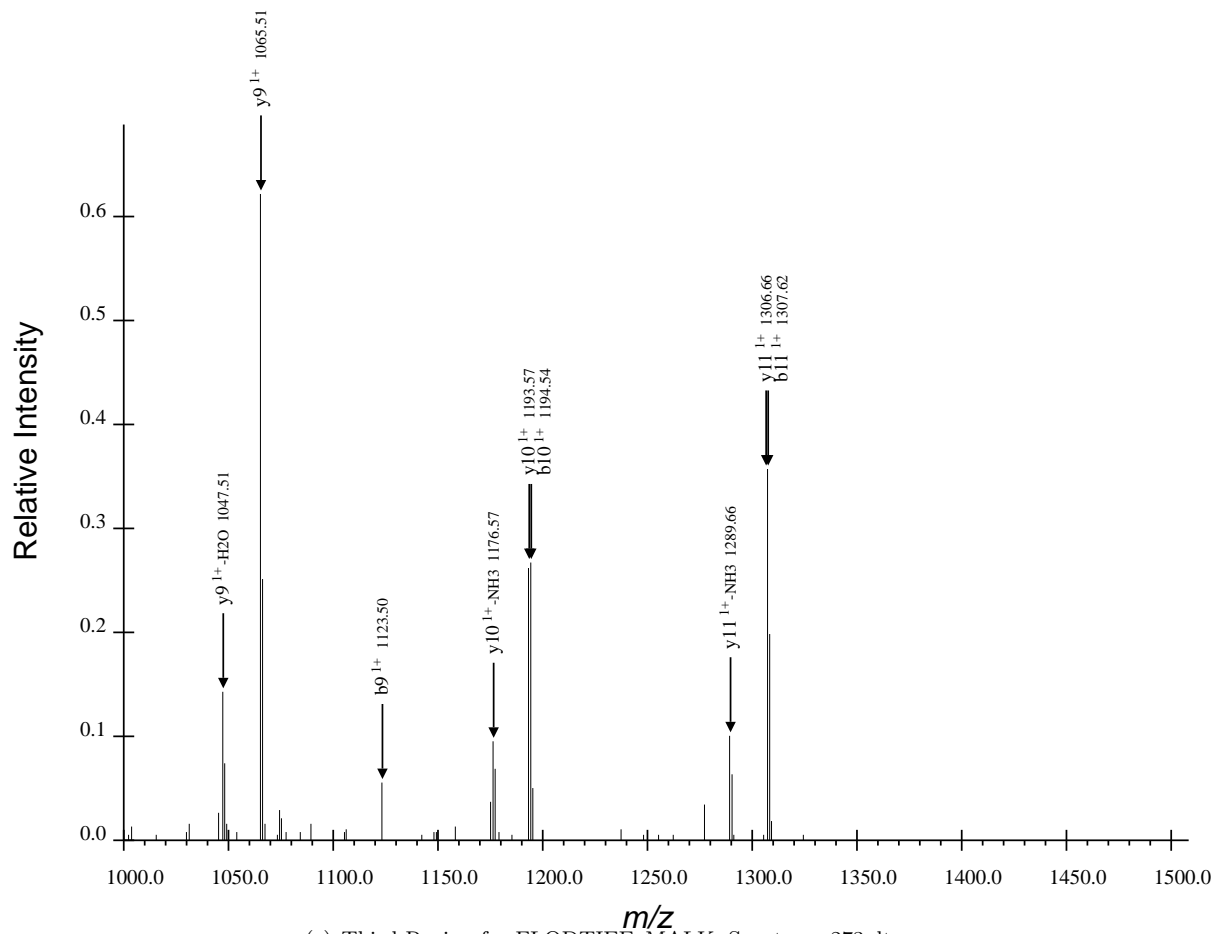

(c) Third Region for FLQDTIEEoMALK, Spectrum 273.dta

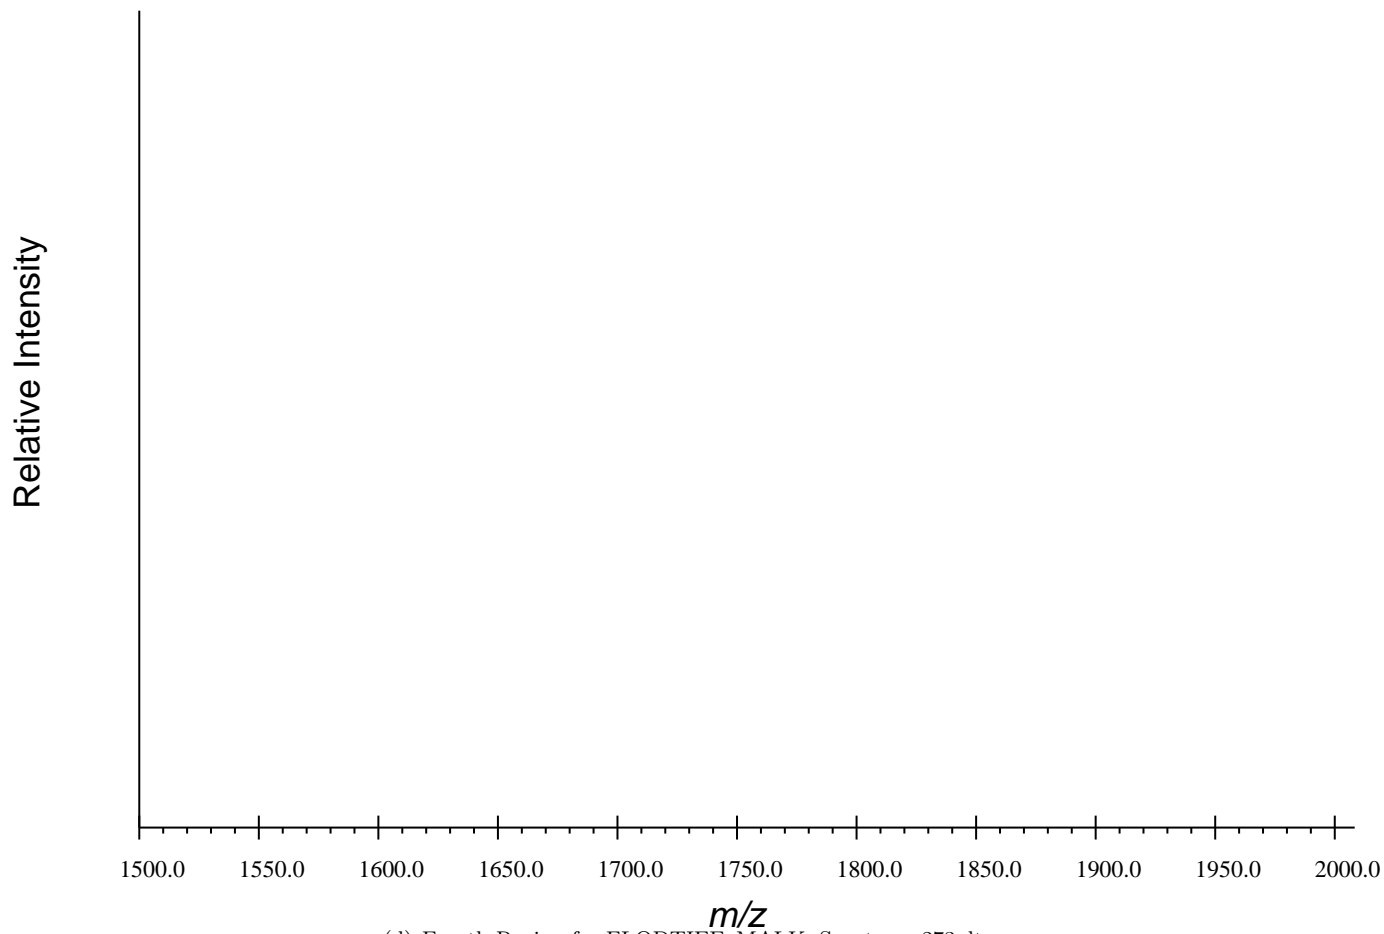

(d) Fourth Region for FLQDTIEEoMALK, Spectrum 273.dta

(b) Second Region for SDIGEVILVGGGMTR, Spectrum 274.dta

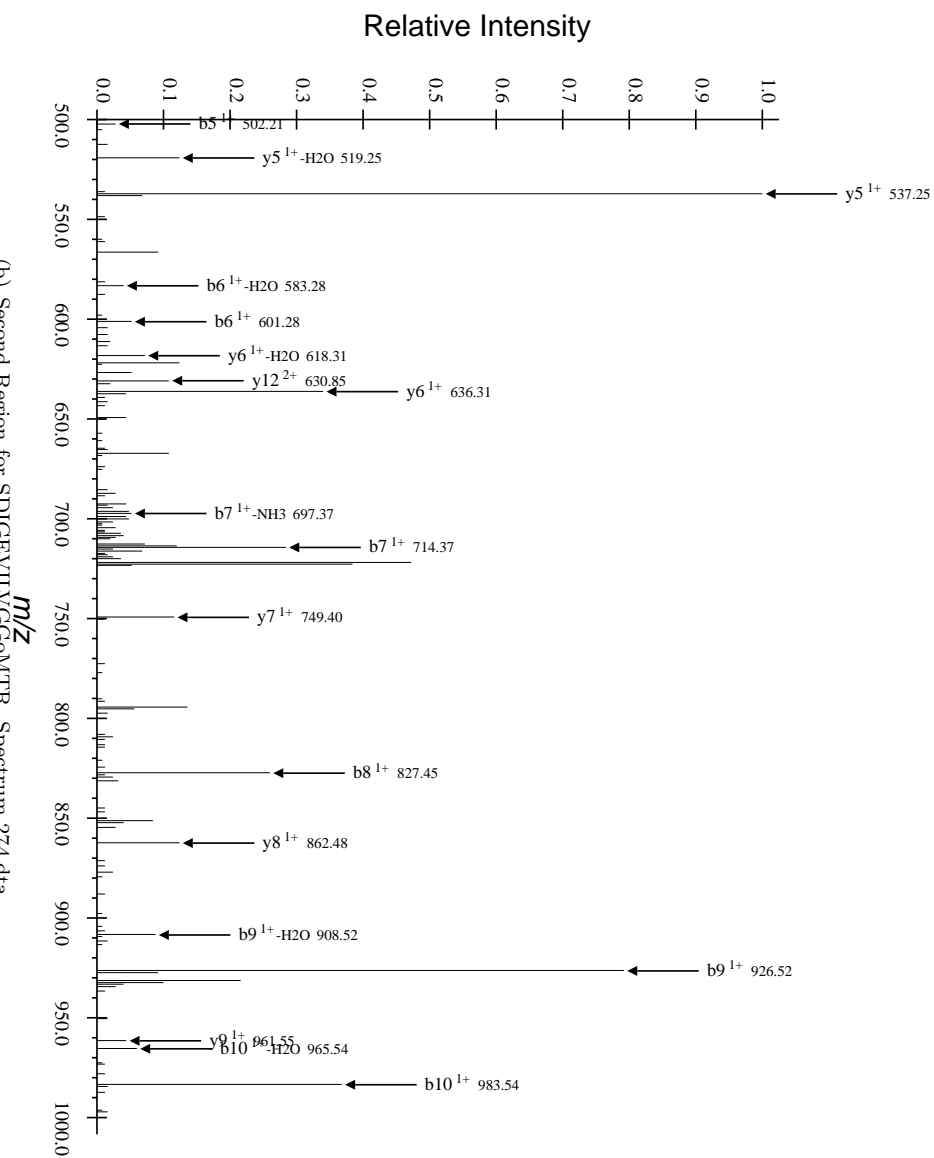

(a) First Region for SDIGEVILVGGGMTR, Spectrum 274.dta

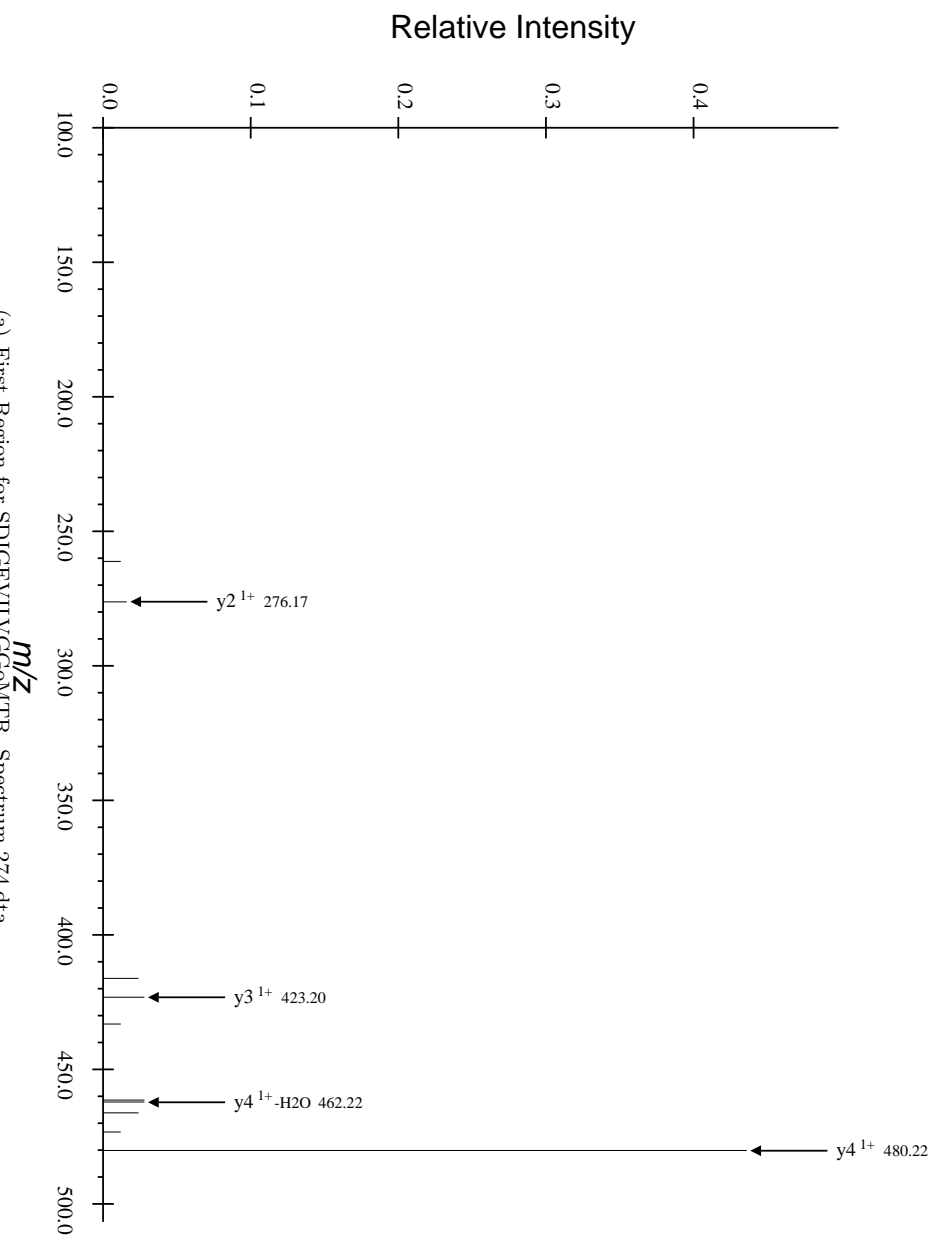

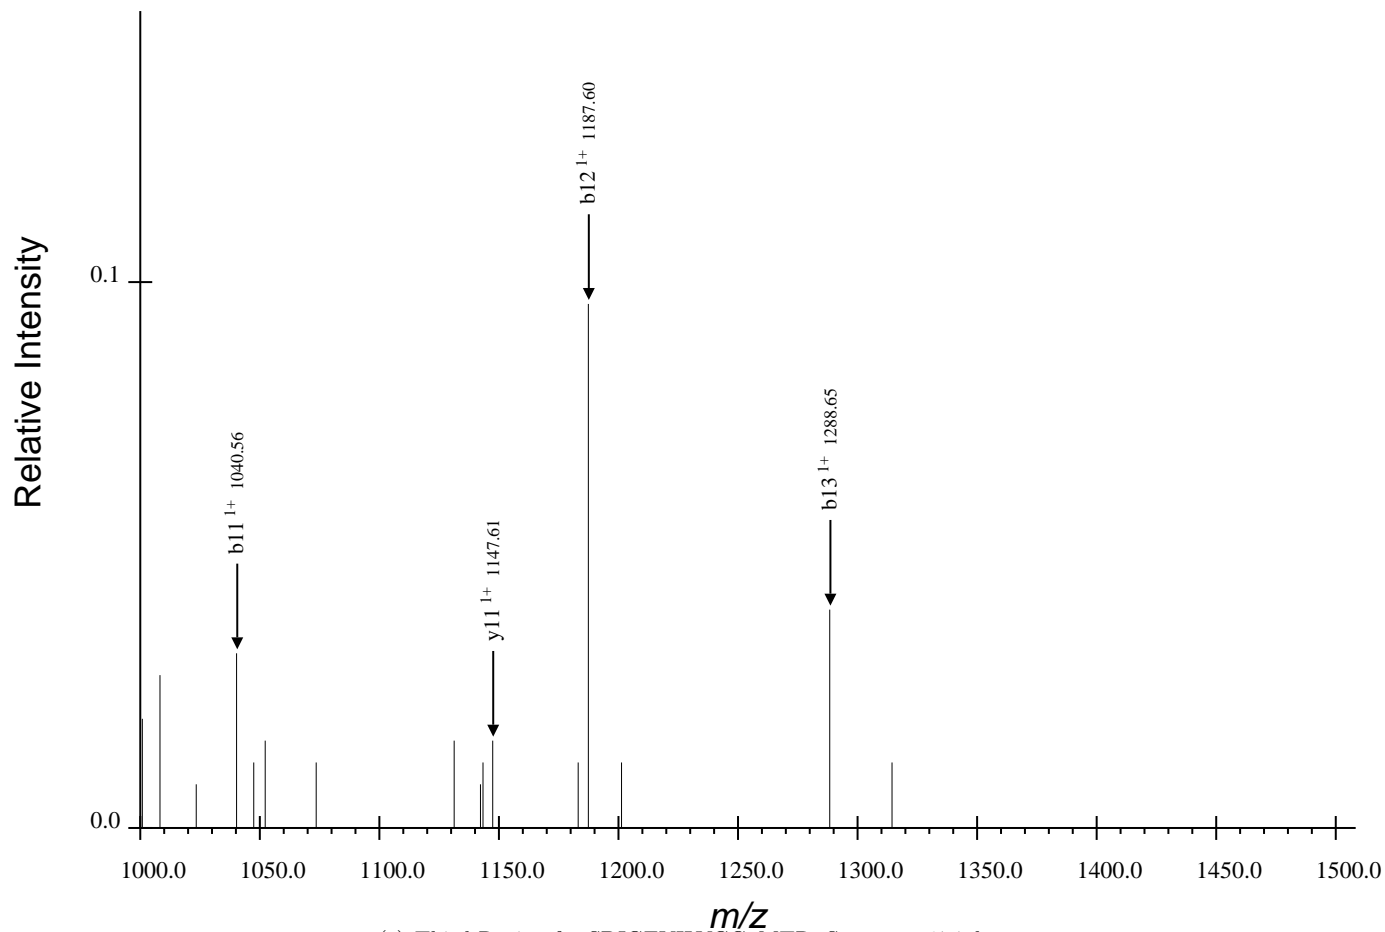

(c) Third Region for SDIGEVILVGGGoMTR, Spectrum 274.dta

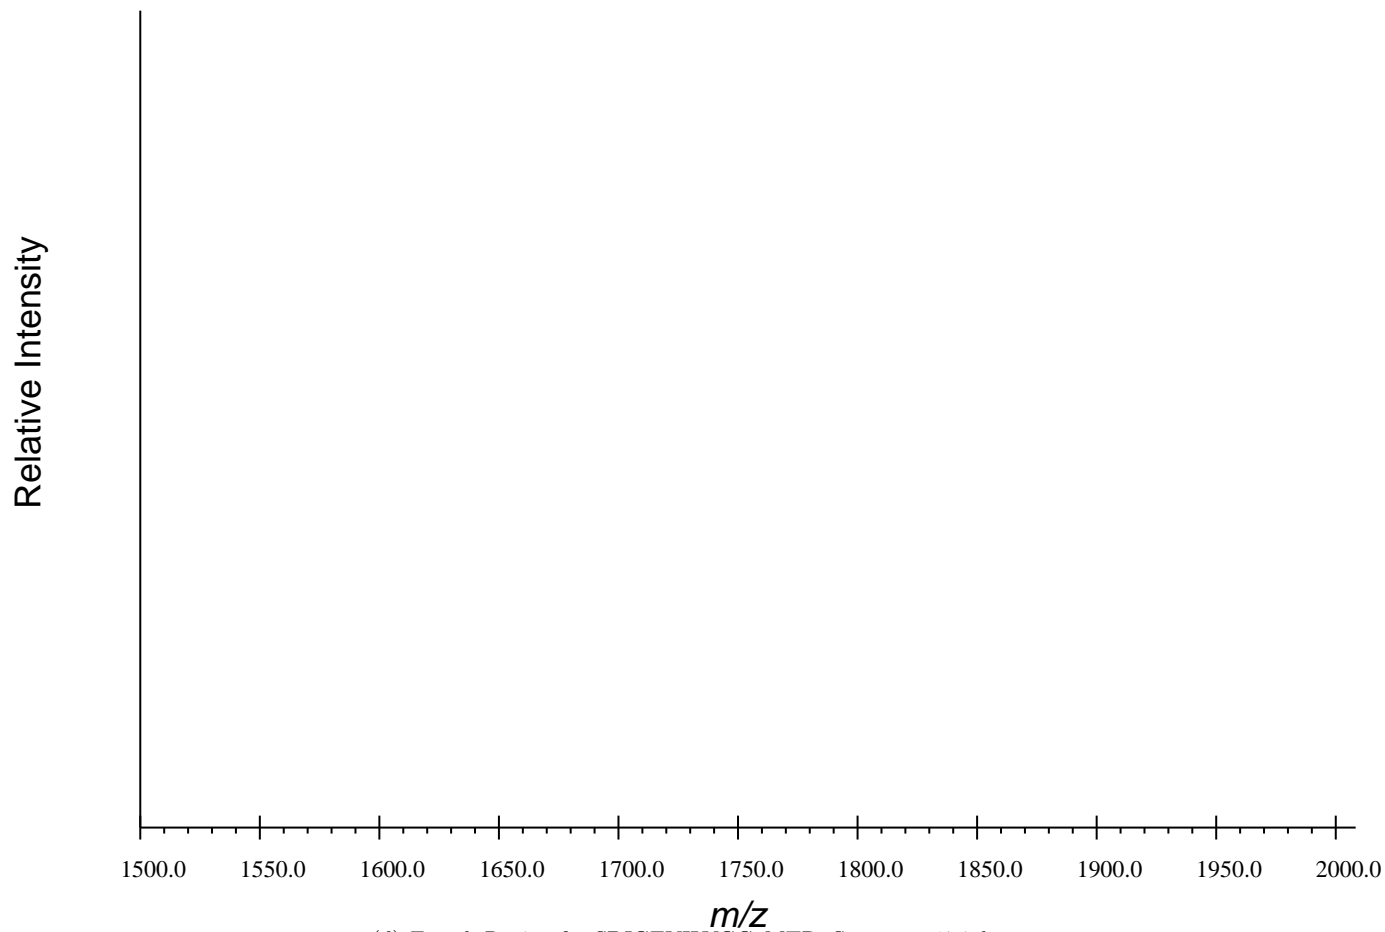

(d) Fourth Region for SDIGEVILVGGGoMTR, Spectrum 274.dta

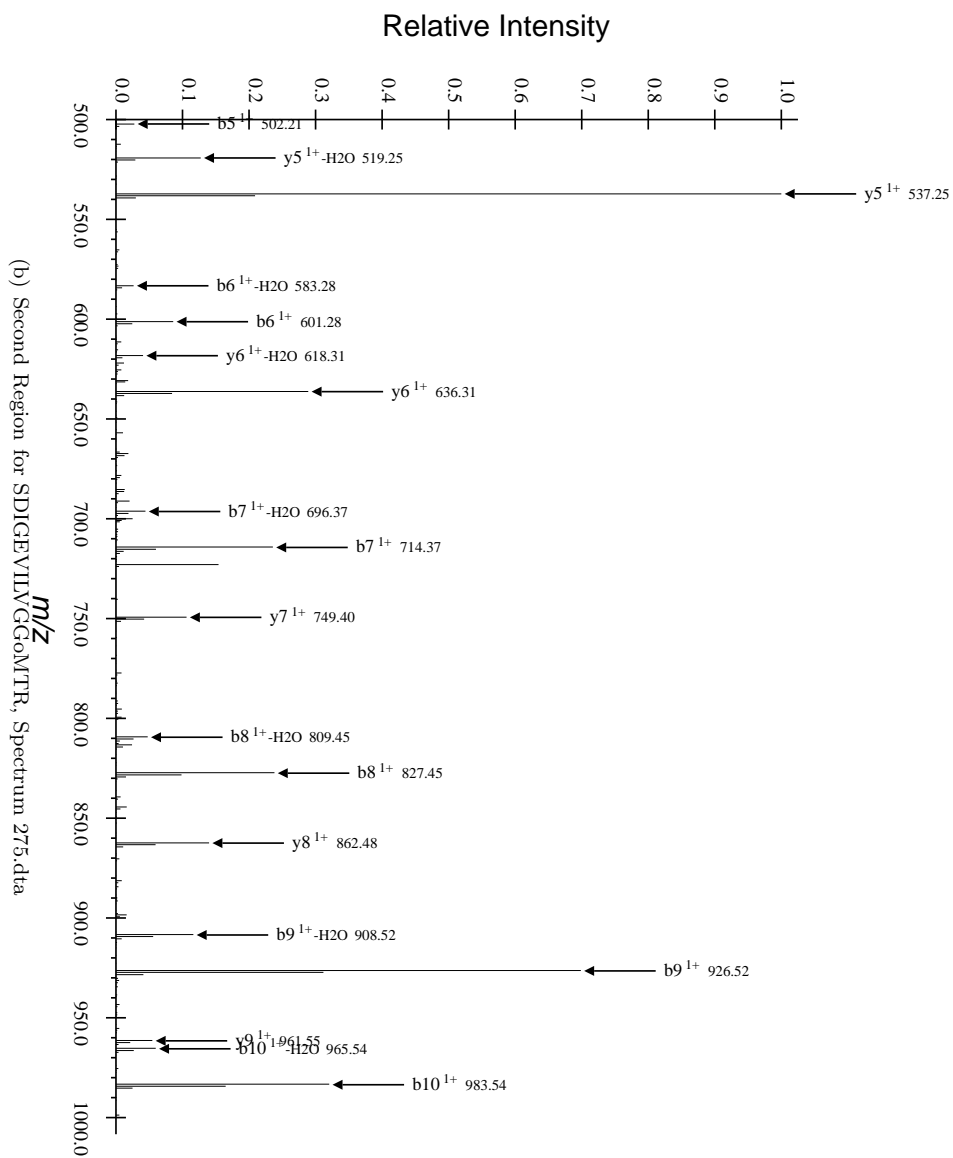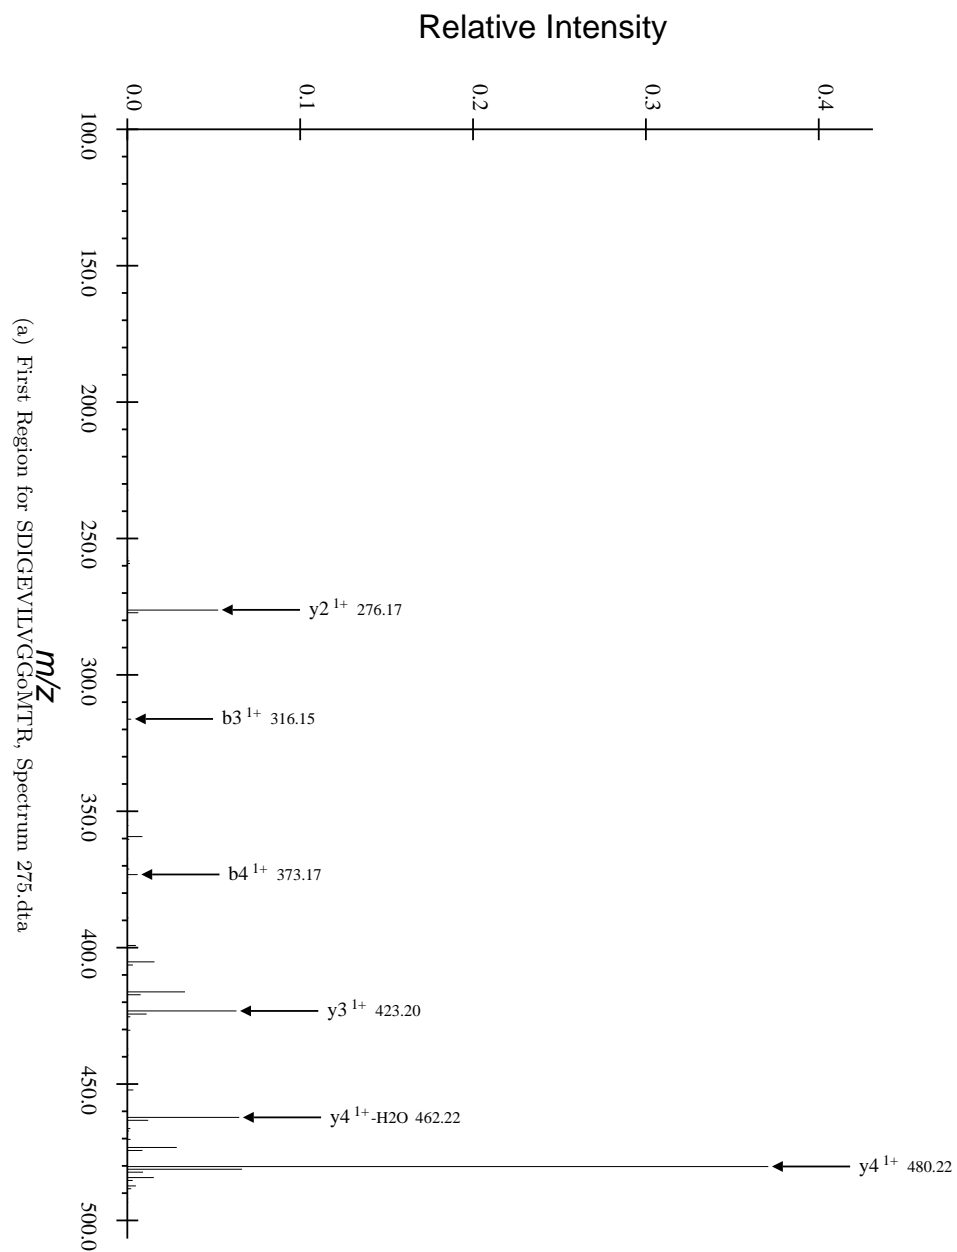

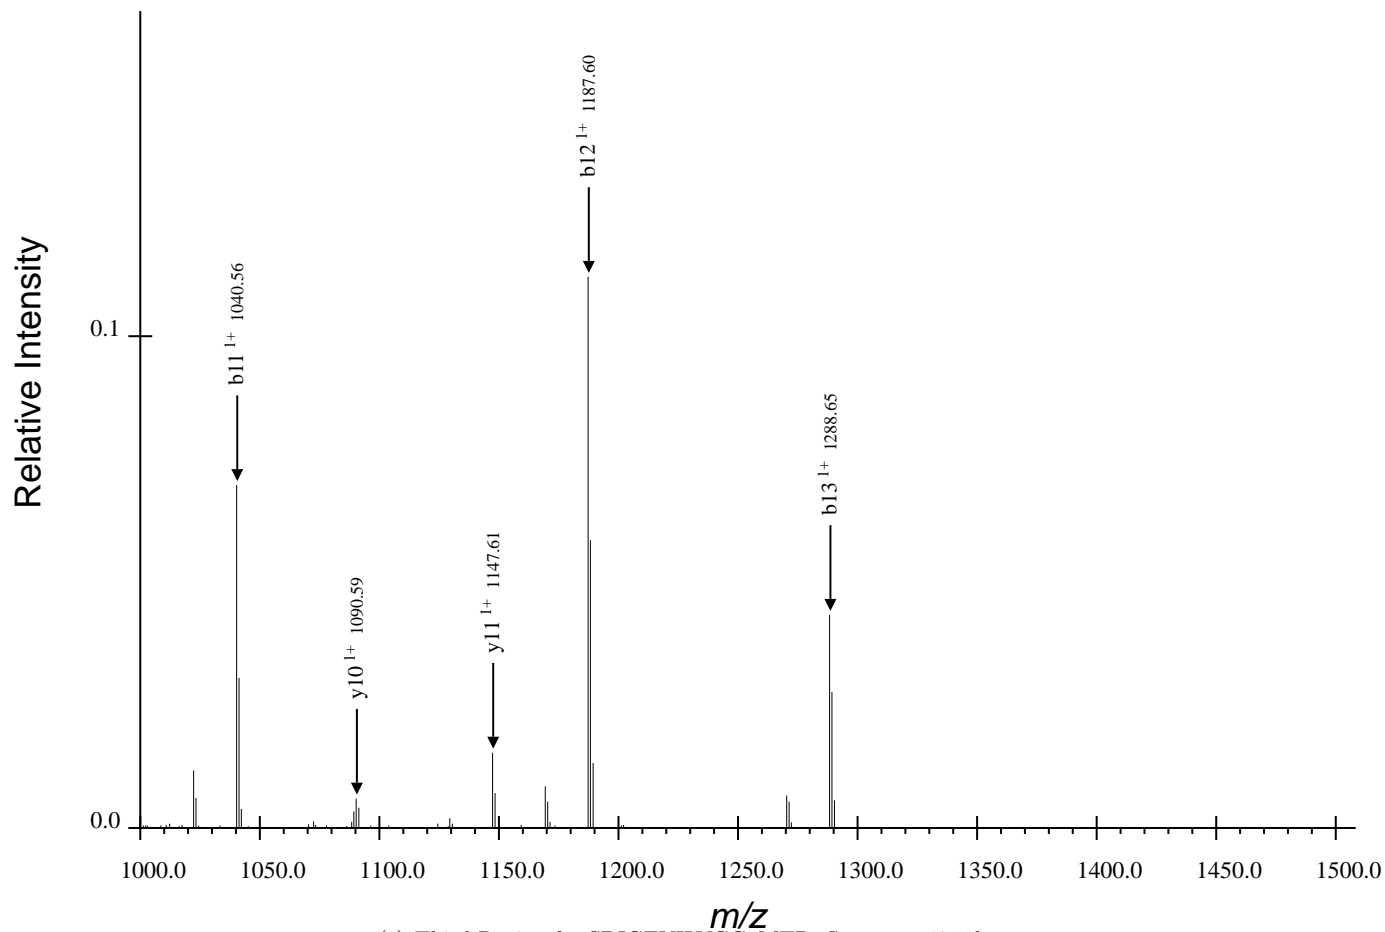

(c) Third Region for SDIGEVILVGGGoMTR, Spectrum 275.dta

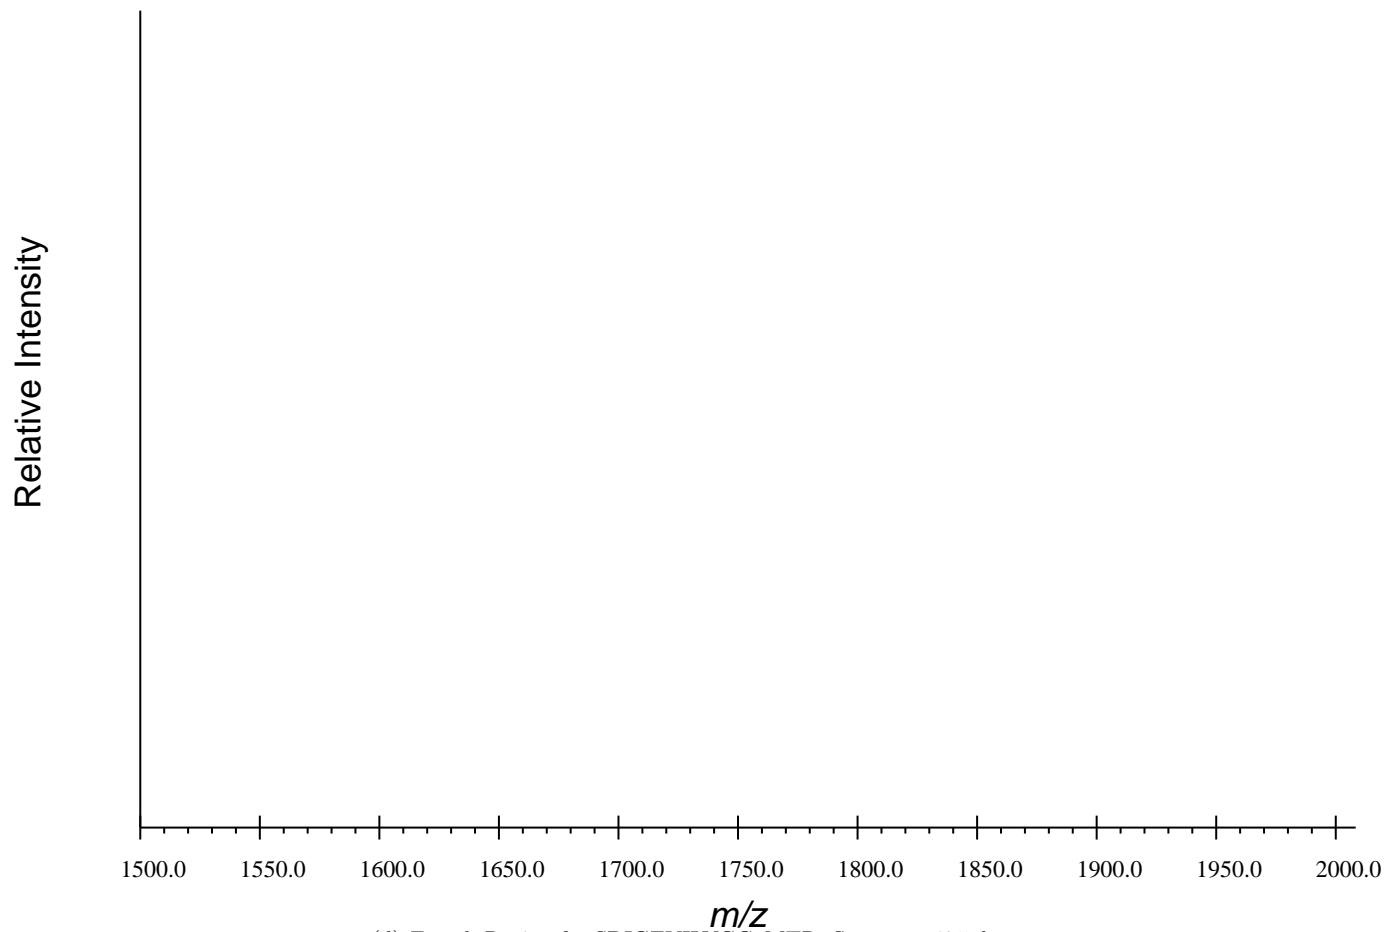

(d) Fourth Region for SDIGEVILVGGGoMTR, Spectrum 275.dta

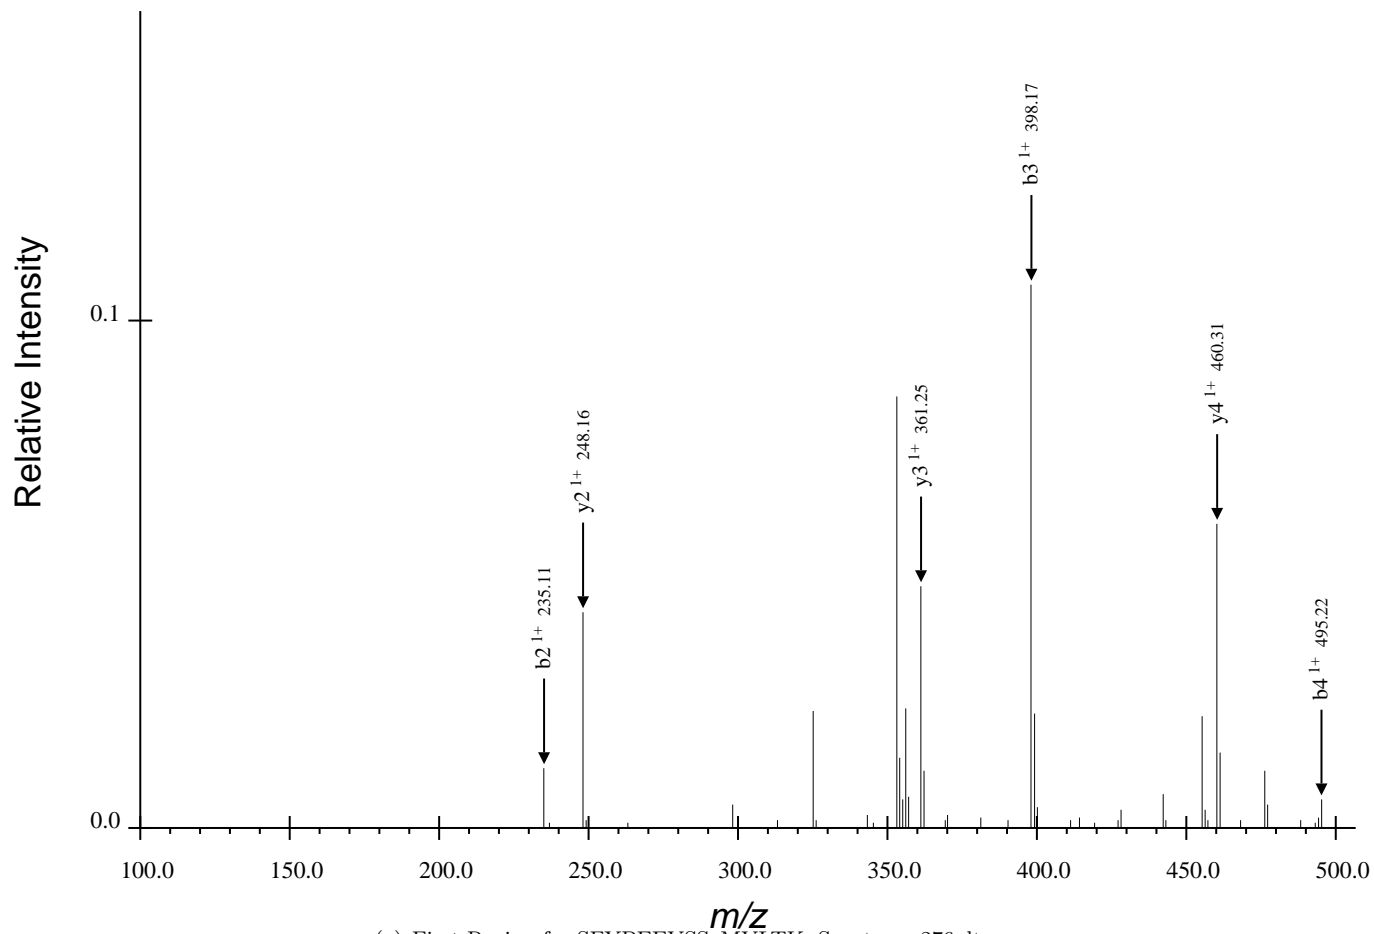

(a) First Region for SFYPEEVSSoMVLTK, Spectrum 276.dta

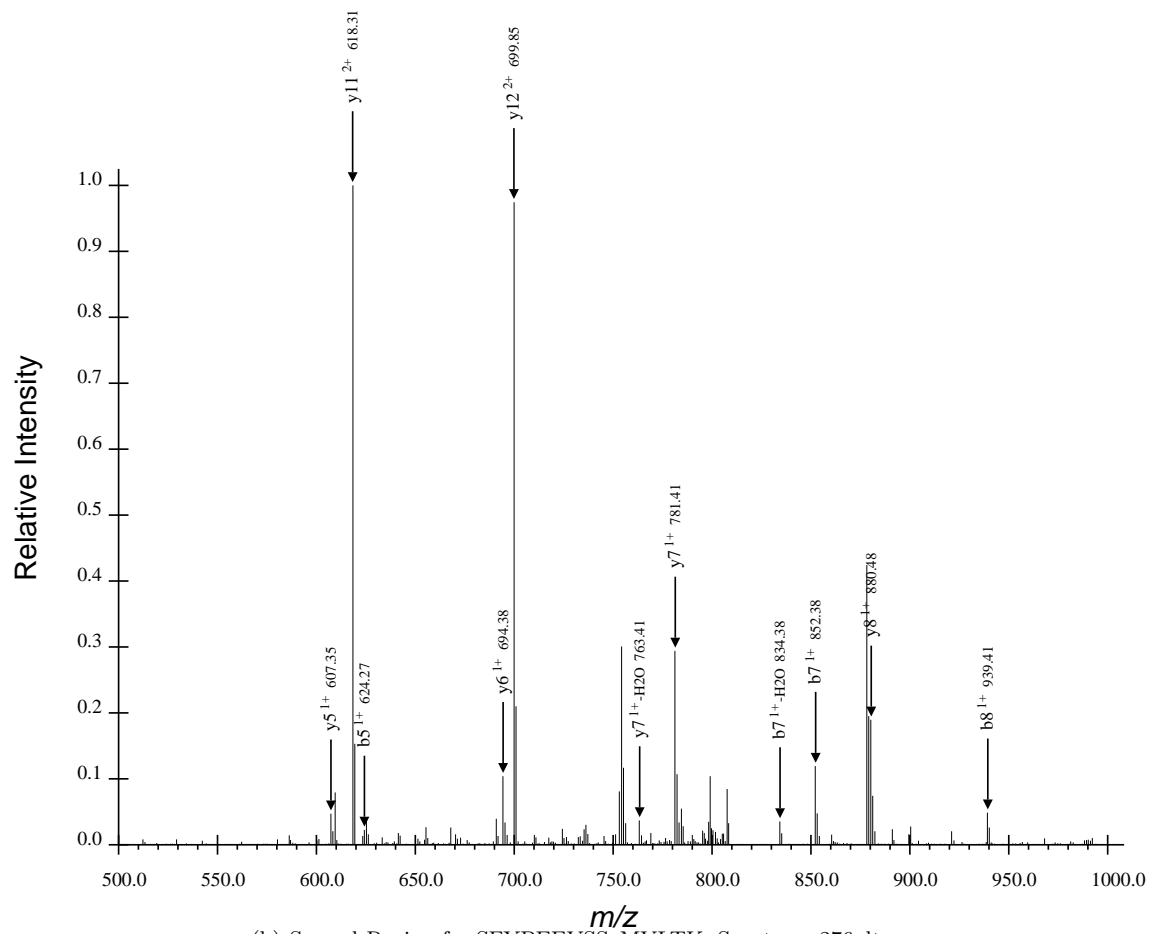

(b) Second Region for SFYPEEVSSoMVLTK, Spectrum 276.dta

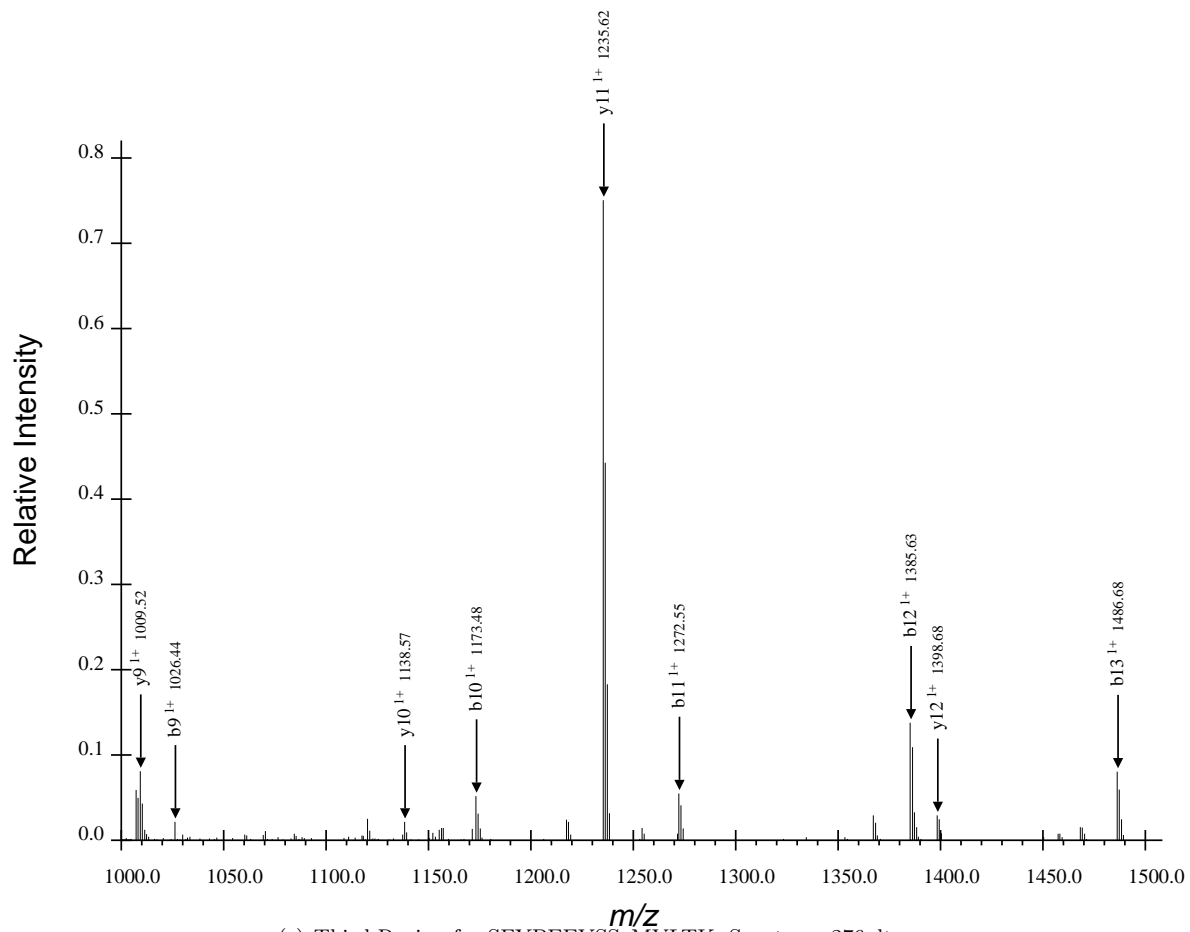

(c) Third Region for SFYPEEVSSoMVLTK, Spectrum 276.dta

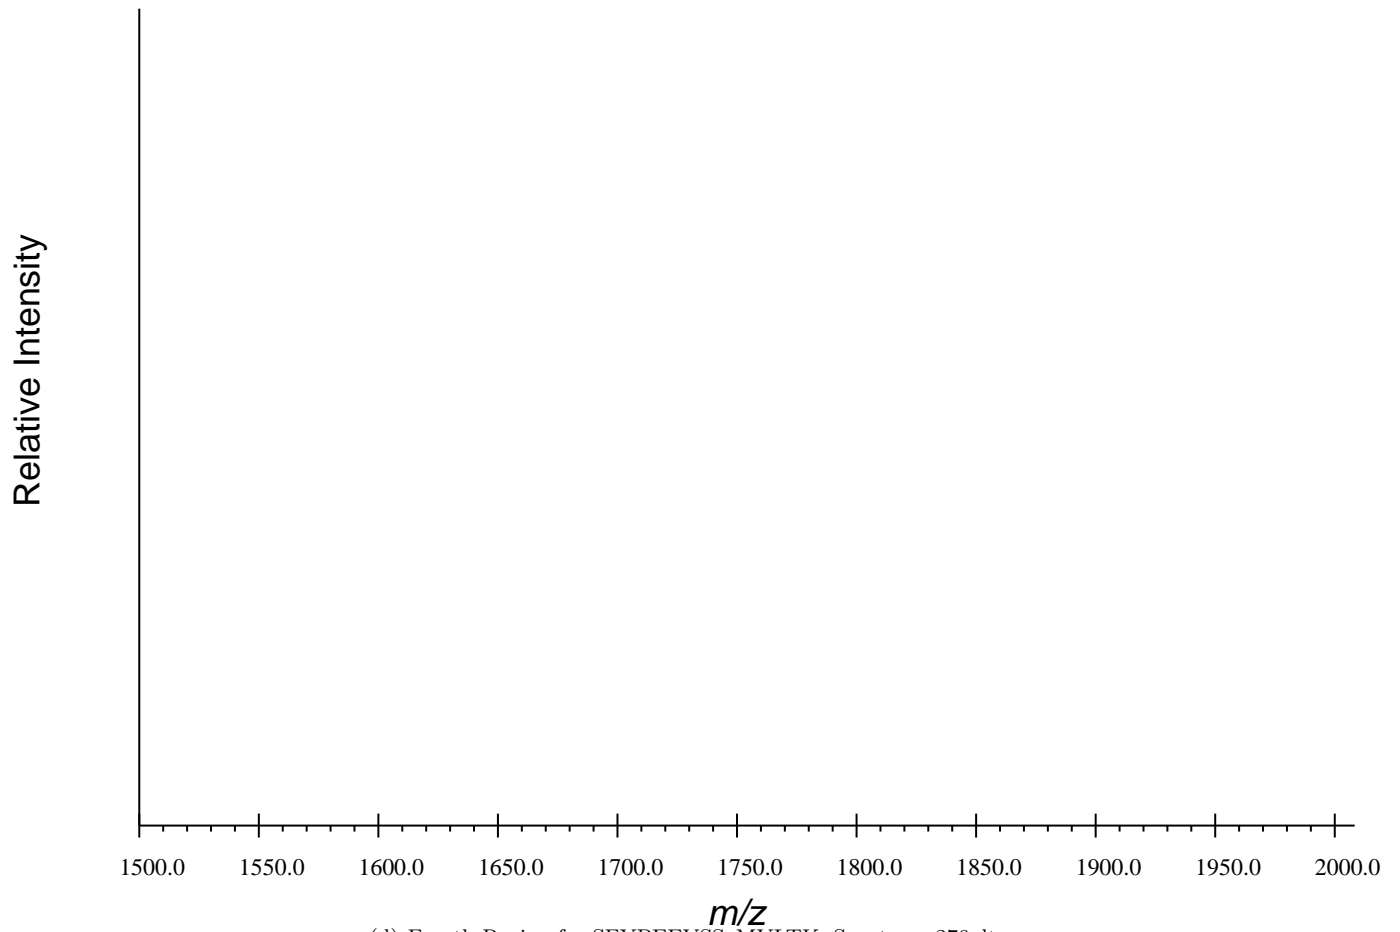

(d) Fourth Region for SFYPEEVSSoMVLTK, Spectrum 276.dta



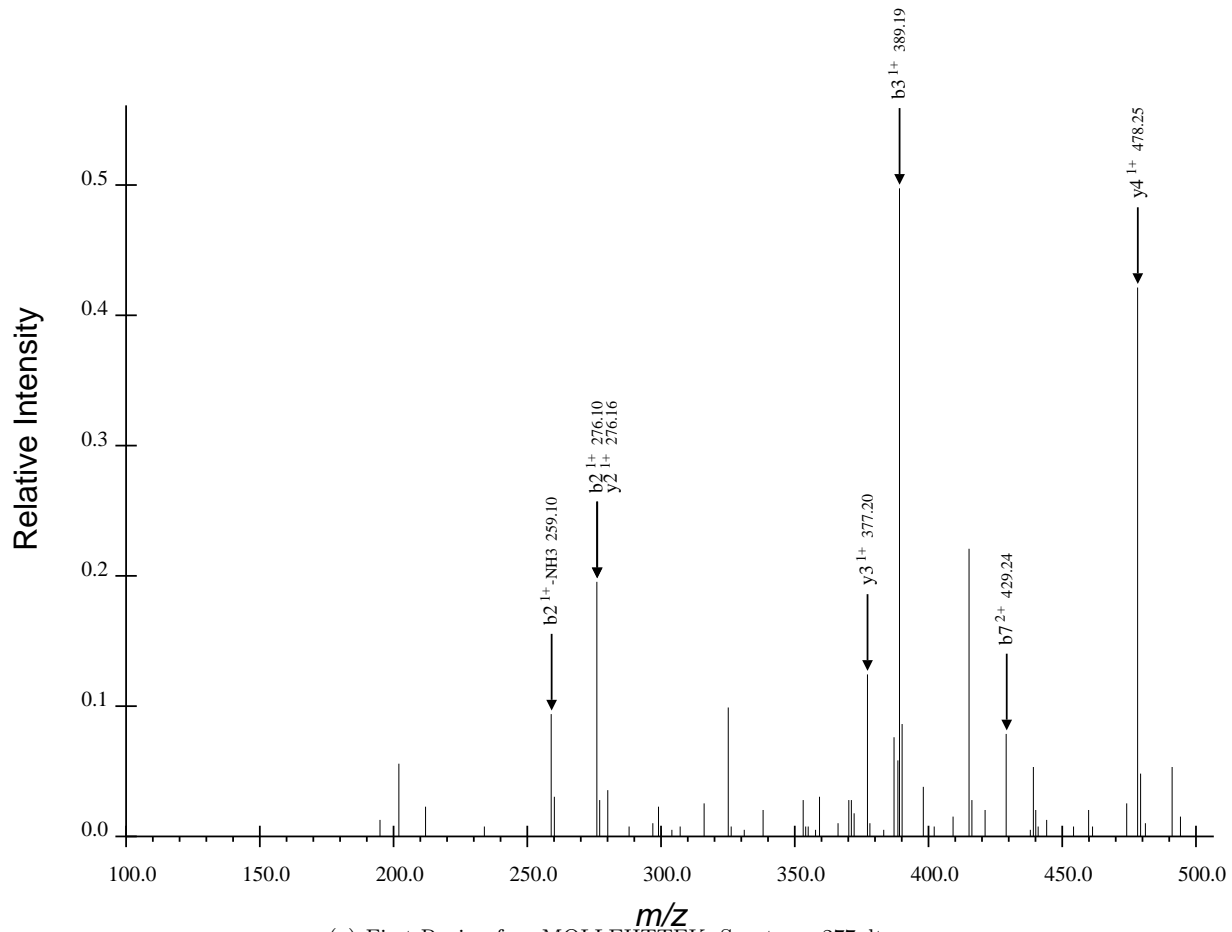

(a) First Region for oMQLLEIITTEK, Spectrum 277.dta

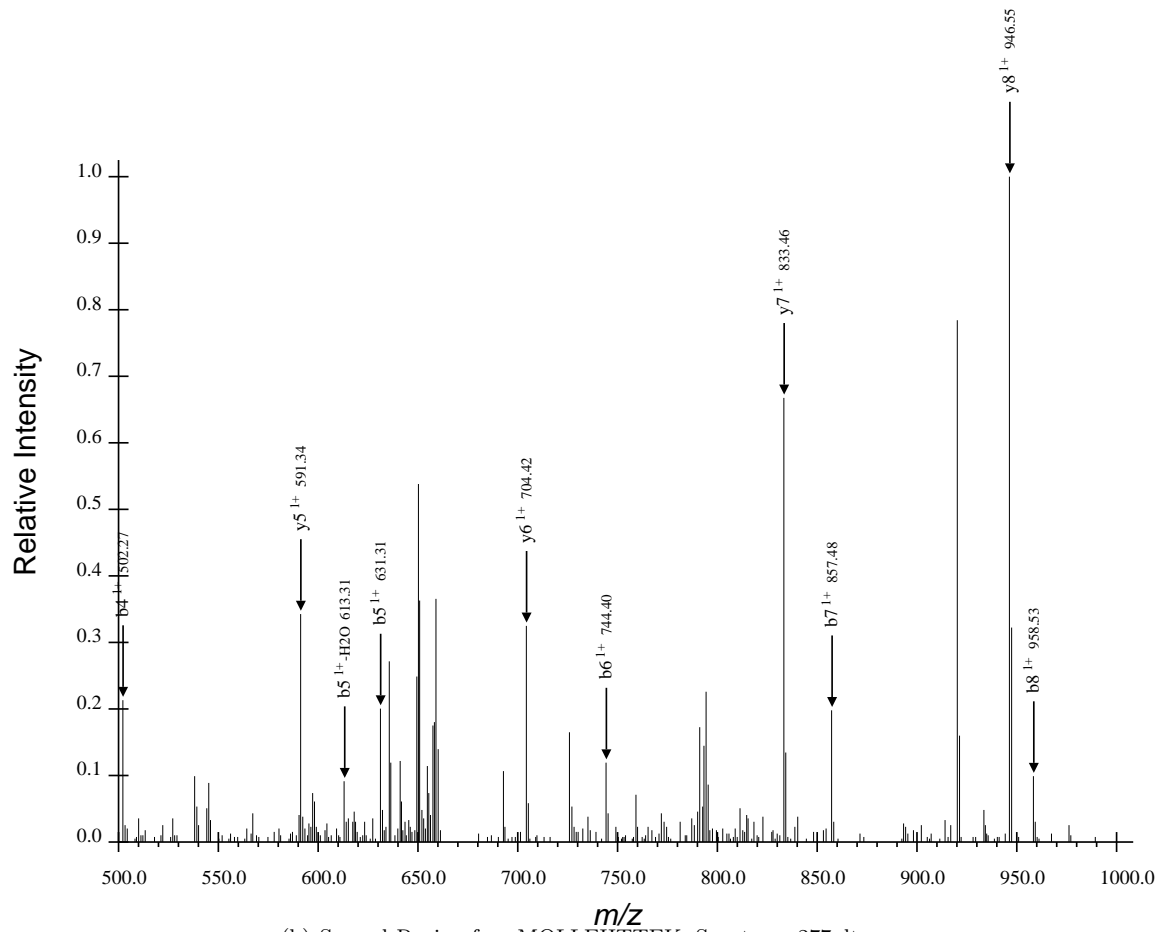

(b) Second Region for oMQLLEIITTEK, Spectrum 277.dta

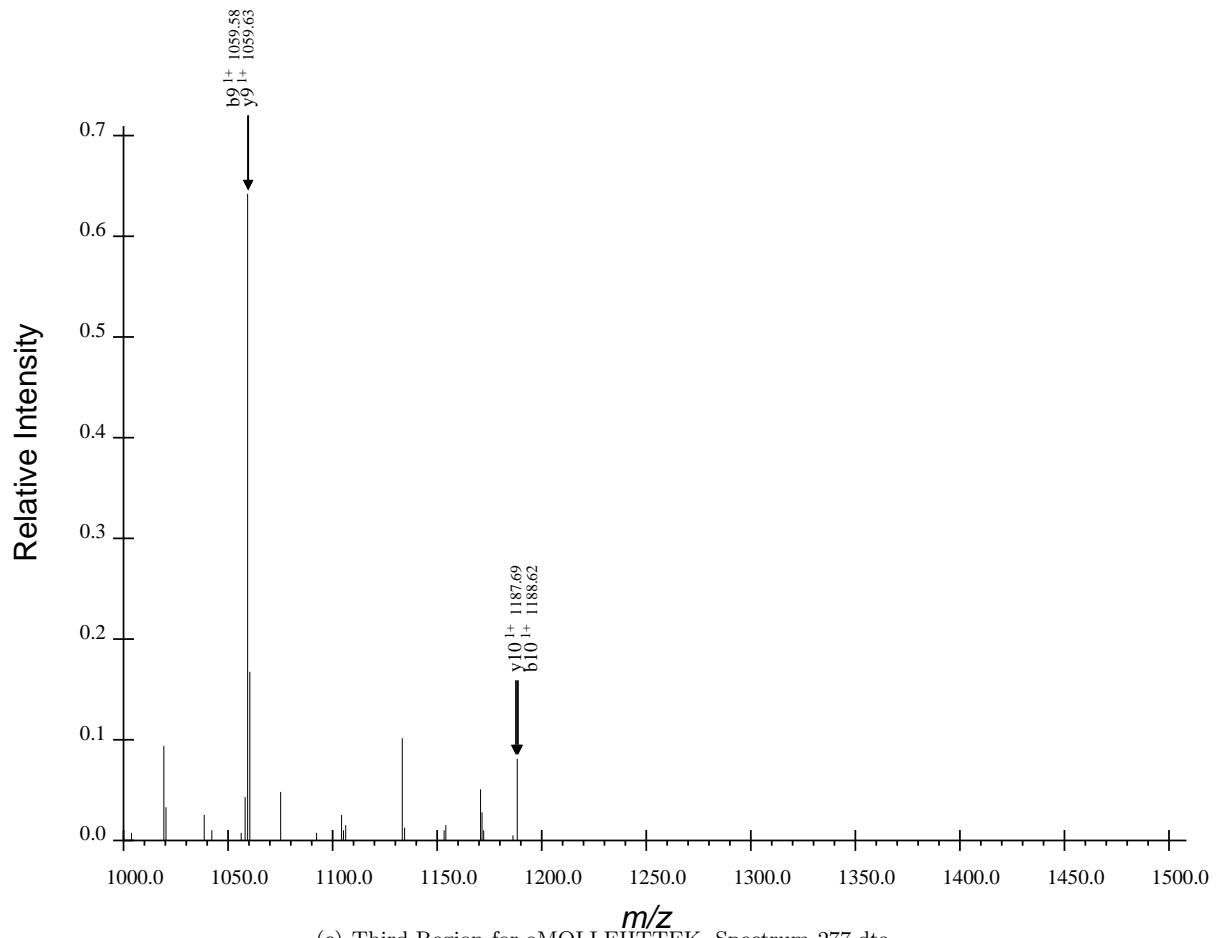

(c) Third Region for oMQLEIITTEK, Spectrum 277.dta

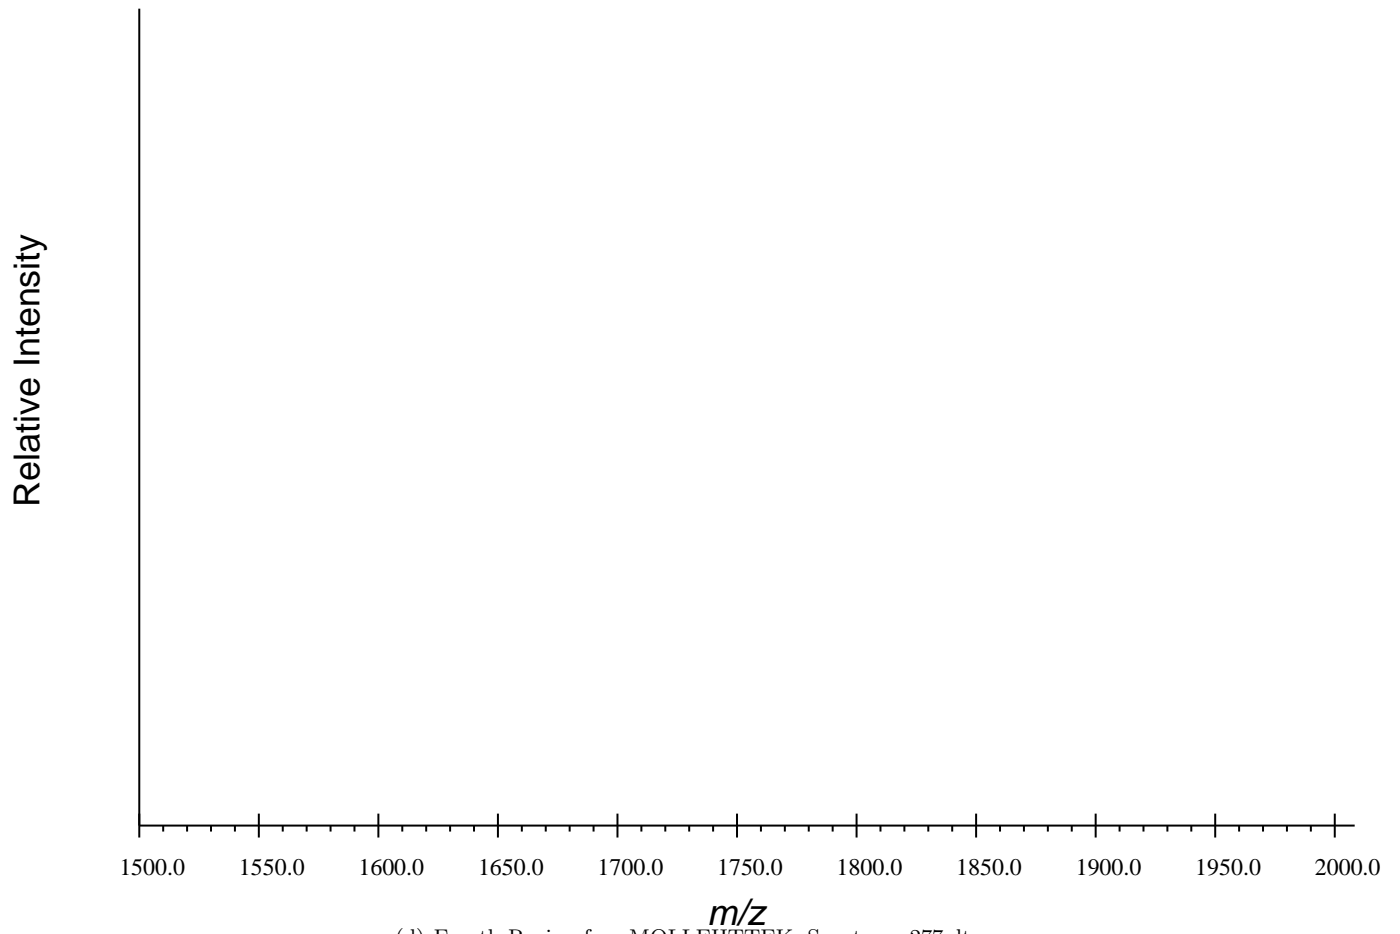

(d) Fourth Region for oMQLEIITTEK, Spectrum 277.dta

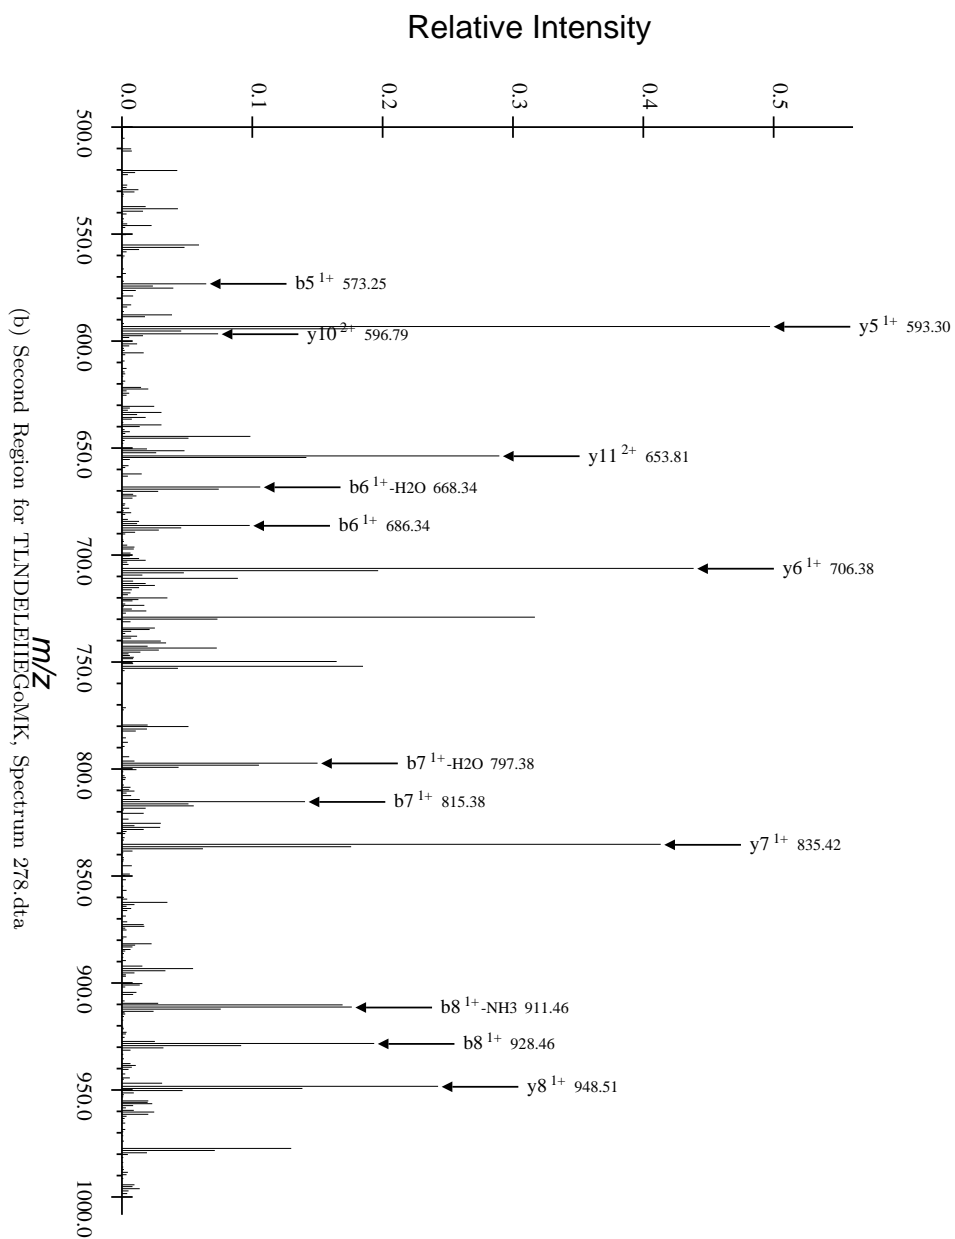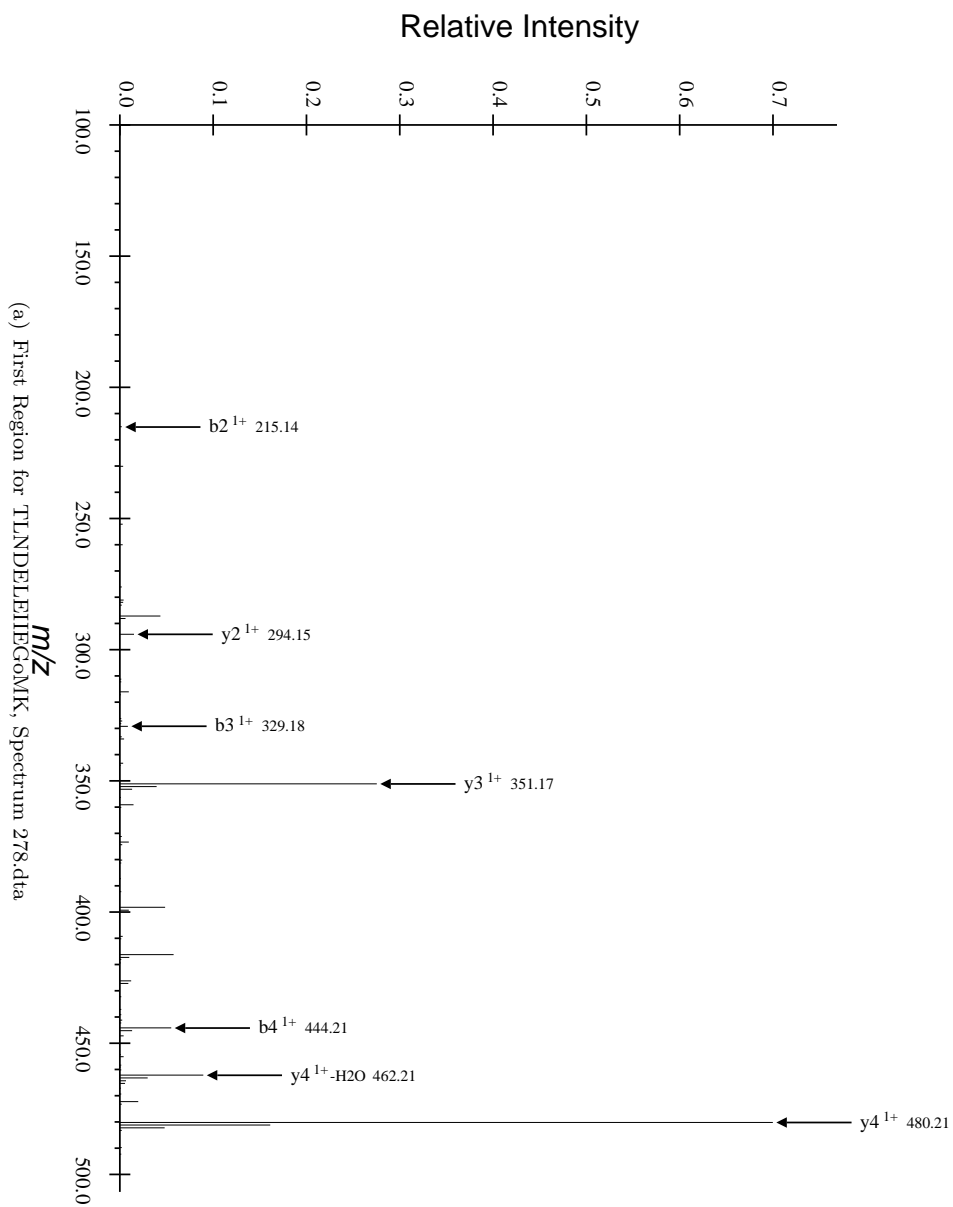

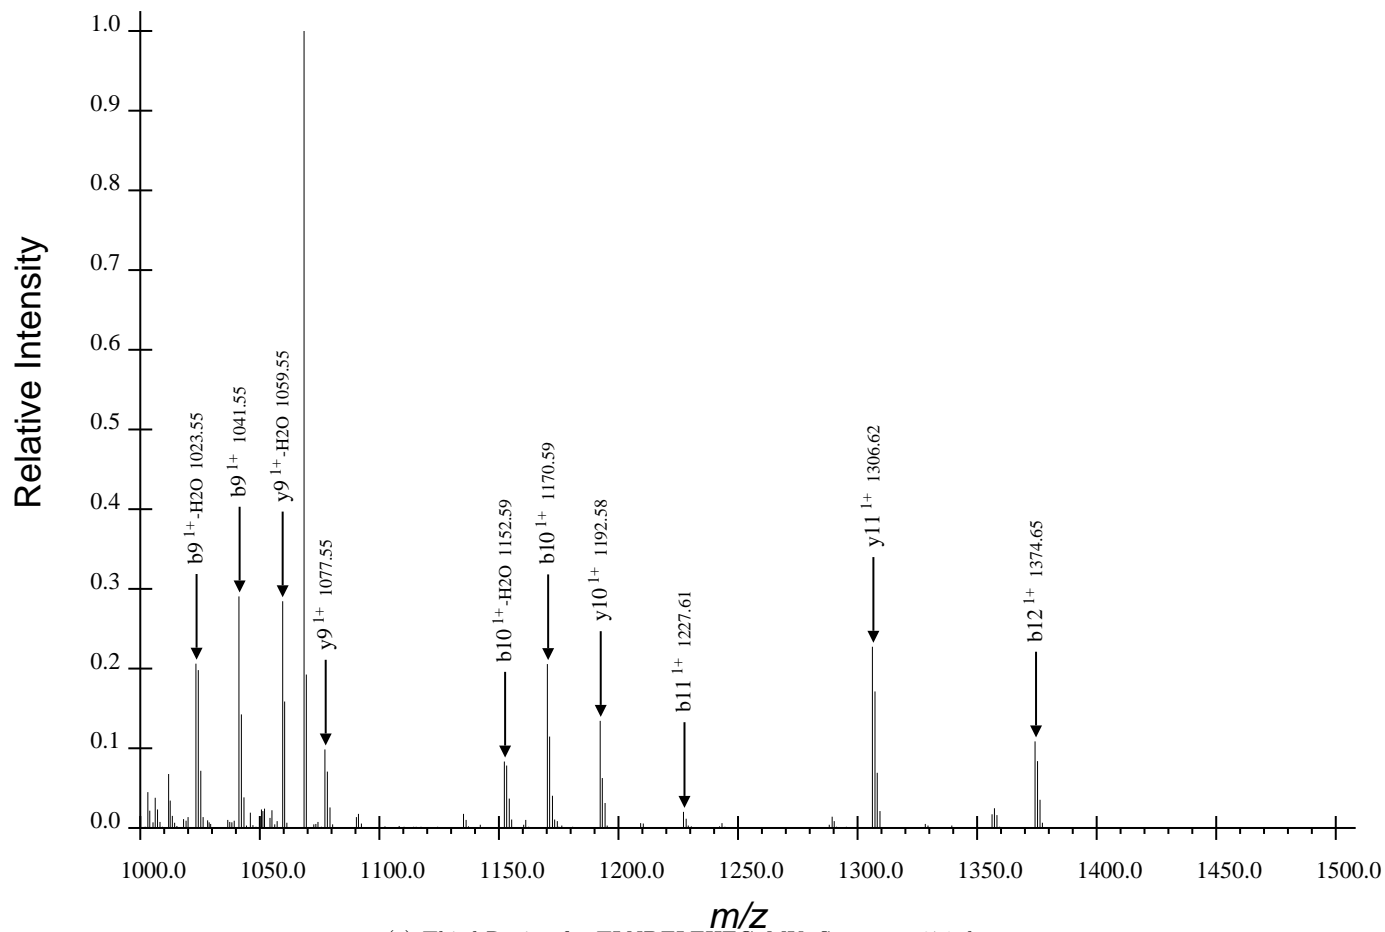

(c) Third Region for TLNDELEIIEGoMK, Spectrum 278.dta

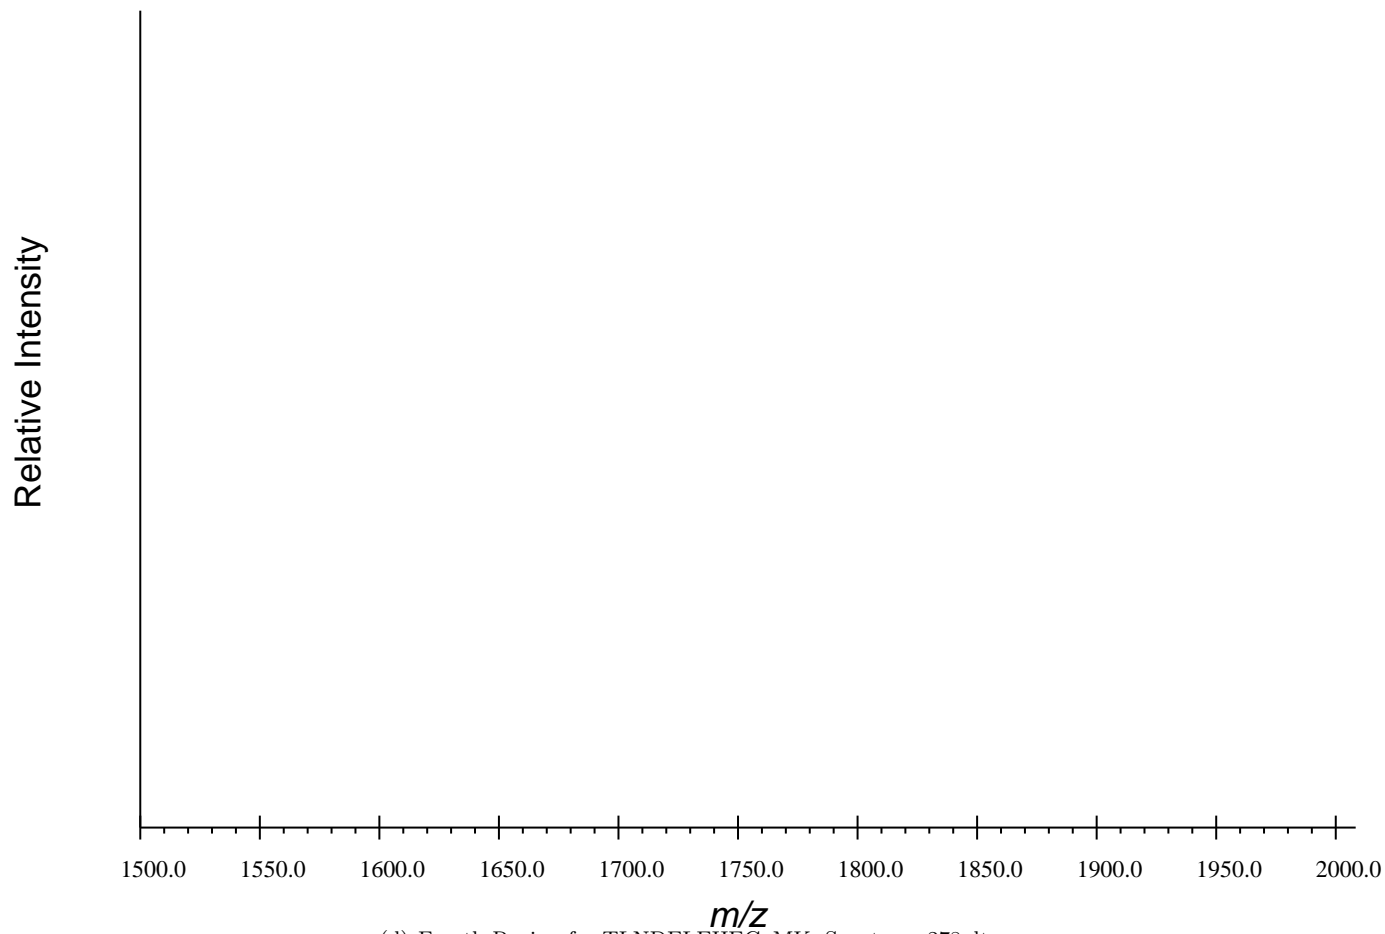

(d) Fourth Region for TLNDELEIIEGoMK, Spectrum 278.dta

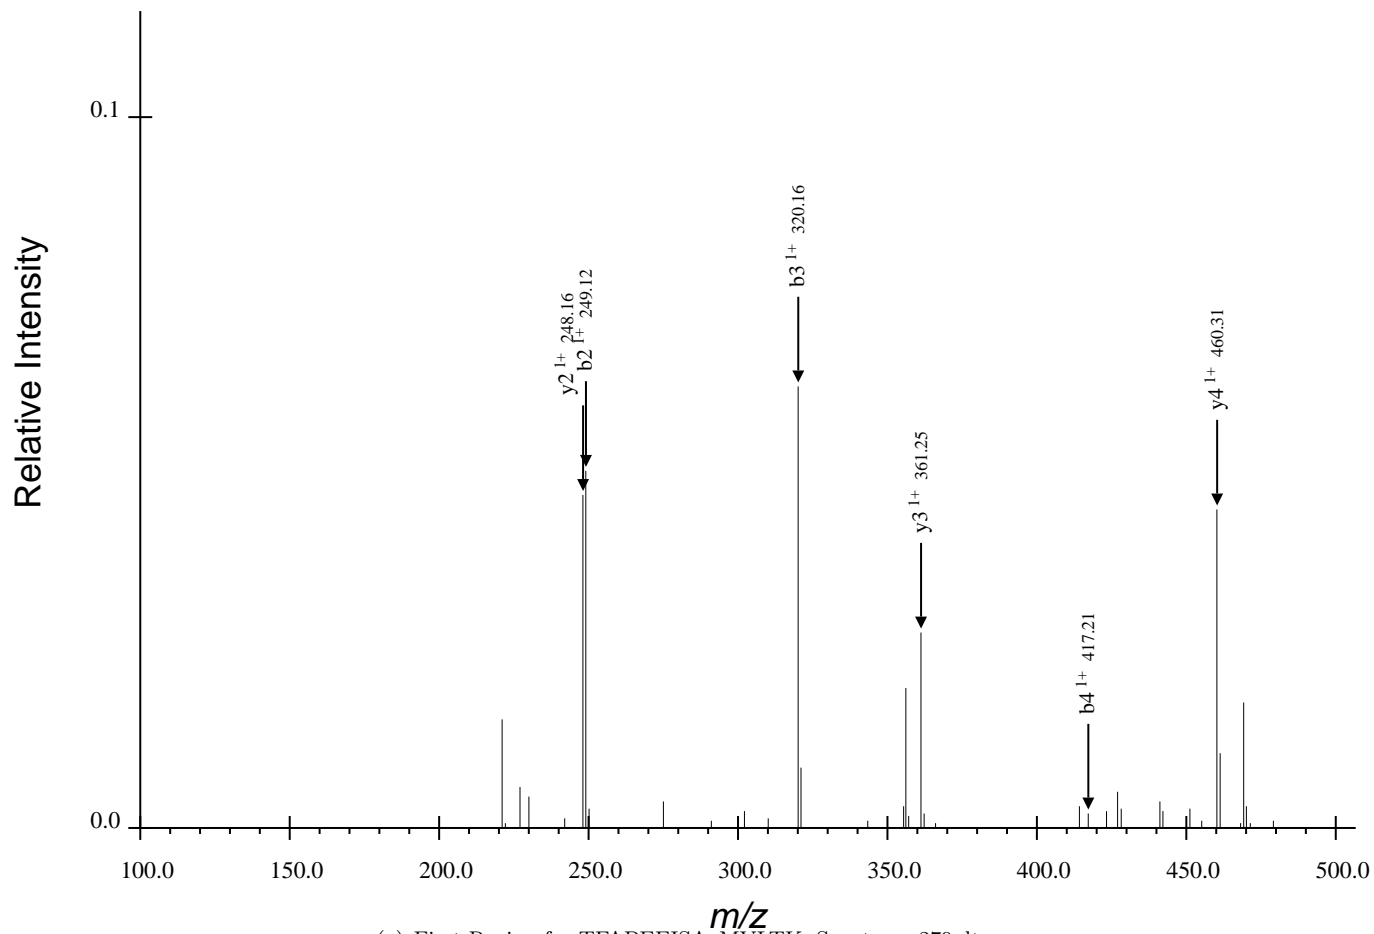

(a) First Region for TFAPEEISAoMVLTK, Spectrum 279.dta

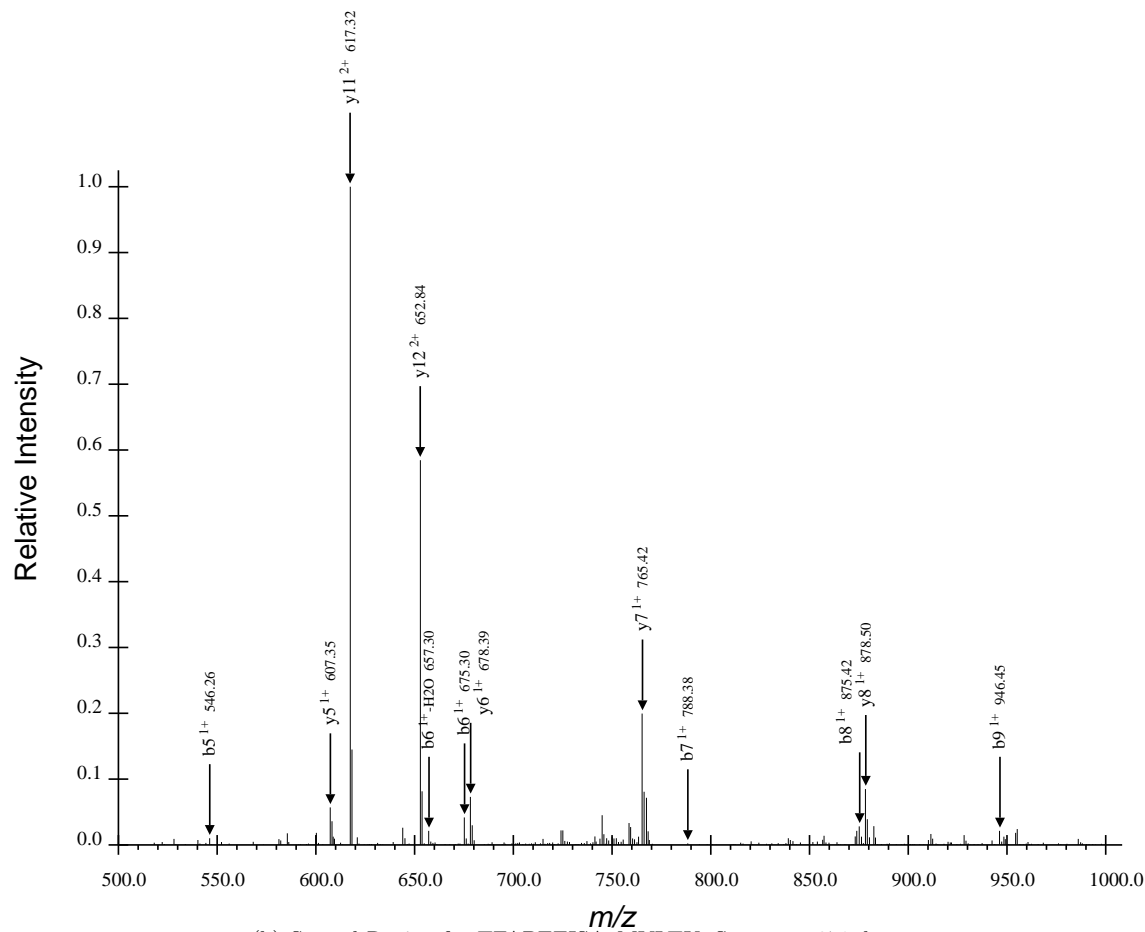

(b) Second Region for TFAPEEISAoMVLTK, Spectrum 279.dta

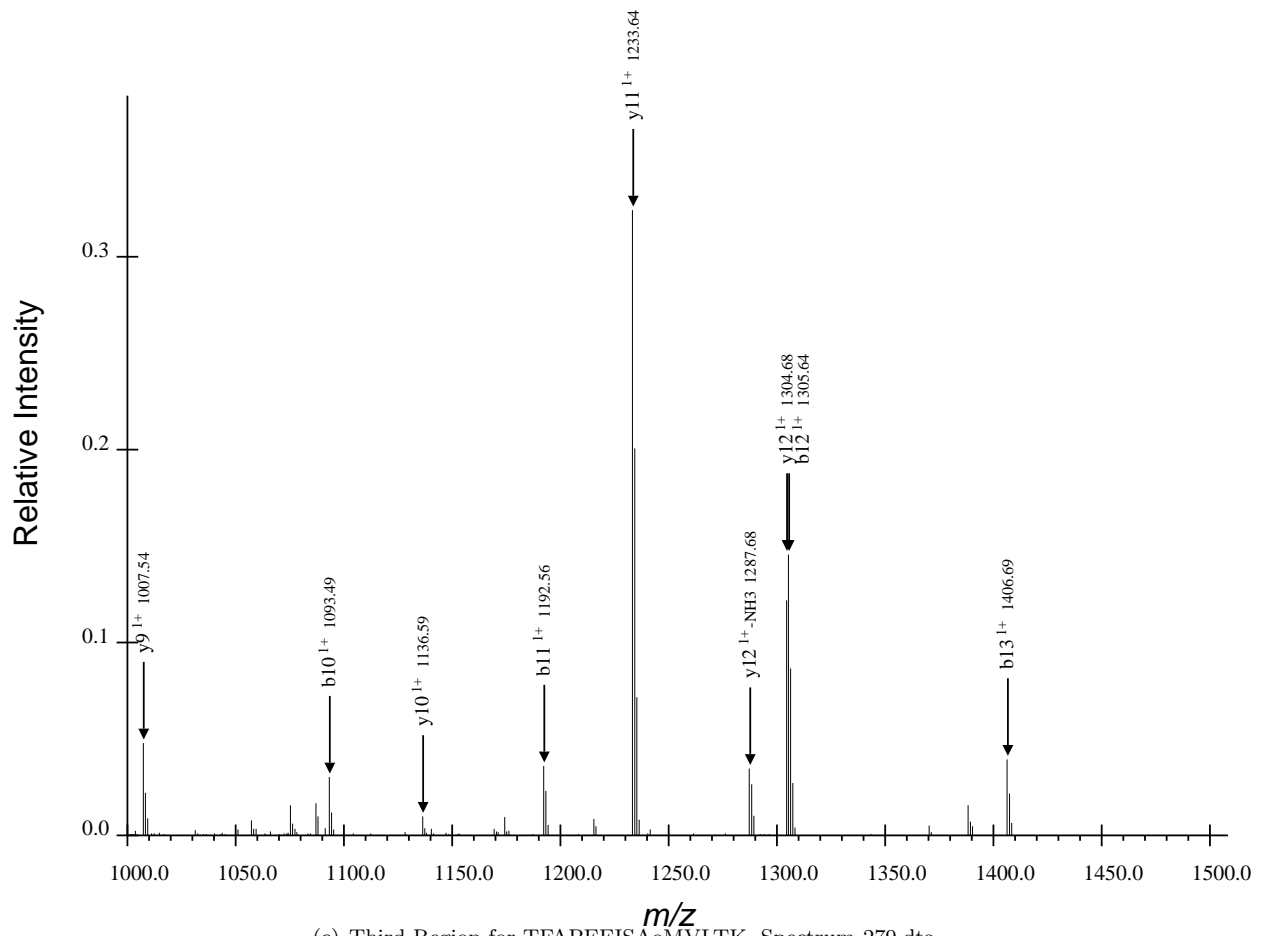

(c) Third Region for TFAPEEISAoMVLTK, Spectrum 279.dta

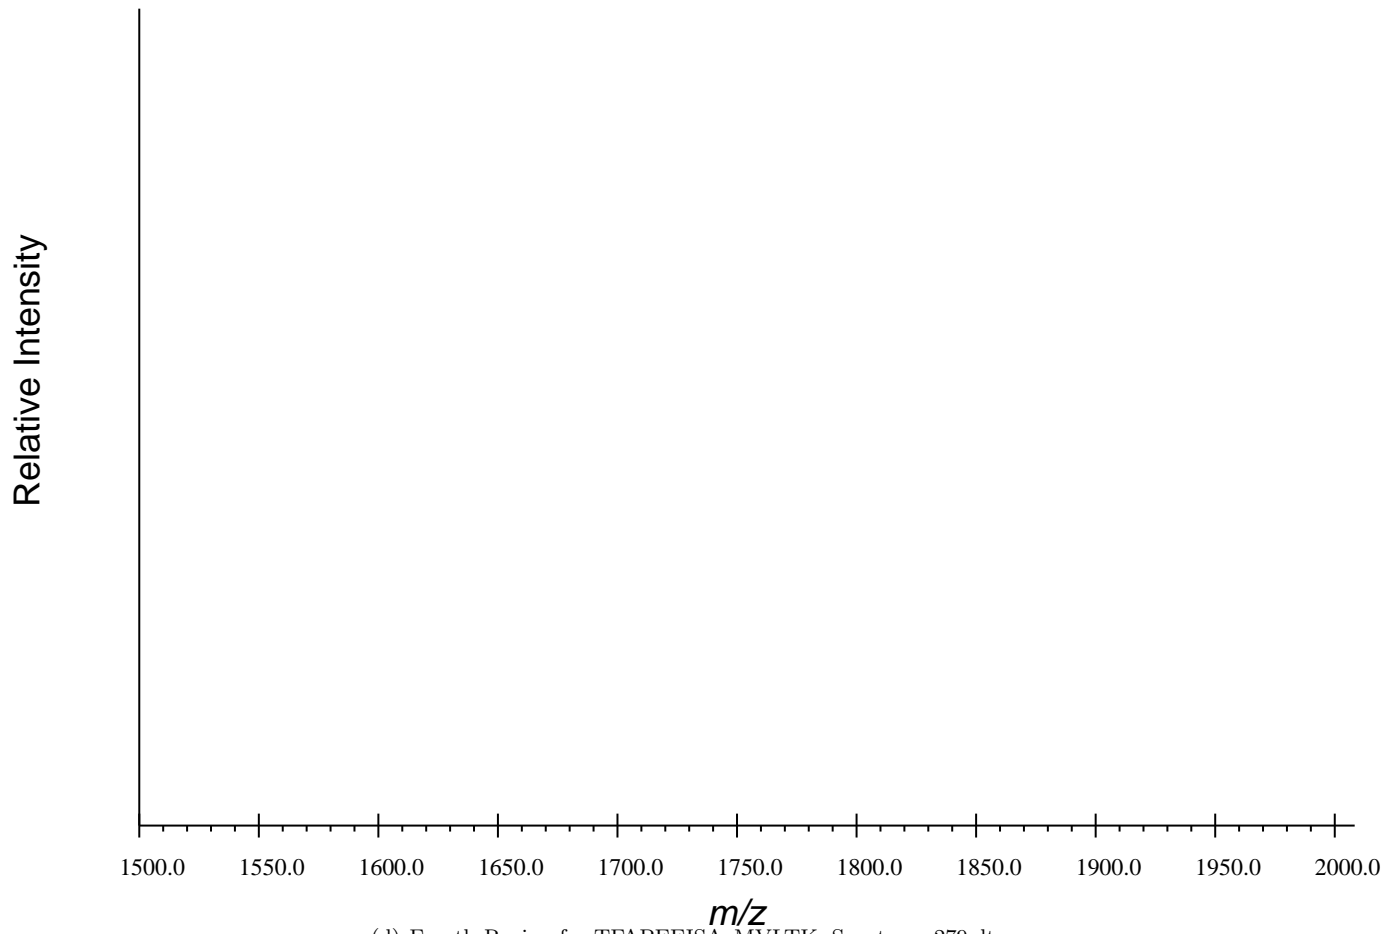

(d) Fourth Region for TFAPEEISAoMVLTK, Spectrum 279.dta

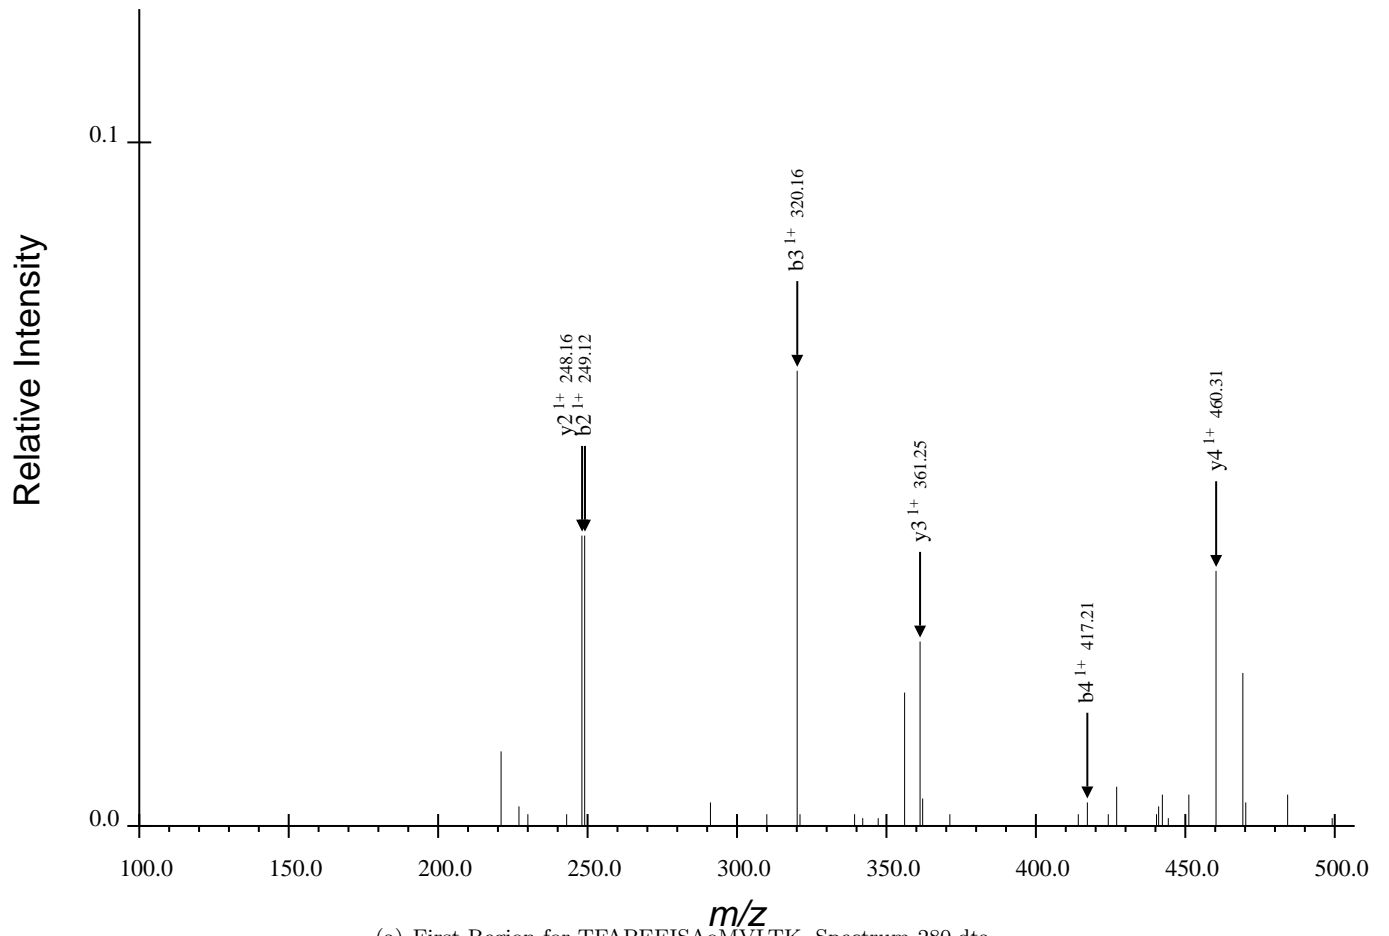

(a) First Region for TFAPEEISAoMVLTK, Spectrum 280.dta

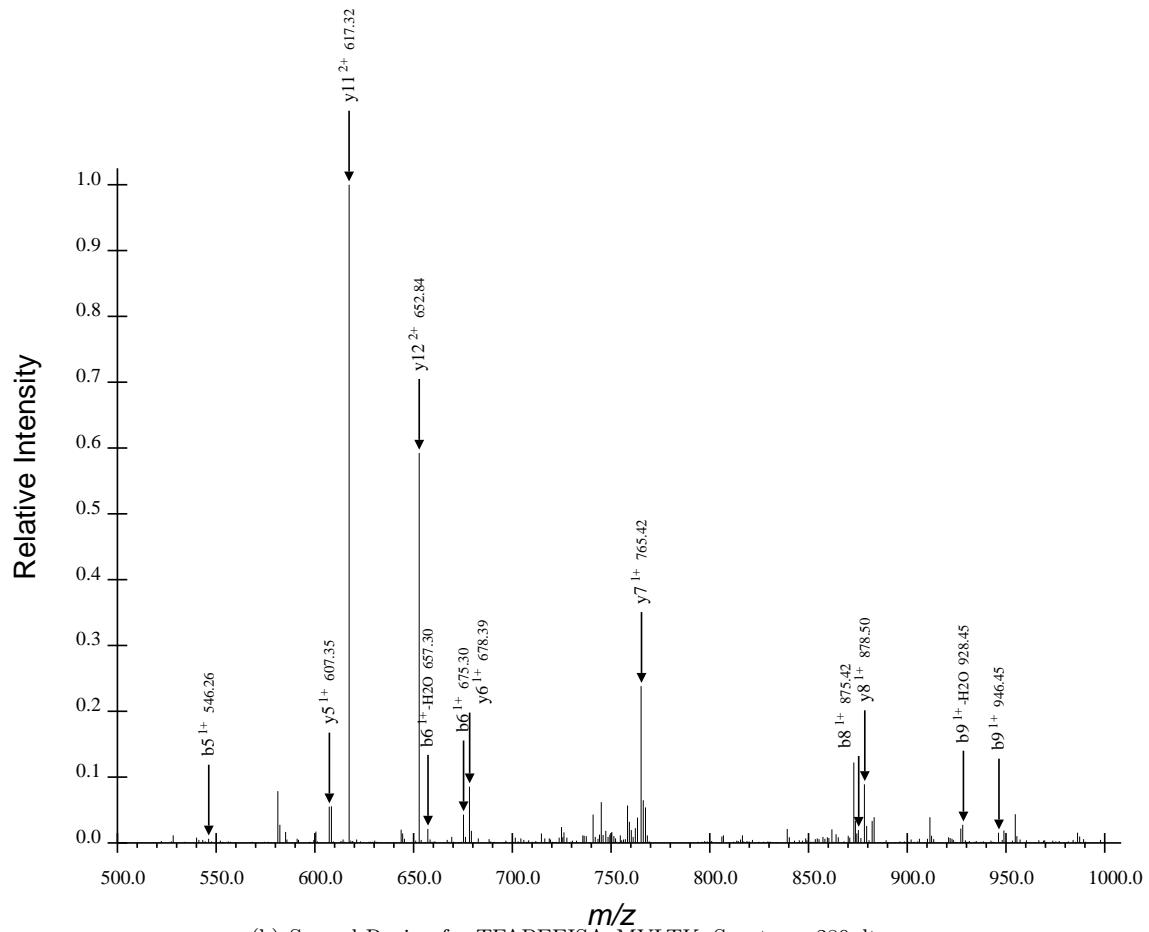

(b) Second Region for TFAPEEISAoMVLTK, Spectrum 280.dta

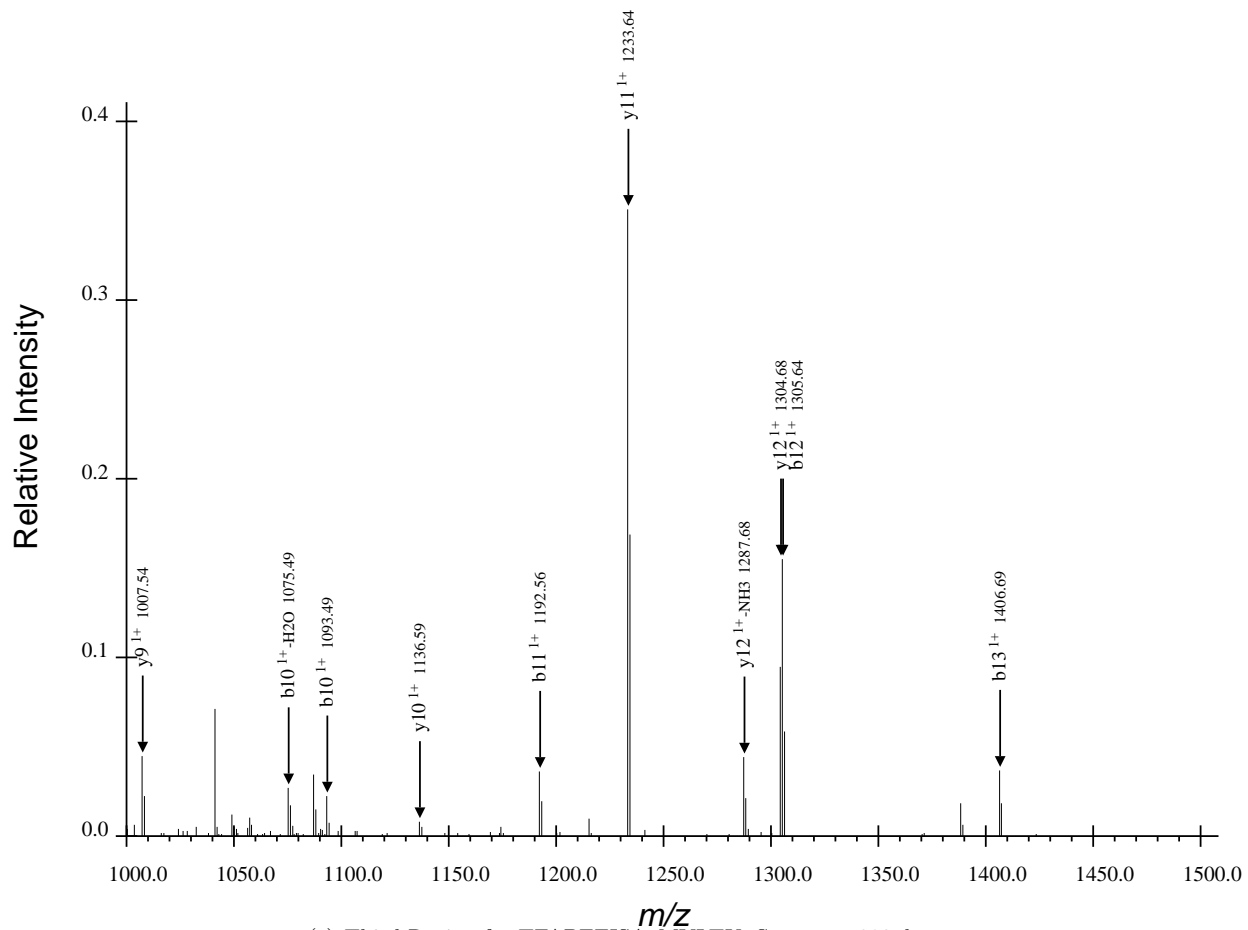

(c) Third Region for TFAPEEISAoMVLTK, Spectrum 280.dta

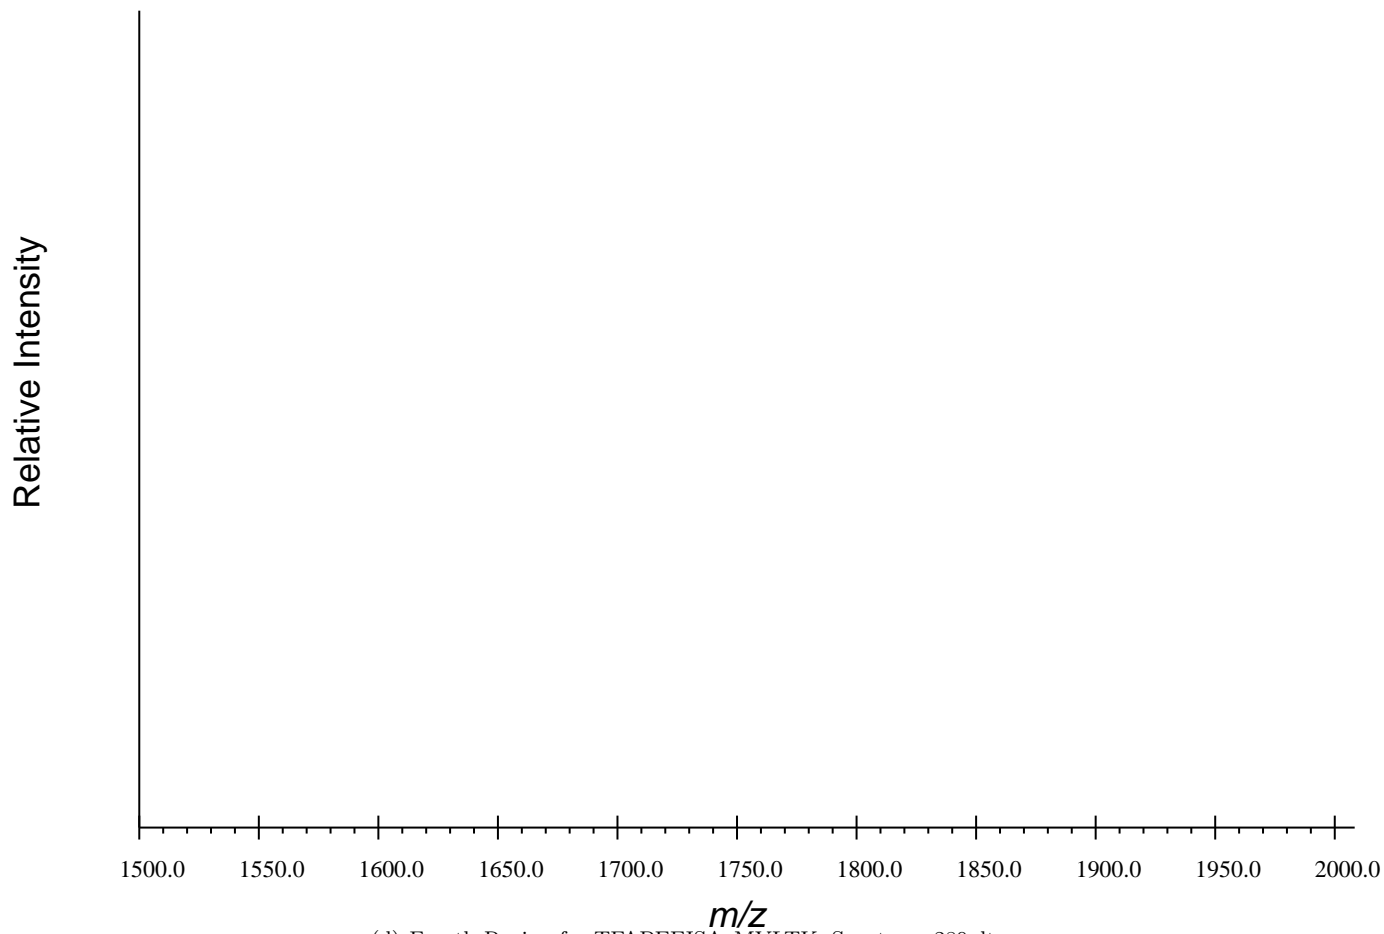

(d) Fourth Region for TFAPEEISAoMVLTK, Spectrum 280.dta



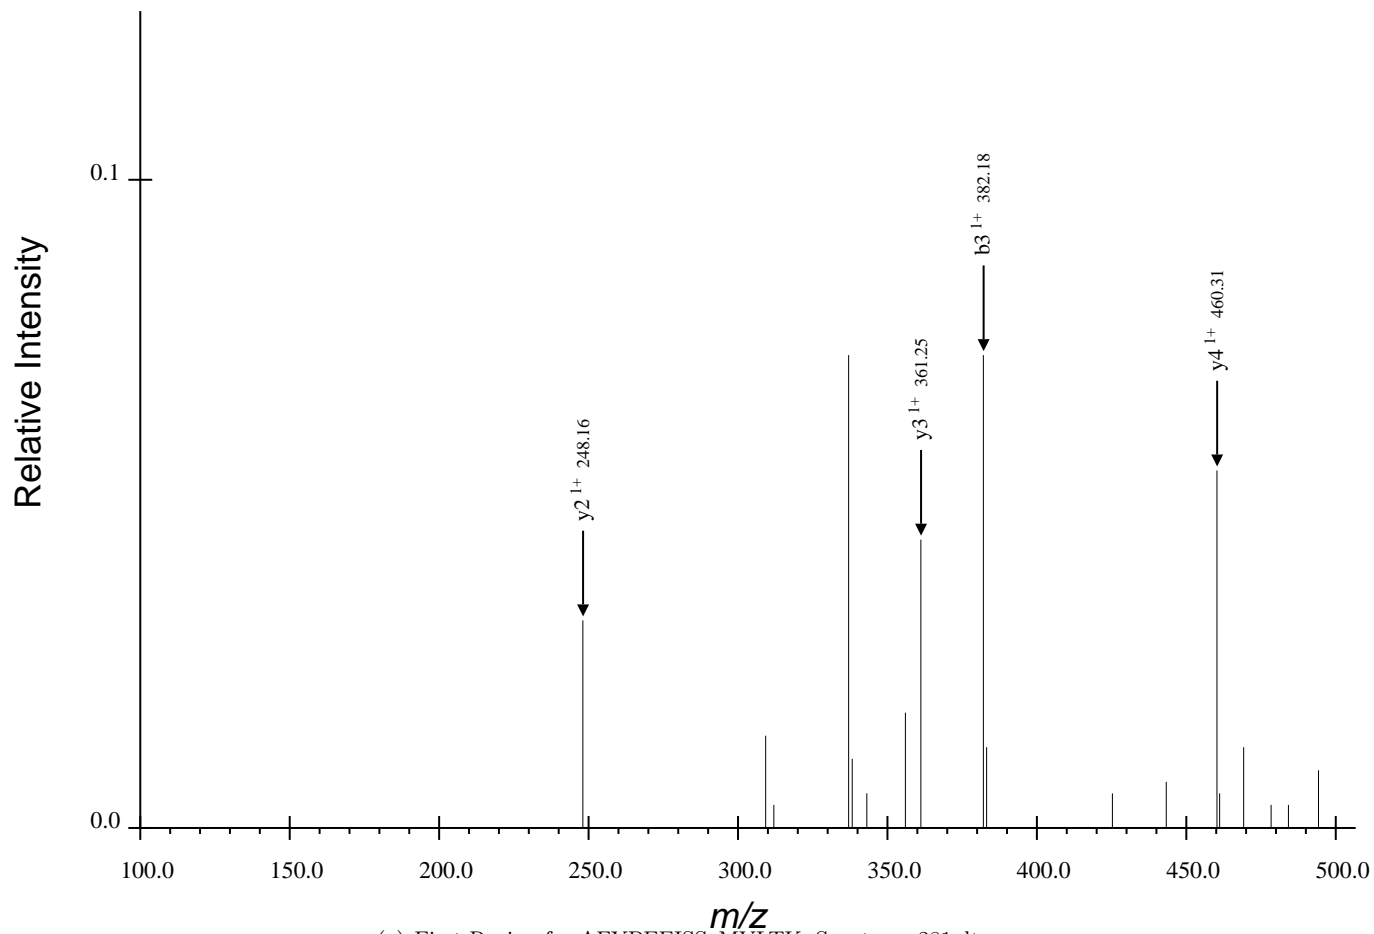

(a) First Region for AFYPEEISSoMVLTK, Spectrum 281.dta

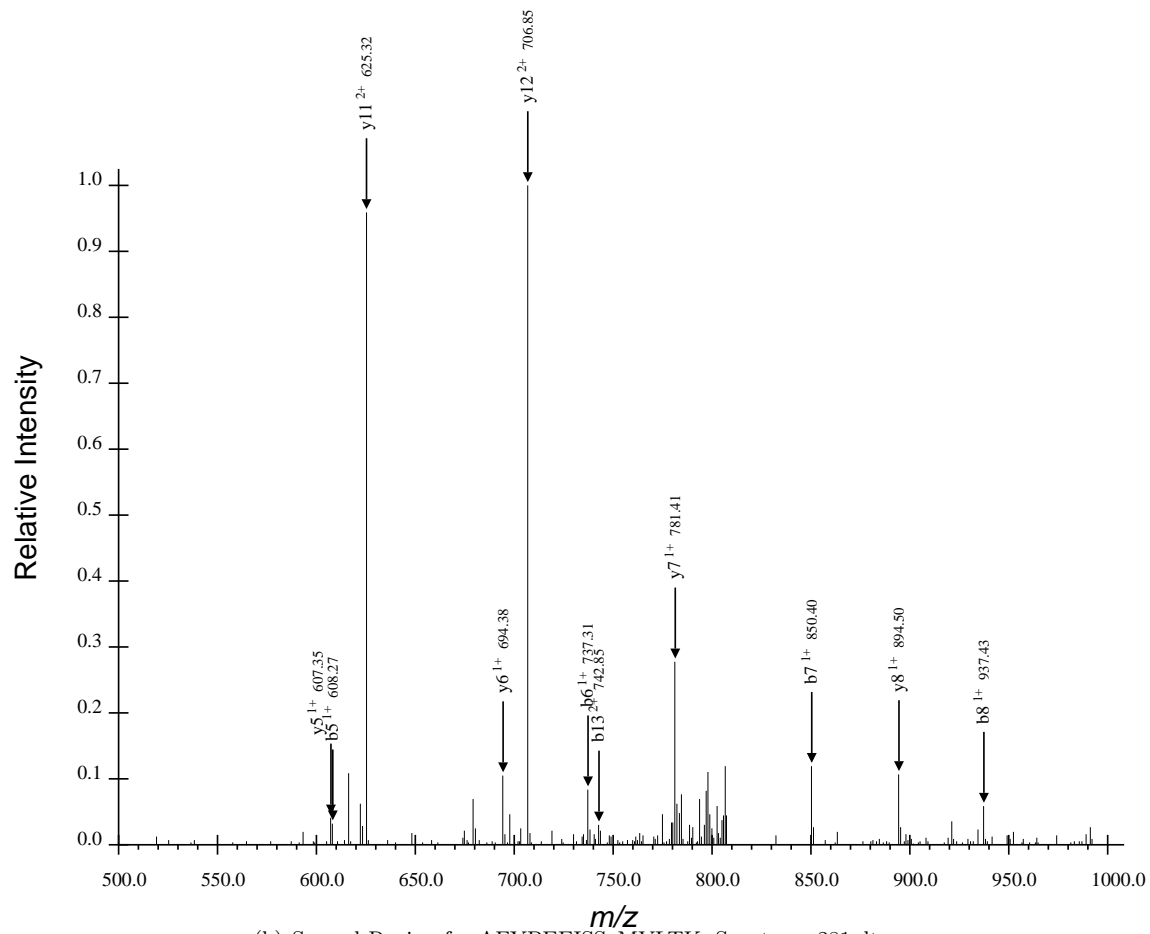

(b) Second Region for AFYPEEISSoMVLTK, Spectrum 281.dta

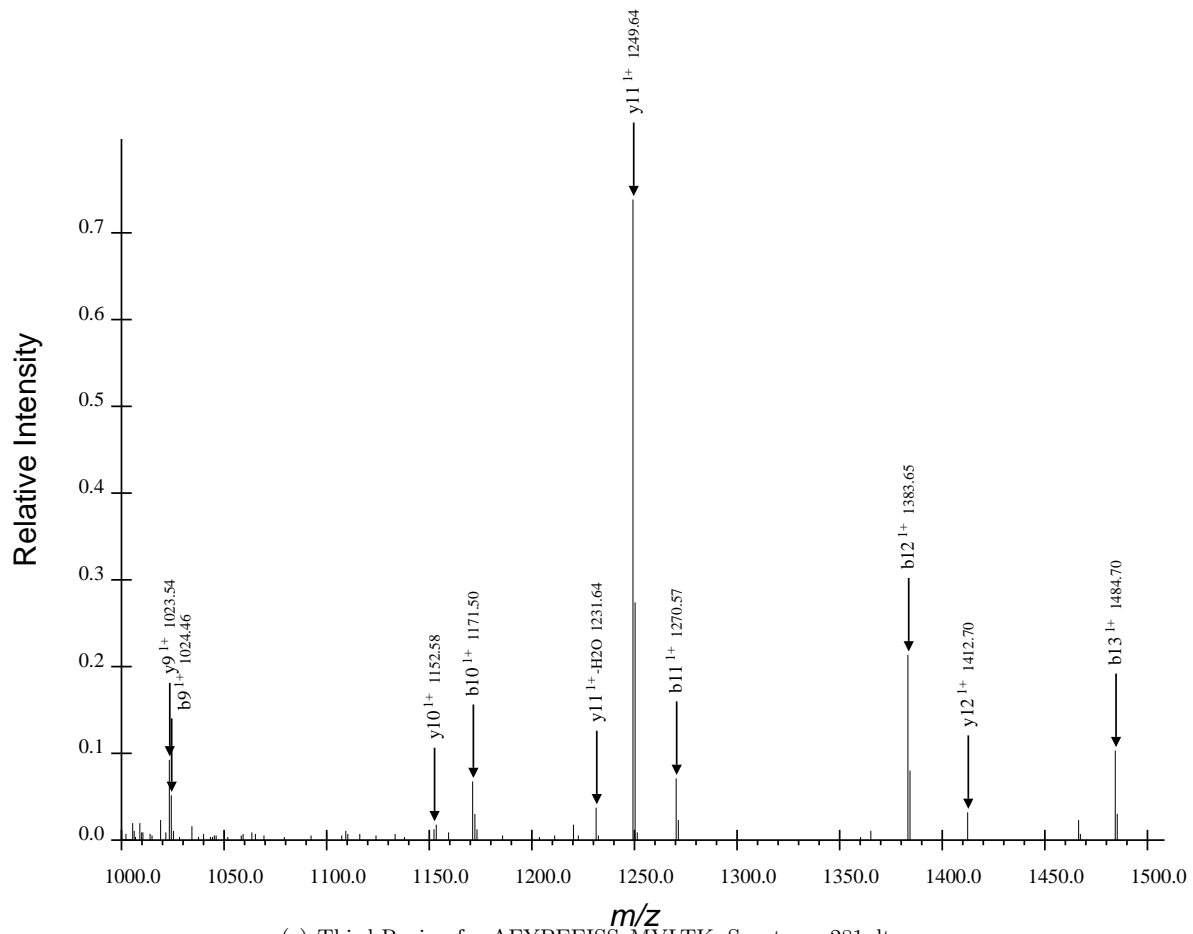

(c) Third Region for AFYPEEISSoMVLTK, Spectrum 281.dta

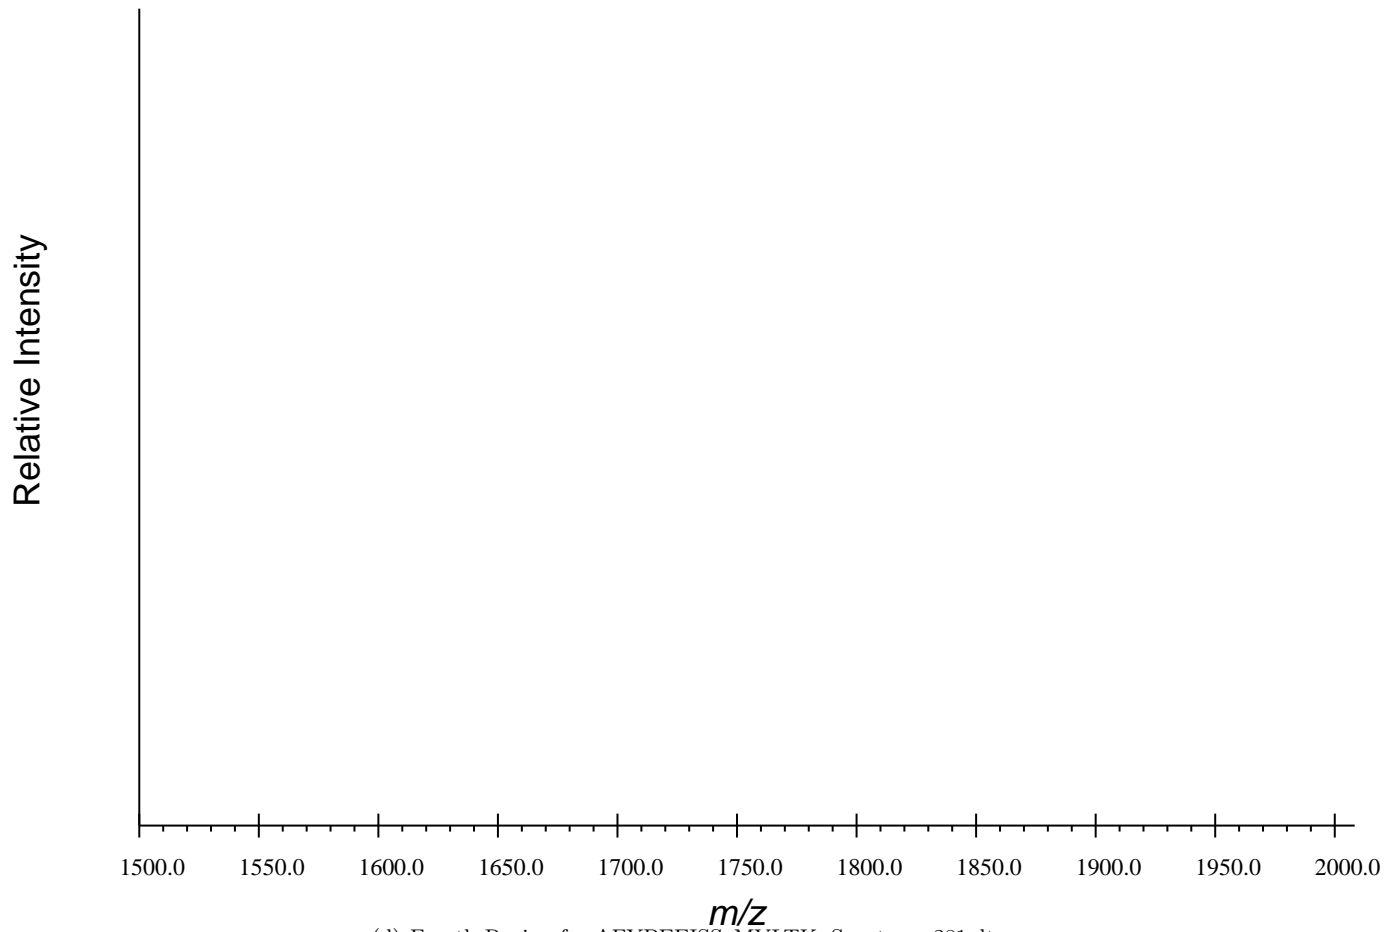

(d) Fourth Region for AFYPEEISSoMVLTK, Spectrum 281.dta

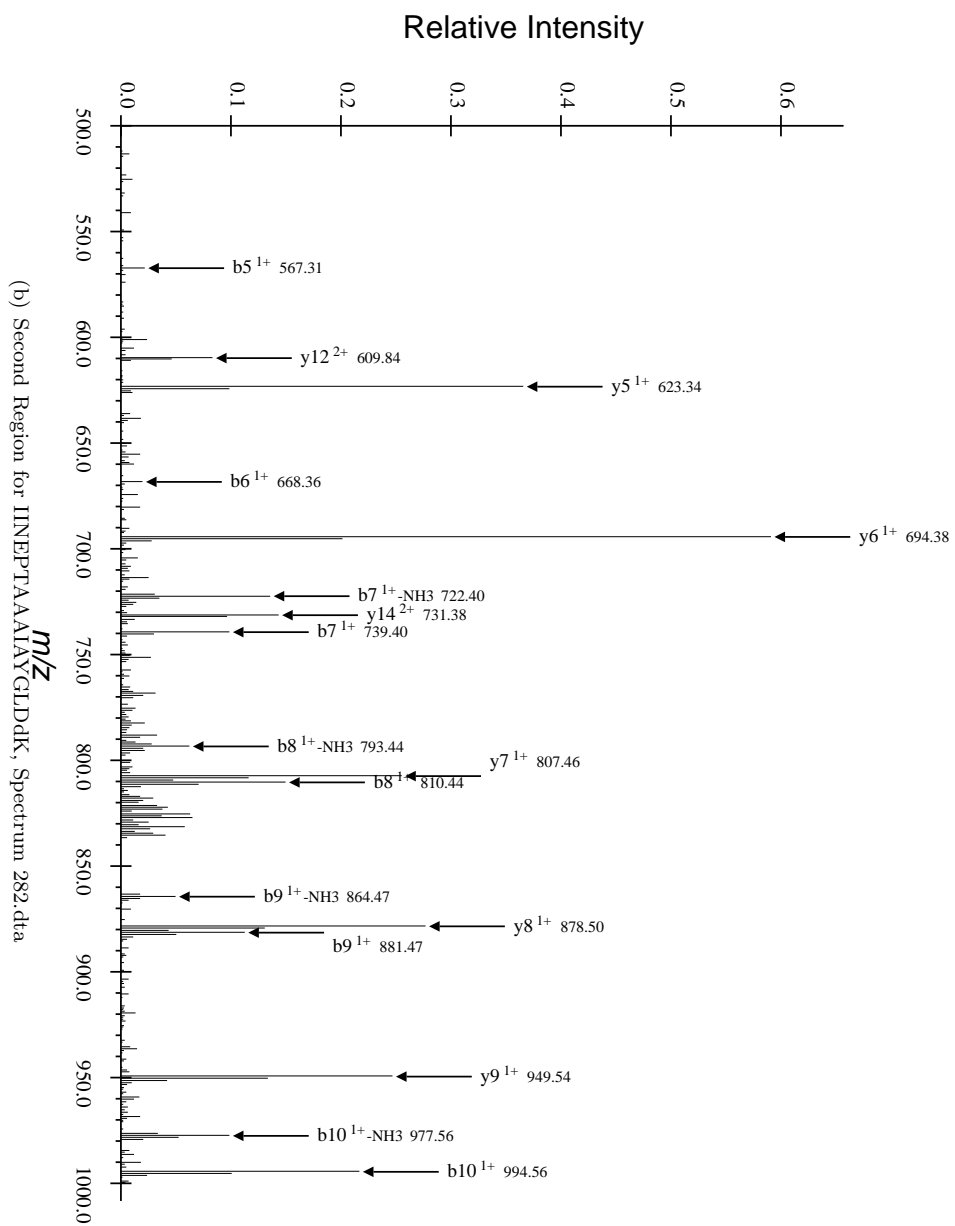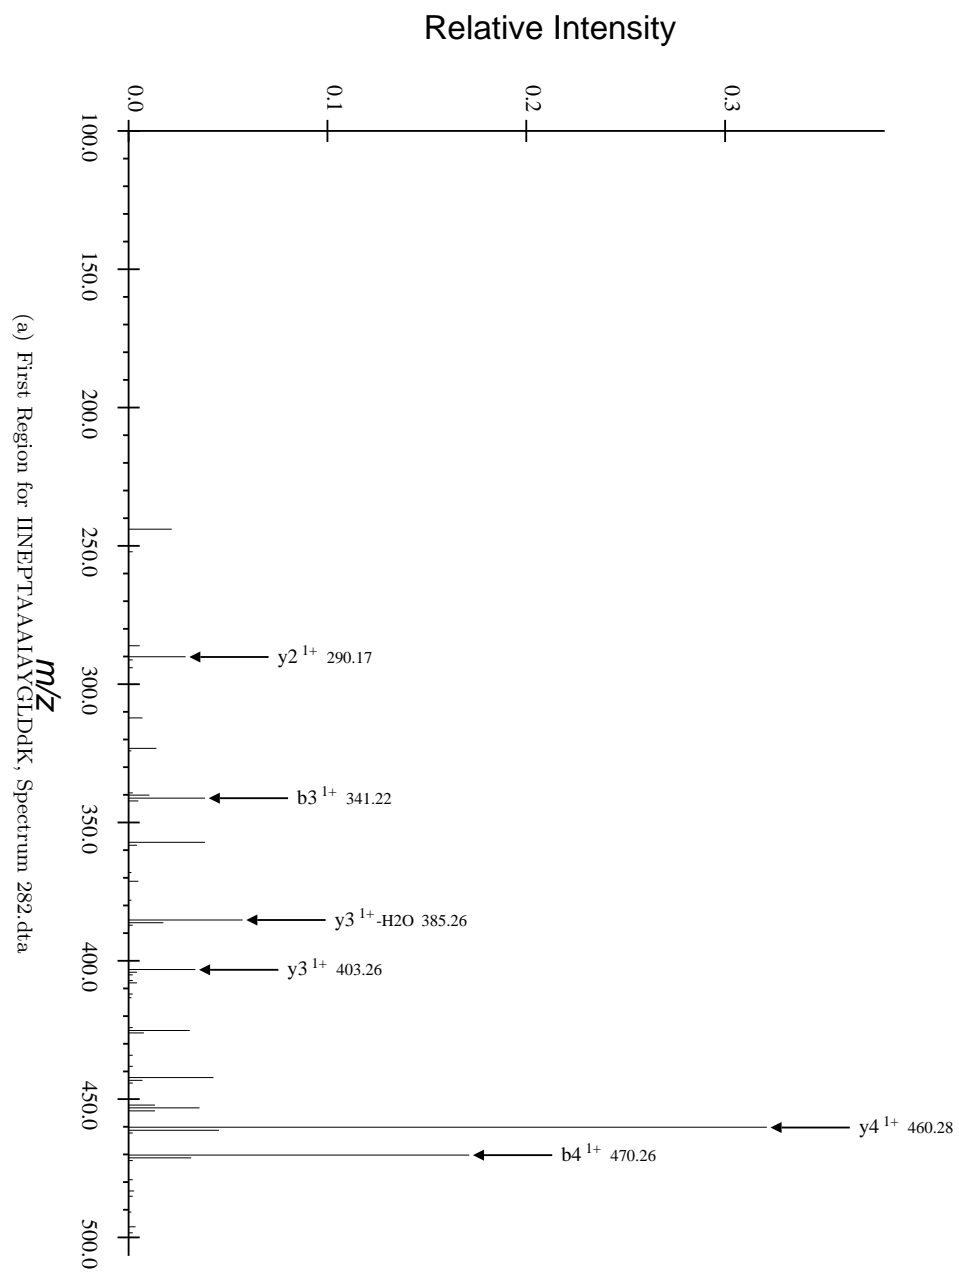

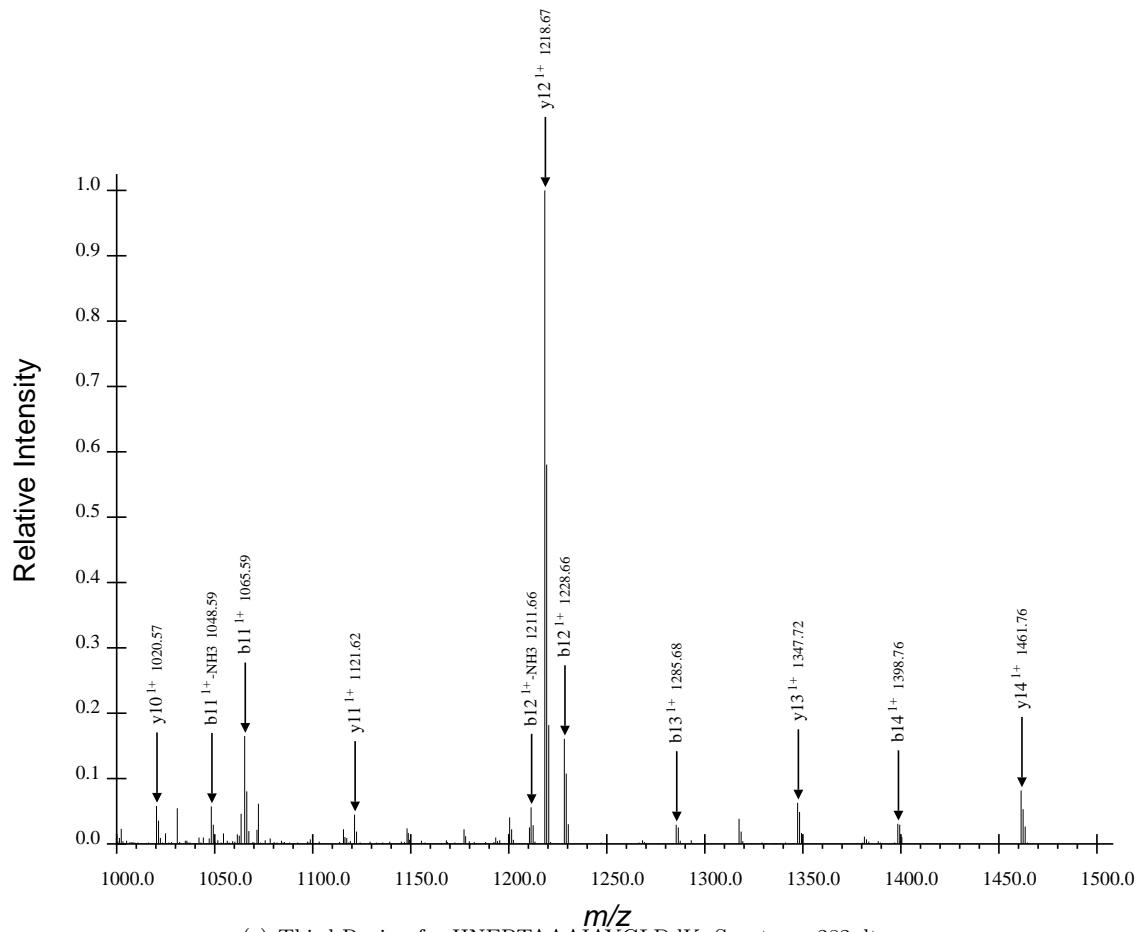

(c) Third Region for IINEPTAAAIAAYGLDdK, Spectrum 282.dta

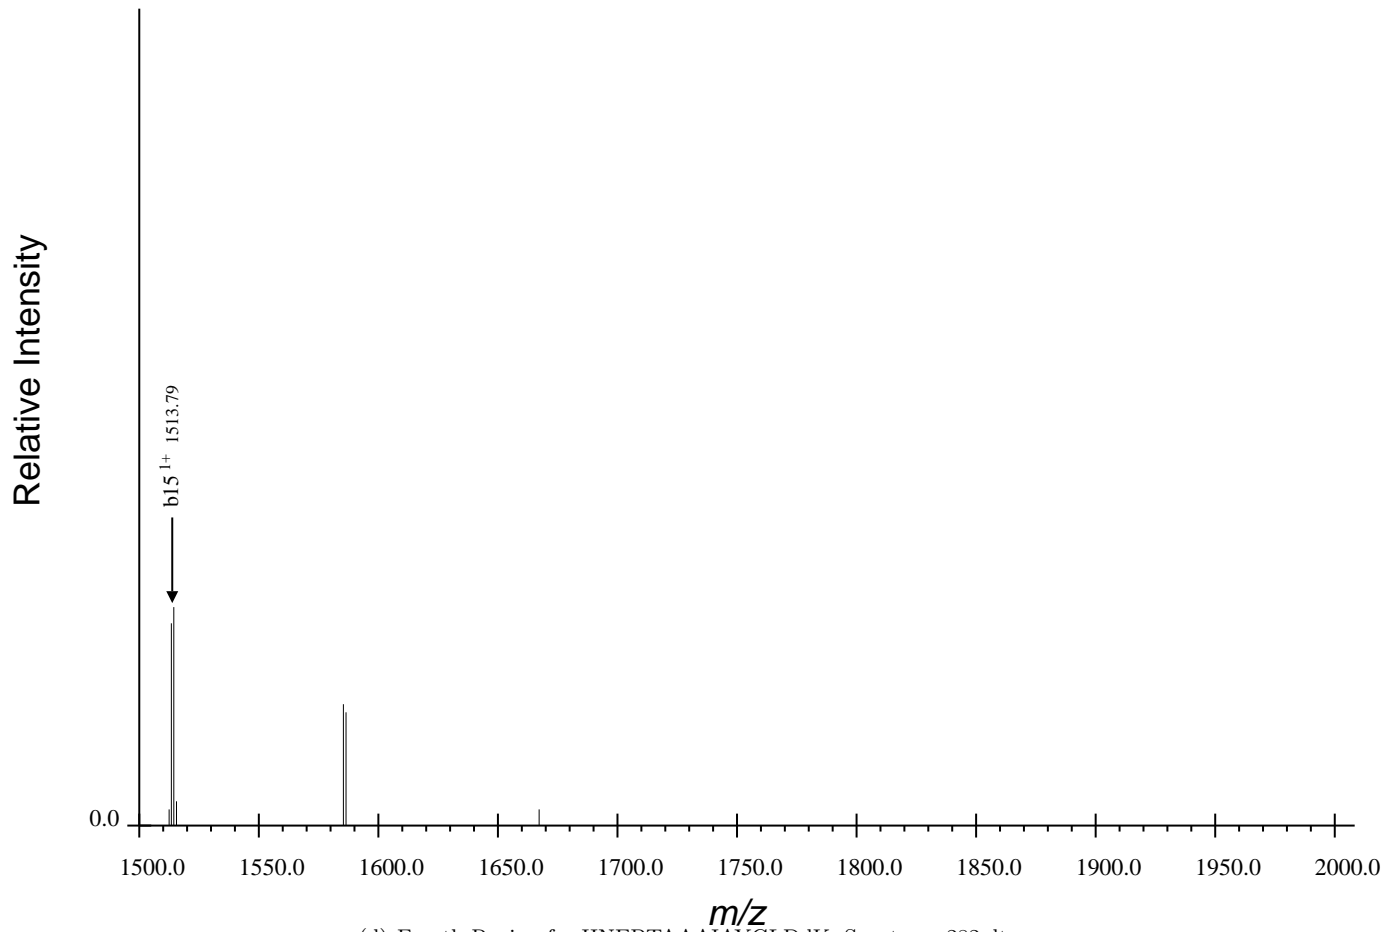

(d) Fourth Region for IINEPTAAAIAAYGLDdK, Spectrum 282.dta

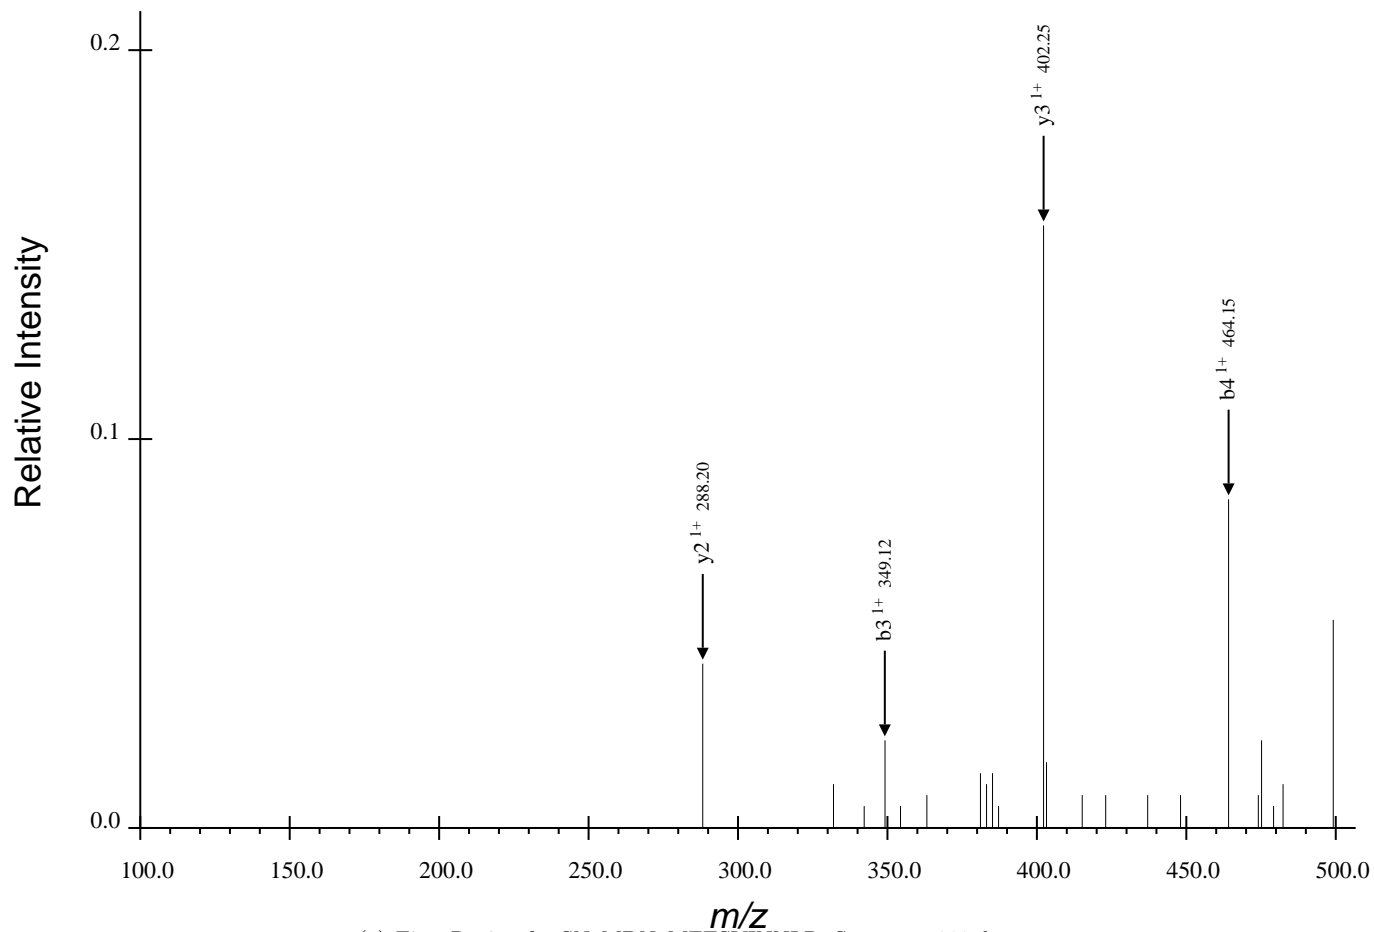

(a) First Region for SNoMDNoMFESYINNLR, Spectrum 283.dta

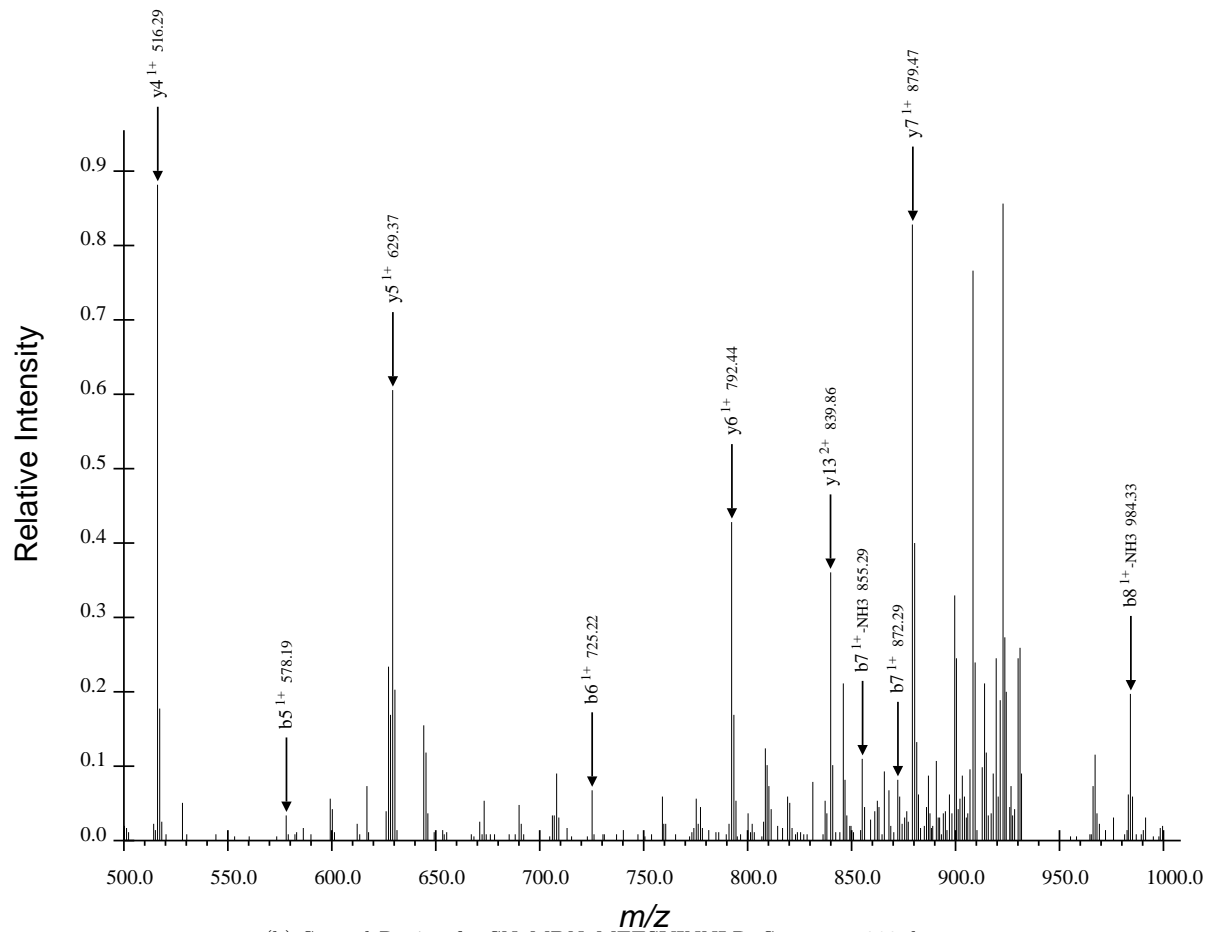

(b) Second Region for SNoMDNoMFESYINNLR, Spectrum 283.dta

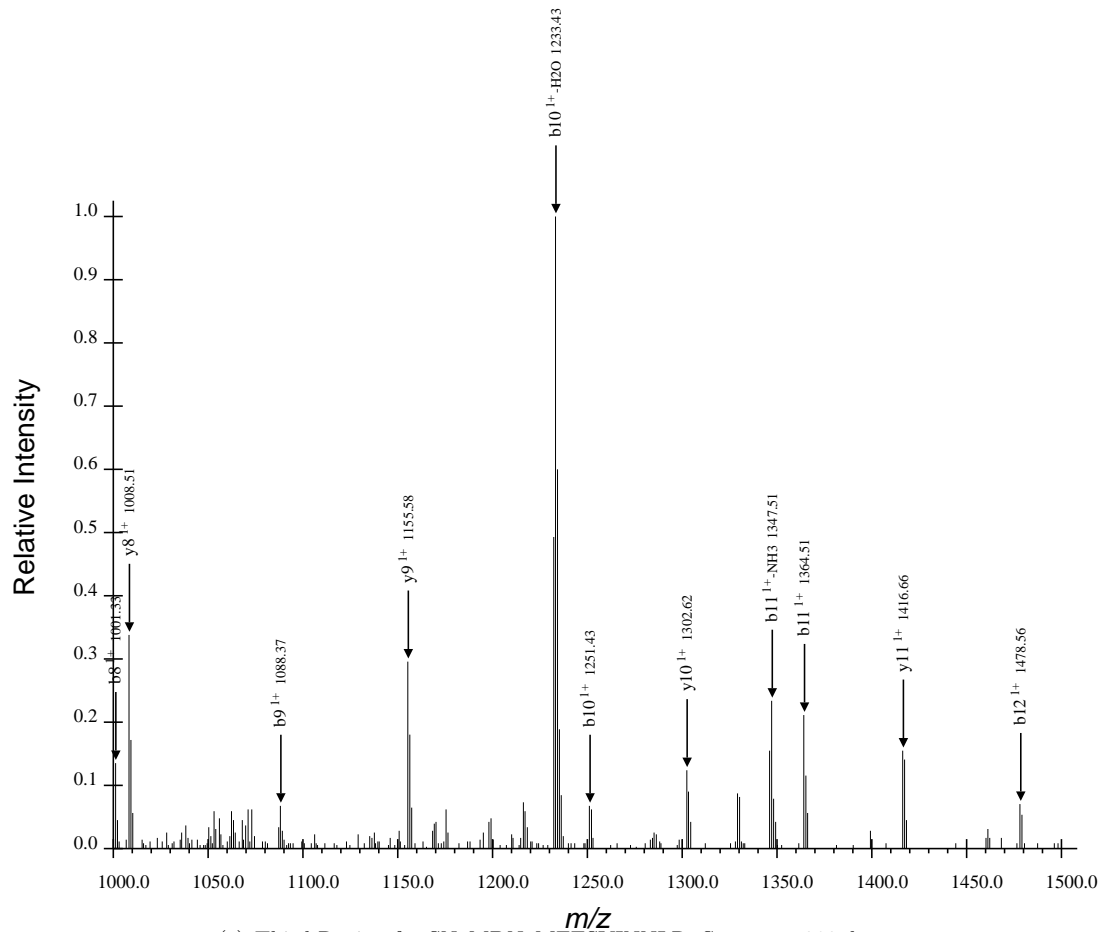

(c) Third Region for SNoMDNoMFESYINNLR, Spectrum 283.dta

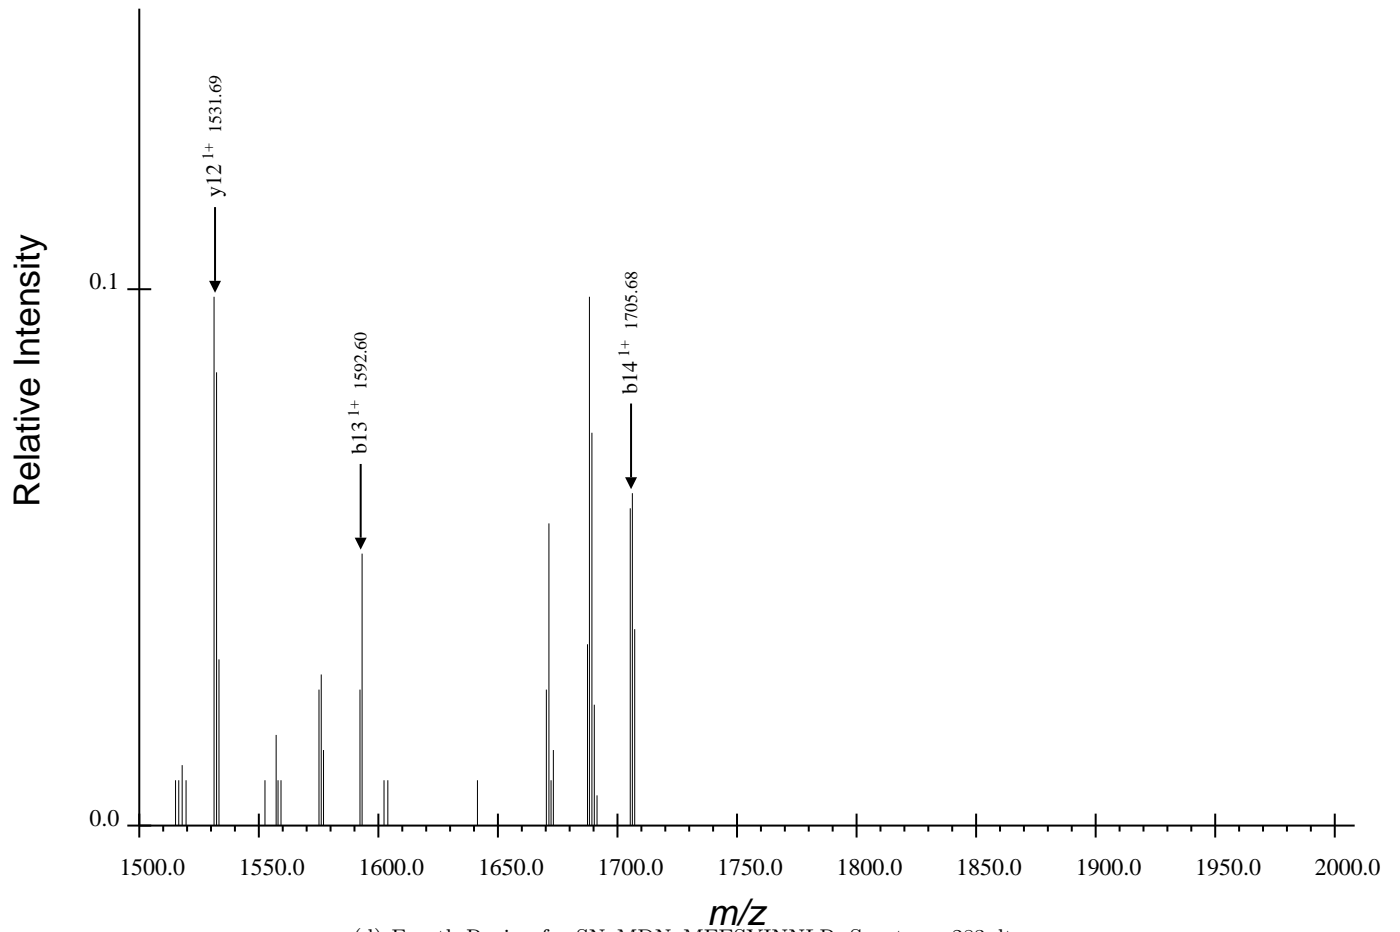

(d) Fourth Region for SNoMDNoMFESYINNLR, Spectrum 283.dta

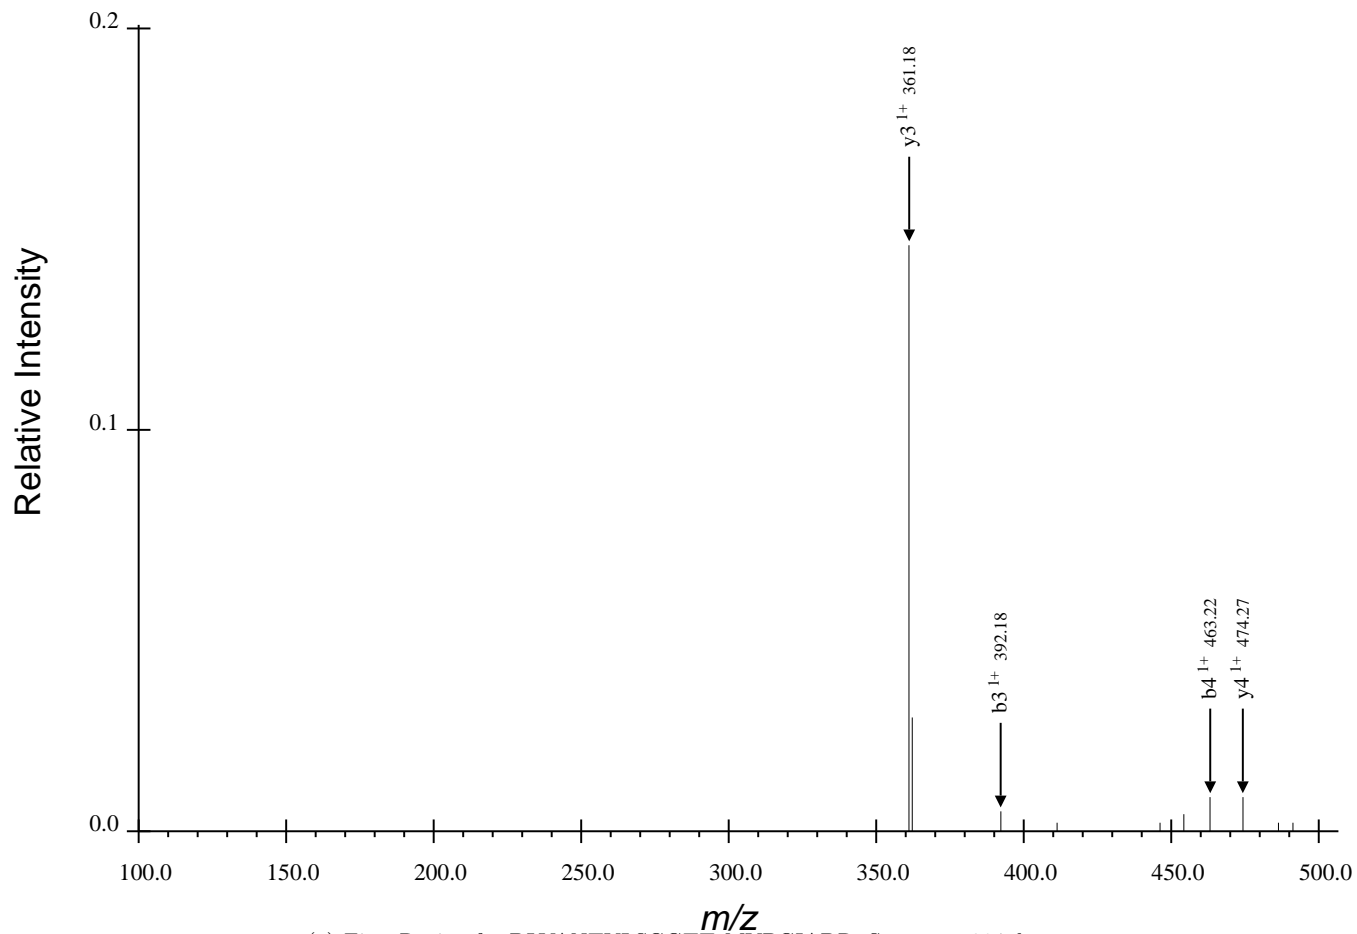

(a) First Region for DLYANTVLSGGTToMYPGIADR, Spectrum 284.dta

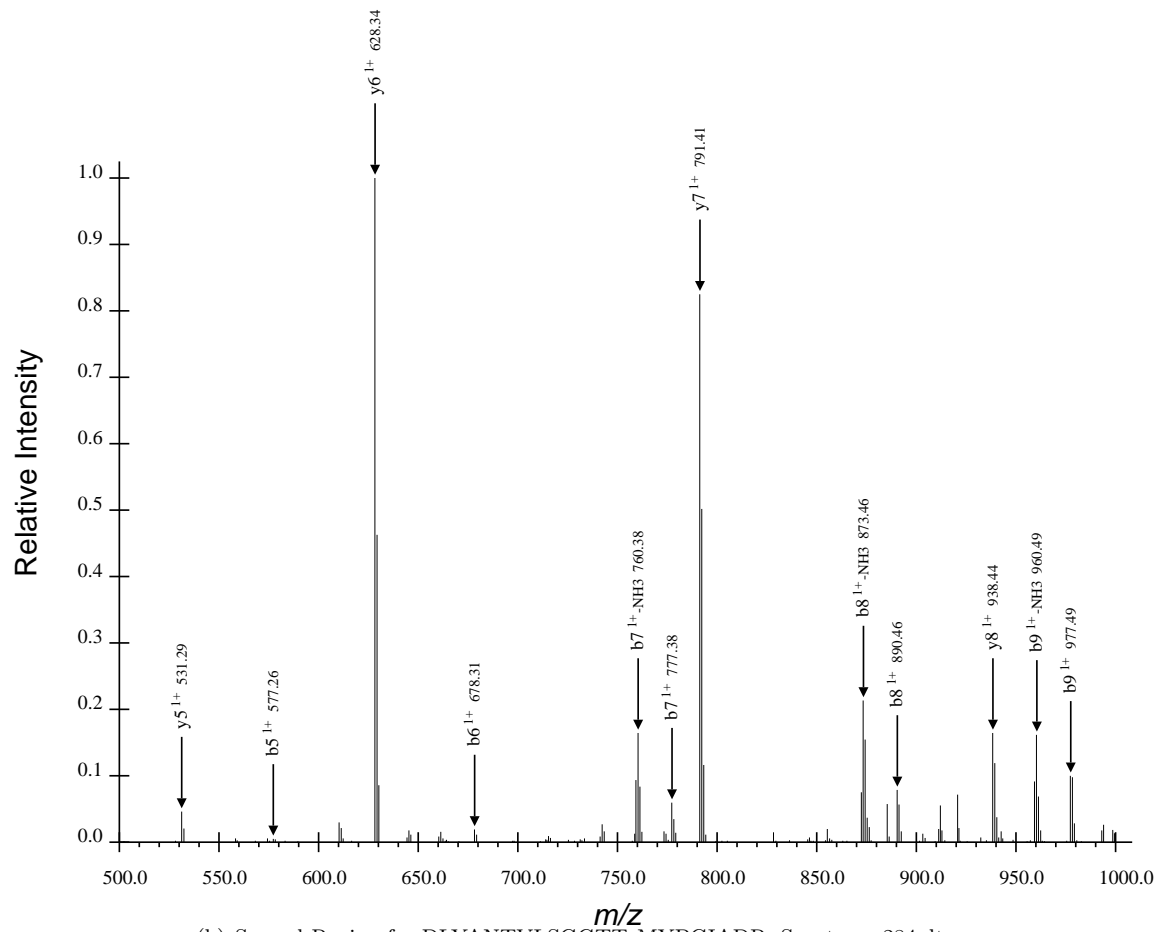

(b) Second Region for DLYANTVLSGGTToMYPGIADR, Spectrum 284.dta

(d) Fourth Region for DIYANTVLSGGTTOMYPGIADR, Spectrum 284.dta

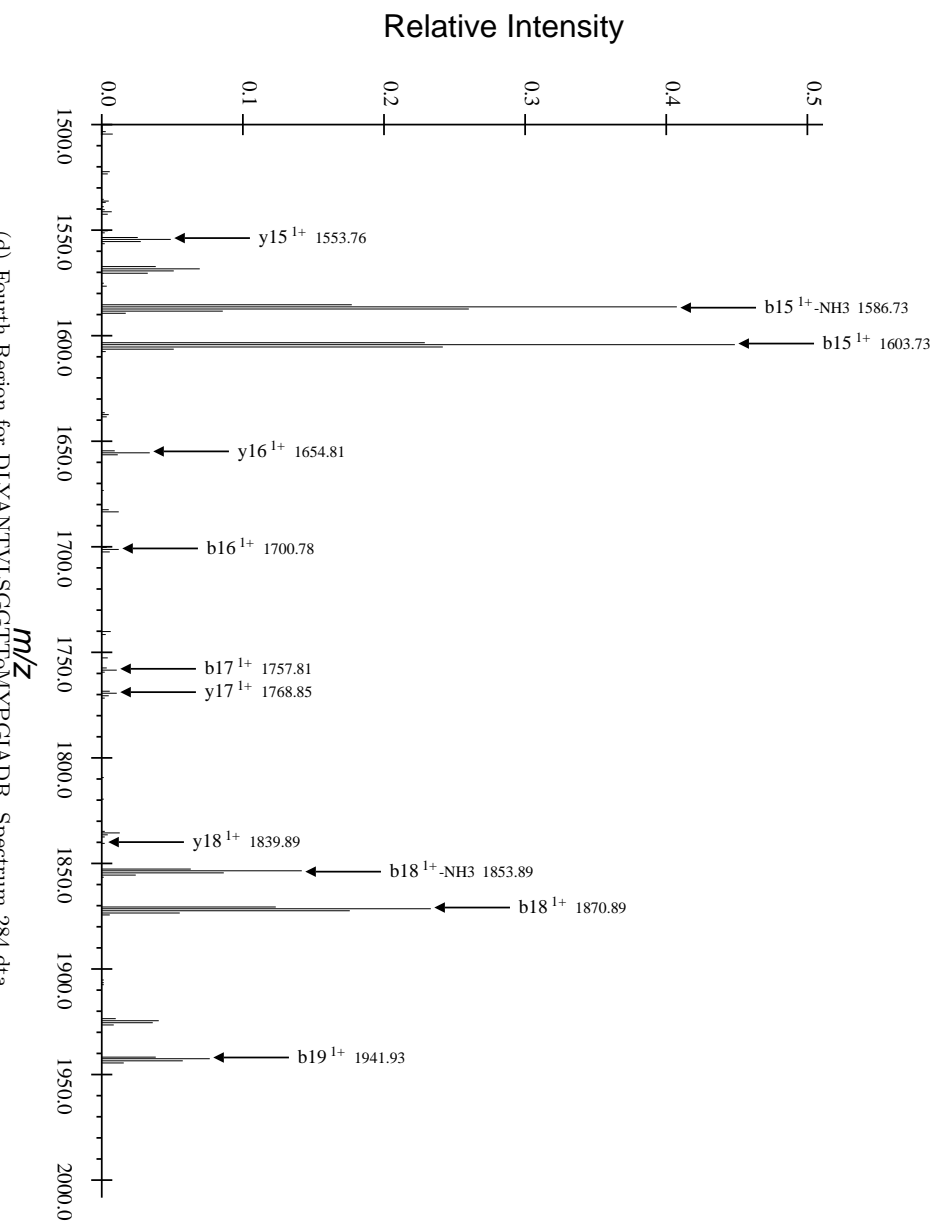

(c) Third Region for DIYANTVLSGGTTOMYPGIADR, Spectrum 284.dta

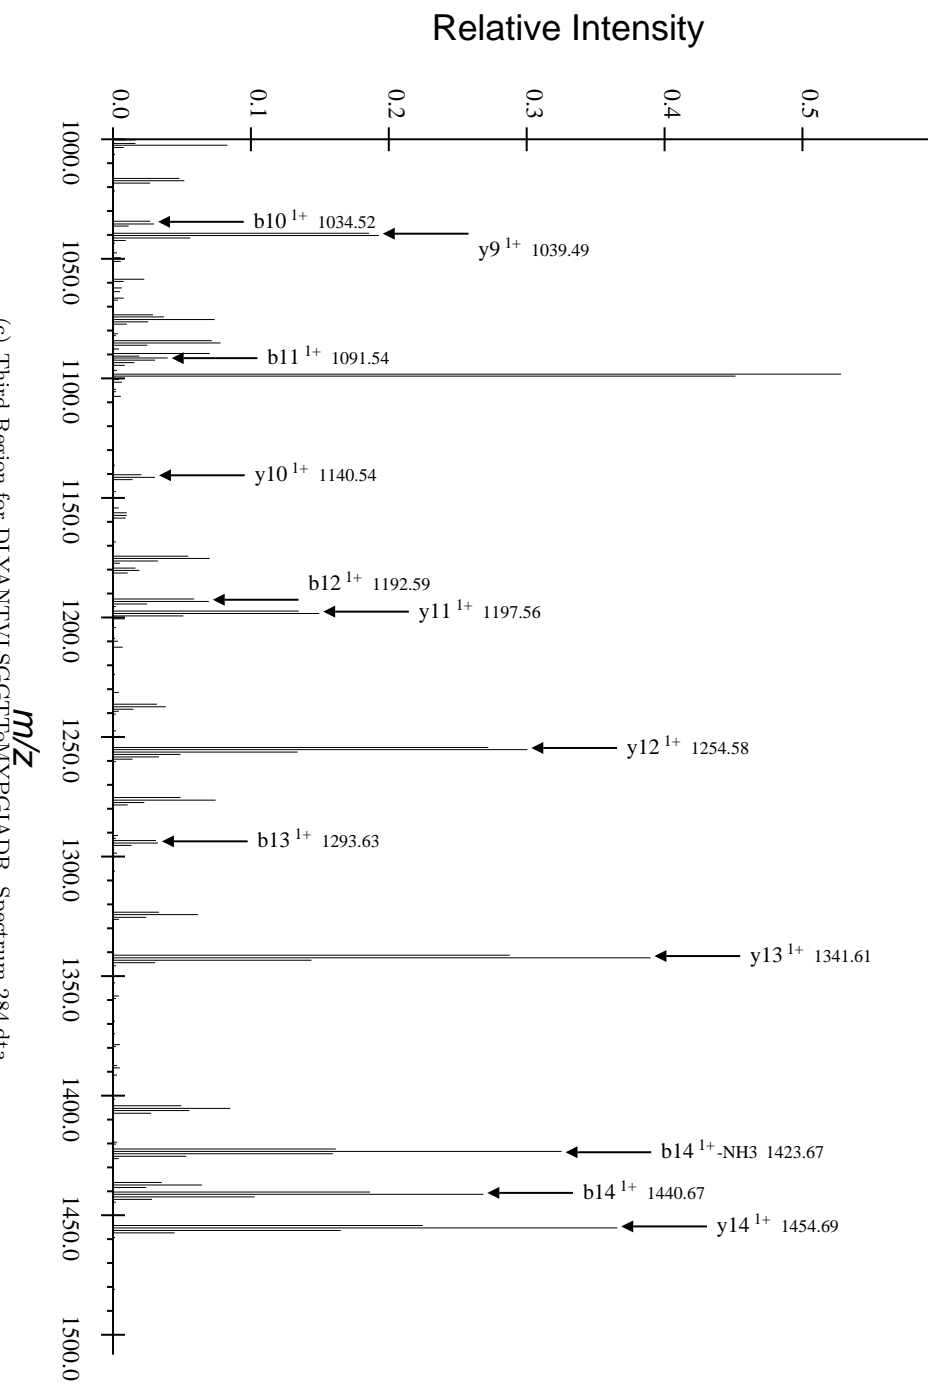



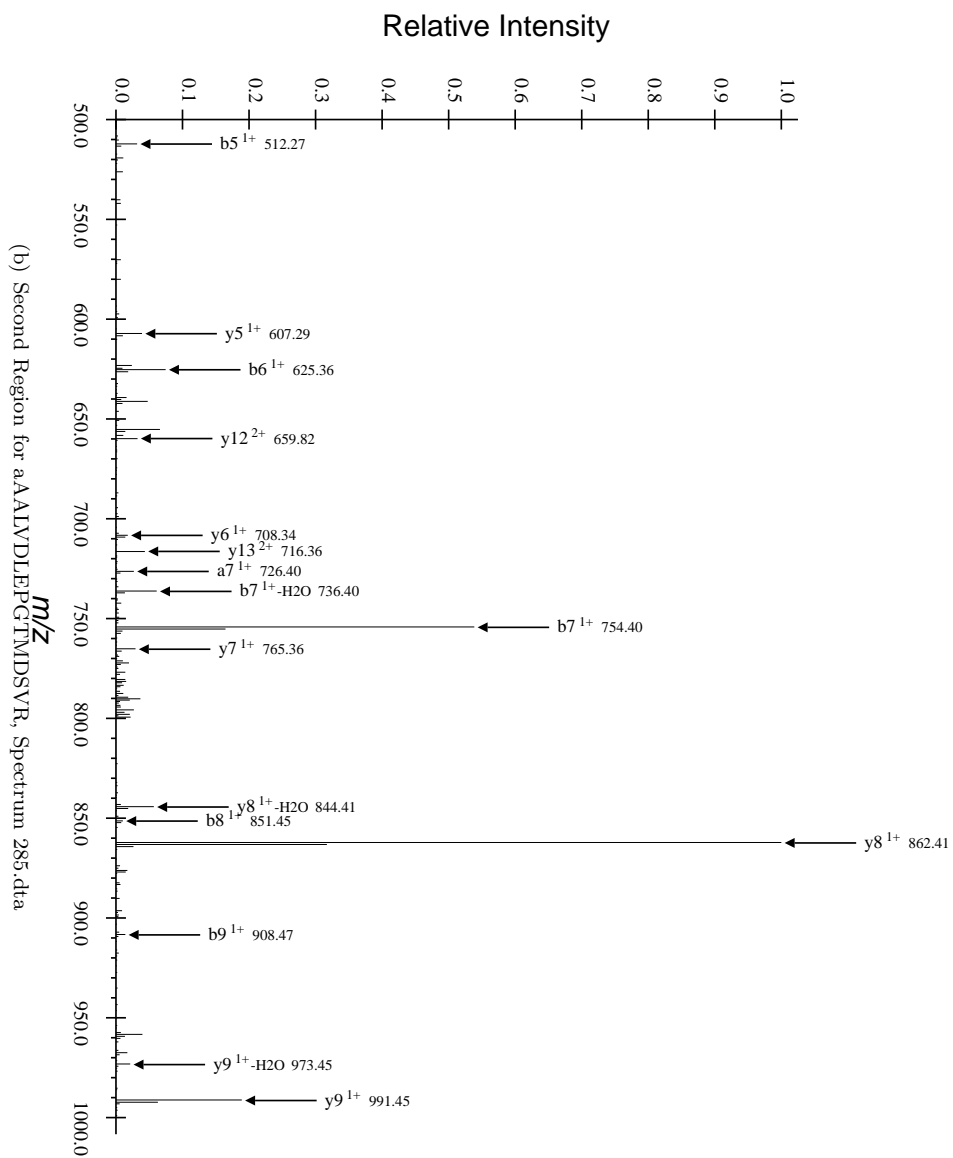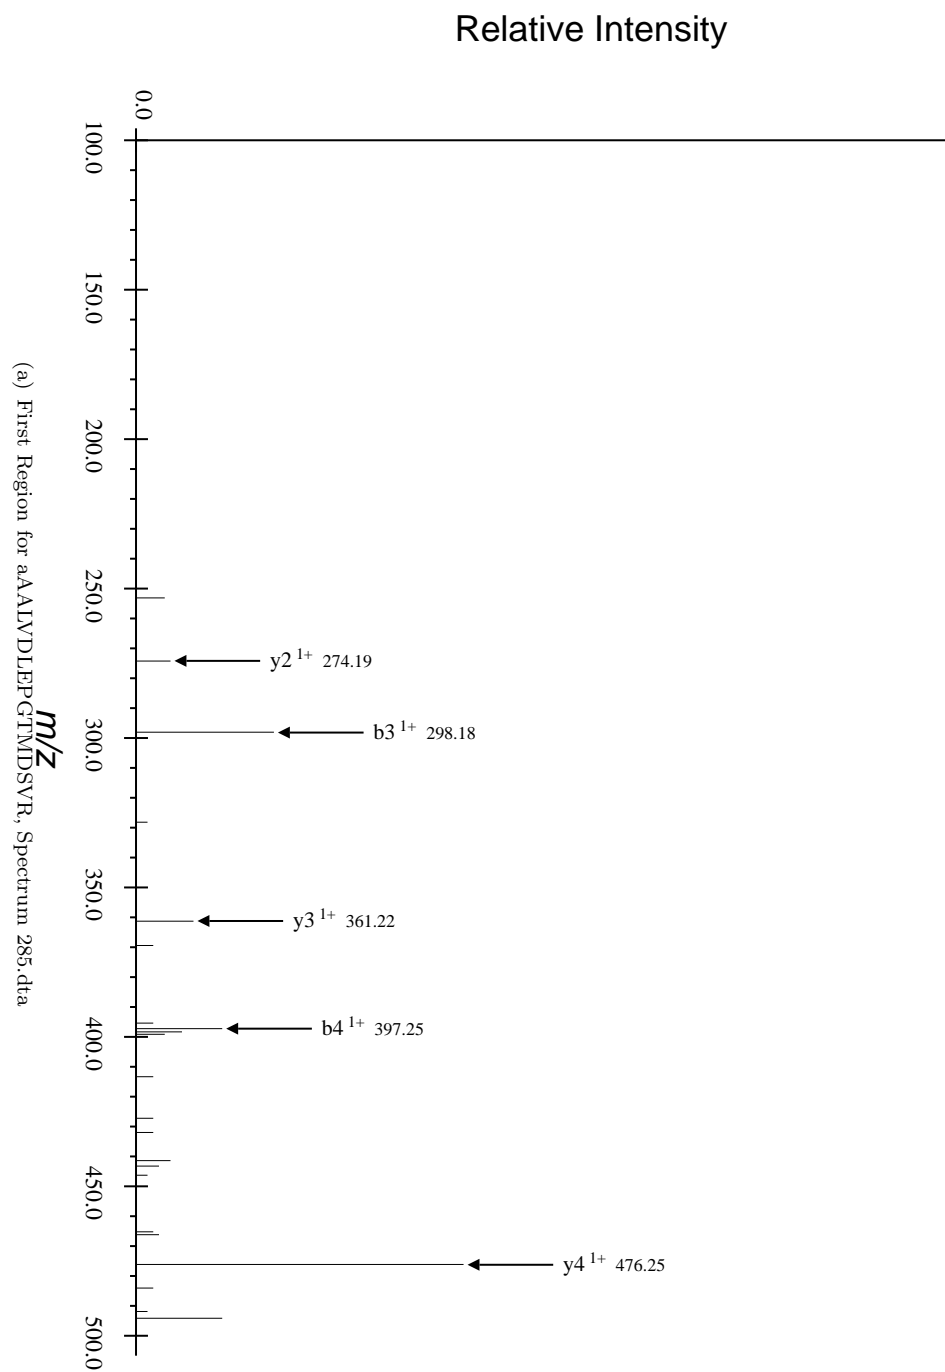

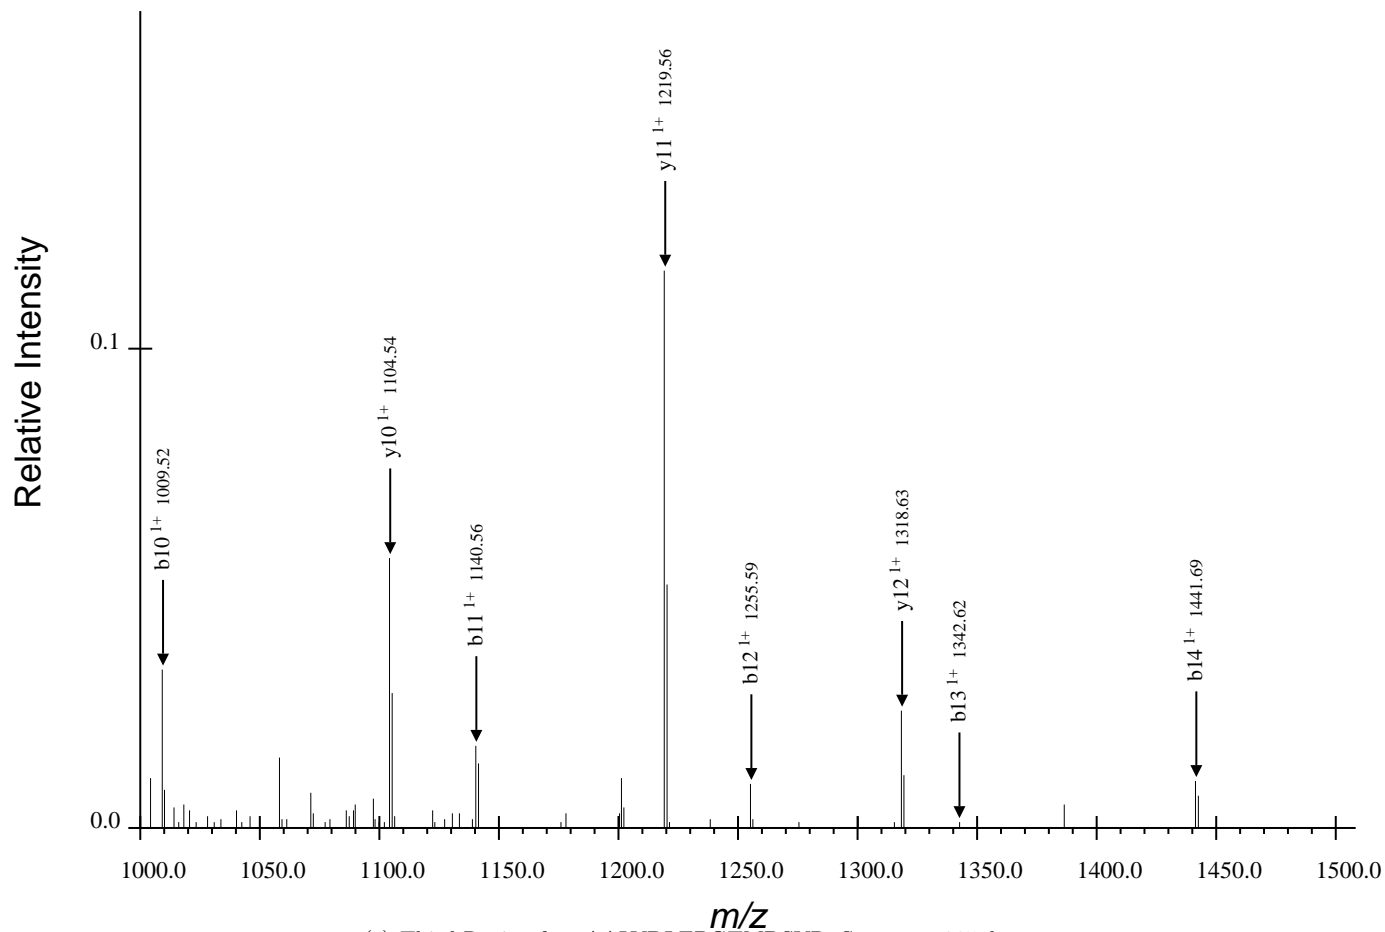

(c) Third Region for aALVDLEPGTMDSVR, Spectrum 285.dta

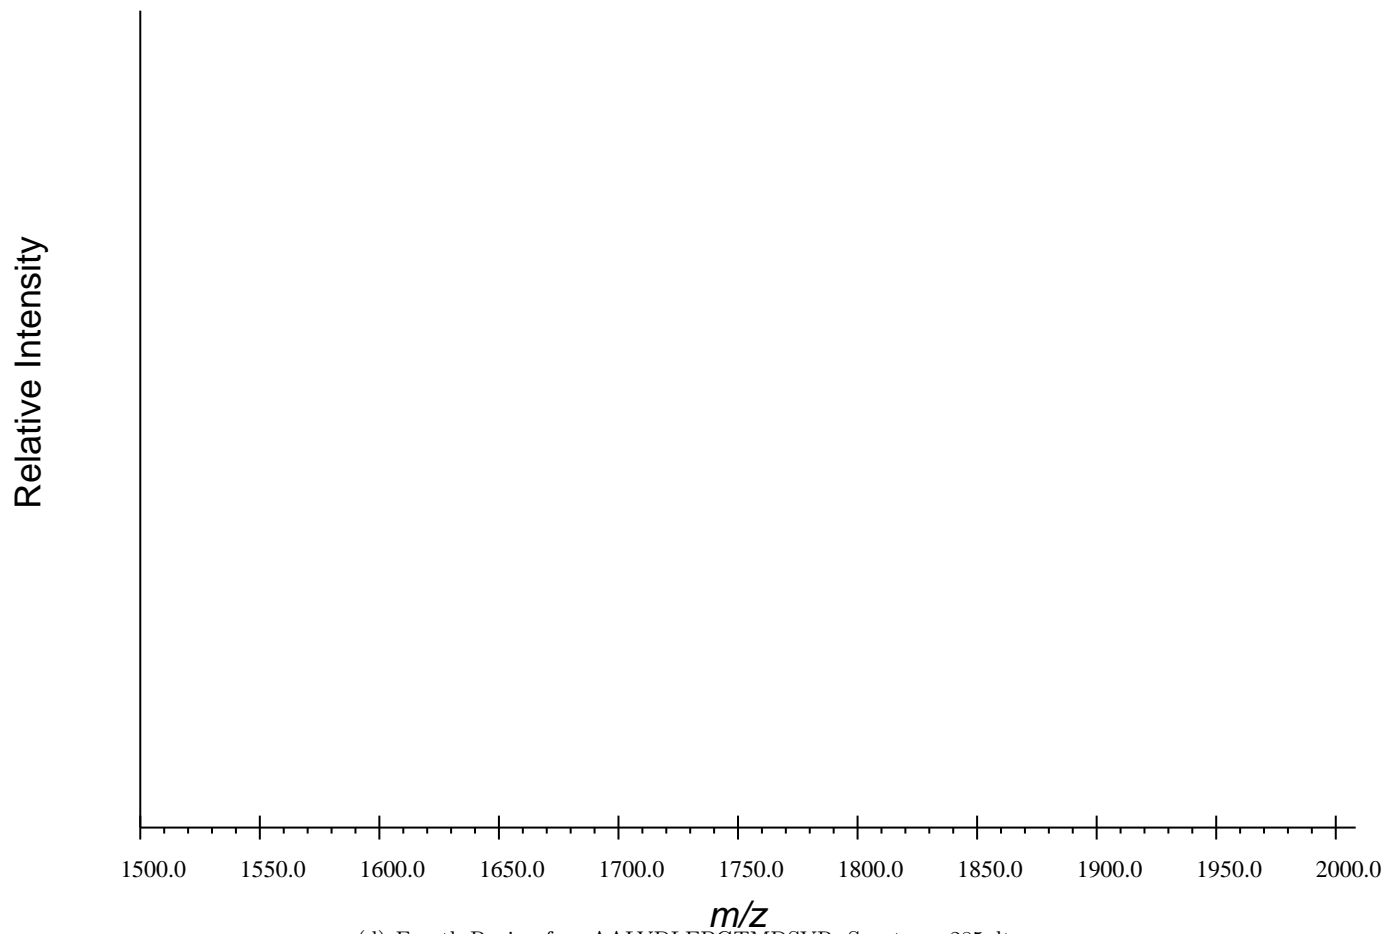

(d) Fourth Region for aALVDLEPGTMDSVR, Spectrum 285.dta

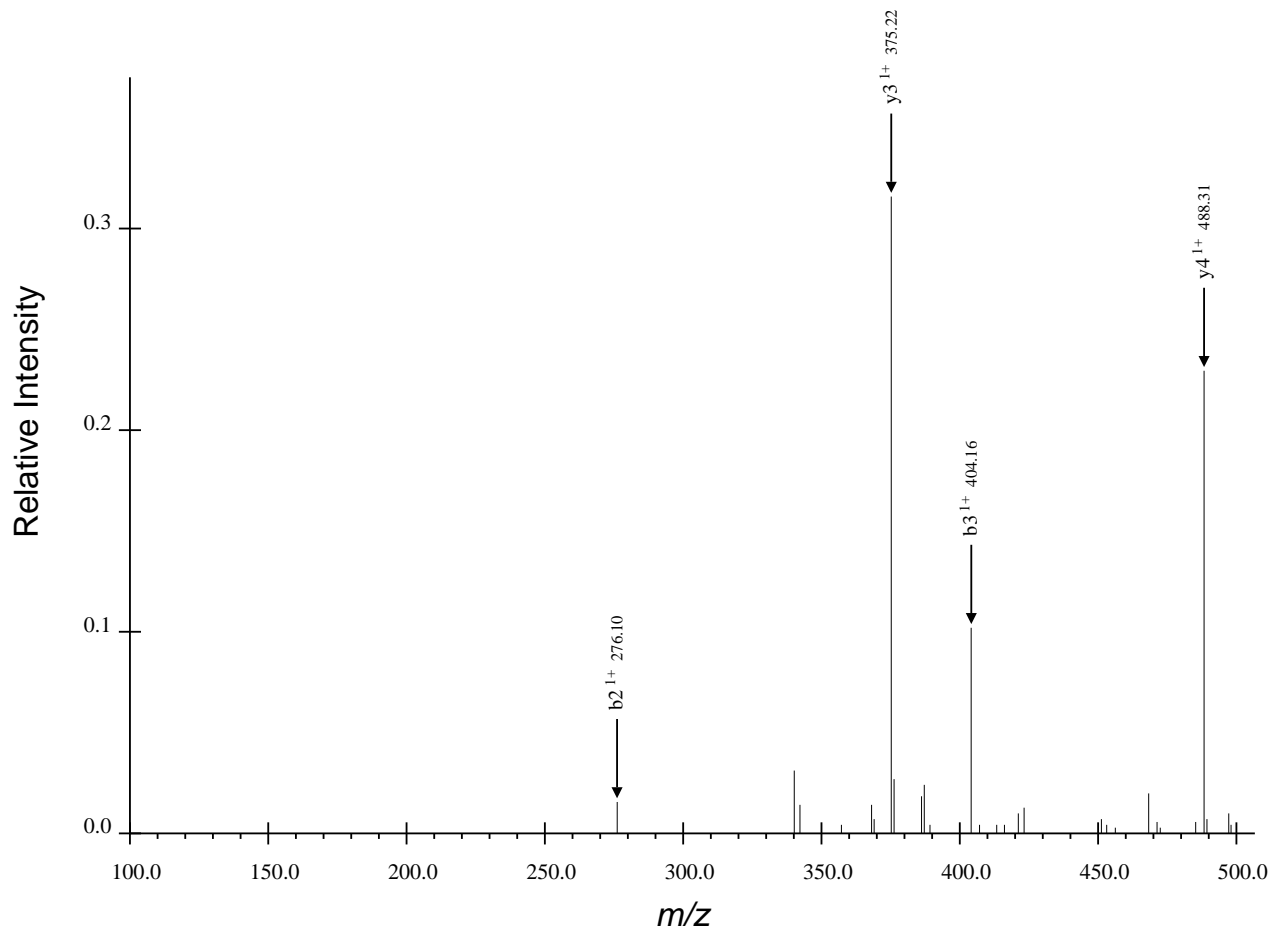

(a) First Region for oMQQQQLDEYQELLDIK, Spectrum 286.dta

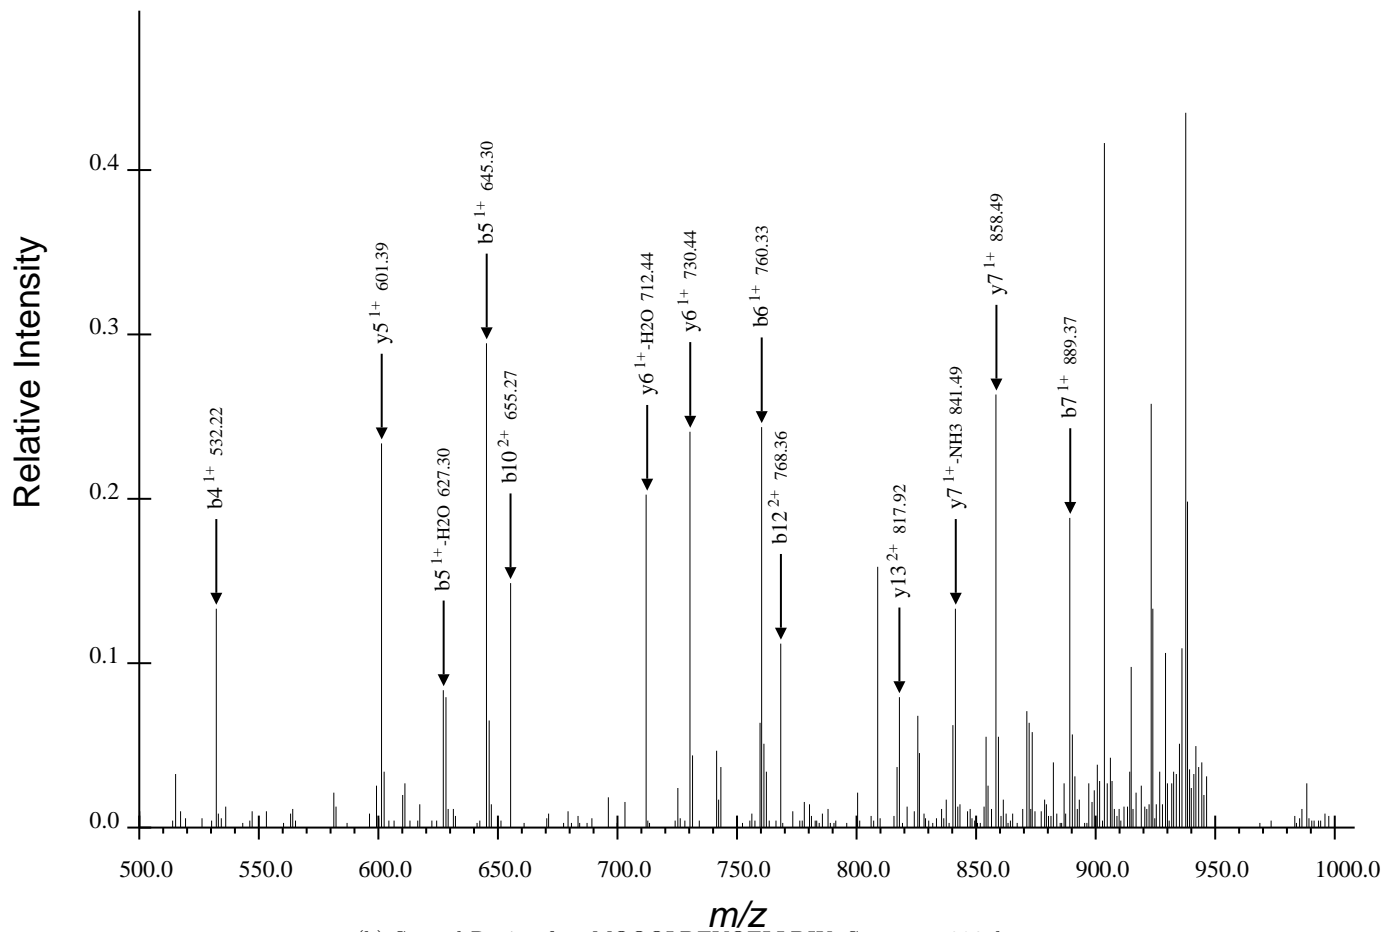

(b) Second Region for oMQQQQLDEYQELLDIK, Spectrum 286.dta

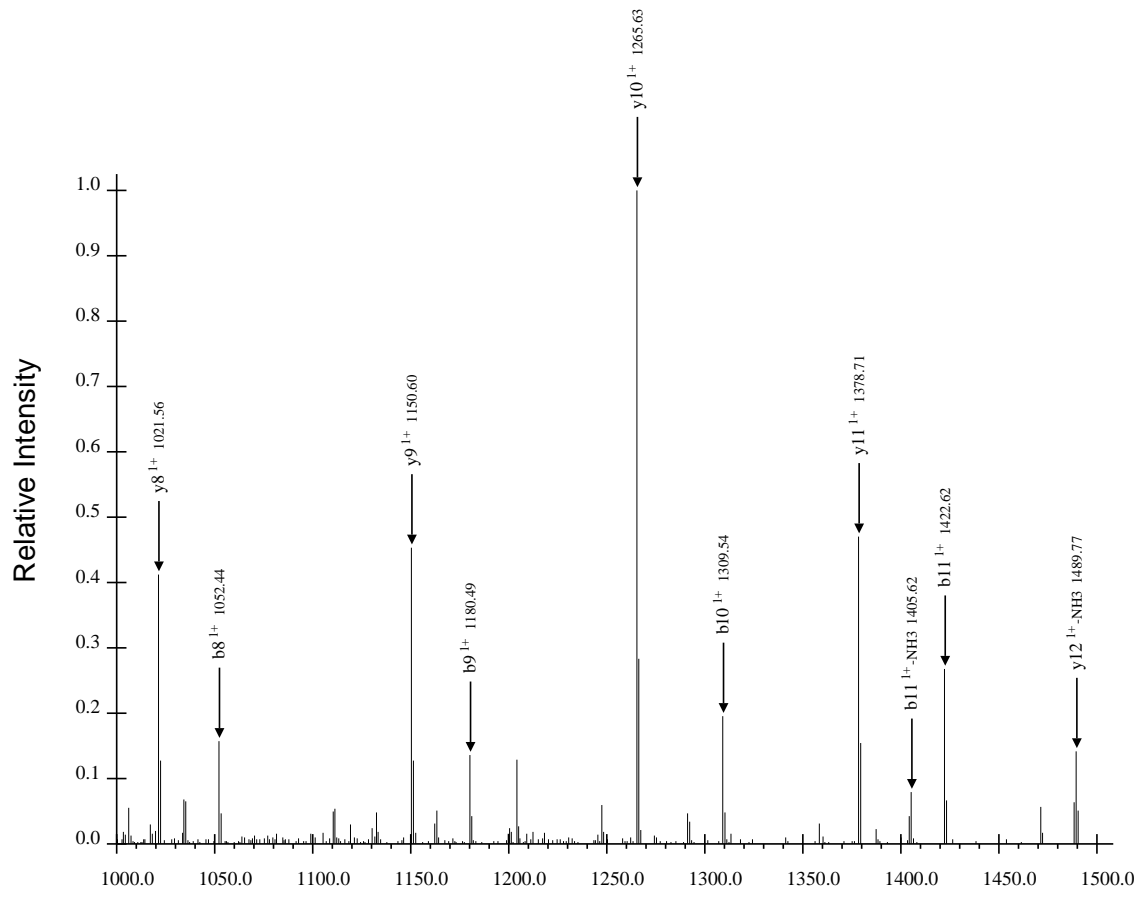

(c) Third Region for oMQQQLDEYQELLDIK, Spectrum 286.dta

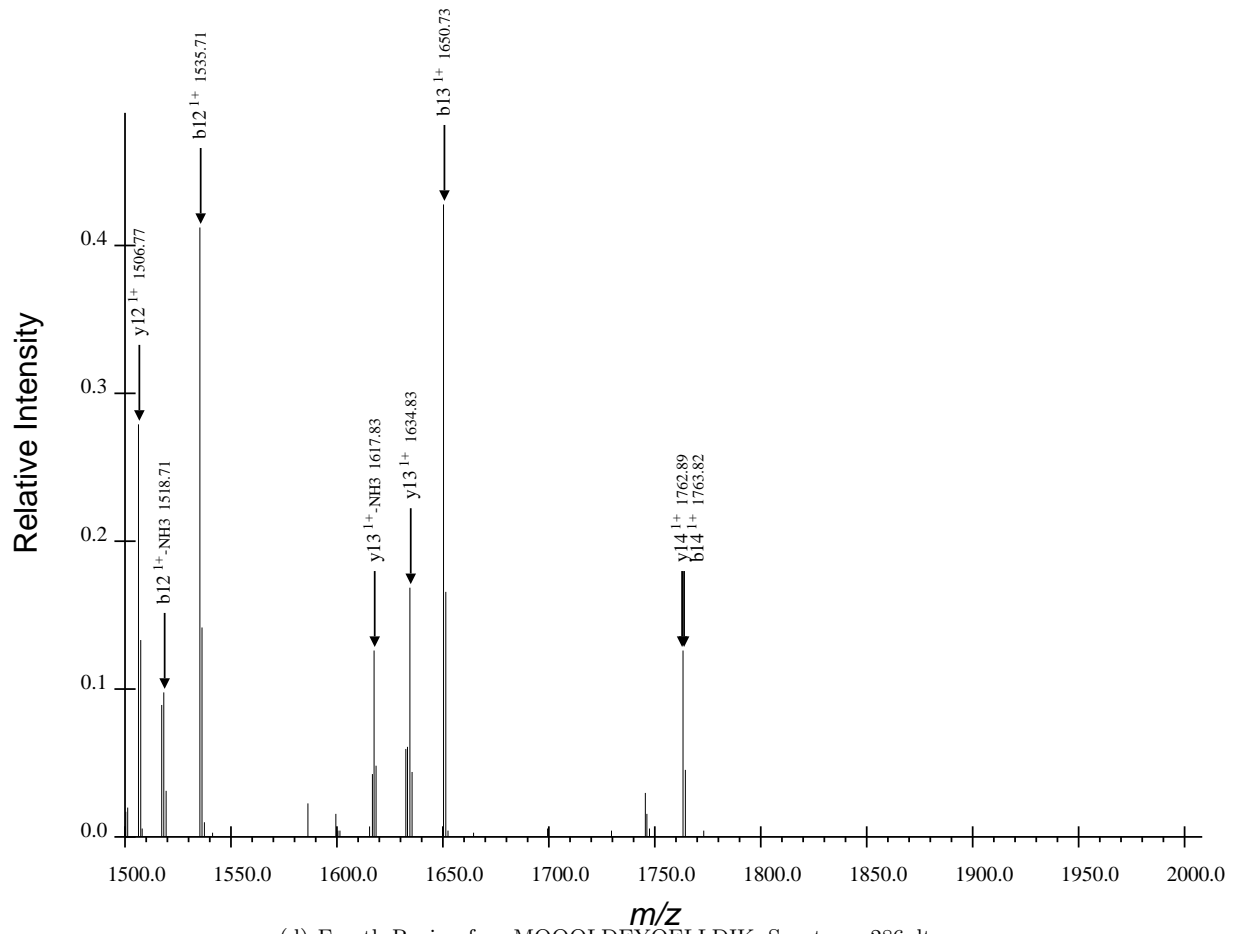

(d) Fourth Region for oMQQQLDEYQELLDIK, Spectrum 286.dta

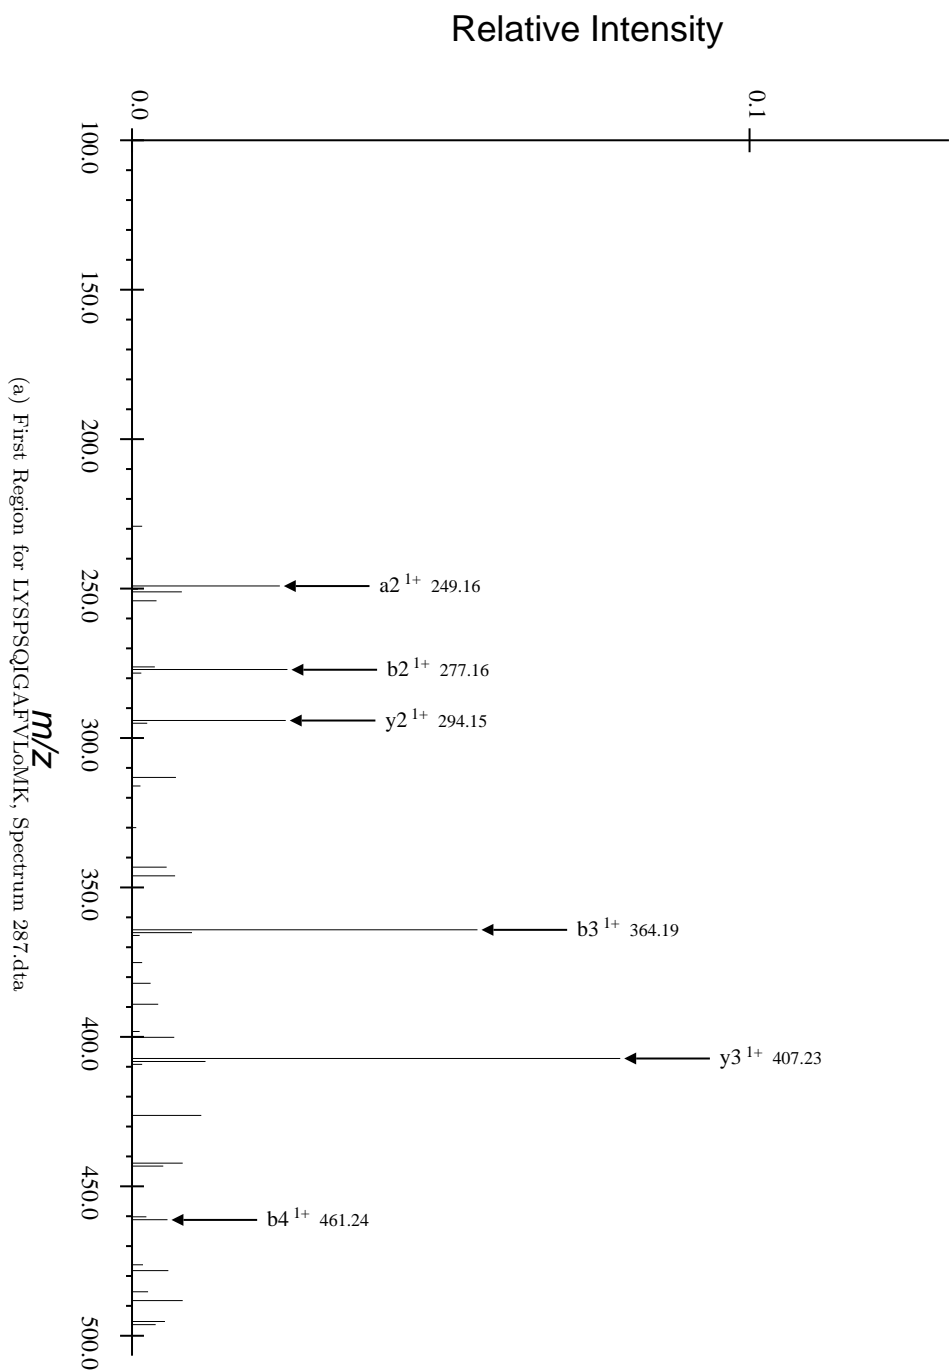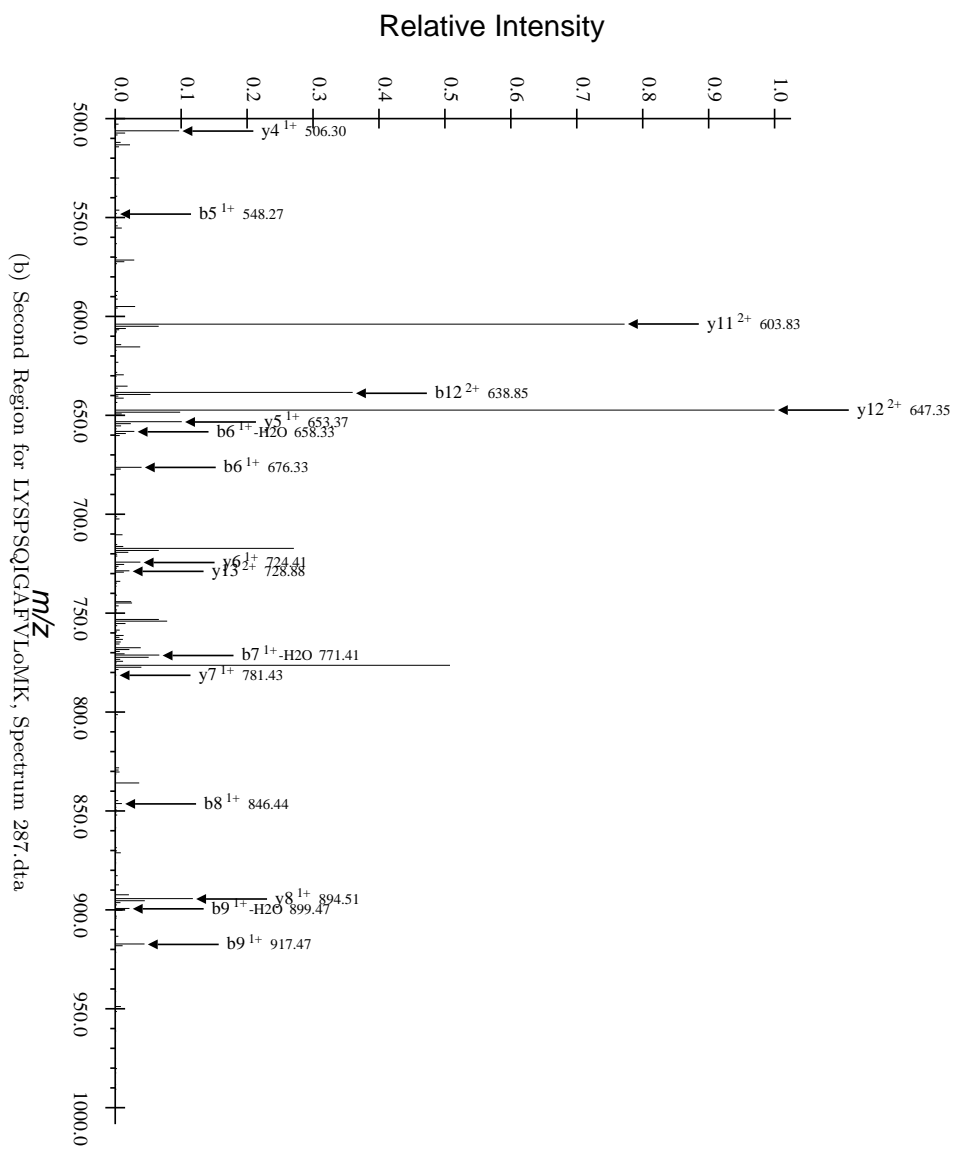

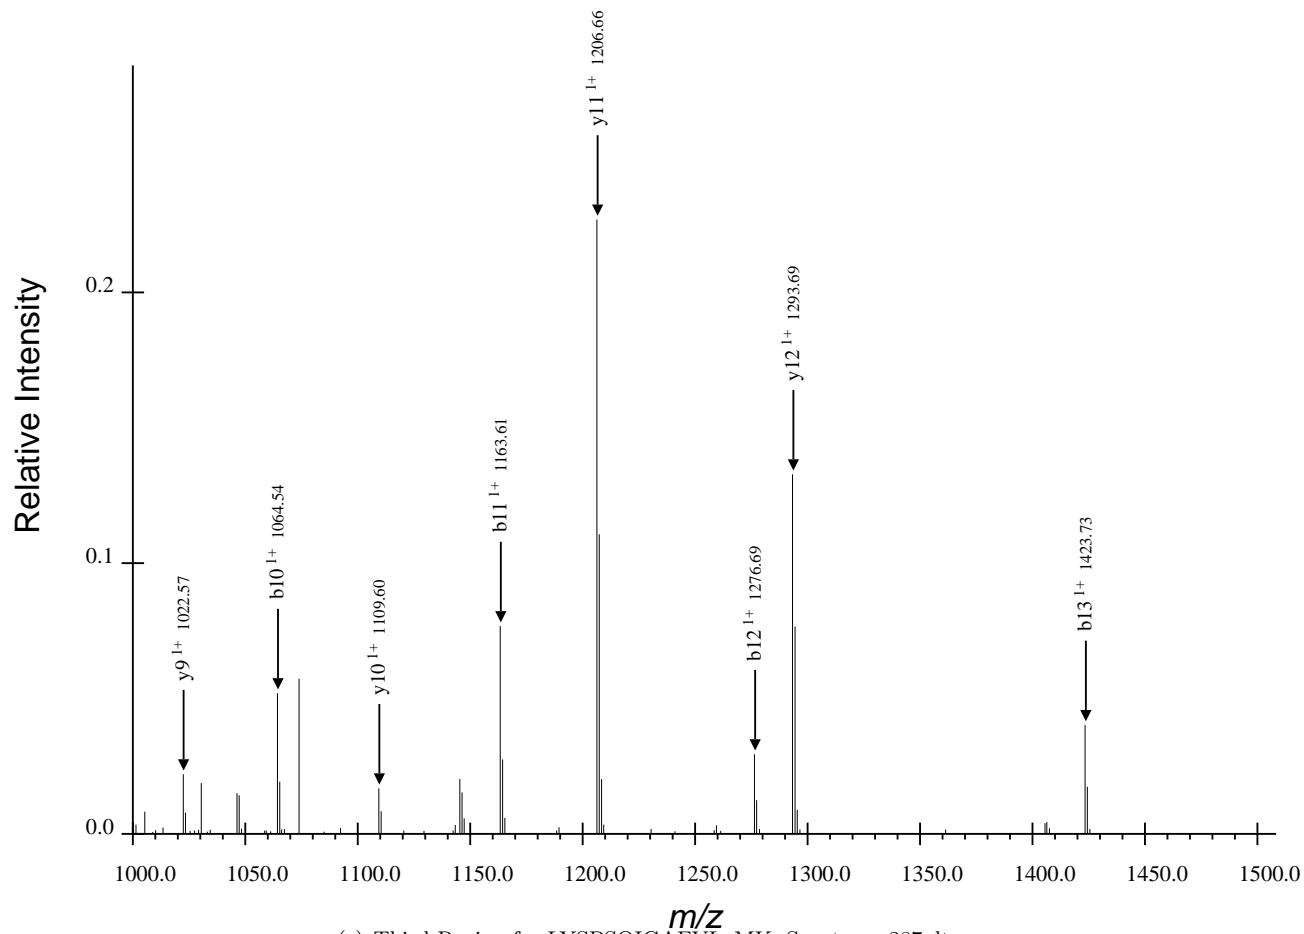

(c) Third Region for LYSPSQIGAFVLoMK, Spectrum 287.dta

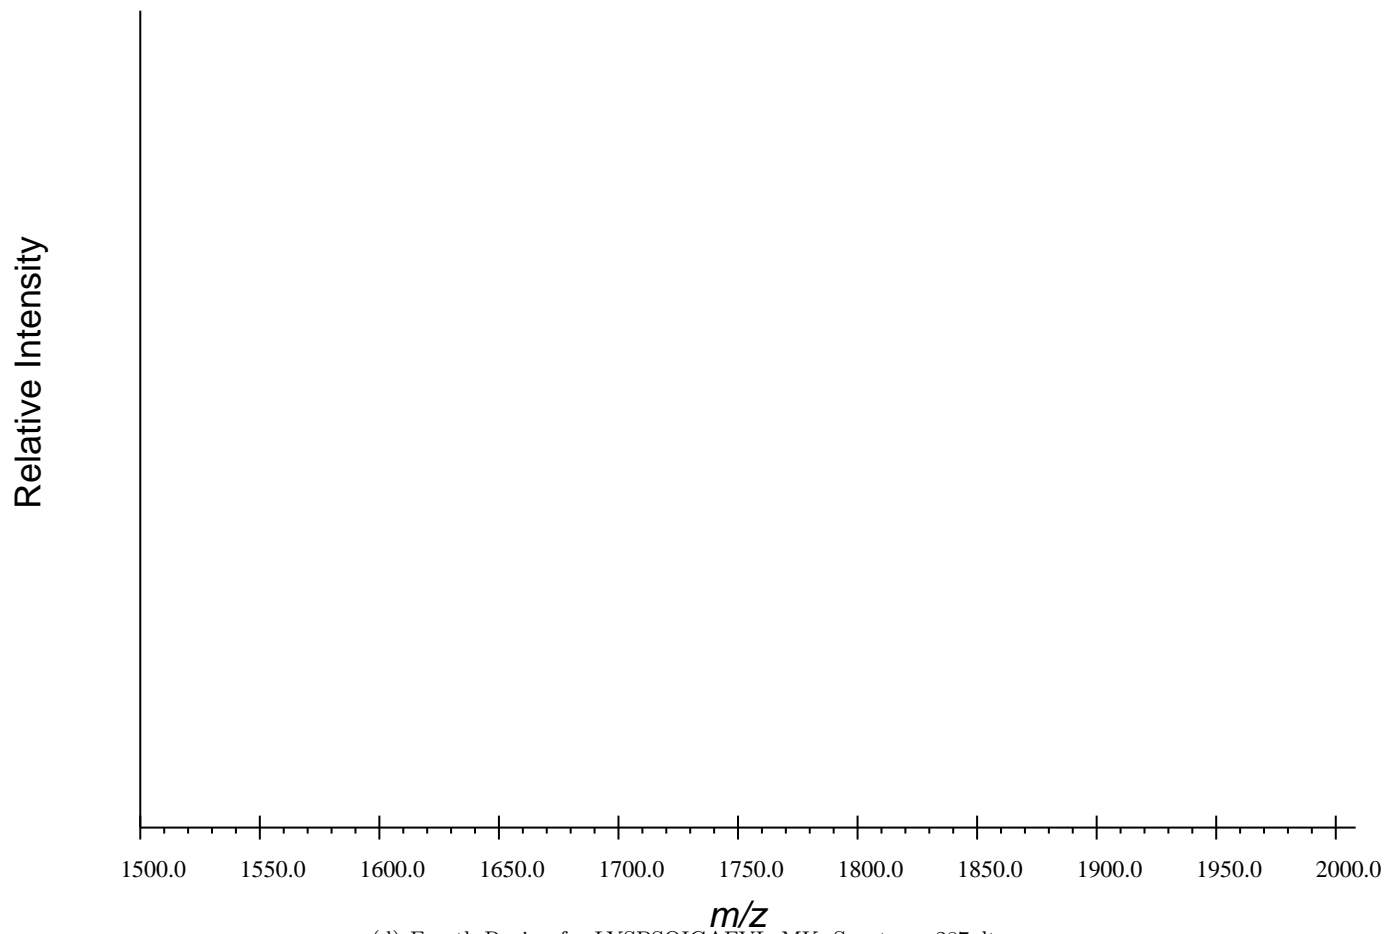

(d) Fourth Region for LYSPSQIGAFVLoMK, Spectrum 287.dta

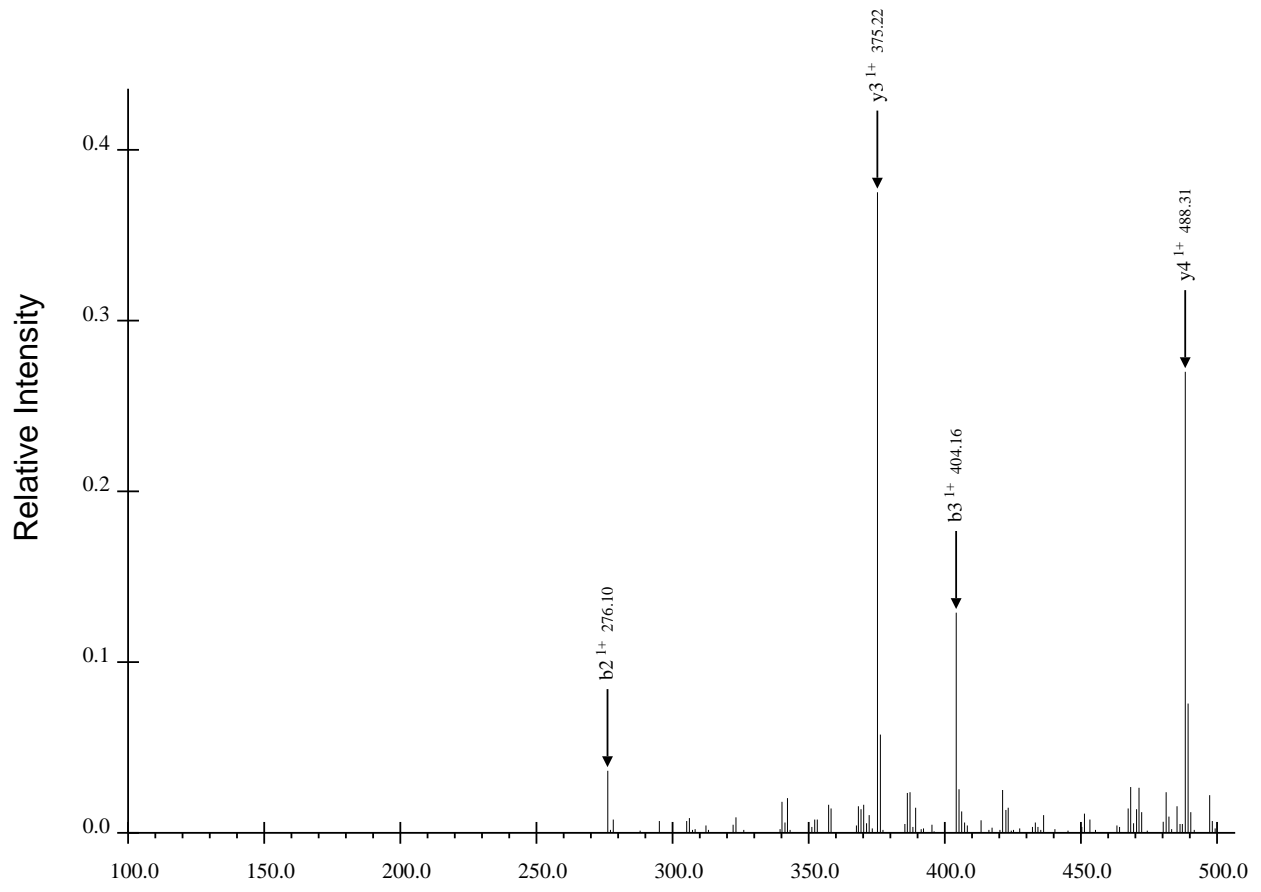

(a) First Region for oMQQQLDEYQELLDIK, Spectrum 288.dta

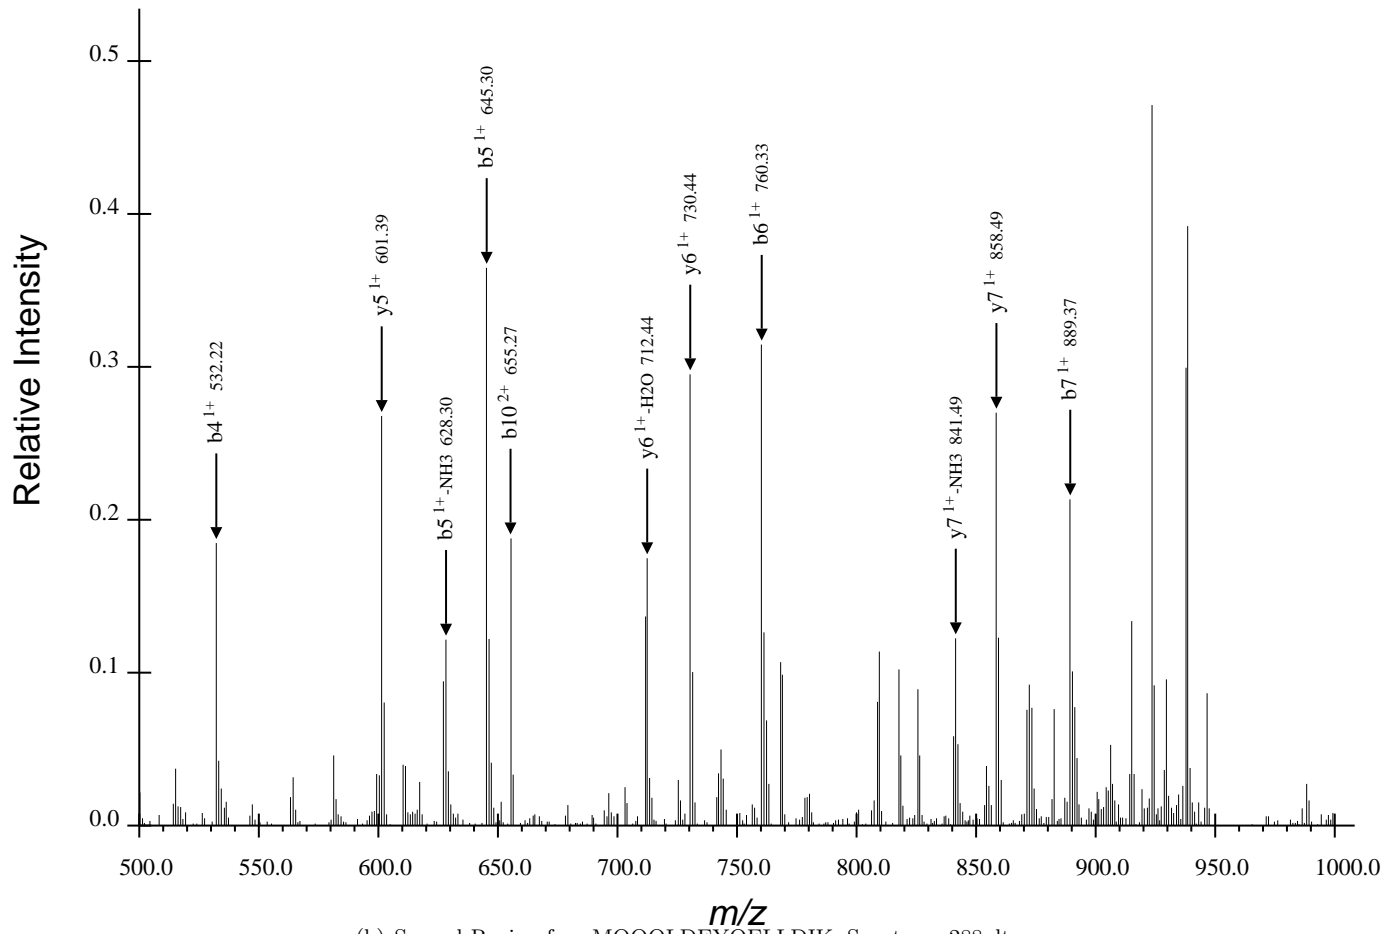

(b) Second Region for oMQQQLDEYQELLDIK, Spectrum 288.dta

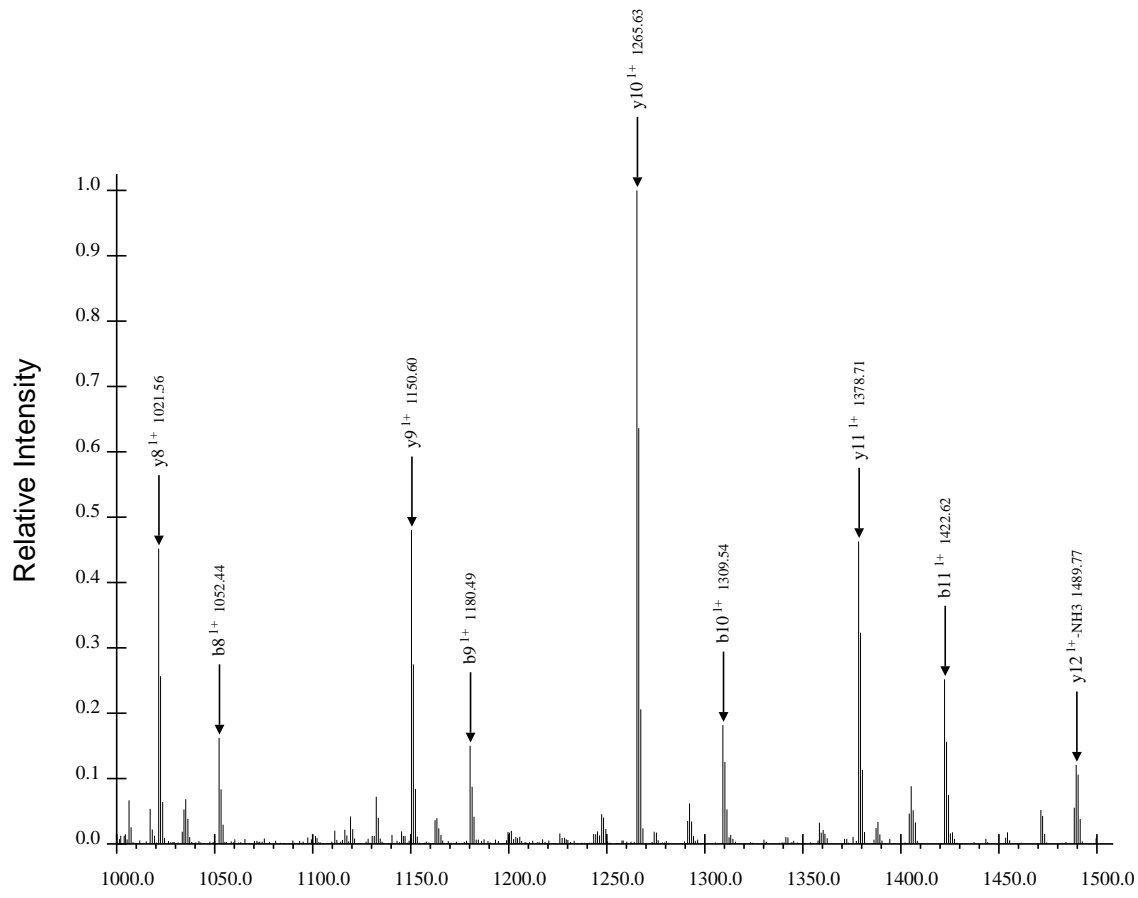

(c) Third Region for oMQQLDEYQELLDIK, Spectrum 288.dta

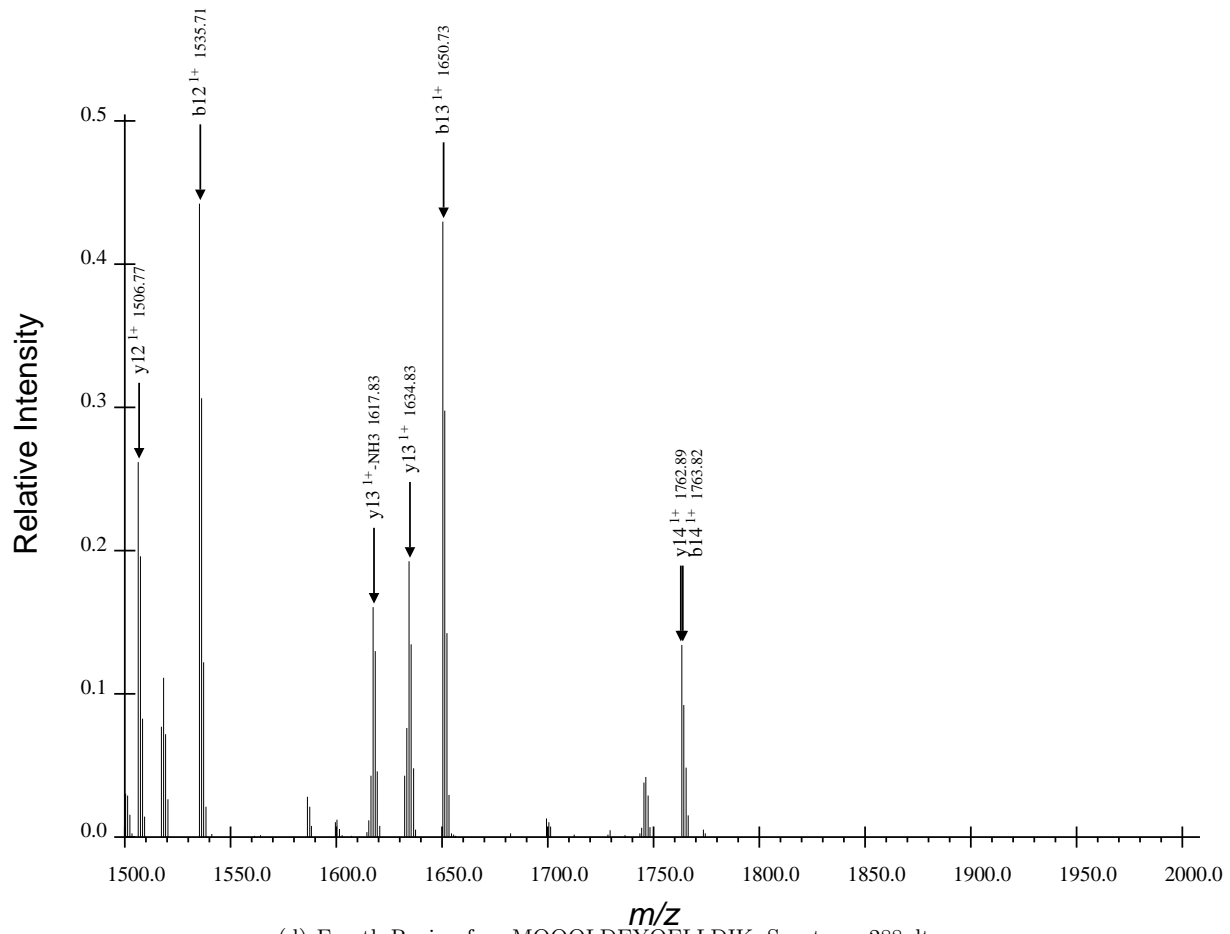

(d) Fourth Region for oMQQLDEYQELLDIK, Spectrum 288.dta



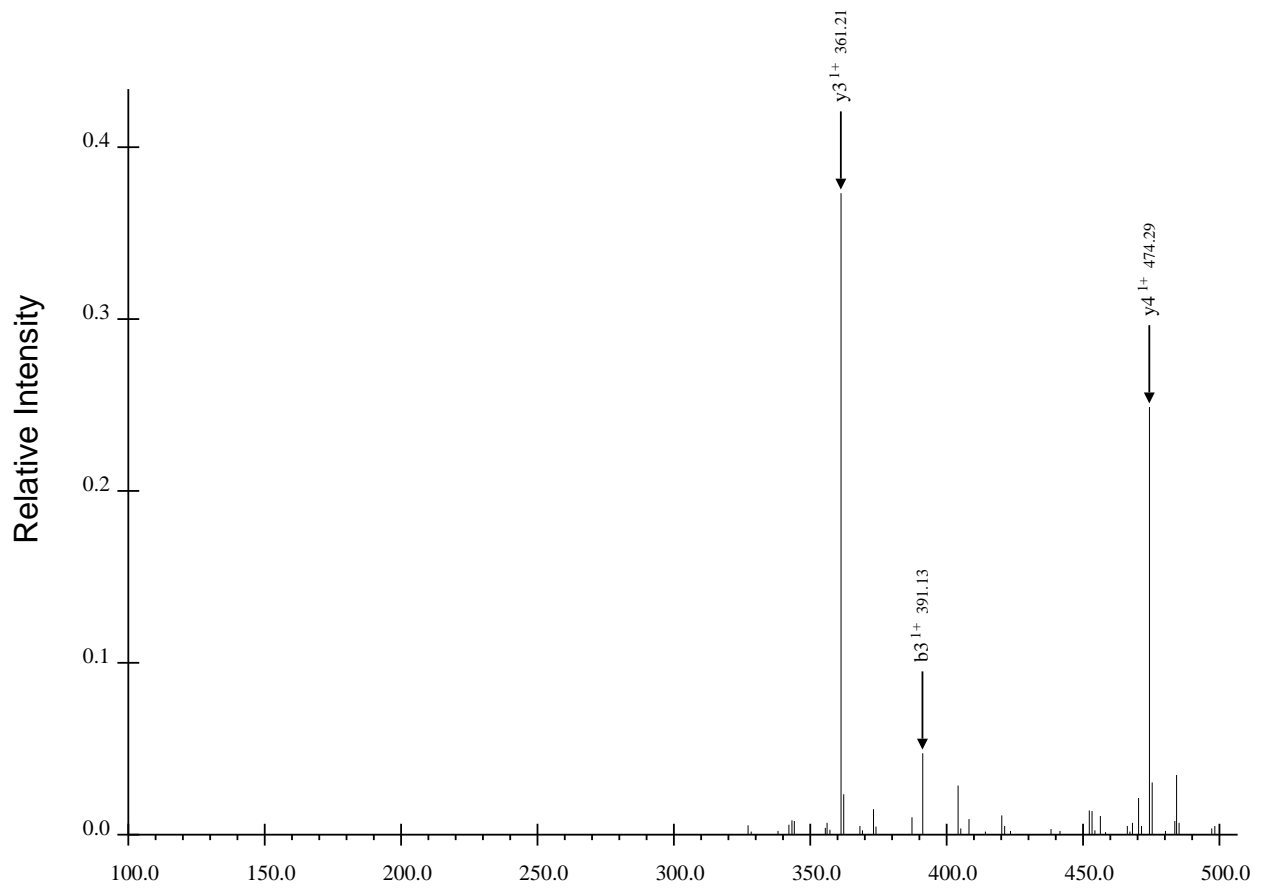

(a) First Region for DQoMQQQLNDYEQLLDVK, Spectrum 289.dta

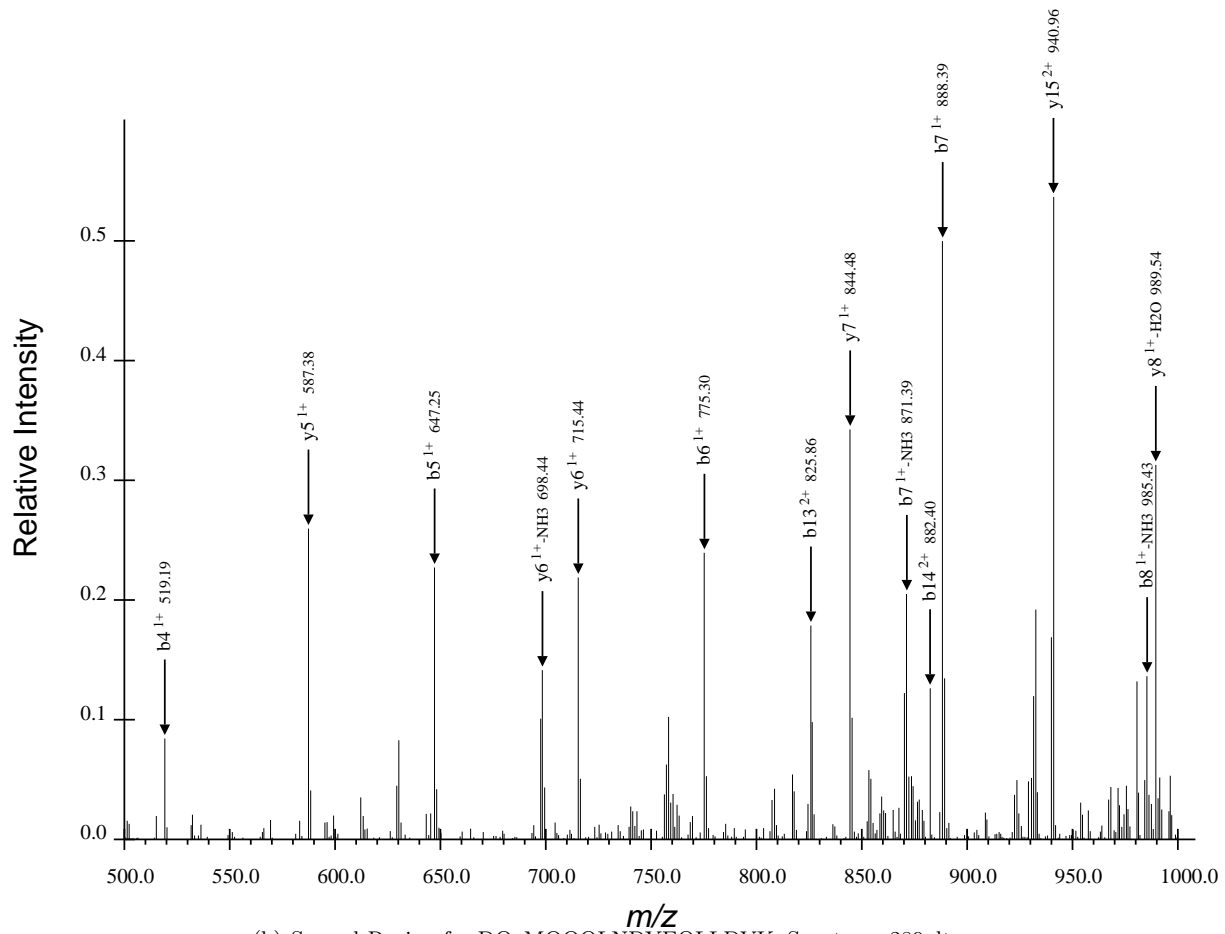

(b) Second Region for DQoMQQQLNDYEQLLDVK, Spectrum 289.dta

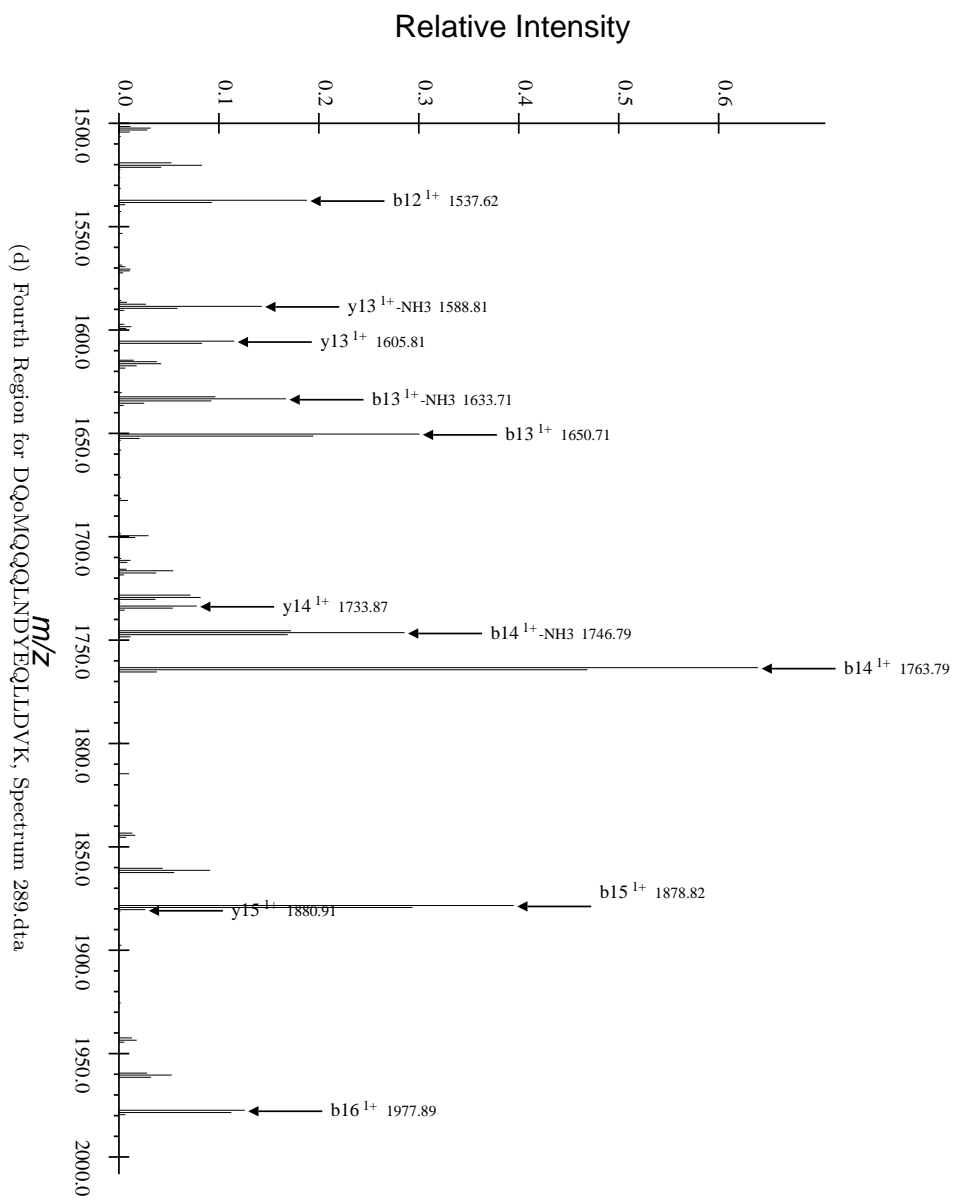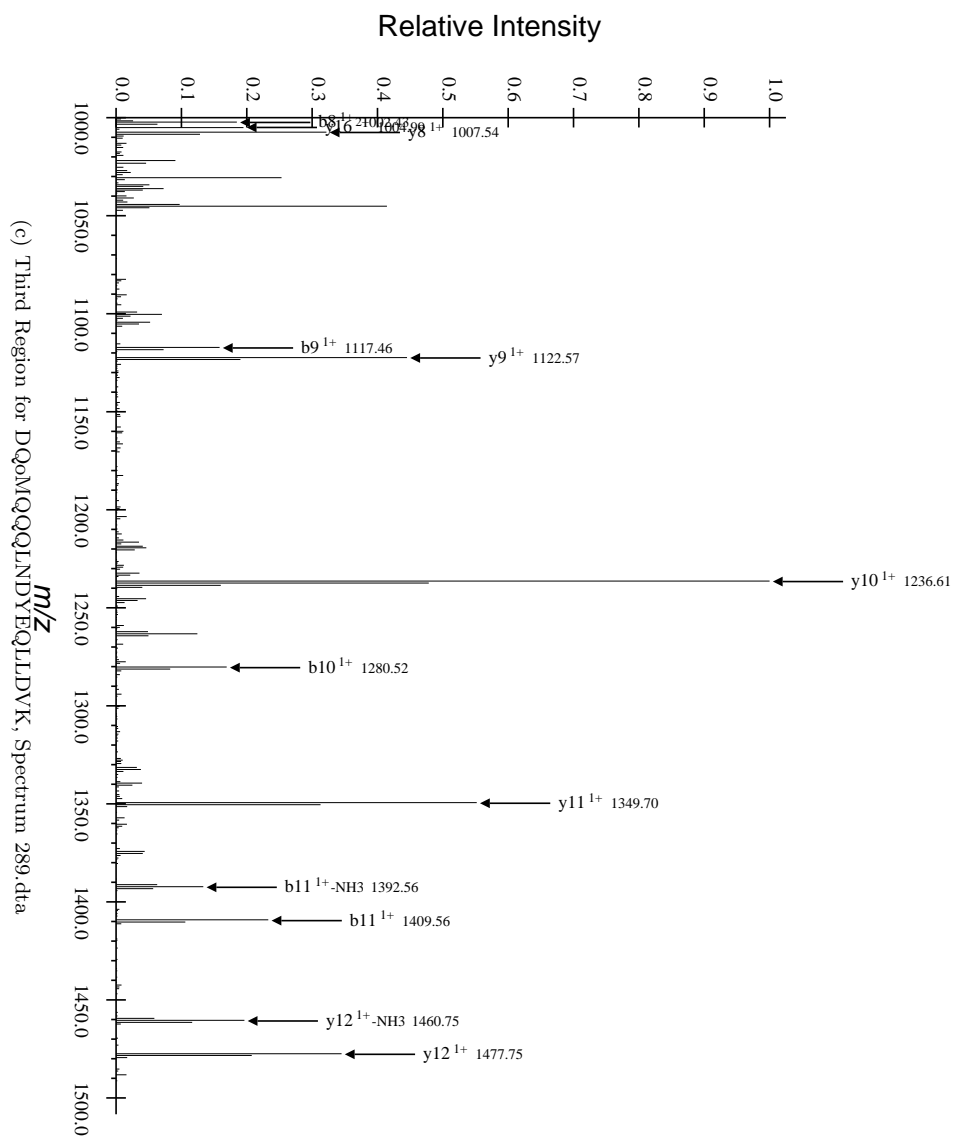

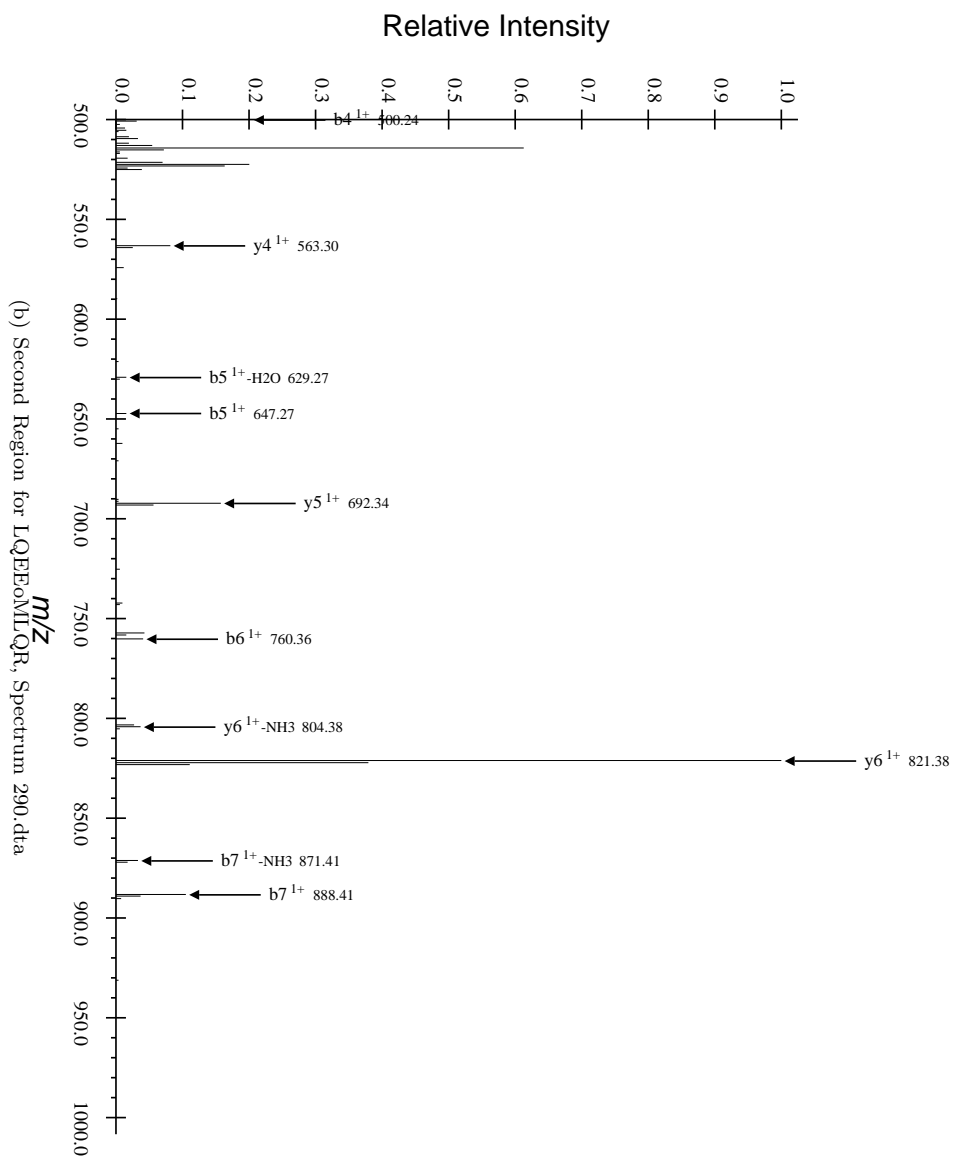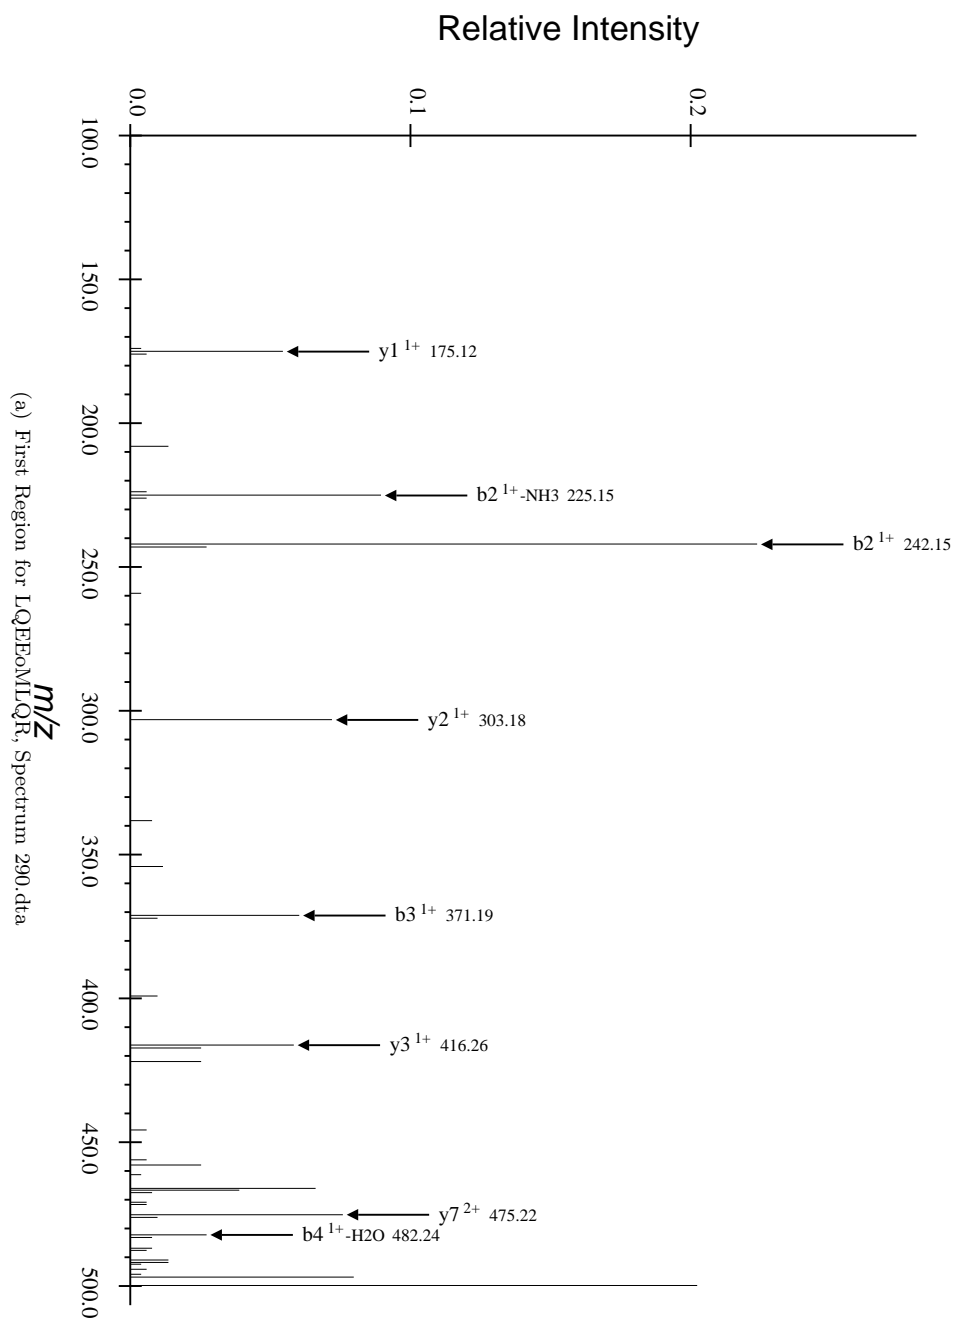

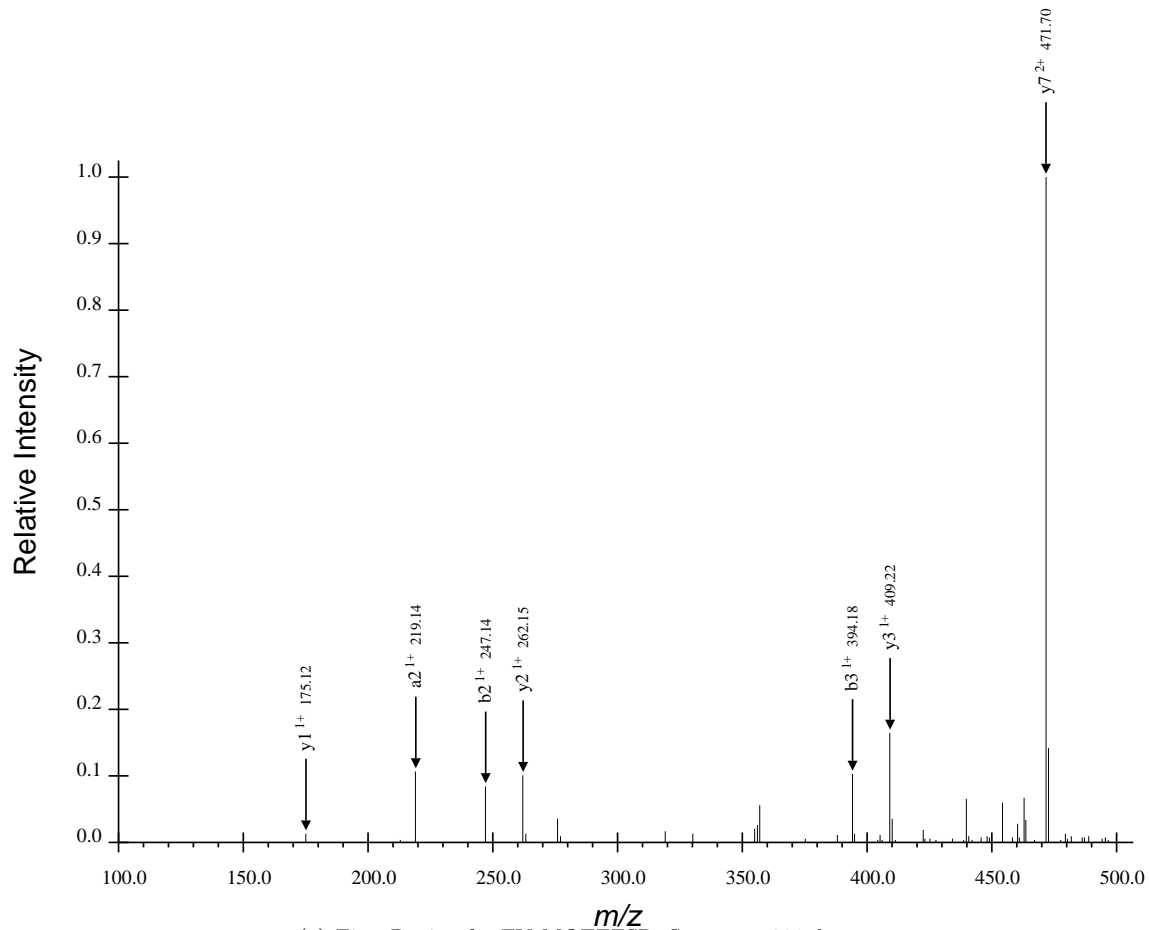

(a) First Region for FVoMQEEFSR, Spectrum 291.dta

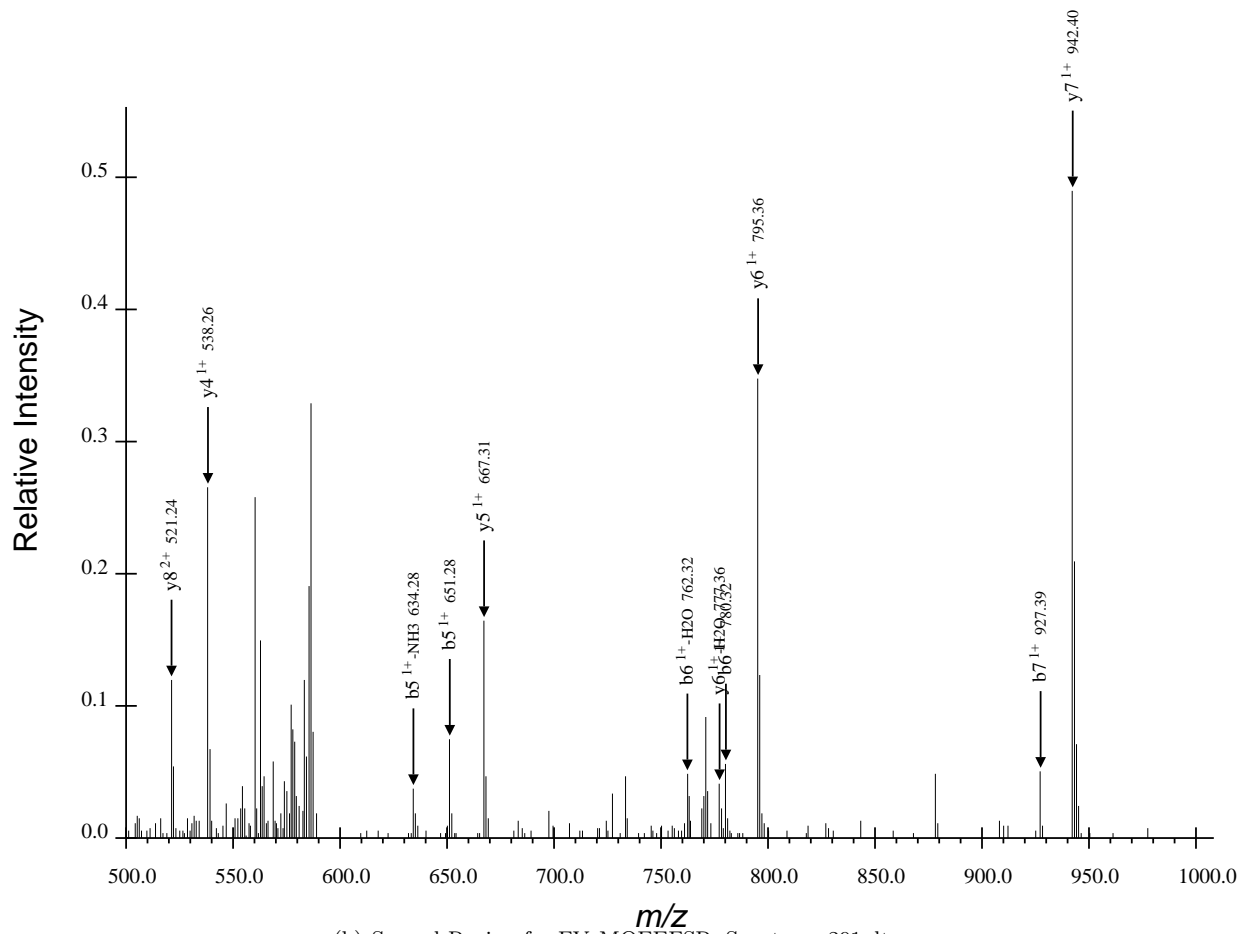

(b) Second Region for FVoMQEEFSR, Spectrum 291.dta

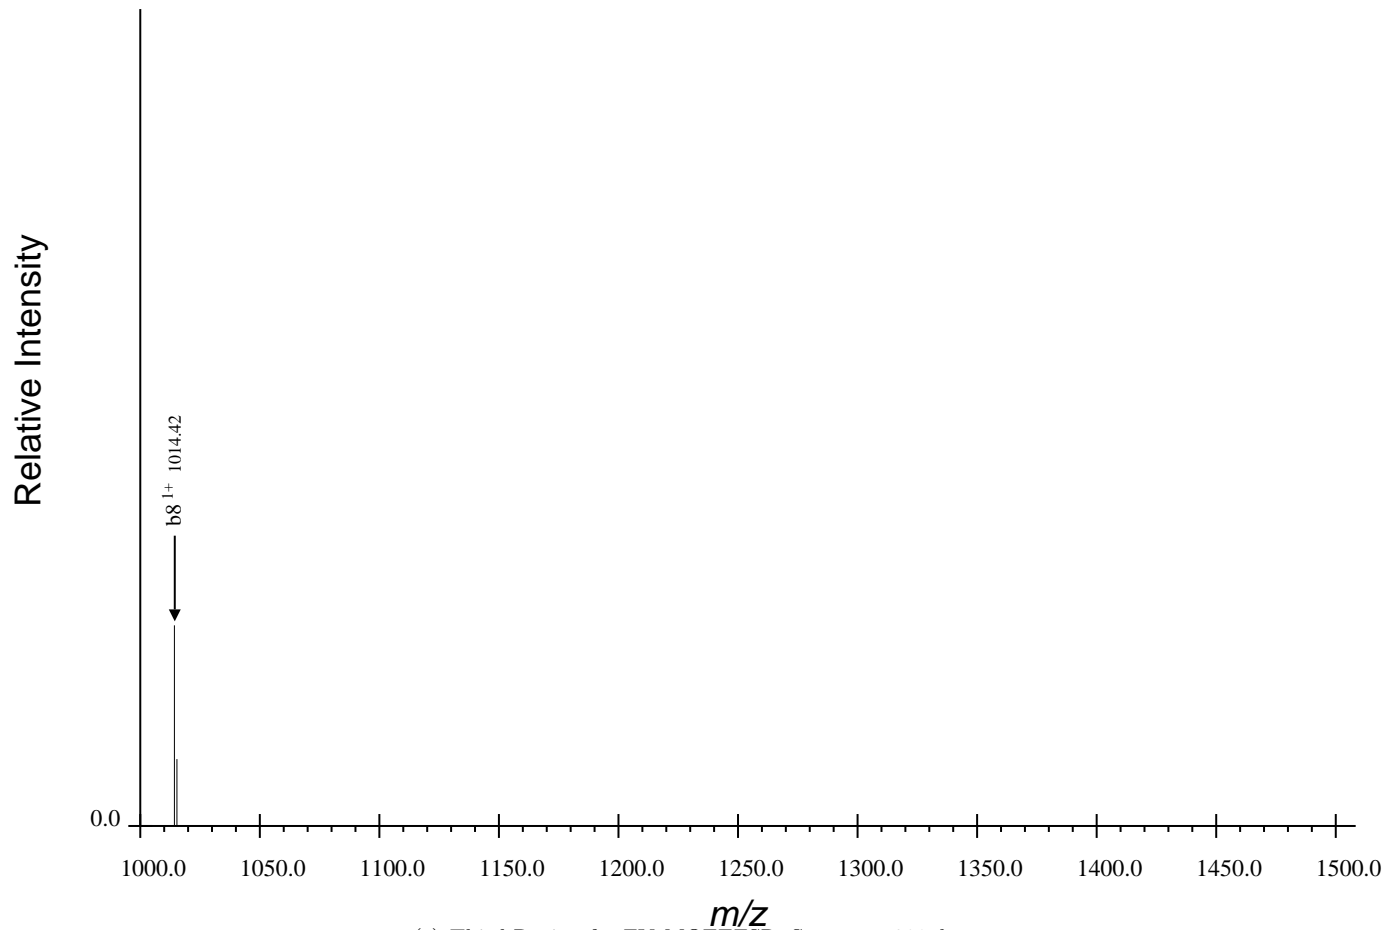

(c) Third Region for FVoMQEEFSR, Spectrum 291.dta

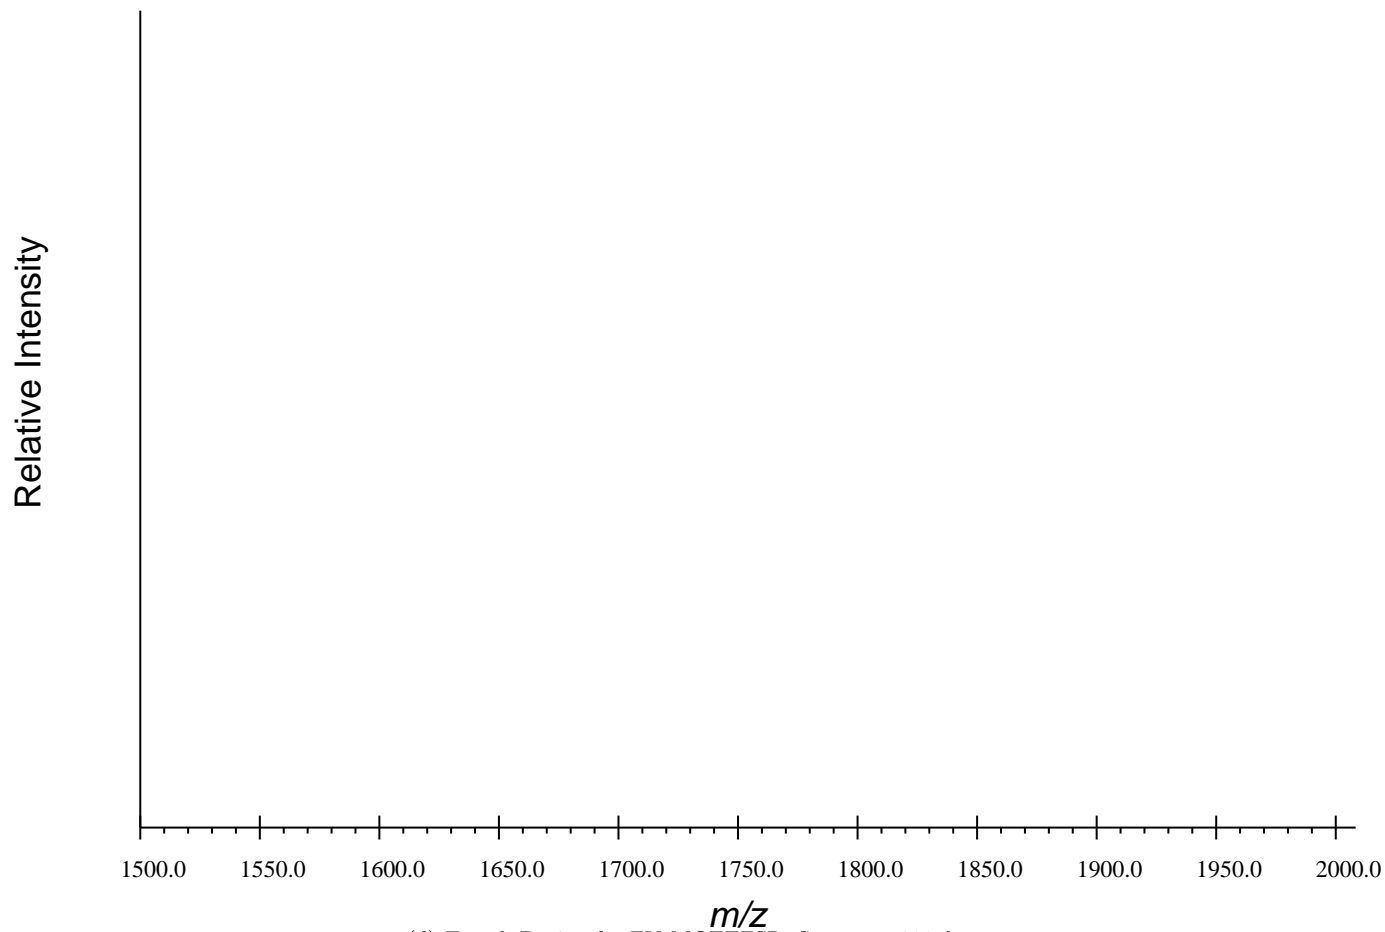

(d) Fourth Region for FVoMQEEFSR, Spectrum 291.dta

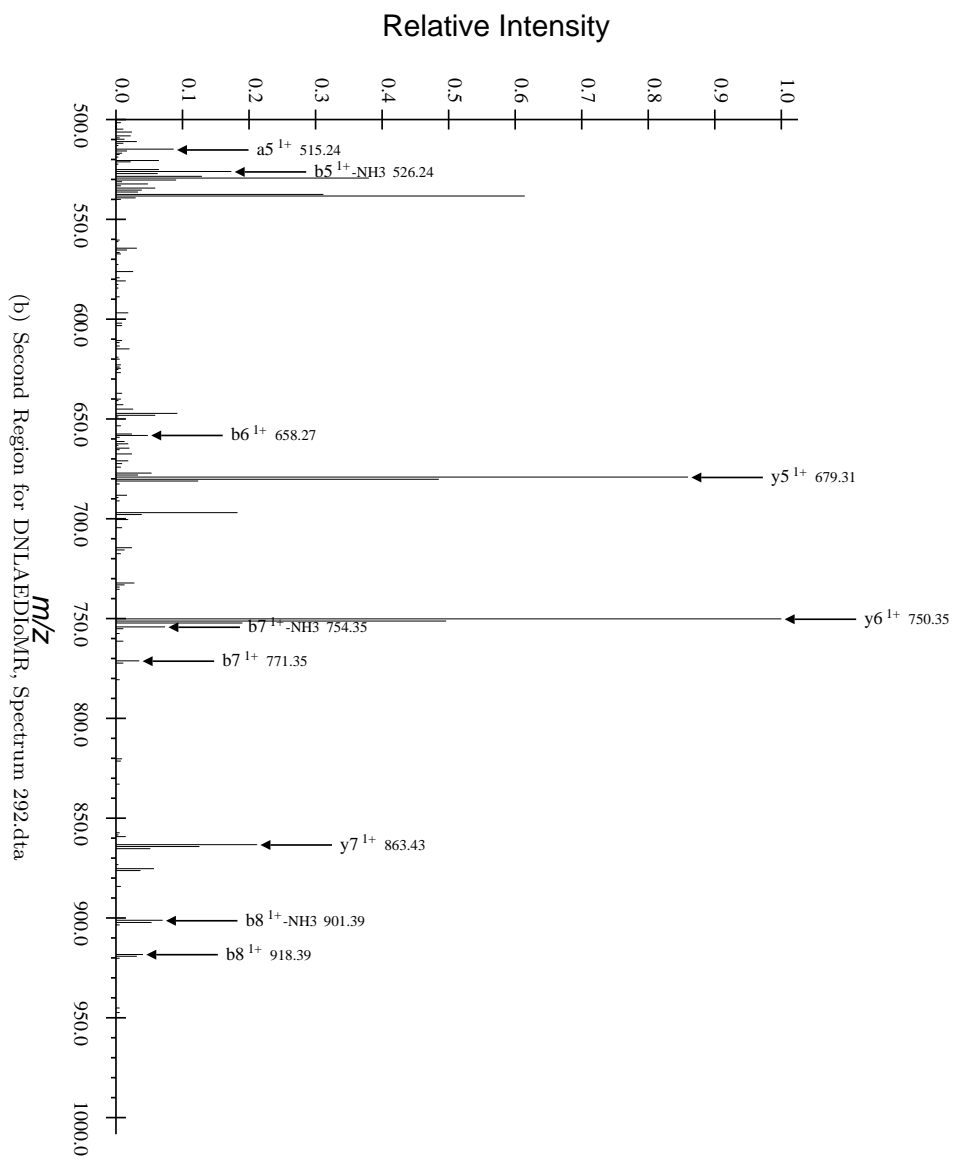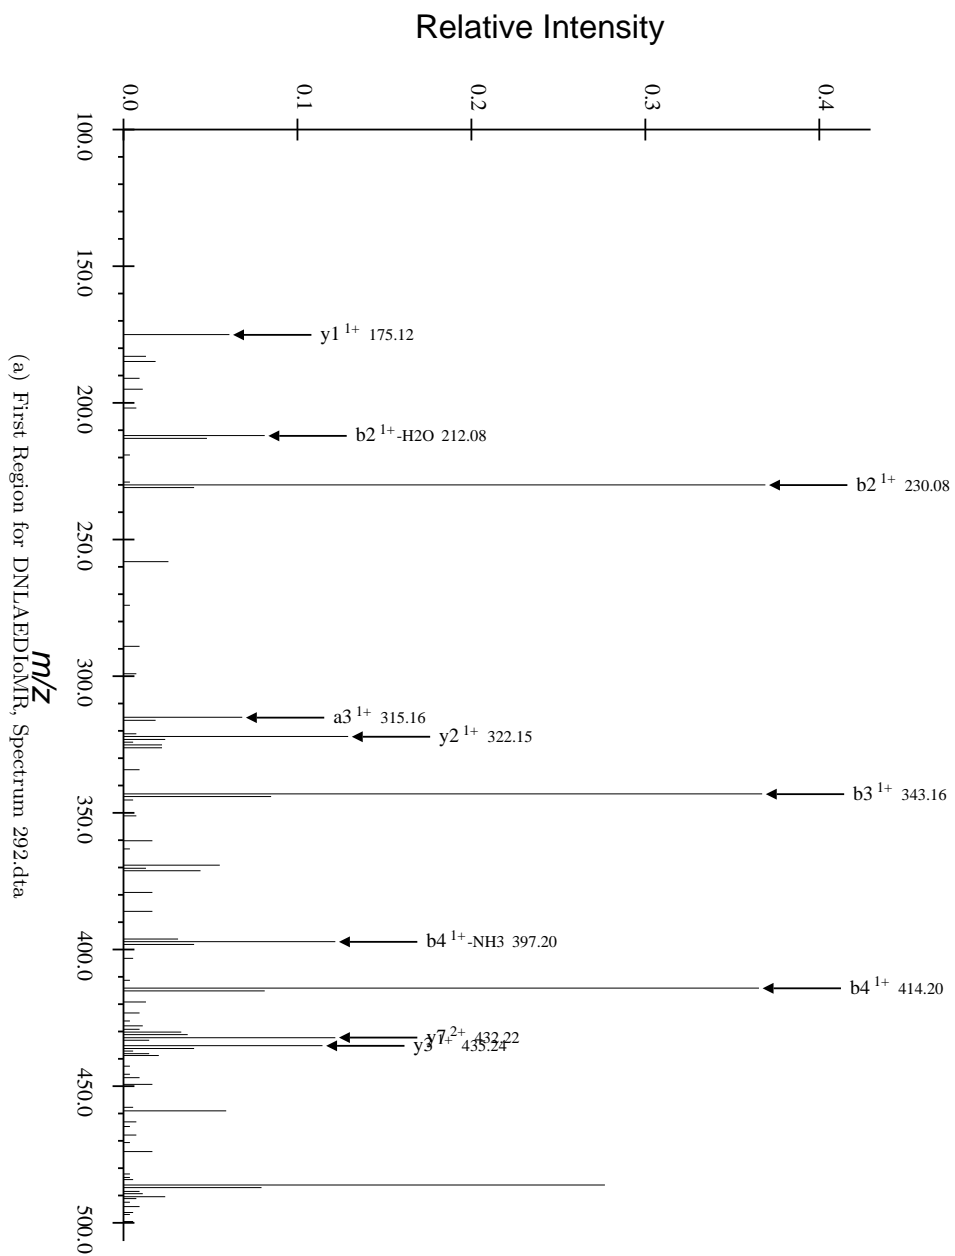

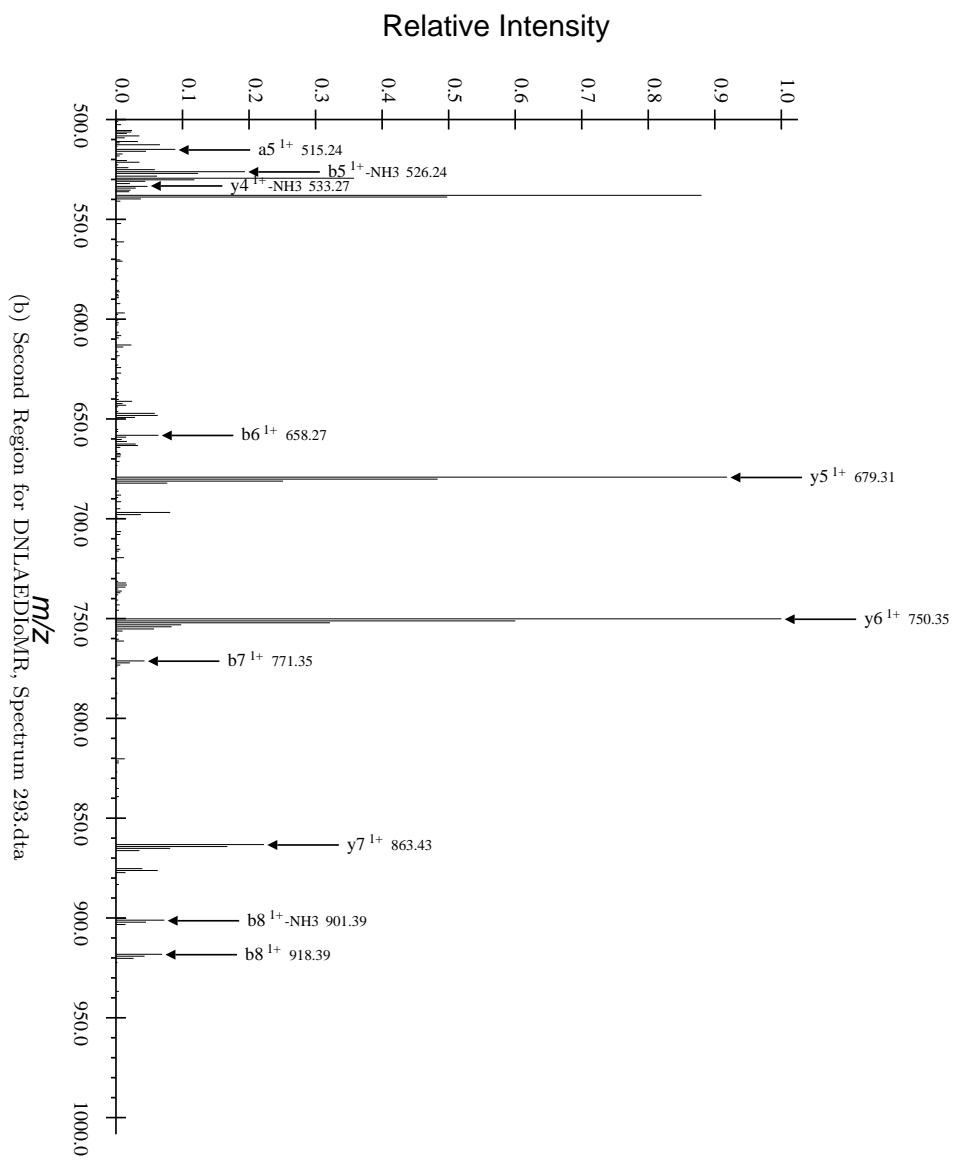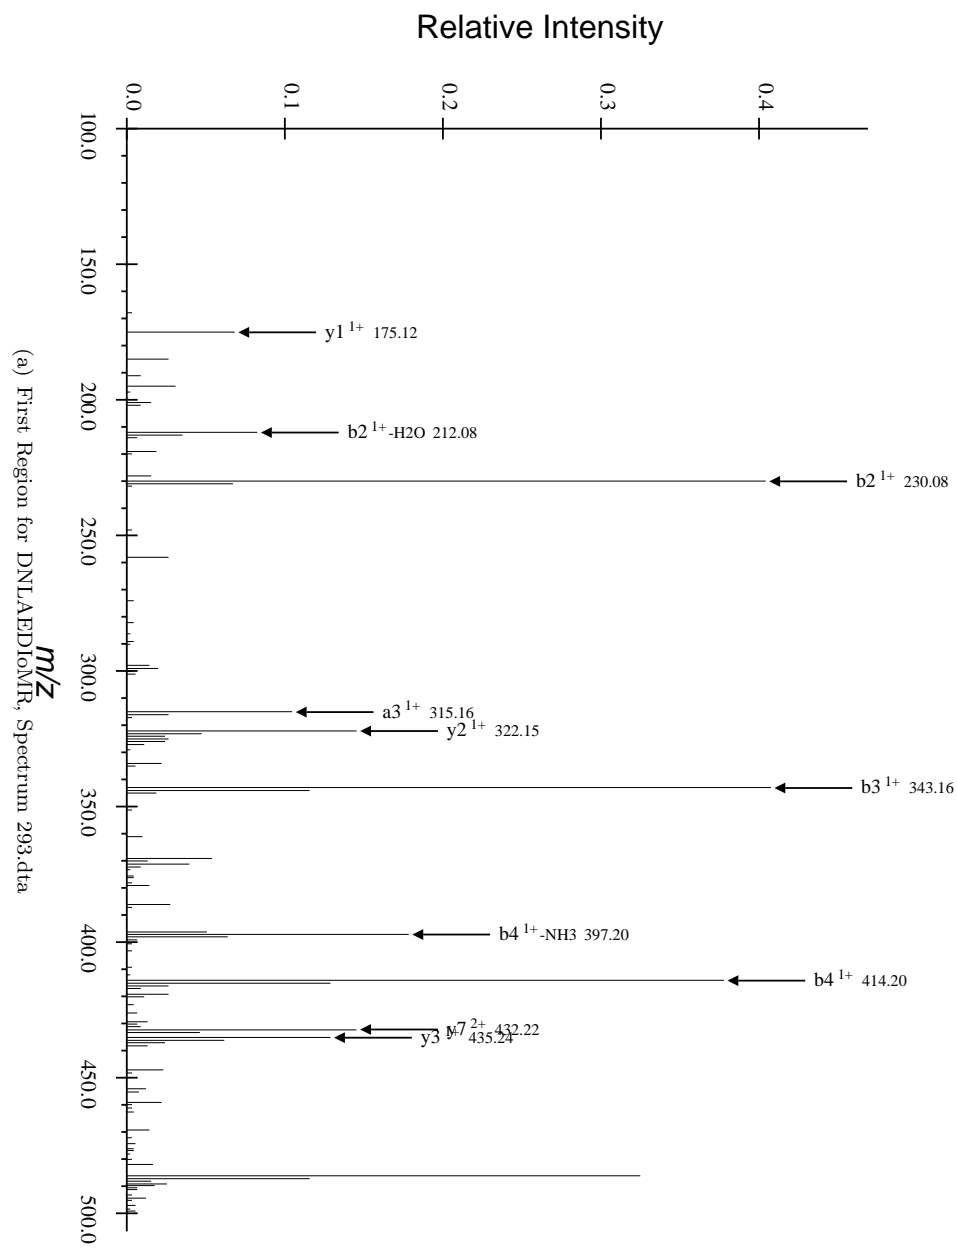

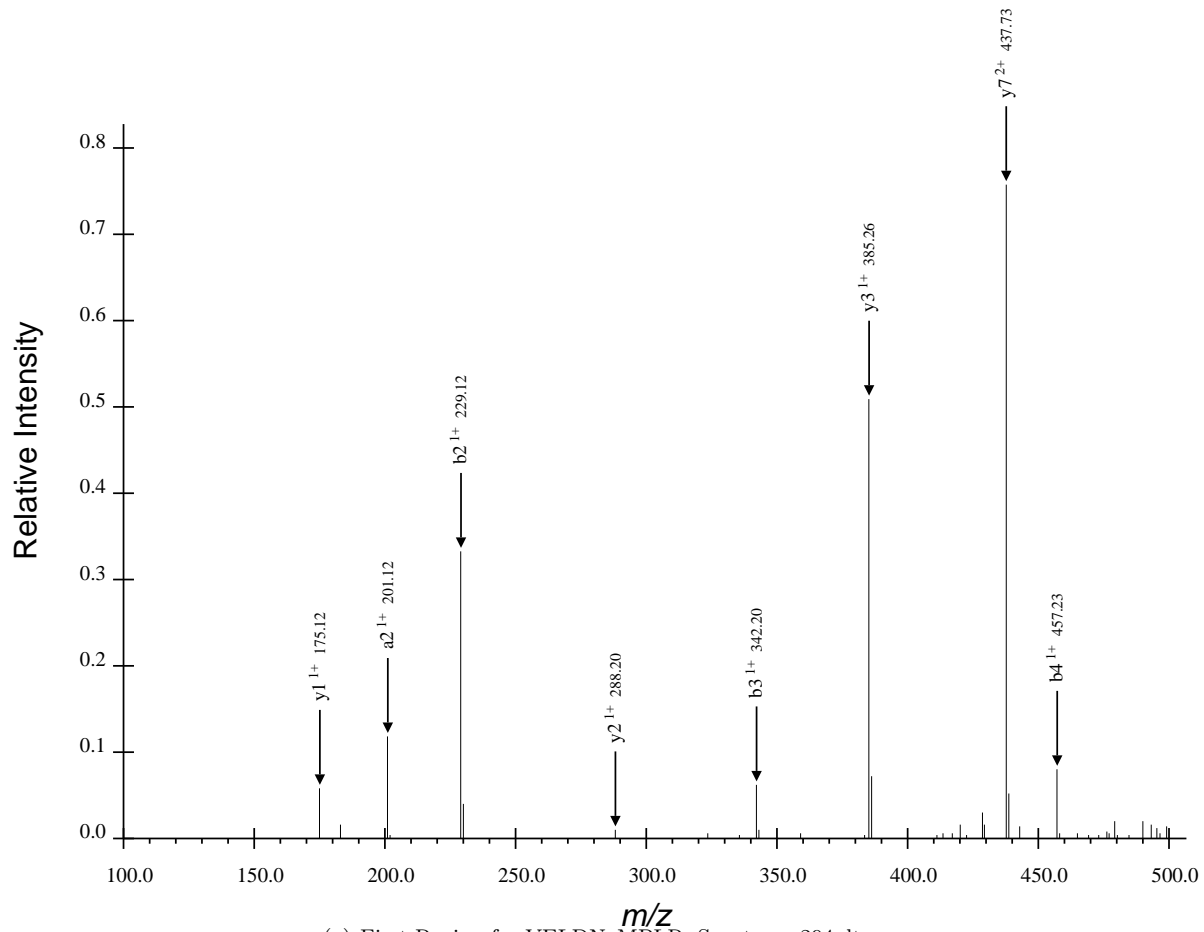

(a) First Region for VELDNoMPLR, Spectrum 294.dta

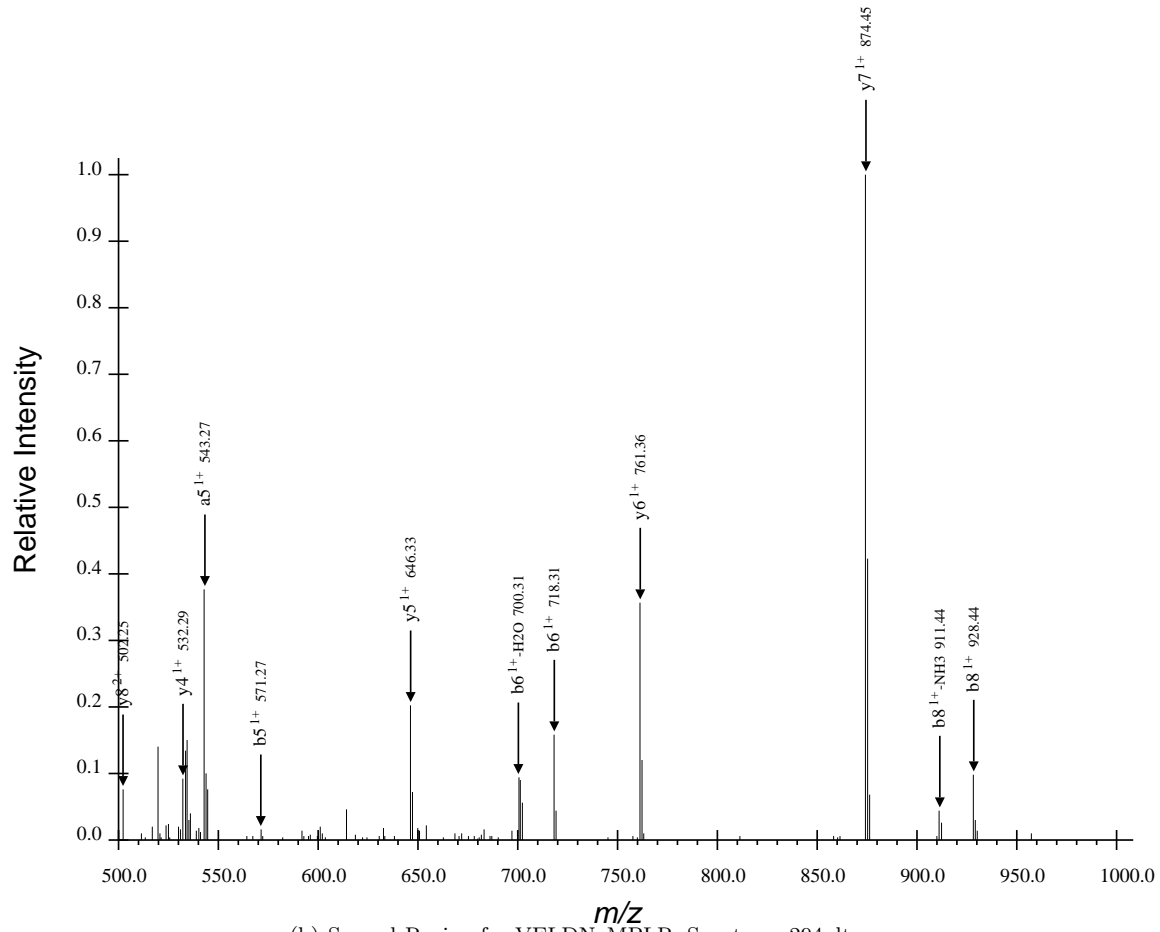

(b) Second Region for VELDNoMPLR, Spectrum 294.dta



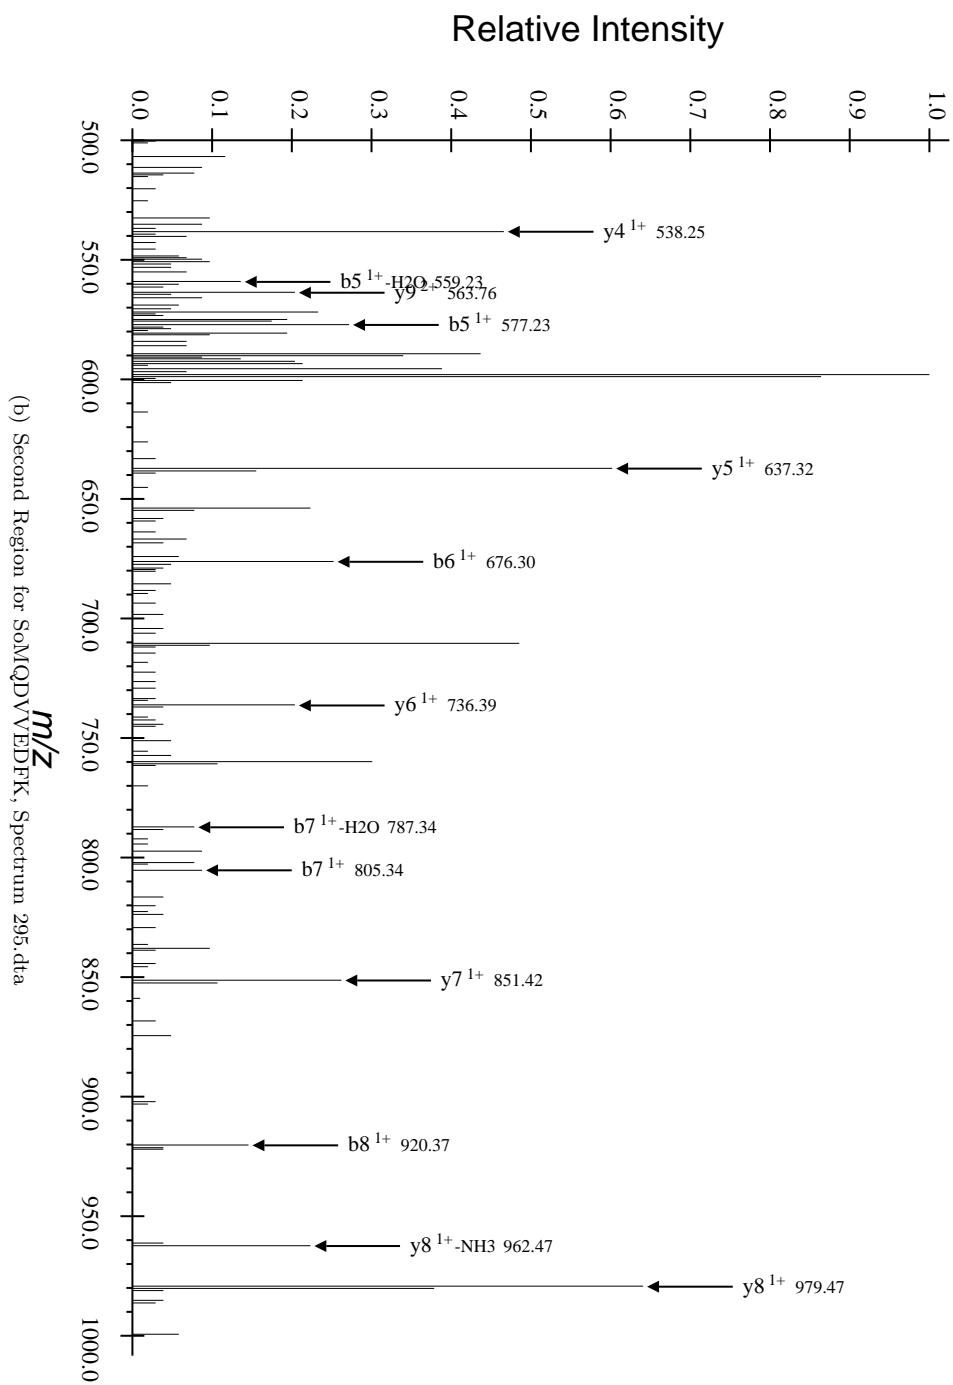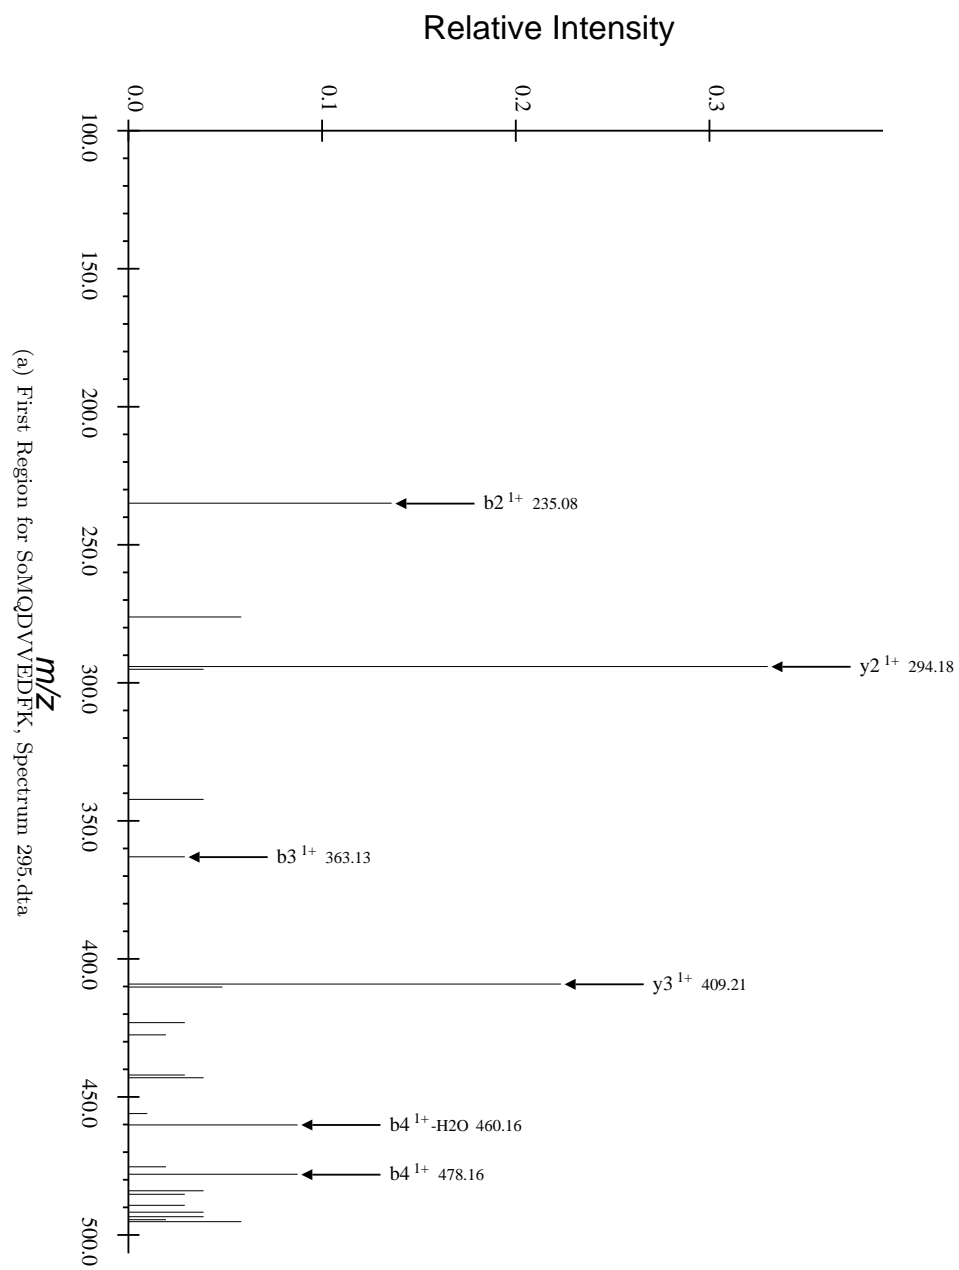

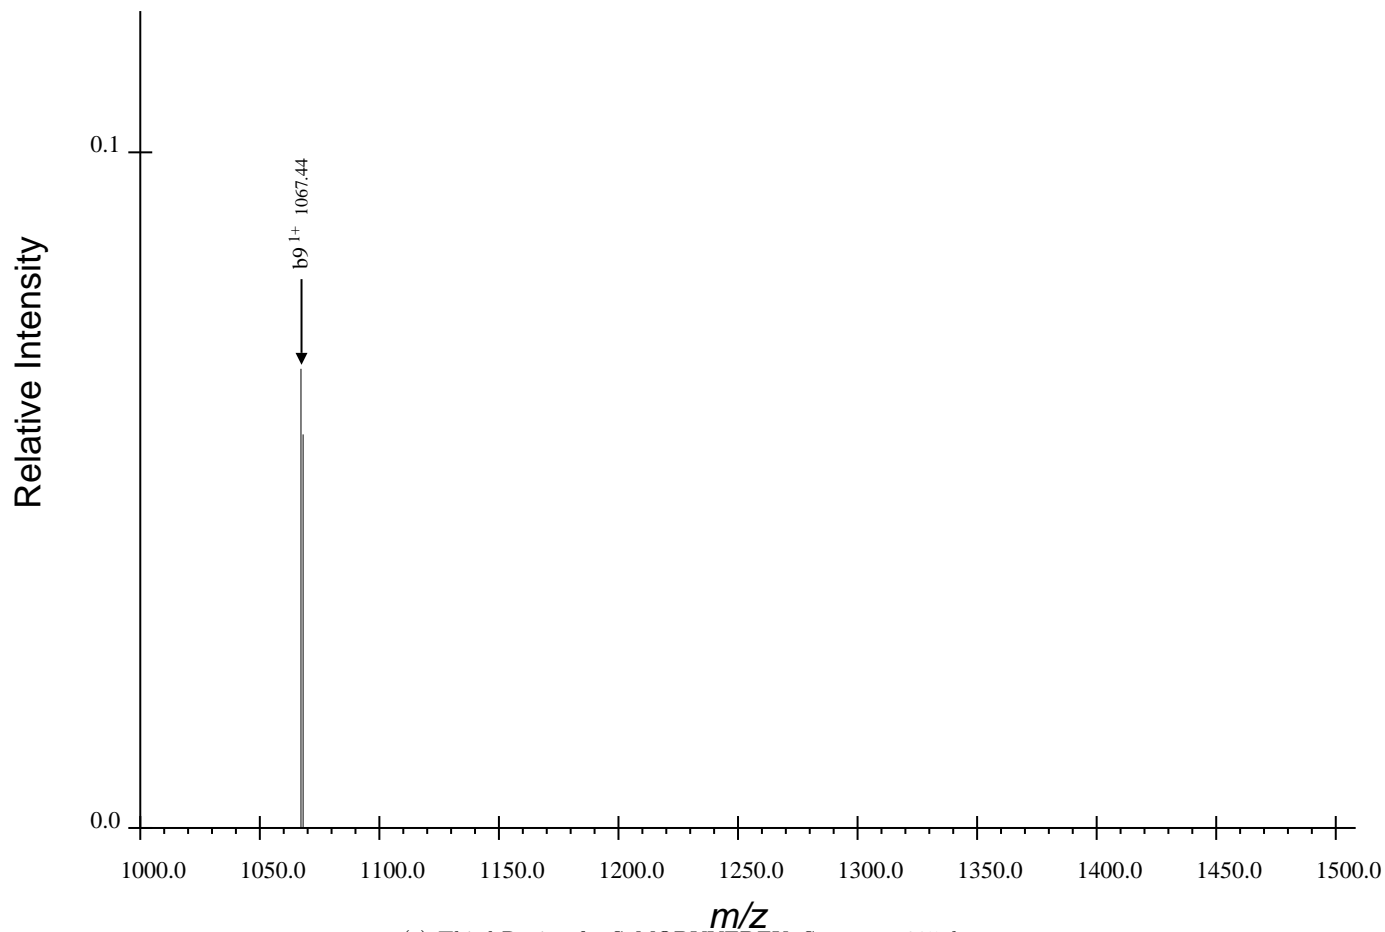

(c) Third Region for SoMQDVVEDFK, Spectrum 295.dta

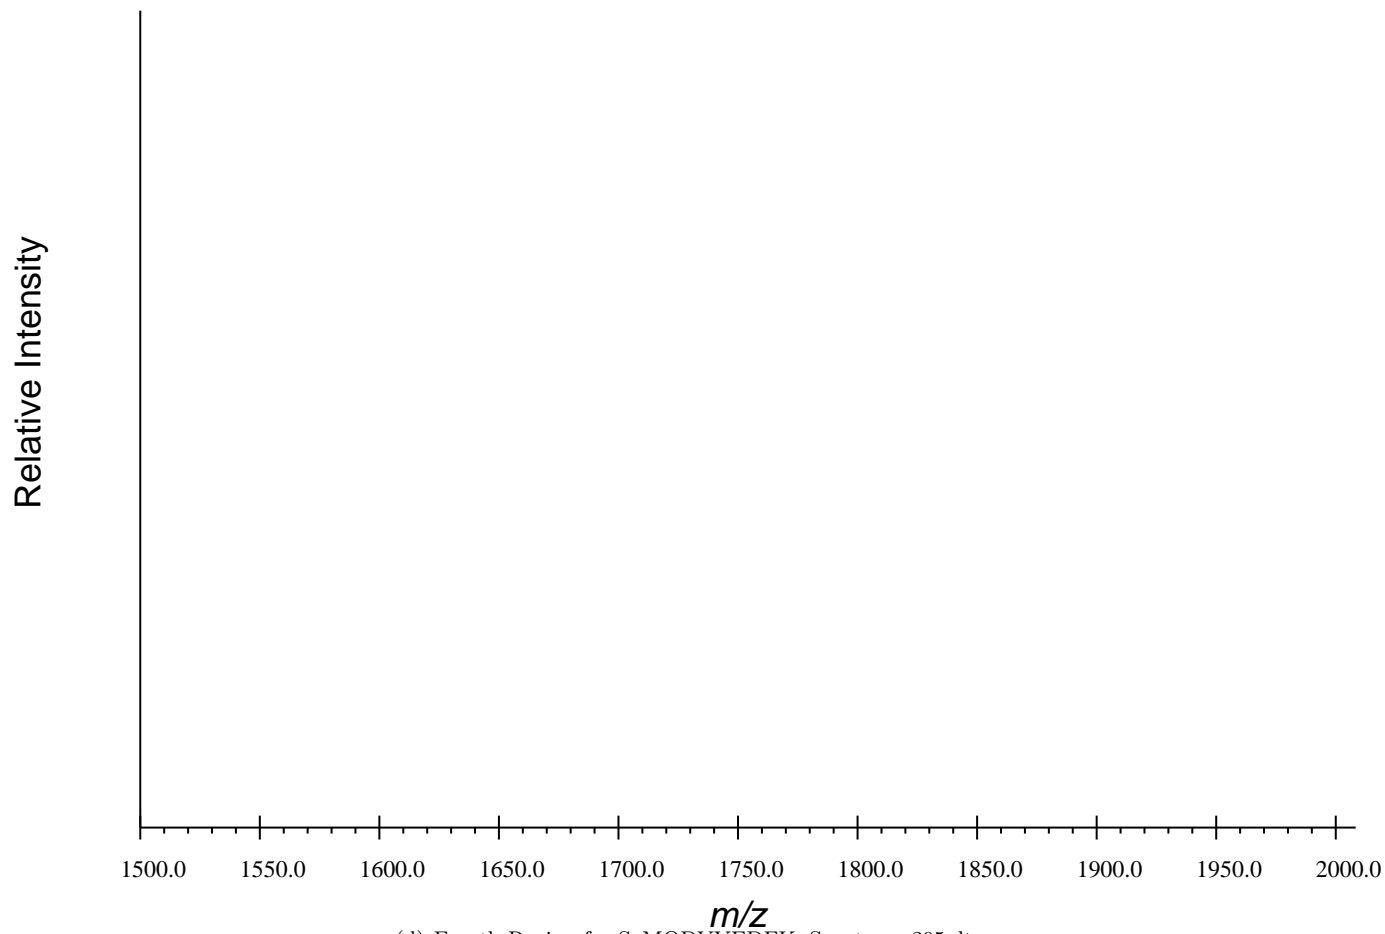

(d) Fourth Region for SoMQDVVEDFK, Spectrum 295.dta

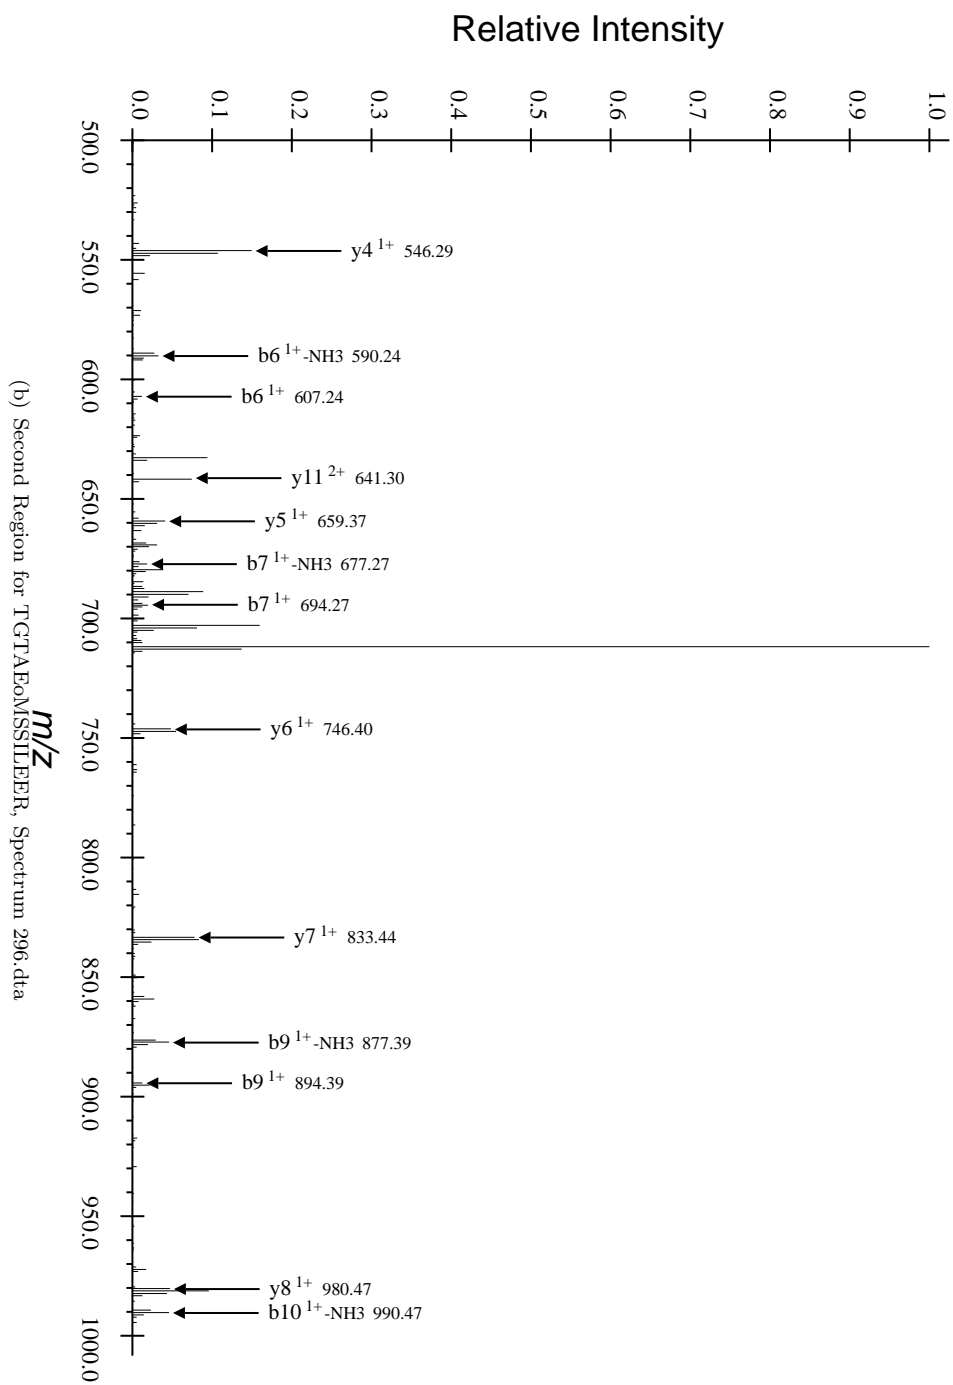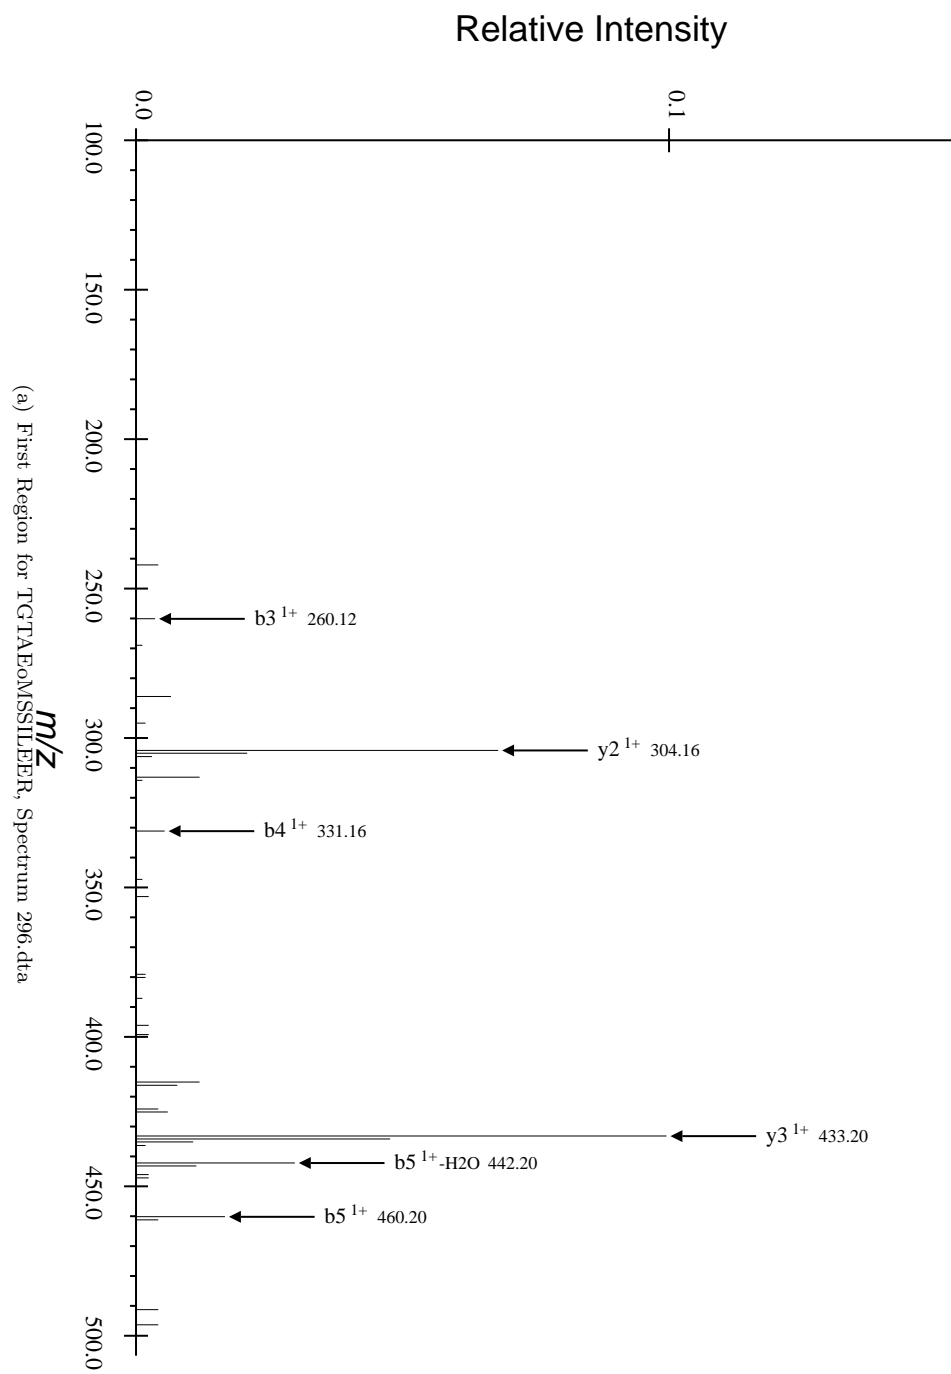

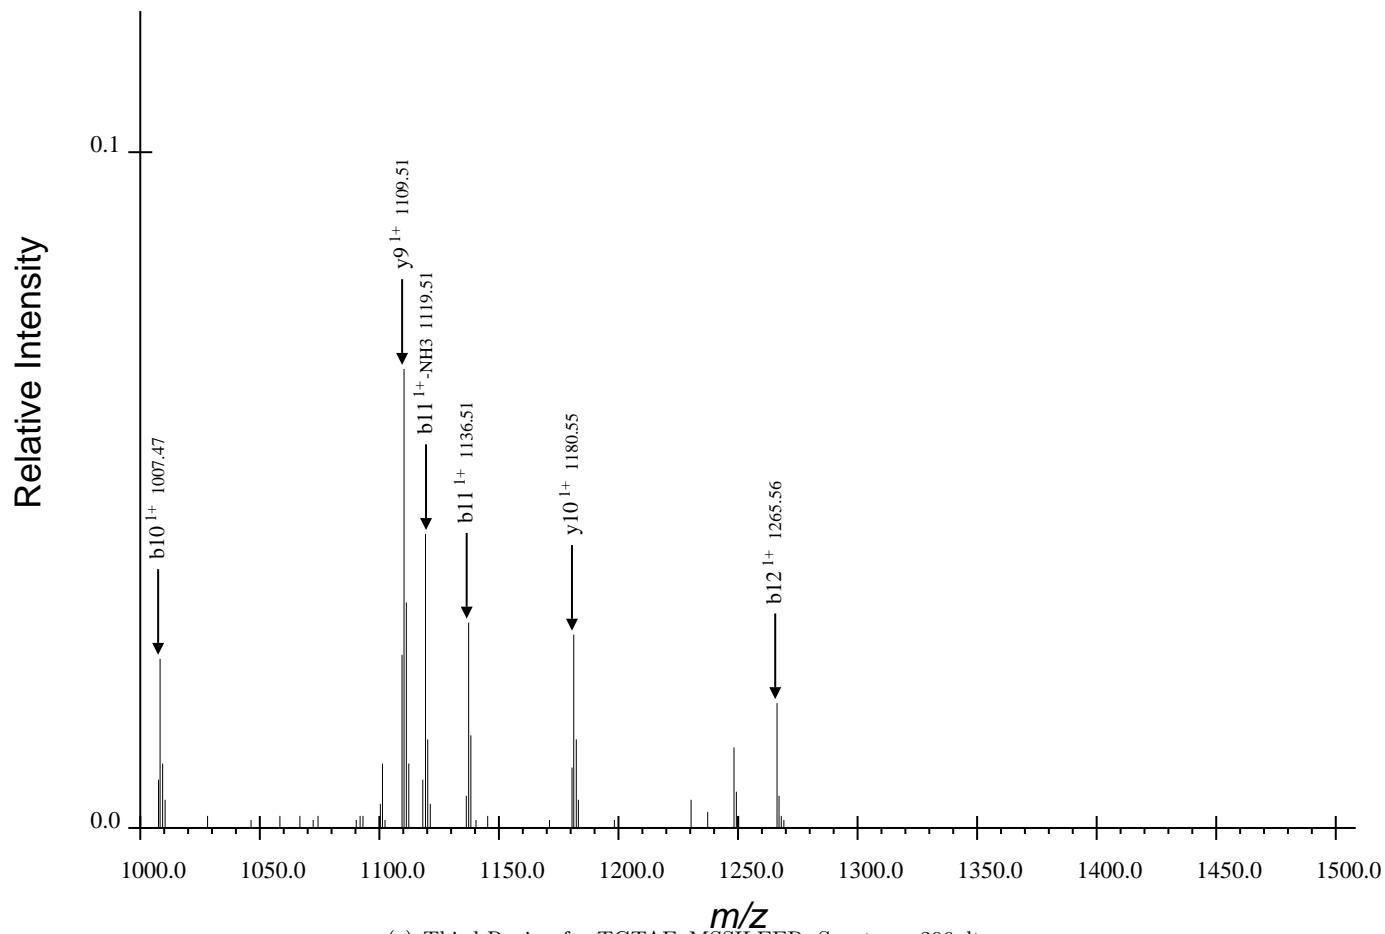

(c) Third Region for TGTAEoMSSILEER, Spectrum 296.dta

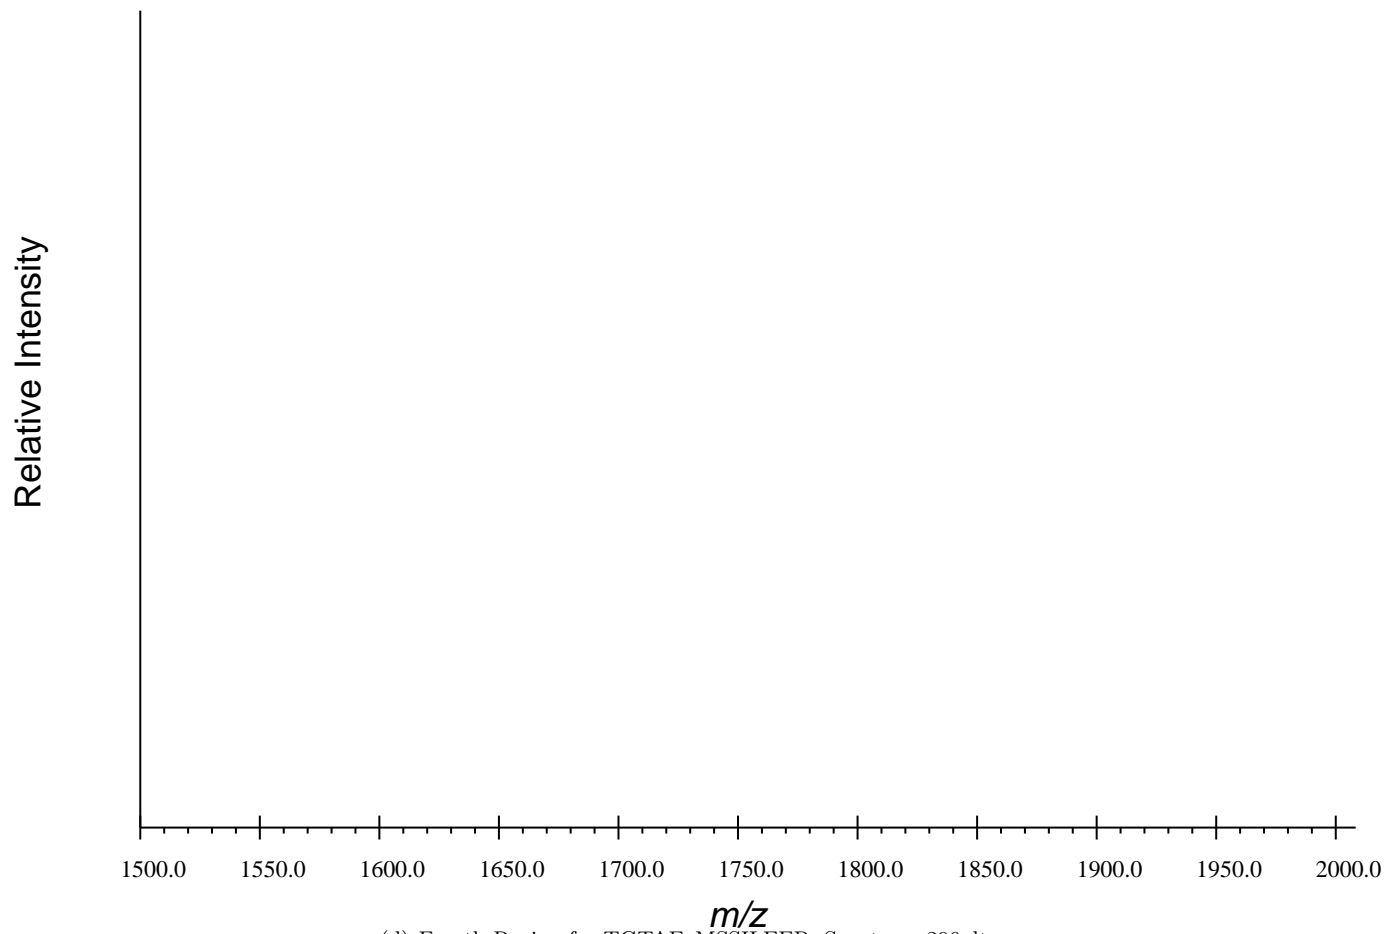

(d) Fourth Region for TGTAEoMSSILEER, Spectrum 296.dta

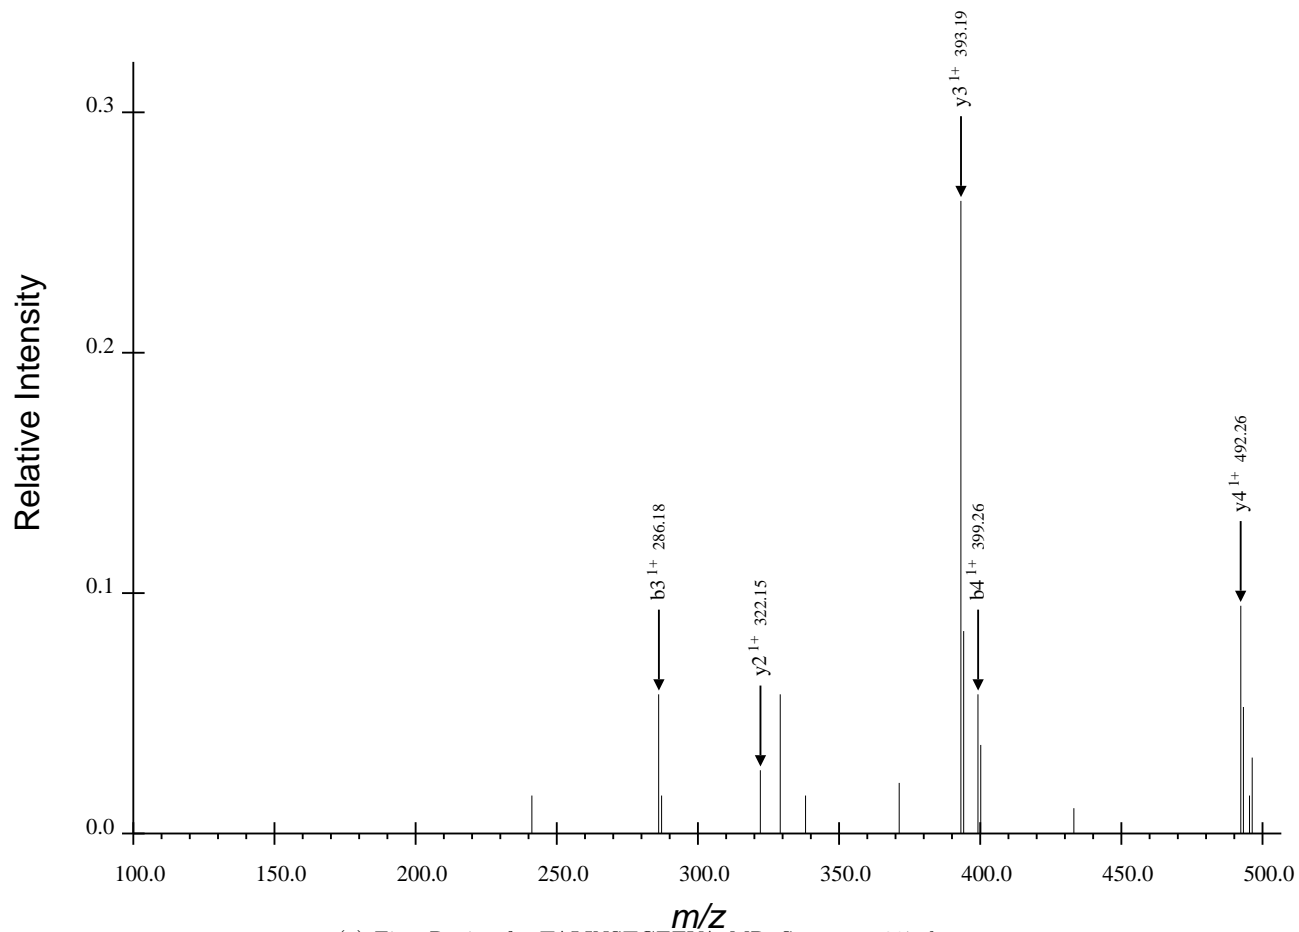

(a) First Region for TALINSTGEEVAoMR, Spectrum 297.dta

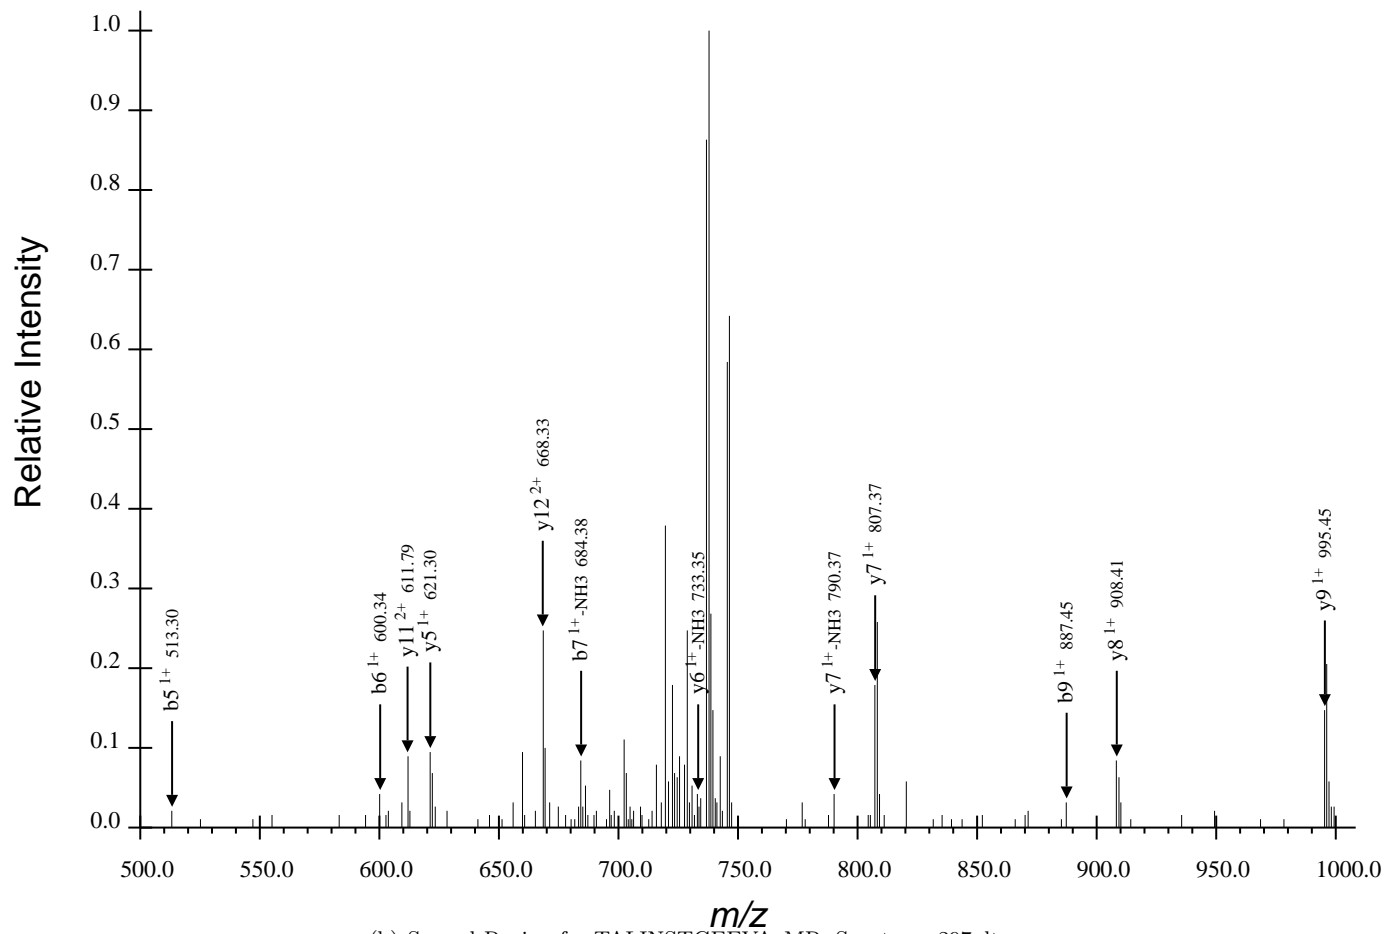

(b) Second Region for TALINSTGEEVAoMR, Spectrum 297.dta

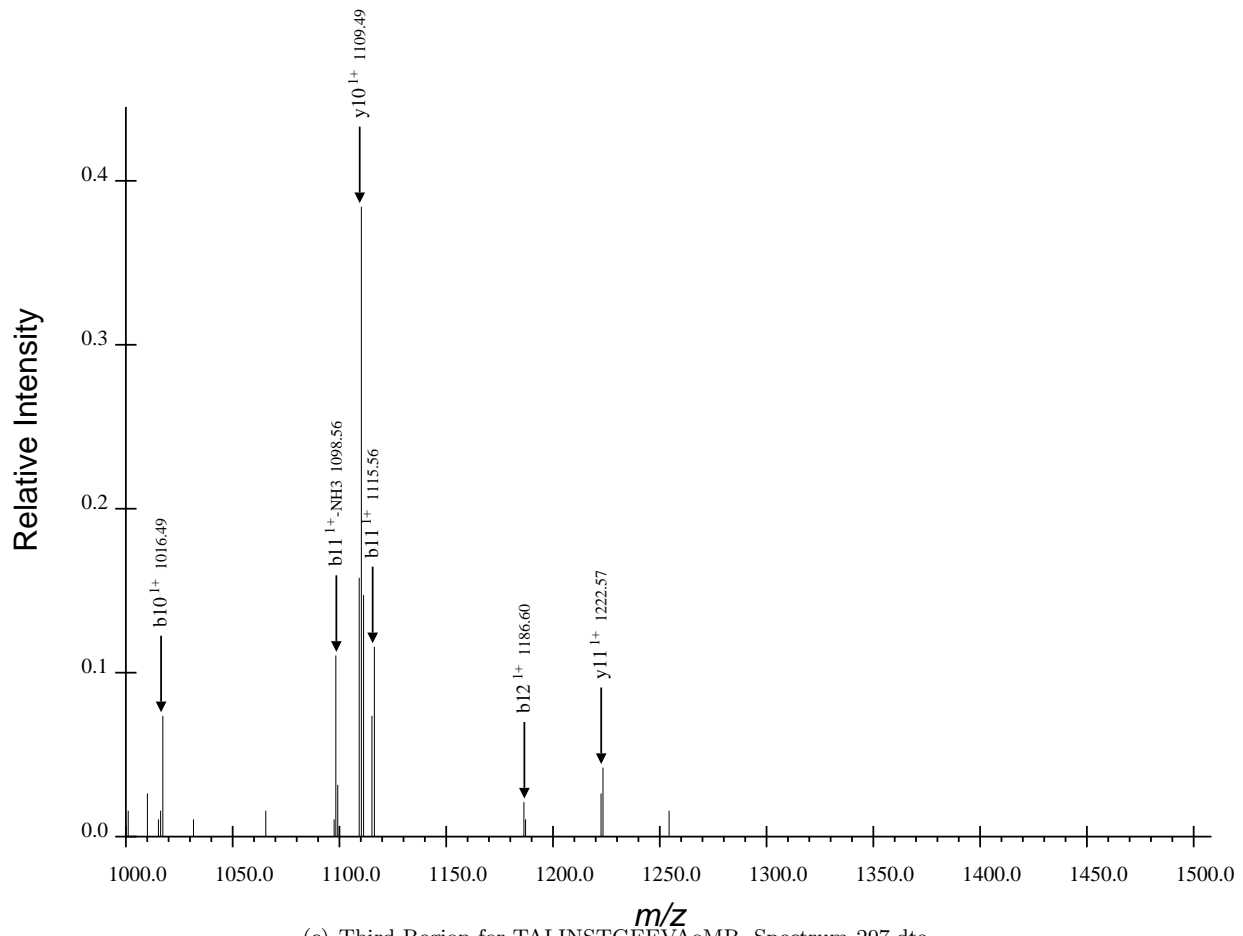

(c) Third Region for TALINSTGEEVAoMR, Spectrum 297.dta

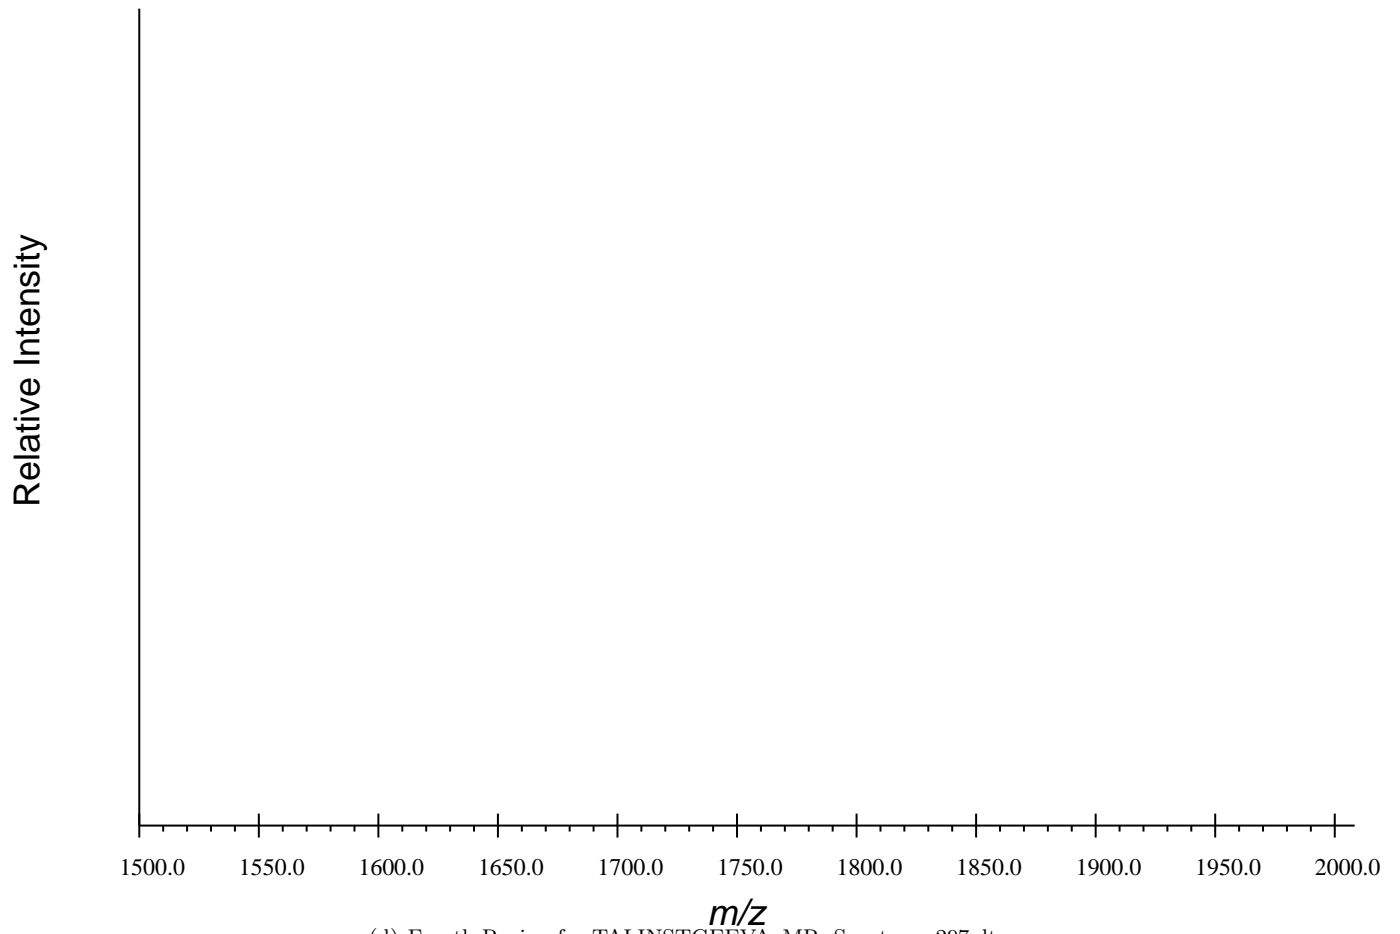

(d) Fourth Region for TALINSTGEEVAoMR, Spectrum 297.dta

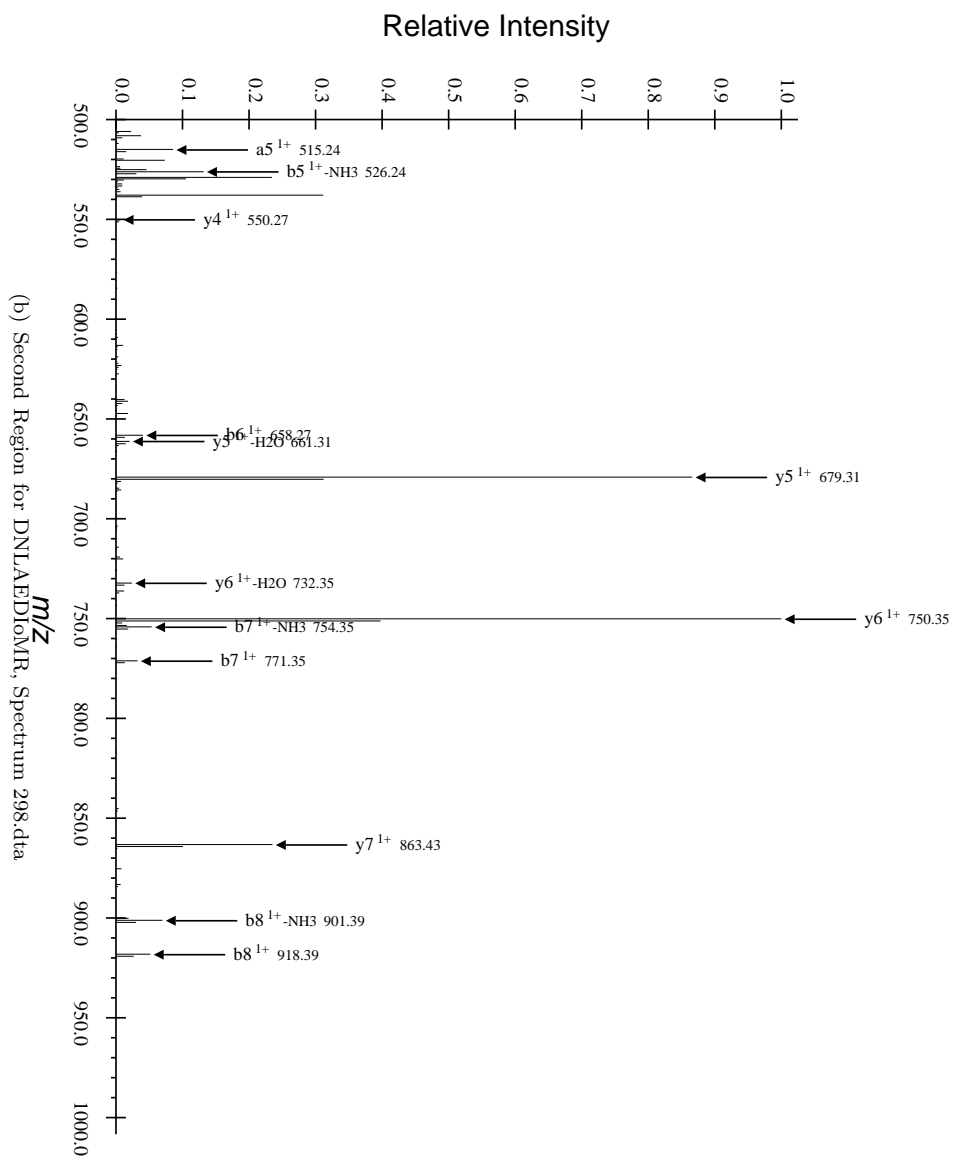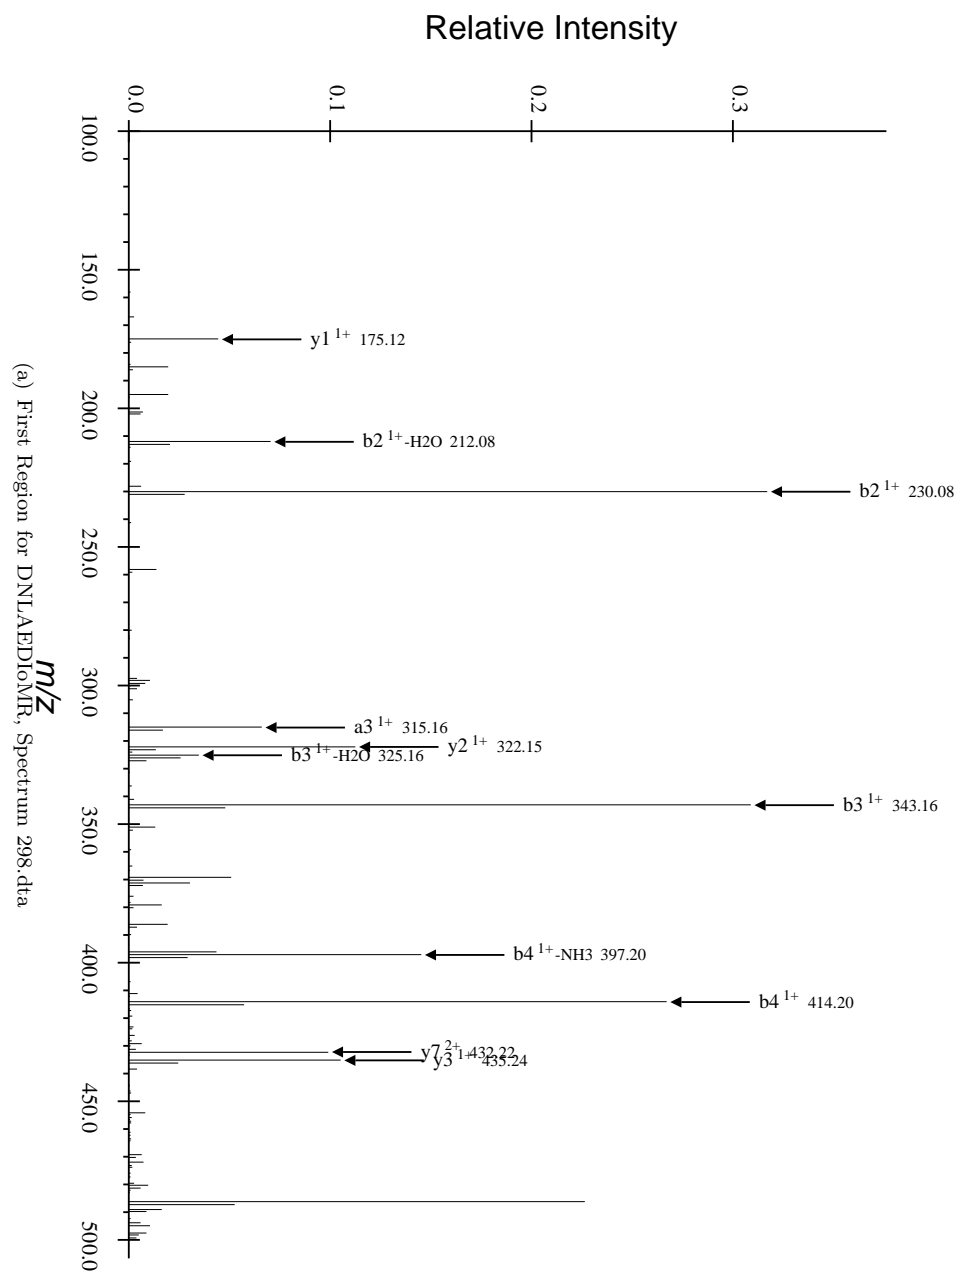

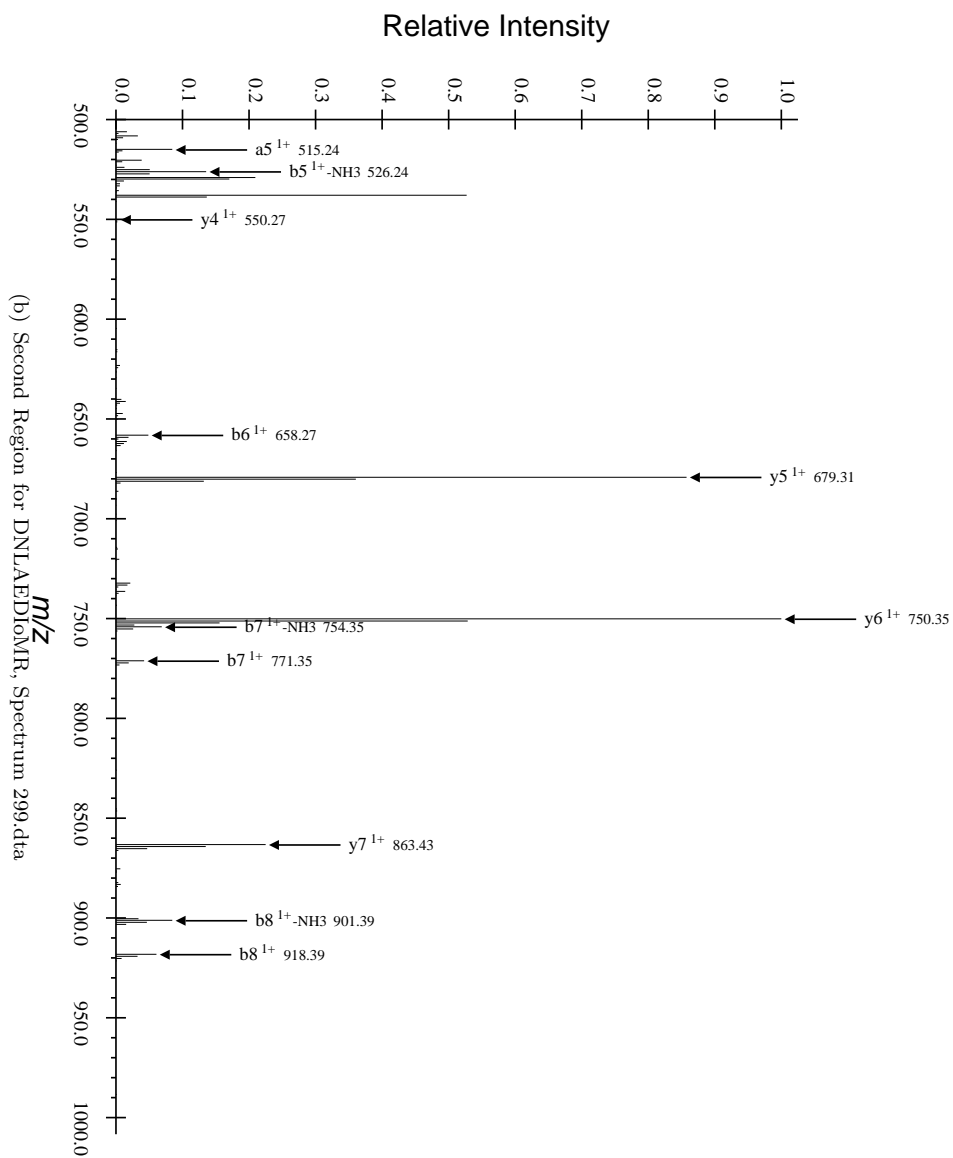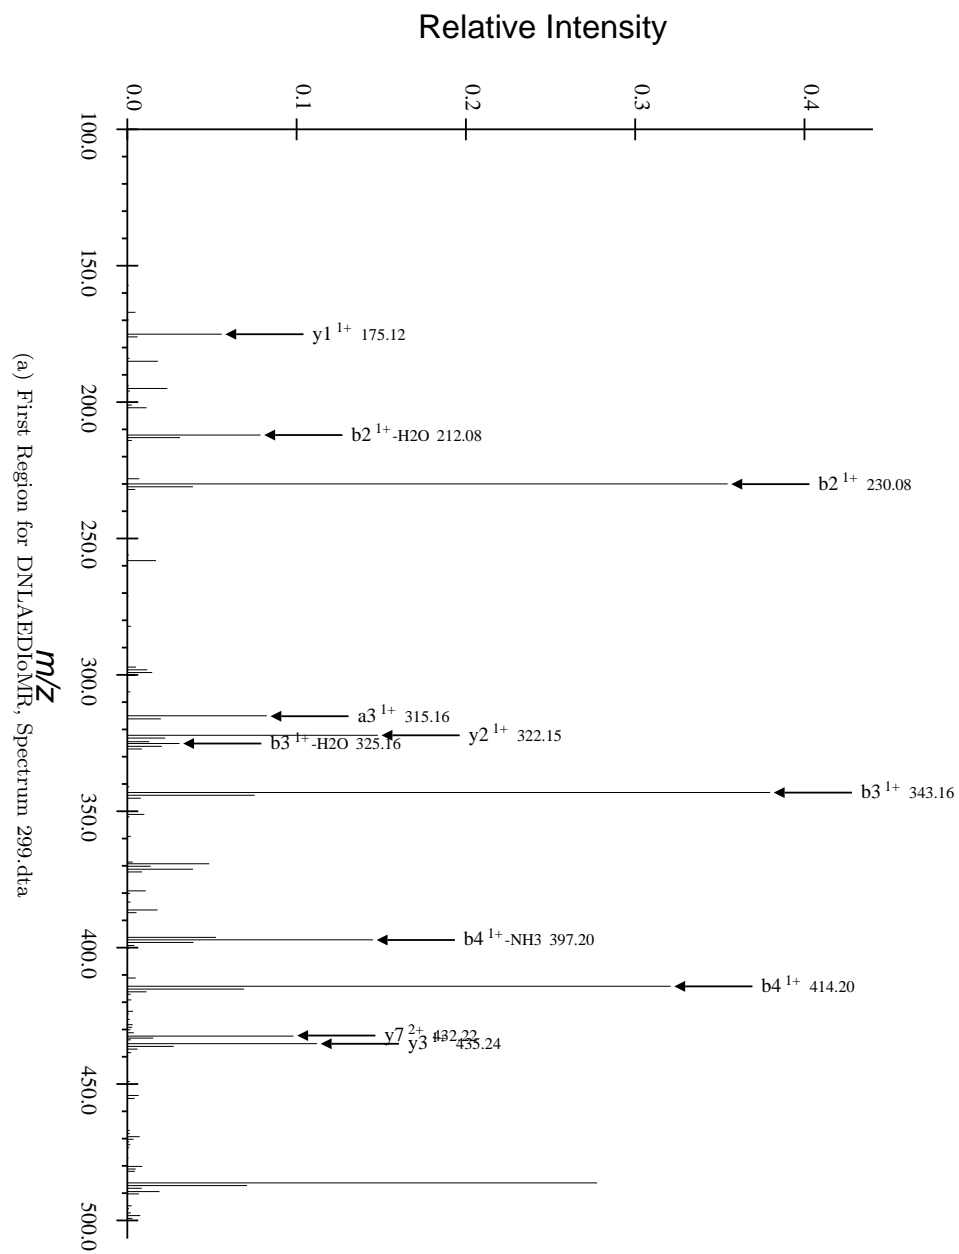



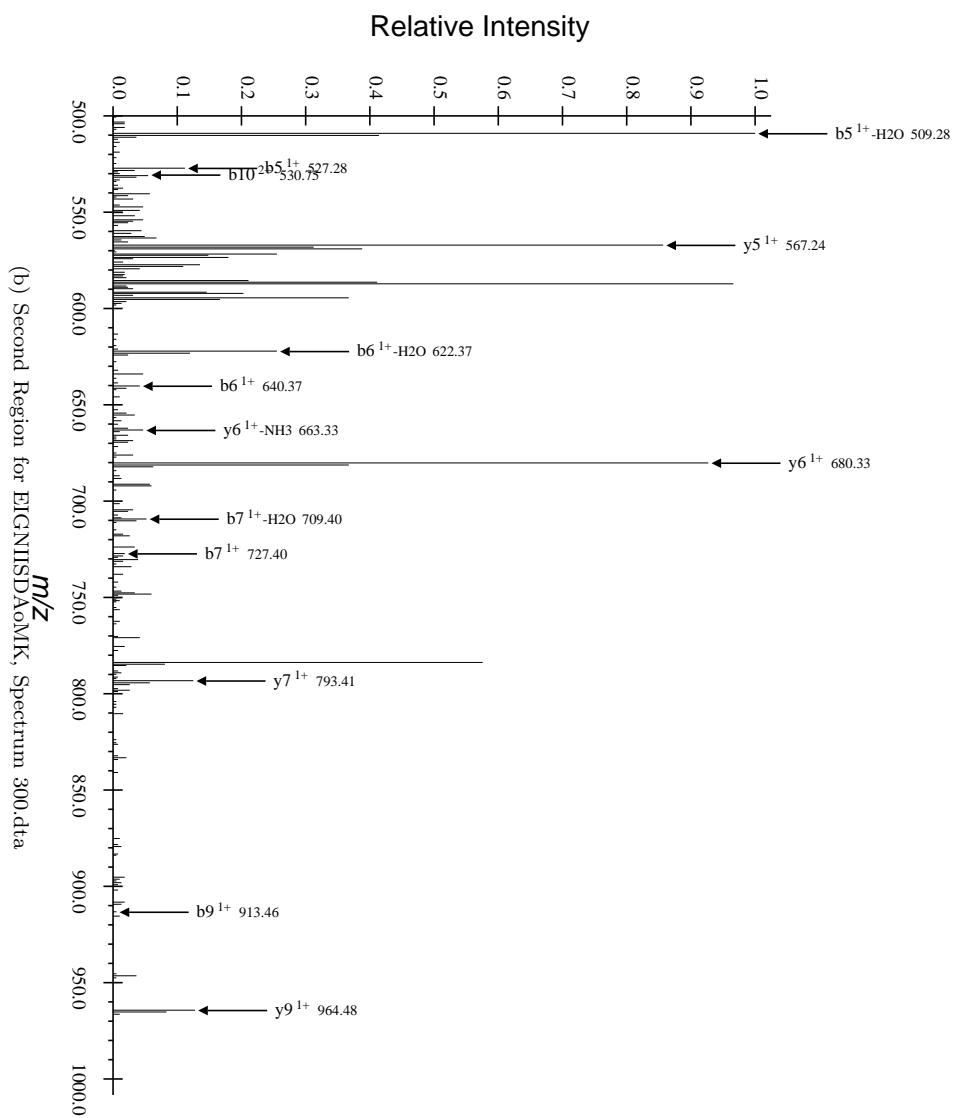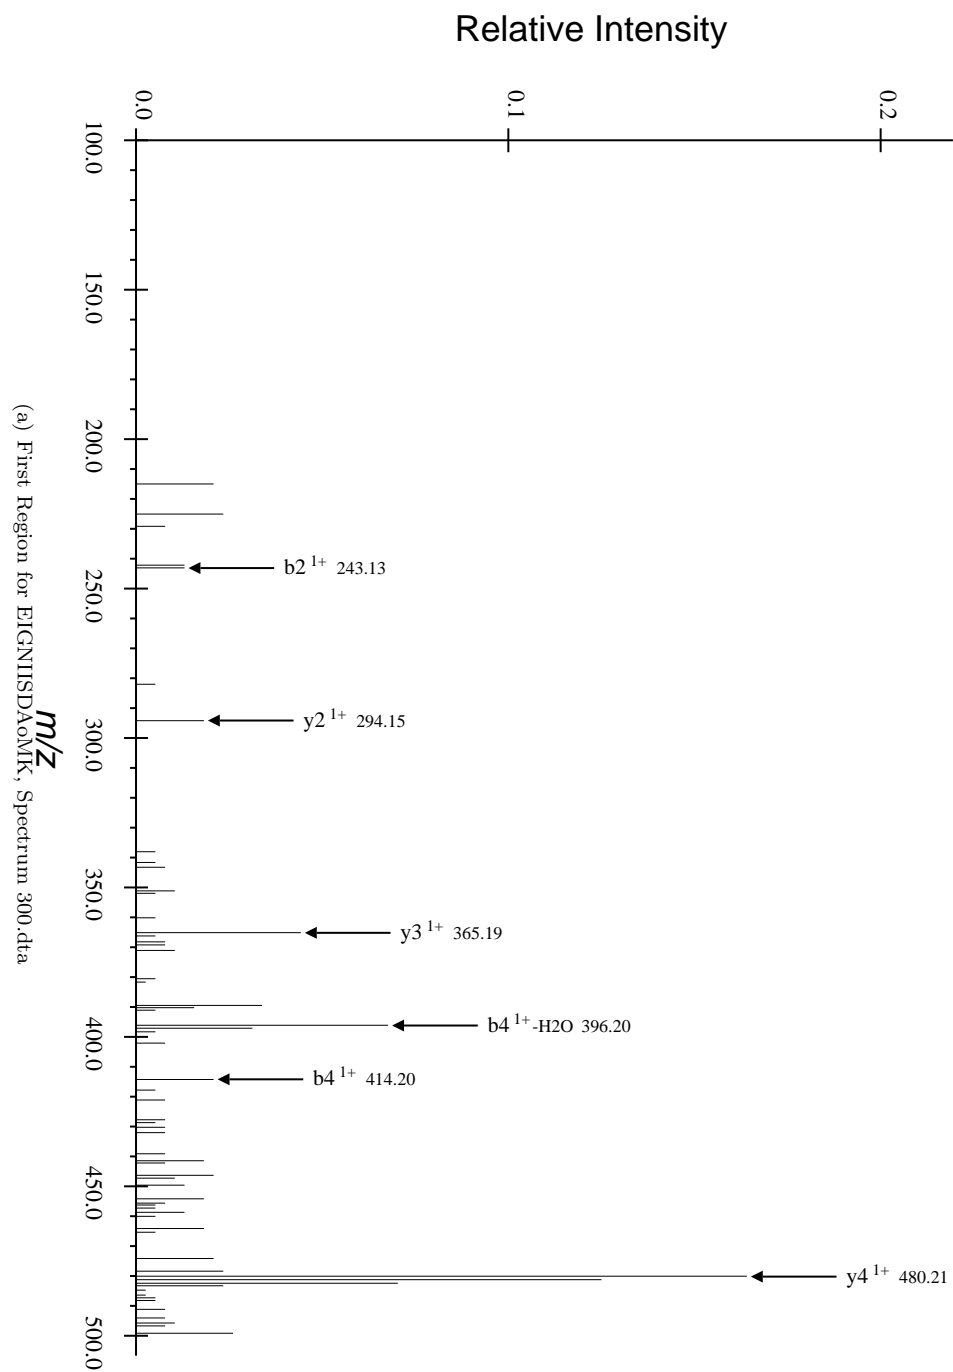

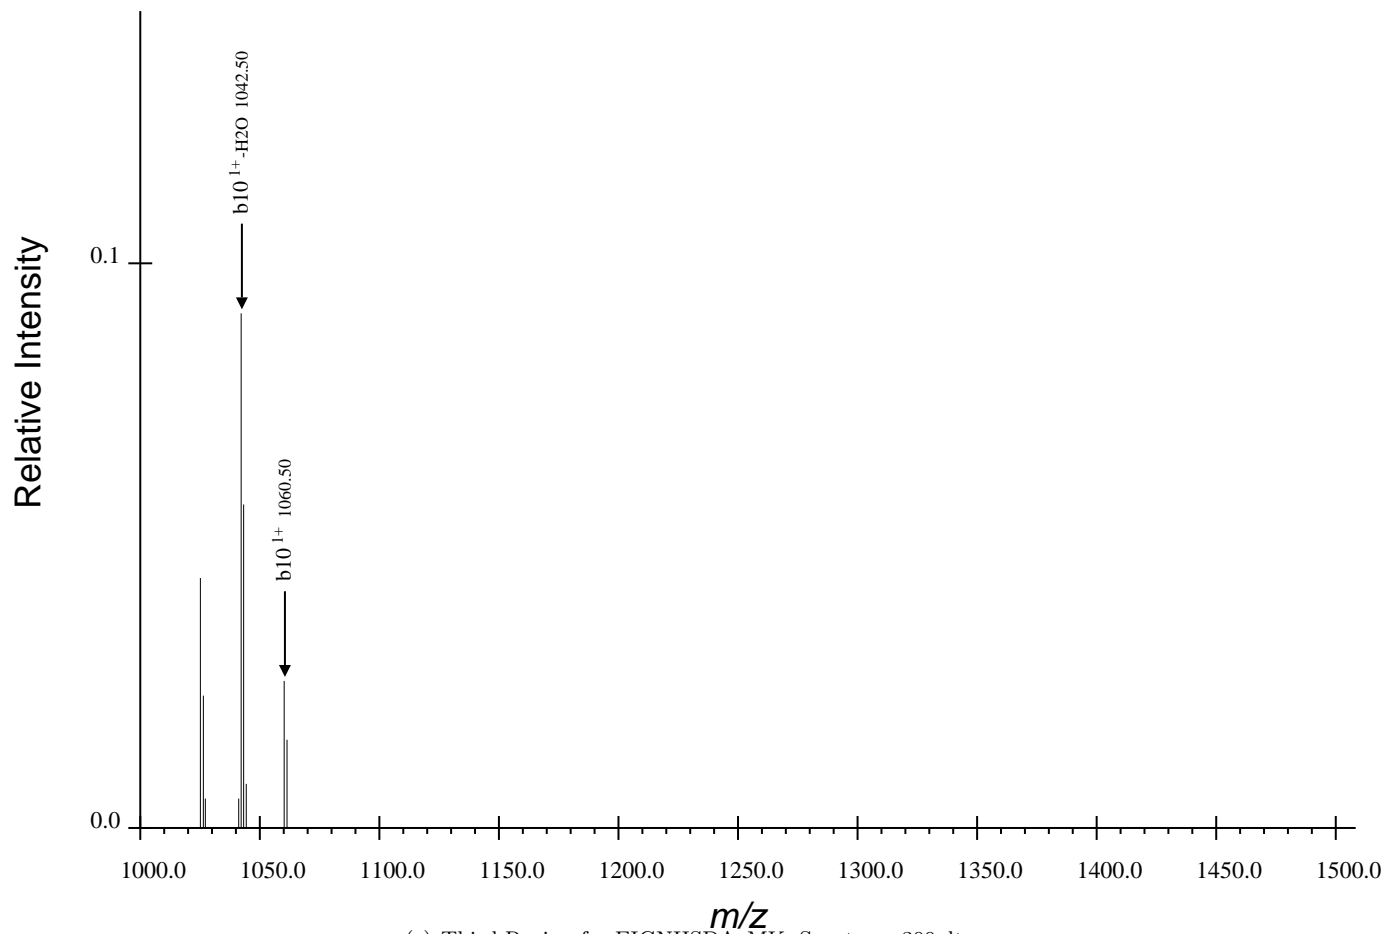

(c) Third Region for EIGNIISDAoMK, Spectrum 300.dta

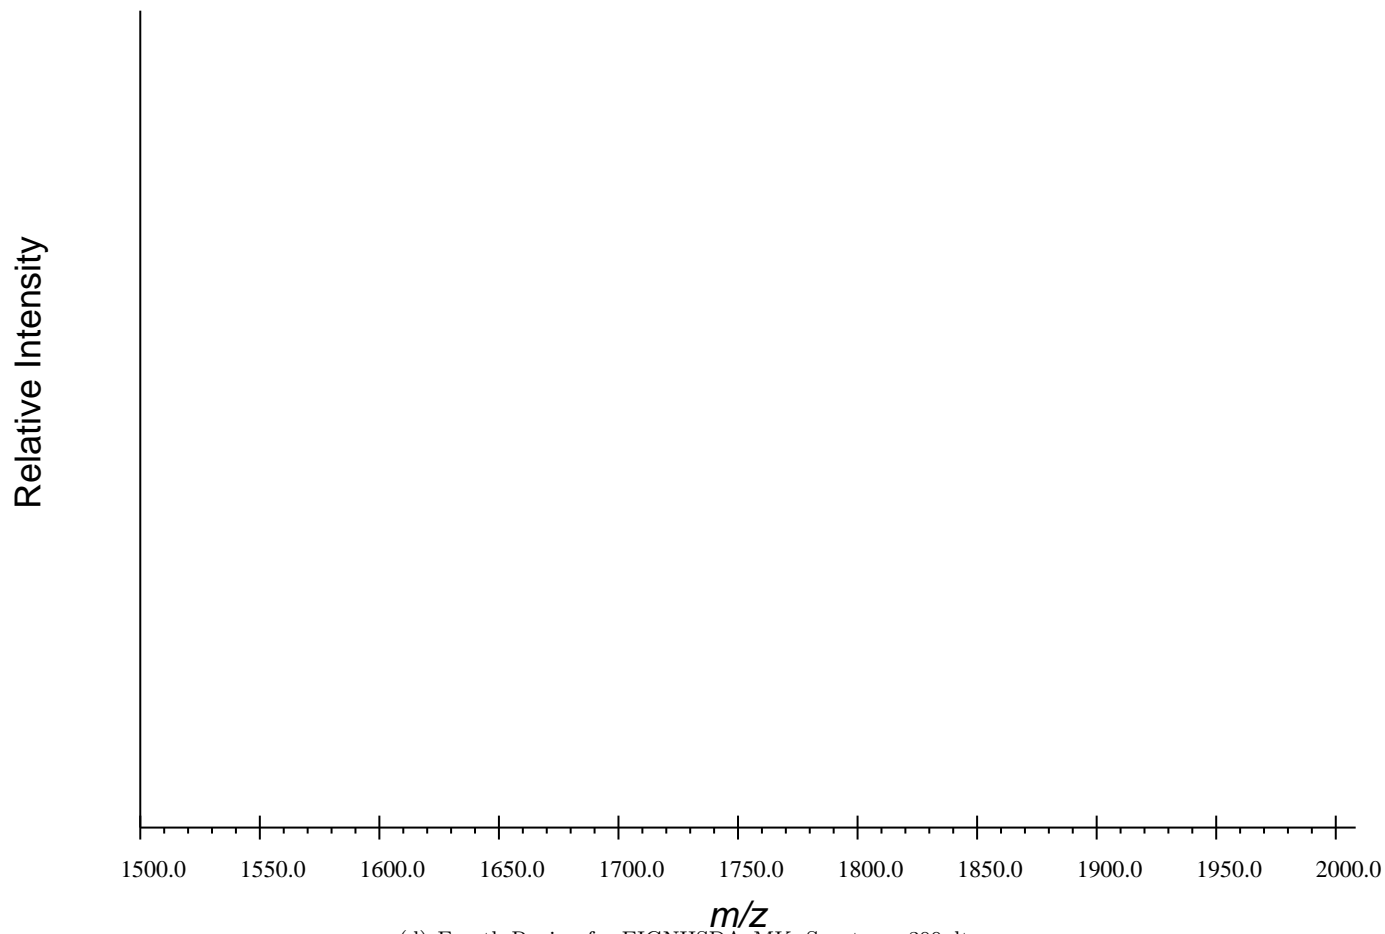

(d) Fourth Region for EIGNIISDAoMK, Spectrum 300.dta

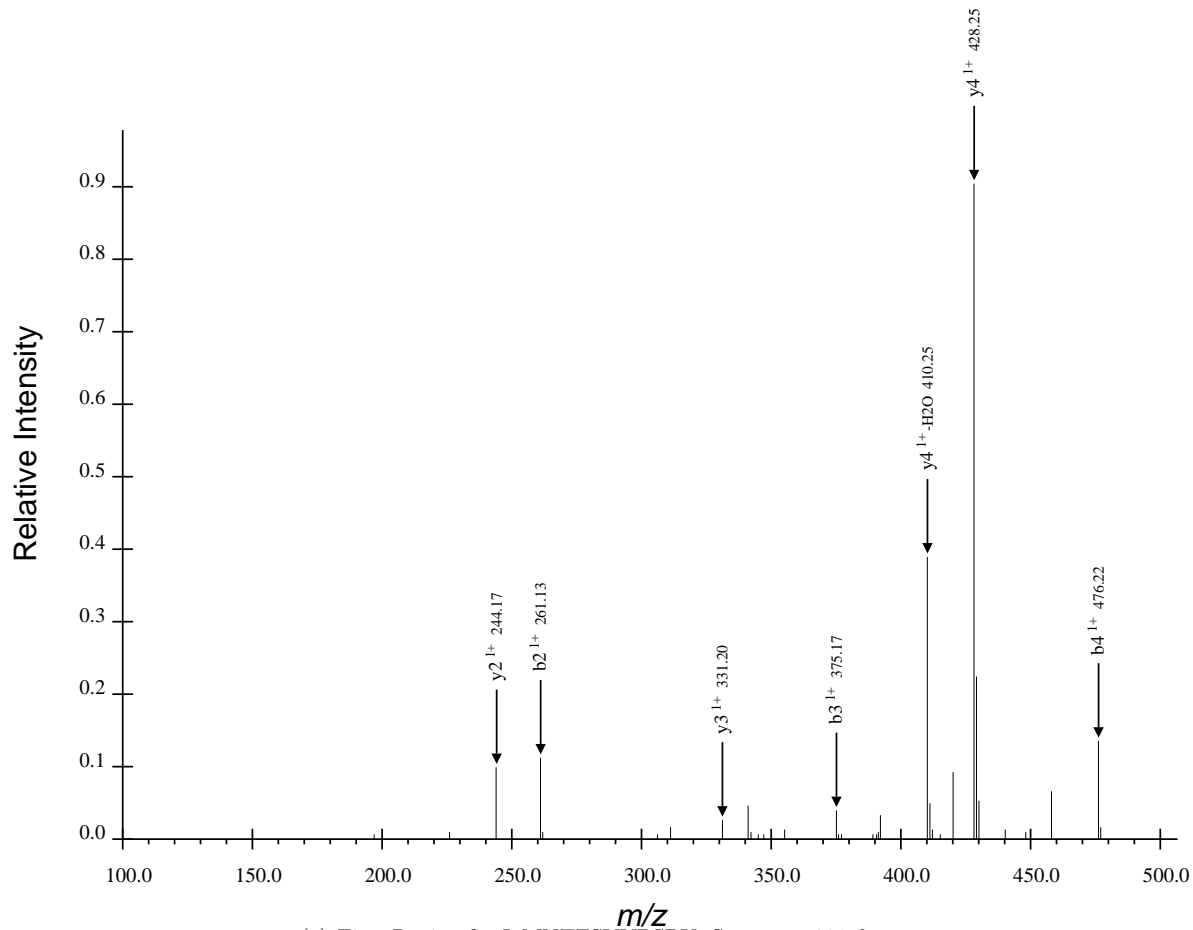

(a) First Region for IoMNTFSVVPSPK, Spectrum 301.dta

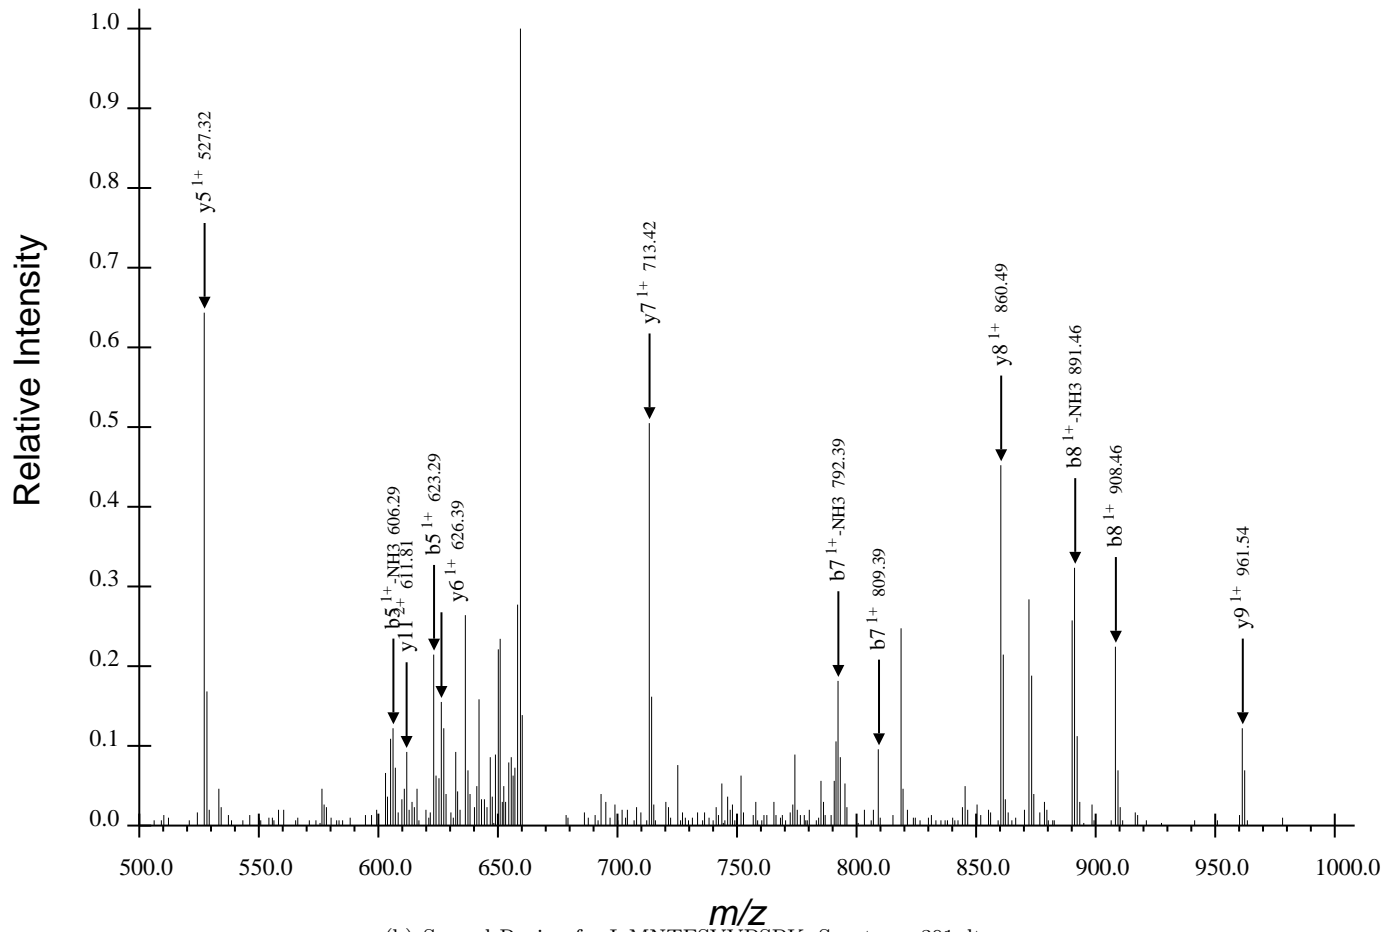

(b) Second Region for IoMNTFSVVPSPK, Spectrum 301.dta

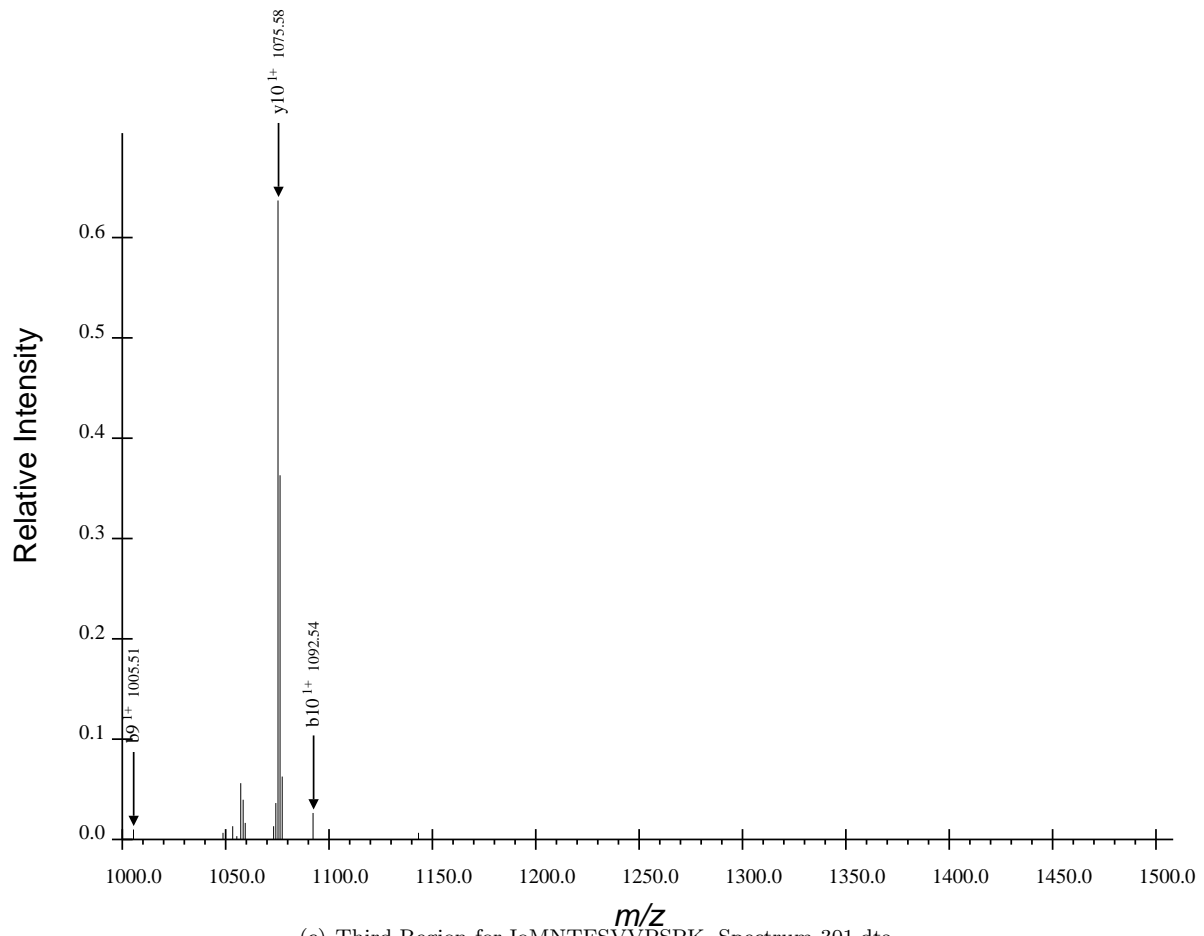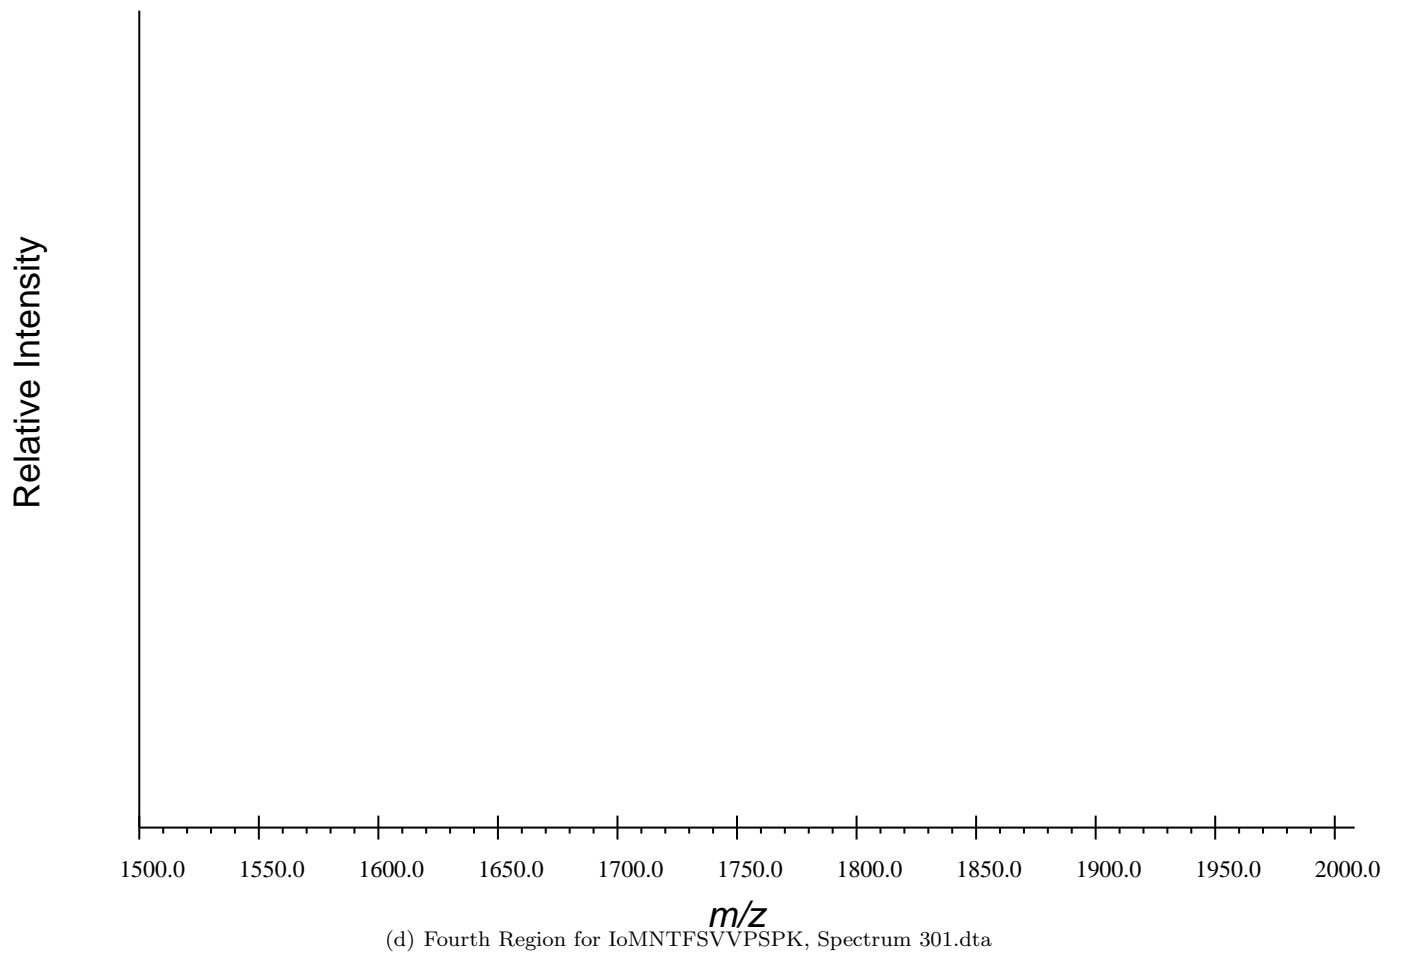

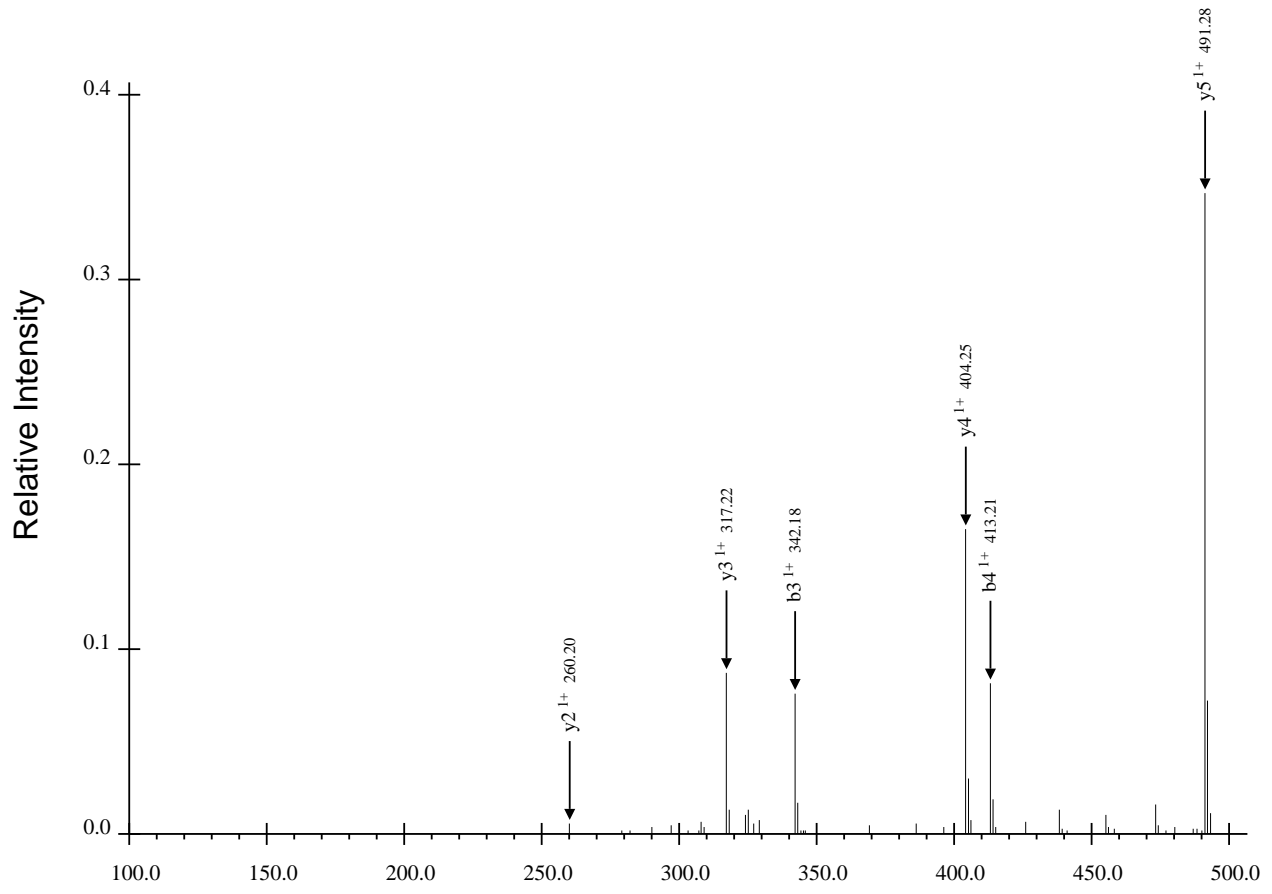

(a) First Region for NVQAEEoMVEFSSGLK, Spectrum 302.dta

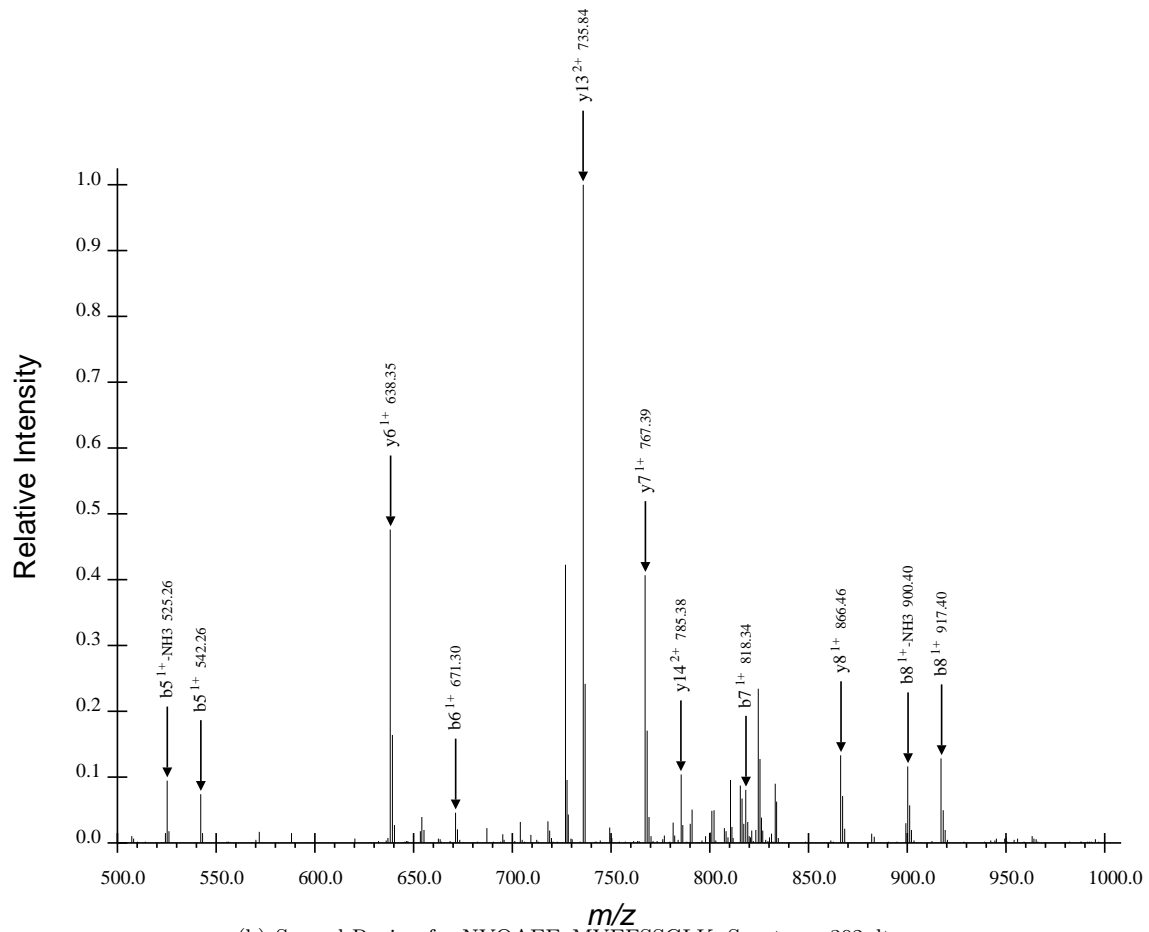

(b) Second Region for NVQAEEoMVEFSSGLK, Spectrum 302.dta

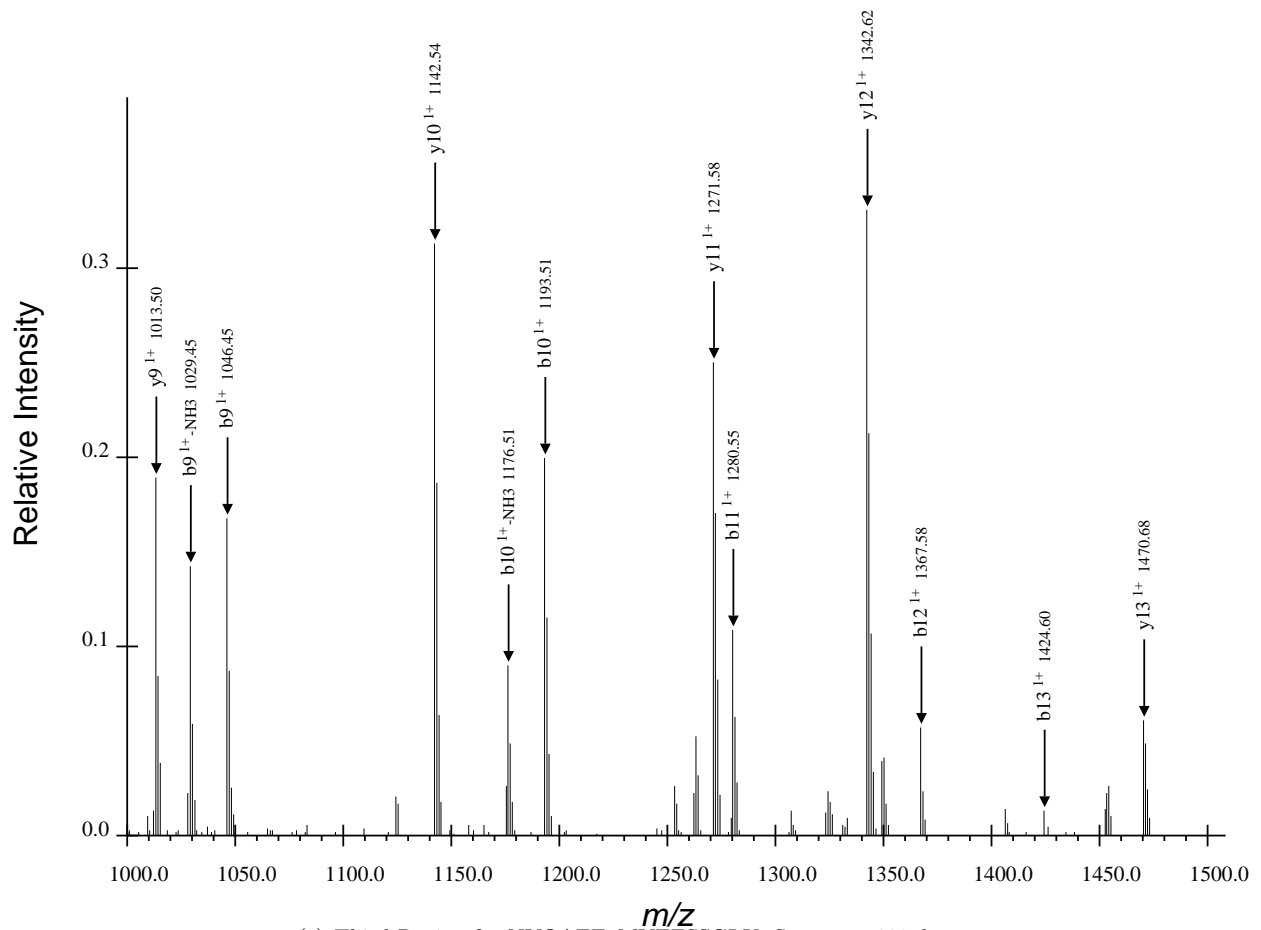

(c) Third Region for NVQAEEoMVEFSSGLK, Spectrum 302.dta

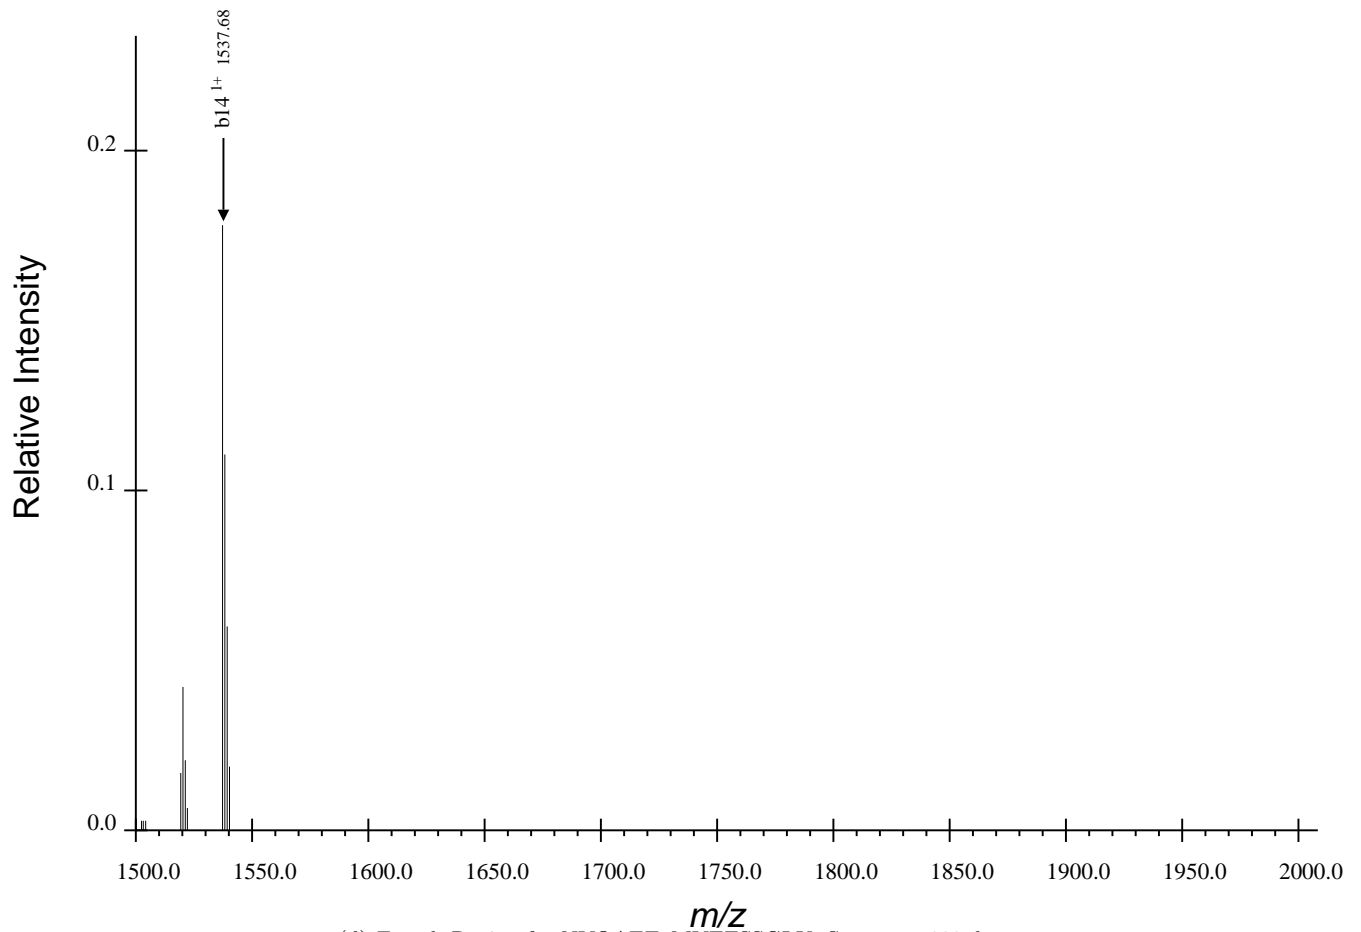

(d) Fourth Region for NVQAEEoMVEFSSGLK, Spectrum 302.dta

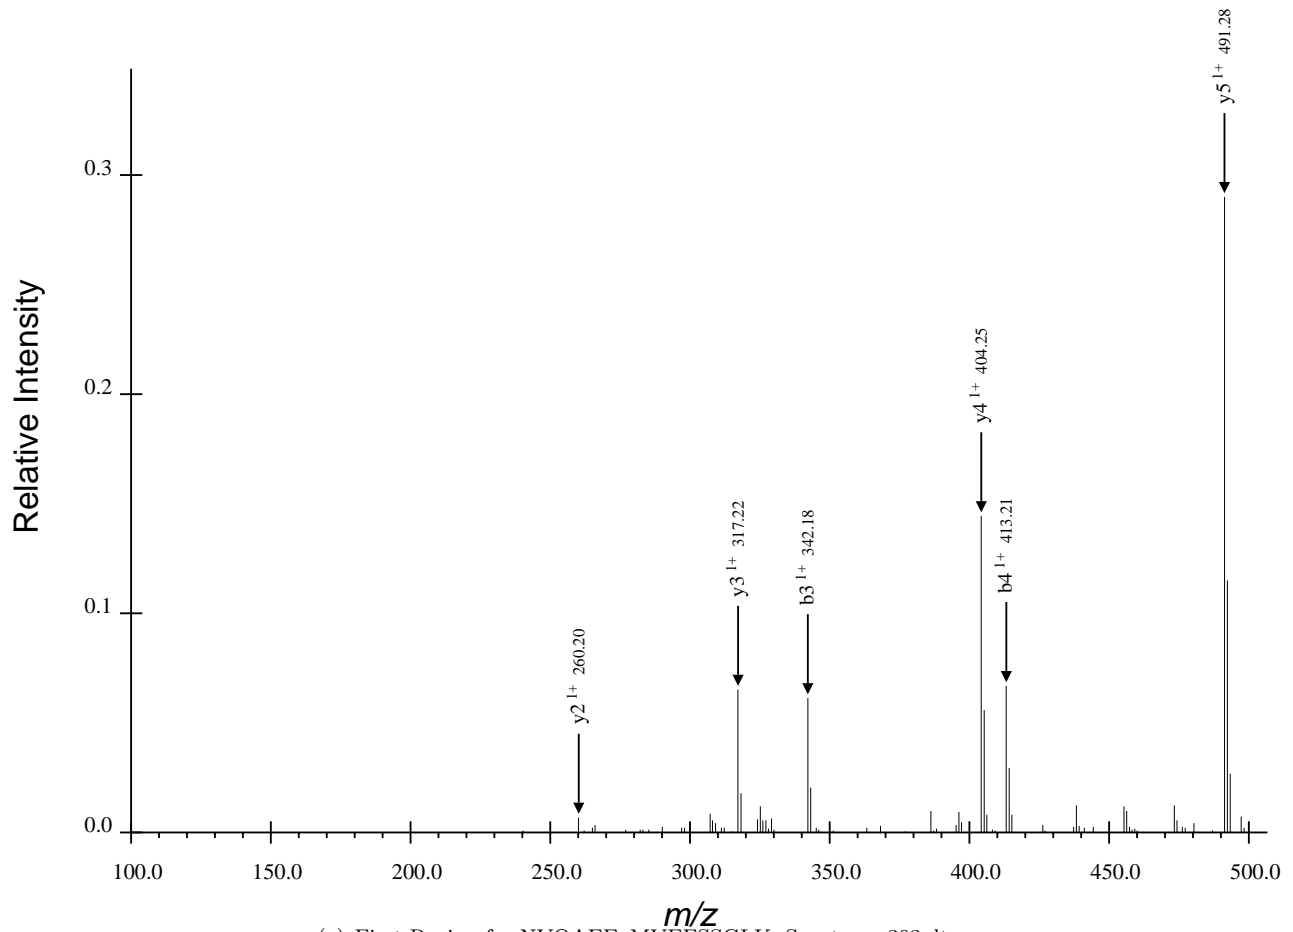

(a) First Region for NVQAEEO MVEFSSGLK, Spectrum 303.dta

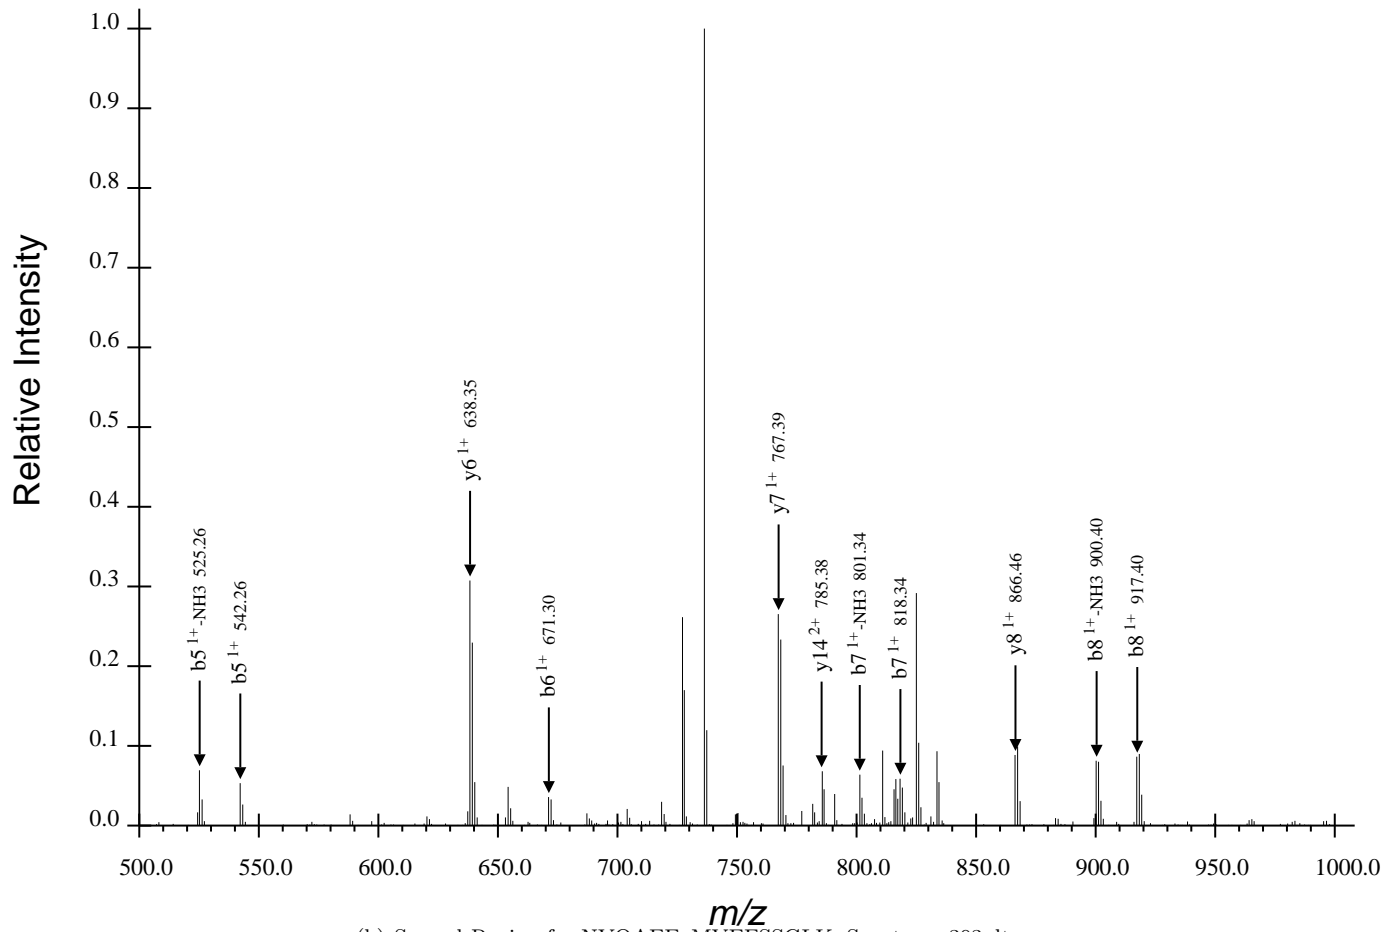

(b) Second Region for NVQAEEO MVEFSSGLK, Spectrum 303.dta

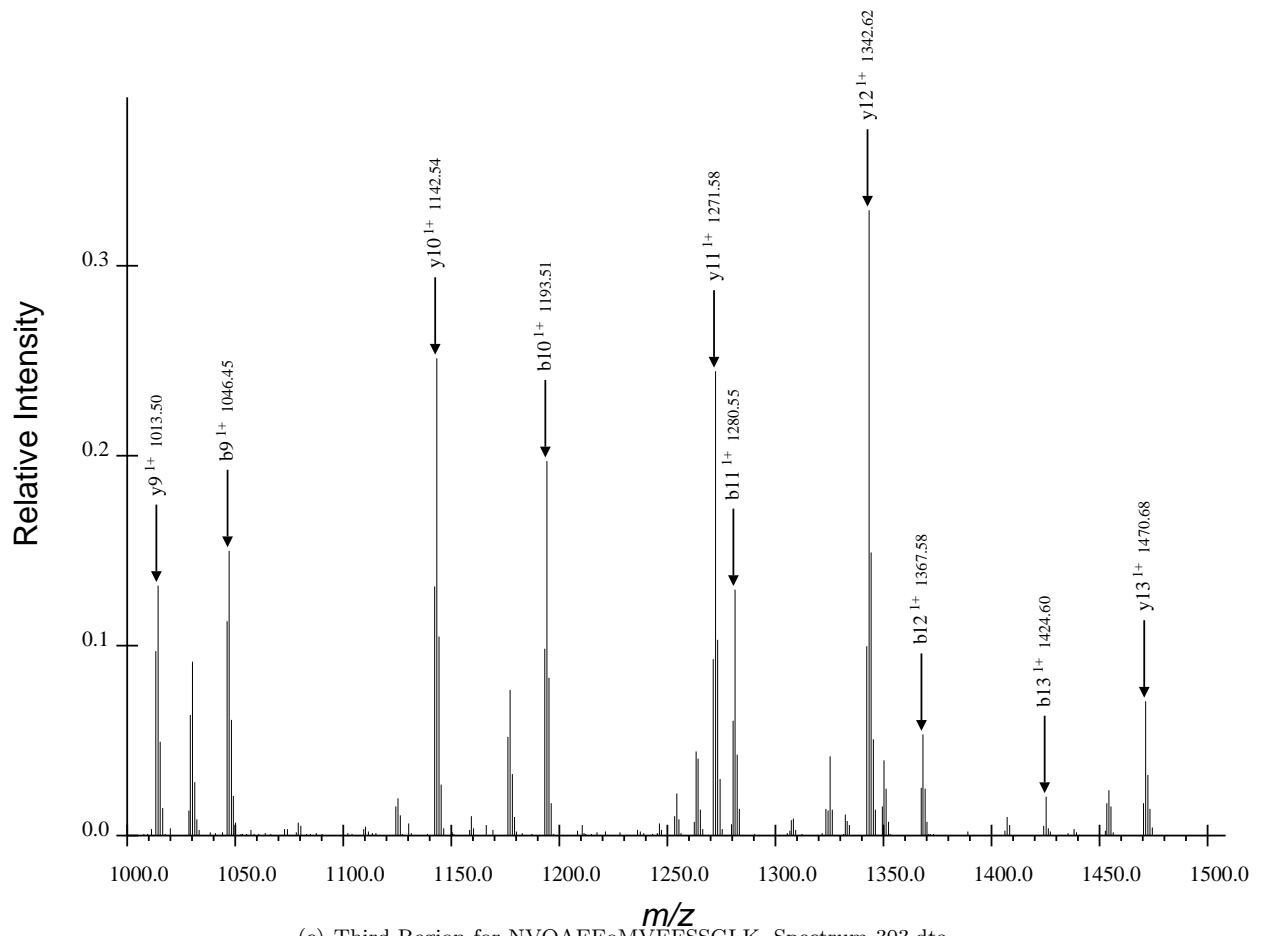

(c) Third Region for NVQAEEoMVEFSSGLK, Spectrum 303.dta

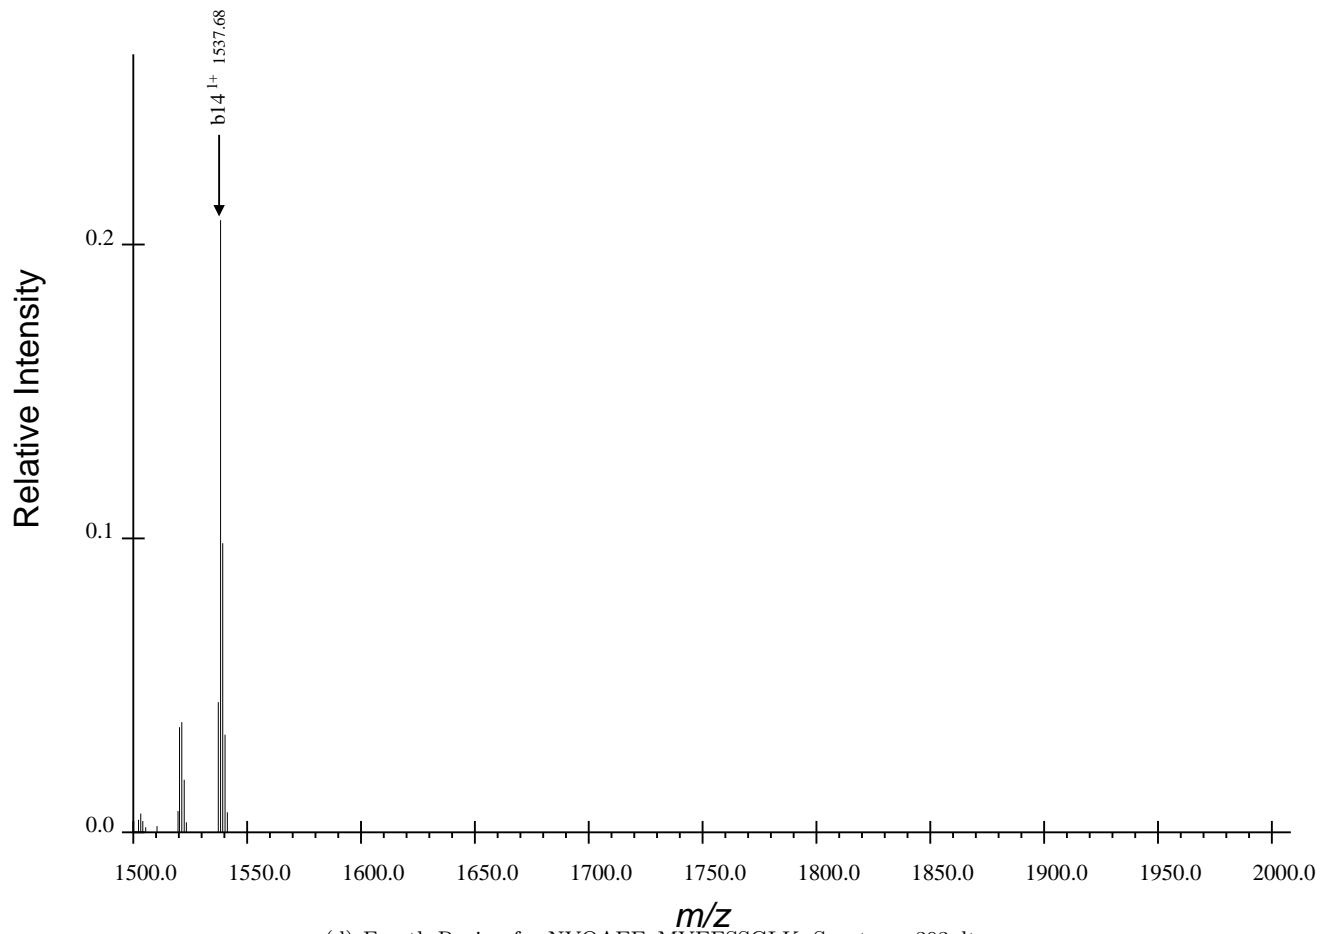

(d) Fourth Region for NVQAEEoMVEFSSGLK, Spectrum 303.dta



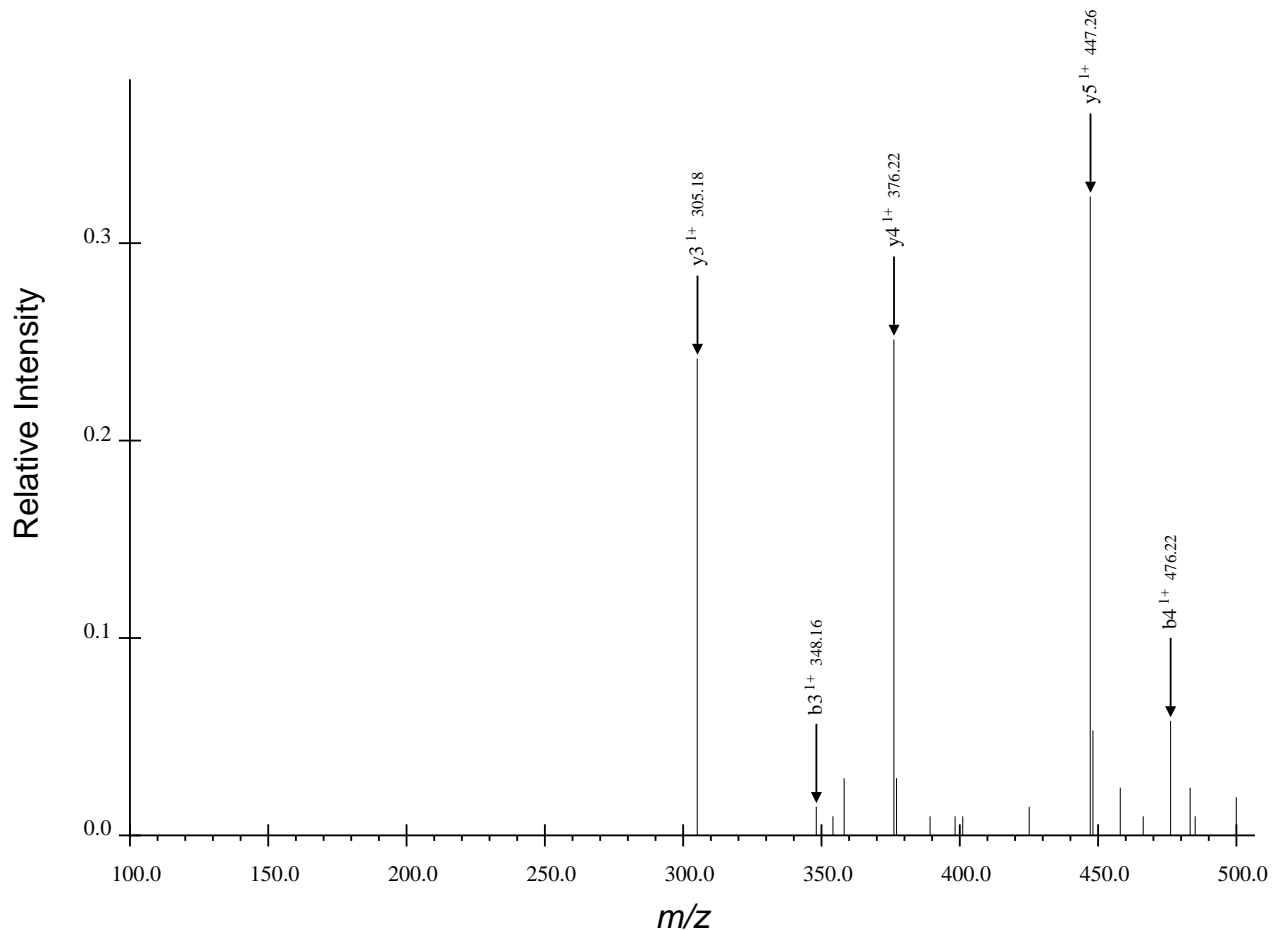

(a) First Region for SoMLQATAEANNLAAAASAK, Spectrum 304.dta

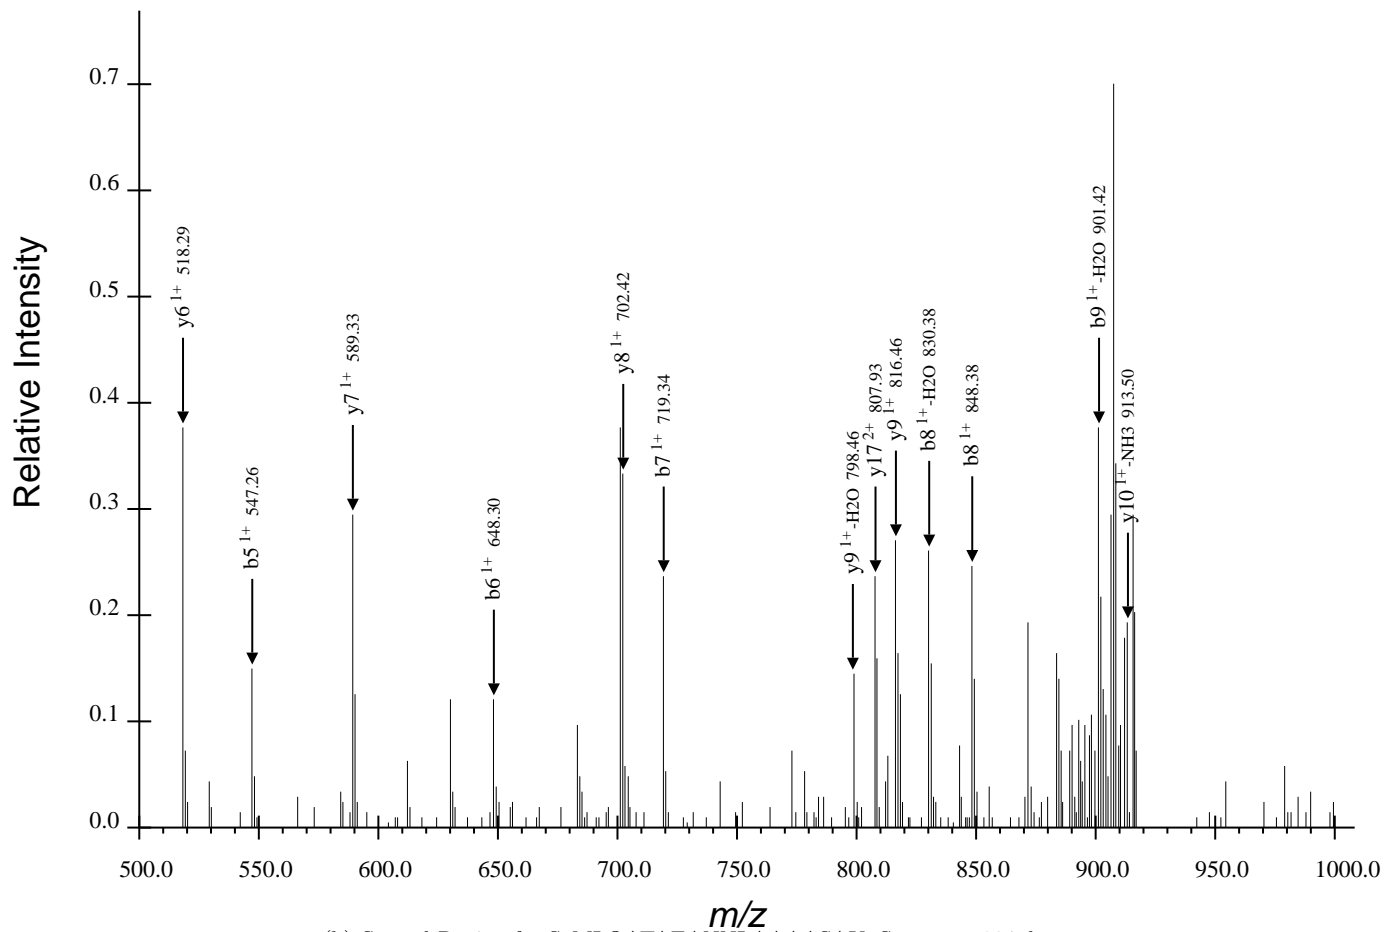

(b) Second Region for SoMLQATAEANNLAAAASAK, Spectrum 304.dta

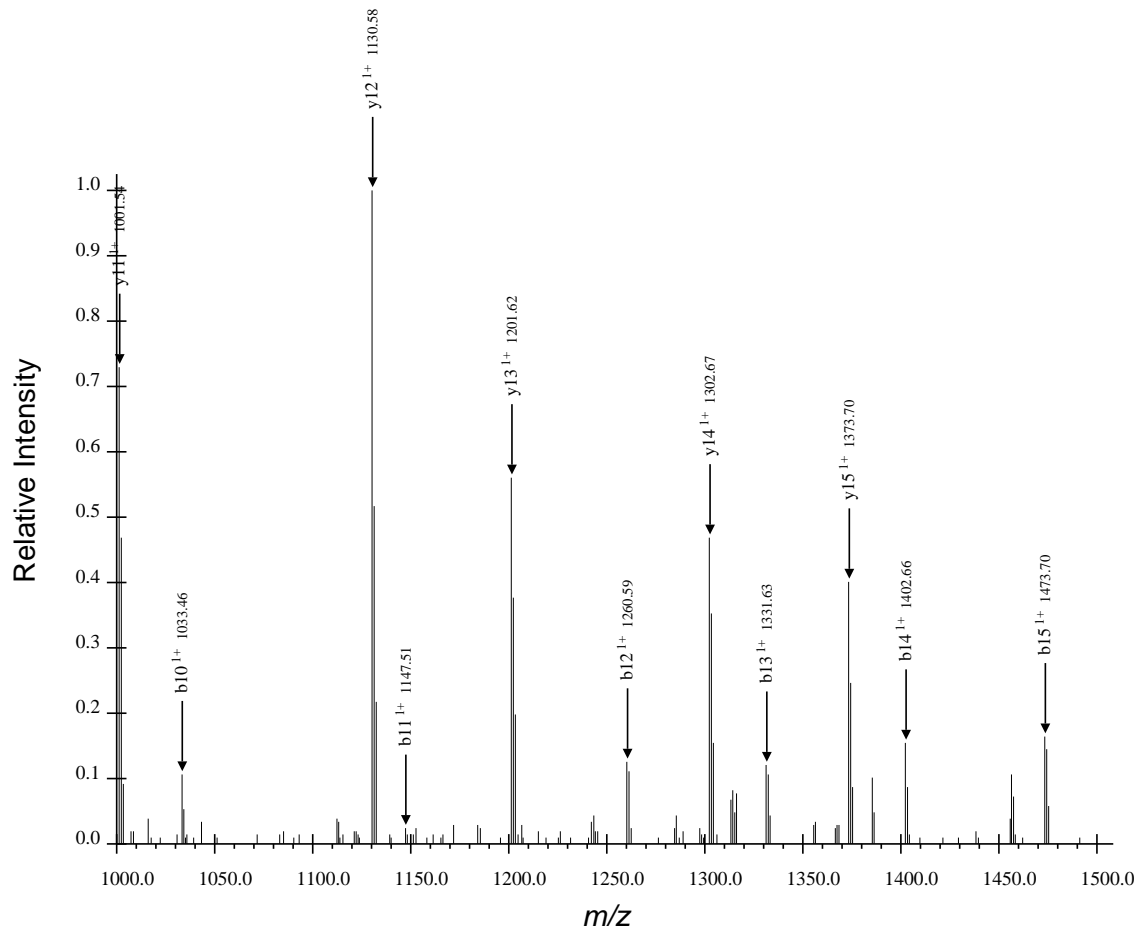

(c) Third Region for SoMLQATAEANNLAAAASAK, Spectrum 304.dta

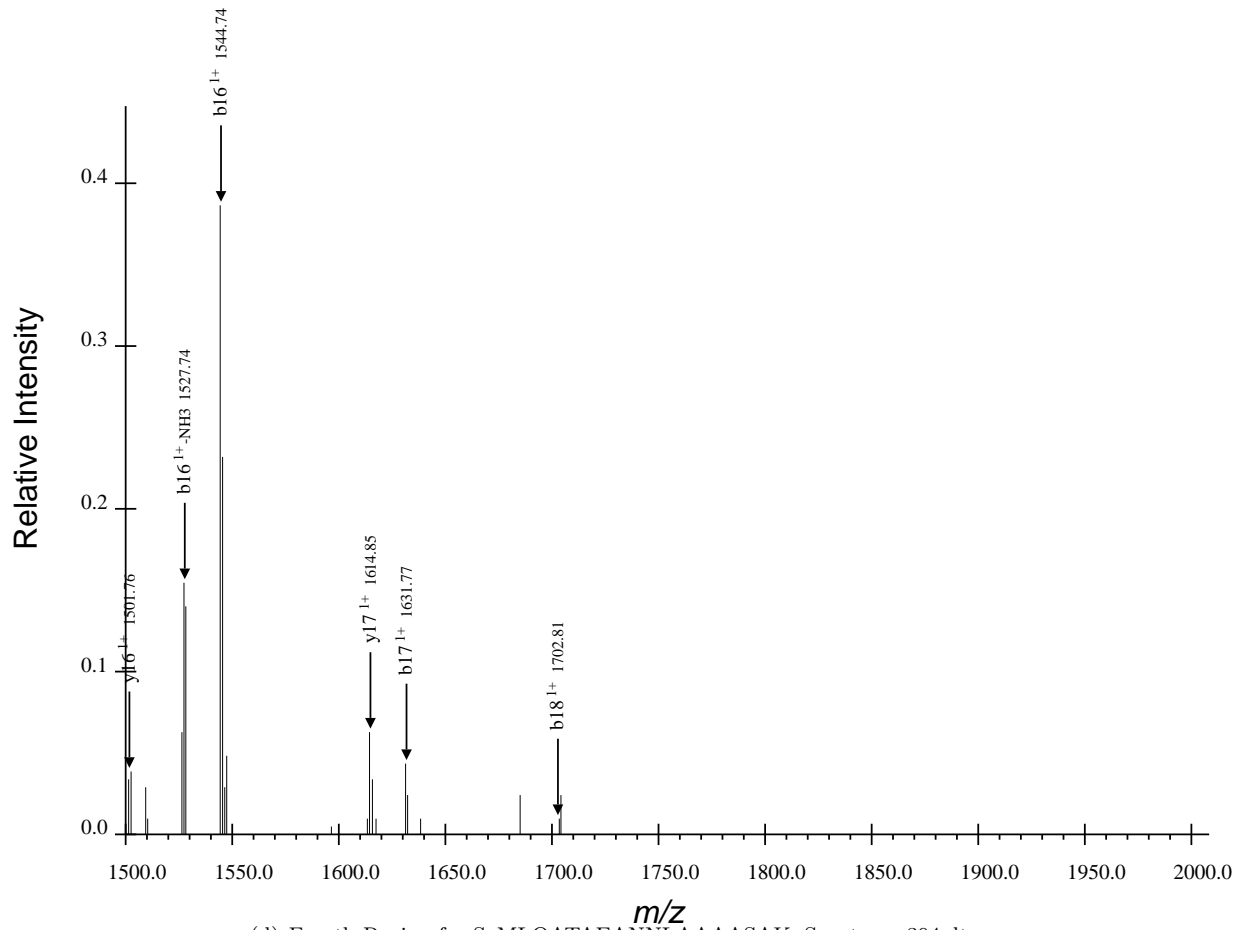

(d) Fourth Region for SoMLQATAEANNLAAAASAK, Spectrum 304.dta

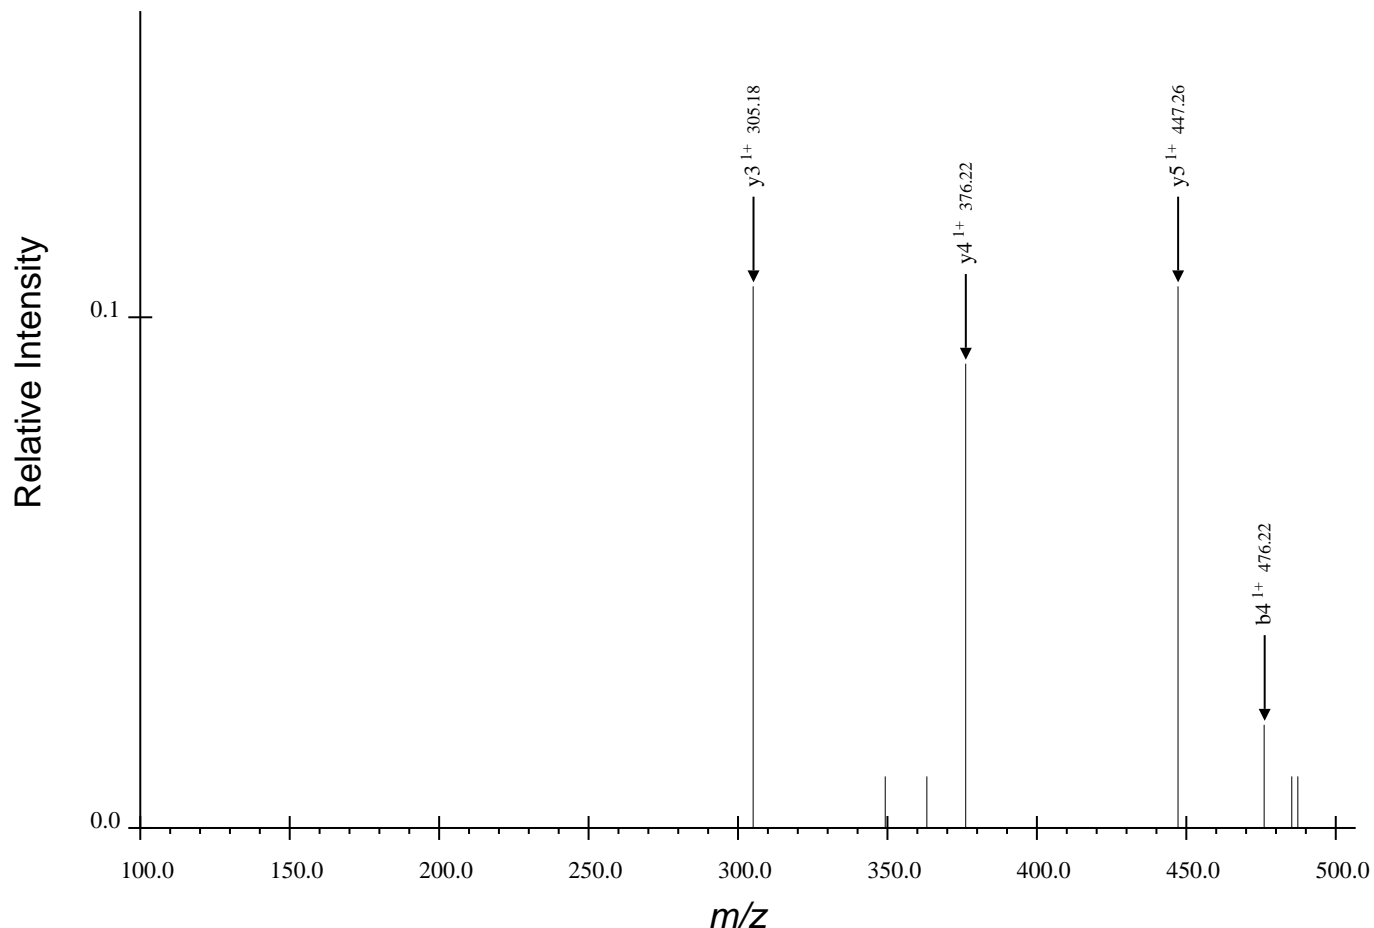

(a) First Region for SoMLQATAEANNLAAAASAK, Spectrum 305.dta

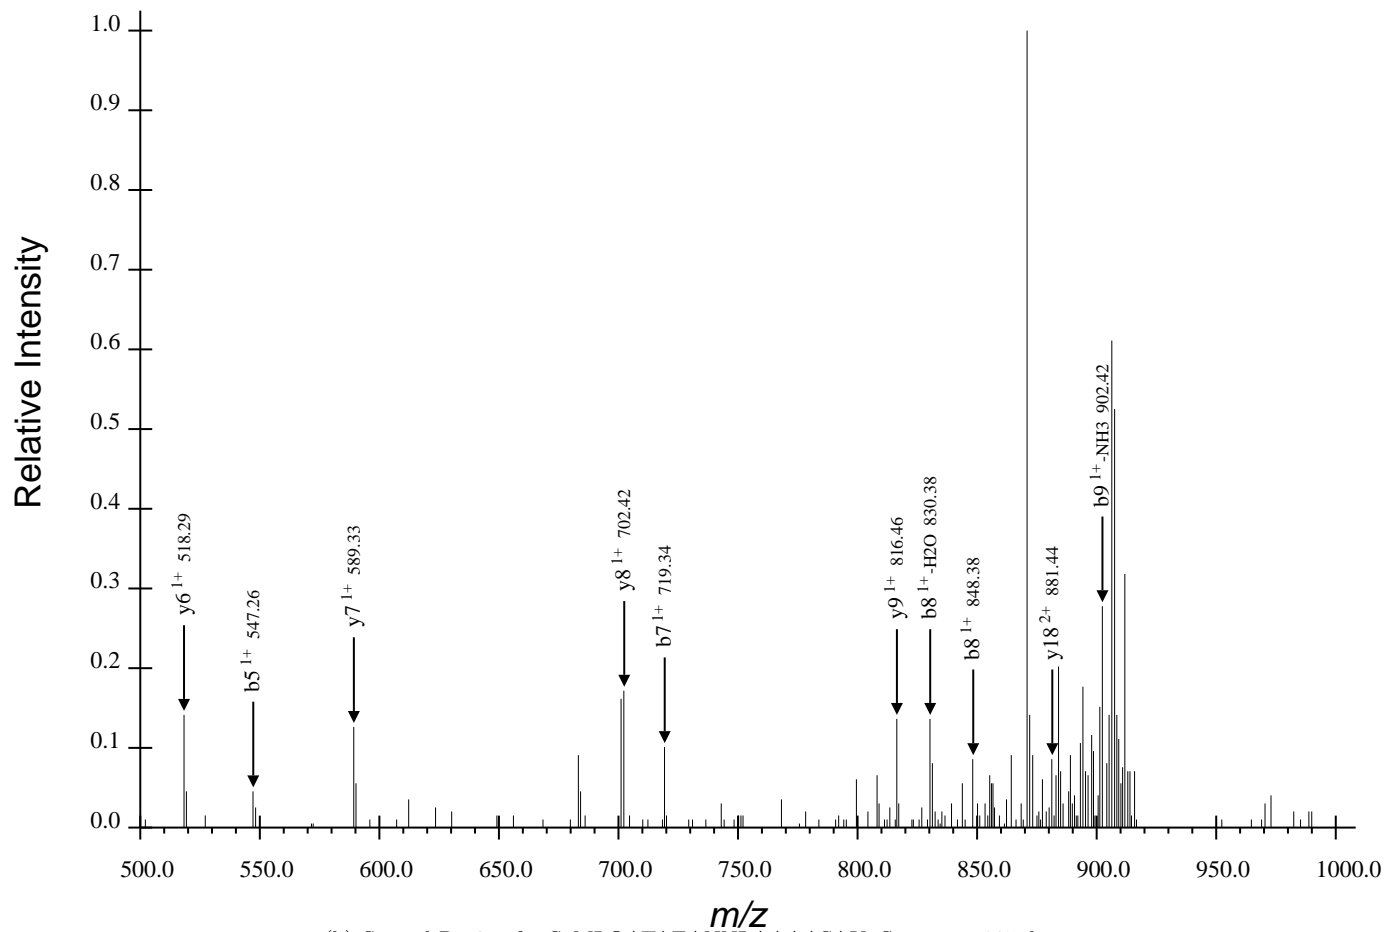

(b) Second Region for SoMLQATAEANNLAAAASAK, Spectrum 305.dta

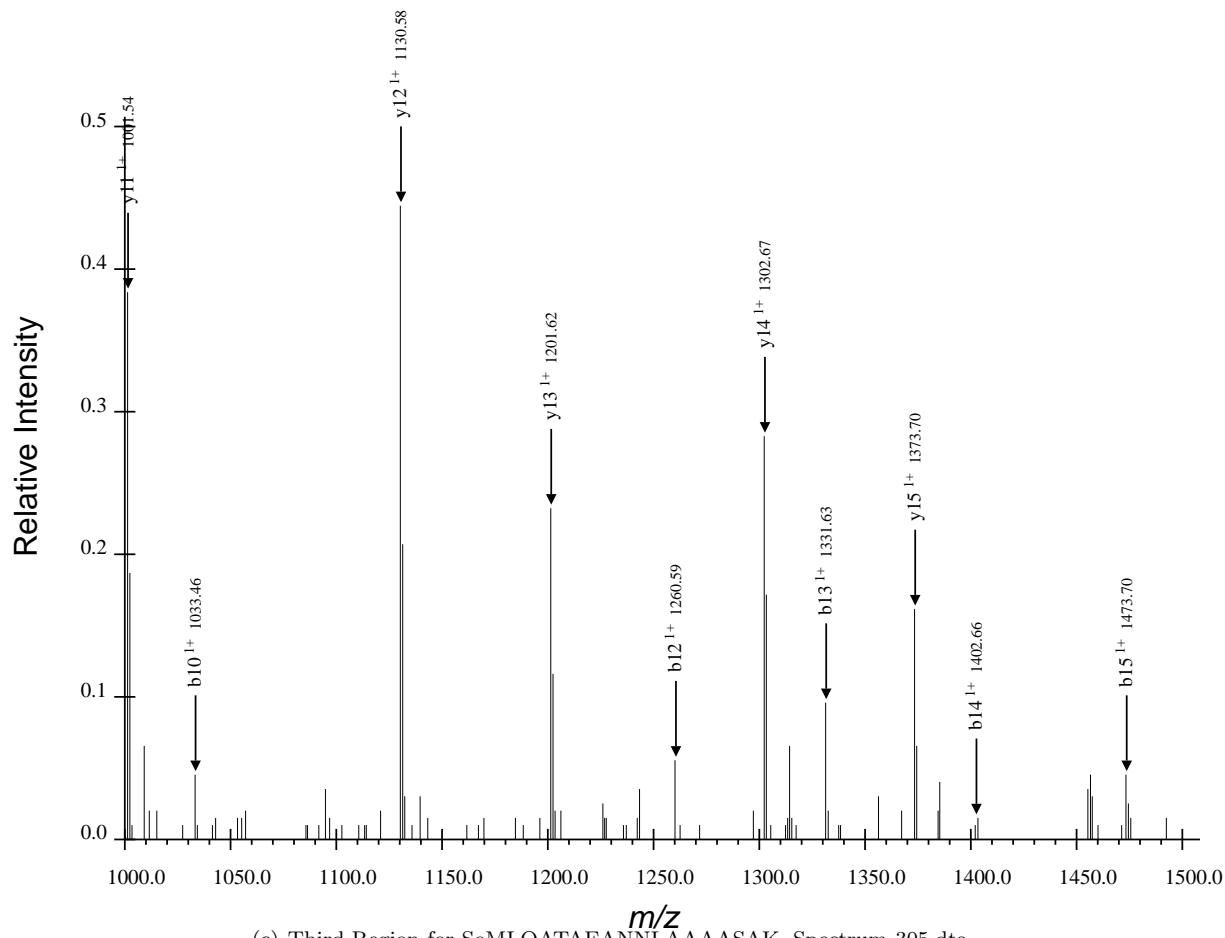

(c) Third Region for SoMLQATAEANNLAAAASAK, Spectrum 305.dta

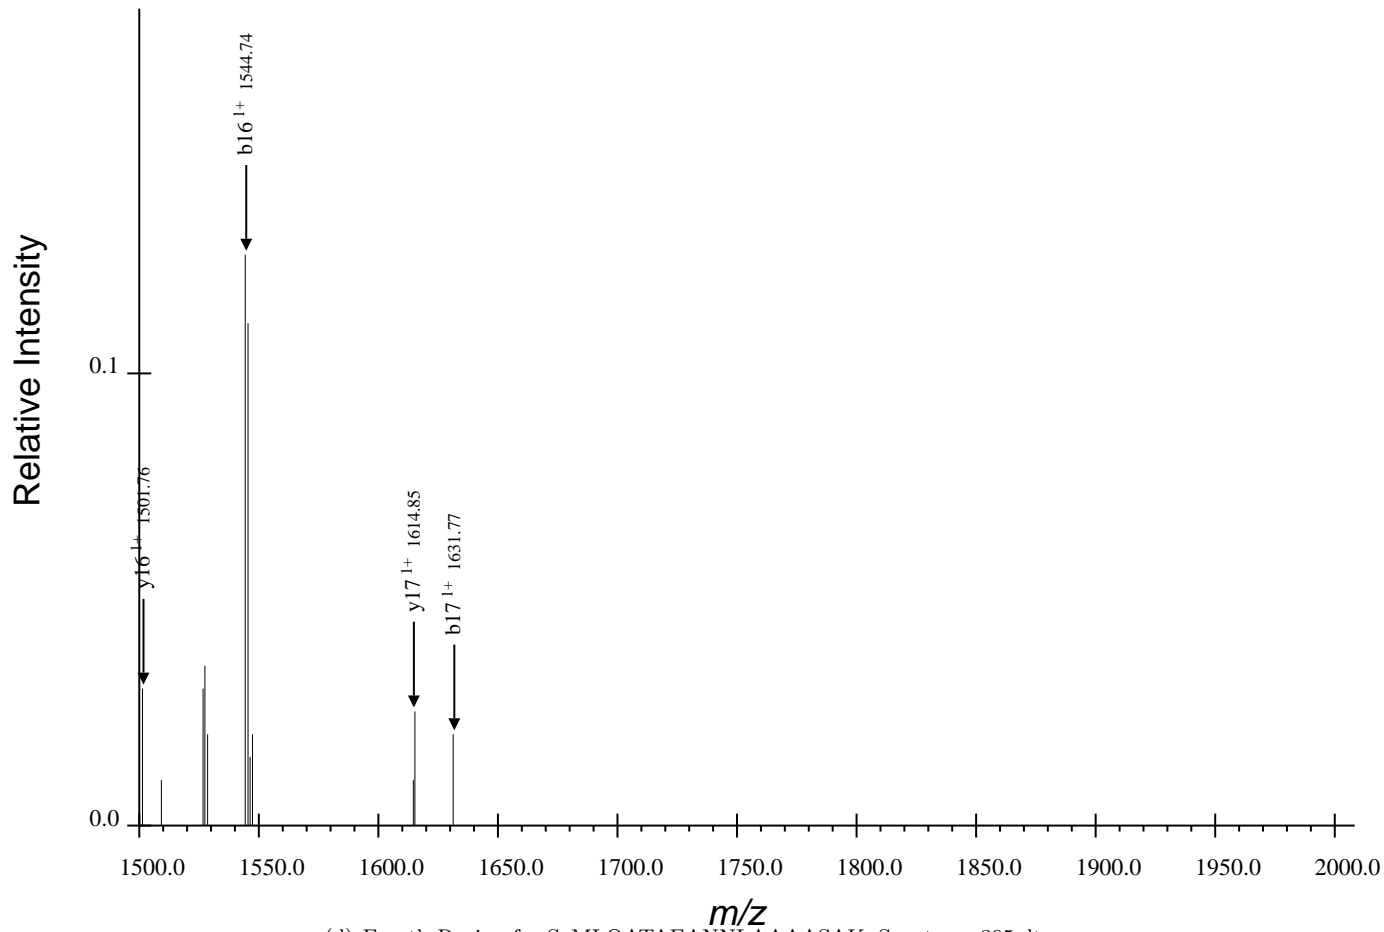

(d) Fourth Region for SoMLQATAEANNLAAAASAK, Spectrum 305.dta

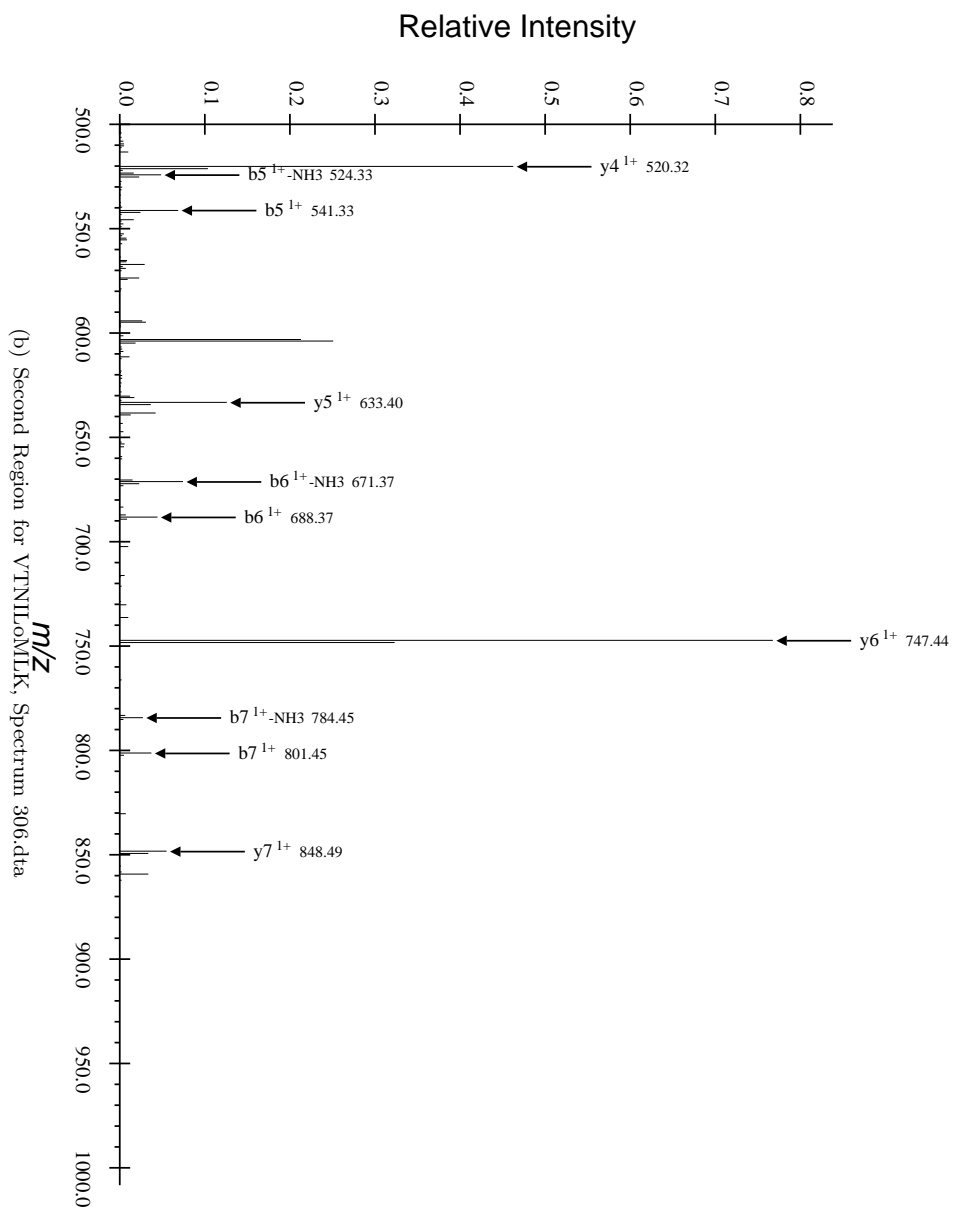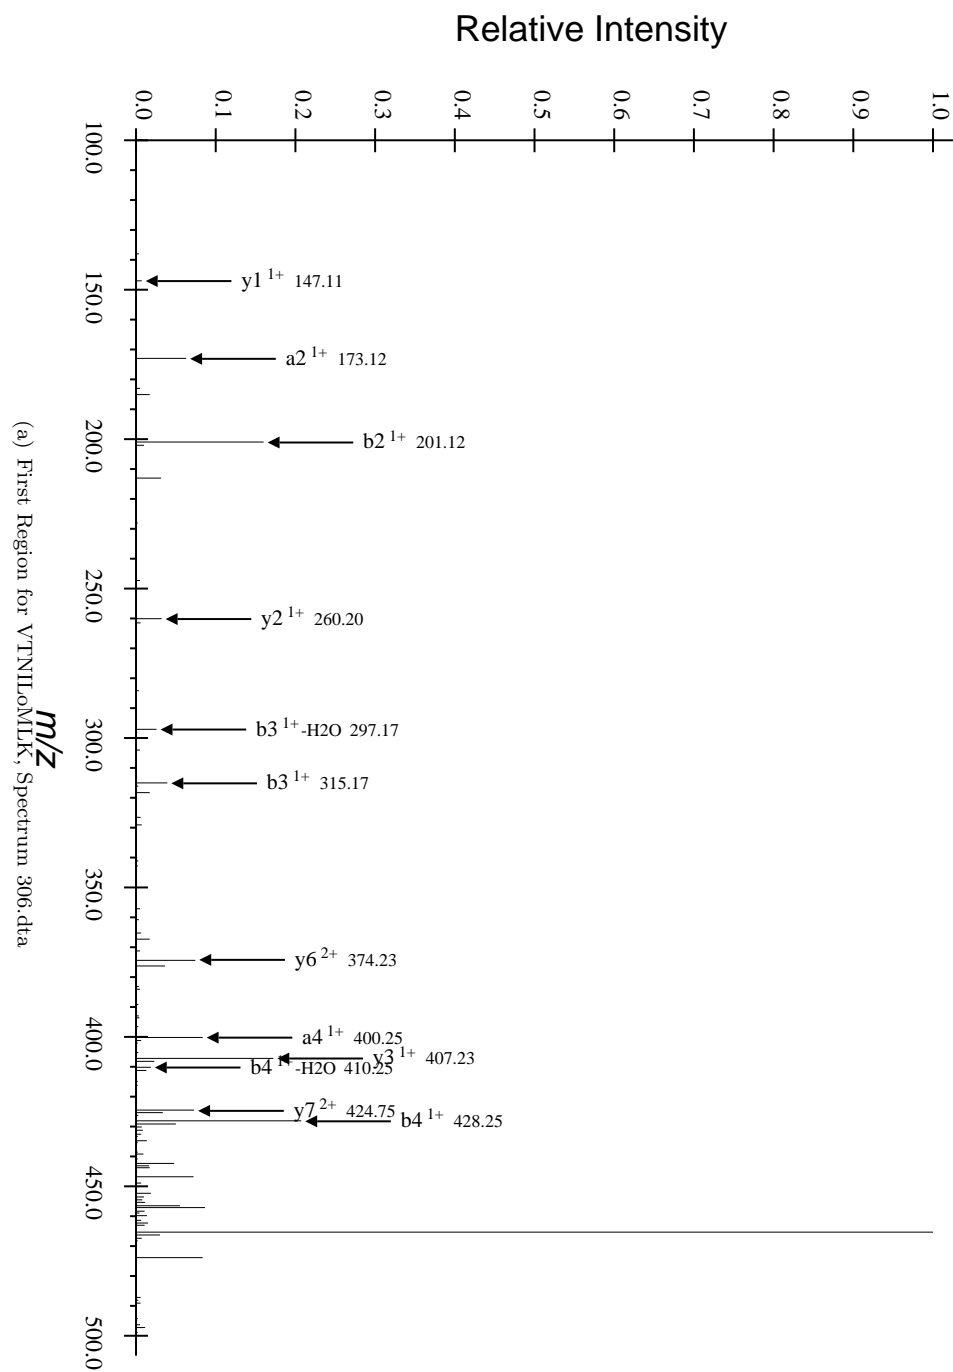

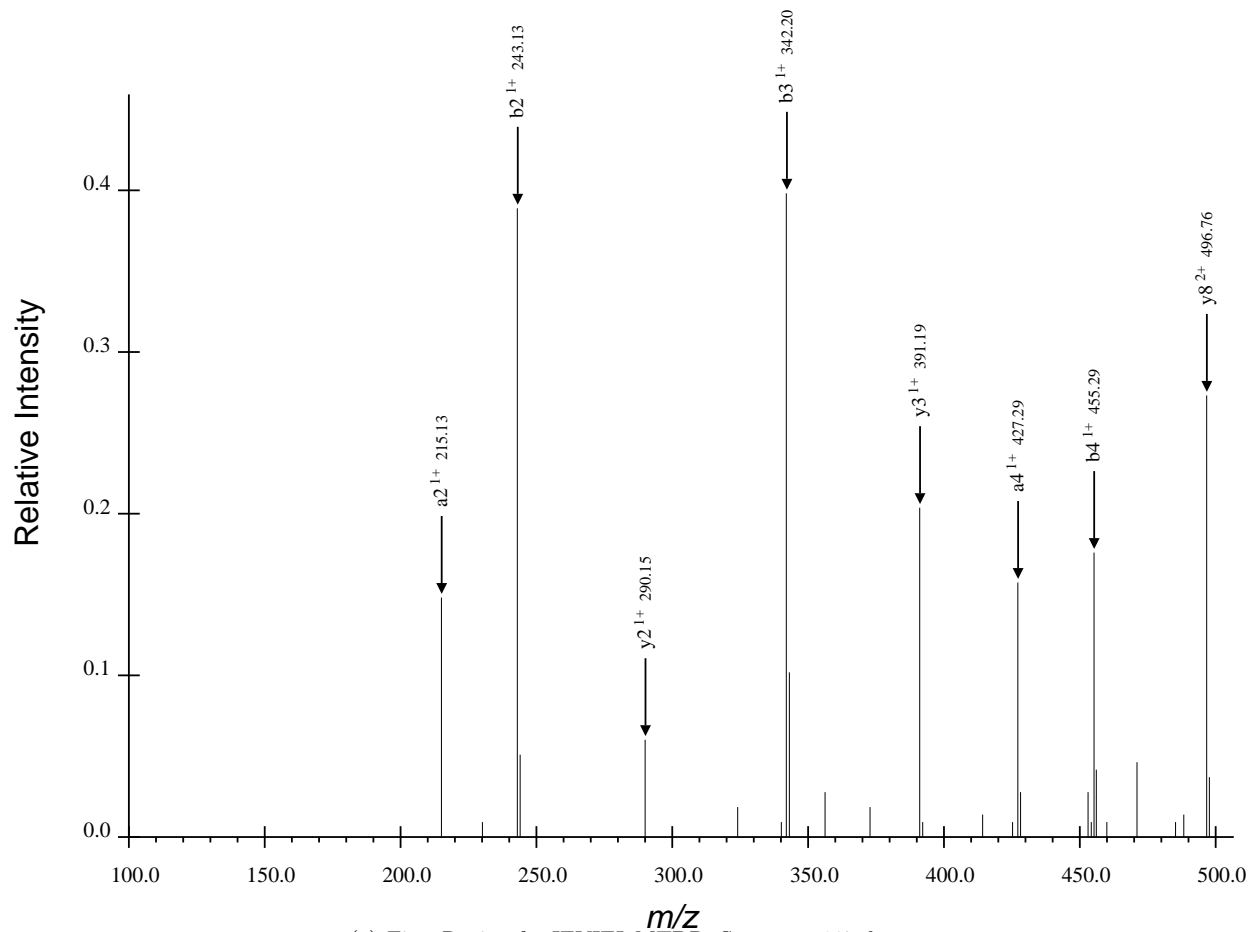

(a) First Region for IEVIEIoMTDR, Spectrum 307.dta

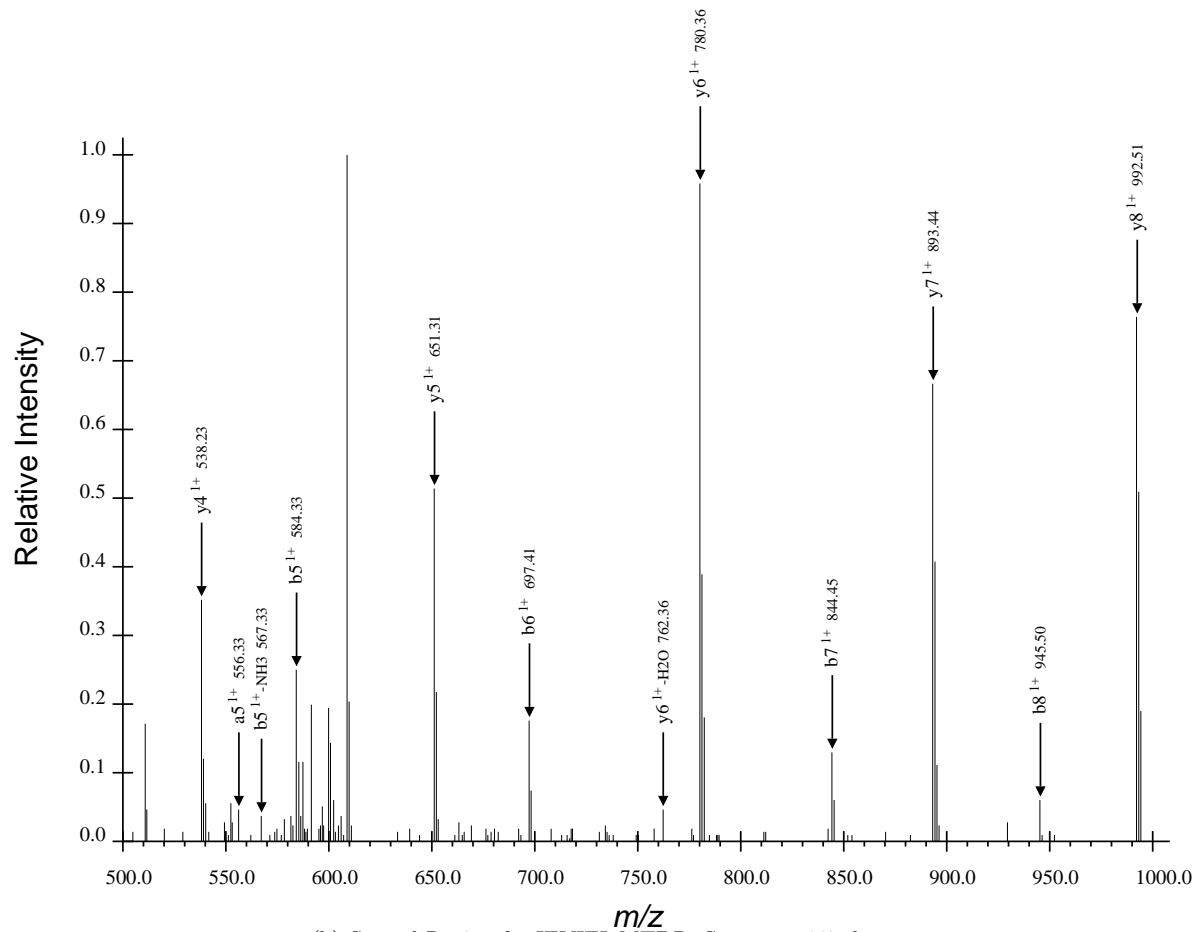

(b) Second Region for IEVIEIoMTDR, Spectrum 307.dta

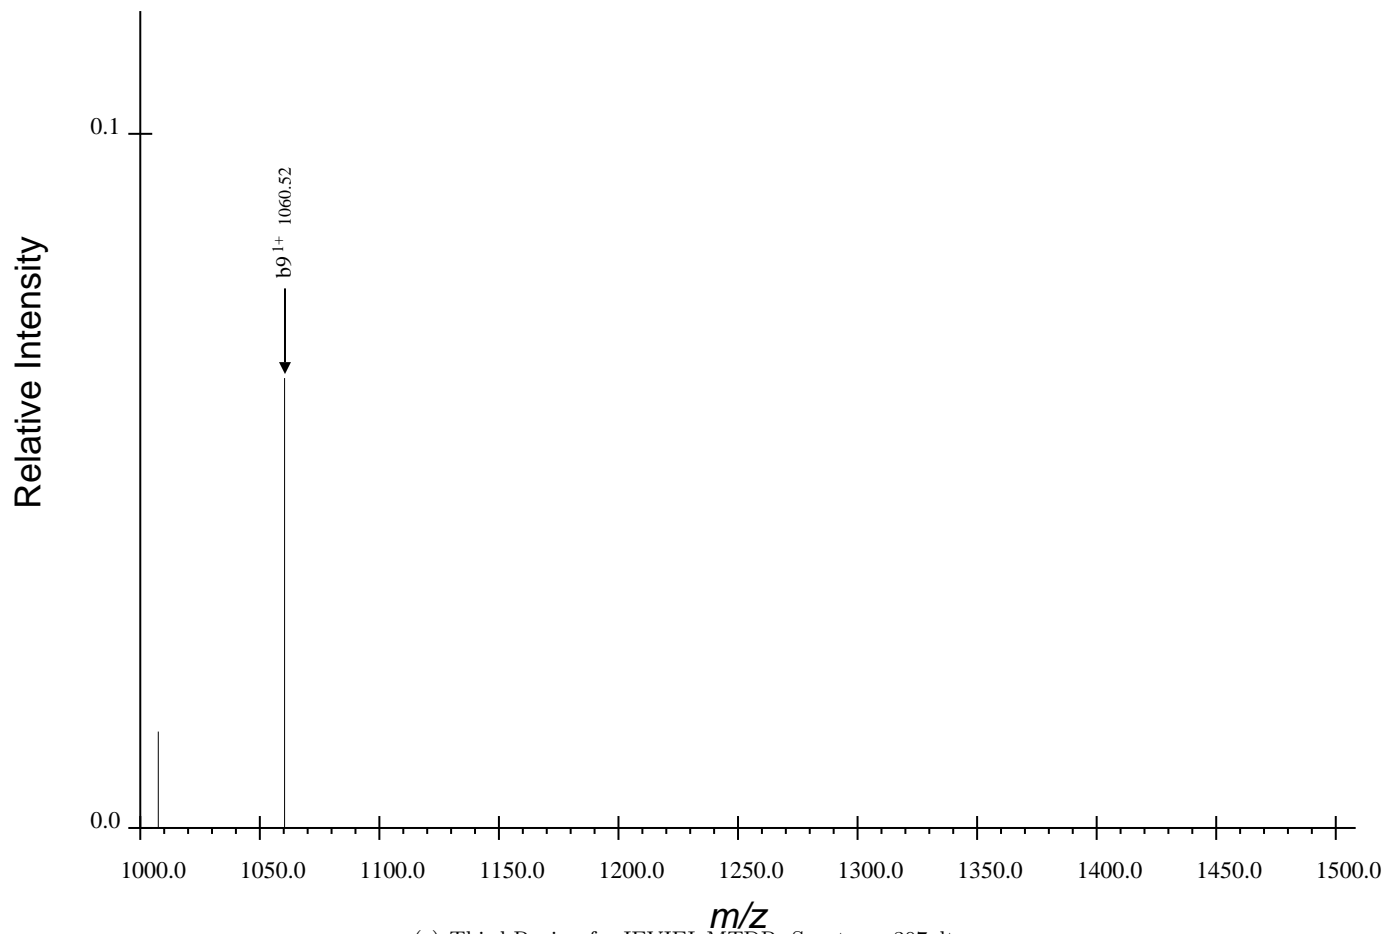

(c) Third Region for IEVIEIoMTDR, Spectrum 307.dta

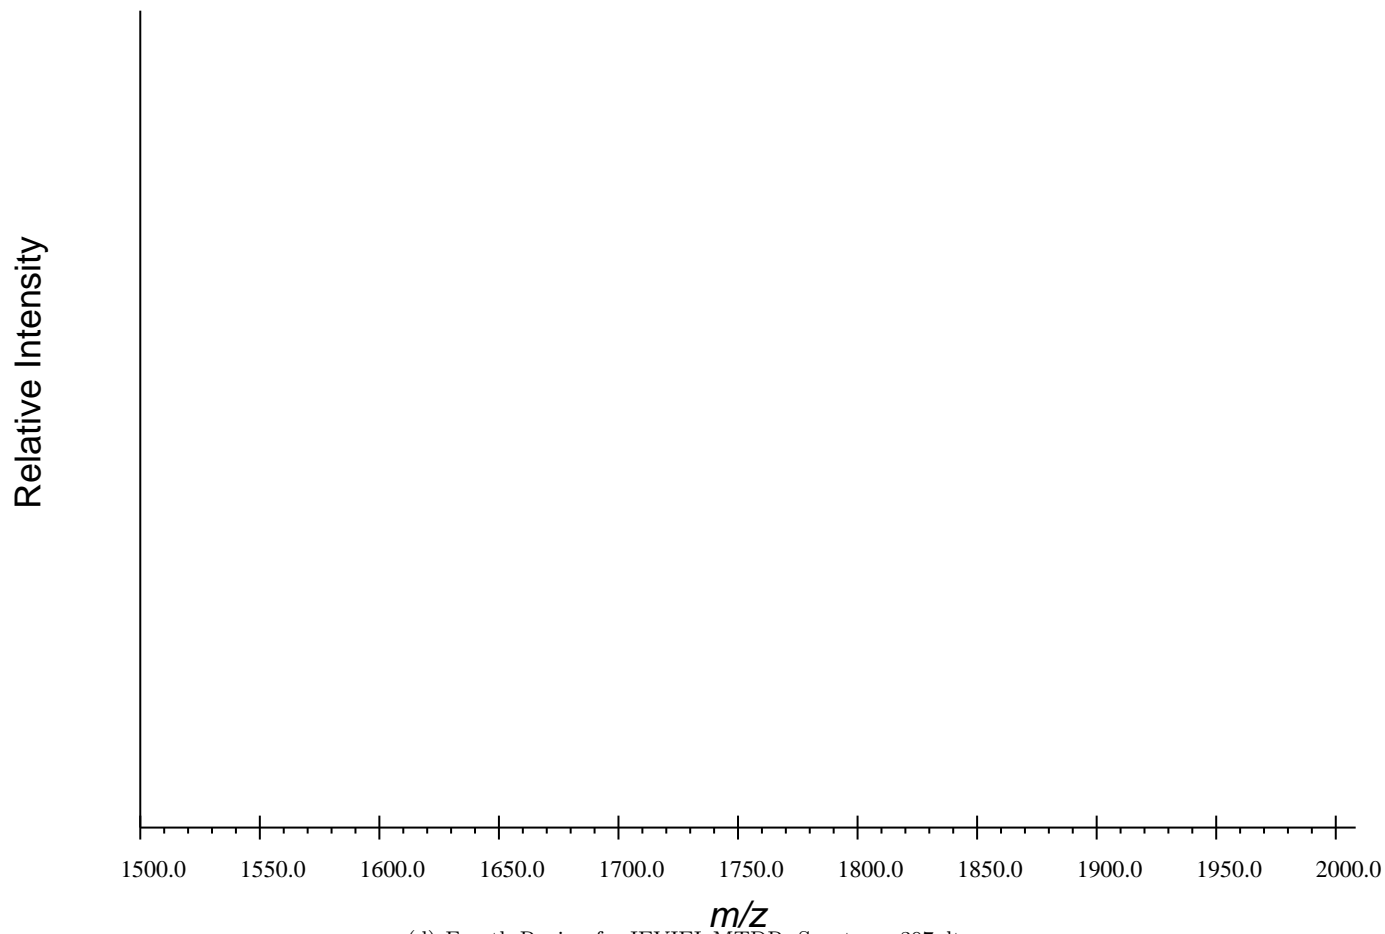

(d) Fourth Region for IEVIEIoMTDR, Spectrum 307.dta

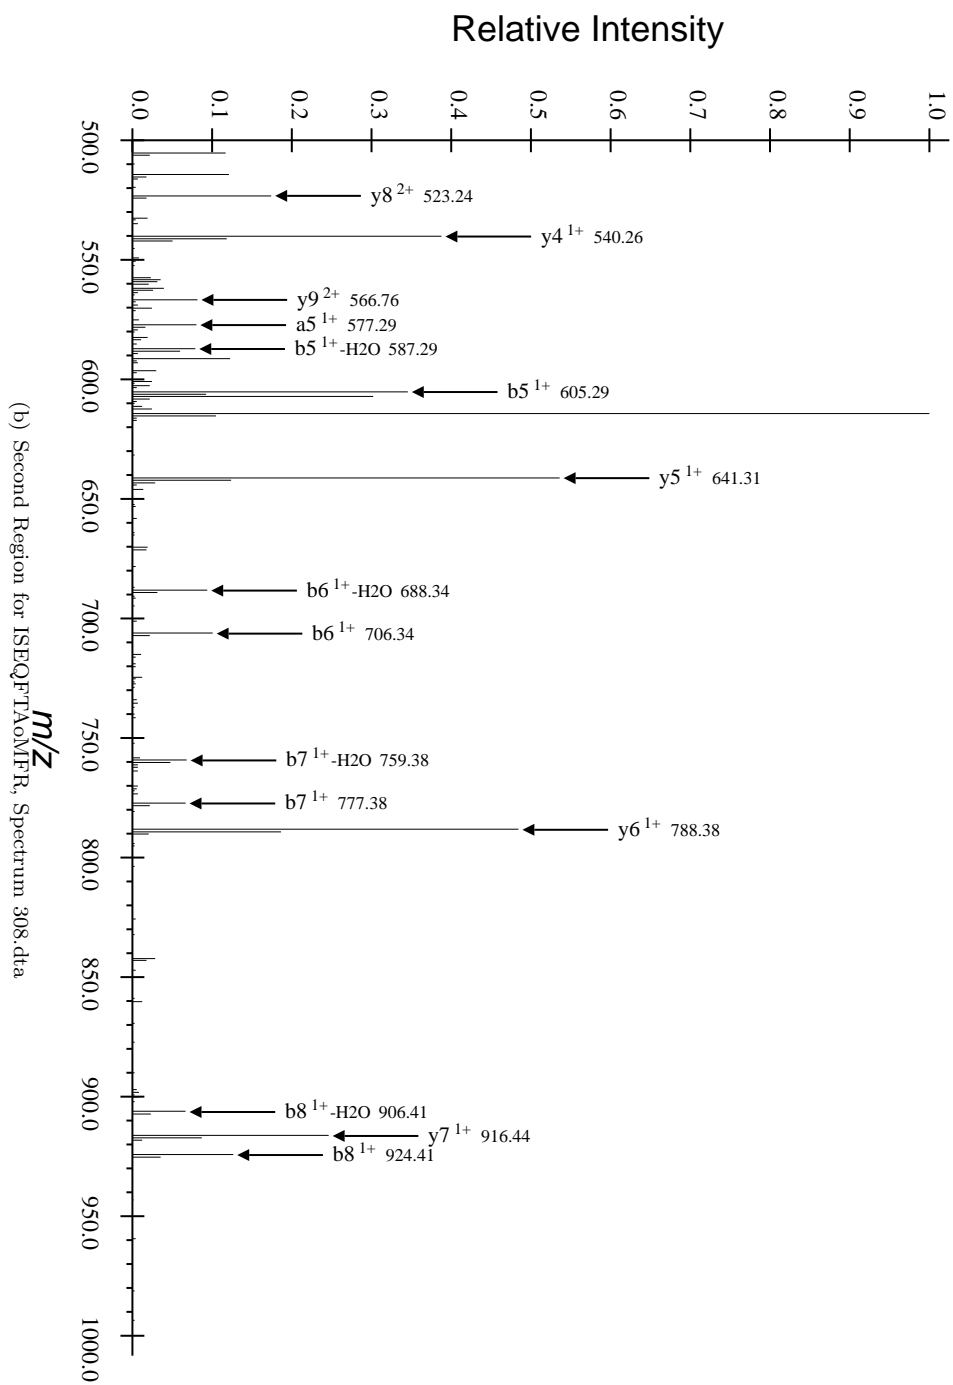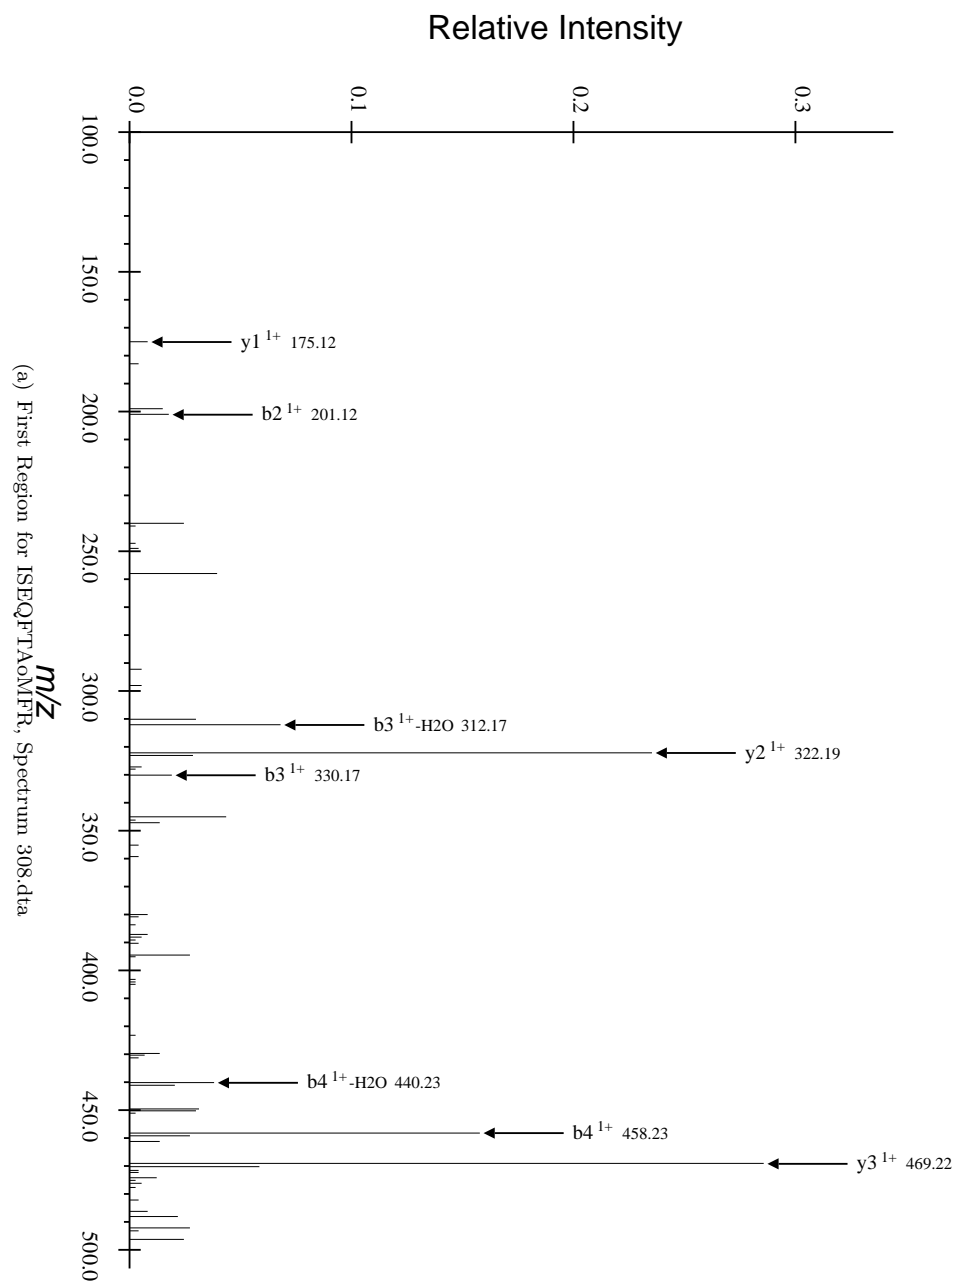



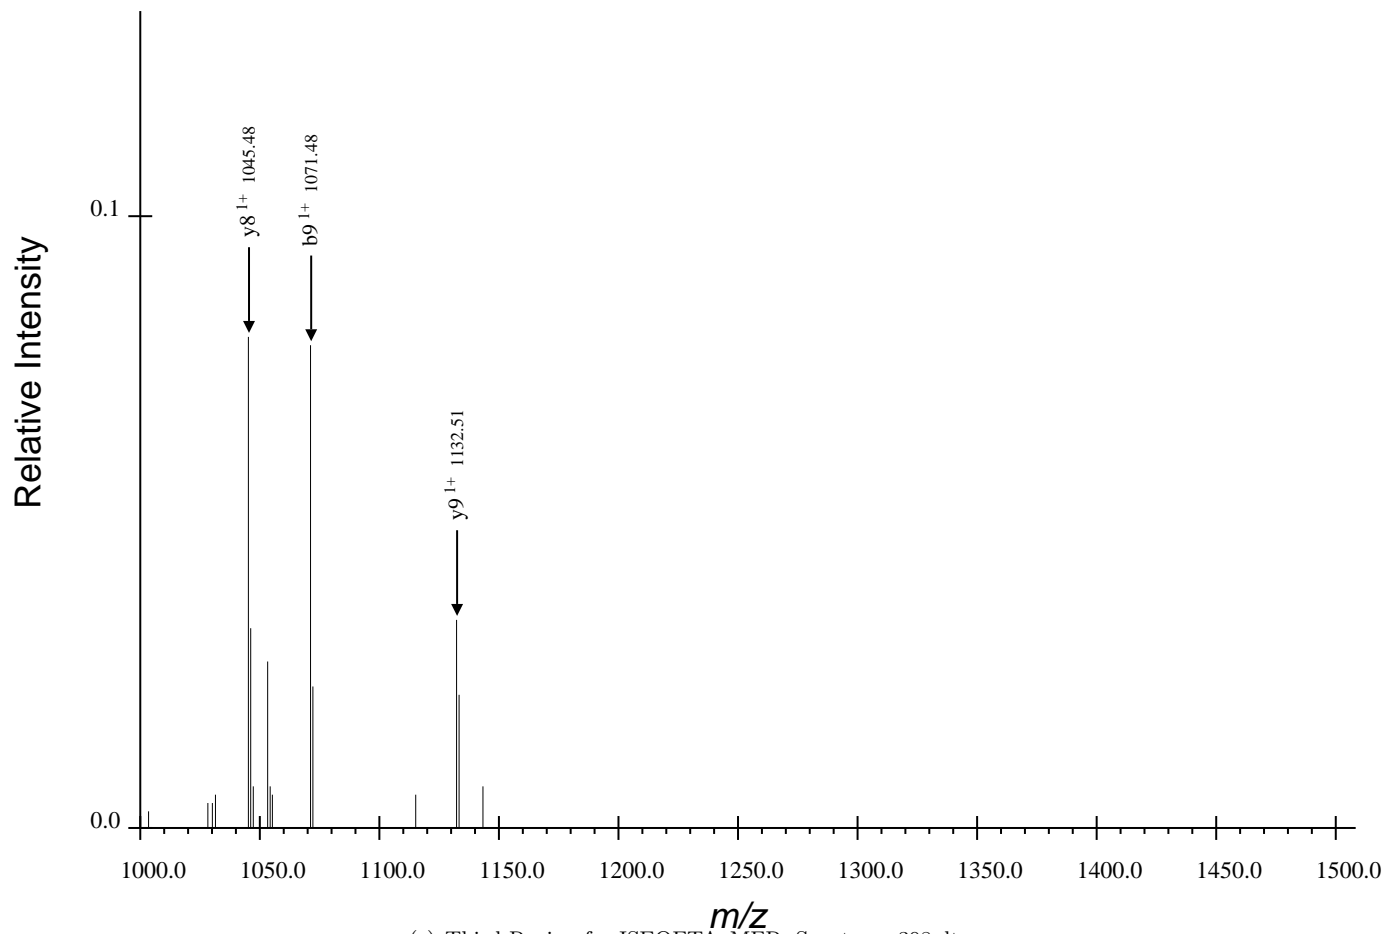

(c) Third Region for ISEQFTAoMFR, Spectrum 308.dta

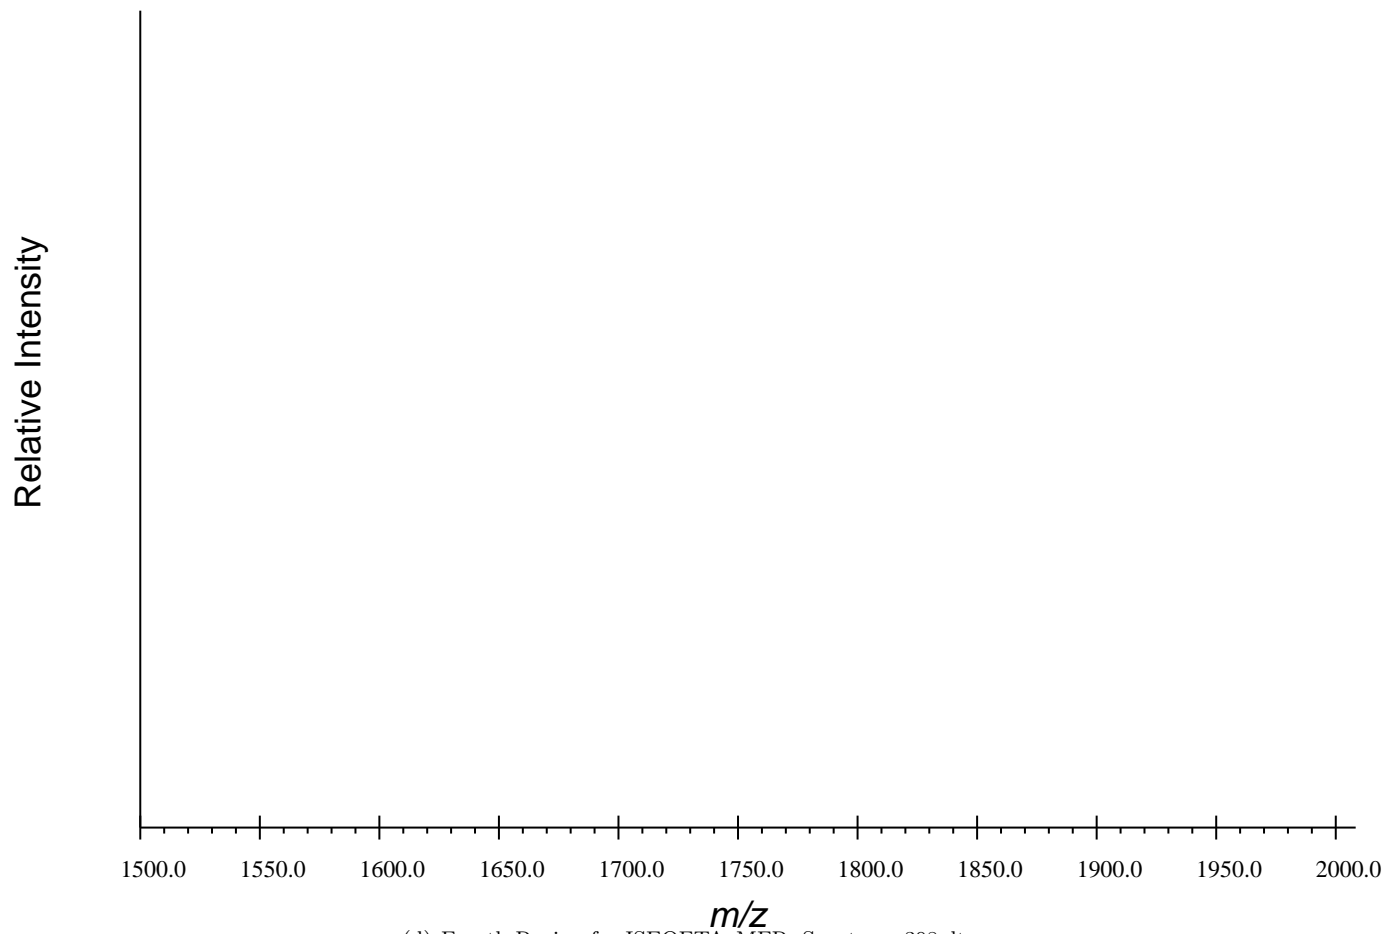

(d) Fourth Region for ISEQFTAoMFR, Spectrum 308.dta

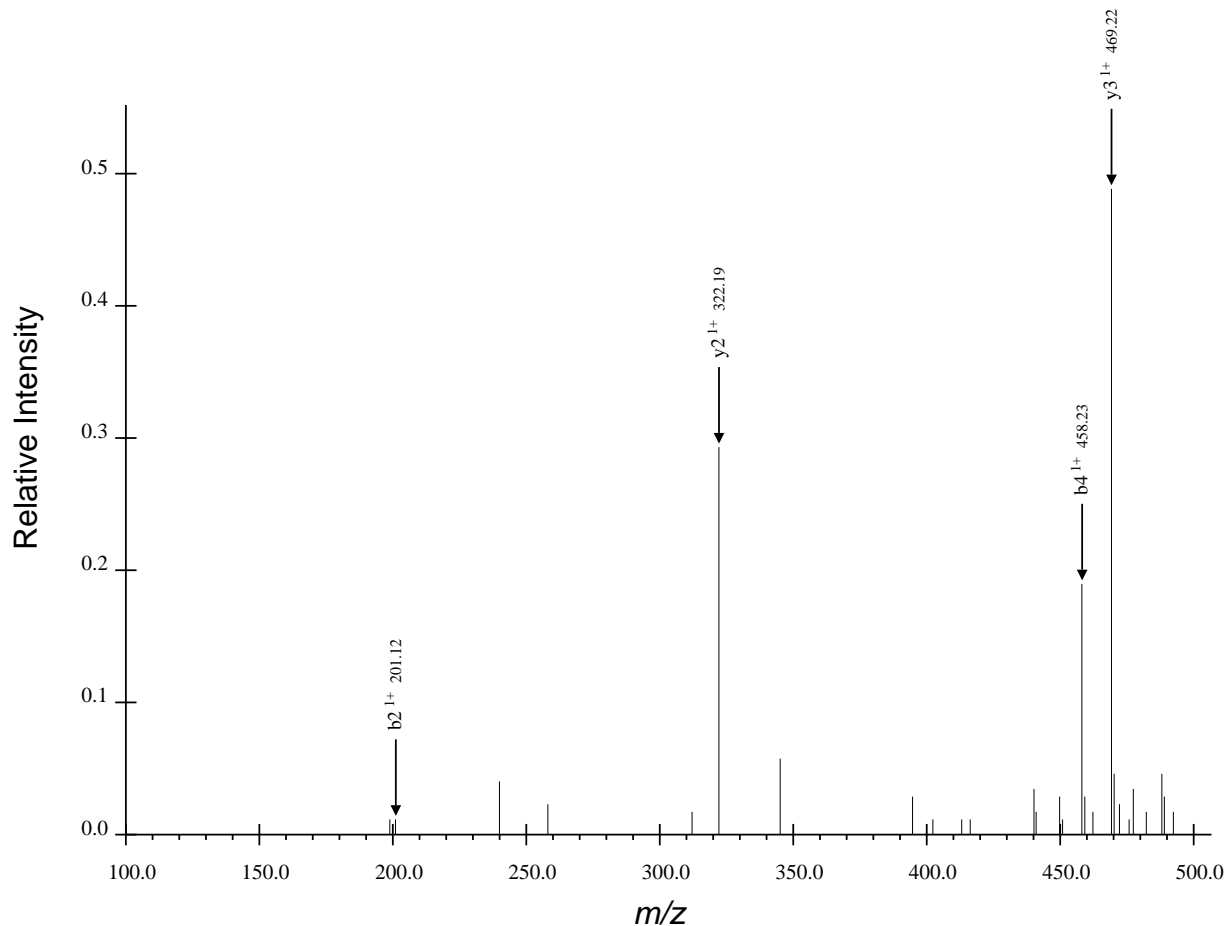

(a) First Region for ISEQFTAoMFR, Spectrum 309.dta

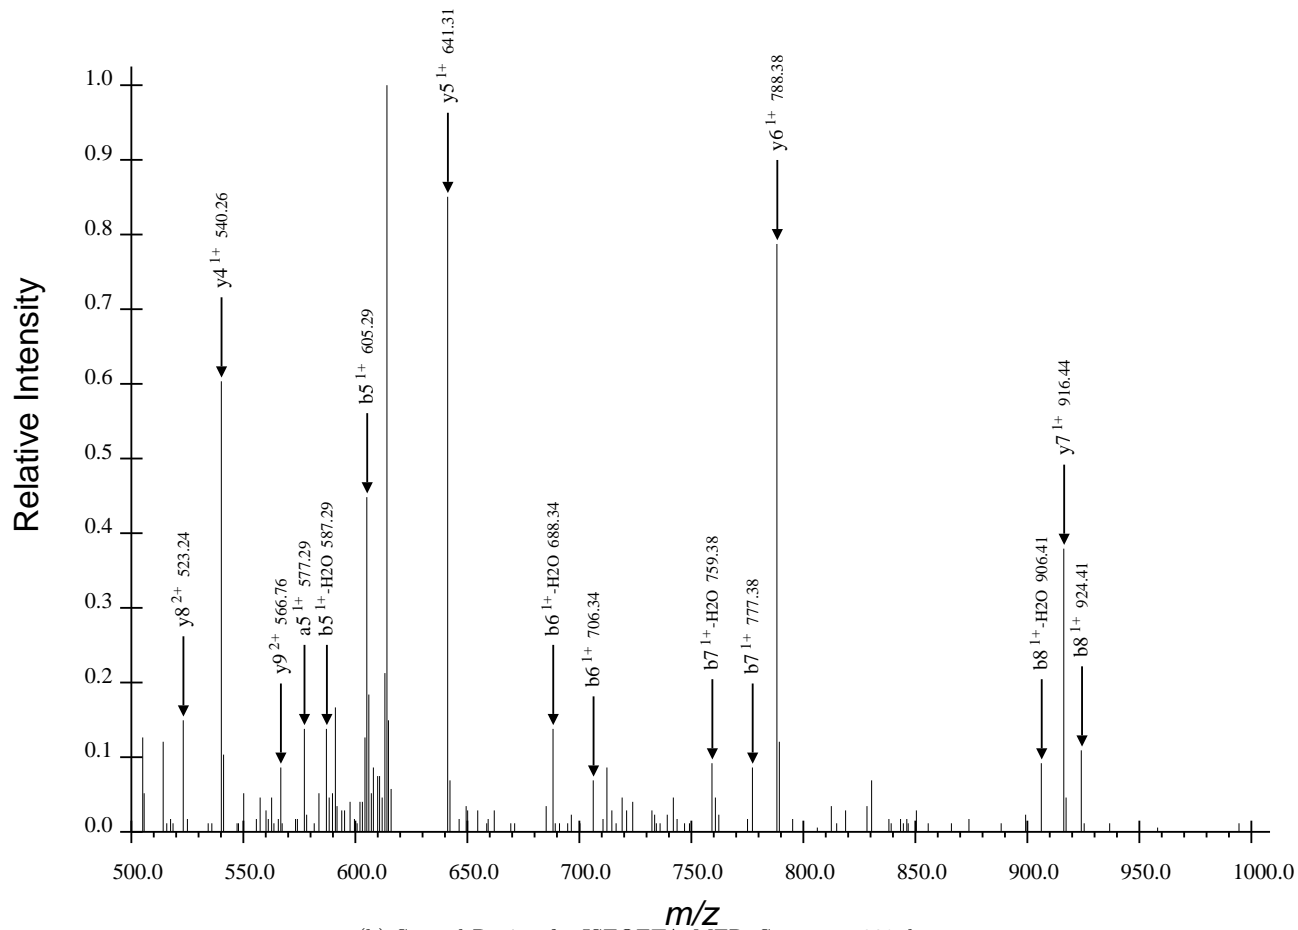

(b) Second Region for ISEQFTAoMFR, Spectrum 309.dta

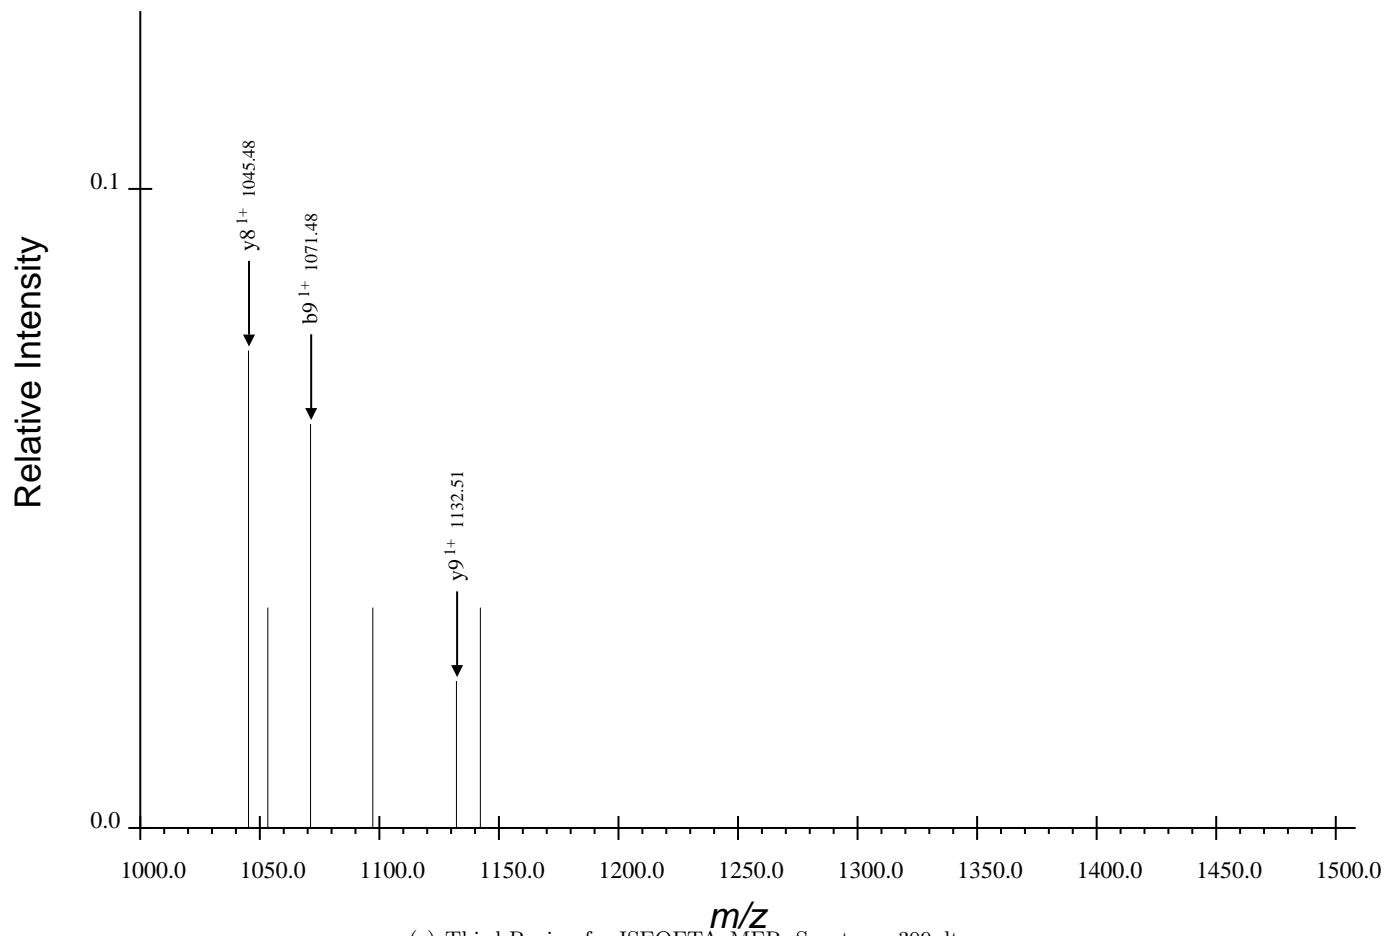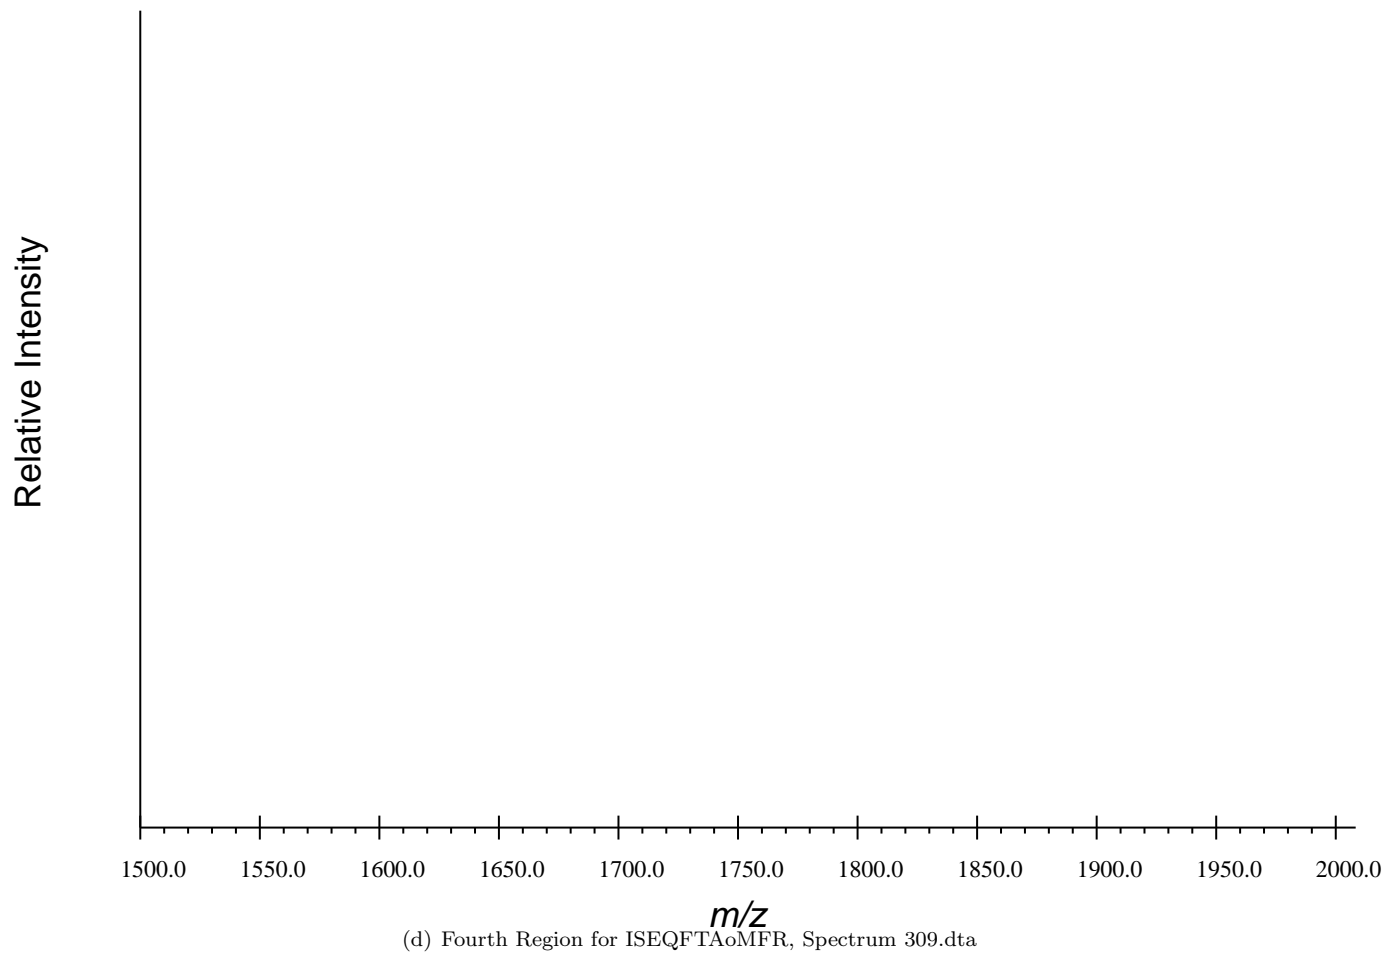

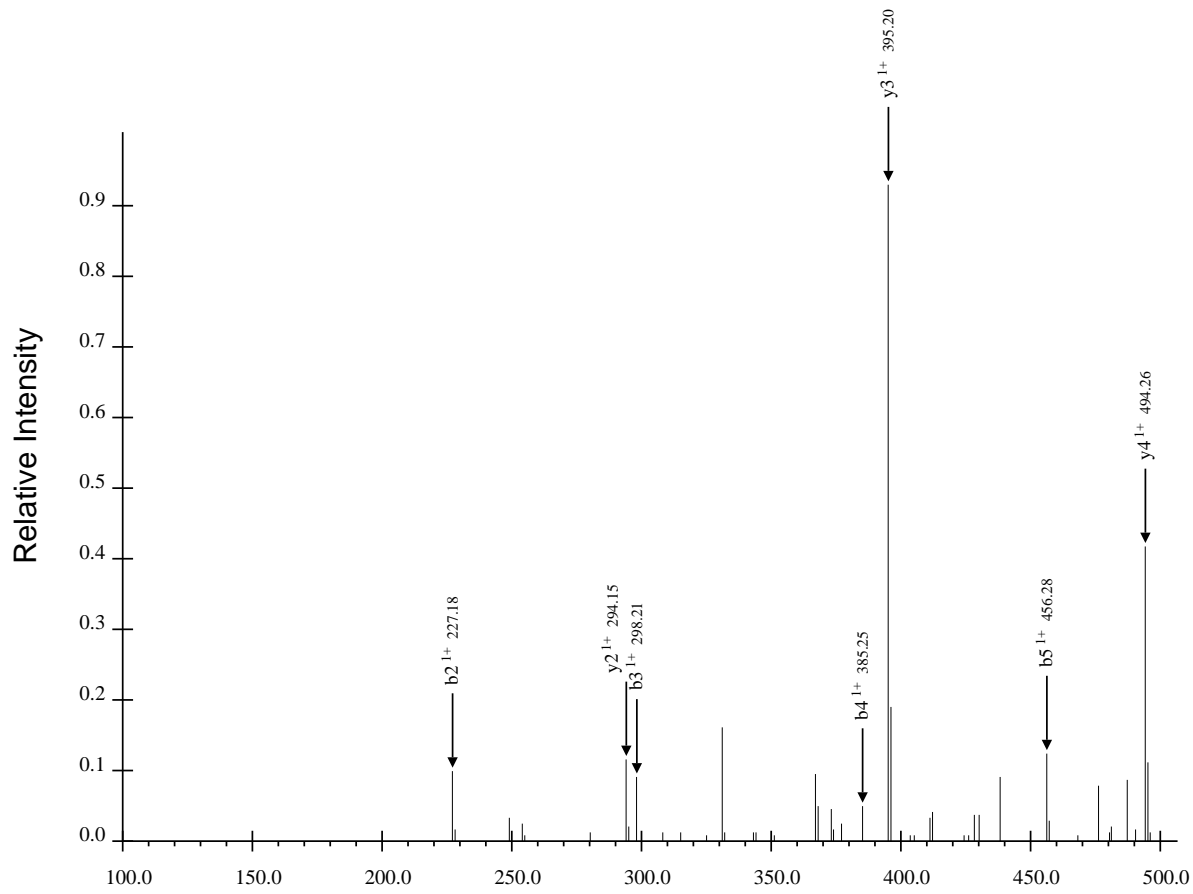

(a) First Region for LLASANLEEVToMK, Spectrum 310.dta

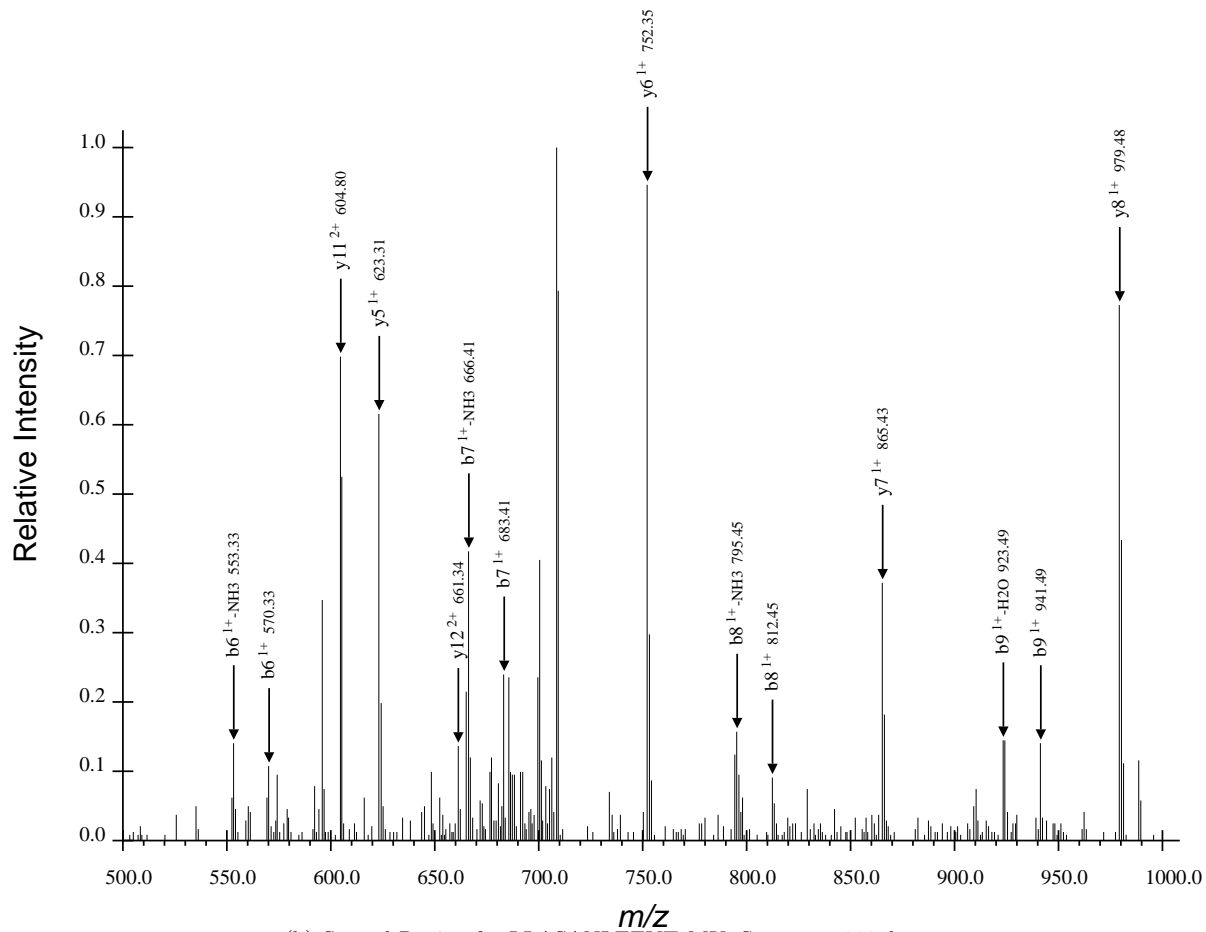

(b) Second Region for LLASANLEEVToMK, Spectrum 310.dta

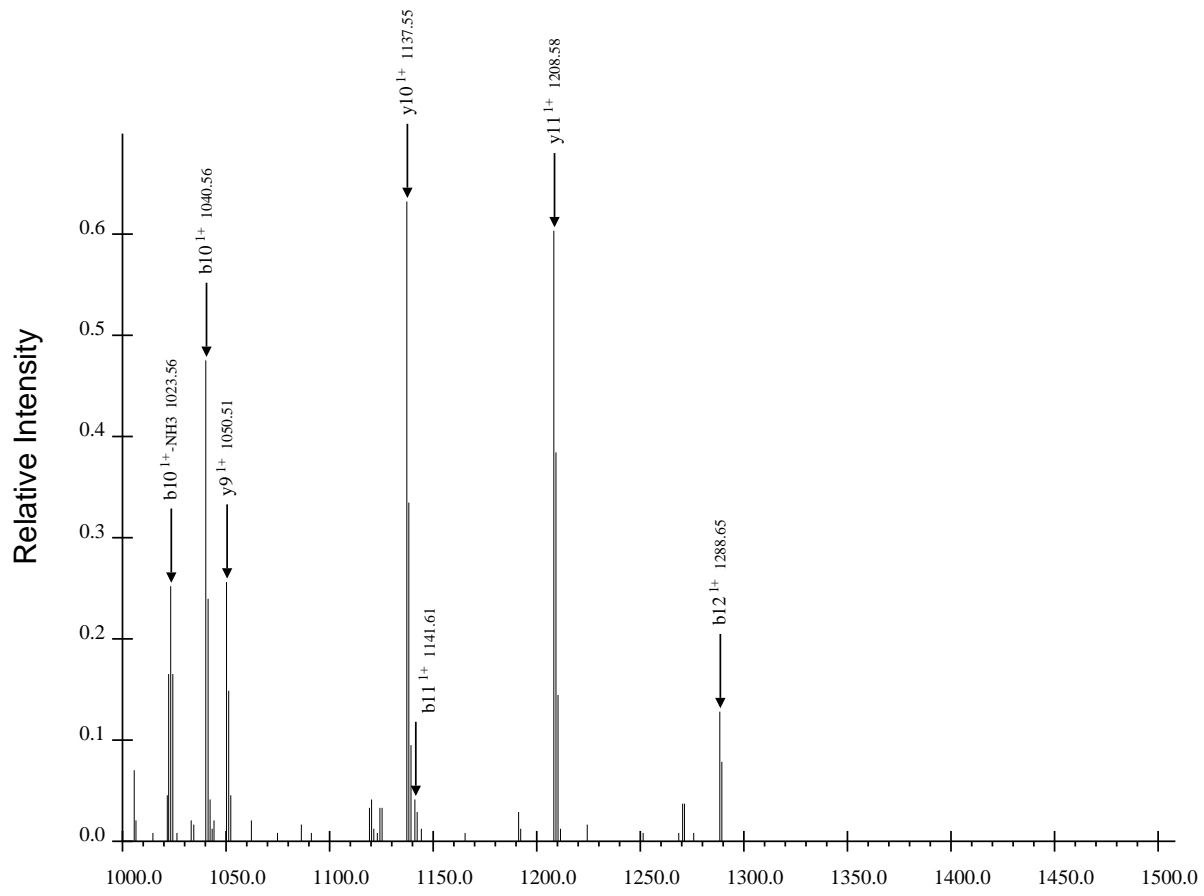

(c) Third Region for LLASANLEEVToMK, Spectrum 310.dta

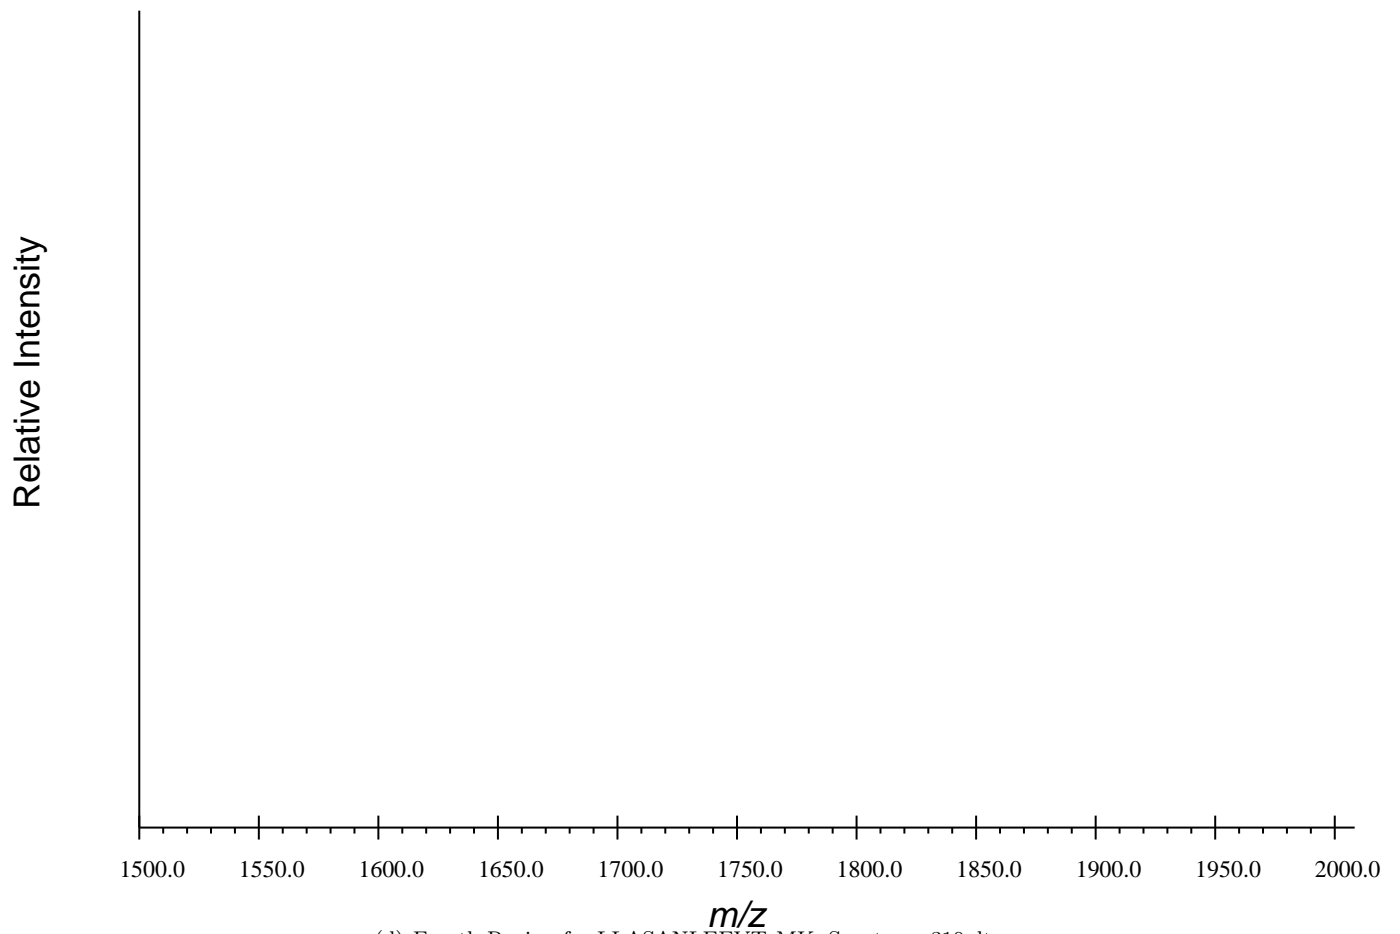

(d) Fourth Region for LLASANLEEVToMK, Spectrum 310.dta

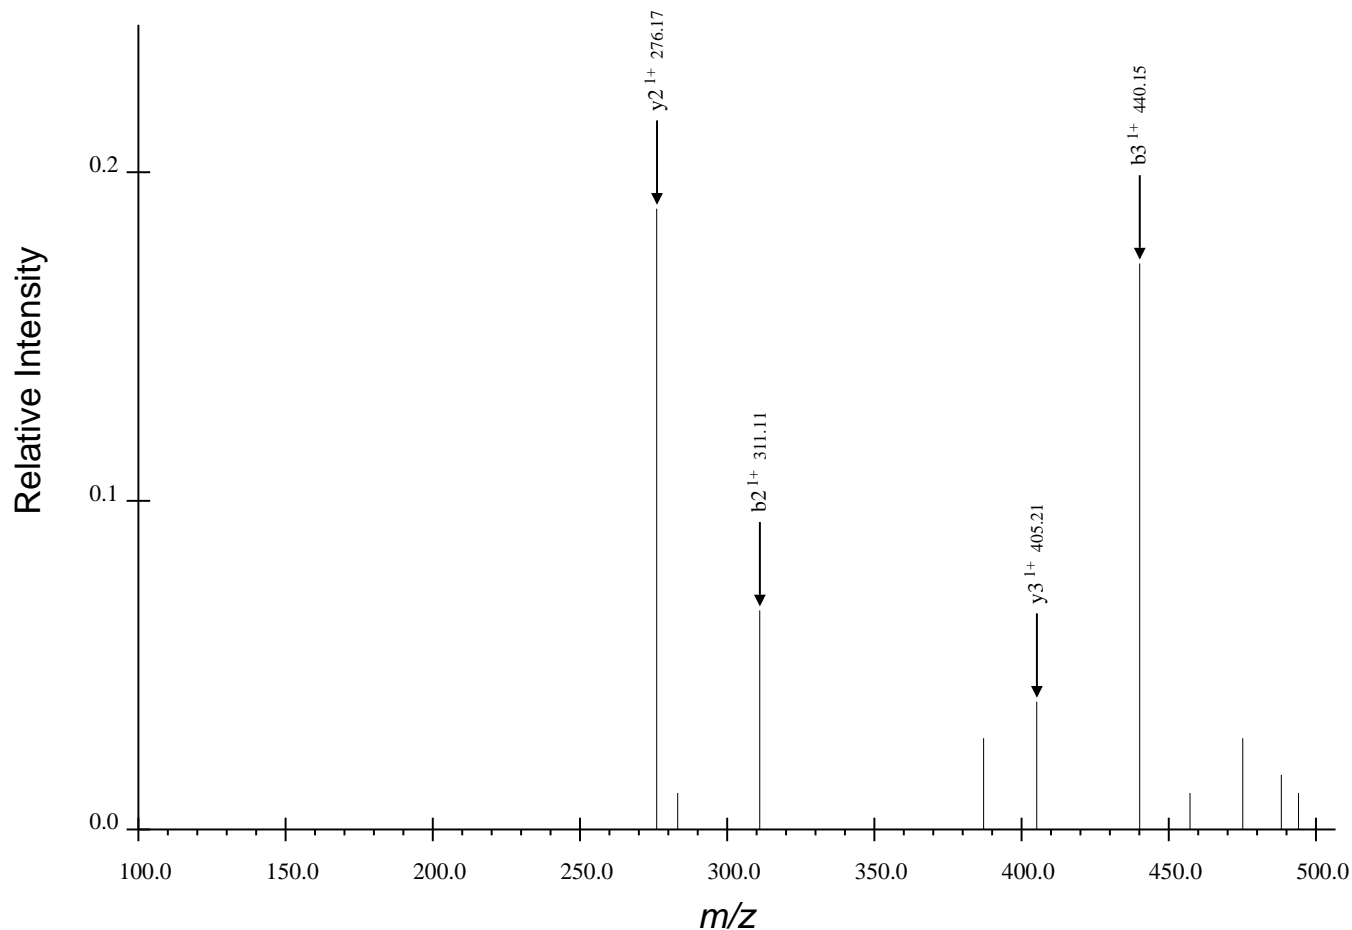

(a) First Region for oMYEVVYQIGTETR, Spectrum 311.dta

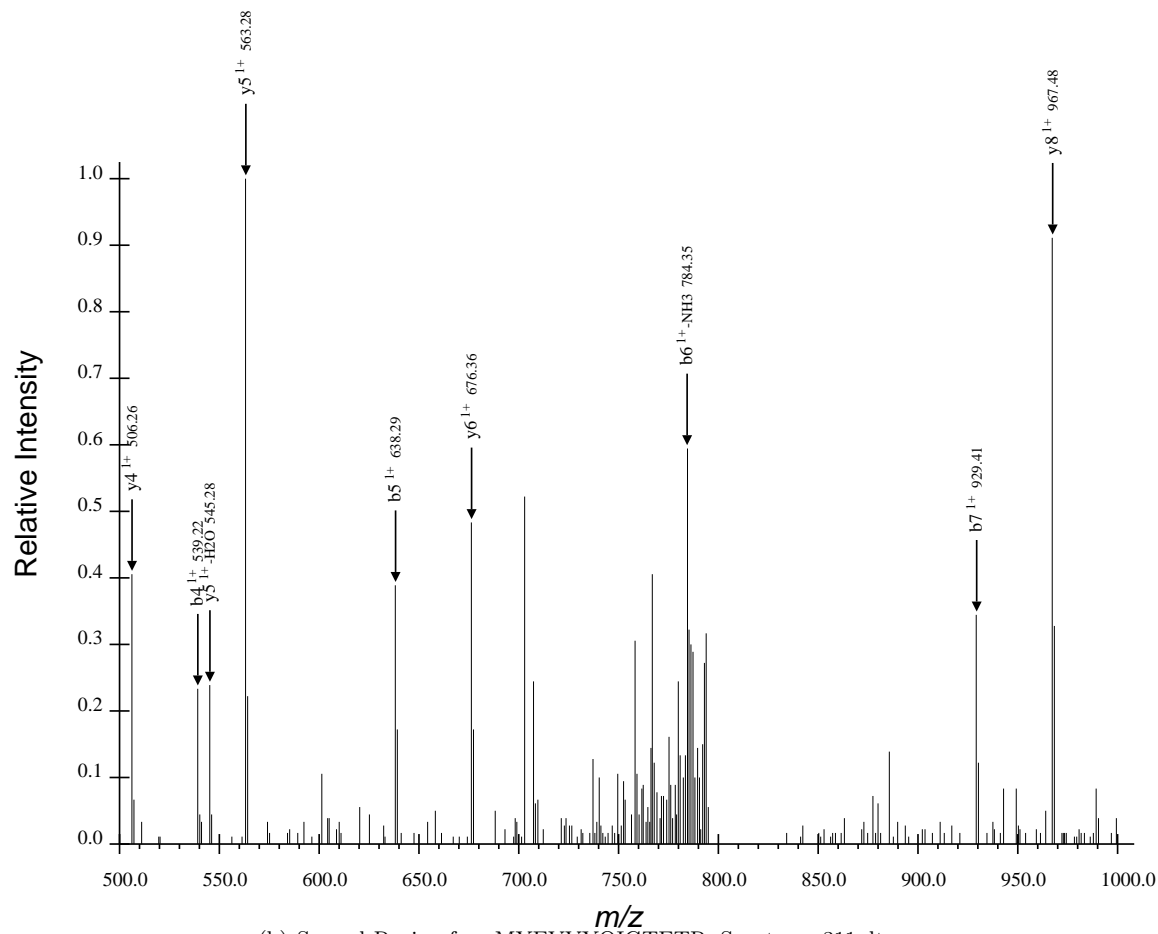

(b) Second Region for oMYEVVYQIGTETR, Spectrum 311.dta

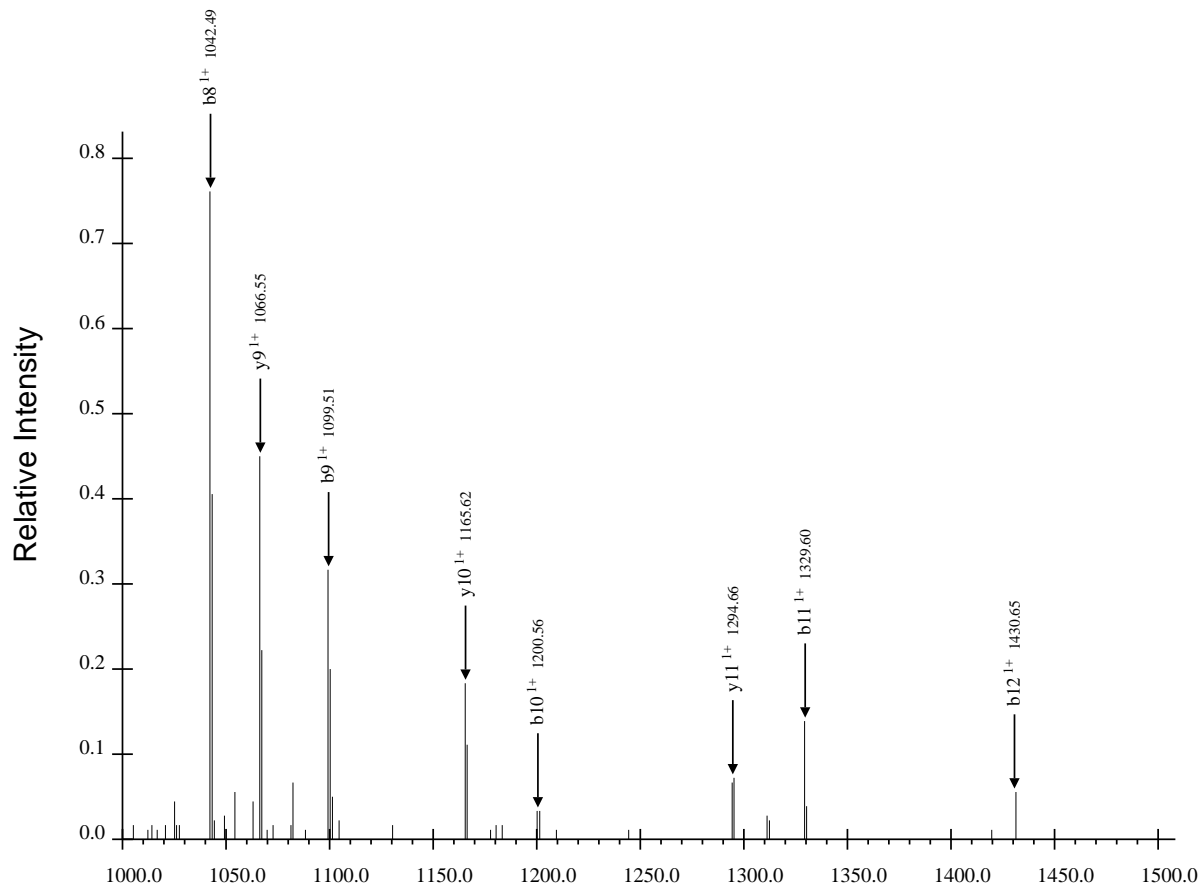

(c) Third Region for oMYEVVYQIGTETR, Spectrum 311.dta

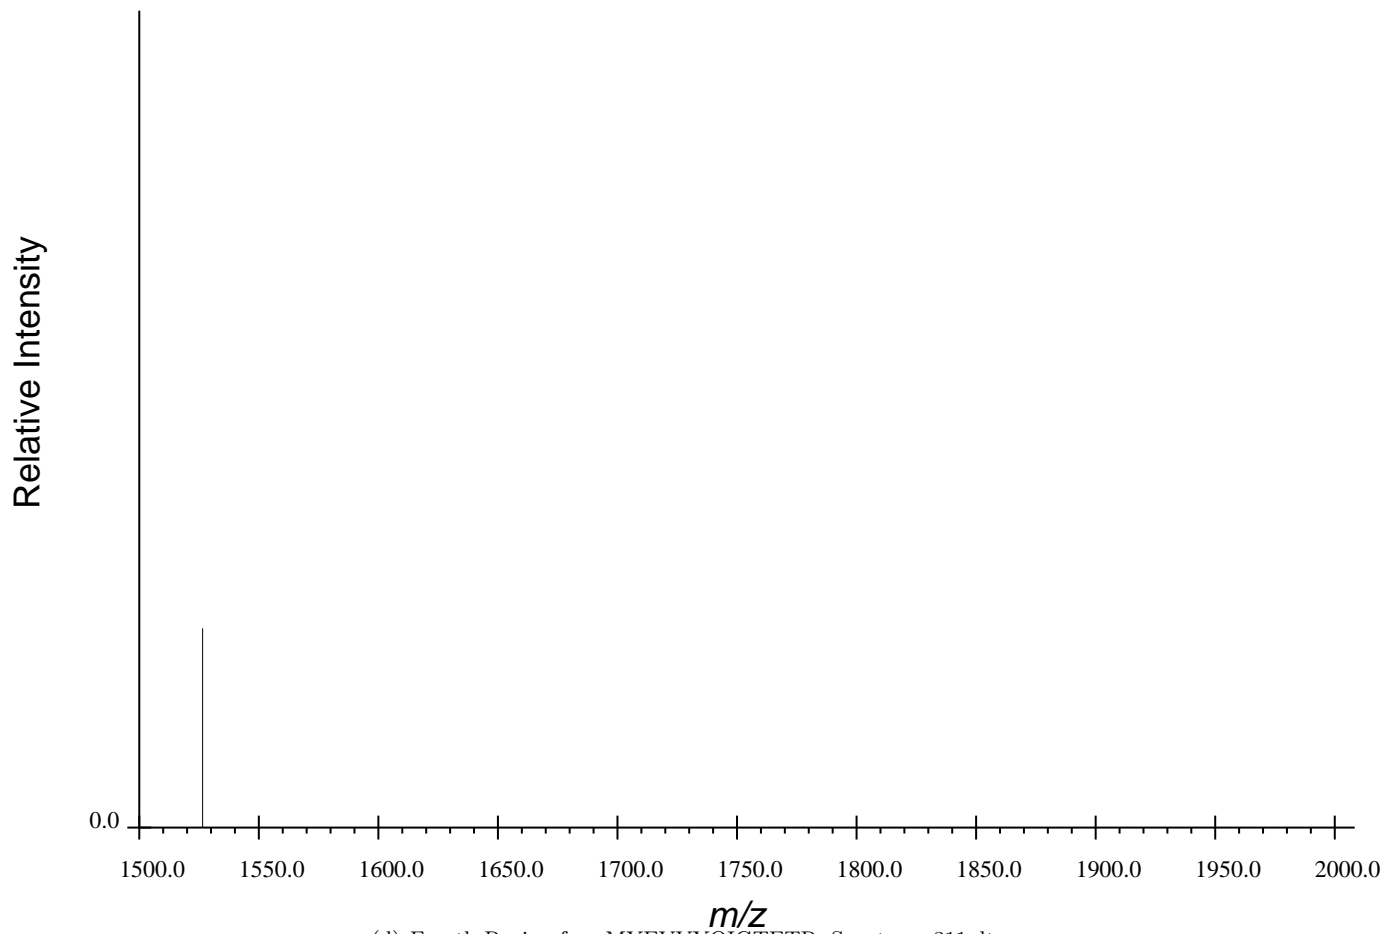

(d) Fourth Region for oMYEVVYQIGTETR, Spectrum 311.dta

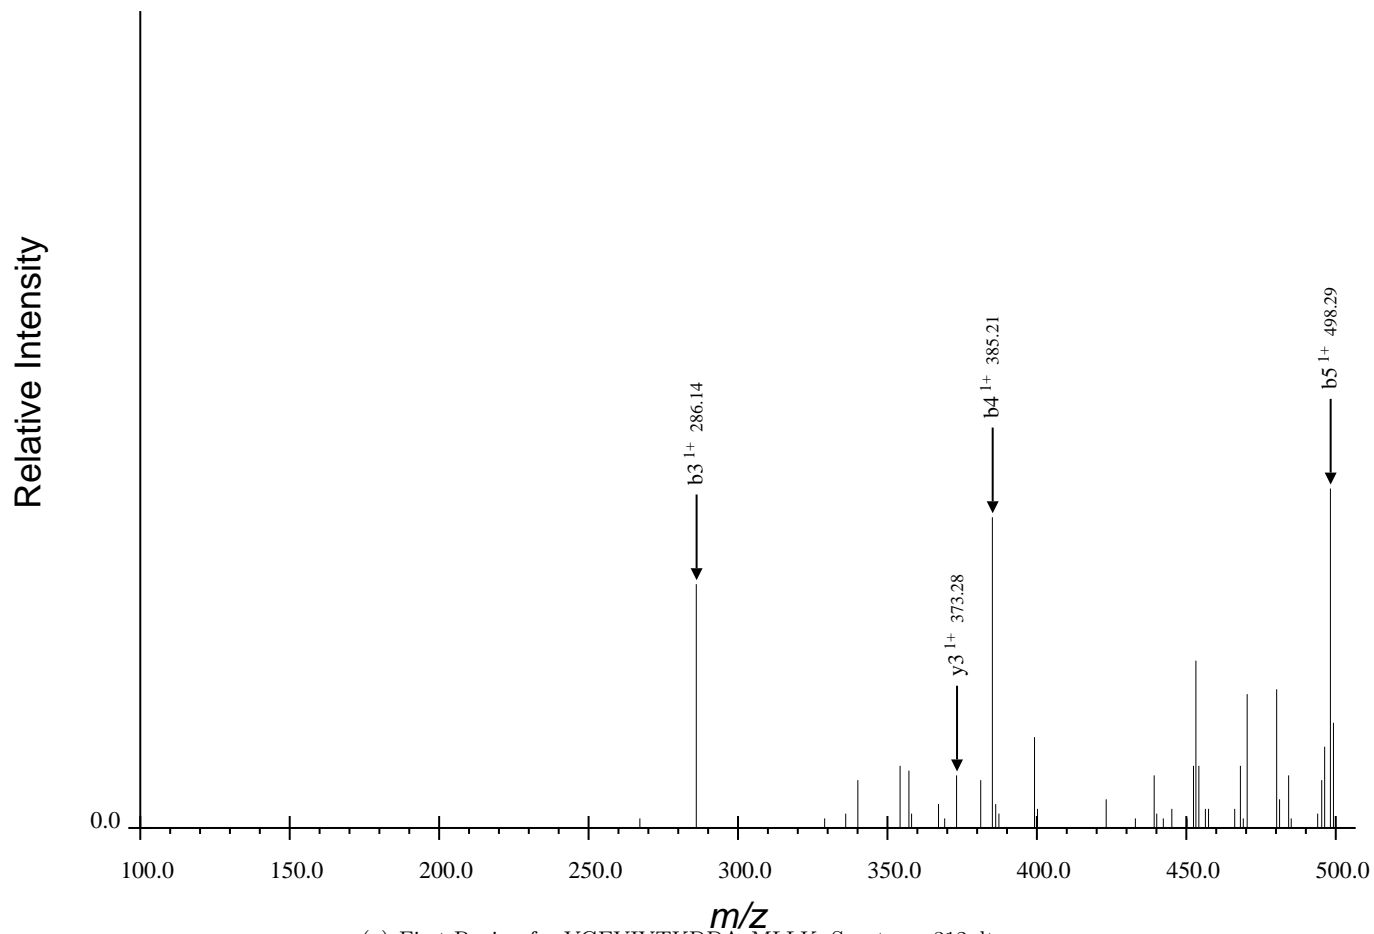

(a) First Region for VGEVIVTKDDAoMLLK, Spectrum 312.dta

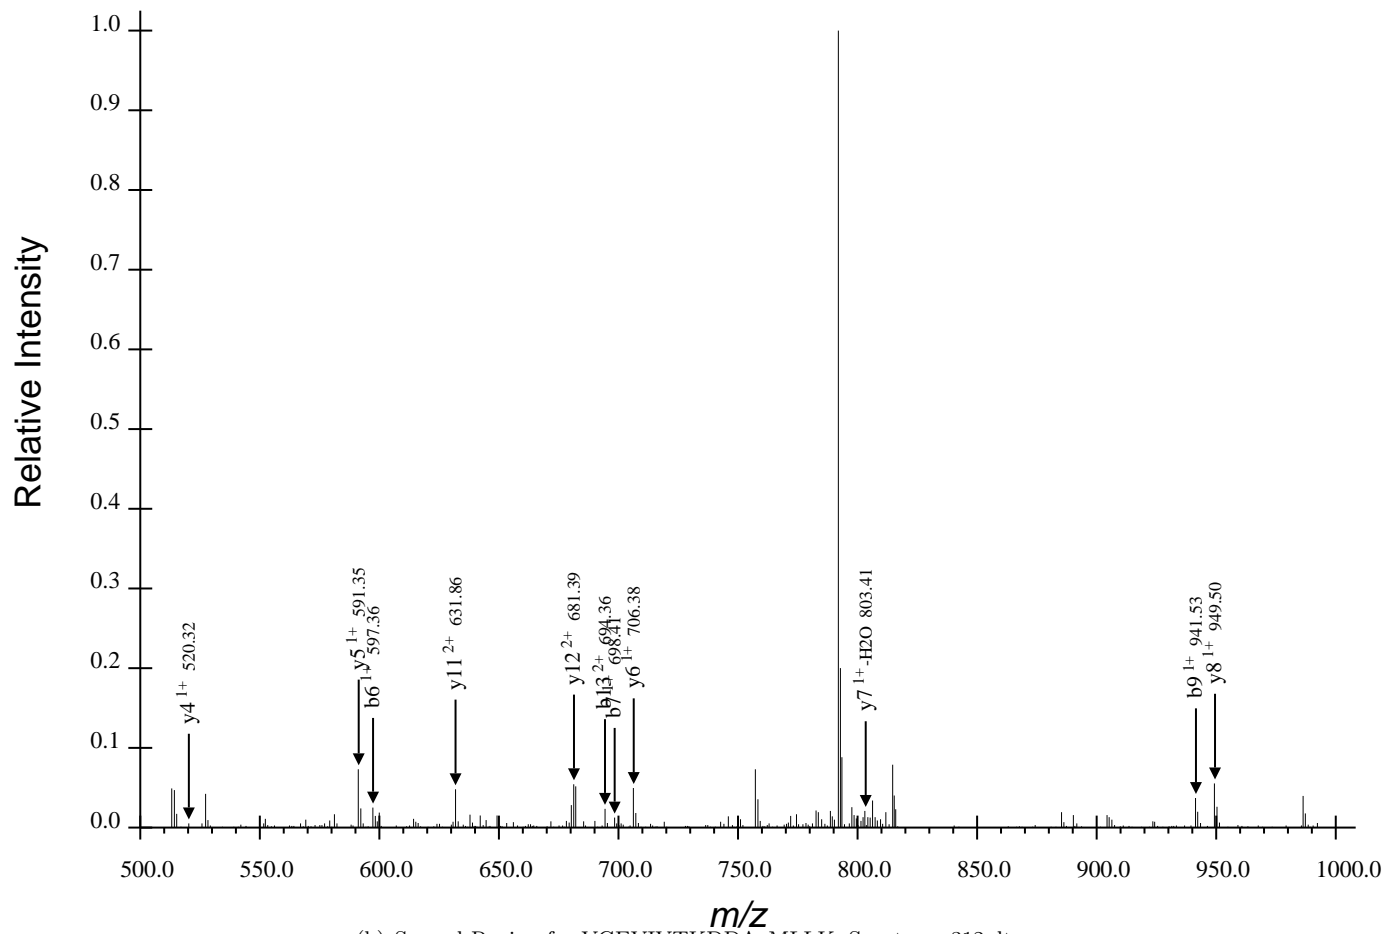

(b) Second Region for VGEVIVTKDDAoMLLK, Spectrum 312.dta



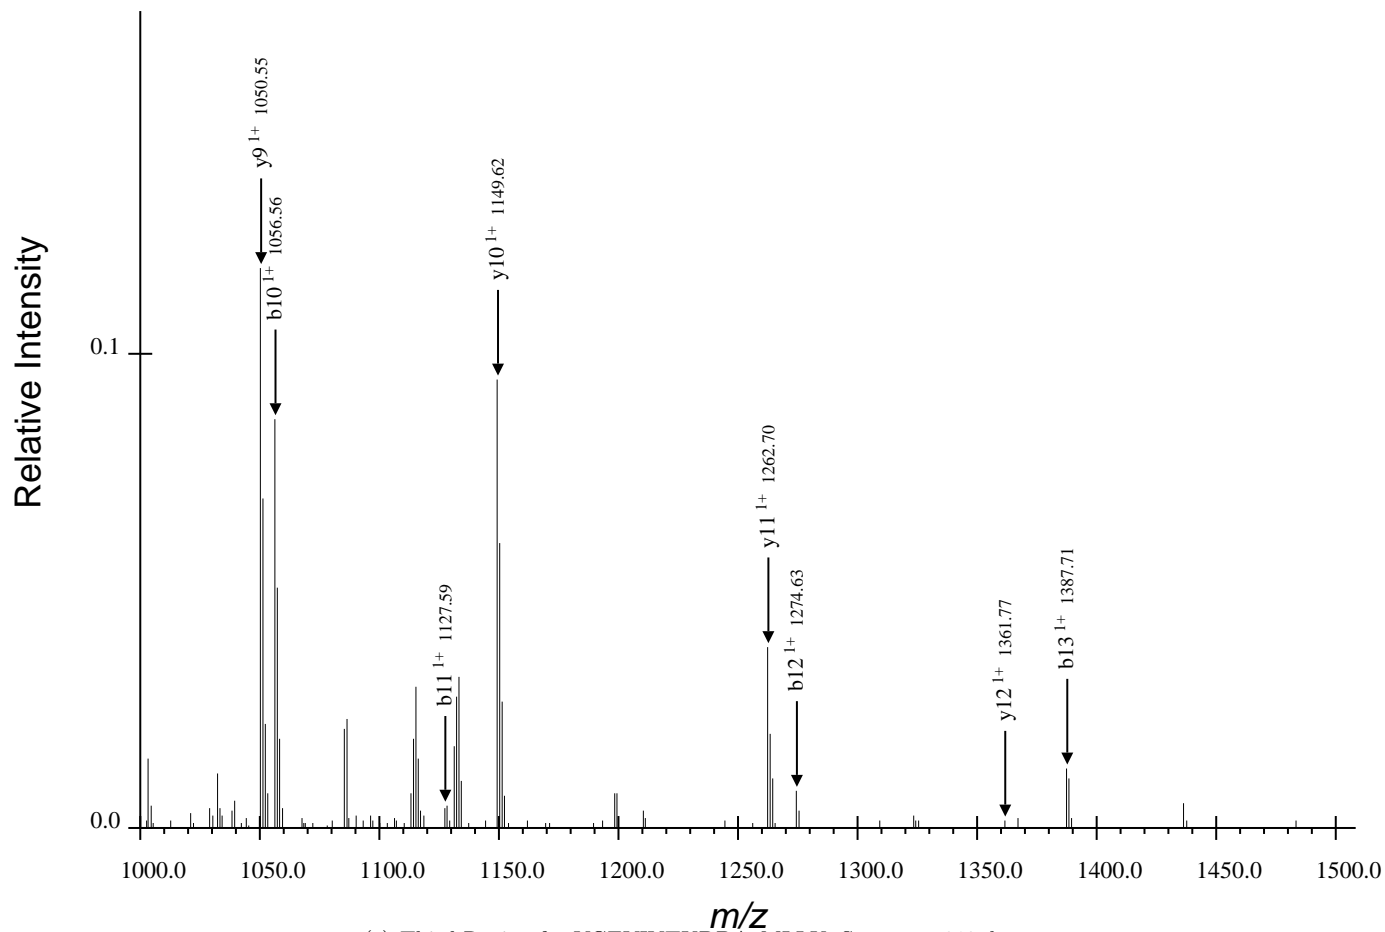

(c) Third Region for VGEVIVTKDDAoMLLK, Spectrum 312.dta

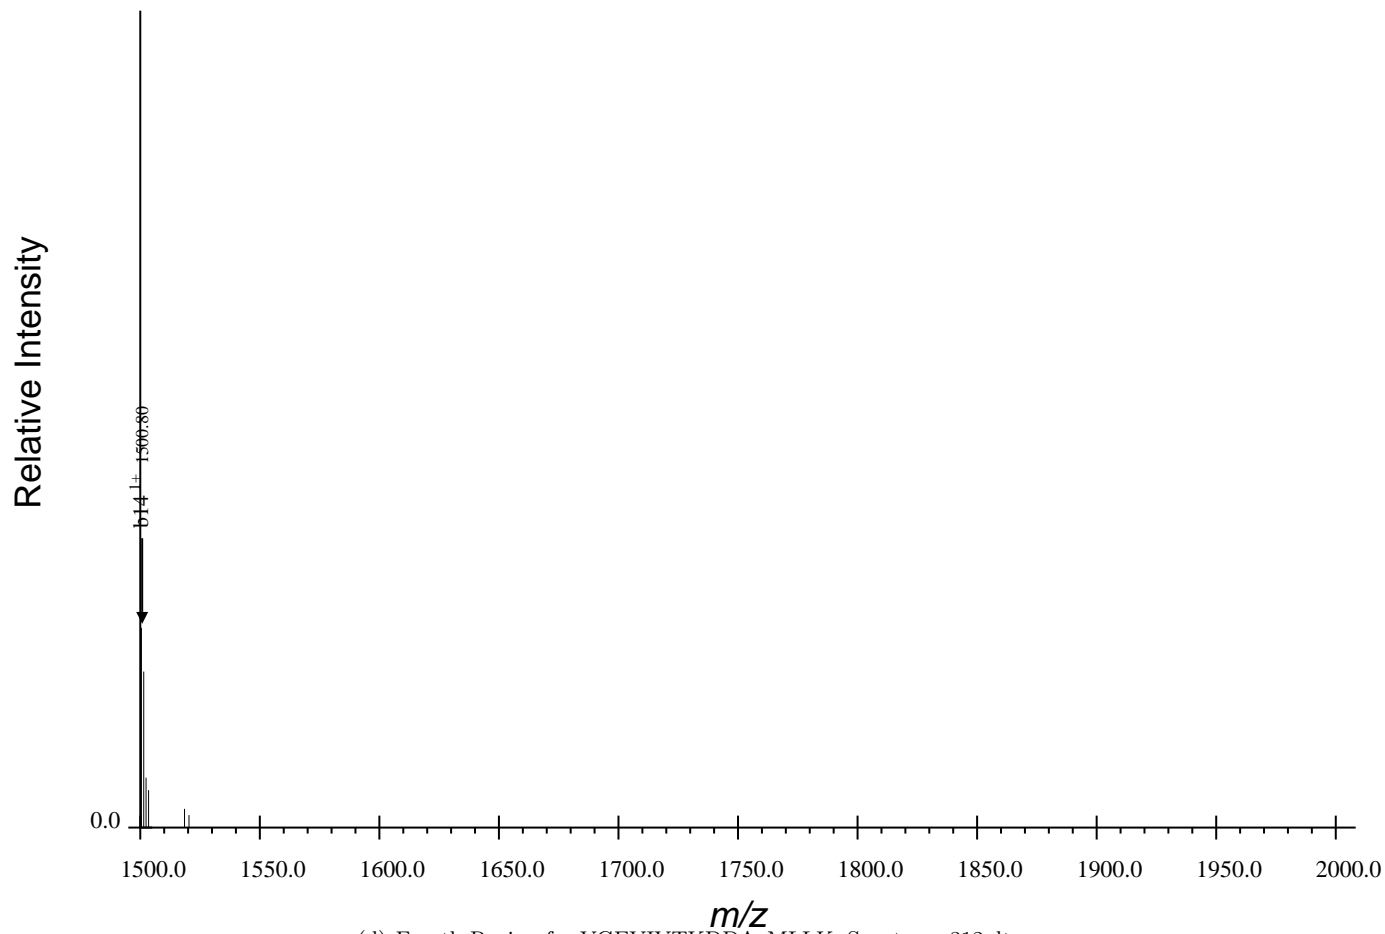

(d) Fourth Region for VGEVIVTKDDAoMLLK, Spectrum 312.dta

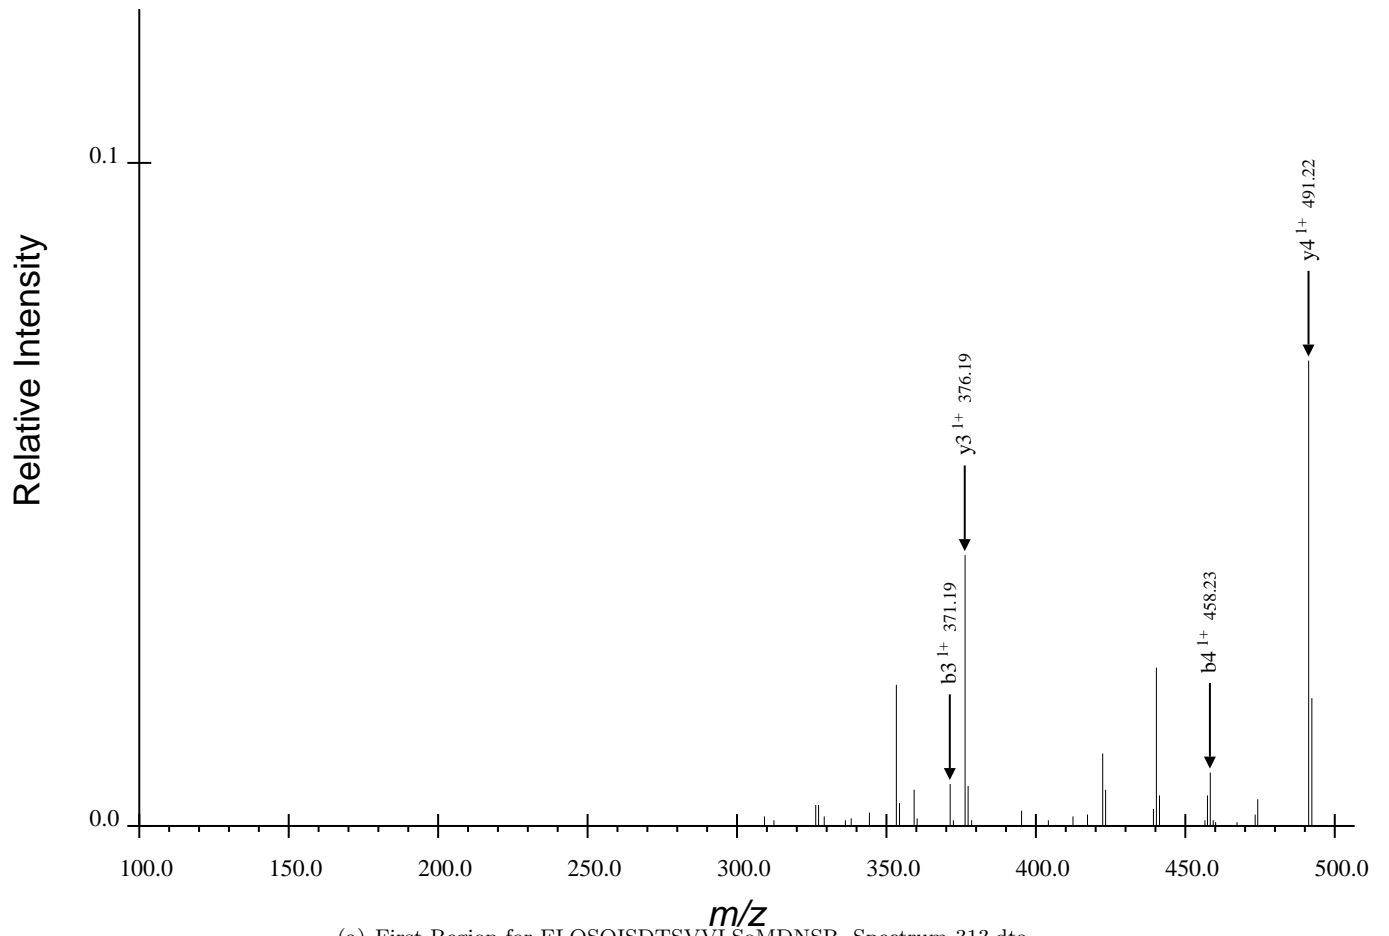

(a) First Region for ELQSQISDTSVVLSMDNSR, Spectrum 313.dta

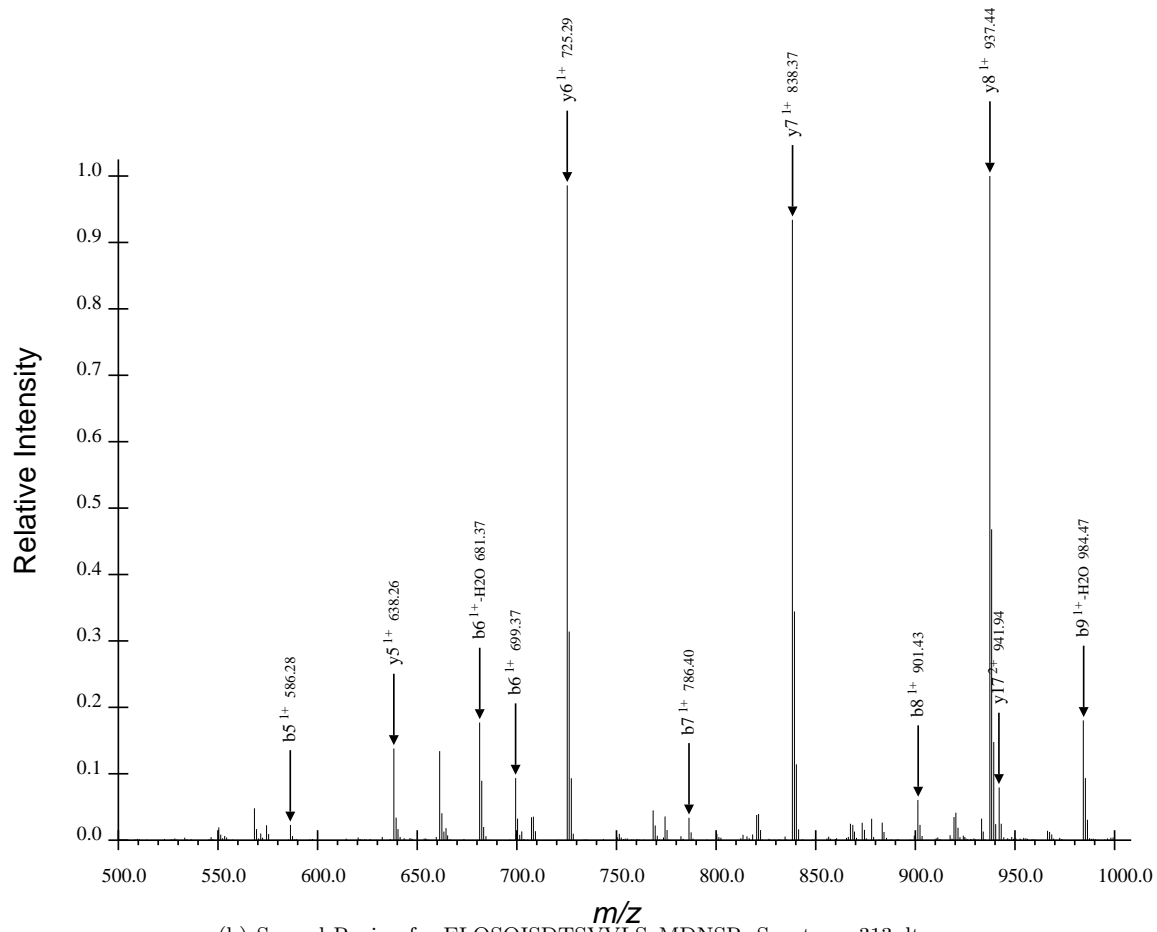

(b) Second Region for ELQSQISDTSVVLSMDNSR, Spectrum 313.dta

(d) Fourth Region for ELQSQISDTSVLS0MIDNSR, Spectrum 313.dta

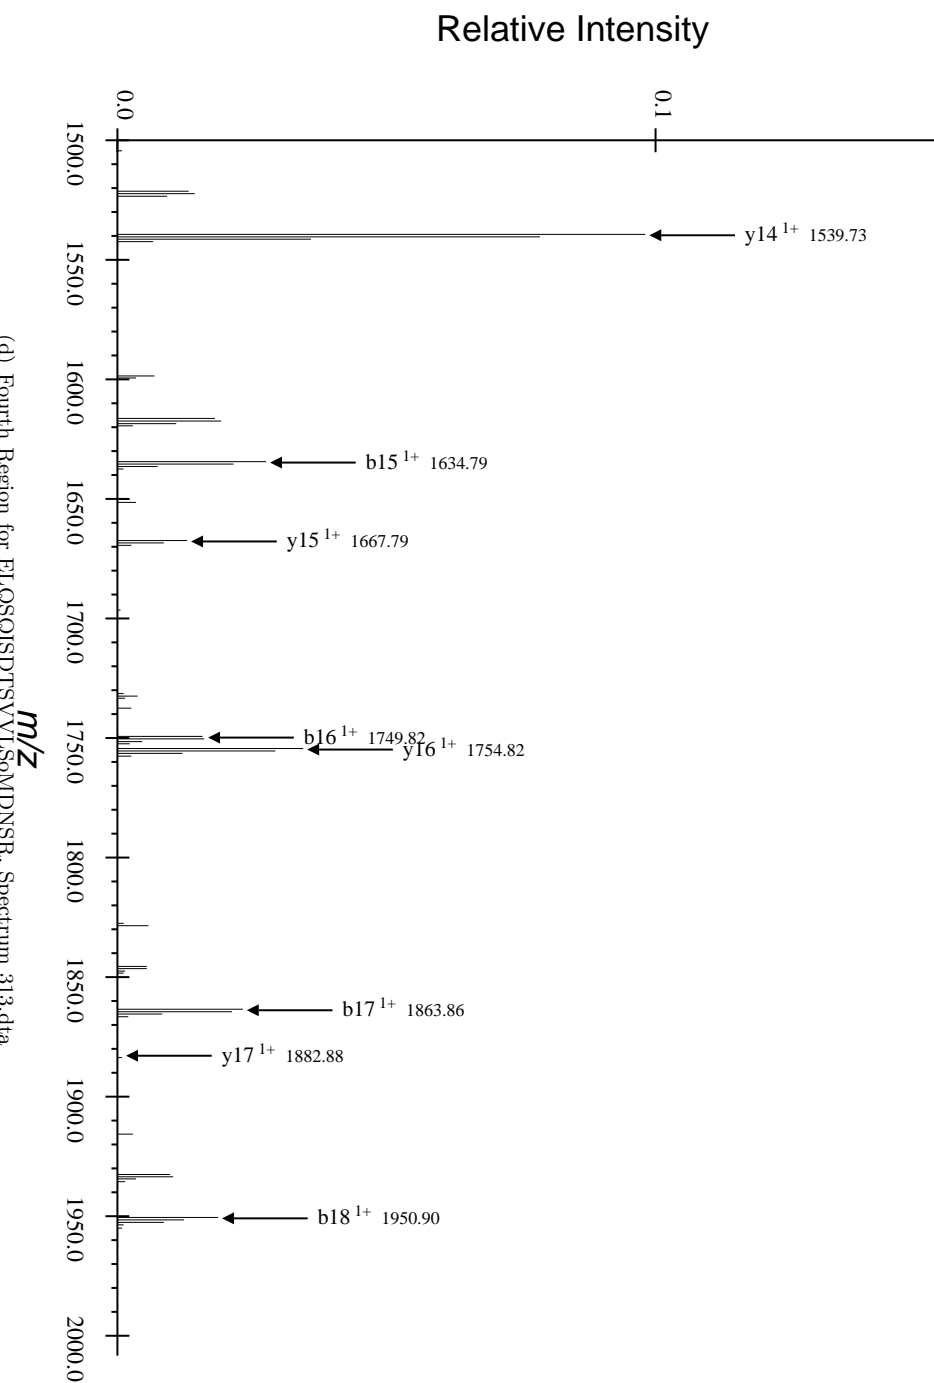

(c) Third Region for ELQSQISDTSVLS0MIDNSR, Spectrum 313.dta

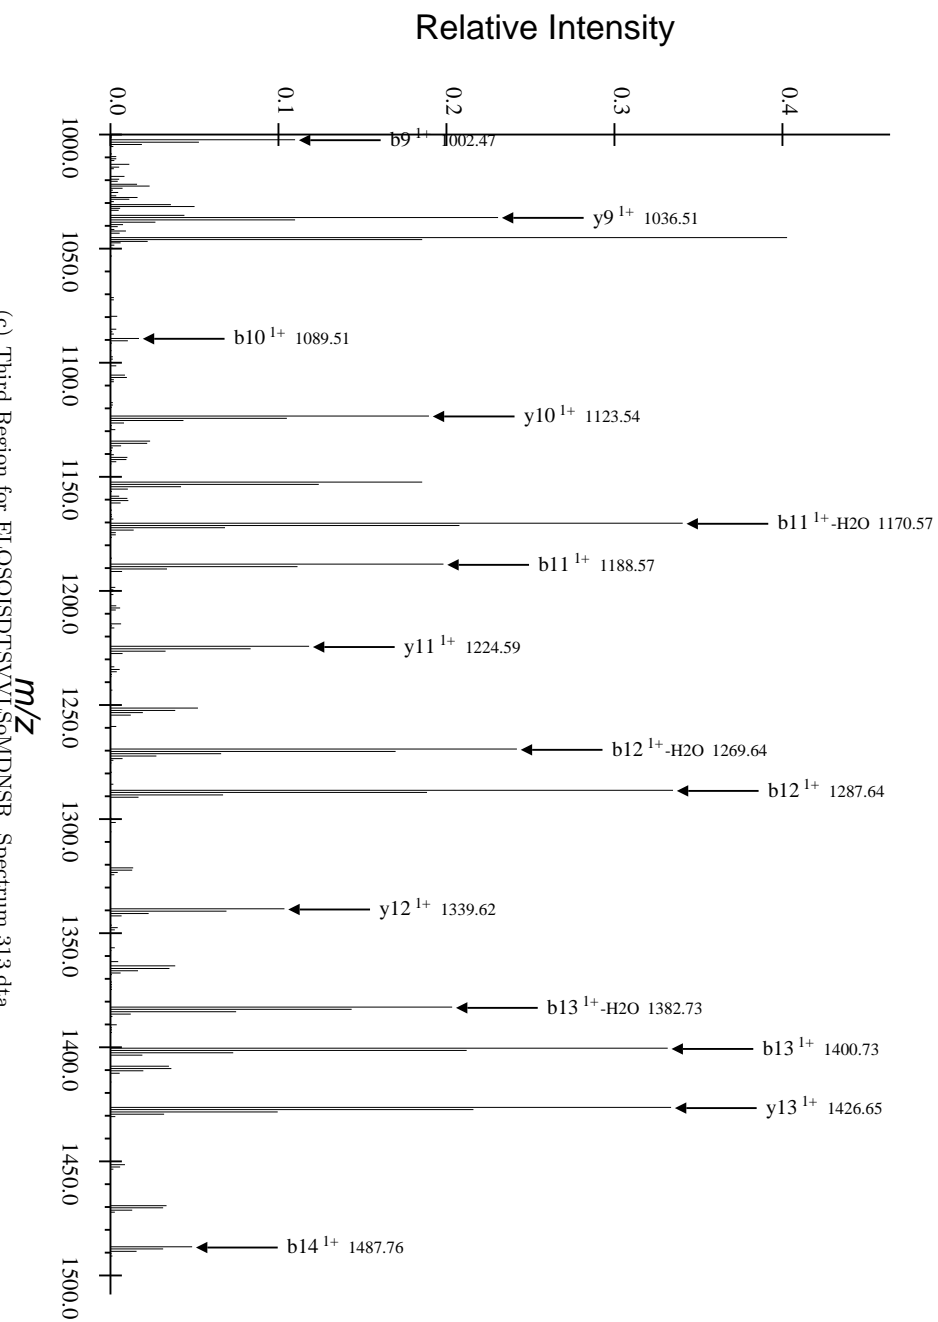

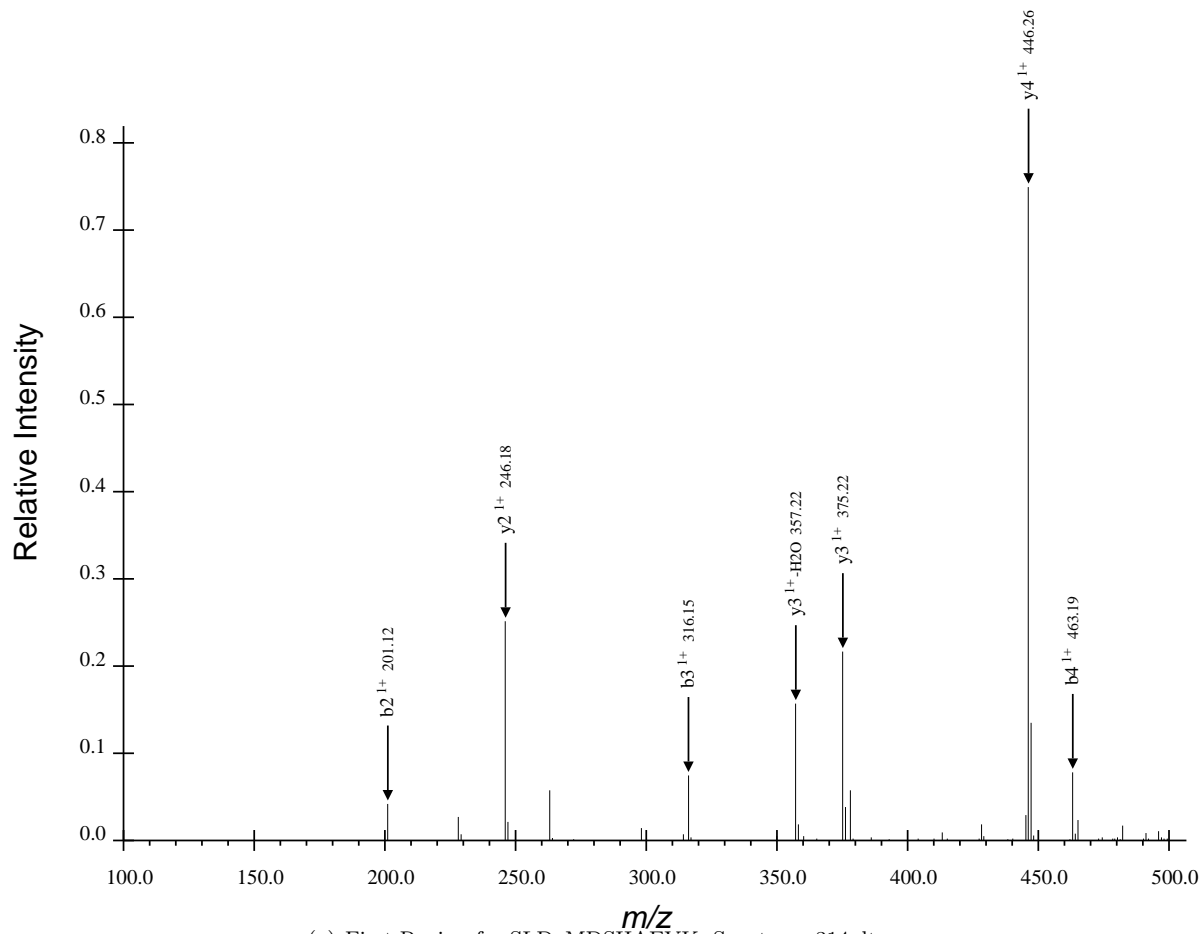

(a) First Region for SLDoMDSIIAEVK, Spectrum 314.dta

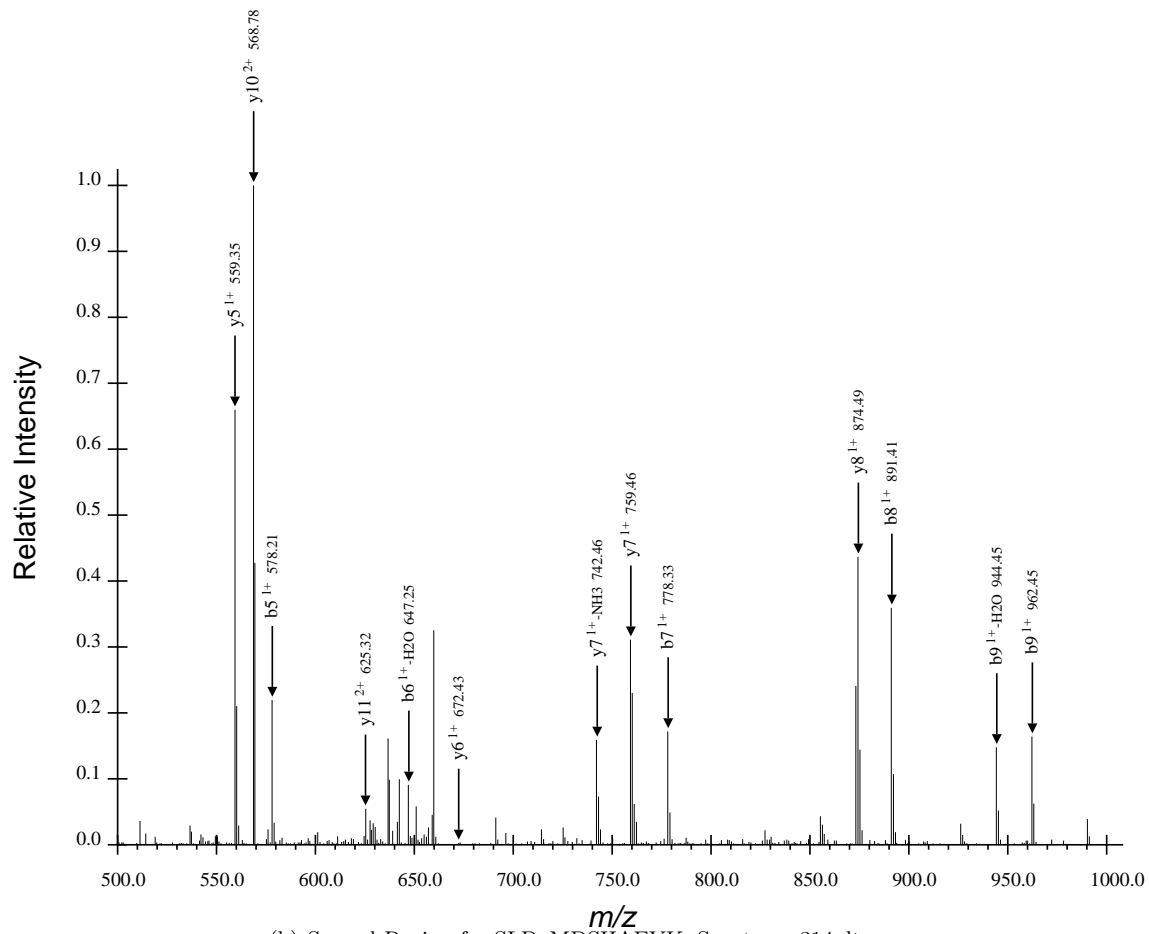

(b) Second Region for SLDoMDSIIAEVK, Spectrum 314.dta

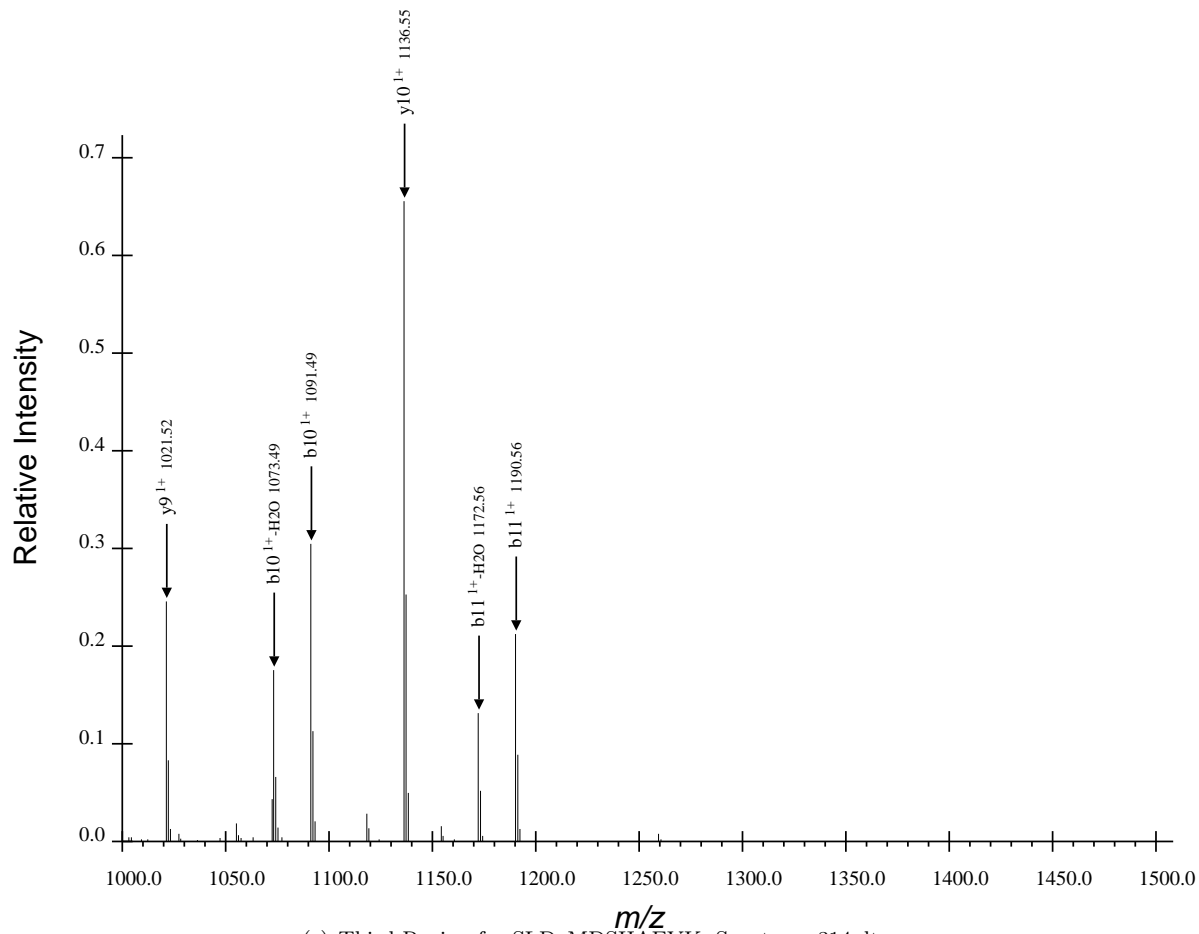

(c) Third Region for SLDoMDSIIAEVK, Spectrum 314.dta

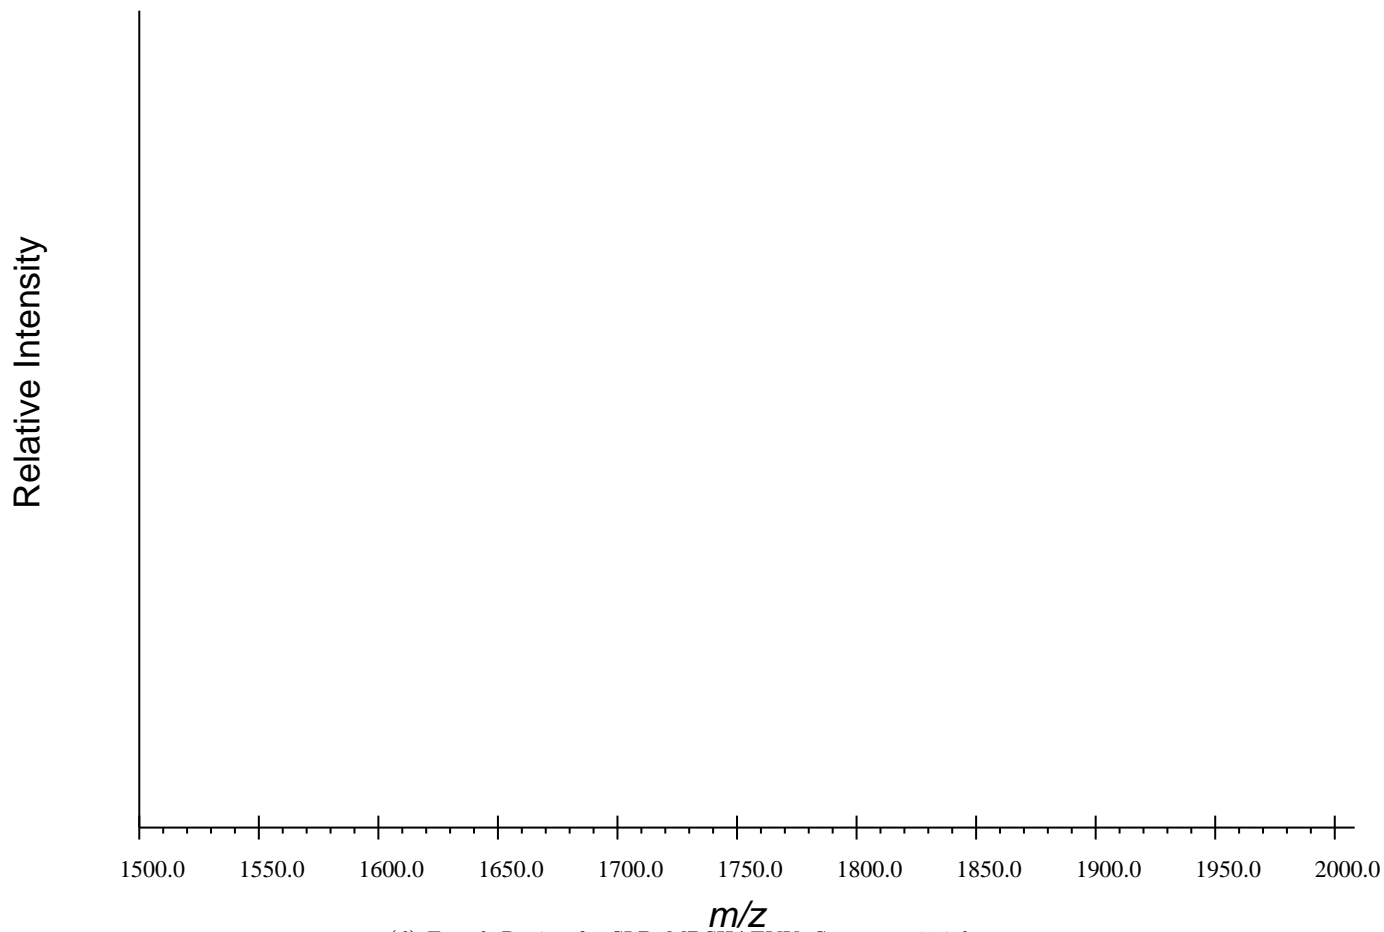

(d) Fourth Region for SLDoMDSIIAEVK, Spectrum 314.dta

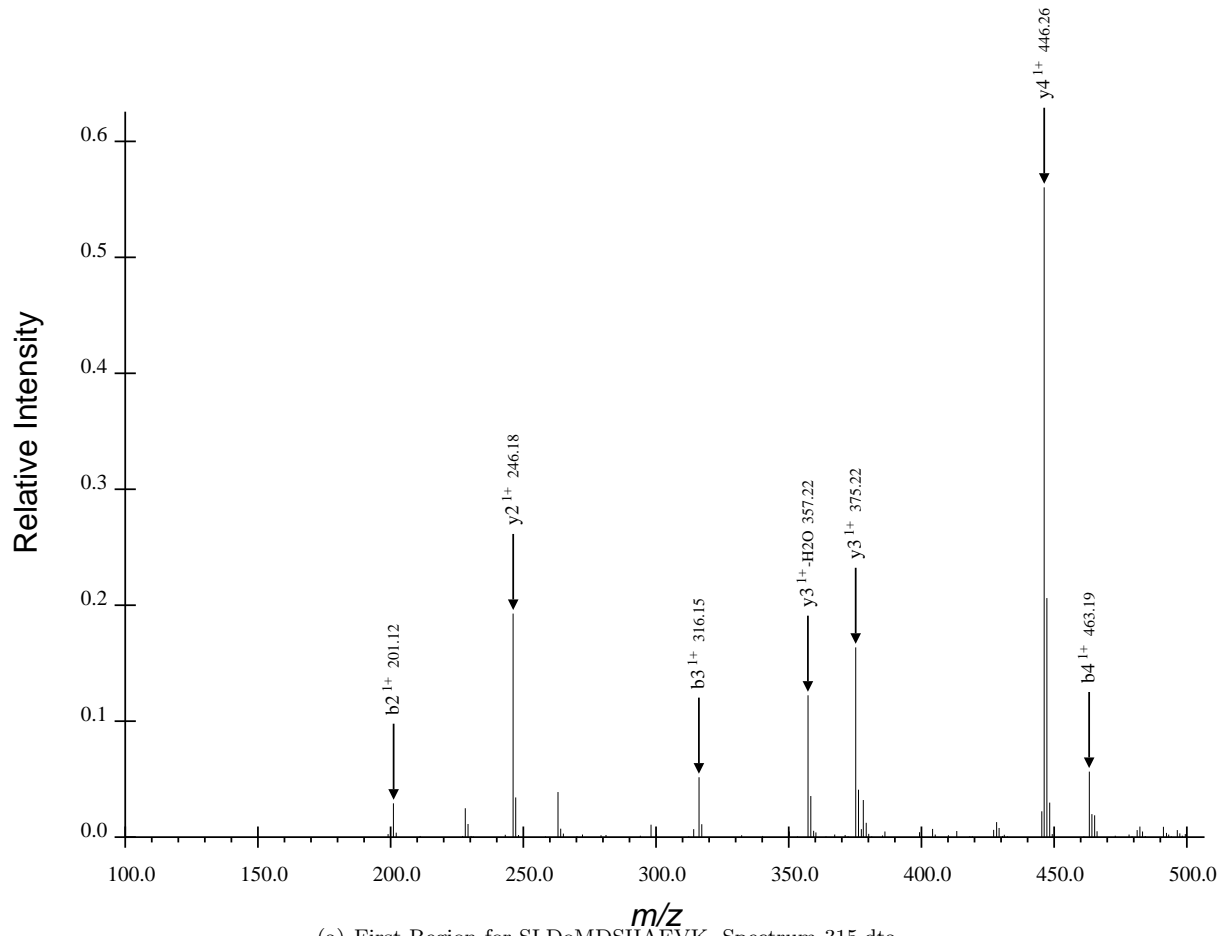

(a) First Region for SLD<sub>o</sub>MDSIIAEVK, Spectrum 315.dta

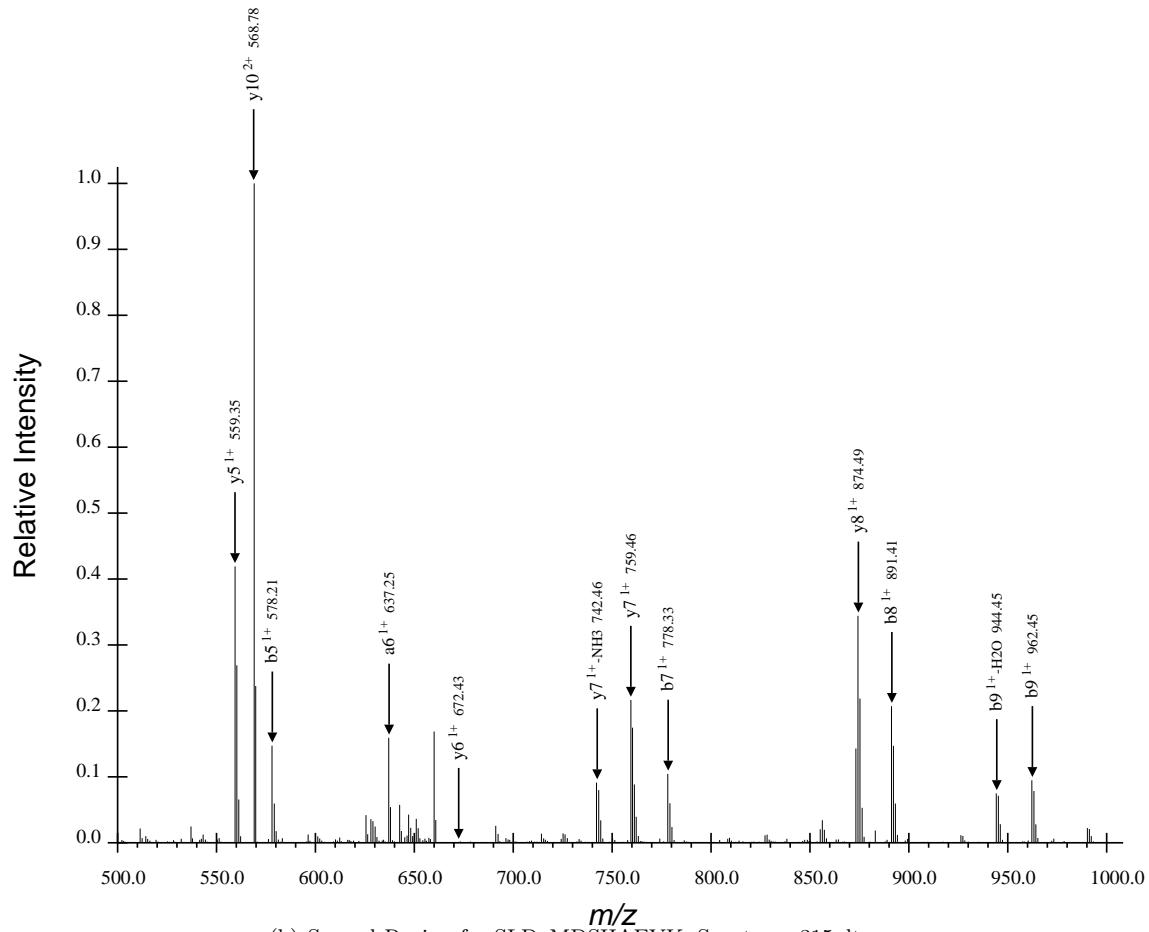

(b) Second Region for SLD<sub>o</sub>MDSIIAEVK, Spectrum 315.dta

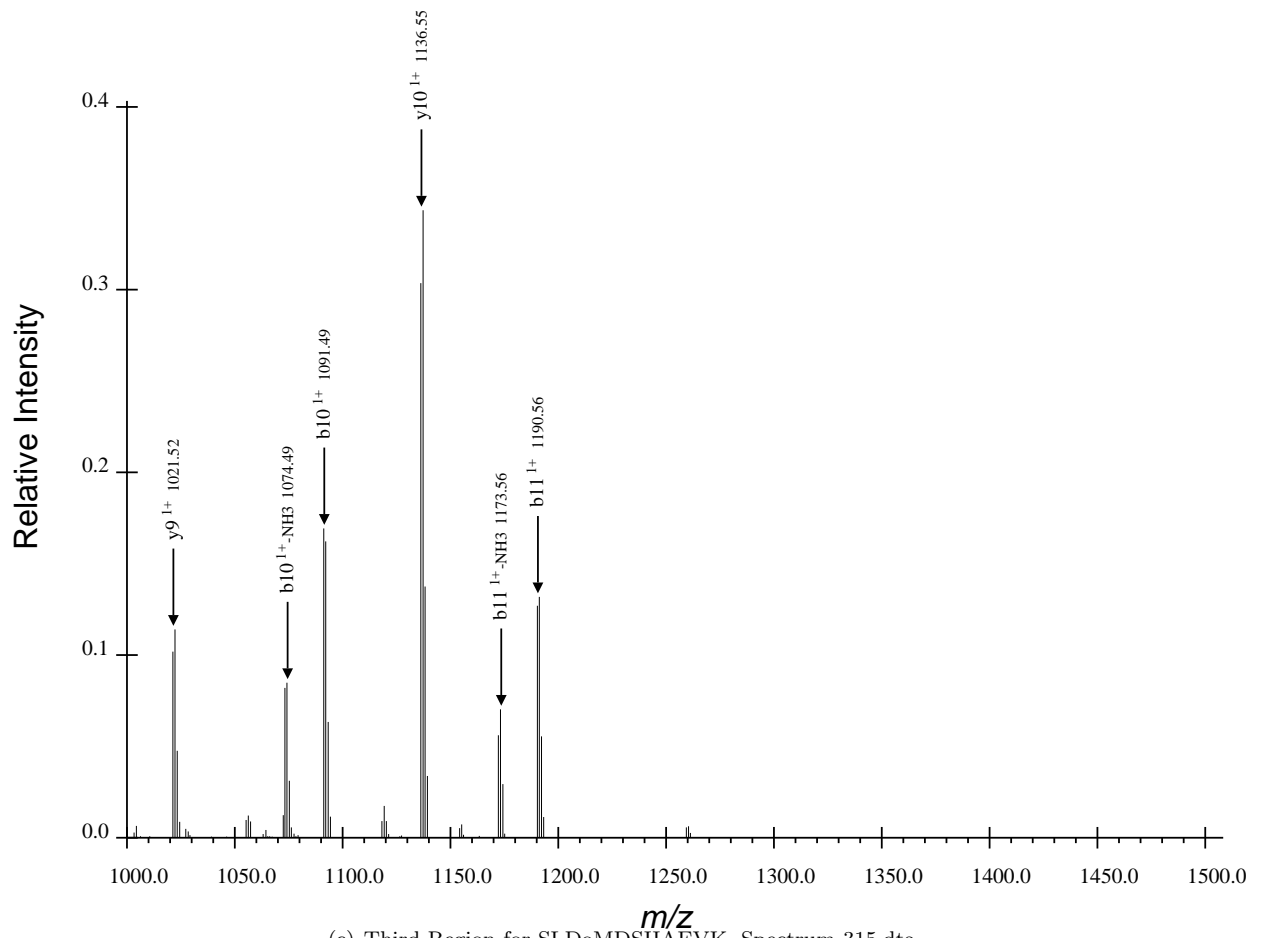

(c) Third Region for SLDoMDSIIAEVK, Spectrum 315.dta

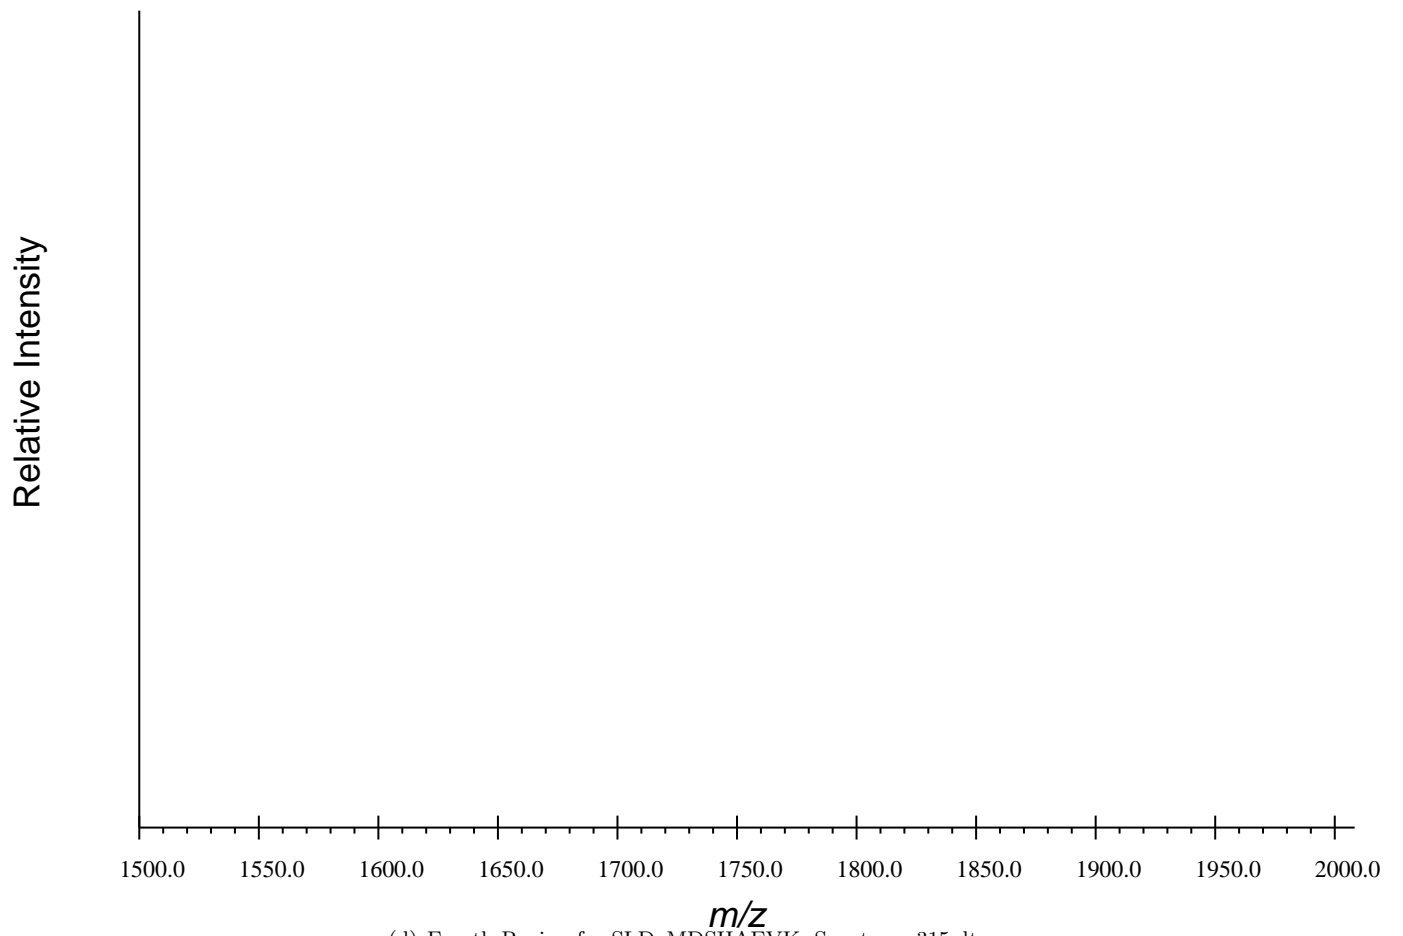

(d) Fourth Region for SLDoMDSIIAEVK, Spectrum 315.dta

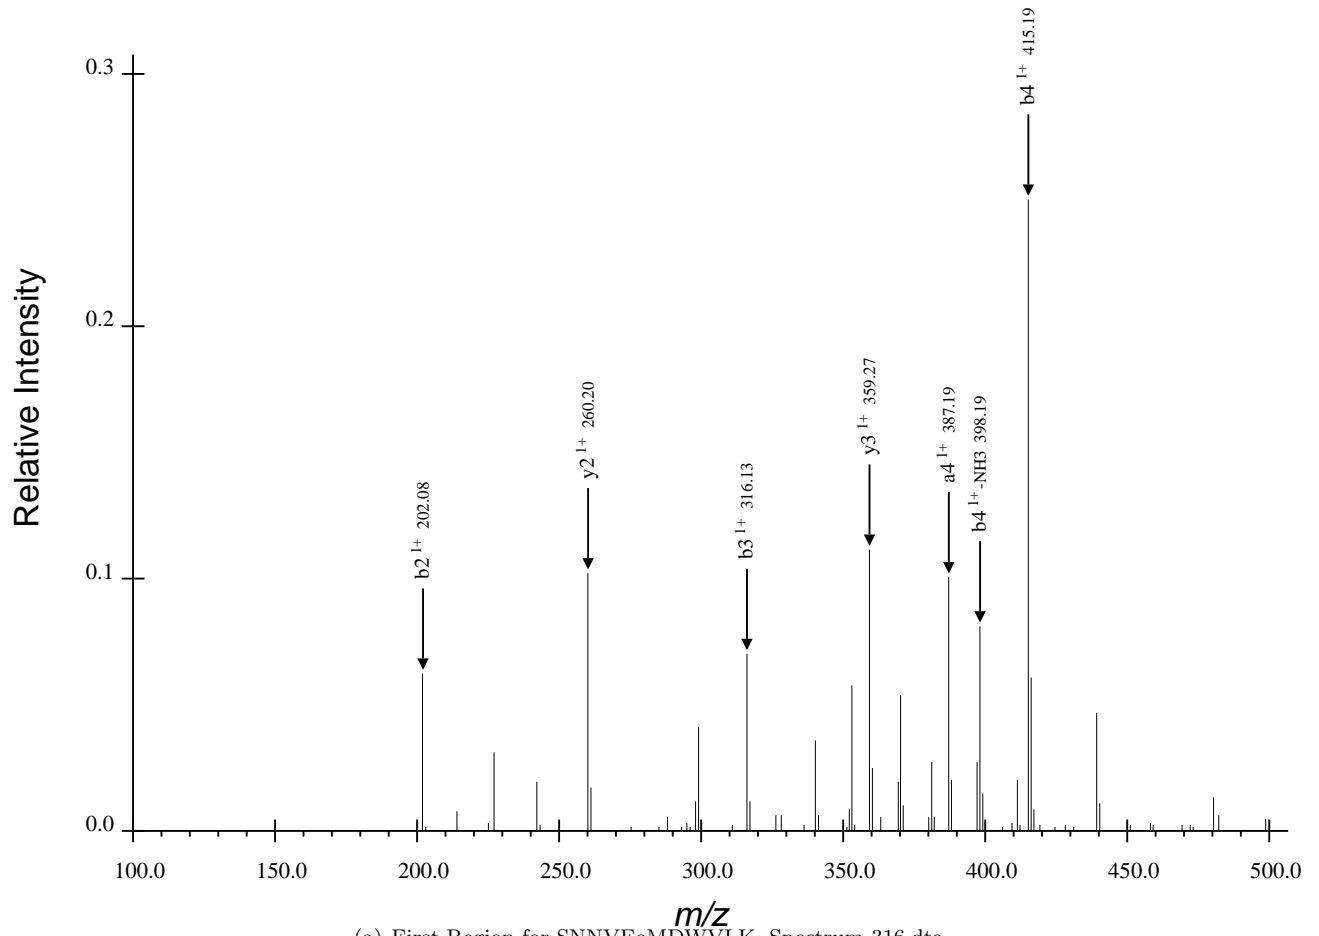

(a) First Region for SNNVEoMDWVLK, Spectrum 316.dta

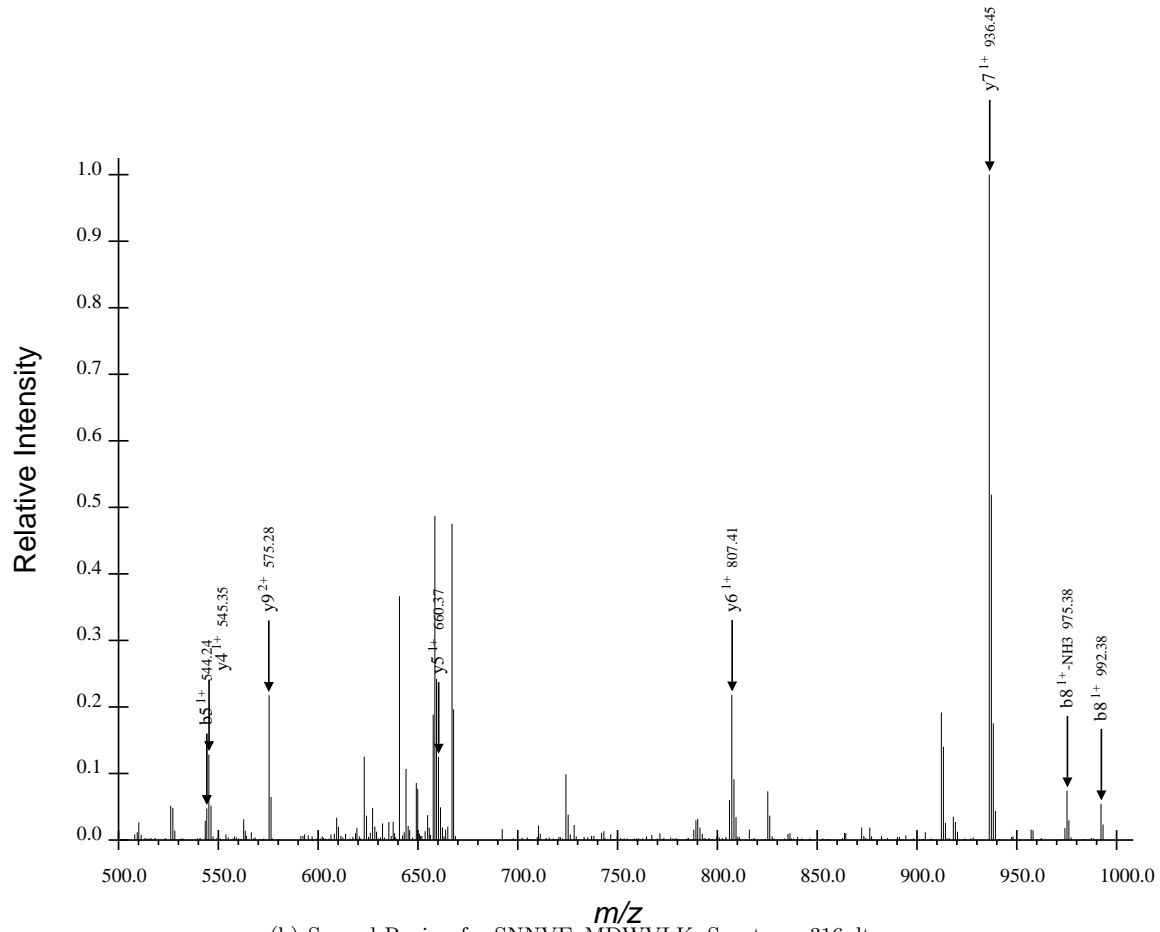

(b) Second Region for SNNVEoMDWVLK, Spectrum 316.dta



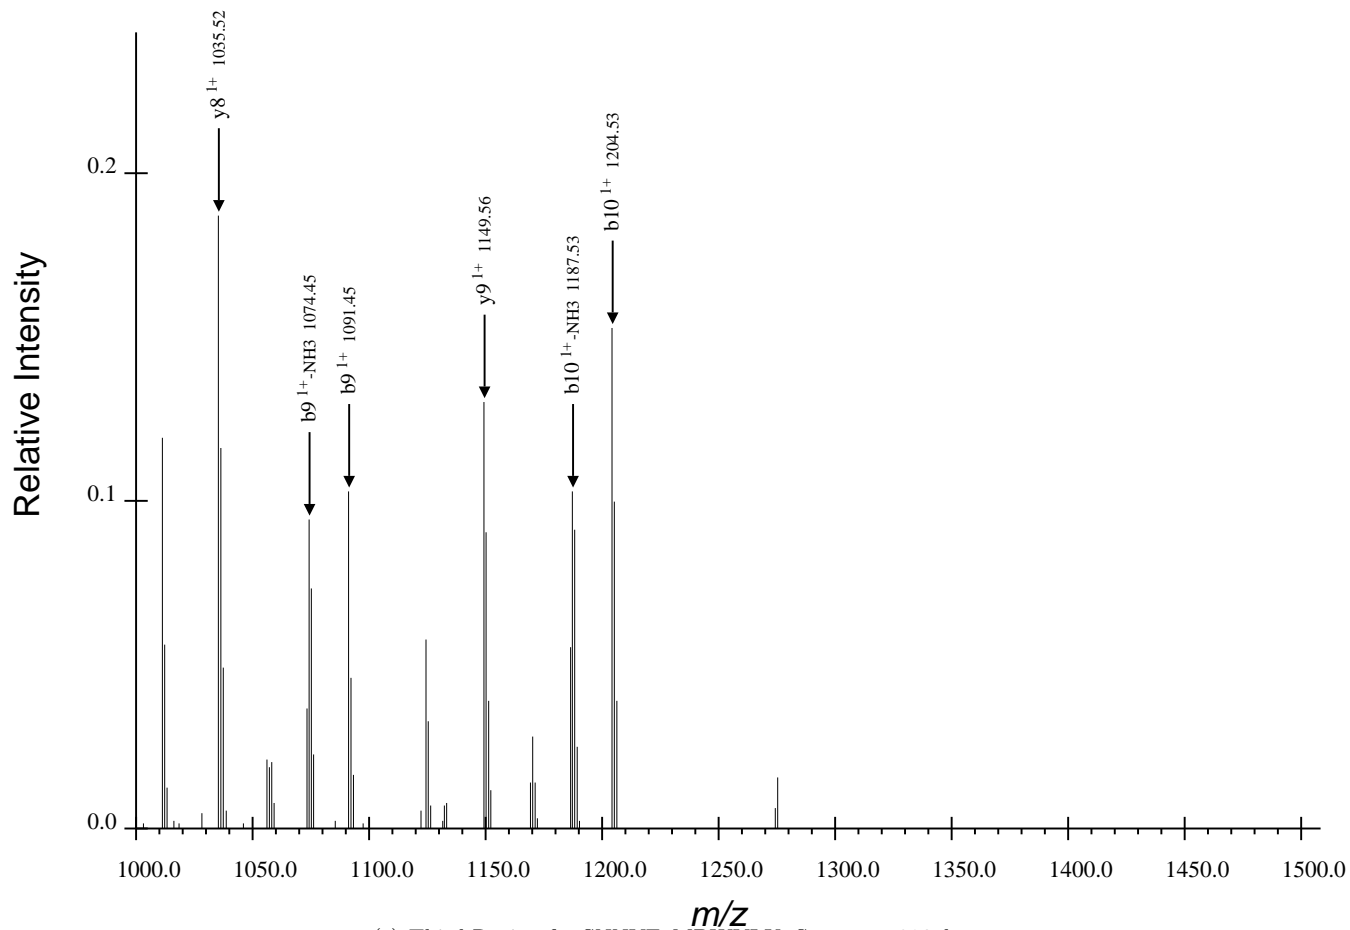

(c) Third Region for SNNVEoMDWVLK, Spectrum 316.dta

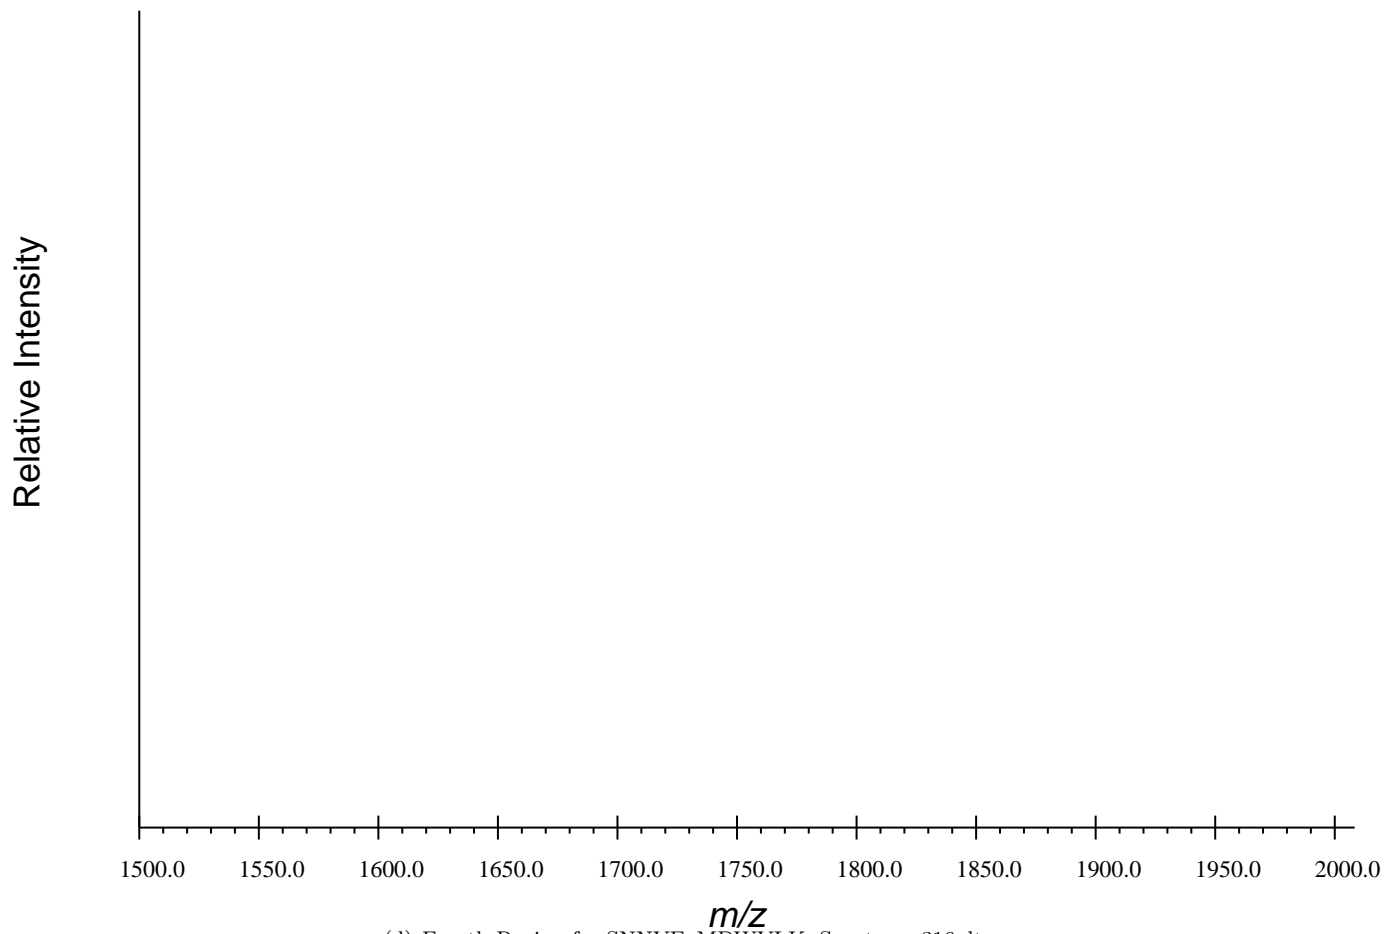

(d) Fourth Region for SNNVEoMDWVLK, Spectrum 316.dta

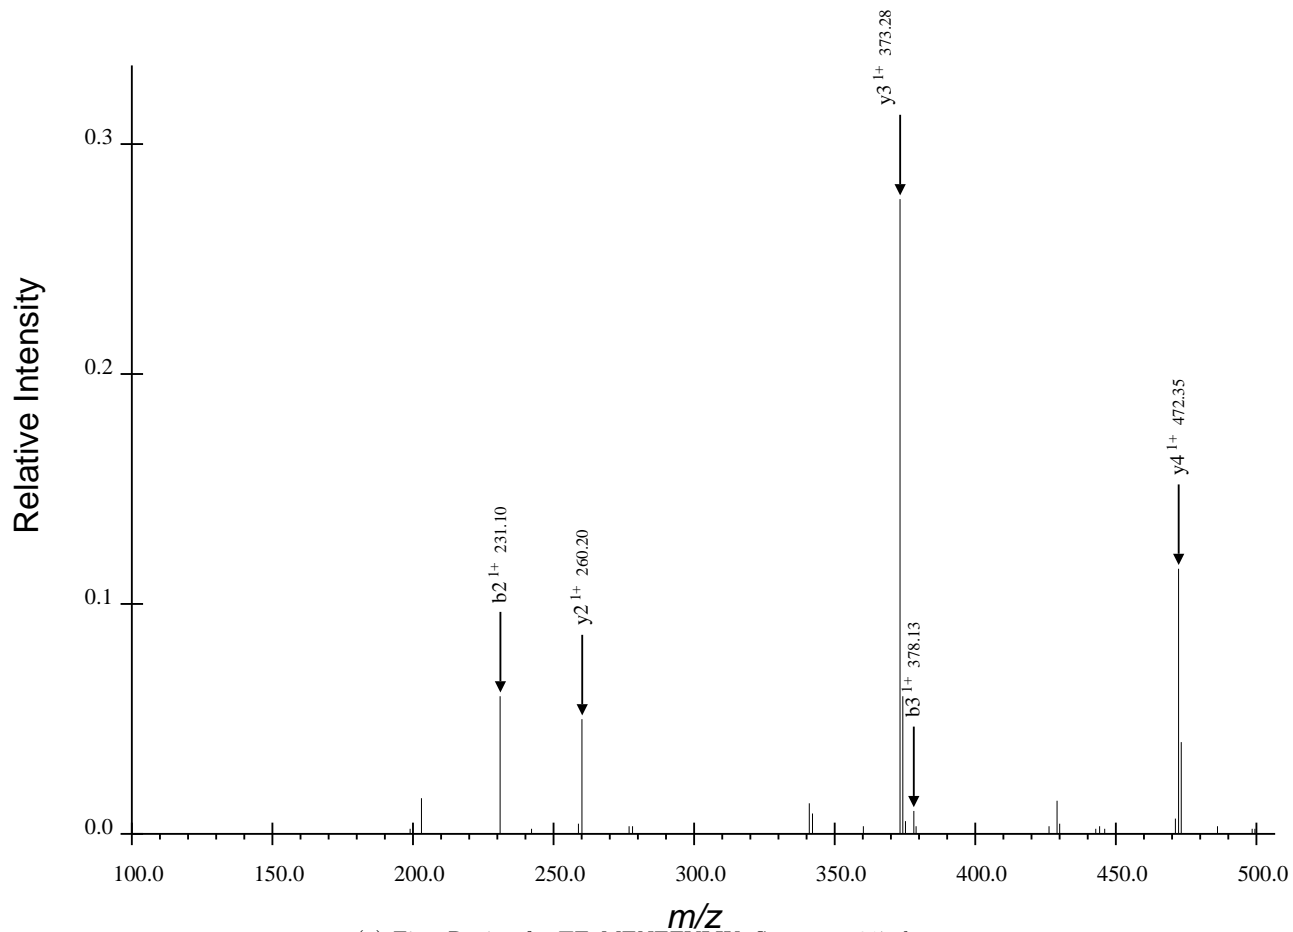

(a) First Region for TEoMENEFLIK, Spectrum 317.dta

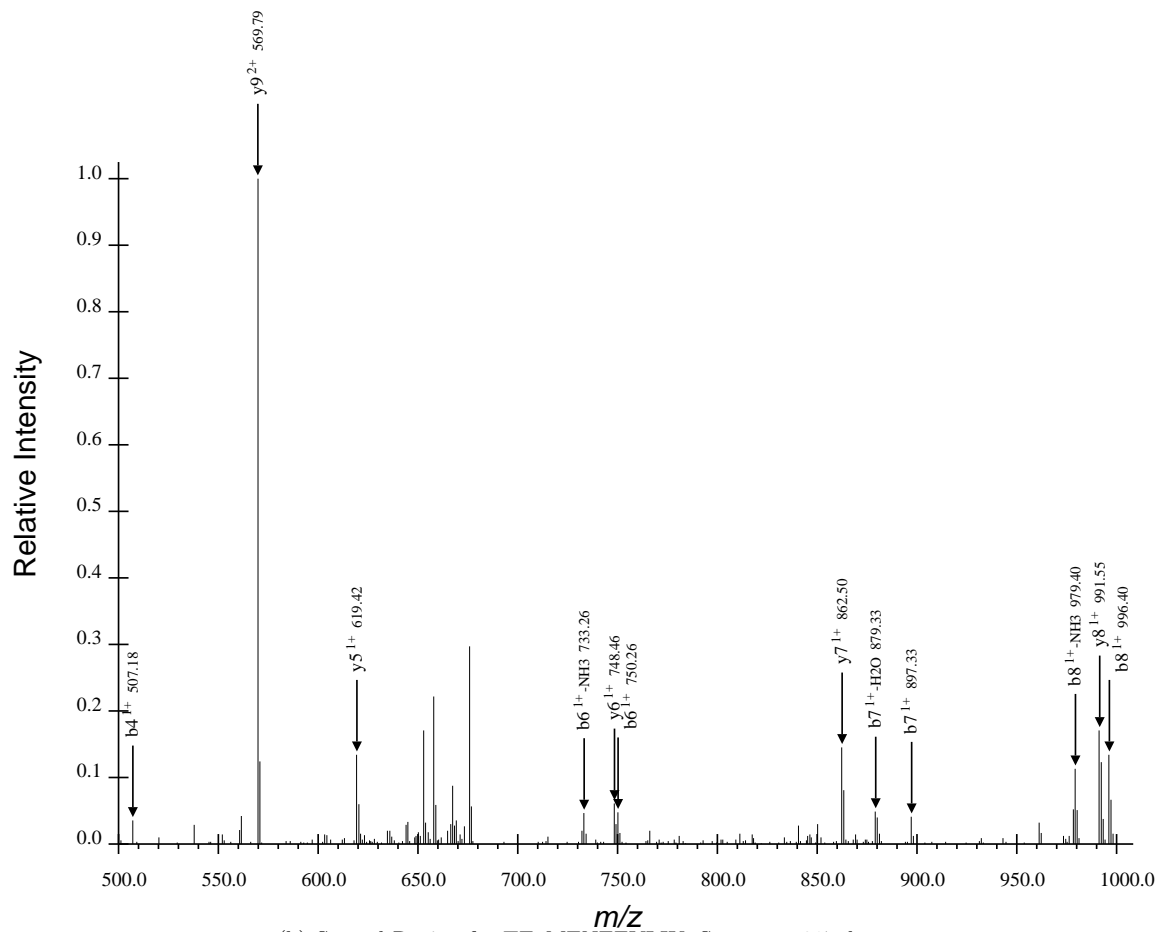

(b) Second Region for TEoMENEFLIK, Spectrum 317.dta

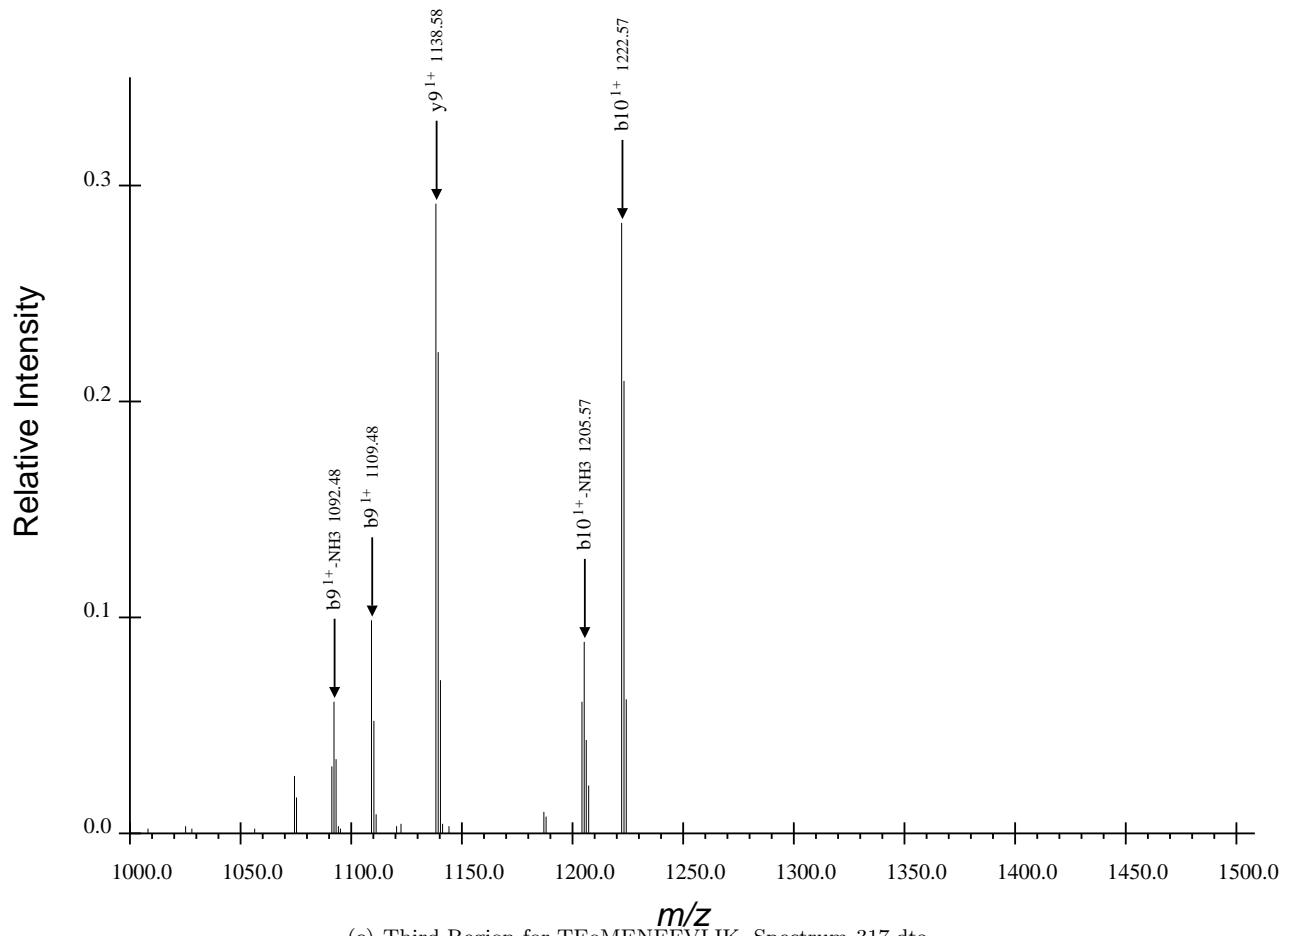

(c) Third Region for TEoMENEFLIK, Spectrum 317.dta

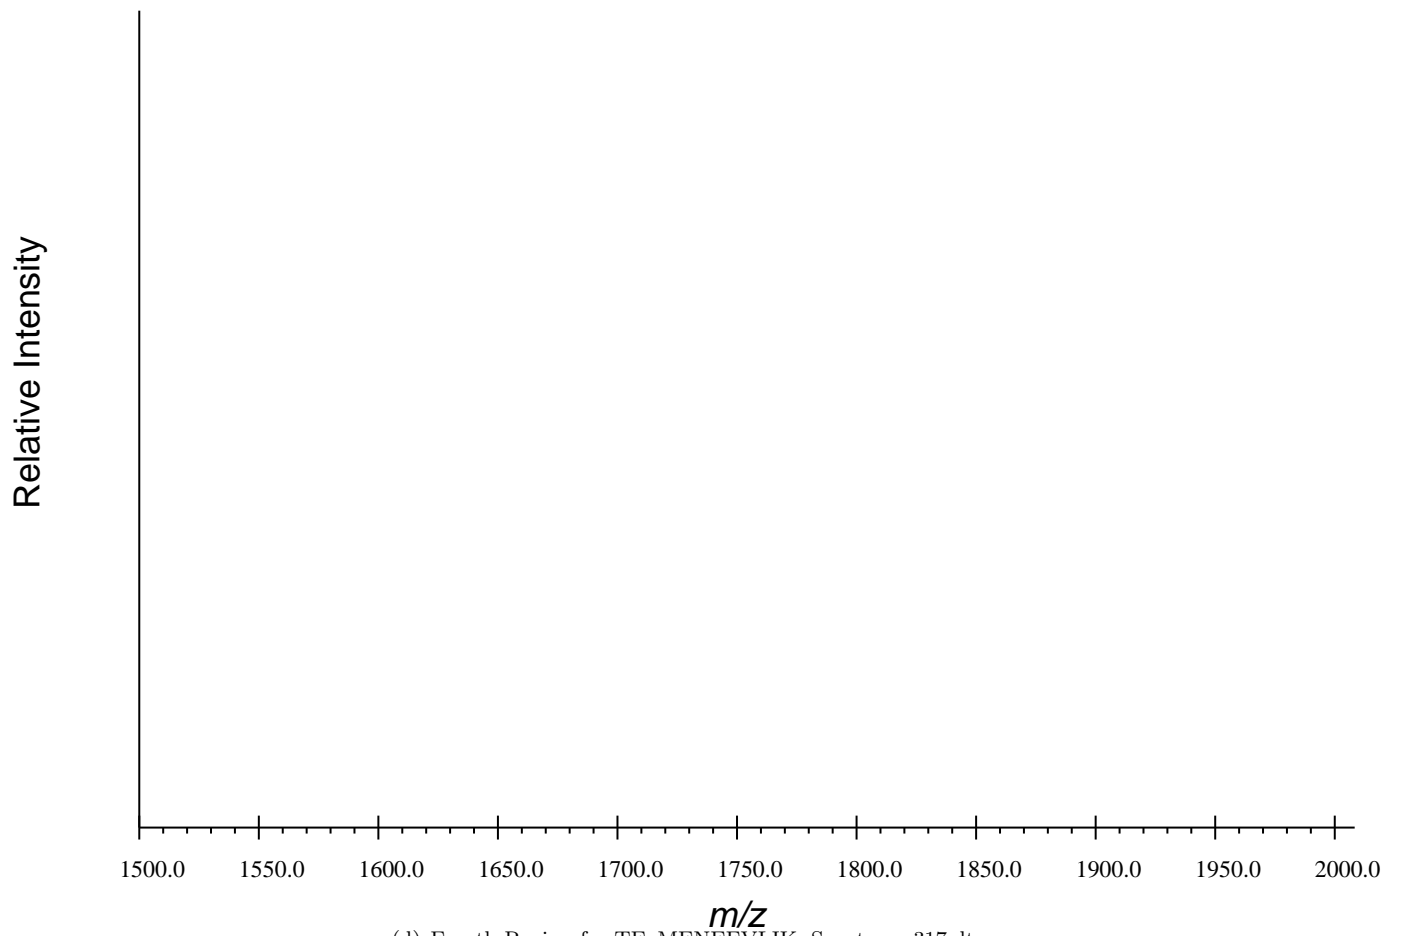

(d) Fourth Region for TEoMENEFLIK, Spectrum 317.dta

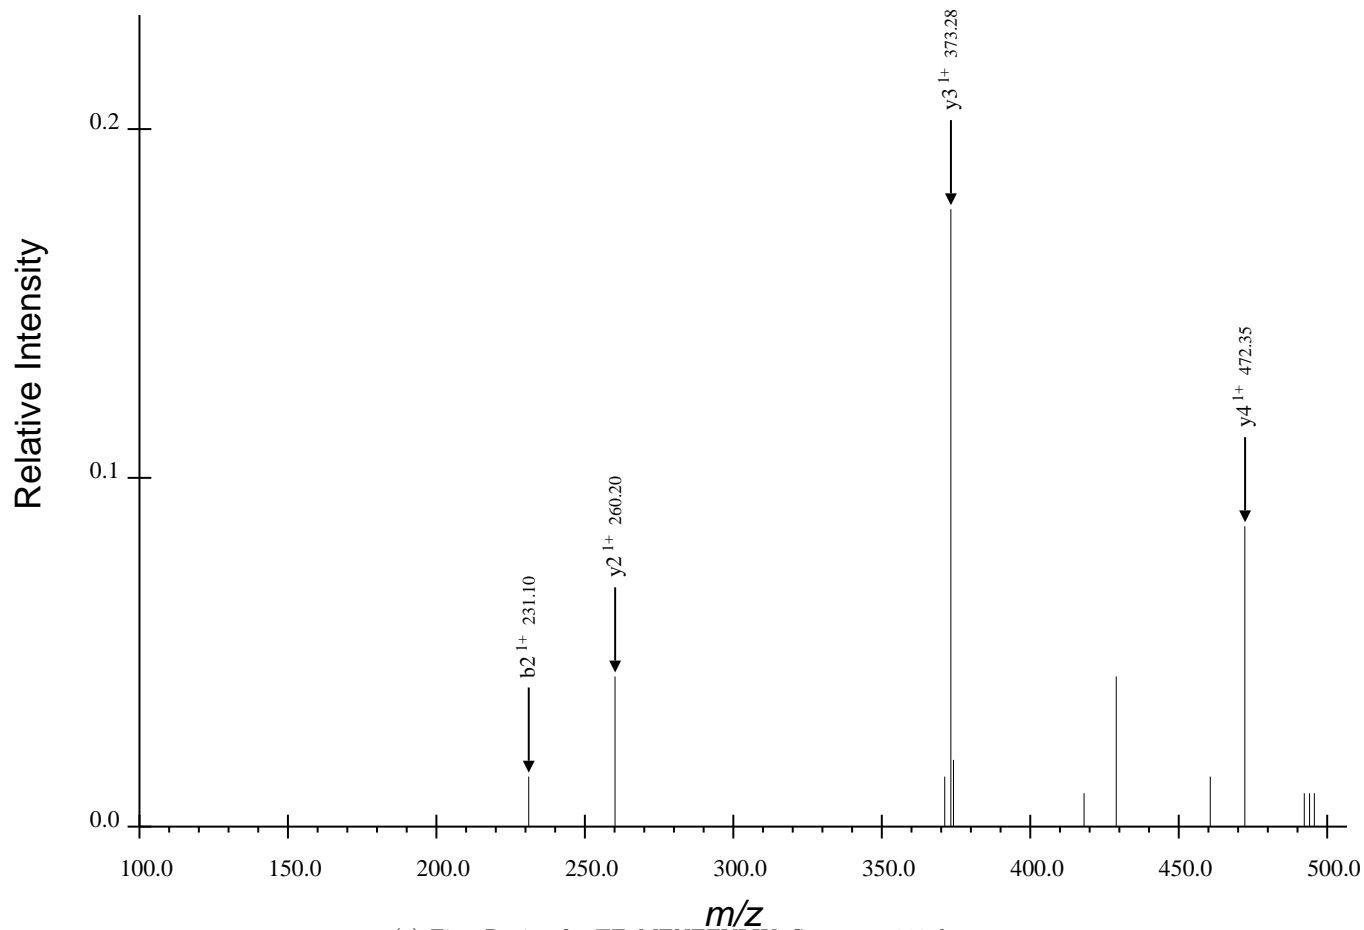

(a) First Region for TEoMENEFLIK, Spectrum 318.dta

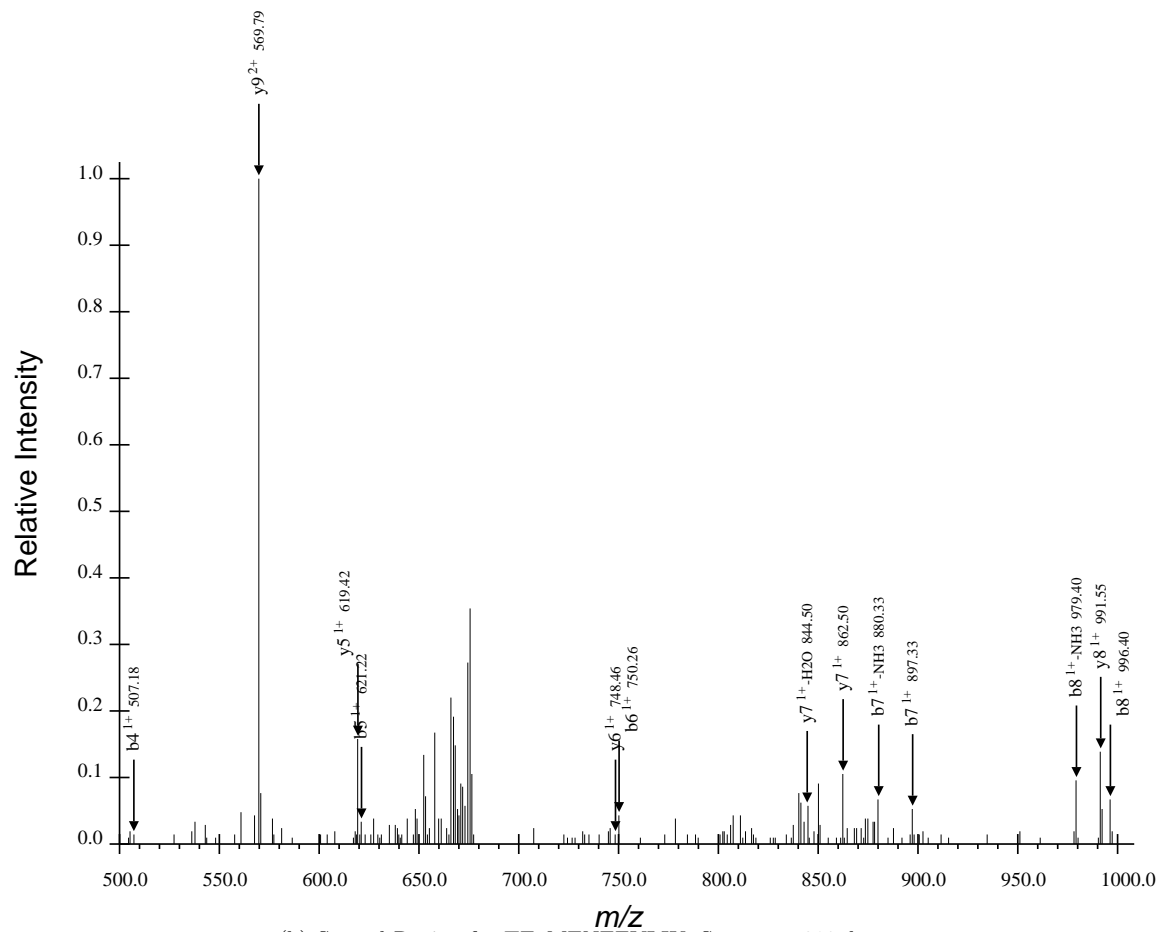

(b) Second Region for TEoMENEFLIK, Spectrum 318.dta

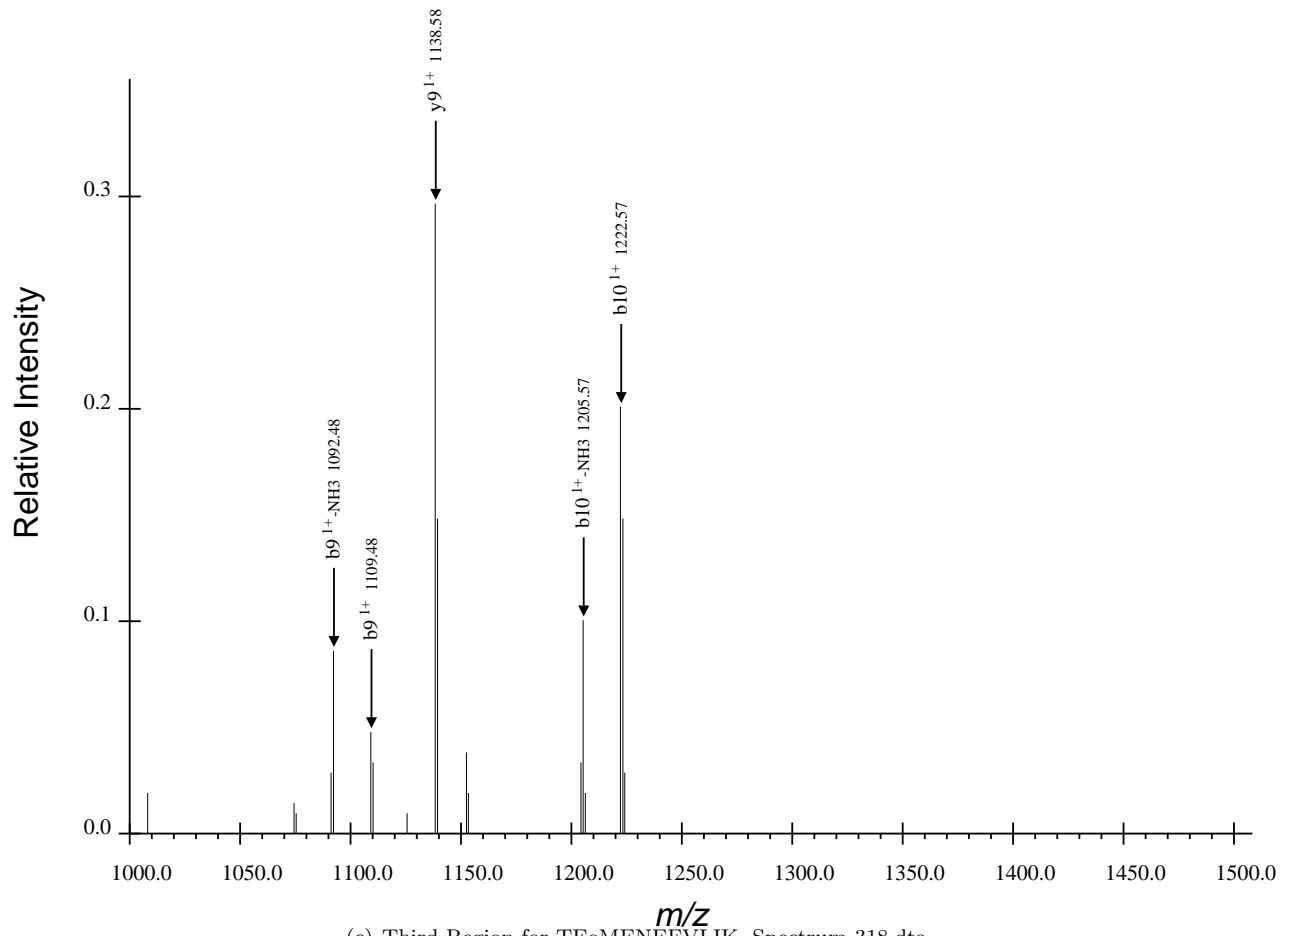

(c) Third Region for TEO MENE FV LIK, Spectrum 318.dta

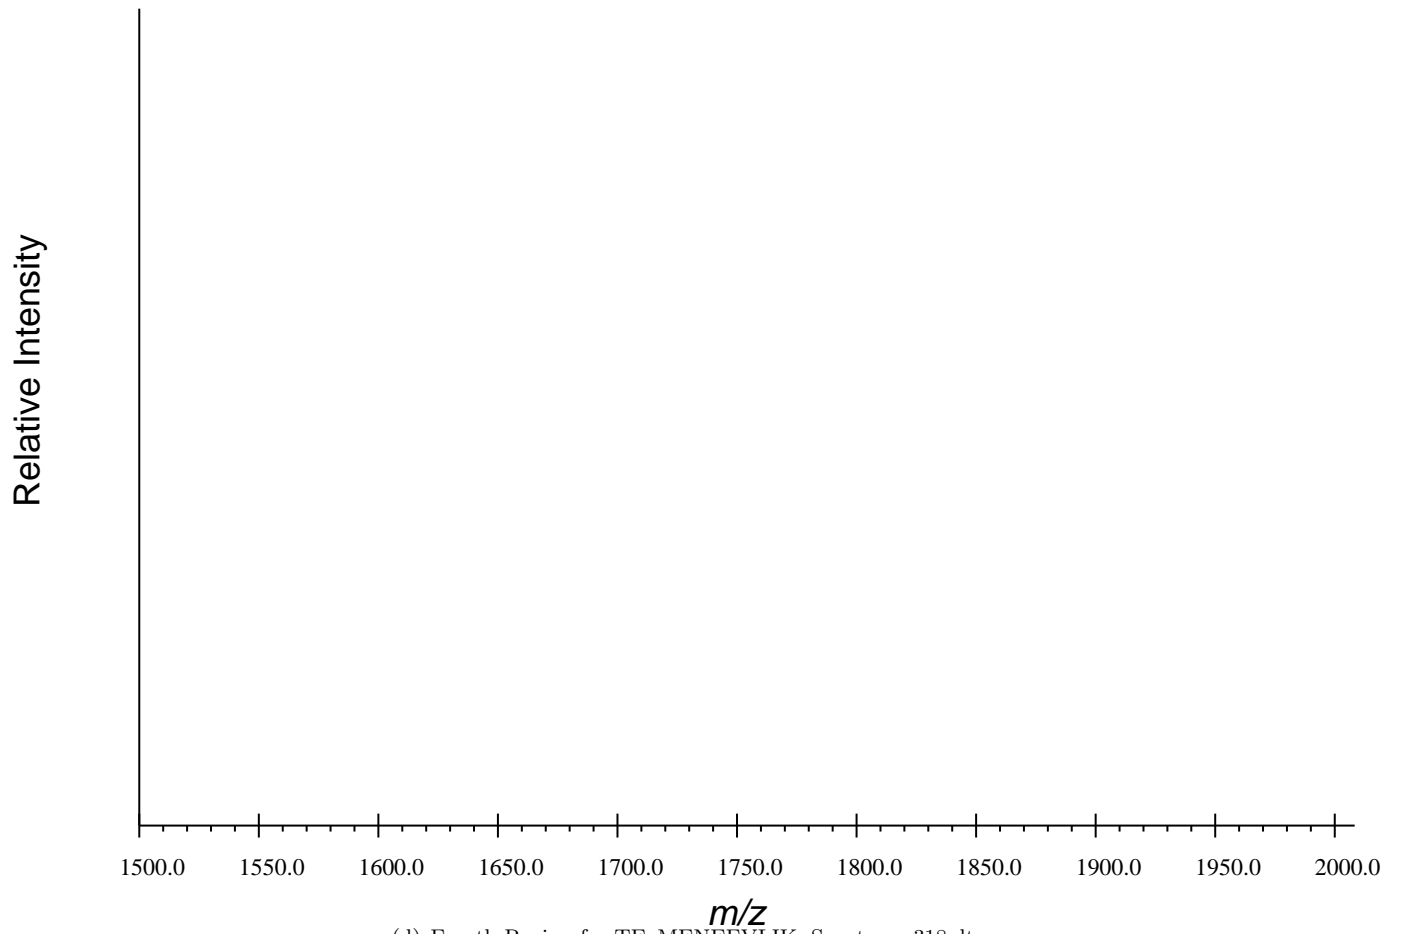

(d) Fourth Region for TEO MENE FV LIK, Spectrum 318.dta

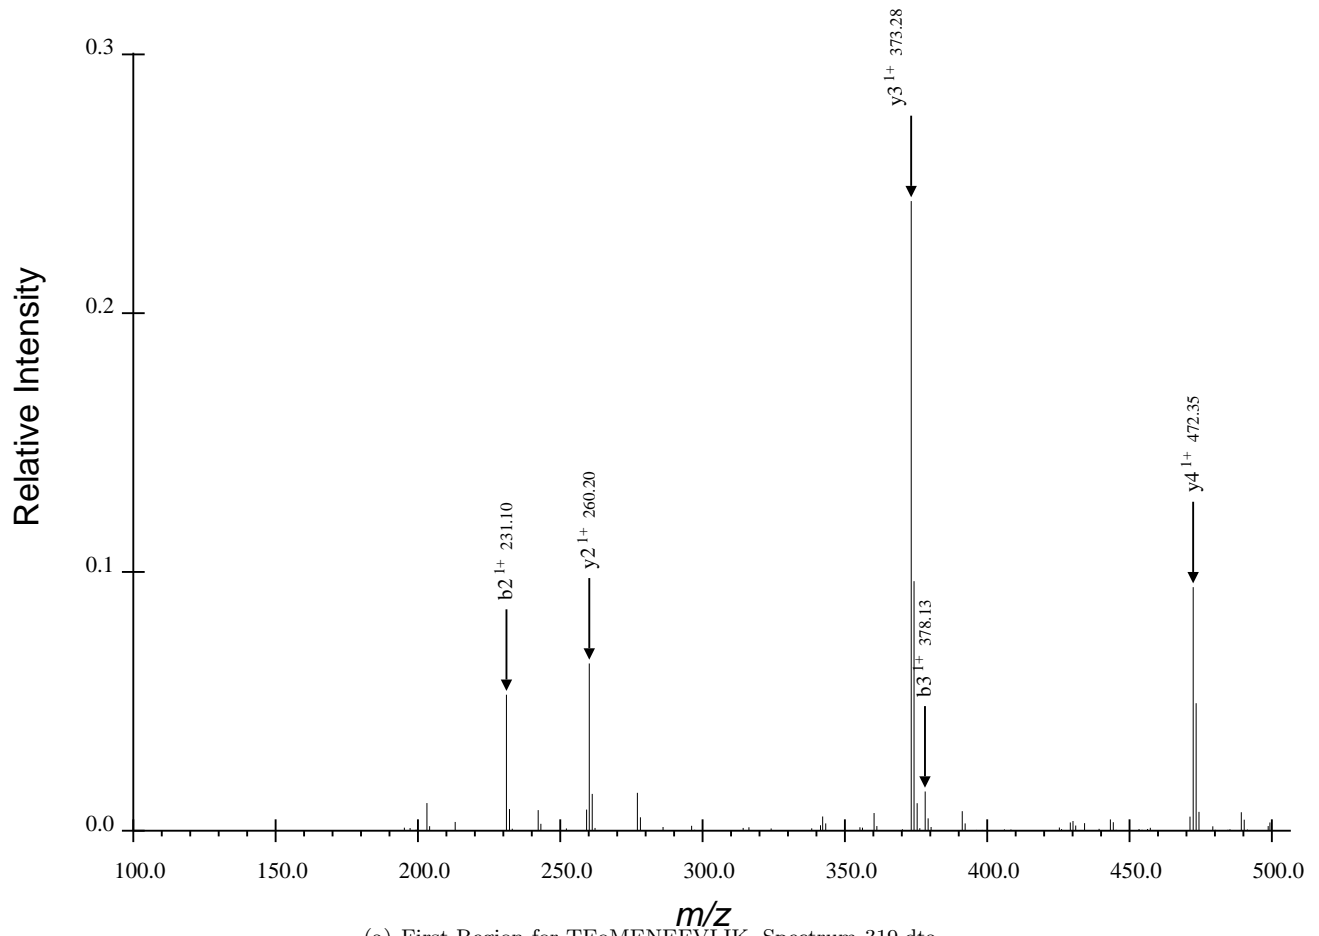

(a) First Region for TEoMENEFLIK, Spectrum 319.dta

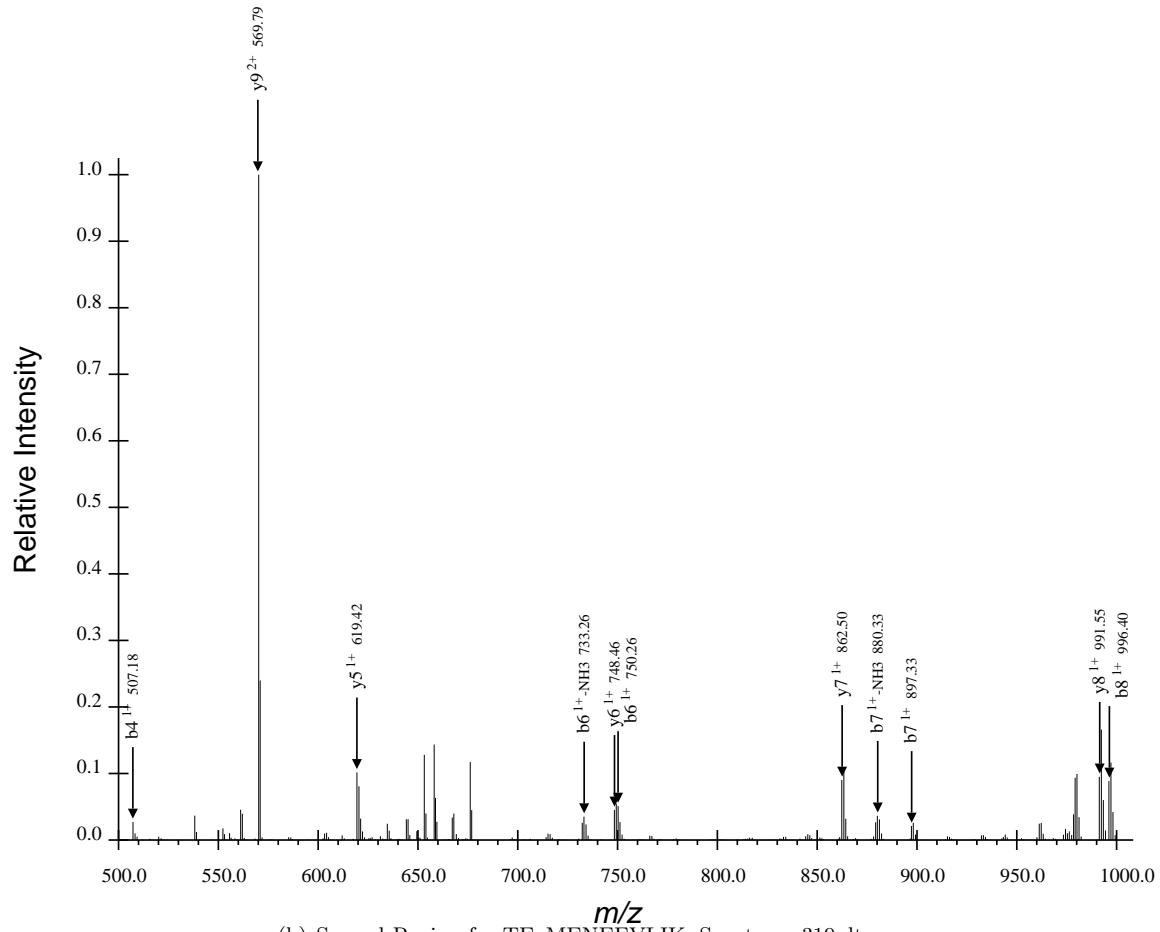

(b) Second Region for TEoMENEFLIK, Spectrum 319.dta

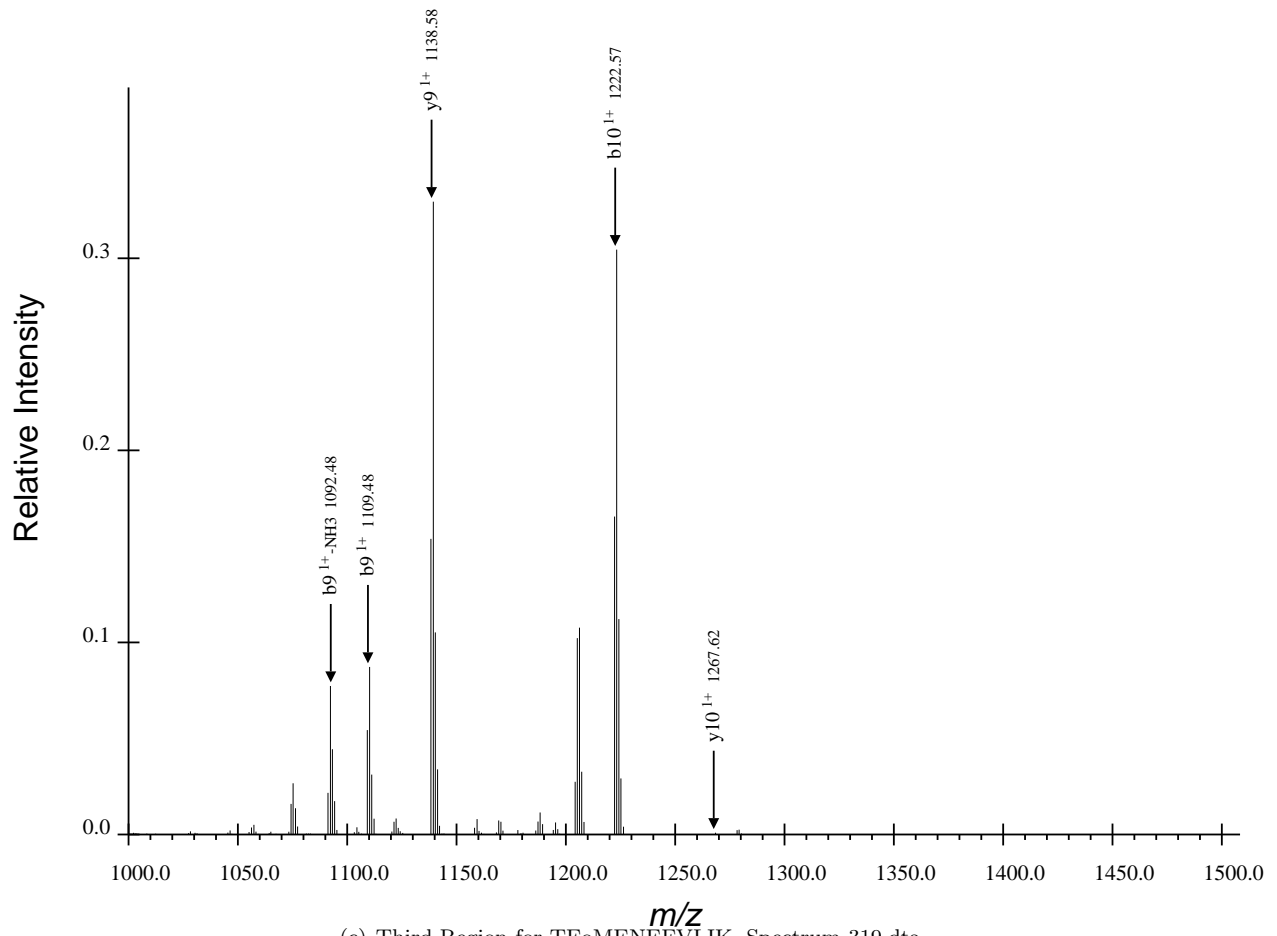

(c) Third Region for TEoMENEFLIK, Spectrum 319.dta

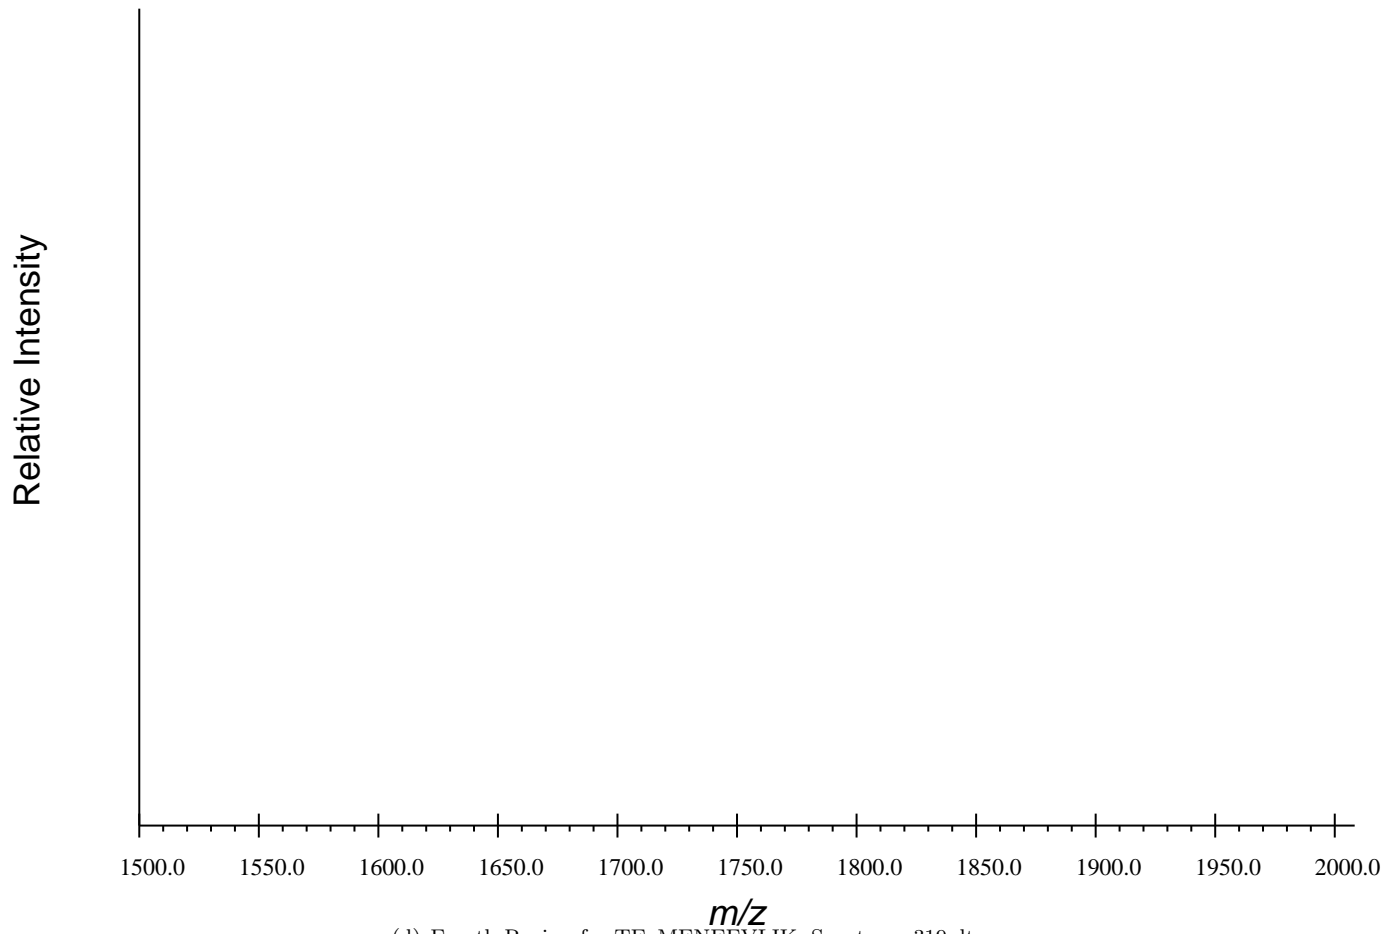

(d) Fourth Region for TEoMENEFLIK, Spectrum 319.dta

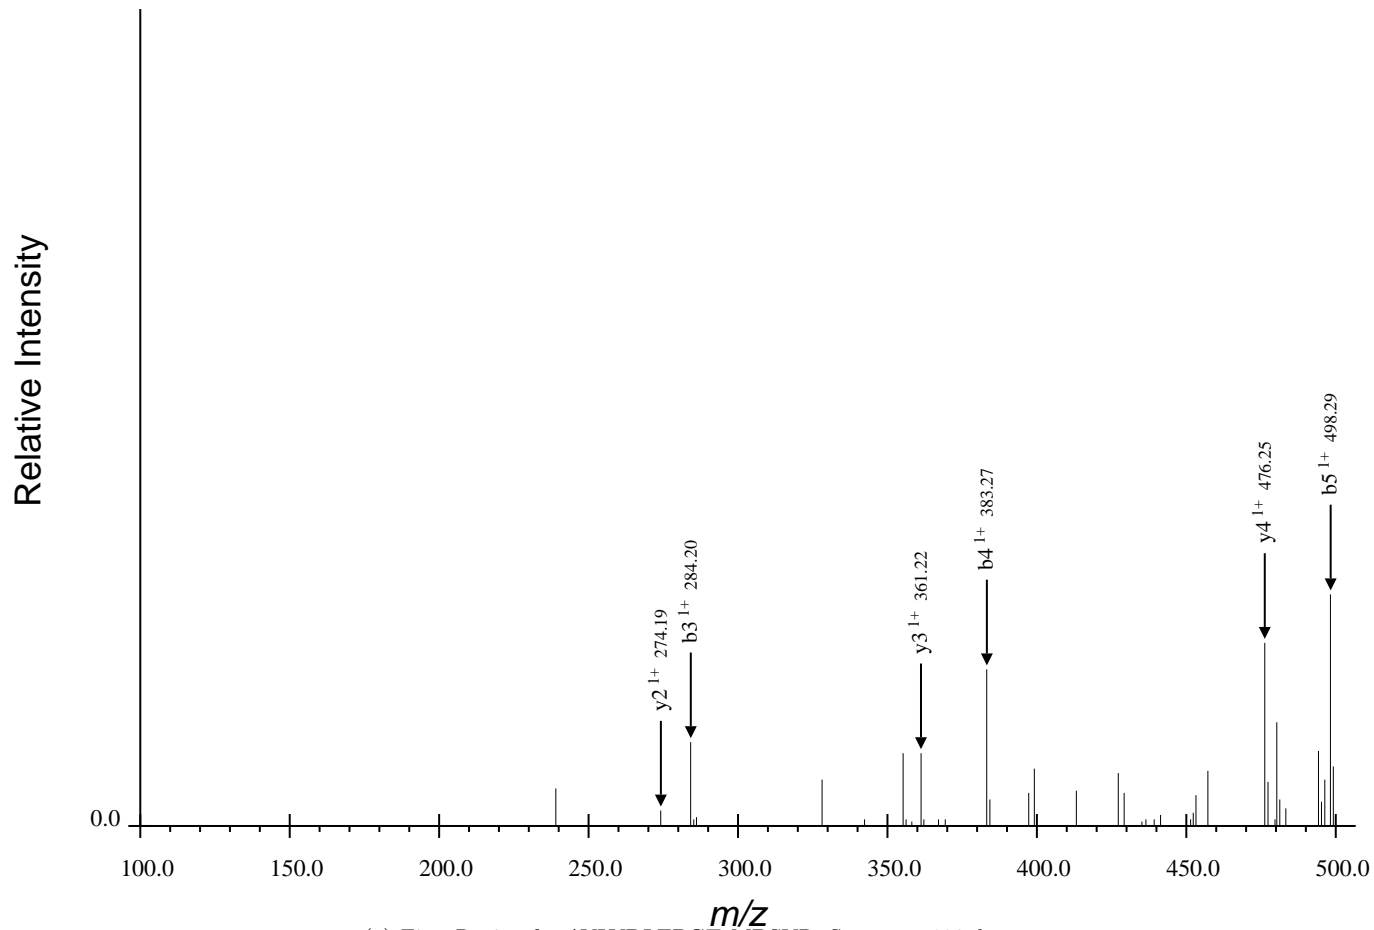

(a) First Region for AVLVDLEPGToMDSVR, Spectrum 320.dta

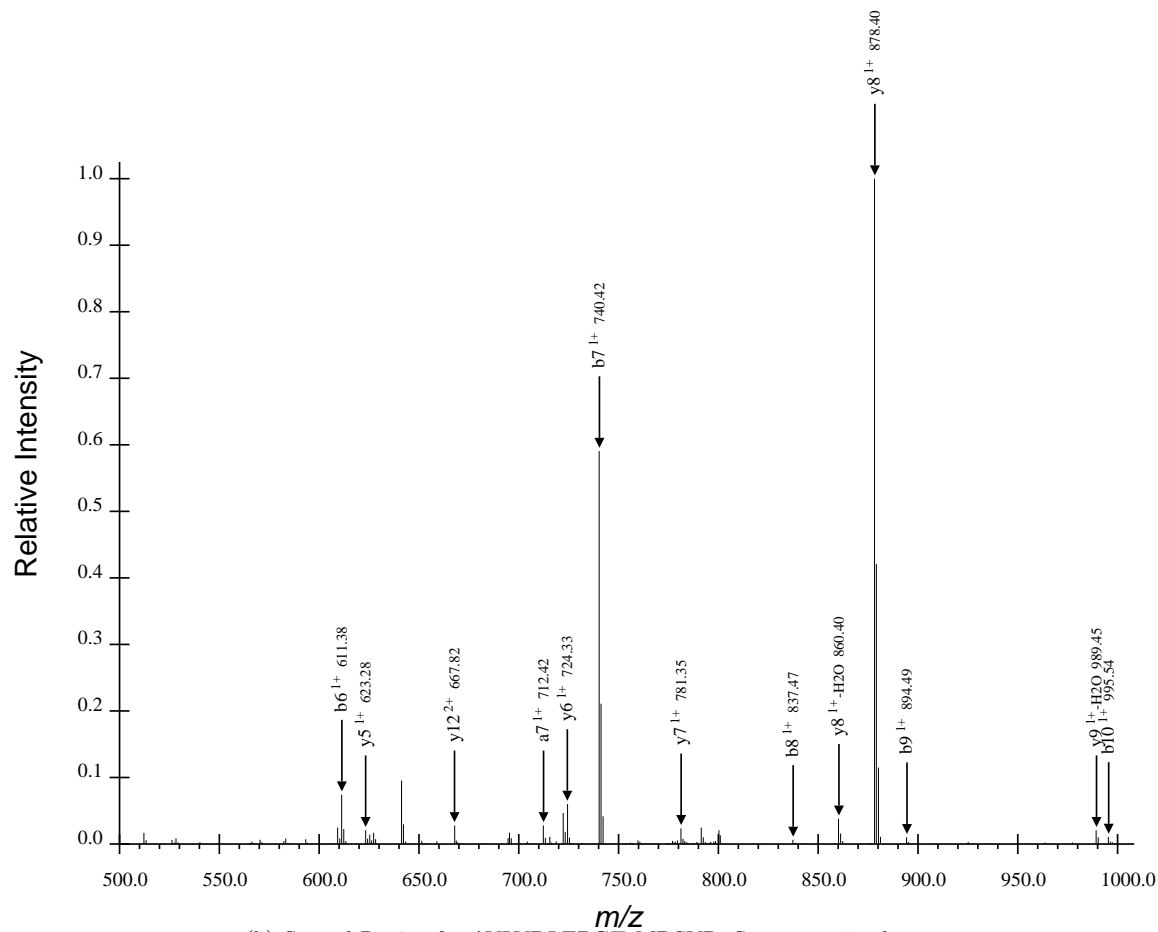

(b) Second Region for AVLVDLEPGToMDSVR, Spectrum 320.dta



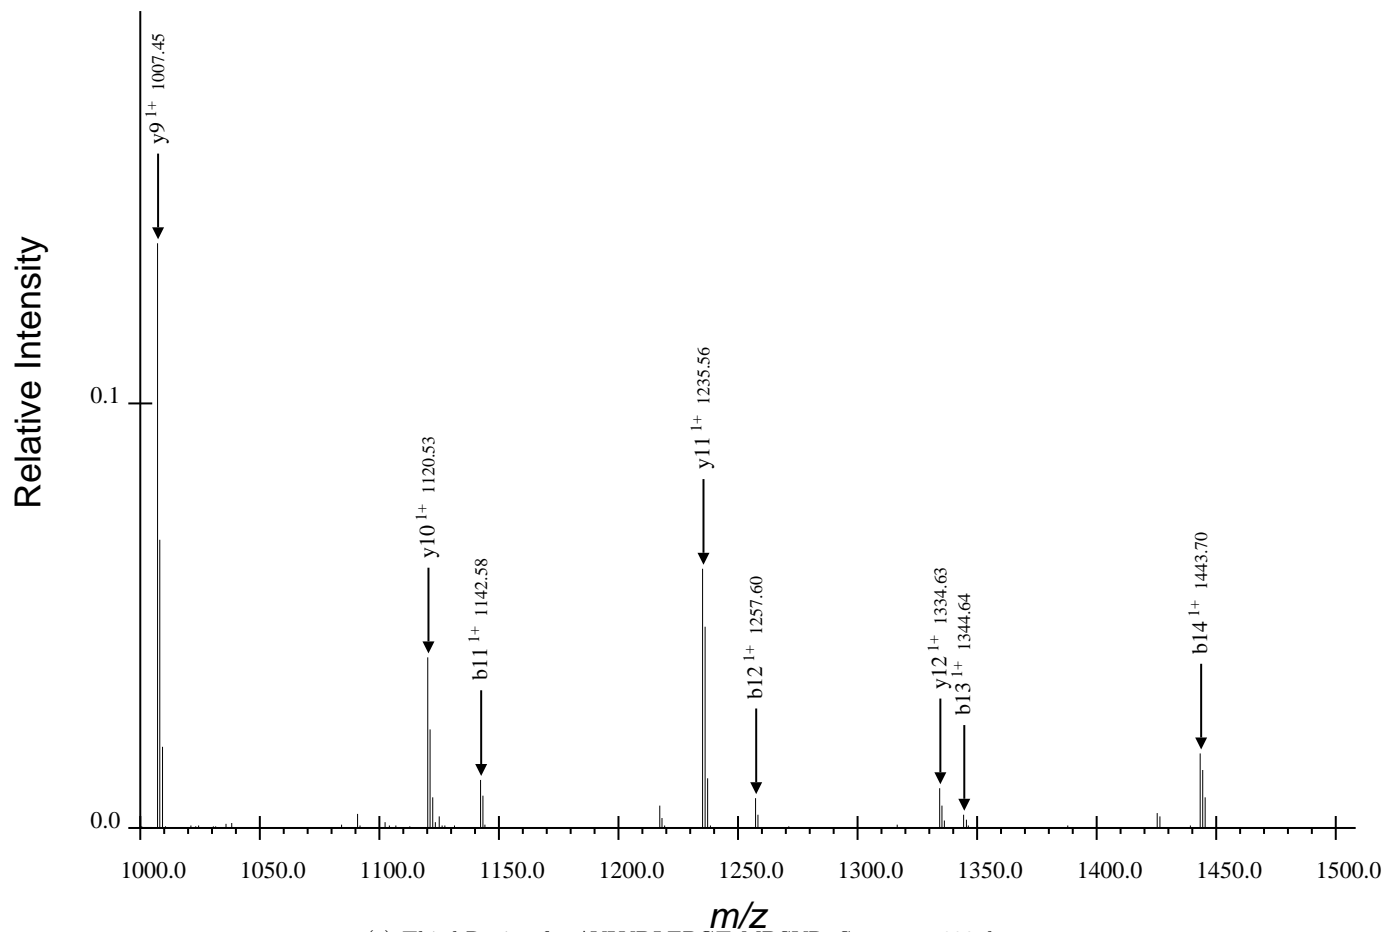

(c) Third Region for AVLVDLEPGToMDSVR, Spectrum 320.dta

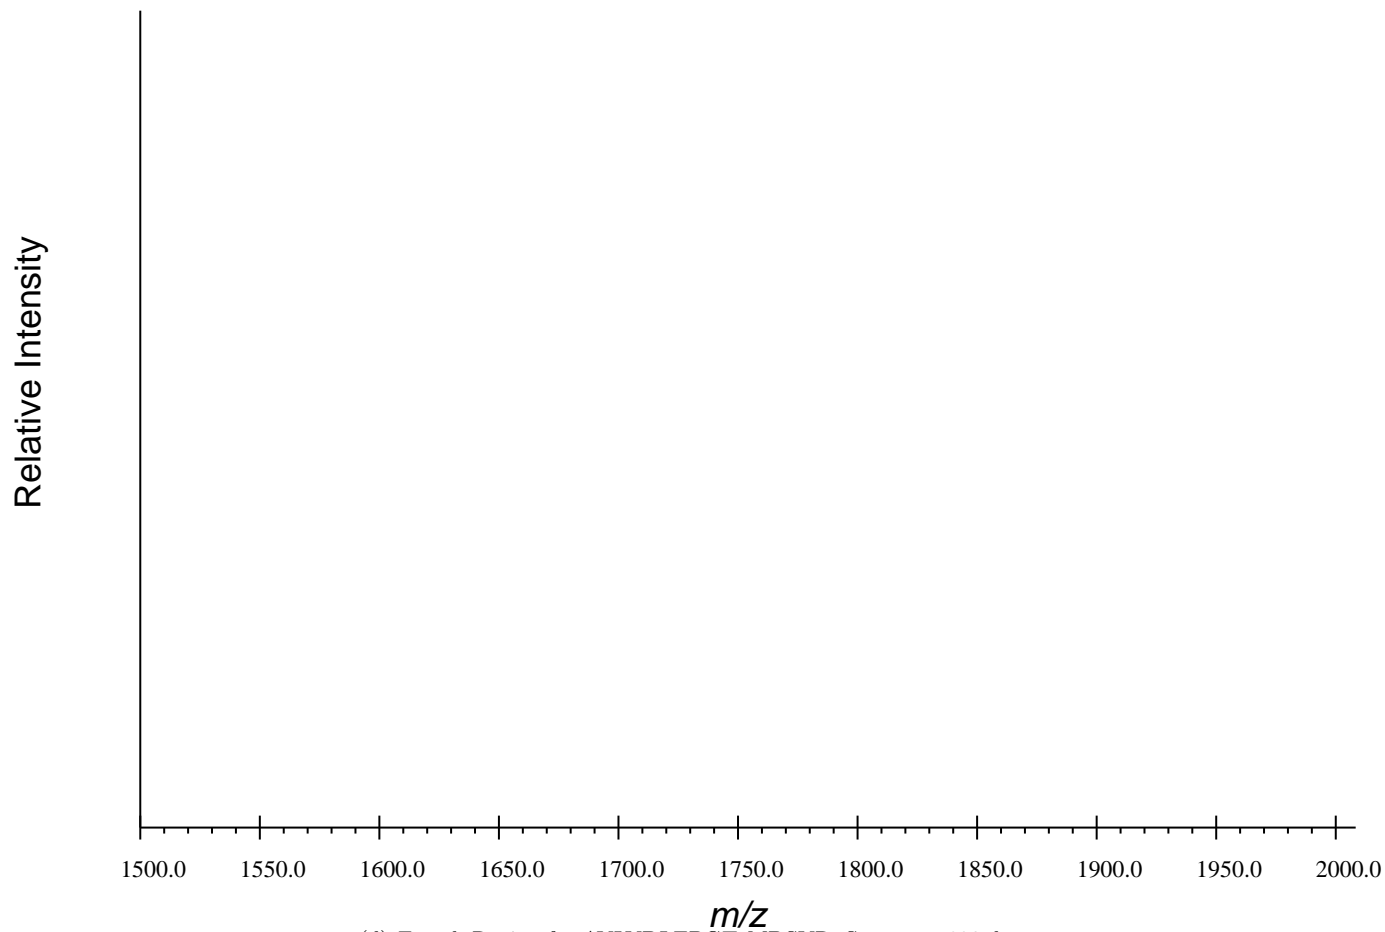

(d) Fourth Region for AVLVDLEPGToMDSVR, Spectrum 320.dta

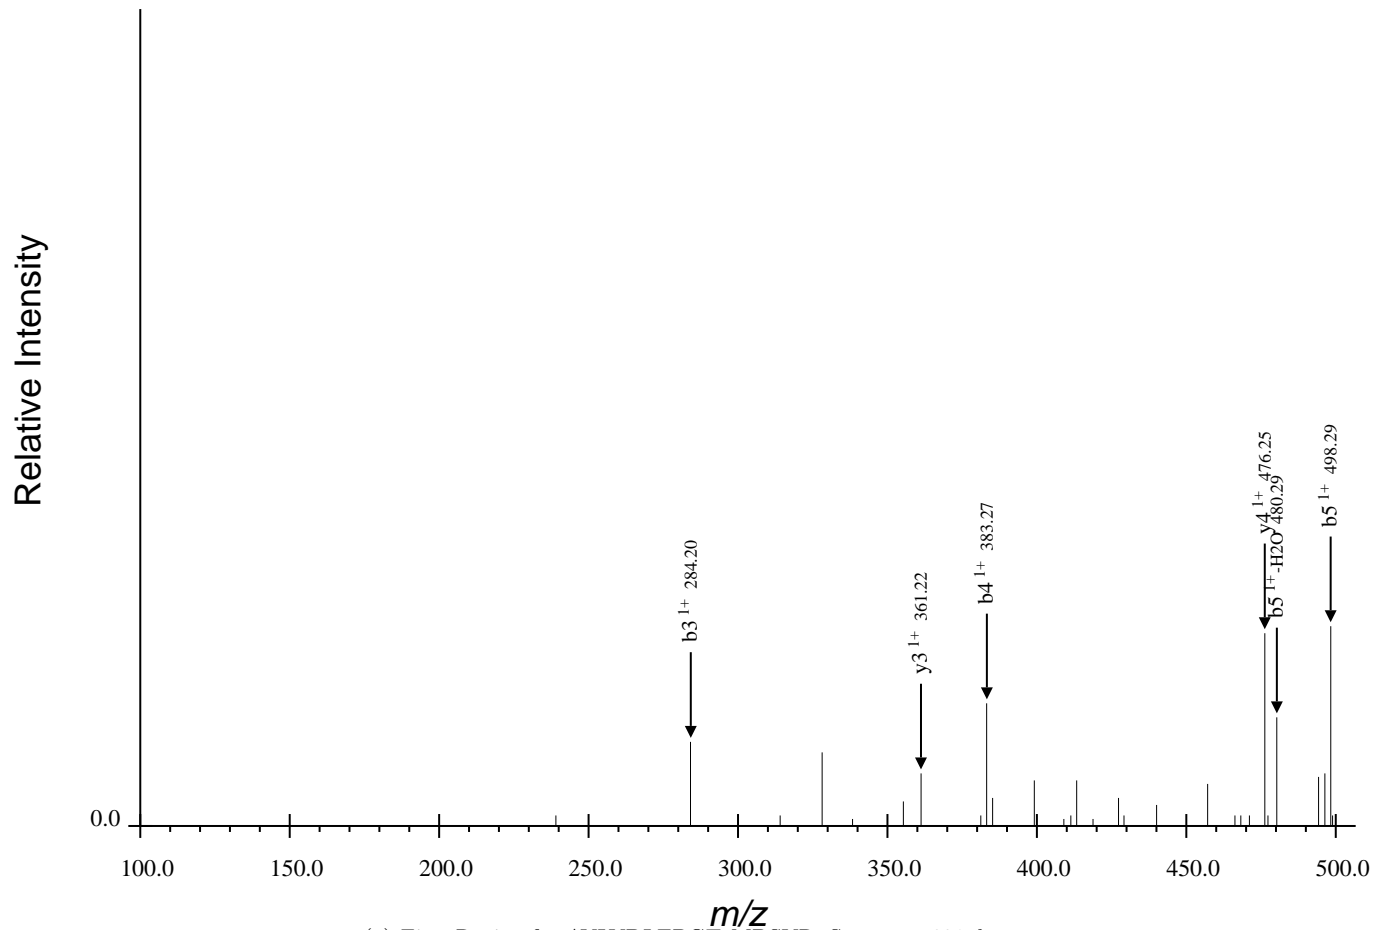

(a) First Region for AVLDLEPGToMDSVR, Spectrum 321.dta

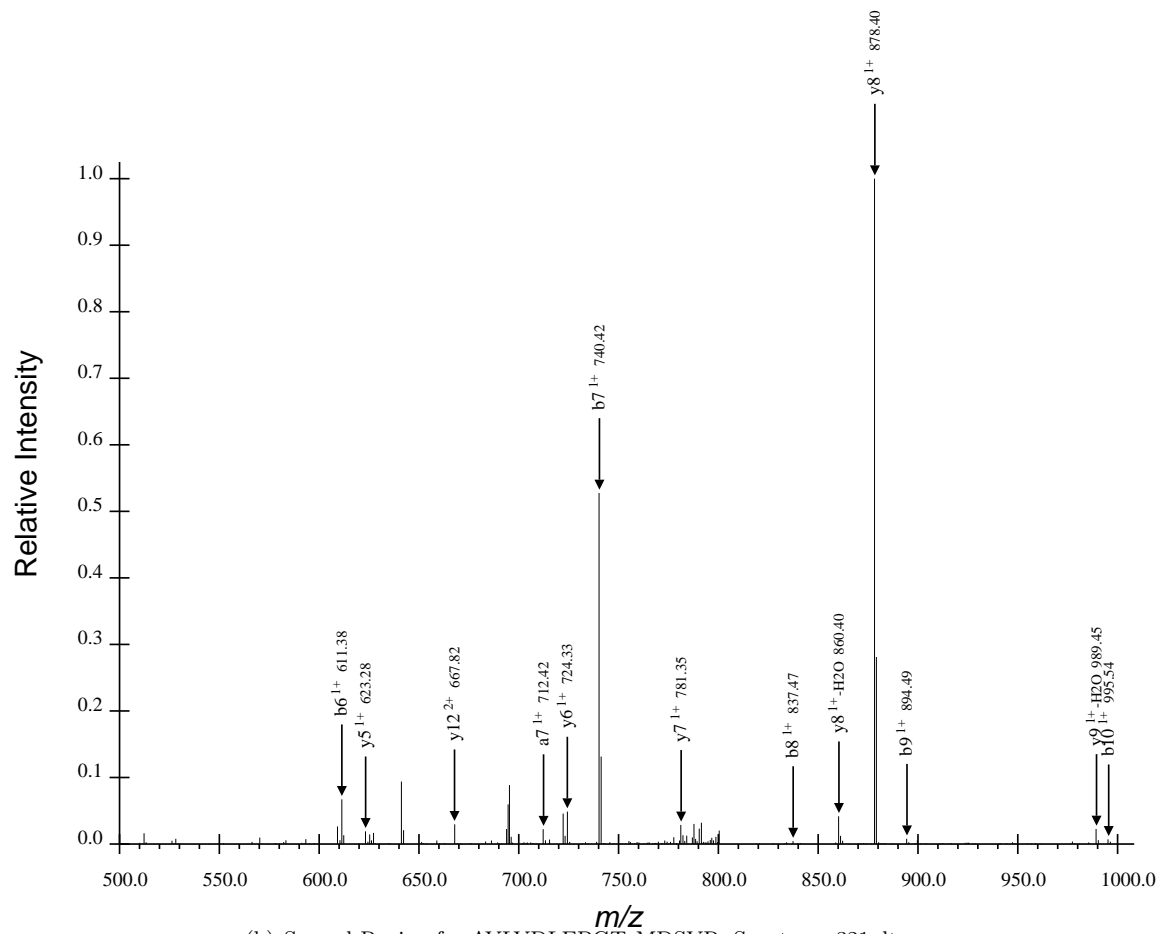

(b) Second Region for AVLDLEPGToMDSVR, Spectrum 321.dta

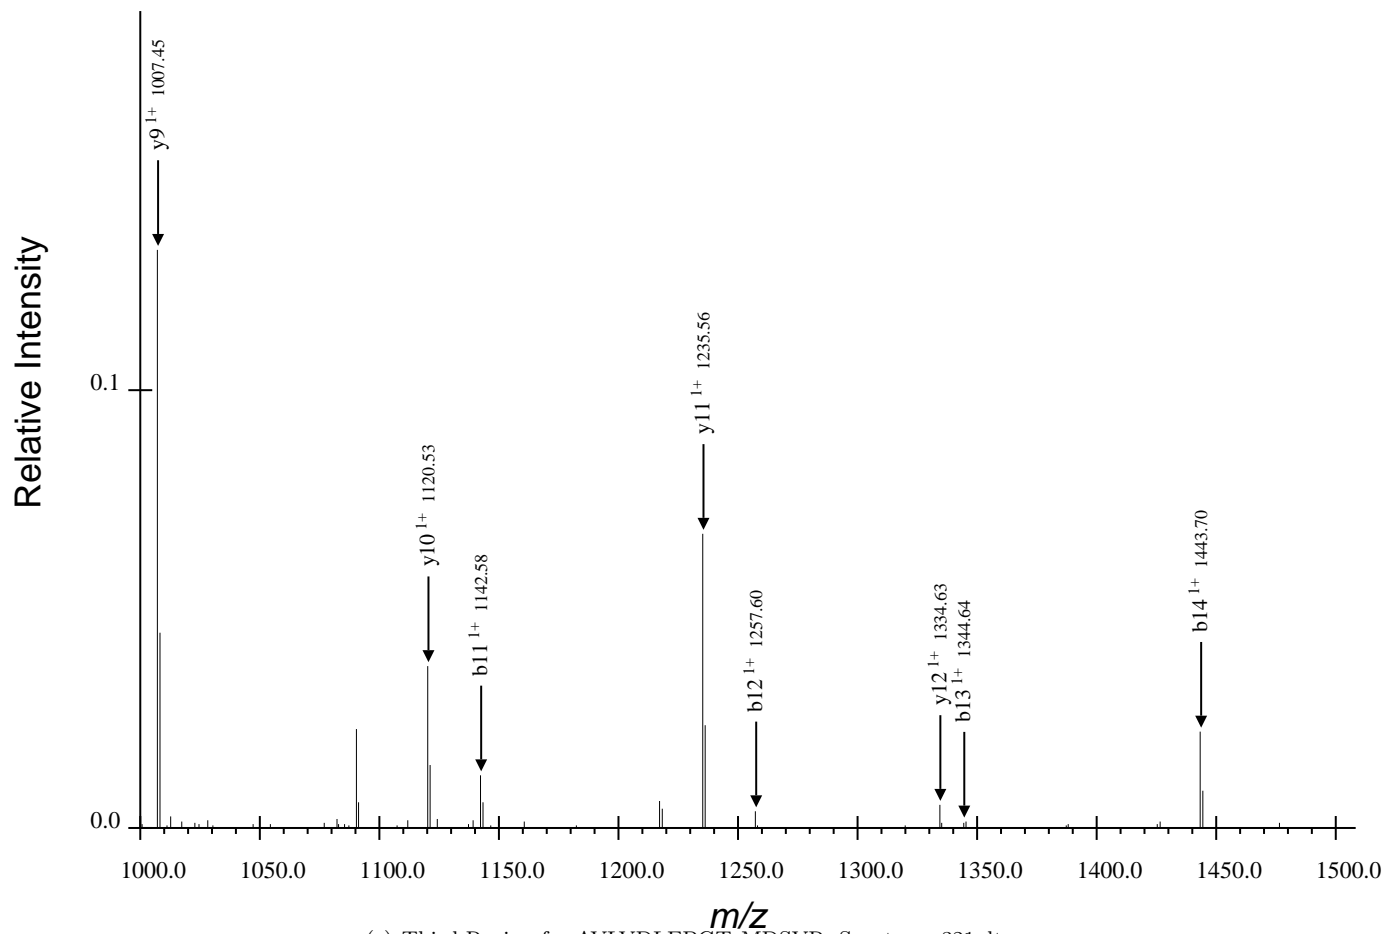

(c) Third Region for AVLVDLEPGToMDSVR, Spectrum 321.dta

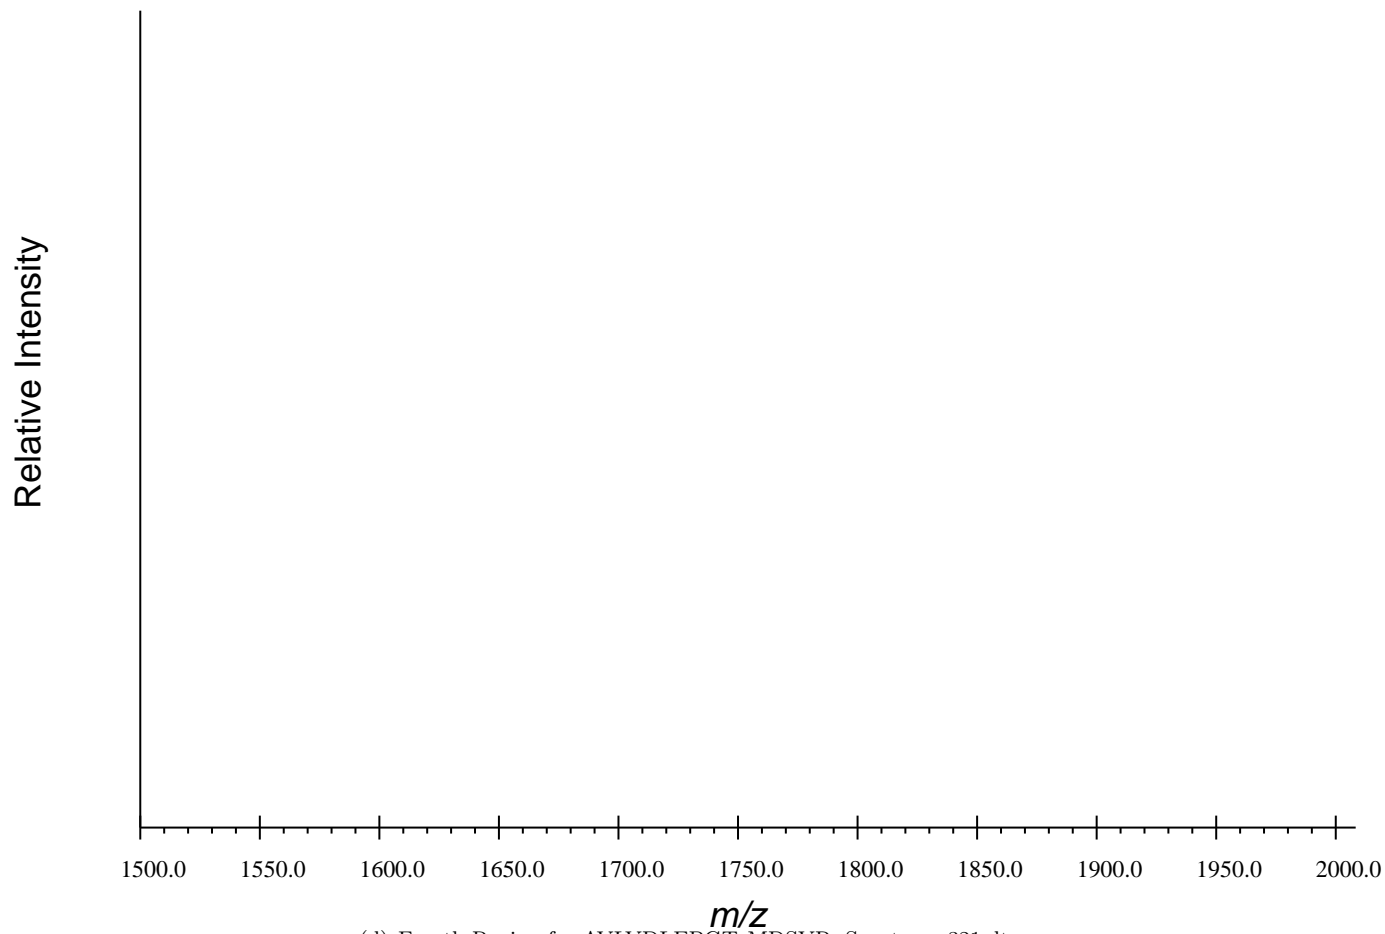

(d) Fourth Region for AVLVDLEPGToMDSVR, Spectrum 321.dta

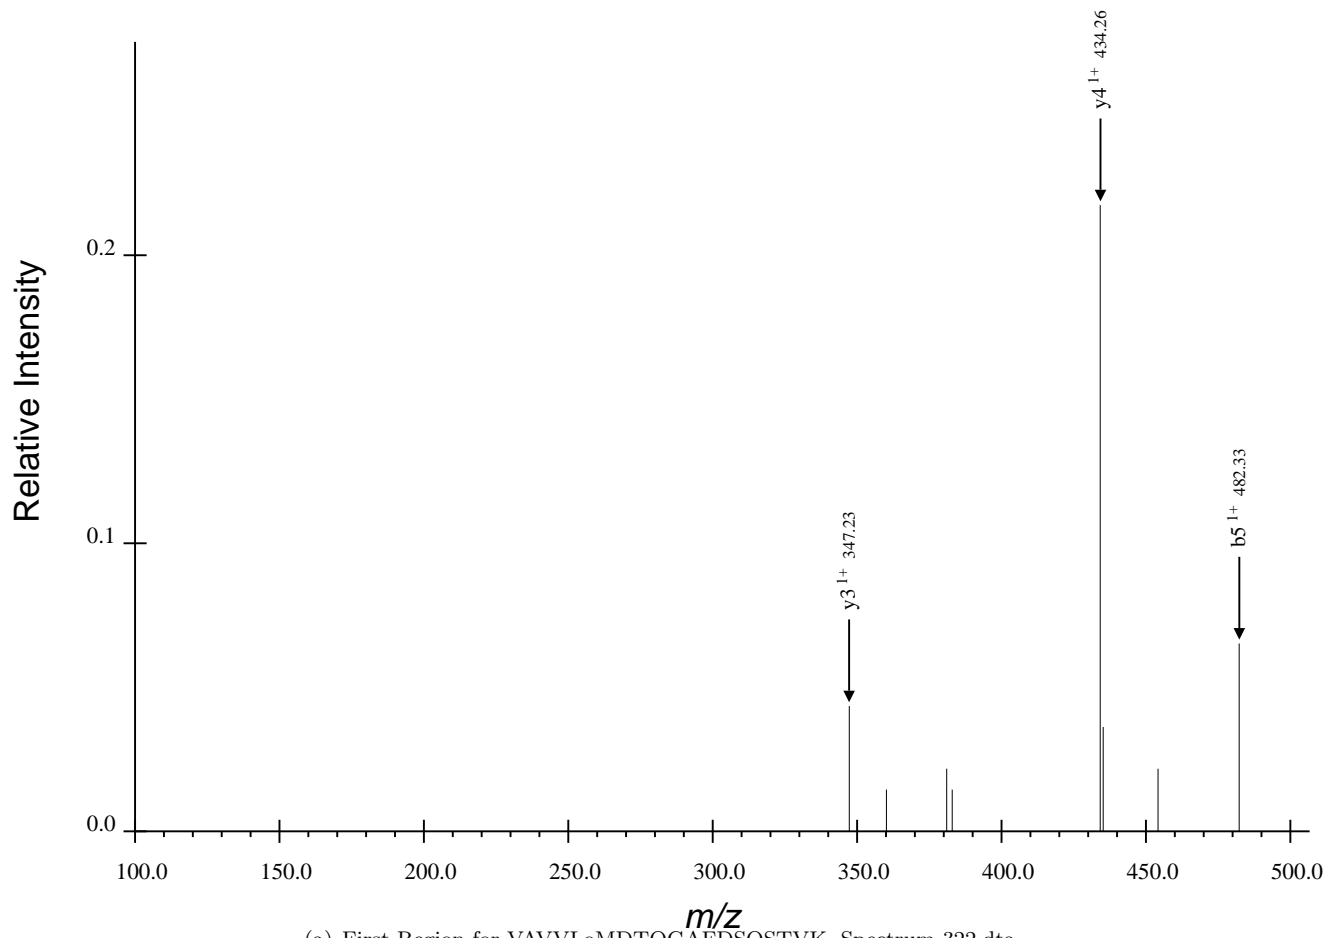

(a) First Region for VAVVLoMDTQGAFDSQSTVK, Spectrum 322.dta

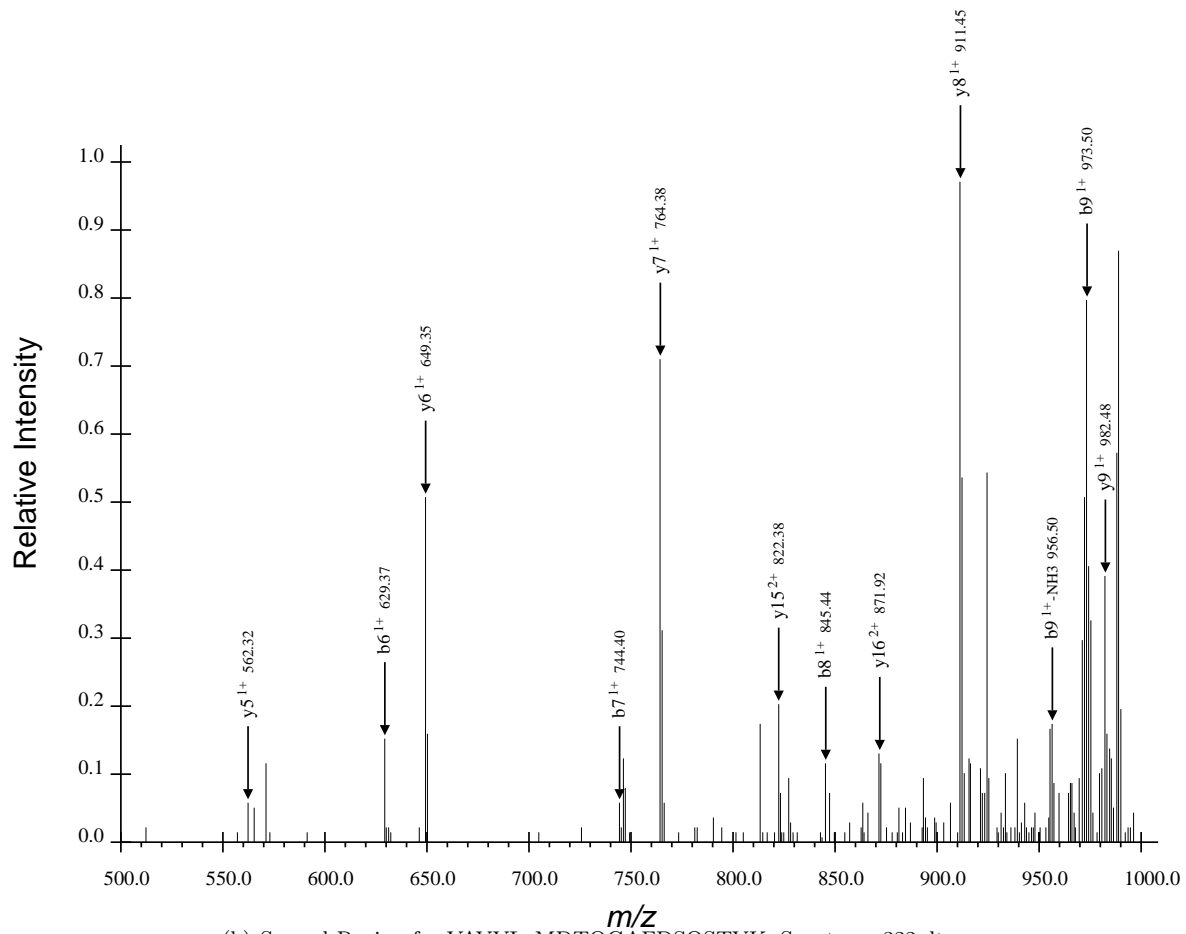

(b) Second Region for VAVVLoMDTQGAFDSQSTVK, Spectrum 322.dta

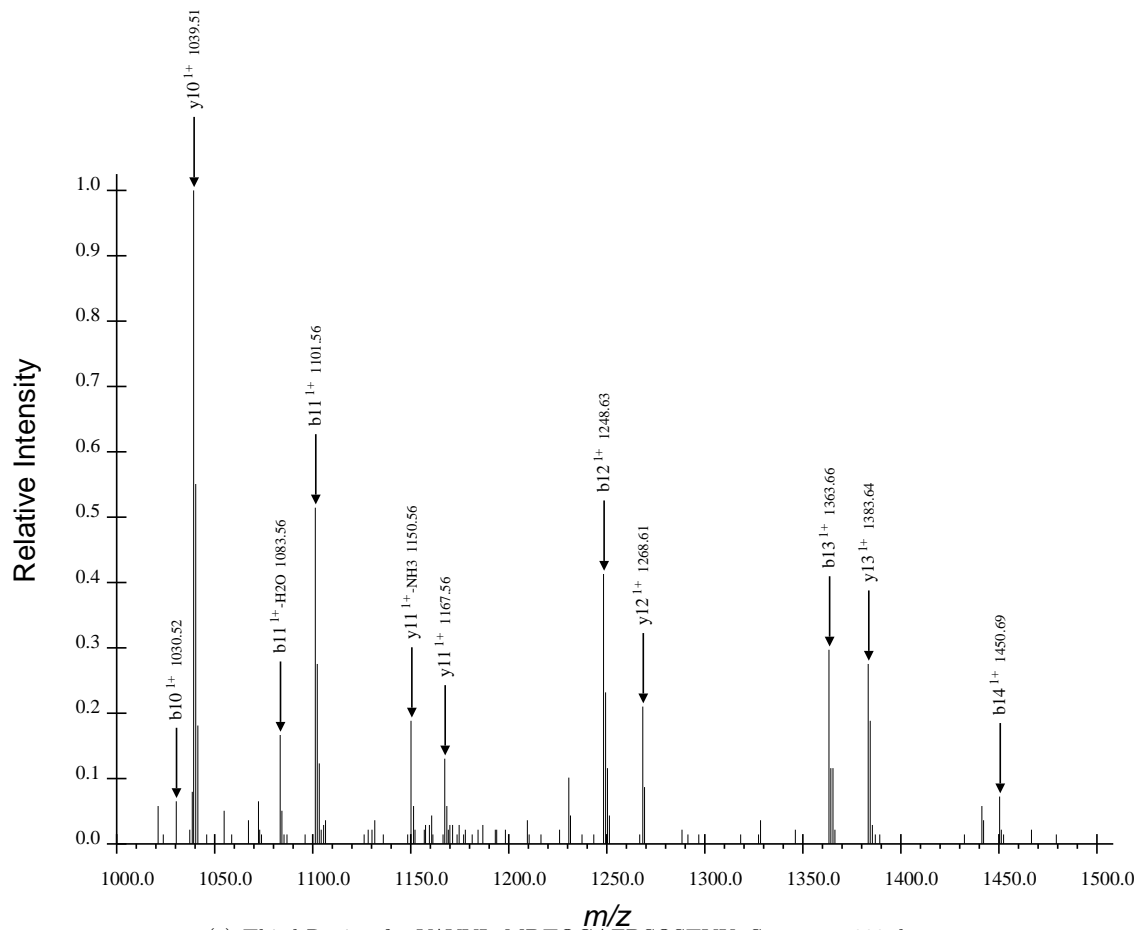

(c) Third Region for VAVVLoMDTQGAFDSQSTVK, Spectrum 322.dta

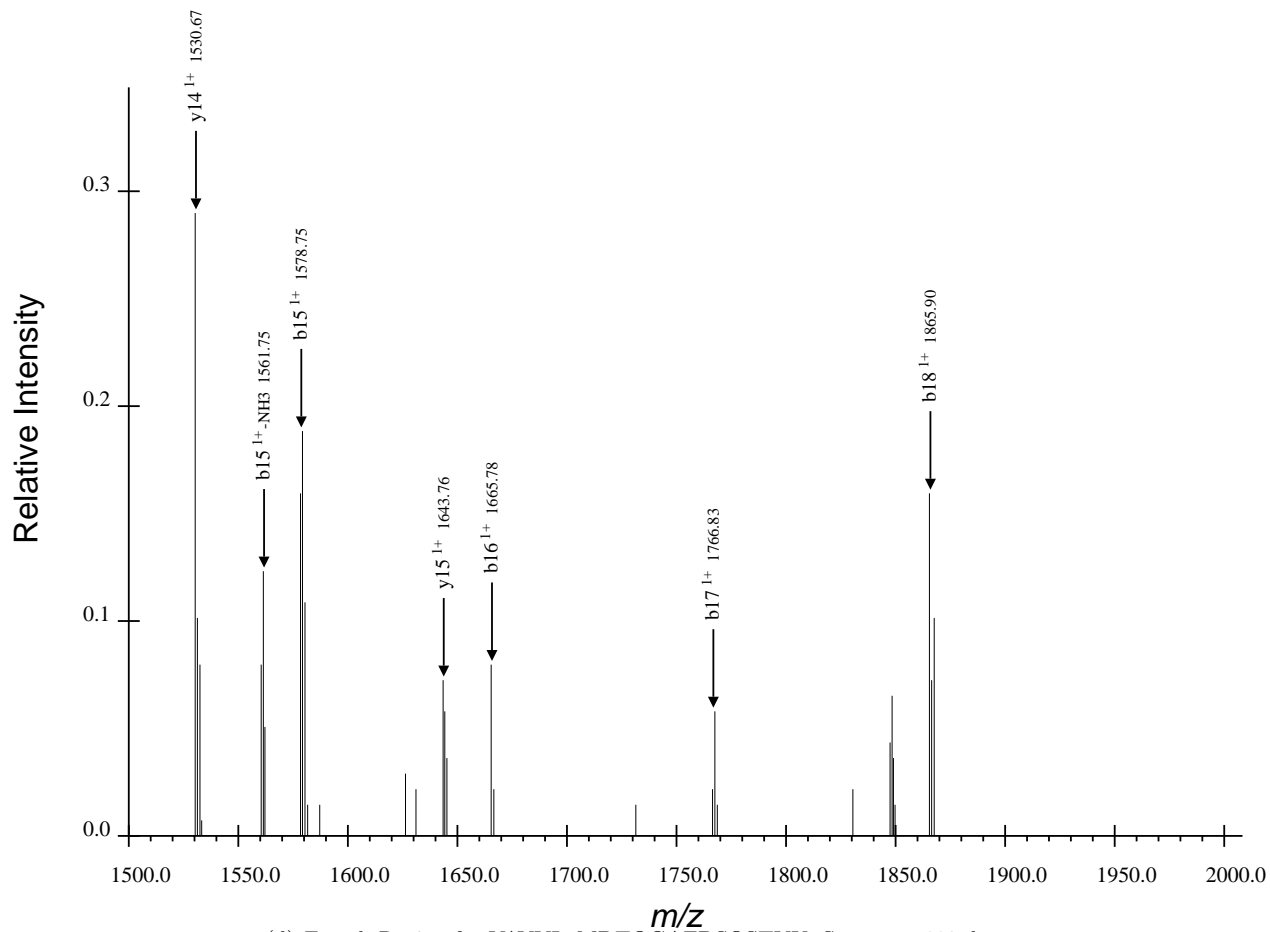

(d) Fourth Region for VAVVLoMDTQGAFDSQSTVK, Spectrum 322.dta

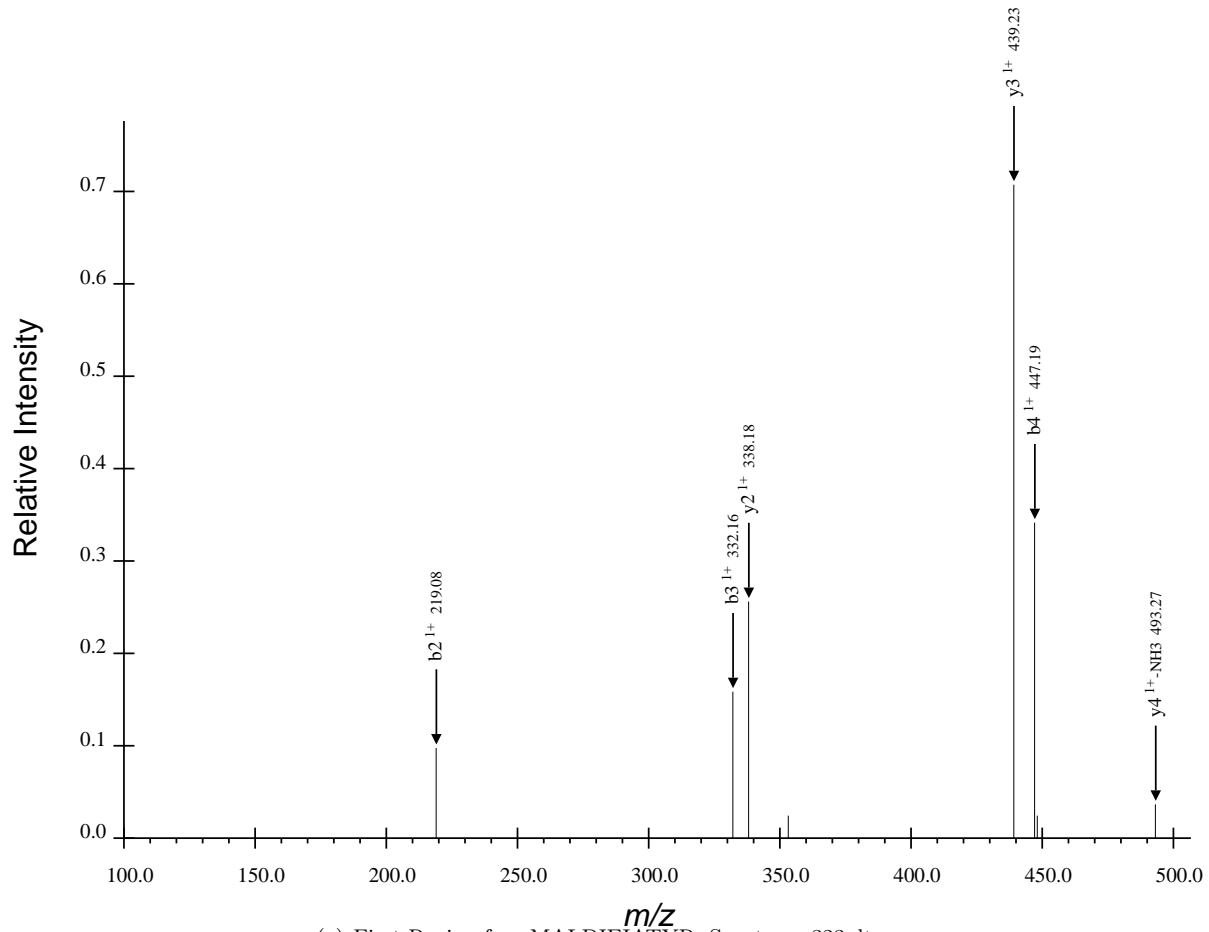

(a) First Region for oMALDIEIATYR, Spectrum 323.dta

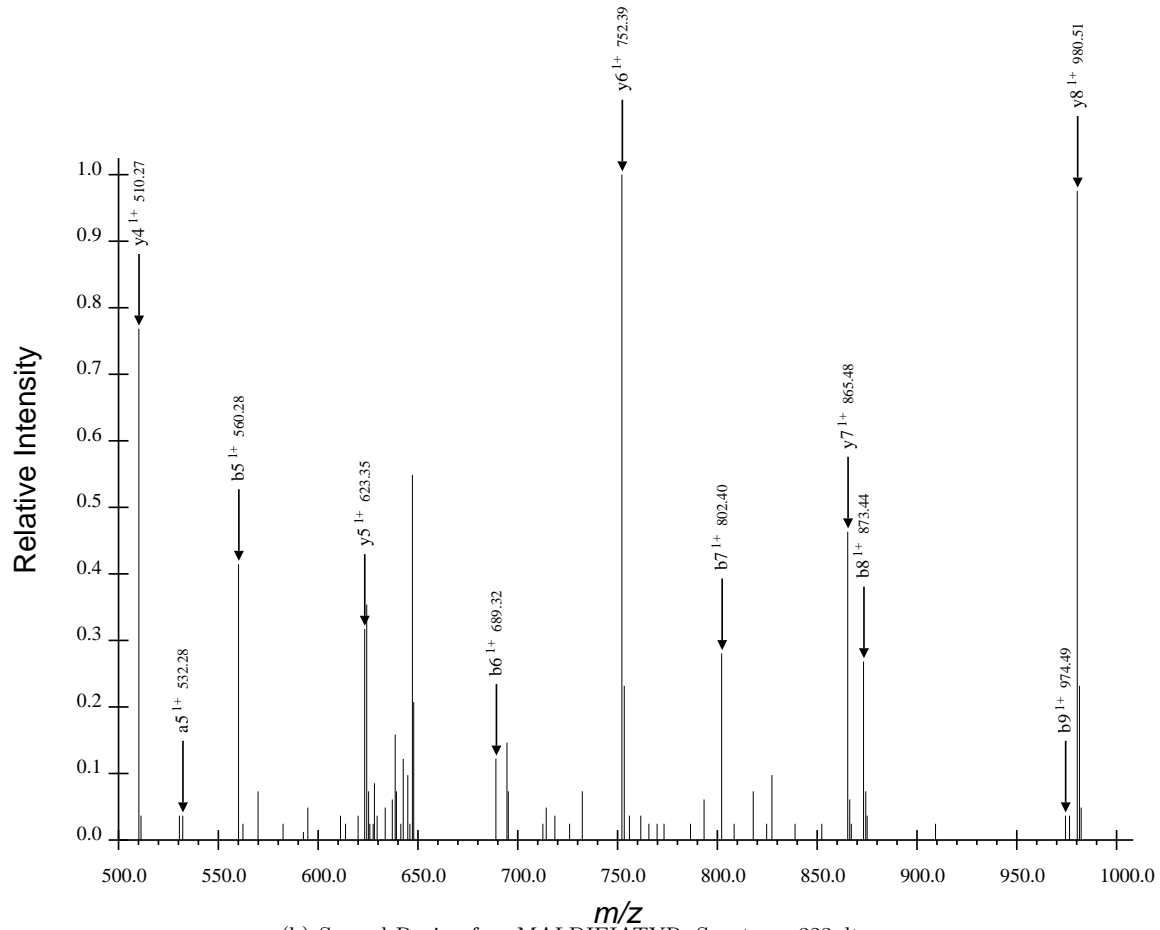

(b) Second Region for oMALDIEIATYR, Spectrum 323.dta

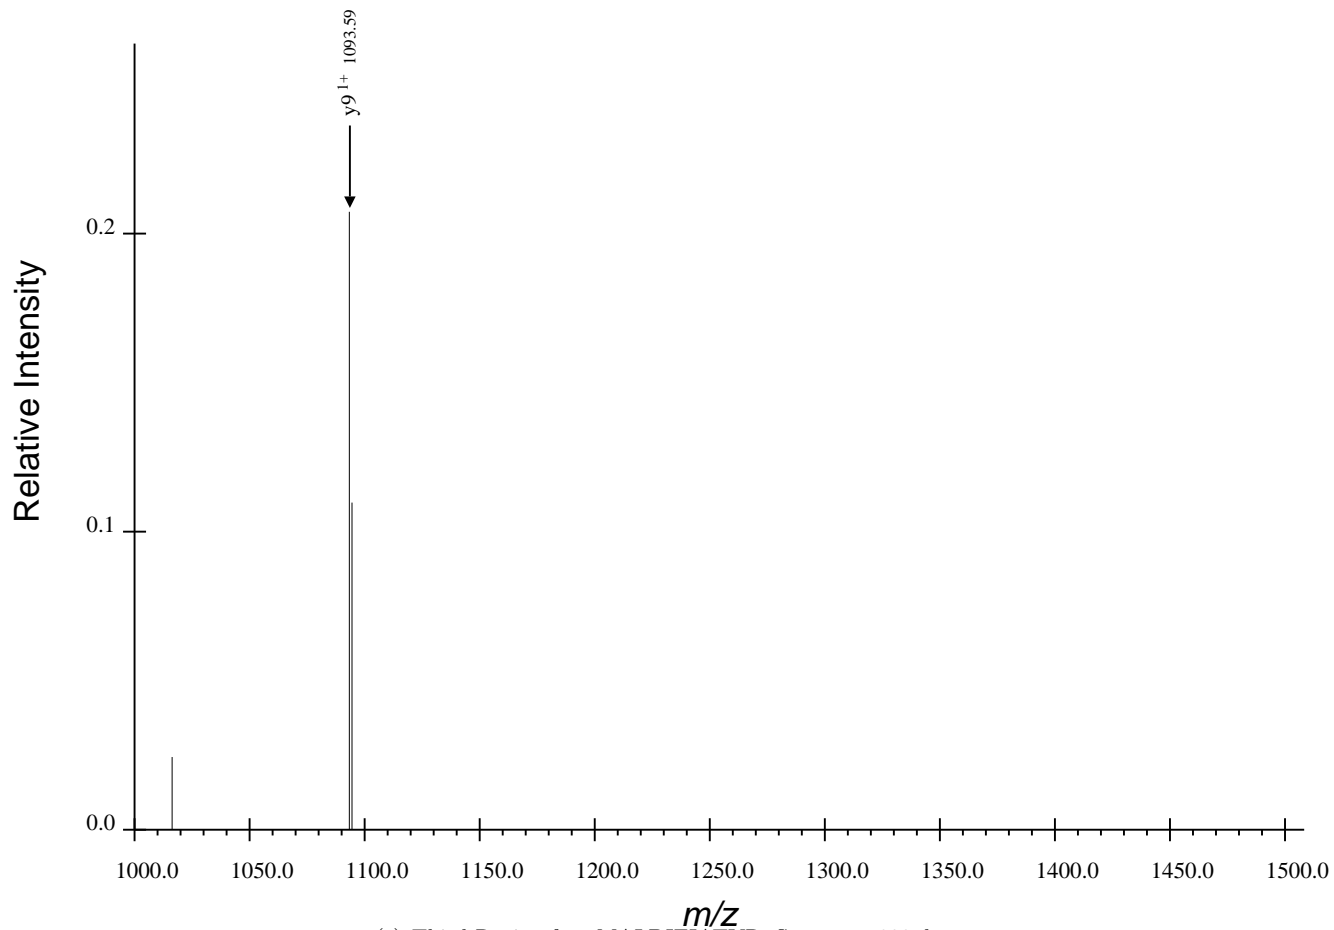

(c) Third Region for oMALDIEIATYR, Spectrum 323.dta

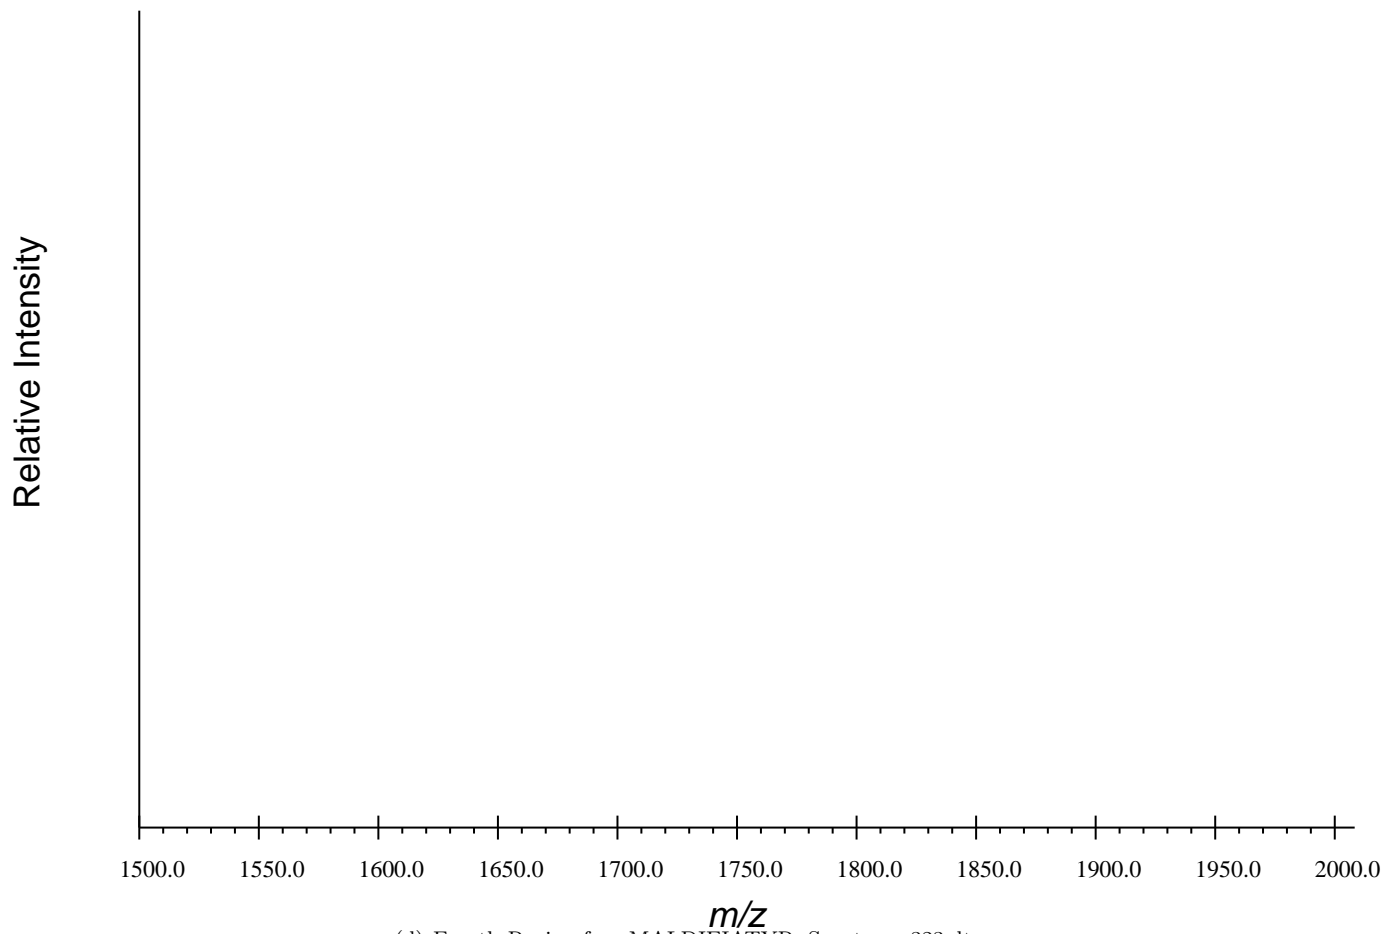

(d) Fourth Region for oMALDIEIATYR, Spectrum 323.dta

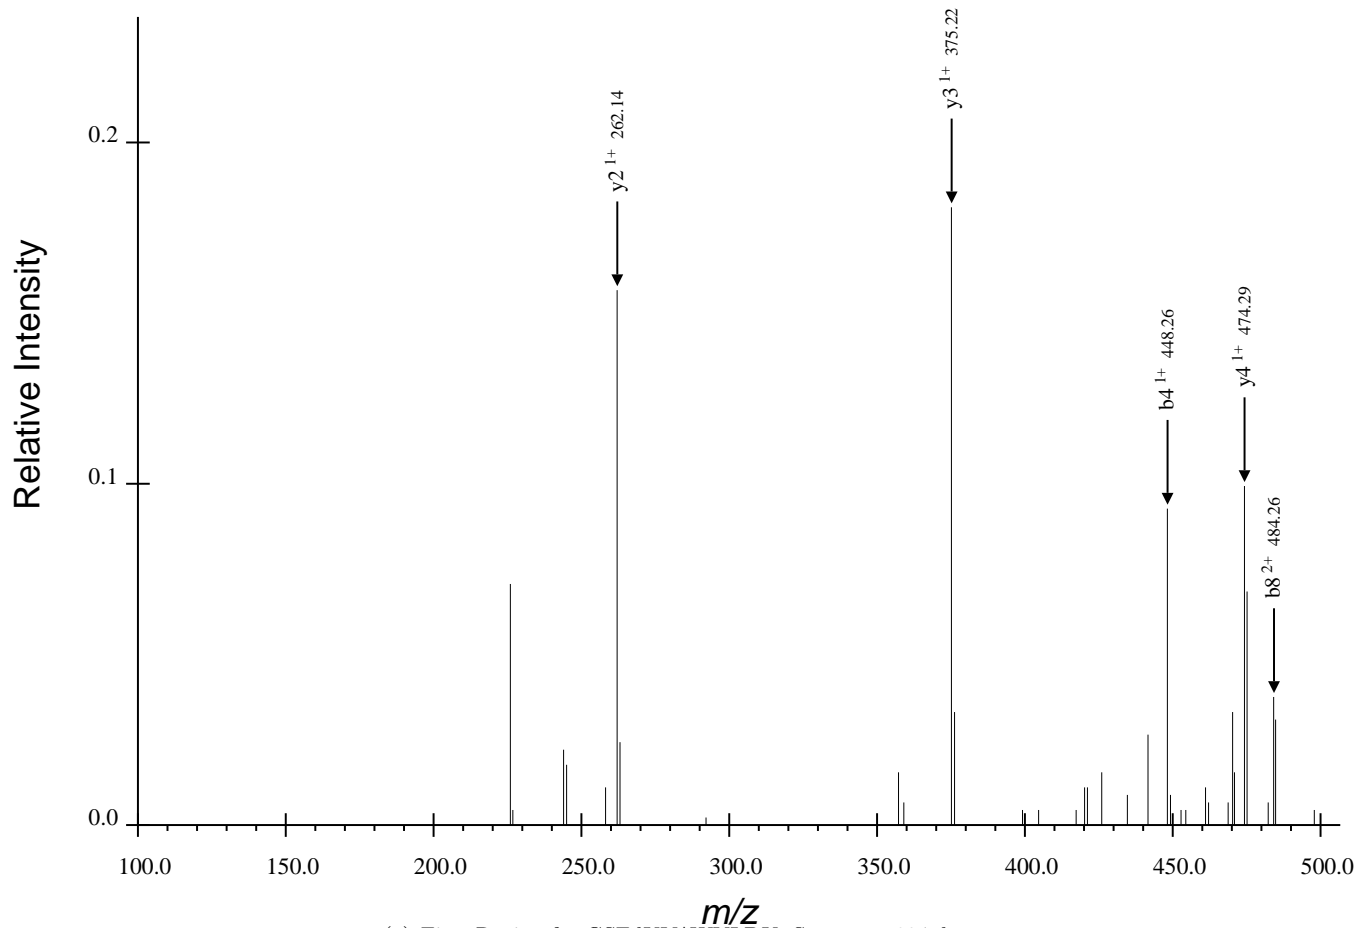

(a) First Region for GSFdKYAWVLDK, Spectrum 324.dta

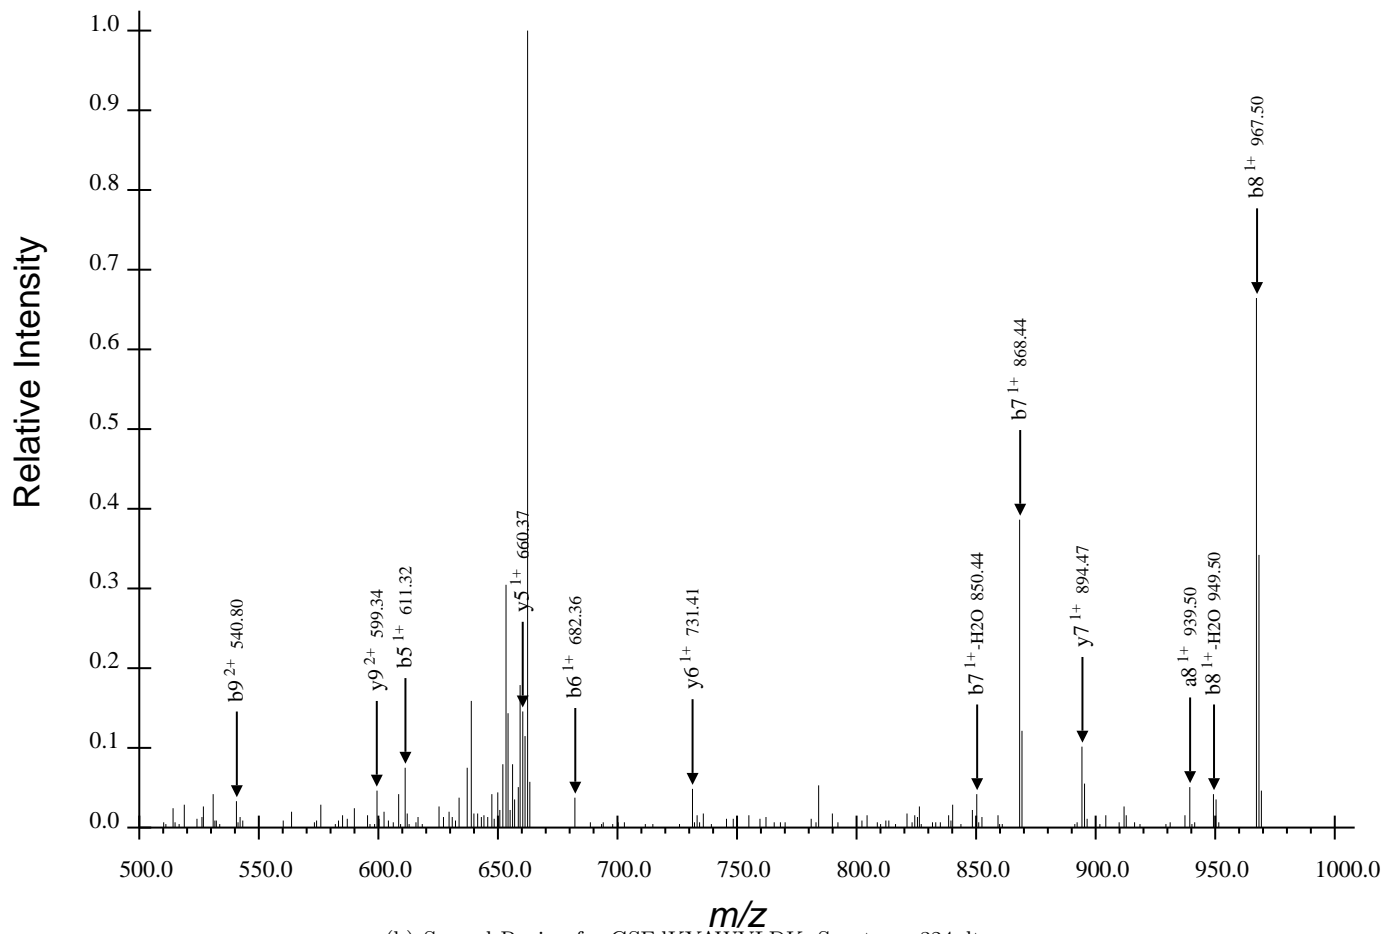

(b) Second Region for GSFdKYAWVLDK, Spectrum 324.dta



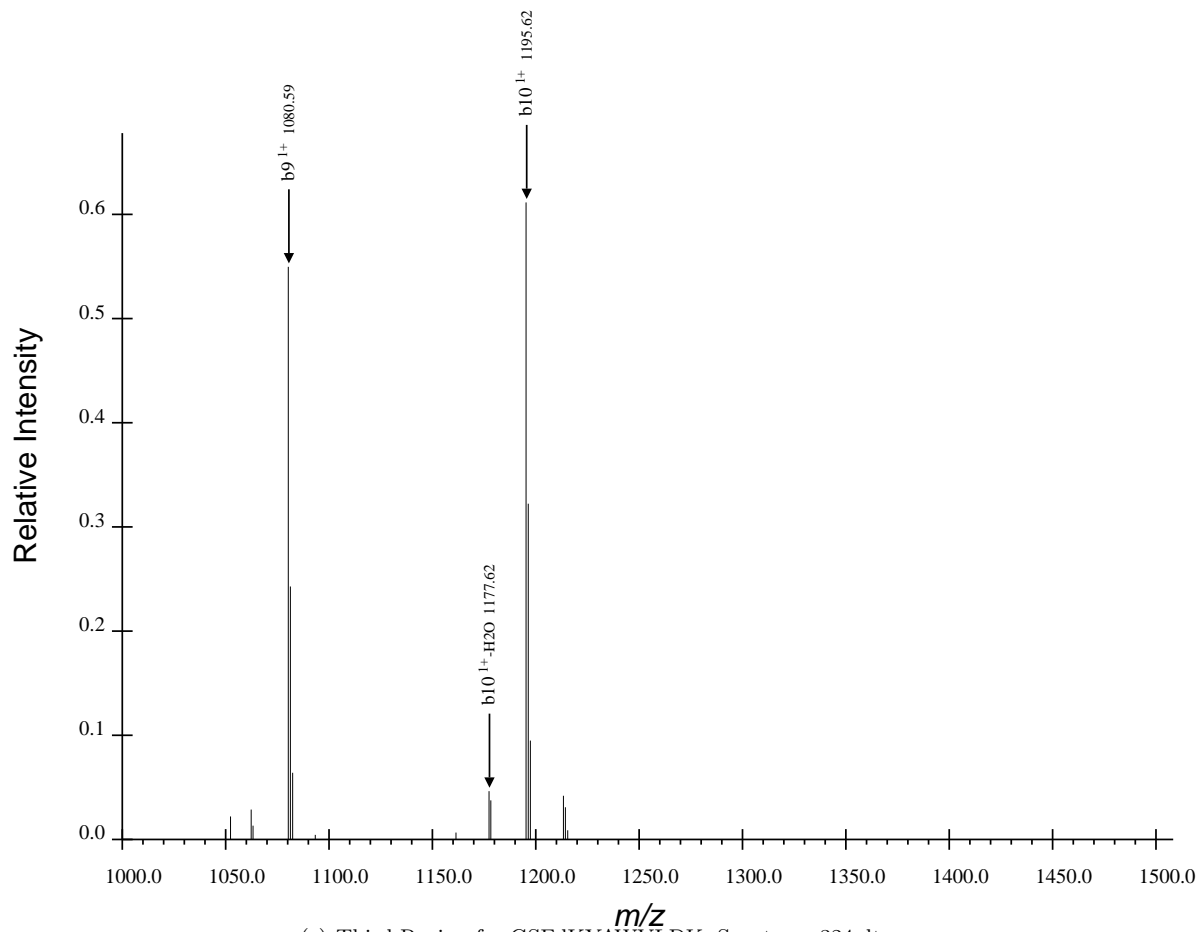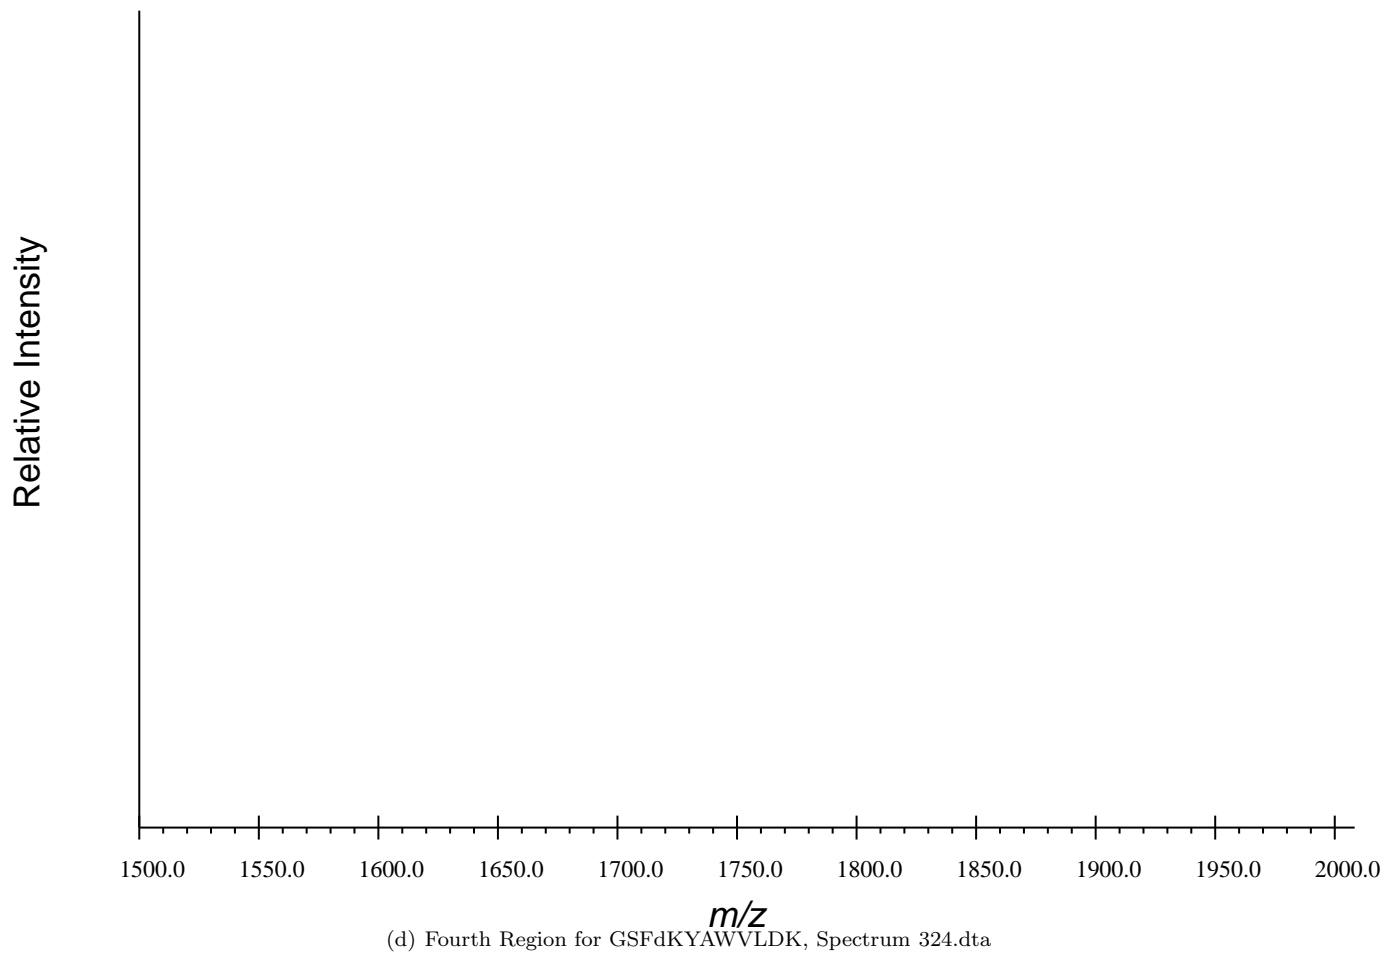

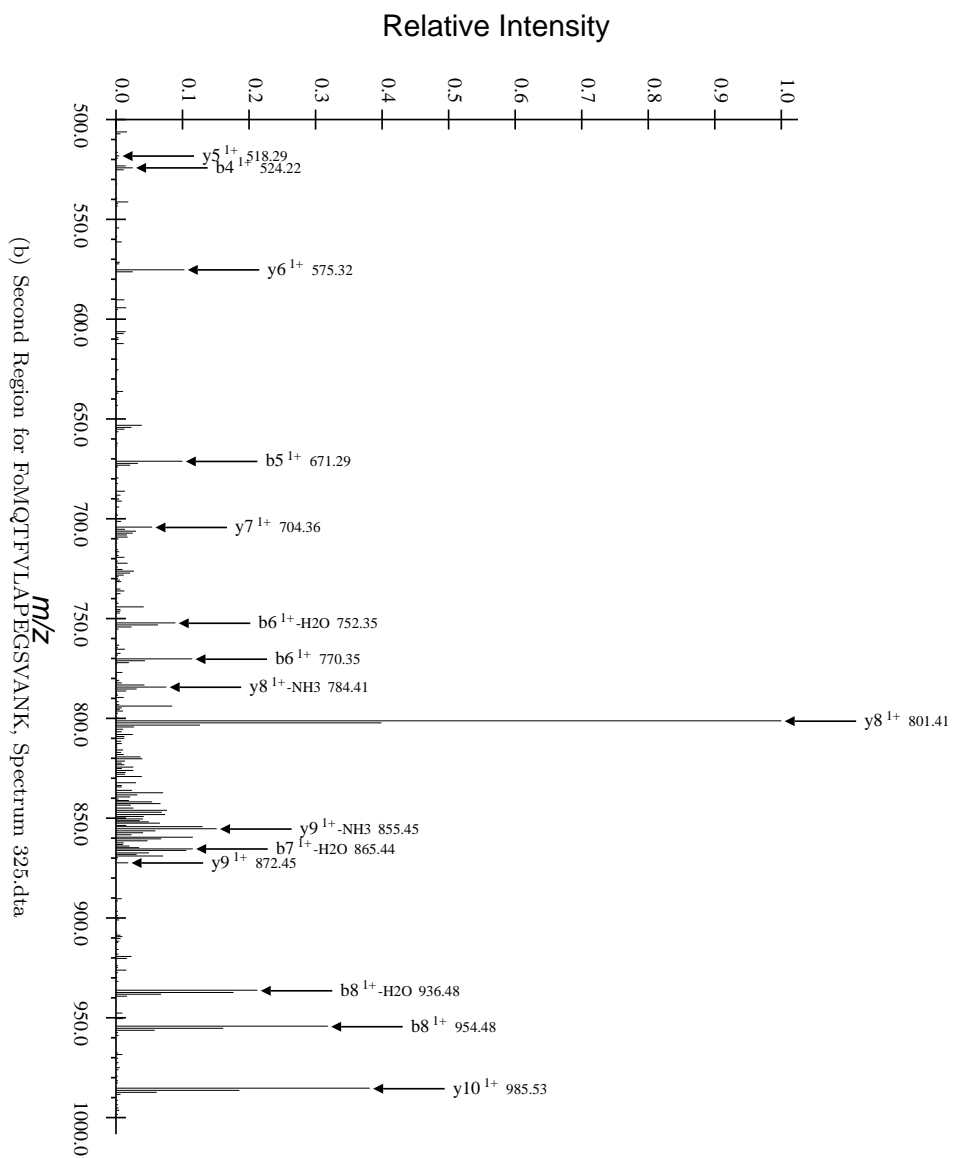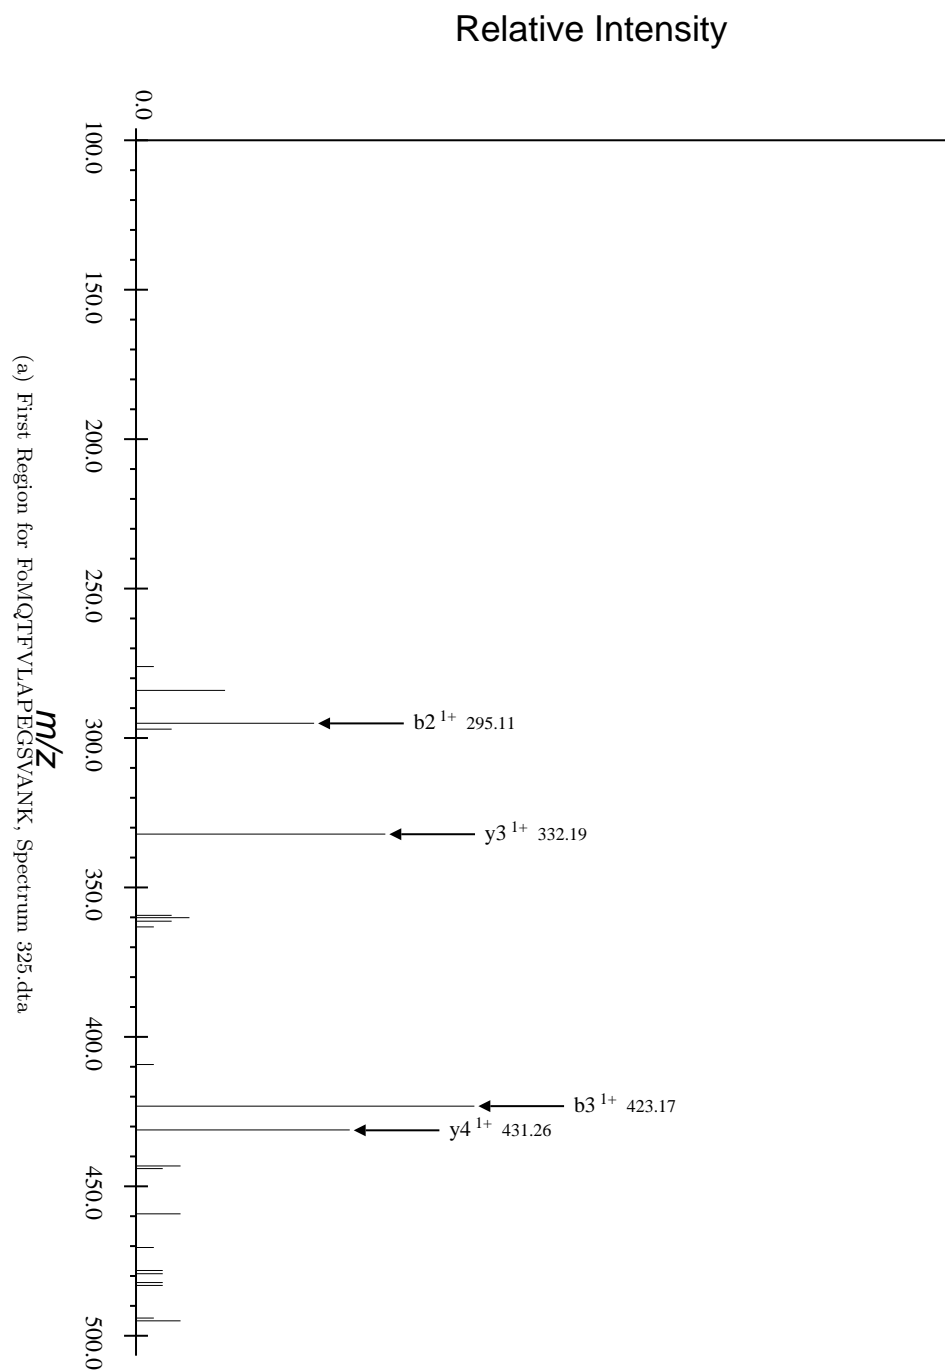

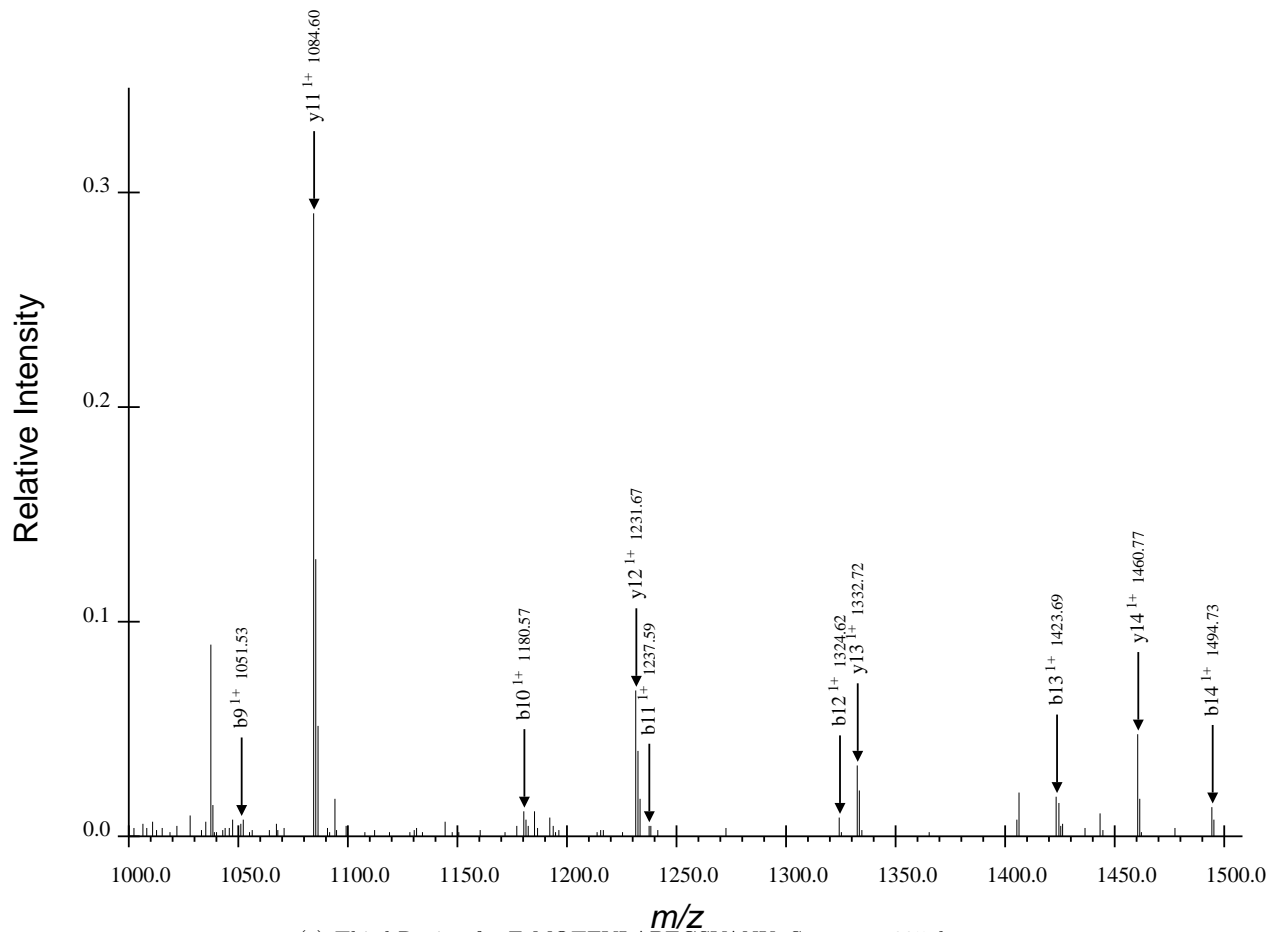

(c) Third Region for FoMQTFVLAPEGSVANK, Spectrum 325.dta

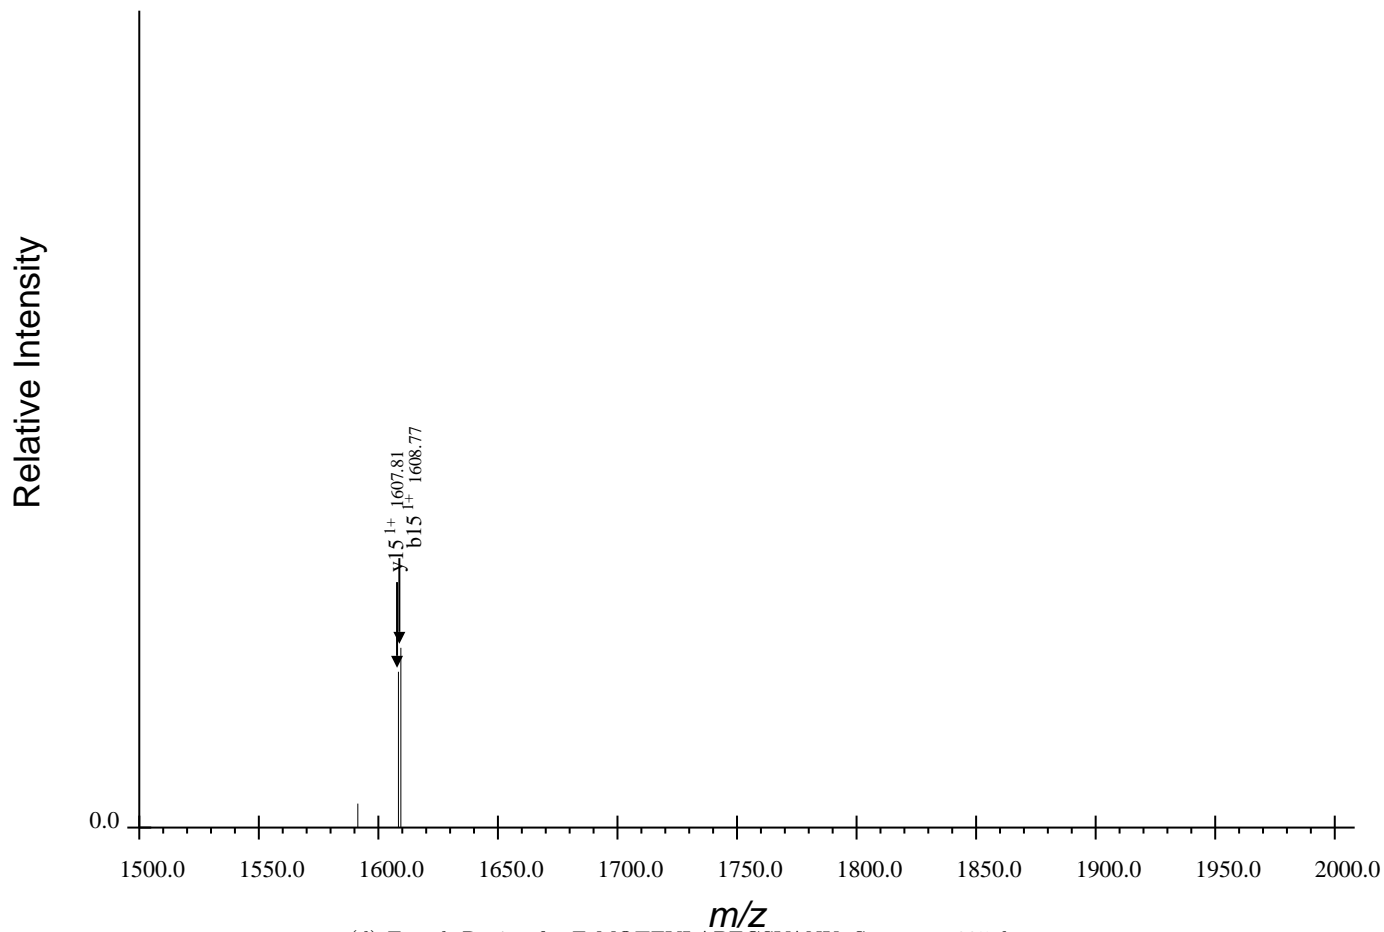

(d) Fourth Region for FoMQTFVLAPEGSVANK, Spectrum 325.dta

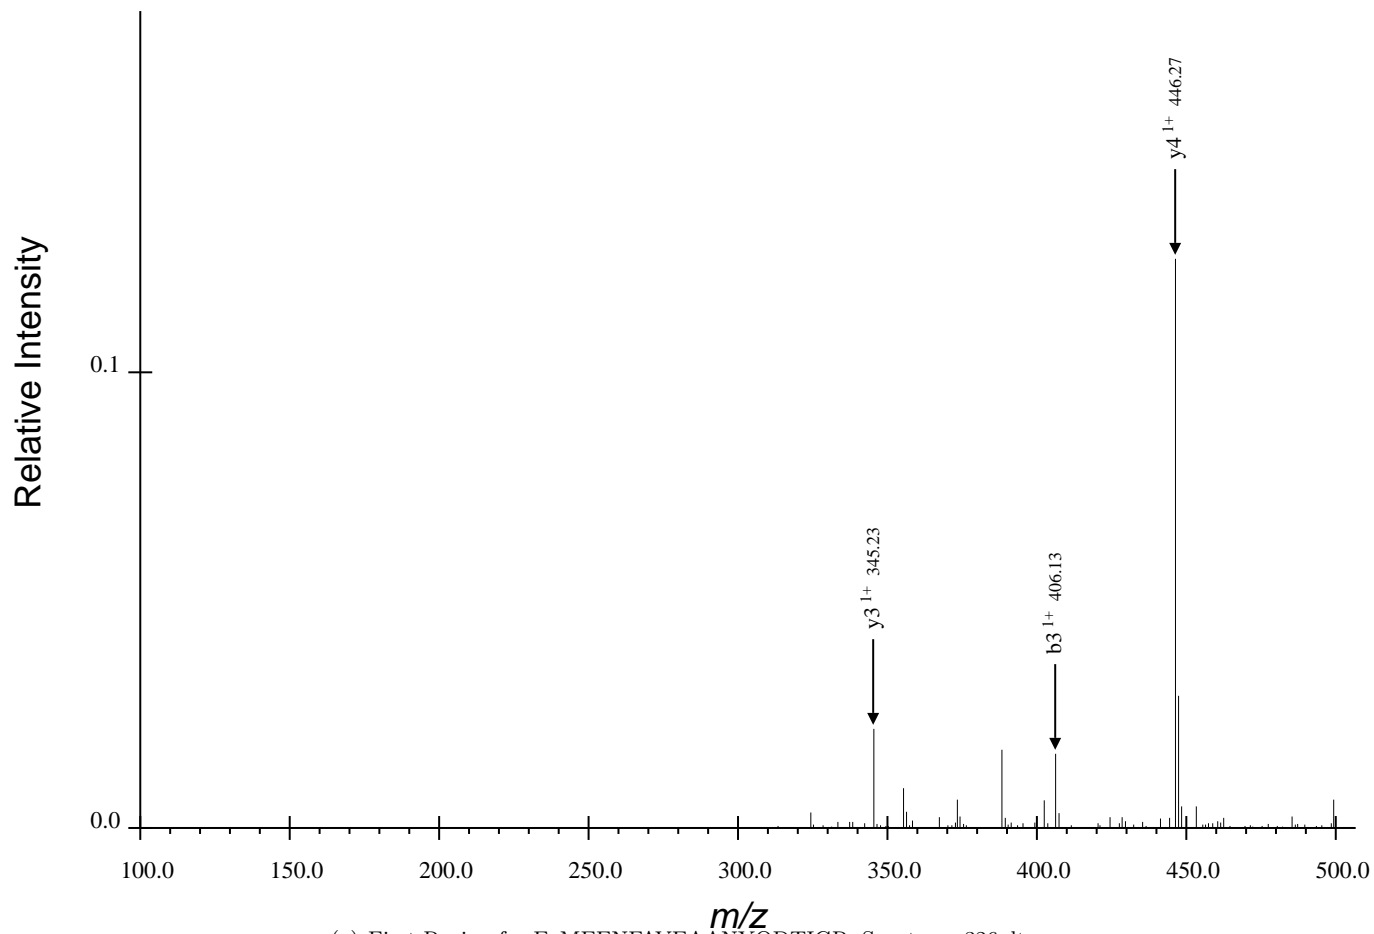

(a) First Region for EoMEENFAVEAANYQDTIGR, Spectrum 326.dta

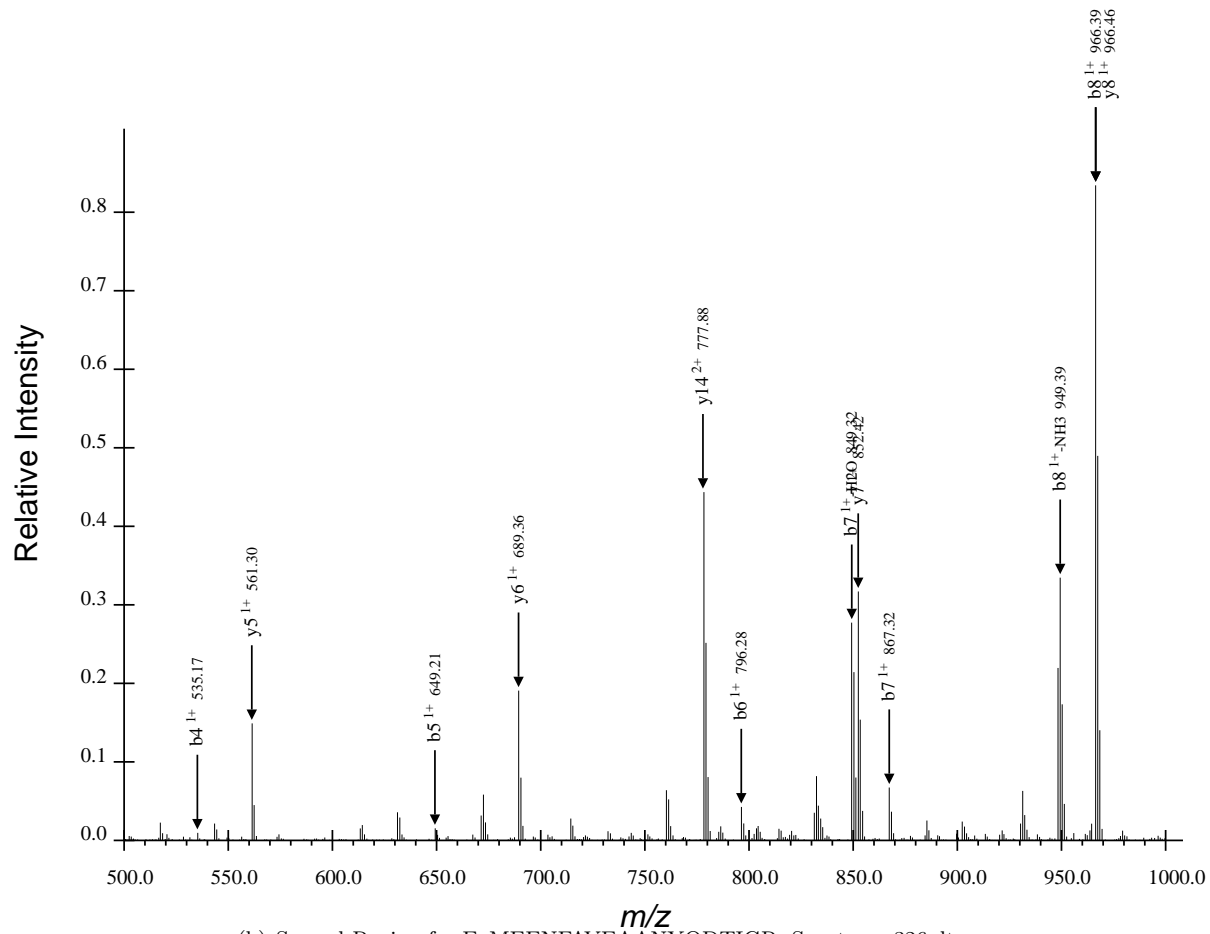

(b) Second Region for EoMEENFAVEAANYQDTIGR, Spectrum 326.dta

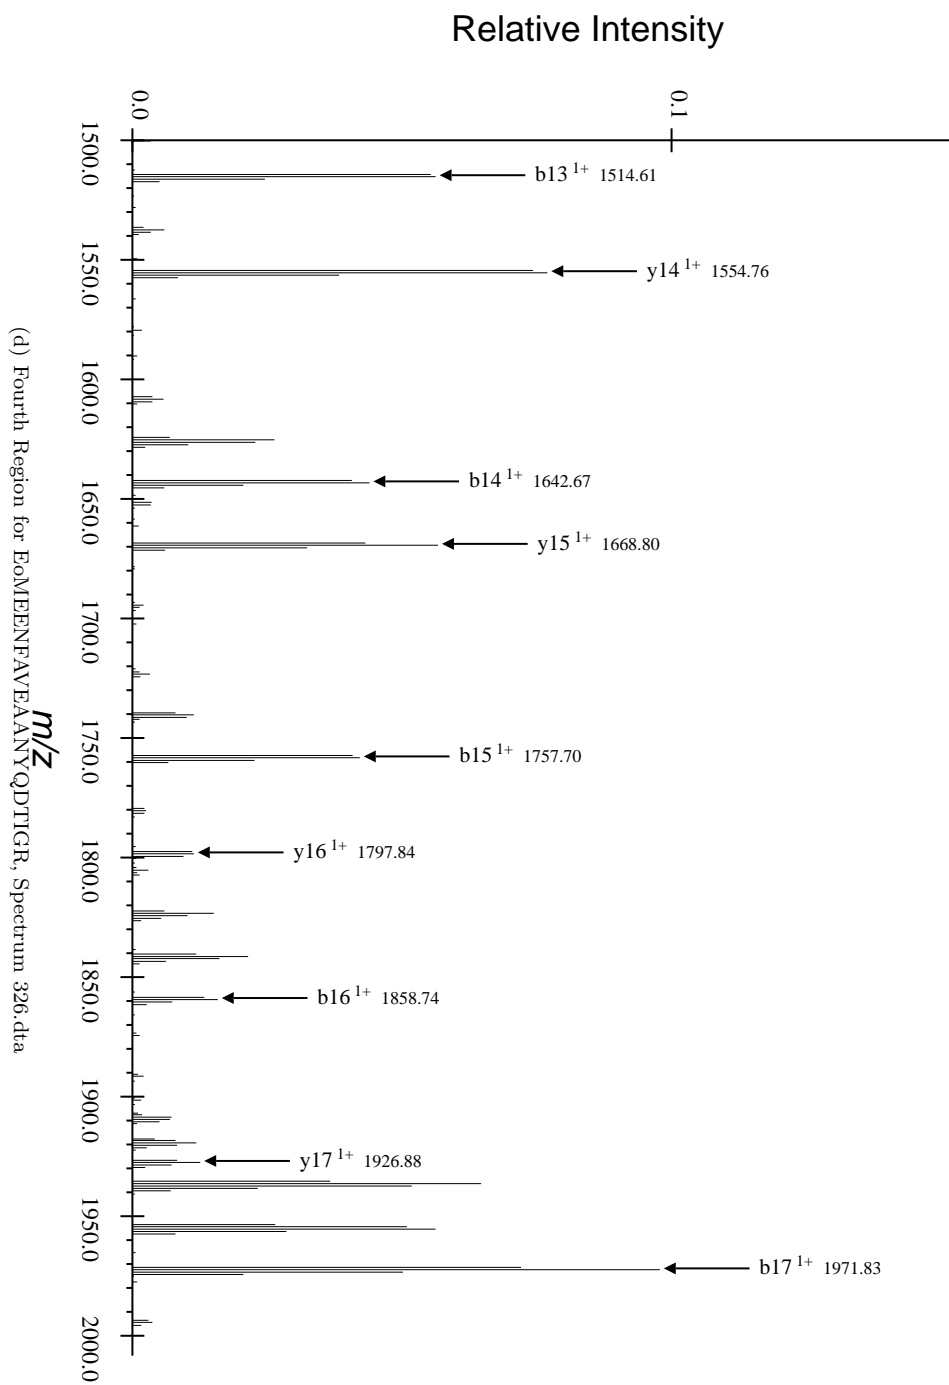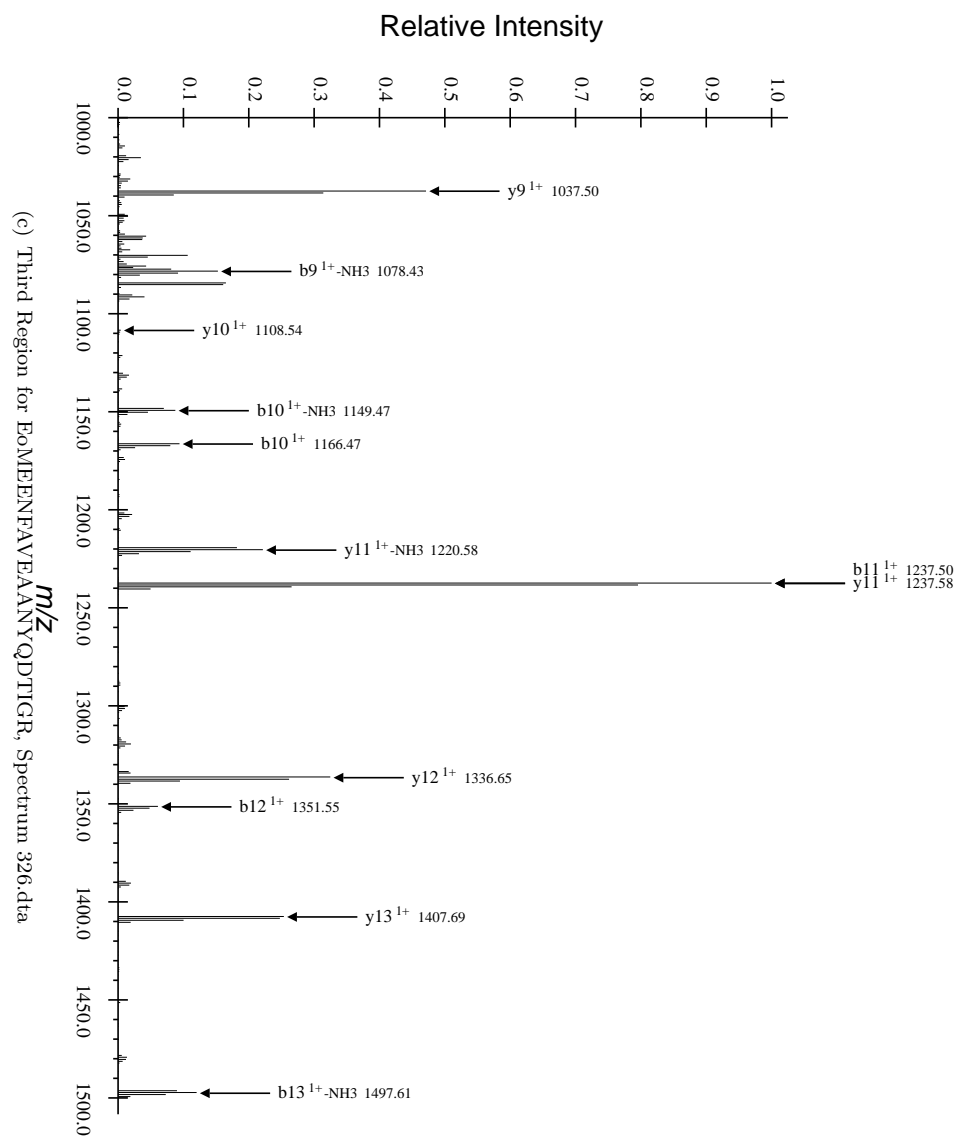

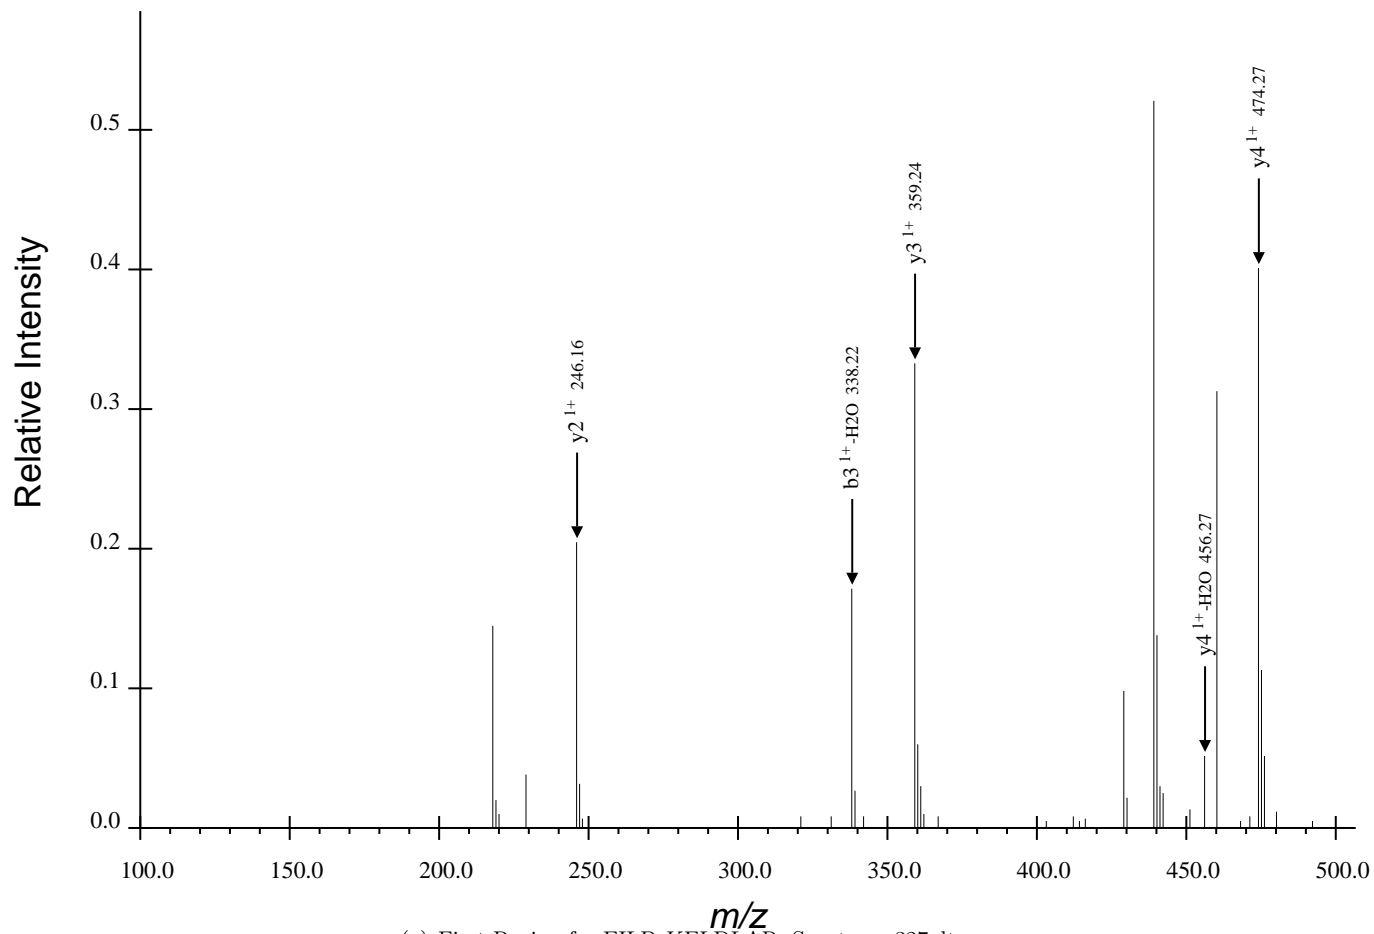

(a) First Region for EILPaKELDLAR, Spectrum 327.dta

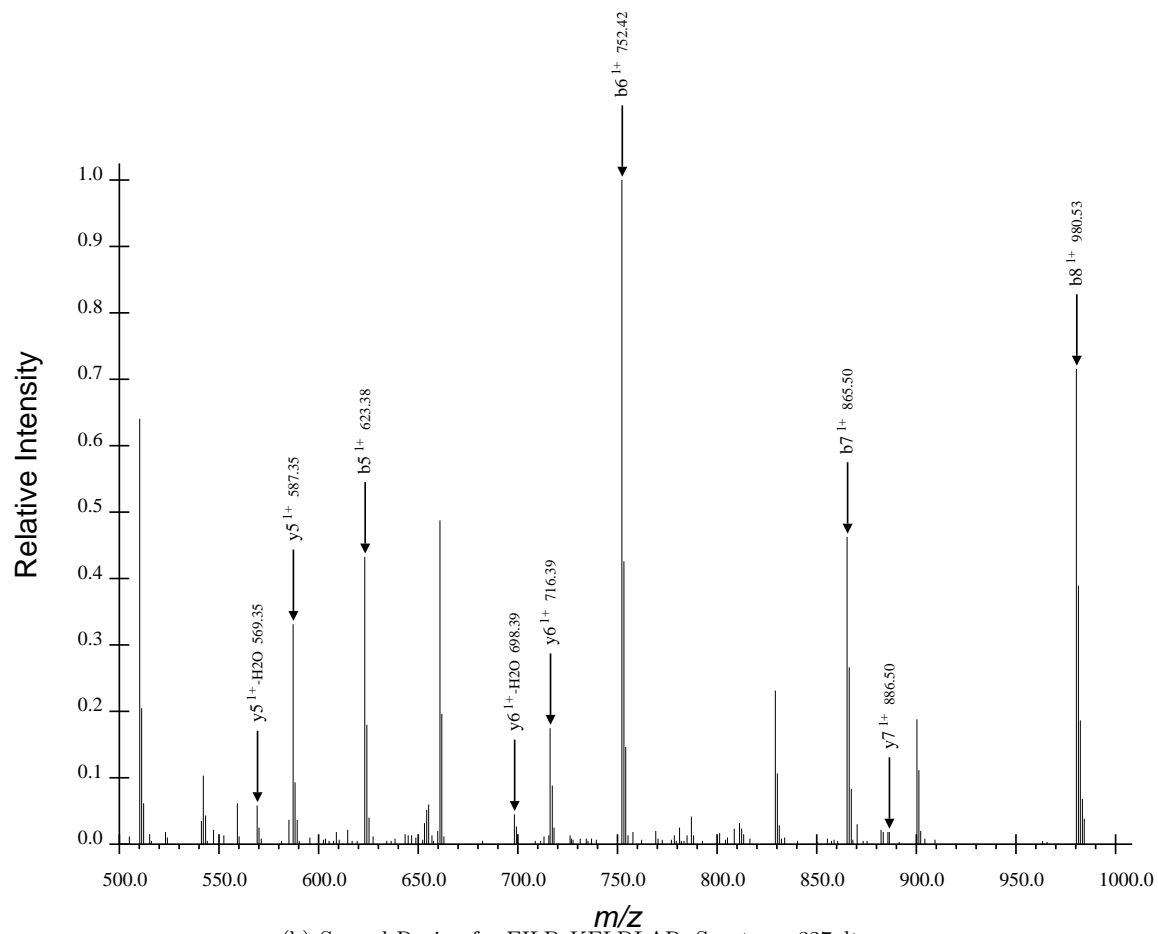

(b) Second Region for EILPaKELDLAR, Spectrum 327.dta

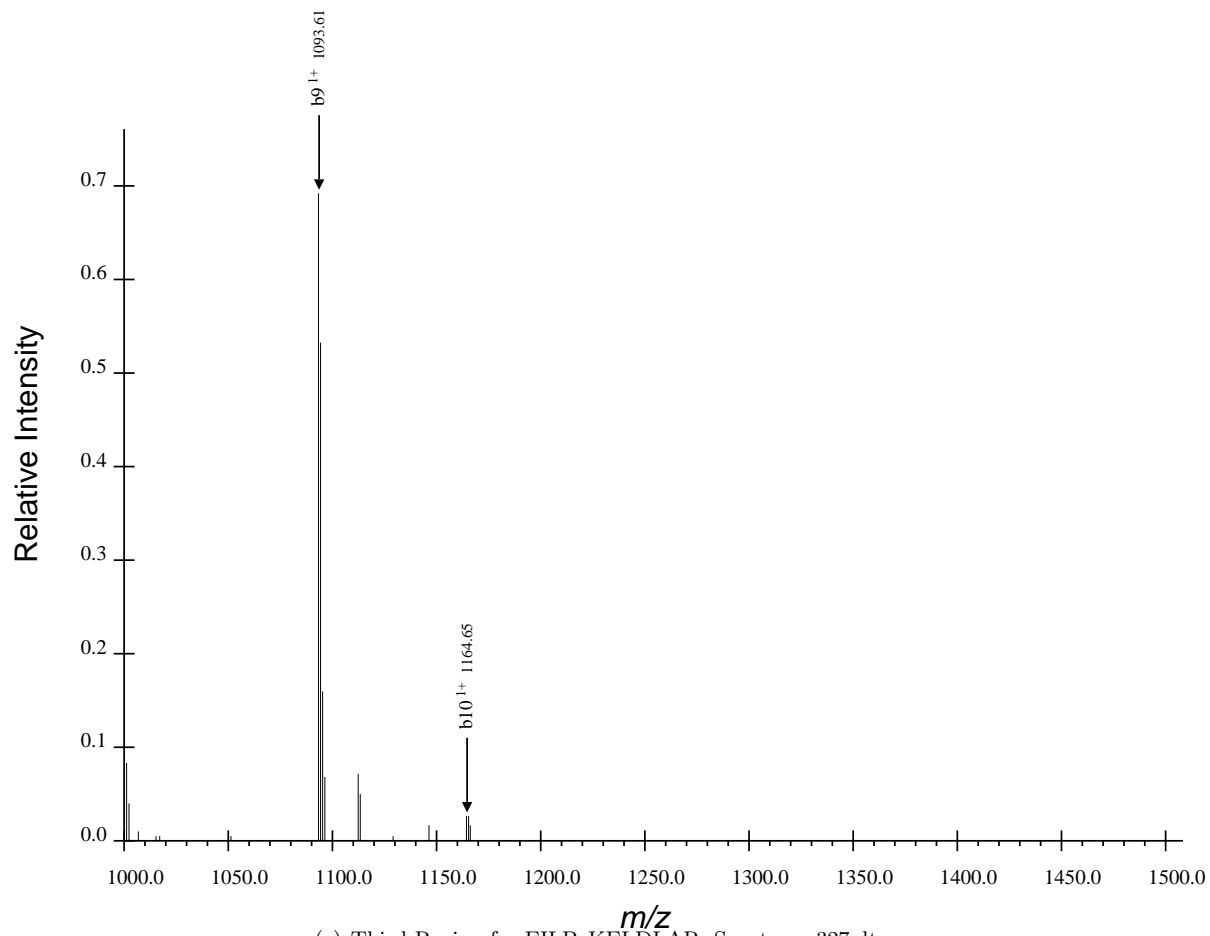

(c) Third Region for EILPaKELDLAR, Spectrum 327.dta

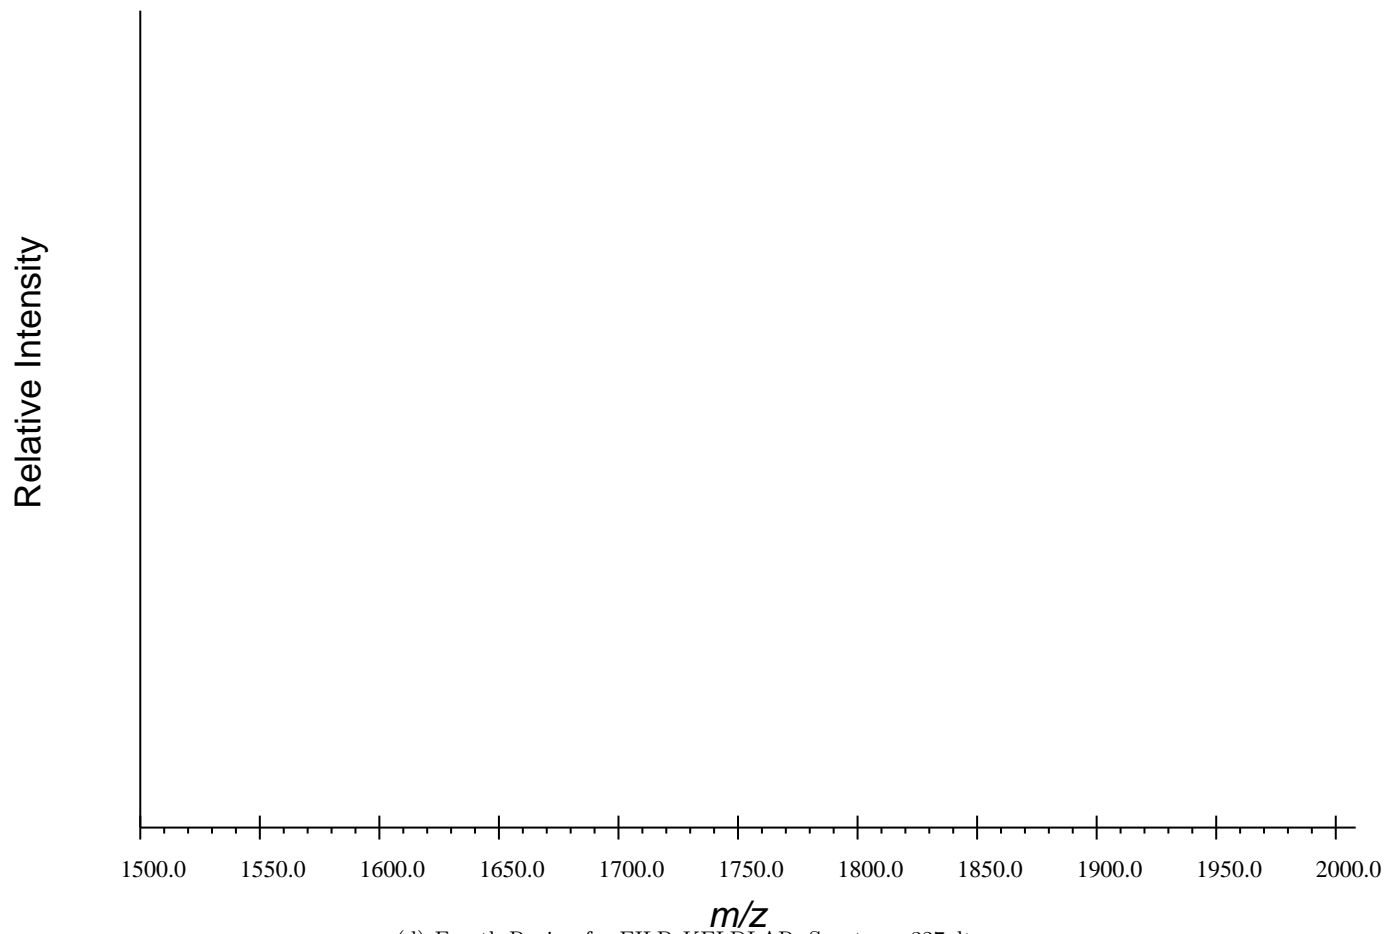

(d) Fourth Region for EILPaKELDLAR, Spectrum 327.dta

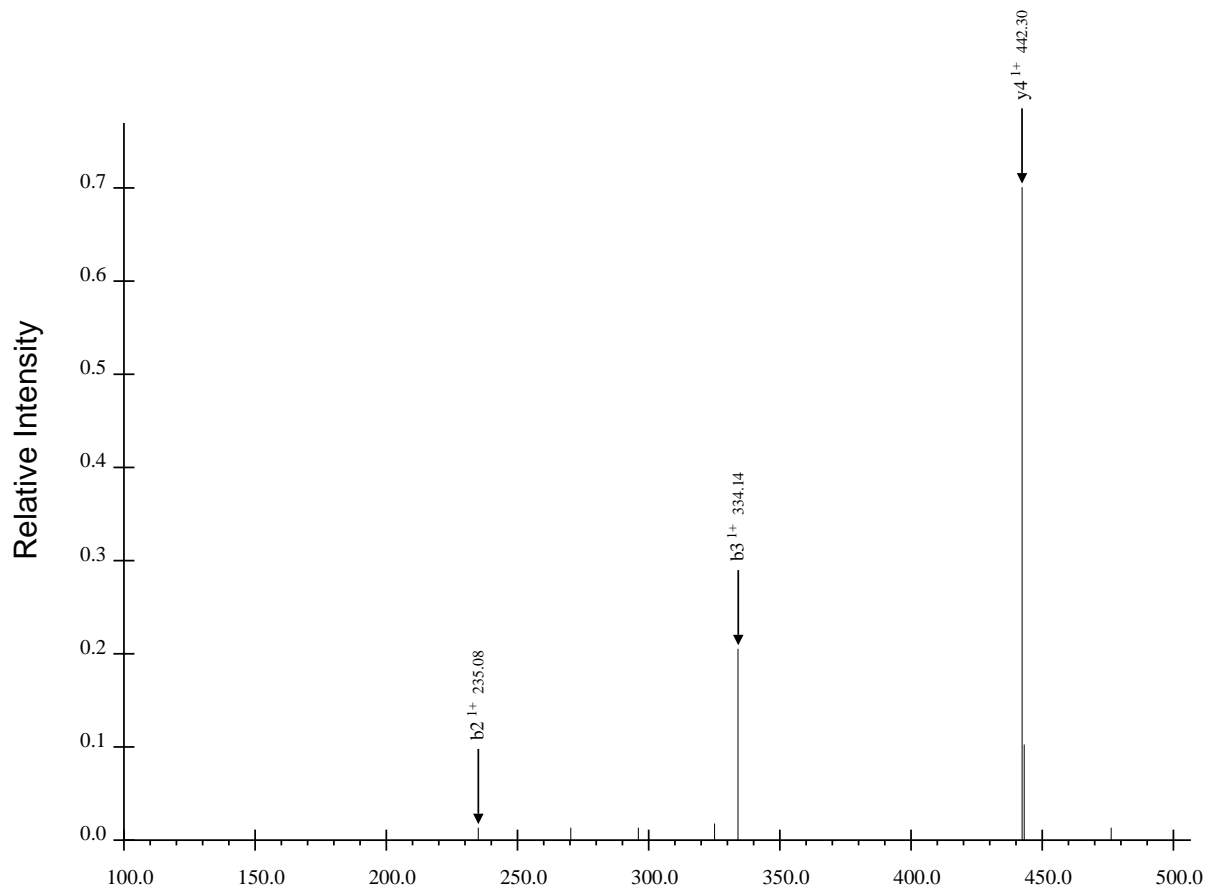

(a) First Region for SoMVPVQVQLDVPVVK, Spectrum 328.dta

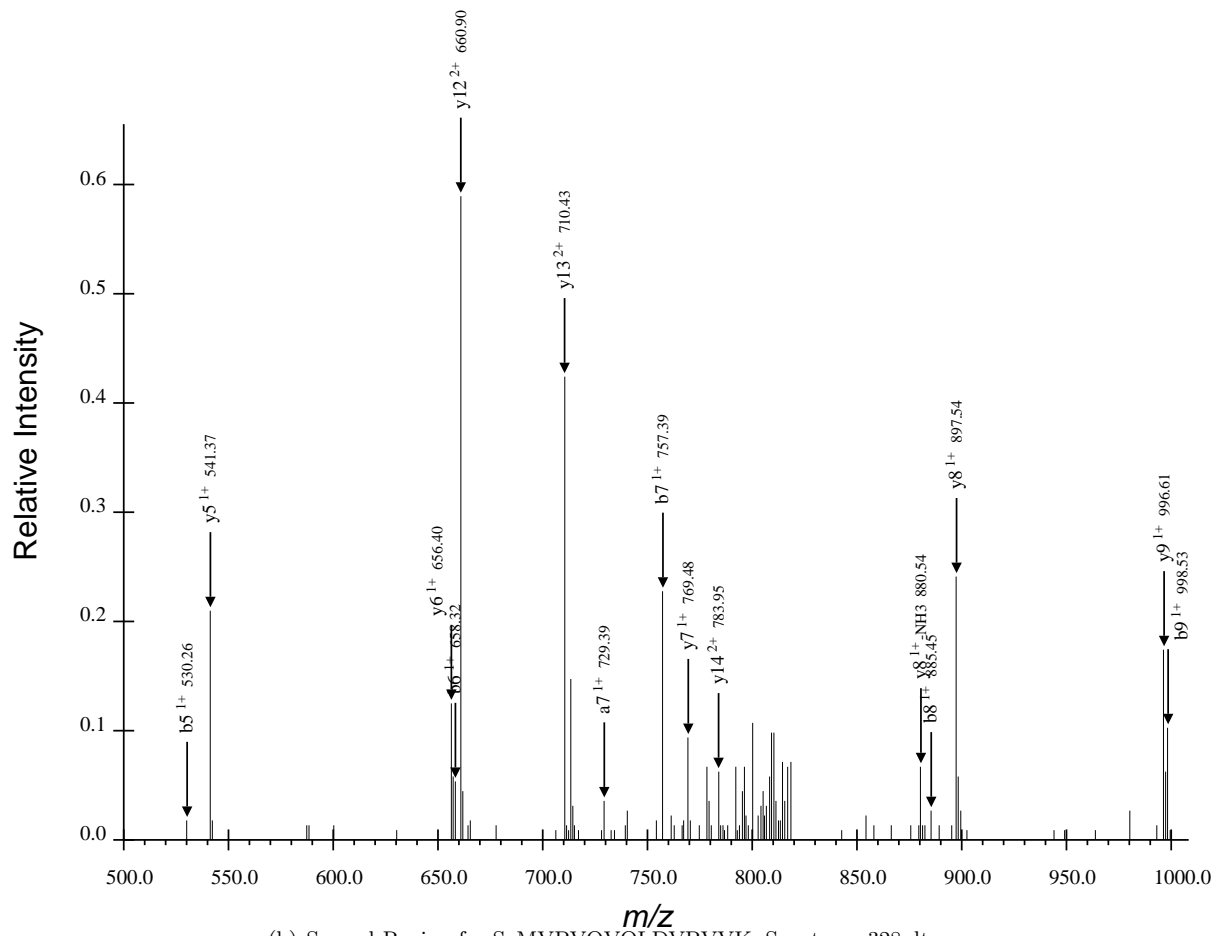

(b) Second Region for SoMVPVQVQLDVPVVK, Spectrum 328.dta



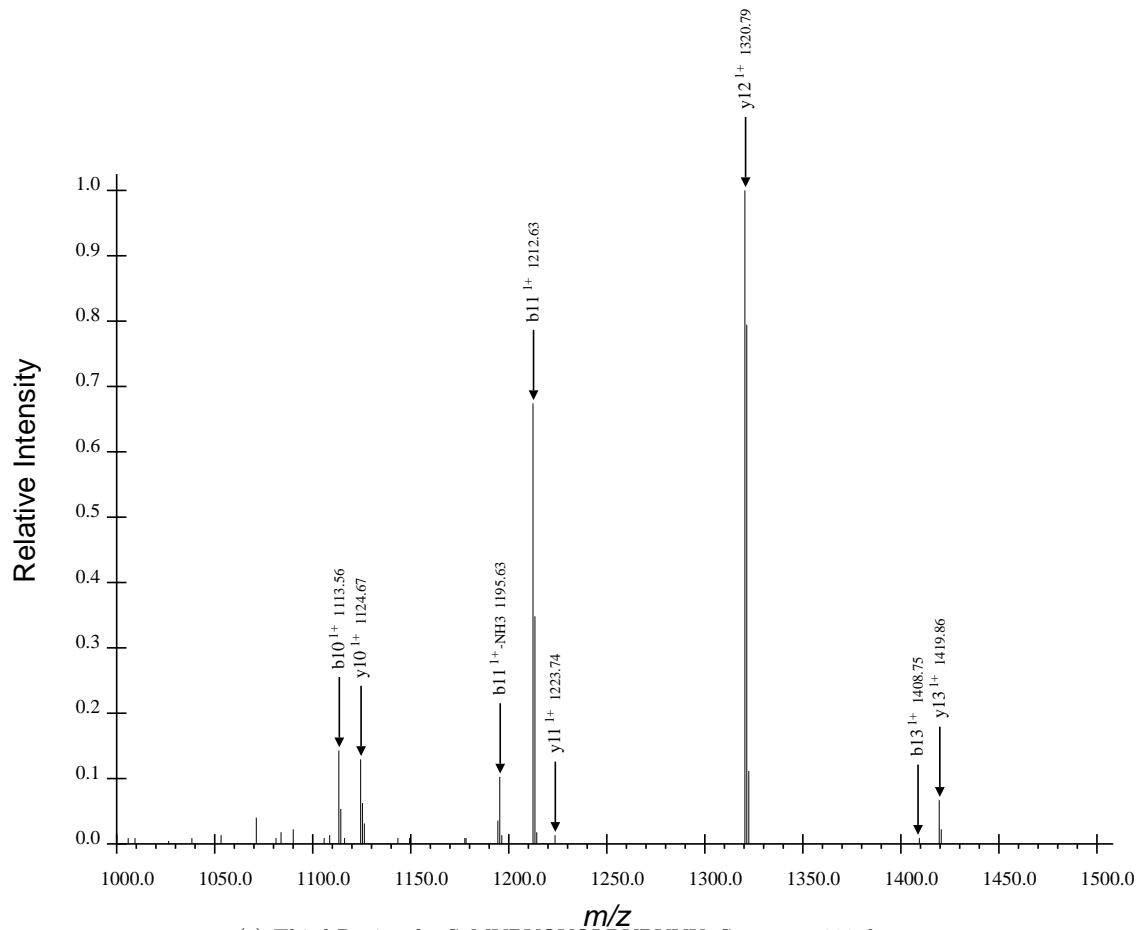

(c) Third Region for SoMVPVQVQLDVPVVK, Spectrum 328.dta

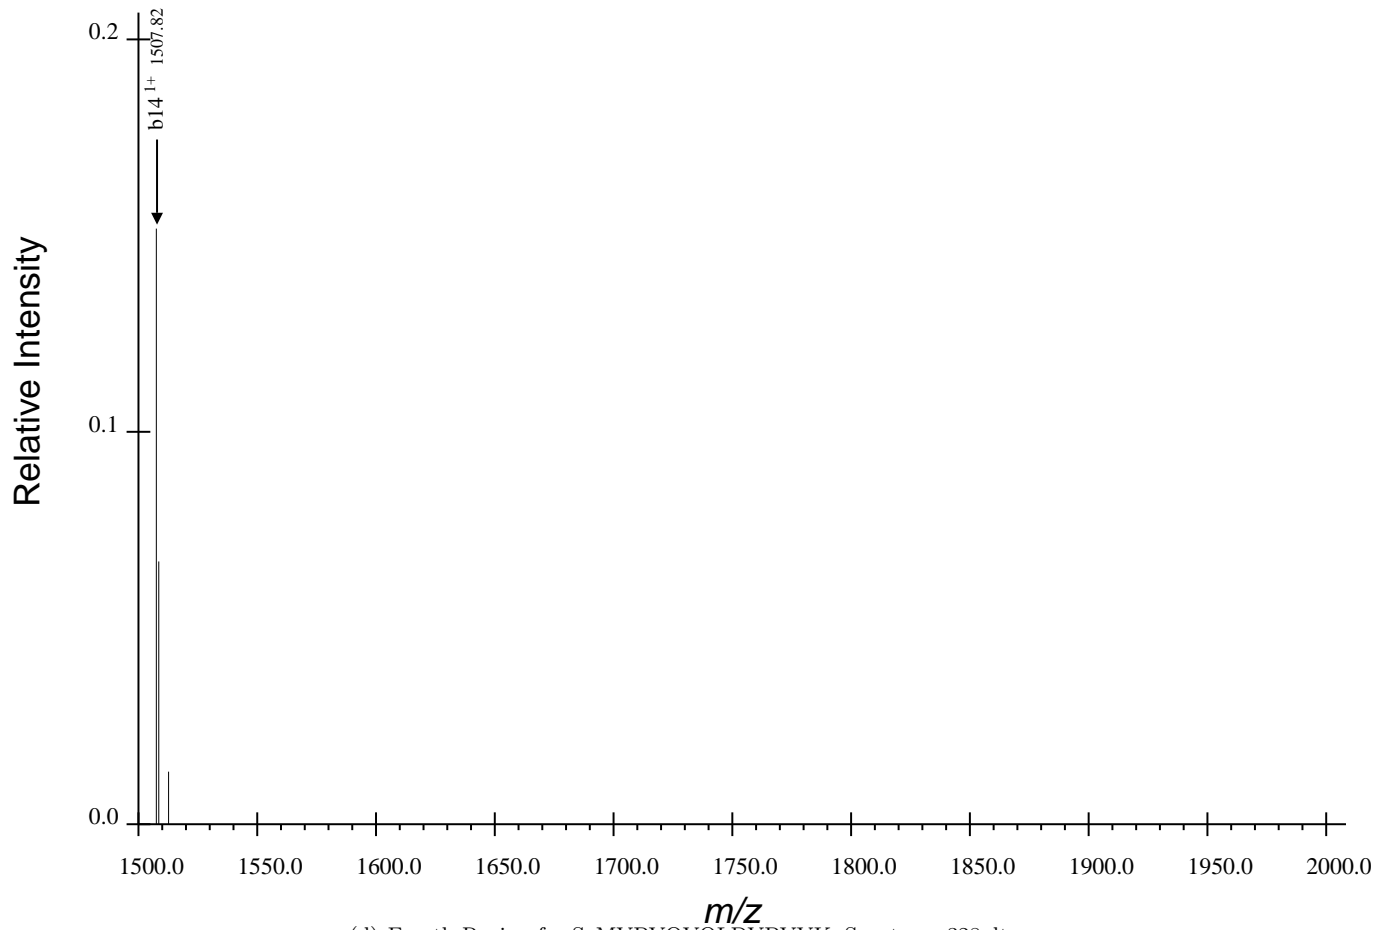

(d) Fourth Region for SoMVPVQVQLDVPVVK, Spectrum 328.dta

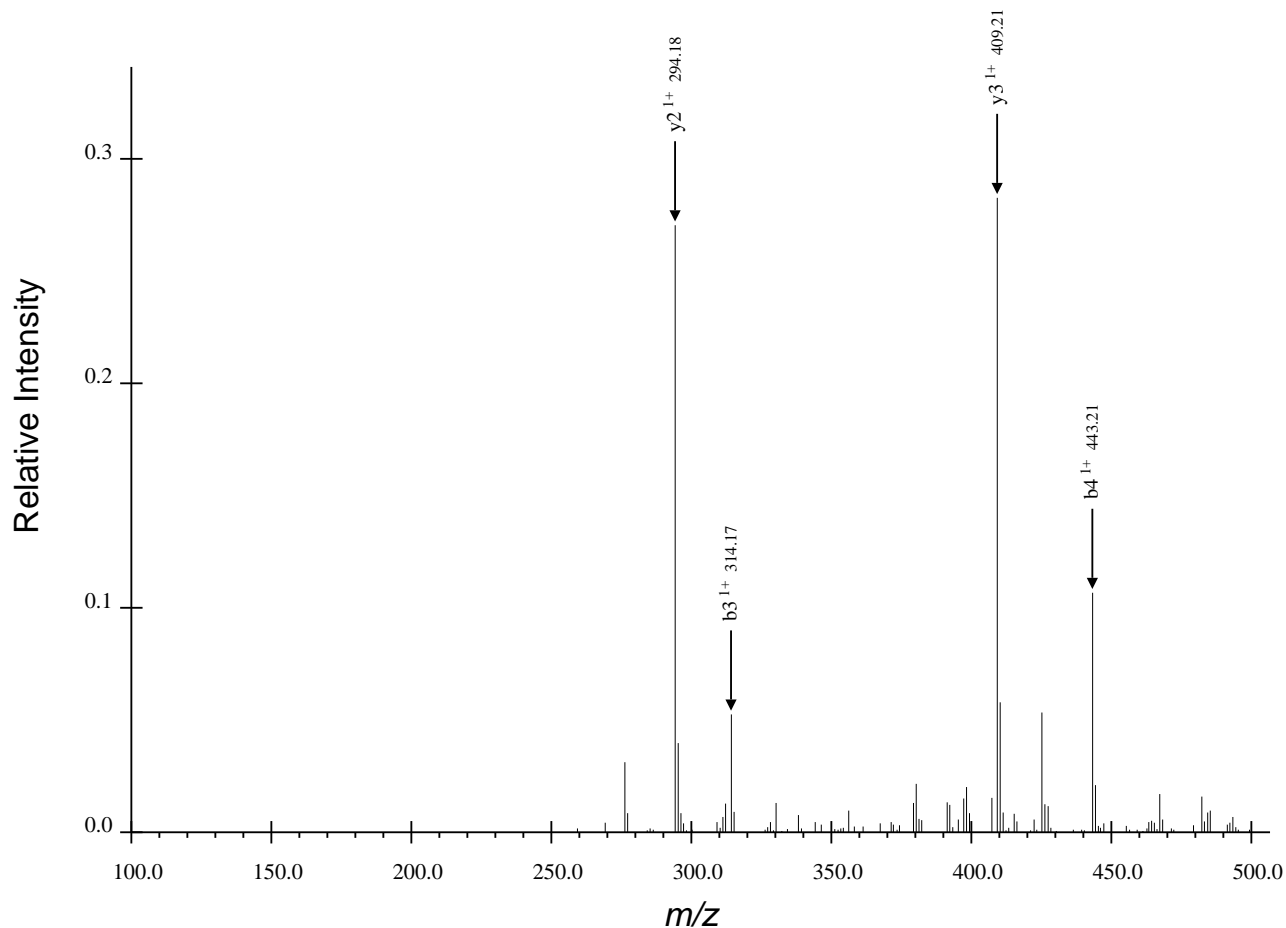

(a) First Region for LEAELGNoMQLVEDFK, Spectrum 329.dta

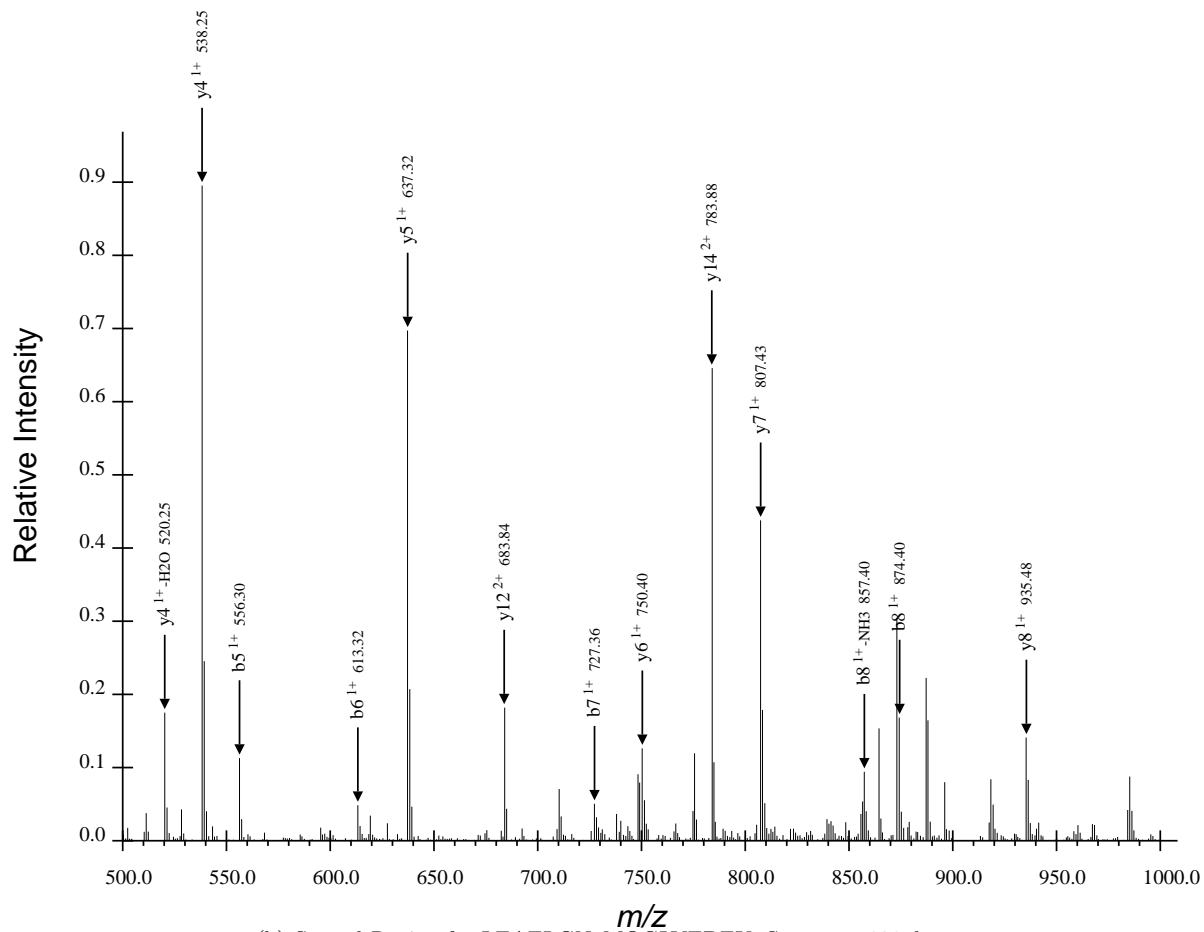

(b) Second Region for LEAELGNoMQLVEDFK, Spectrum 329.dta

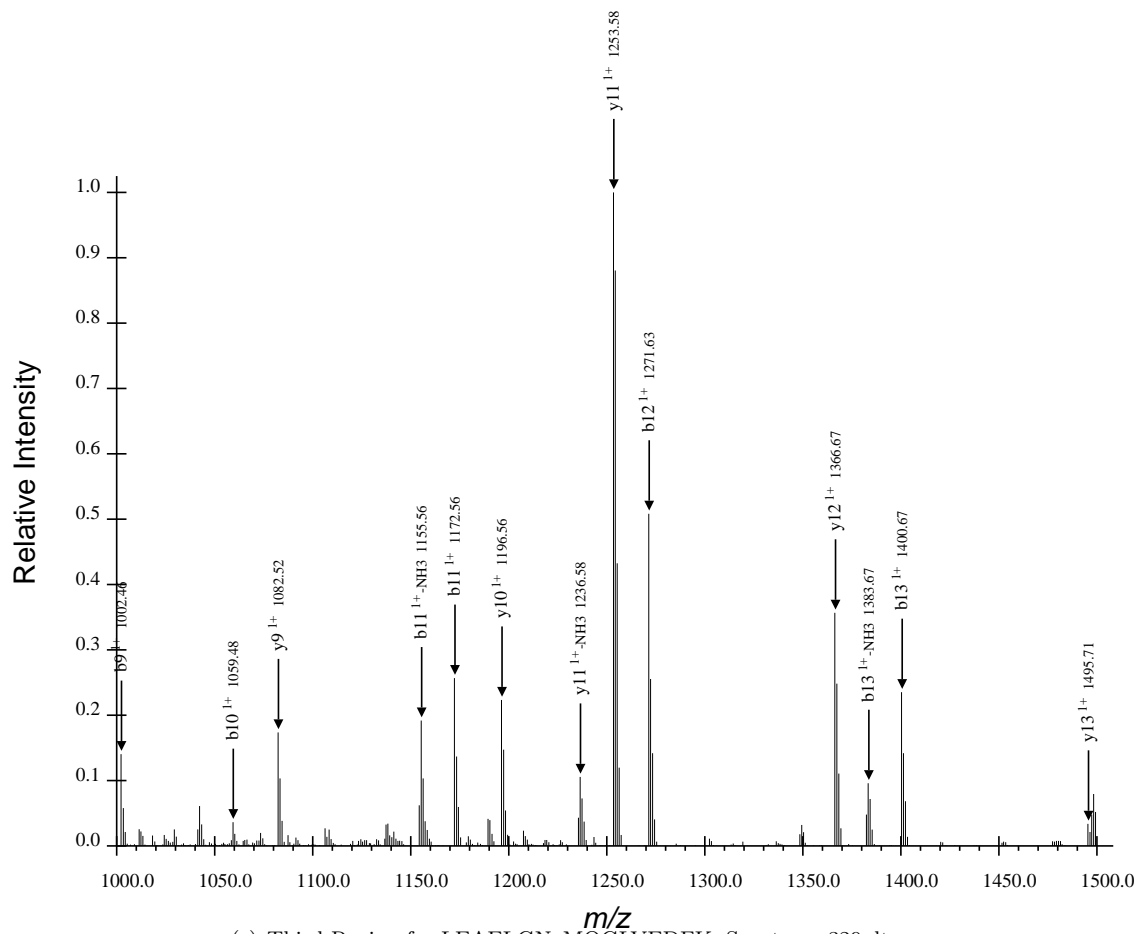

(c) Third Region for LEAELGNoMQGLVEDFK, Spectrum 329.dta

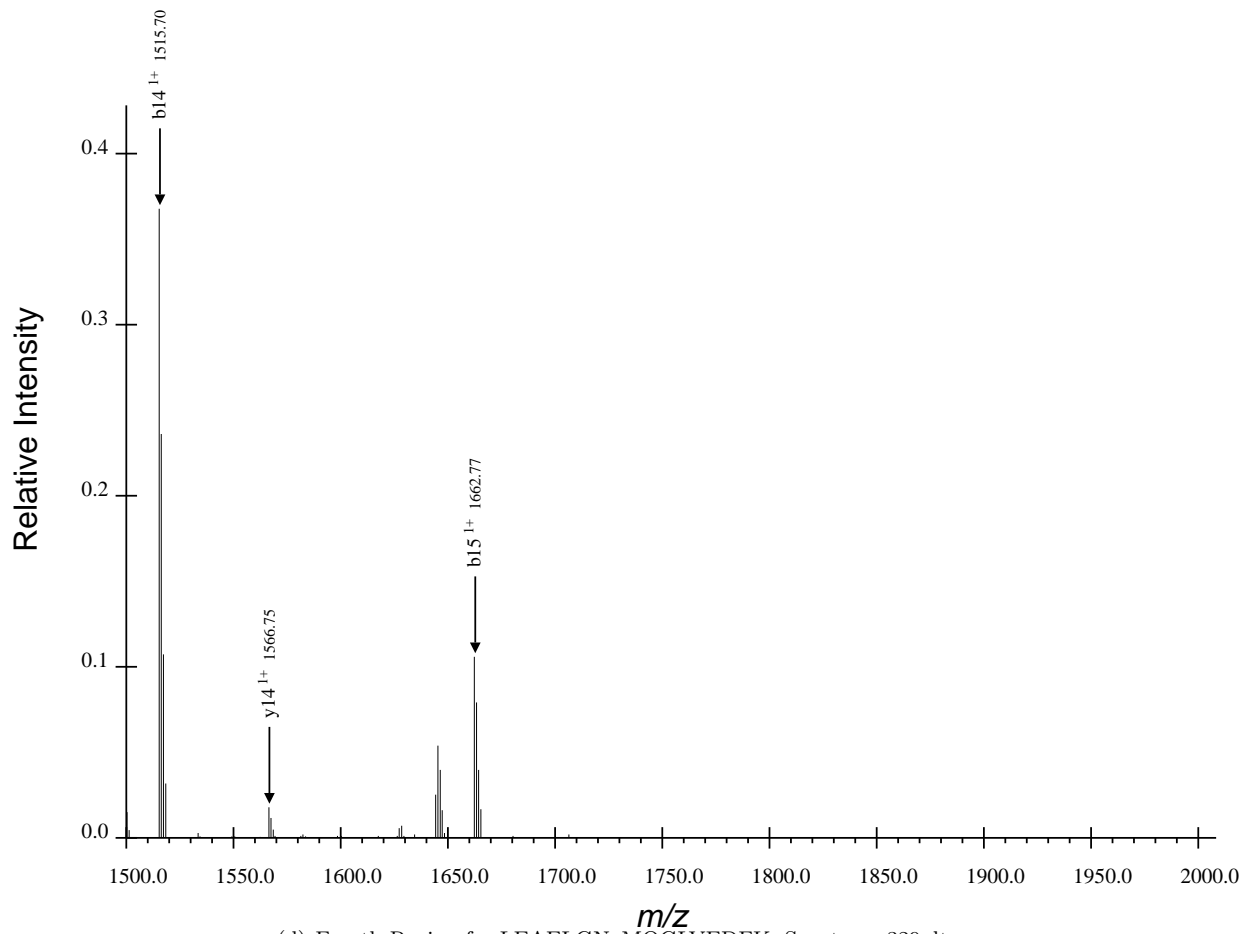

(d) Fourth Region for LEAELGNoMQGLVEDFK, Spectrum 329.dta

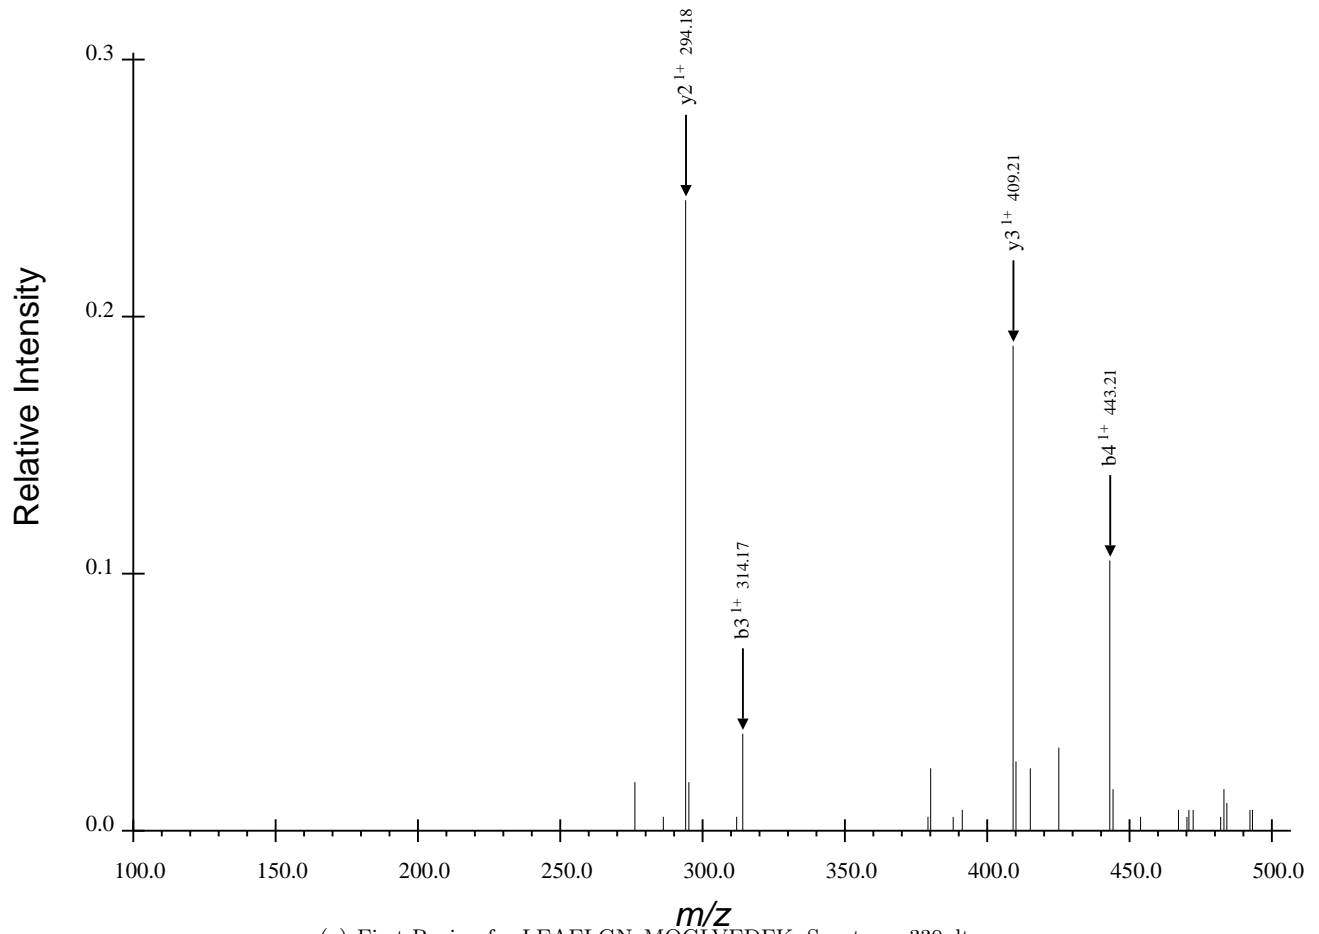

(a) First Region for LEAELGNoMQGLVEDFK, Spectrum 330.dta

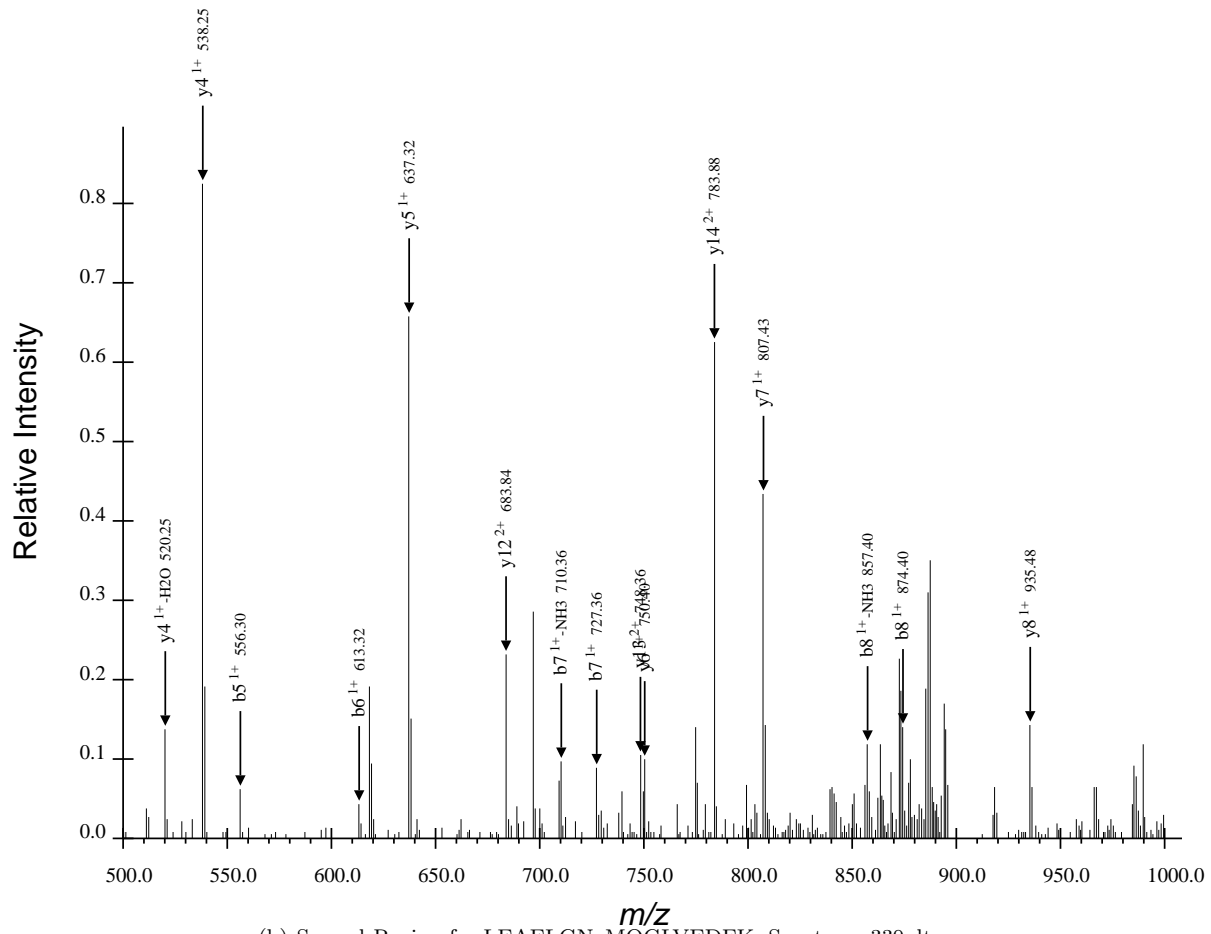

(b) Second Region for LEAELGNoMQGLVEDFK, Spectrum 330.dta

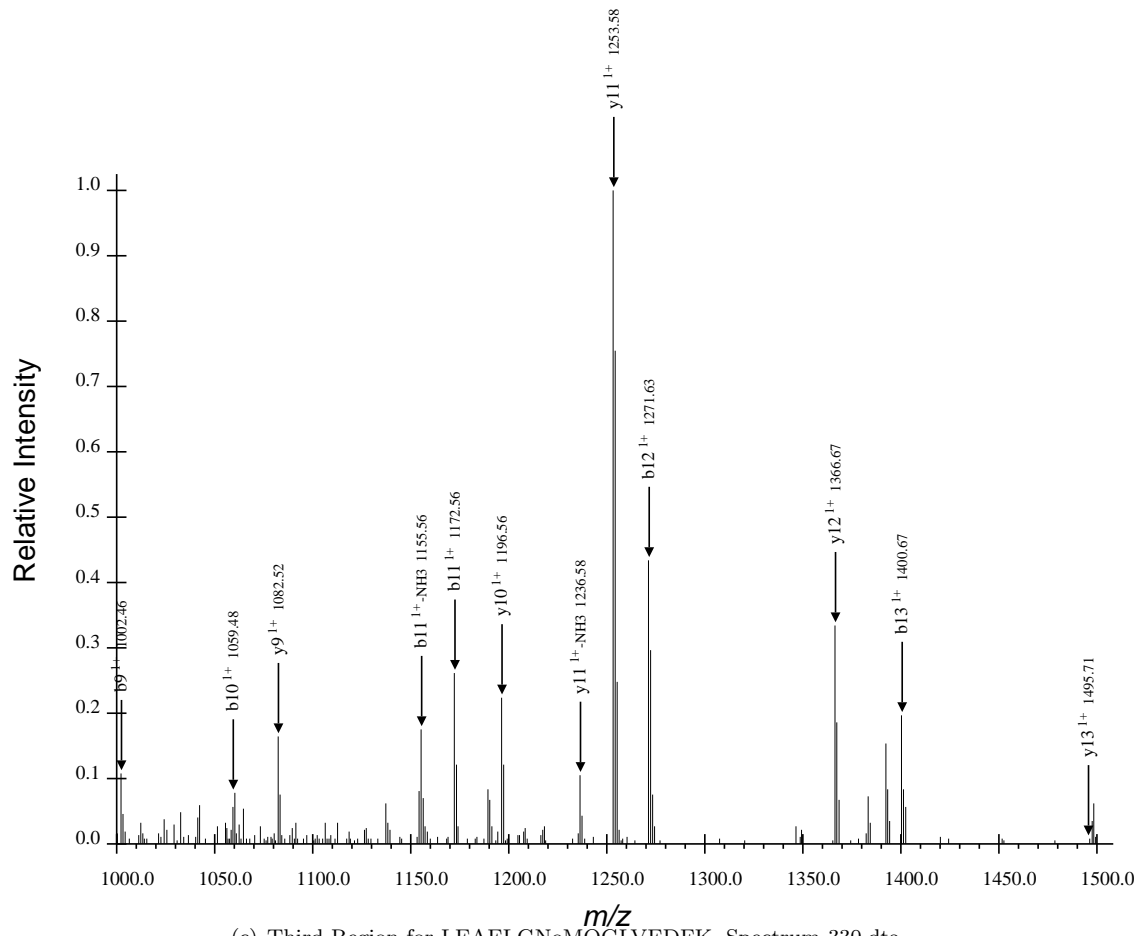

(c) Third Region for LEAELGN<sub>0</sub>MQGLVEDFK, Spectrum 330.dta

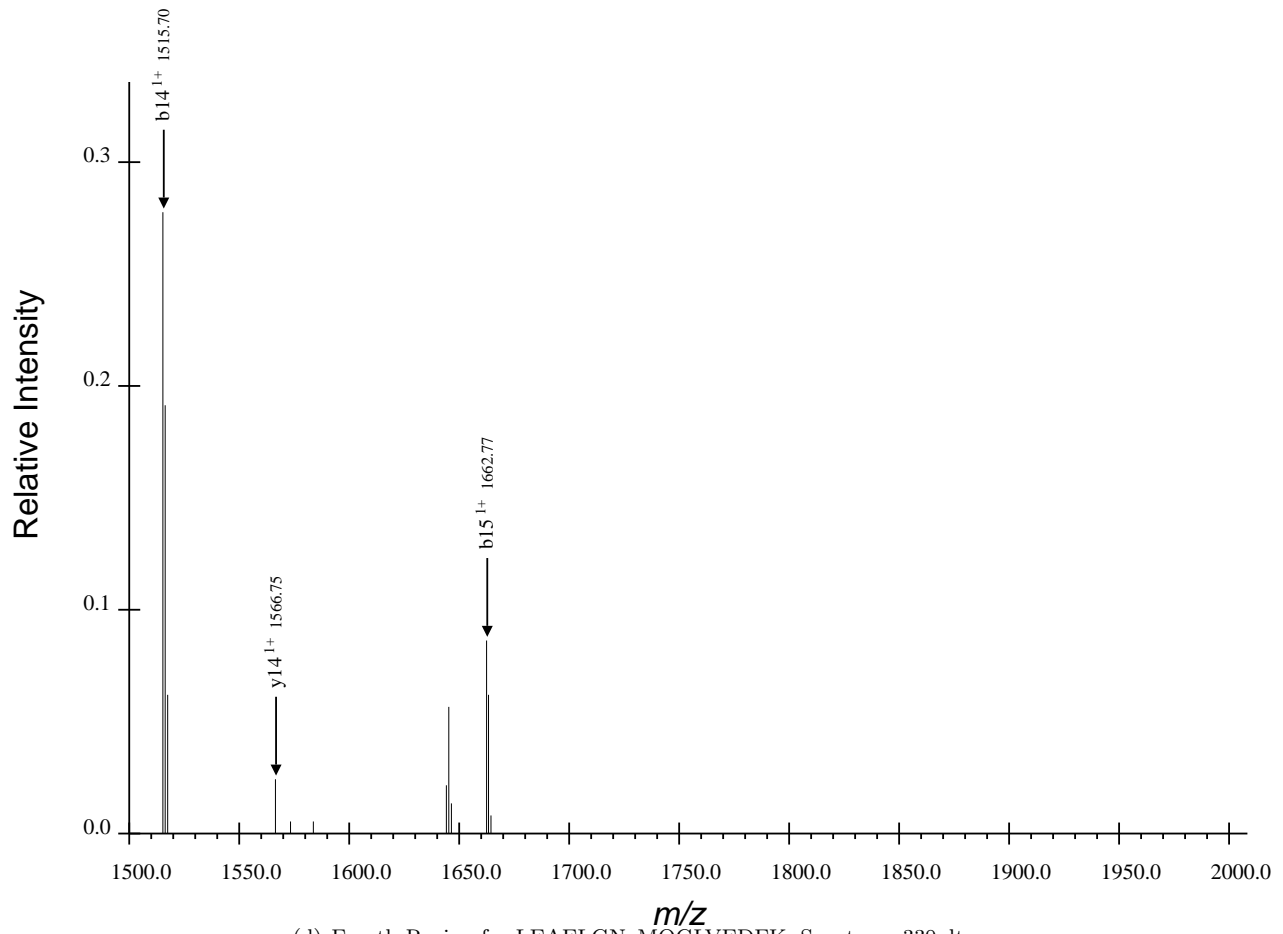

(d) Fourth Region for LEAELGN<sub>0</sub>MQGLVEDFK, Spectrum 330.dta

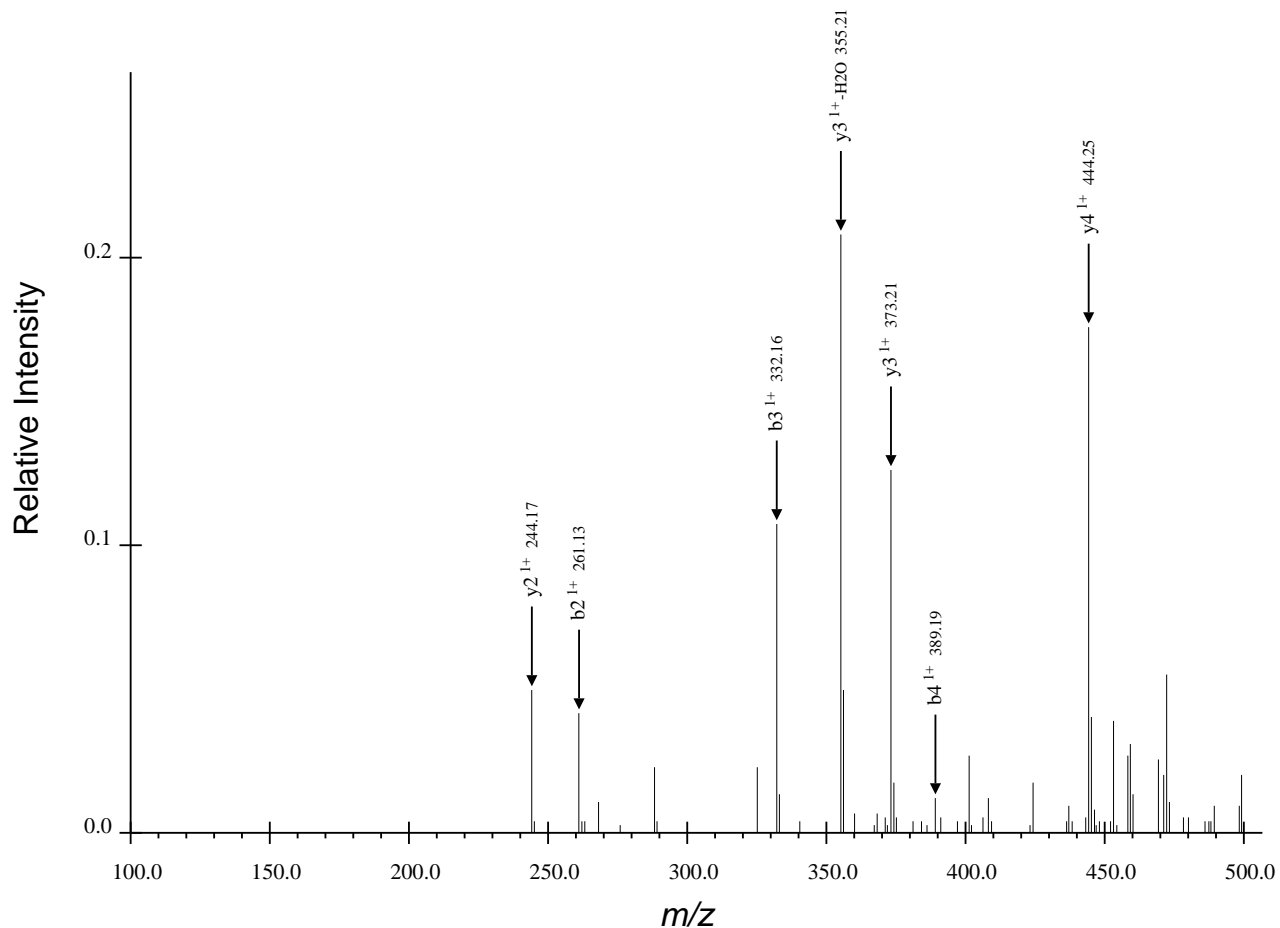

(a) First Region for oMIAGQVLDINLAAEPK, Spectrum 331.dta

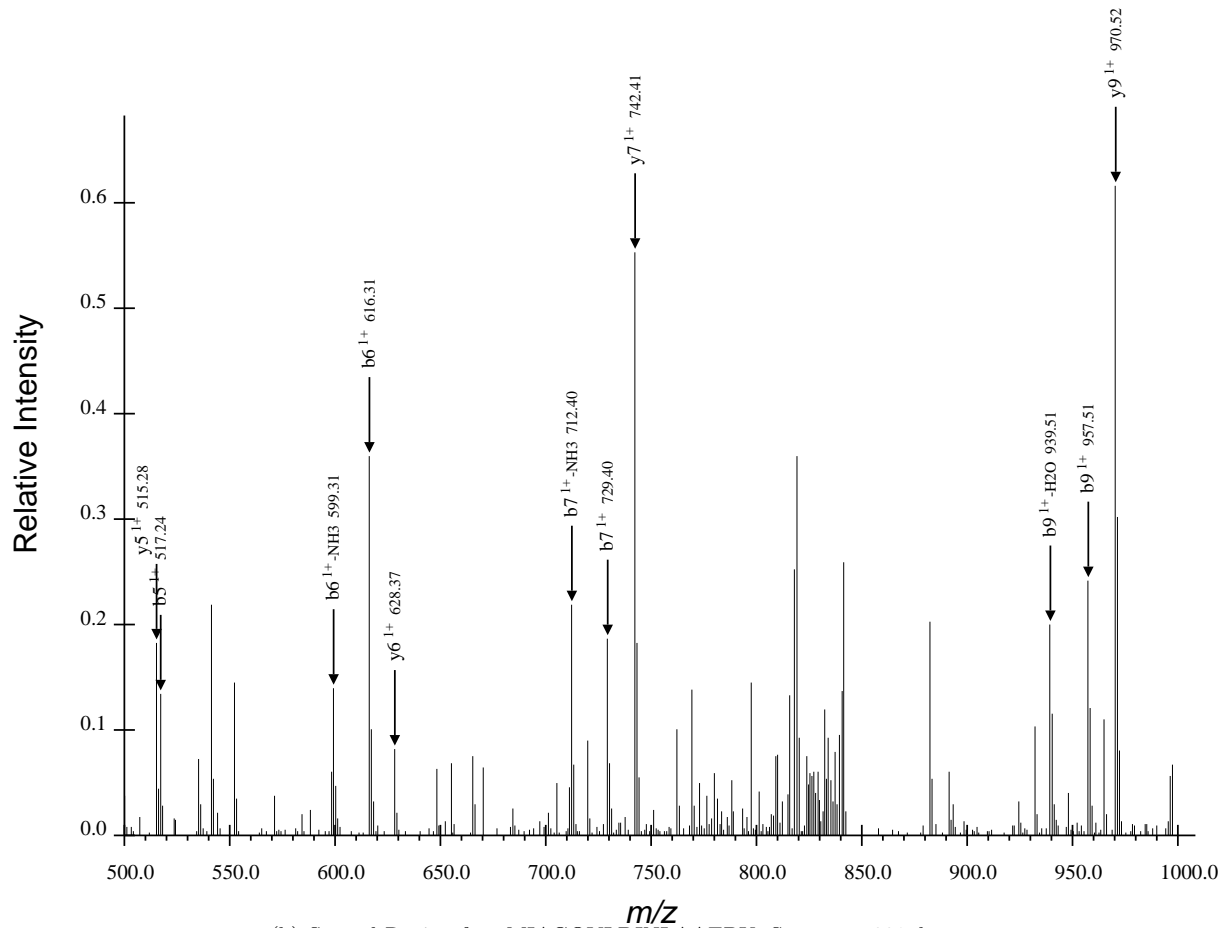

(b) Second Region for oMIAGQVLDINLAAEPK, Spectrum 331.dta

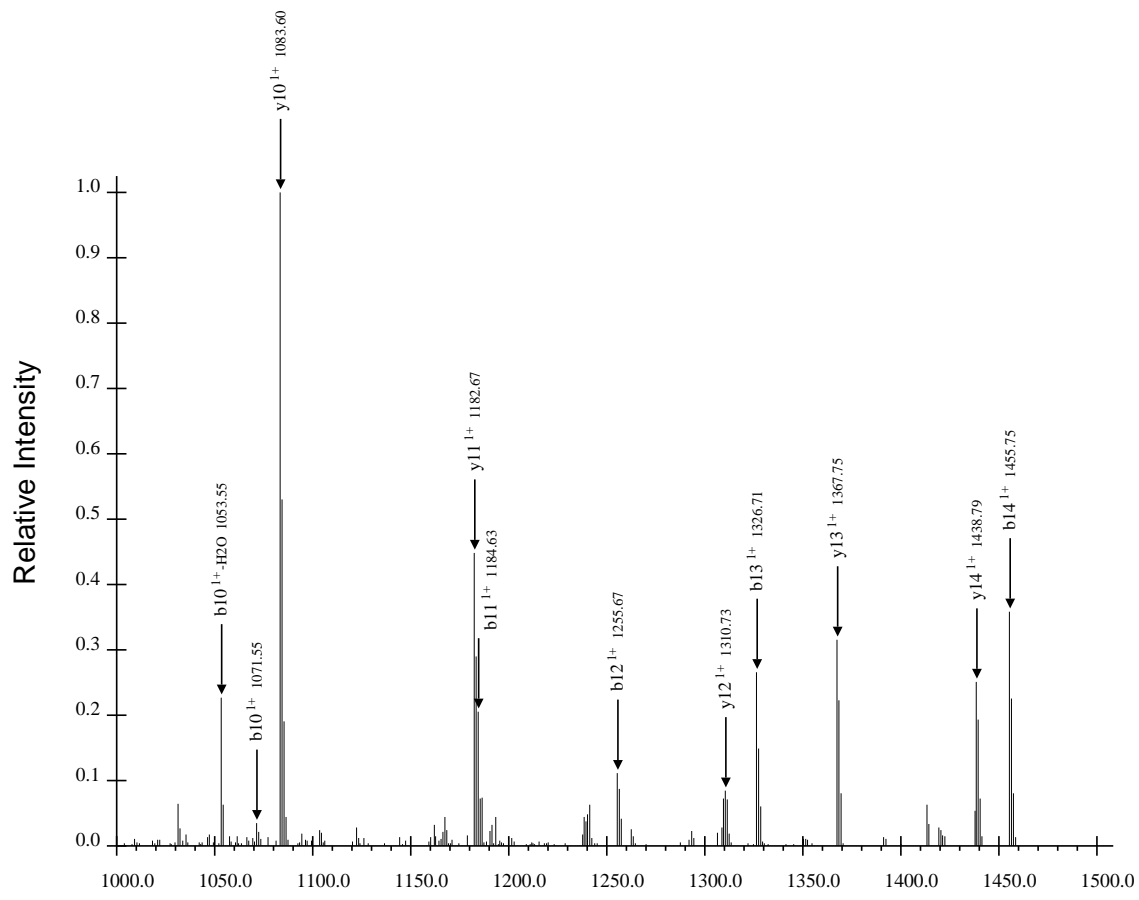

(c) Third Region for oMIAGQVLDINLAAEPK, Spectrum 331.dta

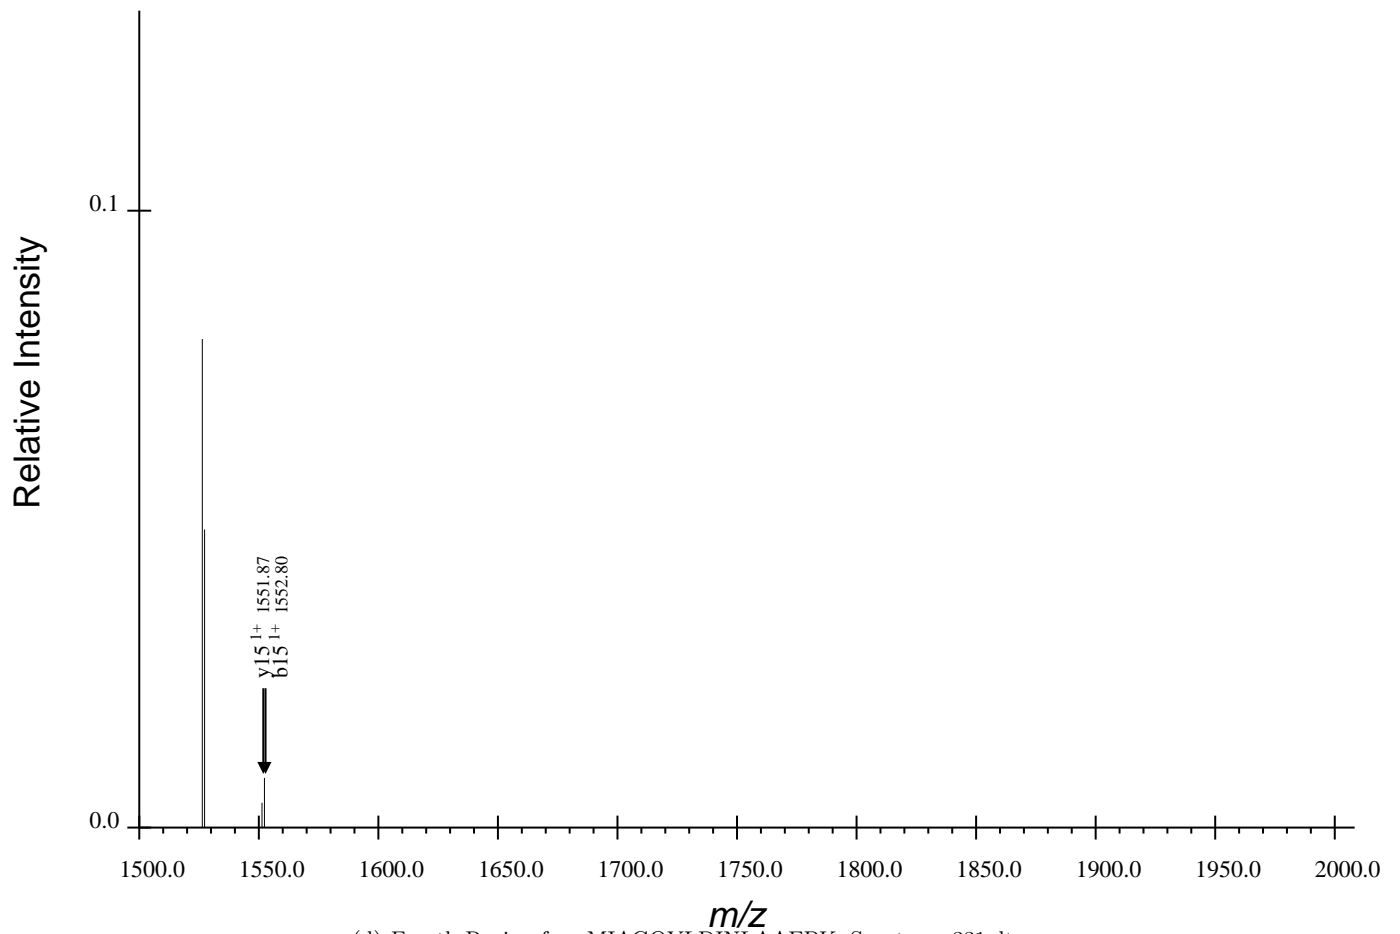

(d) Fourth Region for oMIAGQVLDINLAAEPK, Spectrum 331.dta

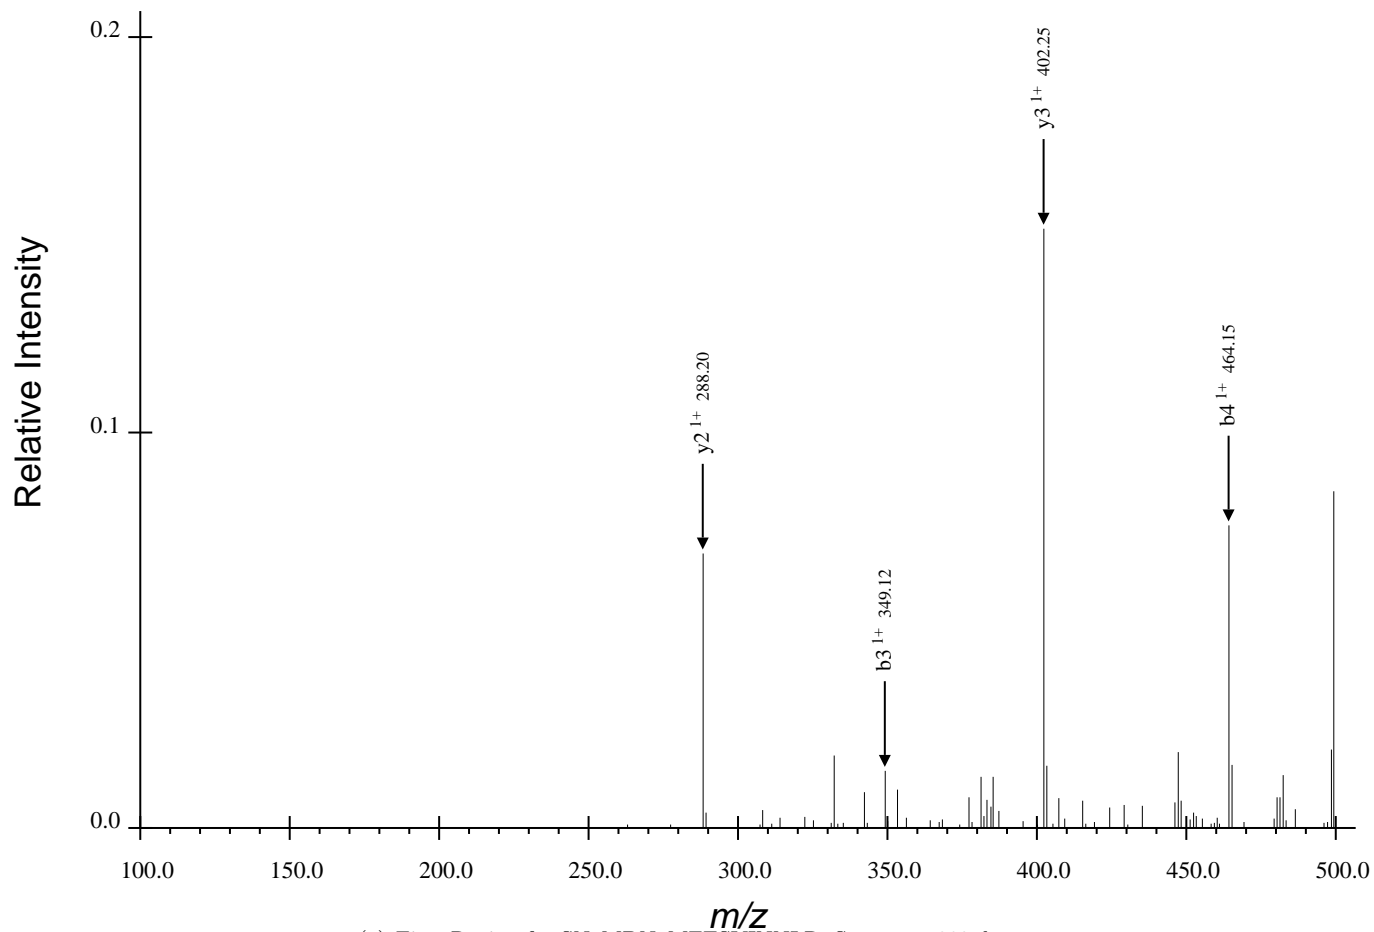

(a) First Region for SNoMDNoMFESYINNLR, Spectrum 332.dta

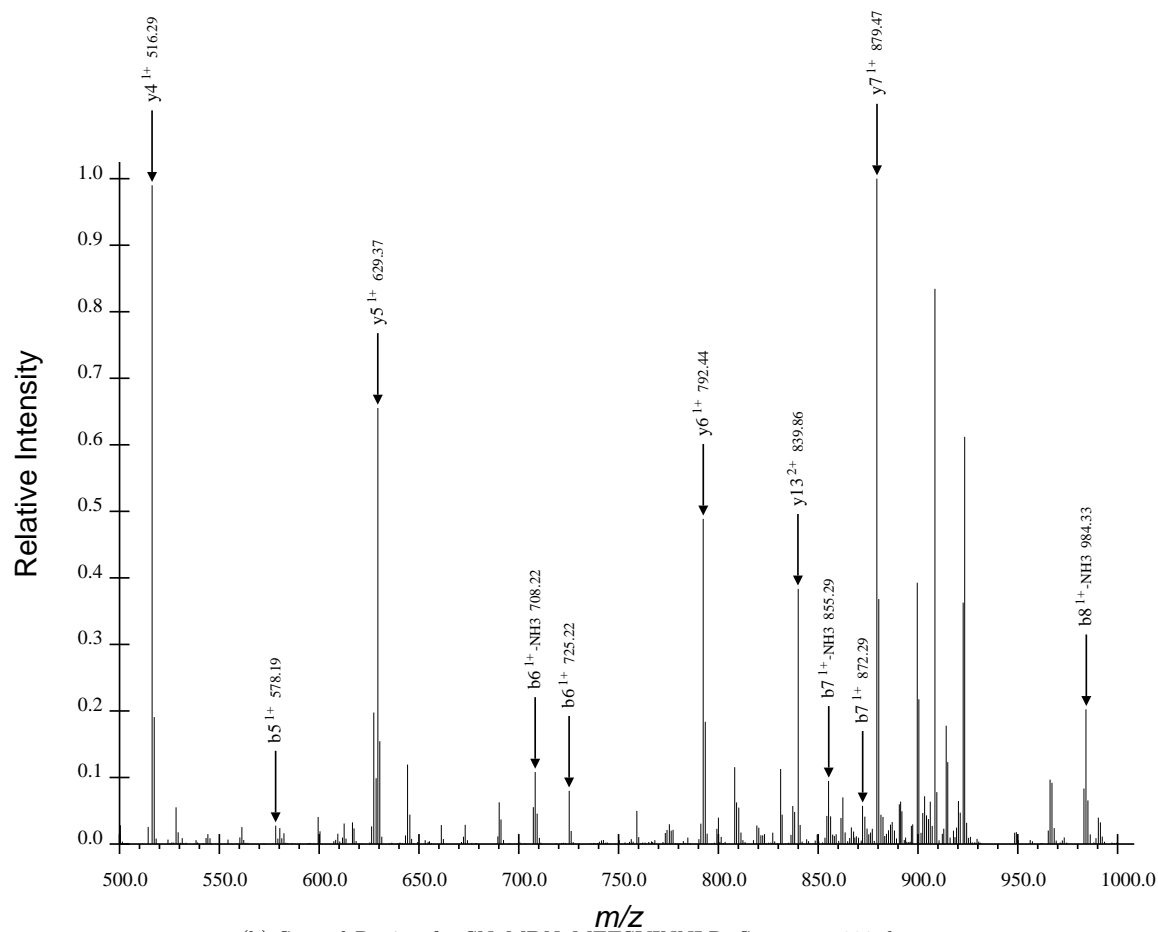

(b) Second Region for SNoMDNoMFESYINNLR, Spectrum 332.dta



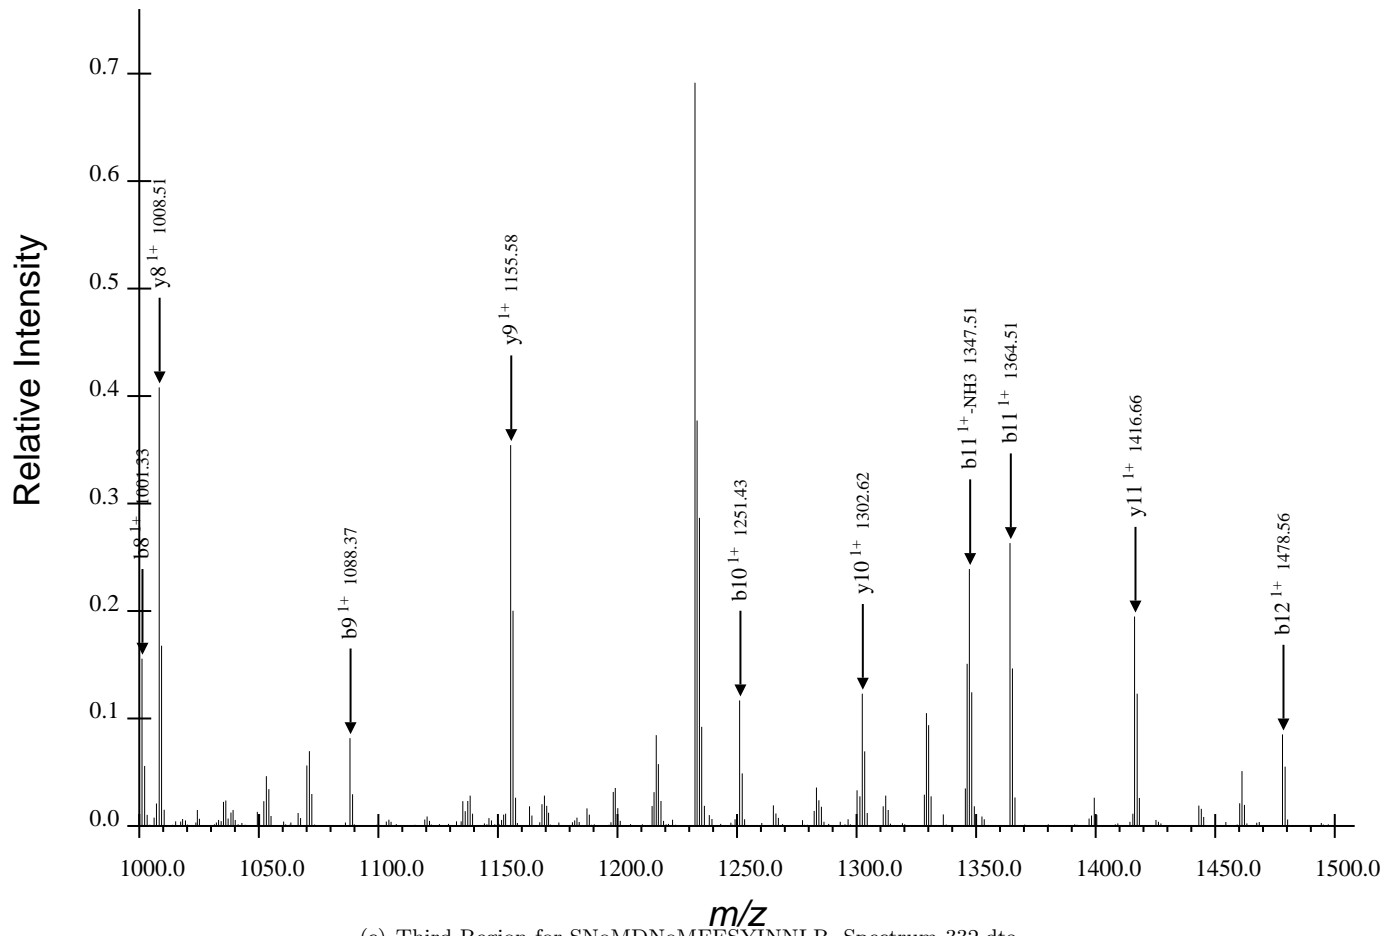

(c) Third Region for SNoMDNoMFESYINNLr, Spectrum 332.dta

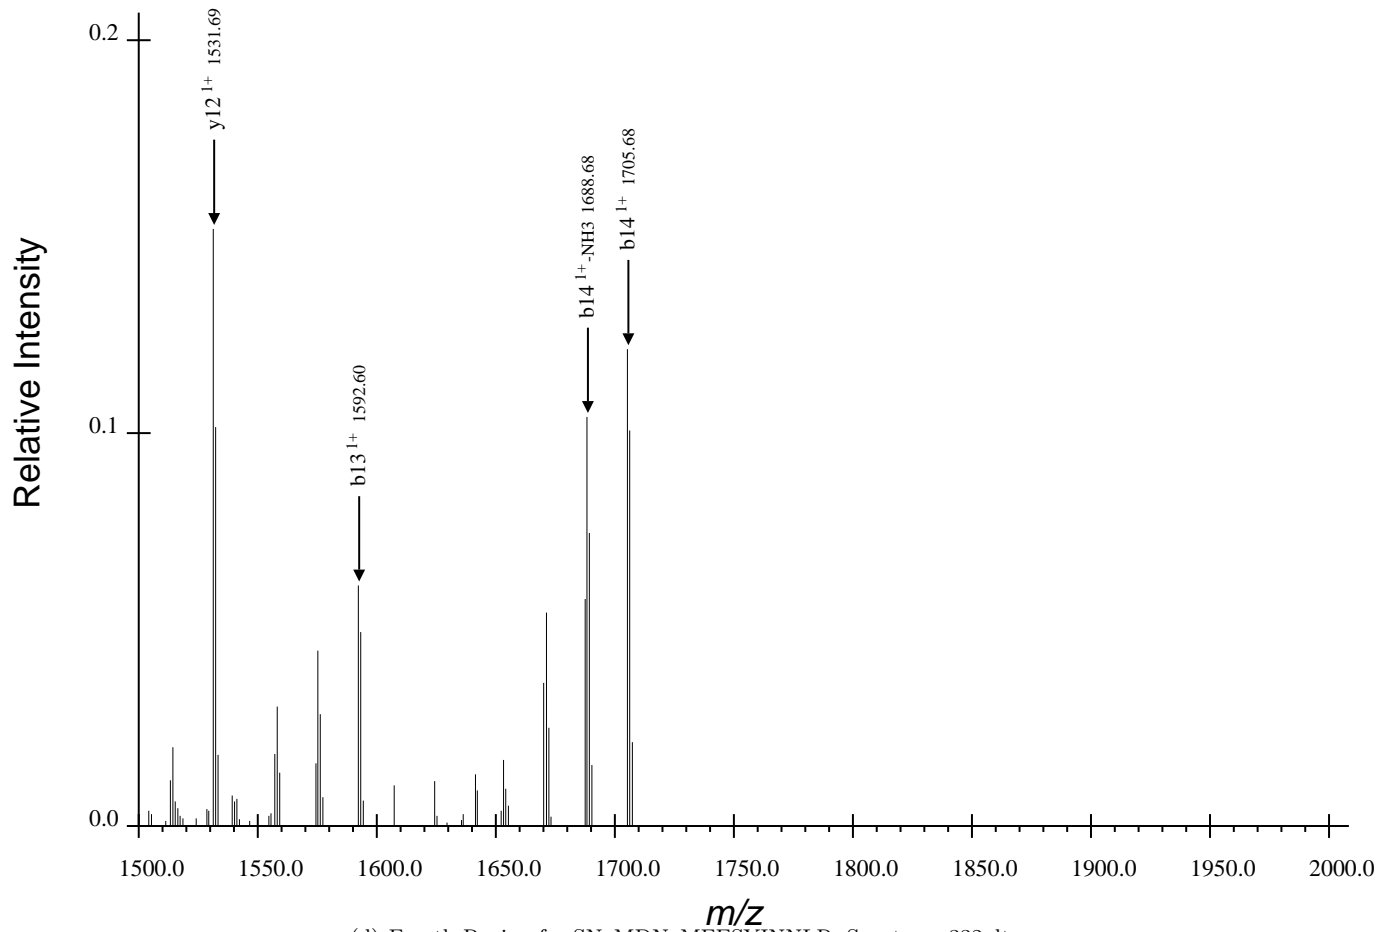

(d) Fourth Region for SNoMDNoMFESYINNLr, Spectrum 332.dta

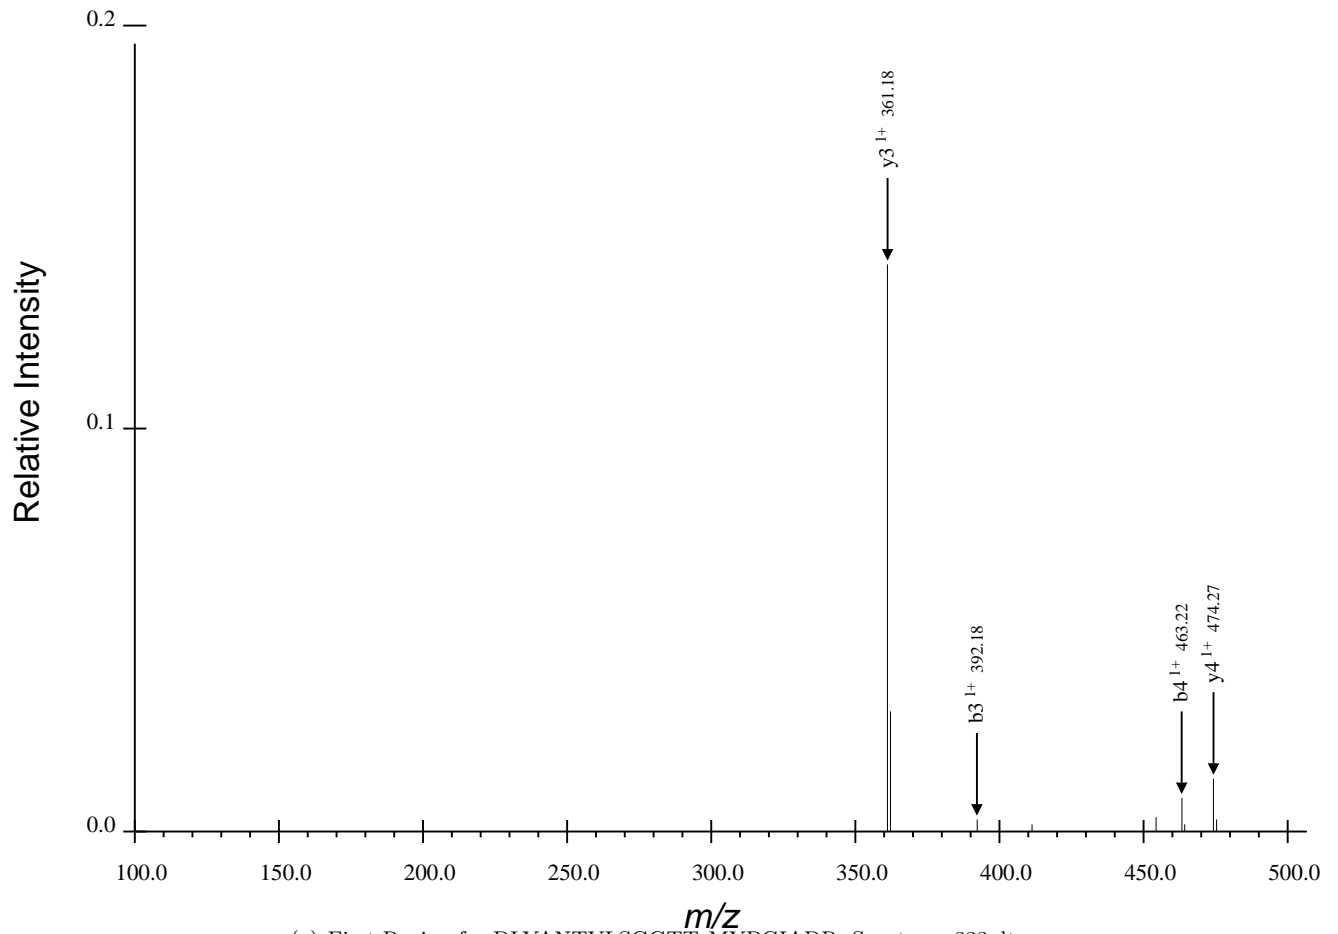

(a) First Region for DLYANTVLSGGTToMYPGIADR, Spectrum 333.dta

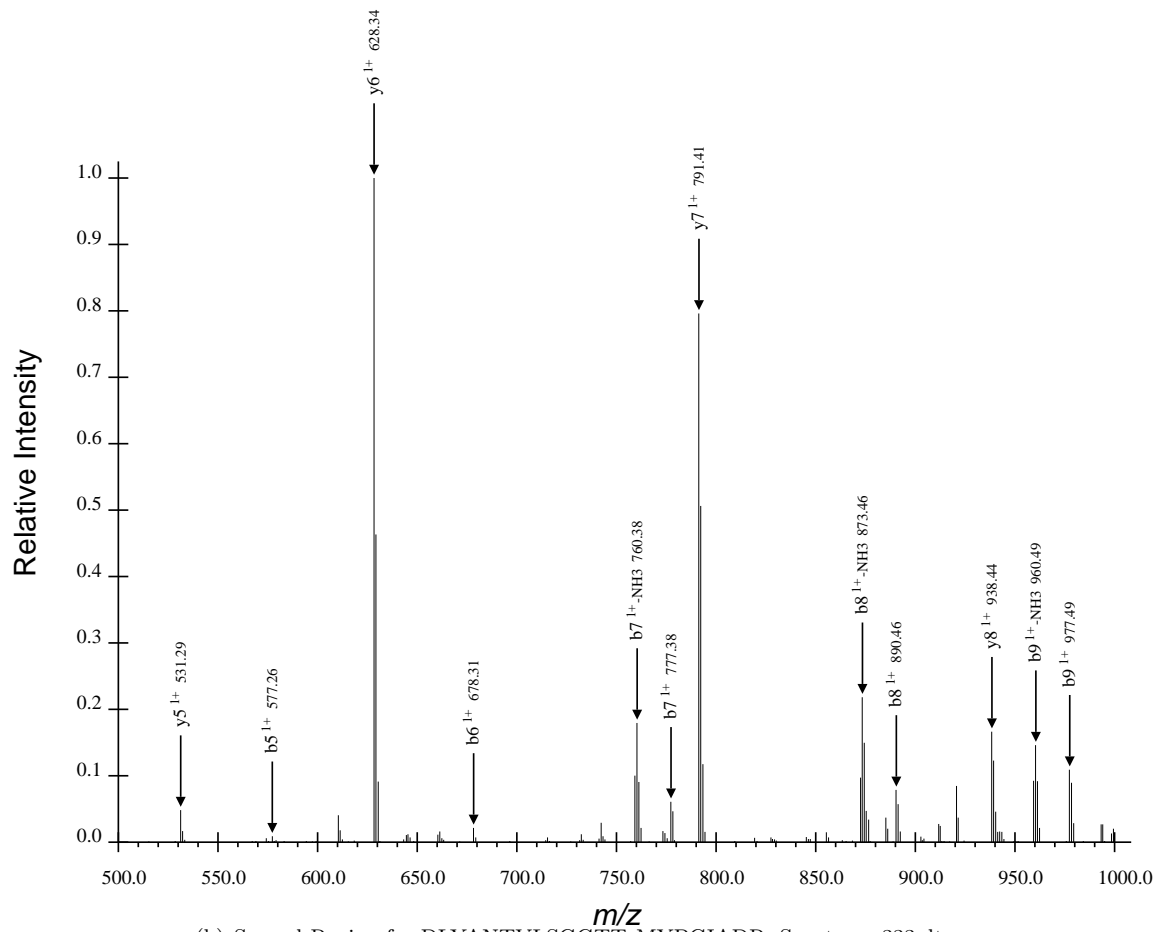

(b) Second Region for DLYANTVLSGGTToMYPGIADR, Spectrum 333.dta

(d) Fourth Region for DIYANTVLSGGTTOMYPGIADR, Spectrum 333.dta

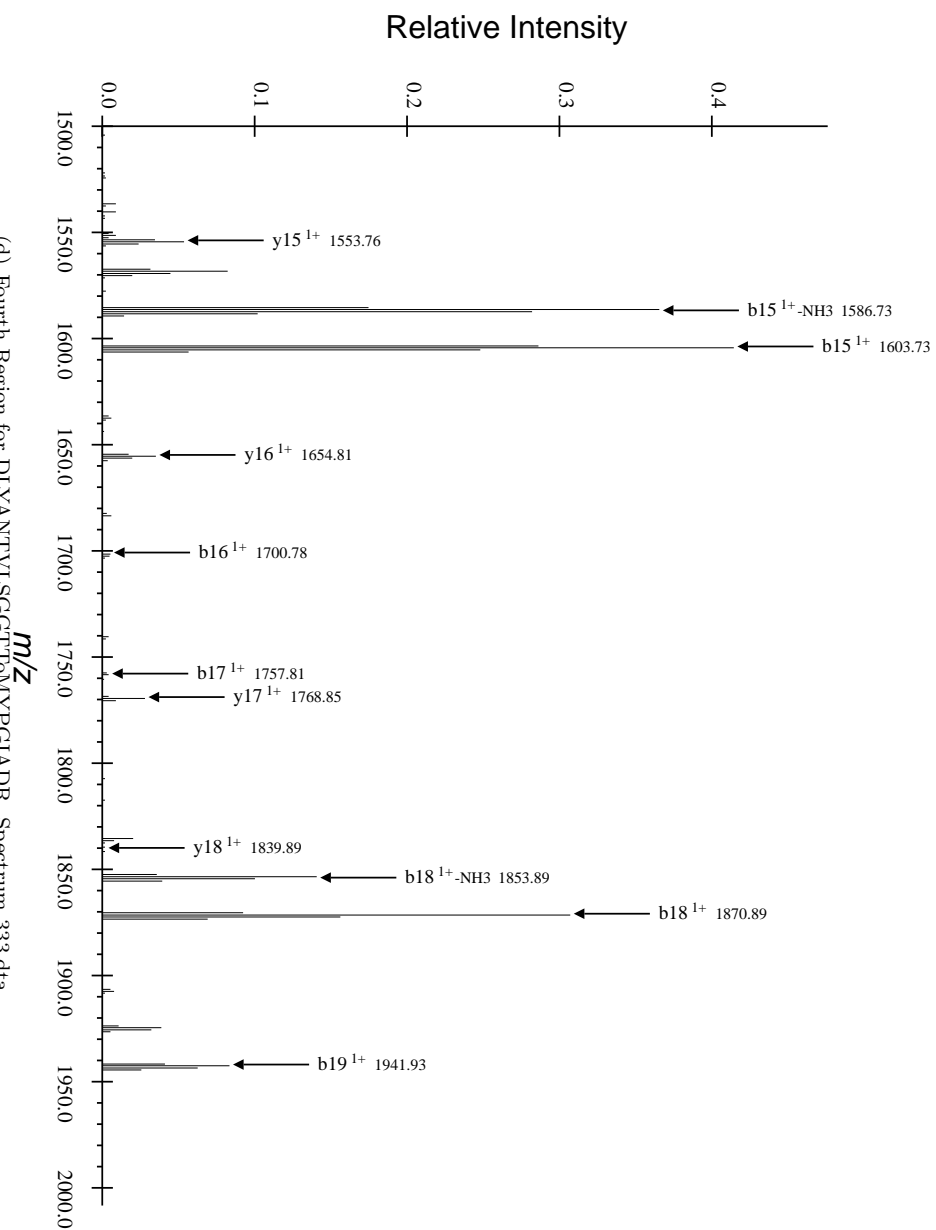

(c) Third Region for DIYANTVLSGGTTOMYPGIADR, Spectrum 333.dta

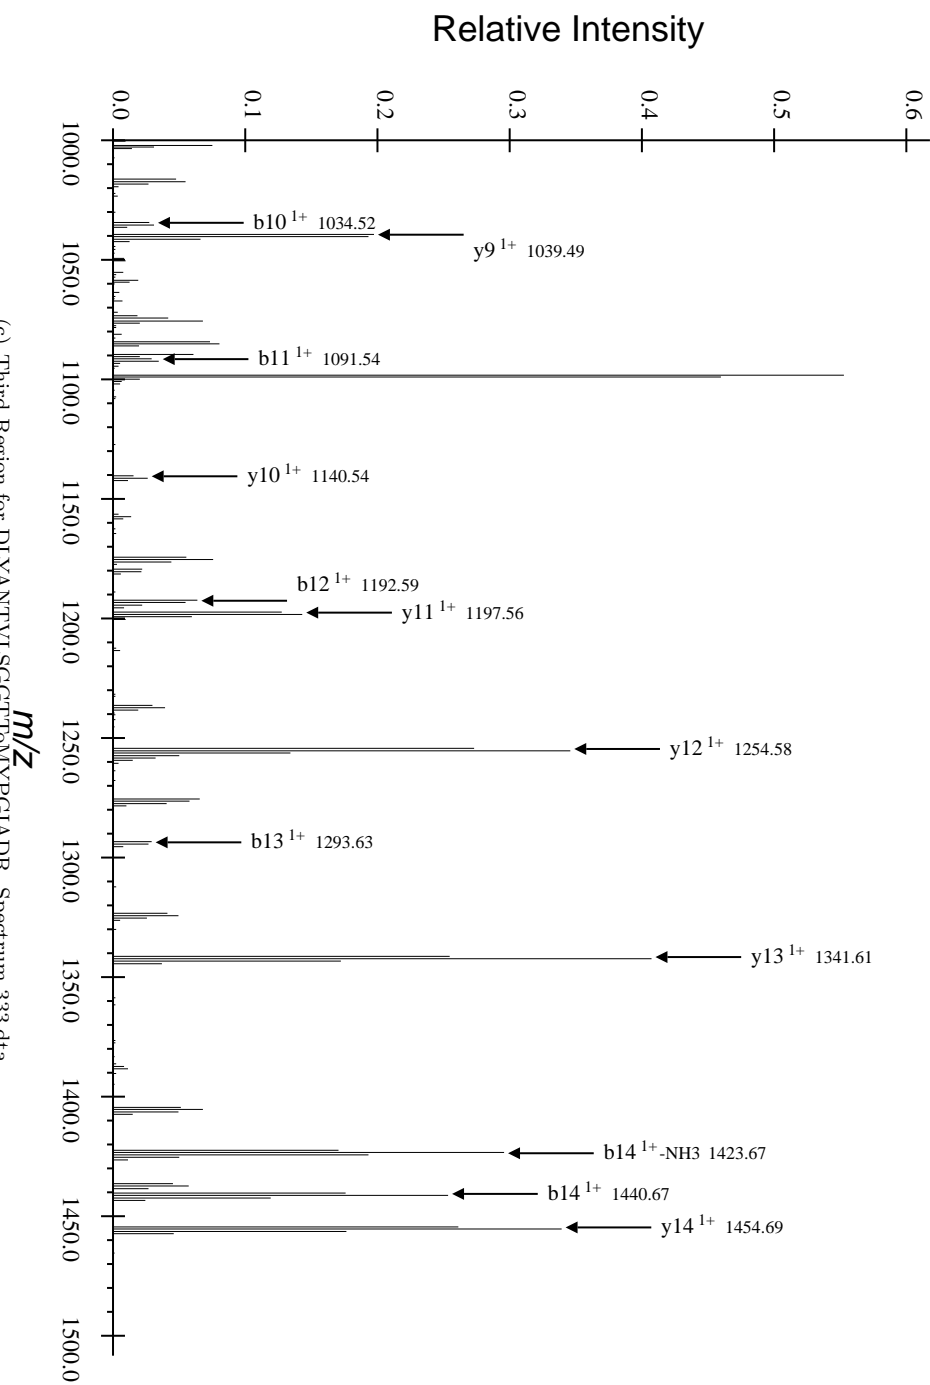

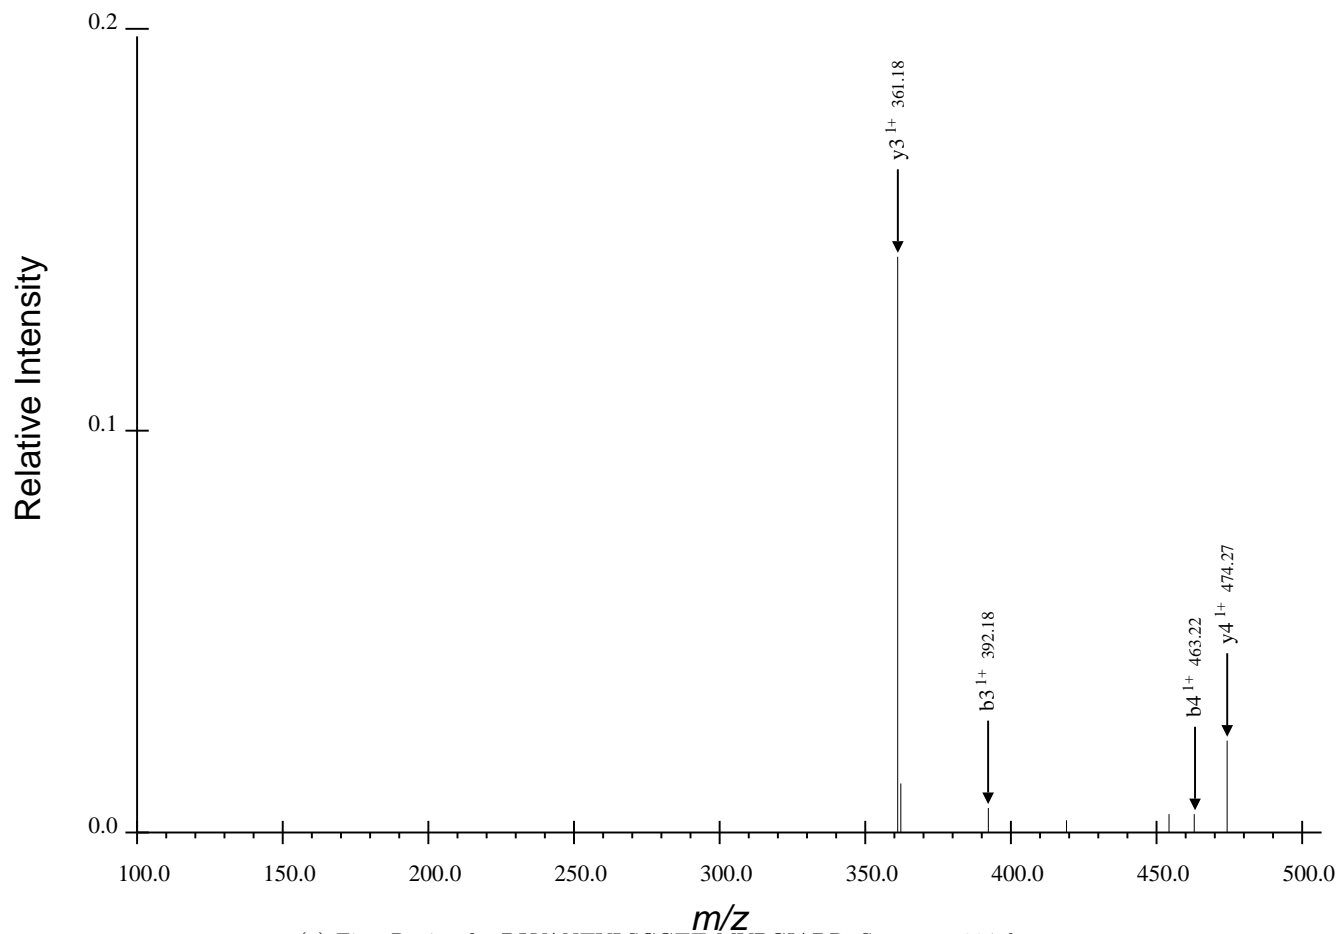

(a) First Region for DLYANTVLSGGTTToMYPGIADR, Spectrum 334.dta

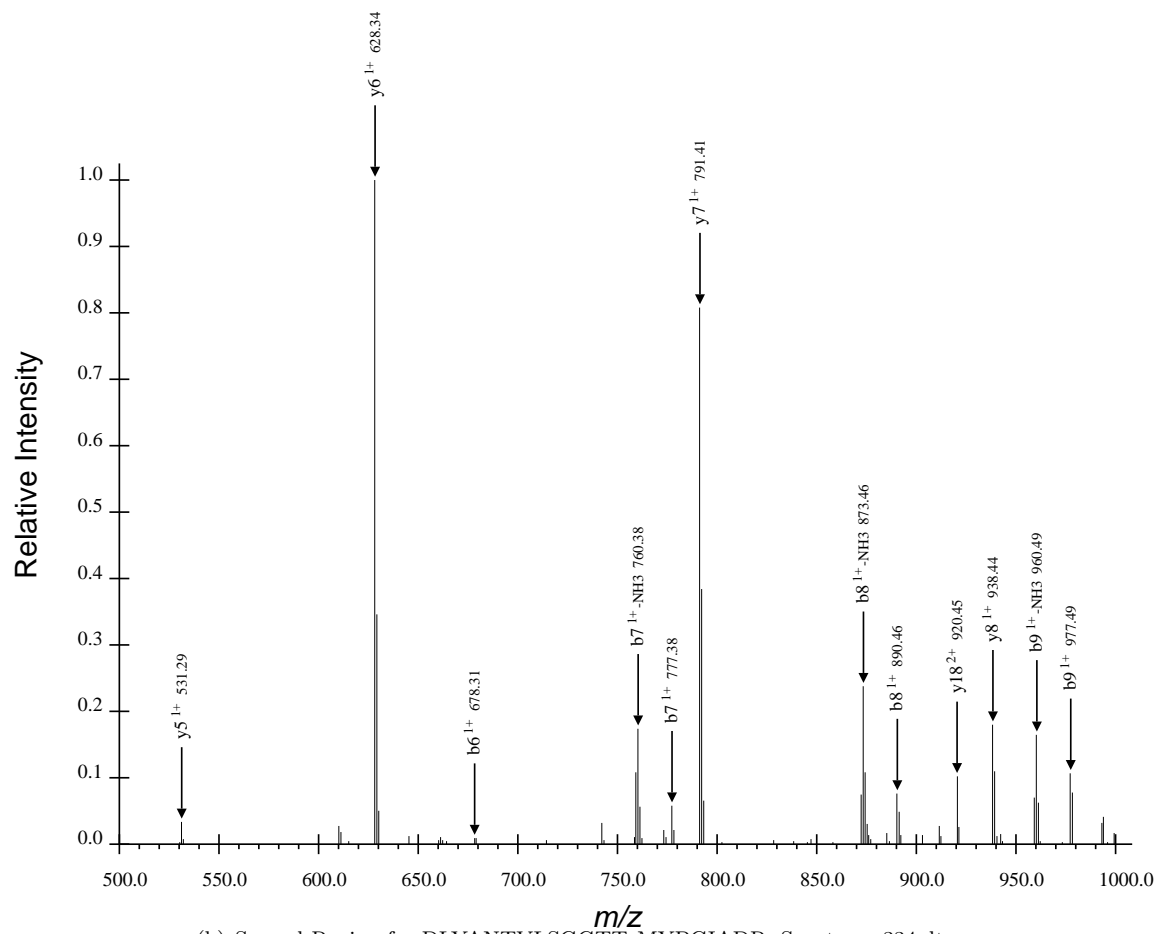

(b) Second Region for DLYANTVLSGGTTToMYPGIADR, Spectrum 334.dta

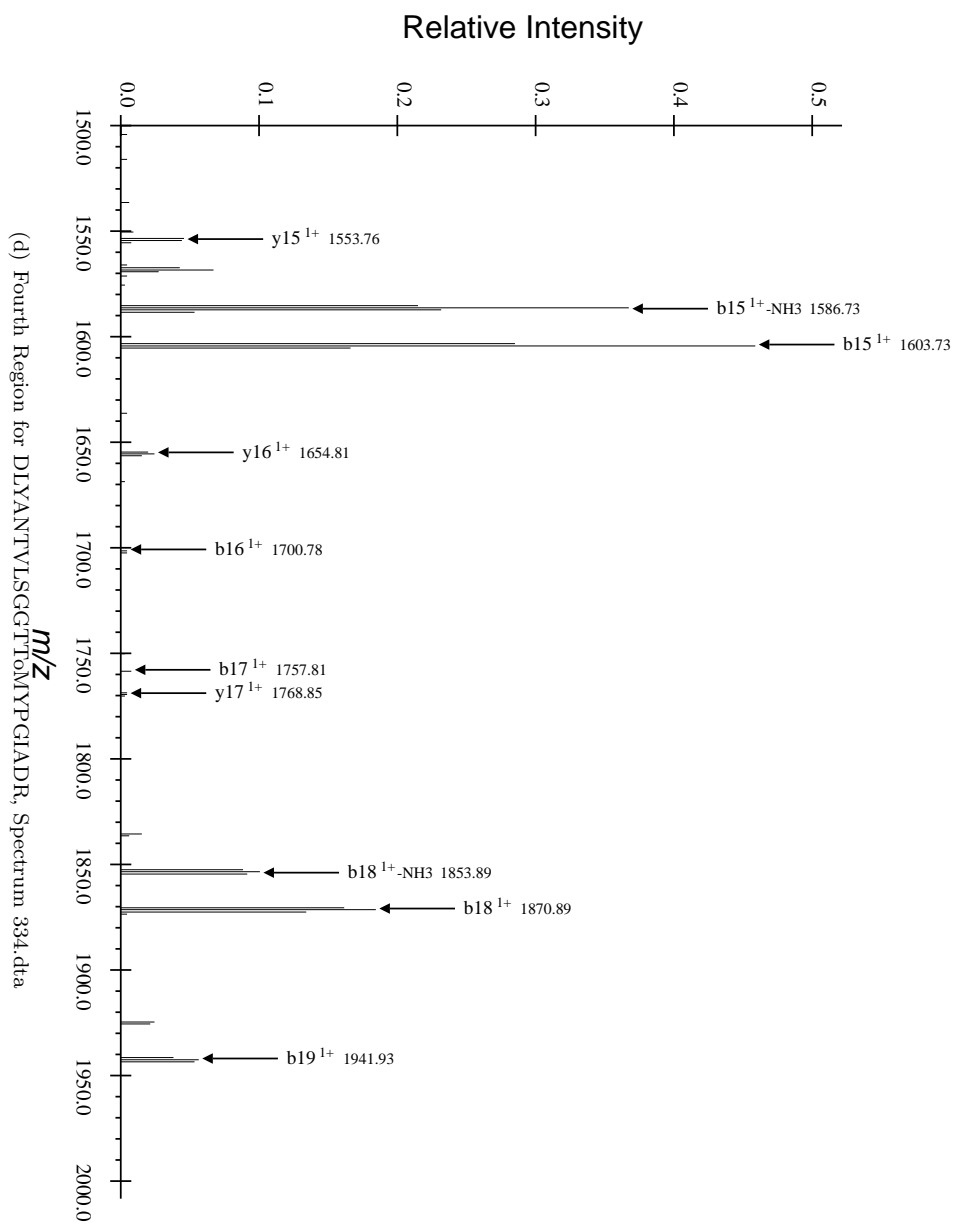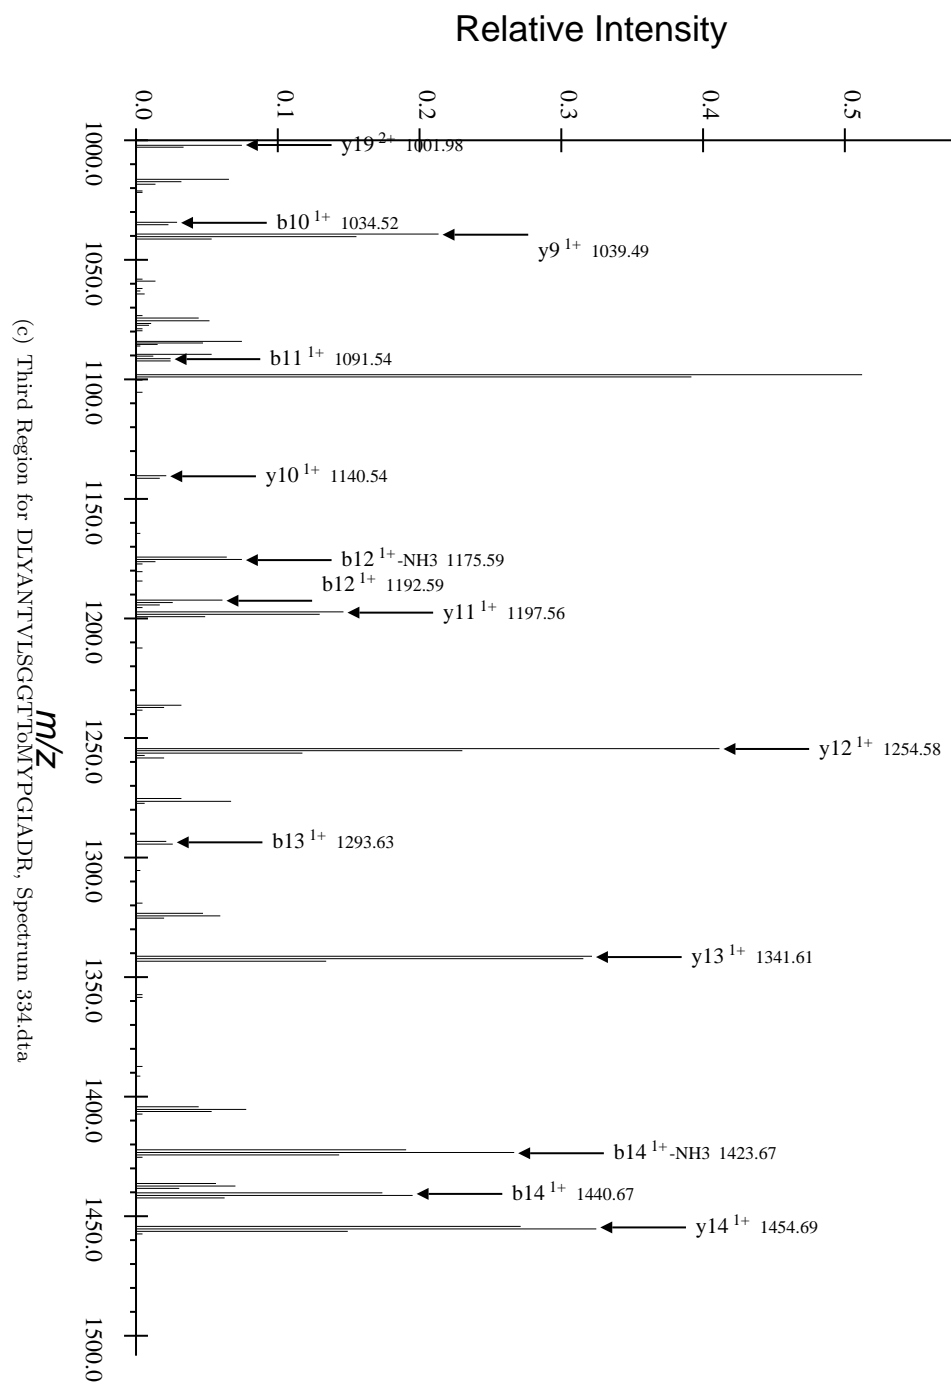

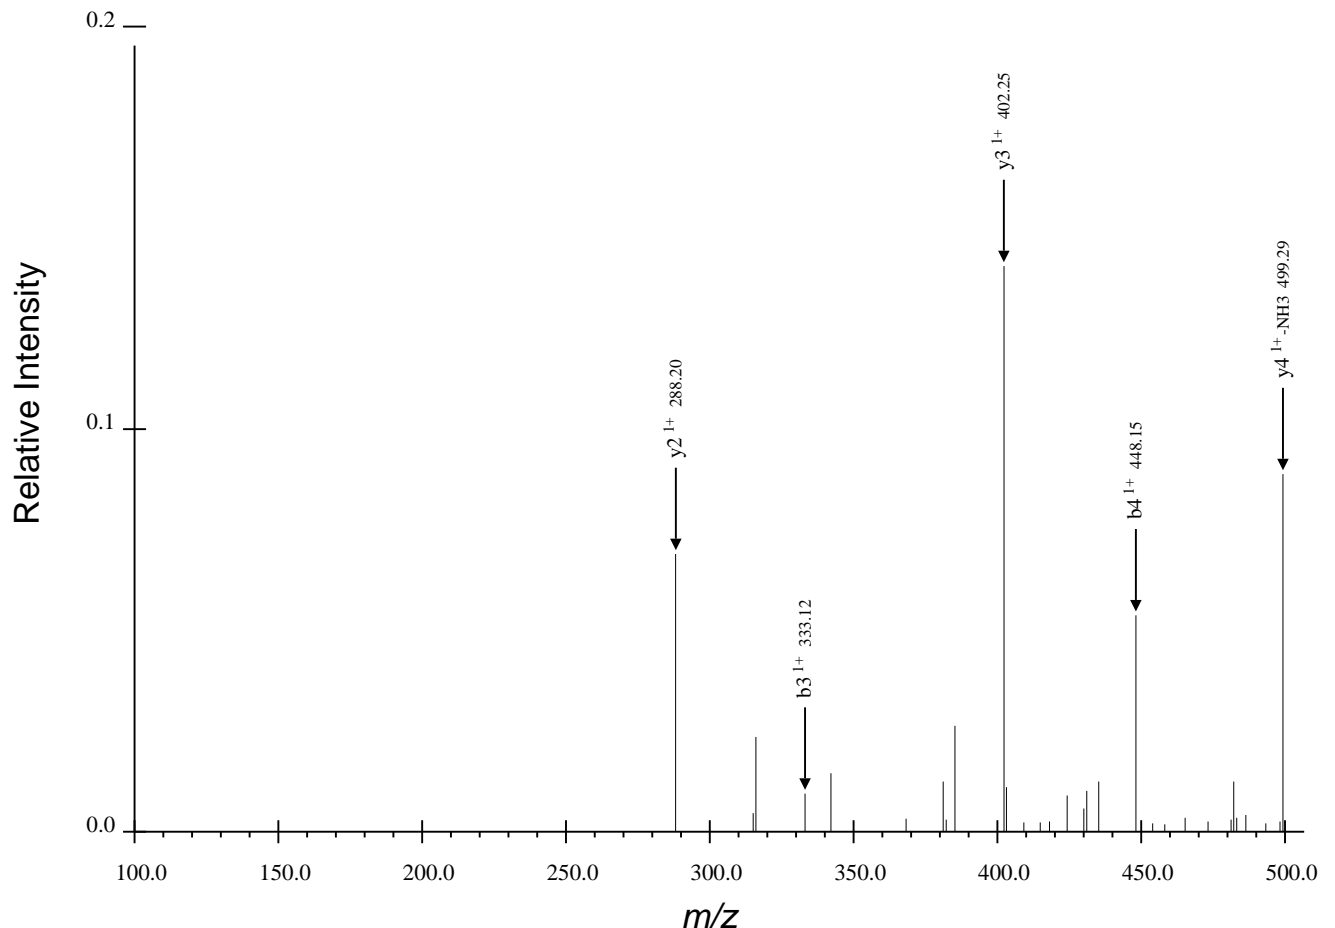

(a) First Region for SNMDNoMFESYINLR, Spectrum 335.dta

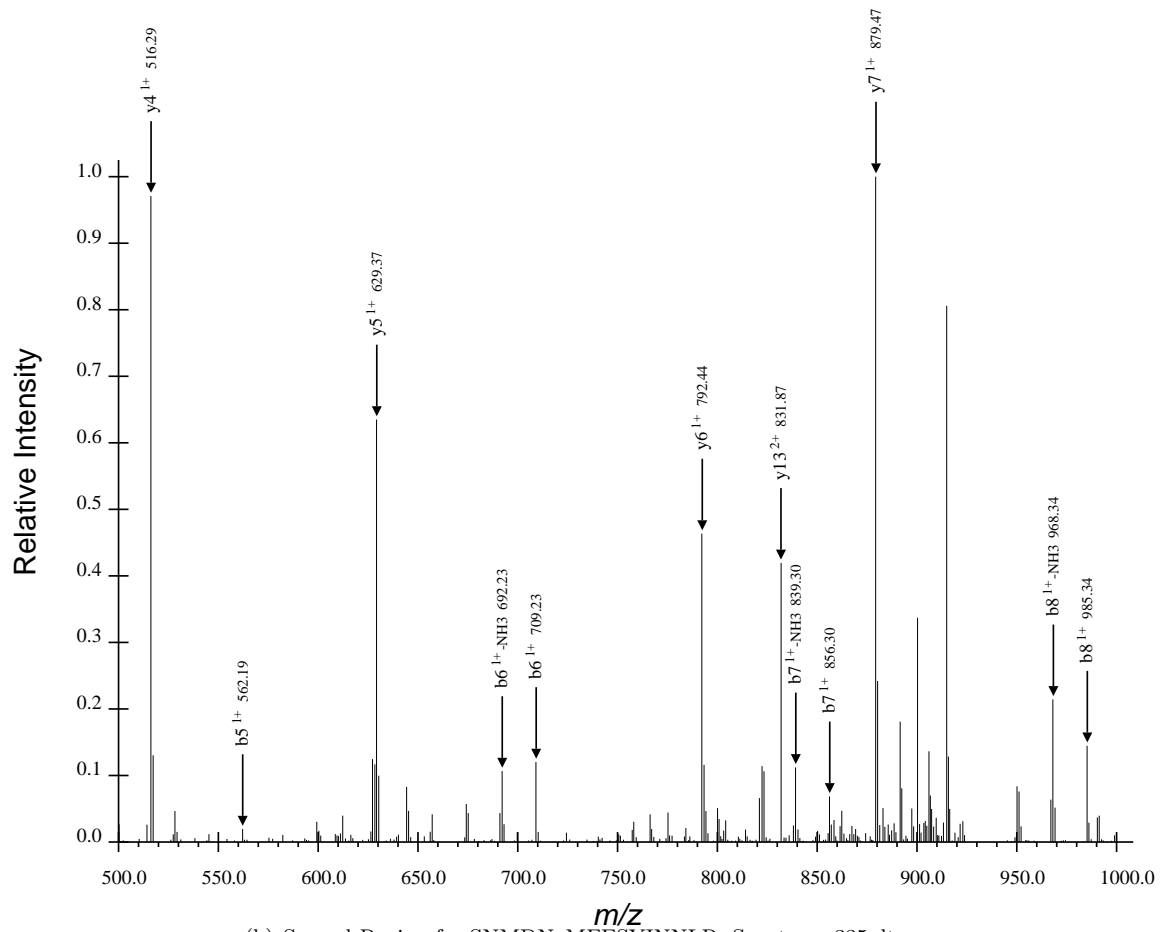

(b) Second Region for SNMDNoMFESYINLR, Spectrum 335.dta

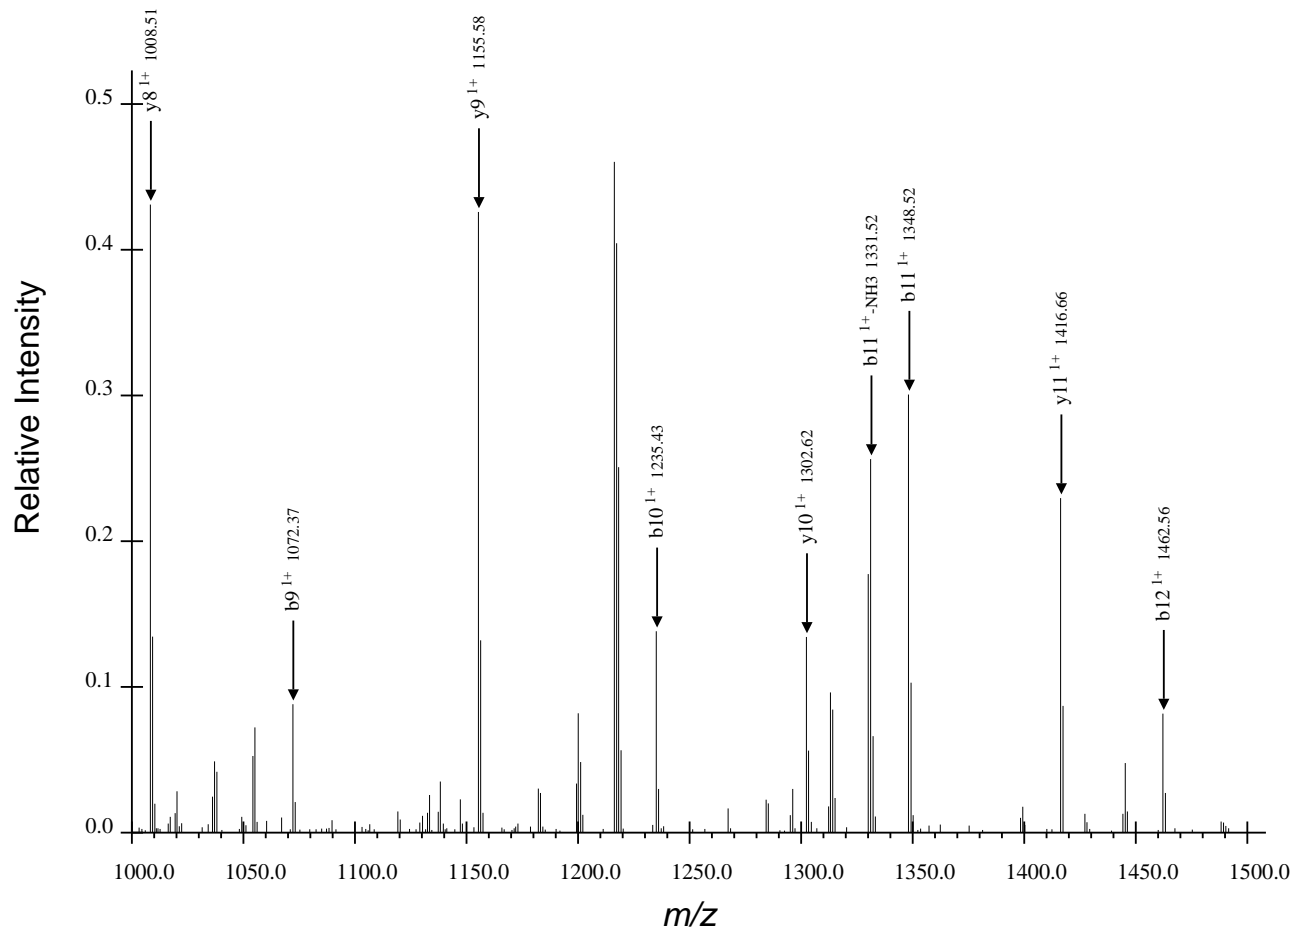

(c) Third Region for SNMDNoMFESYINNLR, Spectrum 335.dta

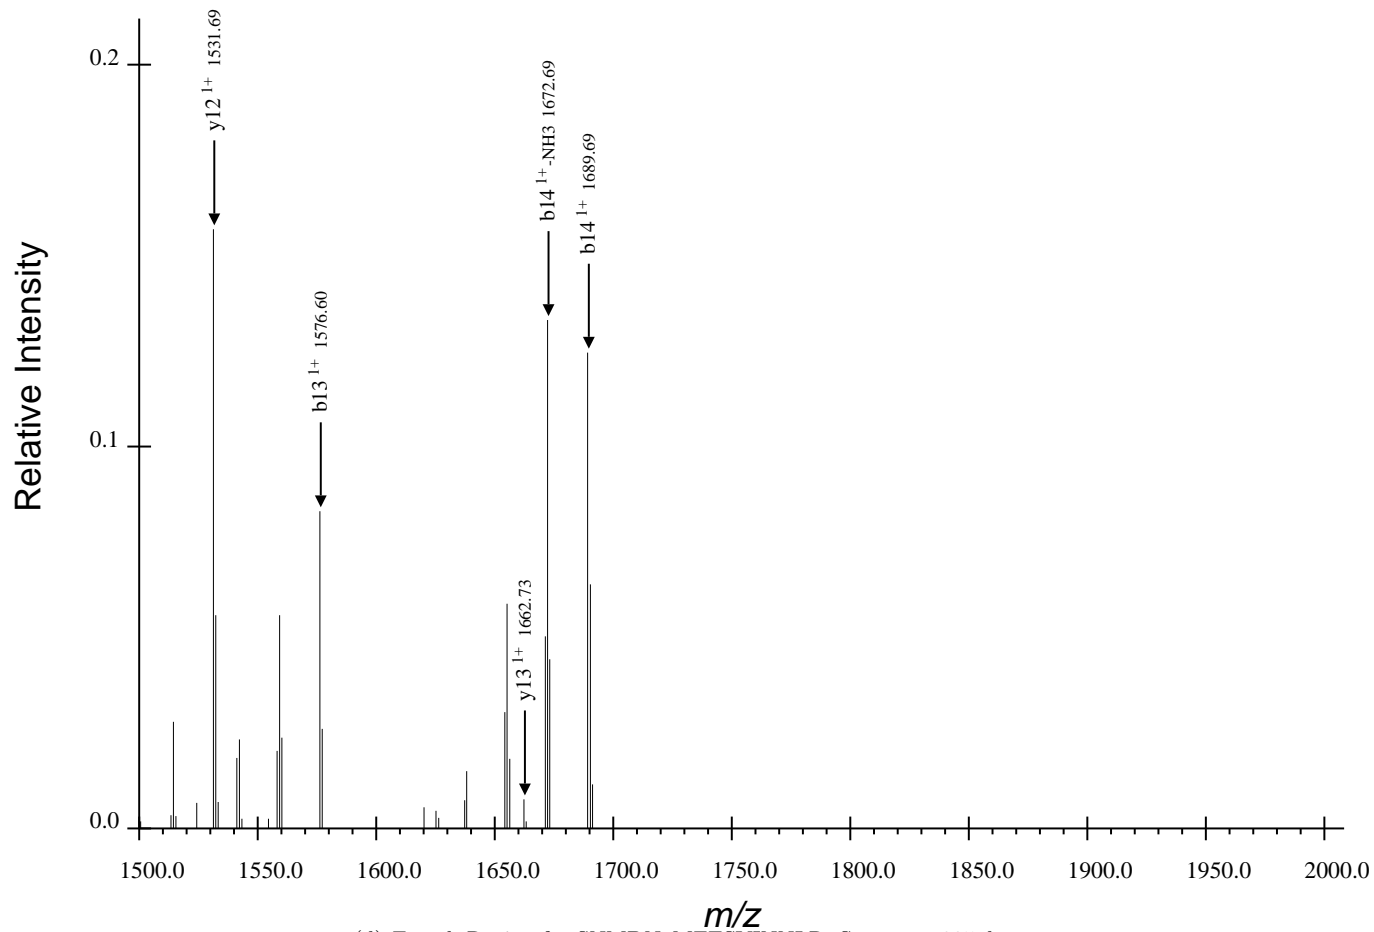

(d) Fourth Region for SNMDNoMFESYINNLR, Spectrum 335.dta

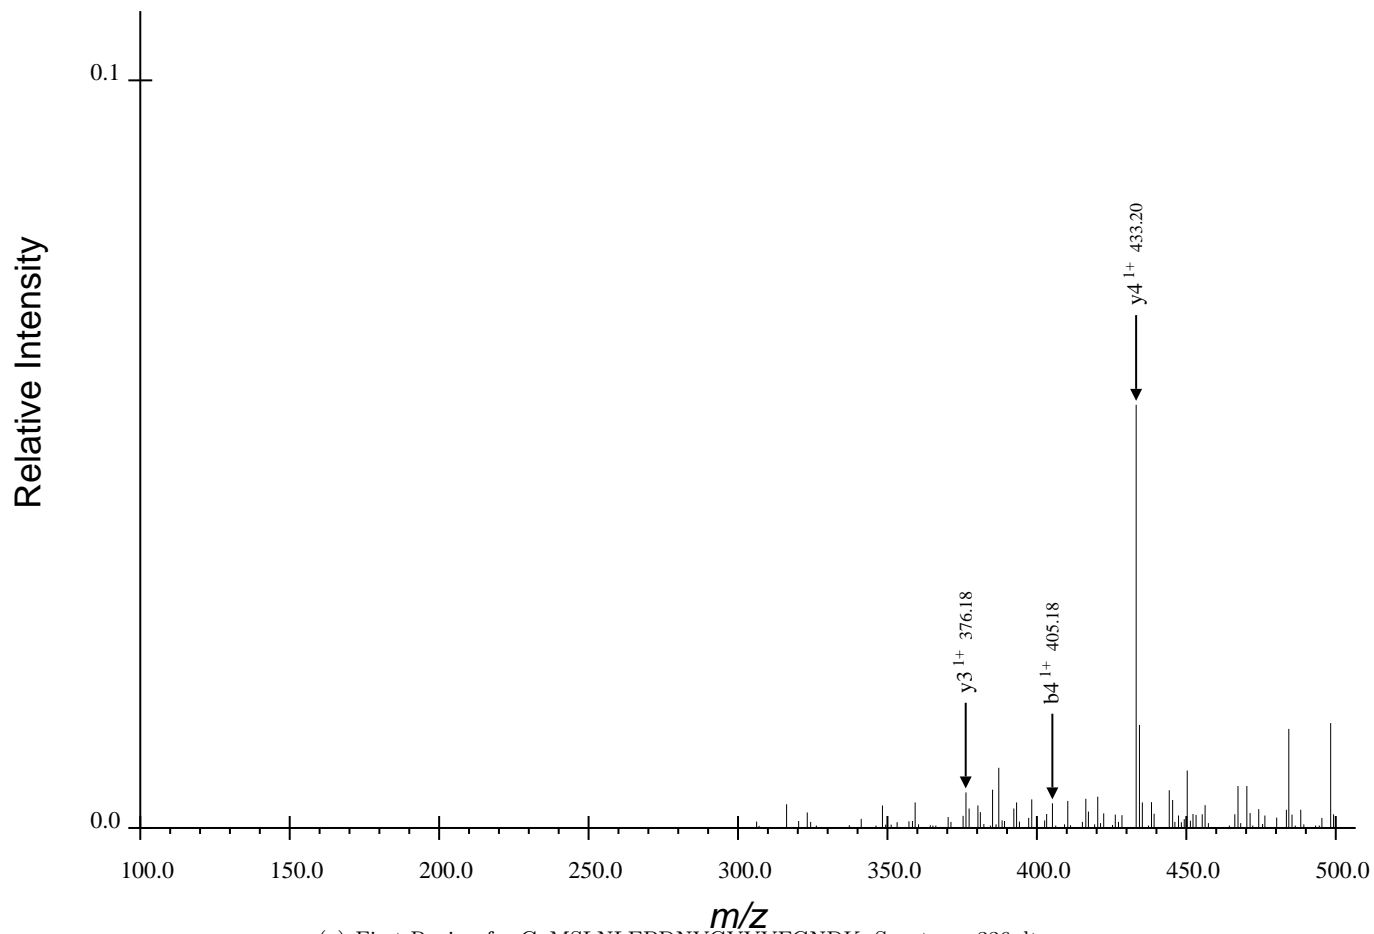

(a) First Region for GoMSLNLEPDNVGVVVFGNDK, Spectrum 336.dta

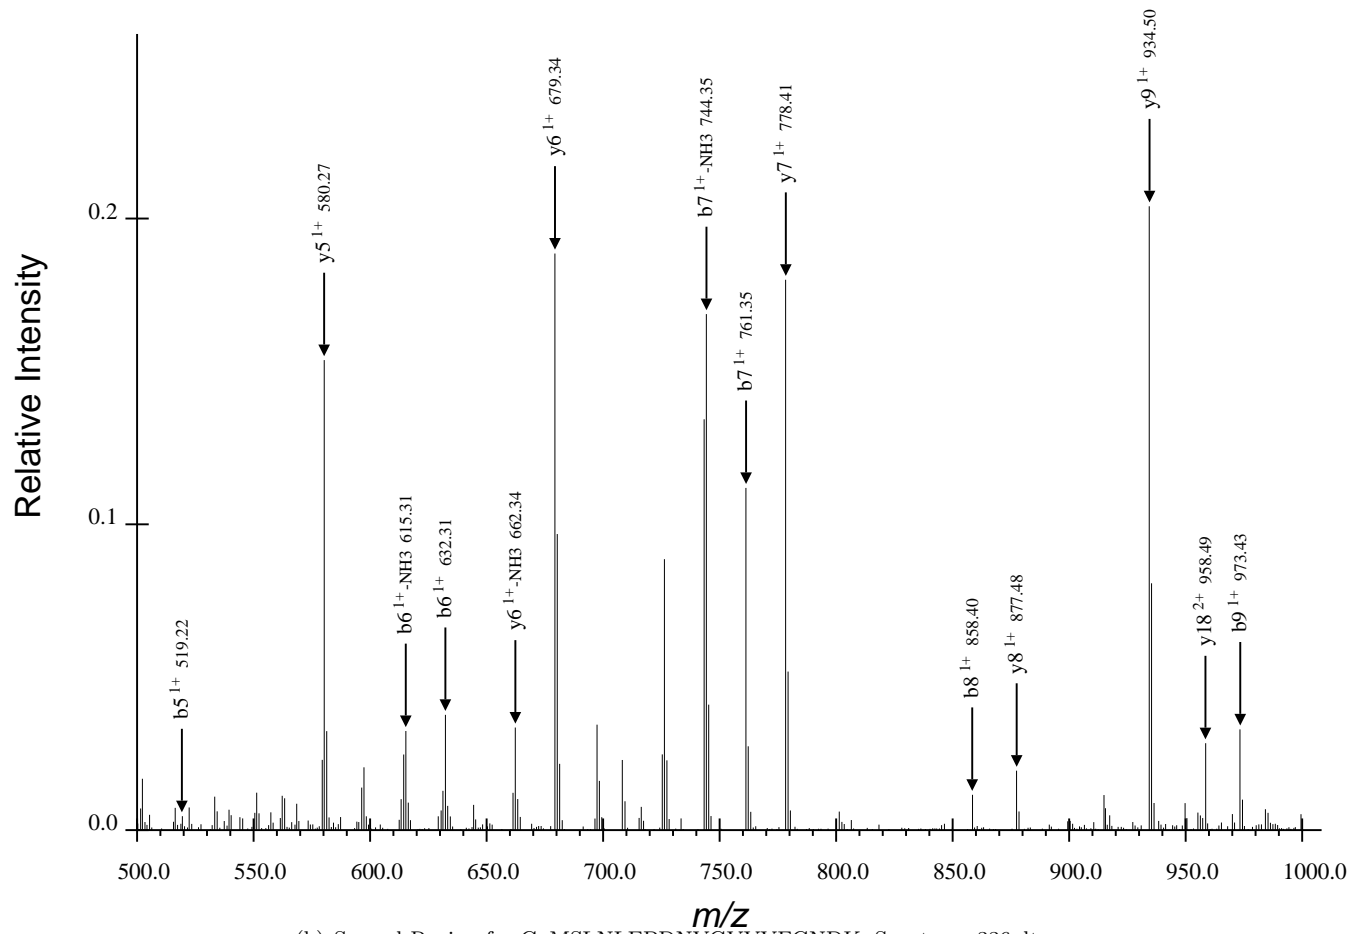

(b) Second Region for GoMSLNLEPDNVGVVVFGNDK, Spectrum 336.dta



(d) Fourth Region for GoMSLNLEPPDNVGVVVF<sup>+</sup>GNDK, Spectrum 336.dta

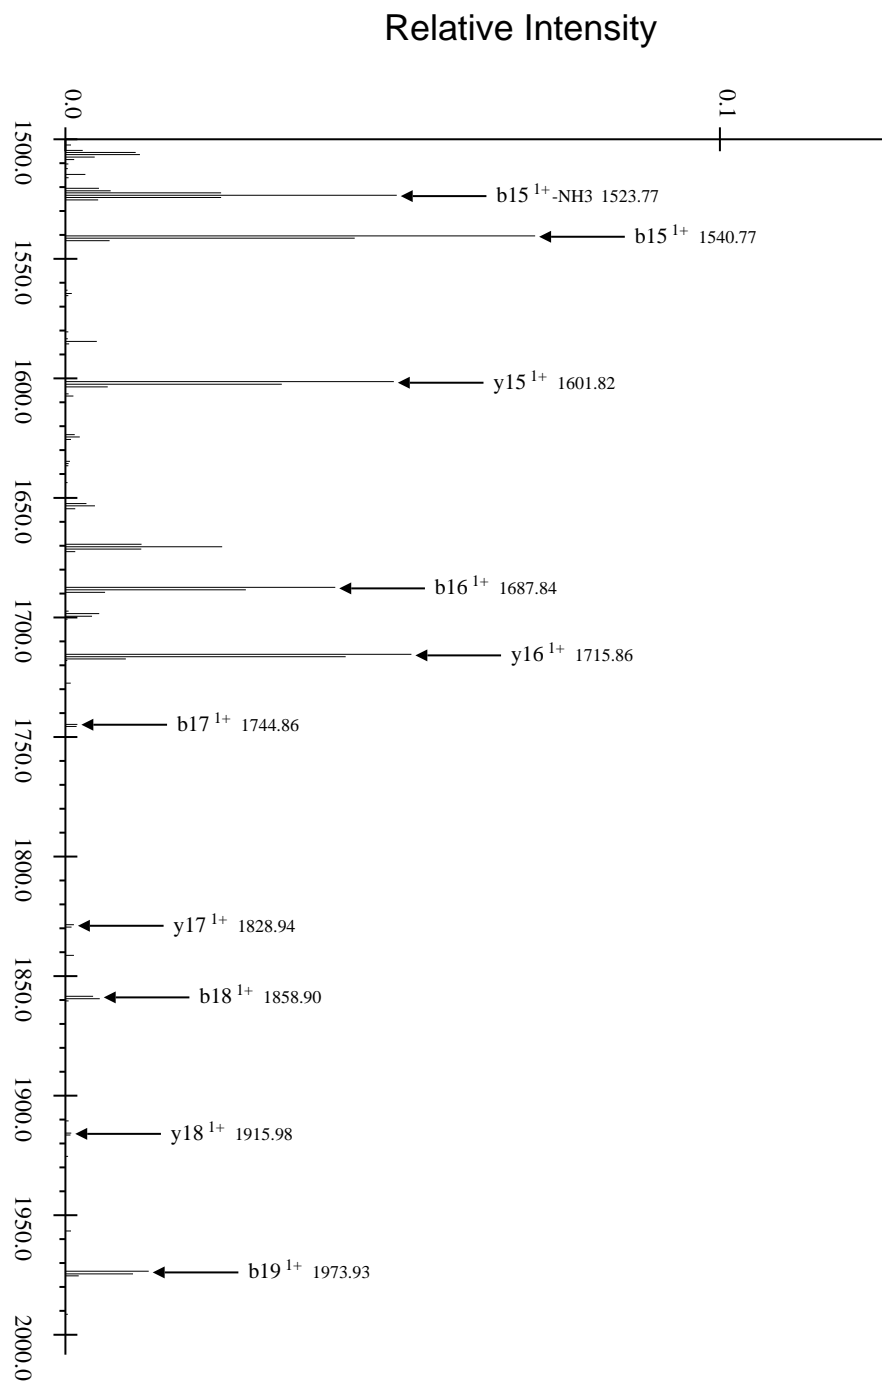

(c) Third Region for GoMSLNLEPPDNVGVVVF<sup>+</sup>GNDK, Spectrum 336.dta

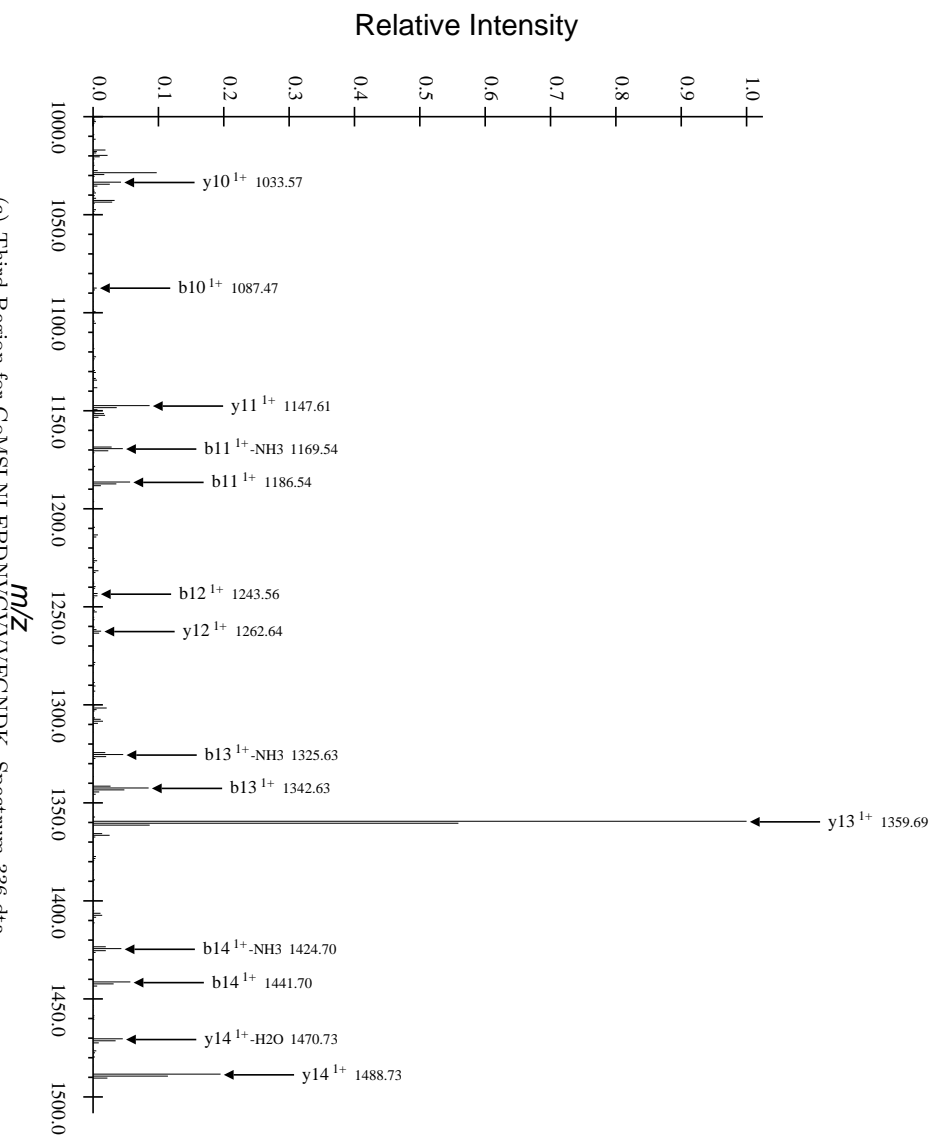

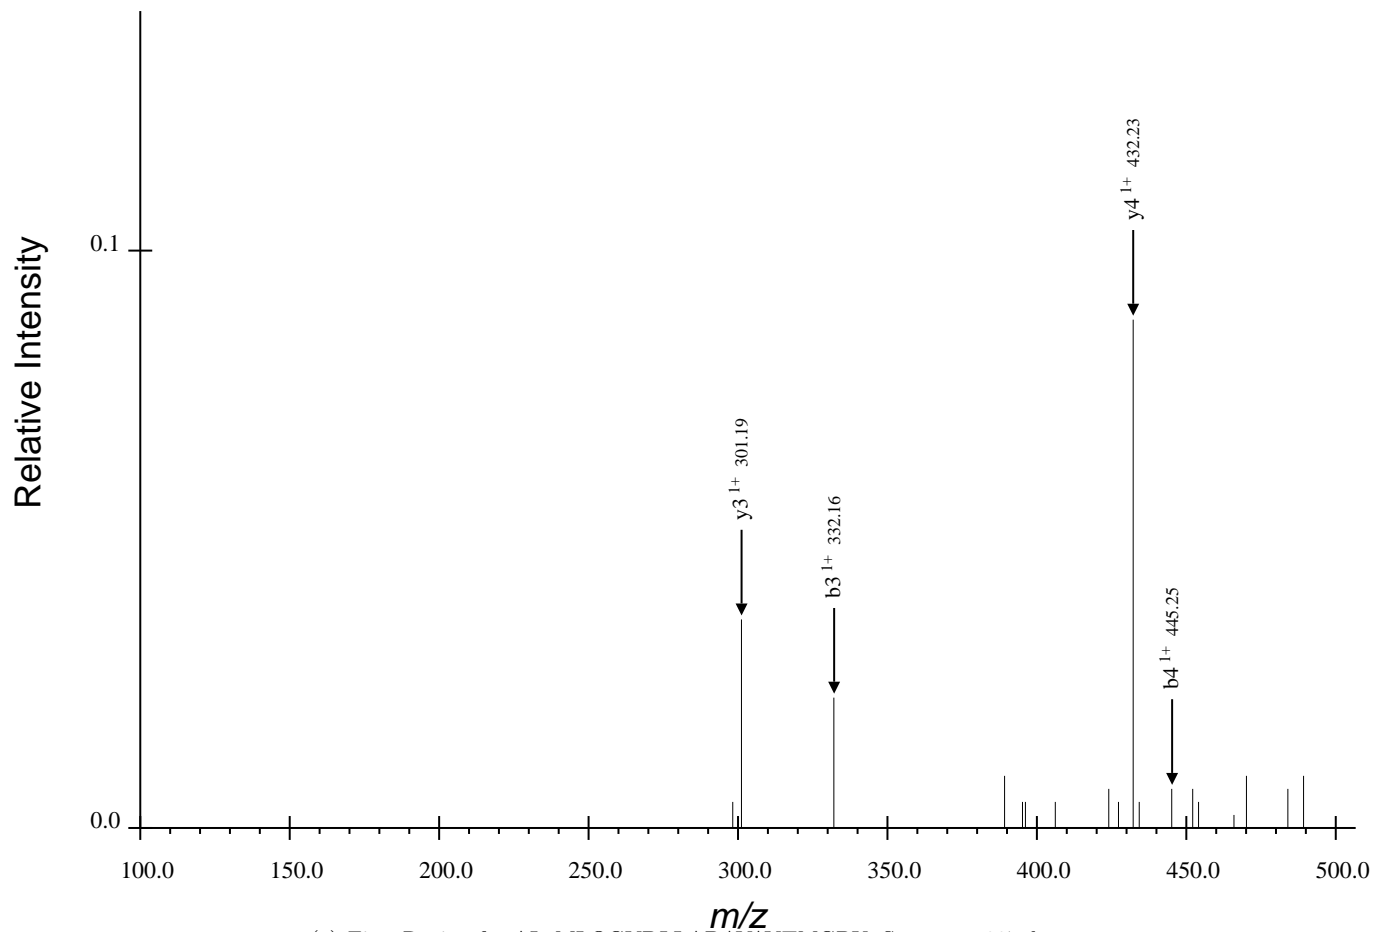

(a) First Region for ALoMLQGVDLLADAVAVTMGPK, Spectrum 337.dta

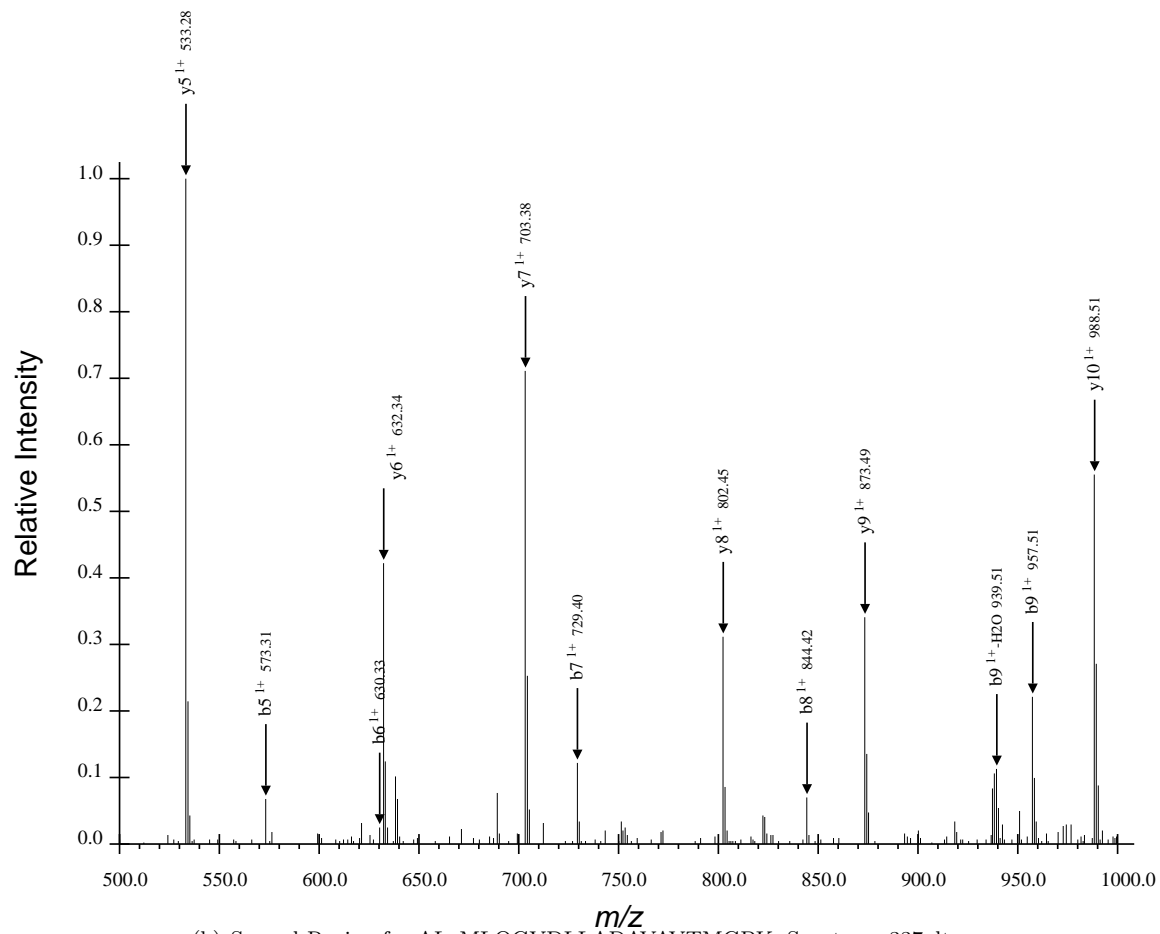

(b) Second Region for ALoMLQGVDLLADAVAVTMGPK, Spectrum 337.dta

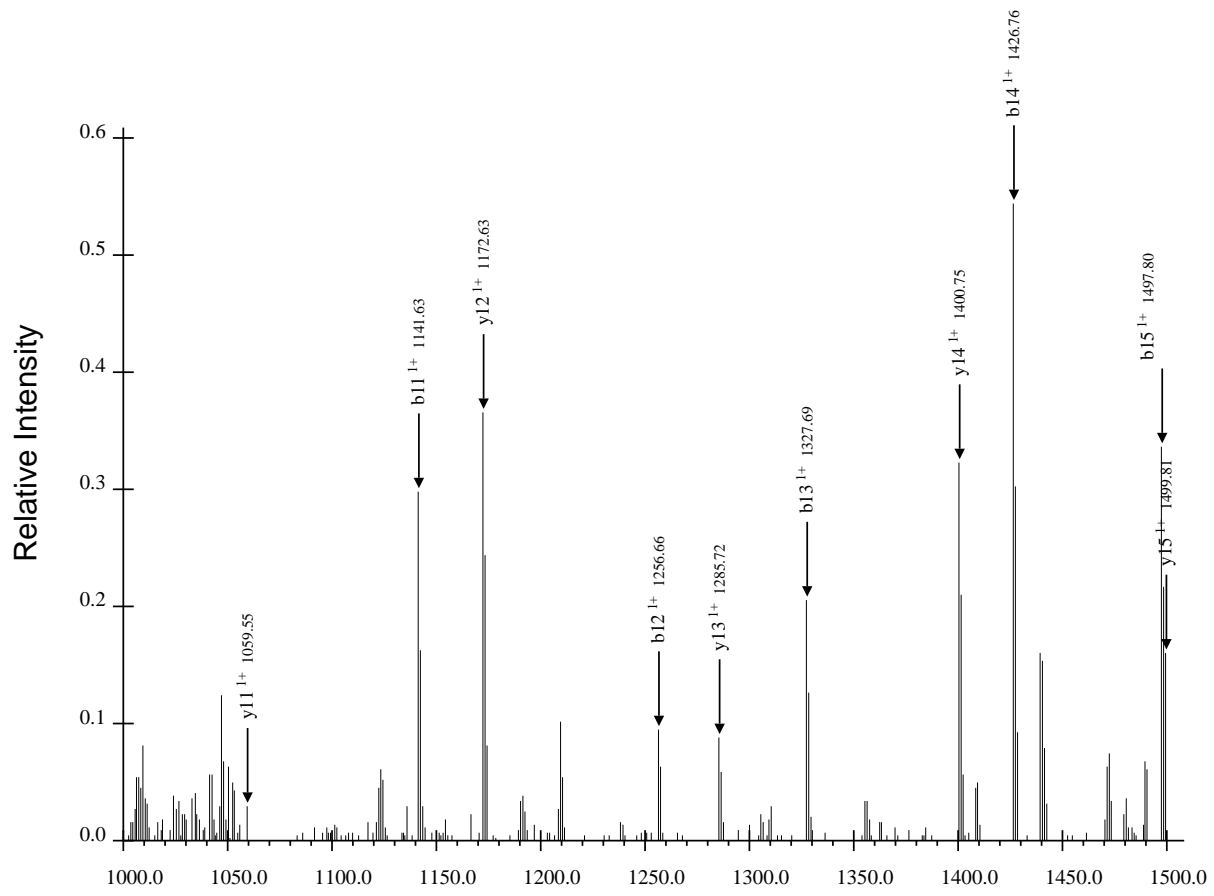

(c) Third Region for ALoMLQGVDLLADAVAVTMGPK, Spectrum 337.dta

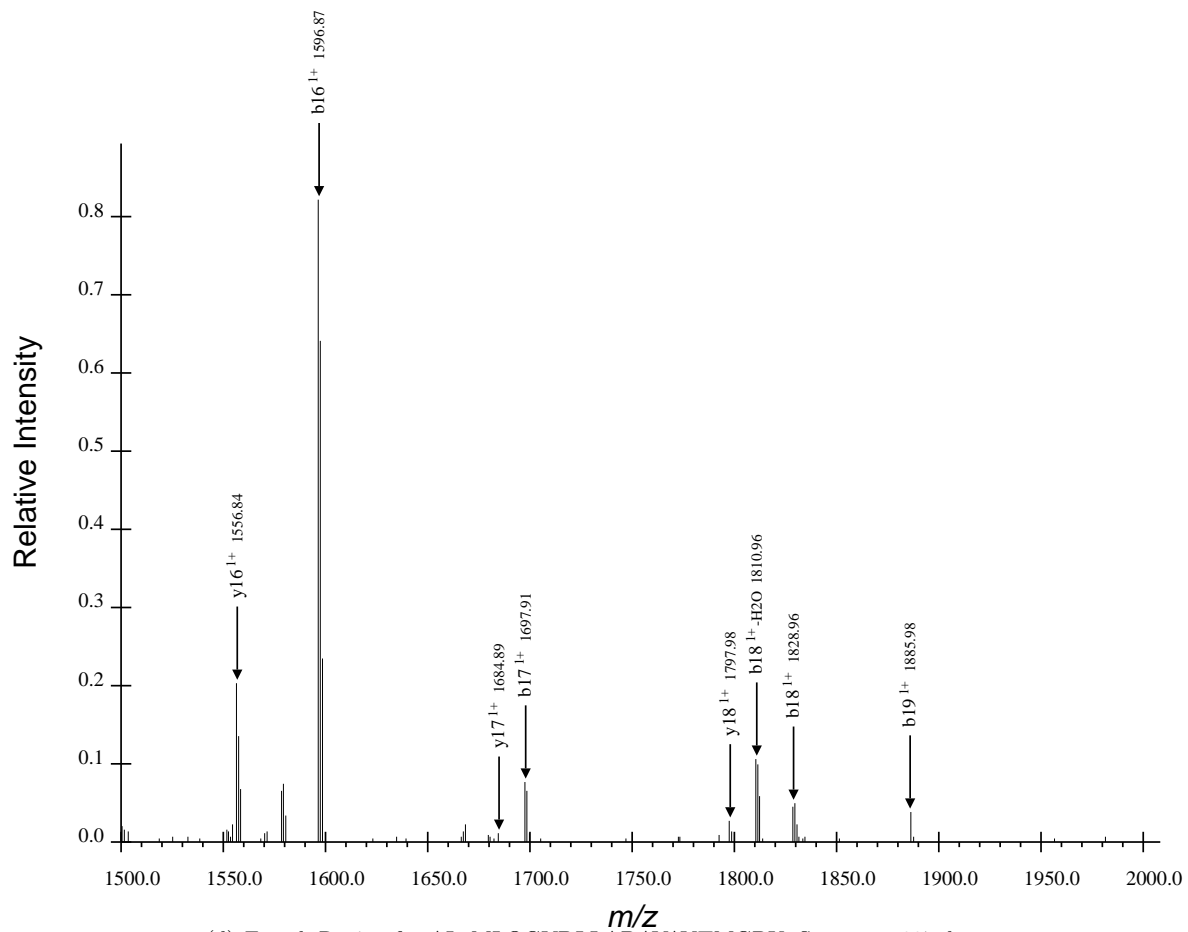

(d) Fourth Region for ALoMLQGVDLLADAVAVTMGPK, Spectrum 337.dta

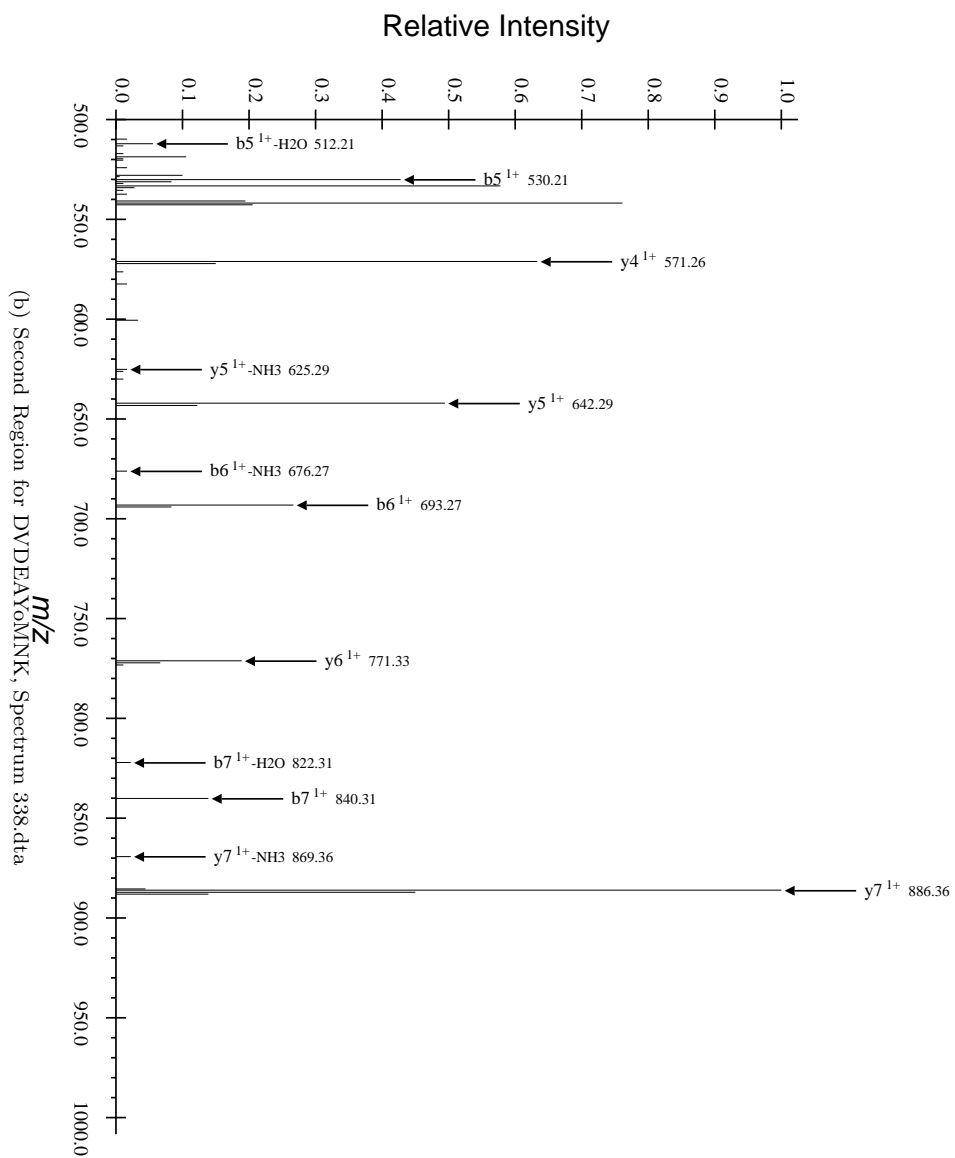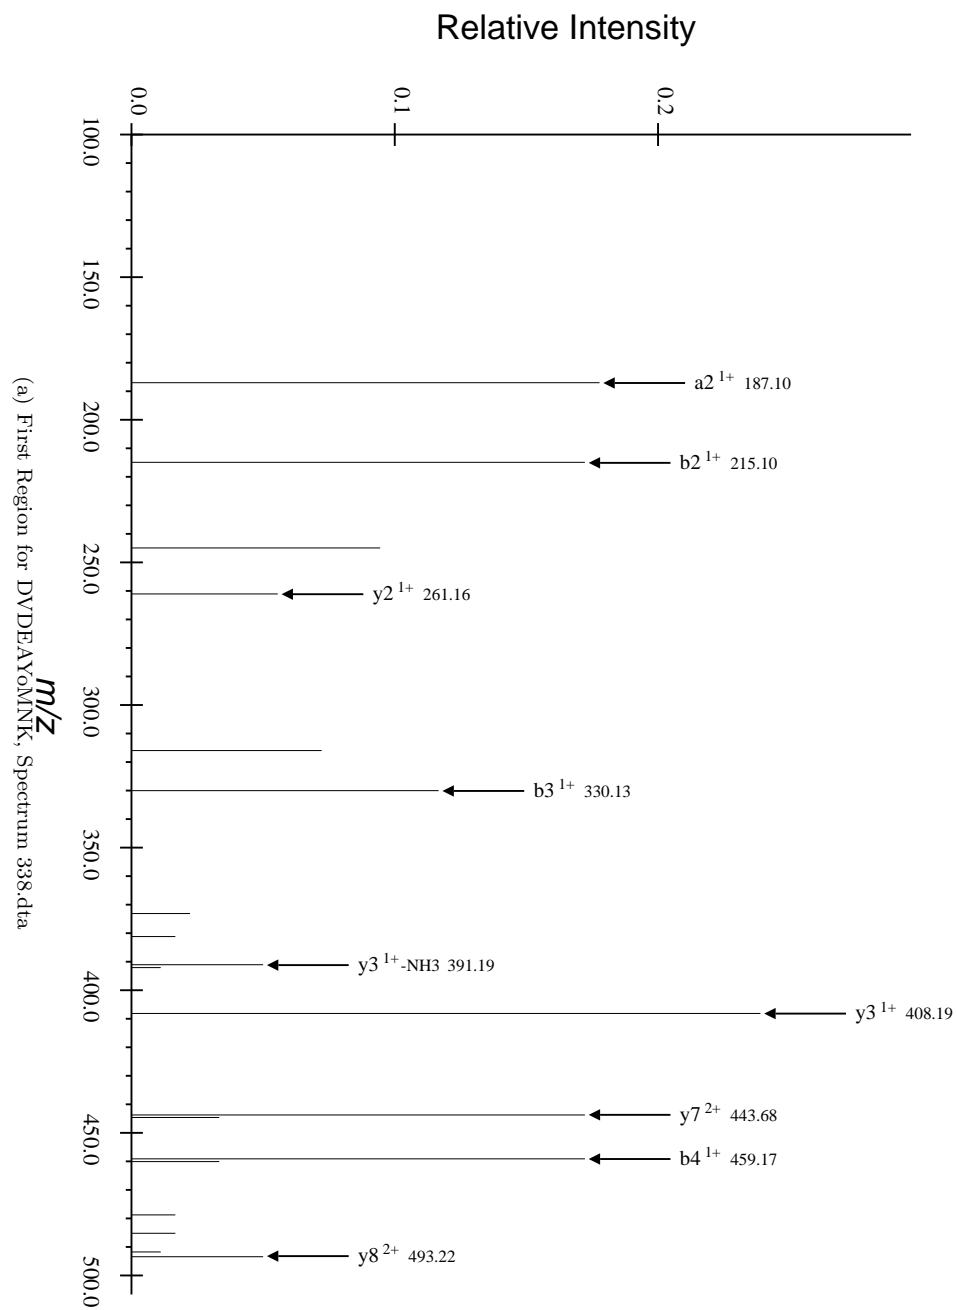

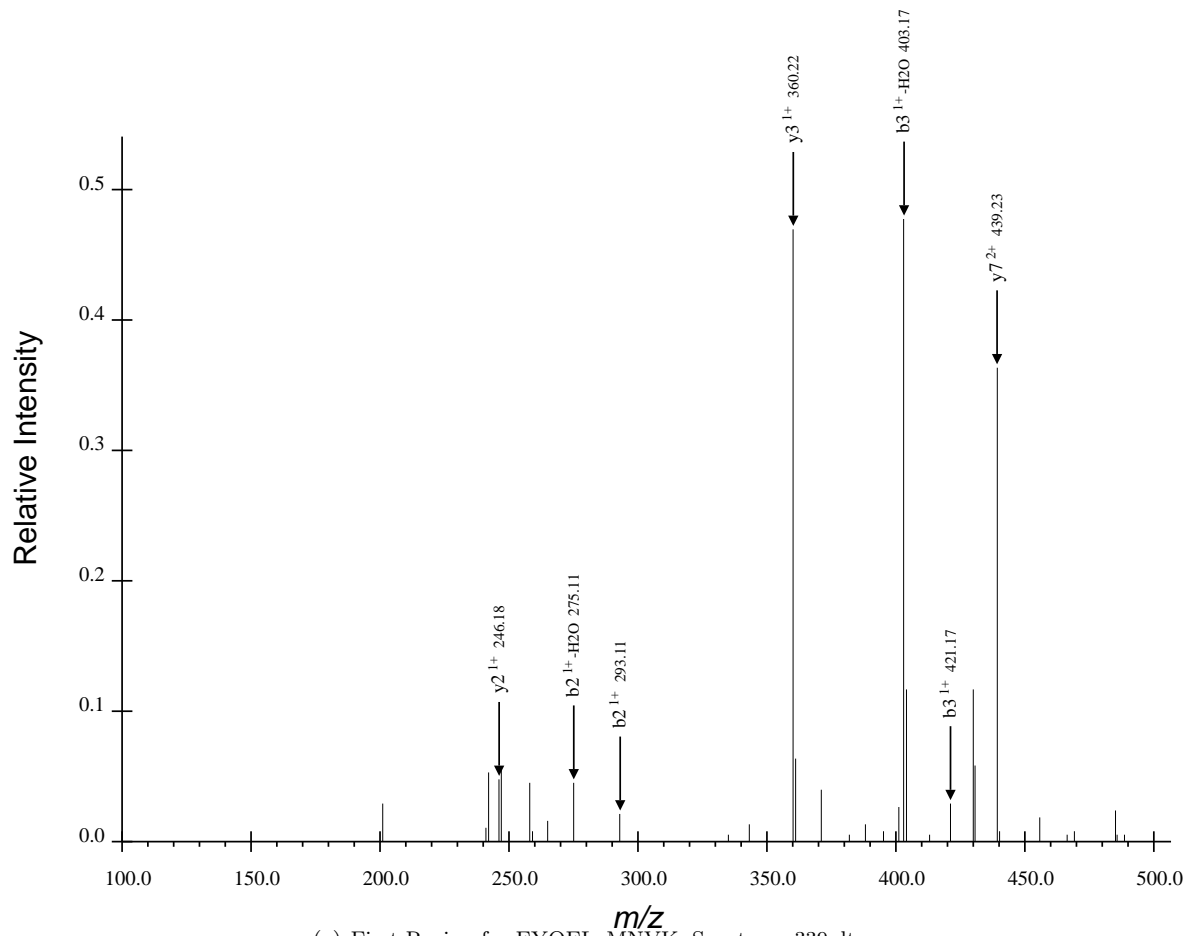

(a) First Region for EYQELoMNVK, Spectrum 339.dta

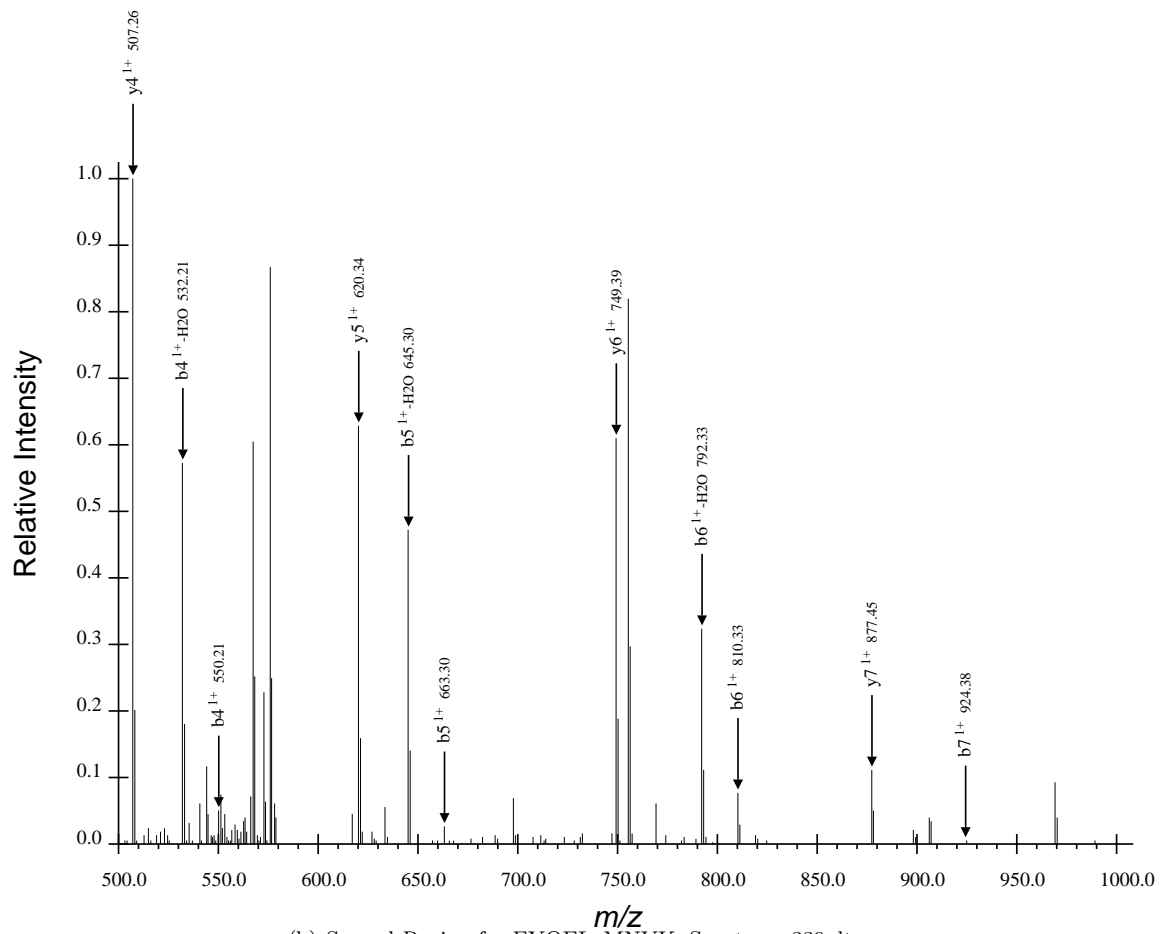

(b) Second Region for EYQELoMNVK, Spectrum 339.dta

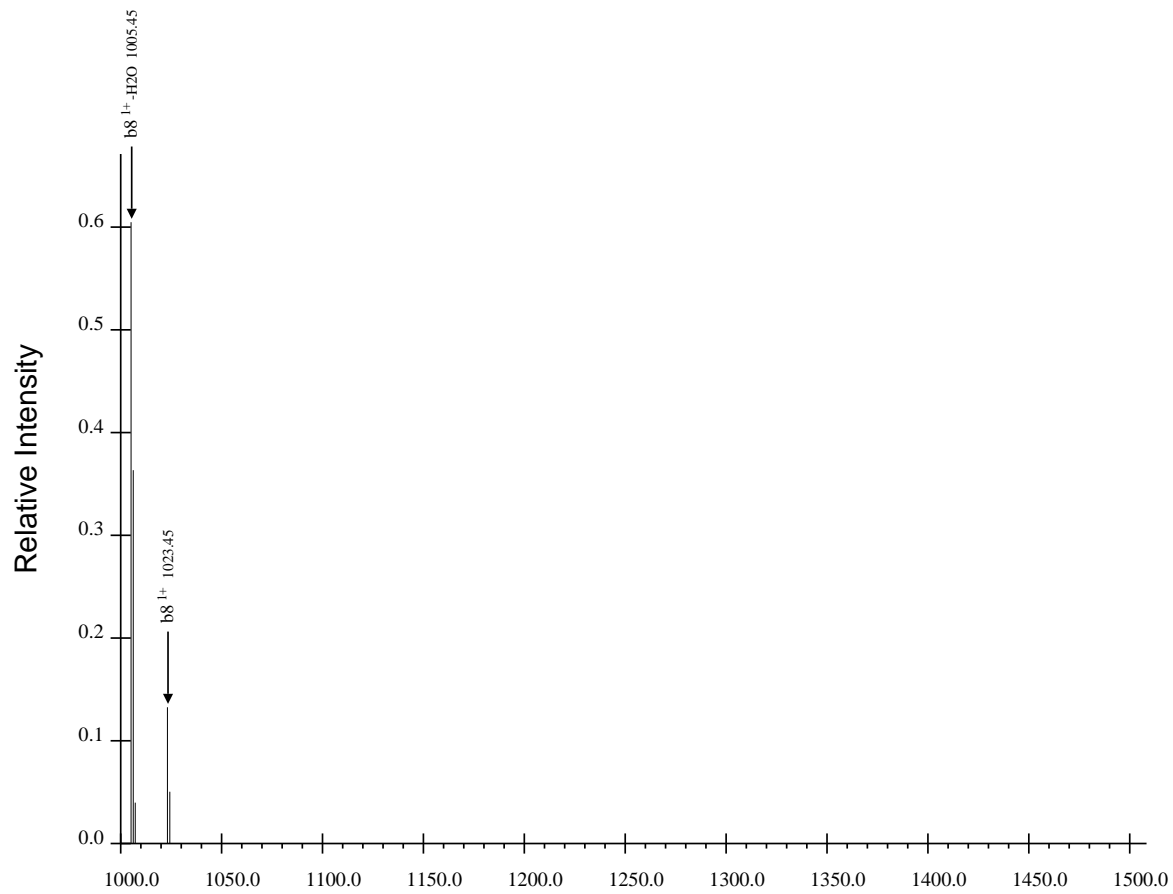

(c) Third Region for EYQELoMNVK, Spectrum 339.dta

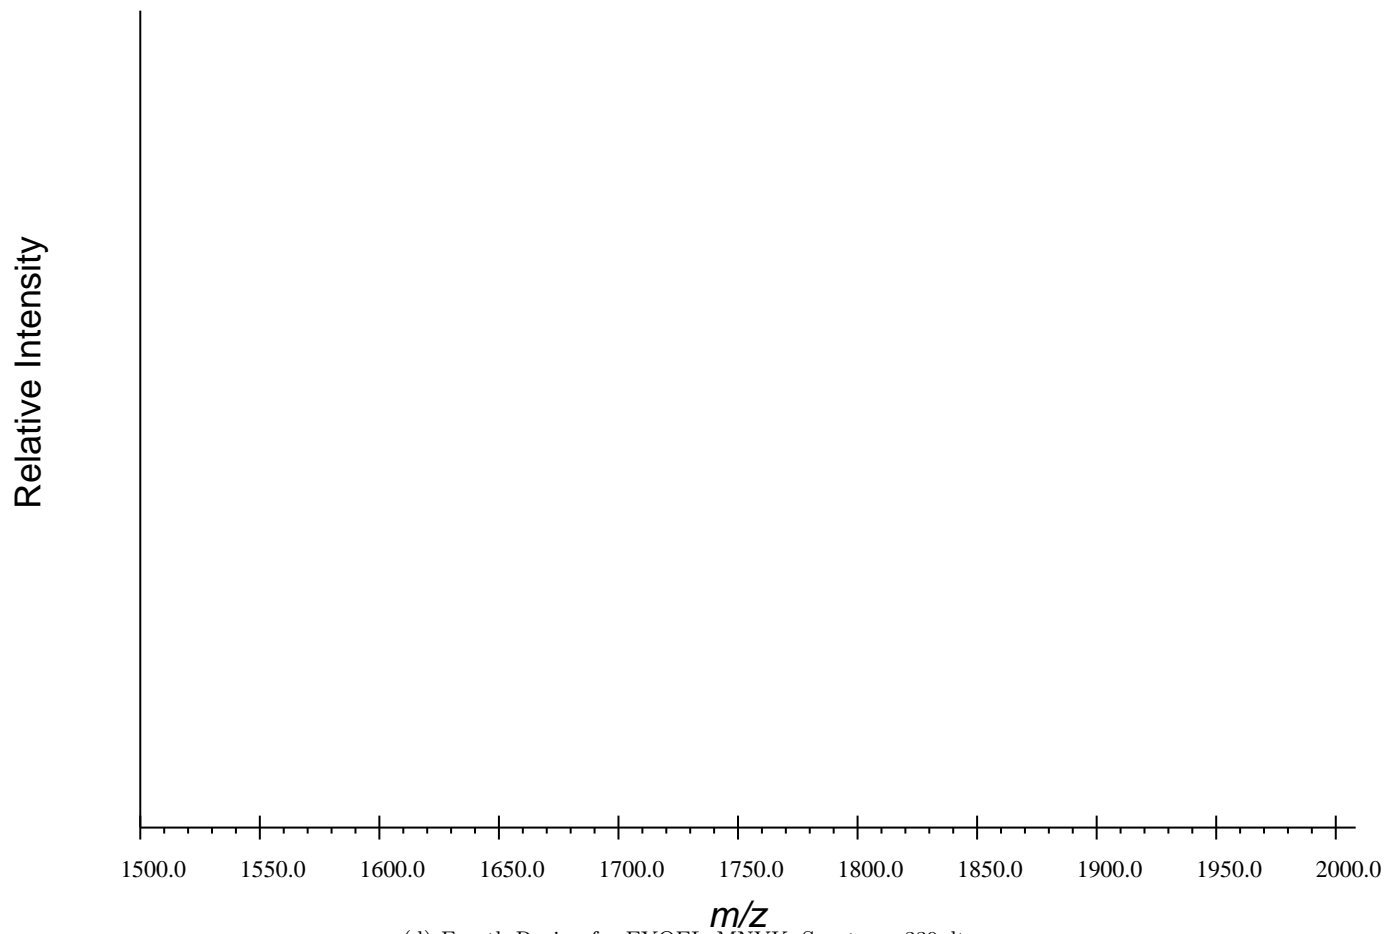

(d) Fourth Region for EYQELoMNVK, Spectrum 339.dta

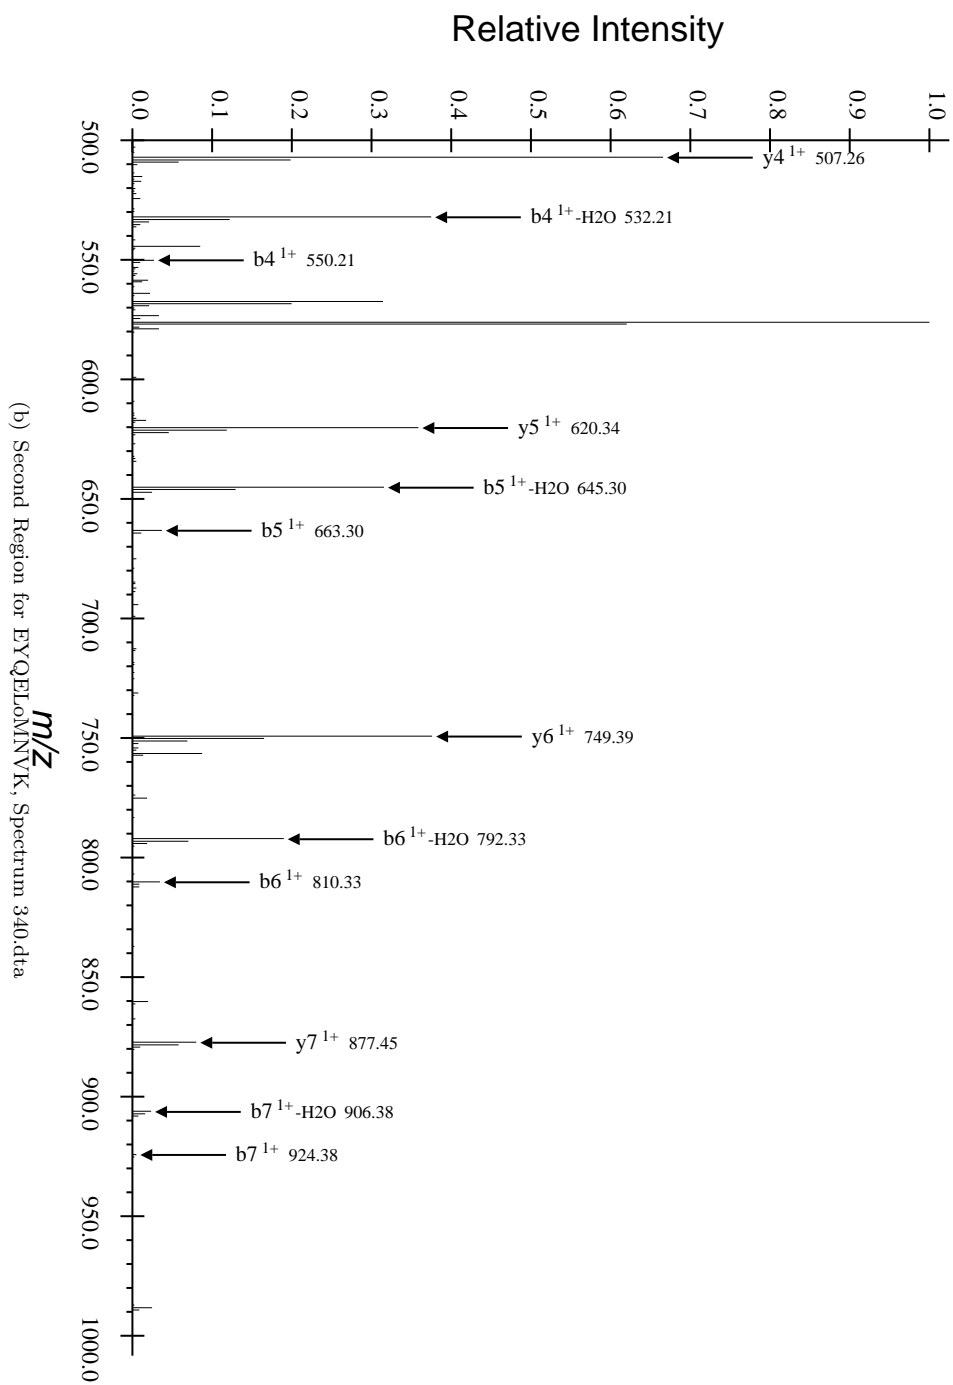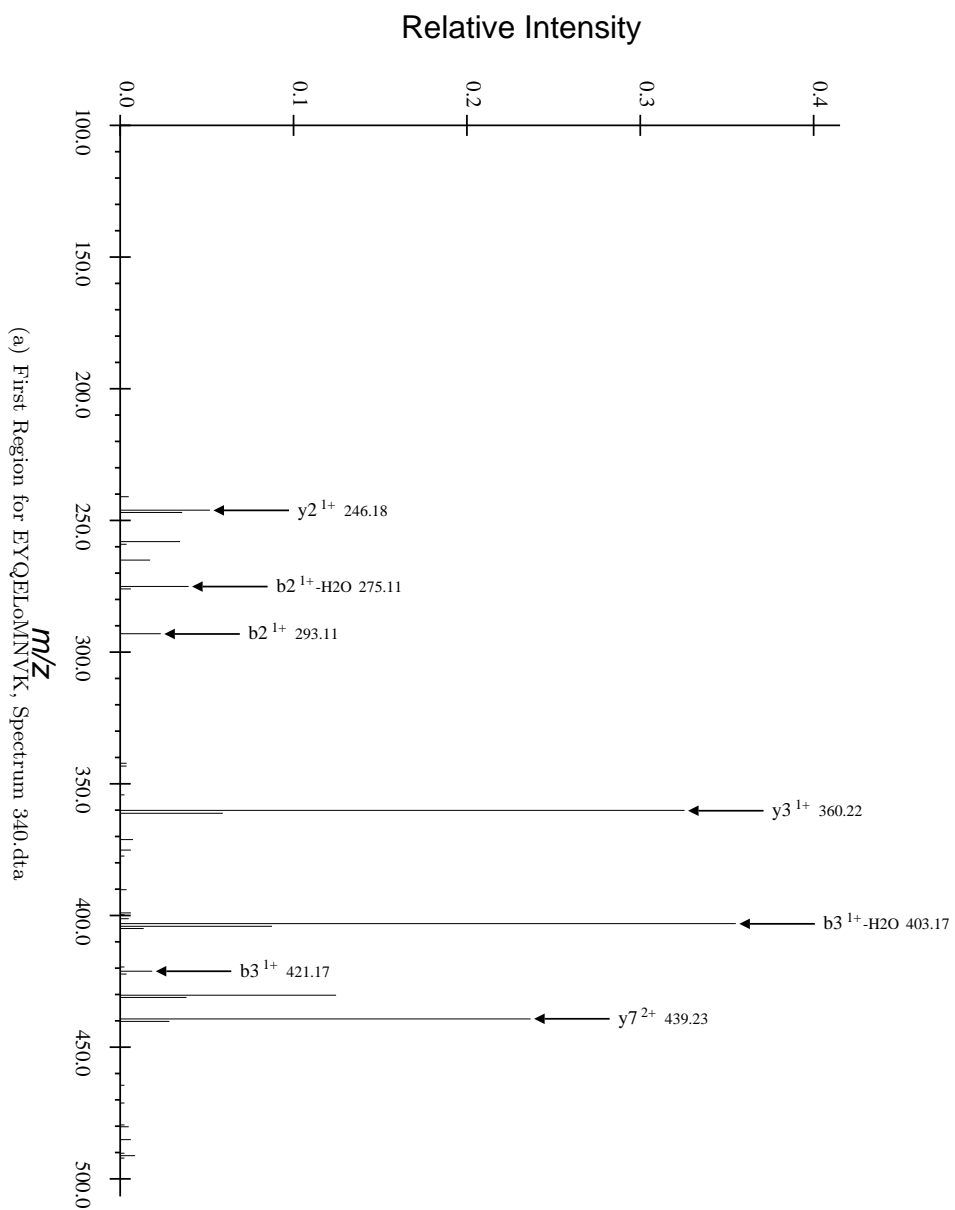

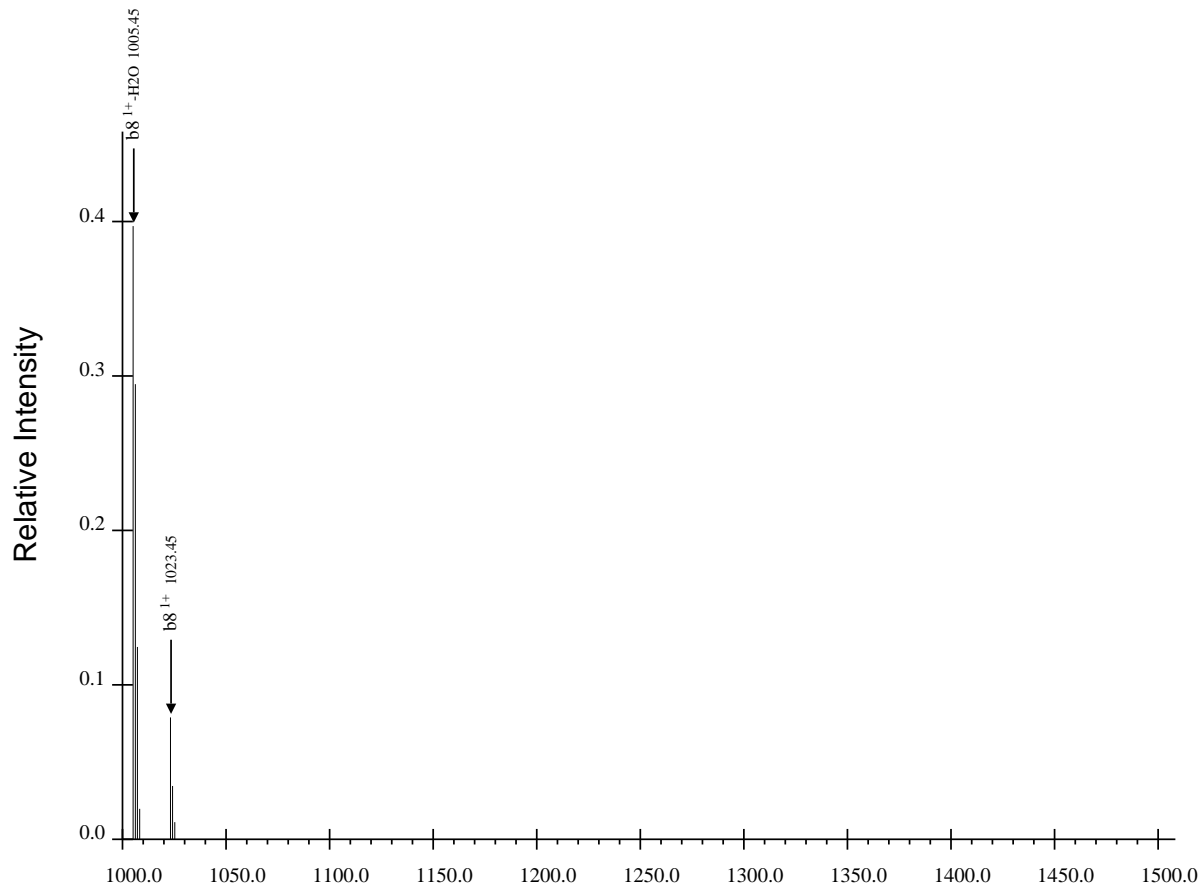

(c) Third Region for EYQELoMNVK, Spectrum 340.dta

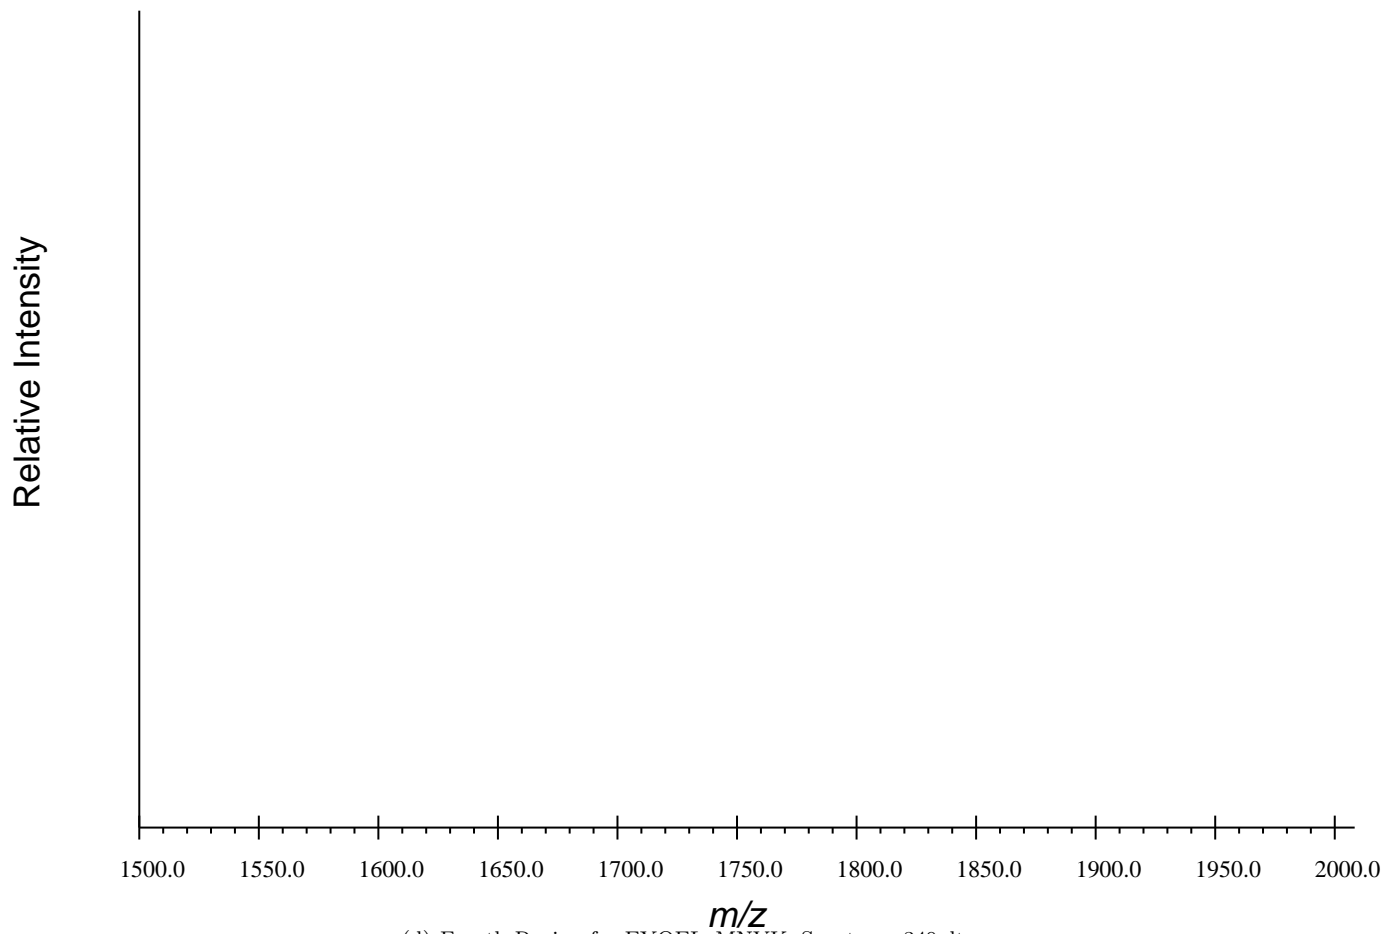

(d) Fourth Region for EYQELoMNVK, Spectrum 340.dta



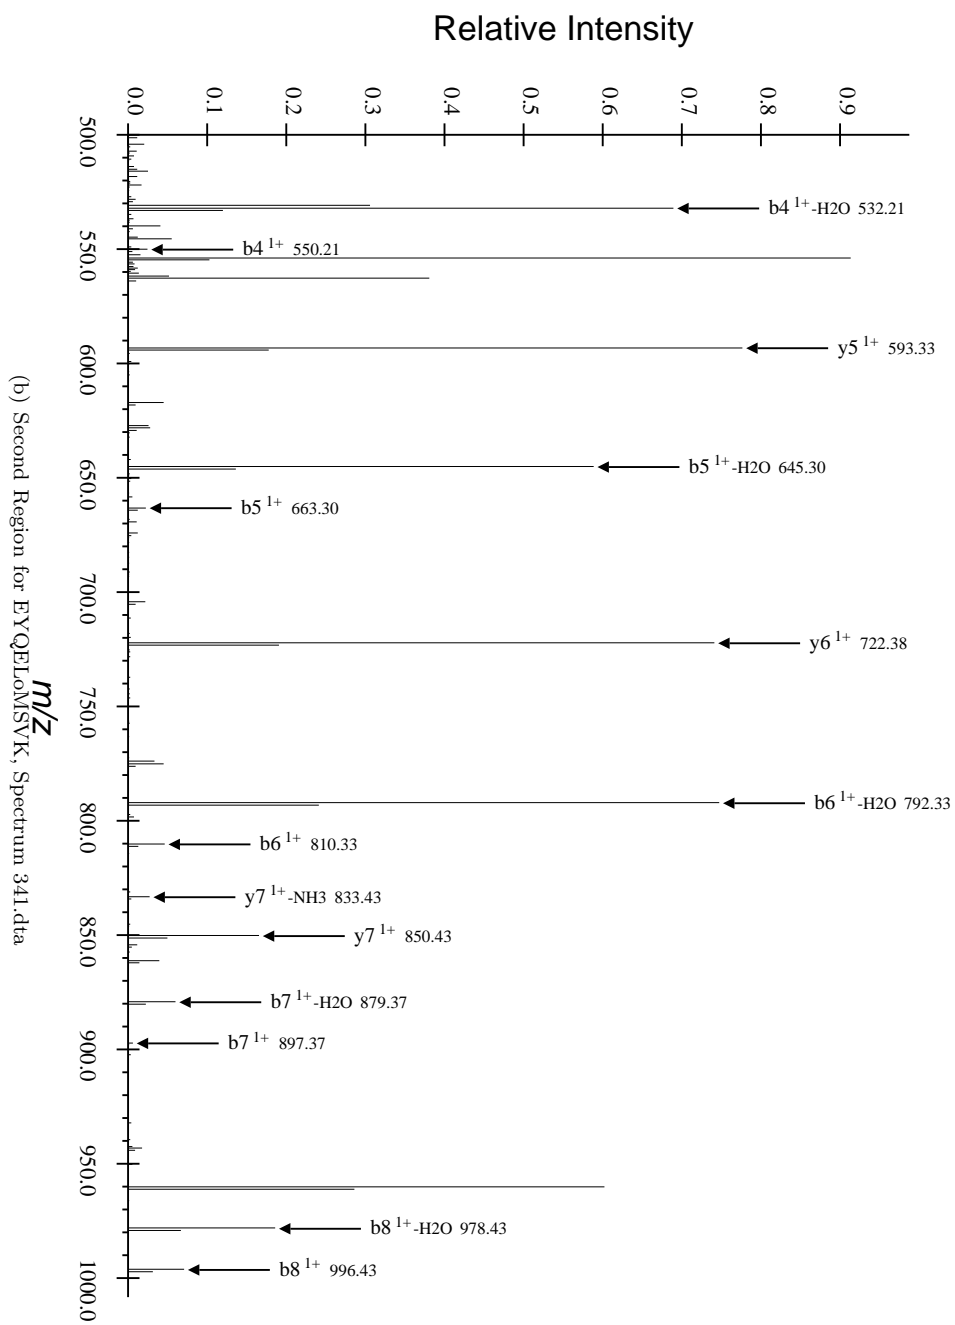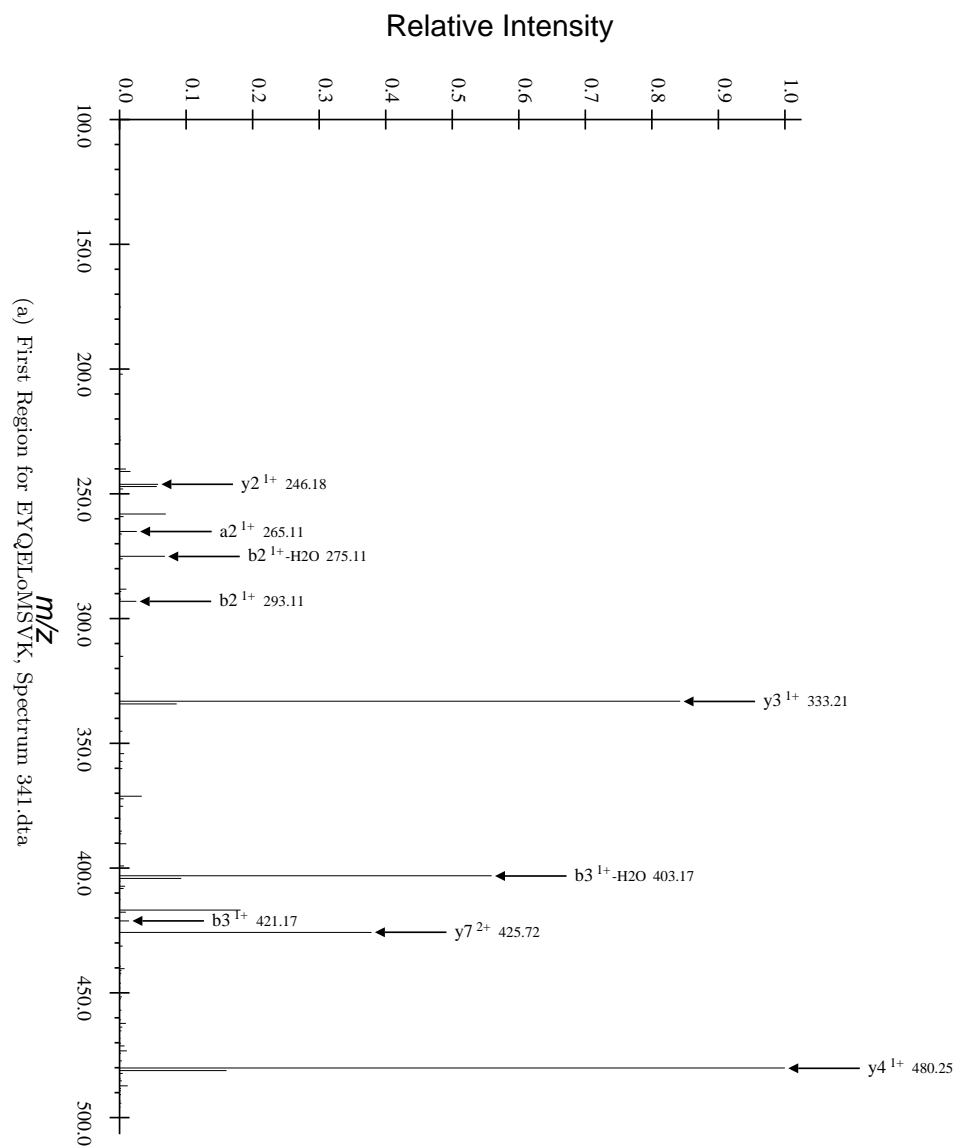

Relative Intensity

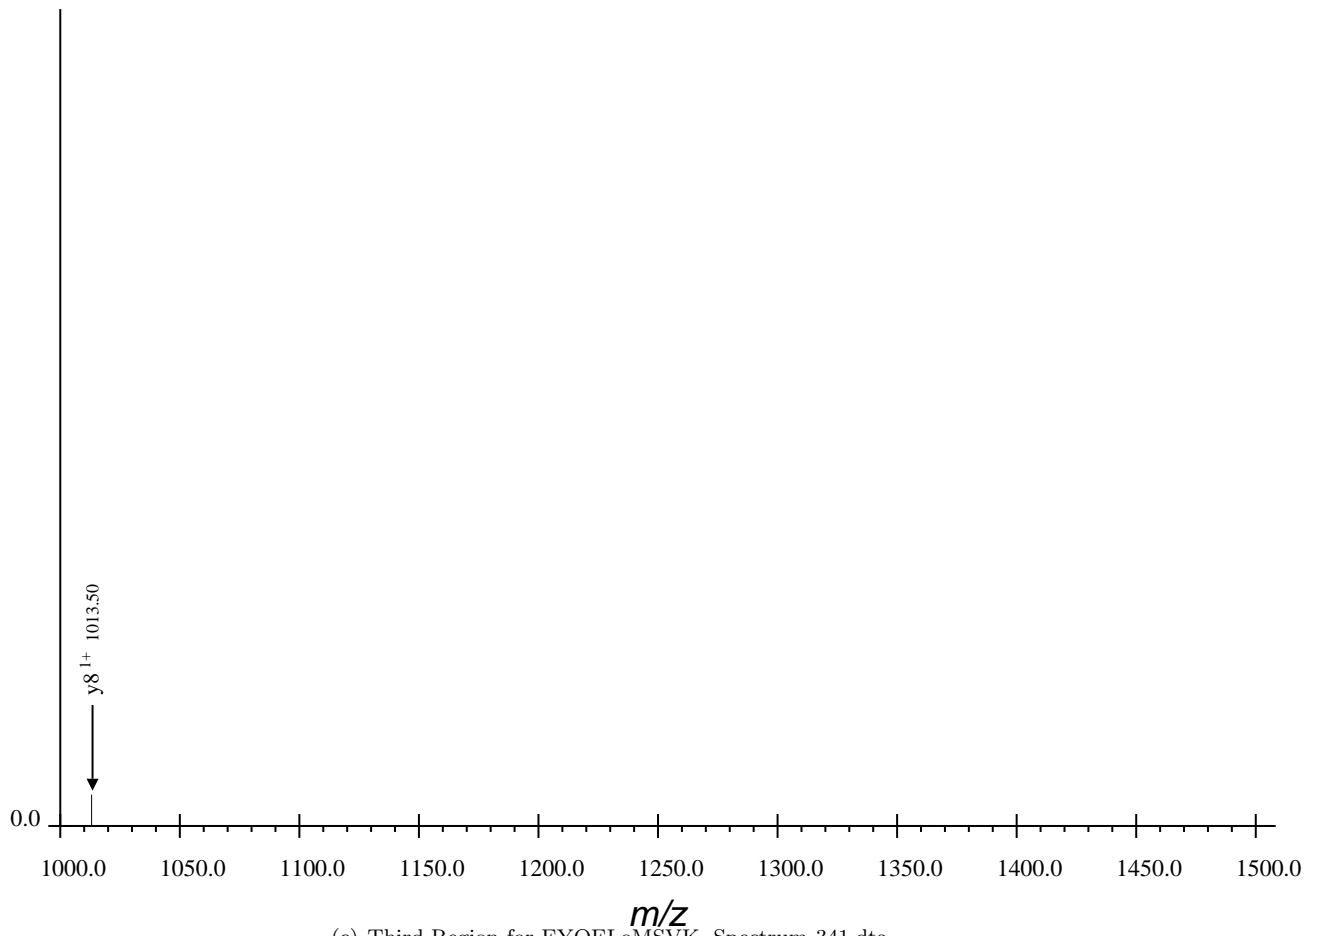

(c) Third Region for EYQELoMSVK, Spectrum 341.dta

Relative Intensity

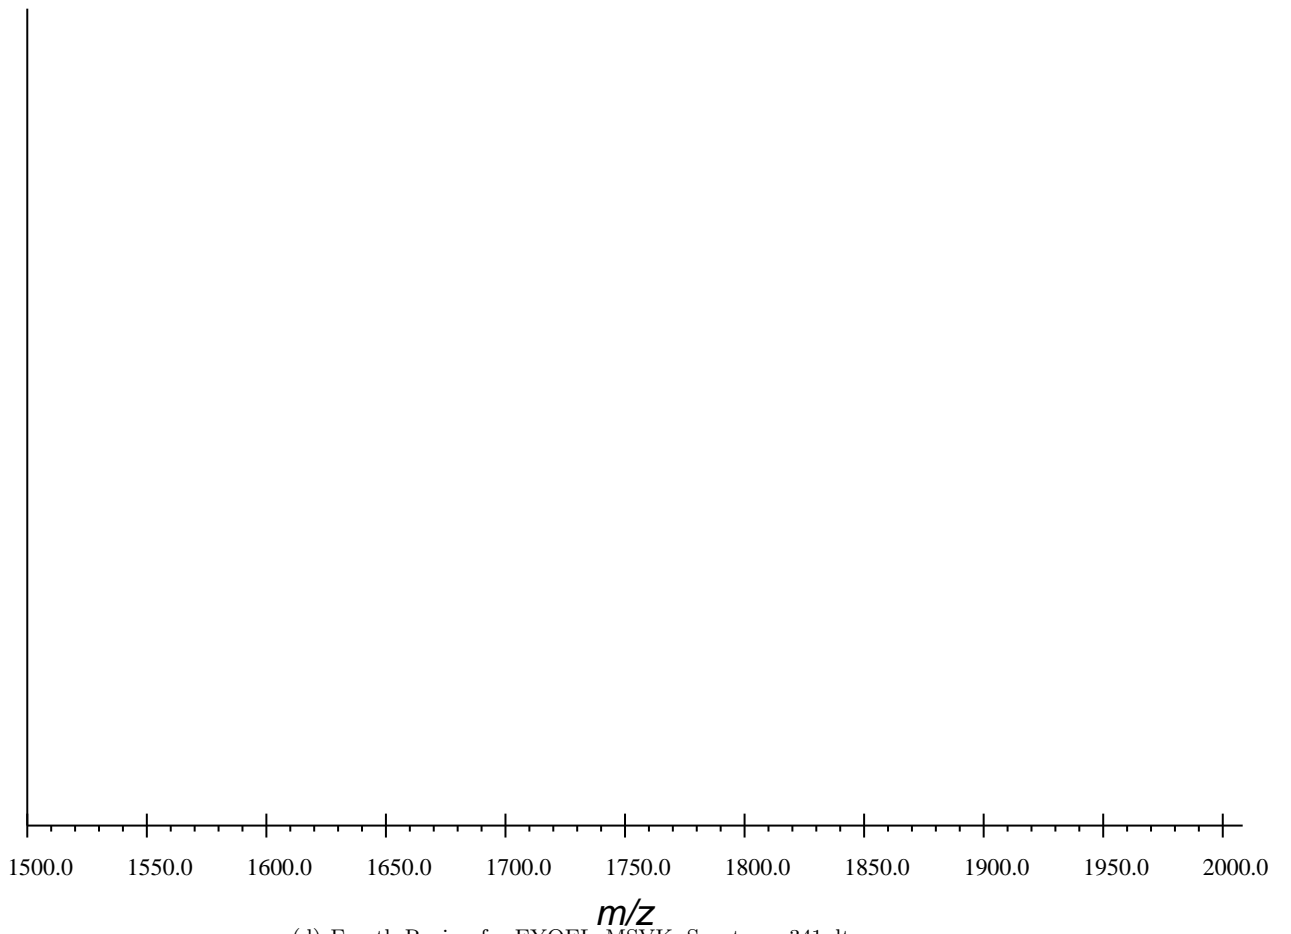

(d) Fourth Region for EYQELoMSVK, Spectrum 341.dta

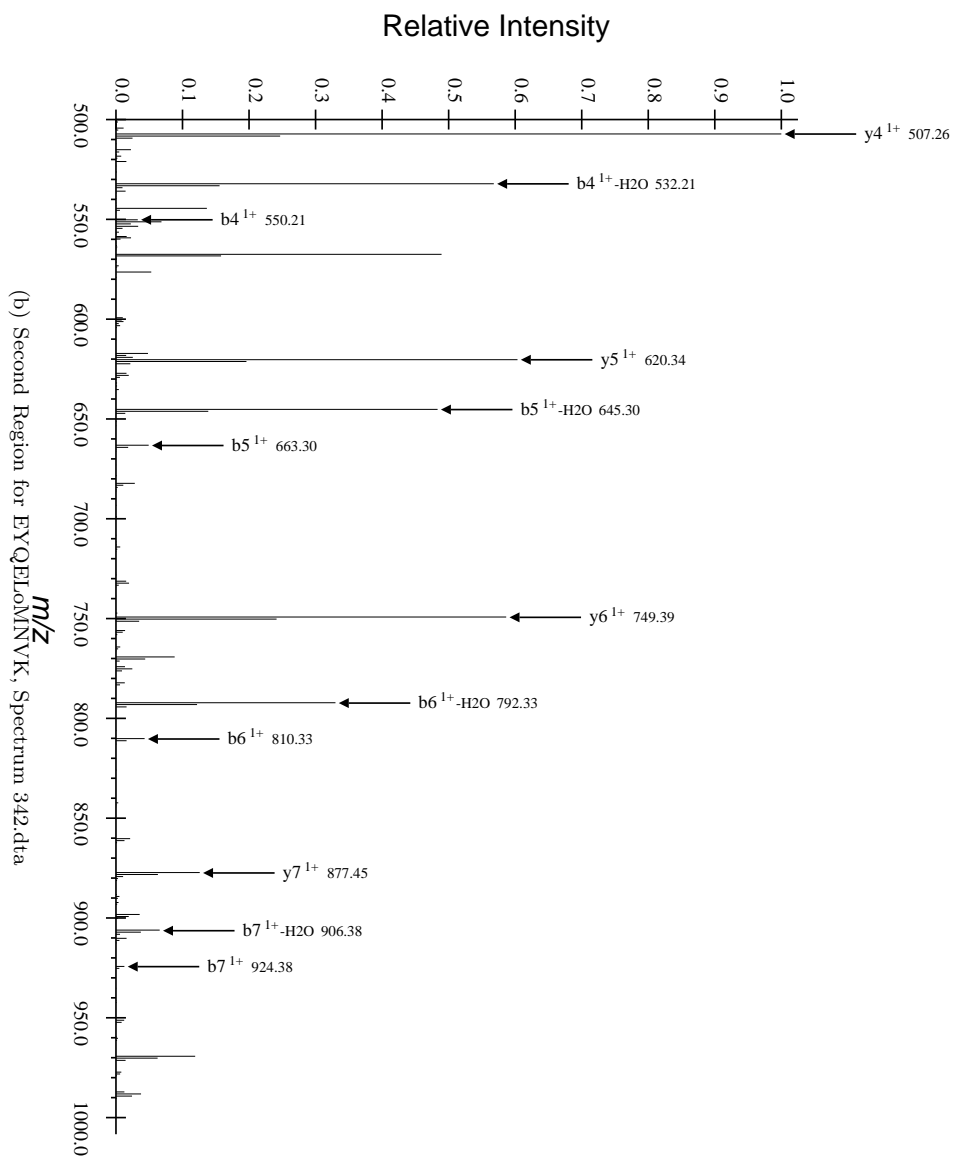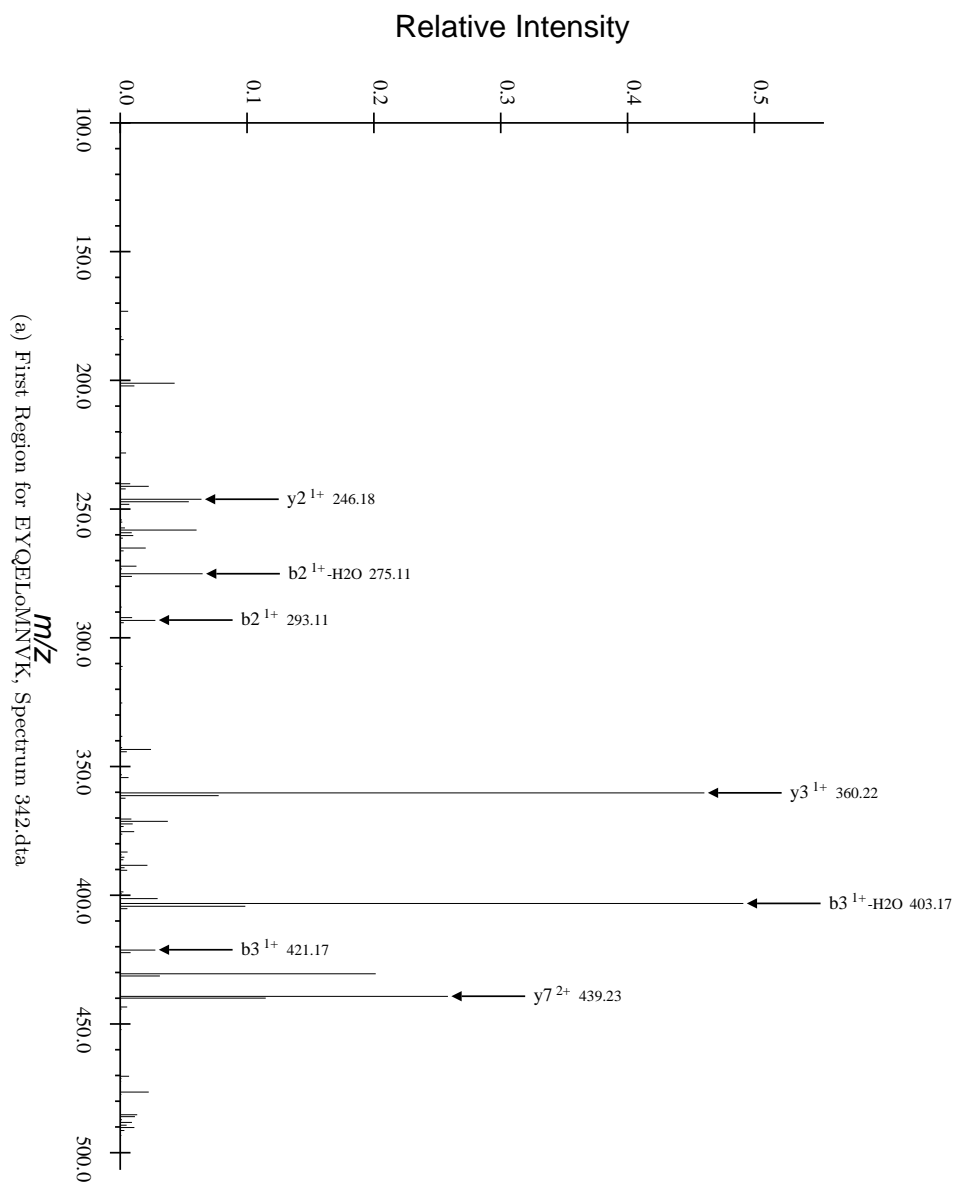

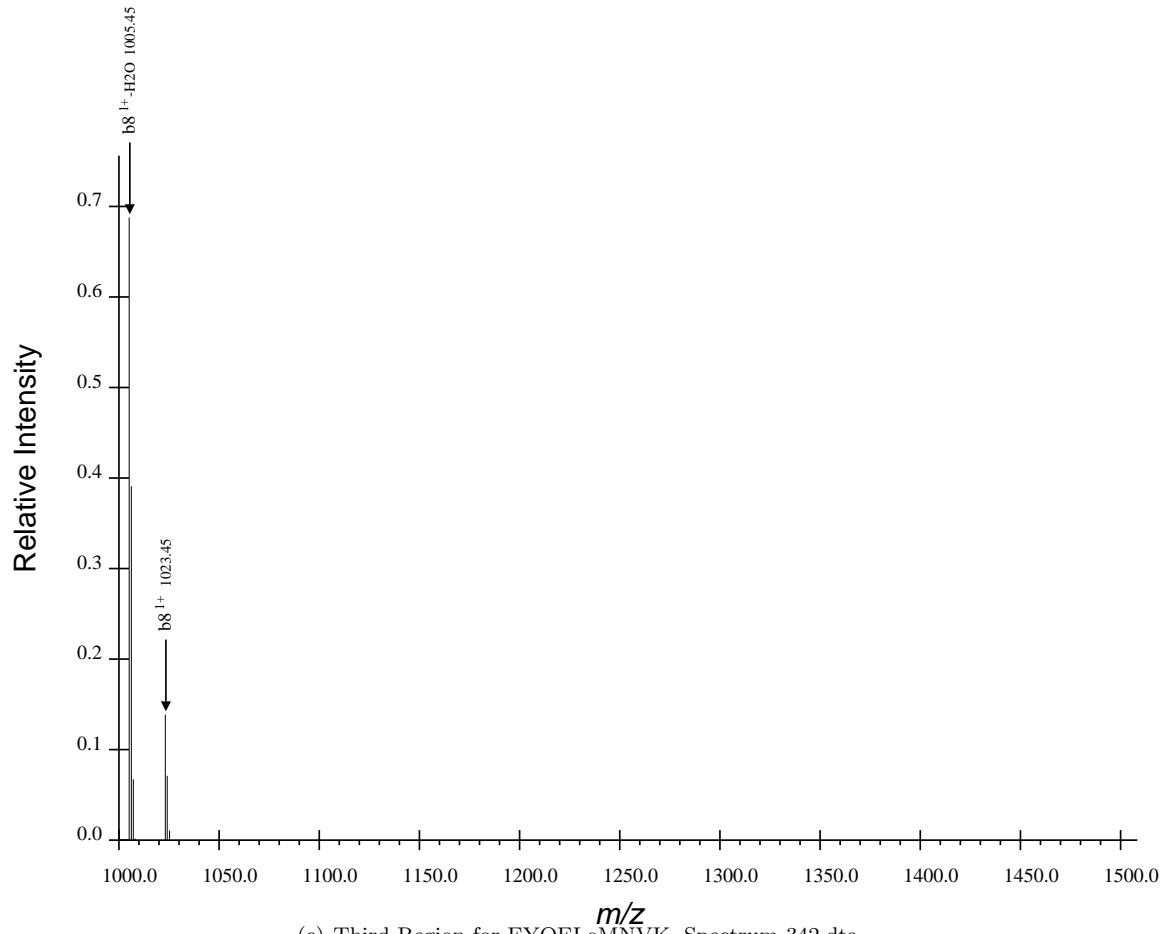

(c) Third Region for EYQELoMNVK, Spectrum 342.dta

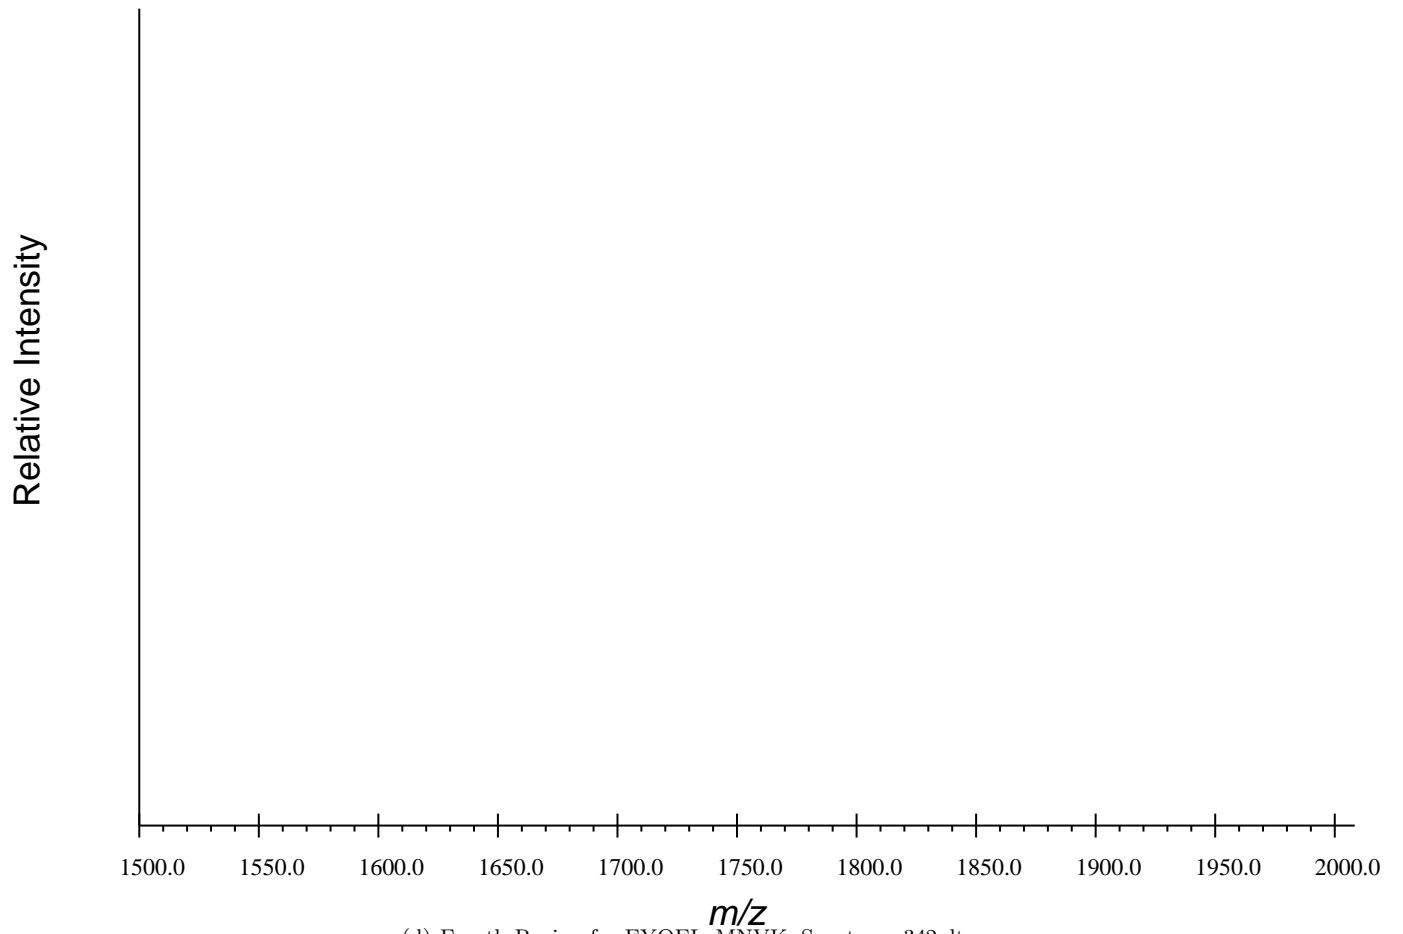

(d) Fourth Region for EYQELoMNVK, Spectrum 342.dta

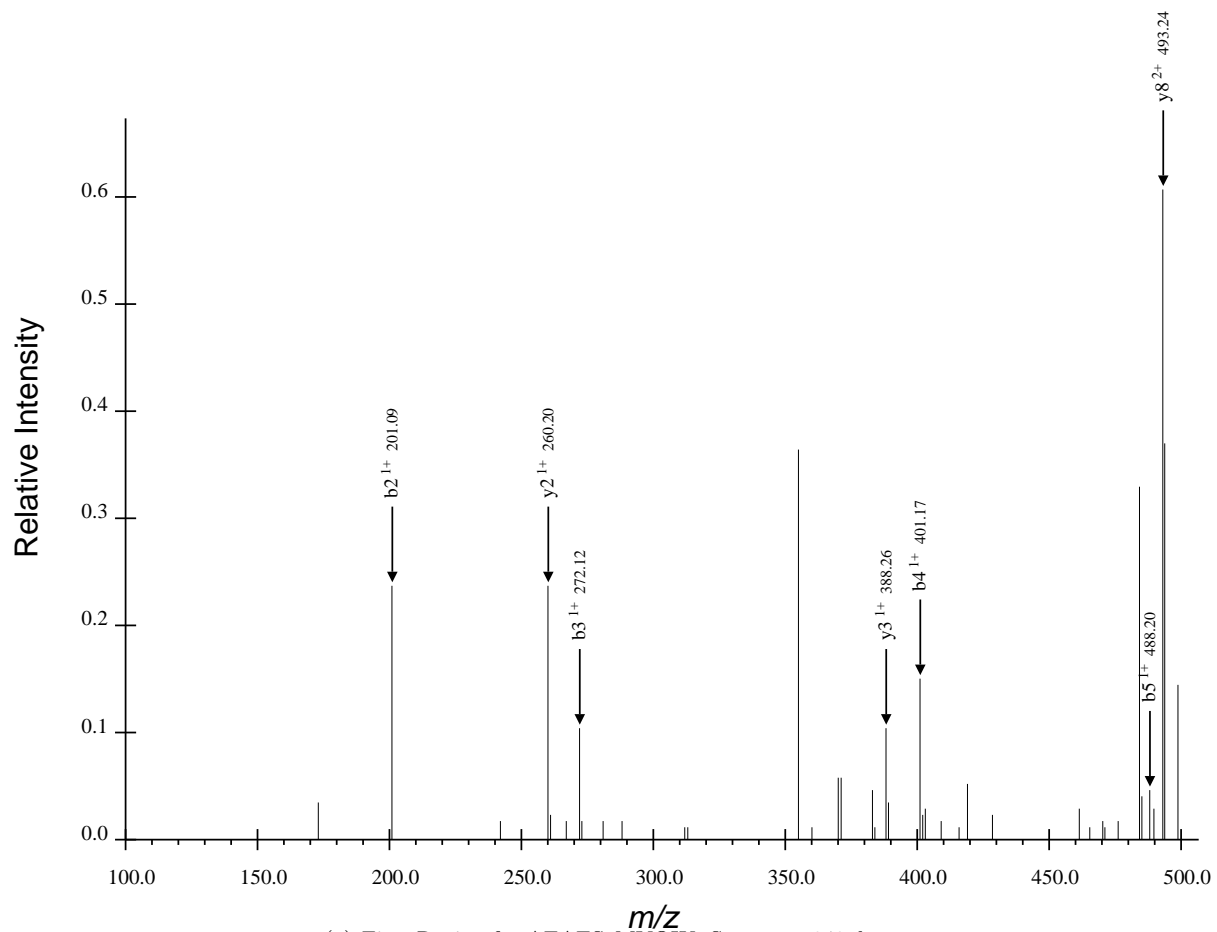

(a) First Region for AEAESoMYQIK, Spectrum 343.dta

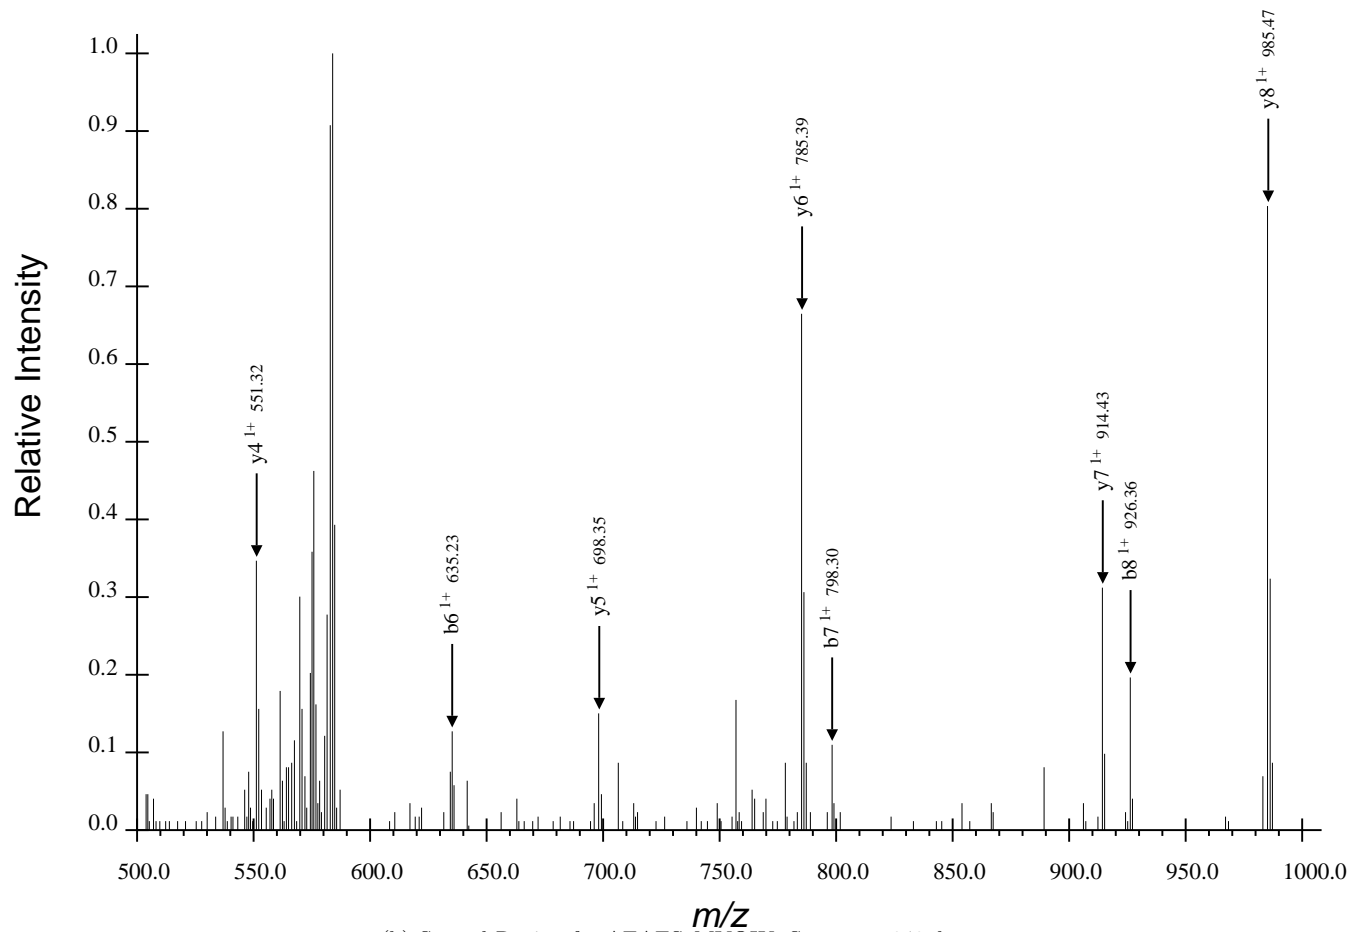

(b) Second Region for AEAESoMYQIK, Spectrum 343.dta

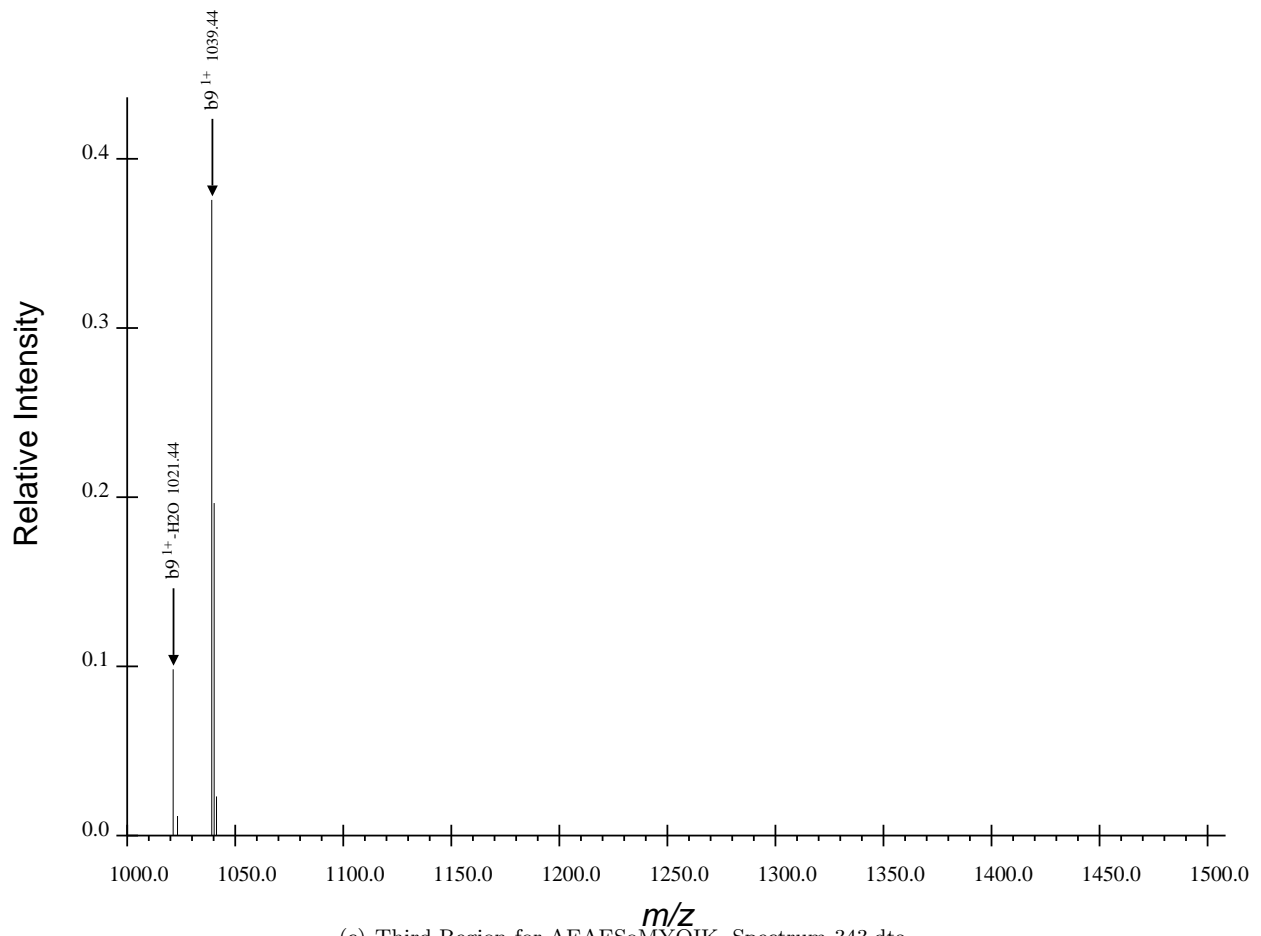

(c) Third Region for AEAESoMYQIK, Spectrum 343.dta

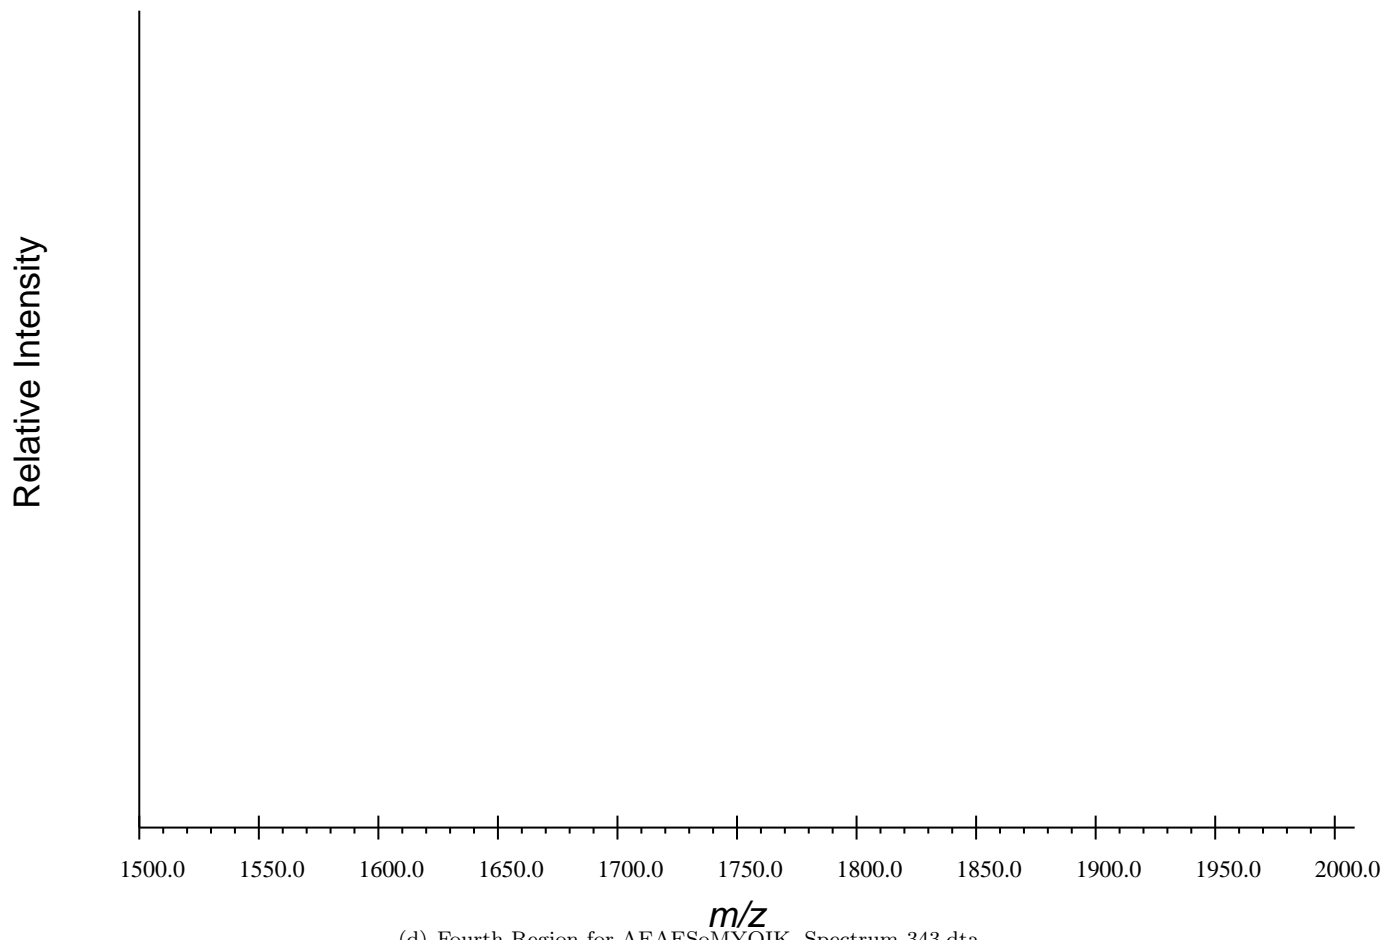

(d) Fourth Region for AEAESoMYQIK, Spectrum 343.dta

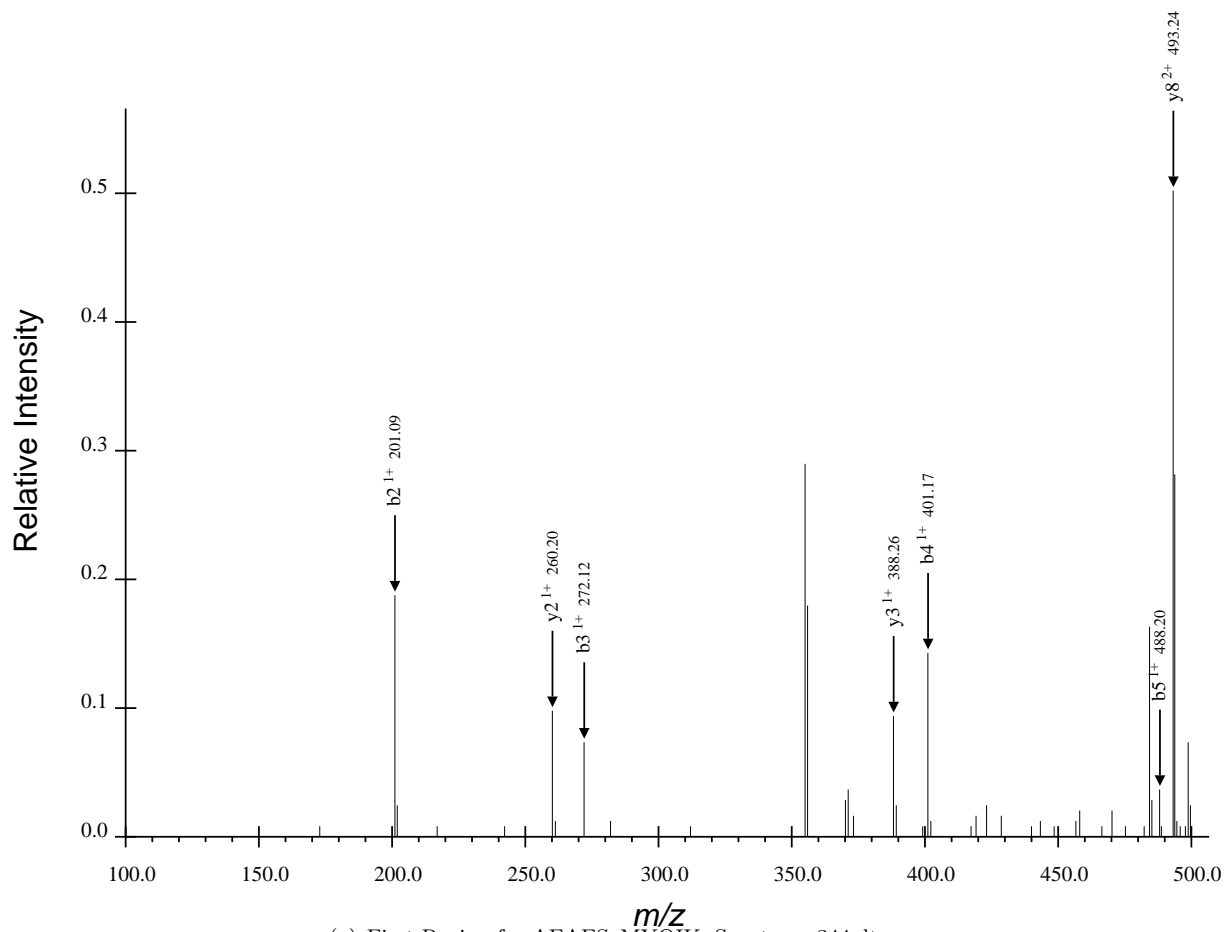

(a) First Region for AEAESoMYQIK, Spectrum 344.dta

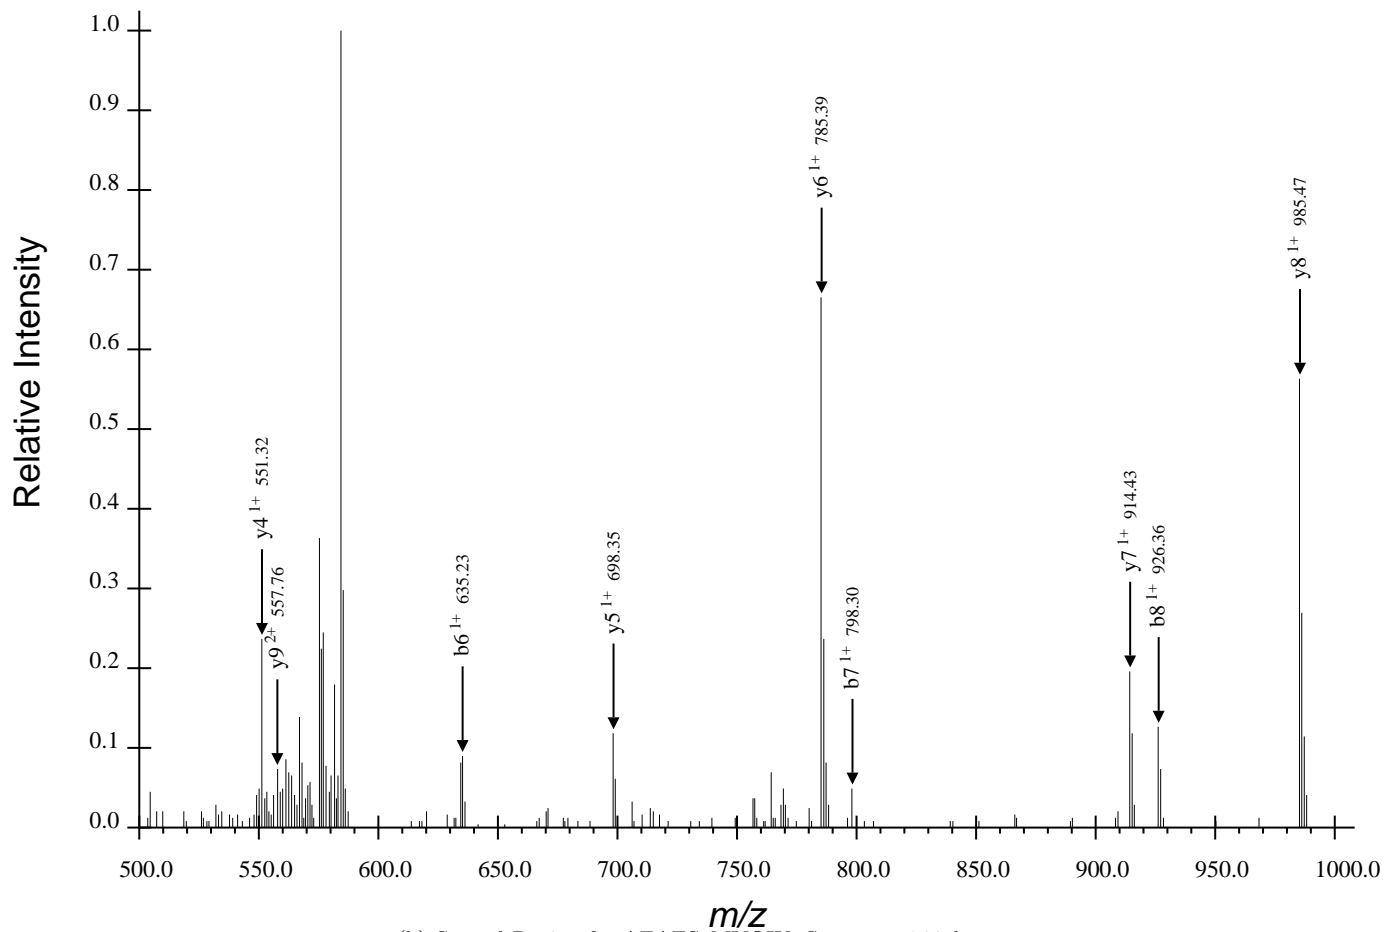

(b) Second Region for AEAESoMYQIK, Spectrum 344.dta

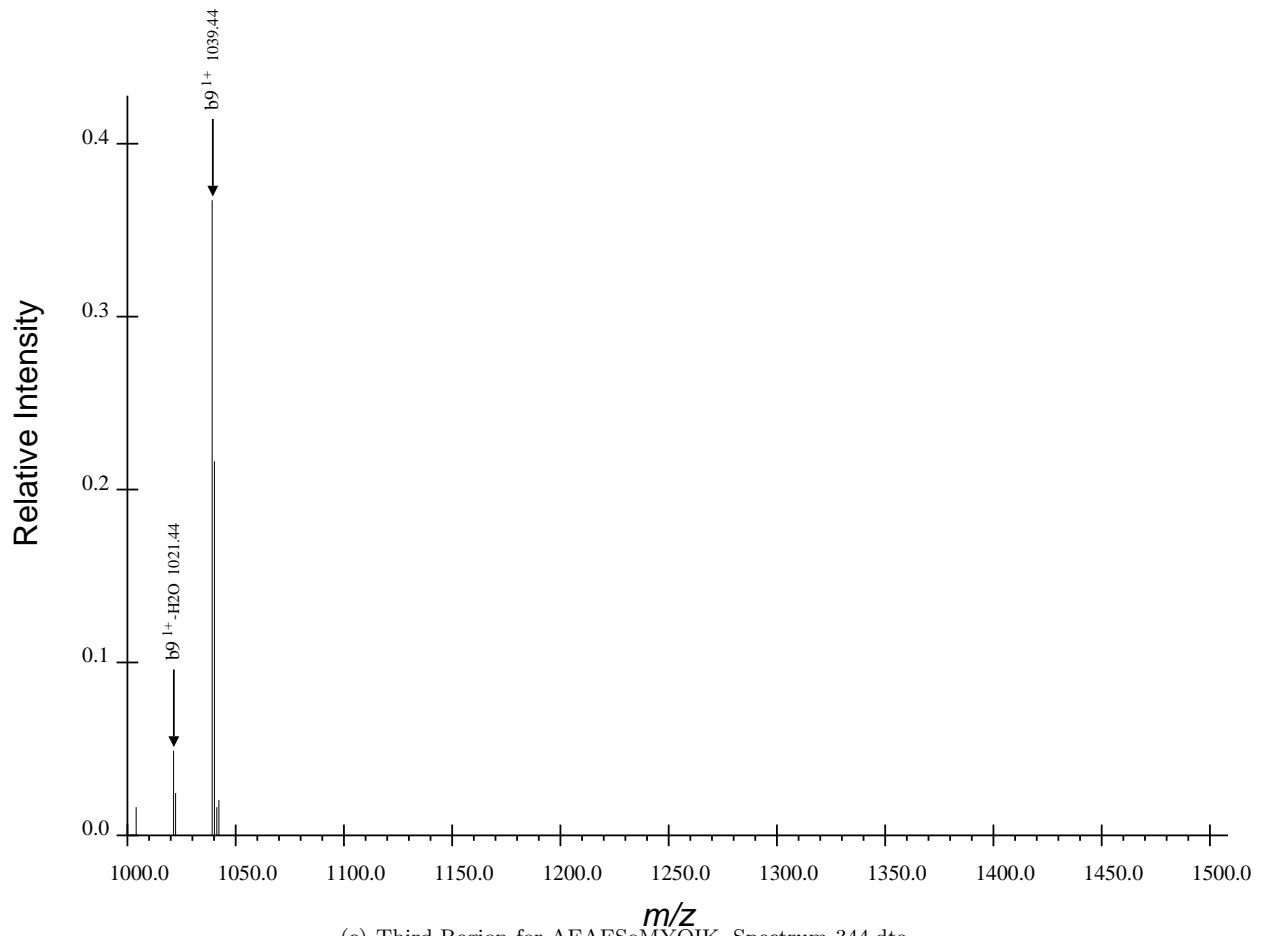

(c) Third Region for AEAESoMYQIK, Spectrum 344.dta

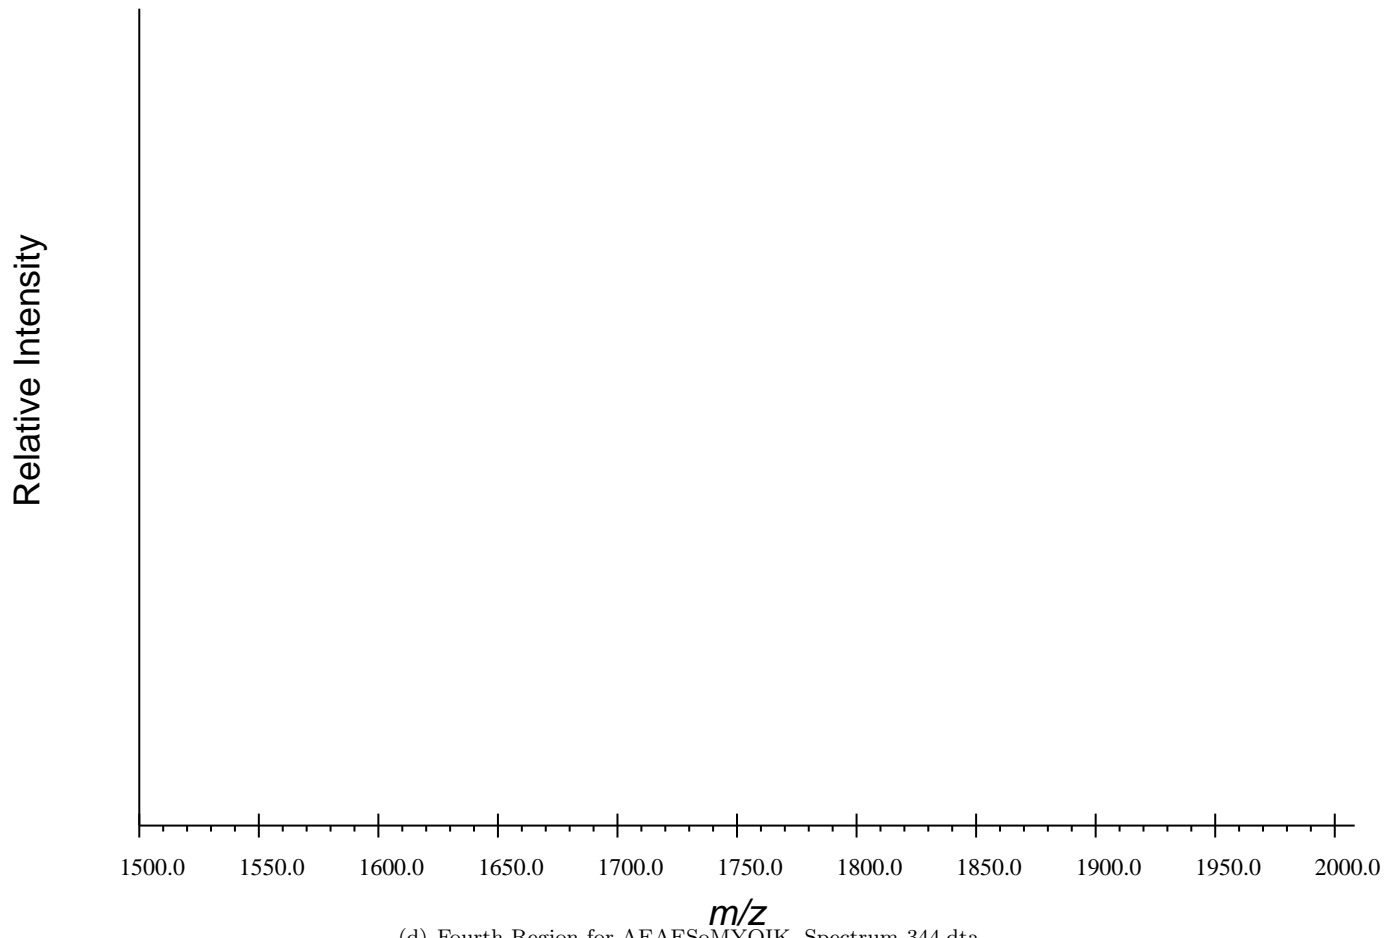

(d) Fourth Region for AEAESoMYQIK, Spectrum 344.dta



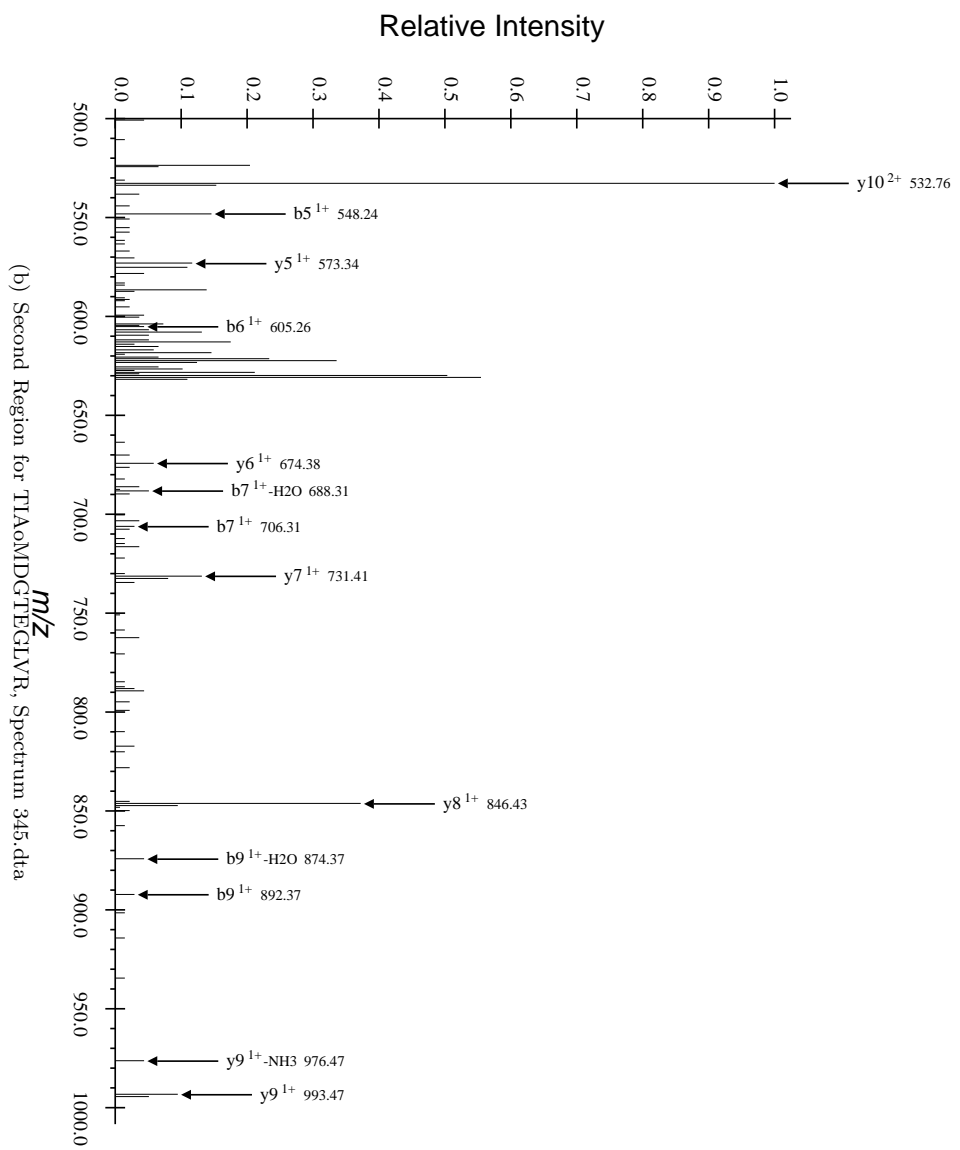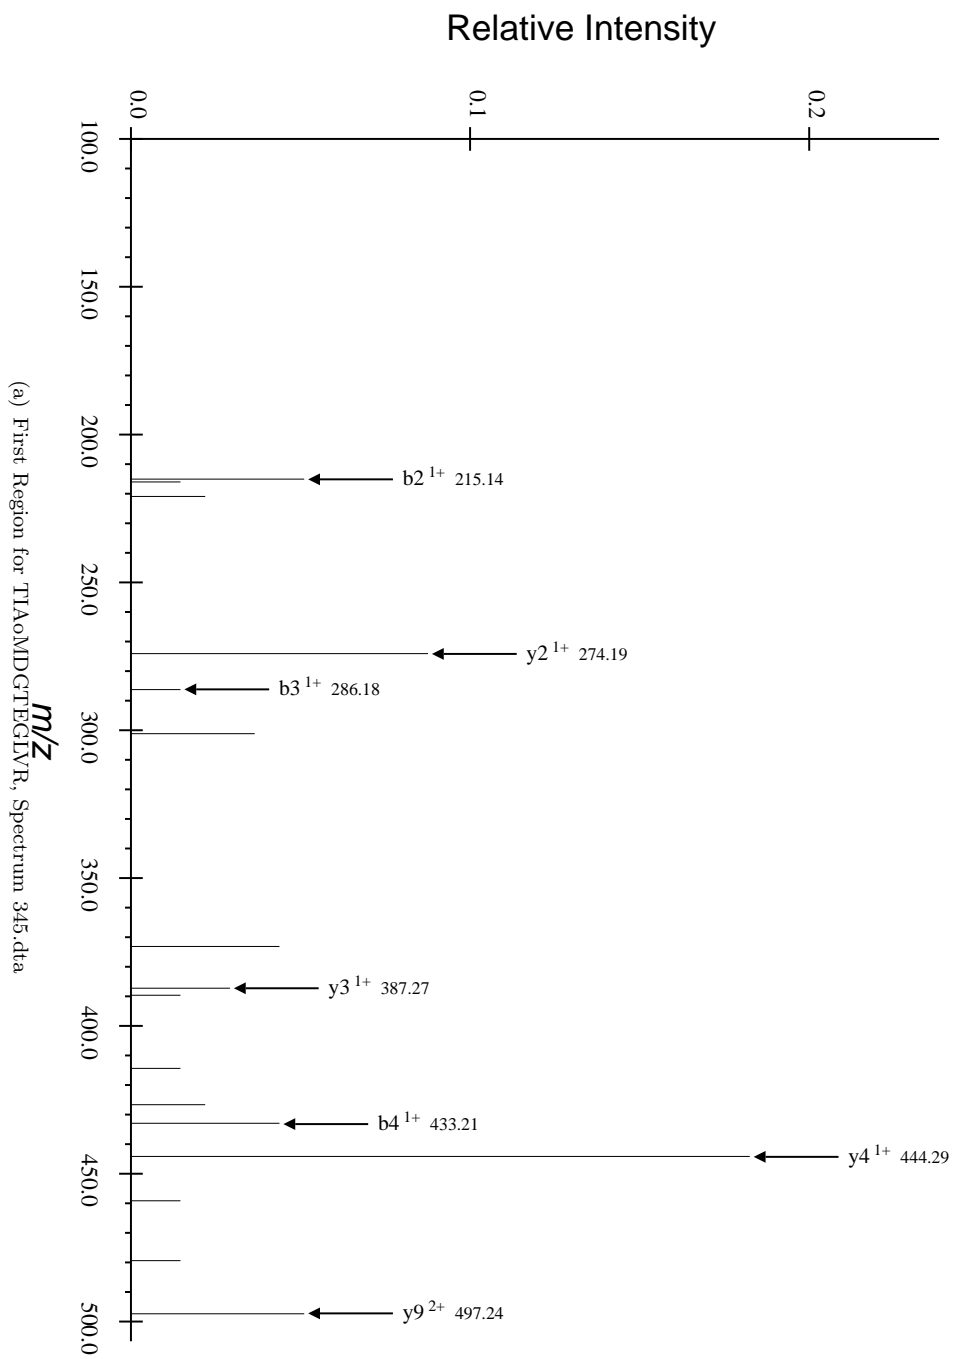

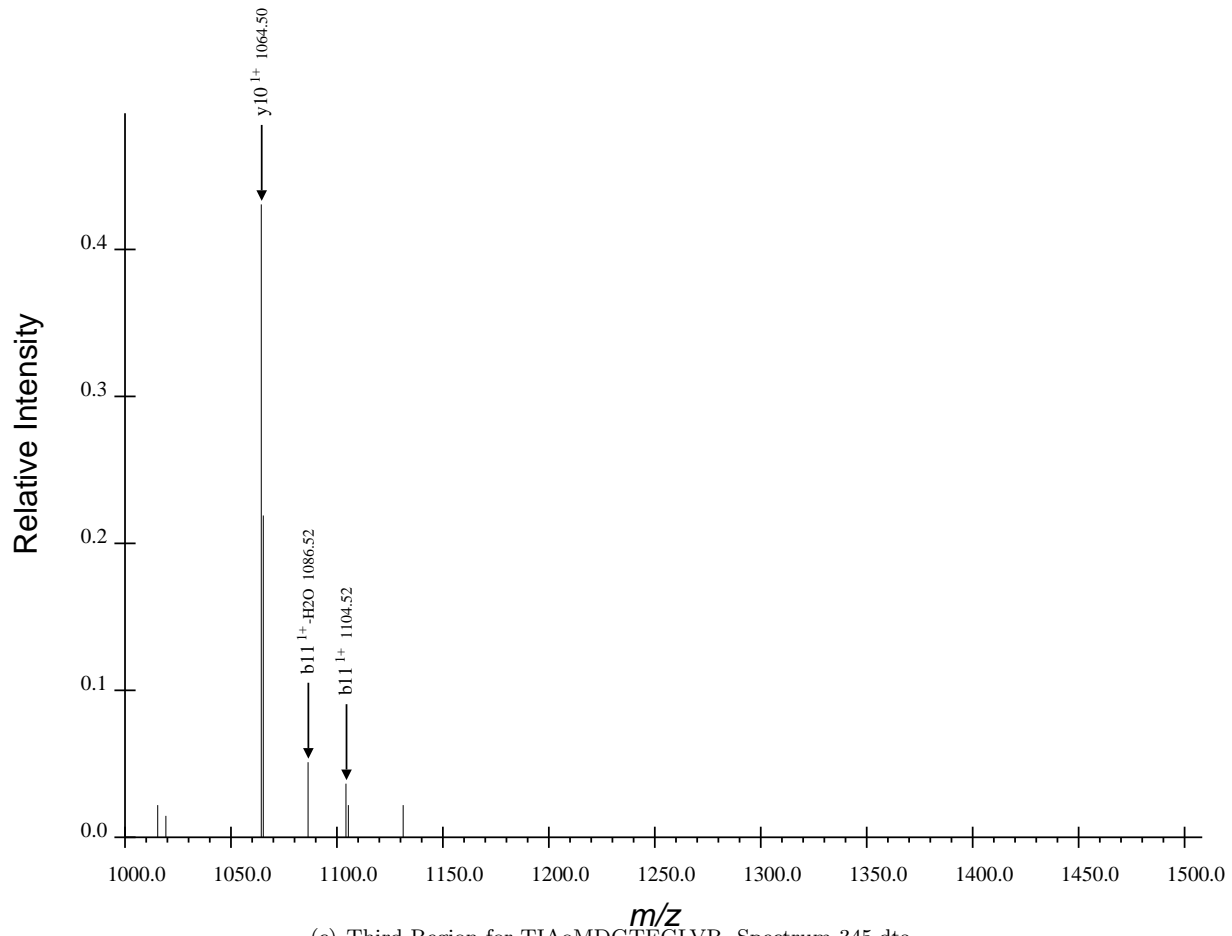

(c) Third Region for TIAoMDGTEGLVR, Spectrum 345.dta

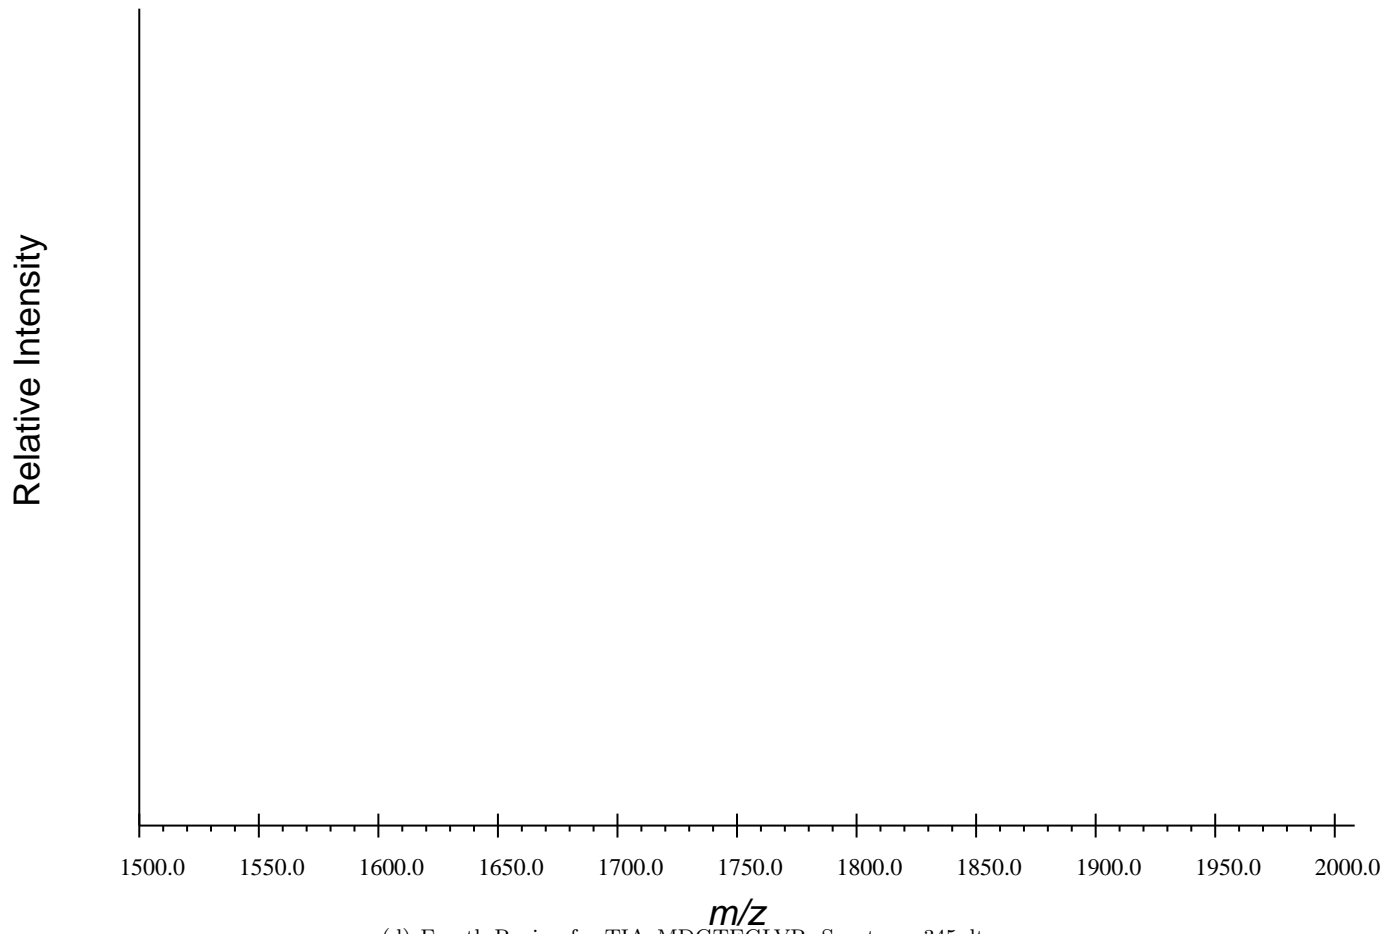

(d) Fourth Region for TIAoMDGTEGLVR, Spectrum 345.dta

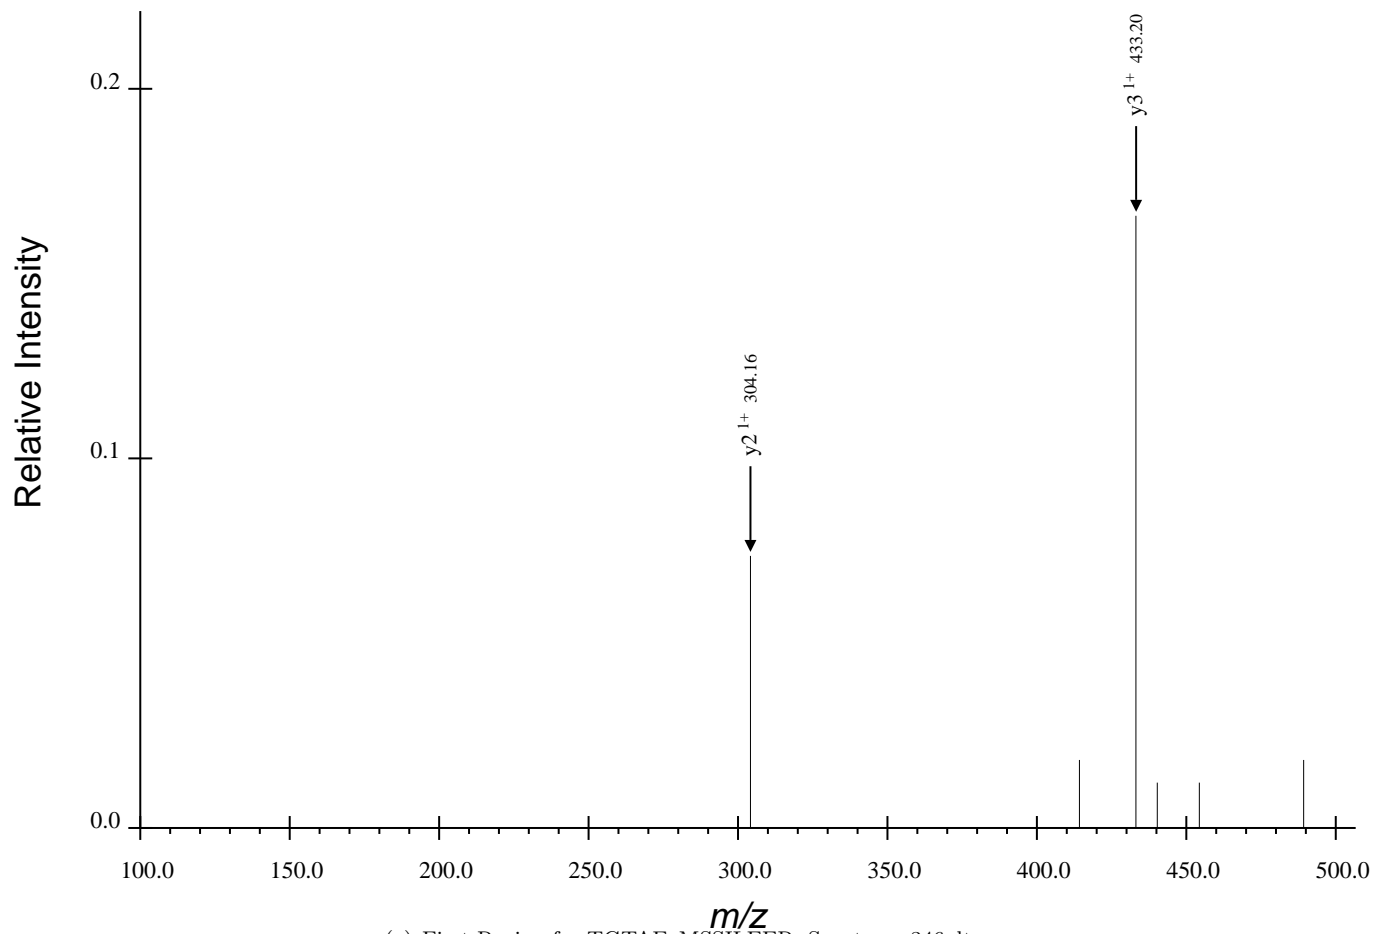

(a) First Region for TGTAEoMSSILEER, Spectrum 346.dta

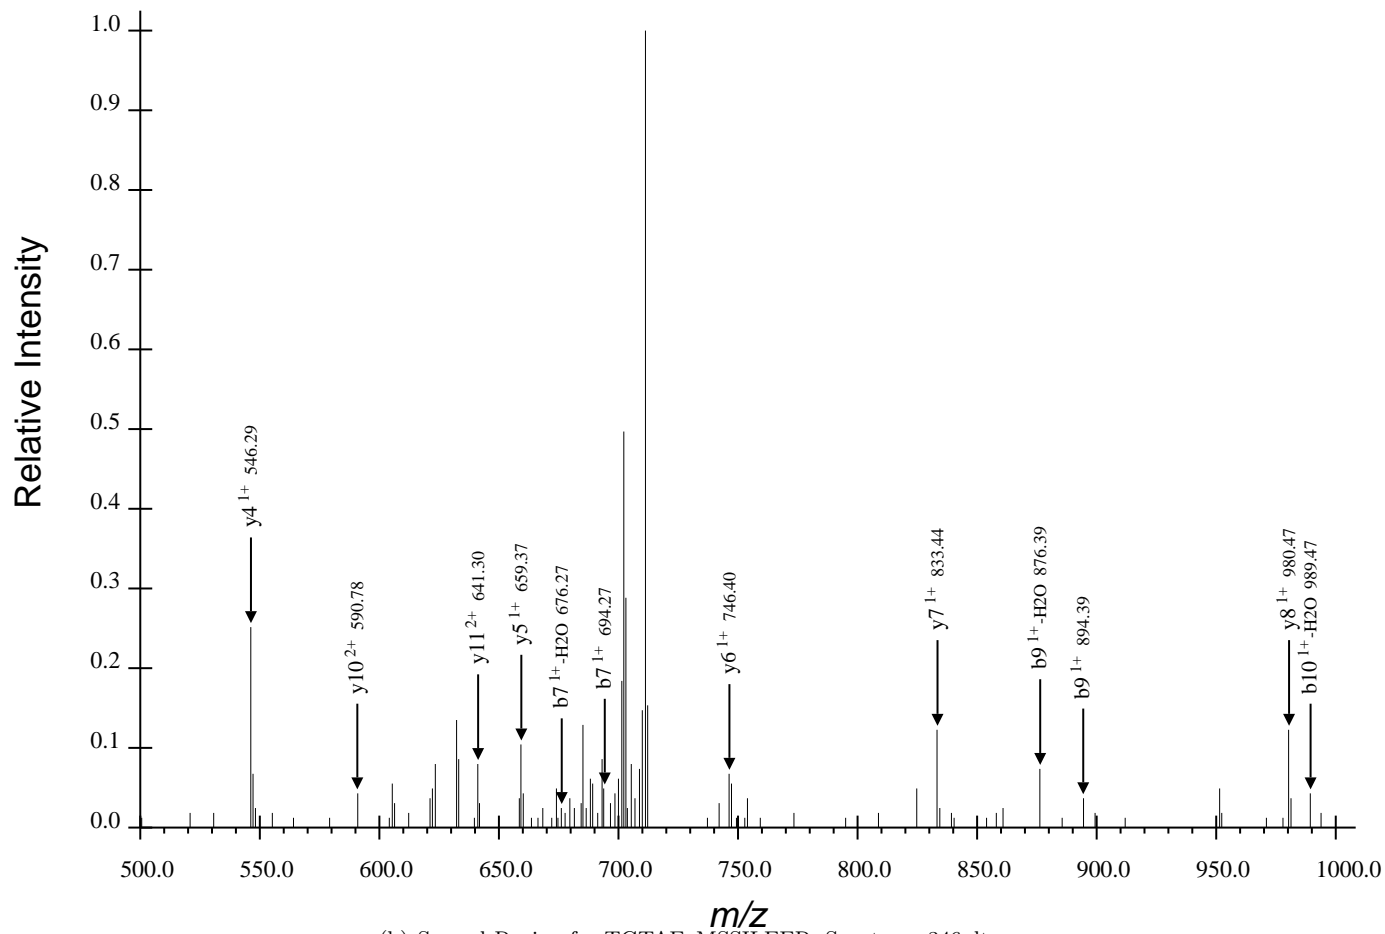

(b) Second Region for TGTAEoMSSILEER, Spectrum 346.dta

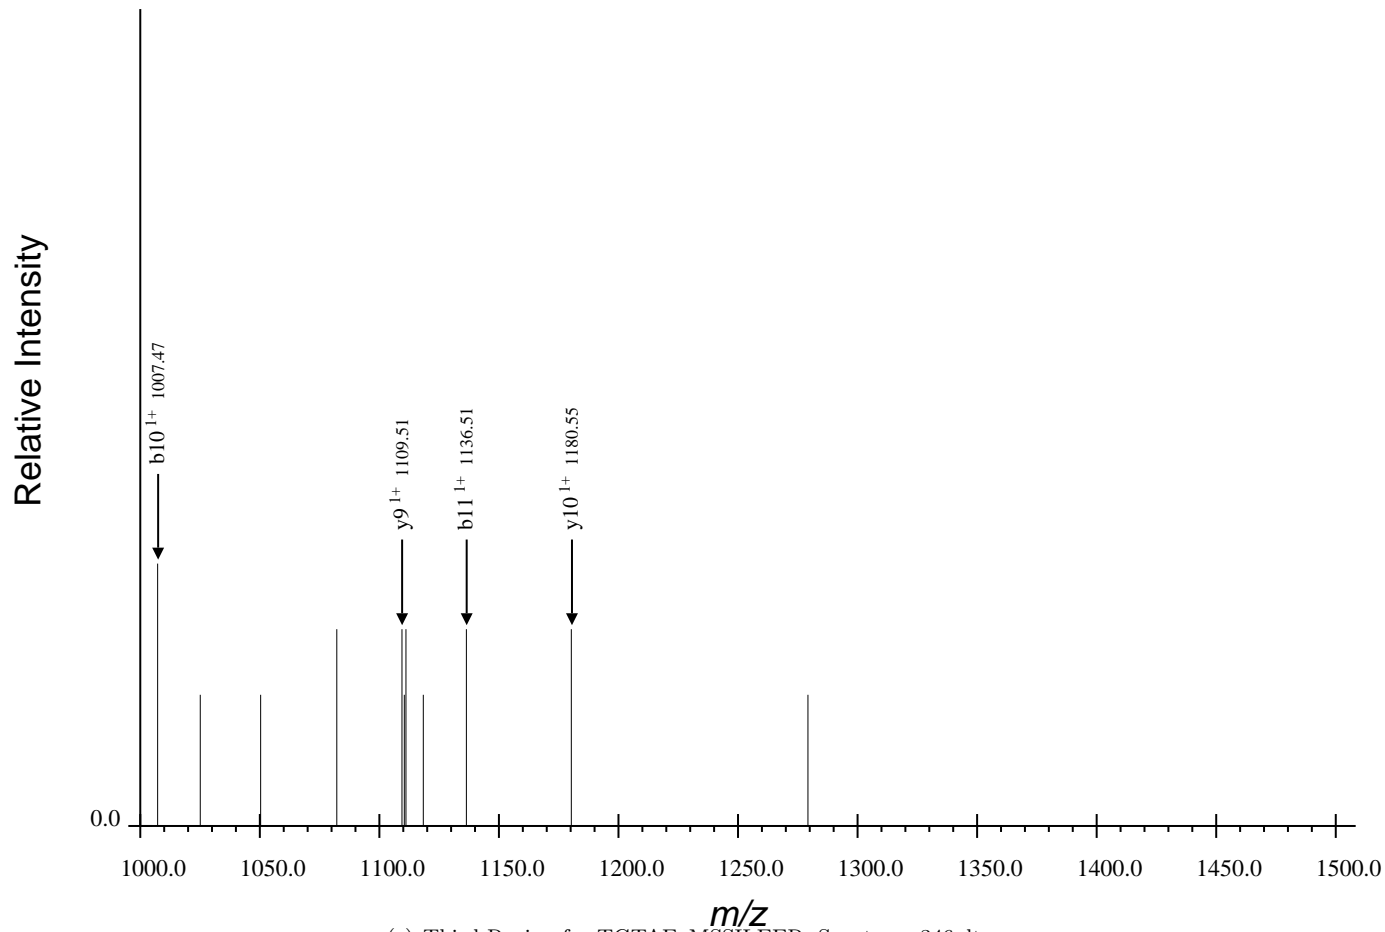

(c) Third Region for TGTAEoMSSILEER, Spectrum 346.dta

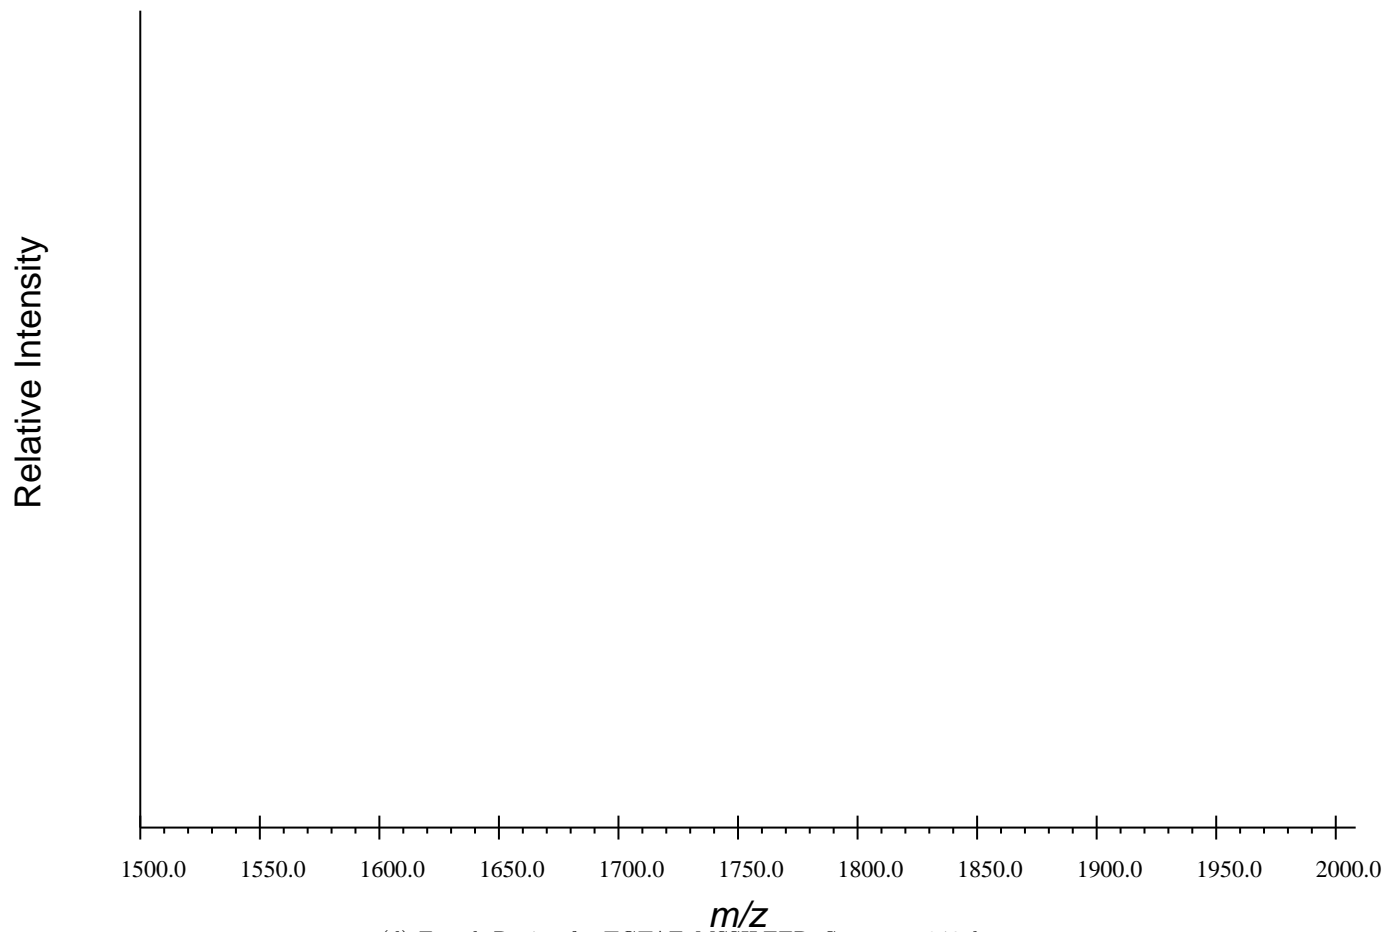

(d) Fourth Region for TGTAEoMSSILEER, Spectrum 346.dta

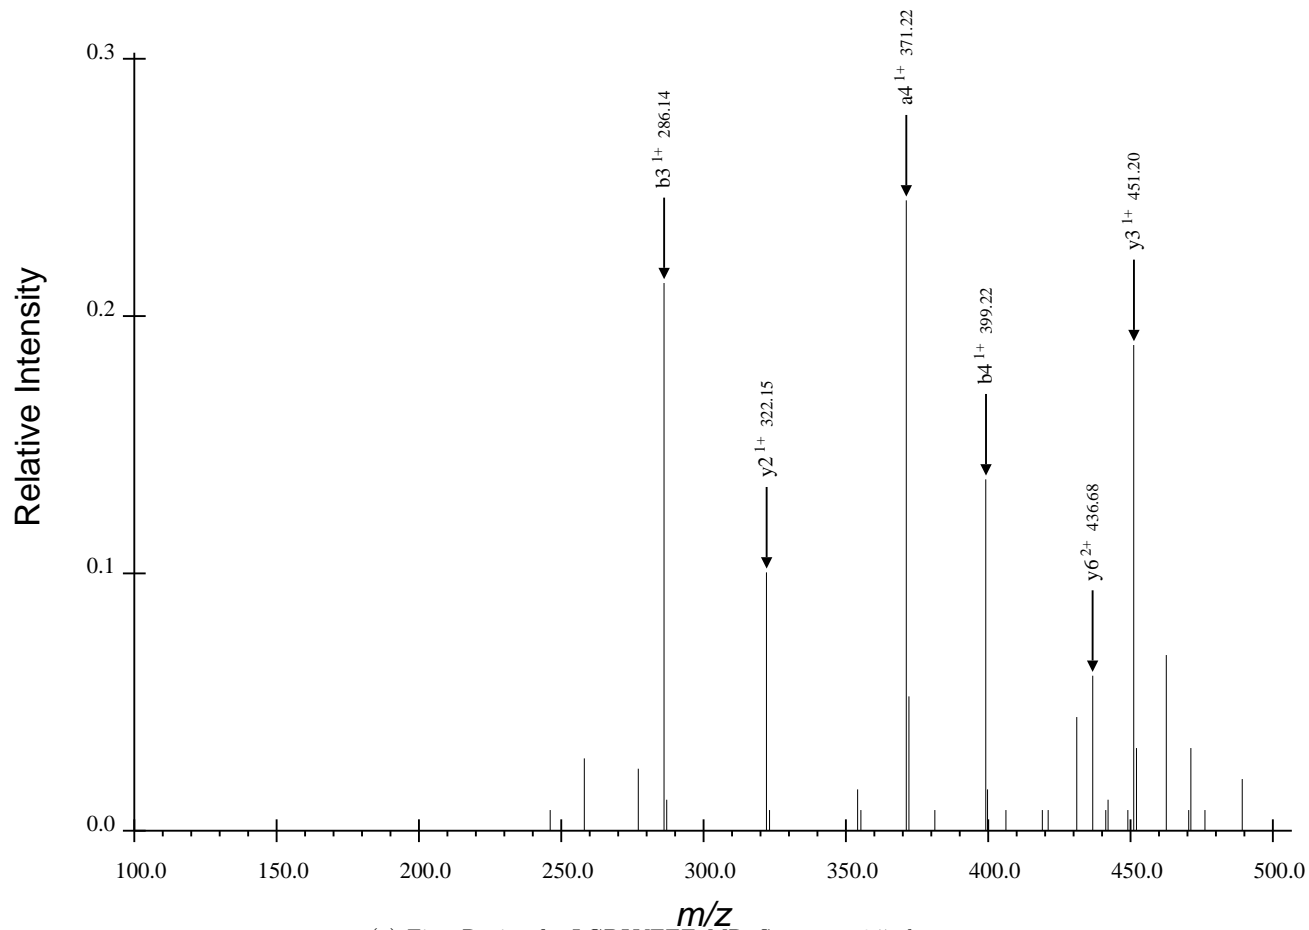

(a) First Region for LGDLYEEEoMR, Spectrum 347.dta

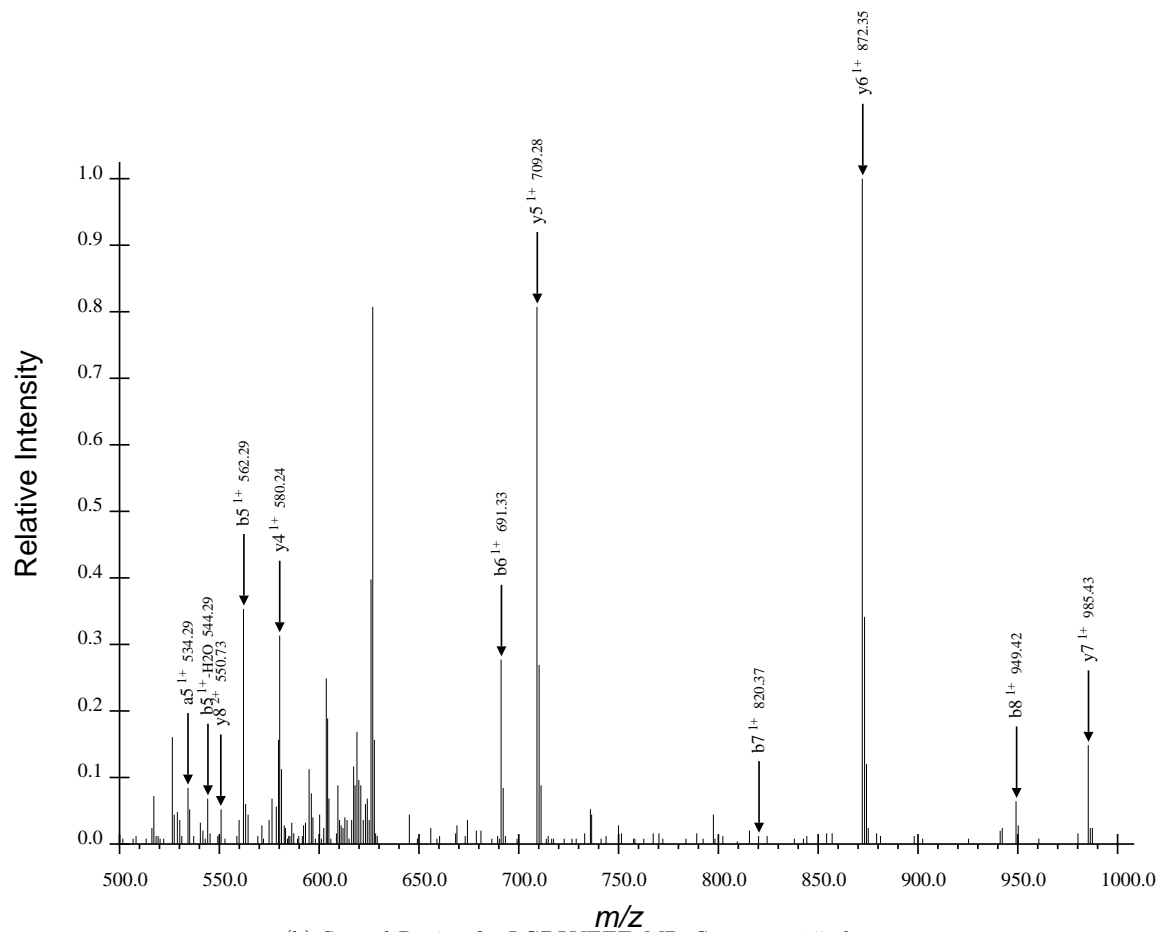

(b) Second Region for LGDLYEEEoMR, Spectrum 347.dta

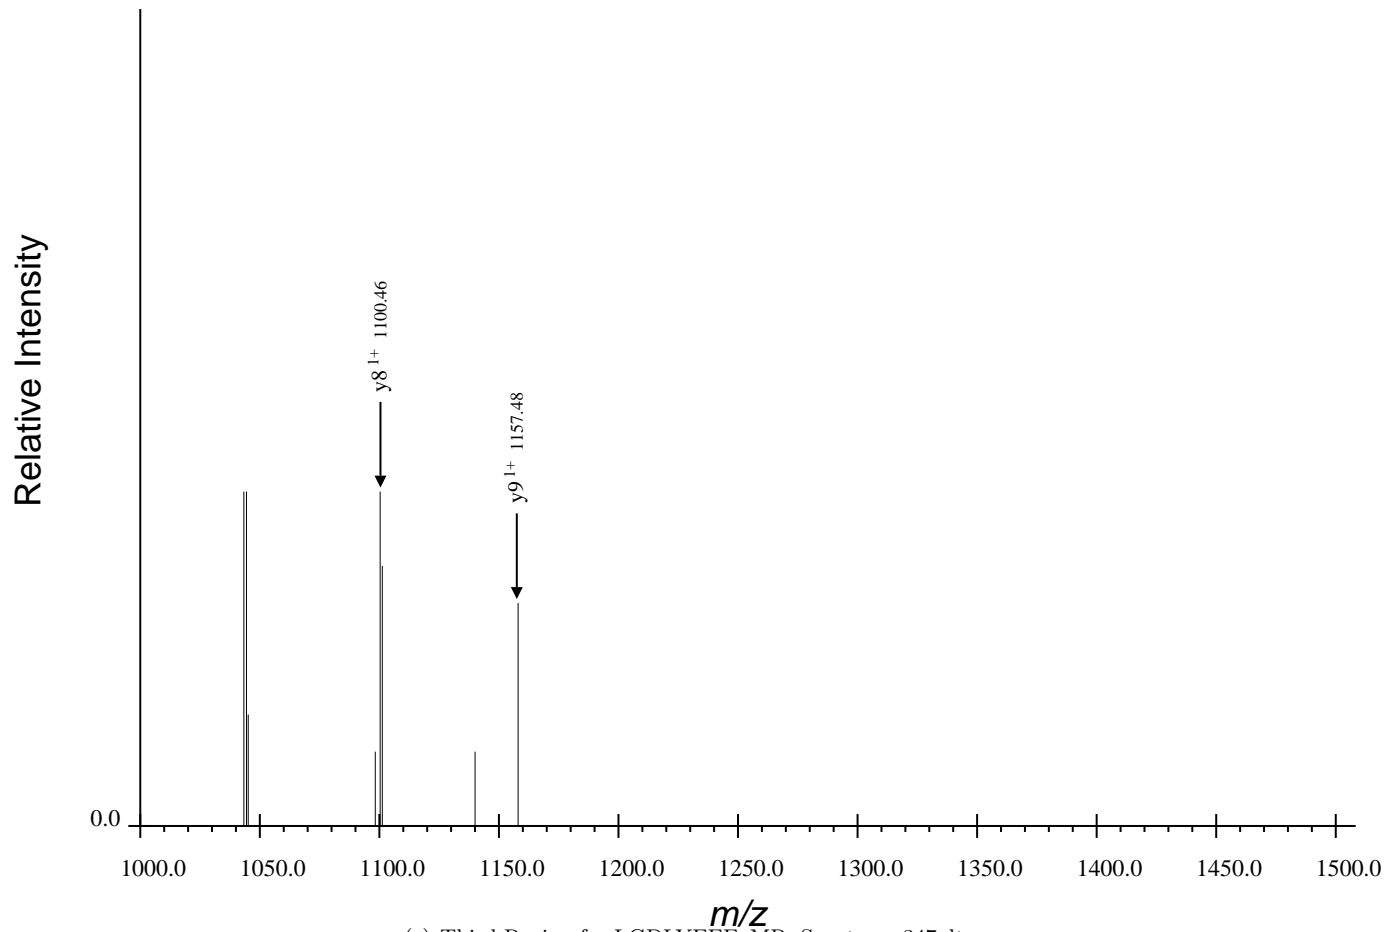

(c) Third Region for LGDLYEEEEoMR, Spectrum 347.dta

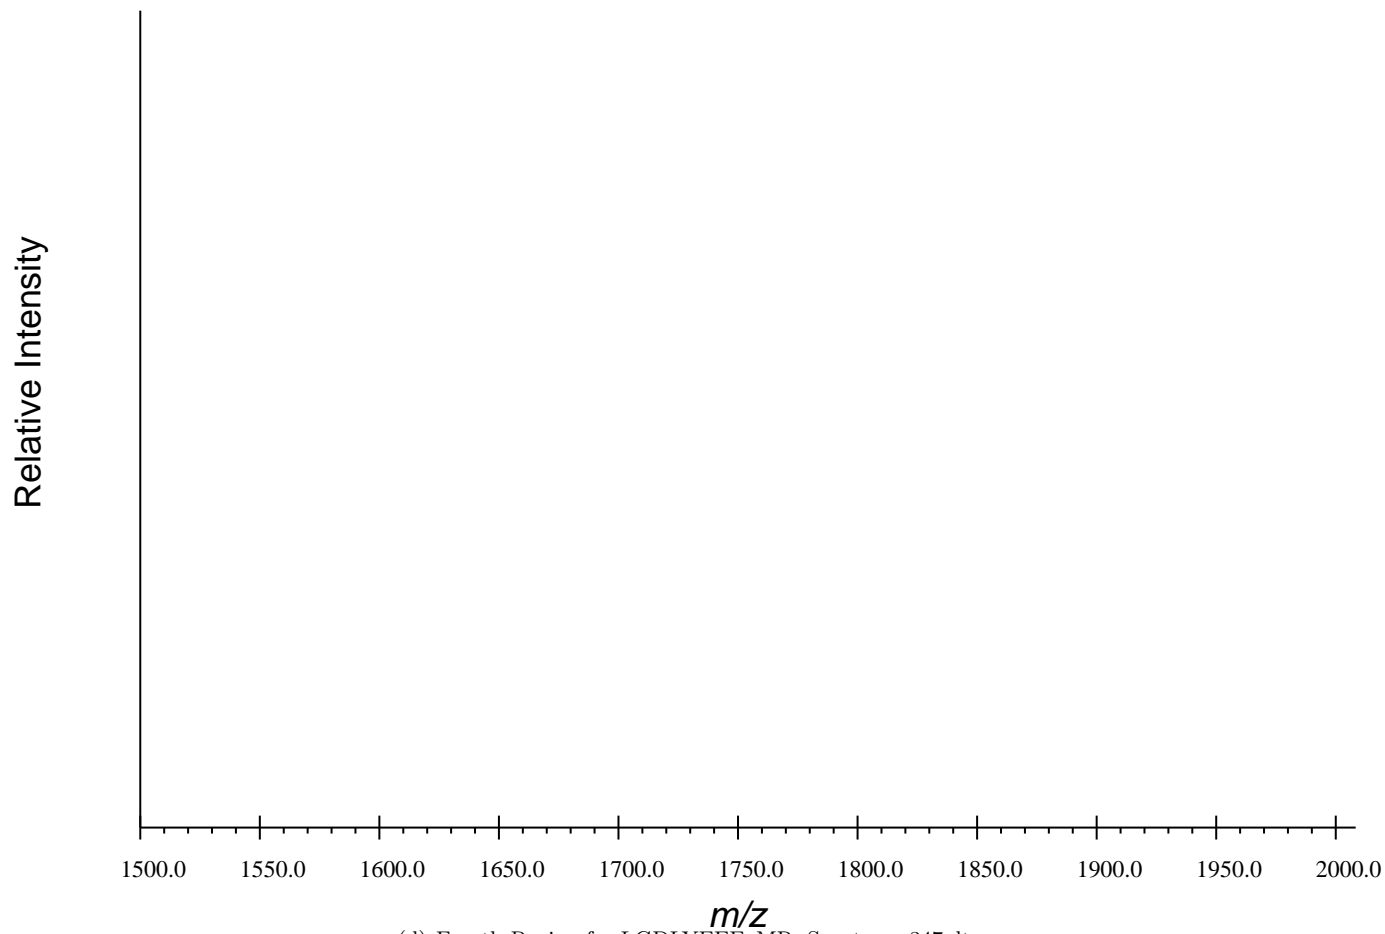

(d) Fourth Region for LGDLYEEEEoMR, Spectrum 347.dta

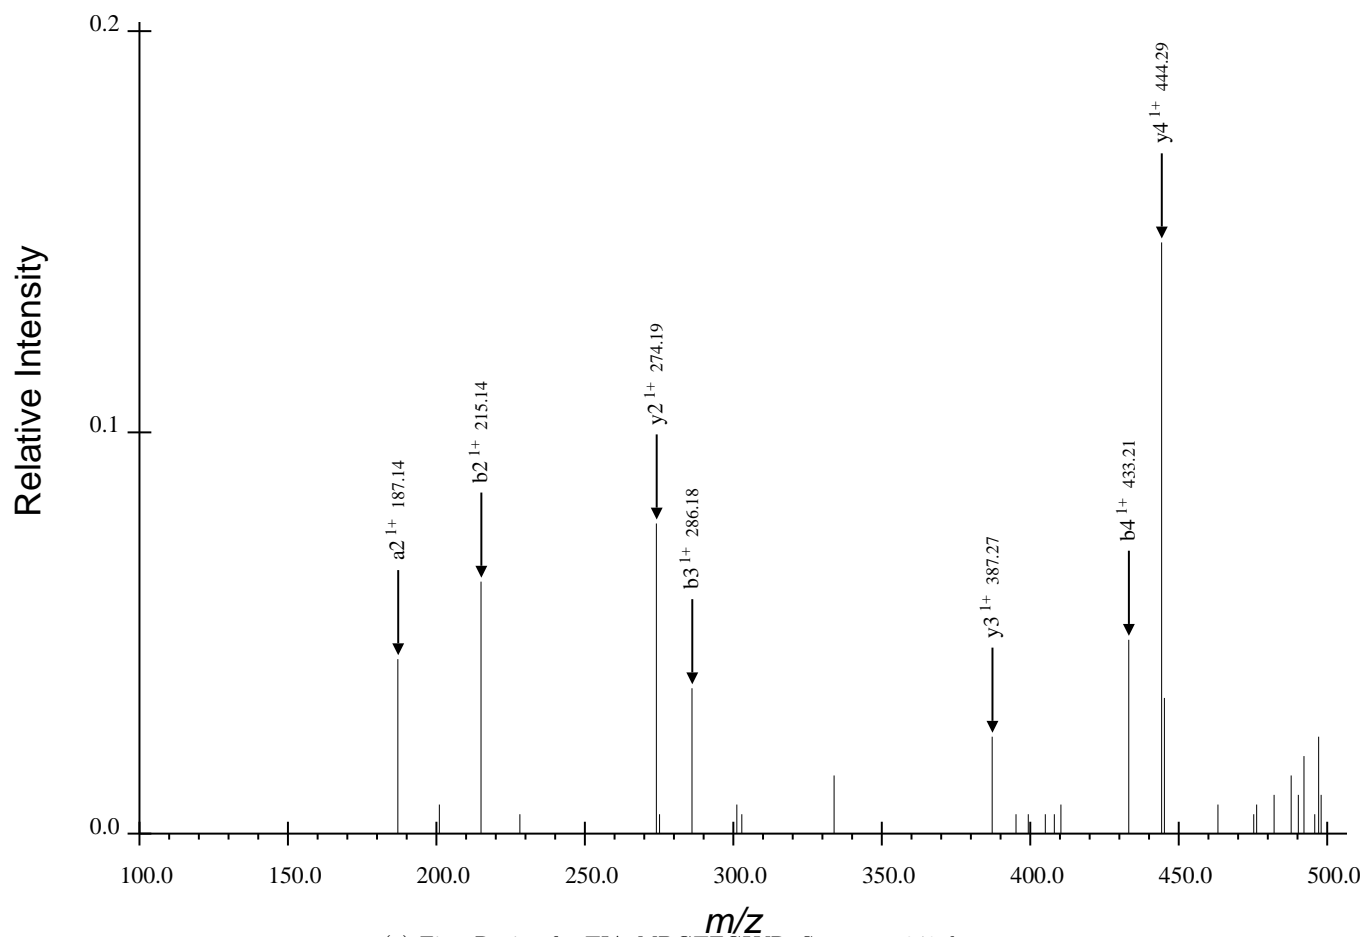

(a) First Region for TIAoMDGTEGLVR, Spectrum 348.dta

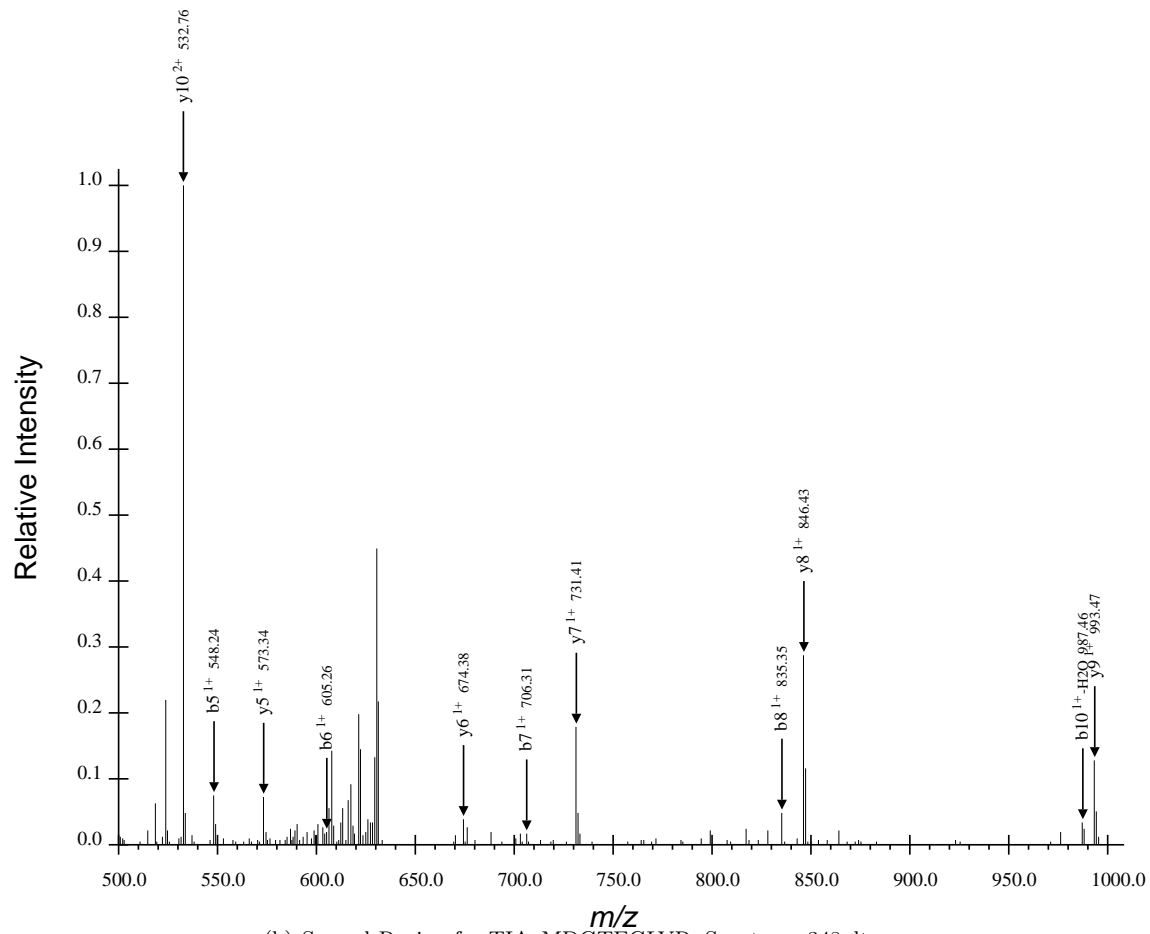

(b) Second Region for TIAoMDGTEGLVR, Spectrum 348.dta

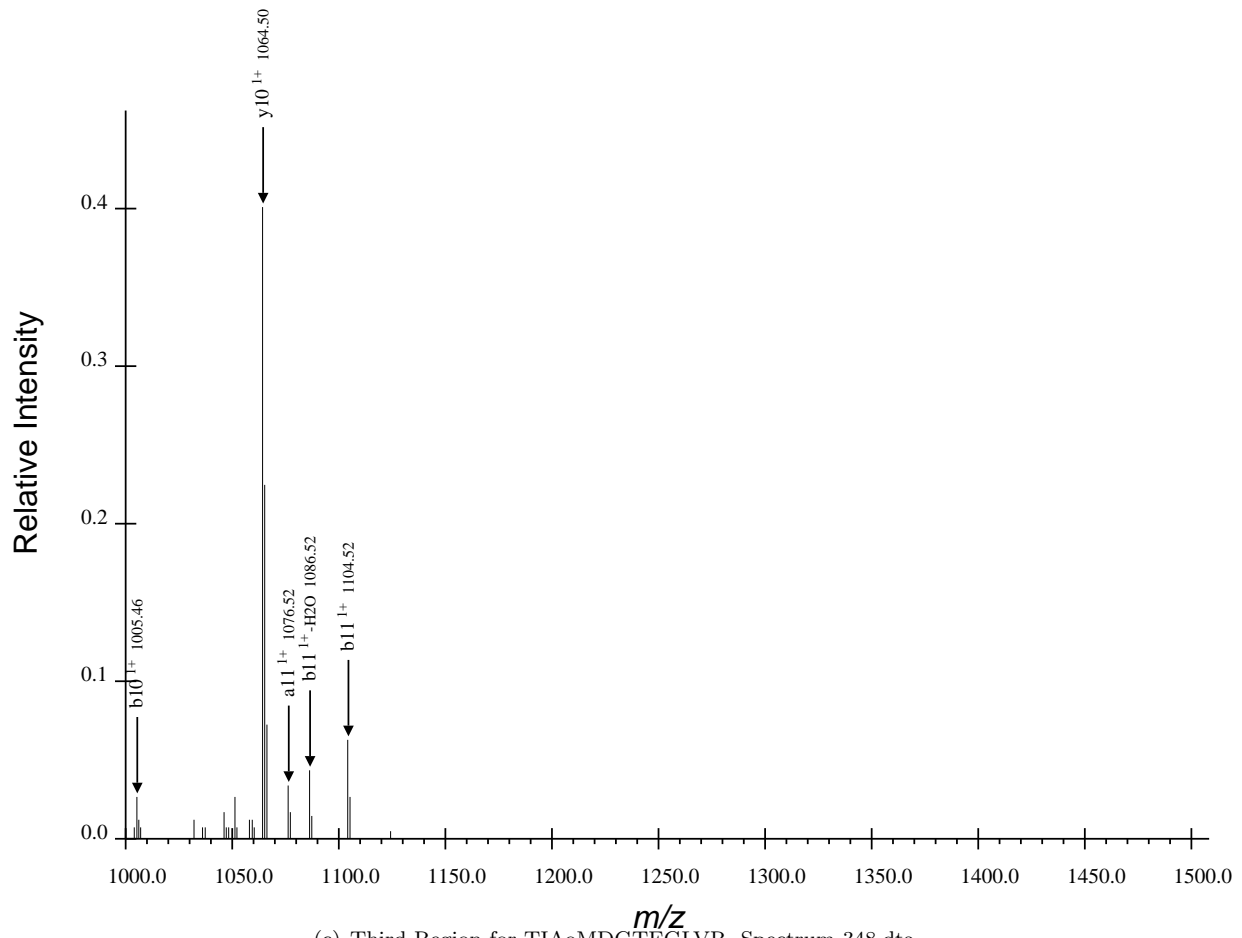

(c) Third Region for TIAoMDGTEGLVR, Spectrum 348.dta

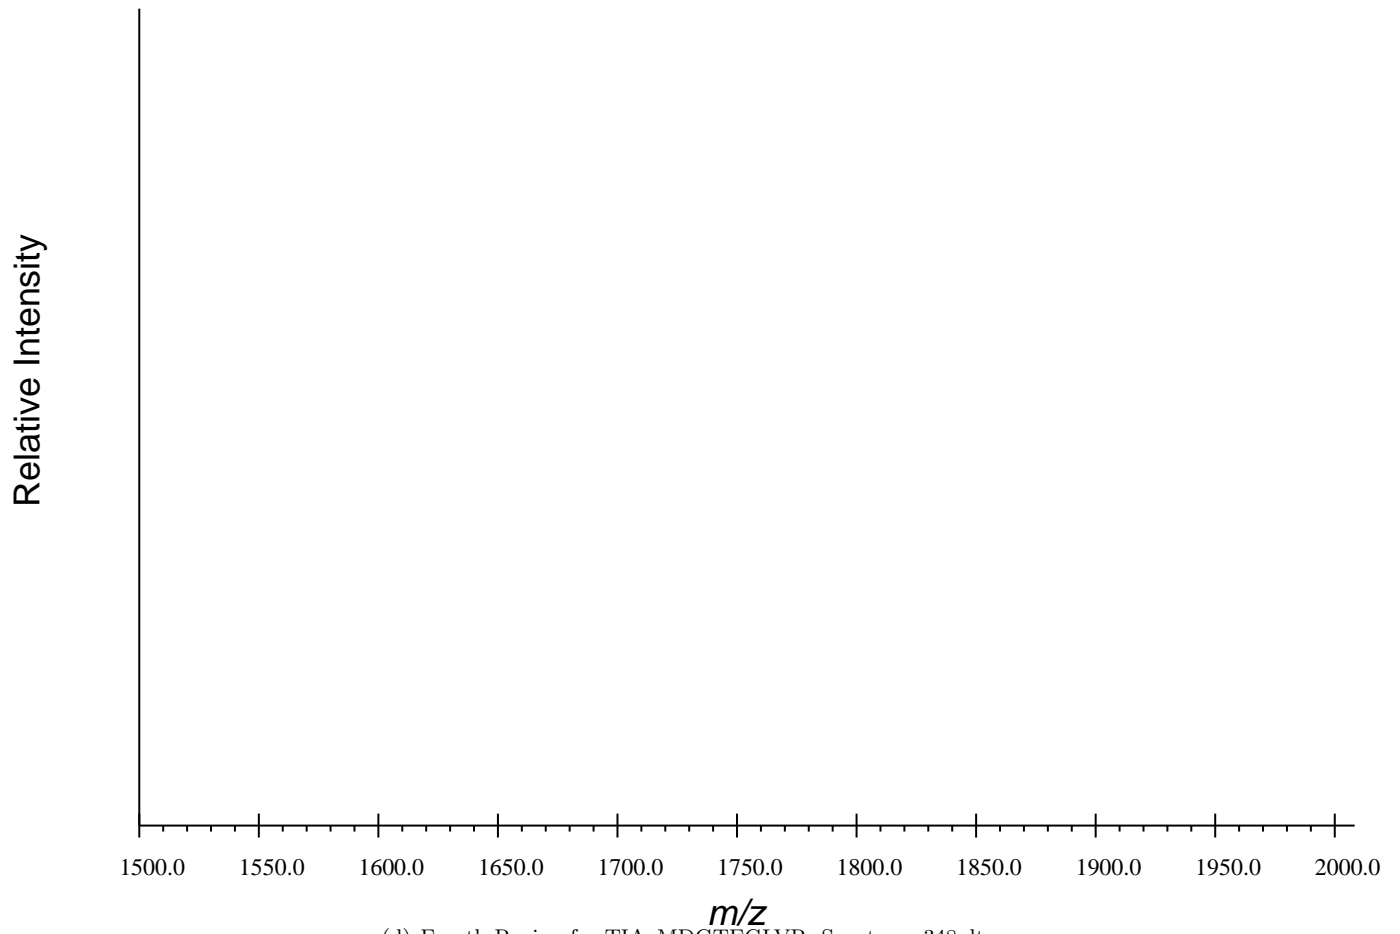

(d) Fourth Region for TIAoMDGTEGLVR, Spectrum 348.dta



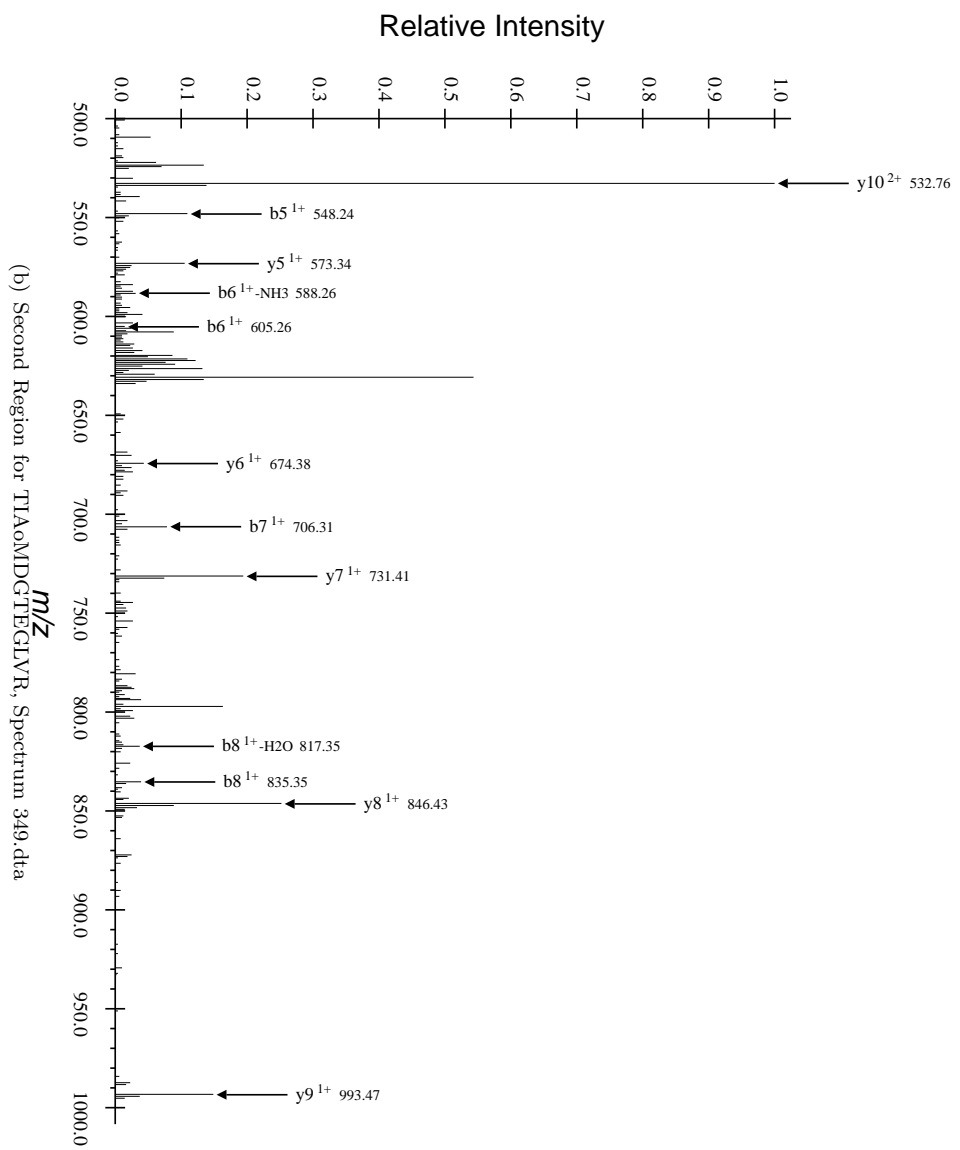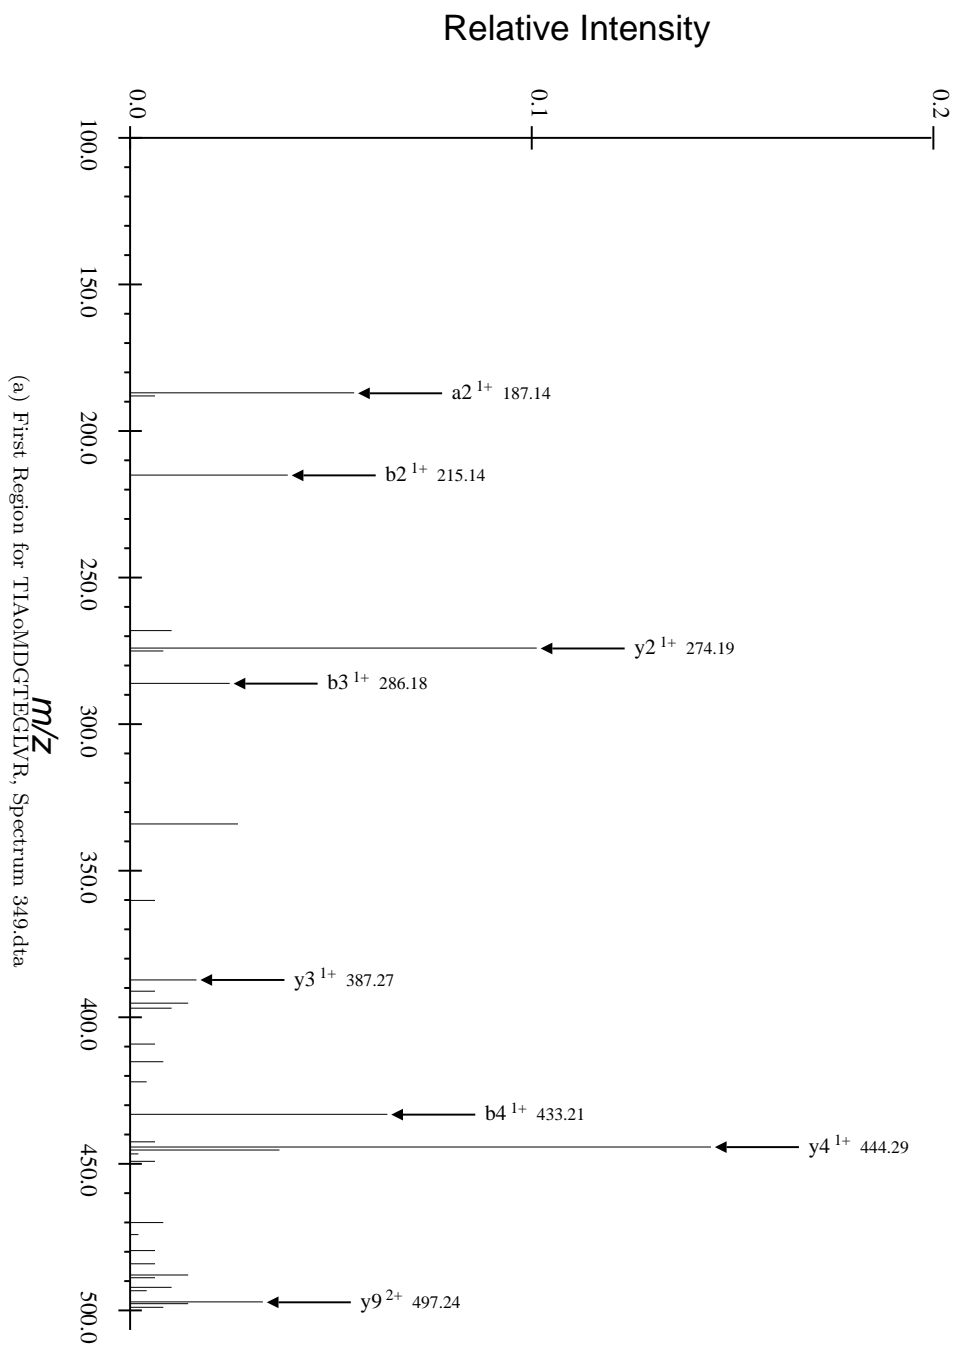

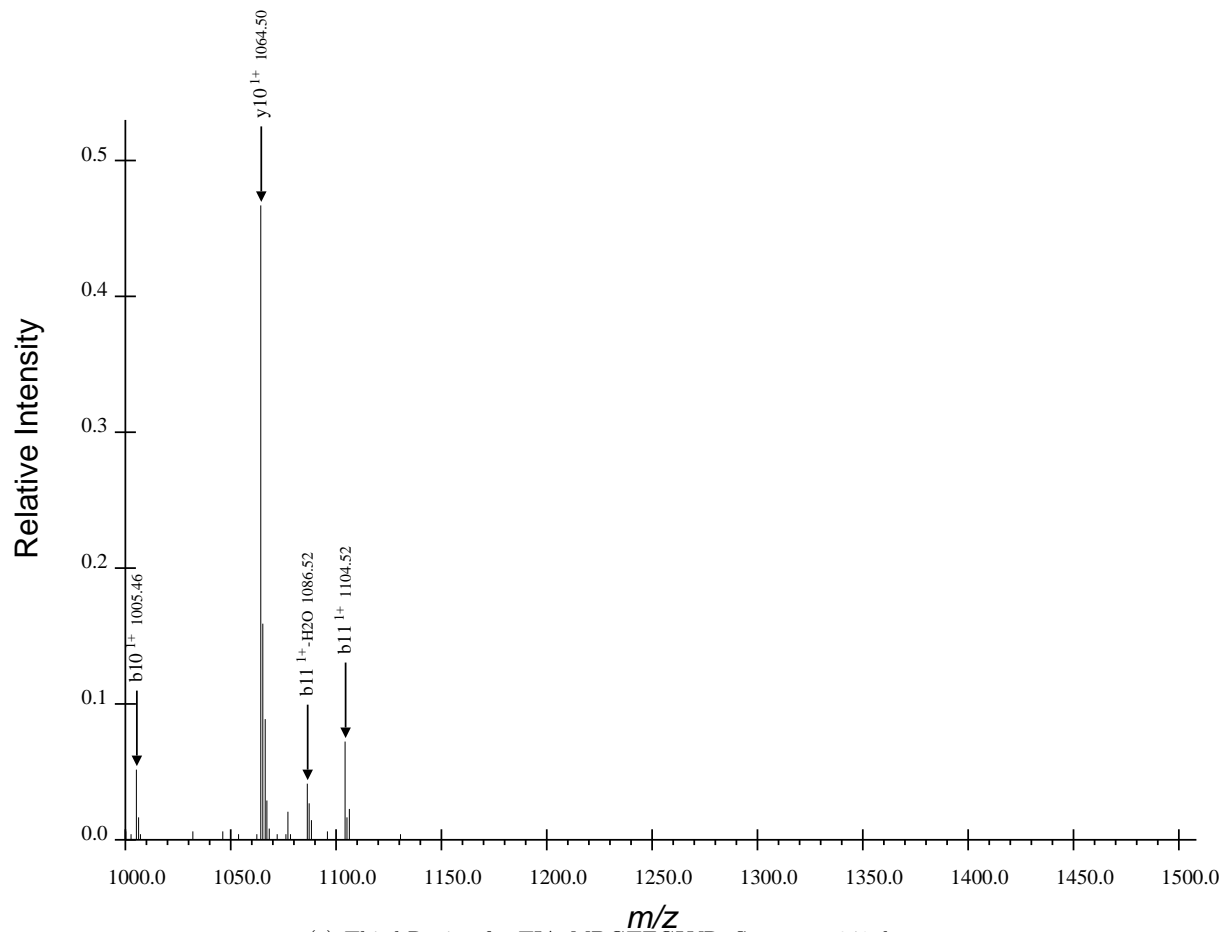

(c) Third Region for TIAoMDGTEGLVR, Spectrum 349.dta

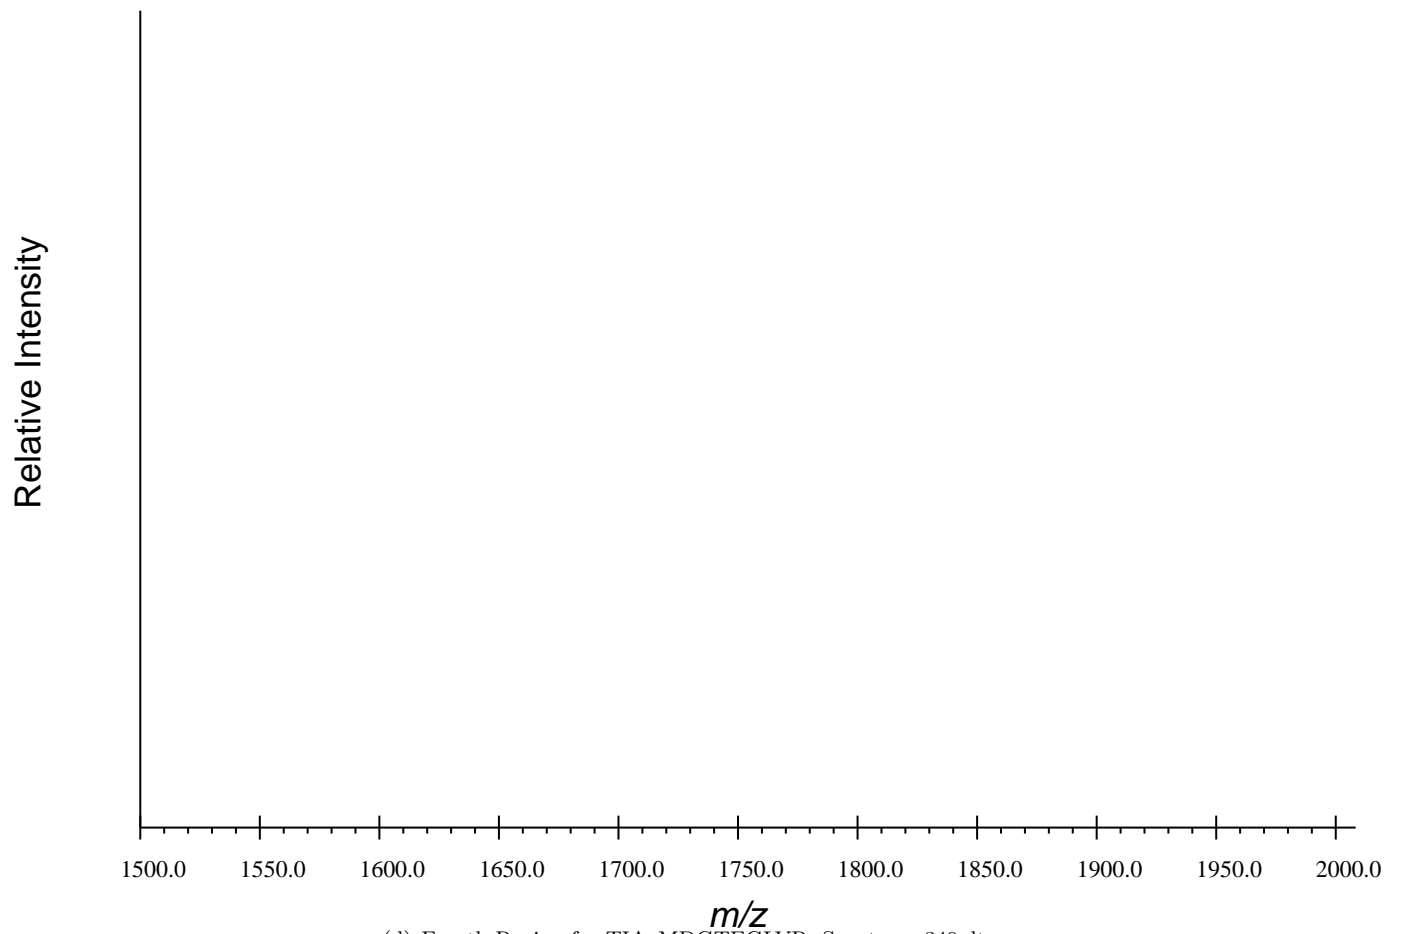

(d) Fourth Region for TIAoMDGTEGLVR, Spectrum 349.dta

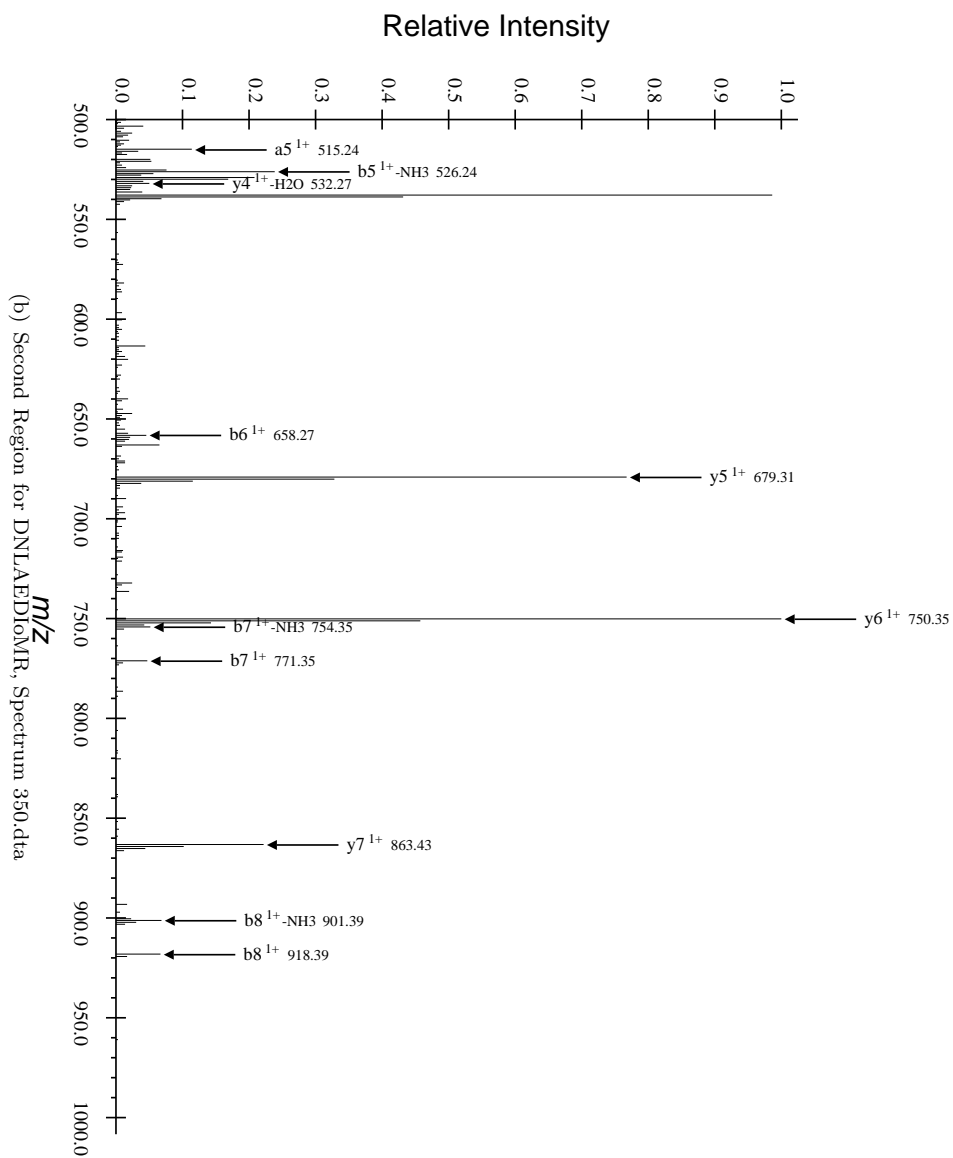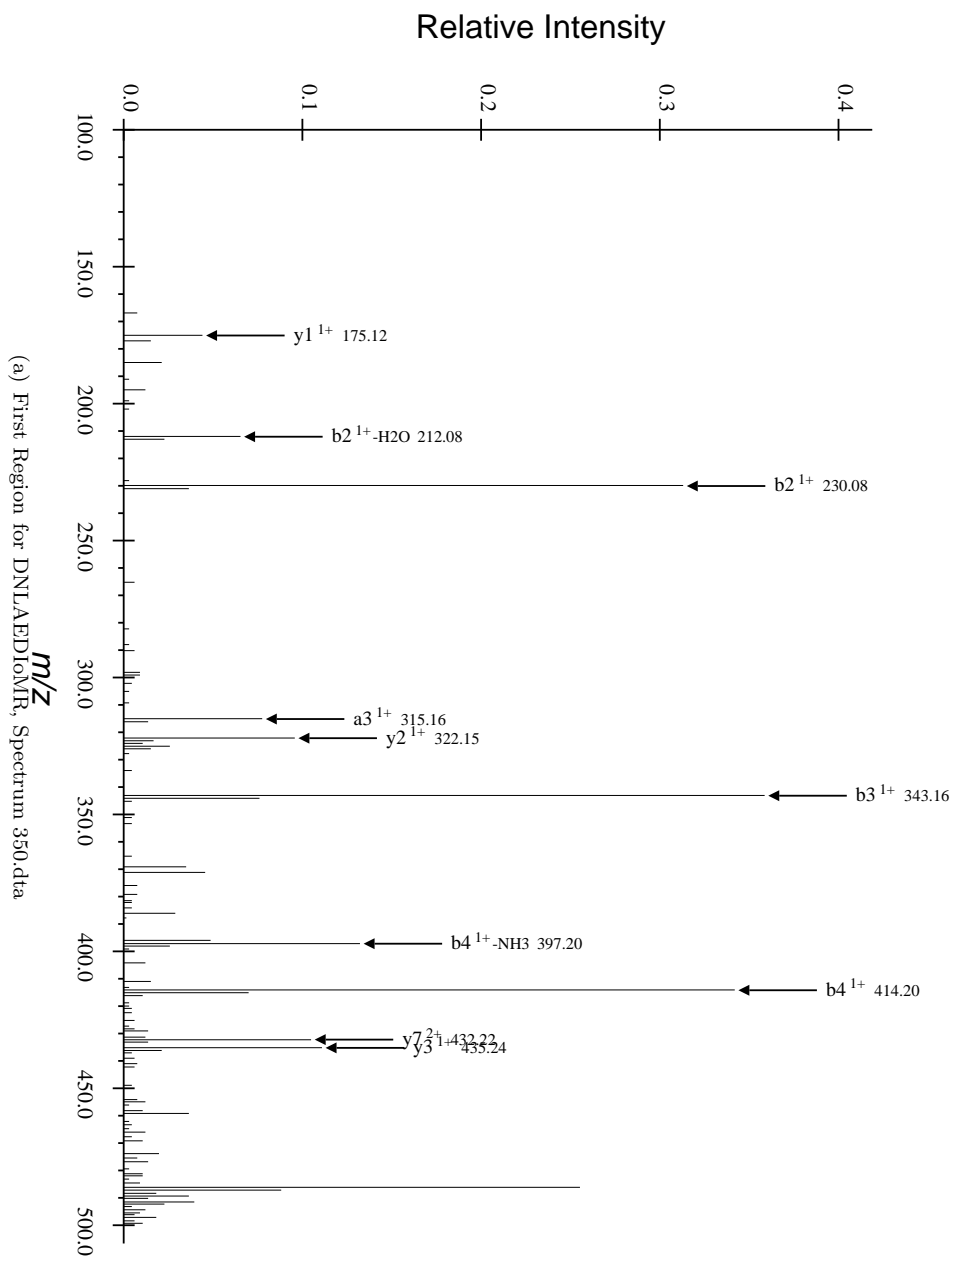

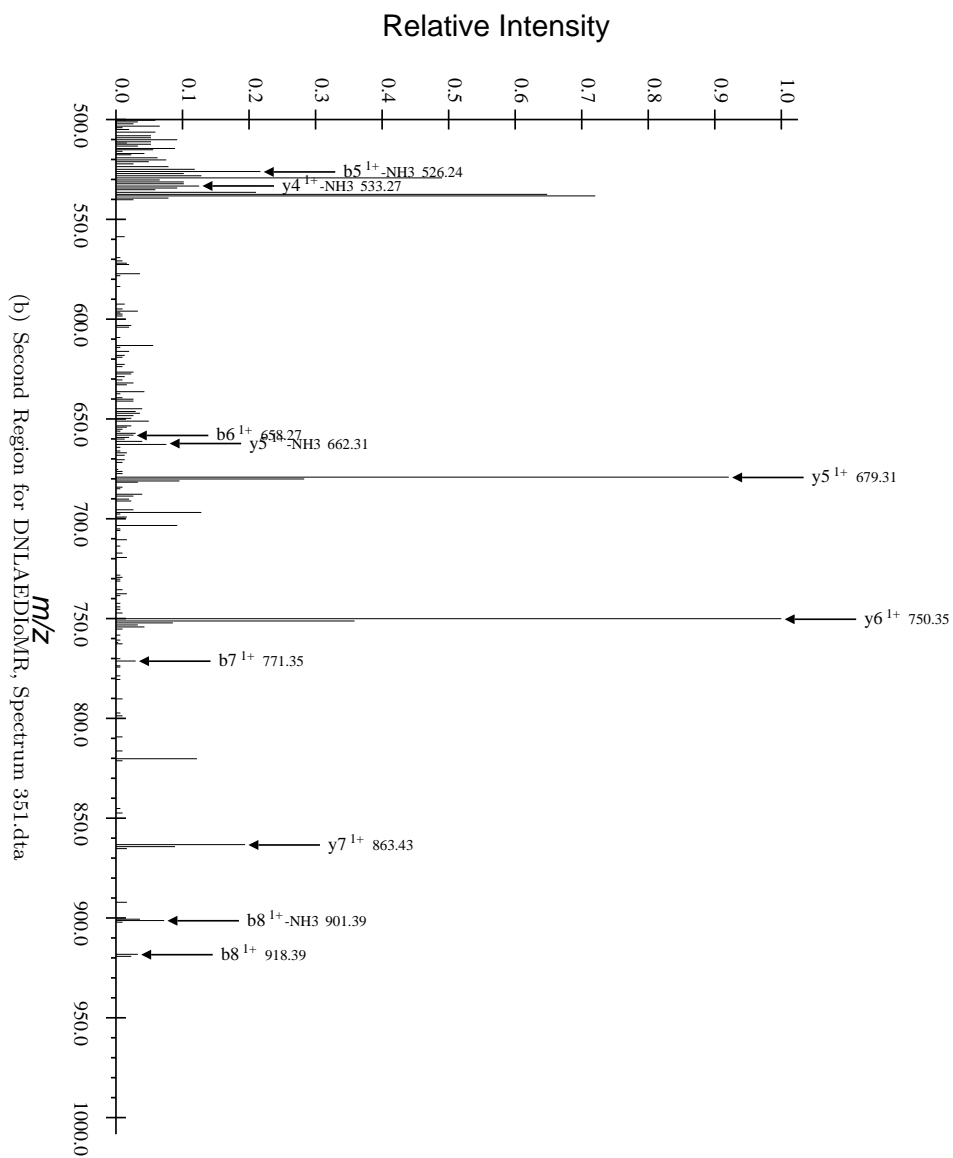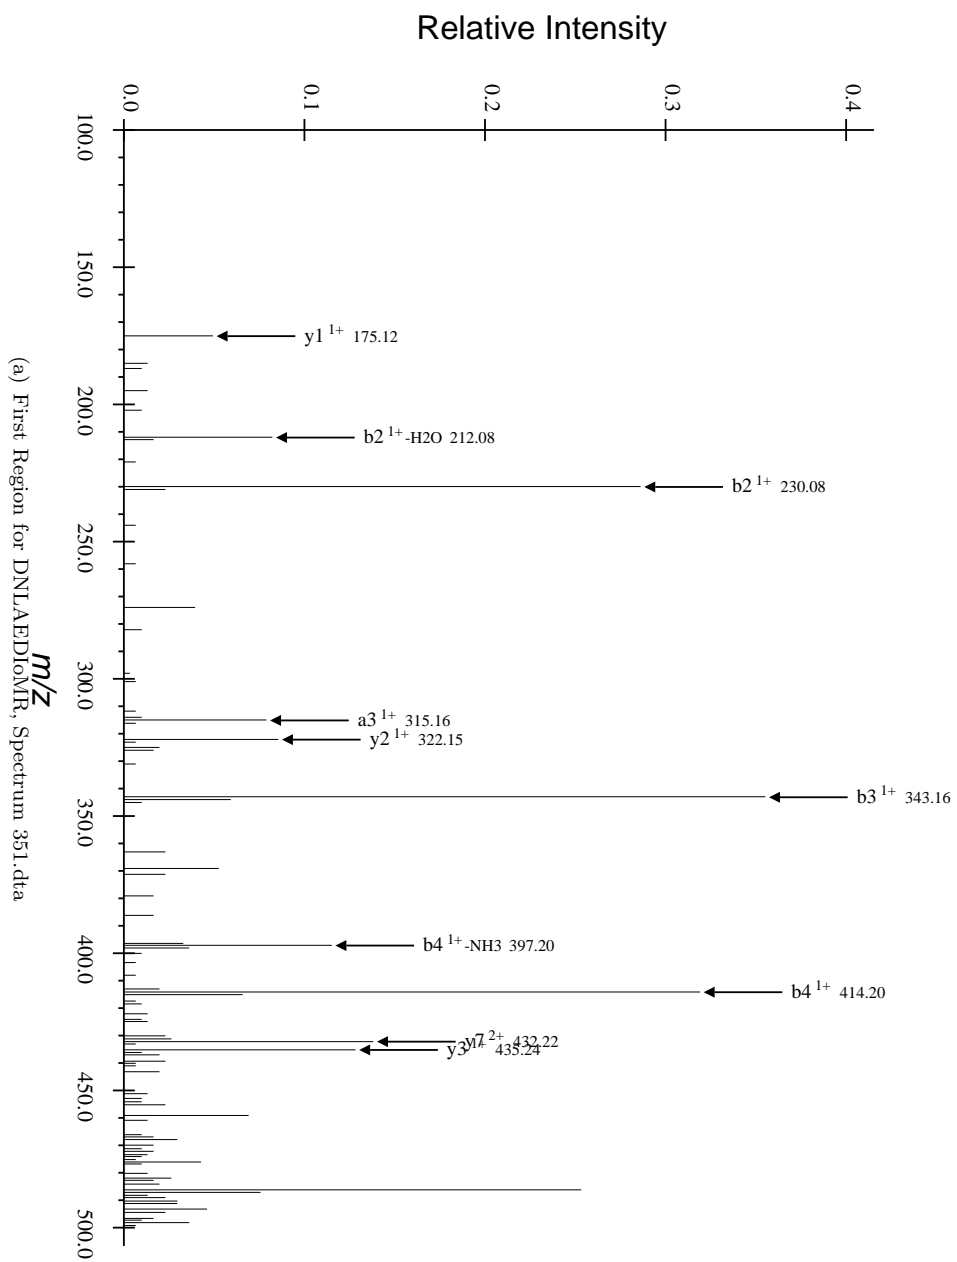

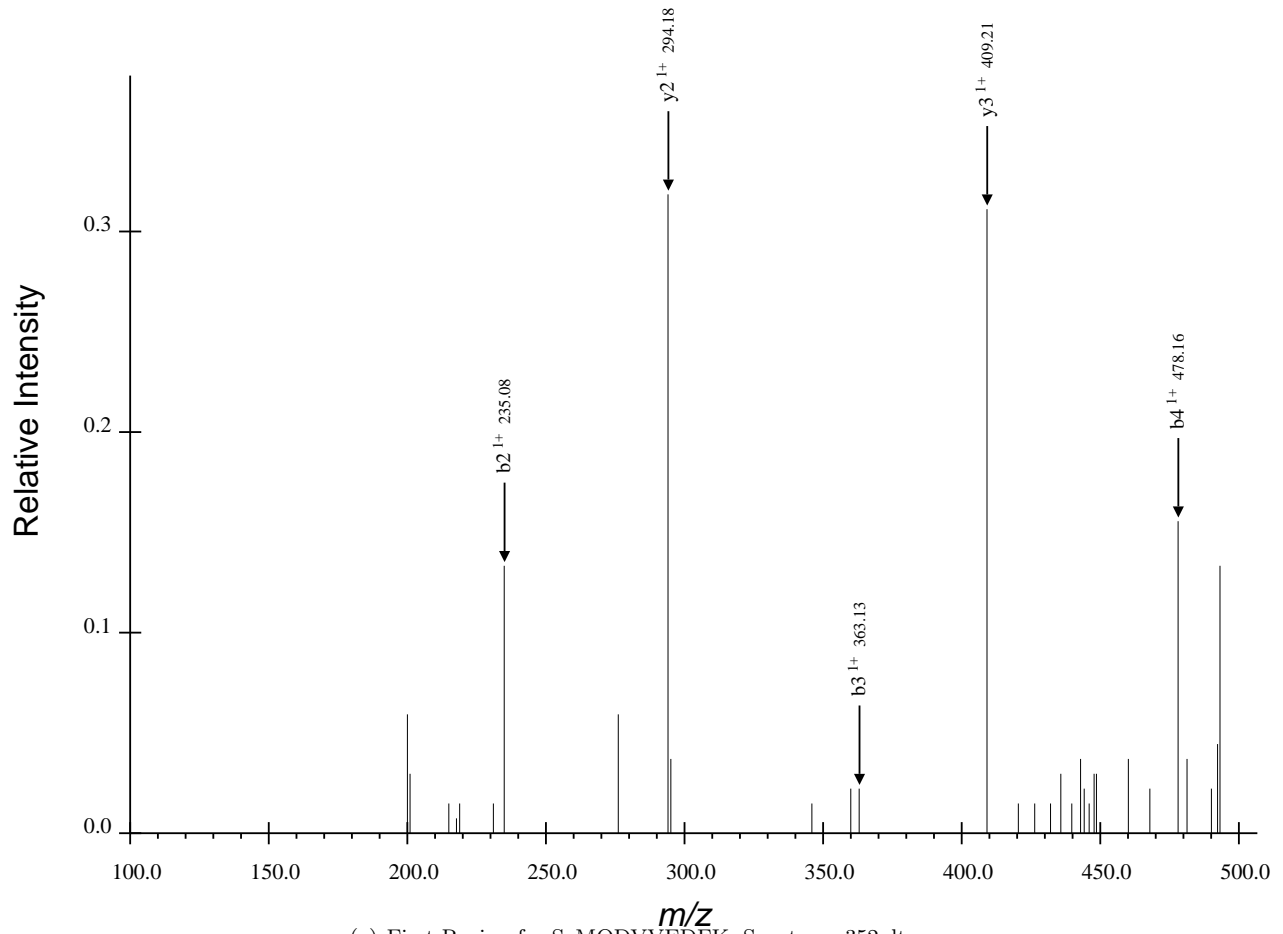

(a) First Region for SoMQDVVEDFK, Spectrum 352.dta

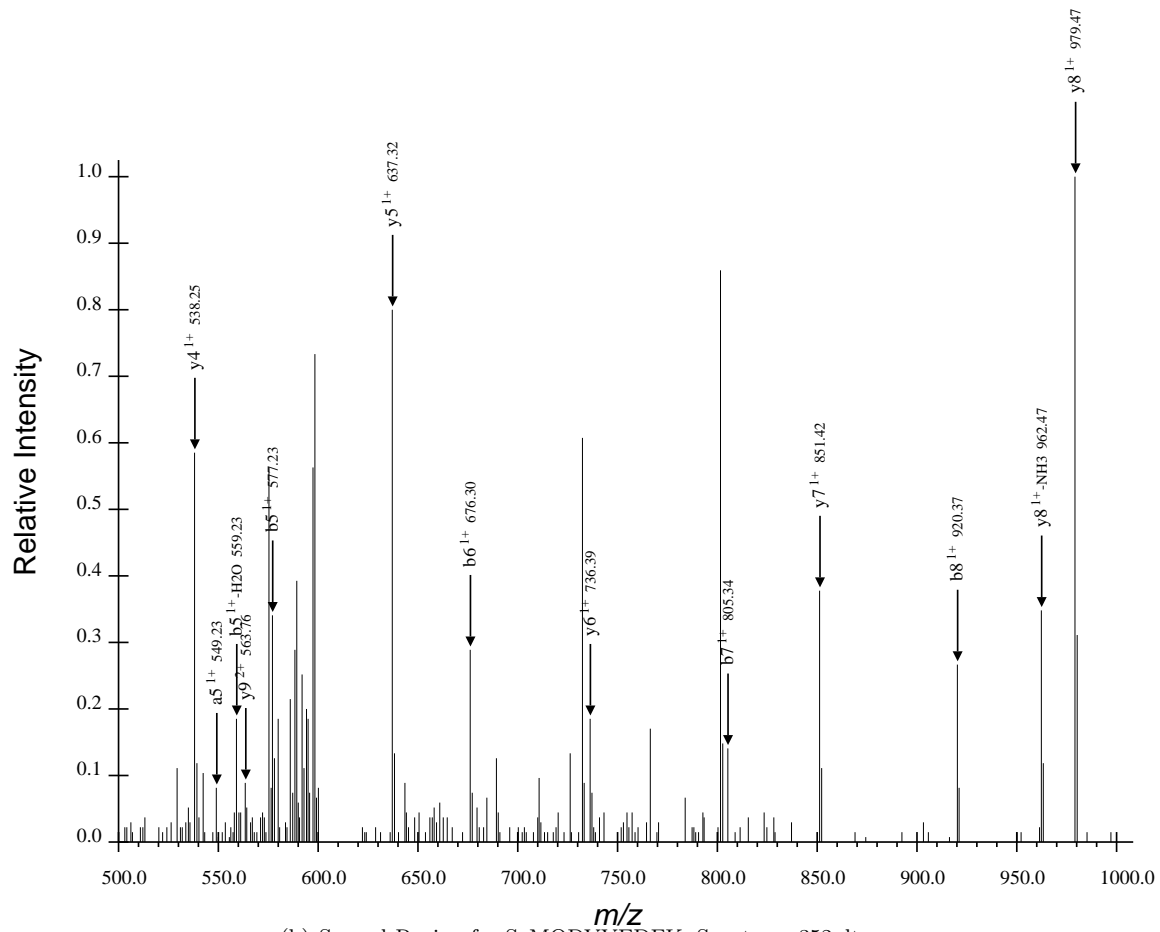

(b) Second Region for SoMQDVVEDFK, Spectrum 352.dta

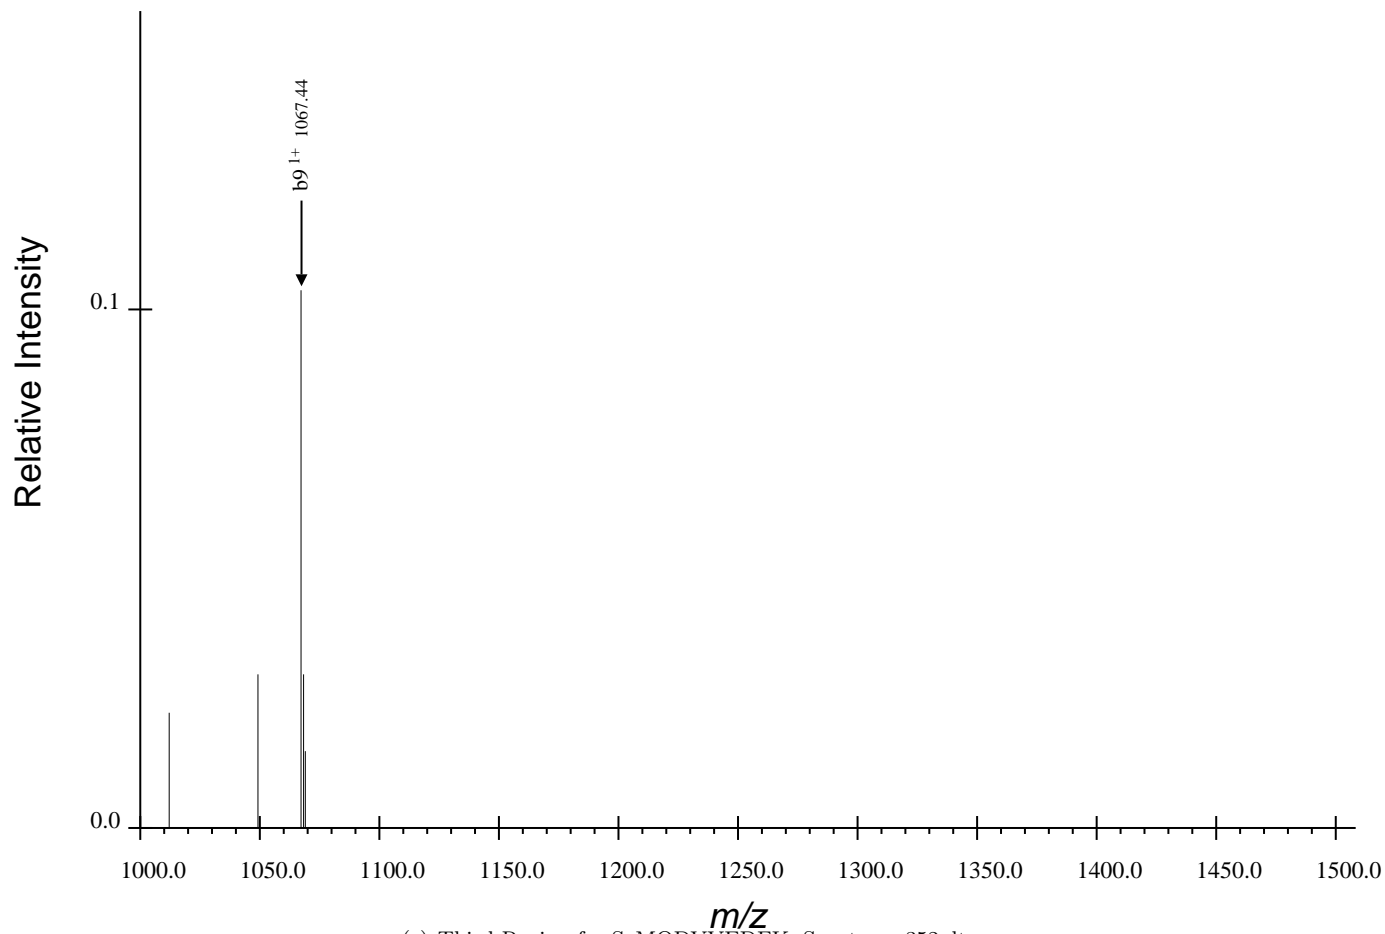

(c) Third Region for SoMQDVVEDFK, Spectrum 352.dta

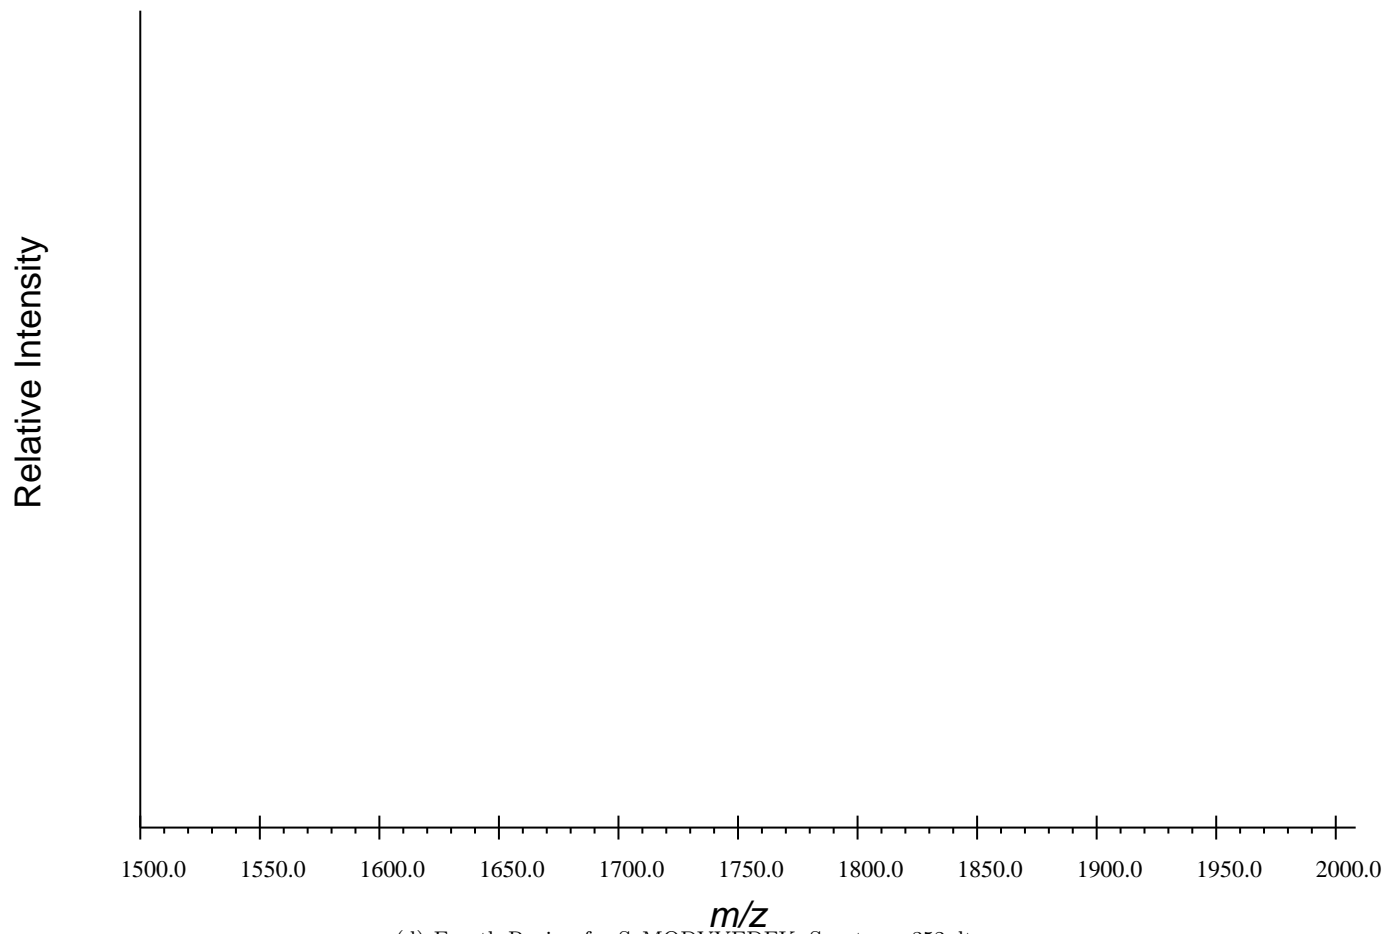

(d) Fourth Region for SoMQDVVEDFK, Spectrum 352.dta

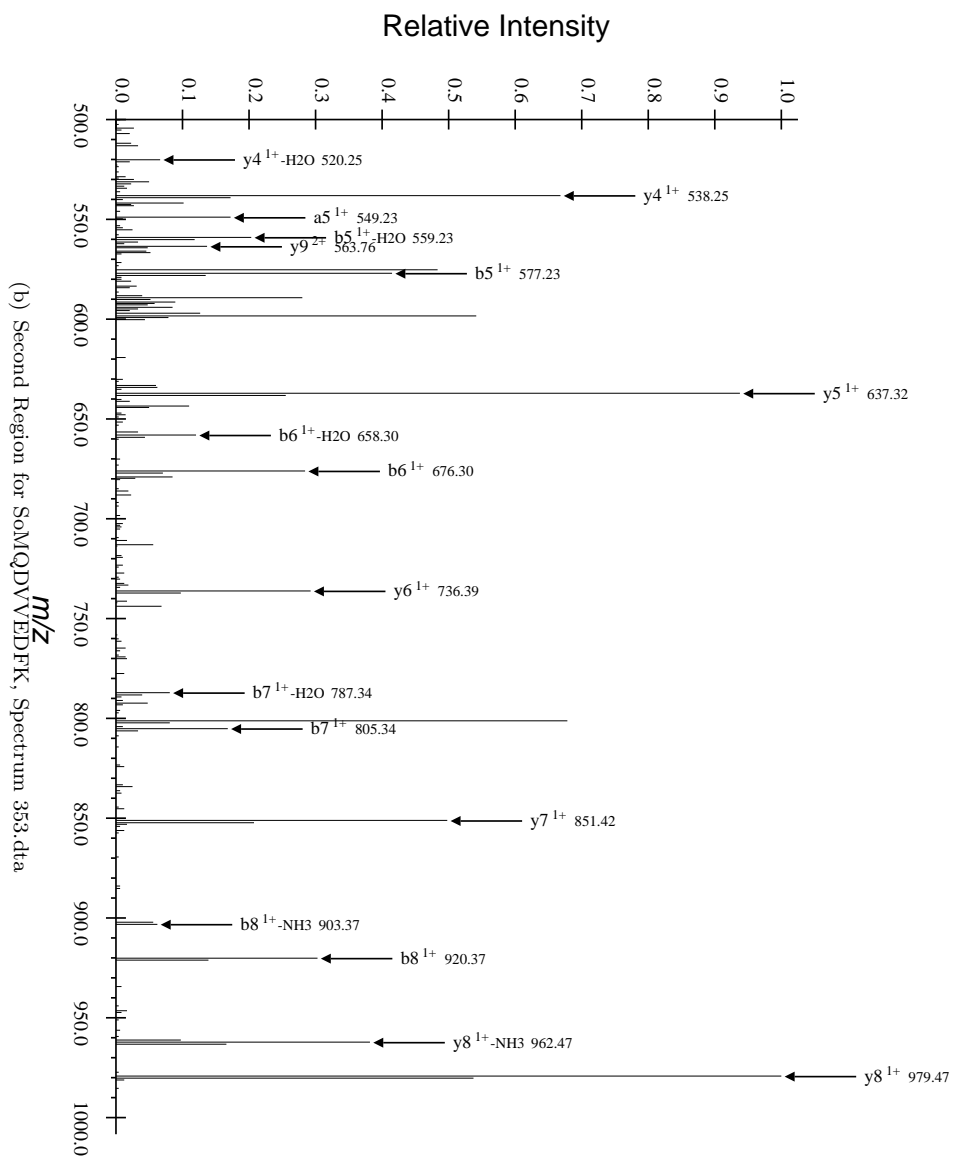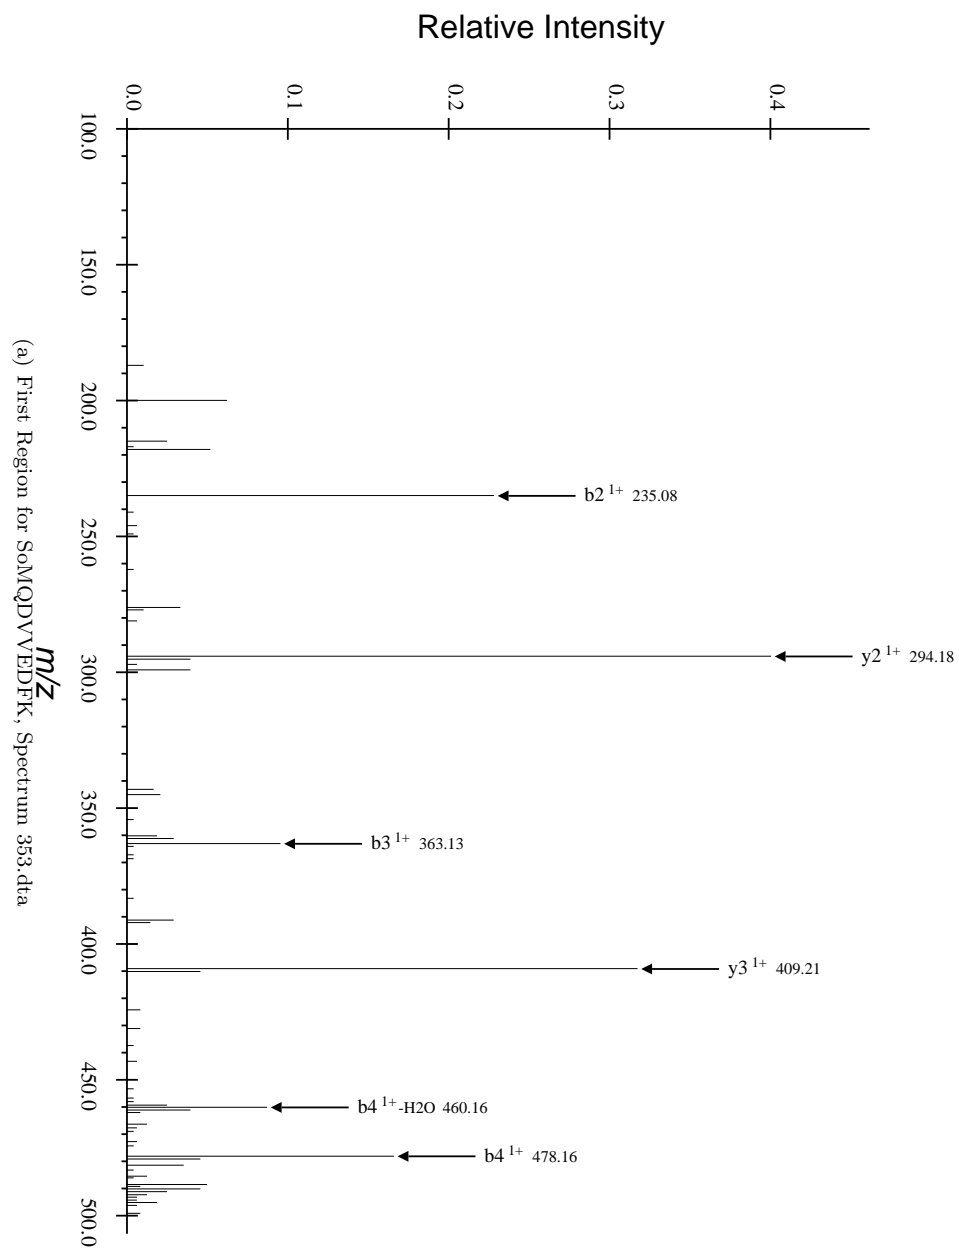





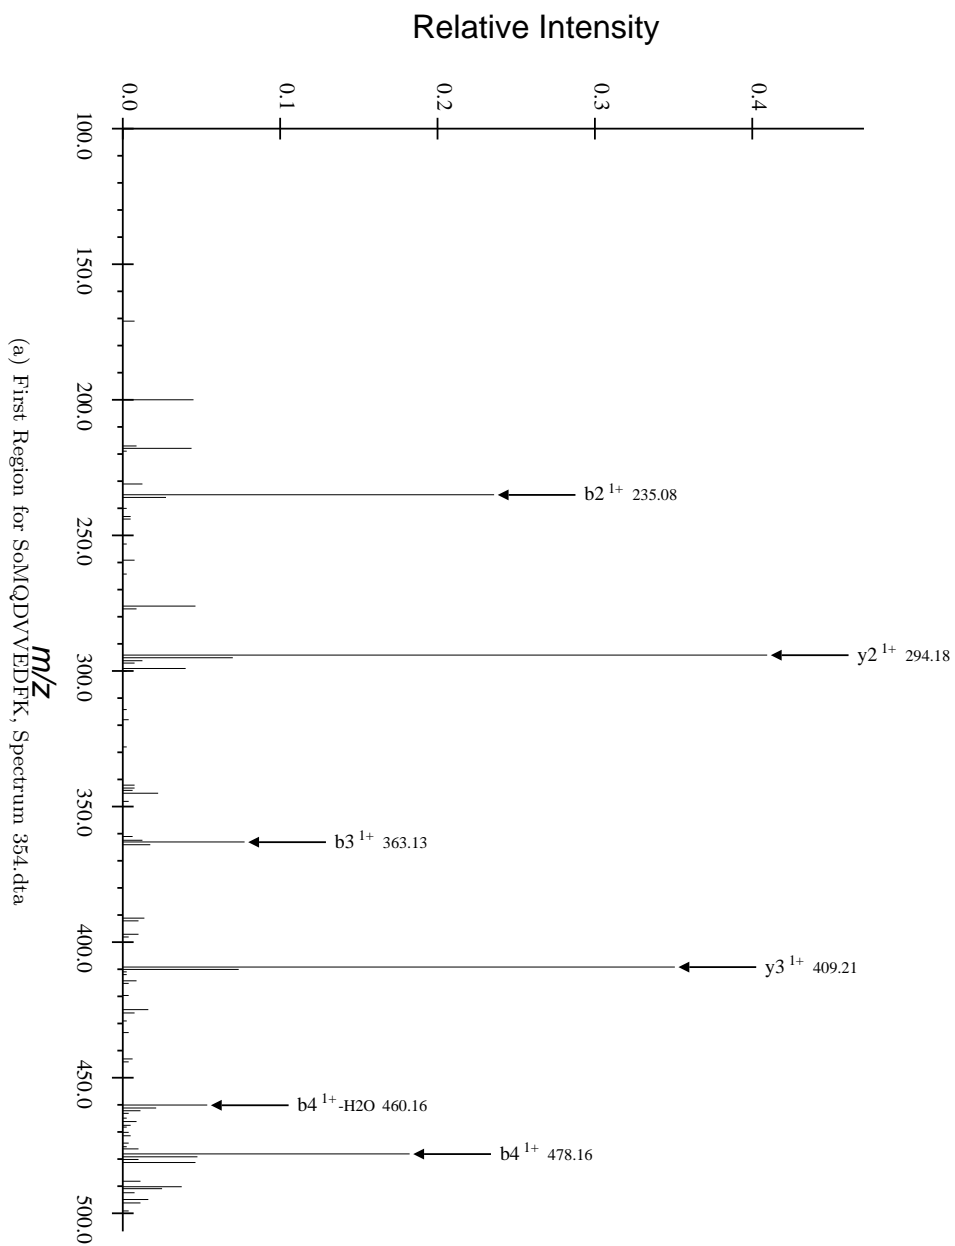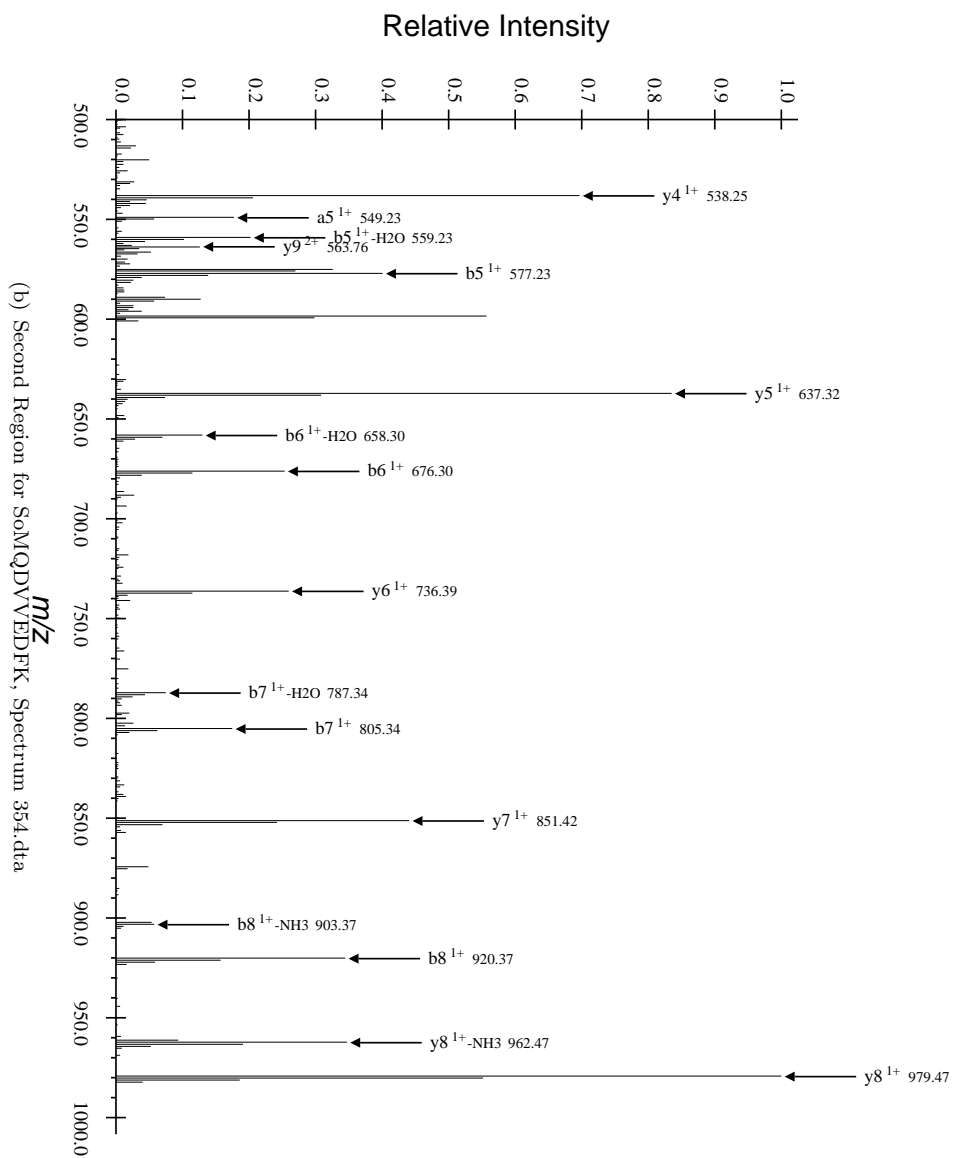

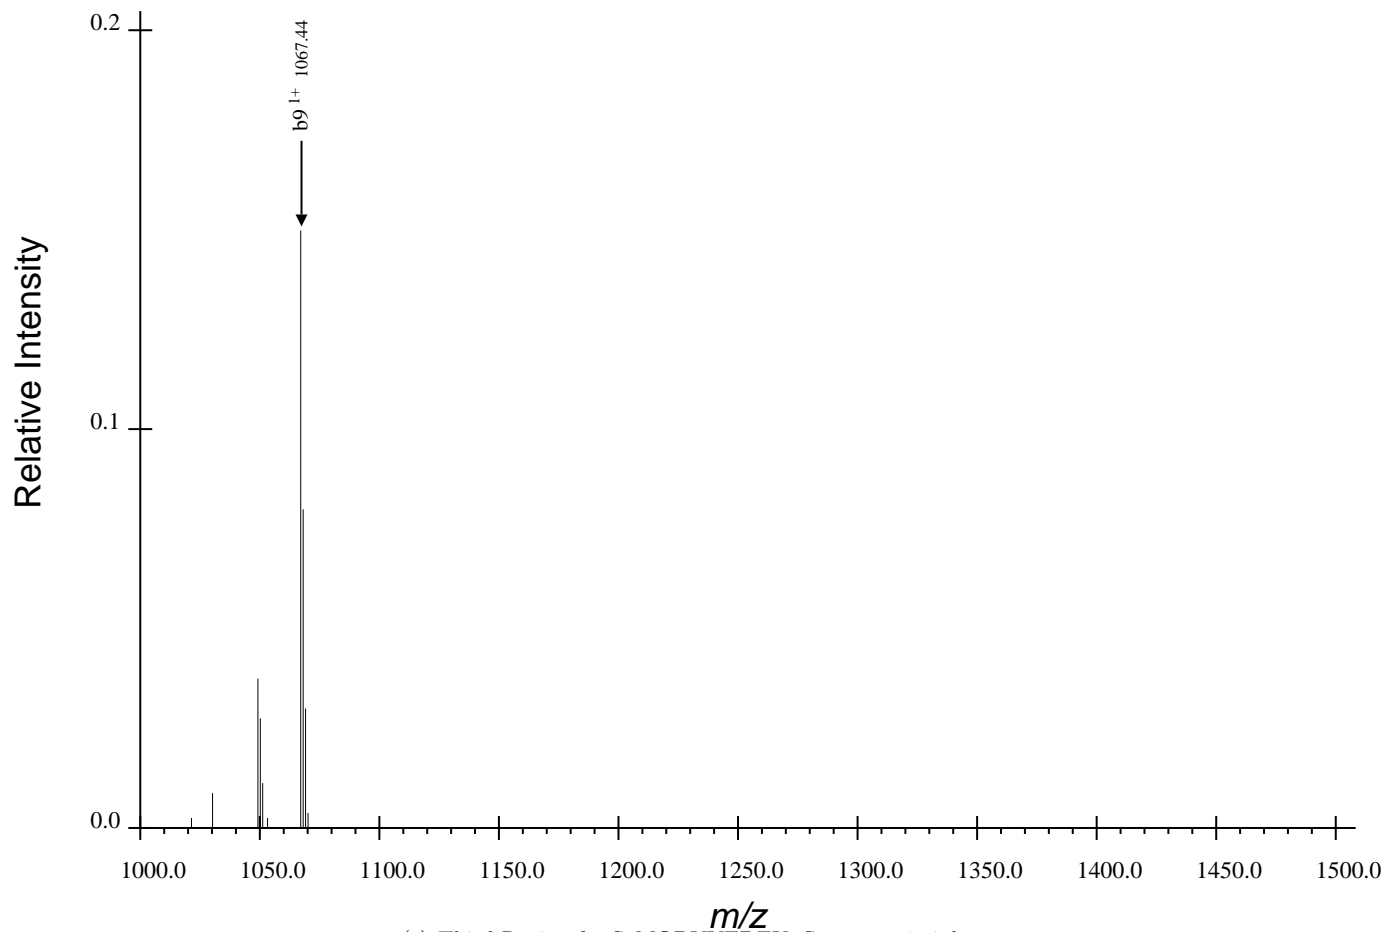

(c) Third Region for SoMQDVVEDFK, Spectrum 354.dta

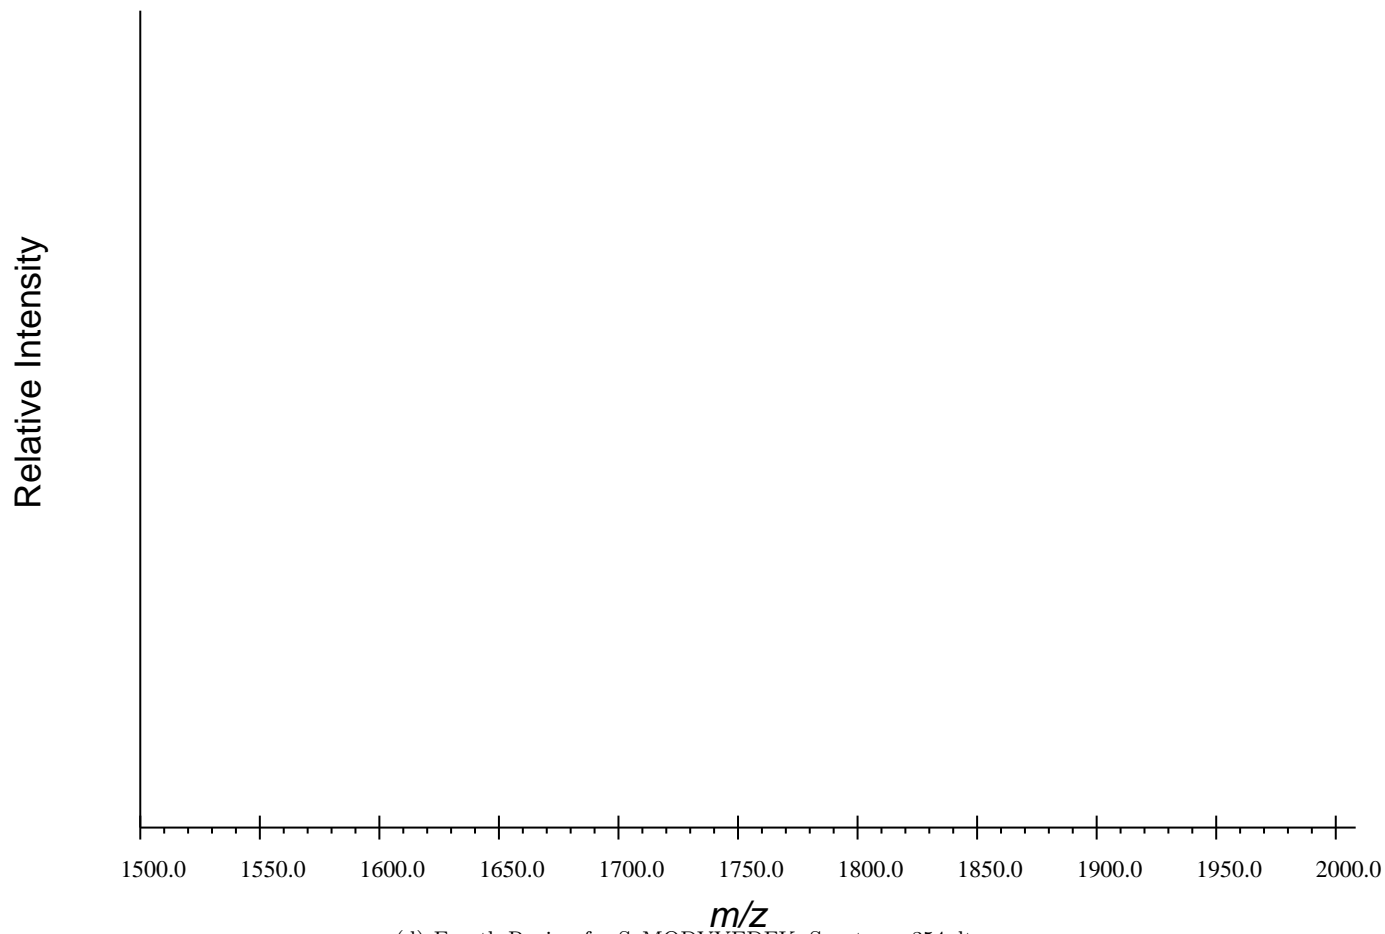

(d) Fourth Region for SoMQDVVEDFK, Spectrum 354.dta

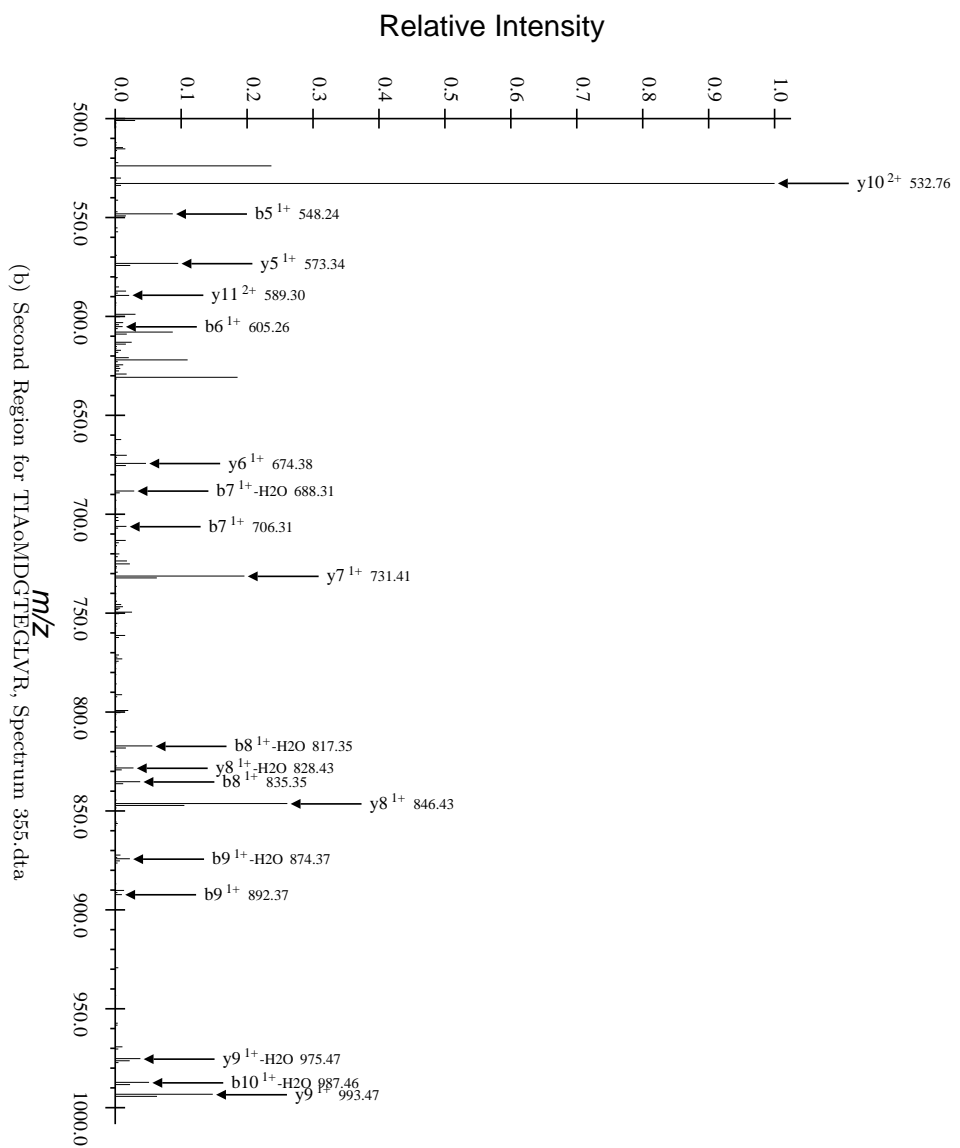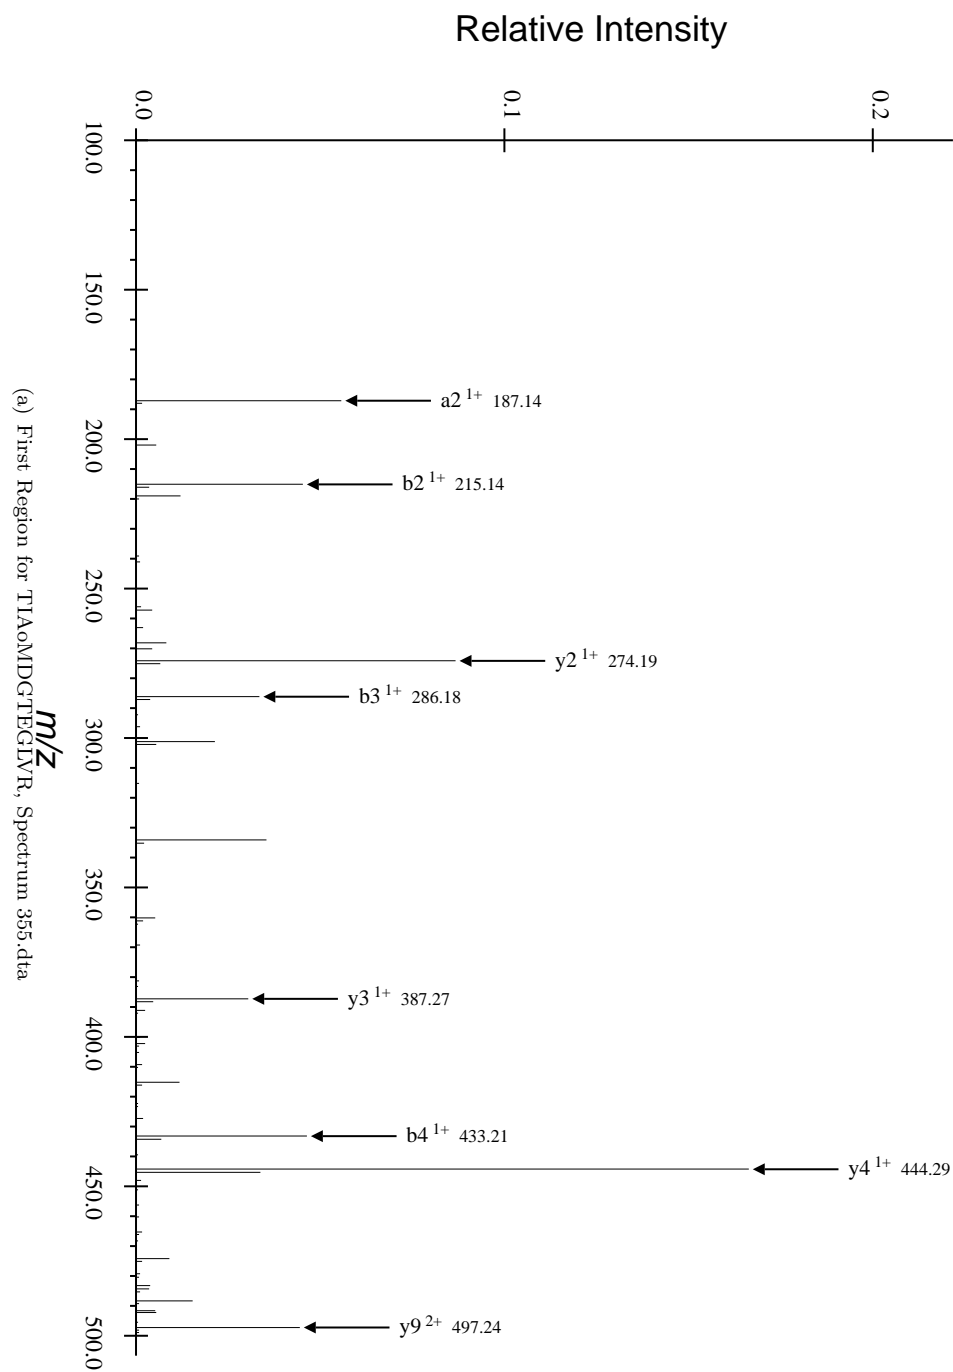

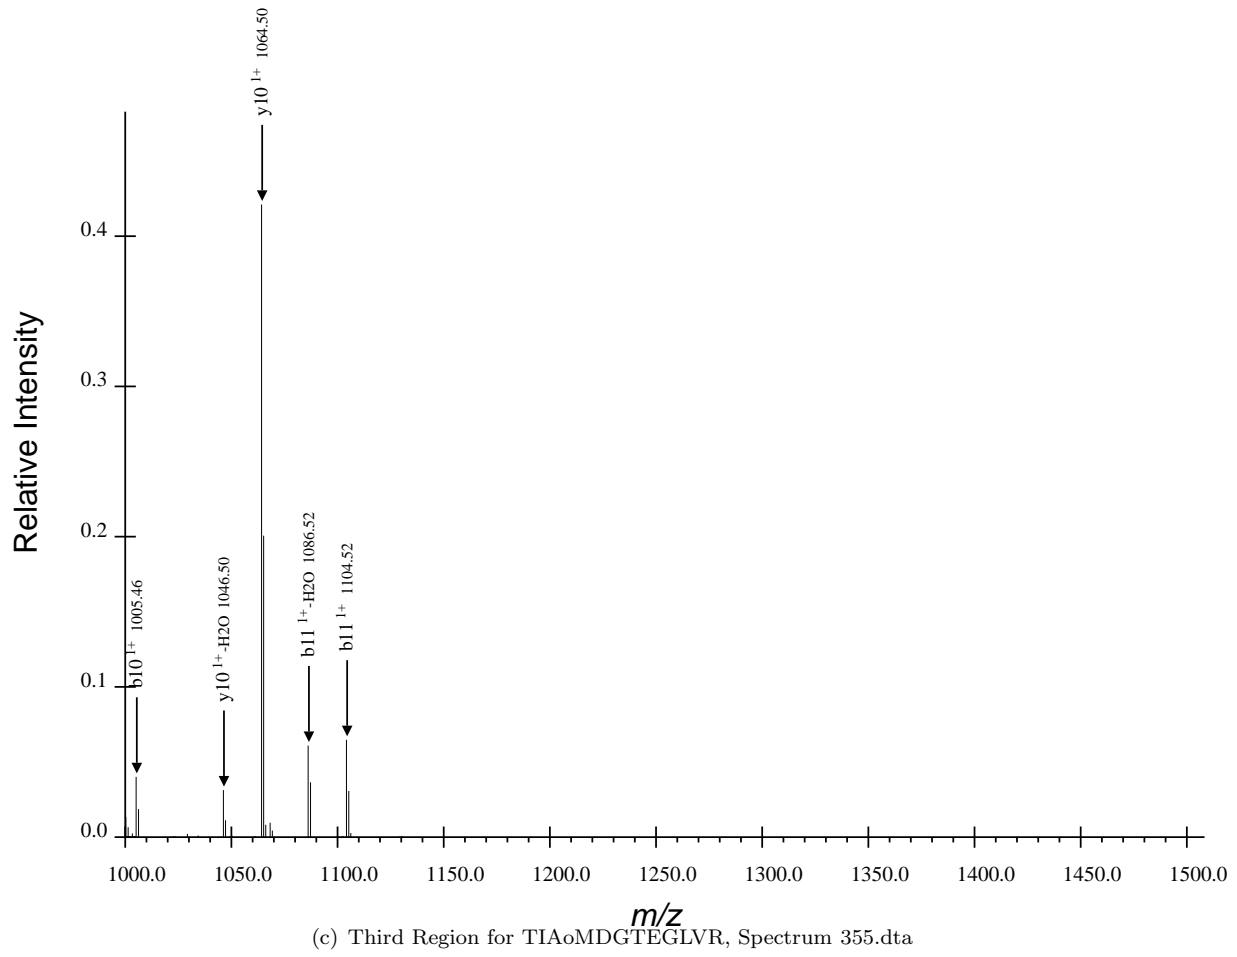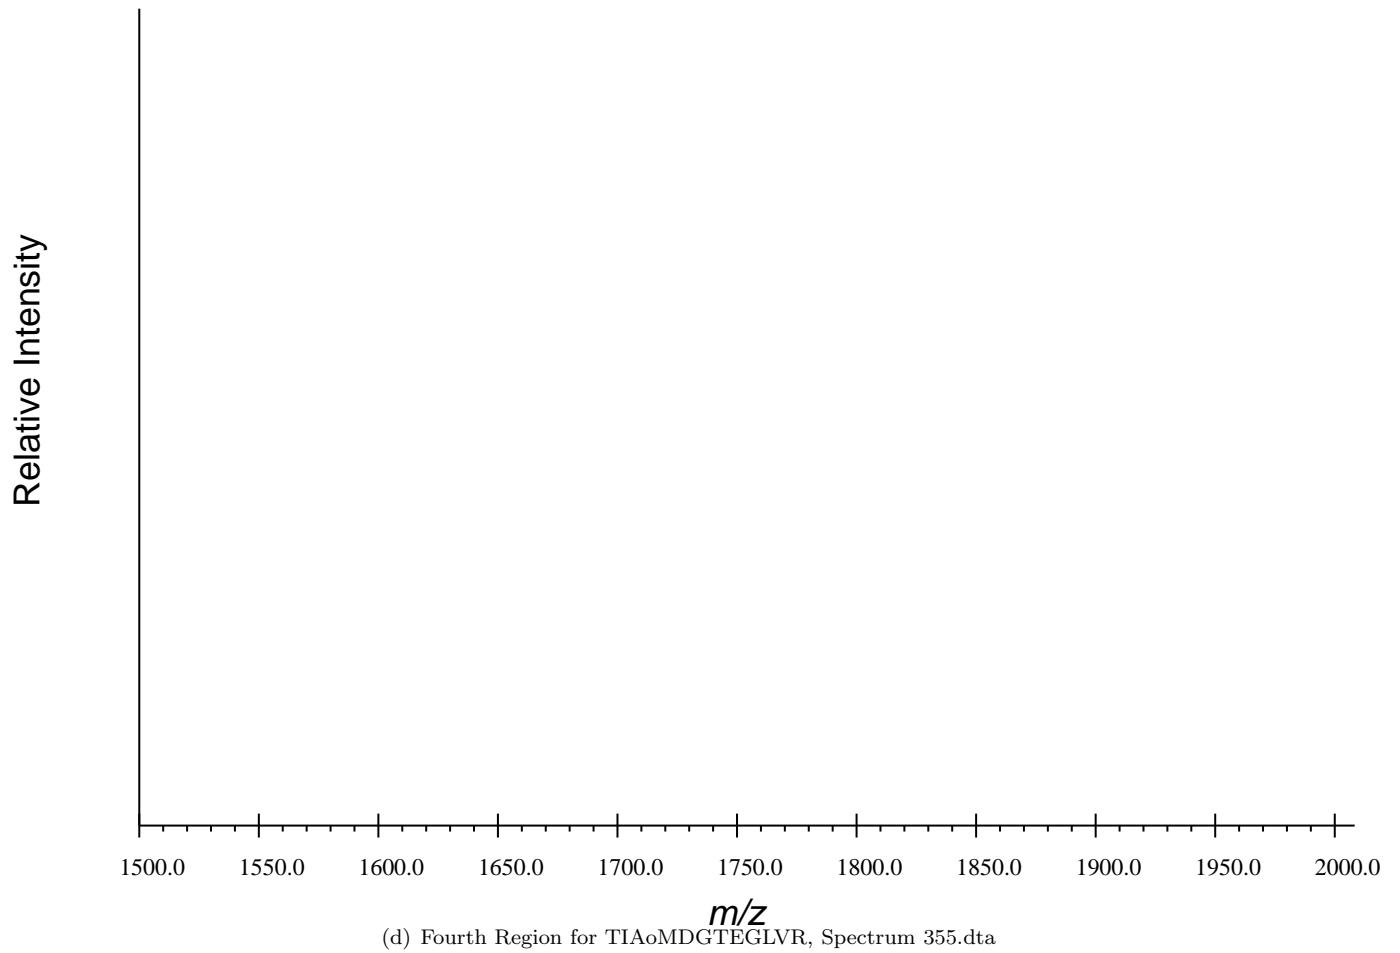

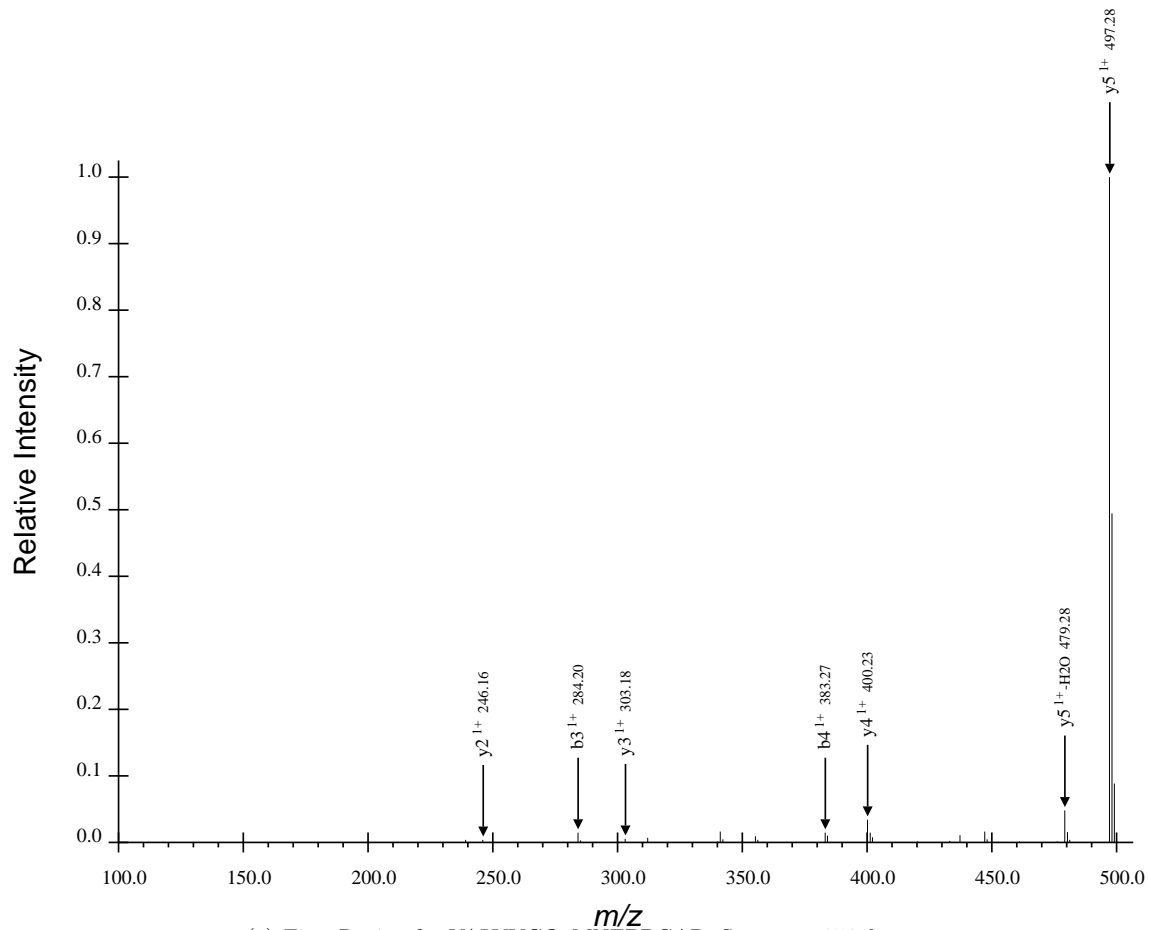

(a) First Region for VALVYGQoMNEPPGAR, Spectrum 356.dta

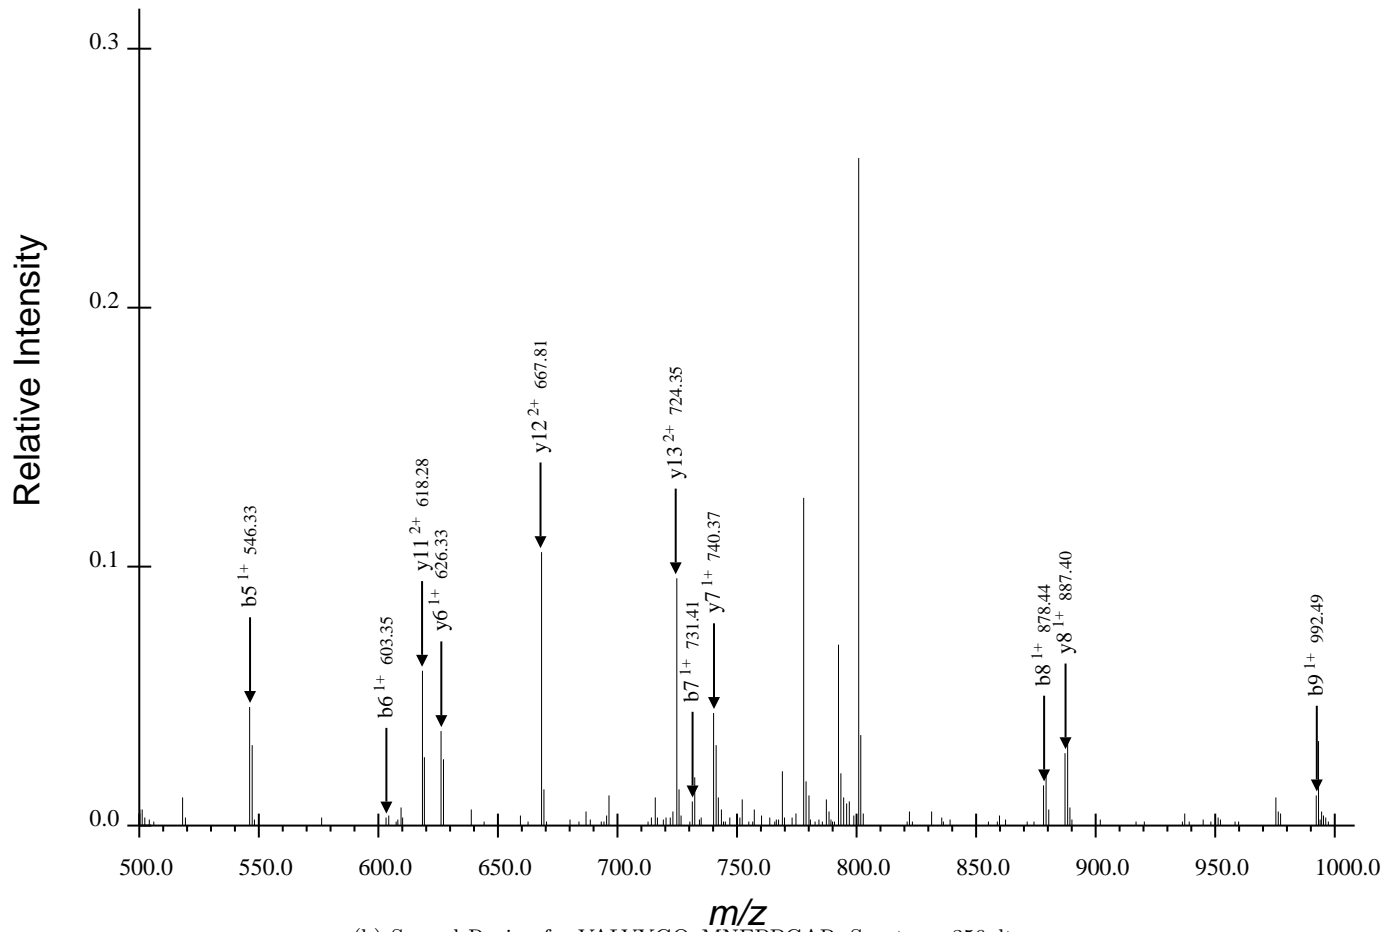

(b) Second Region for VALVYGQoMNEPPGAR, Spectrum 356.dta

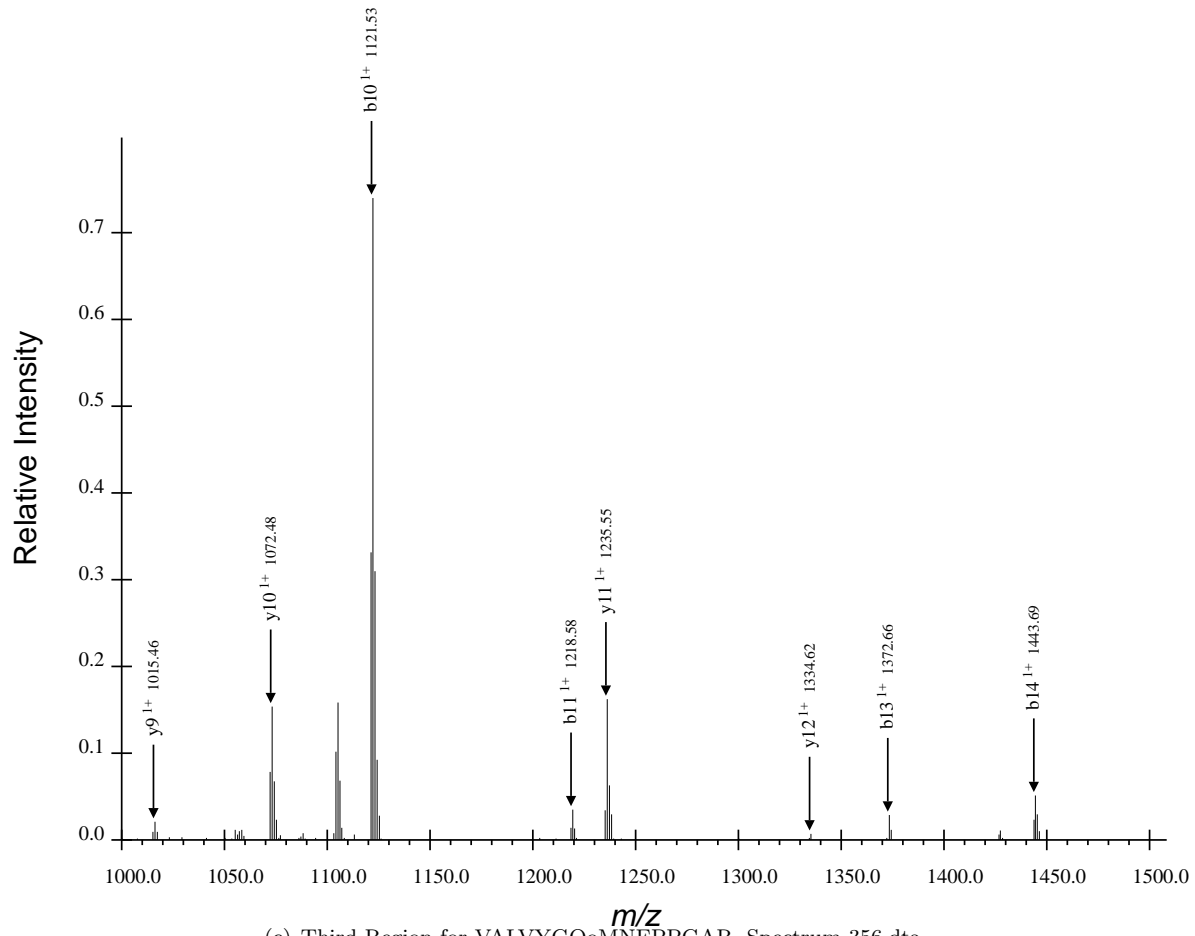

(c) Third Region for VALVYGQoMNEPPGAR, Spectrum 356.dta

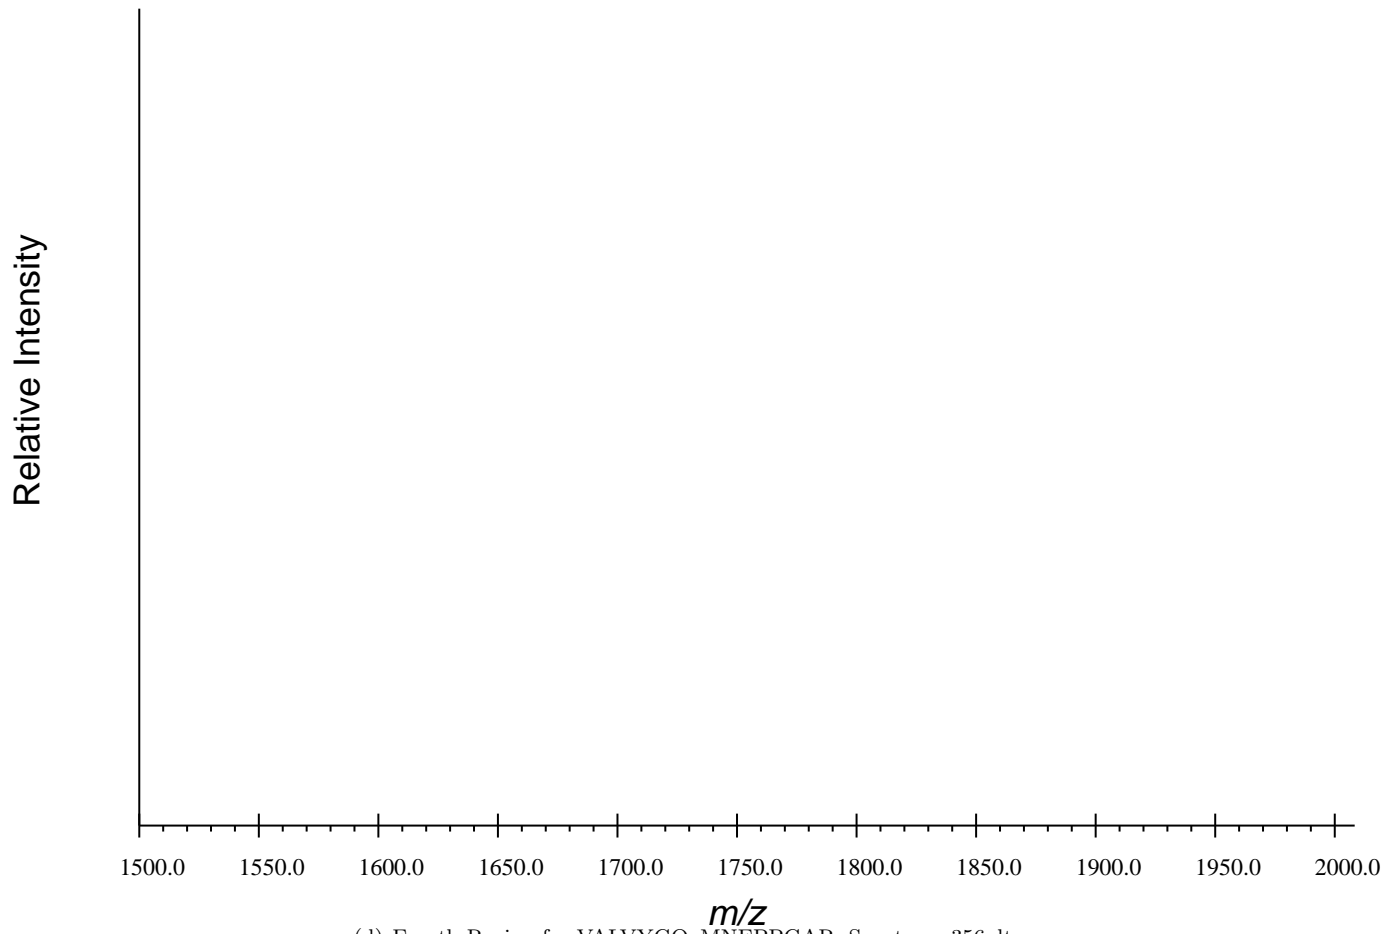

(d) Fourth Region for VALVYGQoMNEPPGAR, Spectrum 356.dta

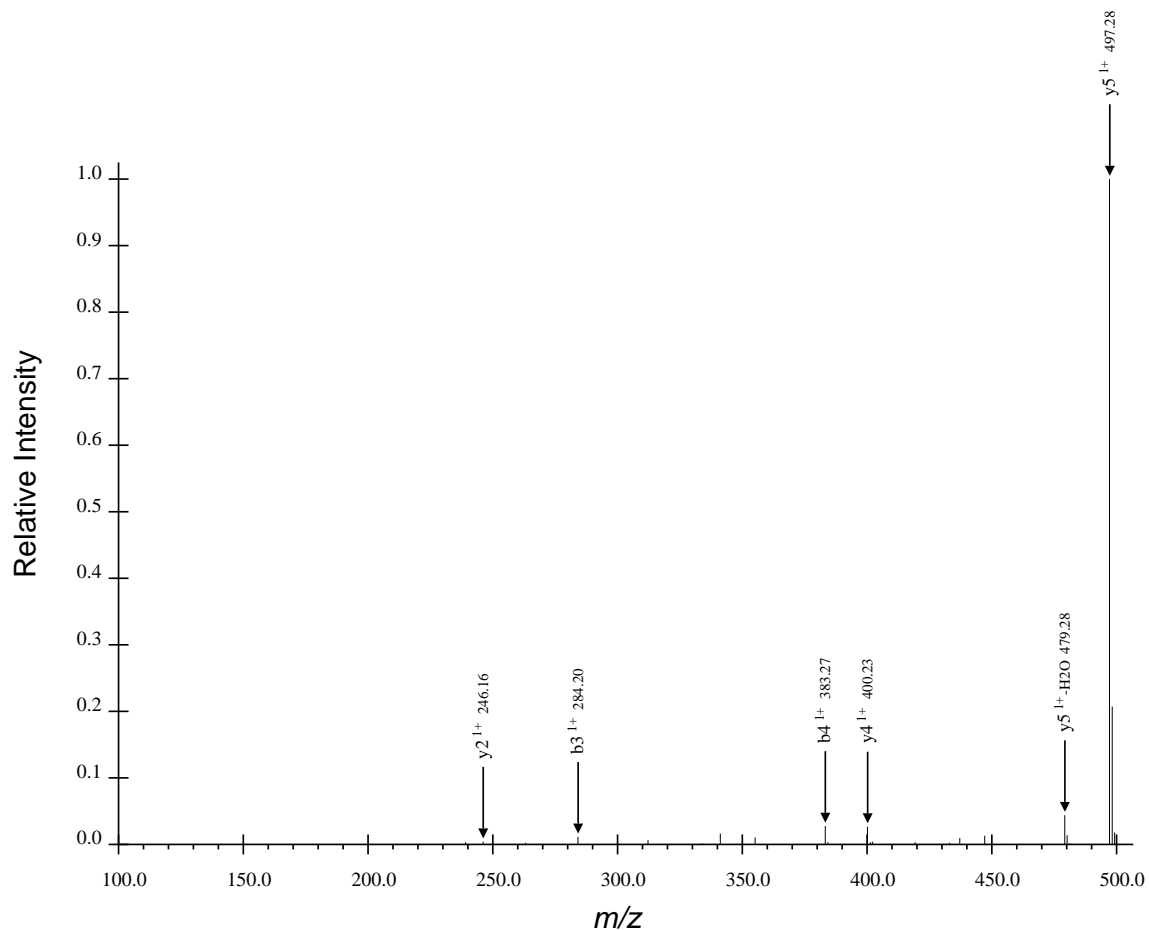

(a) First Region for VALVYGQoMNEPPGAR, Spectrum 357.dta

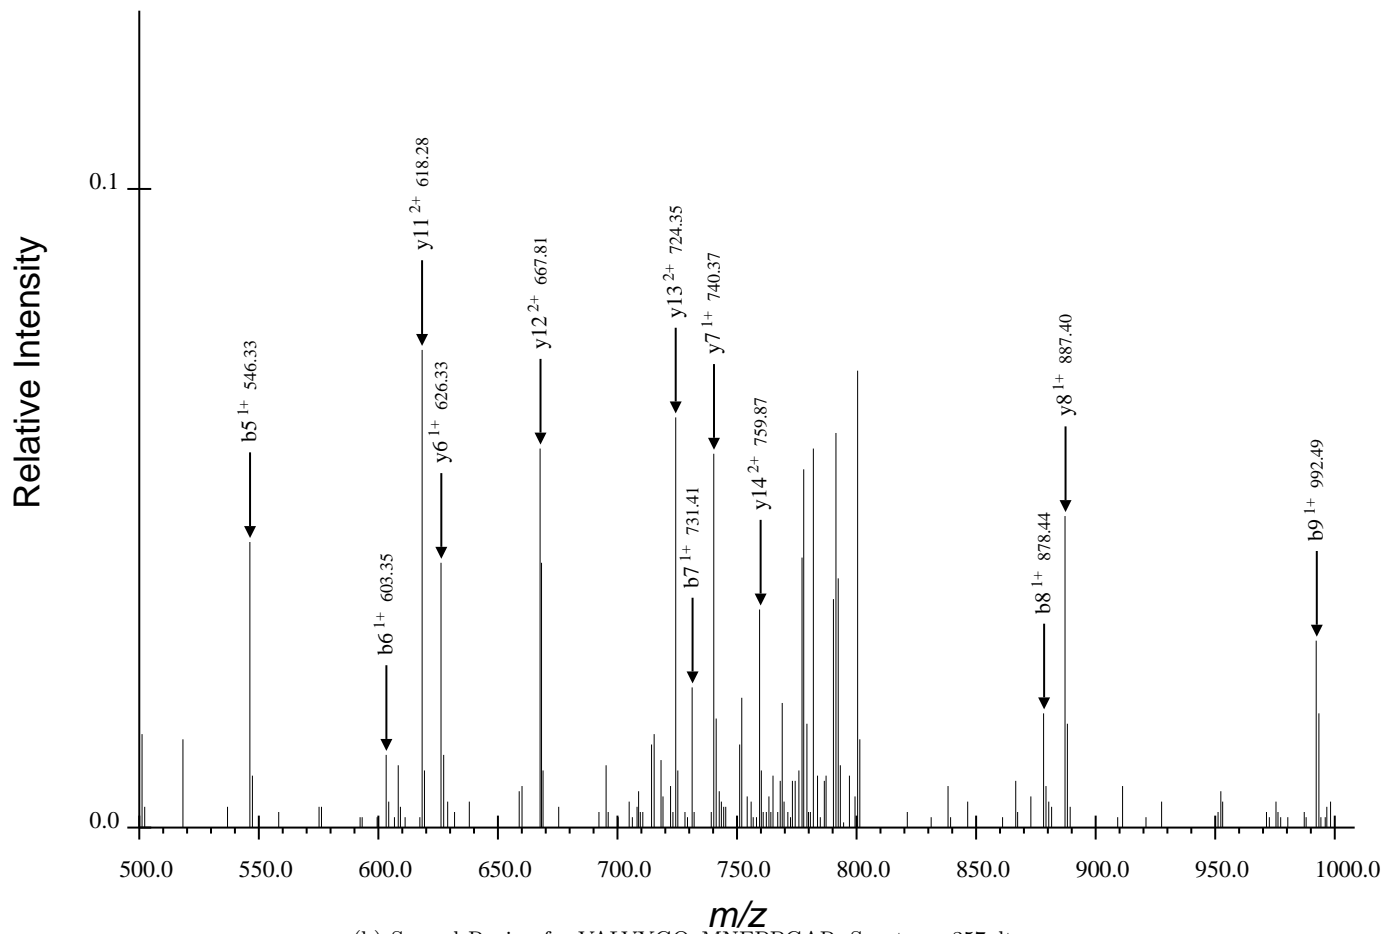

(b) Second Region for VALVYGQoMNEPPGAR, Spectrum 357.dta

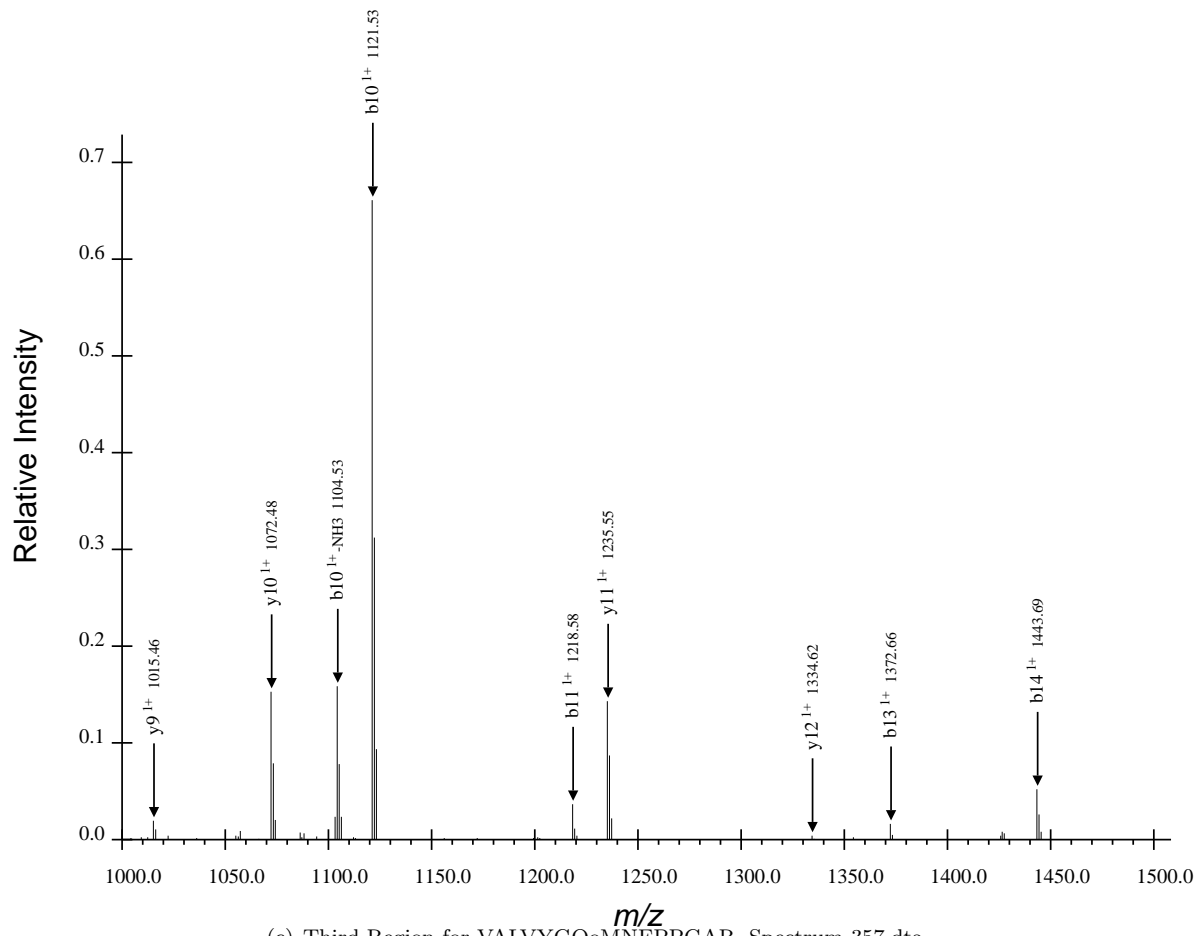

(c) Third Region for VALVYGQoMNEPPGAR, Spectrum 357.dta

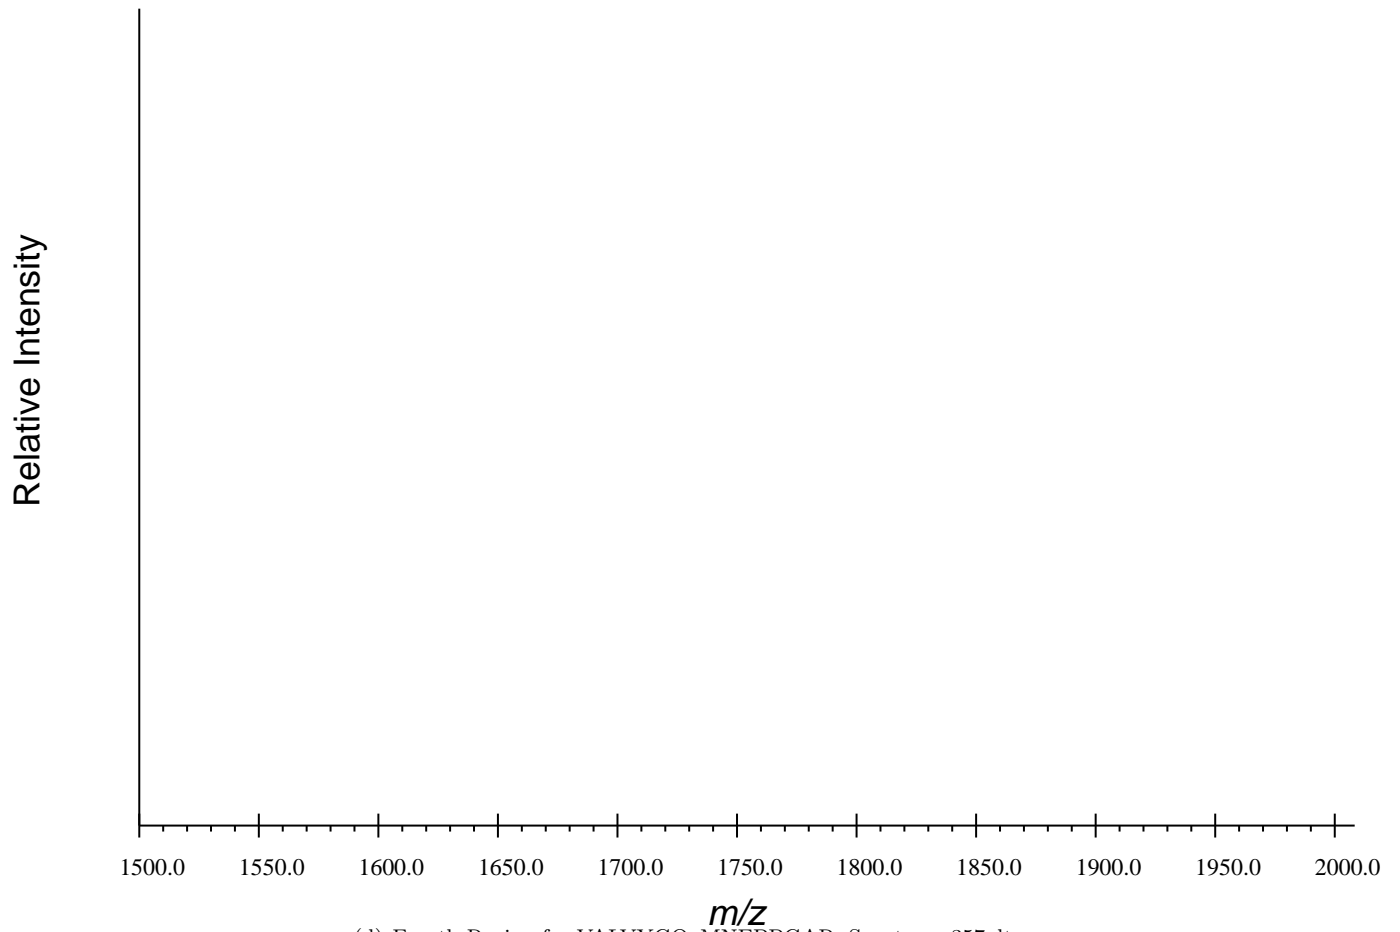

(d) Fourth Region for VALVYGQoMNEPPGAR, Spectrum 357.dta



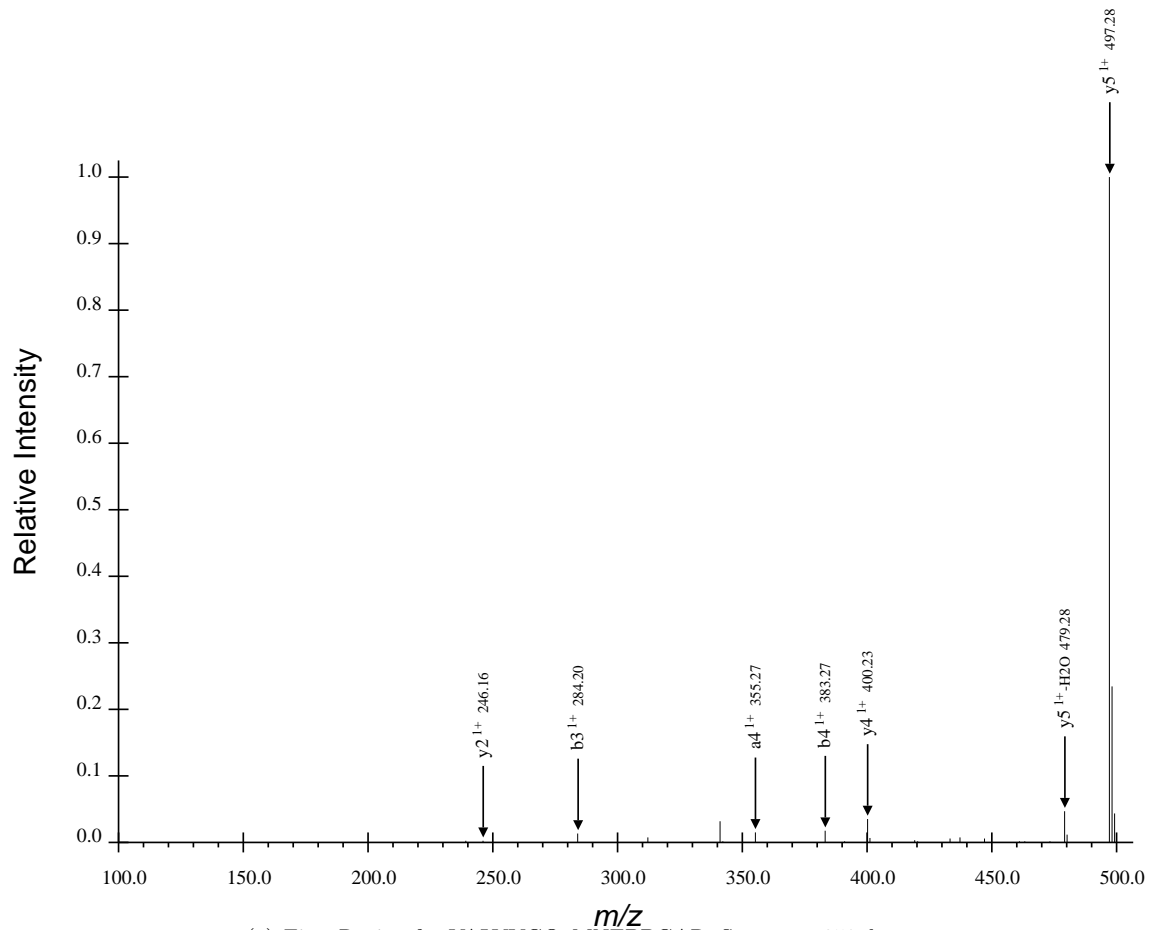

(a) First Region for VALVYGQoMNEPPGAR, Spectrum 358.dta

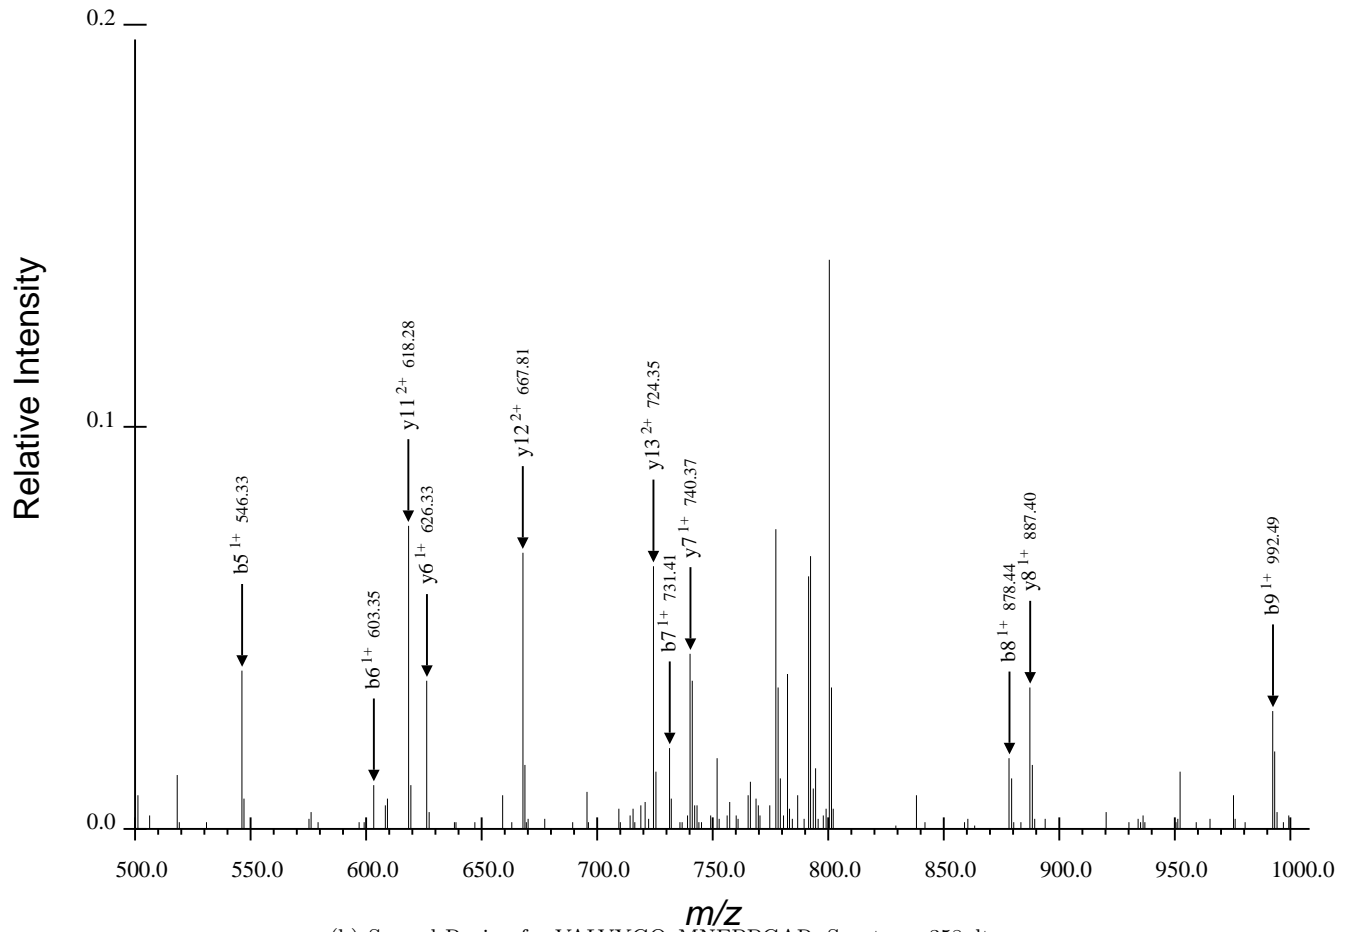

(b) Second Region for VALVYGQoMNEPPGAR, Spectrum 358.dta

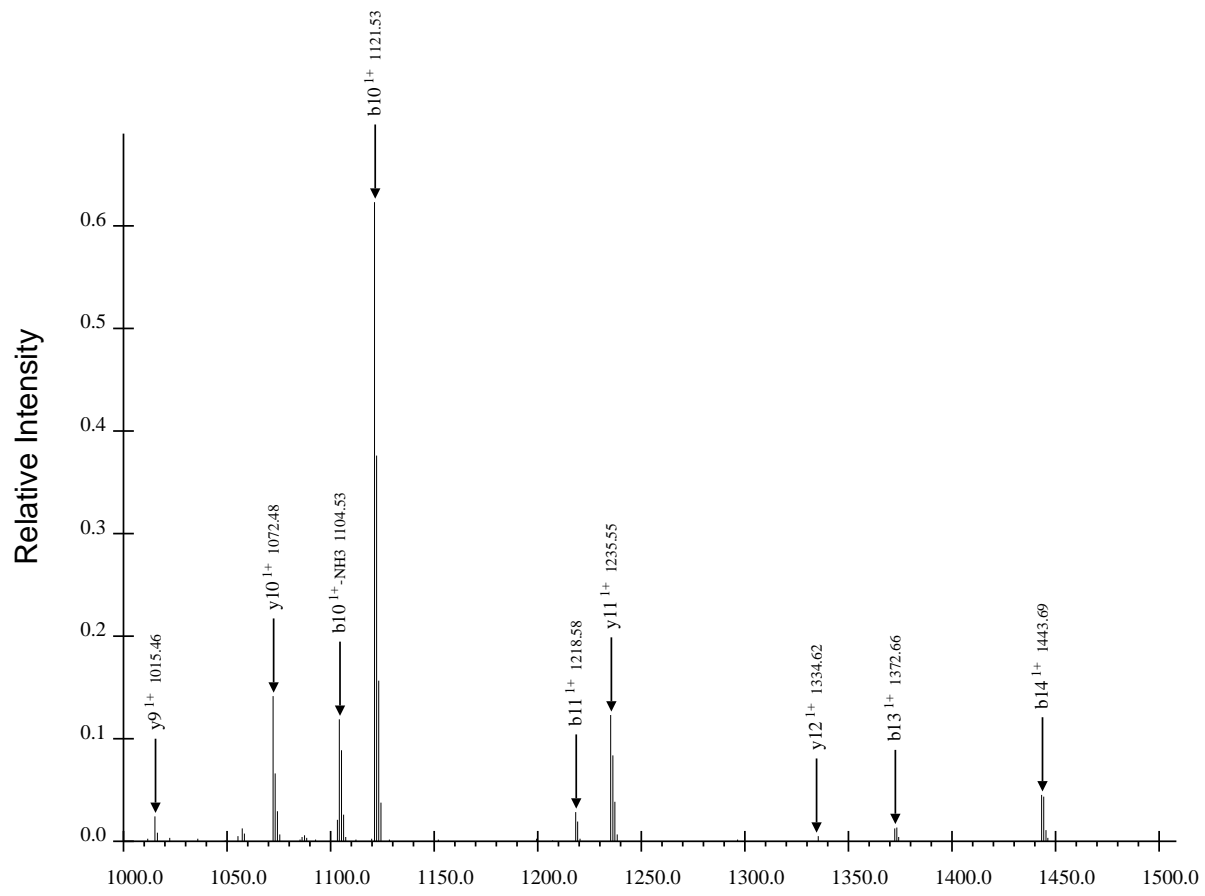

(c) Third Region for VALVYGQoMNEPPGAR, Spectrum 358.dta

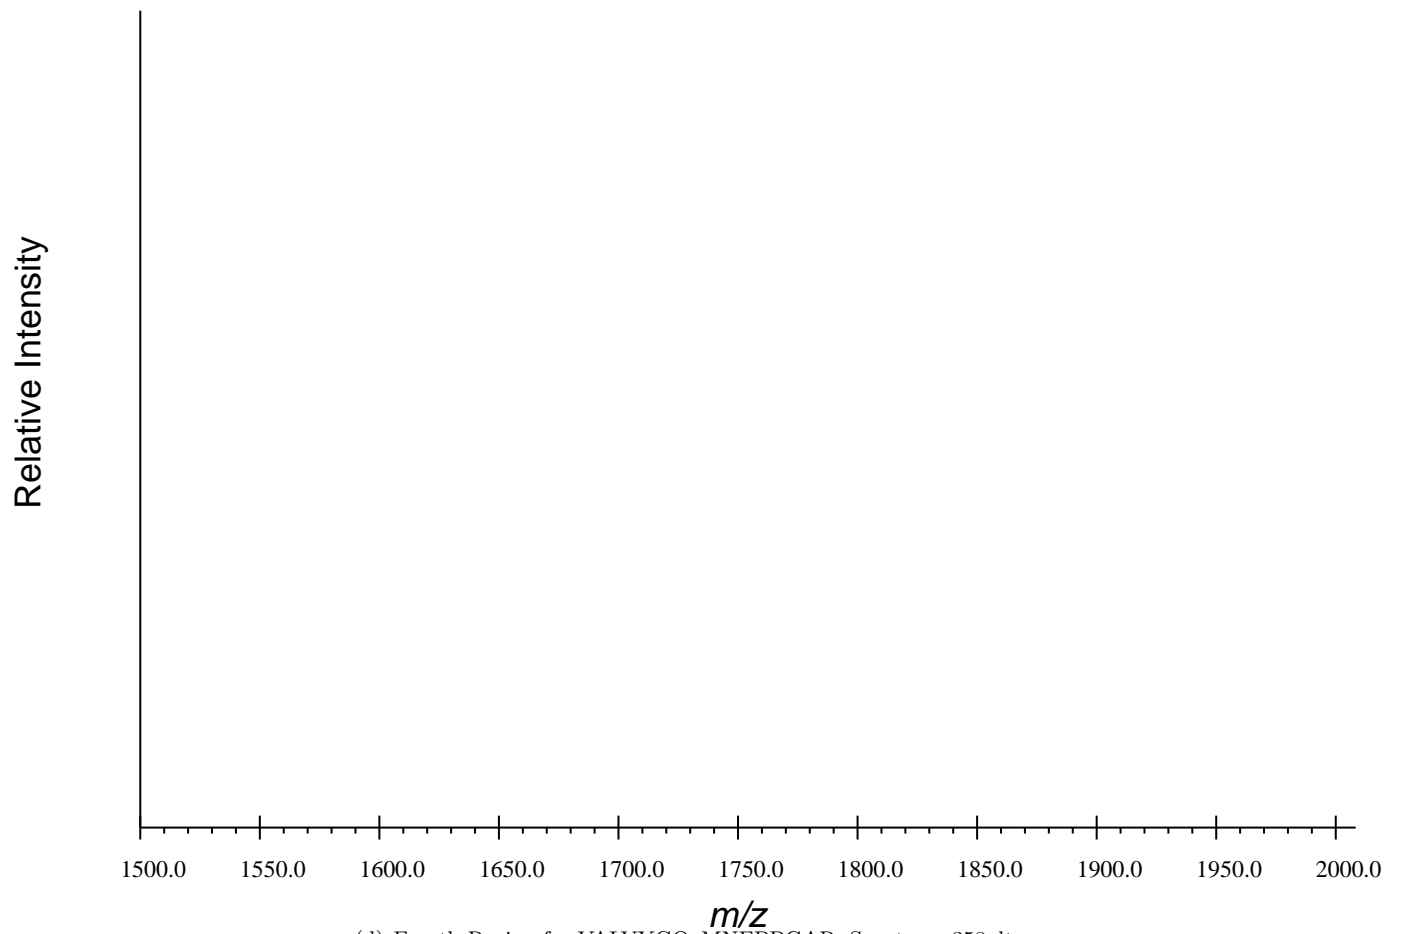

(d) Fourth Region for VALVYGQoMNEPPGAR, Spectrum 358.dta

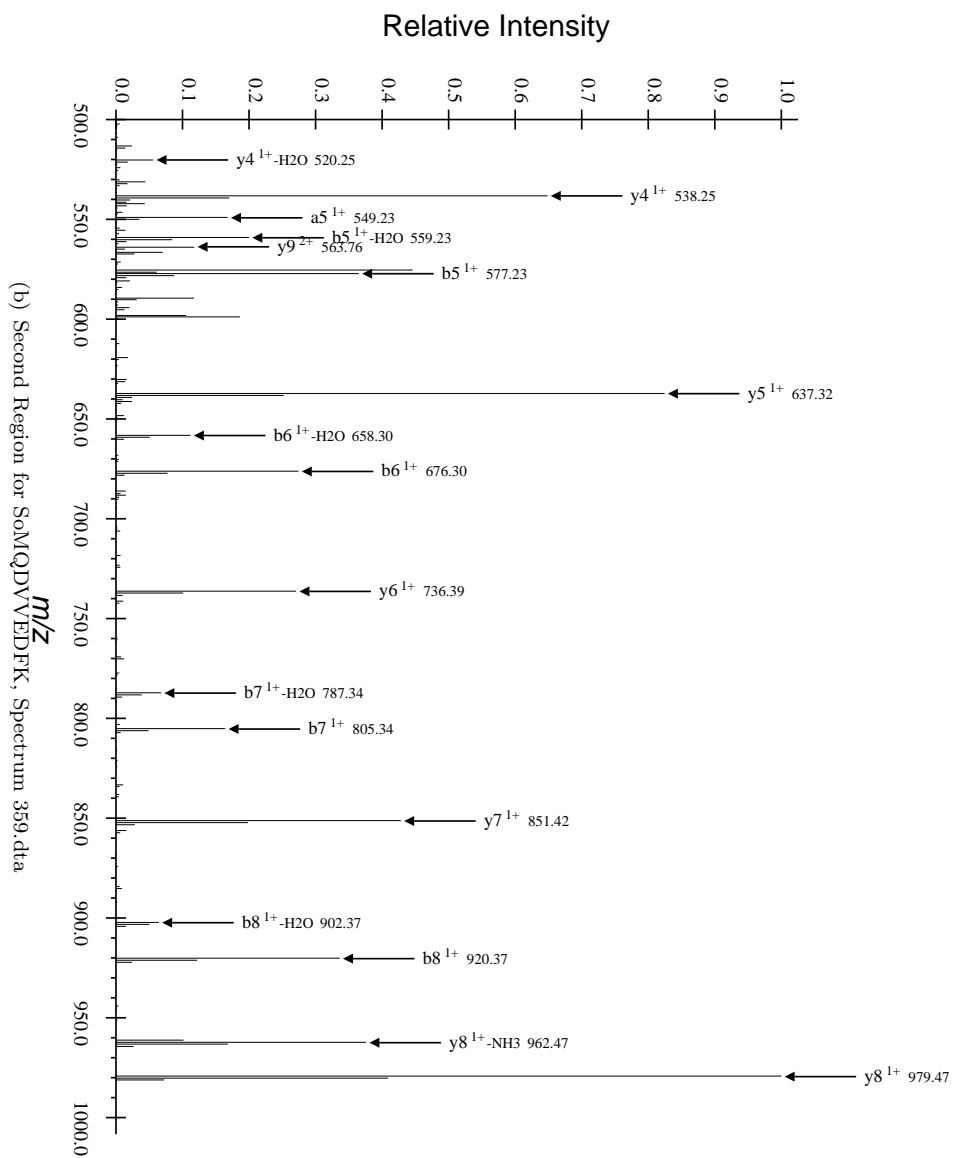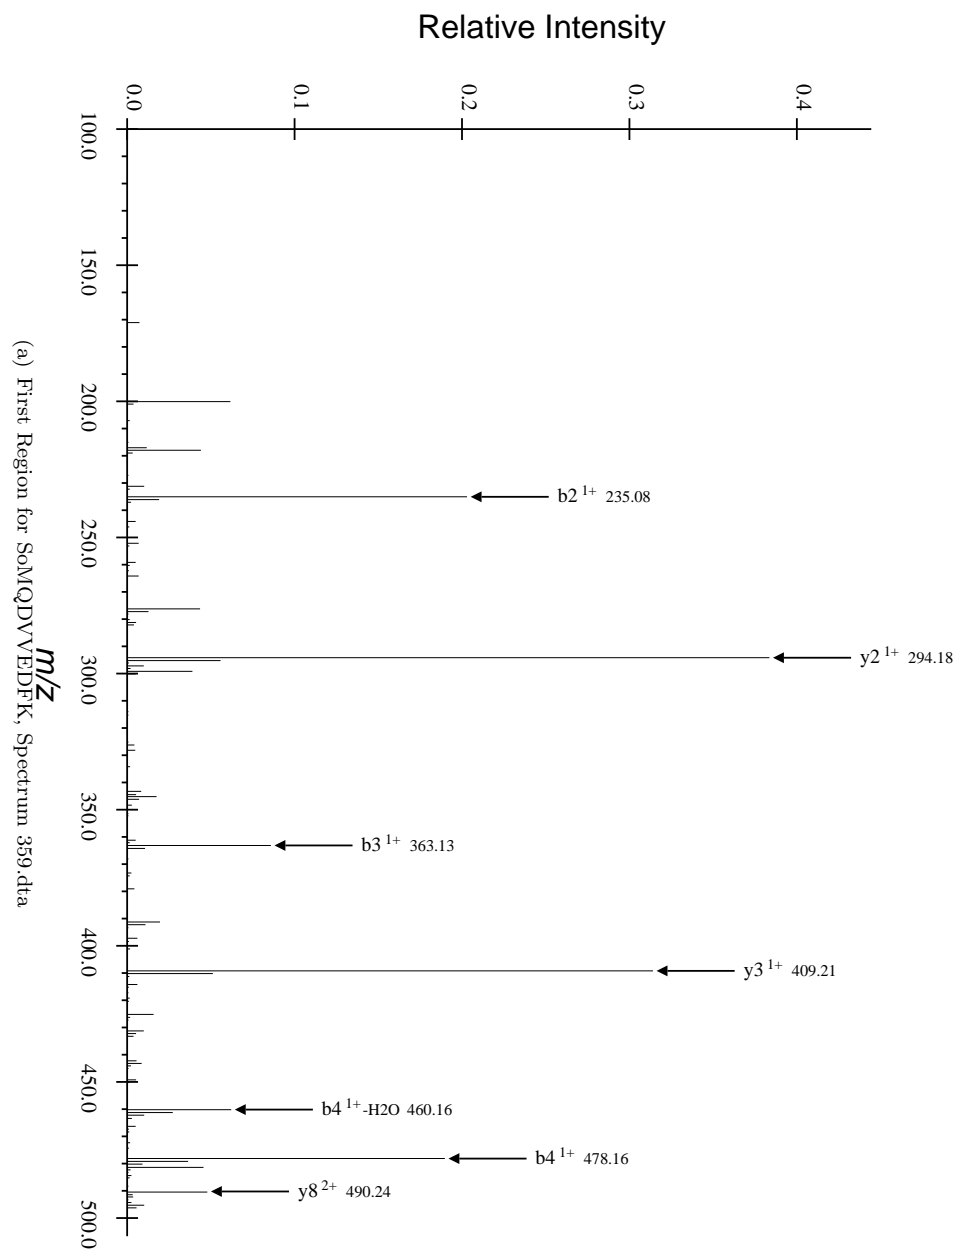

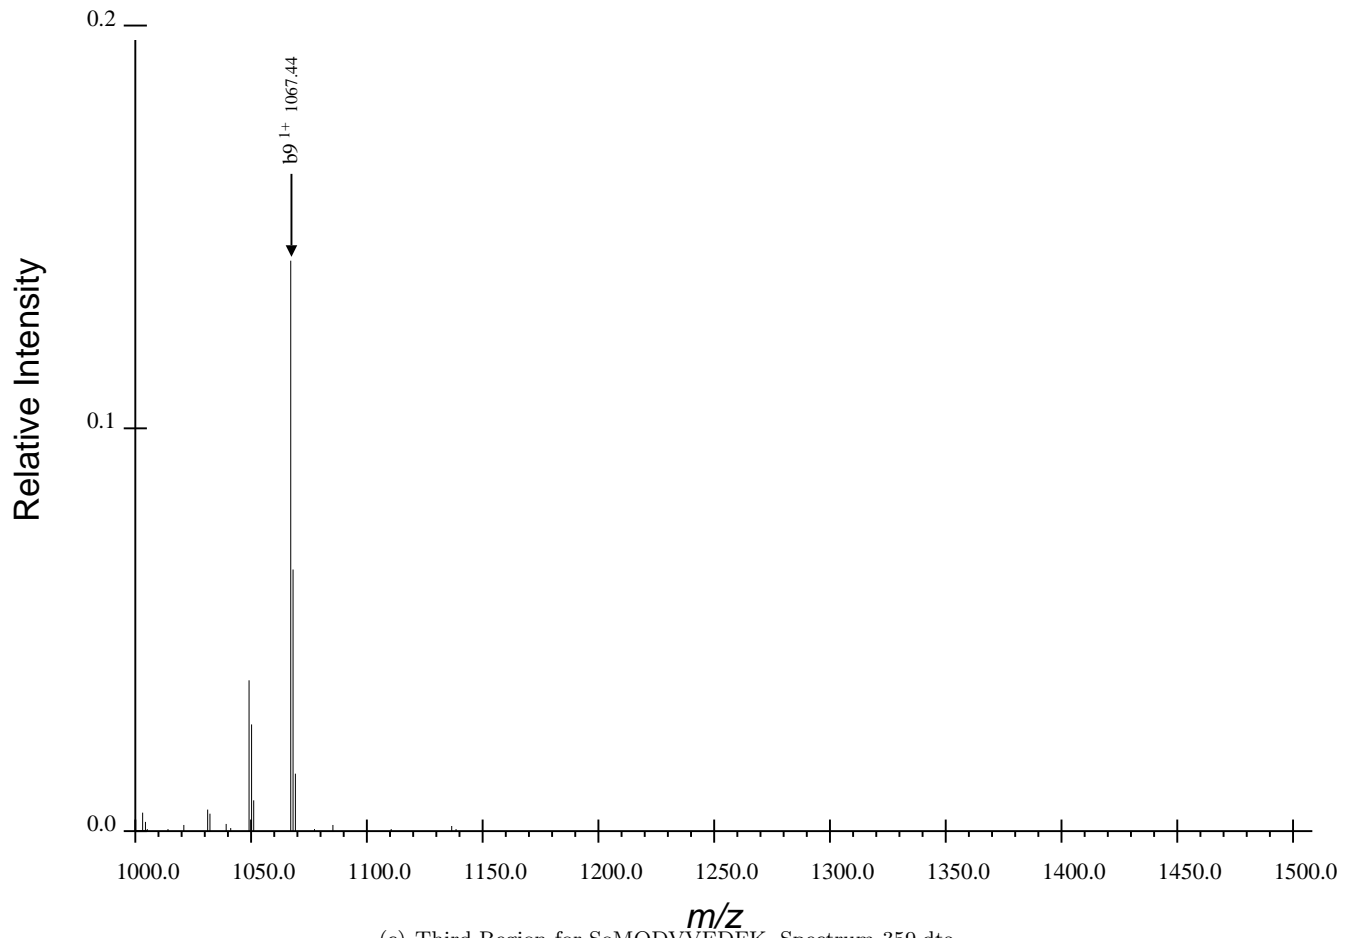

(c) Third Region for SoMQDVVEDFK, Spectrum 359.dta

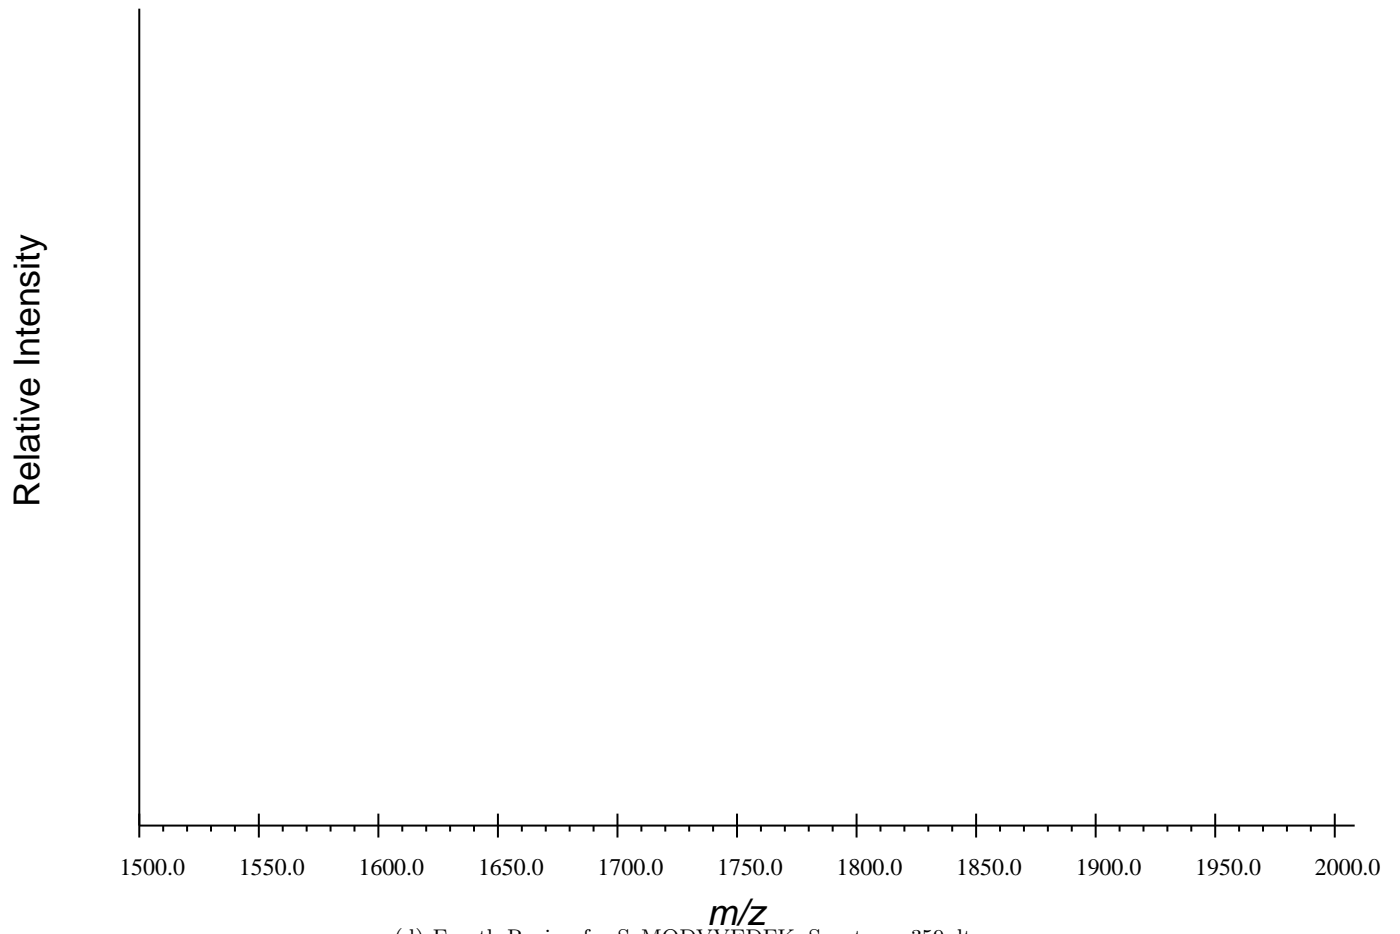

(d) Fourth Region for SoMQDVVEDFK, Spectrum 359.dta

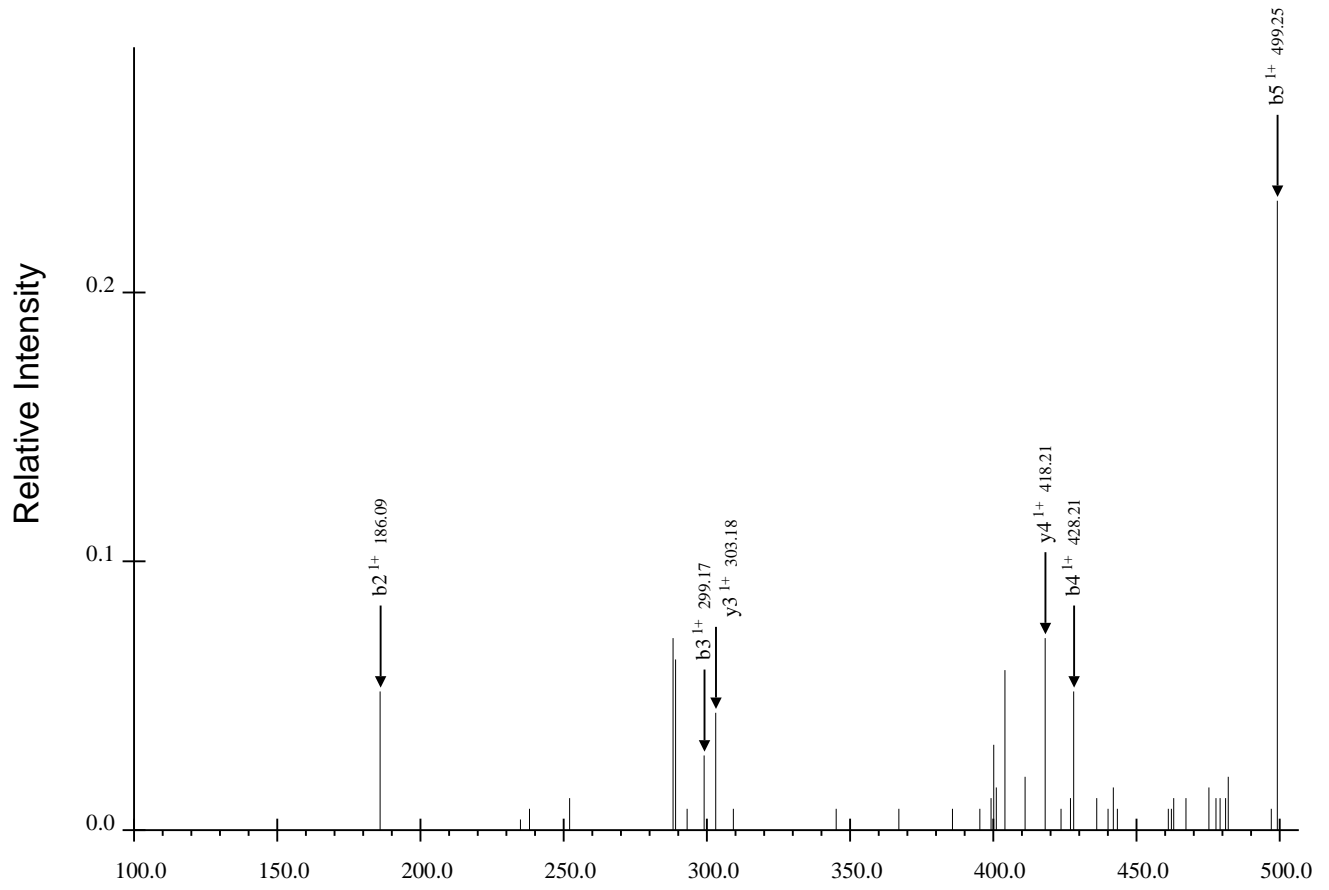

(a) First Region for GQLEALQVDGmR, Spectrum 360.dta

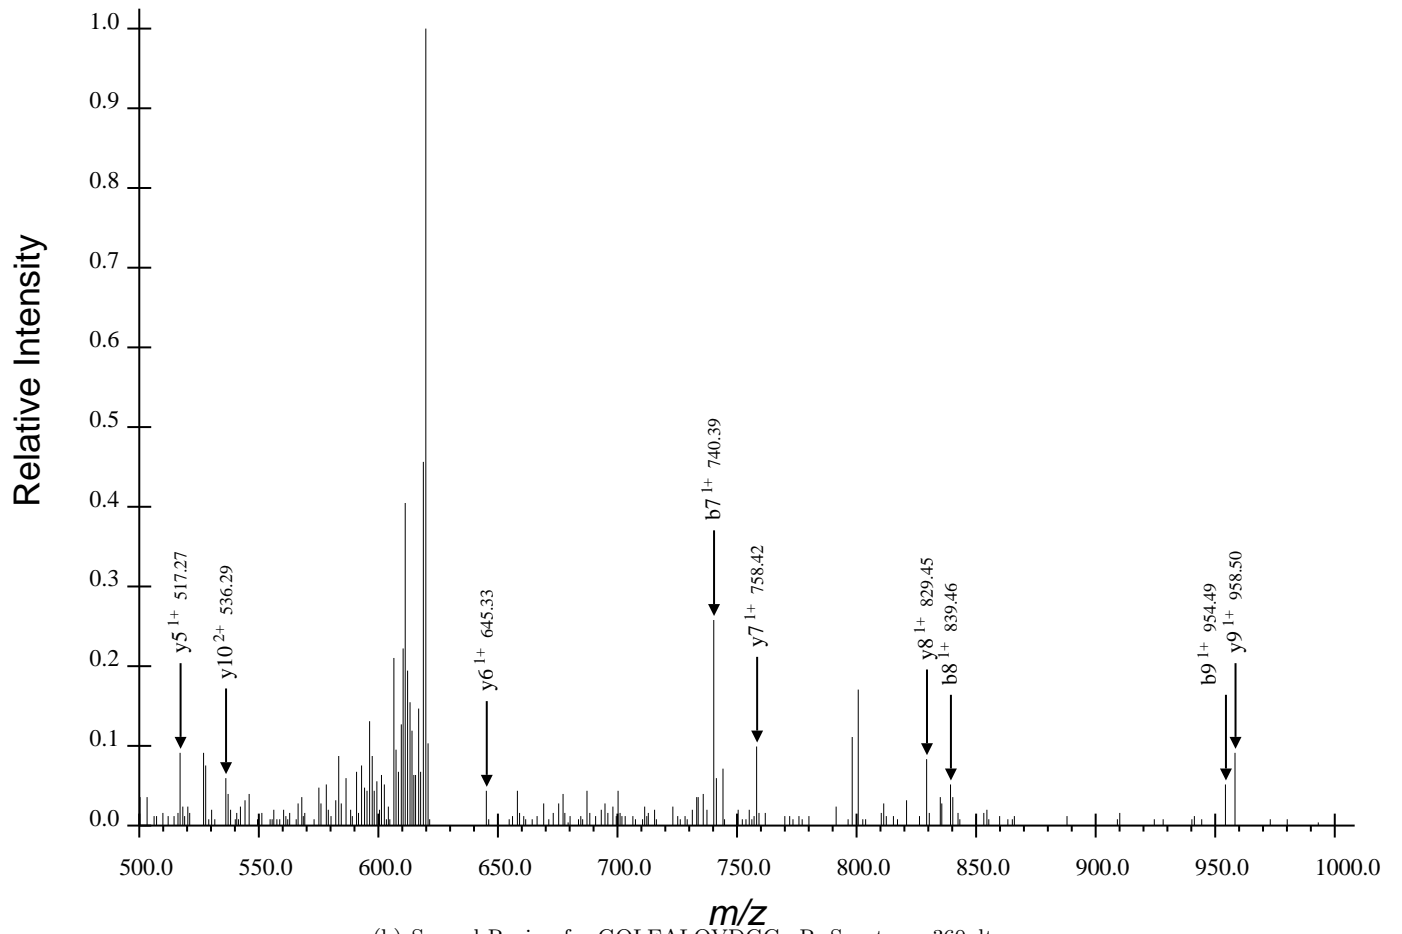

(b) Second Region for GQLEALQVDGmR, Spectrum 360.dta

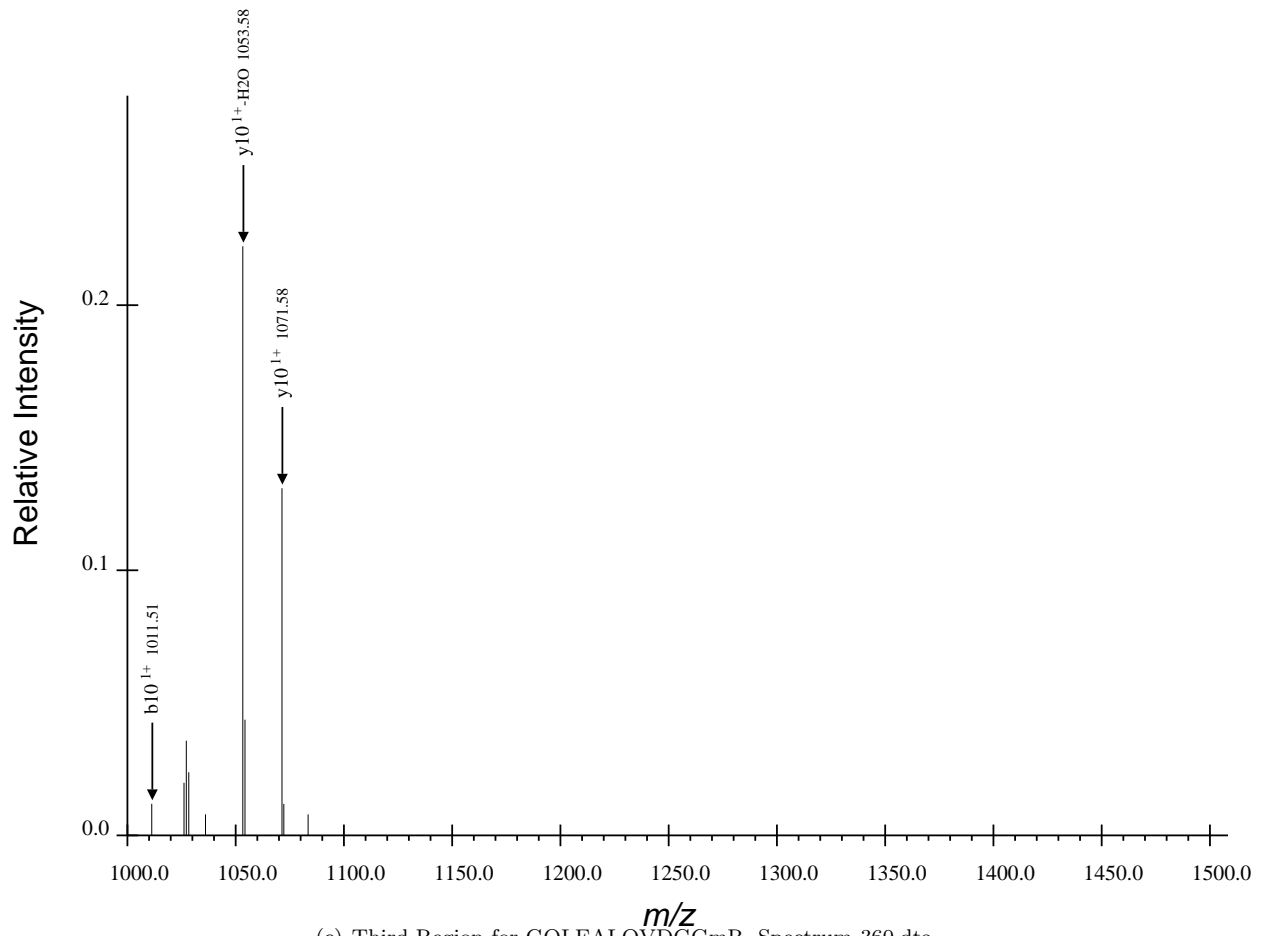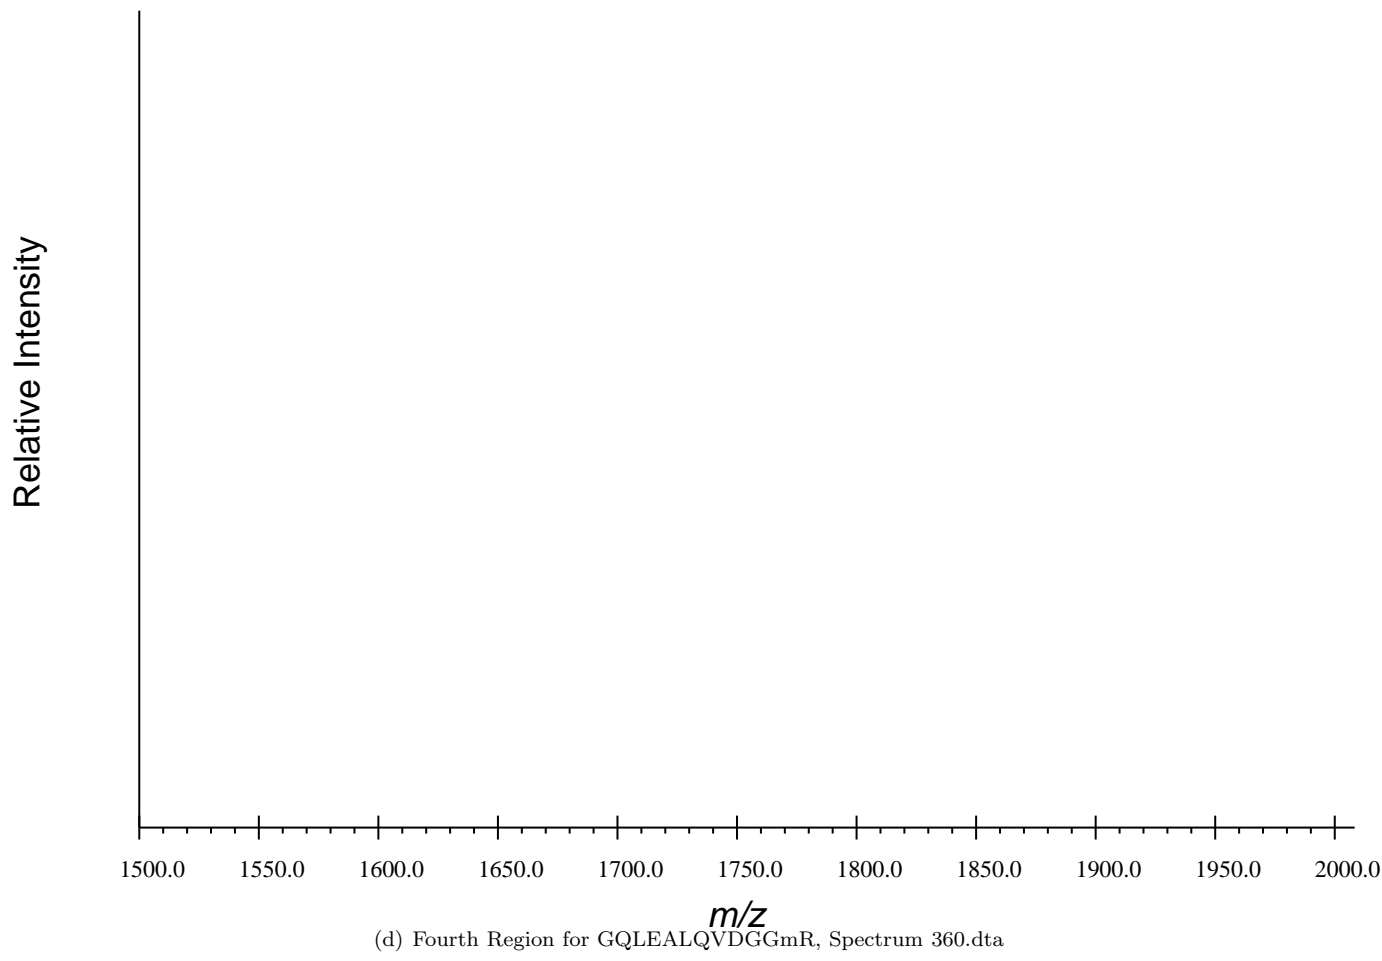

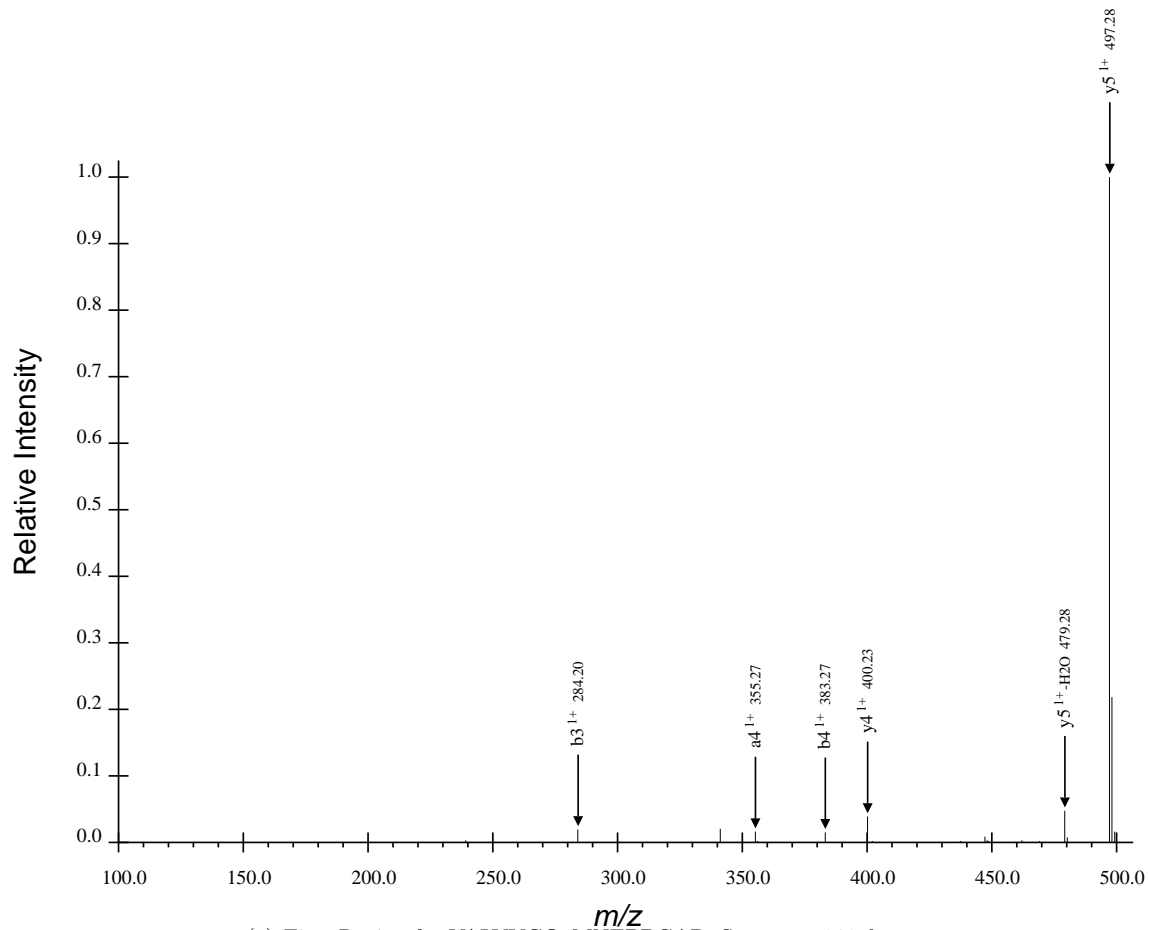

(a) First Region for VALVYGQoMNEPPGAR, Spectrum 361.dta

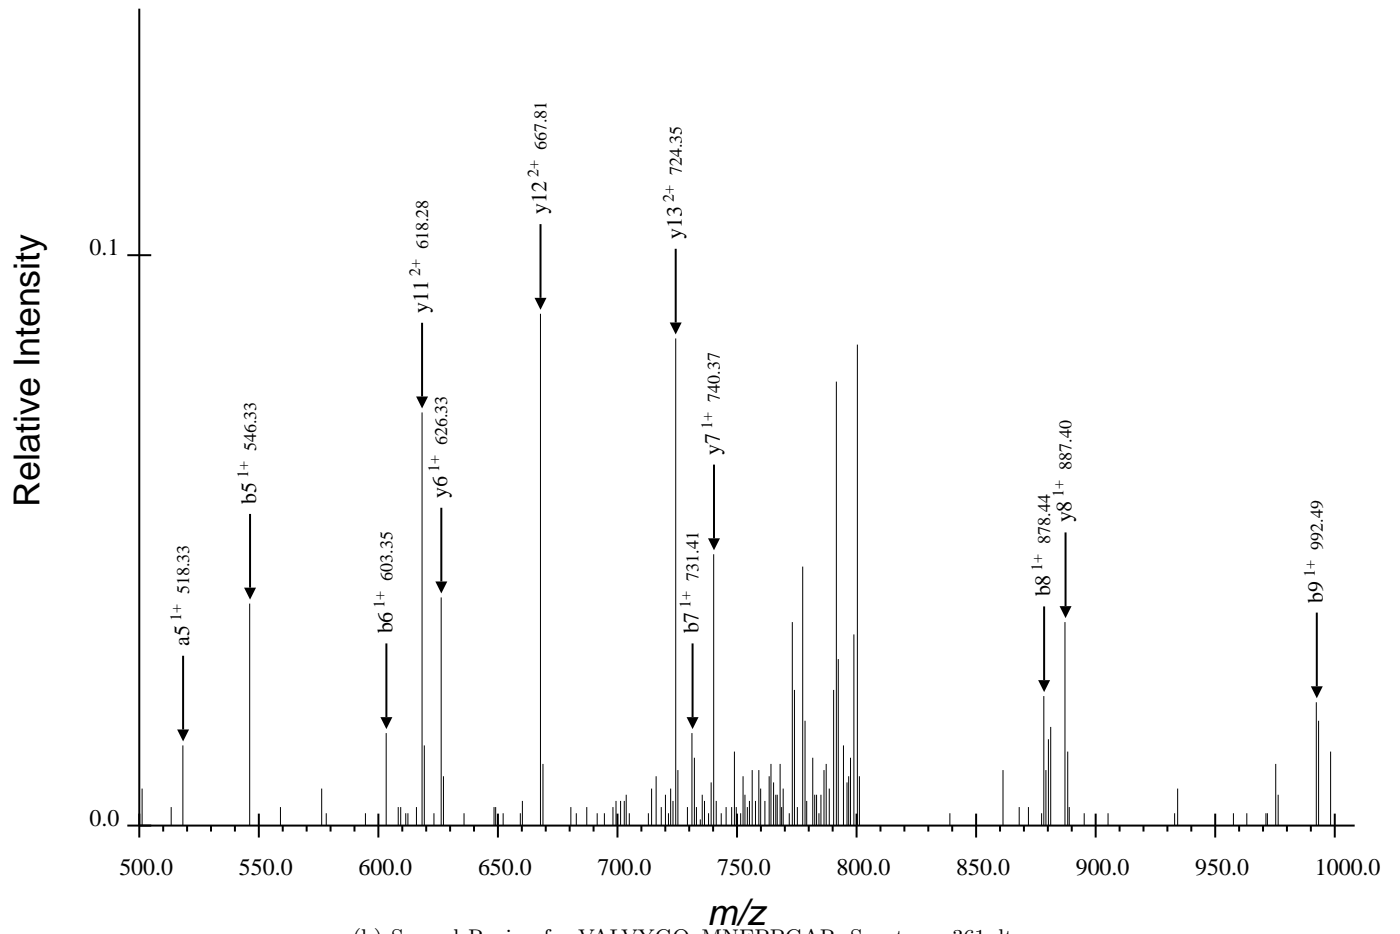

(b) Second Region for VALVYGQoMNEPPGAR, Spectrum 361.dta

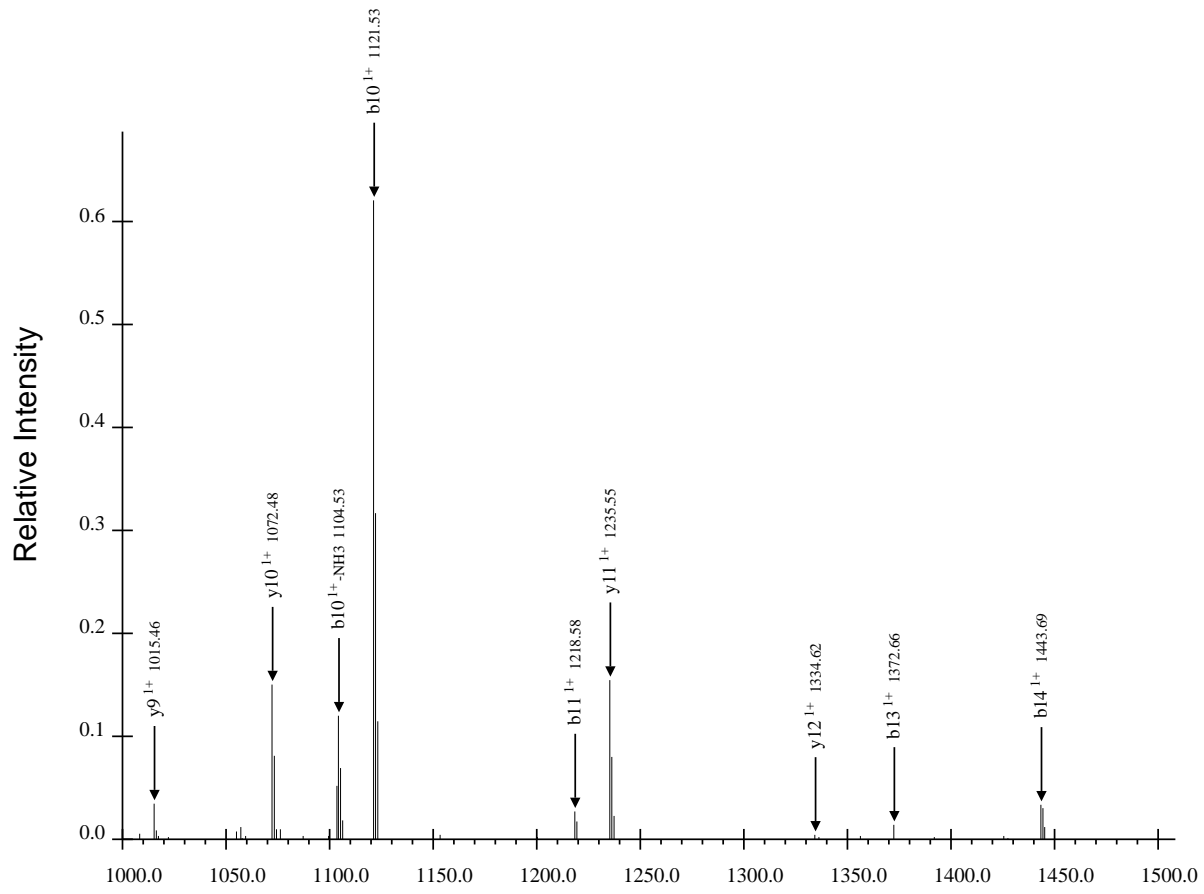

(c) Third Region for VALVYGQoMNEPPGAR, Spectrum 361.dta

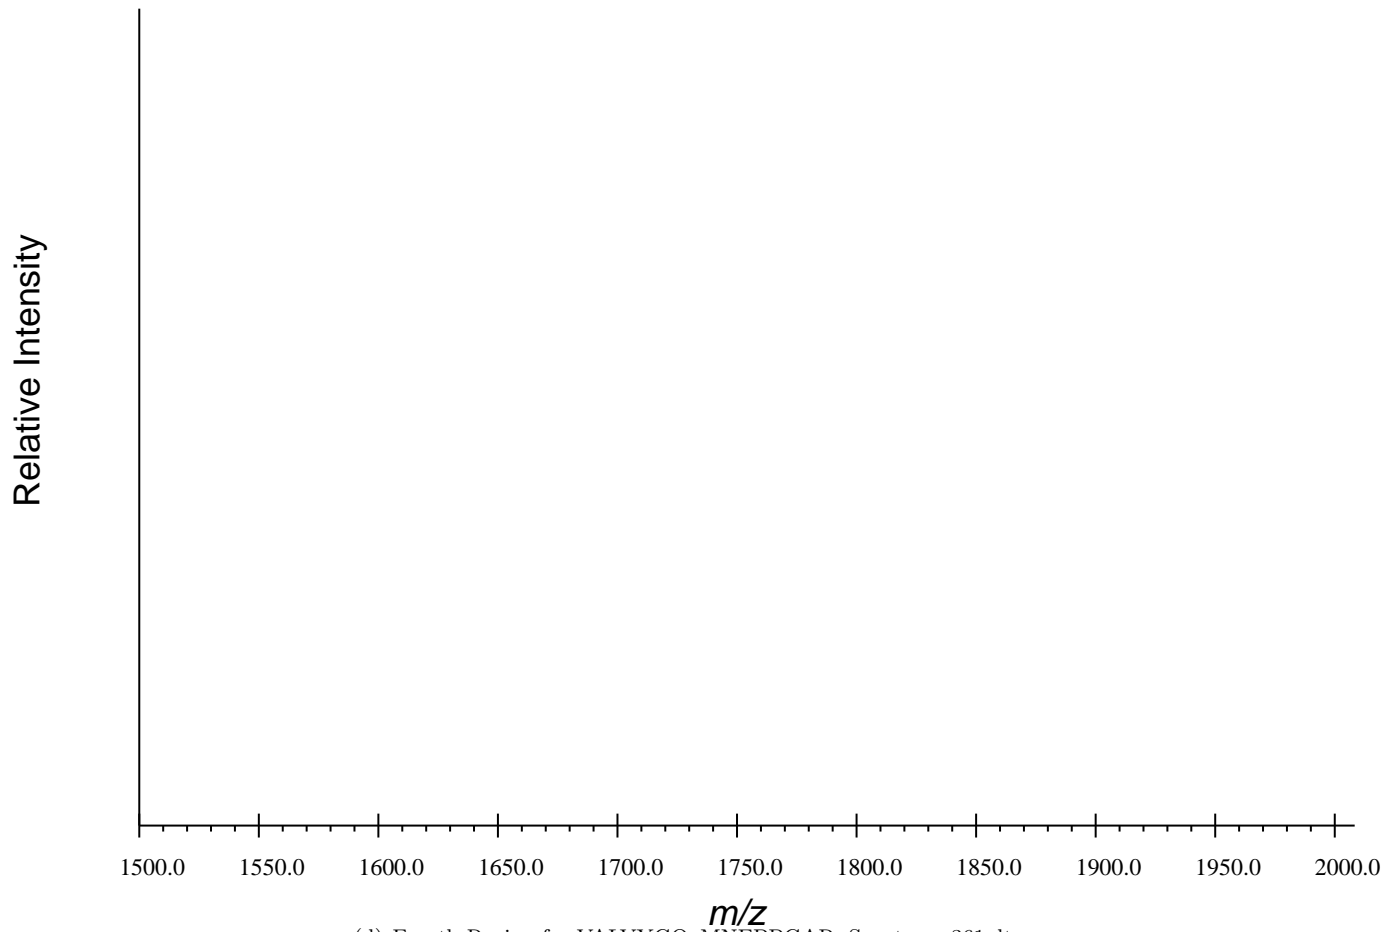

(d) Fourth Region for VALVYGQoMNEPPGAR, Spectrum 361.dta



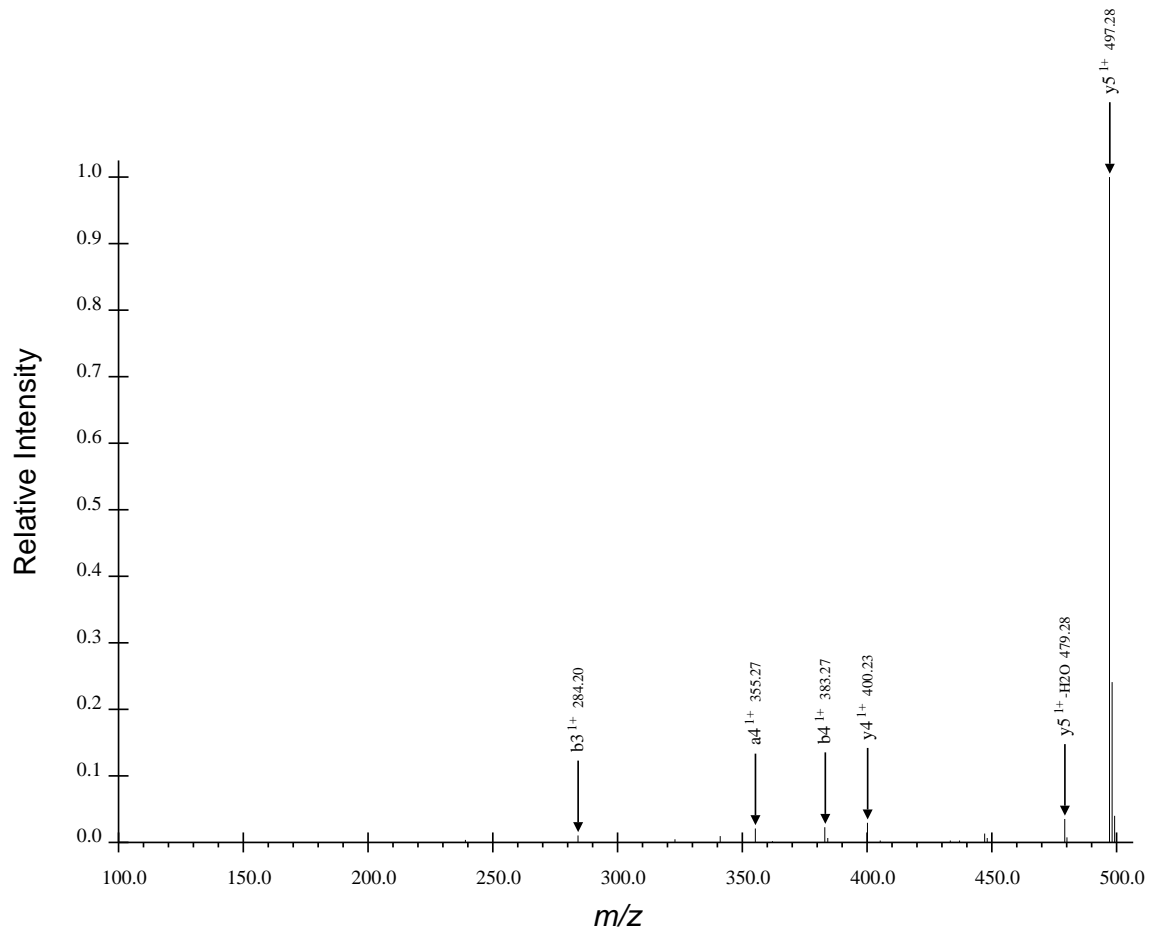

(a) First Region for VALVYGQoMNEPPGAR, Spectrum 362.dta

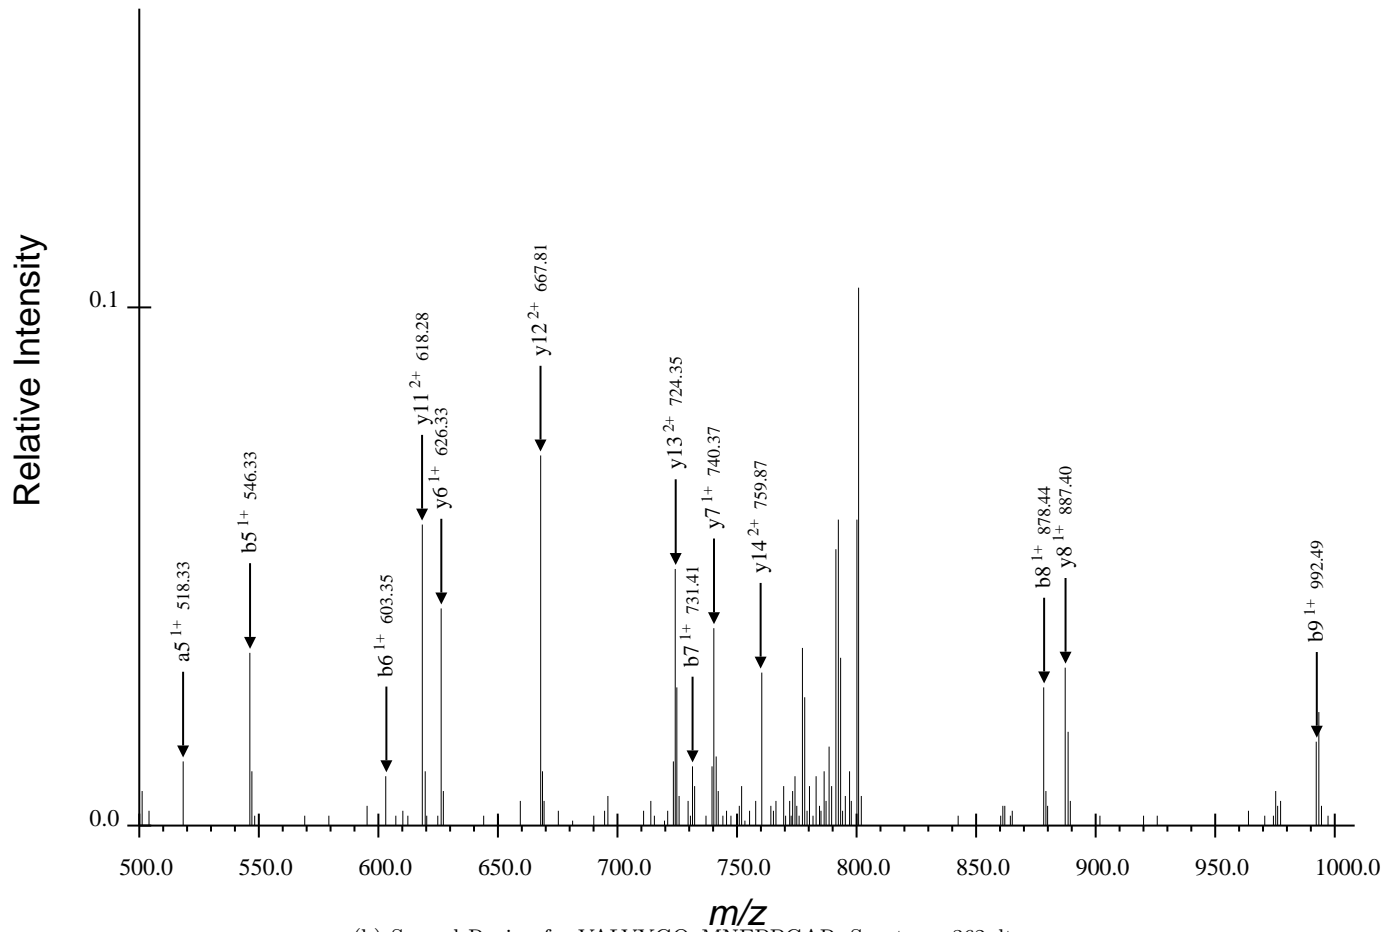

(b) Second Region for VALVYGQoMNEPPGAR, Spectrum 362.dta

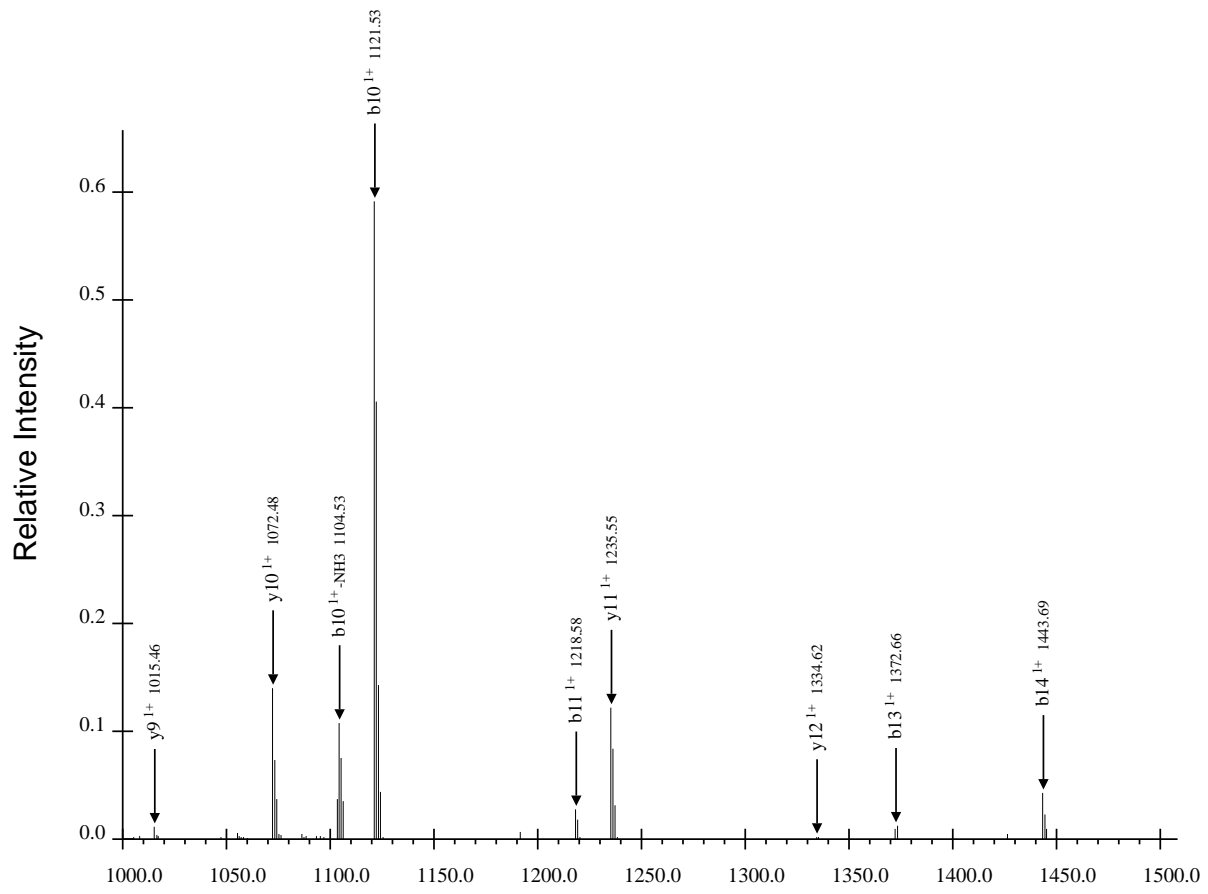

(c) Third Region for VALVYGQoMNEPPGAR, Spectrum 362.dta

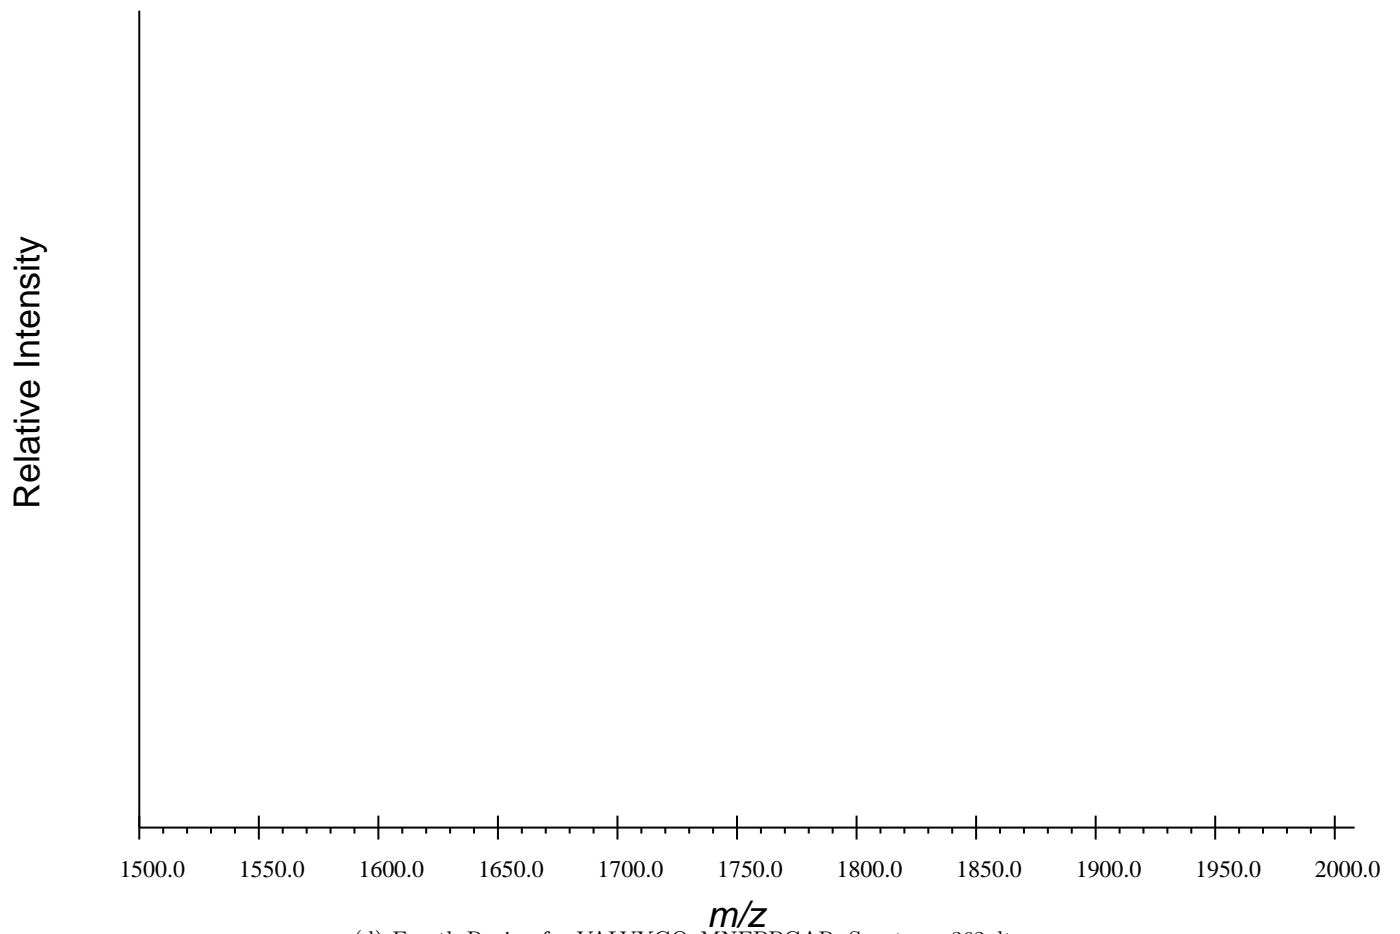

(d) Fourth Region for VALVYGQoMNEPPGAR, Spectrum 362.dta

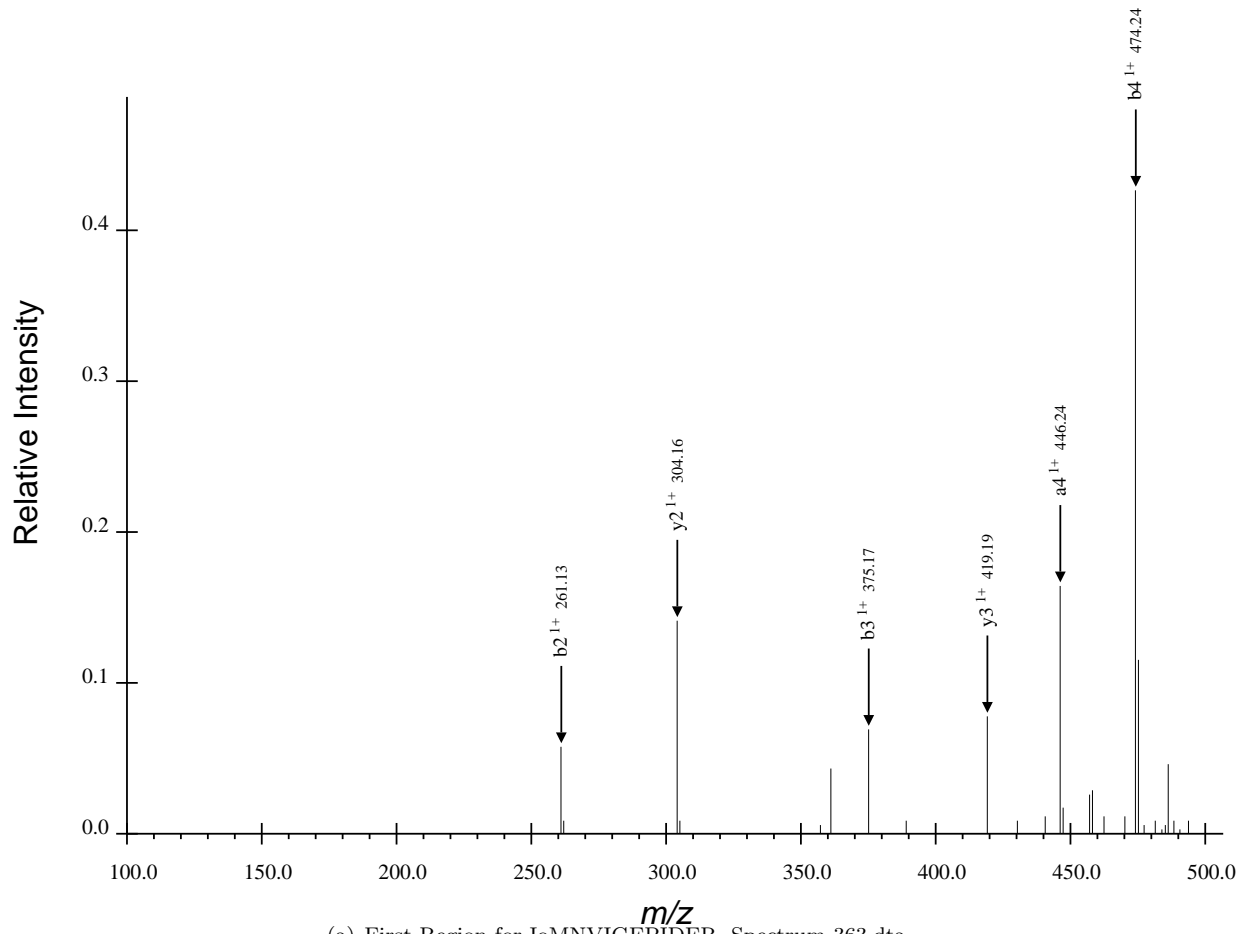

(a) First Region for IoMNVIGEPIDER, Spectrum 363.dta

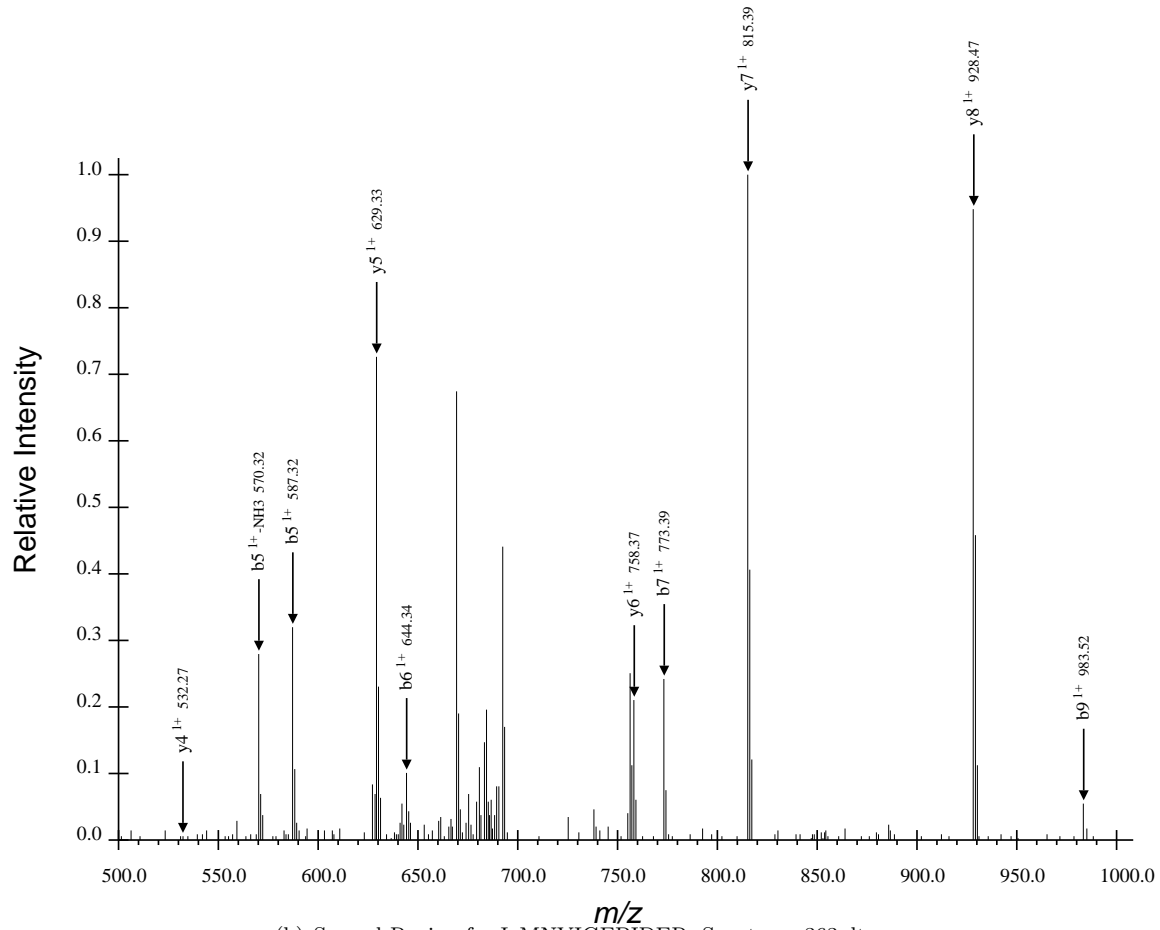

(b) Second Region for IoMNVIGEPIDER, Spectrum 363.dta

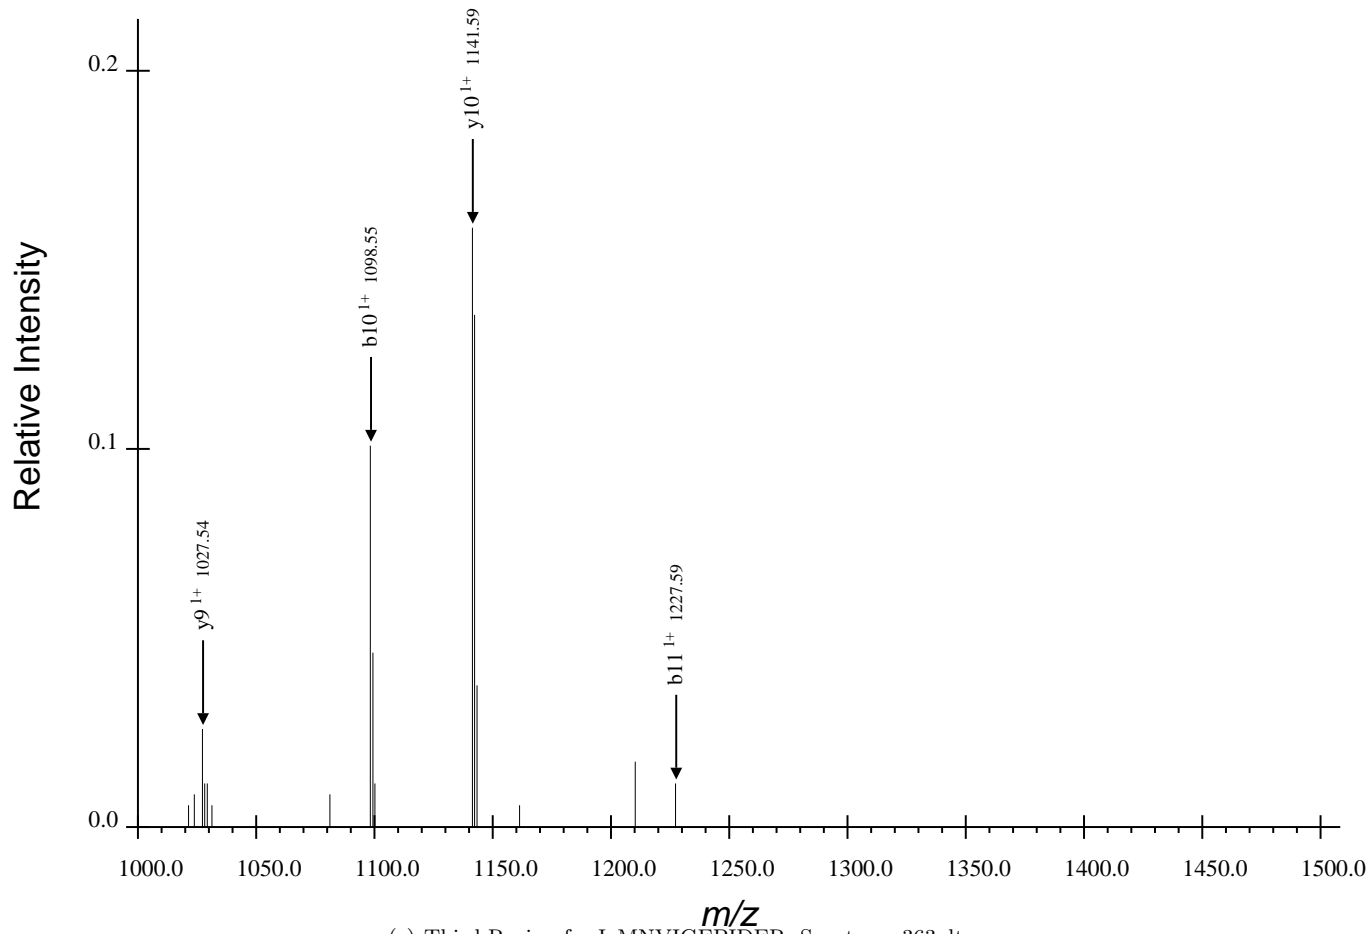

(c) Third Region for IoMNVIGEPIDER, Spectrum 363.dta

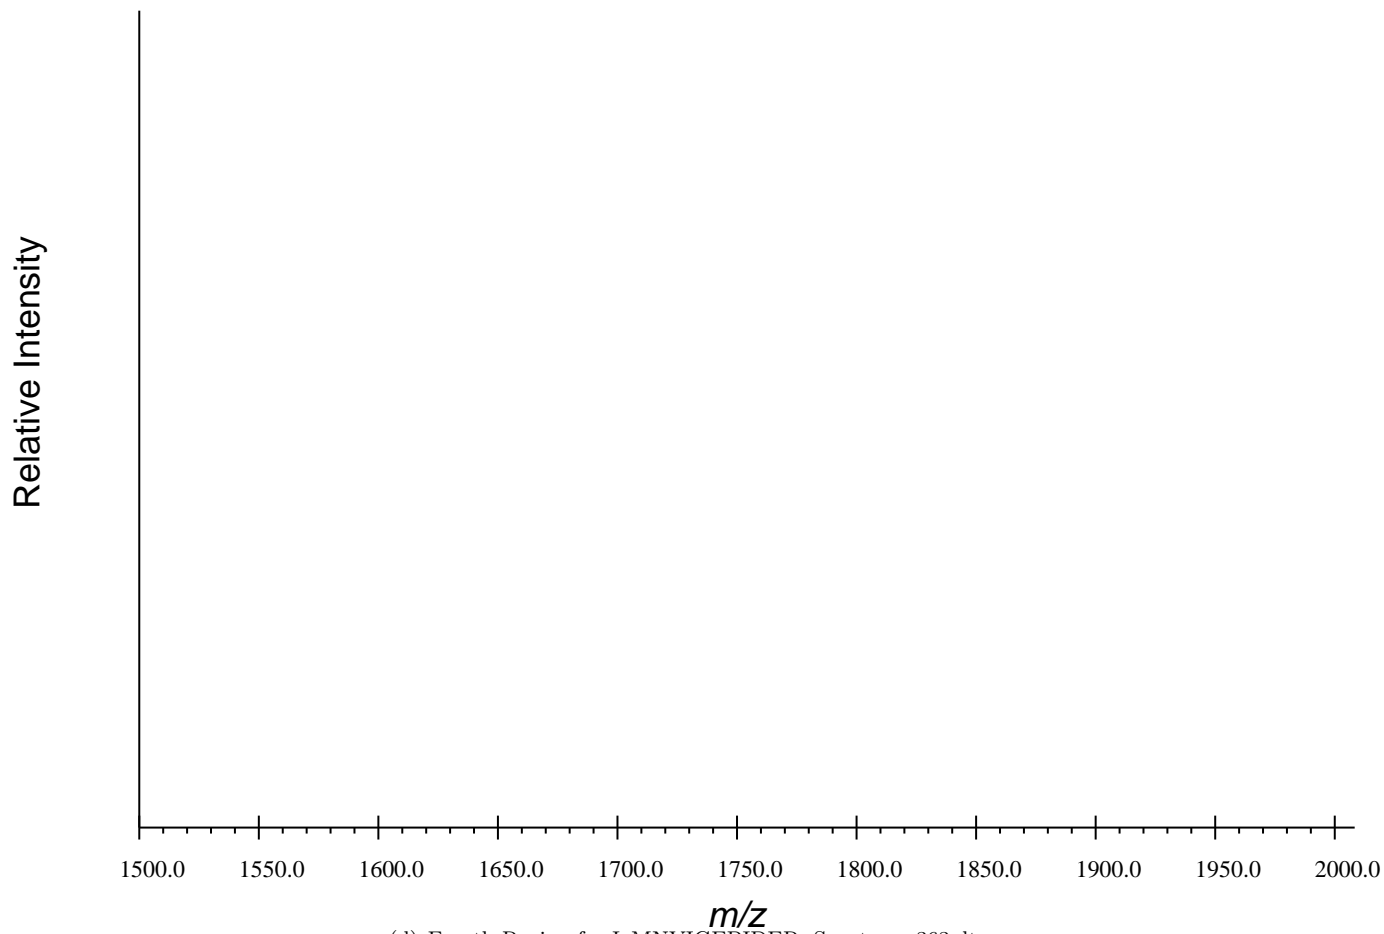

(d) Fourth Region for IoMNVIGEPIDER, Spectrum 363.dta

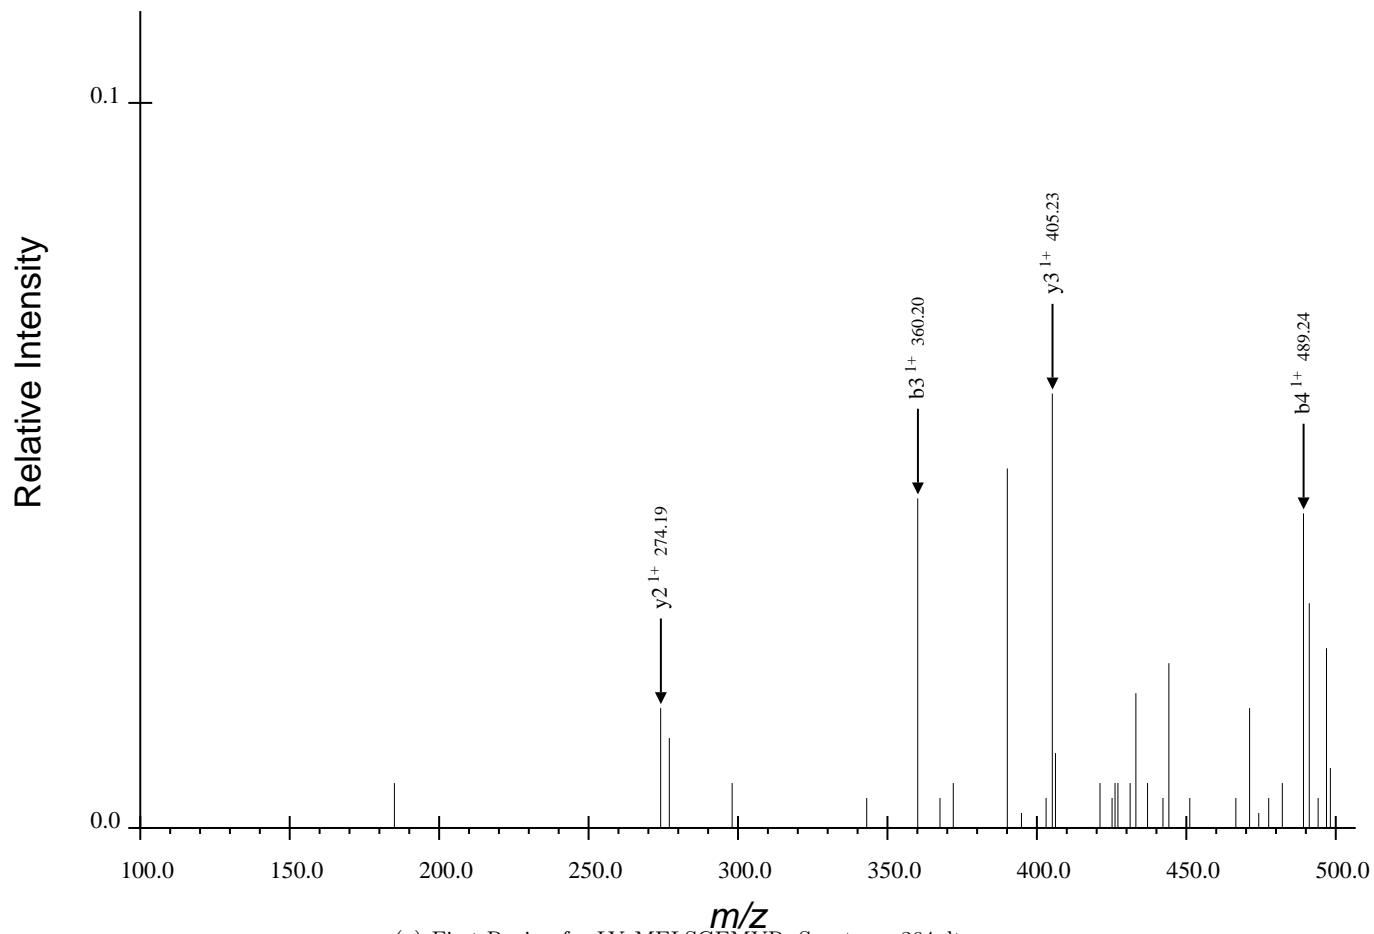

(a) First Region for LVoMELSGEMVR, Spectrum 364.dta

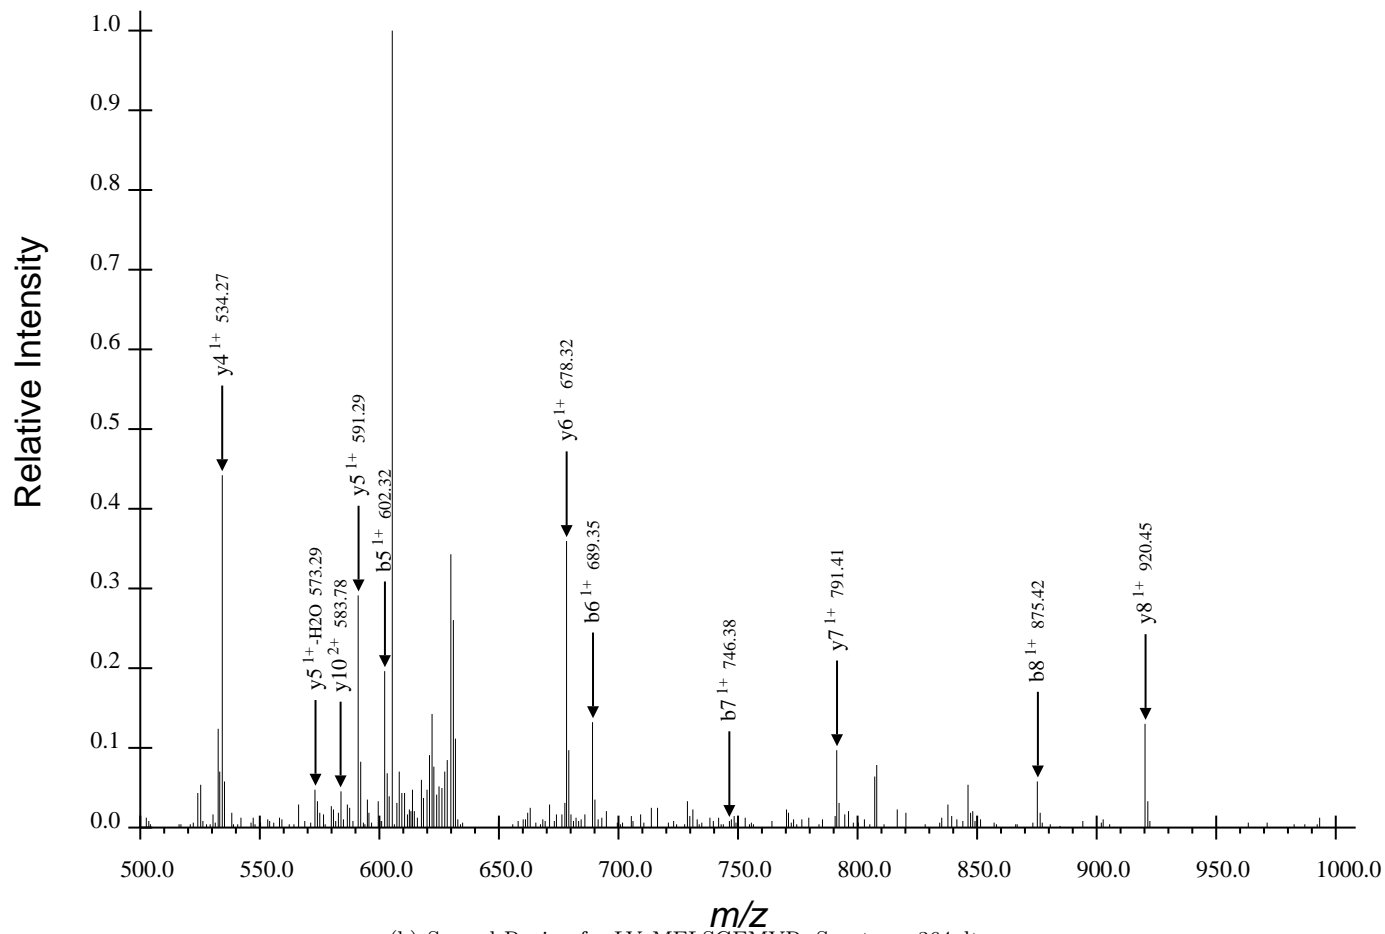

(b) Second Region for LVoMELSGEMVR, Spectrum 364.dta

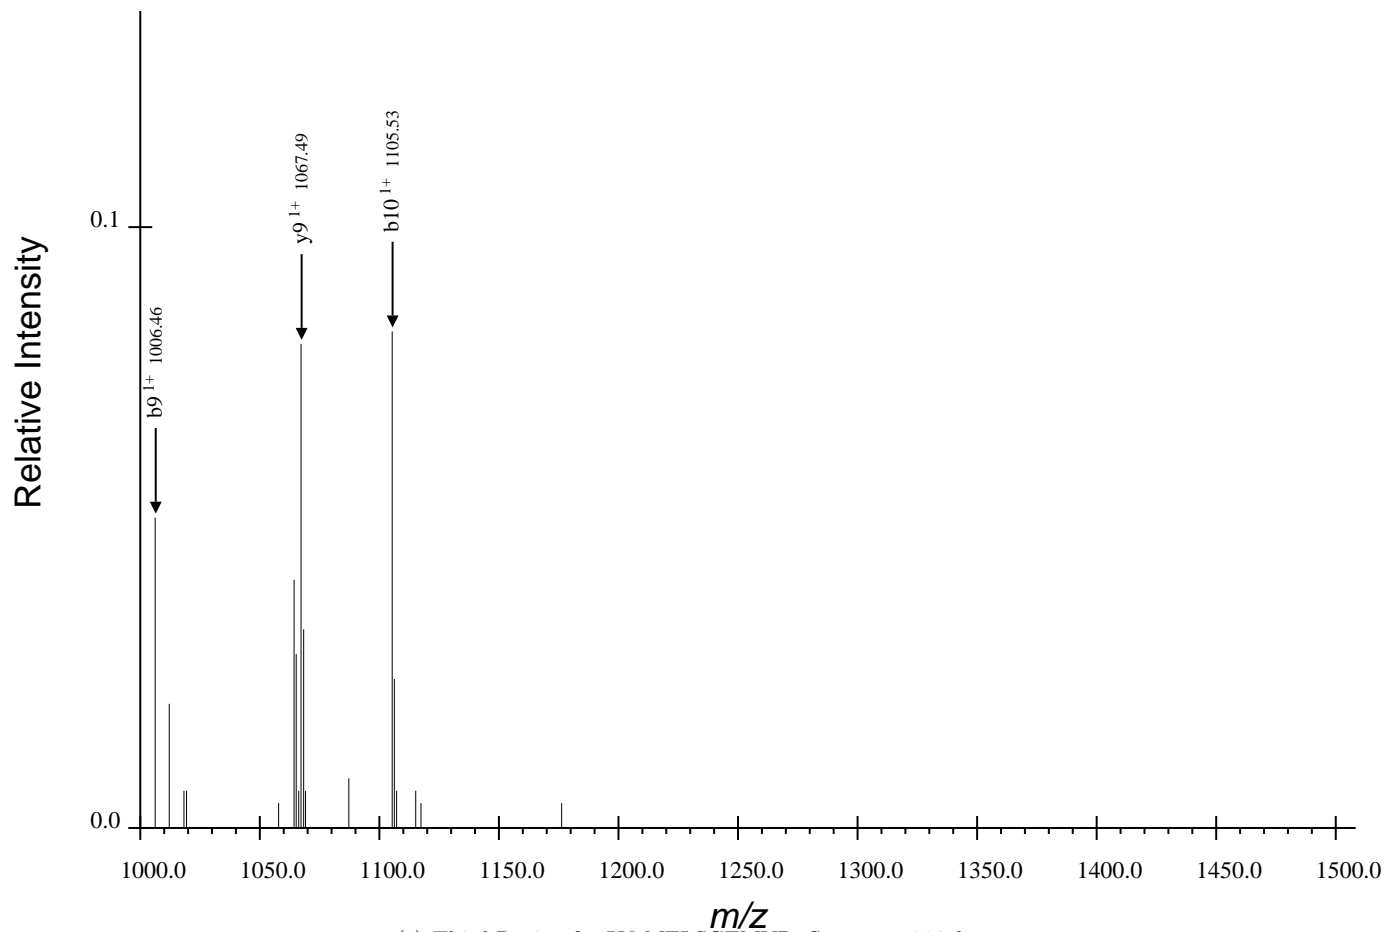

(c) Third Region for LVoMELSGEMVR, Spectrum 364.dta

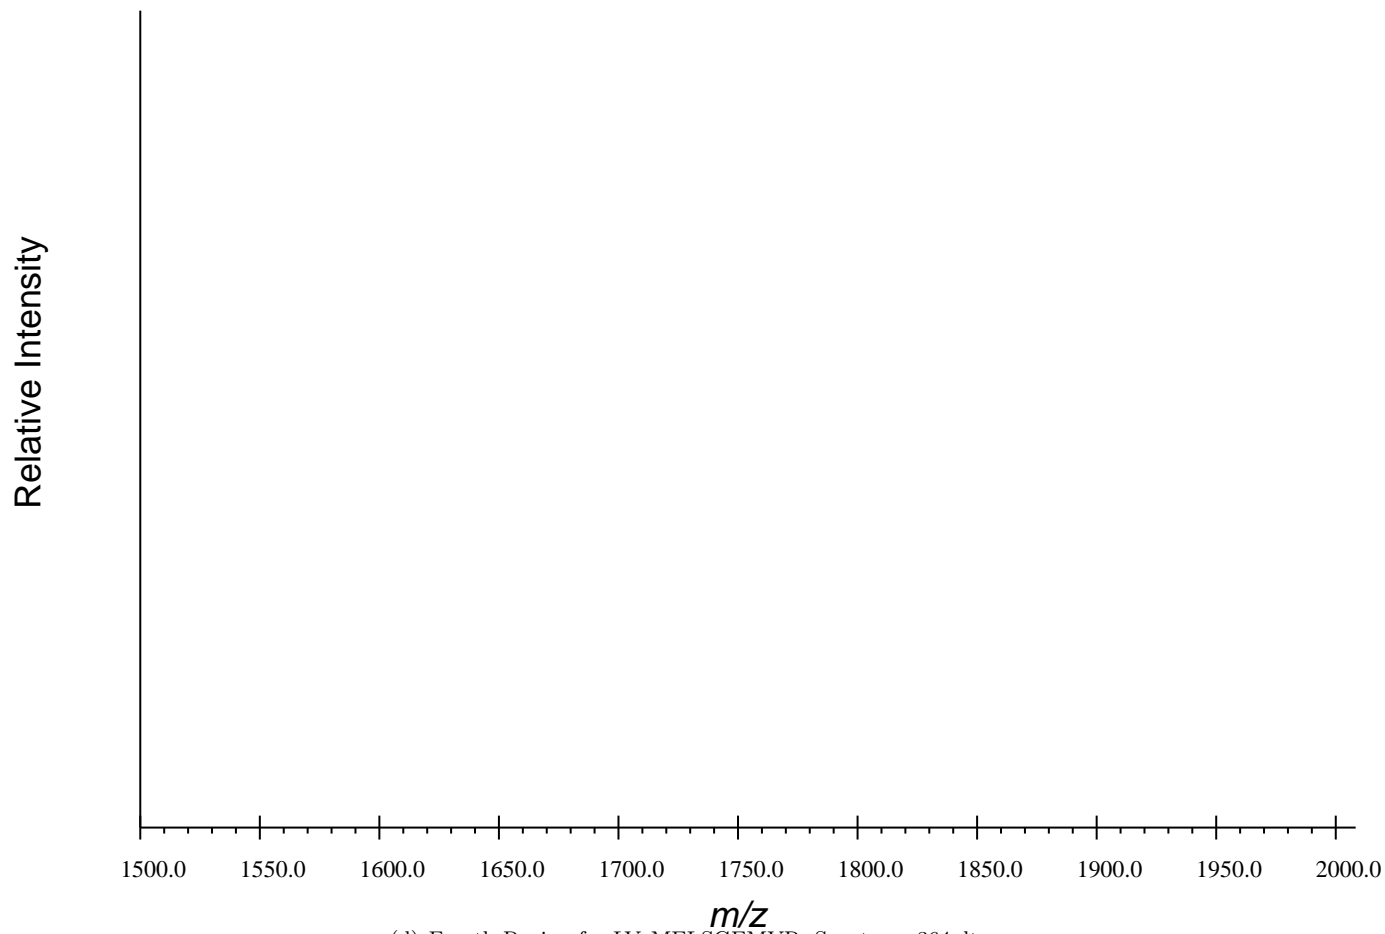

(d) Fourth Region for LVoMELSGEMVR, Spectrum 364.dta

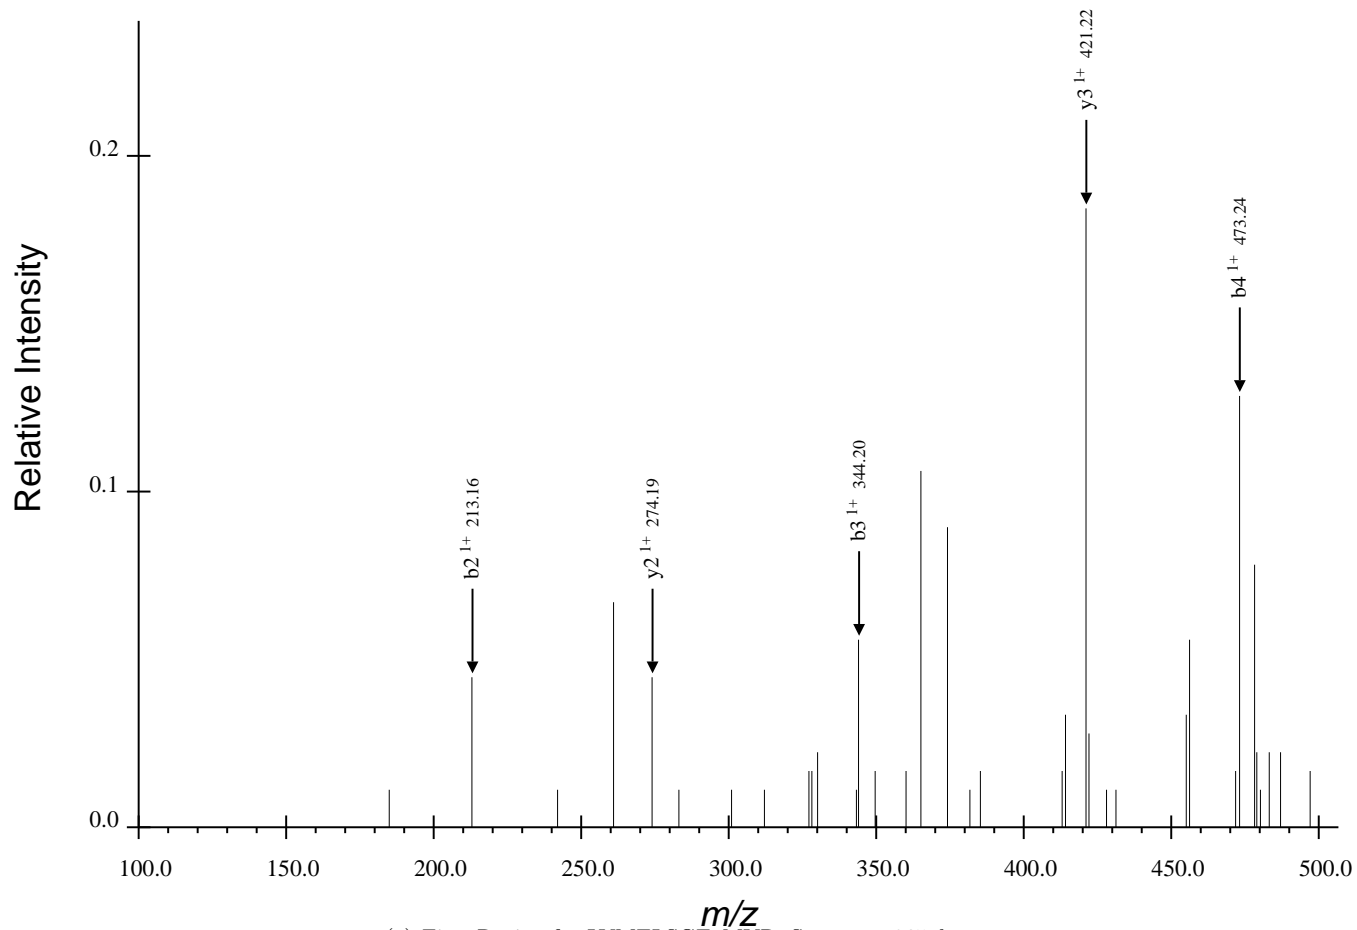

(a) First Region for LVMELSGEoMVR, Spectrum 365.dta

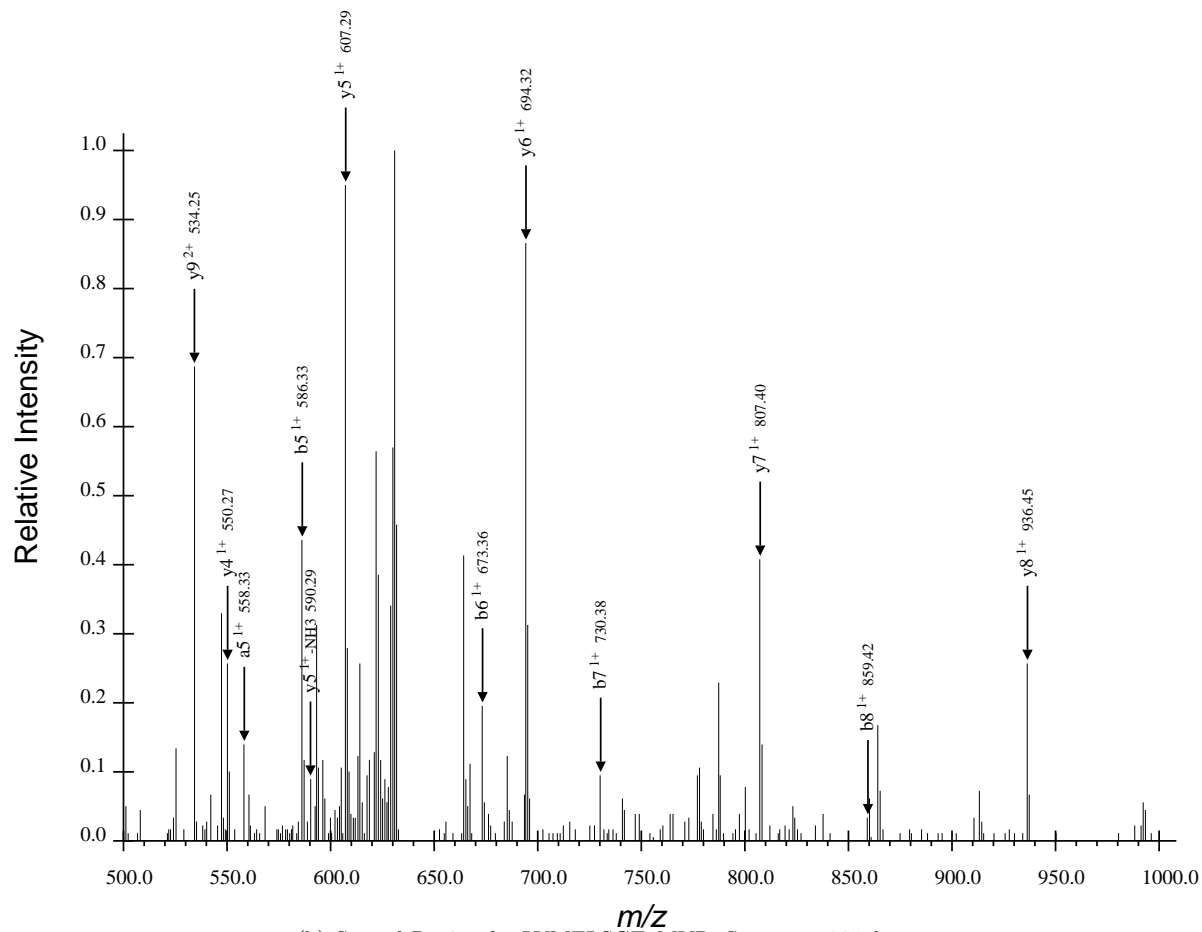

(b) Second Region for LVMELSGEoMVR, Spectrum 365.dta

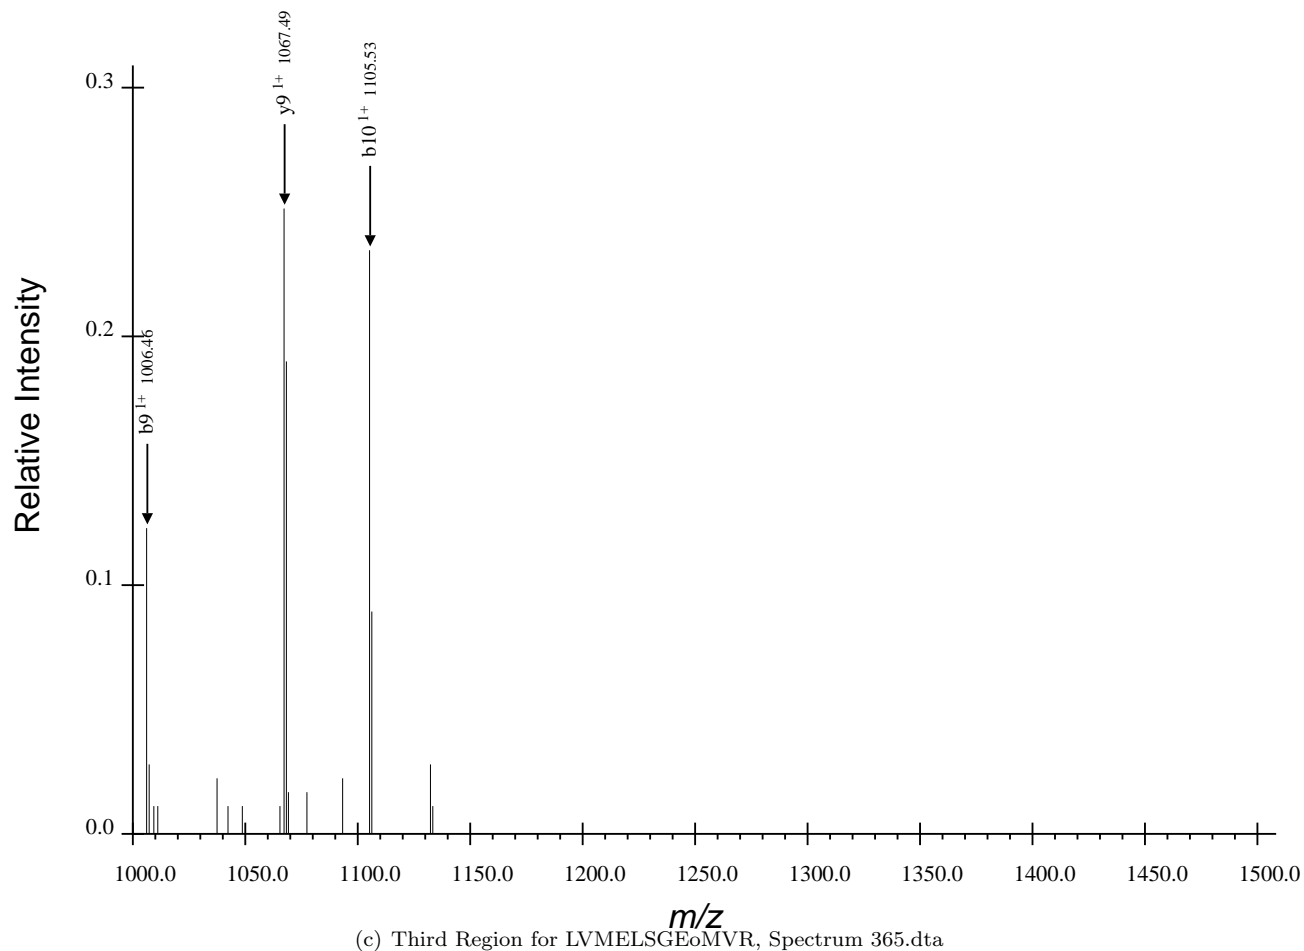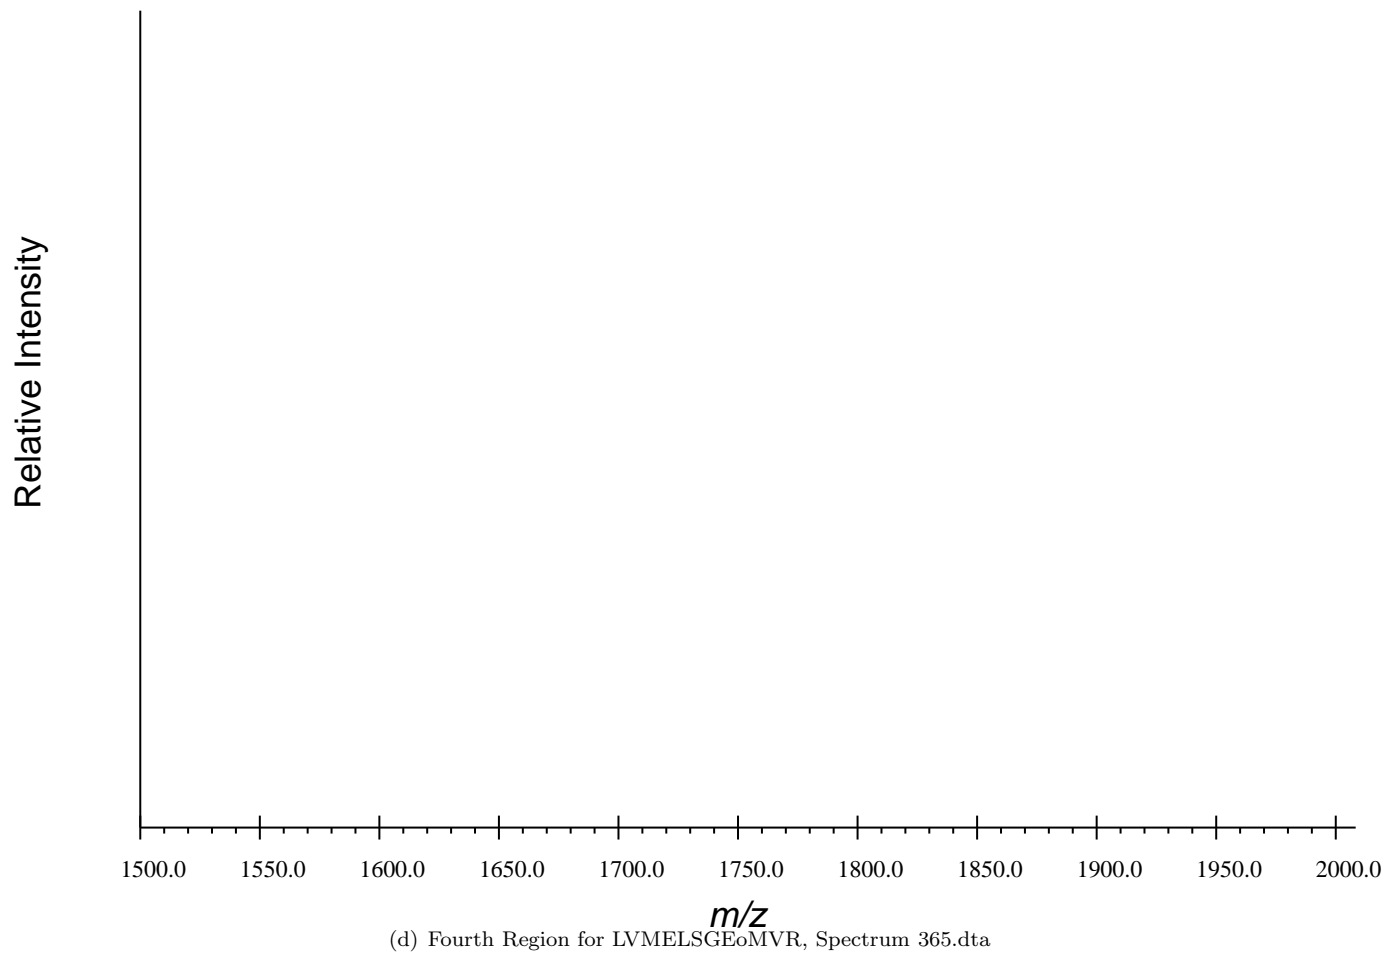



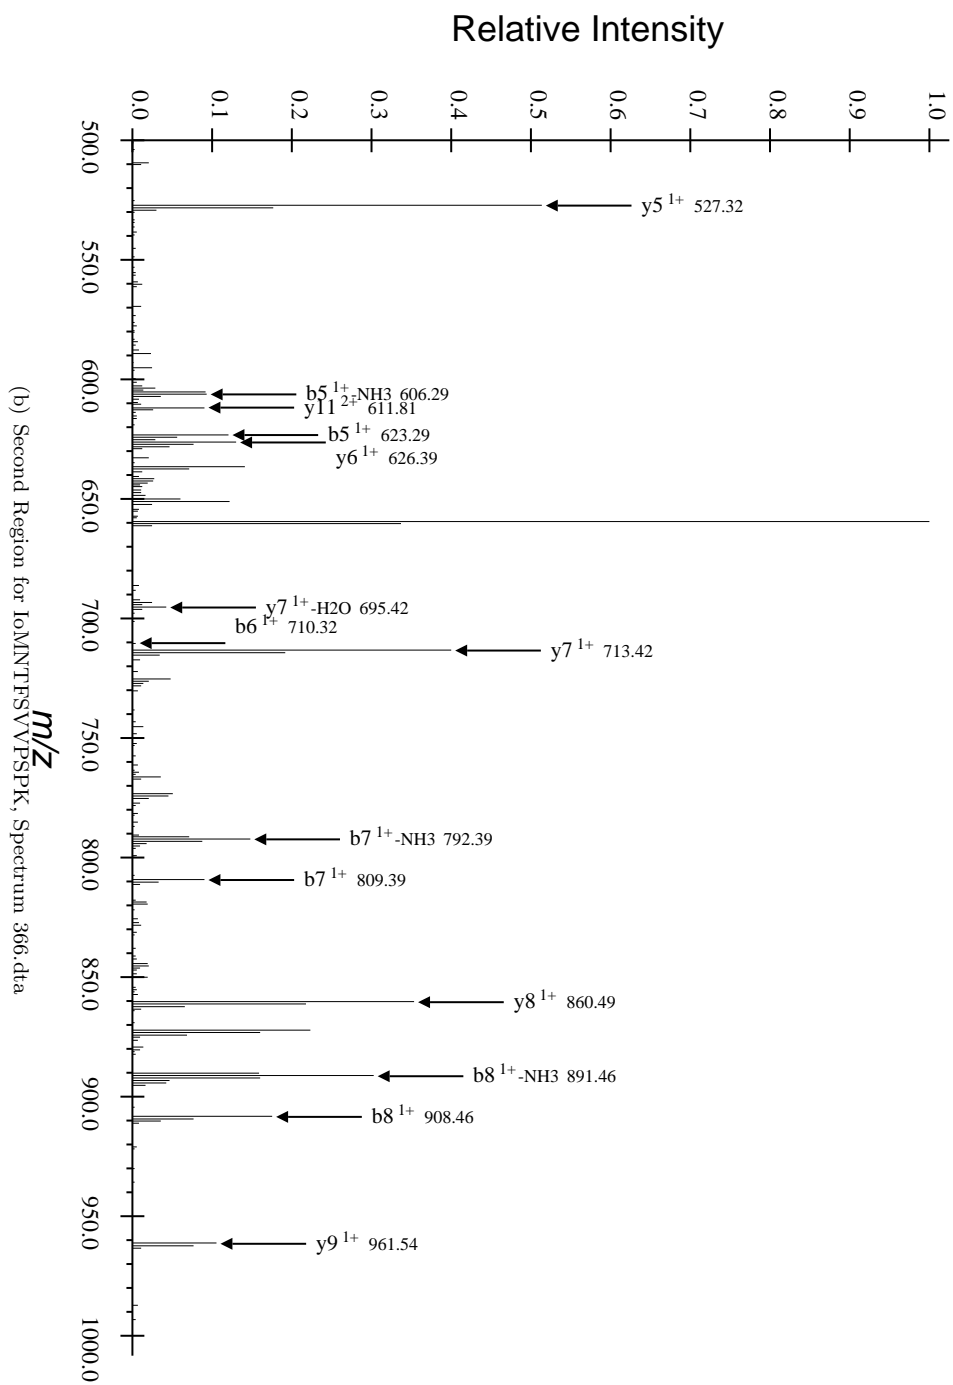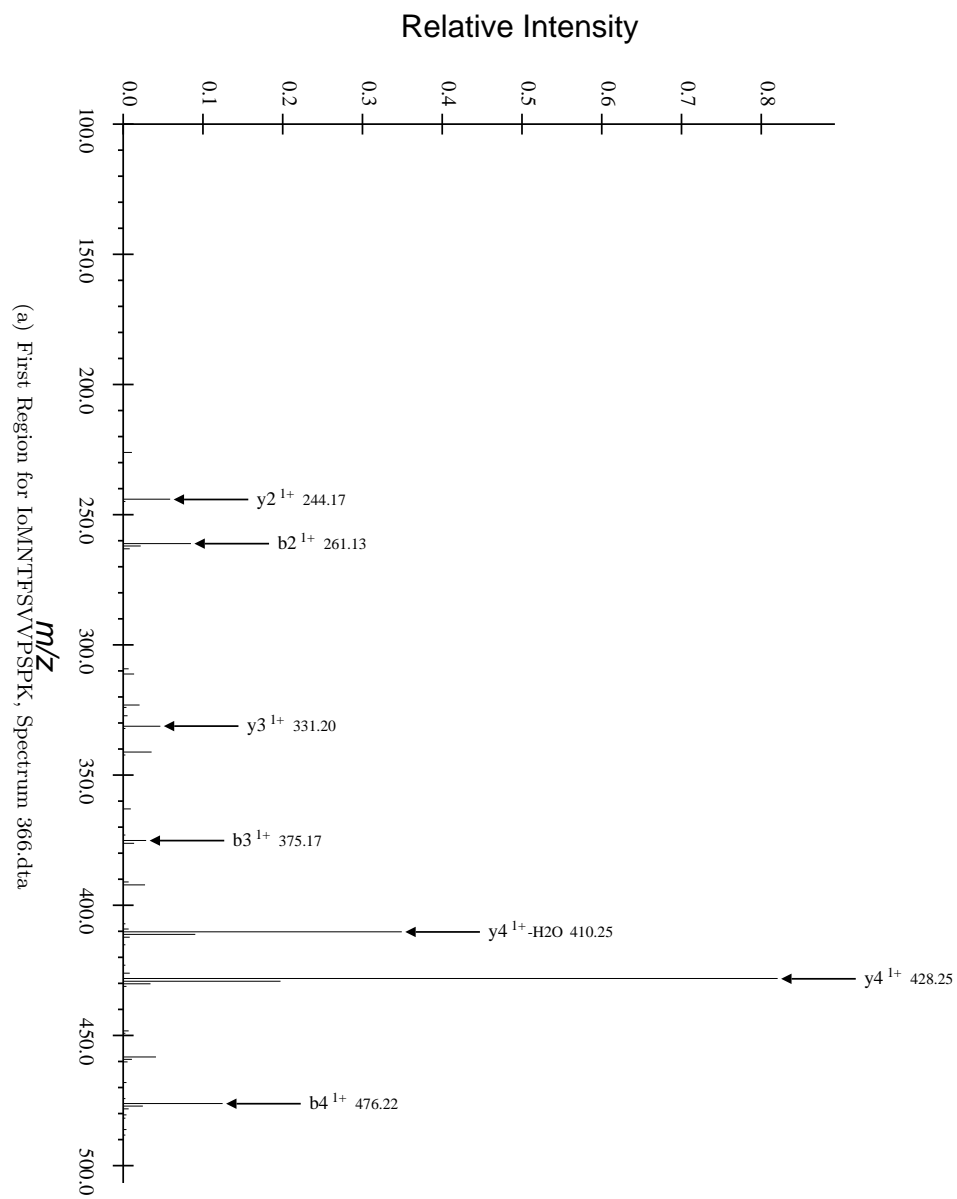

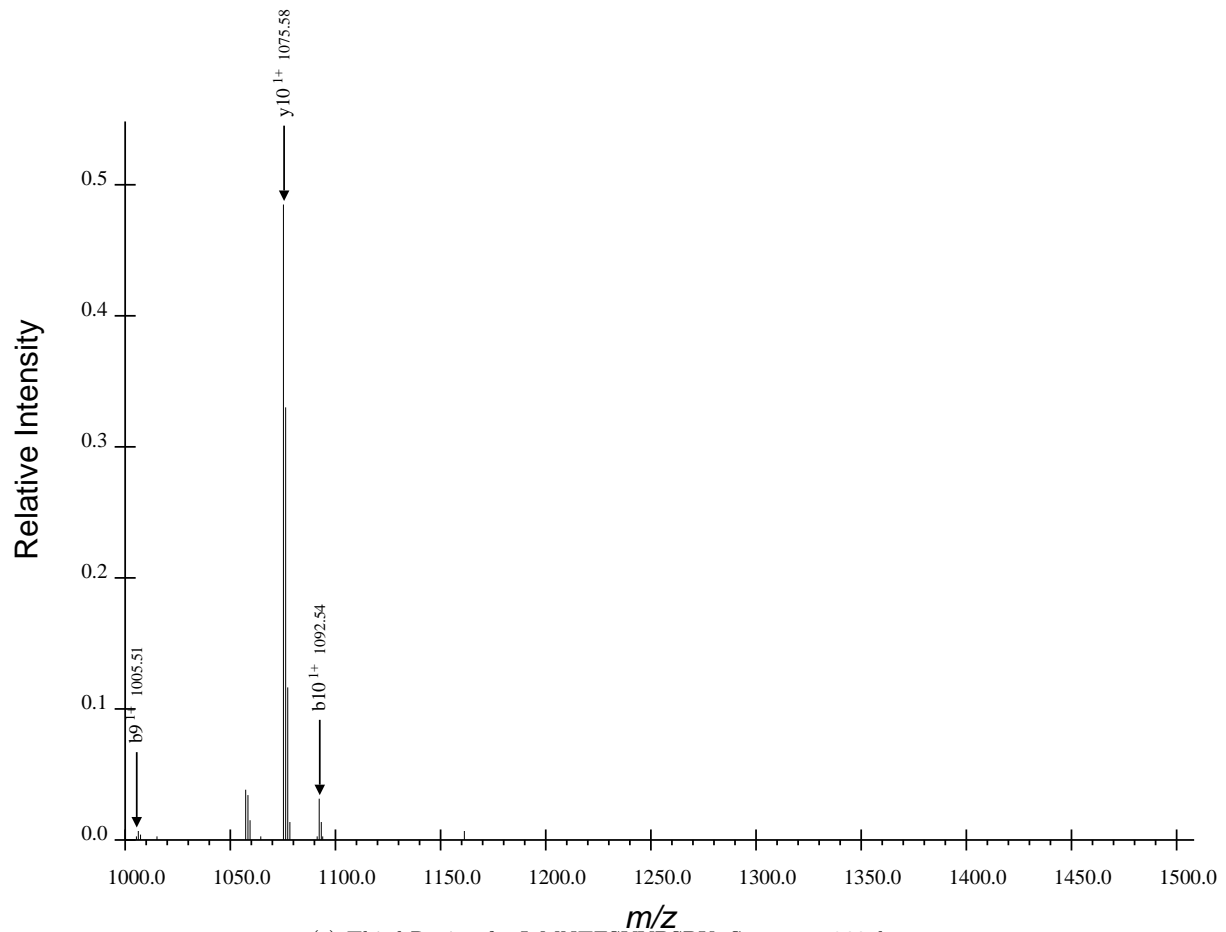

(c) Third Region for IoMNTFSVVPSPK, Spectrum 366.dta

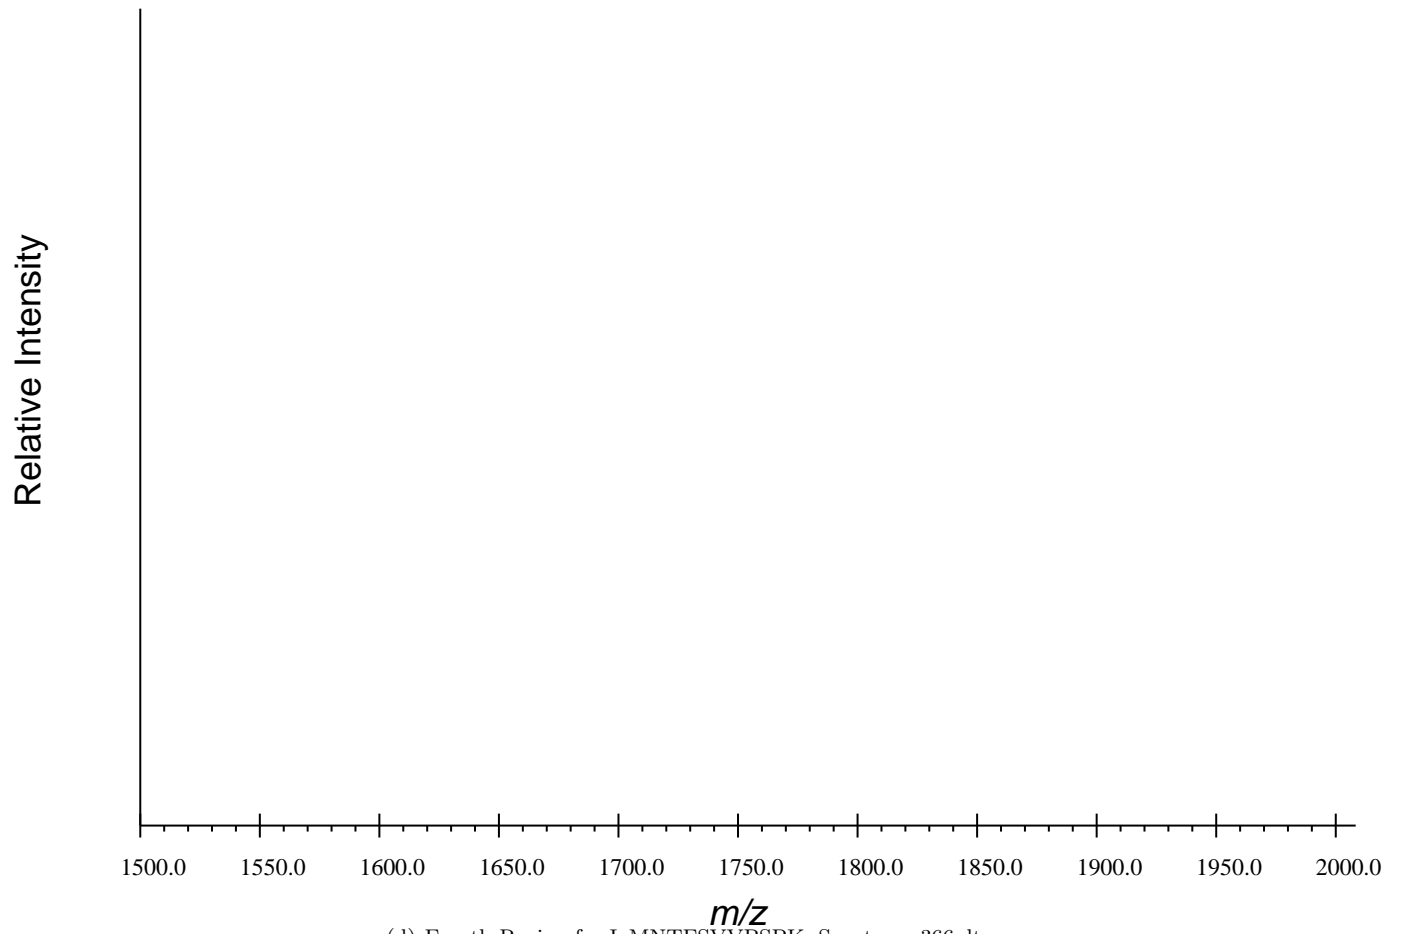

(d) Fourth Region for IoMNTFSVVPSPK, Spectrum 366.dta

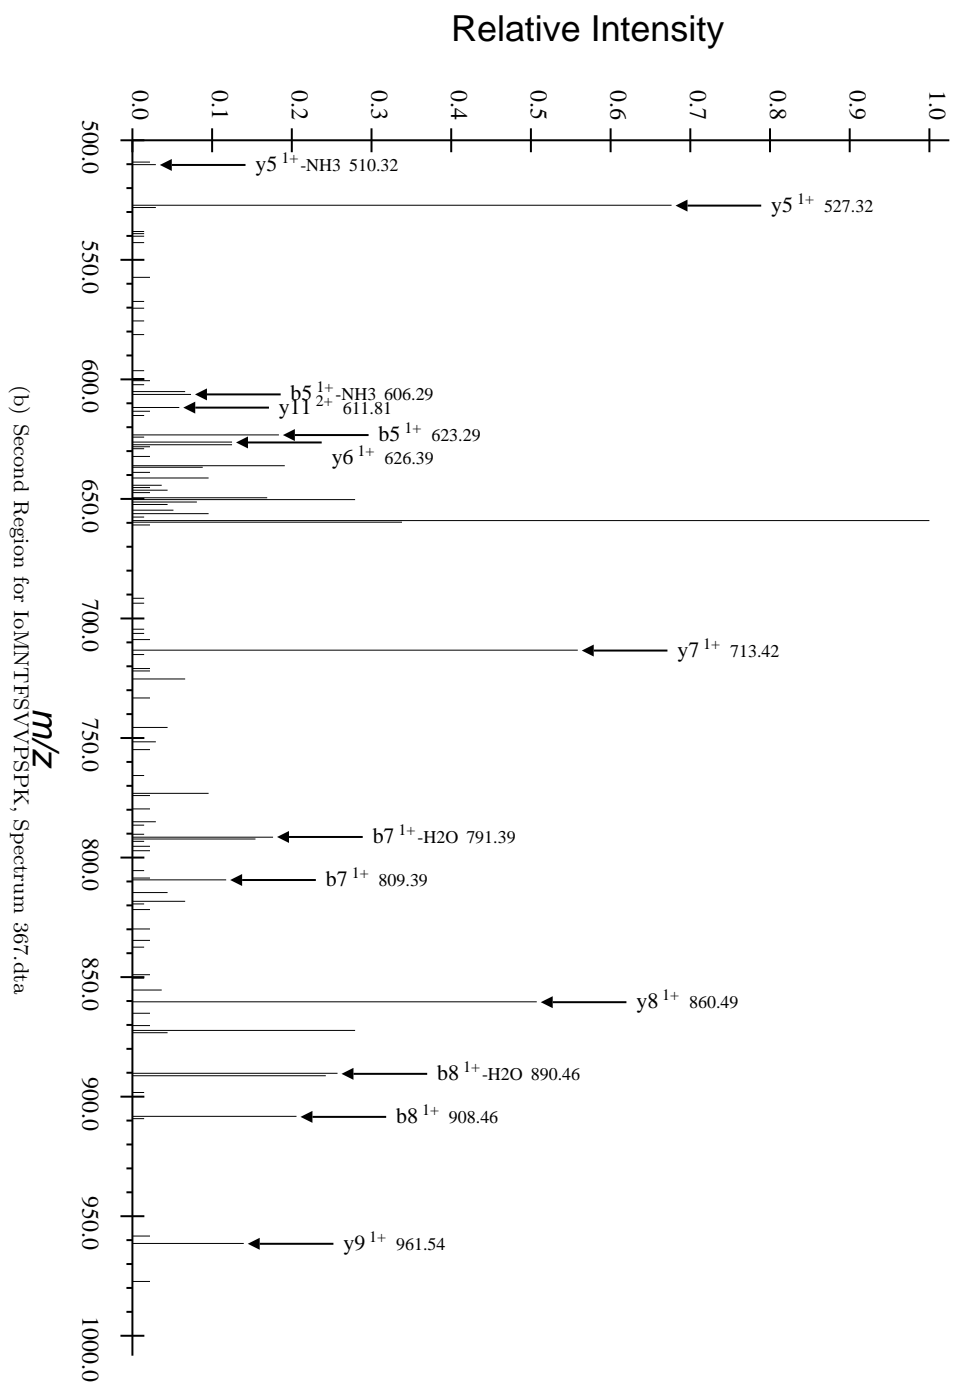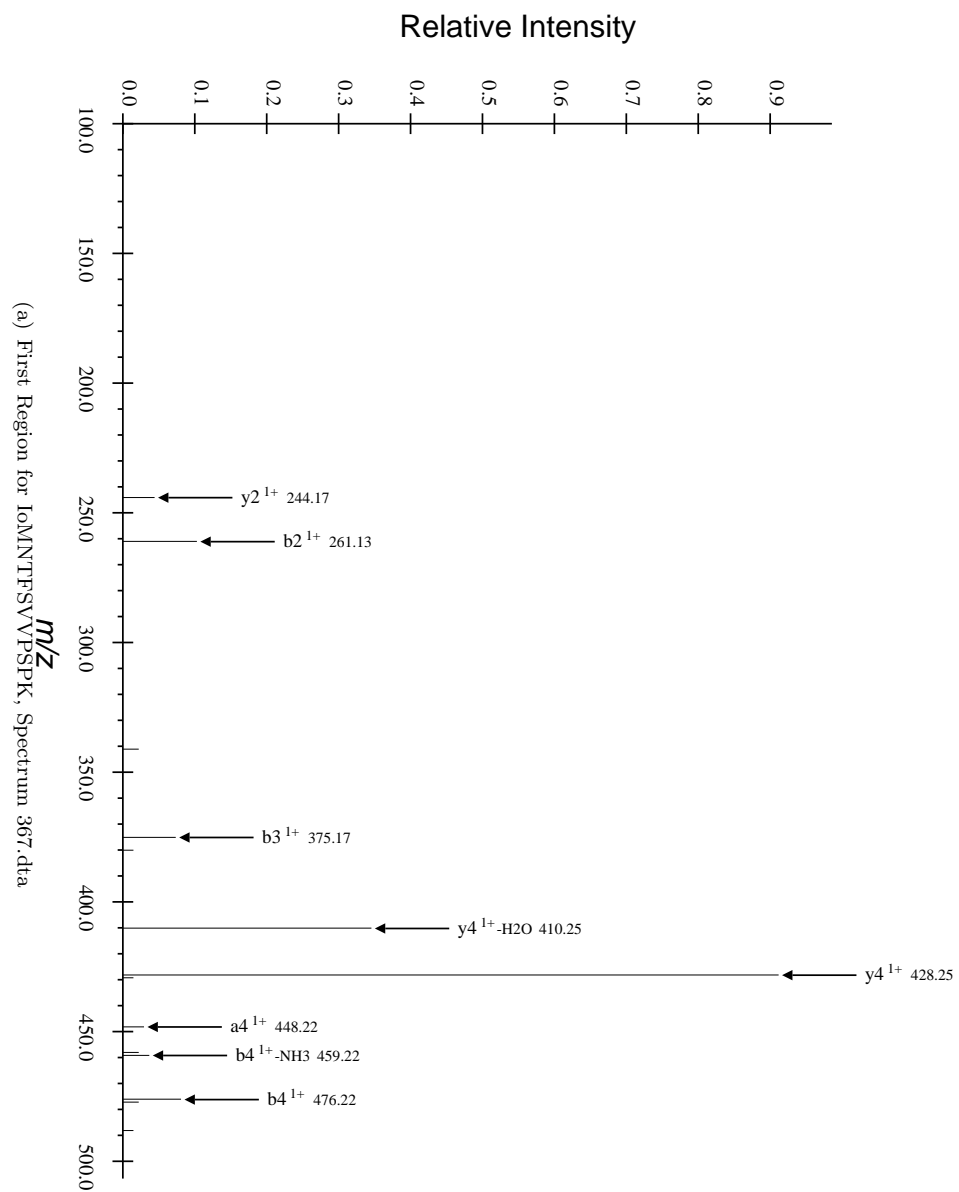

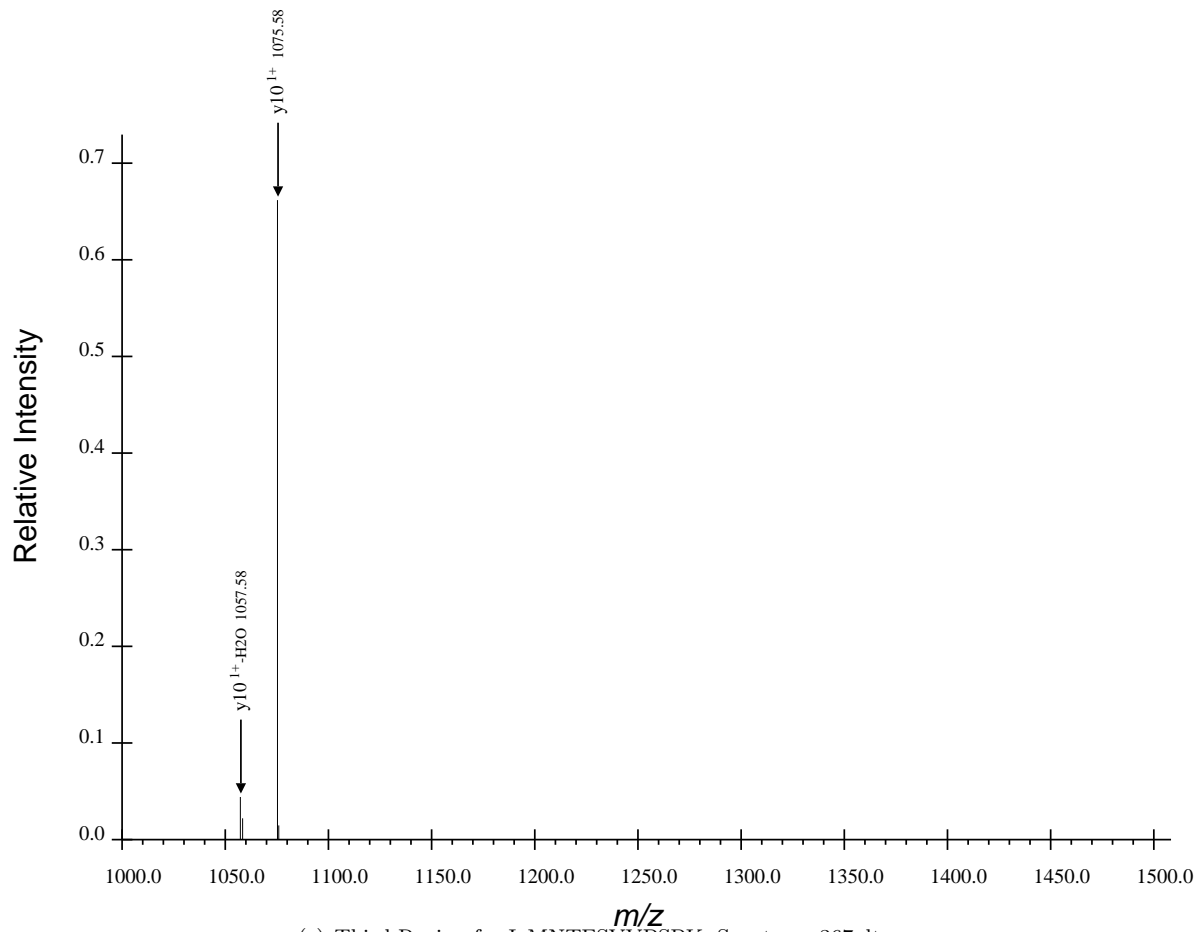

(c) Third Region for IoMNTFSVVVSPK, Spectrum 367.dta

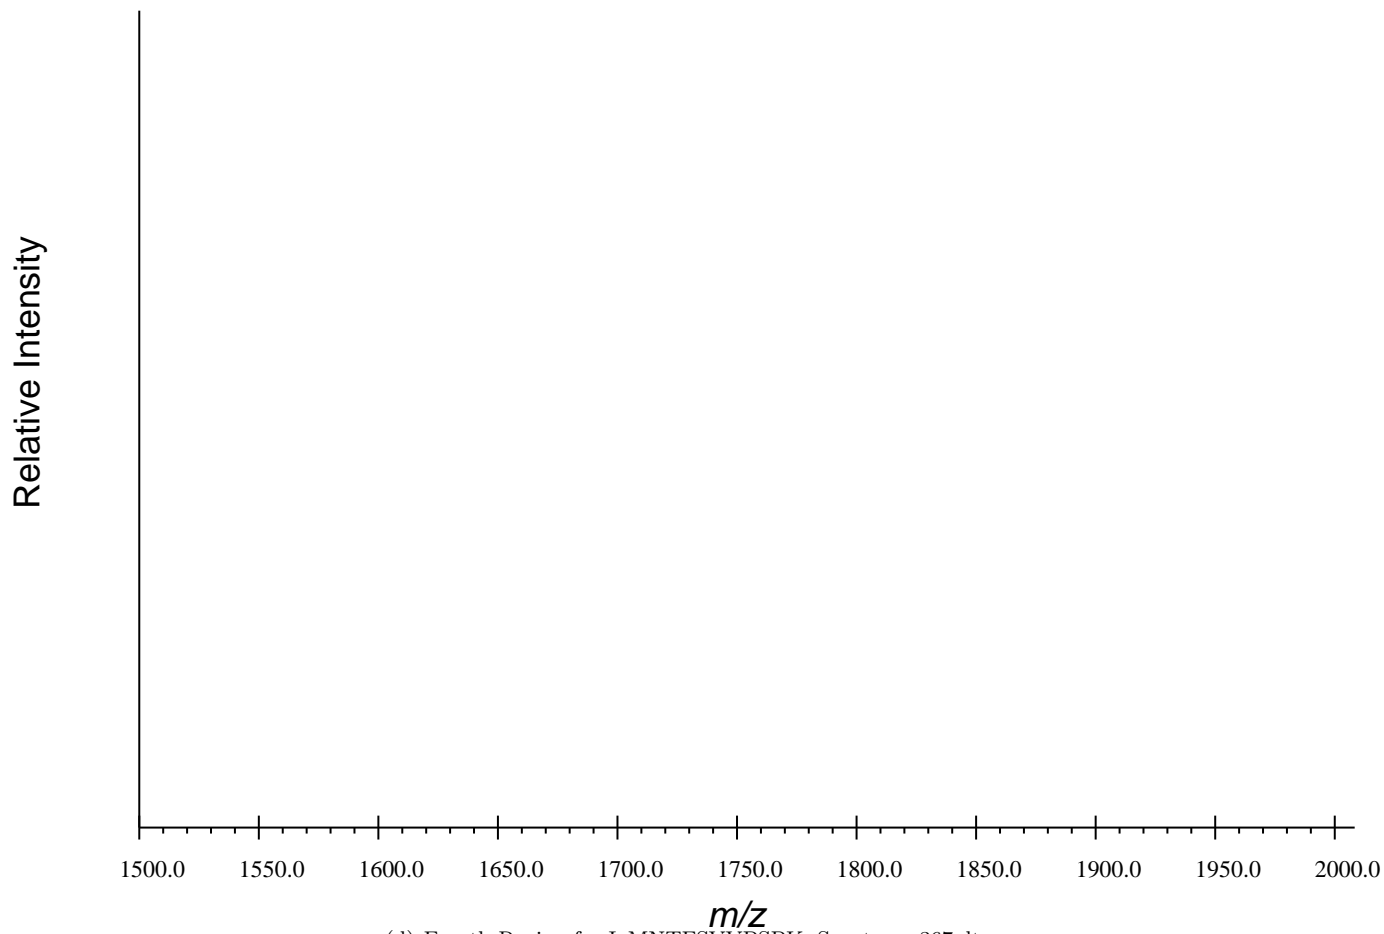

(d) Fourth Region for IoMNTFSVVVSPK, Spectrum 367.dta

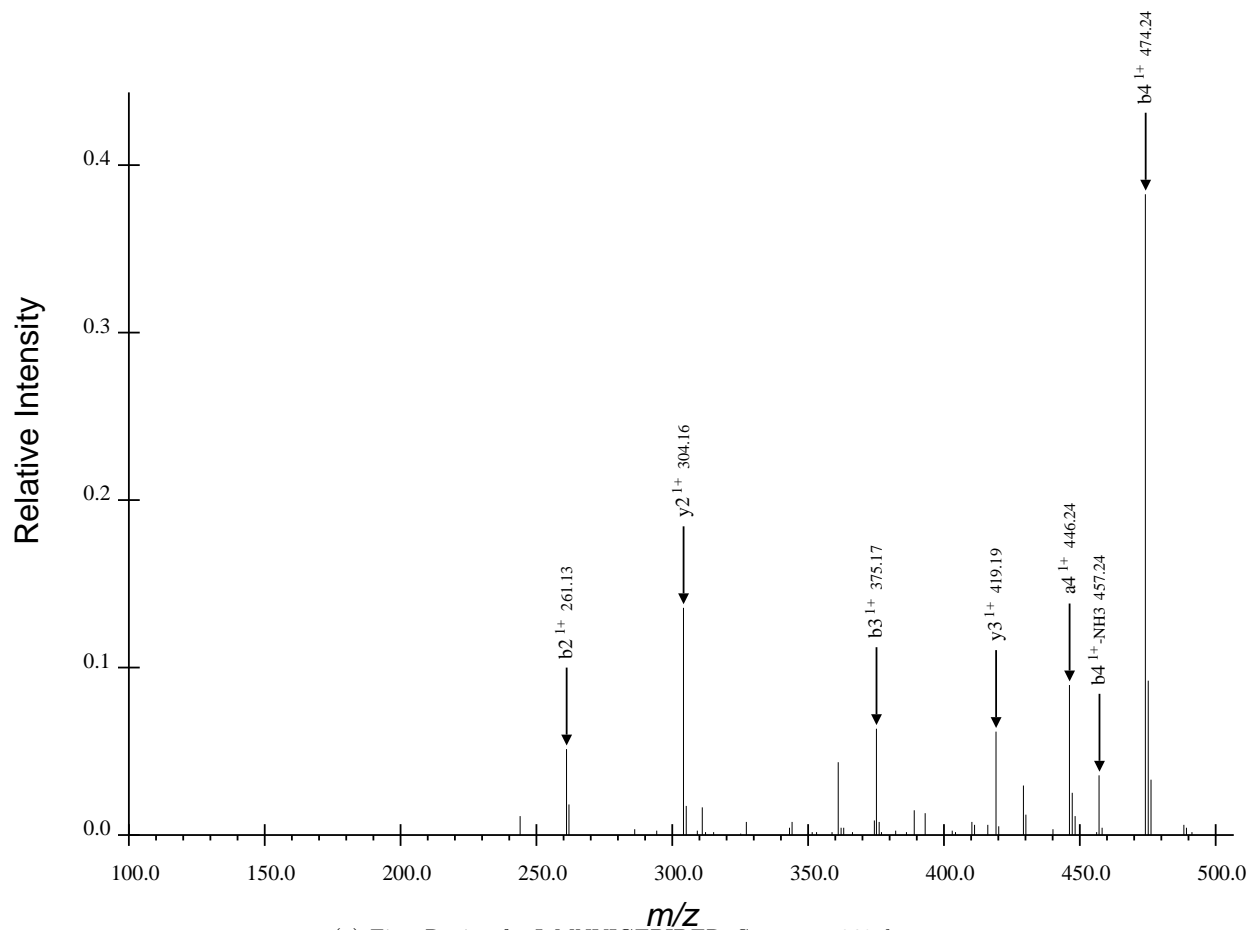

(a) First Region for IoMNVIGEPIDER, Spectrum 368.dta

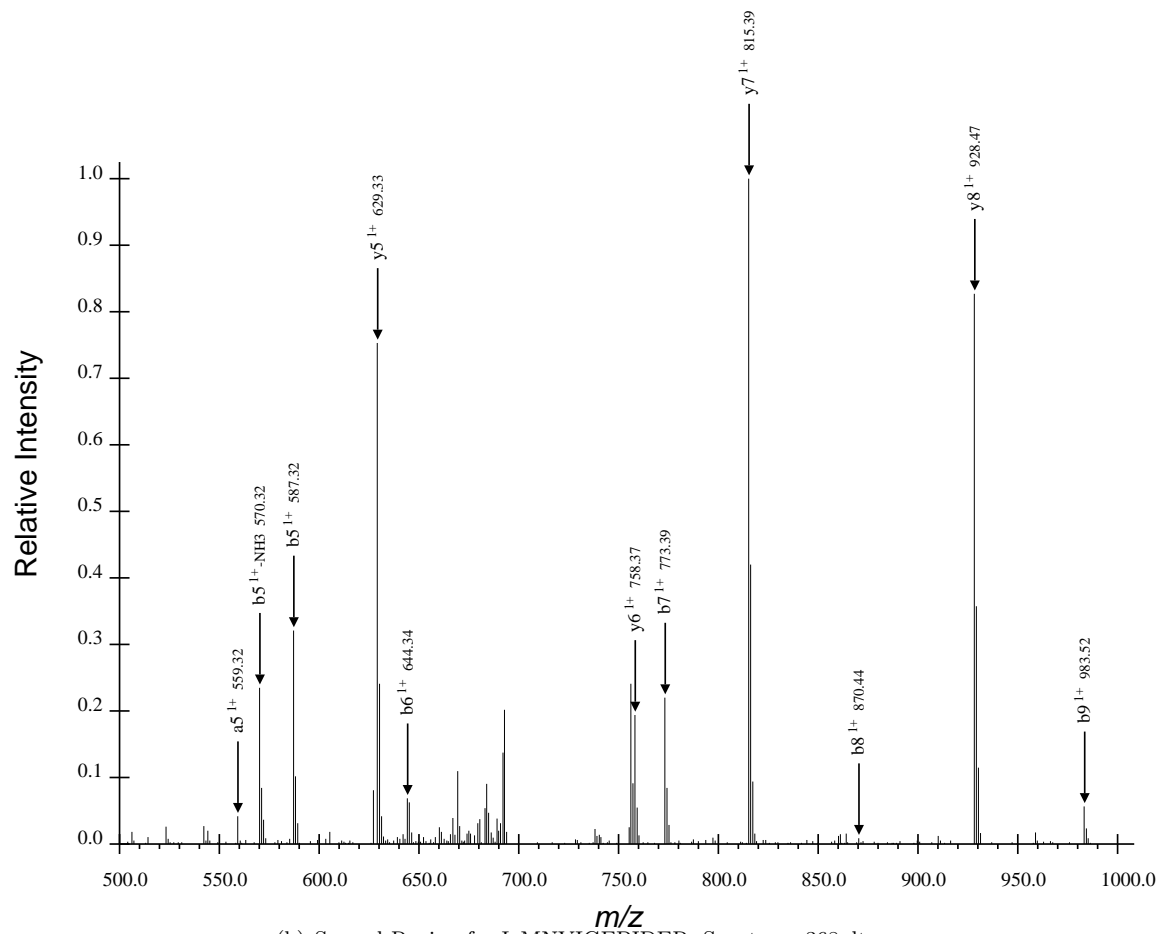

(b) Second Region for IoMNVIGEPIDER, Spectrum 368.dta

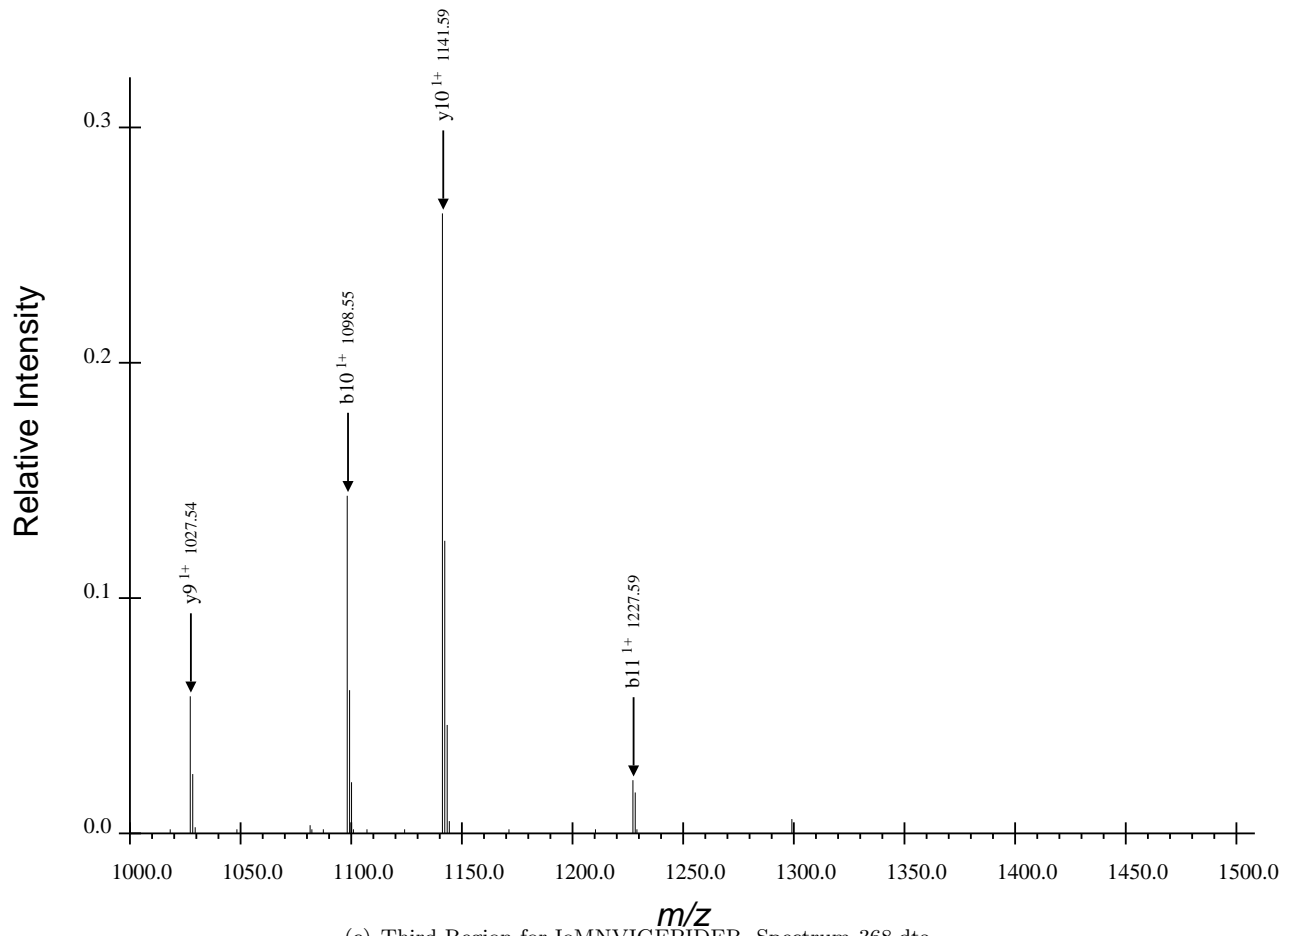

(c) Third Region for IoMNVIGEPIDER, Spectrum 368.dta

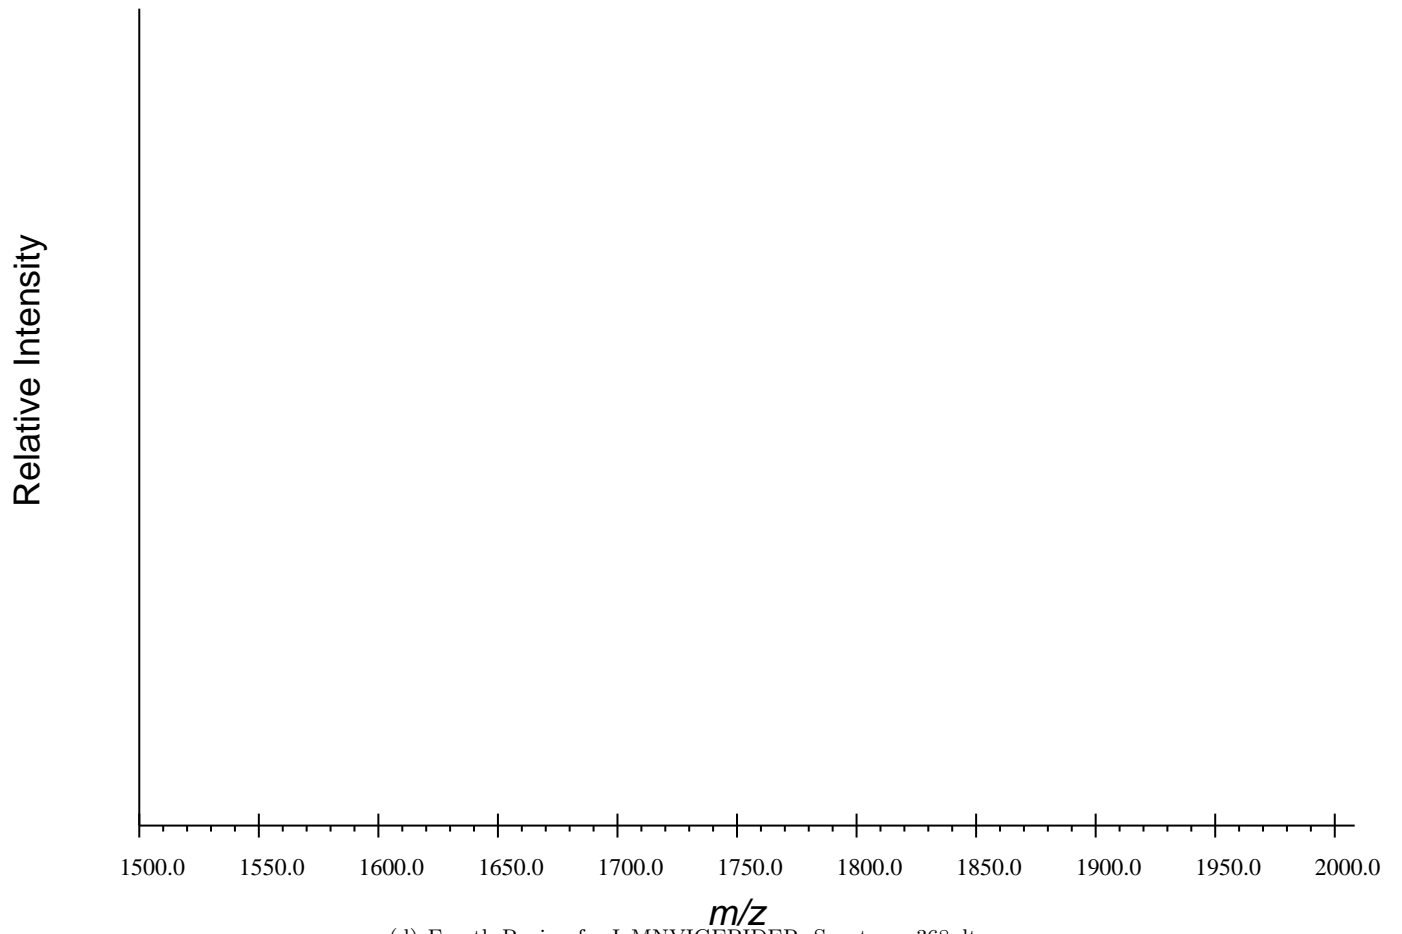

(d) Fourth Region for IoMNVIGEPIDER, Spectrum 368.dta

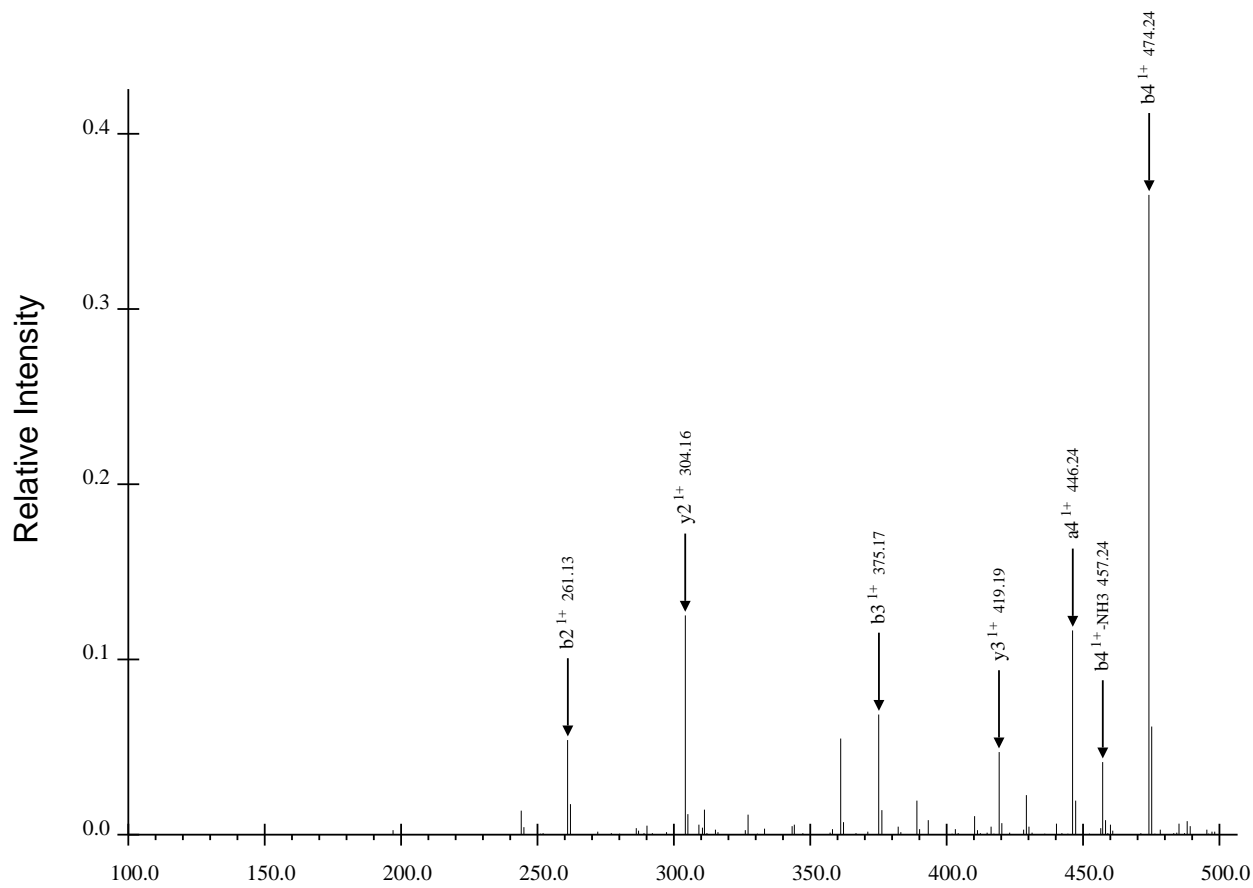

(a) First Region for IoMNVIGEPIDER, Spectrum 369.dta

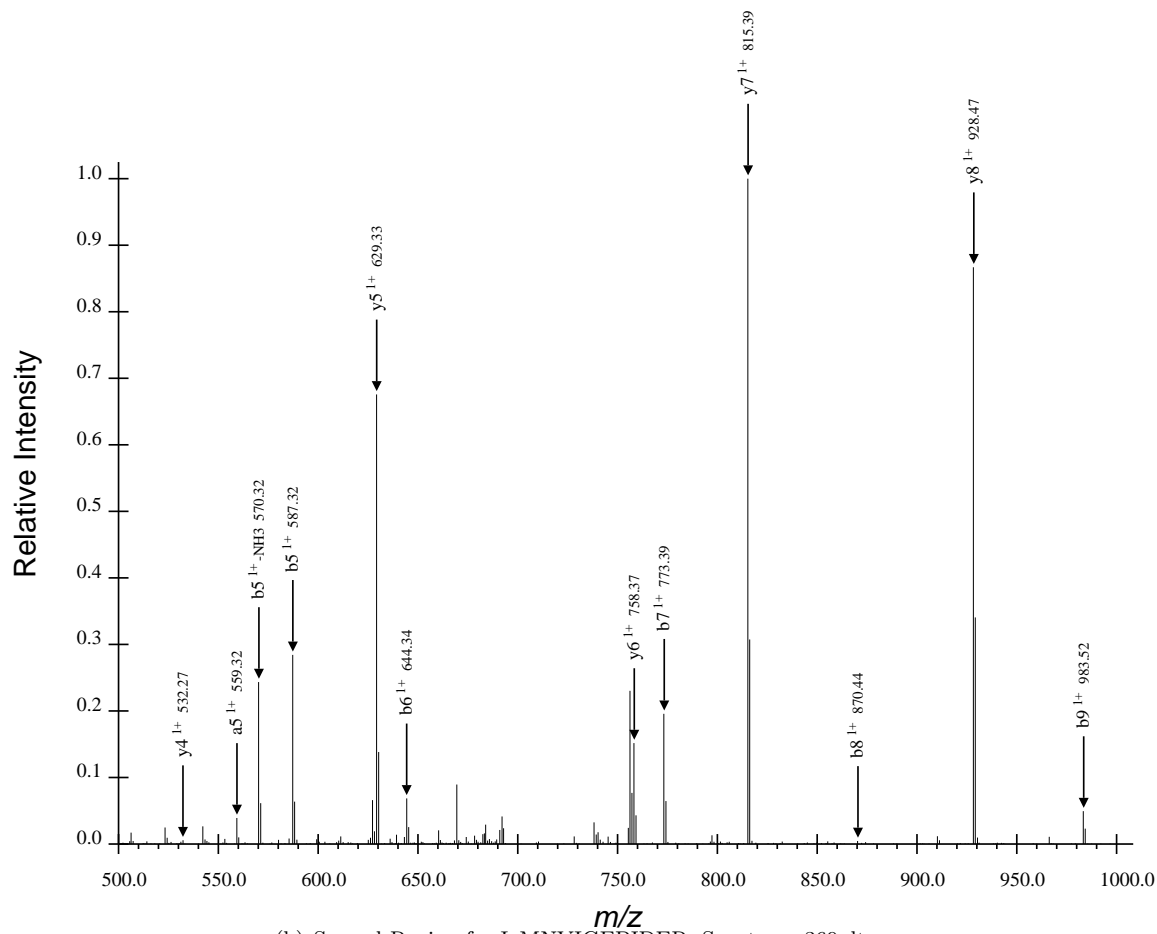

(b) Second Region for IoMNVIGEPIDER, Spectrum 369.dta

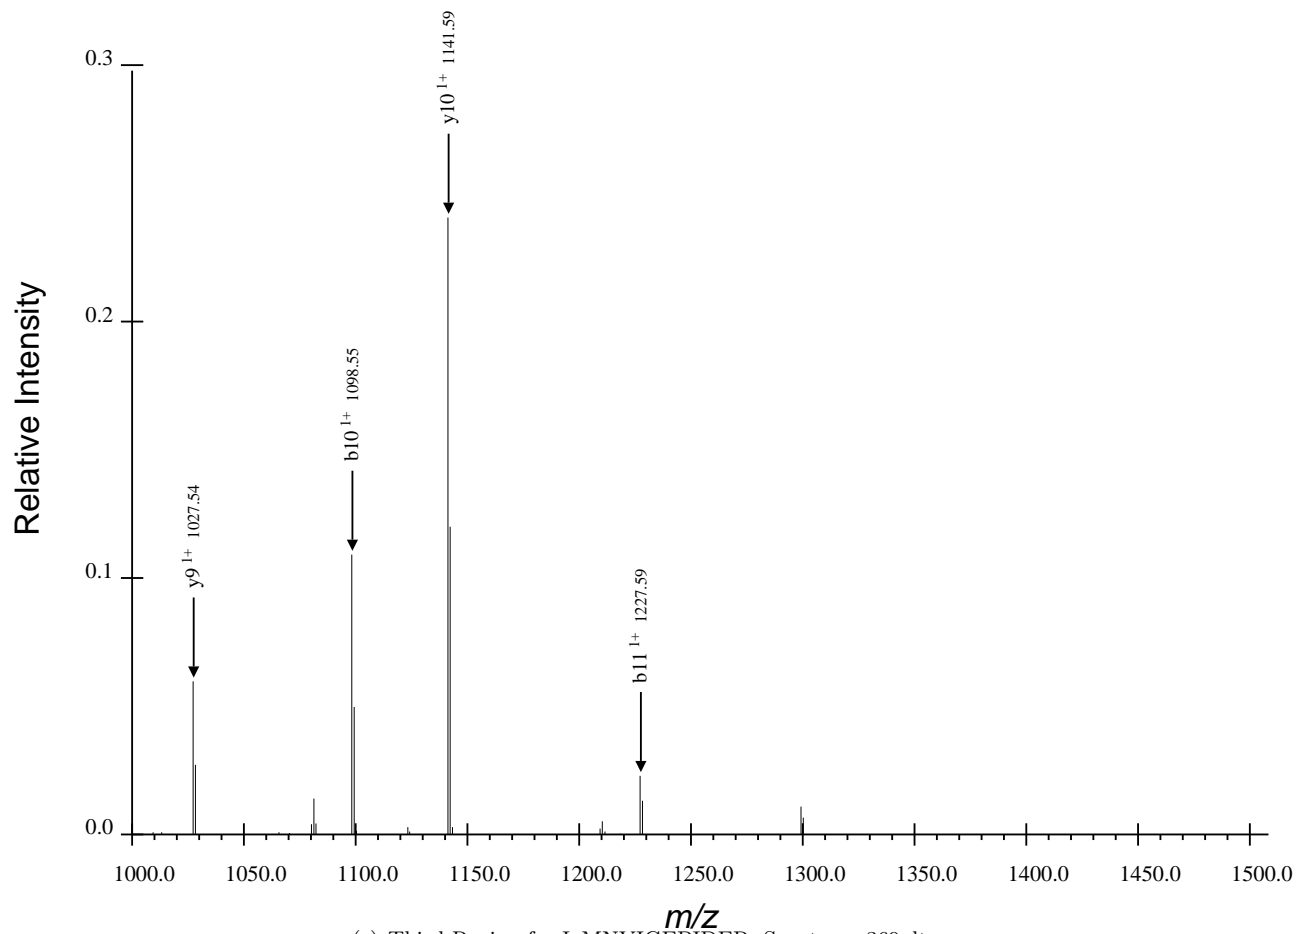

(c) Third Region for IoMNVIGEPIDER, Spectrum 369.dta

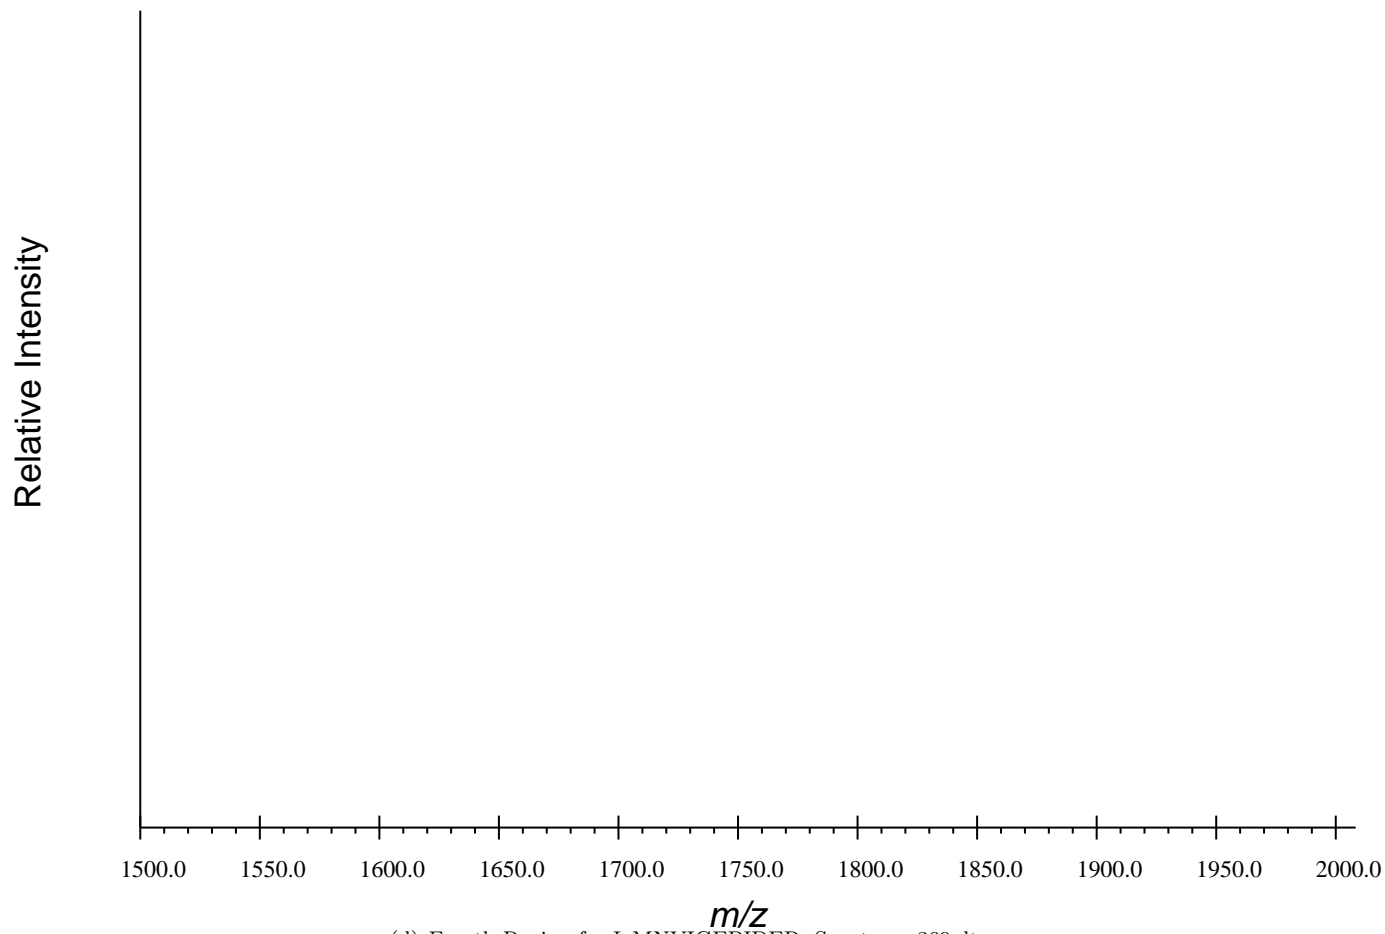

(d) Fourth Region for IoMNVIGEPIDER, Spectrum 369.dta



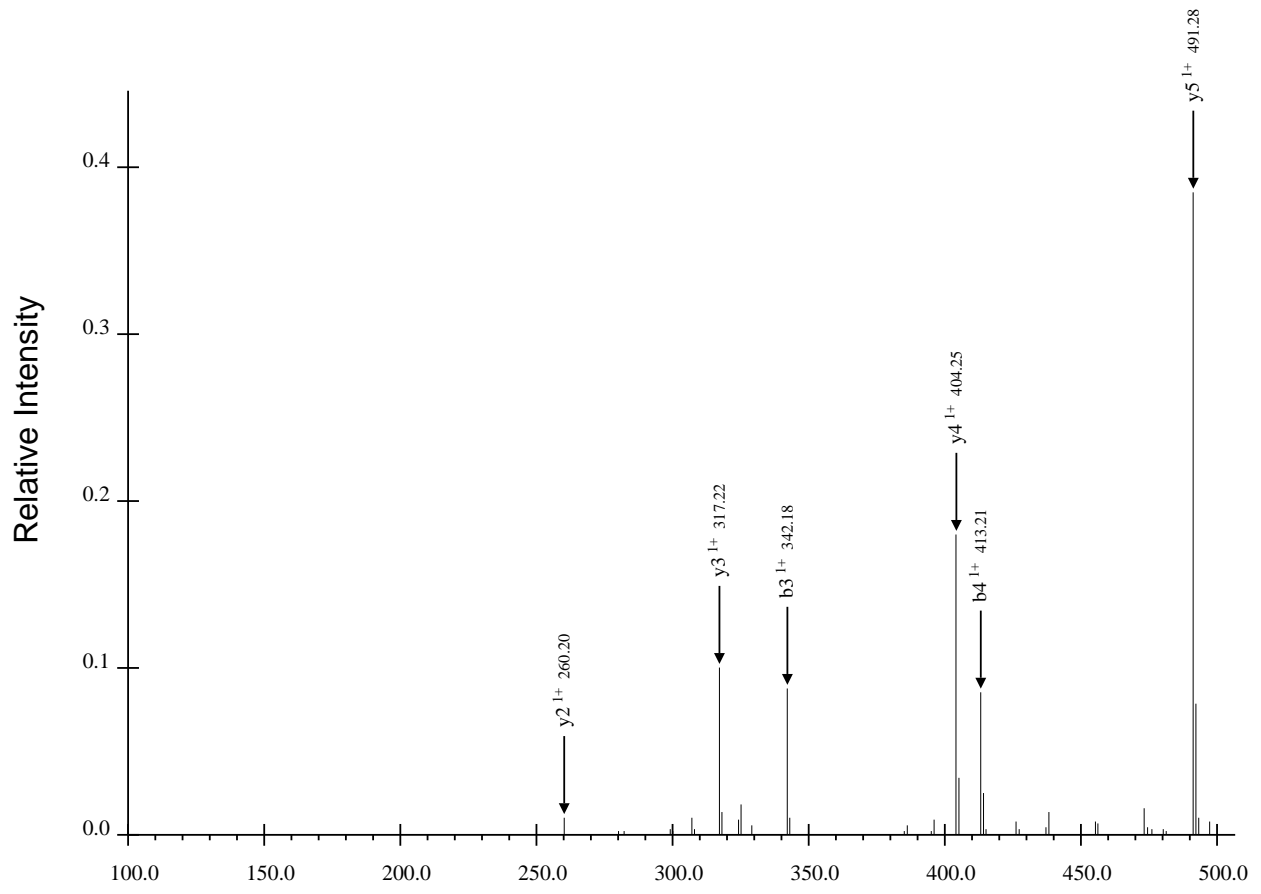

(a) First Region for NVQAEEoMVEFSSGLK, Spectrum 370.dta

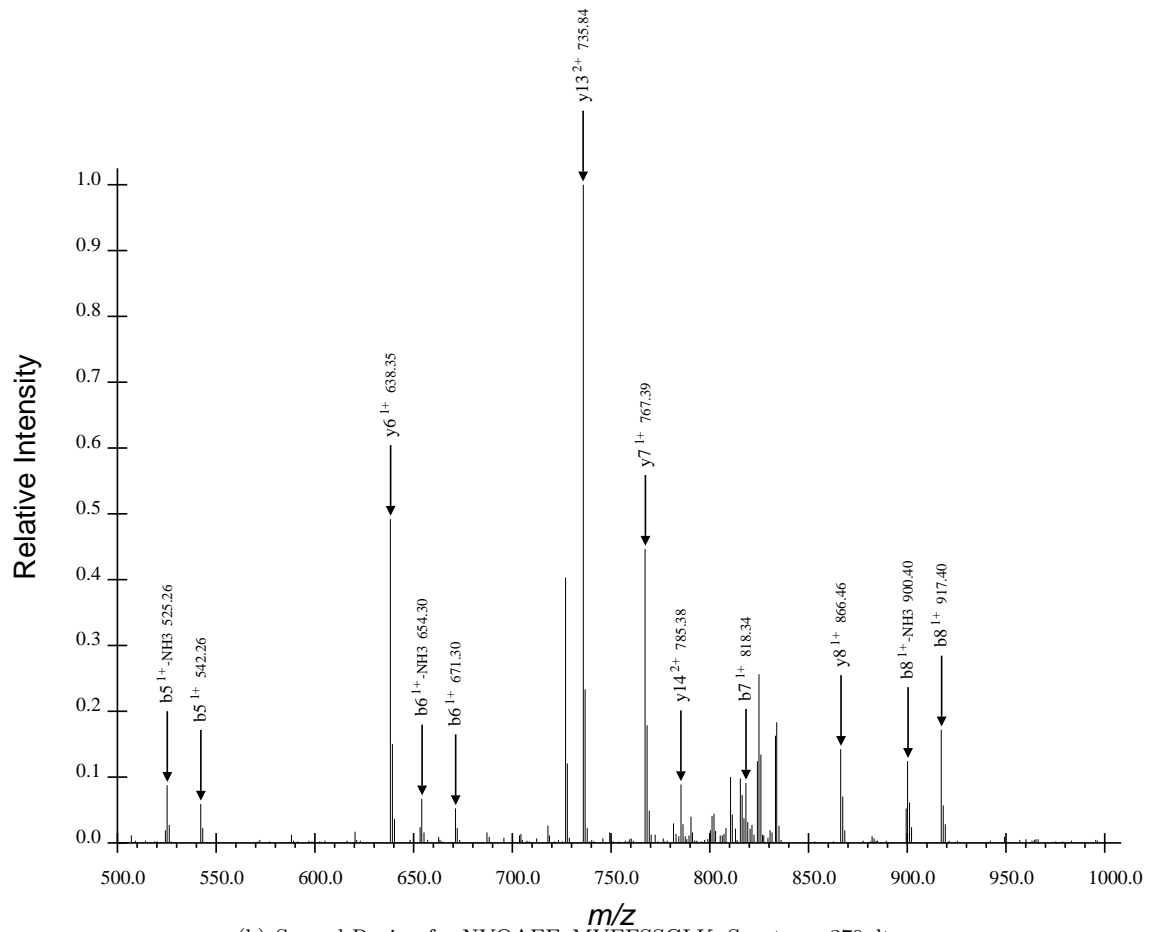

(b) Second Region for NVQAEEoMVEFSSGLK, Spectrum 370.dta

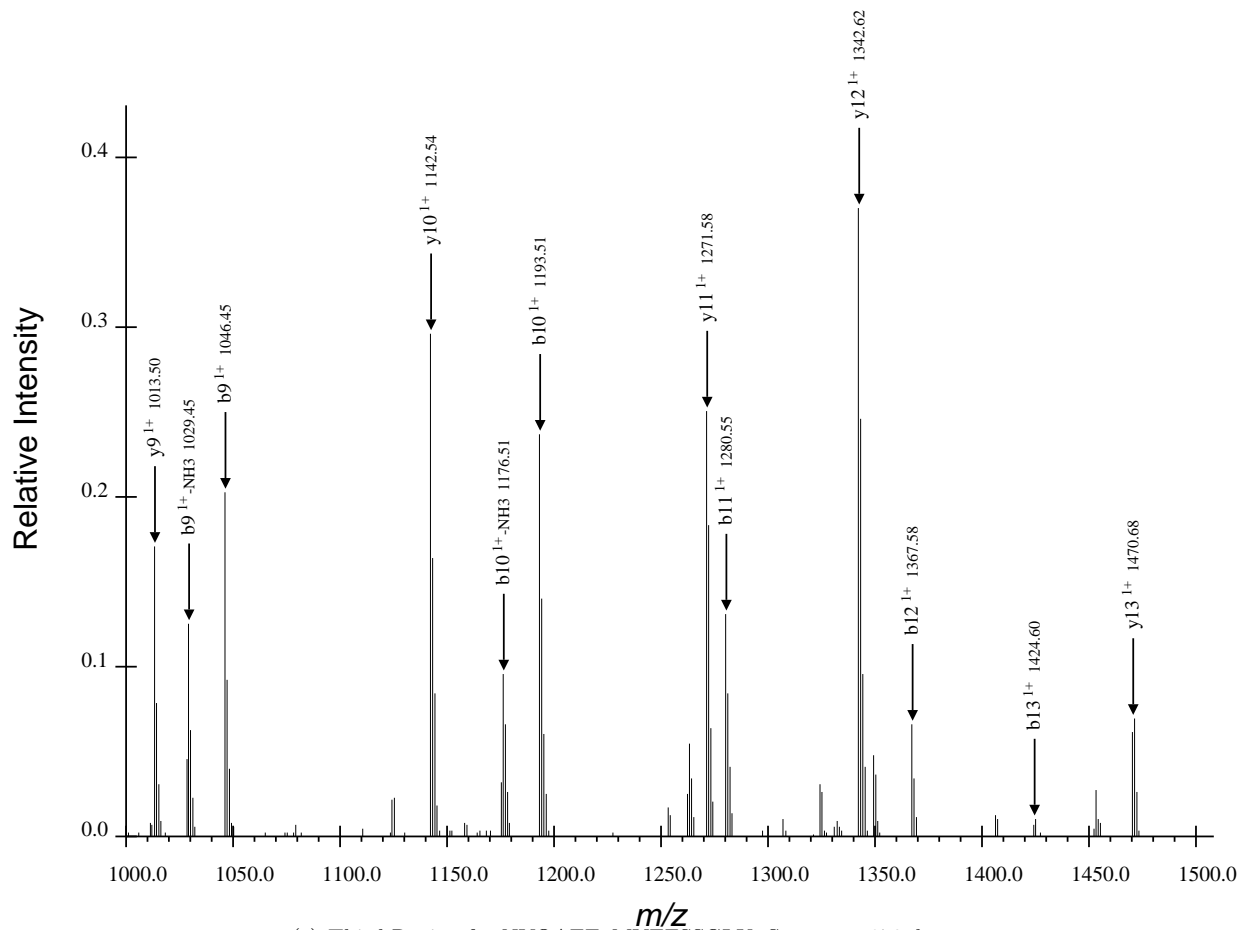

(c) Third Region for NVQAEEoMVEFSSGLK, Spectrum 370.dta

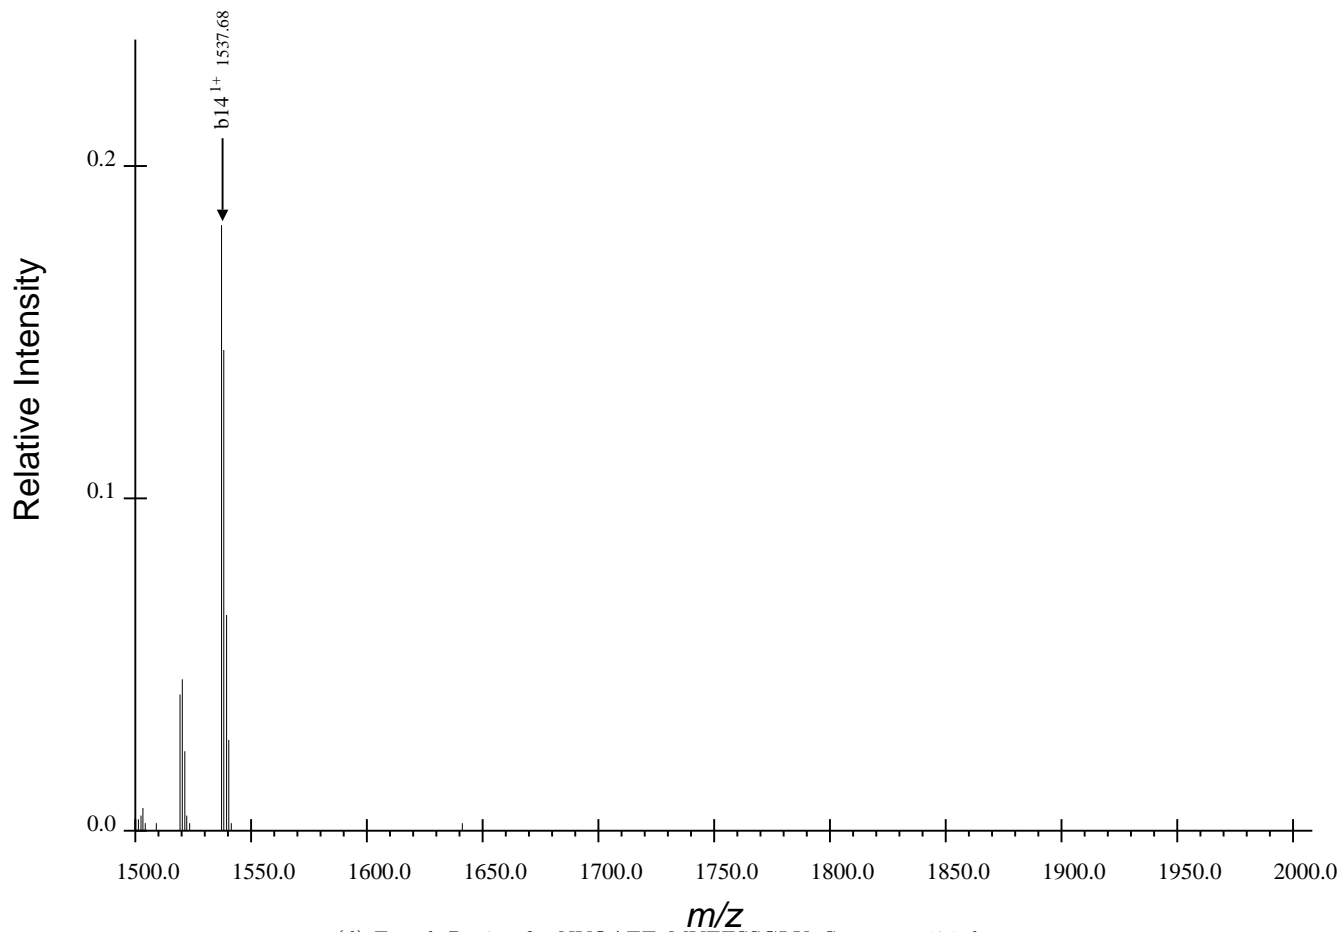

(d) Fourth Region for NVQAEEoMVEFSSGLK, Spectrum 370.dta

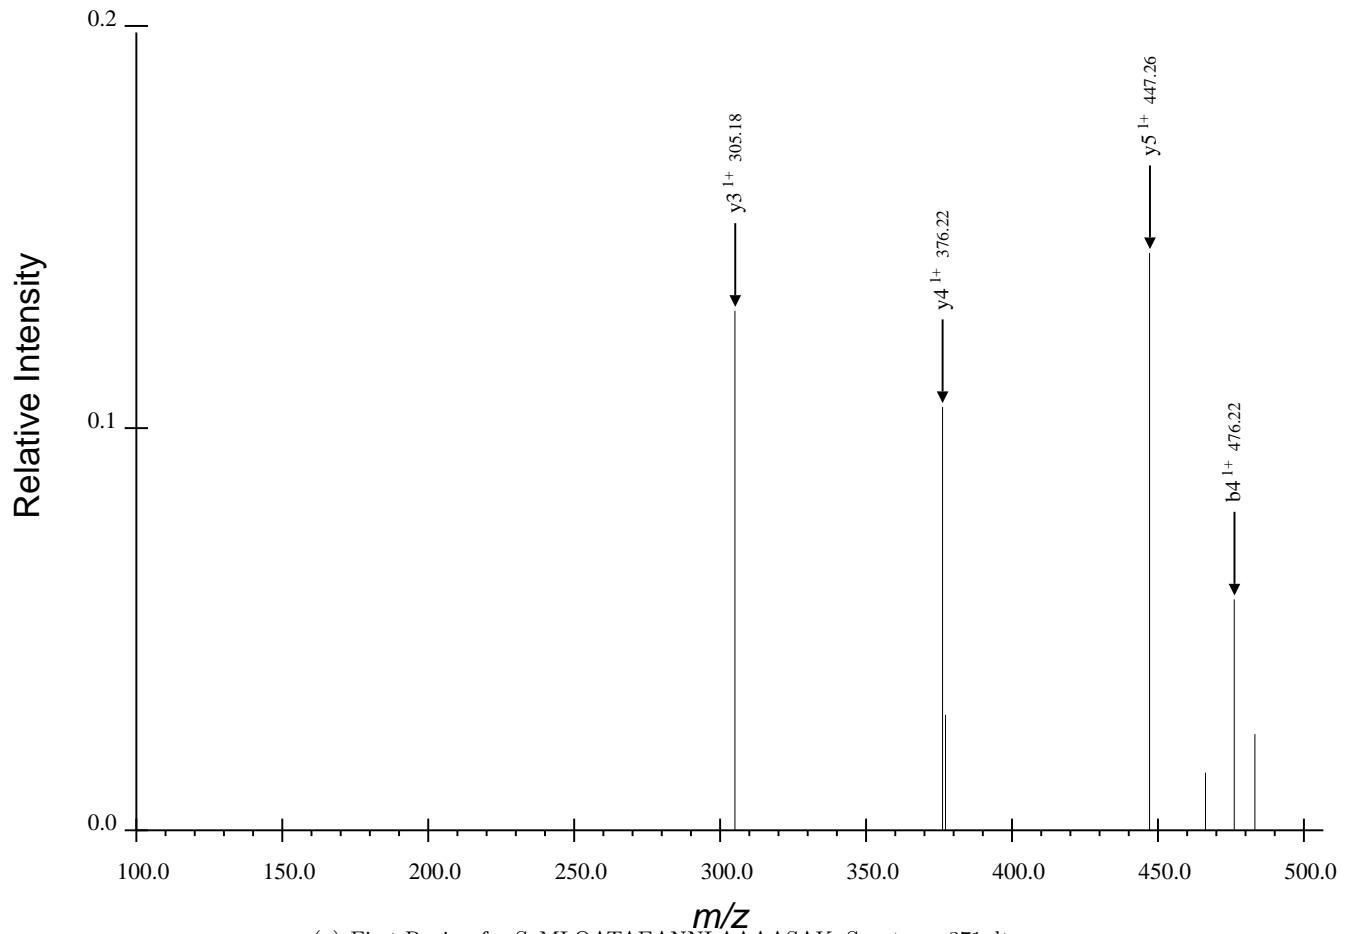

(a) First Region for SoMLQATAEANNLAAAASAK, Spectrum 371.dta

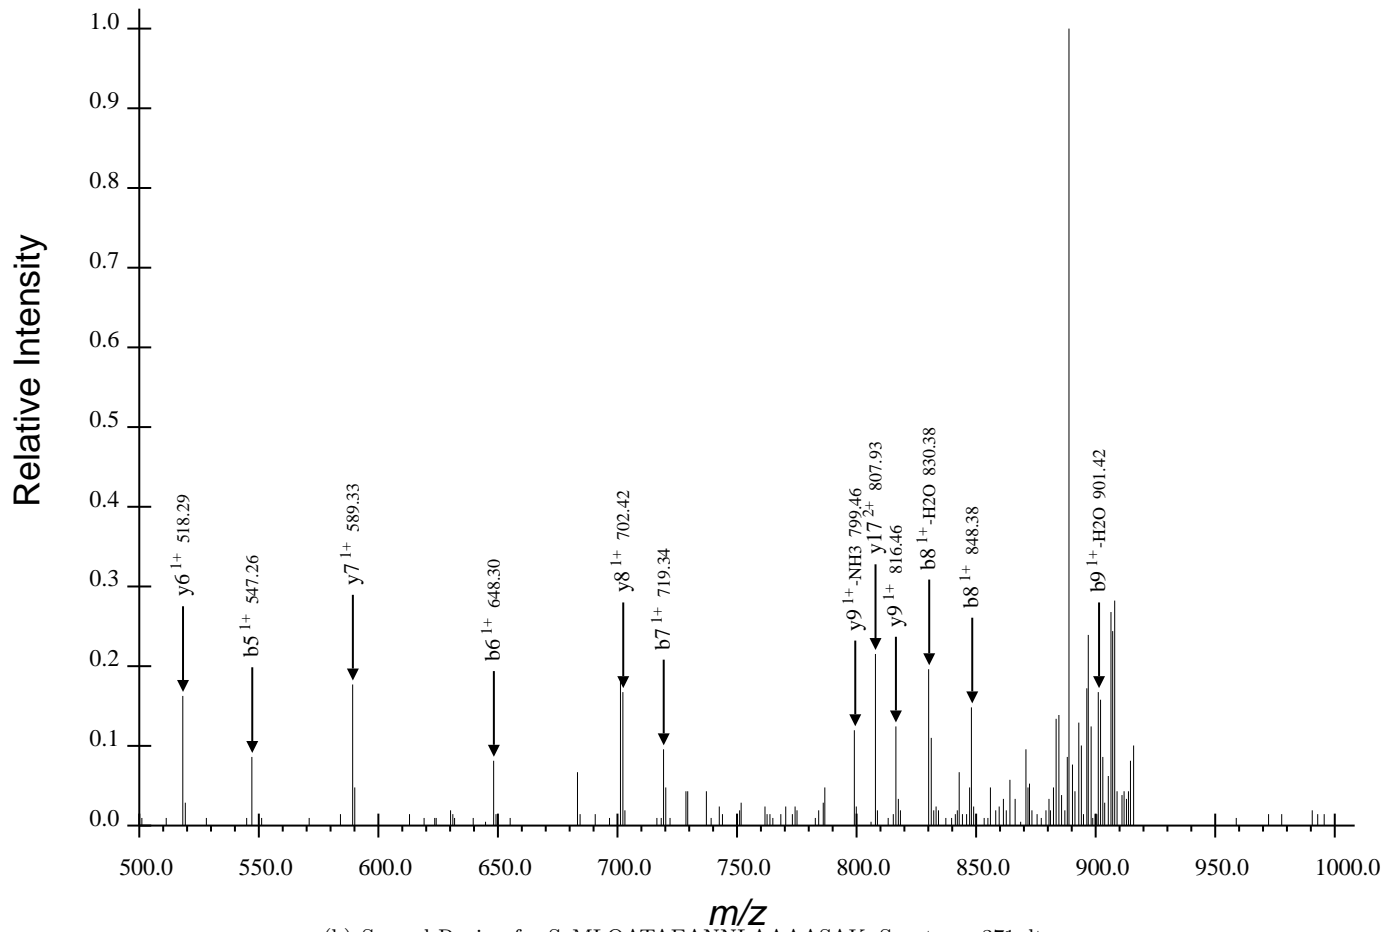

(b) Second Region for SoMLQATAEANNLAAAASAK, Spectrum 371.dta

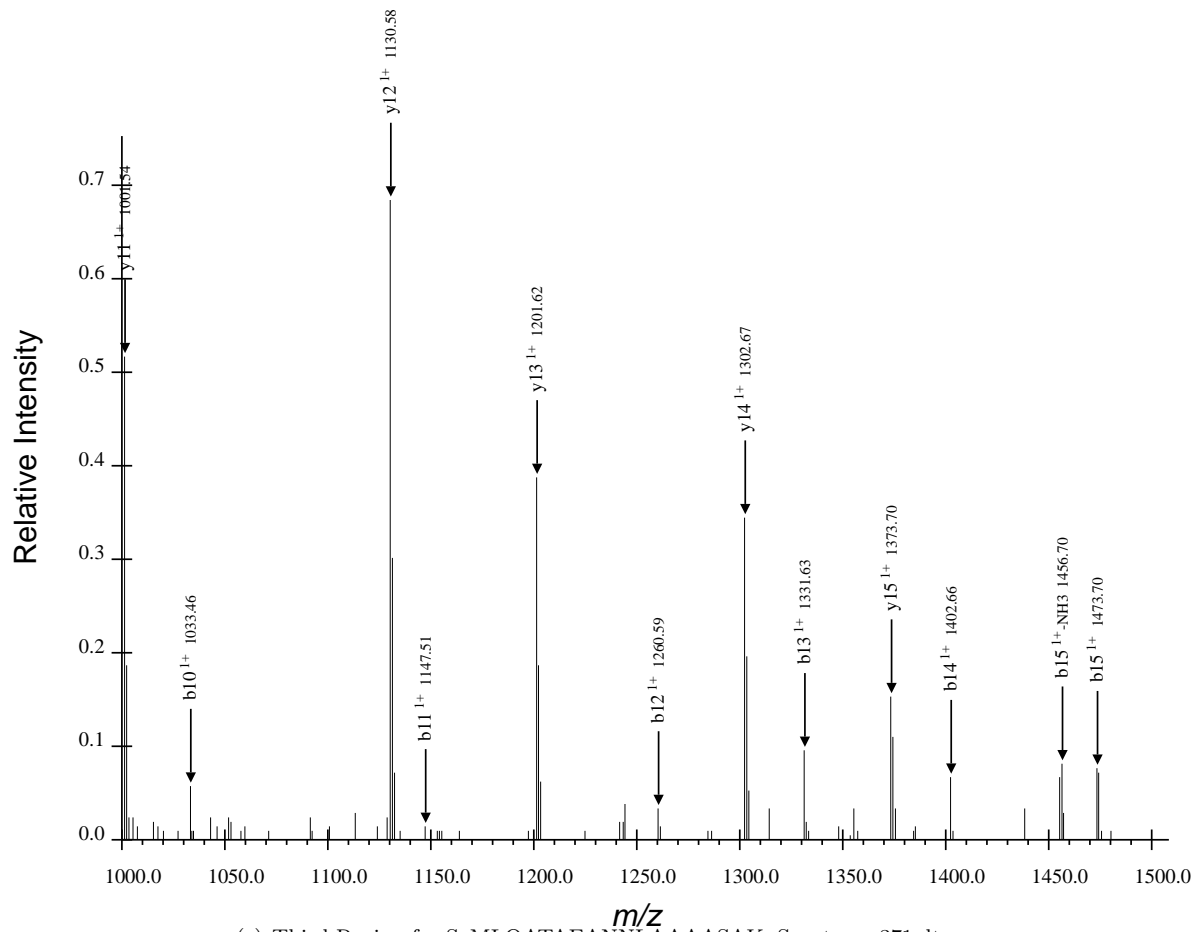

(c) Third Region for SoMLQATAEANNLAAAASAK, Spectrum 371.dta

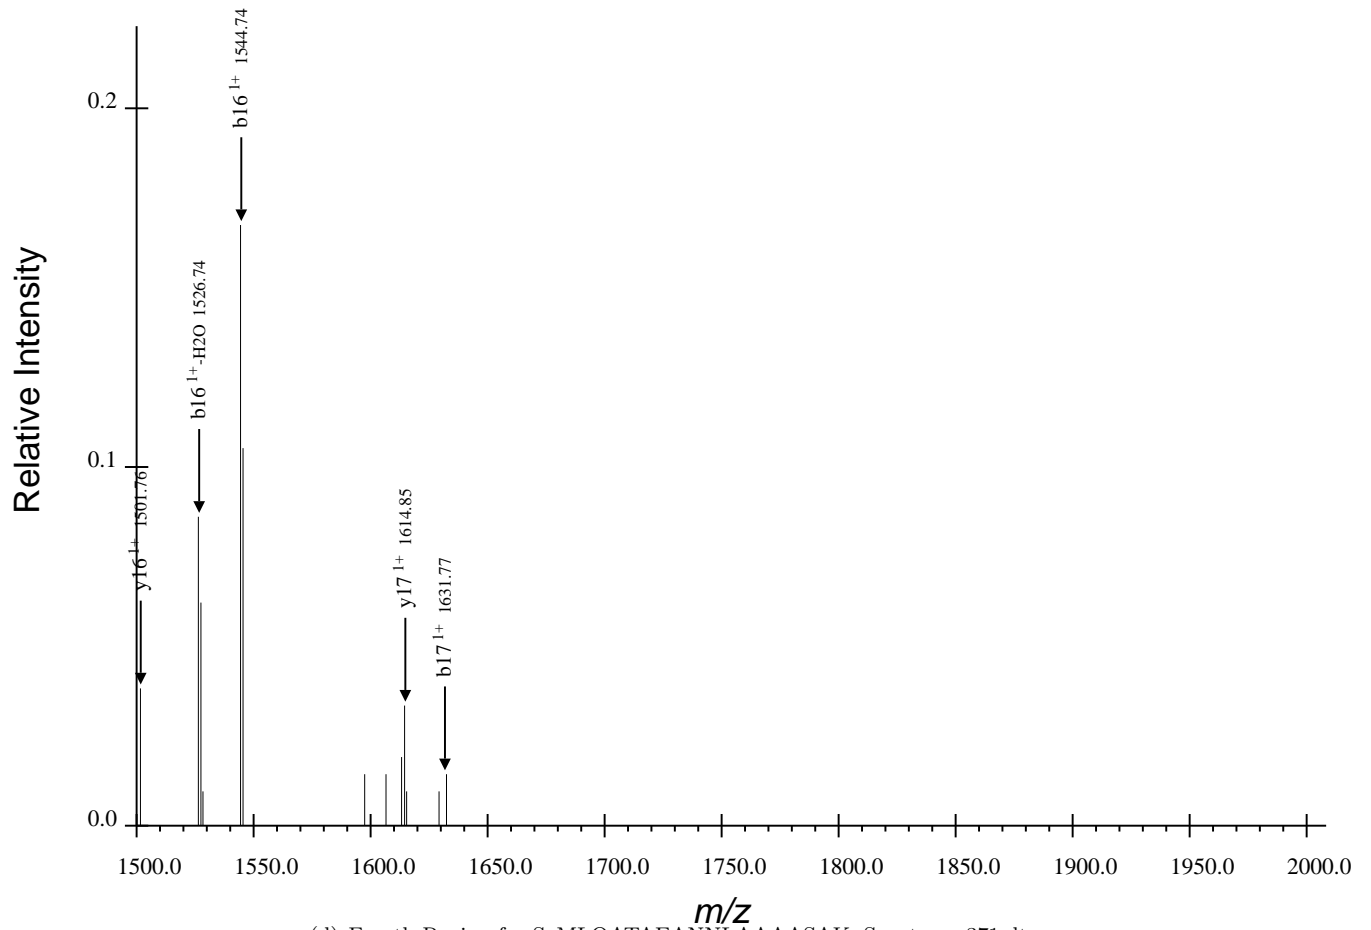

(d) Fourth Region for SoMLQATAEANNLAAAASAK, Spectrum 371.dta

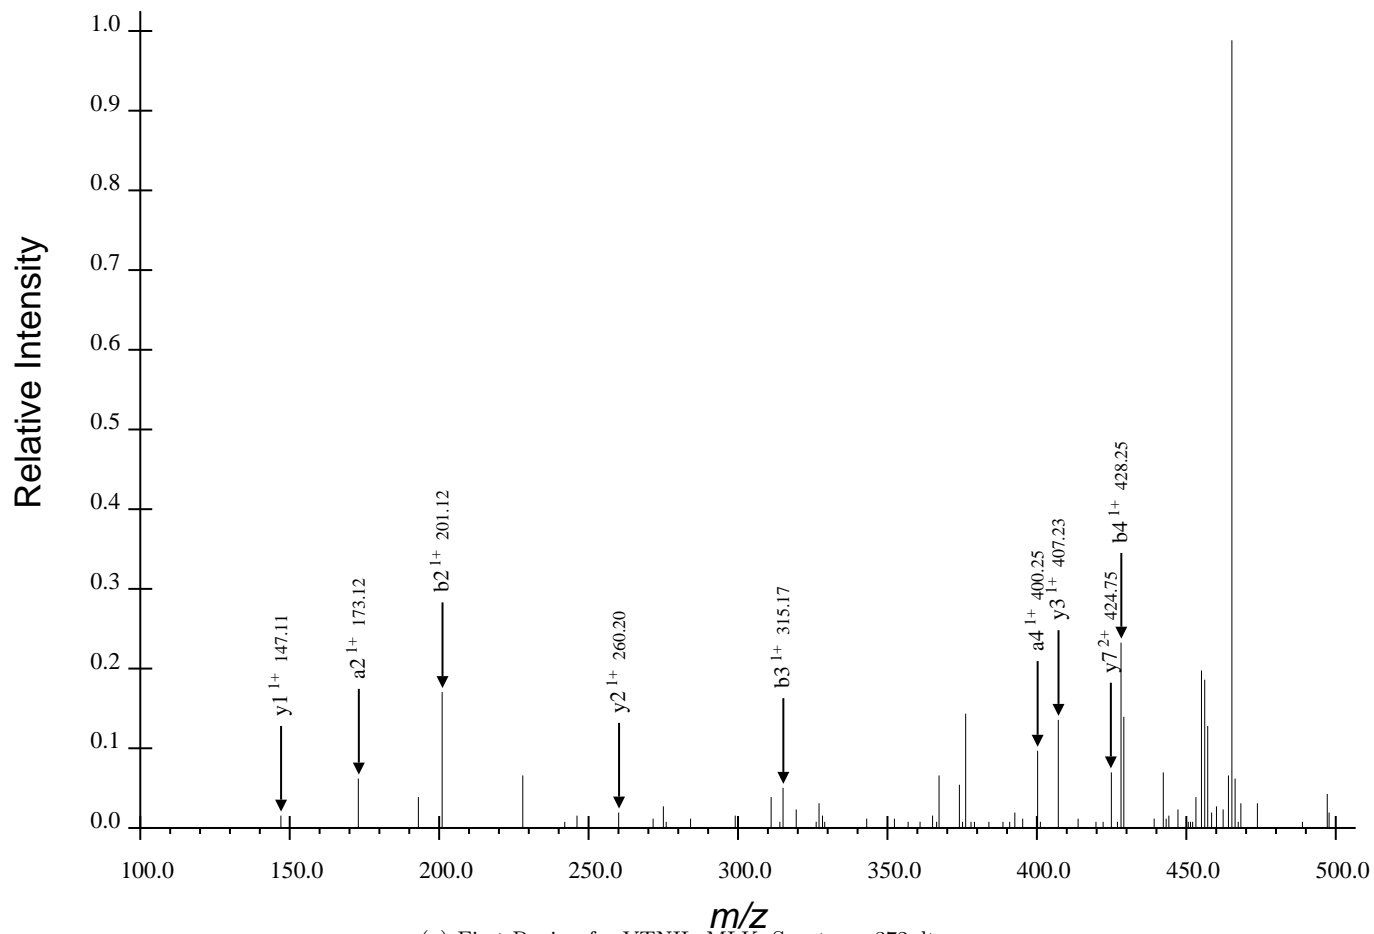

(a) First Region for VTNILOMLK, Spectrum 372.dta

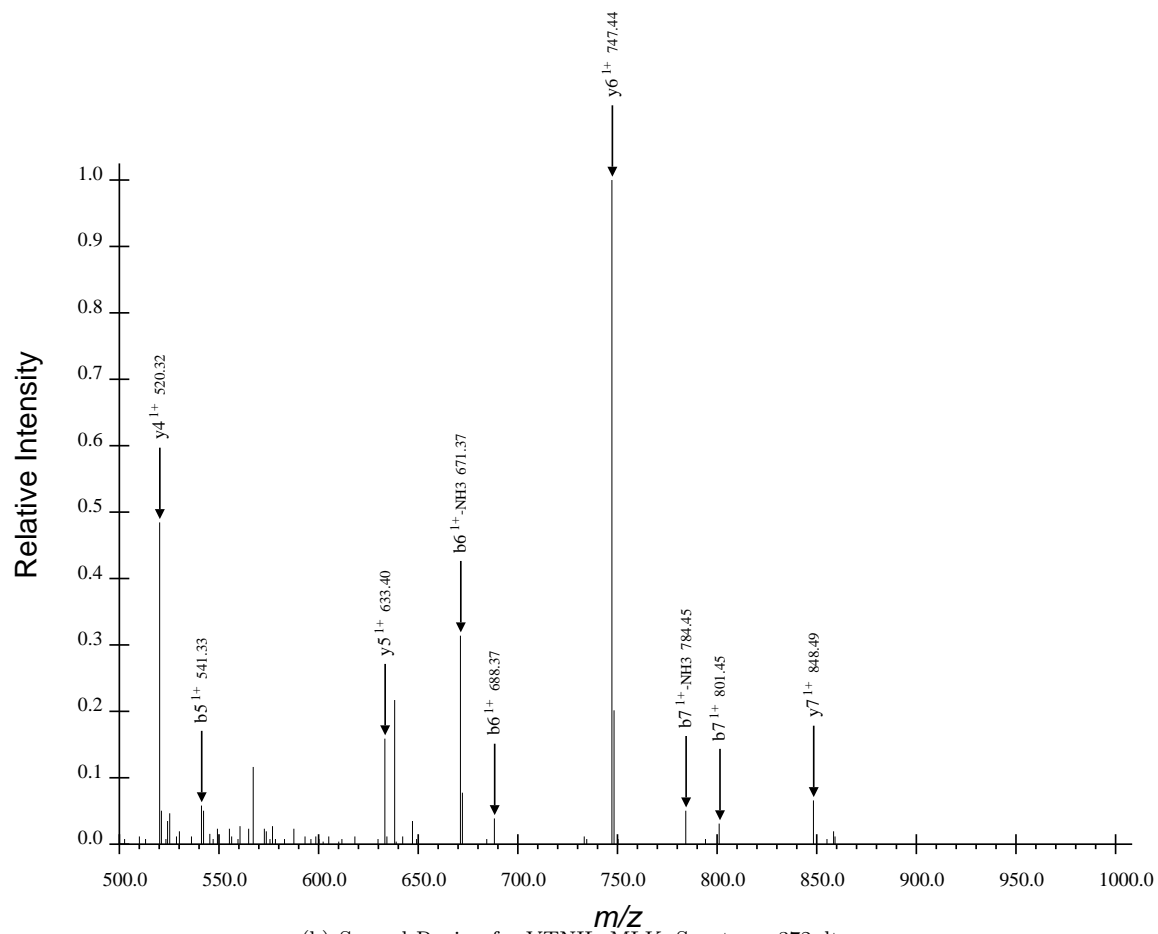

(b) Second Region for VTNILOMLK, Spectrum 372.dta

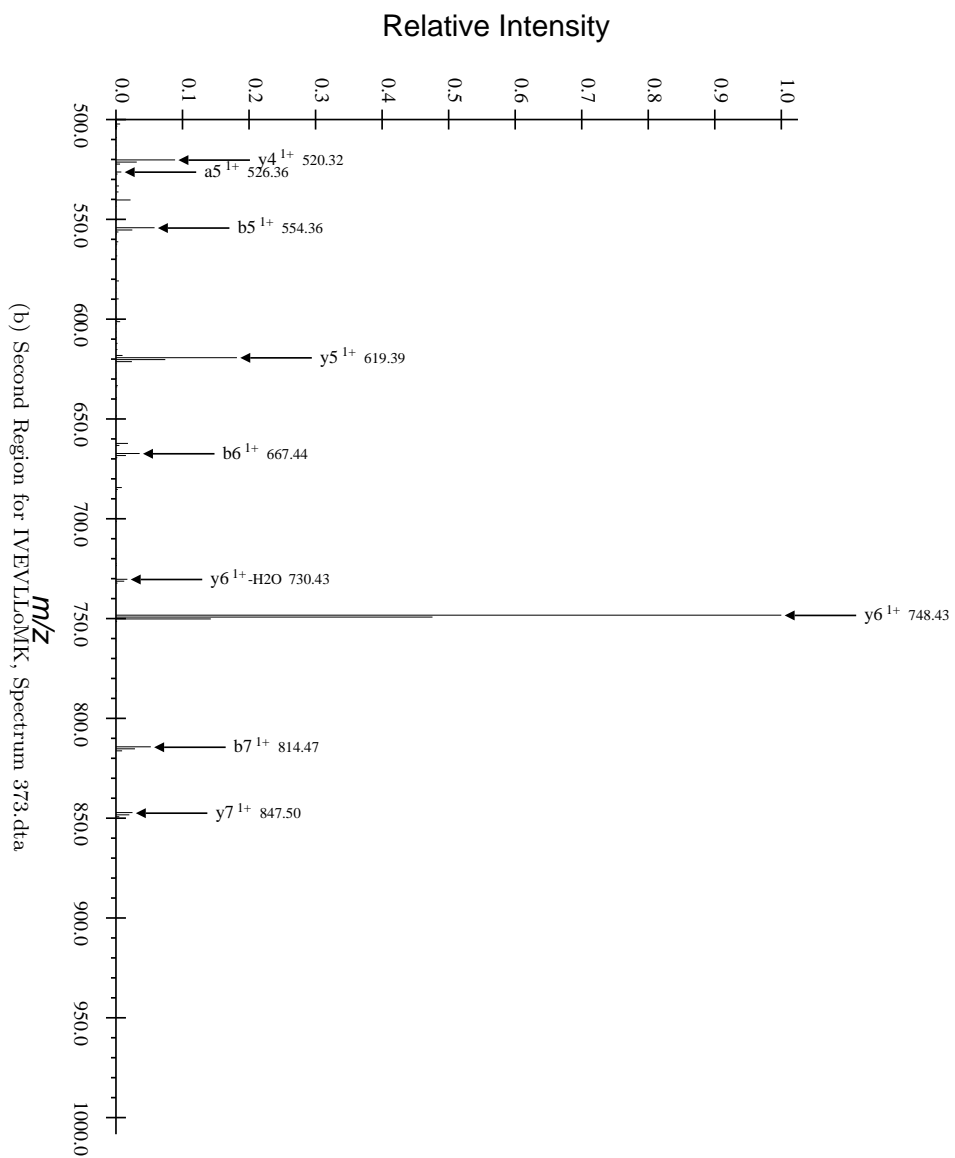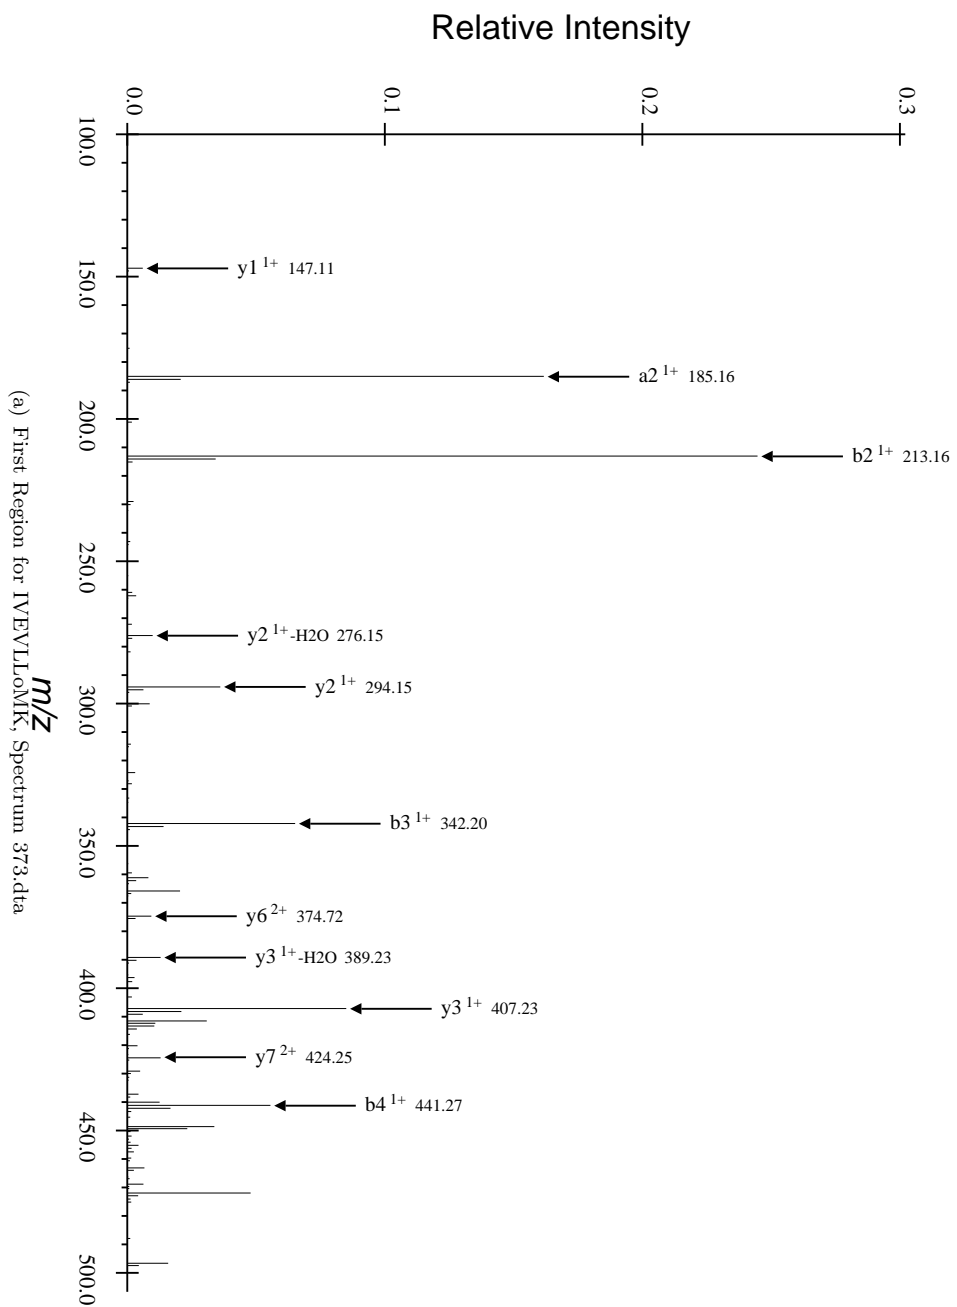

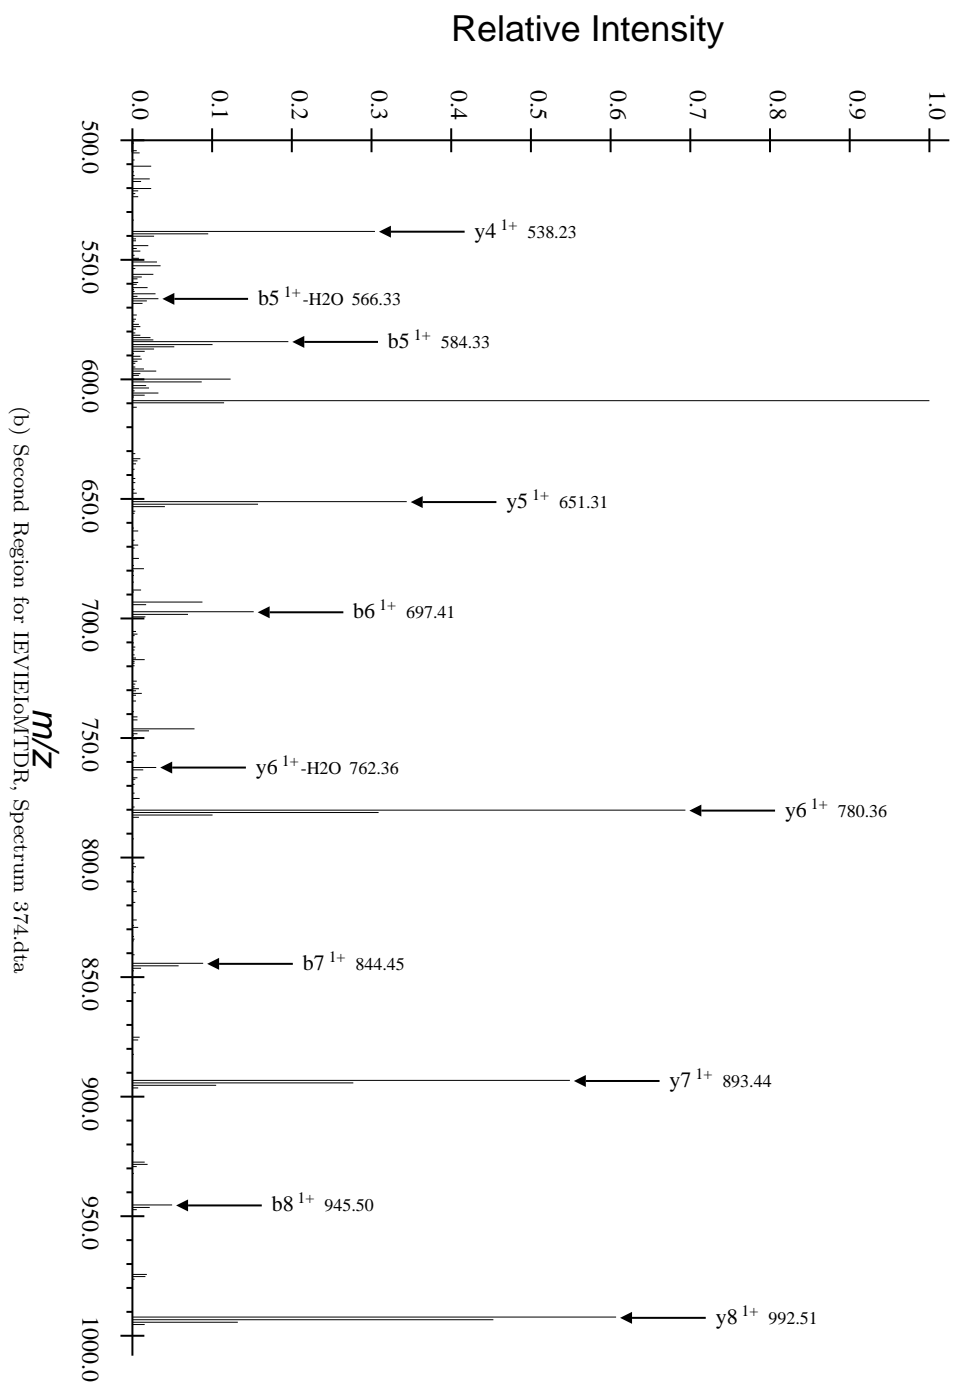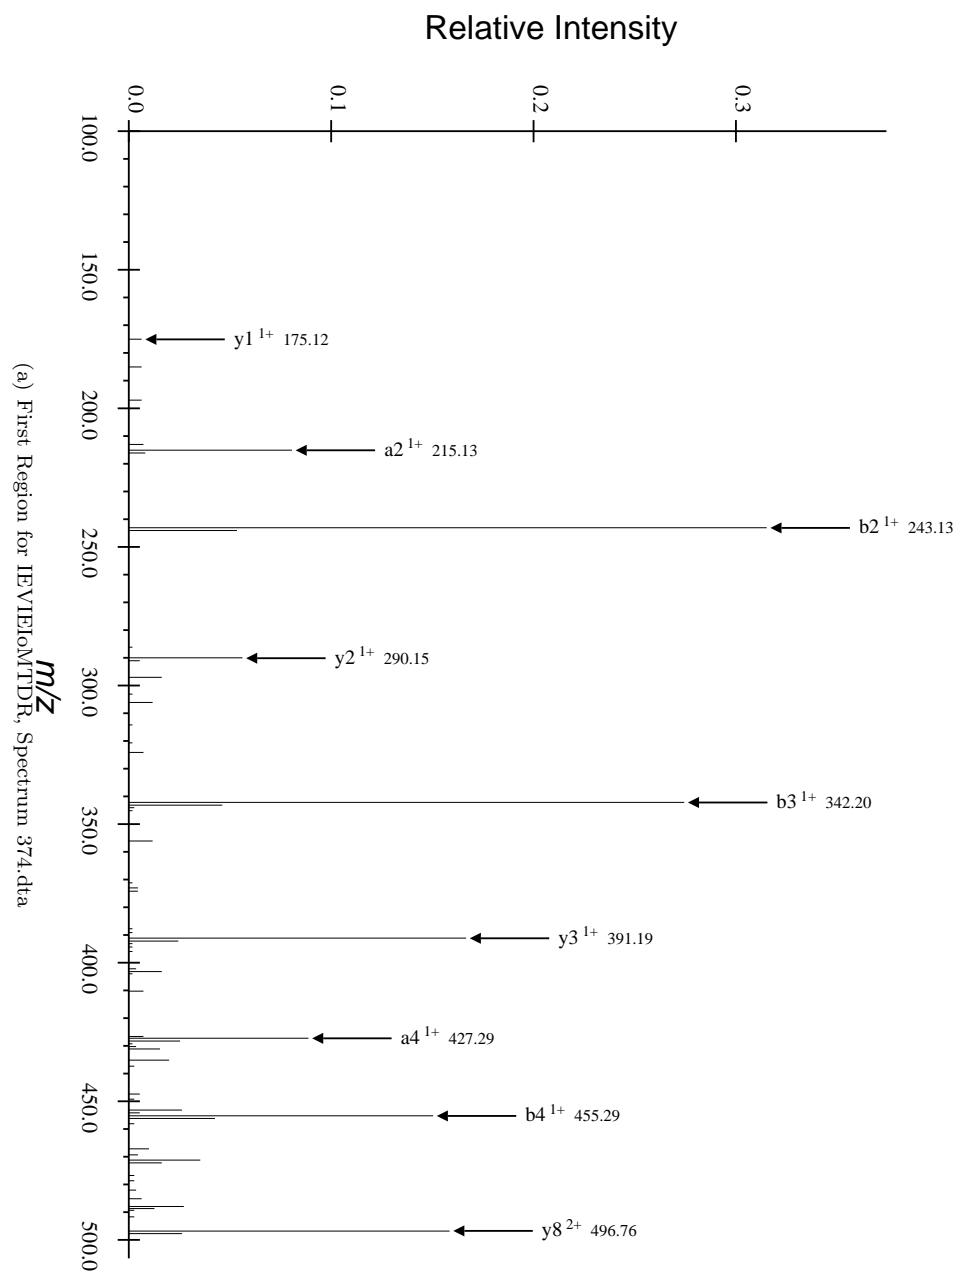

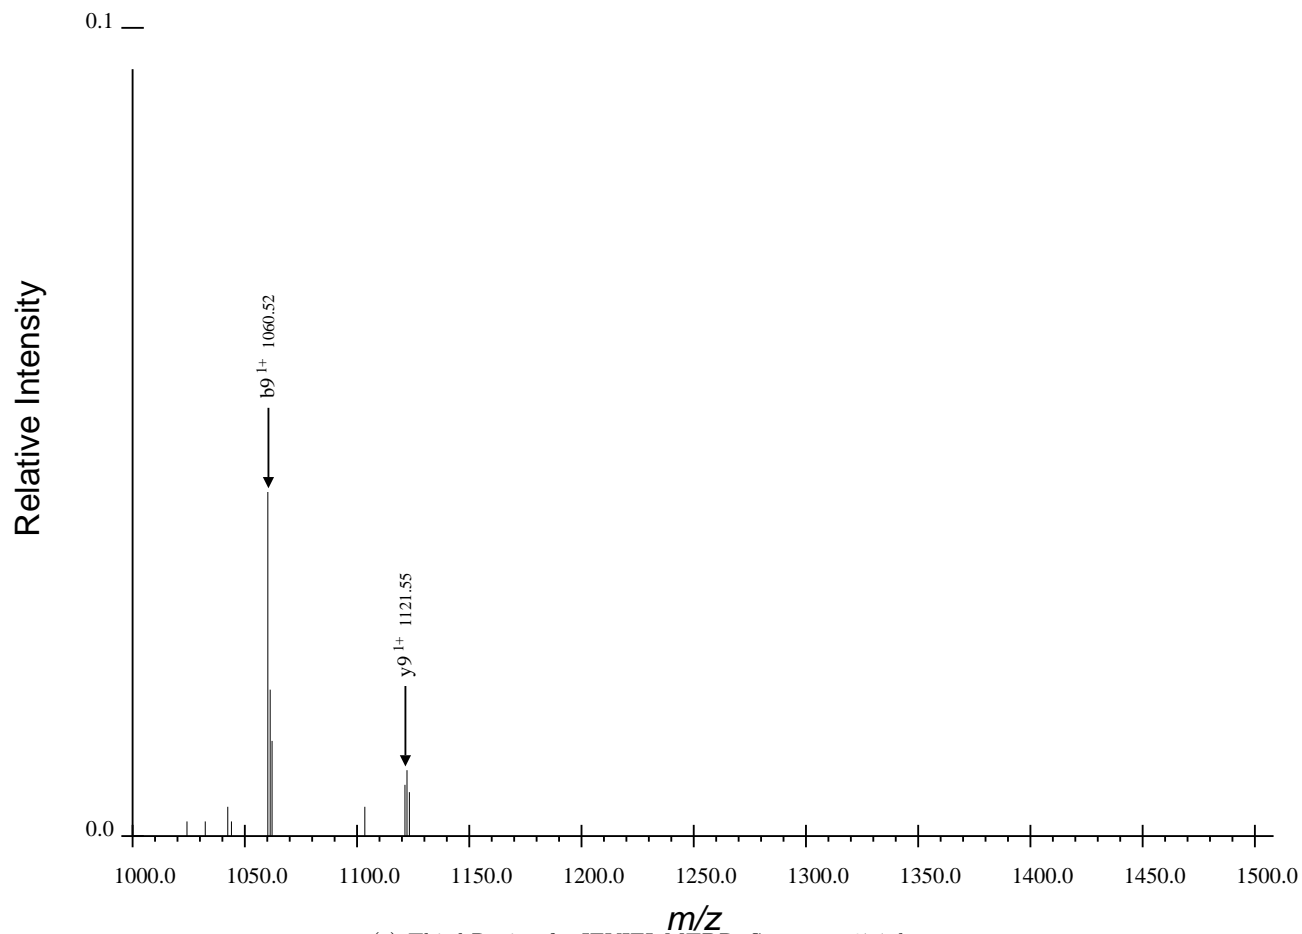

(c) Third Region for IEVIEIoMTDR, Spectrum 374.dta

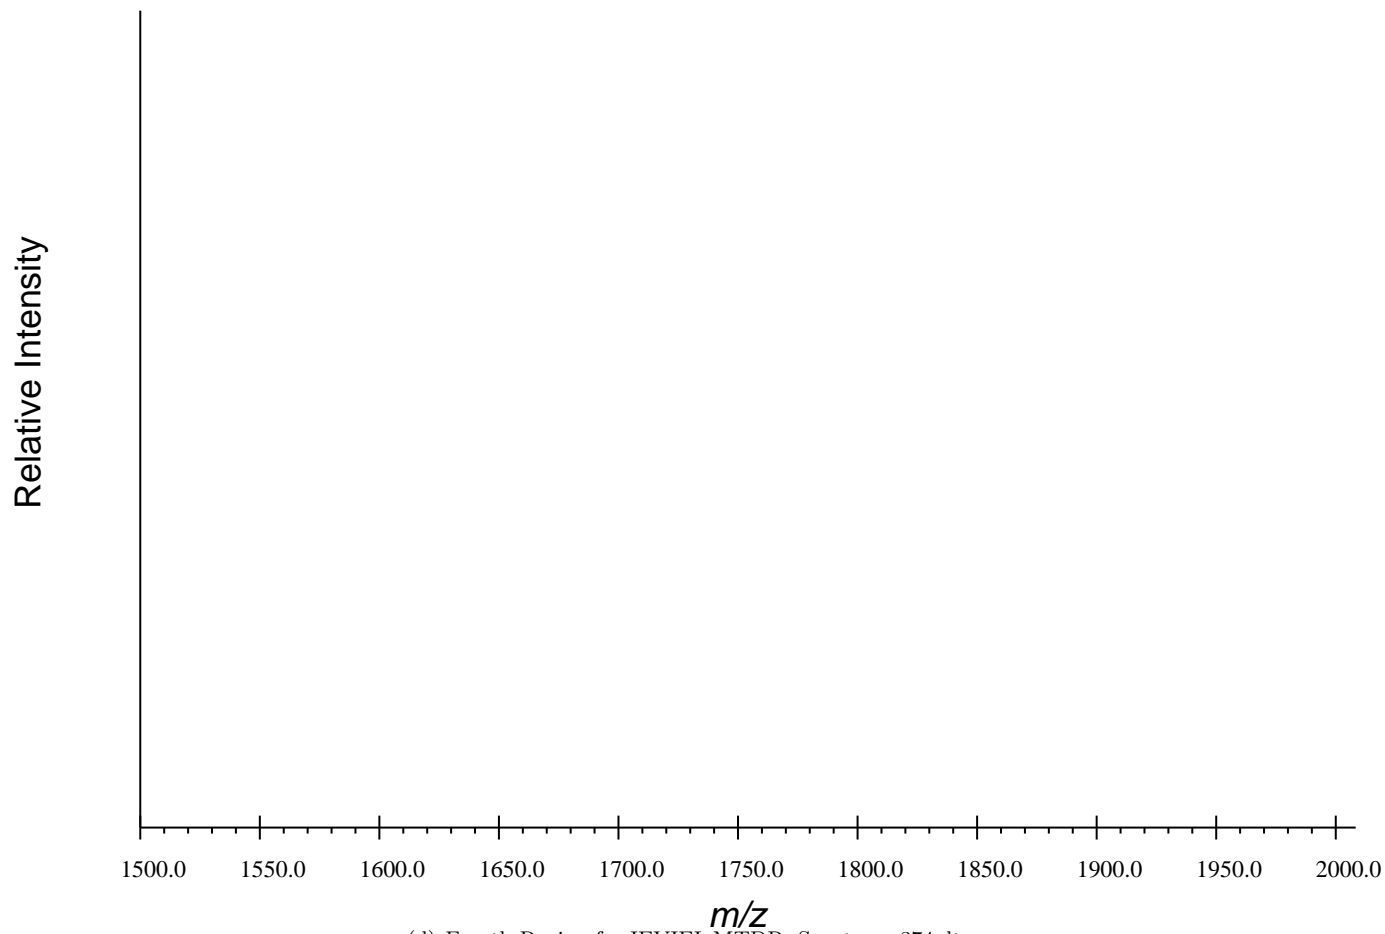

(d) Fourth Region for IEVIEIoMTDR, Spectrum 374.dta



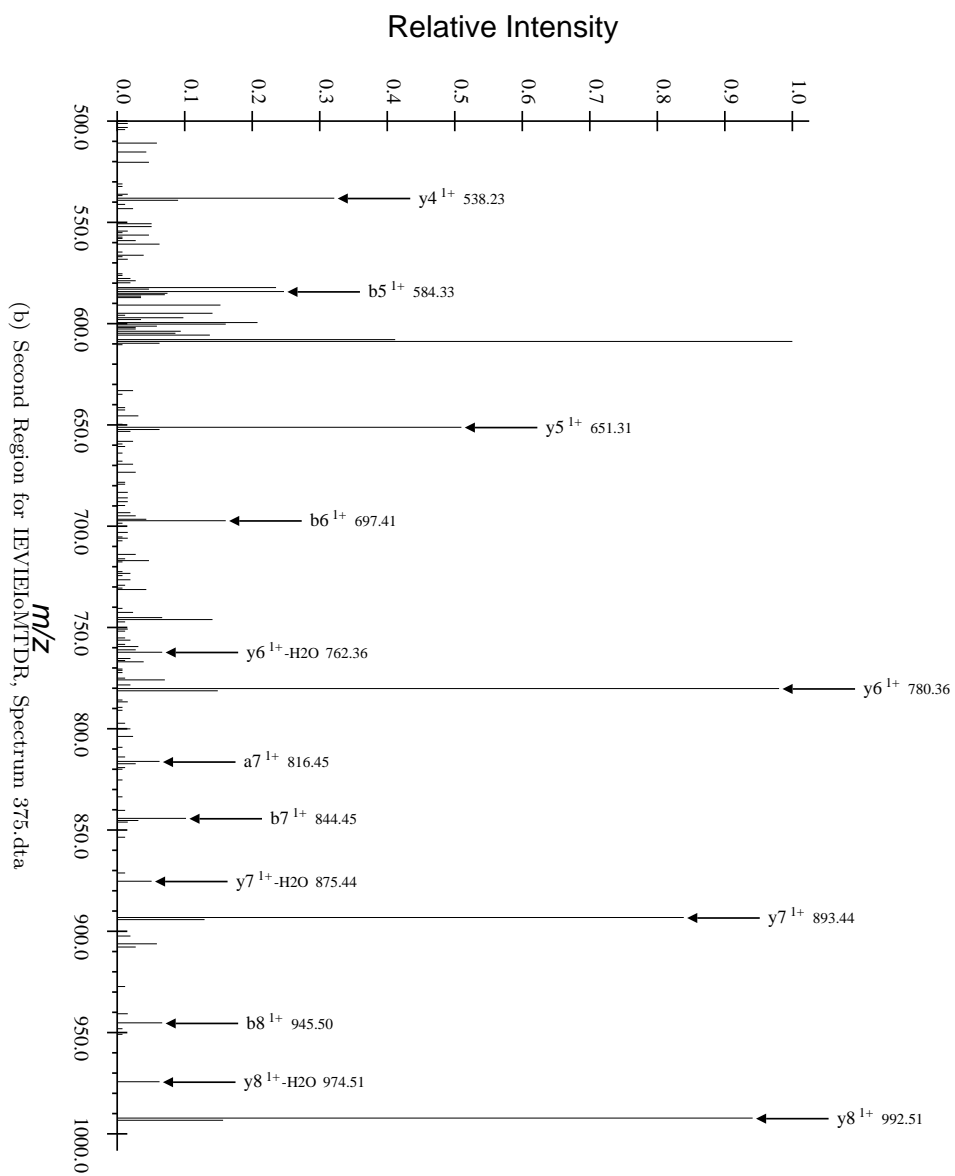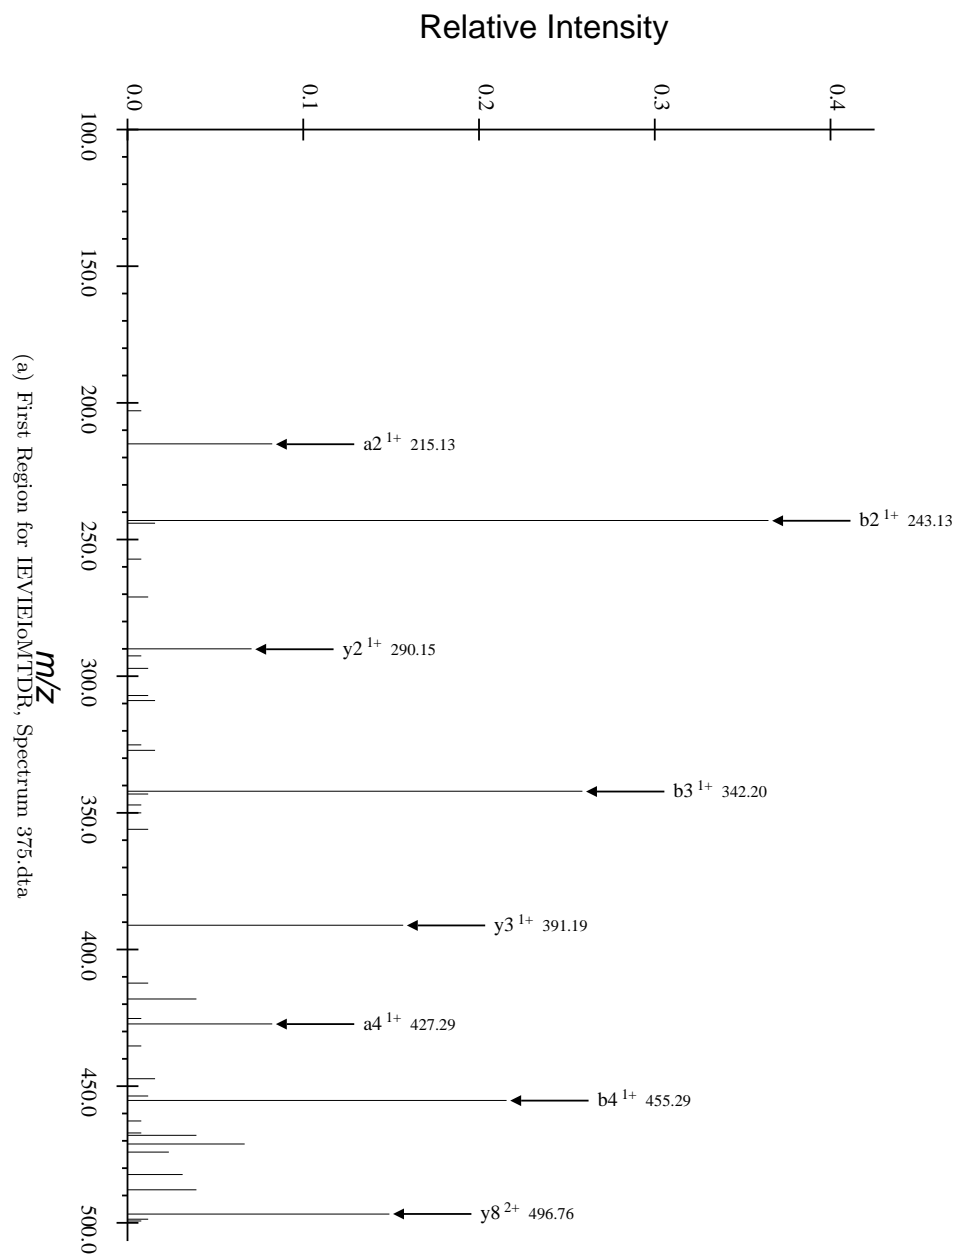

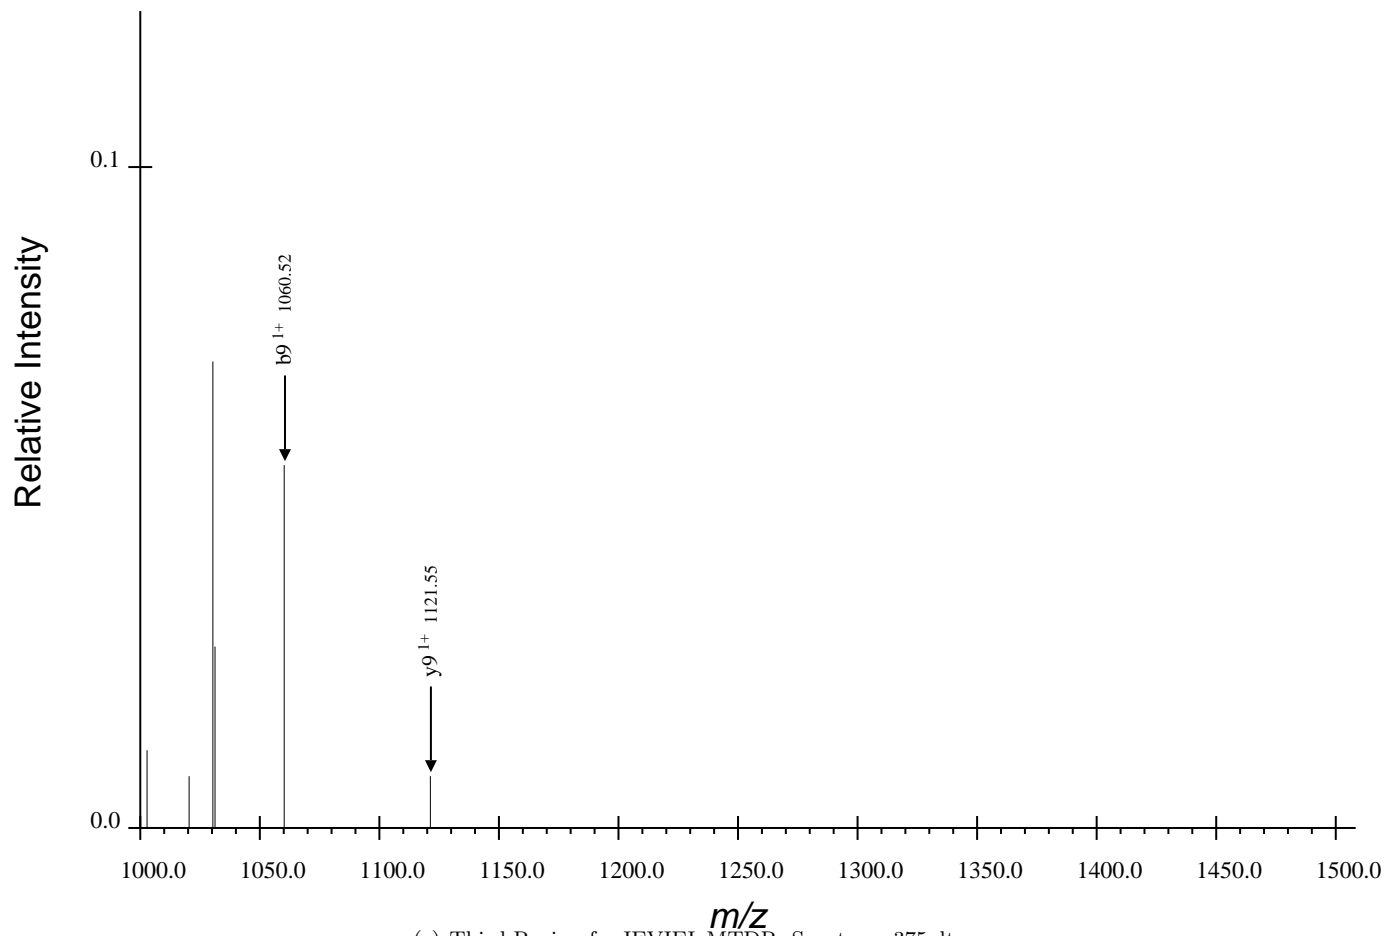

(c) Third Region for IEVIEIoMTDR, Spectrum 375.dta

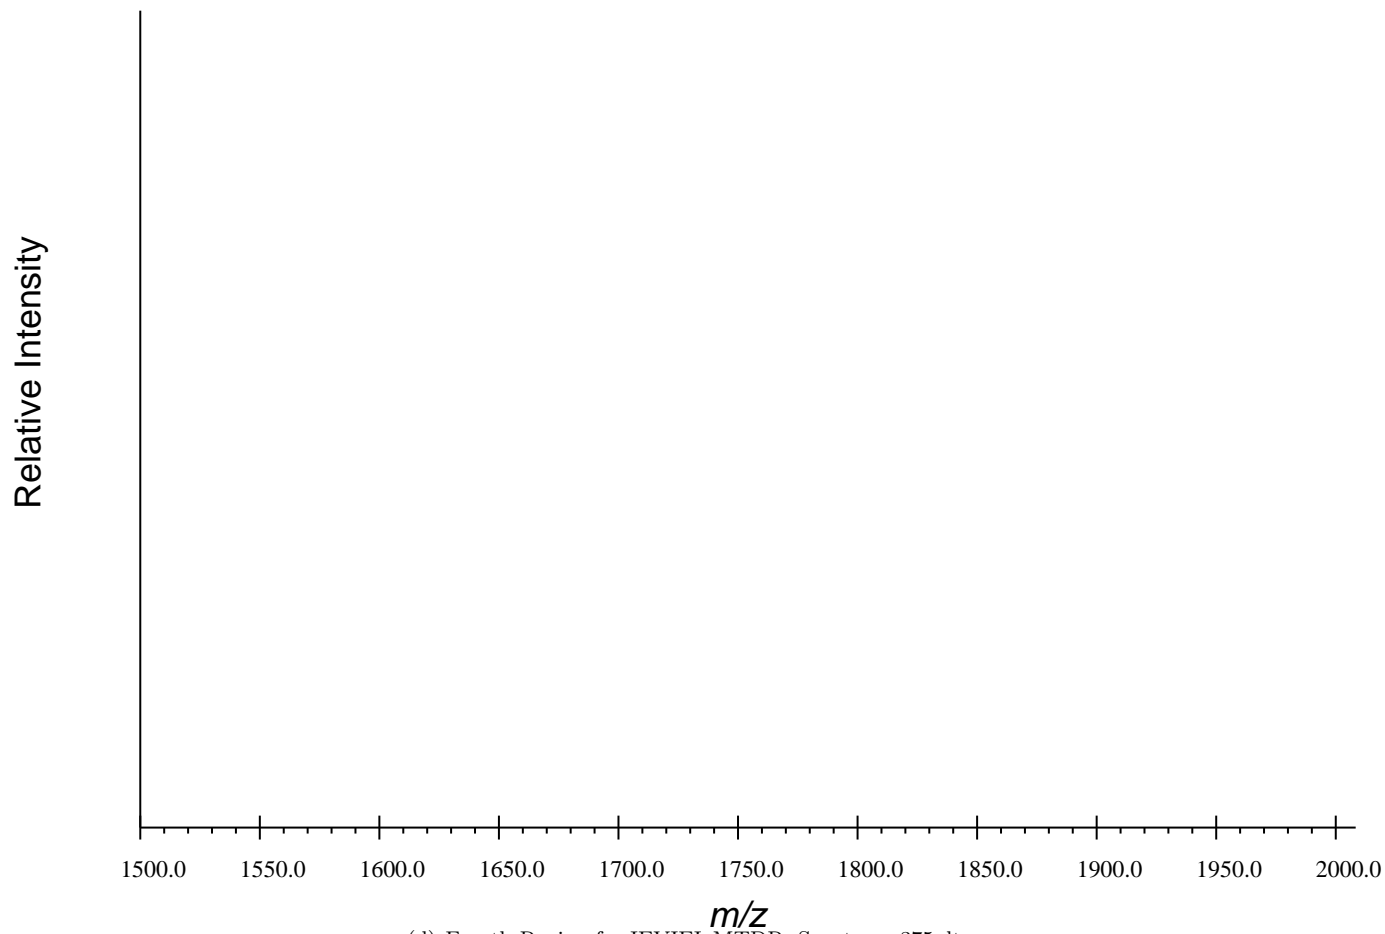

(d) Fourth Region for IEVIEIoMTDR, Spectrum 375.dta

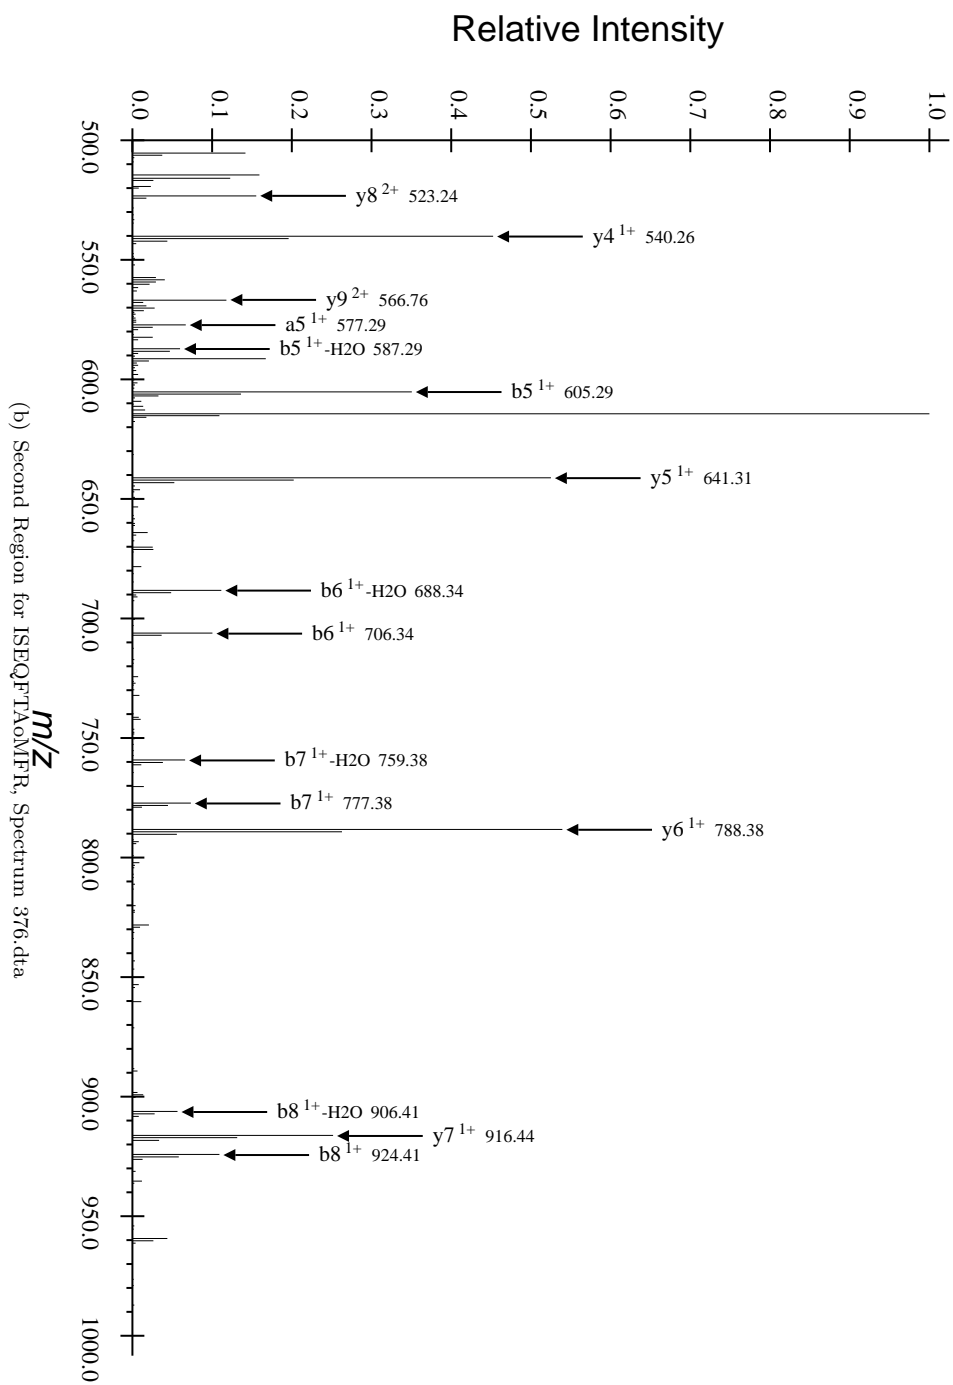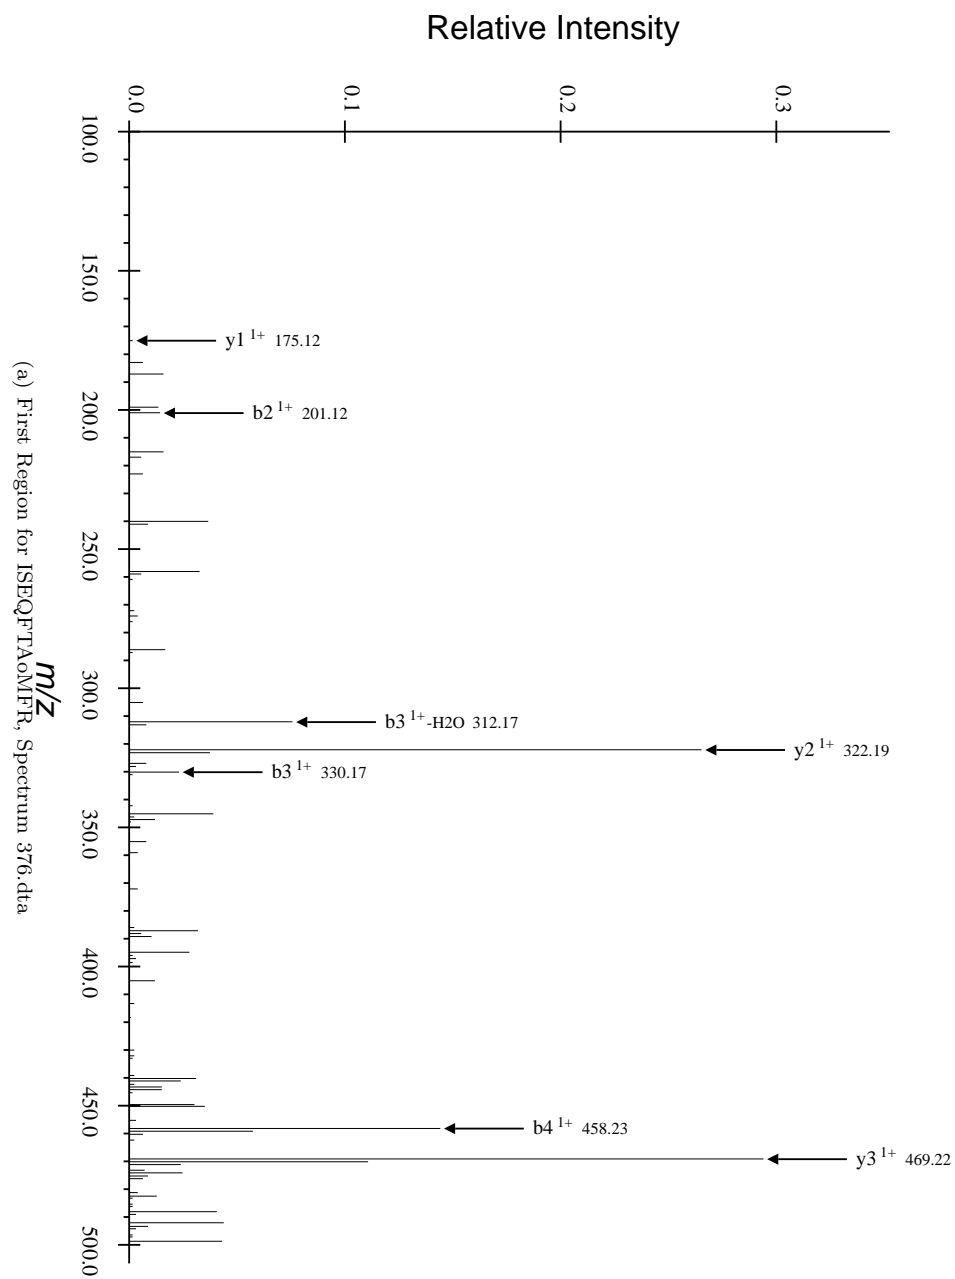

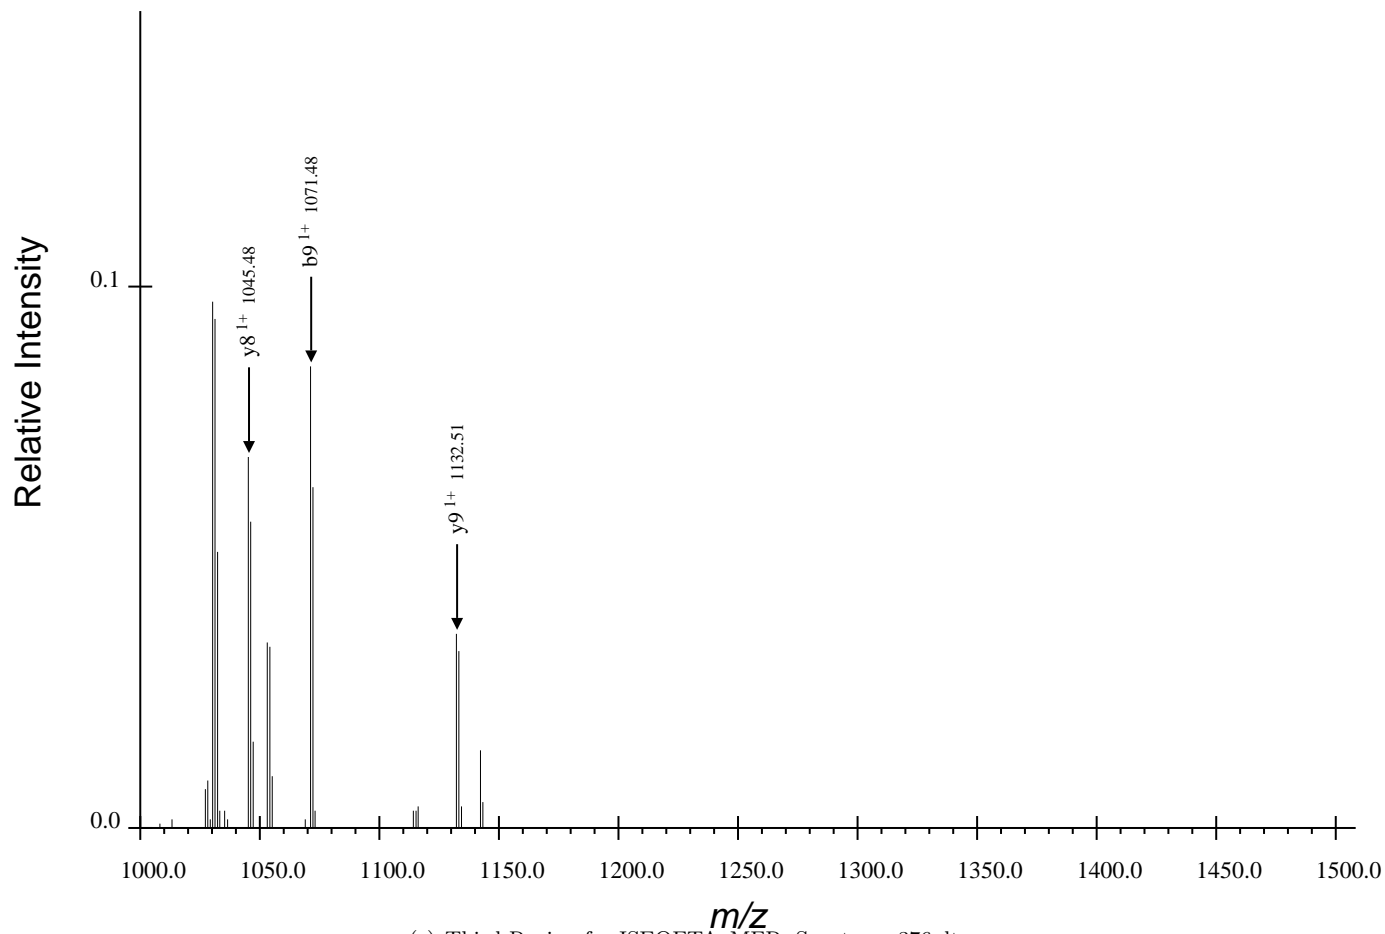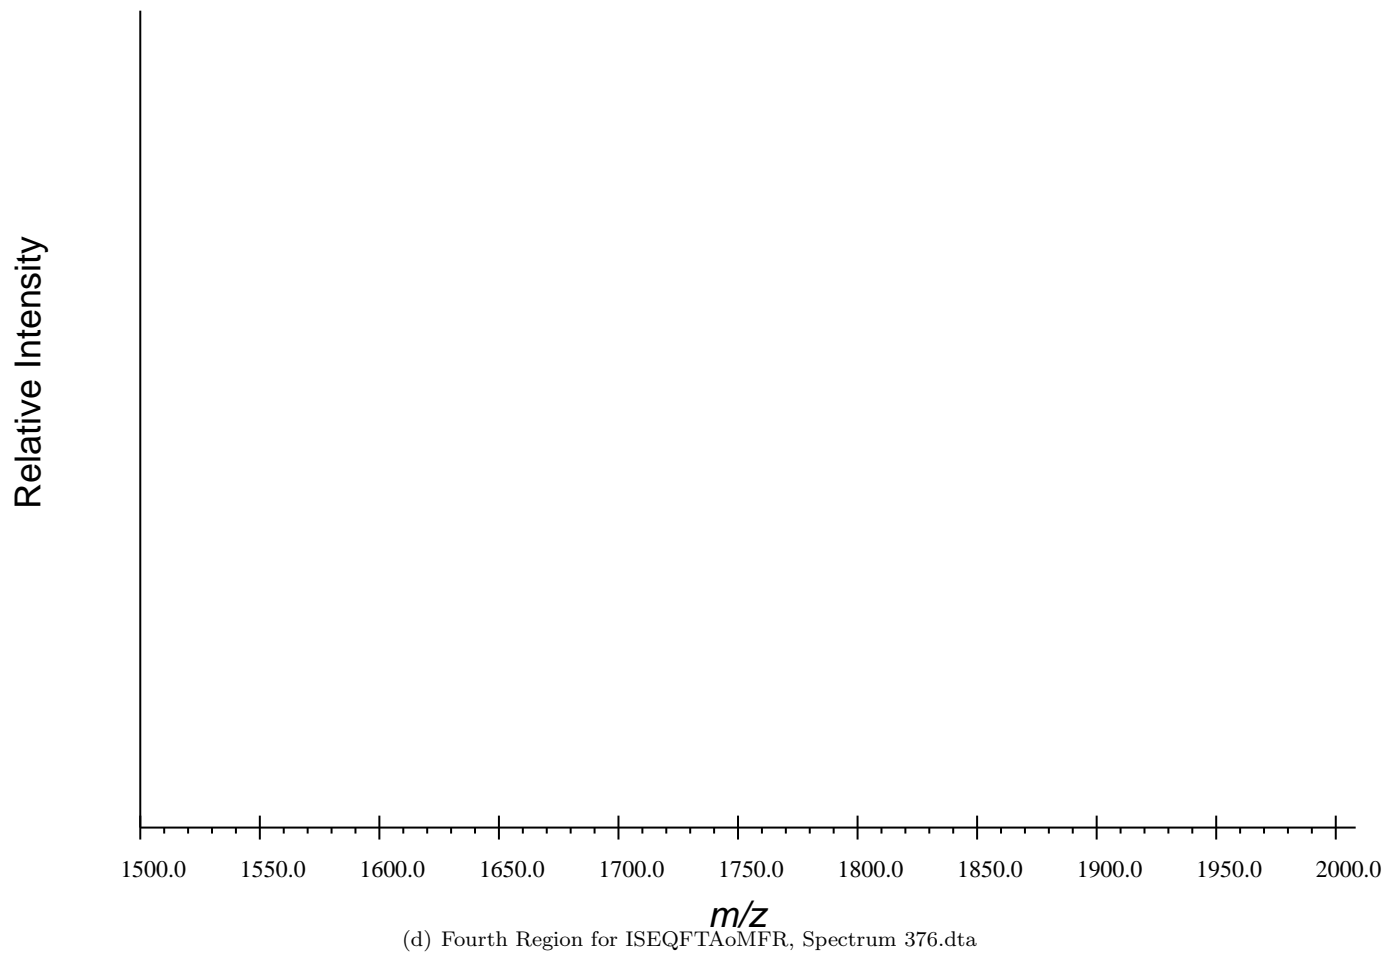

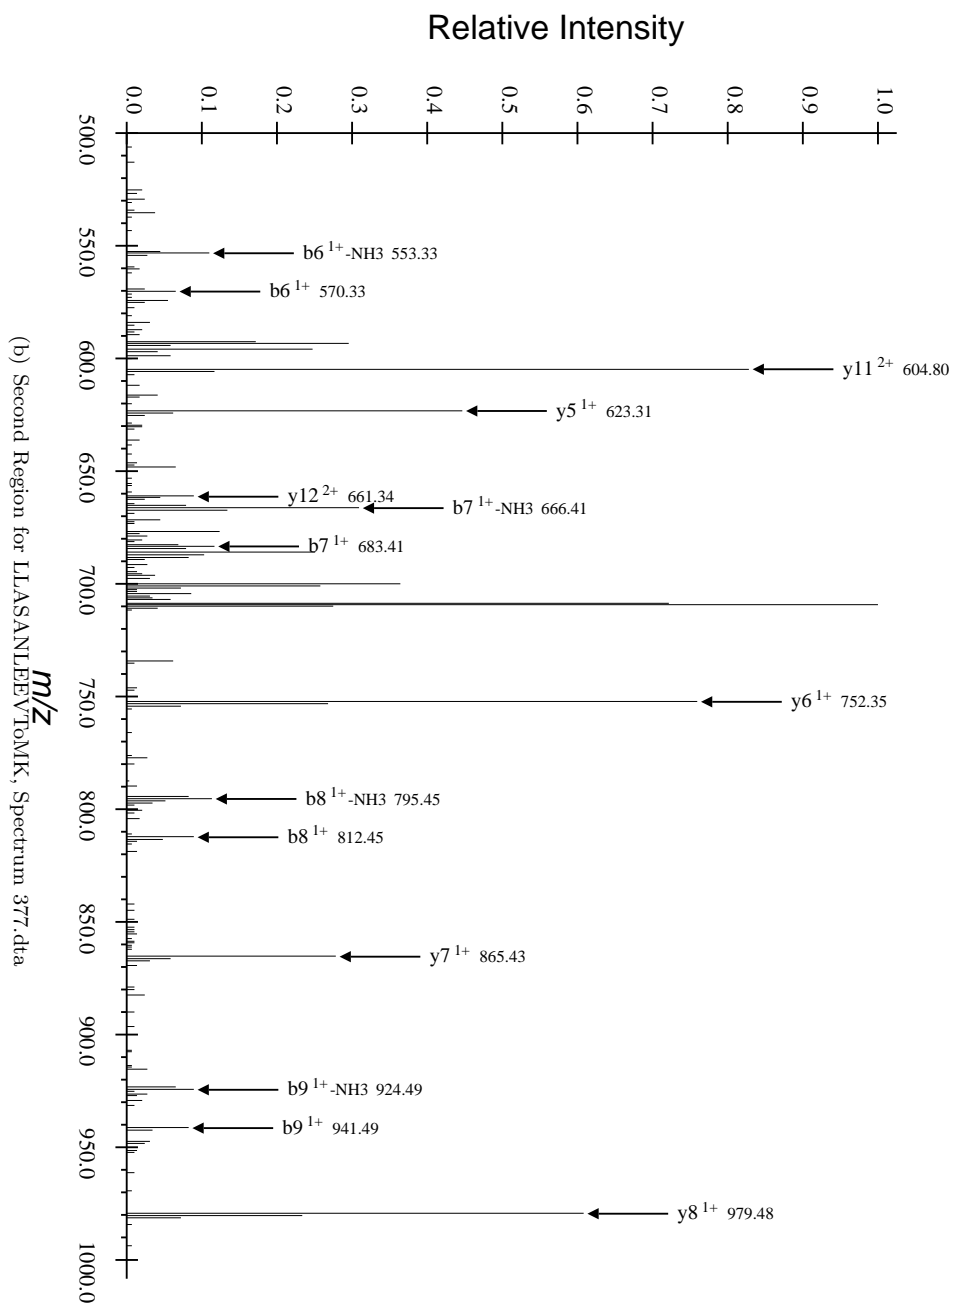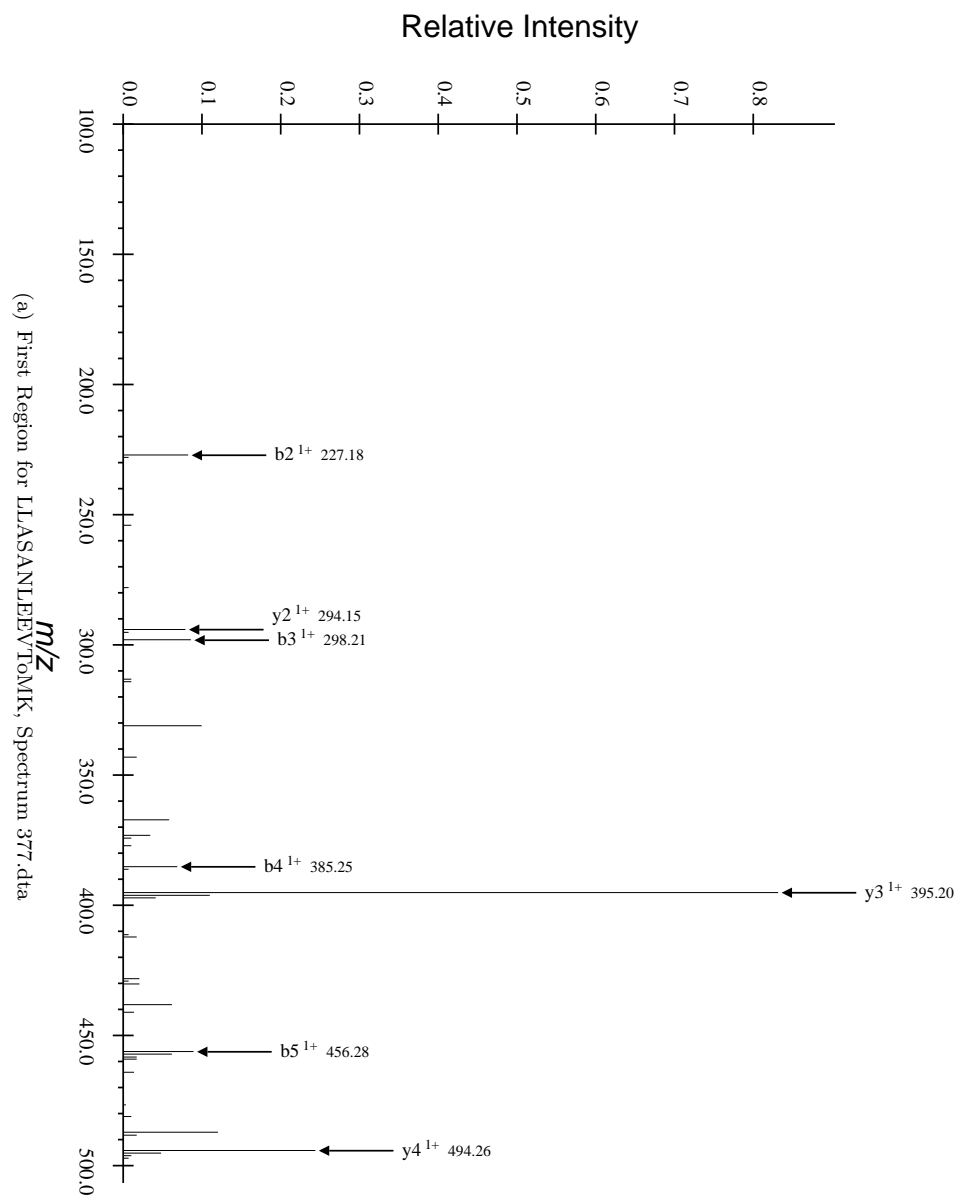

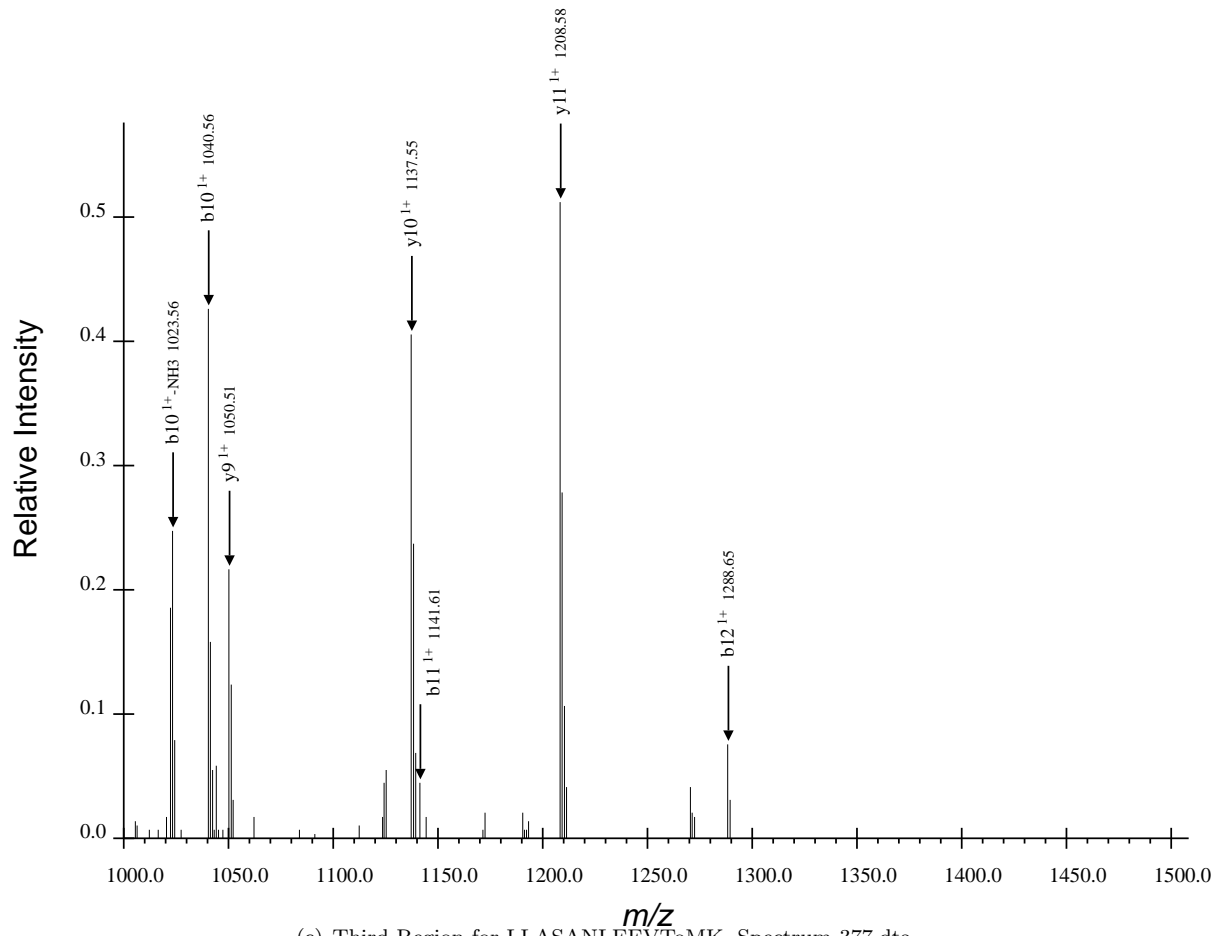

(c) Third Region for LLASANLEEVToMK, Spectrum 377.dta

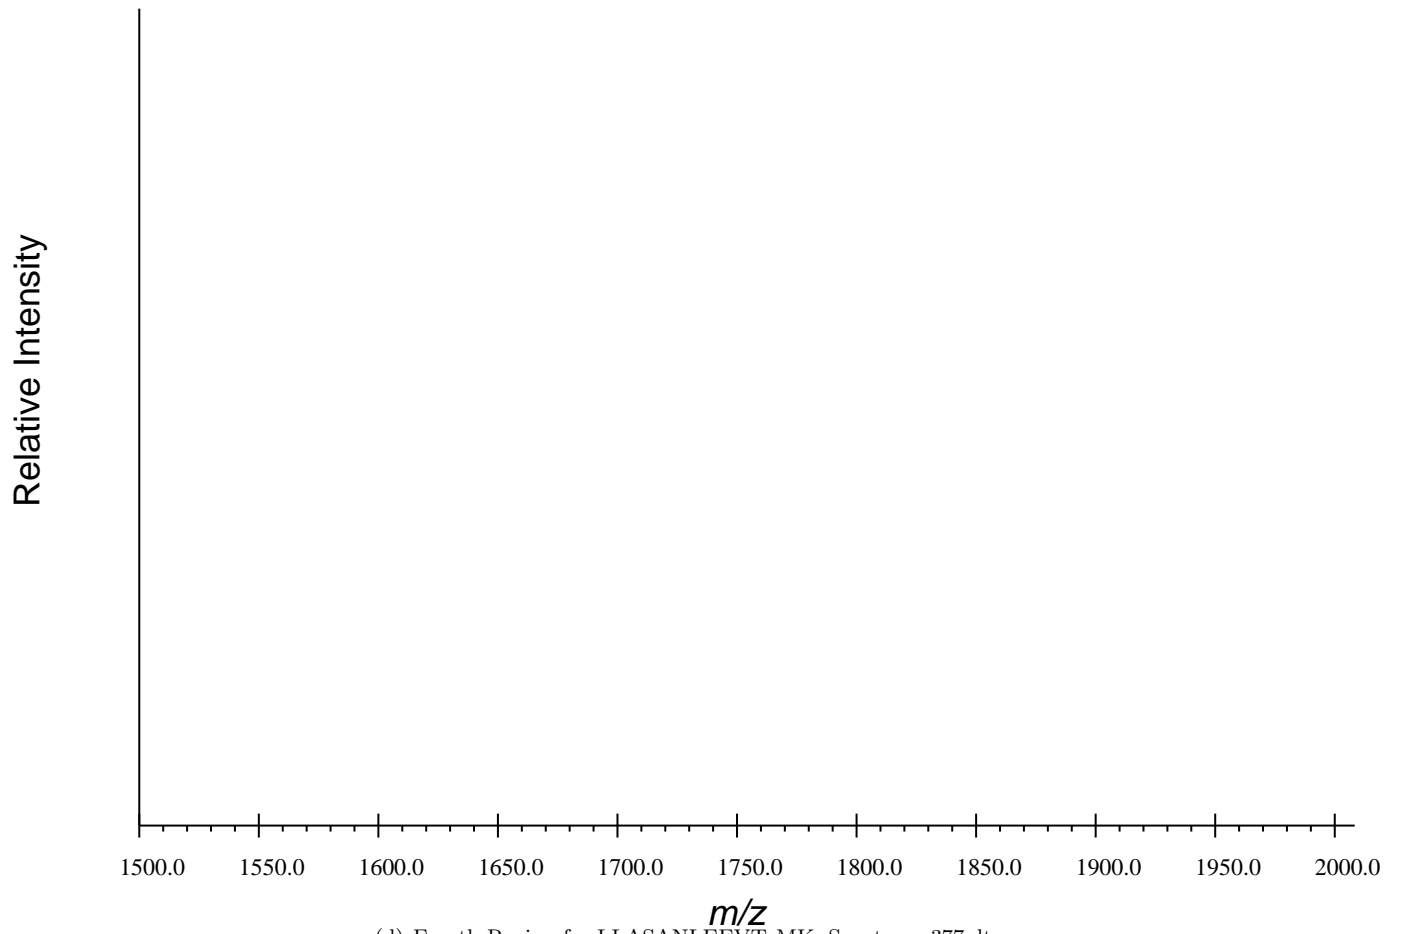

(d) Fourth Region for LLASANLEEVToMK, Spectrum 377.dta

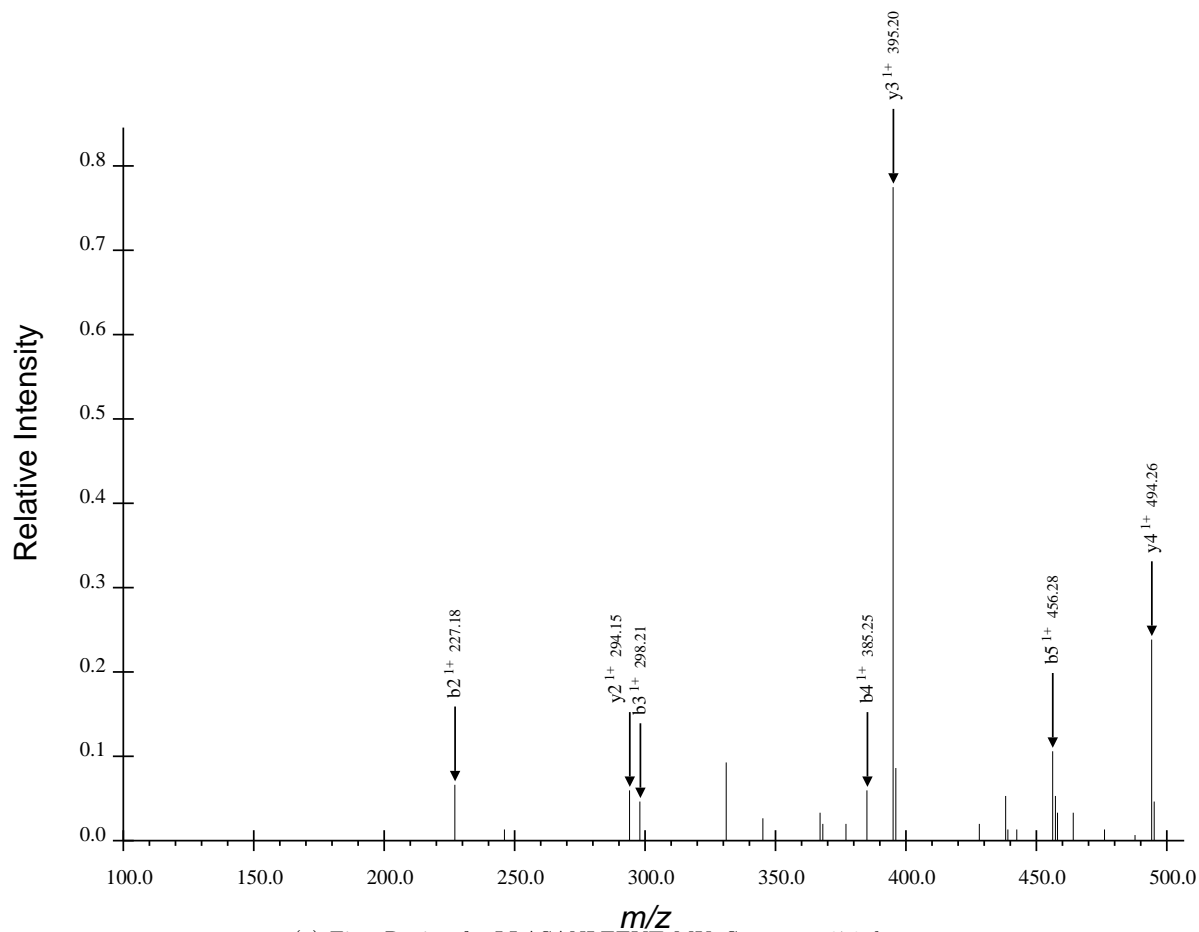

(a) First Region for LLASANLEEVToMK, Spectrum 378.dta

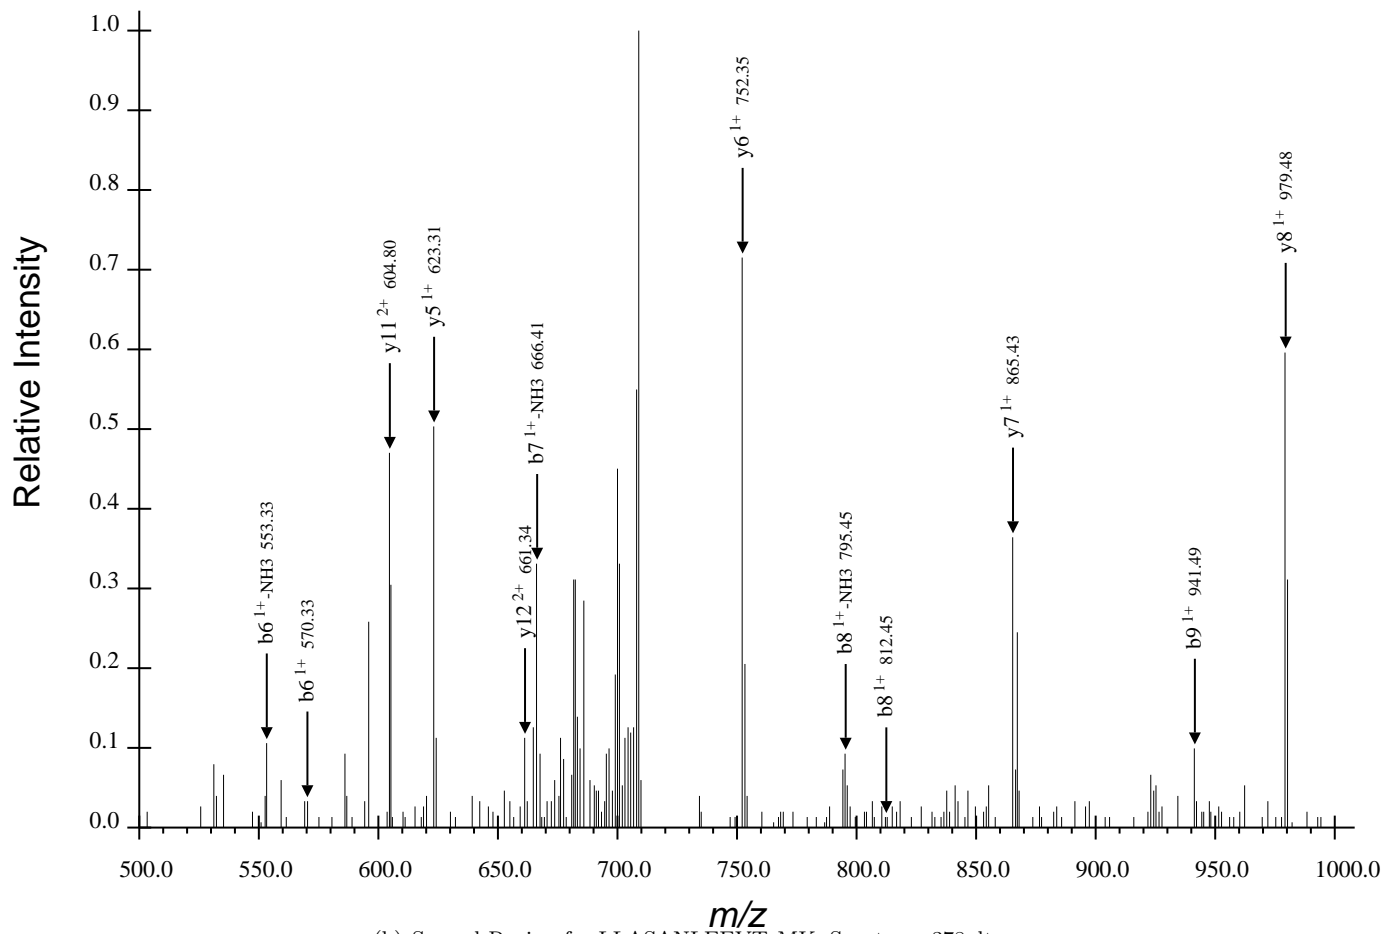

(b) Second Region for LLASANLEEVToMK, Spectrum 378.dta

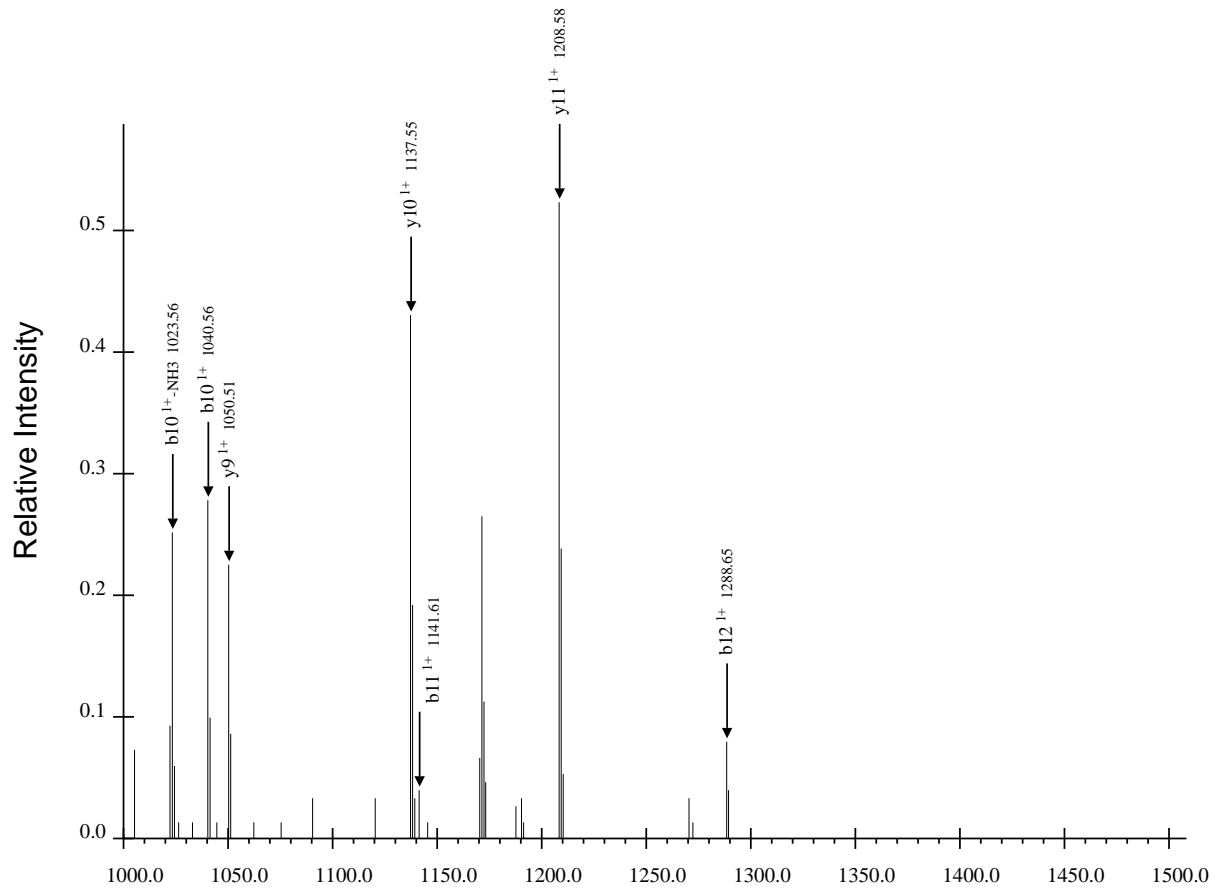

(c) Third Region for LLASANLEEVToMK, Spectrum 378.dta

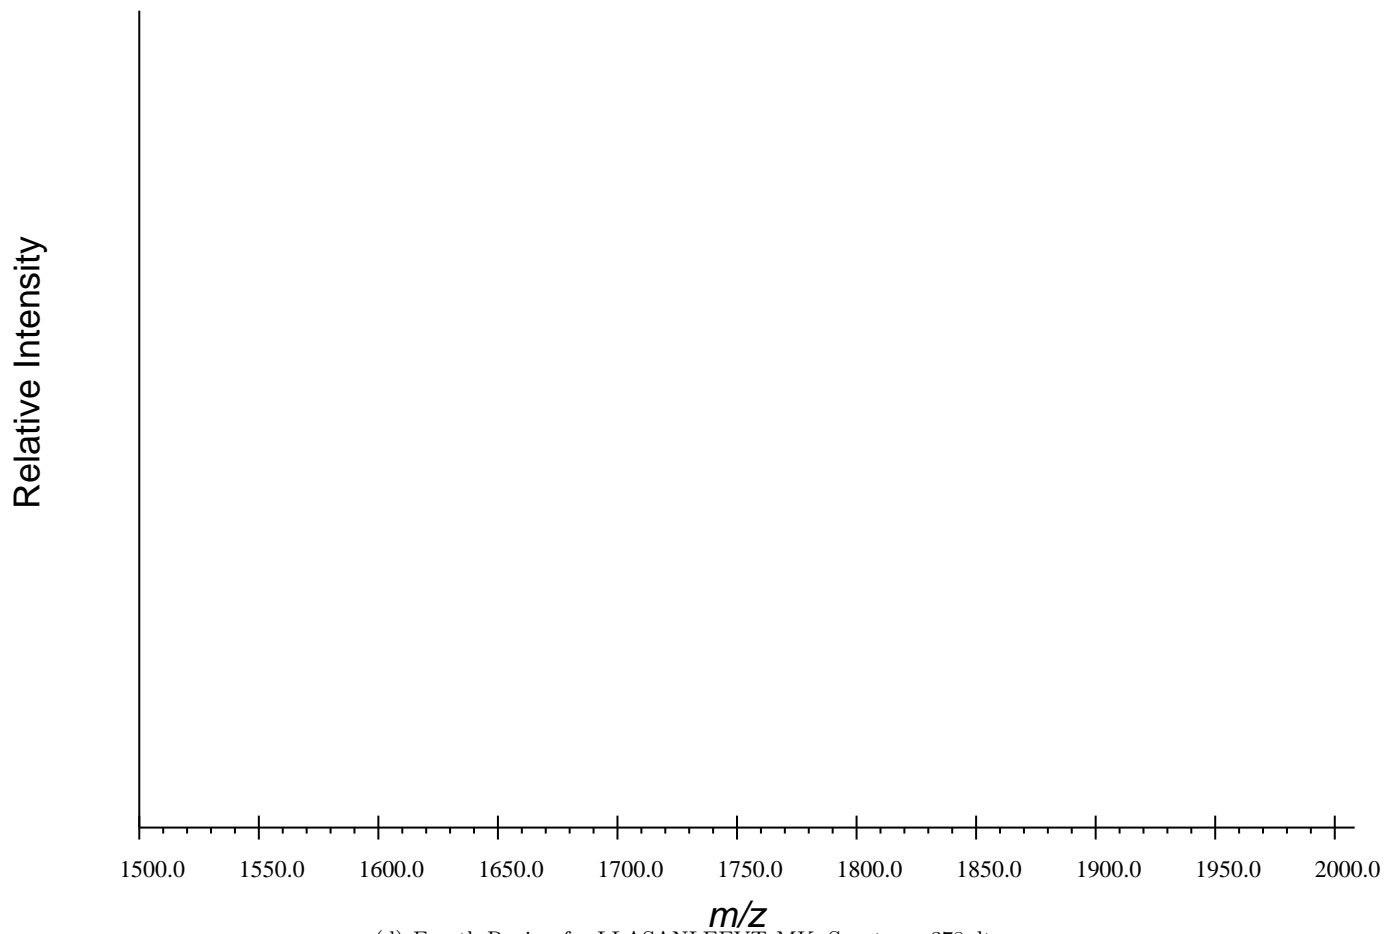

(d) Fourth Region for LLASANLEEVToMK, Spectrum 378.dta



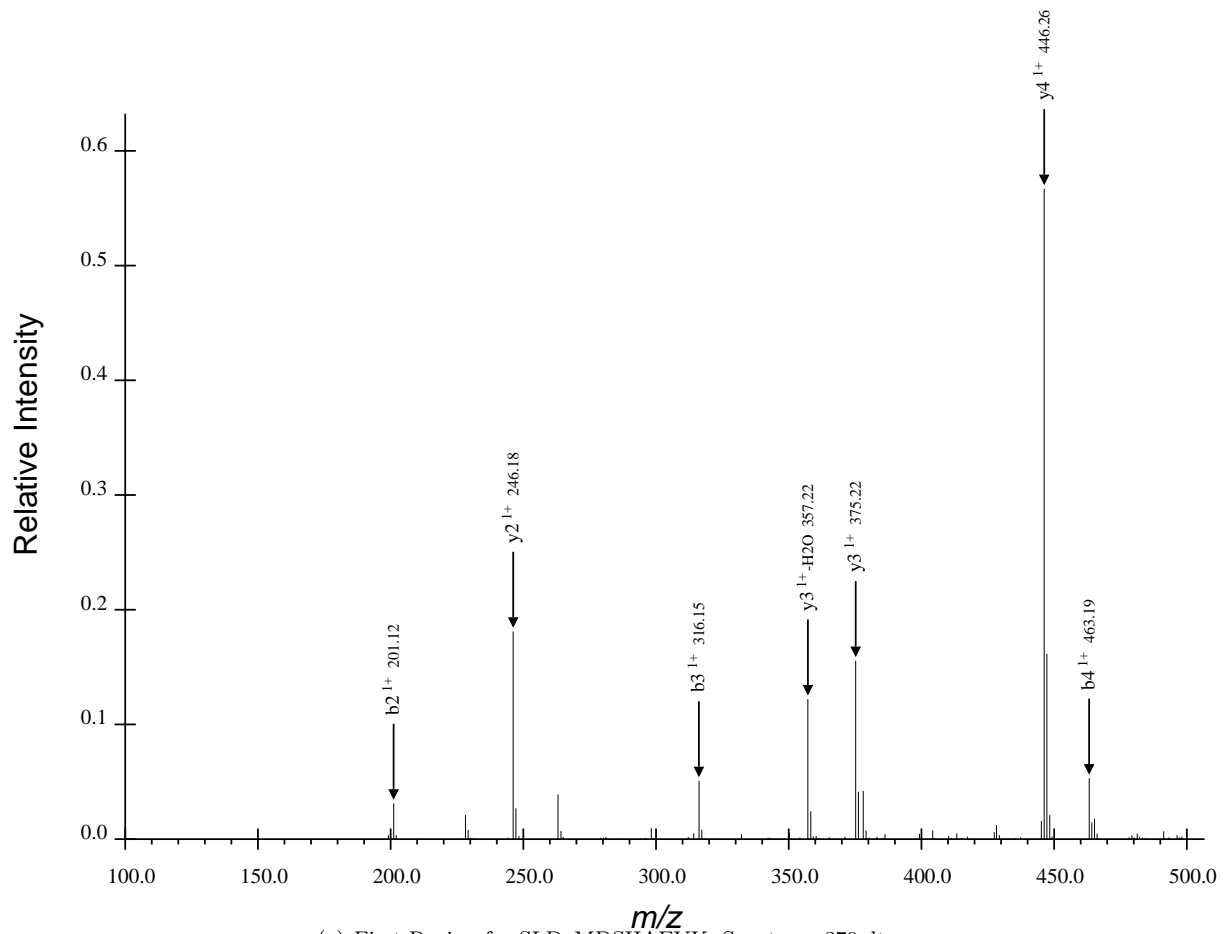

(a) First Region for SLD<sub>o</sub>MDSIIAEVK, Spectrum 379.dta

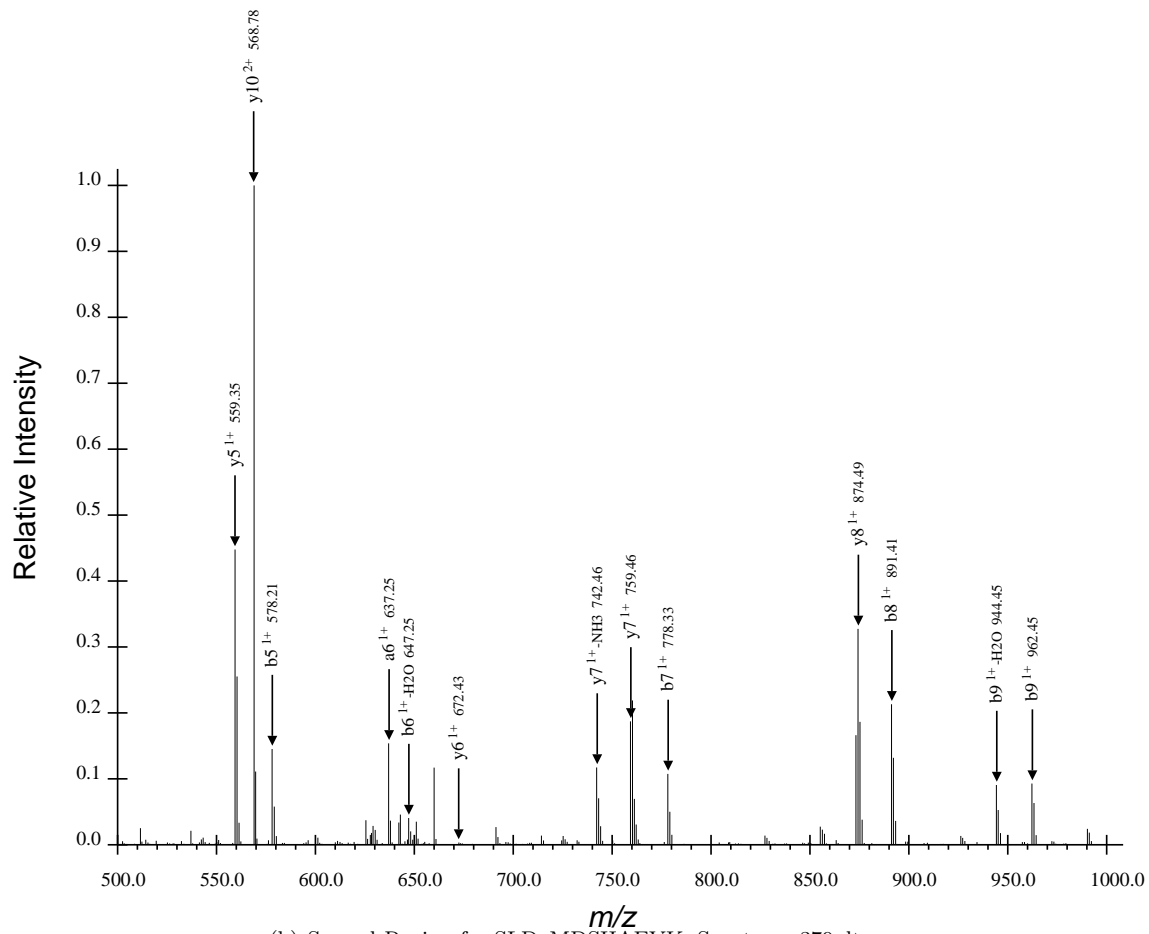

(b) Second Region for SLD<sub>o</sub>MDSIIAEVK, Spectrum 379.dta

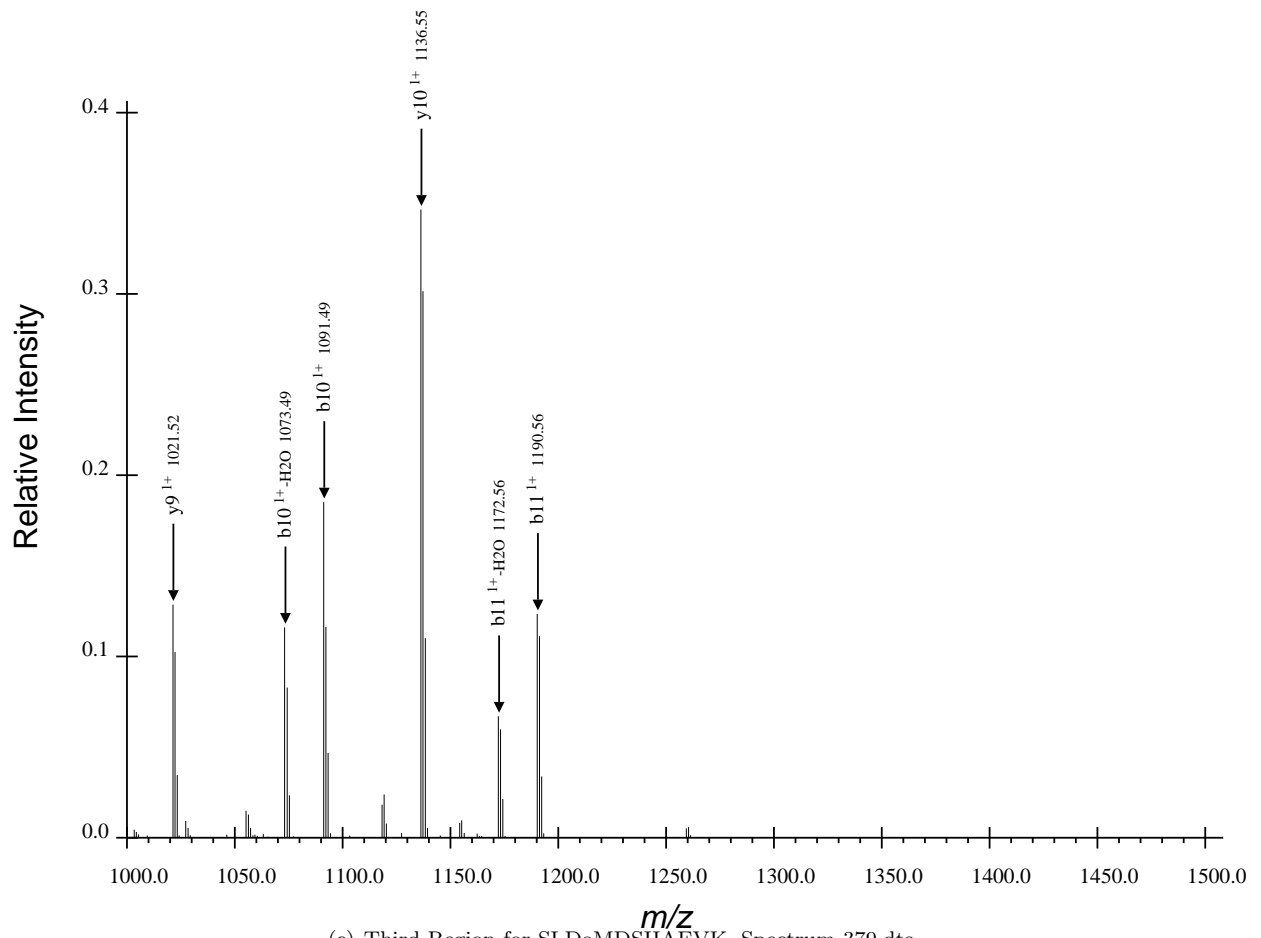

(c) Third Region for SLDoMDSIIAEVK, Spectrum 379.dta

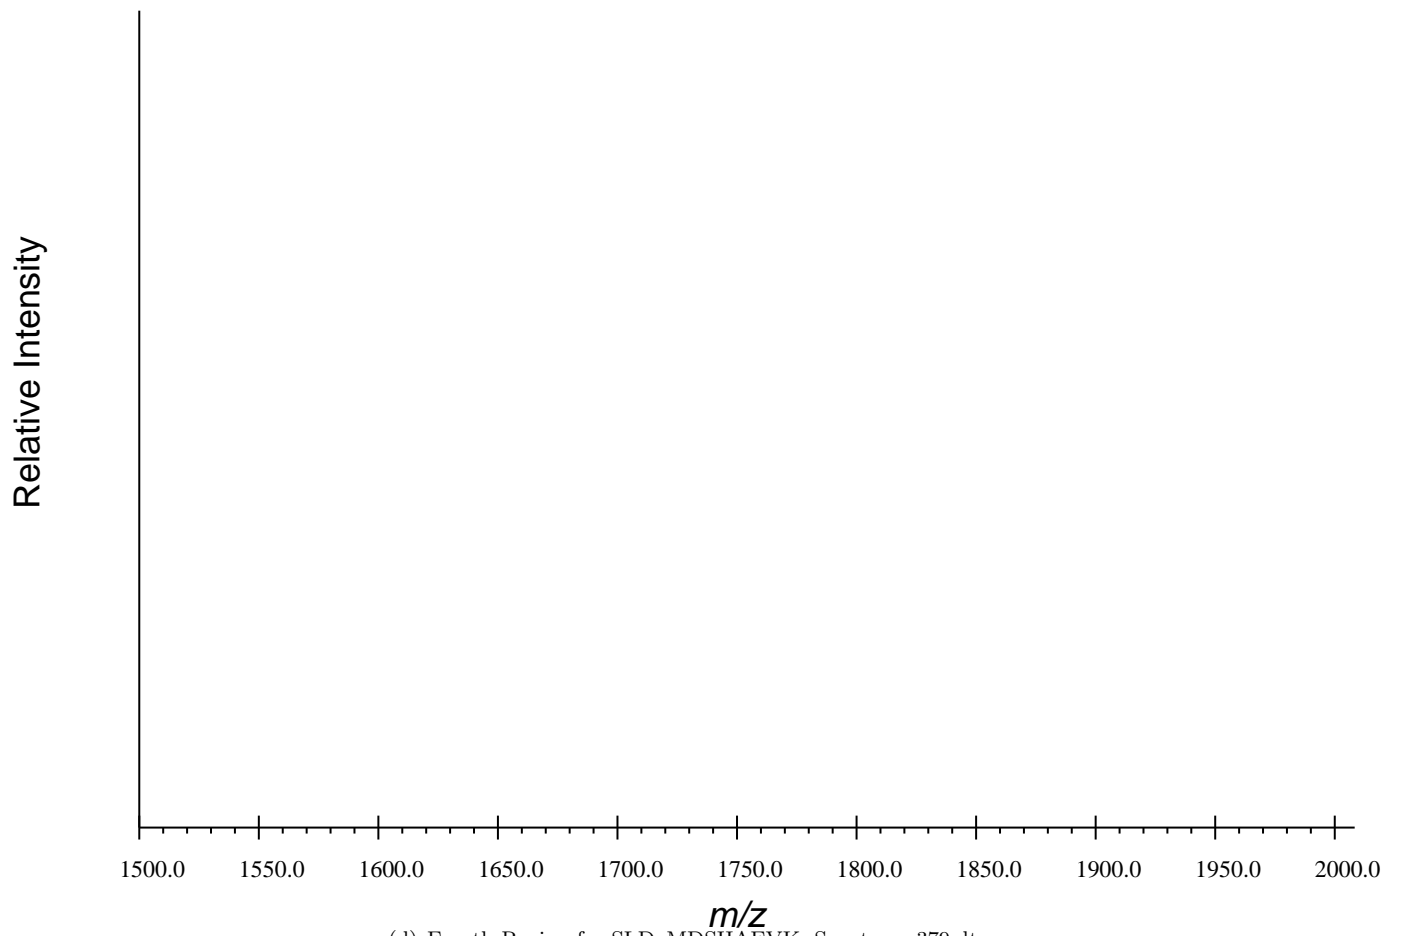

(d) Fourth Region for SLDoMDSIIAEVK, Spectrum 379.dta

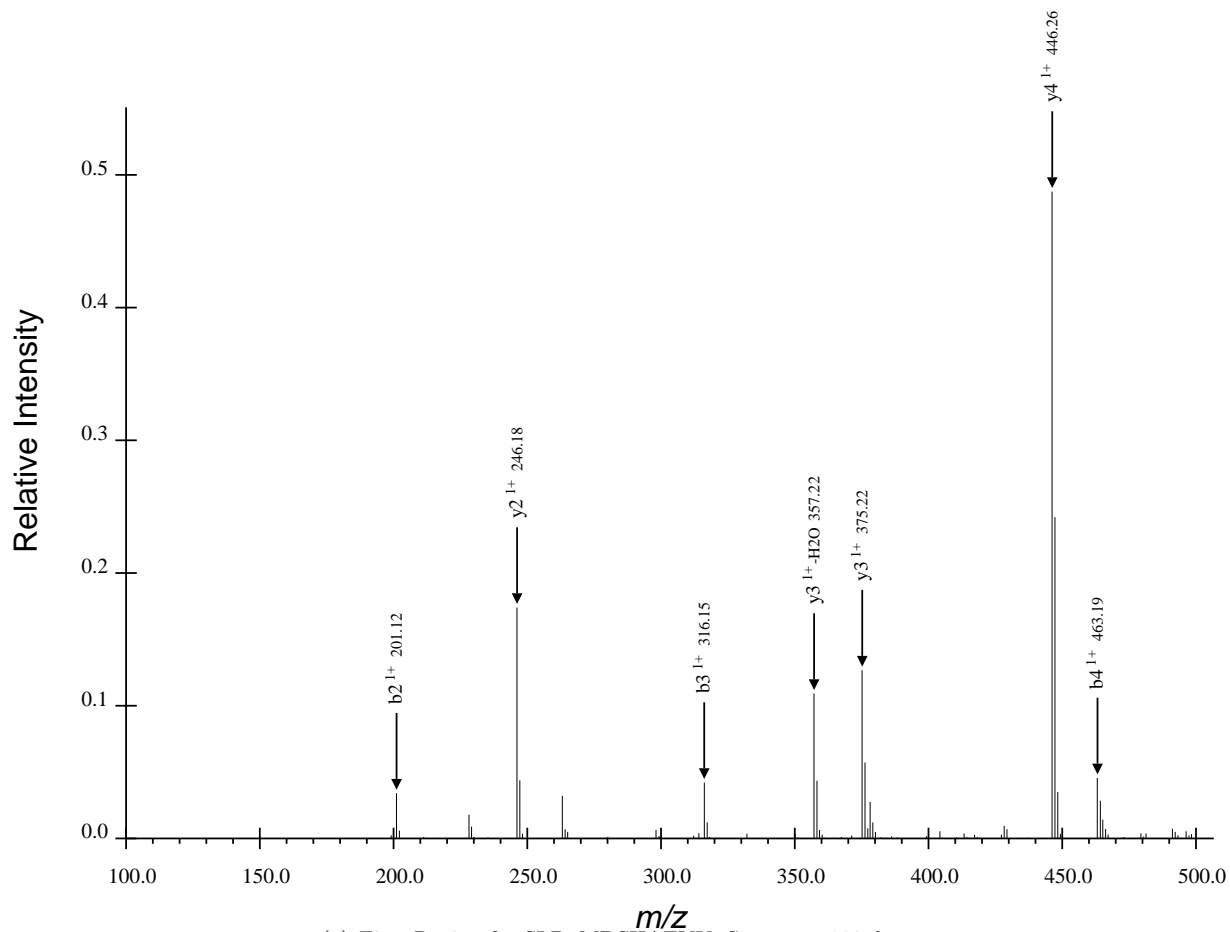

(a) First Region for SLDoMDSIIAEVK, Spectrum 380.dta

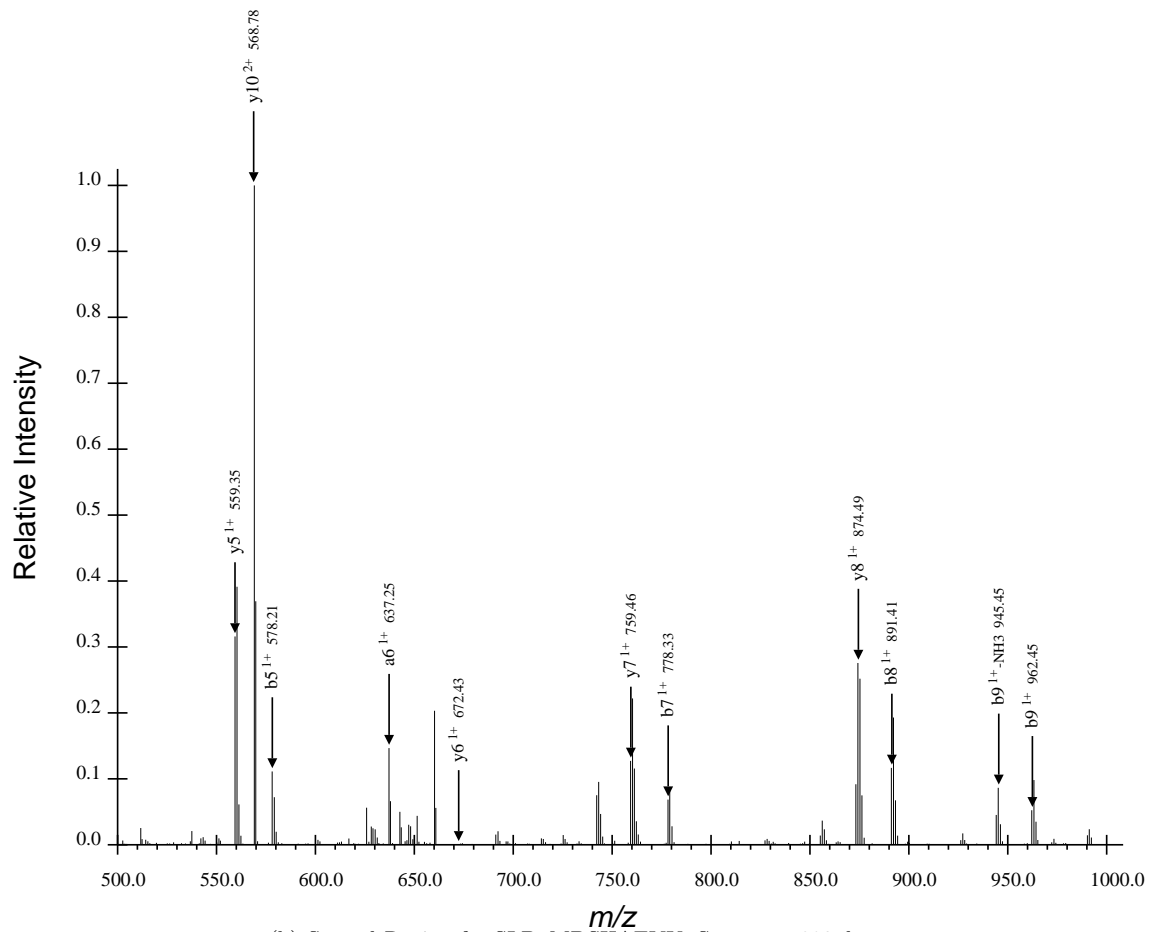

(b) Second Region for SLDoMDSIIAEVK, Spectrum 380.dta

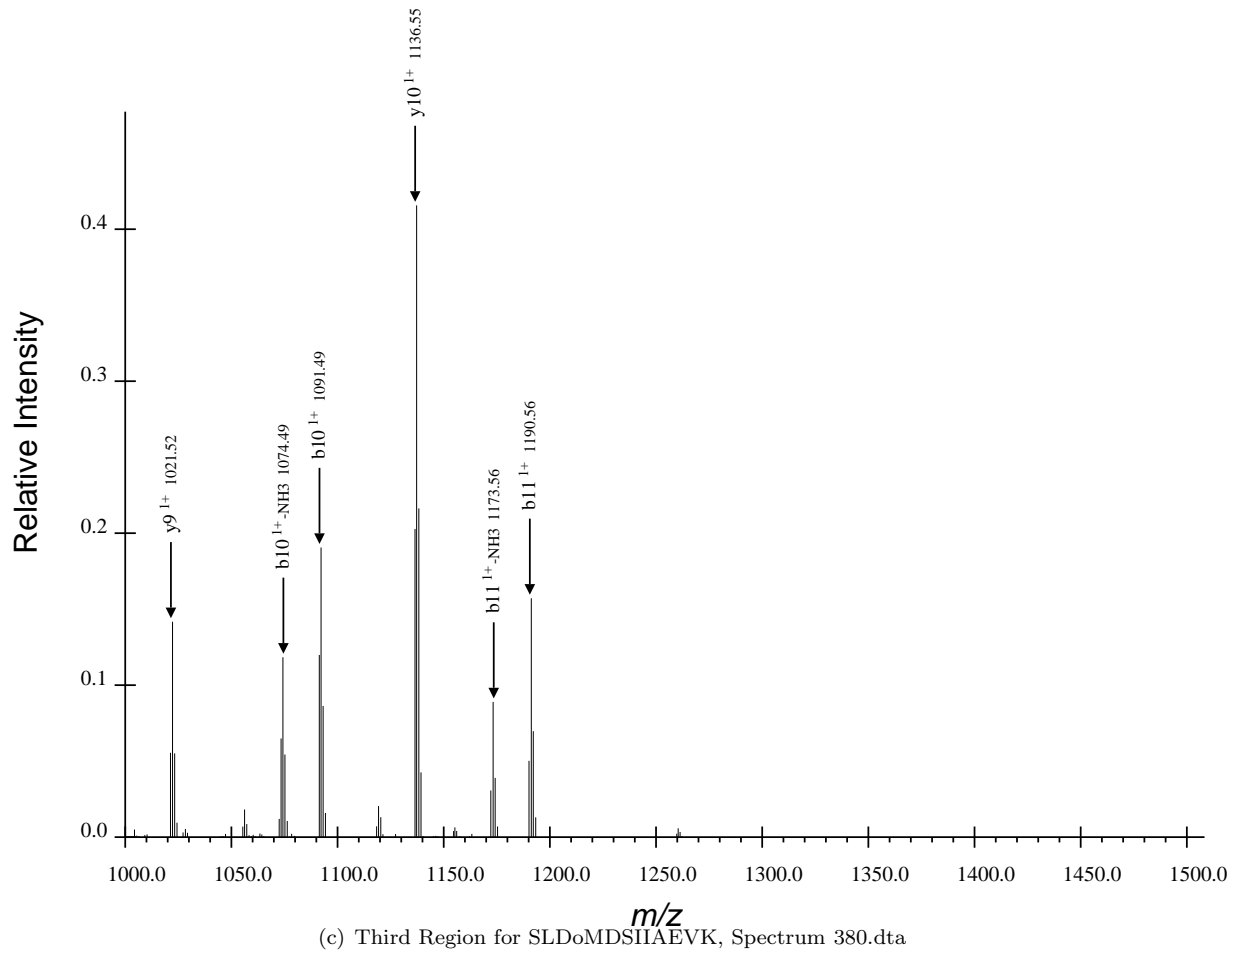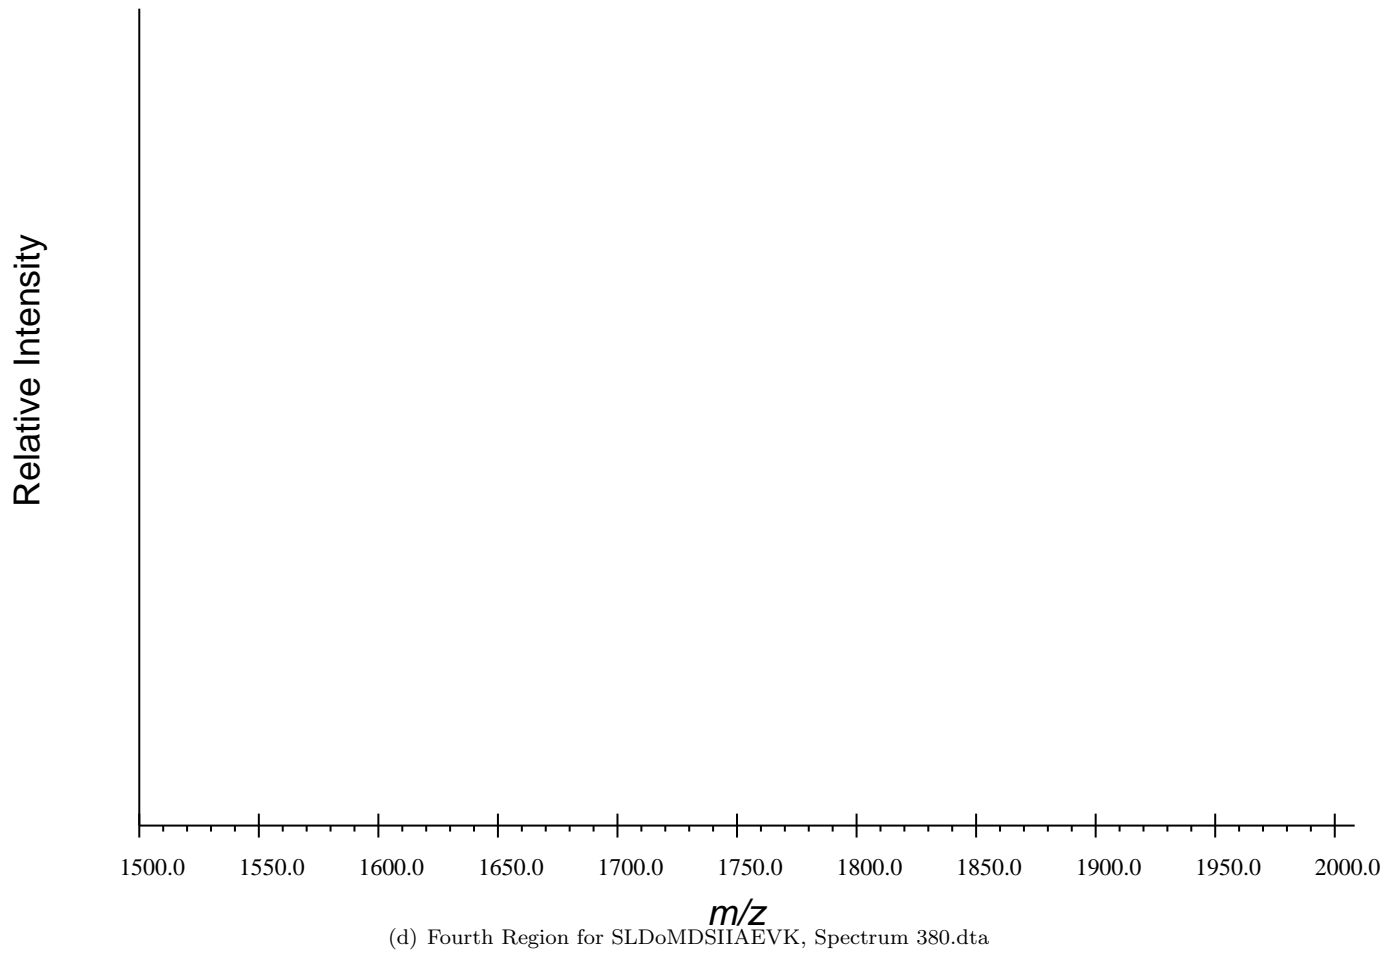

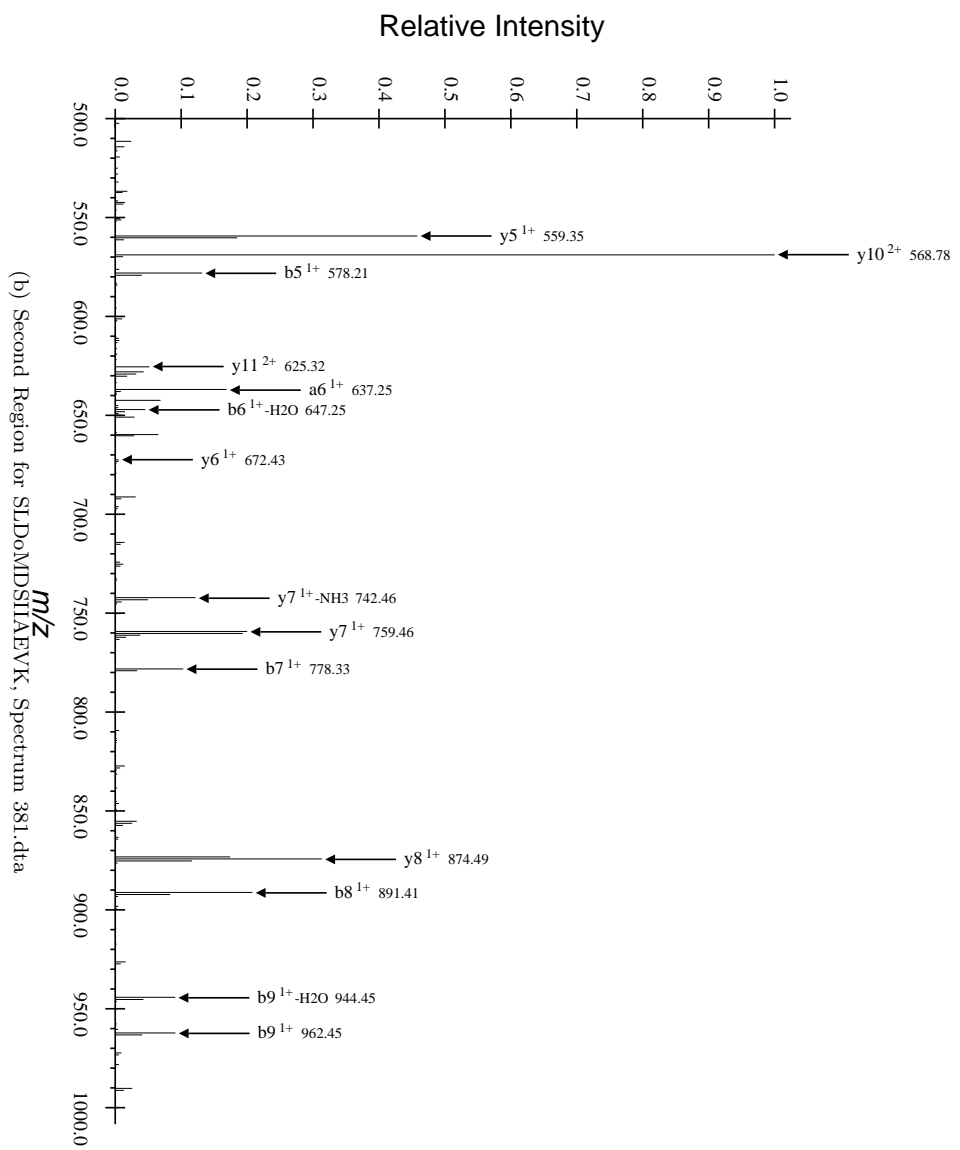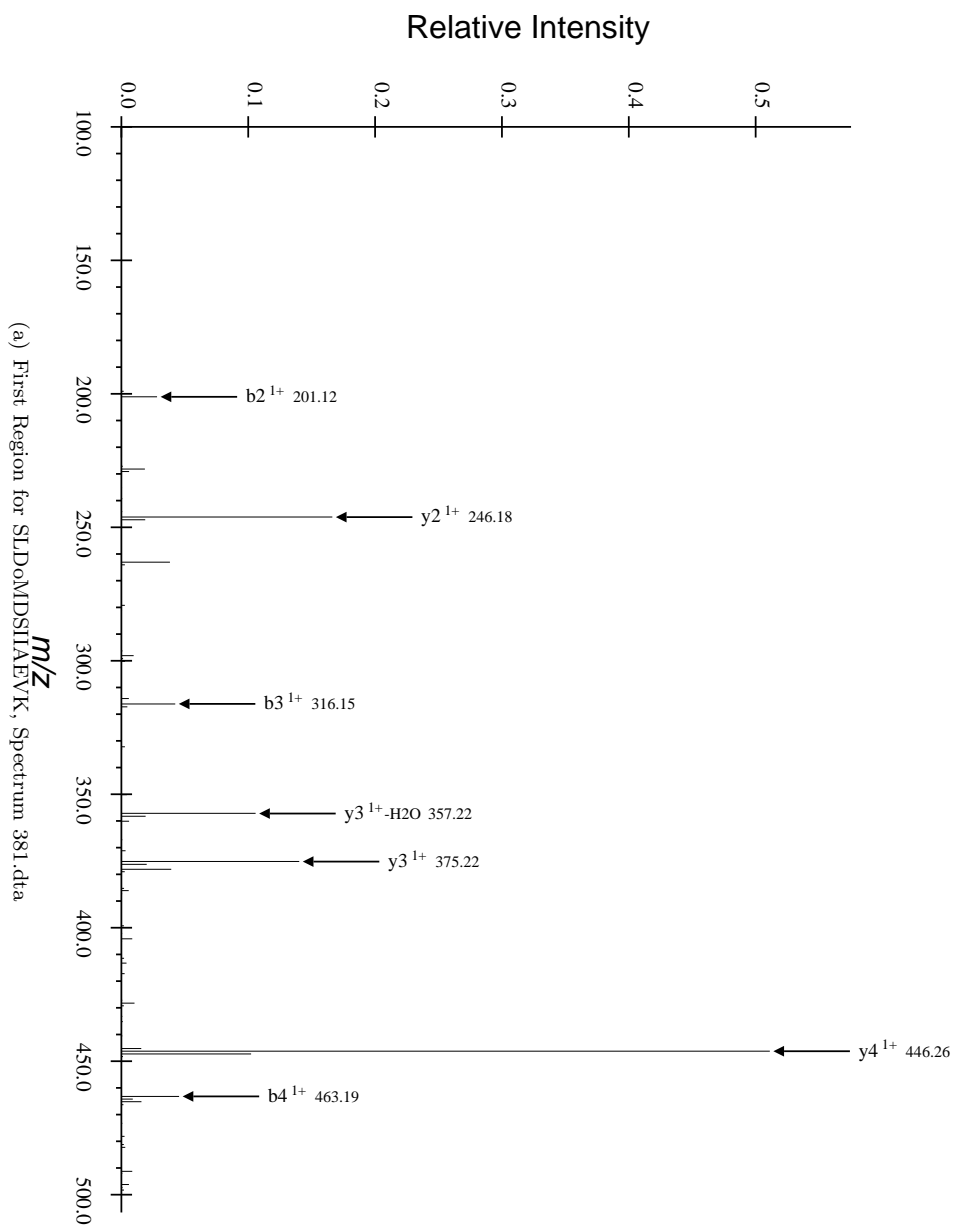

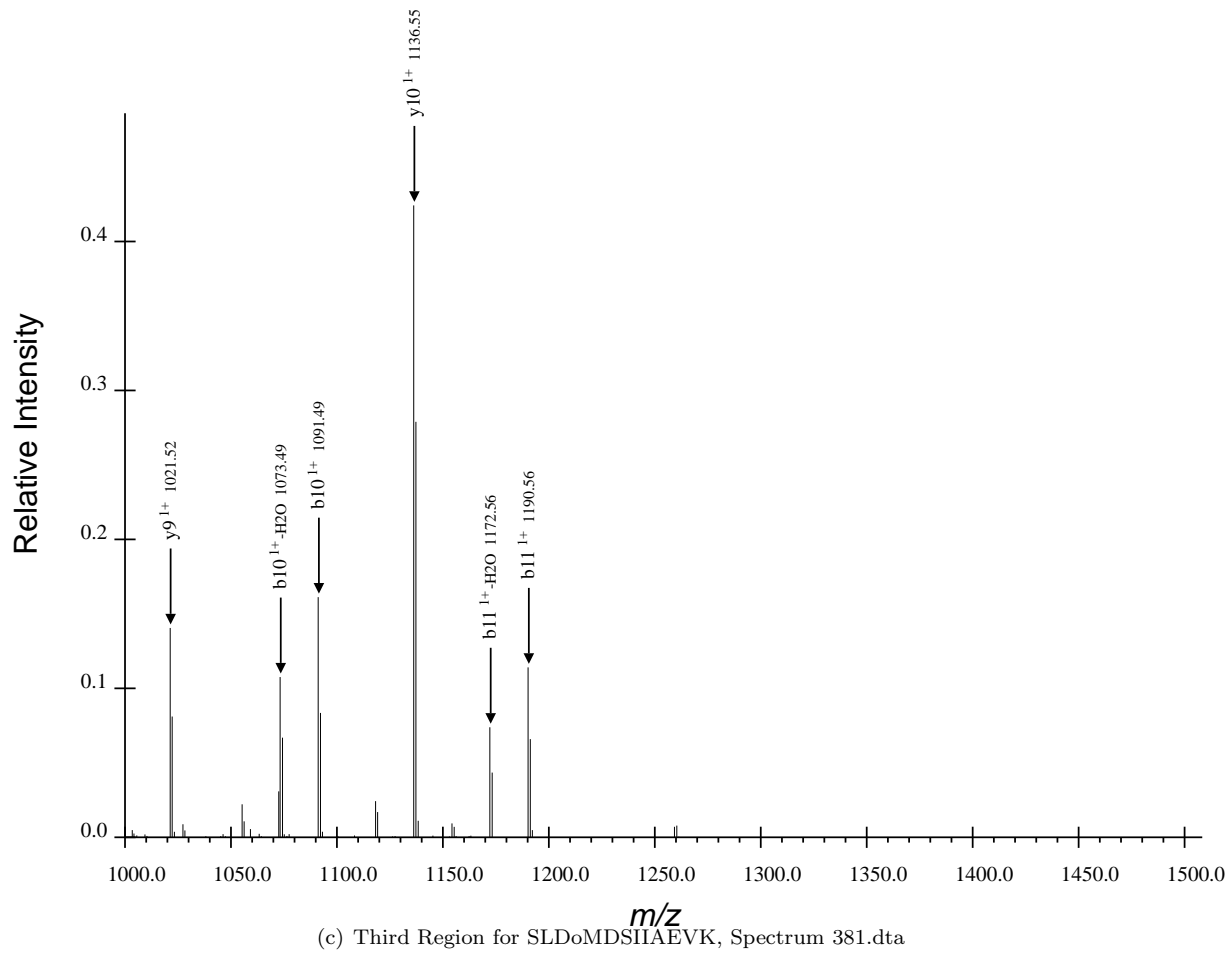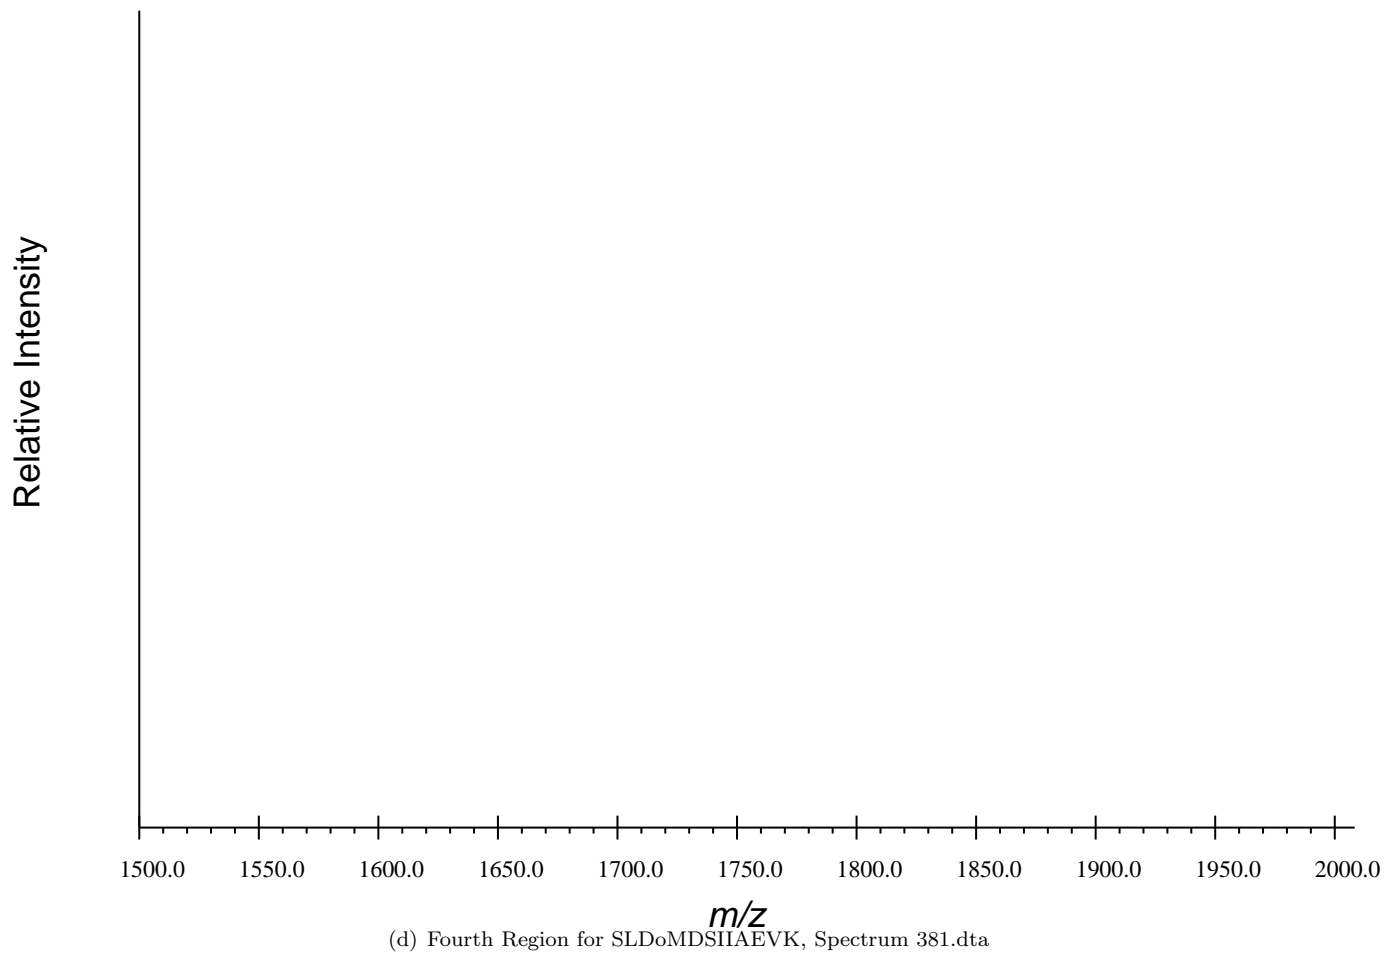

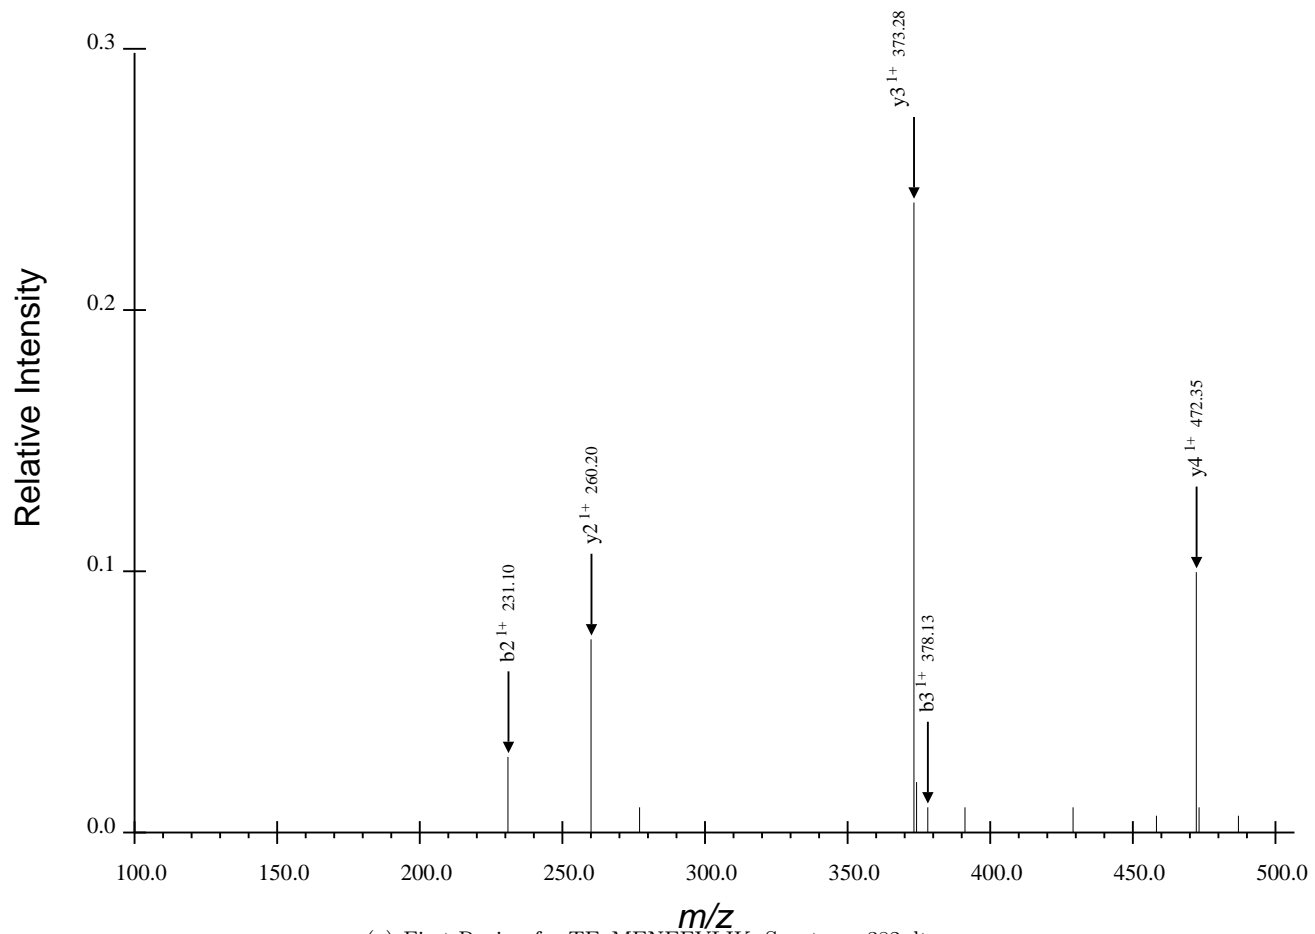

(a) First Region for TEoMENEFLIK, Spectrum 382.dta

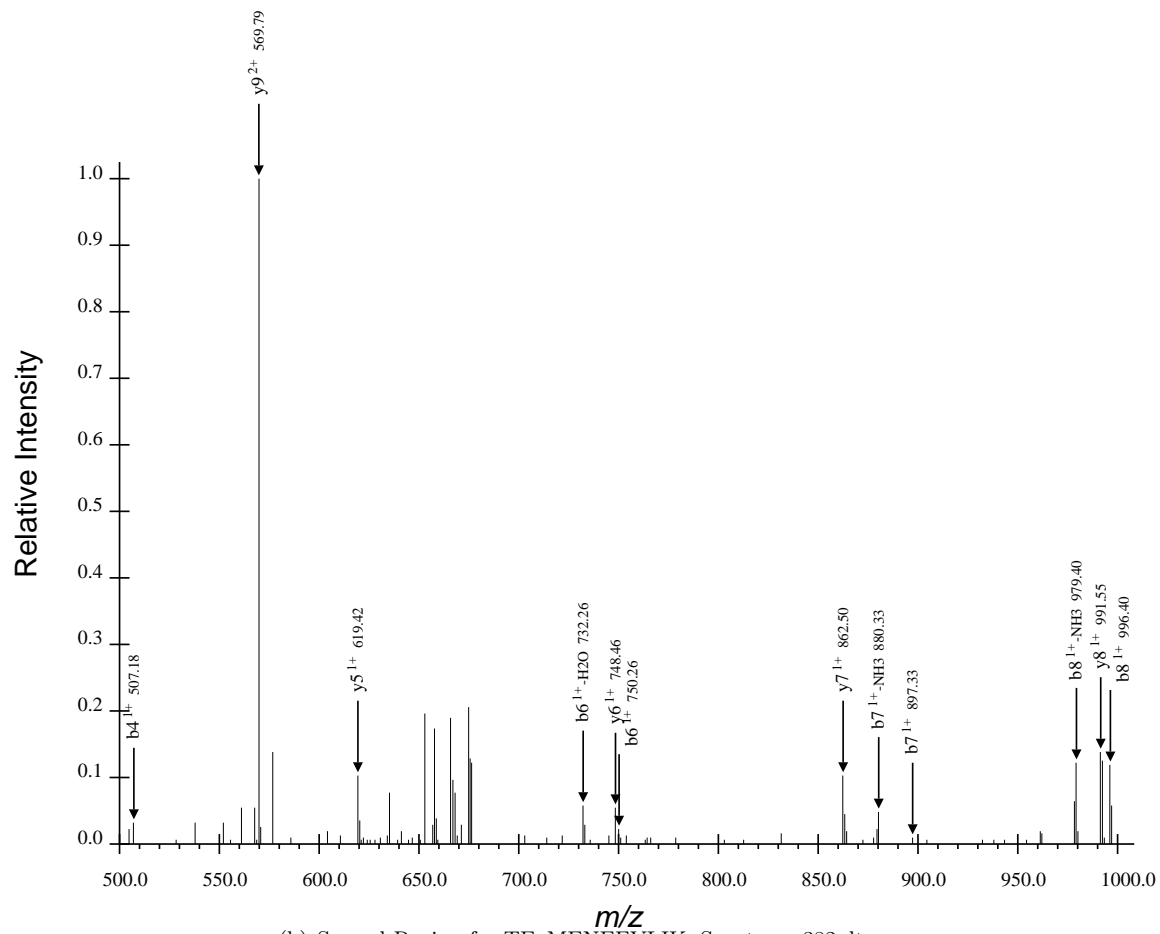

(b) Second Region for TEoMENEFLIK, Spectrum 382.dta

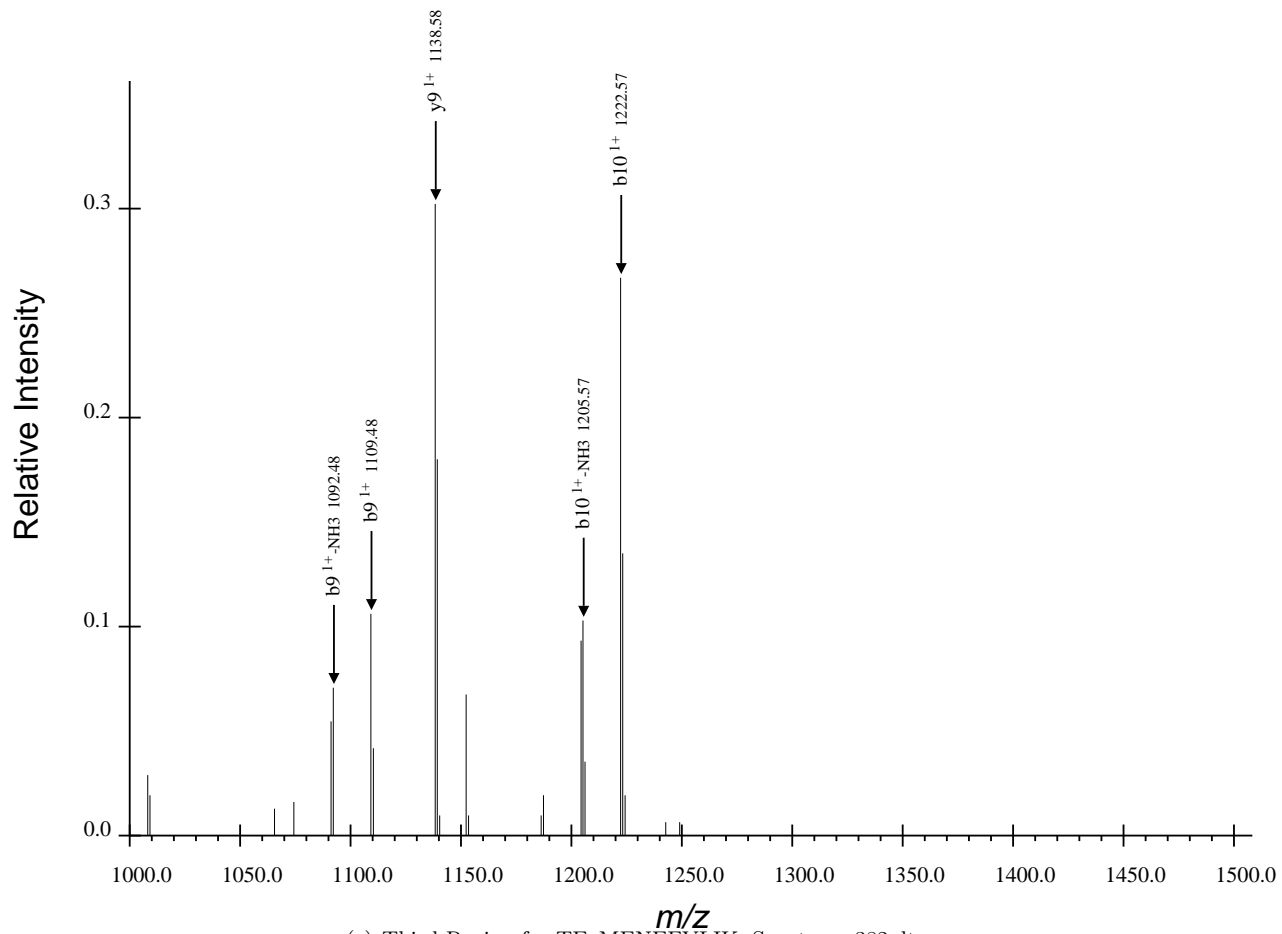

(c) Third Region for TEOmENEFVLIK, Spectrum 382.dta

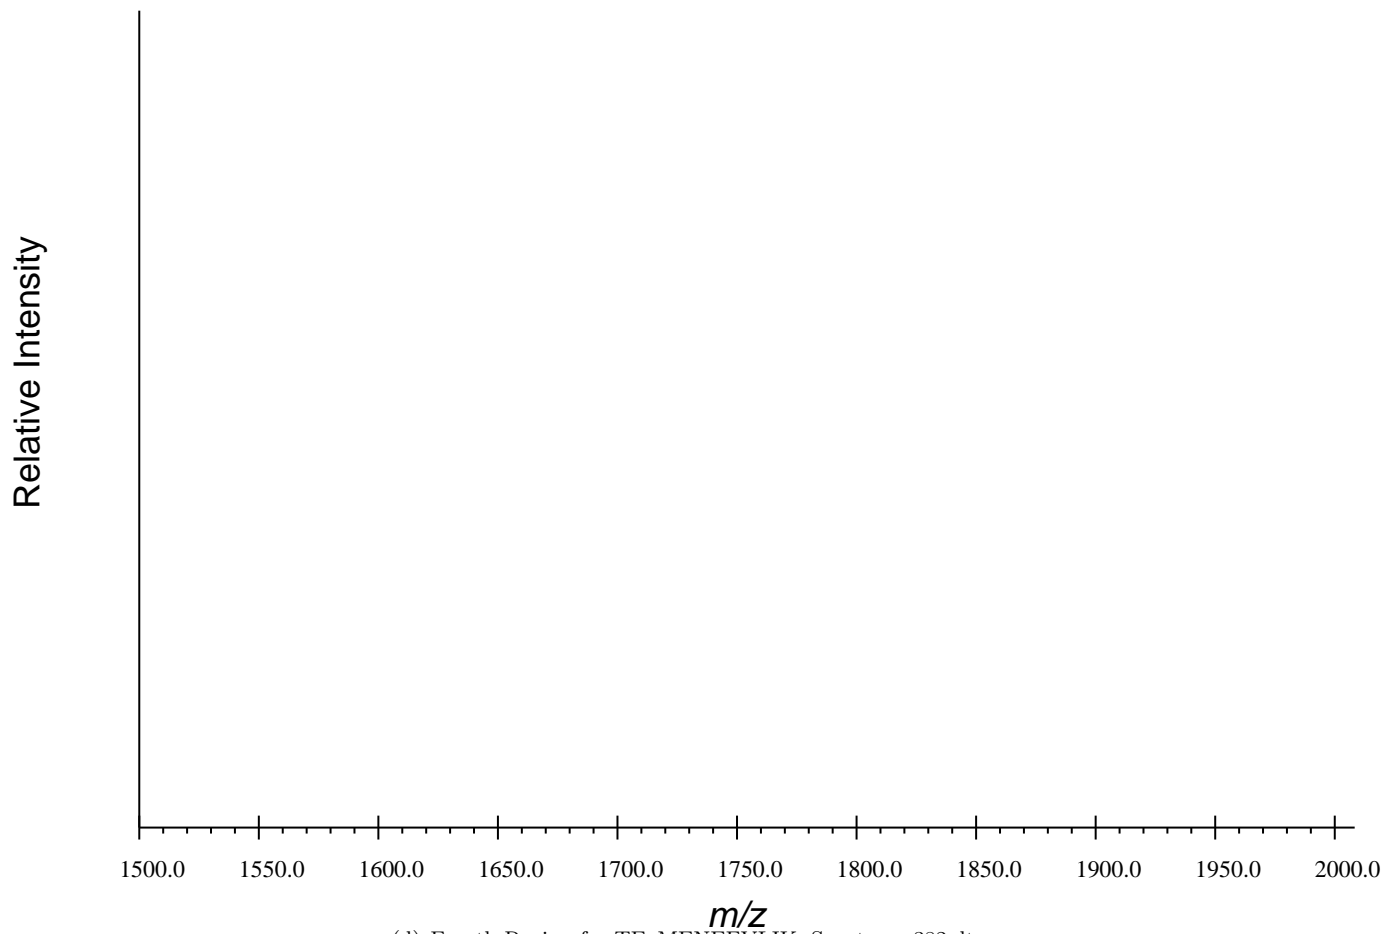

(d) Fourth Region for TEOmENEFVLIK, Spectrum 382.dta



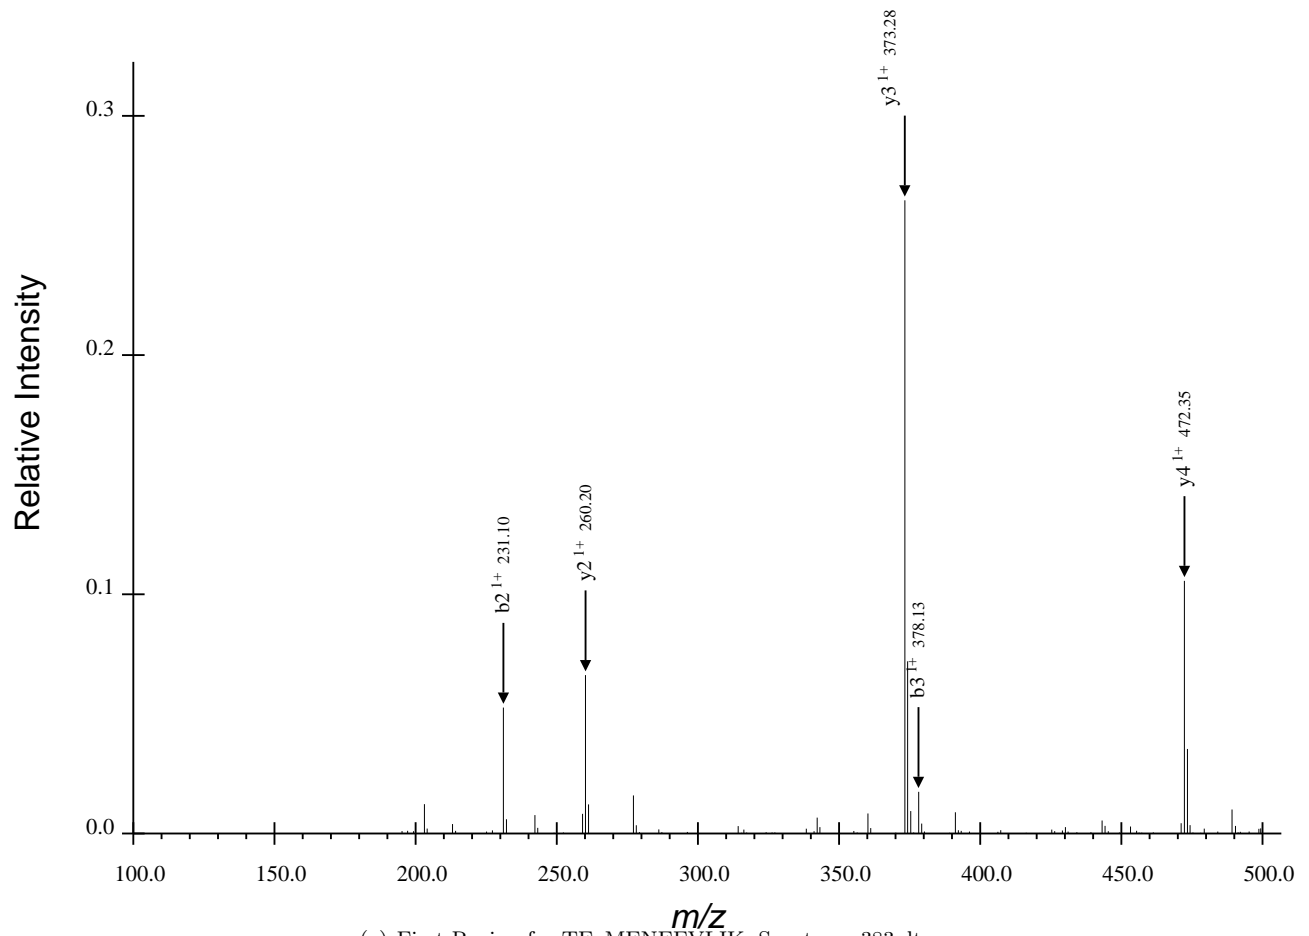

(a) First Region for TEoMENEFLIK, Spectrum 383.dta

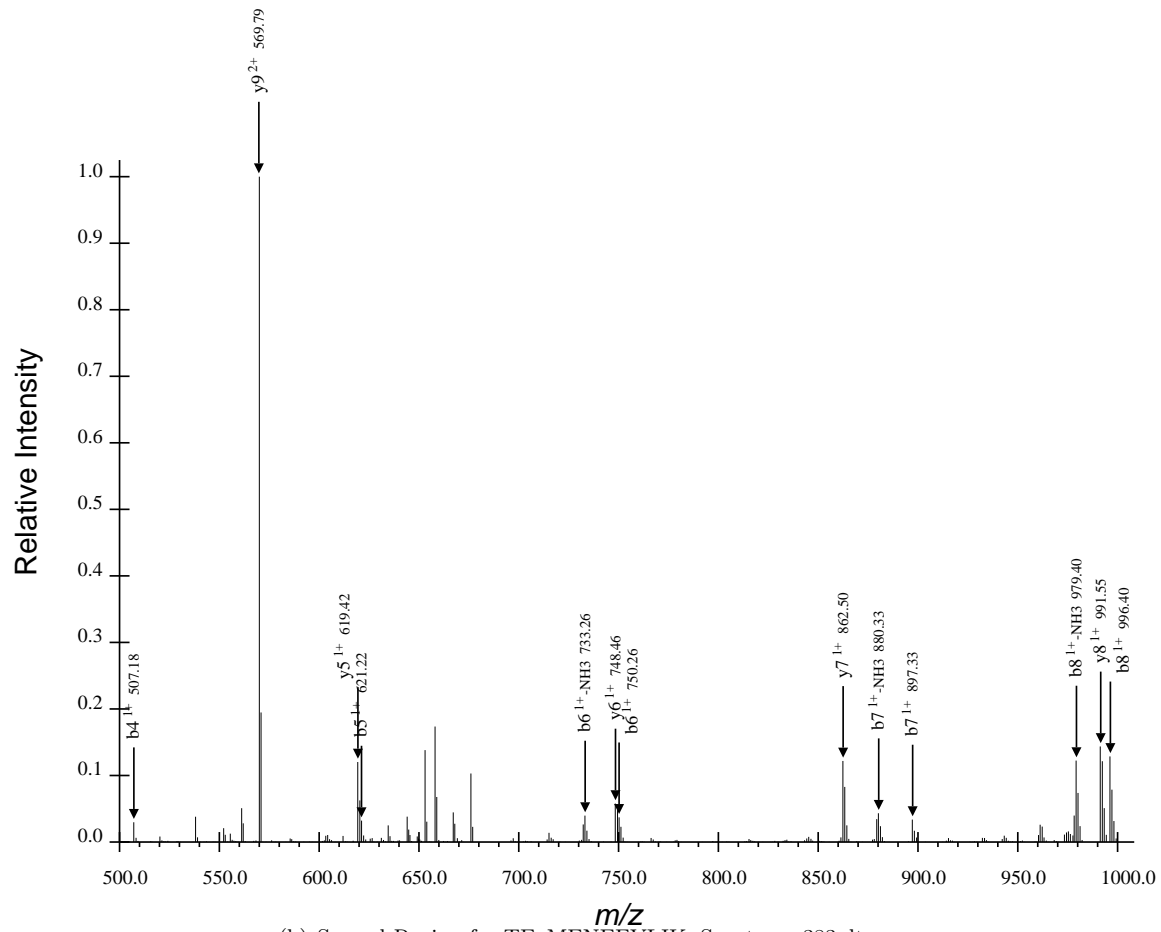

(b) Second Region for TEoMENEFLIK, Spectrum 383.dta

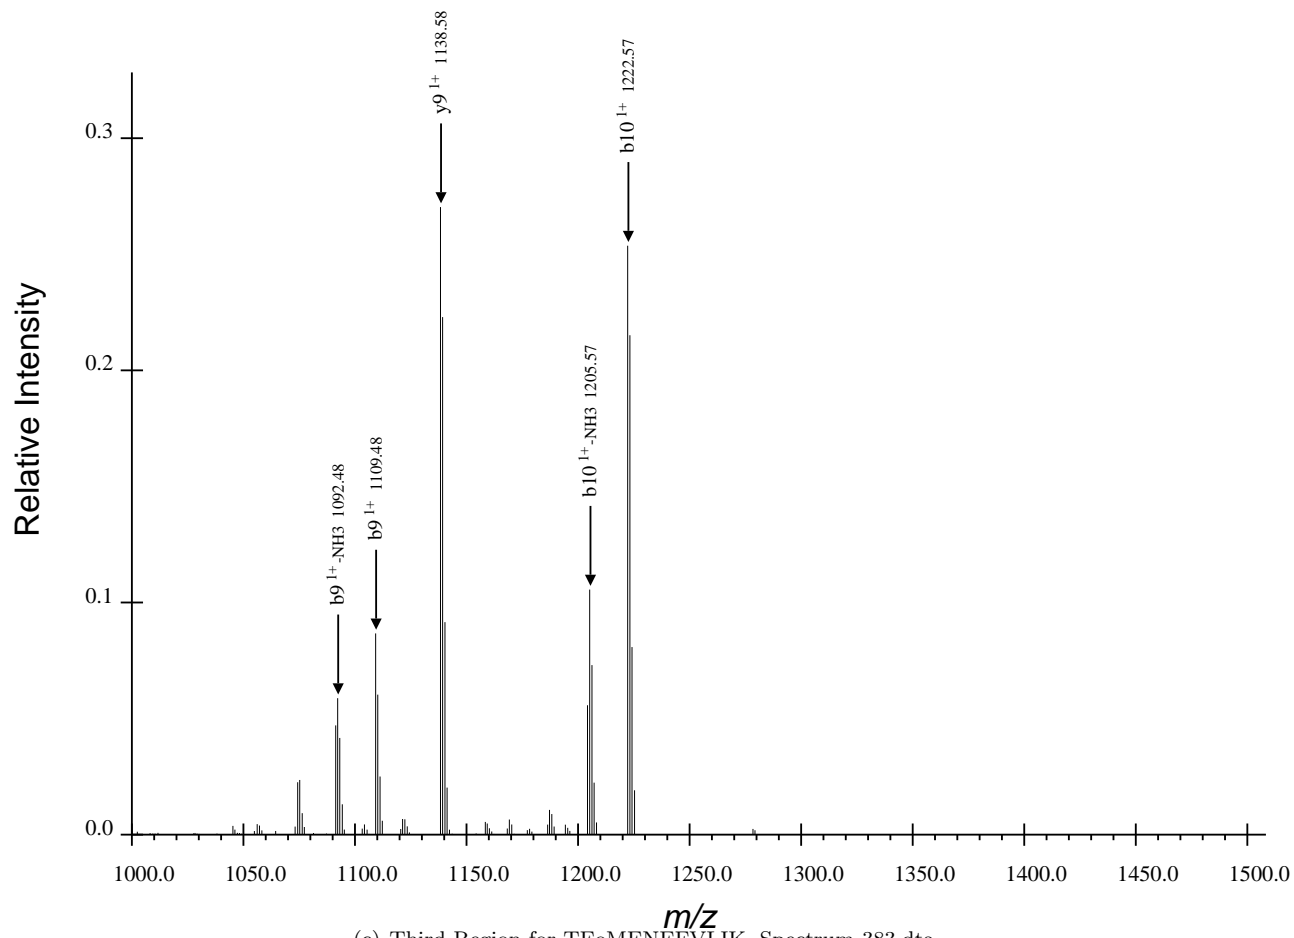

(c) Third Region for TEO MENE FV LIK, Spectrum 383.dta

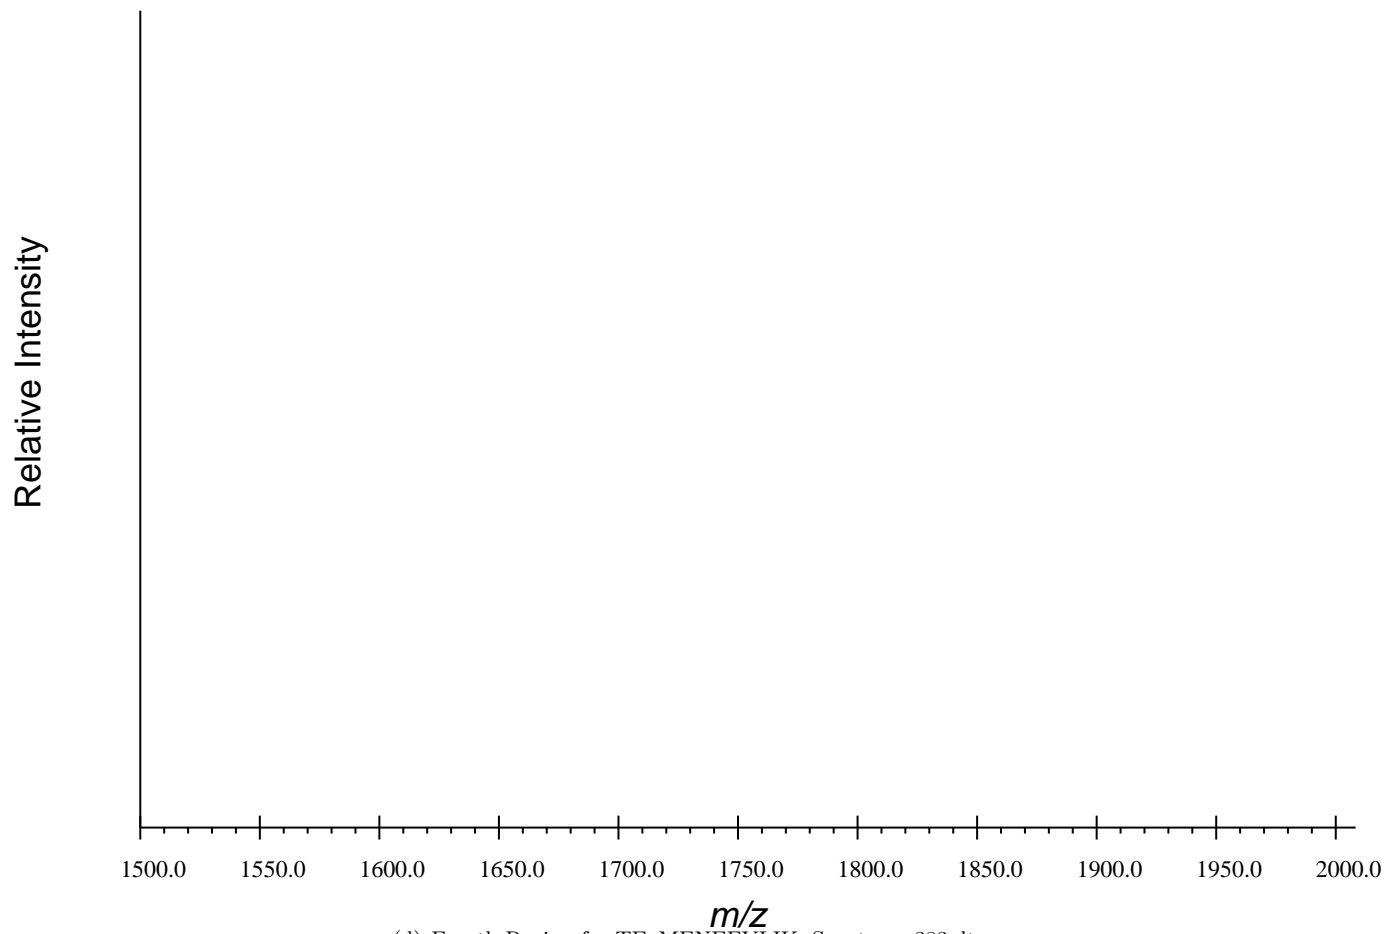

(d) Fourth Region for TEO MENE FV LIK, Spectrum 383.dta

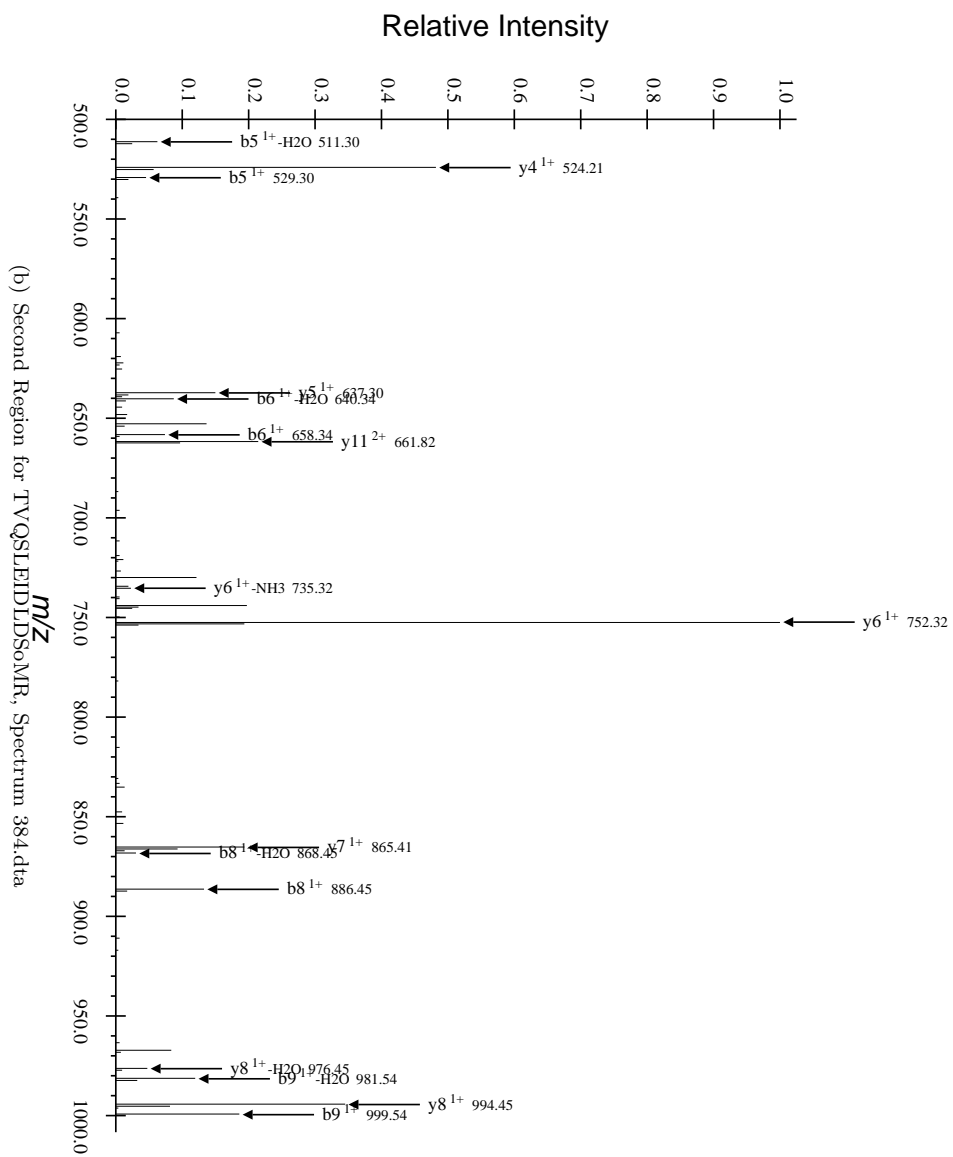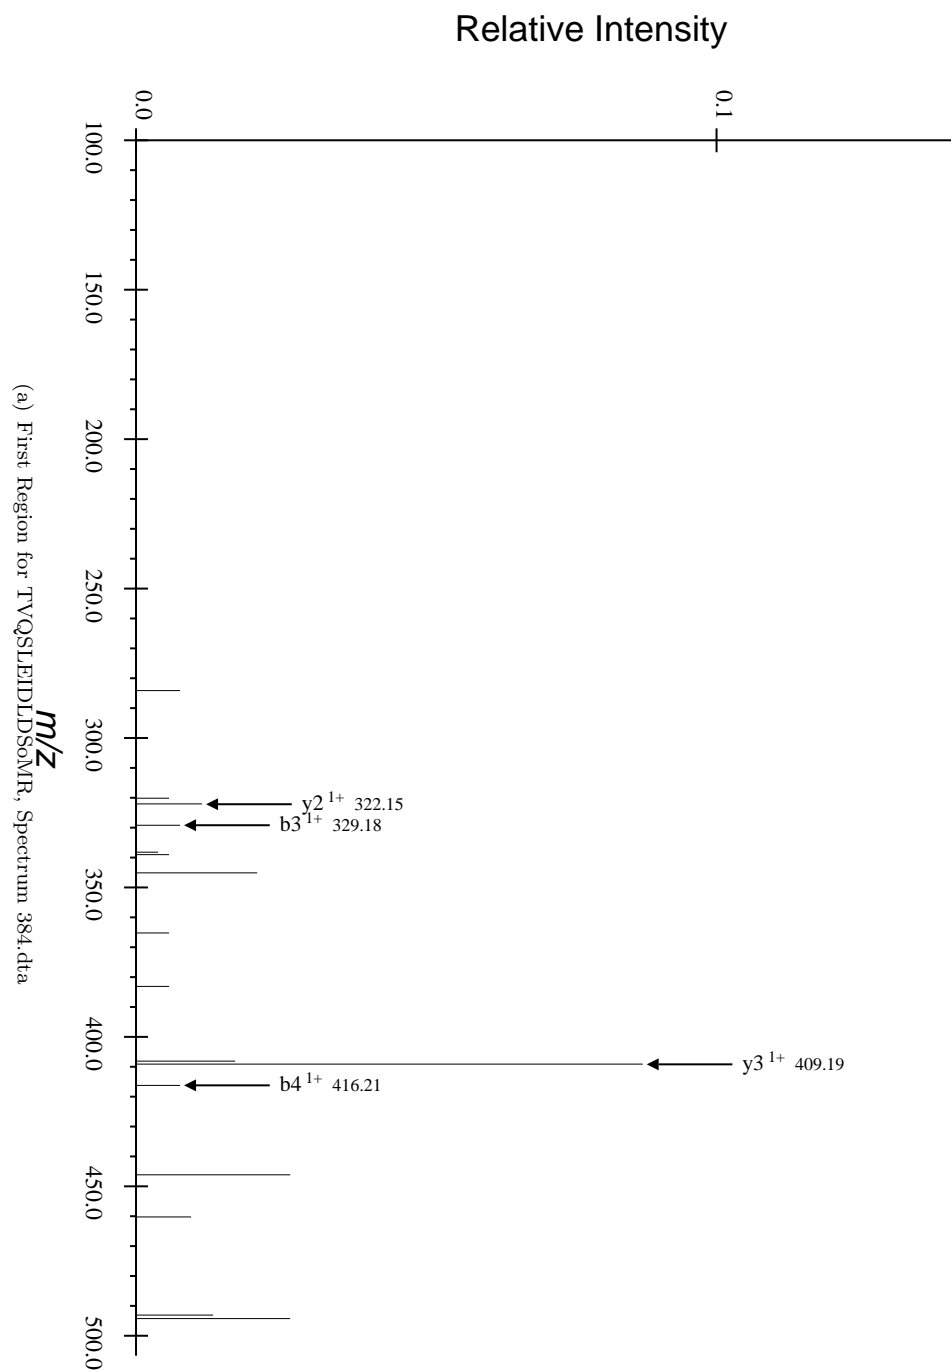

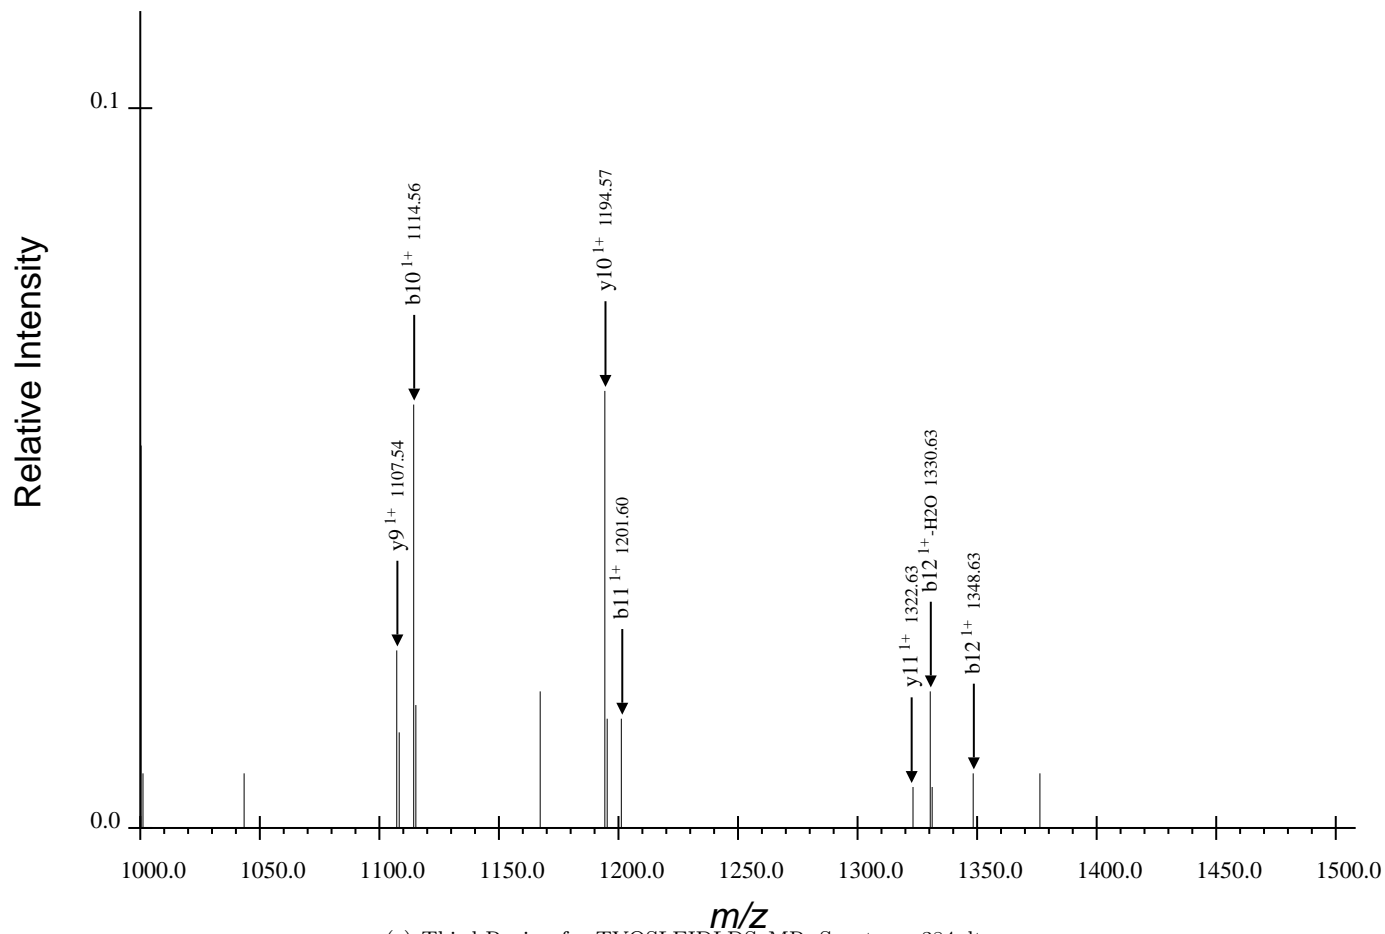

(c) Third Region for TVQSLEIDLDS<sub>o</sub>MR, Spectrum 384.dta

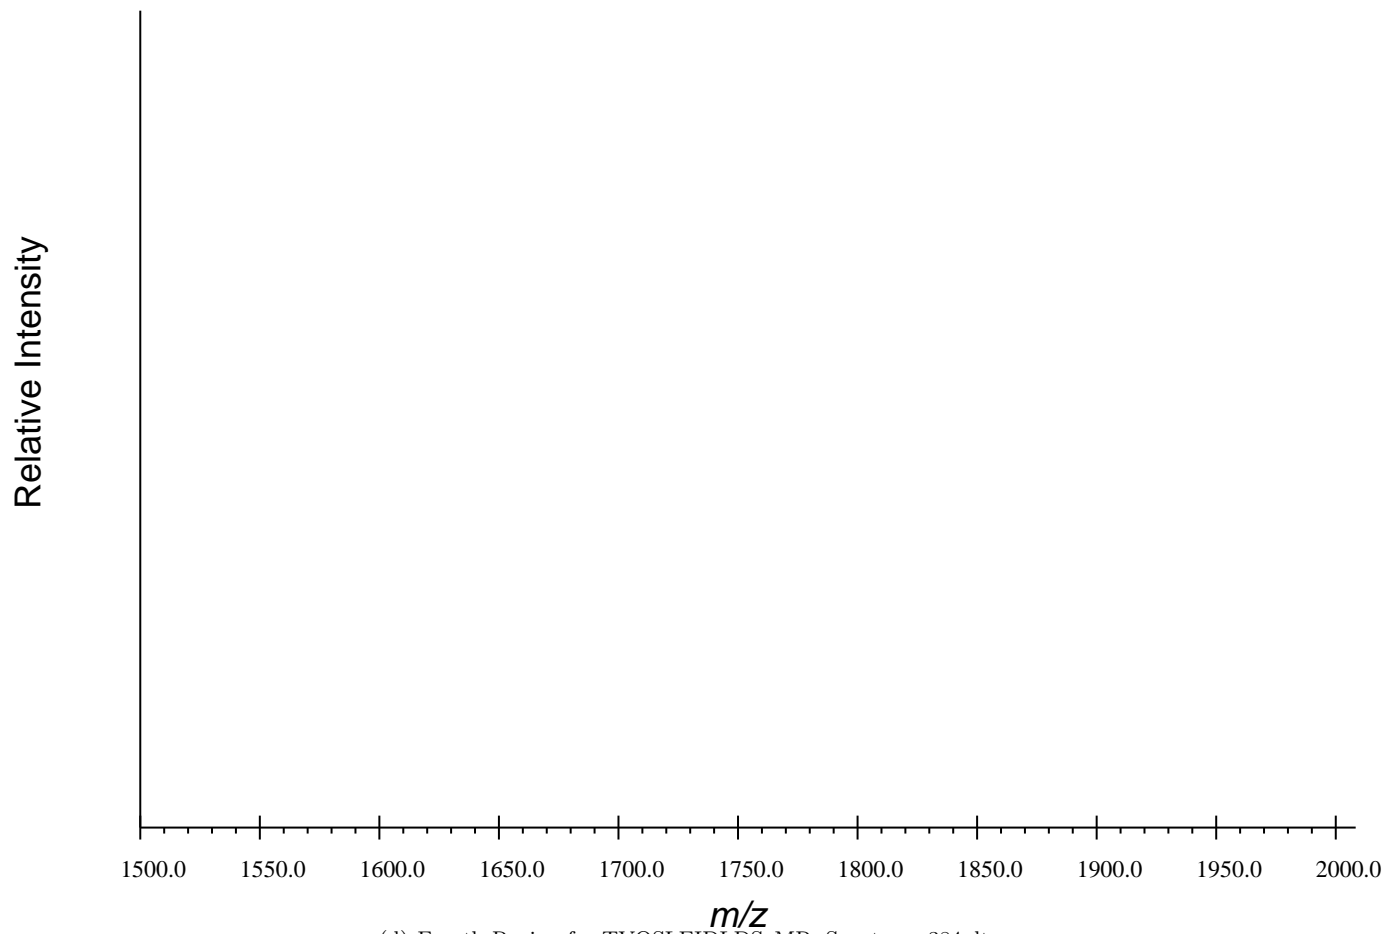

(d) Fourth Region for TVQSLEIDLDS<sub>o</sub>MR, Spectrum 384.dta

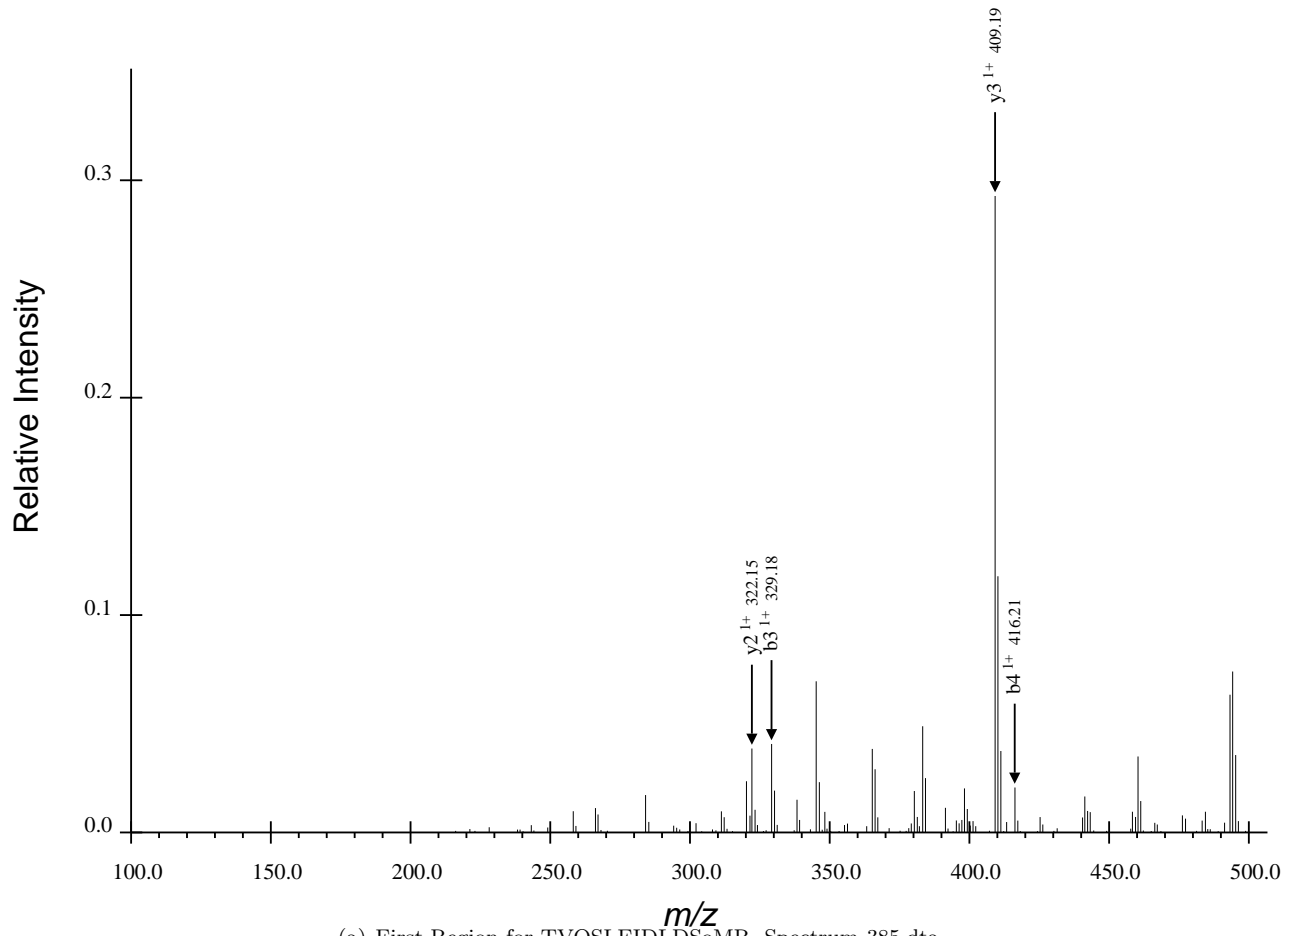

(a) First Region for TVQSLEIDLDSOMR, Spectrum 385.dta

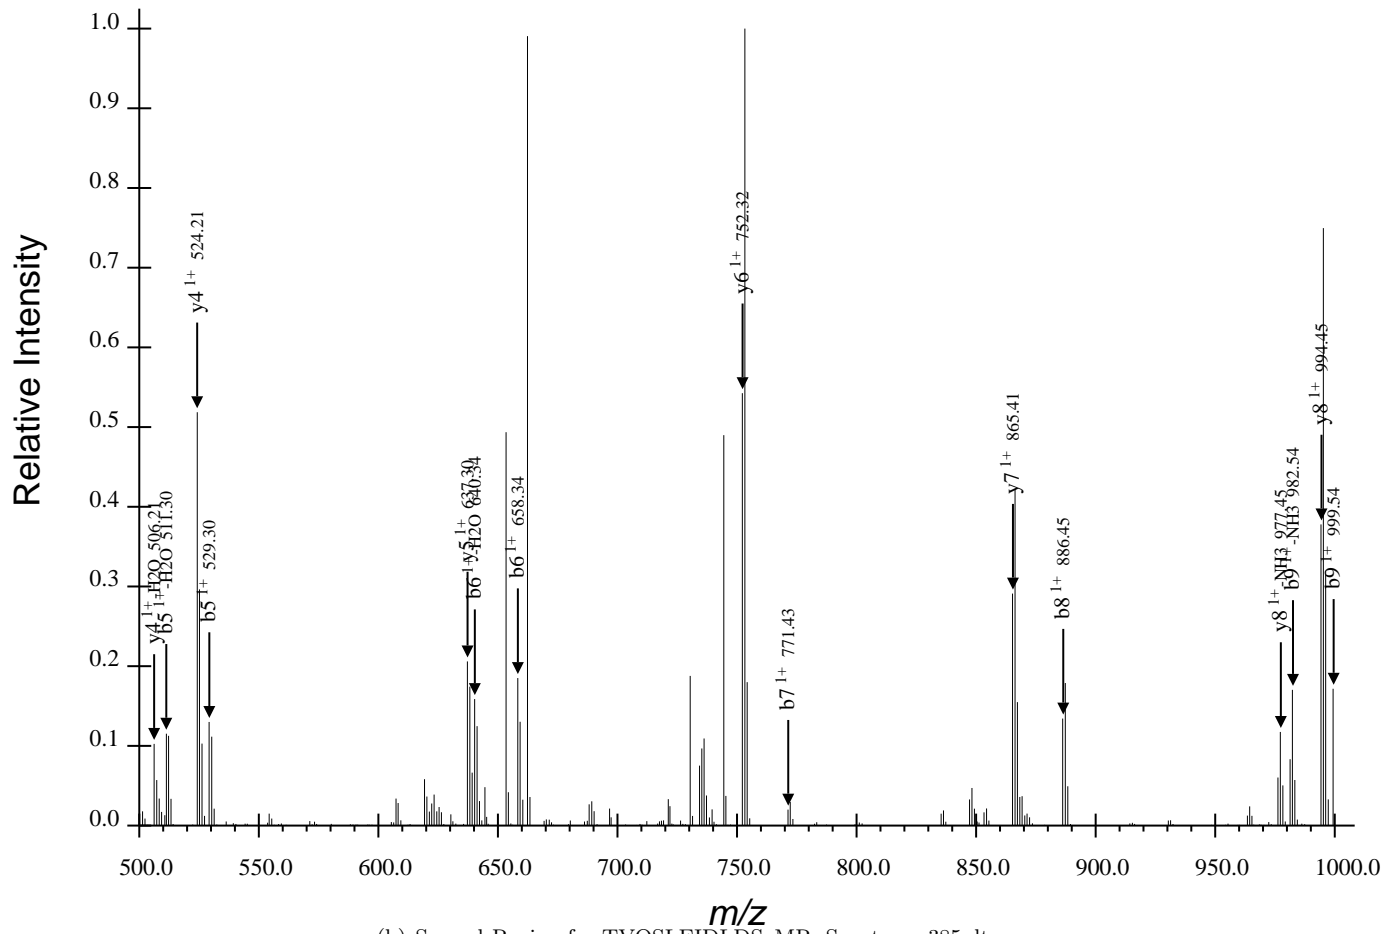

(b) Second Region for TVQSLEIDLDSOMR, Spectrum 385.dta

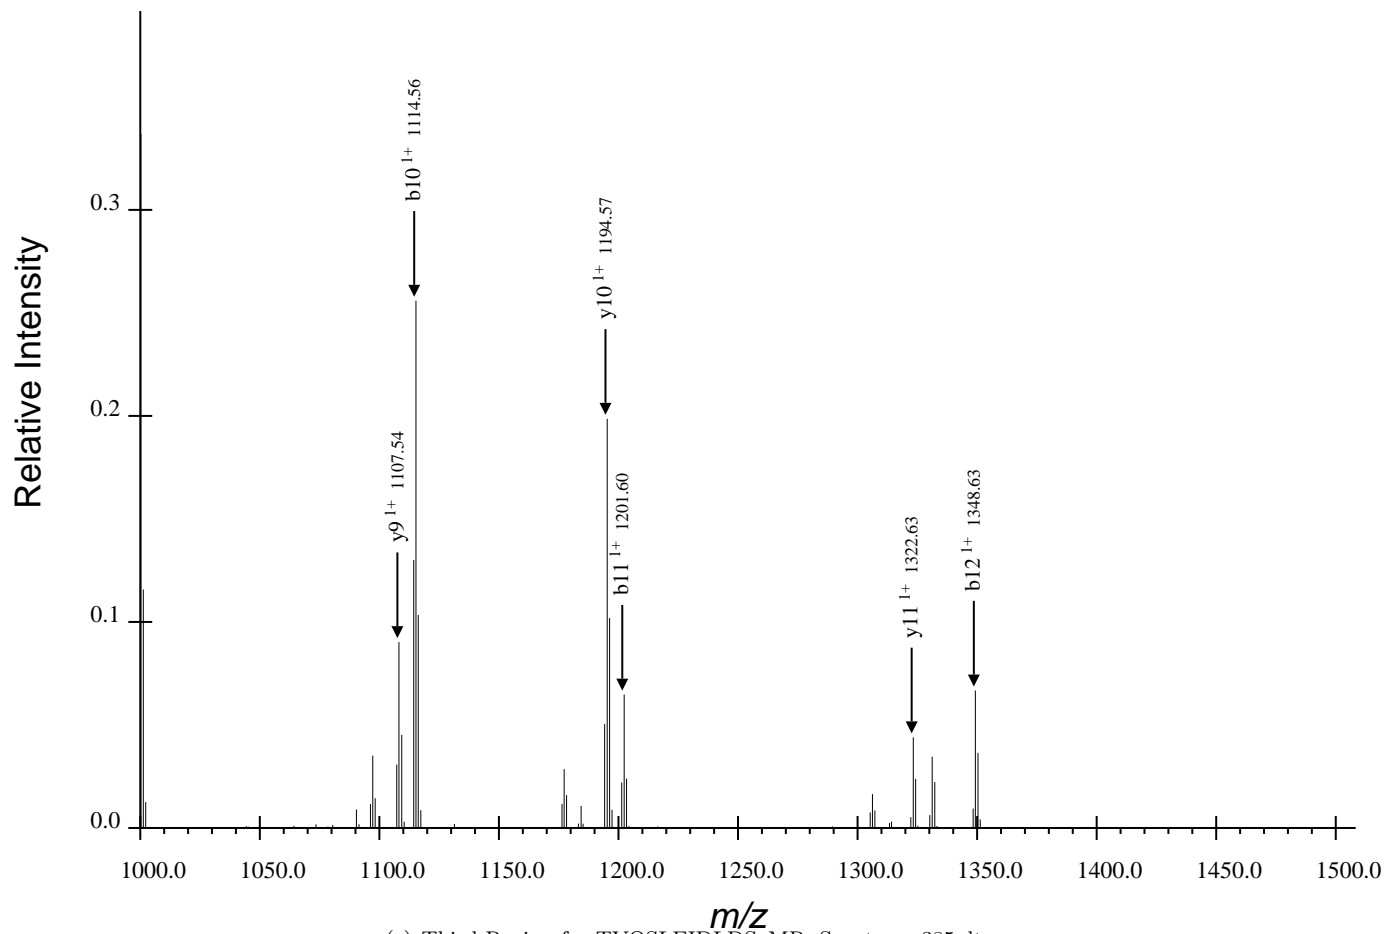

(c) Third Region for TVQSLEIDLDSO<sub>MR</sub>, Spectrum 385.dta

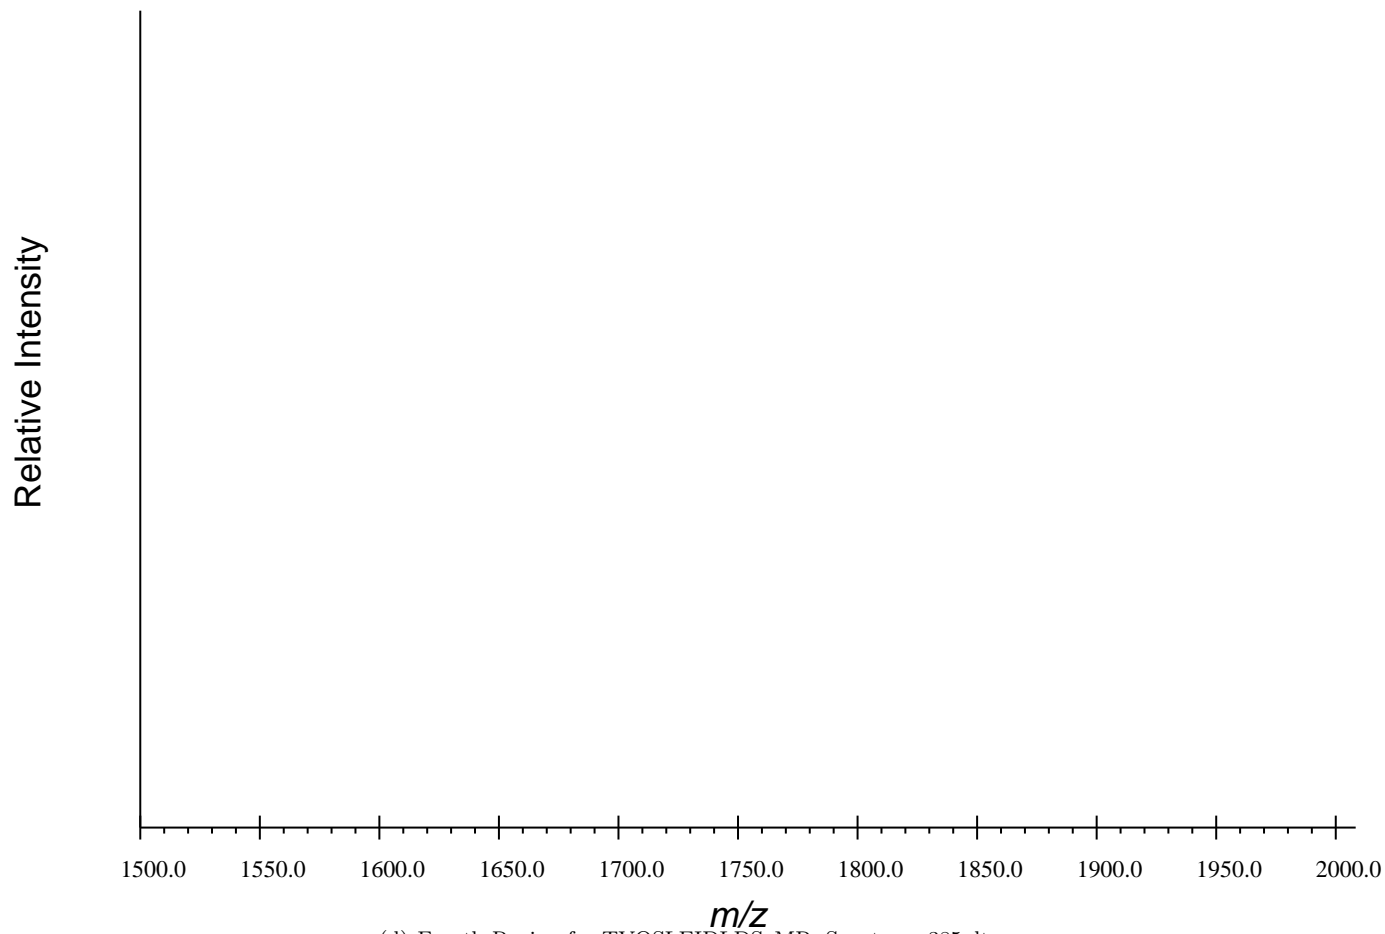

(d) Fourth Region for TVQSLEIDLDSO<sub>MR</sub>, Spectrum 385.dta

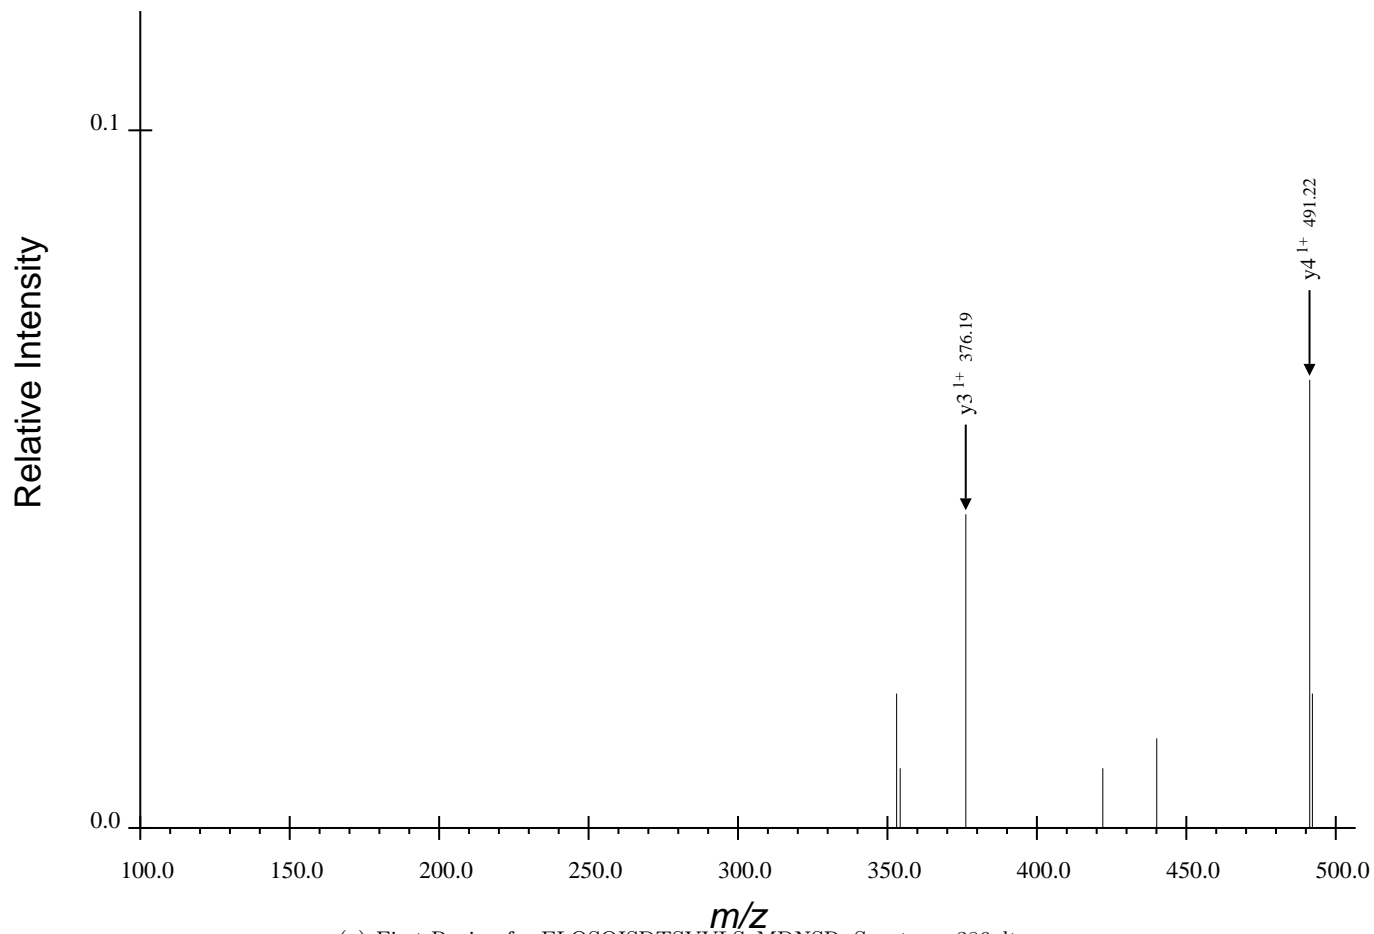

(a) First Region for ELQSQISDTSVVLSMDNSR, Spectrum 386.dta

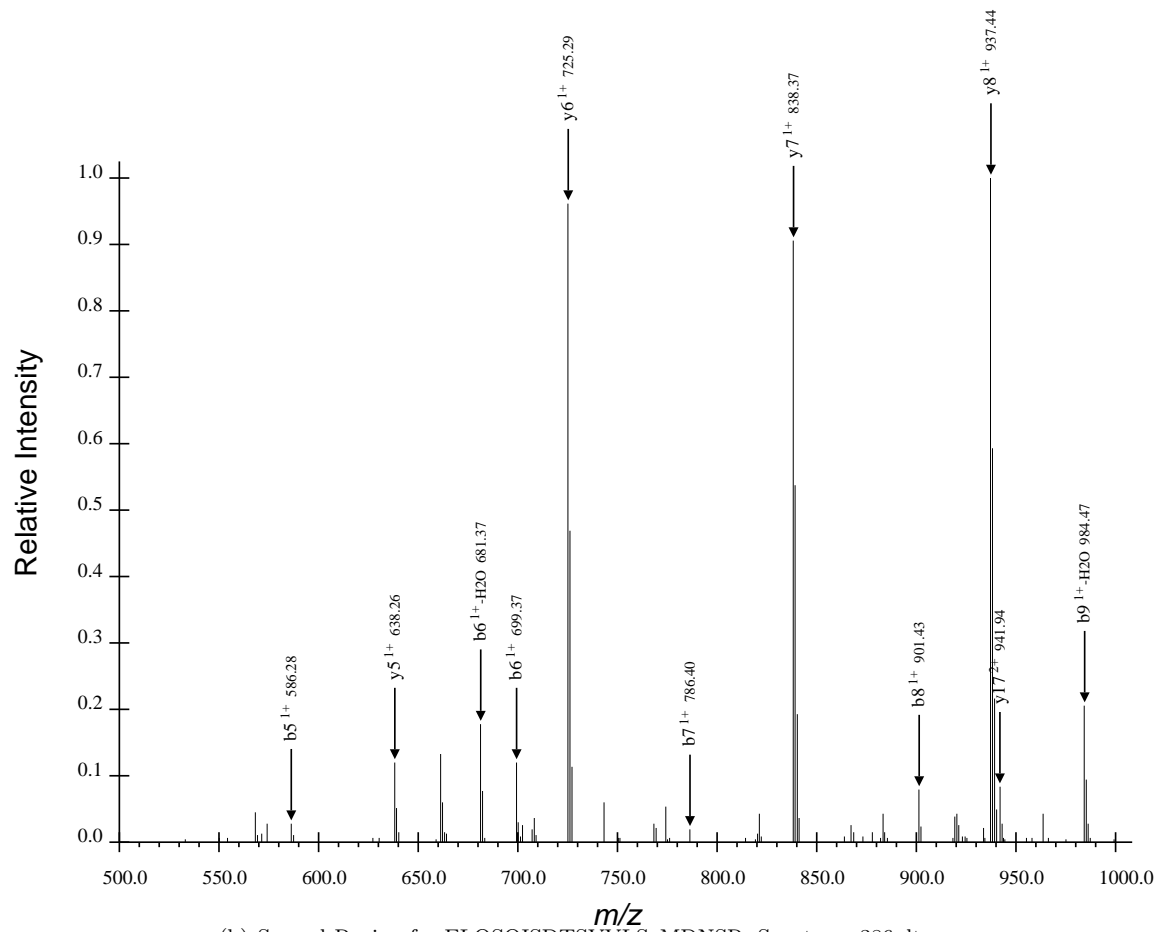

(b) Second Region for ELQSQISDTSVVLSMDNSR, Spectrum 386.dta

(d) Fourth Region for ELQSQISDTSVLSO MIDNSR, Spectrum 386.dta

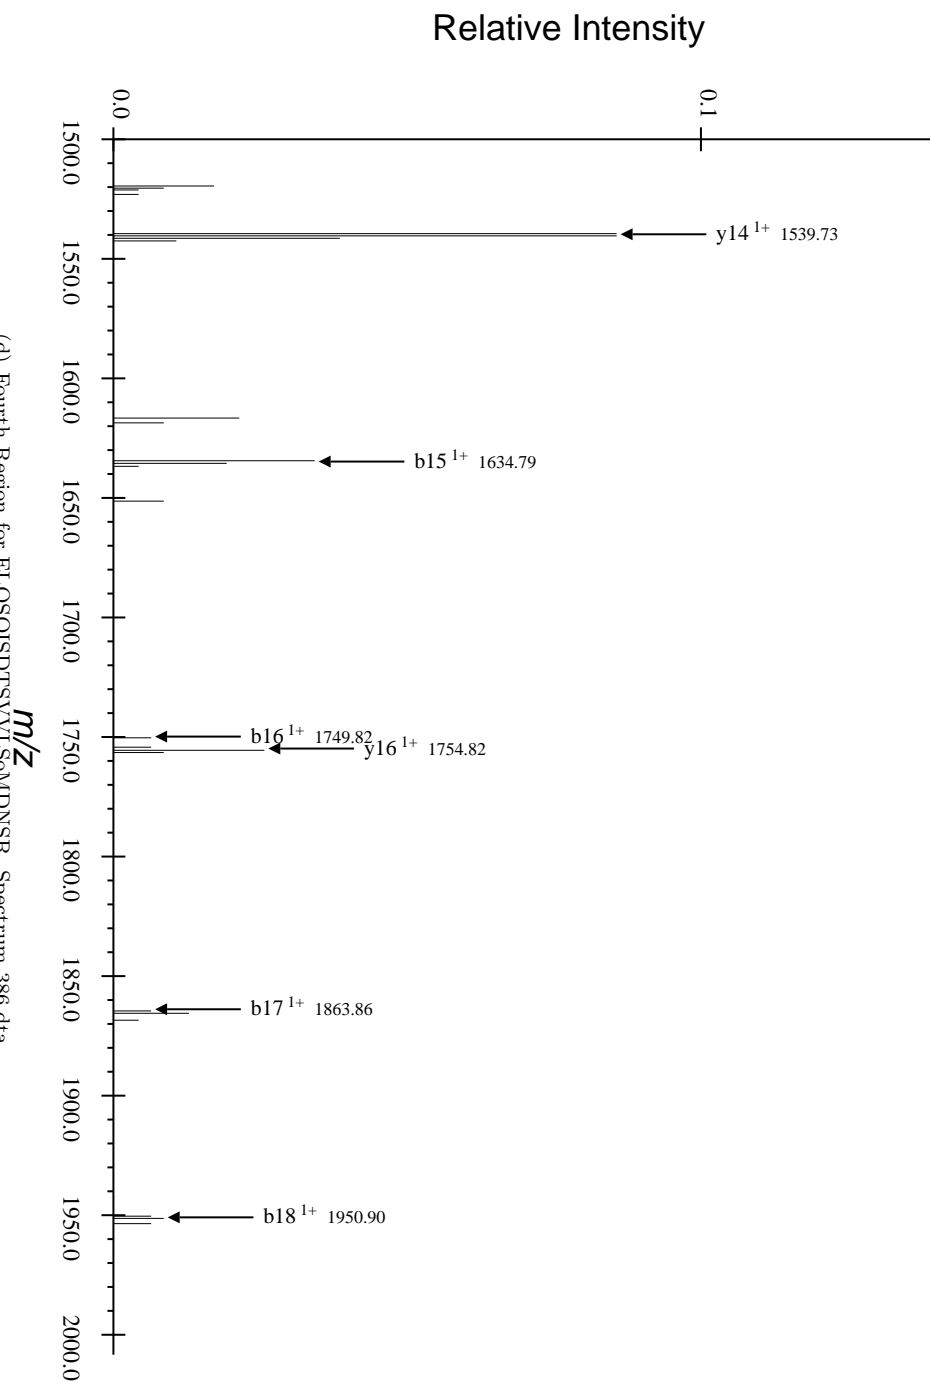

(c) Third Region for ELQSQISDTSVLSO MIDNSR, Spectrum 386.dta

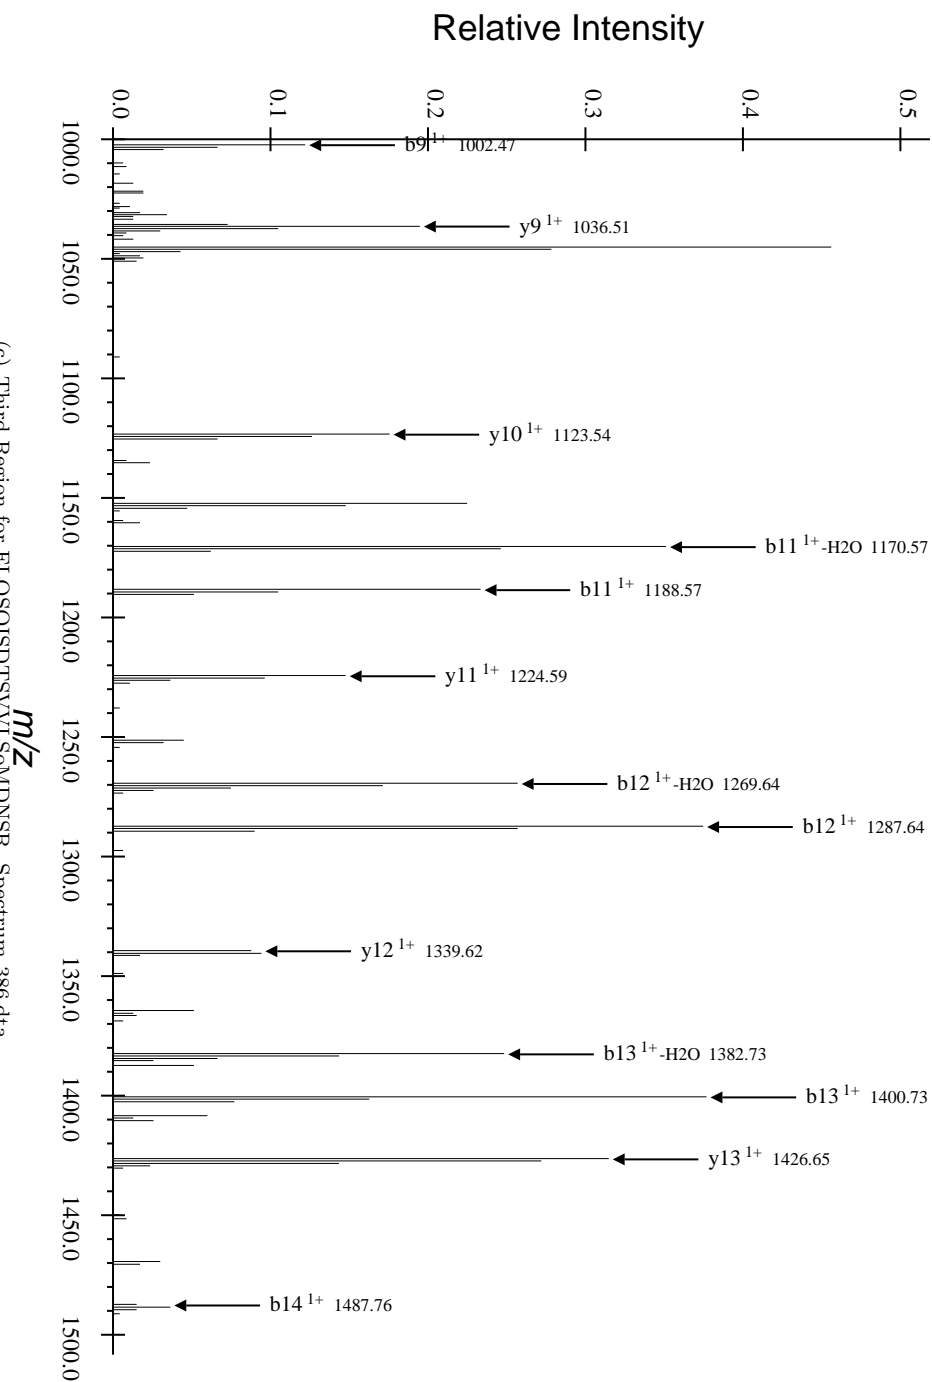



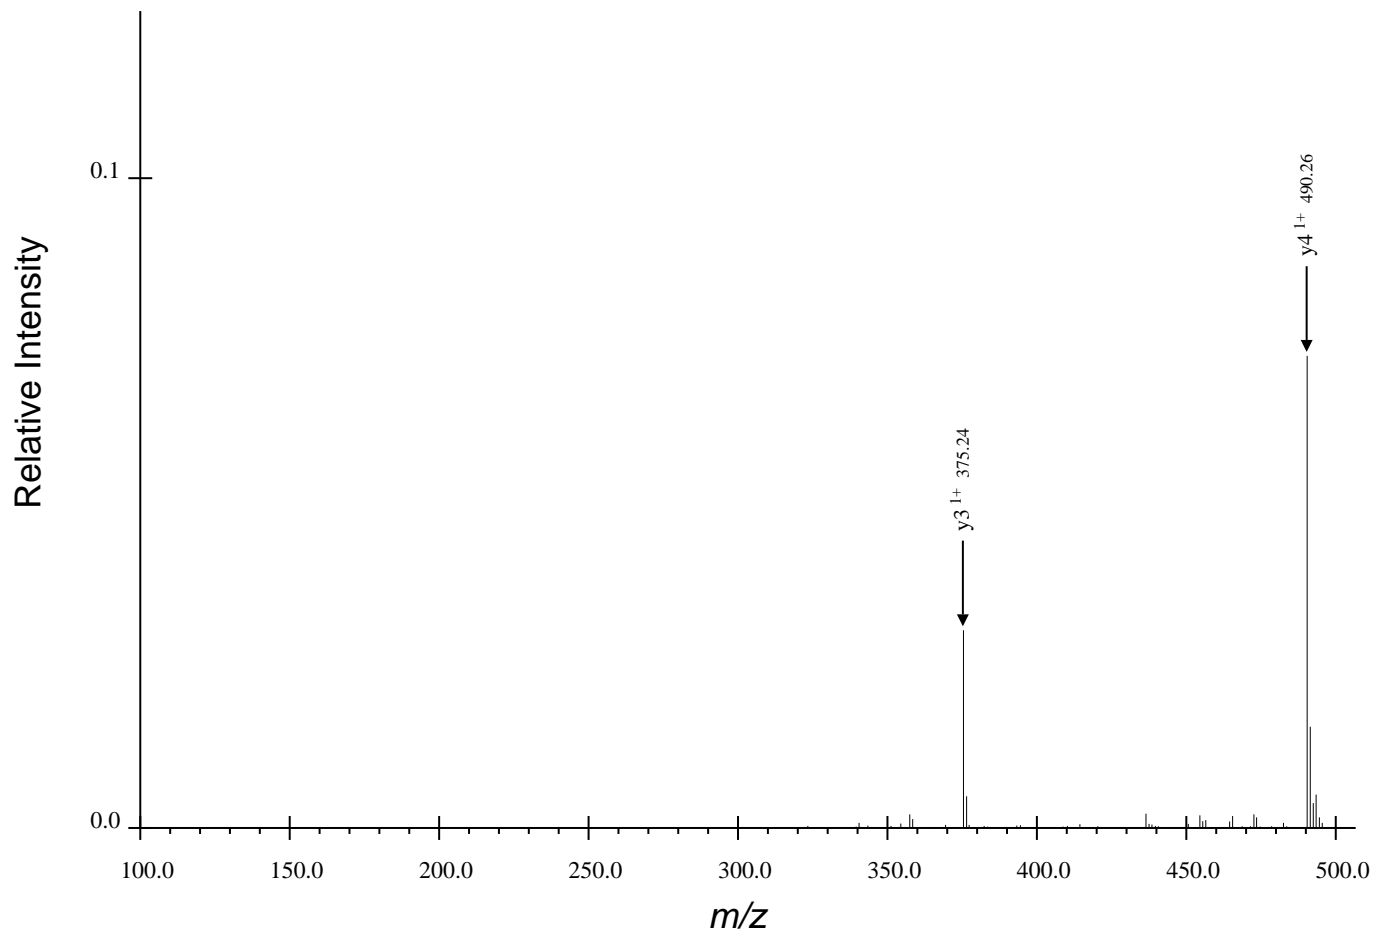

(a) First Region for GQVGGEINVEoMDAAPGVDSLR, Spectrum 387.dta

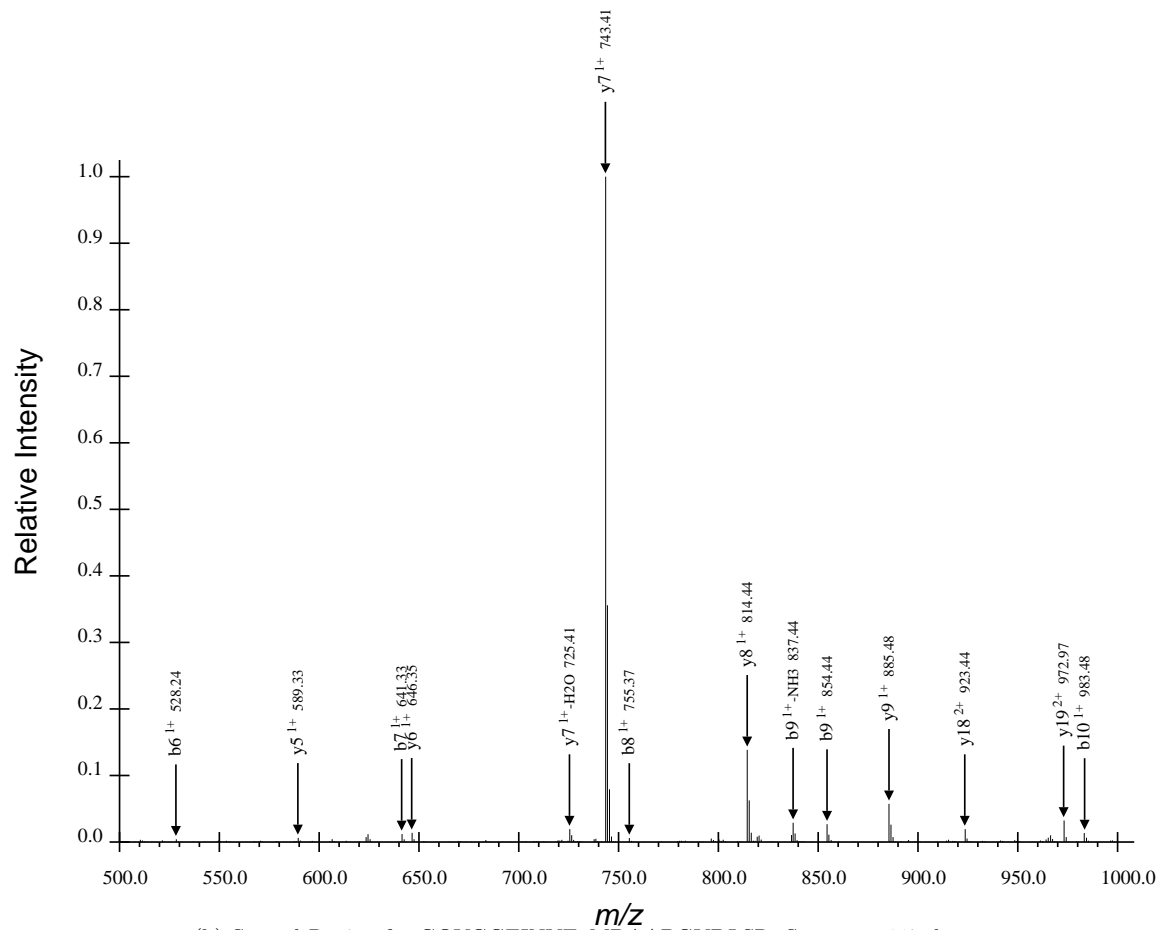

(b) Second Region for GQVGGEINVEoMDAAPGVDSLR, Spectrum 387.dta

(d) Fourth Region for GQVGGEINVEQMDAAPGVDSLRS, Spectrum 387.dta

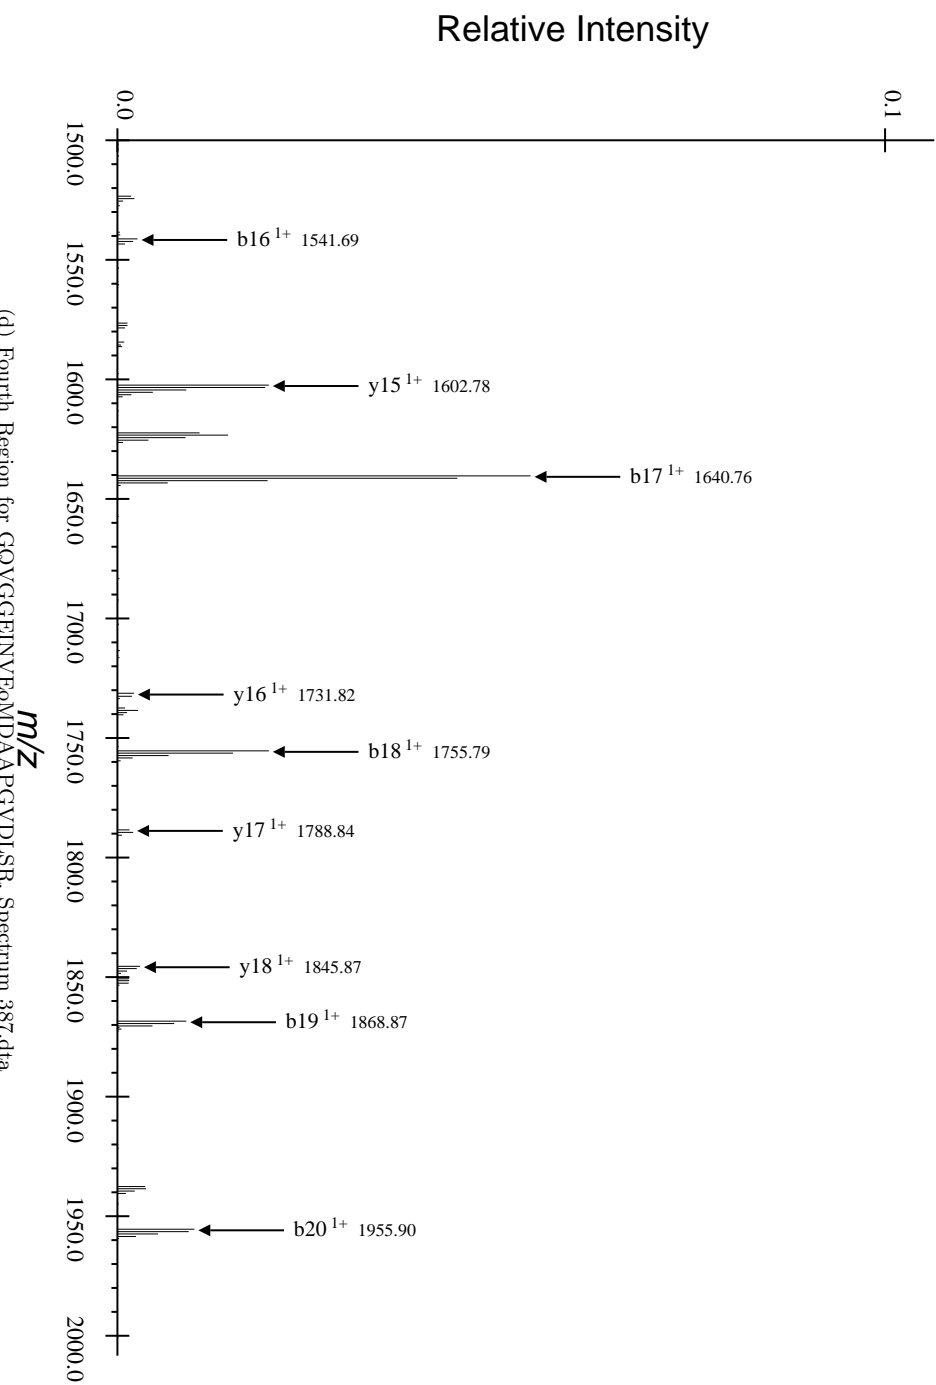

(c) Third Region for GQVGGEINVEQMDAAPGVDSLRS, Spectrum 387.dta

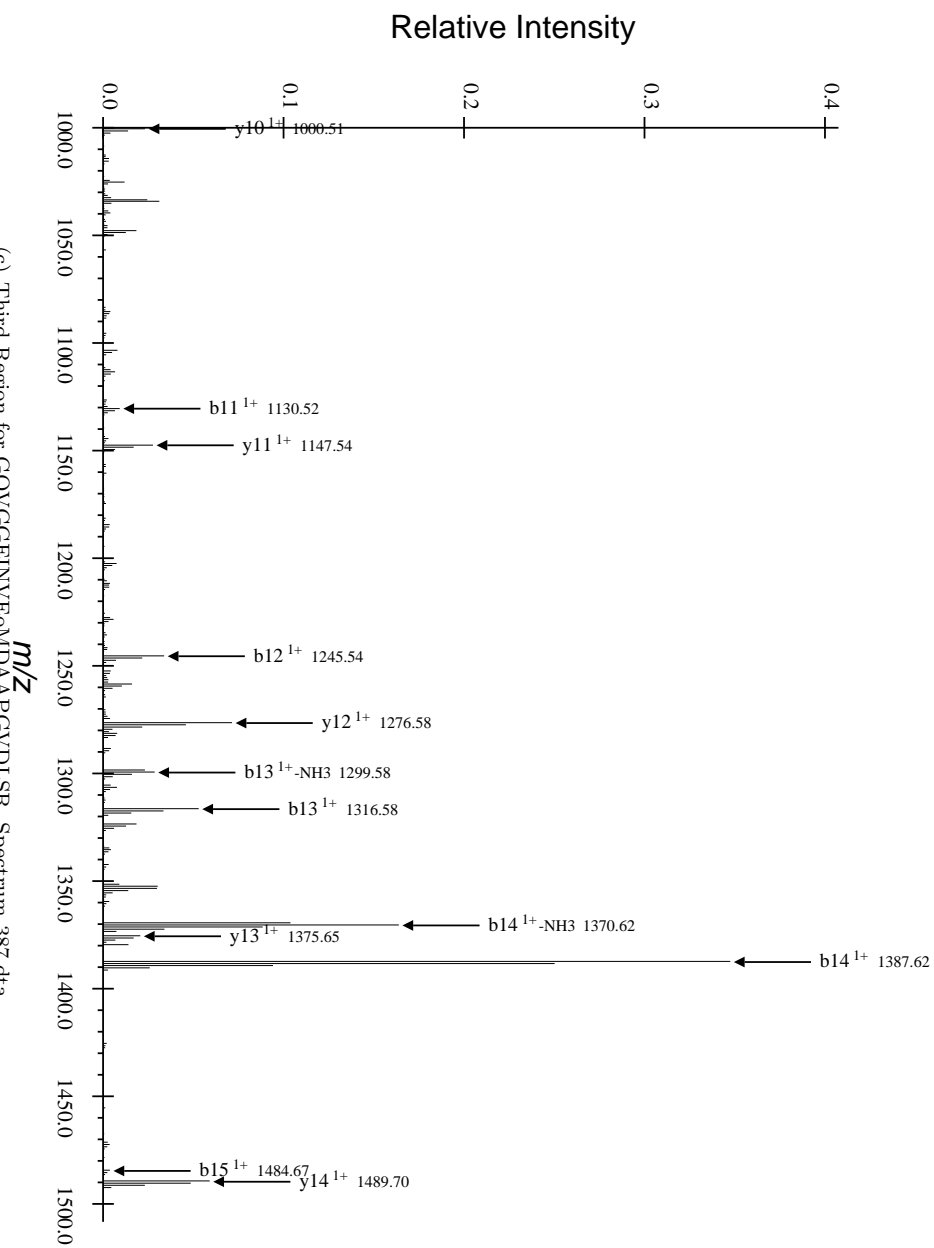

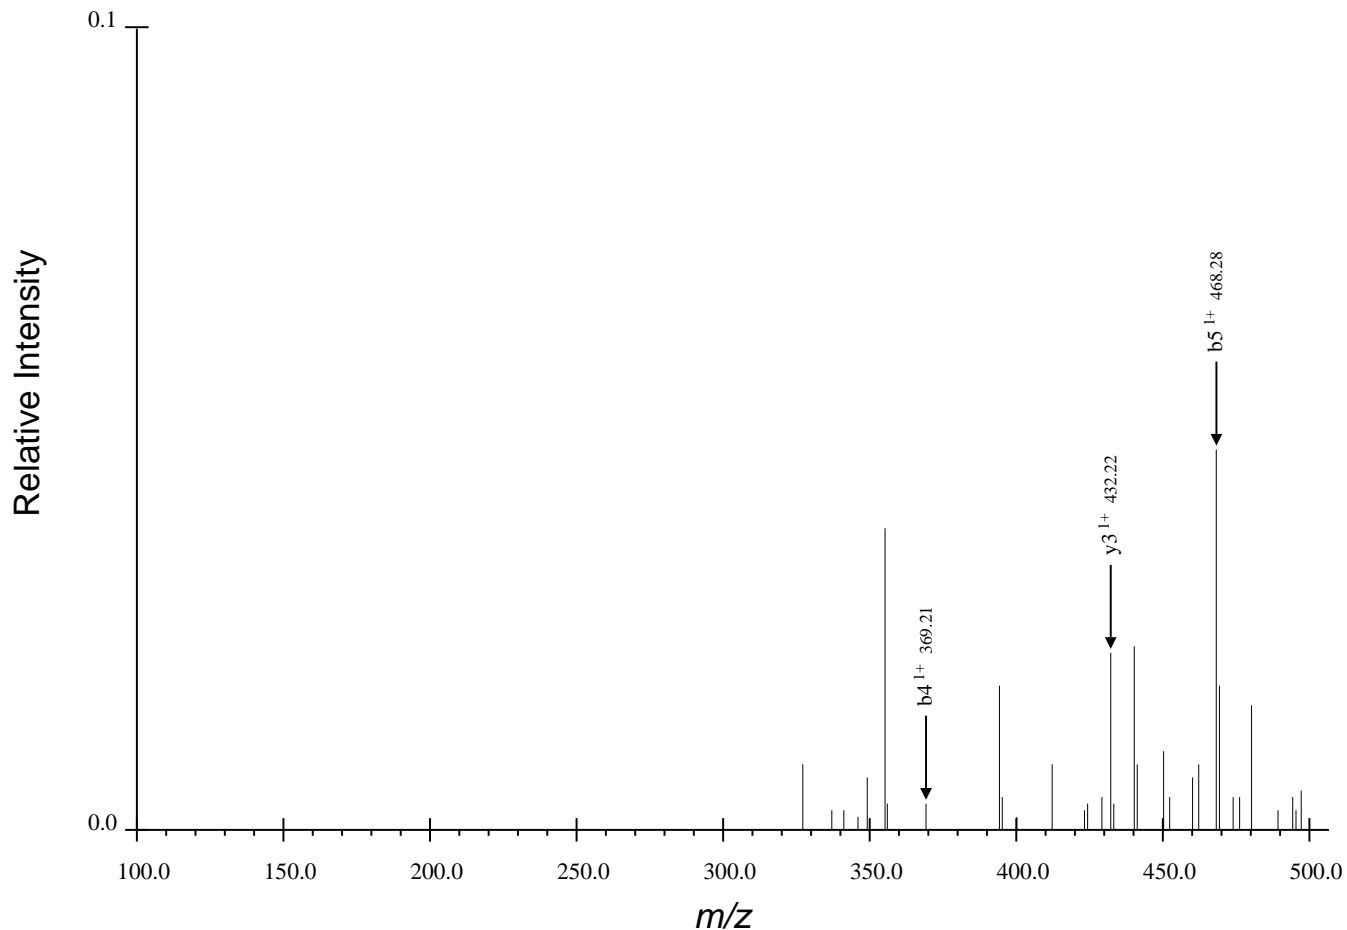

(a) First Region for IP(SAV)GYQPTLAT(DMG)T(MQ)ER, Spectrum 388.dta

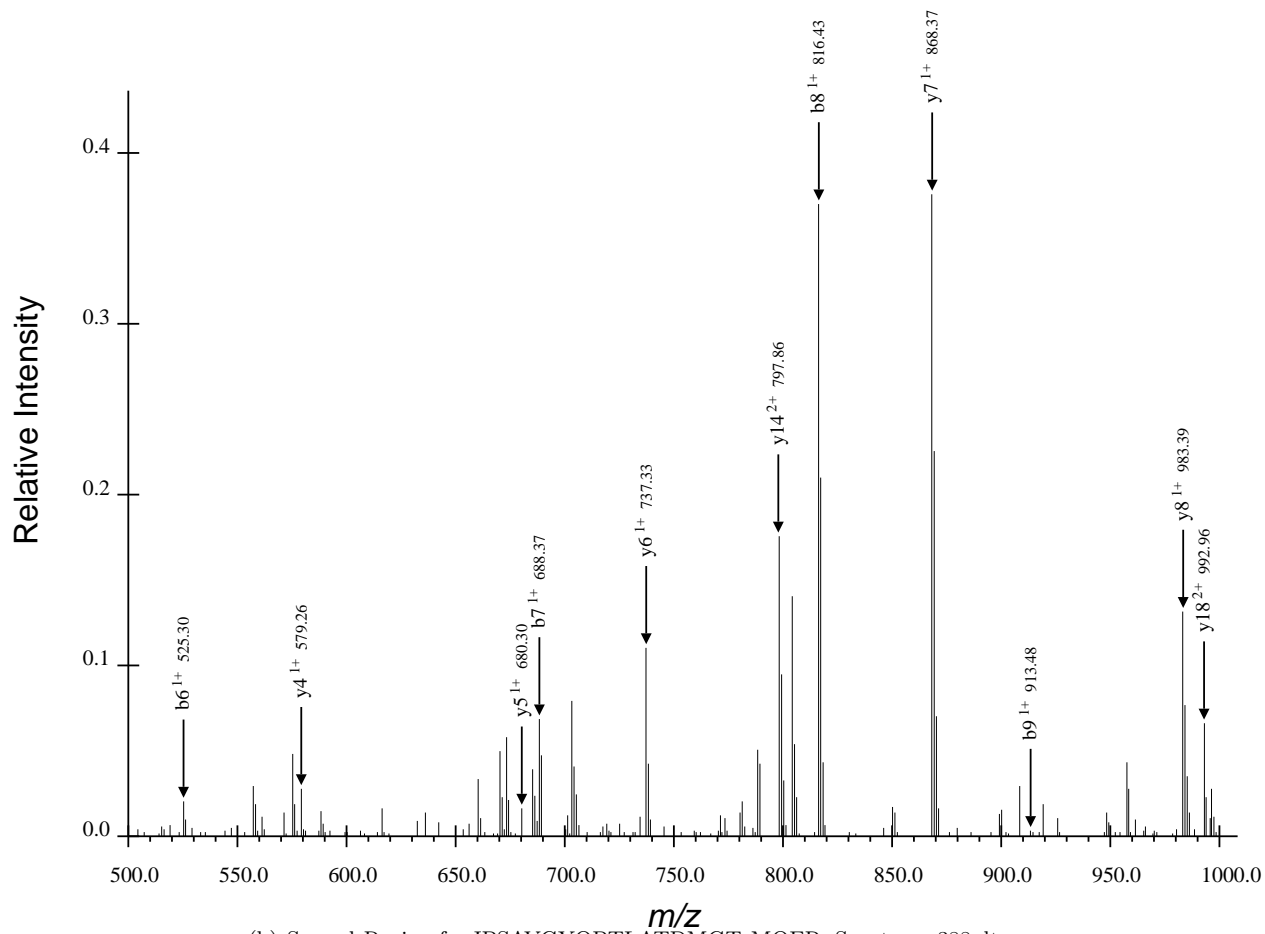

(b) Second Region for IP(SAV)GYQPTLAT(DMG)T(MQ)ER, Spectrum 388.dta

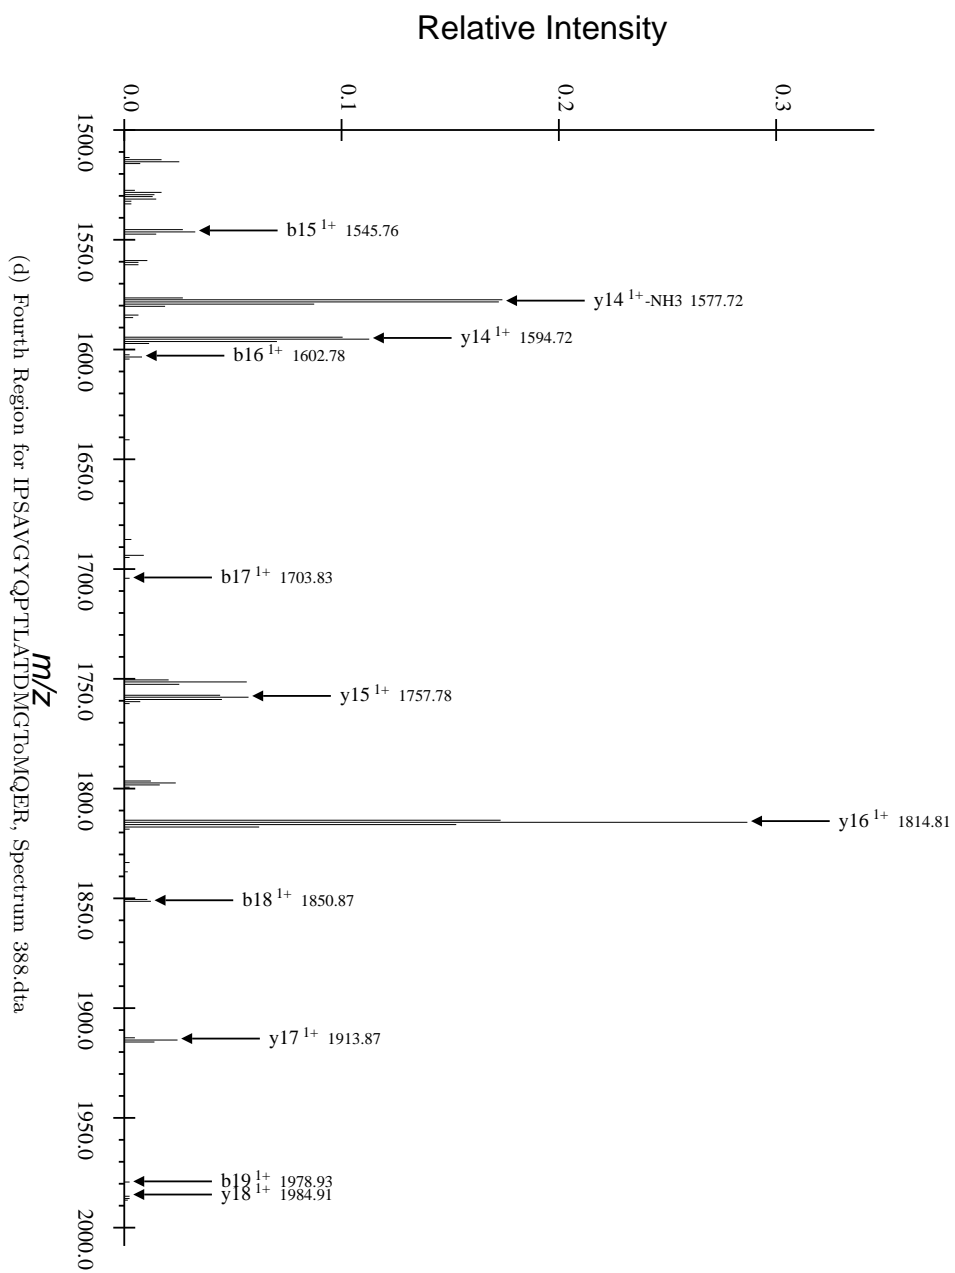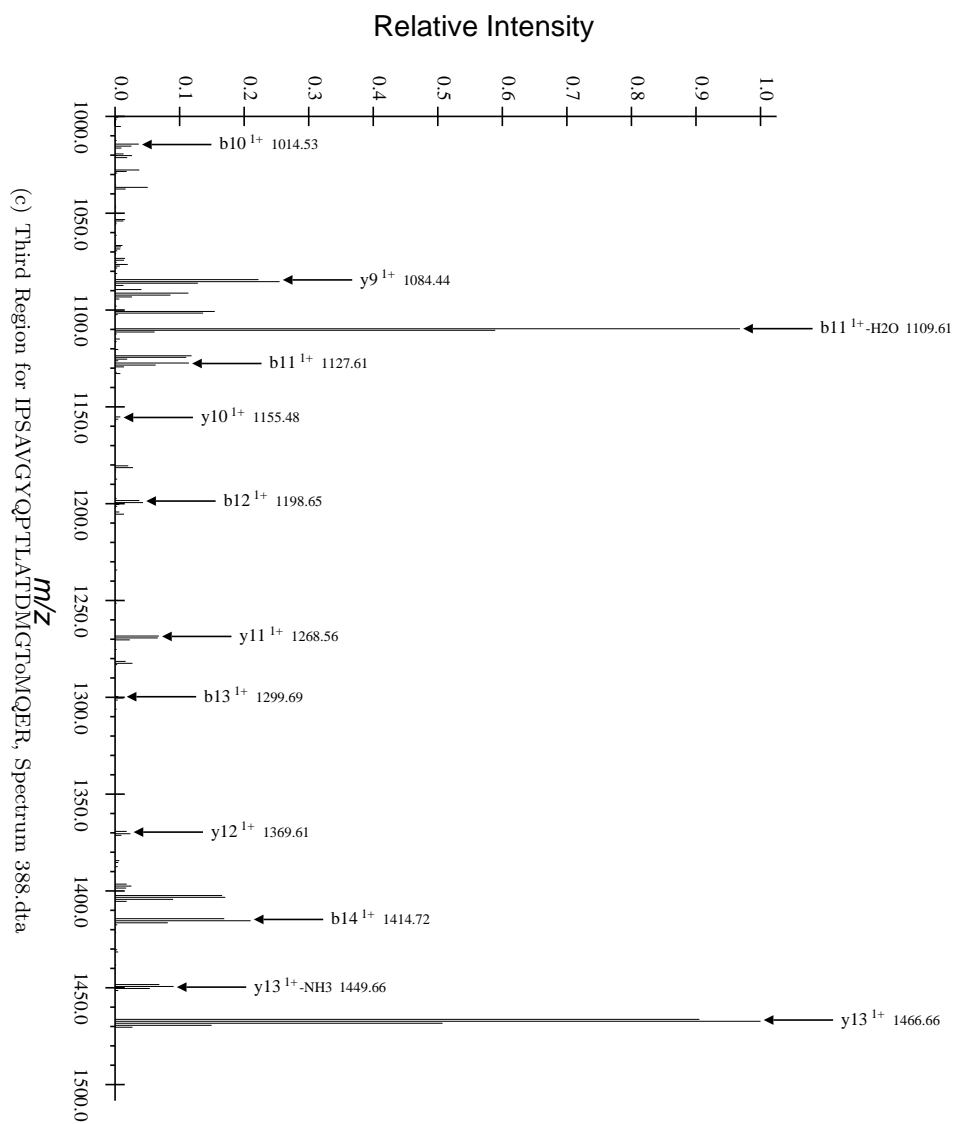

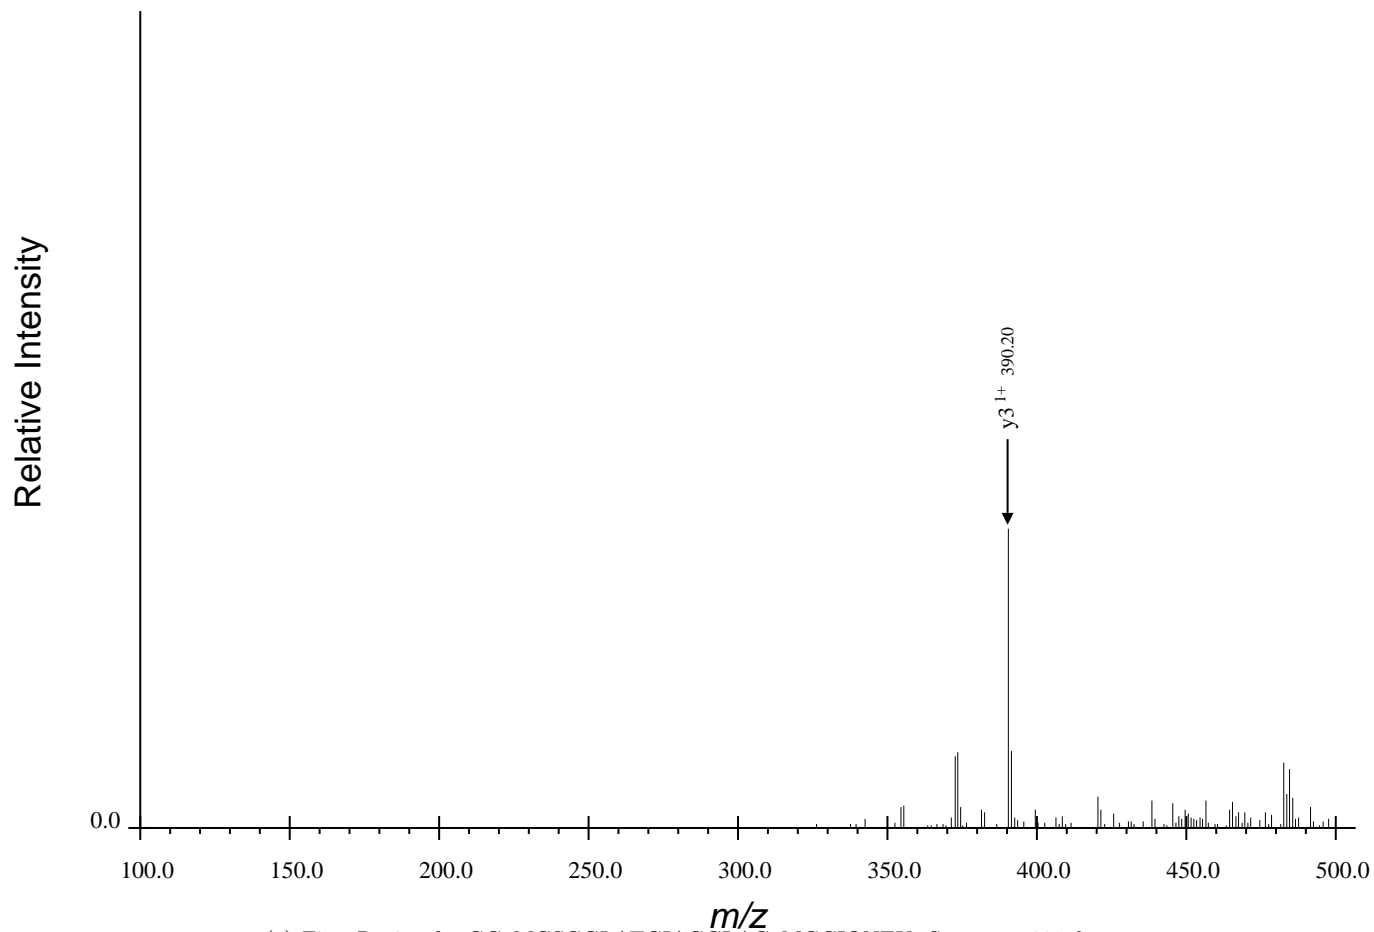

(a) First Region for GGoMGSGGLATGIAGGLAGoMGGIQNEK, Spectrum 389.dta

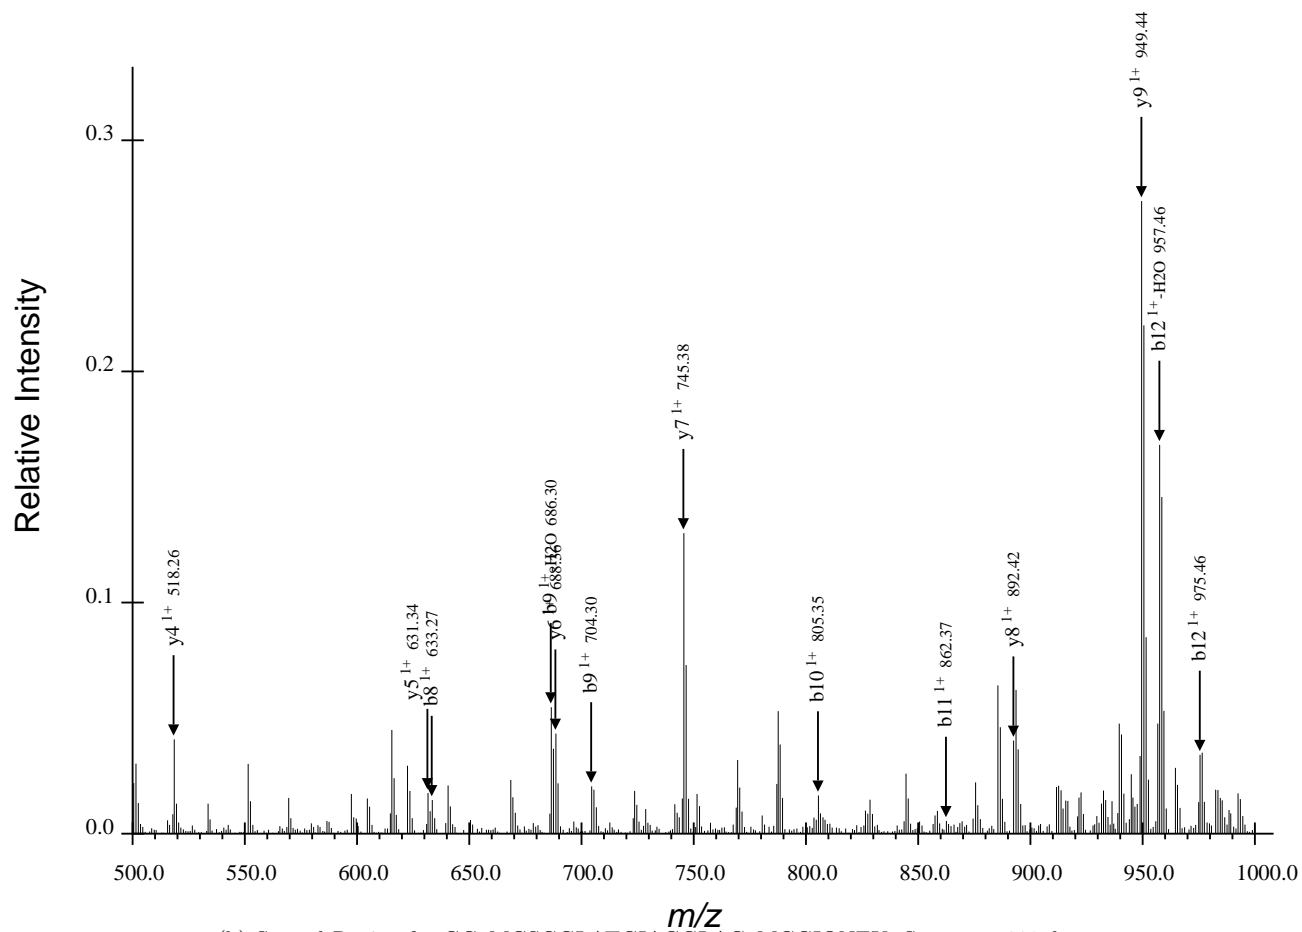

(b) Second Region for GGoMGSGGLATGIAGGLAGoMGGIQNEK, Spectrum 389.dta

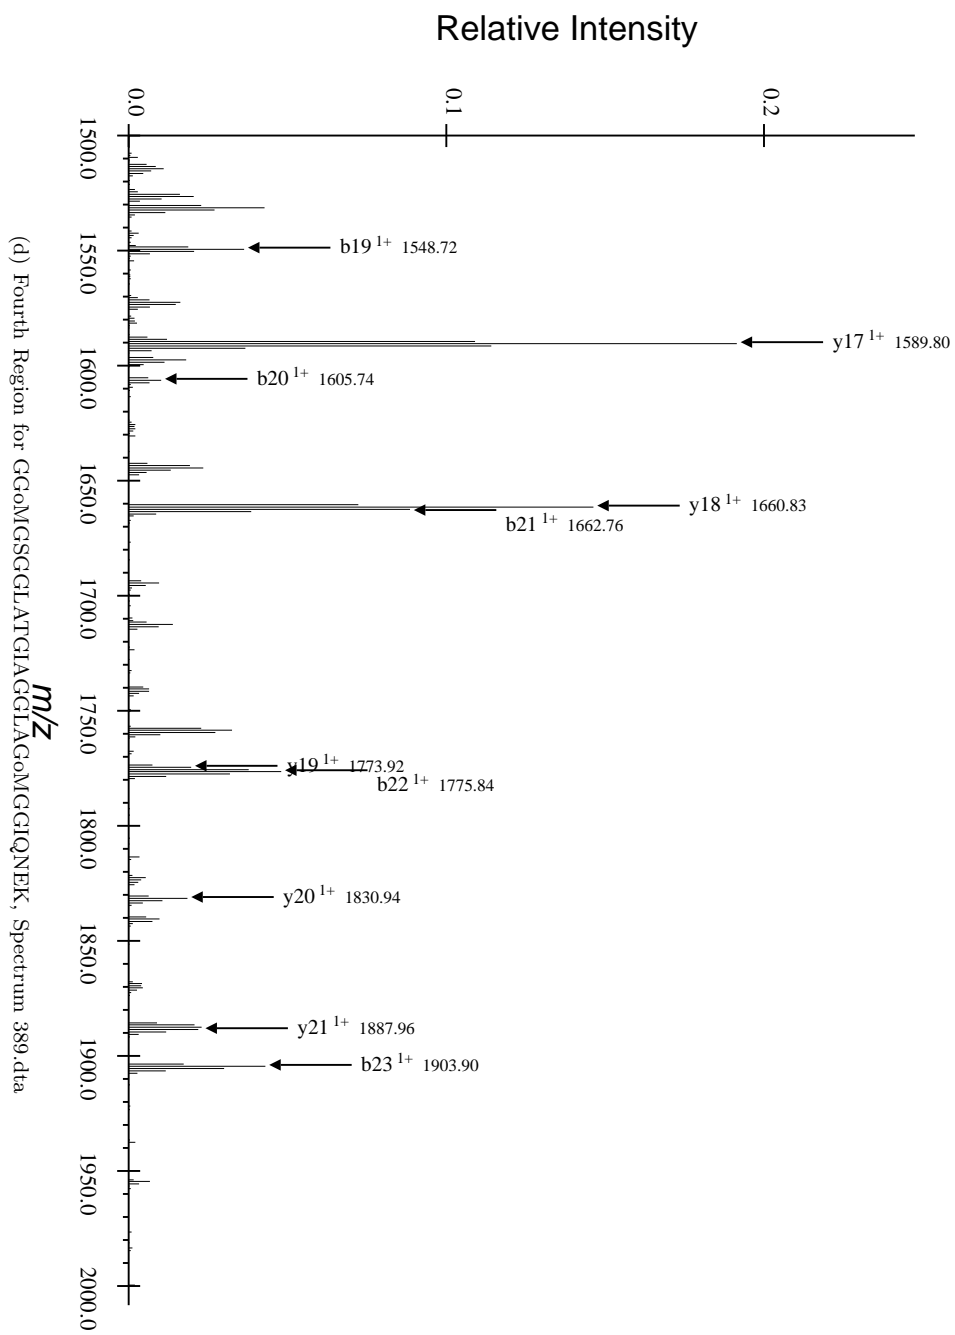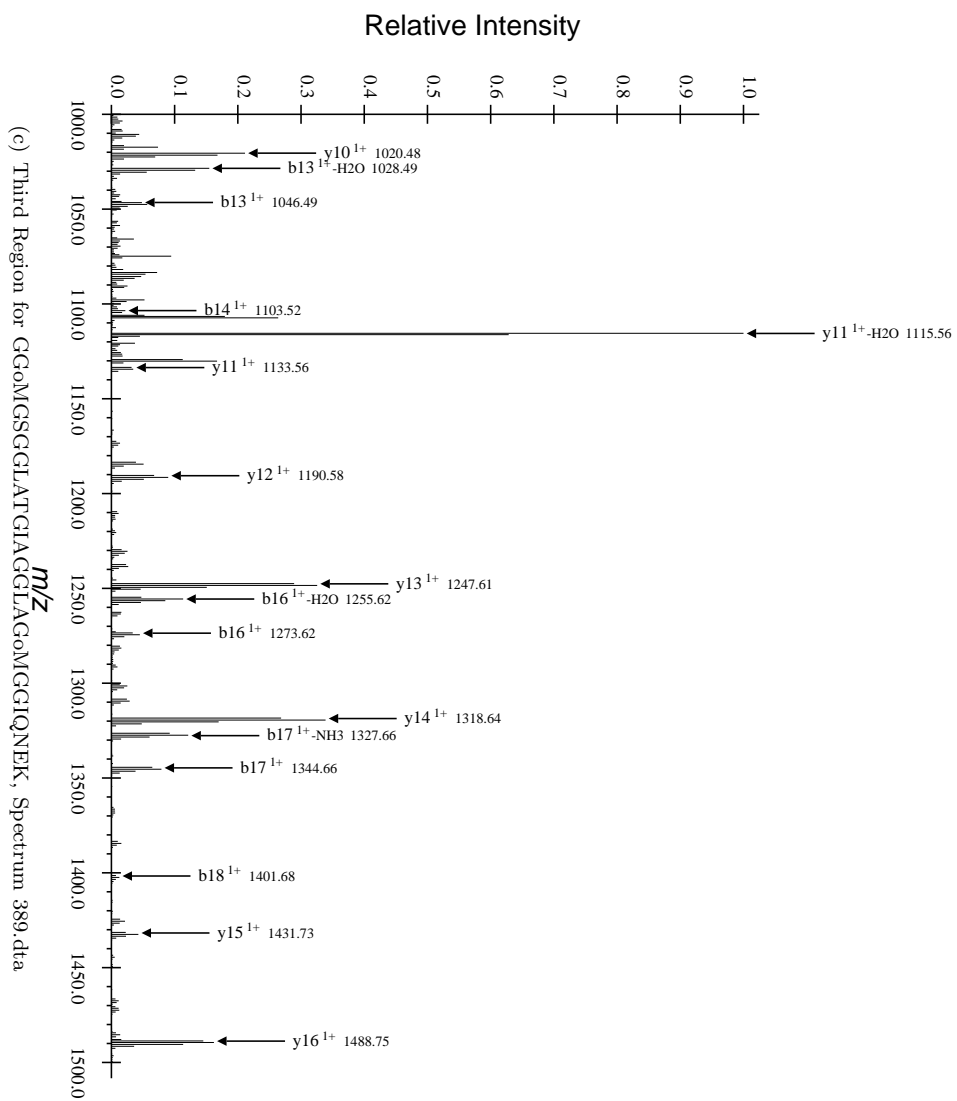

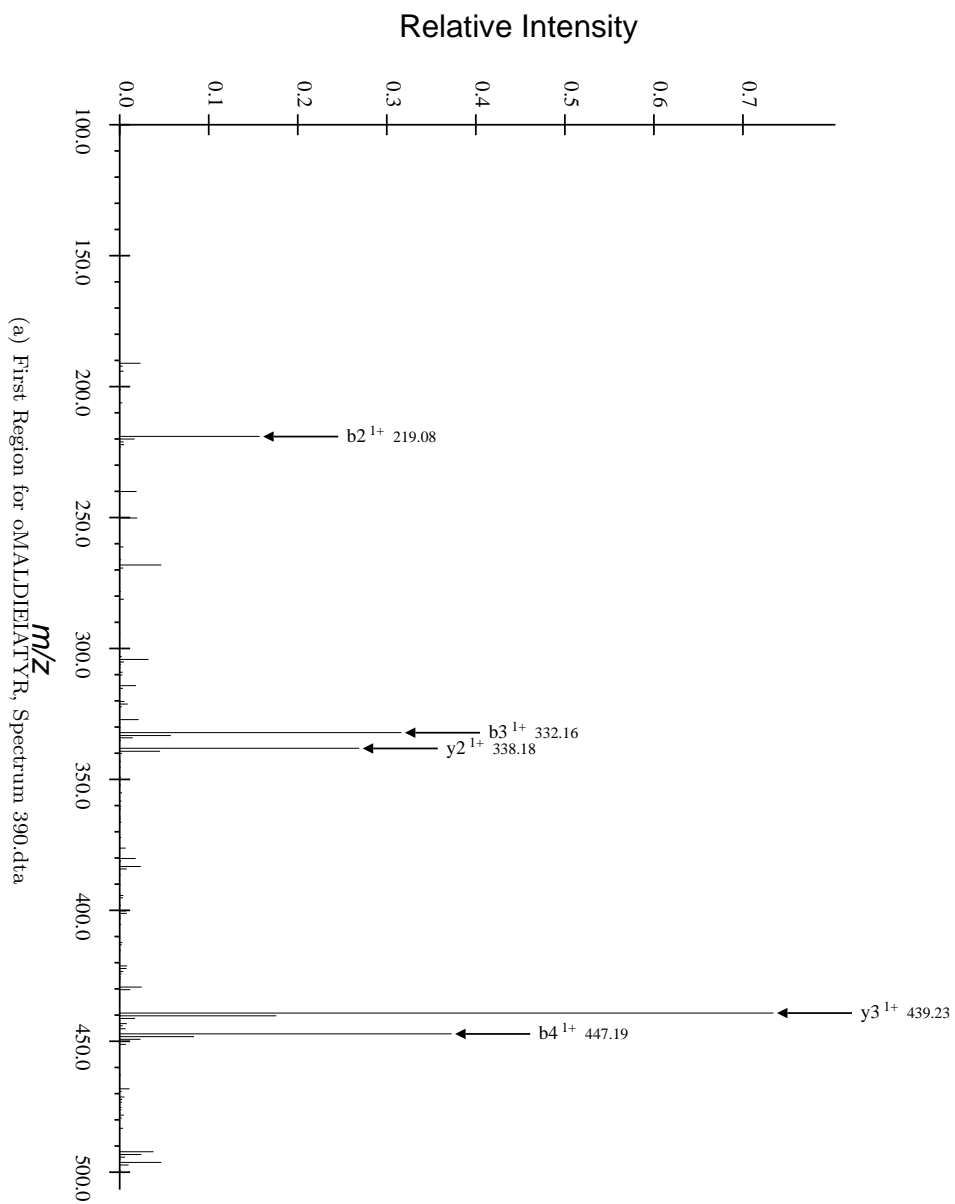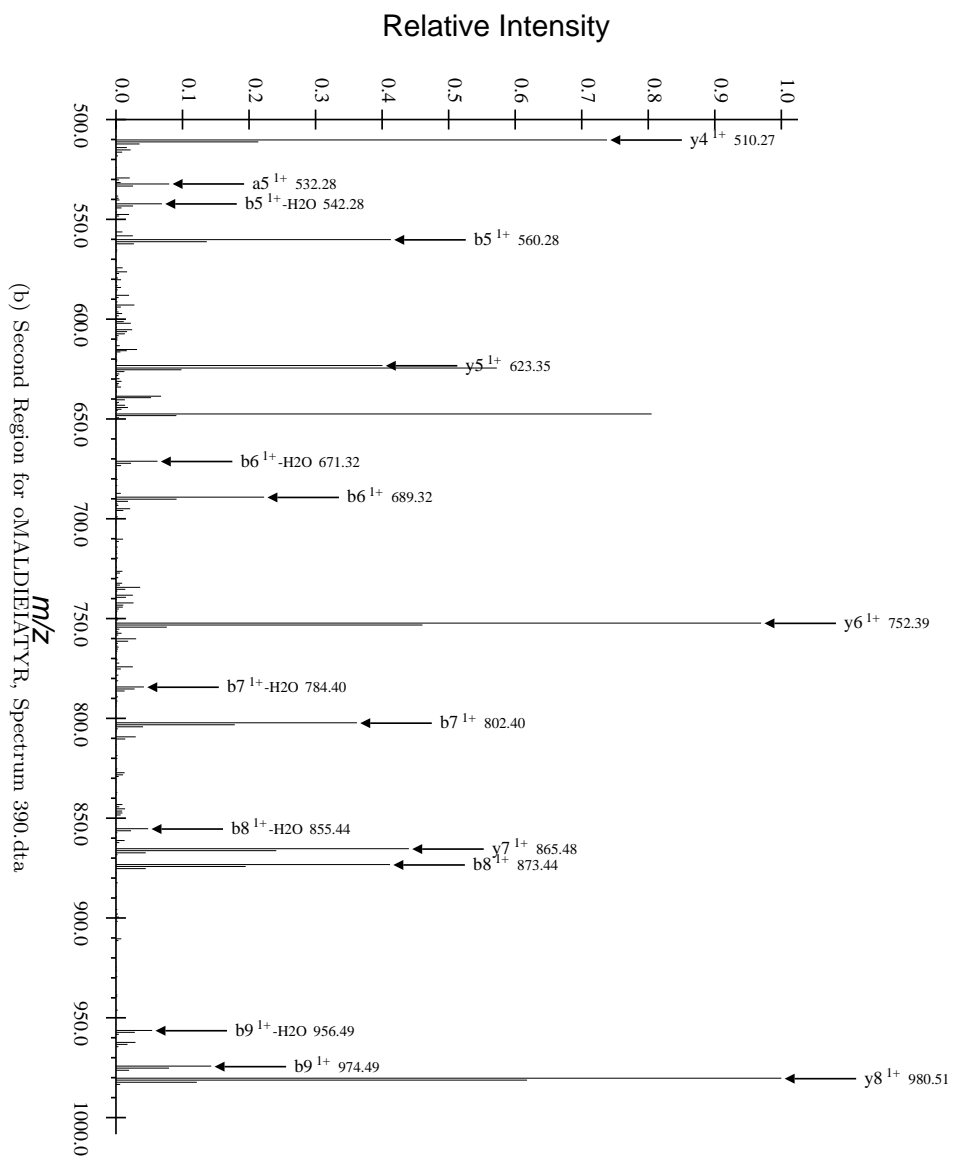

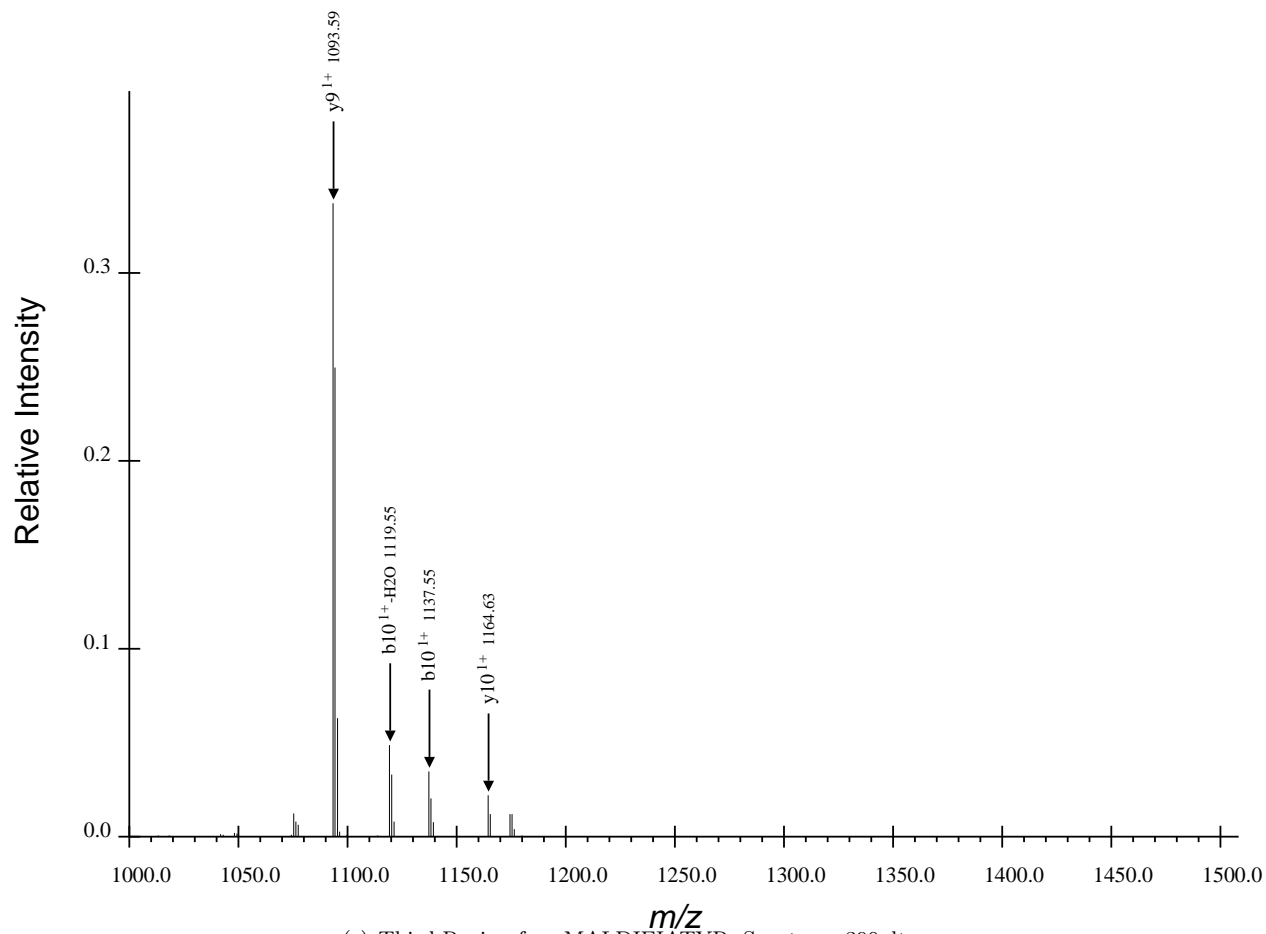

(c) Third Region for oMALDIEIATYR, Spectrum 390.dta

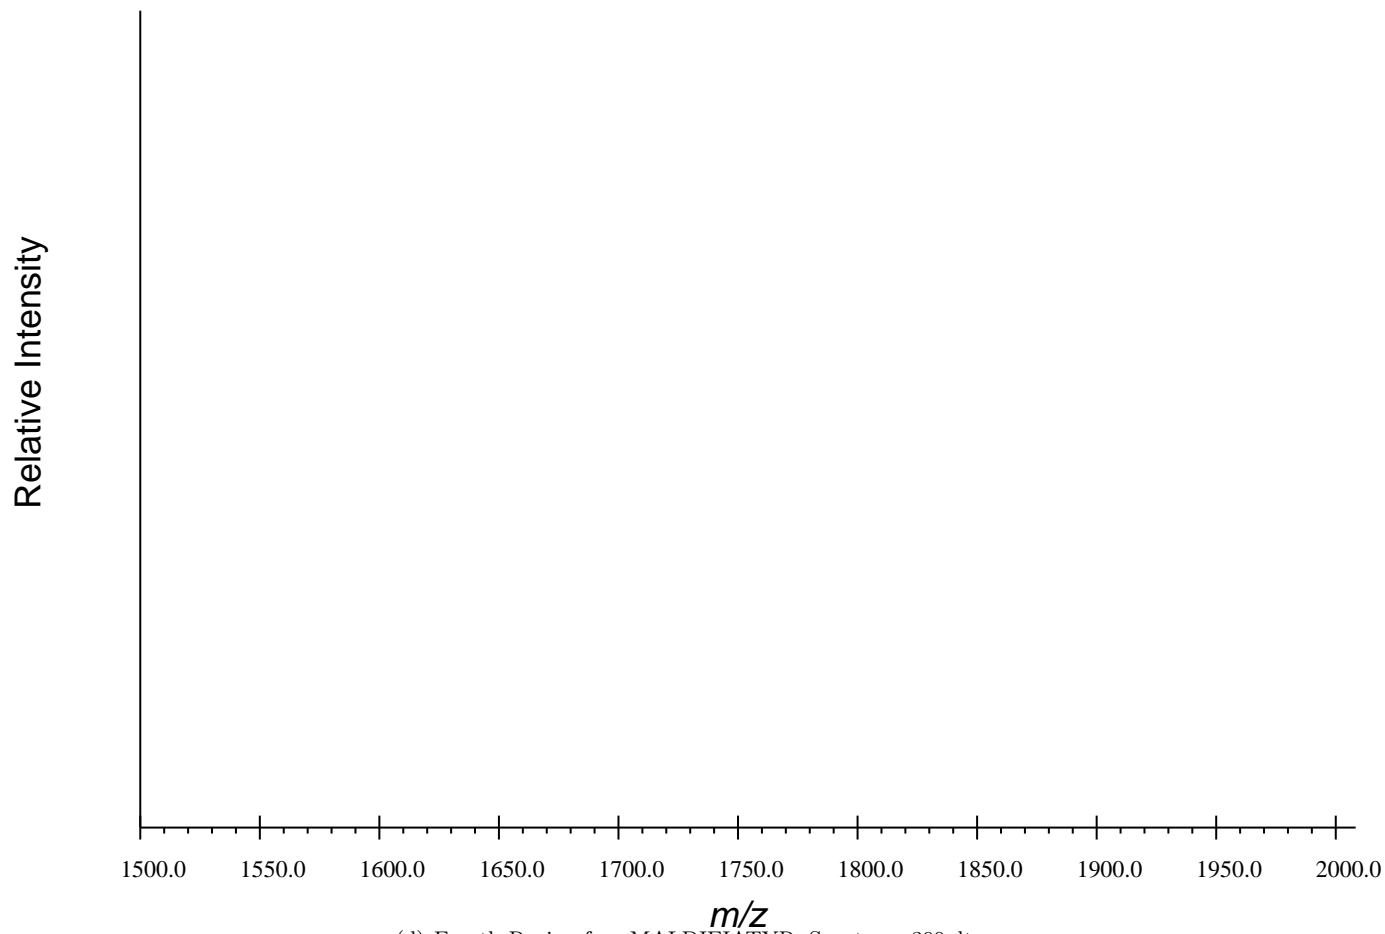

(d) Fourth Region for oMALDIEIATYR, Spectrum 390.dta



(b) Second Region for ADLEoMQJENLK, Spectrum 391.dta

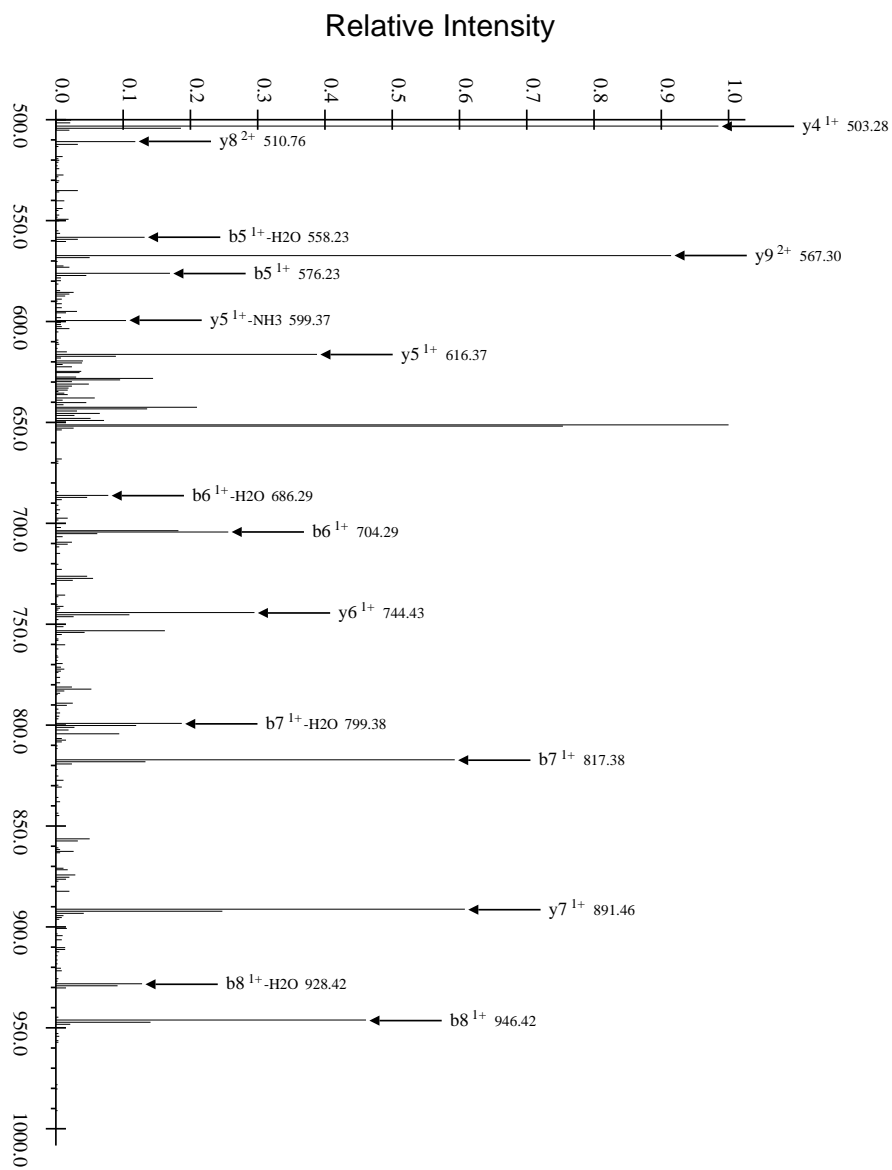

(a) First Region for ADLEoMQJENLK, Spectrum 391.dta

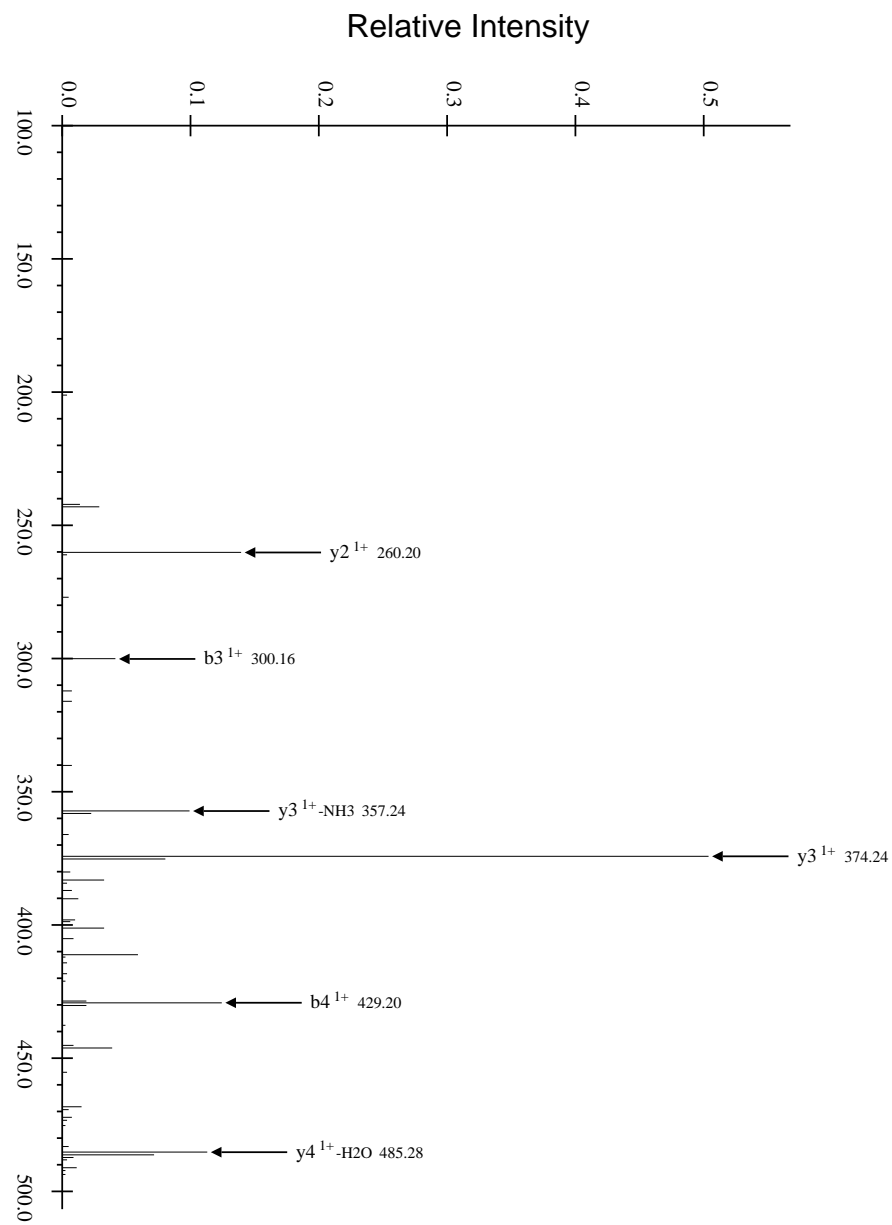

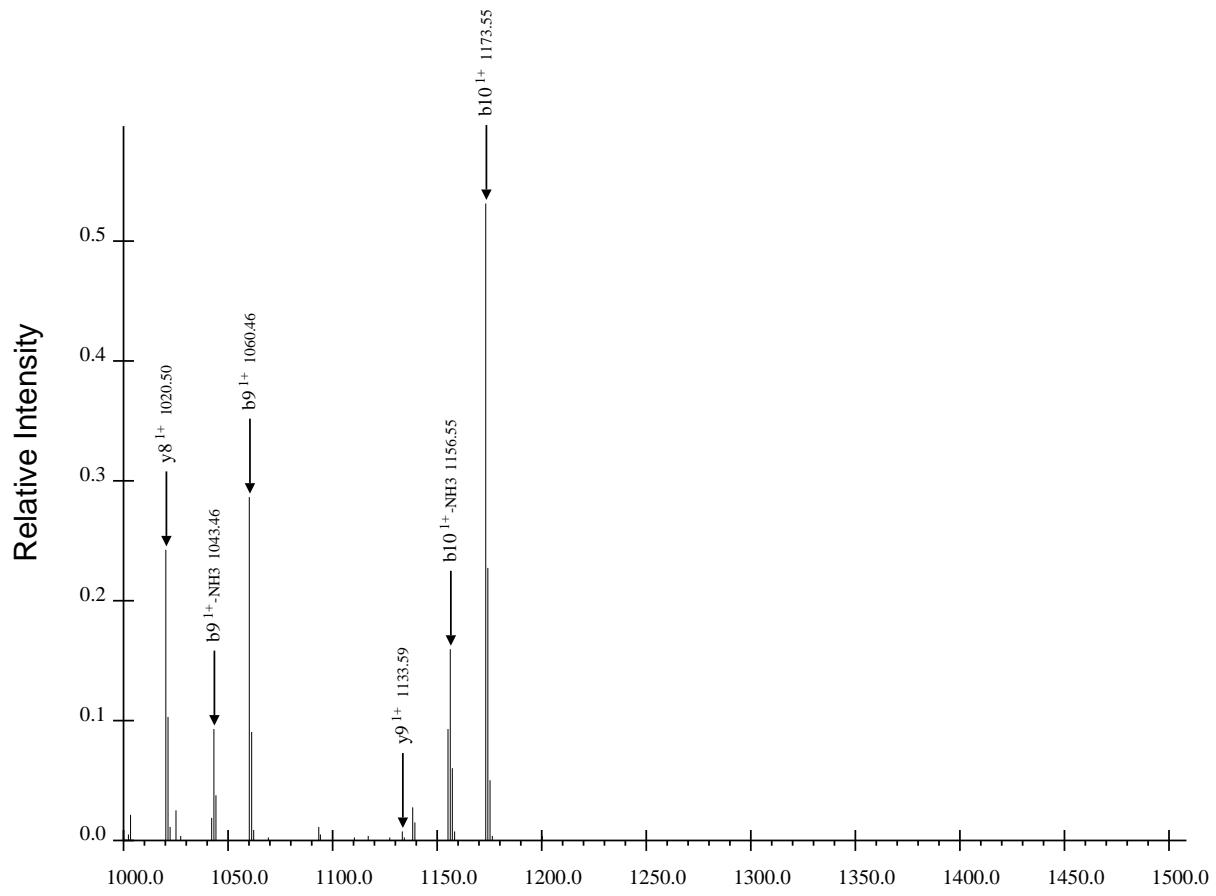

(c) Third Region for ADLEoMQIENLK, Spectrum 391.dta

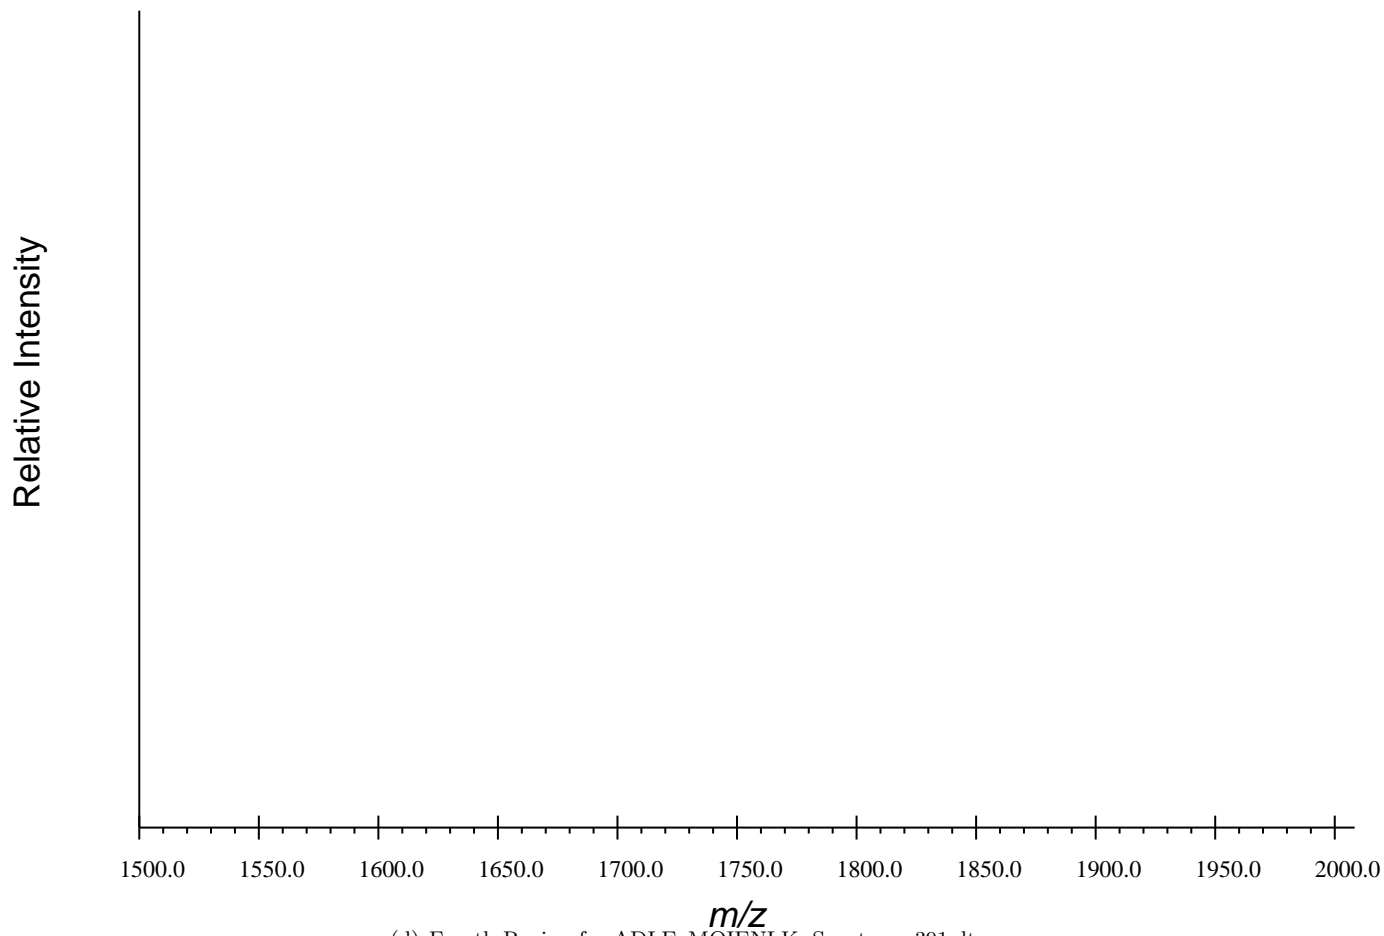

(d) Fourth Region for ADLEoMQIENLK, Spectrum 391.dta

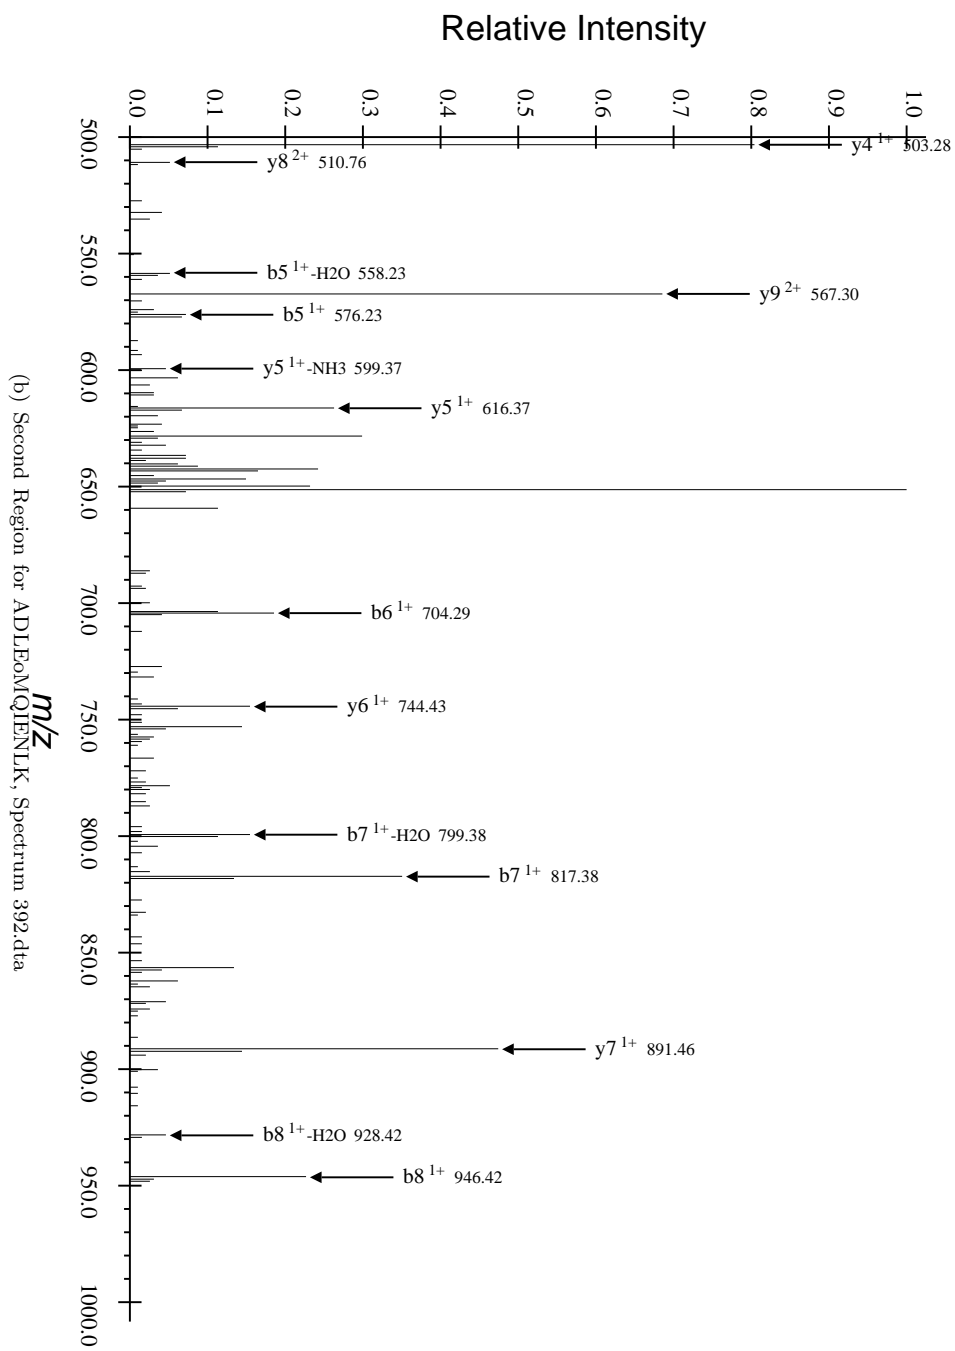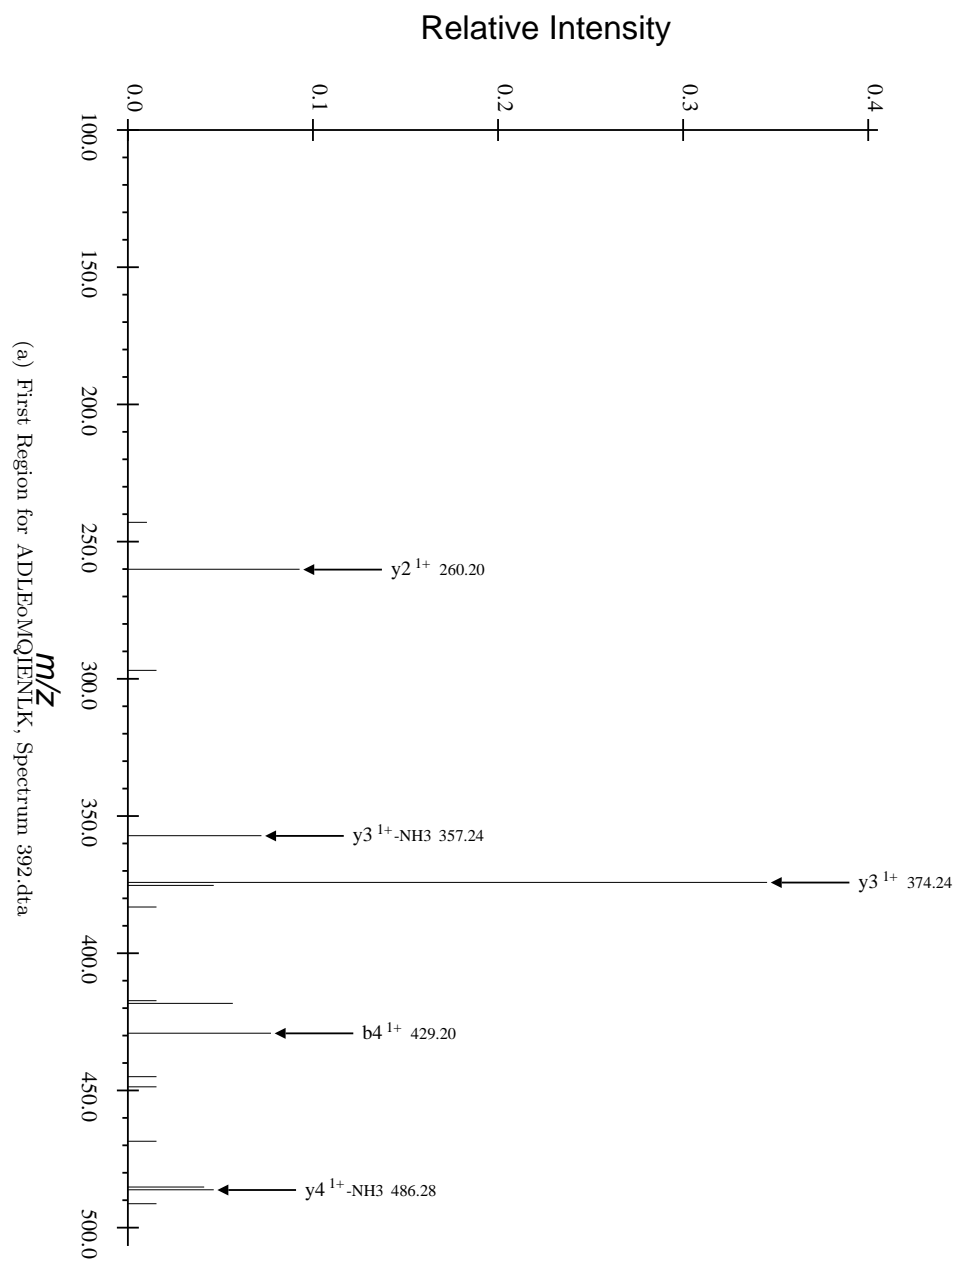

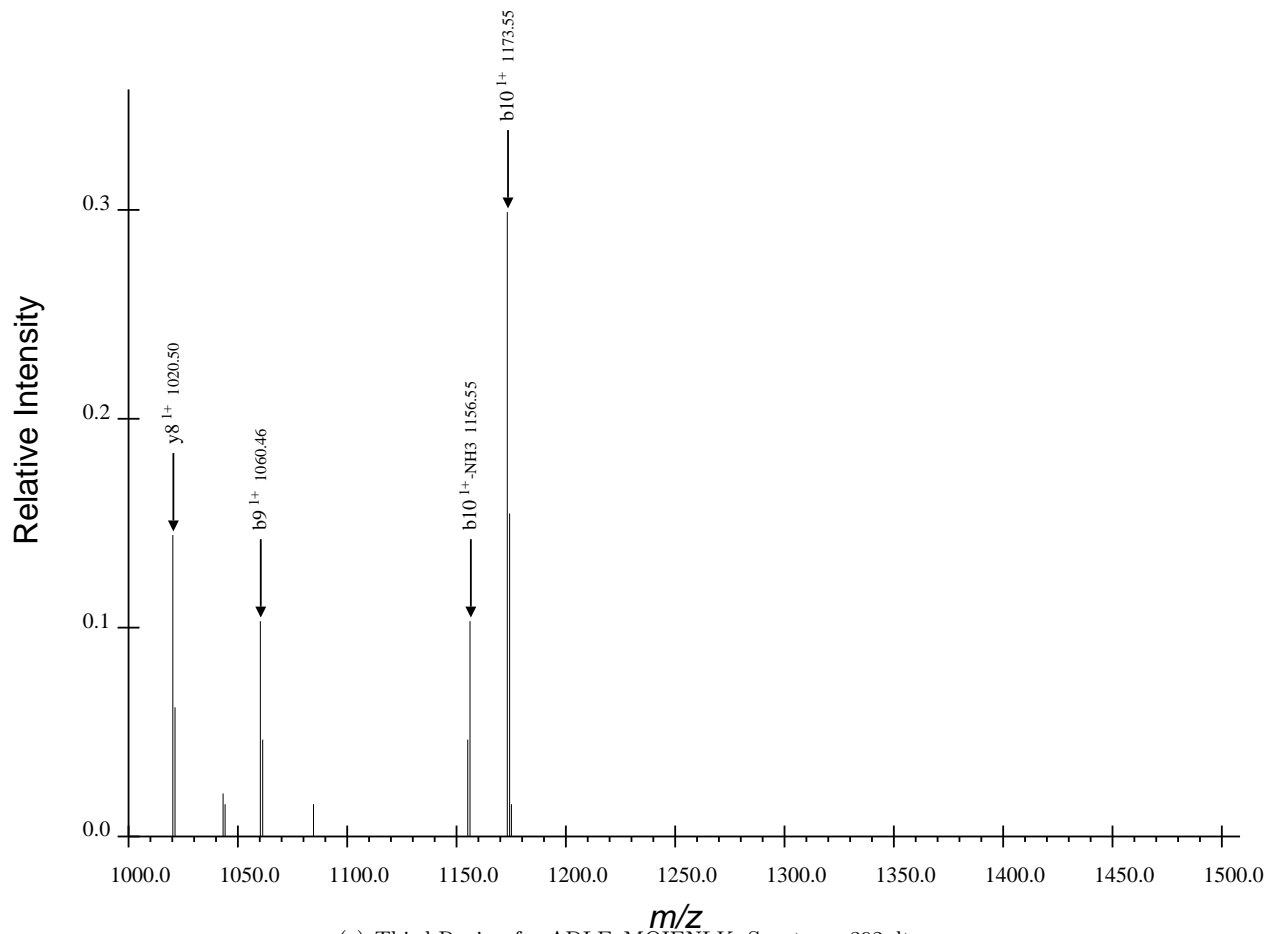

(c) Third Region for ADLEoMQIENLK, Spectrum 392.dta

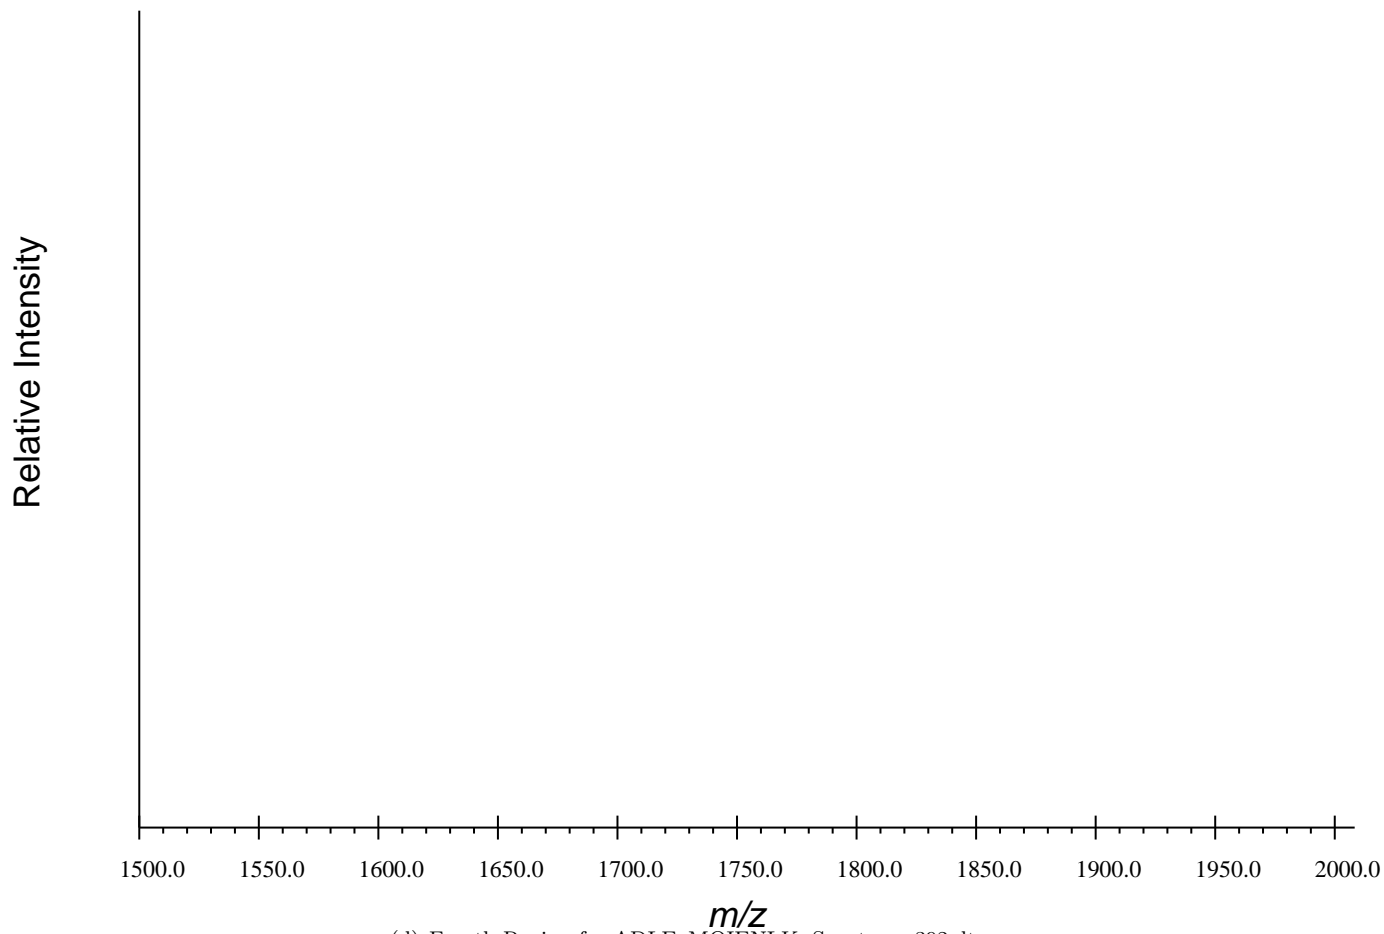

(d) Fourth Region for ADLEoMQIENLK, Spectrum 392.dta

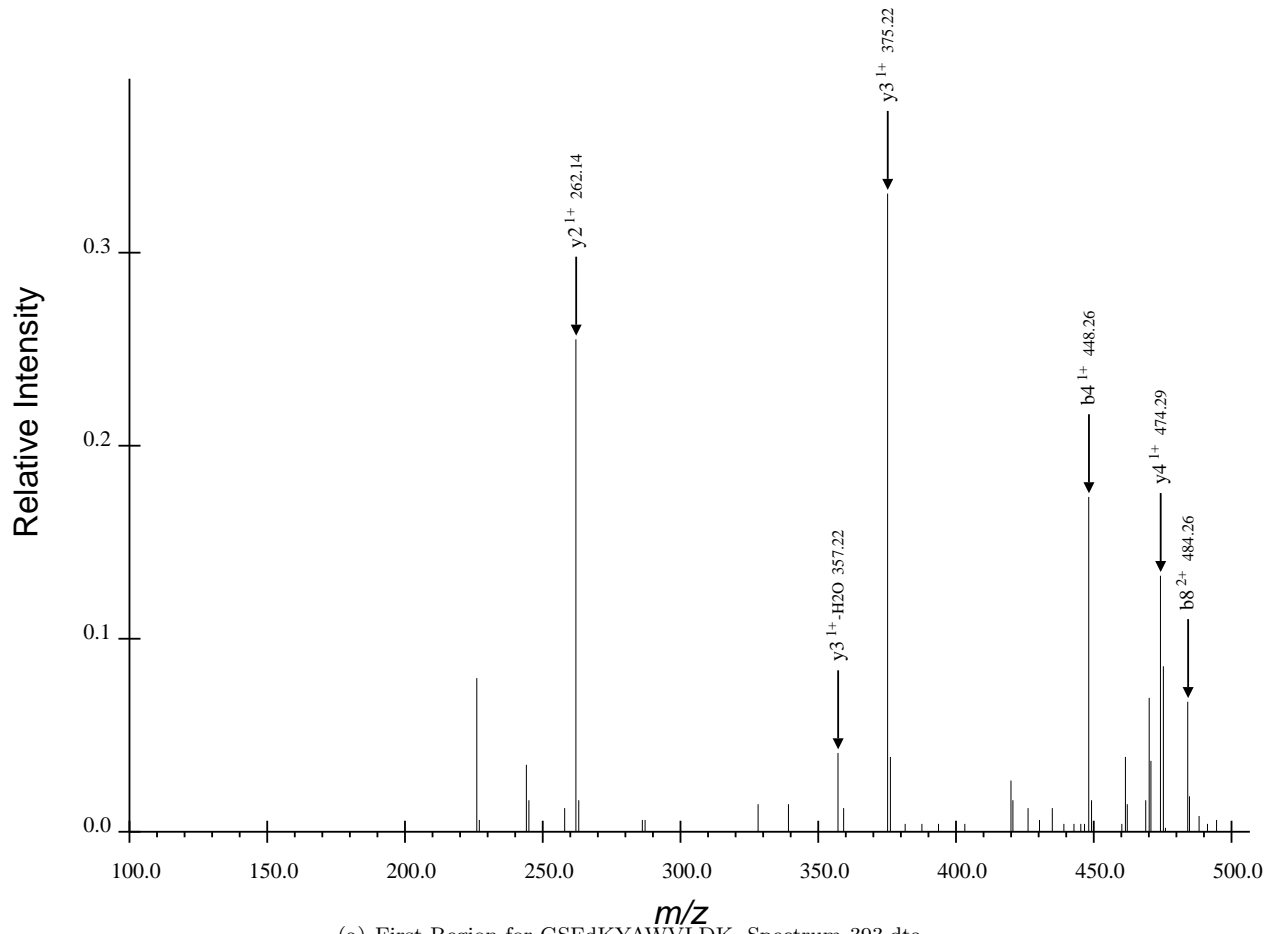

(a) First Region for GSFdKYAWVLDK, Spectrum 393.dta

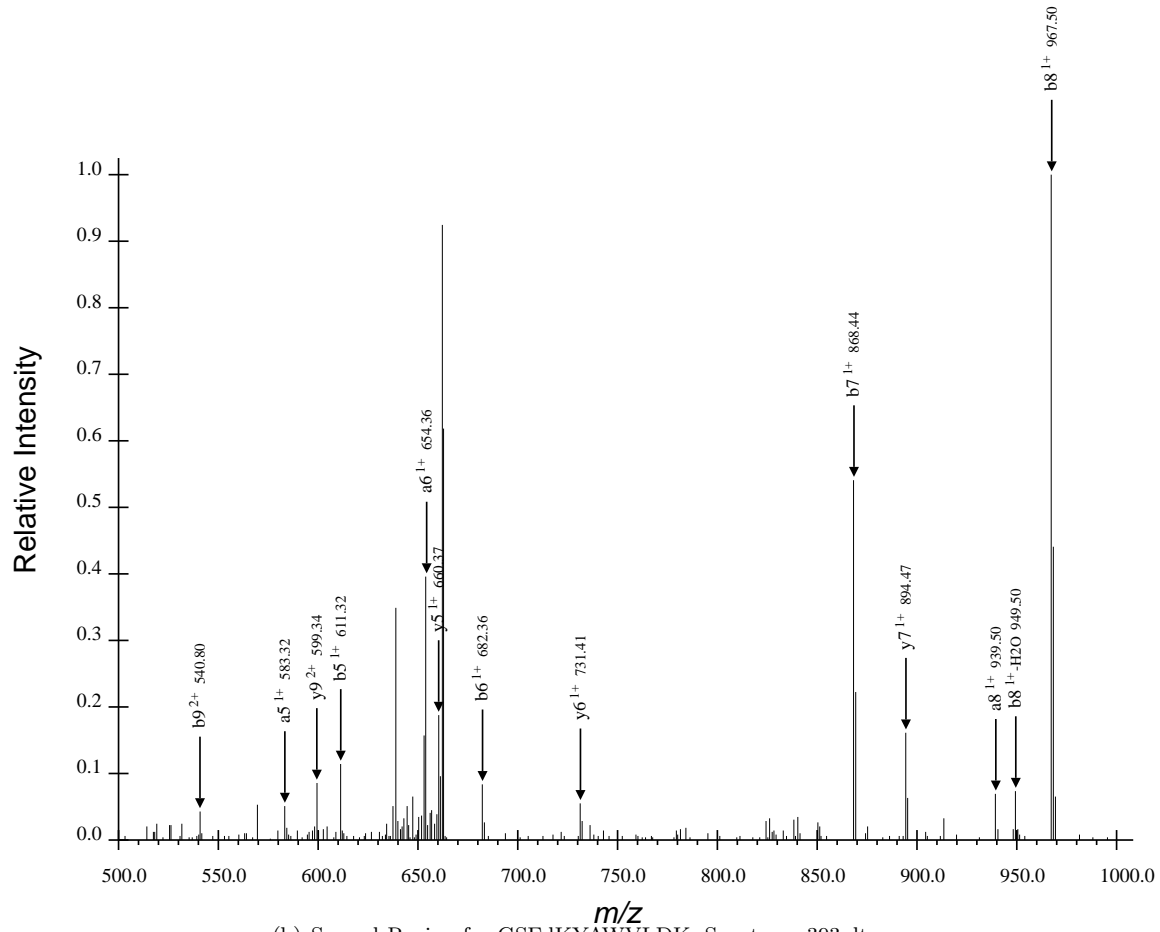

(b) Second Region for GSFdKYAWVLDK, Spectrum 393.dta

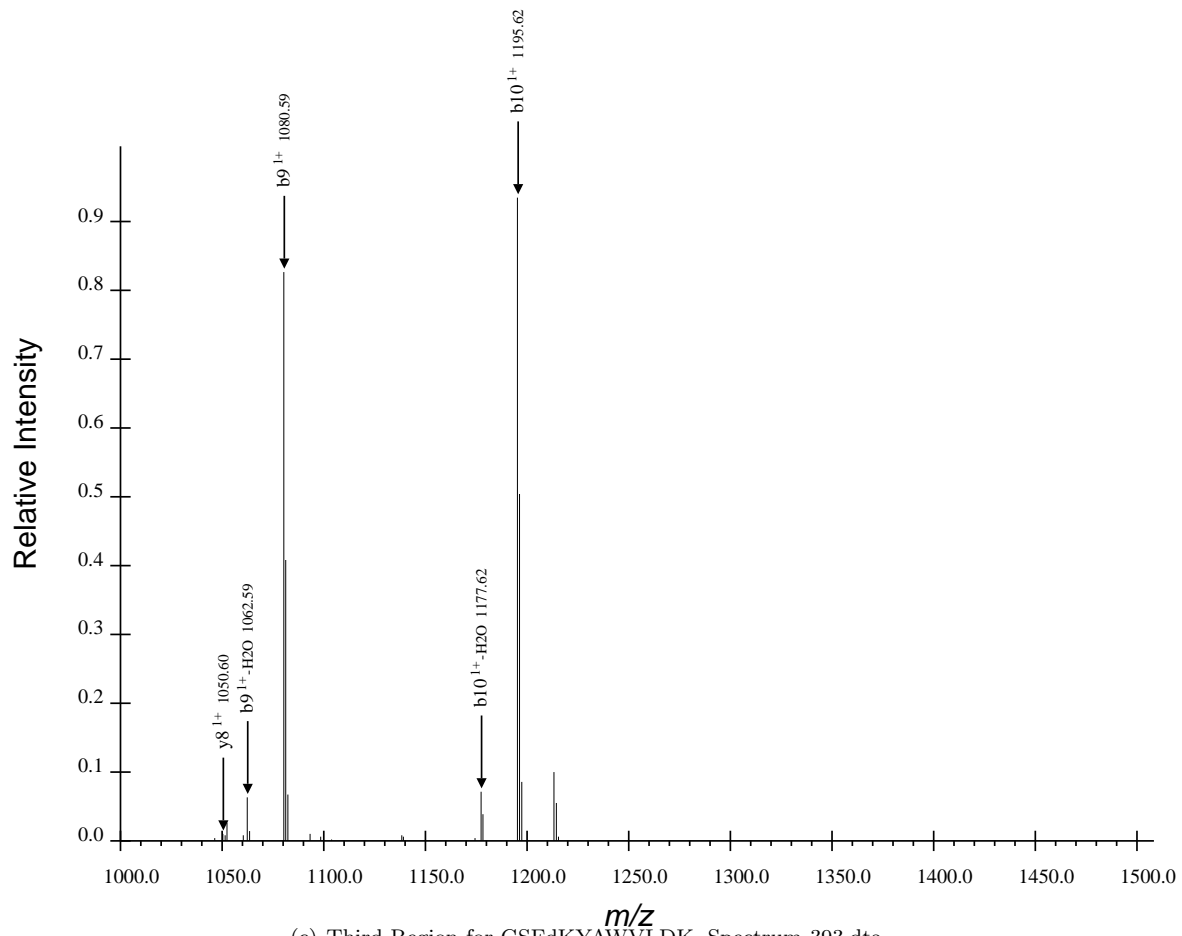

(c) Third Region for GSFdKYAWVLDK, Spectrum 393.dta

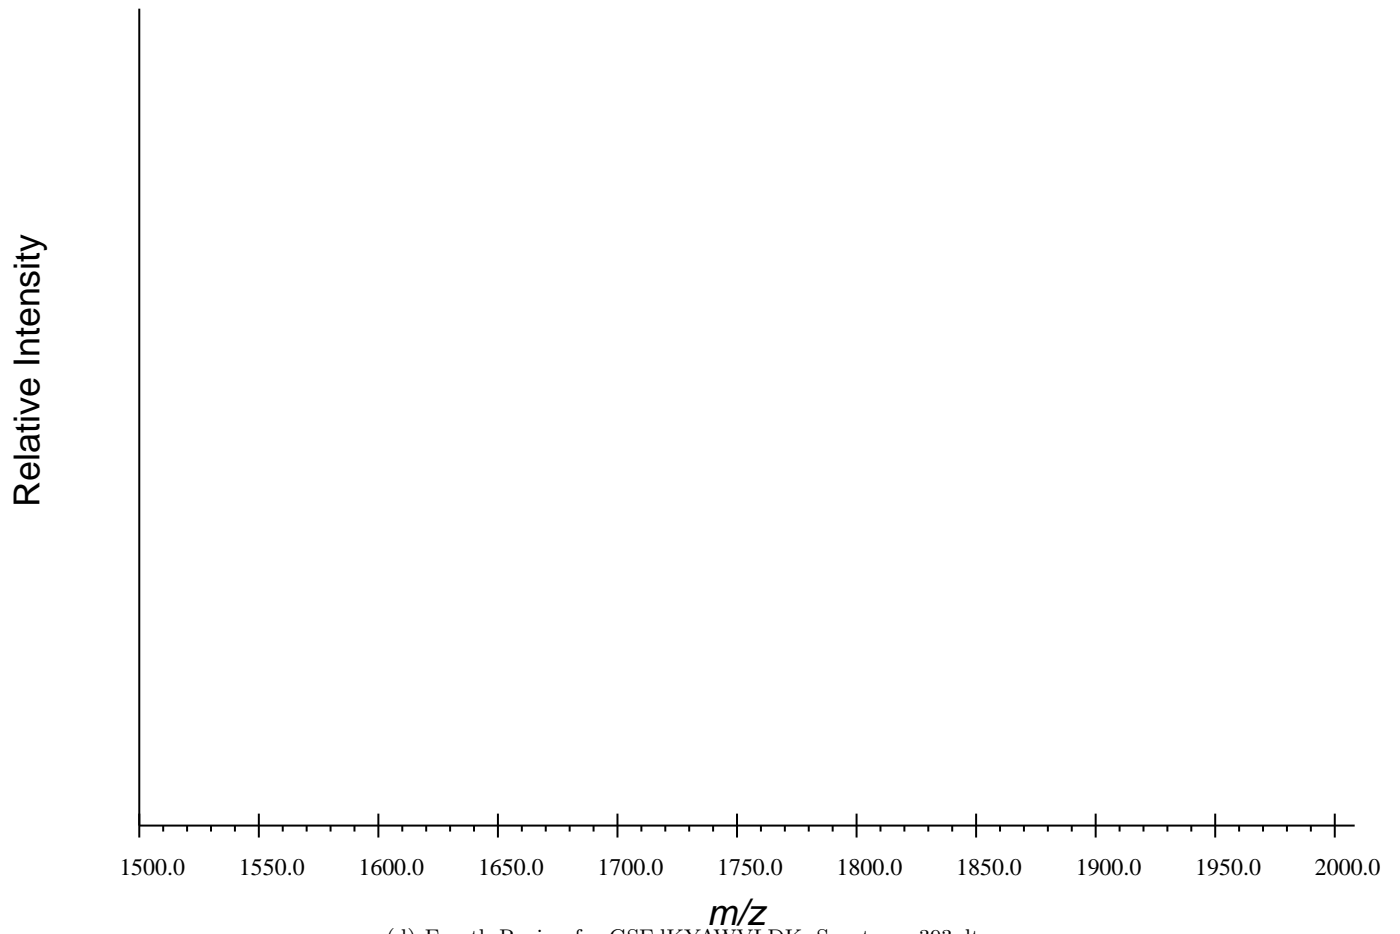

(d) Fourth Region for GSFdKYAWVLDK, Spectrum 393.dta

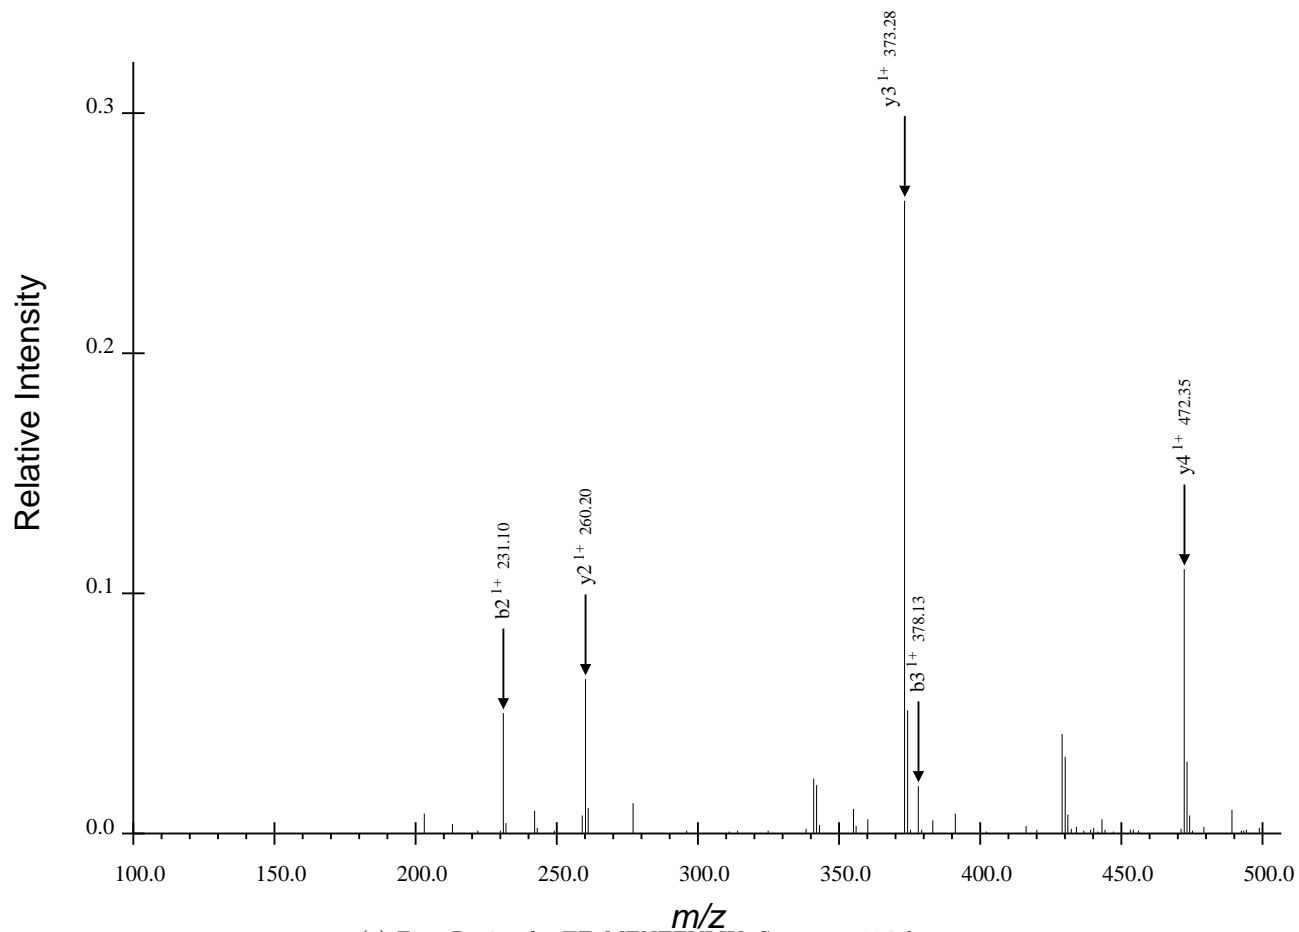

(a) First Region for TEOmENEFVLIK, Spectrum 394.dta

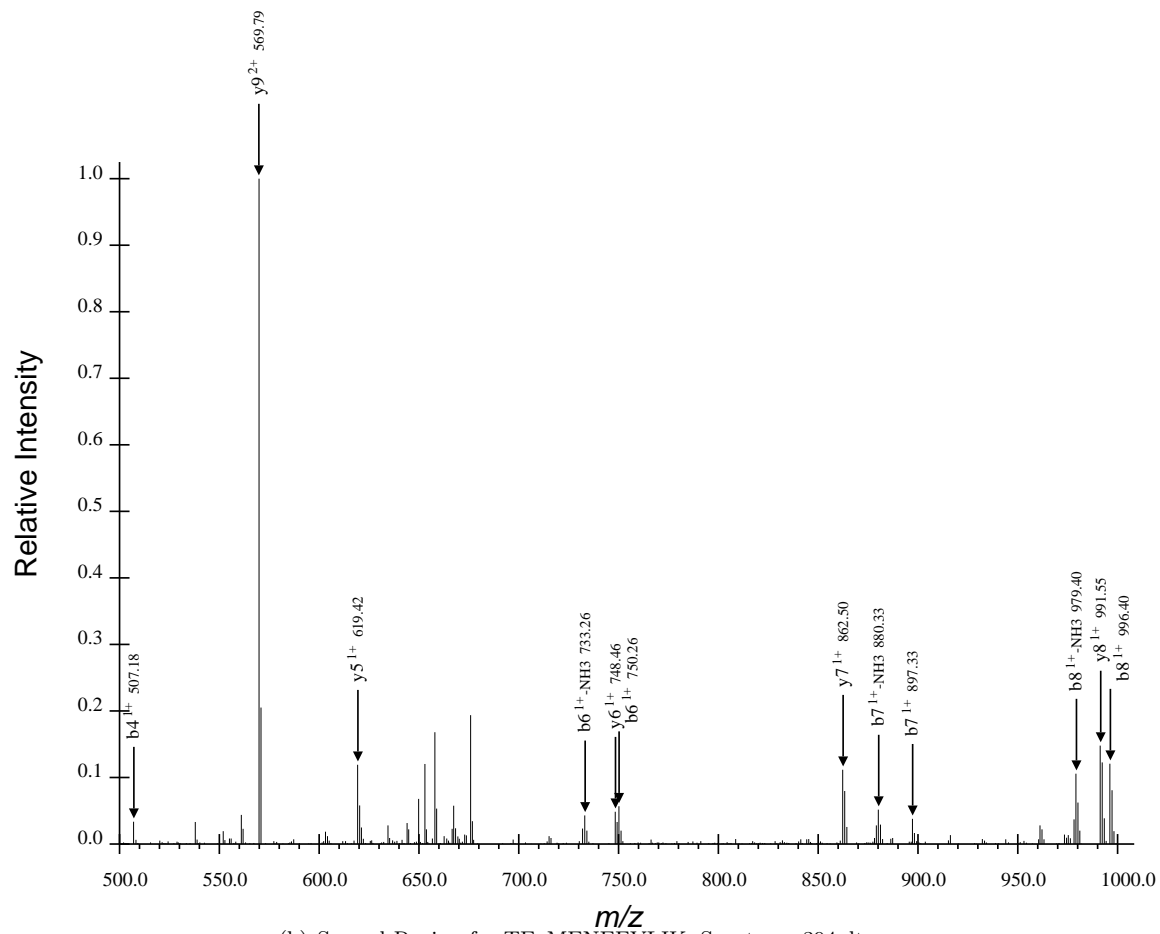

(b) Second Region for TEOmENEFVLIK, Spectrum 394.dta

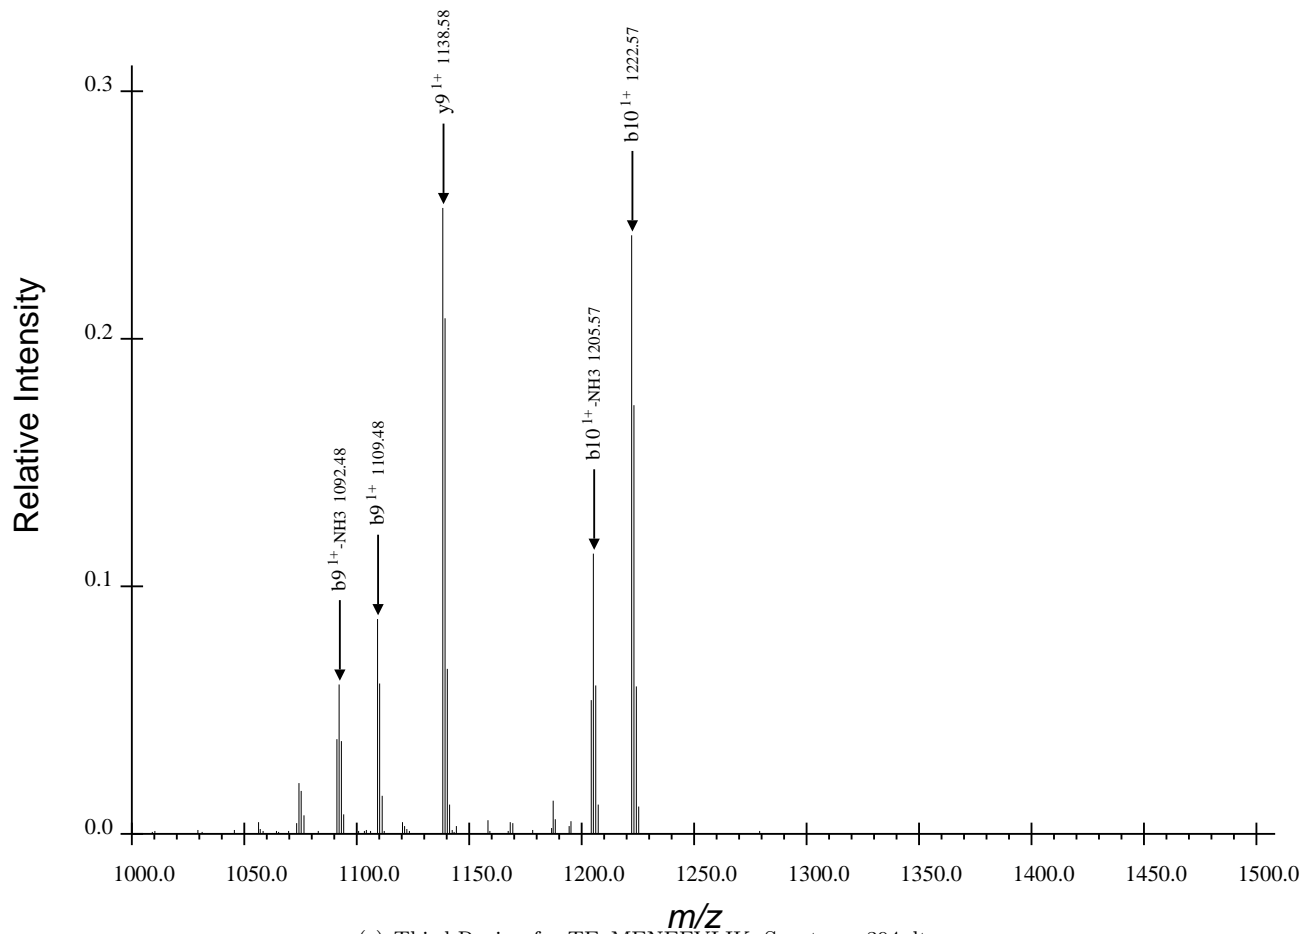

(c) Third Region for TEoMENEFLIK, Spectrum 394.dta

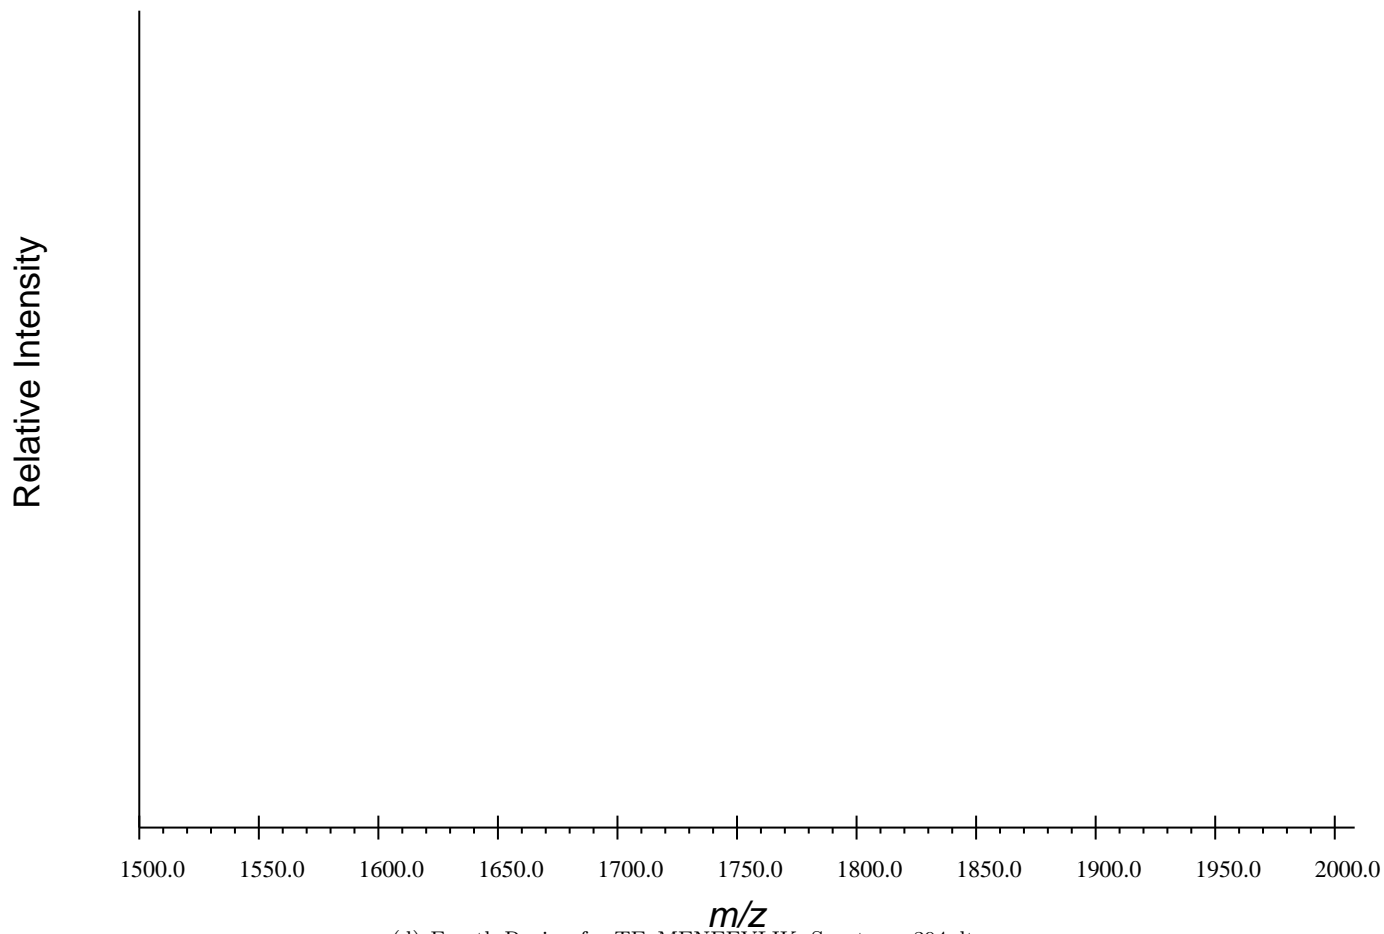

(d) Fourth Region for TEoMENEFLIK, Spectrum 394.dta



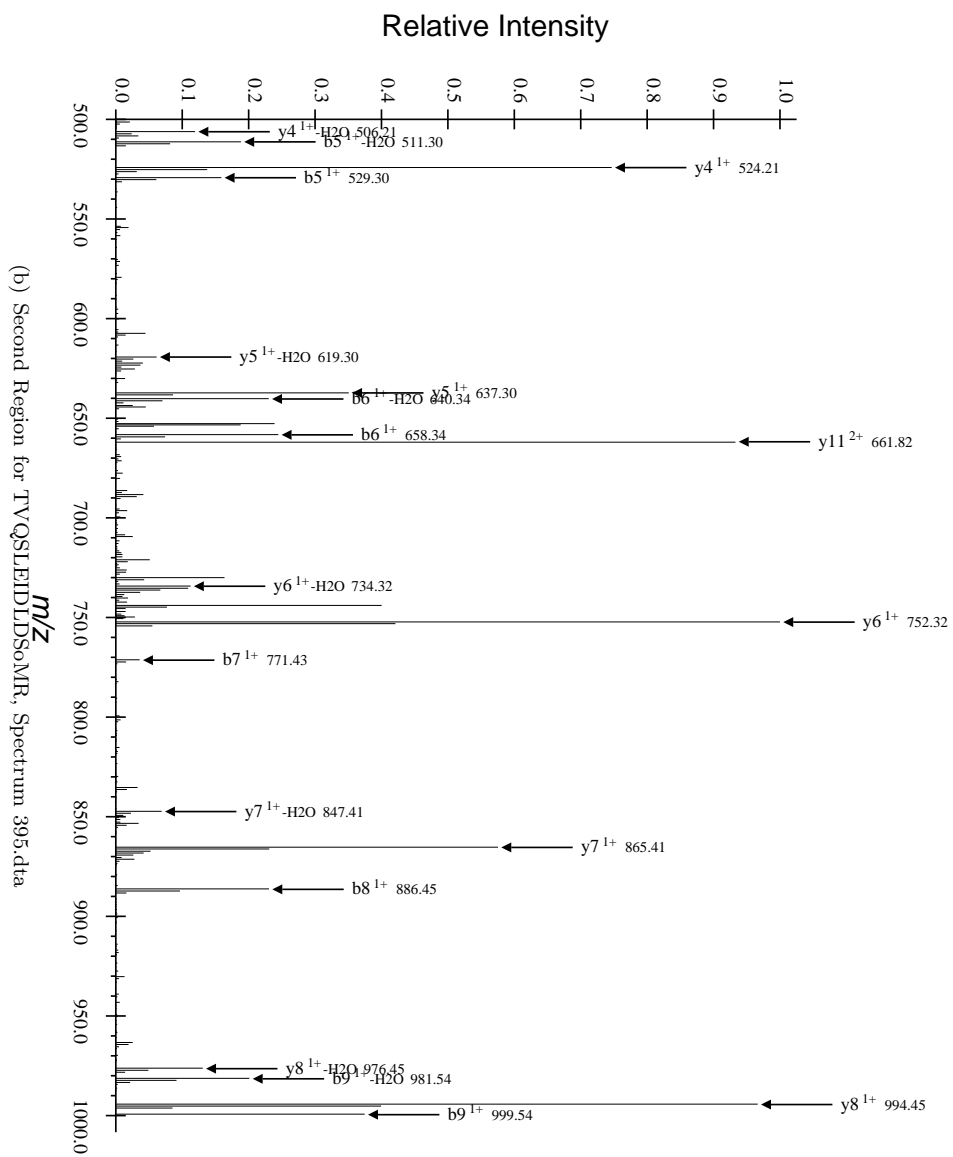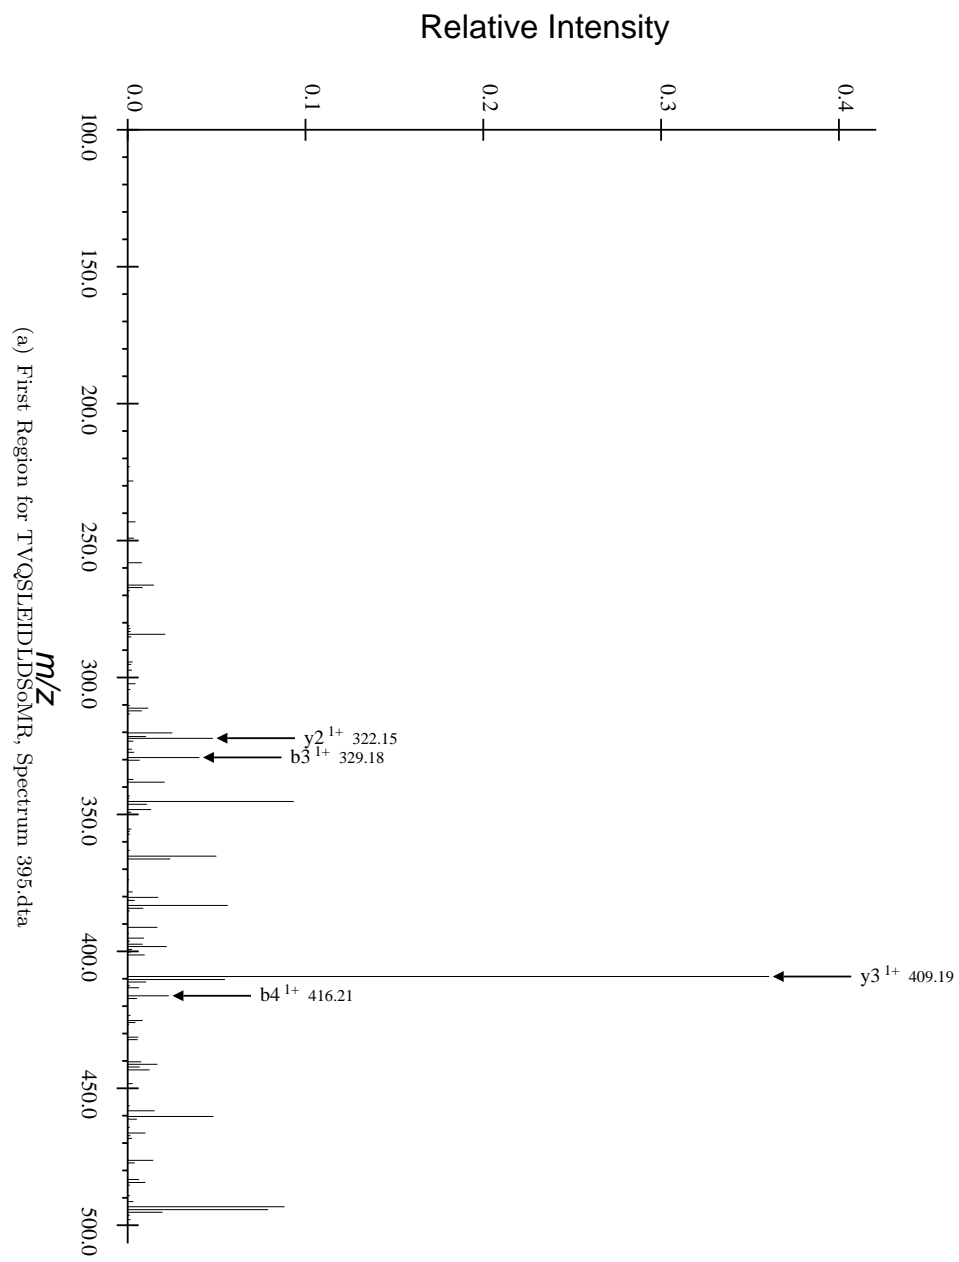

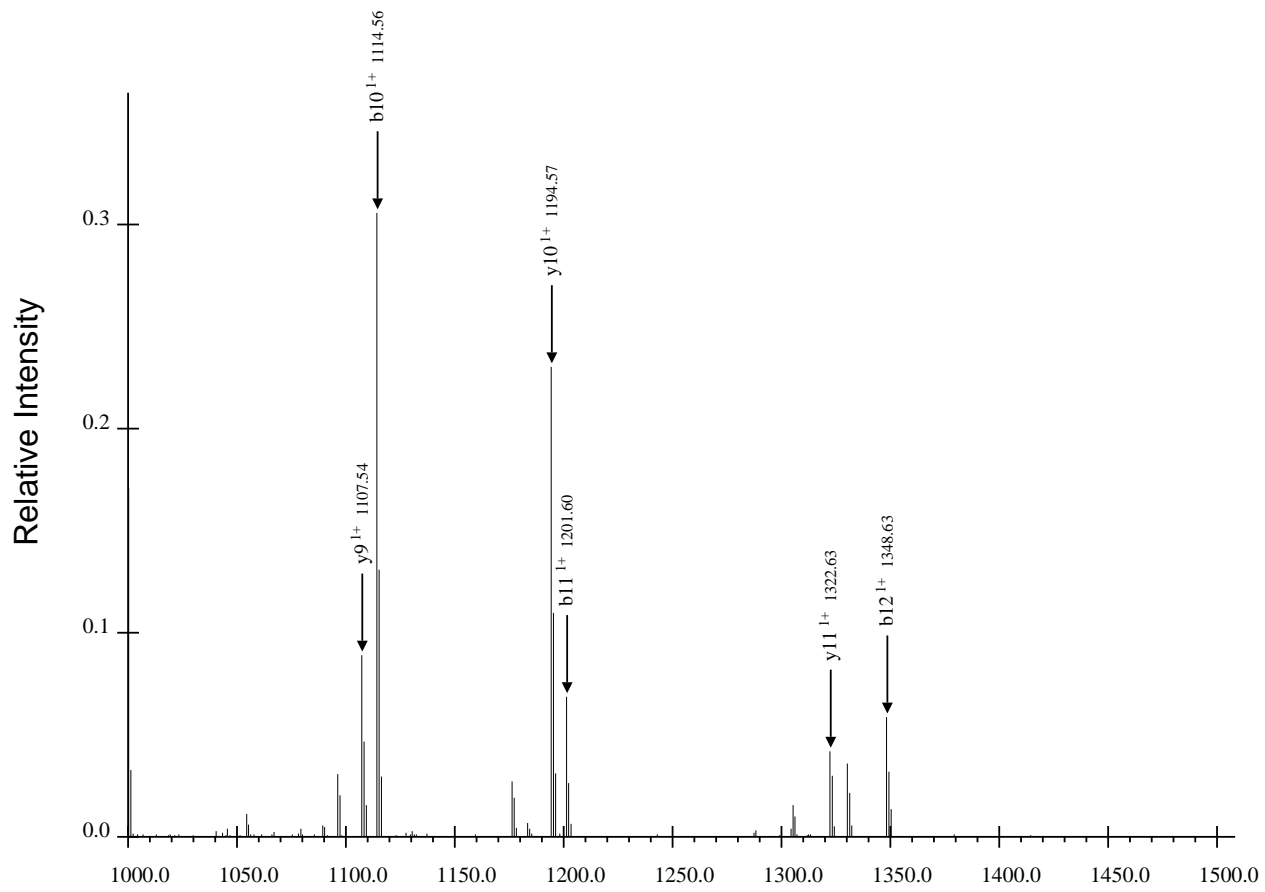

(c) Third Region for TVQSLEIDLDSoMR, Spectrum 395.dta

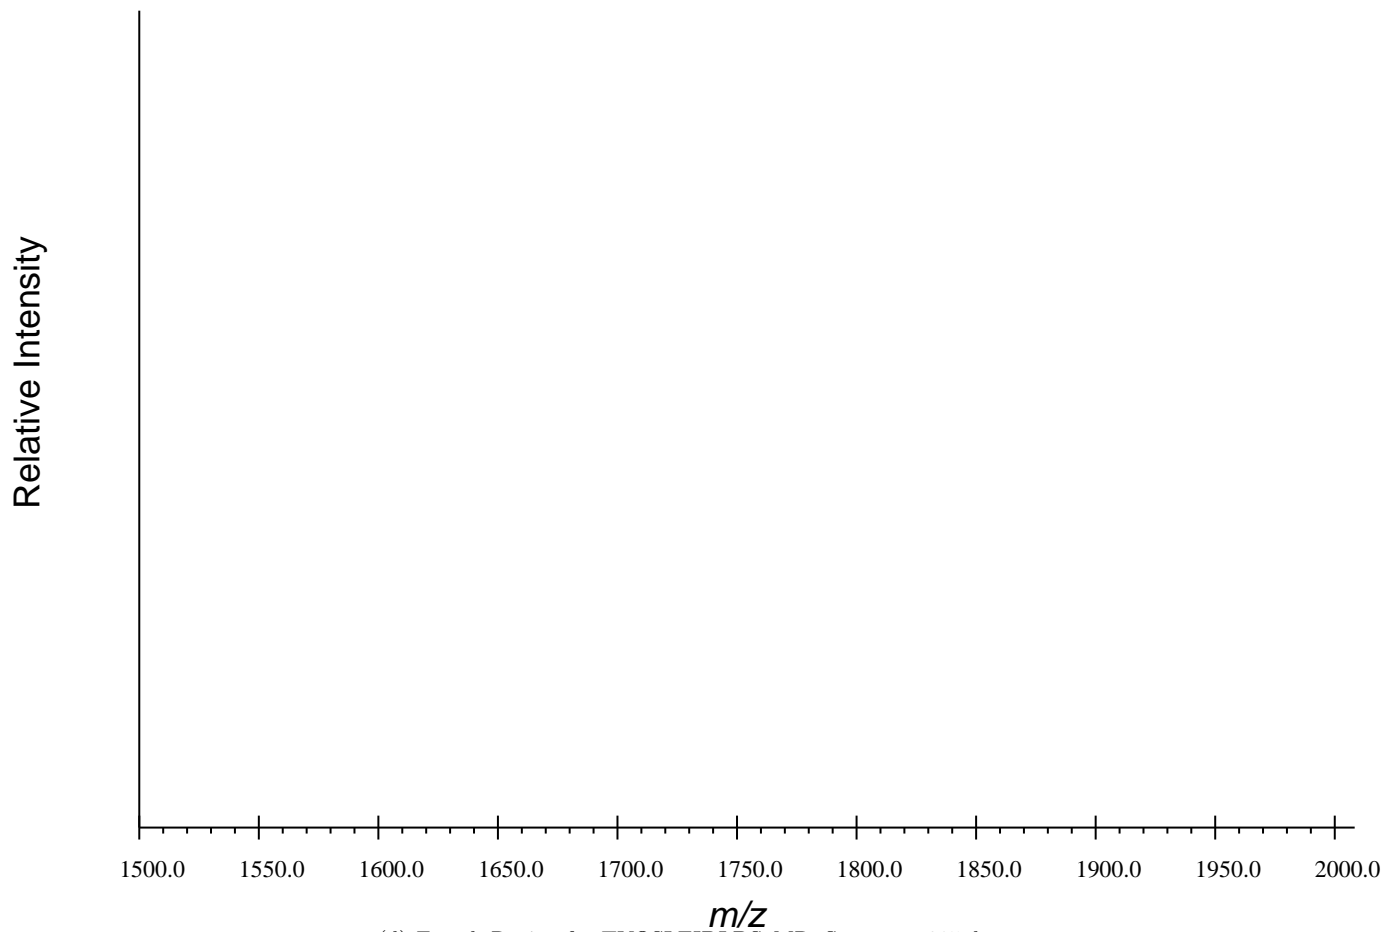

(d) Fourth Region for TVQSLEIDLDSoMR, Spectrum 395.dta

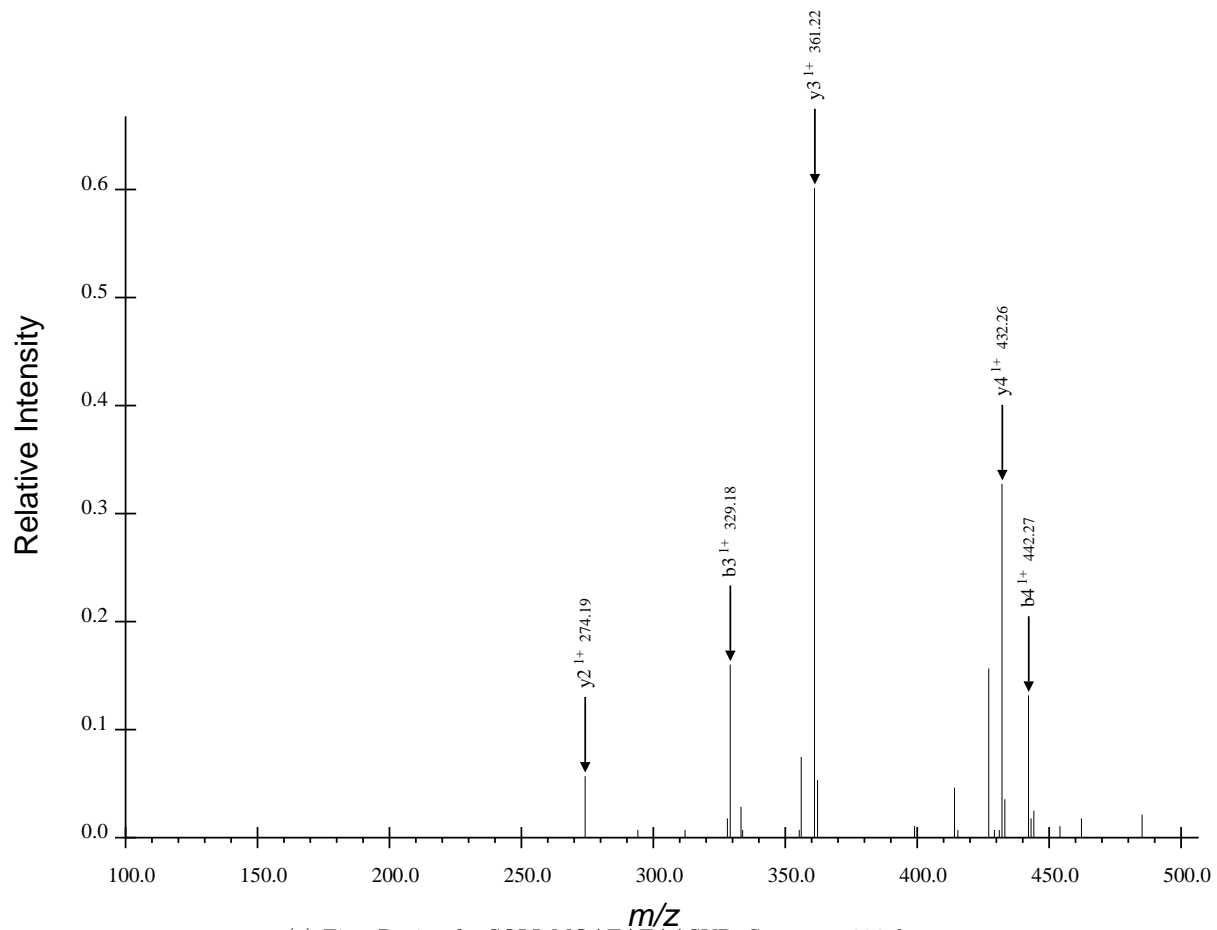

(a) First Region for SQLIoMQAEAEAASVR, Spectrum 396.dta

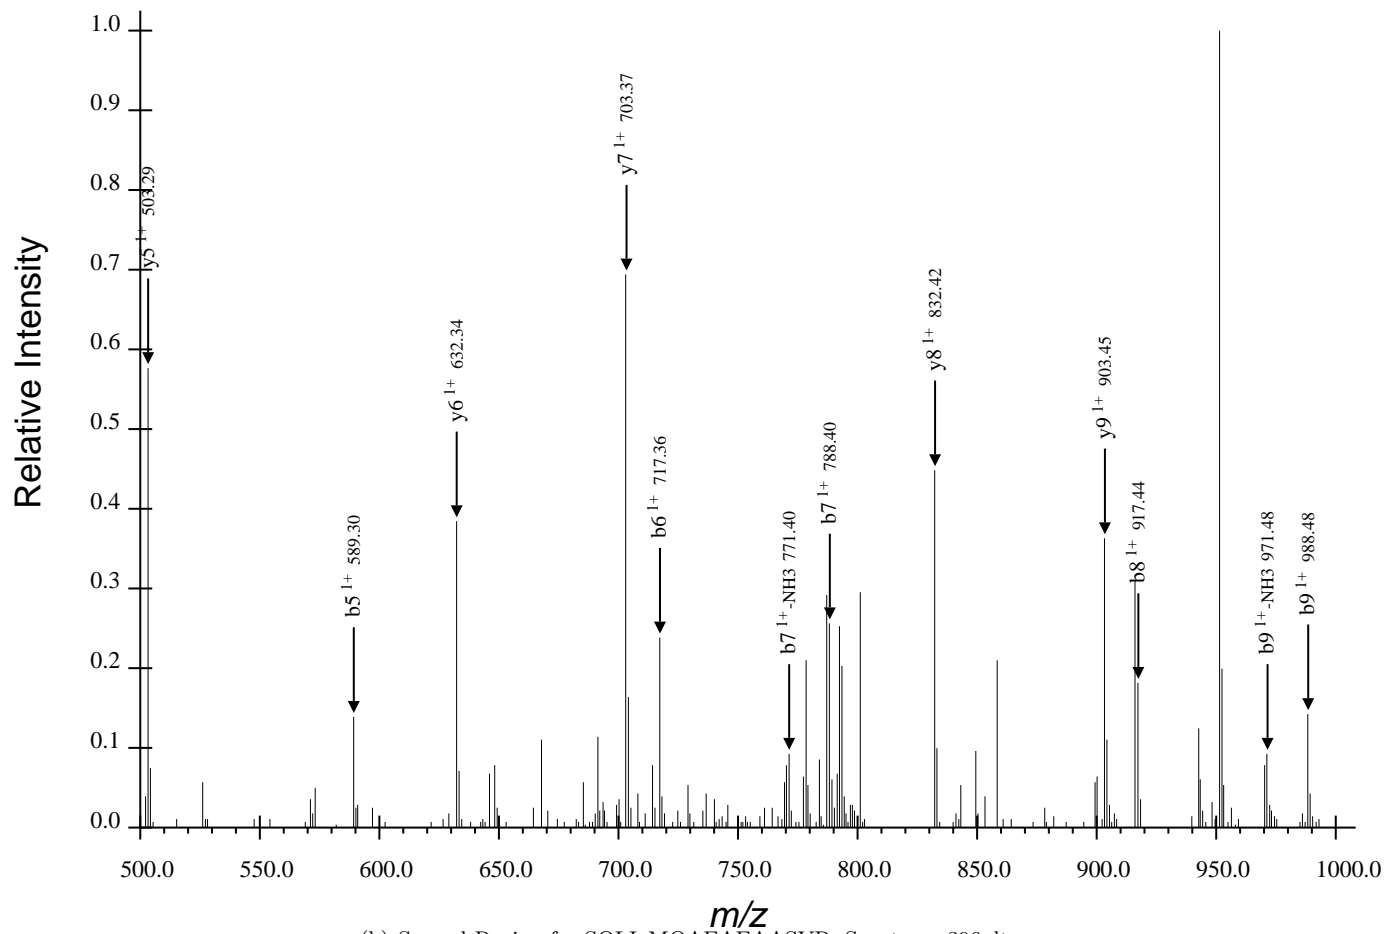

(b) Second Region for SQLIoMQAEAEAASVR, Spectrum 396.dta

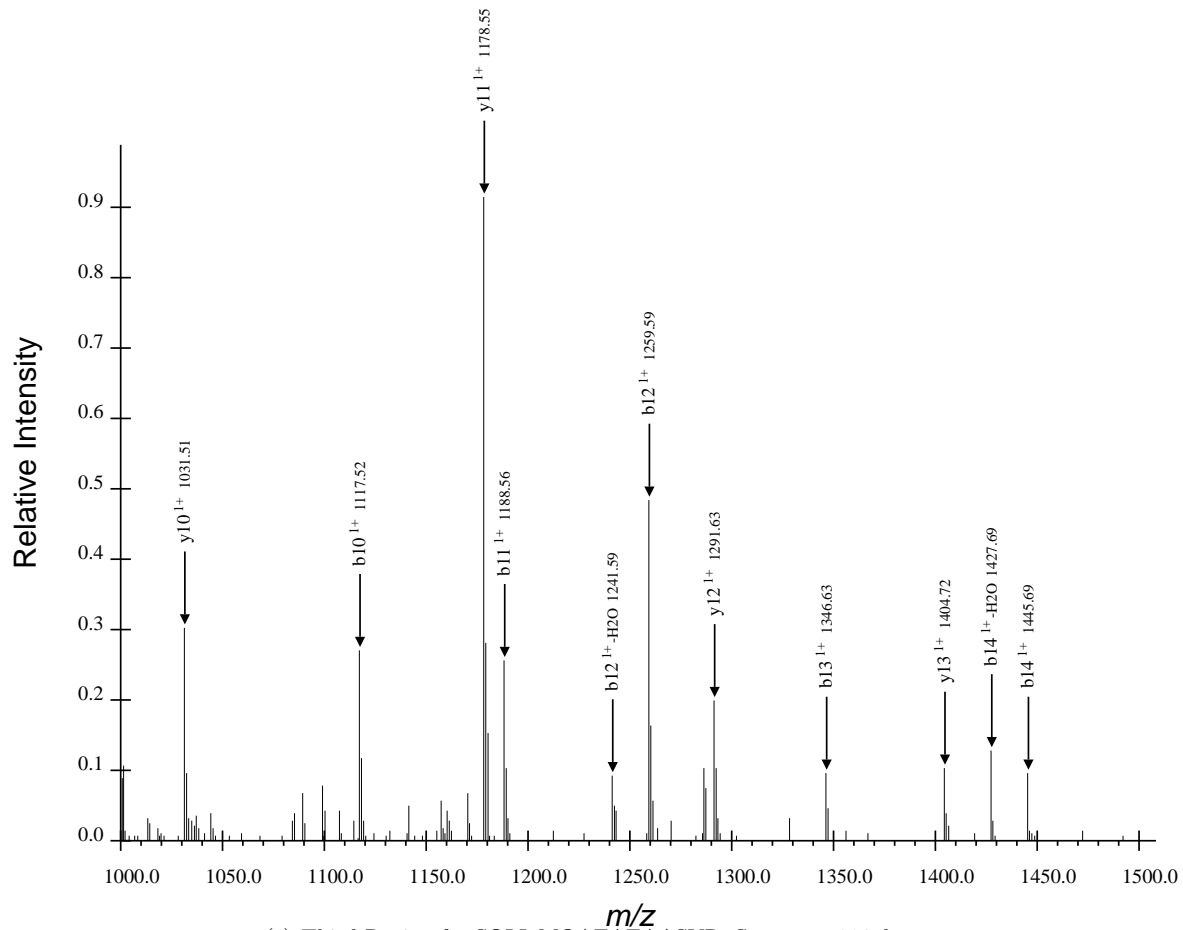

(c) Third Region for SQLIoMQAEAEAASVR, Spectrum 396.dta

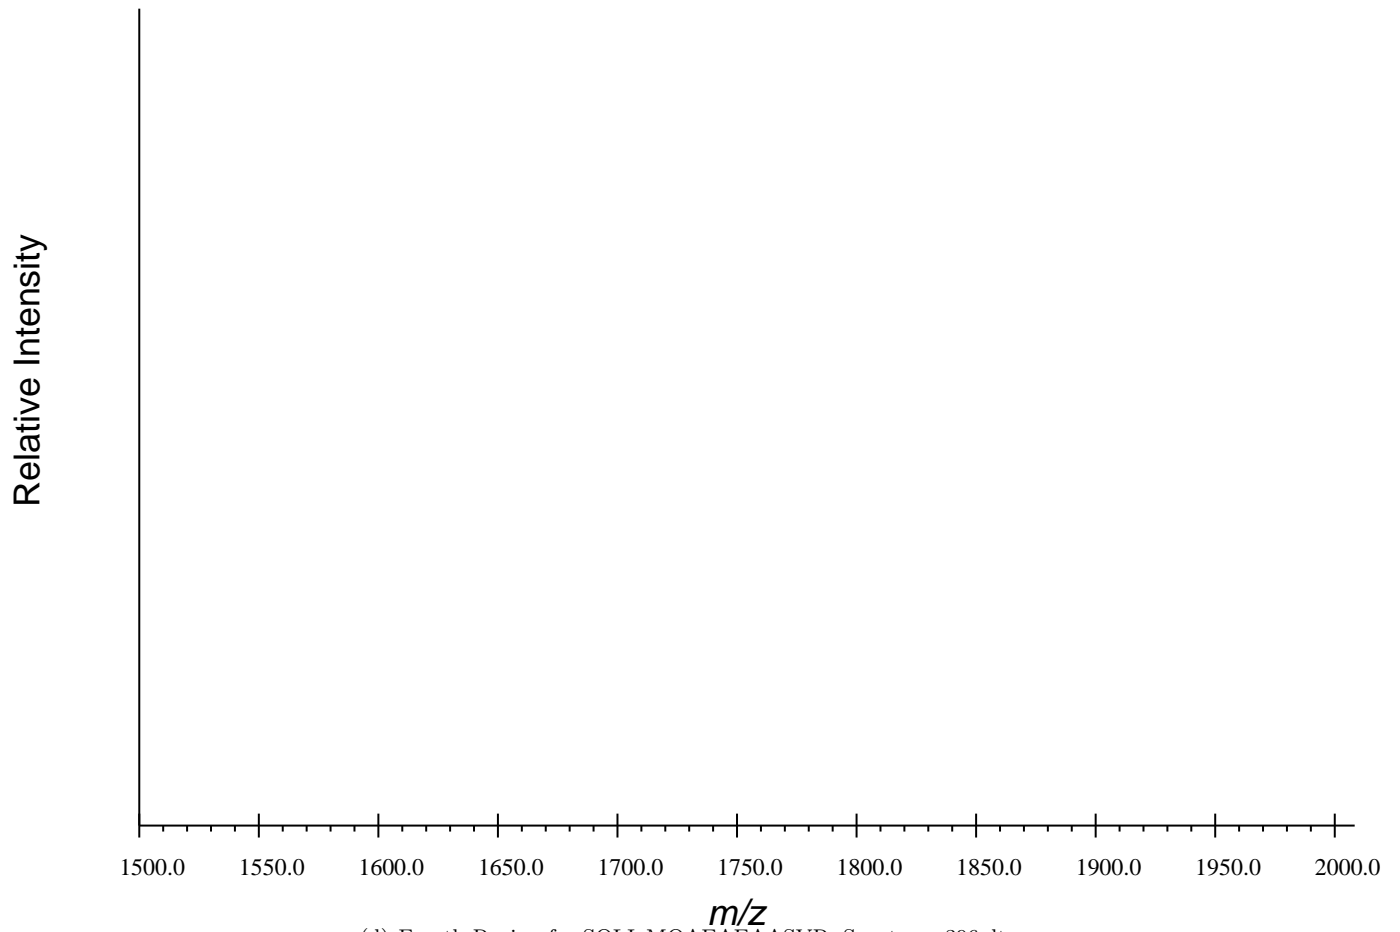

(d) Fourth Region for SQLIoMQAEAEAASVR, Spectrum 396.dta

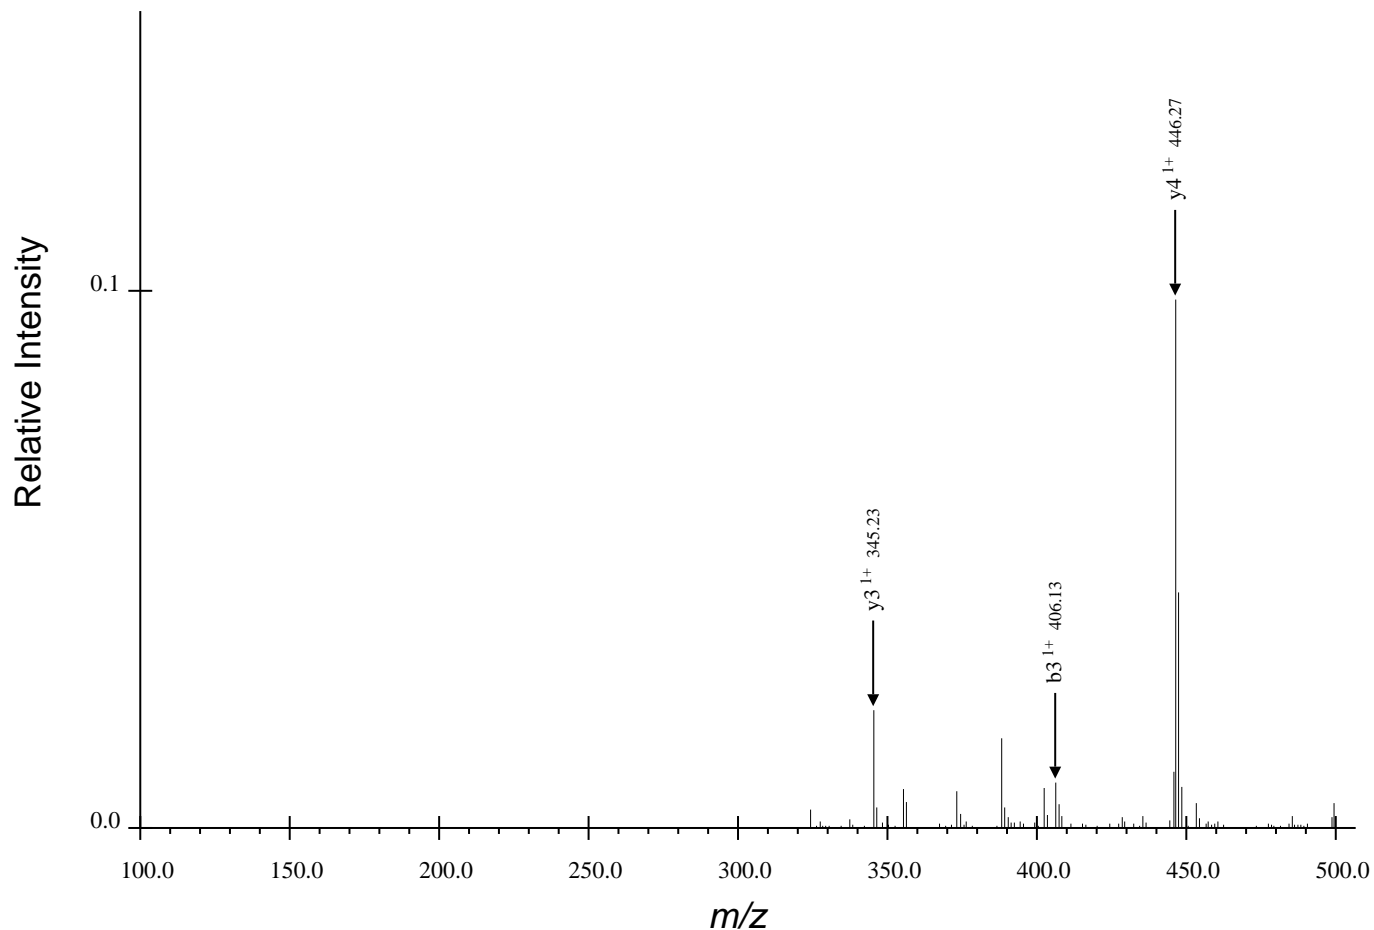

(a) First Region for EoMEENFAVEAANYQDTIGR, Spectrum 397.dta

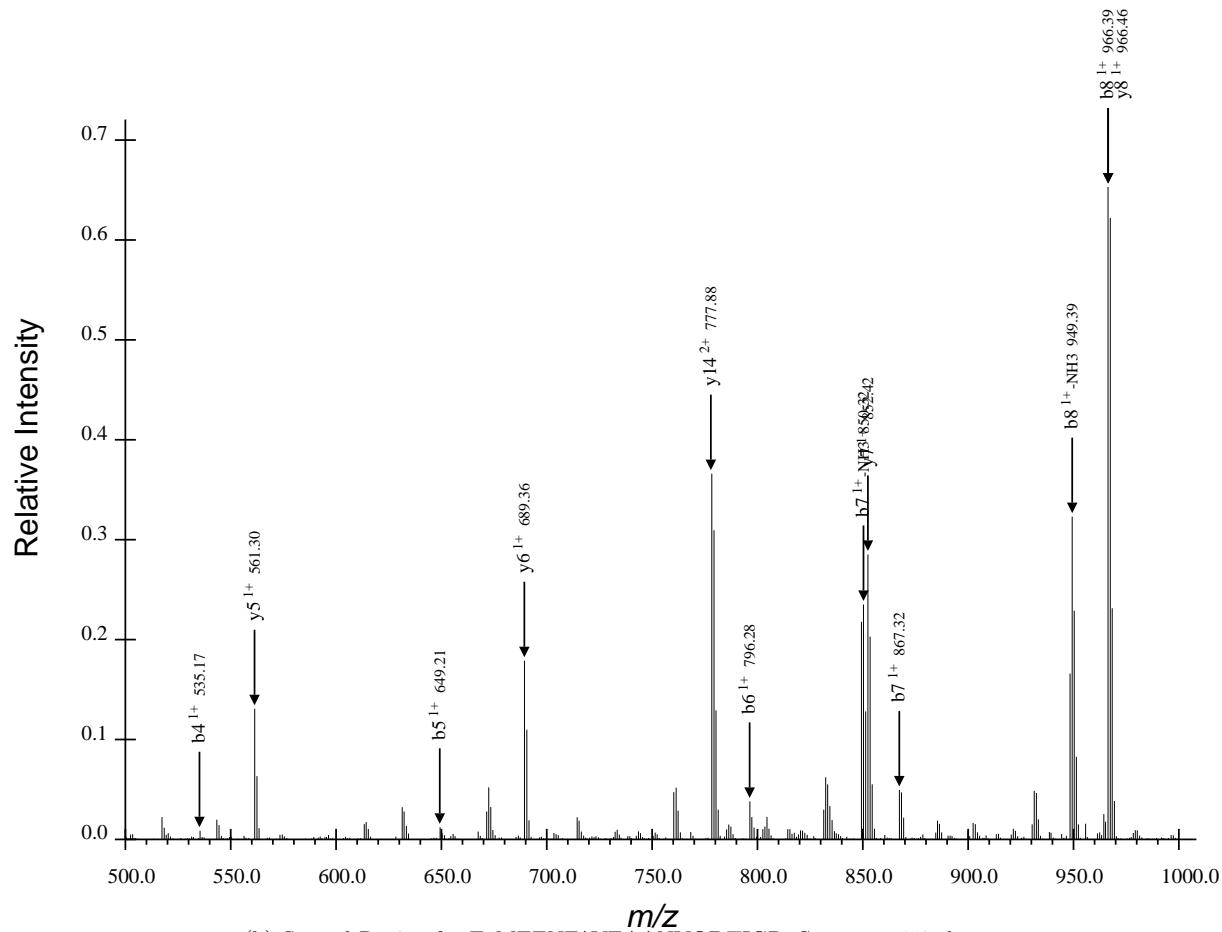

(b) Second Region for EoMEENFAVEAANYQDTIGR, Spectrum 397.dta

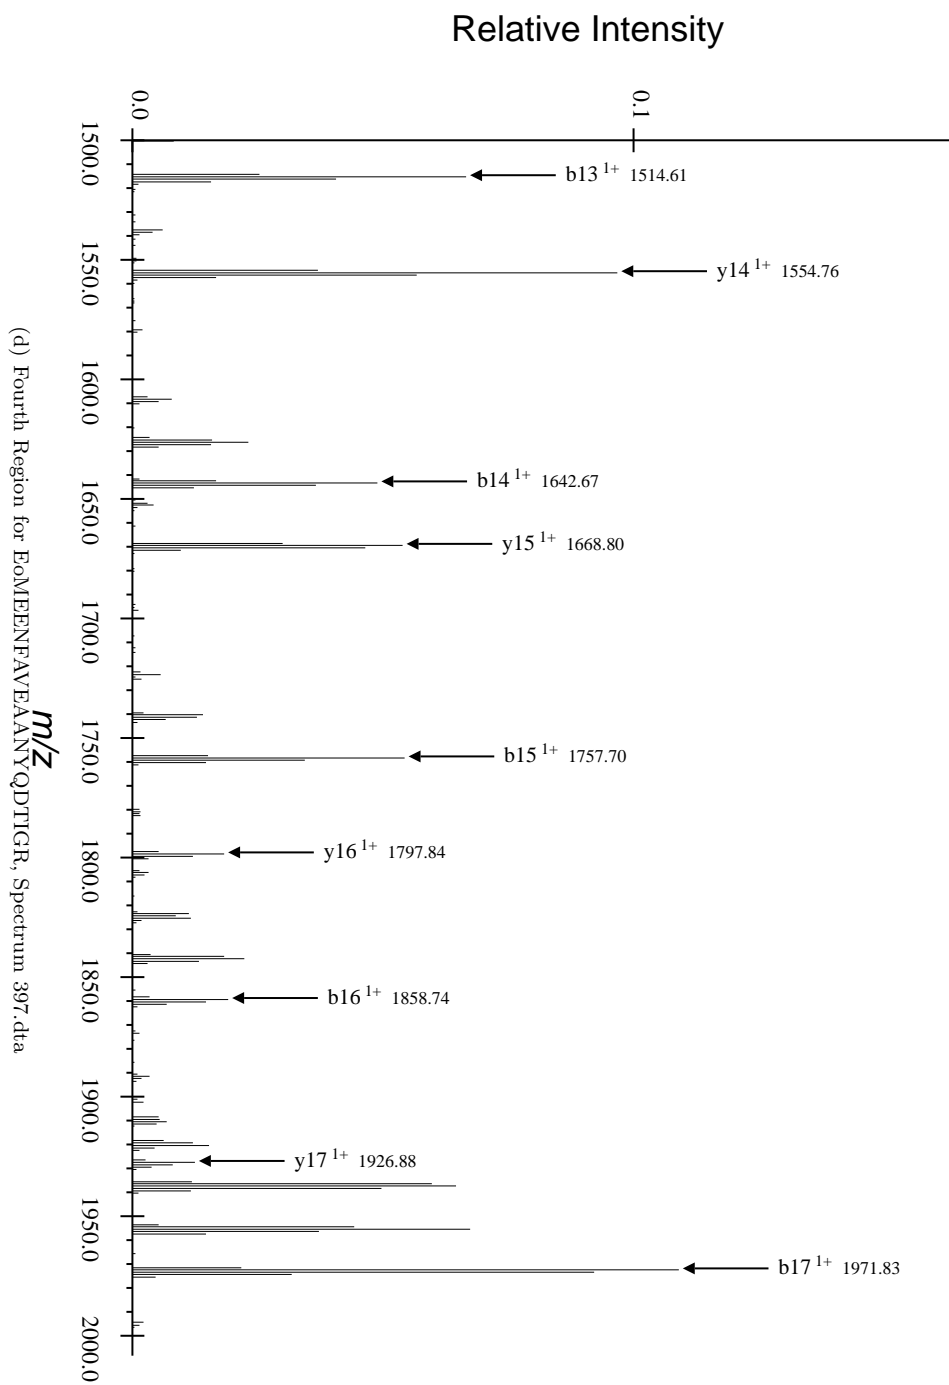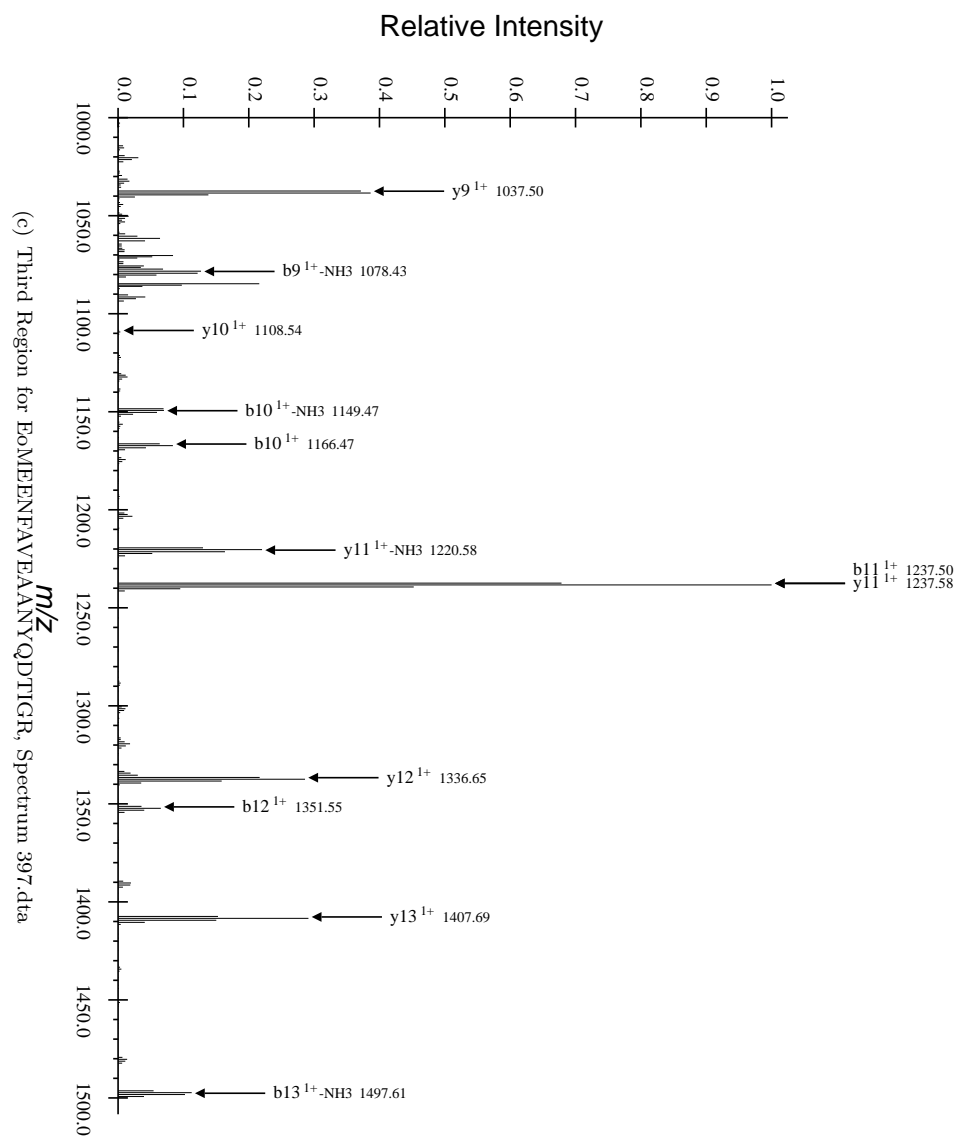

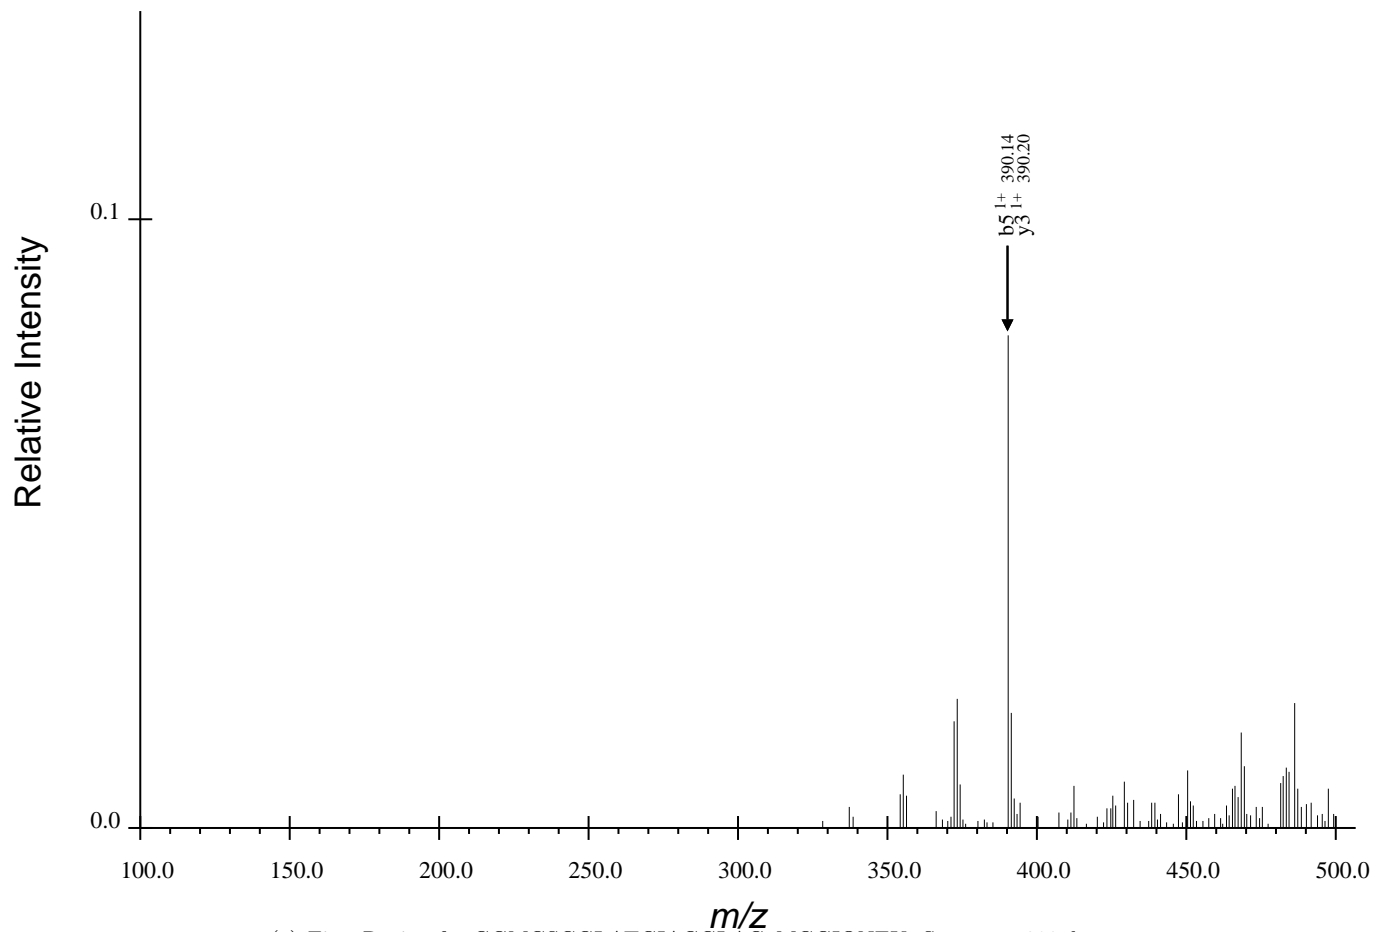

(a) First Region for GGMGSGGLATGIAGGLAGoMGGIQNEK, Spectrum 398.dta

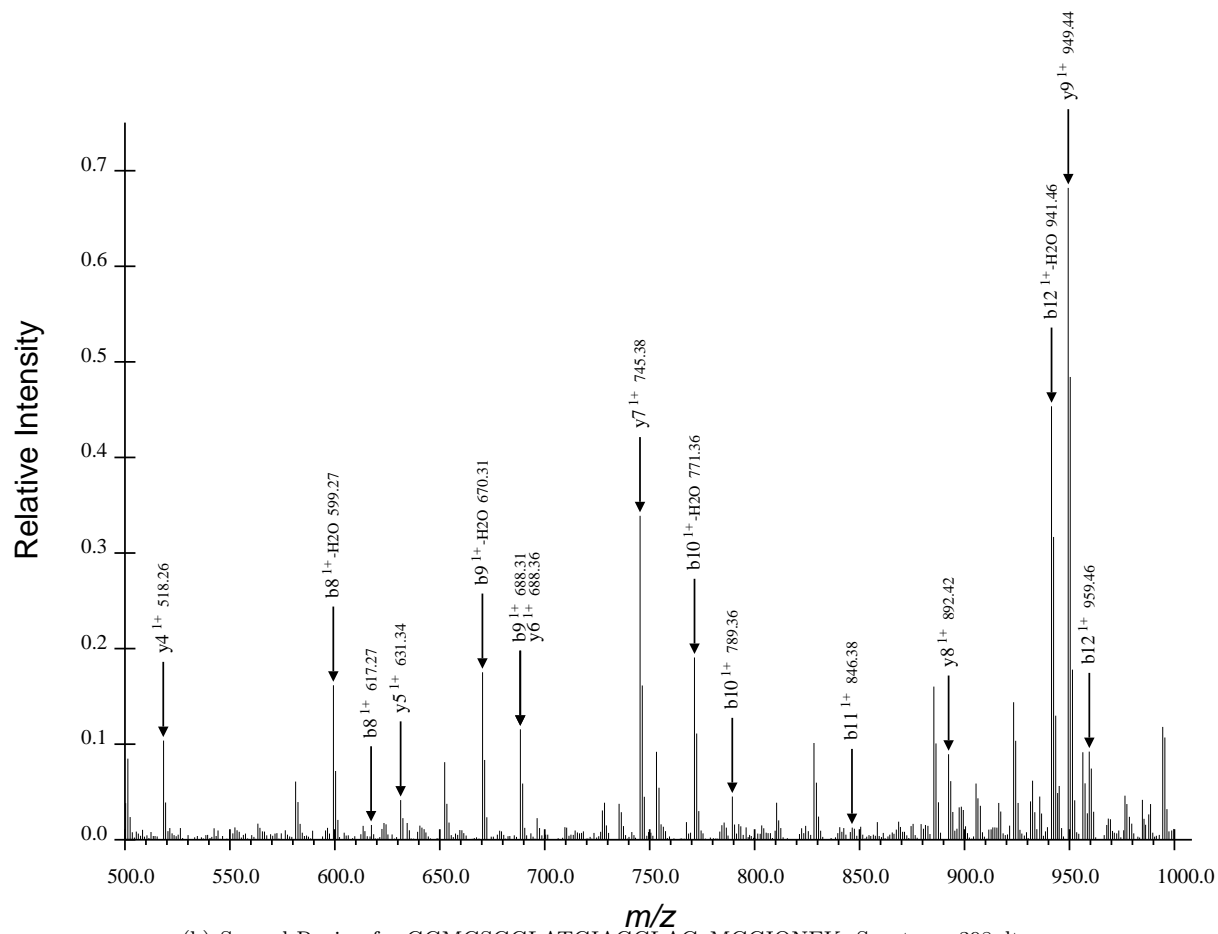

(b) Second Region for GGMGSGGLATGIAGGLAGoMGGIQNEK, Spectrum 398.dta

(d) Fourth Region for GGMSGGLATGIAGGLAGoMGGIQNEK, Spectrum 398.dta

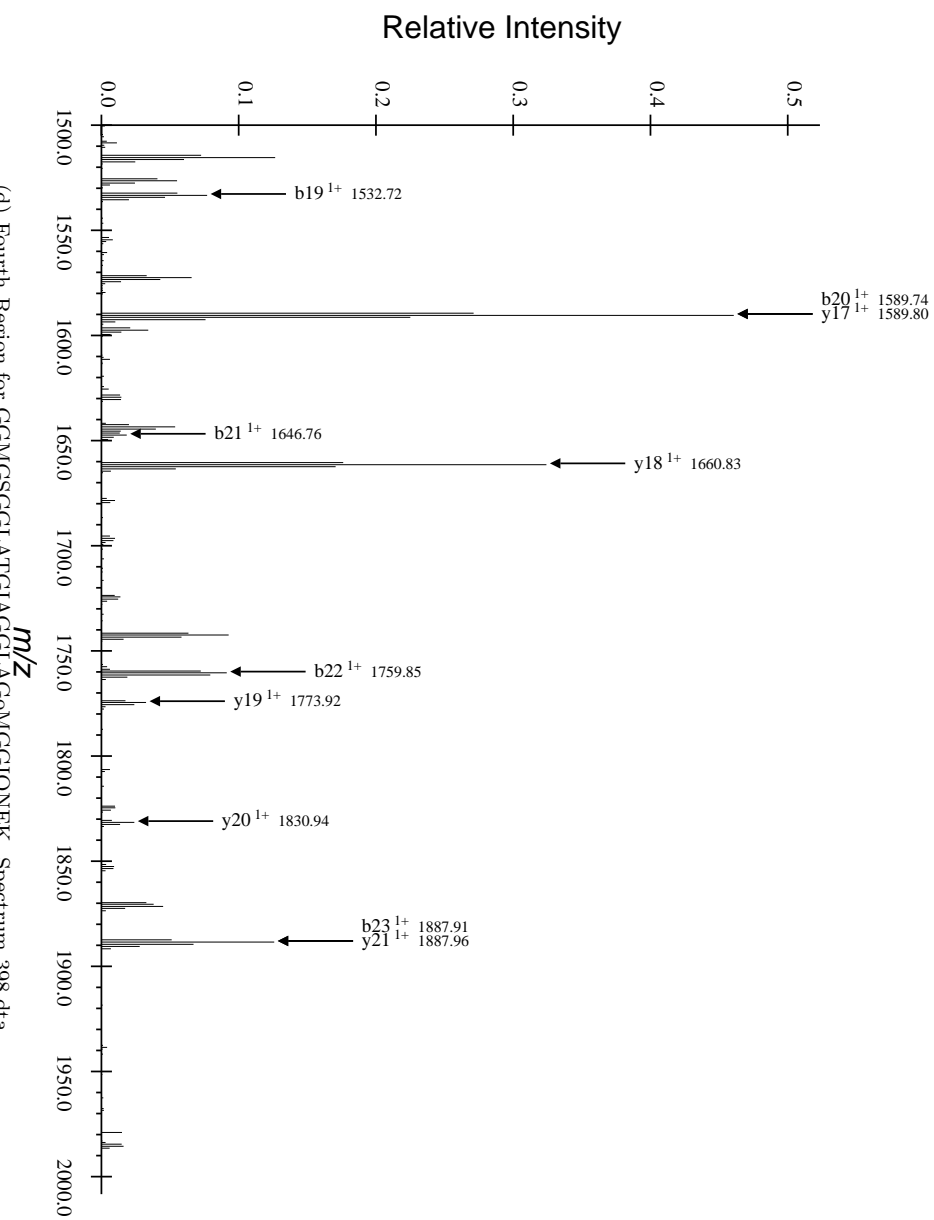

(c) Third Region for GGMSGGLATGIAGGLAGoMGGIQNEK, Spectrum 398.dta

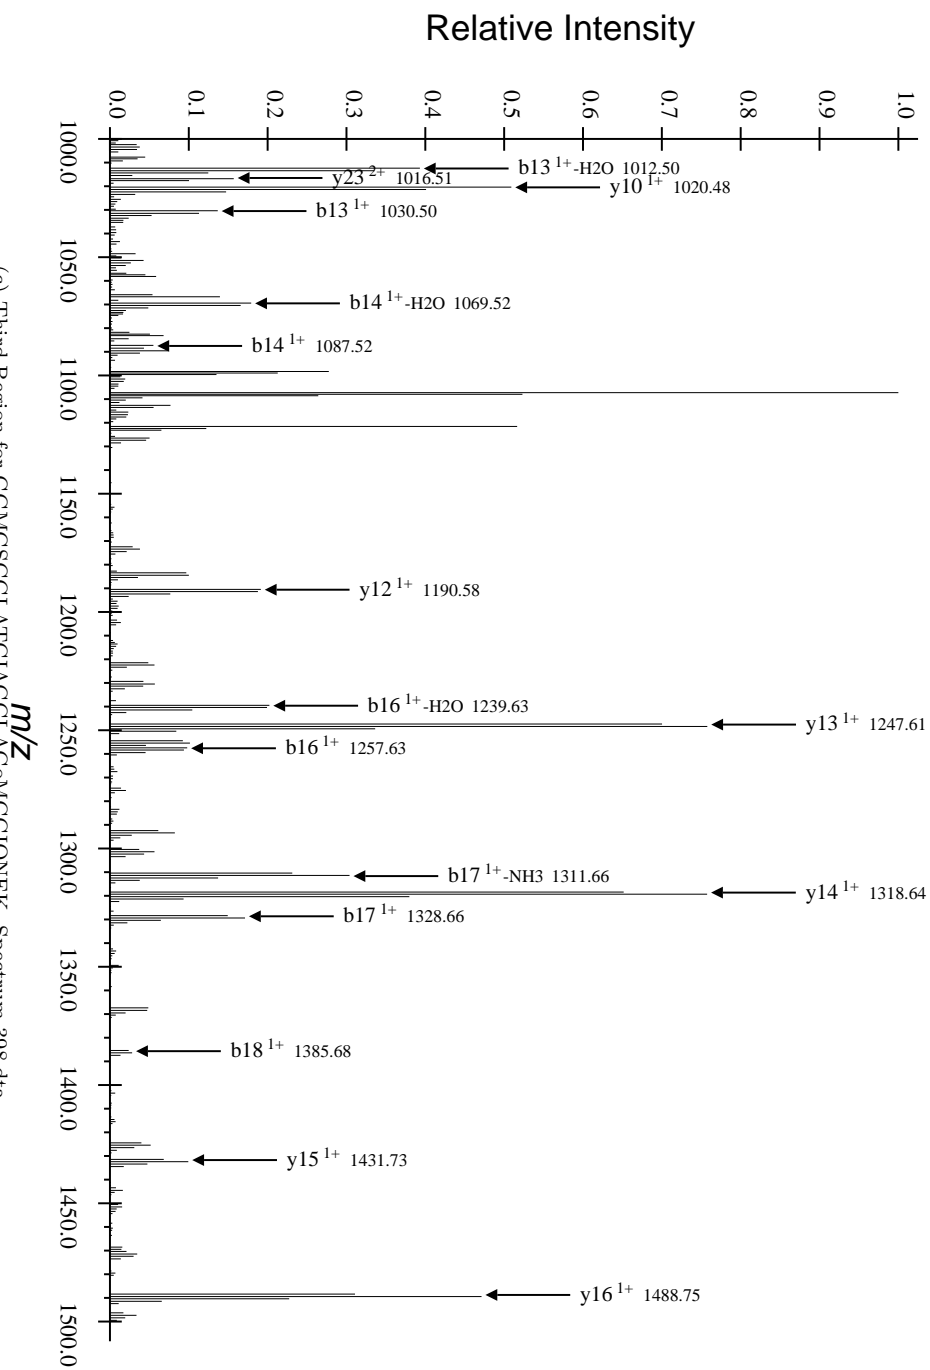



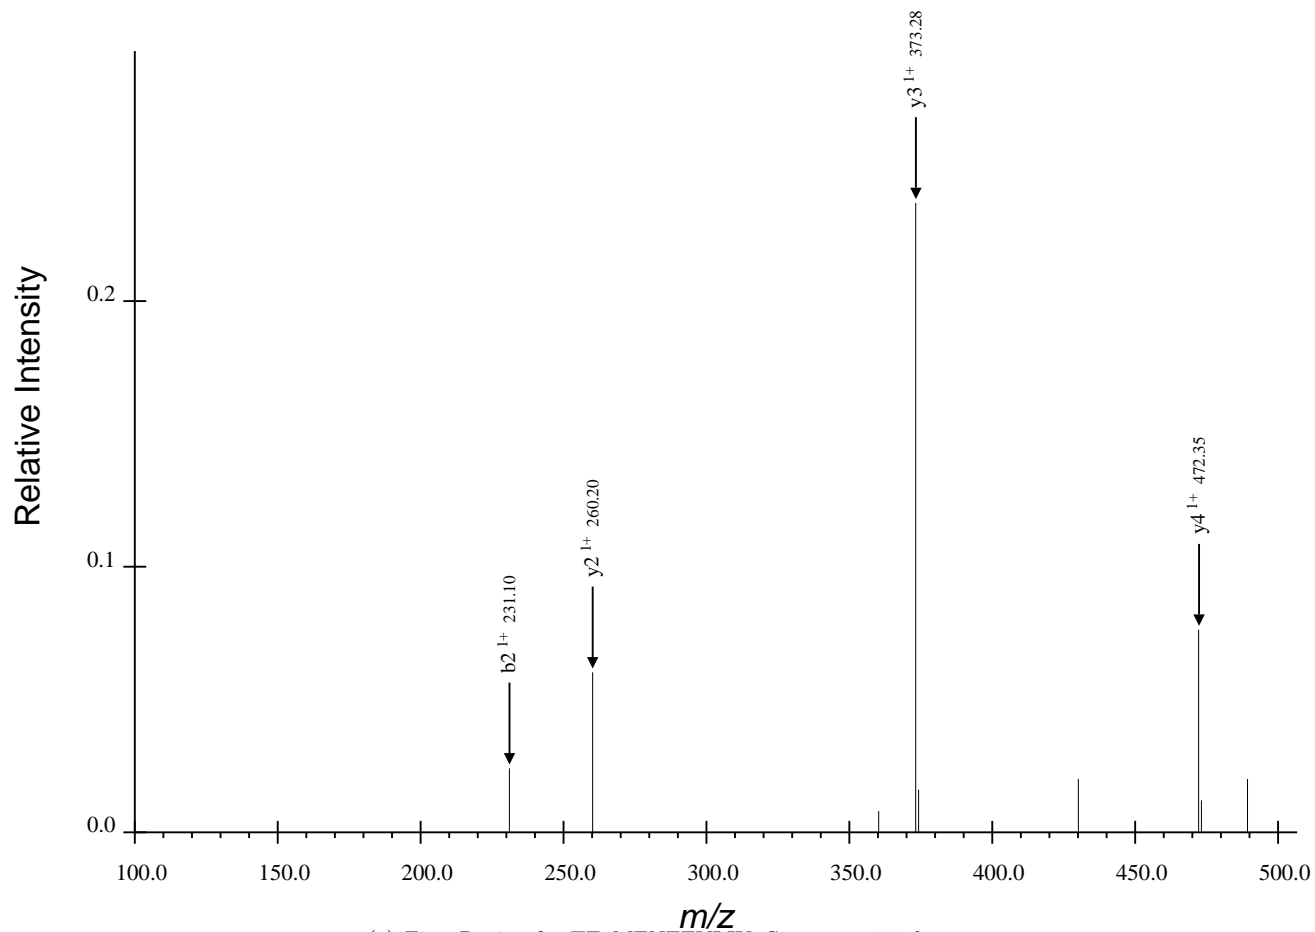

(a) First Region for TEoMENEFLIK, Spectrum 399.dta

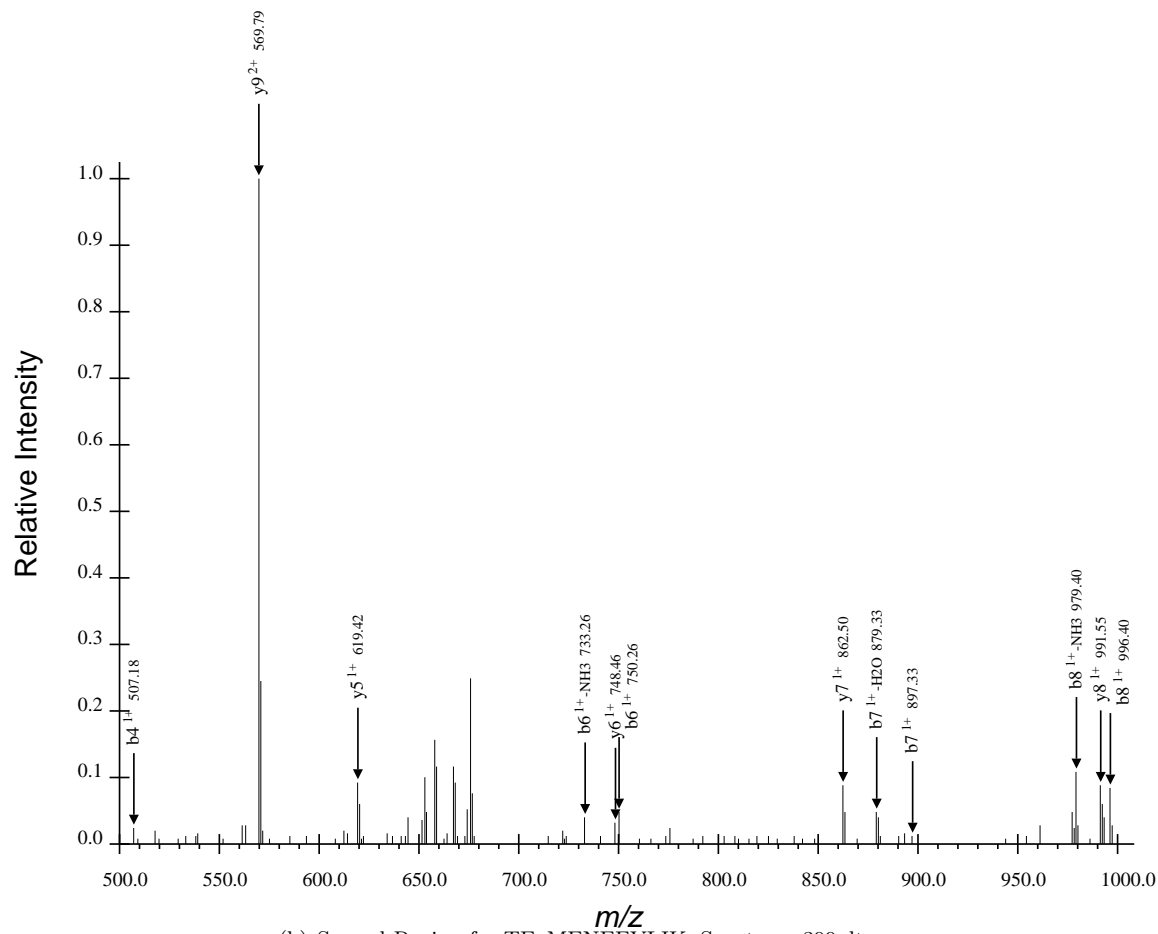

(b) Second Region for TEoMENEFLIK, Spectrum 399.dta

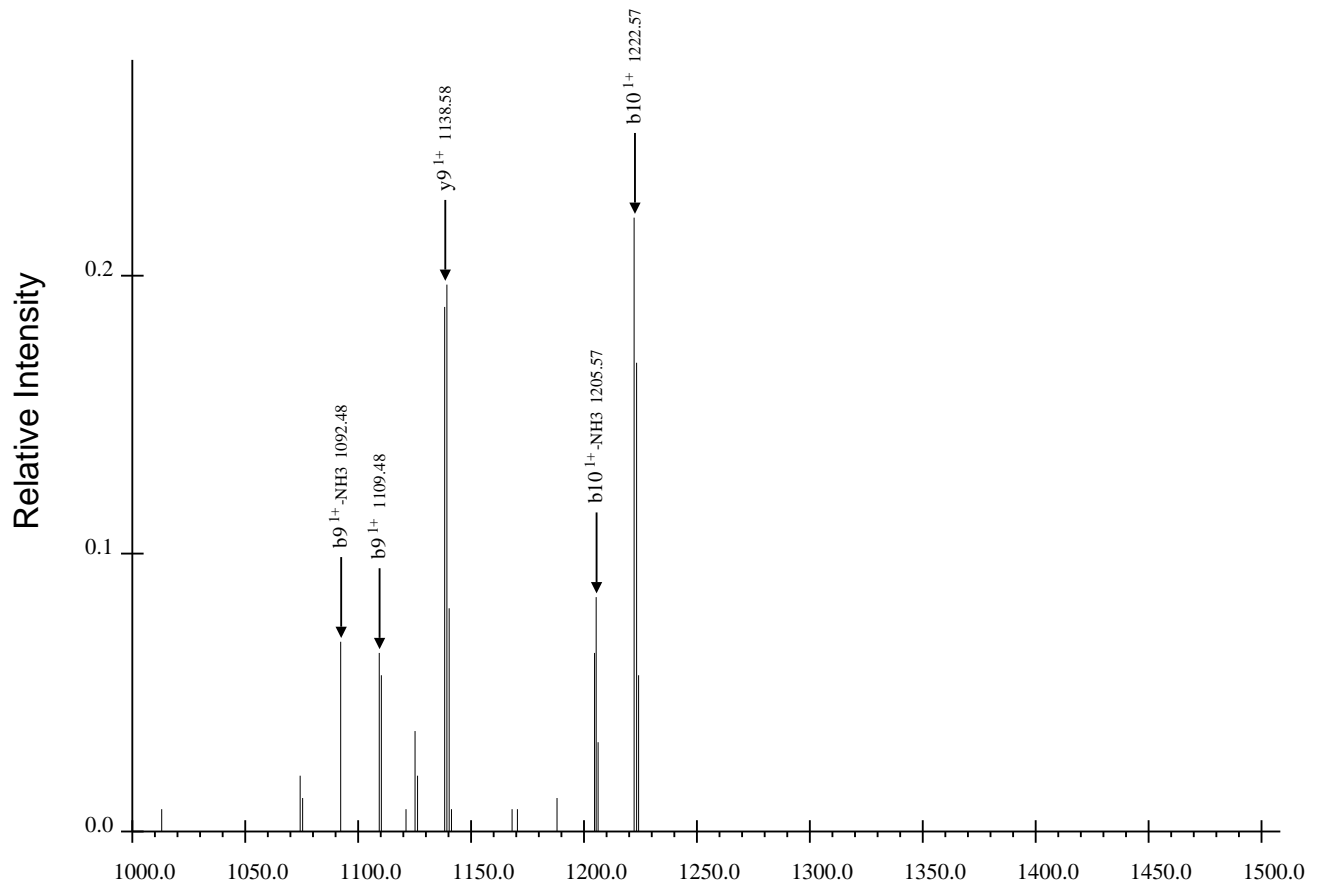

(c) Third Region for TEoMENEFLIK, Spectrum 399.dta

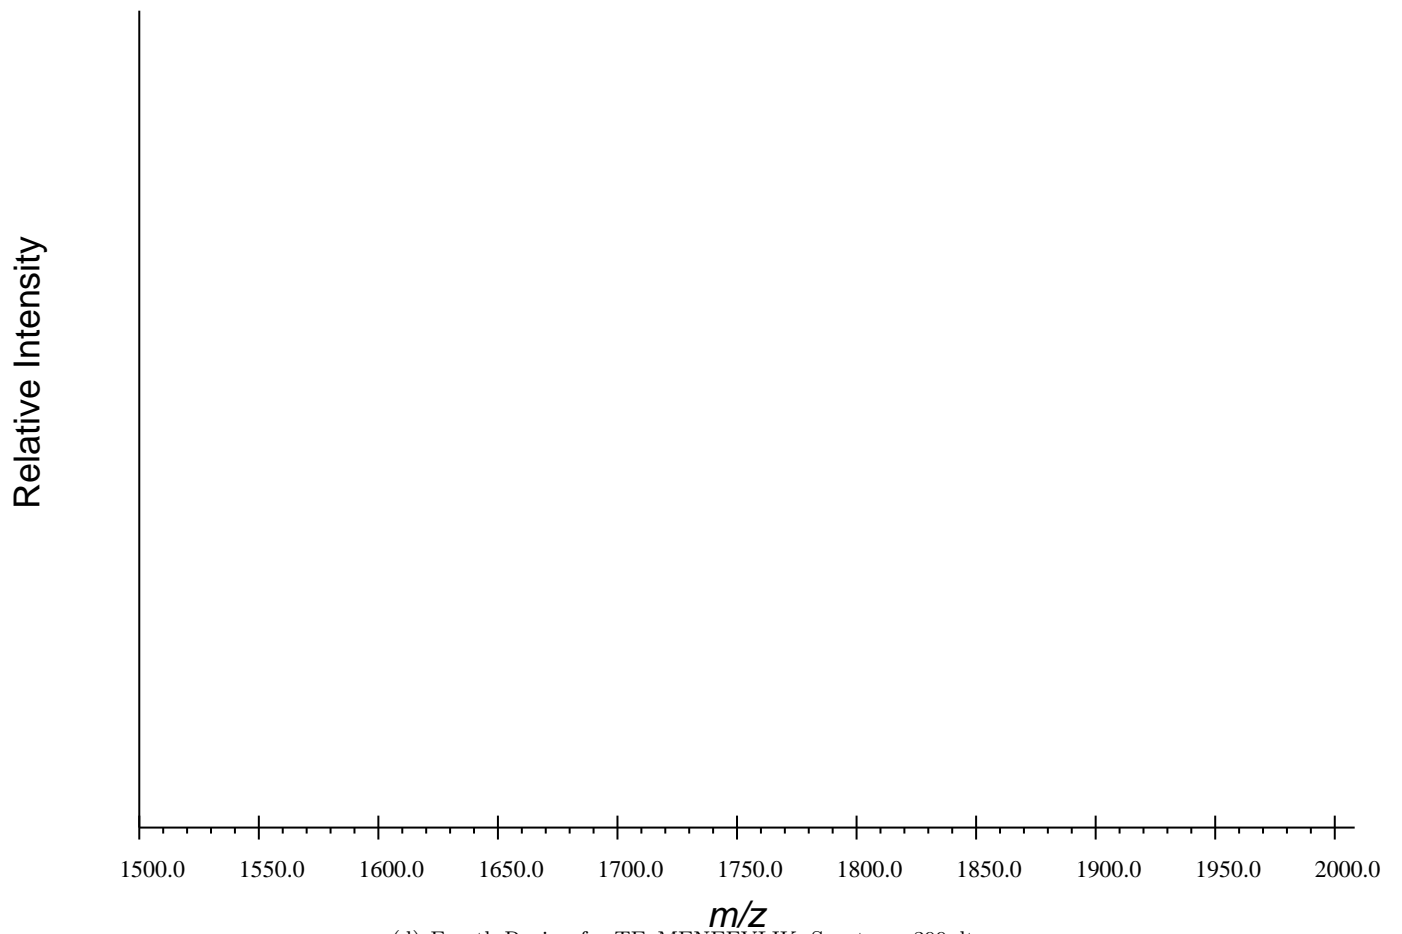

(d) Fourth Region for TEoMENEFLIK, Spectrum 399.dta

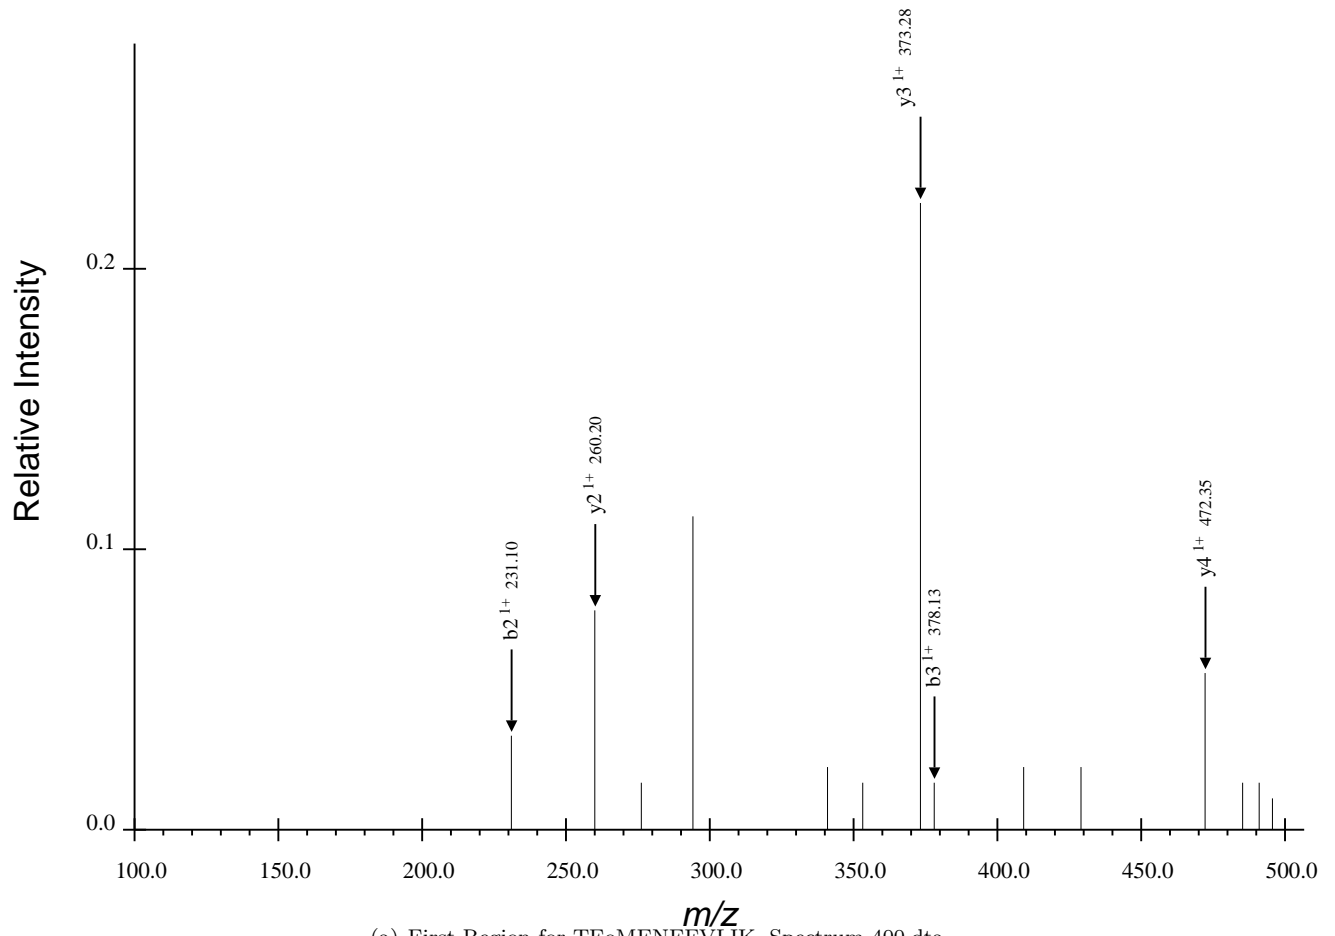

(a) First Region for TEoMENEFLIK, Spectrum 400.dta

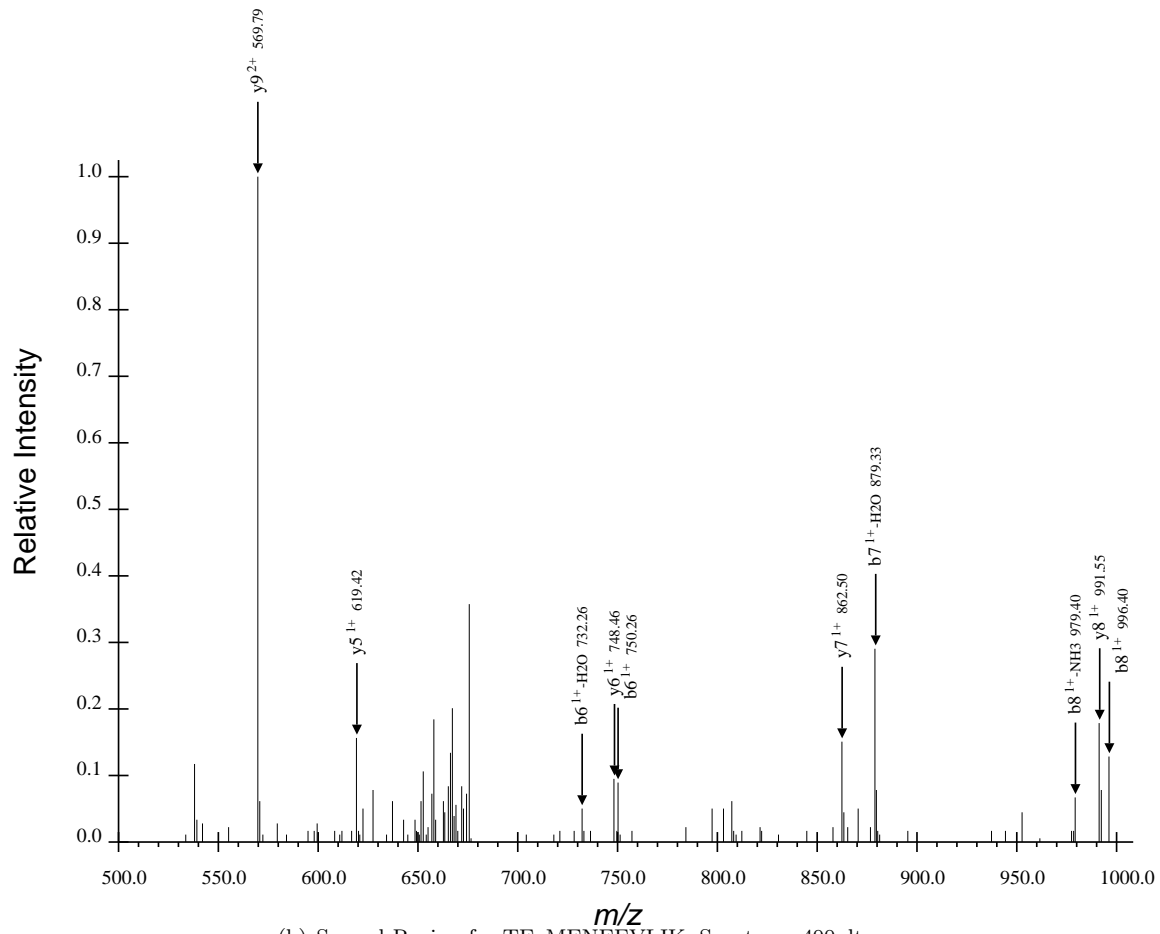

(b) Second Region for TEoMENEFLIK, Spectrum 400.dta

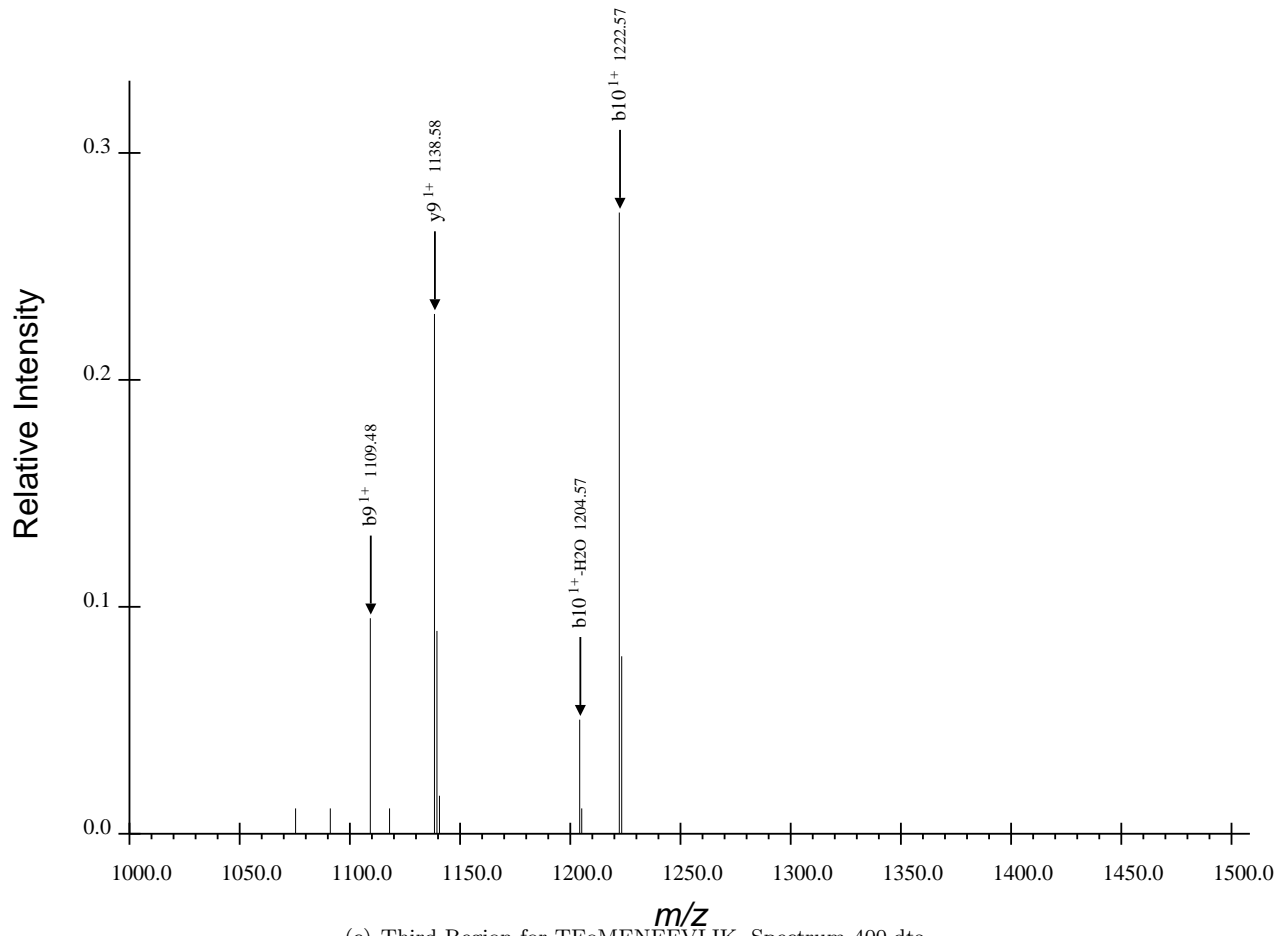

(c) Third Region for TEoMENEFLIK, Spectrum 400.dta

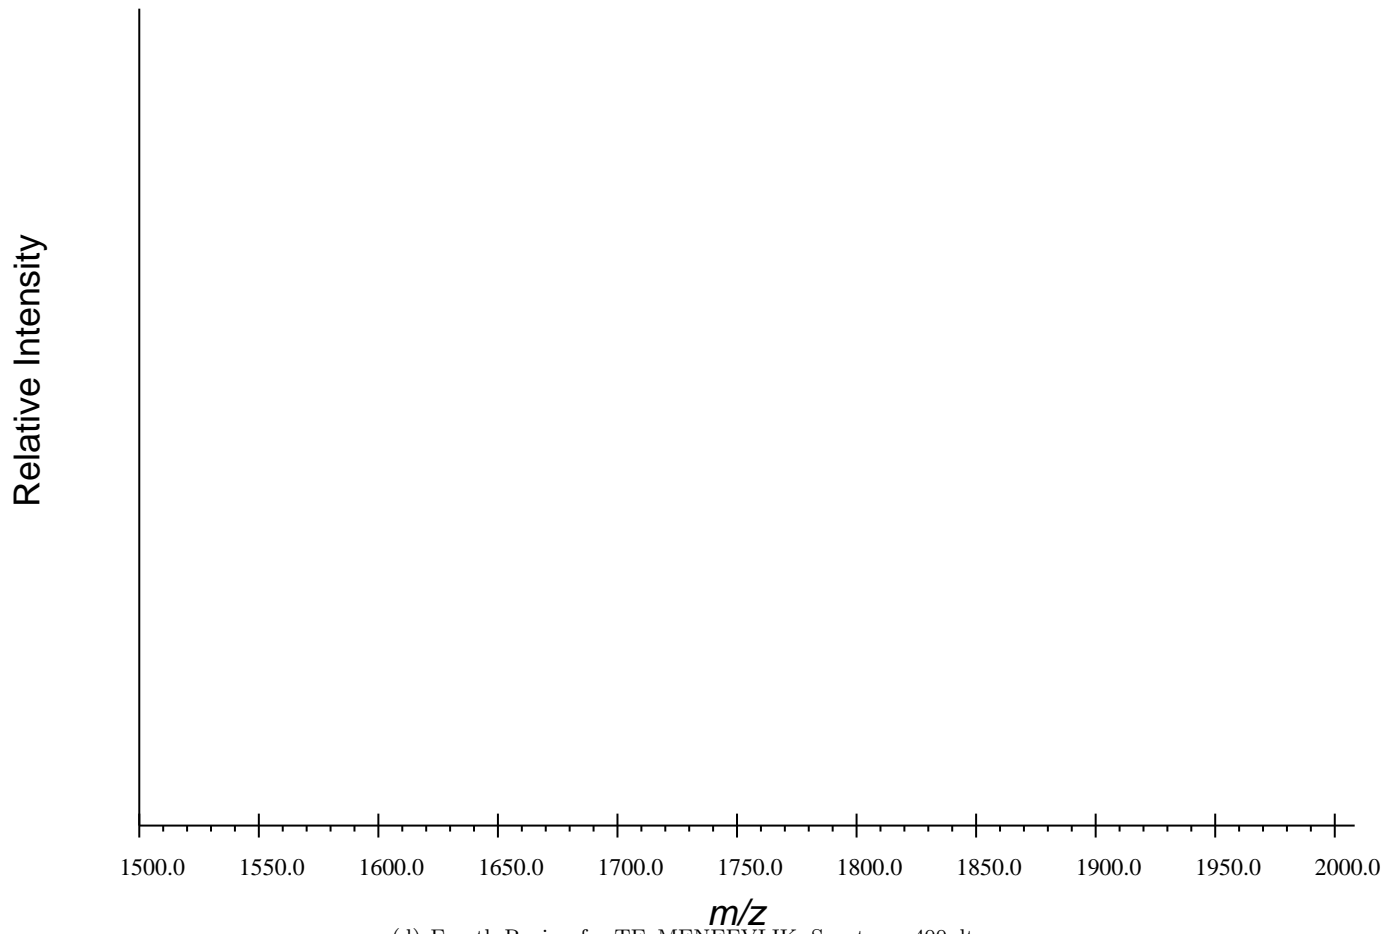

(d) Fourth Region for TEoMENEFLIK, Spectrum 400.dta

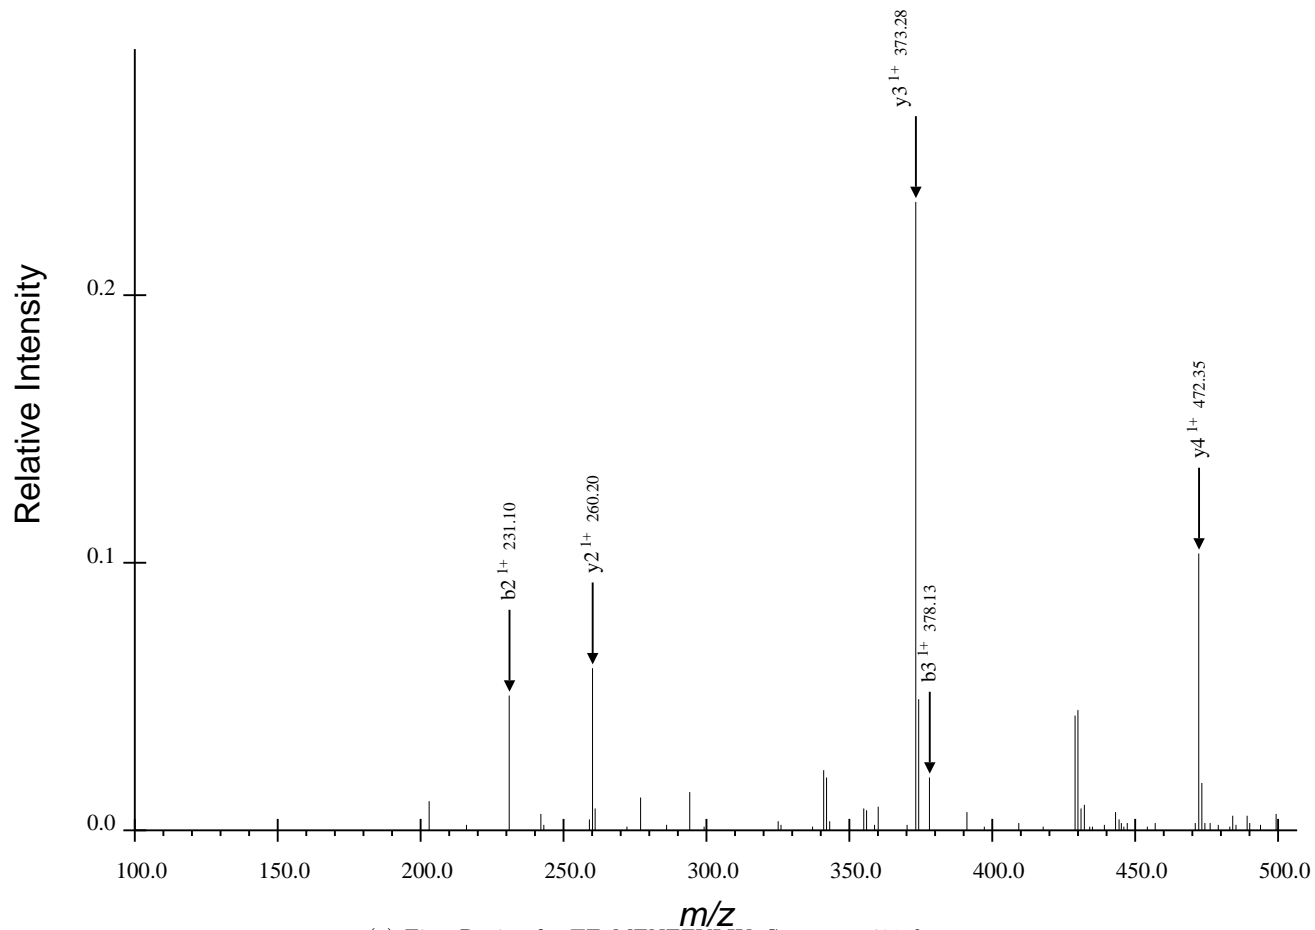

(a) First Region for TEoMENEFLIK, Spectrum 401.dta

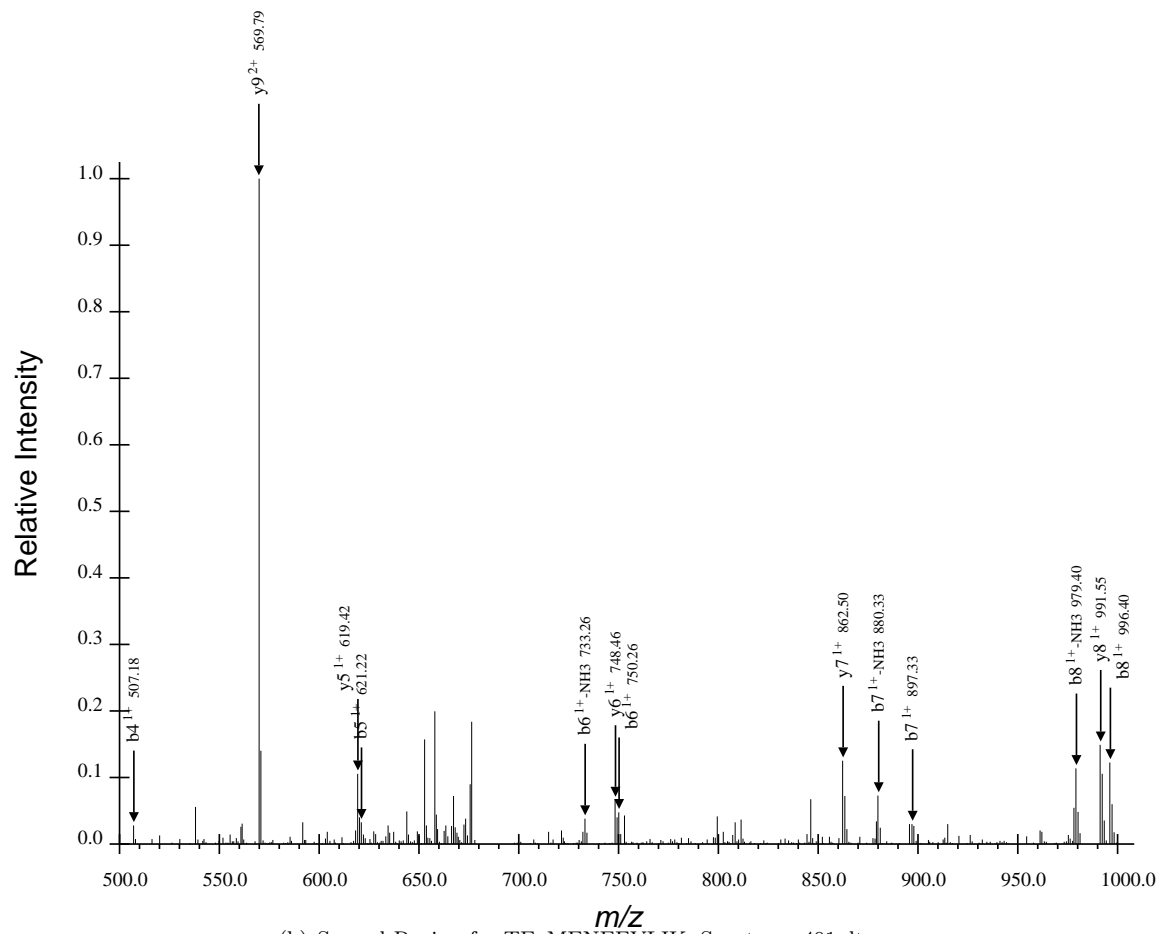

(b) Second Region for TEoMENEFLIK, Spectrum 401.dta

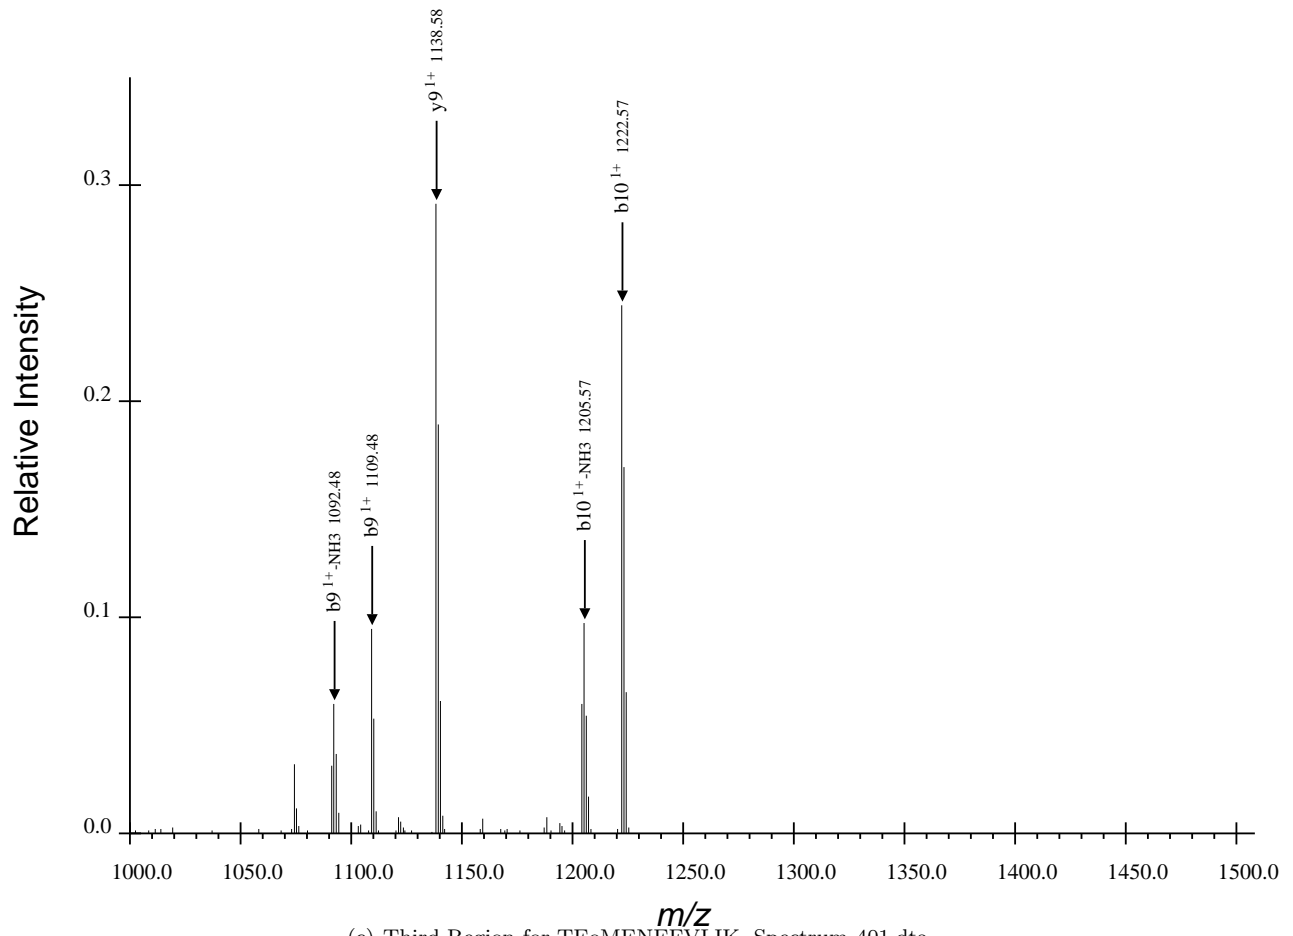

(c) Third Region for TEoMENEFLIK, Spectrum 401.dta

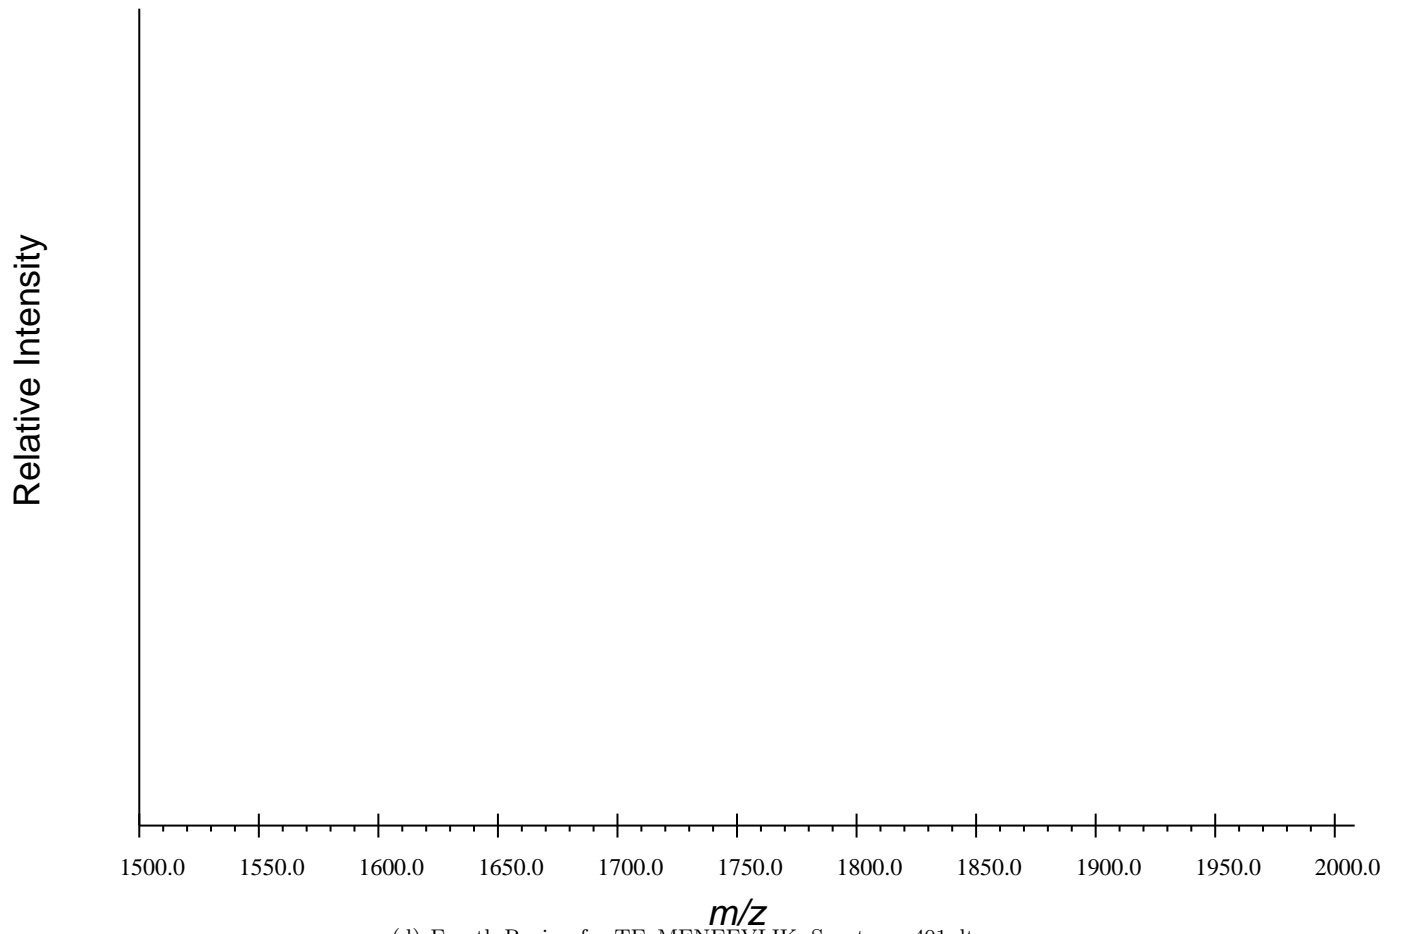

(d) Fourth Region for TEoMENEFLIK, Spectrum 401.dta

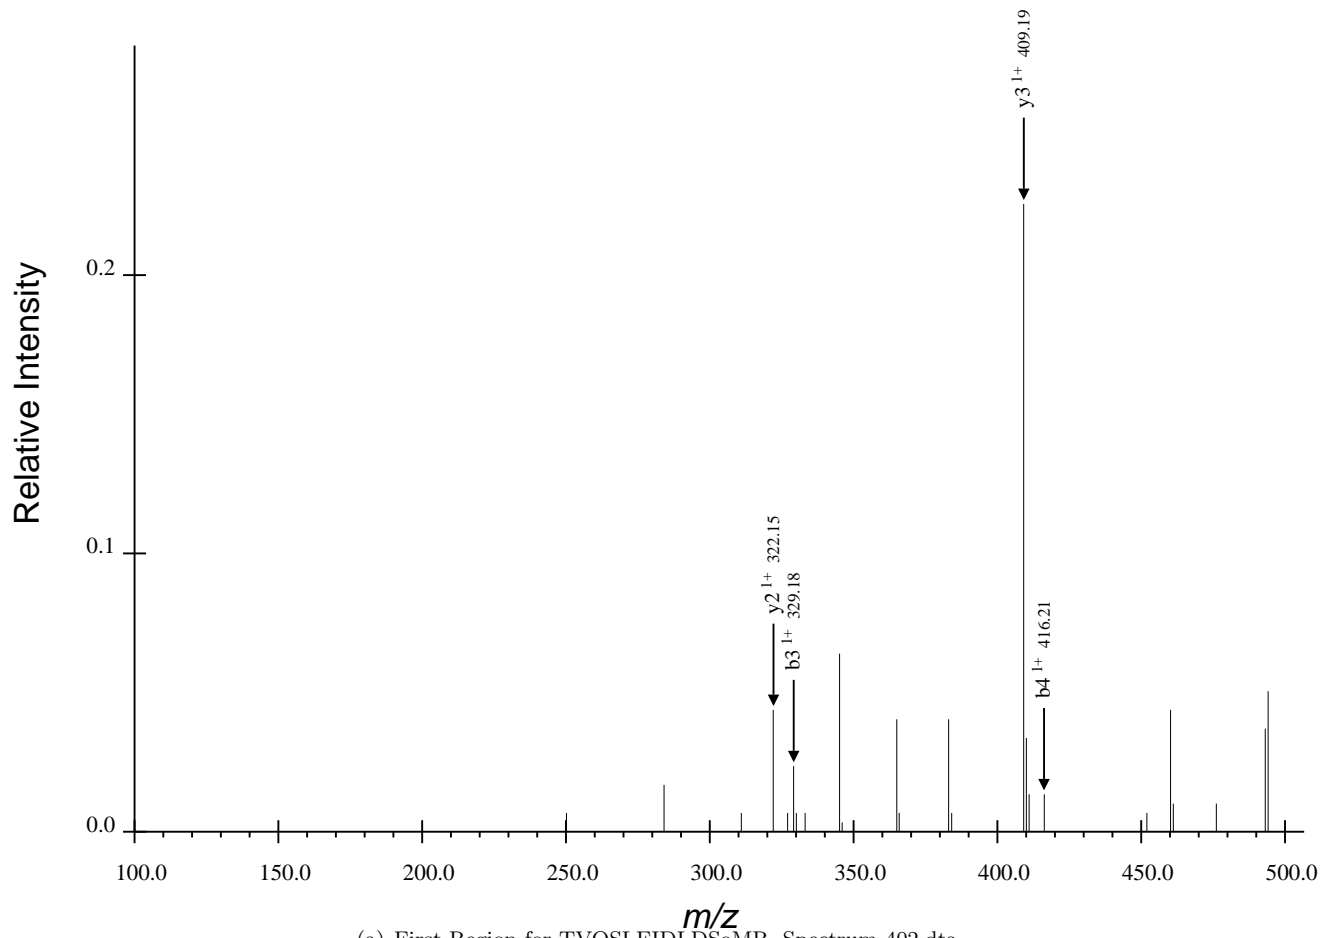

(a) First Region for TVQSLEIDLDS<sub>o</sub>MR, Spectrum 402.dta

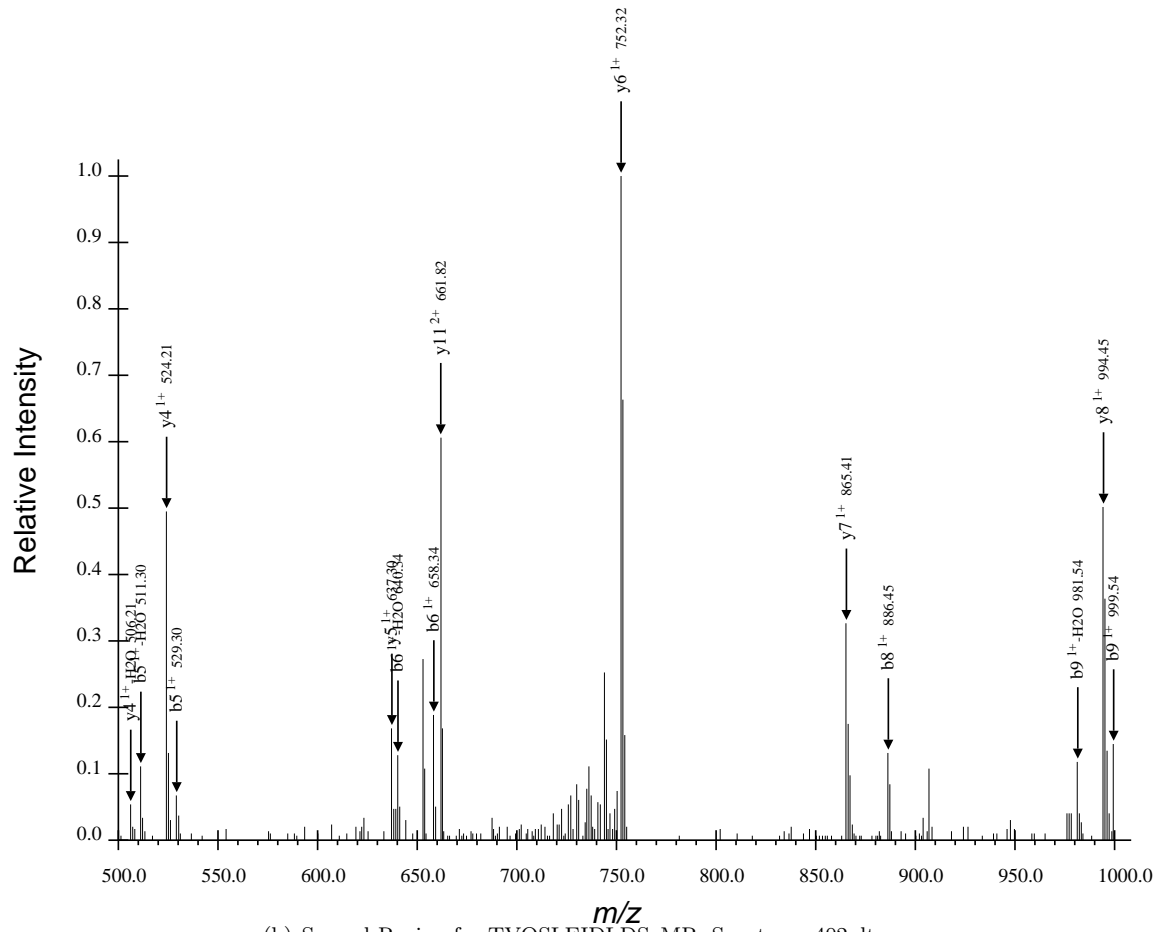

(b) Second Region for TVQSLEIDLDS<sub>o</sub>MR, Spectrum 402.dta

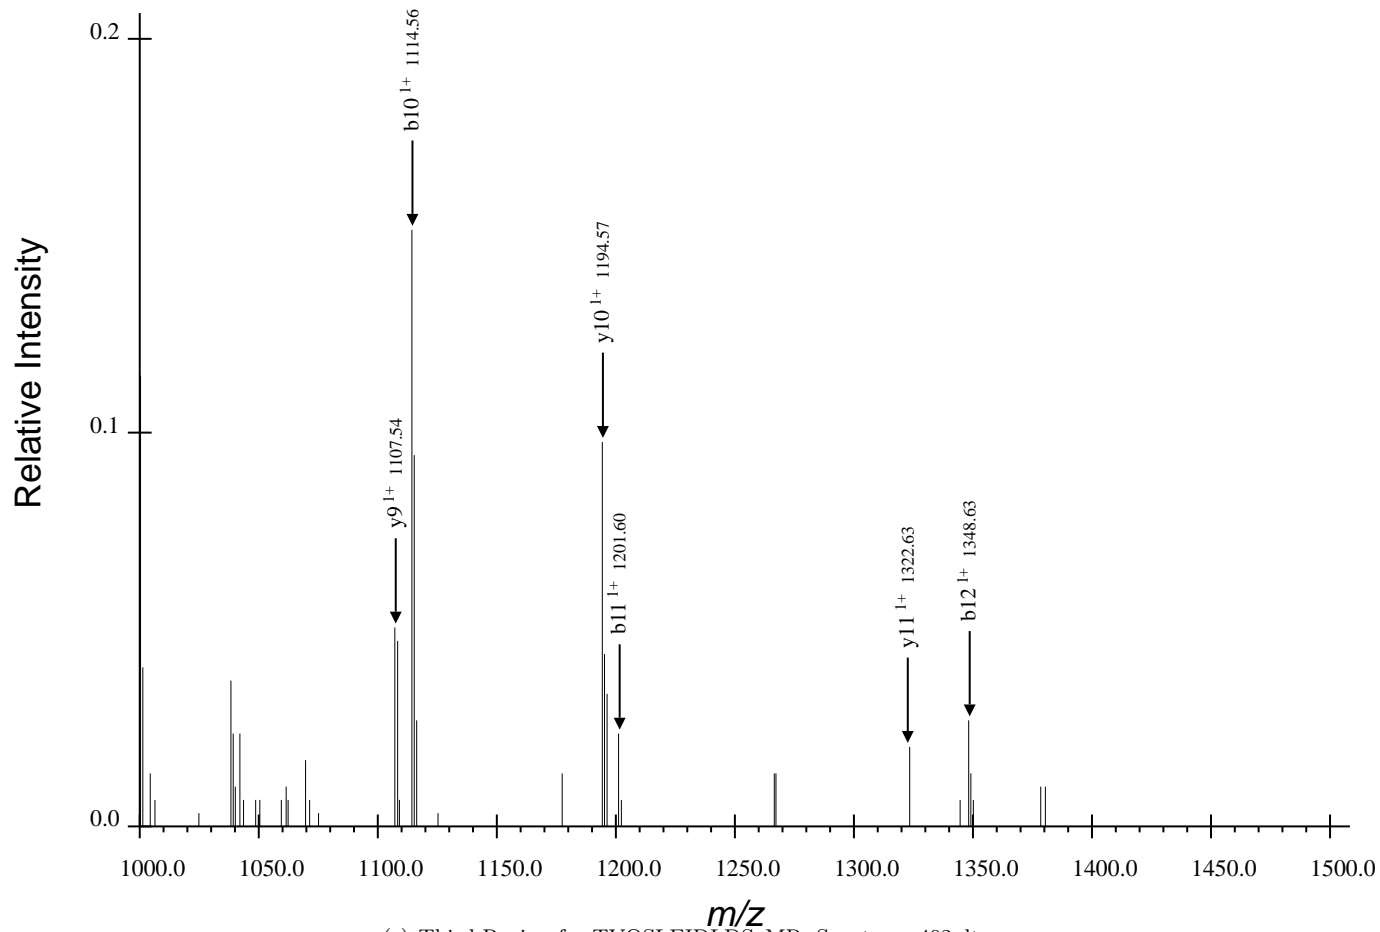

(c) Third Region for TVQSLEIDLDSMR, Spectrum 402.dta

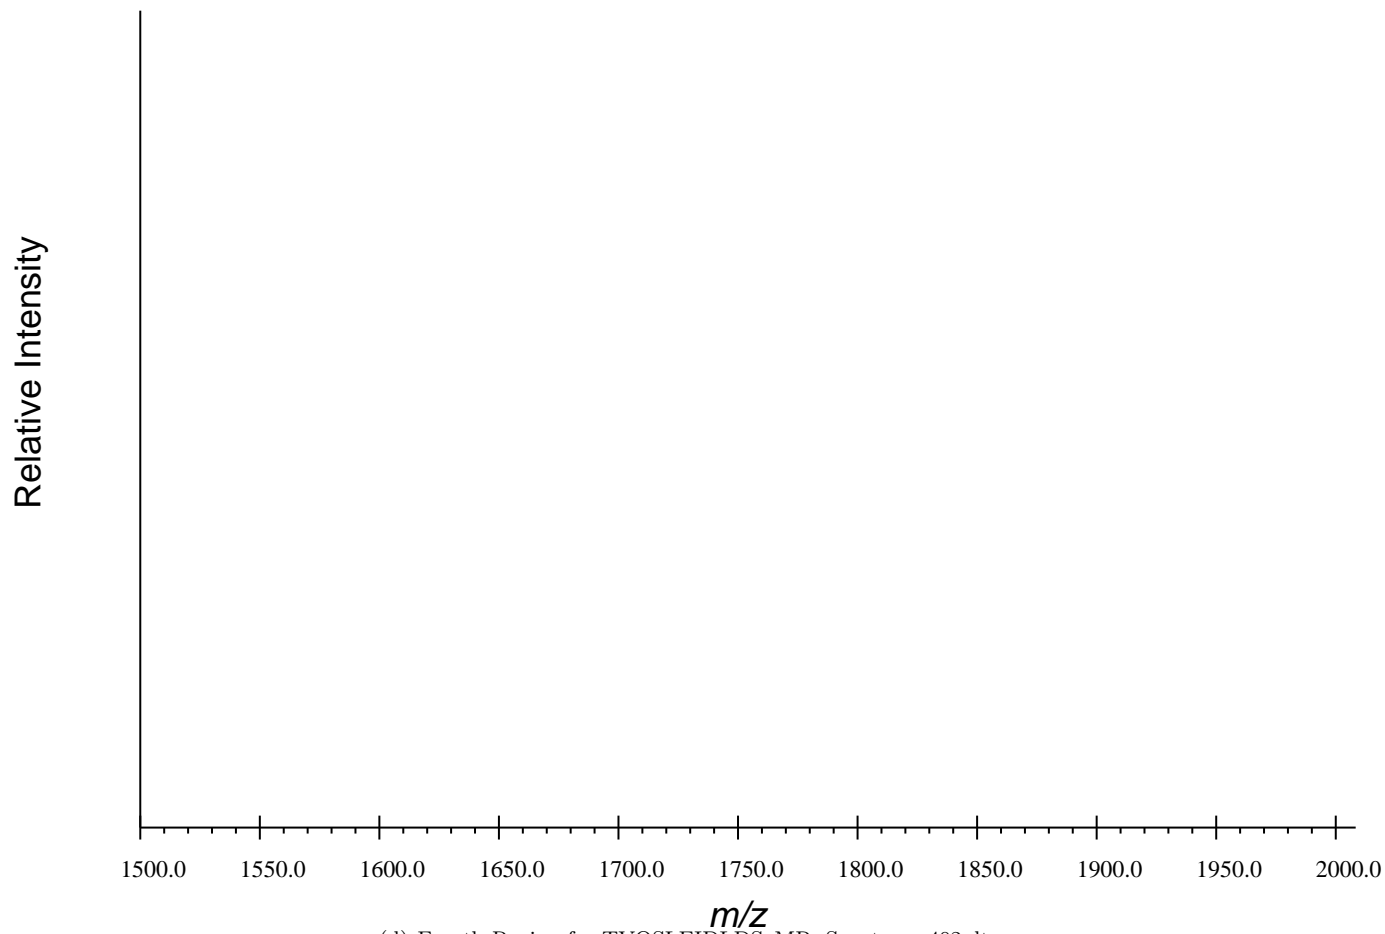

(d) Fourth Region for TVQSLEIDLDSMR, Spectrum 402.dta



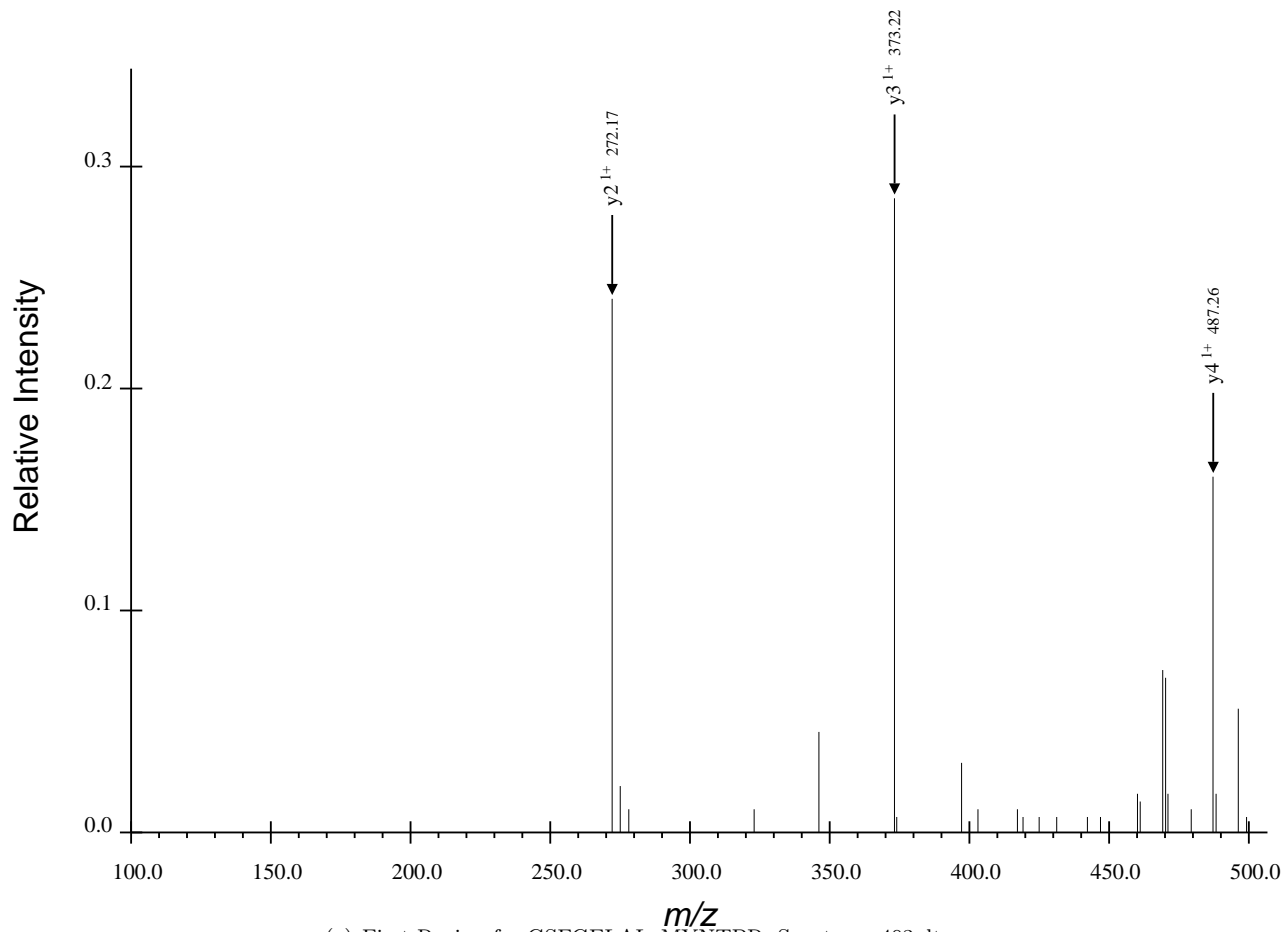

(a) First Region for GSFGEALoMYNTPR, Spectrum 403.dta

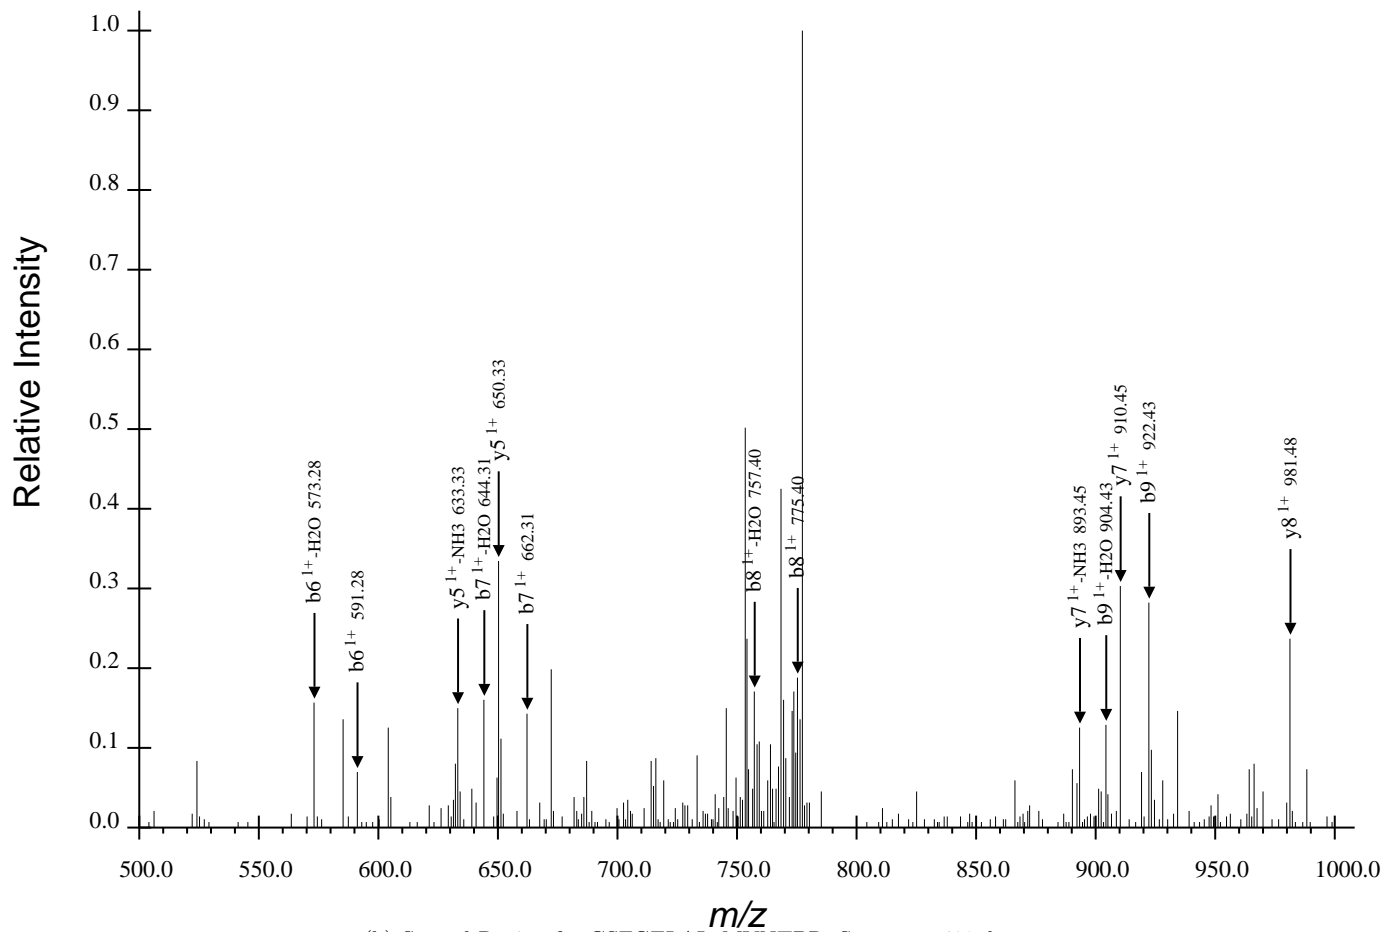

(b) Second Region for GSFGEALoMYNTPR, Spectrum 403.dta

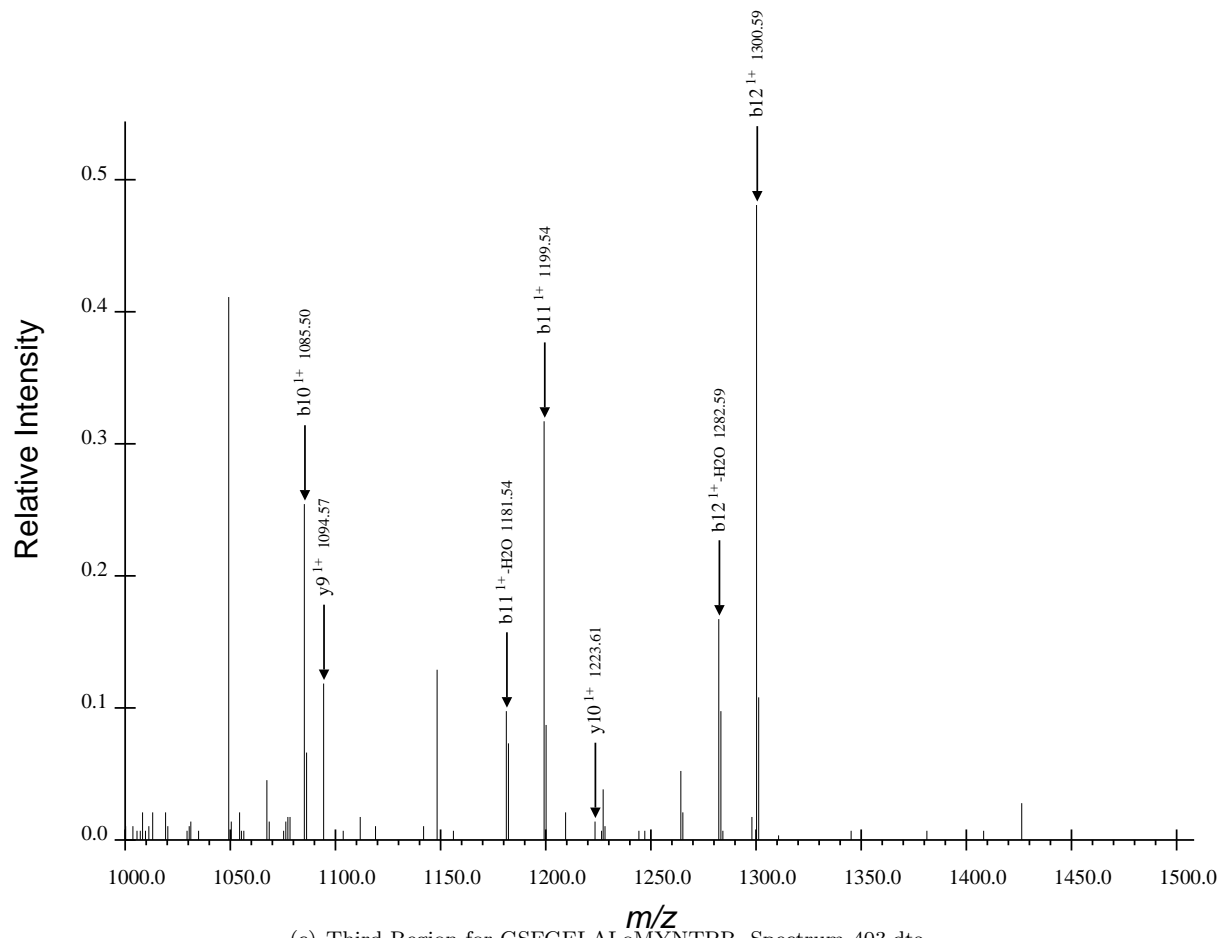

(c) Third Region for GSFGELALoMYNTPR, Spectrum 403.dta

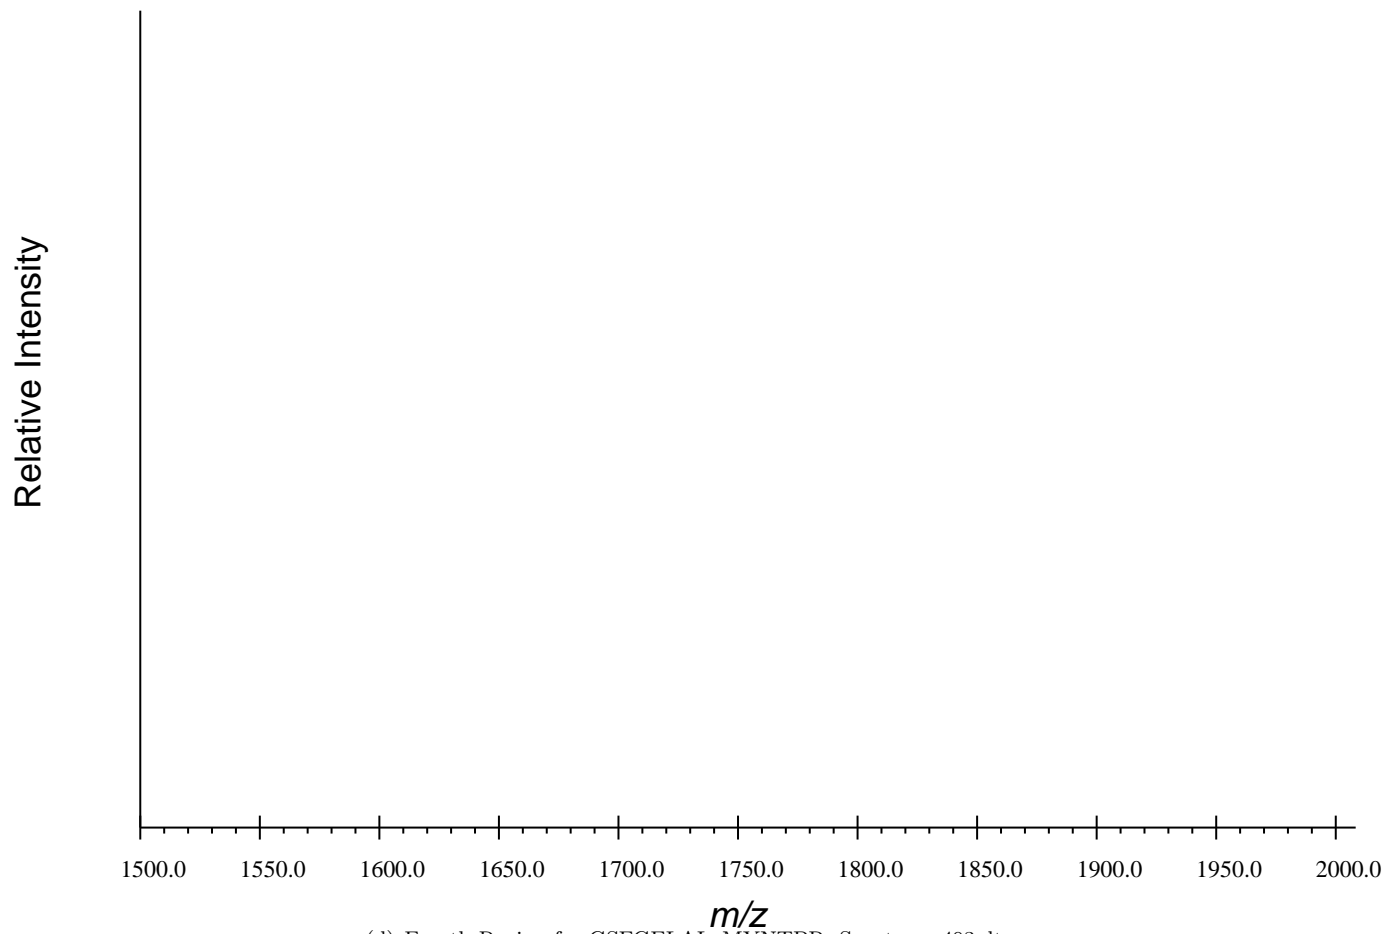

(d) Fourth Region for GSFGELALoMYNTPR, Spectrum 403.dta

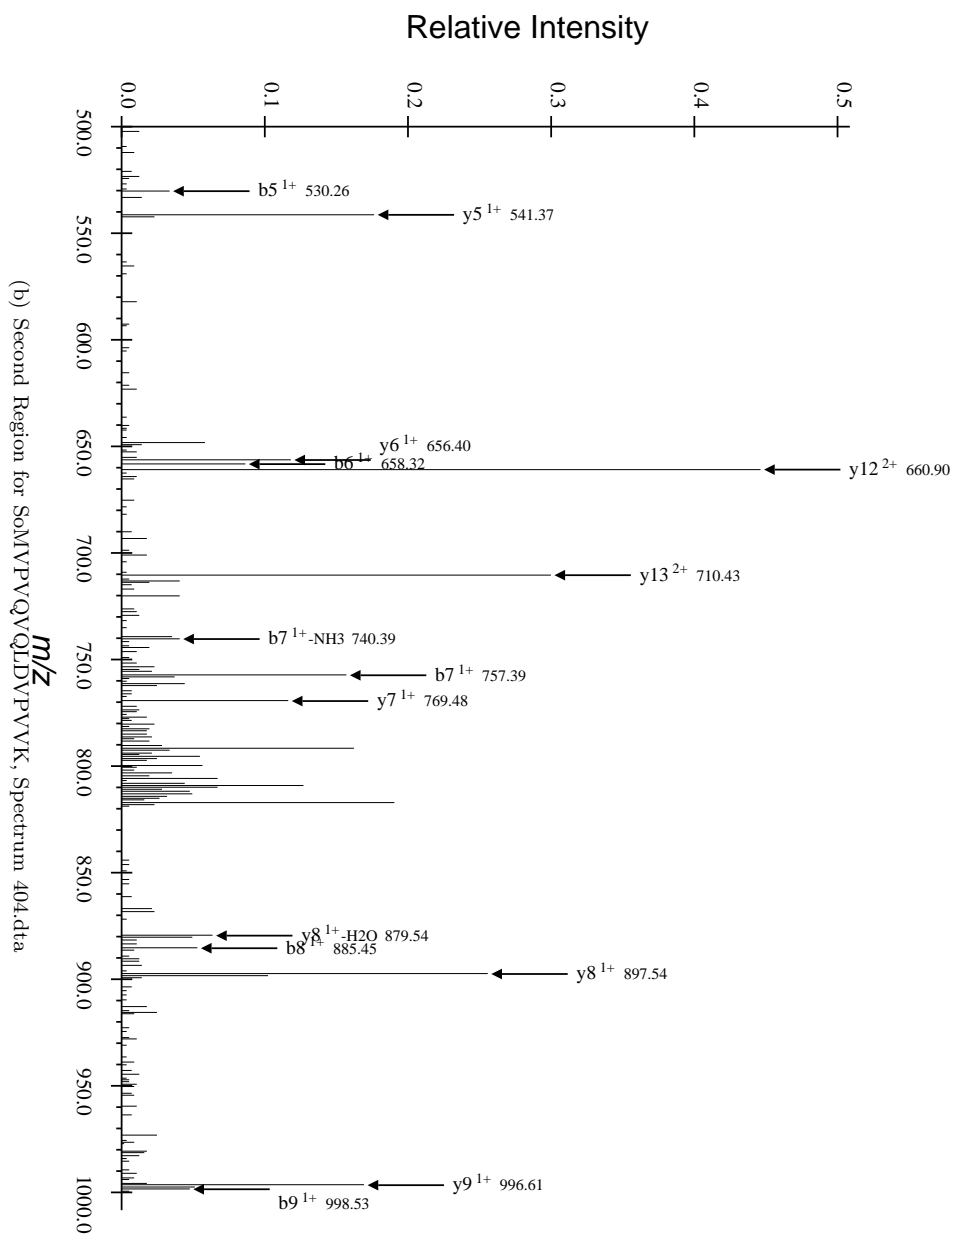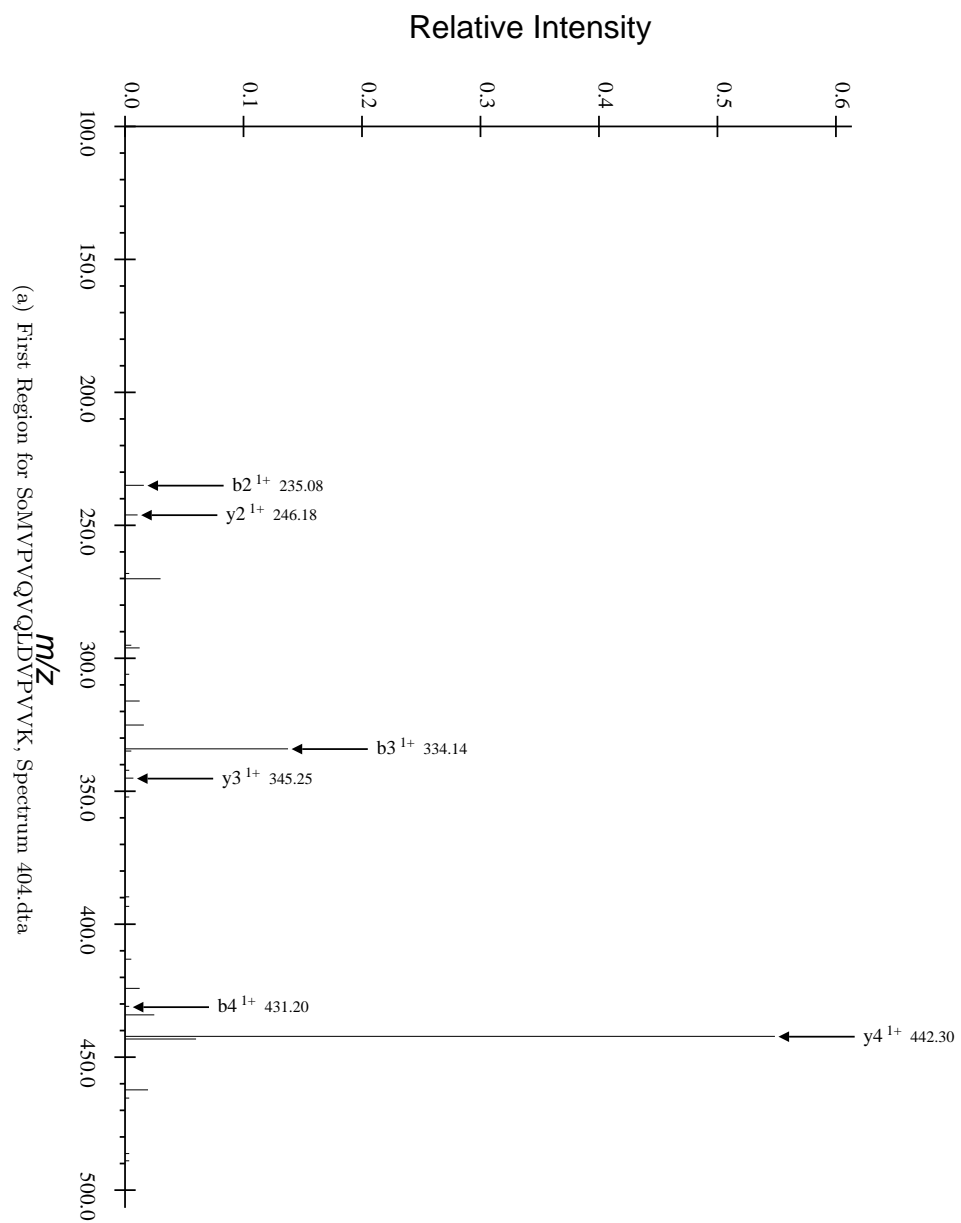

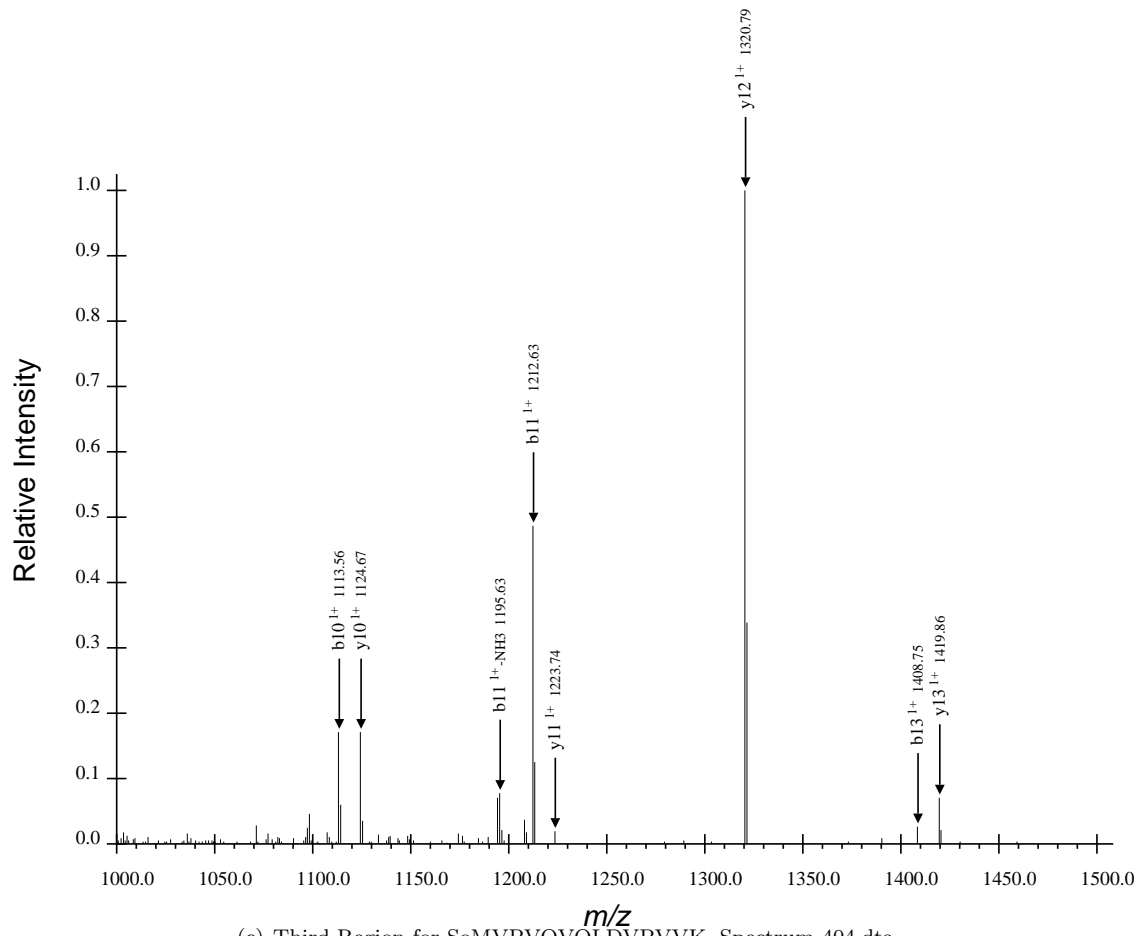

(c) Third Region for SoMVPVQVQLDVPVVK, Spectrum 404.dta

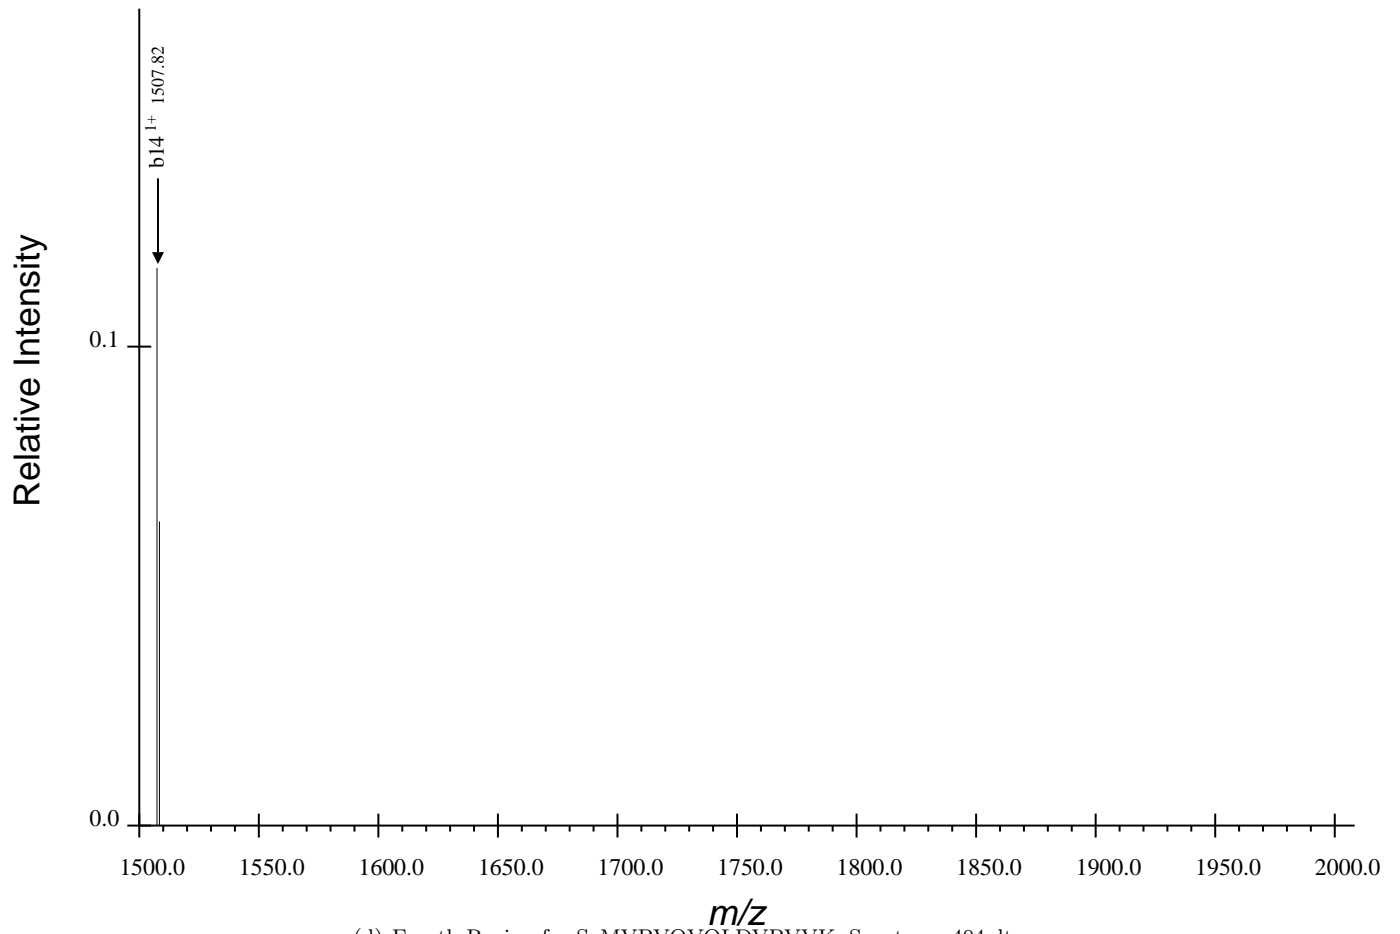

(d) Fourth Region for SoMVPVQVQLDVPVVK, Spectrum 404.dta

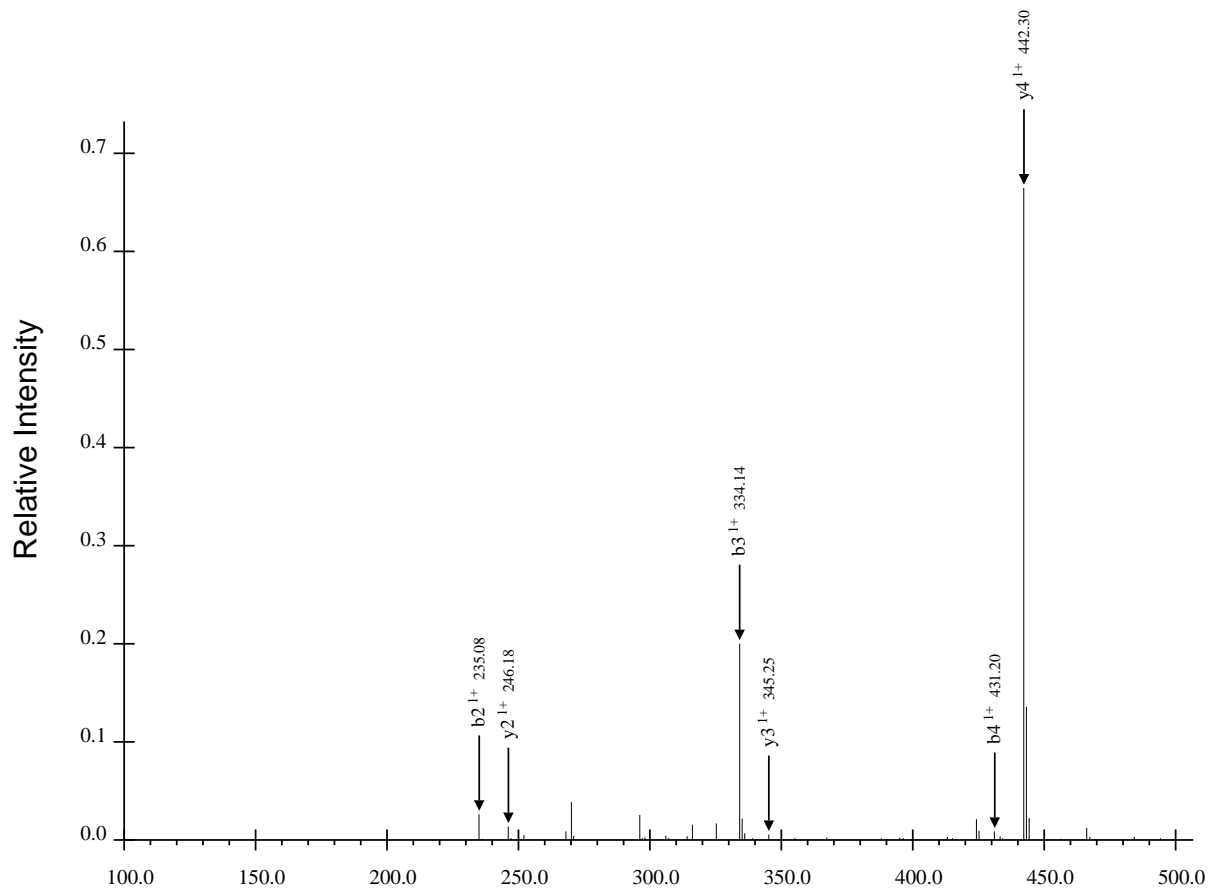

(a) First Region for SoMVPVQVQLDVPVVK, Spectrum 405.dta

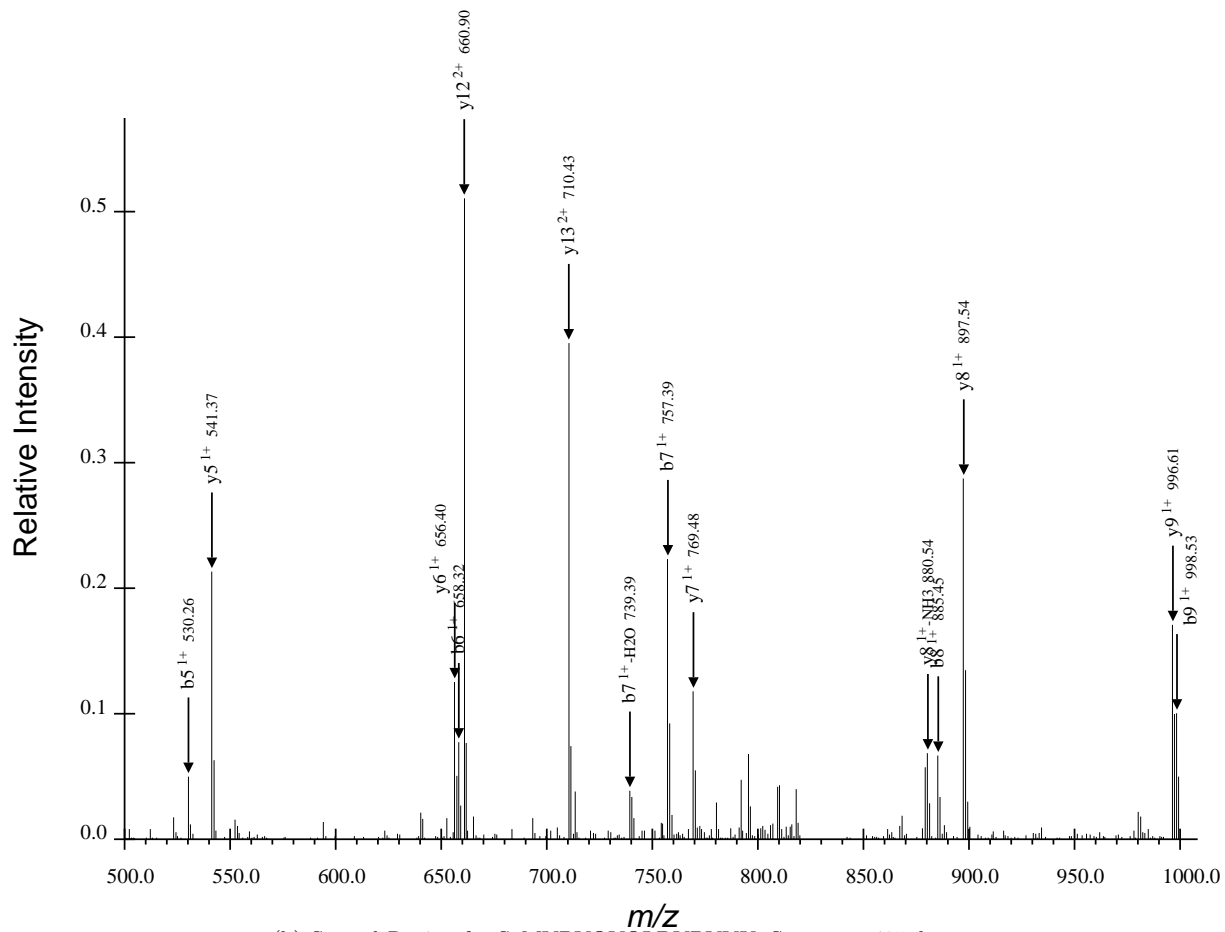

(b) Second Region for SoMVPVQVQLDVPVVK, Spectrum 405.dta

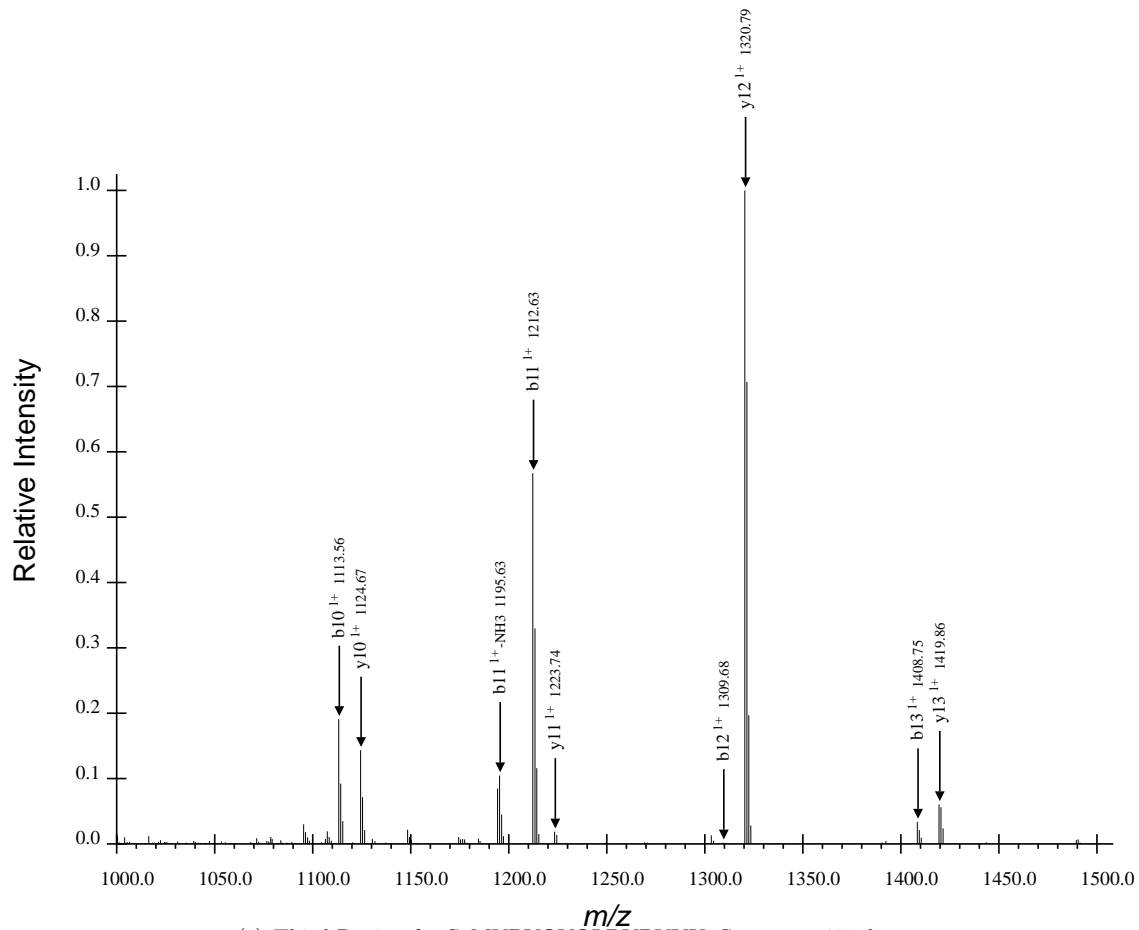

(c) Third Region for SoMVPVQVQLDVPVVK, Spectrum 405.dta

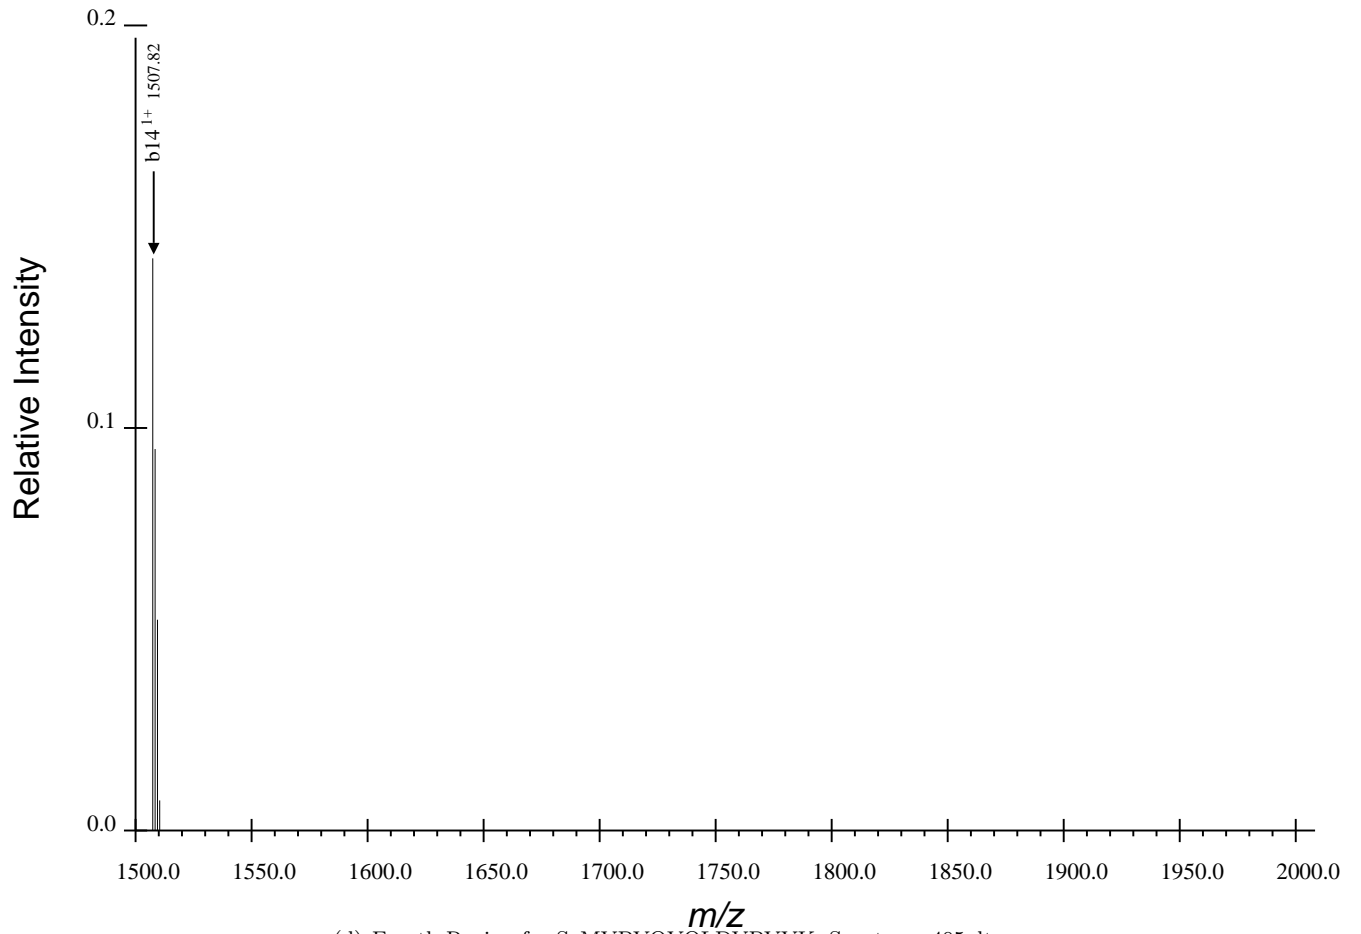

(d) Fourth Region for SoMVPVQVQLDVPVVK, Spectrum 405.dta

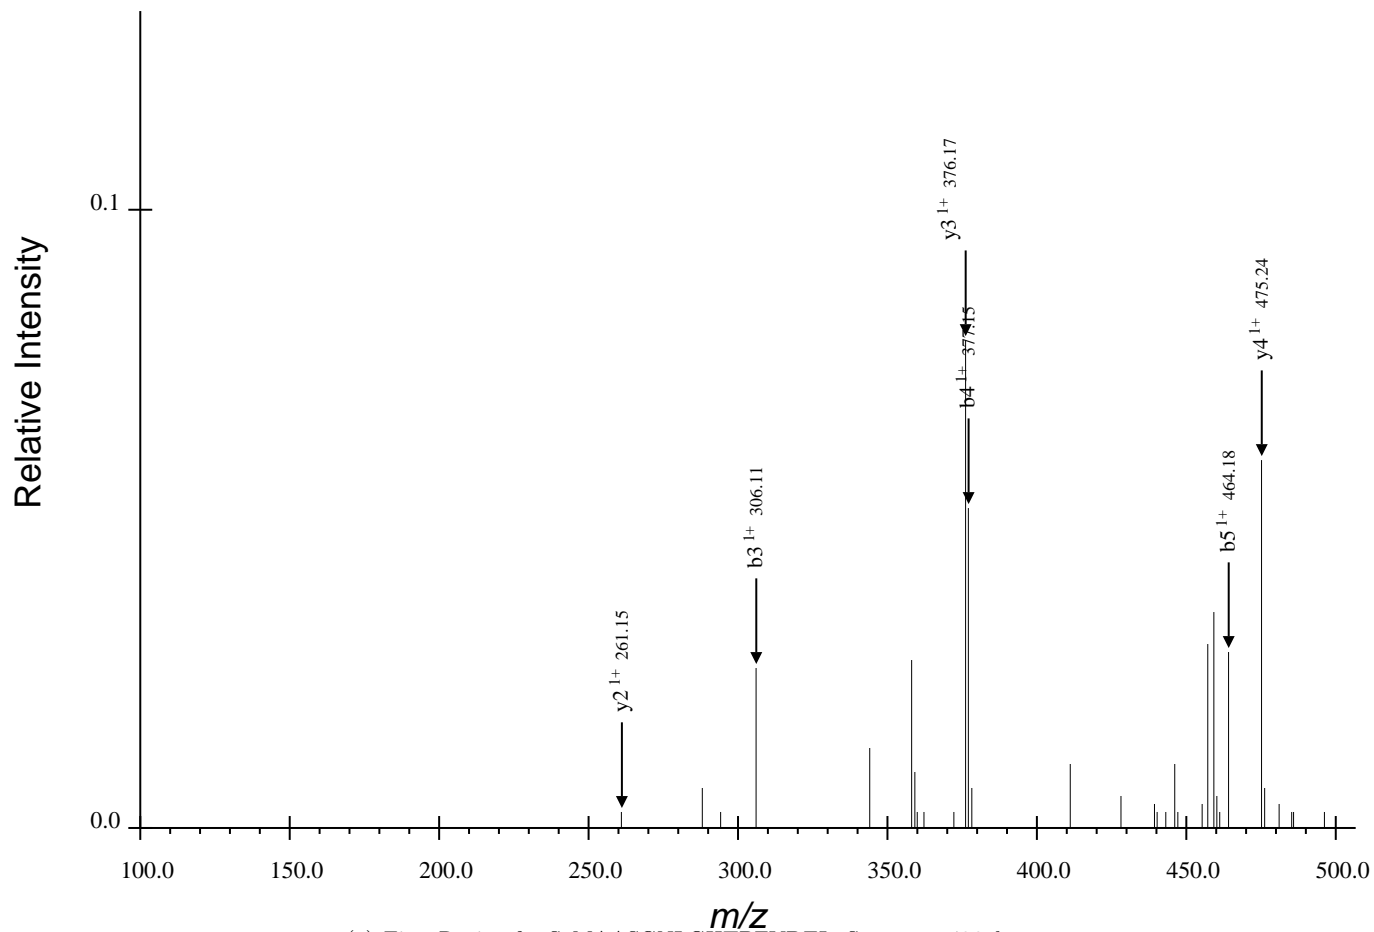

(a) First Region for SoMAASGNLGHPTPFVDEL, Spectrum 406.dta

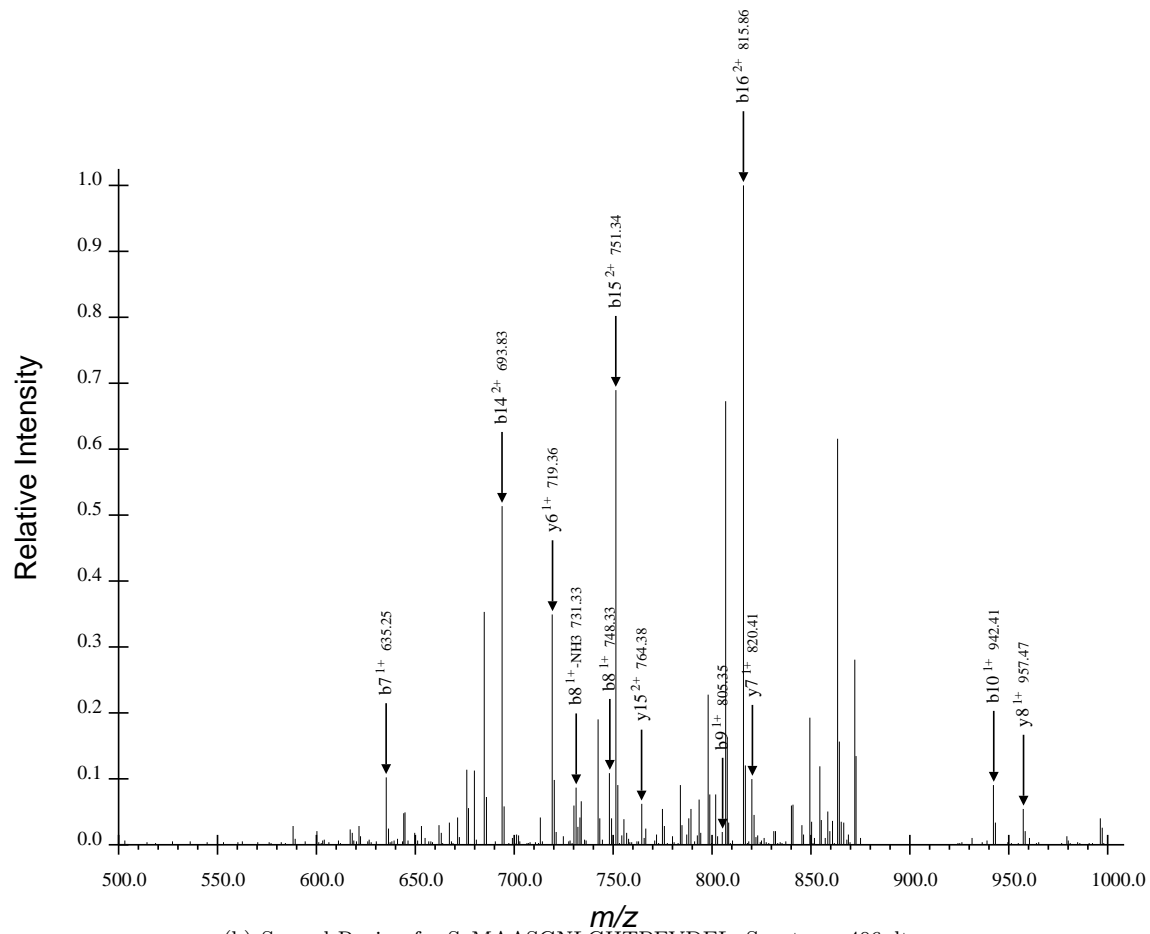

(b) Second Region for SoMAASGNLGHPTPFVDEL, Spectrum 406.dta

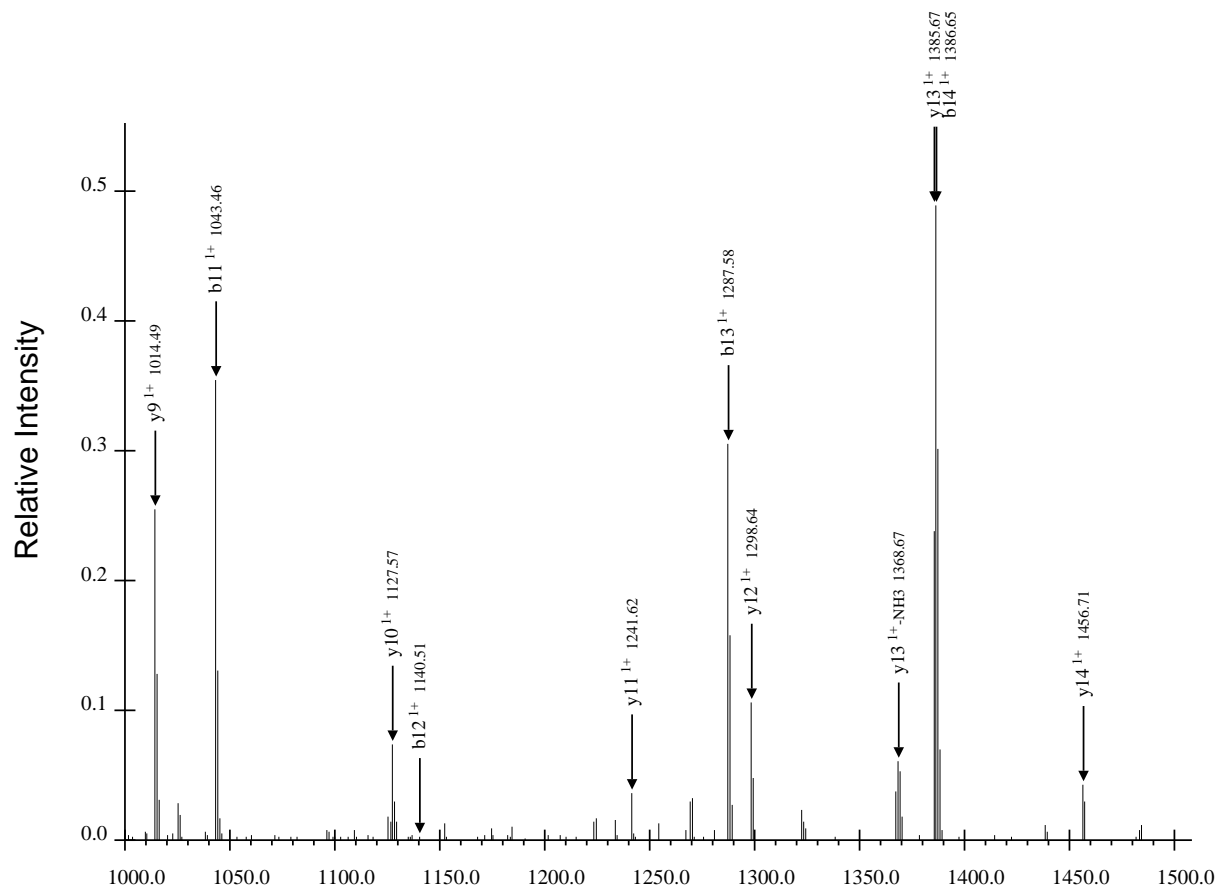

(c) Third Region for SoMAASGNLGHTPFVDEL, Spectrum 406.dta

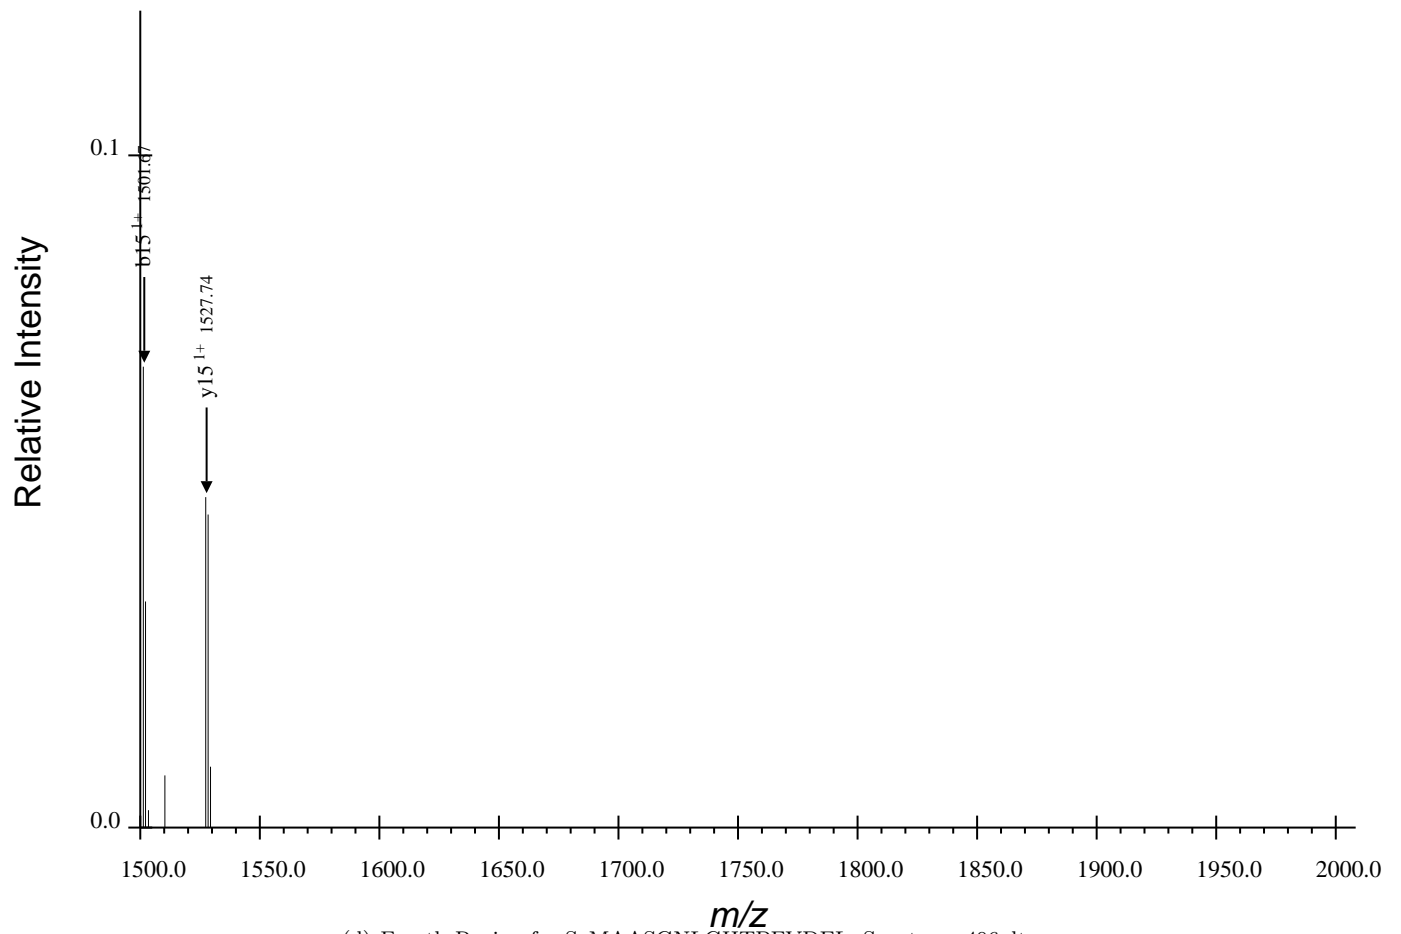

(d) Fourth Region for SoMAASGNLGHTPFVDEL, Spectrum 406.dta



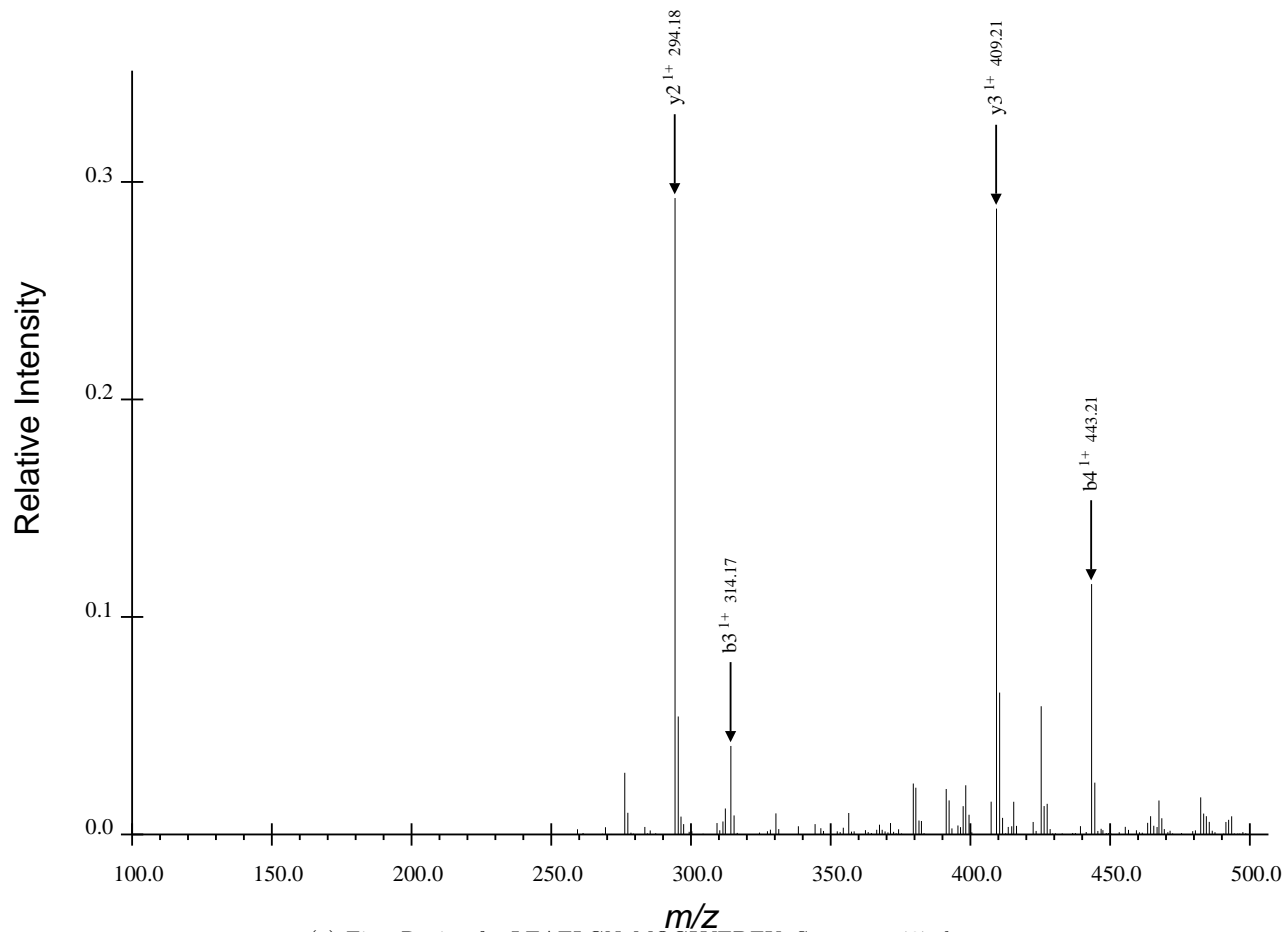

(a) First Region for LEAELGNoMQGLVEDFK, Spectrum 407.dta

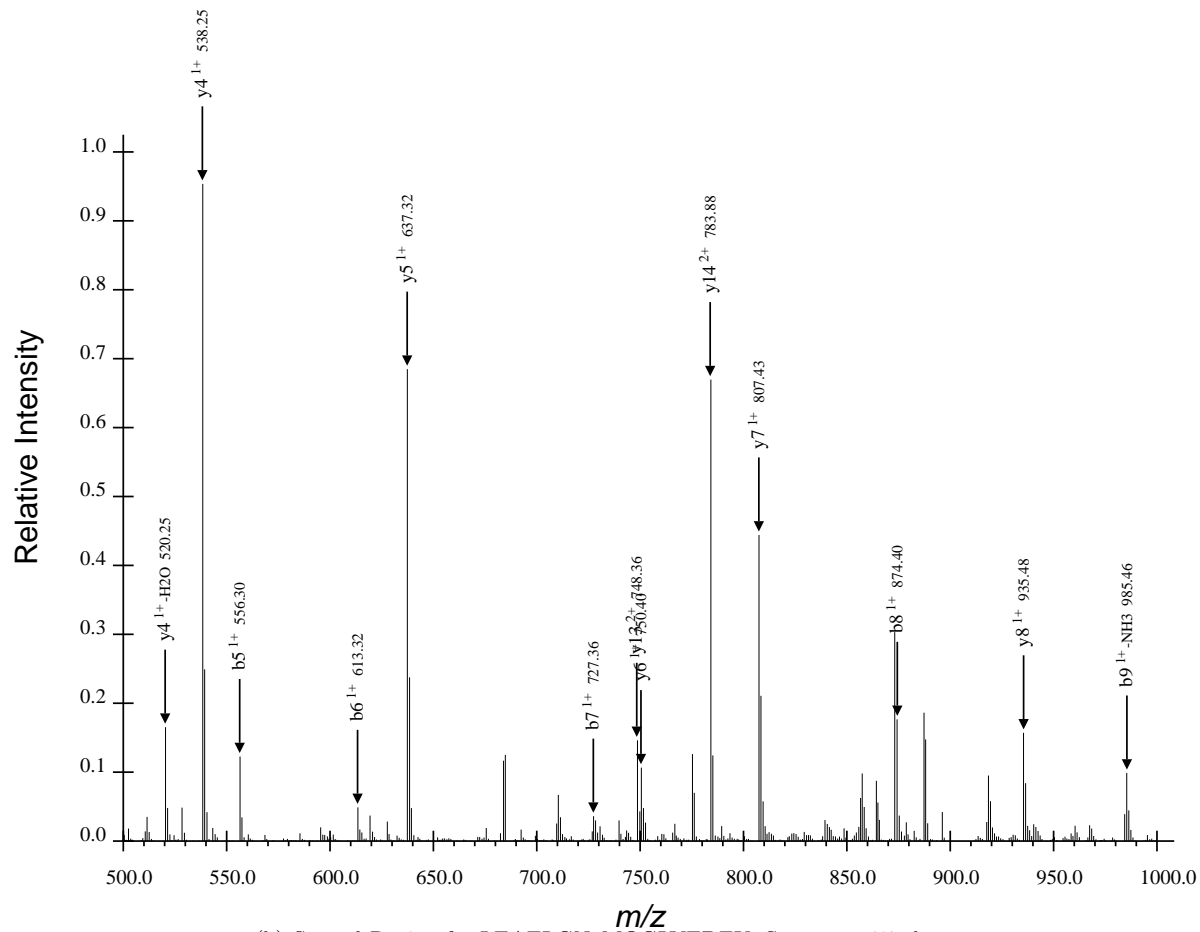

(b) Second Region for LEAELGNoMQGLVEDFK, Spectrum 407.dta

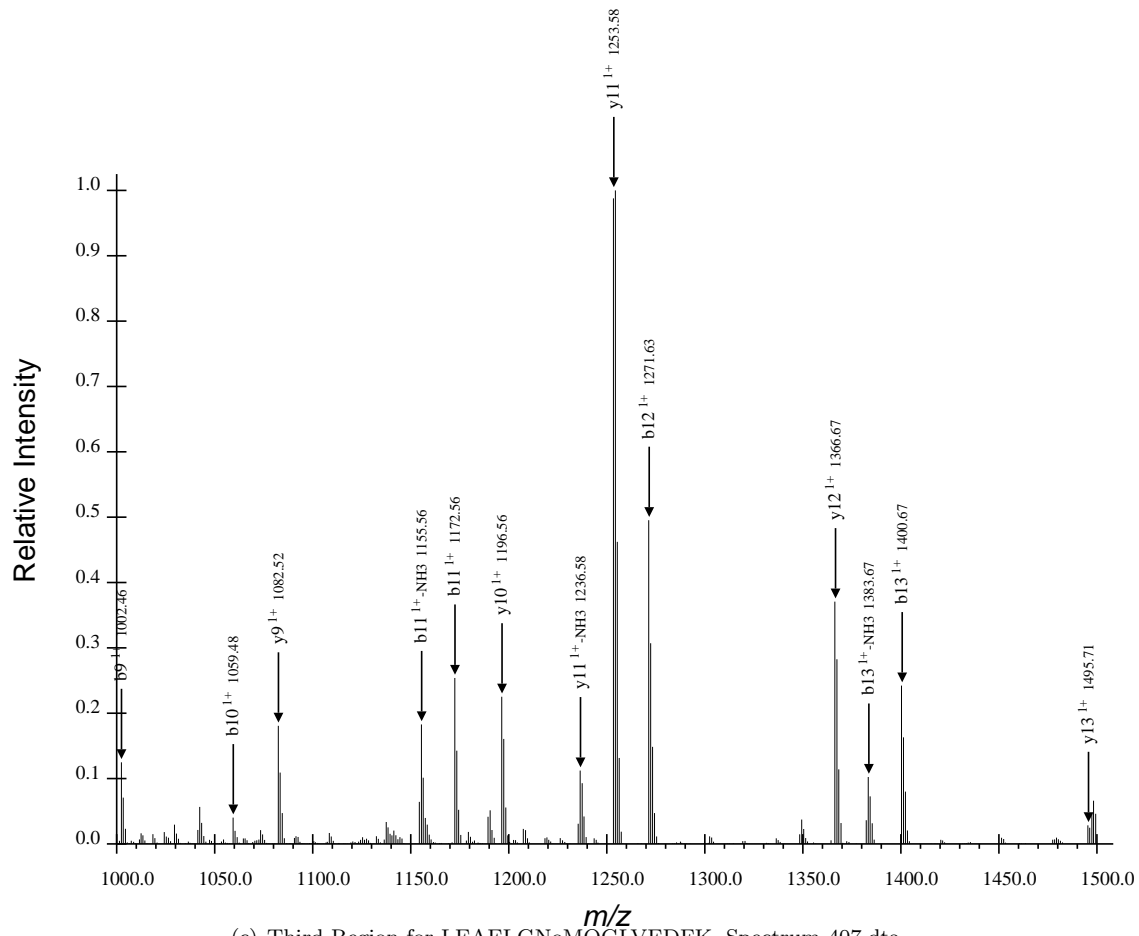

(c) Third Region for LEAELGNoMQGLVEDFK, Spectrum 407.dta

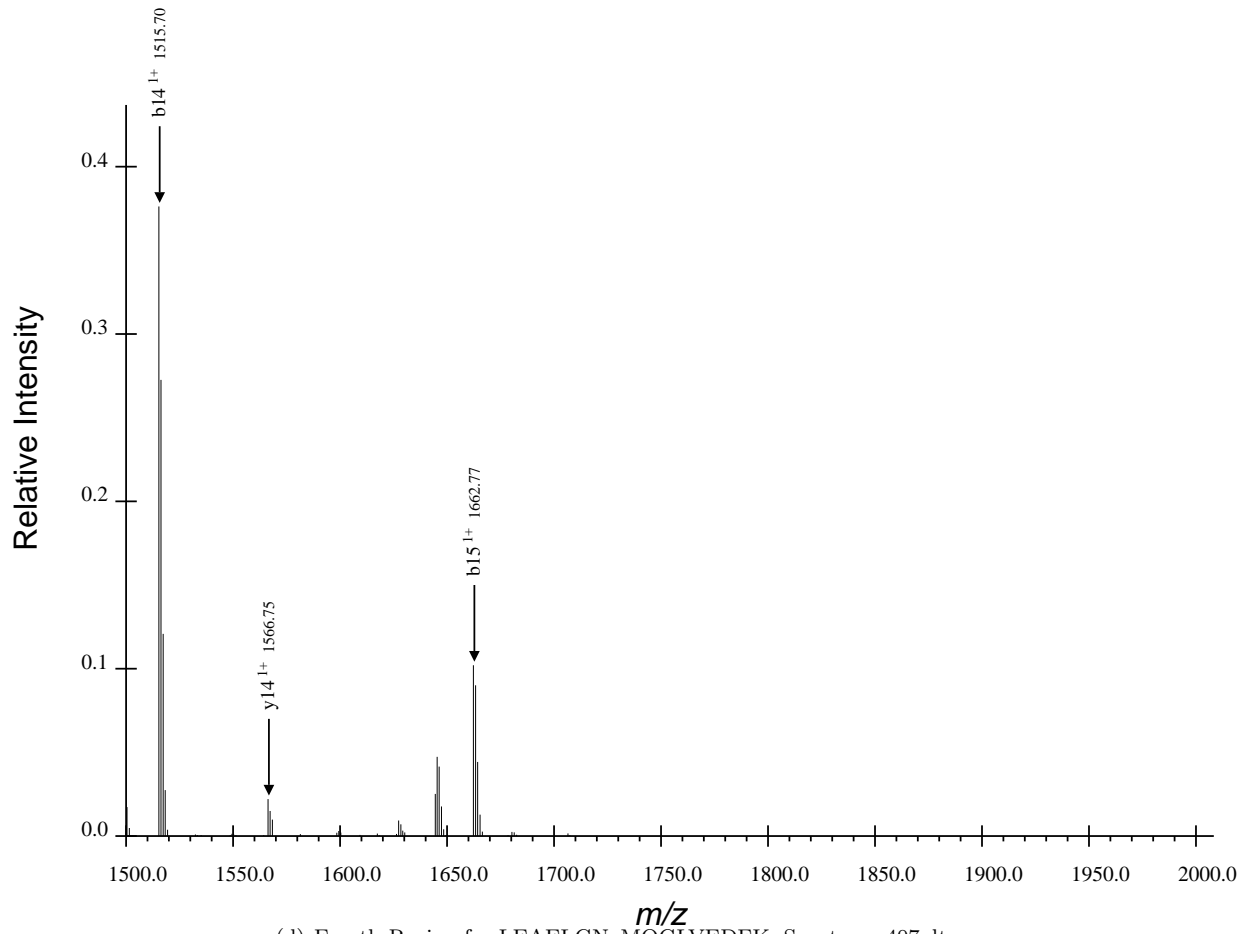

(d) Fourth Region for LEAELGNoMQGLVEDFK, Spectrum 407.dta

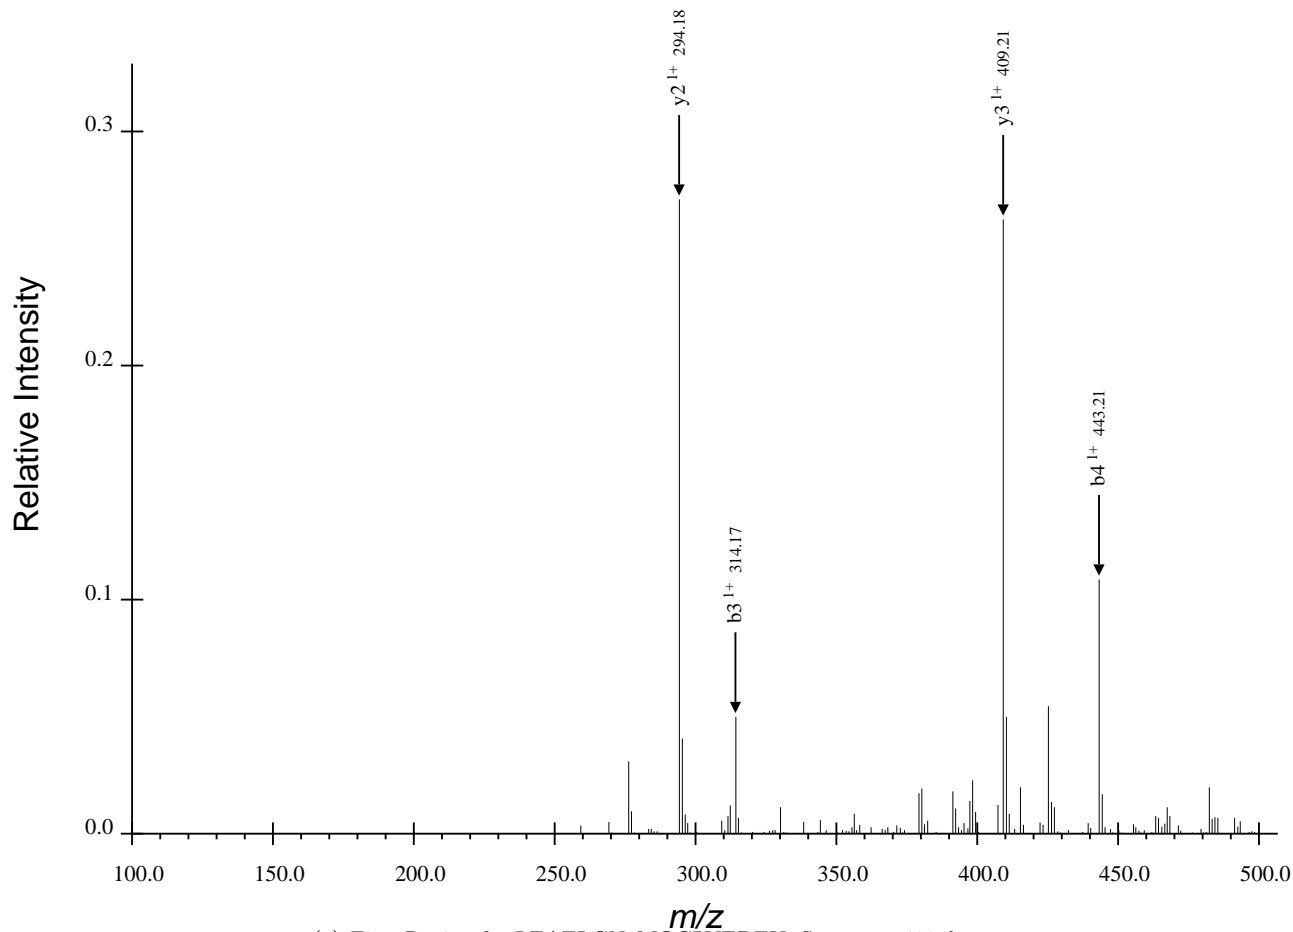

(a) First Region for LEAELGNbMQGLVEDFK, Spectrum 408.dta

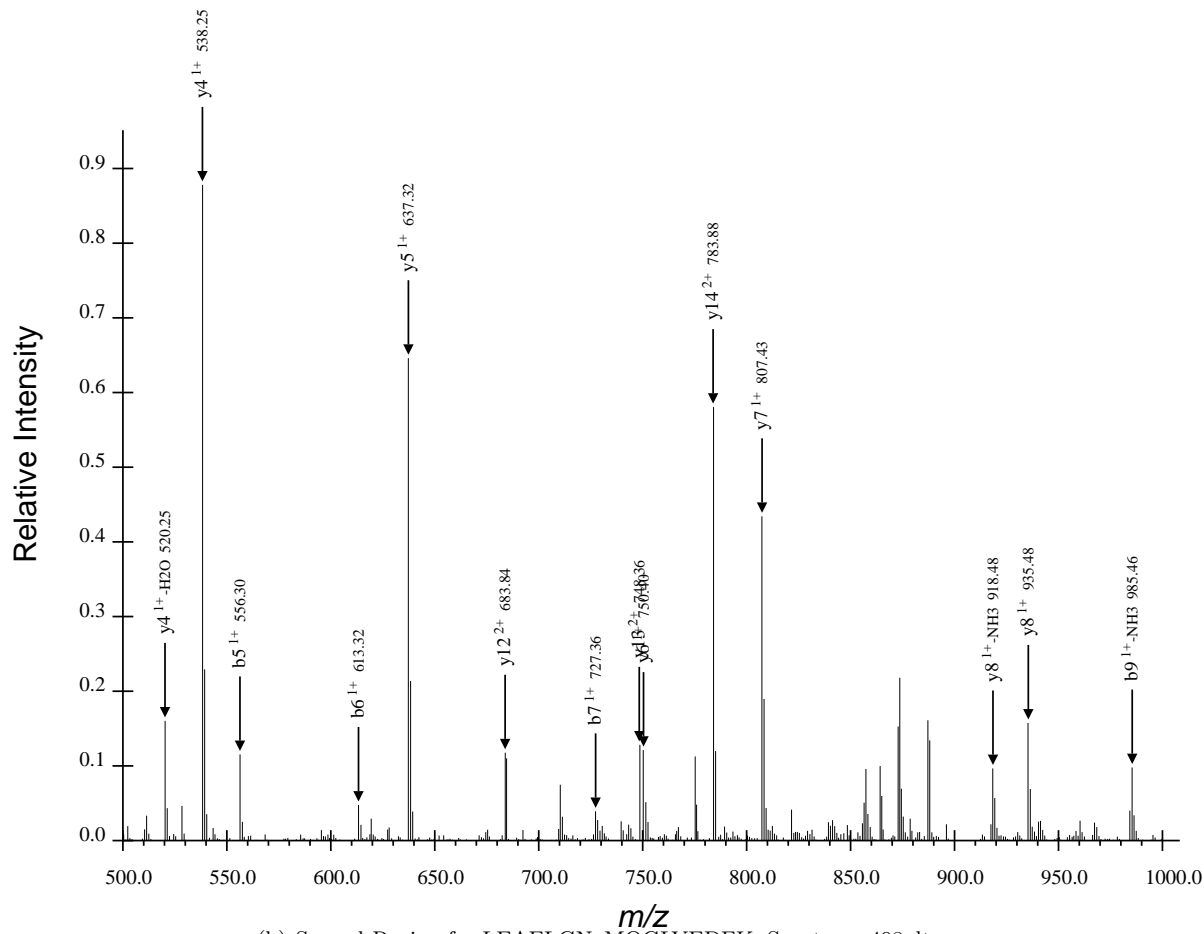

(b) Second Region for LEAELGNbMQGLVEDFK, Spectrum 408.dta

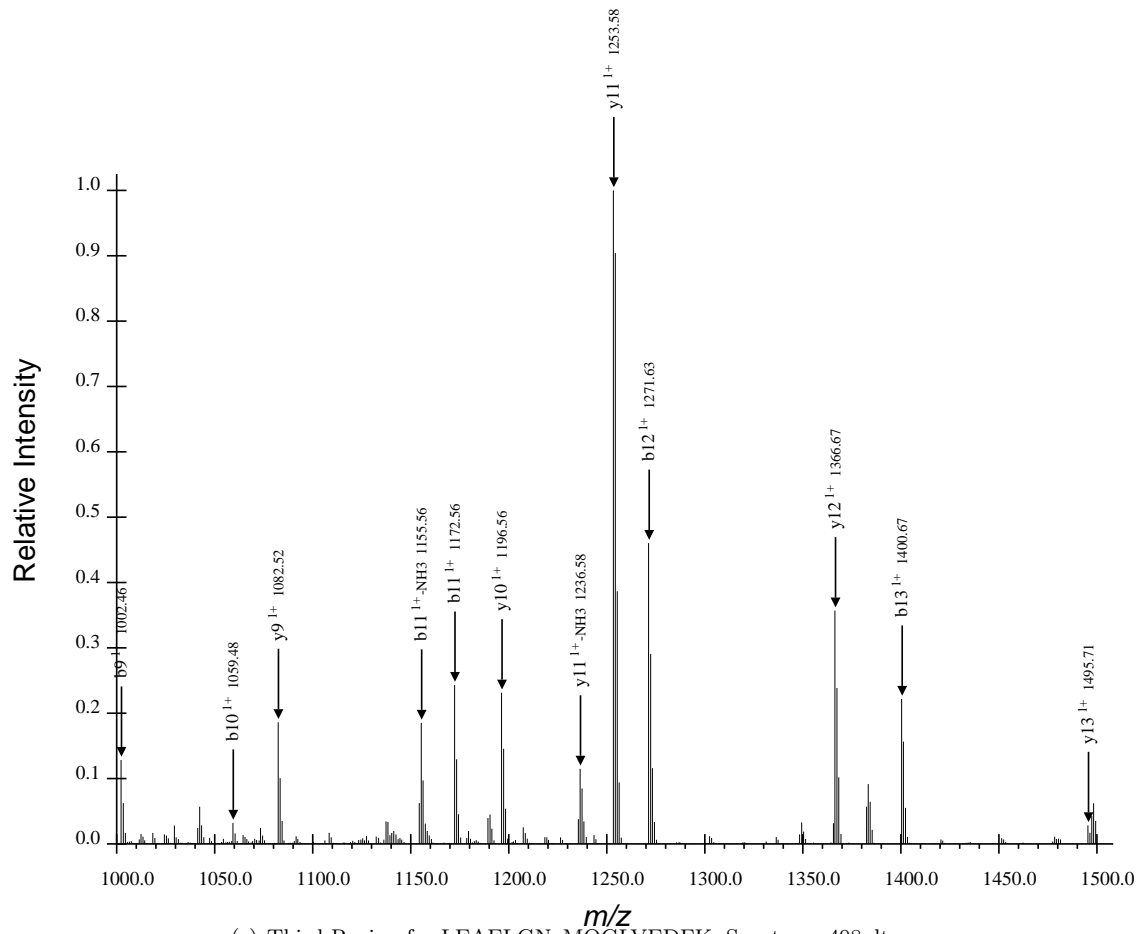

(c) Third Region for LEAELGNoMQGLVEDFK, Spectrum 408.dta

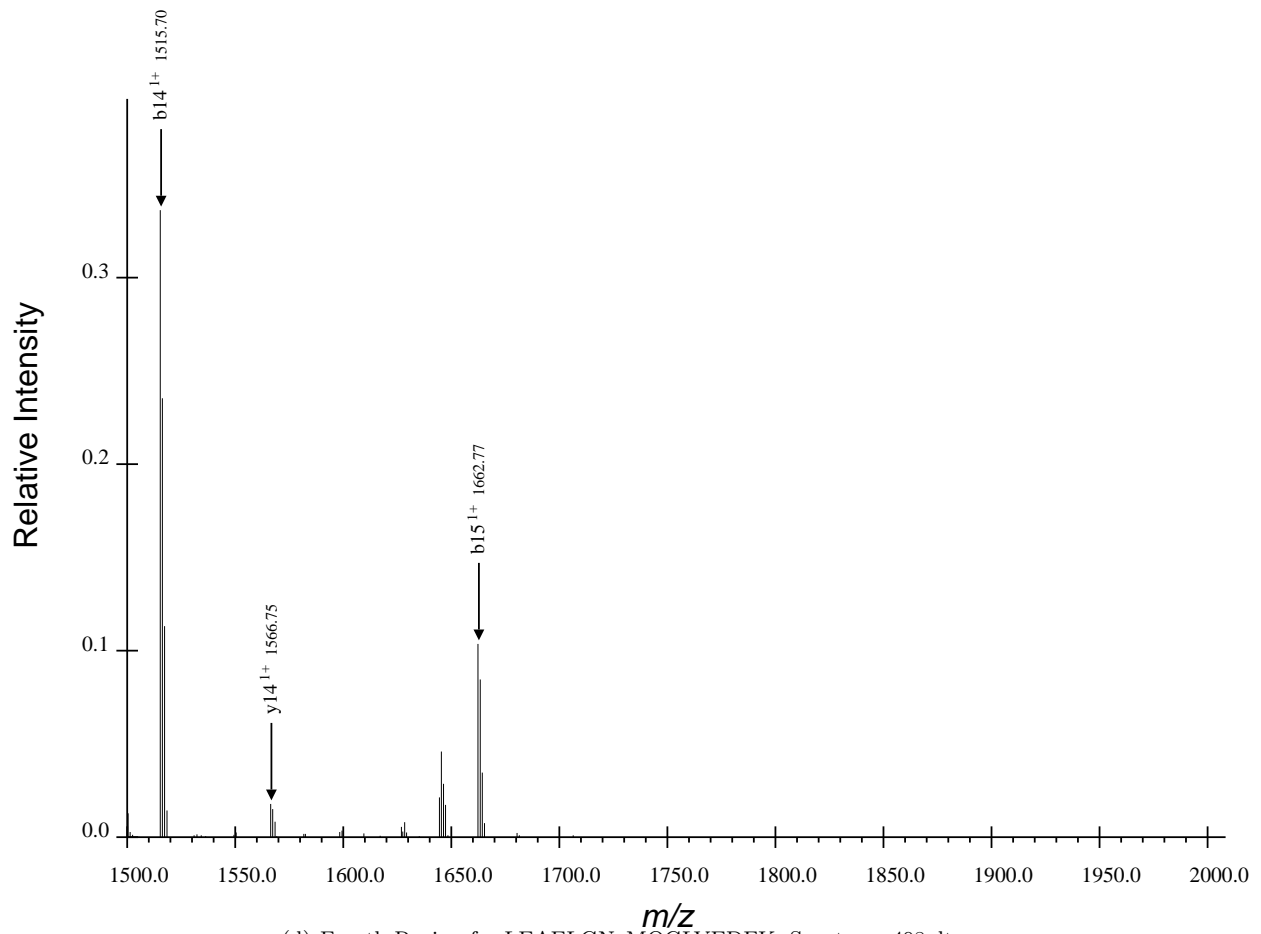

(d) Fourth Region for LEAELGNoMQGLVEDFK, Spectrum 408.dta

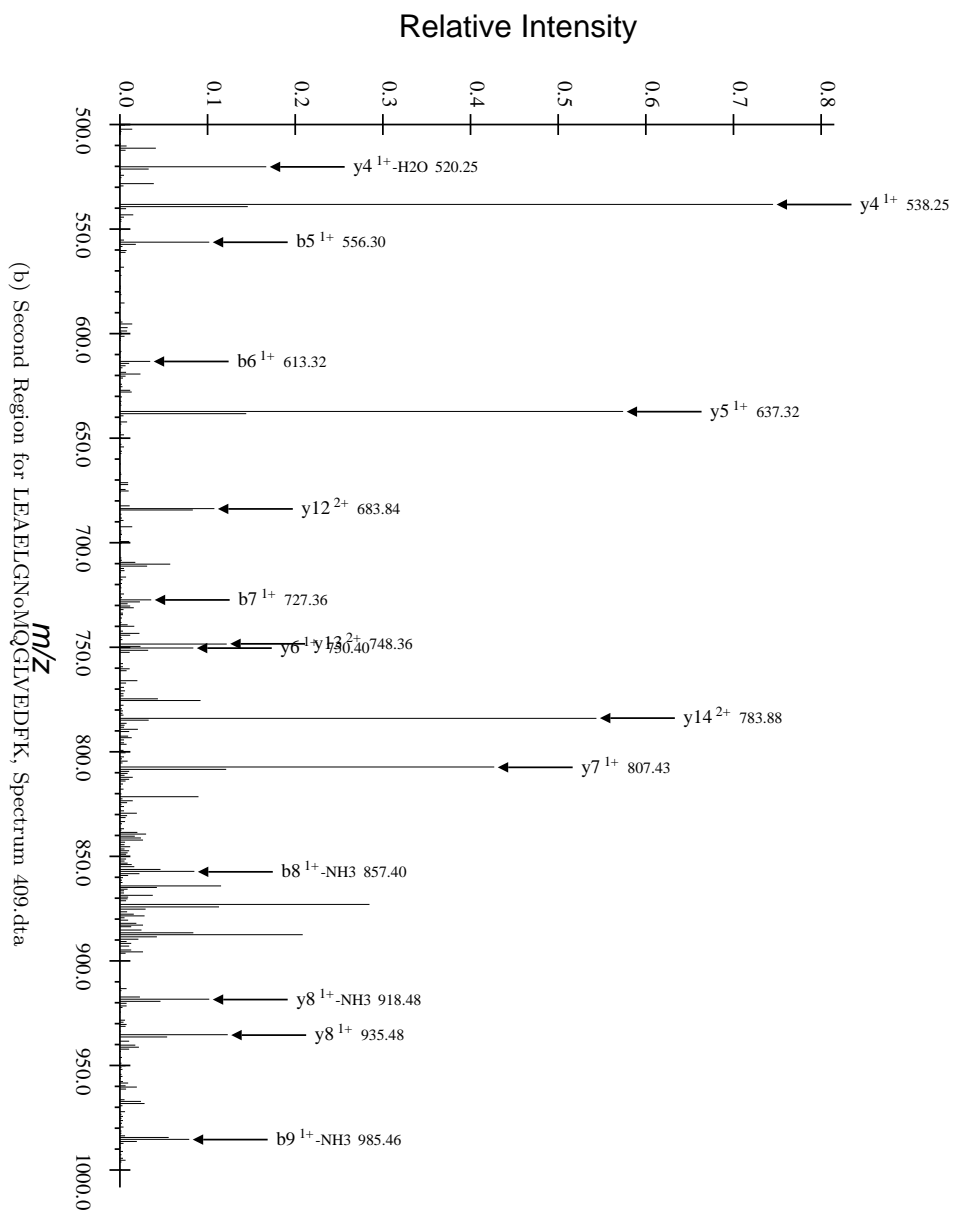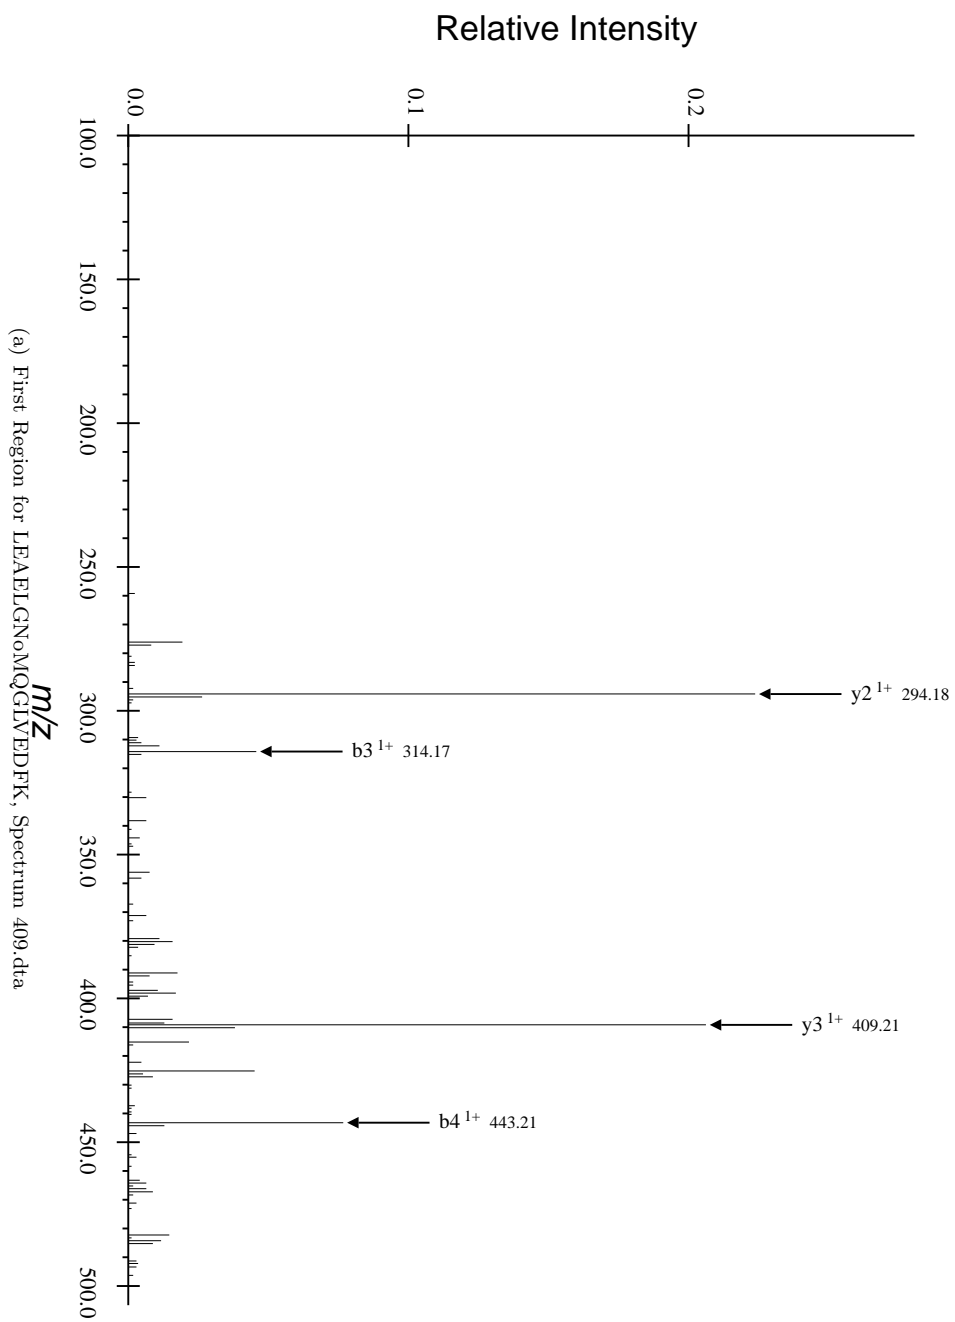

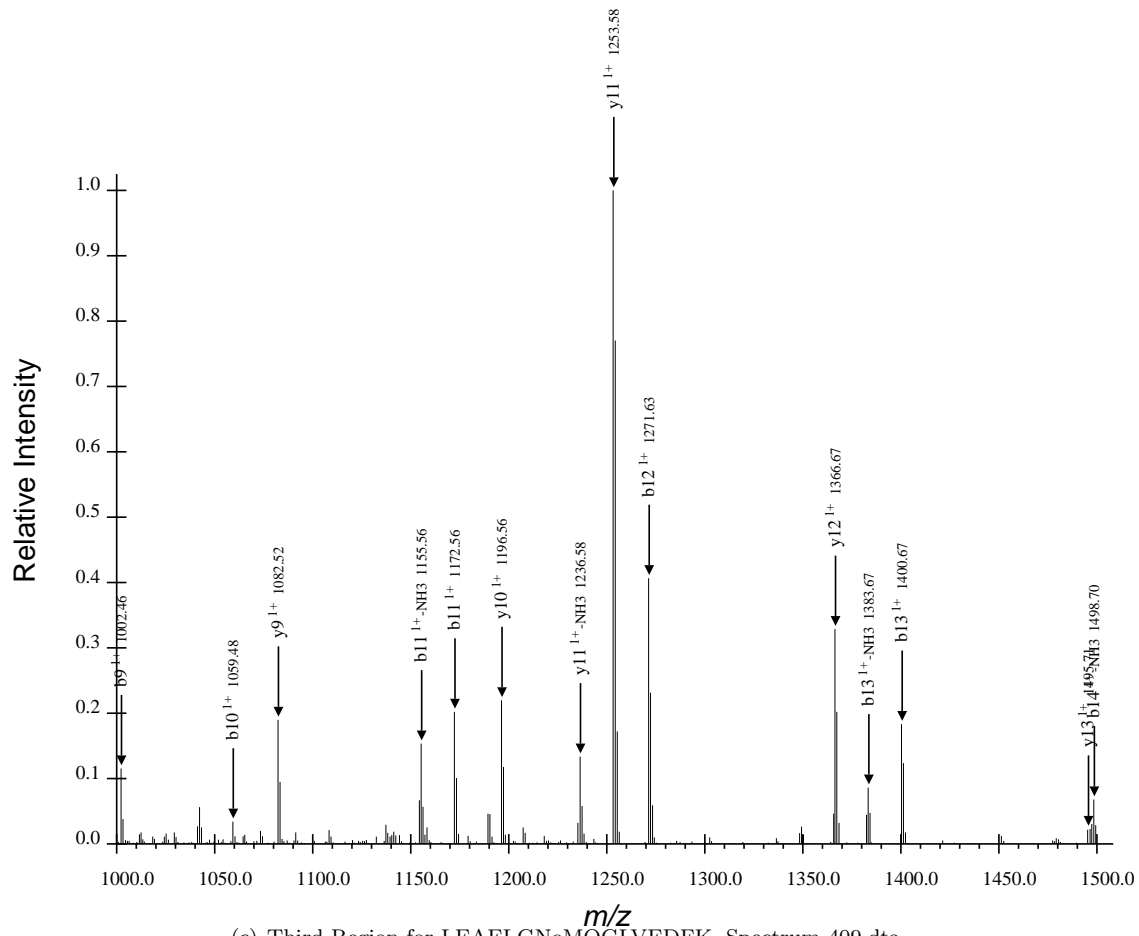

(c) Third Region for LEAELGNoMQGLVEDFK, Spectrum 409.dta

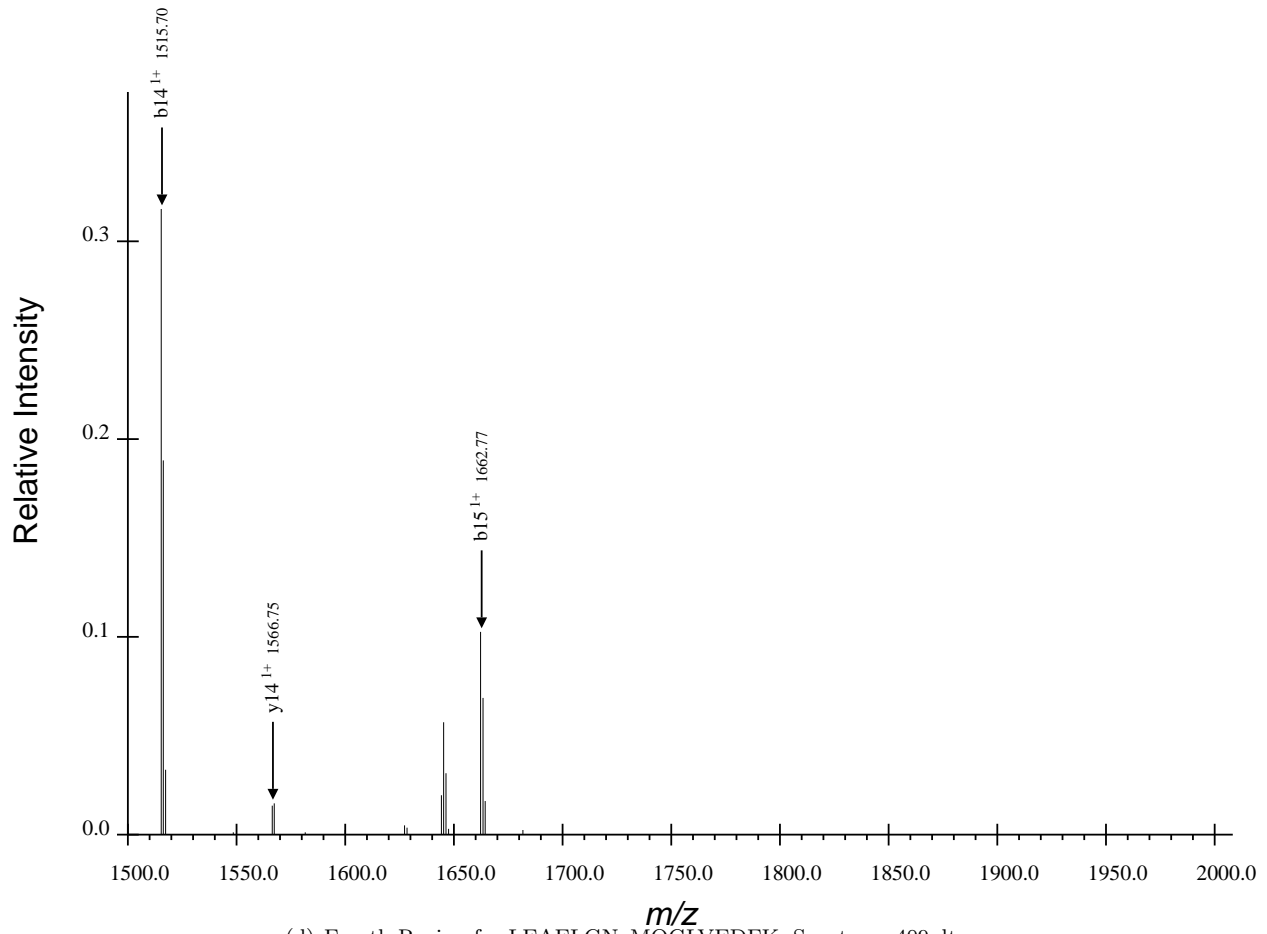

(d) Fourth Region for LEAELGNoMQGLVEDFK, Spectrum 409.dta

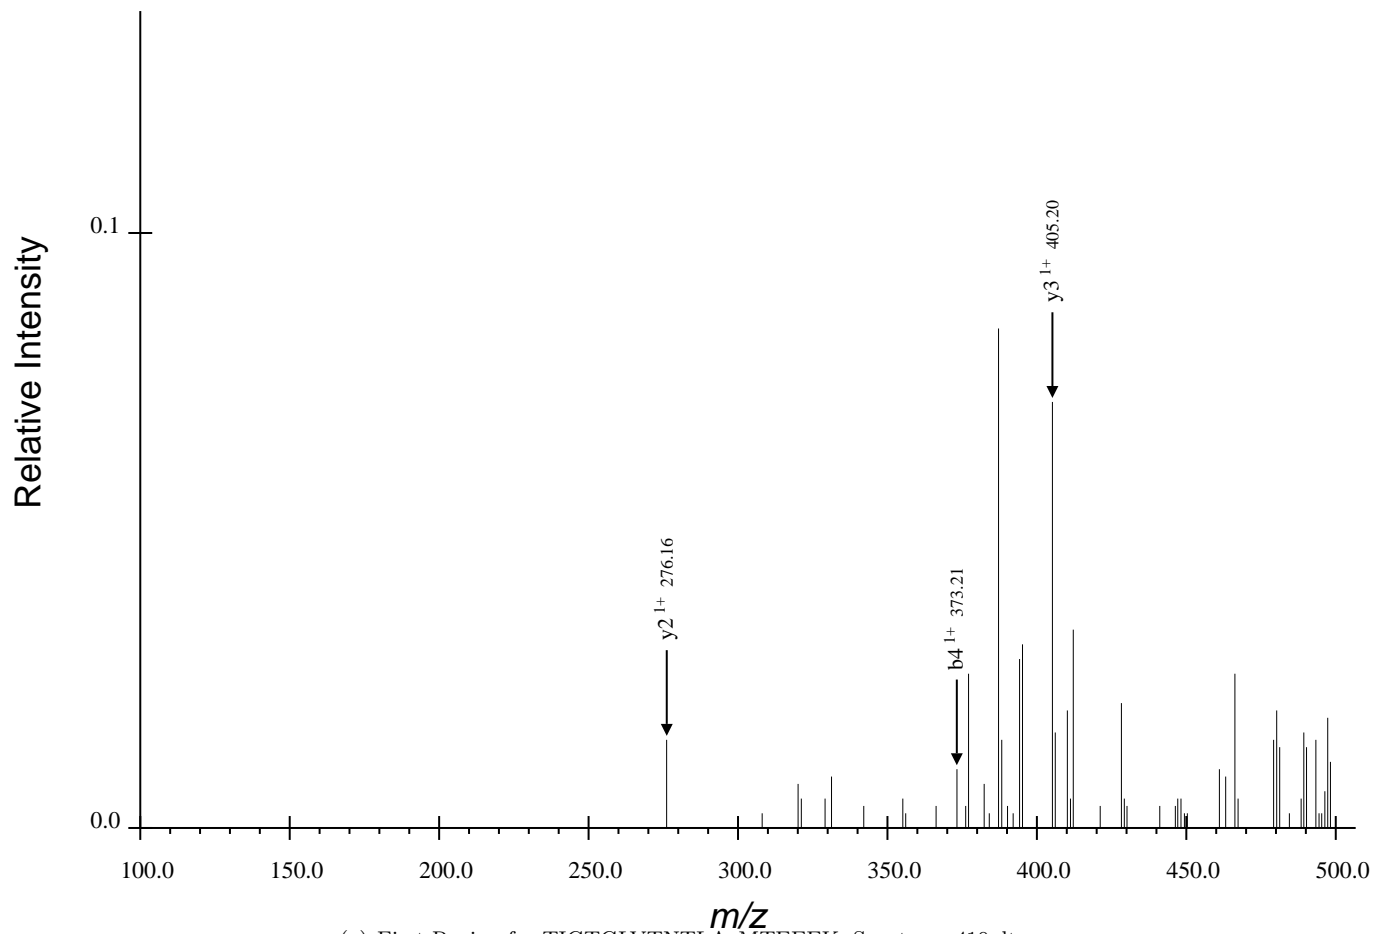

(a) First Region for TIGTGLVTNTLAoMTTEEEK, Spectrum 410.dta

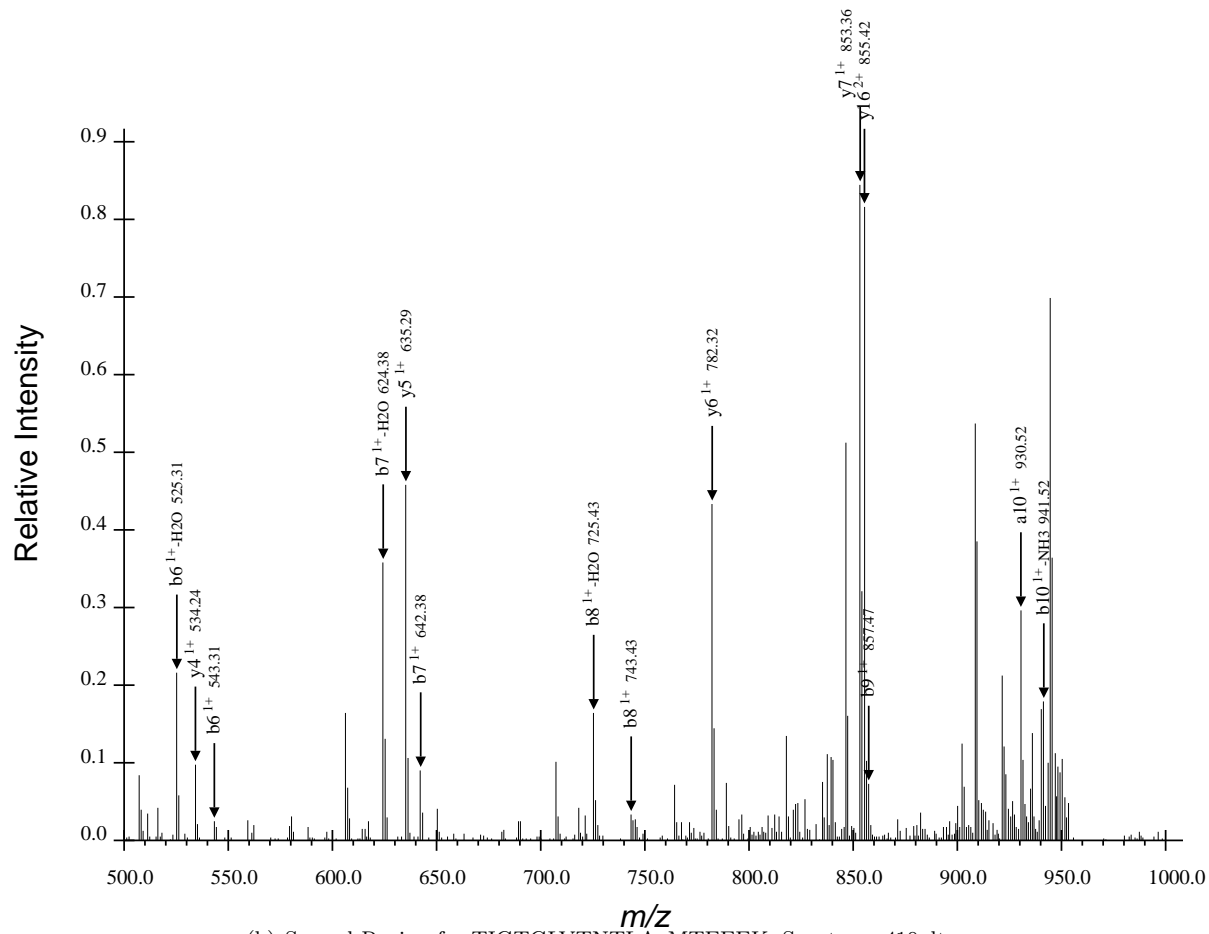

(b) Second Region for TIGTGLVTNTLAoMTTEEEK, Spectrum 410.dta

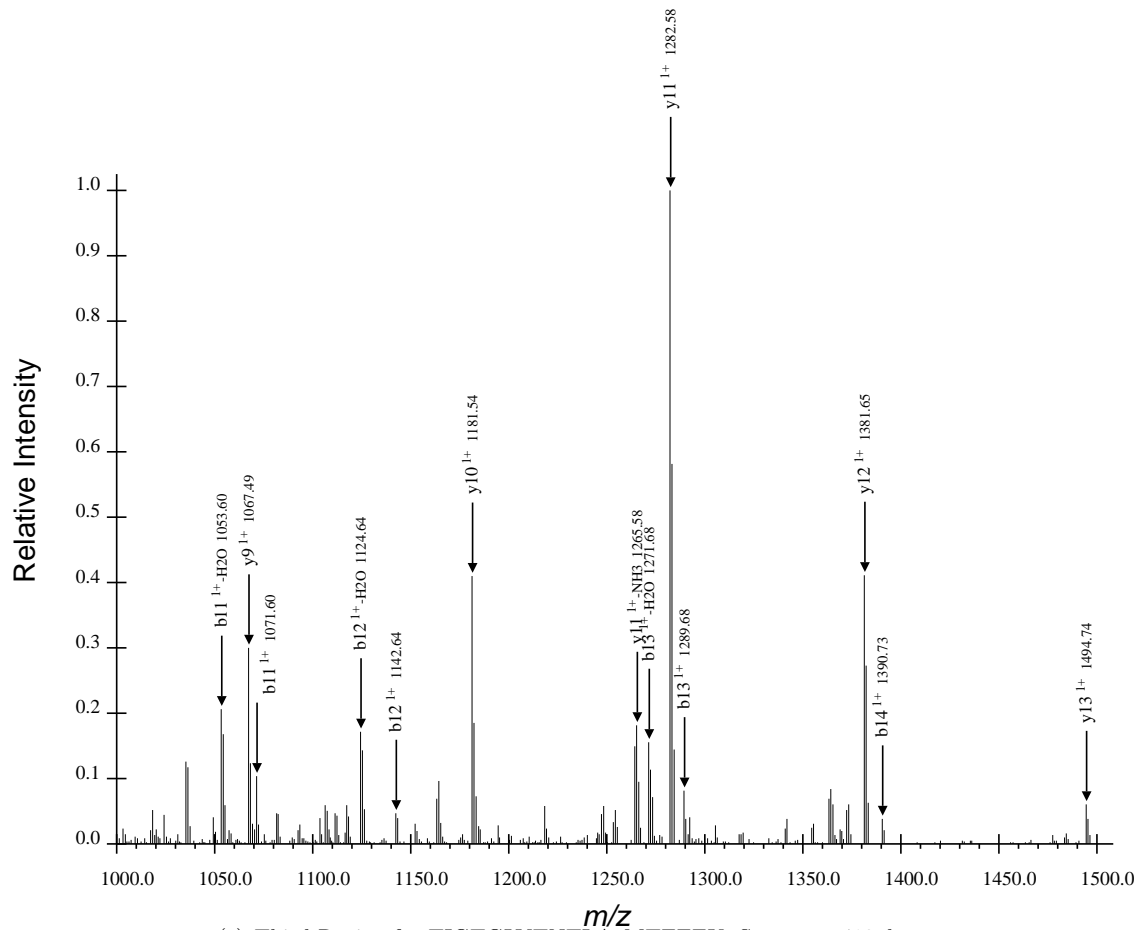

(c) Third Region for TIGTGLVTNTLAoMTEEEK, Spectrum 410.dta

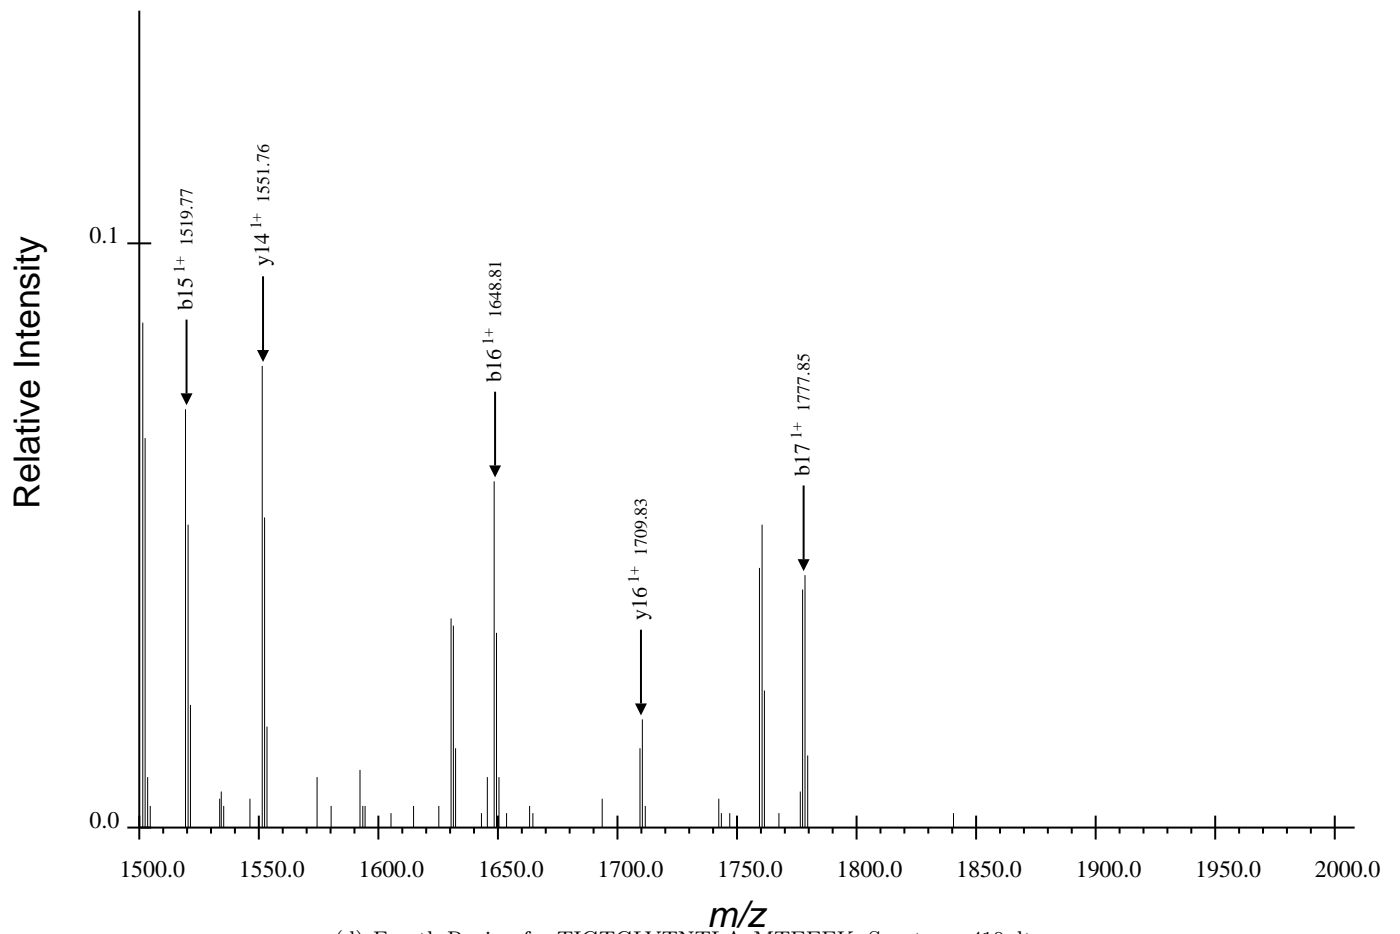

(d) Fourth Region for TIGTGLVTNTLAoMTEEEK, Spectrum 410.dta



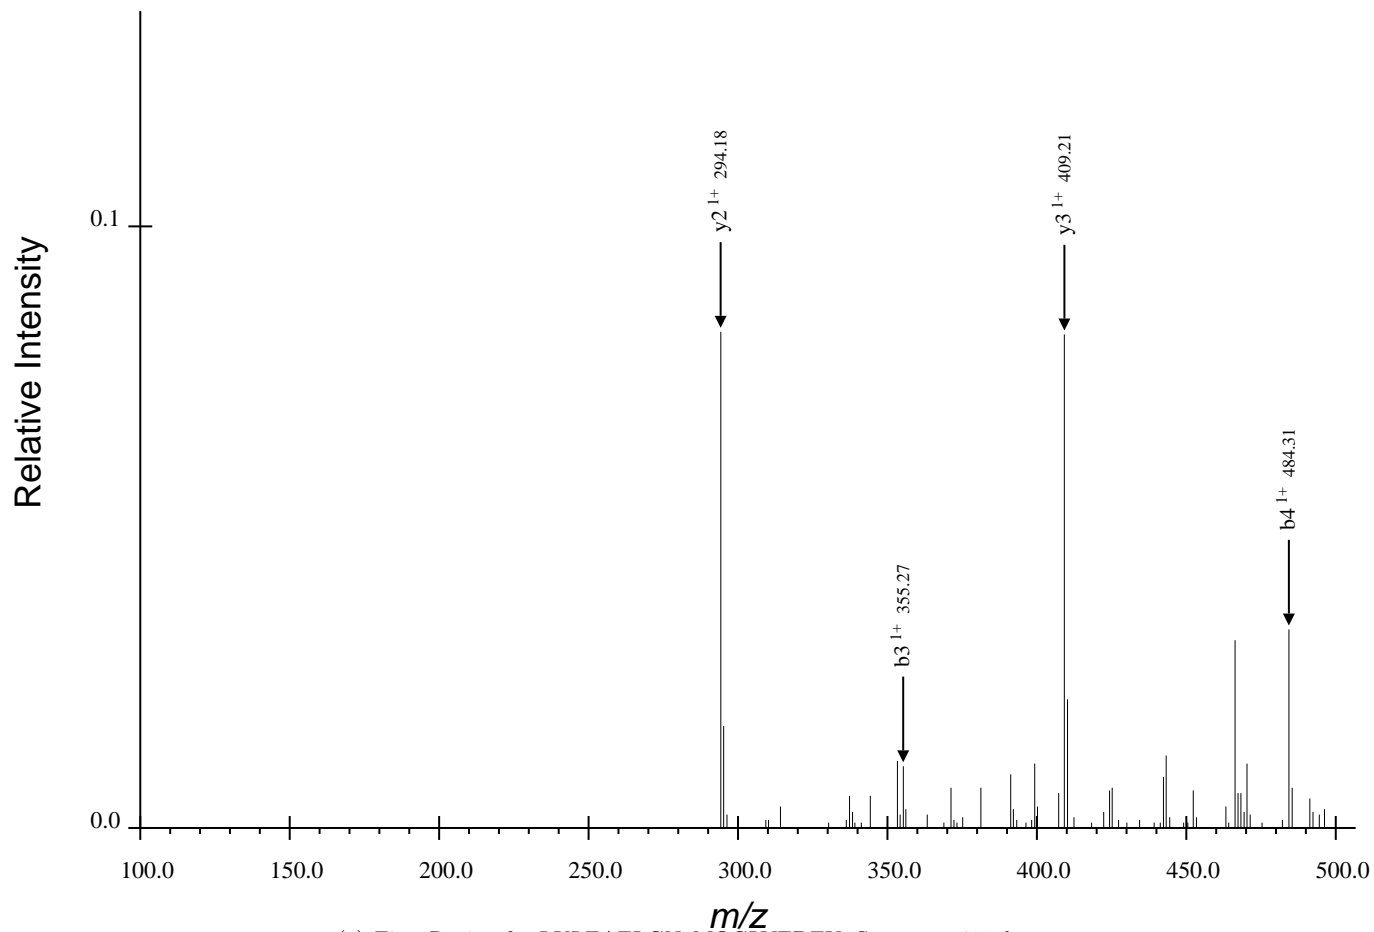

(a) First Region for LKLEAELGNoMQGLVEDFK, Spectrum 411.dta

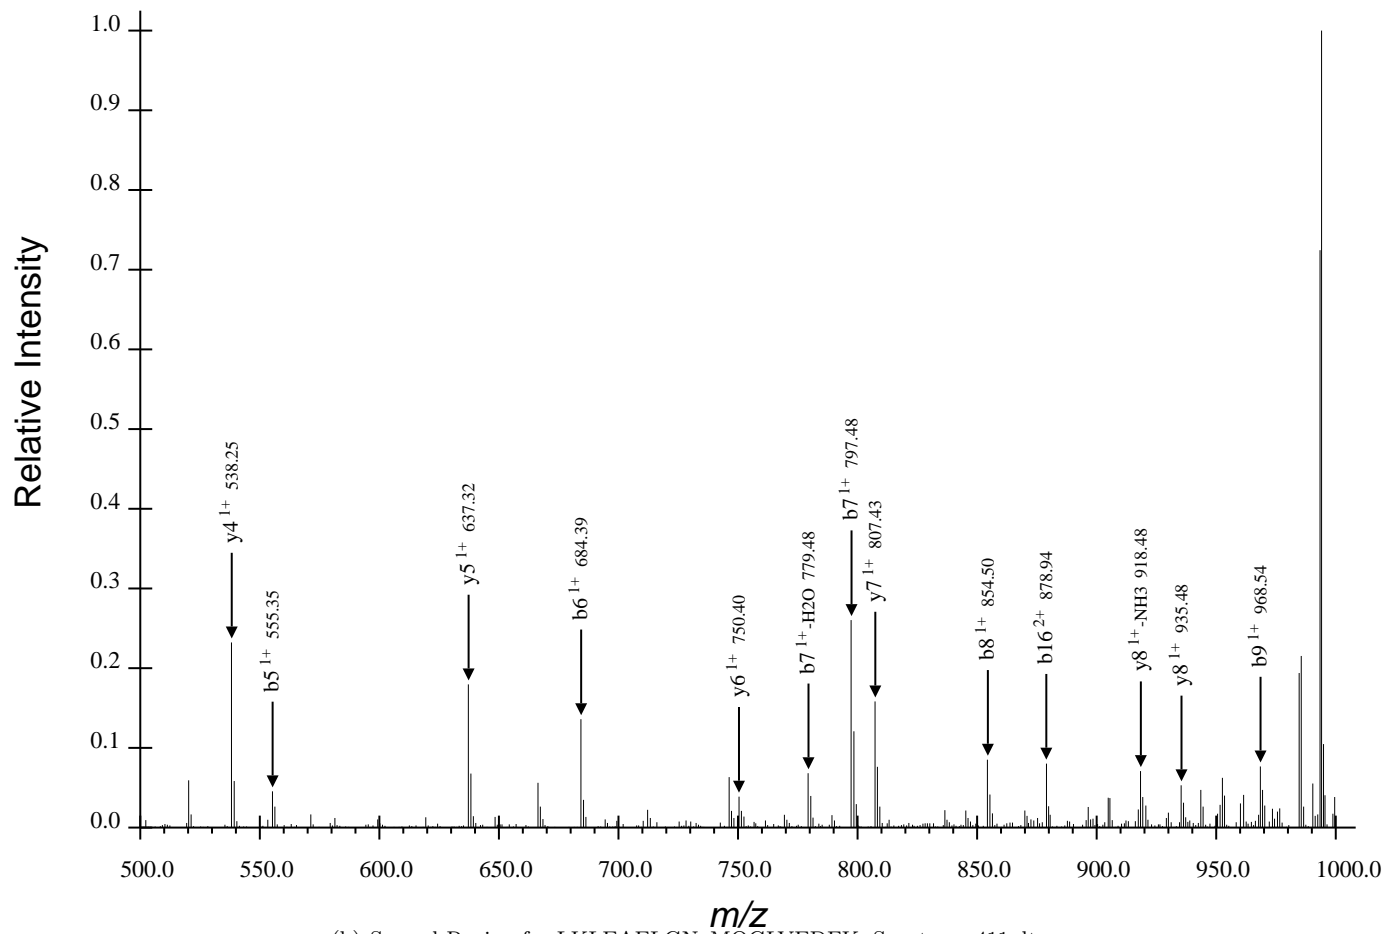

(b) Second Region for LKLEAELGNoMQGLVEDFK, Spectrum 411.dta

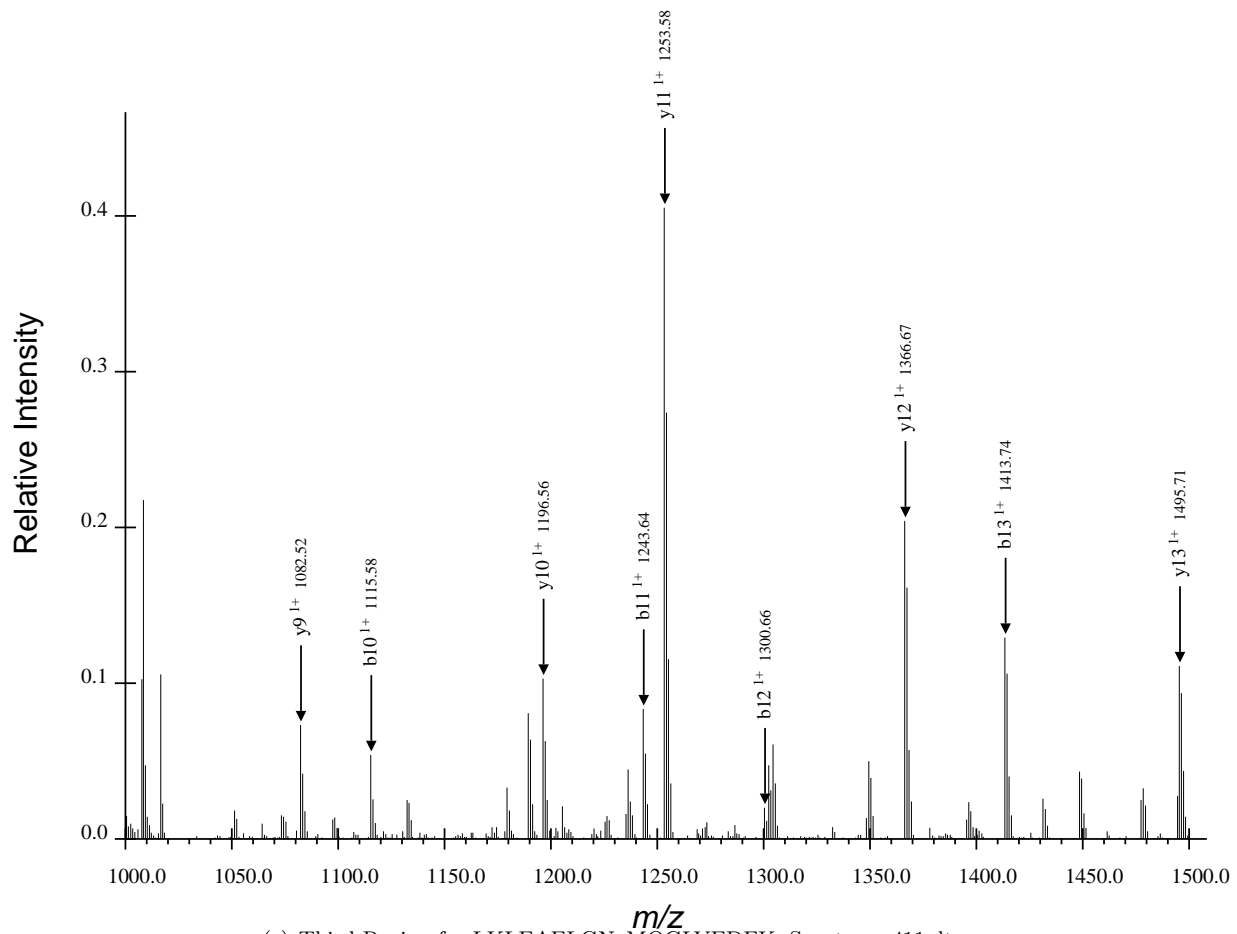

(c) Third Region for LKLEAELGNoMQGLVEDFK, Spectrum 411.dta

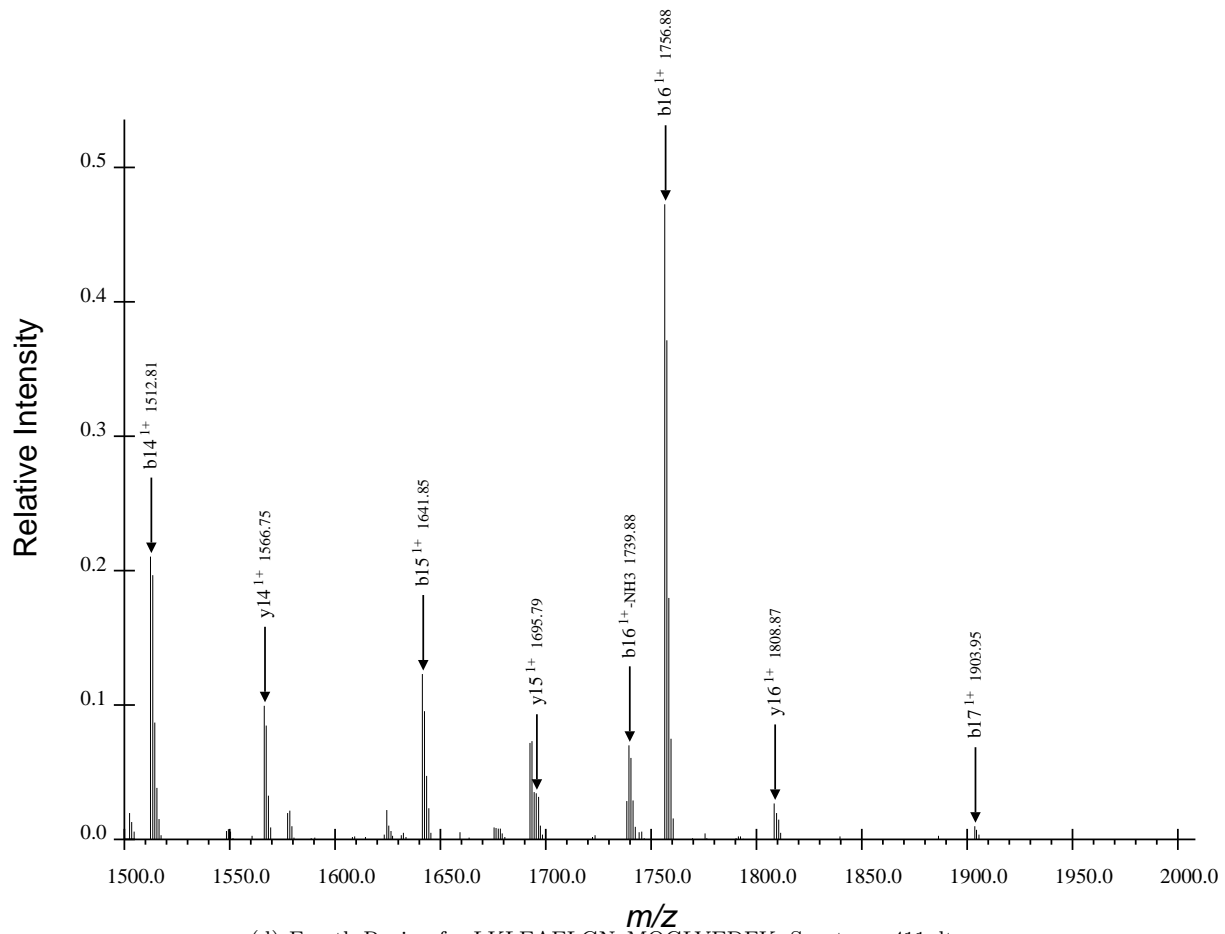

(d) Fourth Region for LKLEAELGNoMQGLVEDFK, Spectrum 411.dta

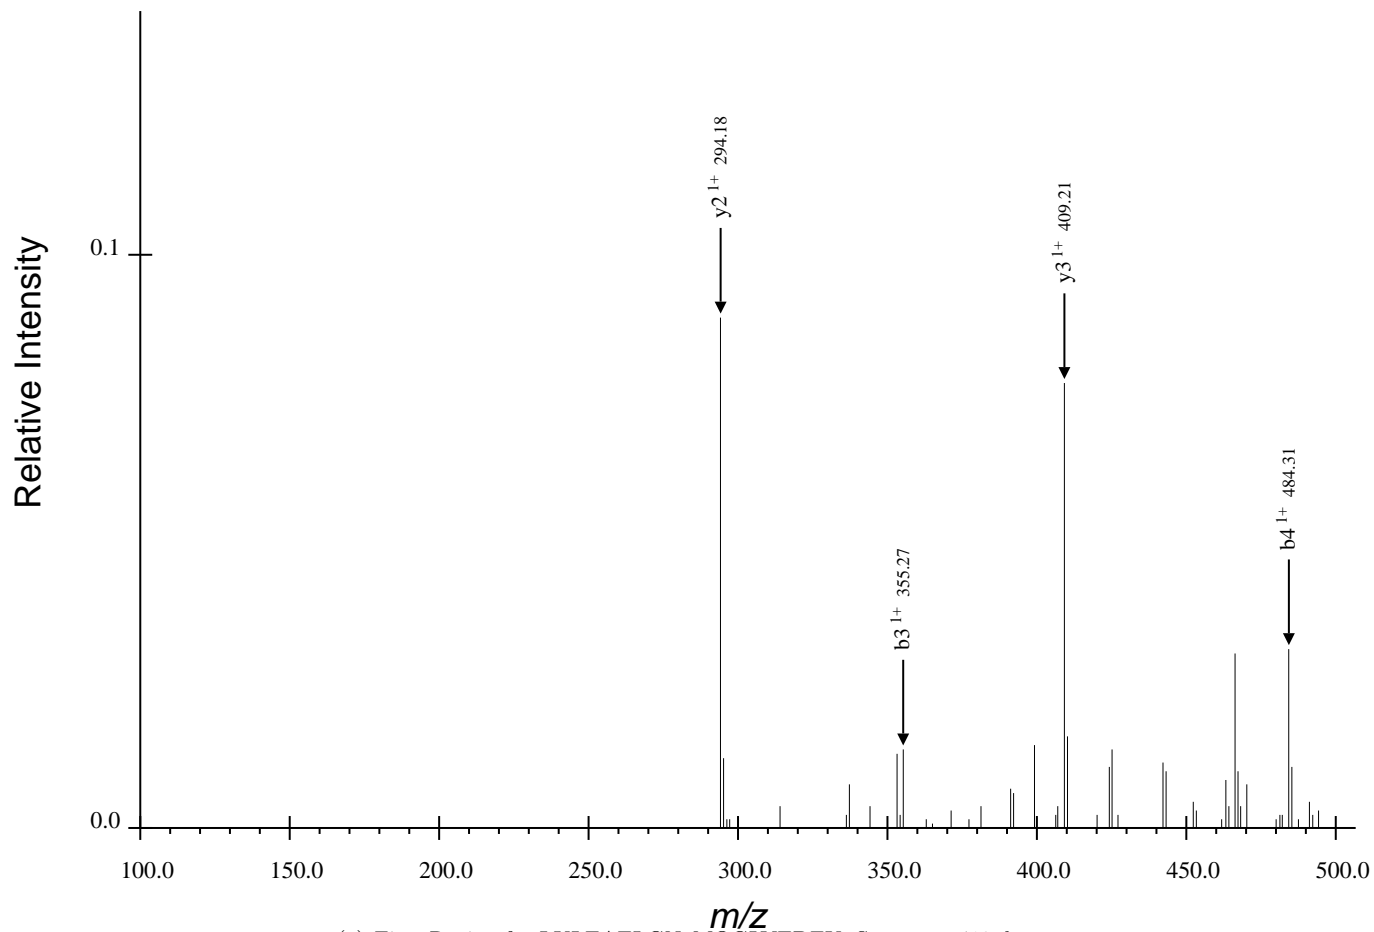

(a) First Region for LKLEAELGNoMQGLVEDFK, Spectrum 412.dta

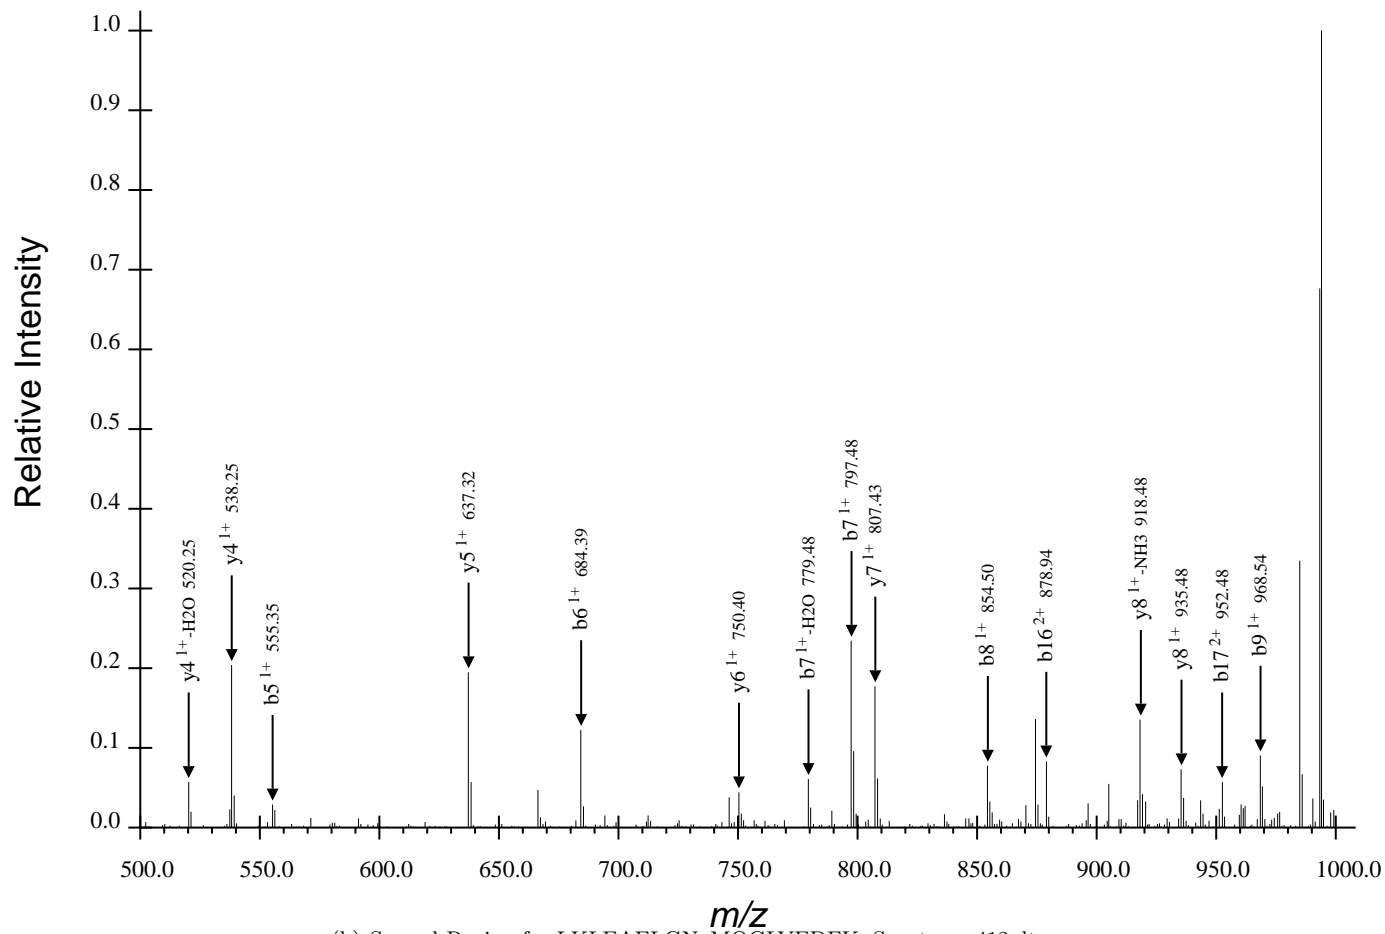

(b) Second Region for LKLEAELGNoMQGLVEDFK, Spectrum 412.dta

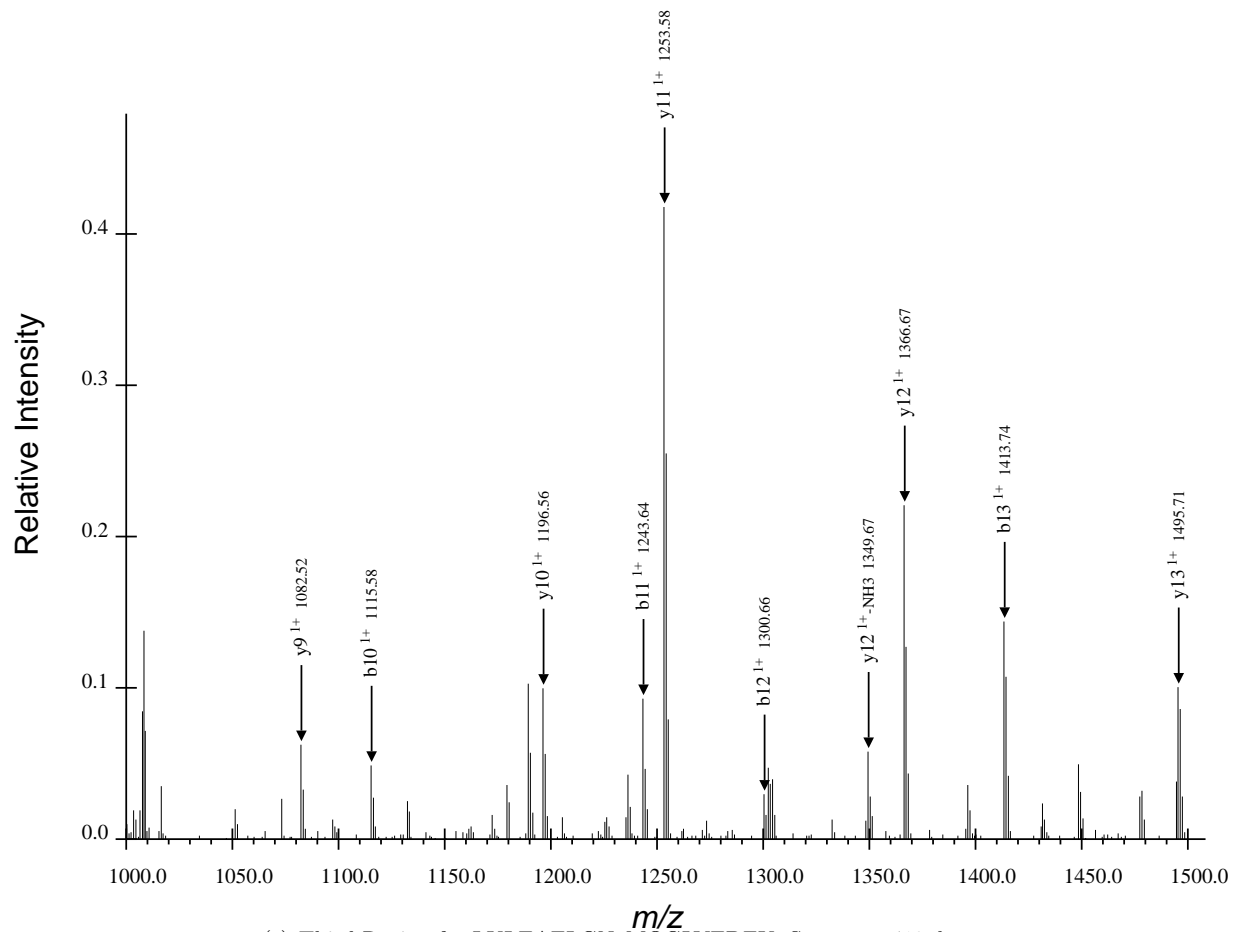

(c) Third Region for LKLEAELGNoMQGLVEDFK, Spectrum 412.dta

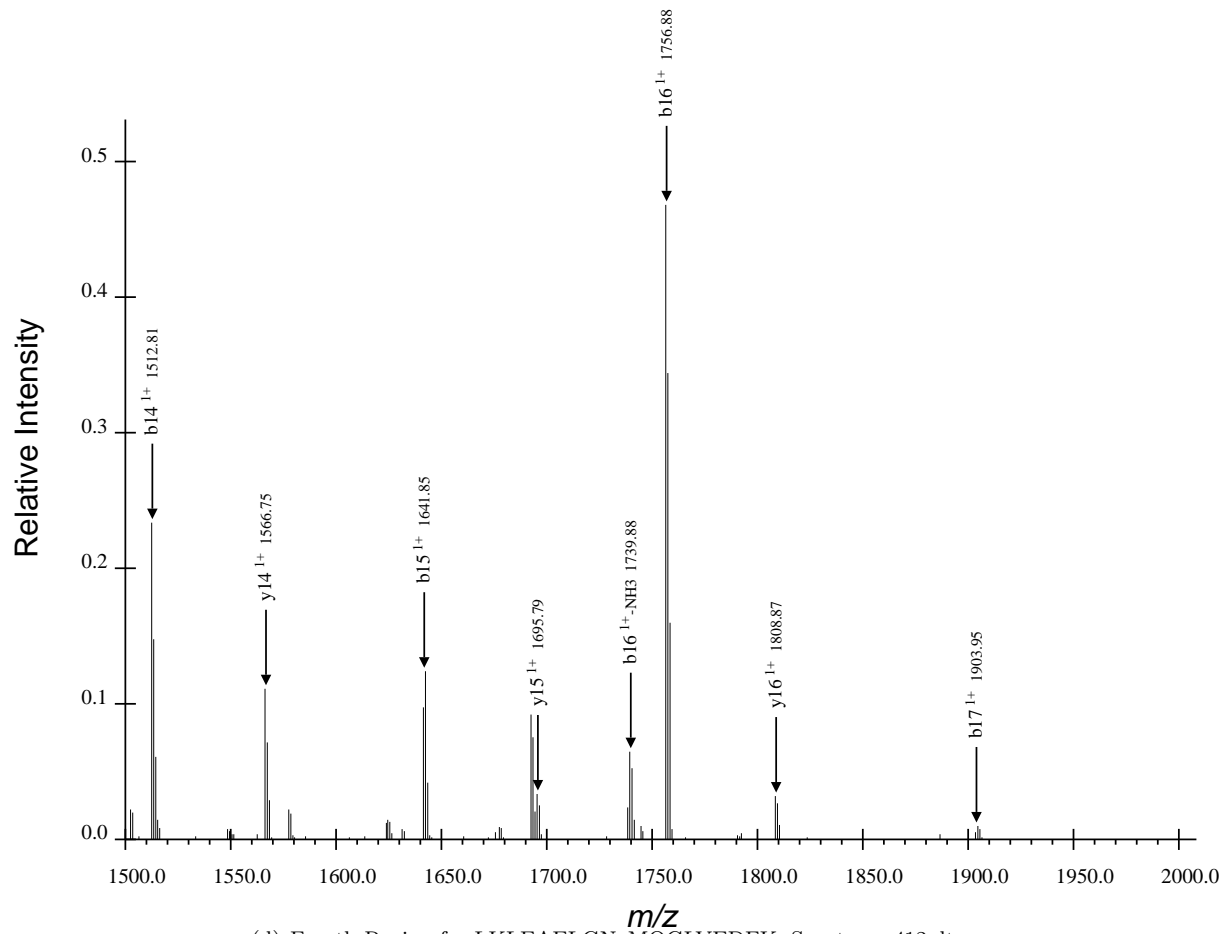

(d) Fourth Region for LKLEAELGNoMQGLVEDFK, Spectrum 412.dta

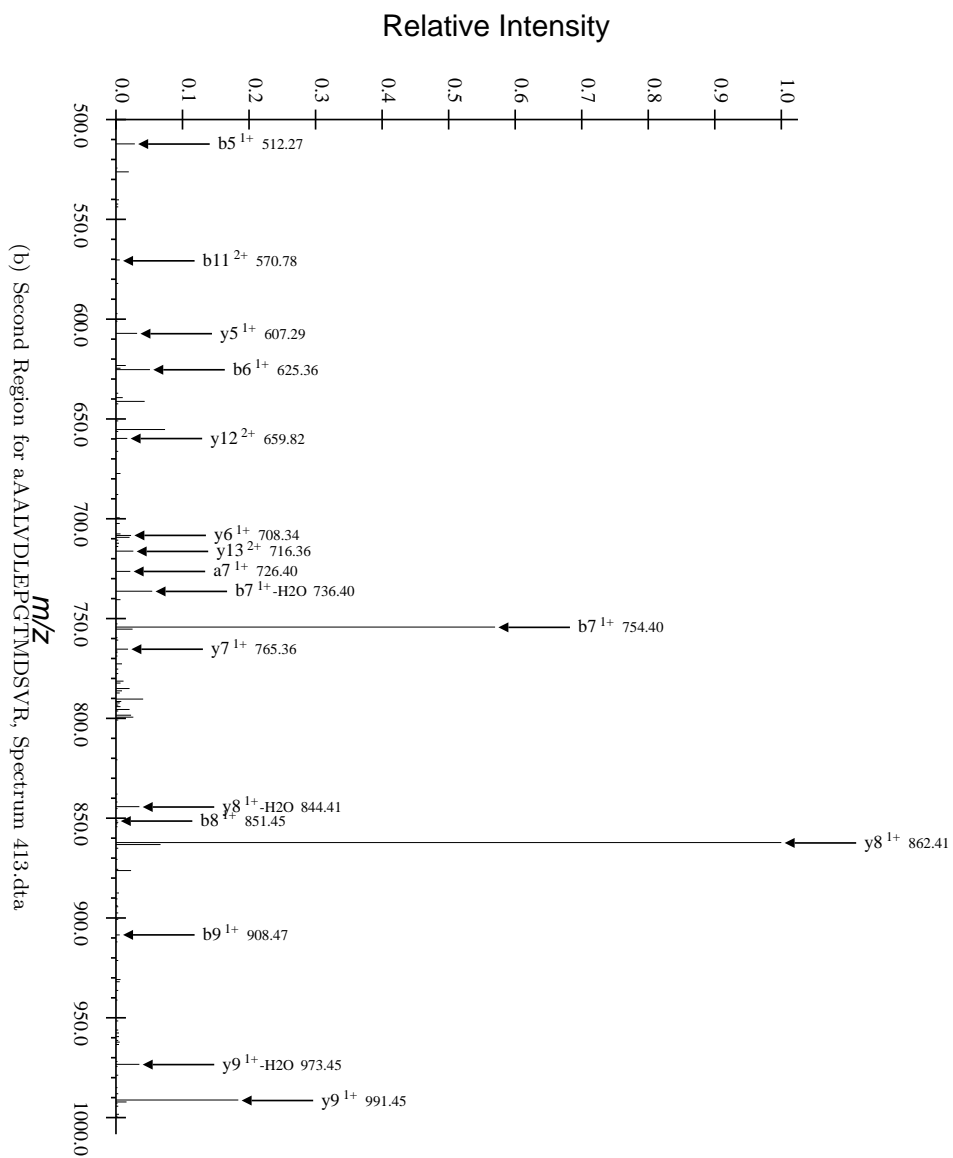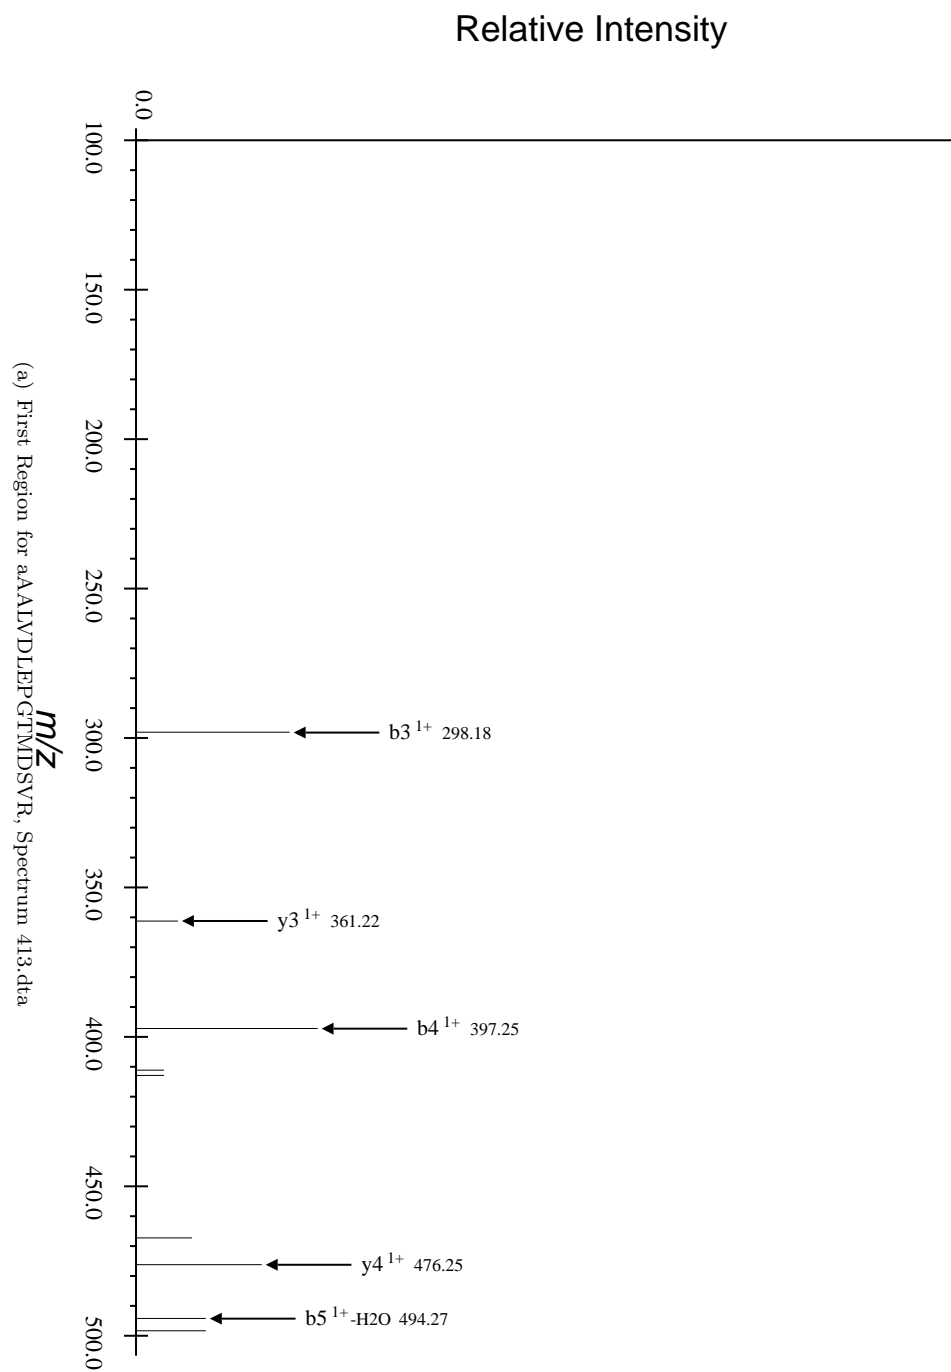

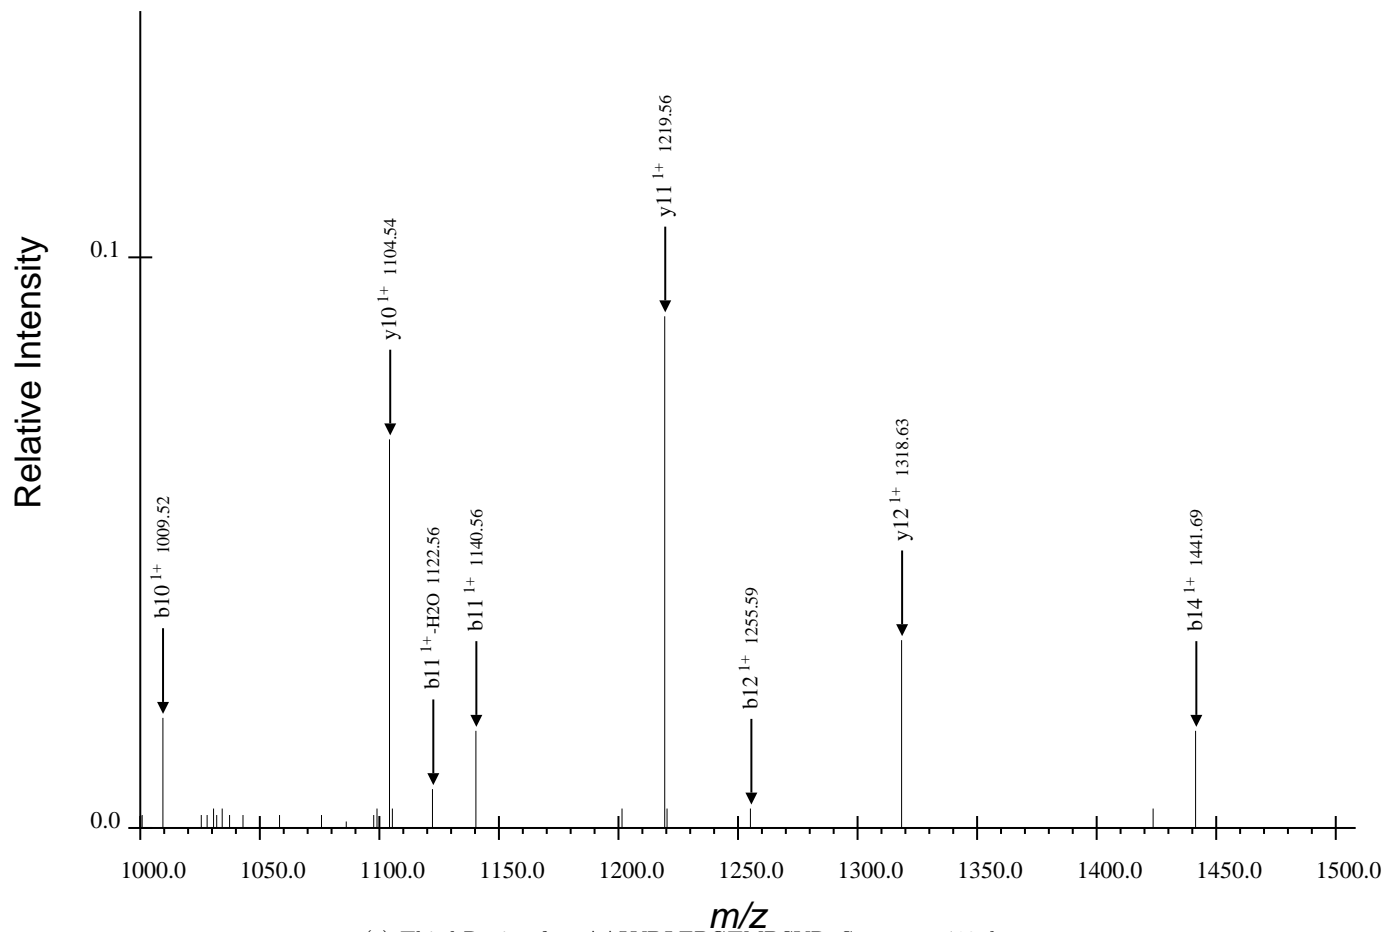

(c) Third Region for aAALVDLEPGTMDSVR, Spectrum 413.dta

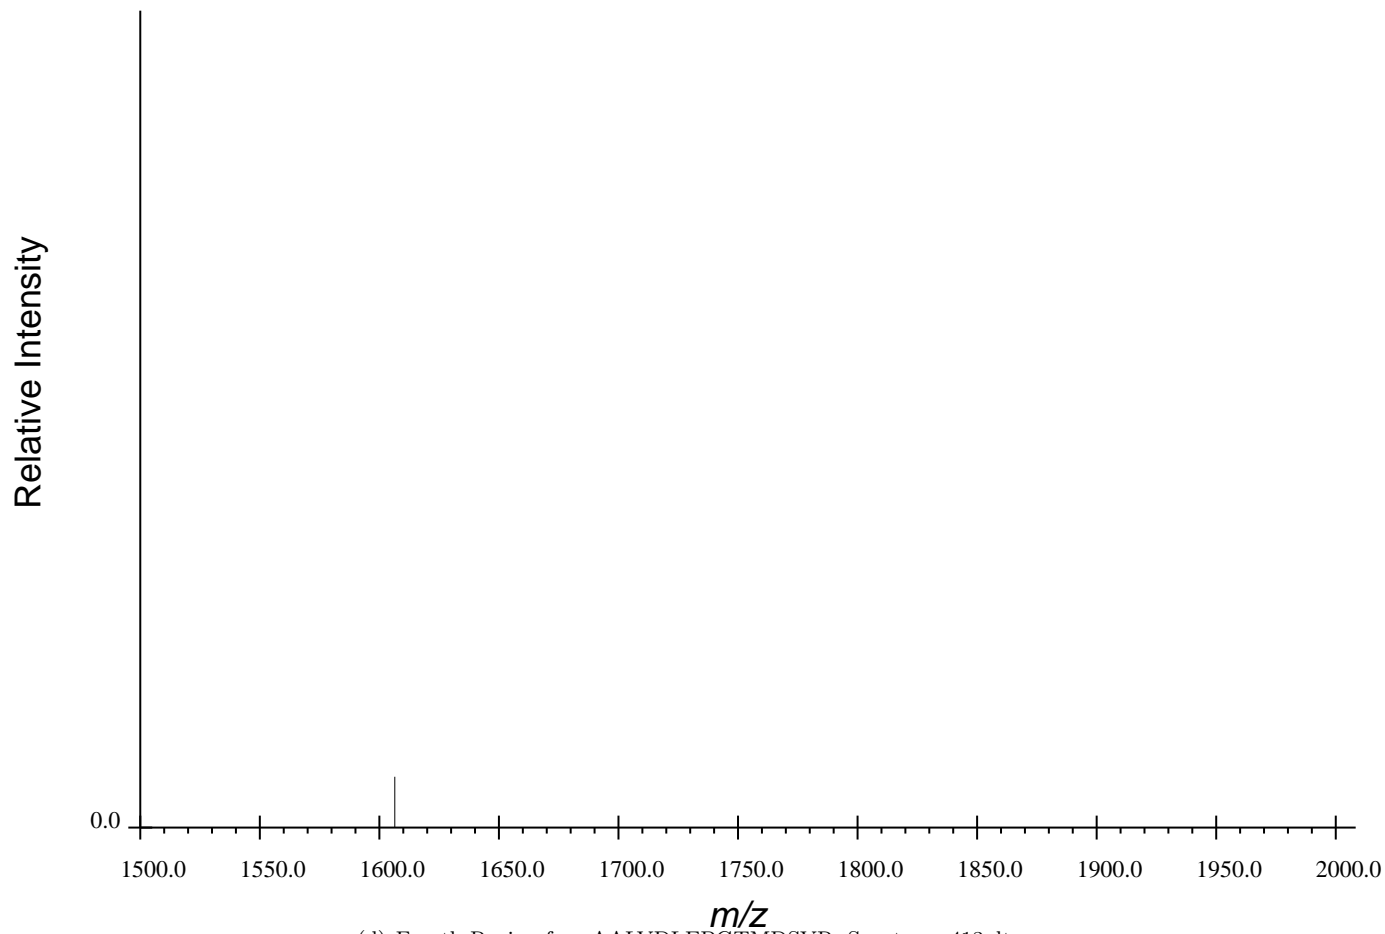

(d) Fourth Region for aAALVDLEPGTMDSVR, Spectrum 413.dta

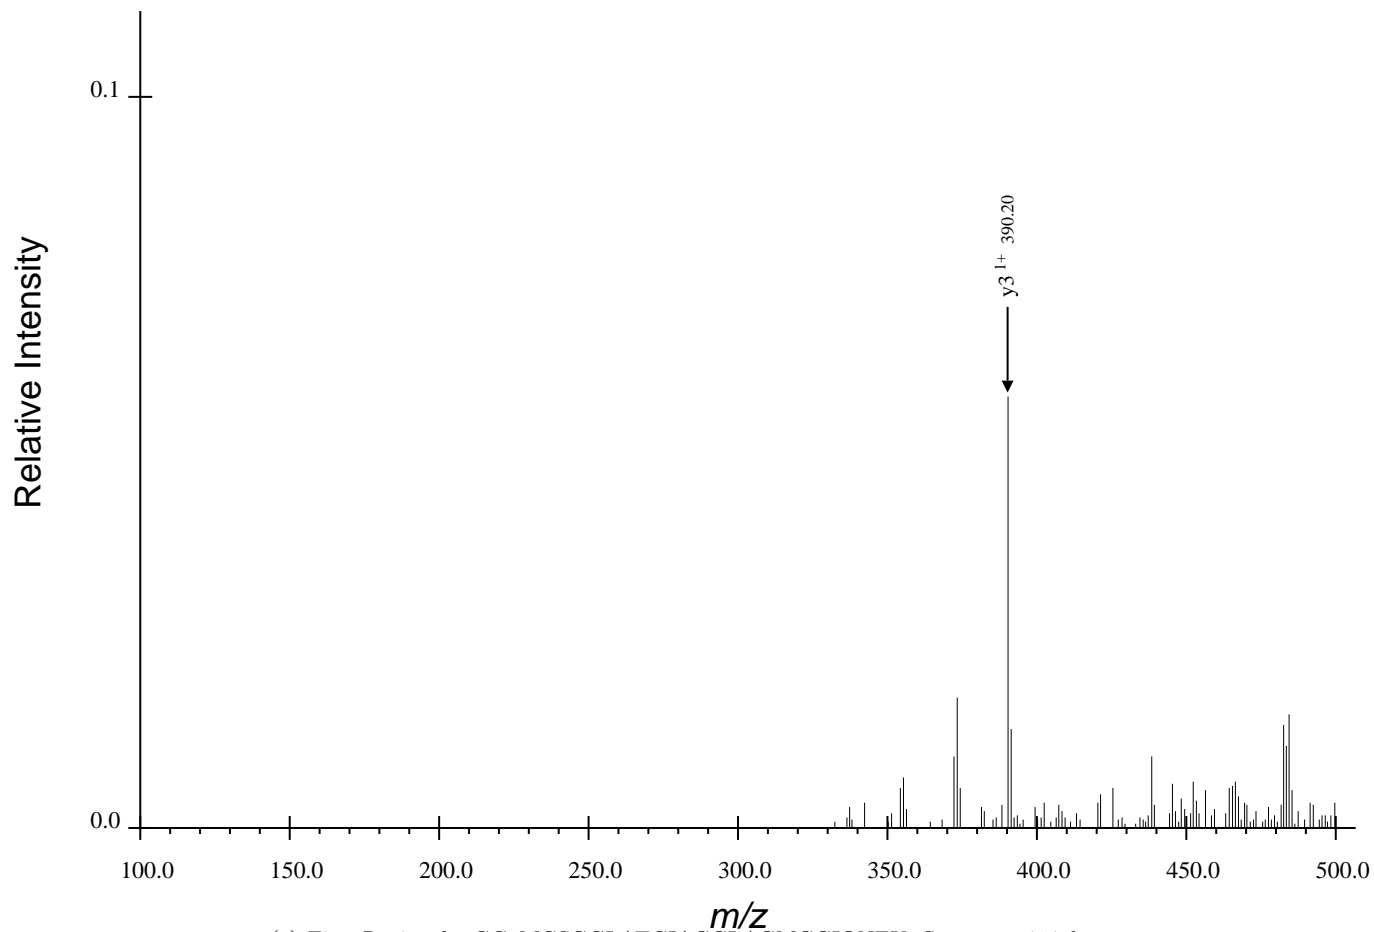

(a) First Region for GGoMGSGLATGIAGGLAGMGGIQNEK, Spectrum 414.dta

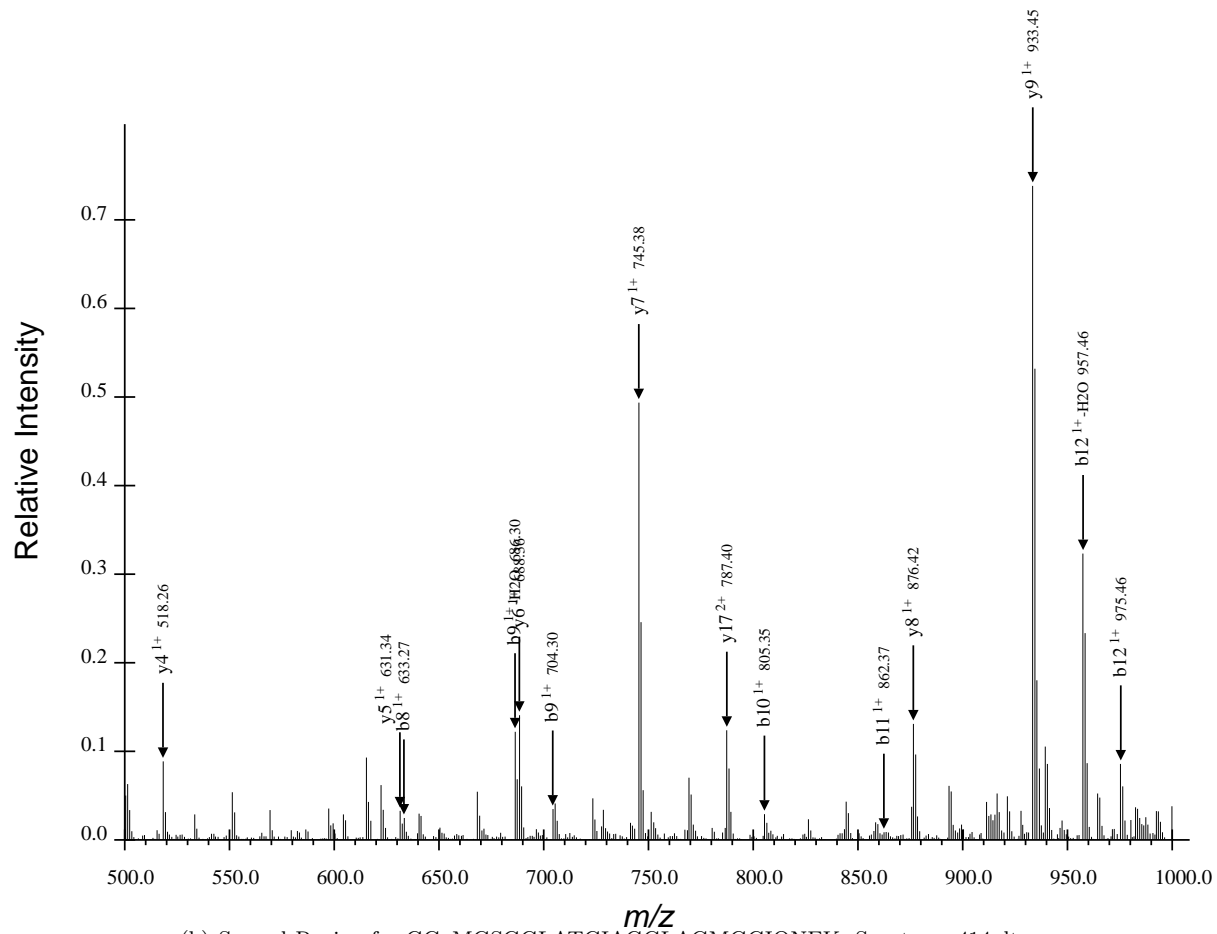

(b) Second Region for GGoMGSGLATGIAGGLAGMGGIQNEK, Spectrum 414.dta

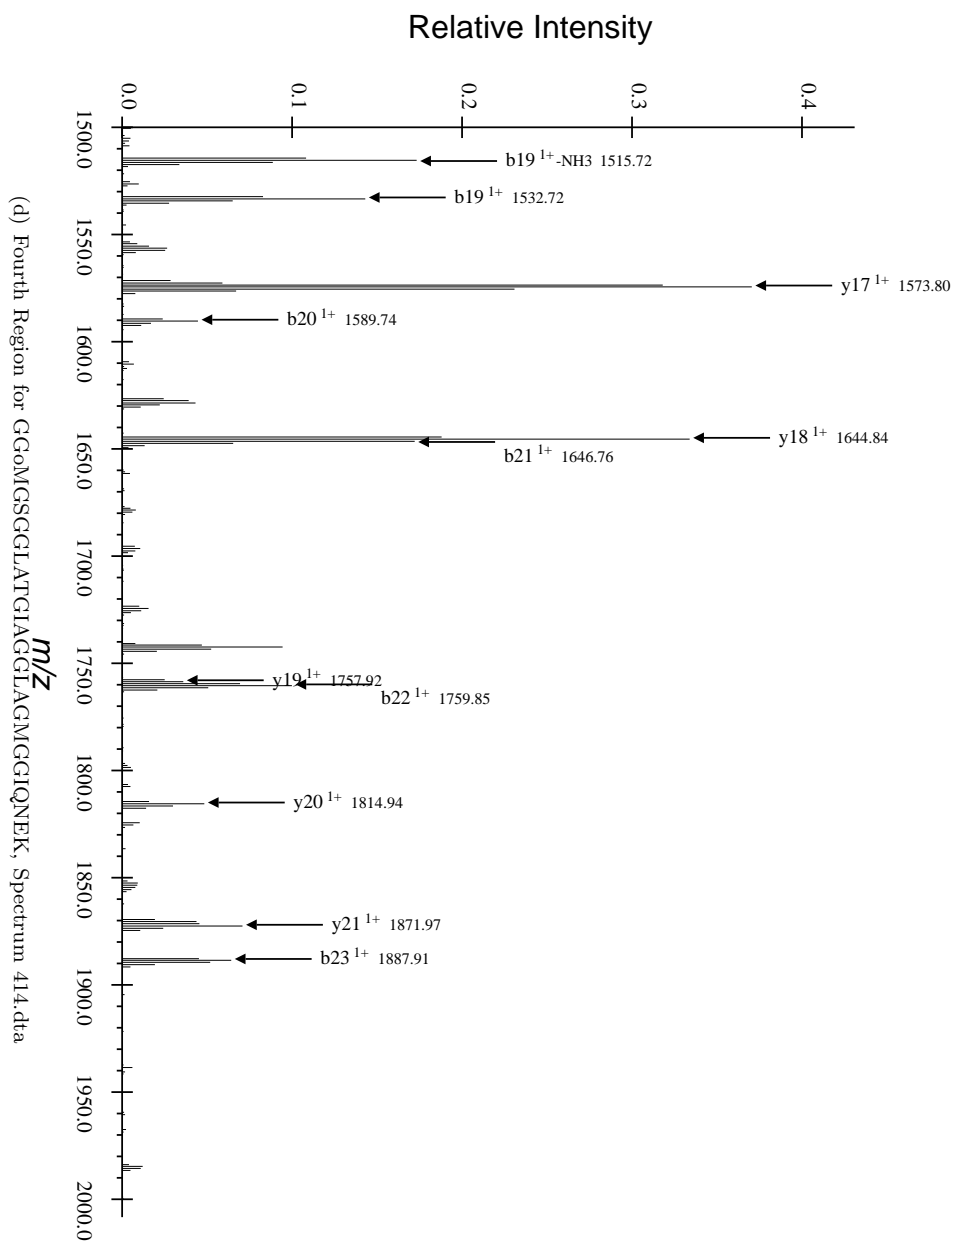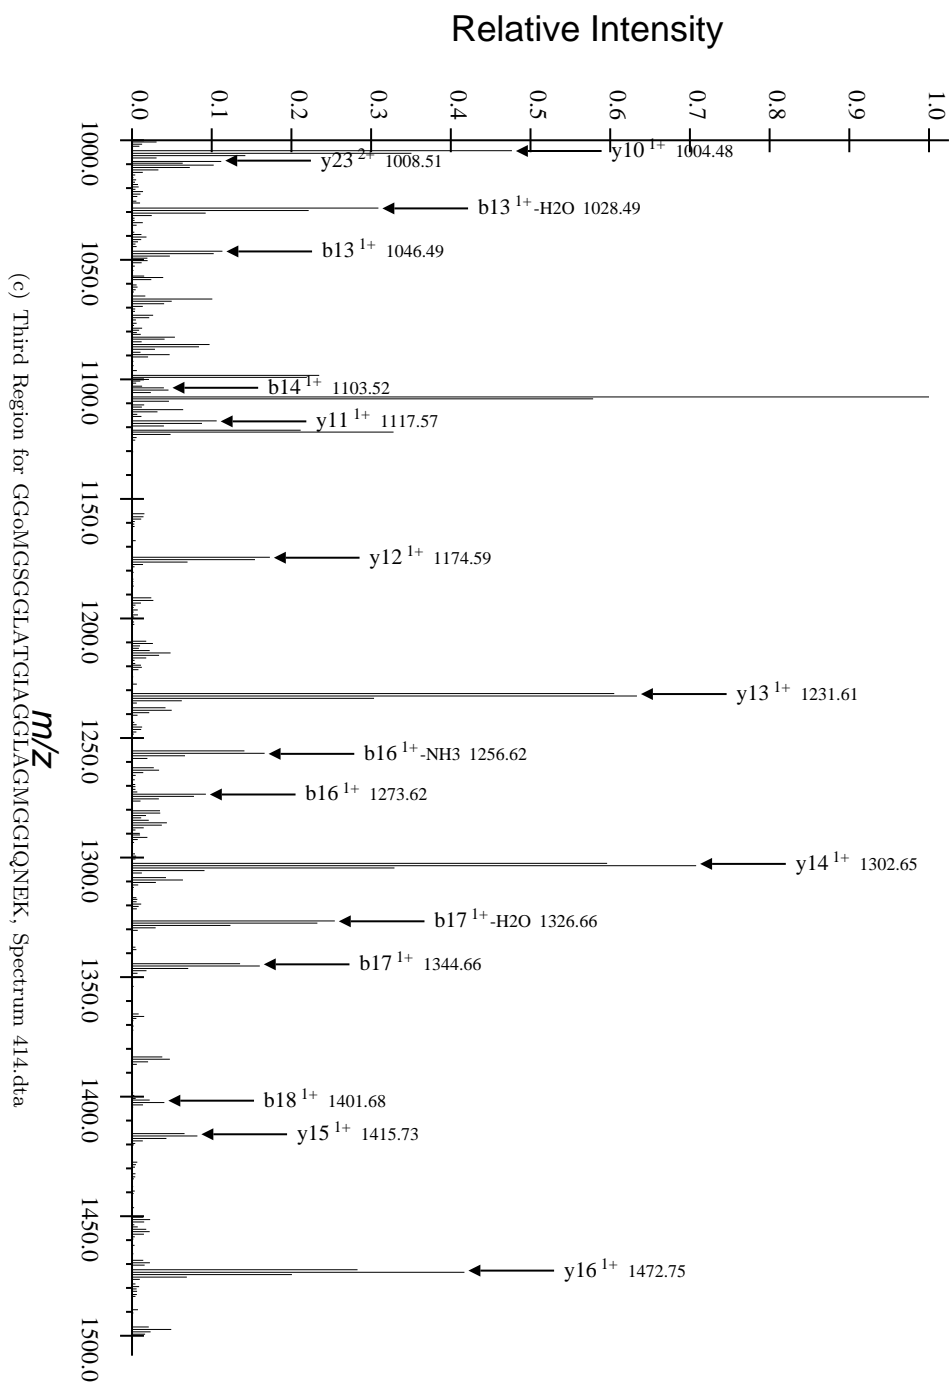



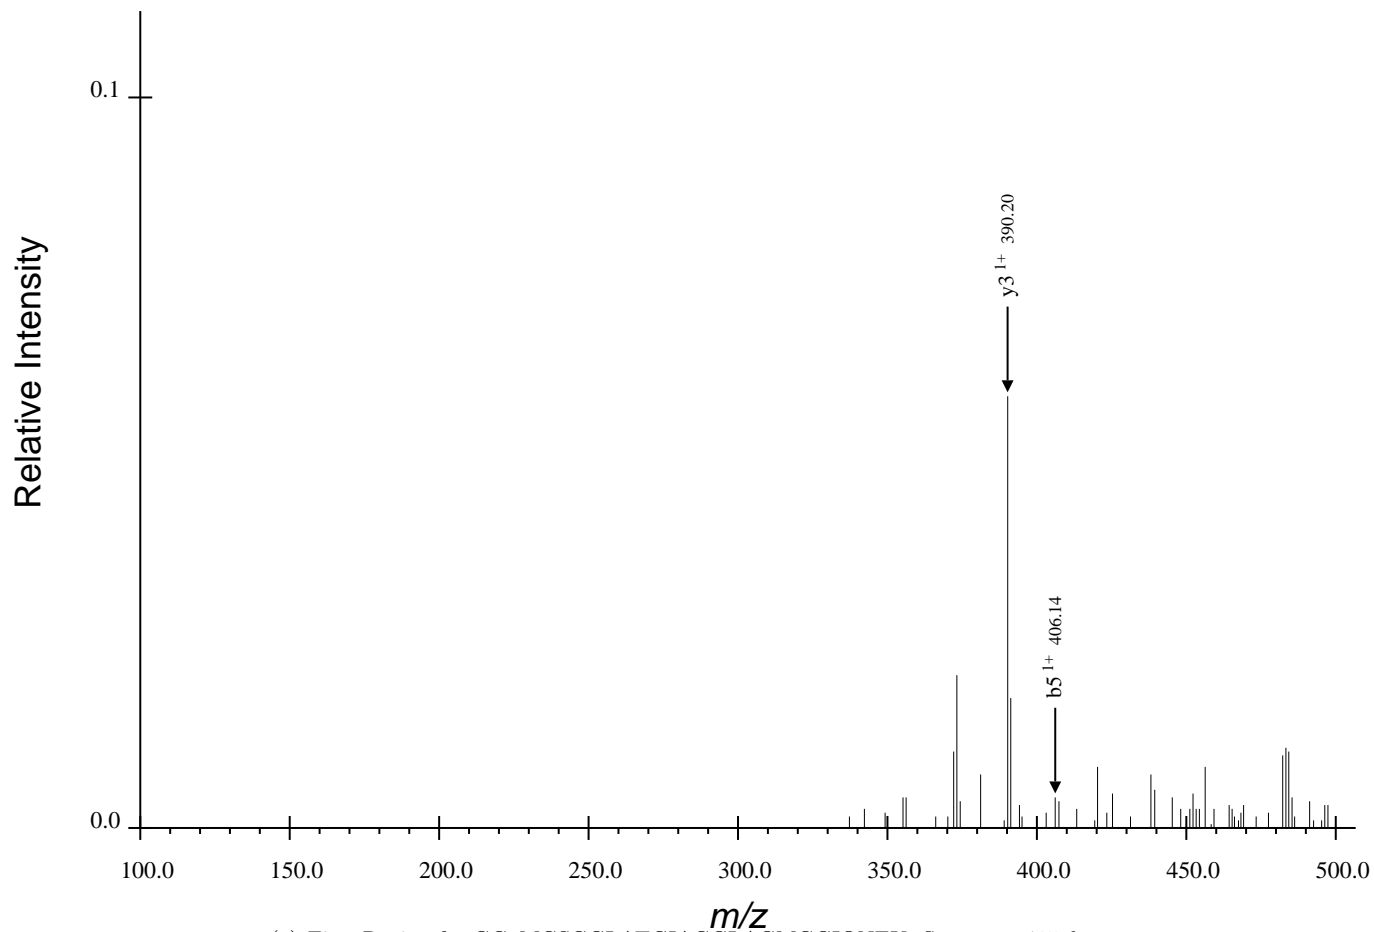

(a) First Region for GGoMGSGLATGIAGGLAGMGGIQNEK, Spectrum 415.dta

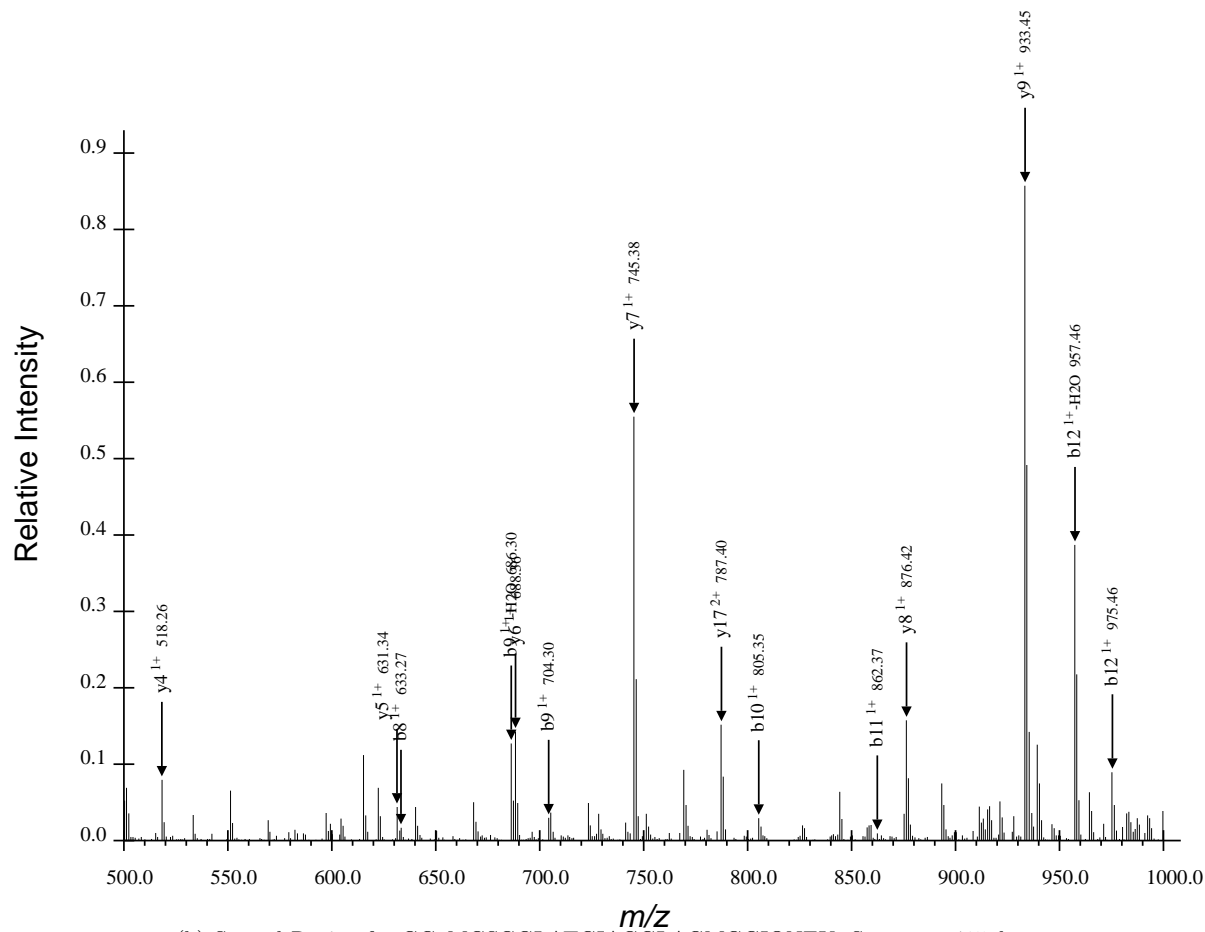

(b) Second Region for GGoMGSGLATGIAGGLAGMGGIQNEK, Spectrum 415.dta

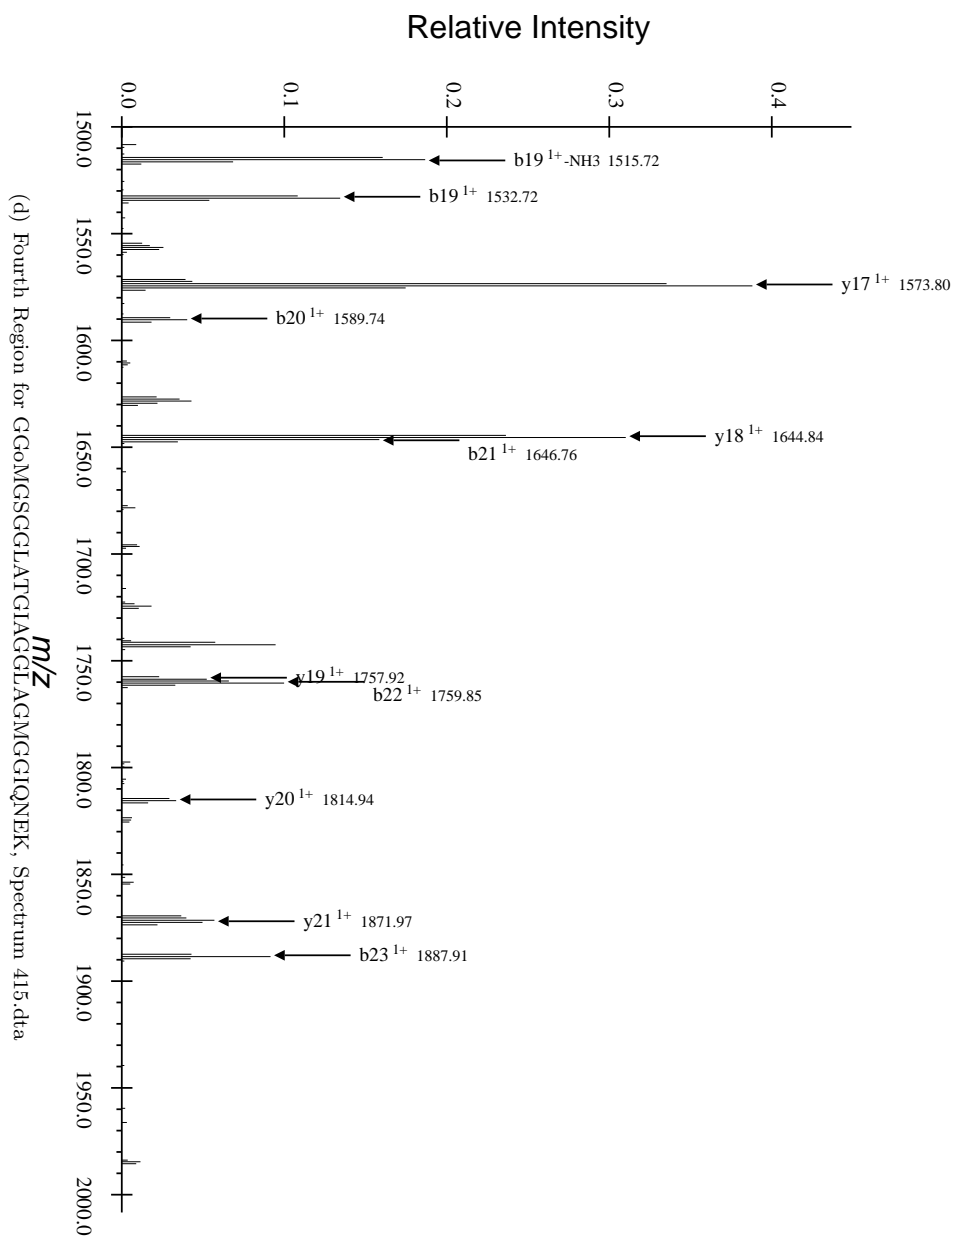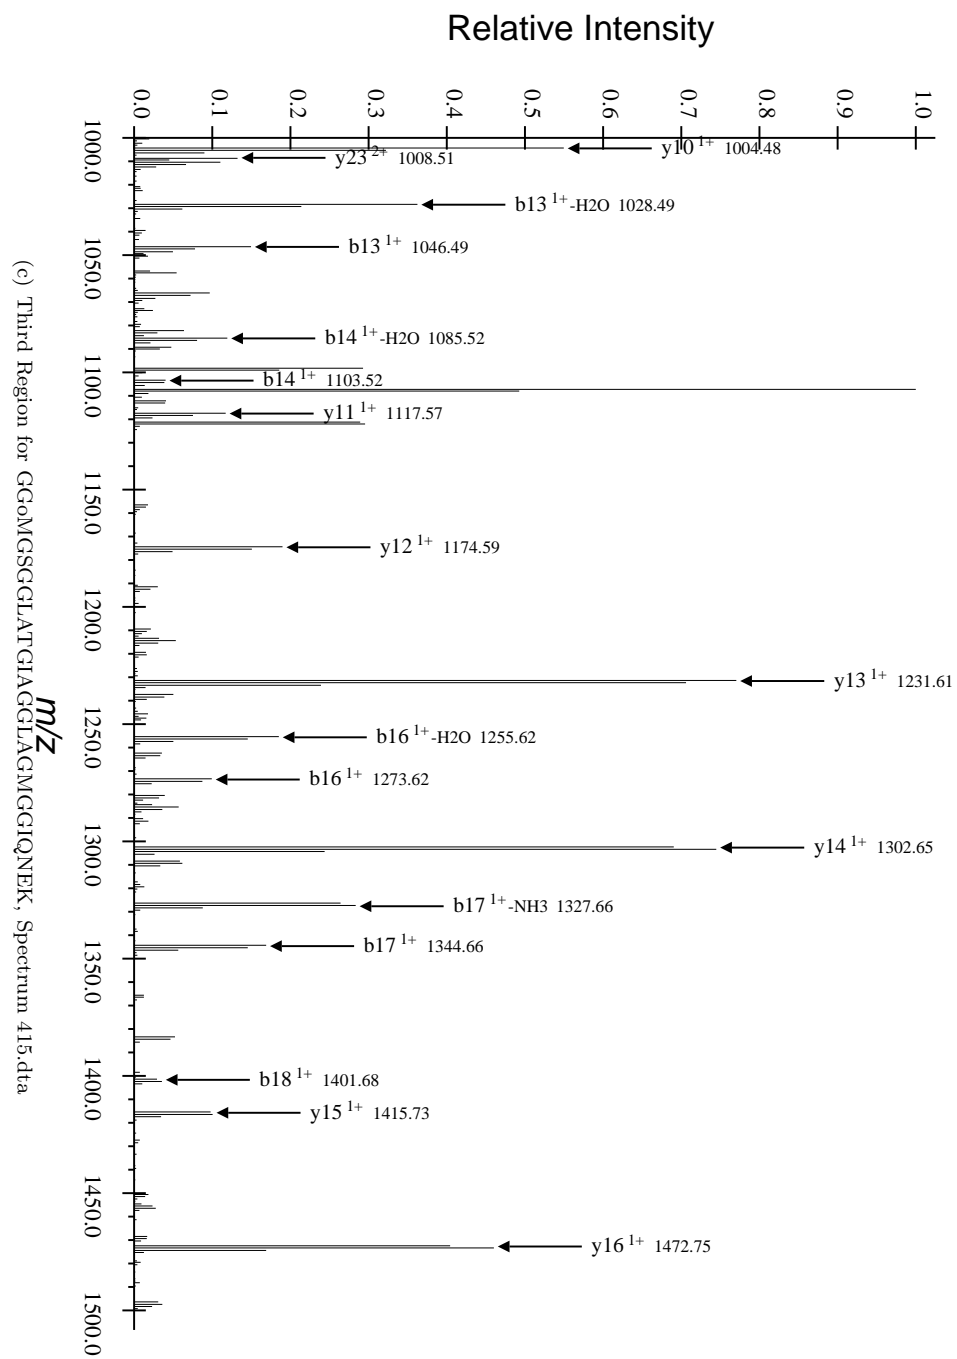

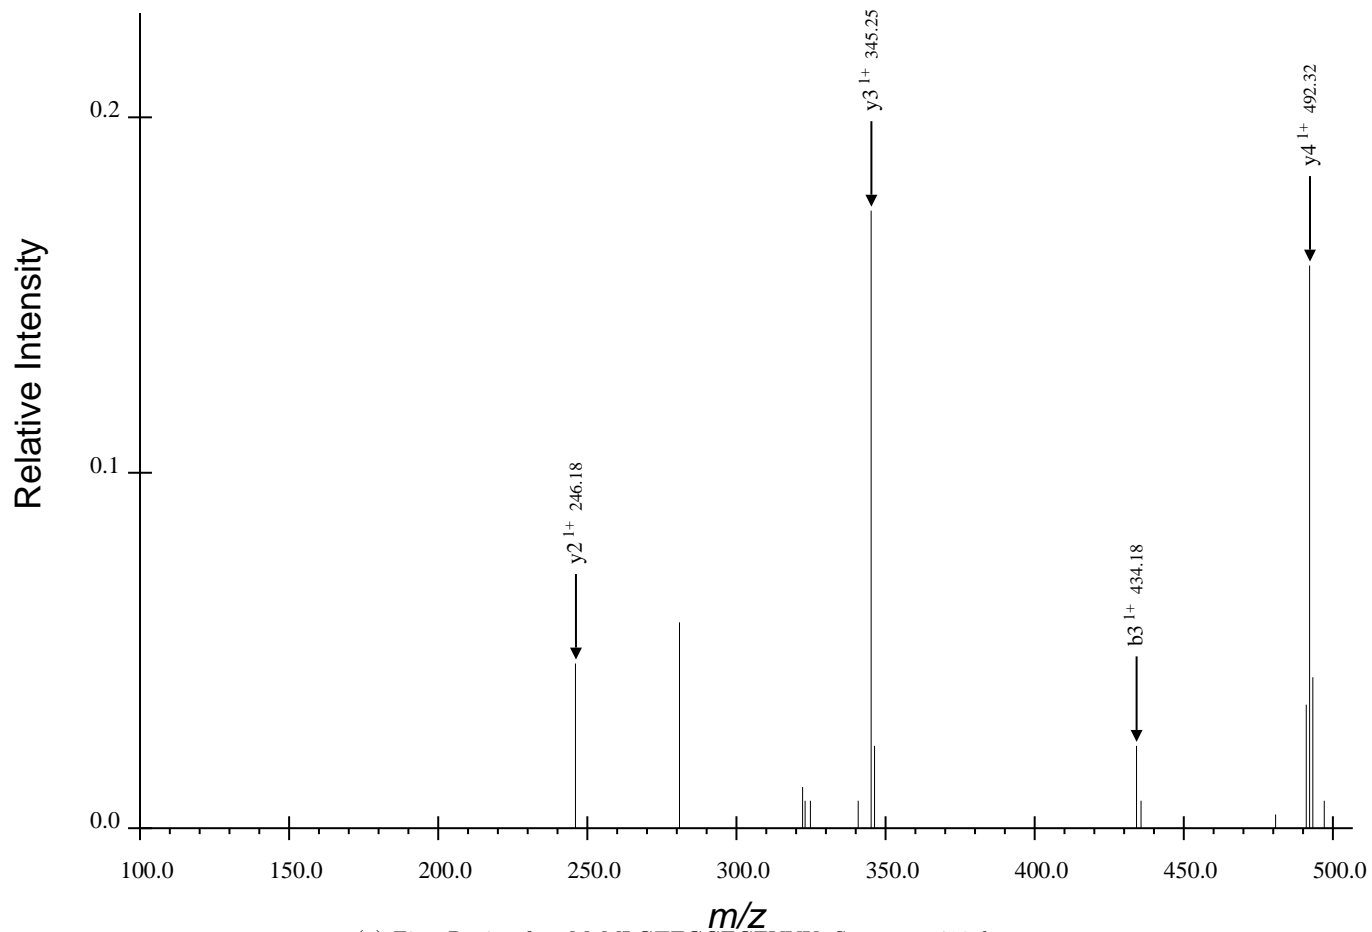

(a) First Region for aMoMLGTEGGEGFVVK, Spectrum 416.dta

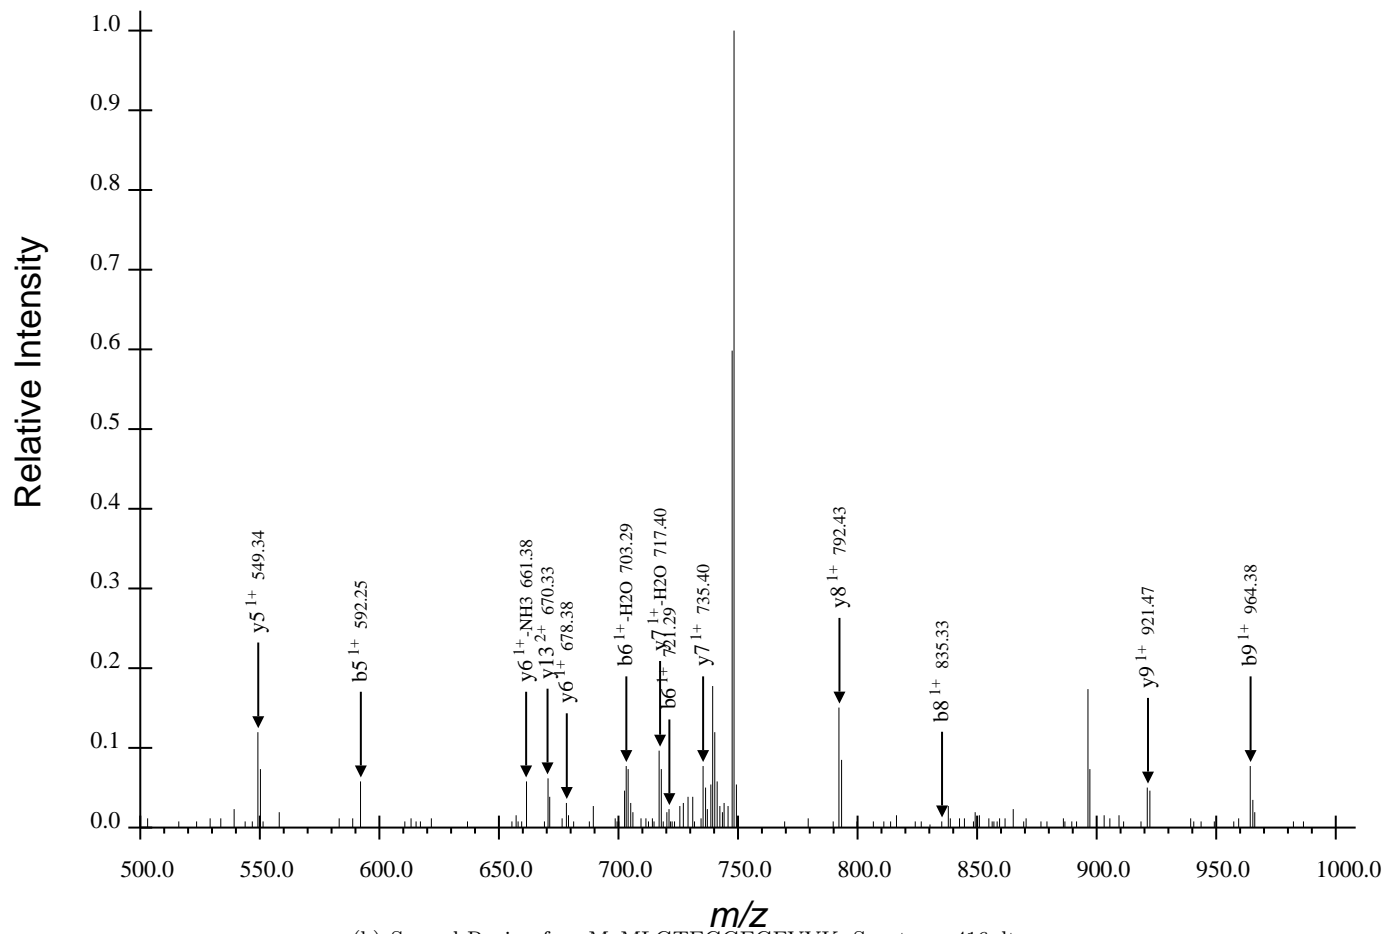

(b) Second Region for aMoMLGTEGGEGFVVK, Spectrum 416.dta

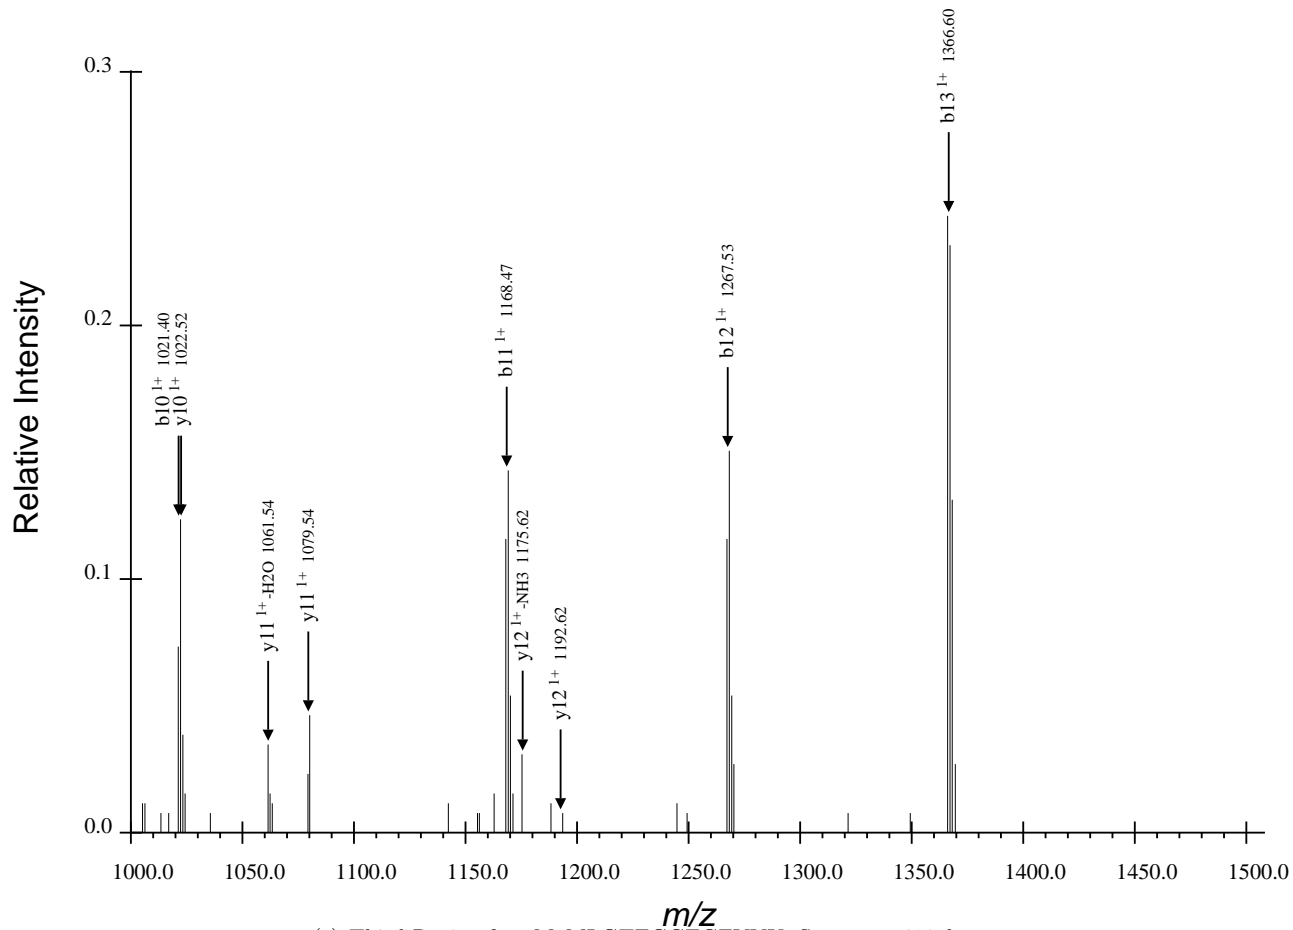

(c) Third Region for aMoMLGTEGGEGFVVK, Spectrum 416.dta

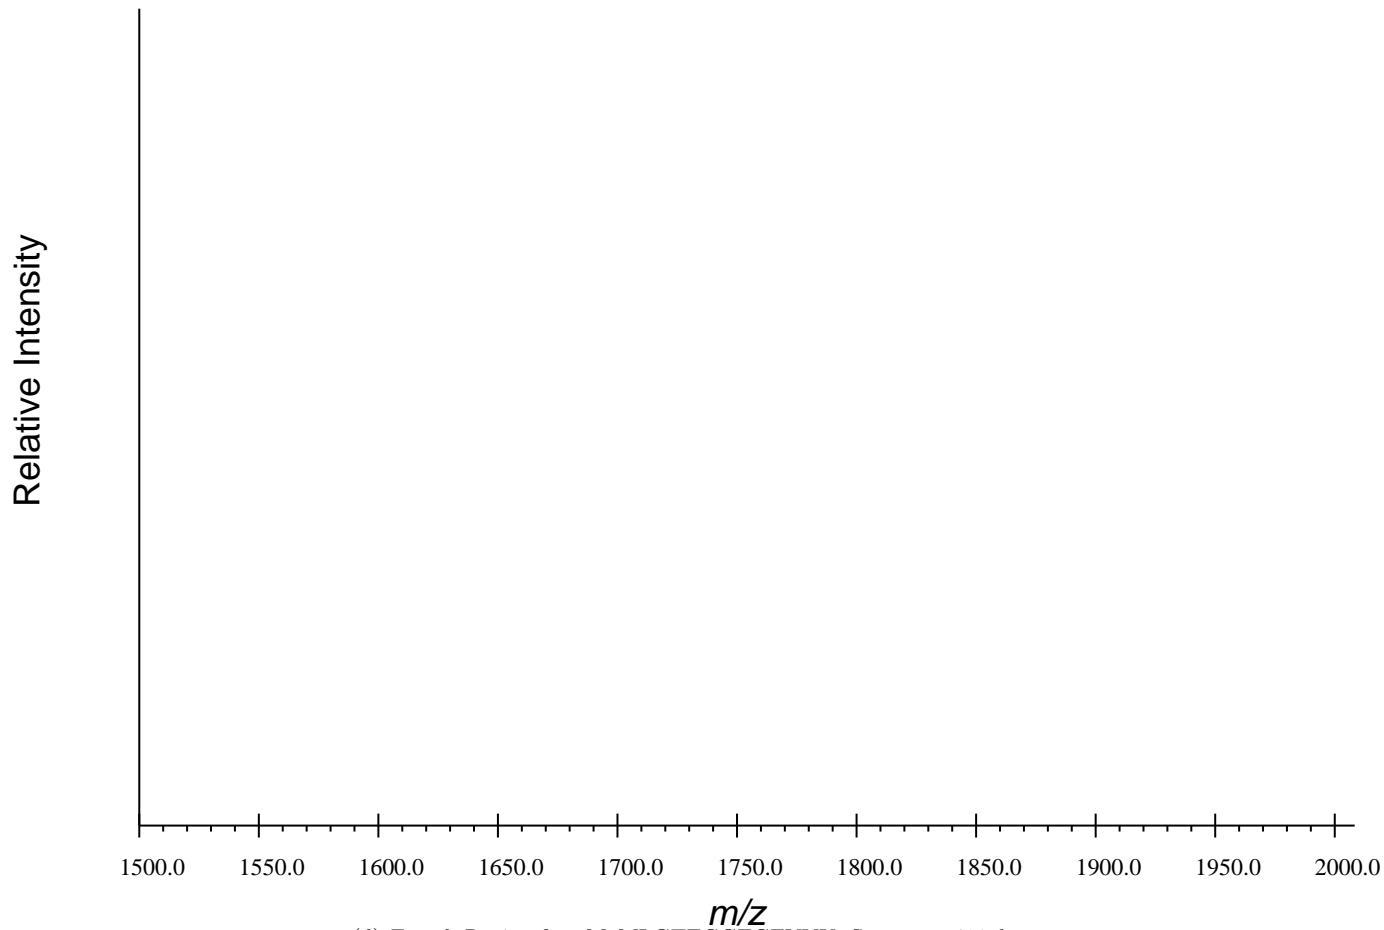

(d) Fourth Region for aMoMLGTEGGEGFVVK, Spectrum 416.dta

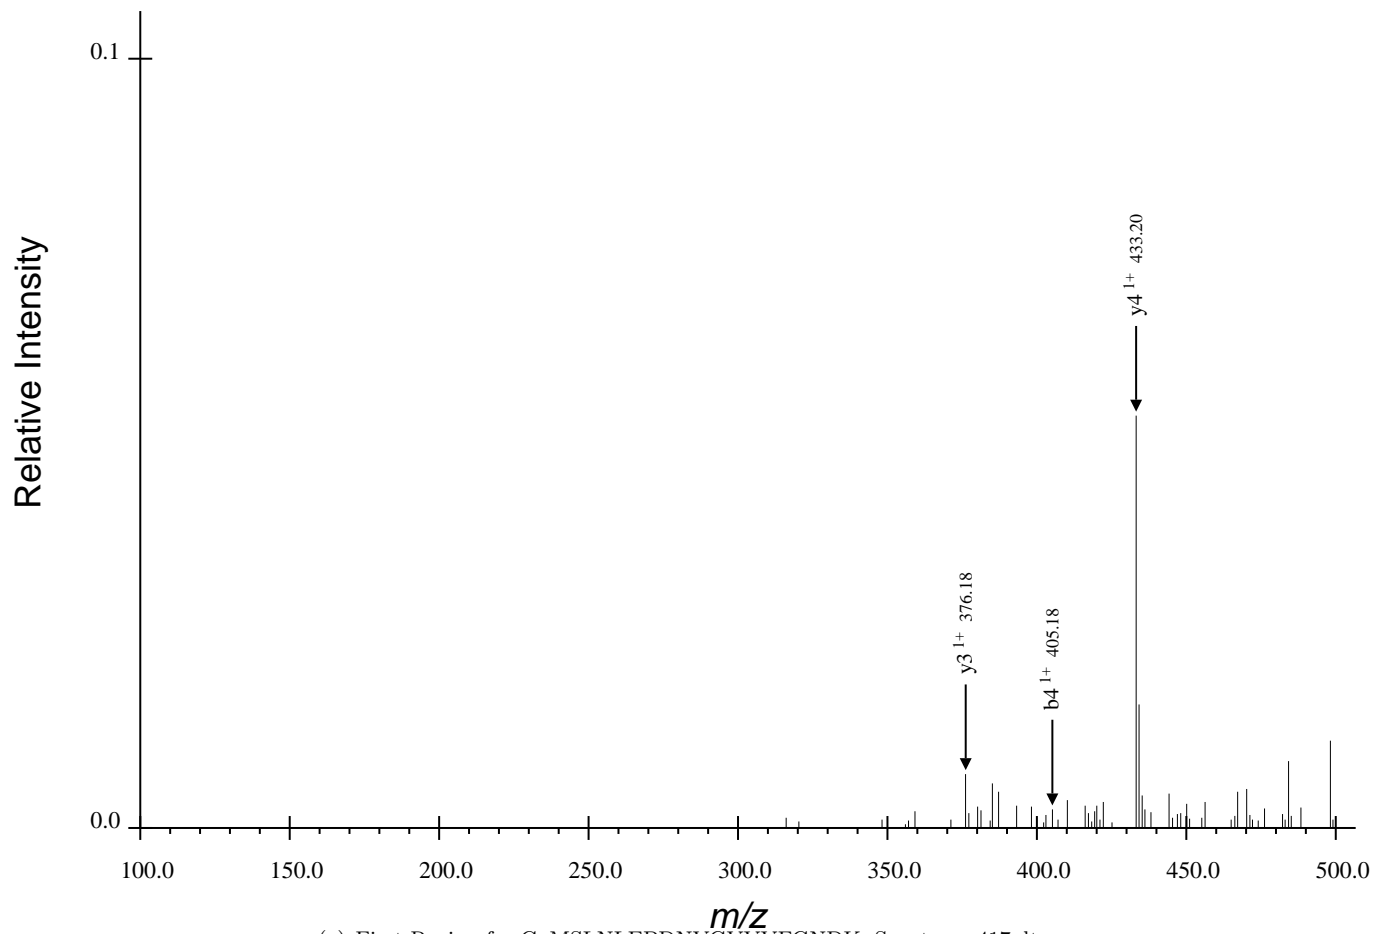

(a) First Region for GoMSLNLEPDNVGVVVFQNDK, Spectrum 417.dta

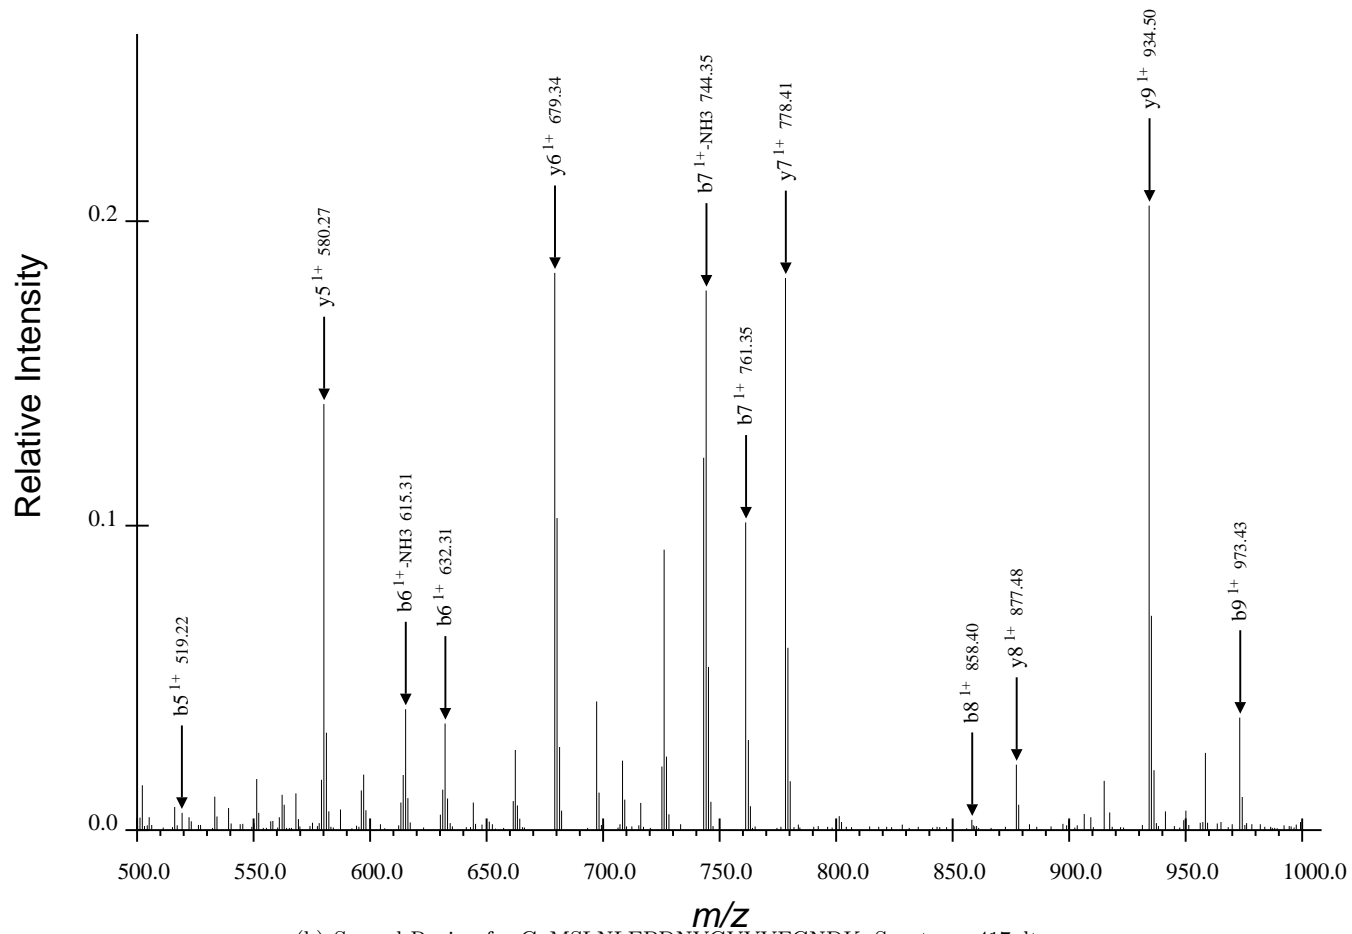

(b) Second Region for GoMSLNLEPDNVGVVVFQNDK, Spectrum 417.dta

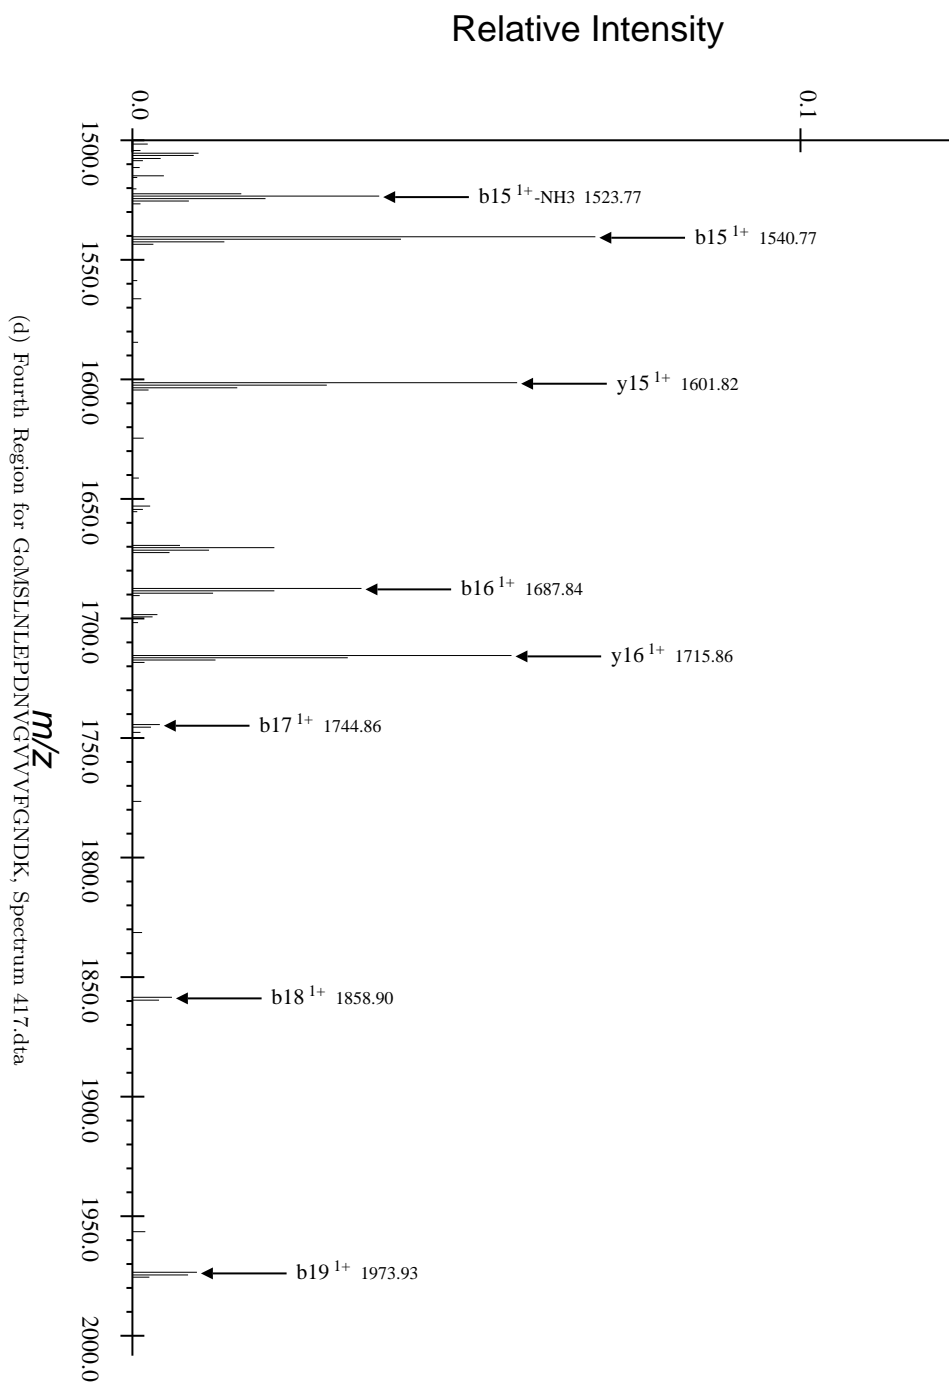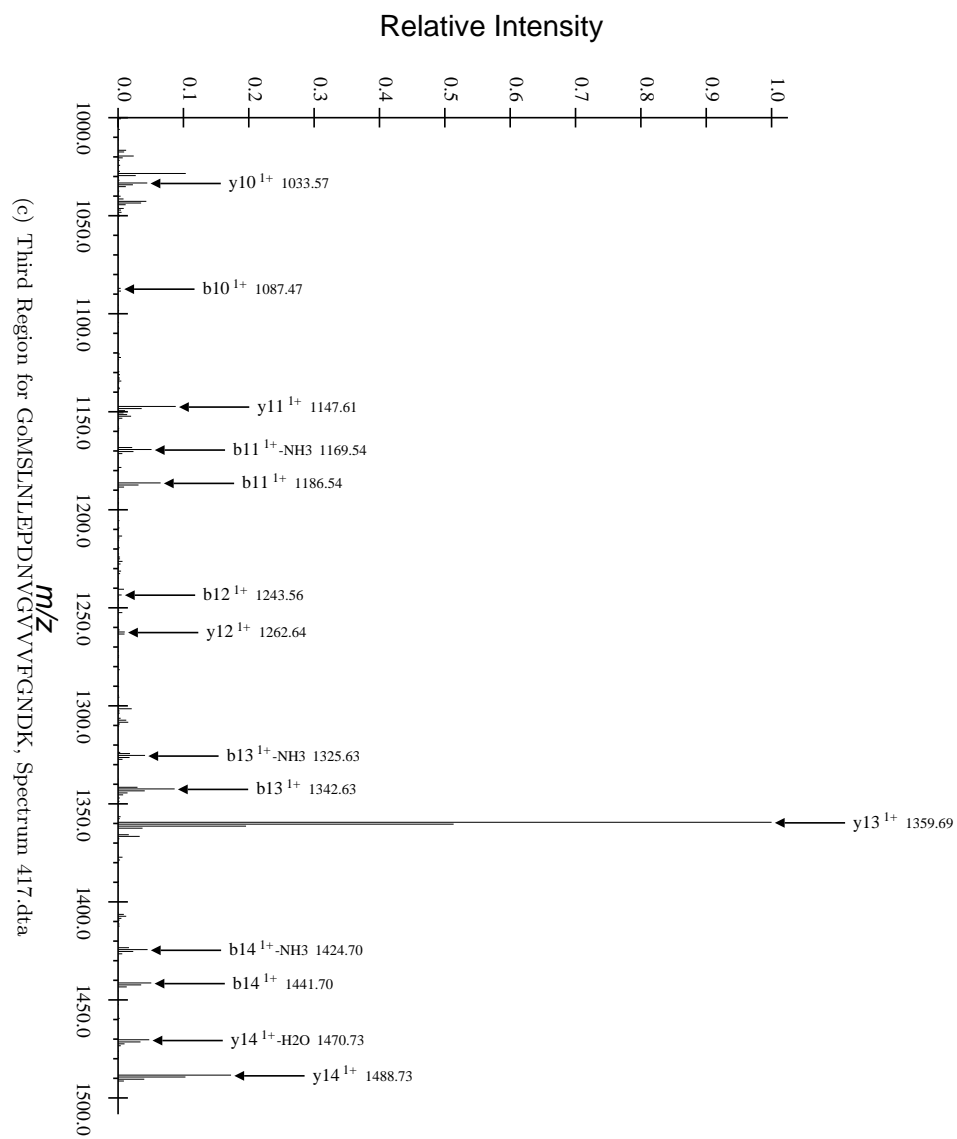

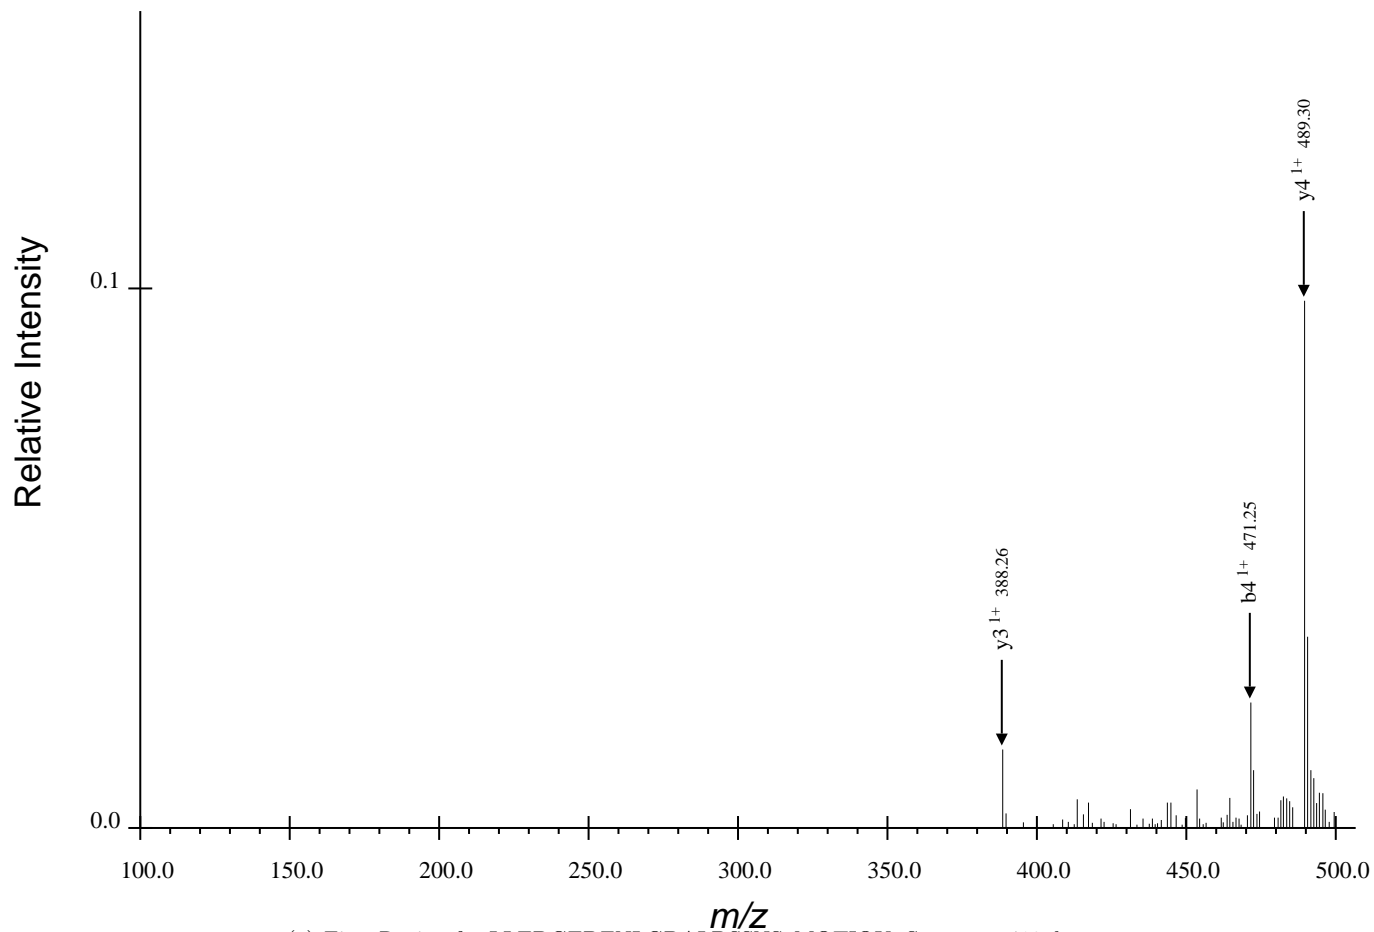

(a) First Region for LLEDGEDFNLGDALDSSNSoMQTIQK, Spectrum 418.dta

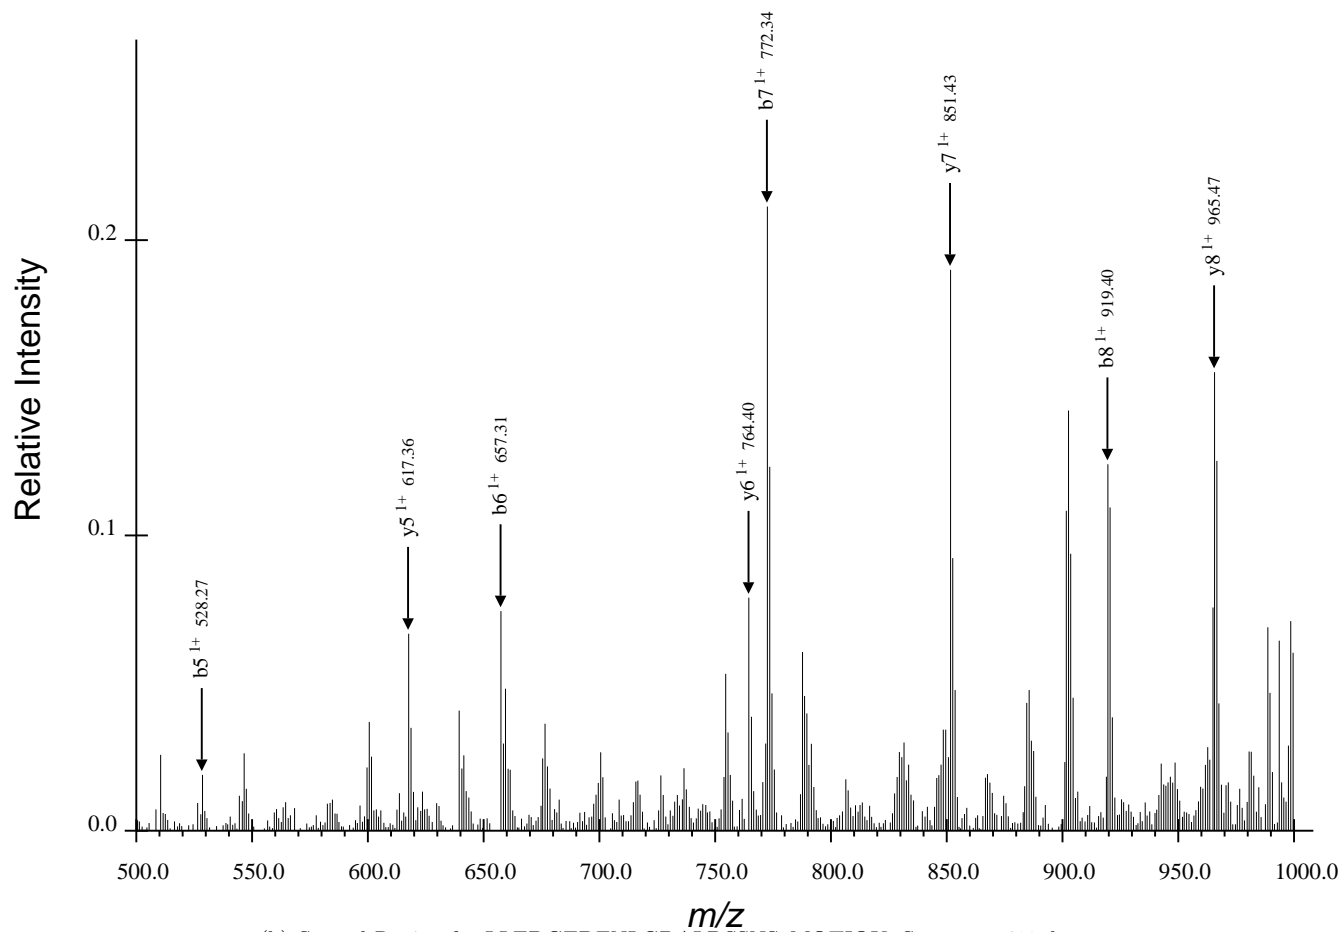

(b) Second Region for LLEDGEDFNLGDALDSSNSoMQTIQK, Spectrum 418.dta

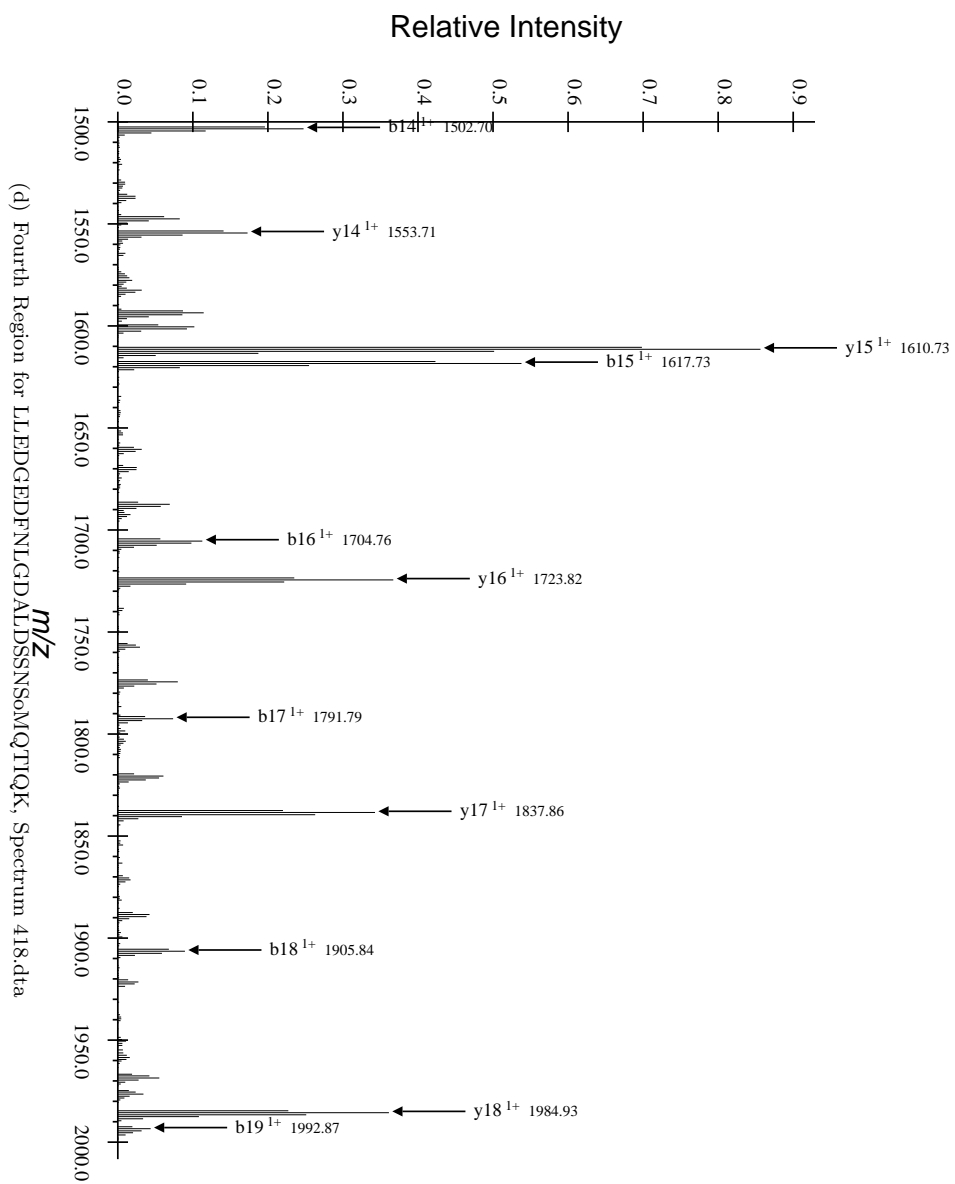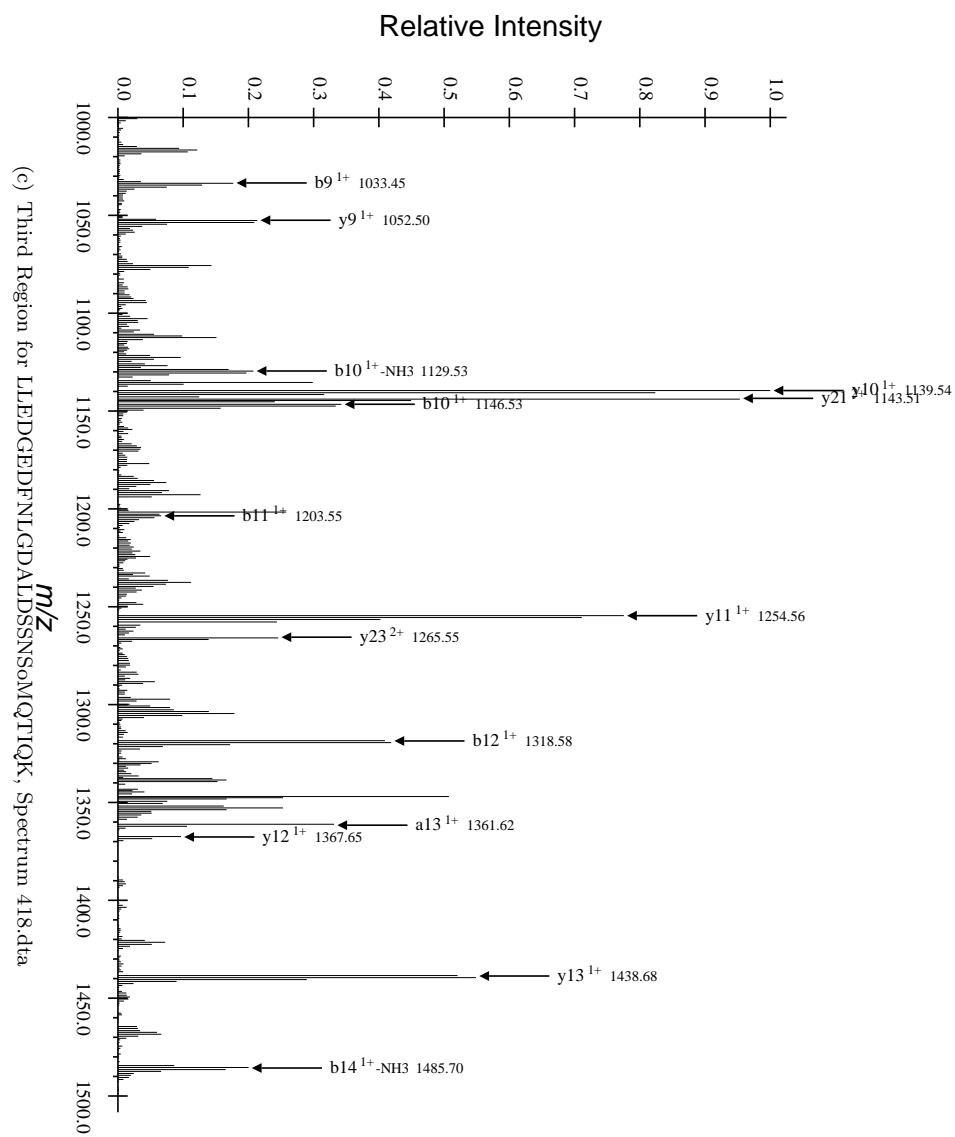



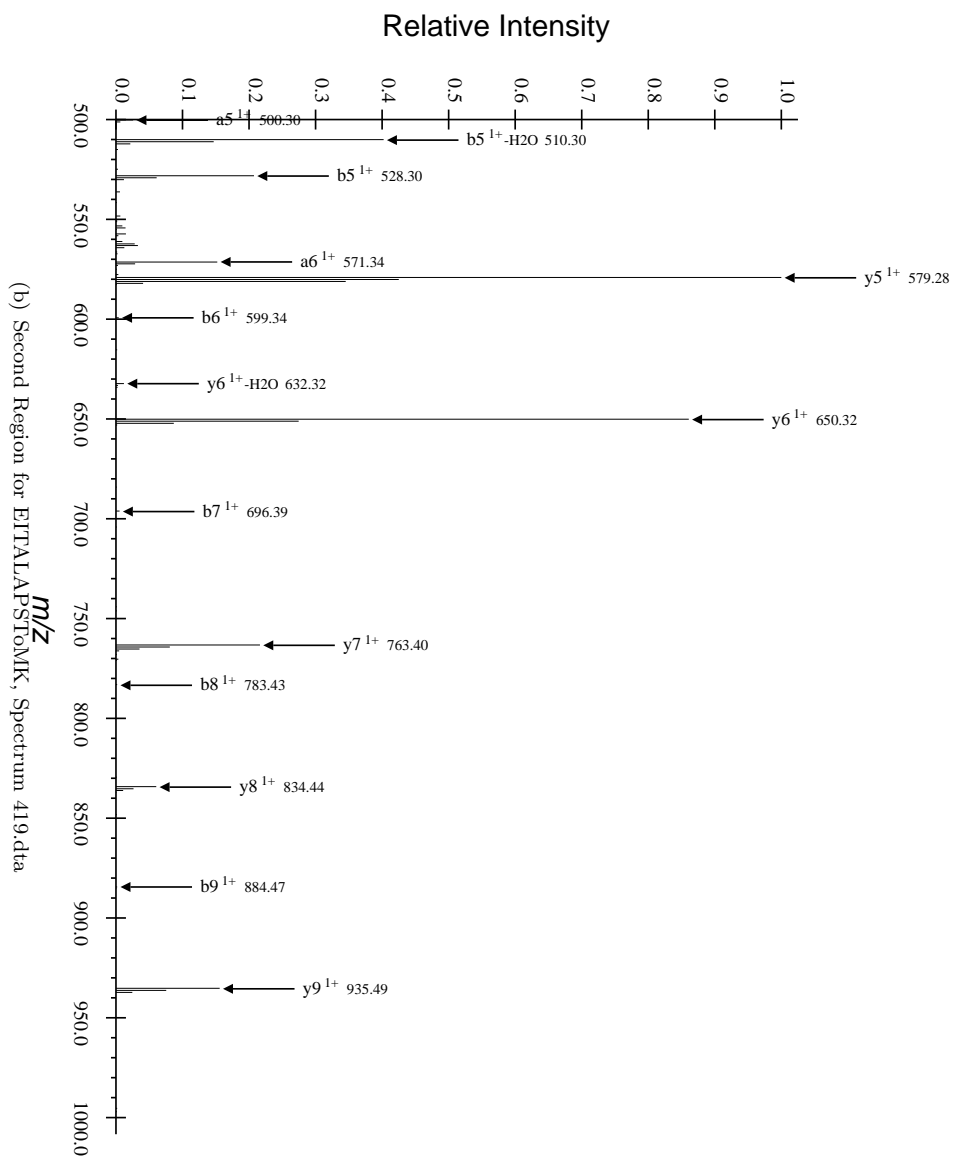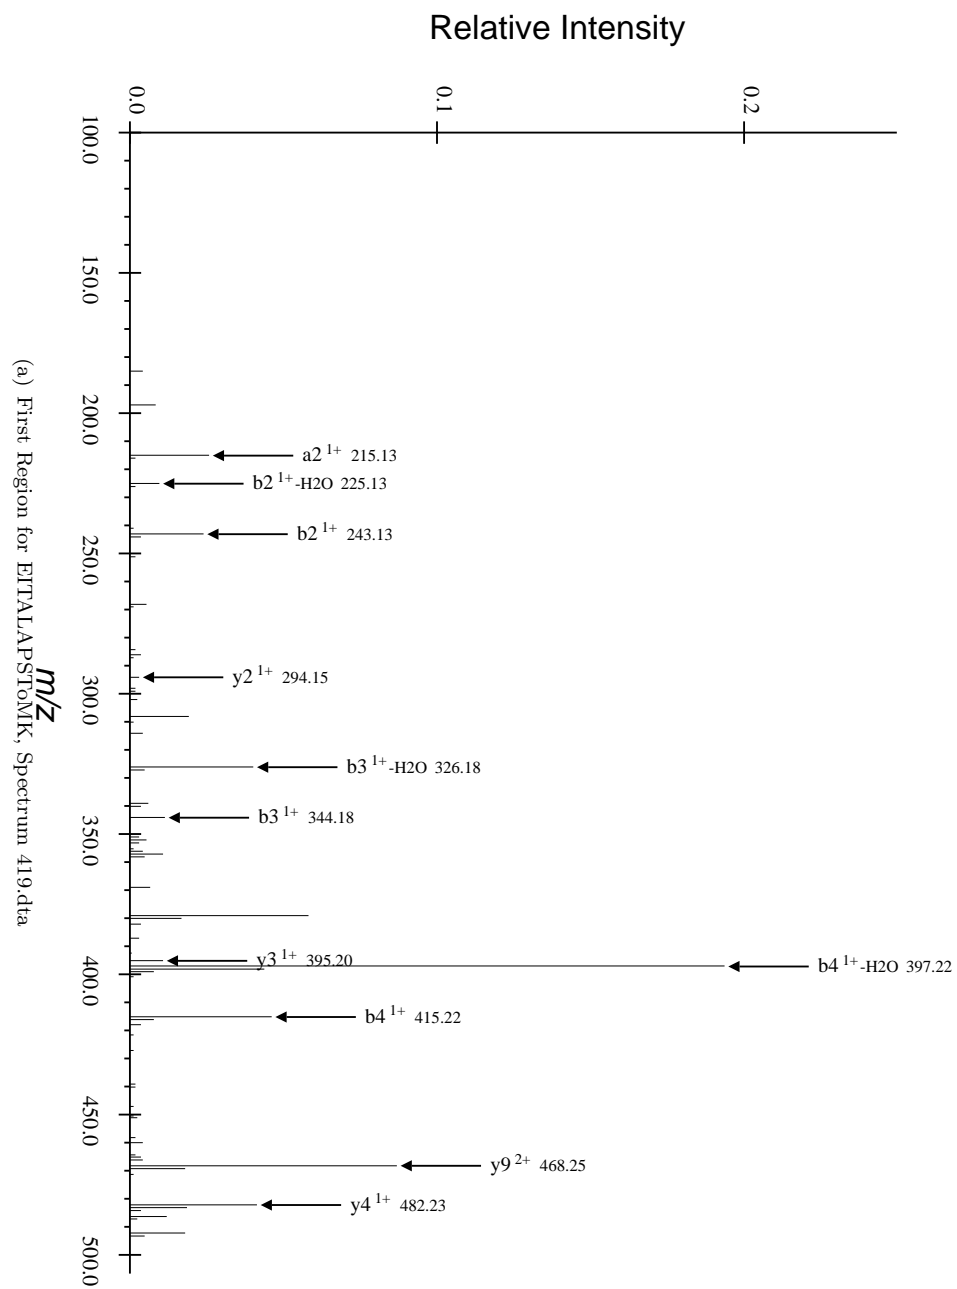

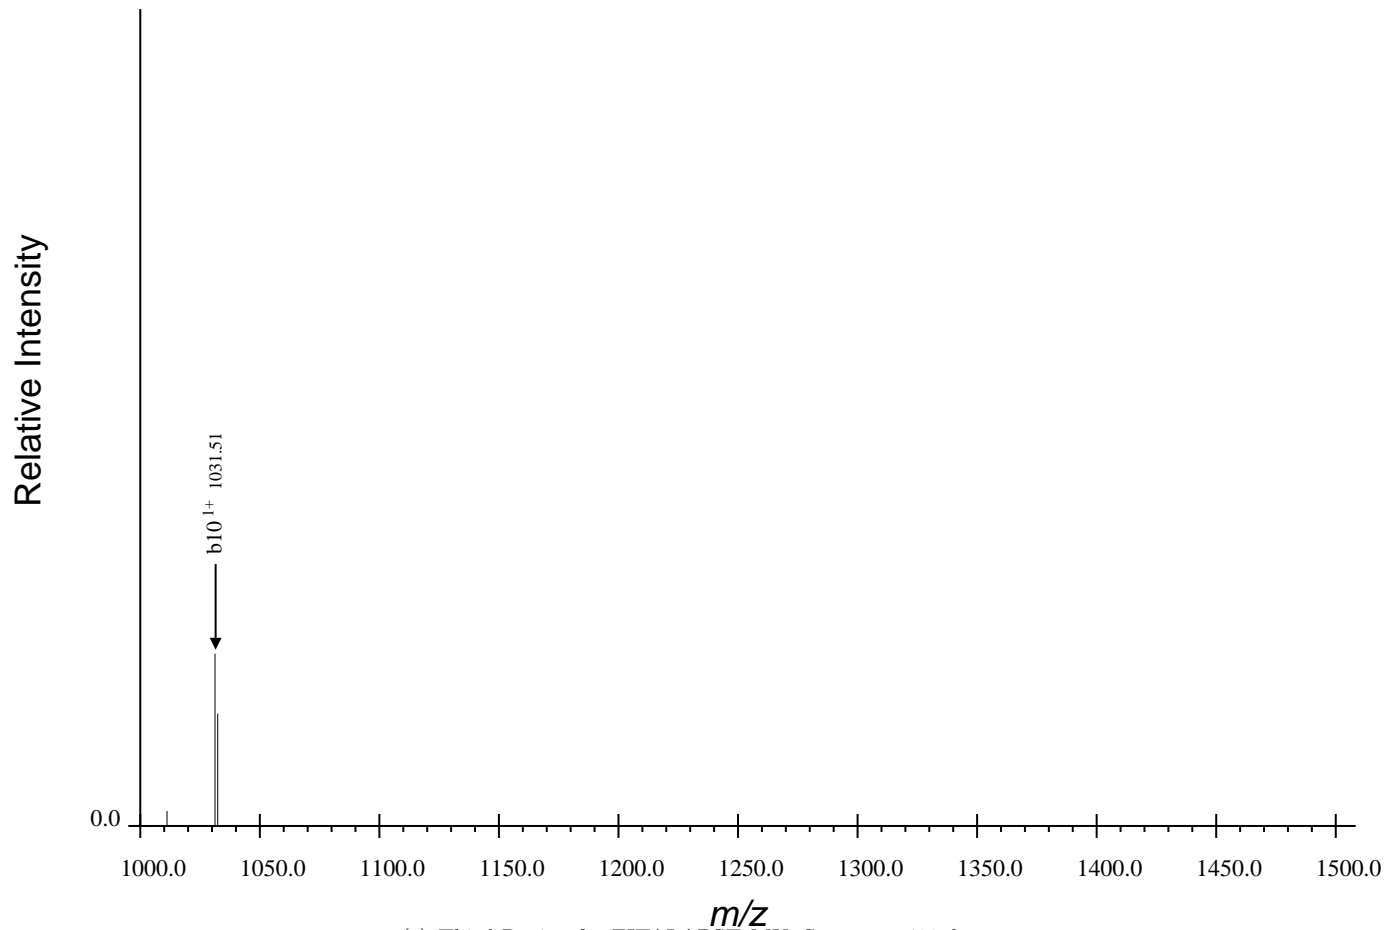

(c) Third Region for EITALAPSToMK, Spectrum 419.dta

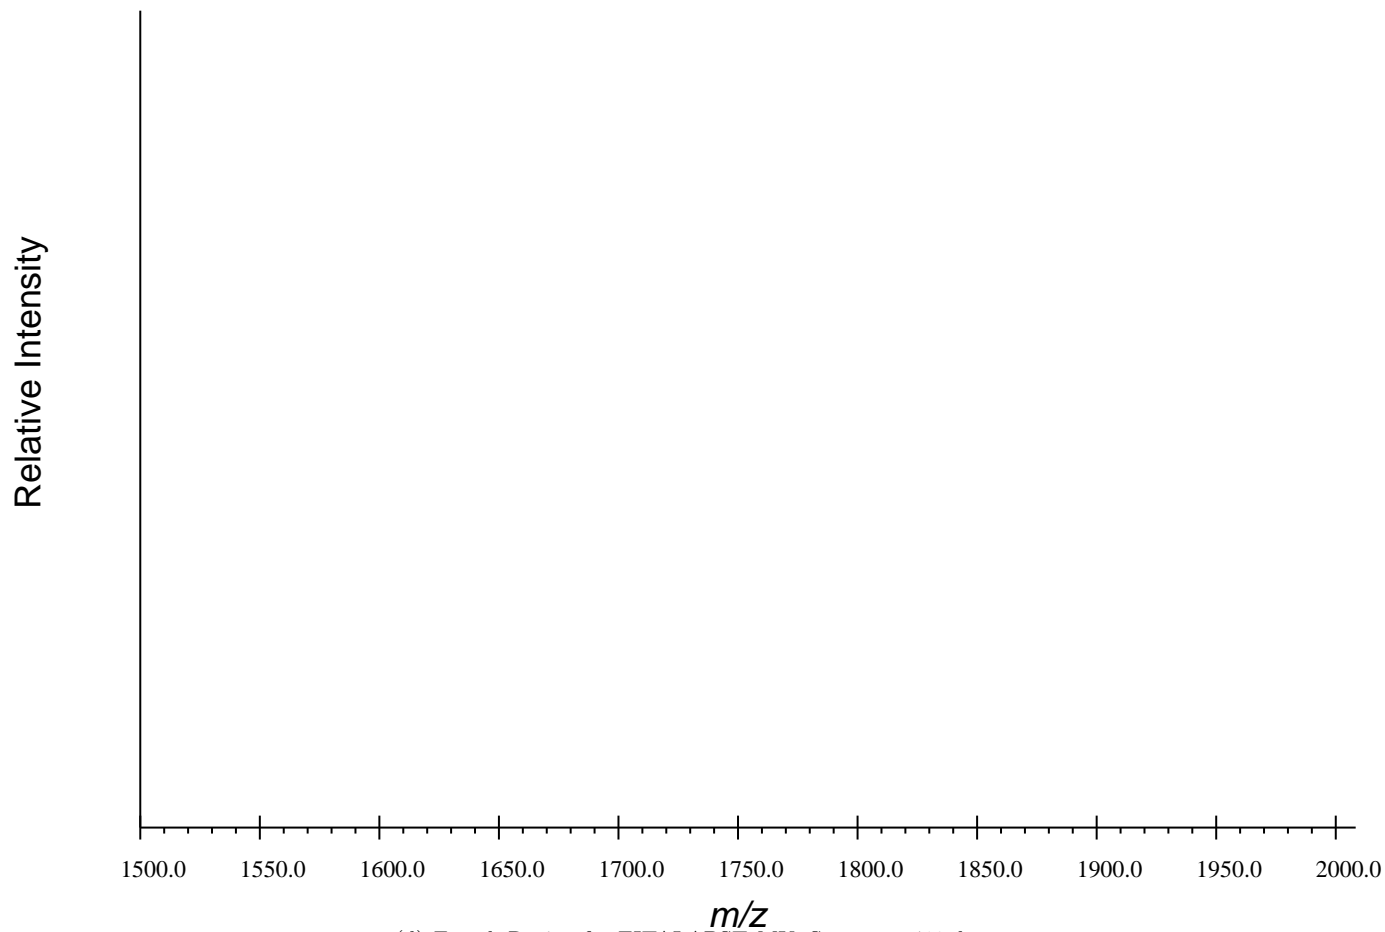

(d) Fourth Region for EITALAPSToMK, Spectrum 419.dta

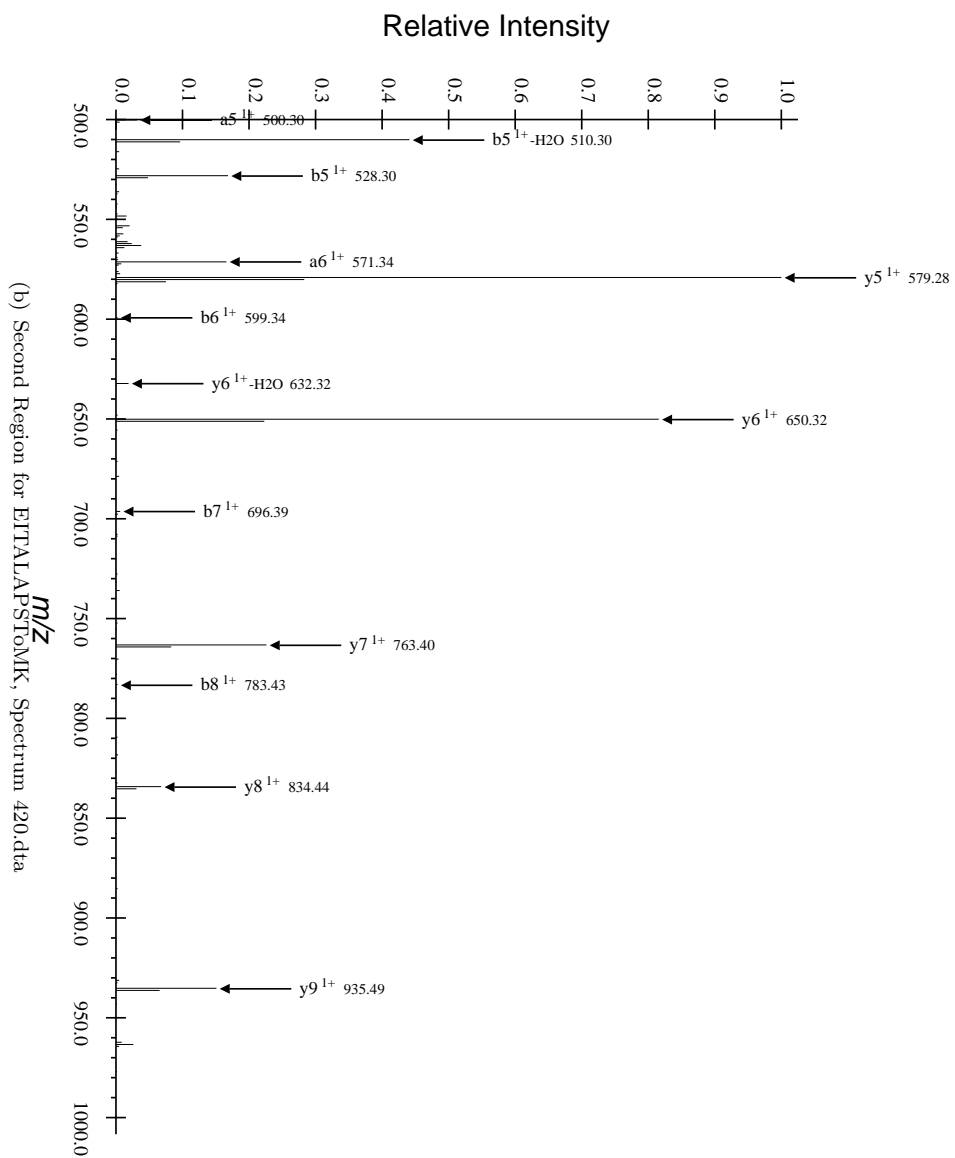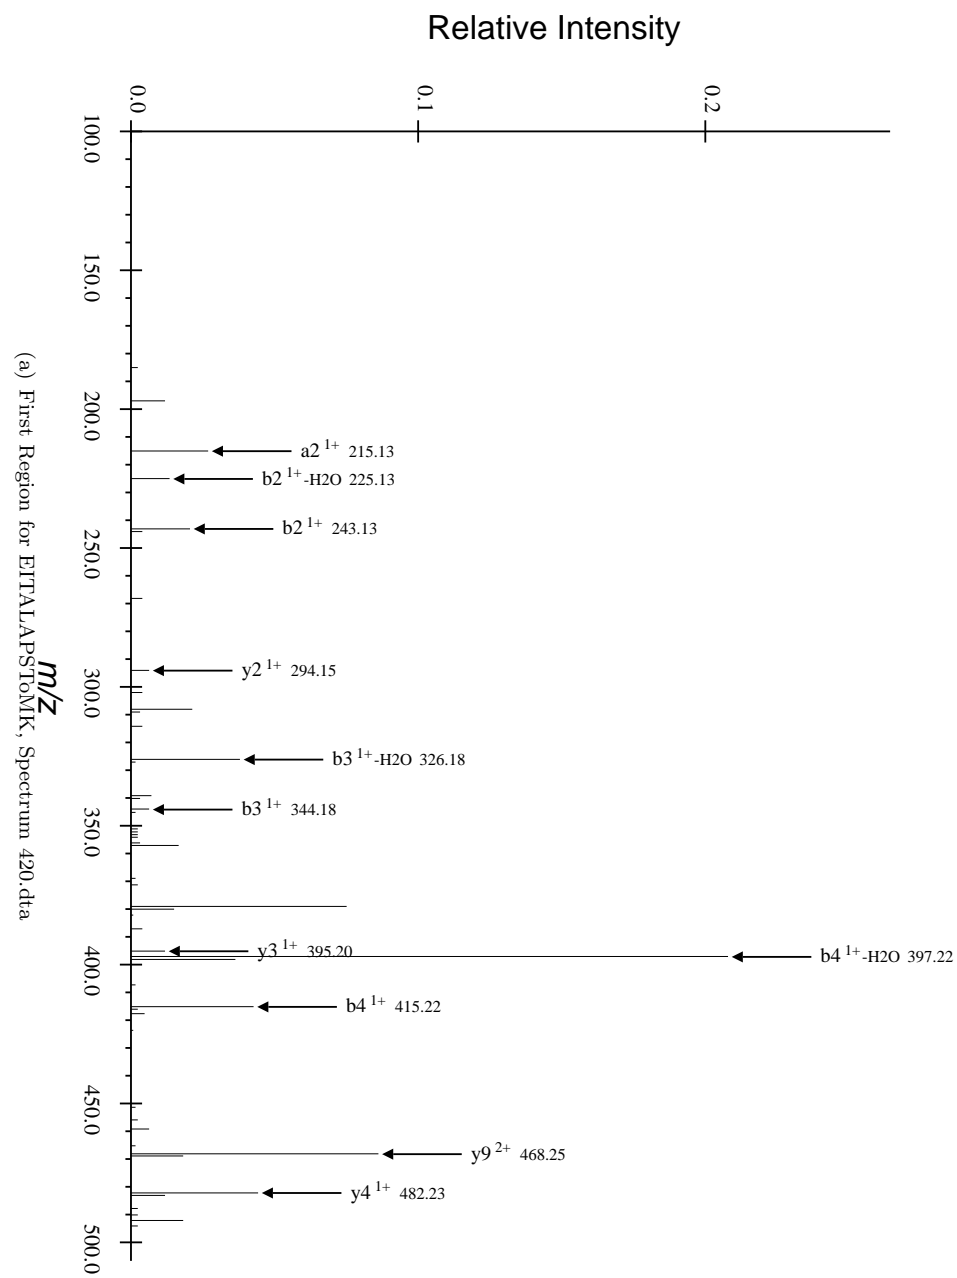

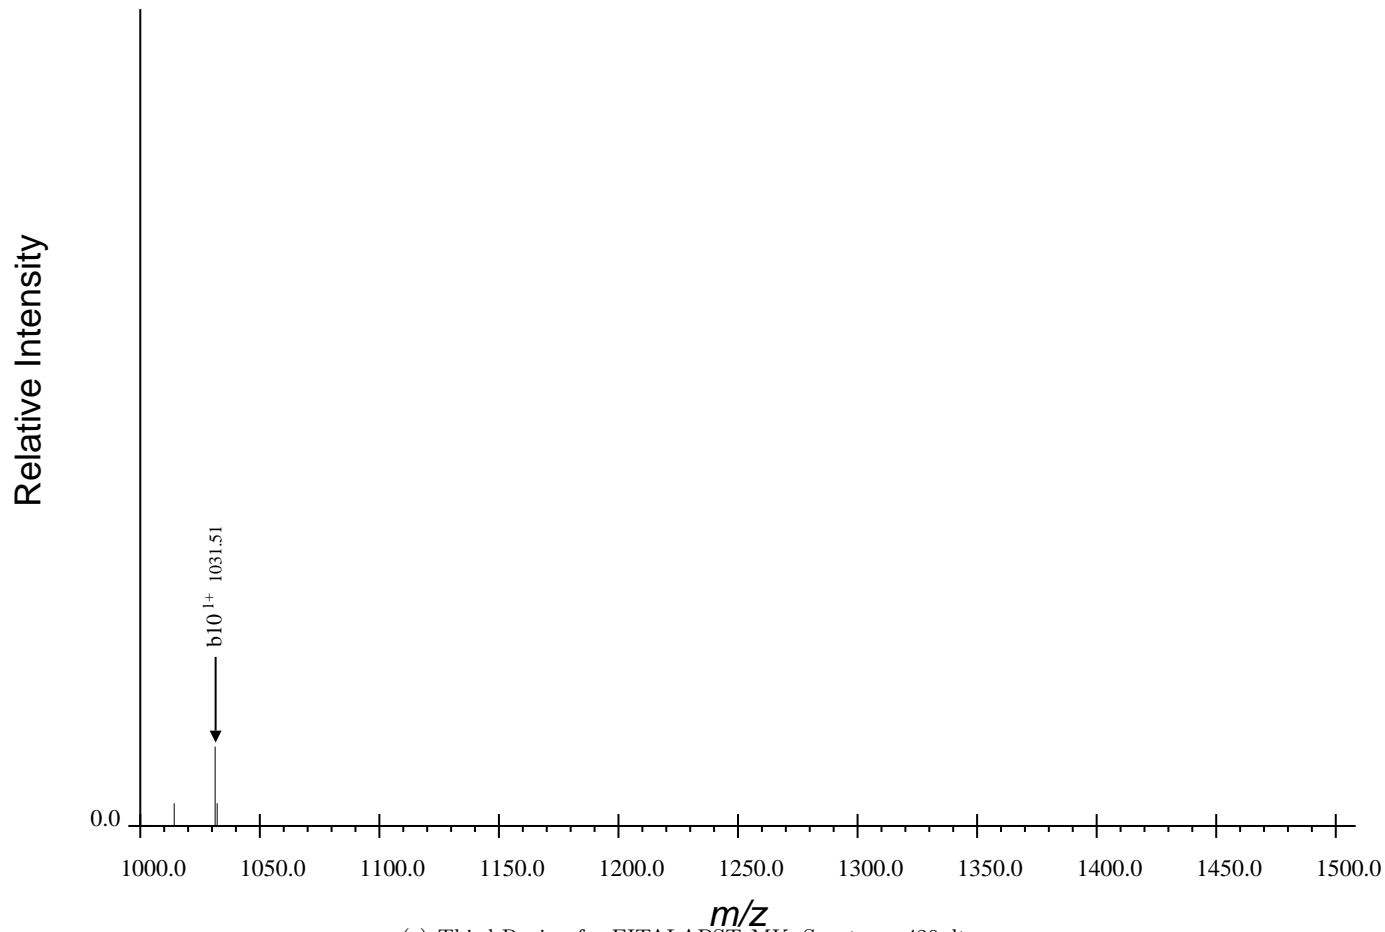

(c) Third Region for EITALAPSToMK, Spectrum 420.dta

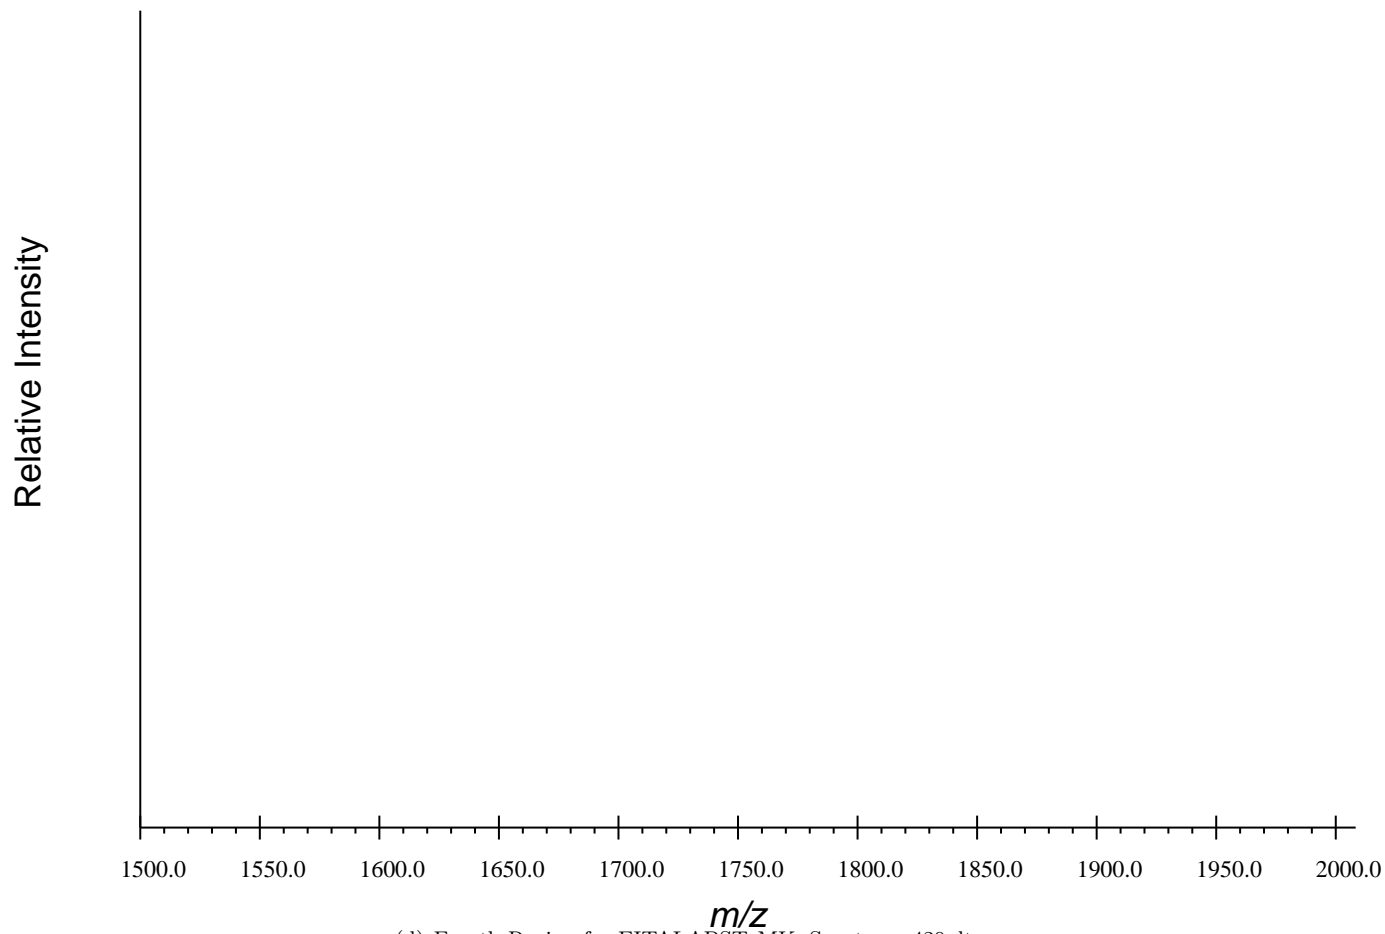

(d) Fourth Region for EITALAPSToMK, Spectrum 420.dta

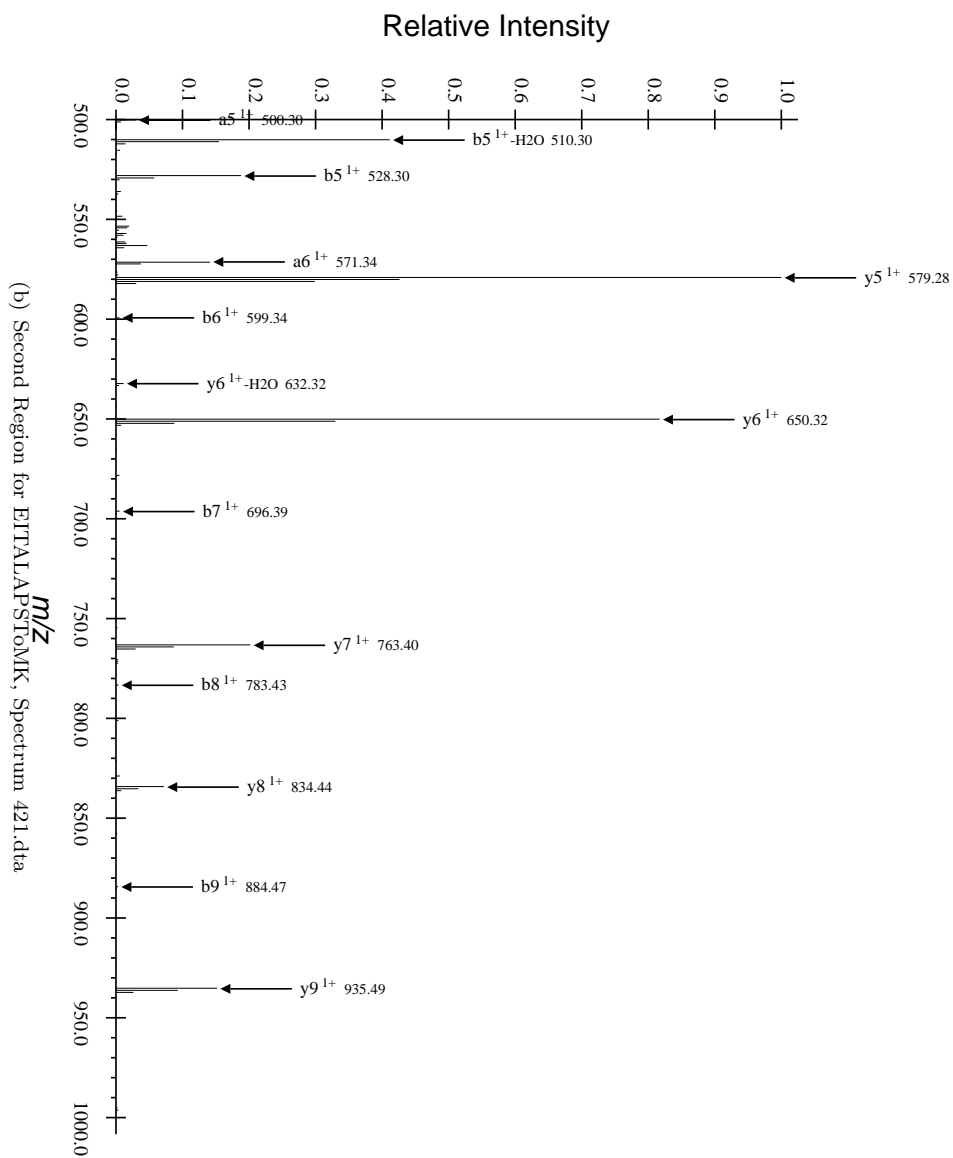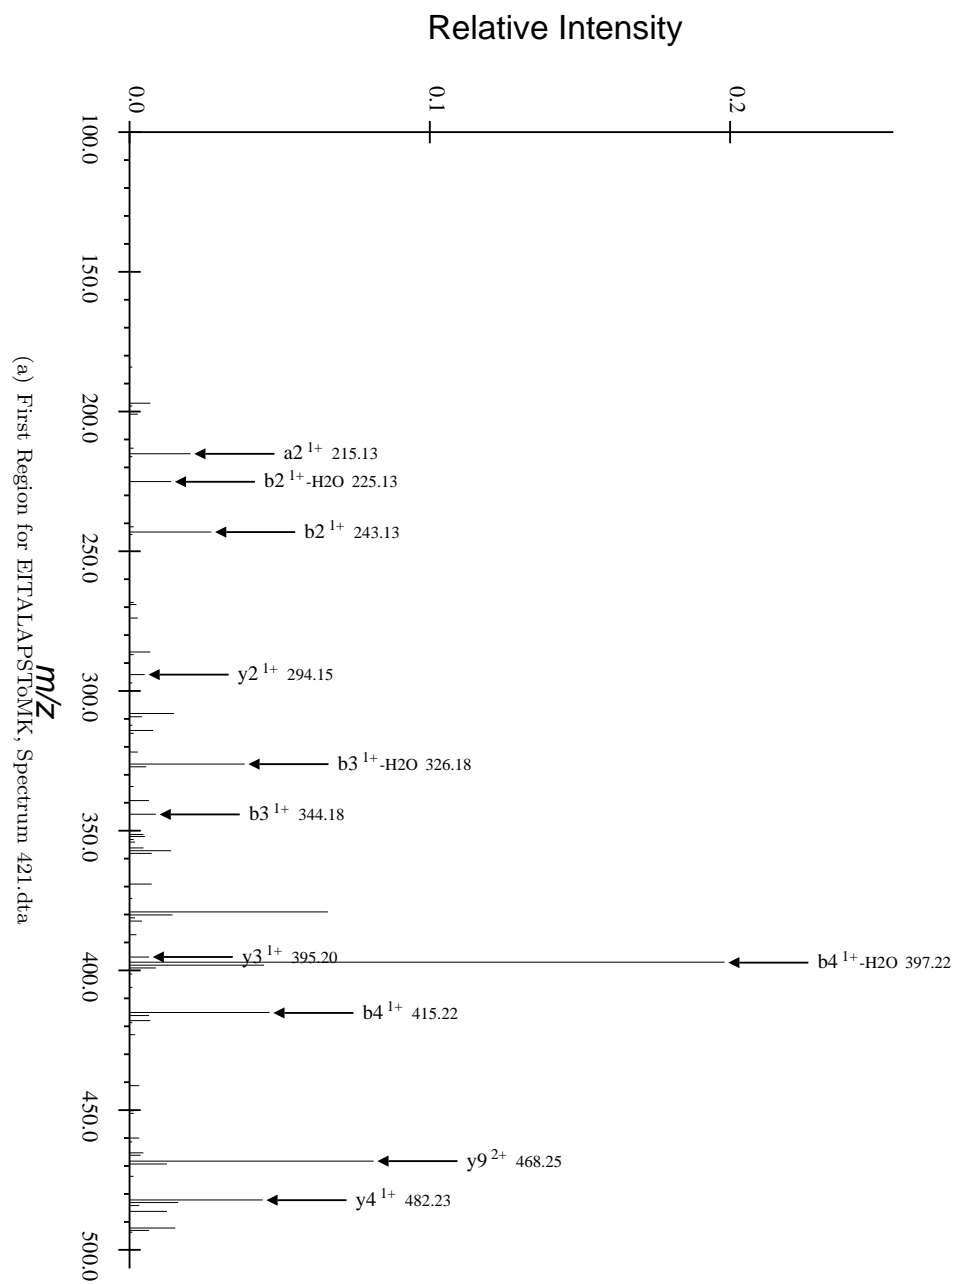

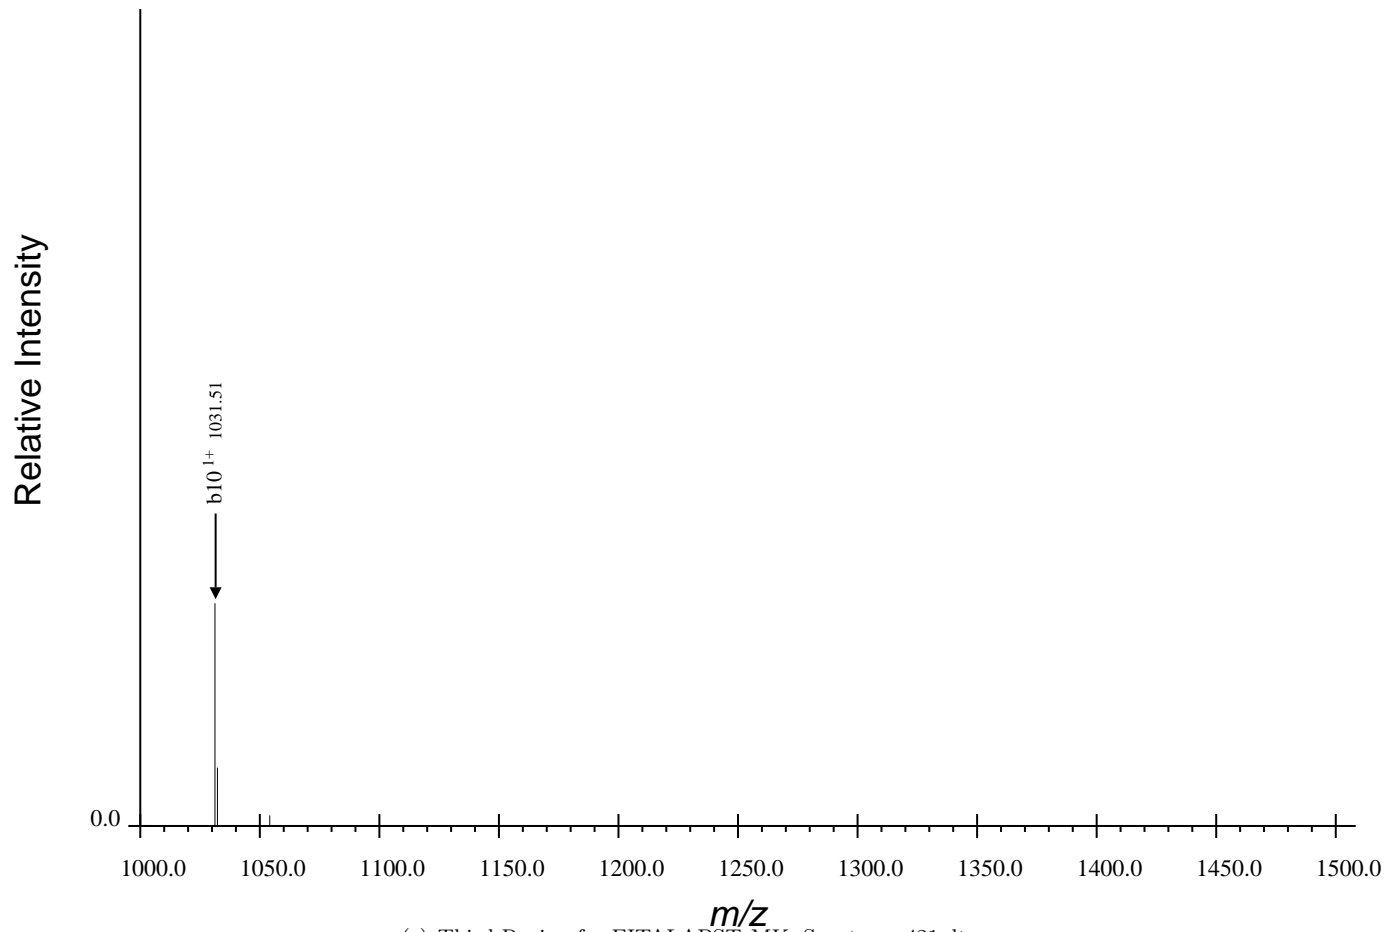

(c) Third Region for EITALAPSToMK, Spectrum 421.dta

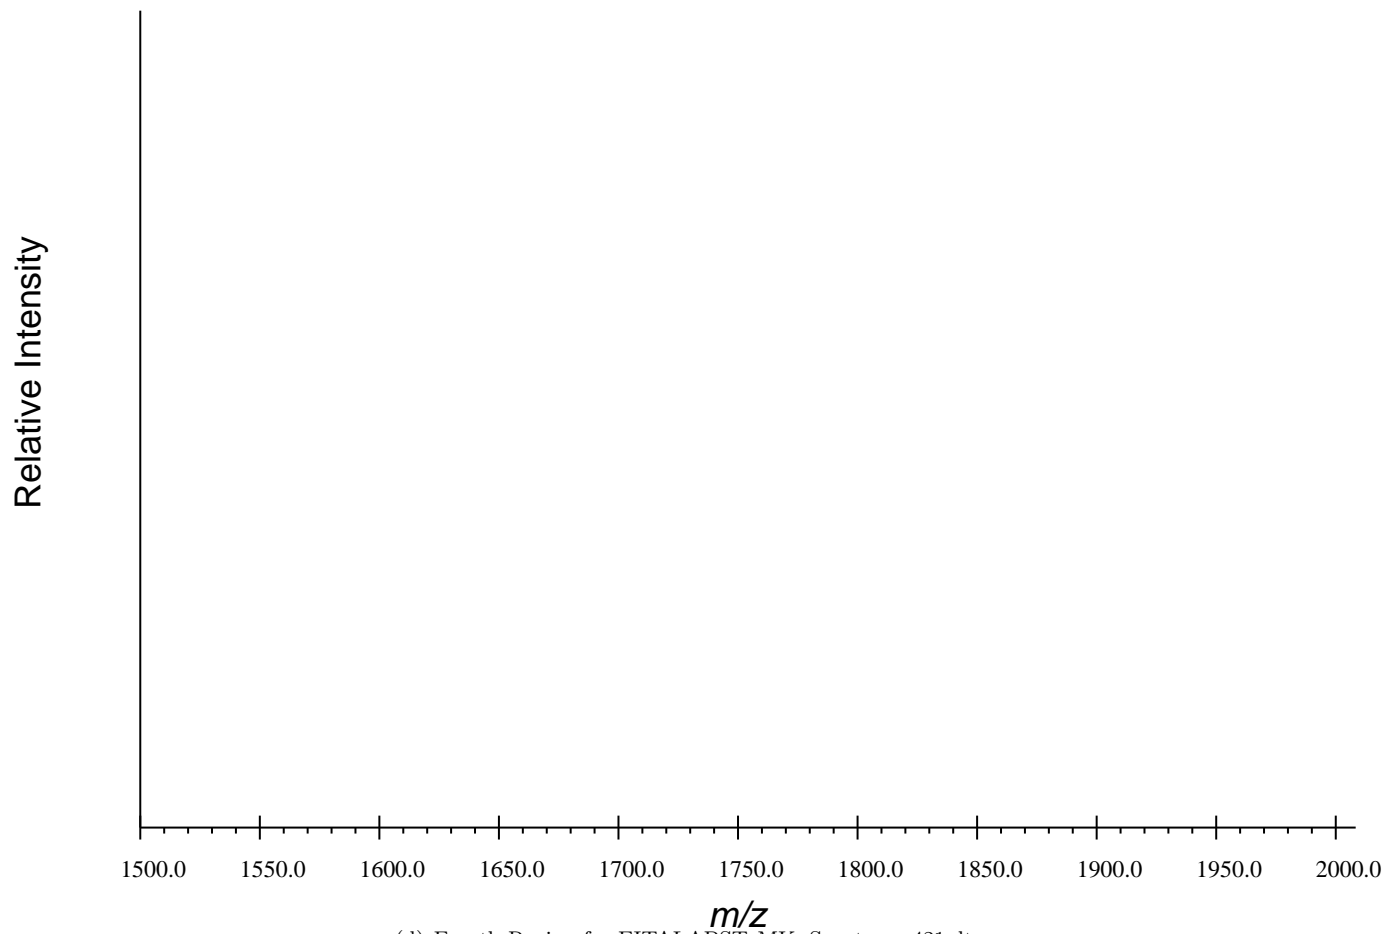

(d) Fourth Region for EITALAPSToMK, Spectrum 421.dta

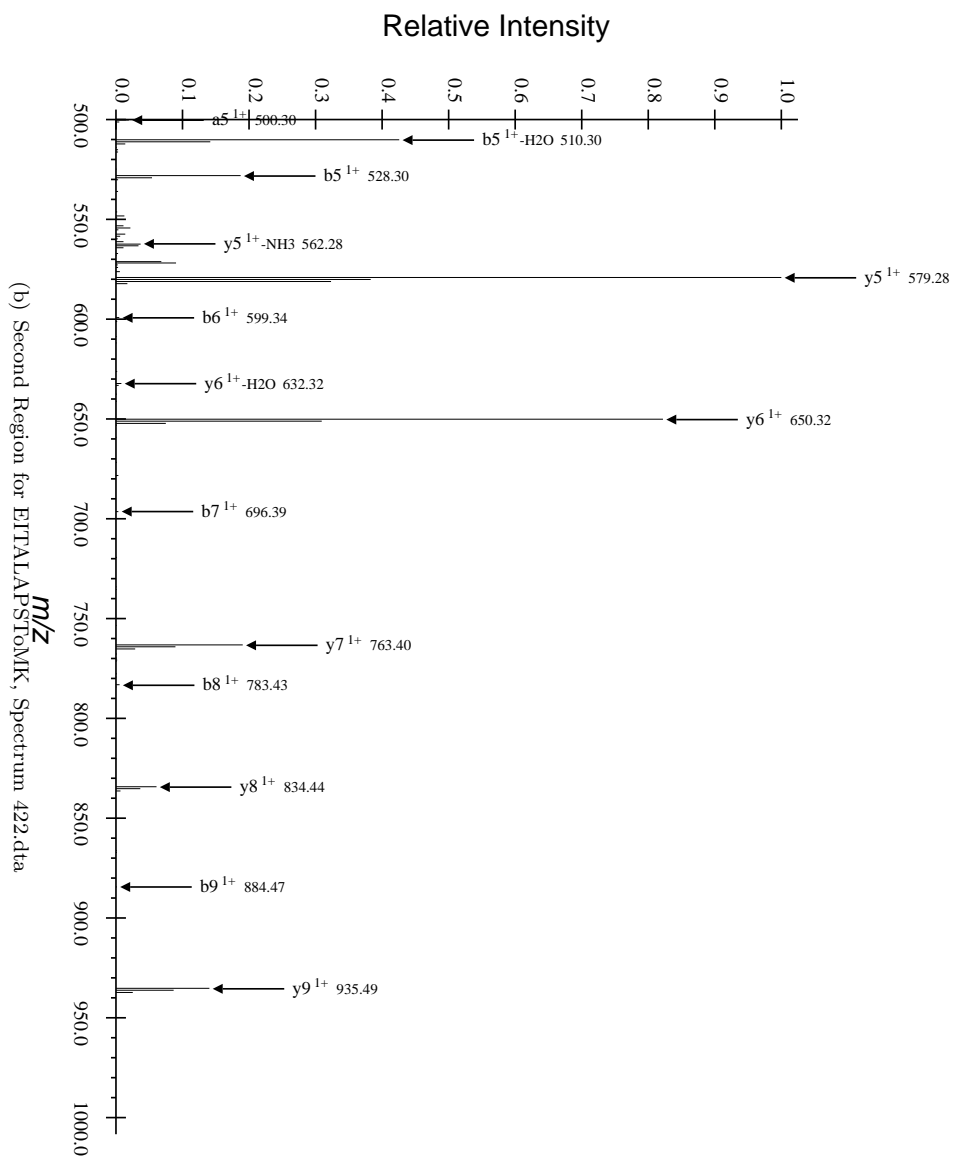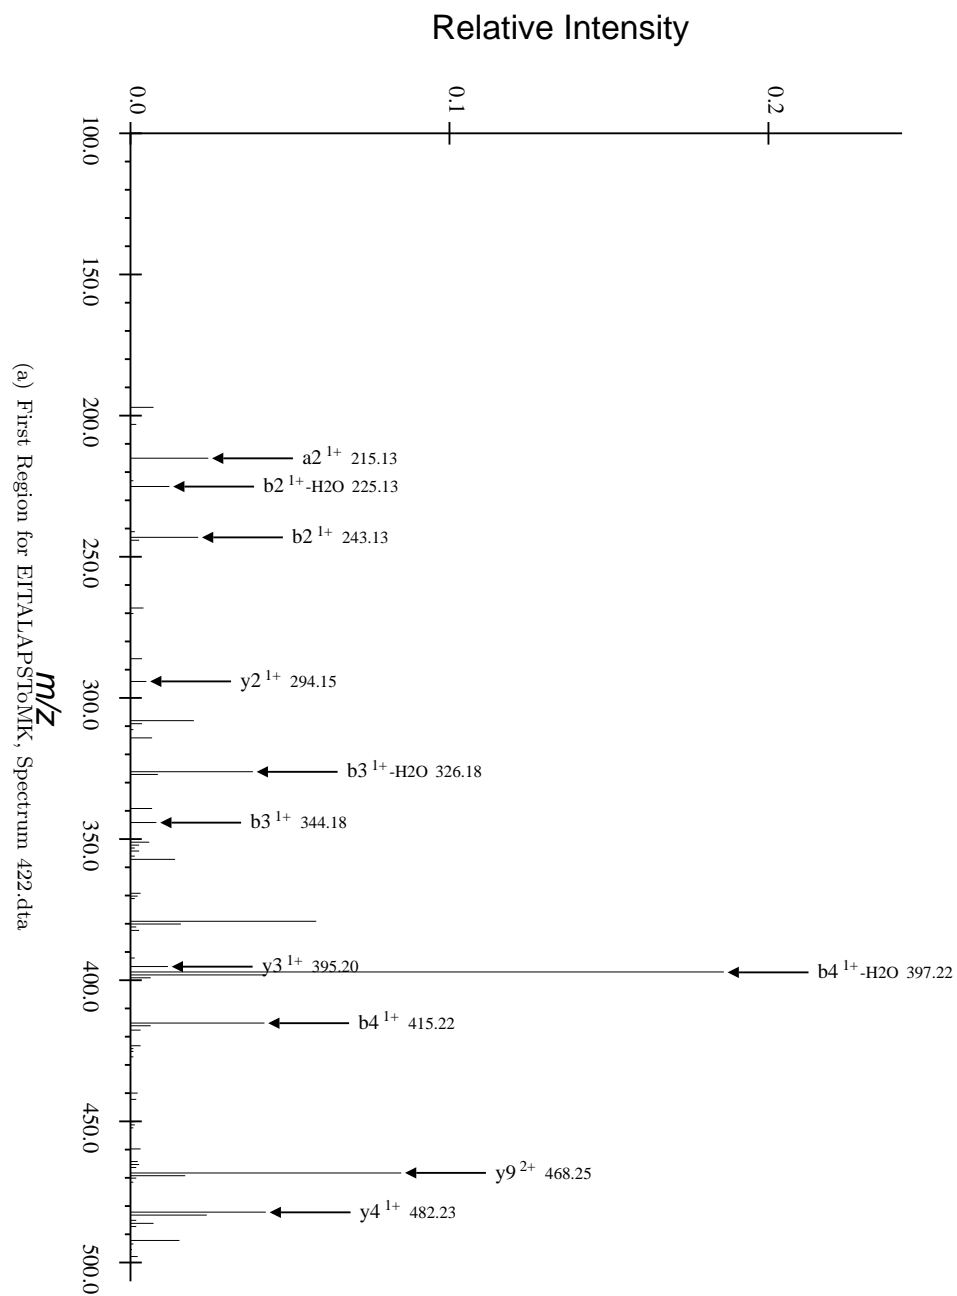

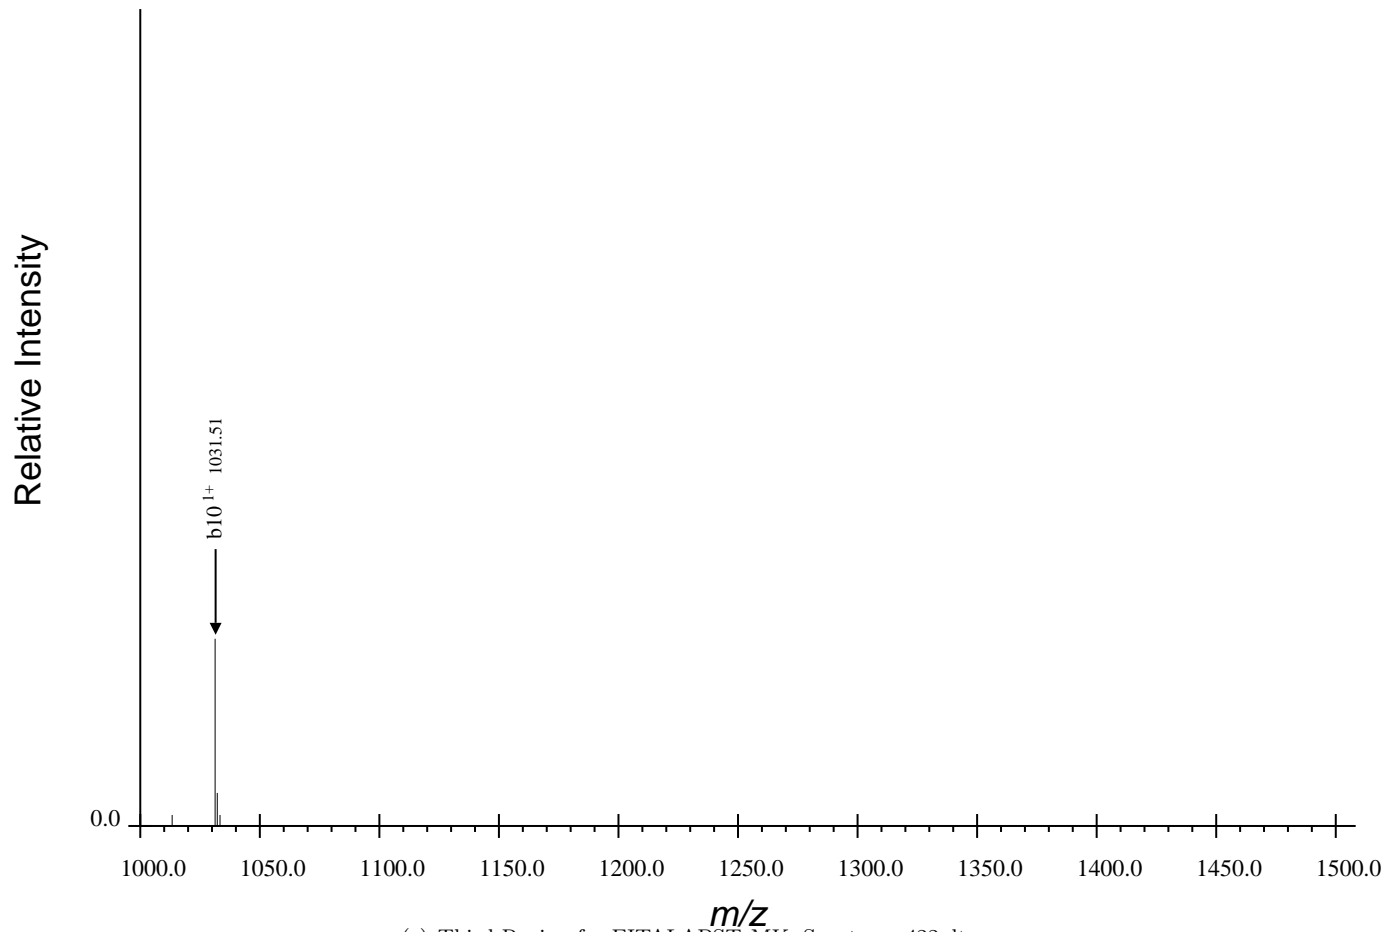

(c) Third Region for EITALAPSToMK, Spectrum 422.dta

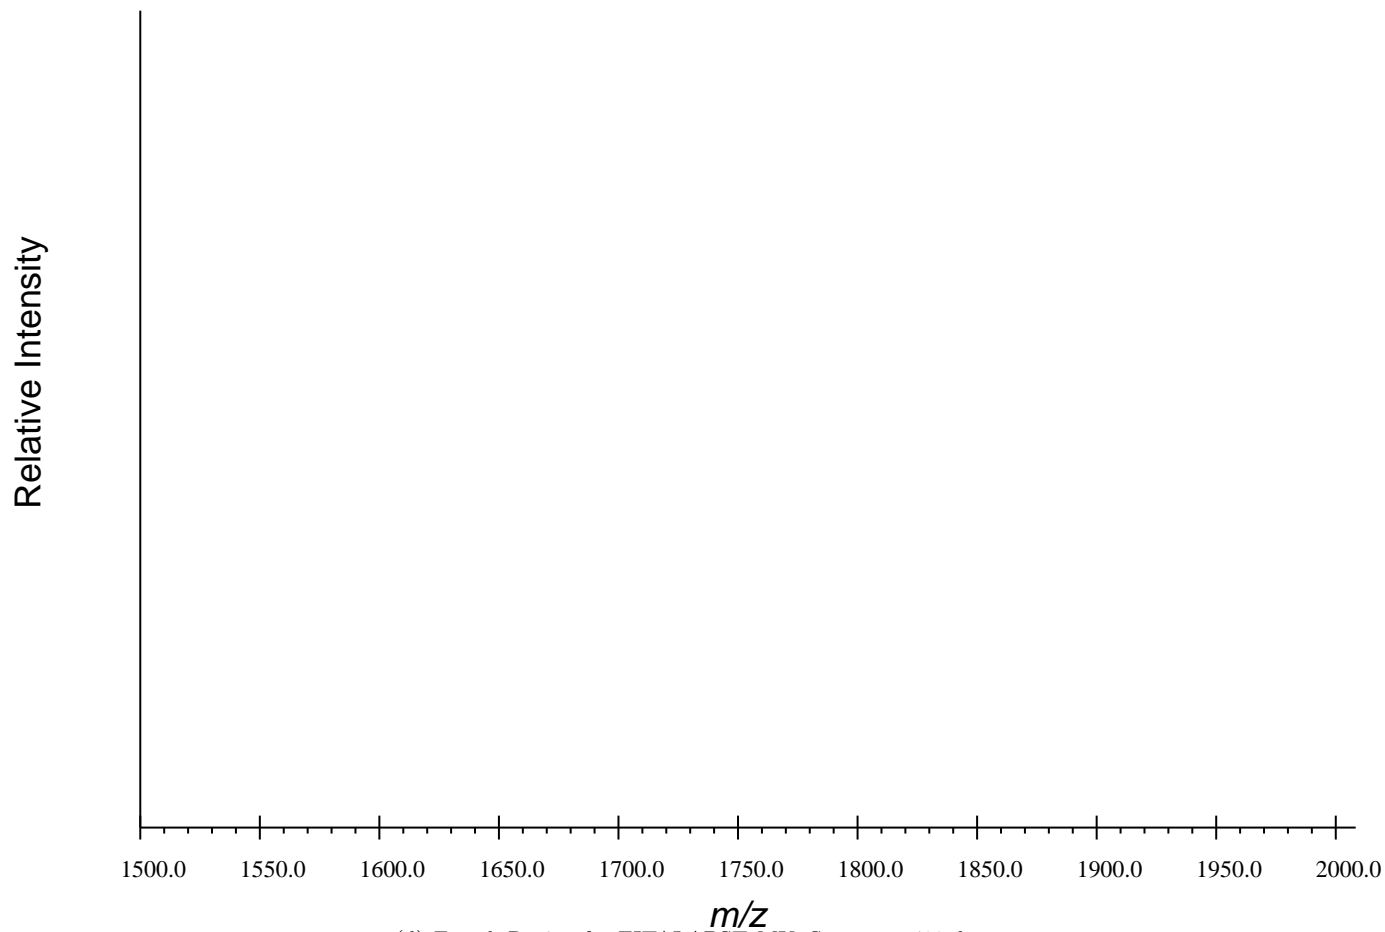

(d) Fourth Region for EITALAPSToMK, Spectrum 422.dta



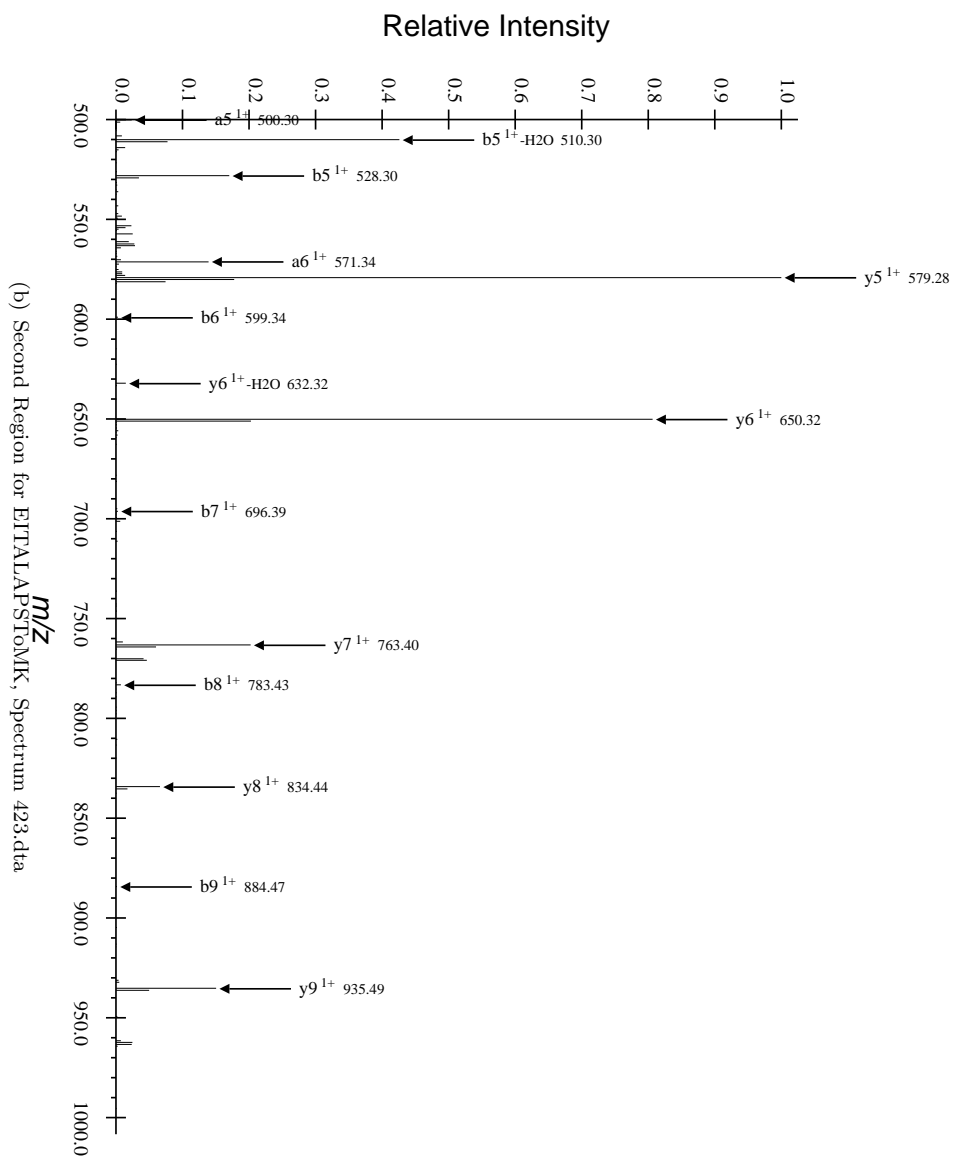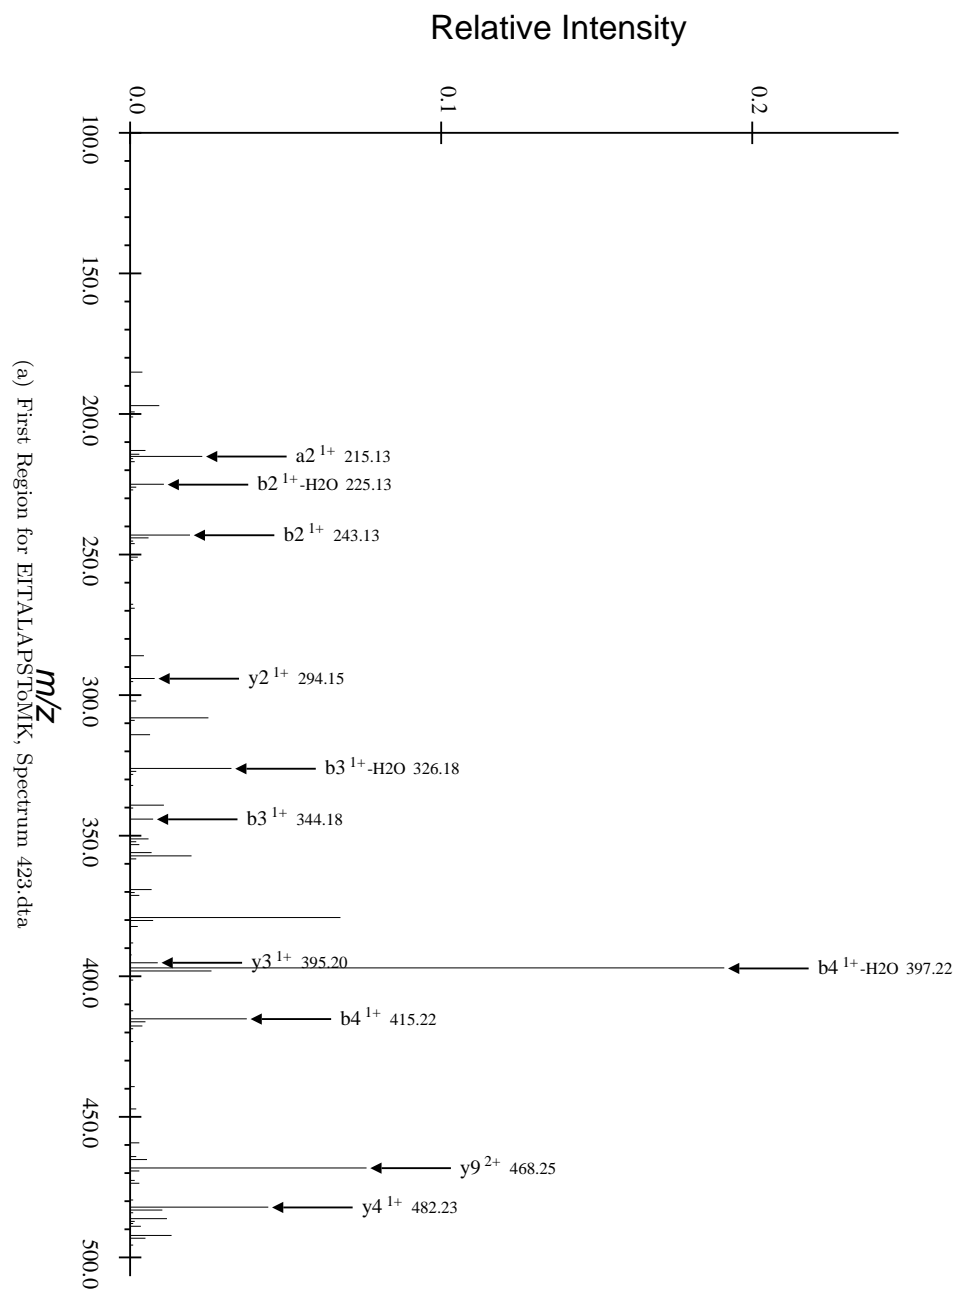

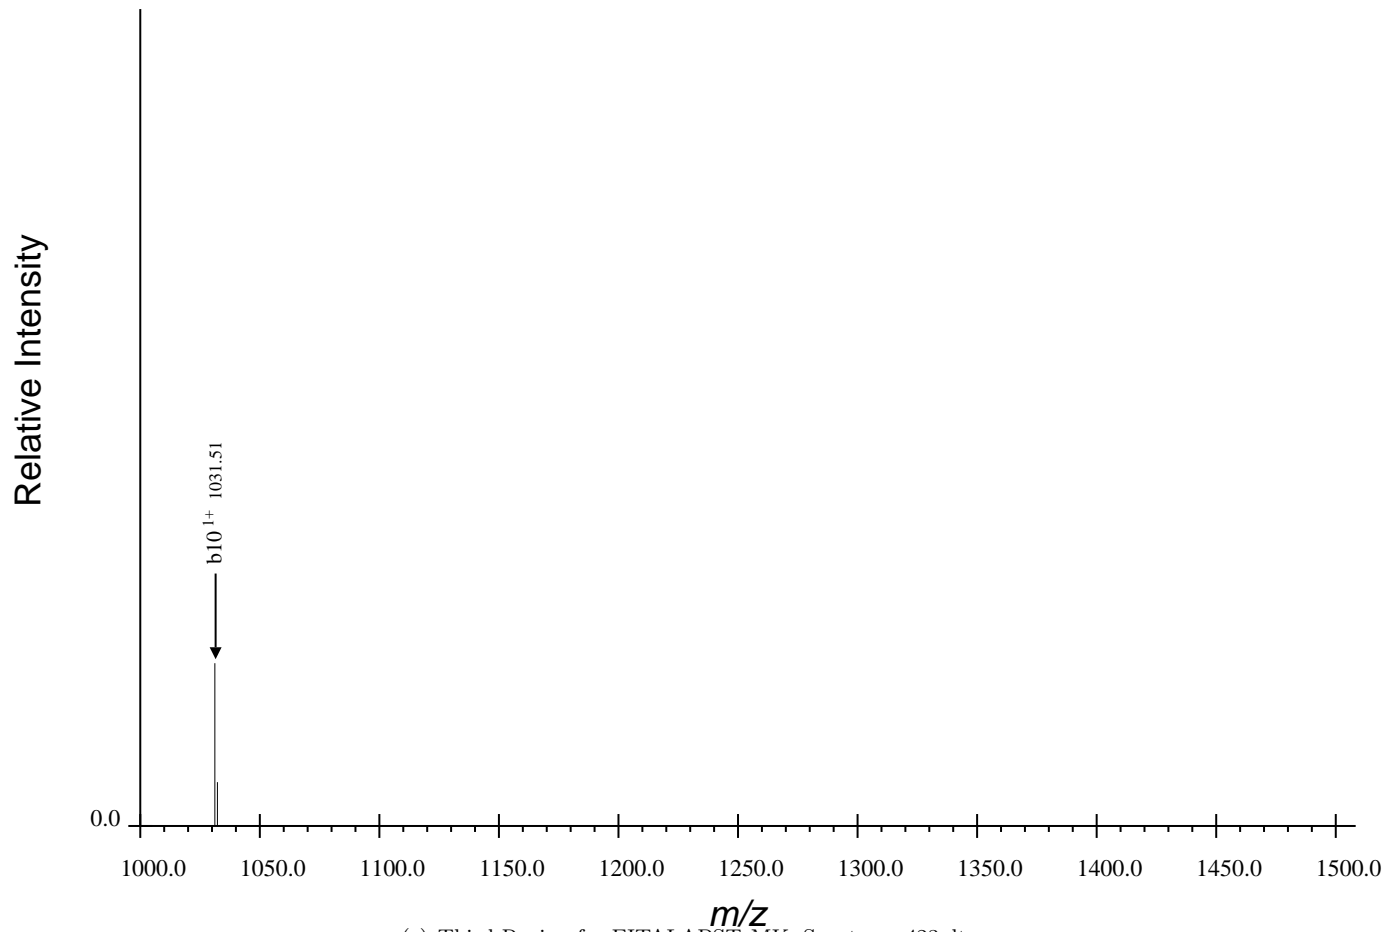

(c) Third Region for EITALAPSToMK, Spectrum 423.dta

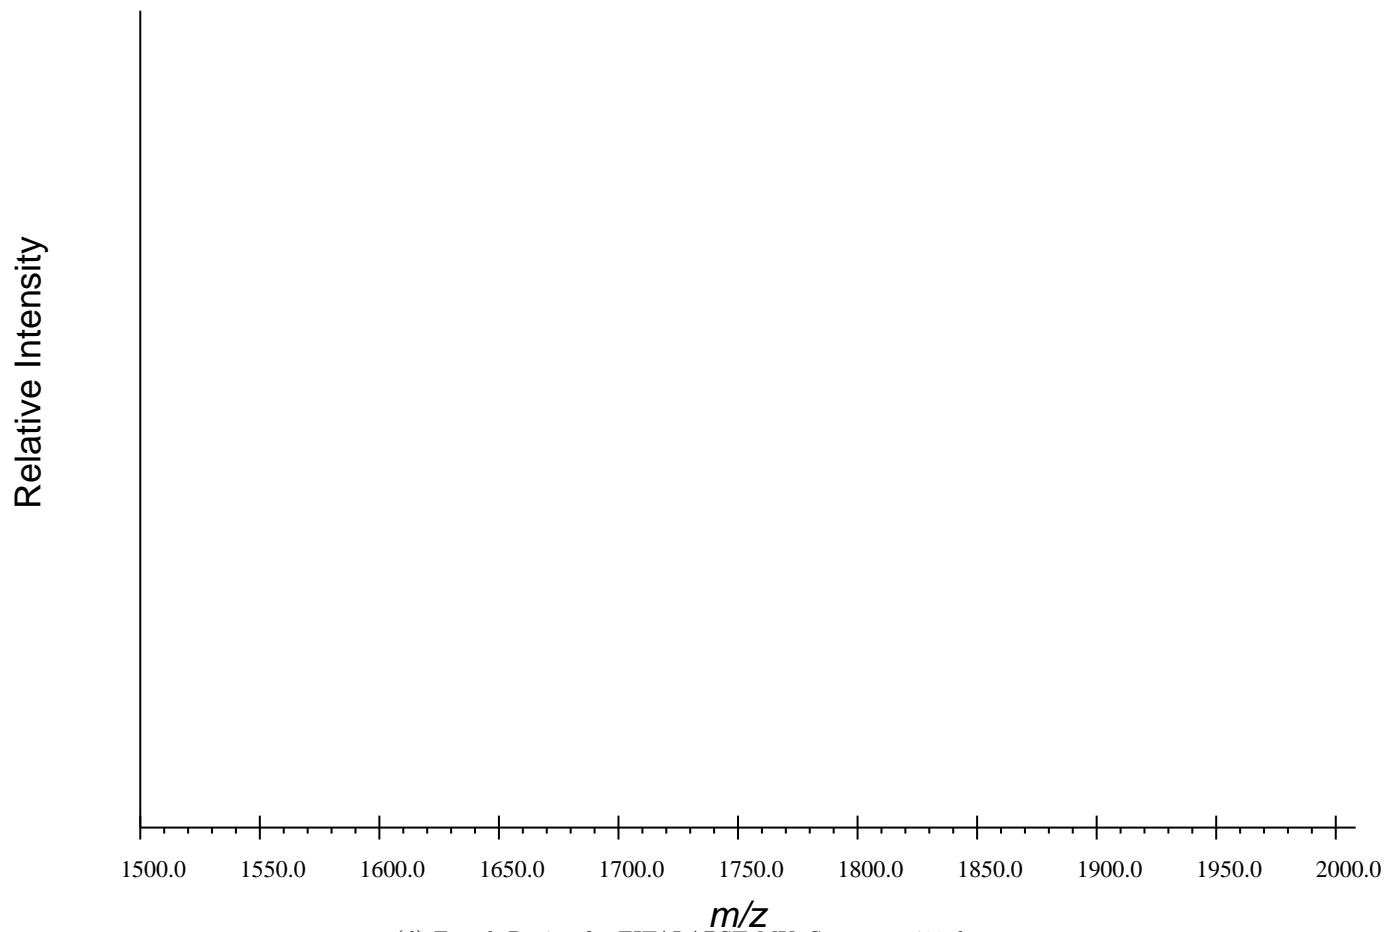

(d) Fourth Region for EITALAPSToMK, Spectrum 423.dta

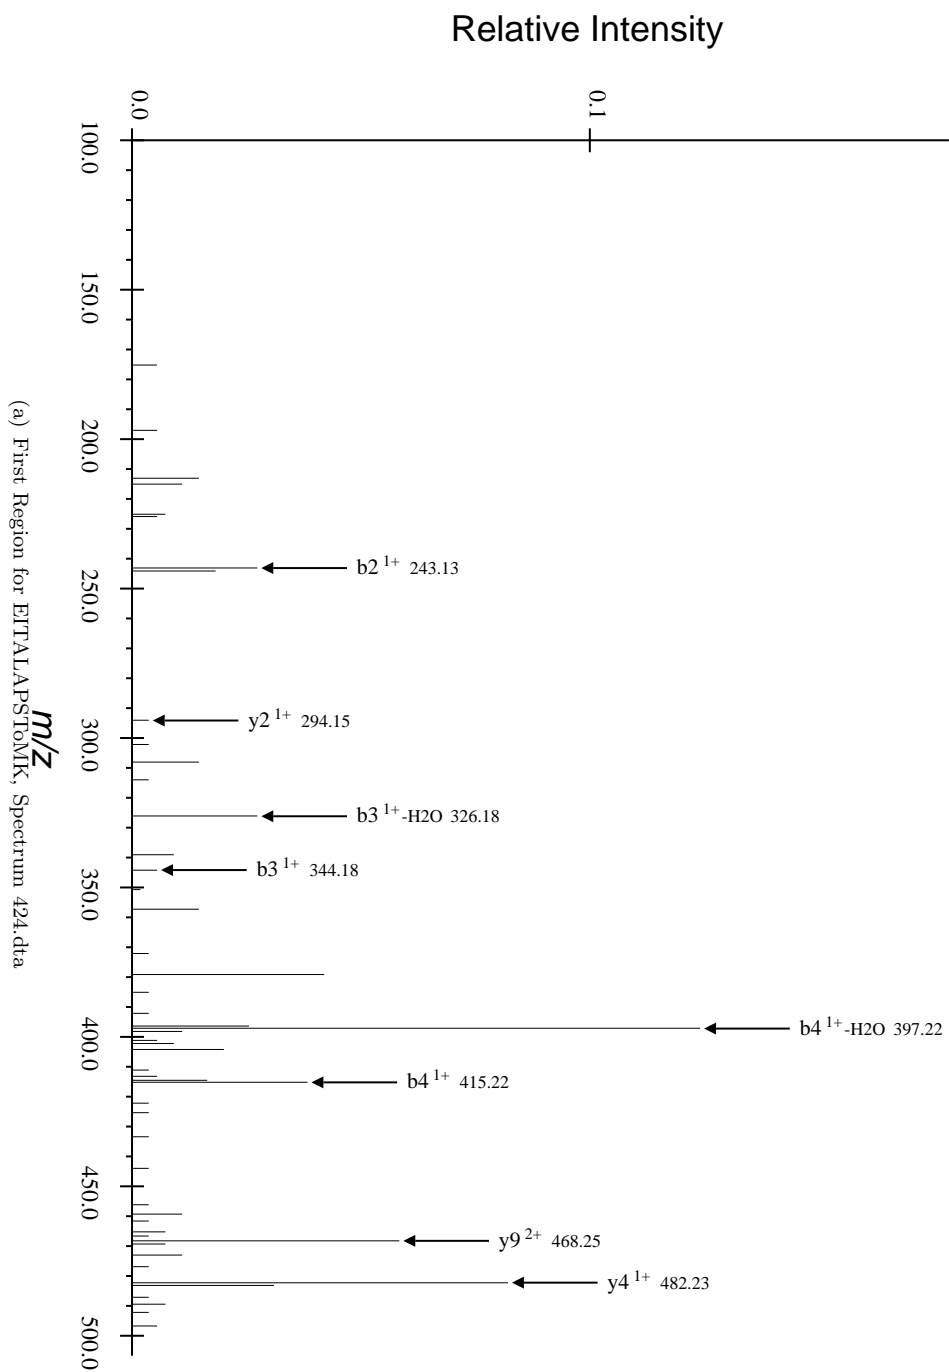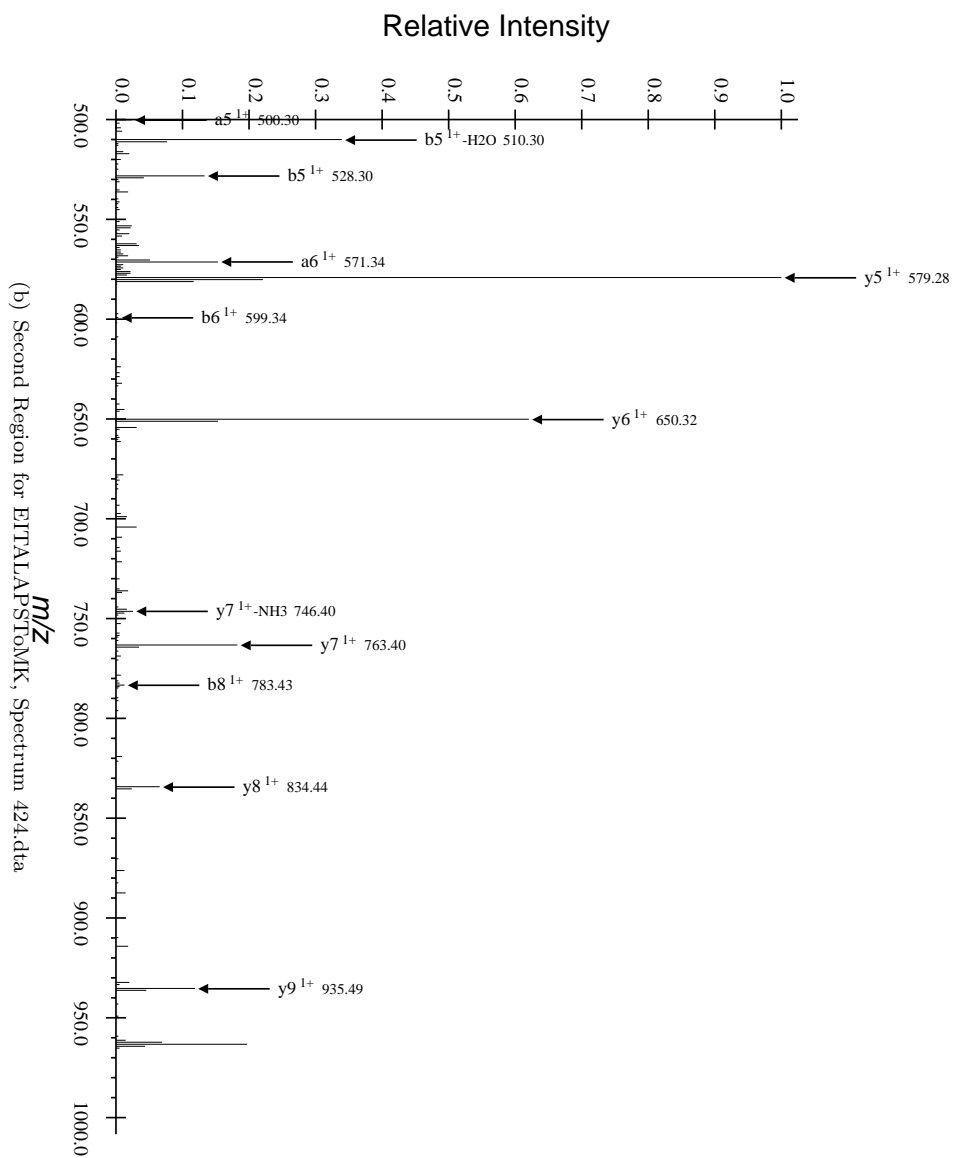

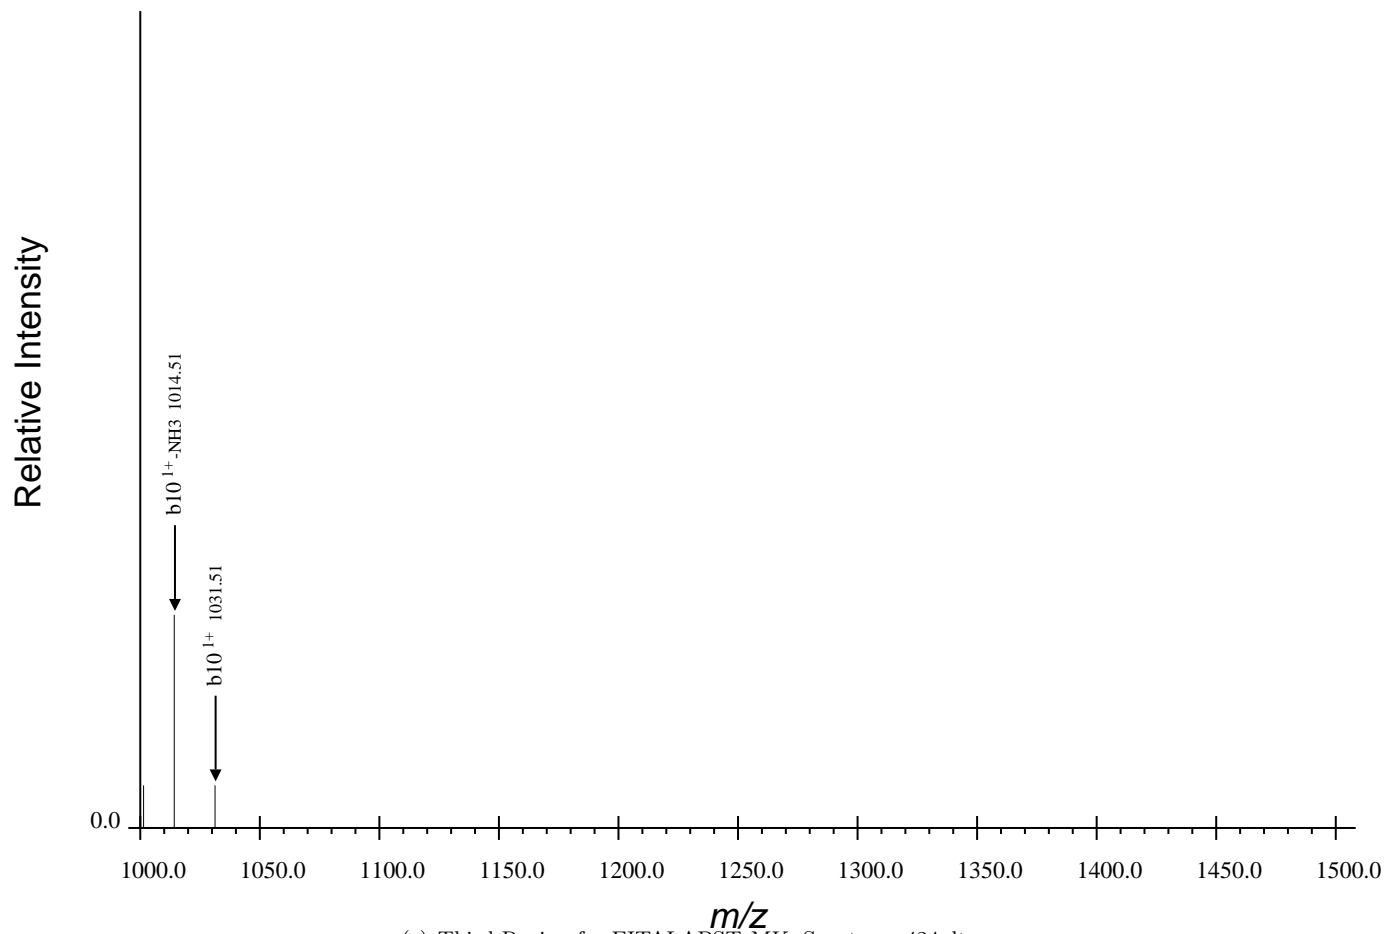

(c) Third Region for EITALAPSToMK, Spectrum 424.dta

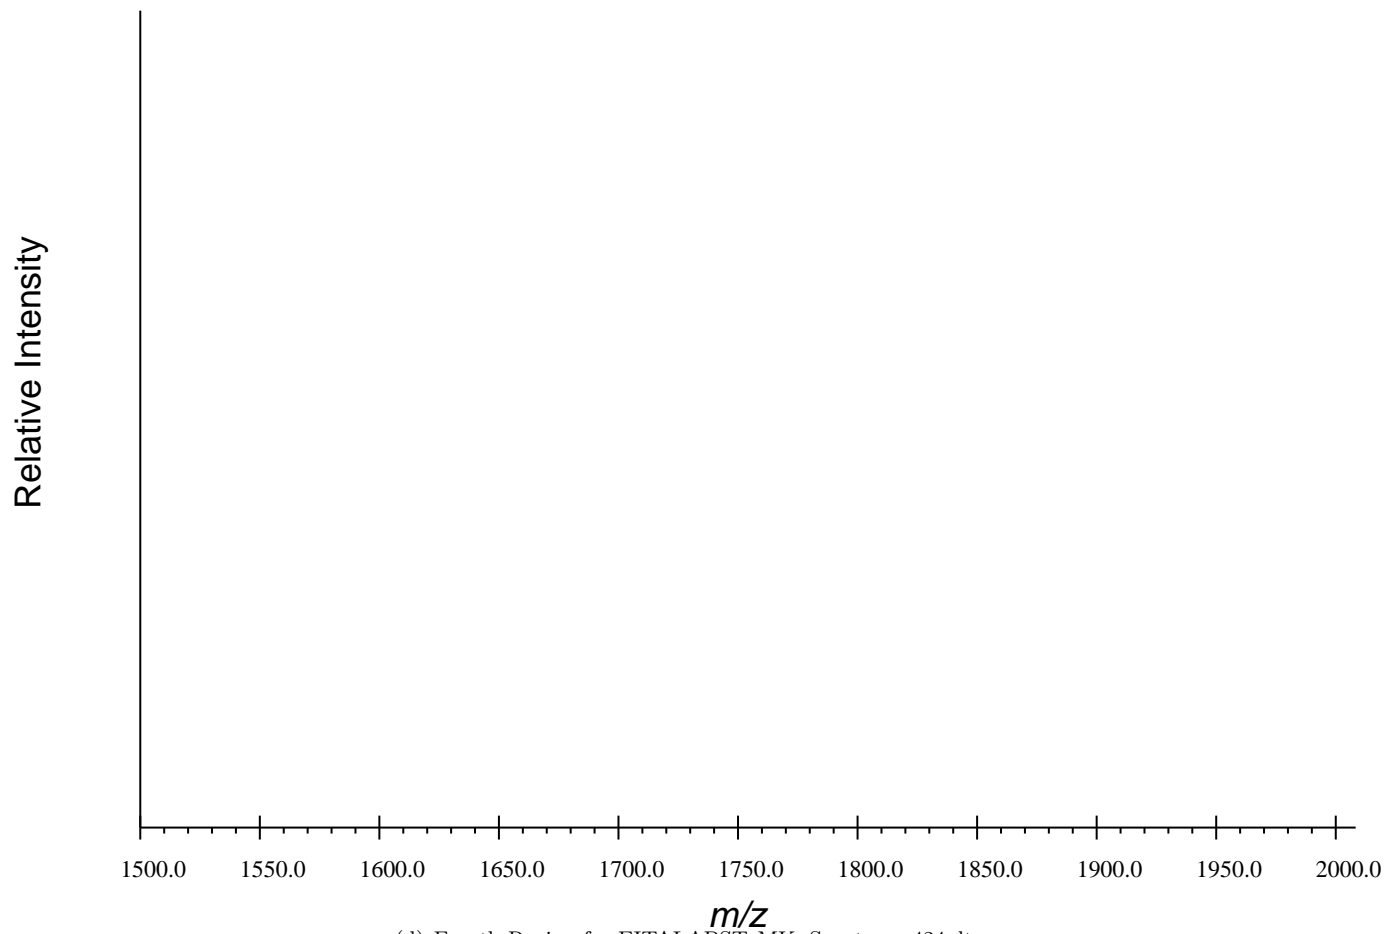

(d) Fourth Region for EITALAPSToMK, Spectrum 424.dta

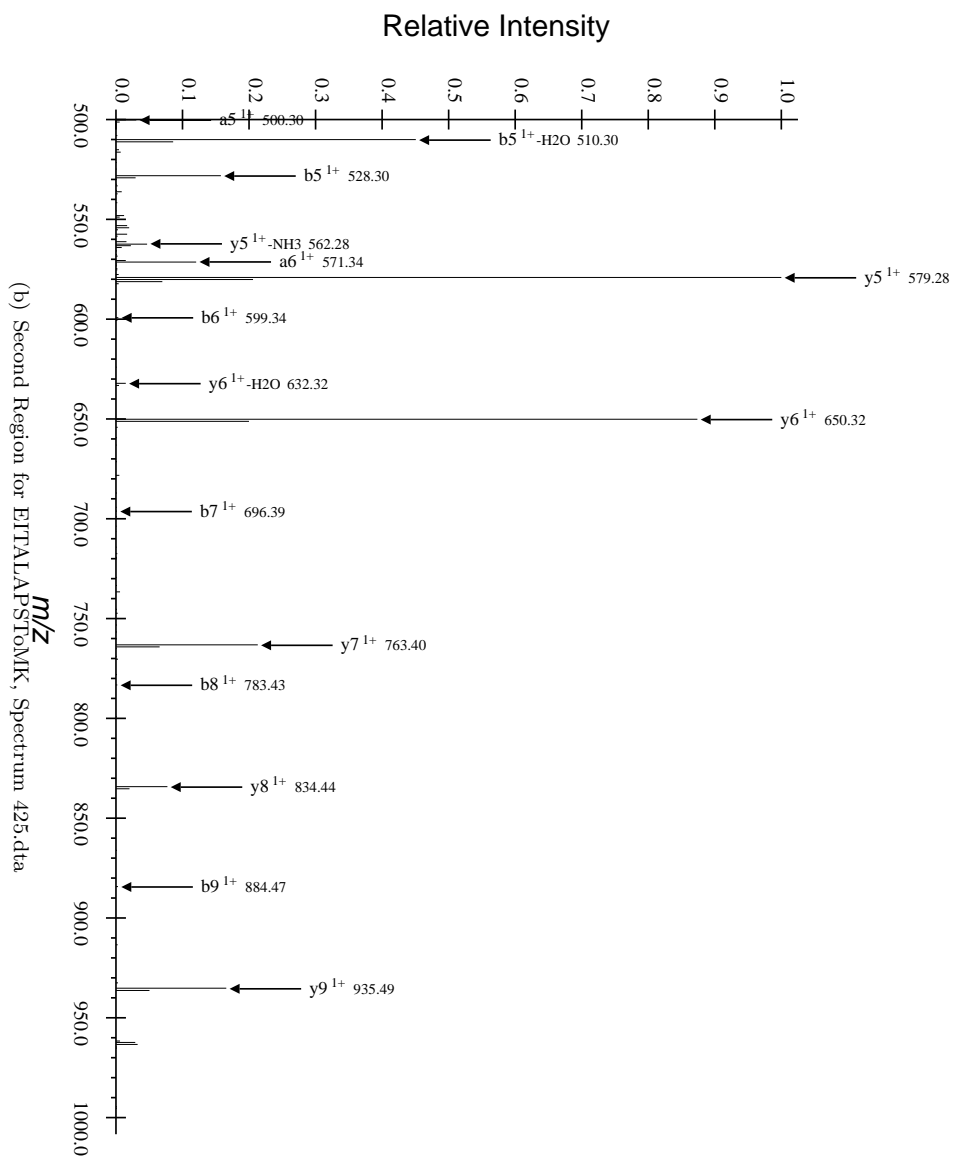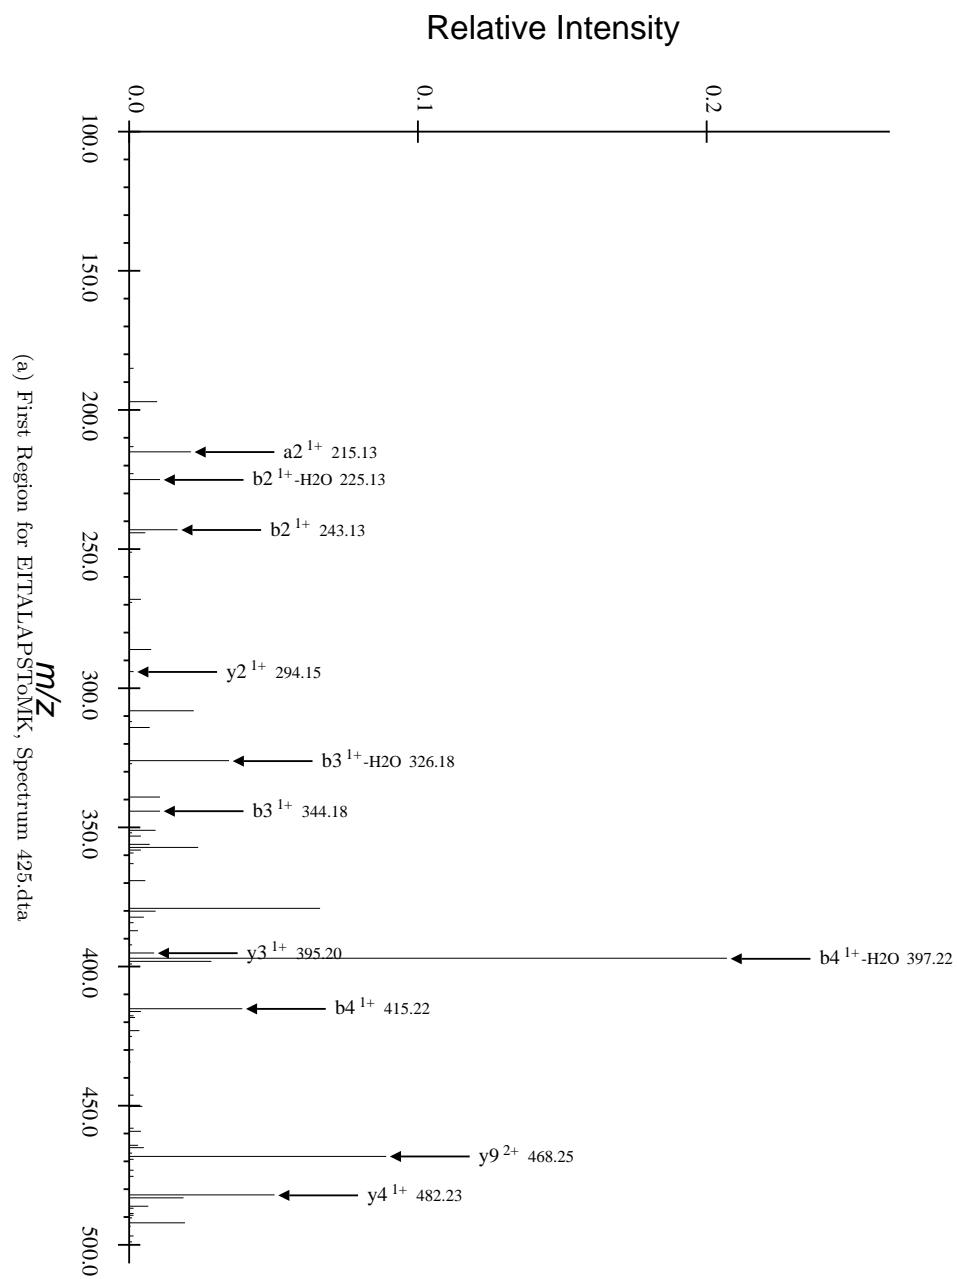

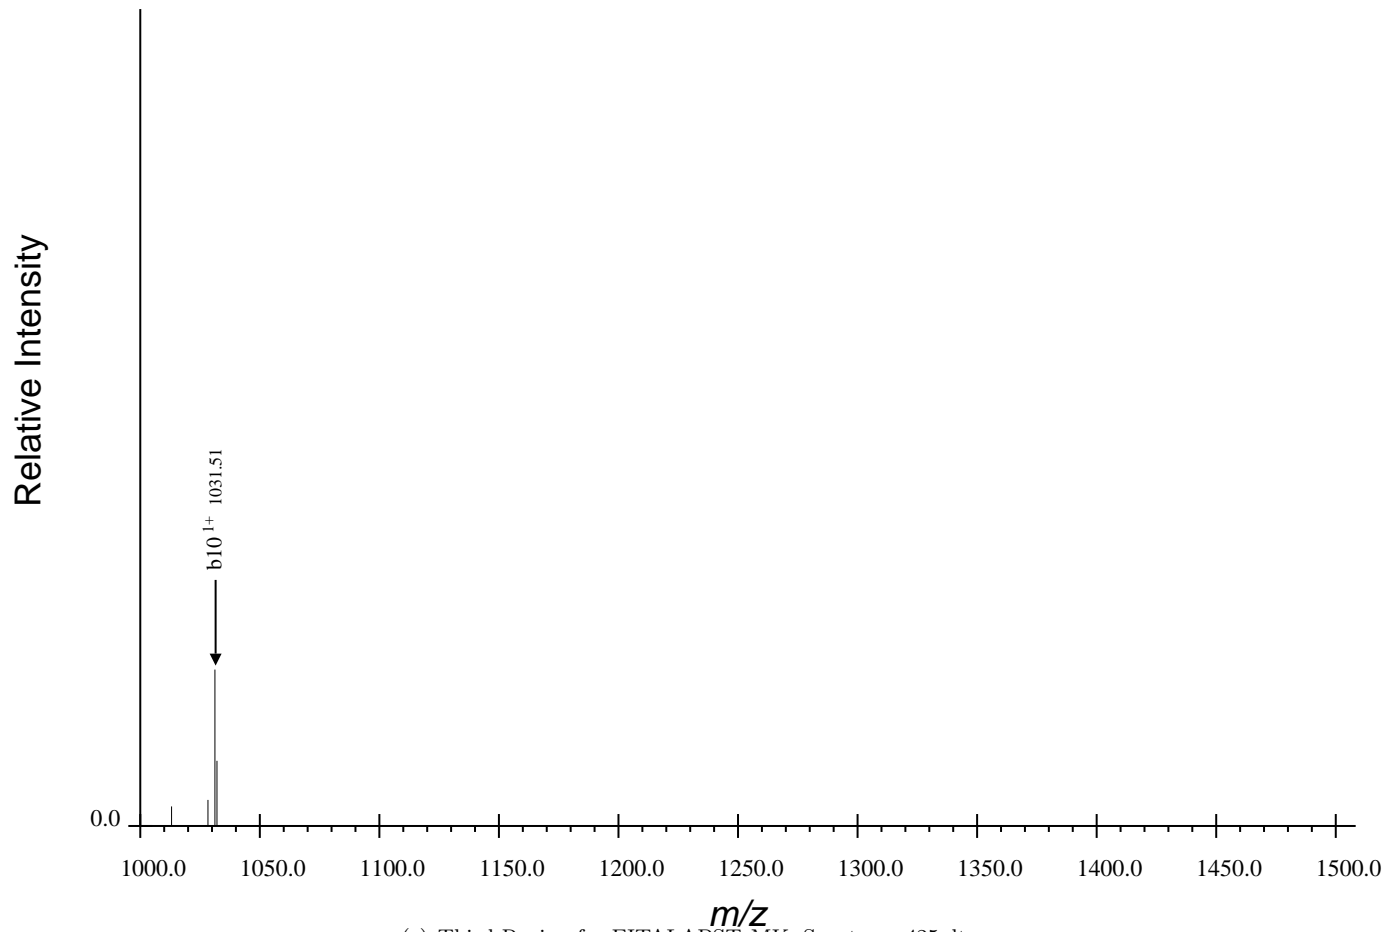

(c) Third Region for EITALAPSToMK, Spectrum 425.dta

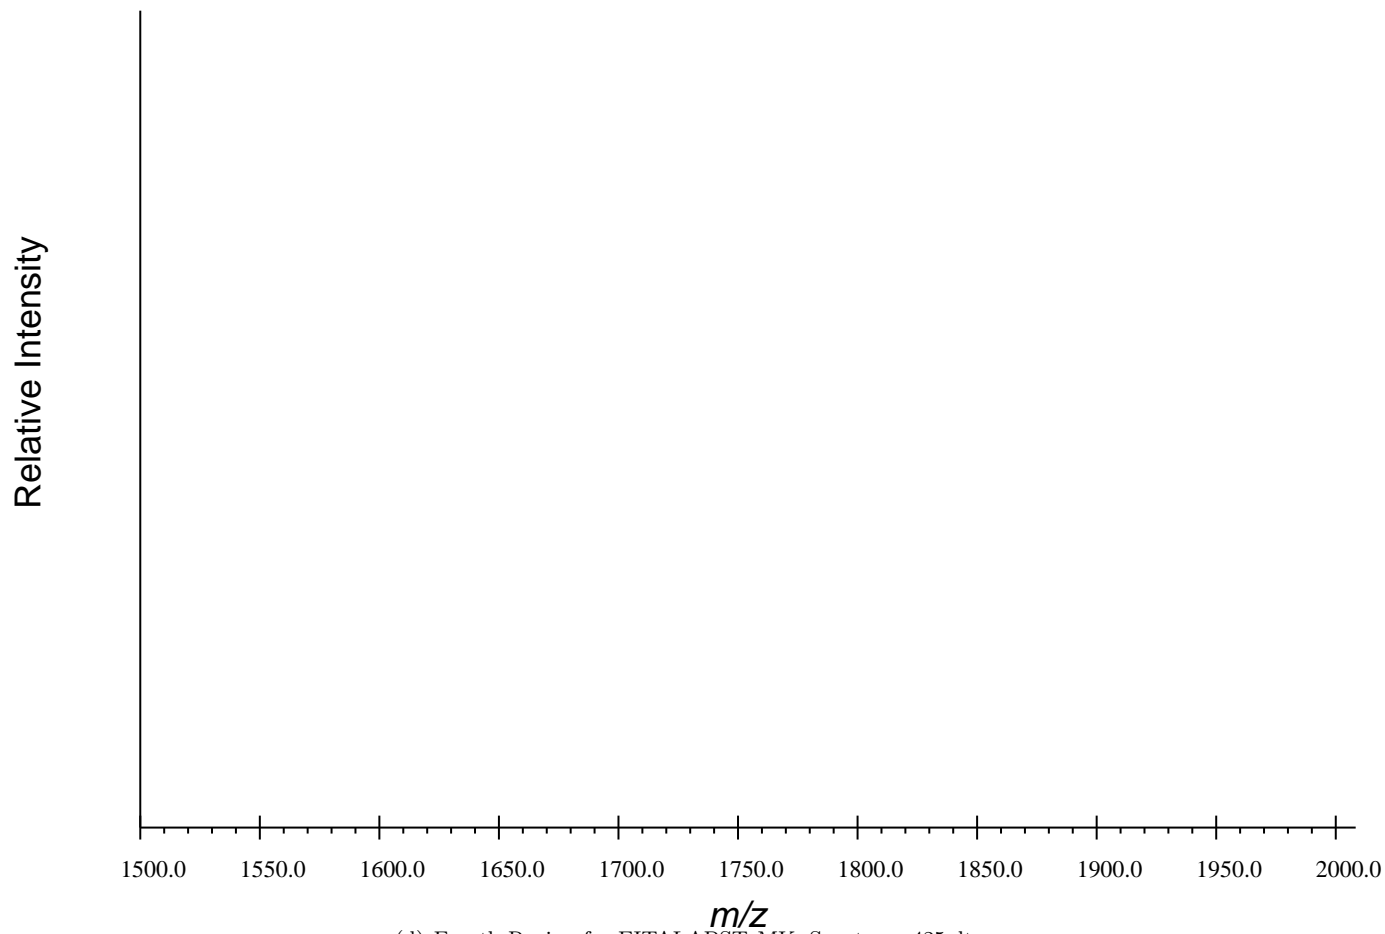

(d) Fourth Region for EITALAPSToMK, Spectrum 425.dta

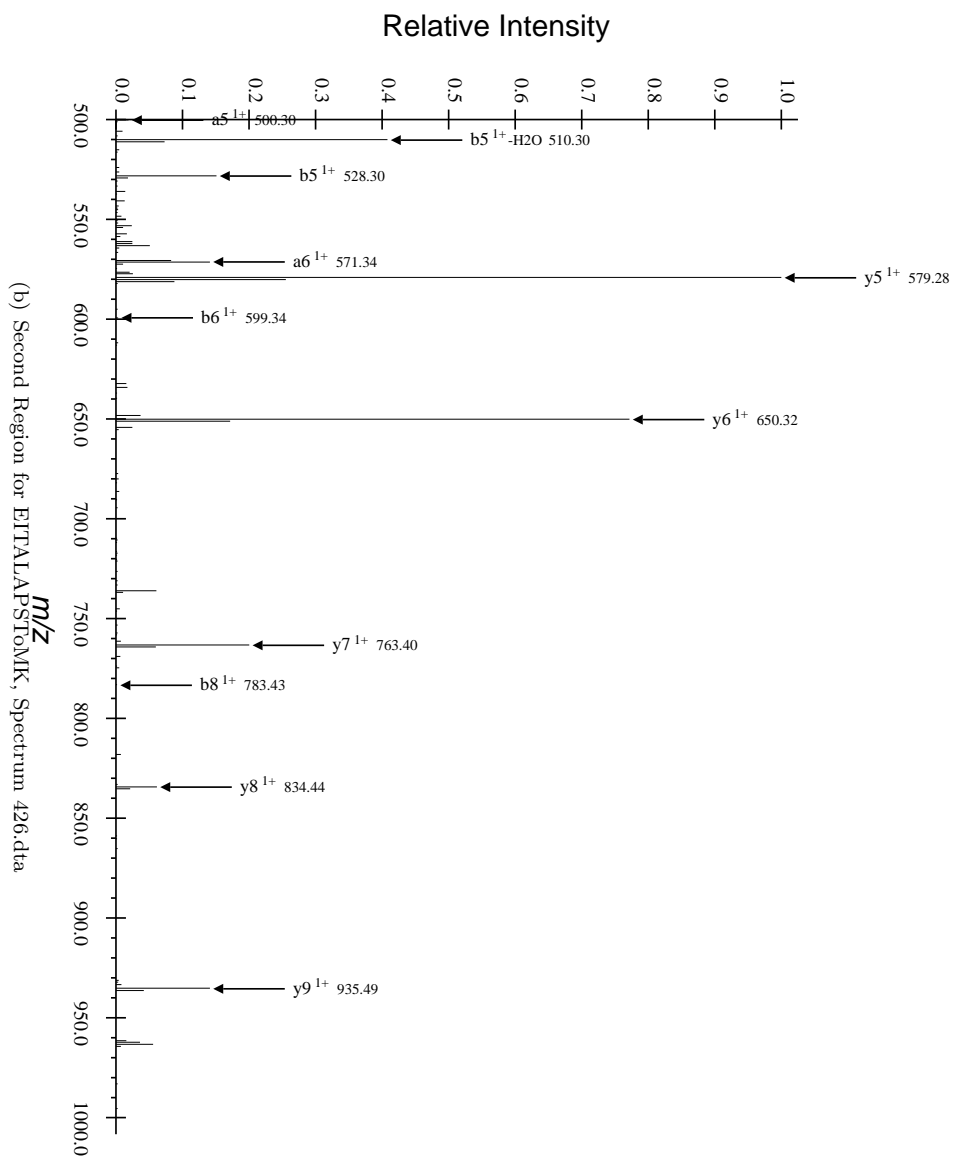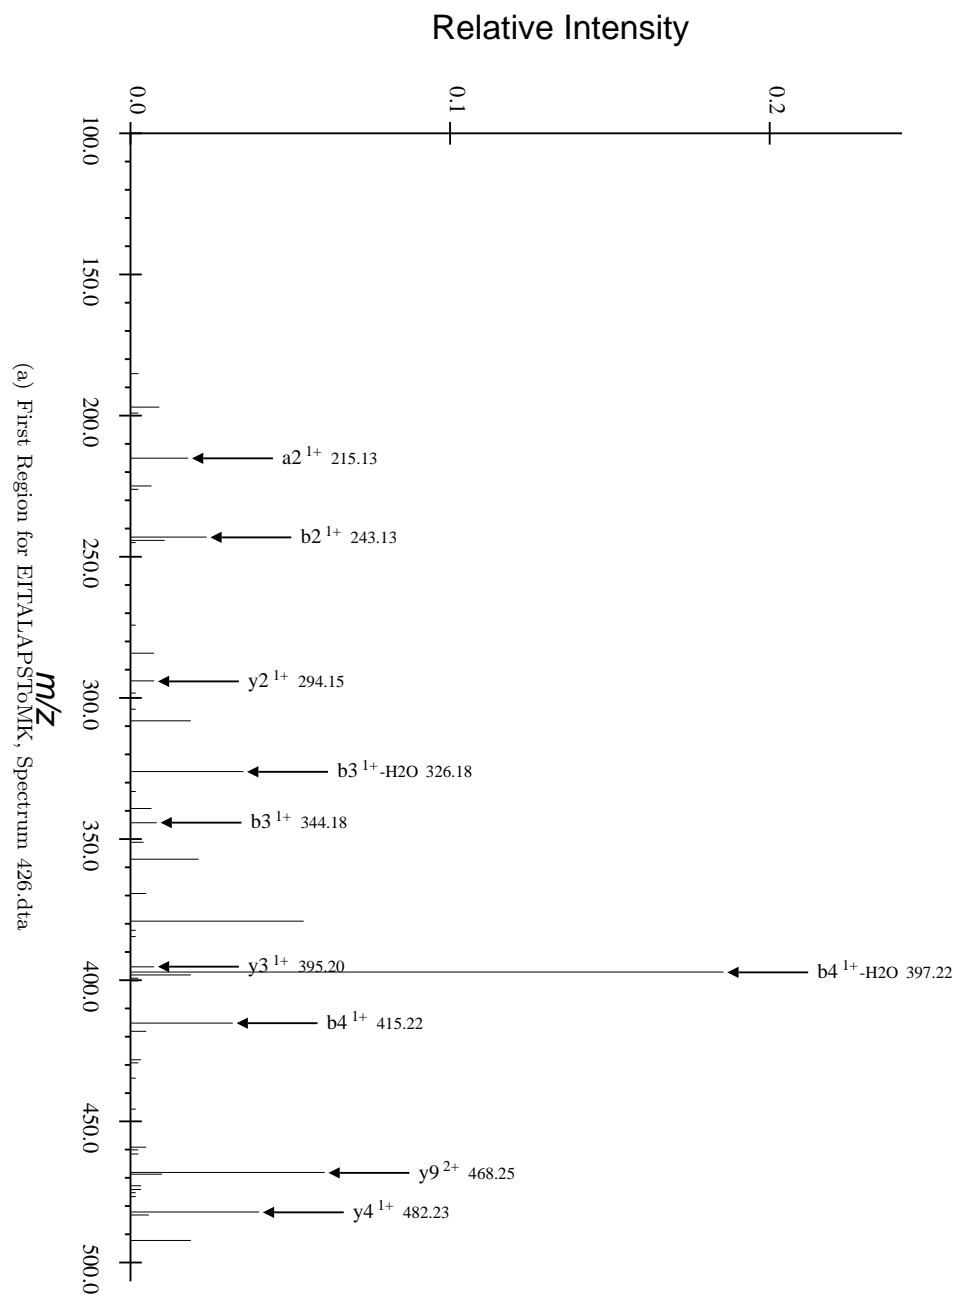

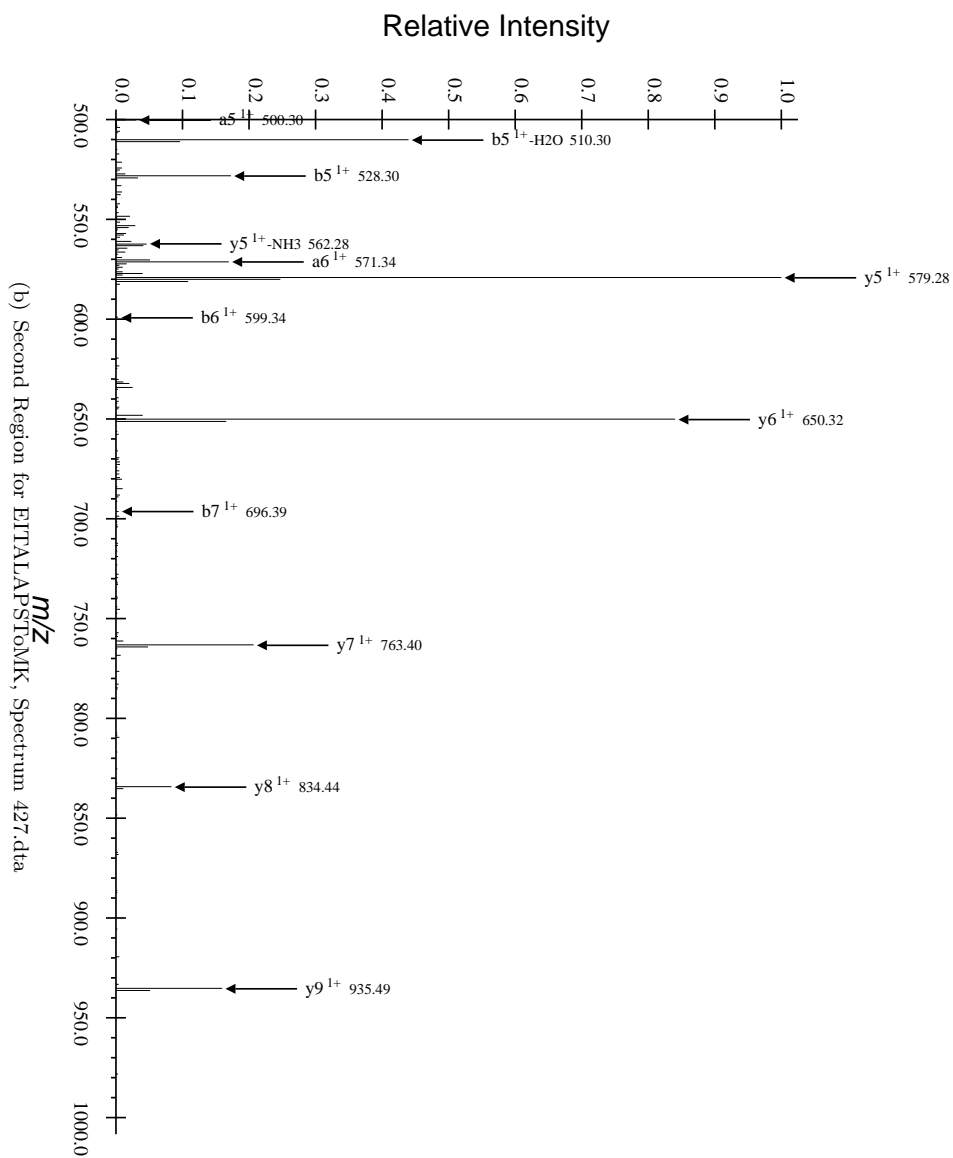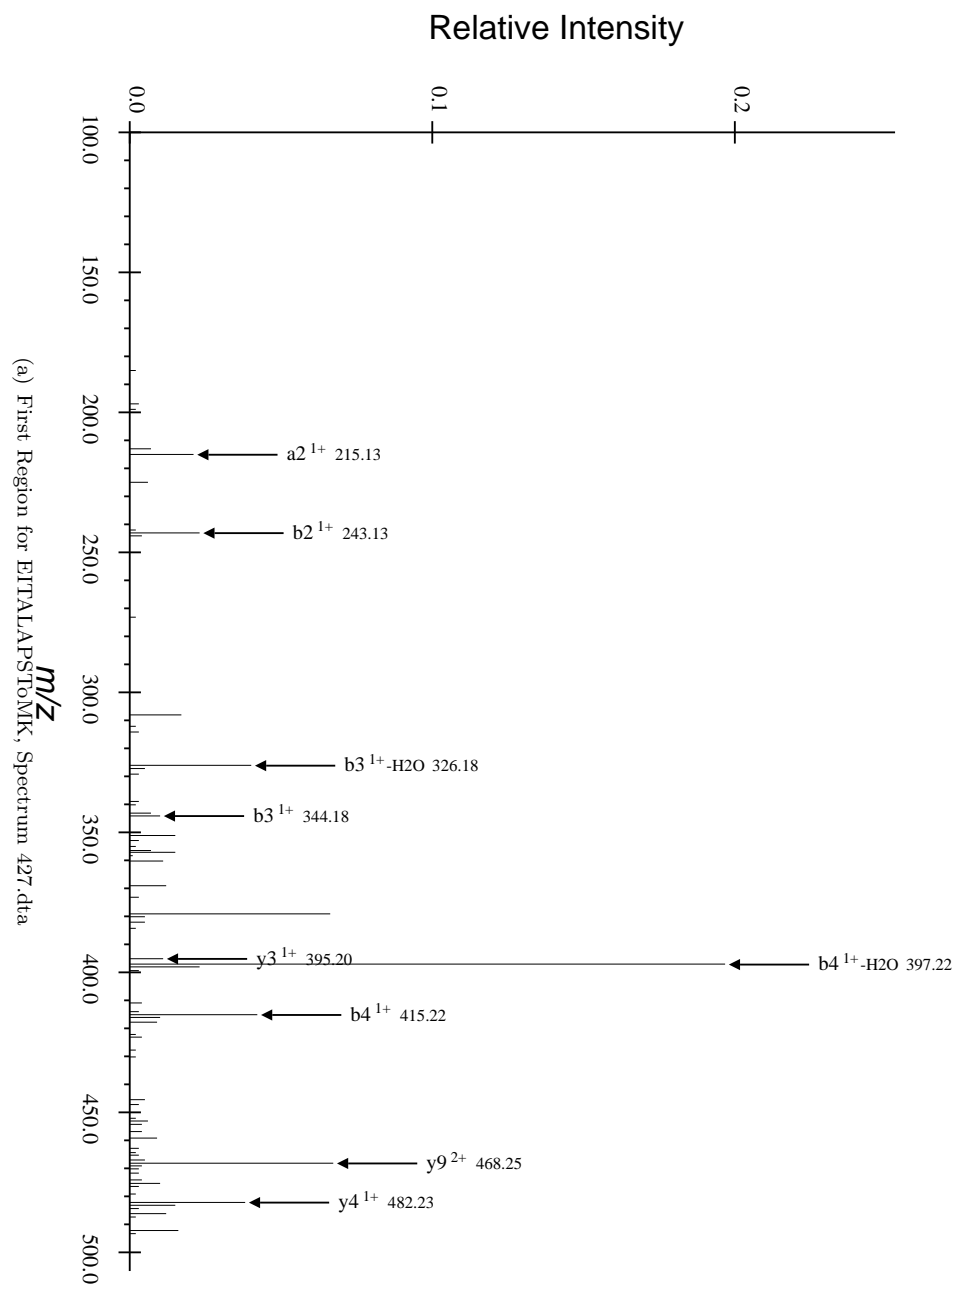



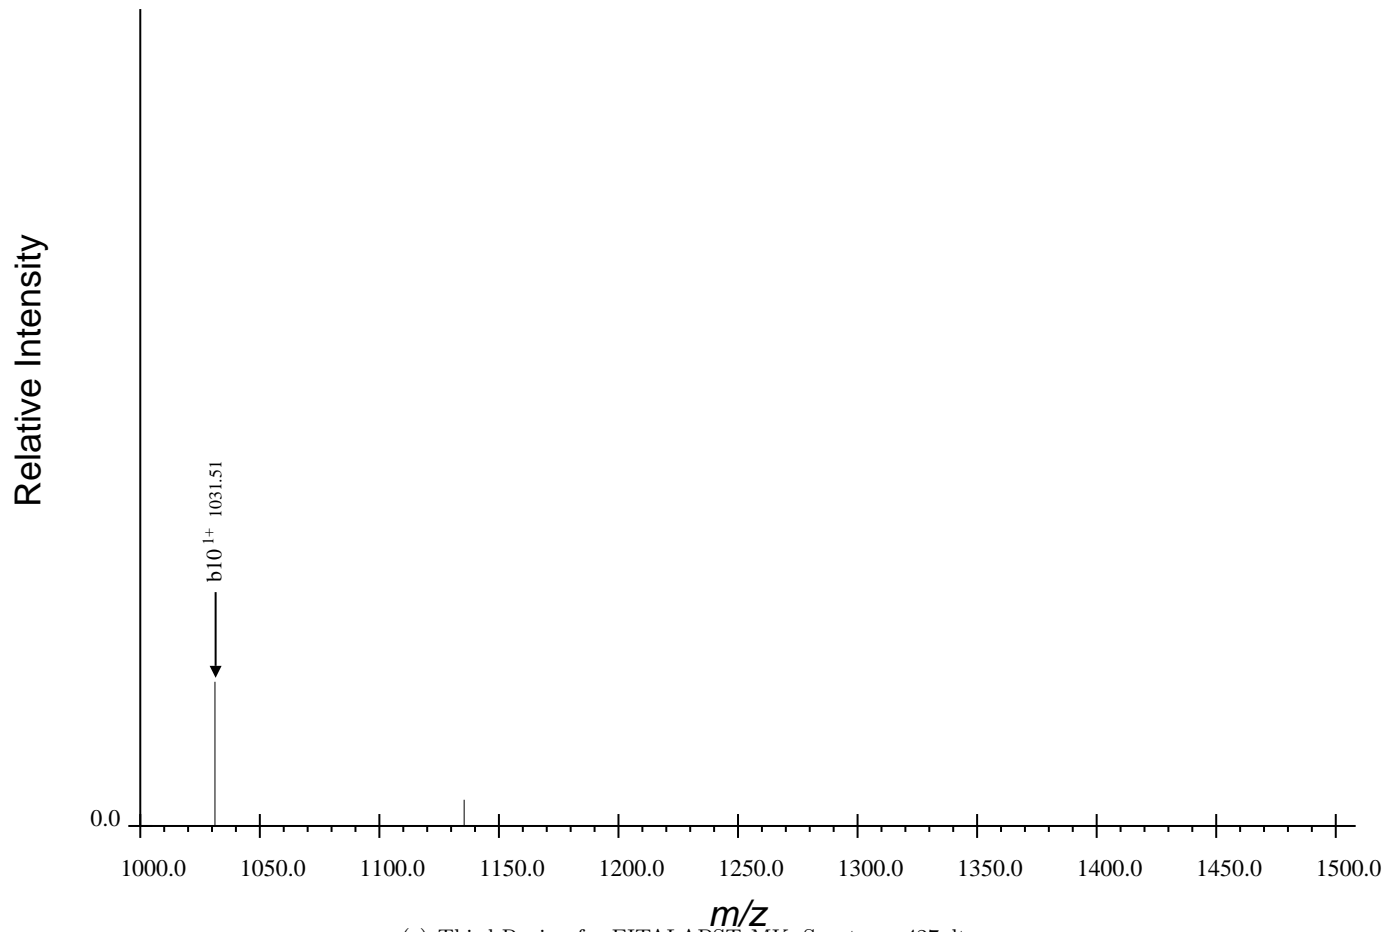

(c) Third Region for EITALAPSToMK, Spectrum 427.dta

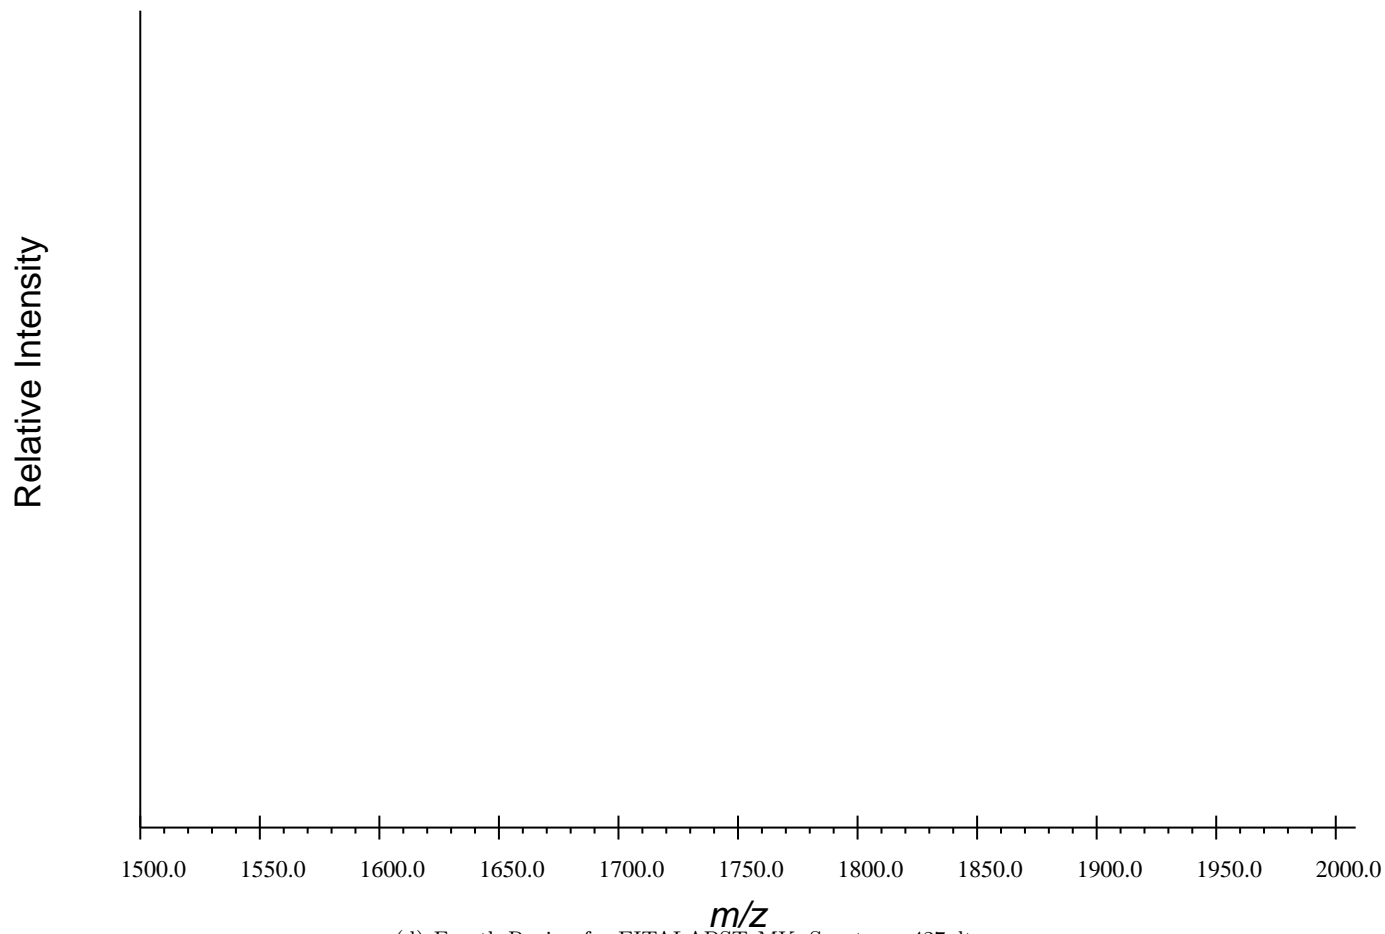

(d) Fourth Region for EITALAPSToMK, Spectrum 427.dta

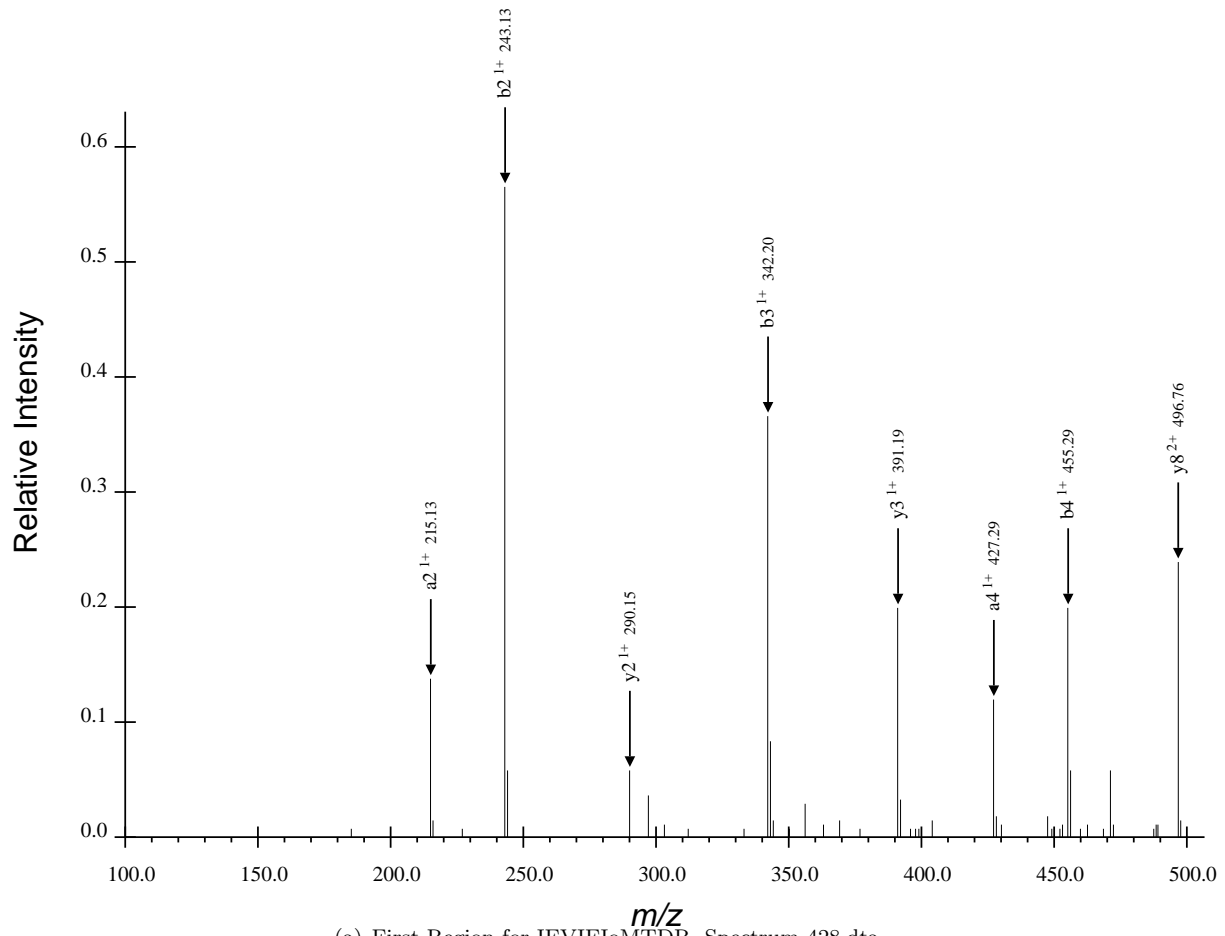

(a) First Region for IEVIEIoMTDR, Spectrum 428.dta

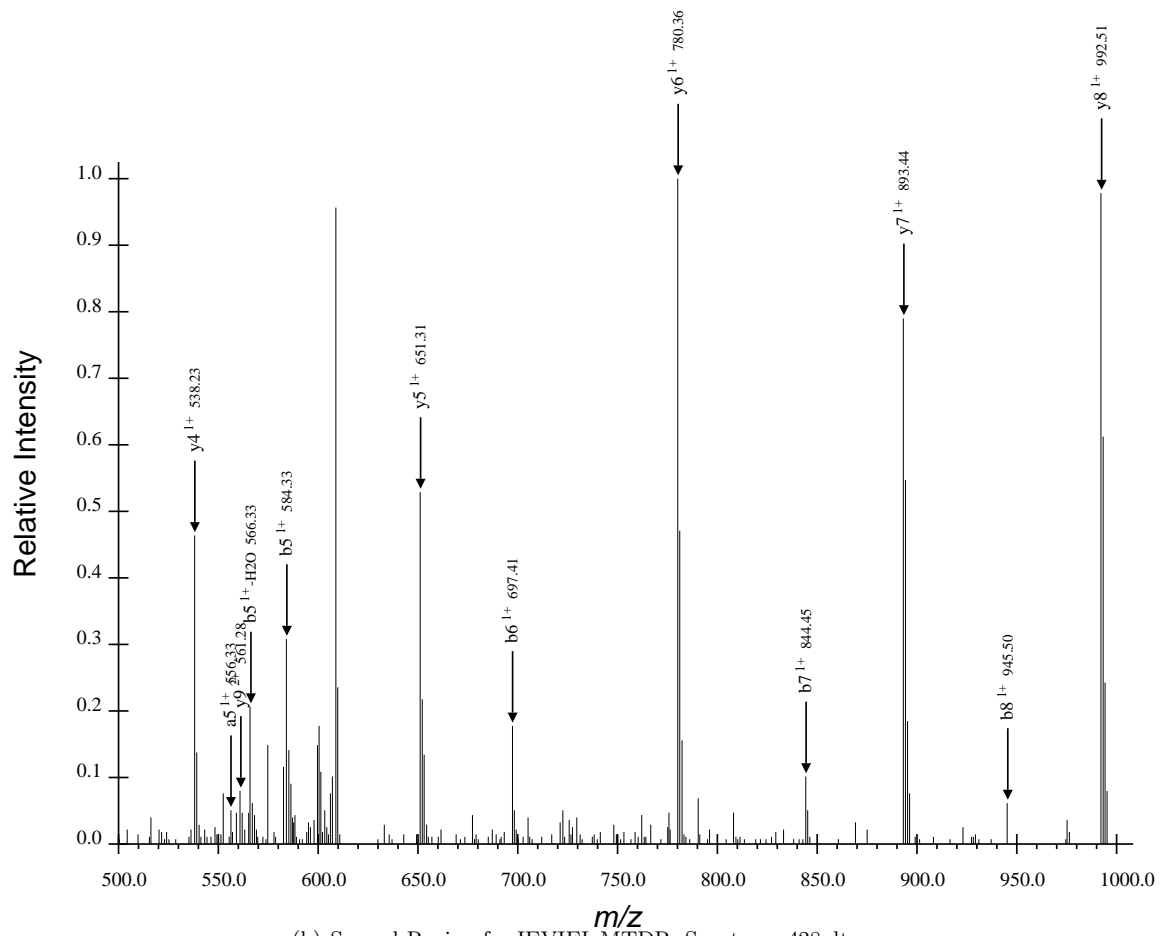

(b) Second Region for IEVIEIoMTDR, Spectrum 428.dta

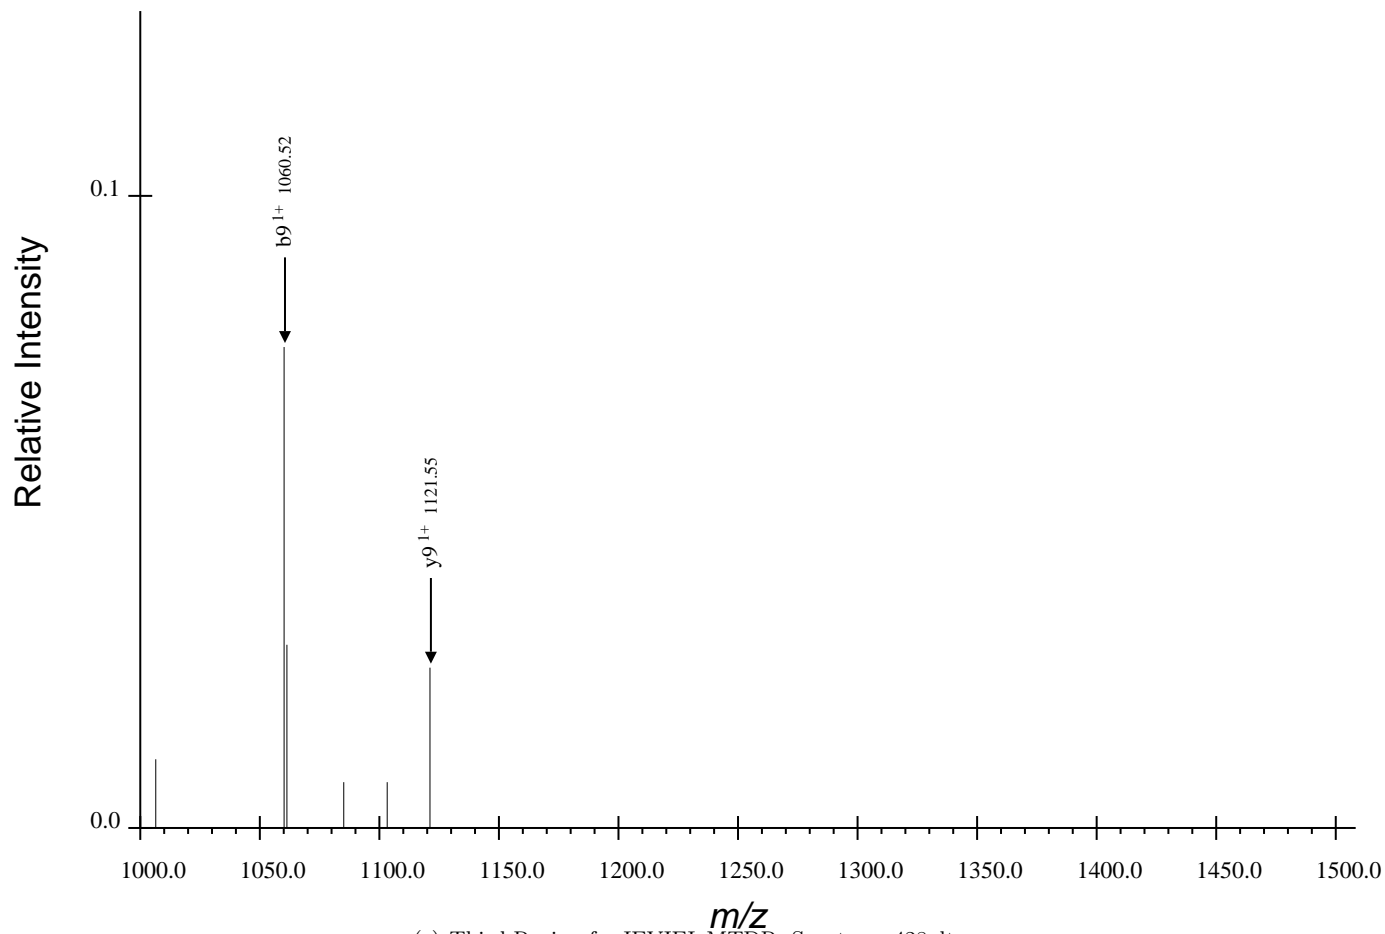

(c) Third Region for IEVIEIoMTDR, Spectrum 428.dta

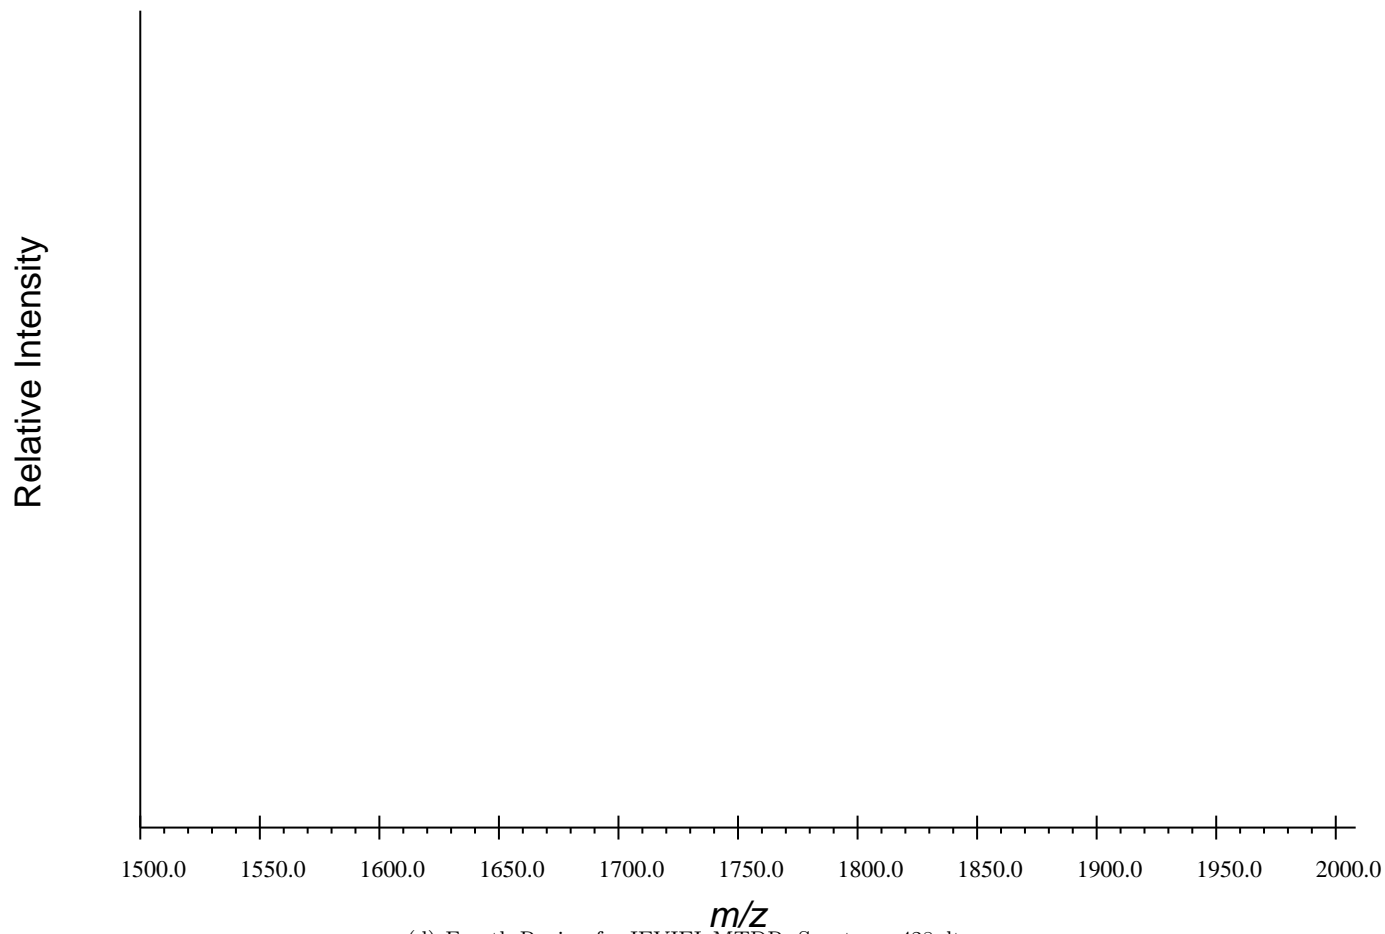

(d) Fourth Region for IEVIEIoMTDR, Spectrum 428.dta

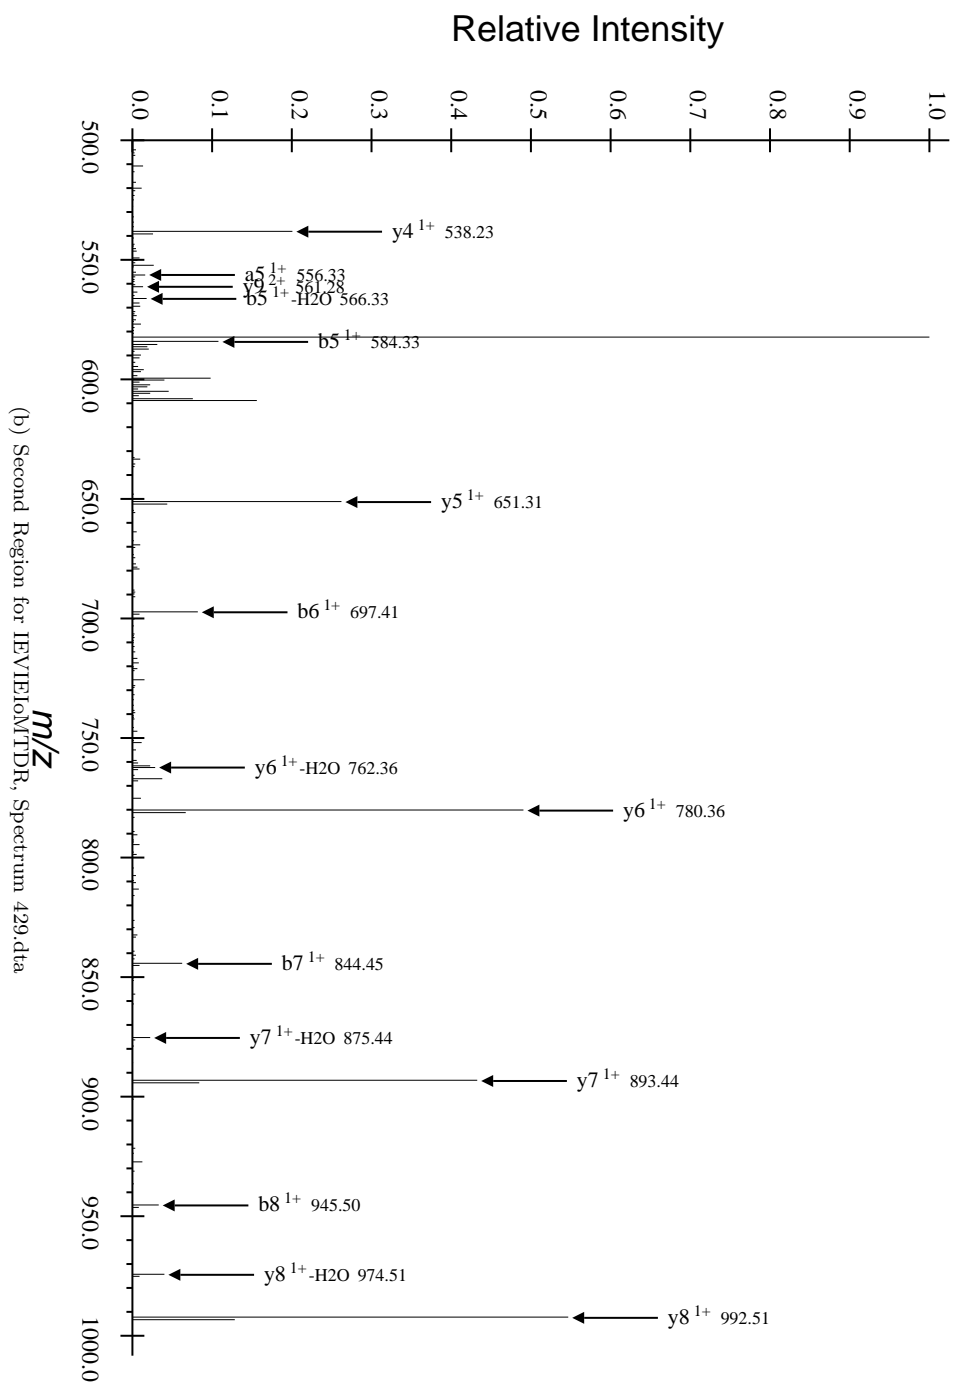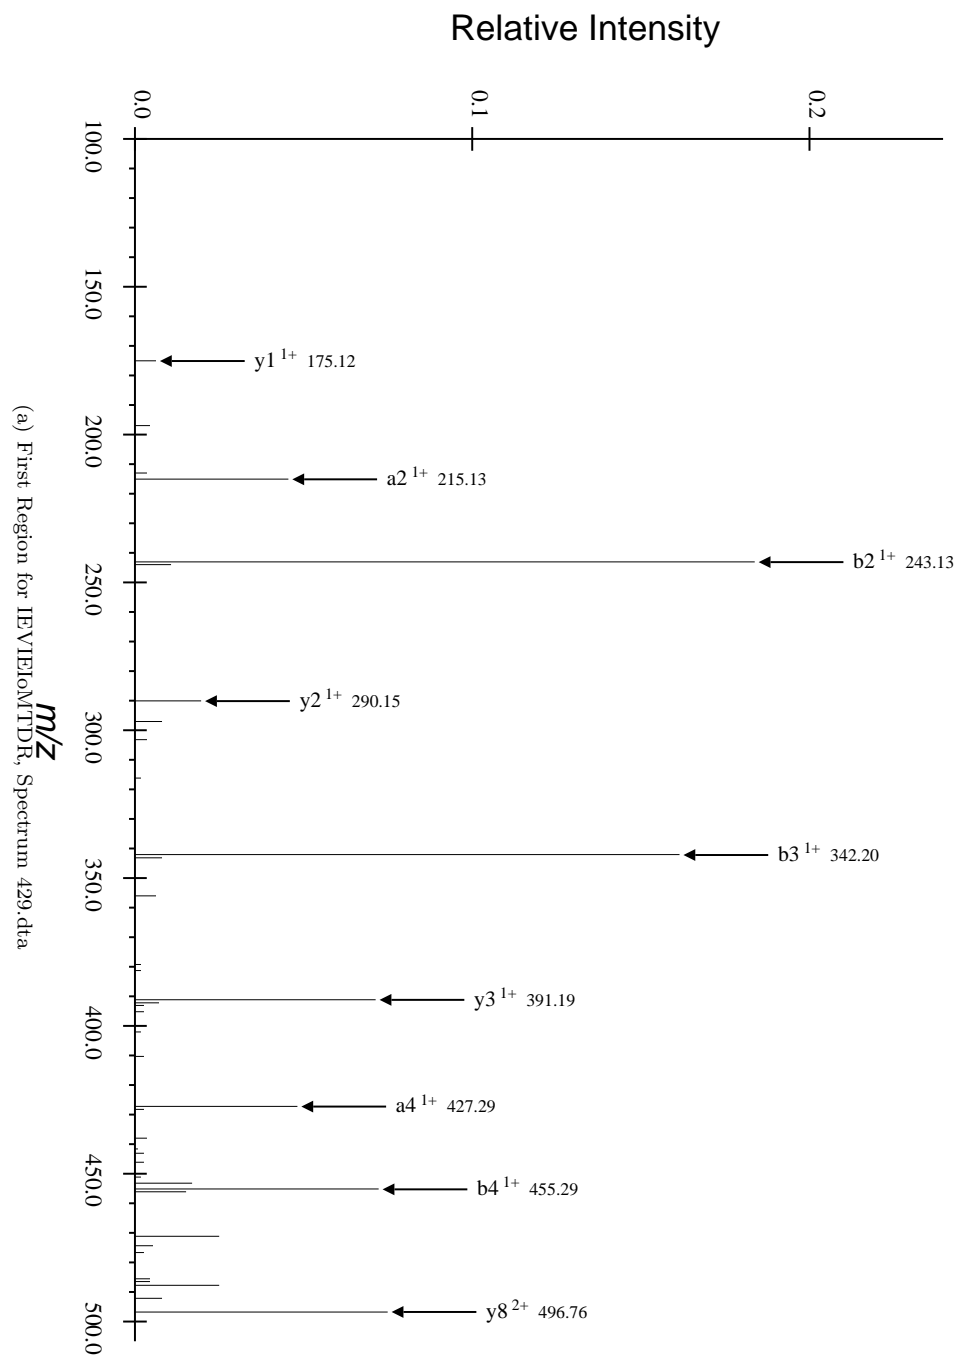

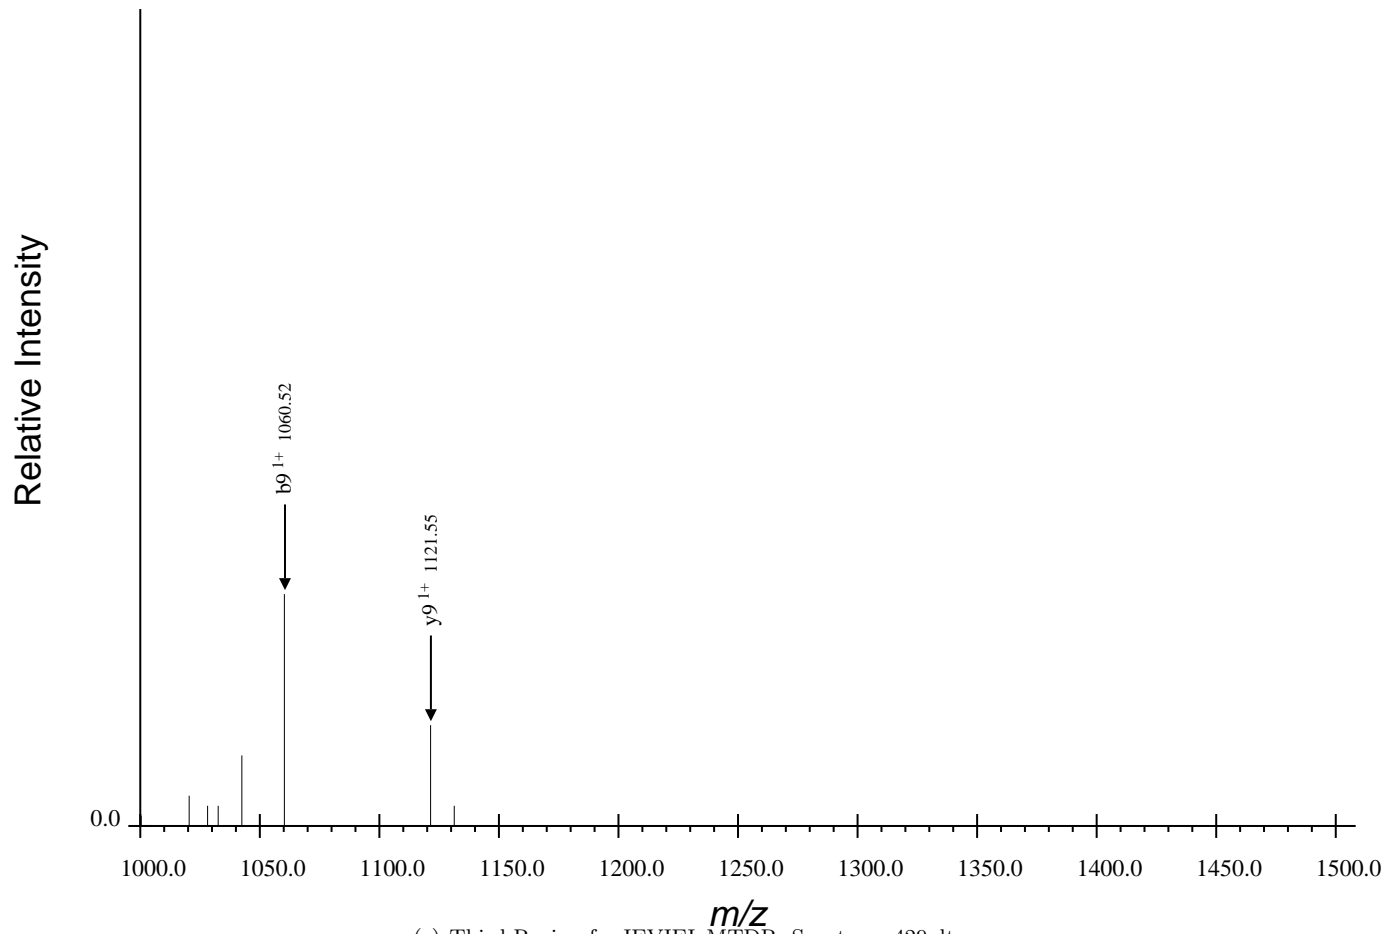

(c) Third Region for IEVIEIoMTDR, Spectrum 429.dta

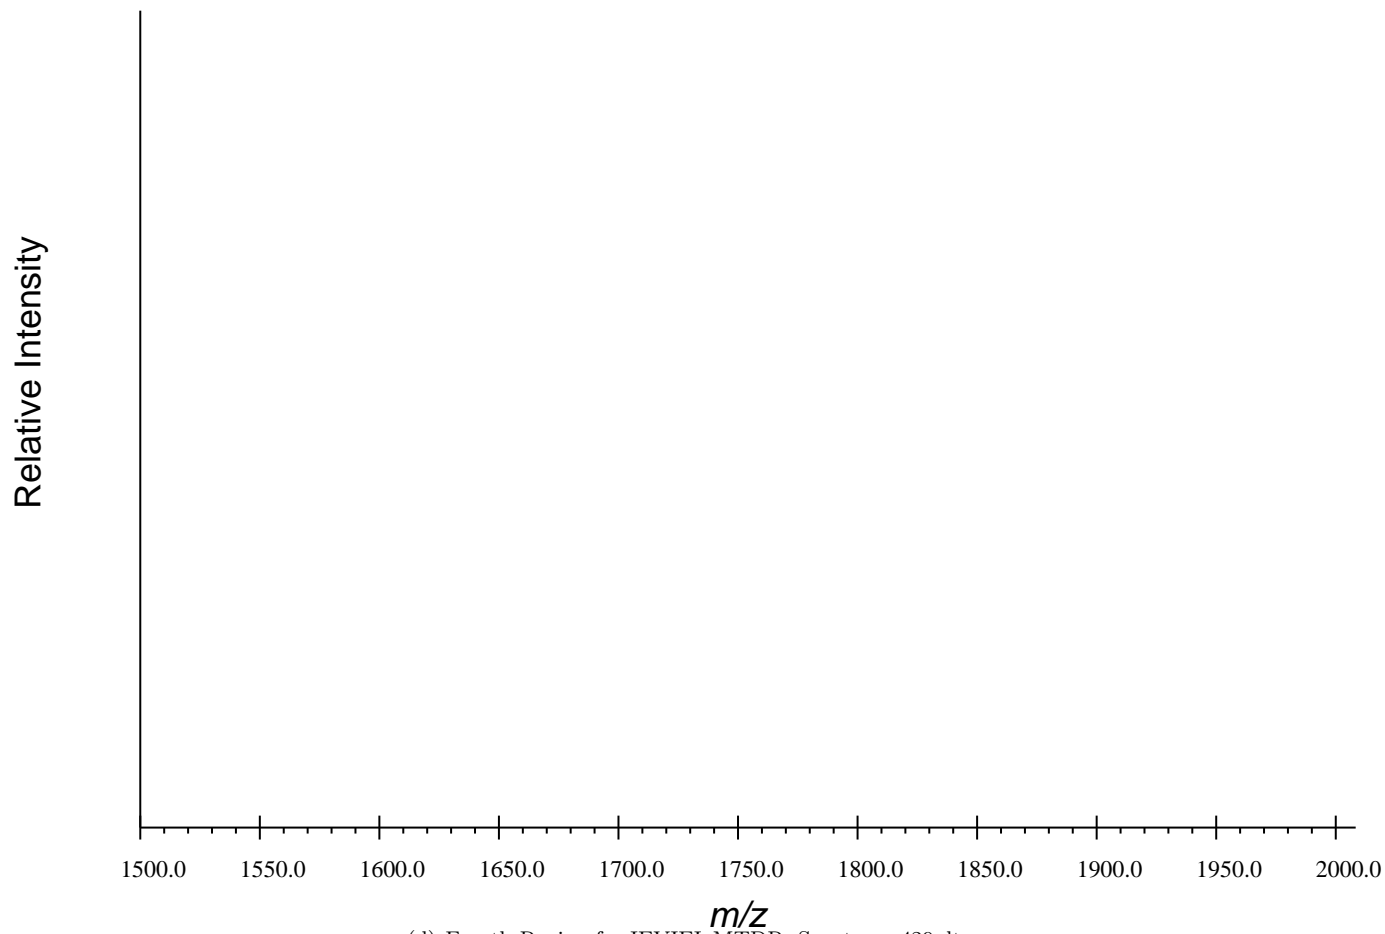

(d) Fourth Region for IEVIEIoMTDR, Spectrum 429.dta

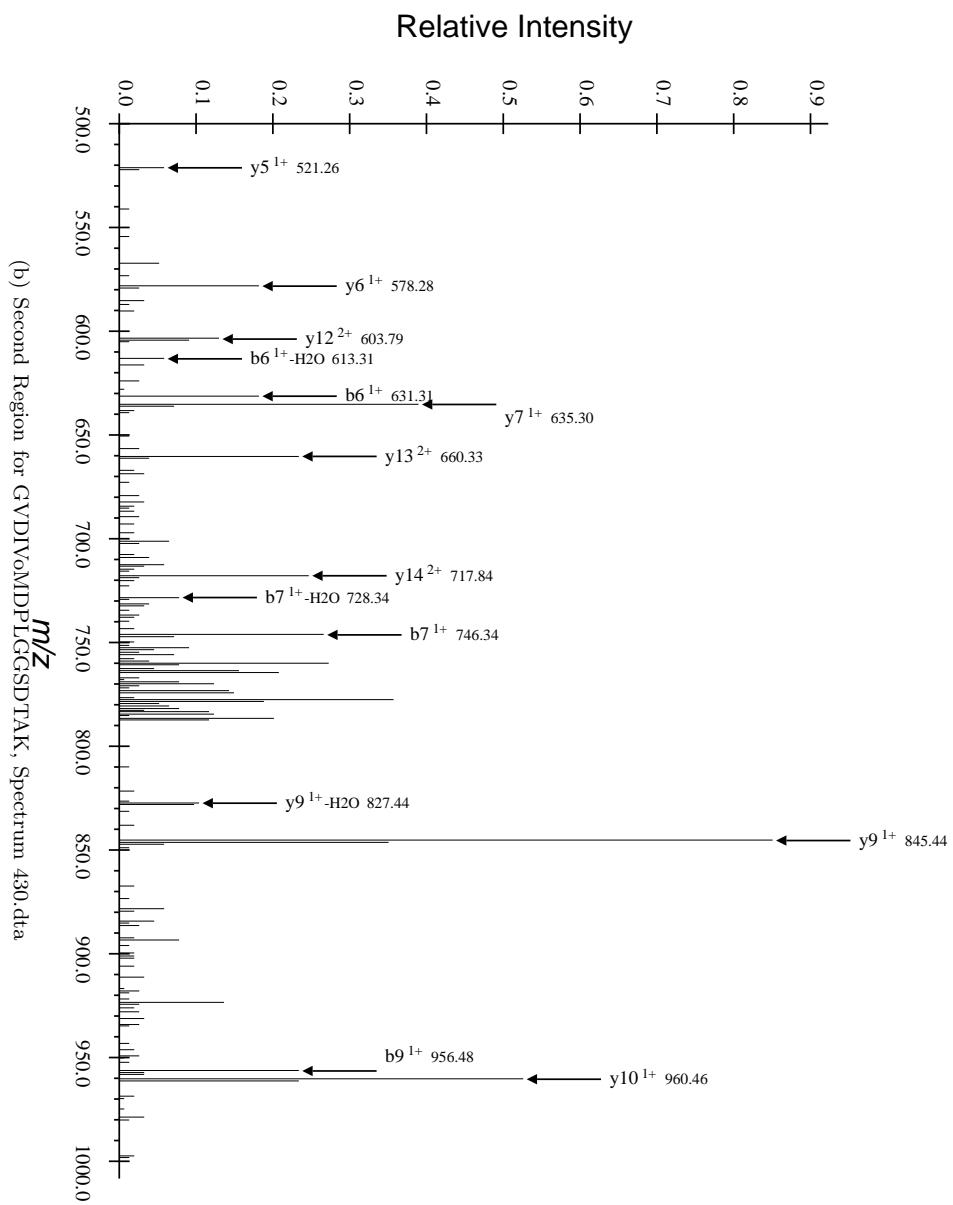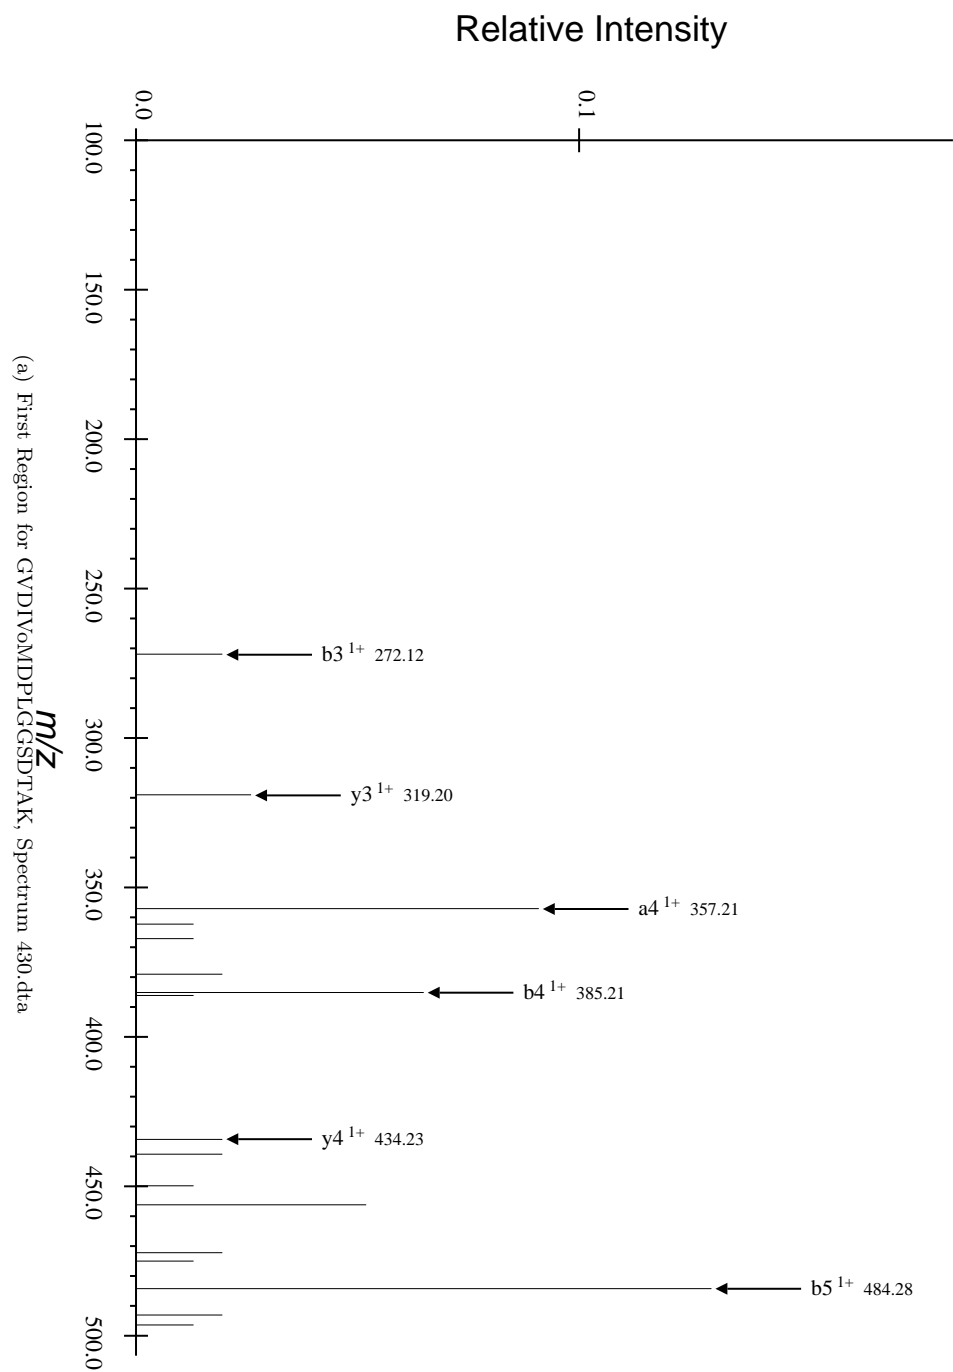

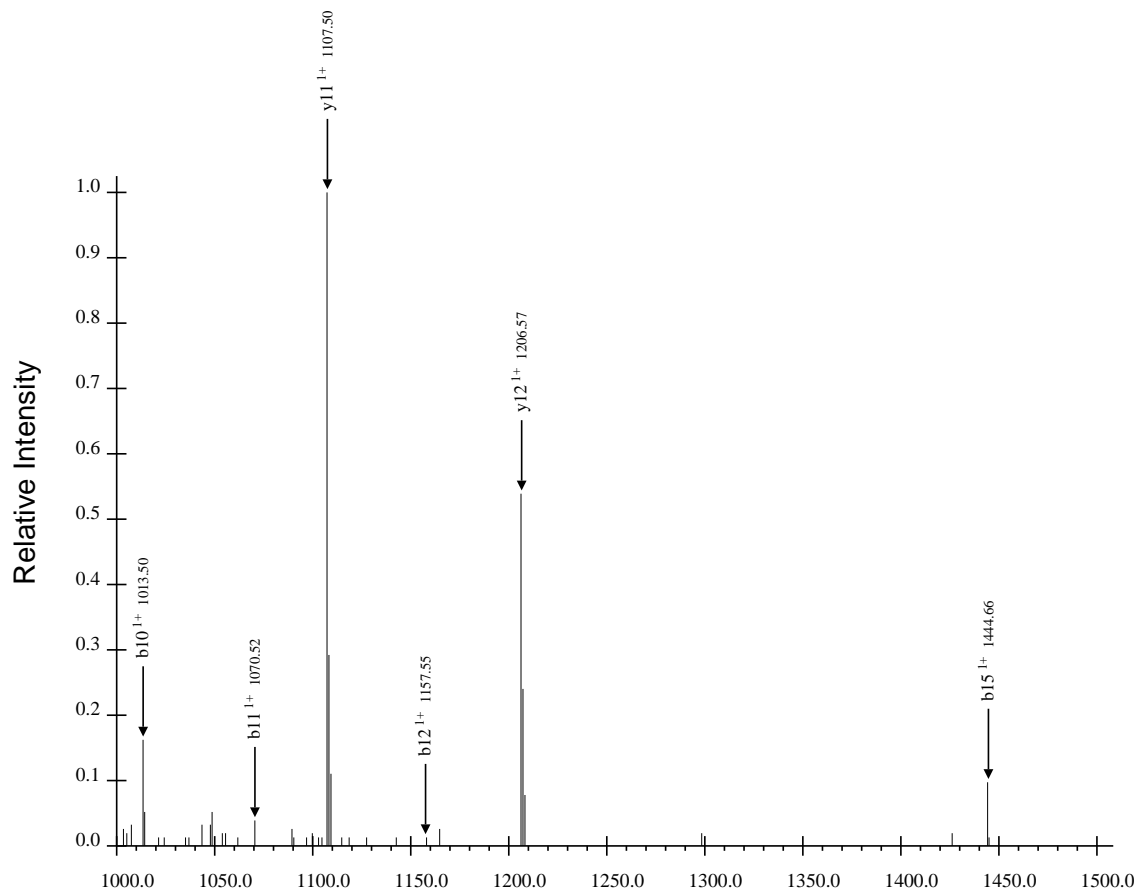

(c) Third Region for GVDIVoMDPLGGSDTAK, Spectrum 430.dta

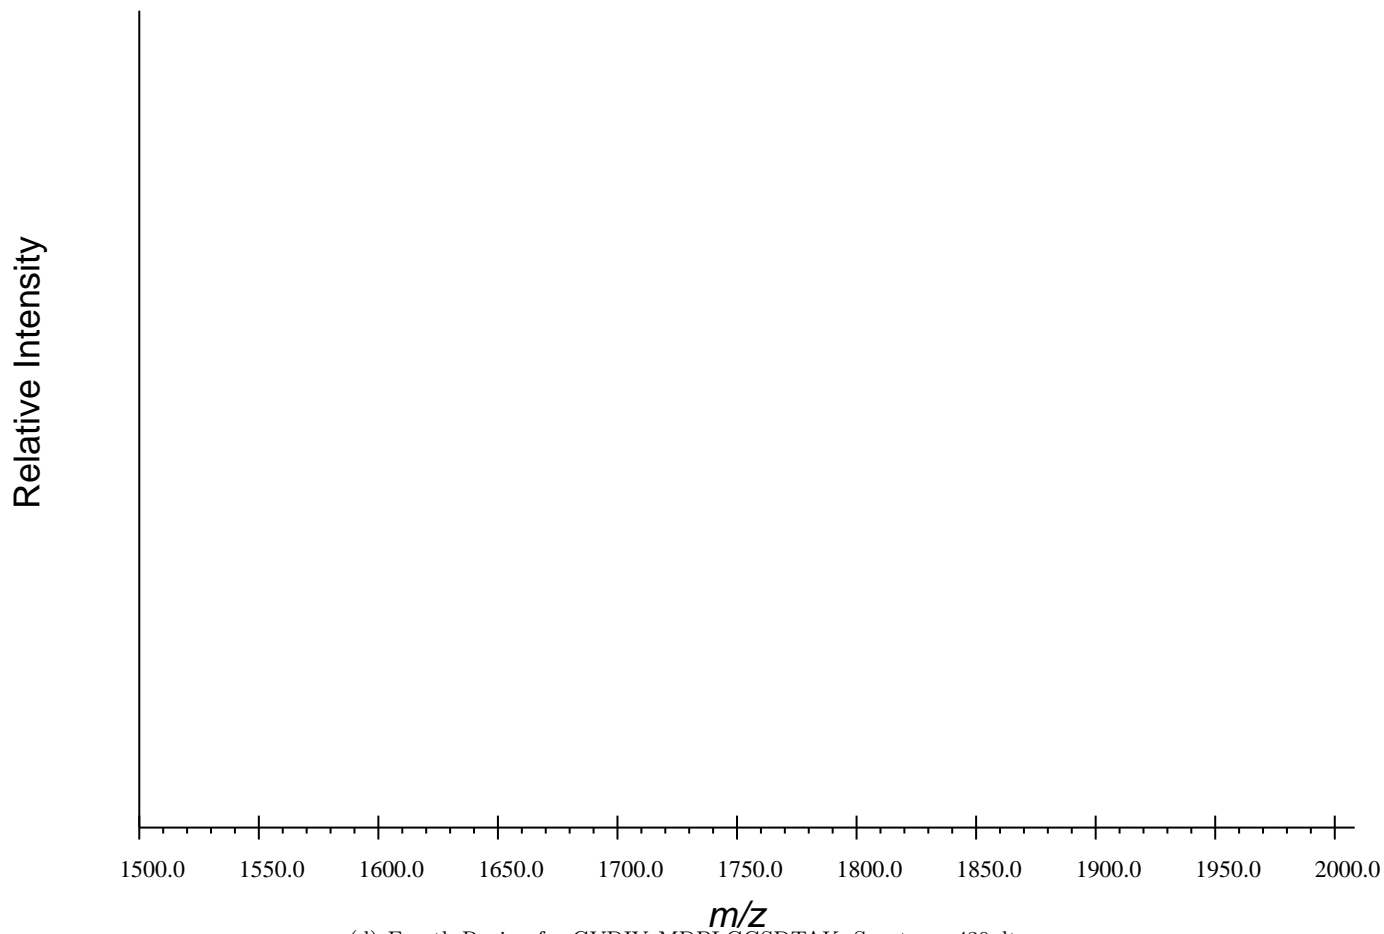

(d) Fourth Region for GVDIVoMDPLGGSDTAK, Spectrum 430.dta

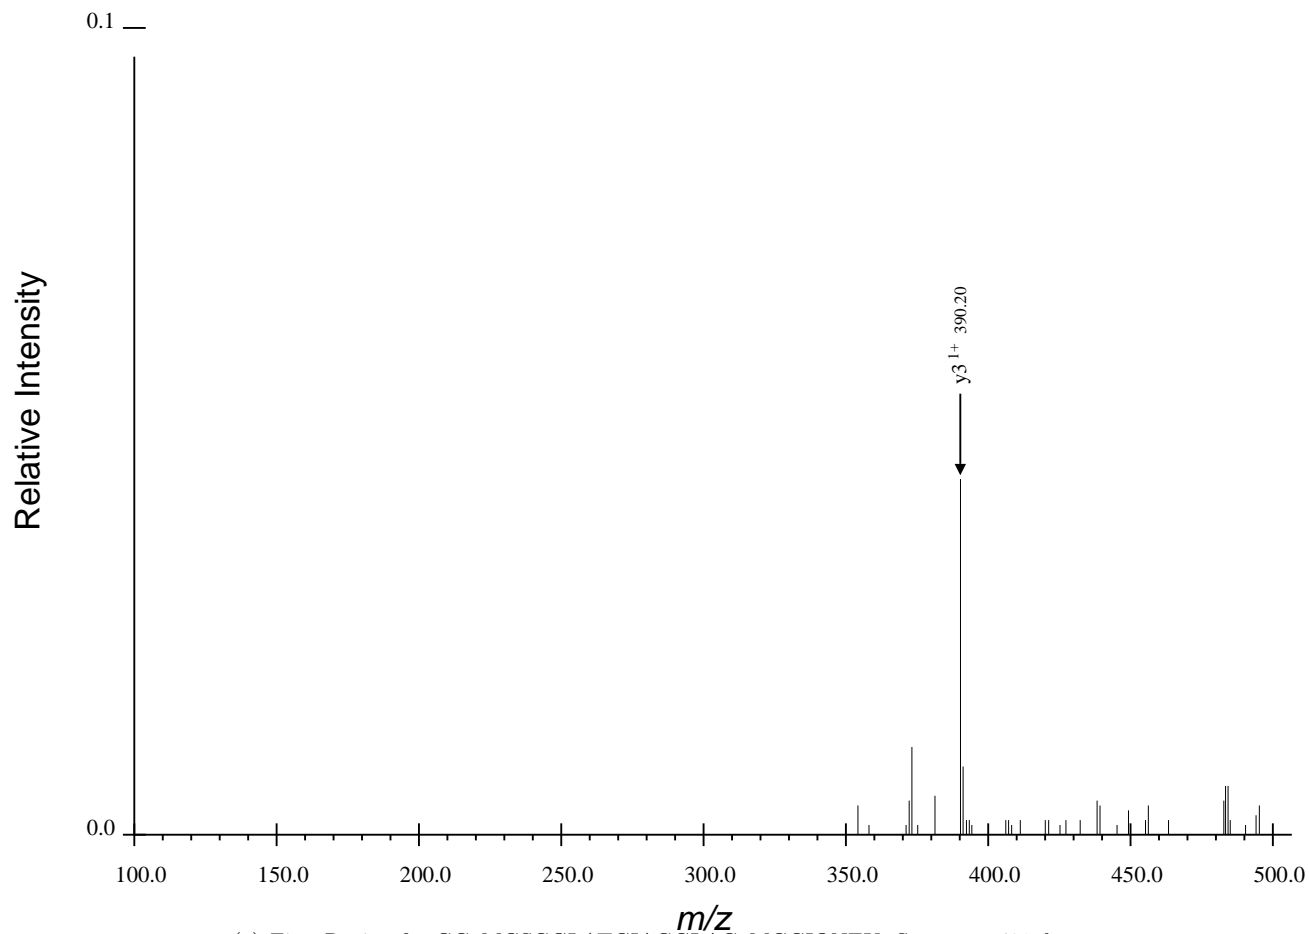

(a) First Region for GGoMGSGLATGIAGGLAGoMGGIQNEK, Spectrum 431.dta

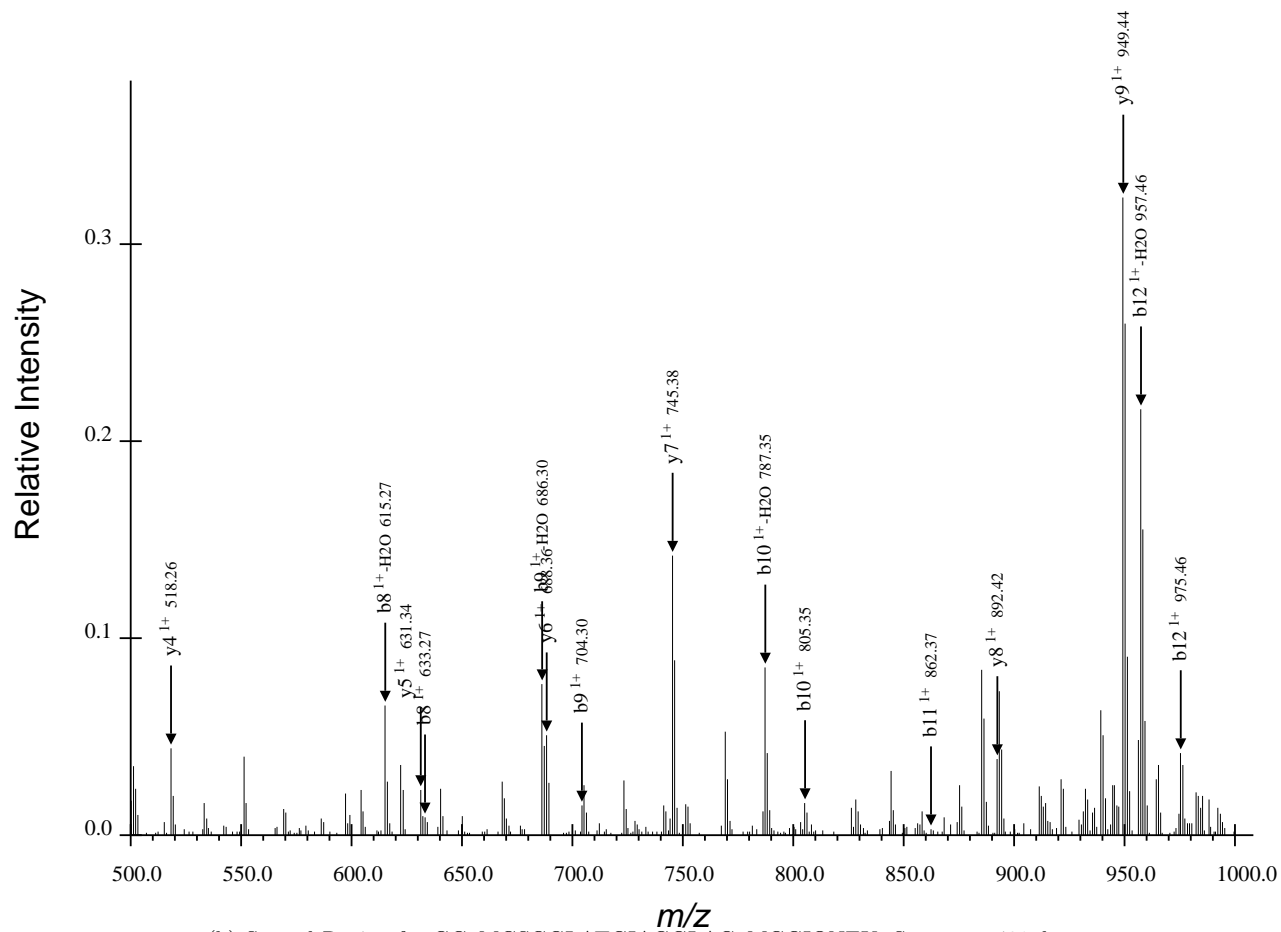

(b) Second Region for GGoMGSGLATGIAGGLAGoMGGIQNEK, Spectrum 431.dta



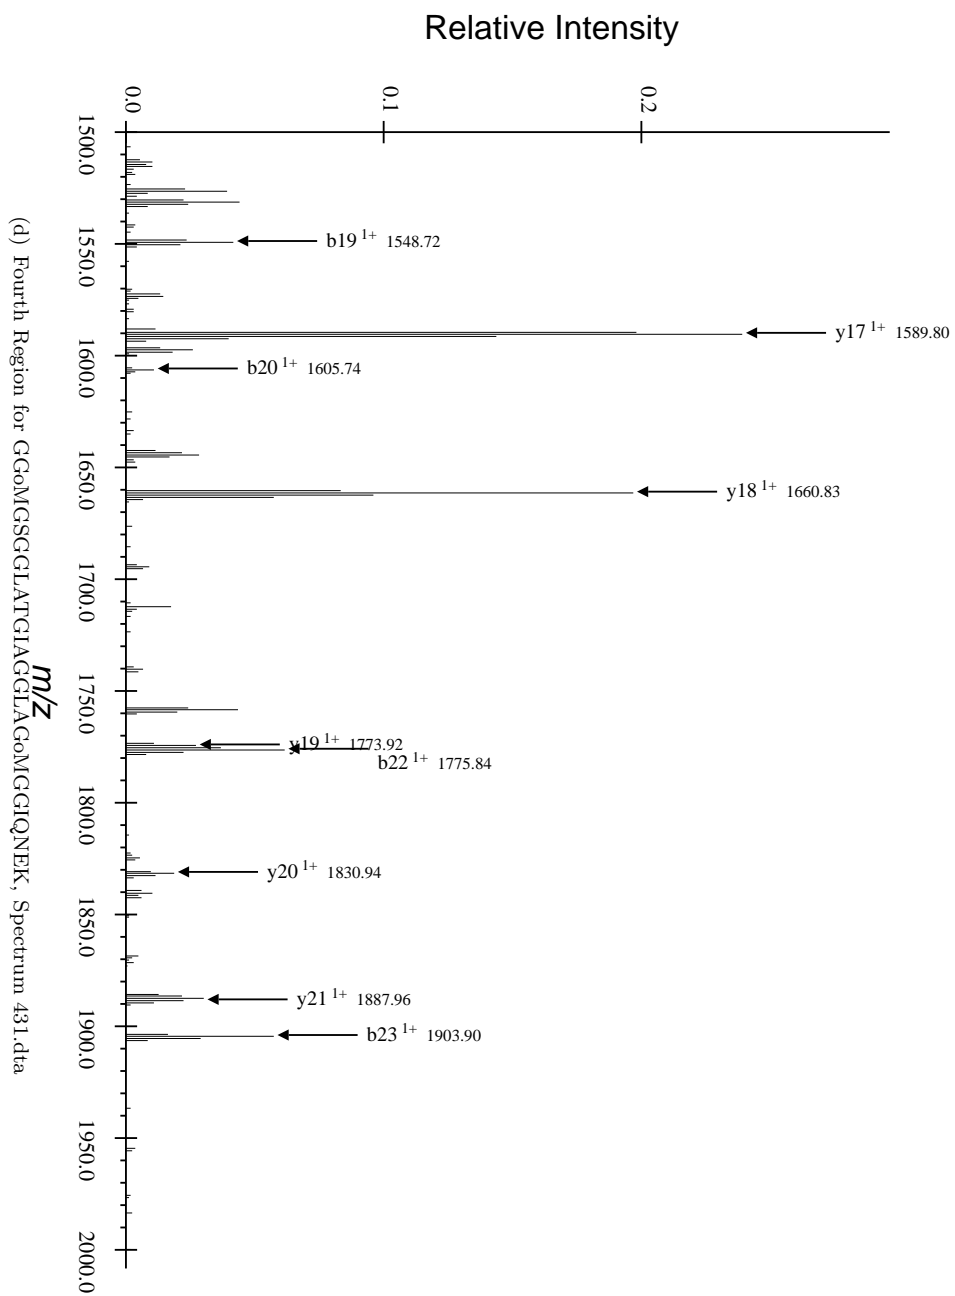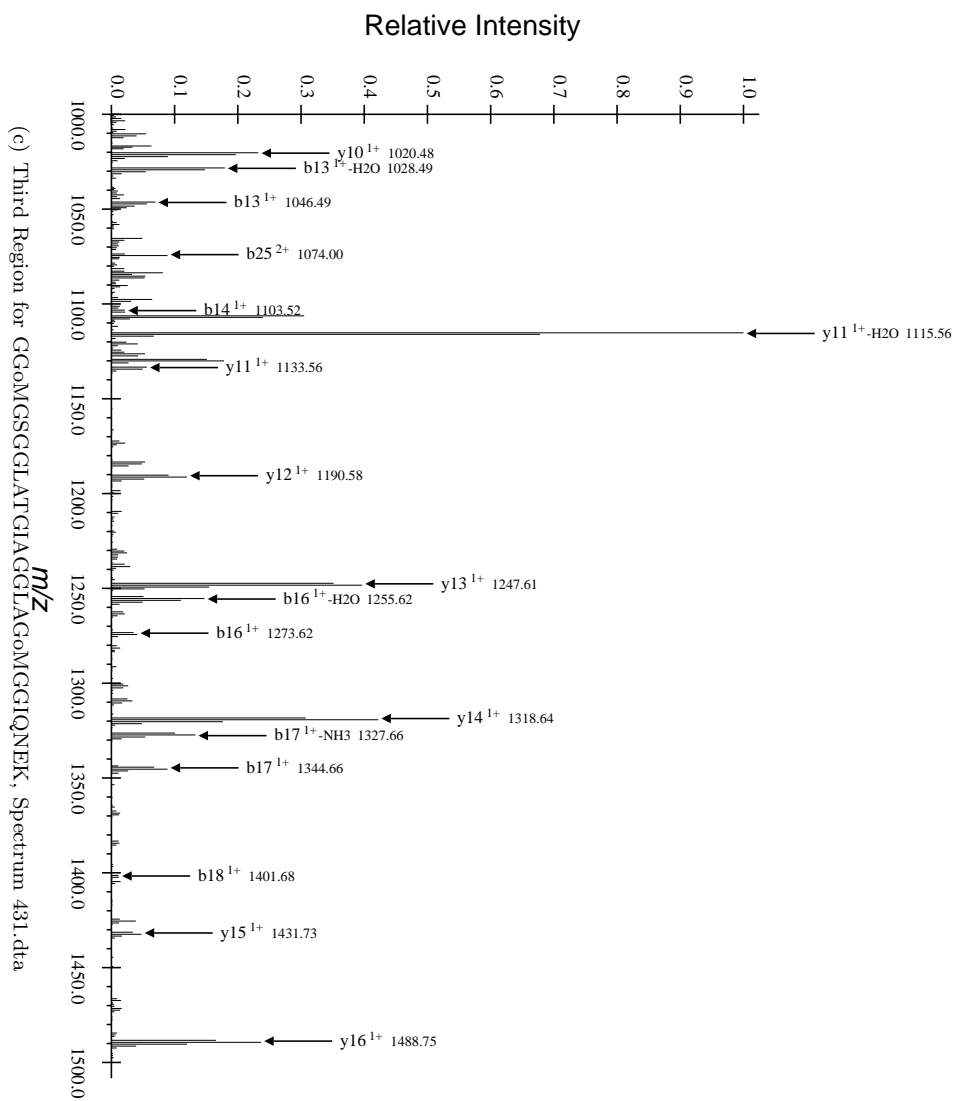

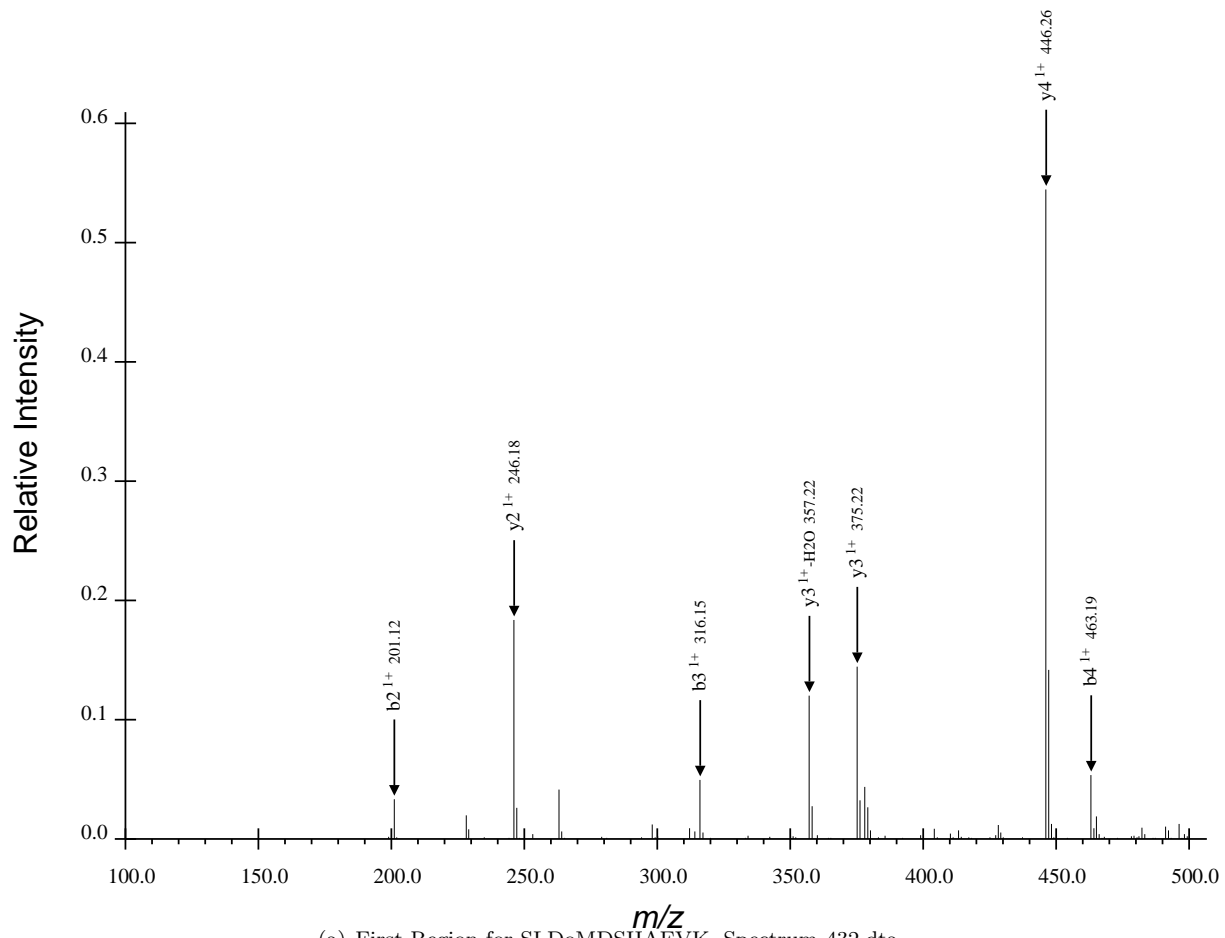

(a) First Region for SLDoMDSIIAEVK, Spectrum 432.dta

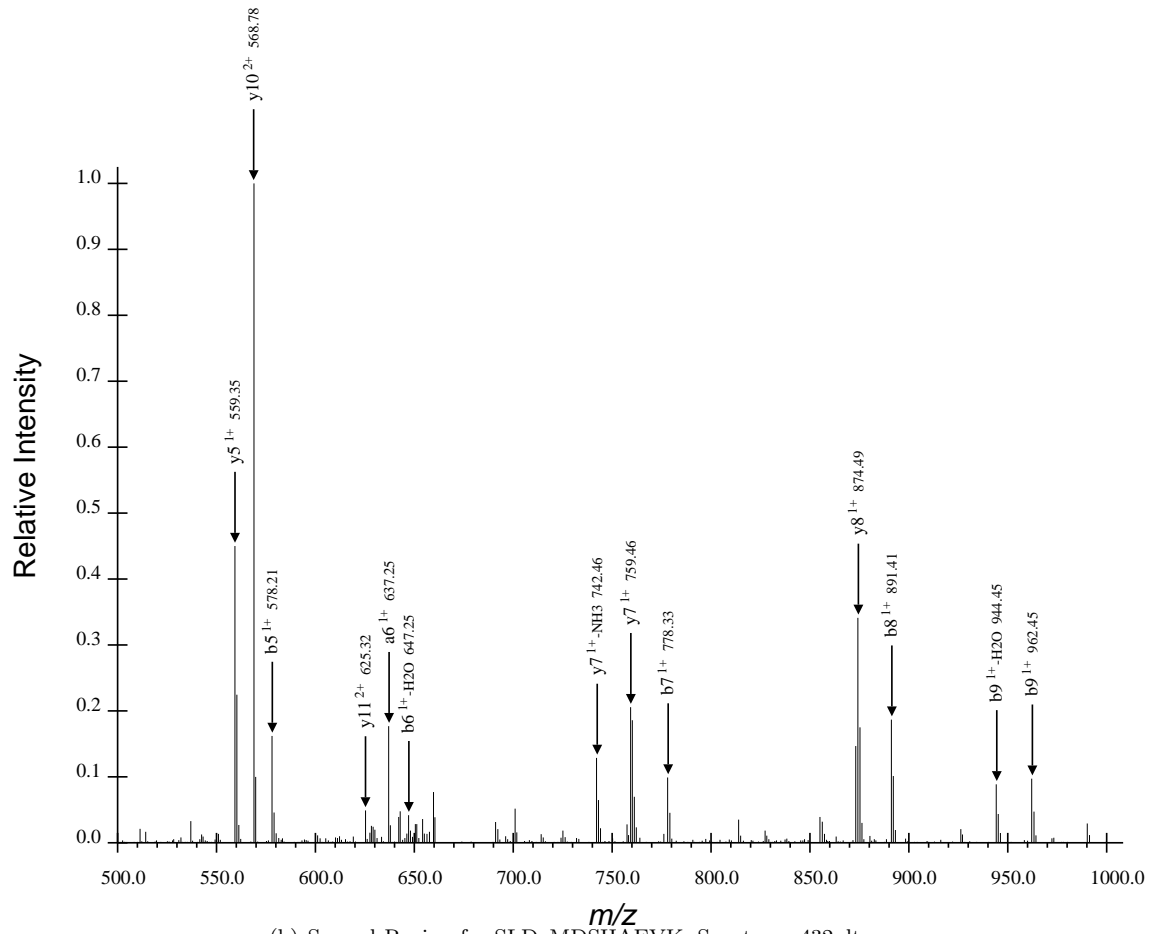

(b) Second Region for SLDoMDSIIAEVK, Spectrum 432.dta

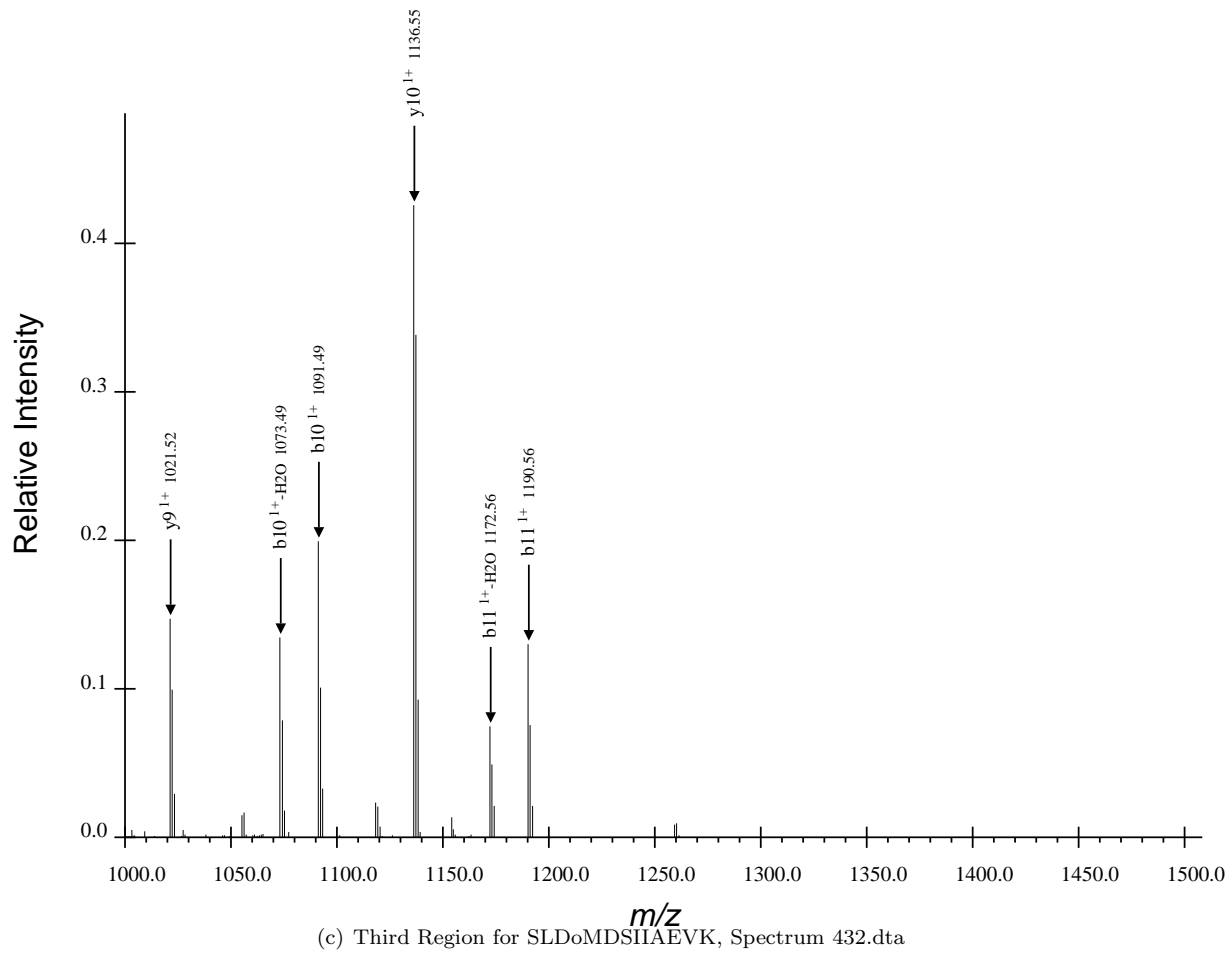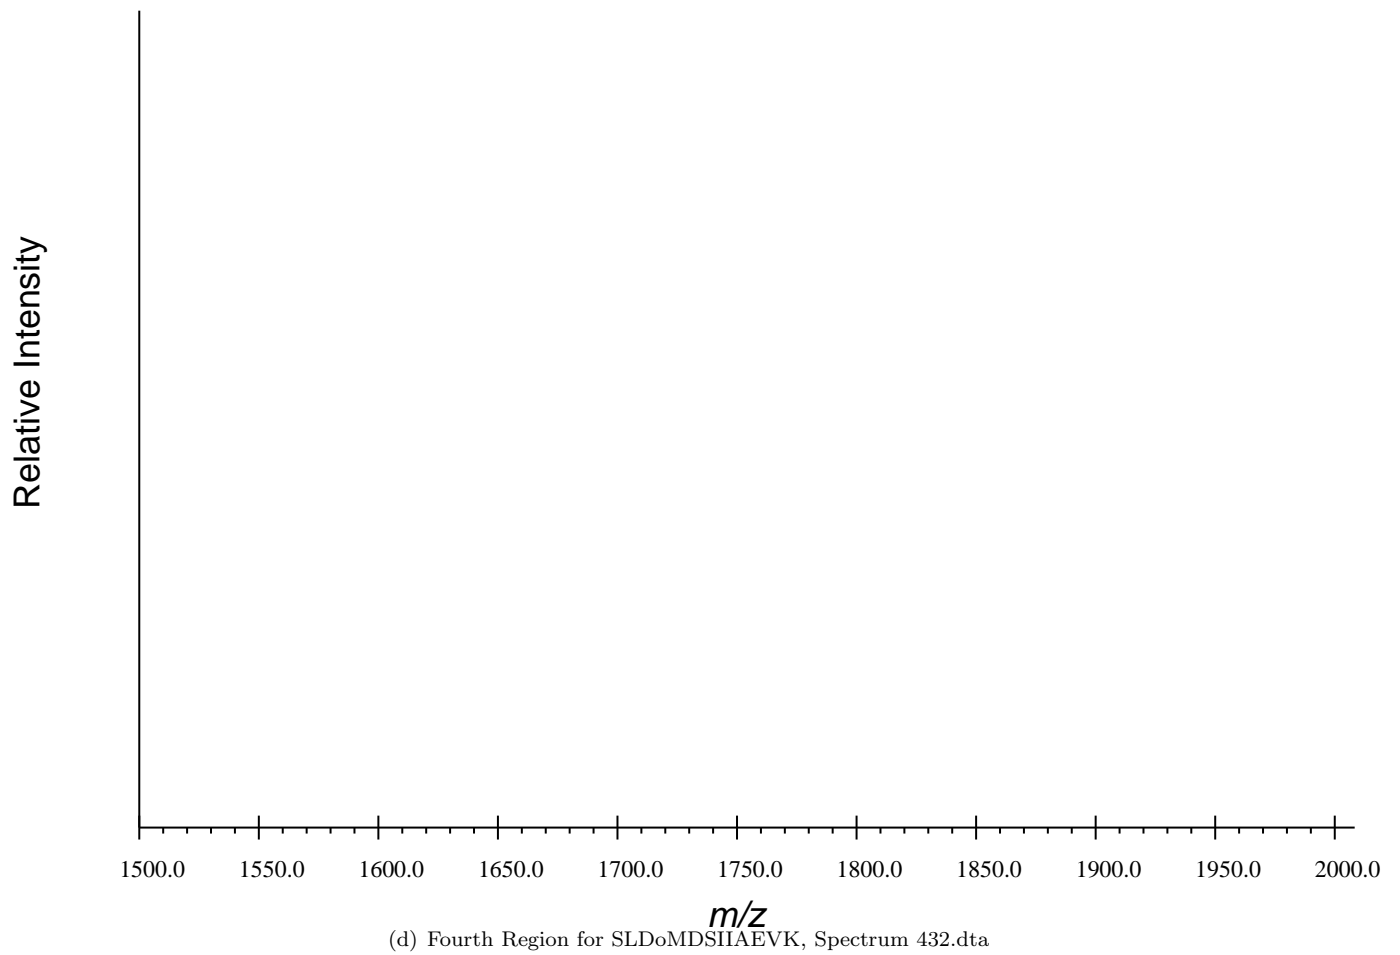

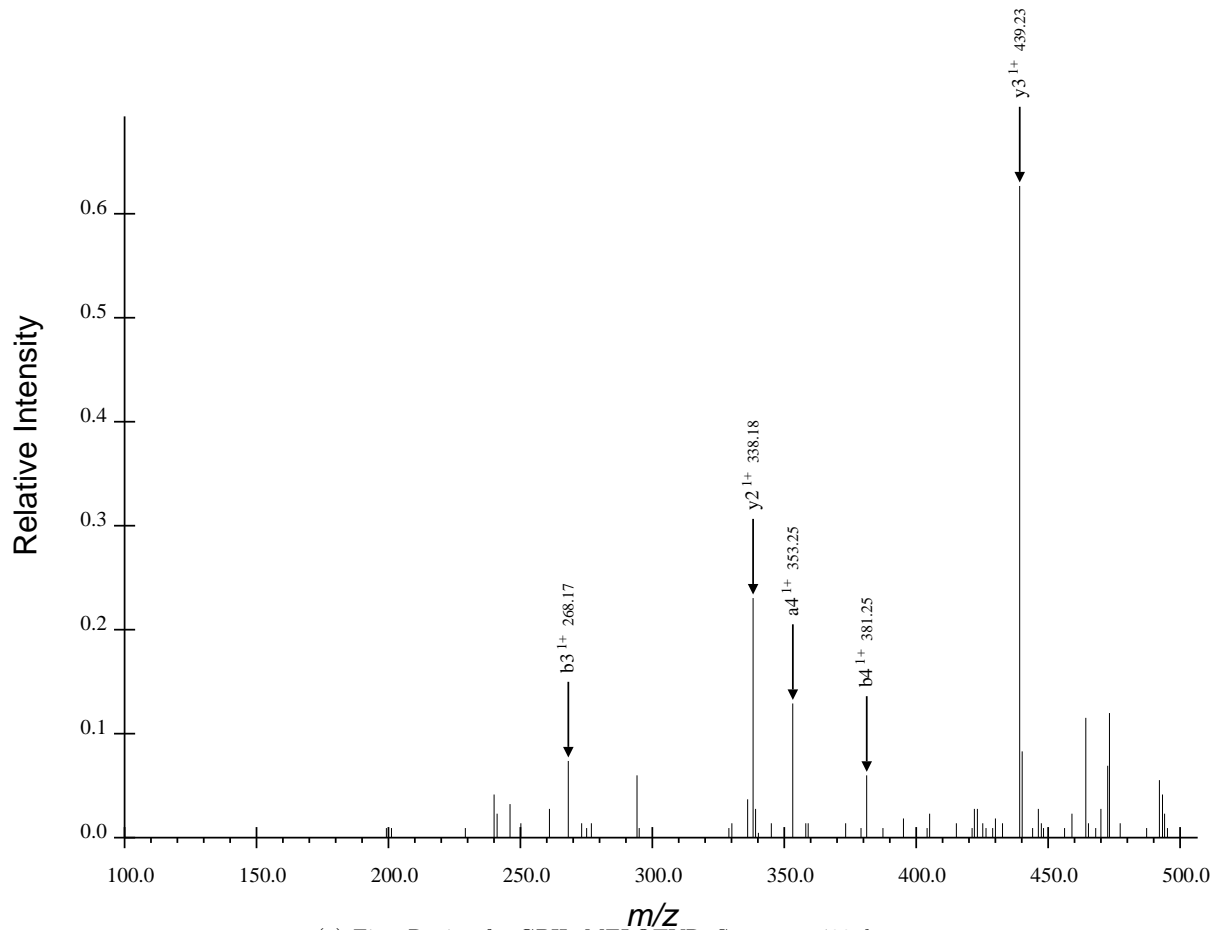

(a) First Region for GPILoMELQTYR, Spectrum 433.dta

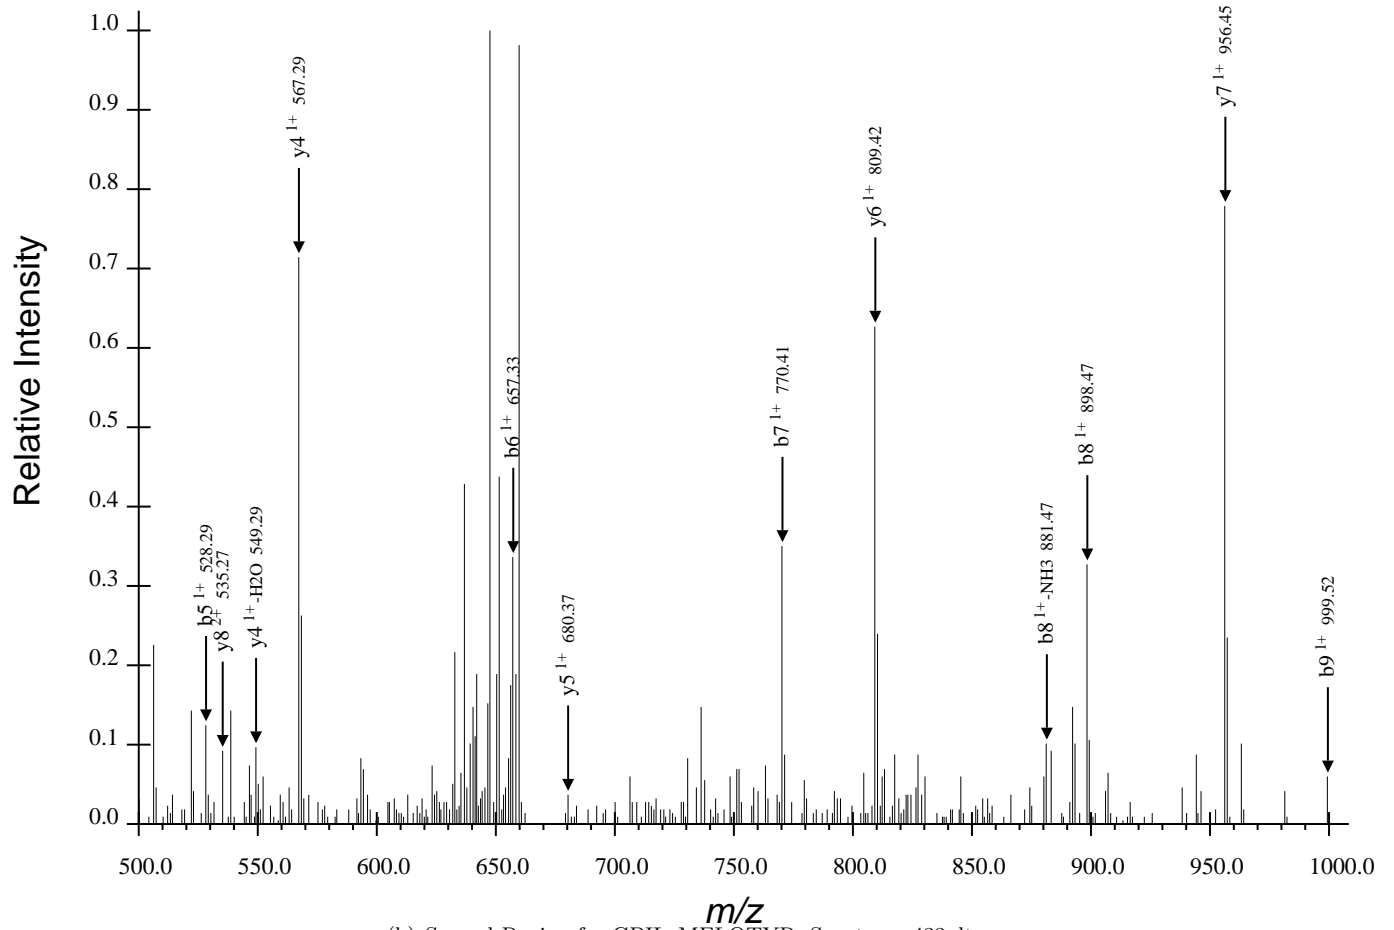

(b) Second Region for GPILoMELQTYR, Spectrum 433.dta

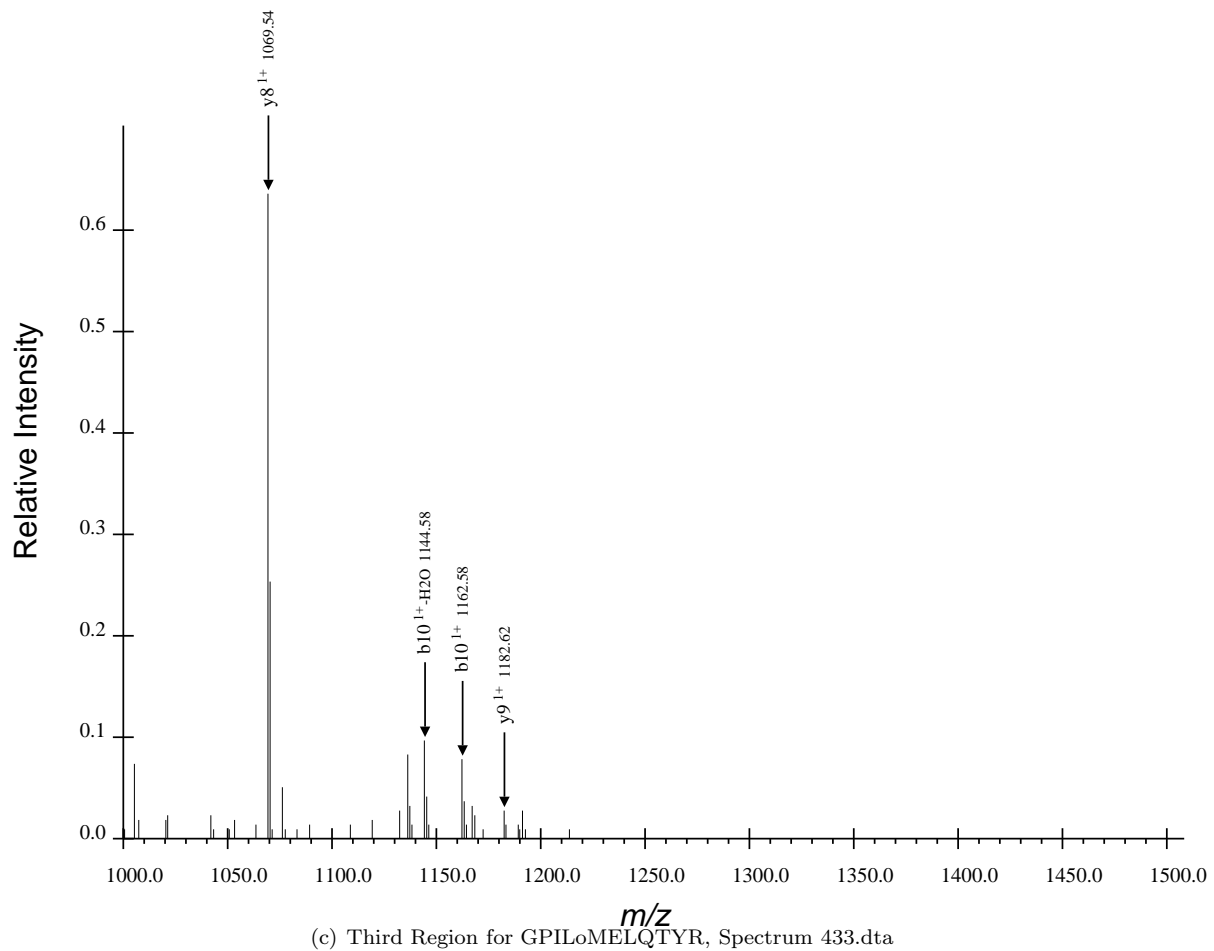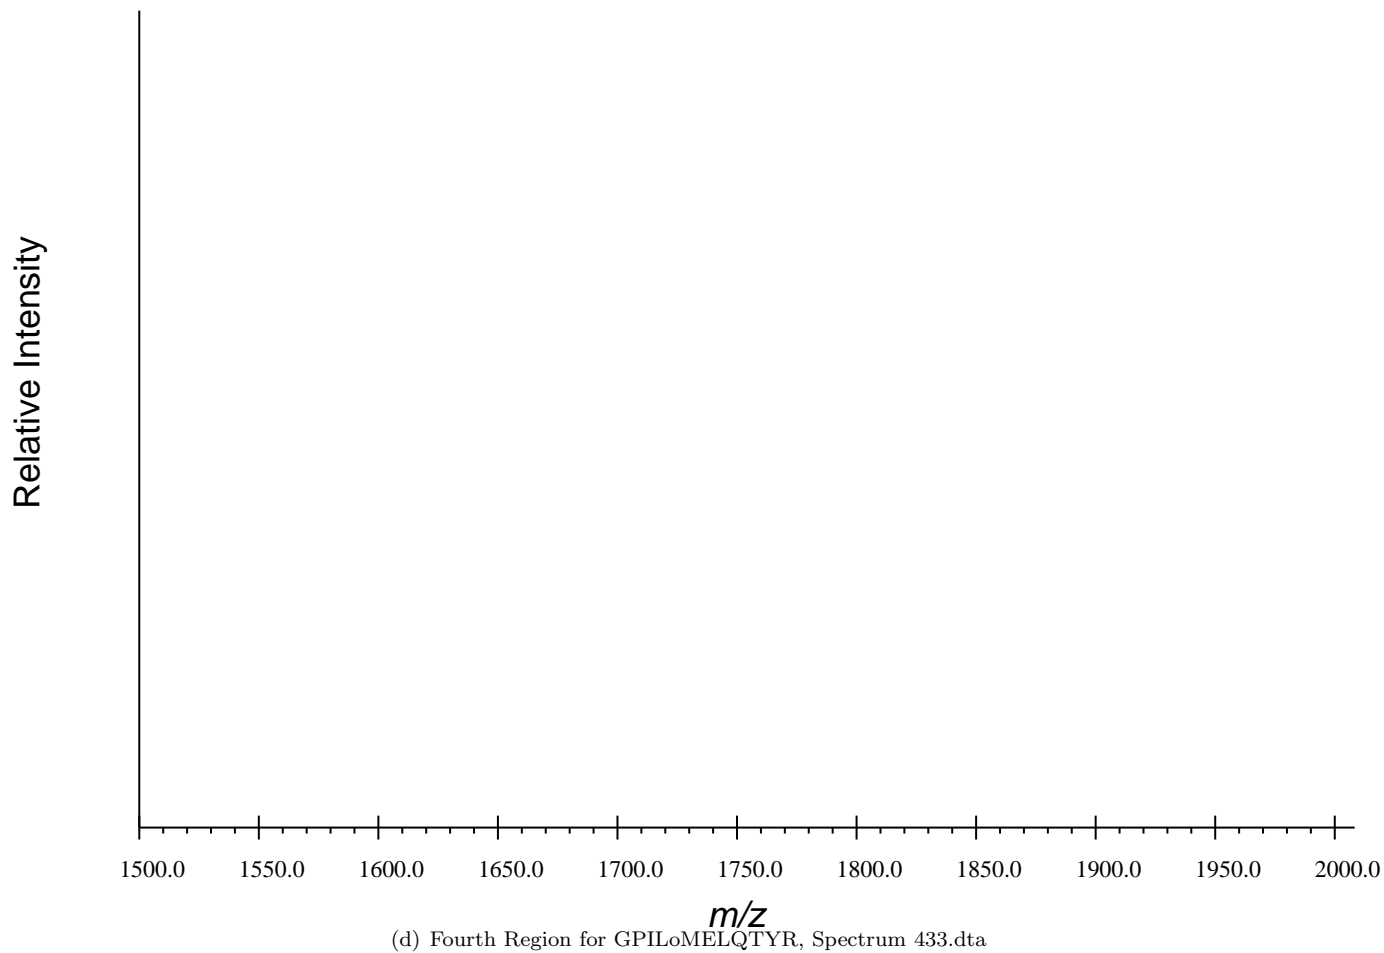

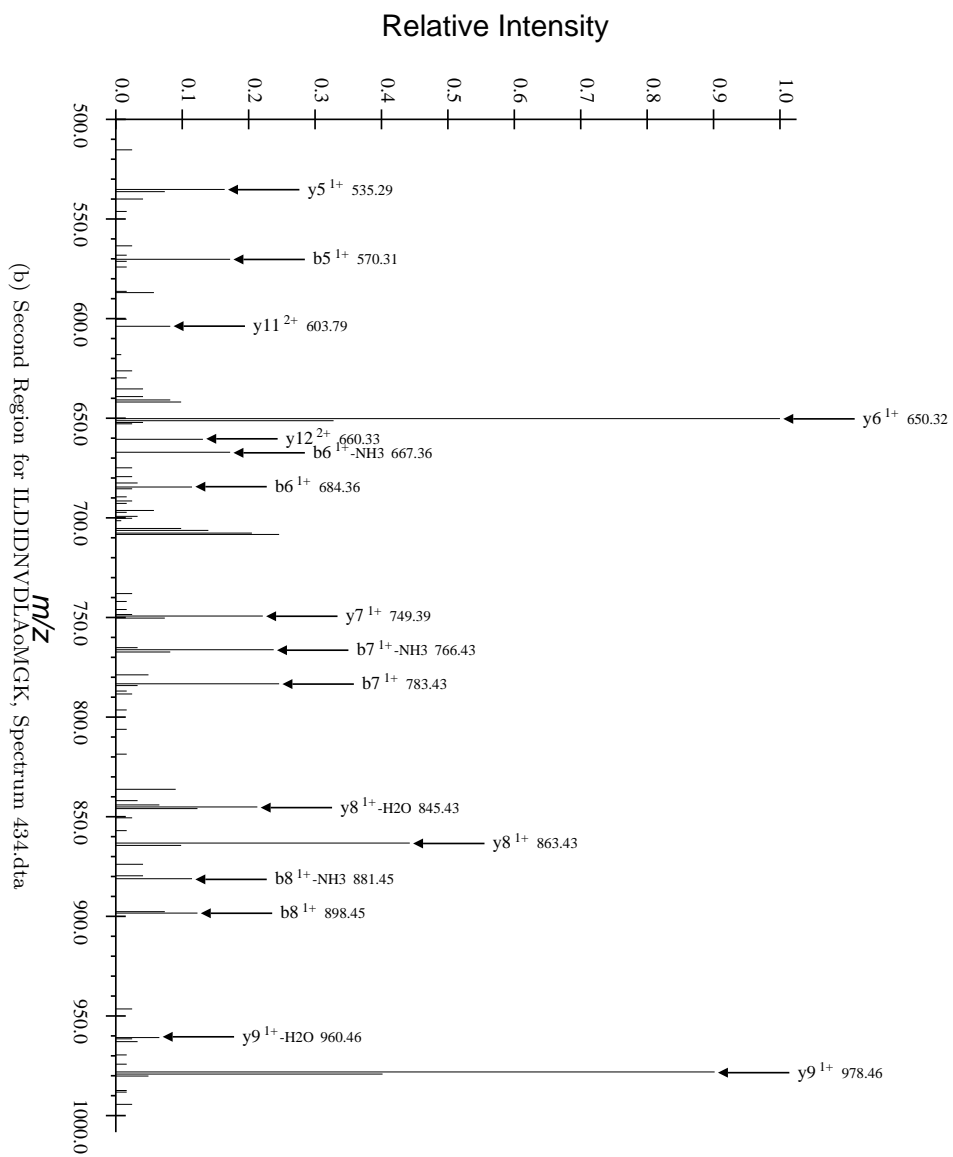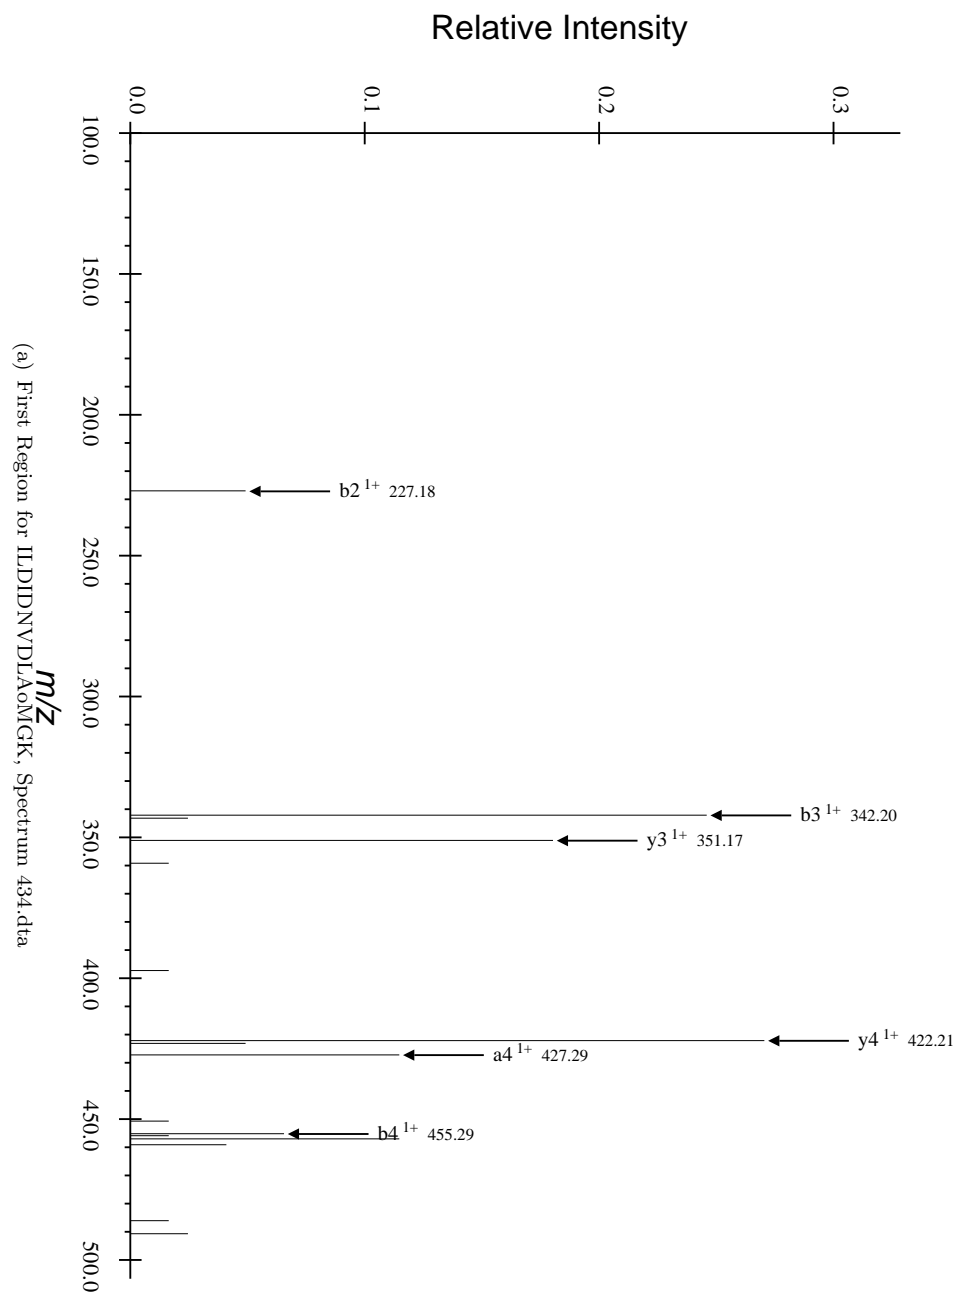

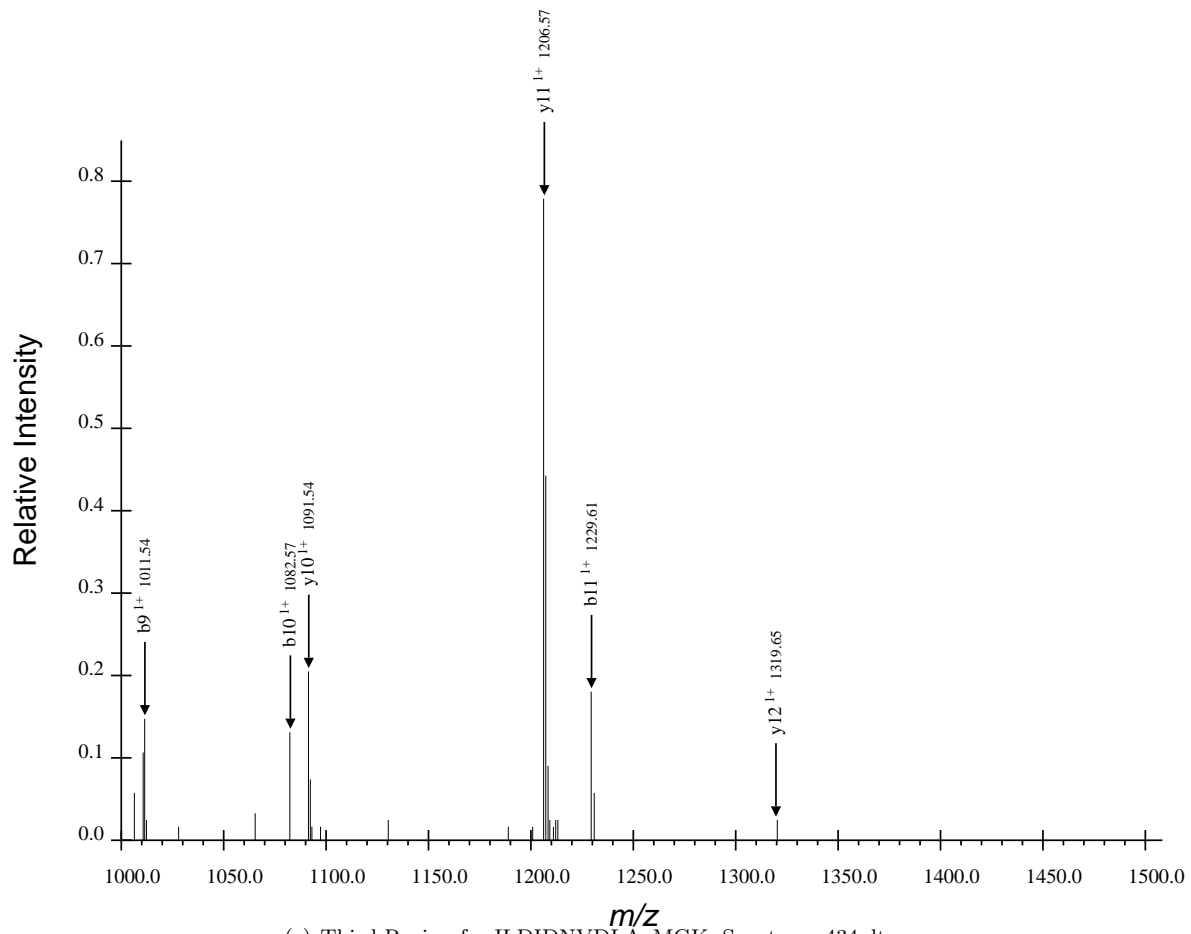

(c) Third Region for ILDIDNVDLA<sub>o</sub>MGK, Spectrum 434.dta

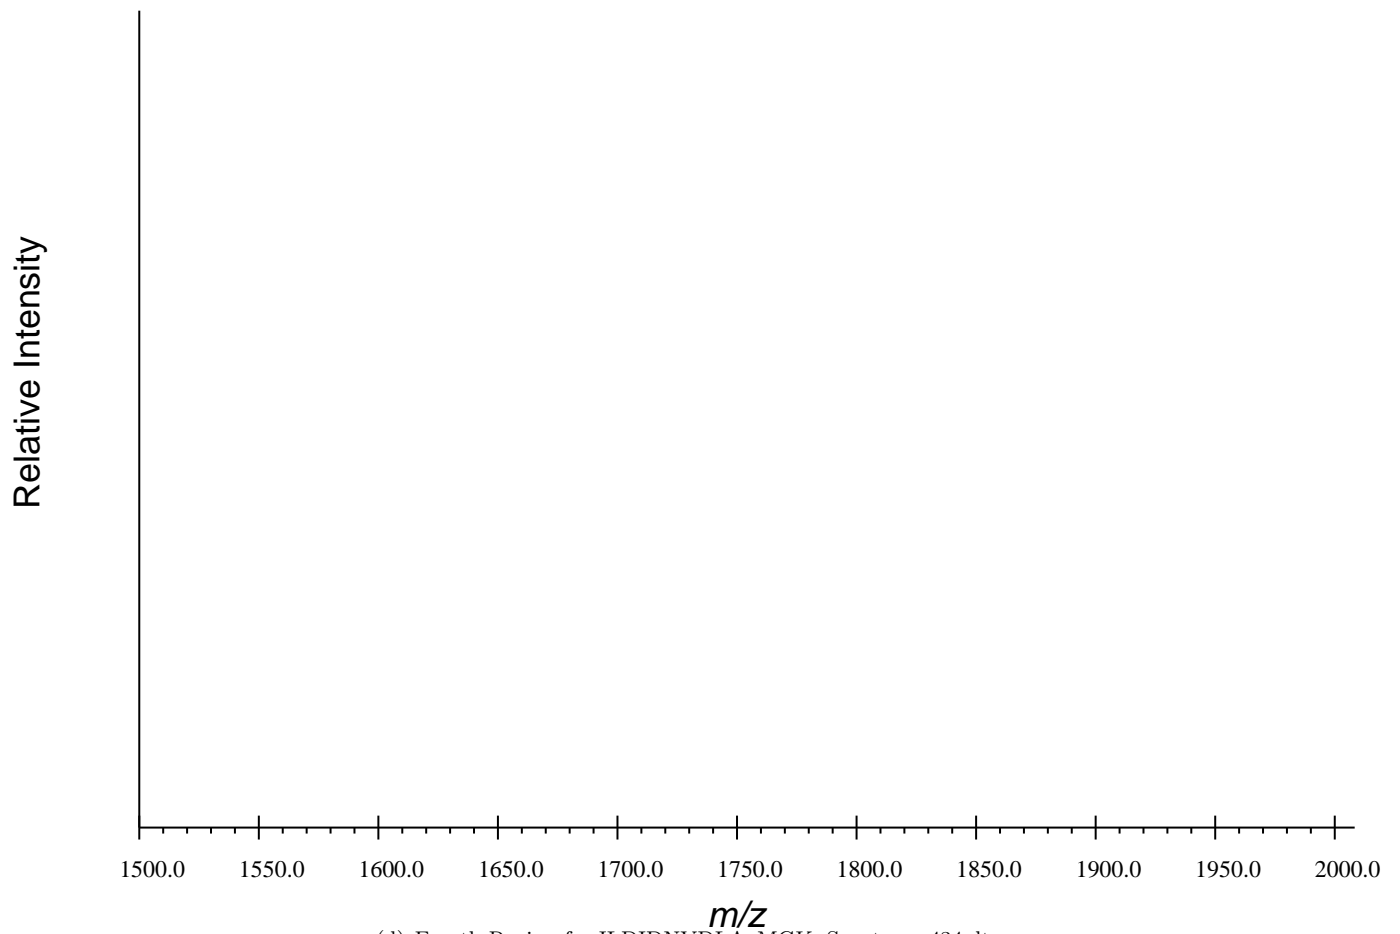

(d) Fourth Region for ILDIDNVDLA<sub>o</sub>MGK, Spectrum 434.dta

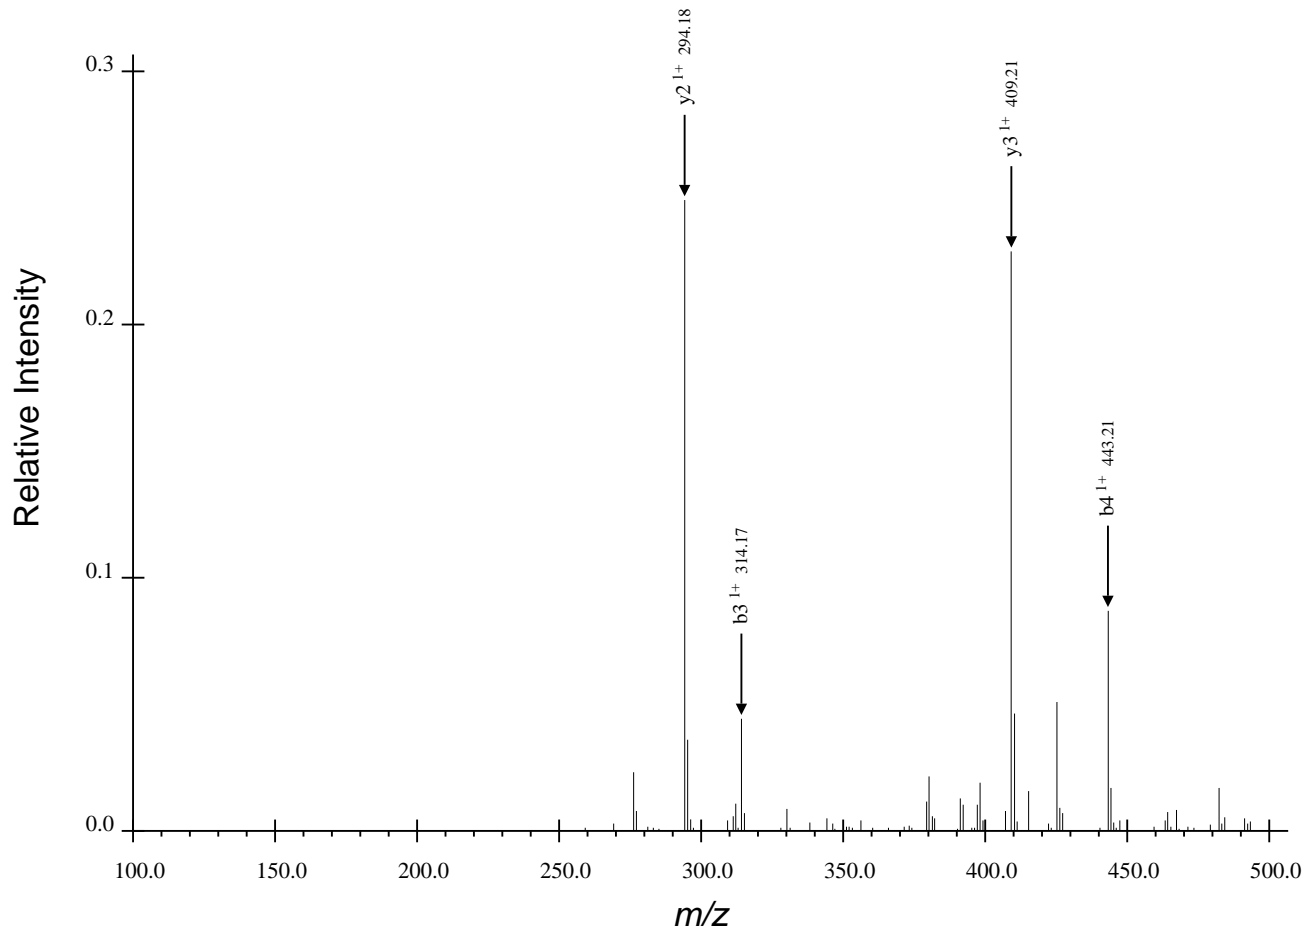

(a) First Region for LEAELGN<sub>0</sub>MQGLVEDFK, Spectrum 435.dta

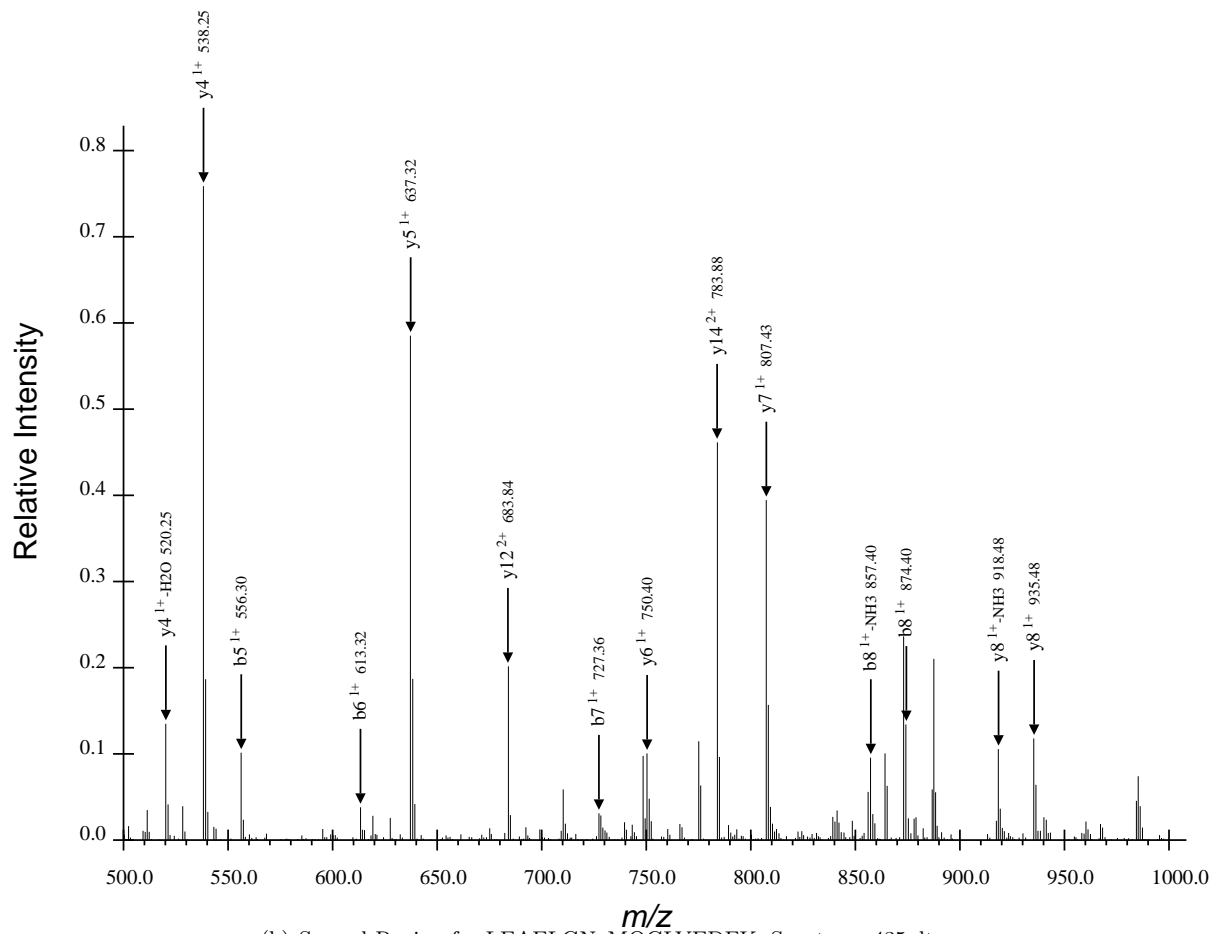

(b) Second Region for LEAELGN<sub>0</sub>MQGLVEDFK, Spectrum 435.dta



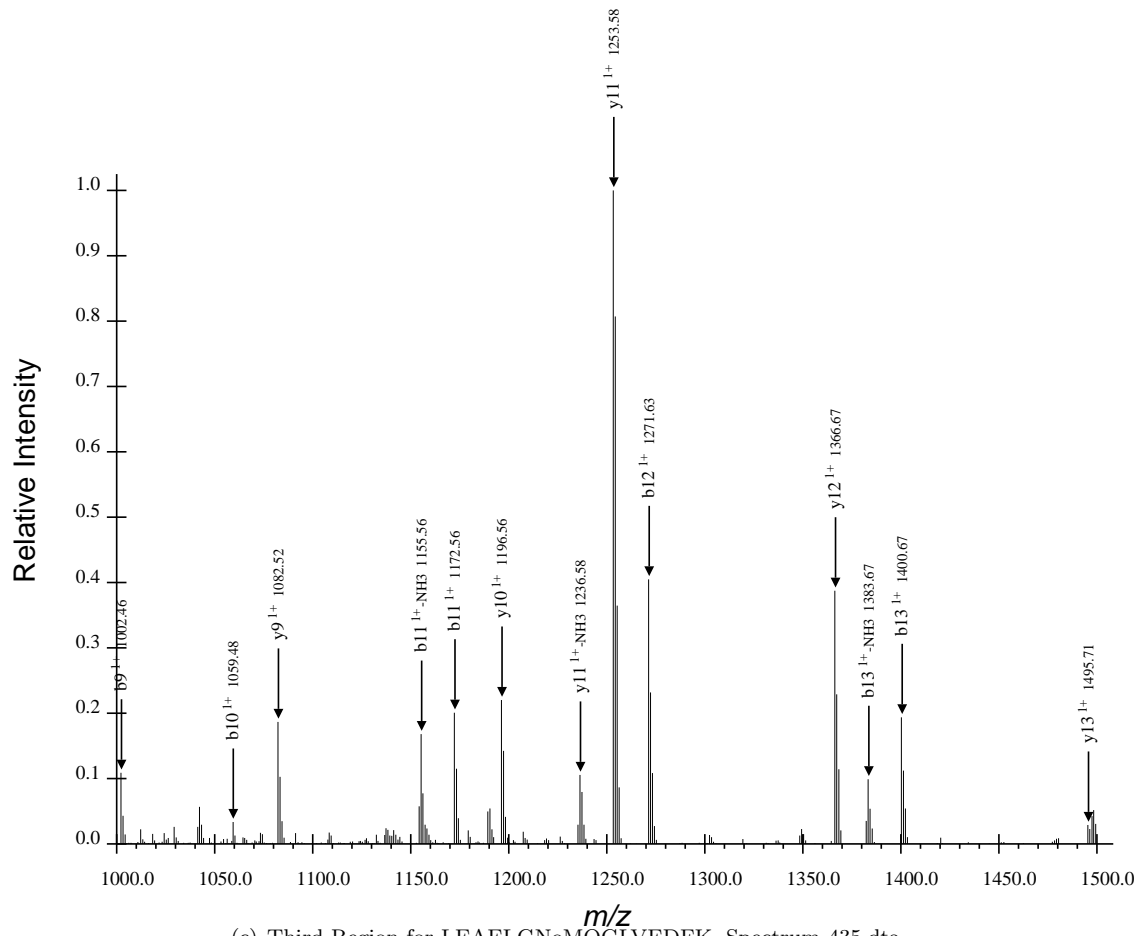

(c) Third Region for LEAELGNoMQGLVEDFK, Spectrum 435.dta

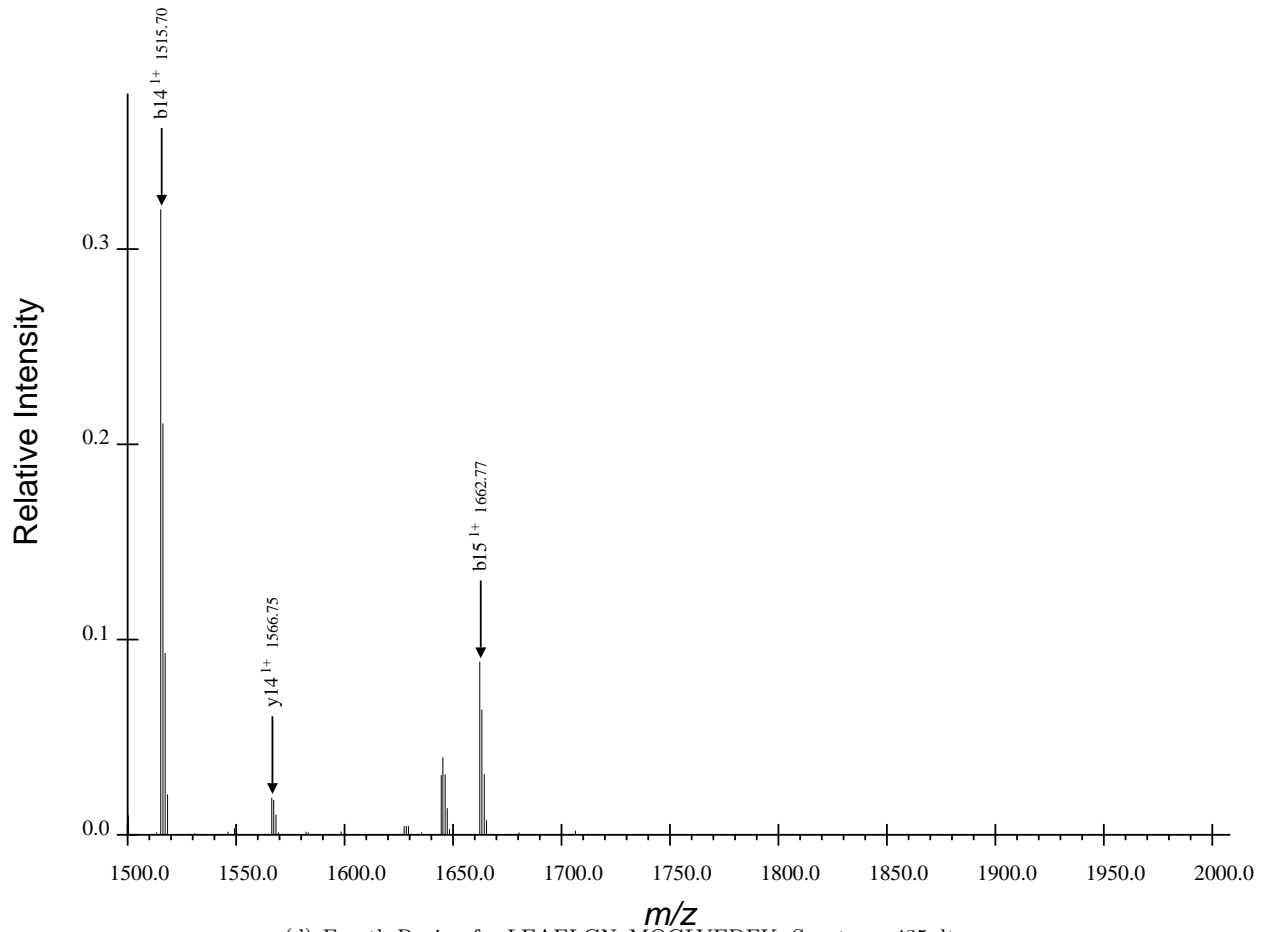

(d) Fourth Region for LEAELGNoMQGLVEDFK, Spectrum 435.dta

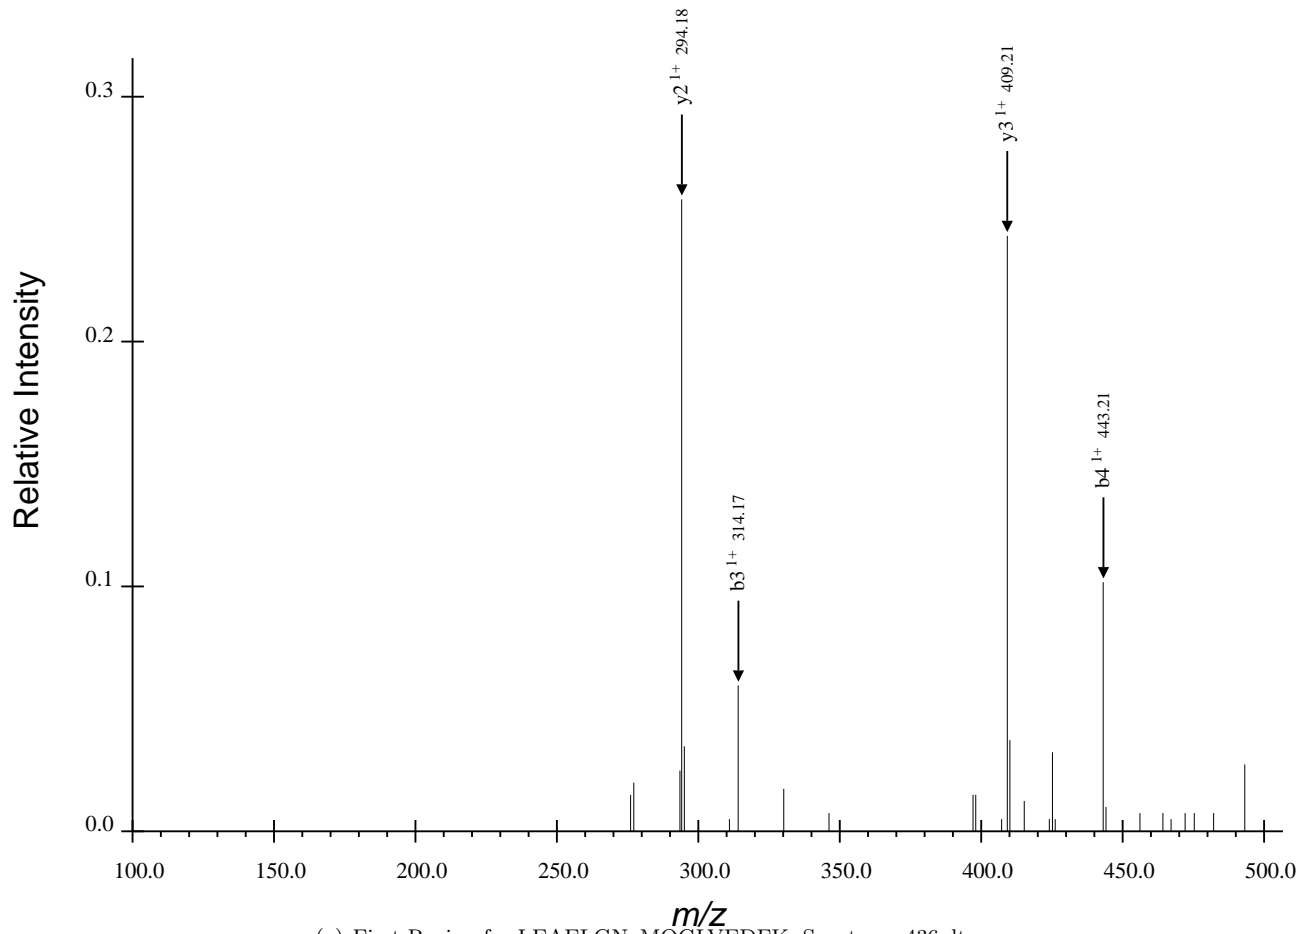

(a) First Region for LEAELGNoMQGLVEDFK, Spectrum 436.dta

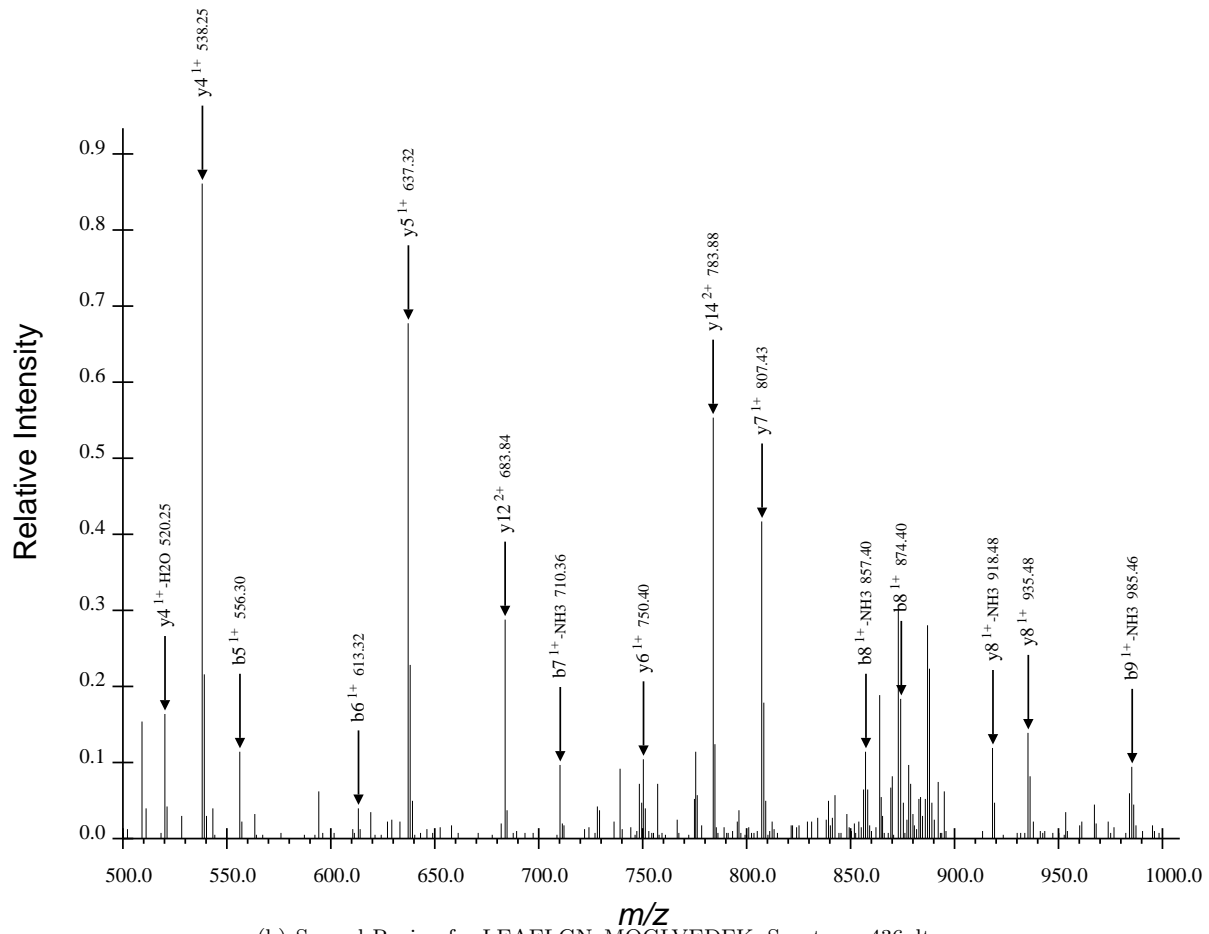

(b) Second Region for LEAELGNoMQGLVEDFK, Spectrum 436.dta

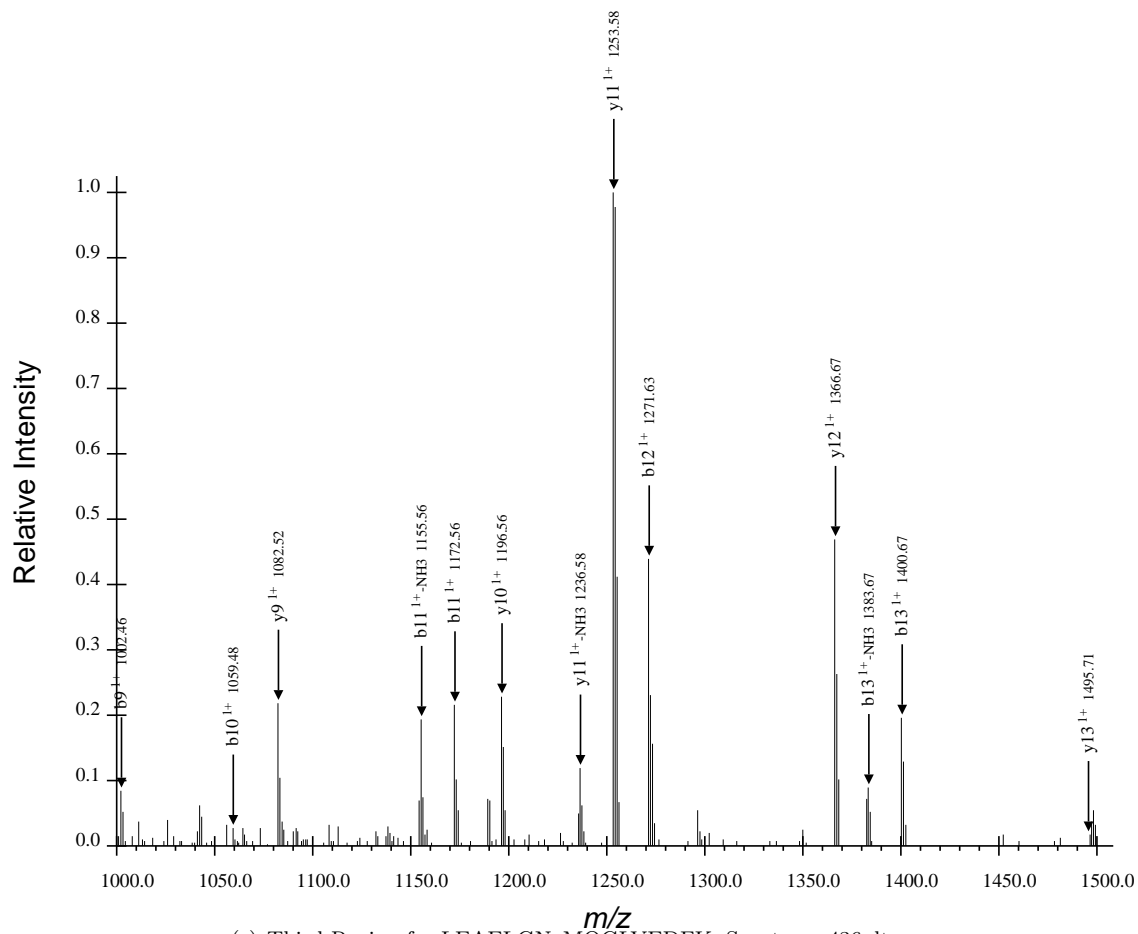

(c) Third Region for LEAELGNoMQGLVEDFK, Spectrum 436.dta

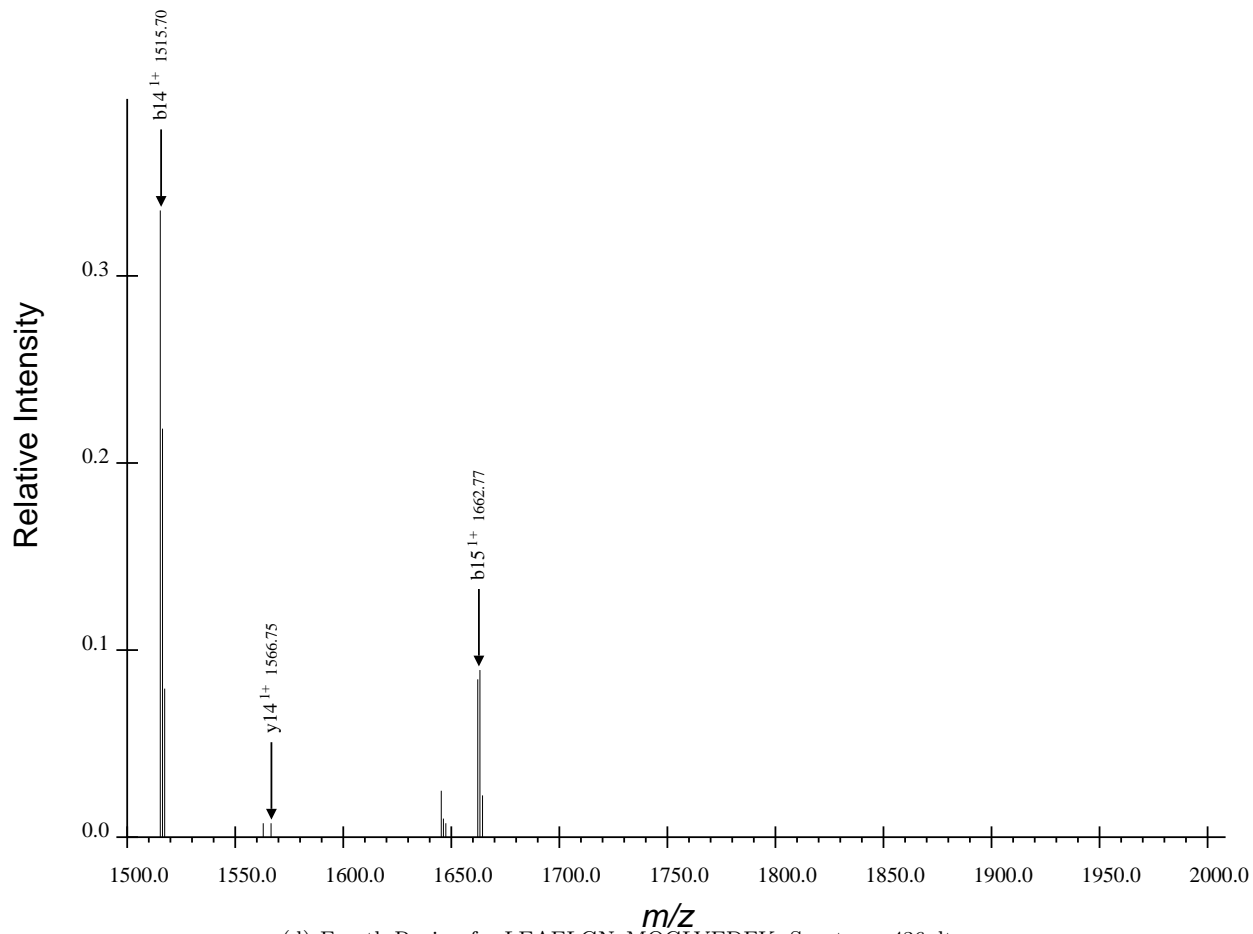

(d) Fourth Region for LEAELGNoMQGLVEDFK, Spectrum 436.dta

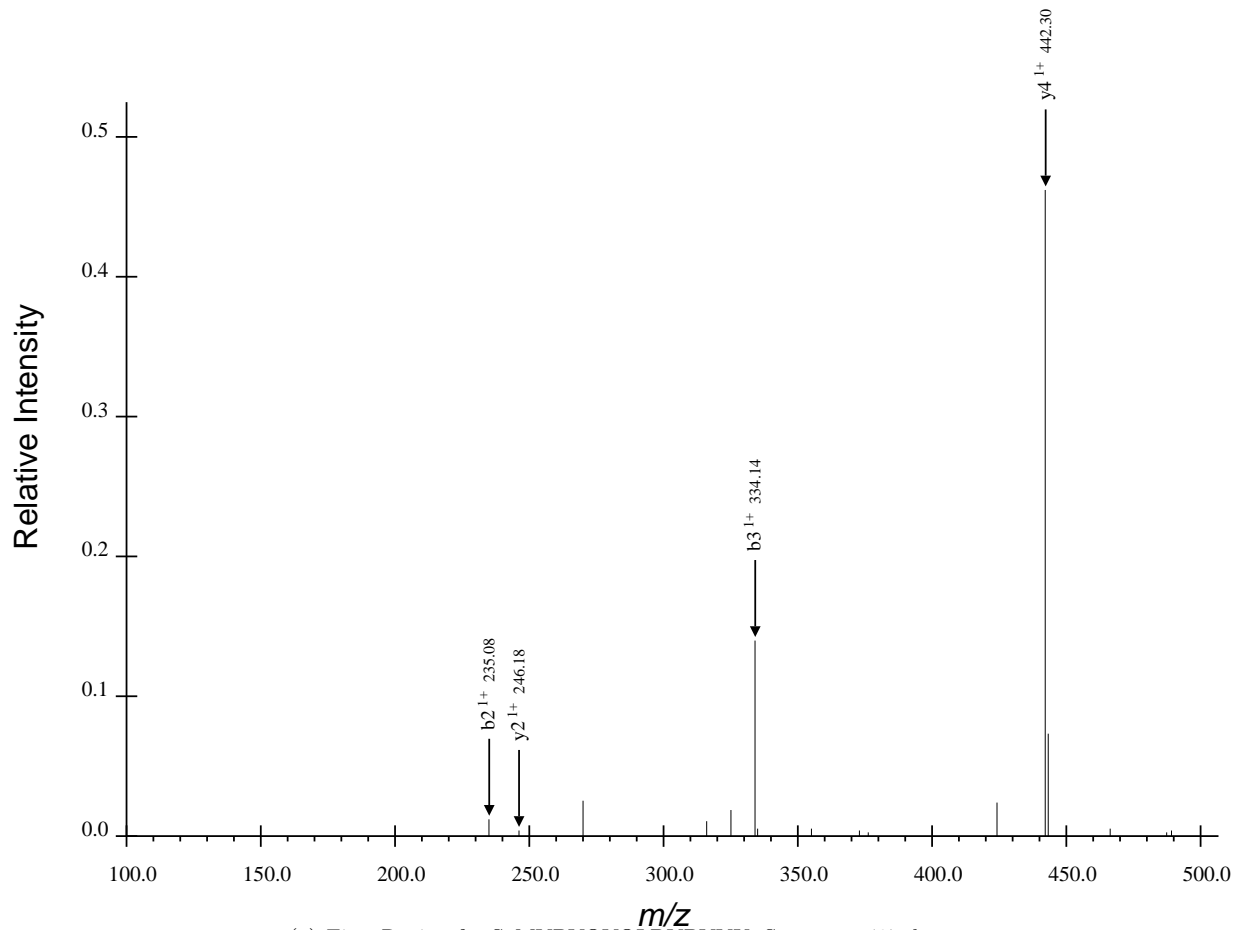

(a) First Region for SoMVPVQVQLDVPVVK, Spectrum 437.dta

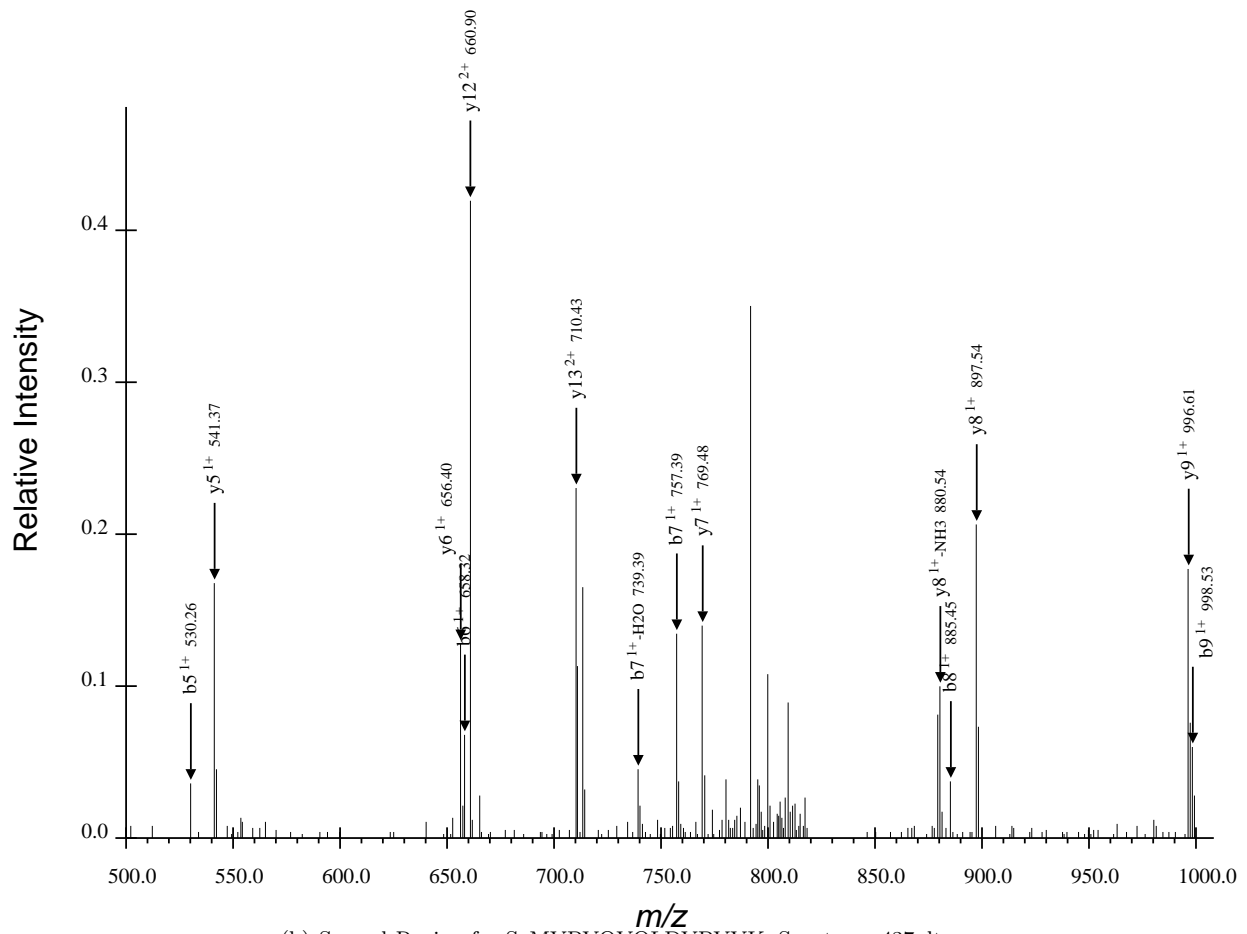

(b) Second Region for SoMVPVQVQLDVPVVK, Spectrum 437.dta

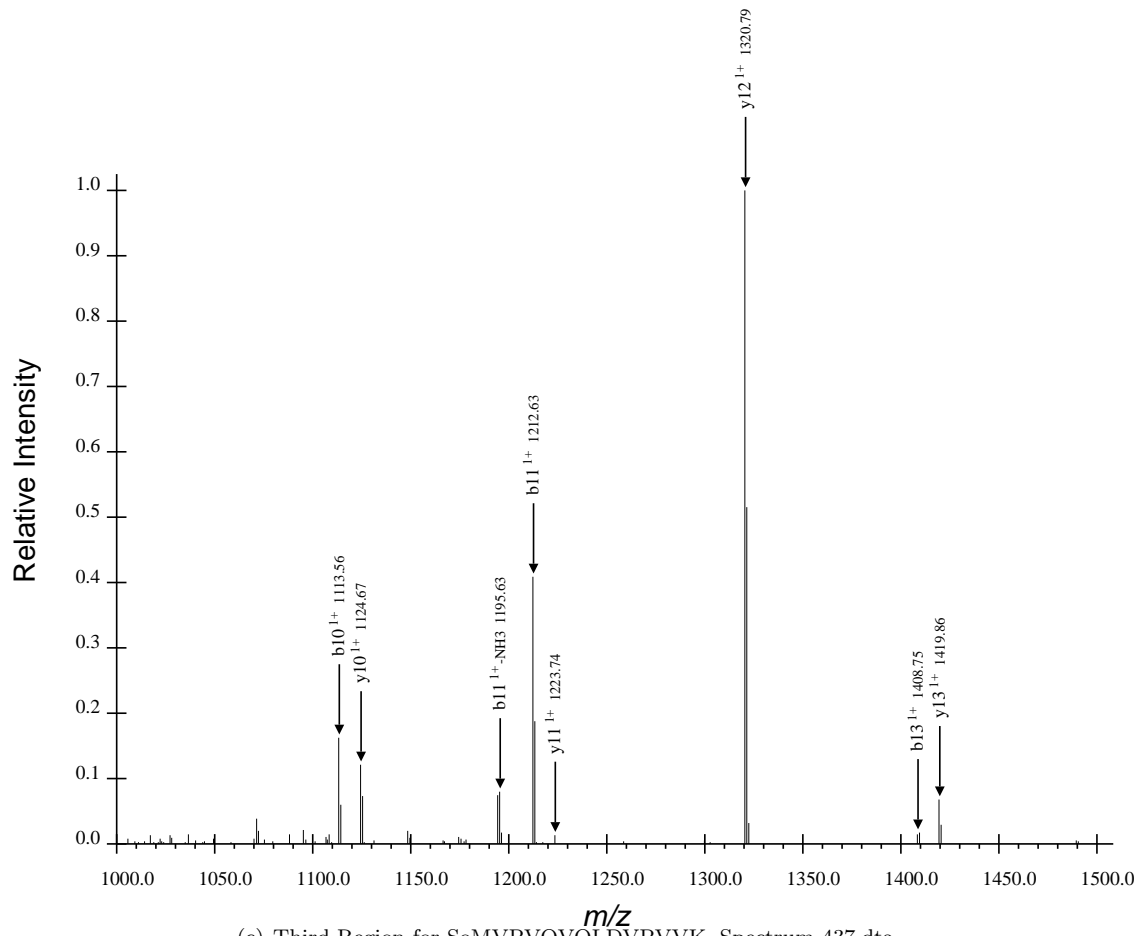

(c) Third Region for SoMVPVQVQLDVPVVK, Spectrum 437.dta

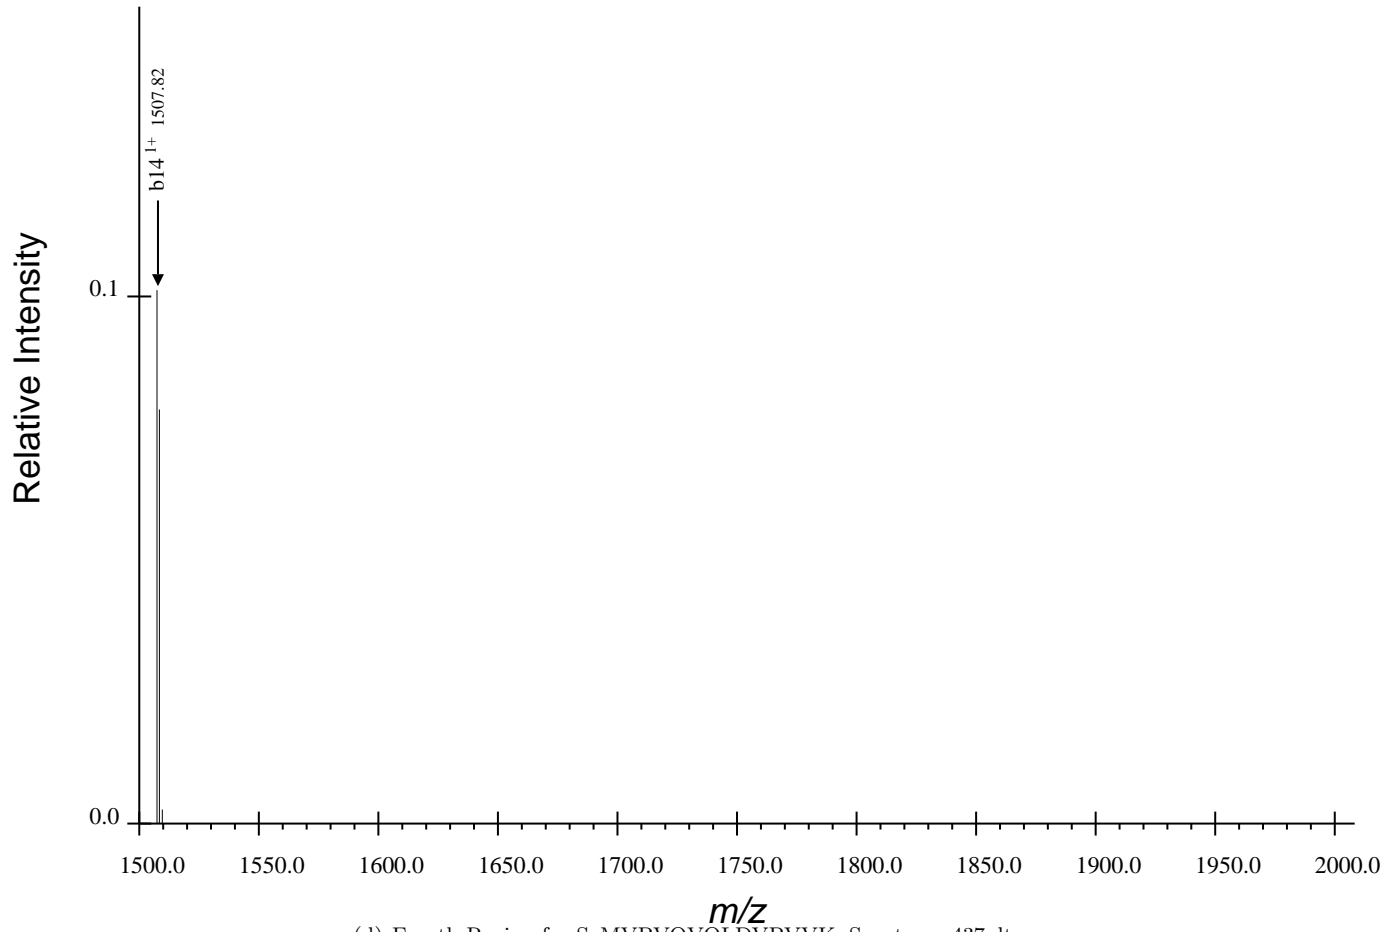

(d) Fourth Region for SoMVPVQVQLDVPVVK, Spectrum 437.dta

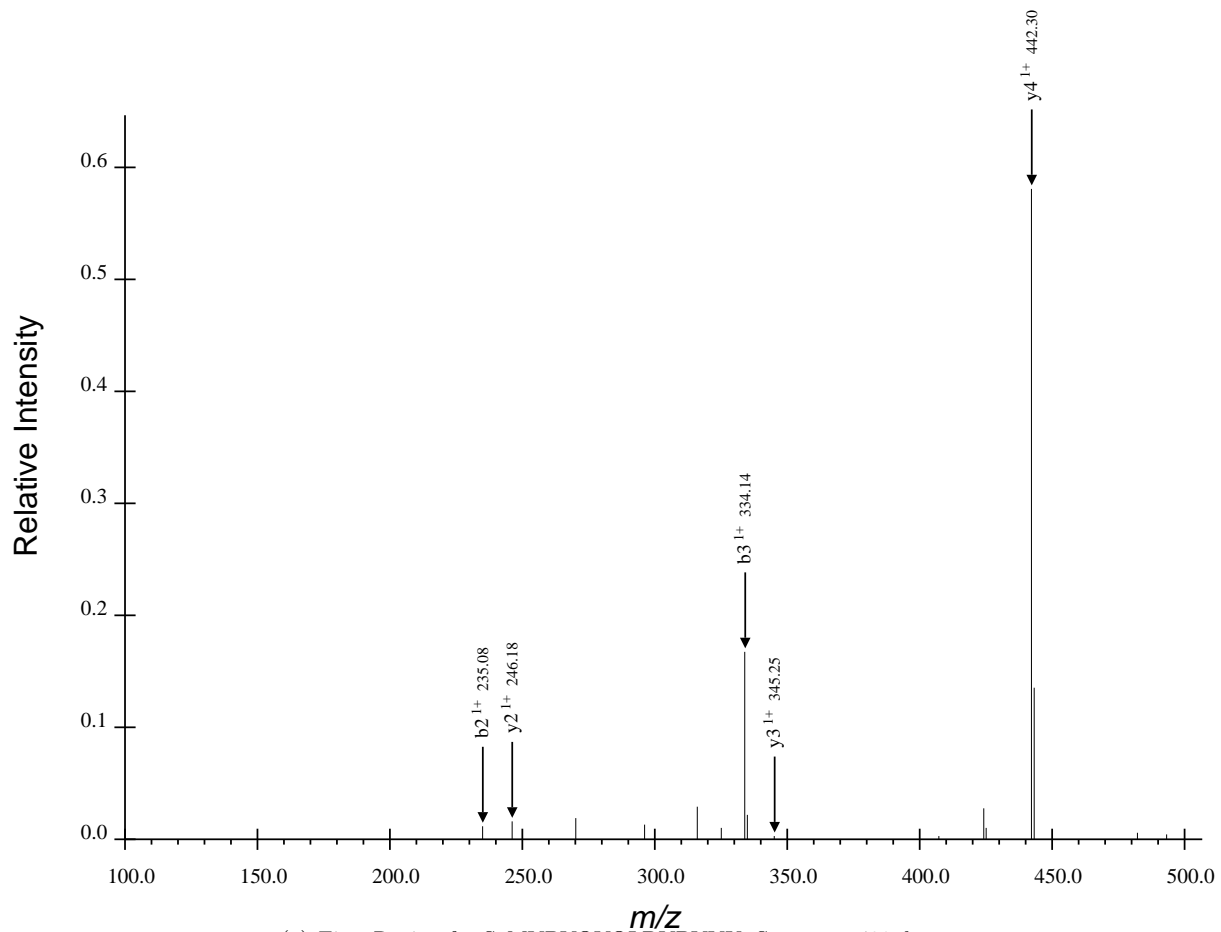

(a) First Region for SoMVPVQVQLDVPVVK, Spectrum 438.dta

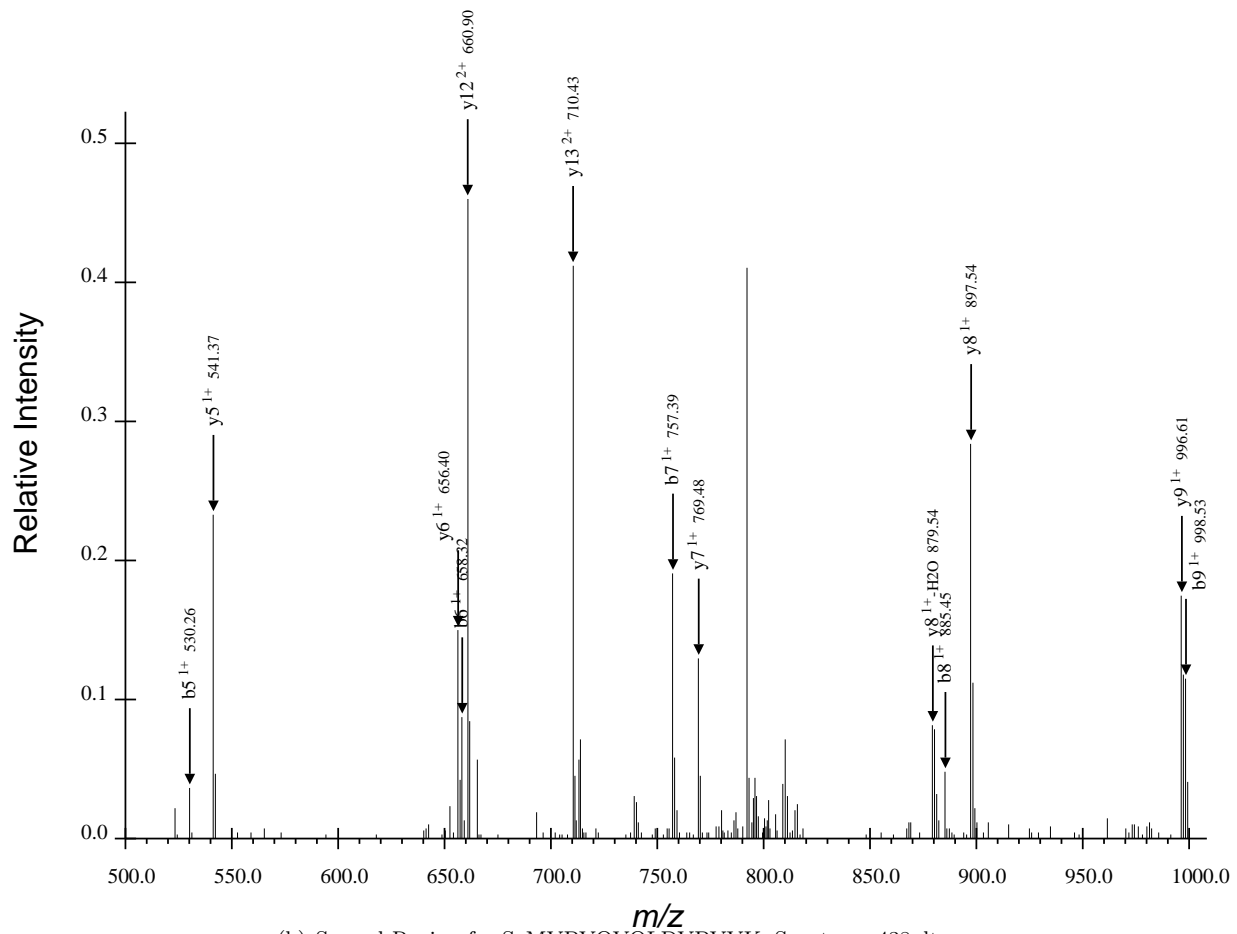

(b) Second Region for SoMVPVQVQLDVPVVK, Spectrum 438.dta

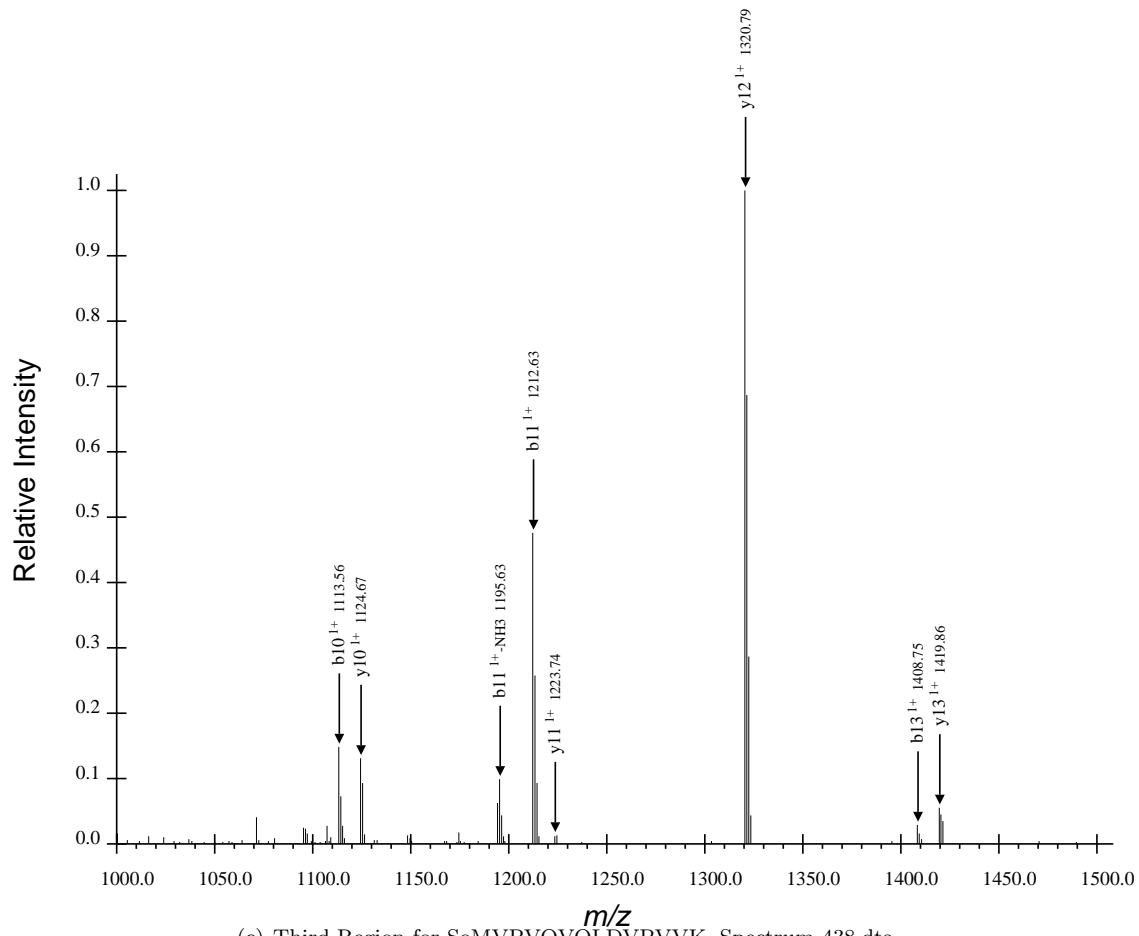

(c) Third Region for SoMVPVQVQLDVPVVK, Spectrum 438.dta

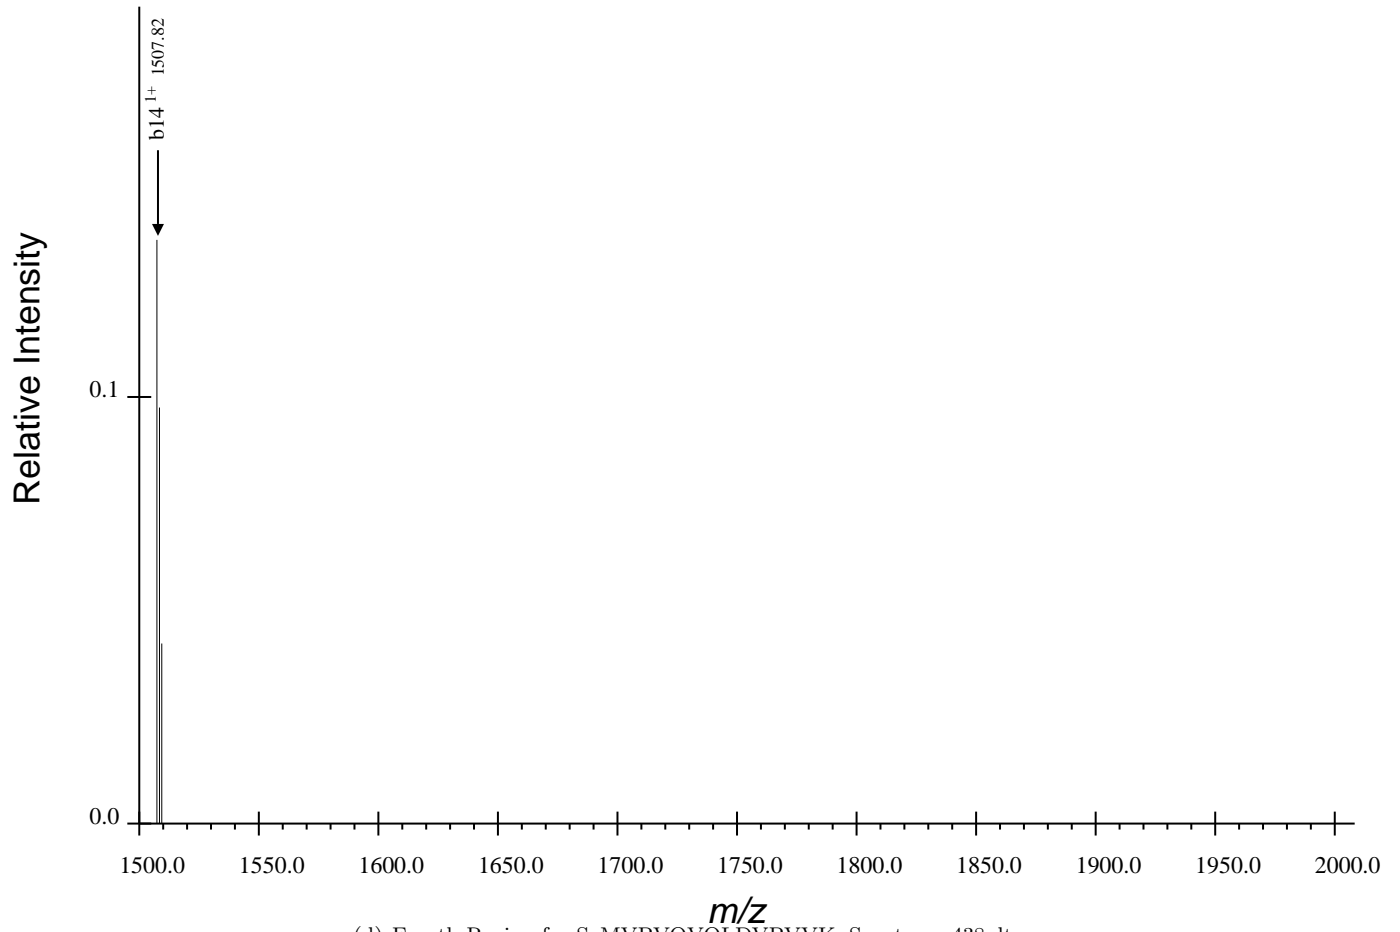

(d) Fourth Region for SoMVPVQVQLDVPVVK, Spectrum 438.dta

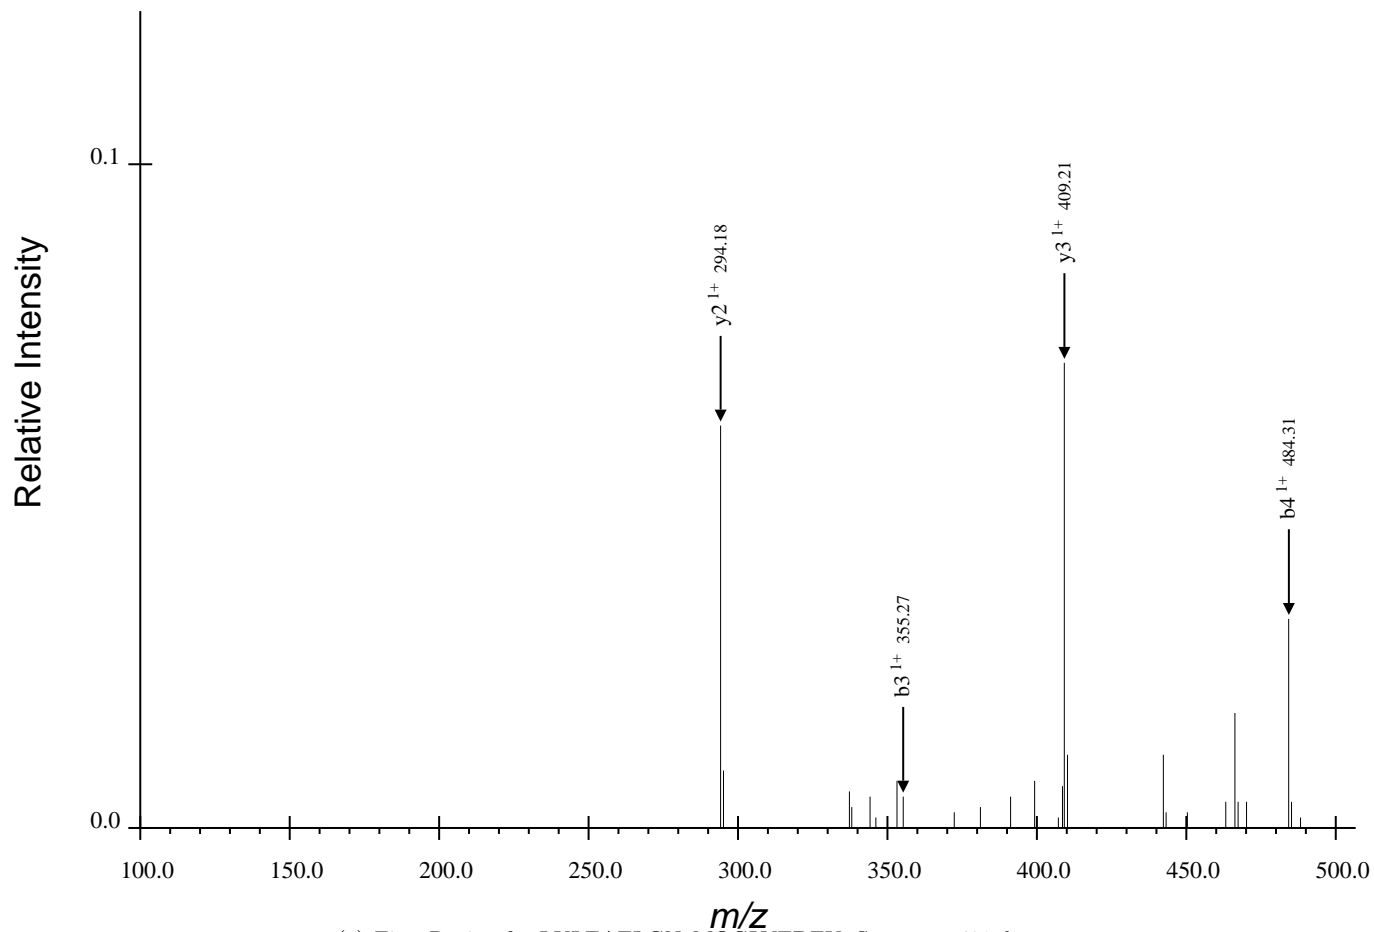

(a) First Region for LKLEAELGNoMQGLVEDFK, Spectrum 439.dta

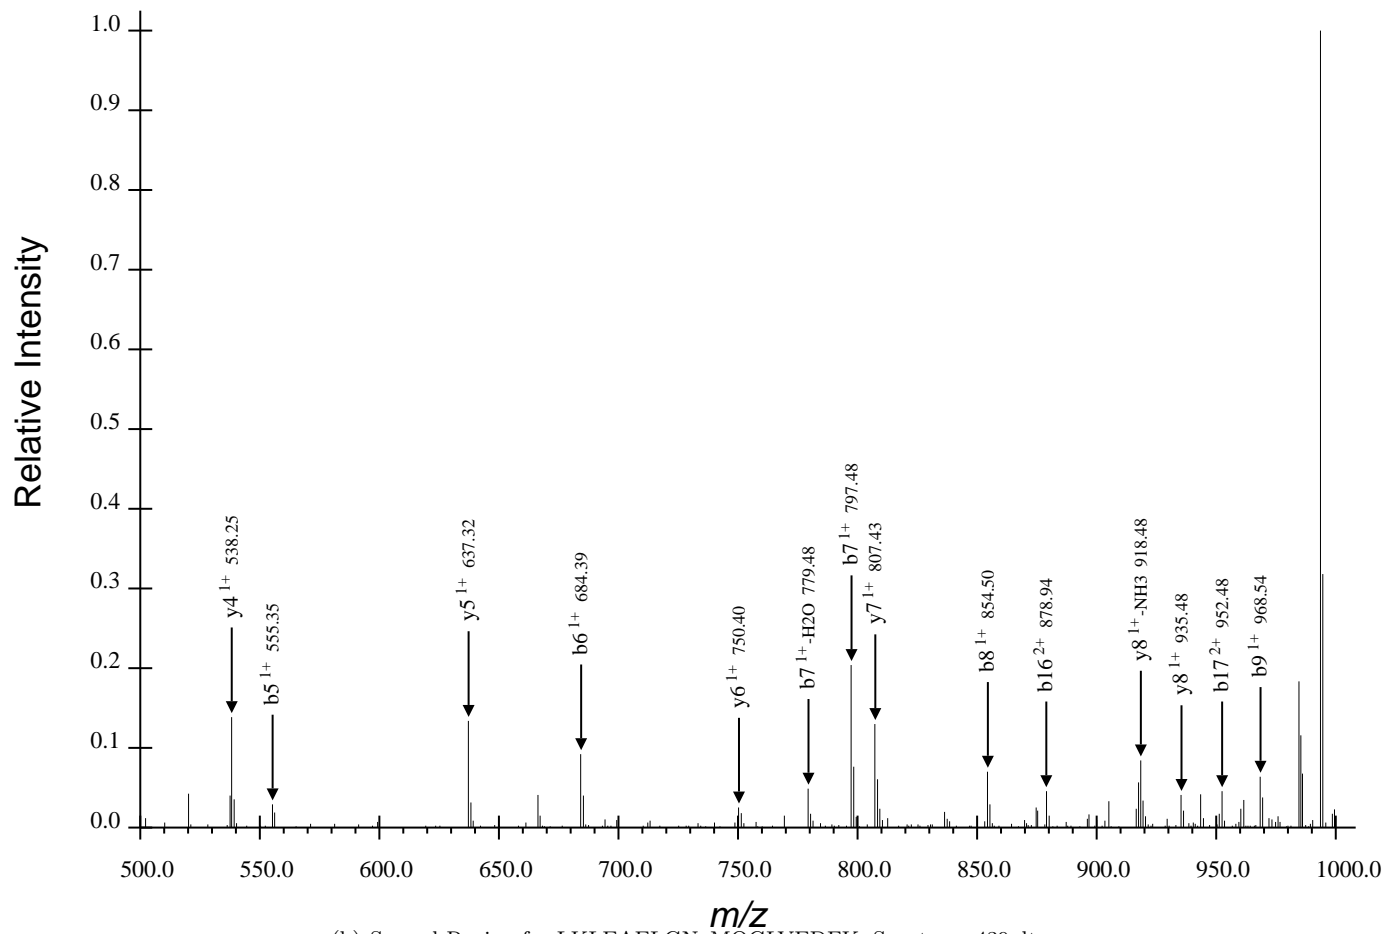

(b) Second Region for LKLEAELGNoMQGLVEDFK, Spectrum 439.dta



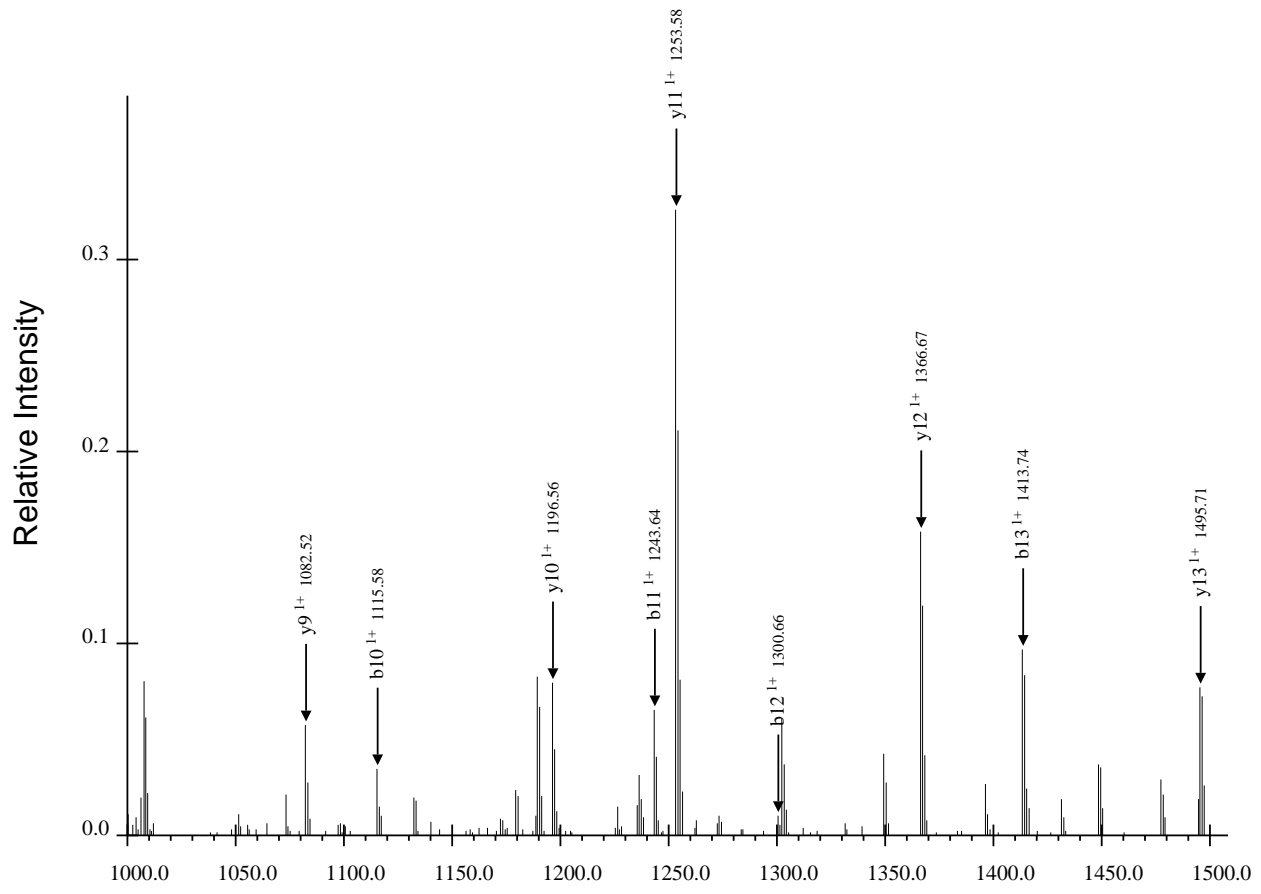

(c) Third Region for LKLEAELGNoMQGLVEDFK, Spectrum 439.dta

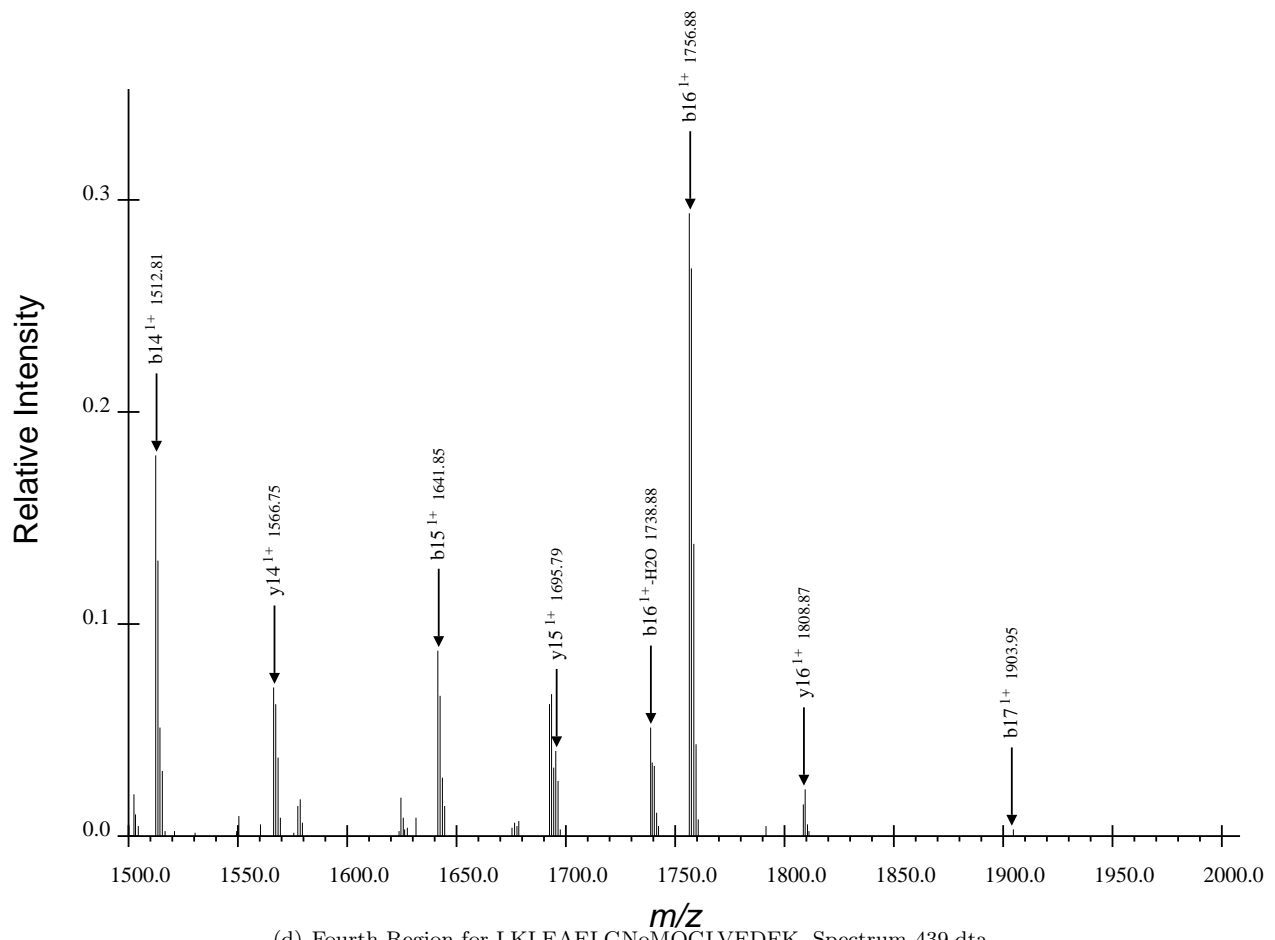

(d) Fourth Region for LKLEAELGNoMQGLVEDFK, Spectrum 439.dta

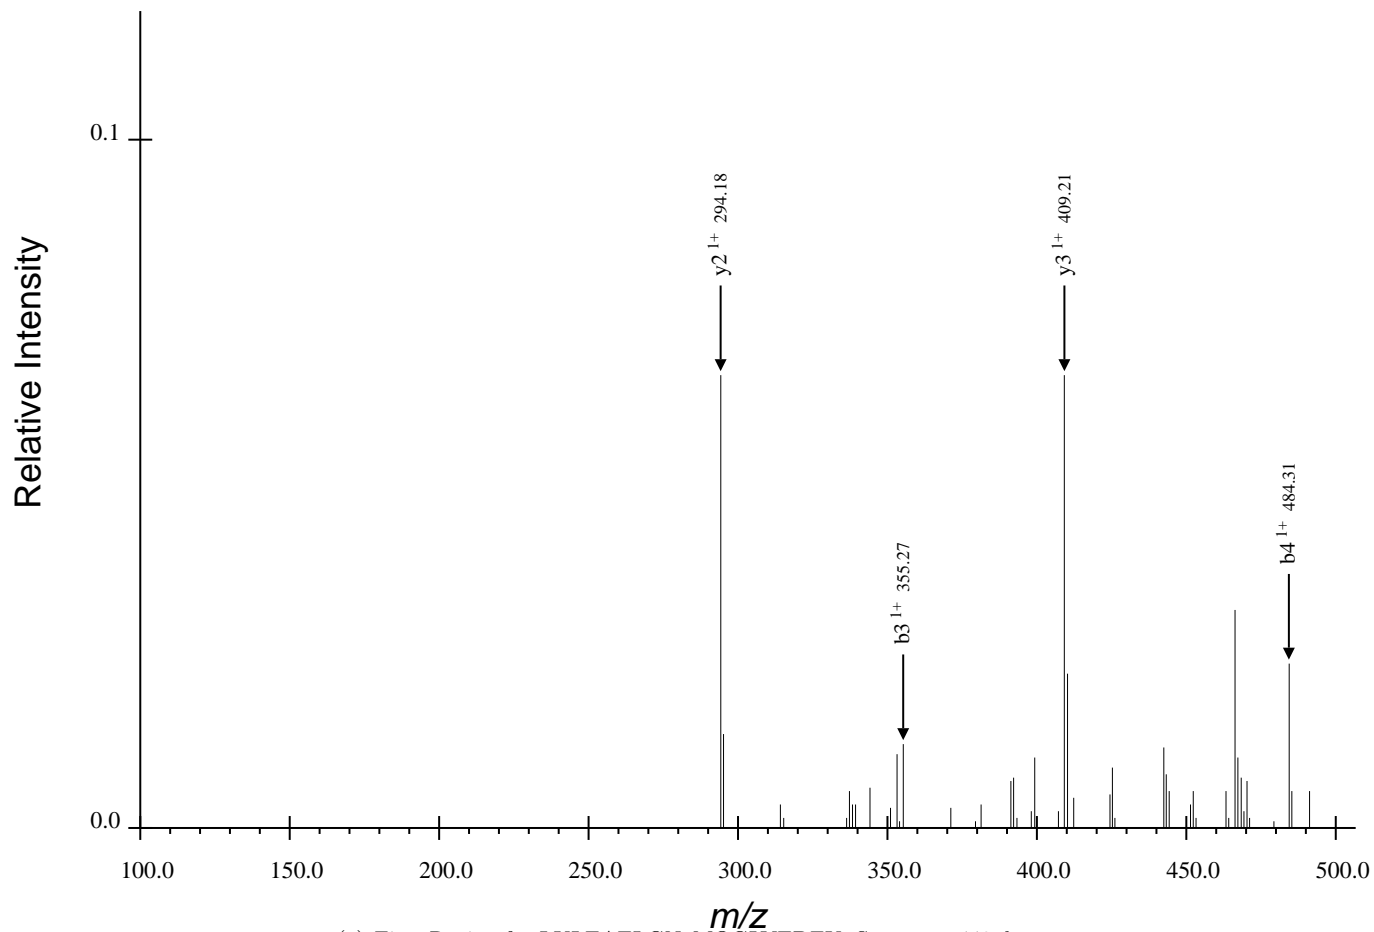

(a) First Region for LKLEAELGNoMQGLVEDFK, Spectrum 440.dta

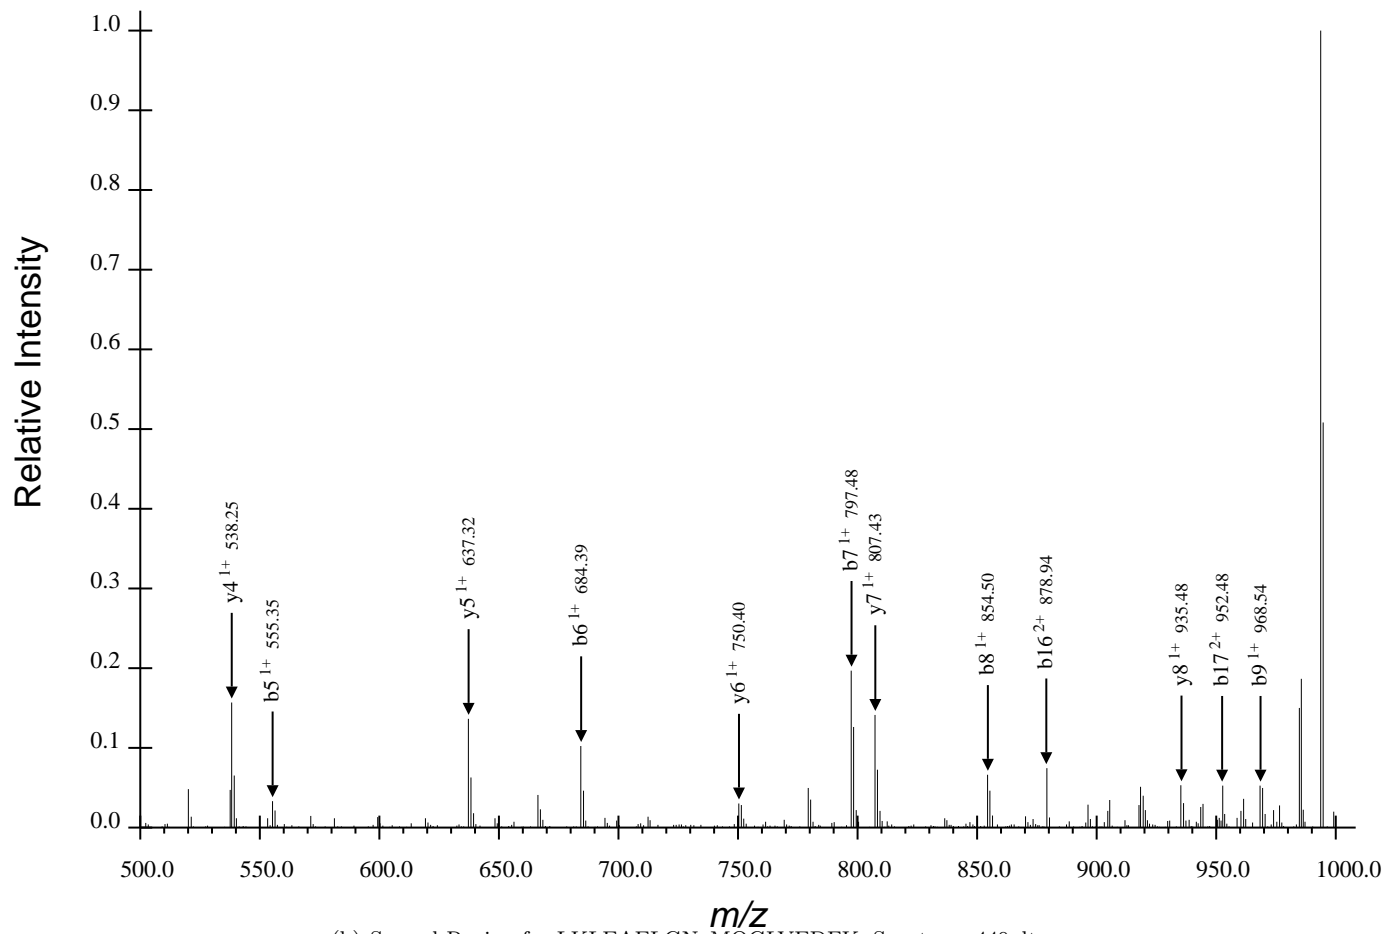

(b) Second Region for LKLEAELGNoMQGLVEDFK, Spectrum 440.dta

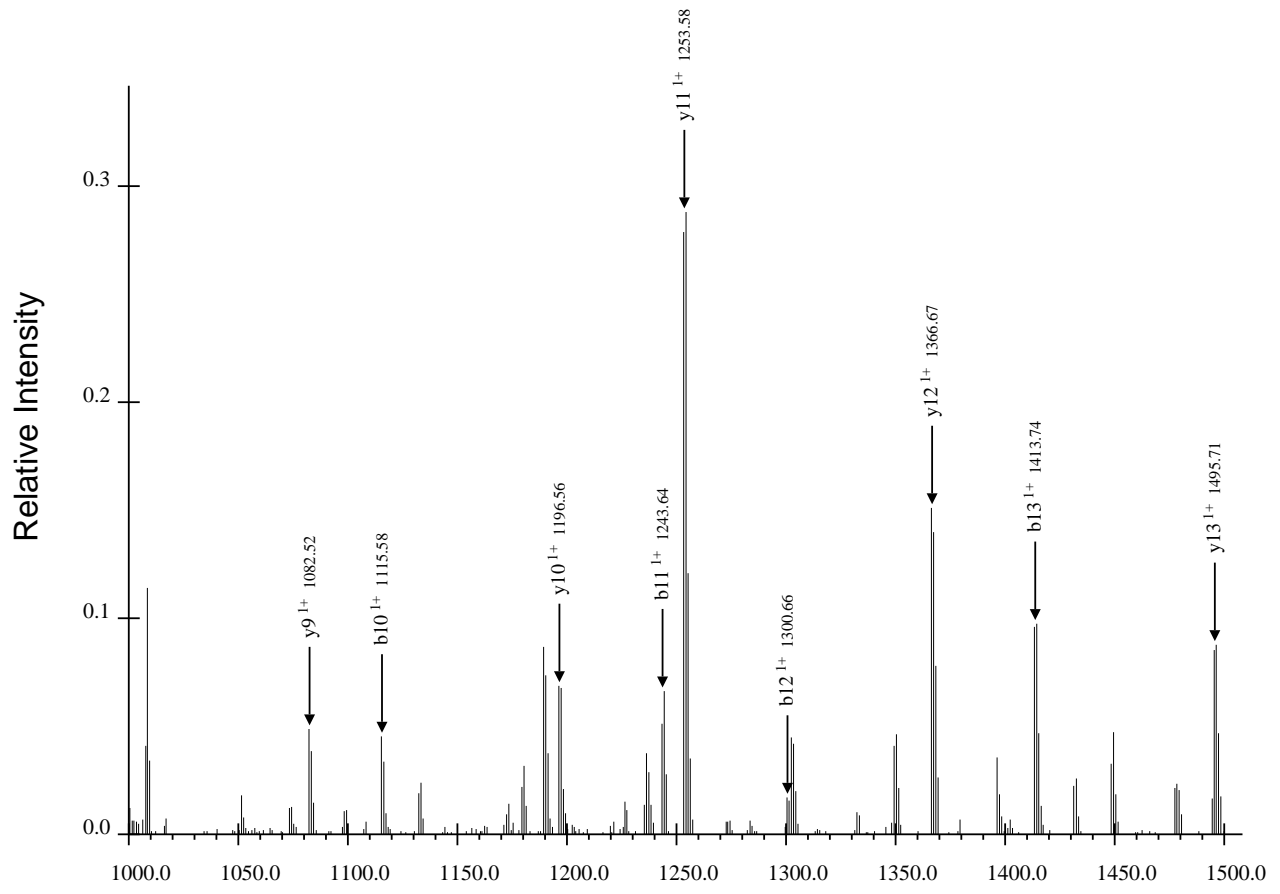

(c) Third Region for LKLEAELGNoMQGLVEDFK, Spectrum 440.dta

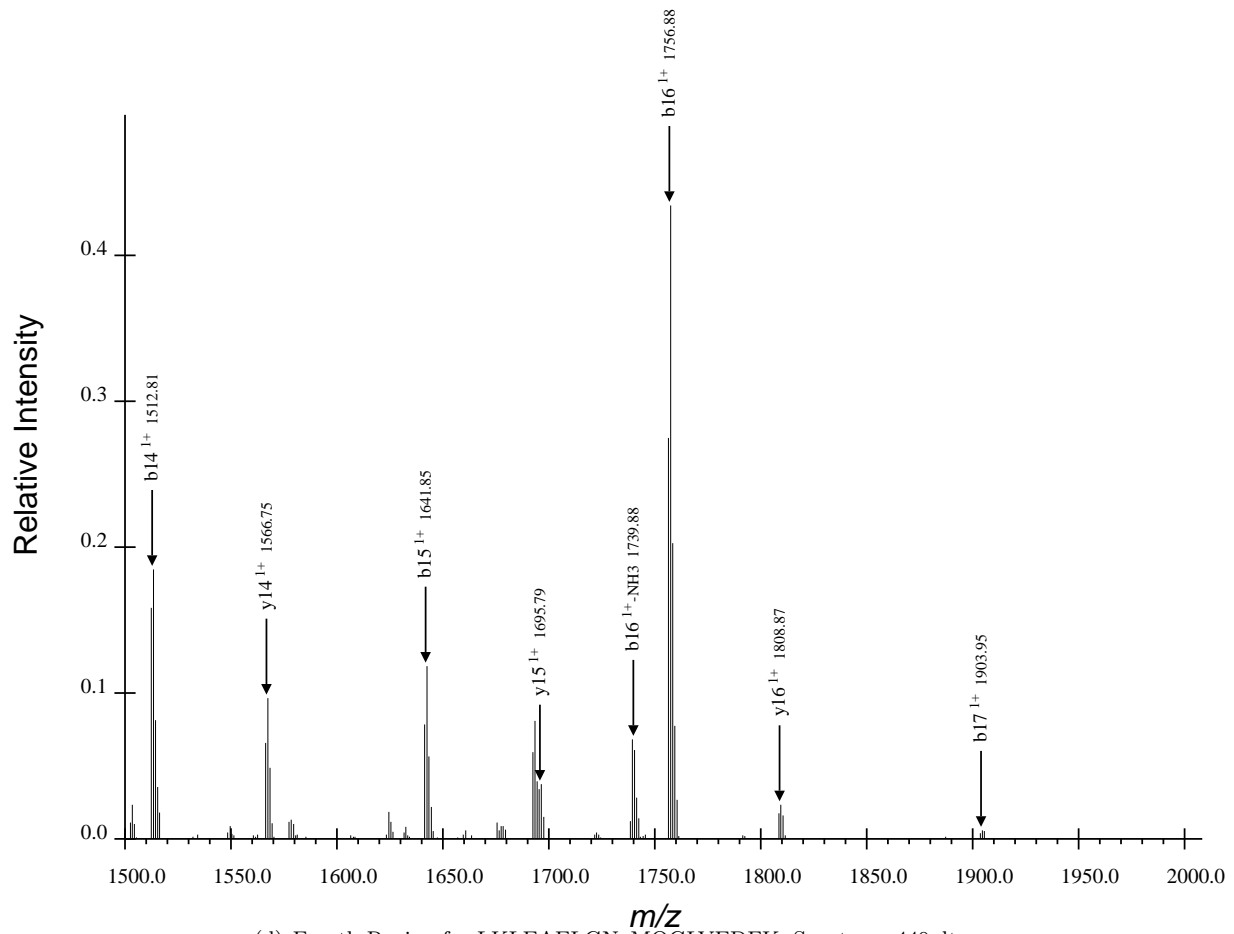

(d) Fourth Region for LKLEAELGNoMQGLVEDFK, Spectrum 440.dta

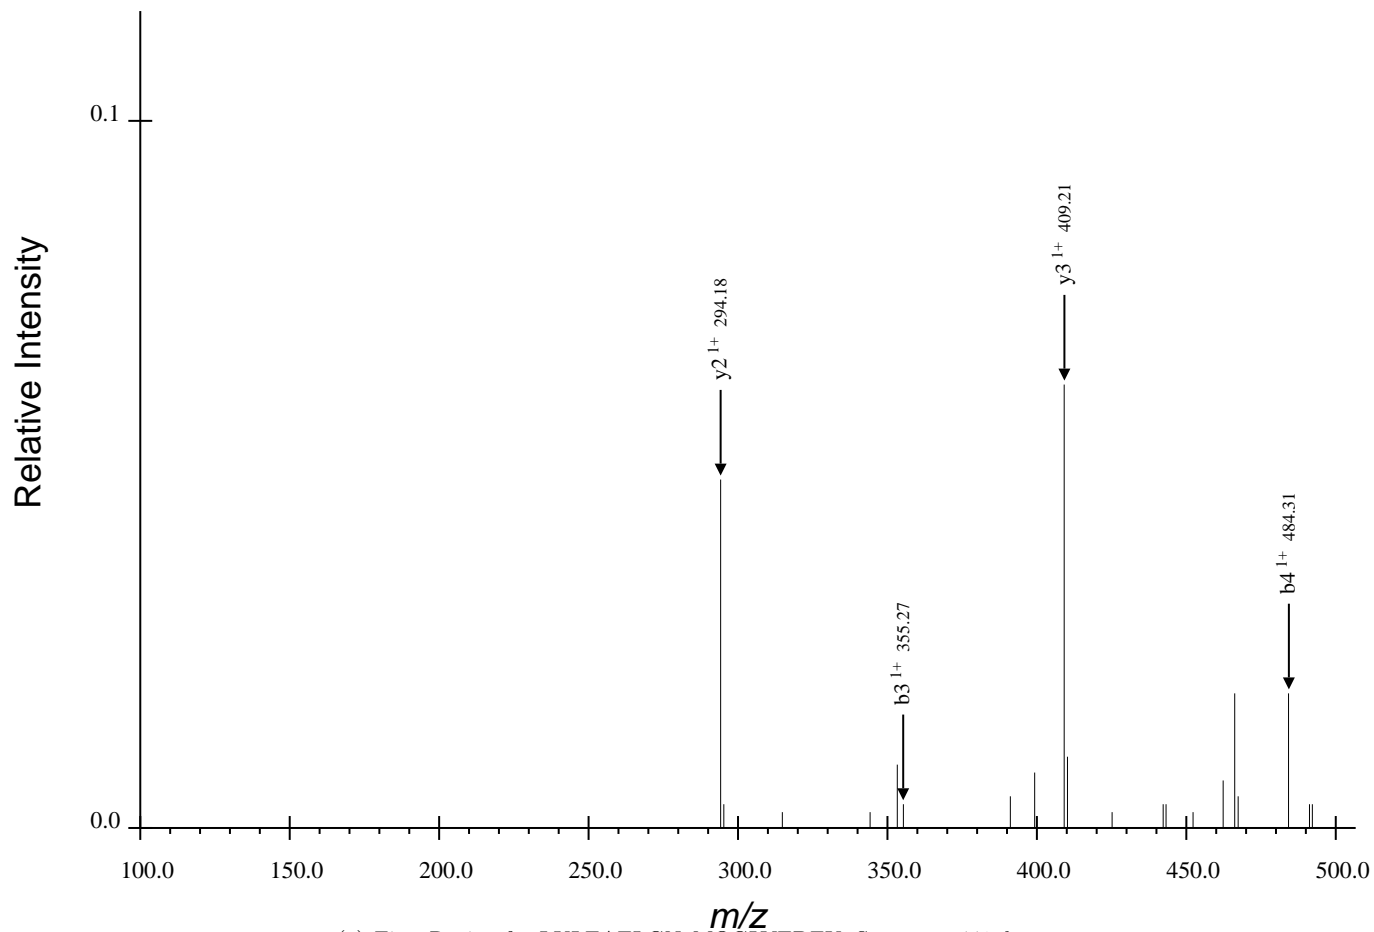

(a) First Region for LKLEAELGNoMQGLVEDFK, Spectrum 441.dta

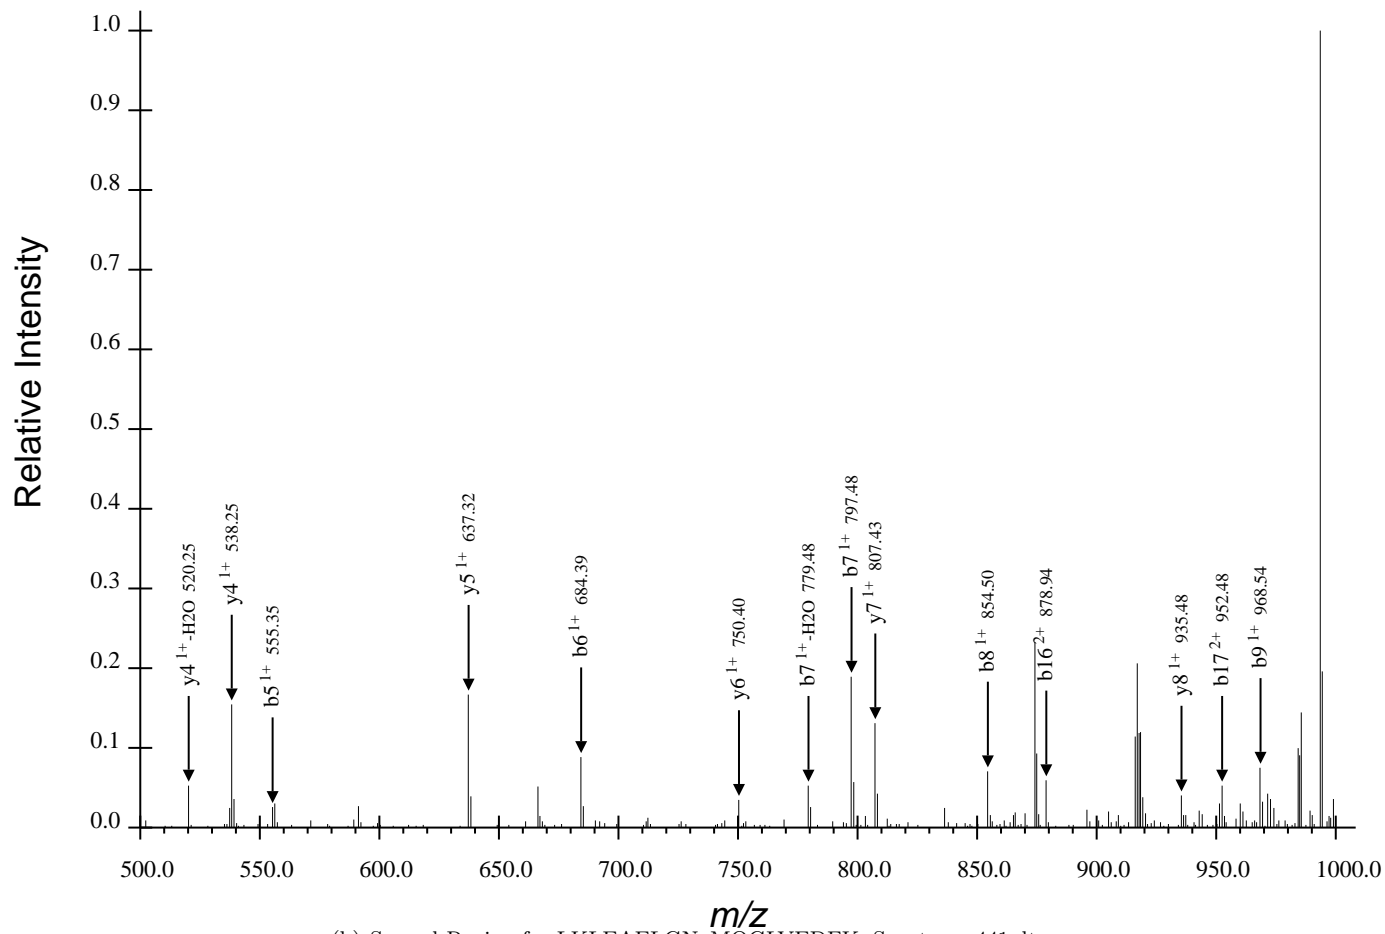

(b) Second Region for LKLEAELGNoMQGLVEDFK, Spectrum 441.dta

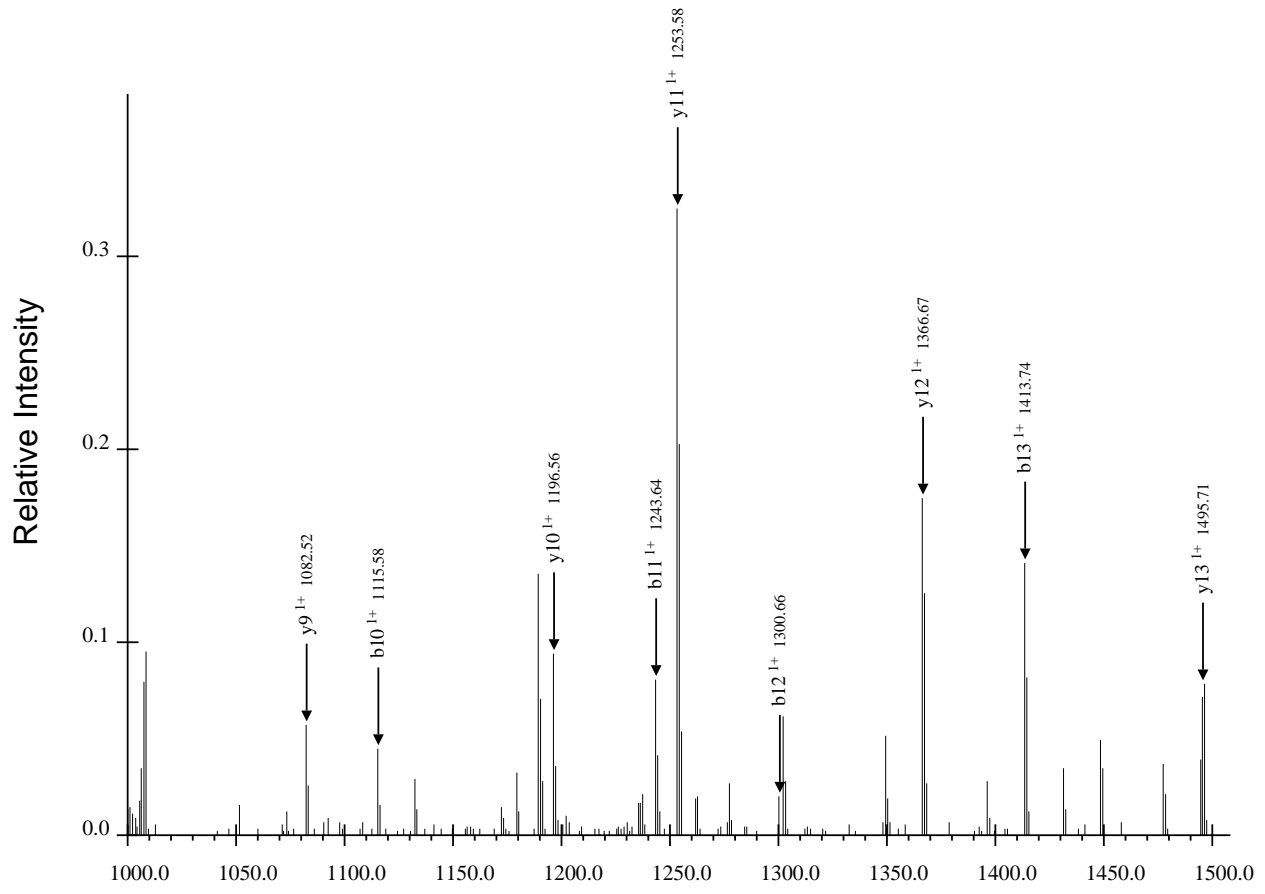

(c) Third Region for LKLEAELGNoMQGLVEDFK, Spectrum 441.dta

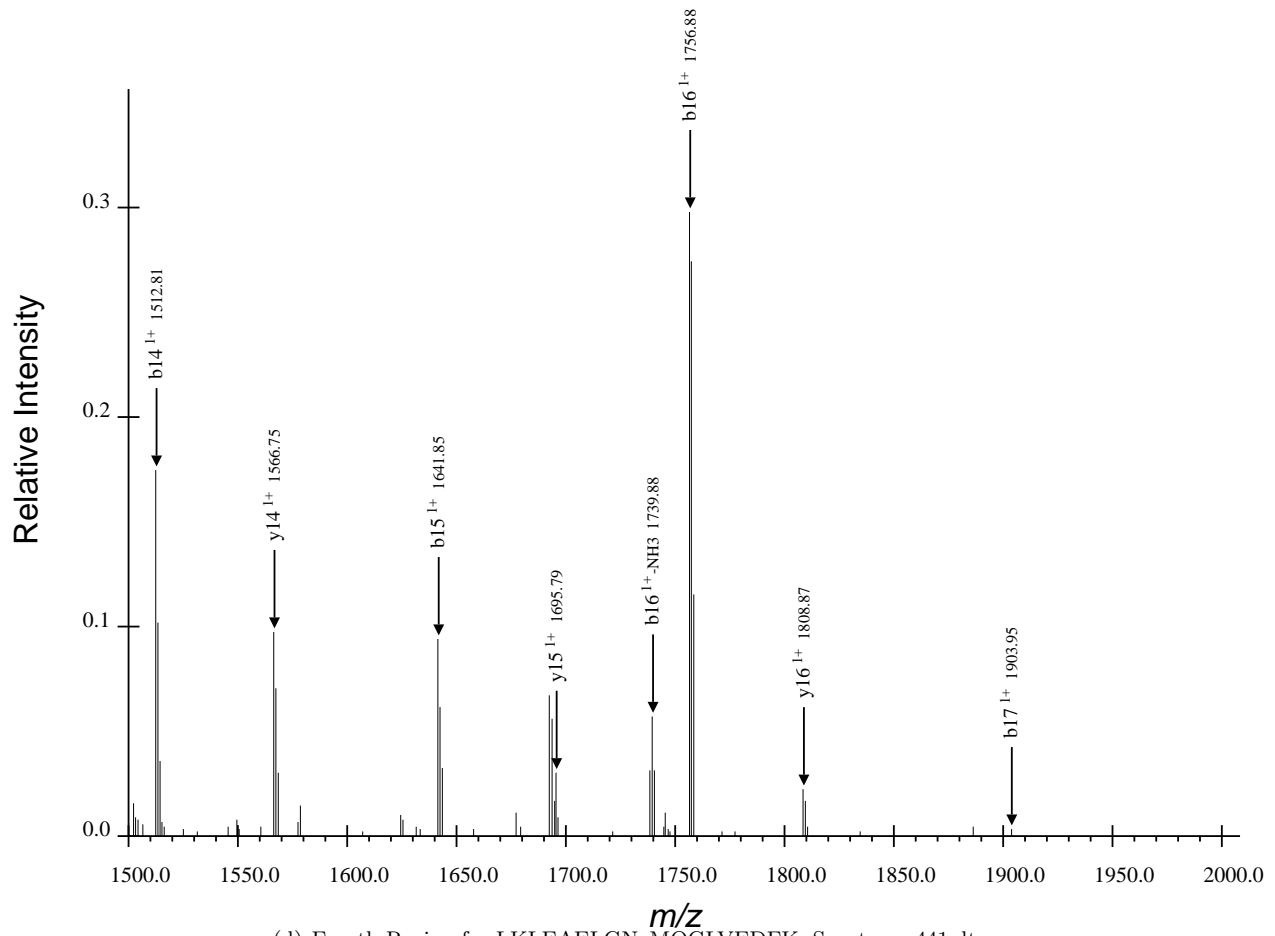

(d) Fourth Region for LKLEAELGNoMQGLVEDFK, Spectrum 441.dta

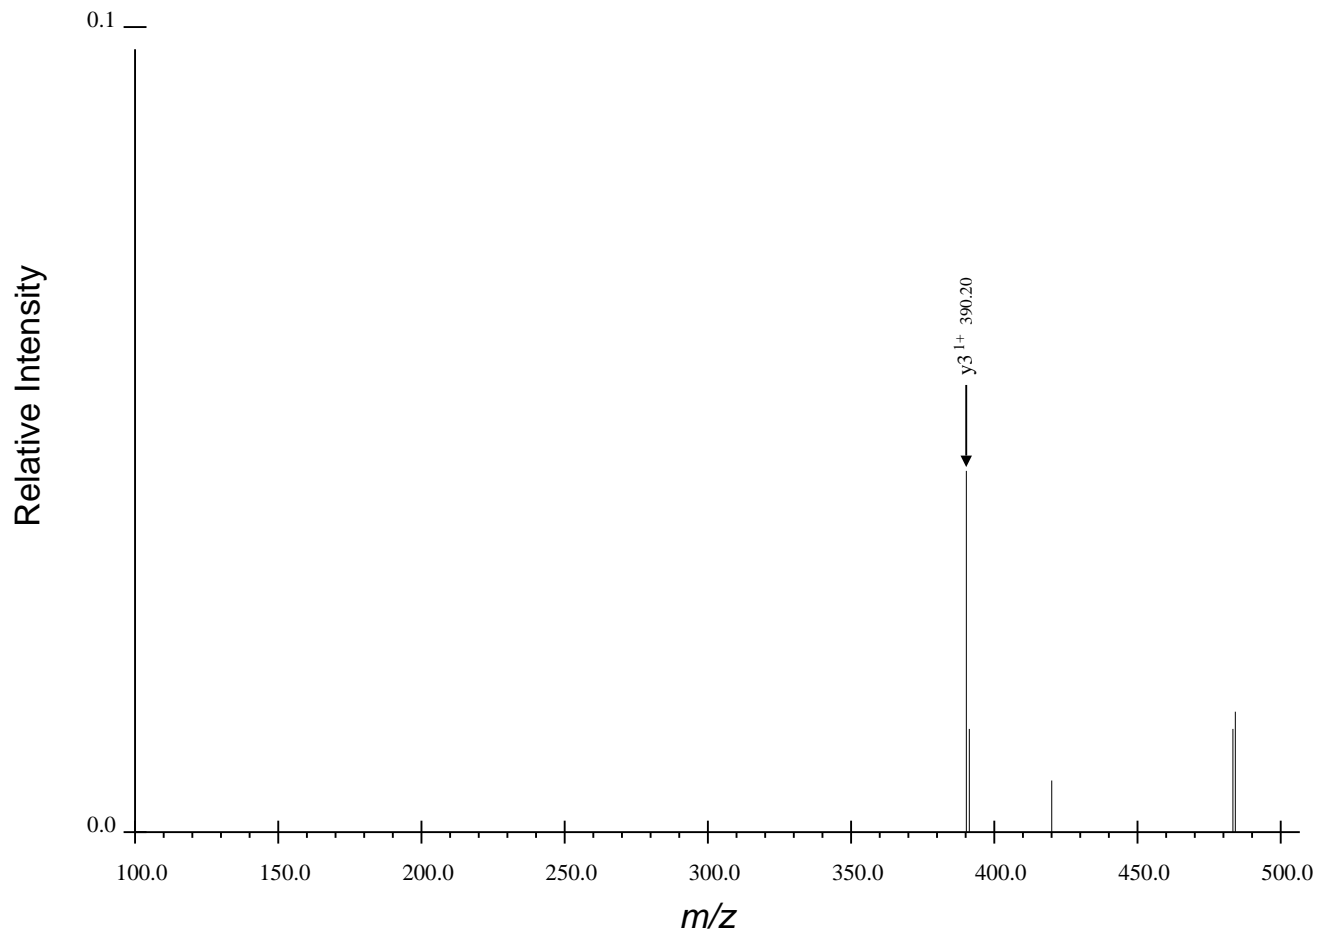

(a) First Region for GGoMGSGLATGIAGGLAGMGGIQNEK, Spectrum 442.dta

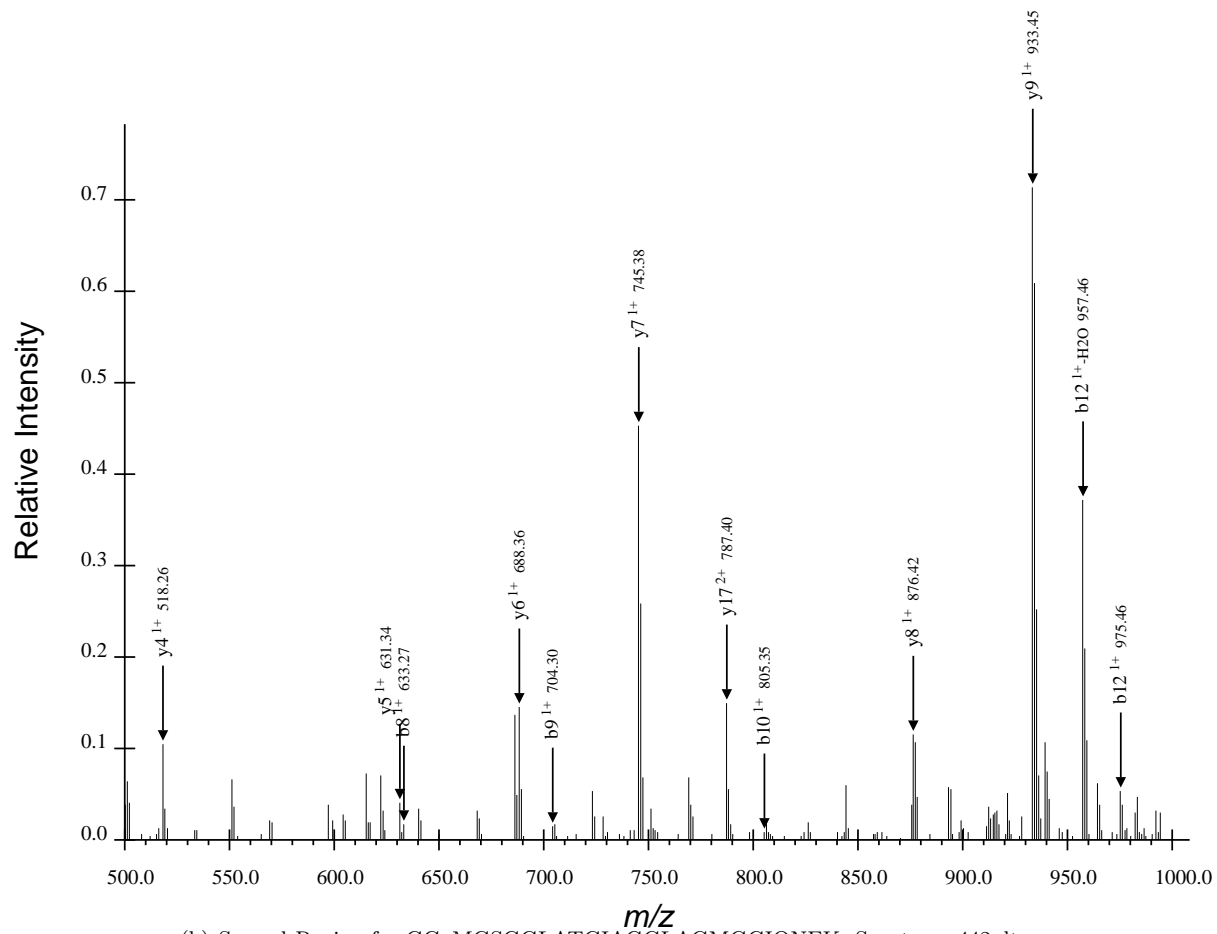

(b) Second Region for GGoMGSGLATGIAGGLAGMGGIQNEK, Spectrum 442.dta

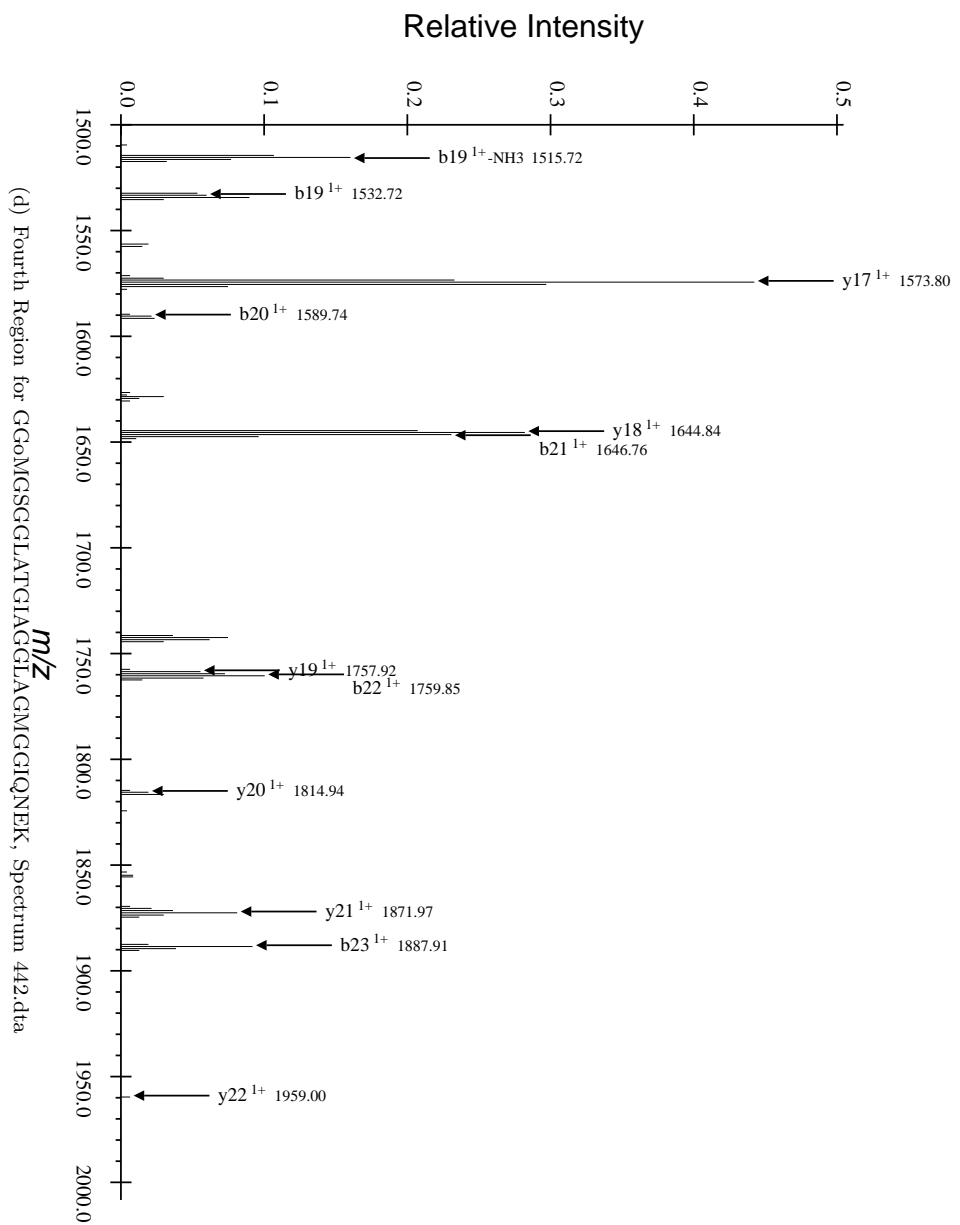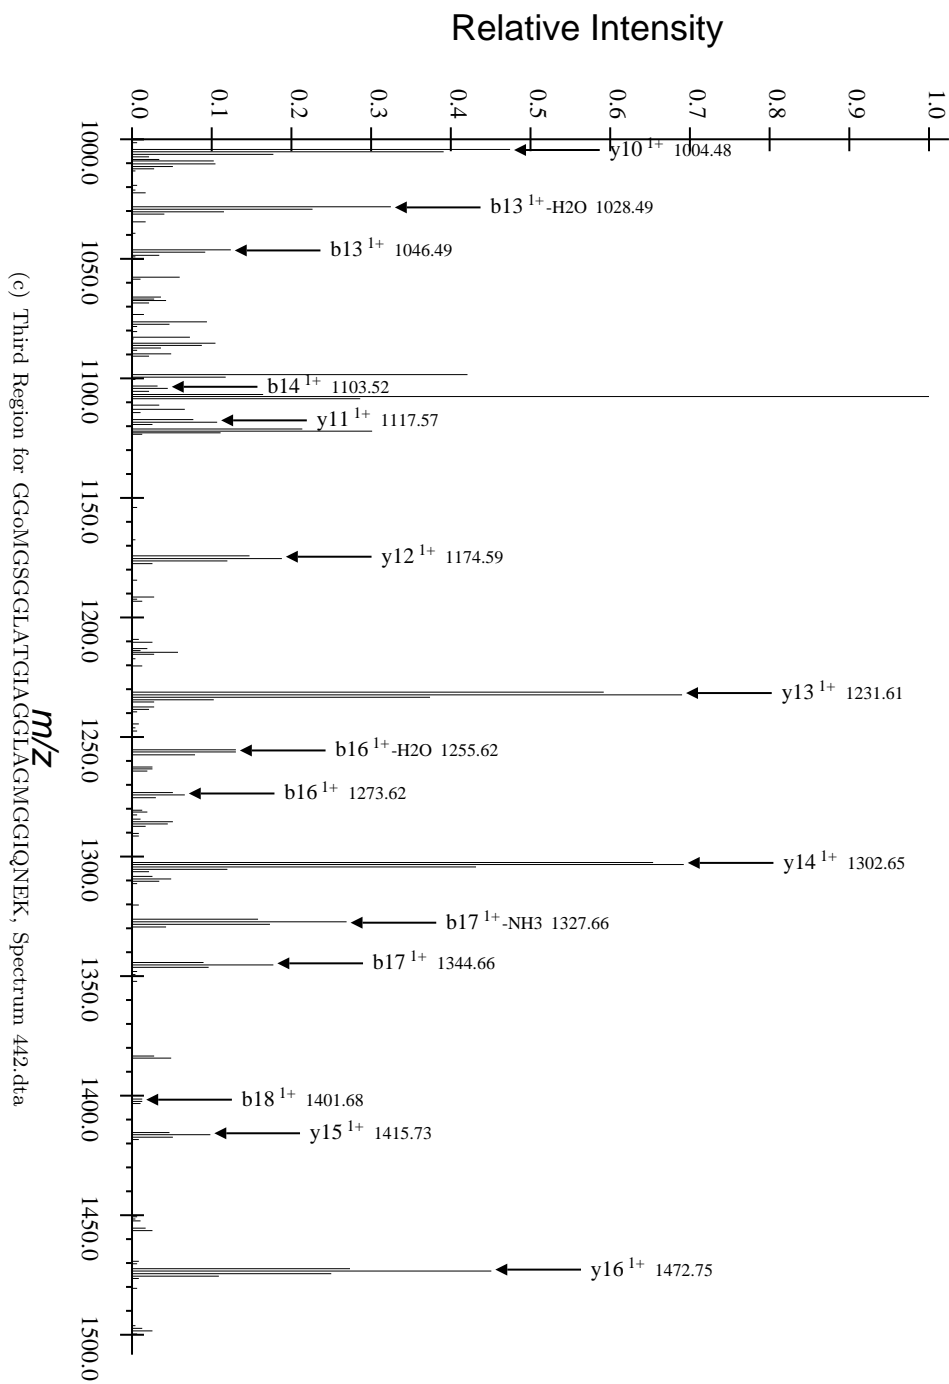

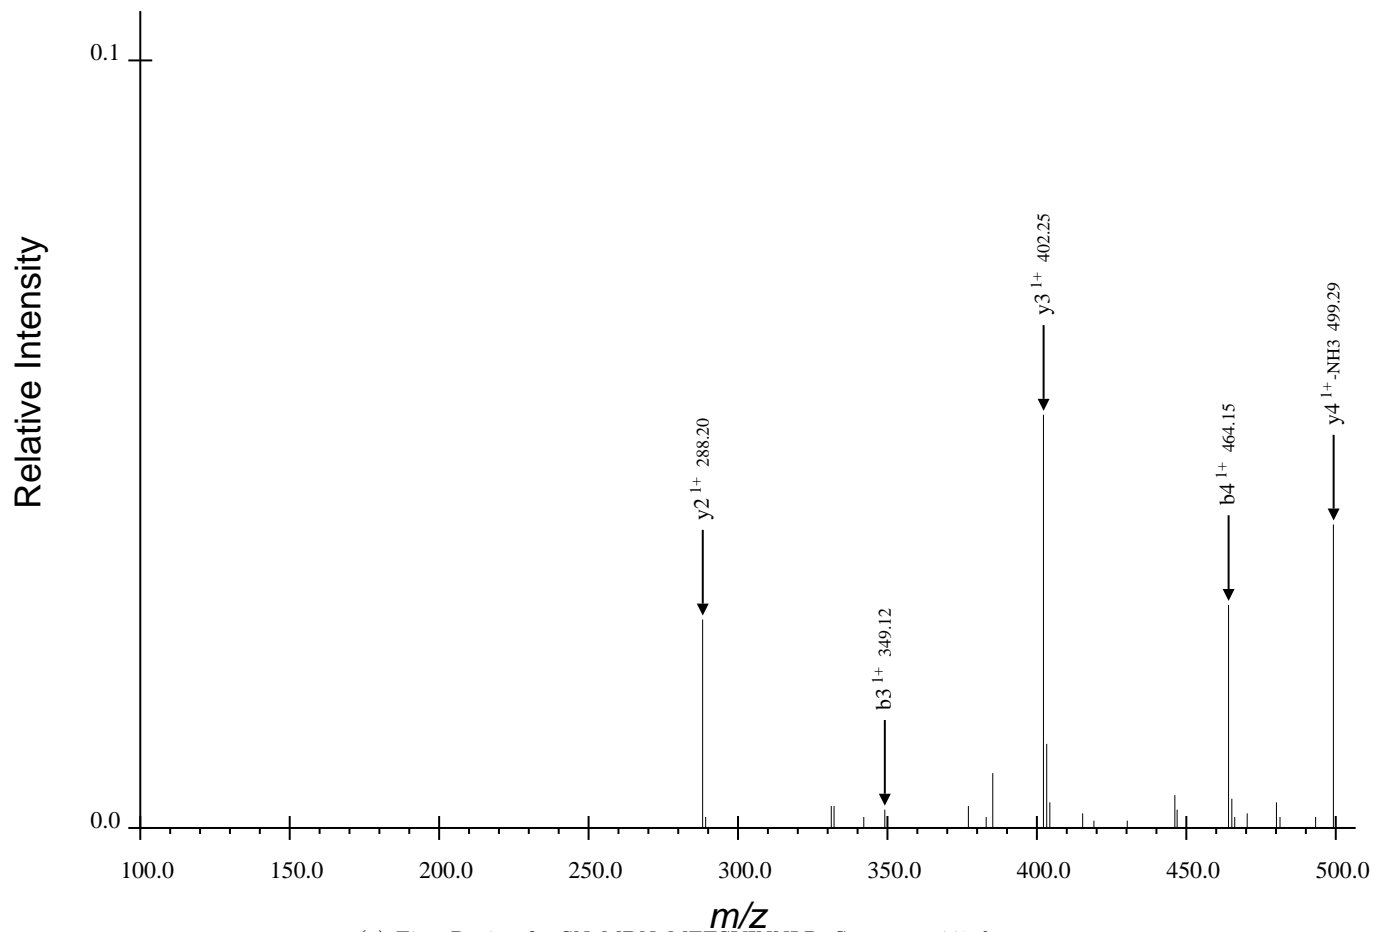

(a) First Region for SNoMDNoMFESYINNLR, Spectrum 443.dta

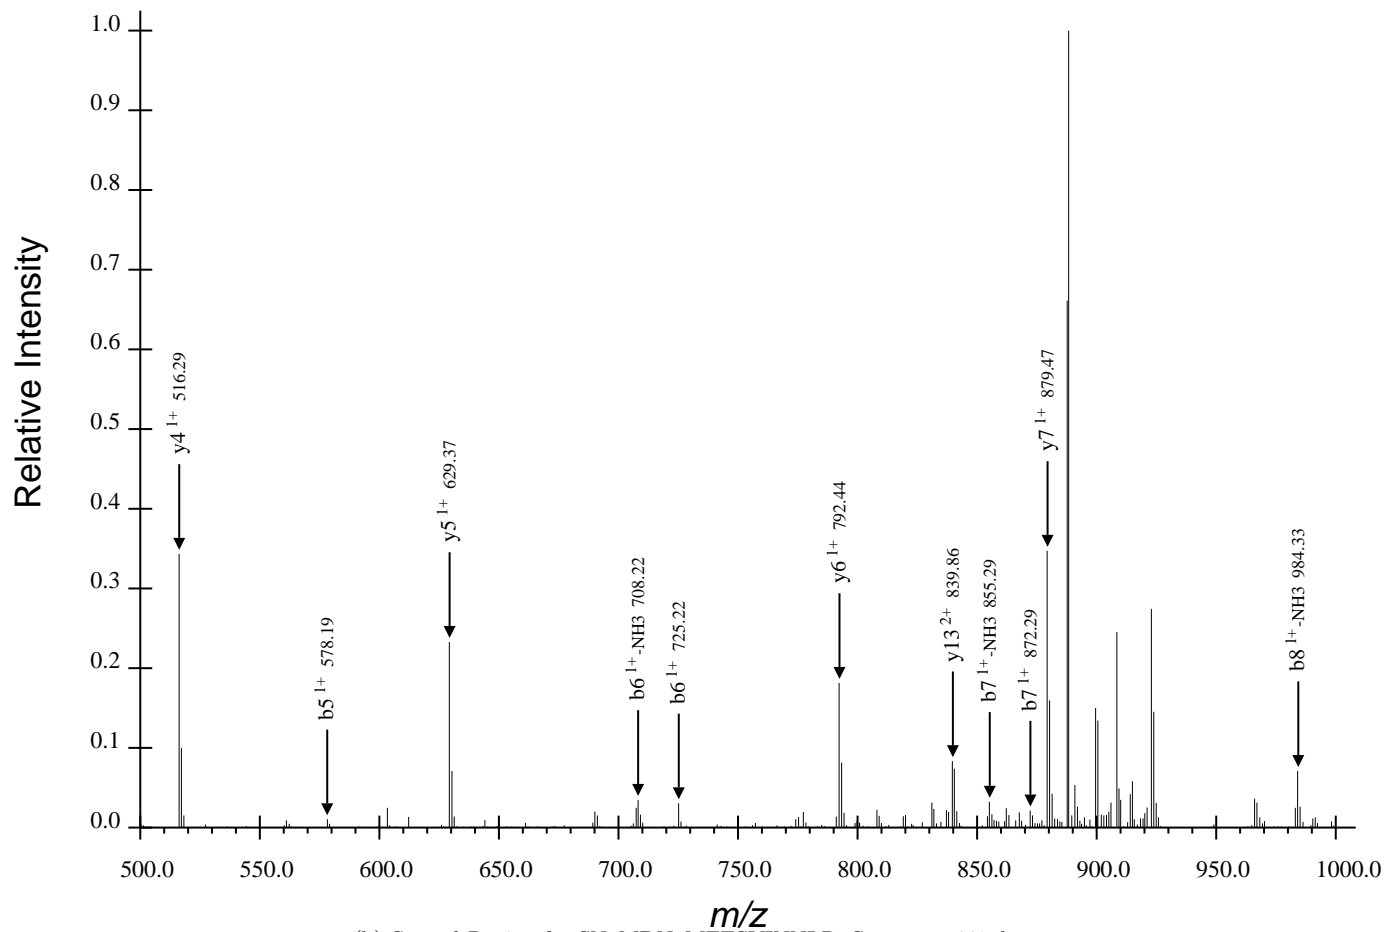

(b) Second Region for SNoMDNoMFESYINNLR, Spectrum 443.dta



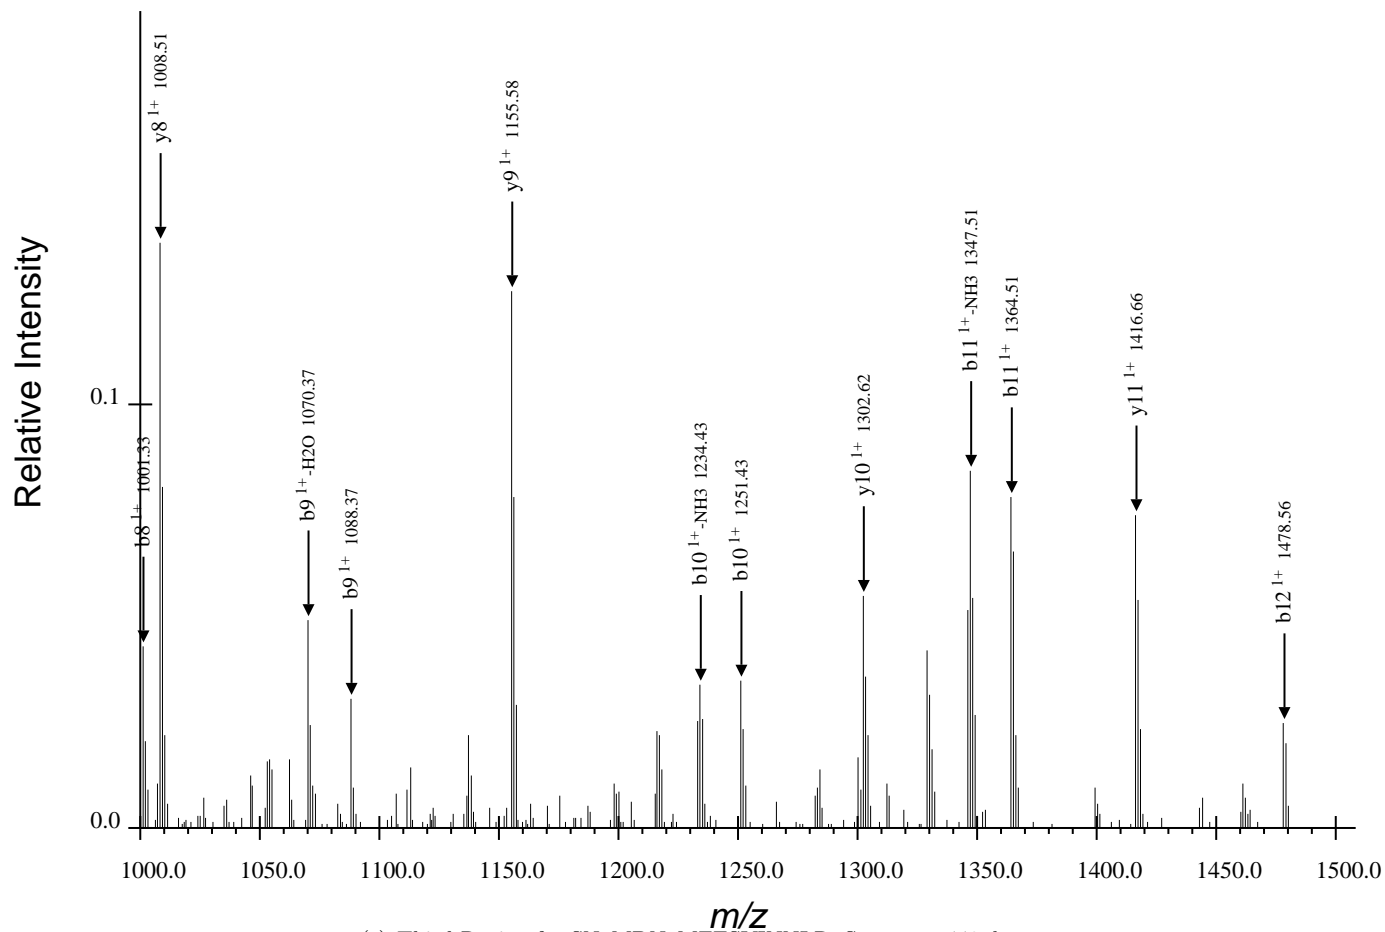

(c) Third Region for SNoMDNoMFESYINNLR, Spectrum 443.dta

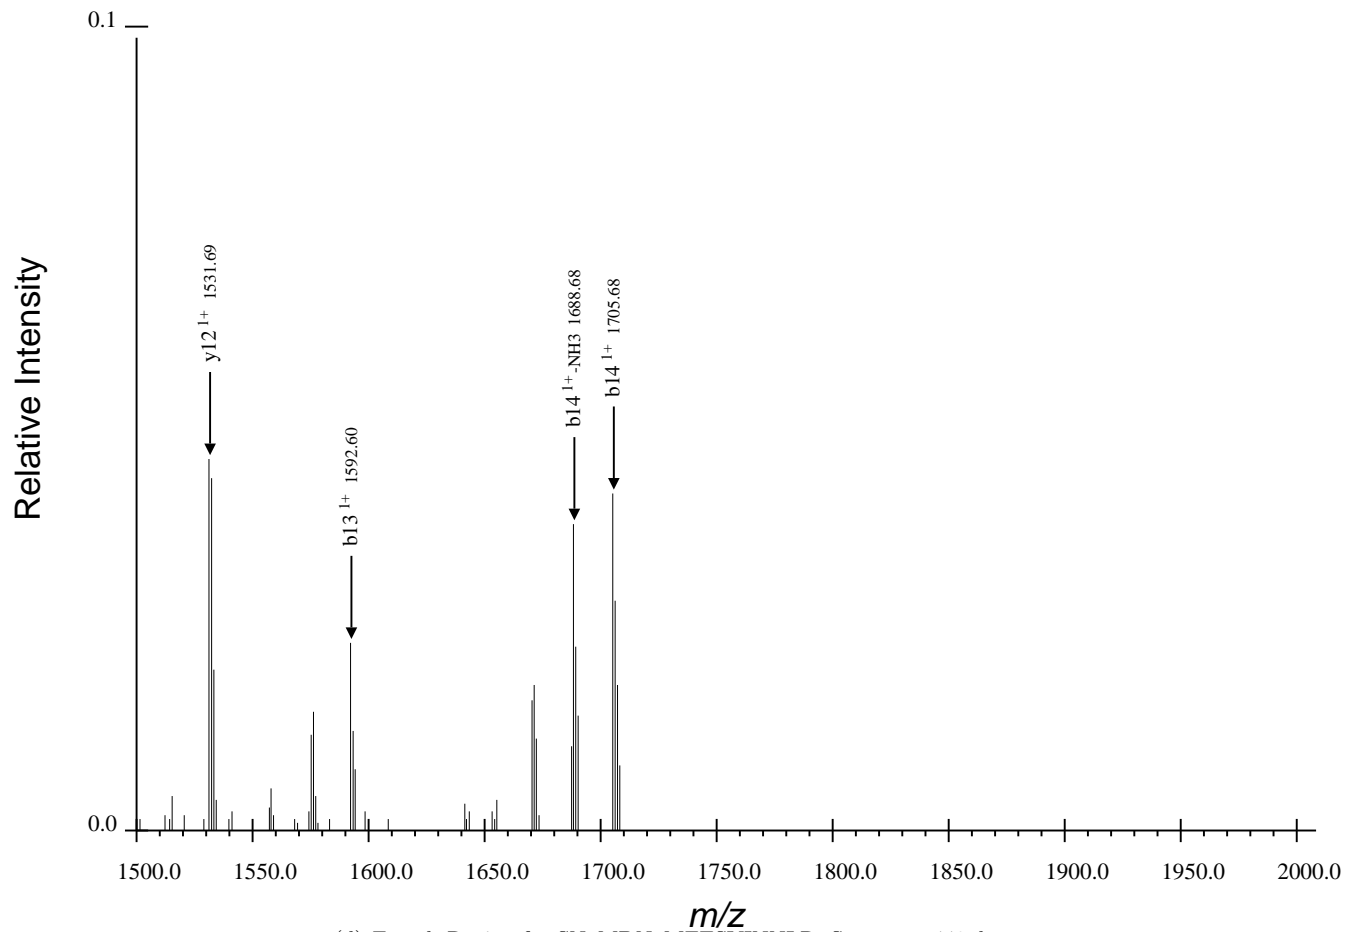

(d) Fourth Region for SNoMDNoMFESYINNLR, Spectrum 443.dta

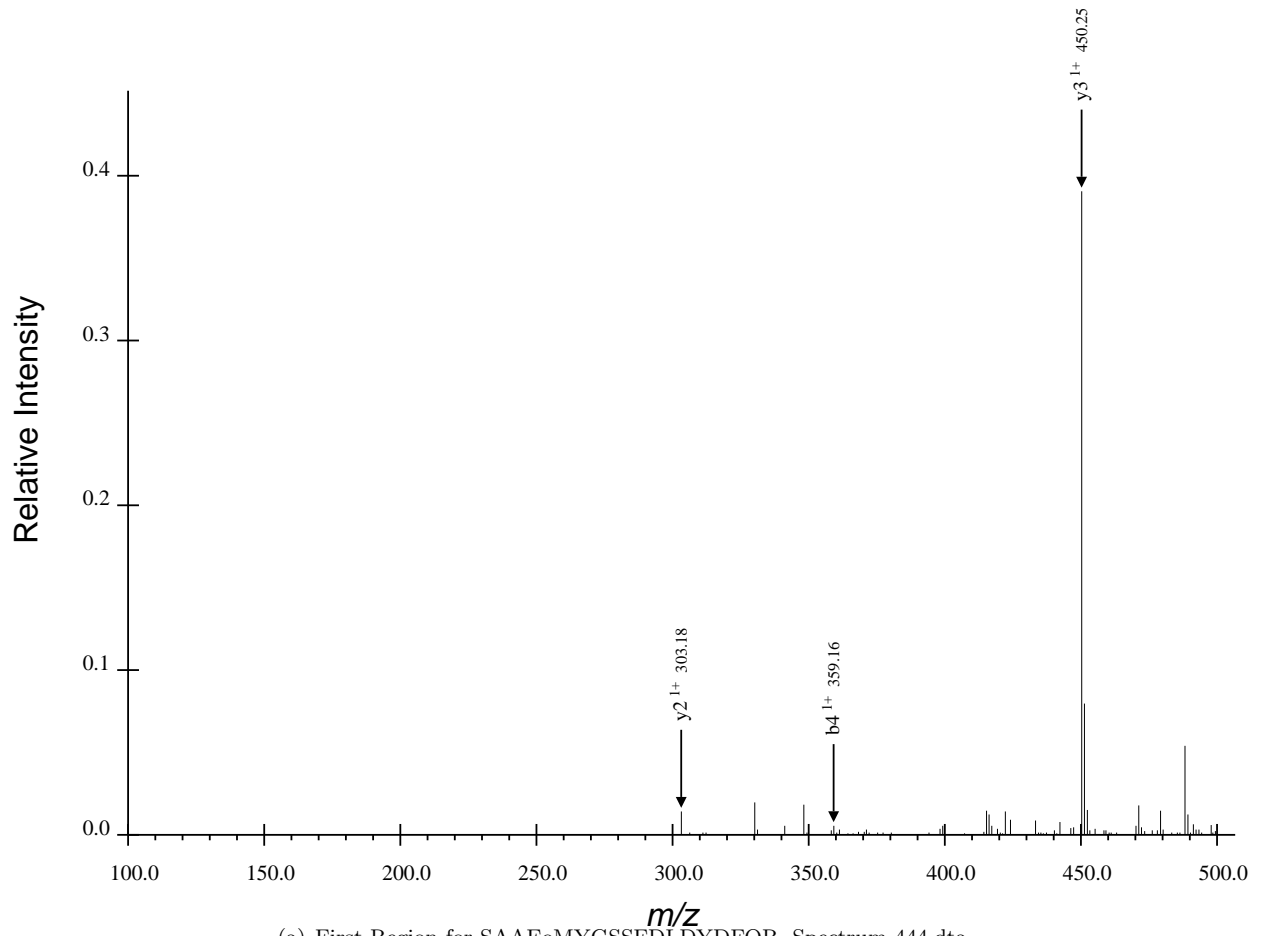

(a) First Region for SAAEoMYGSSFDLDYDFQR, Spectrum 444.dta

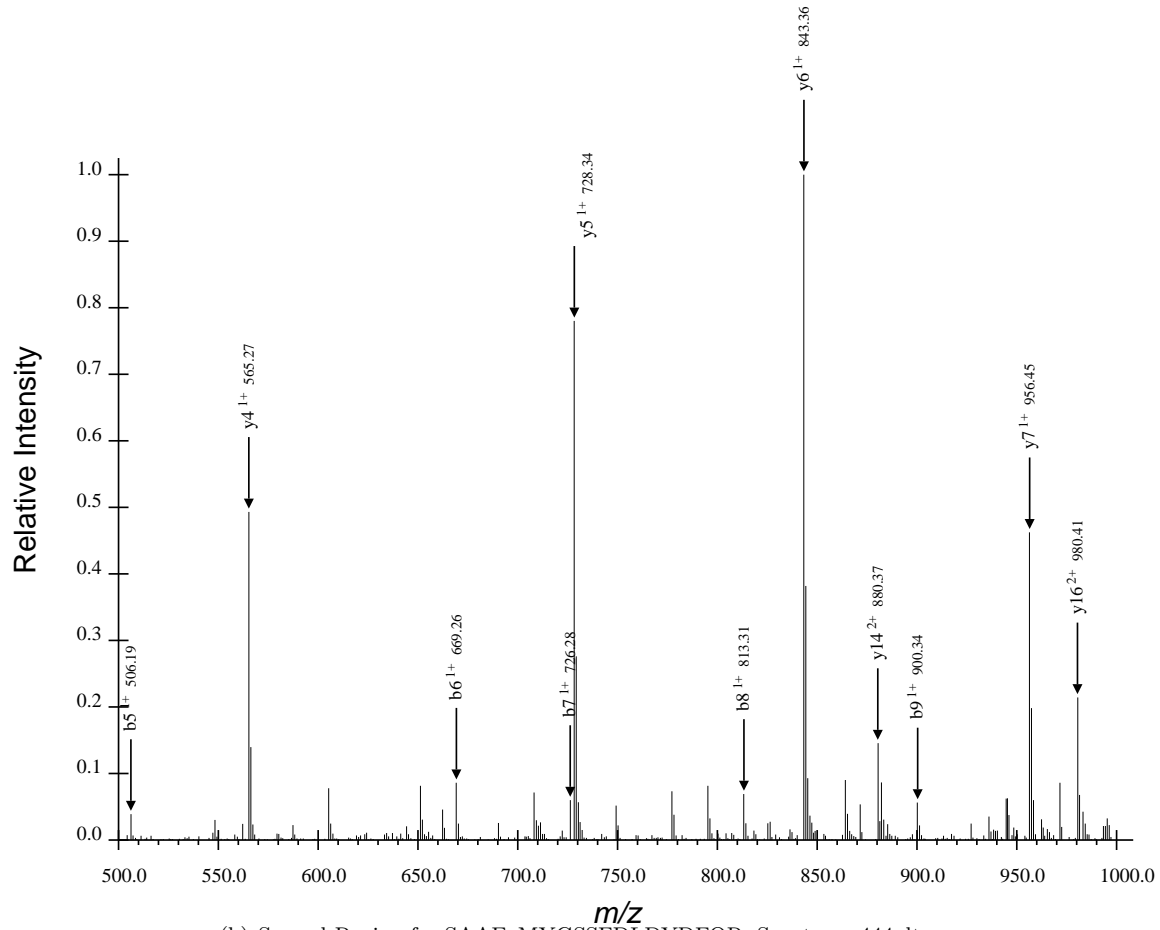

(b) Second Region for SAAEoMYGSSFDLDYDFQR, Spectrum 444.dta

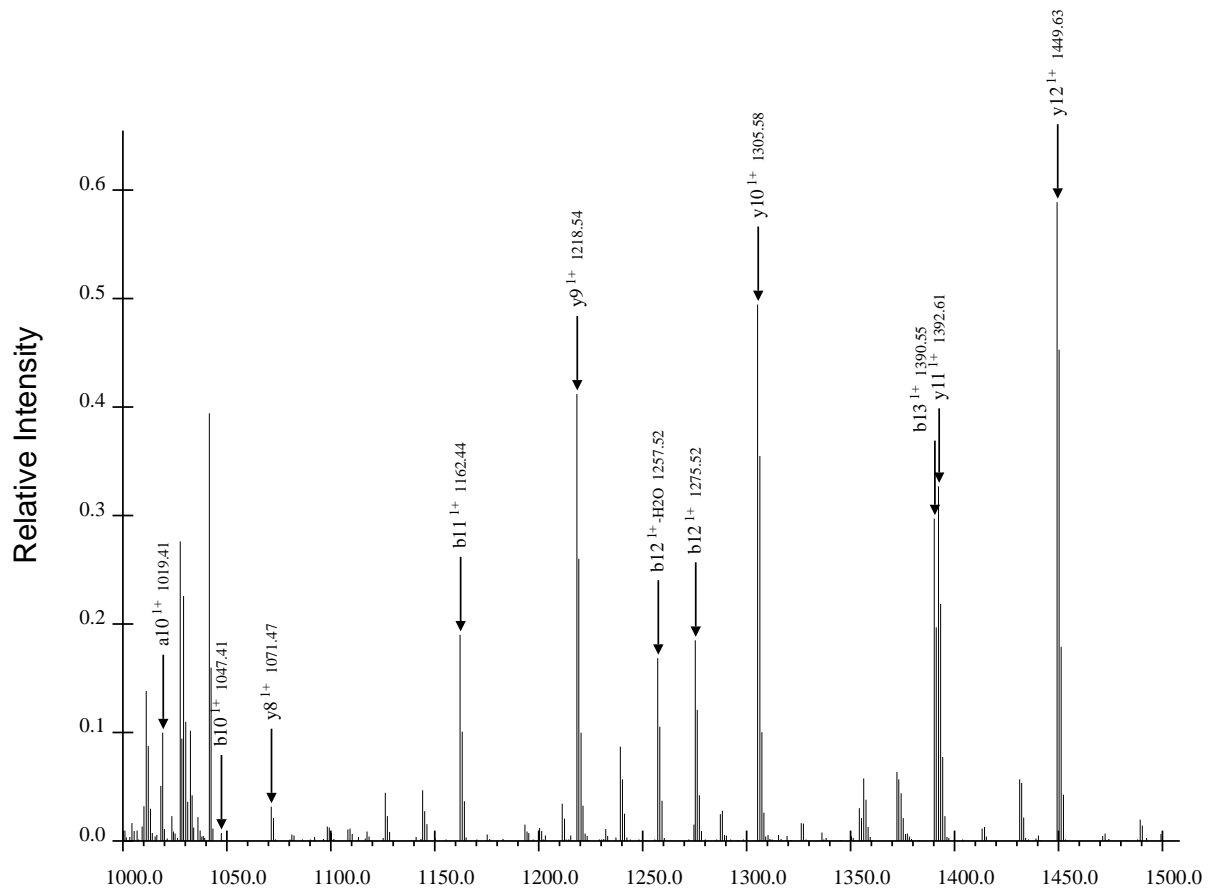

(c) Third Region for SAAEoMYGSSFLLDYDFQR, Spectrum 444.dta

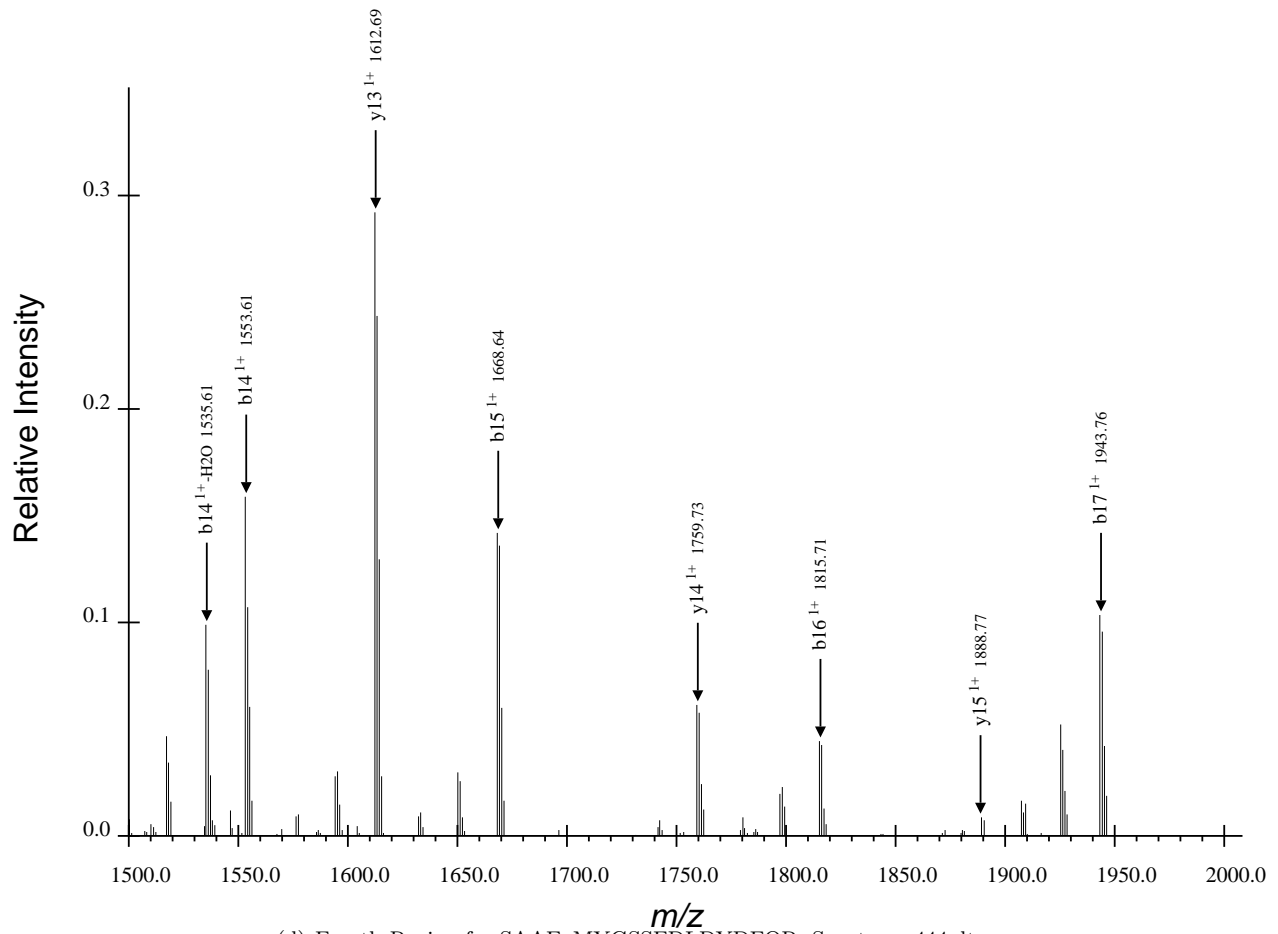

(d) Fourth Region for SAAEoMYGSSFLLDYDFQR, Spectrum 444.dta

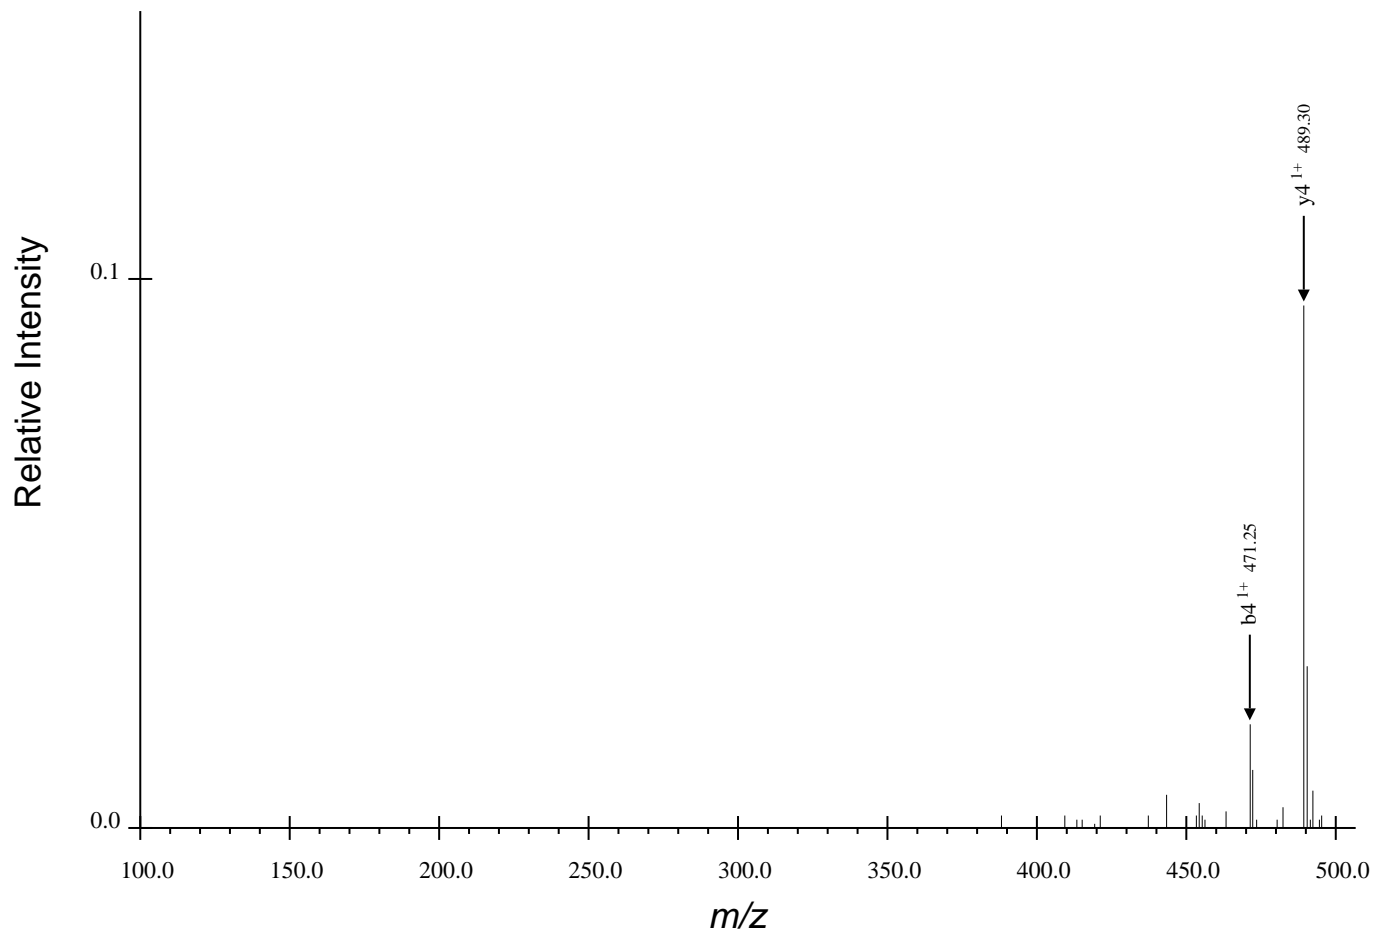

(a) First Region for LLEDGEDFNLGDALDSSNSoMQTIQK, Spectrum 445.dta

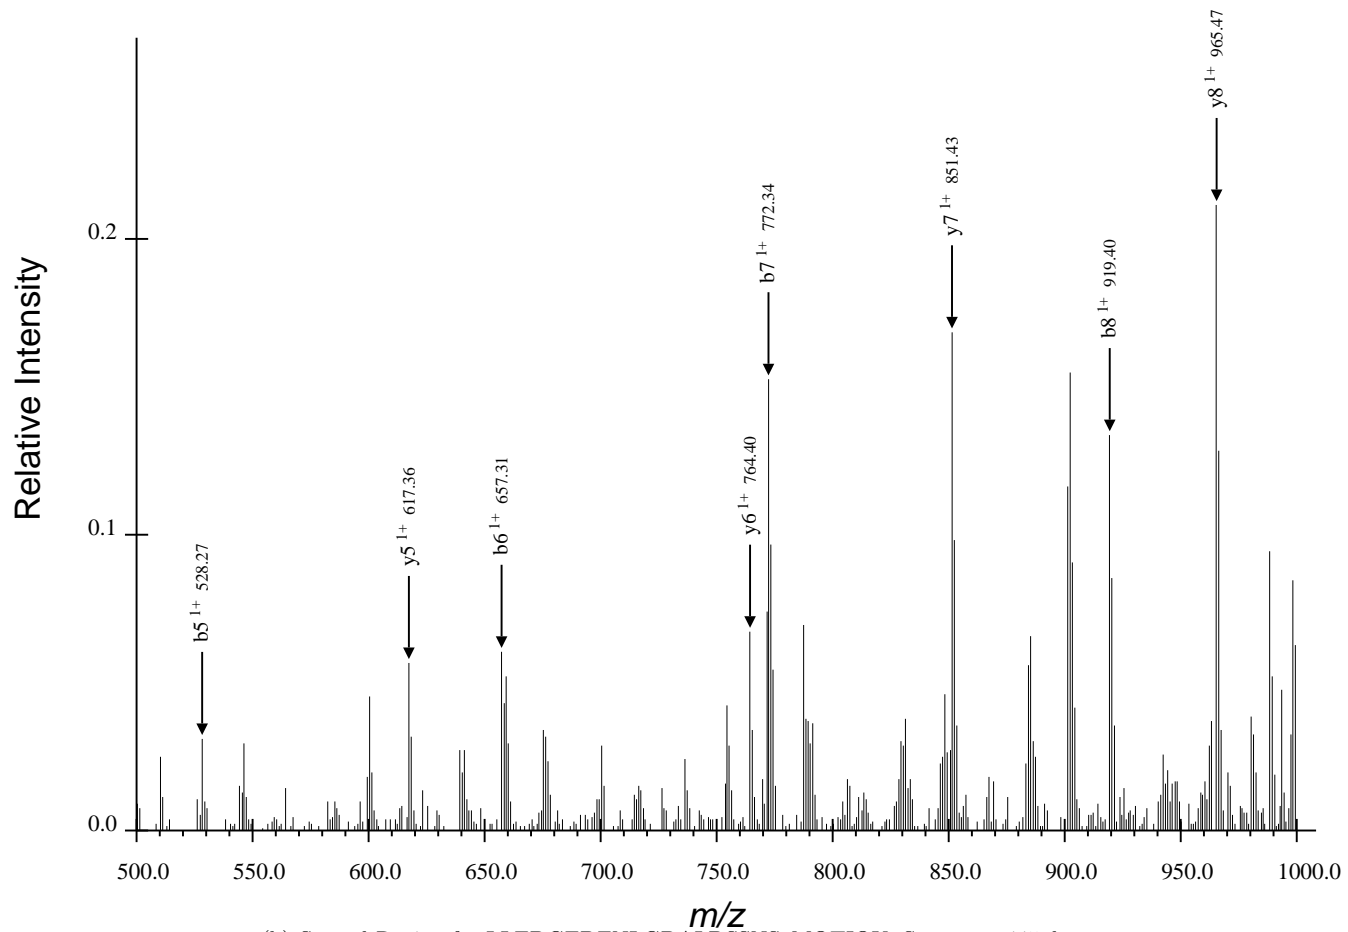

(b) Second Region for LLEDGEDFNLGDALDSSNSoMQTIQK, Spectrum 445.dta

(d) Fourth Region for LLEDDGEDFNLGDALDSSNSoMQTTQK, Spectrum 445.dta

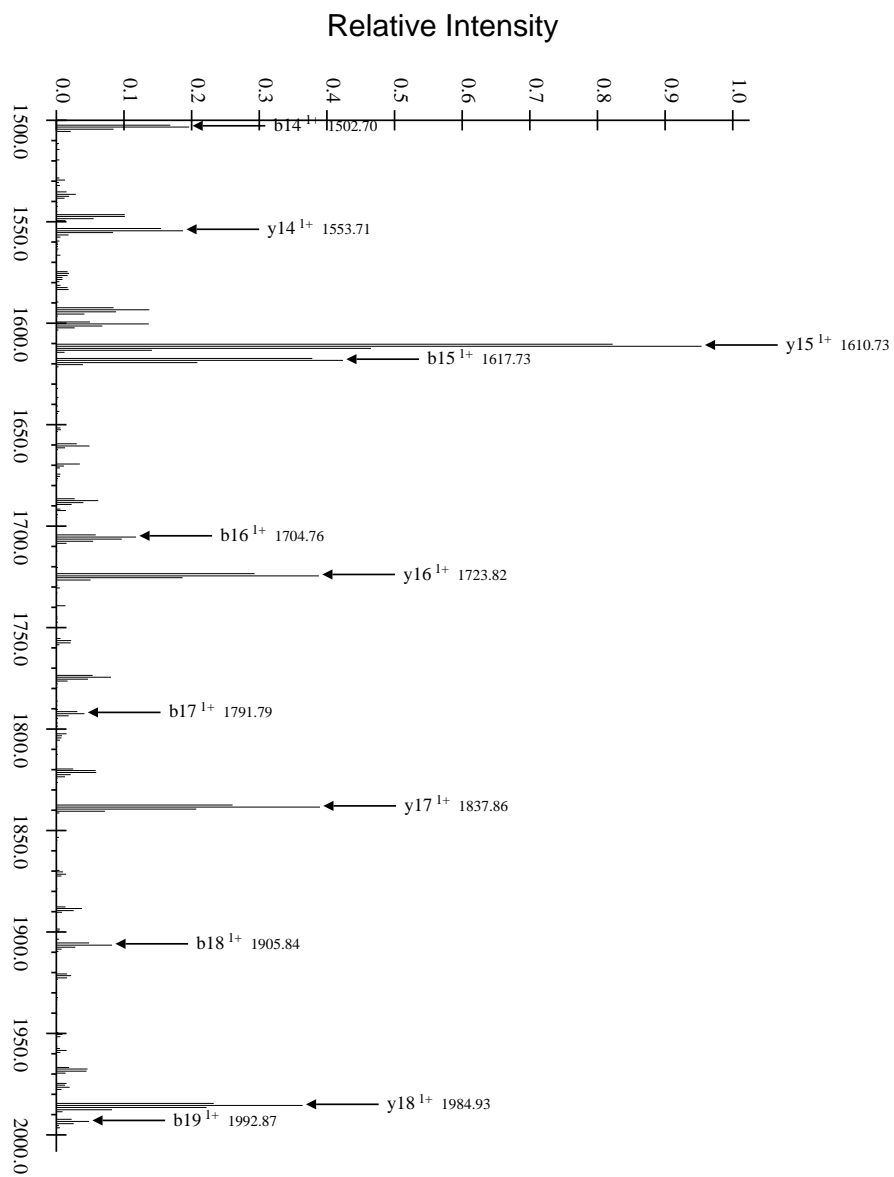

(c) Third Region for LLEDDGEDFNLGDALDSSNSoMQTTQK, Spectrum 445.dta

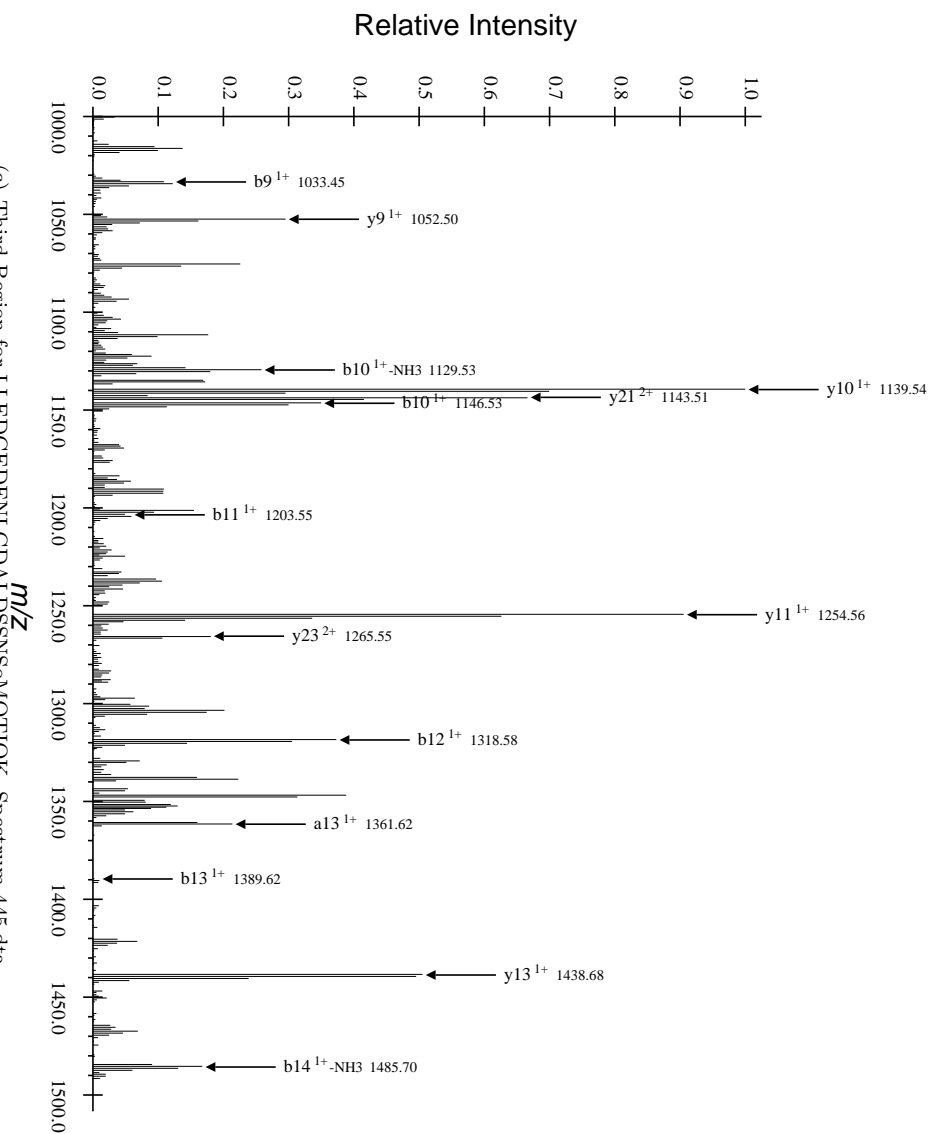

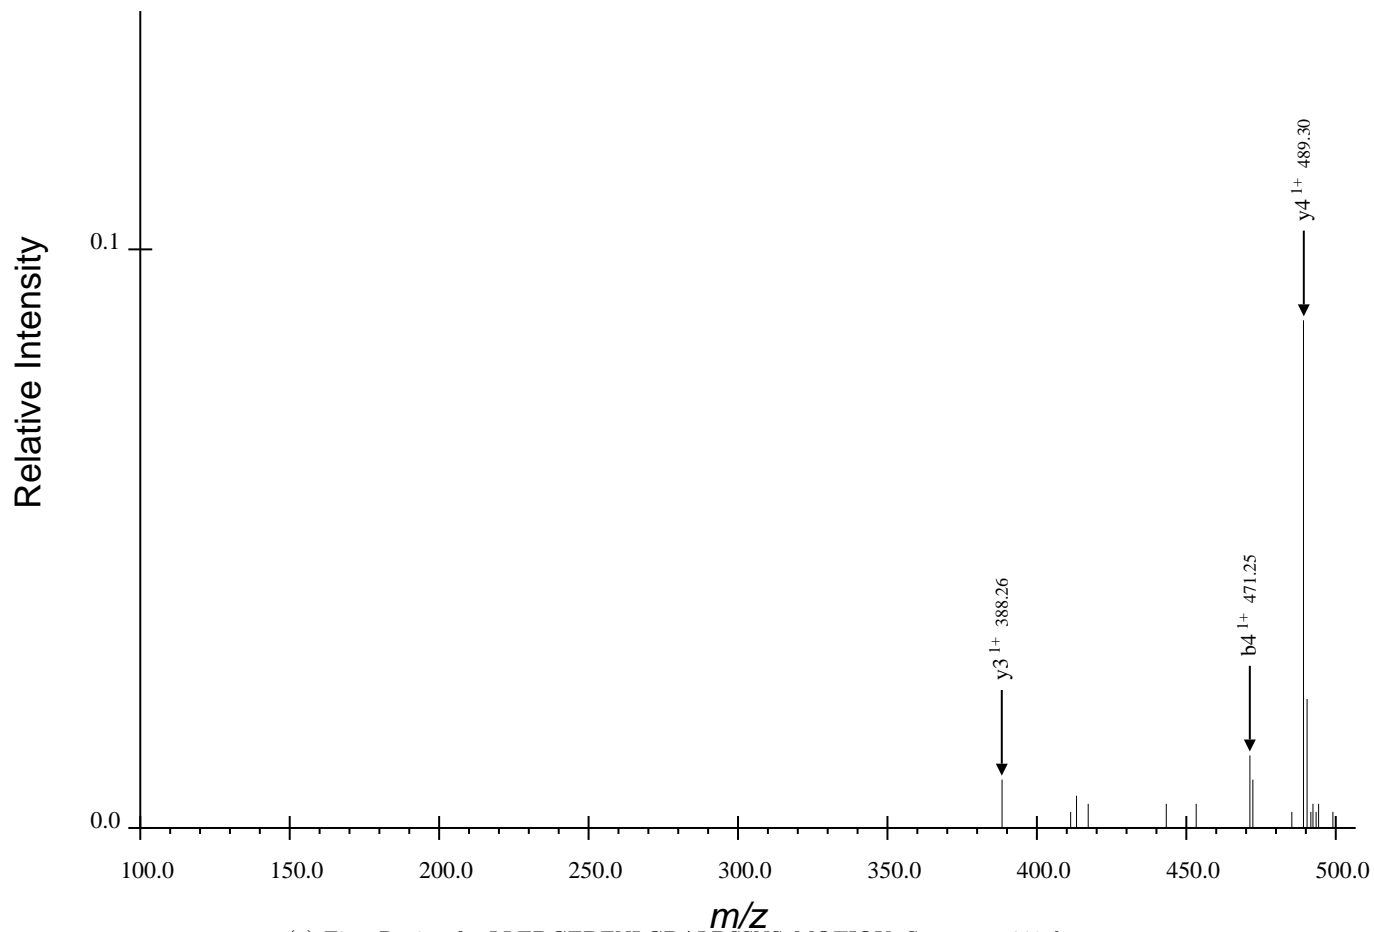

(a) First Region for LLEDGEDFNLGDALDSSNSoMQTIQK, Spectrum 446.dta

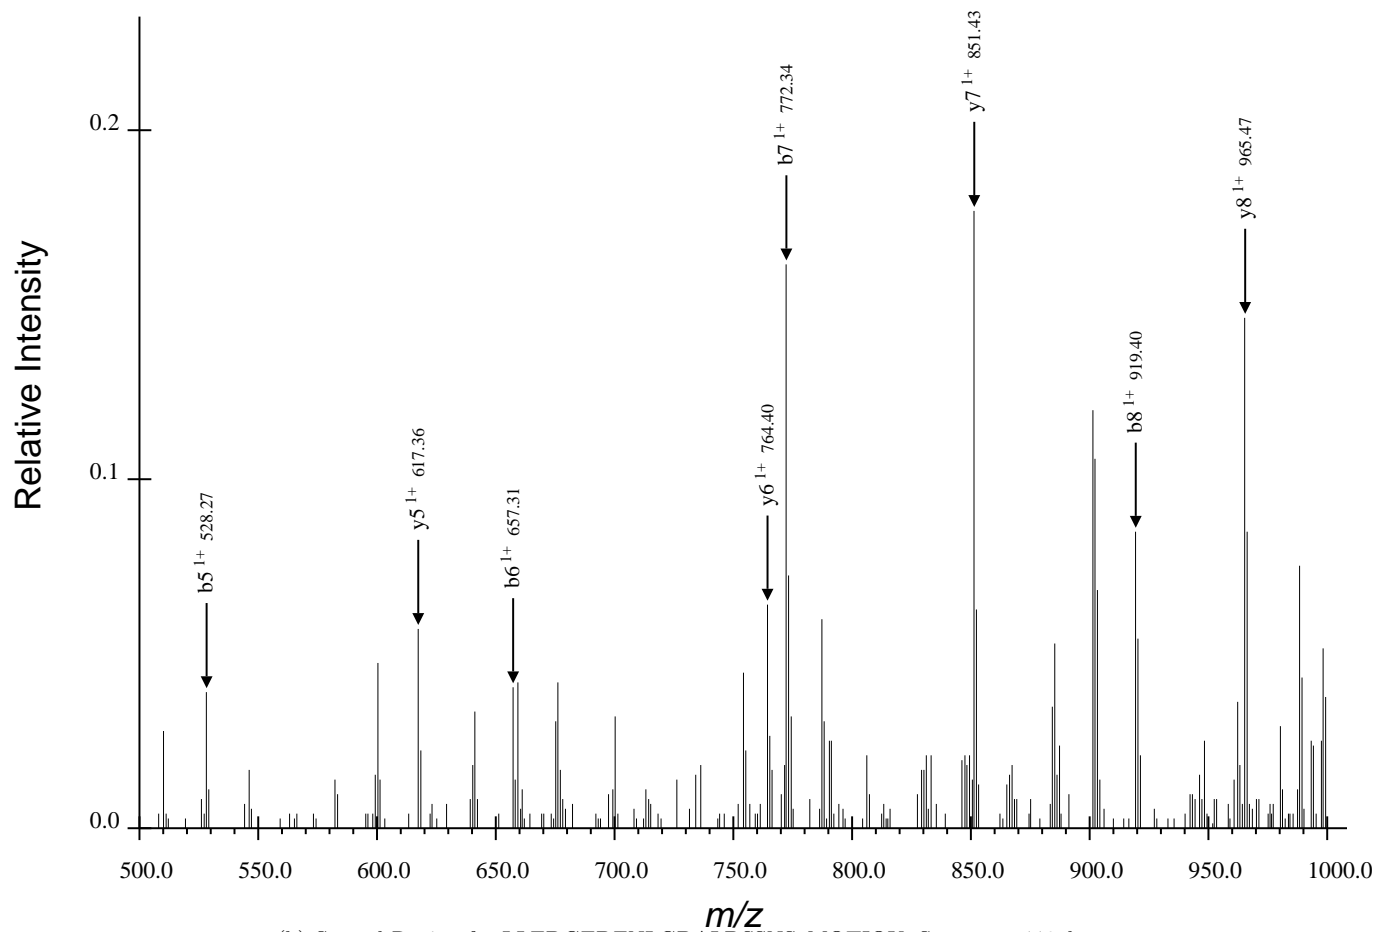

(b) Second Region for LLEDGEDFNLGDALDSSNSoMQTIQK, Spectrum 446.dta

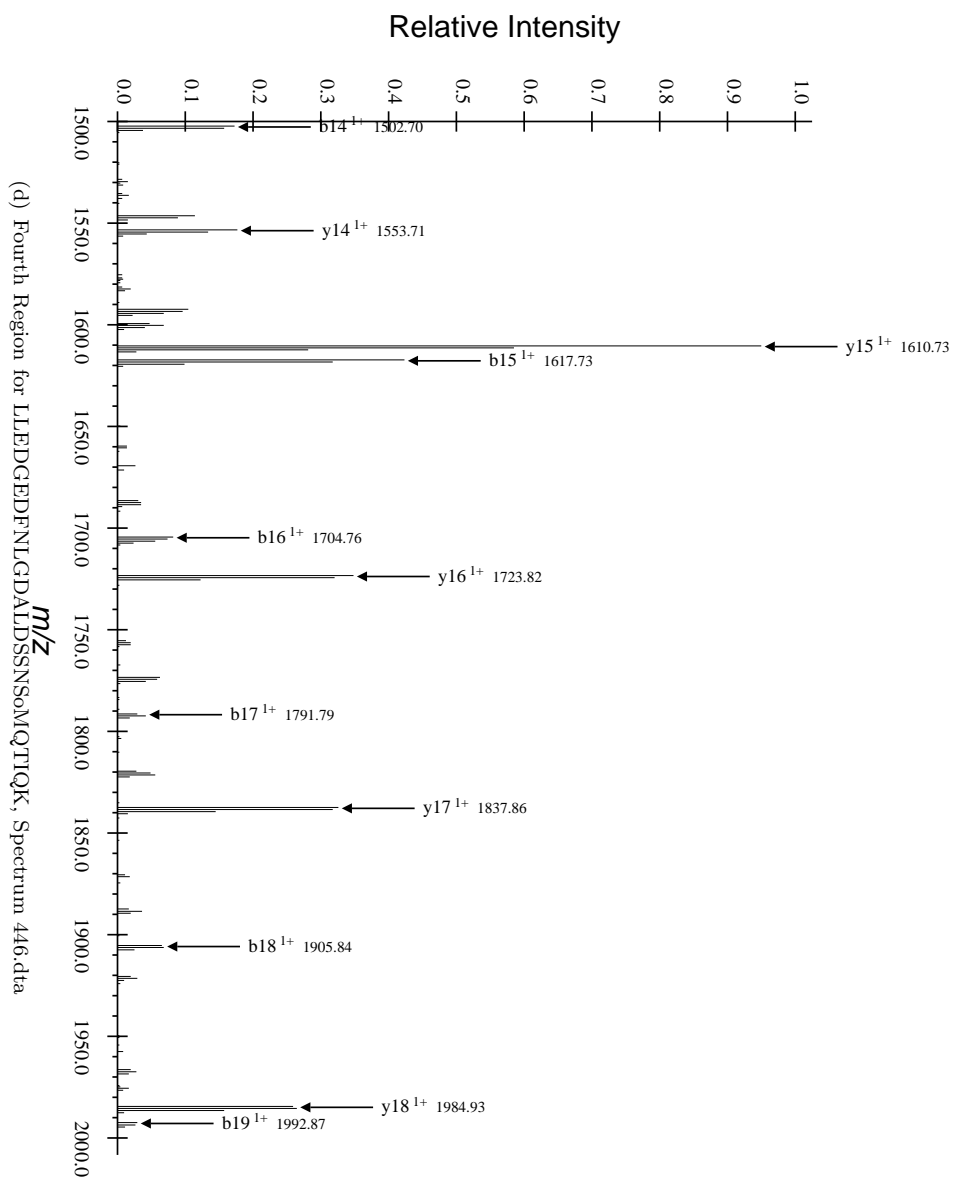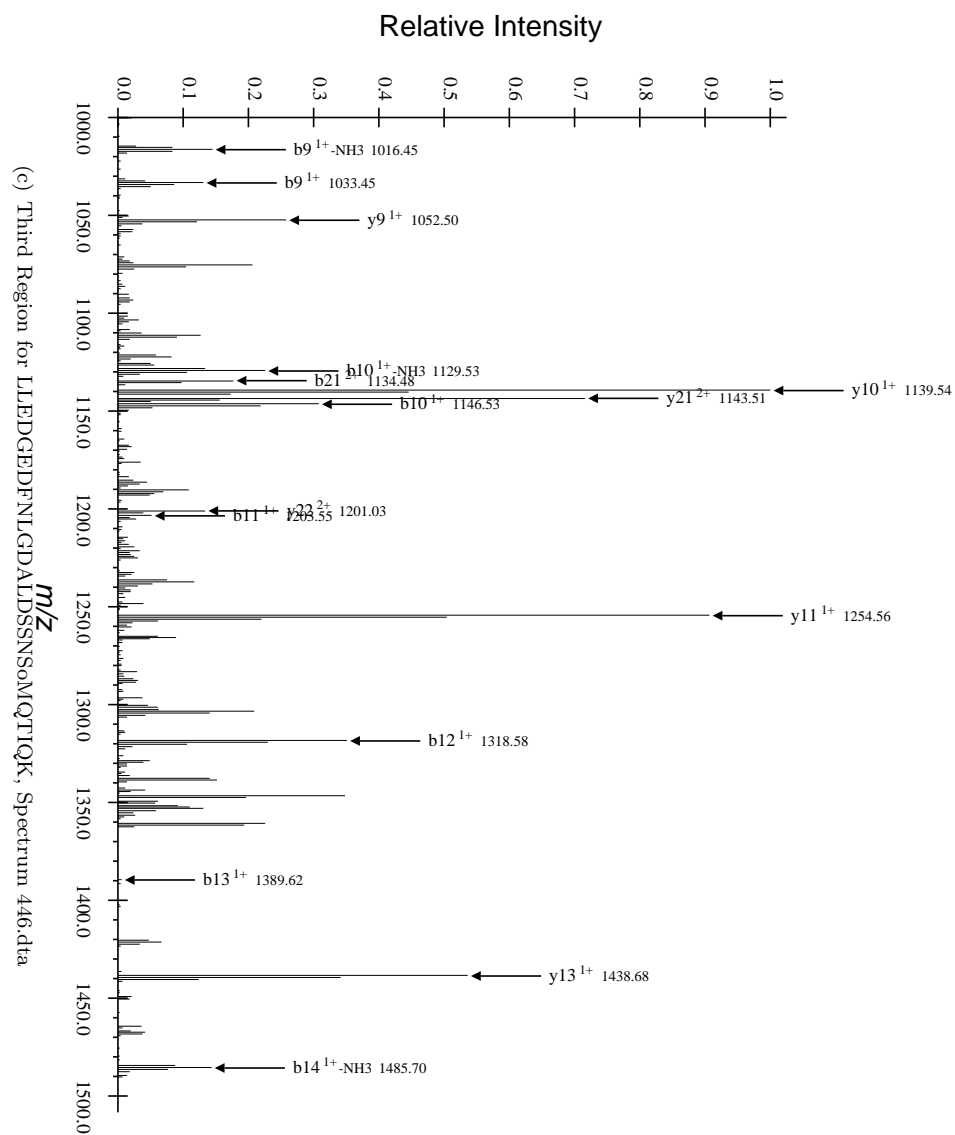

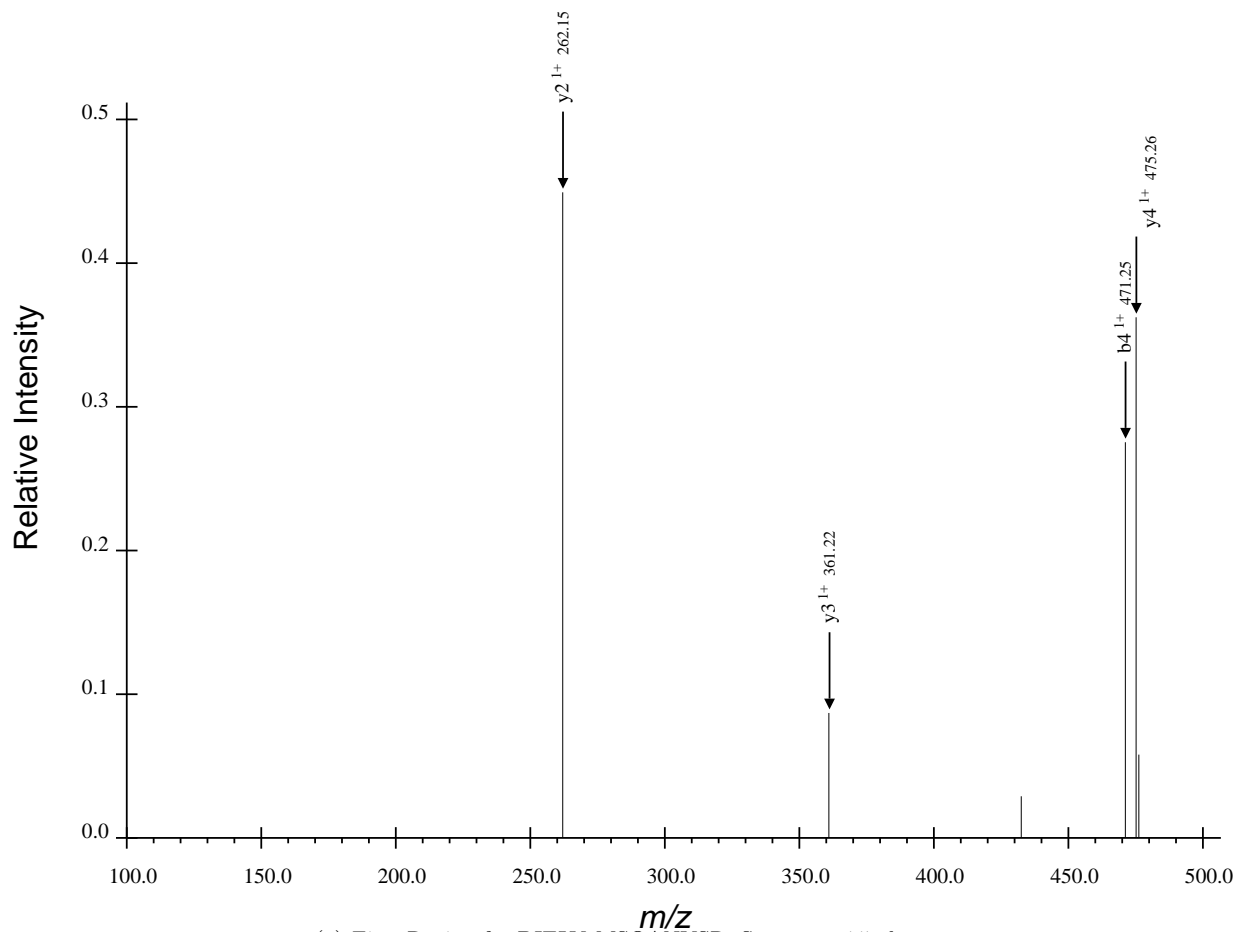

(a) First Region for DIELVoMSQANVSR, Spectrum 447.dta

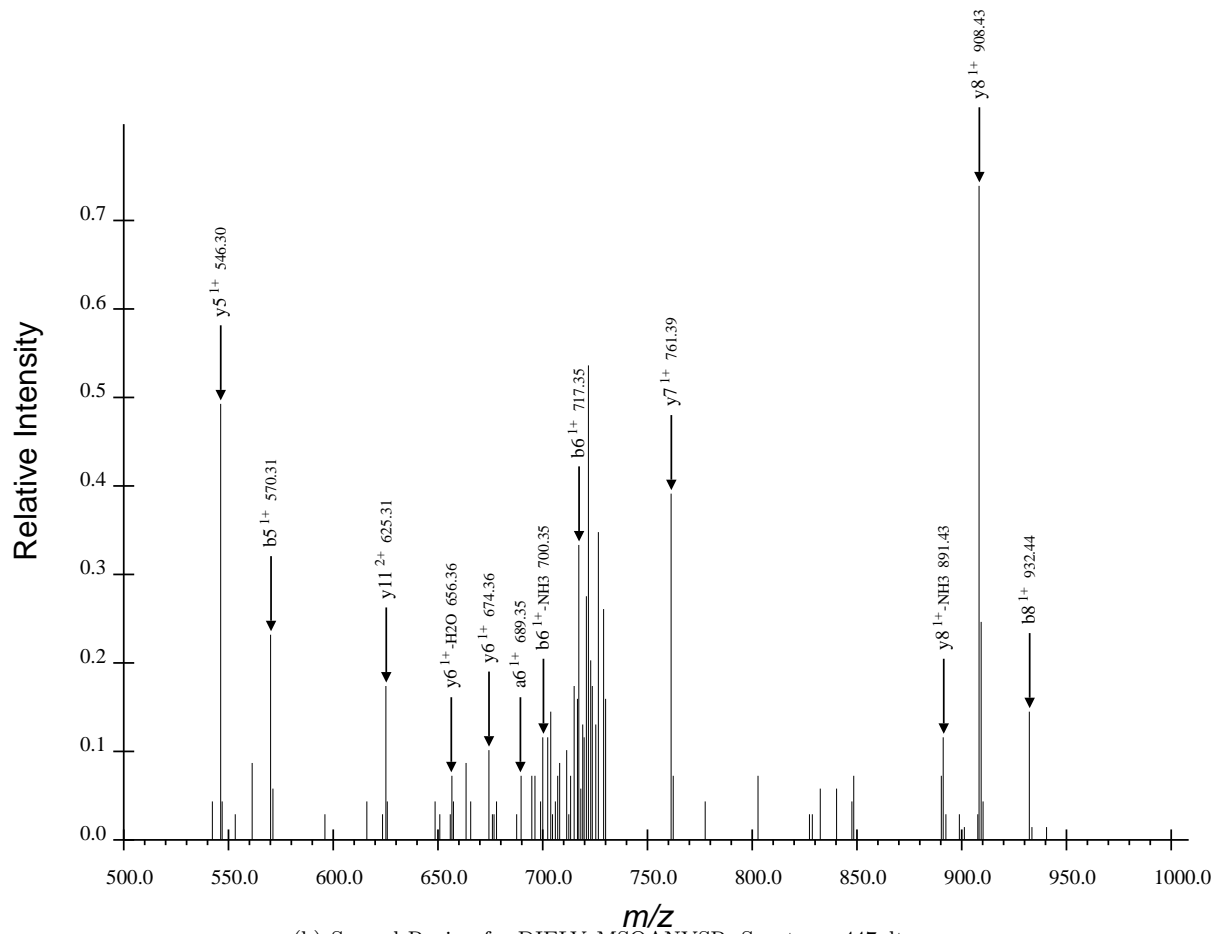

(b) Second Region for DIELVoMSQANVSR, Spectrum 447.dta



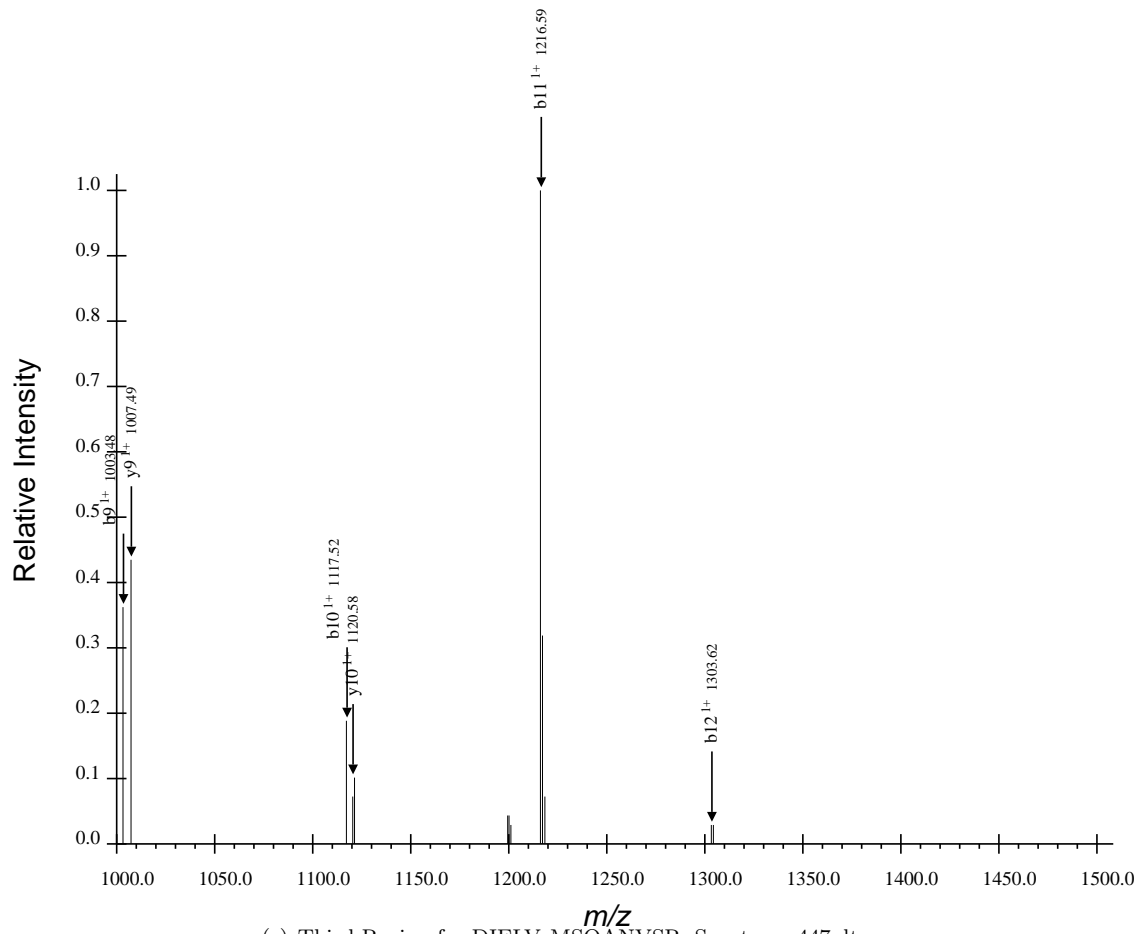

(c) Third Region for DIELVoMSQANVSR, Spectrum 447.dta

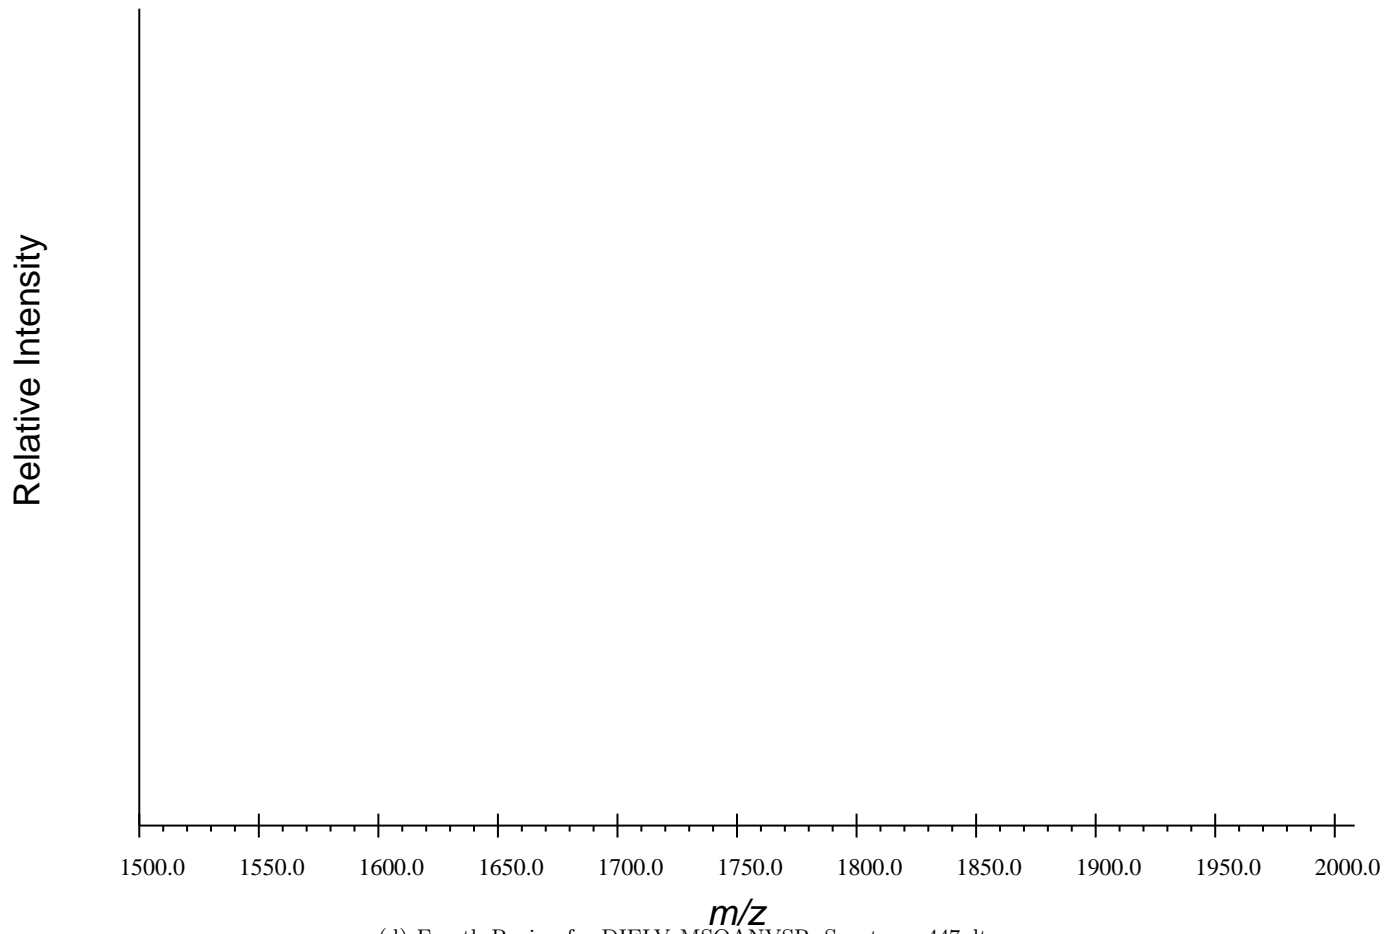

(d) Fourth Region for DIELVoMSQANVSR, Spectrum 447.dta

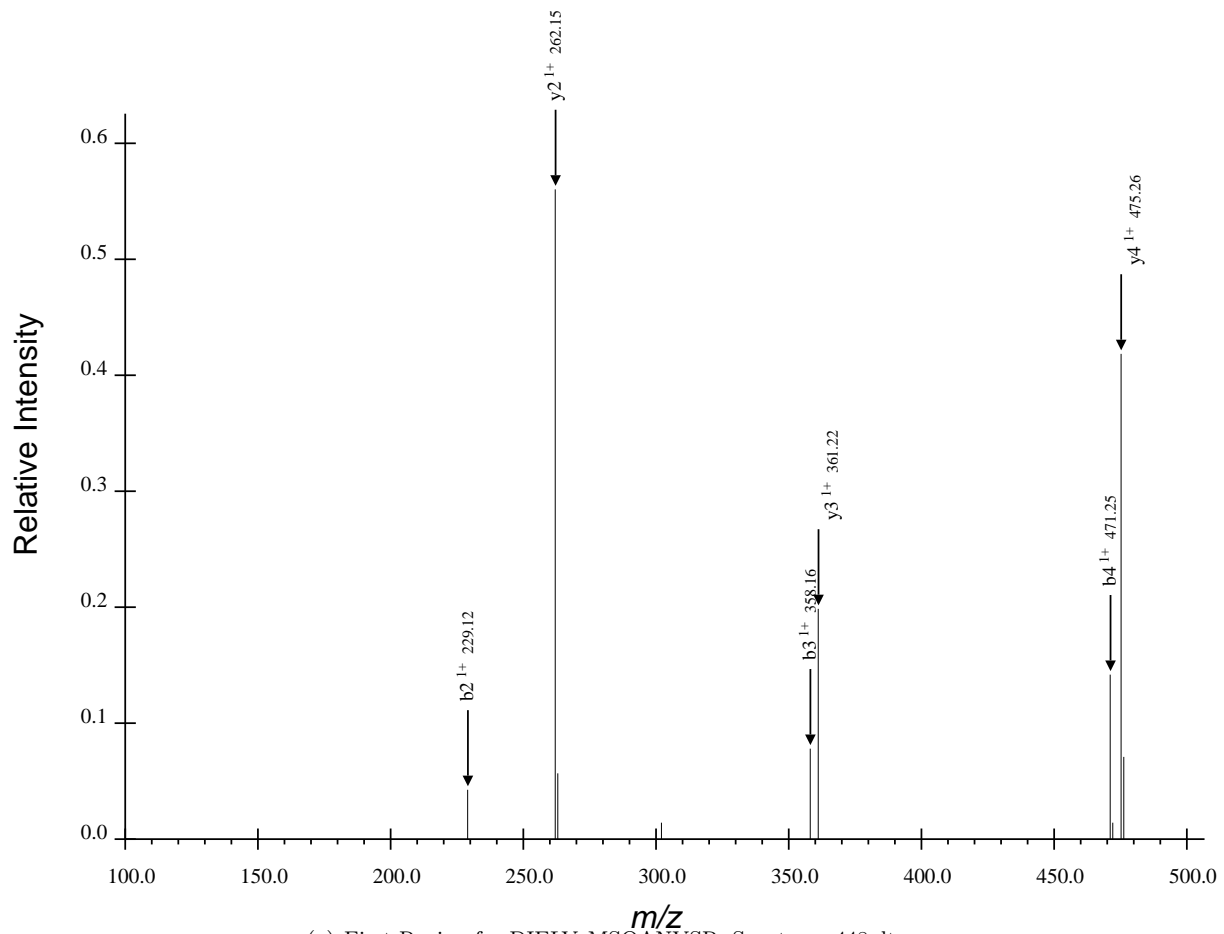

(a) First Region for DIELVoMSQANVSR, Spectrum 448.dta

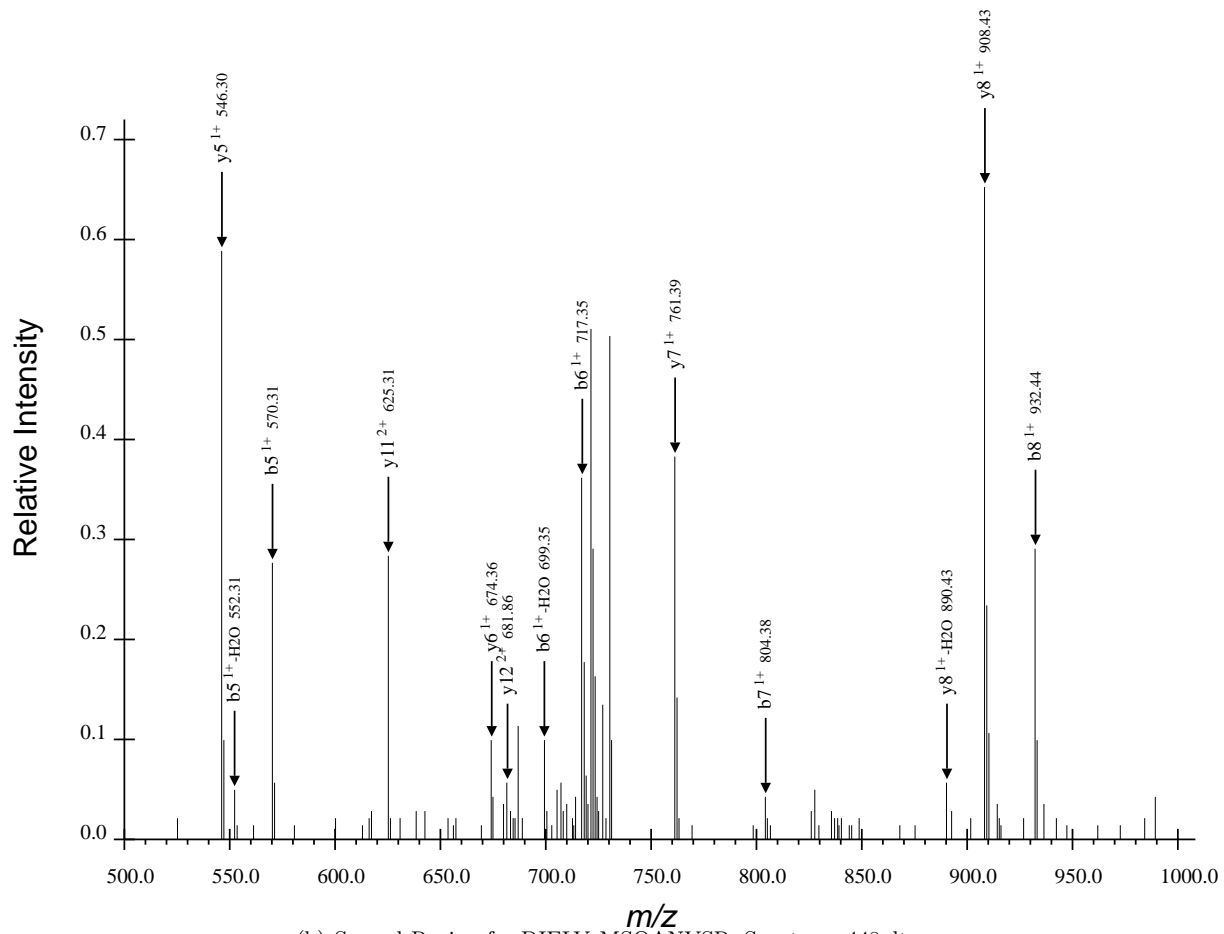

(b) Second Region for DIELVoMSQANVSR, Spectrum 448.dta

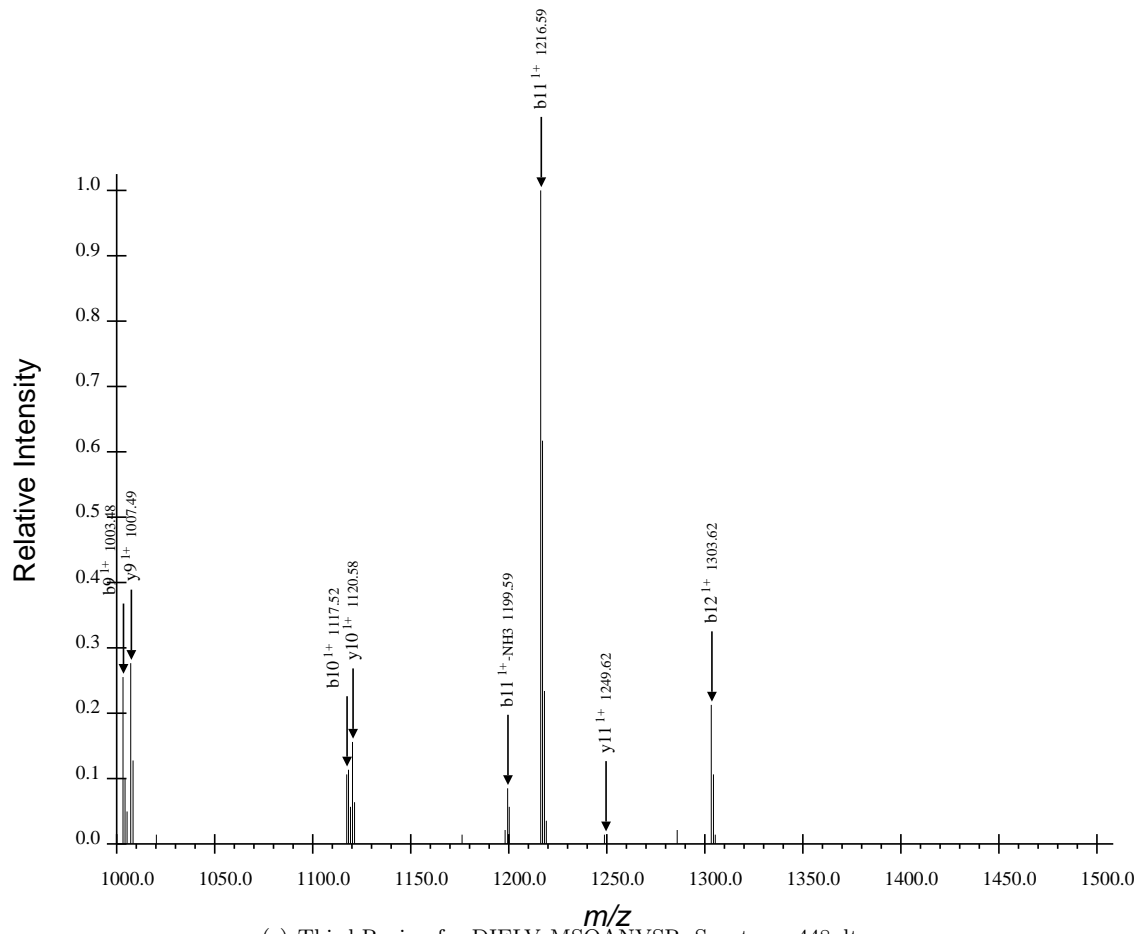

(c) Third Region for DIELVoMSQANVSR, Spectrum 448.dta

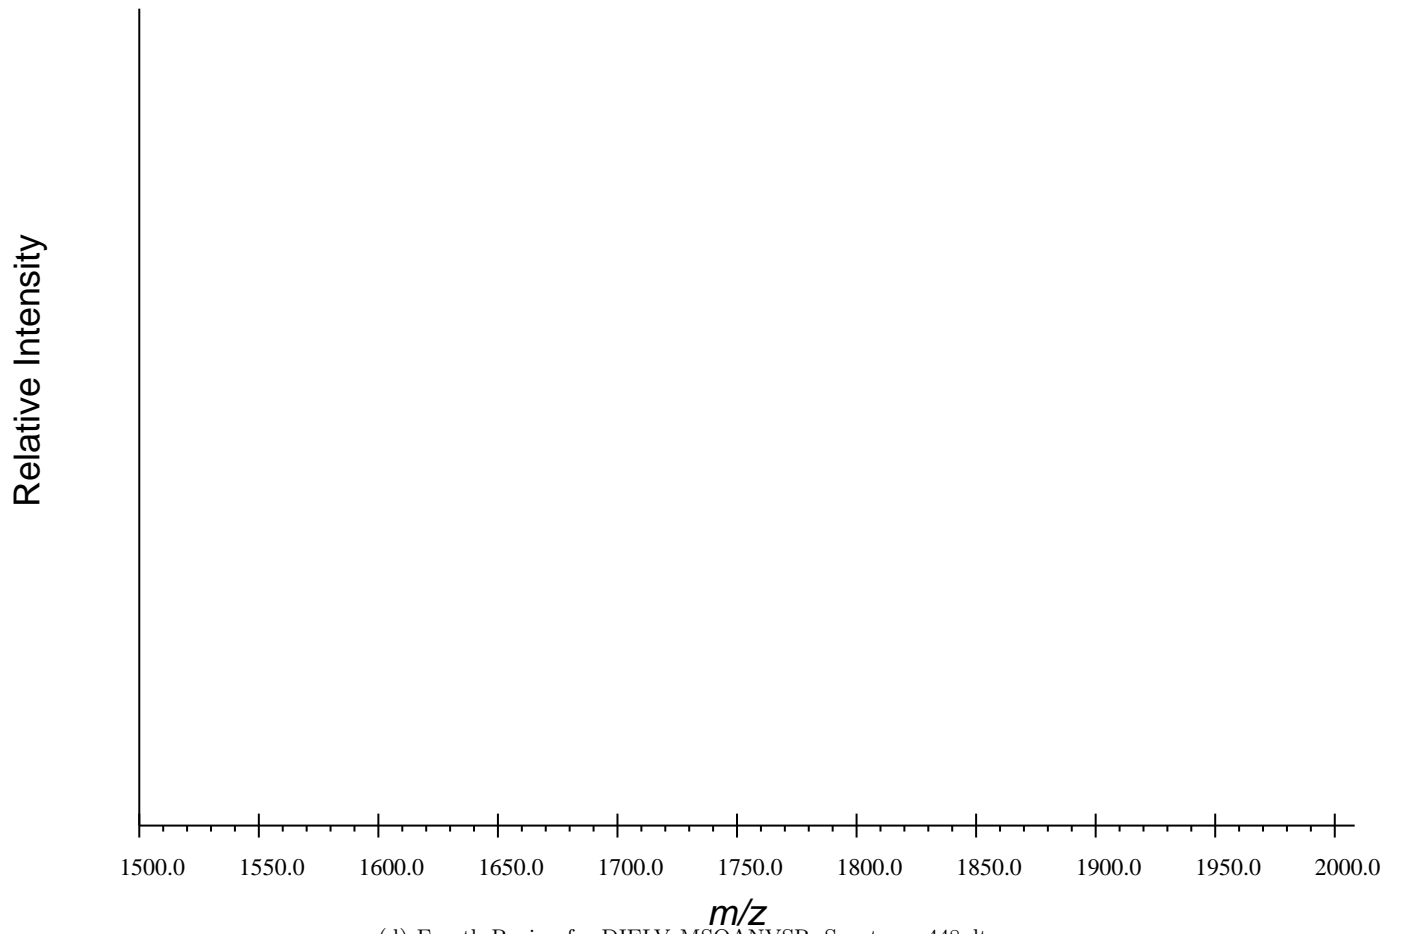

(d) Fourth Region for DIELVoMSQANVSR, Spectrum 448.dta

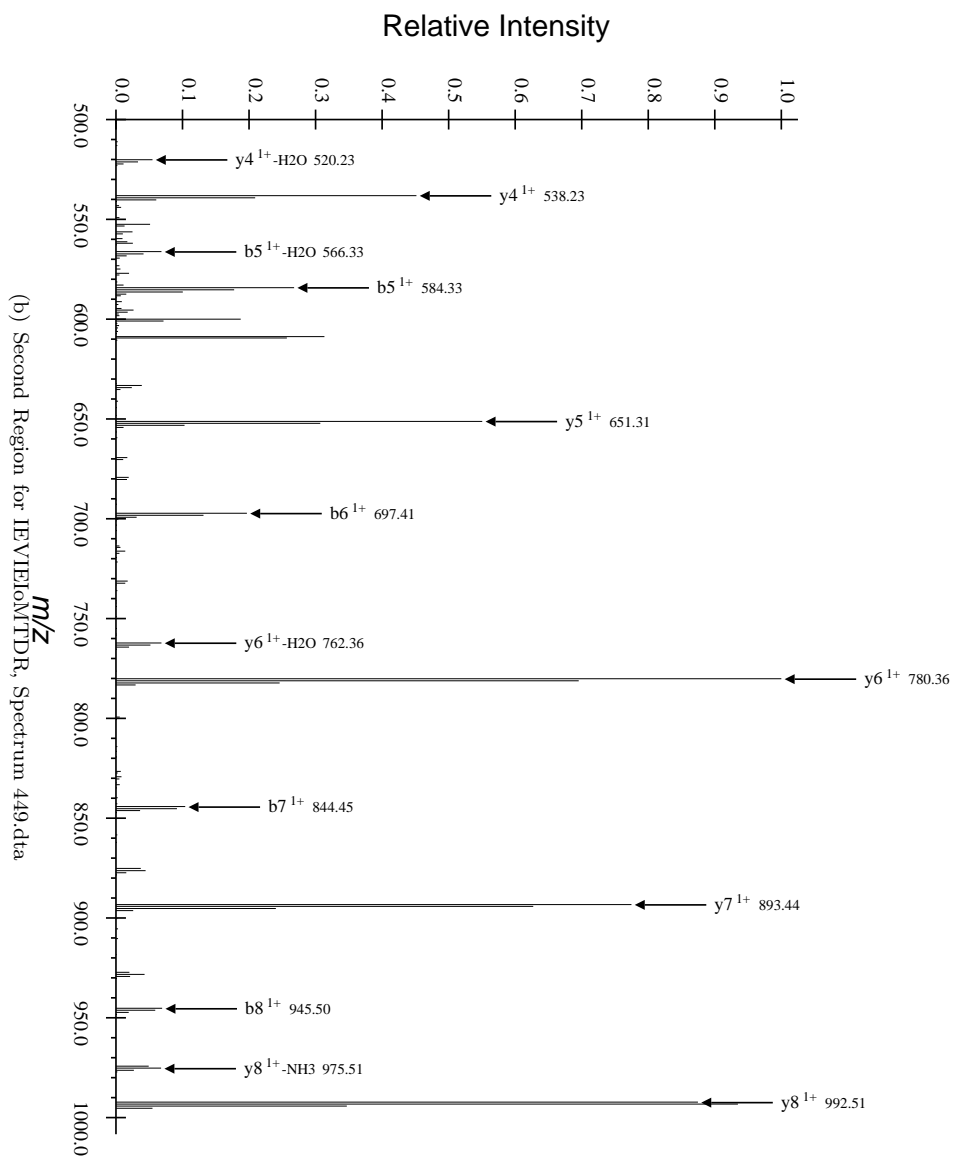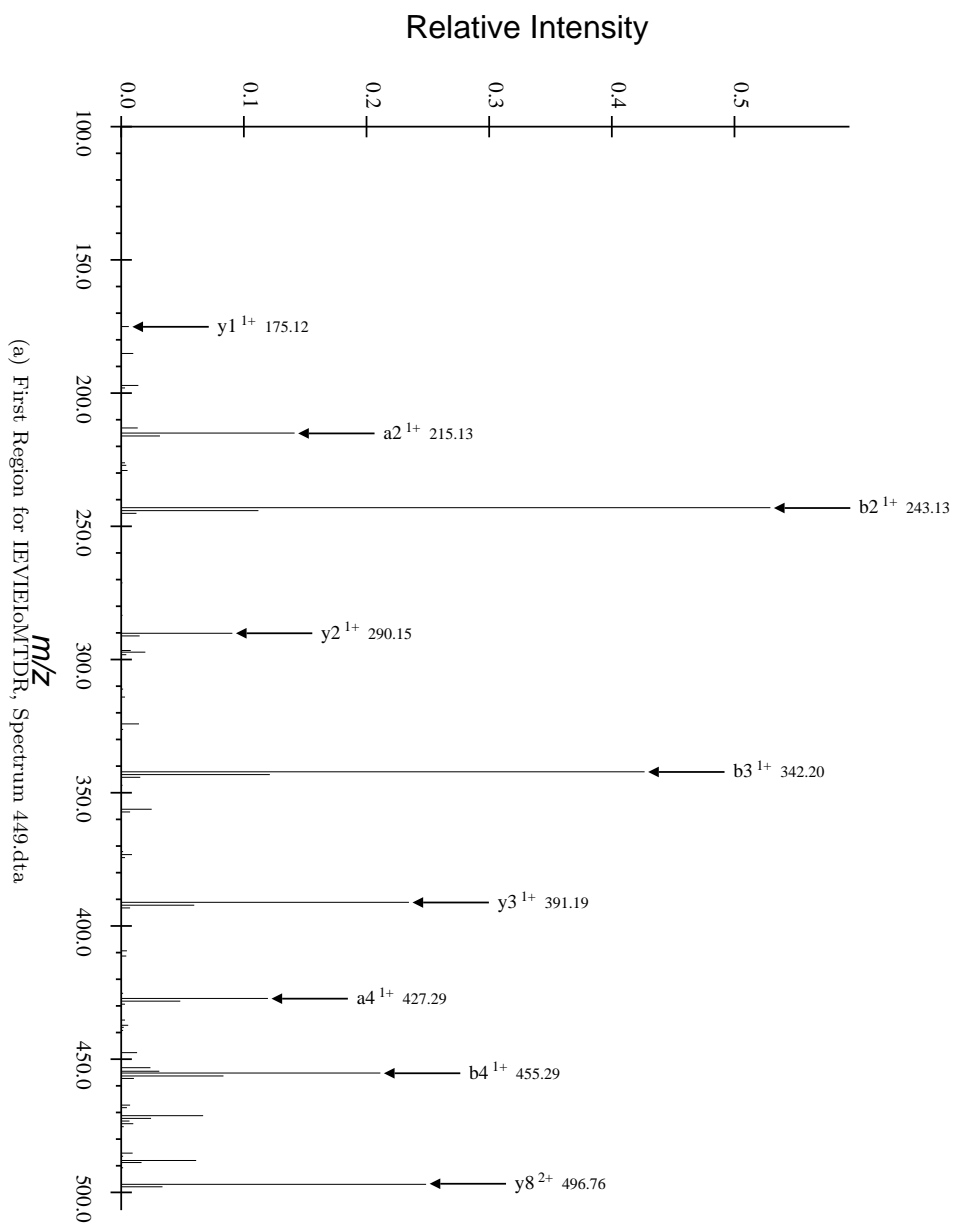

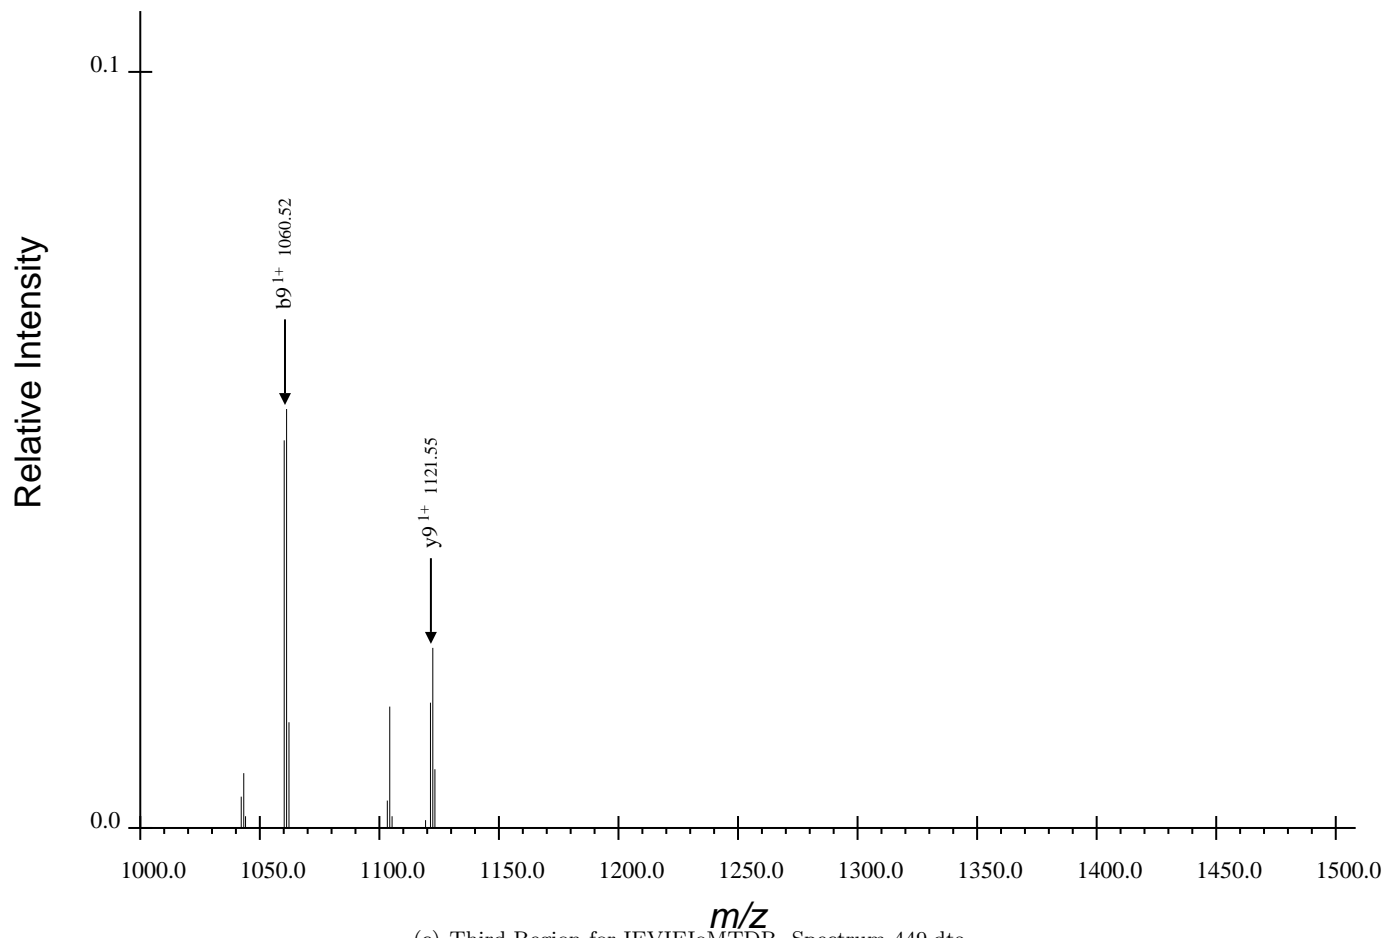

(c) Third Region for IEVIEIoMTDR, Spectrum 449.dta

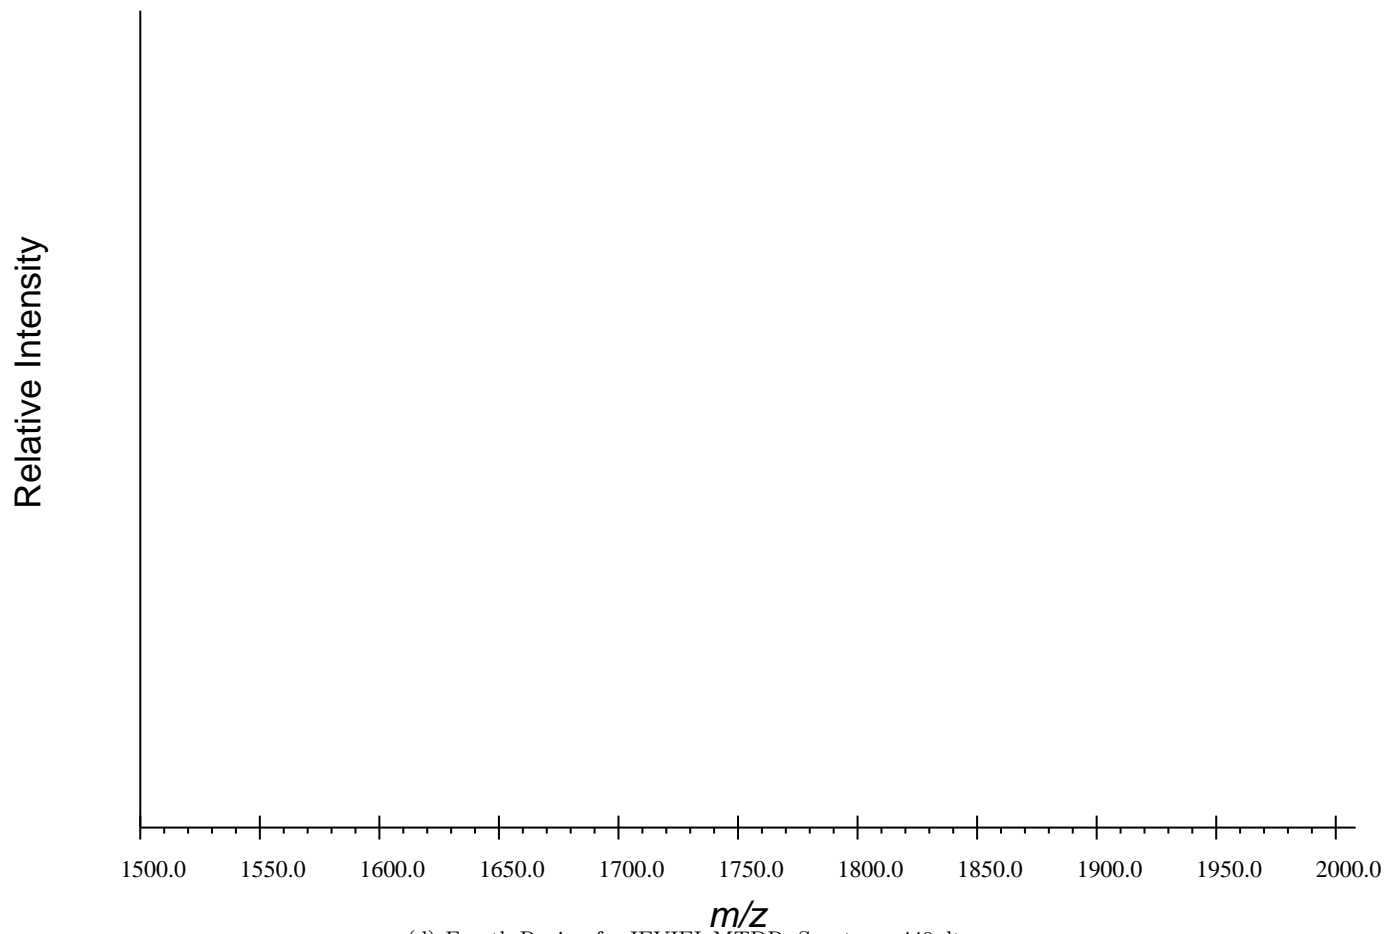

(d) Fourth Region for IEVIEIoMTDR, Spectrum 449.dta

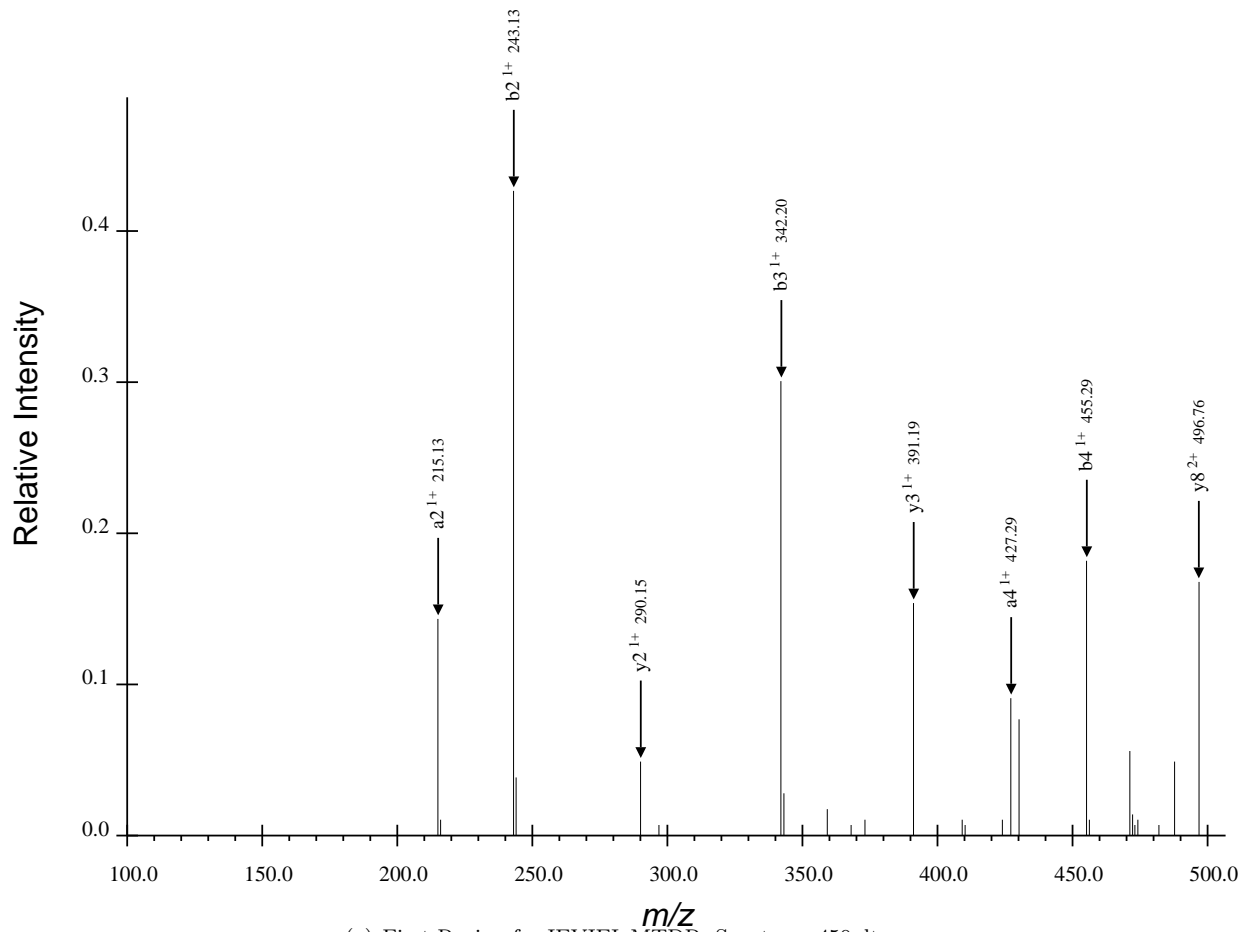

(a) First Region for IEVIEIoMTDR, Spectrum 450.dta

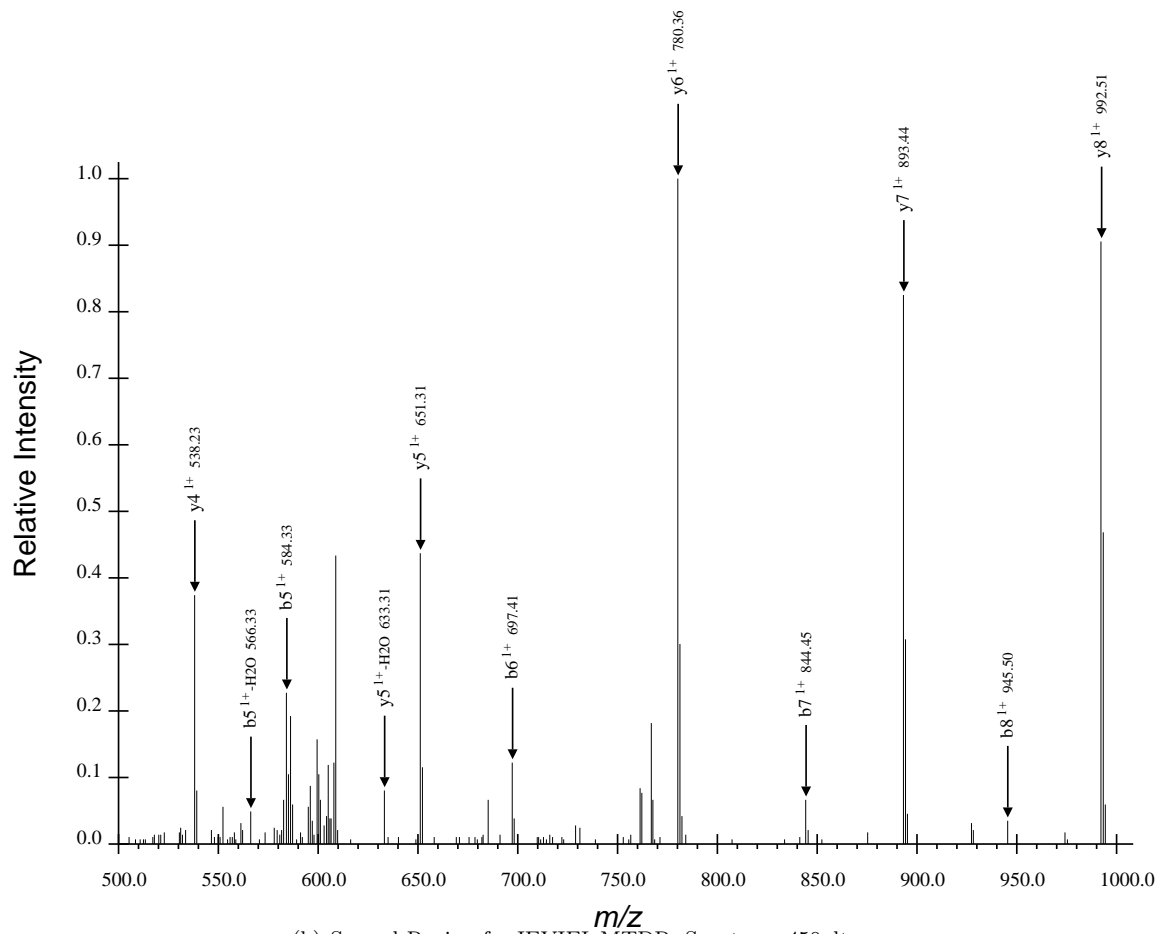

(b) Second Region for IEVIEIoMTDR, Spectrum 450.dta

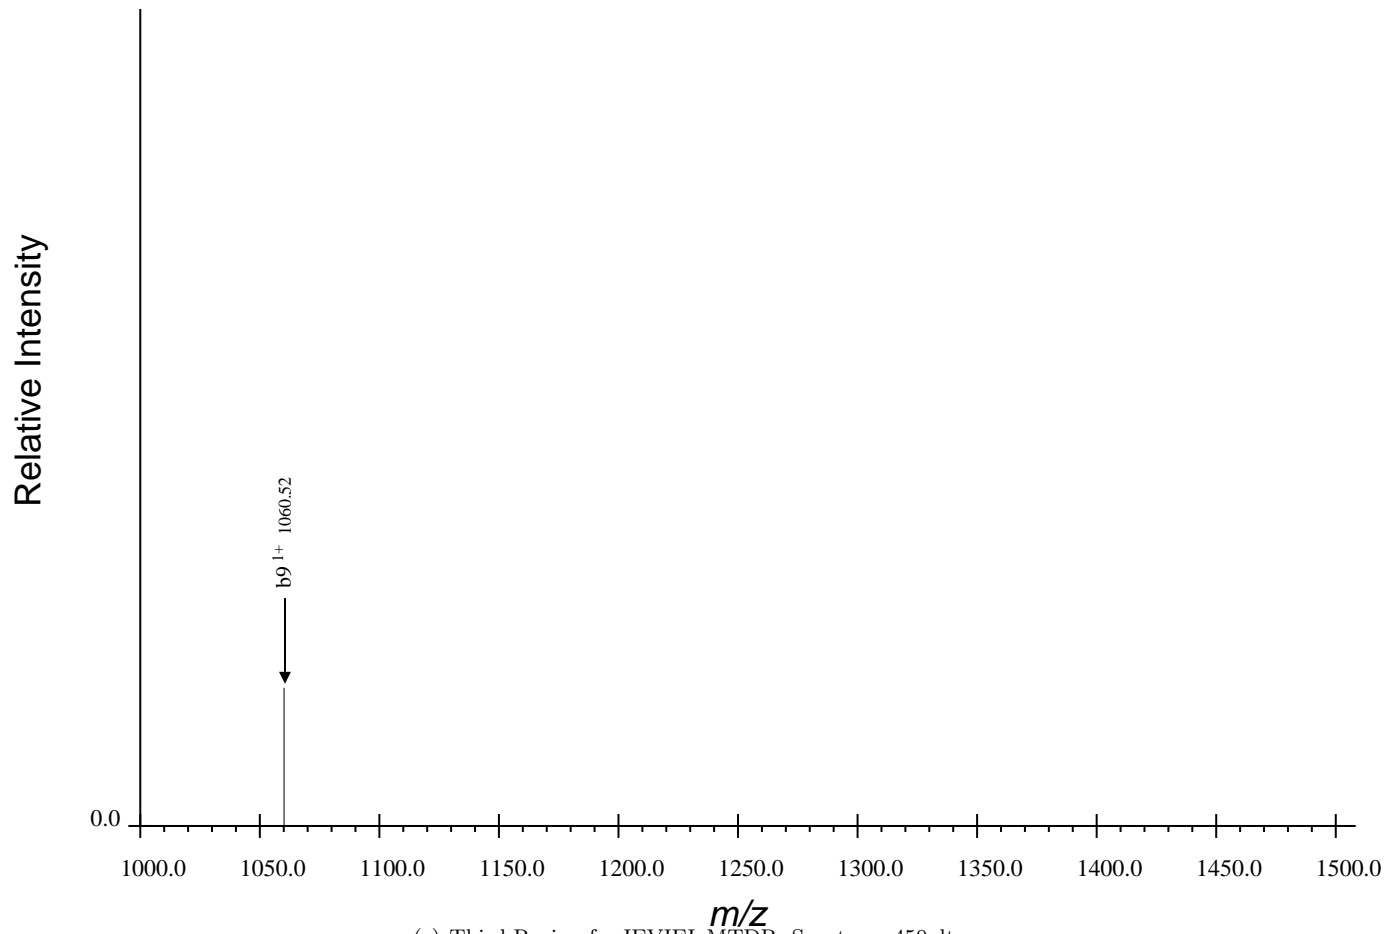

(c) Third Region for IEVIEIoMTDR, Spectrum 450.dta

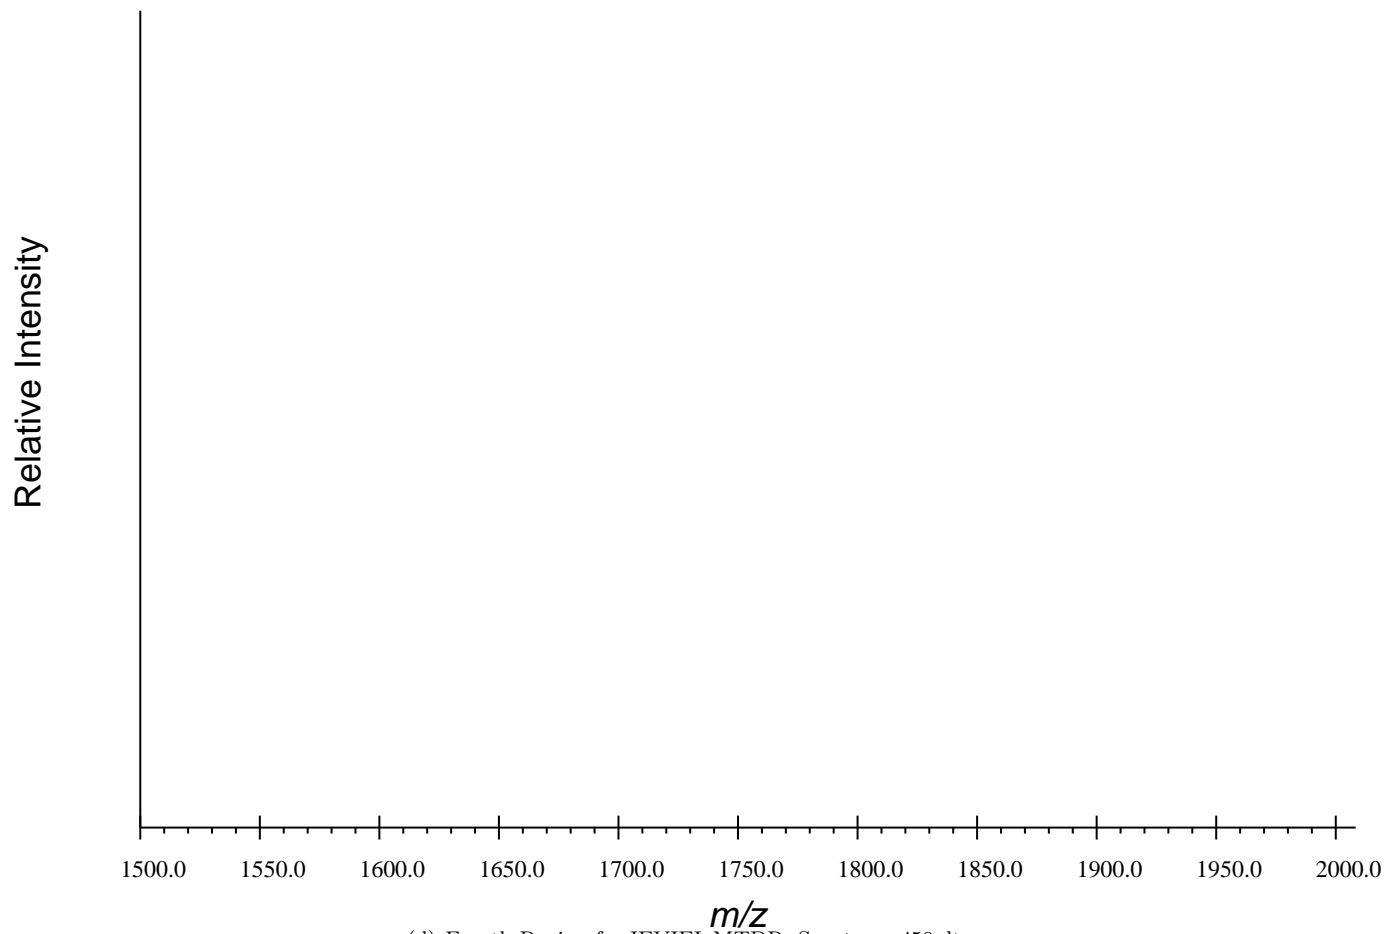

(d) Fourth Region for IEVIEIoMTDR, Spectrum 450.dta

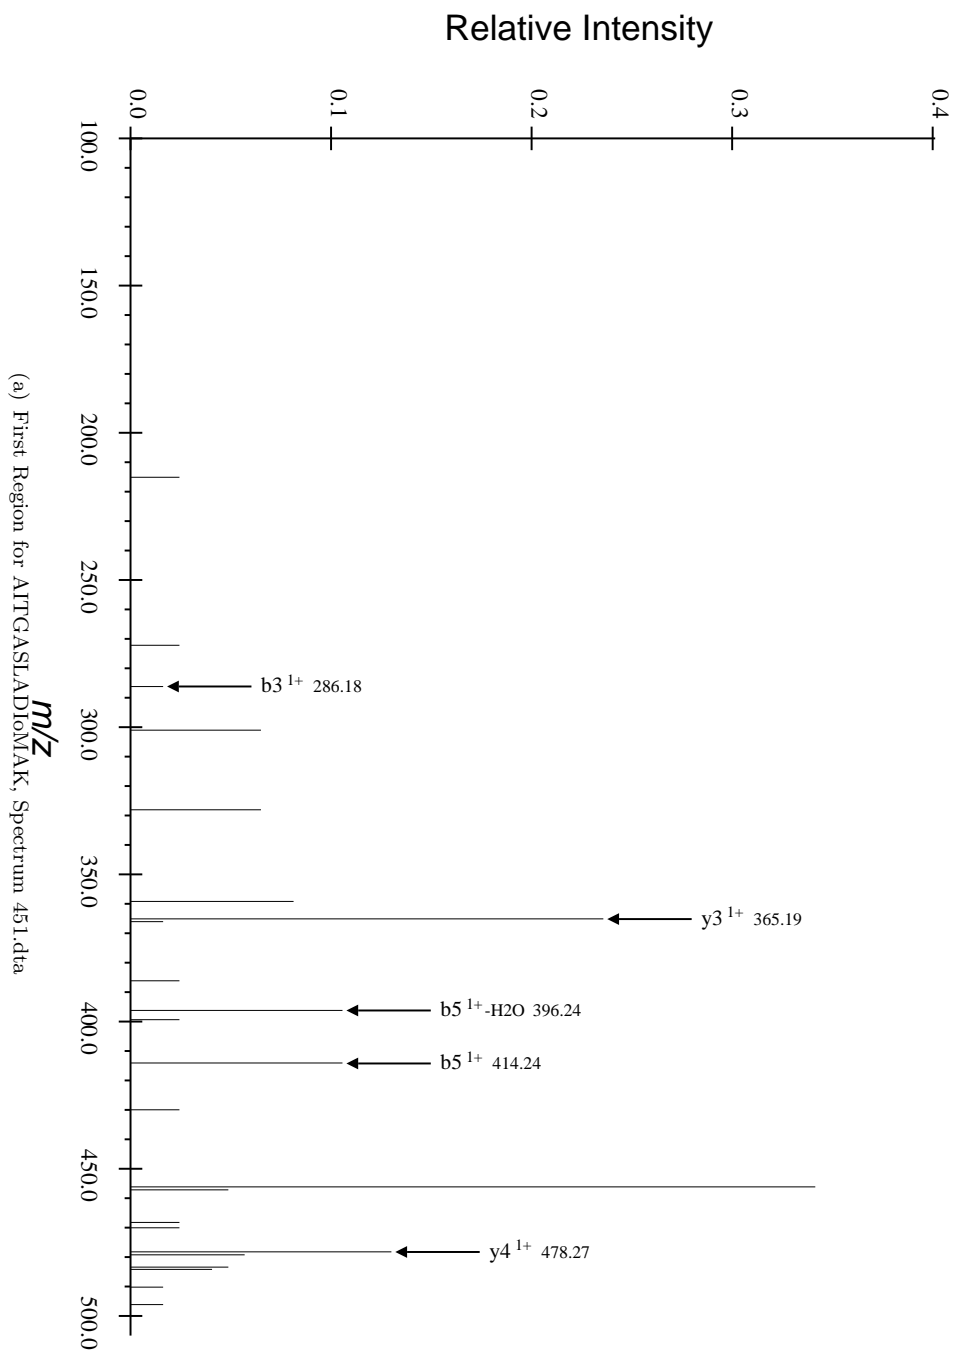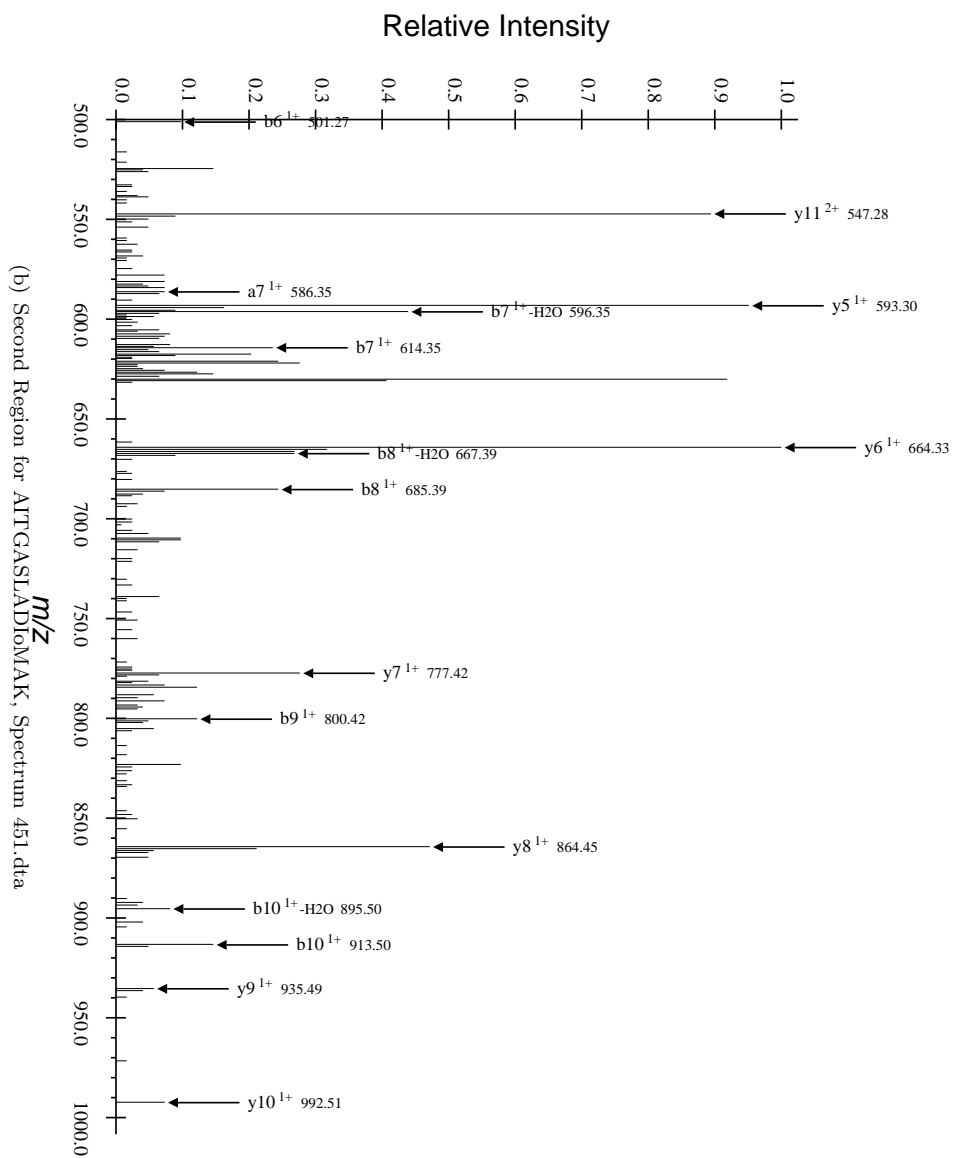



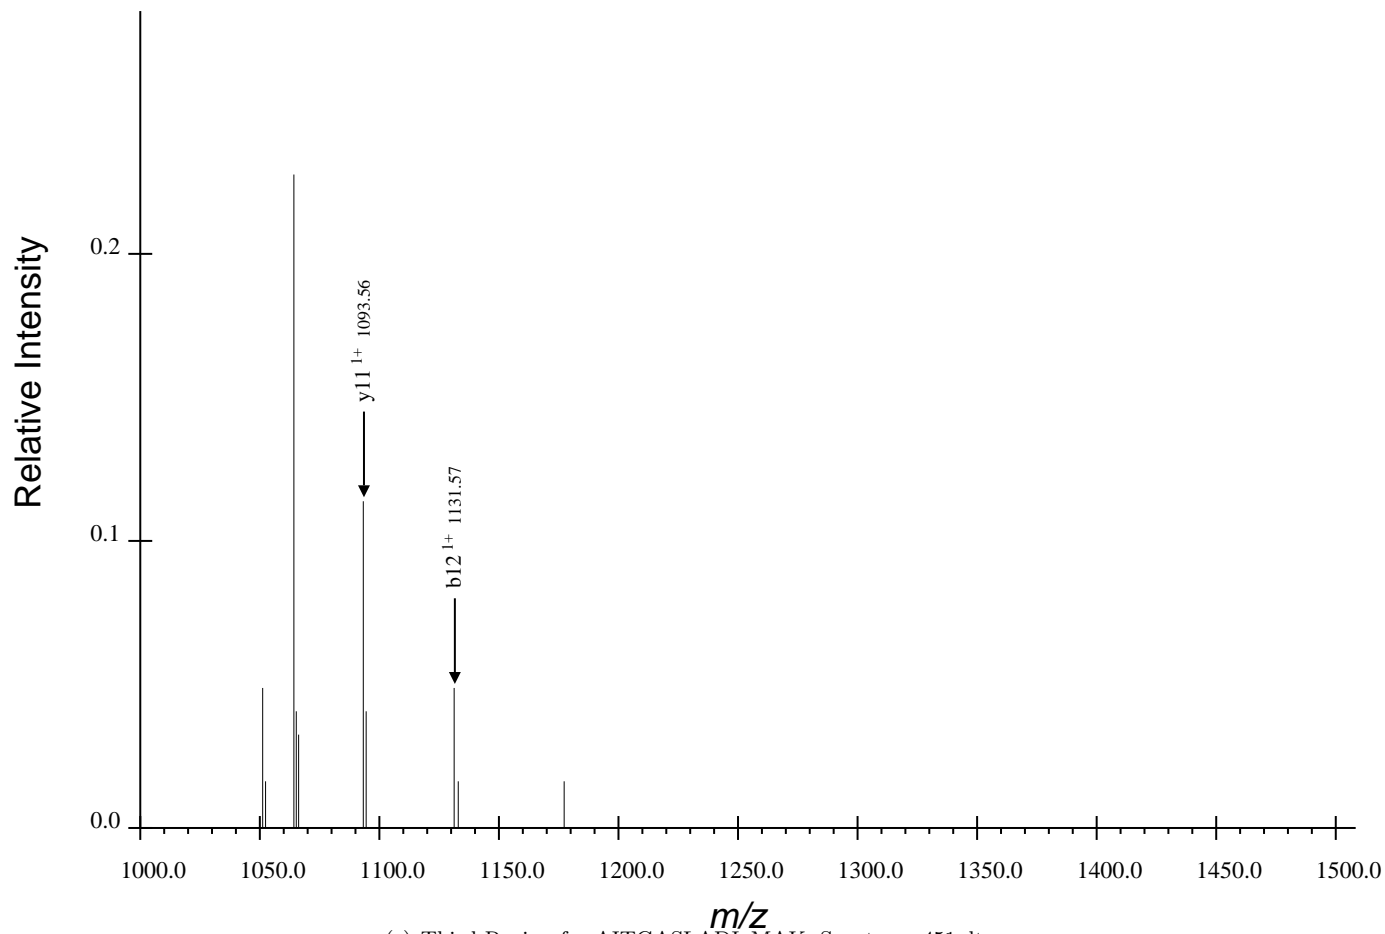

(c) Third Region for AITGASLADIoMAK, Spectrum 451.dta

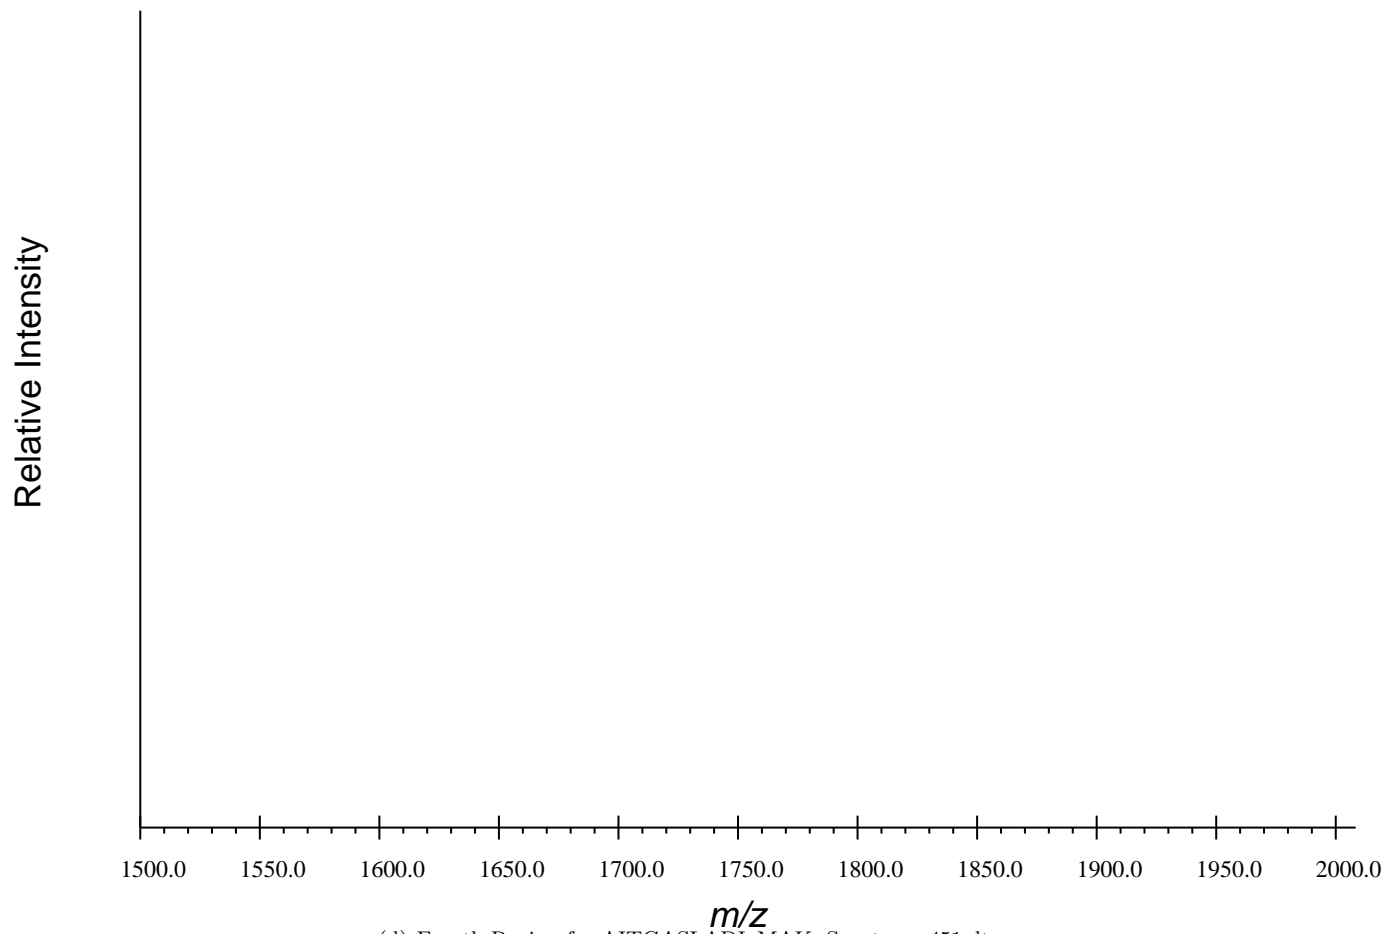

(d) Fourth Region for AITGASLADIoMAK, Spectrum 451.dta

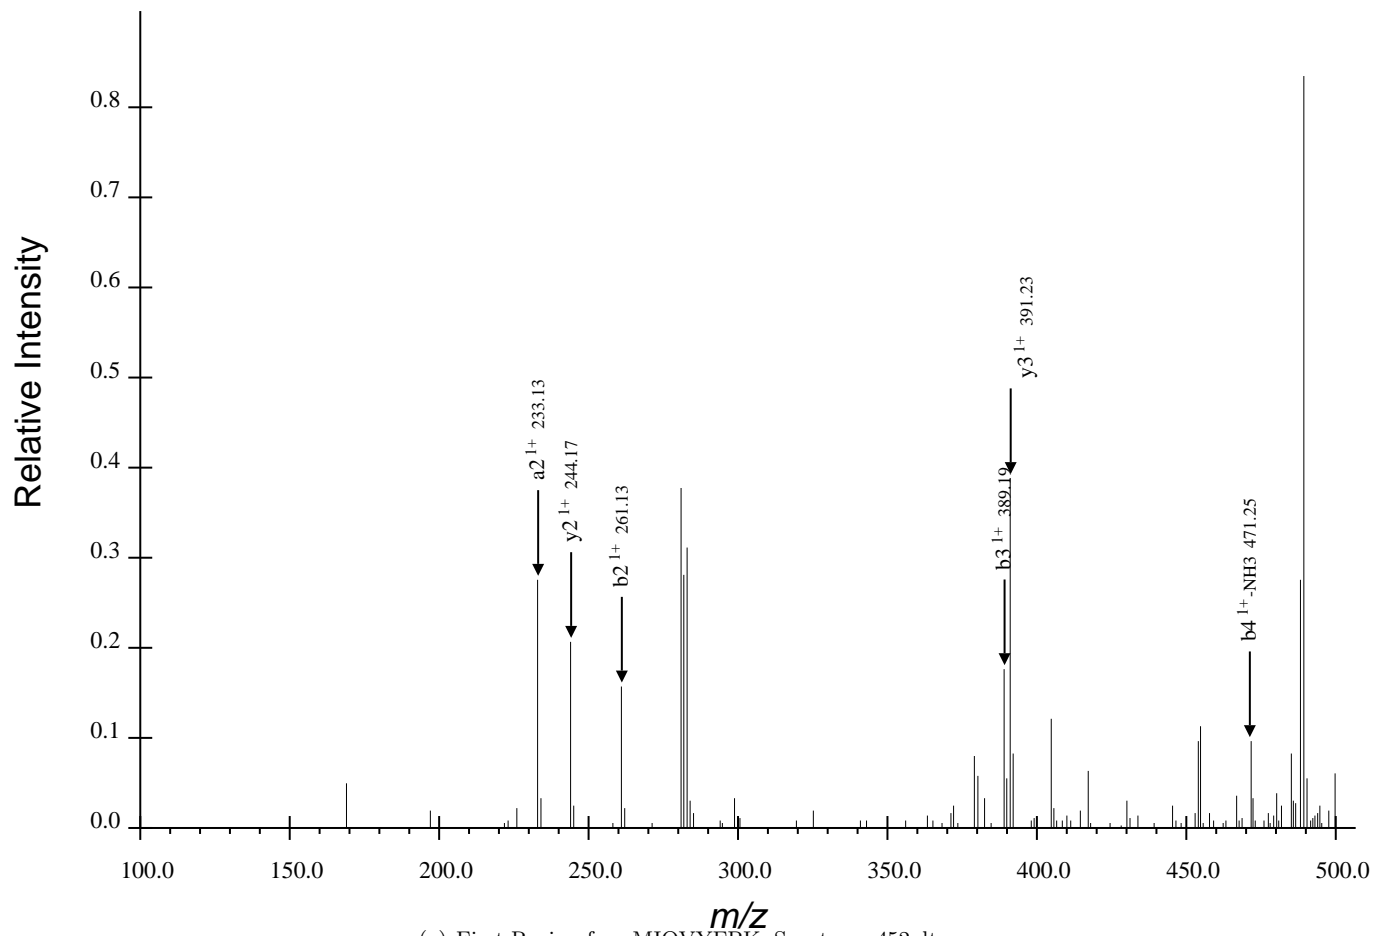

(a) First Region for oMIQVYFPK, Spectrum 452.dta

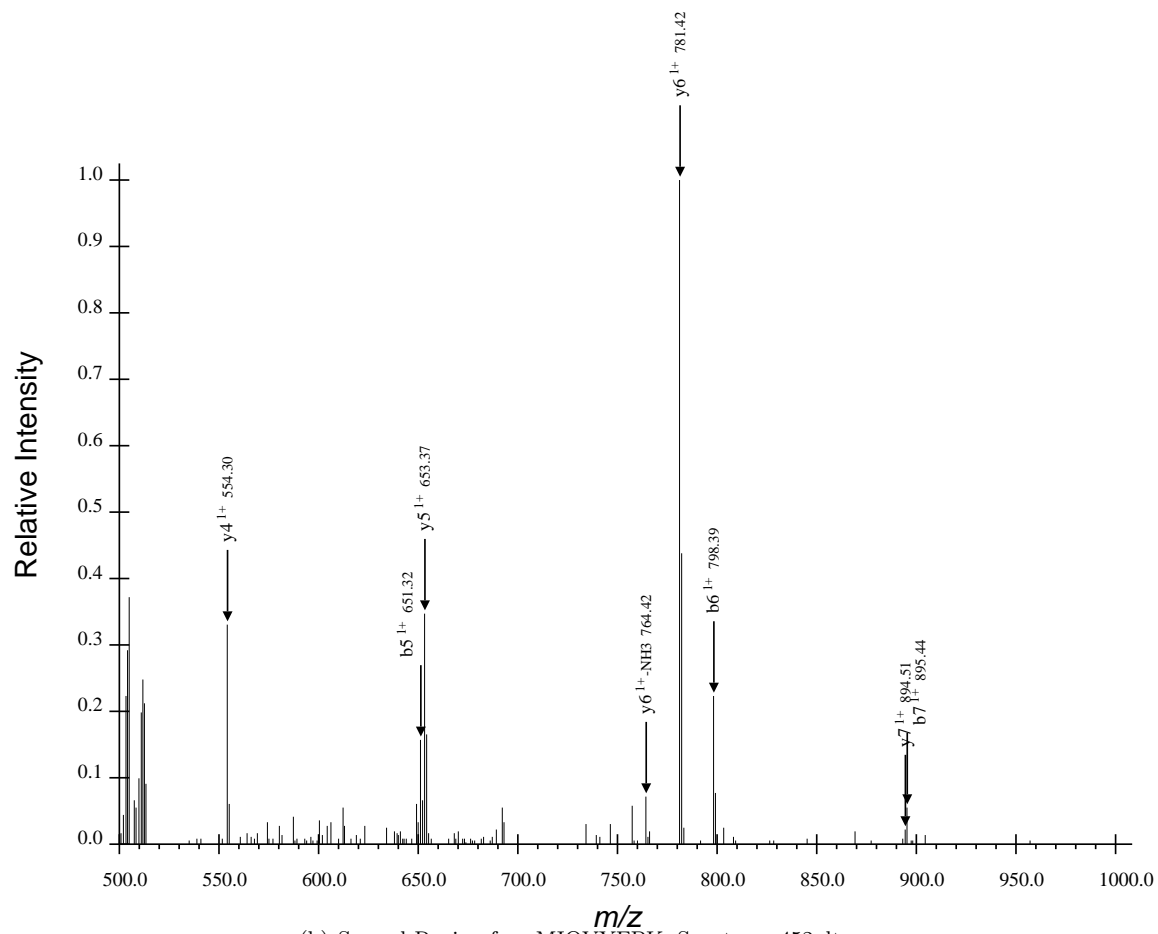

(b) Second Region for oMIQVYFPK, Spectrum 452.dta

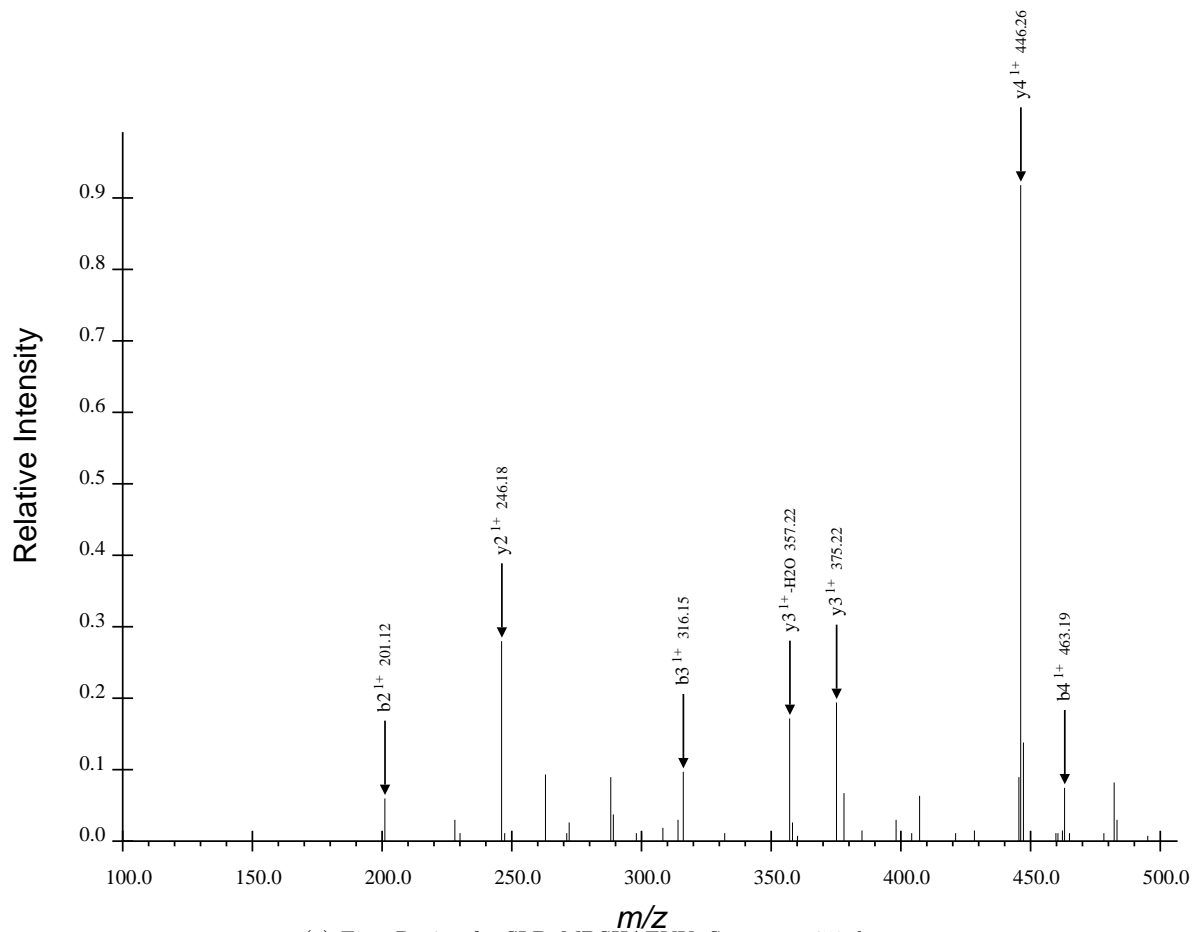

(a) First Region for SLDoMDSIIAEVK, Spectrum 453.dta

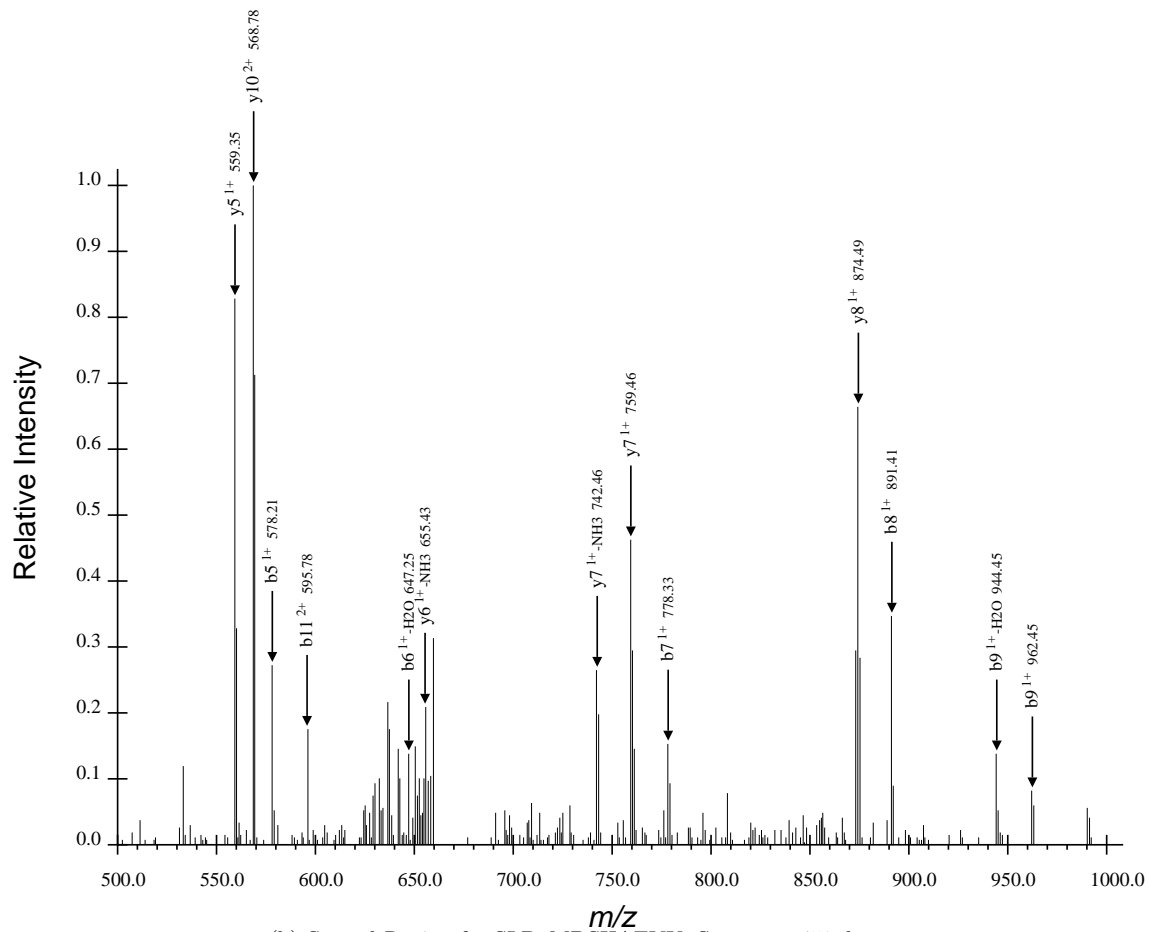

(b) Second Region for SLDoMDSIIAEVK, Spectrum 453.dta

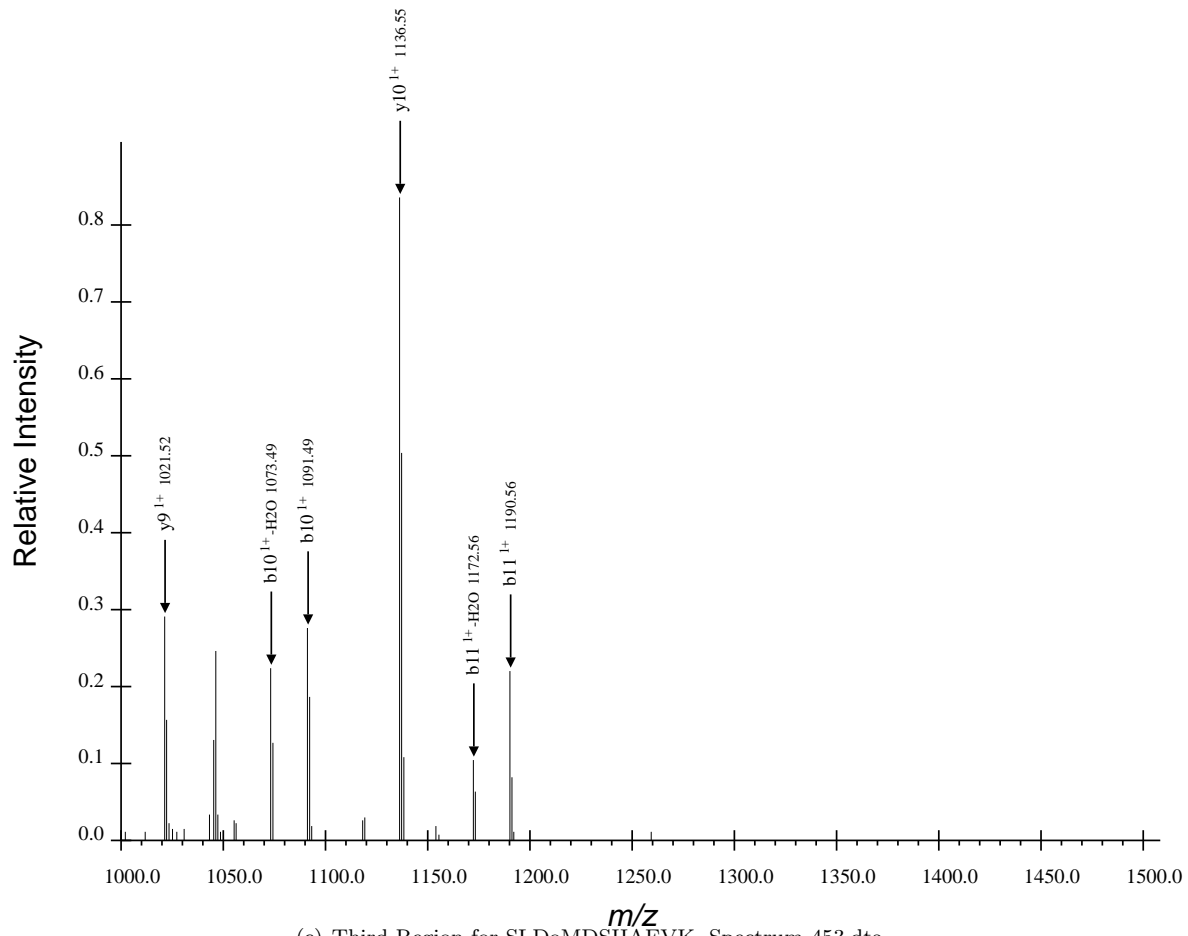

(c) Third Region for SLDoMDSIIAEVK, Spectrum 453.dta

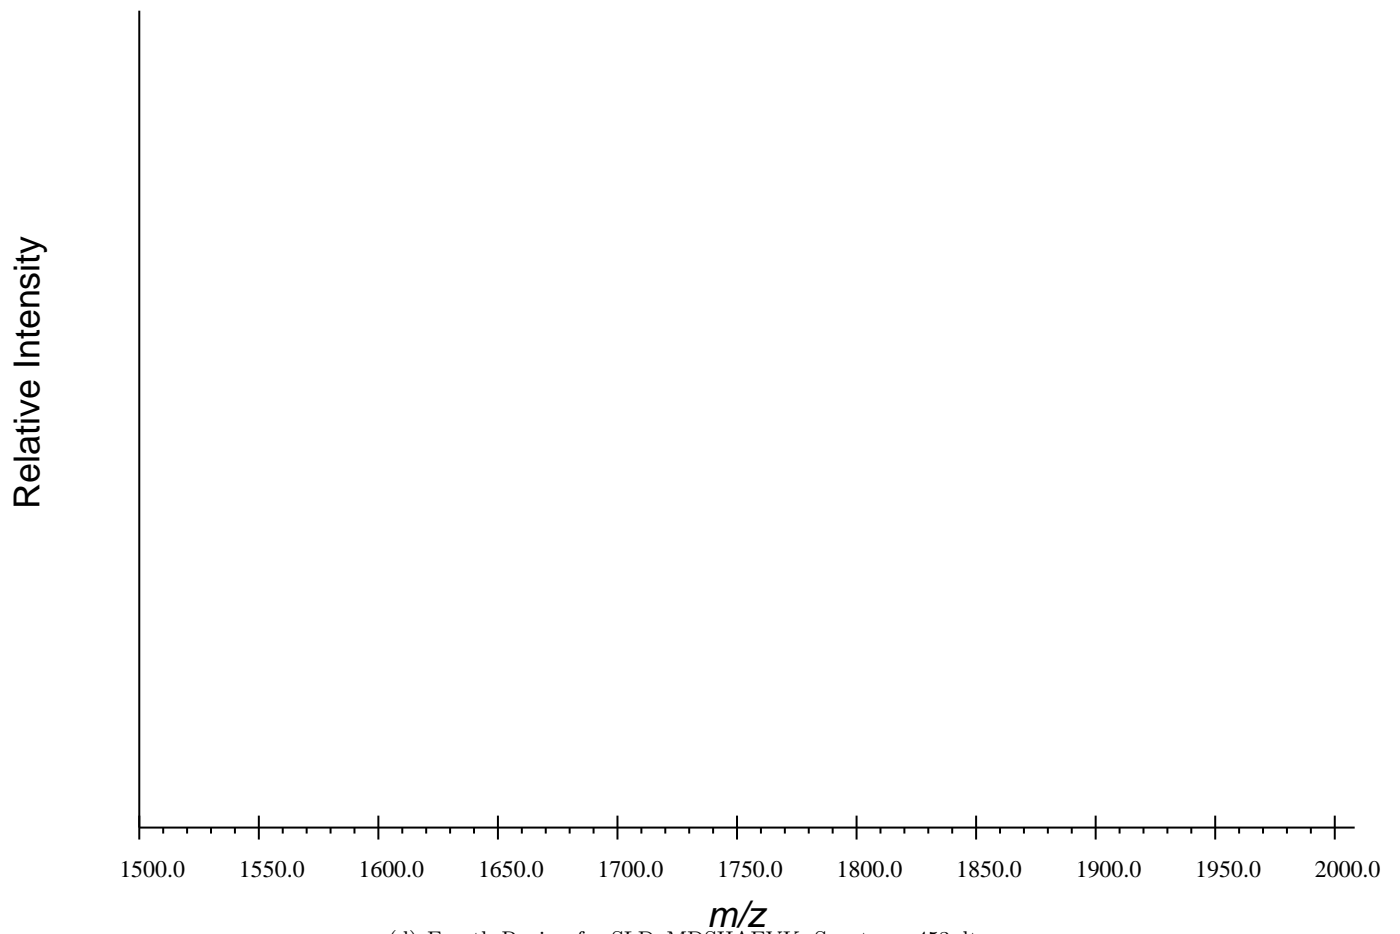

(d) Fourth Region for SLDoMDSIIAEVK, Spectrum 453.dta

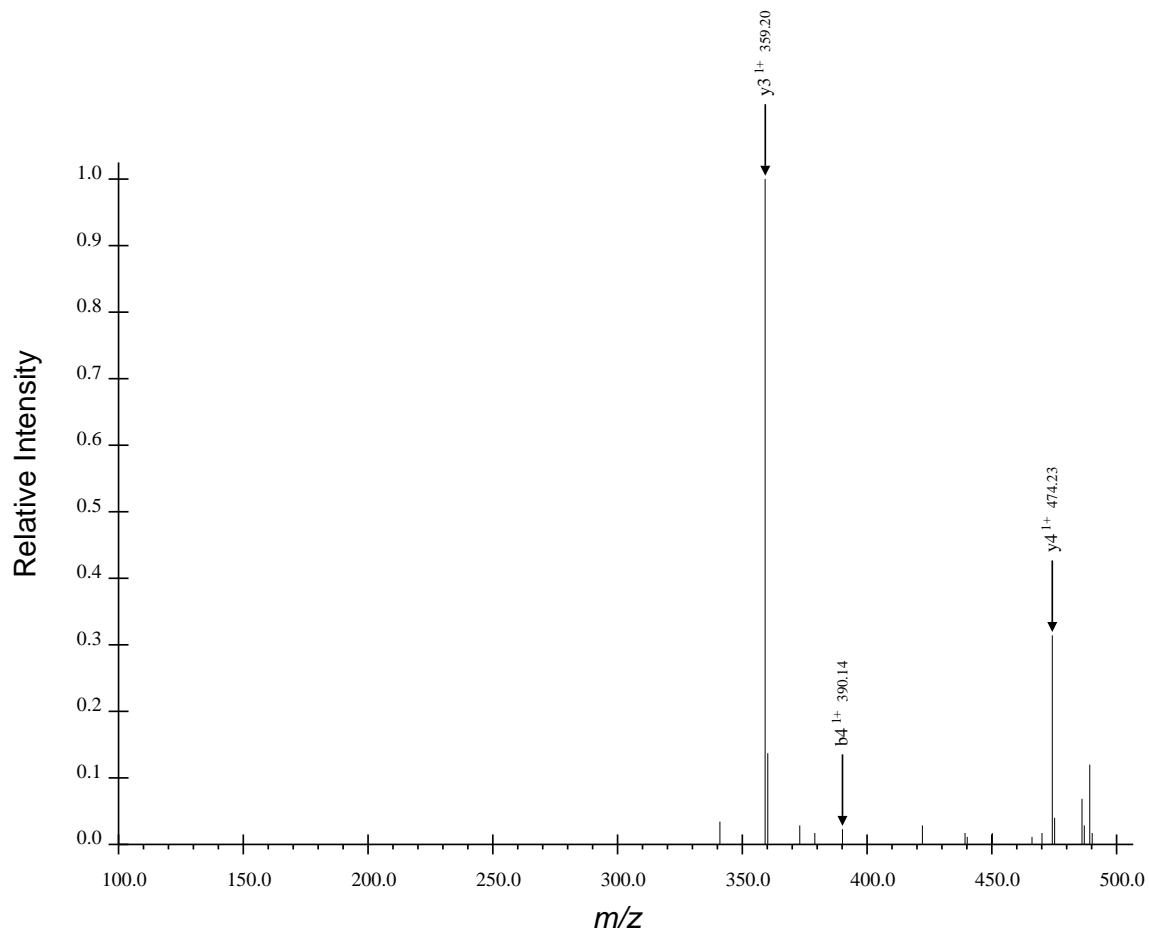

(a) First Region for AoMGNLQIDFADPSR, Spectrum 454.dta

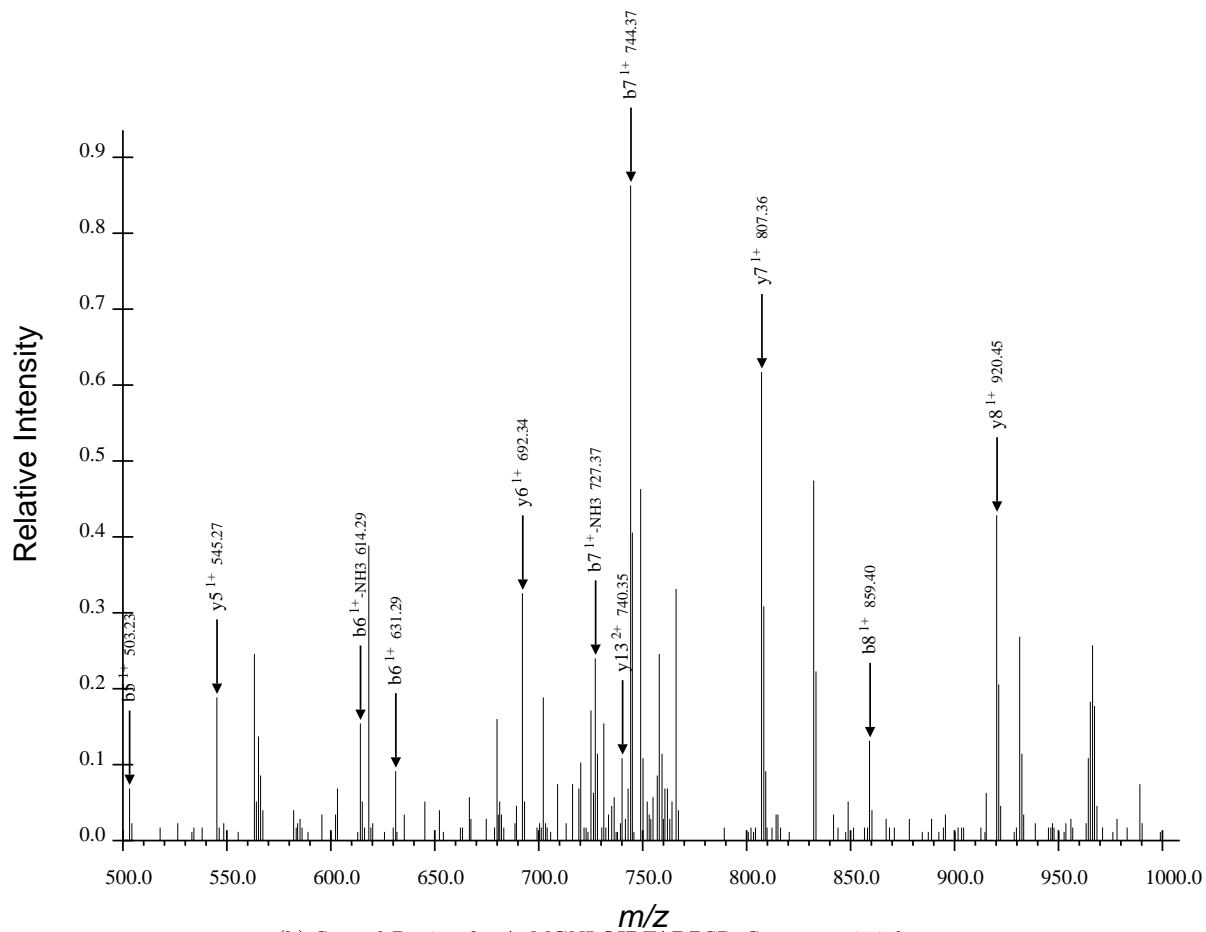

(b) Second Region for AoMGNLQIDFADPSR, Spectrum 454.dta

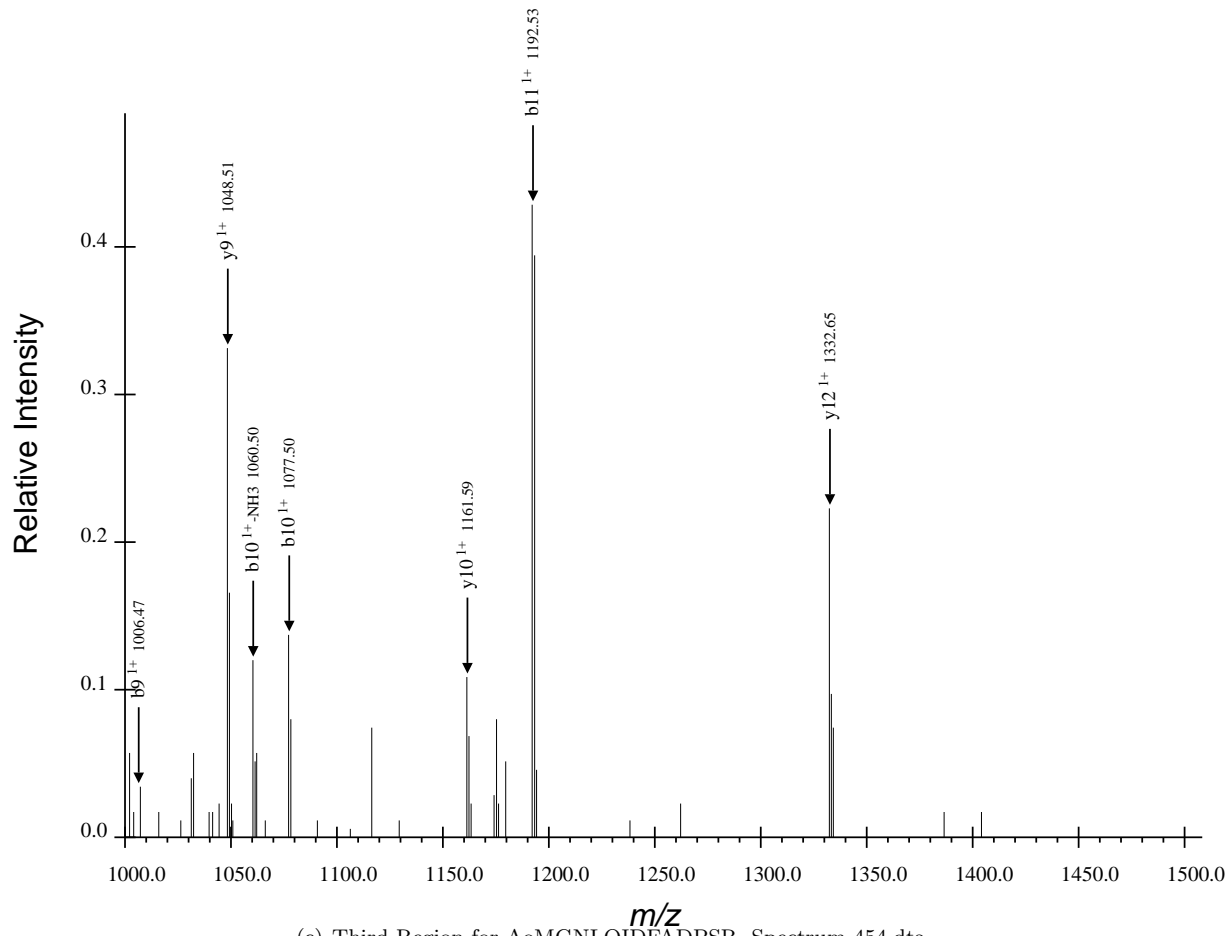

(c) Third Region for AoMGNLQIDFADPSR, Spectrum 454.dta

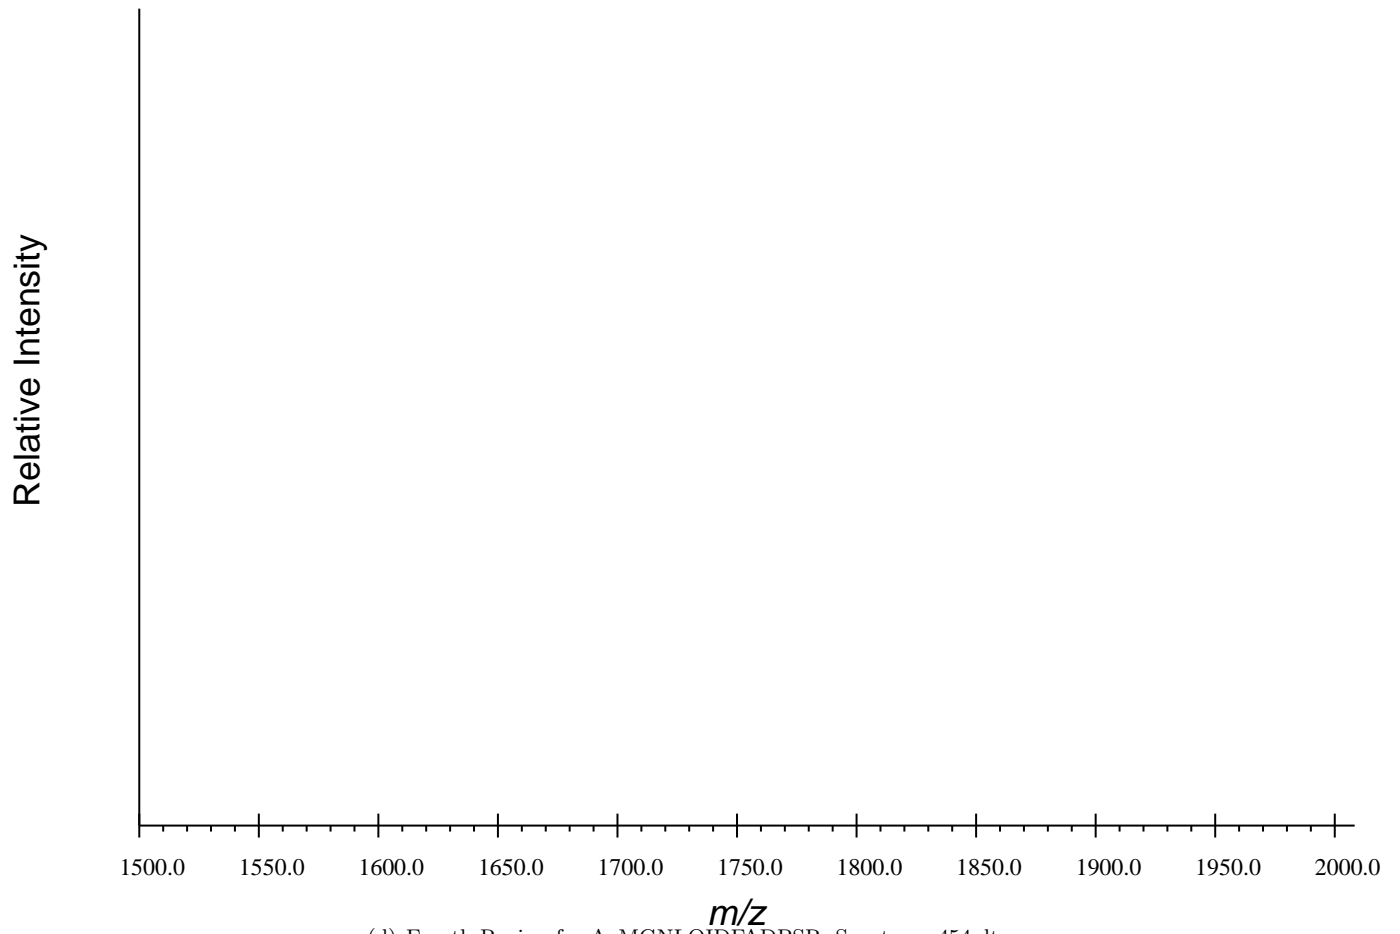

(d) Fourth Region for AoMGNLQIDFADPSR, Spectrum 454.dta

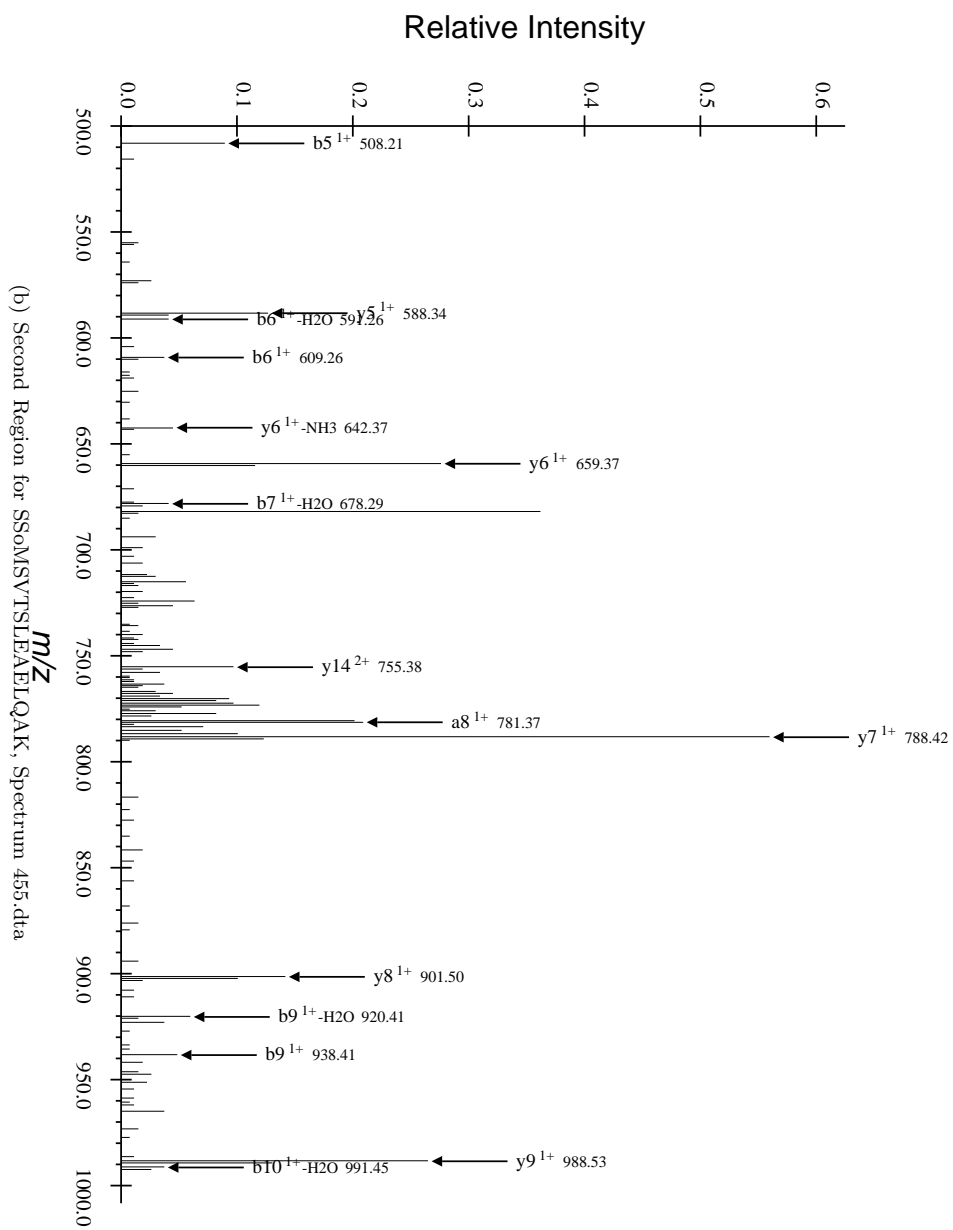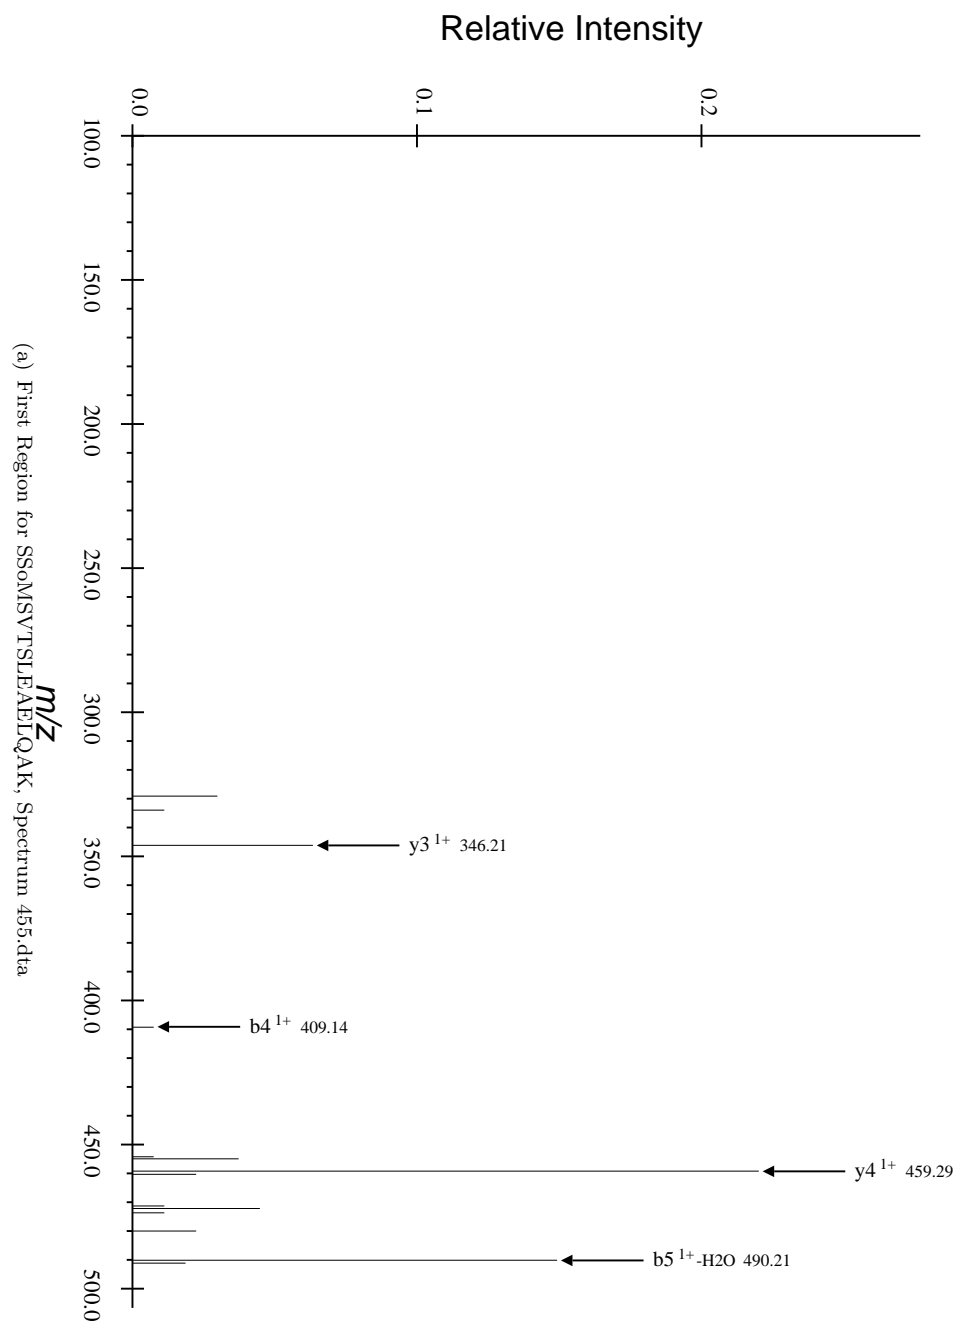

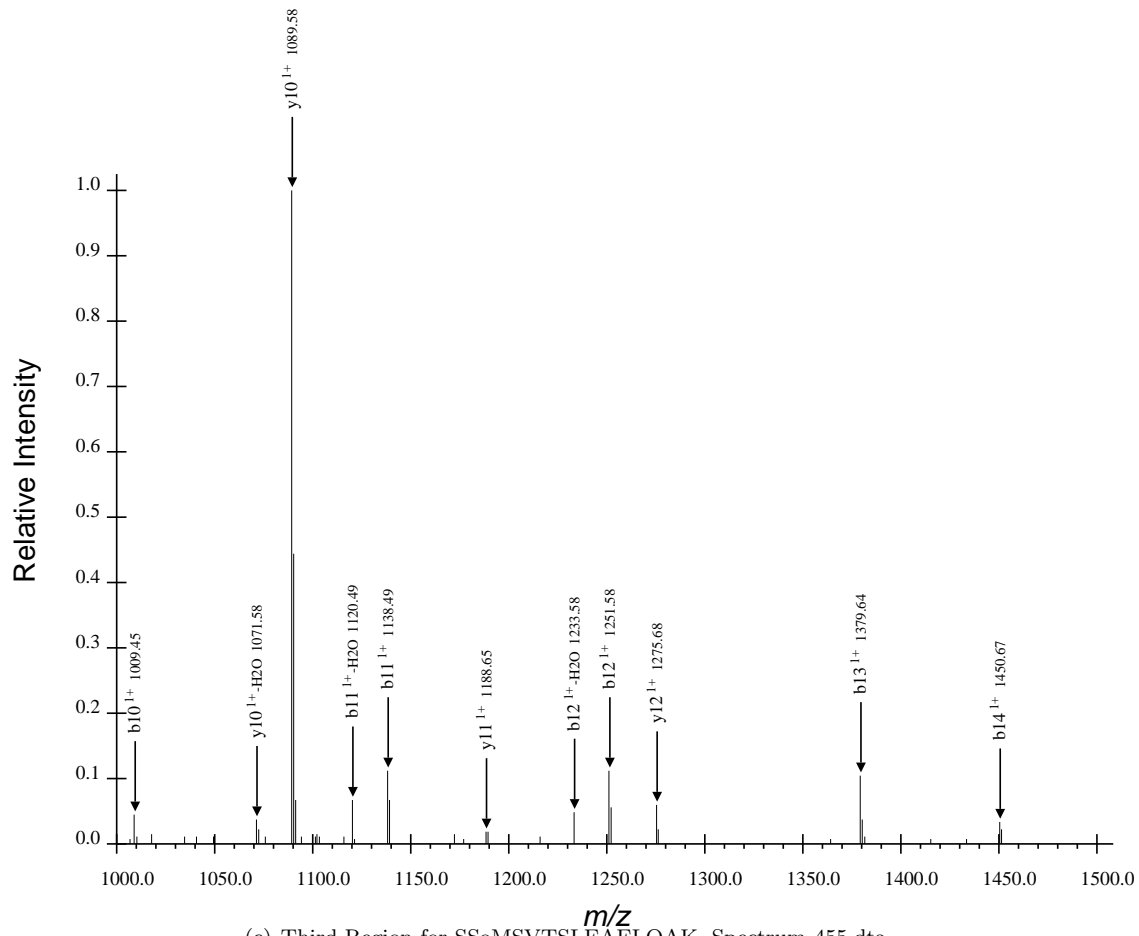

(c) Third Region for SSoMSVTSLEAELQAK, Spectrum 455.dta

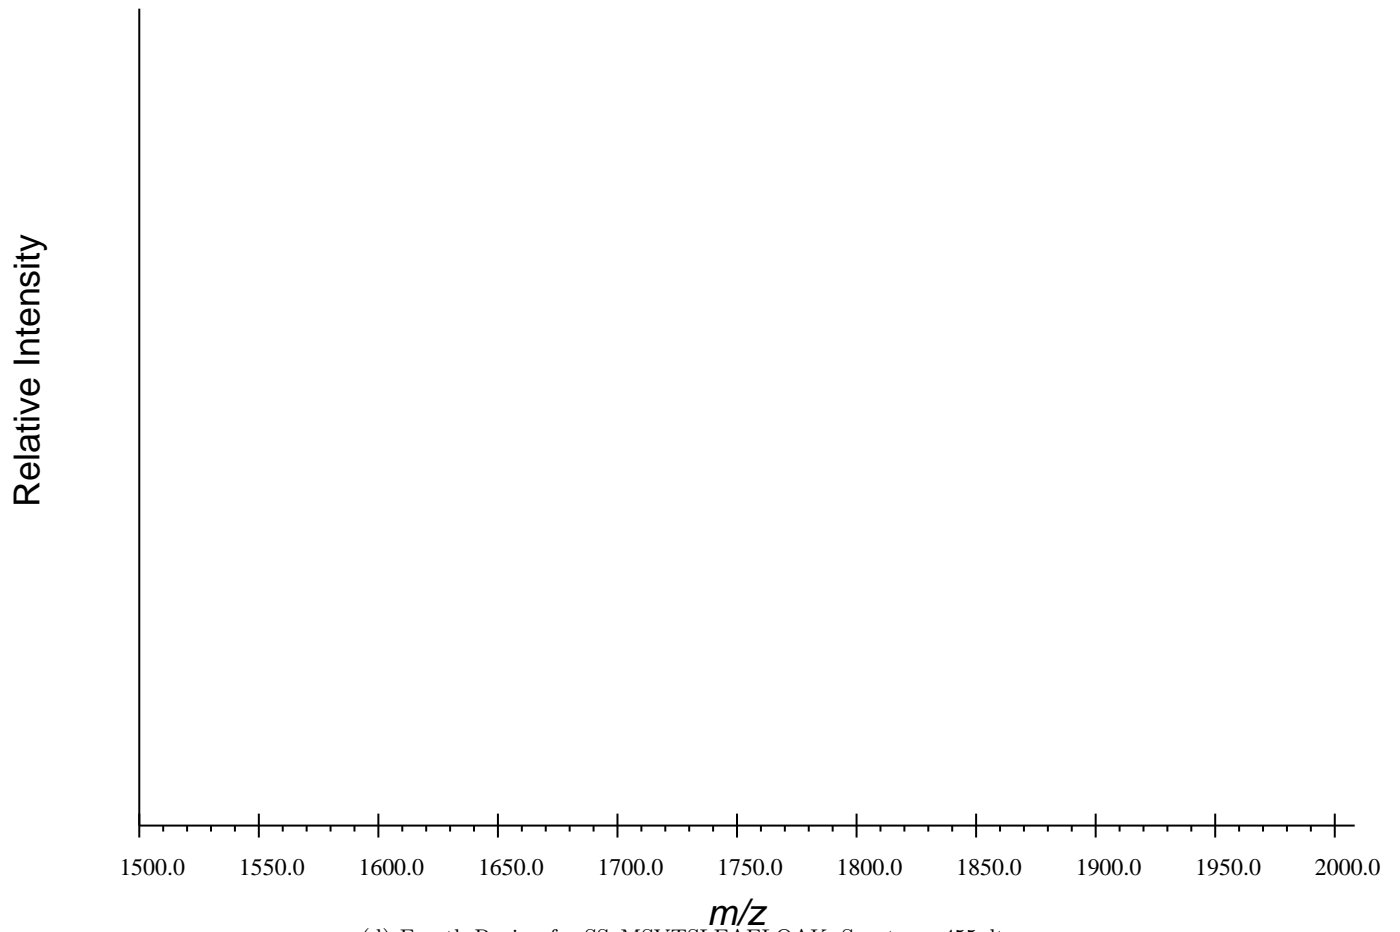

(d) Fourth Region for SSoMSVTSLEAELQAK, Spectrum 455.dta



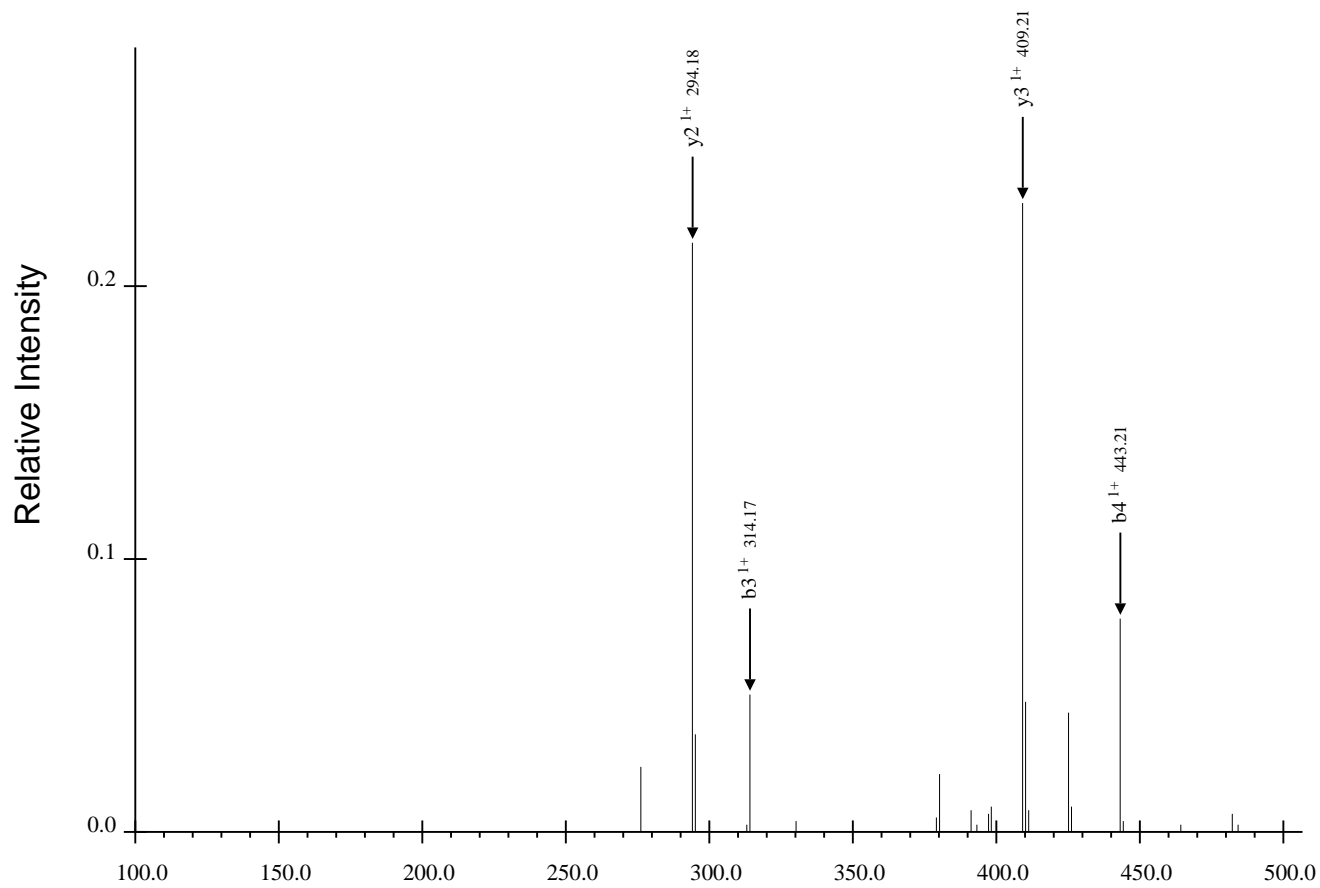

(a) First Region for LEAELGNoMQGLVEDFK, Spectrum 456.dta

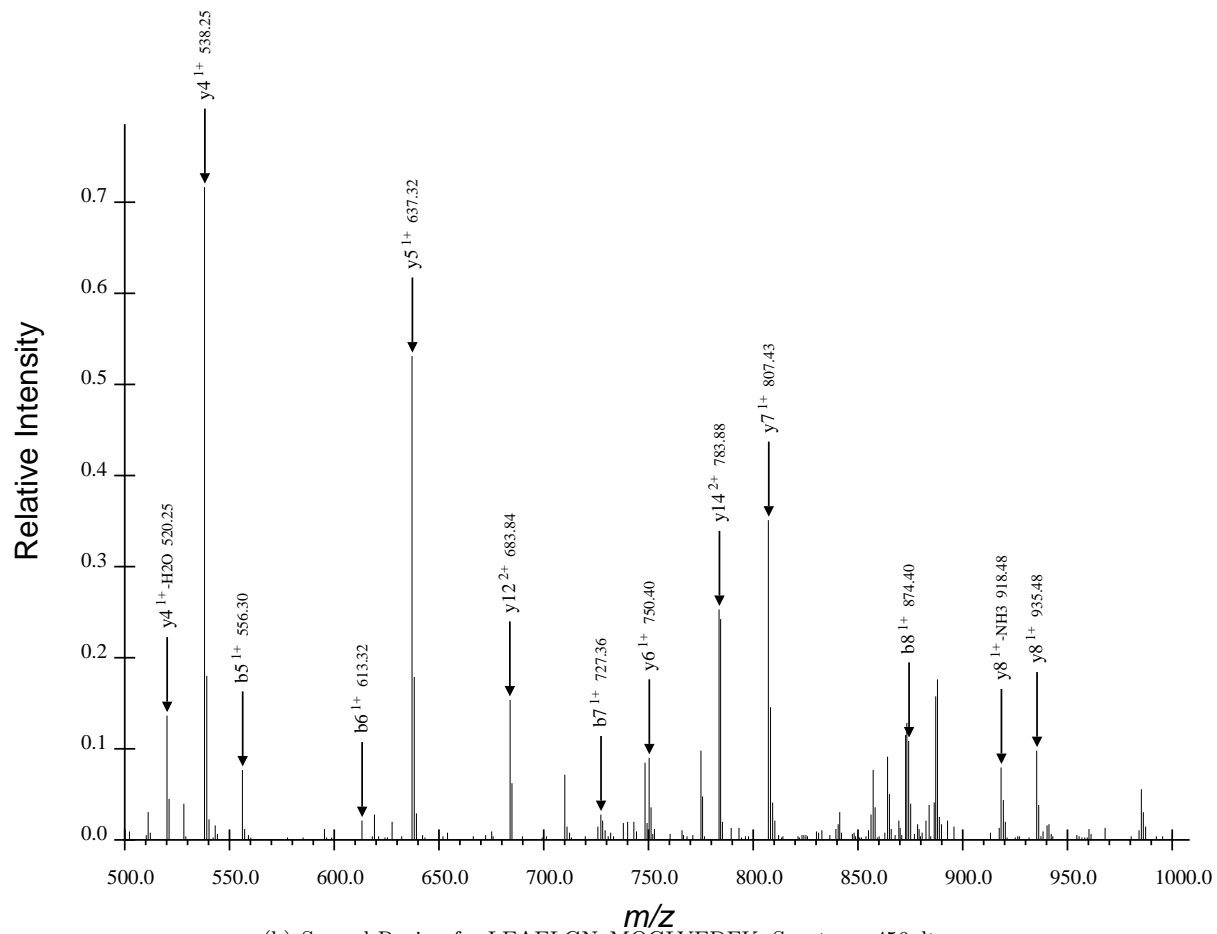

(b) Second Region for LEAELGNoMQGLVEDFK, Spectrum 456.dta

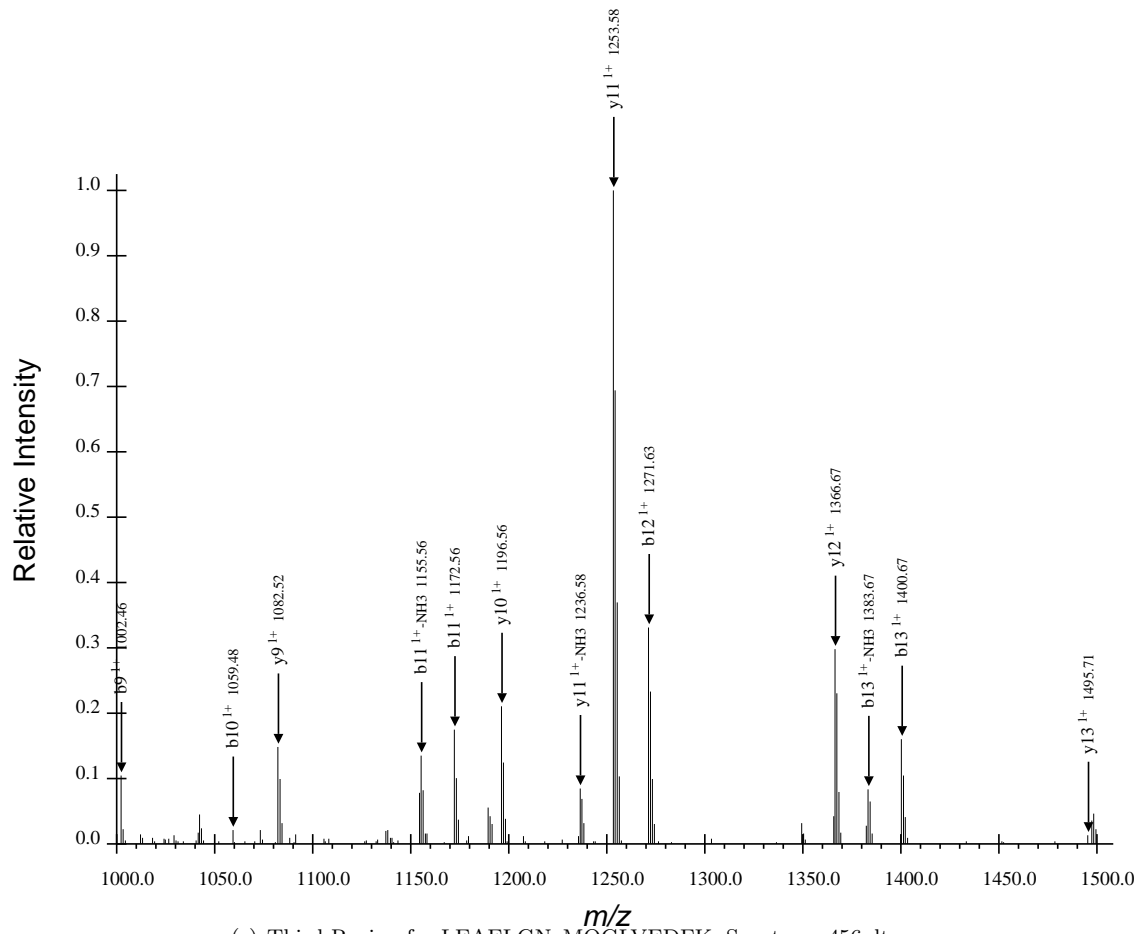

(c) Third Region for LEAELGNoMQGLVEDFK, Spectrum 456.dta

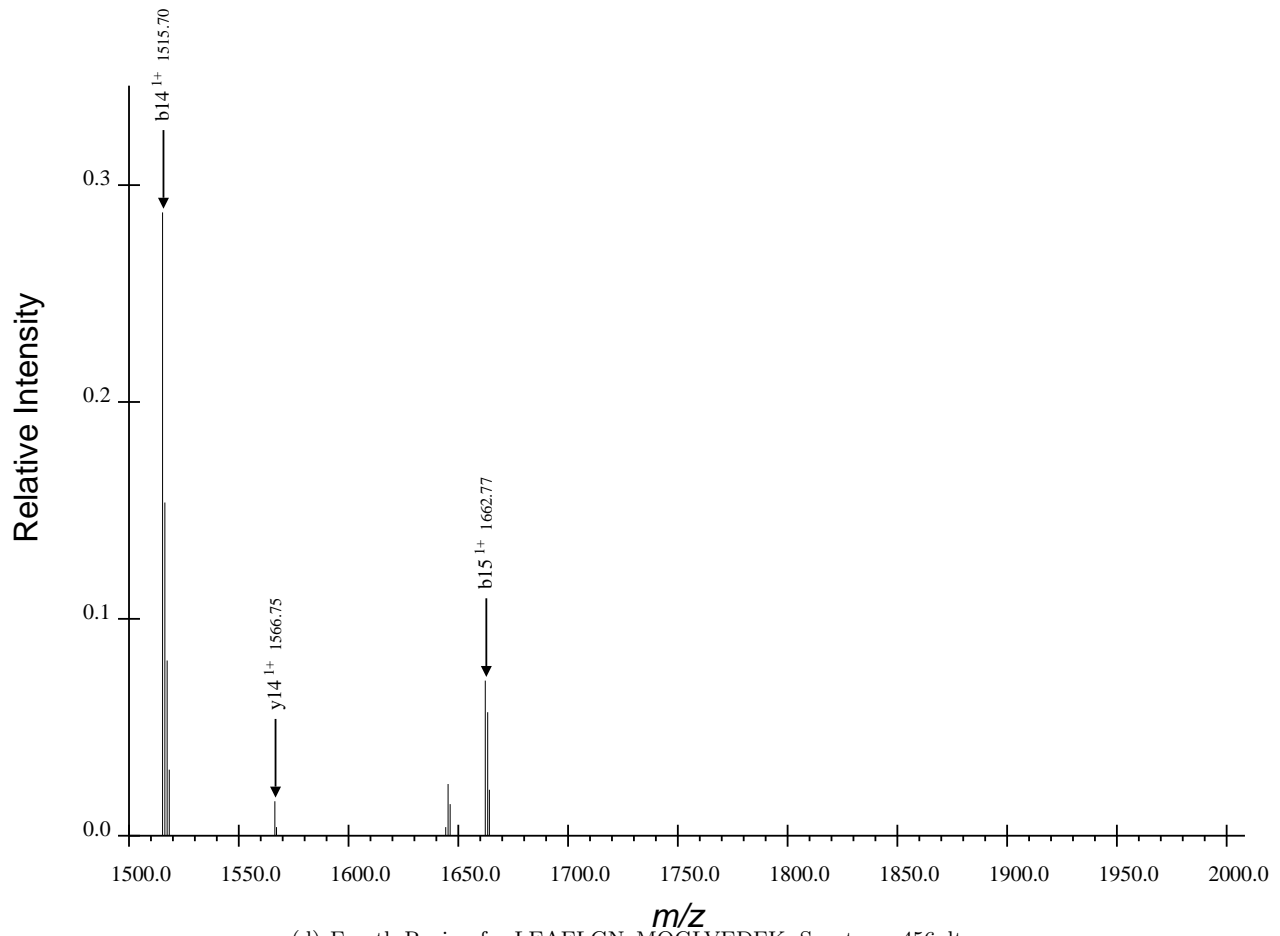

(d) Fourth Region for LEAELGNoMQGLVEDFK, Spectrum 456.dta

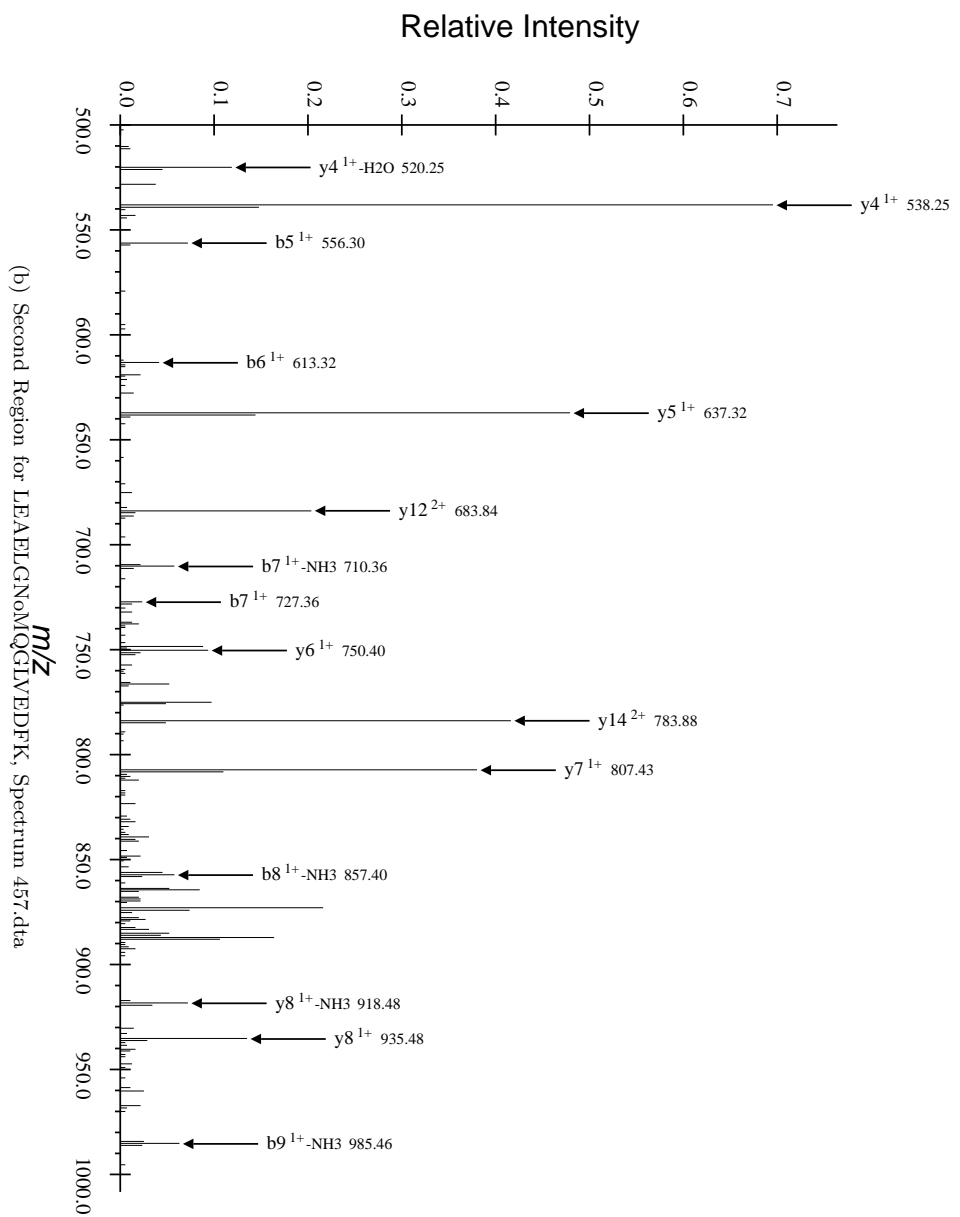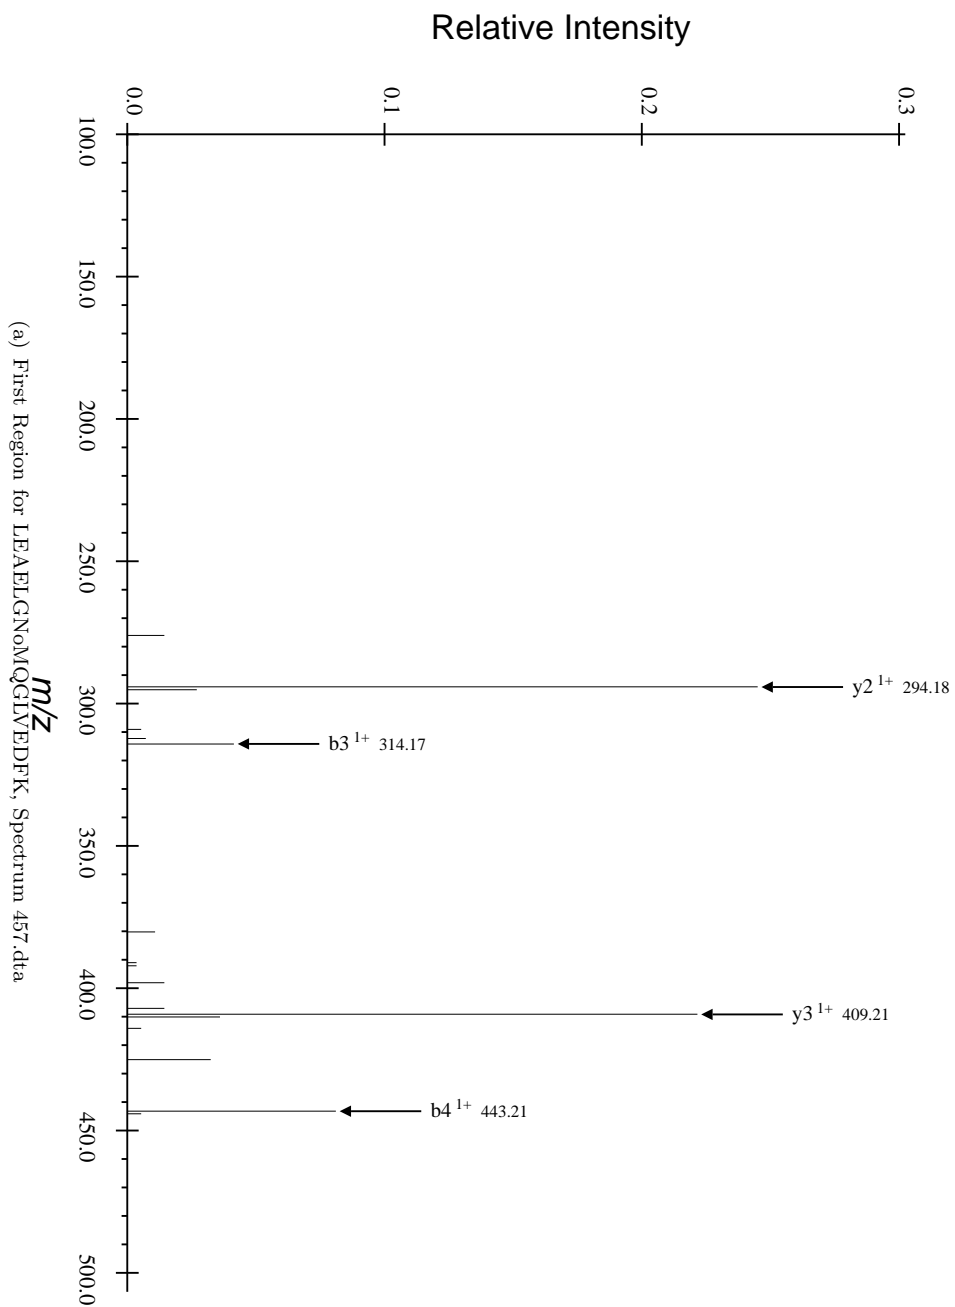

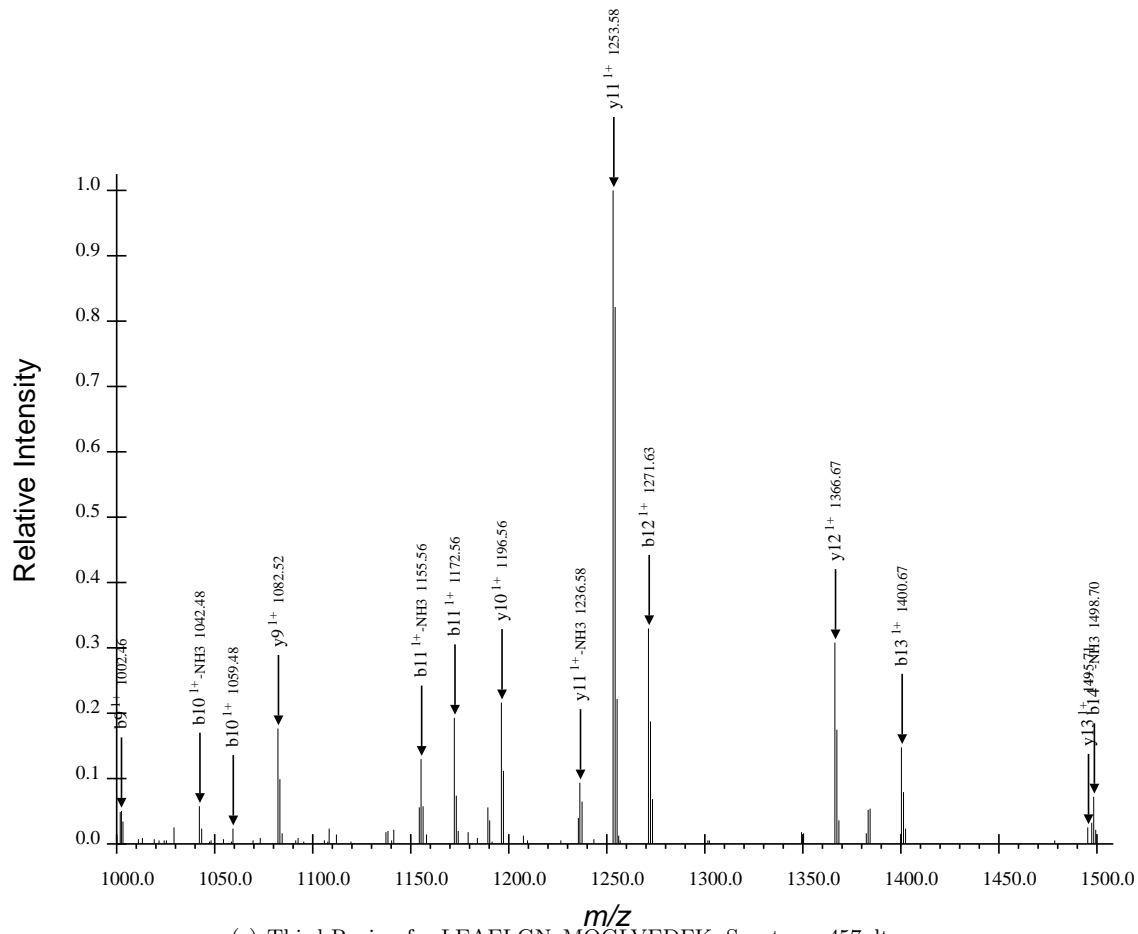

(c) Third Region for LEAELGNoMQGLVEDFK, Spectrum 457.dta

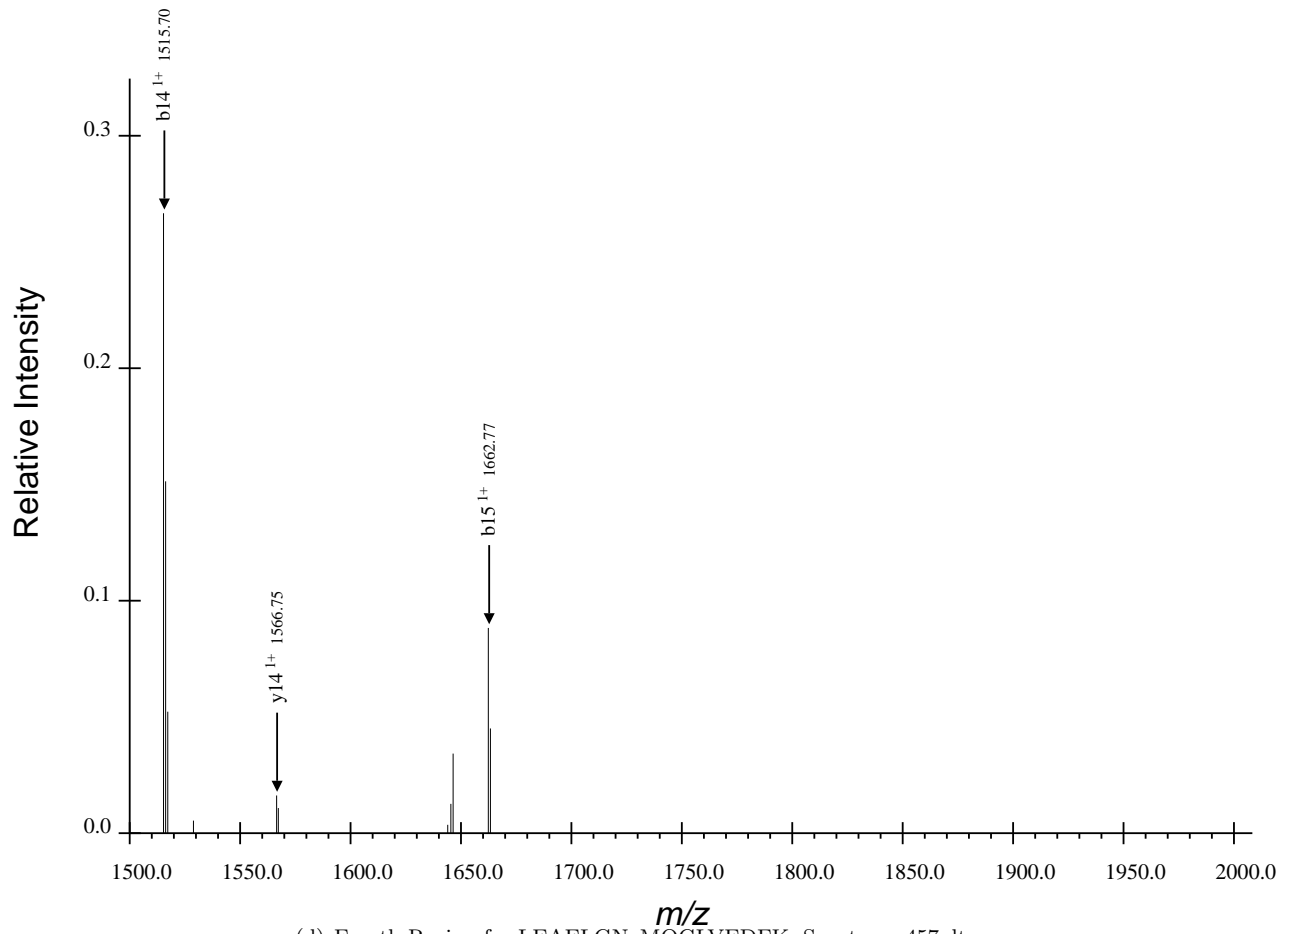

(d) Fourth Region for LEAELGNoMQGLVEDFK, Spectrum 457.dta

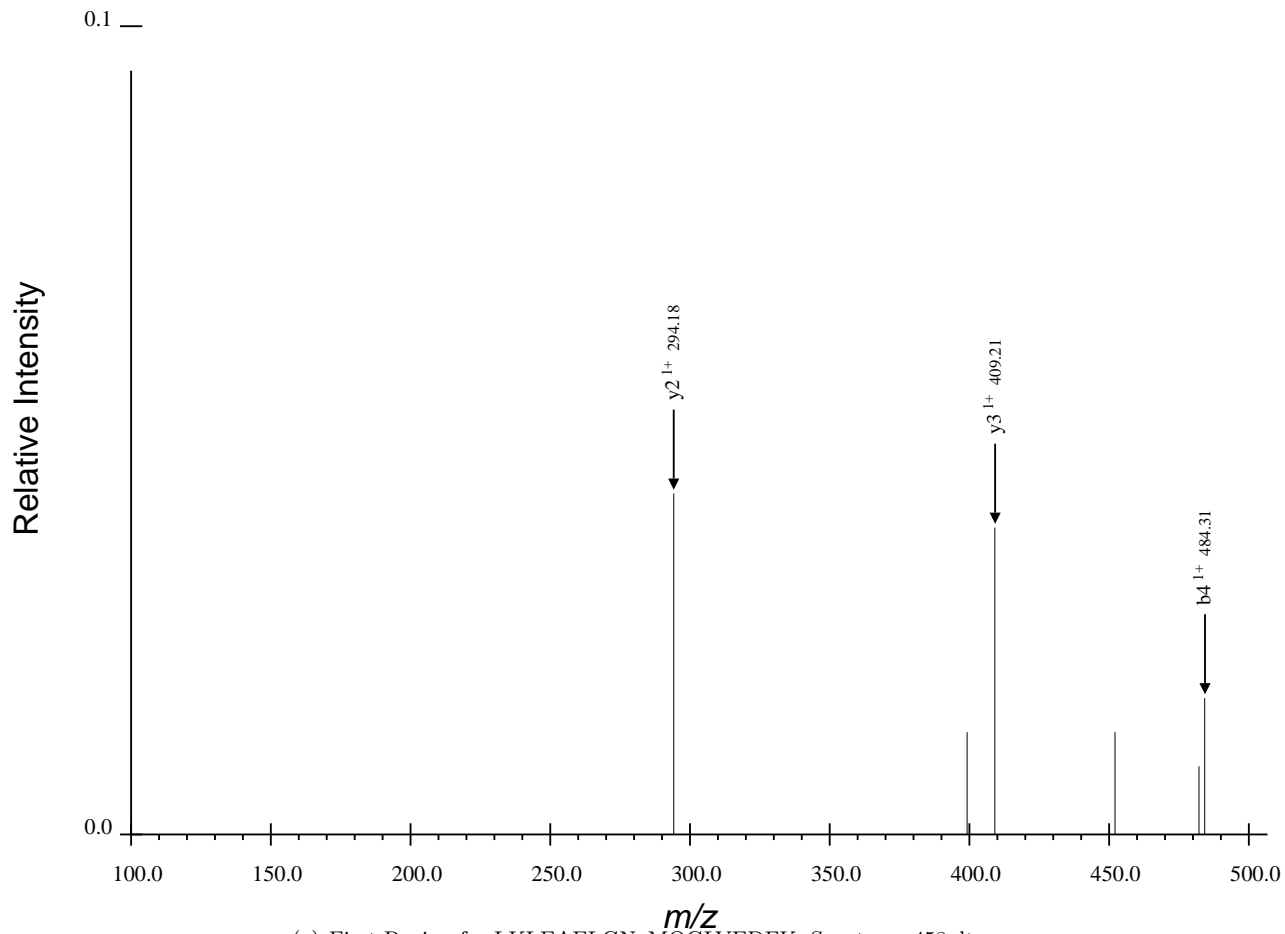

(a) First Region for LKLEAELGNoMQGLVEDFK, Spectrum 458.dta

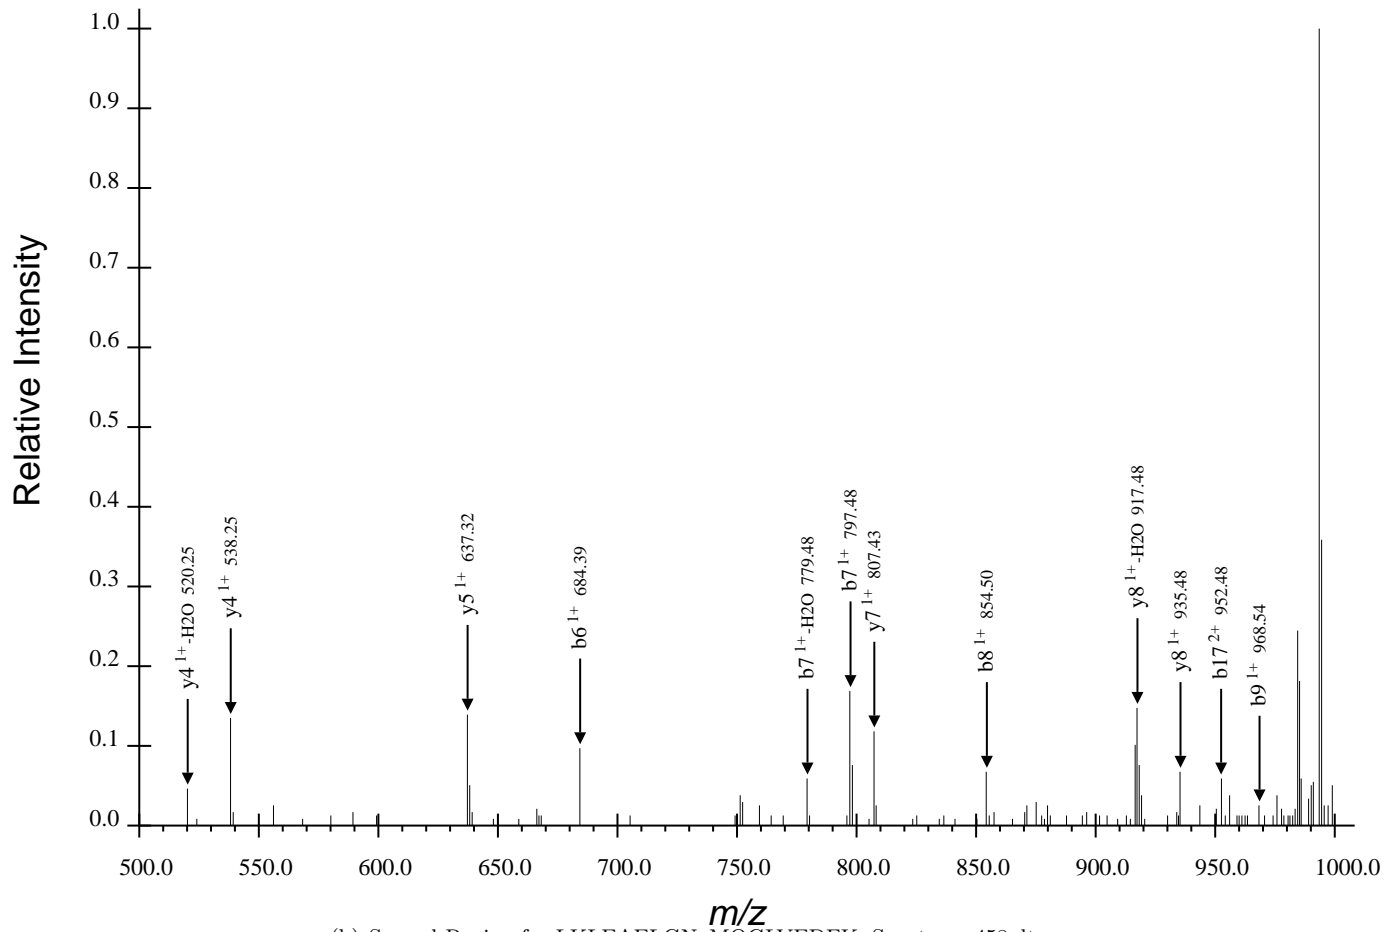

(b) Second Region for LKLEAELGNoMQGLVEDFK, Spectrum 458.dta

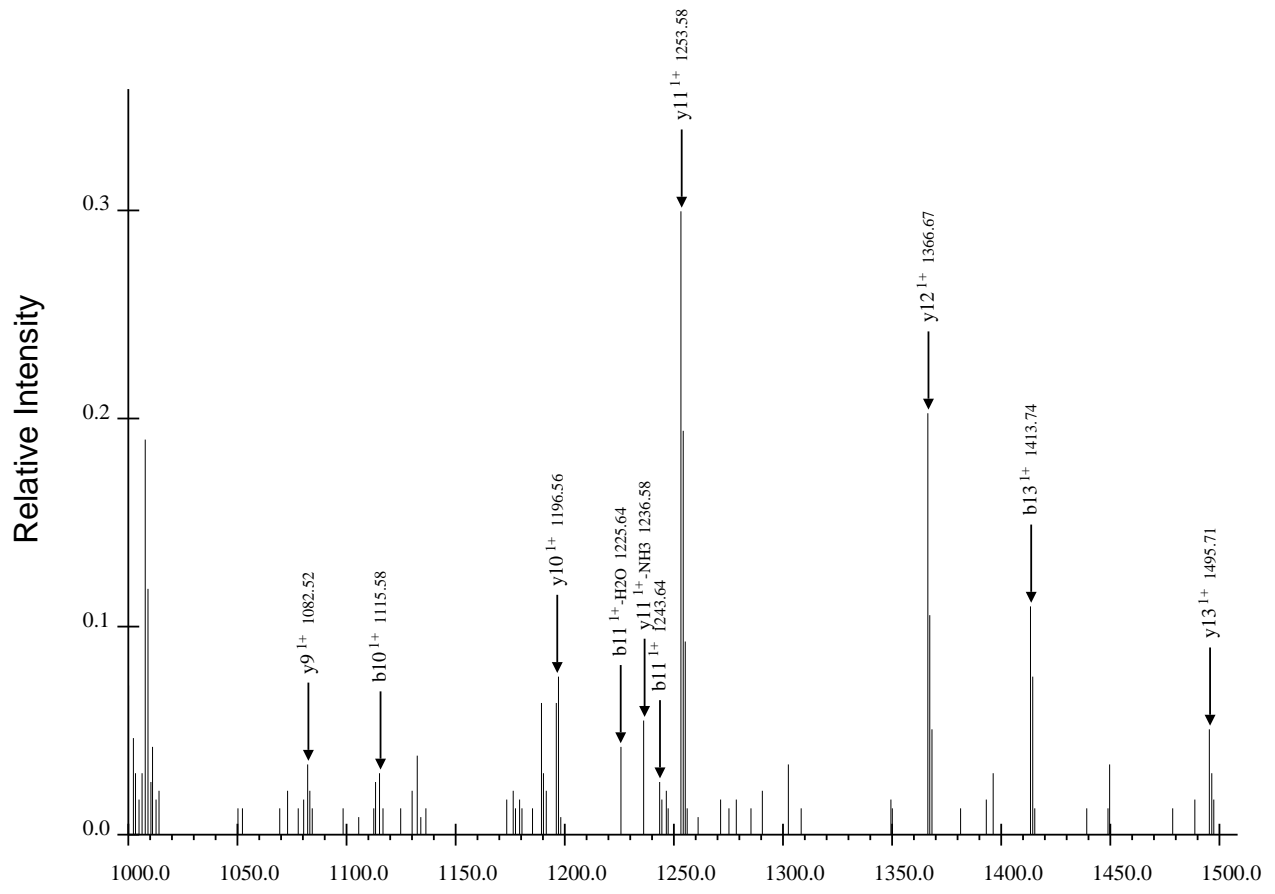

(c) Third Region for LKLEAELGNoMQGLVEDFK, Spectrum 458.dta

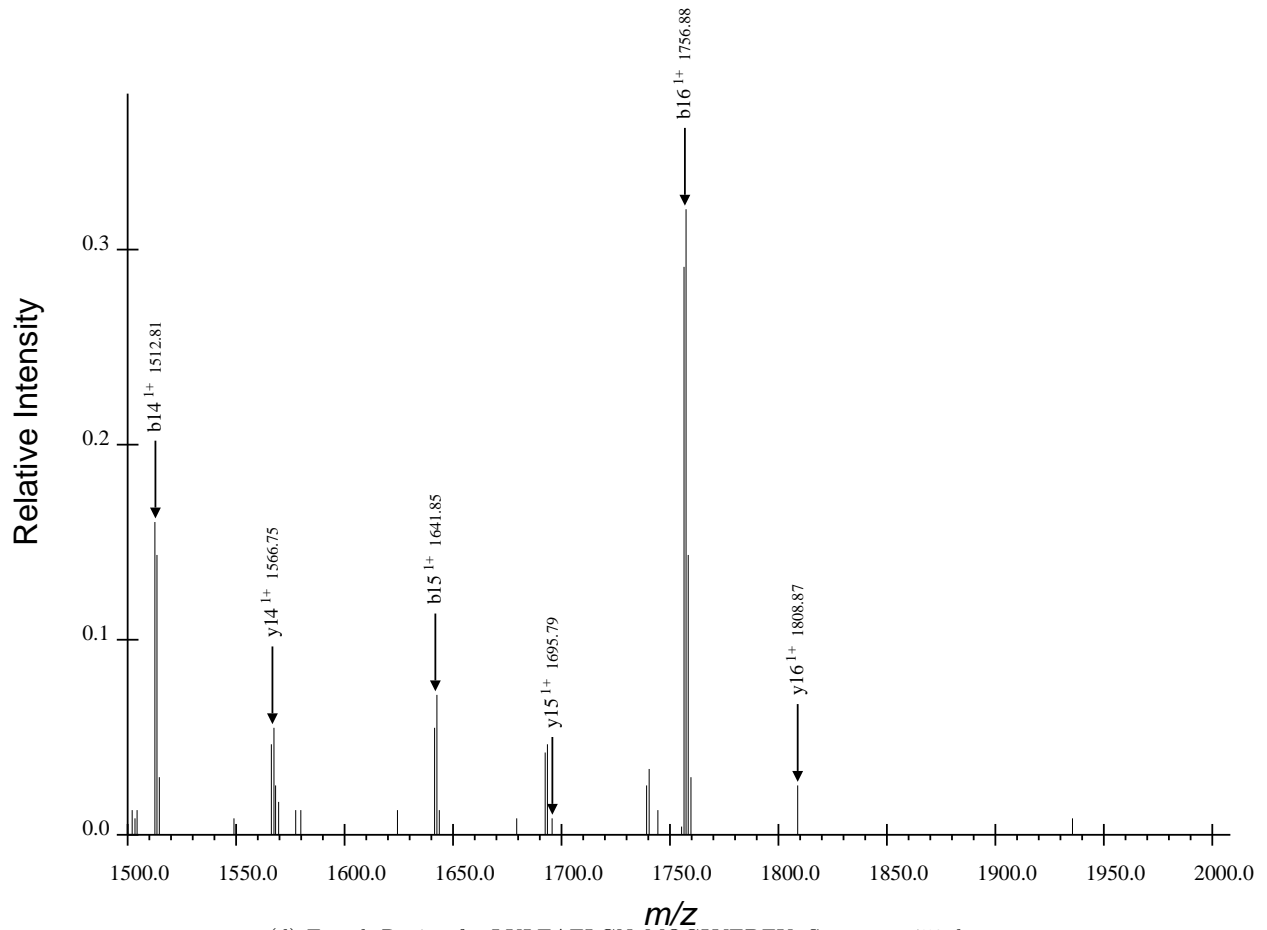

(d) Fourth Region for LKLEAELGNoMQGLVEDFK, Spectrum 458.dta

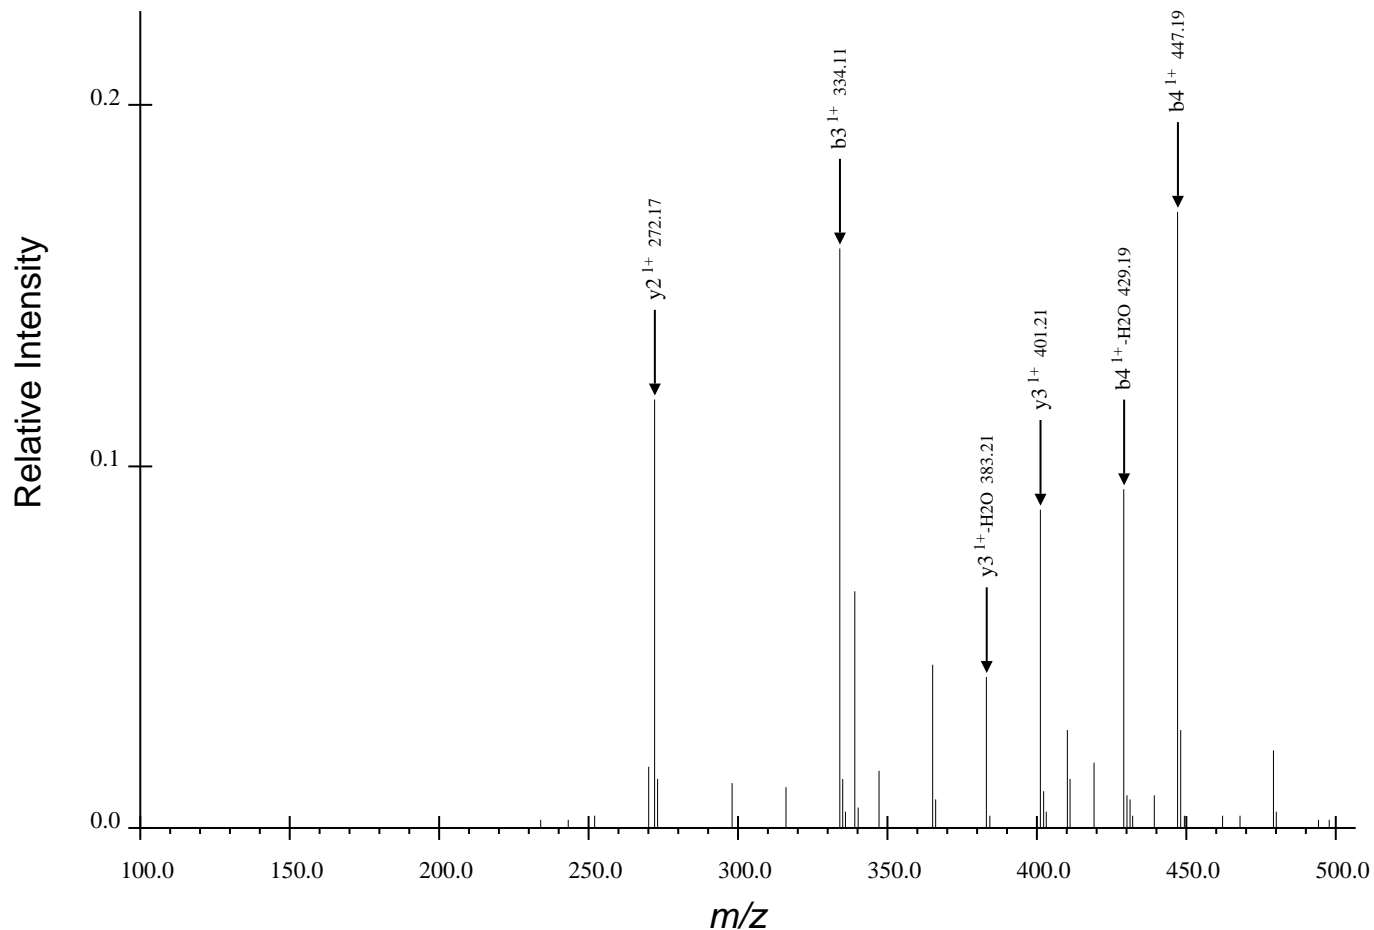

(a) First Region for oMGELPLDINIQEPR, Spectrum 459.dta

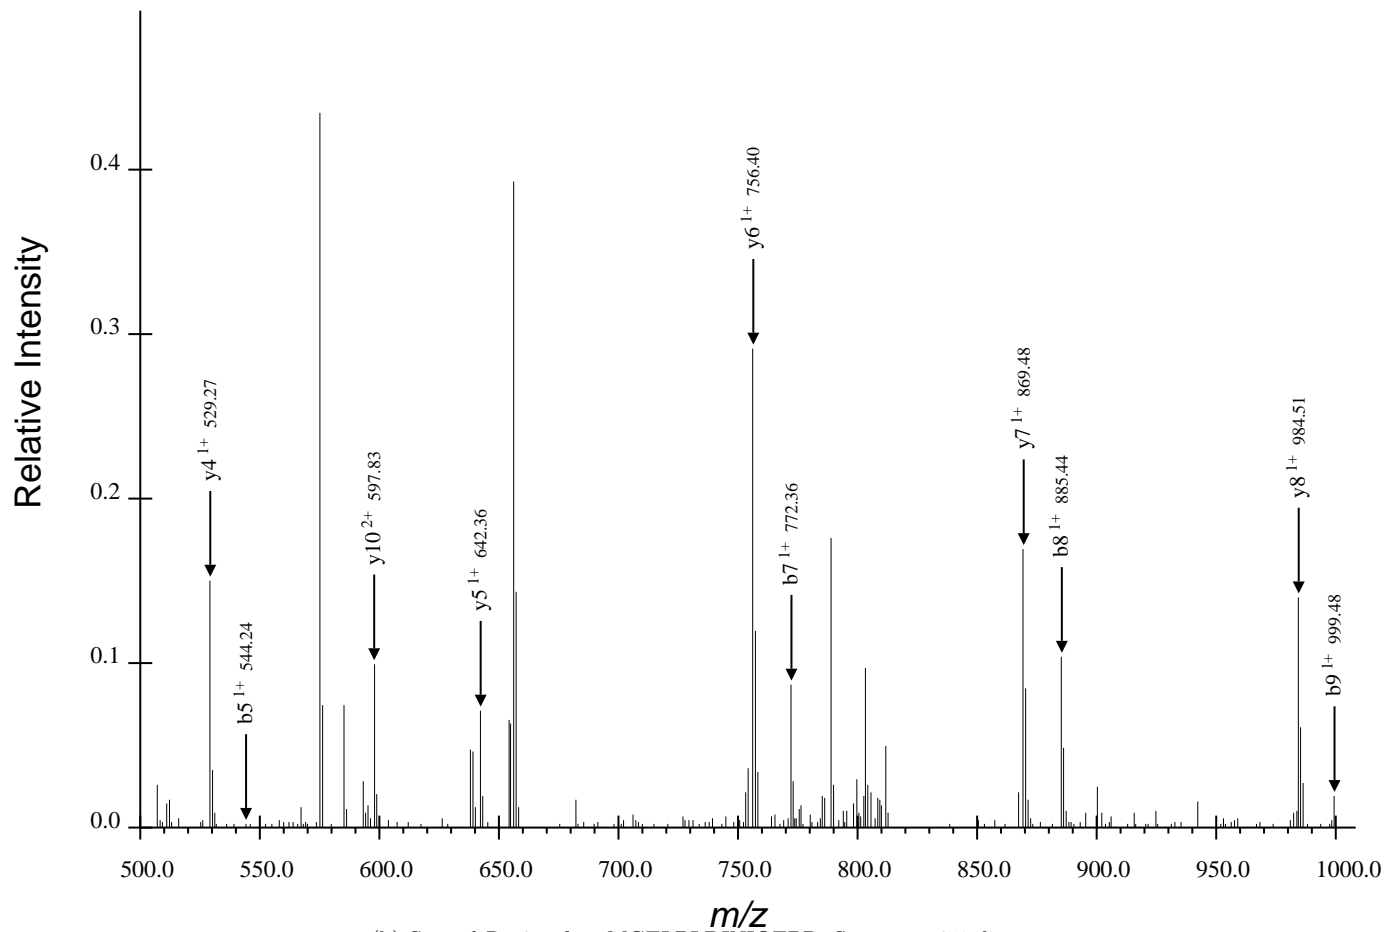

(b) Second Region for oMGELPLDINIQEPR, Spectrum 459.dta

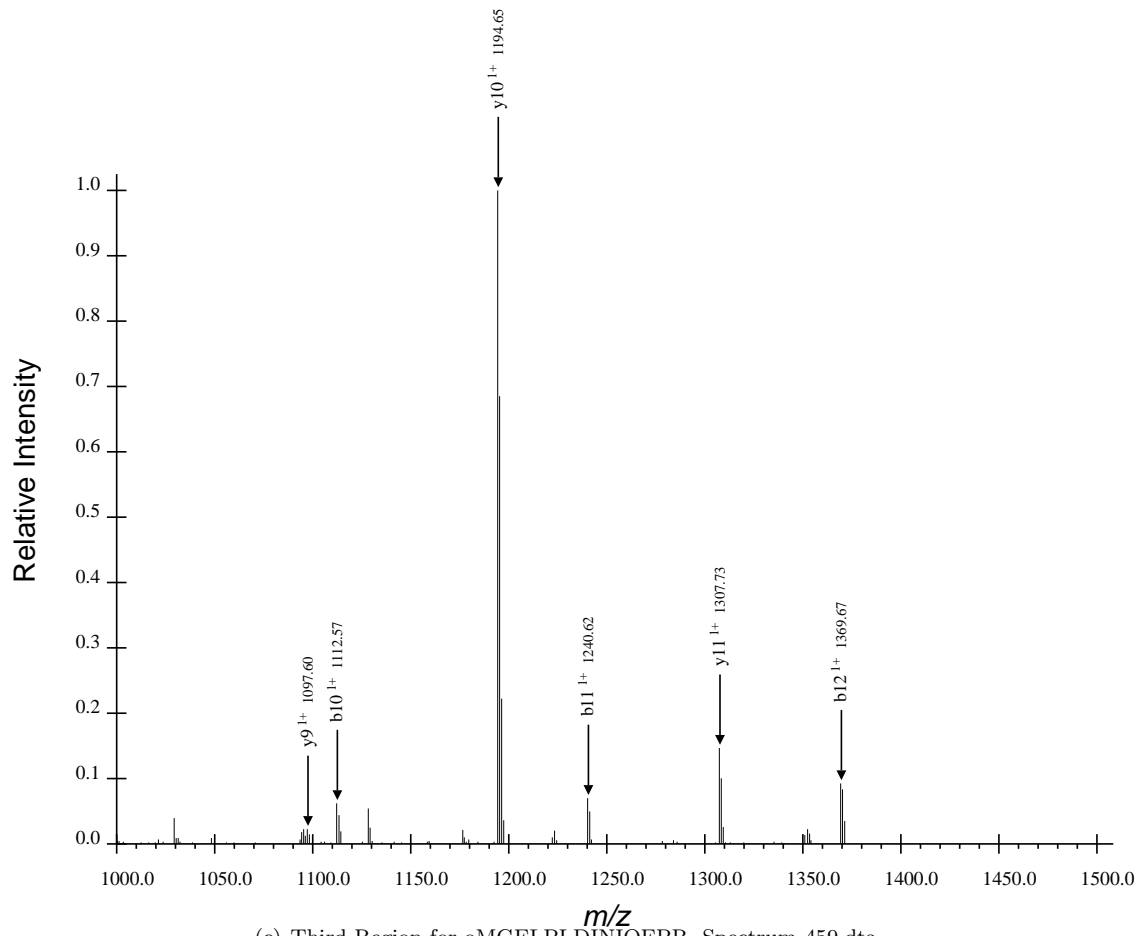

(c) Third Region for oMGELPLDINIQEPR, Spectrum 459.dta

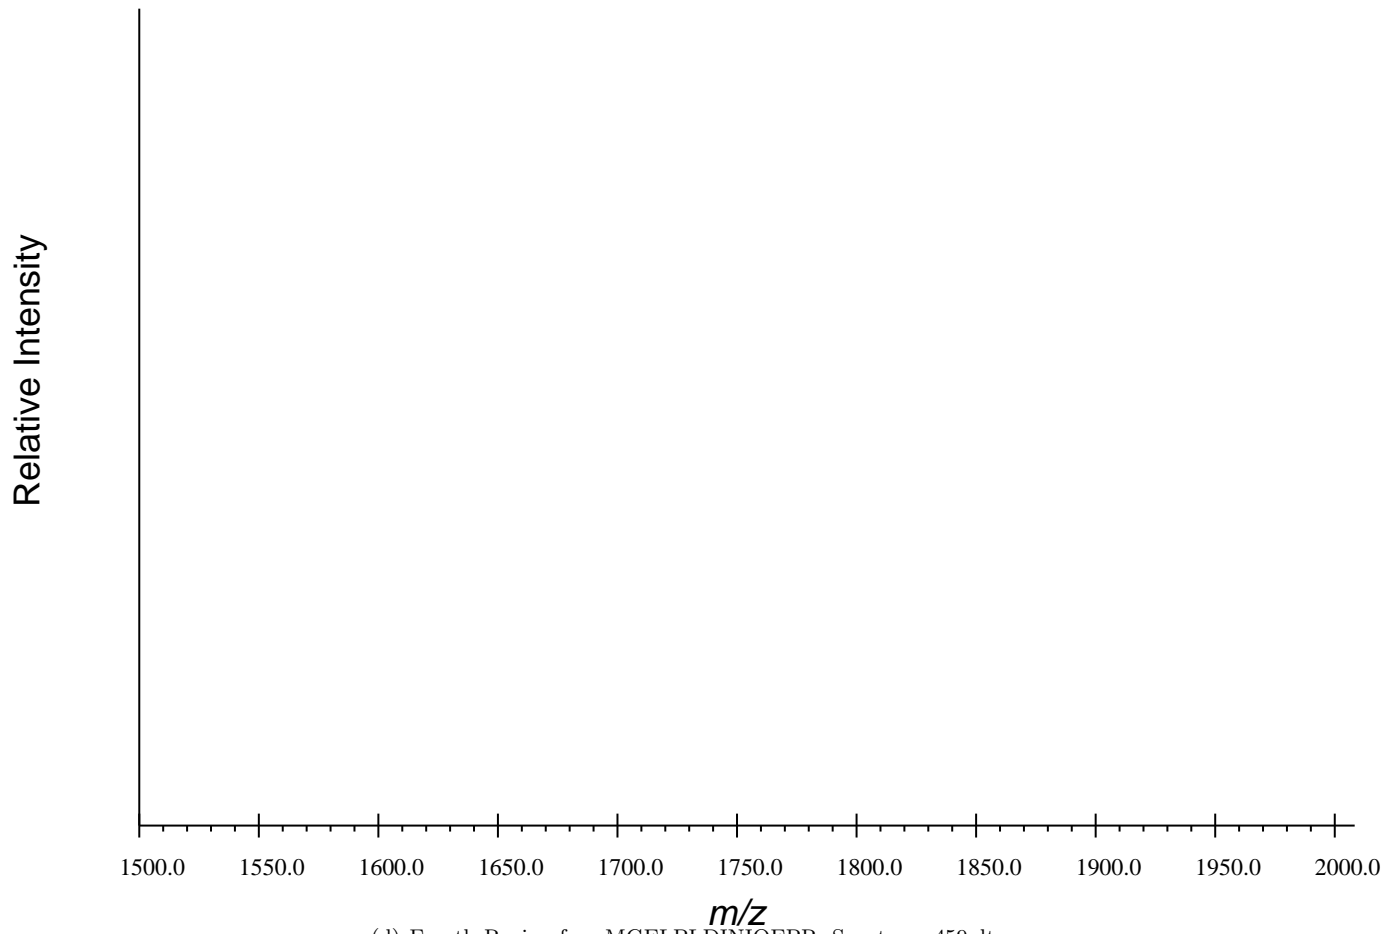

(d) Fourth Region for oMGELPLDINIQEPR, Spectrum 459.dta



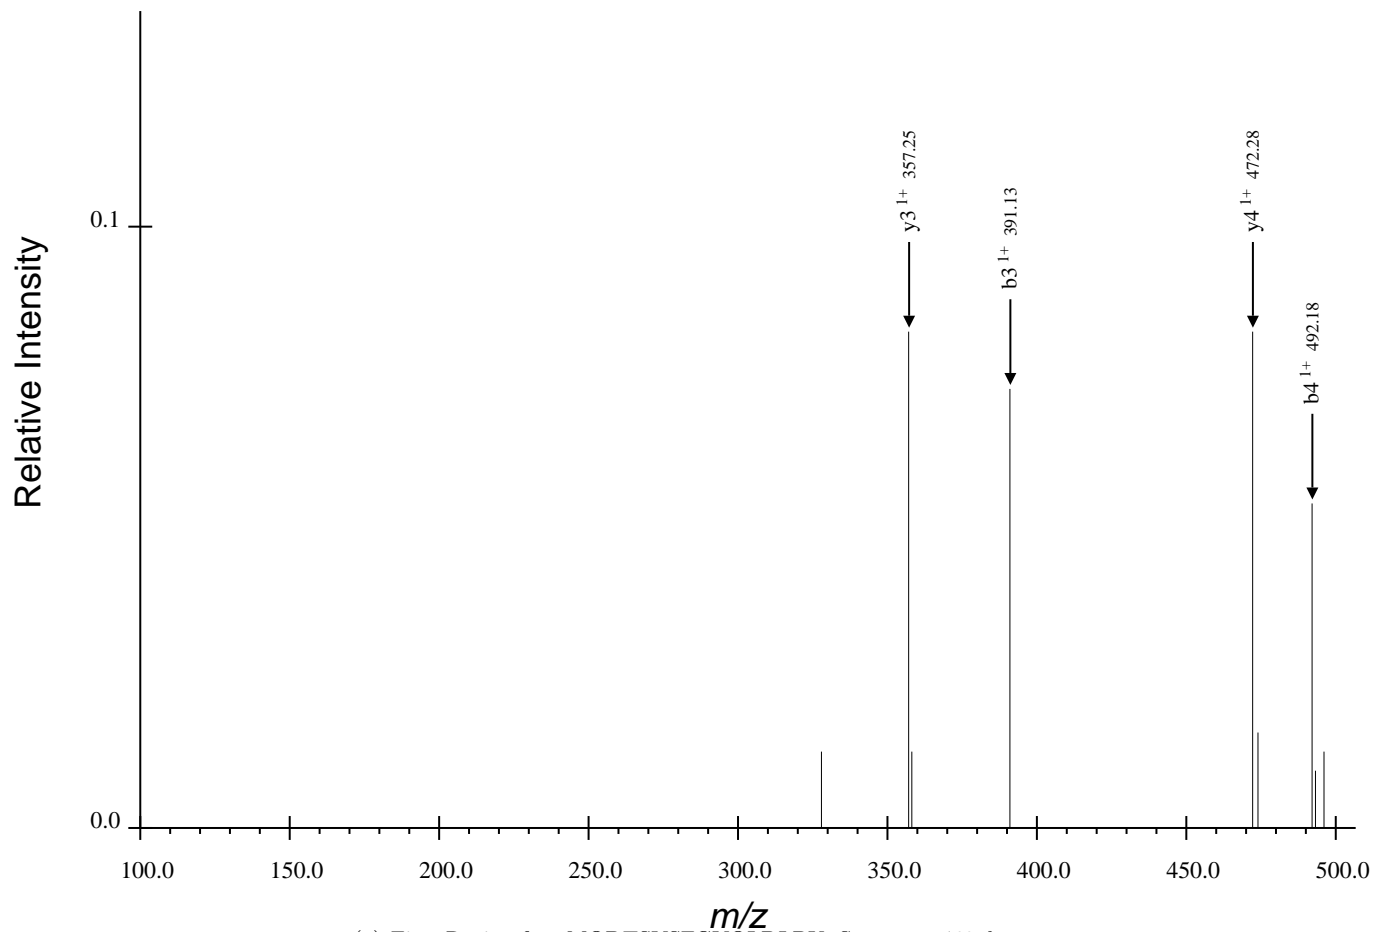

(a) First Region for oMQDTSVSVFGYQLDLPK, Spectrum 460.dta

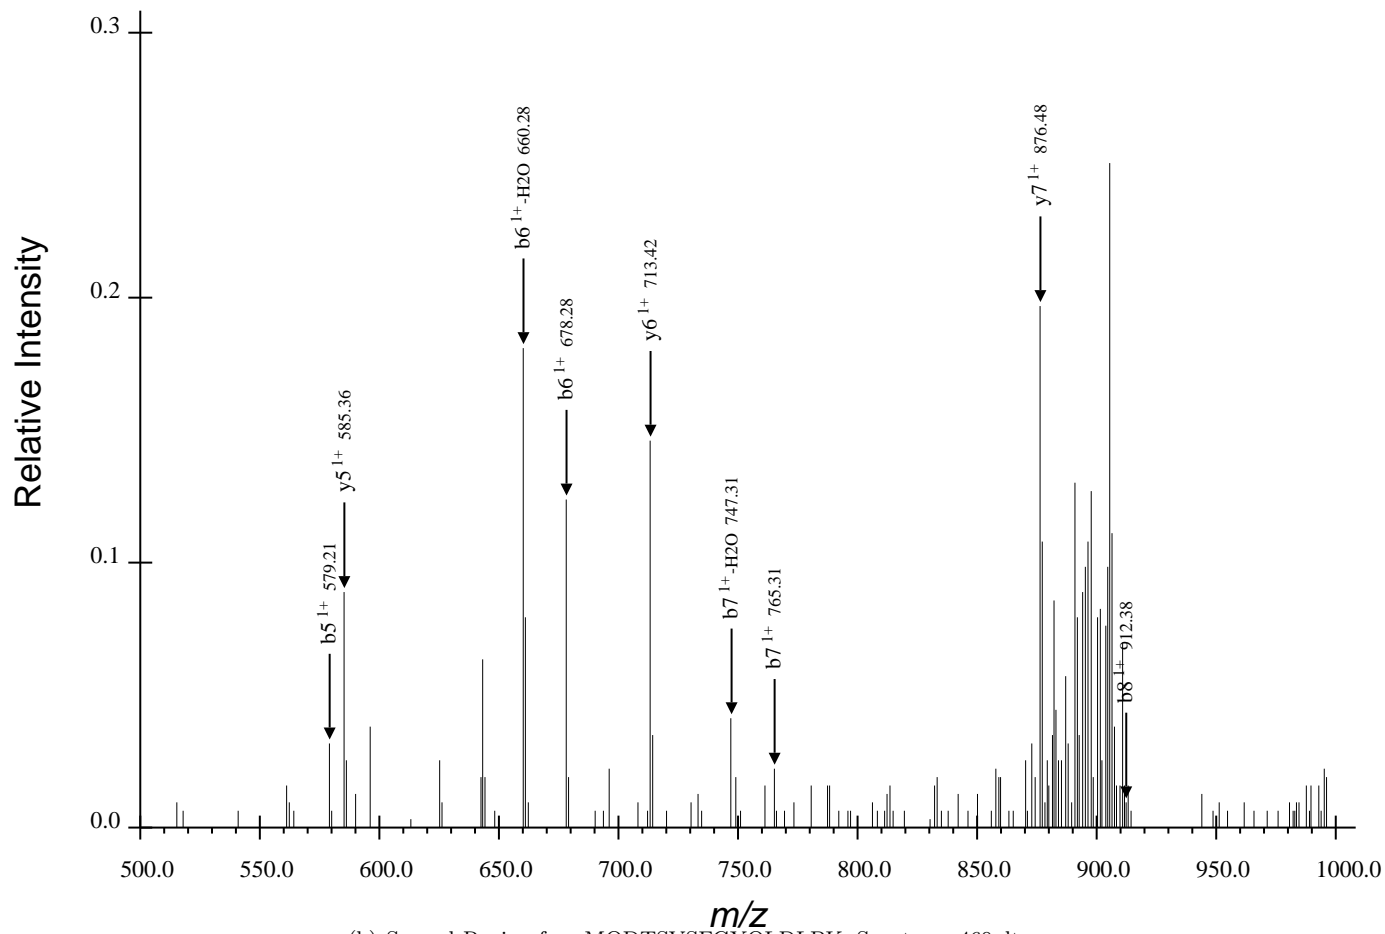

(b) Second Region for oMQDTSVSVFGYQLDLPK, Spectrum 460.dta

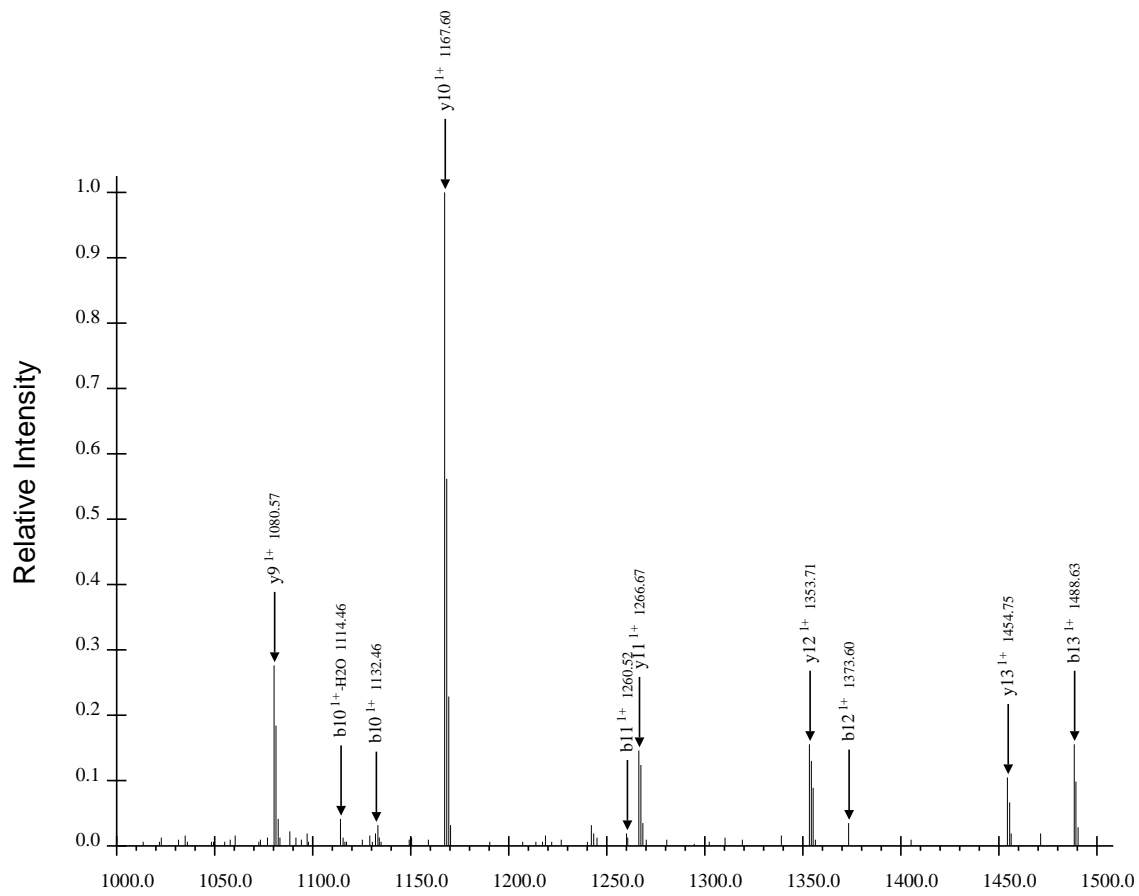

(c) Third Region for oMQDTSVSGYQLDLPK, Spectrum 460.dta

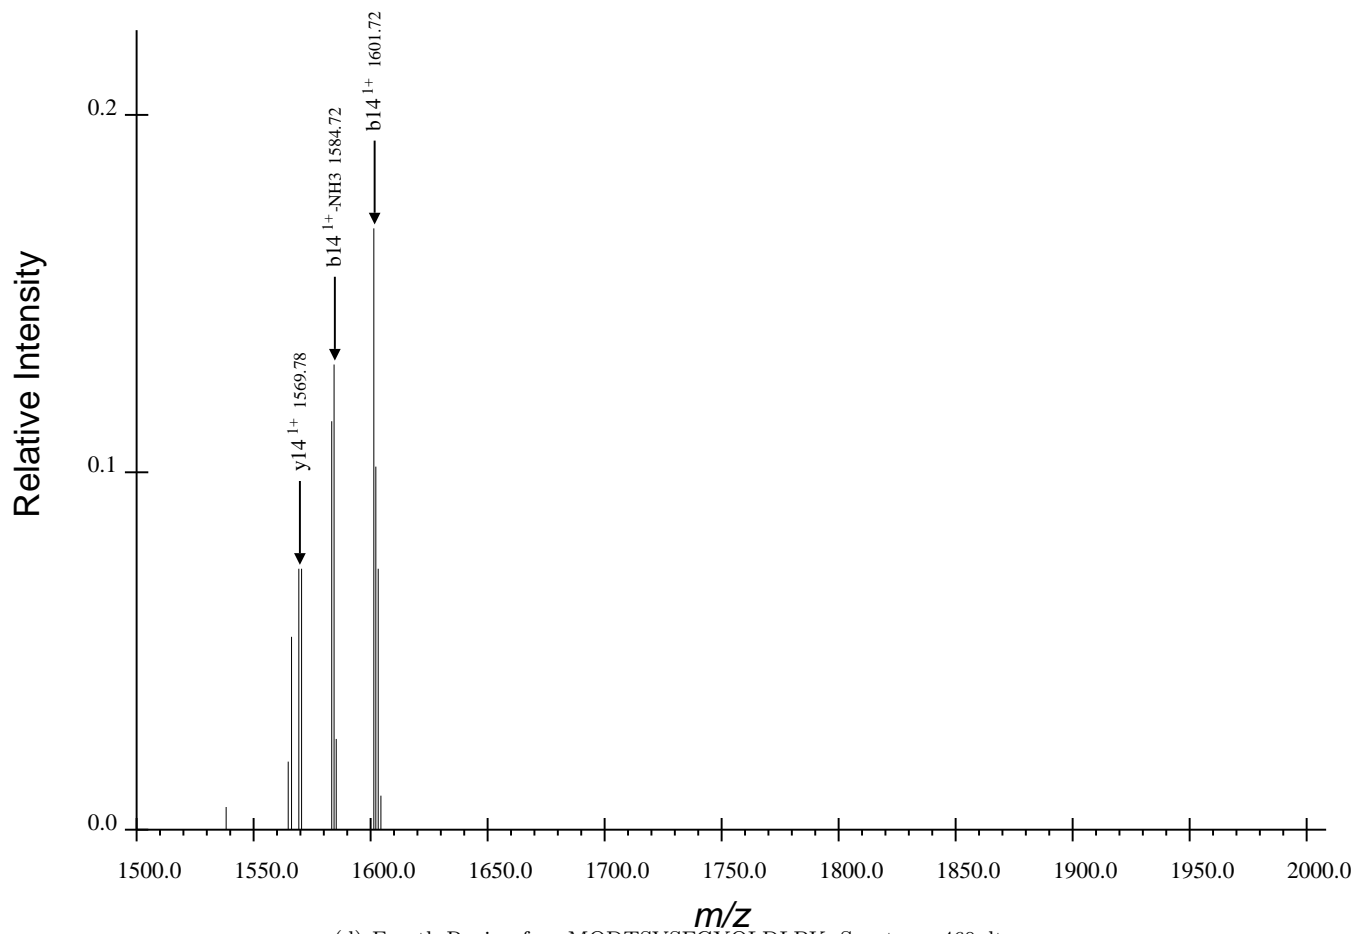

(d) Fourth Region for oMQDTSVSGYQLDLPK, Spectrum 460.dta

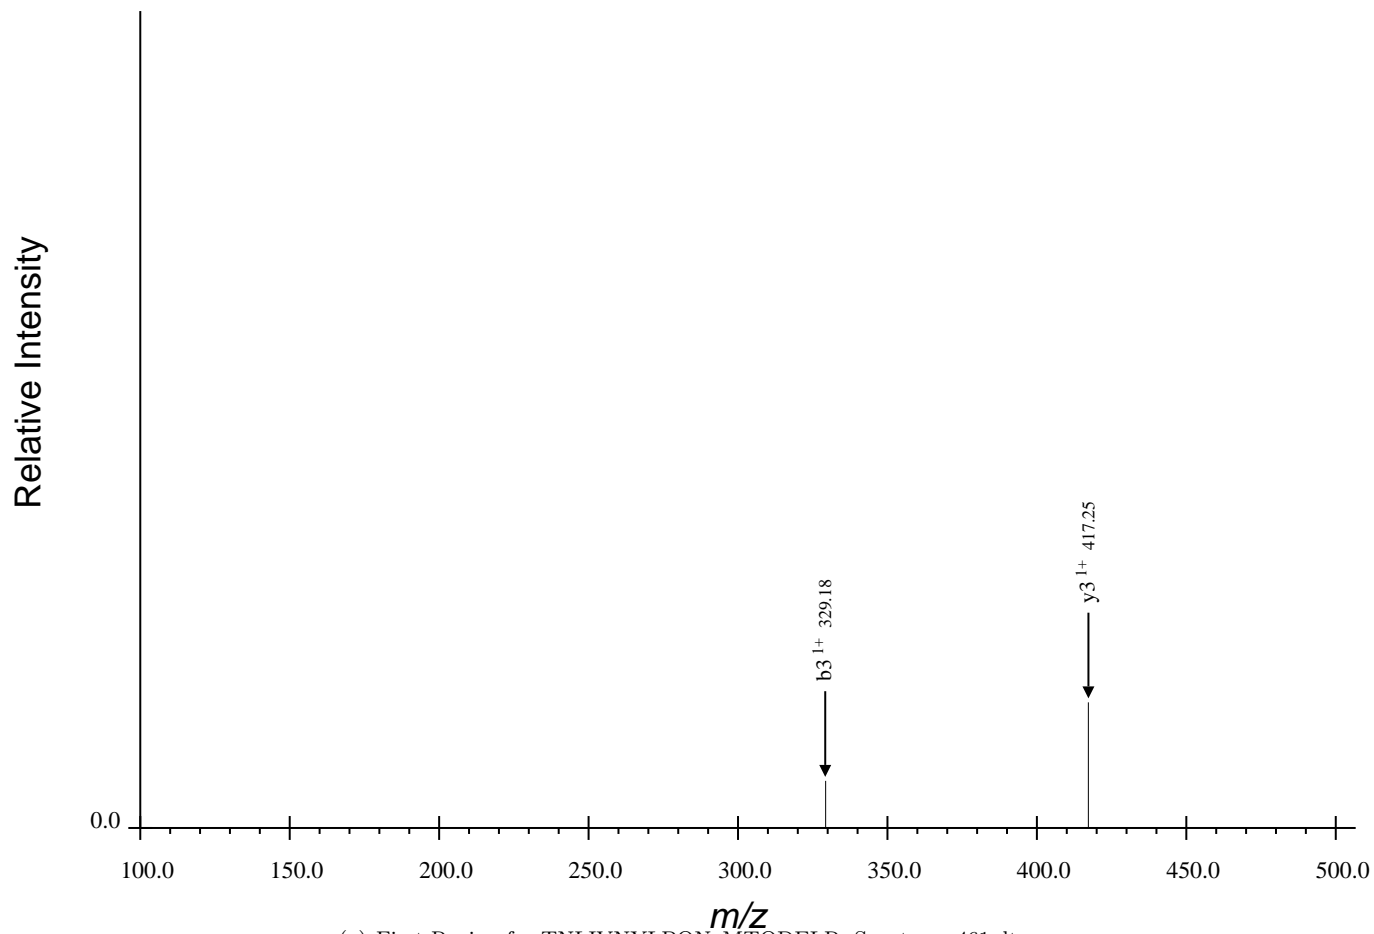

(a) First Region for TNLIVNYLPQNoMTQDELK, Spectrum 461.dta

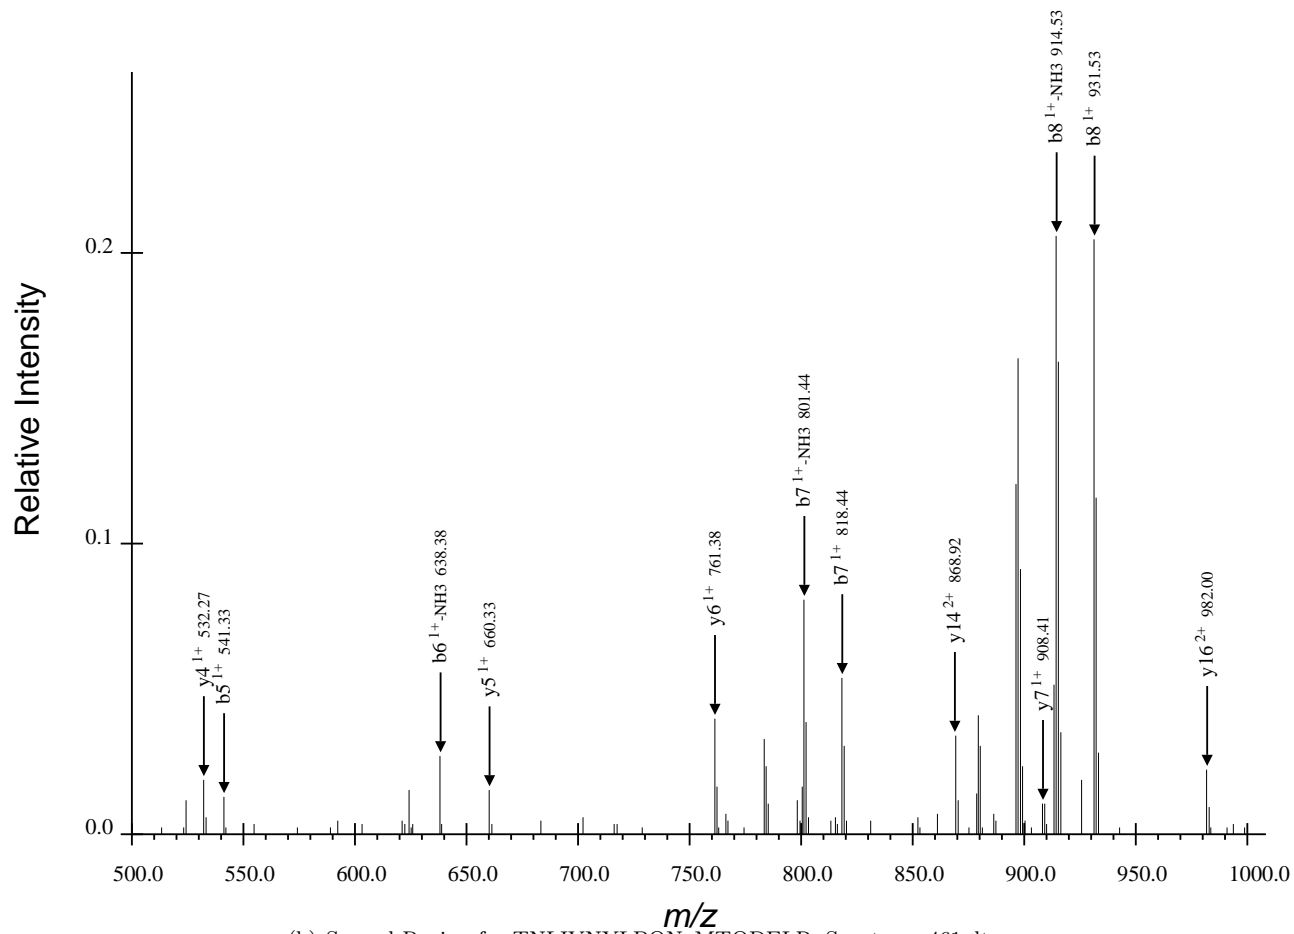

(b) Second Region for TNLIVNYLPQNoMTQDELK, Spectrum 461.dta

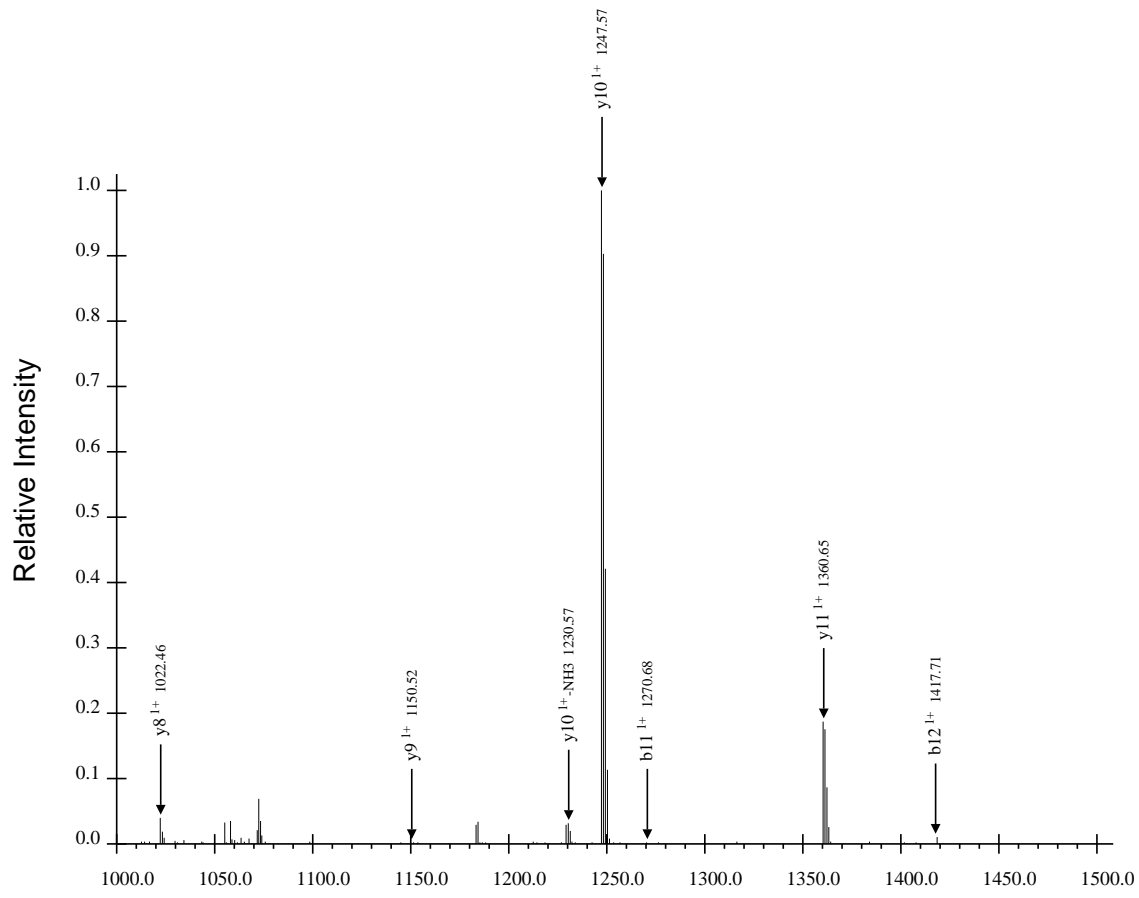

(c) Third Region for TNLIVNYLPQNoMTQDEL<sub>R</sub>, Spectrum 461.dta

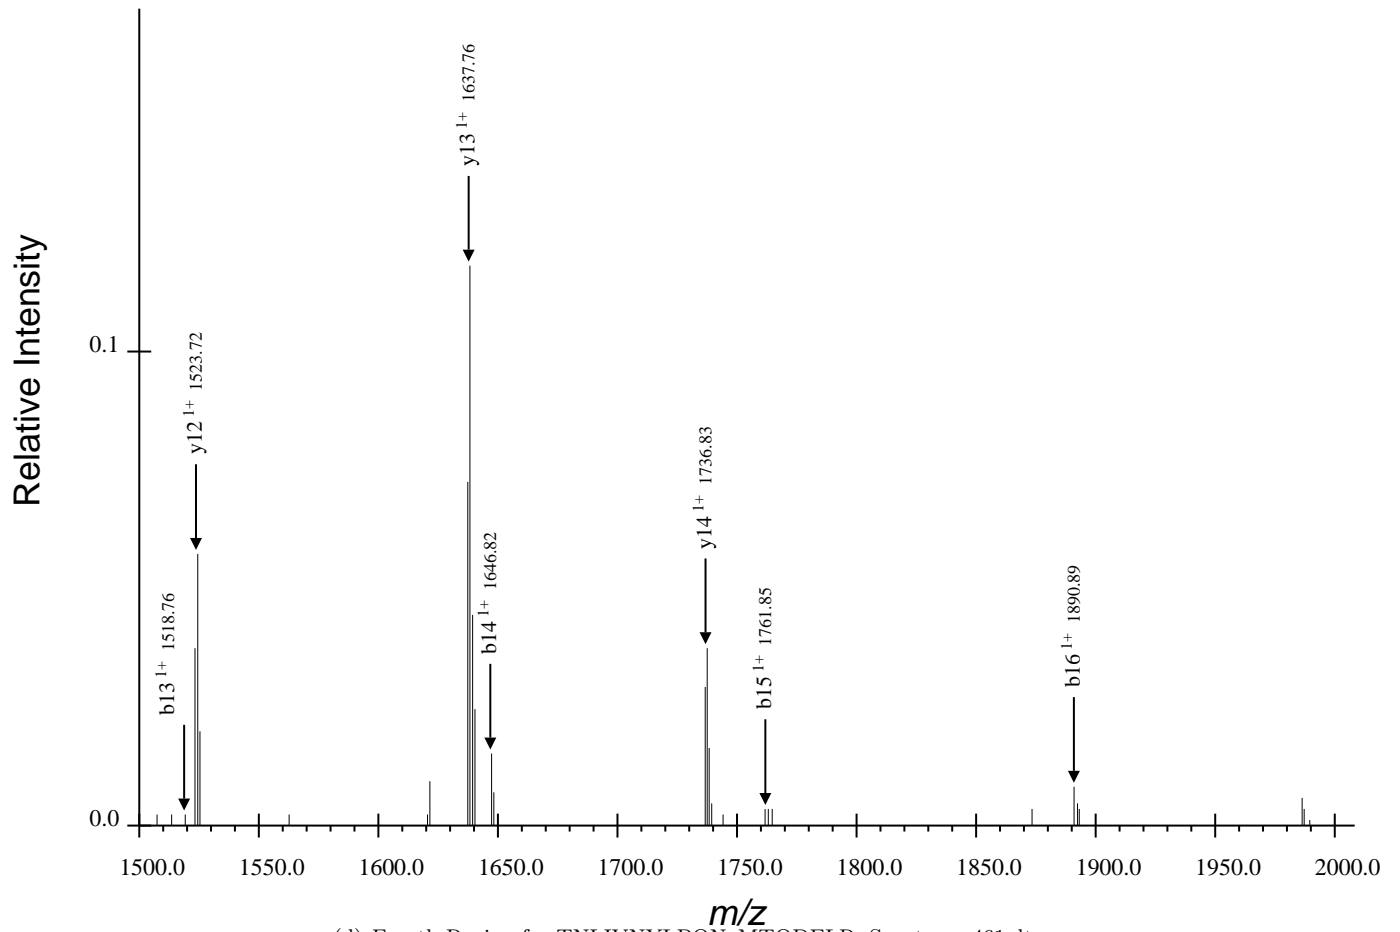

(d) Fourth Region for TNLIVNYLPQNoMTQDEL<sub>R</sub>, Spectrum 461.dta

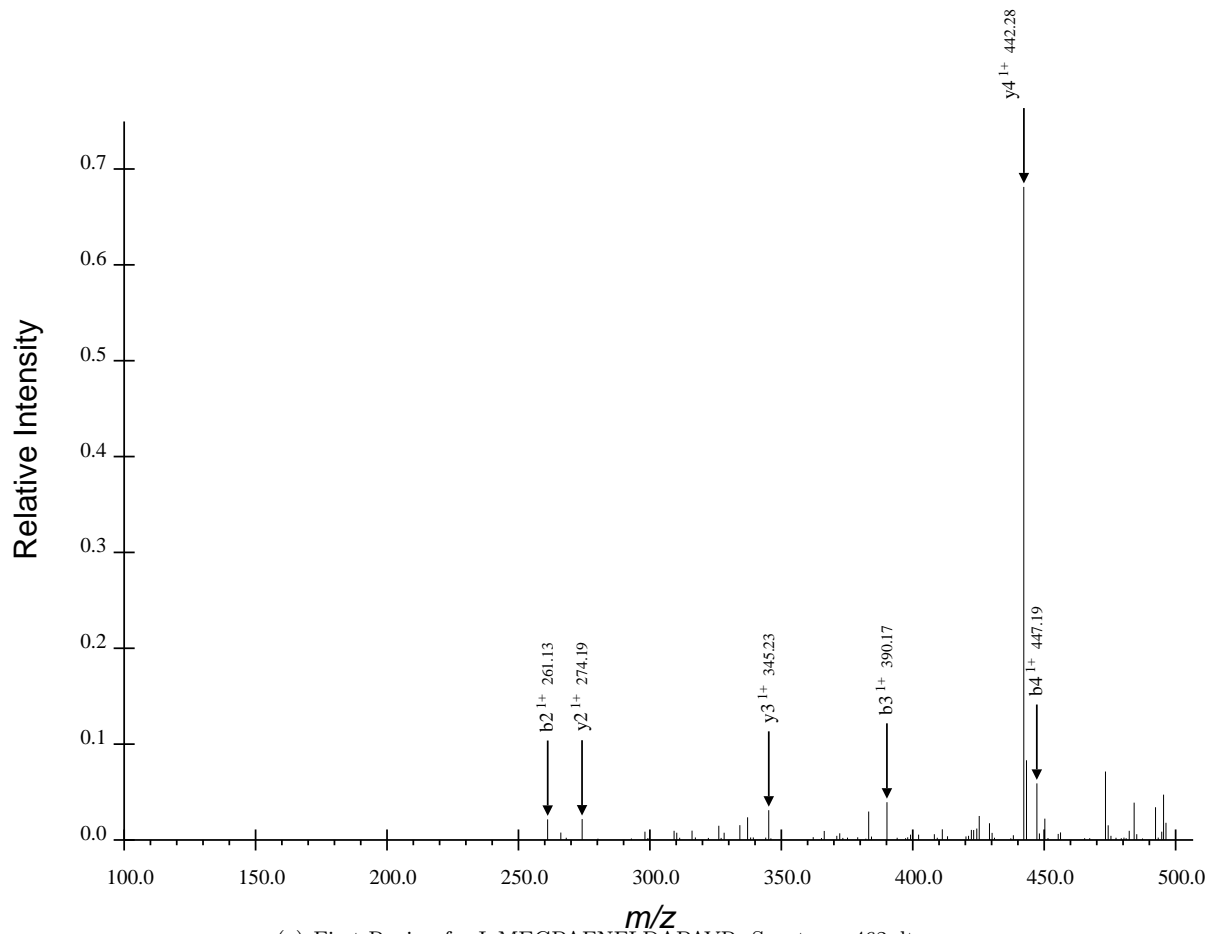

(a) First Region for IoMEGPAFNFLDAPAVR, Spectrum 462.dta

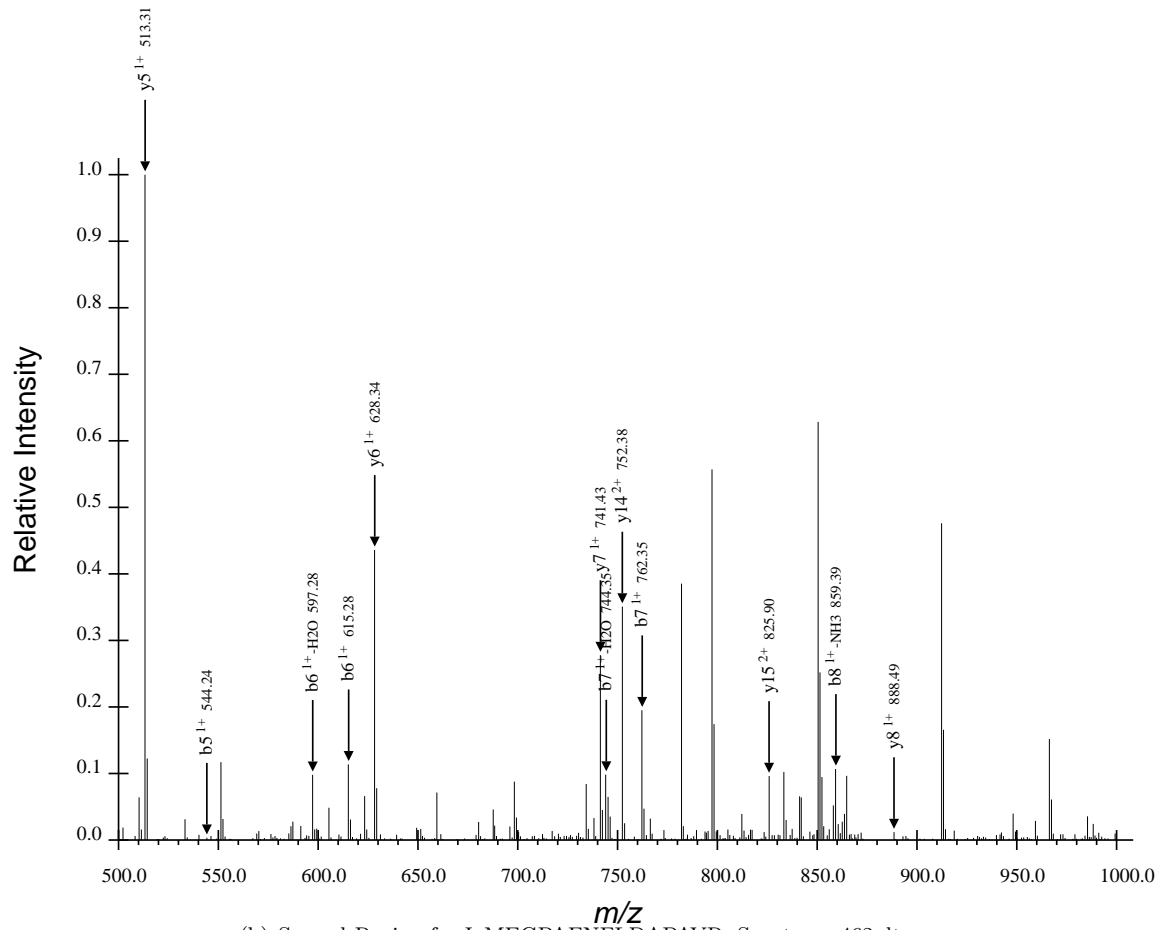

(b) Second Region for IoMEGPAFNFLDAPAVR, Spectrum 462.dta

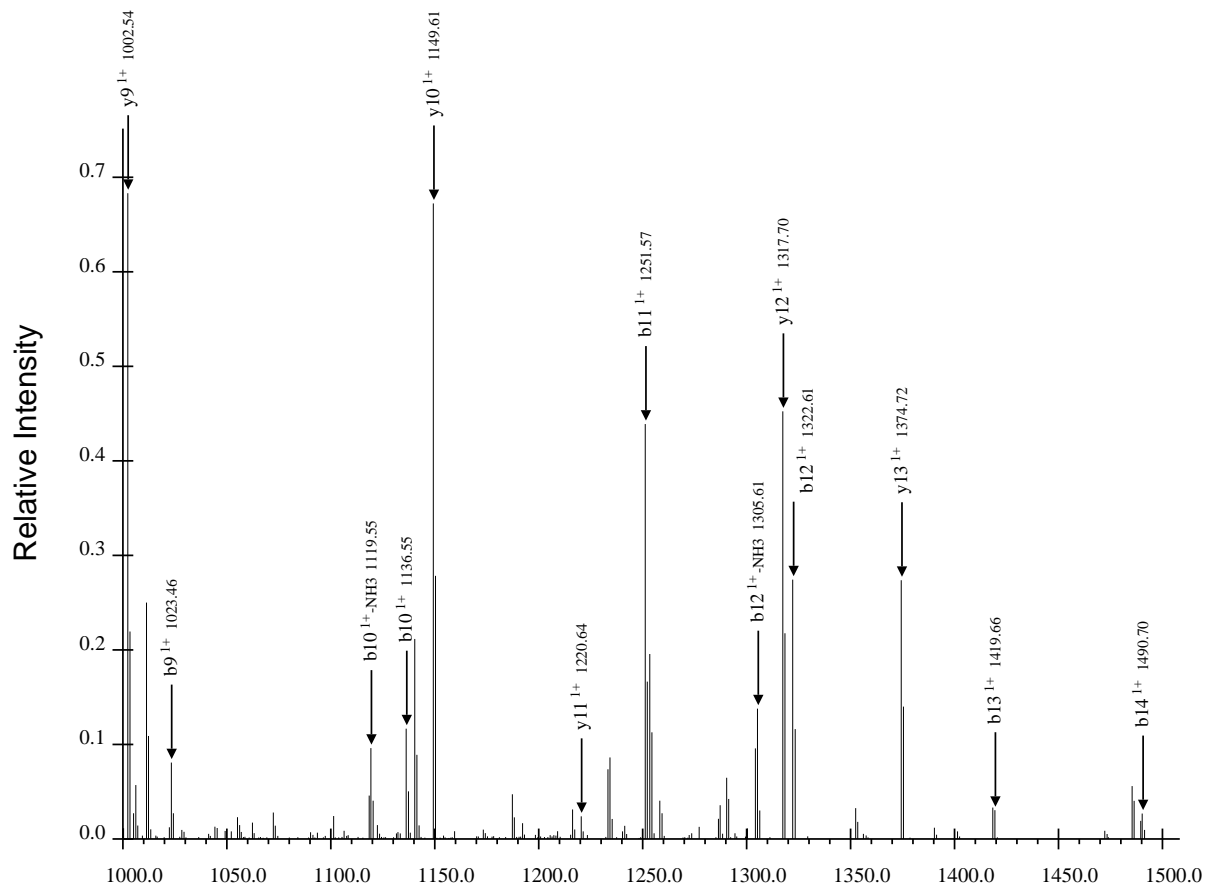

(c) Third Region for IoMEGPAFNFLDAPAVR, Spectrum 462.dta

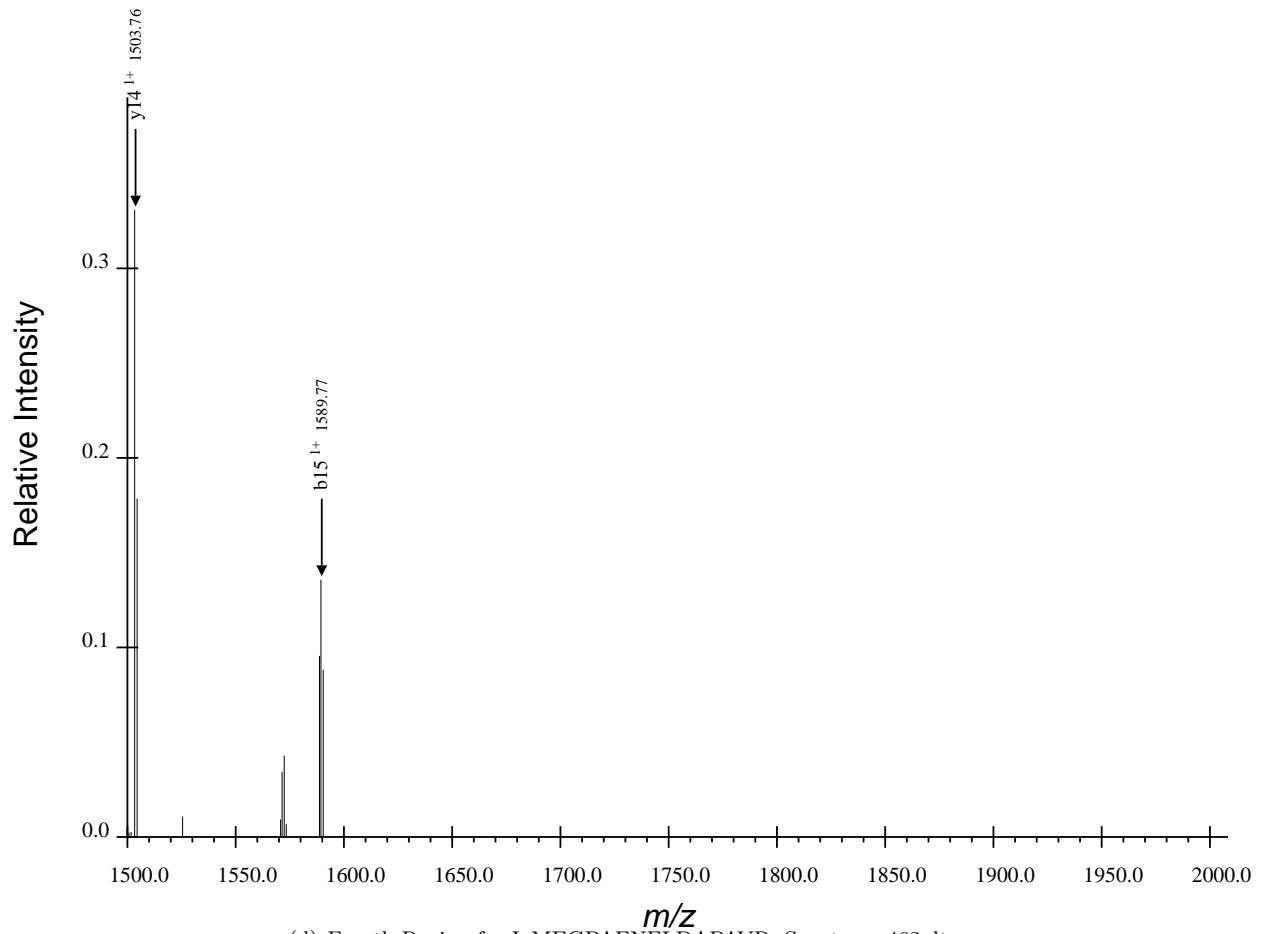

(d) Fourth Region for IoMEGPAFNFLDAPAVR, Spectrum 462.dta

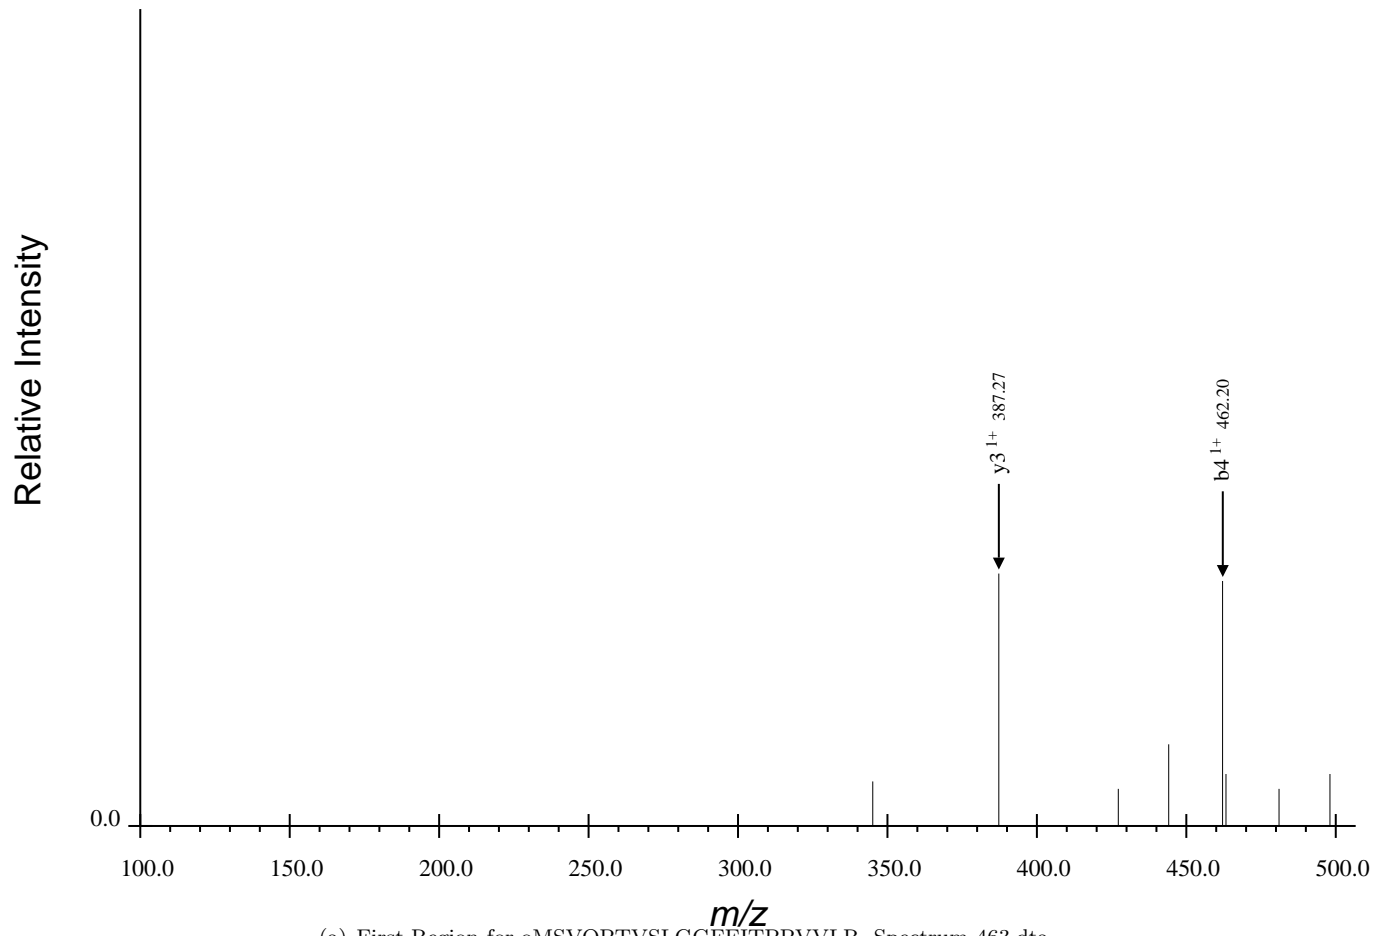

(a) First Region for  $\text{oMSVQPTVSLGGFEITPPVLR}$ , Spectrum 463.dta

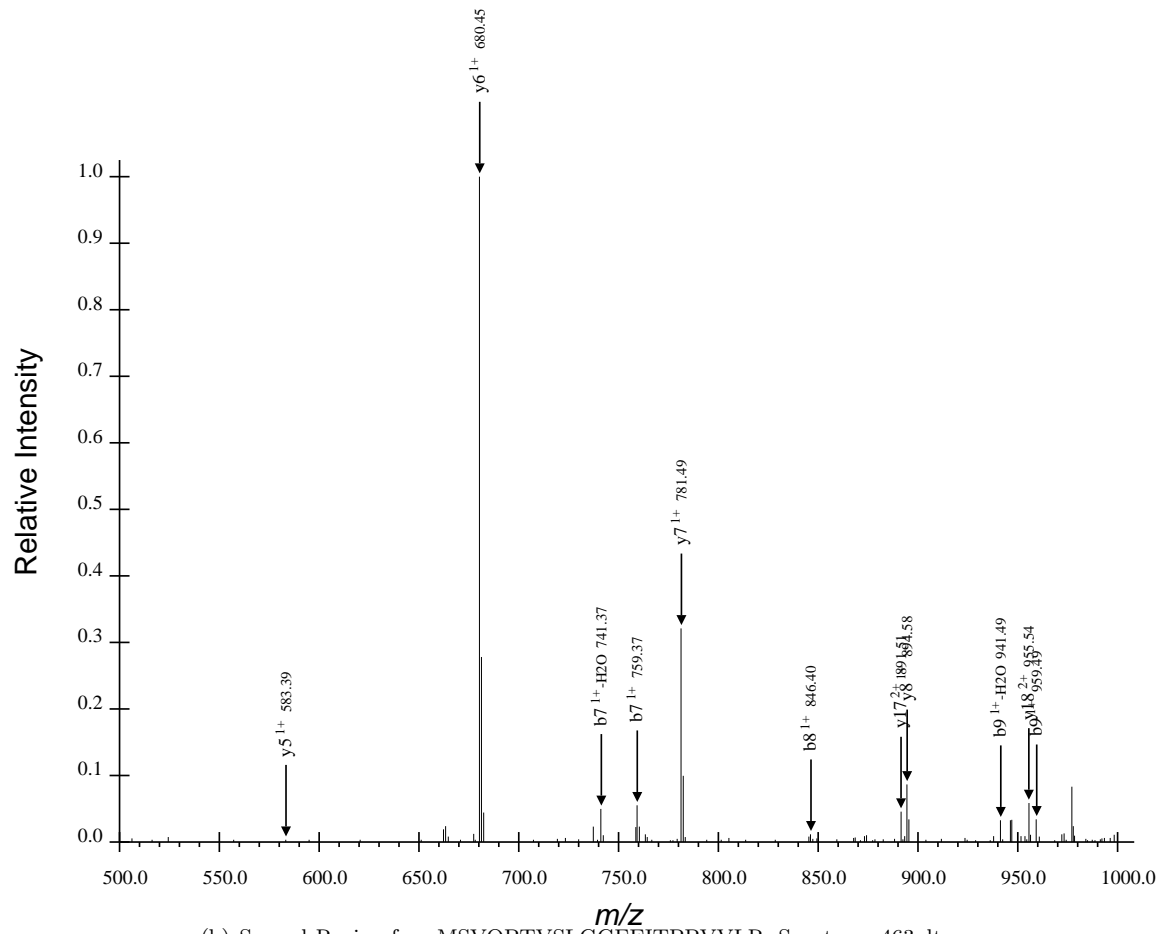

(b) Second Region for  $\text{oMSVQPTVSLGGFEITPPVLR}$ , Spectrum 463.dta

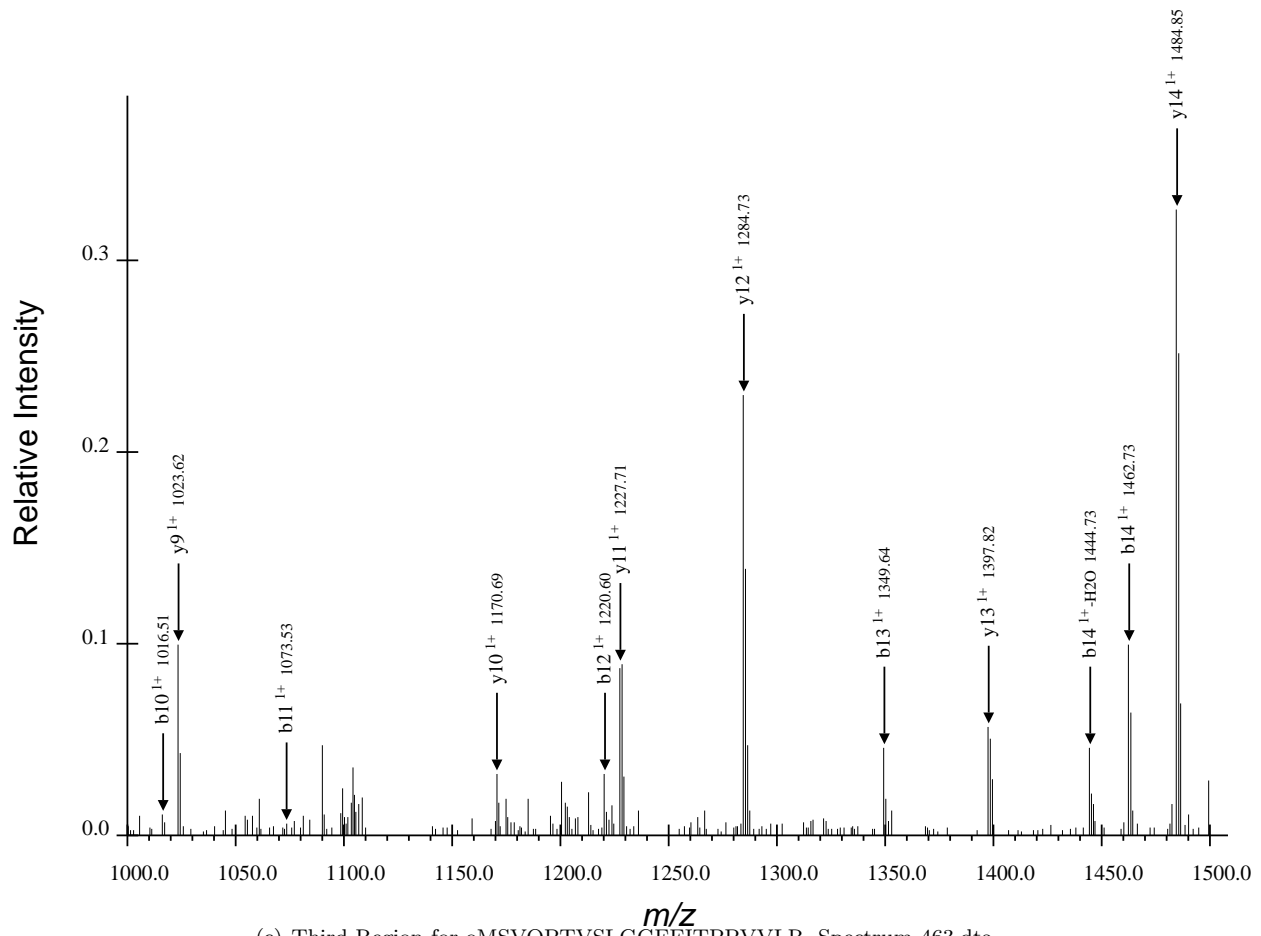

(c) Third Region for oMSVQPTVSLGGFEITPPVLR, Spectrum 463.dta

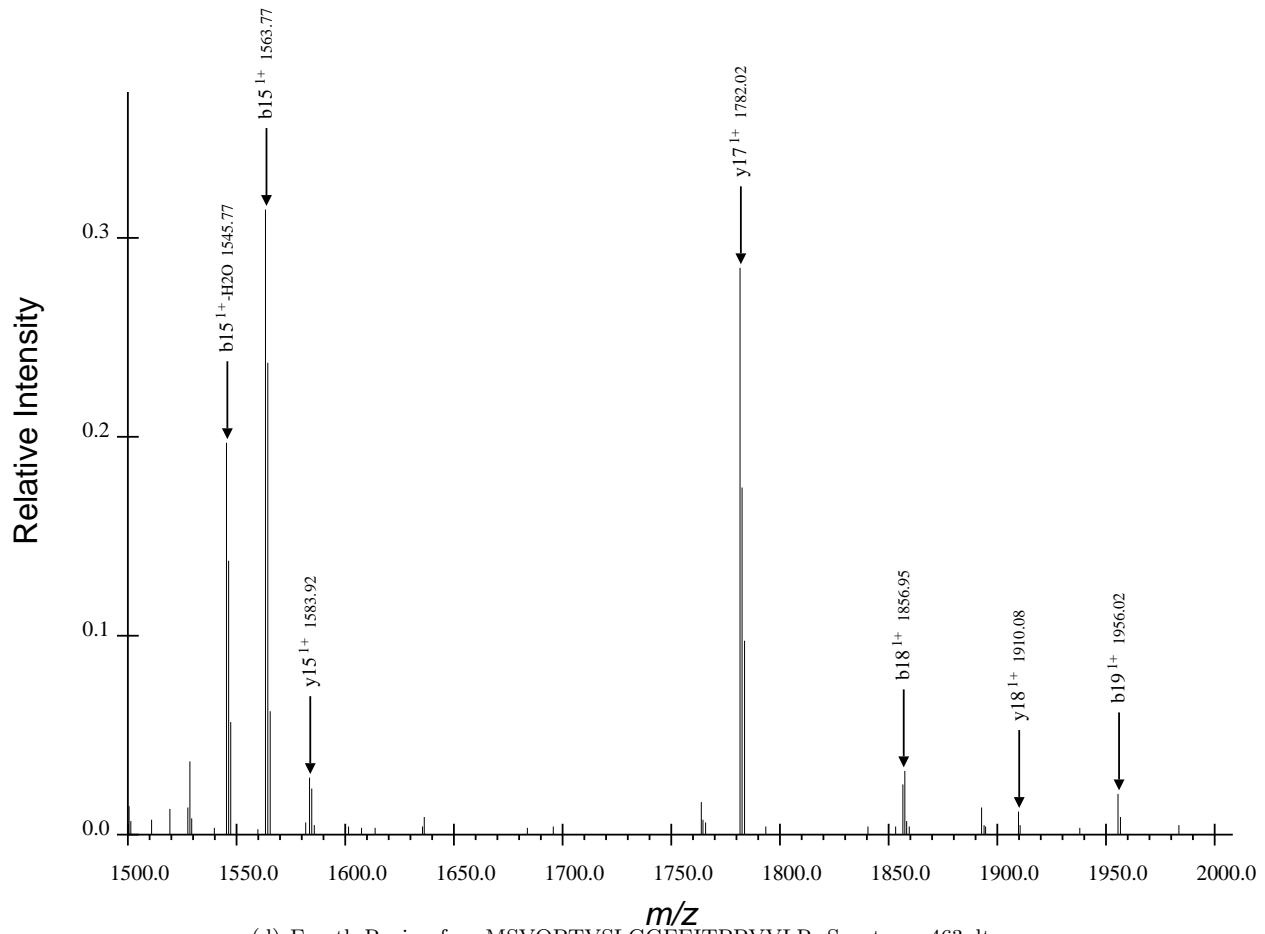

(d) Fourth Region for oMSVQPTVSLGGFEITPPVLR, Spectrum 463.dta



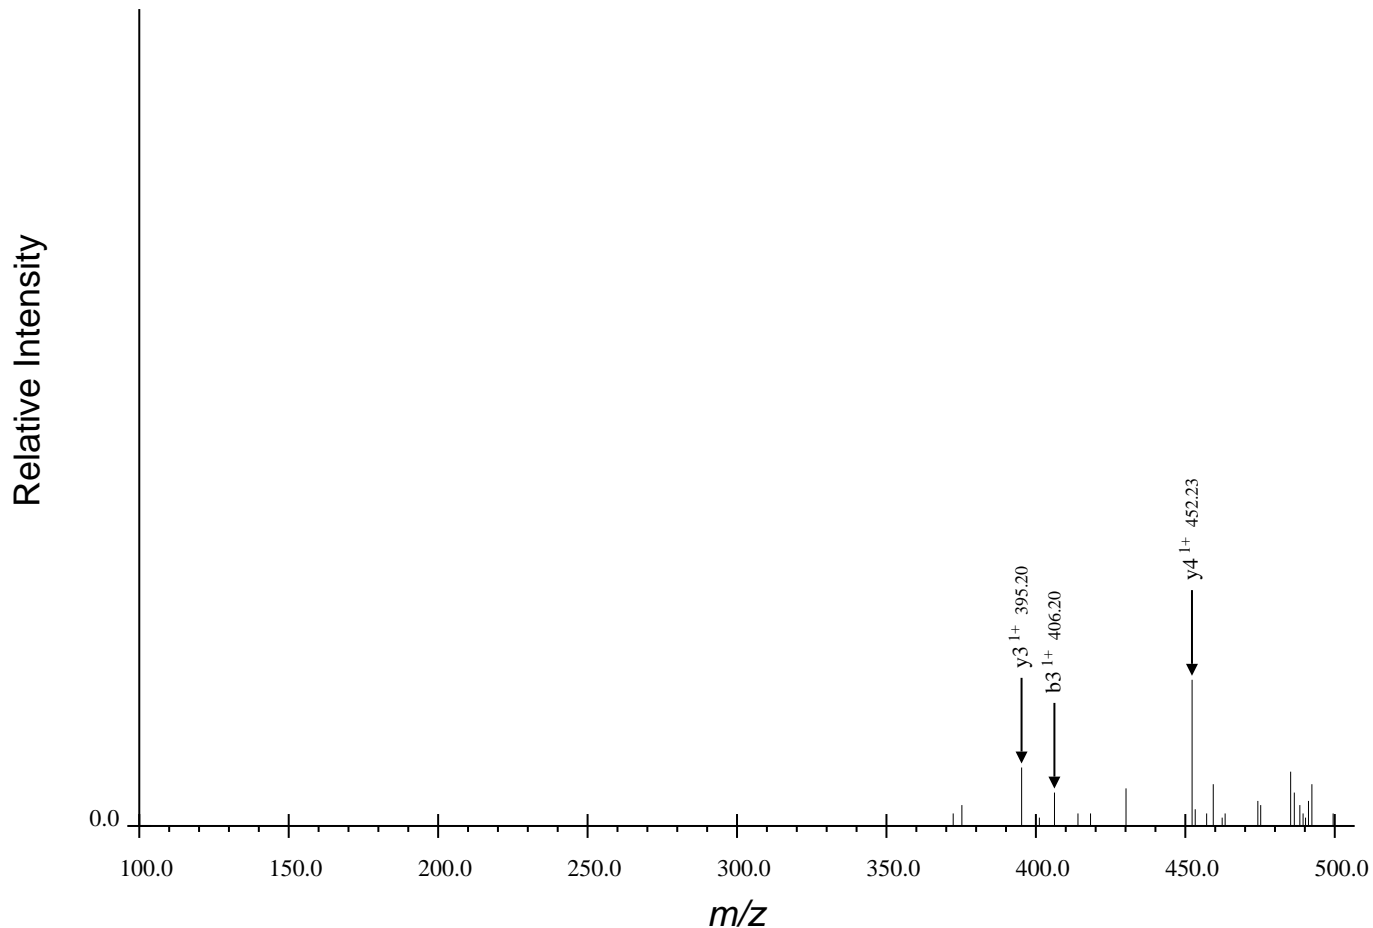

(a) First Region for YIELFLNSTPGGGSGMGGSGoMGGYGR, Spectrum 464.dta

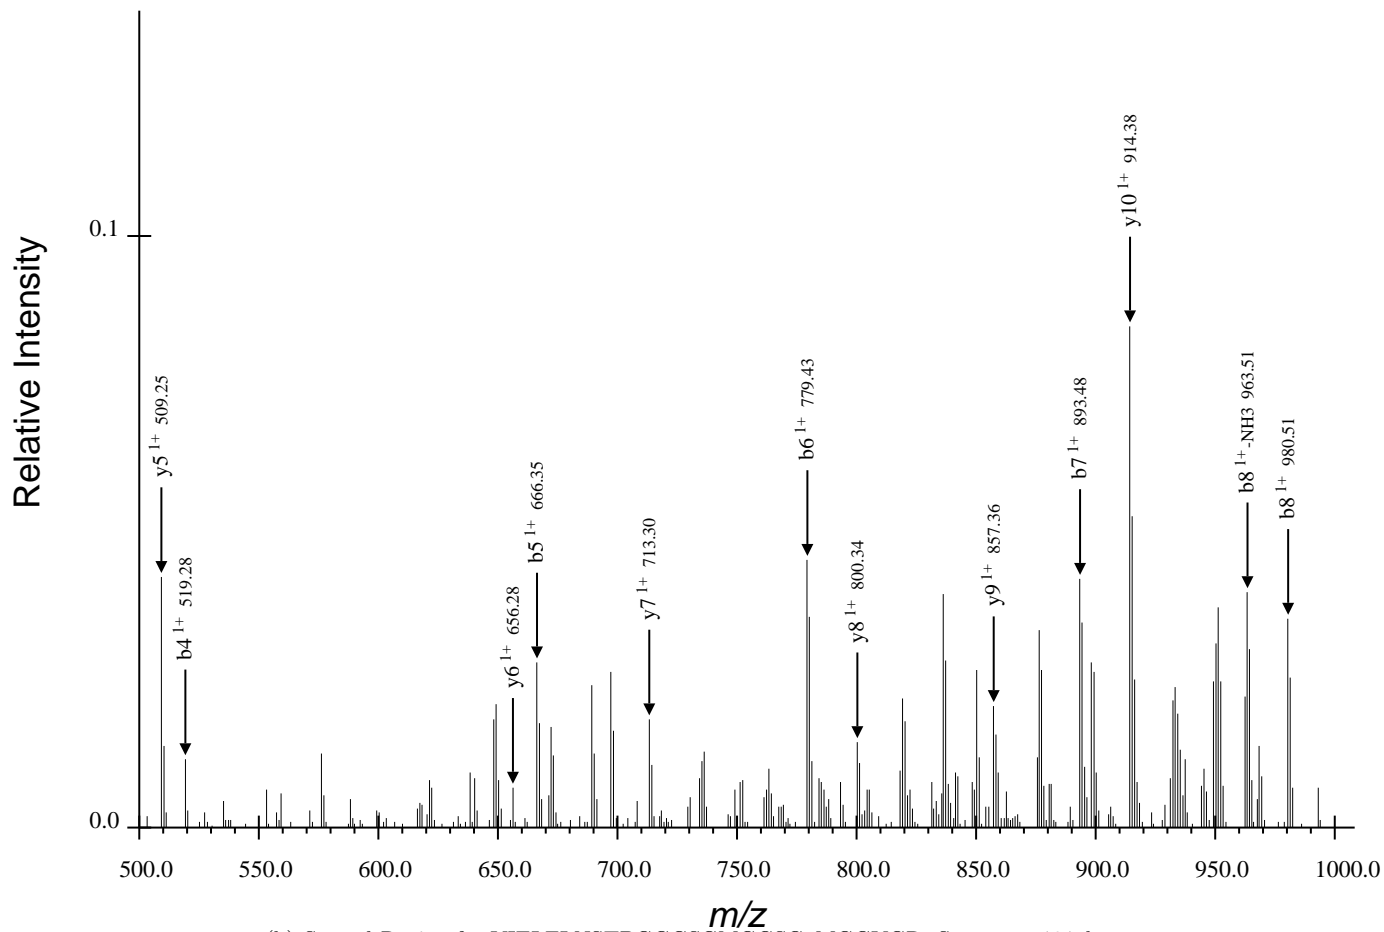

(b) Second Region for YIELFLNSTPGGGSGMGGSGoMGGYGR, Spectrum 464.dta

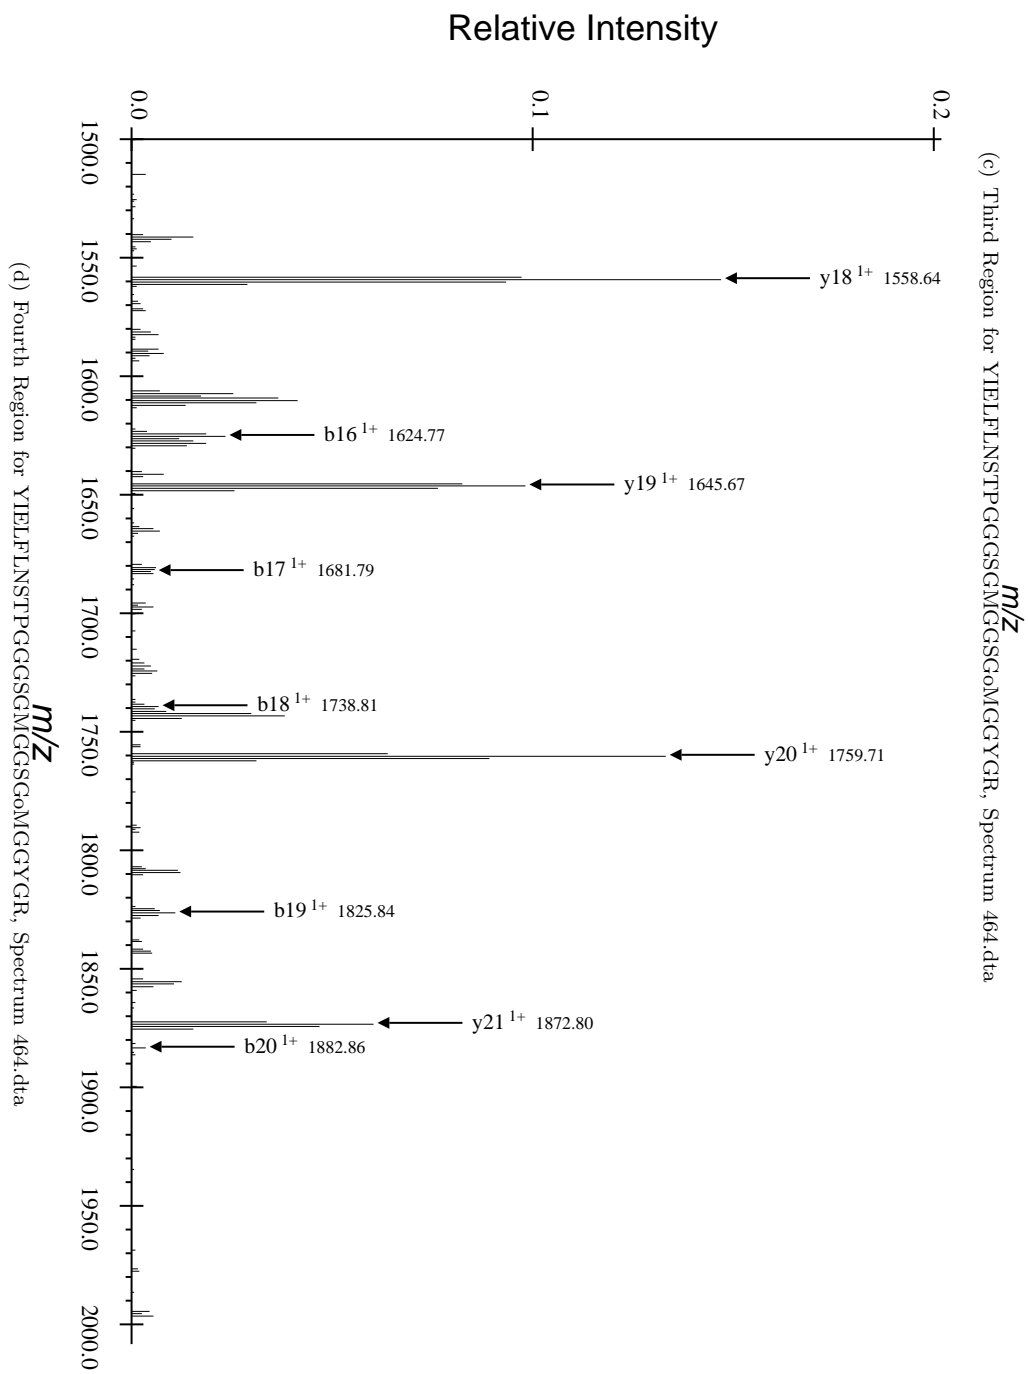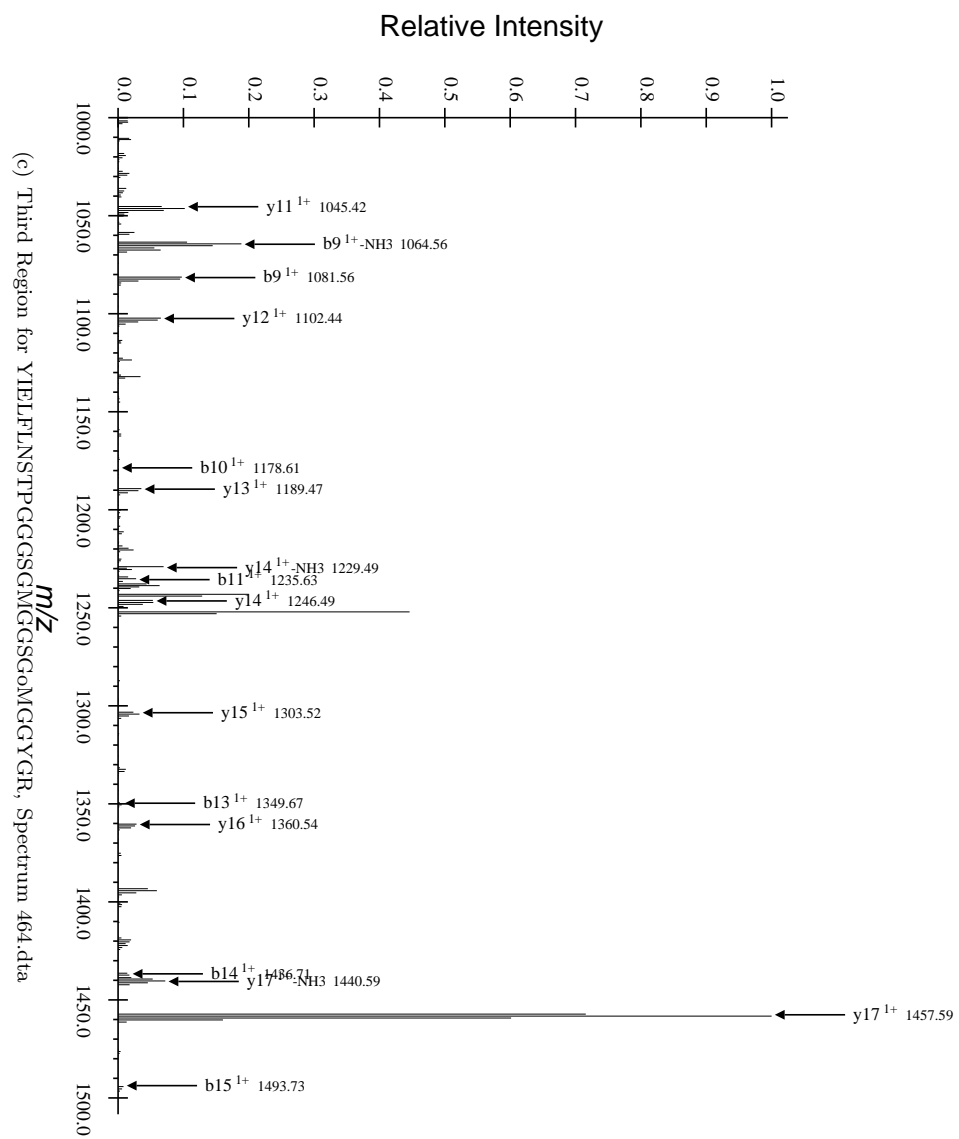

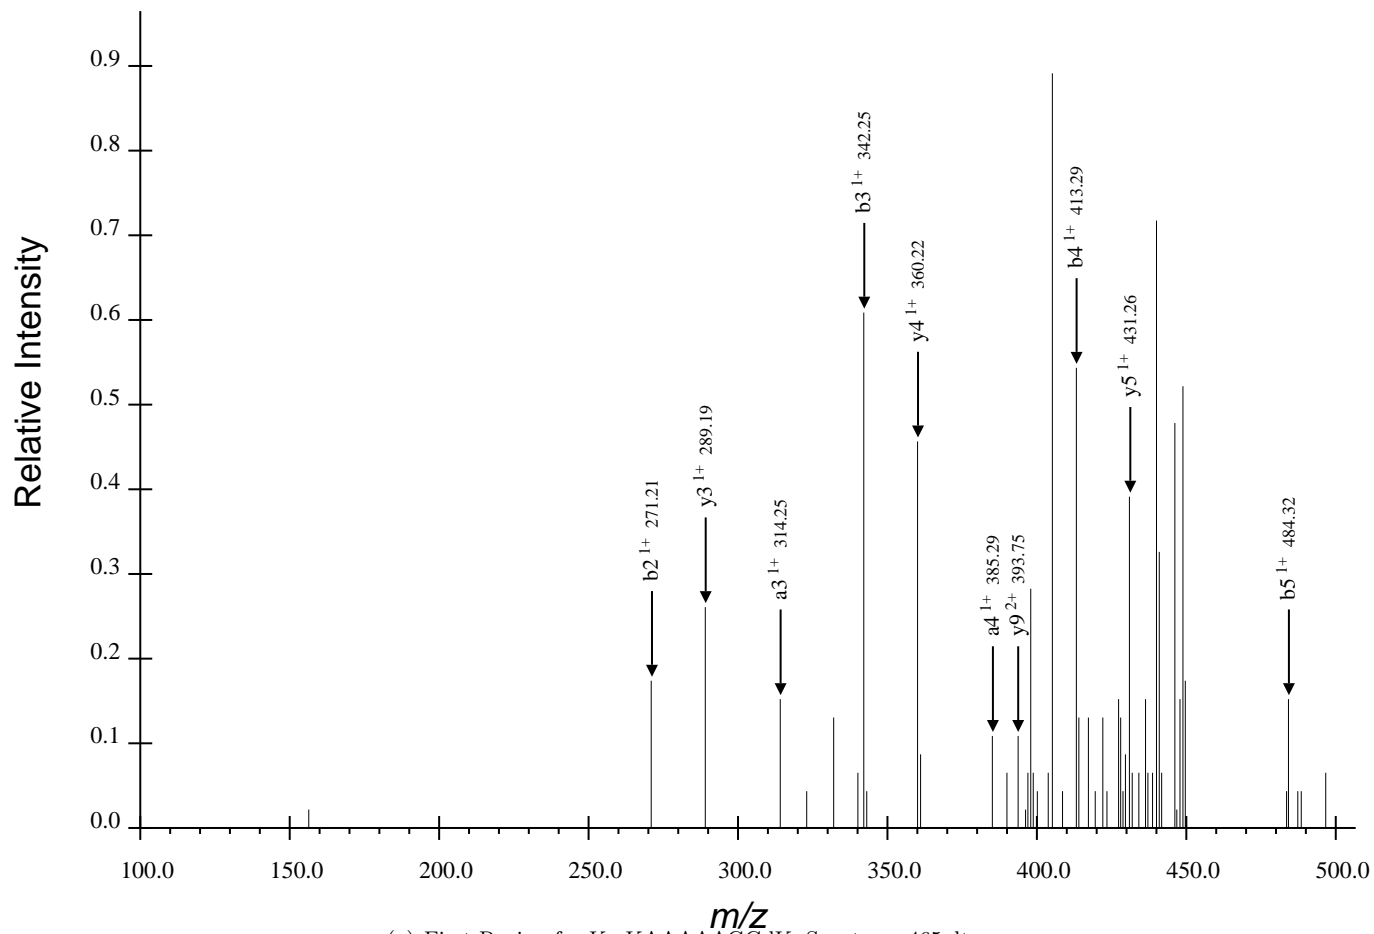

(a) First Region for KmKAAAAAGGdK, Spectrum 465.dta

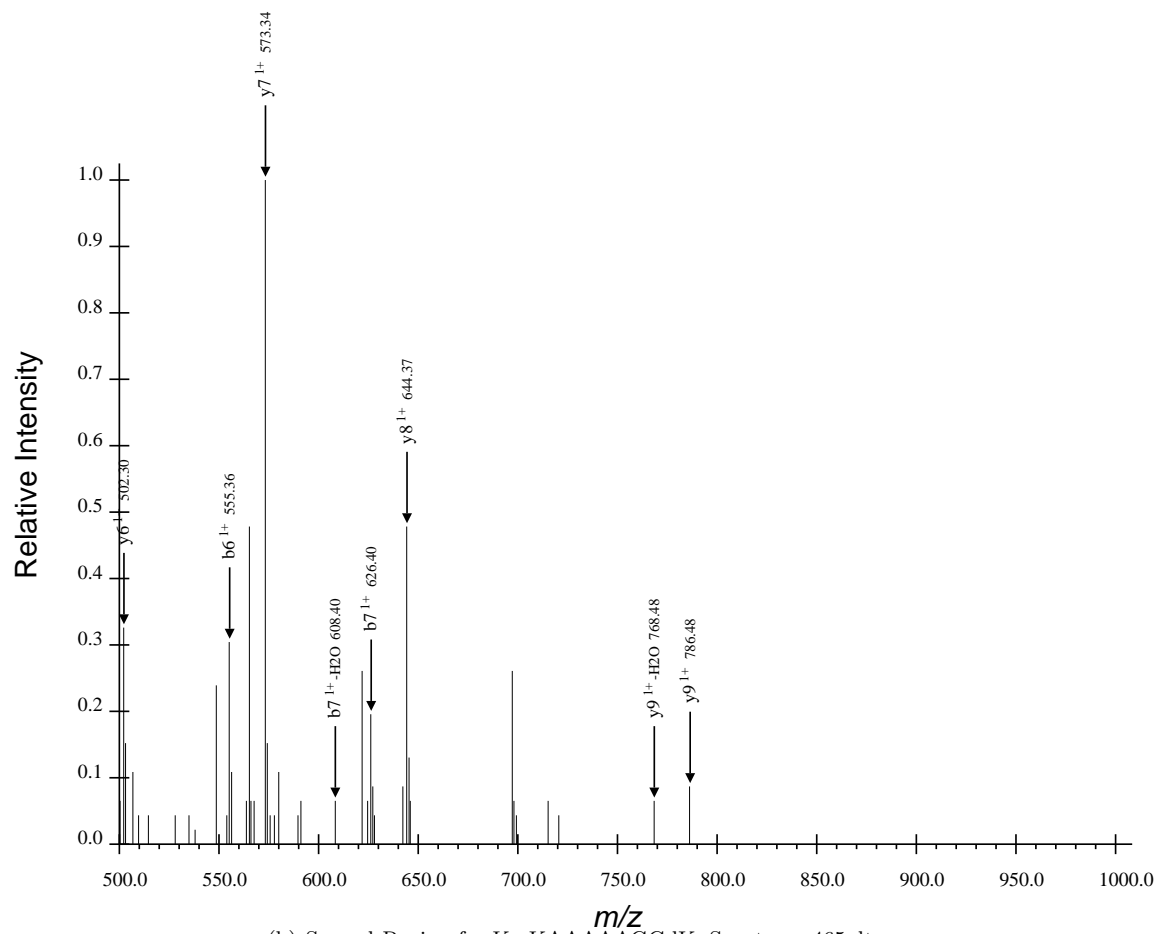

(b) Second Region for KmKAAAAAGGdK, Spectrum 465.dta

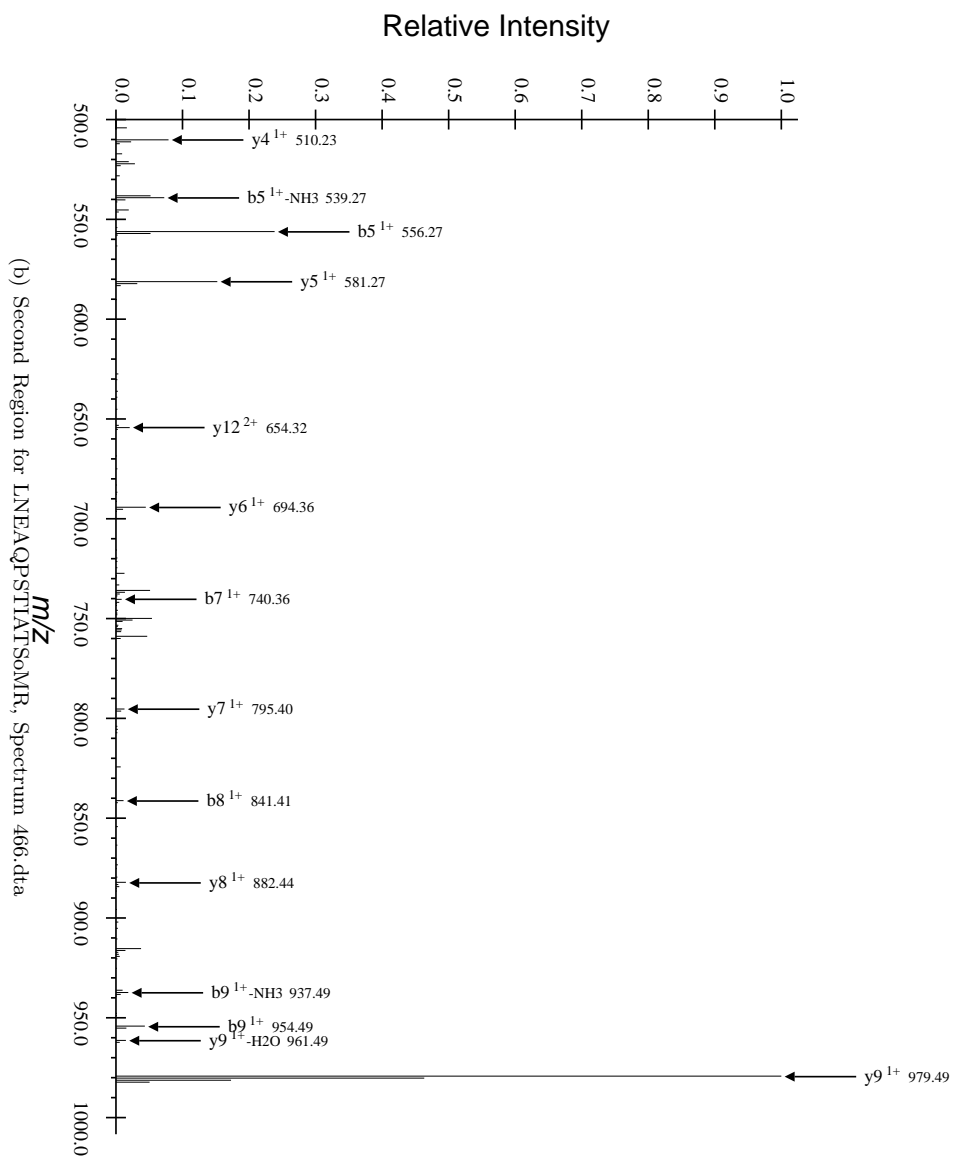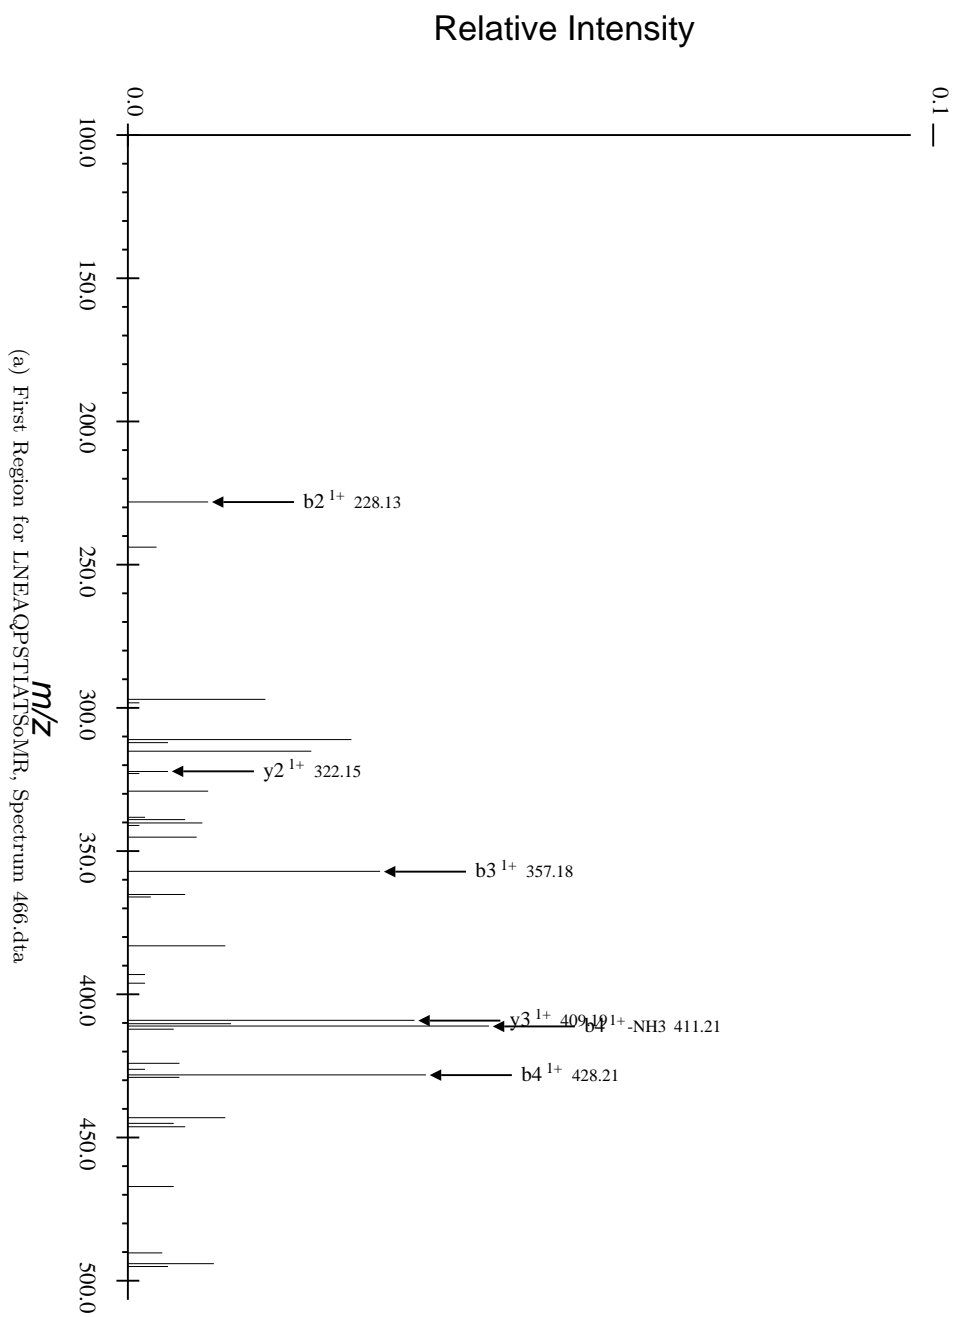

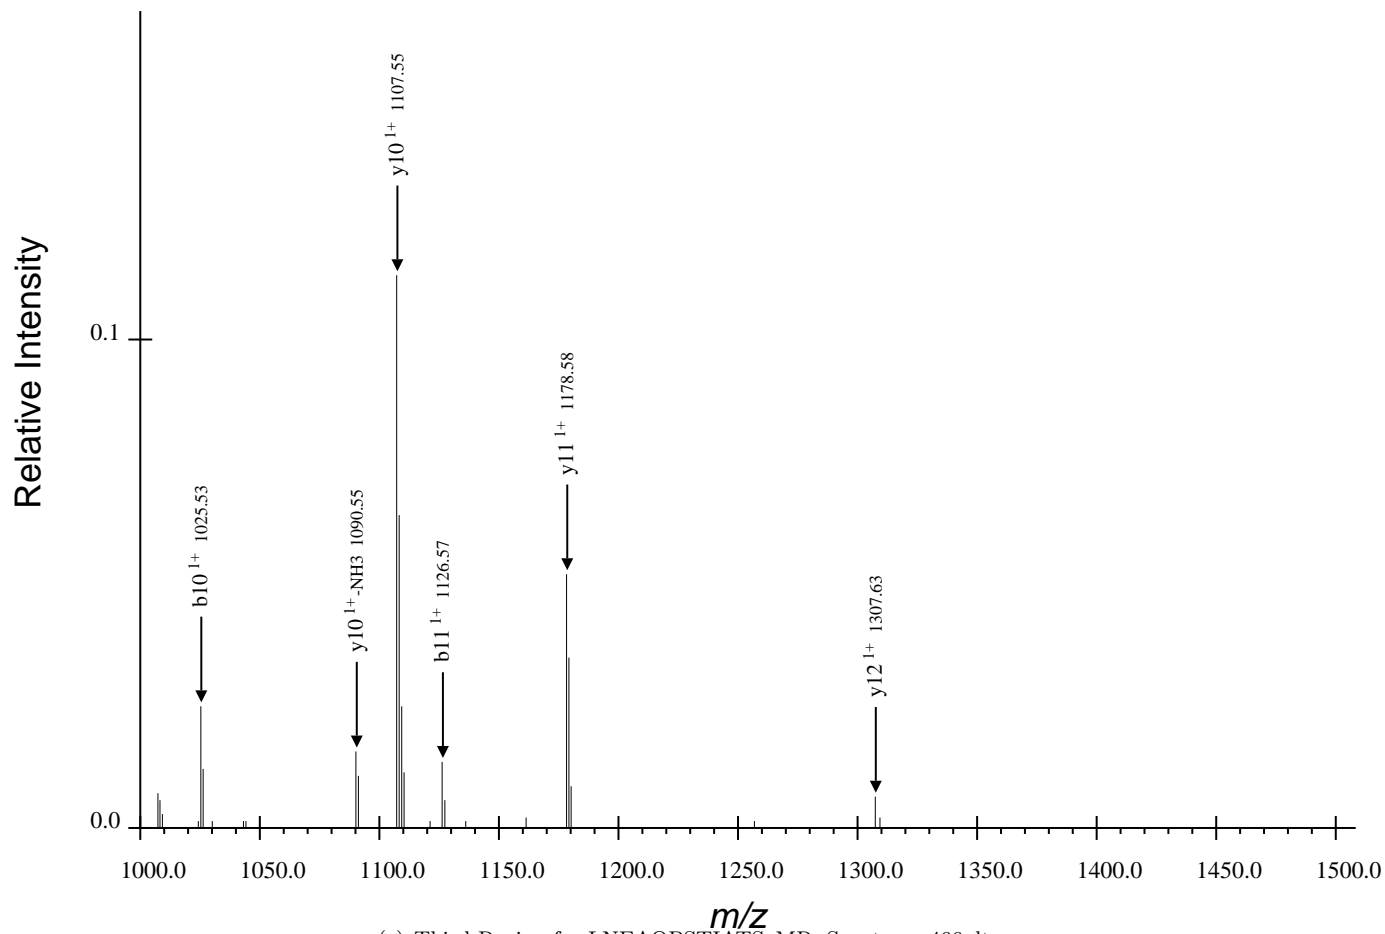

(c) Third Region for LNEAQPSTIATSoMR, Spectrum 466.dta

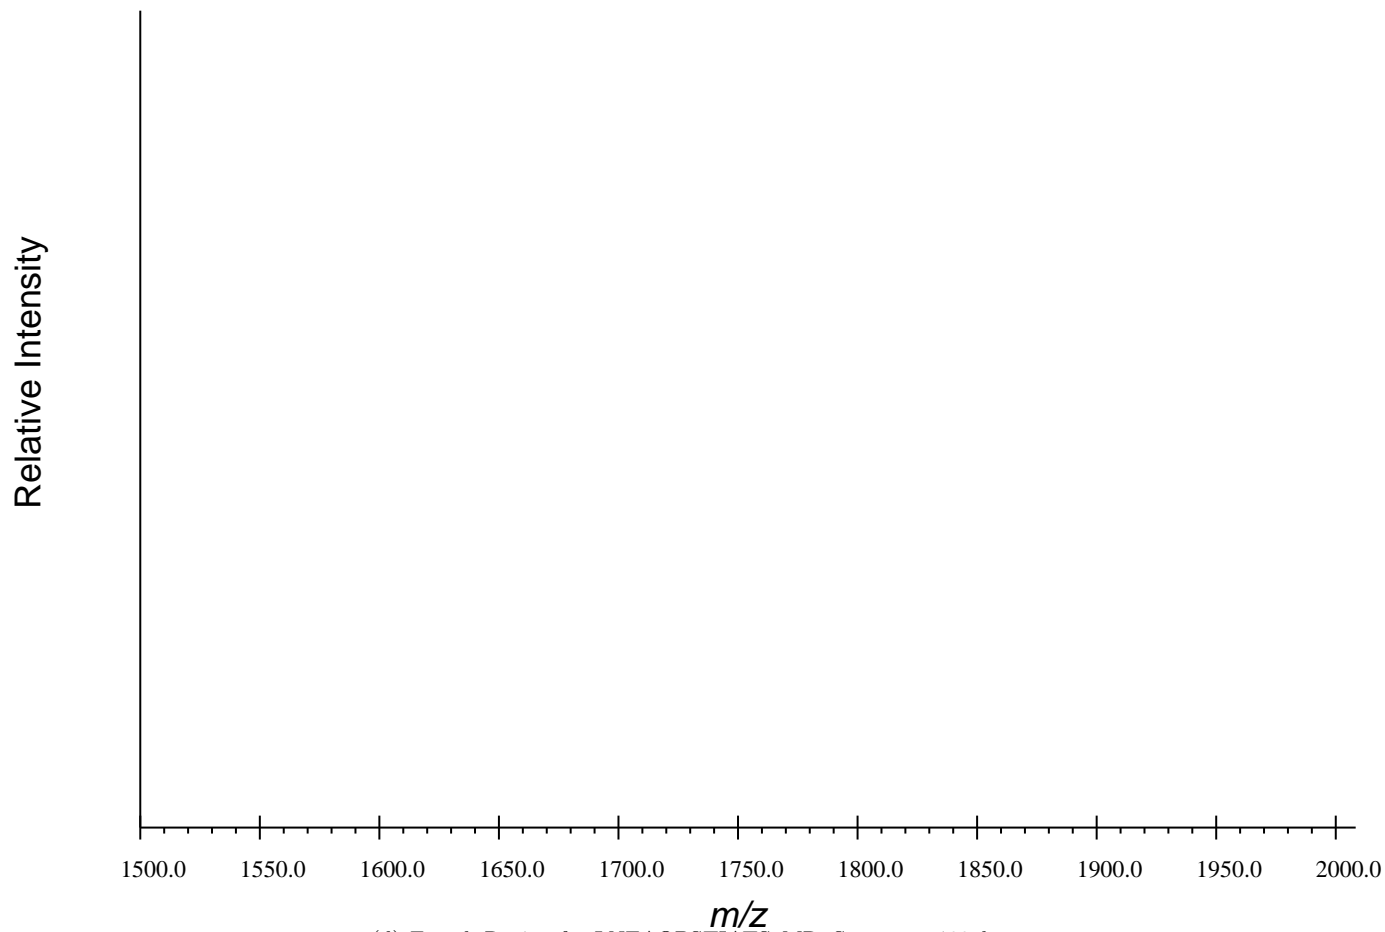

(d) Fourth Region for LNEAQPSTIATSoMR, Spectrum 466.dta

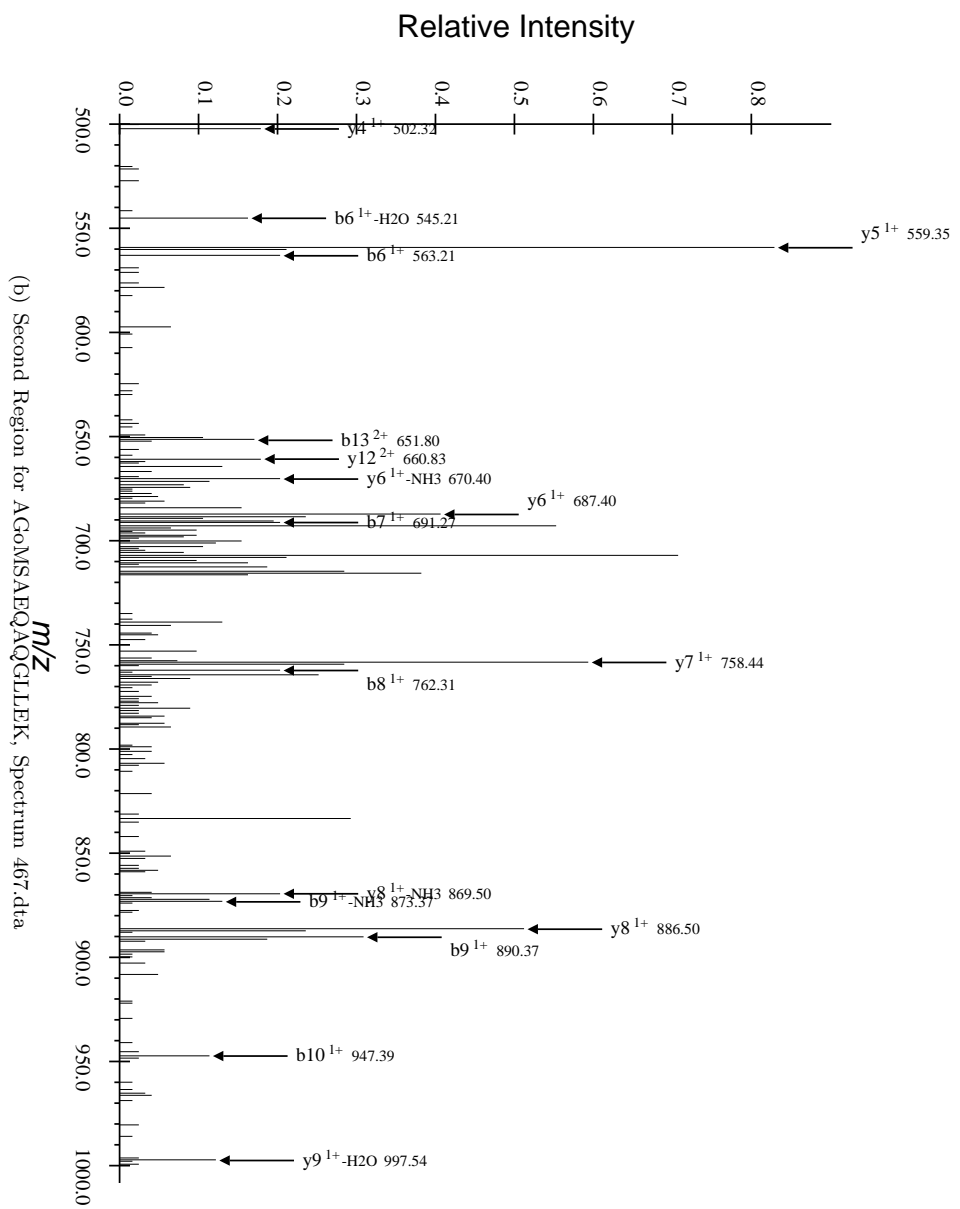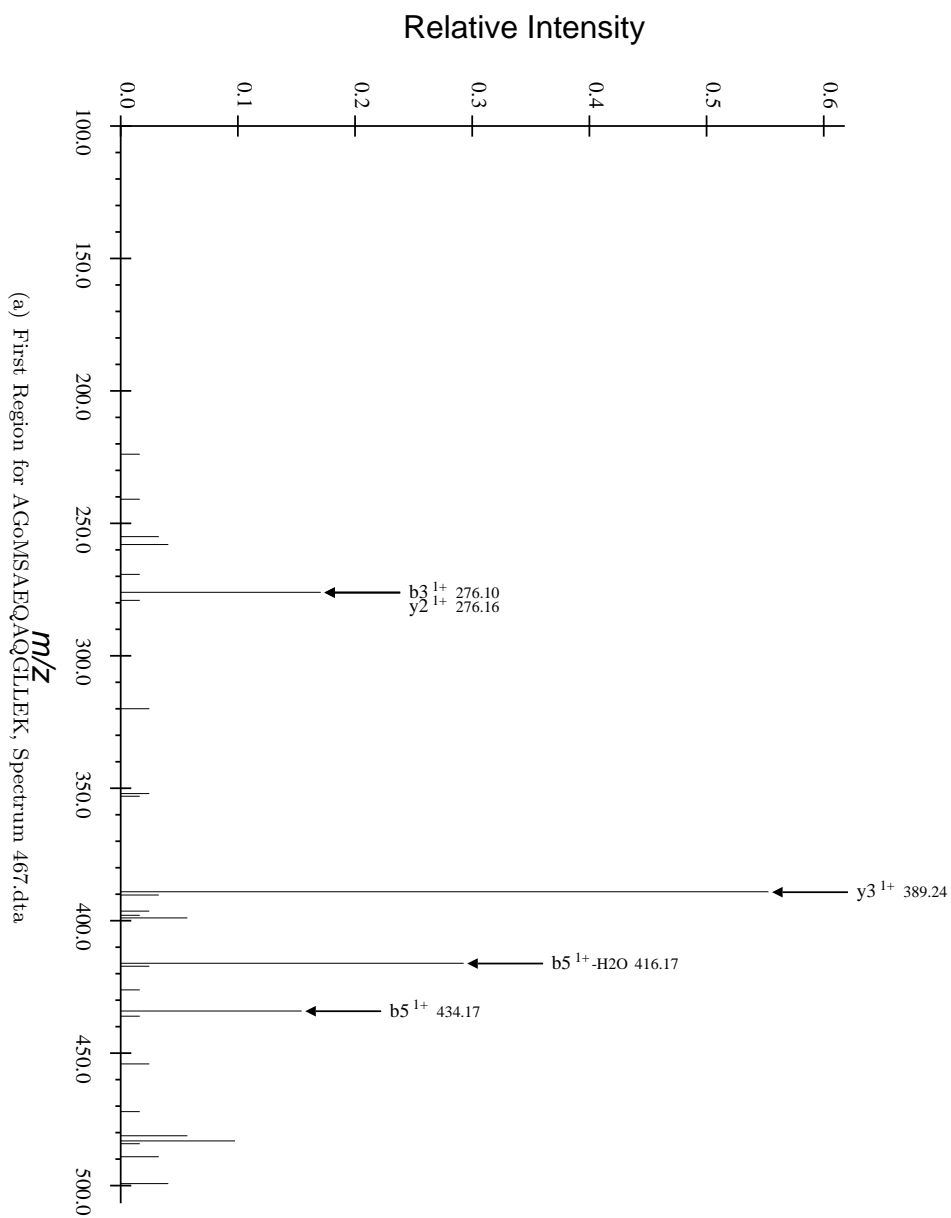

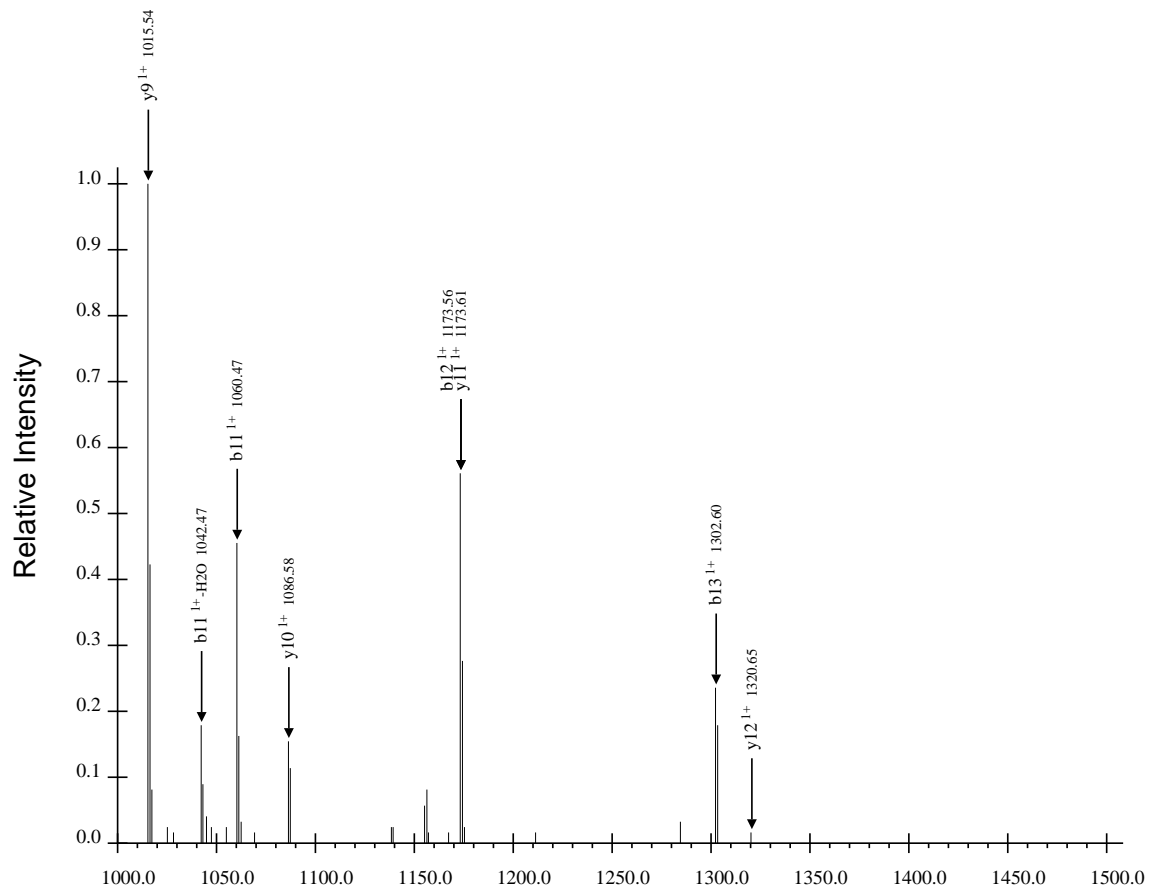

(c) Third Region for AGoMSAEQAQG LLEK, Spectrum 467.dta

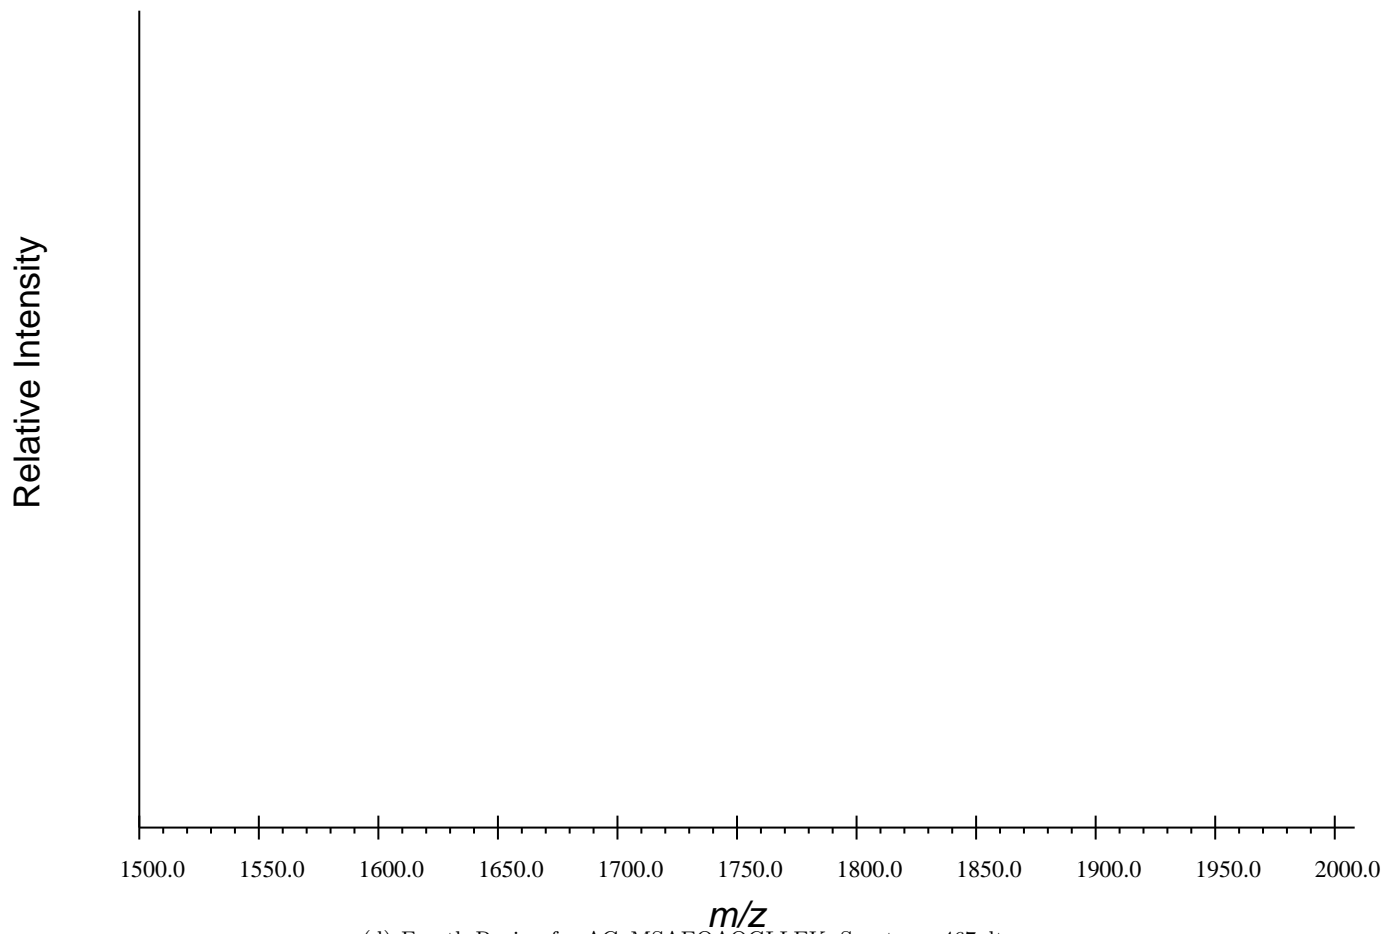

(d) Fourth Region for AGoMSAEQAQG LLEK, Spectrum 467.dta

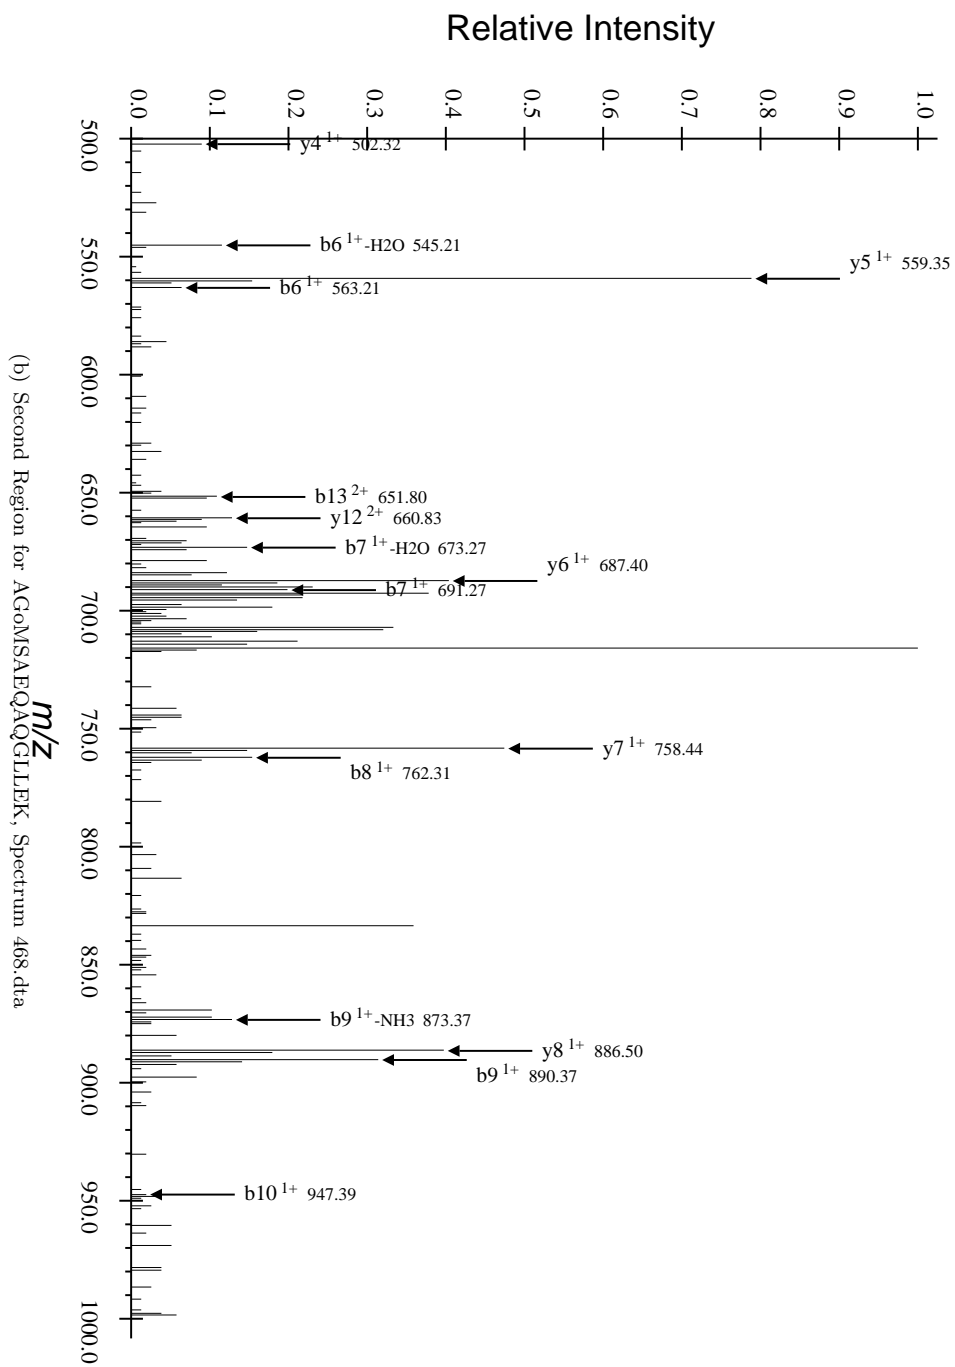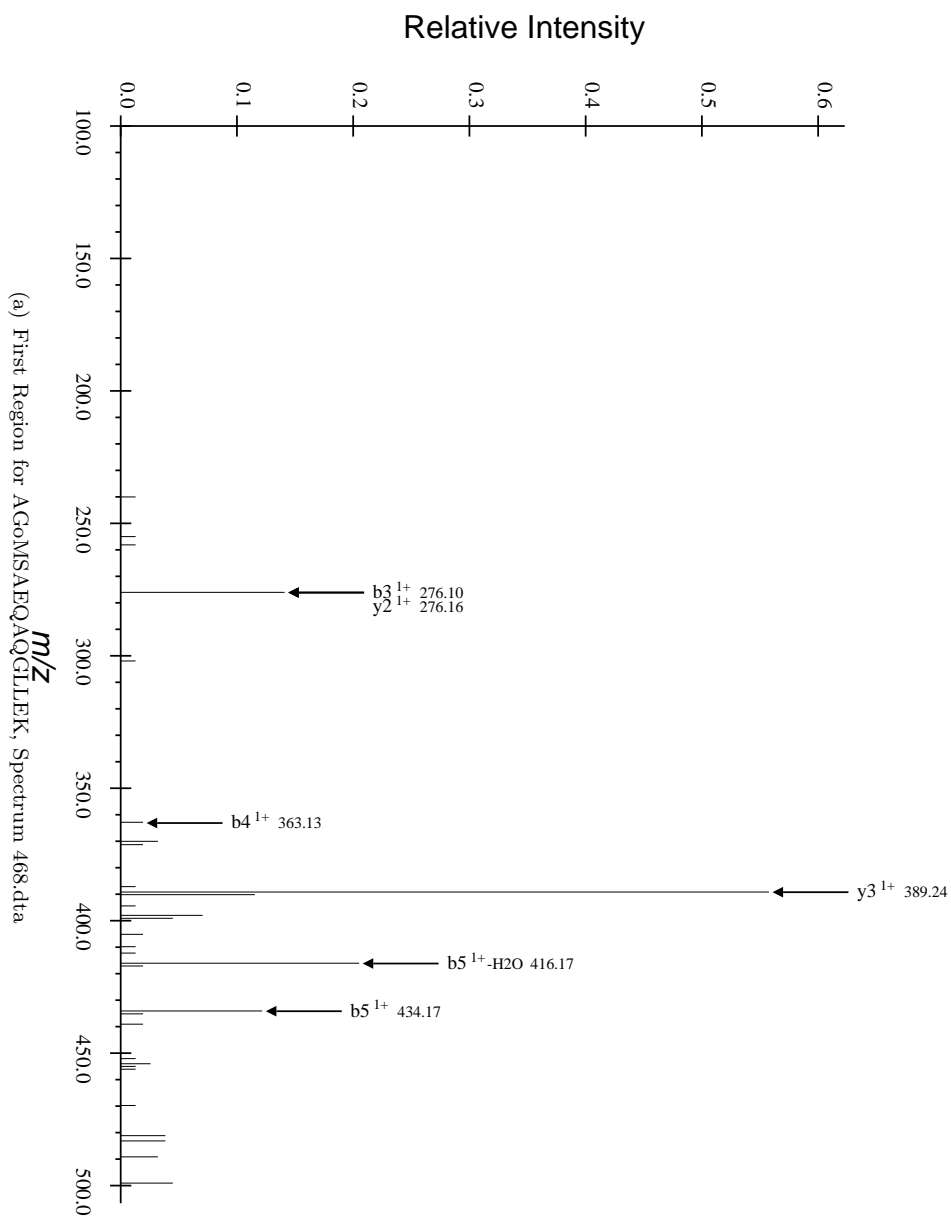



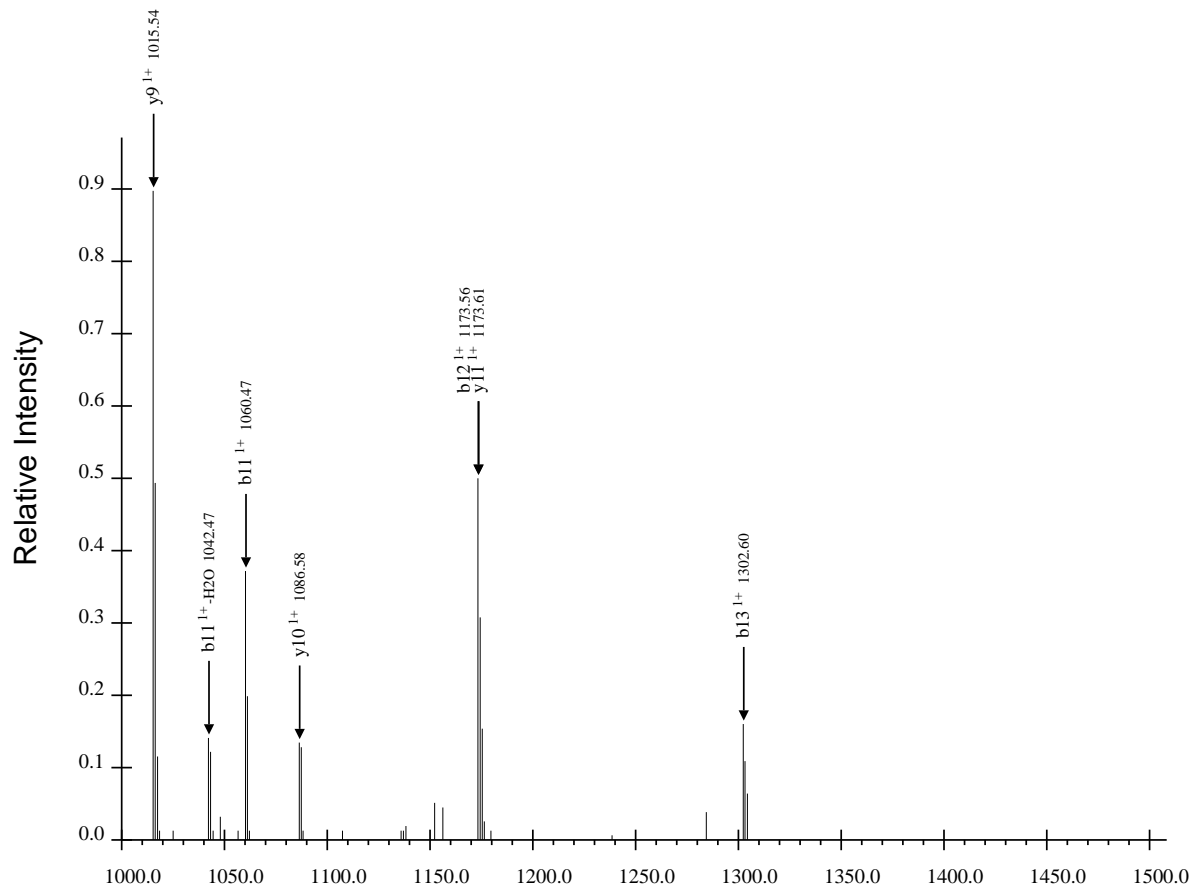

(c) Third Region for AGoMSAEQAQGLLEK, Spectrum 468.dta

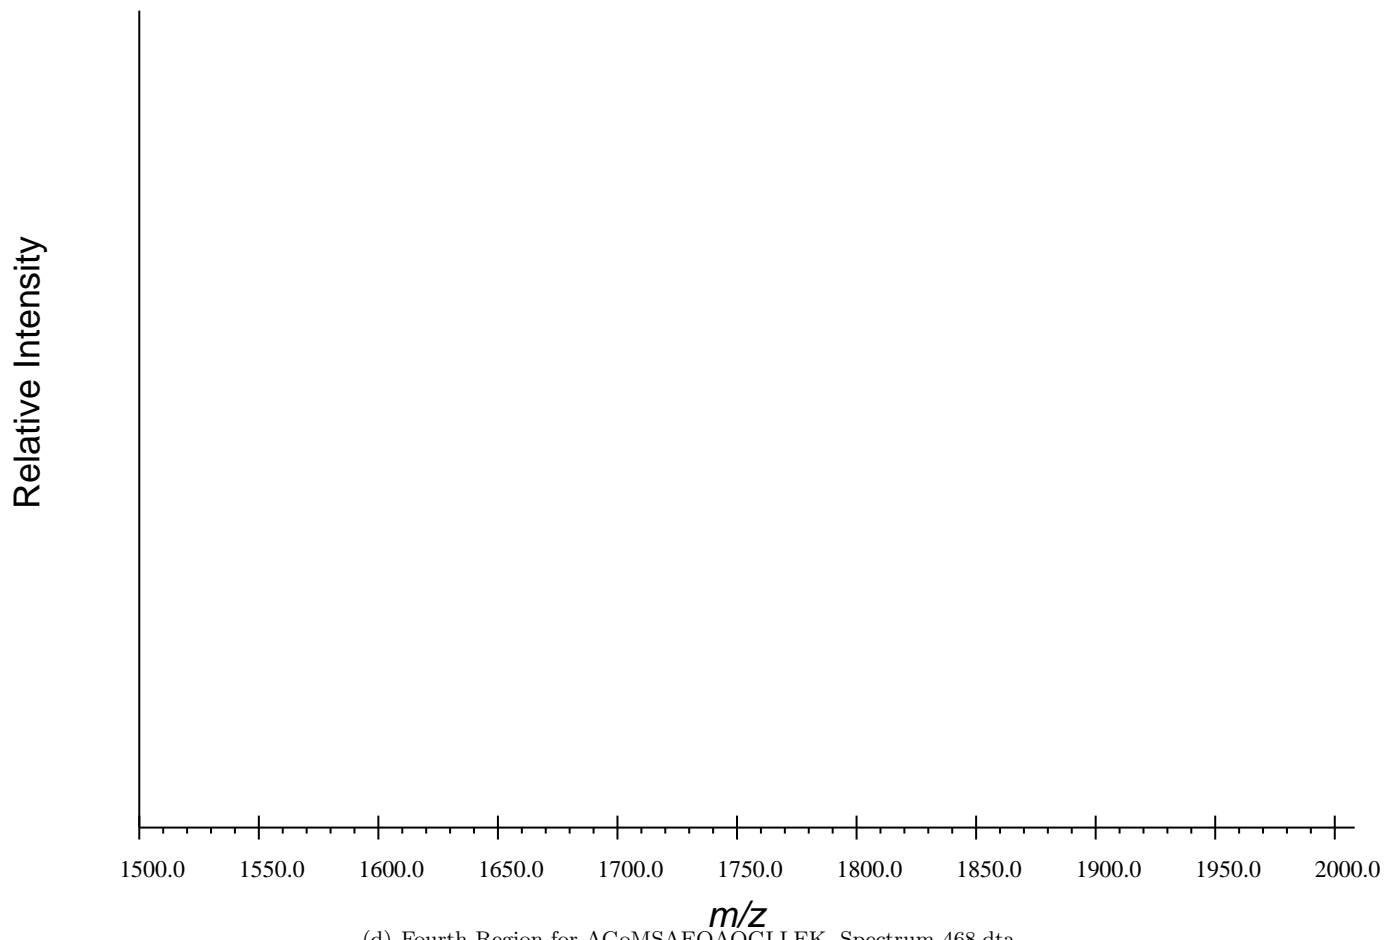

(d) Fourth Region for AGoMSAEQAQGLLEK, Spectrum 468.dta

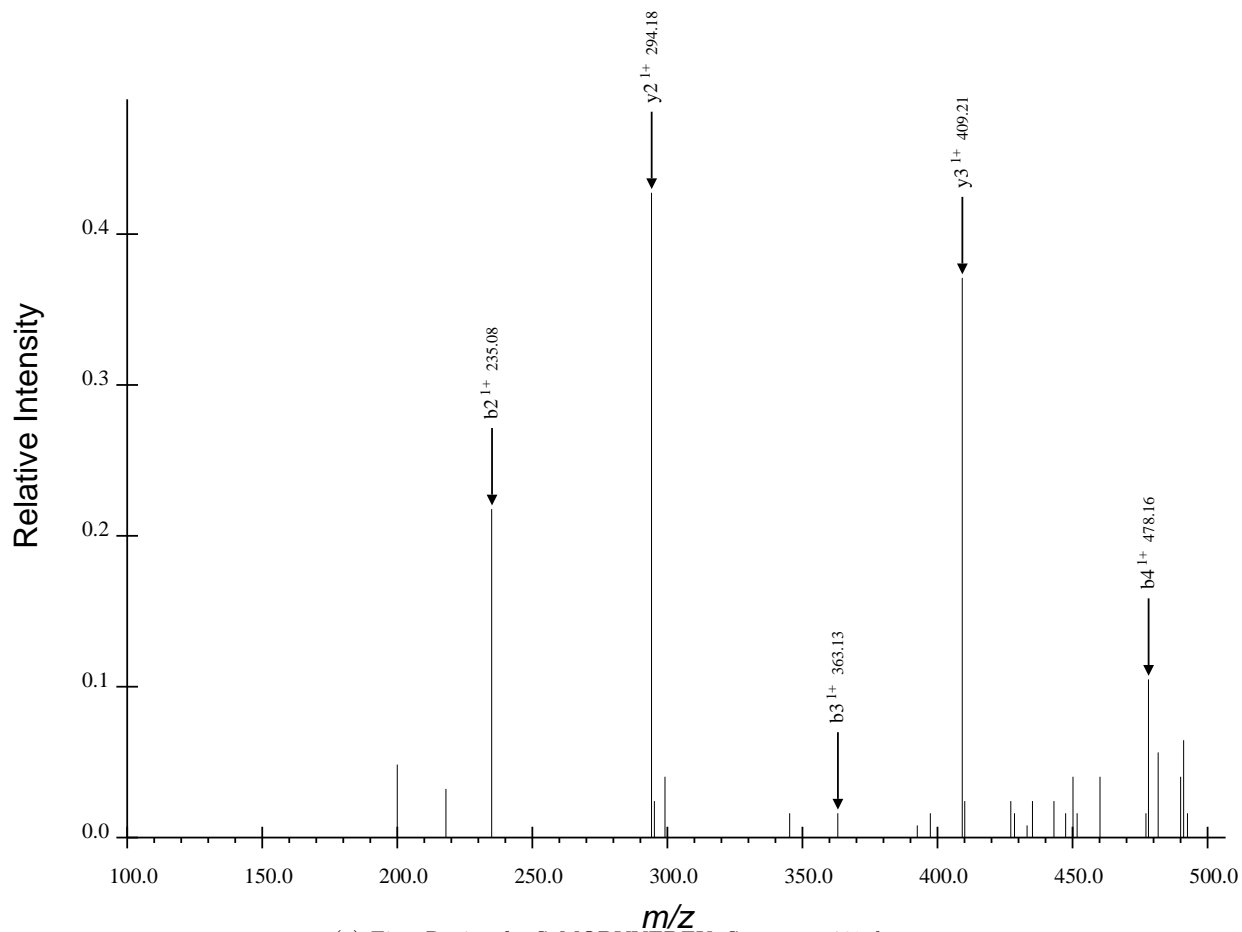

(a) First Region for SoMQDVVEDFK, Spectrum 469.dta

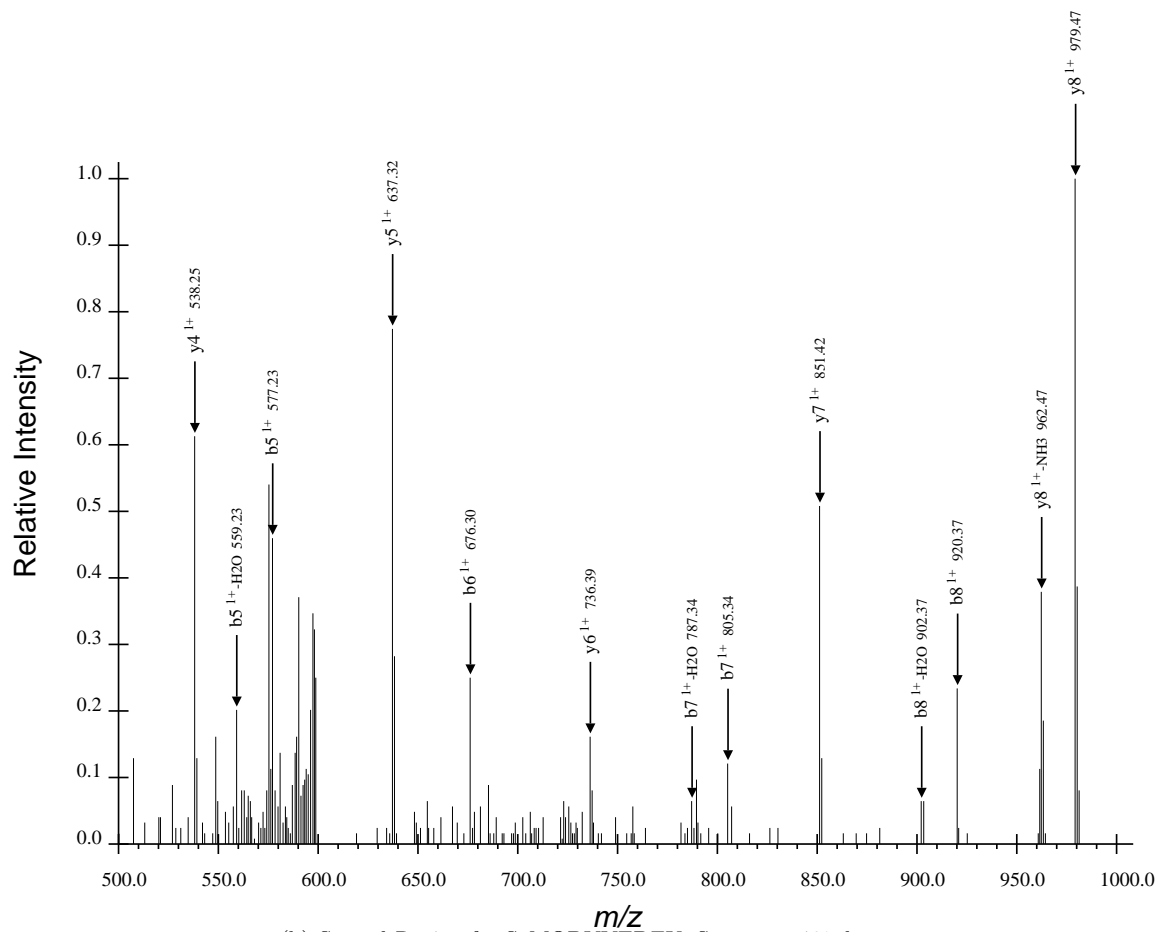

(b) Second Region for SoMQDVVEDFK, Spectrum 469.dta

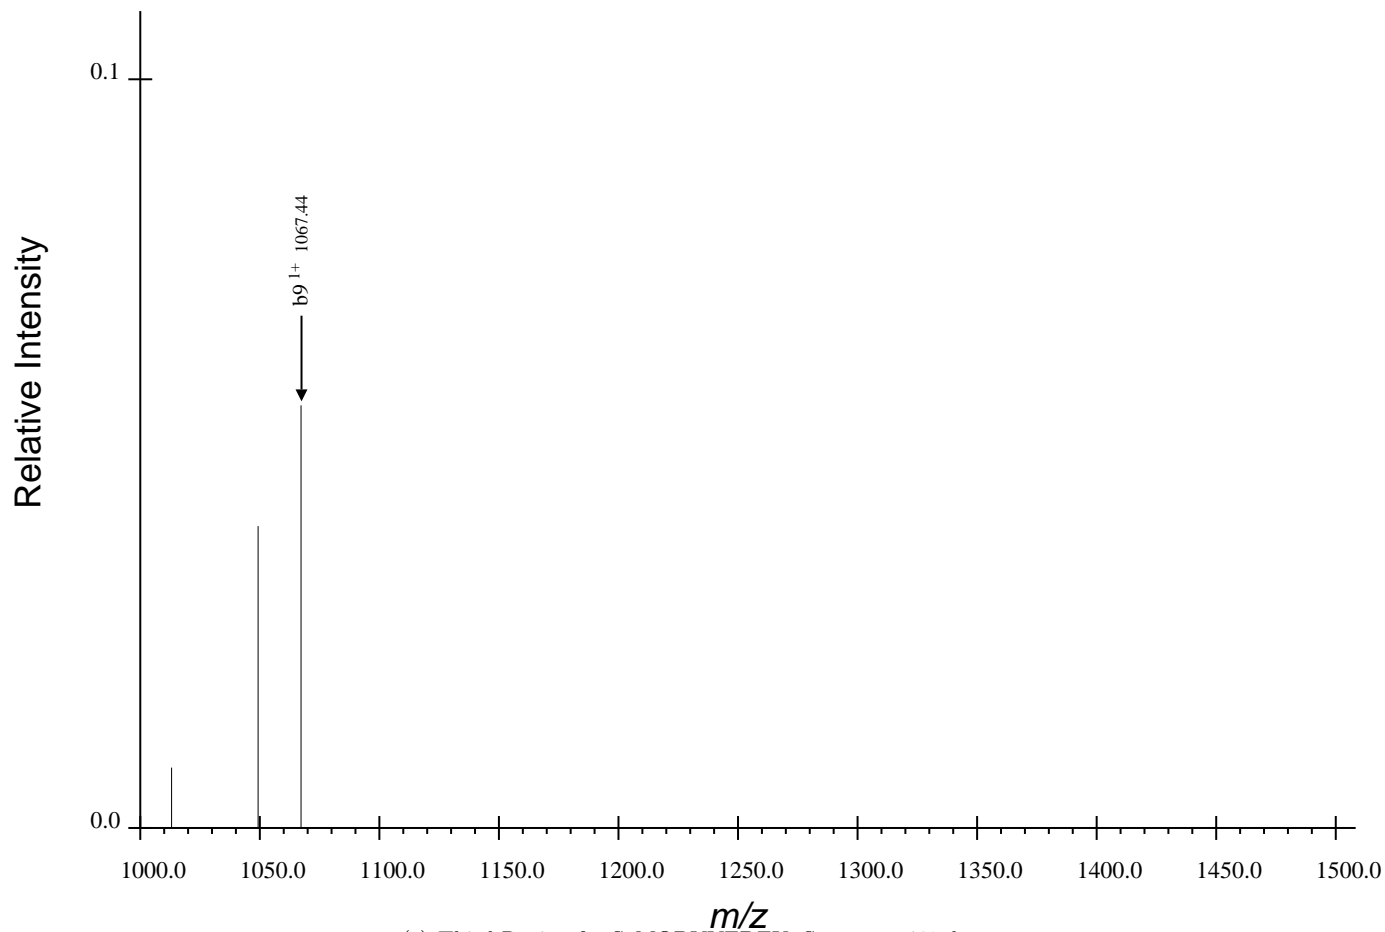

(c) Third Region for SoMQDVVEDFK, Spectrum 469.dta

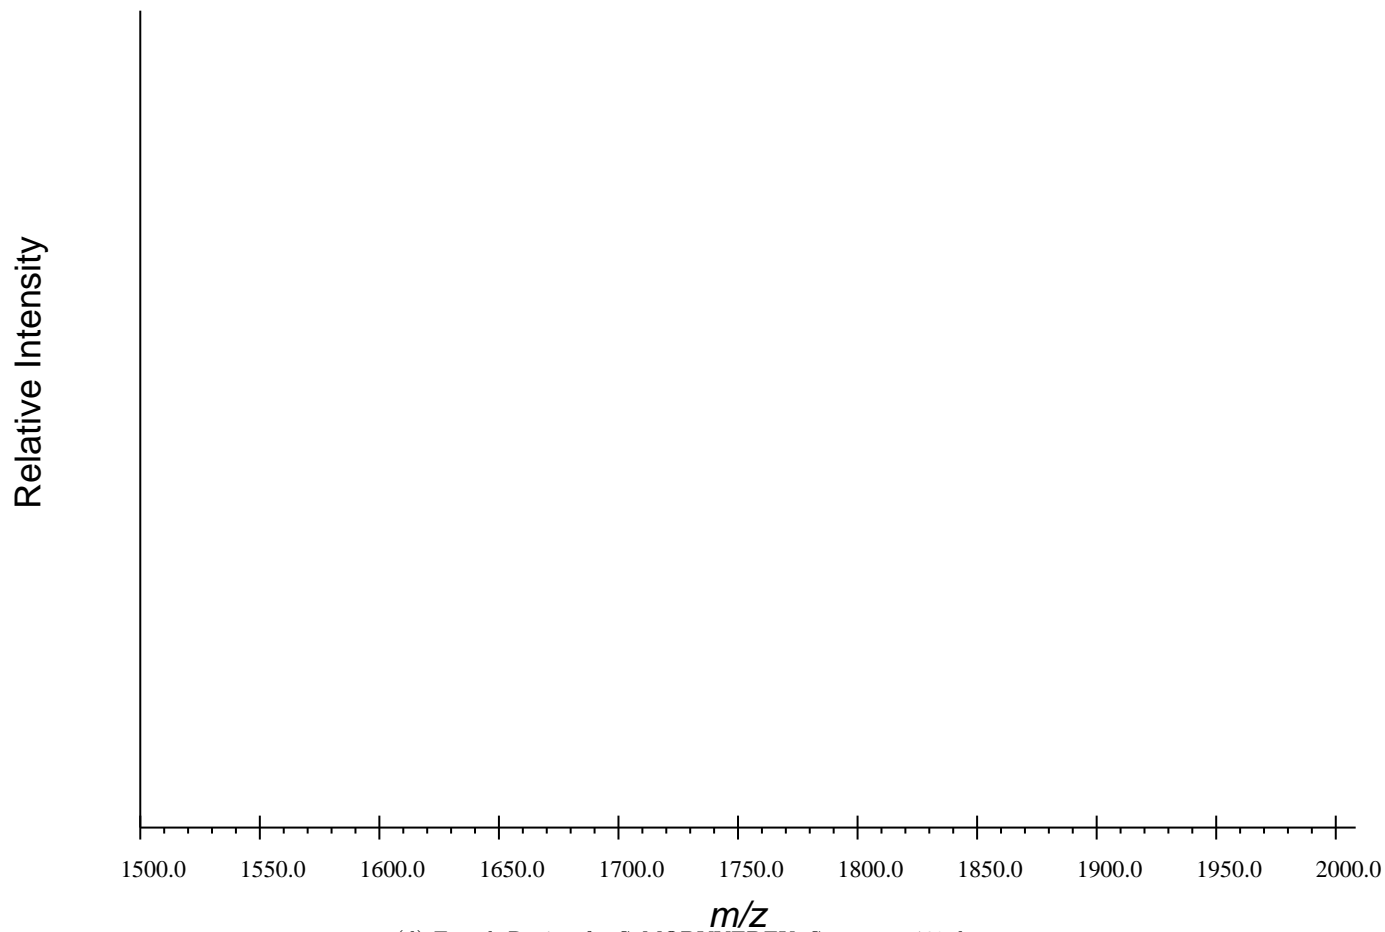

(d) Fourth Region for SoMQDVVEDFK, Spectrum 469.dta

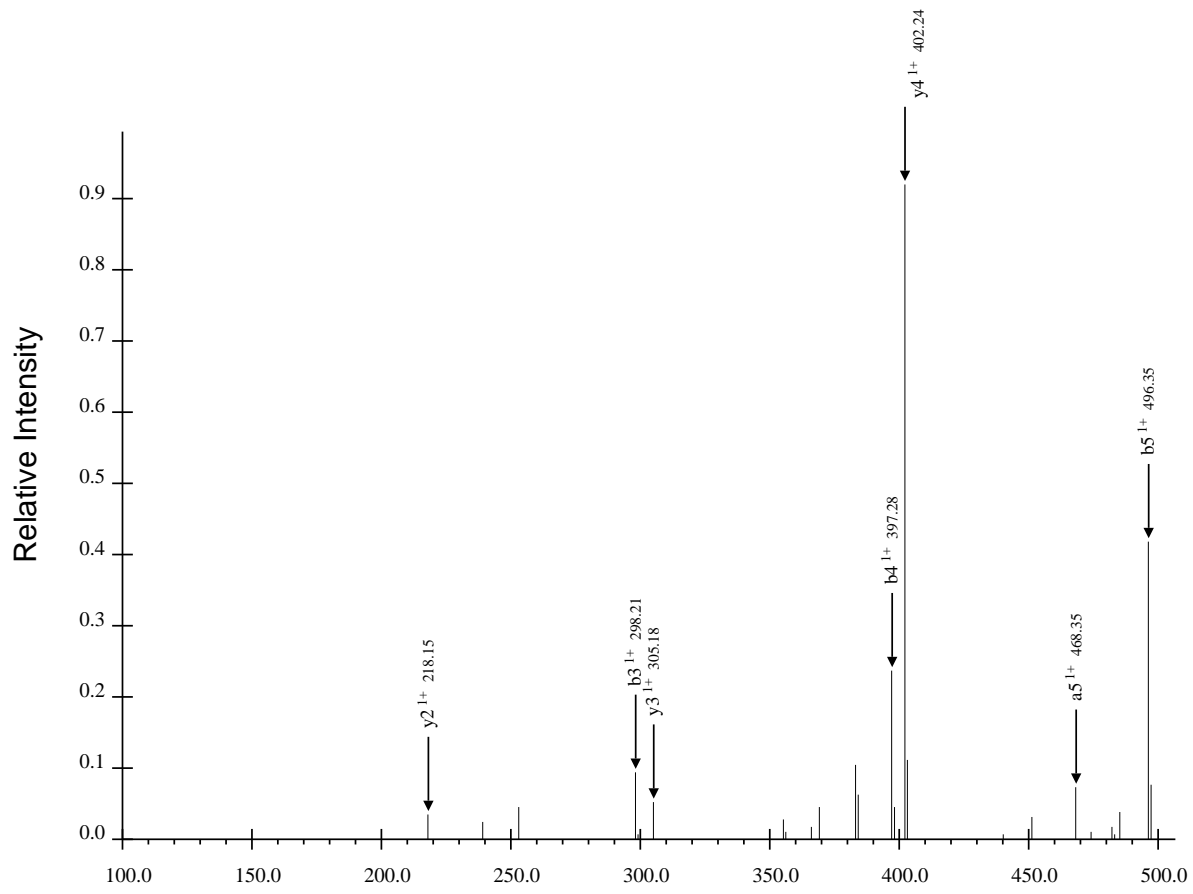

(a) First Region for ALIVVQQGoMTPSAK, Spectrum 470.dta

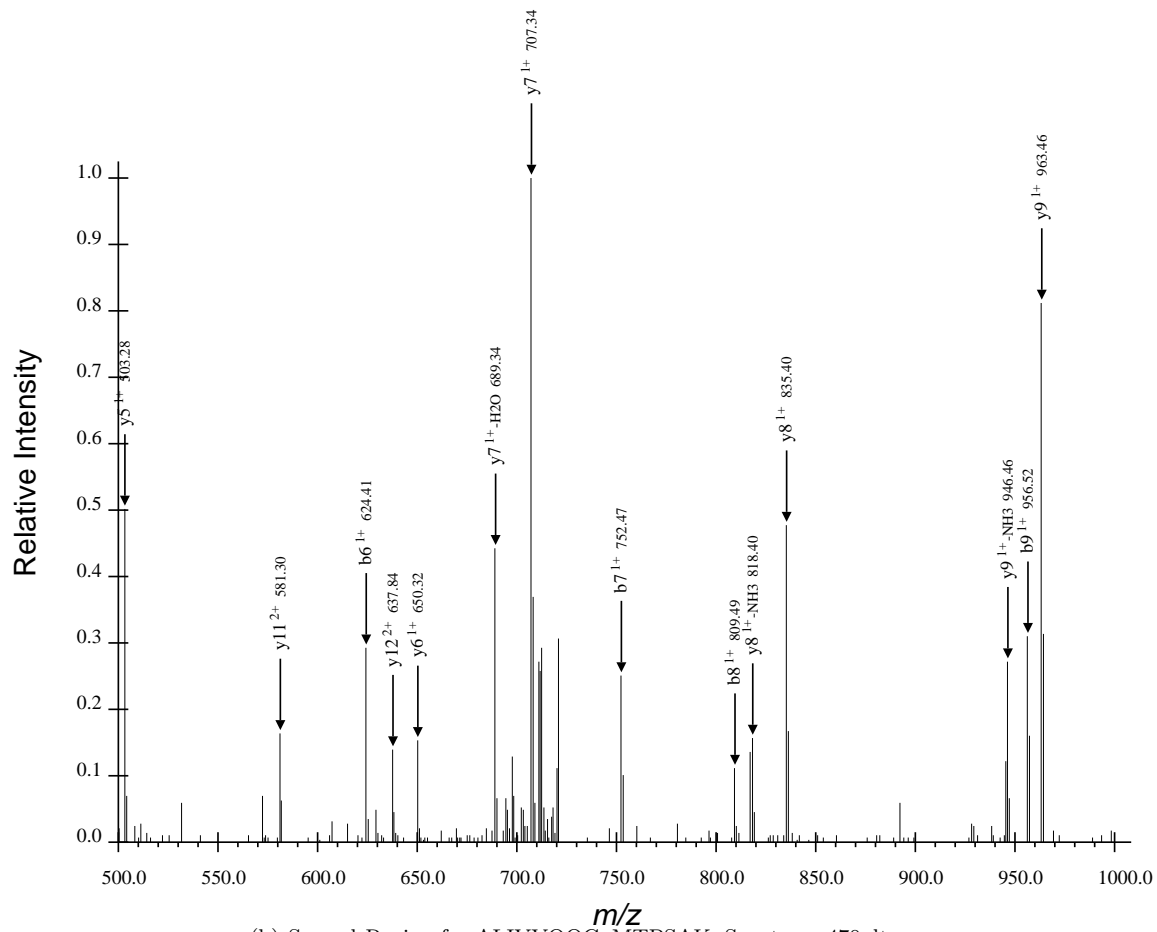

(b) Second Region for ALIVVQQGoMTPSAK, Spectrum 470.dta

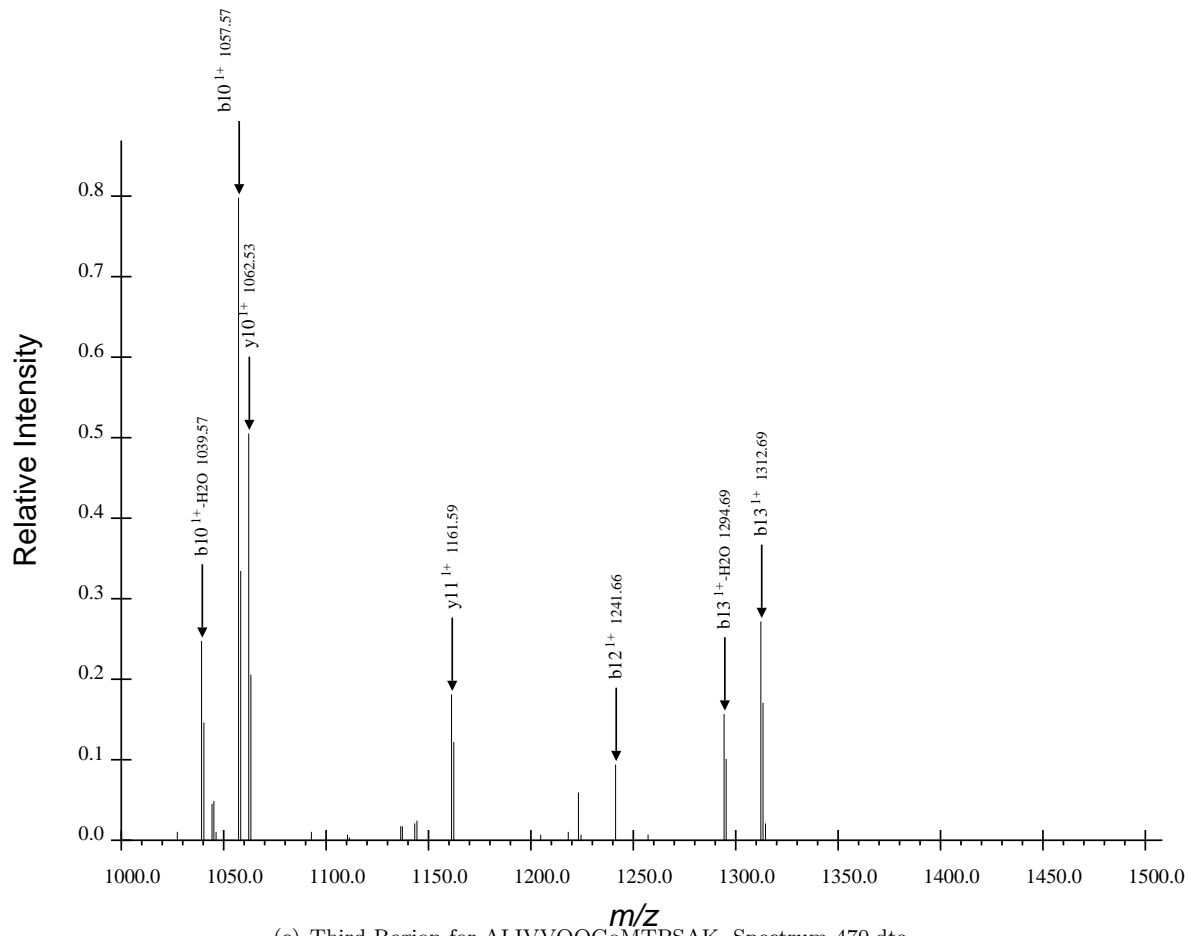

(c) Third Region for ALIVVQQGoMTPSAK, Spectrum 470.dta

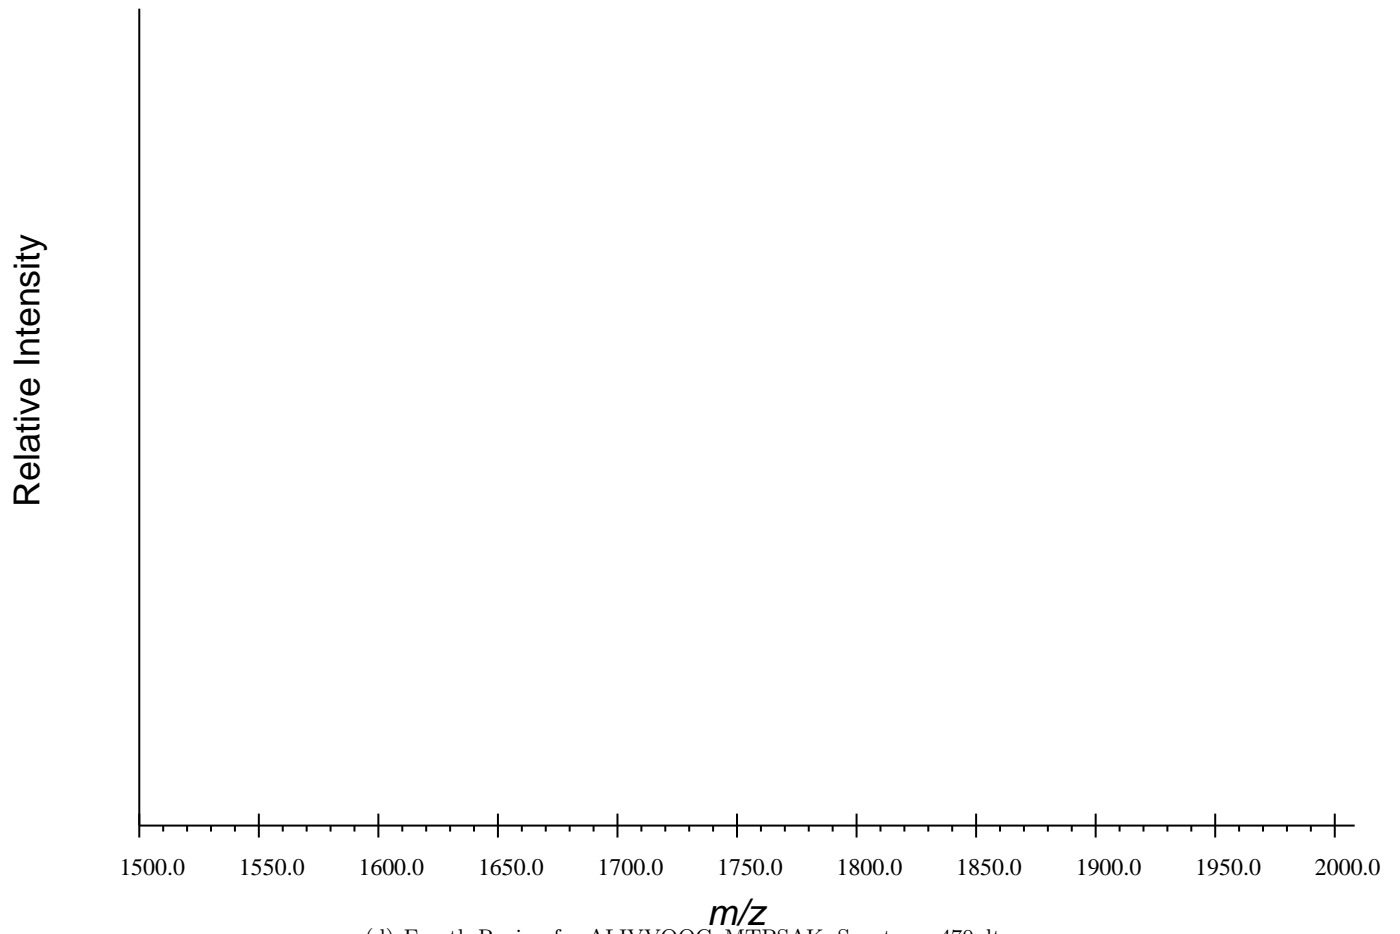

(d) Fourth Region for ALIVVQQGoMTPSAK, Spectrum 470.dta

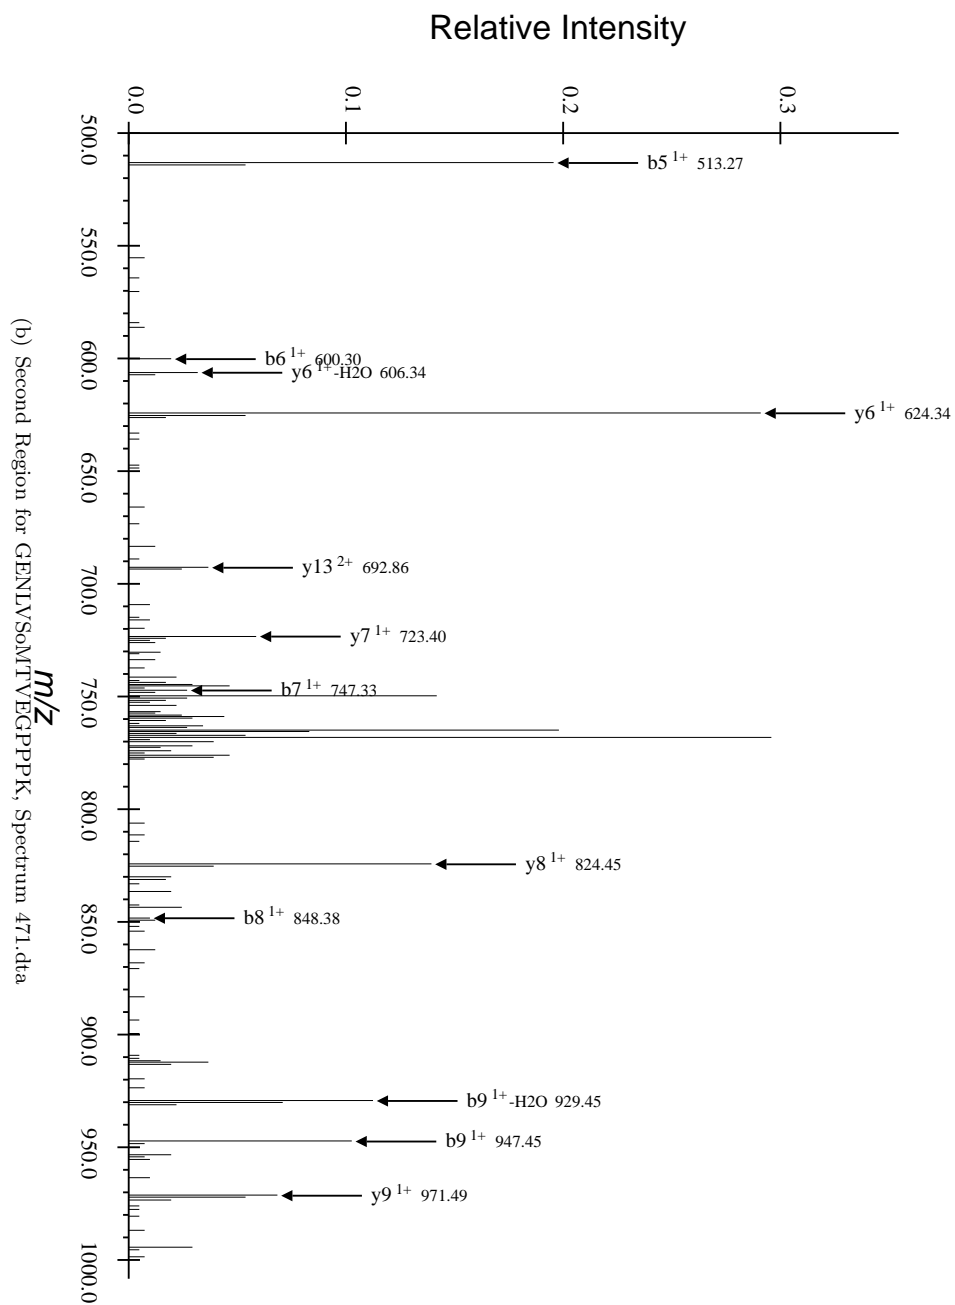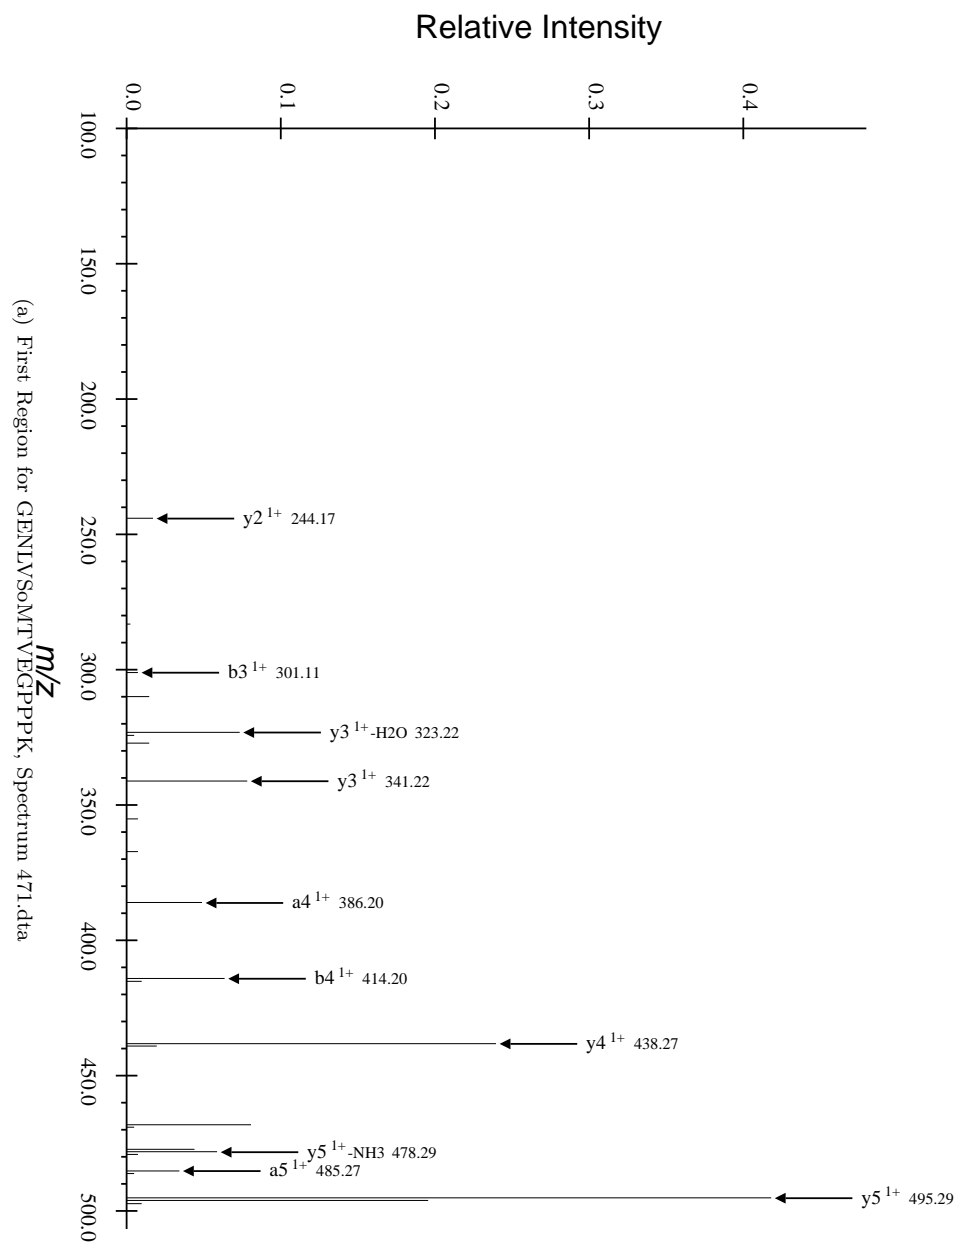

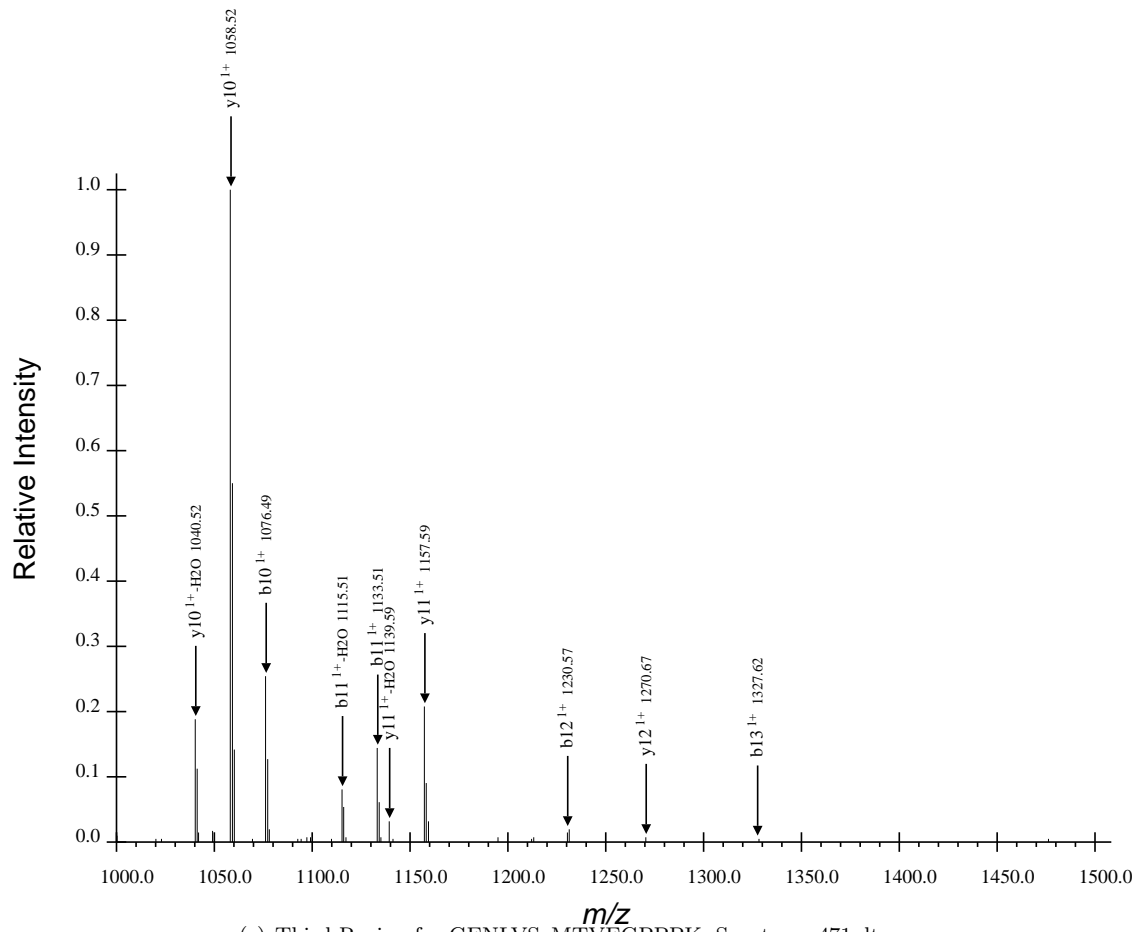

(c) Third Region for GENLVSomMTVEGPPPK, Spectrum 471.dta

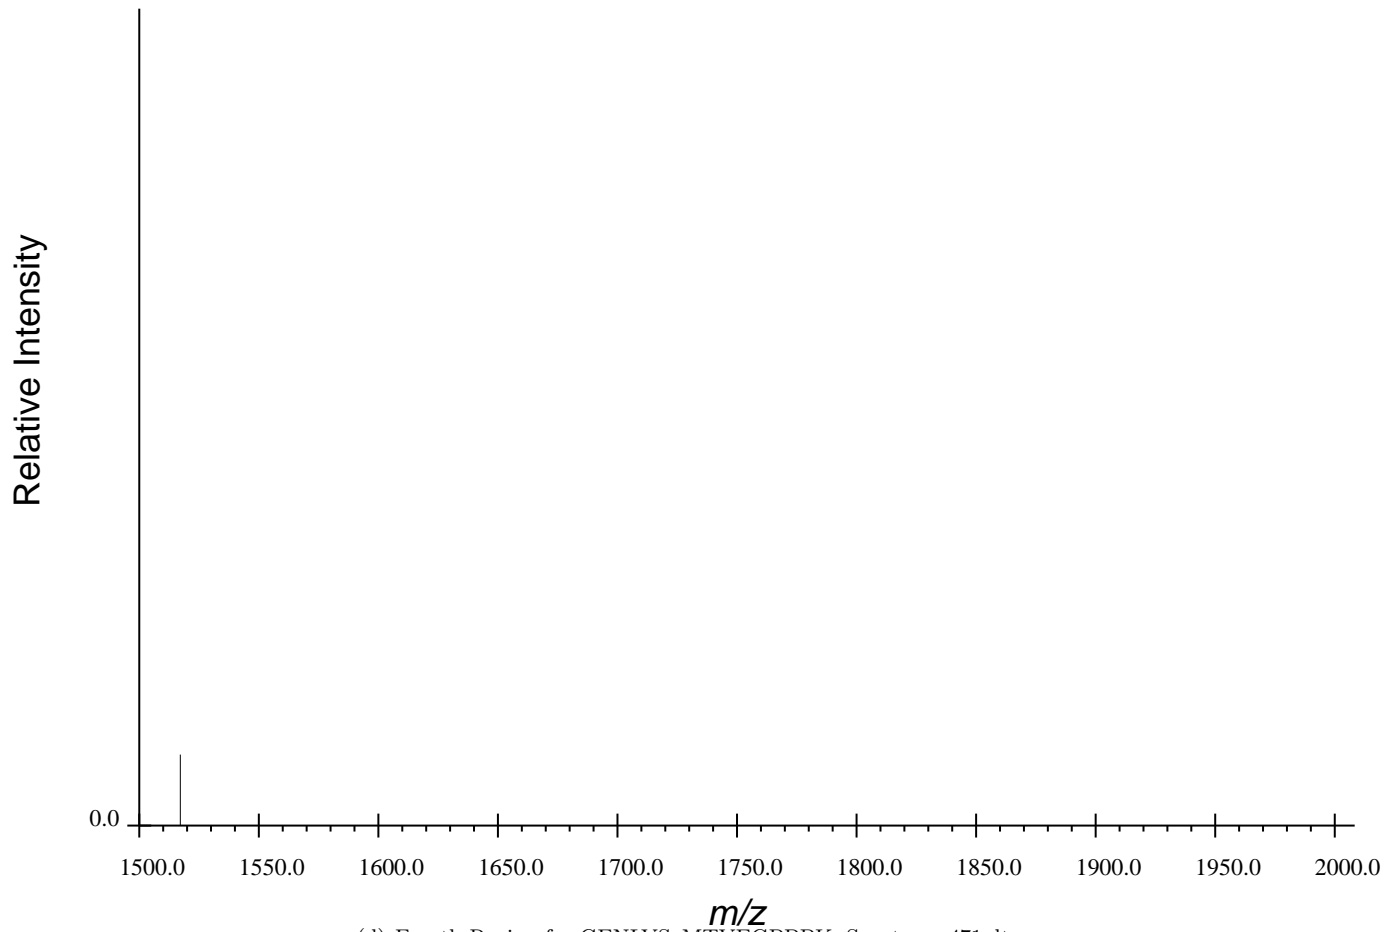

(d) Fourth Region for GENLVSomMTVEGPPPK, Spectrum 471.dta

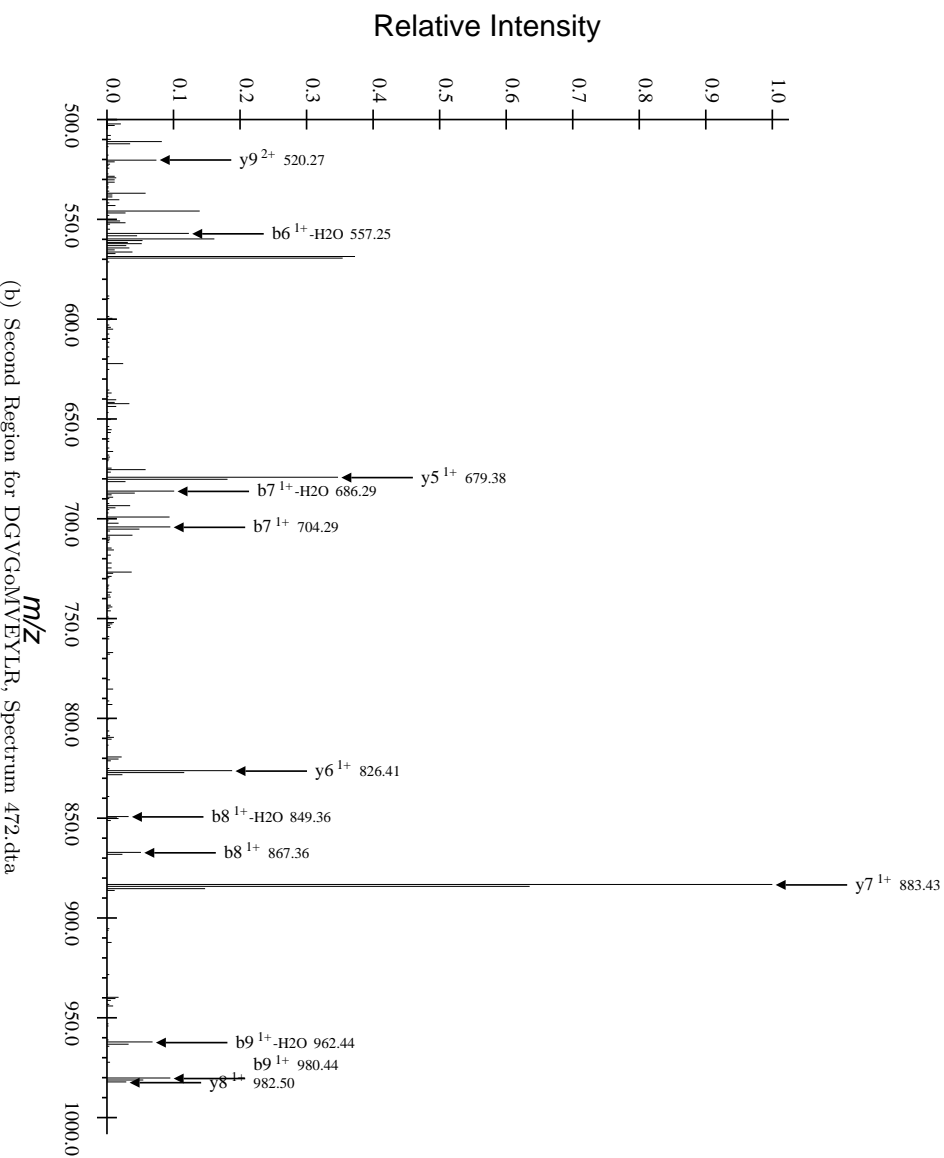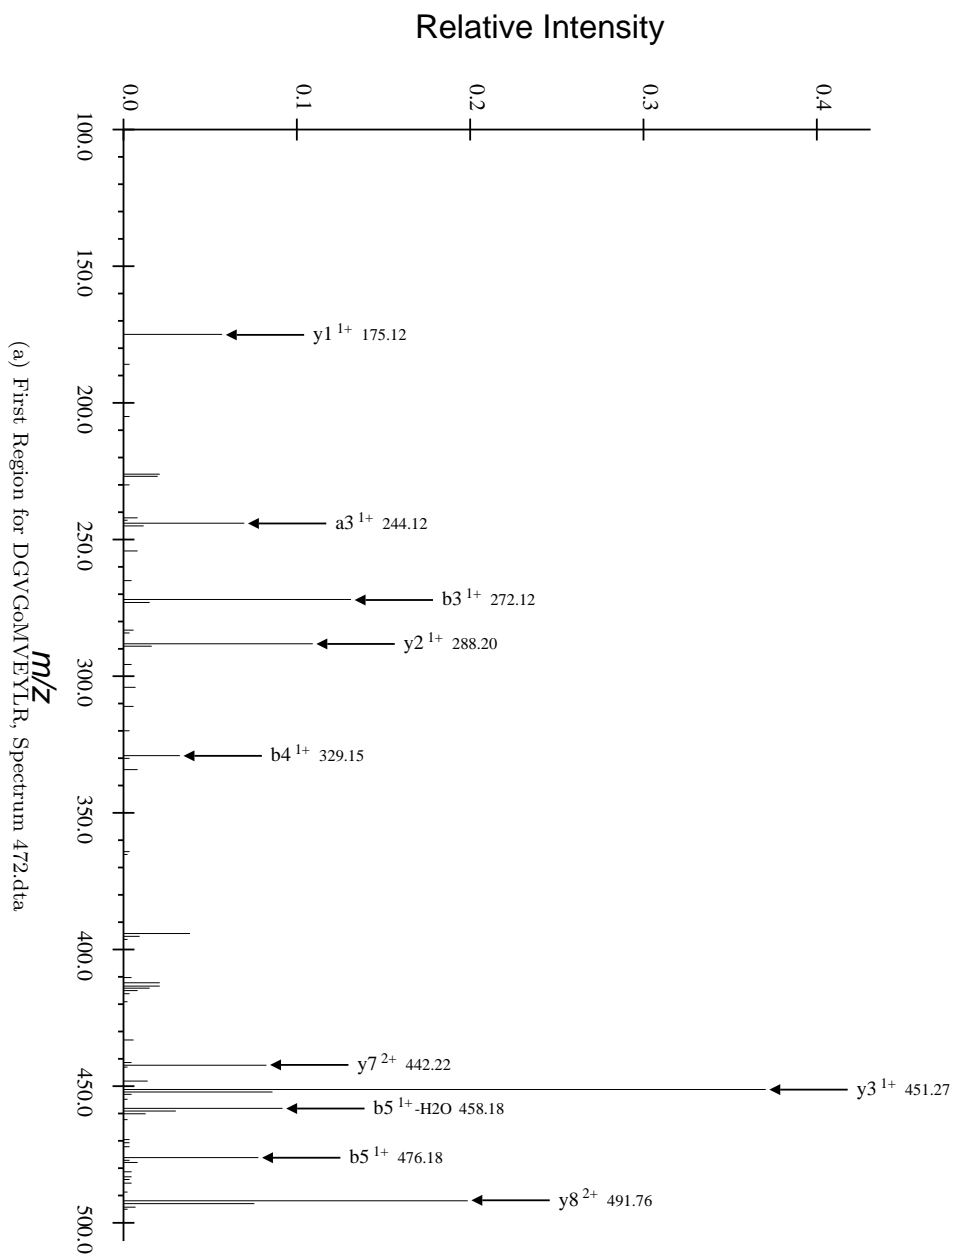



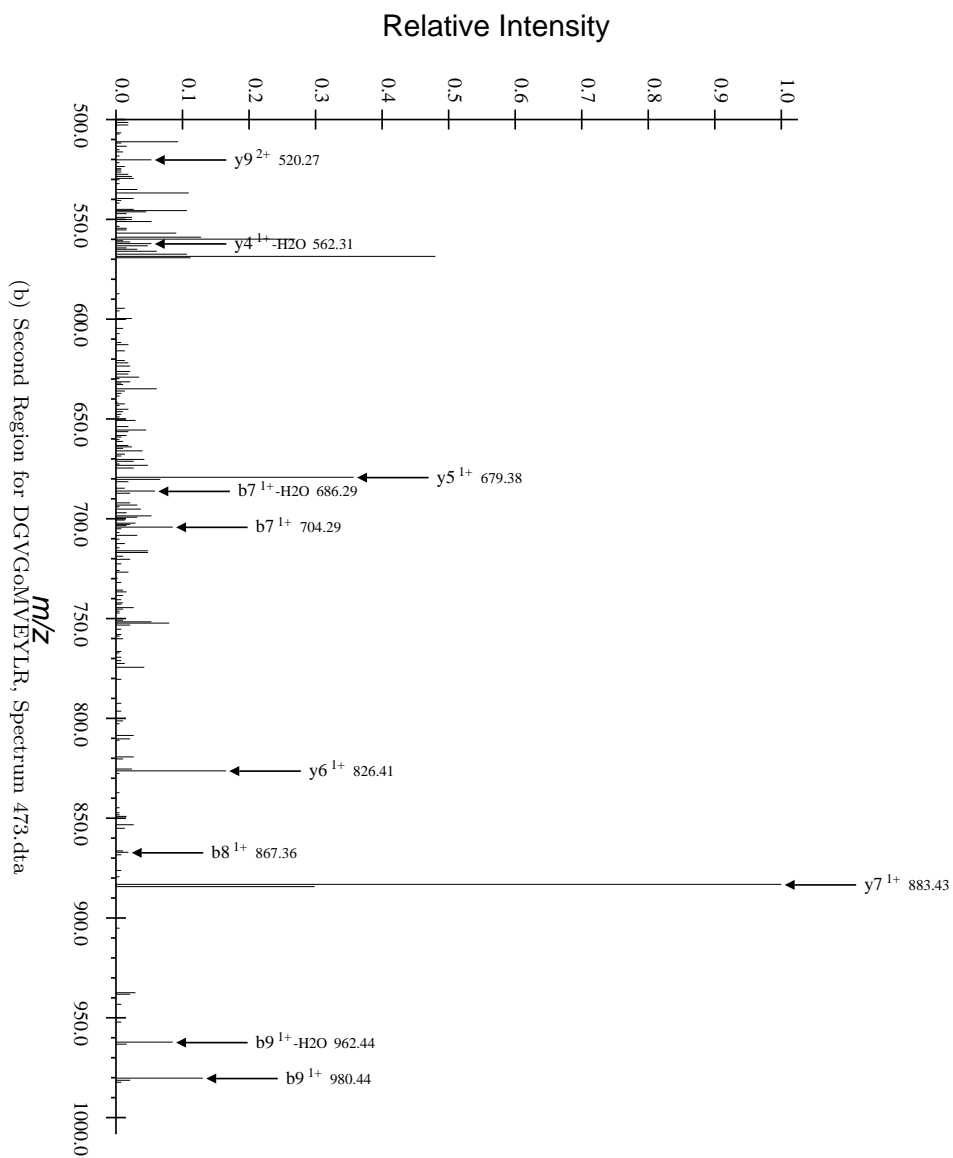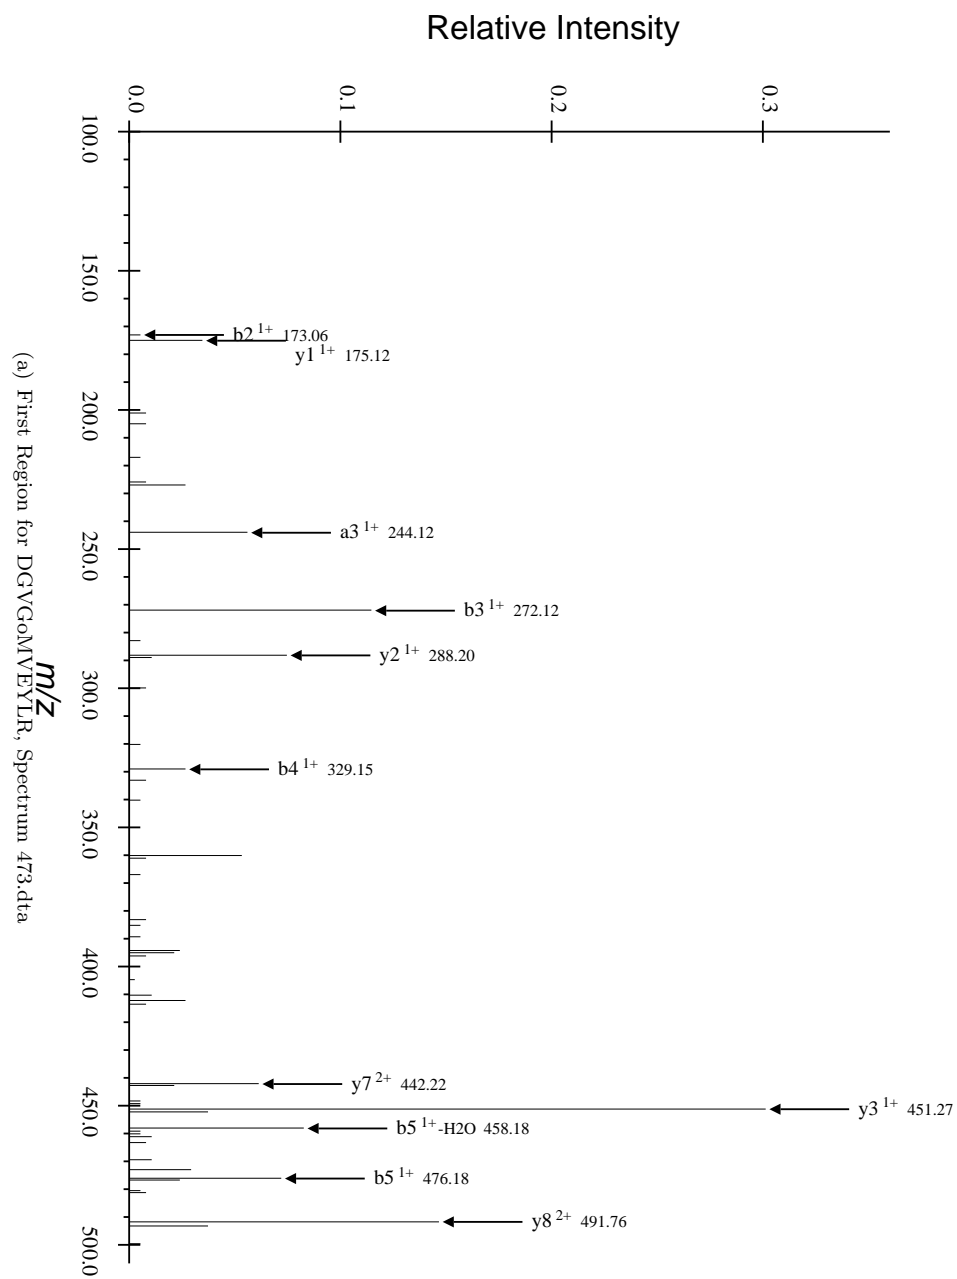

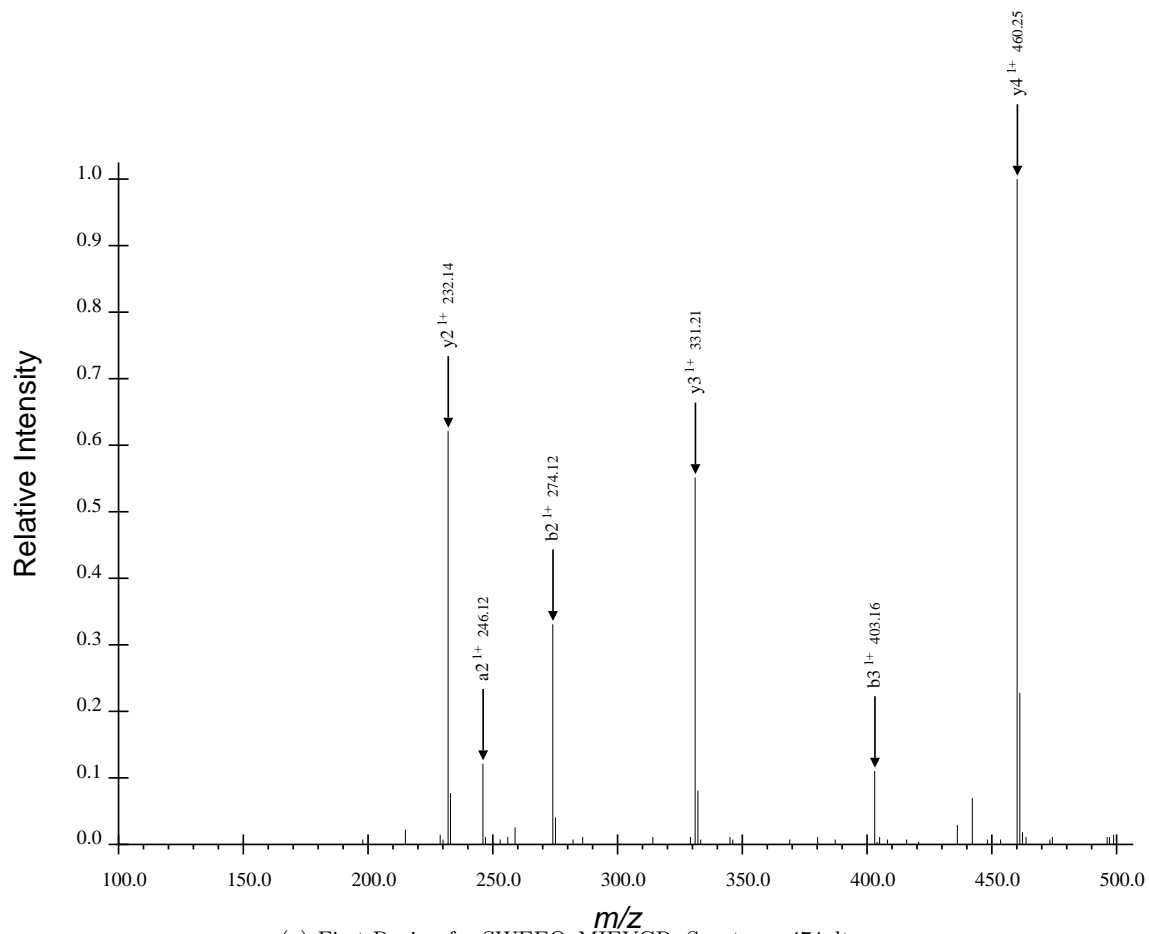

(a) First Region for SWEEQoMIEVGR, Spectrum 474.dta

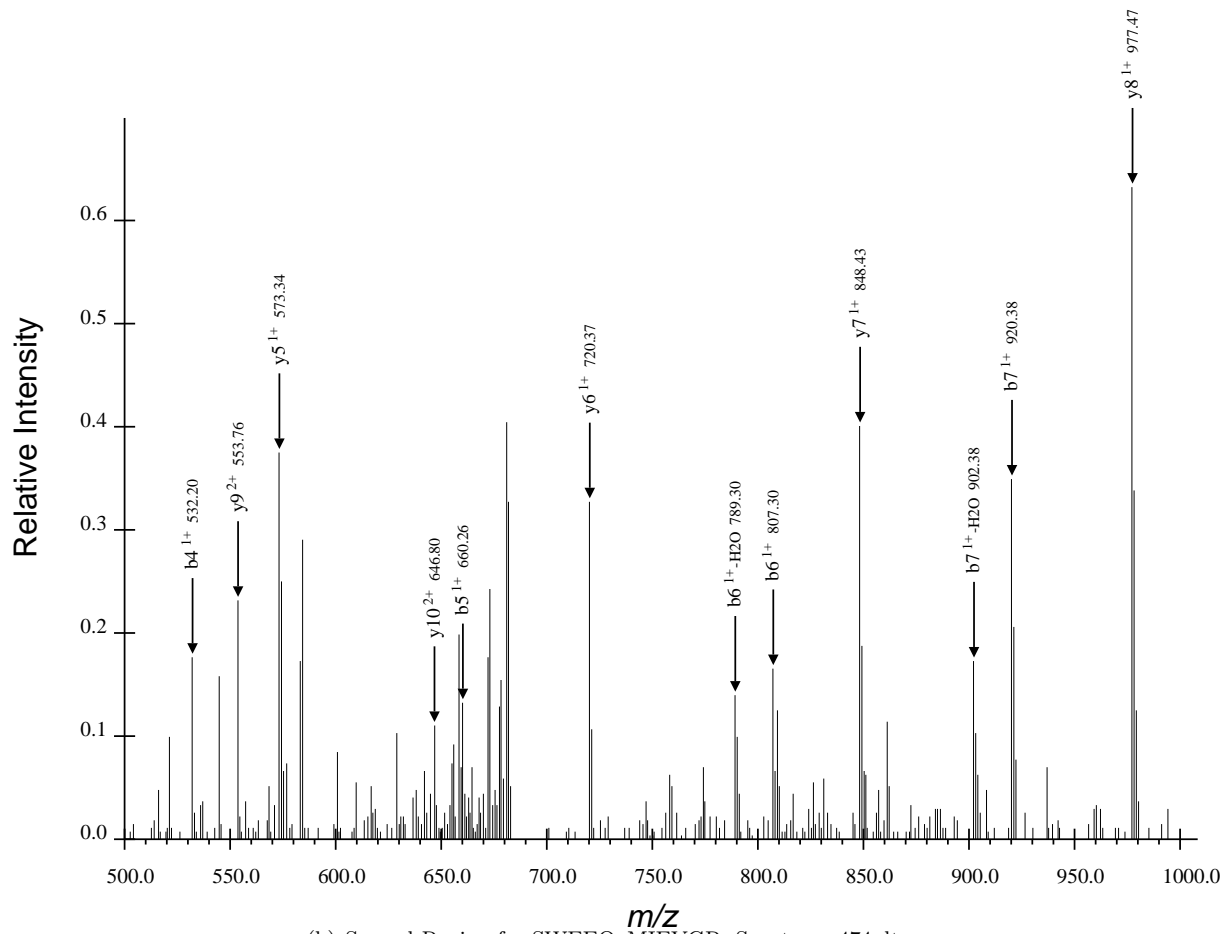

(b) Second Region for SWEEQoMIEVGR, Spectrum 474.dta

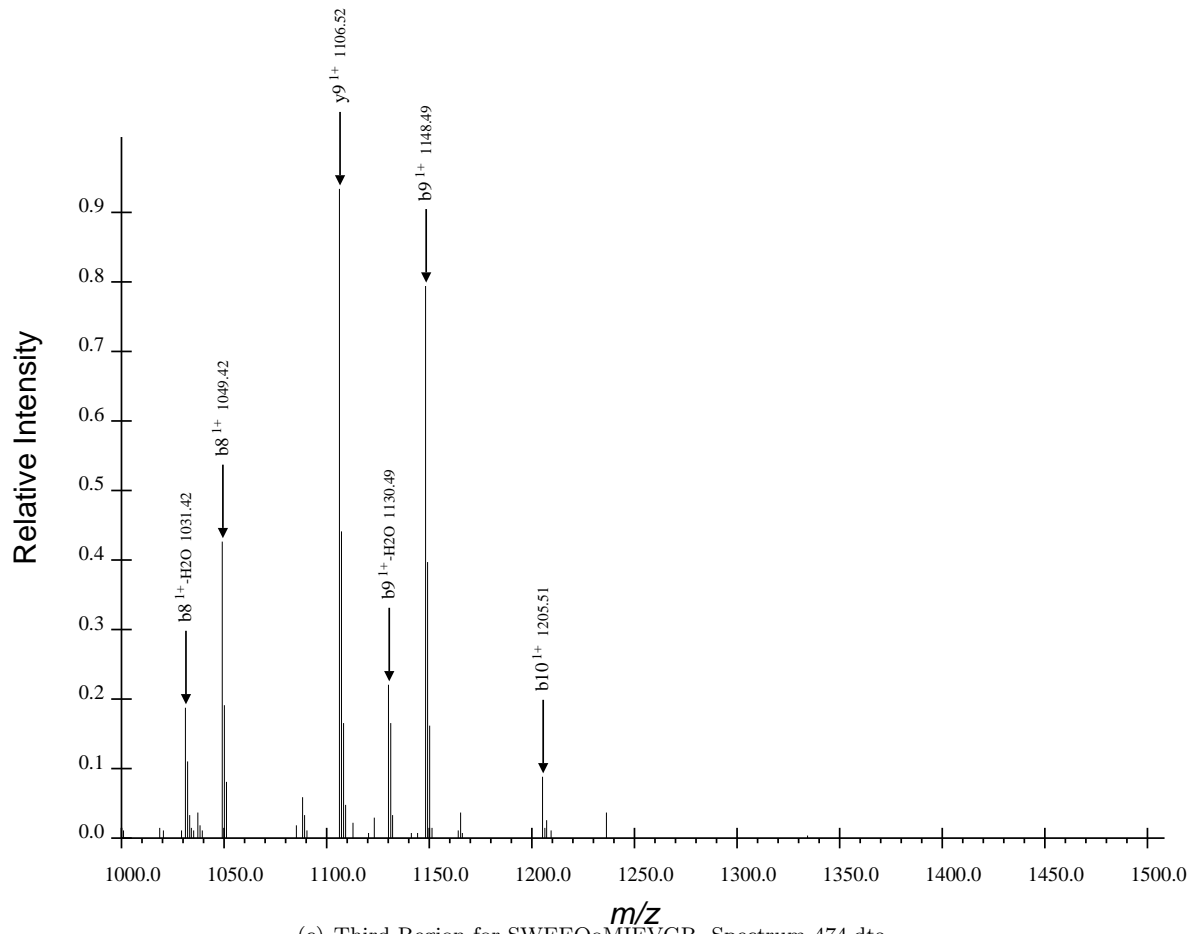

(c) Third Region for SWEEQoMIEVGR, Spectrum 474.dta

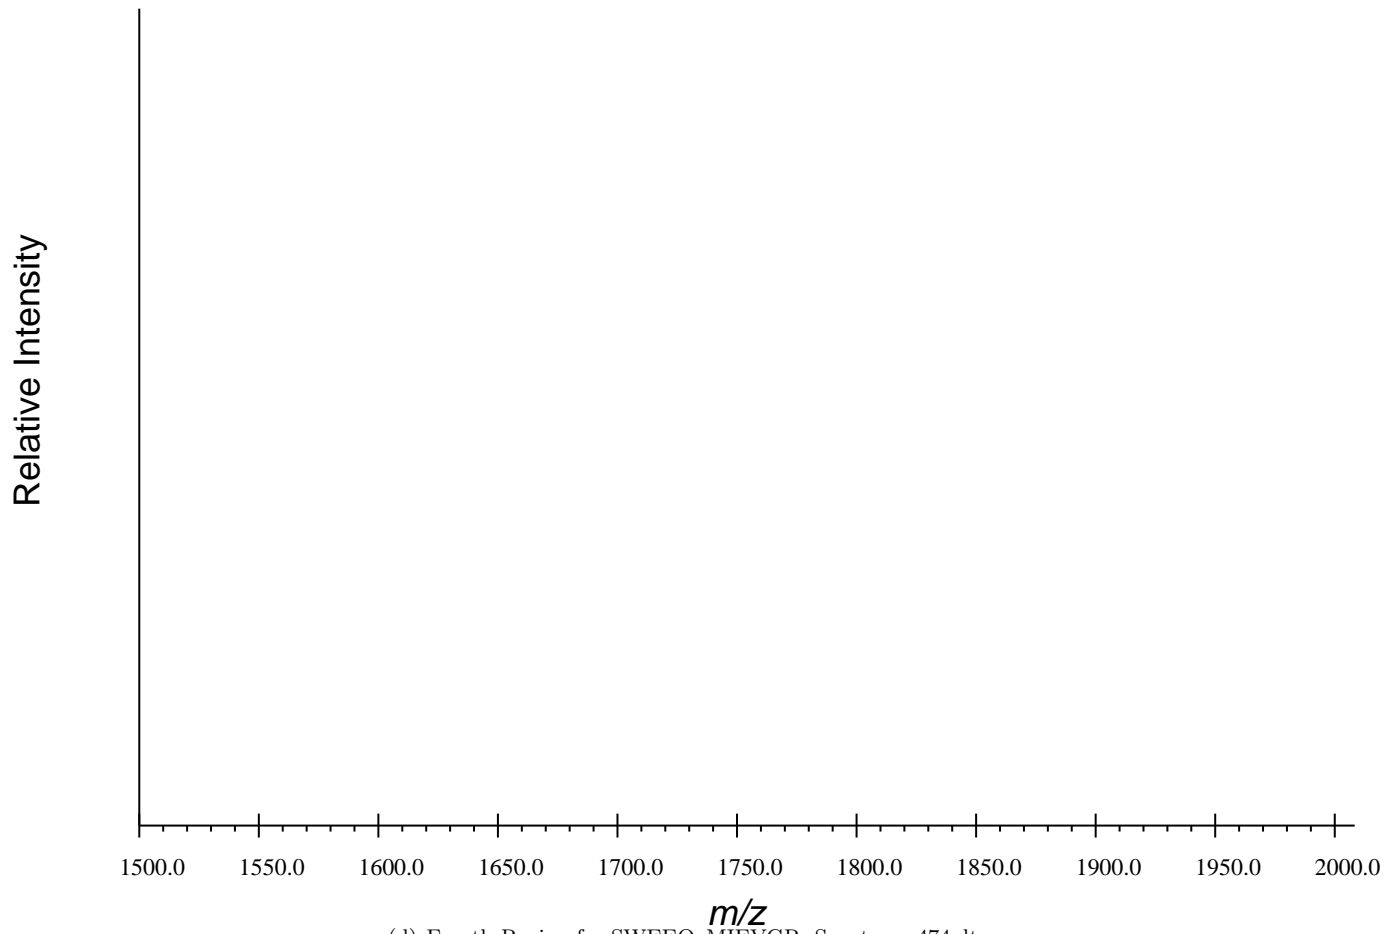

(d) Fourth Region for SWEEQoMIEVGR, Spectrum 474.dta

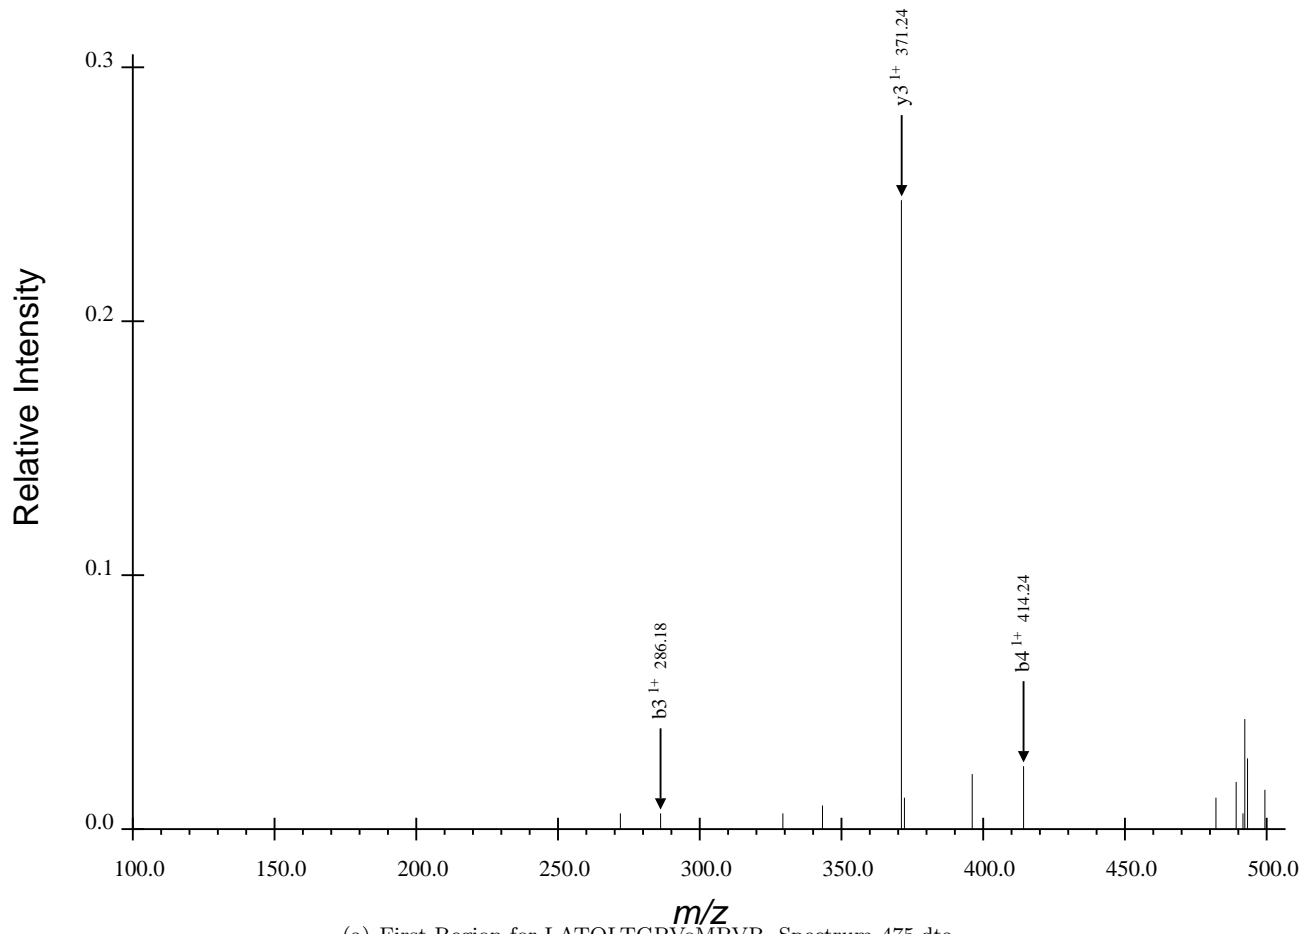

(a) First Region for LATQLTGPVoMPVR, Spectrum 475.dta

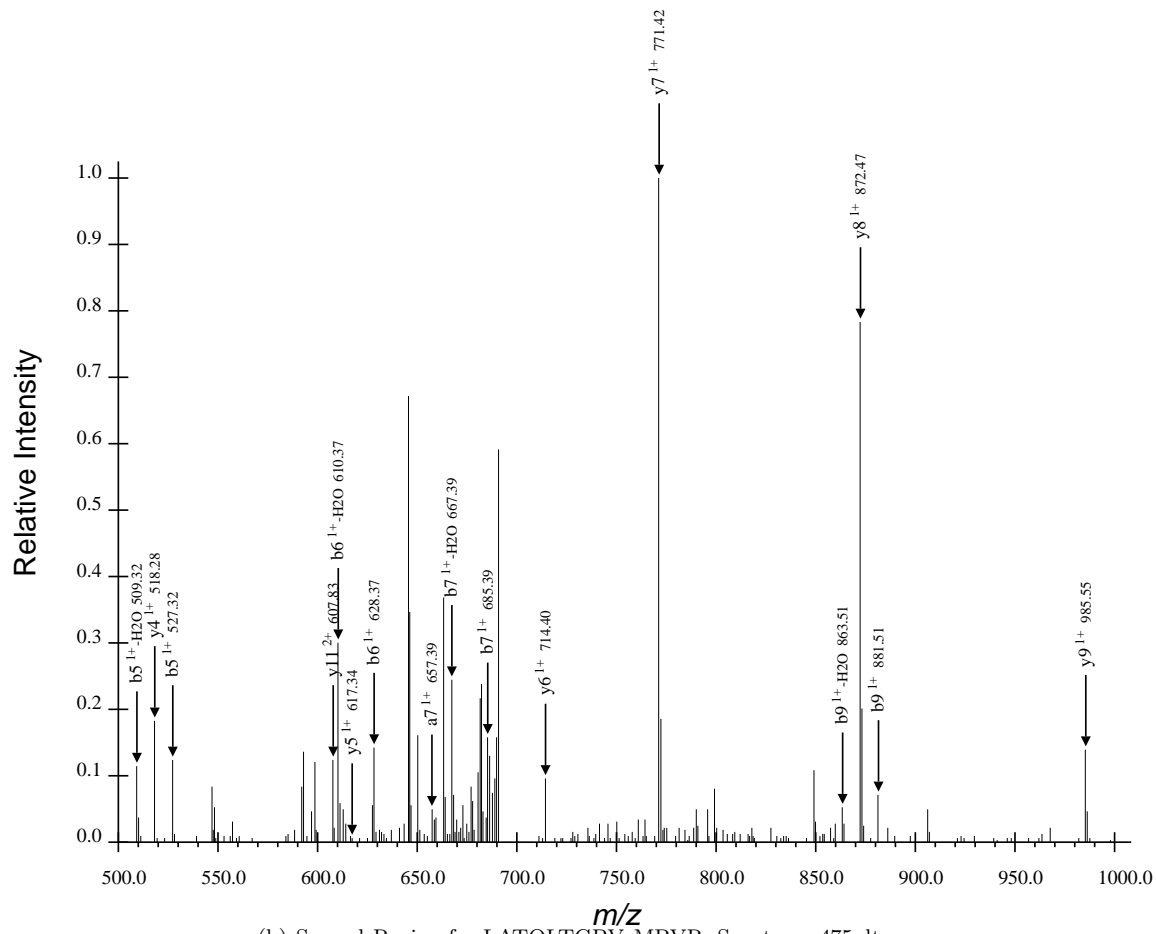

(b) Second Region for LATQLTGPVoMPVR, Spectrum 475.dta

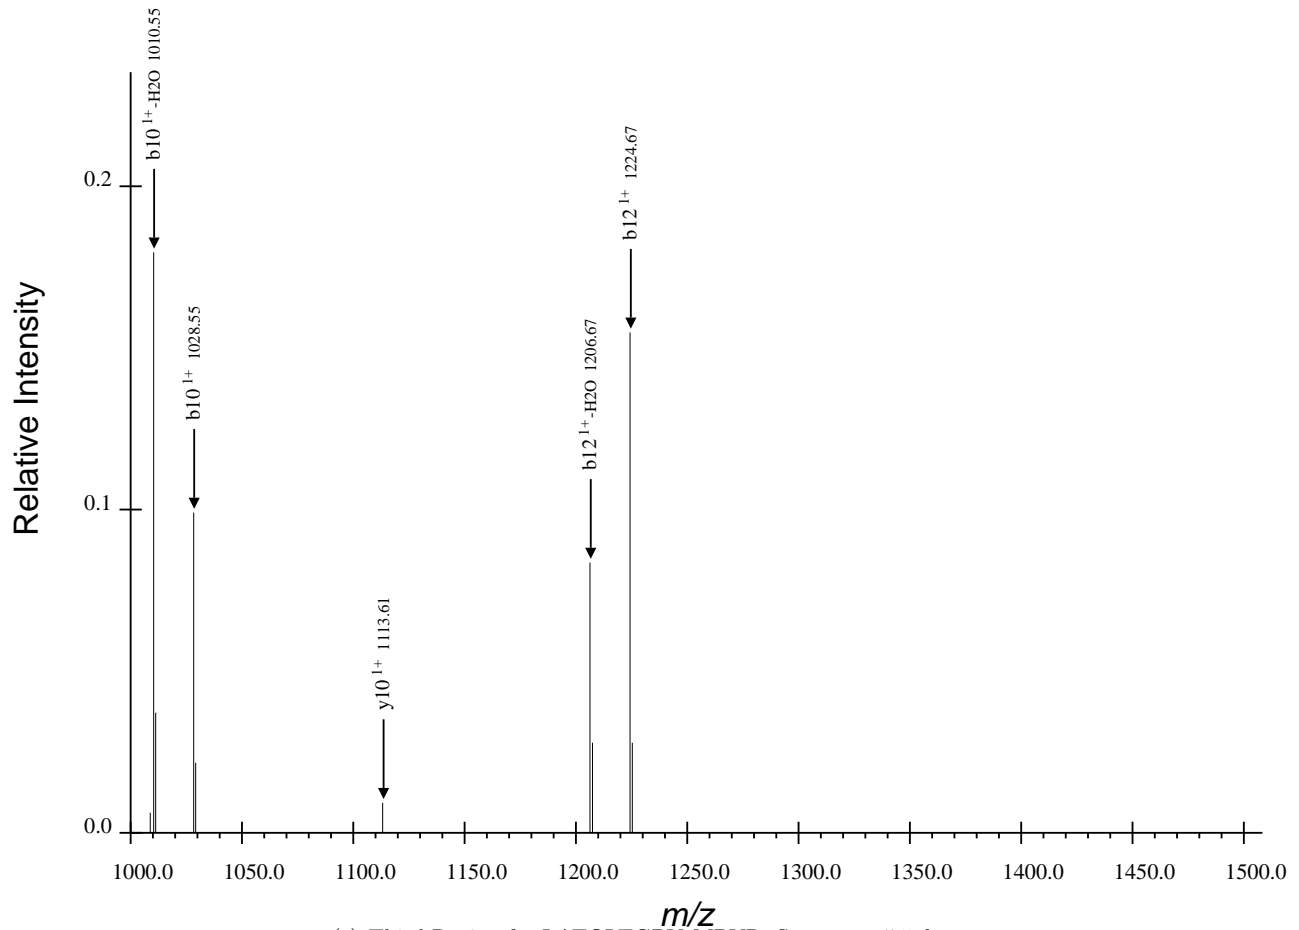

(c) Third Region for LATQLTGPPVoMPVR, Spectrum 475.dta

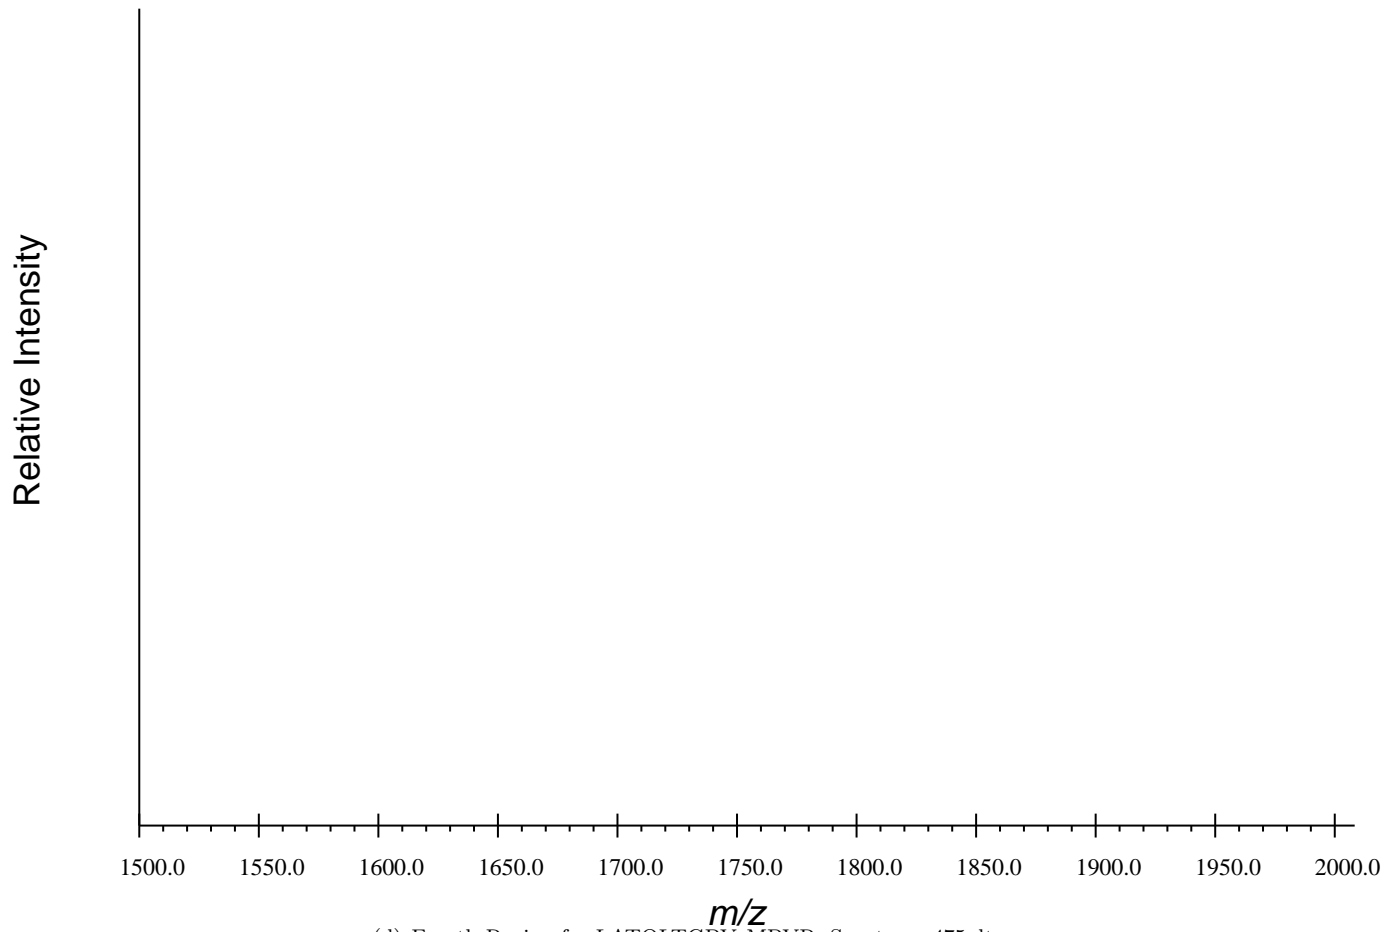

(d) Fourth Region for LATQLTGPPVoMPVR, Spectrum 475.dta

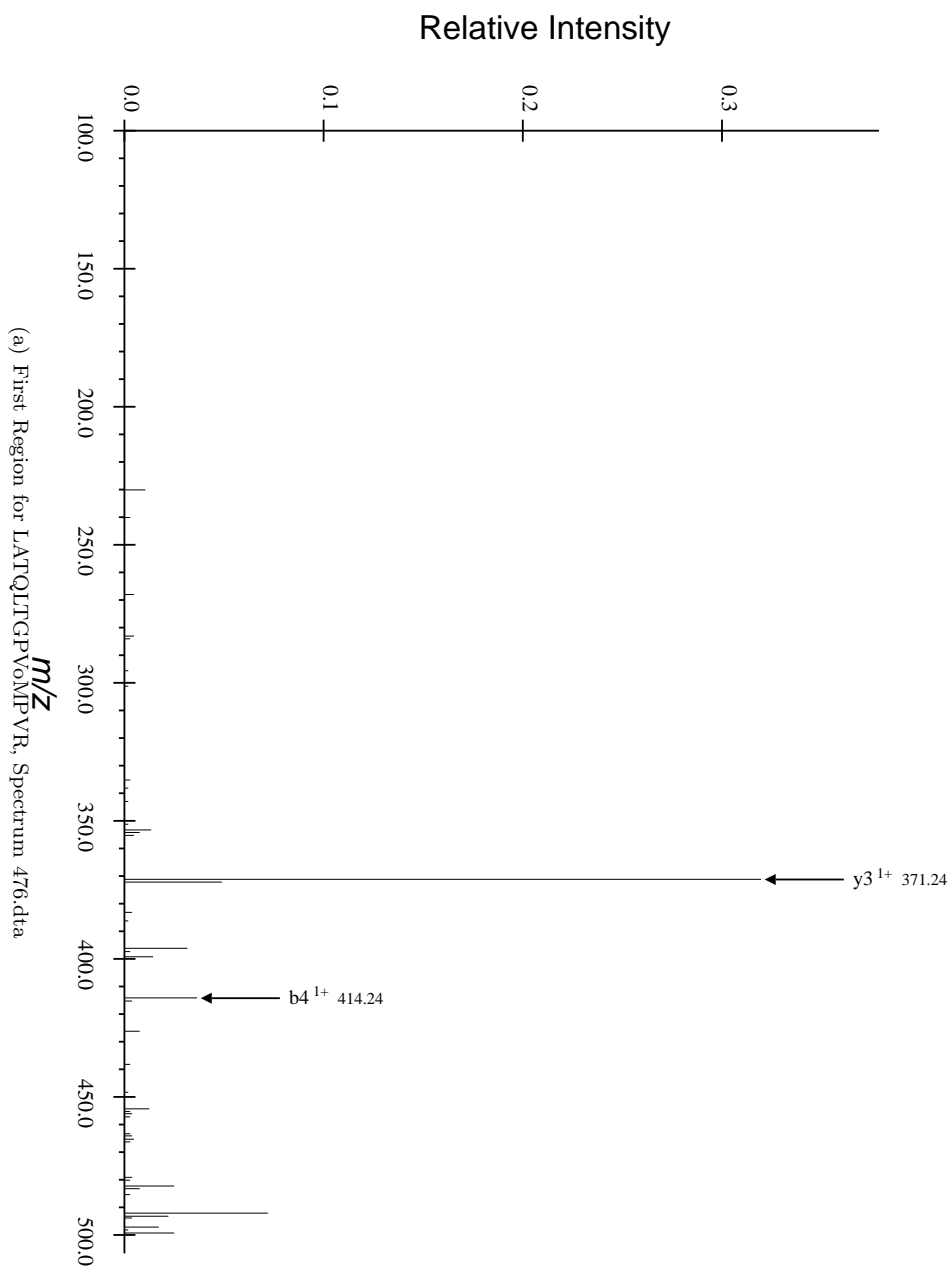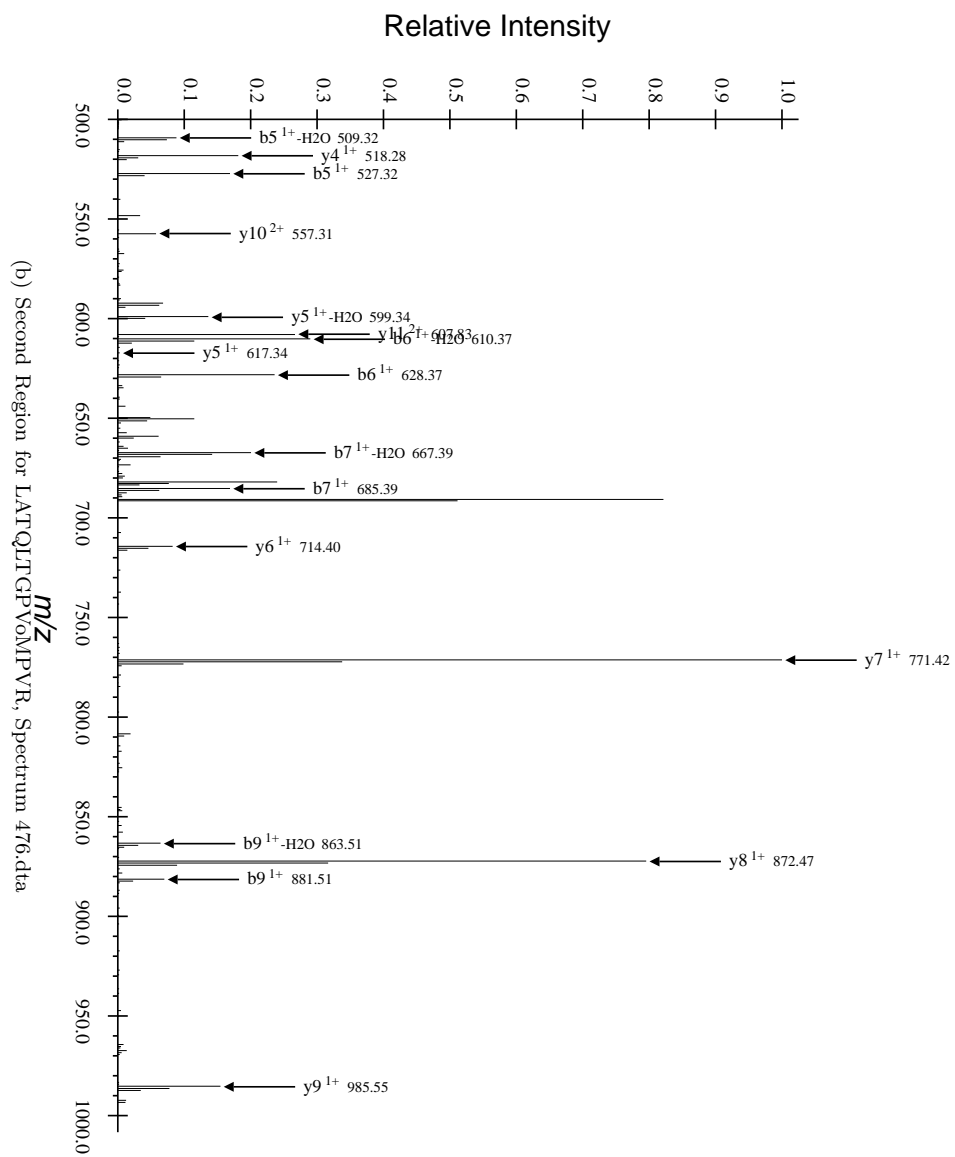

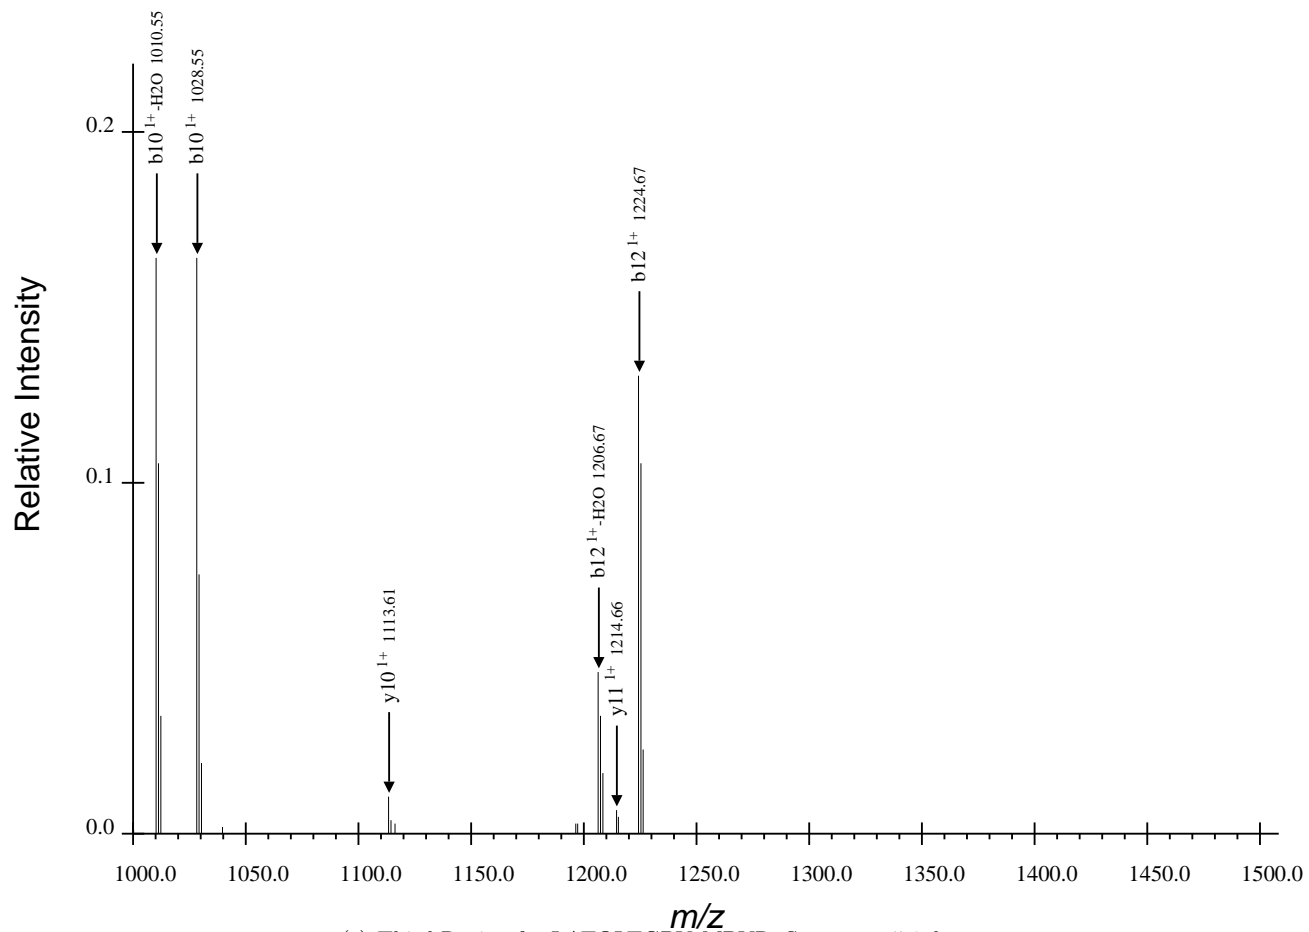

(c) Third Region for LATQLTGPVoMPVR, Spectrum 476.dta

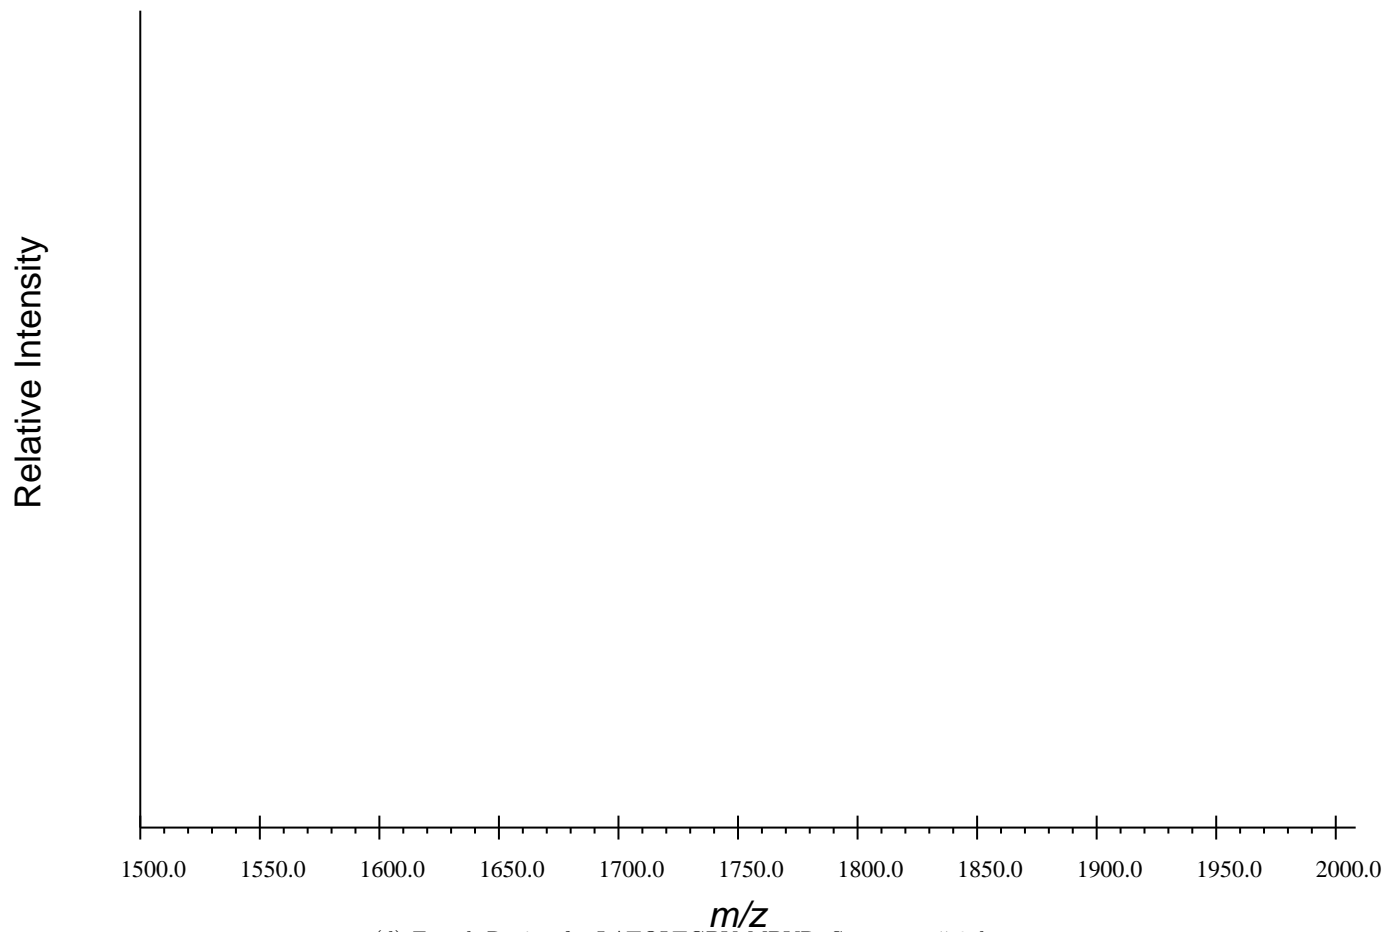

(d) Fourth Region for LATQLTGPVoMPVR, Spectrum 476.dta

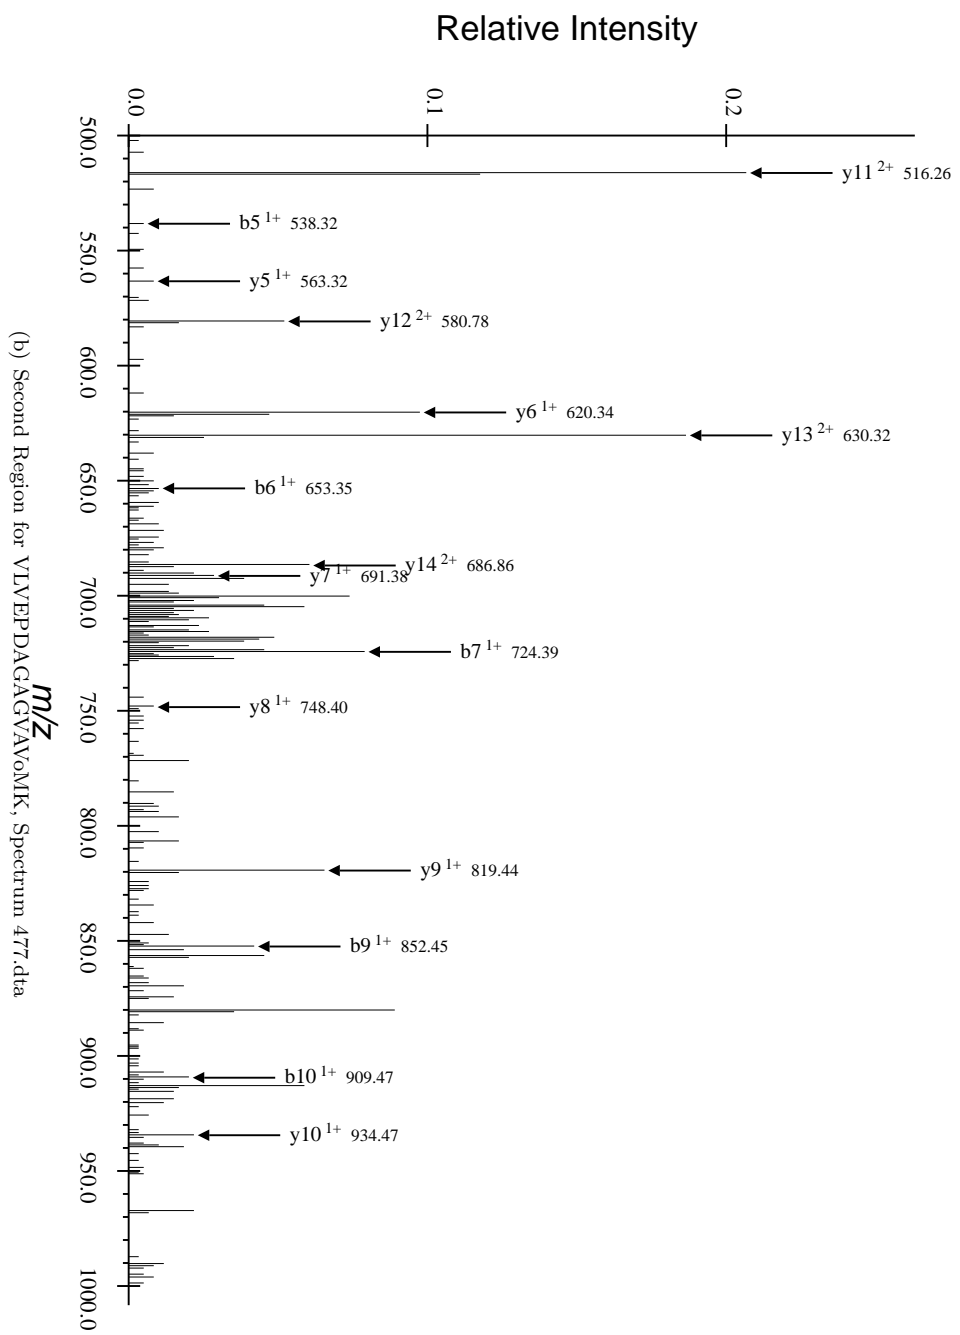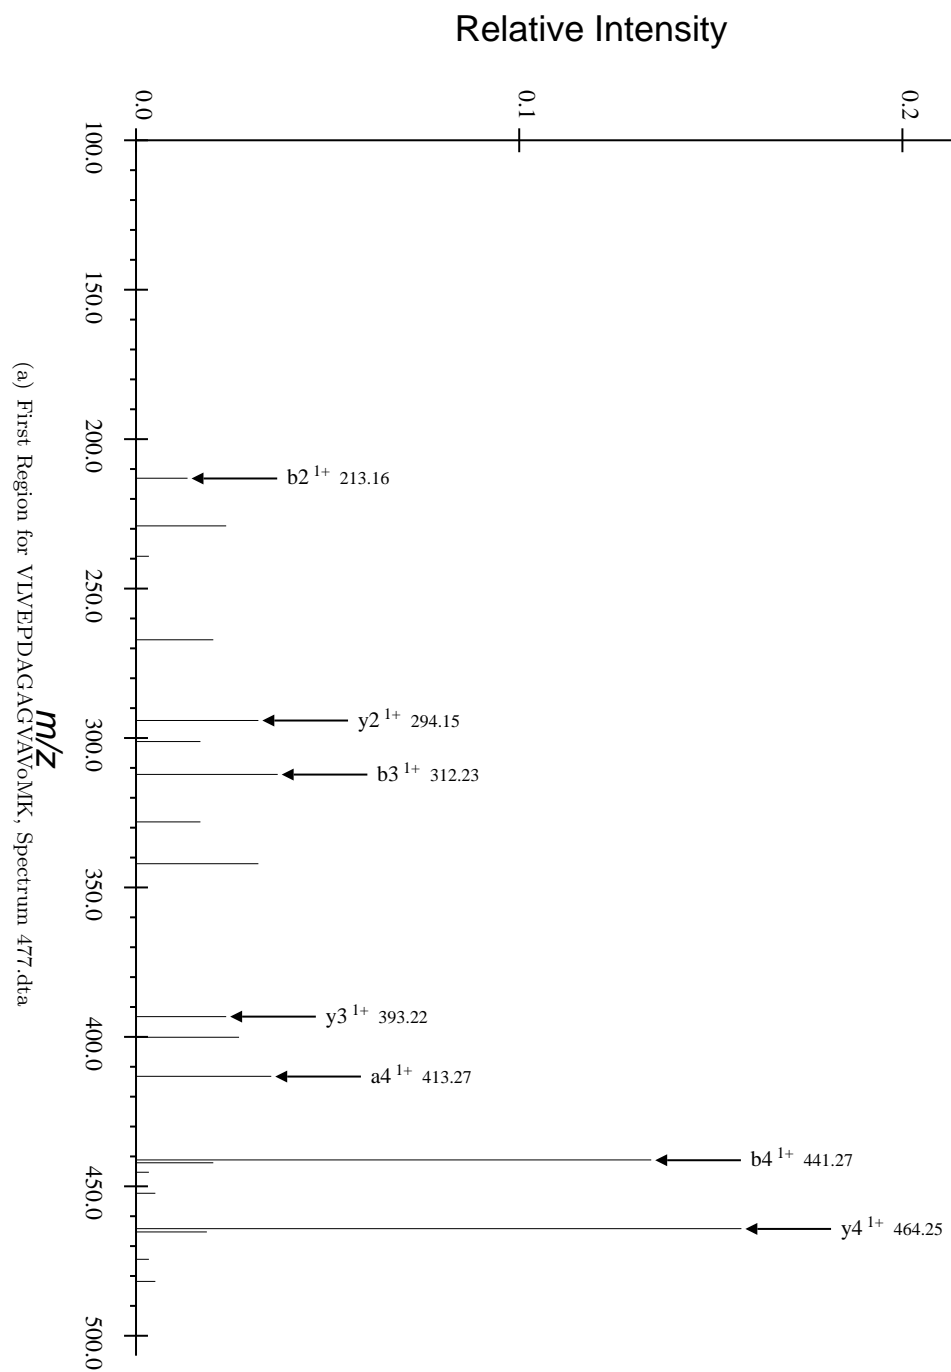



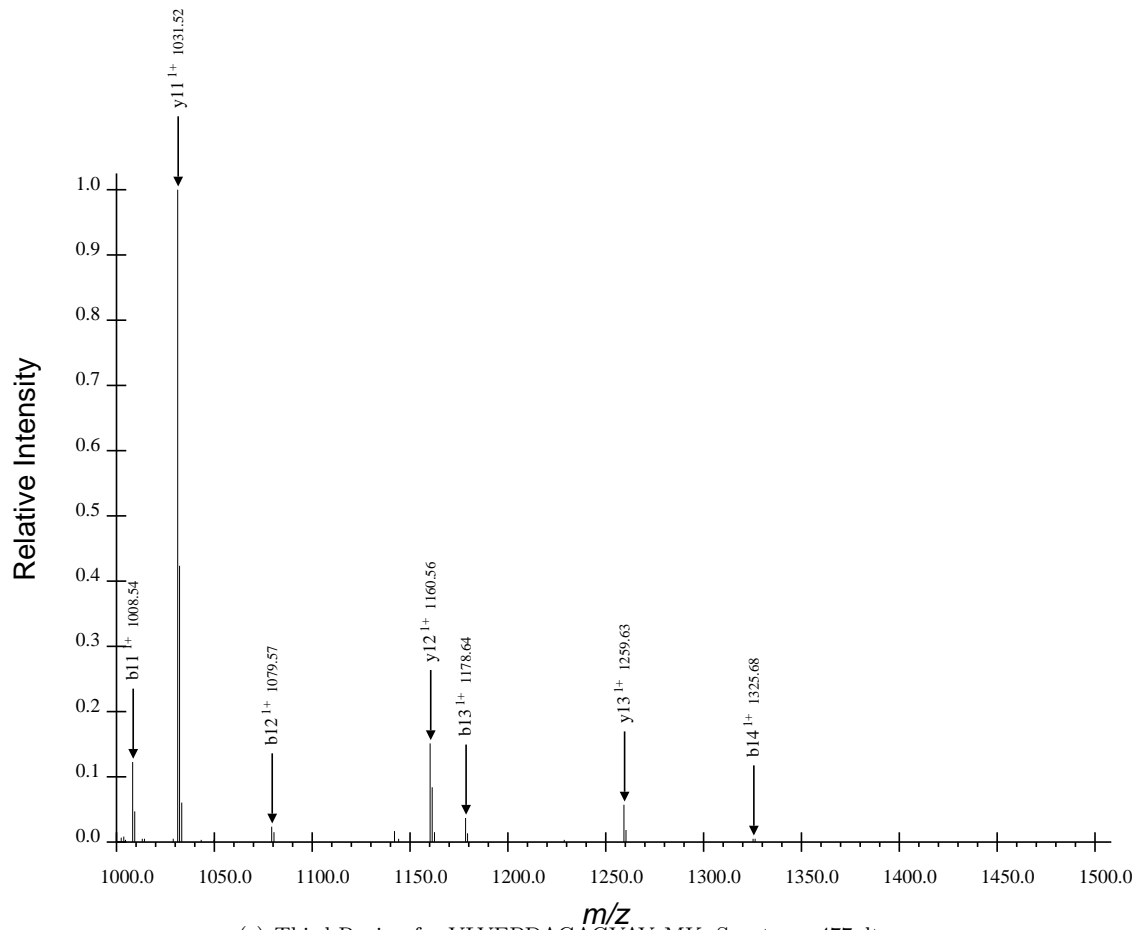

(c) Third Region for VLVEPDAGAGVAVoMK, Spectrum 477.dta

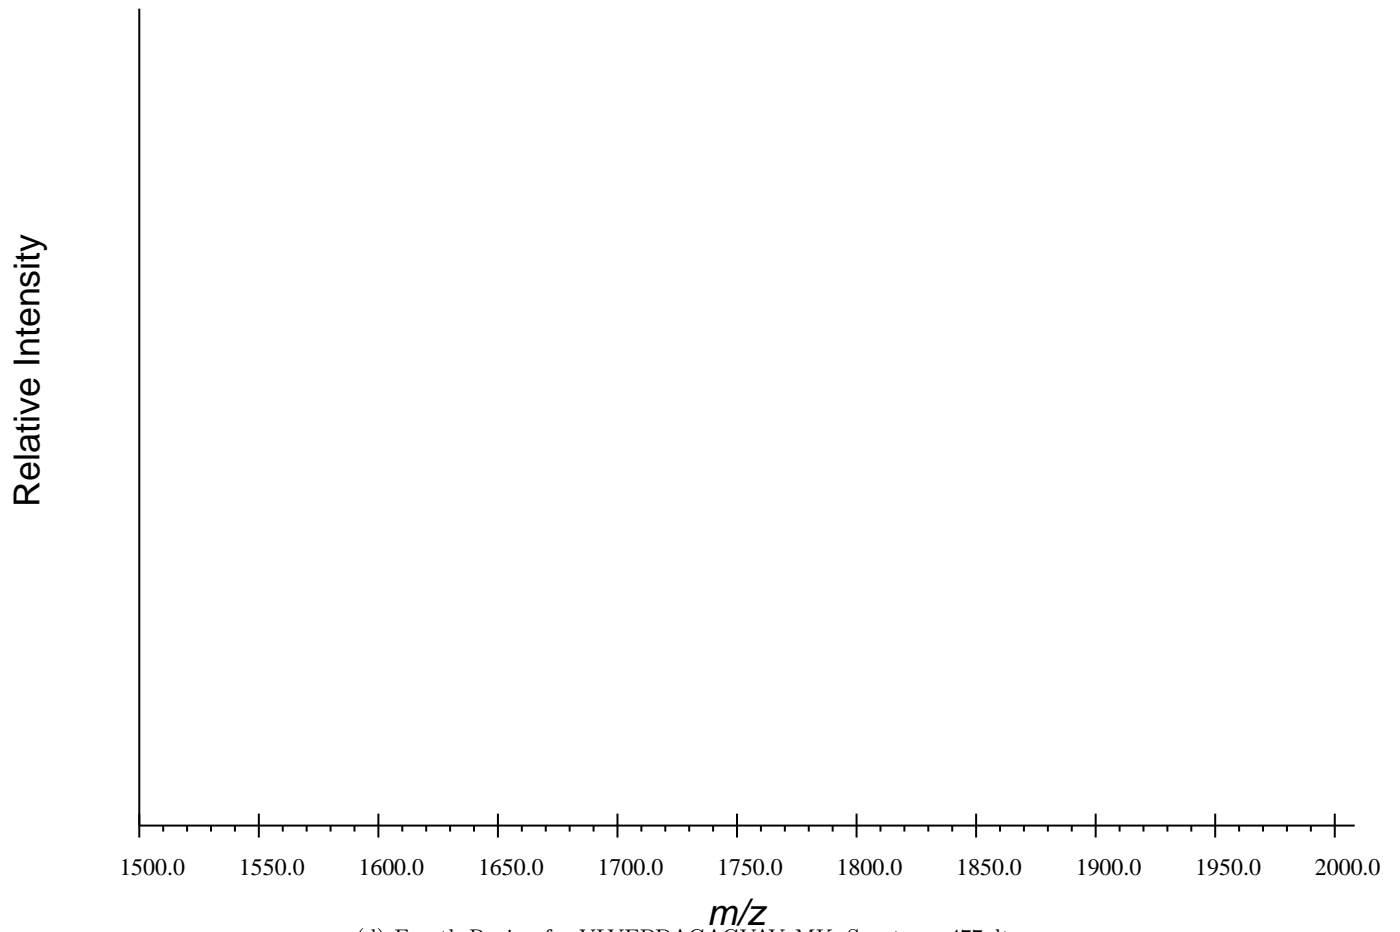

(d) Fourth Region for VLVEPDAGAGVAVoMK, Spectrum 477.dta

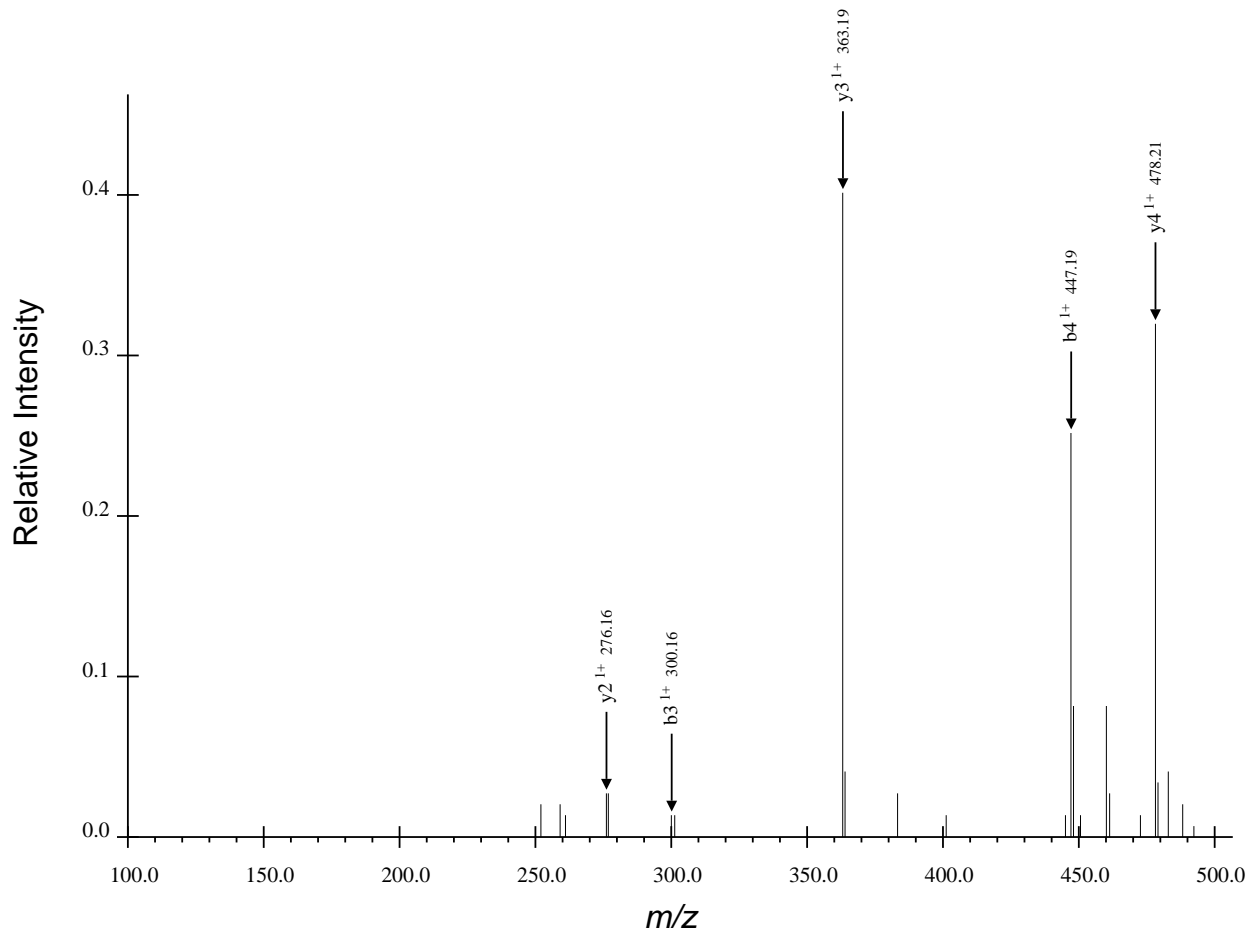

(a) First Region for LGEoMWNNLNDSEK, Spectrum 478.dta

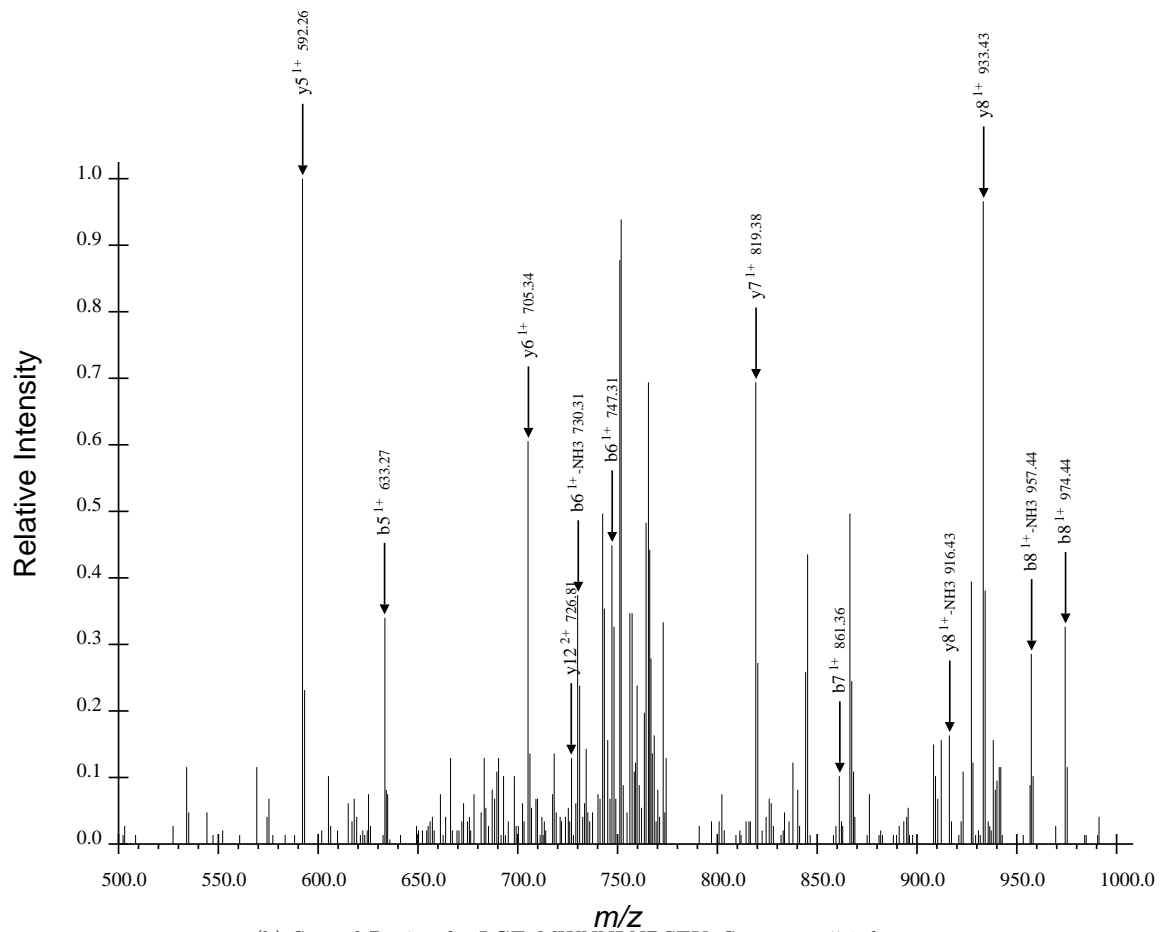

(b) Second Region for LGEoMWNNLNDSEK, Spectrum 478.dta

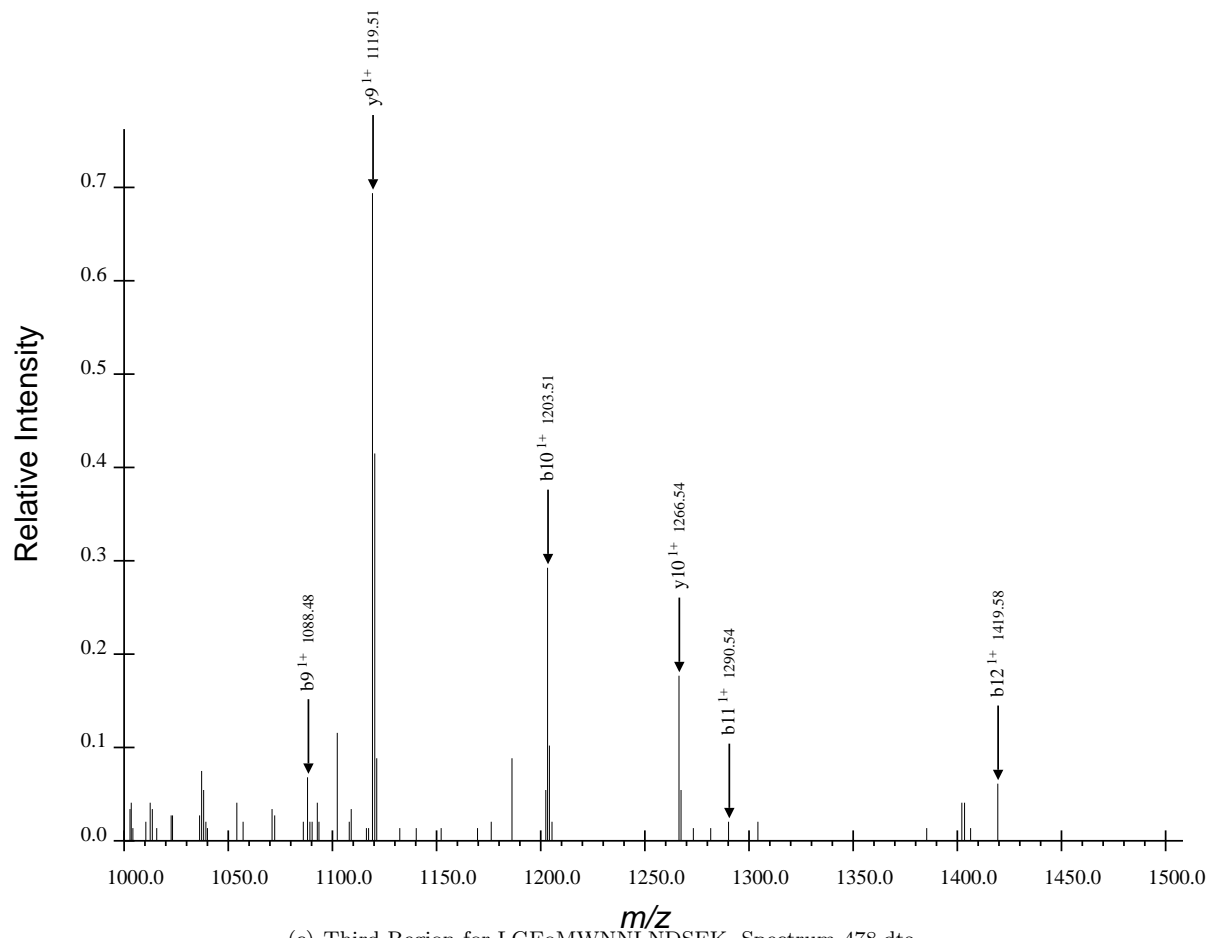

(c) Third Region for LGEoMWNNLNDSEK, Spectrum 478.dta

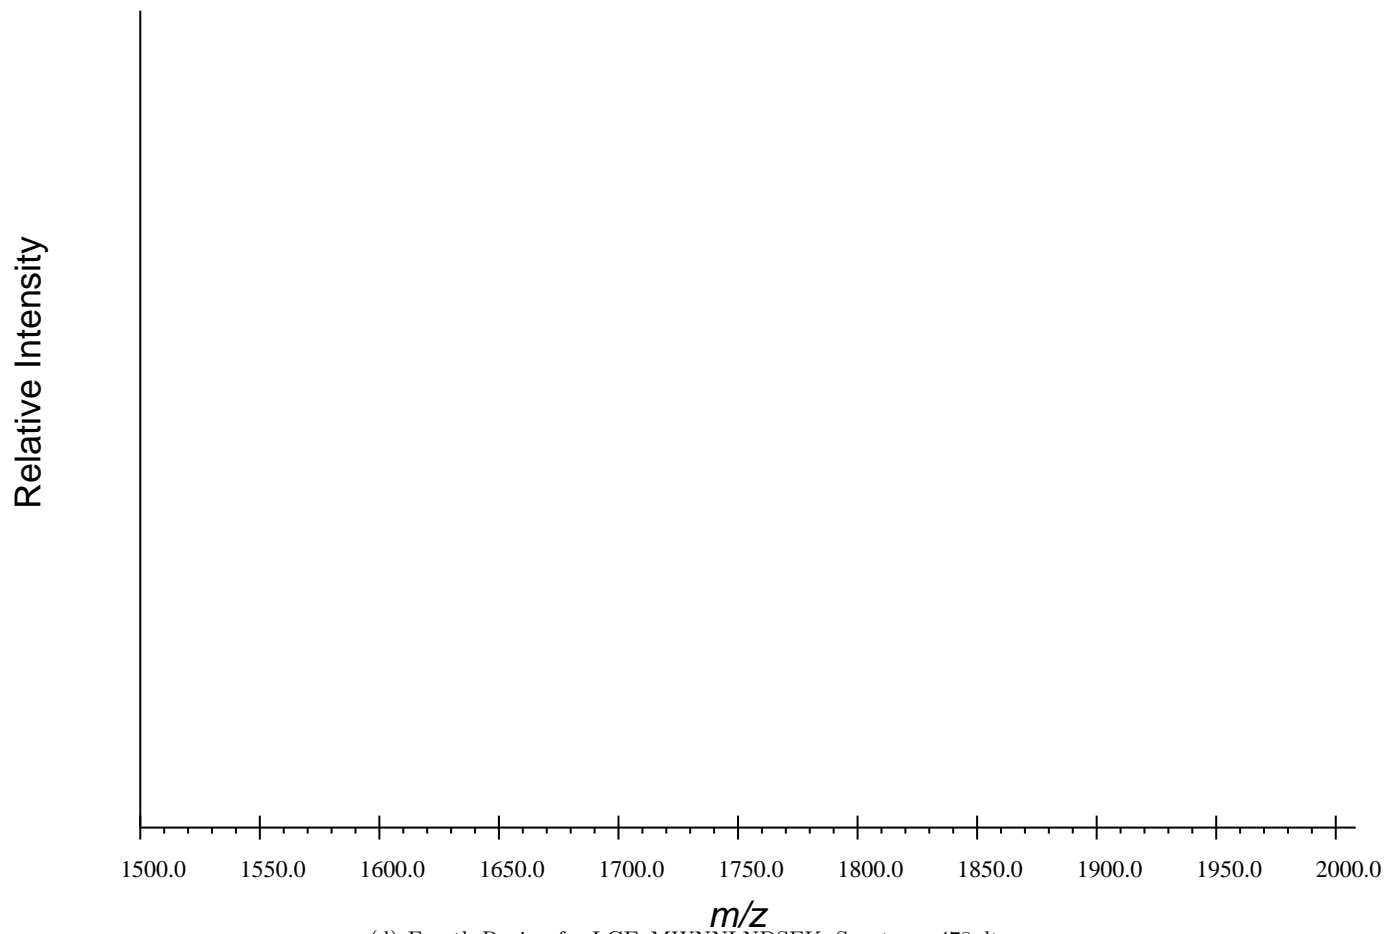

(d) Fourth Region for LGEoMWNNLNDSEK, Spectrum 478.dta

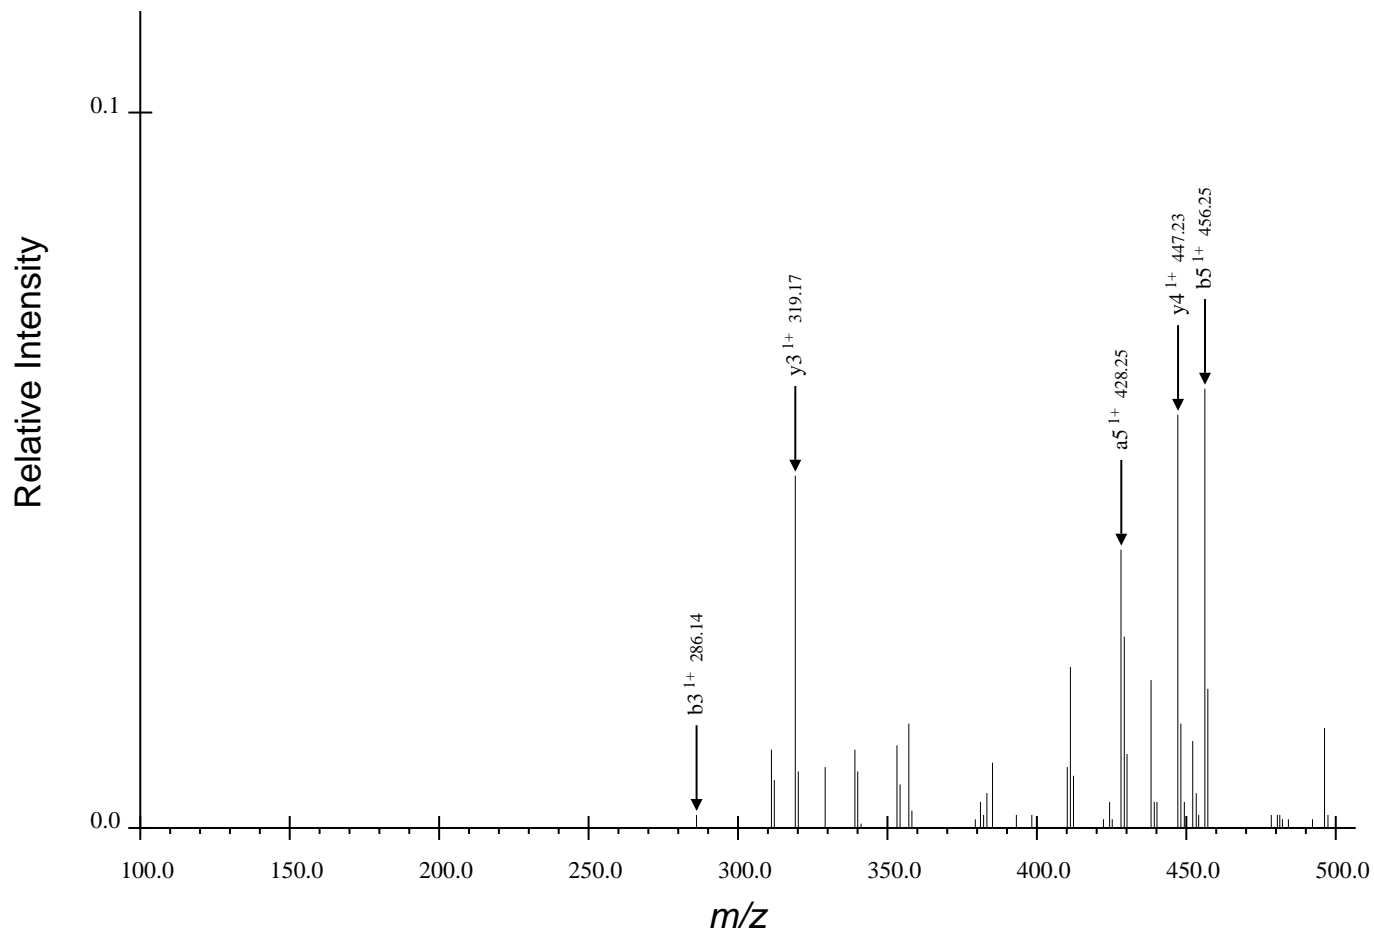

(a) First Region for VADGLPLAASoMQEDEQSGR, Spectrum 479.dta

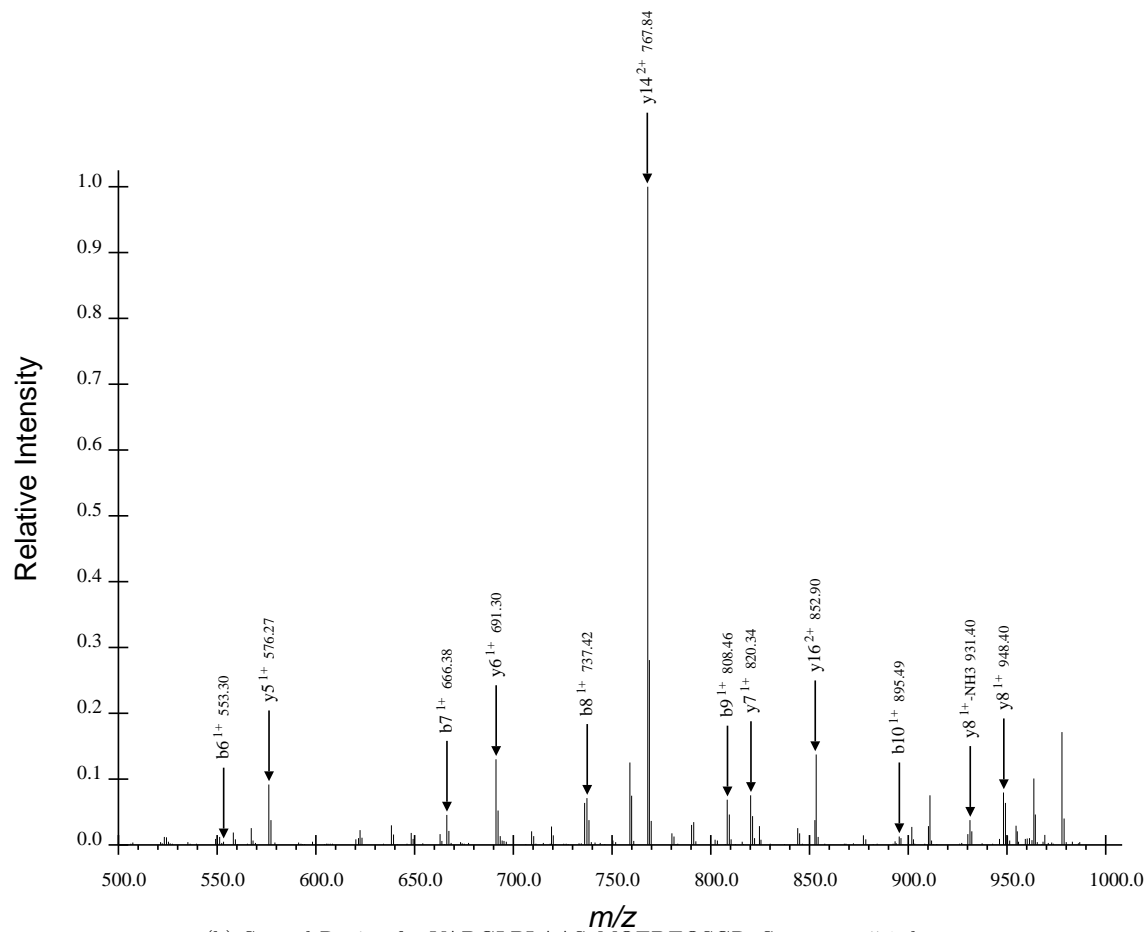

(b) Second Region for VADGLPLAASoMQEDEQSGR, Spectrum 479.dta

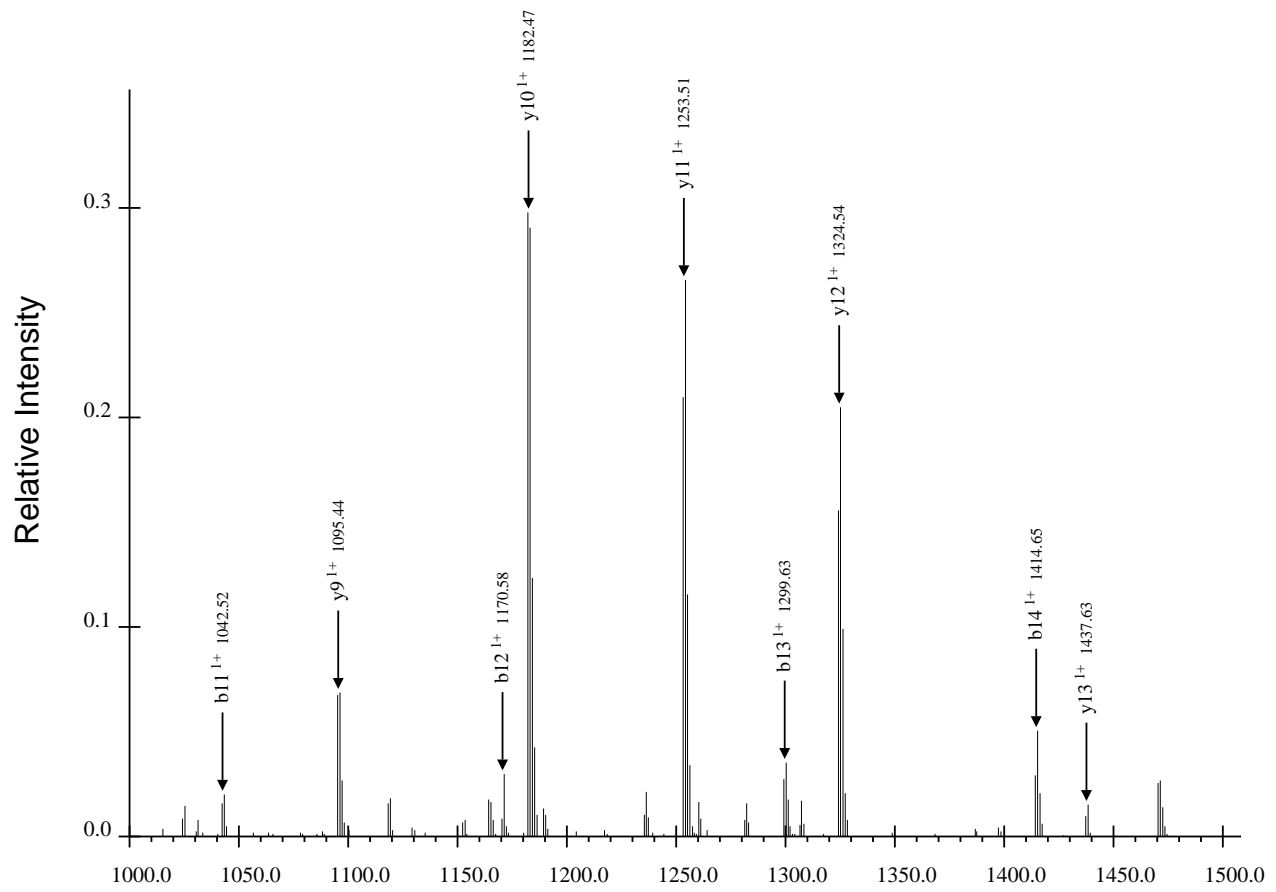

(c) Third Region for VADGLPLAASoMQEDEQSGR, Spectrum 479.dta

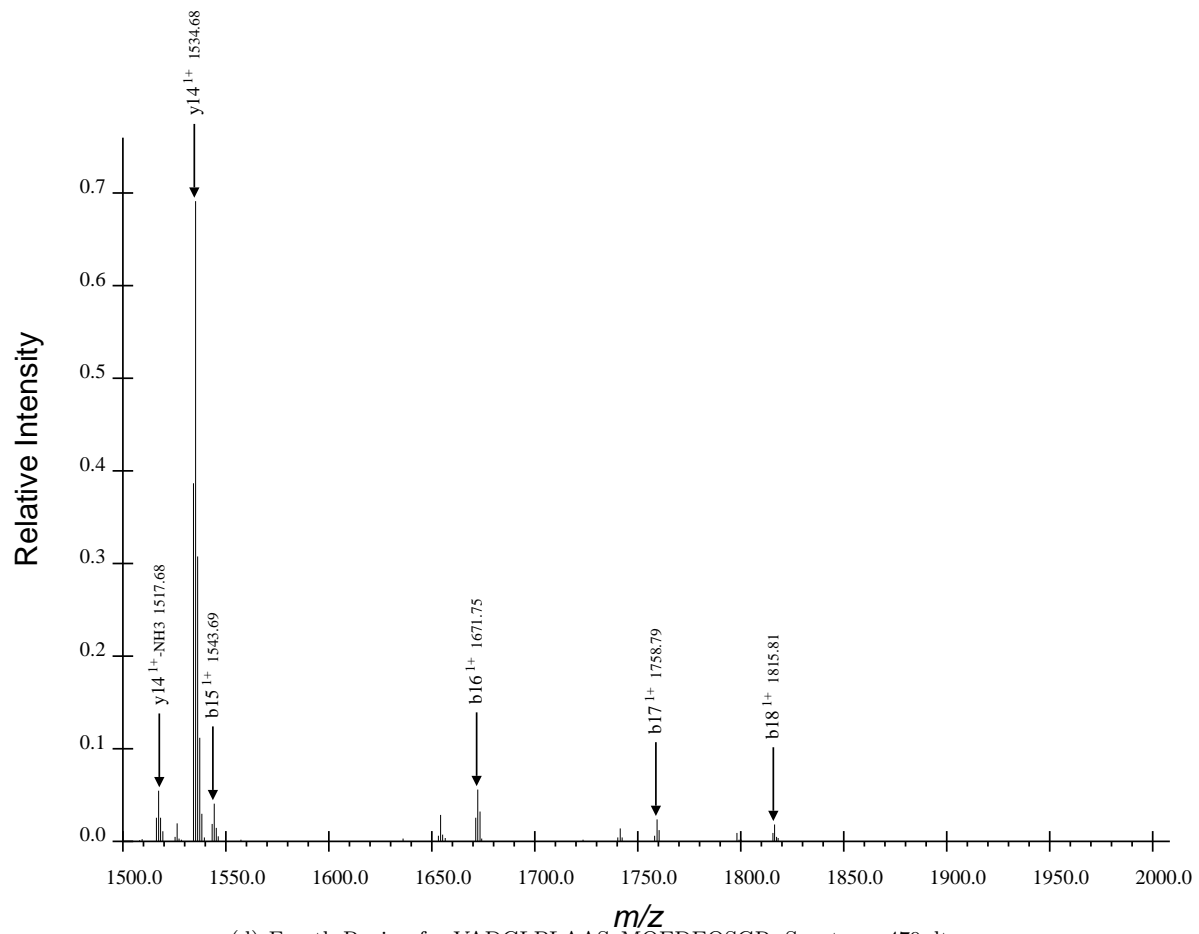

(d) Fourth Region for VADGLPLAASoMQEDEQSGR, Spectrum 479.dta

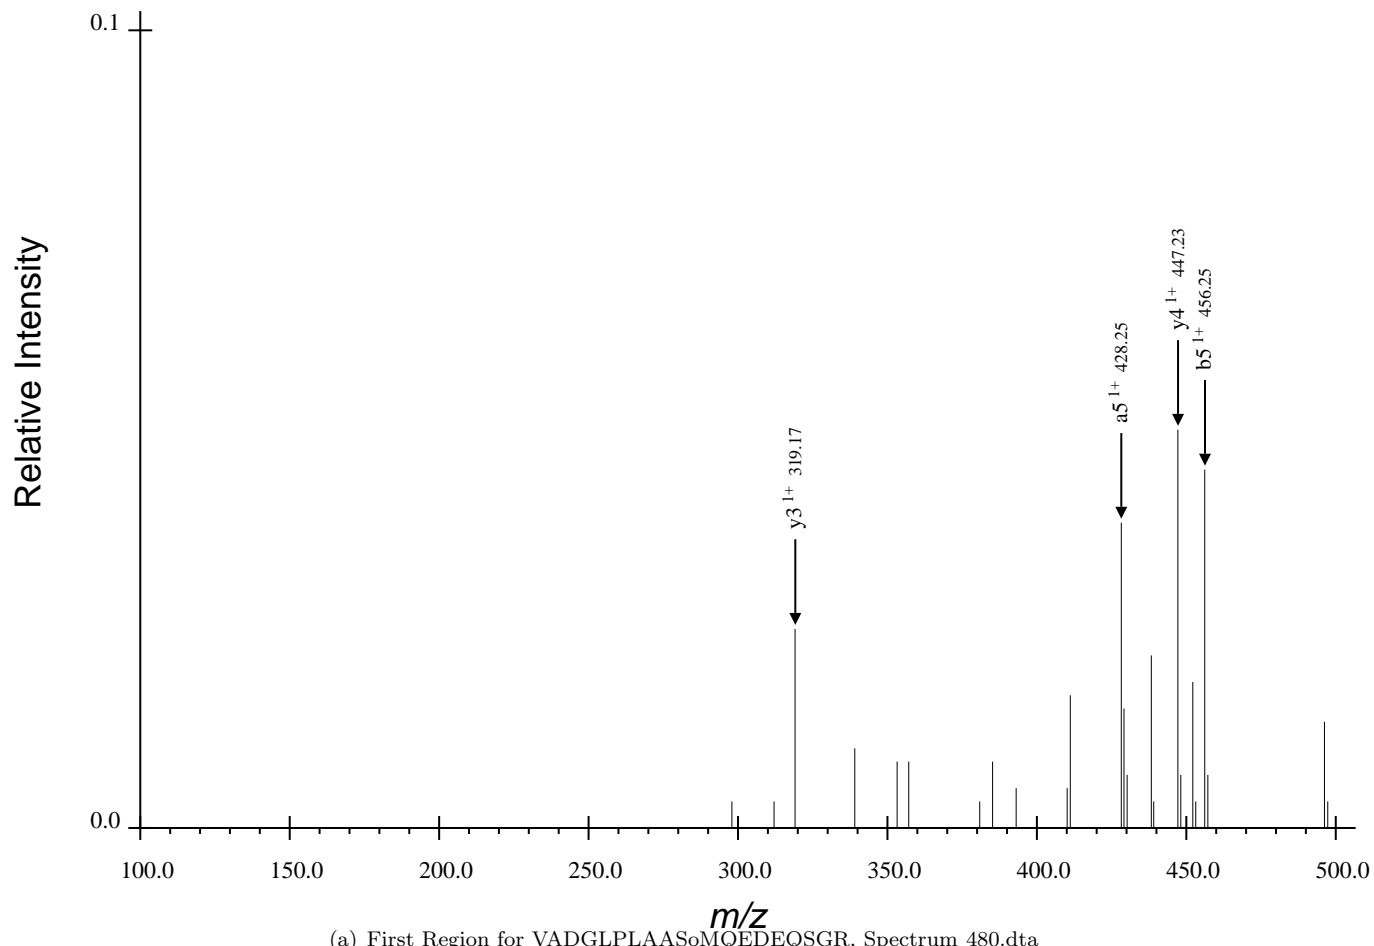

(a) First Region for VADGLPLAASoMQEDEQSGR, Spectrum 480.dta

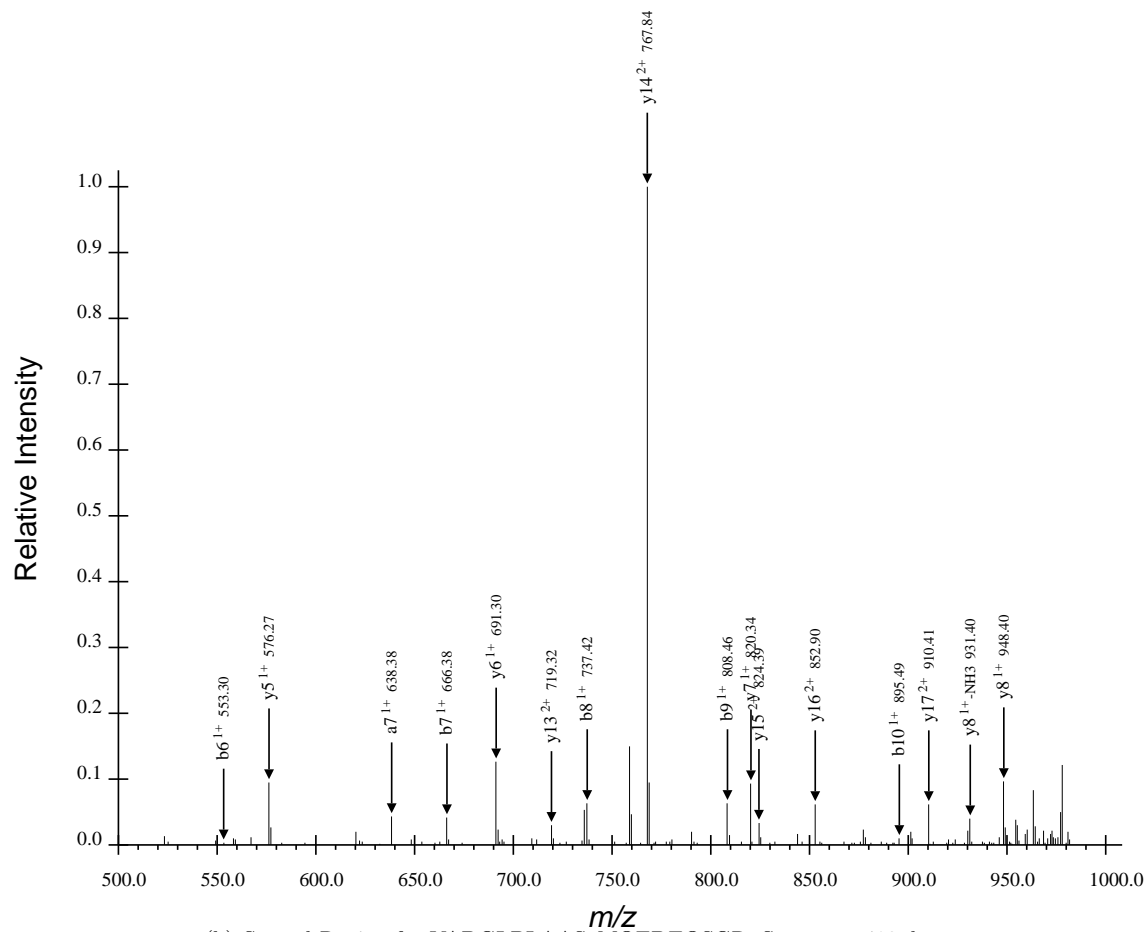

(b) Second Region for VADGLPLAASoMQEDEQSGR, Spectrum 480.dta

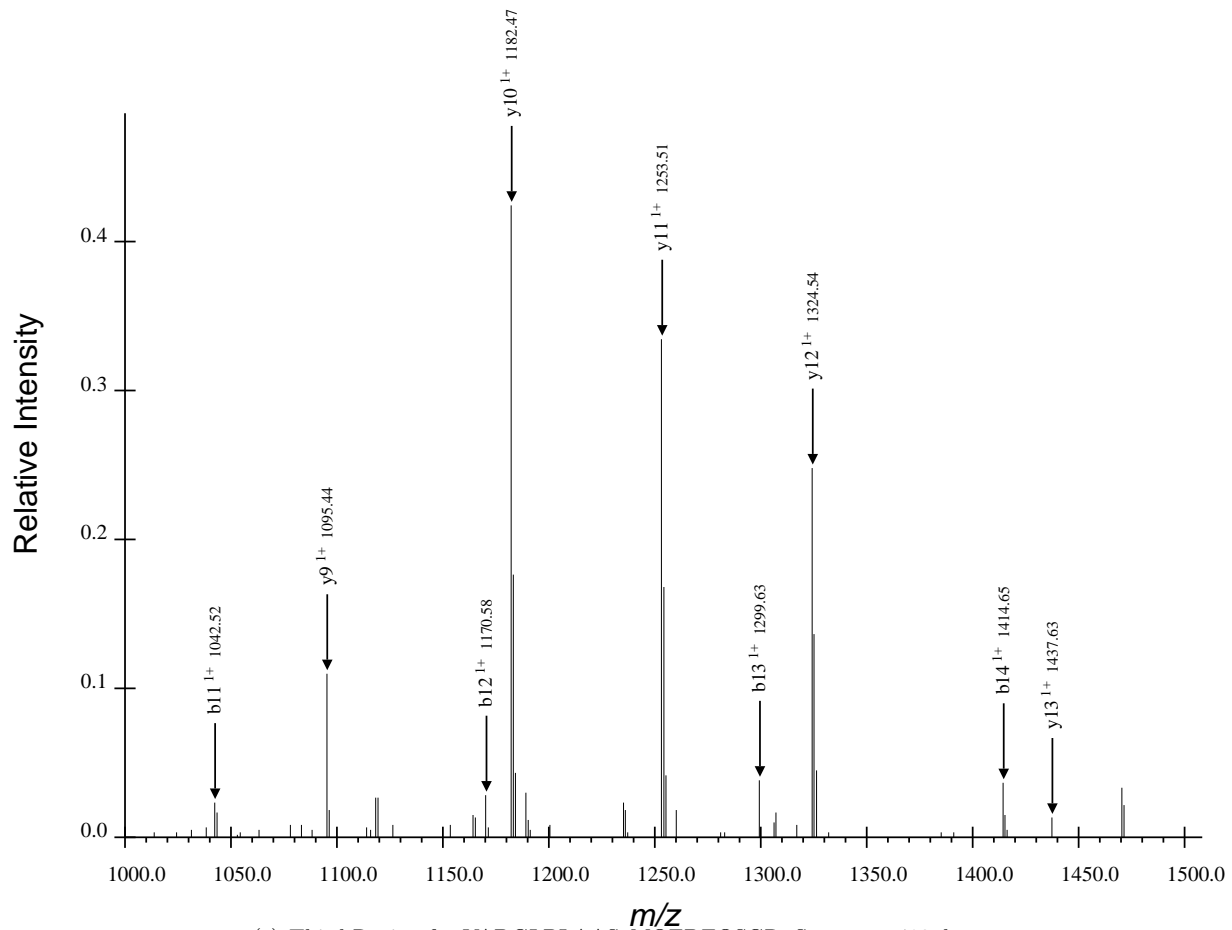

(c) Third Region for VADGLPLAASoMQEDEQSGR, Spectrum 480.dta

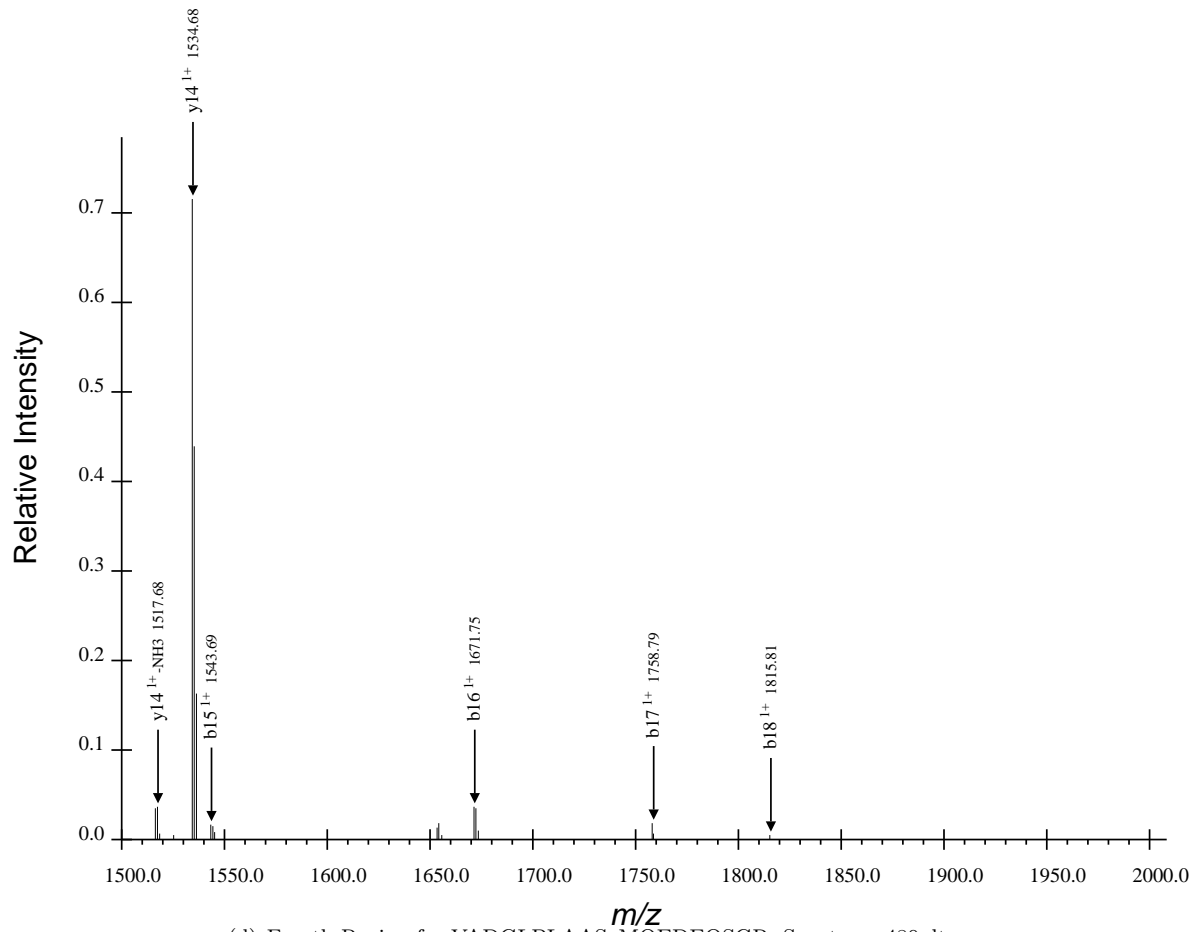

(d) Fourth Region for VADGLPLAASoMQEDEQSGR, Spectrum 480.dta

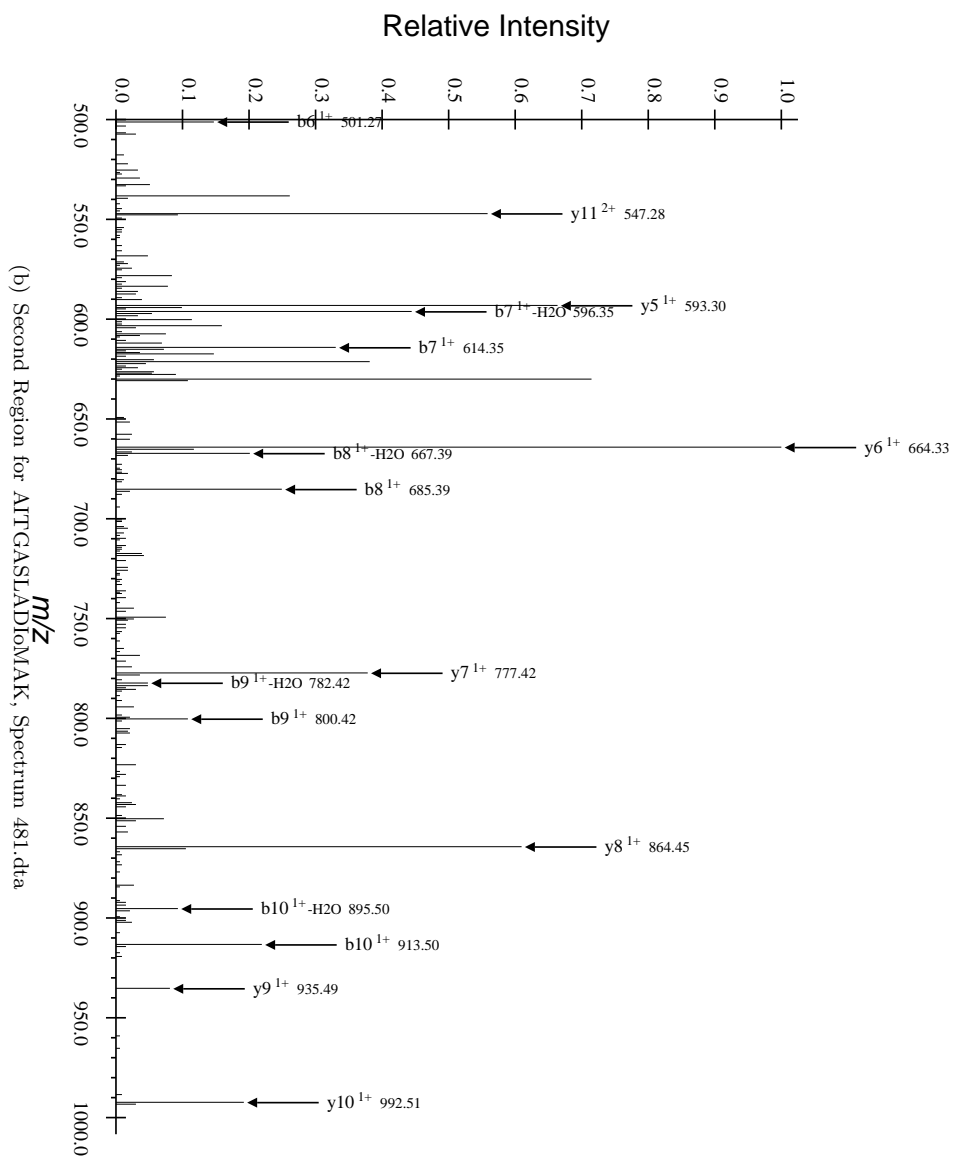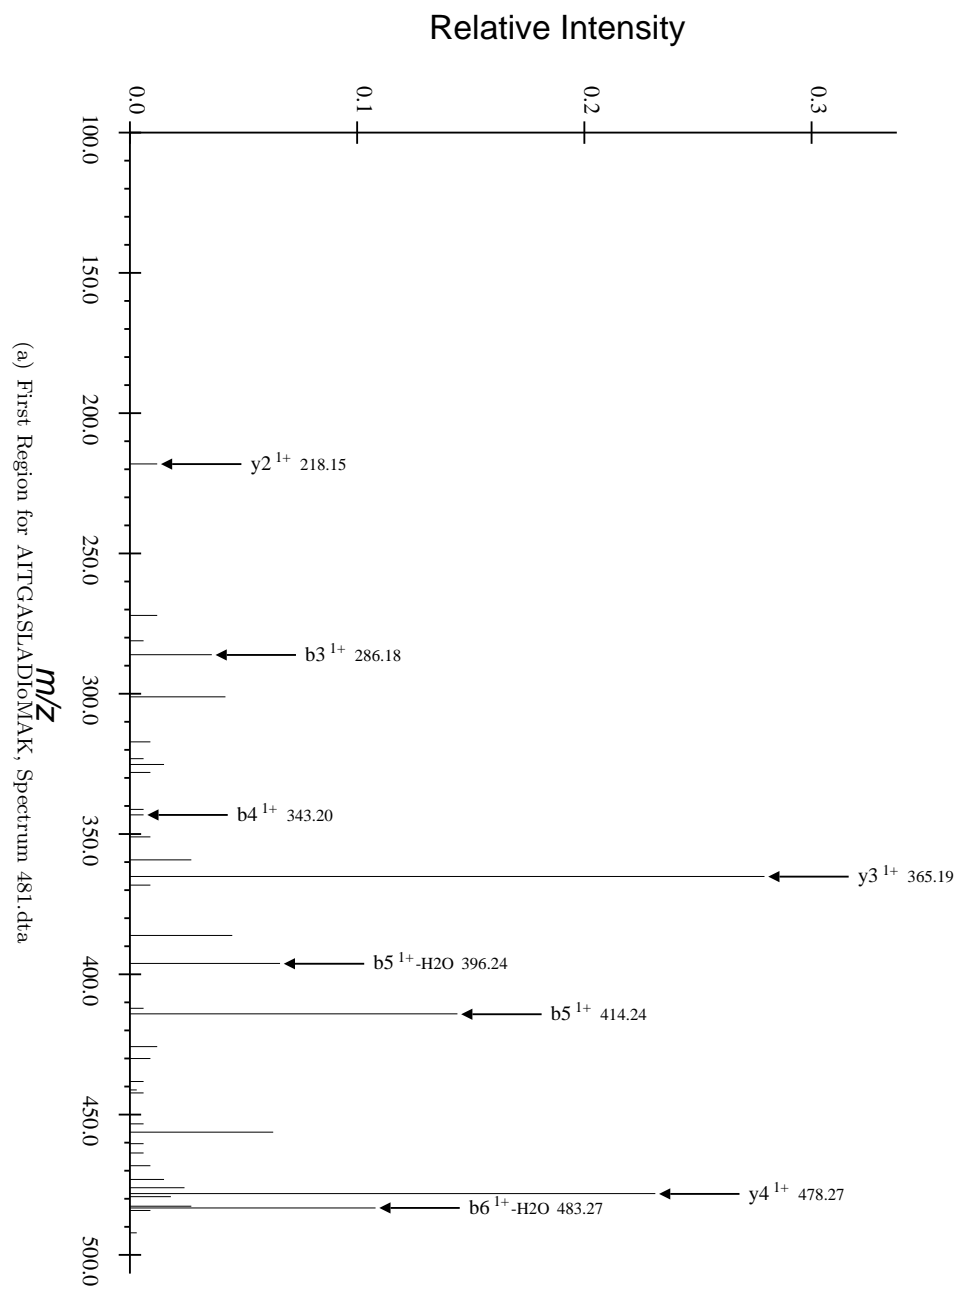



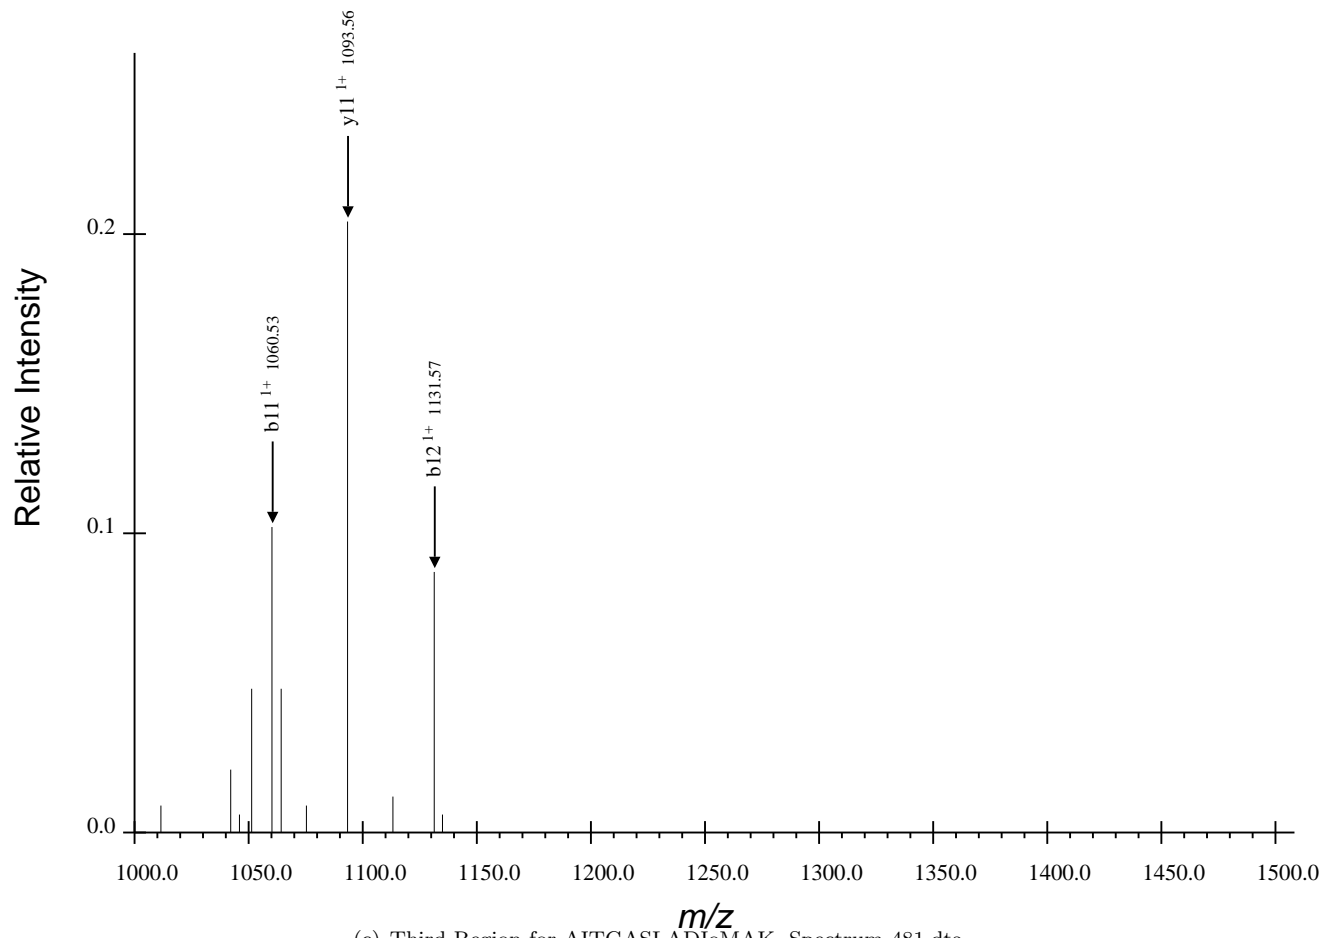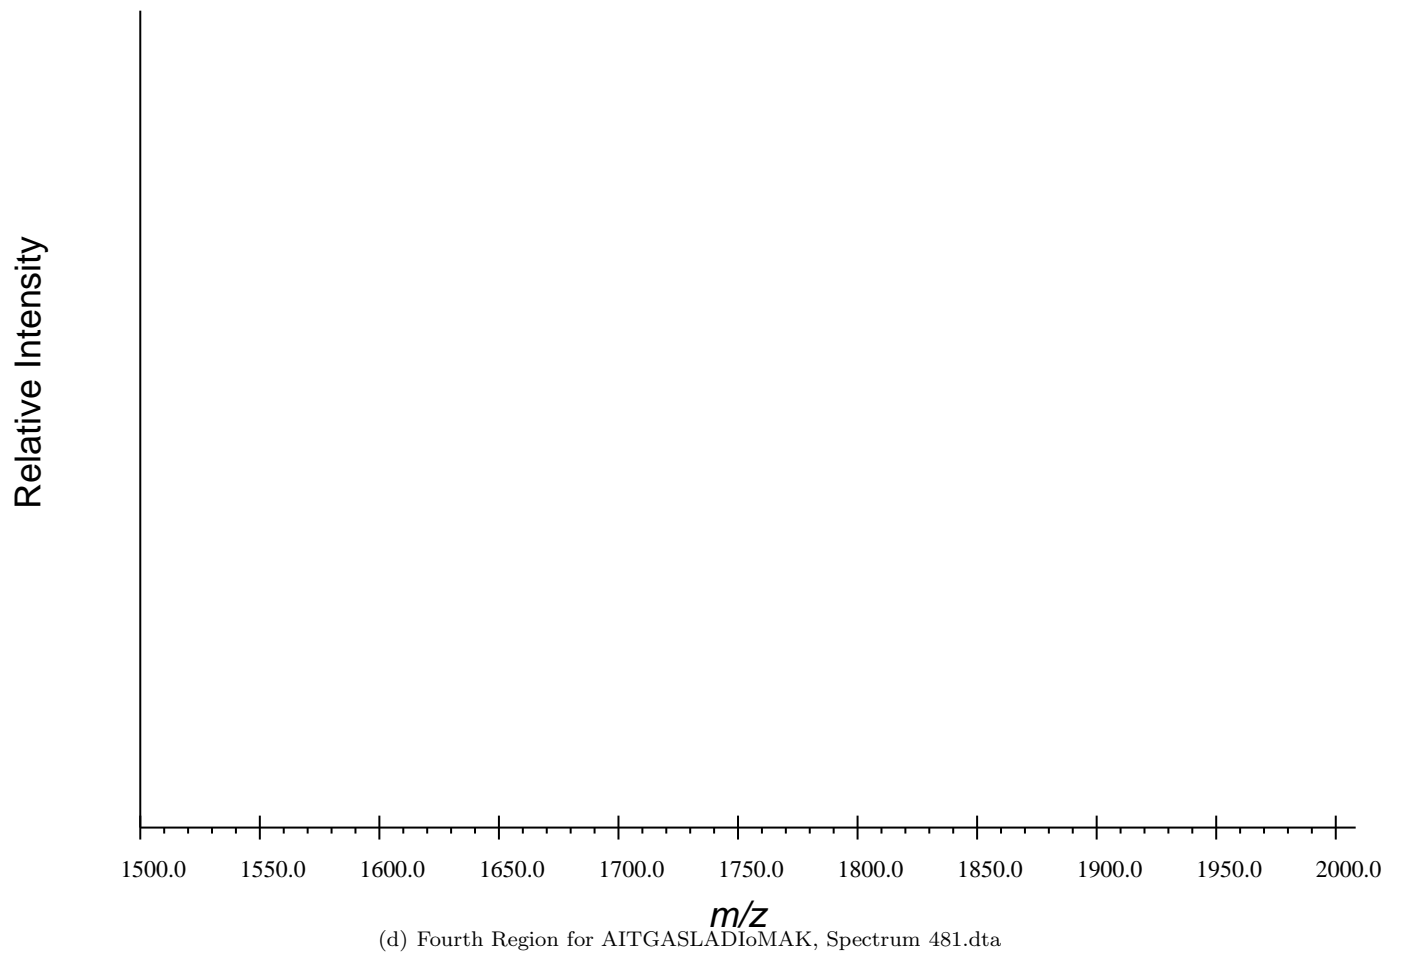

(b) Second Region for AITGASLAD101AK, Spectrum 482.dta

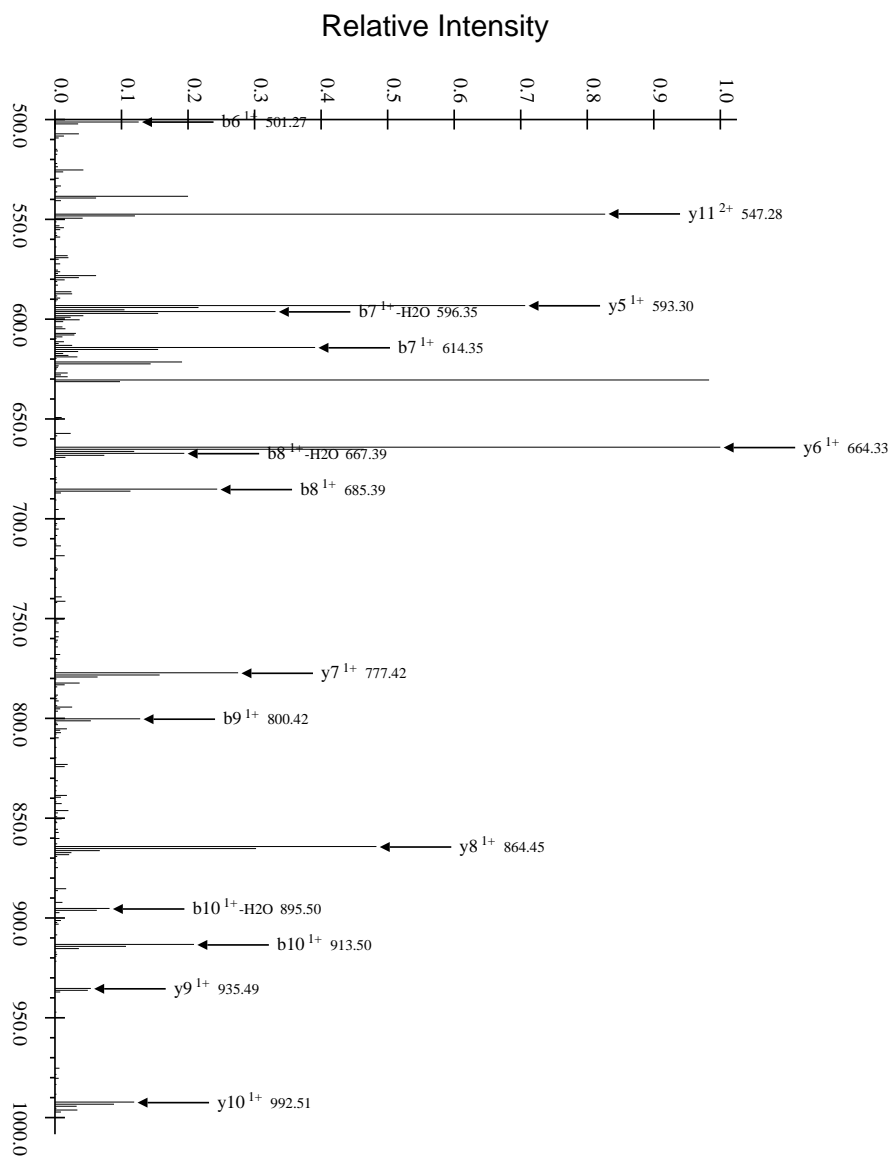

(a) First Region for AITGASLAD101AK, Spectrum 482.dta

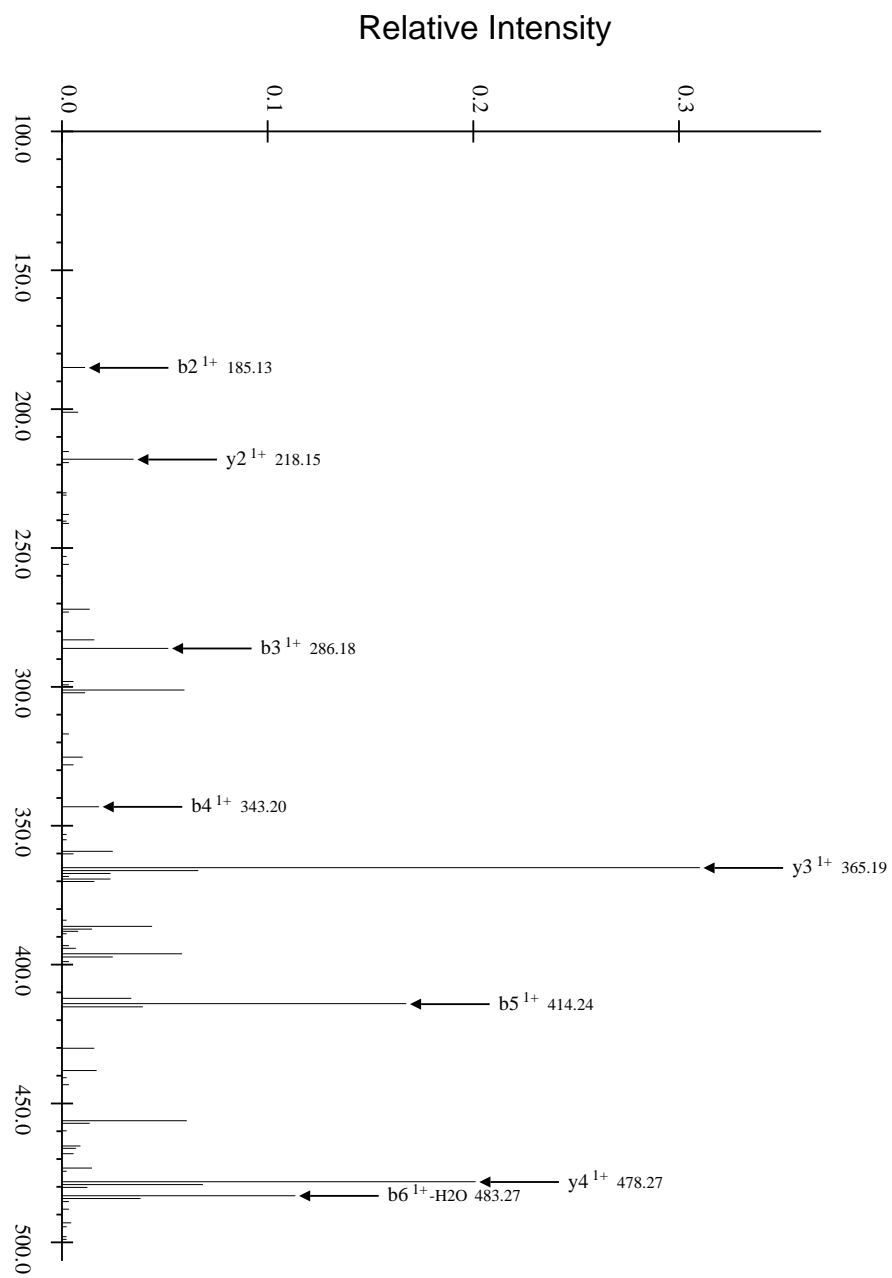

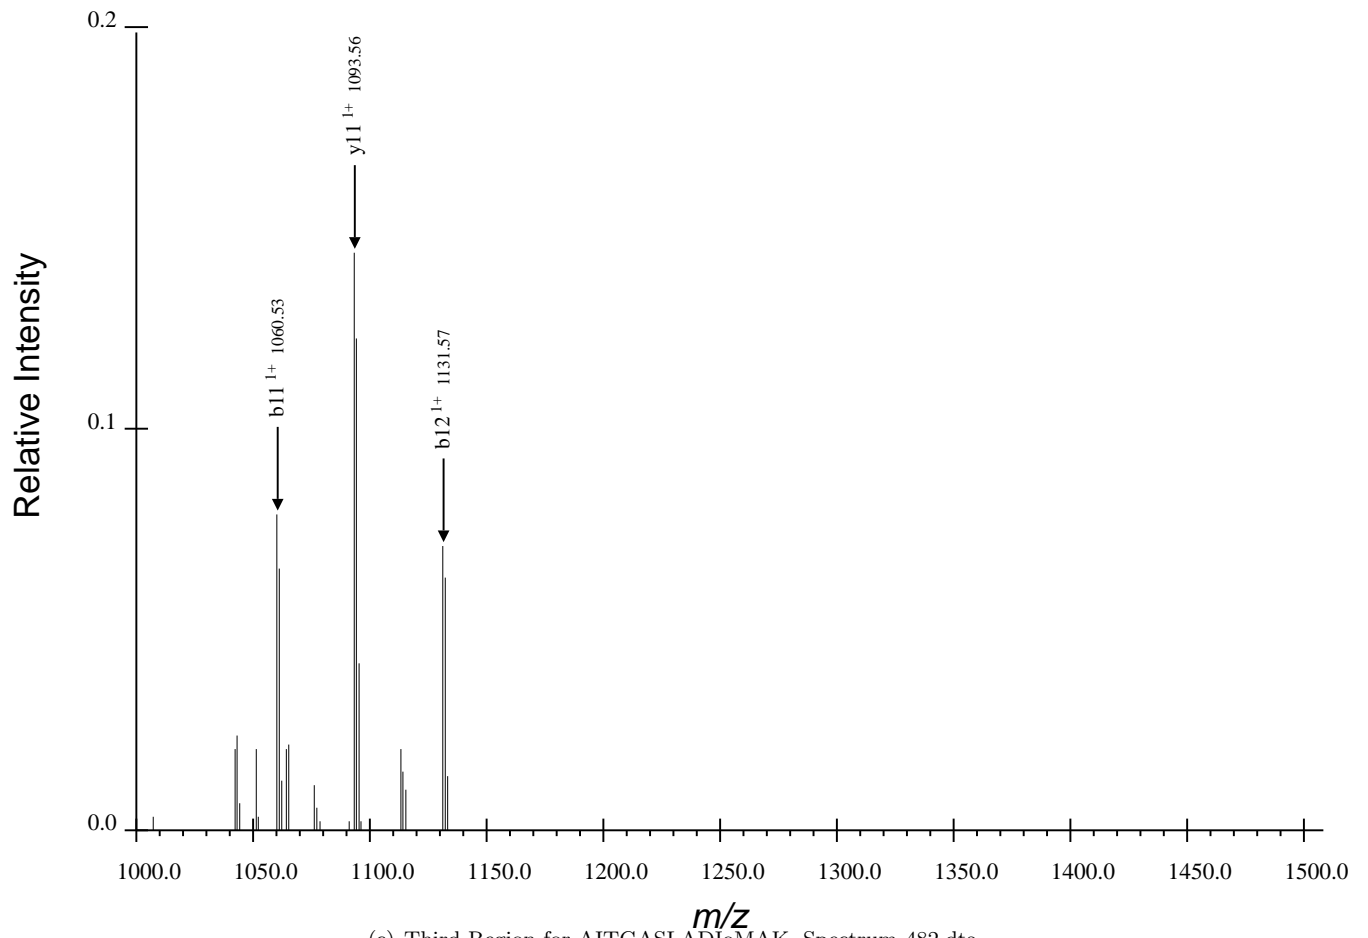

(c) Third Region for AITGASLADIoMAK, Spectrum 482.dta

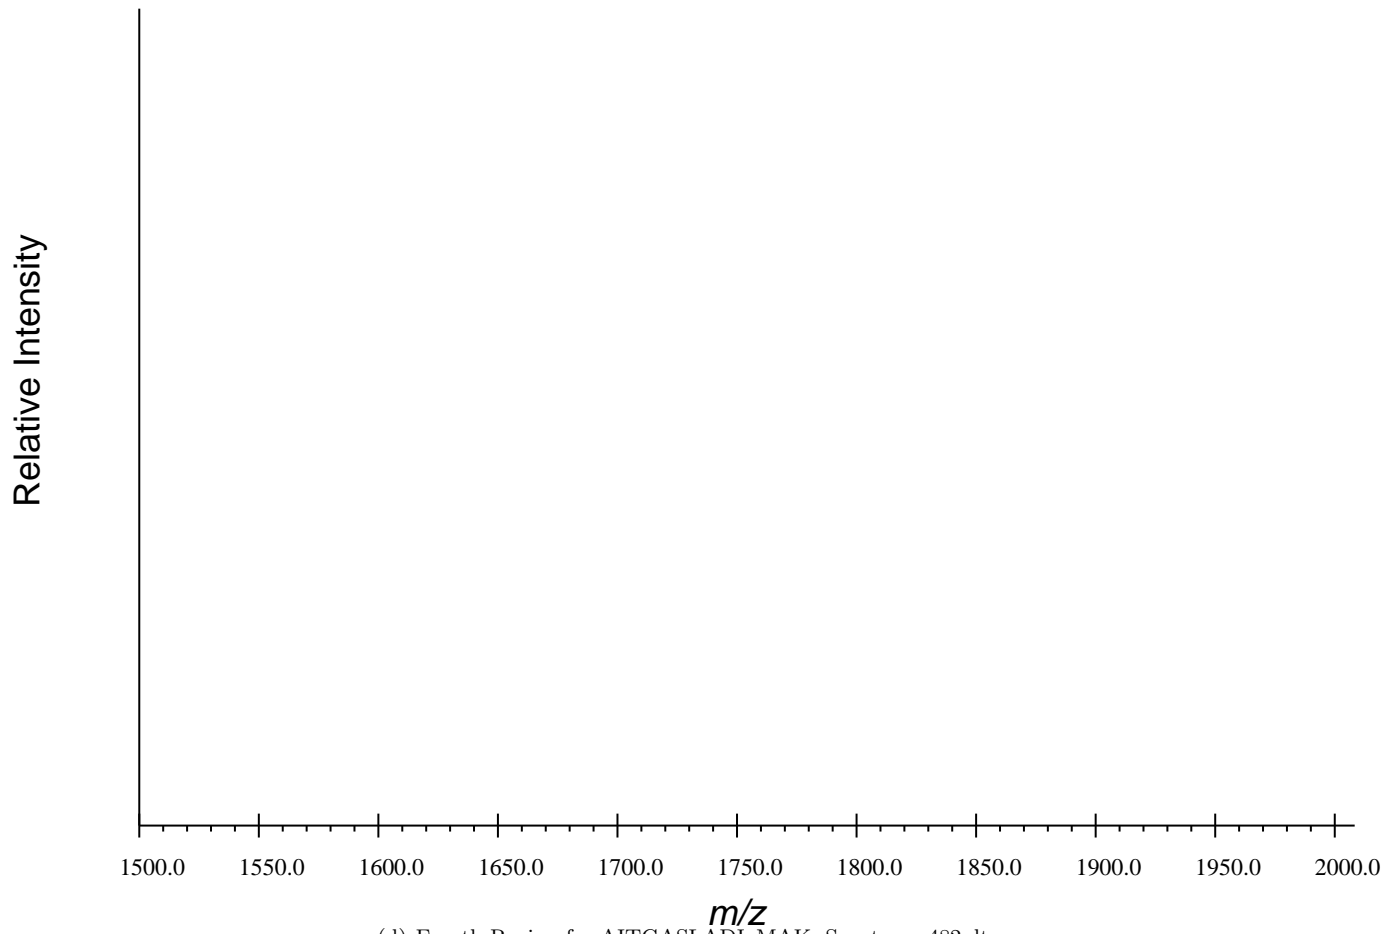

(d) Fourth Region for AITGASLADIoMAK, Spectrum 482.dta

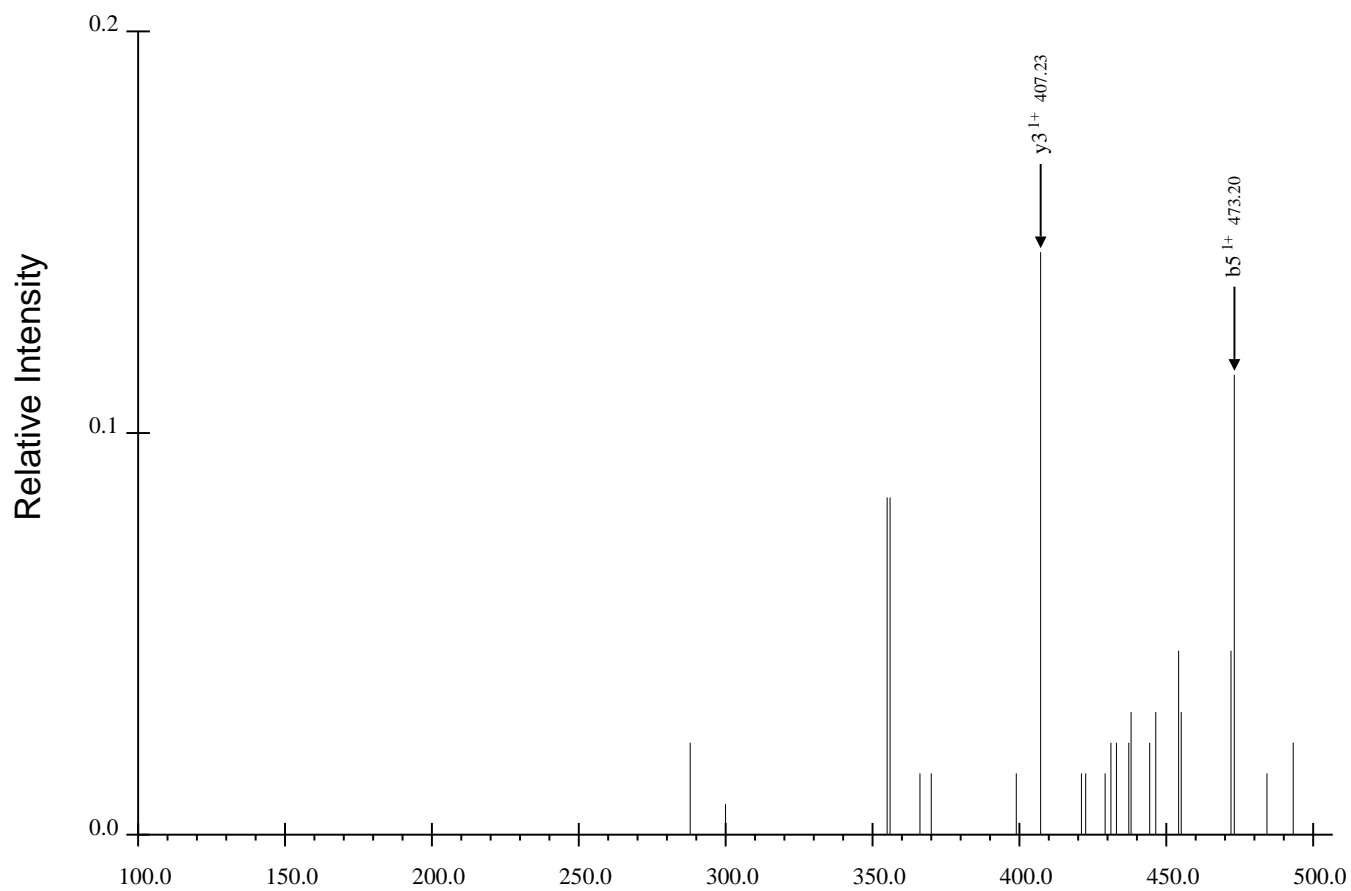

(a) First Region for GQATDIAIQAEElMK, Spectrum 483.dta

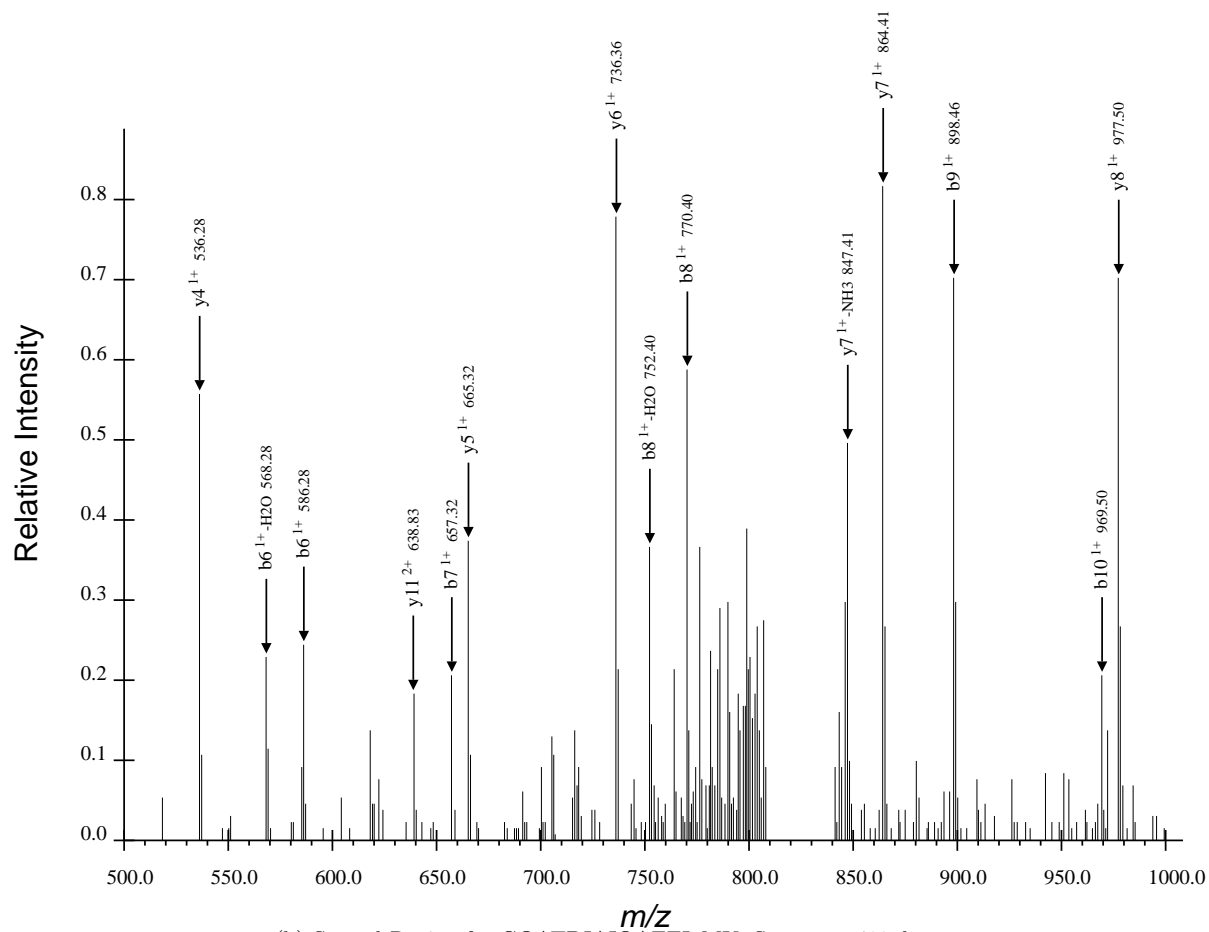

(b) Second Region for GQATDIAIQAEElMK, Spectrum 483.dta

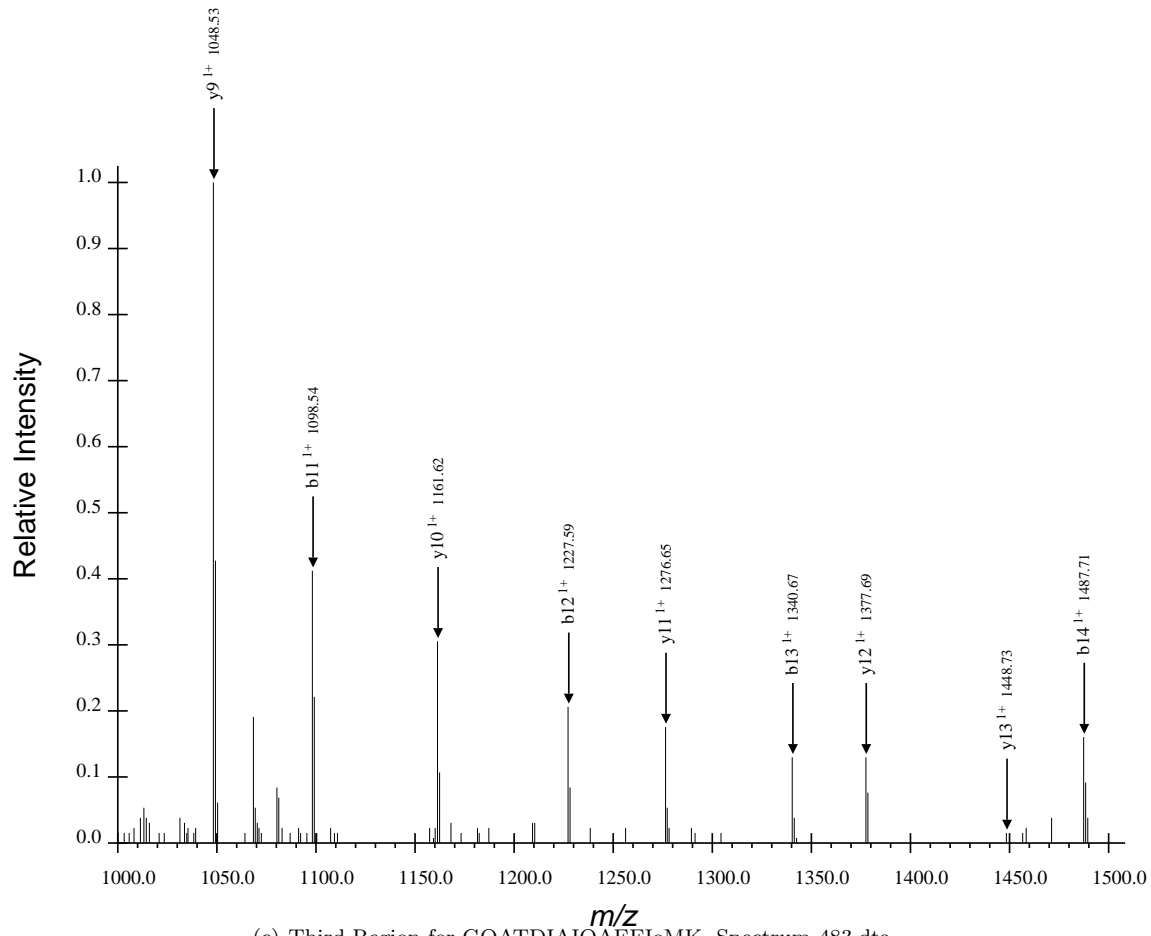

(c) Third Region for GQATDIAIQAEElOMK, Spectrum 483.dta

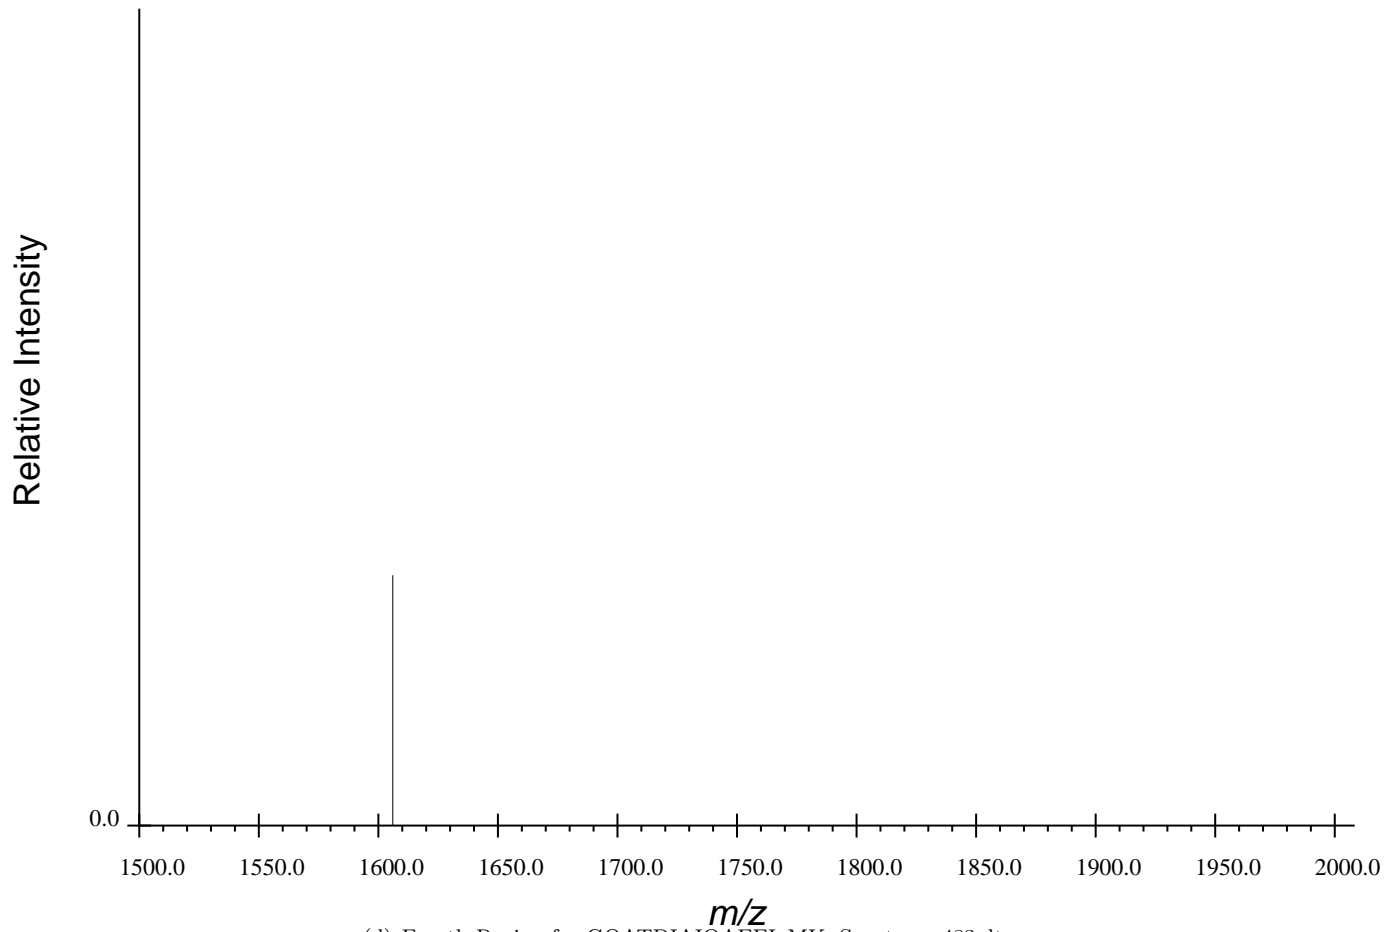

(d) Fourth Region for GQATDIAIQAEElOMK, Spectrum 483.dta

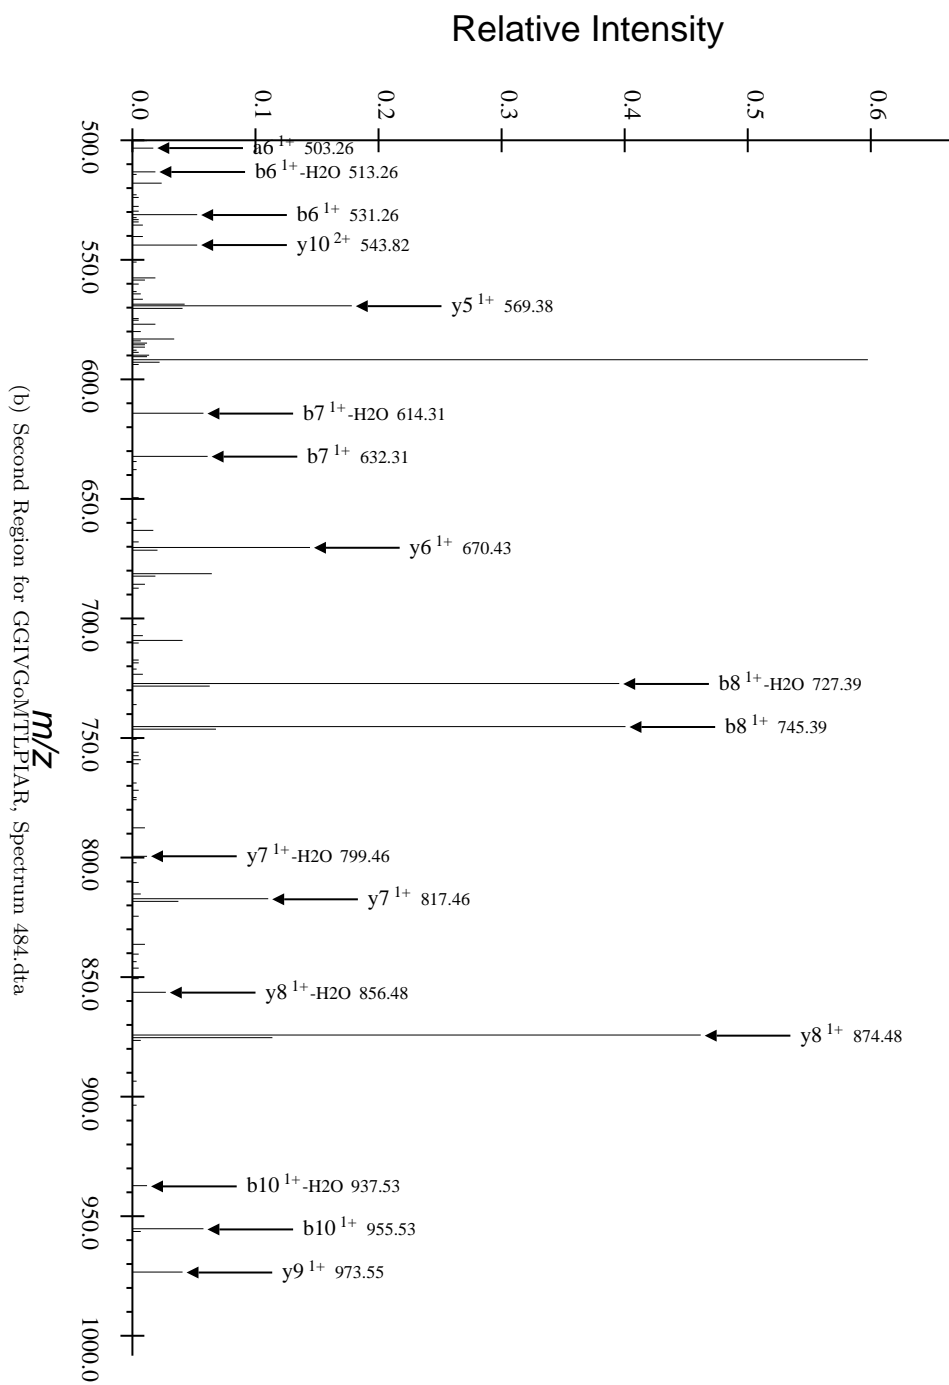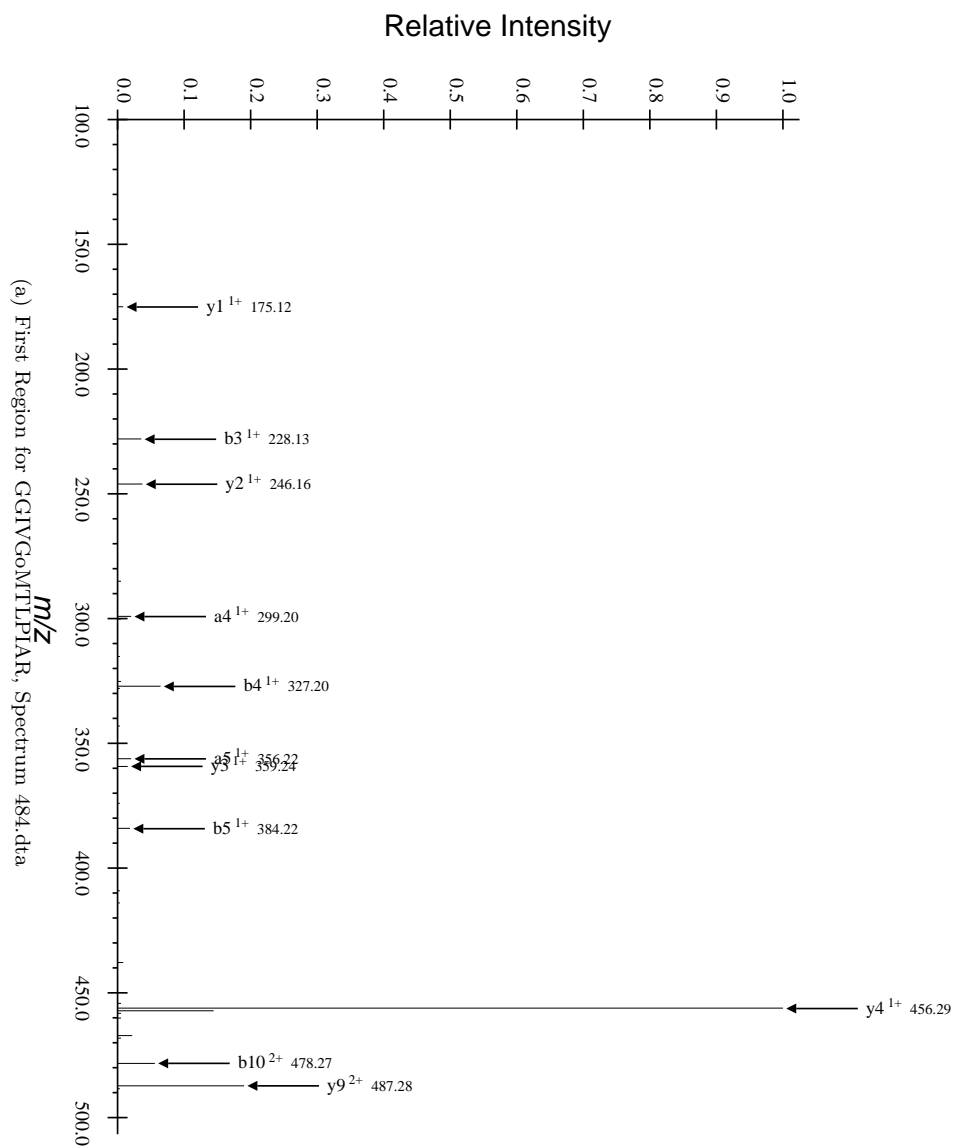

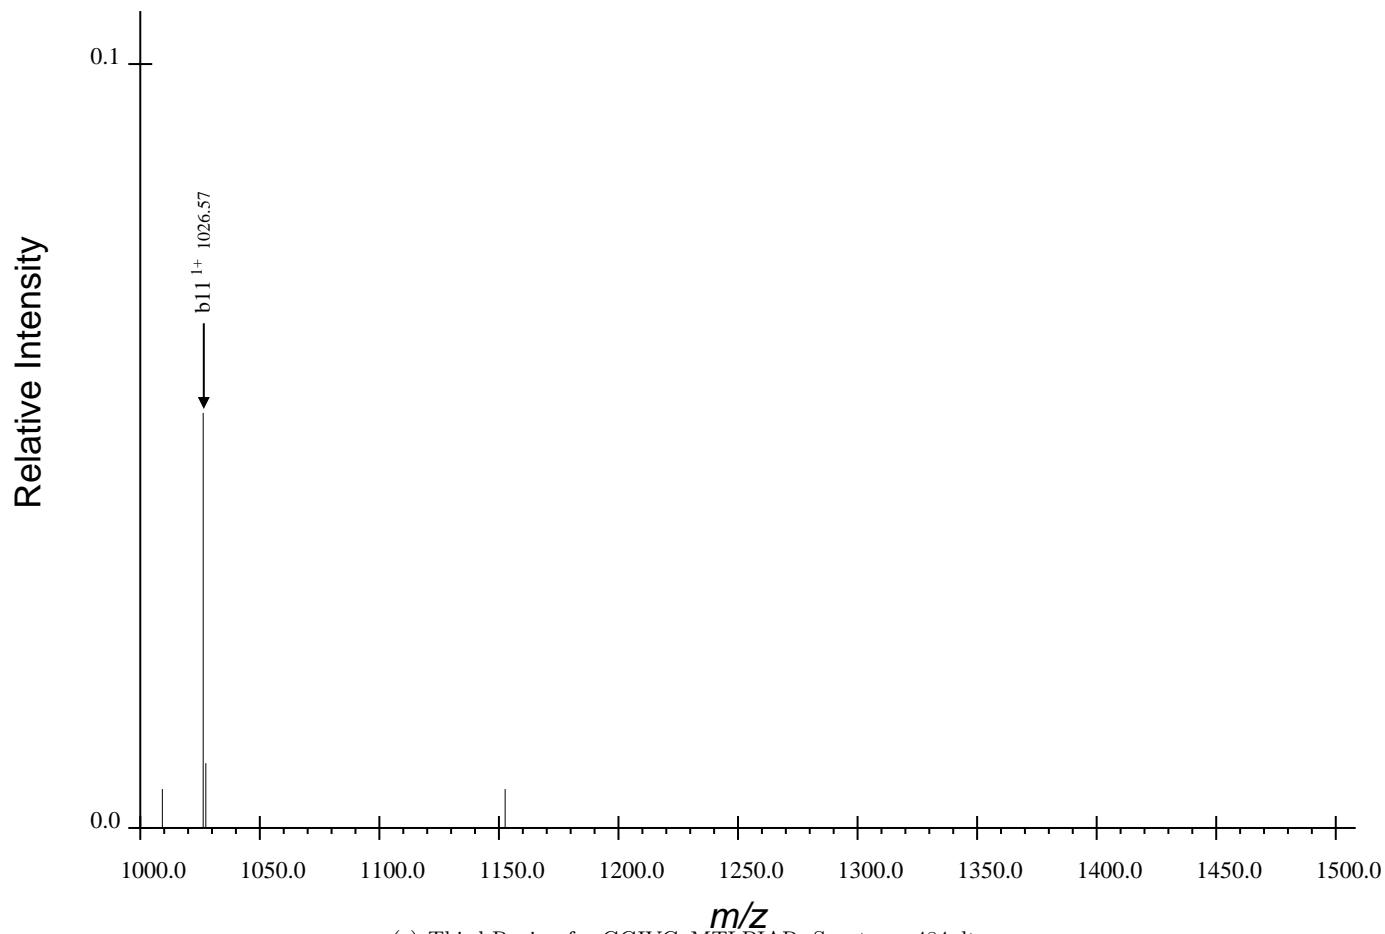

(c) Third Region for GGIVGoMTLPIAR, Spectrum 484.dta

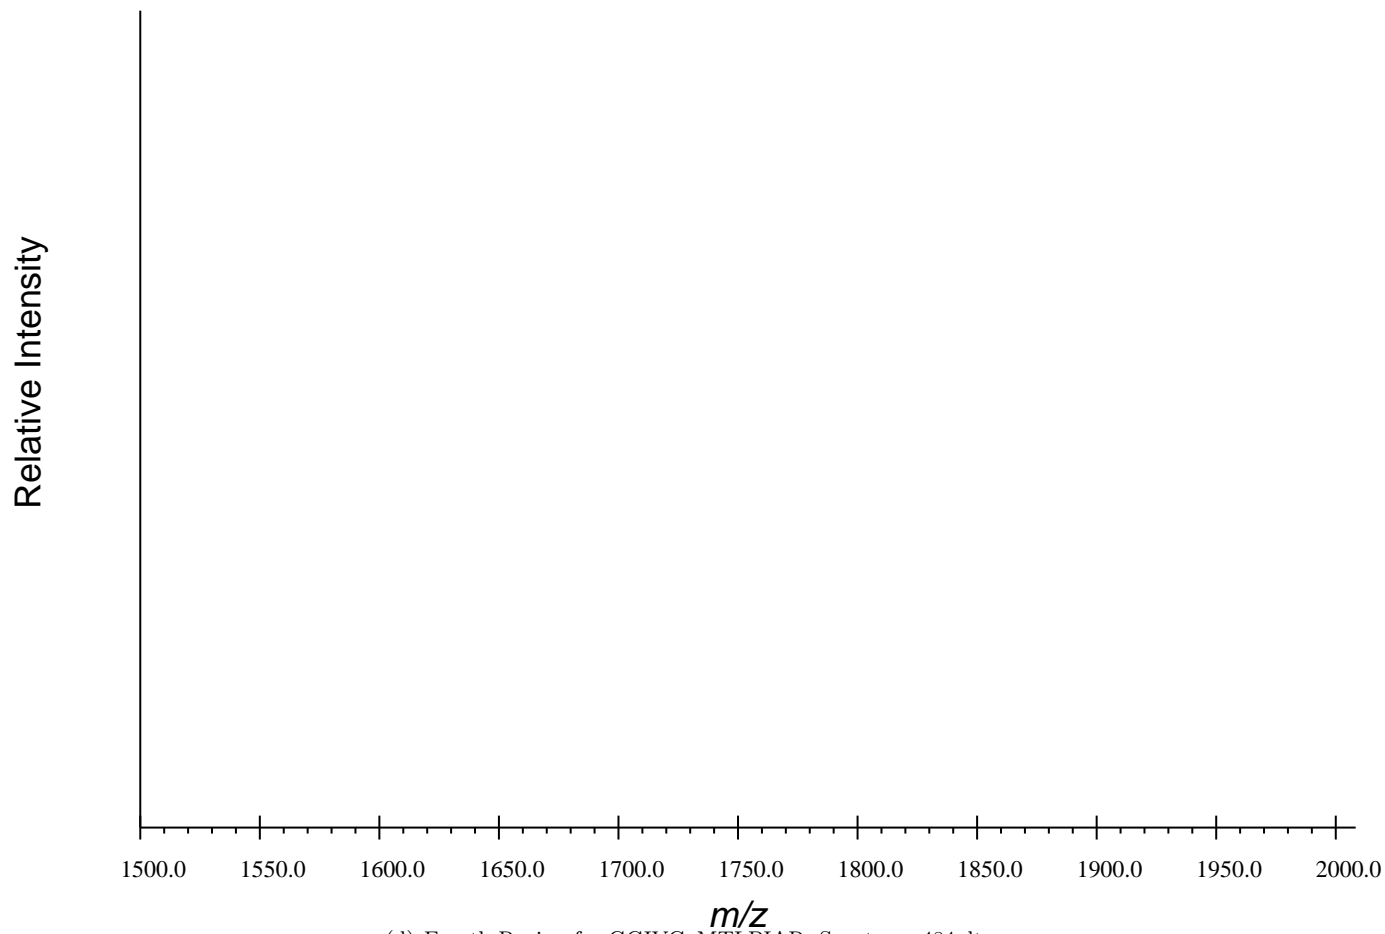

(d) Fourth Region for GGIVGoMTLPIAR, Spectrum 484.dta

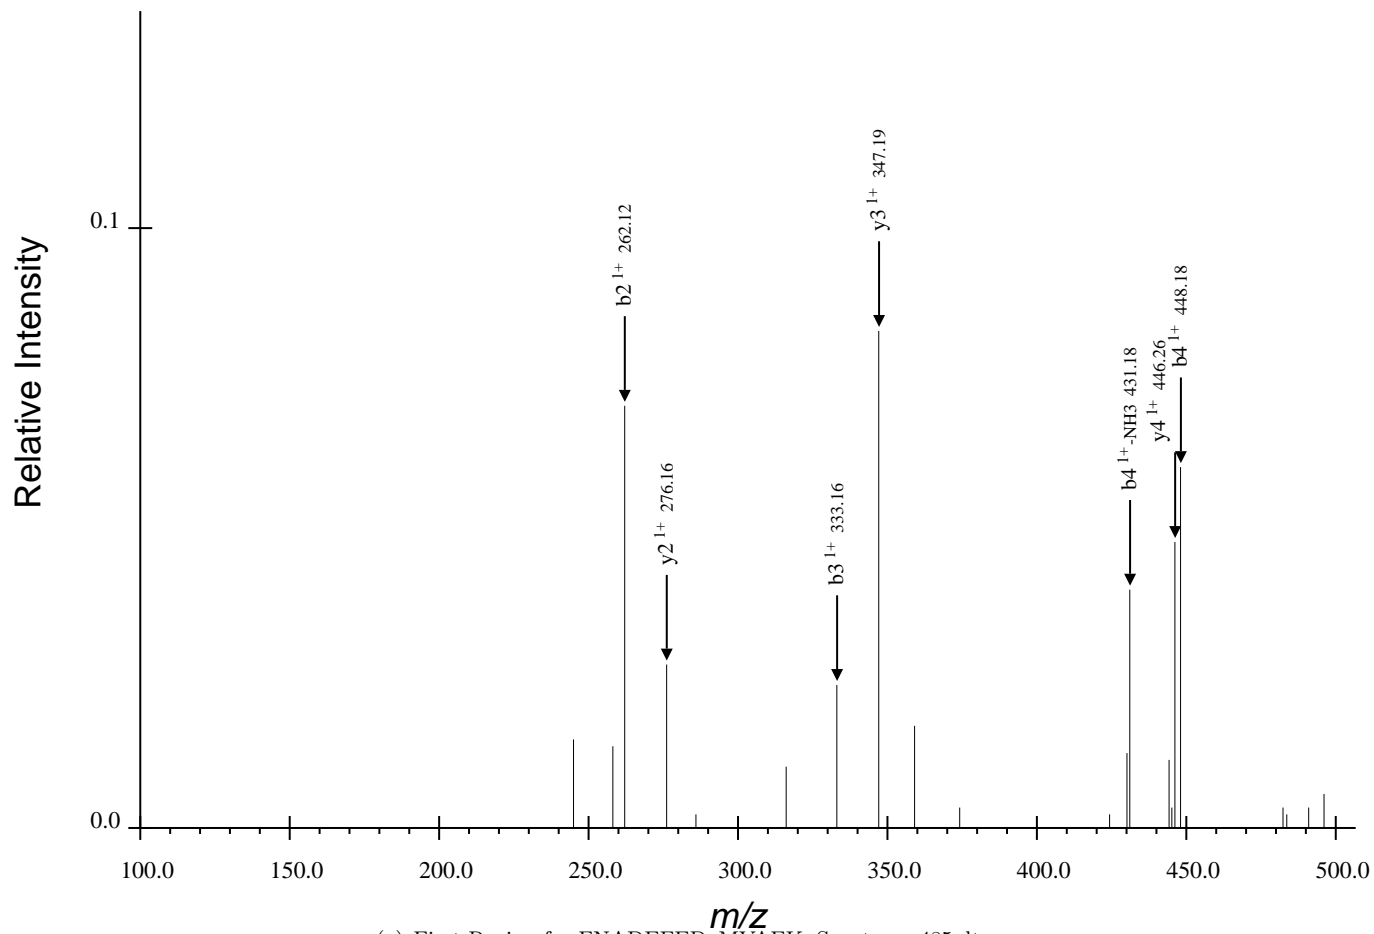

(a) First Region for FNADFEDoMVAEK, Spectrum 485.dta

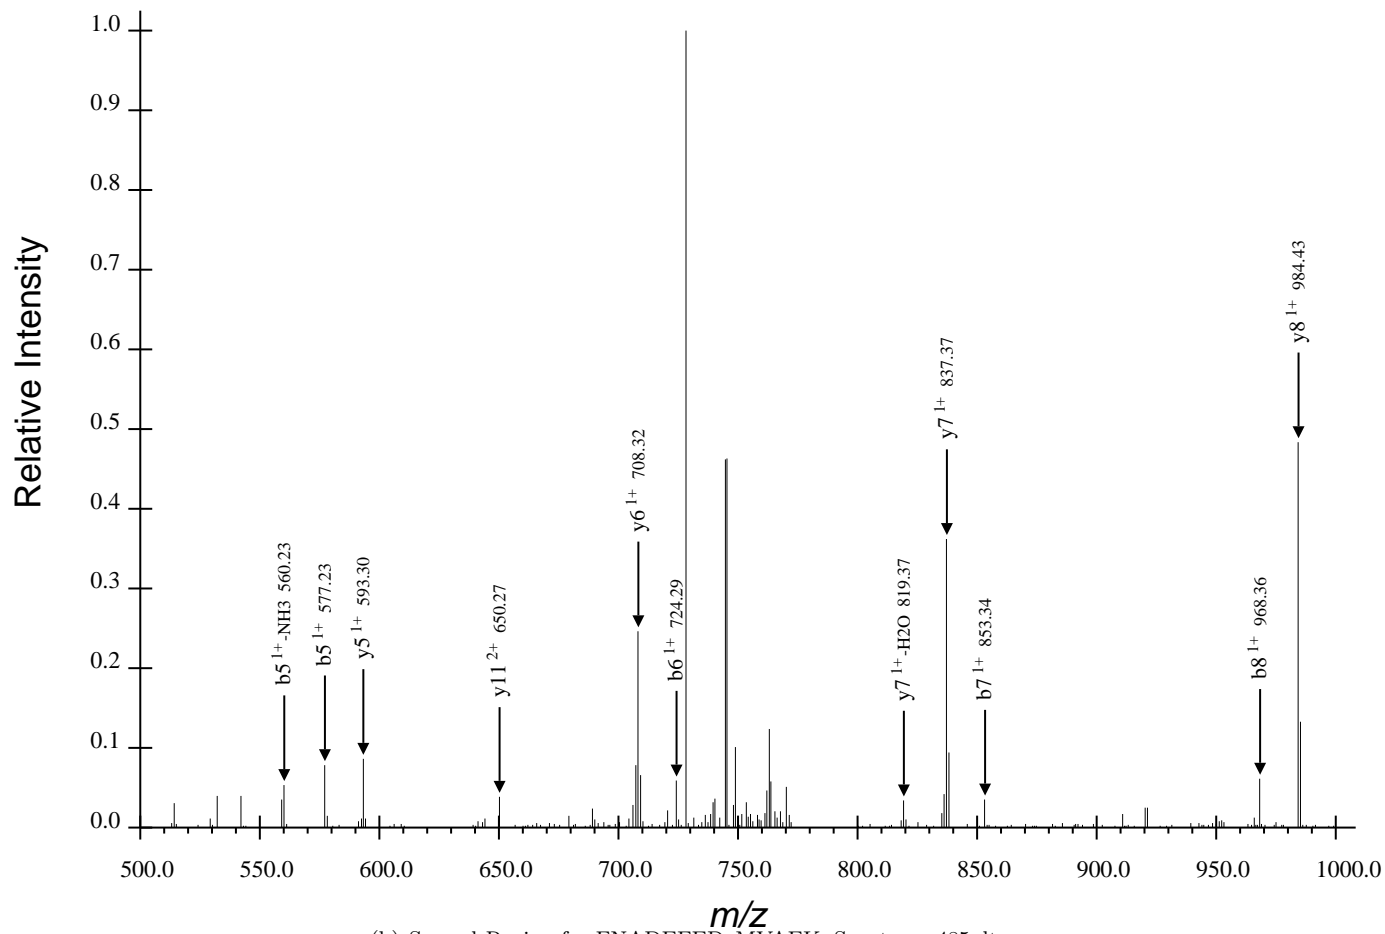

(b) Second Region for FNADFEDoMVAEK, Spectrum 485.dta



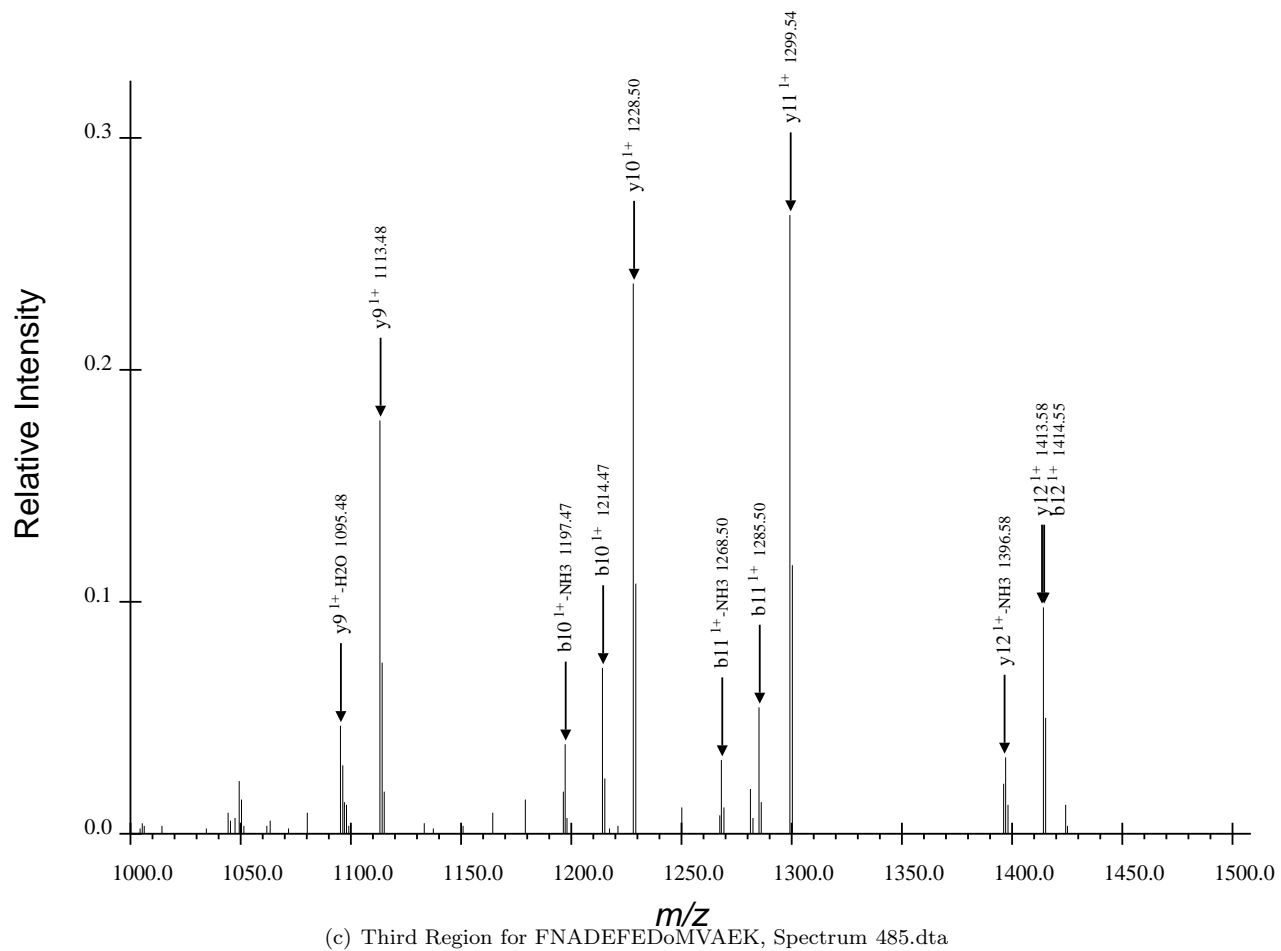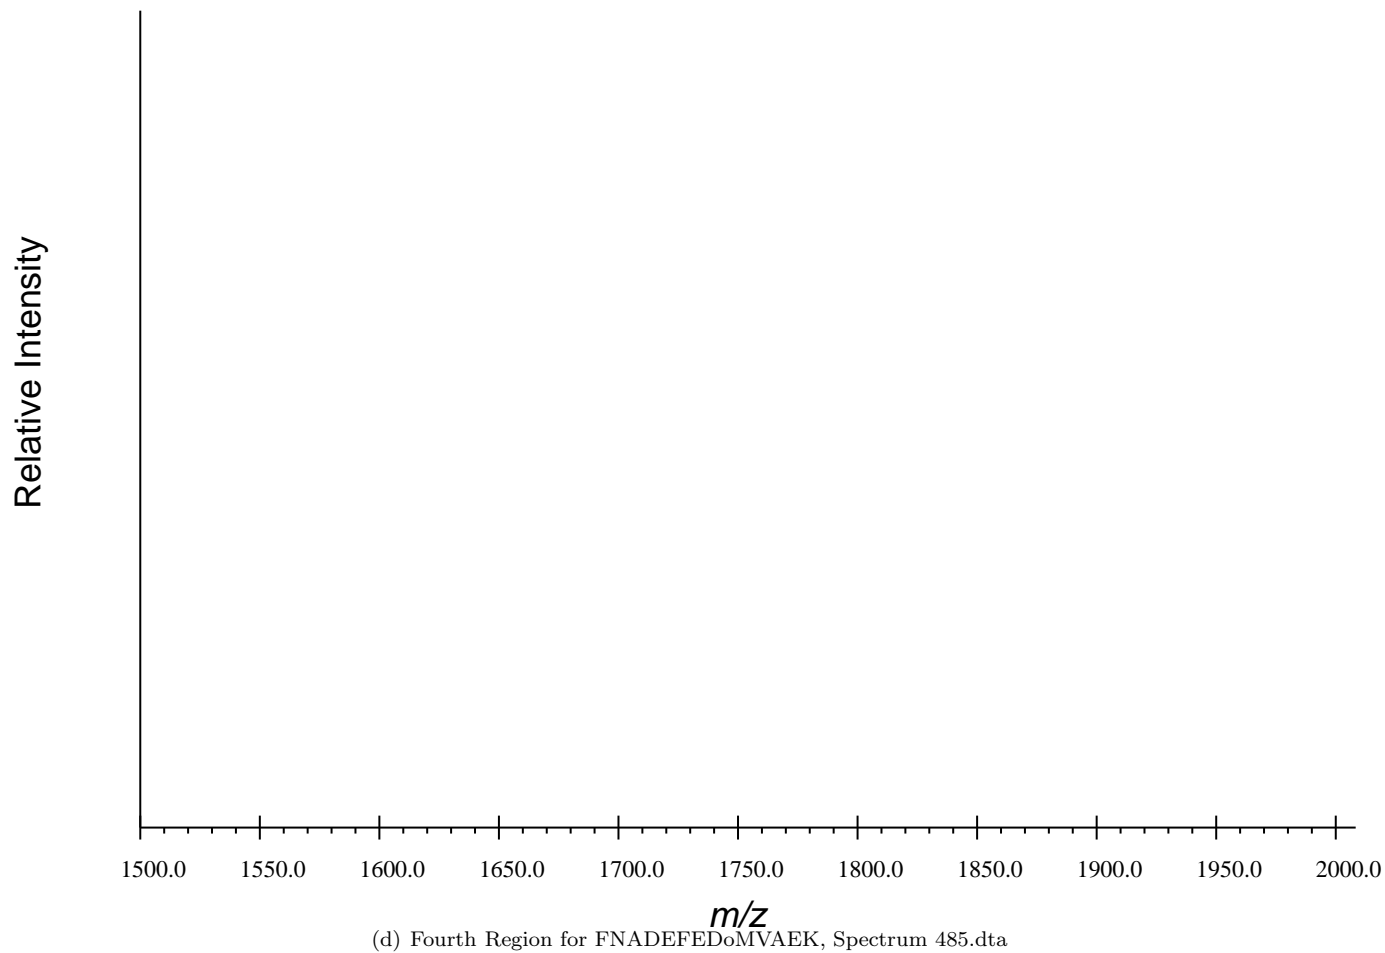

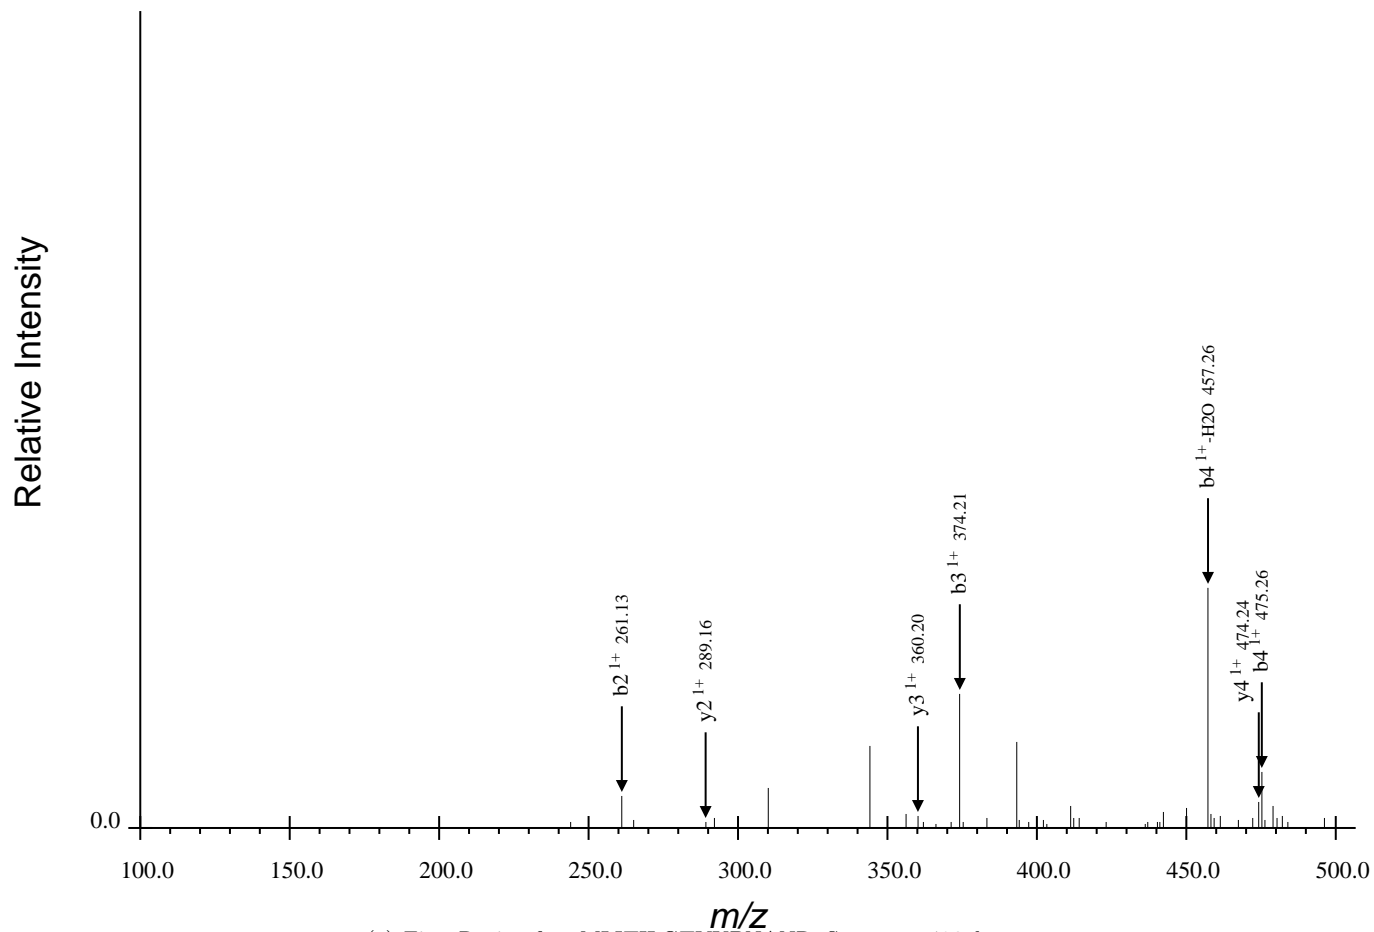

(a) First Region for oMLITILGTVKPNANR, Spectrum 486.dta

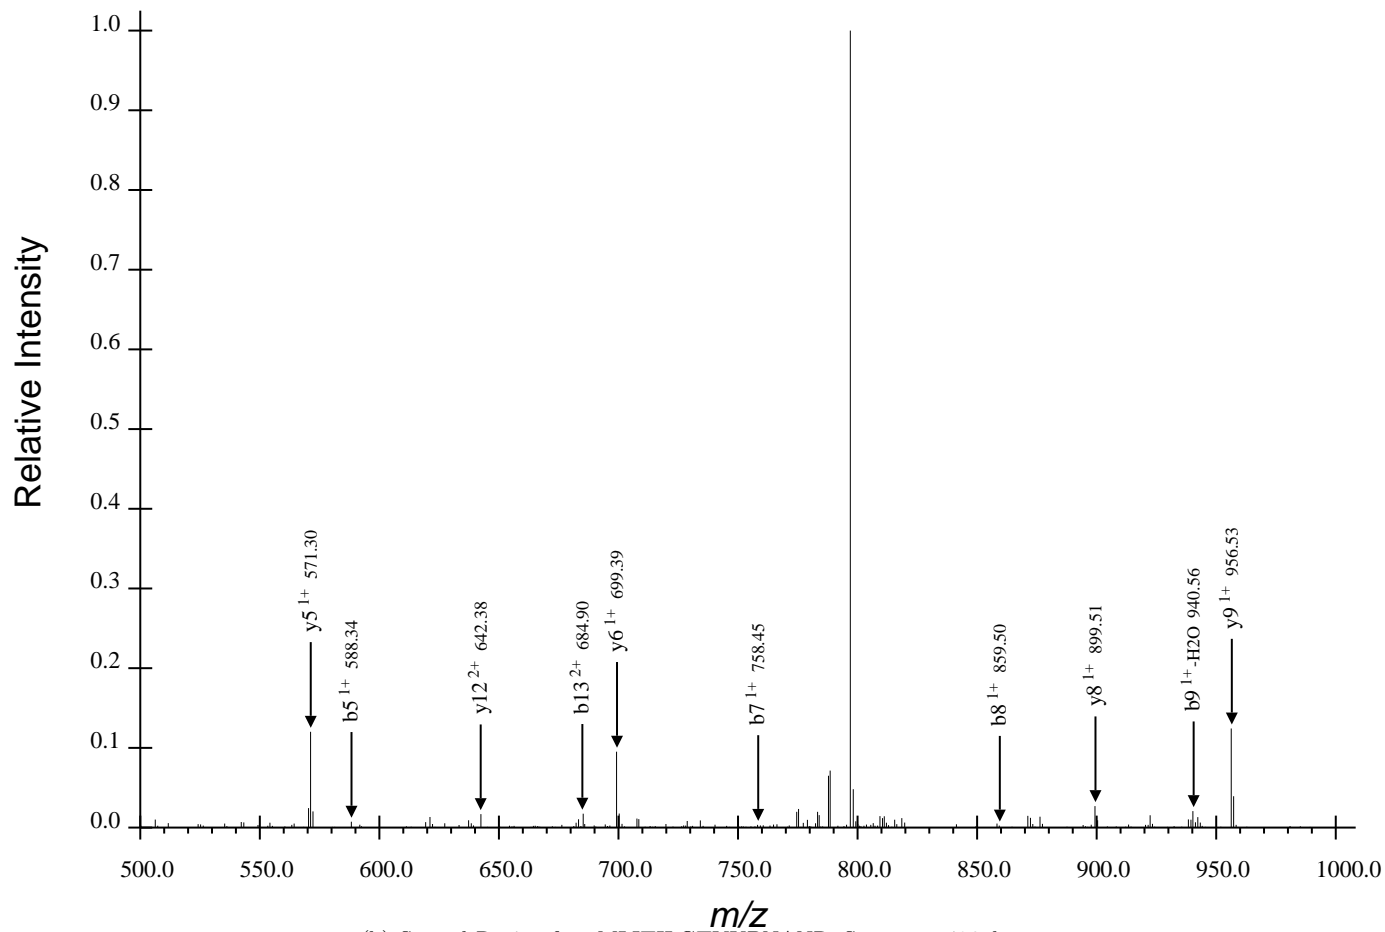

(b) Second Region for oMLITILGTVKPNANR, Spectrum 486.dta

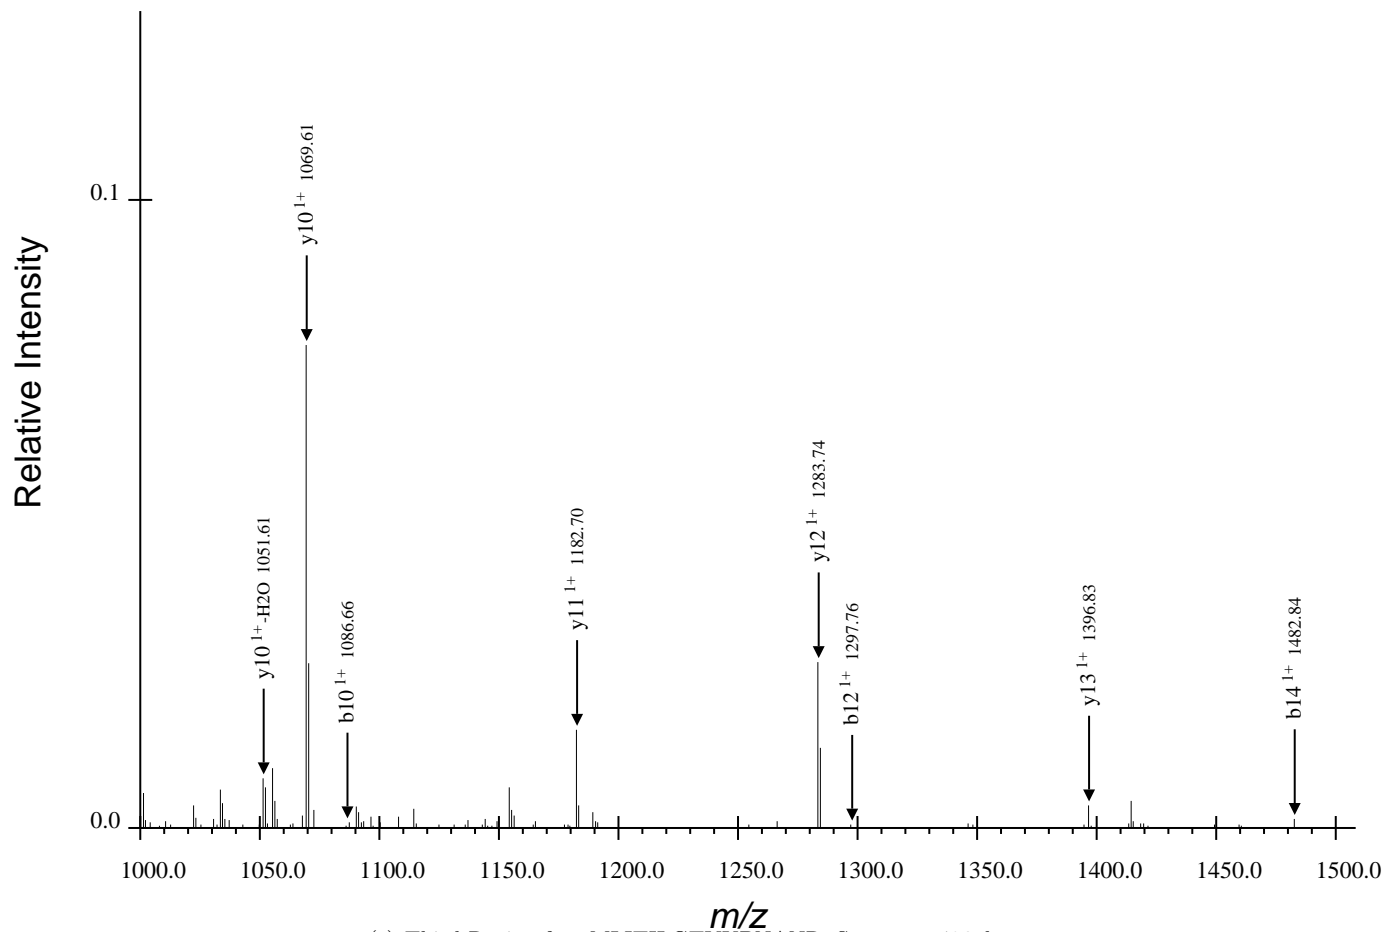

(c) Third Region for oMLITILGTVKPNANR, Spectrum 486.dta

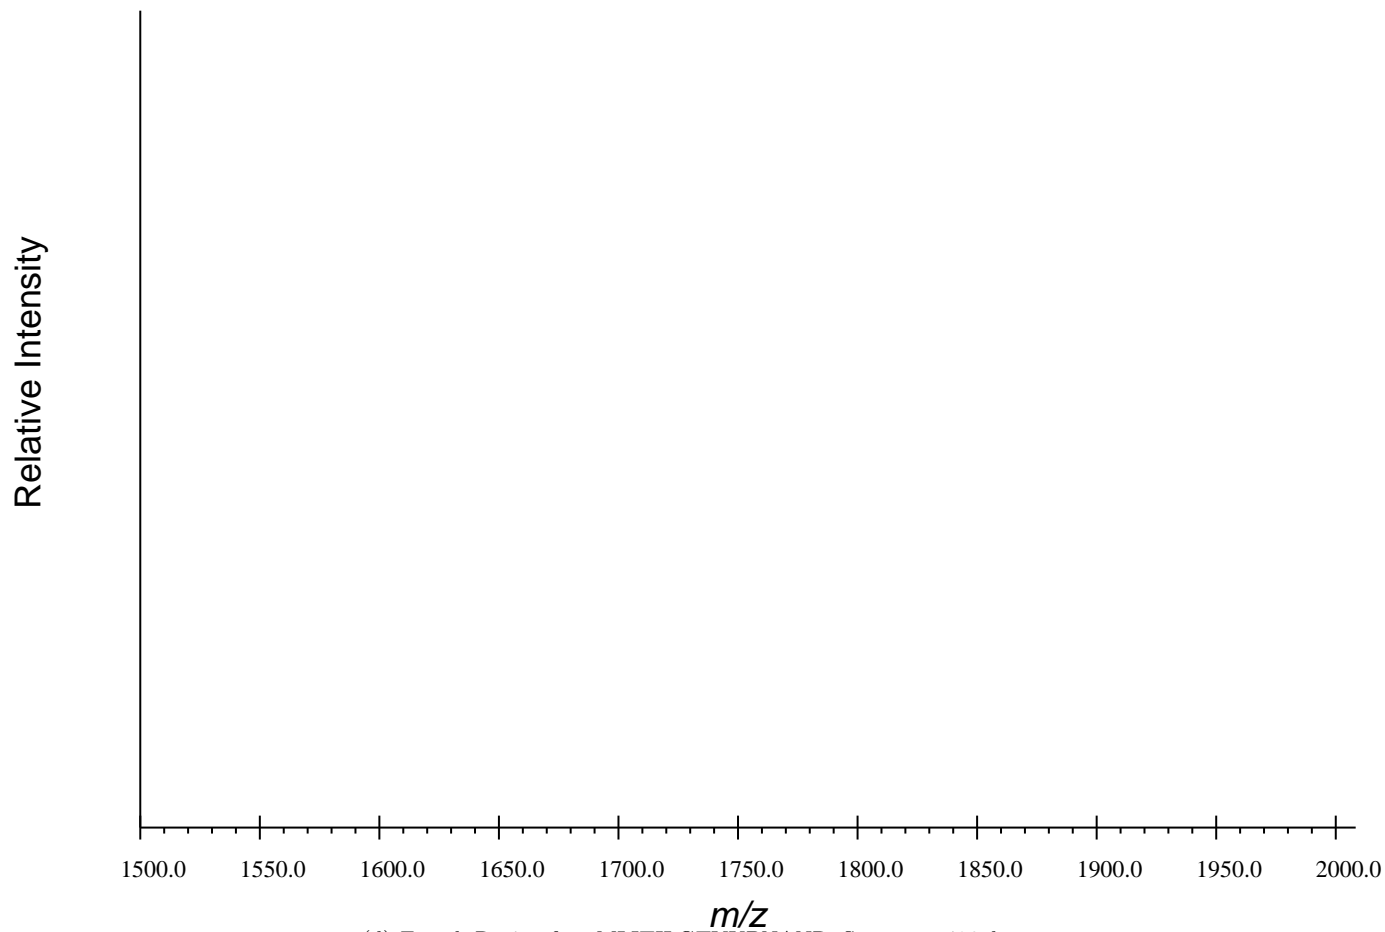

(d) Fourth Region for oMLITILGTVKPNANR, Spectrum 486.dta

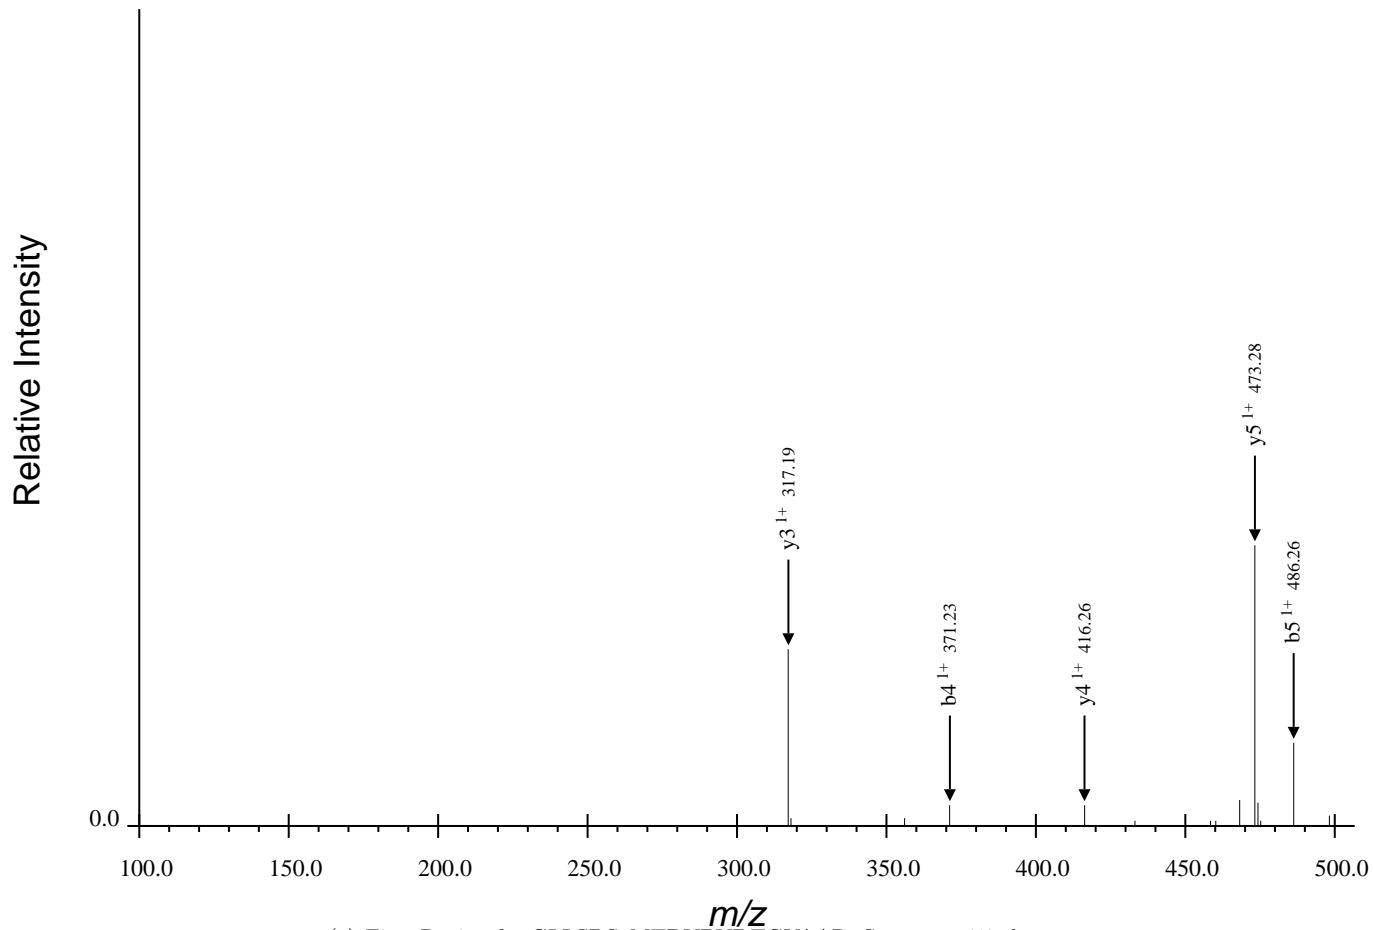

(a) First Region for GLLSDSoMTDVPVDTGVAAR, Spectrum 487.dta

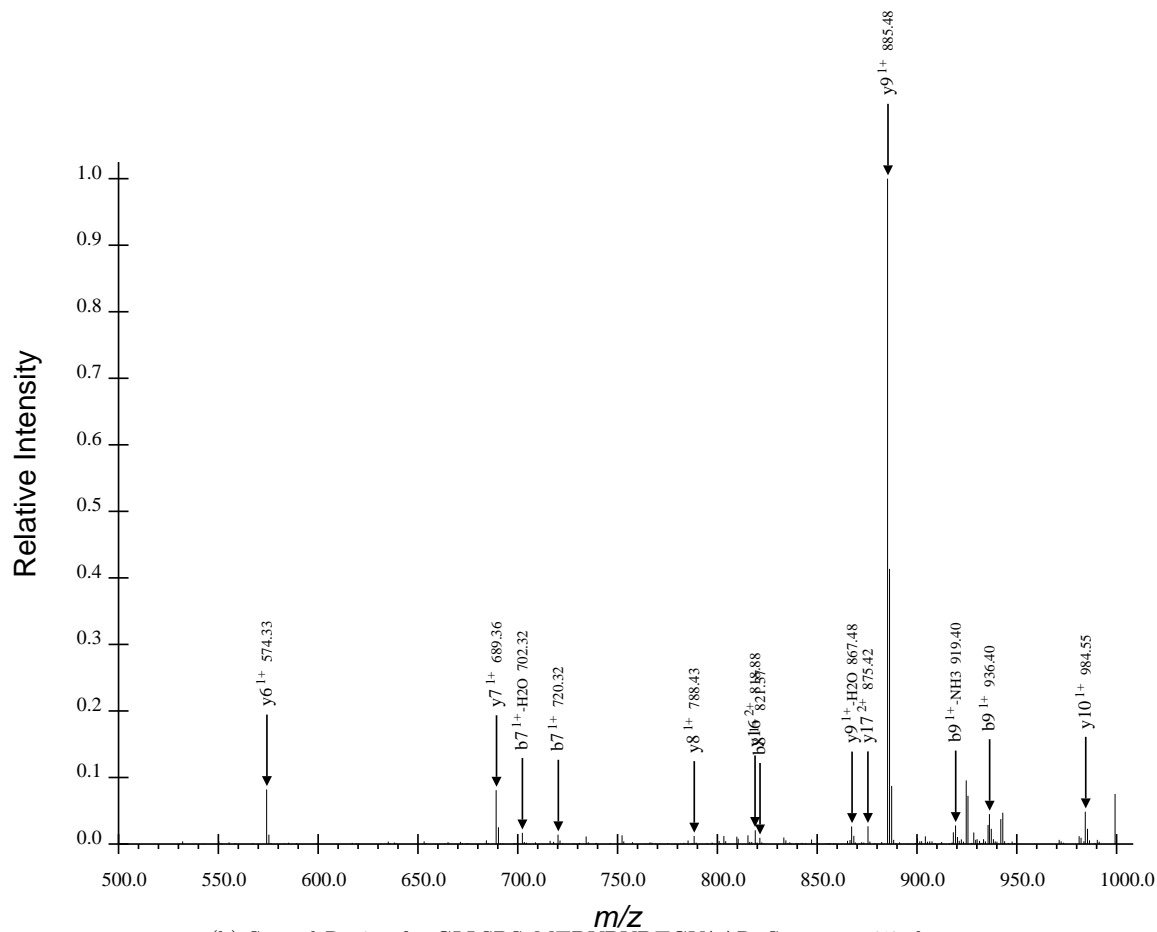

(b) Second Region for GLLSDSoMTDVPVDTGVAAR, Spectrum 487.dta

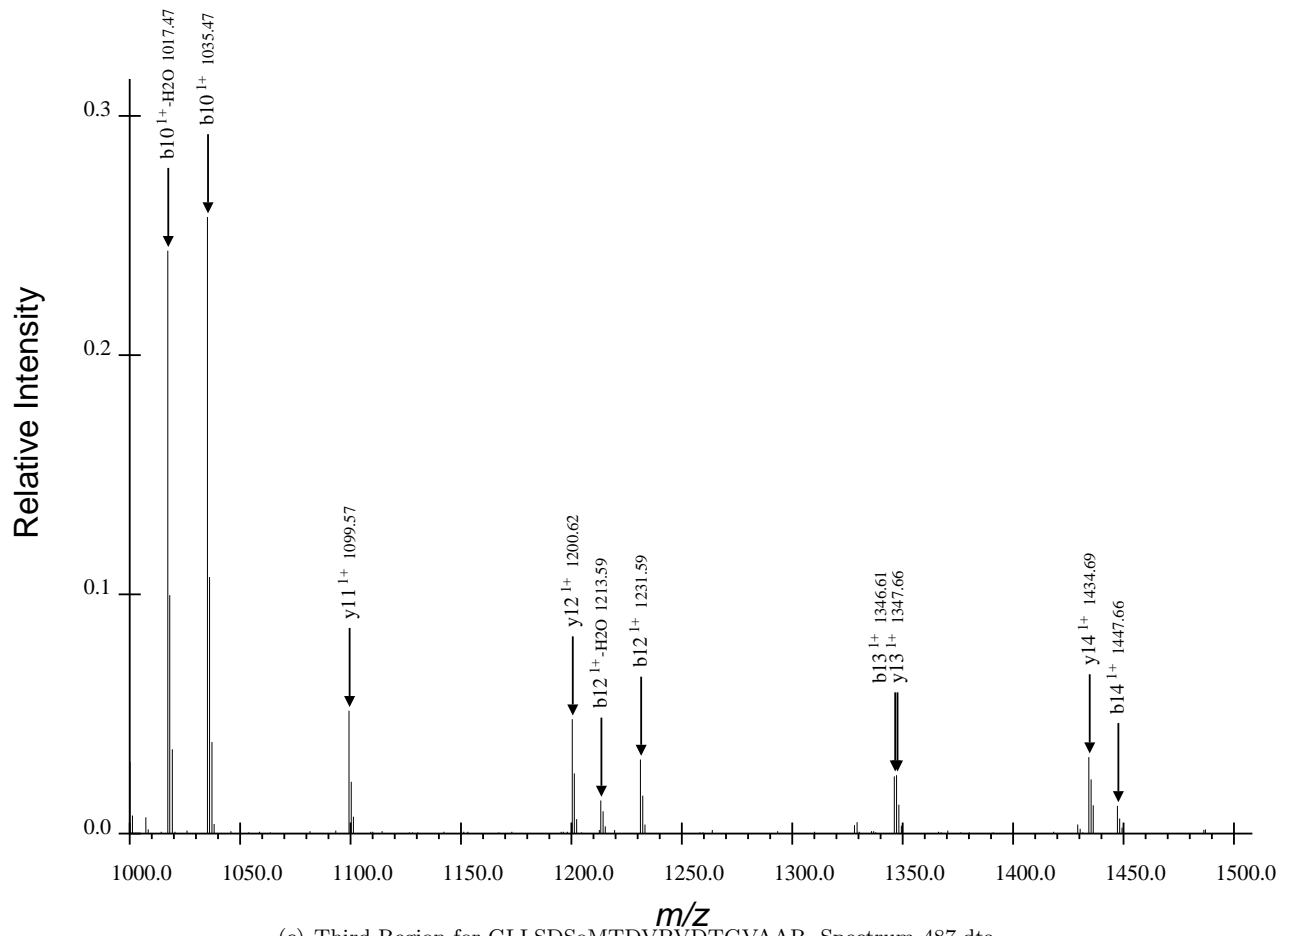

(c) Third Region for GLLSDSoMTDVPVDTGVAAR, Spectrum 487.dta

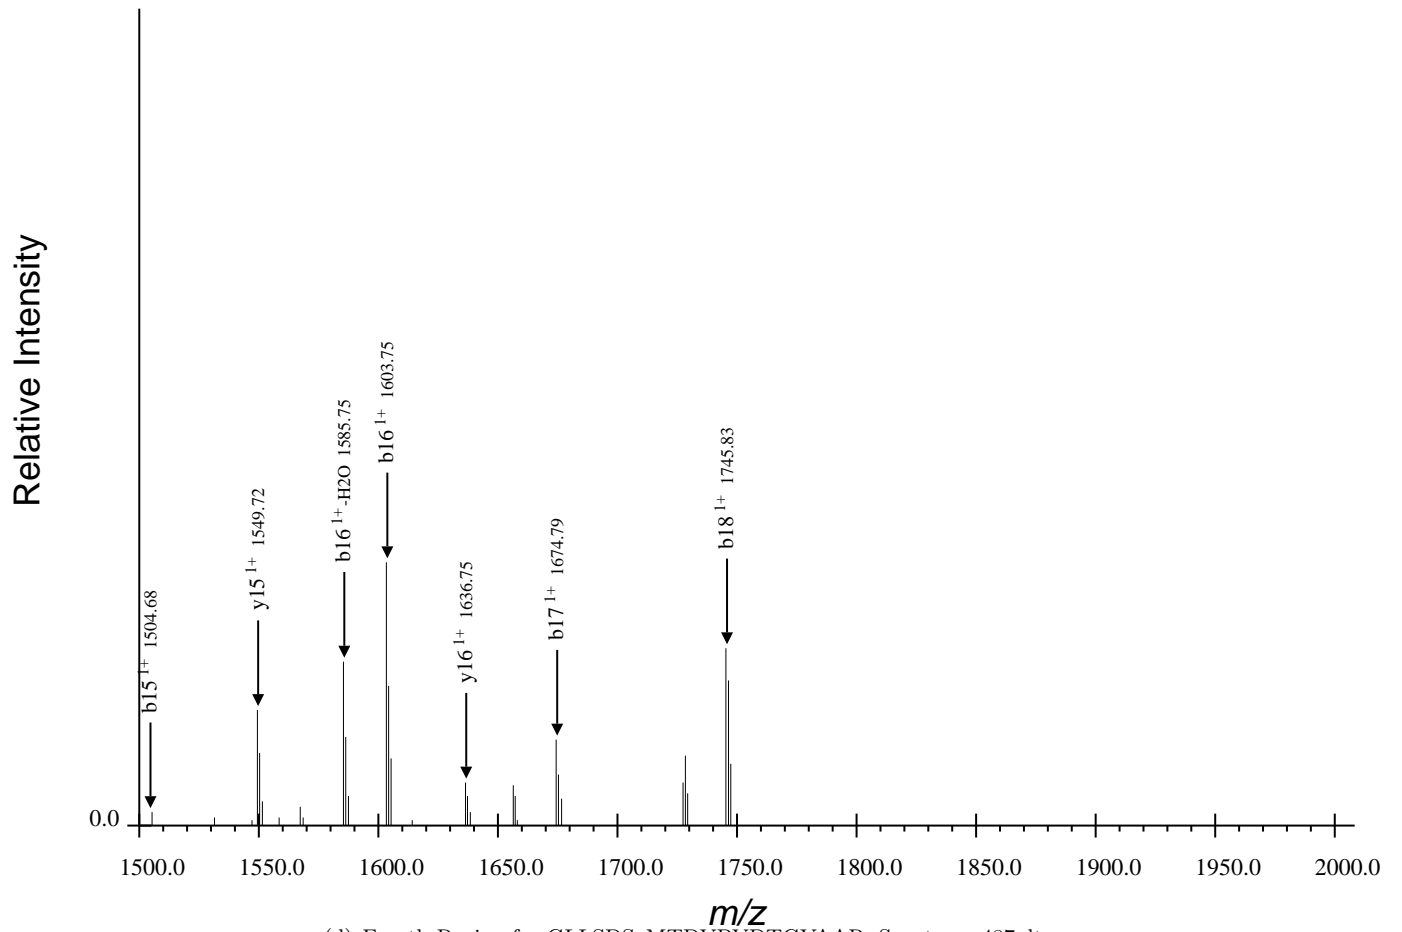

(d) Fourth Region for GLLSDSoMTDVPVDTGVAAR, Spectrum 487.dta

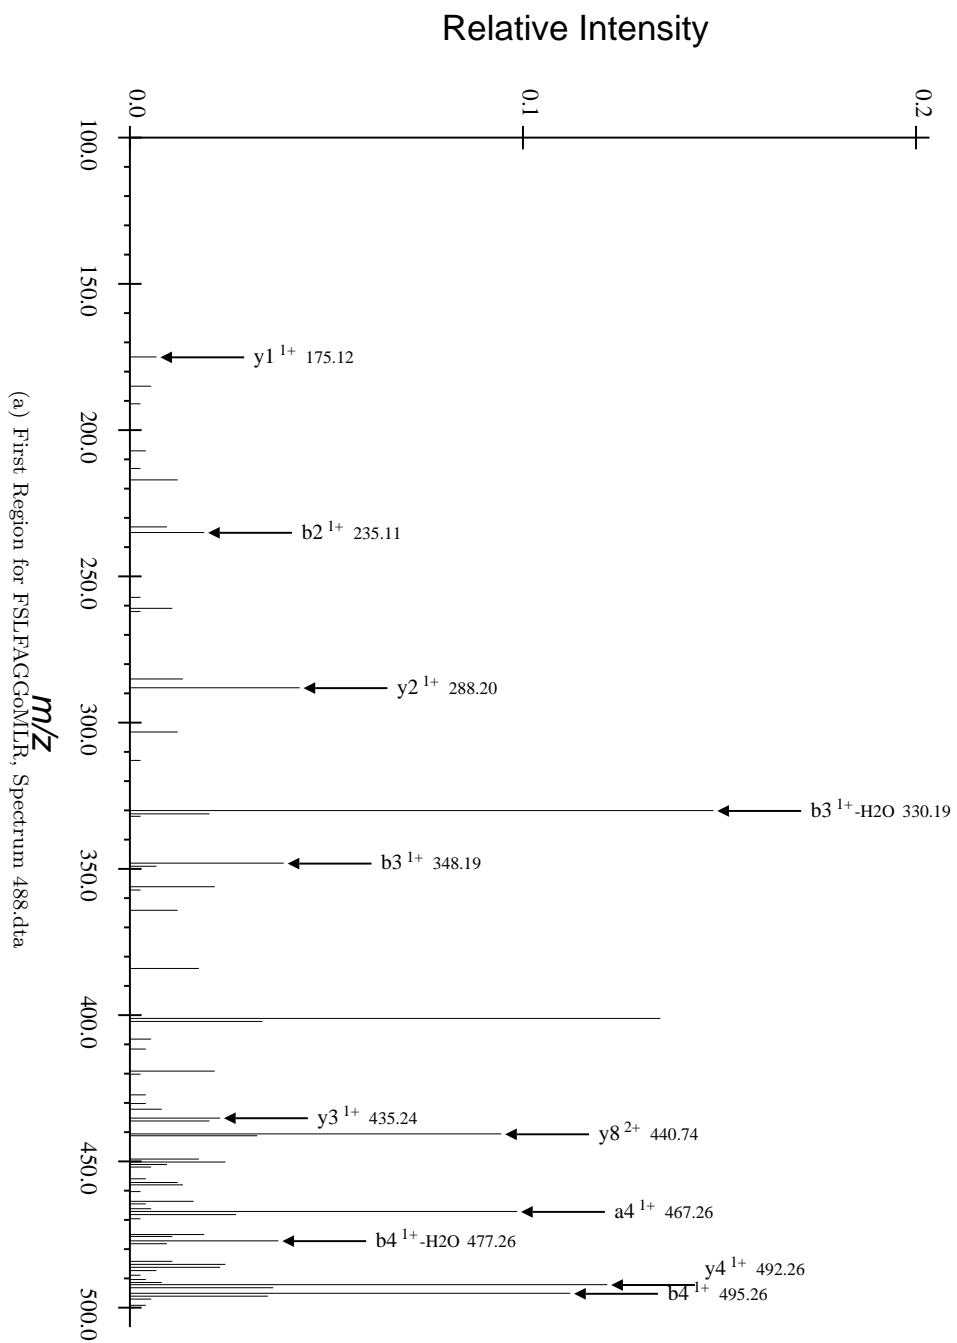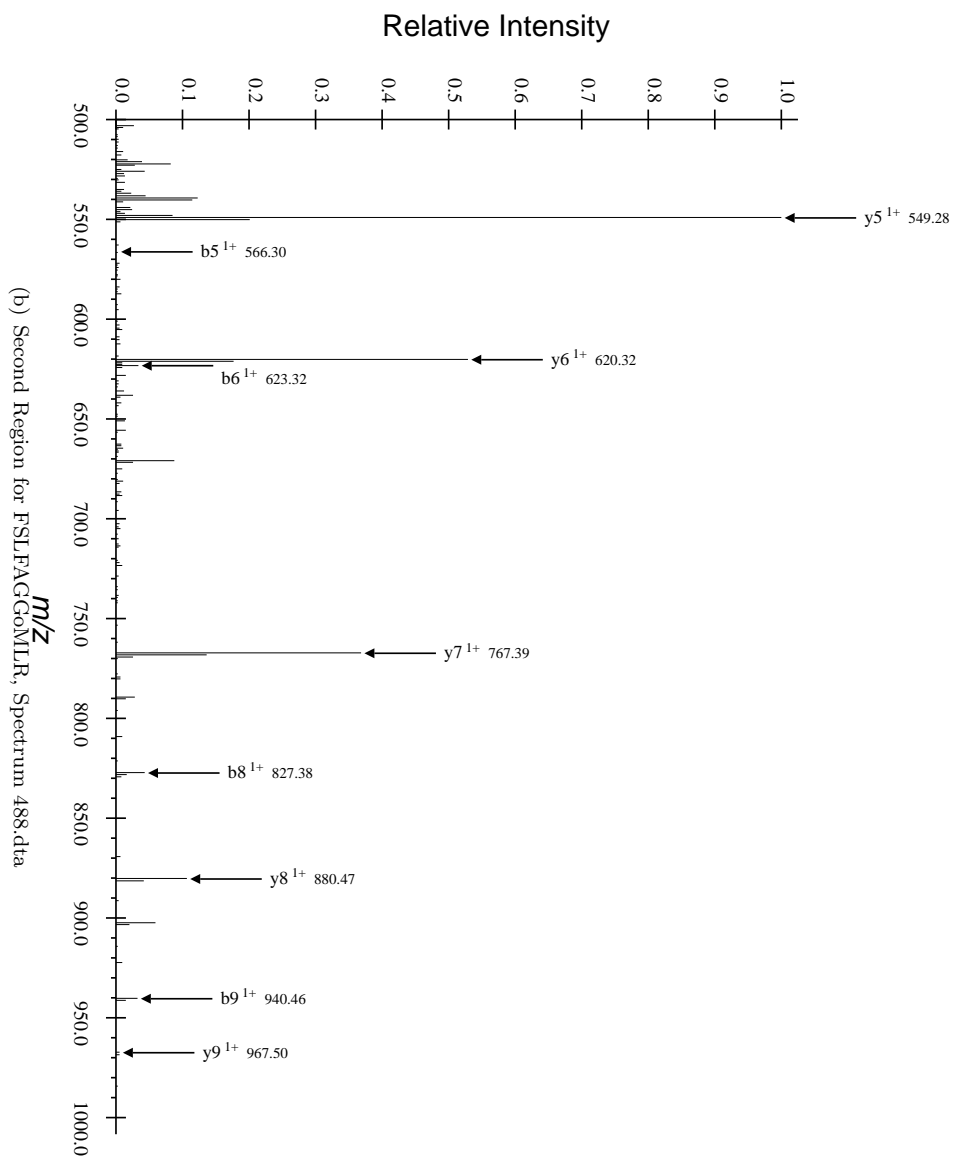

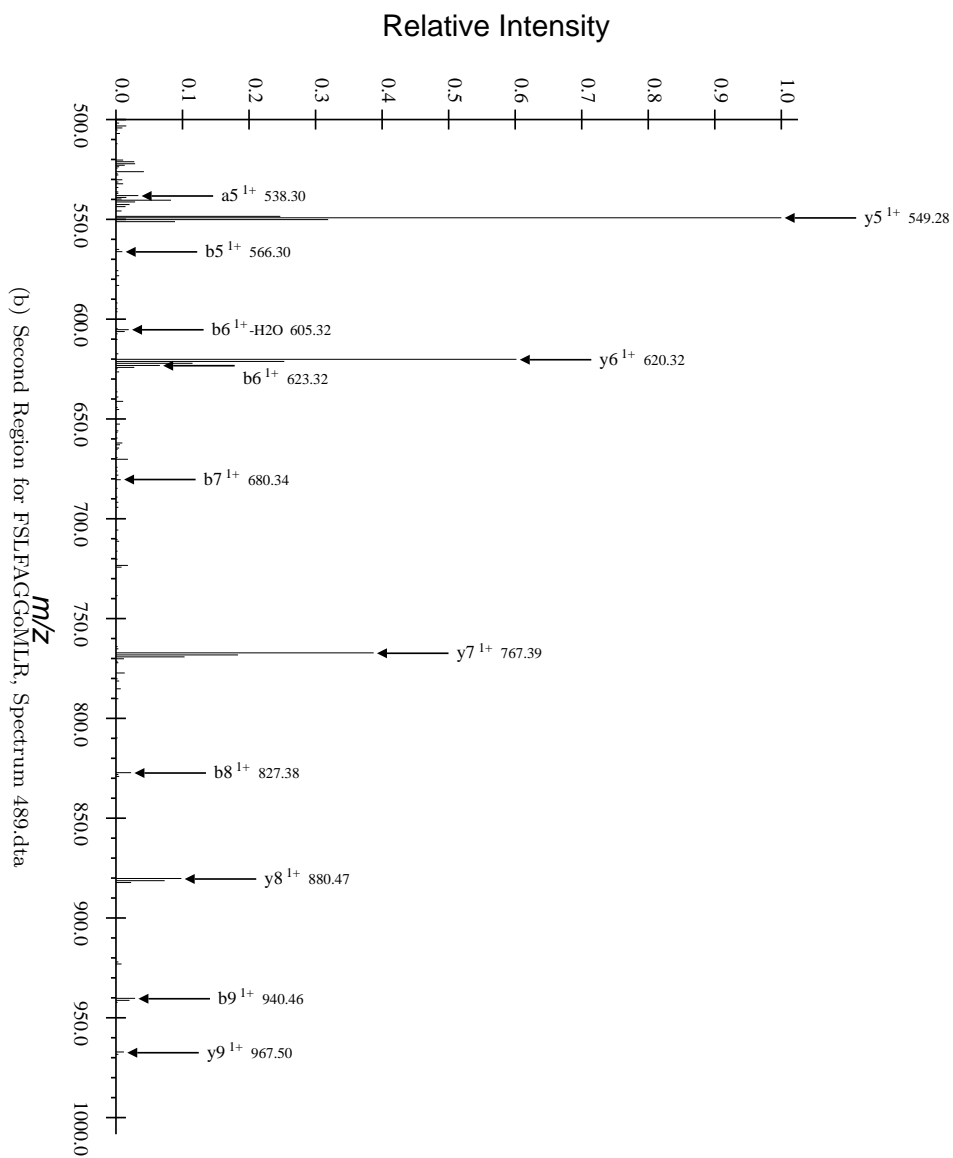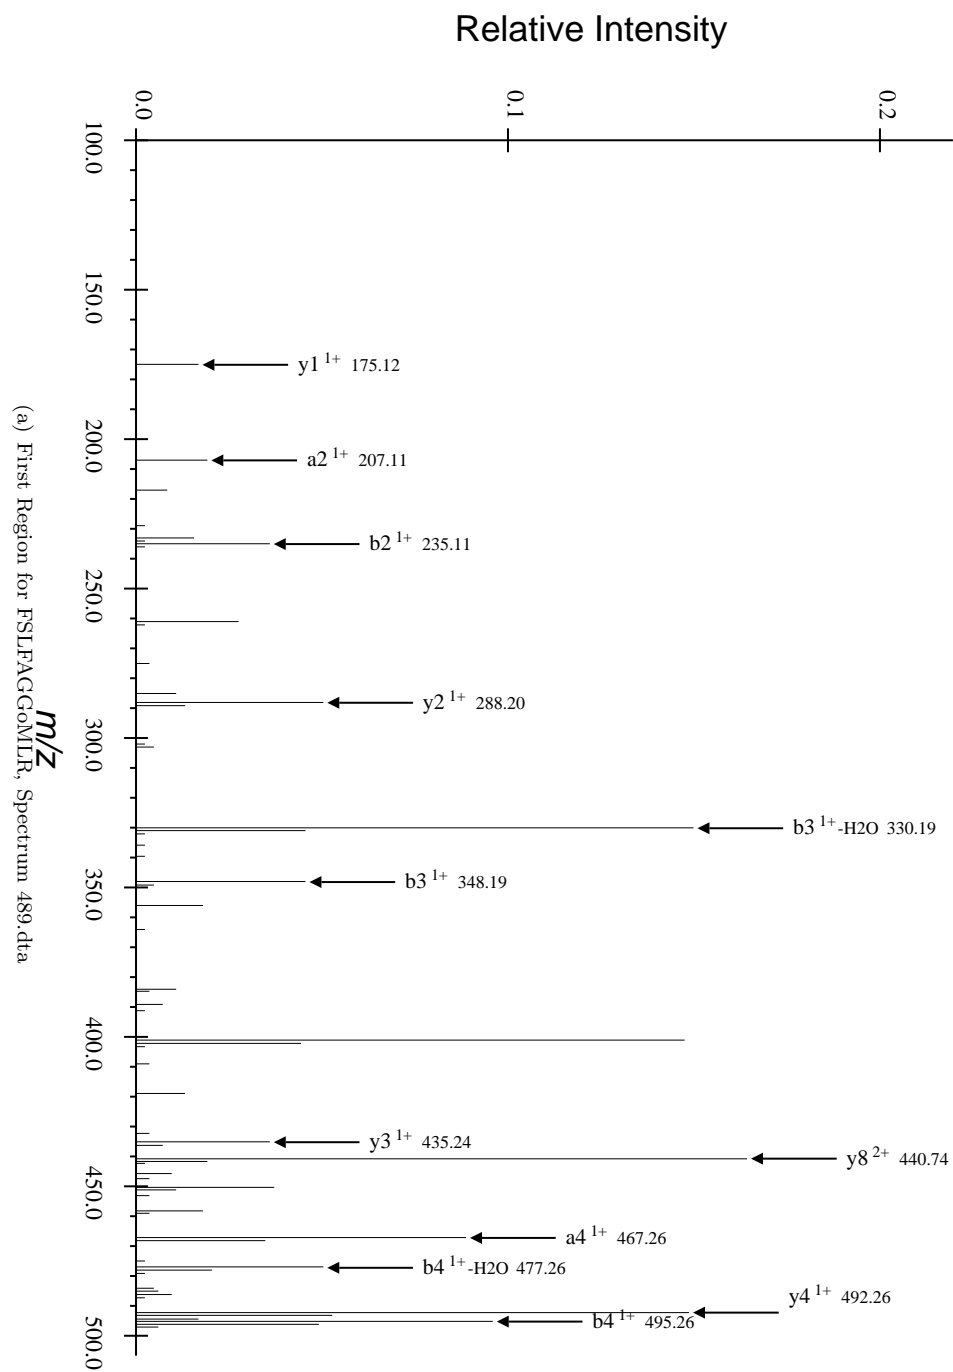

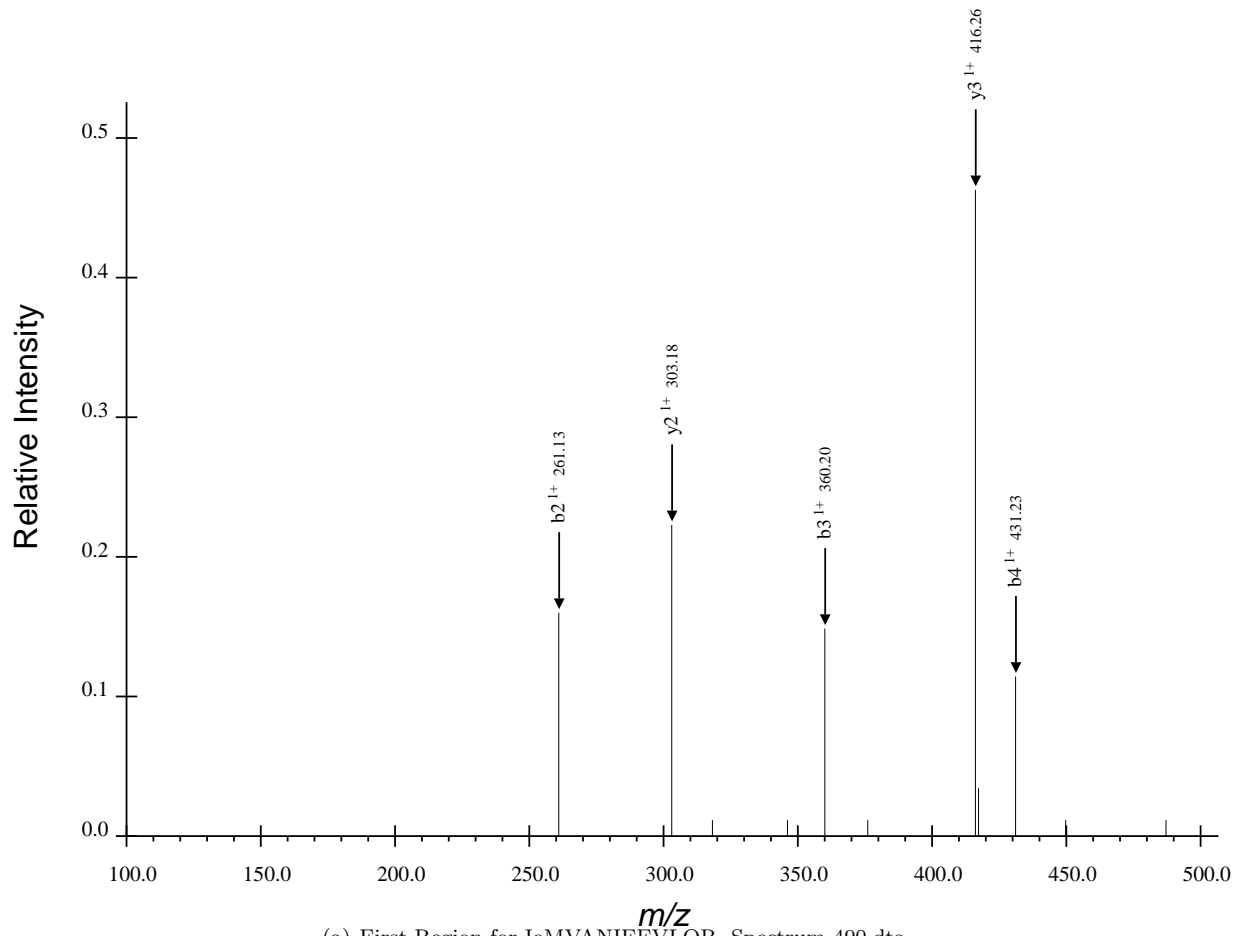

(a) First Region for IoMVANIEEVLQR, Spectrum 490.dta

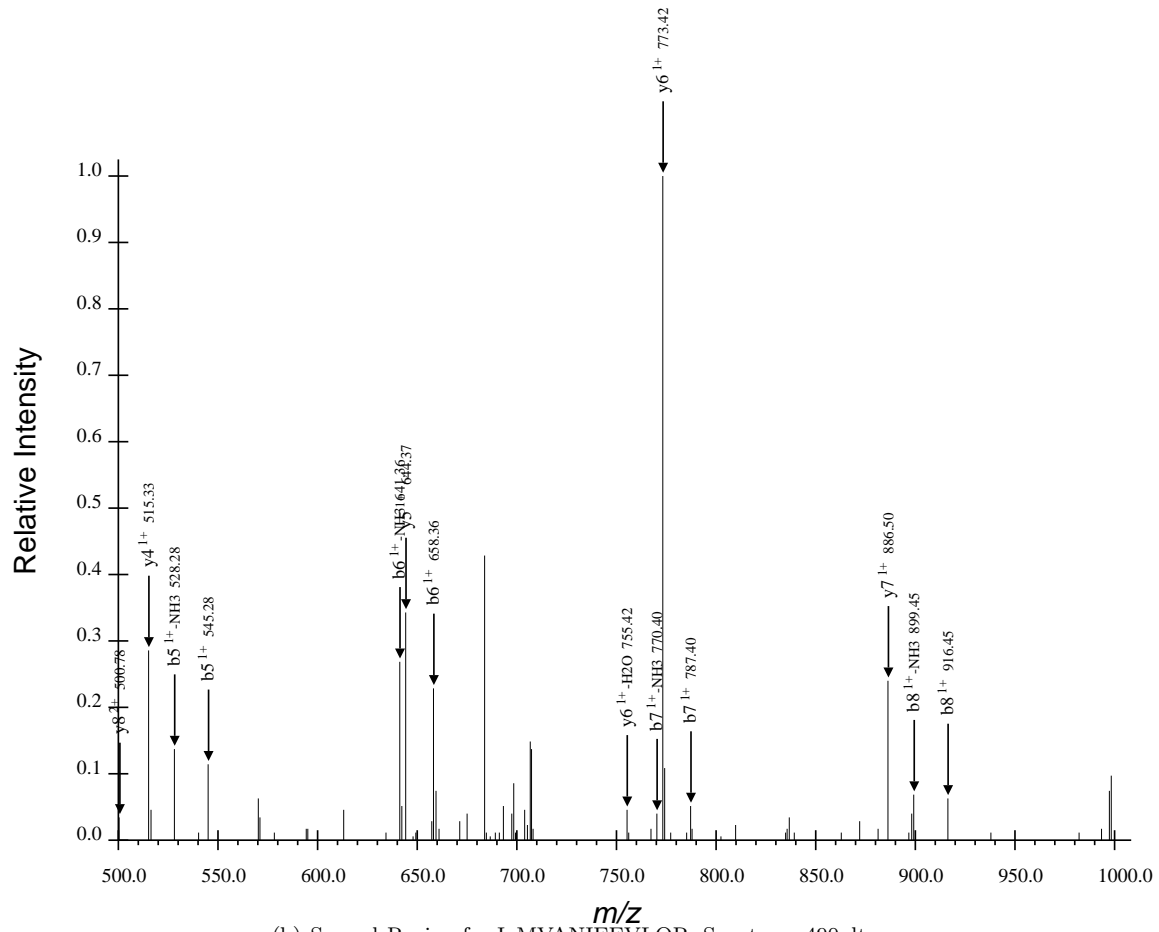

(b) Second Region for IoMVANIEEVLQR, Spectrum 490.dta



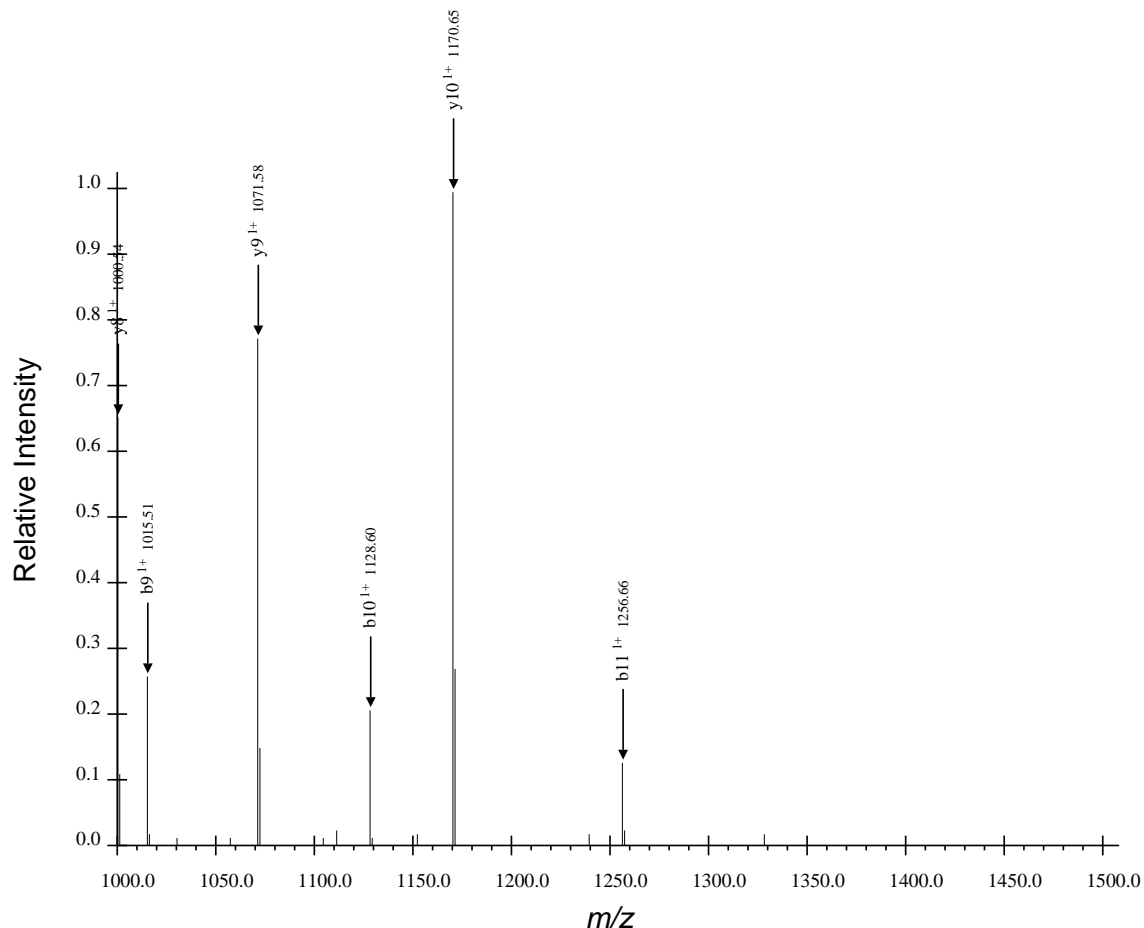

(c) Third Region for IoMVANIEEVLQR, Spectrum 490.dta

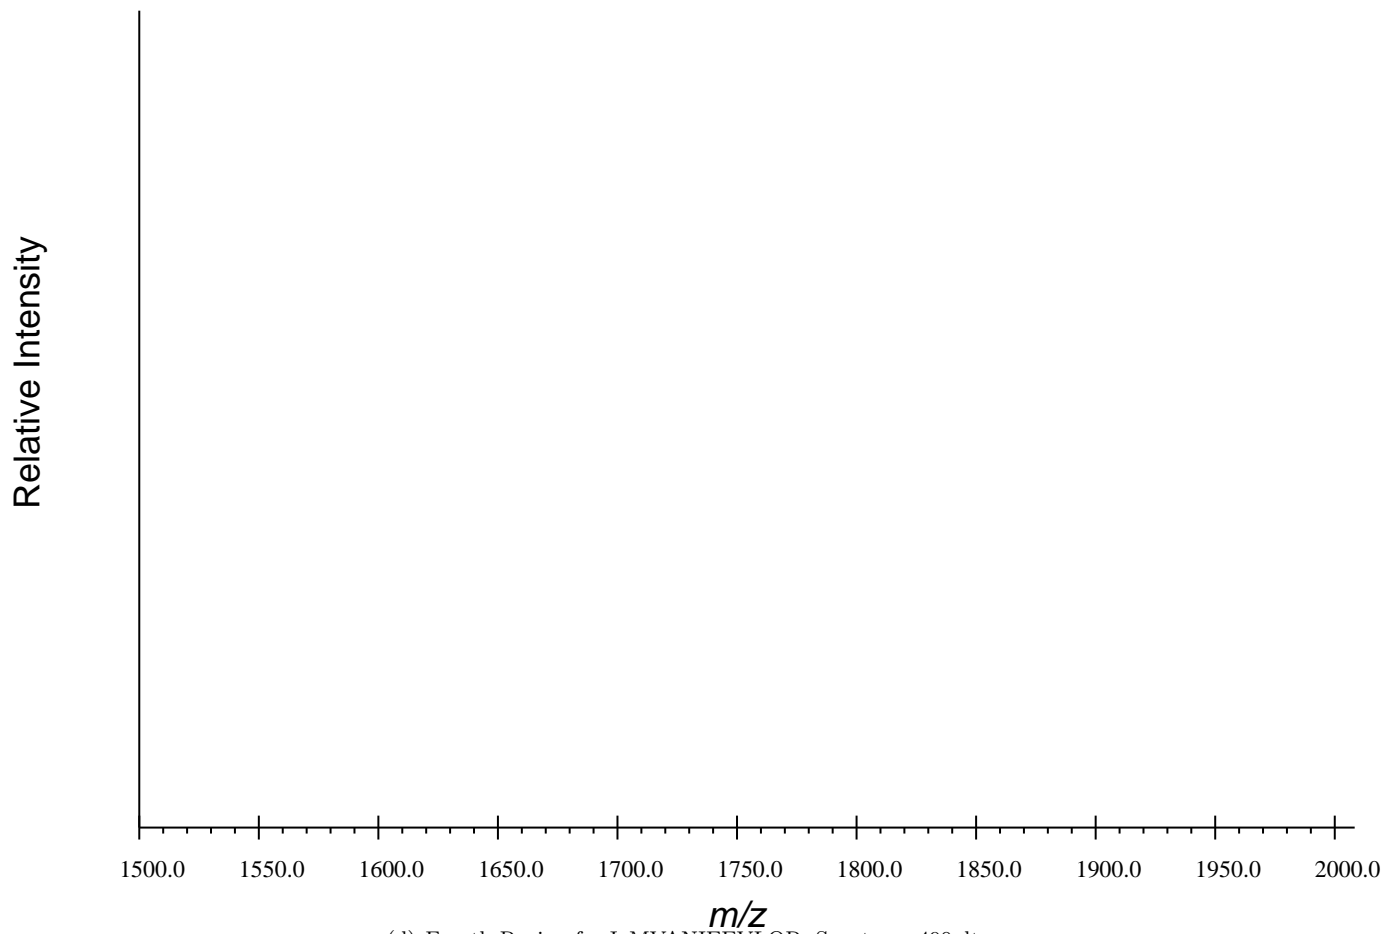

(d) Fourth Region for IoMVANIEEVLQR, Spectrum 490.dta

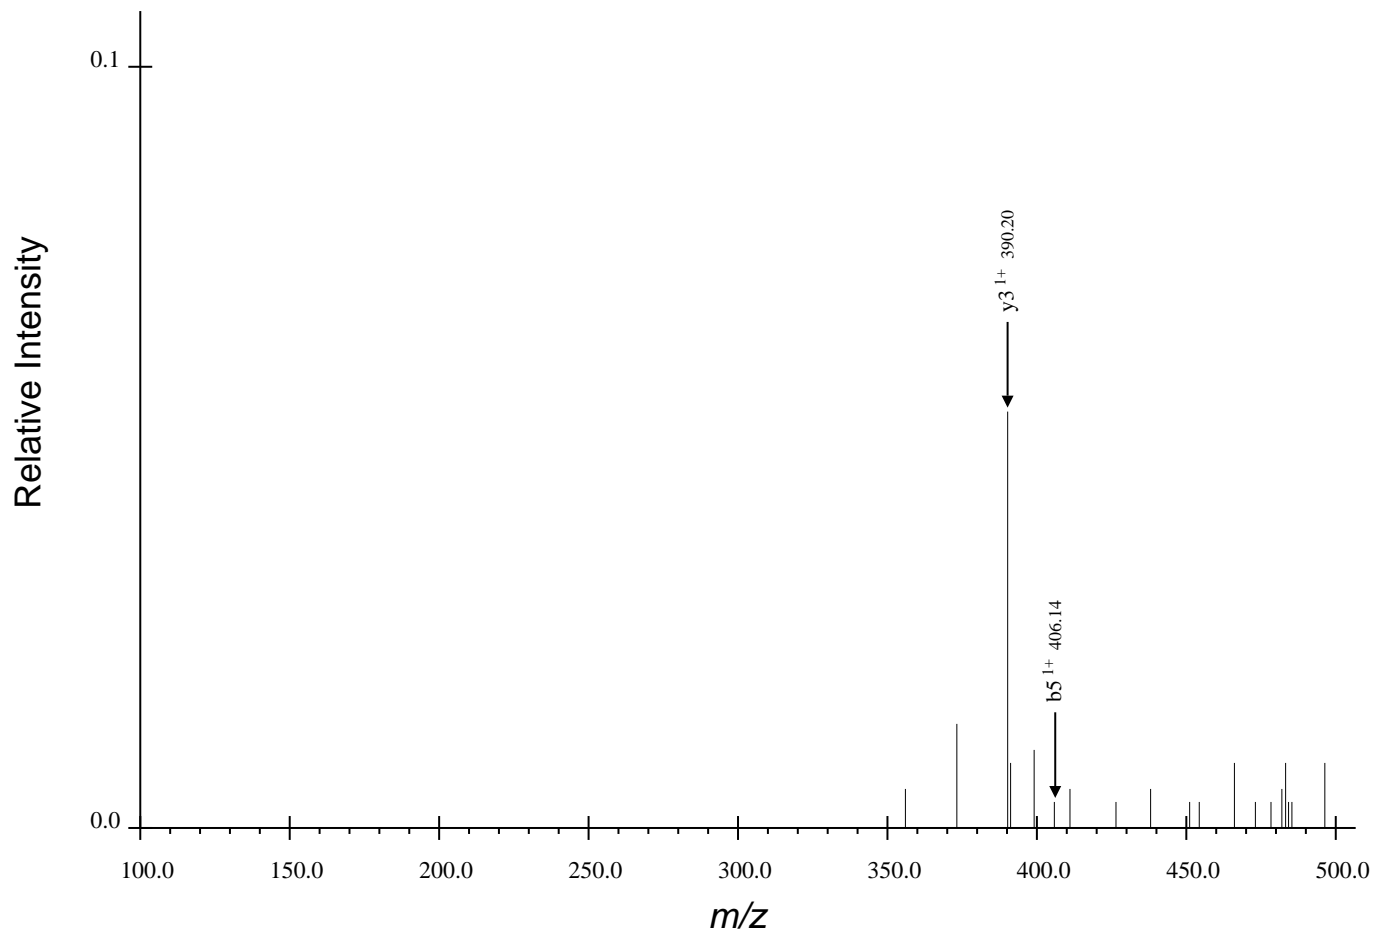

(a) First Region for GGoMGSGLATGIAGGLAGMGGIQNEK, Spectrum 491.dta

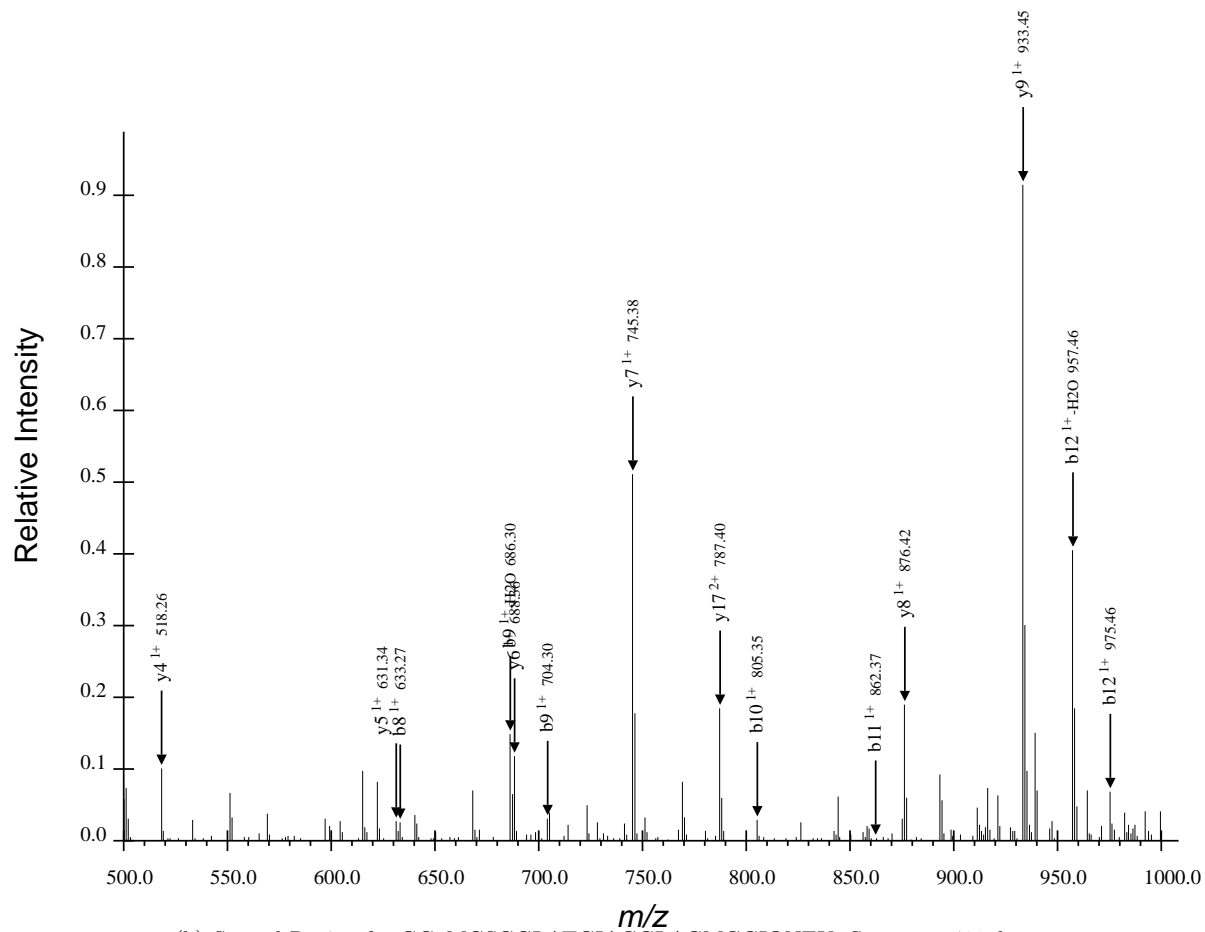

(b) Second Region for GGoMGSGLATGIAGGLAGMGGIQNEK, Spectrum 491.dta

(d) Fourth Region for GG0MGSGGLATGIAGGLAGMGGIQNEK, Spectrum 491.dta

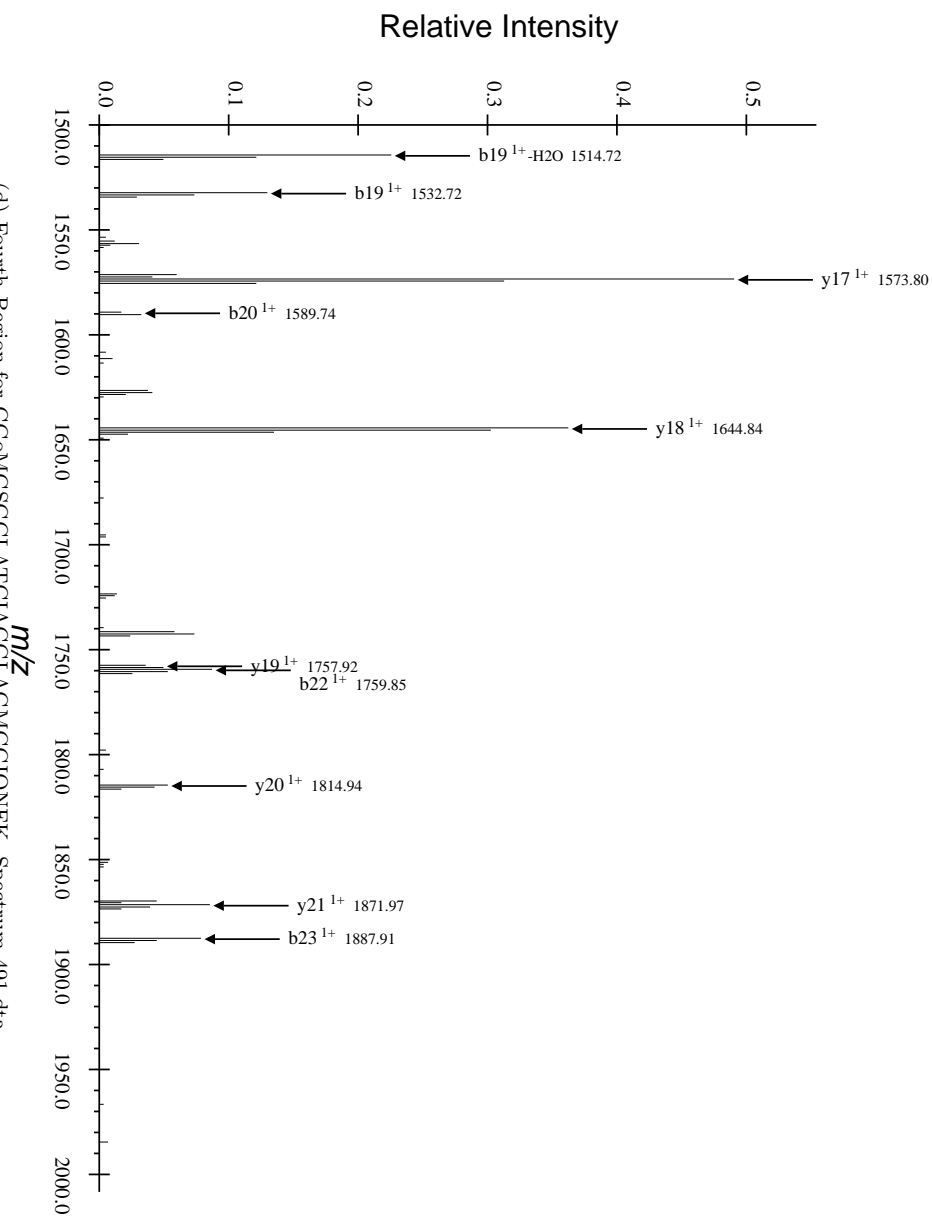

(c) Third Region for GG0MGSGGLATGIAGGLAGMGGIQNEK, Spectrum 491.dta

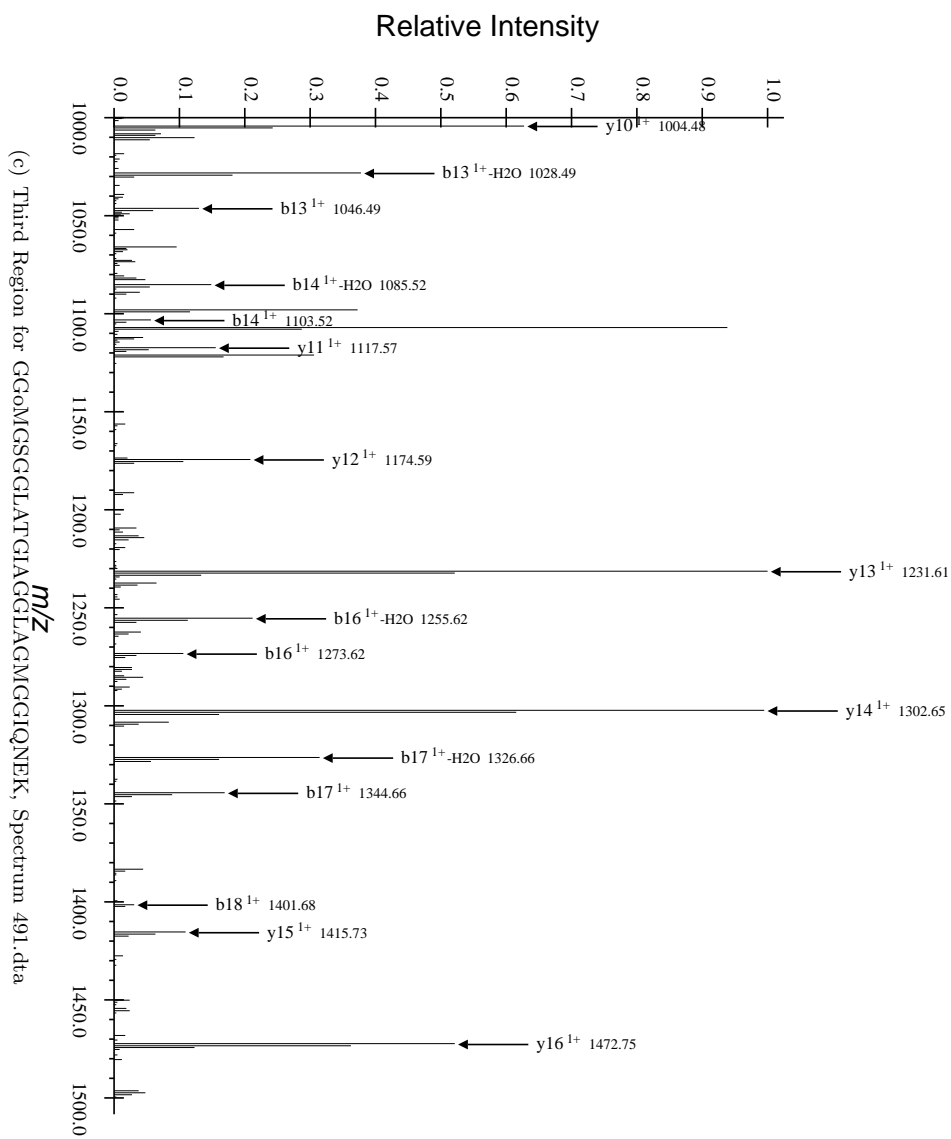

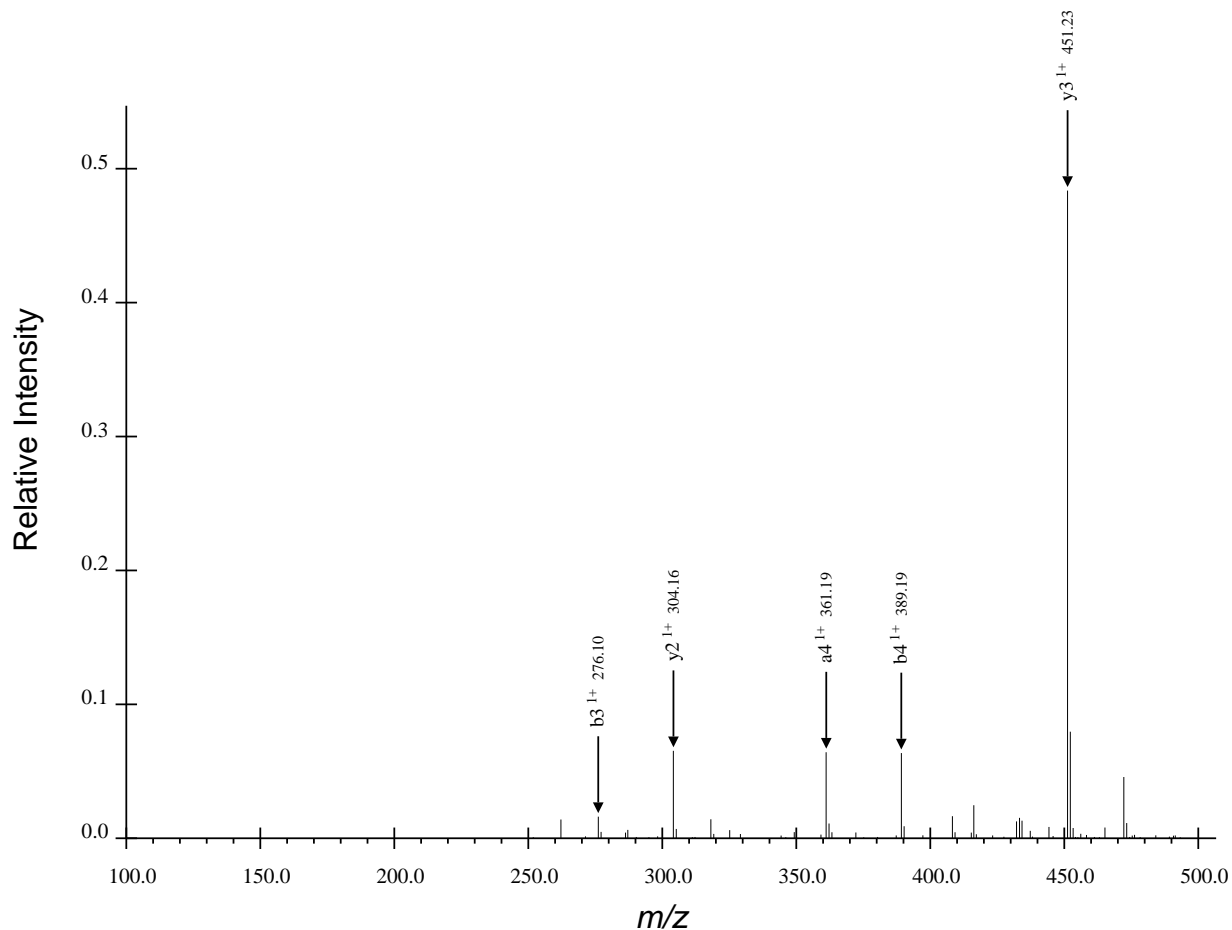

(a) First Region for AoMGIoMNSFVNDIFER, Spectrum 492.dta

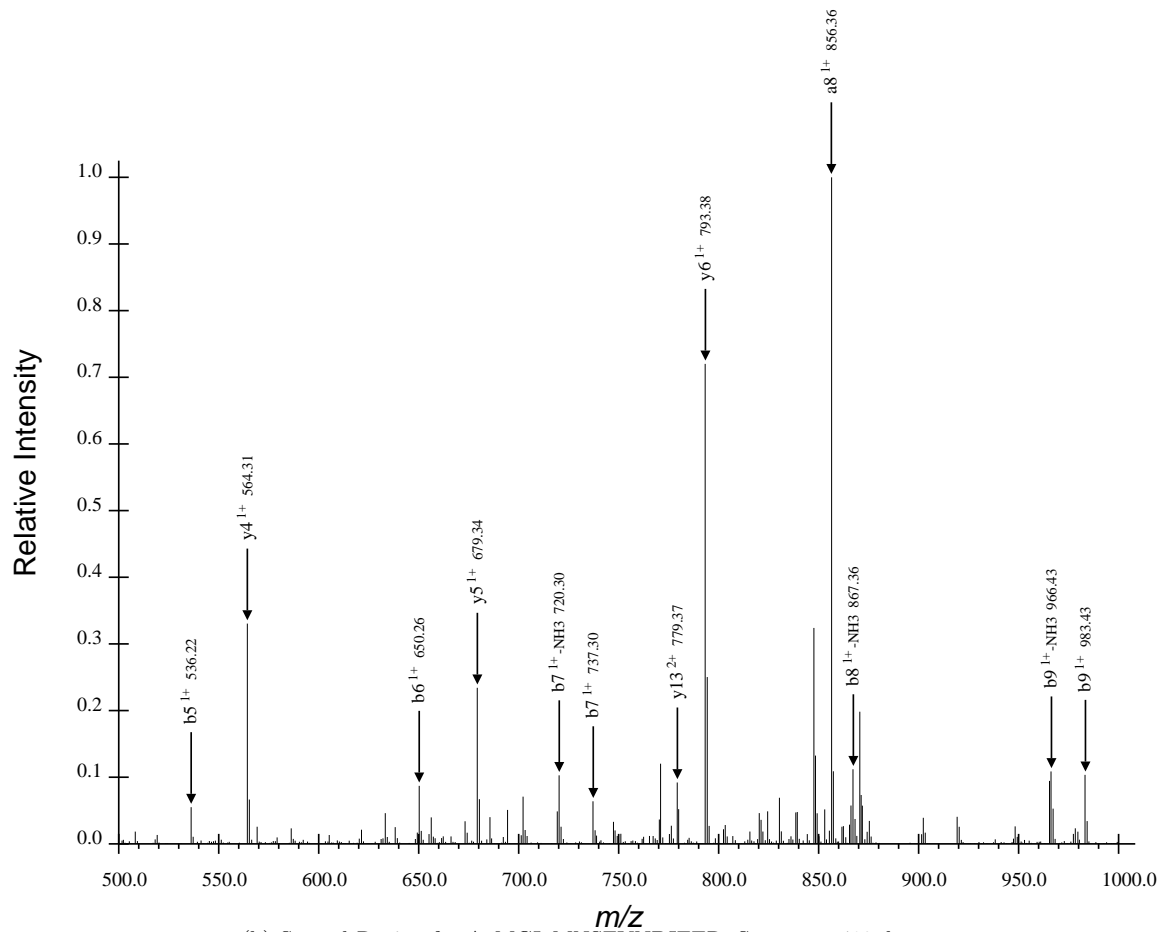

(b) Second Region for AoMGIoMNSFVNDIFER, Spectrum 492.dta

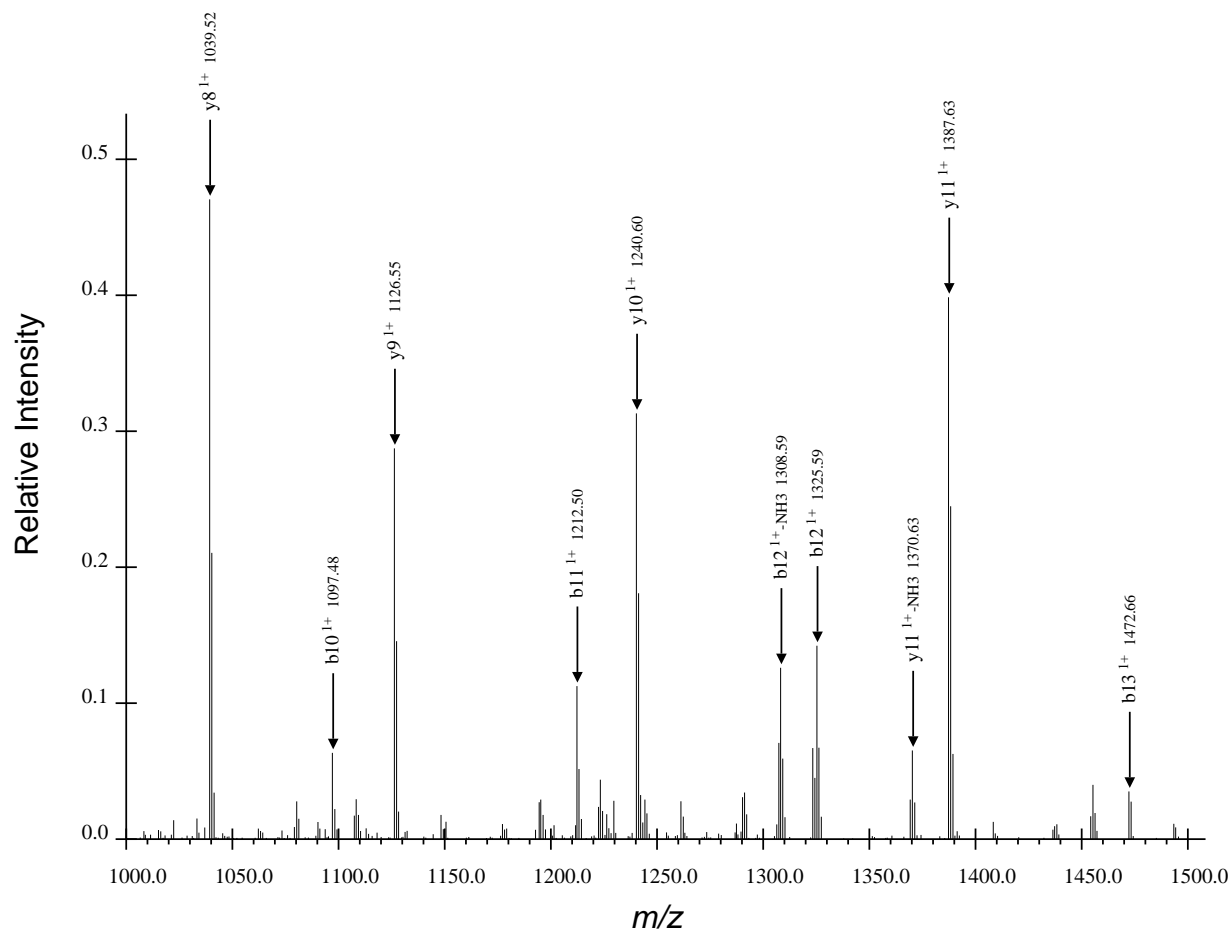

(c) Third Region for AoMGIoMNSFVNDIFER, Spectrum 492.dta

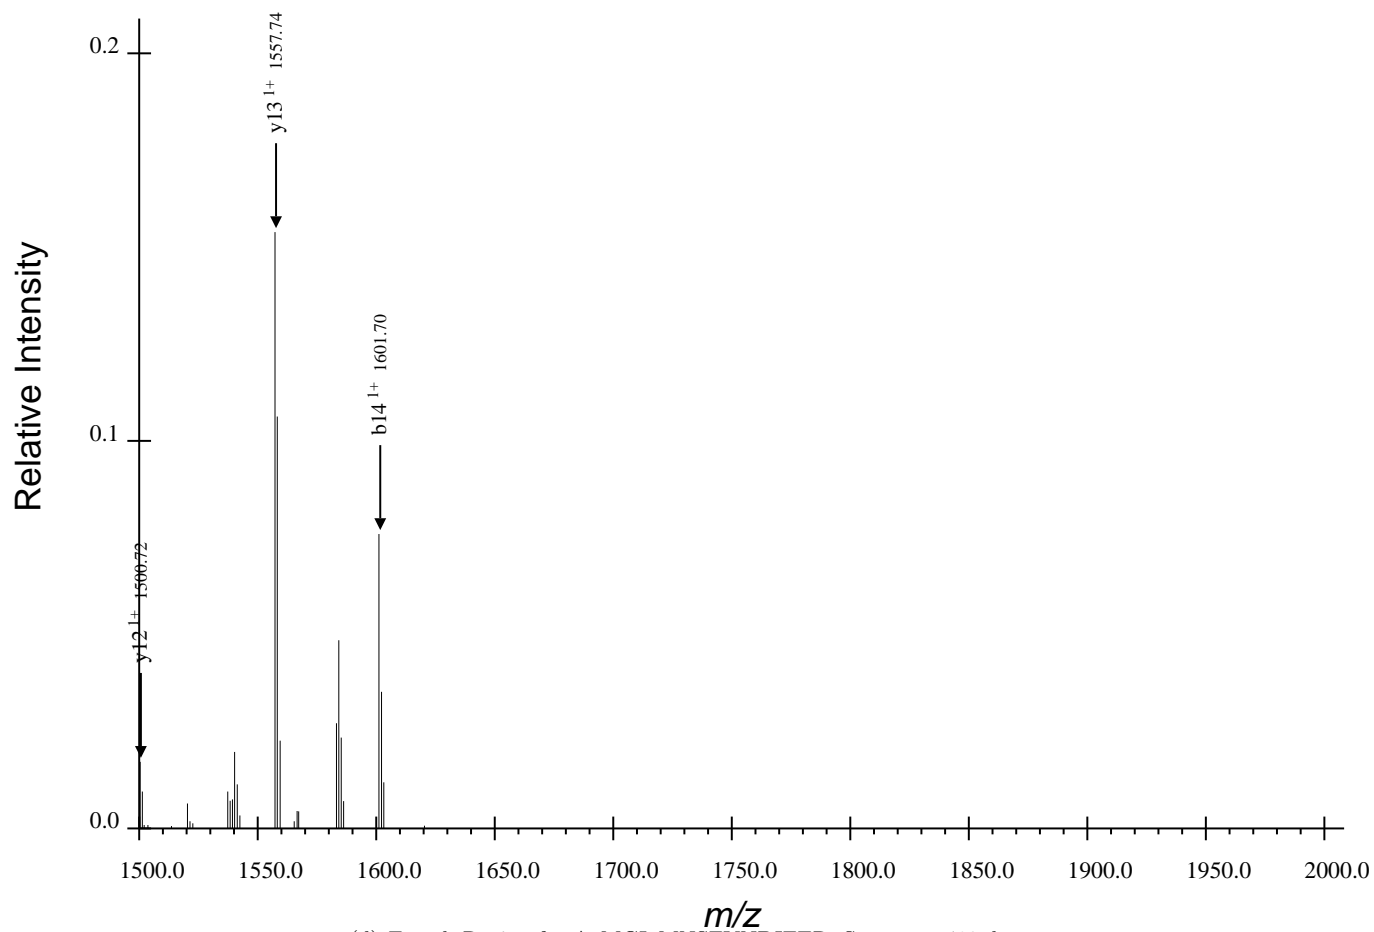

(d) Fourth Region for AoMGIoMNSFVNDIFER, Spectrum 492.dta

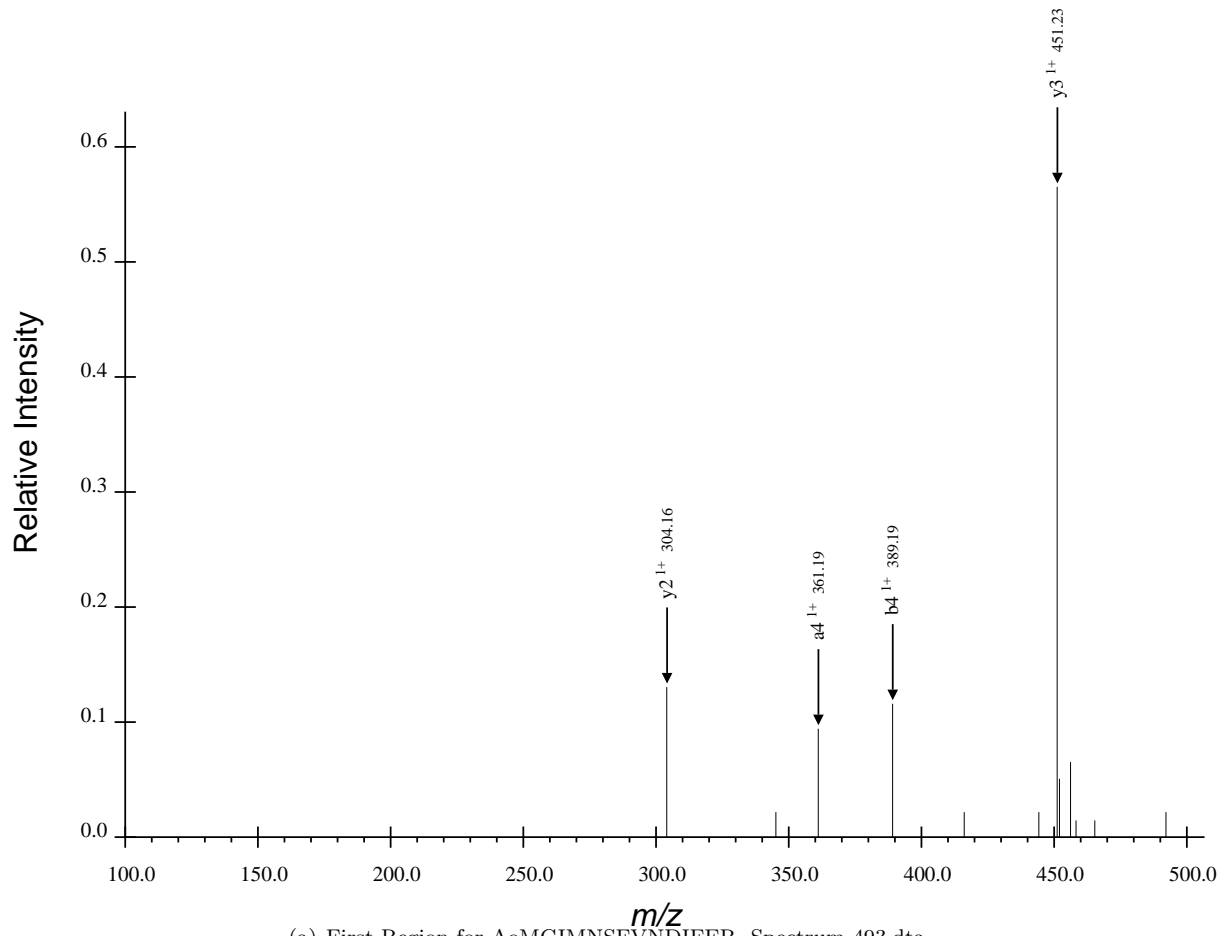

(a) First Region for AoMGIMNSFVNDIFER, Spectrum 493.dta

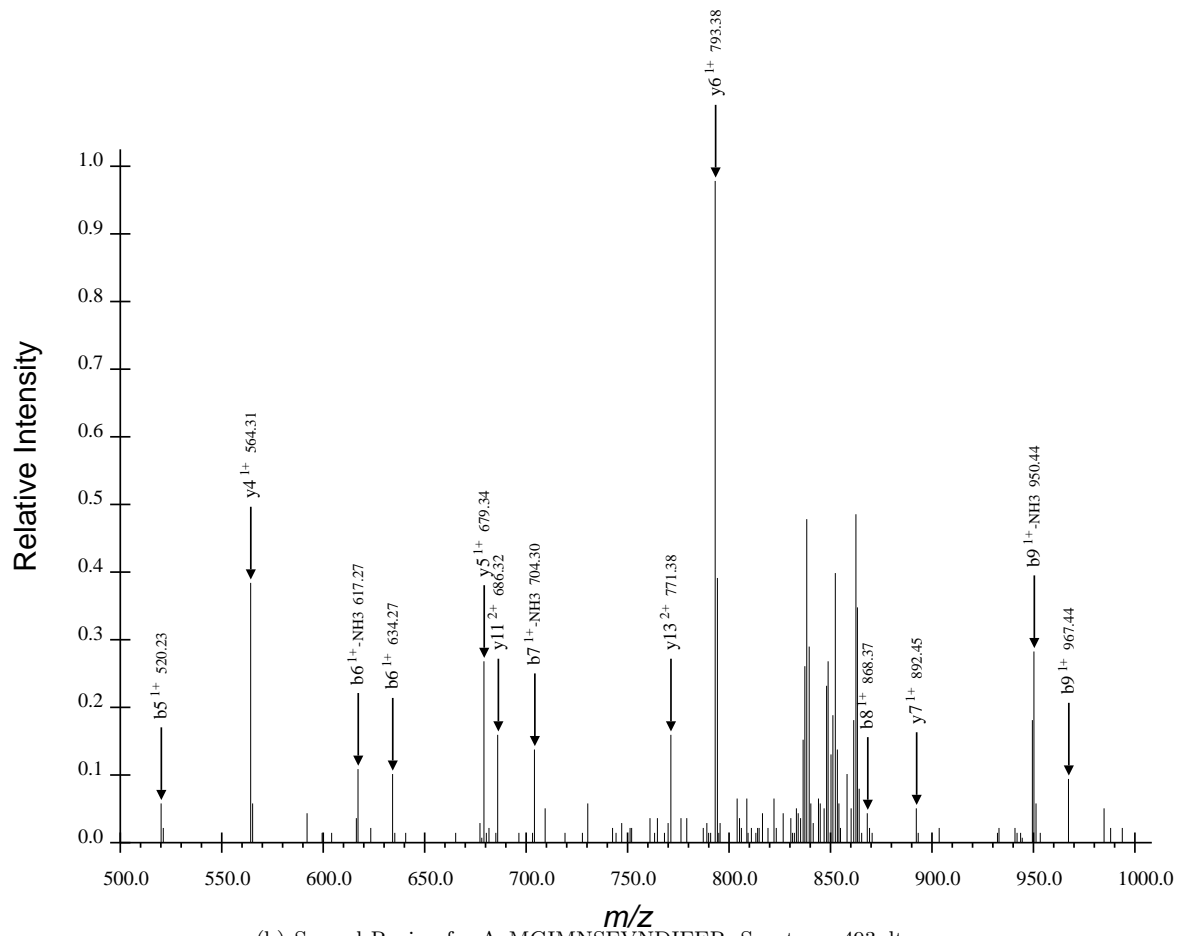

(b) Second Region for AoMGIMNSFVNDIFER, Spectrum 493.dta

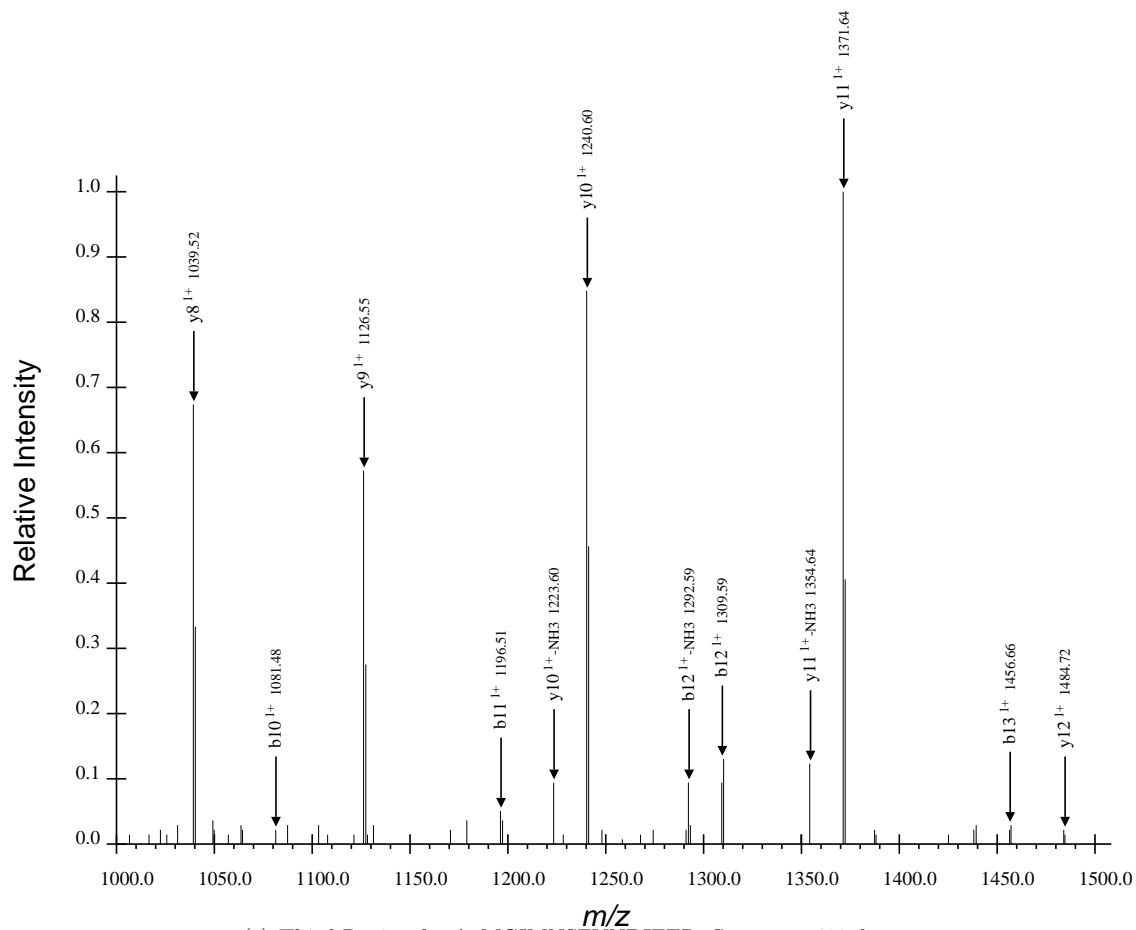

(c) Third Region for AoMGIMNSFVNDIFER, Spectrum 493.dta

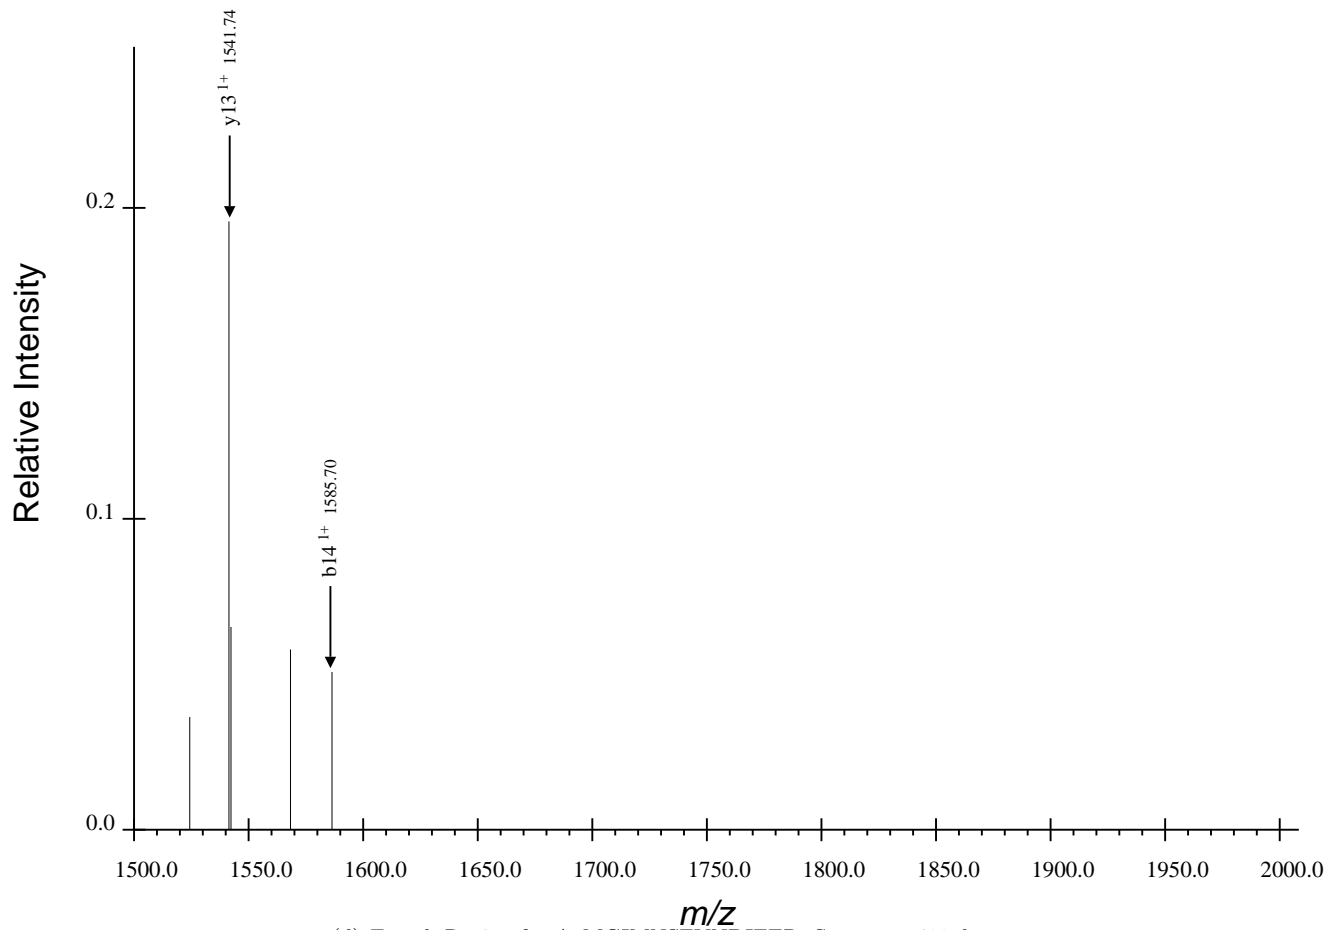

(d) Fourth Region for AoMGIMNSFVNDIFER, Spectrum 493.dta

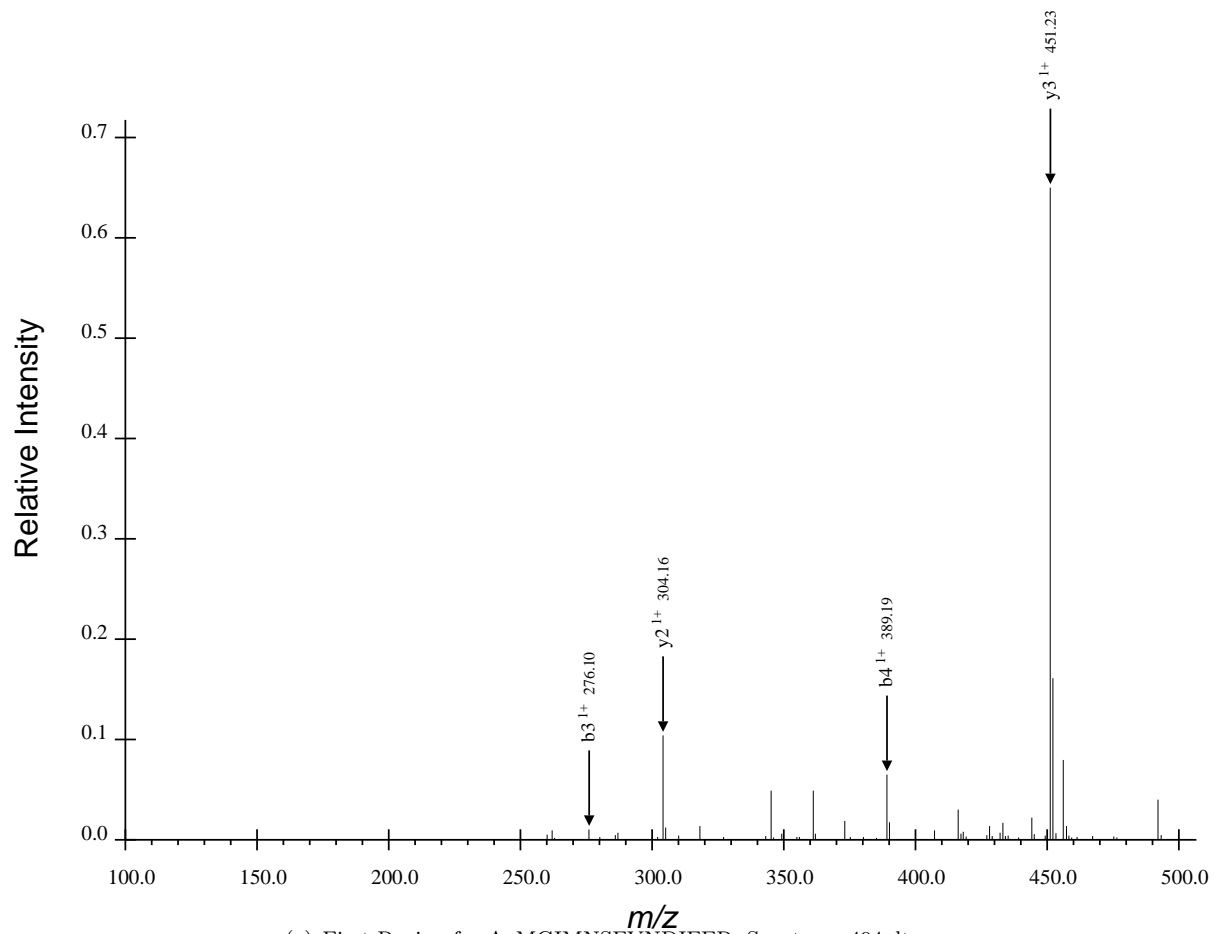

(a) First Region for AoMGIMNSFVNDIFER, Spectrum 494.dta

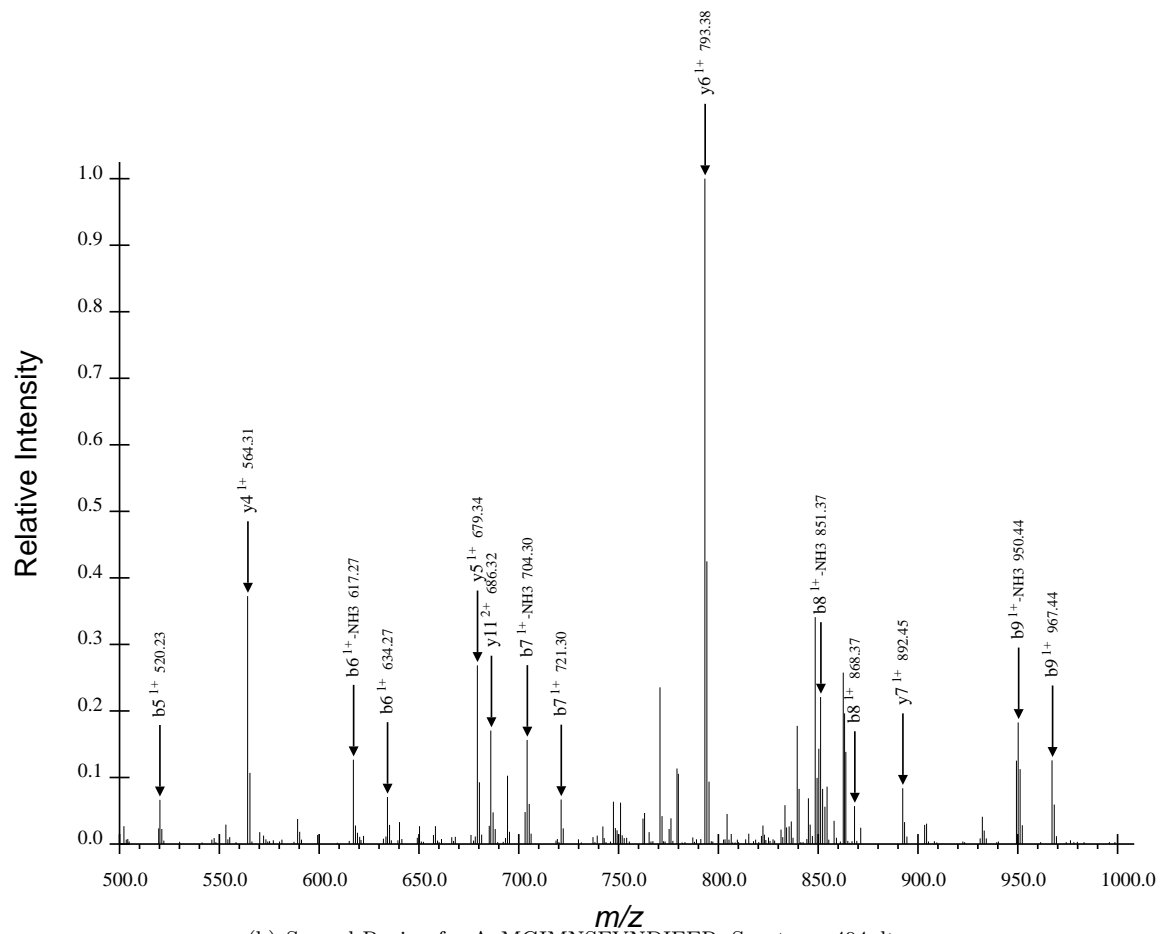

(b) Second Region for AoMGIMNSFVNDIFER, Spectrum 494.dta



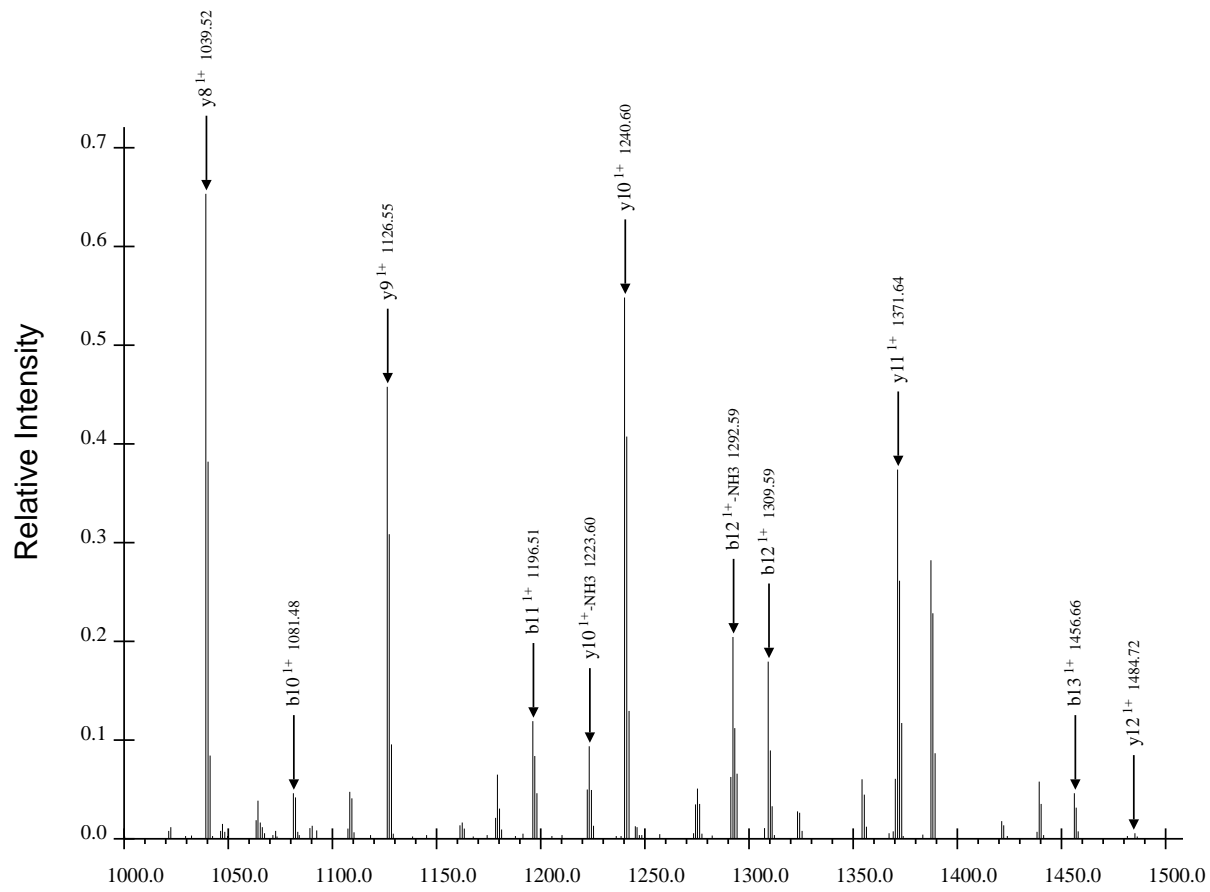

(c) Third Region for AoMGIMNSFVNDIFER, Spectrum 494.dta

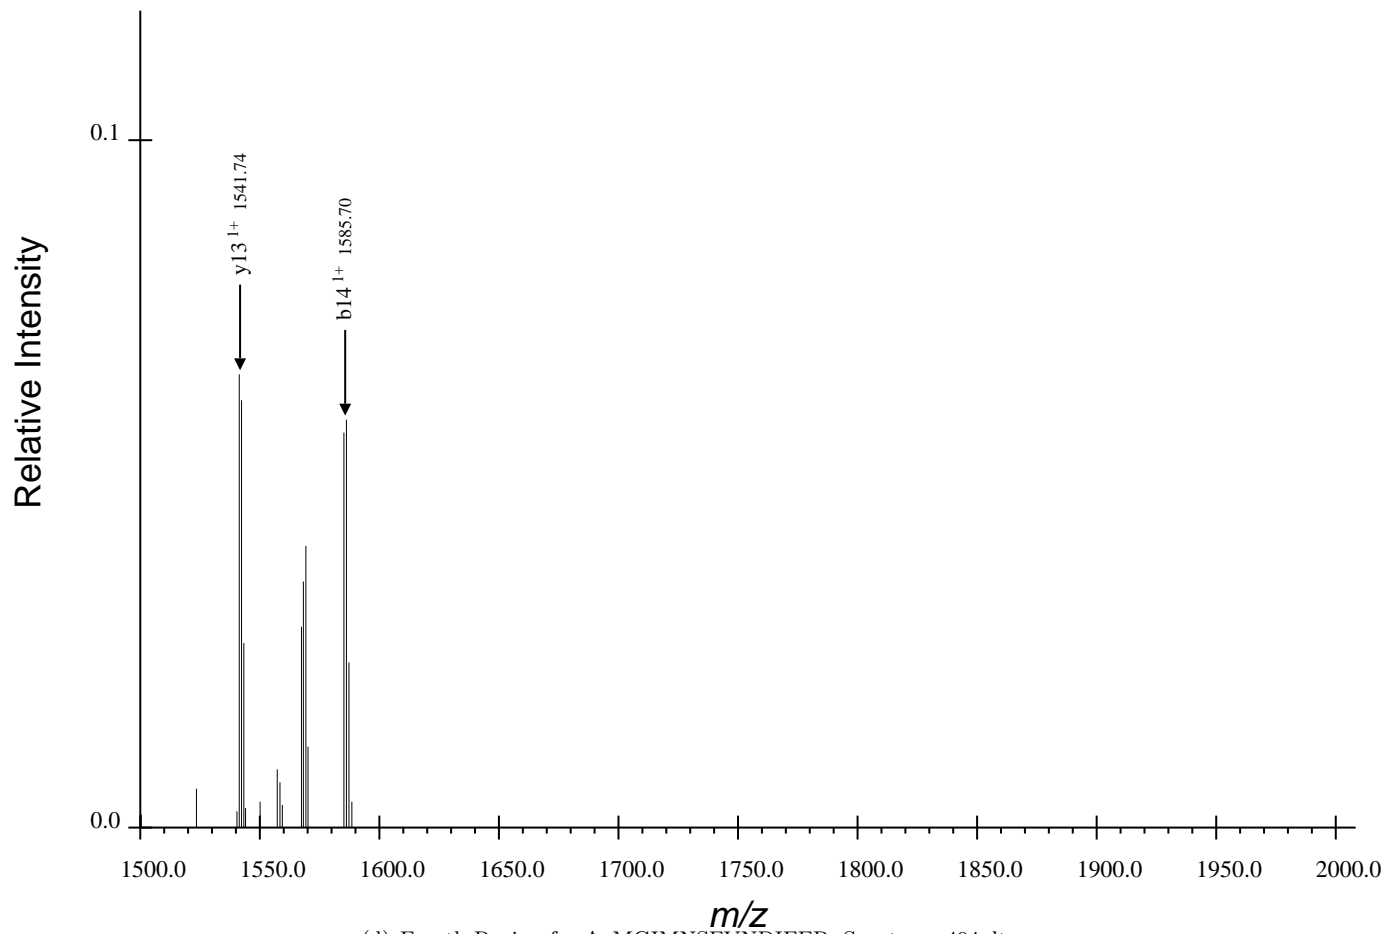

(d) Fourth Region for AoMGIMNSFVNDIFER, Spectrum 494.dta

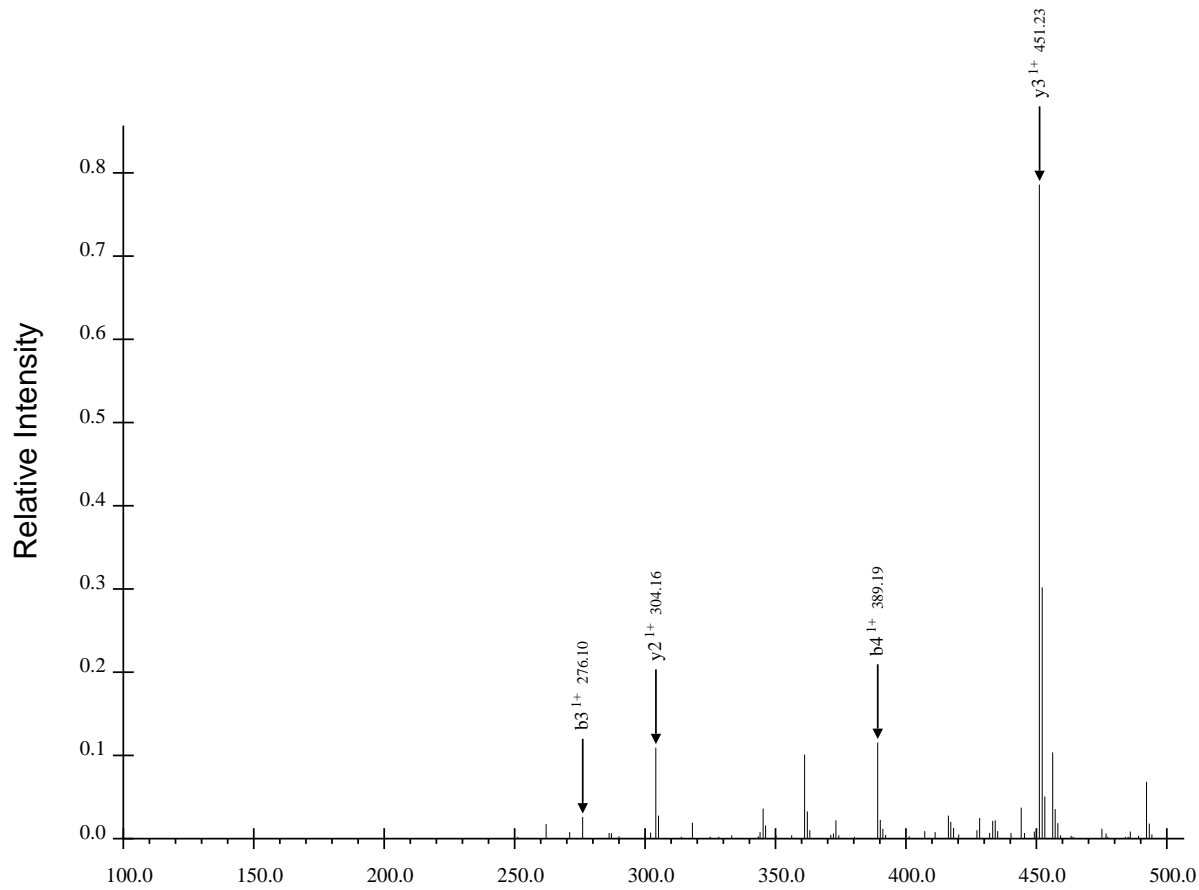

(a) First Region for AoMGIMNSFVNDIFER, Spectrum 495.dta

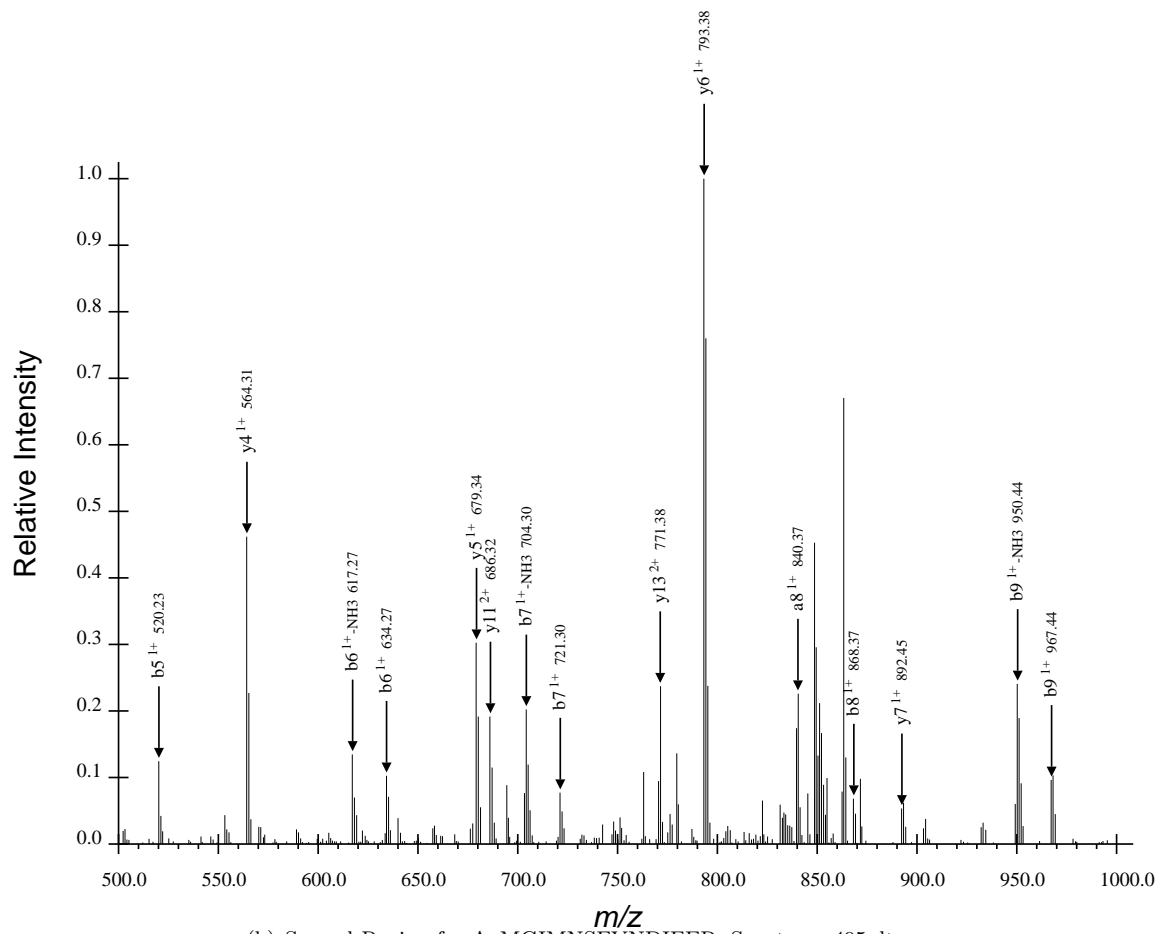

(b) Second Region for AoMGIMNSFVNDIFER, Spectrum 495.dta

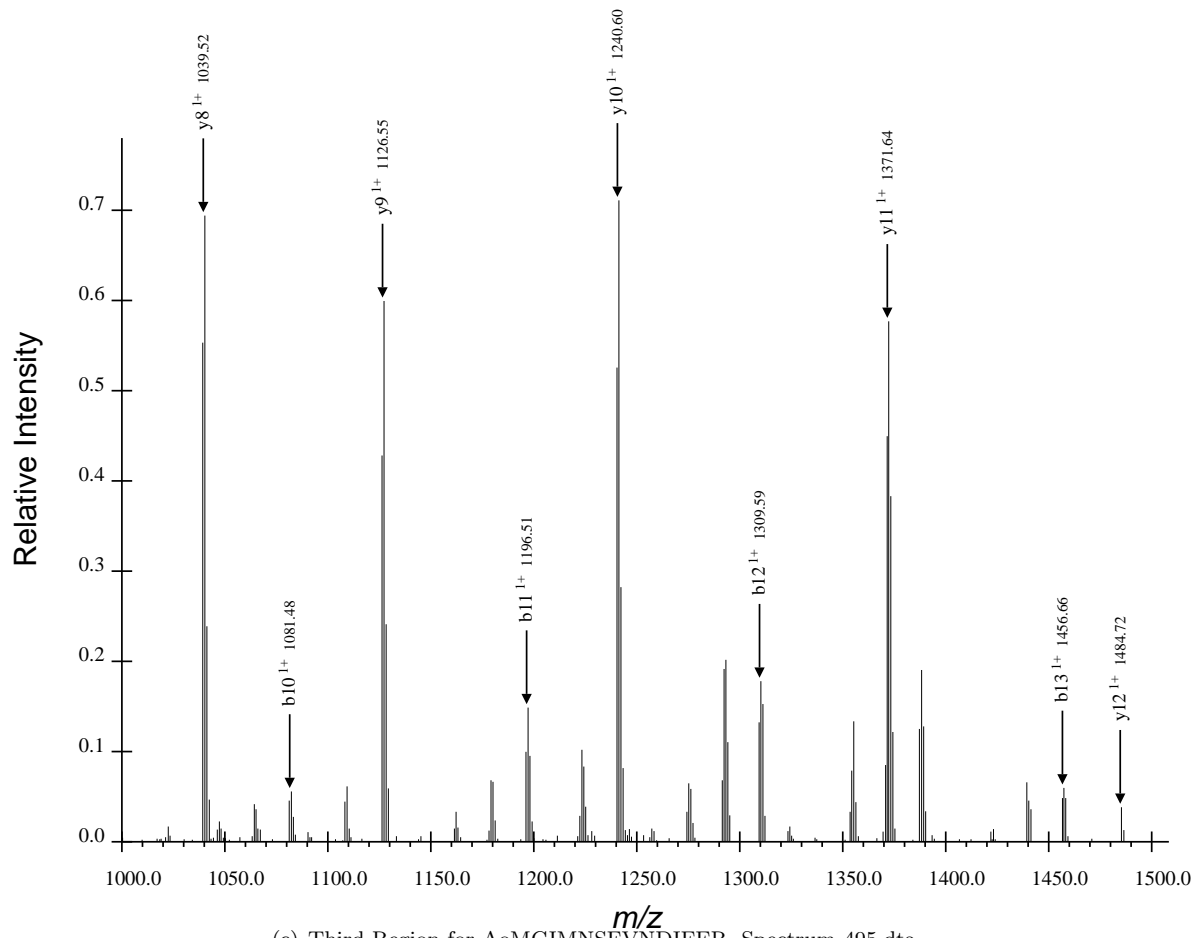

(c) Third Region for AoMGIMNSFVNDIFER, Spectrum 495.dta

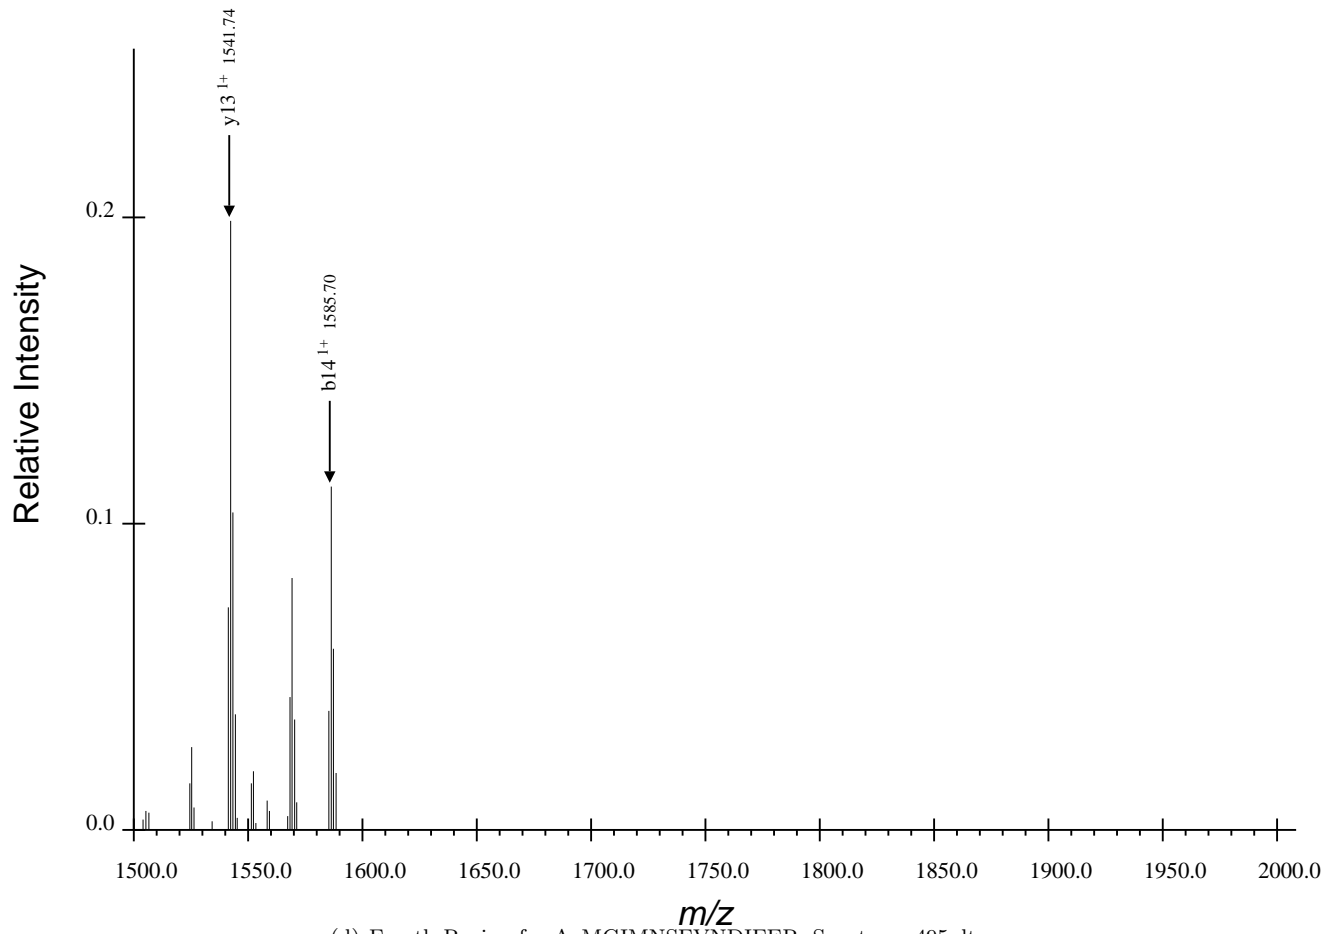

(d) Fourth Region for AoMGIMNSFVNDIFER, Spectrum 495.dta

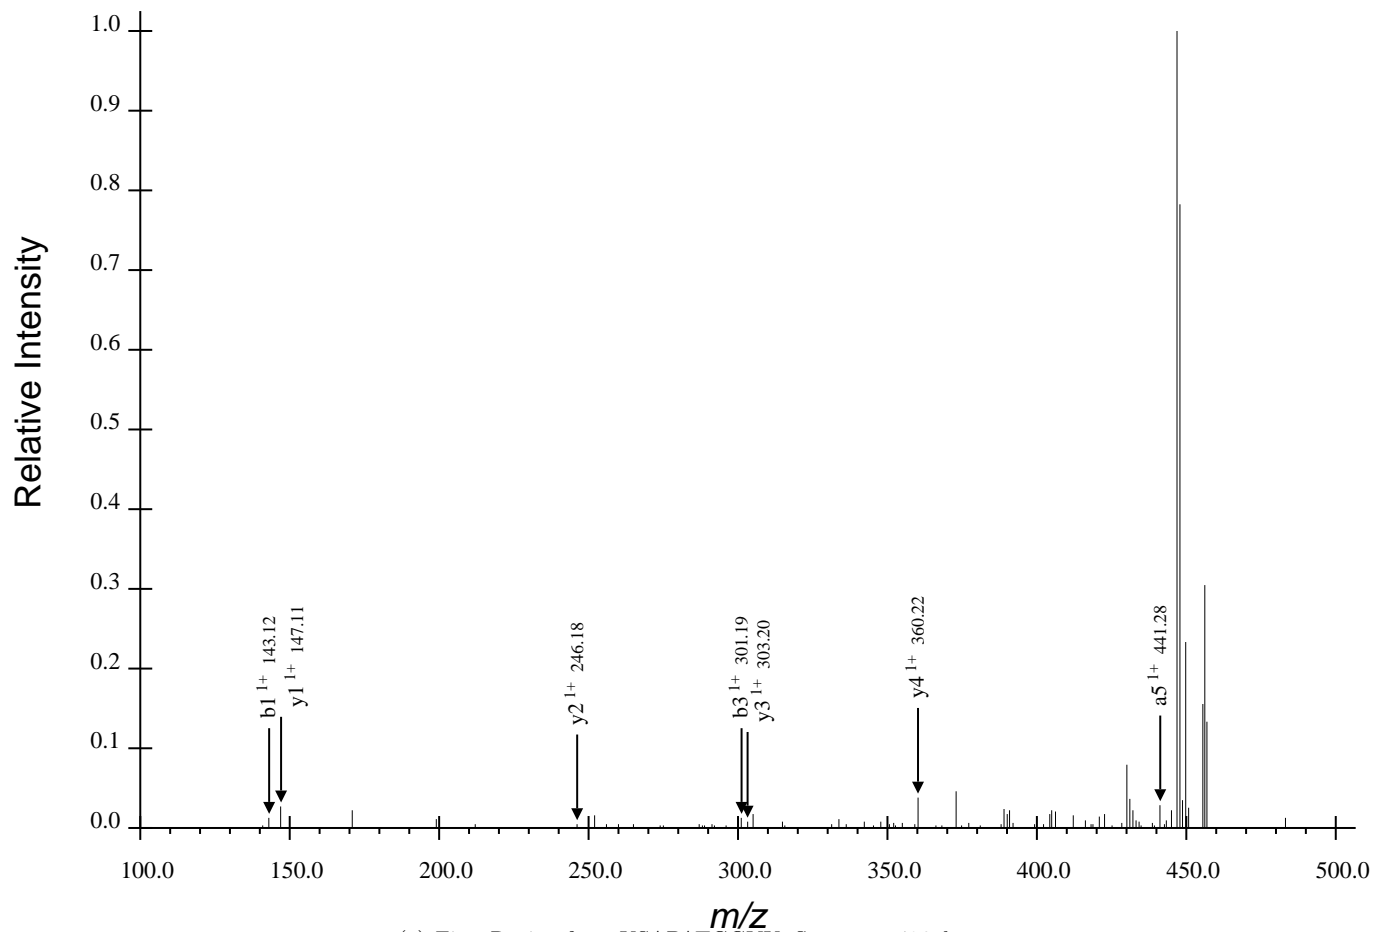

(a) First Region for mKSAPATGGVK, Spectrum 496.dta

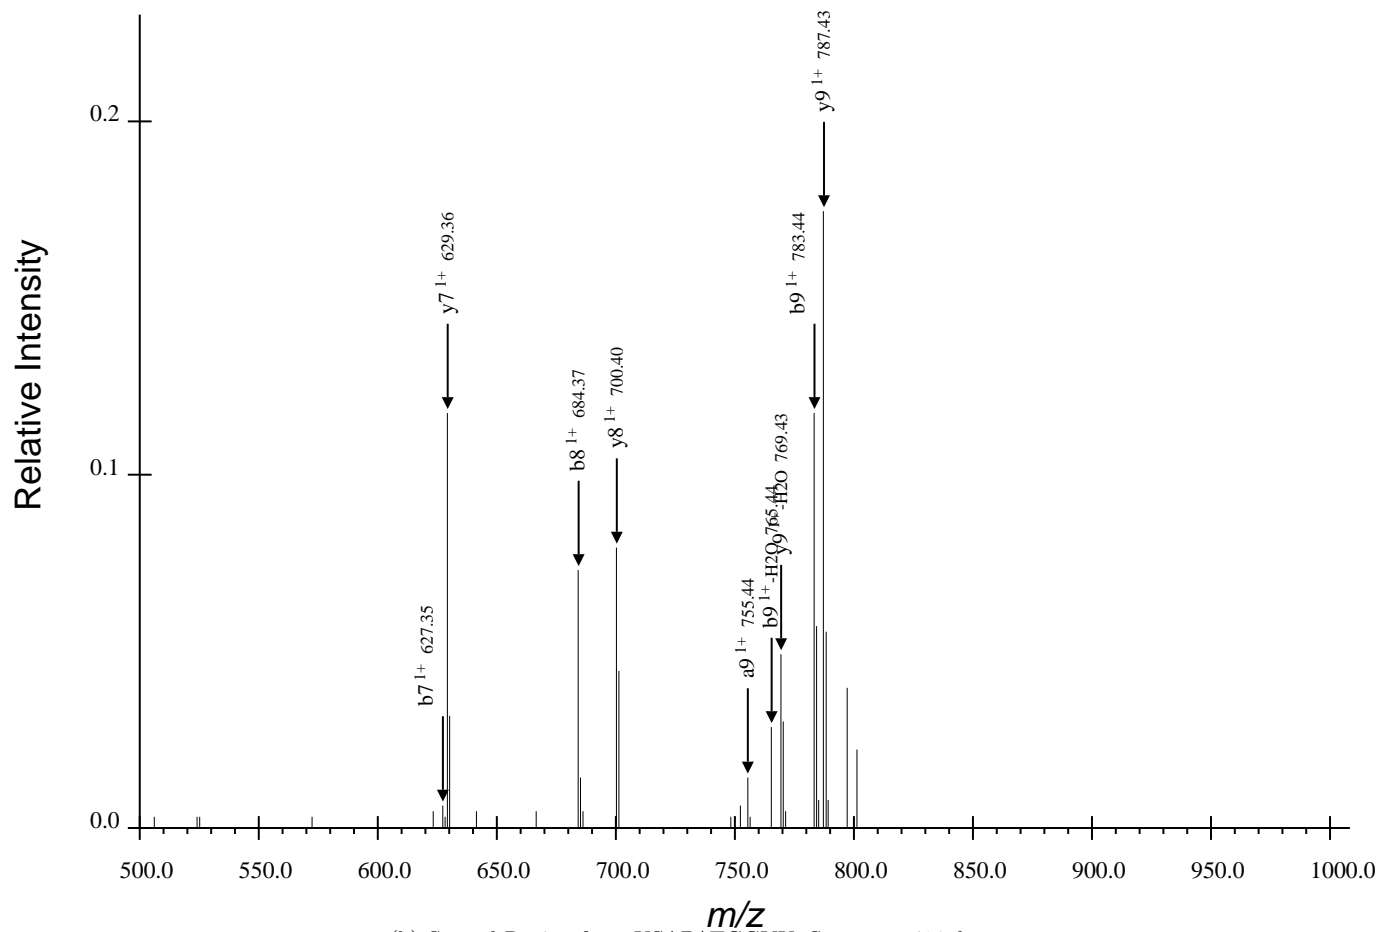

(b) Second Region for mKSAPATGGVK, Spectrum 496.dta

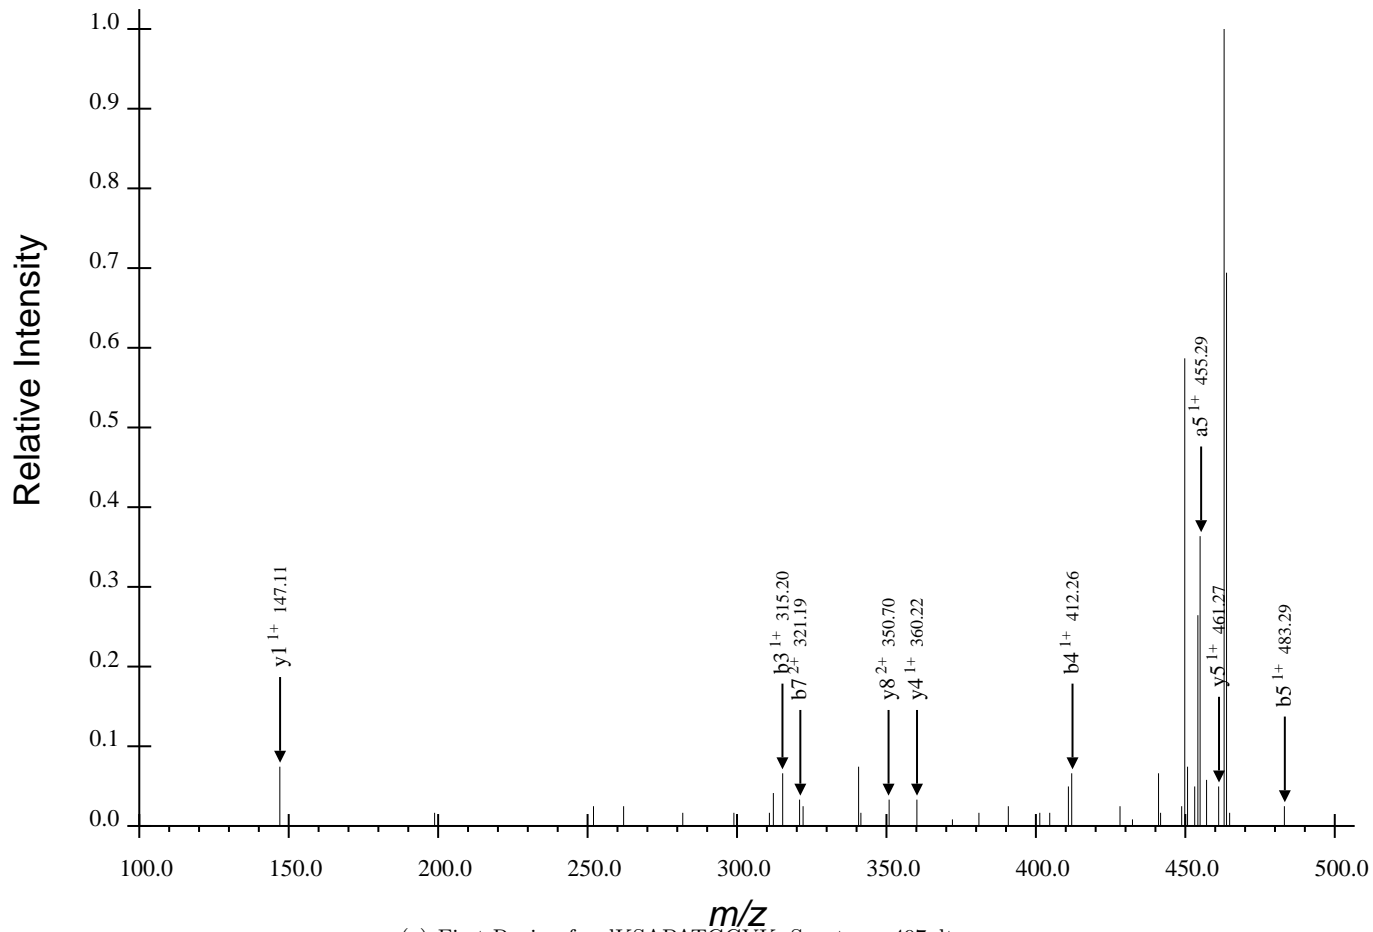

(a) First Region for dKSAPATGGVK, Spectrum 497.dta

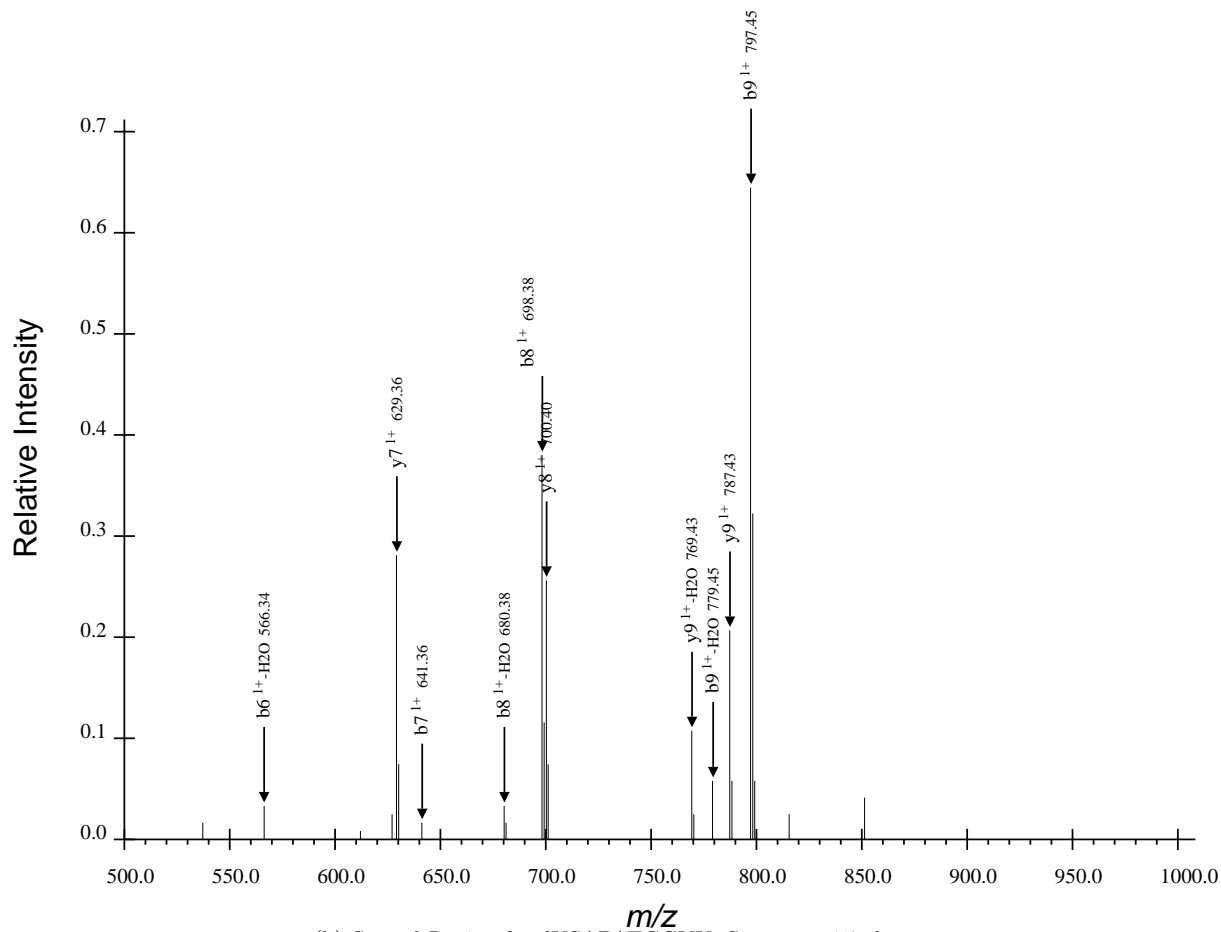

(b) Second Region for dKSAPATGGVK, Spectrum 497.dta

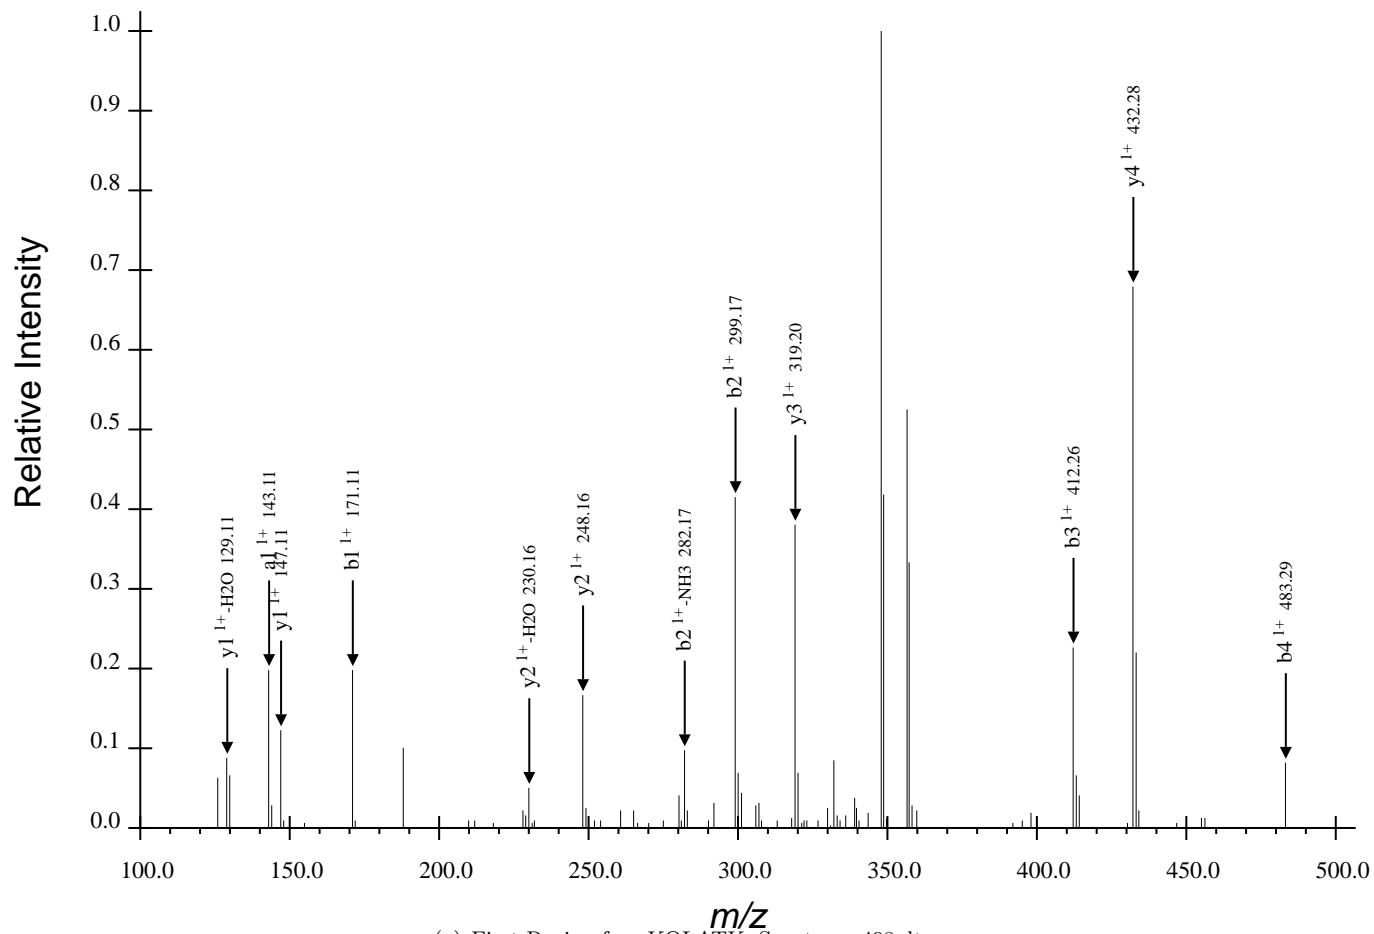

(a) First Region for aKQLATK, Spectrum 498.dta

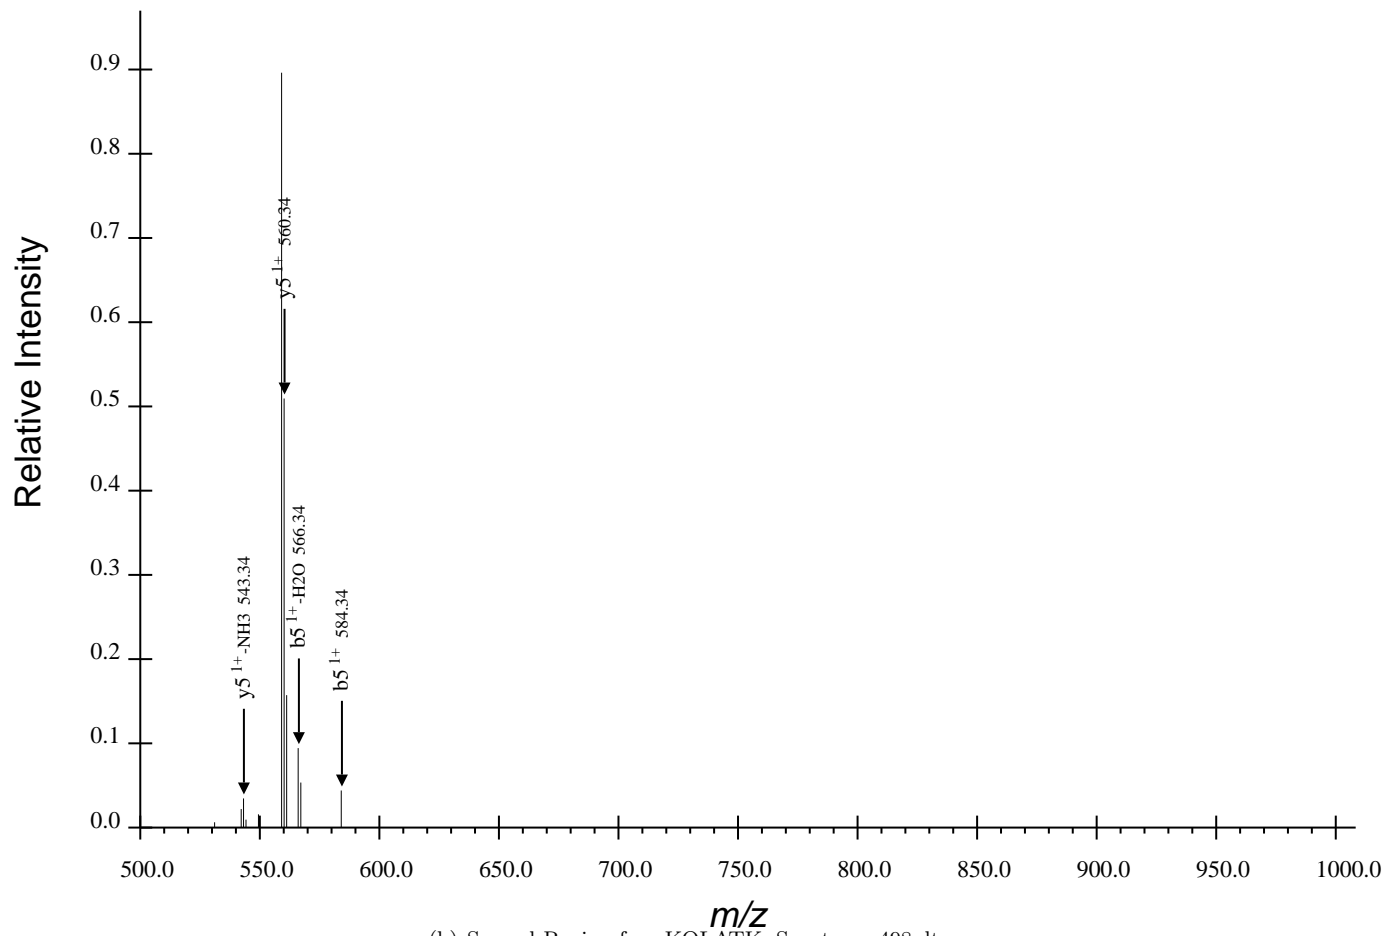

(b) Second Region for aKQLATK, Spectrum 498.dta

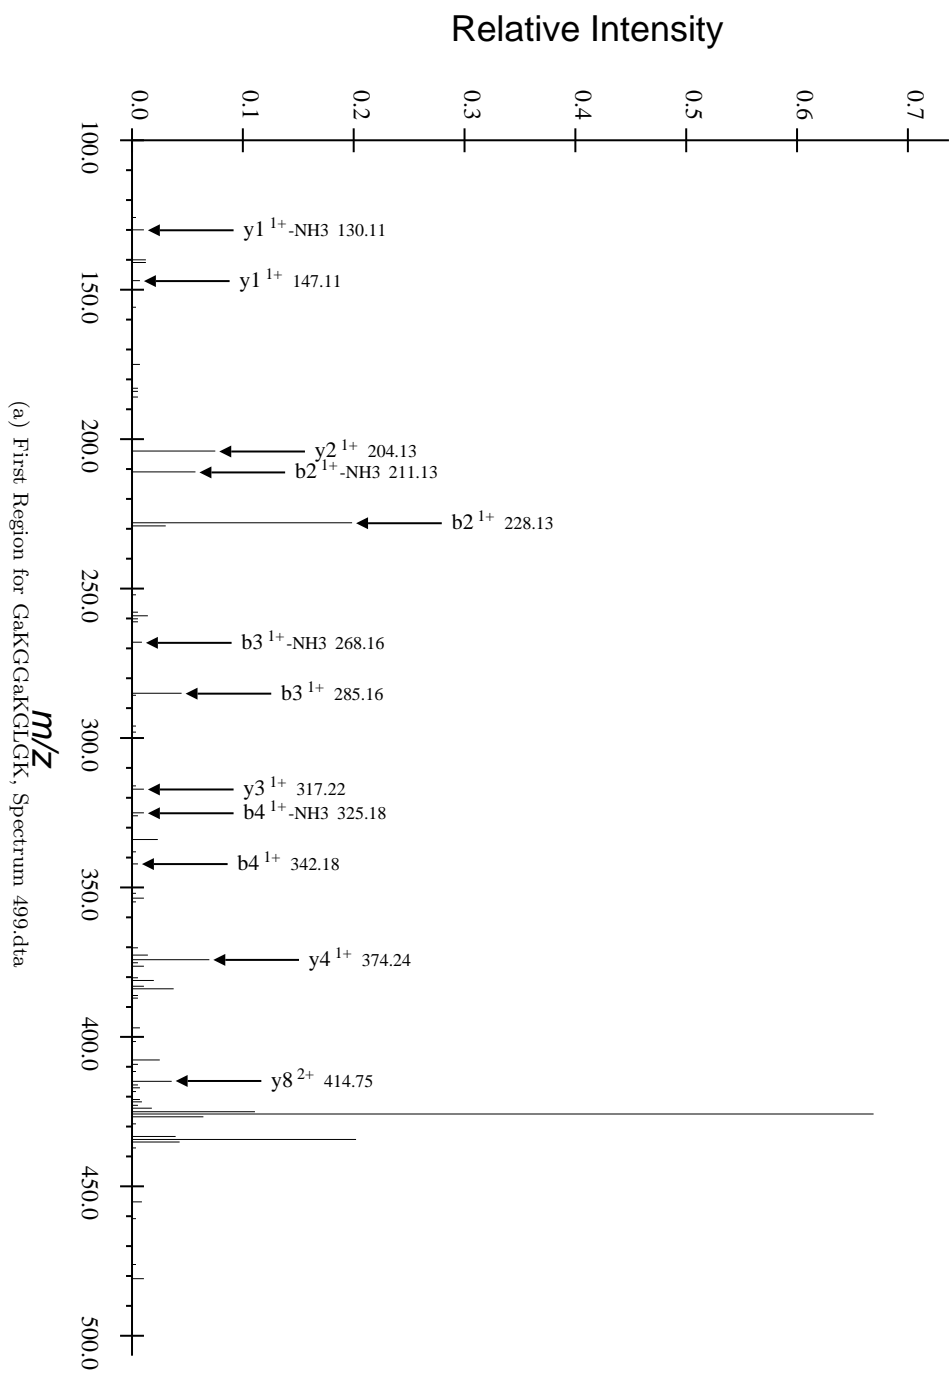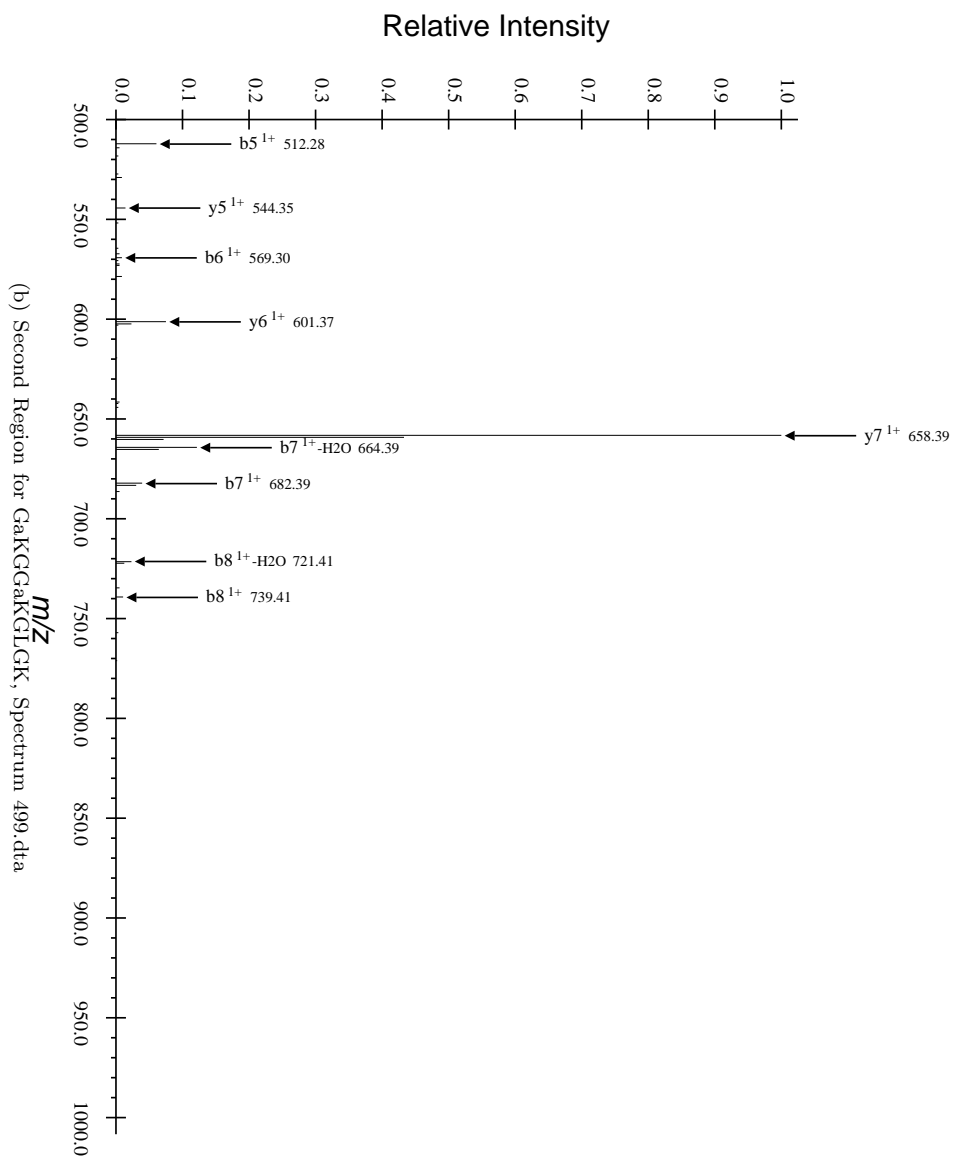

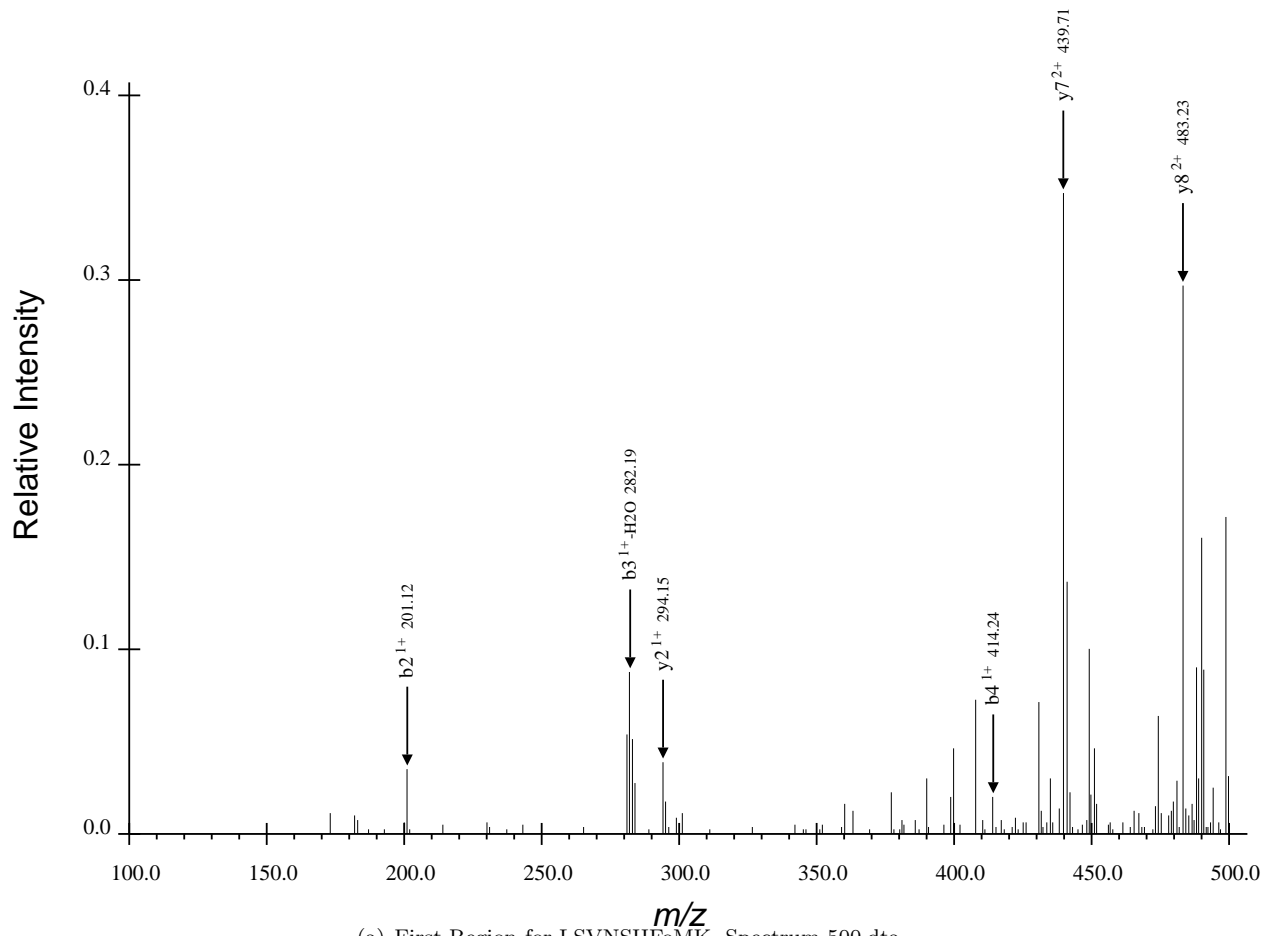

(a) First Region for LSVNSHFoMK, Spectrum 500.dta

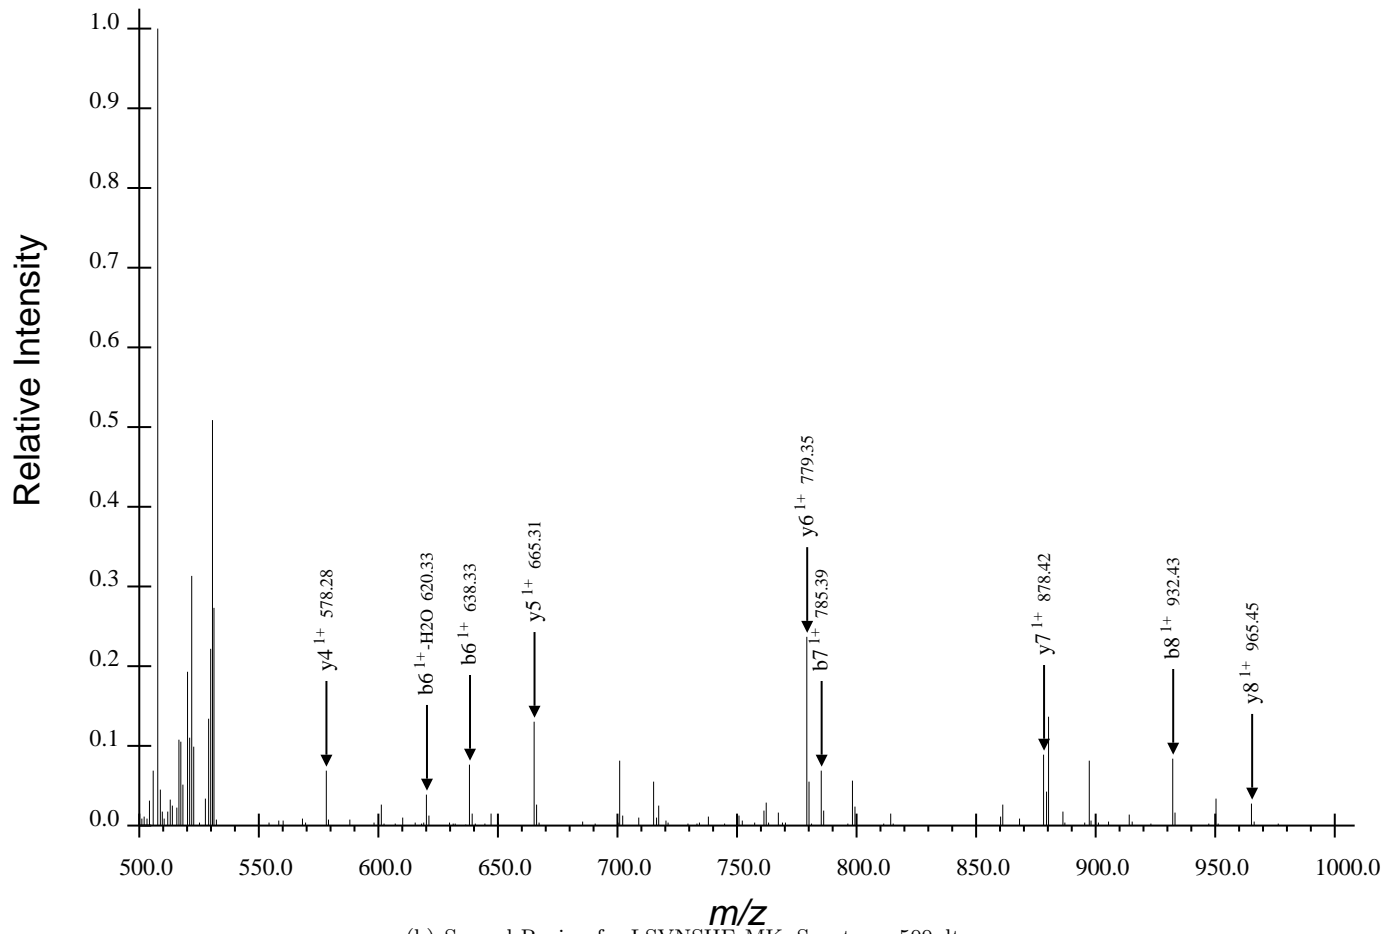

(b) Second Region for LSVNSHFoMK, Spectrum 500.dta



(b) Second Region for GGaKGLGaKGGaKR, Spectrum 501.dta

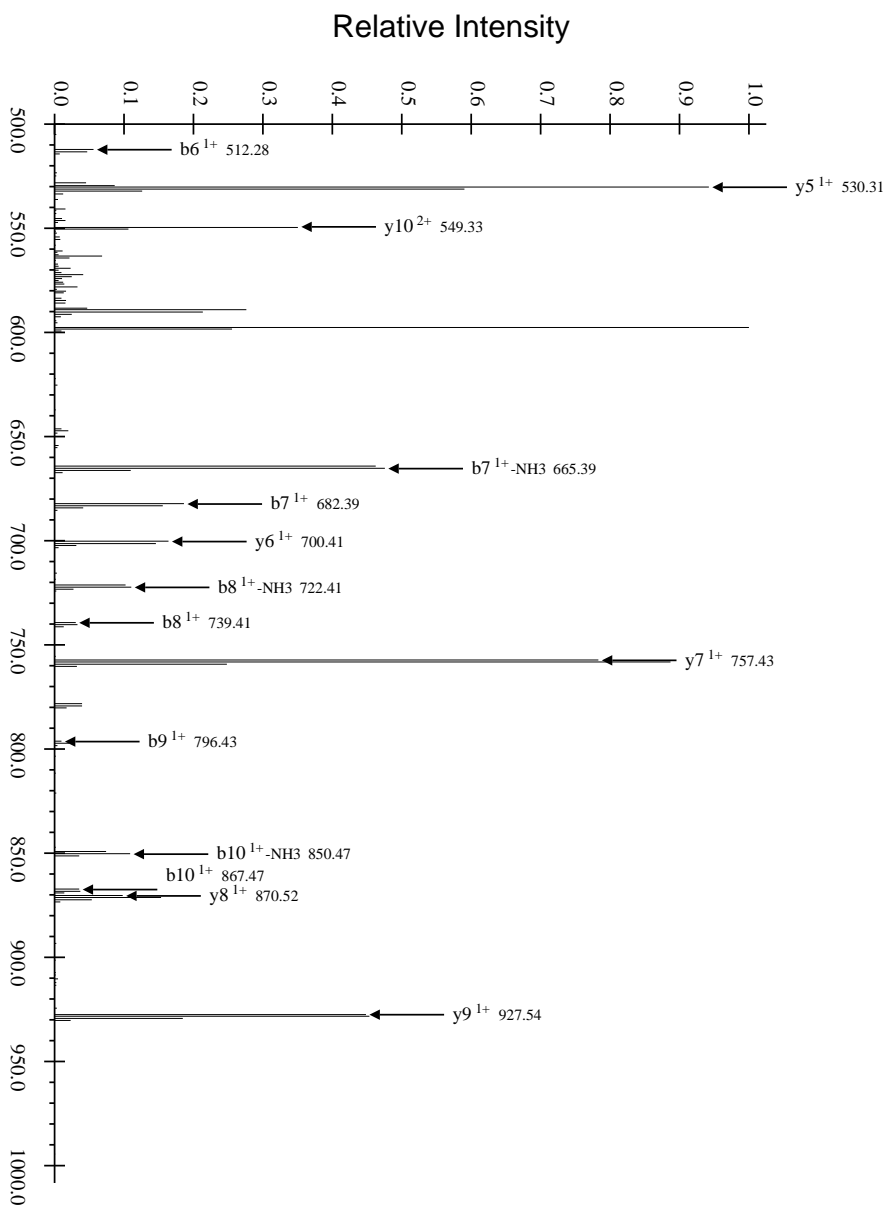

(a) First Region for GGaKGLGaKGGaKR, Spectrum 501.dta

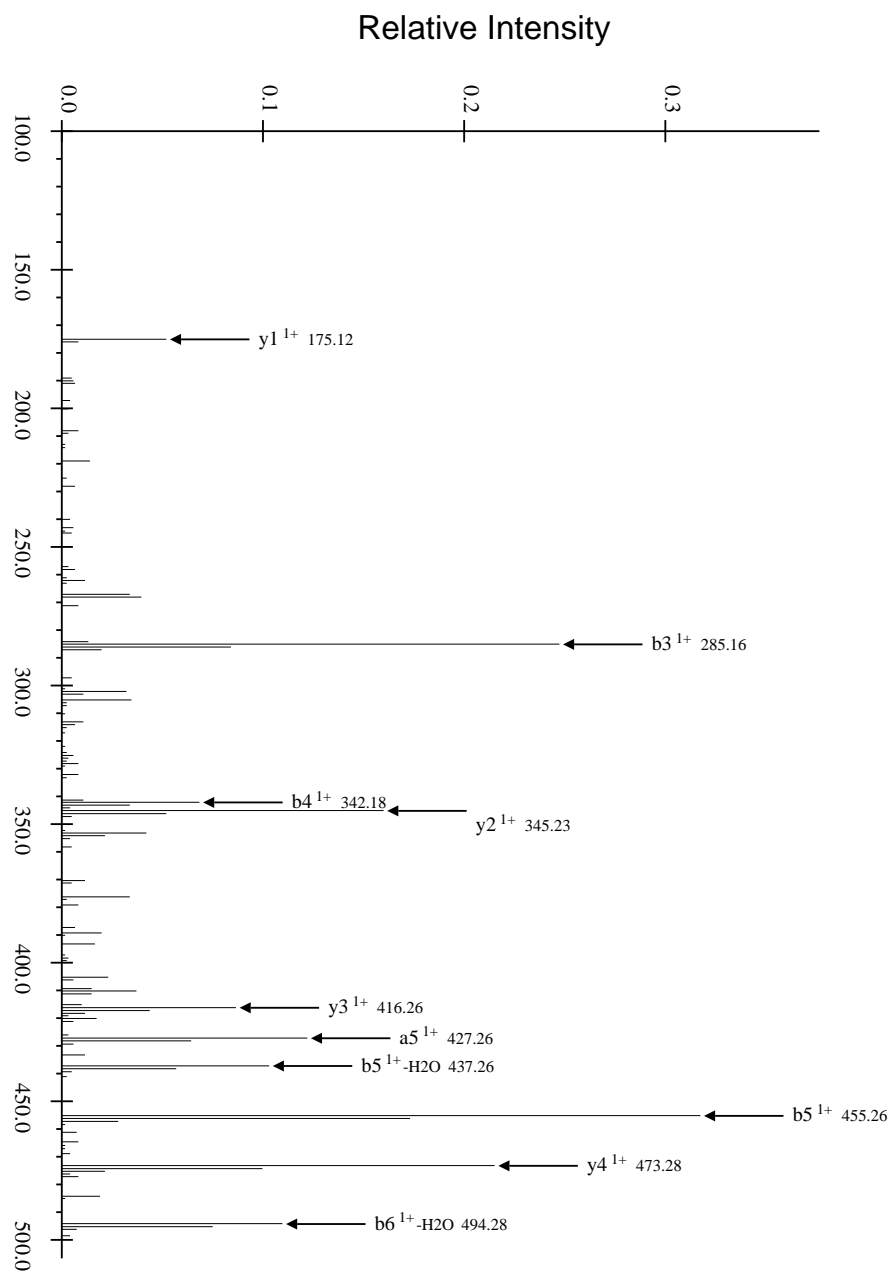

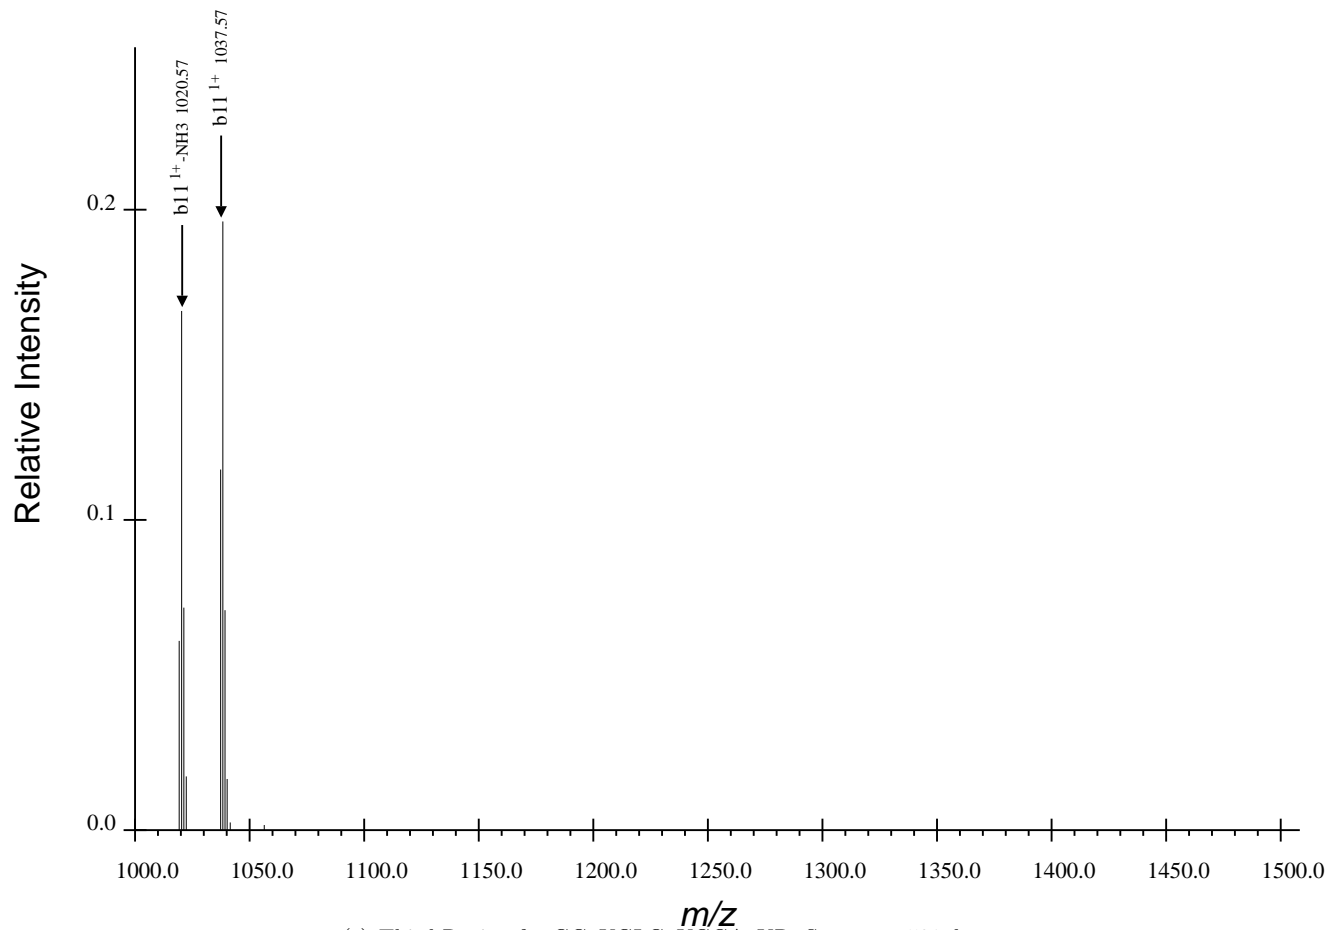

(c) Third Region for GGaKGLGaKGGaKR, Spectrum 501.dta

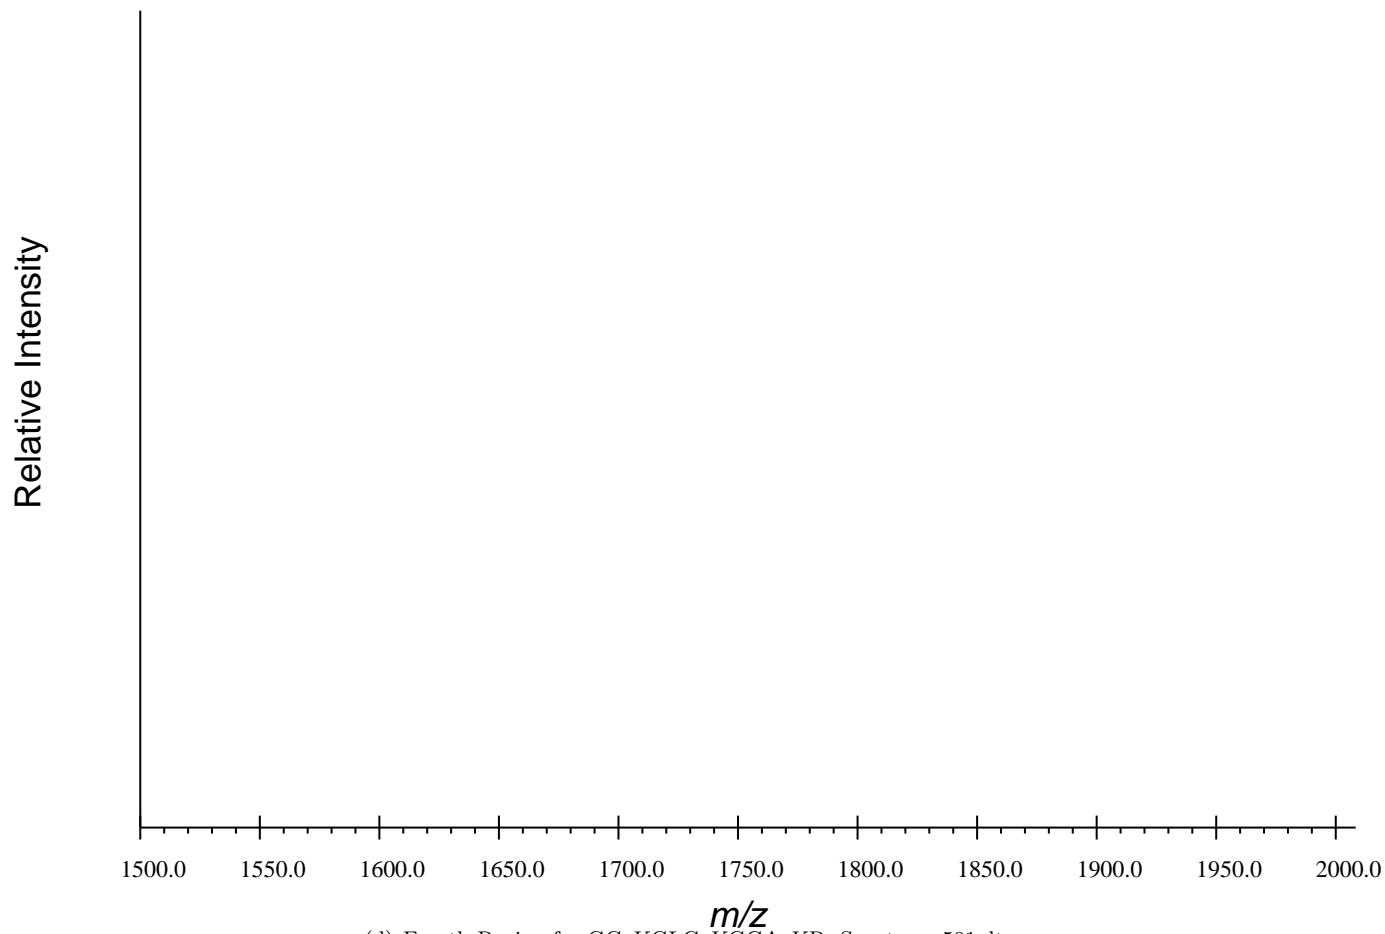

(d) Fourth Region for GGaKGLGaKGGaKR, Spectrum 501.dta

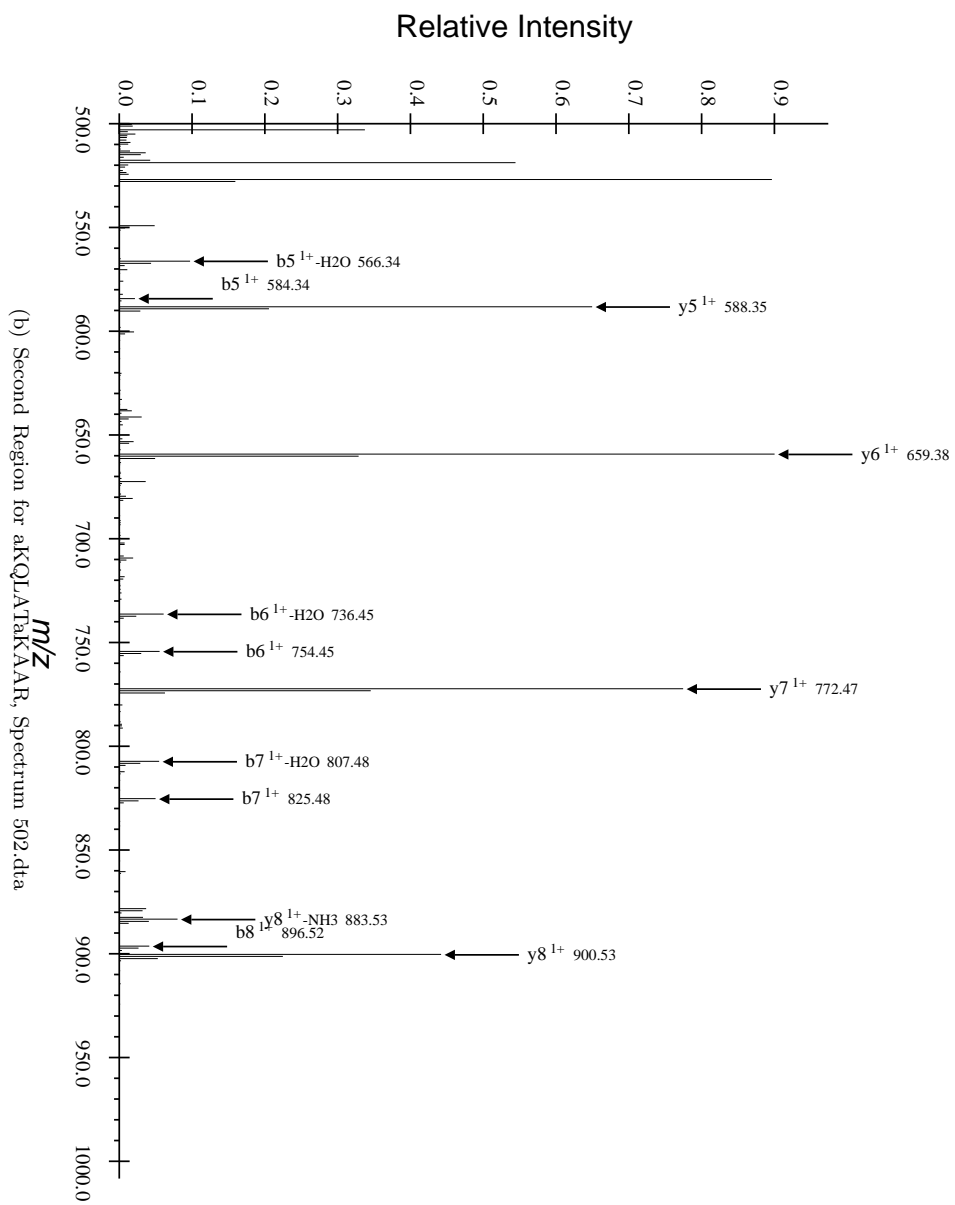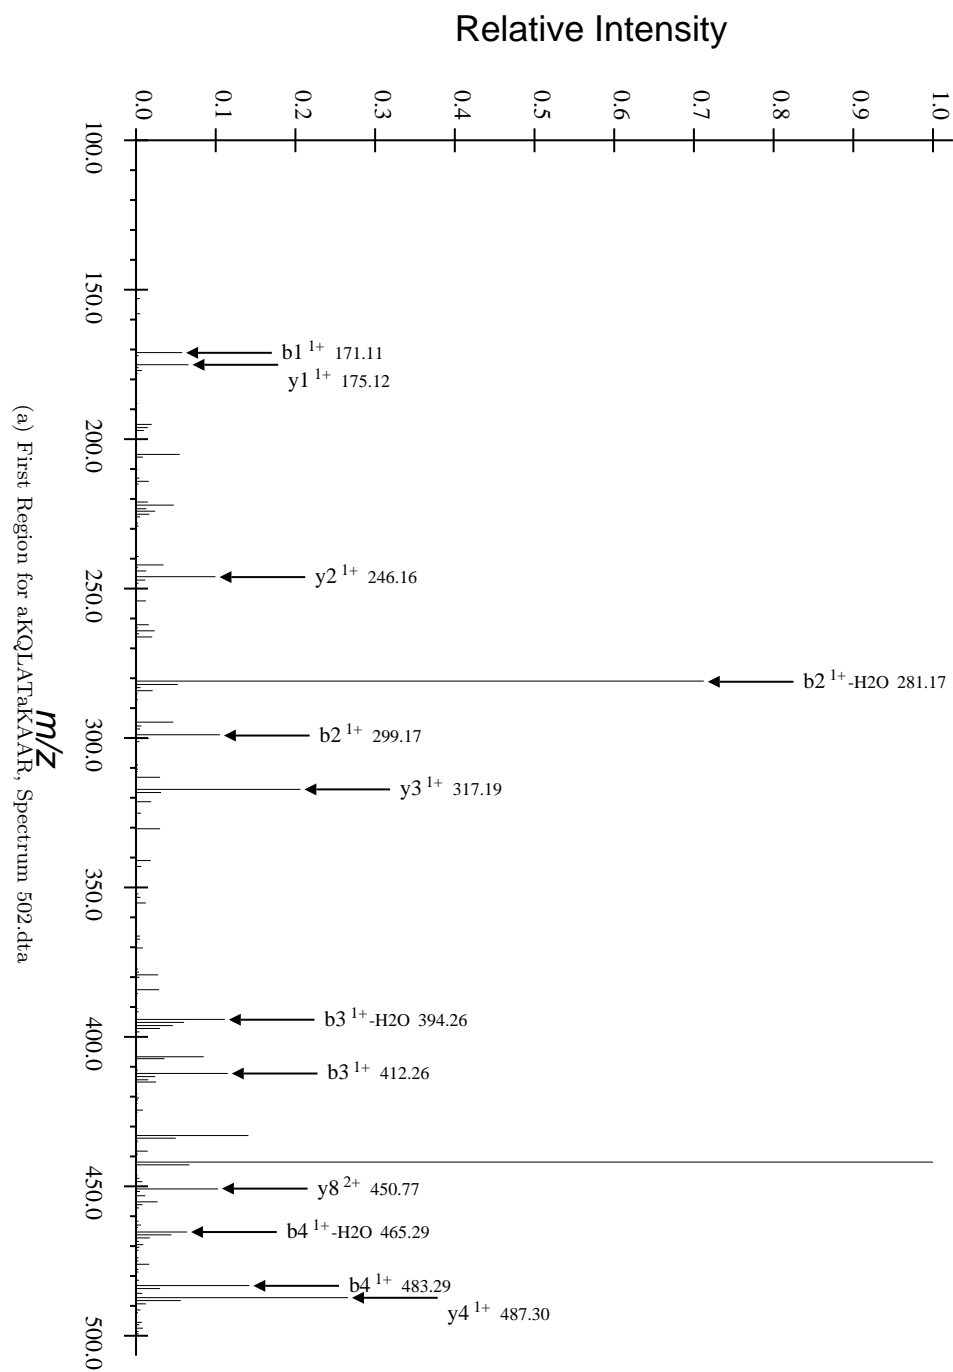

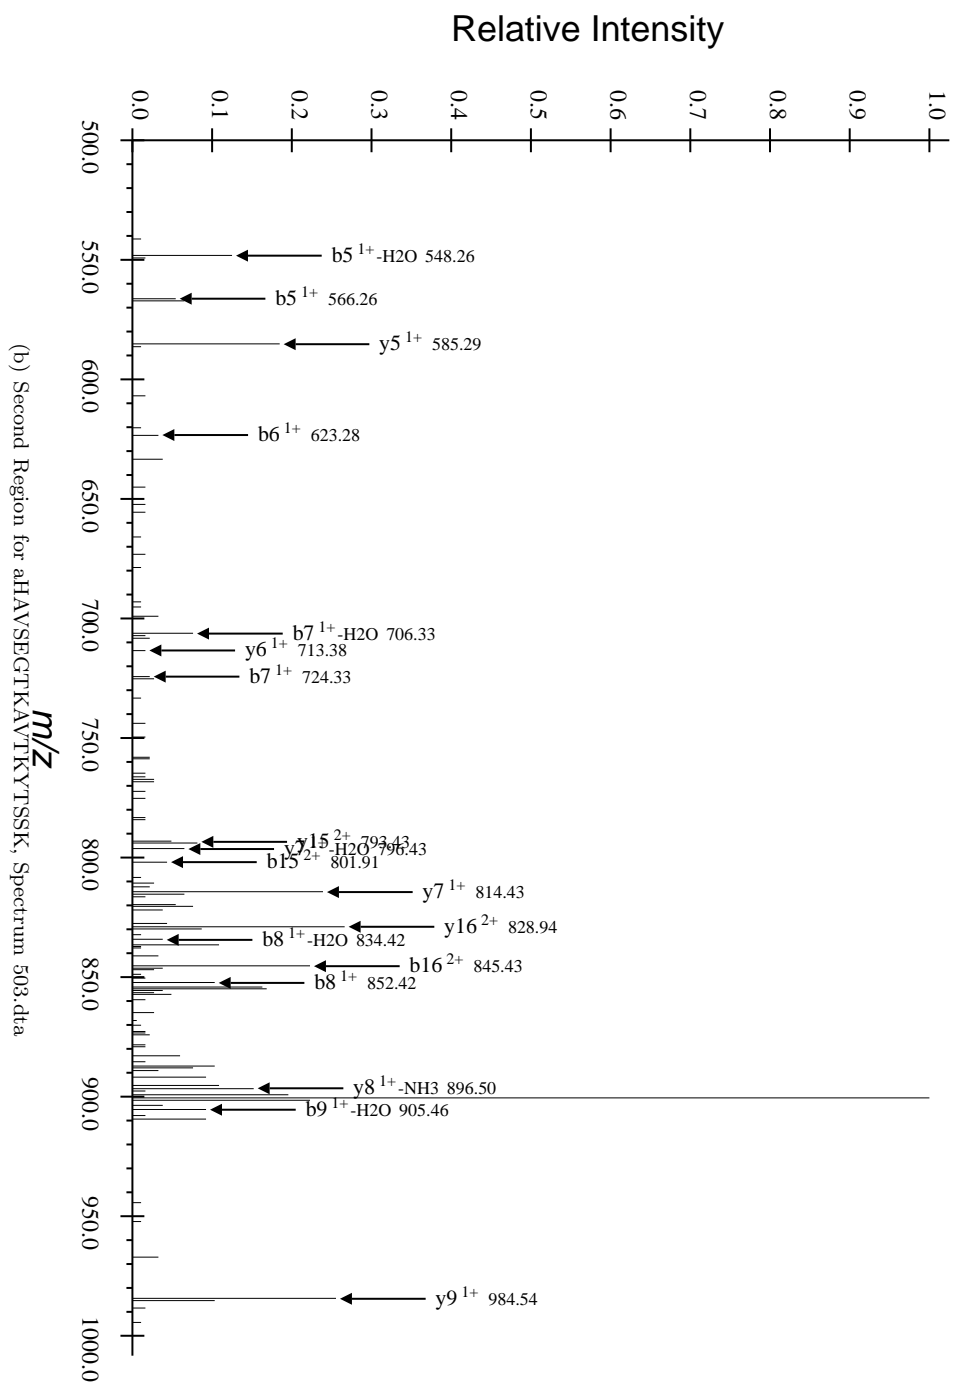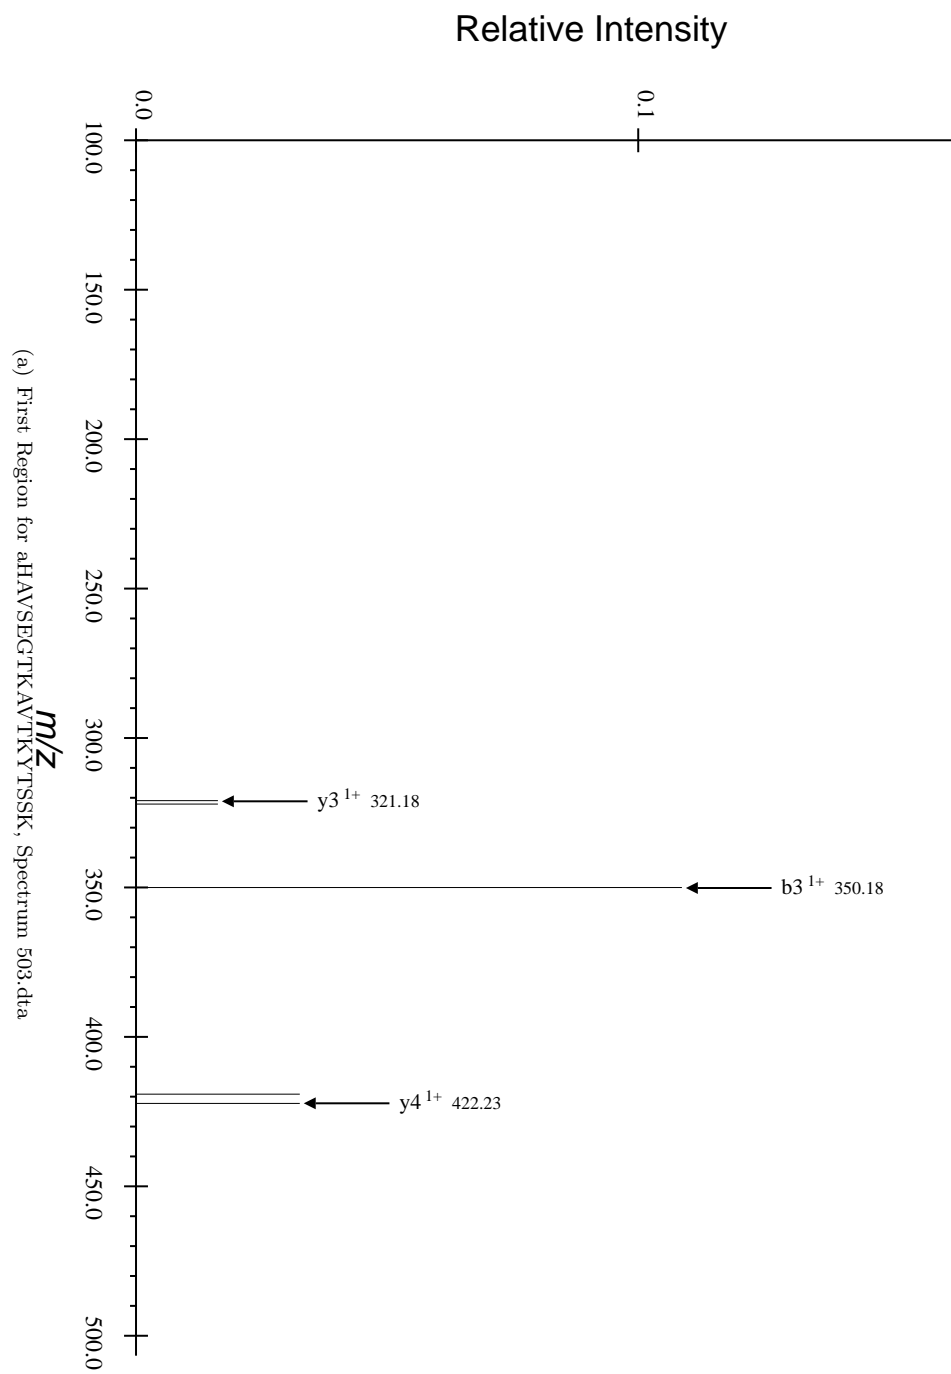

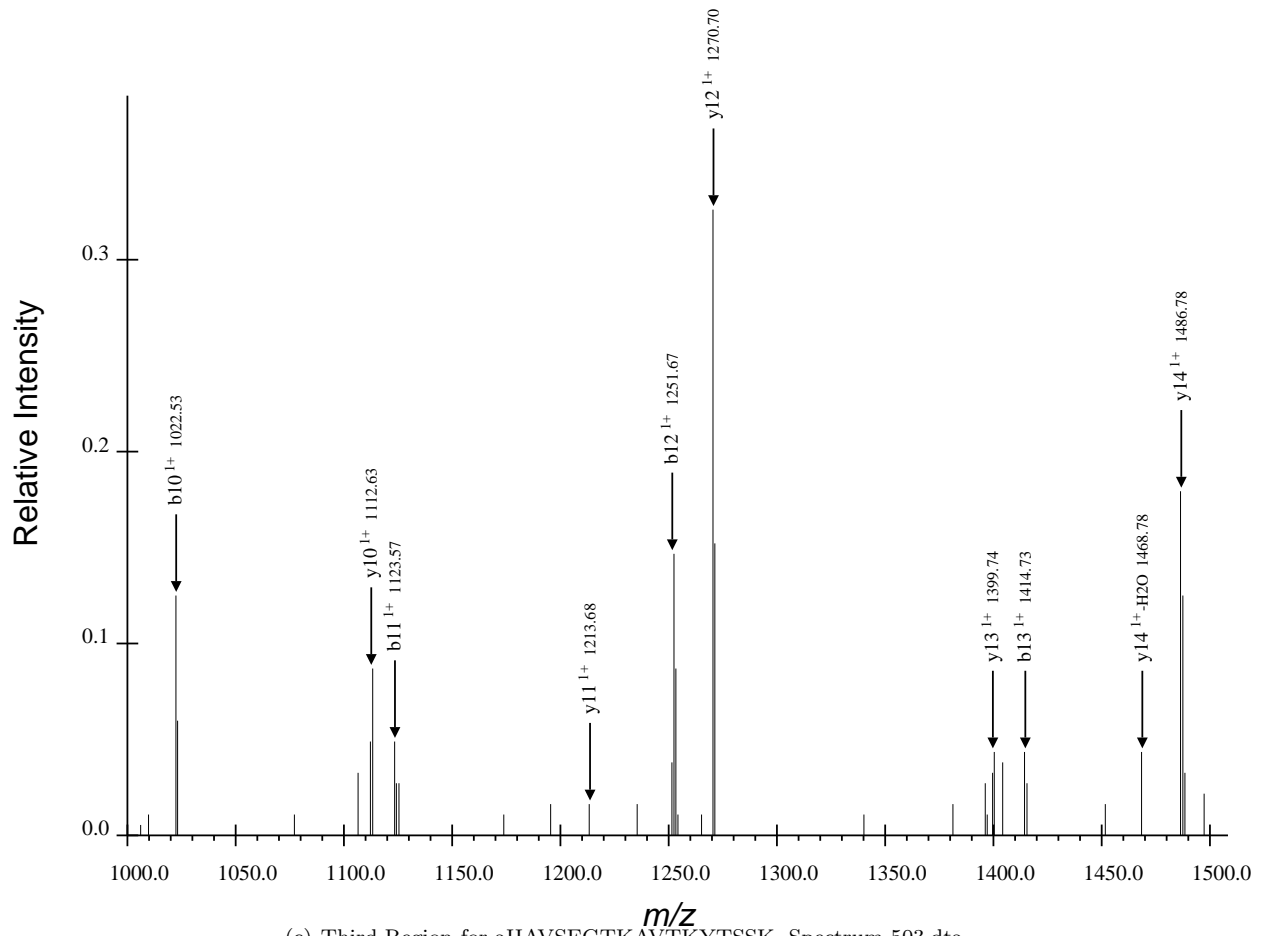

(c) Third Region for aHAVSEGTKAVTKYTSSK, Spectrum 503.dta

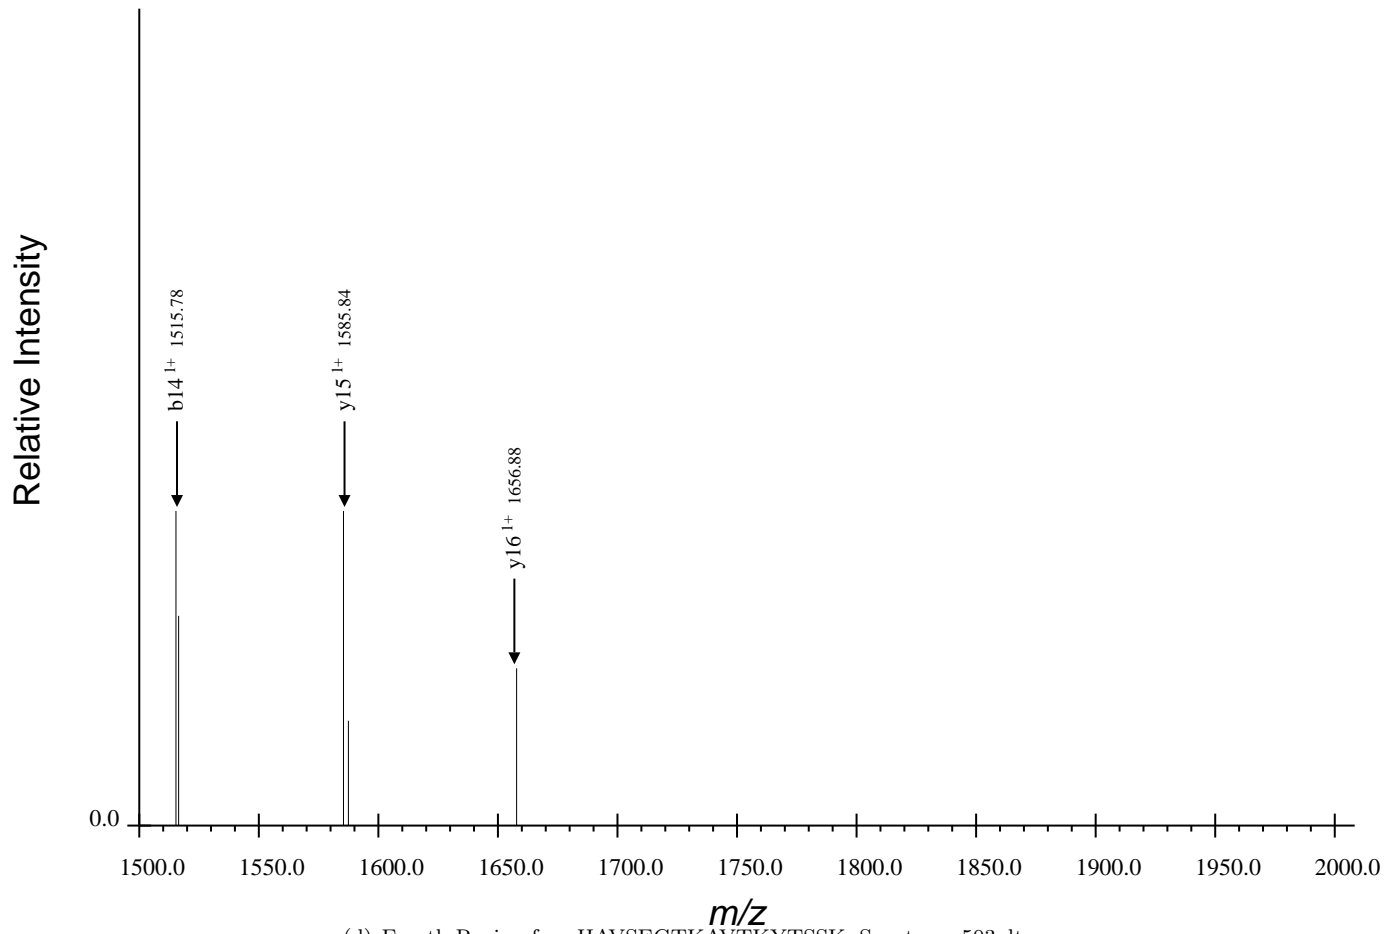

(d) Fourth Region for aHAVSEGTKAVTKYTSSK, Spectrum 503.dta

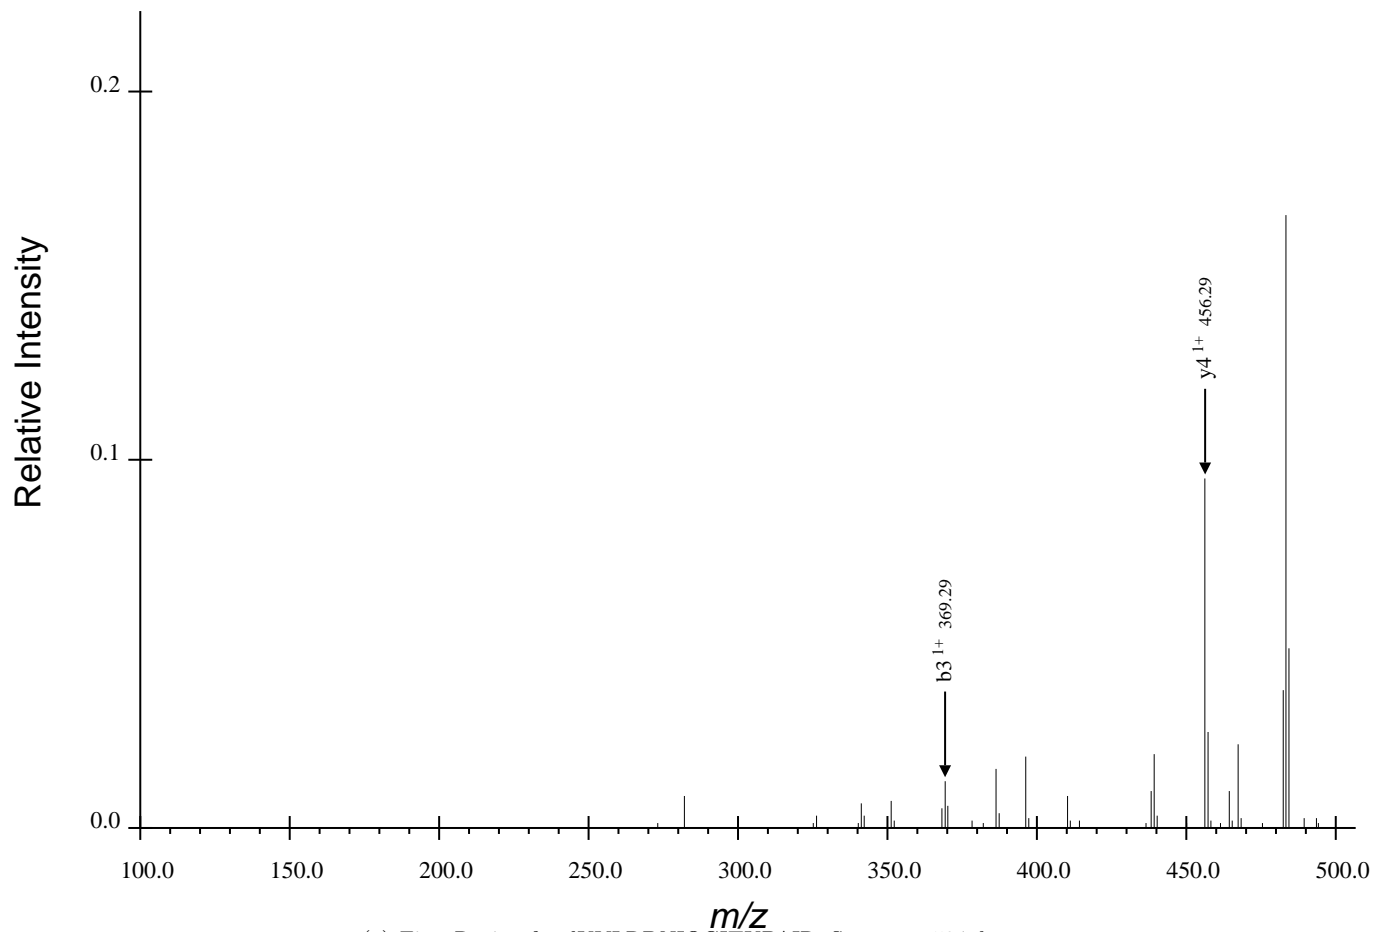

(a) First Region for dKVLRDNIQGITKPAIR, Spectrum 504.dta

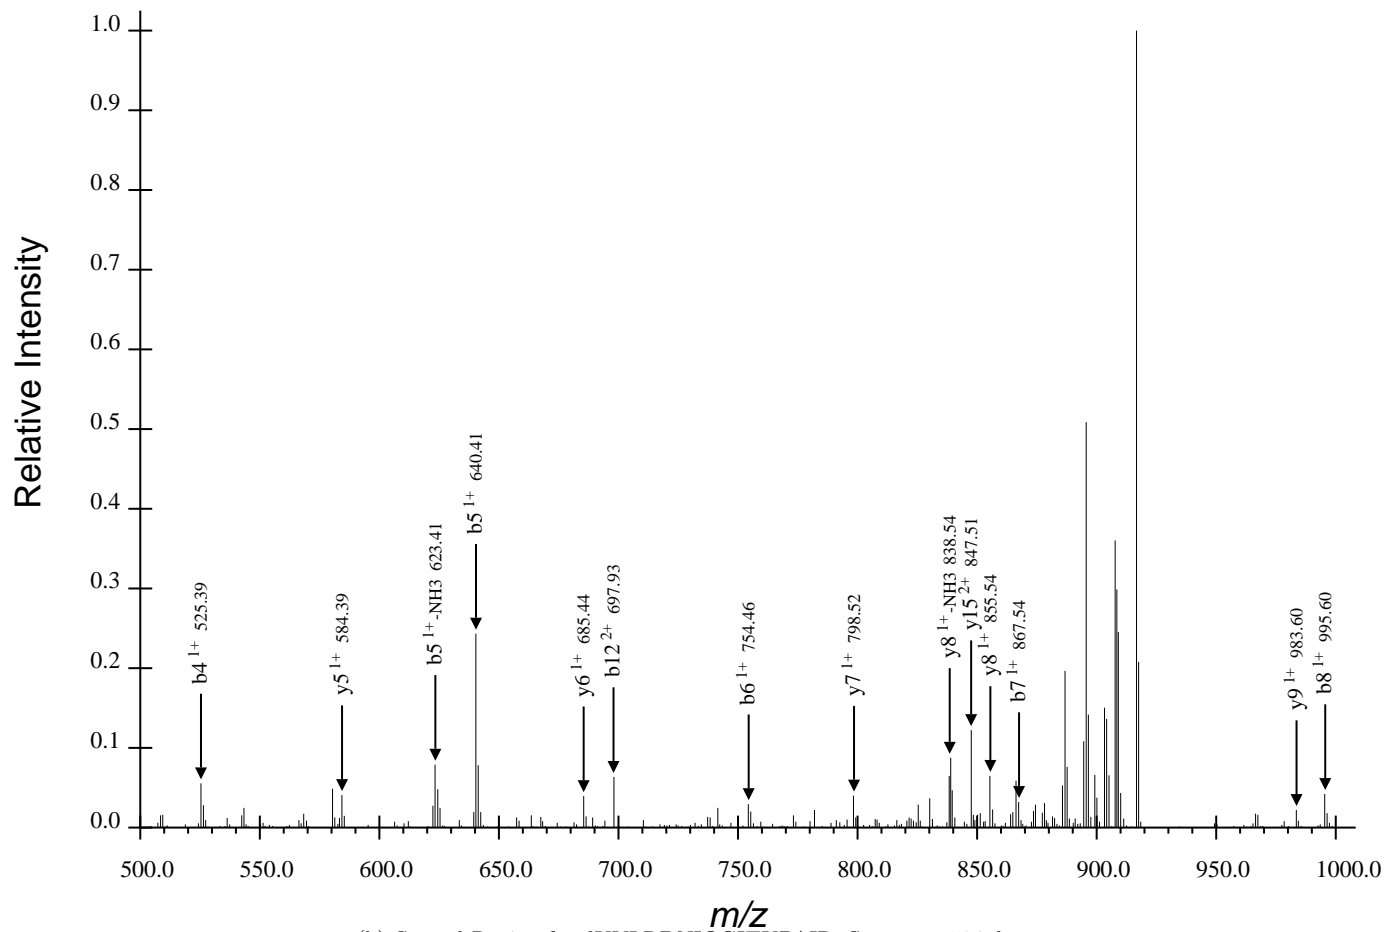

(b) Second Region for dKVLRDNIQGITKPAIR, Spectrum 504.dta

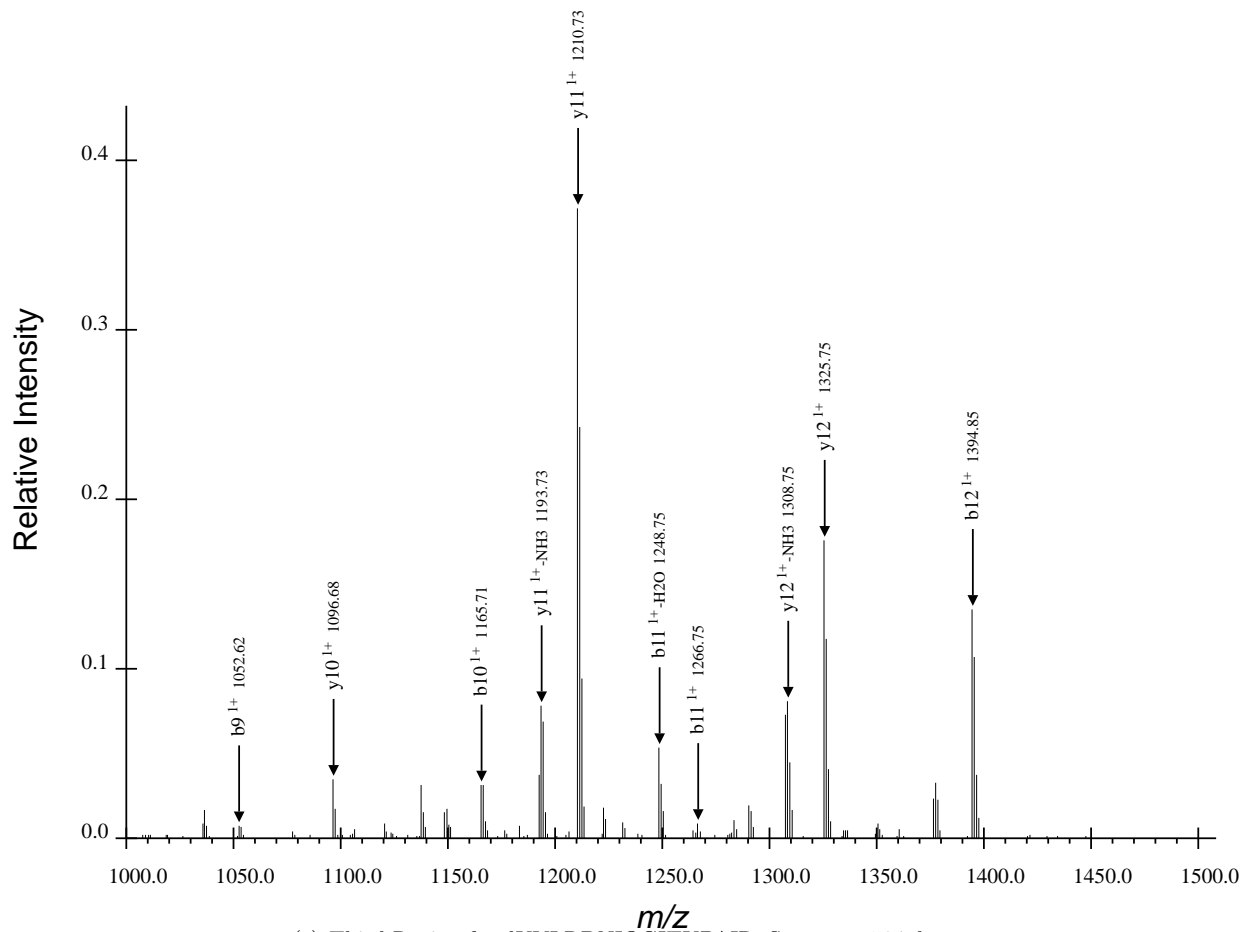

(c) Third Region for dKVL RDNIQGITKPAIR, Spectrum 504.dta

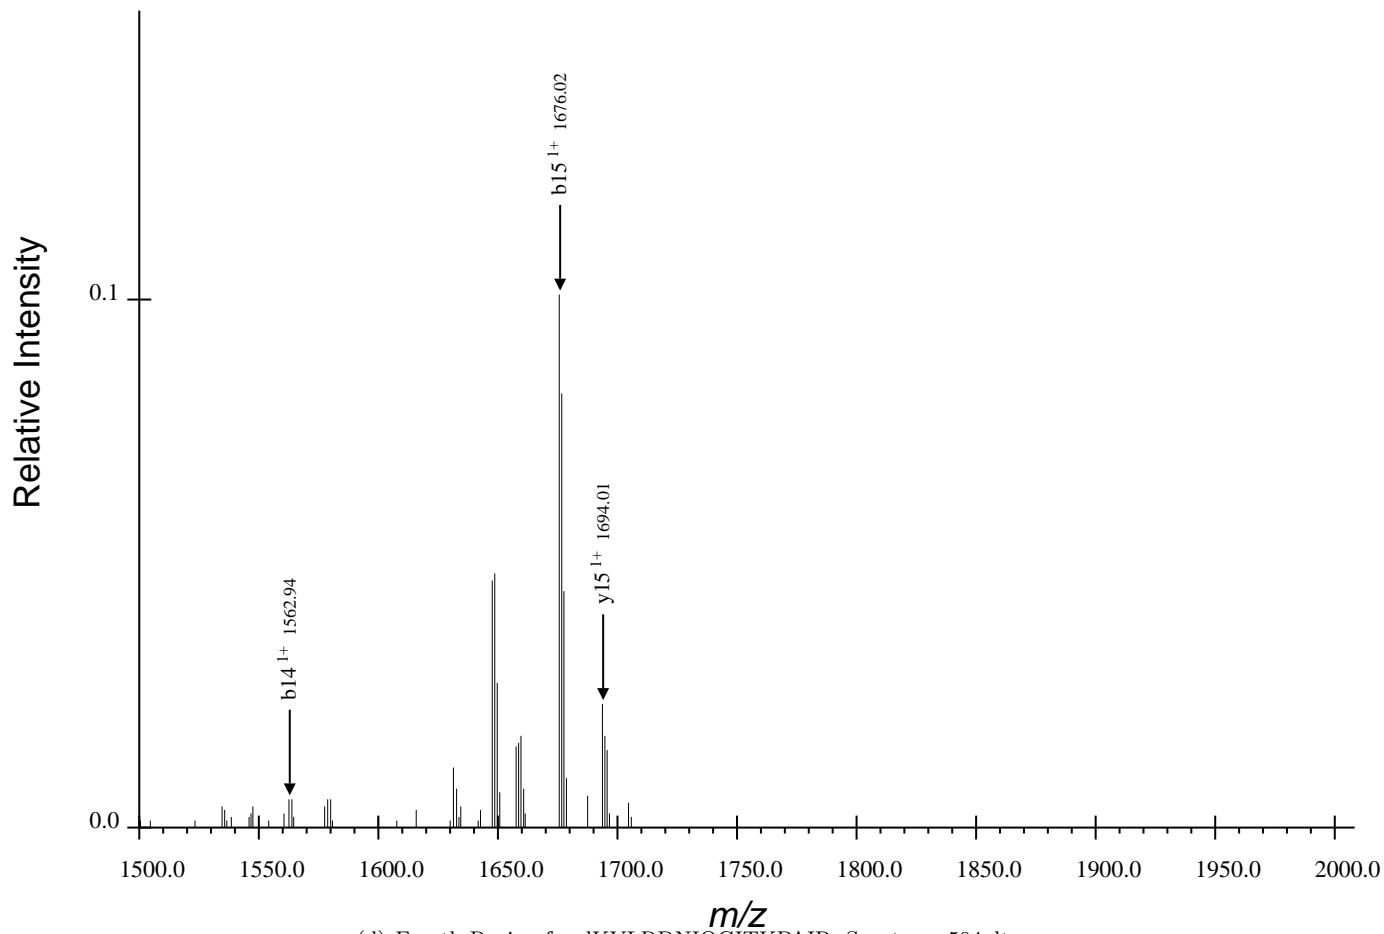

(d) Fourth Region for dKVL RDNIQGITKPAIR, Spectrum 504.dta

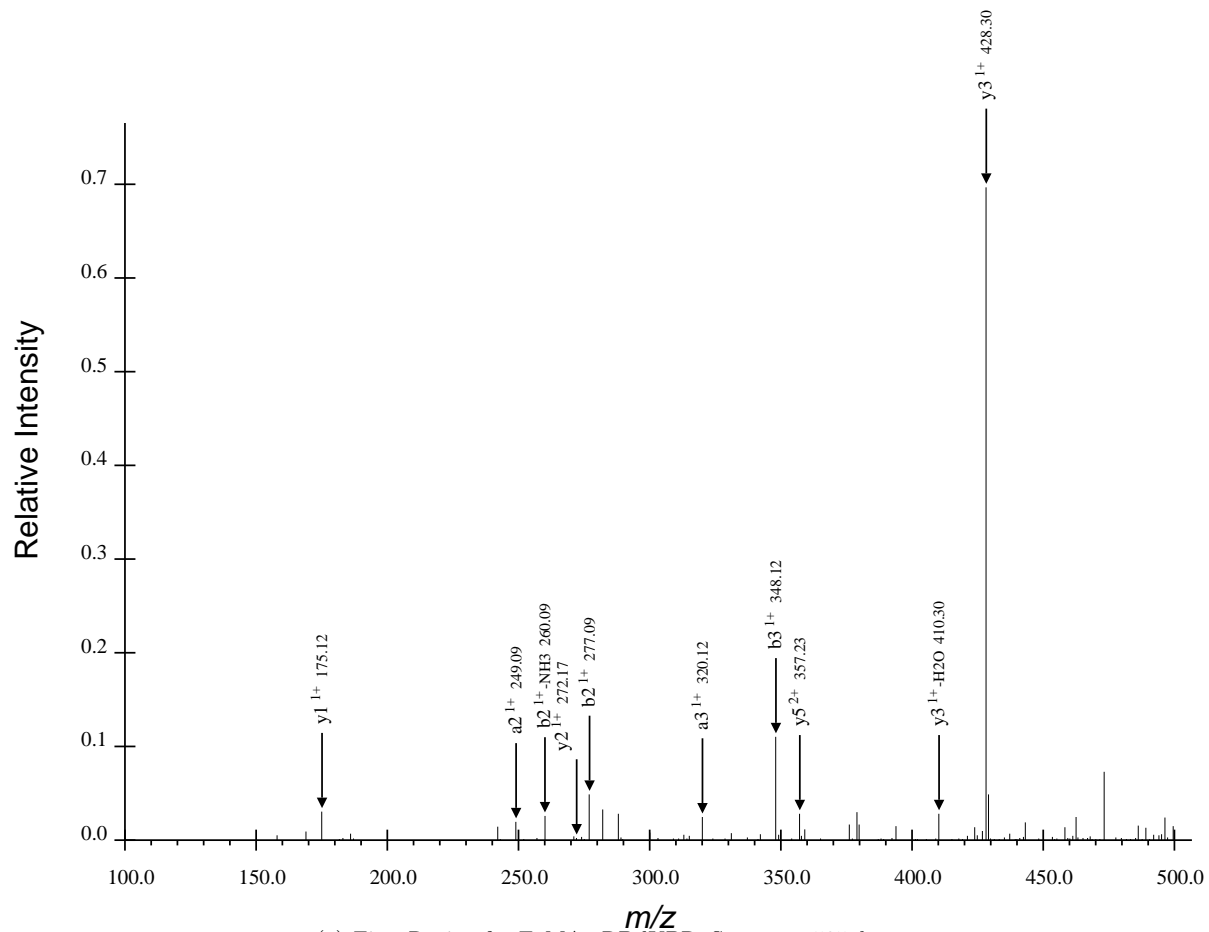

(a) First Region for EoMAmRDdKPR, Spectrum 505.dta

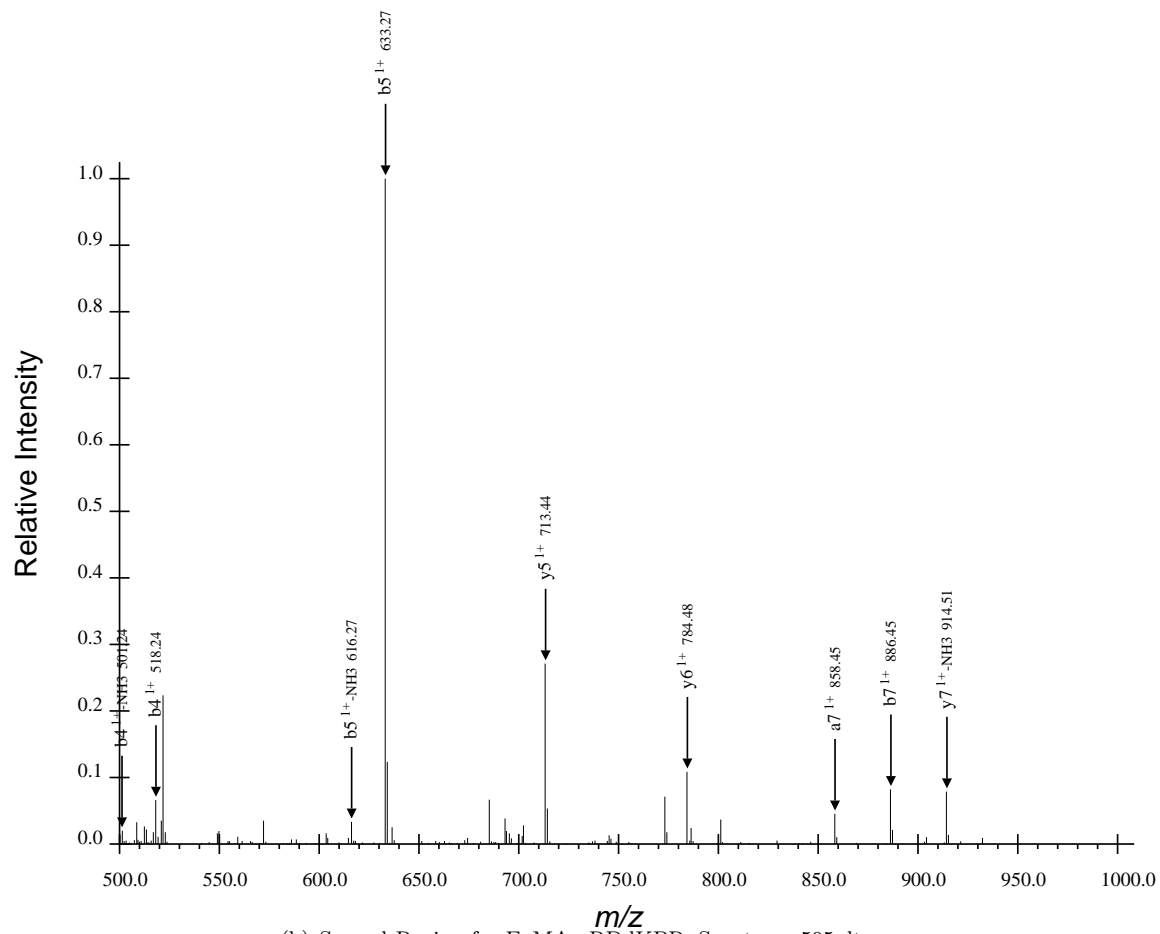

(b) Second Region for EoMAmRDdKPR, Spectrum 505.dta



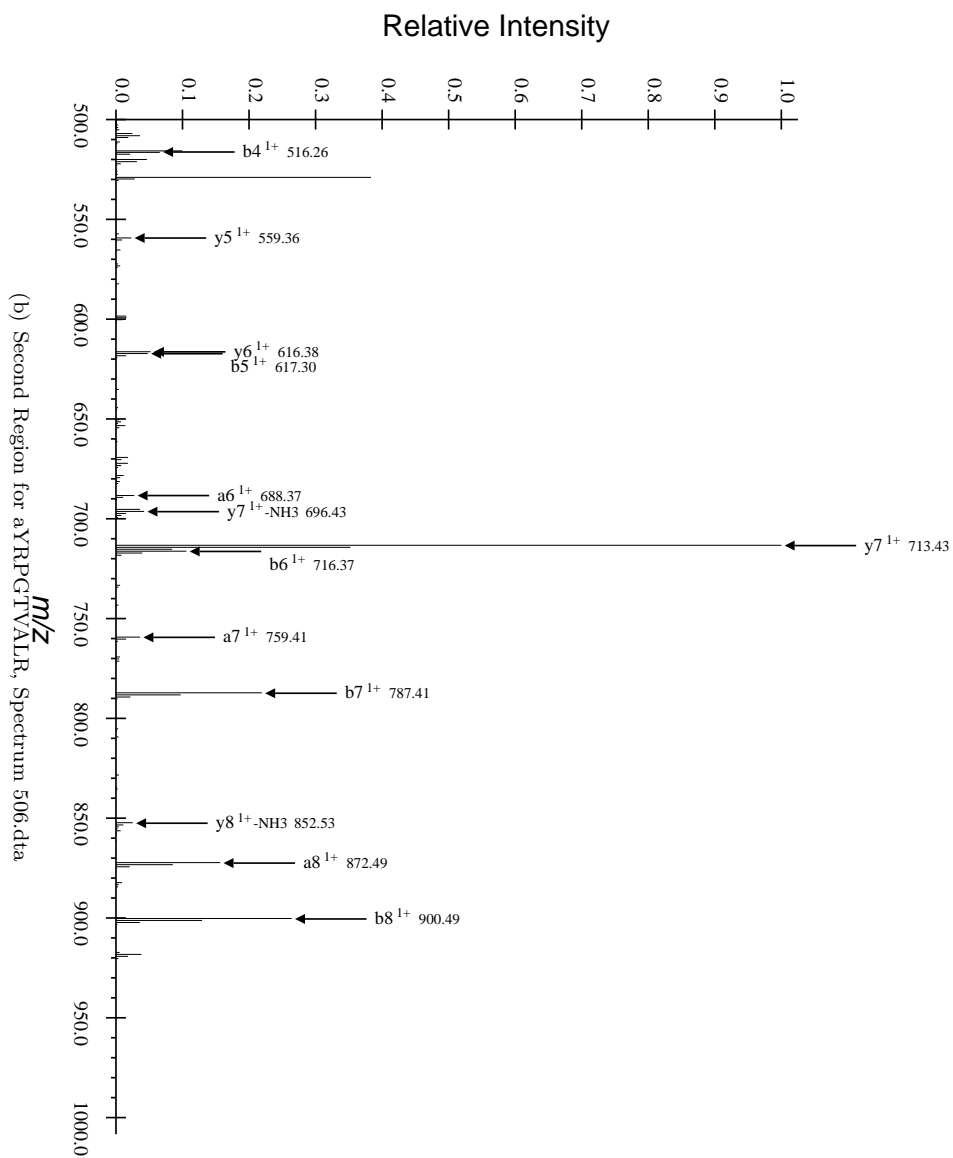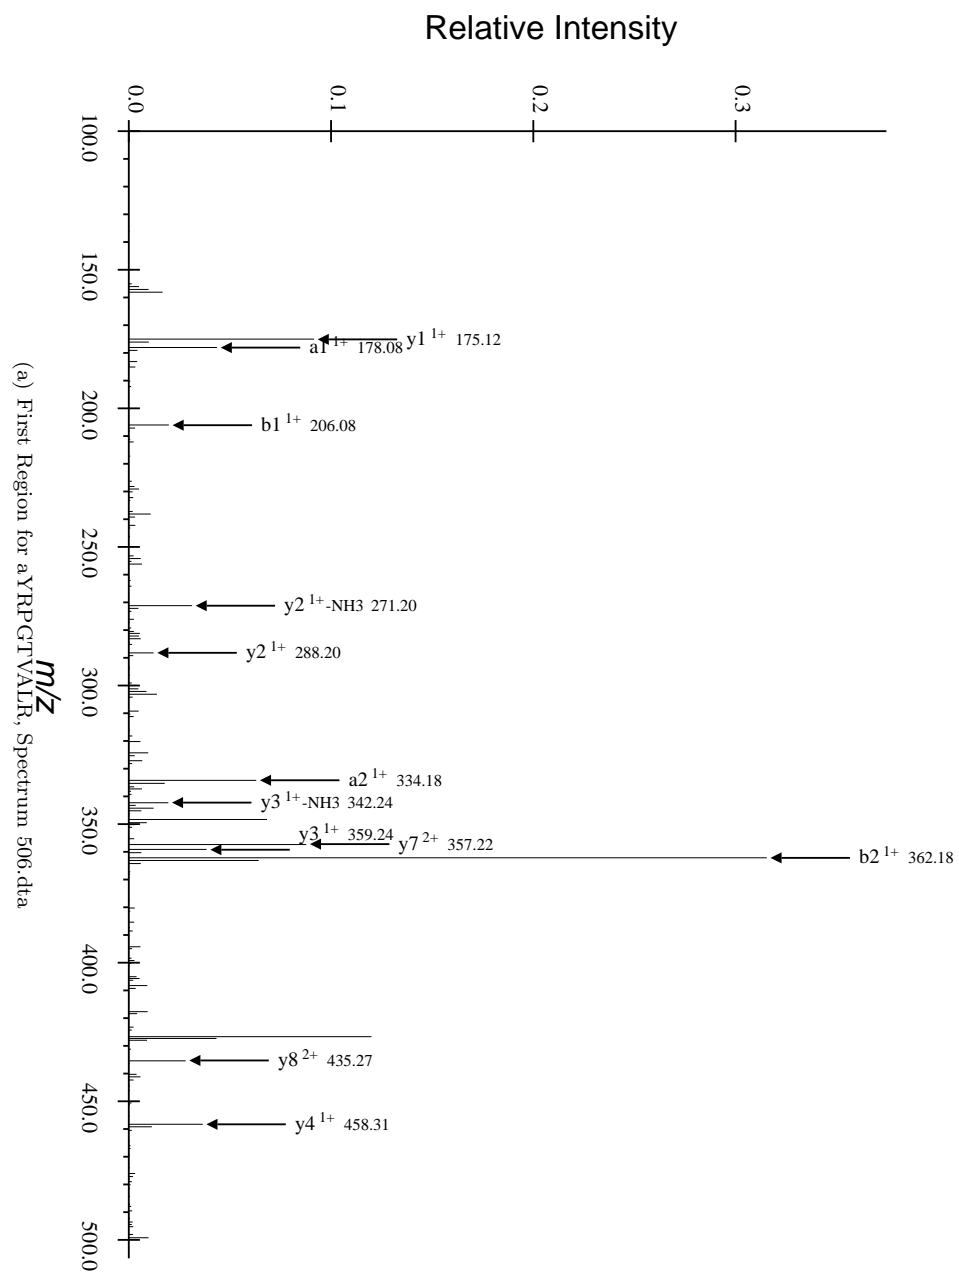

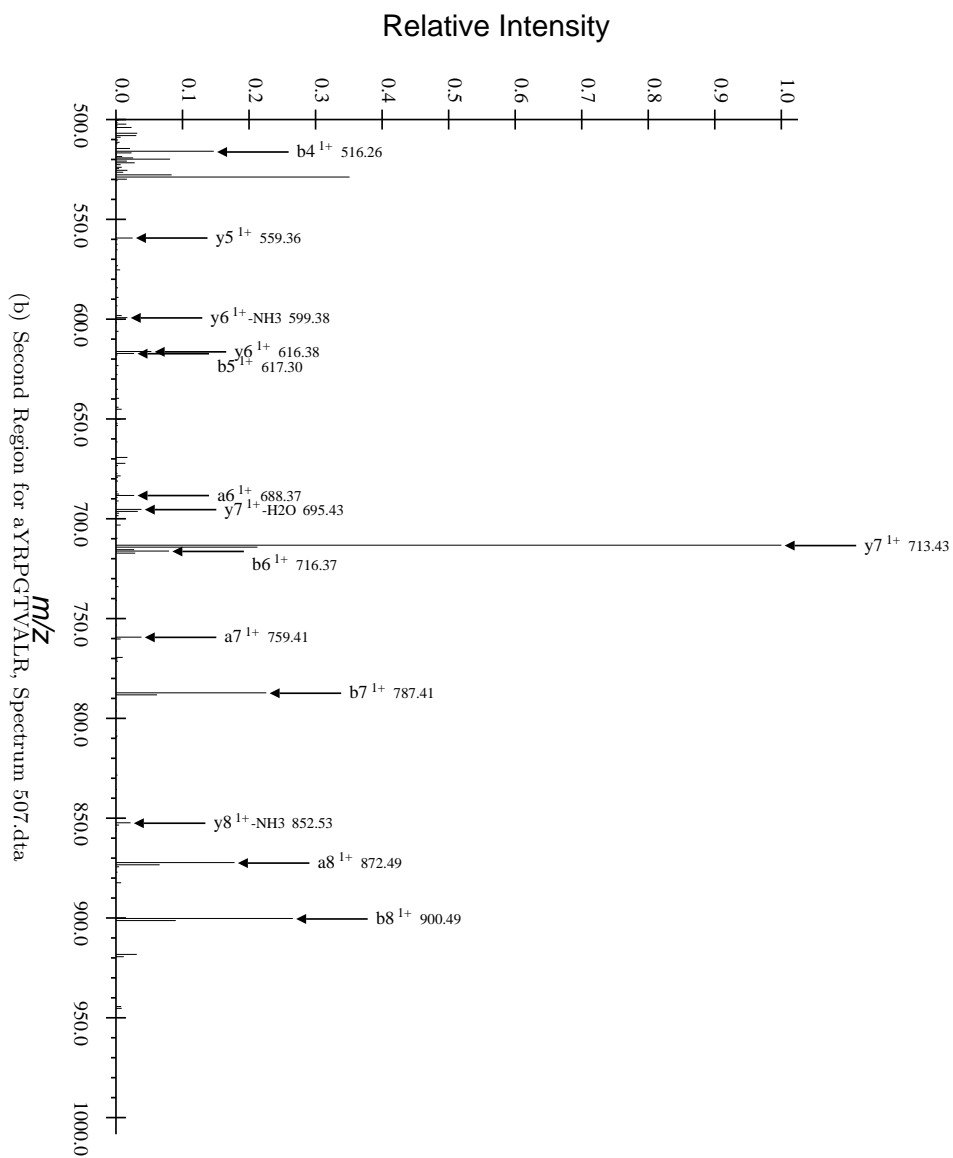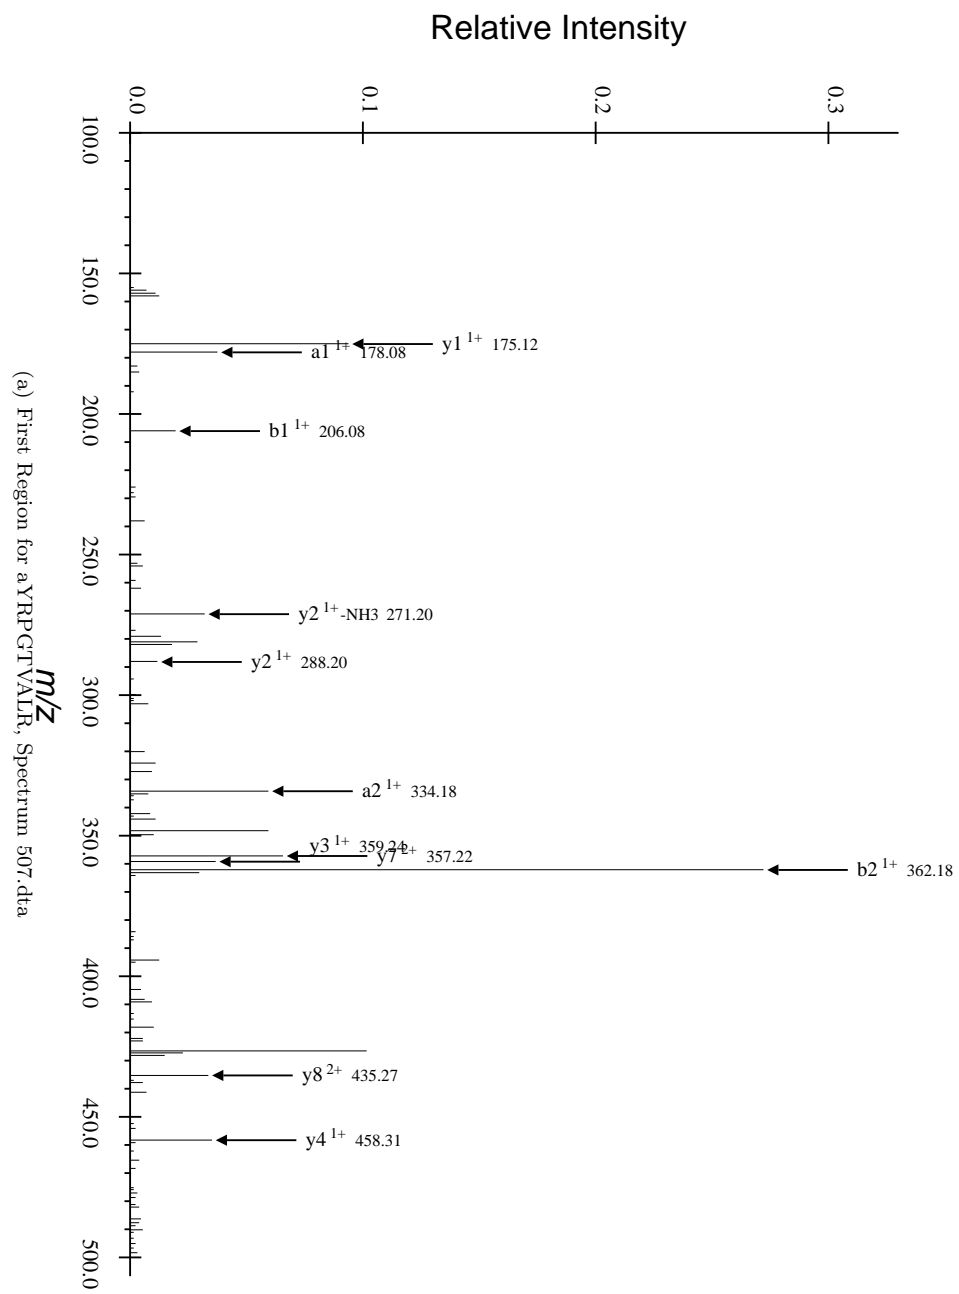

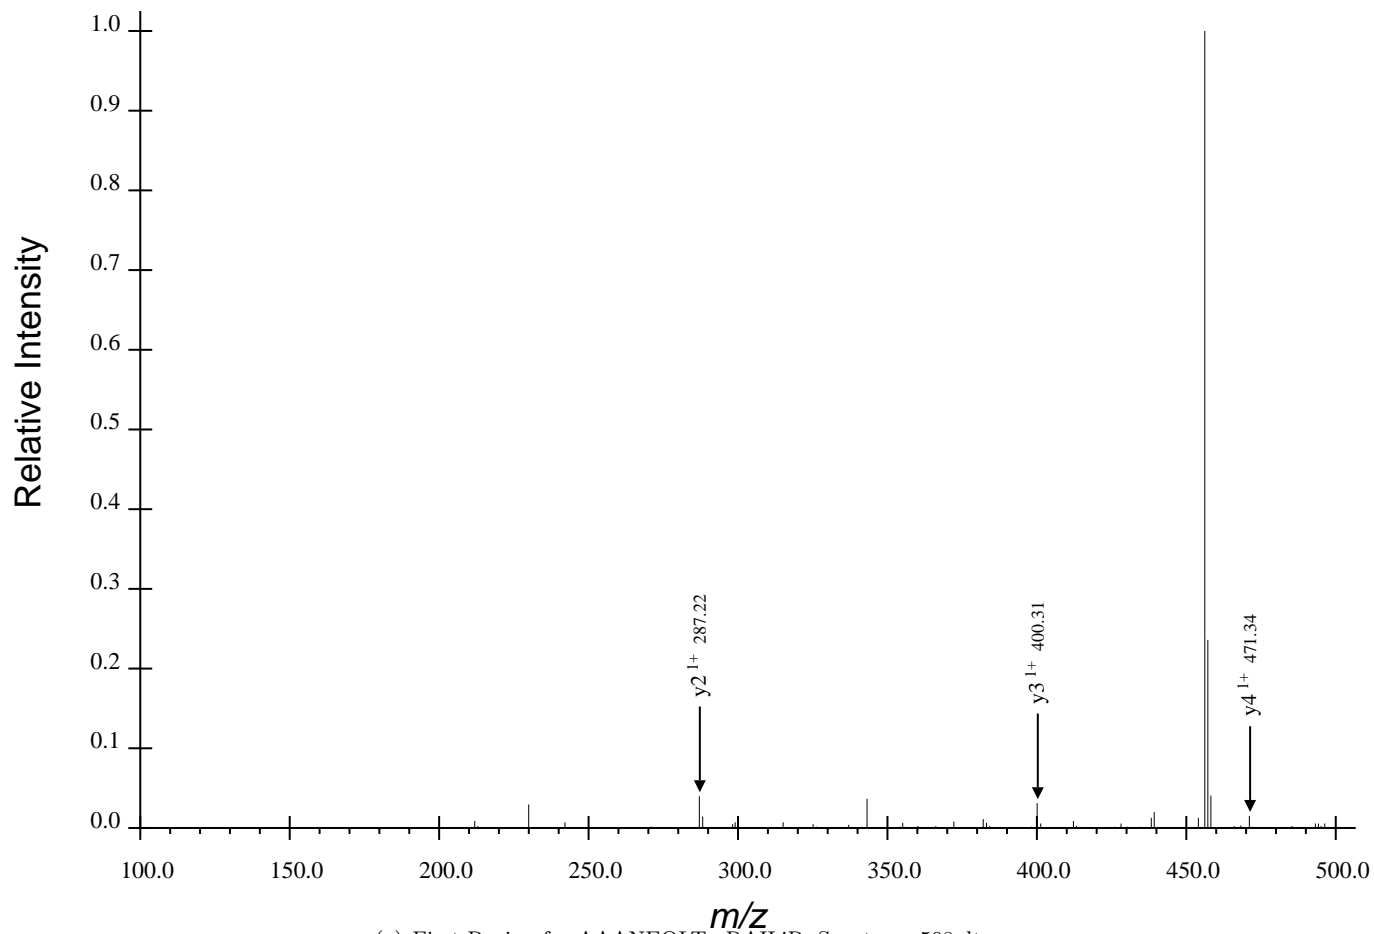

(a) First Region for AAANEQLTmRAILiR, Spectrum 508.dta

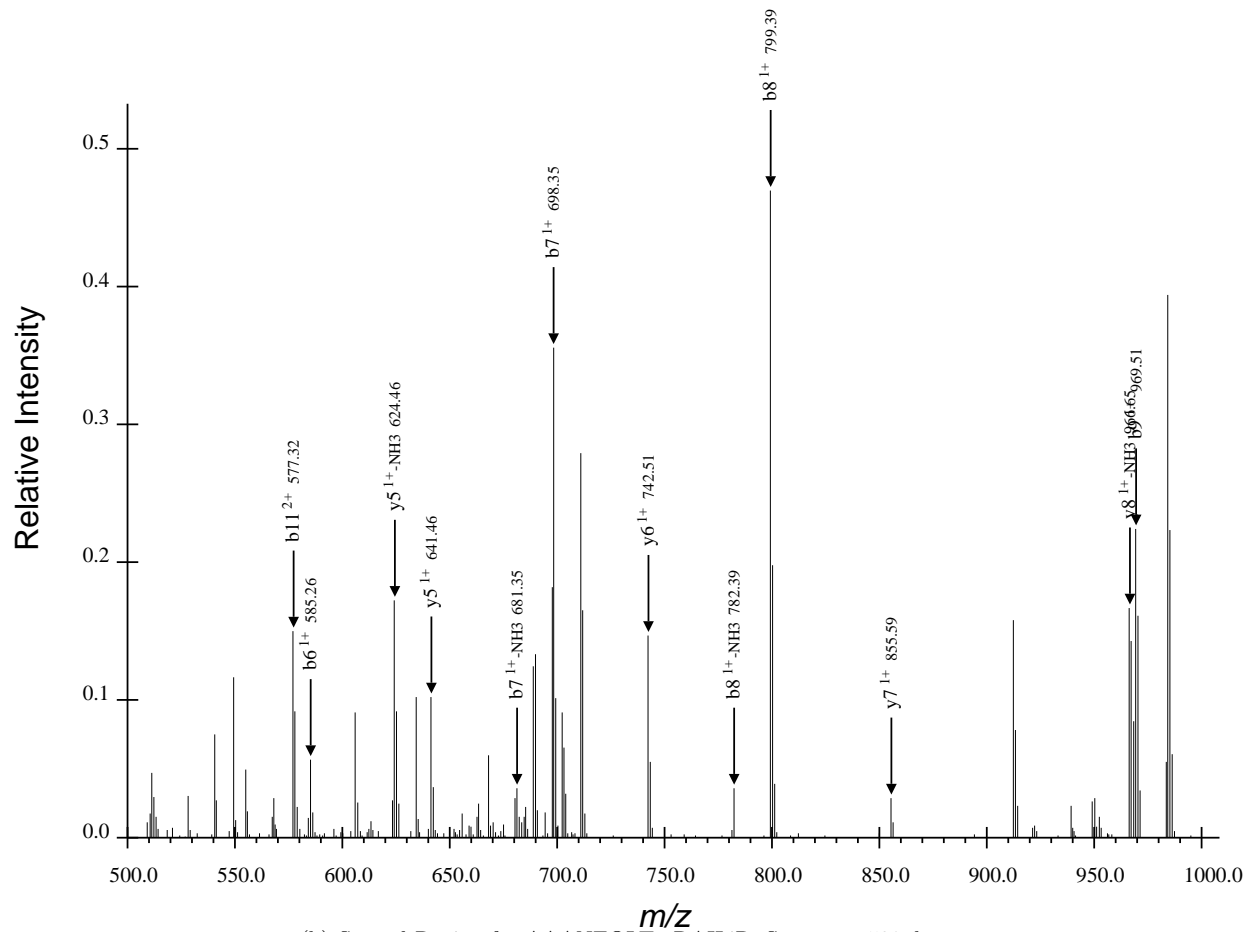

(b) Second Region for AAANEQLTmRAILiR, Spectrum 508.dta

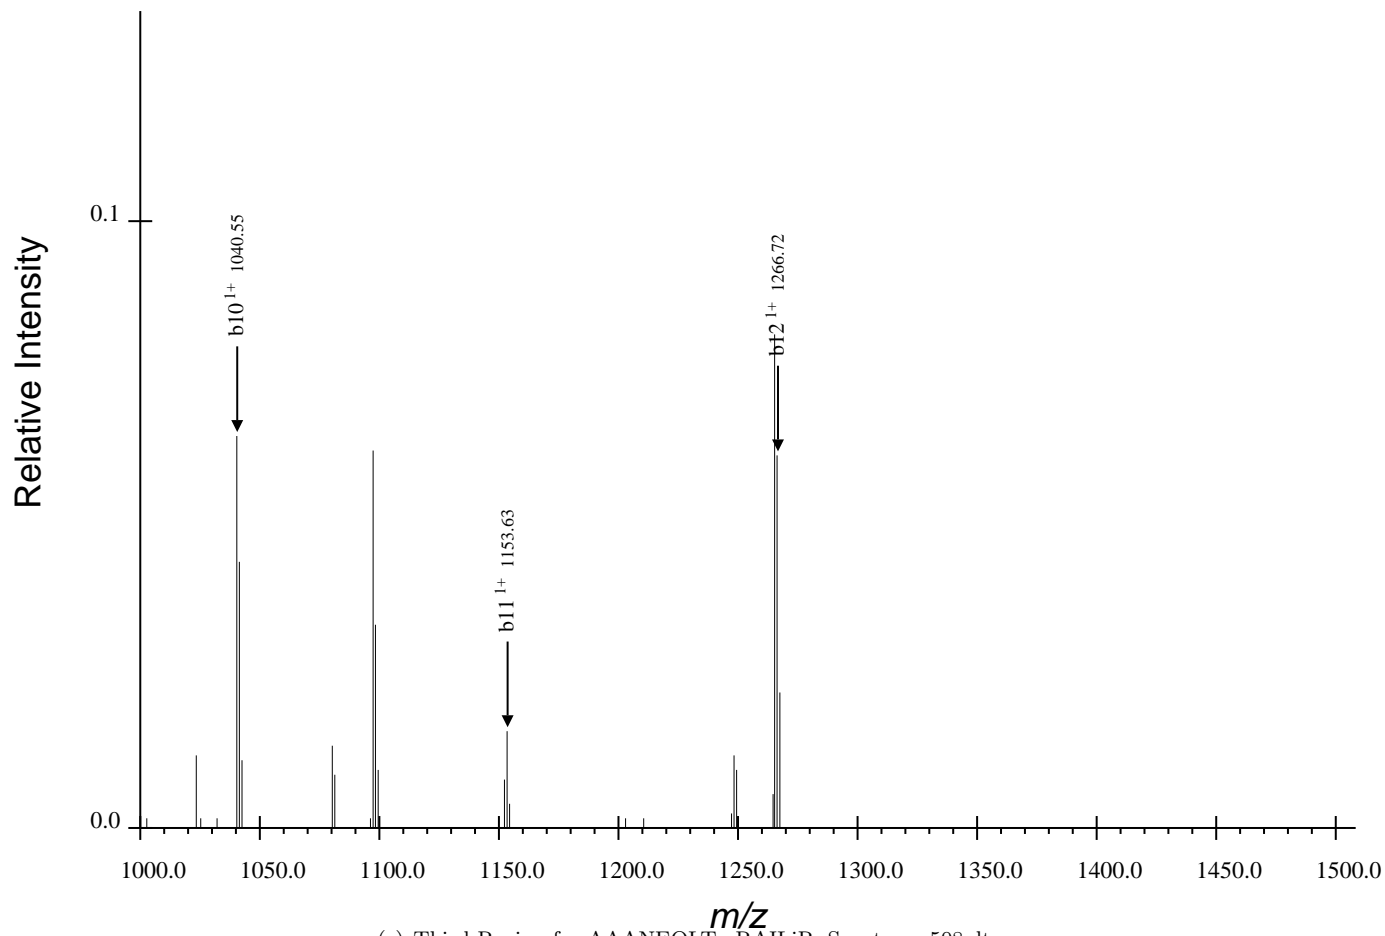

(c) Third Region for AAANEQLTmRAILiR, Spectrum 508.dta

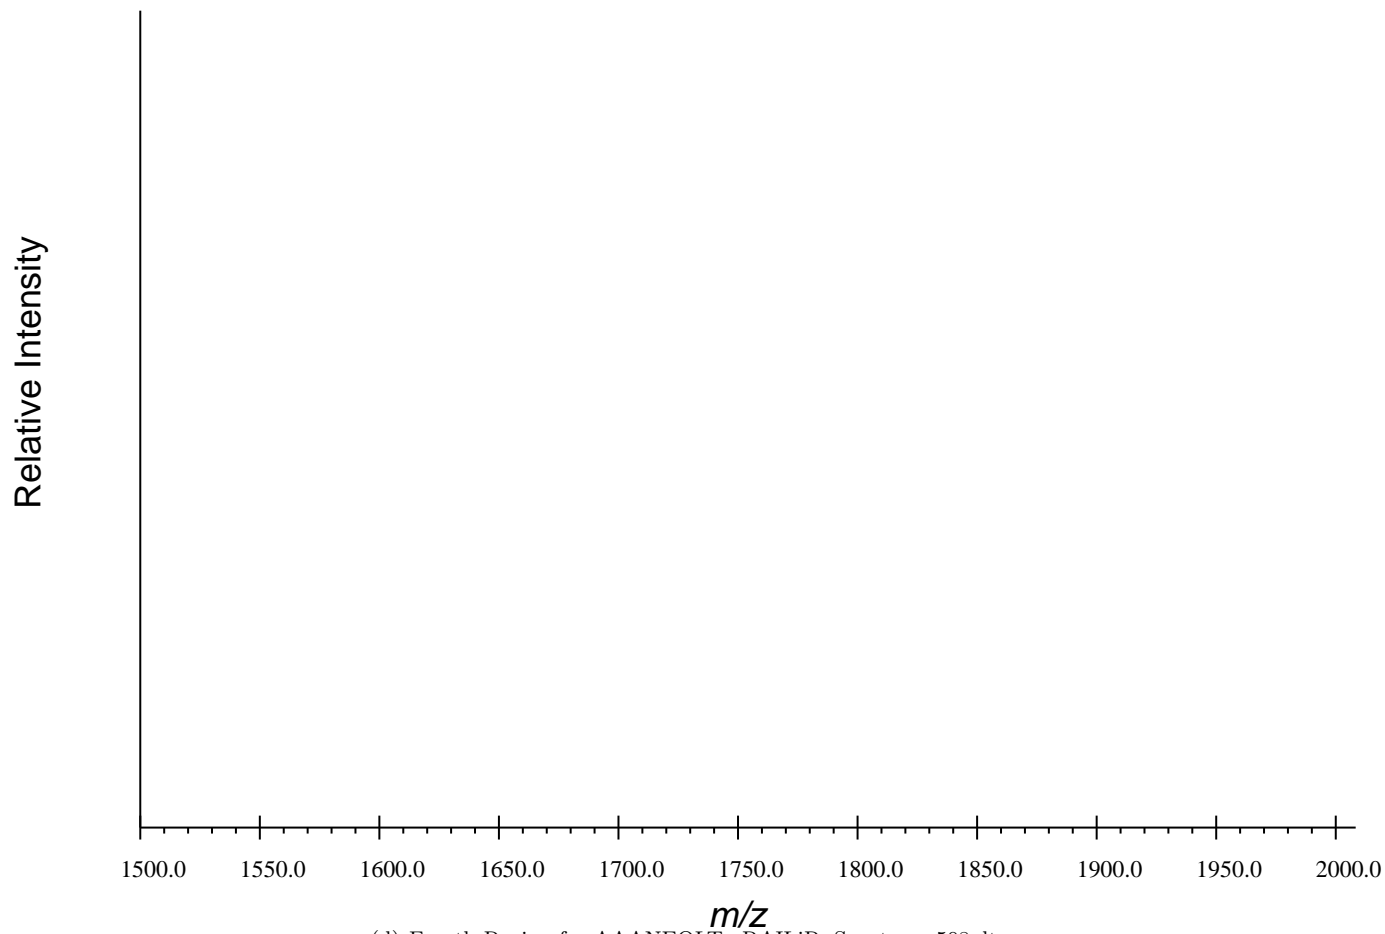

(d) Fourth Region for AAANEQLTmRAILiR, Spectrum 508.dta

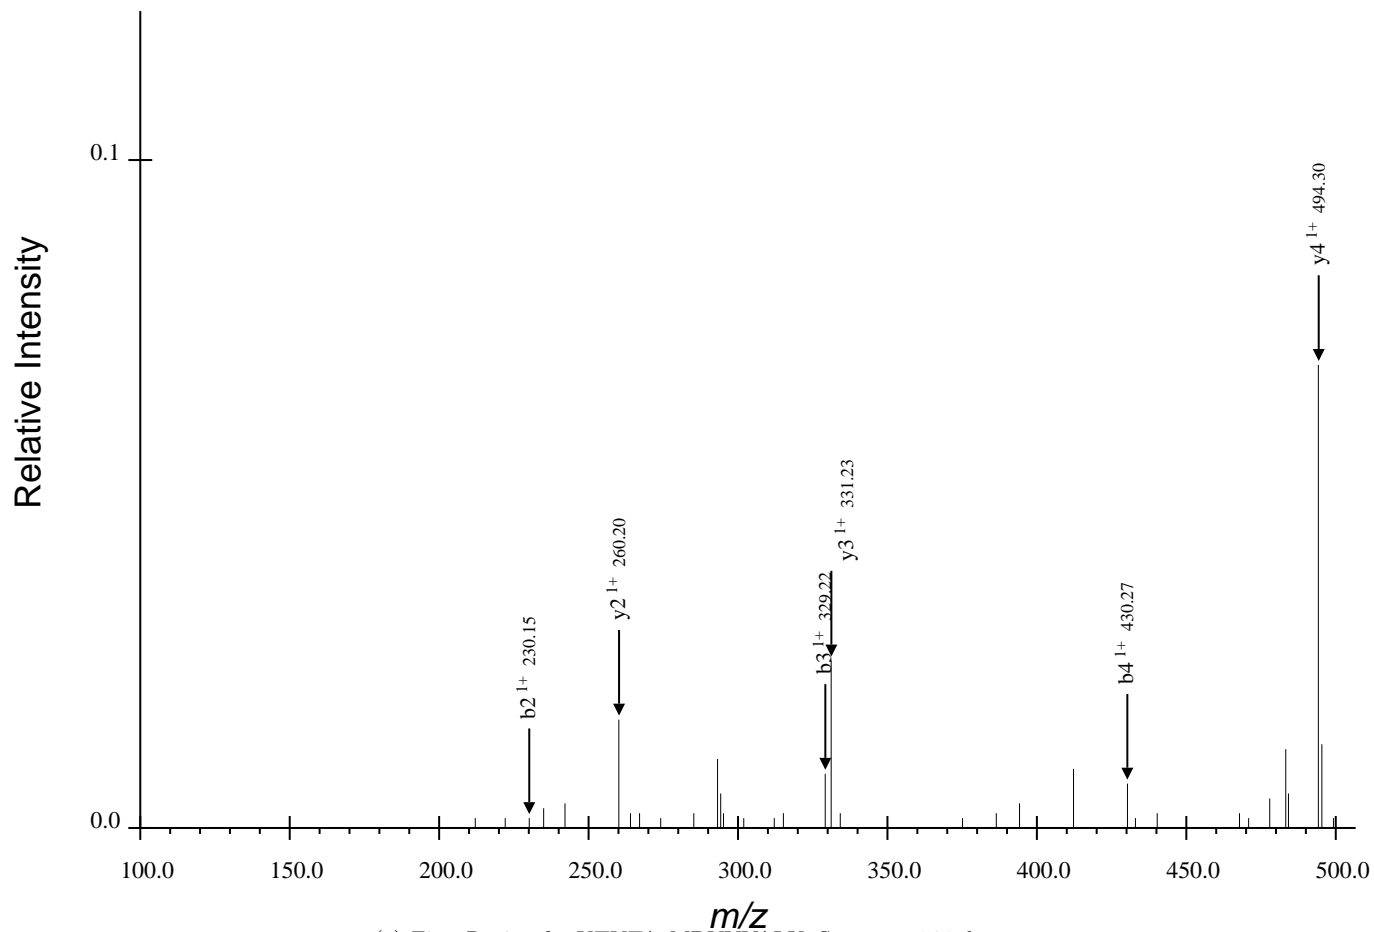

(a) First Region for KTVTAAoMDVVYALK, Spectrum 509.dta

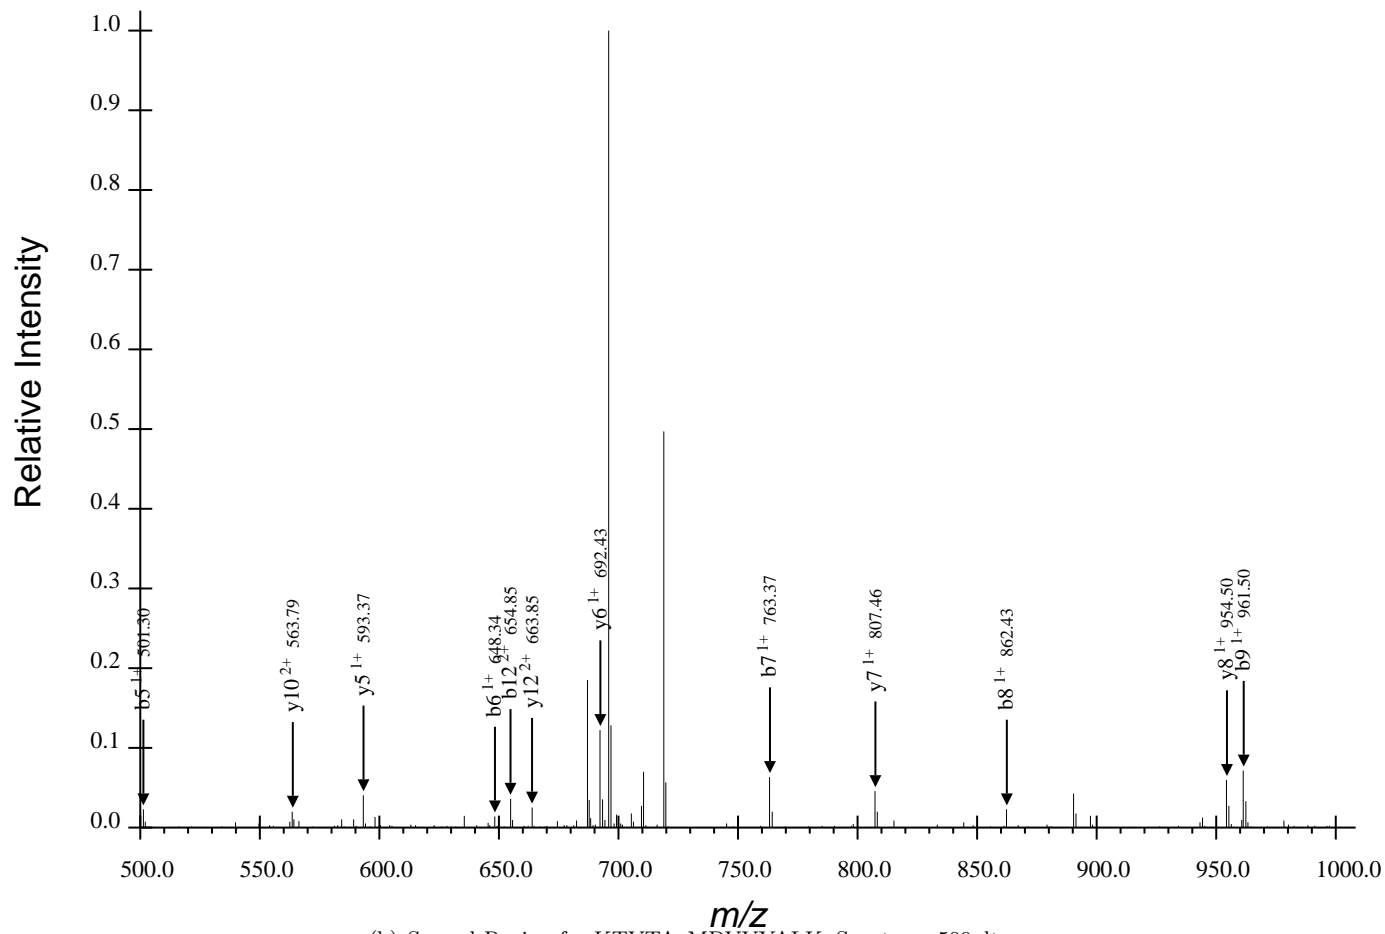

(b) Second Region for KTVTAAoMDVVYALK, Spectrum 509.dta

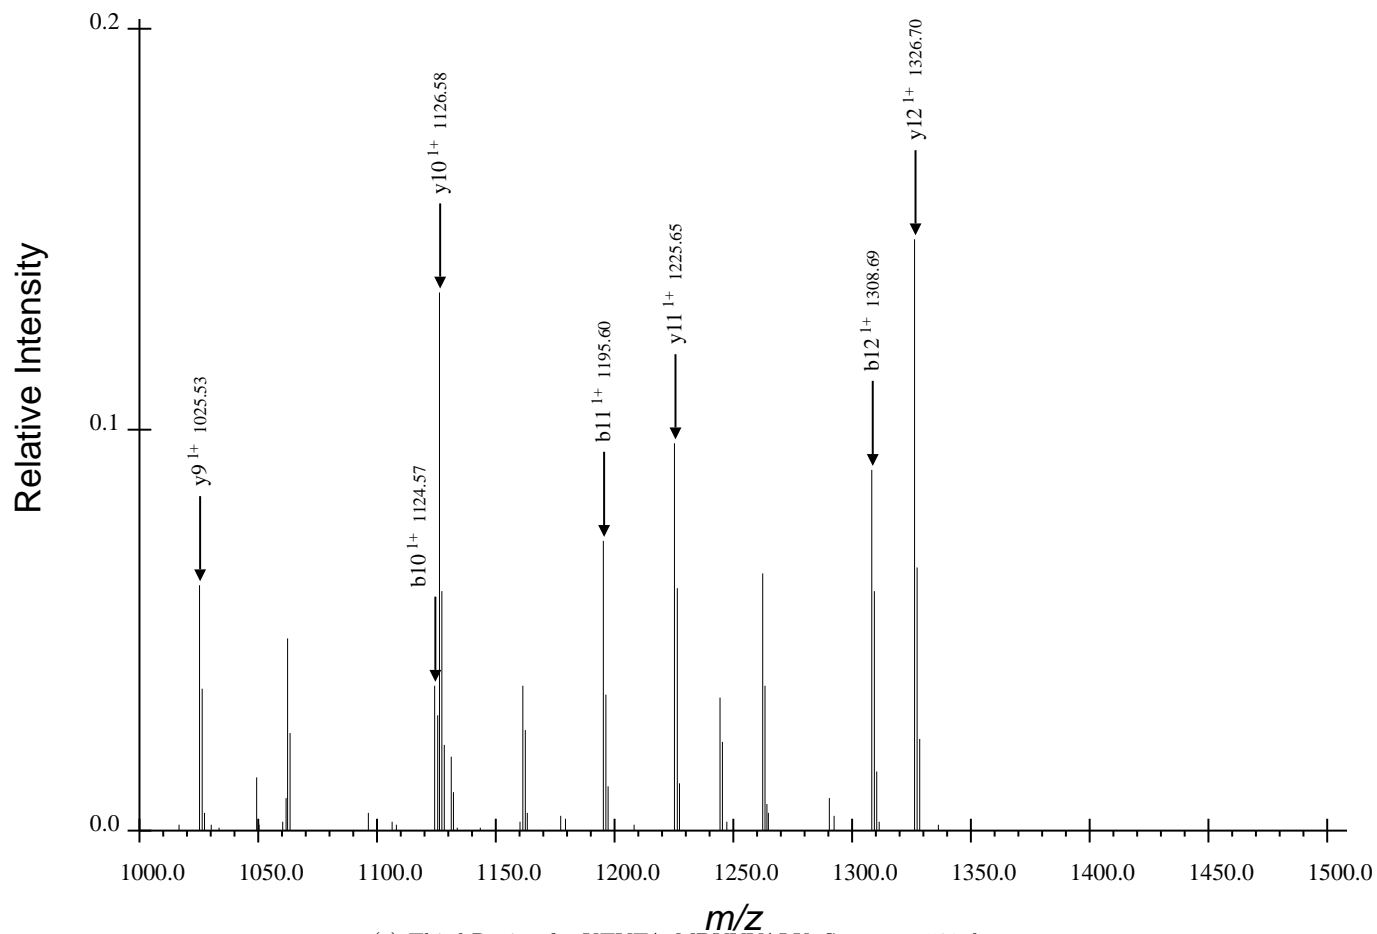

(c) Third Region for KTVTAAoMDVVYALK, Spectrum 509.dta

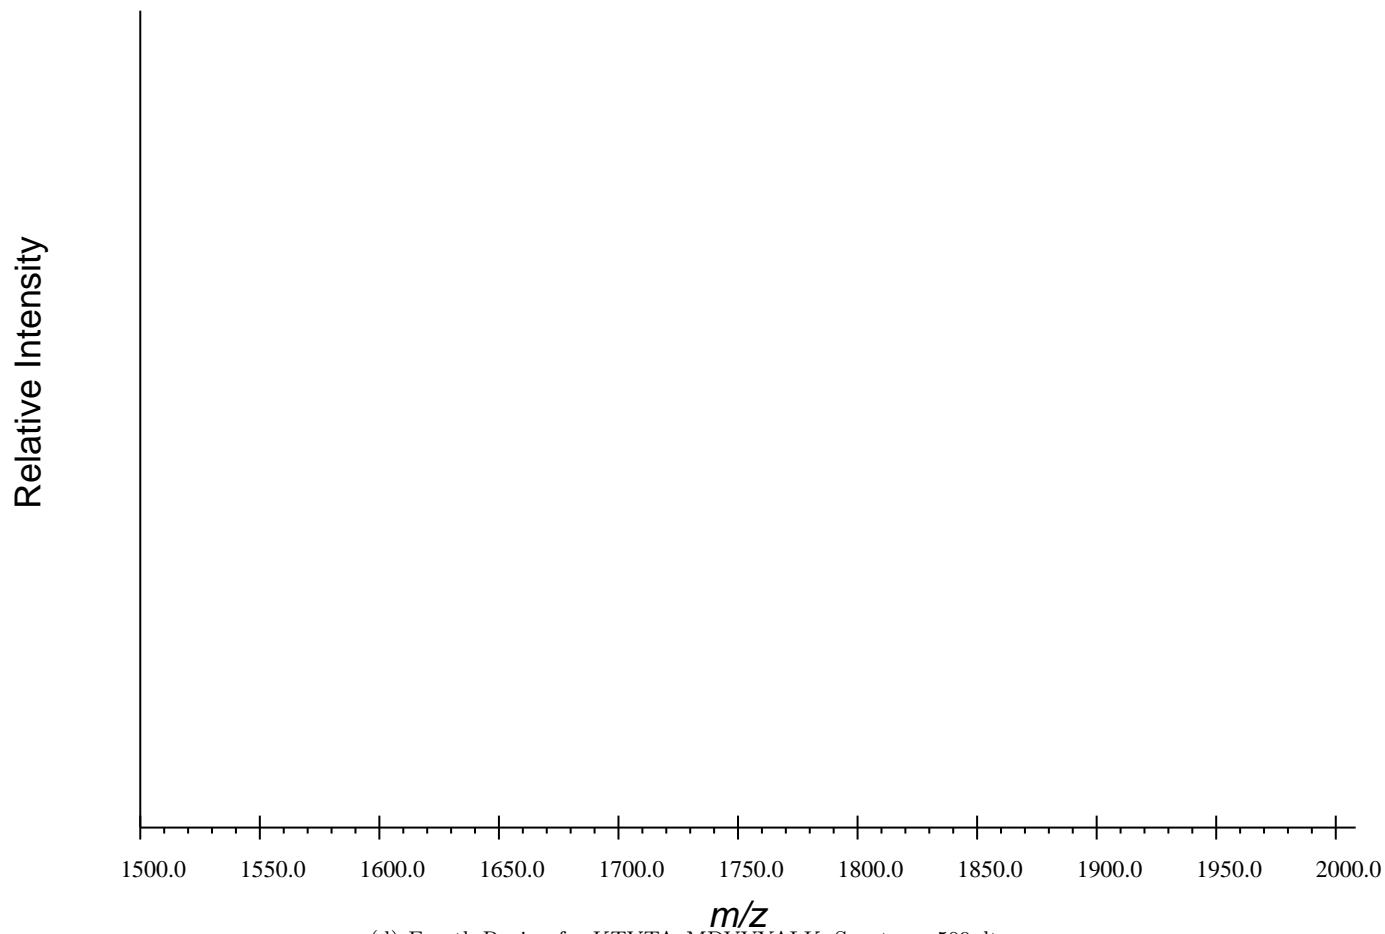

(d) Fourth Region for KTVTAAoMDVVYALK, Spectrum 509.dta

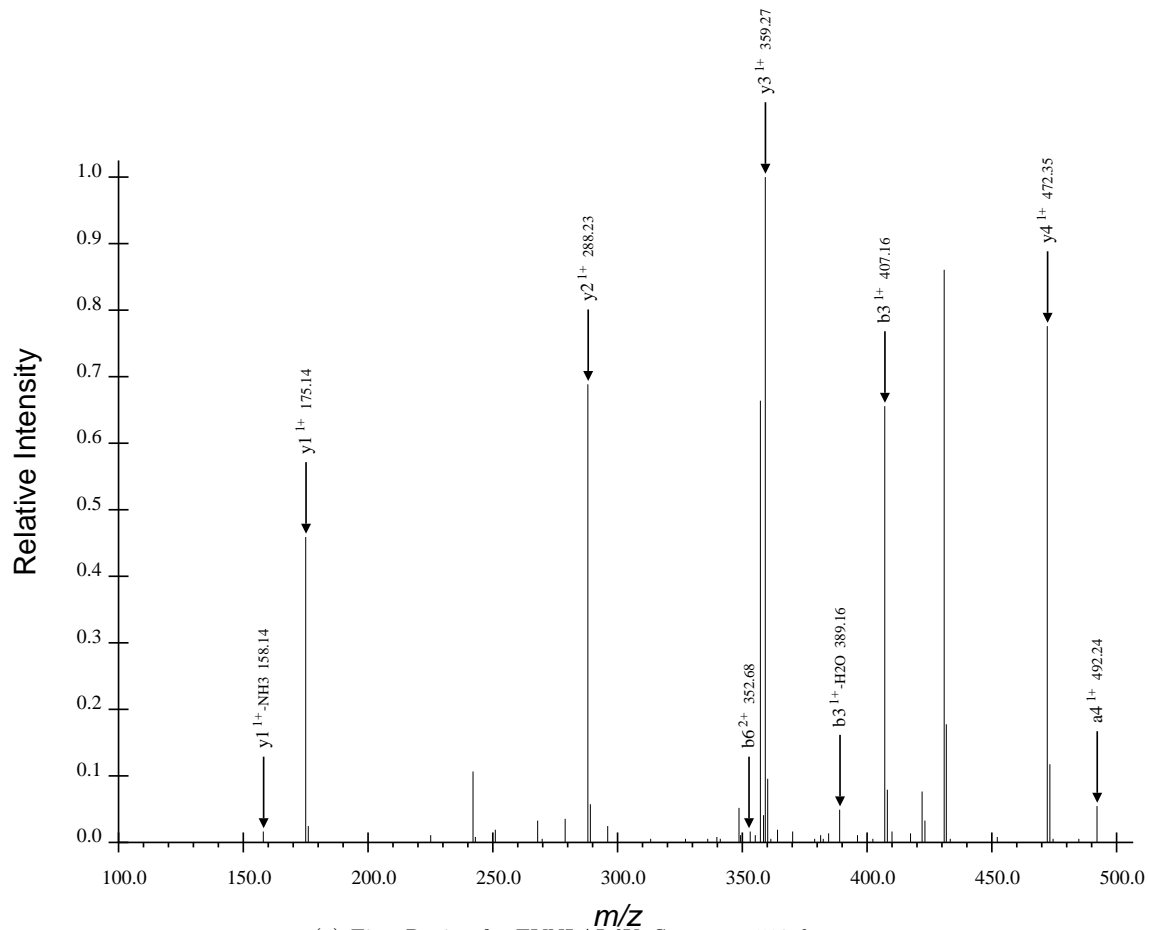

(a) First Region for EYNLALdK, Spectrum 510.dta

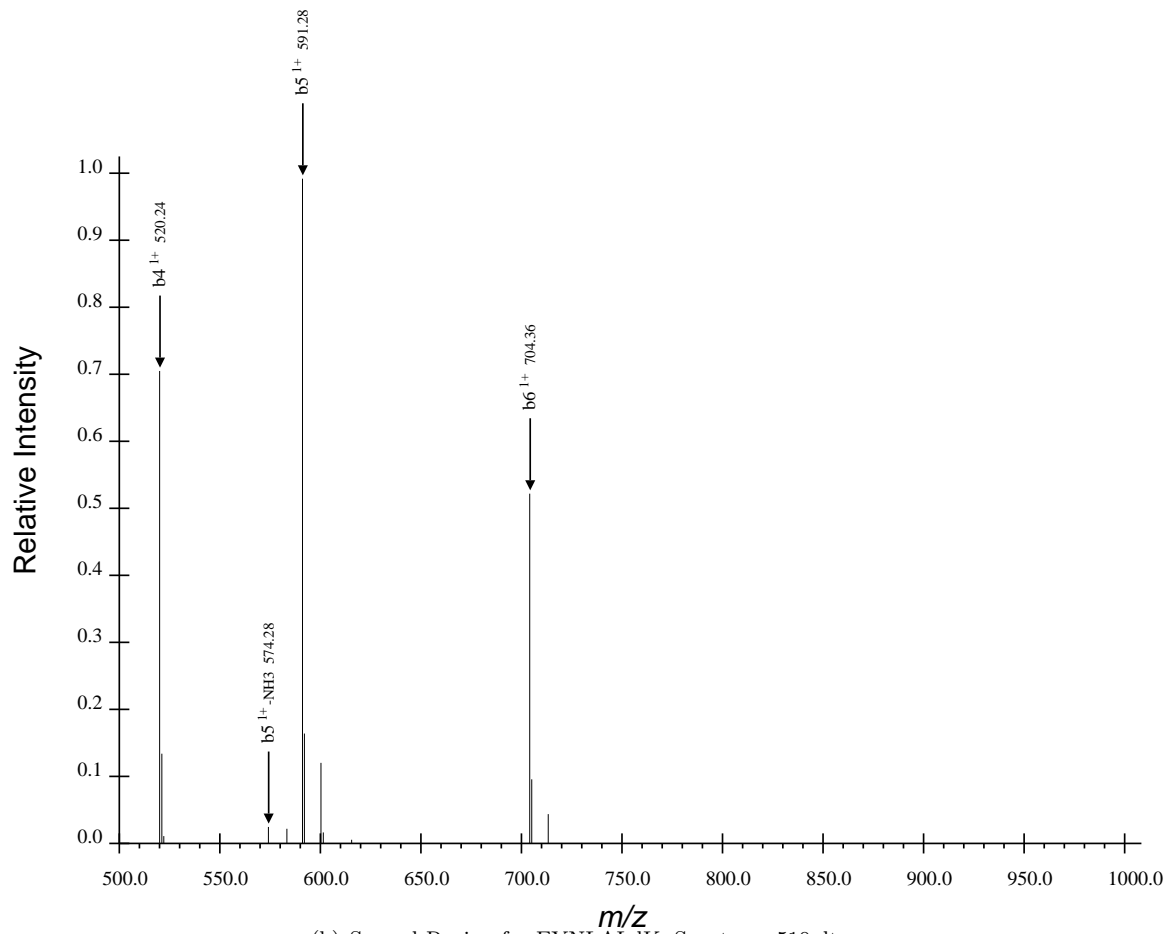

(b) Second Region for EYNLALdK, Spectrum 510.dta

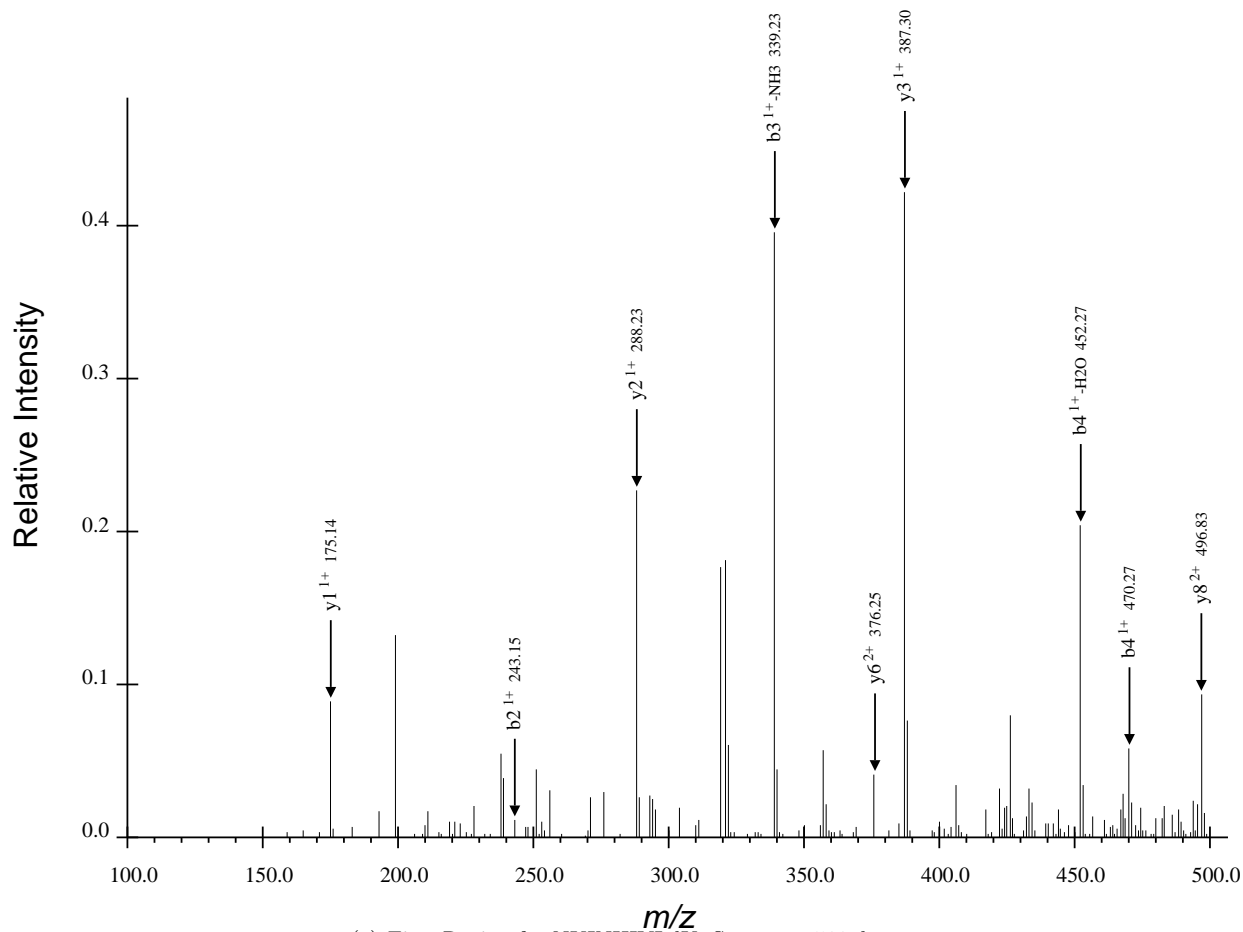

(a) First Region for NKINHIVLdK, Spectrum 511.dta

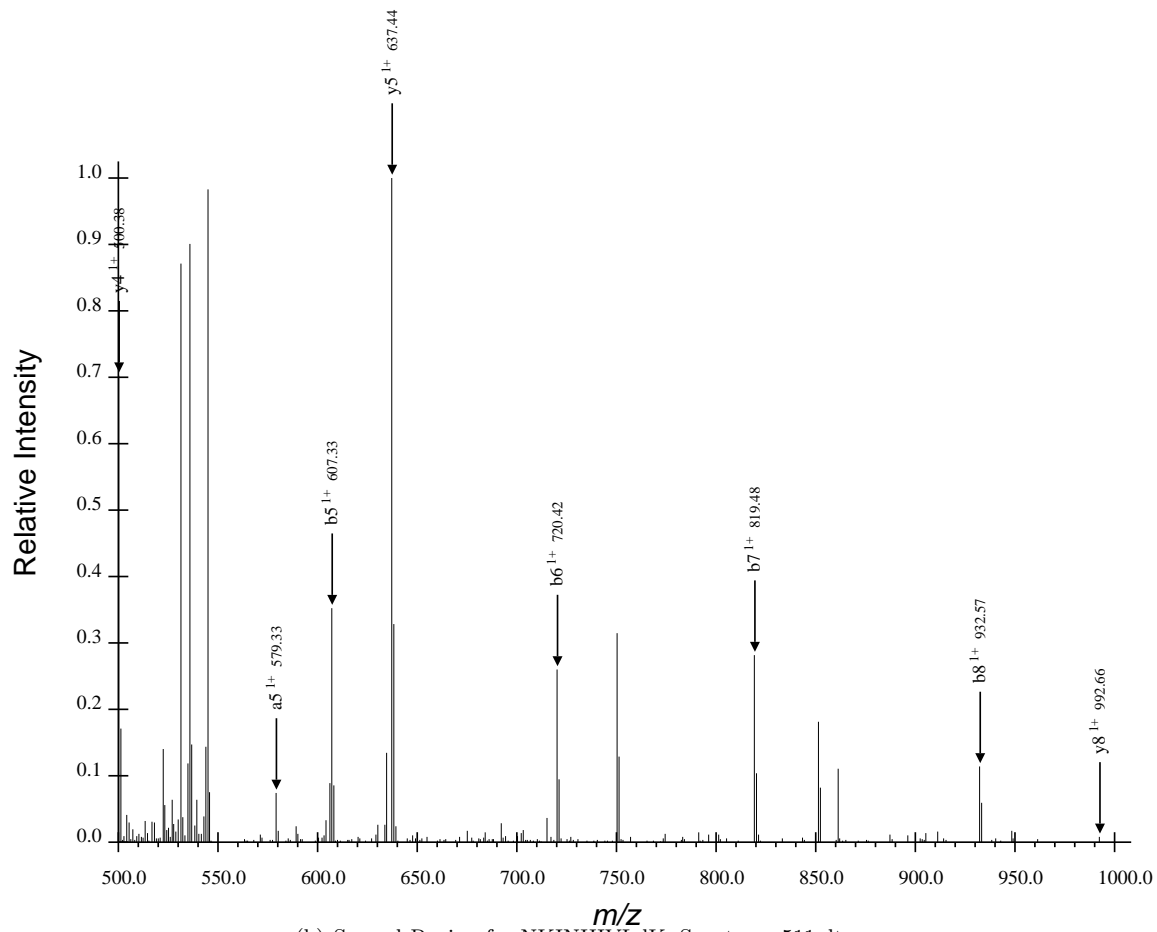

(b) Second Region for NKINHIVLdK, Spectrum 511.dta



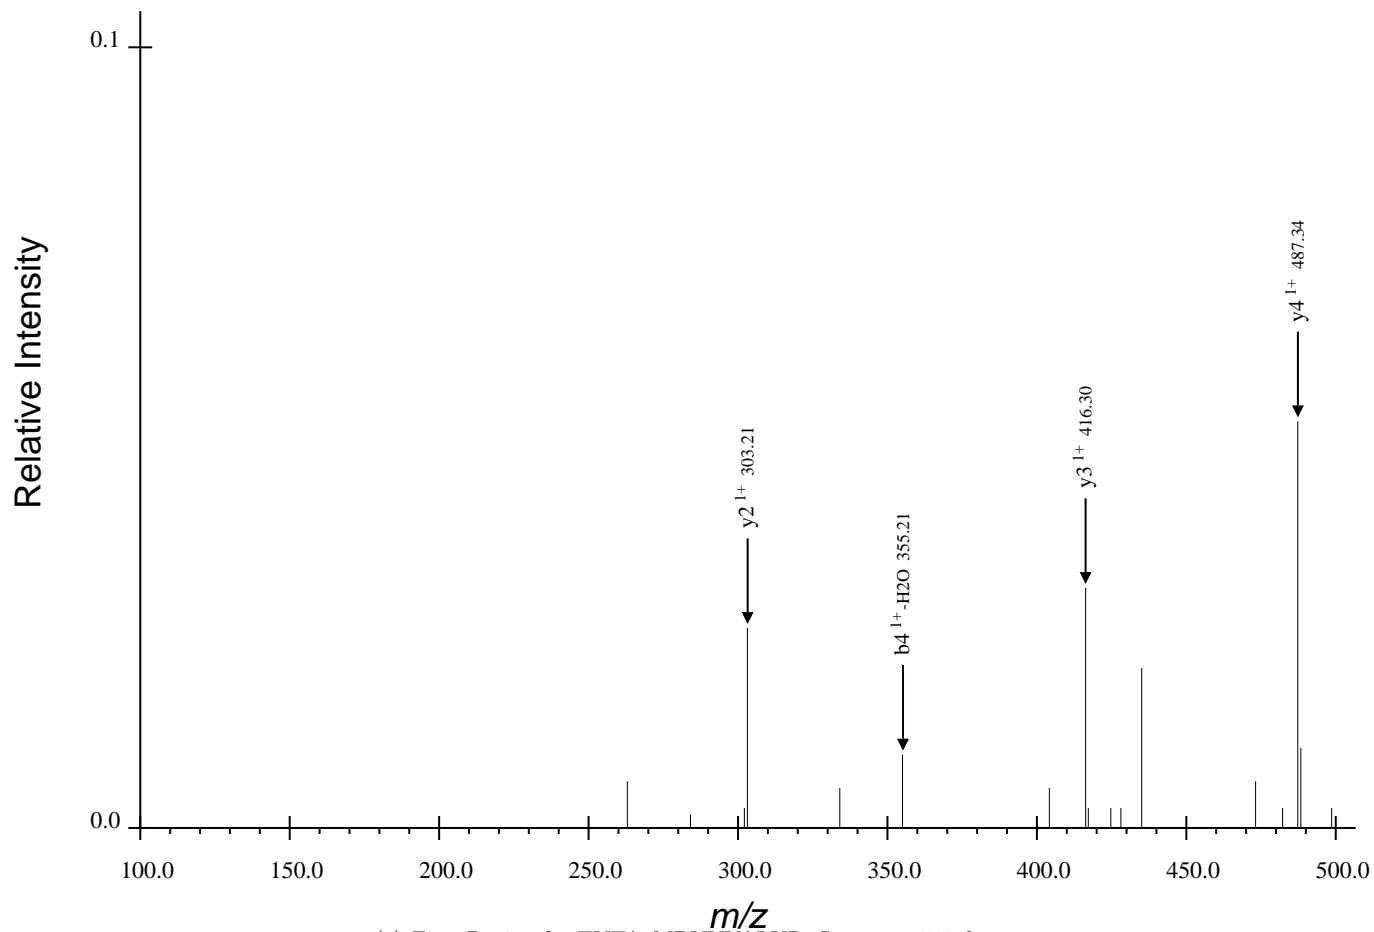

(a) First Region for TVTAoMDVVYALKR, Spectrum 512.dta

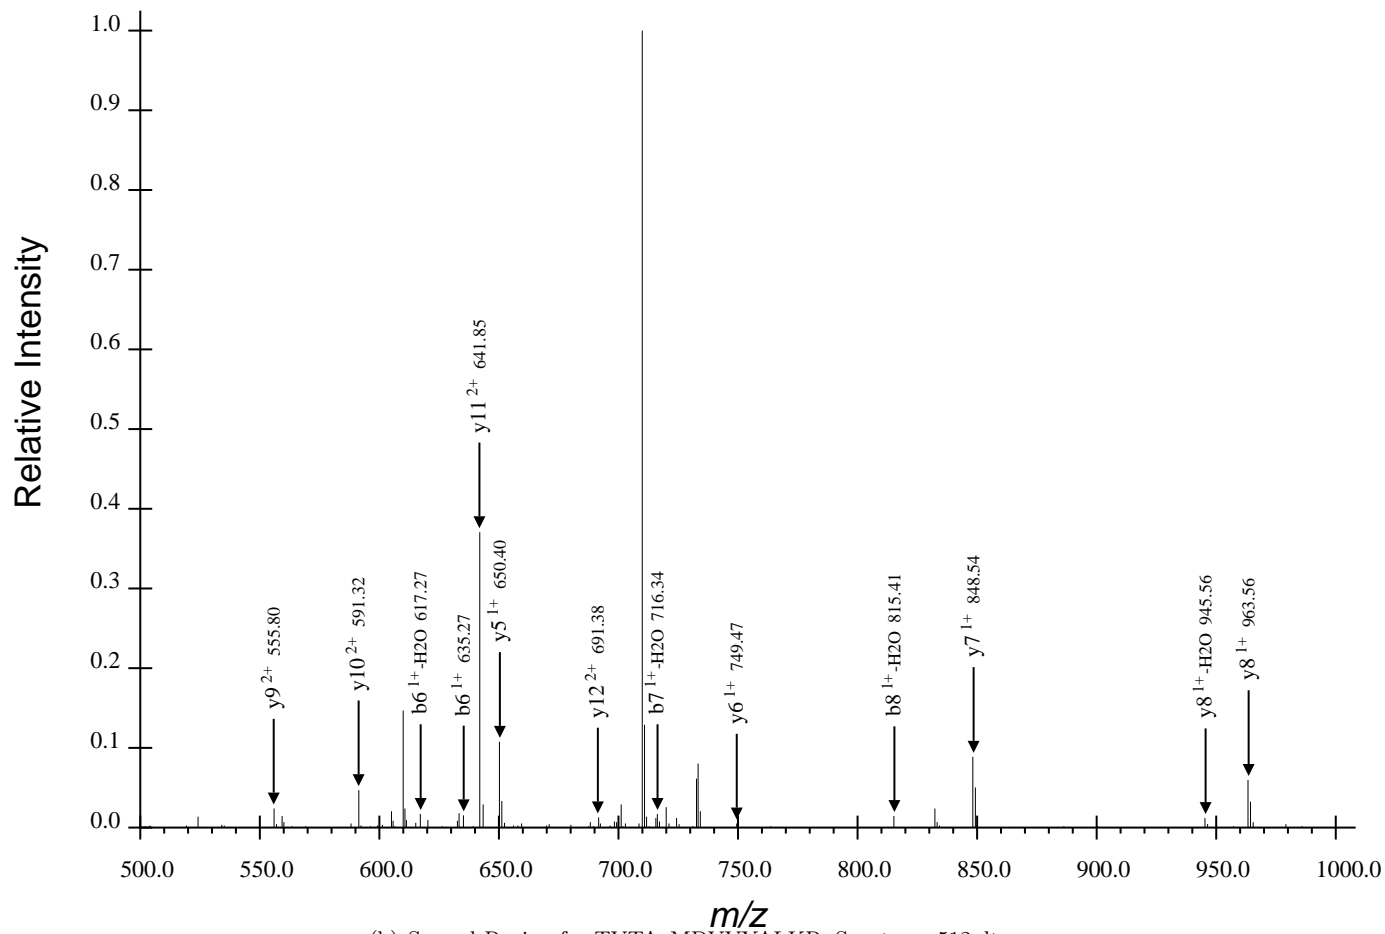

(b) Second Region for TVTAoMDVVYALKR, Spectrum 512.dta

Relative Intensity

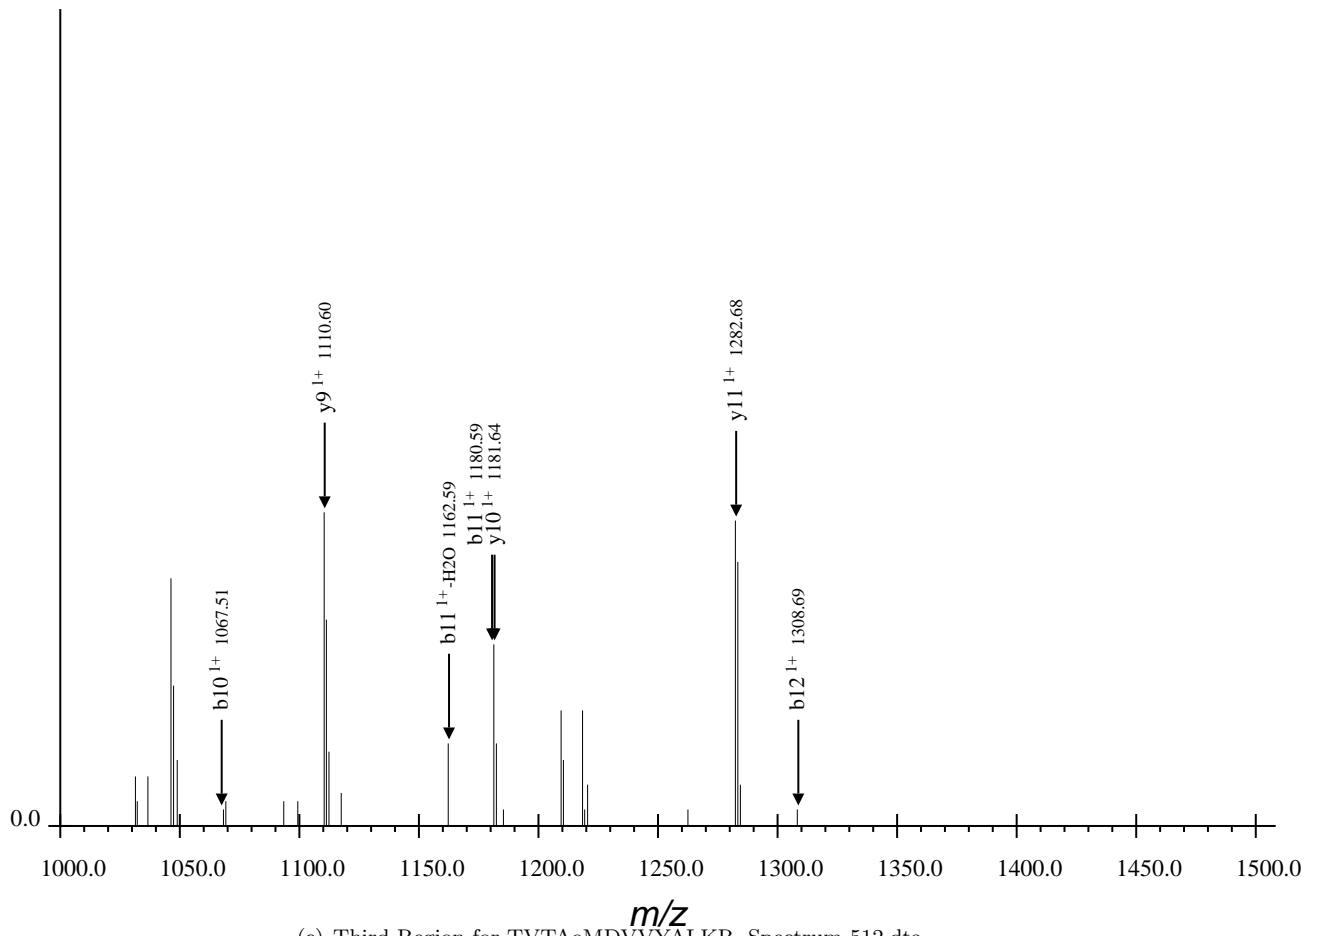

(c) Third Region for TVTAoMDVVYALKR, Spectrum 512.dta

Relative Intensity

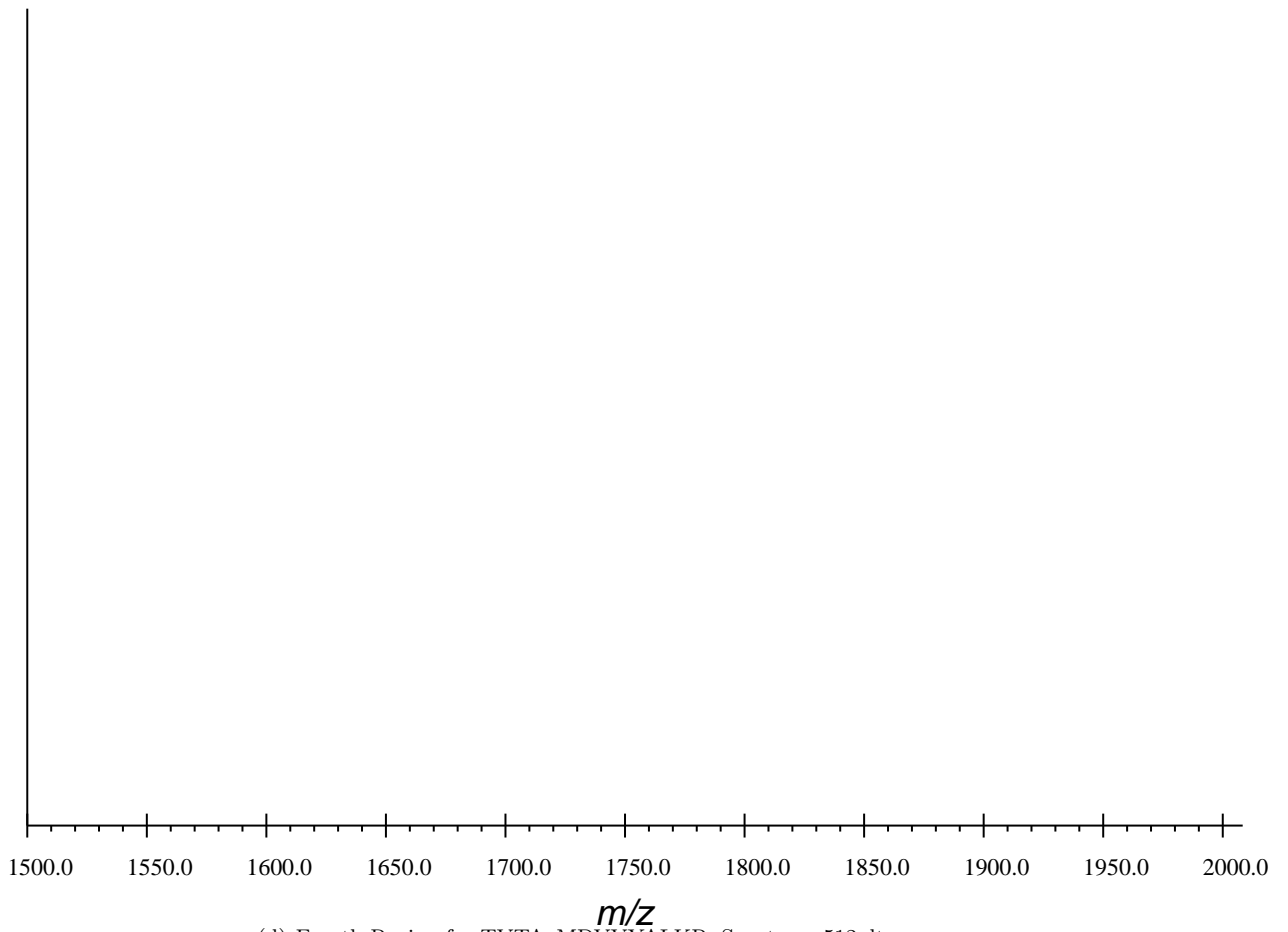

(d) Fourth Region for TVTAoMDVVYALKR, Spectrum 512.dta

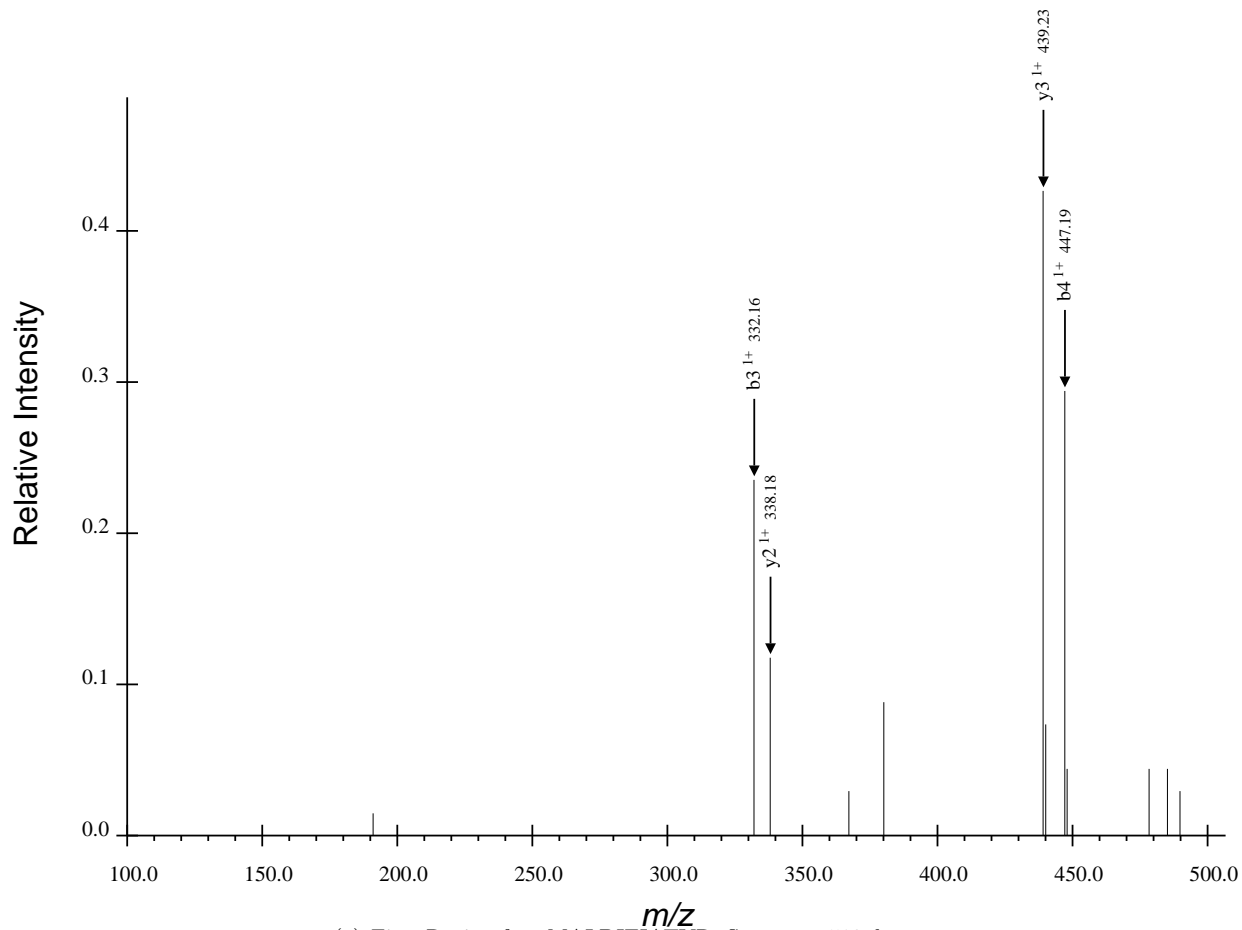

(a) First Region for oMALDIEIATYR, Spectrum 513.dta

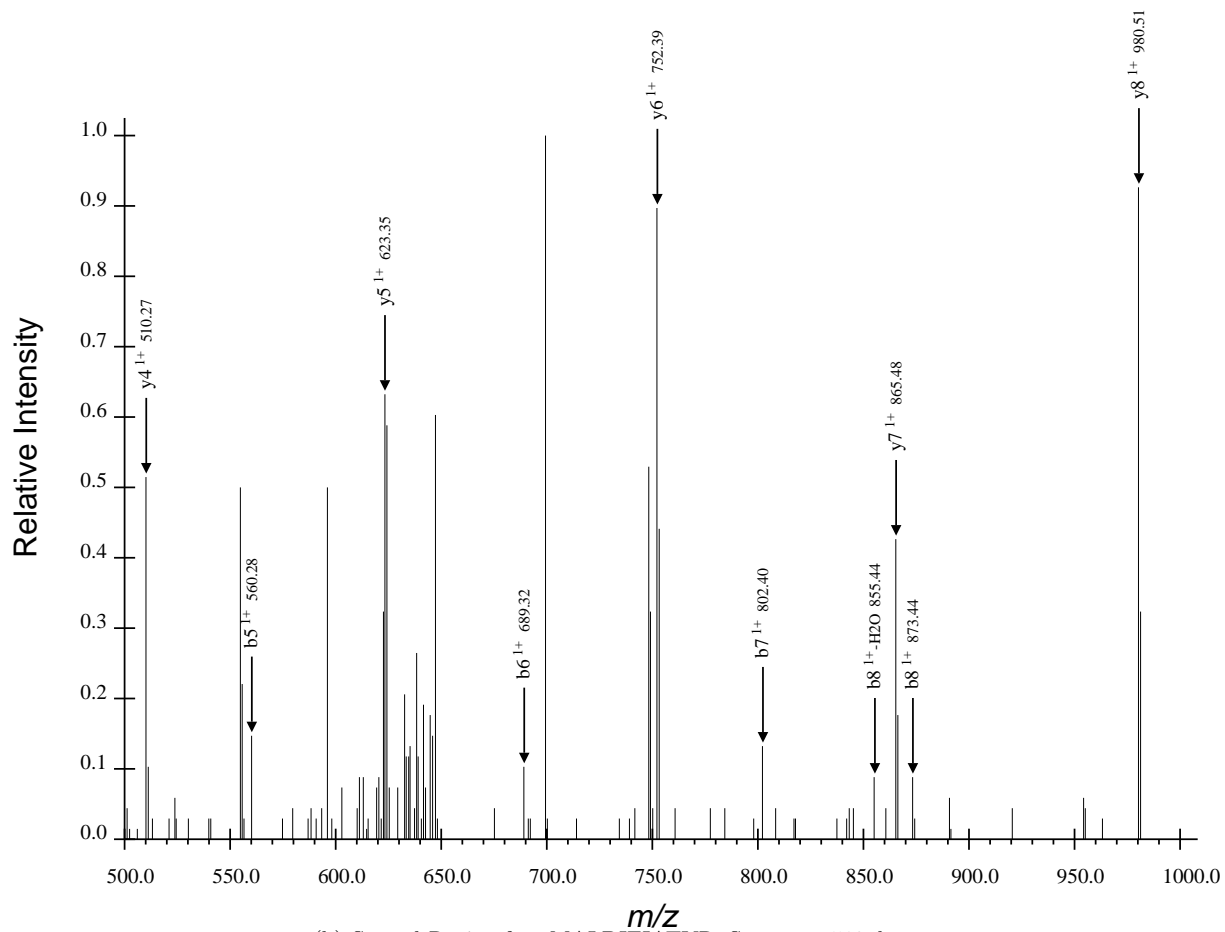

(b) Second Region for oMALDIEIATYR, Spectrum 513.dta

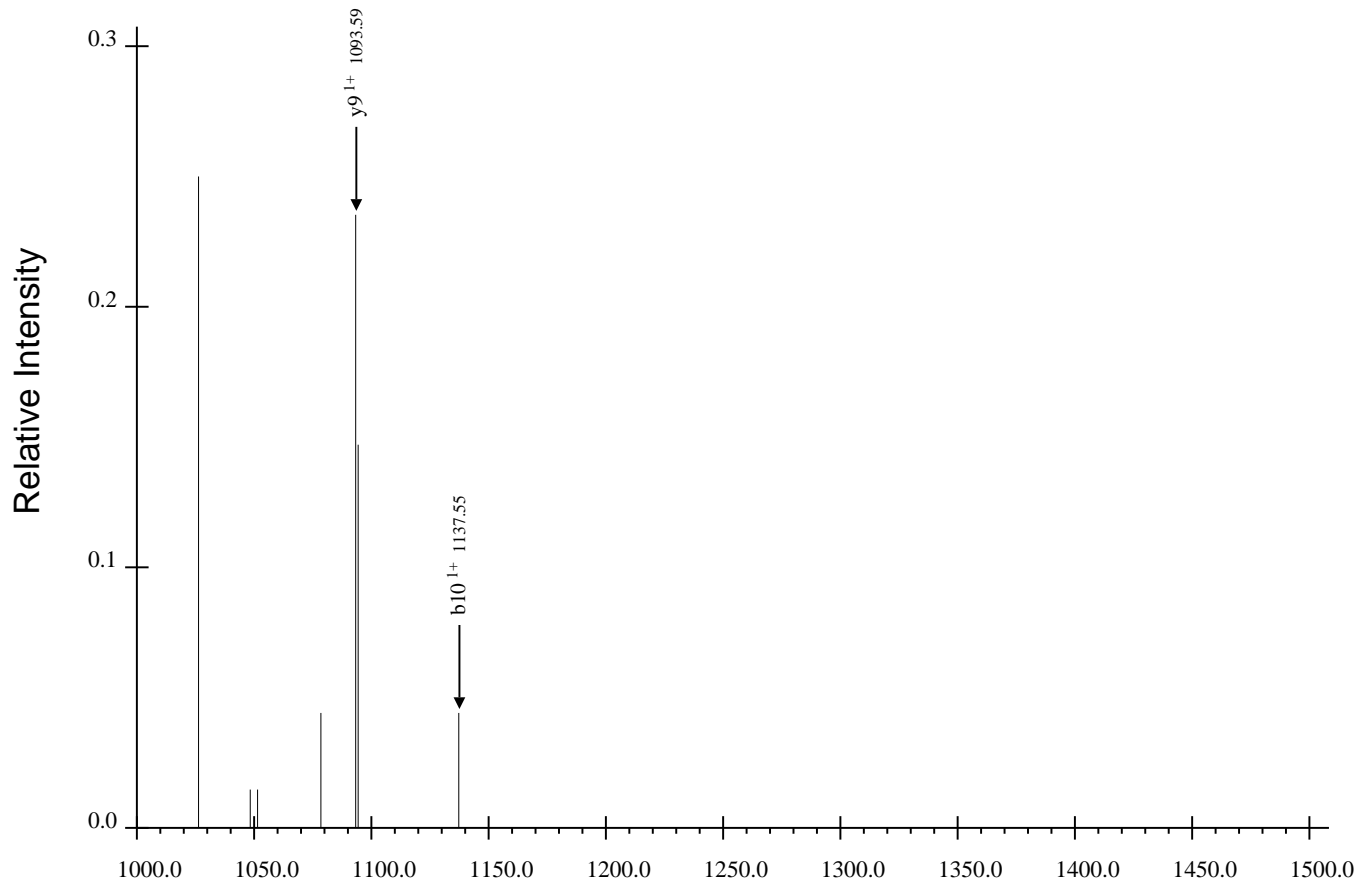

(c) Third Region for oMALDIEIATYR, Spectrum 513.dta

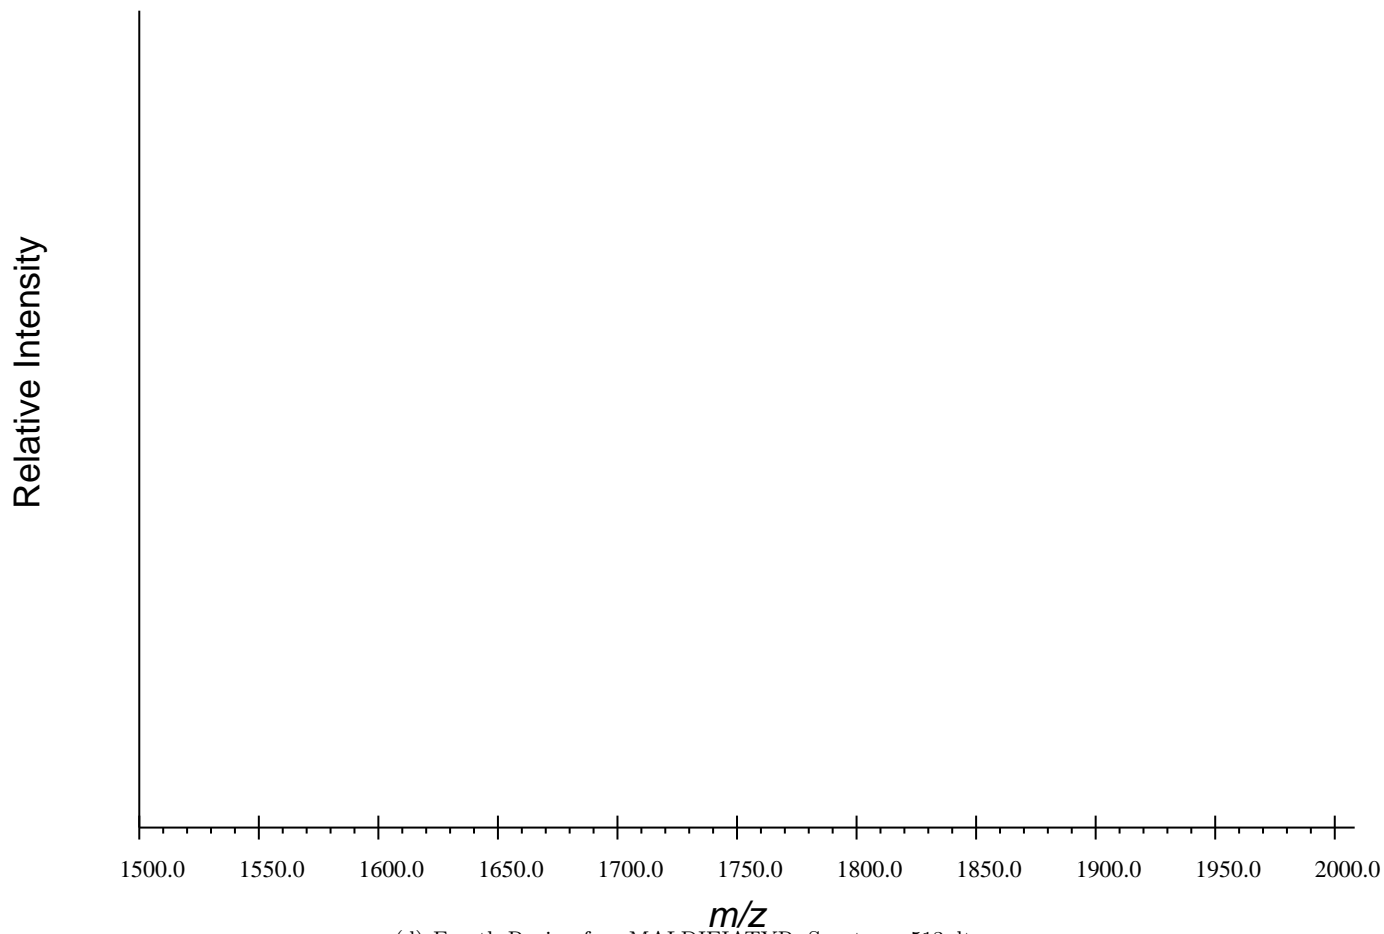

(d) Fourth Region for oMALDIEIATYR, Spectrum 513.dta

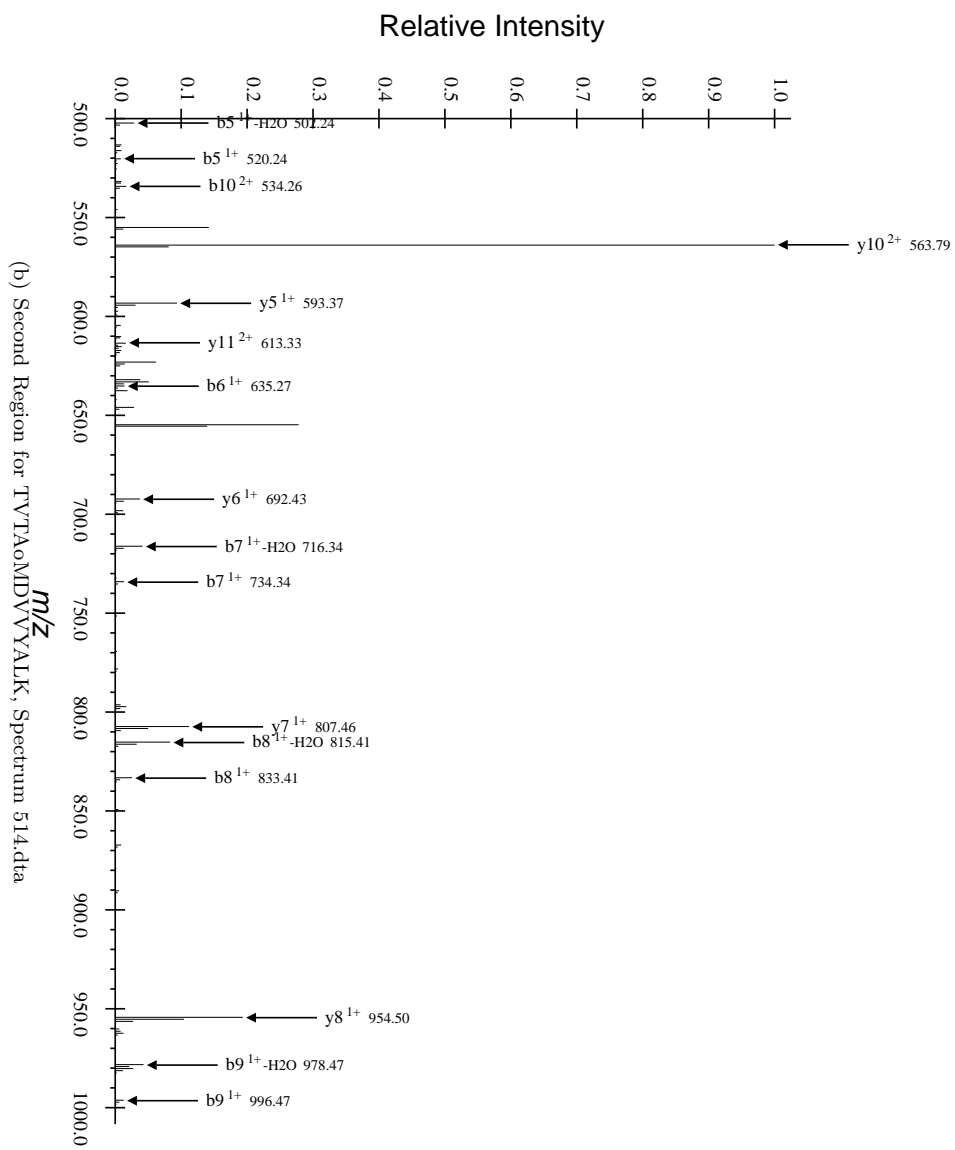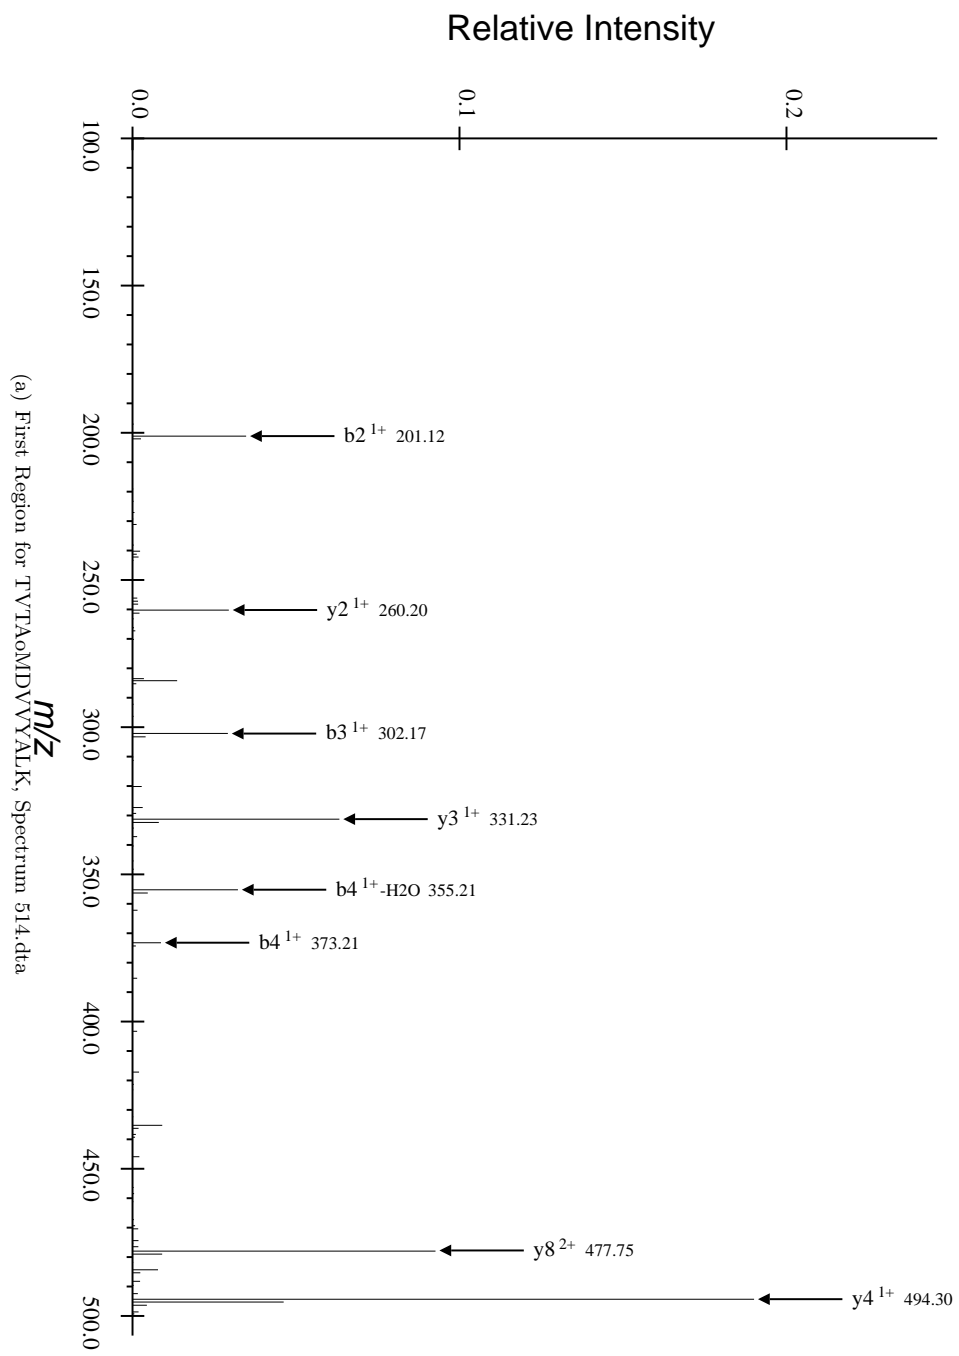

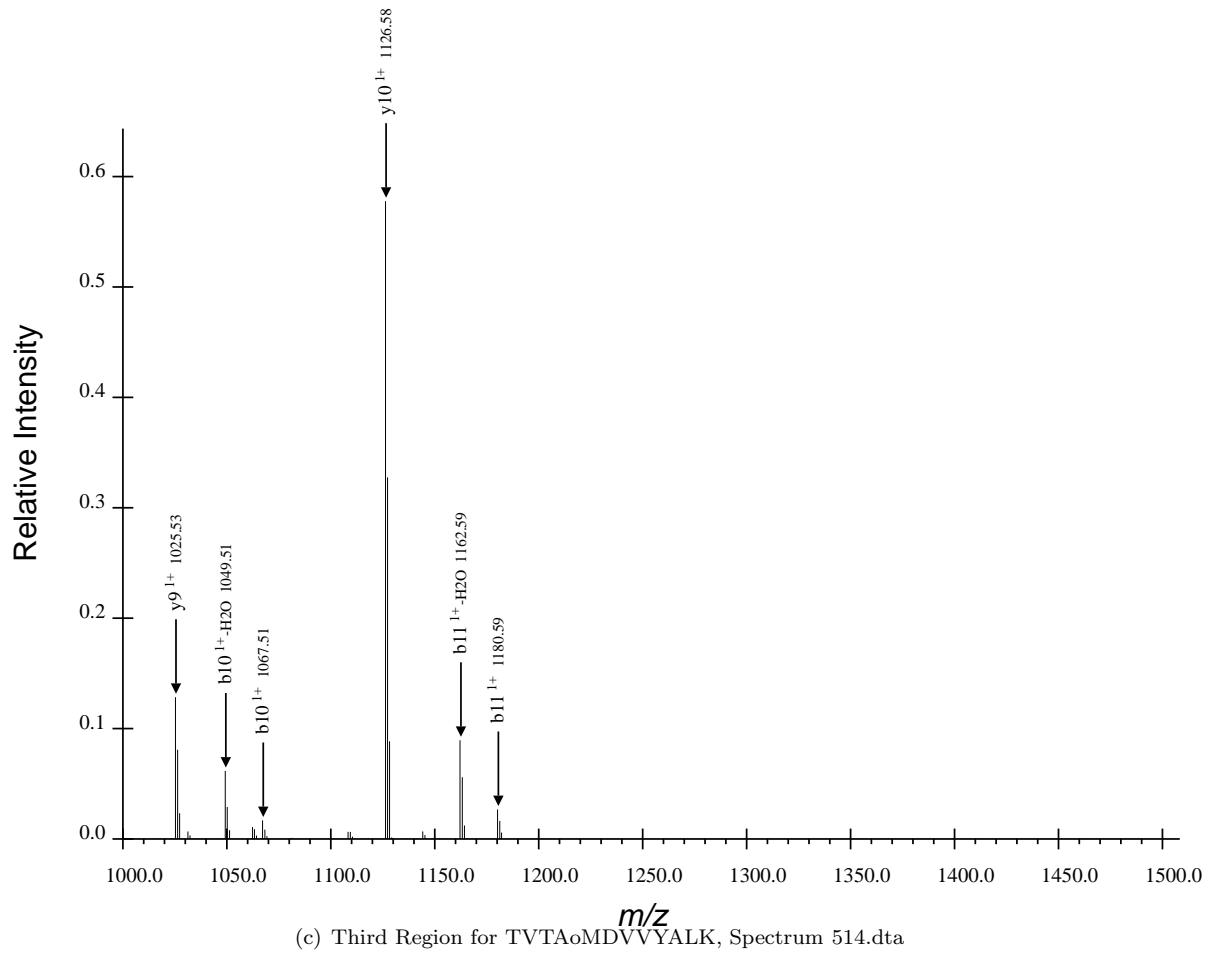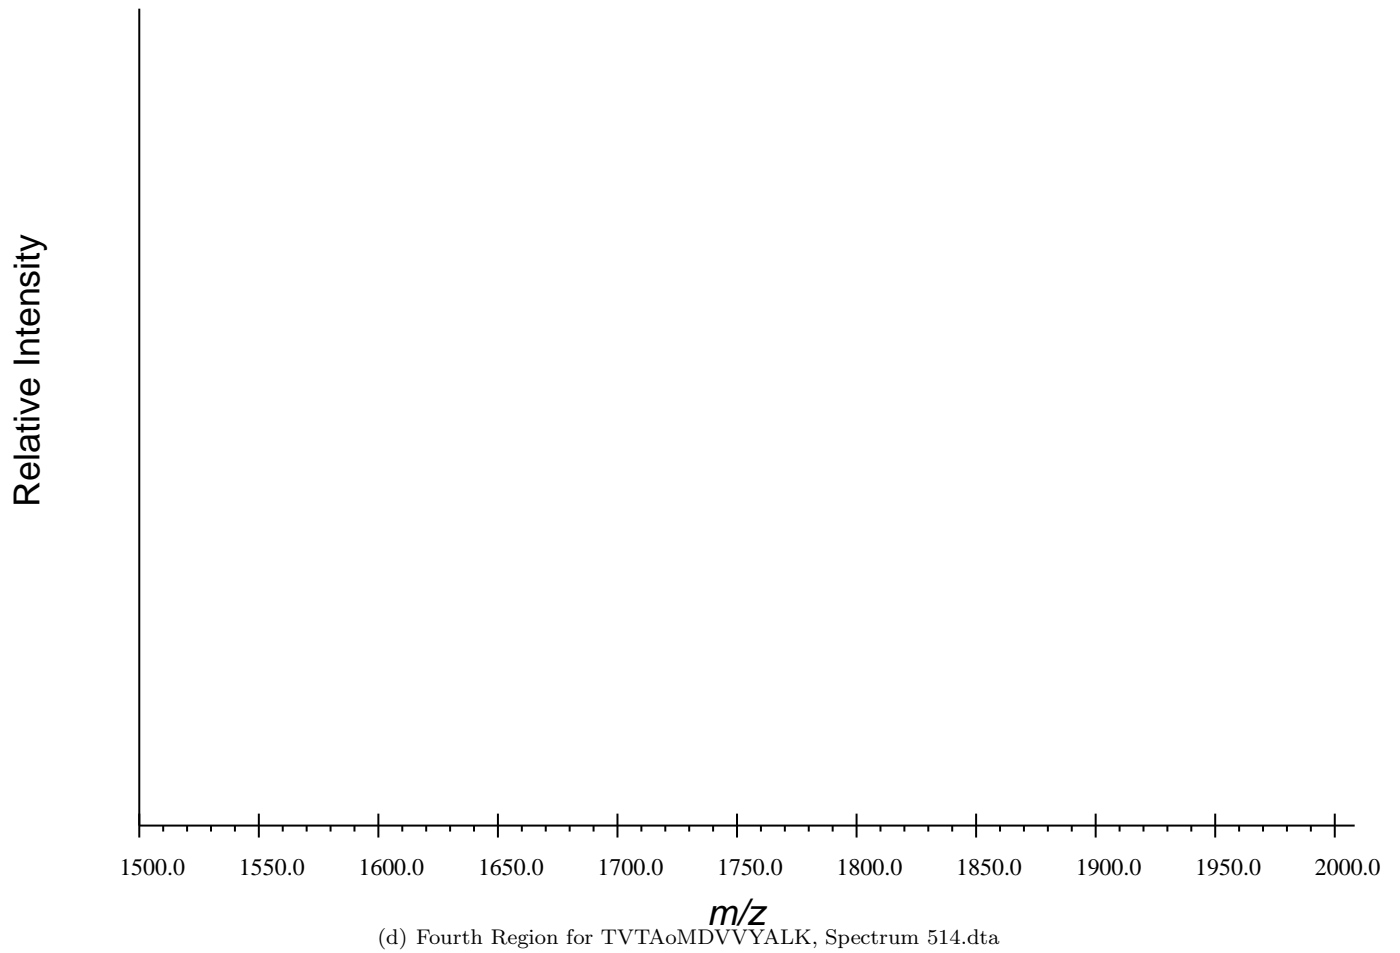

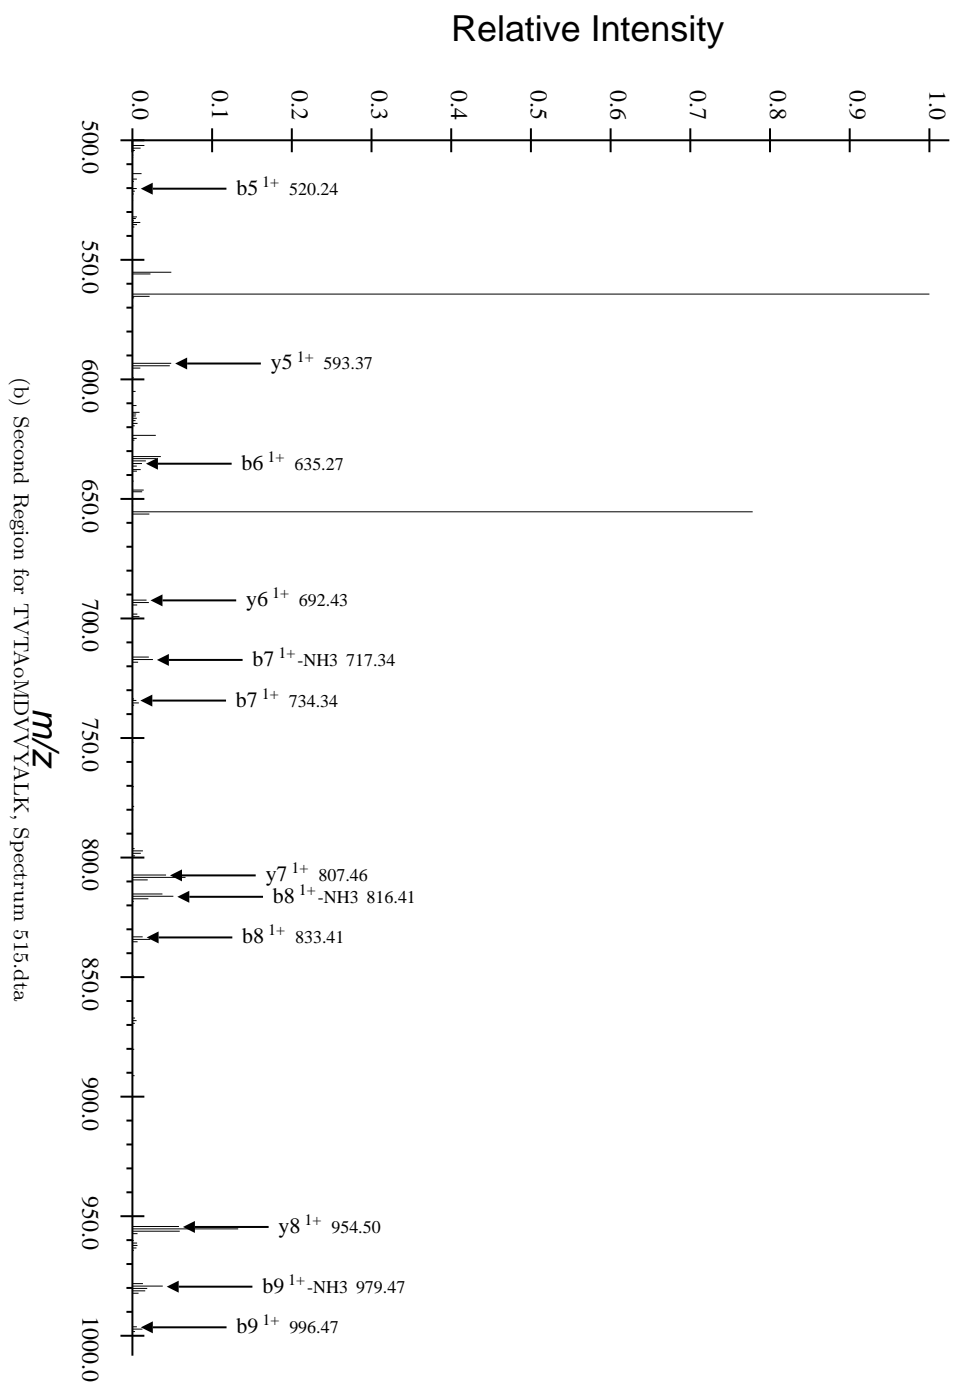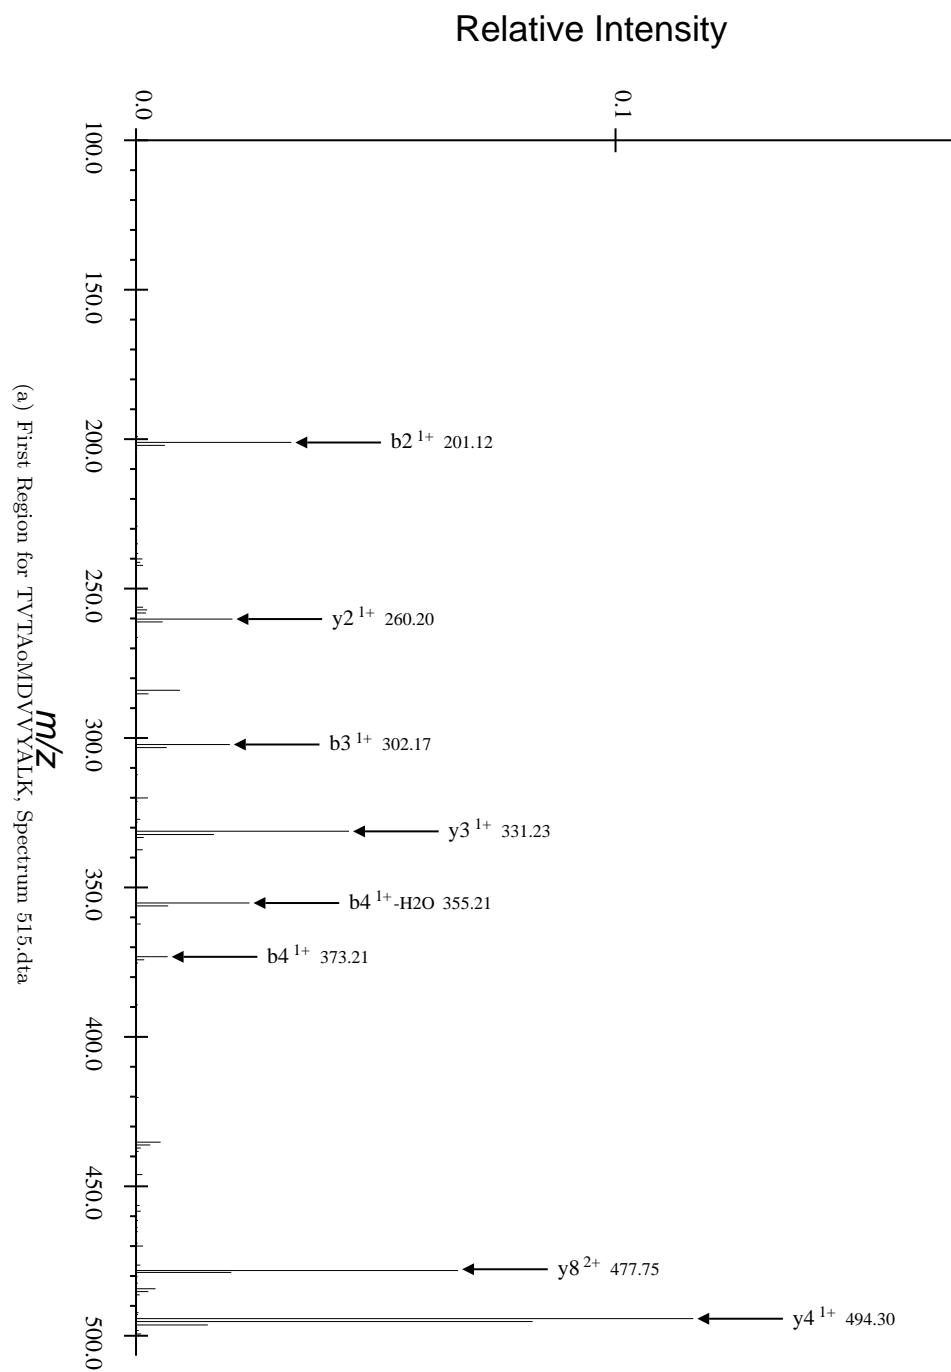

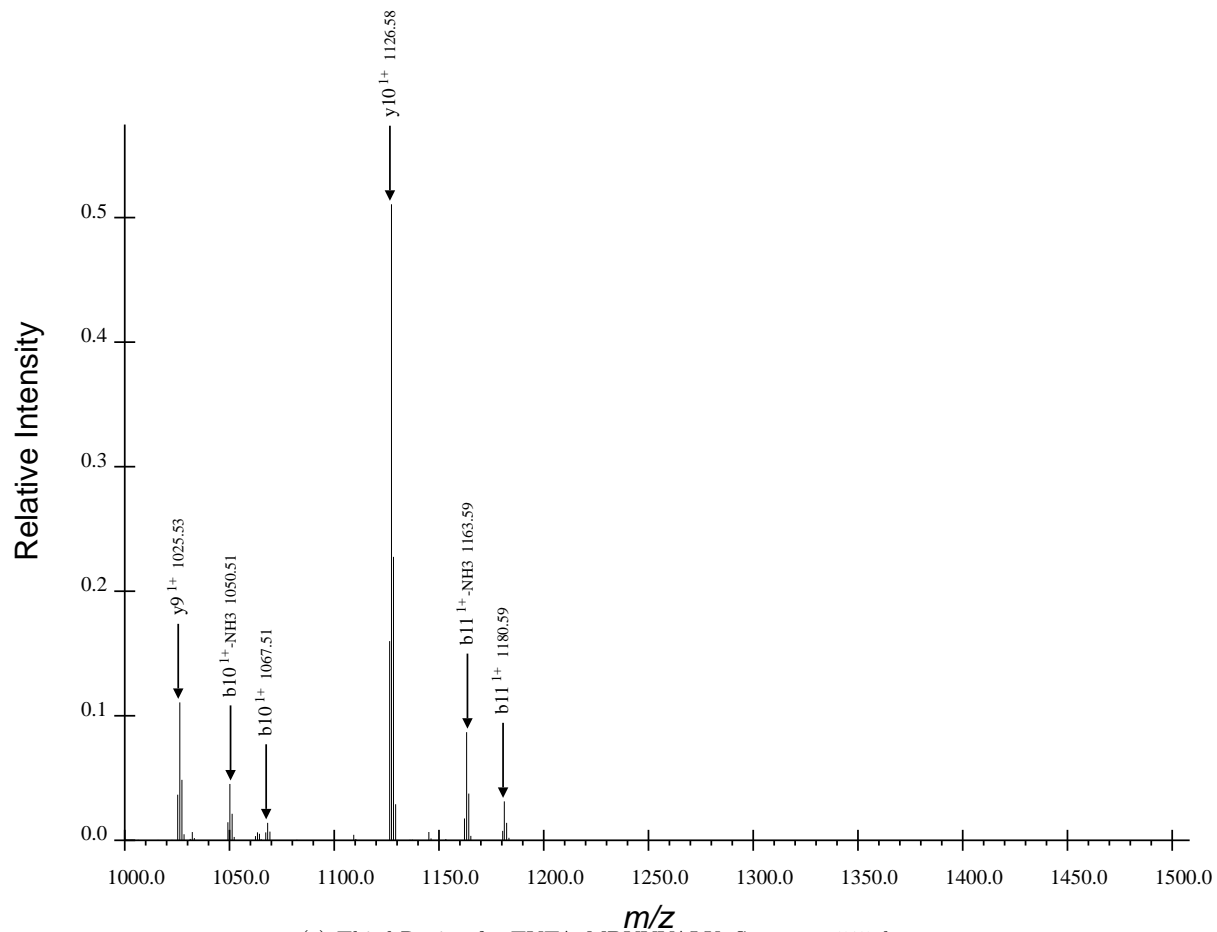

(c) Third Region for TVTAoMDVVYALK, Spectrum 515.dta

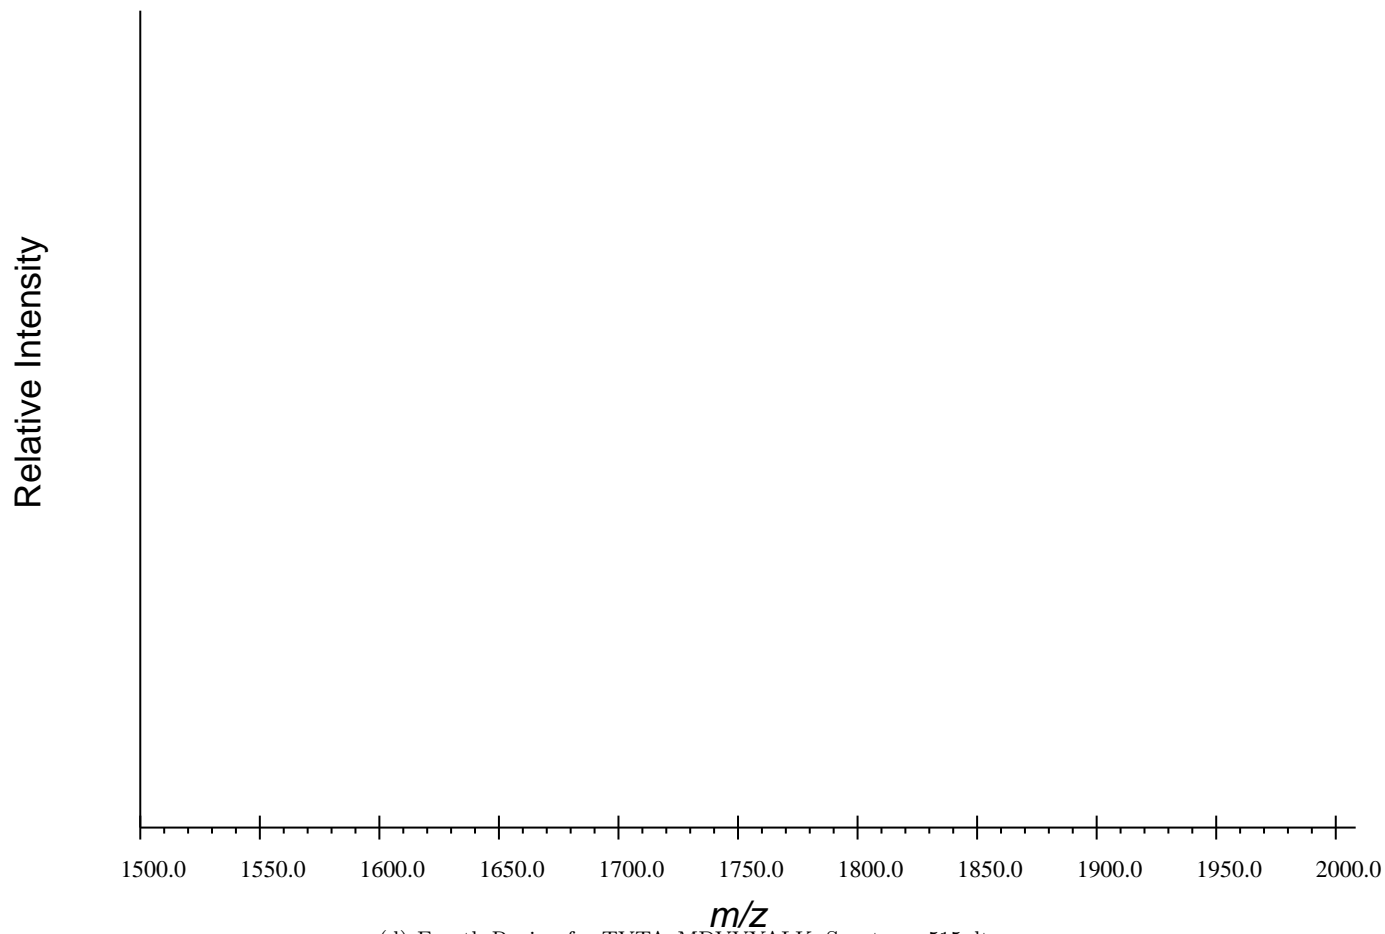

(d) Fourth Region for TVTAoMDVVYALK, Spectrum 515.dta



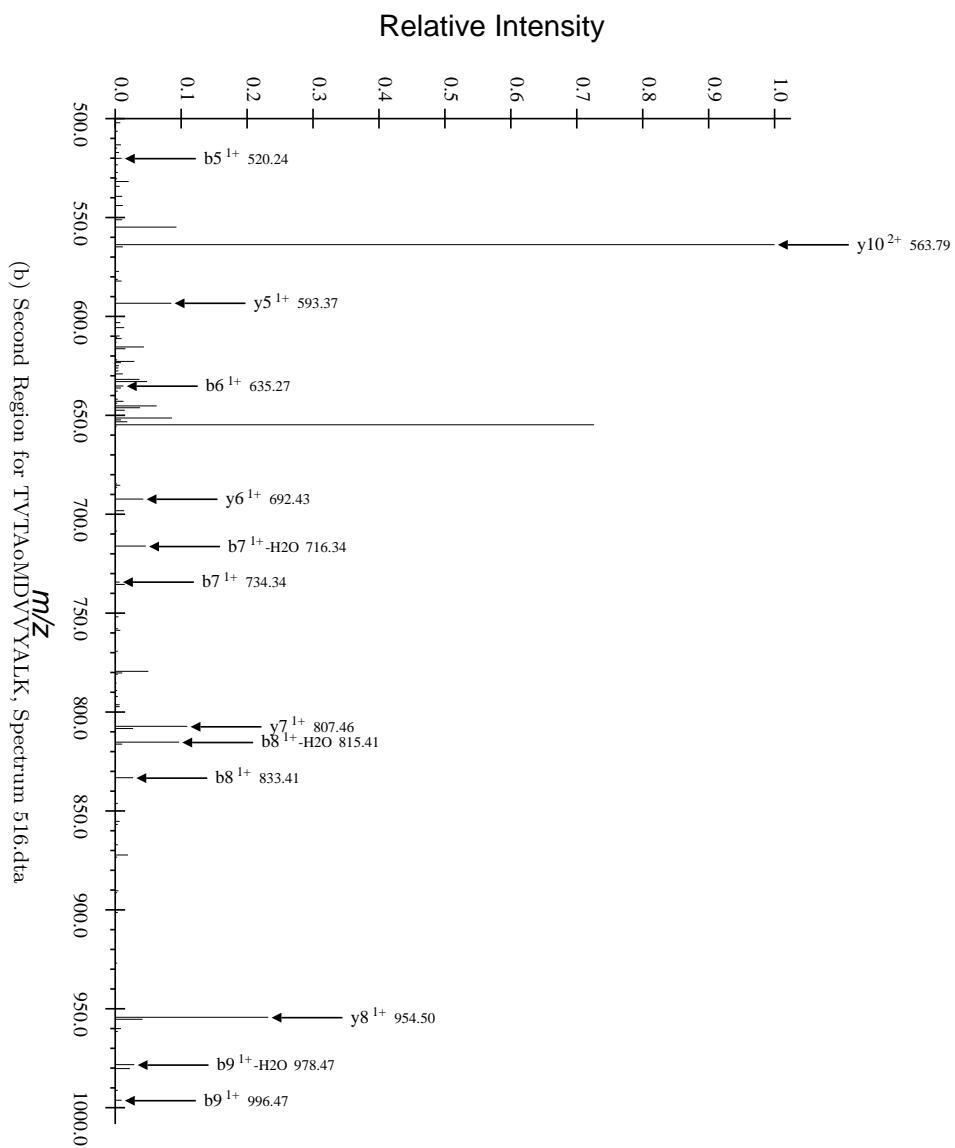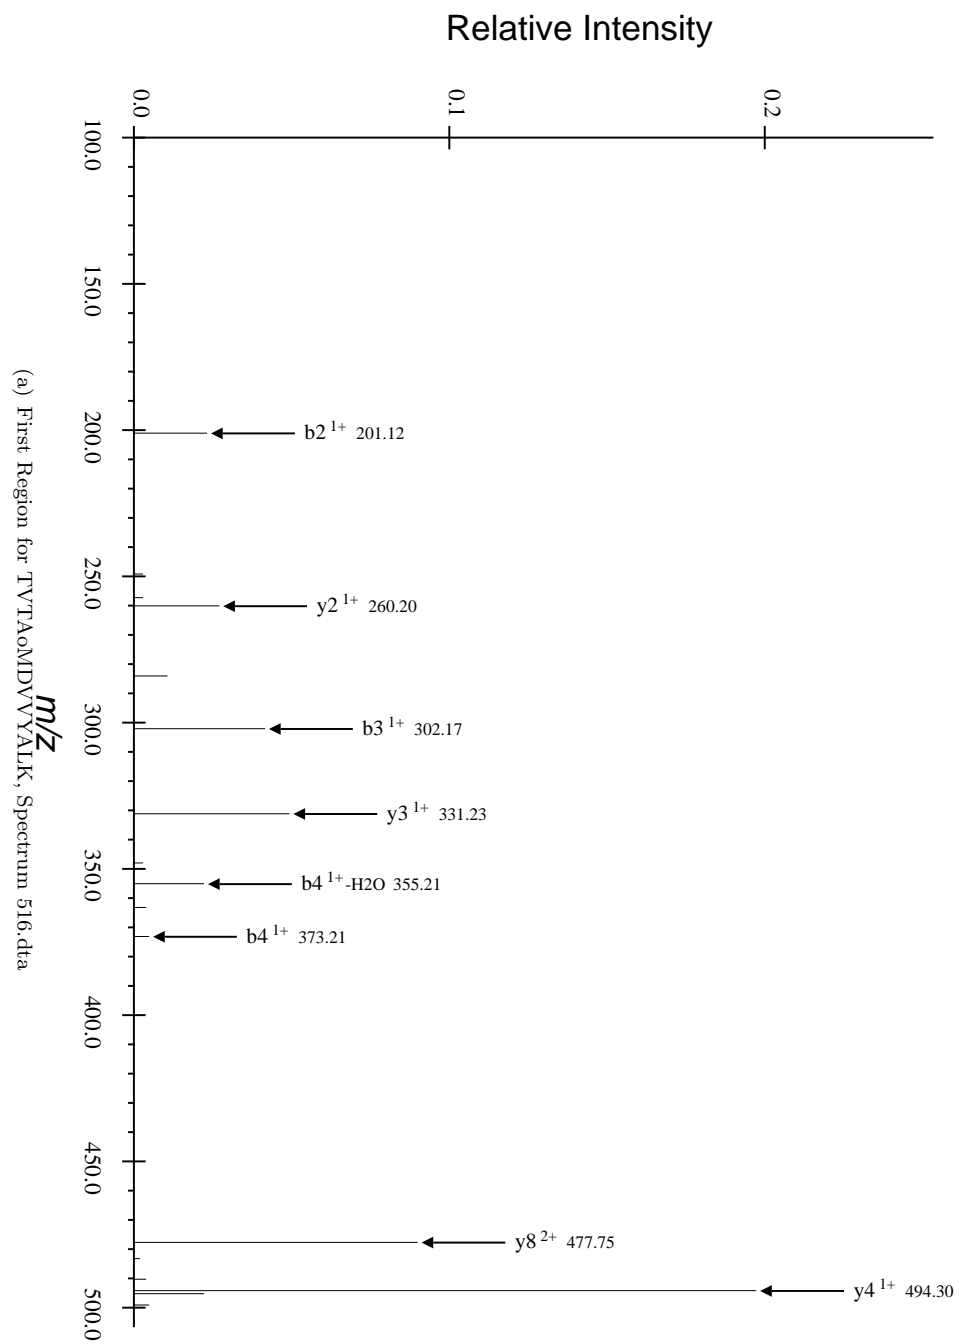

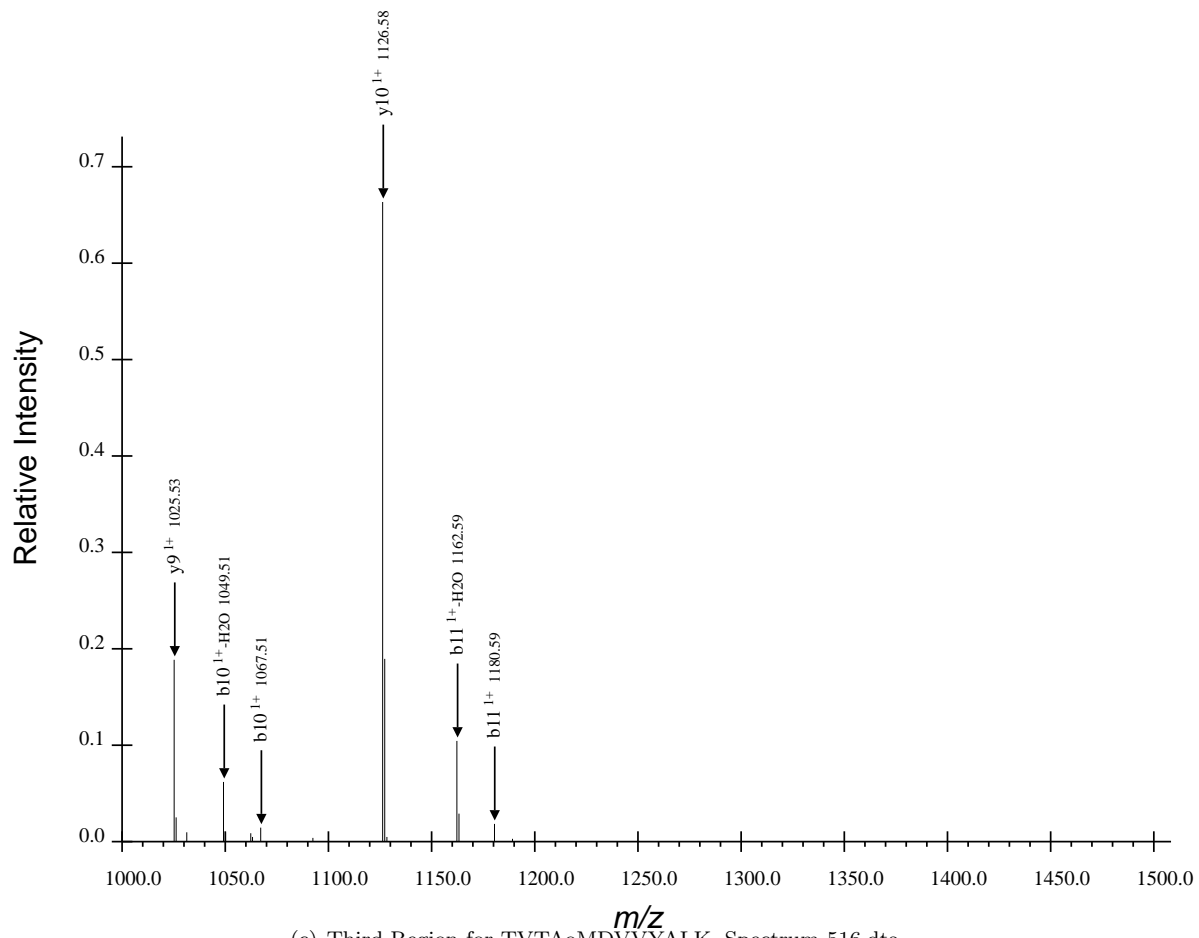

(c) Third Region for TVTAoMDVVYALK, Spectrum 516.dta

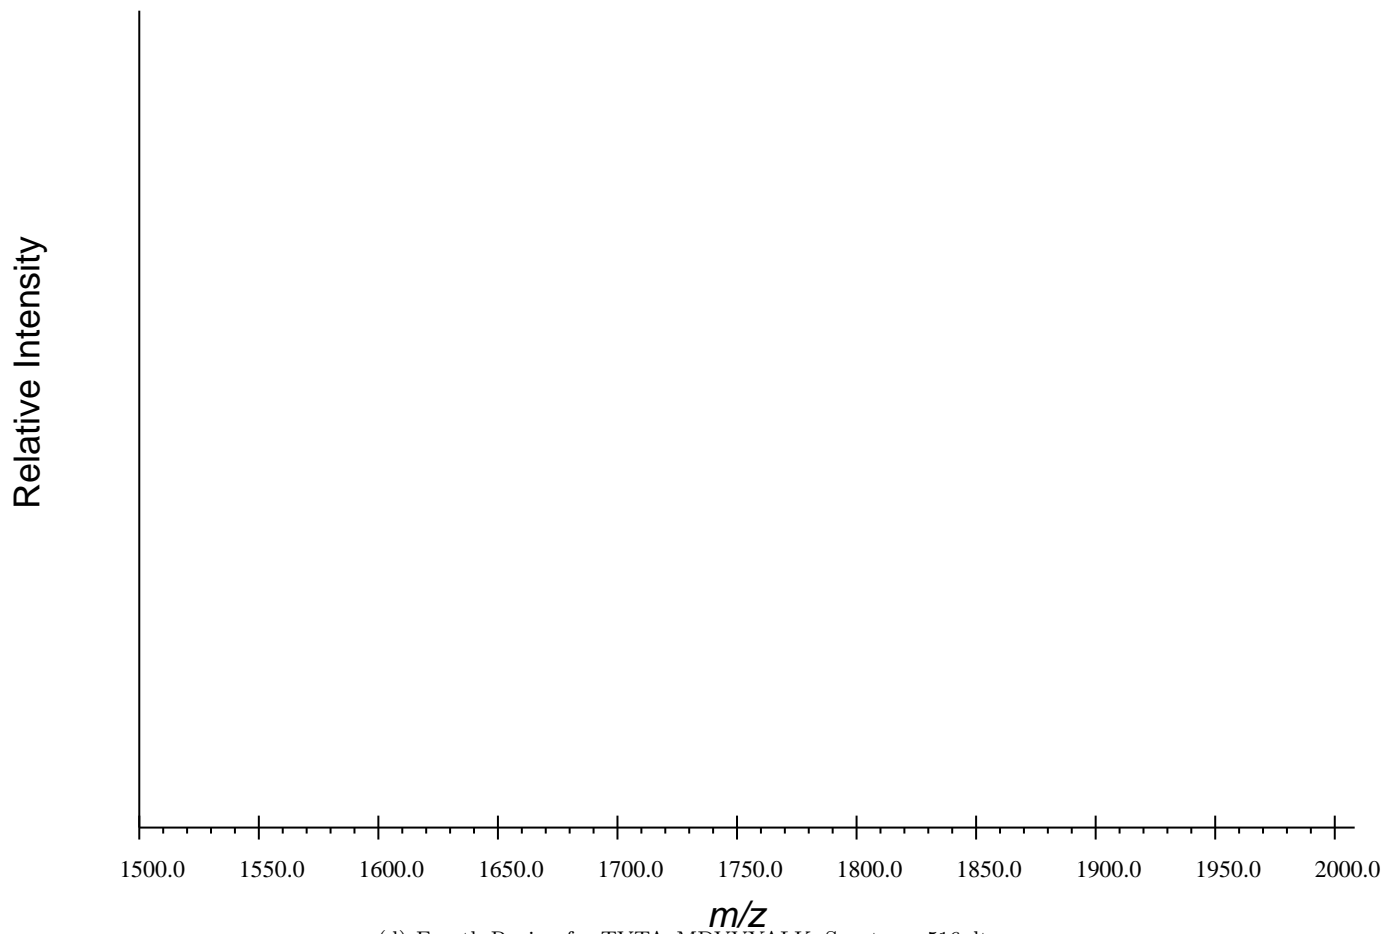

(d) Fourth Region for TVTAoMDVVYALK, Spectrum 516.dta

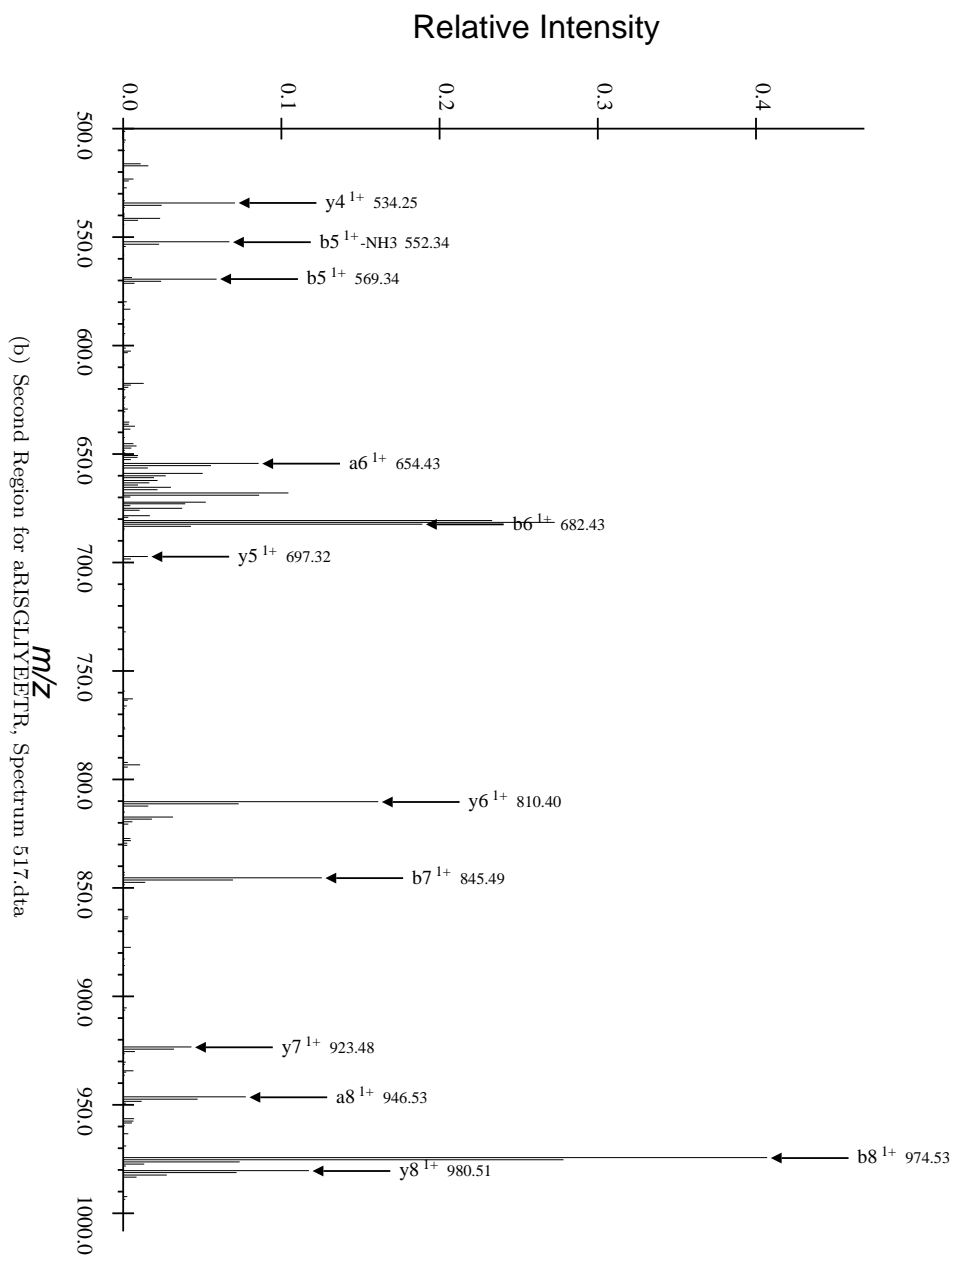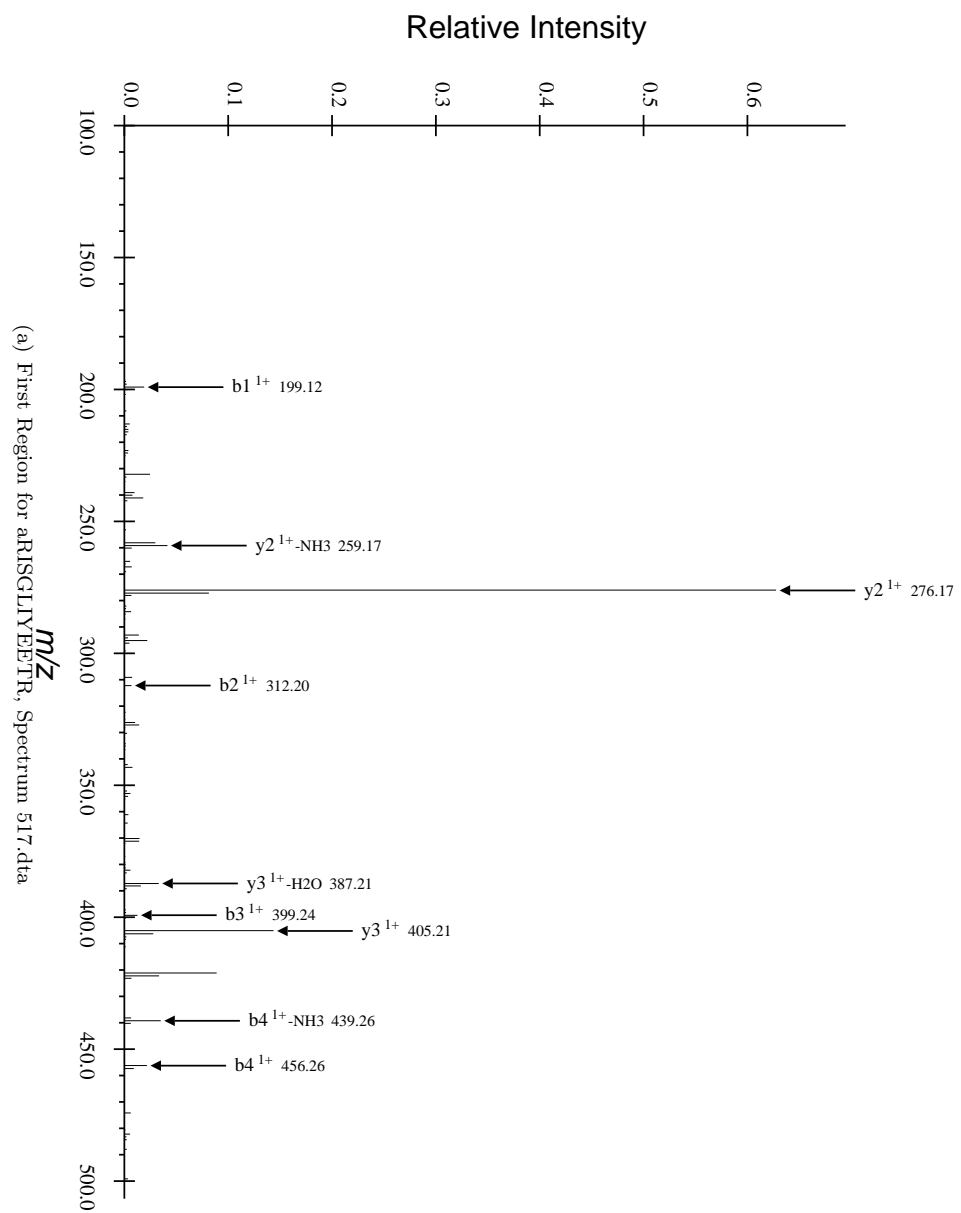

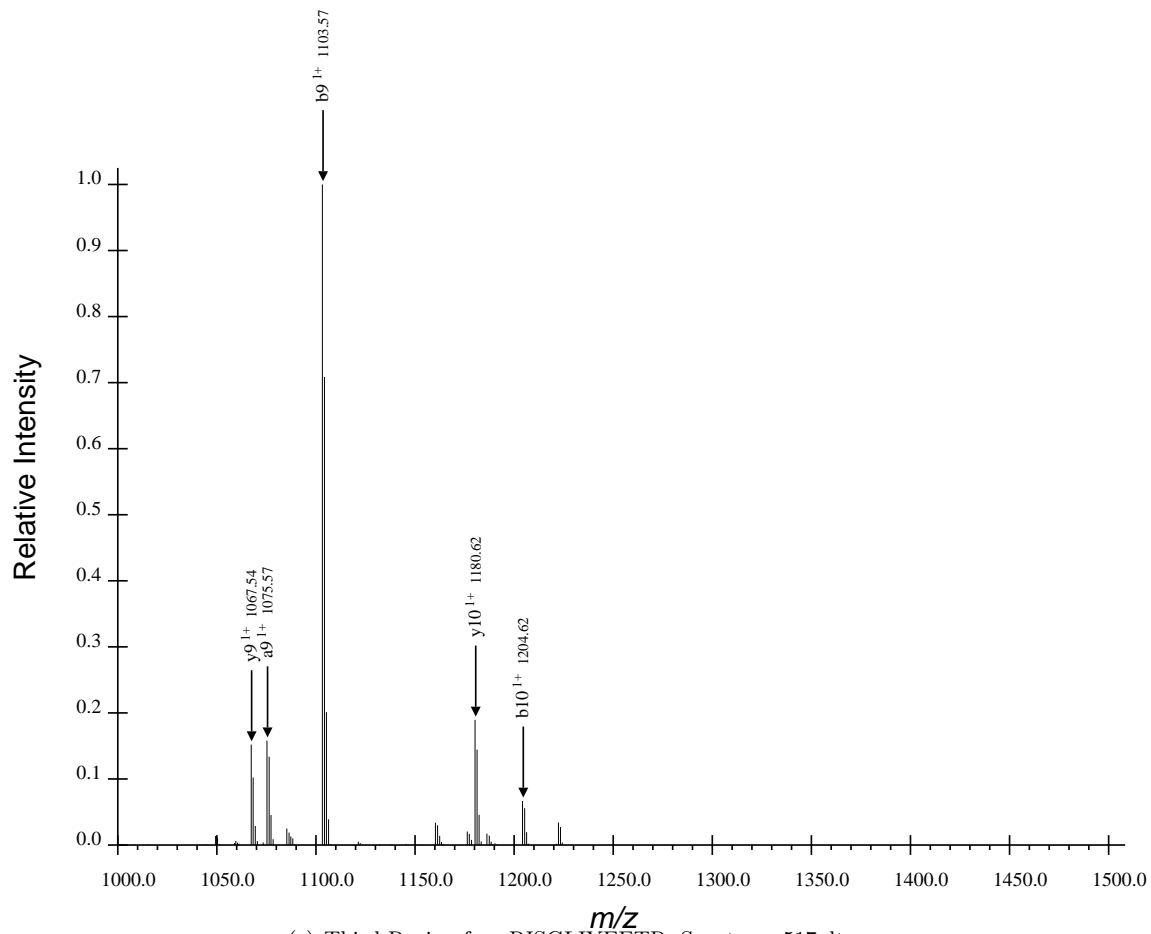

(c) Third Region for aRISGLIYEETR, Spectrum 517.dta

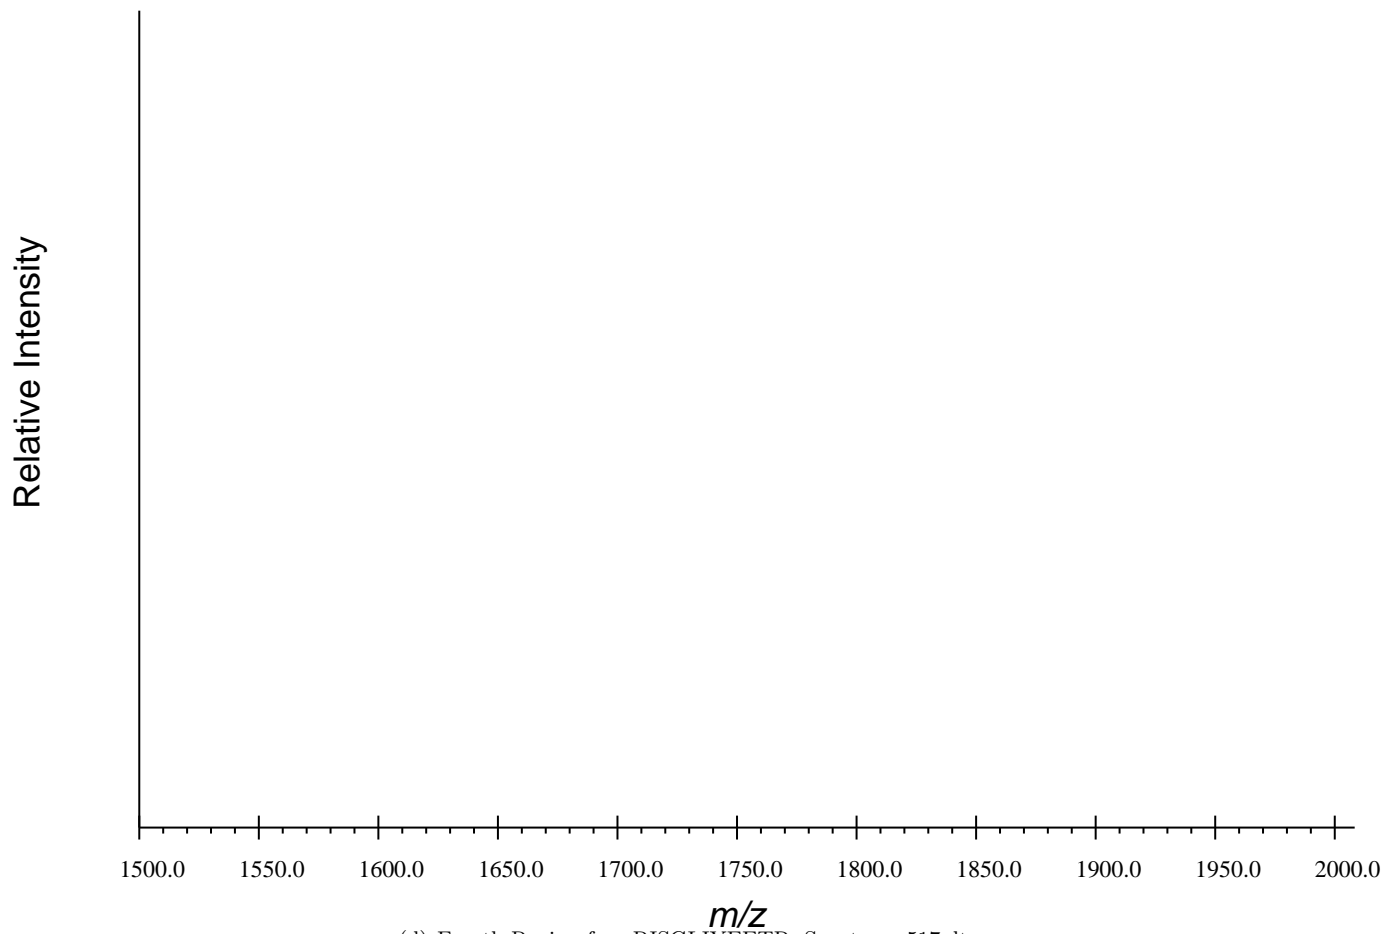

(d) Fourth Region for aRISGLIYEETR, Spectrum 517.dta

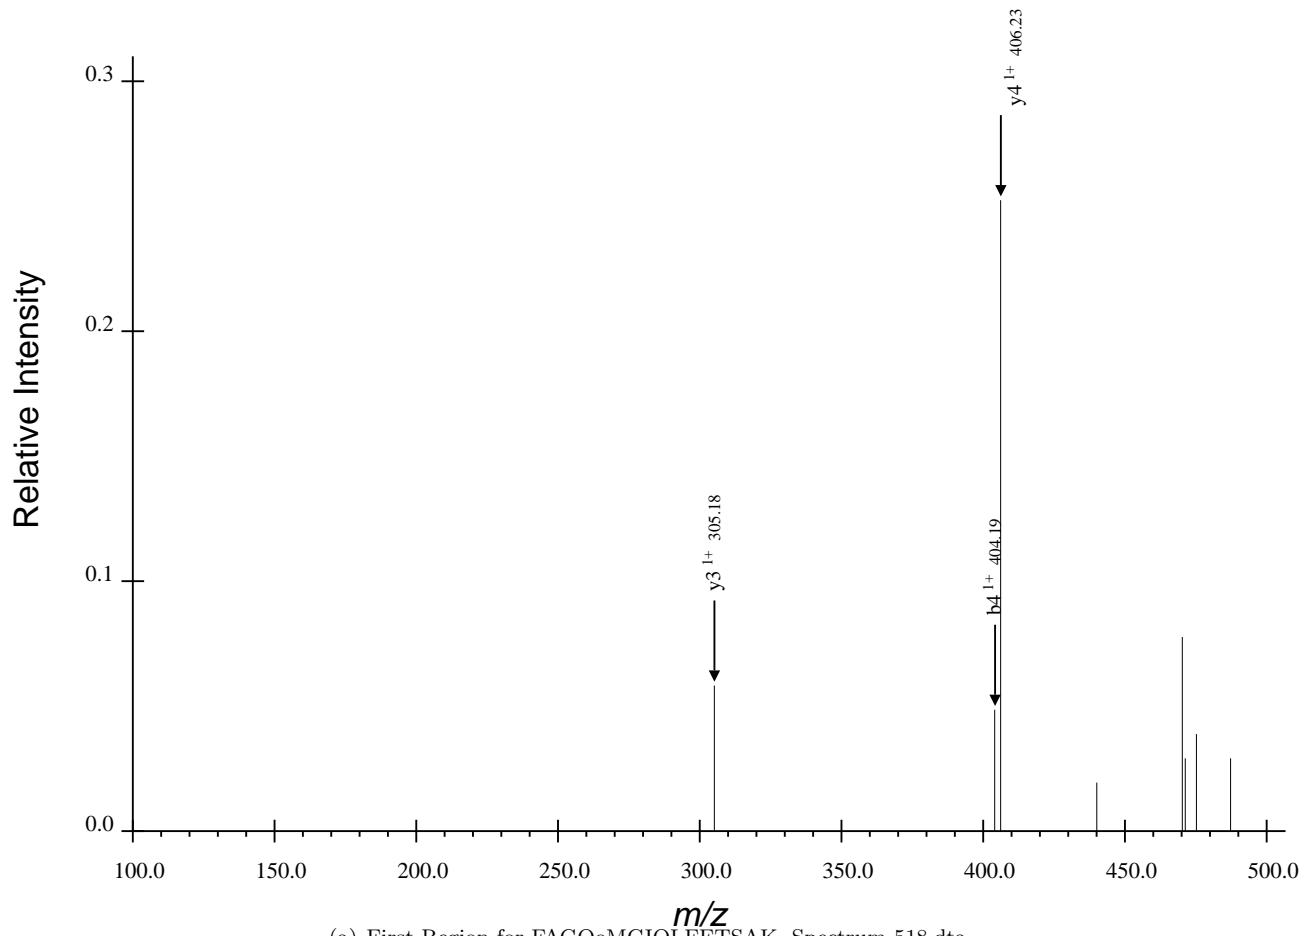

(a) First Region for FAGQoMGIQLFETSAK, Spectrum 518.dta

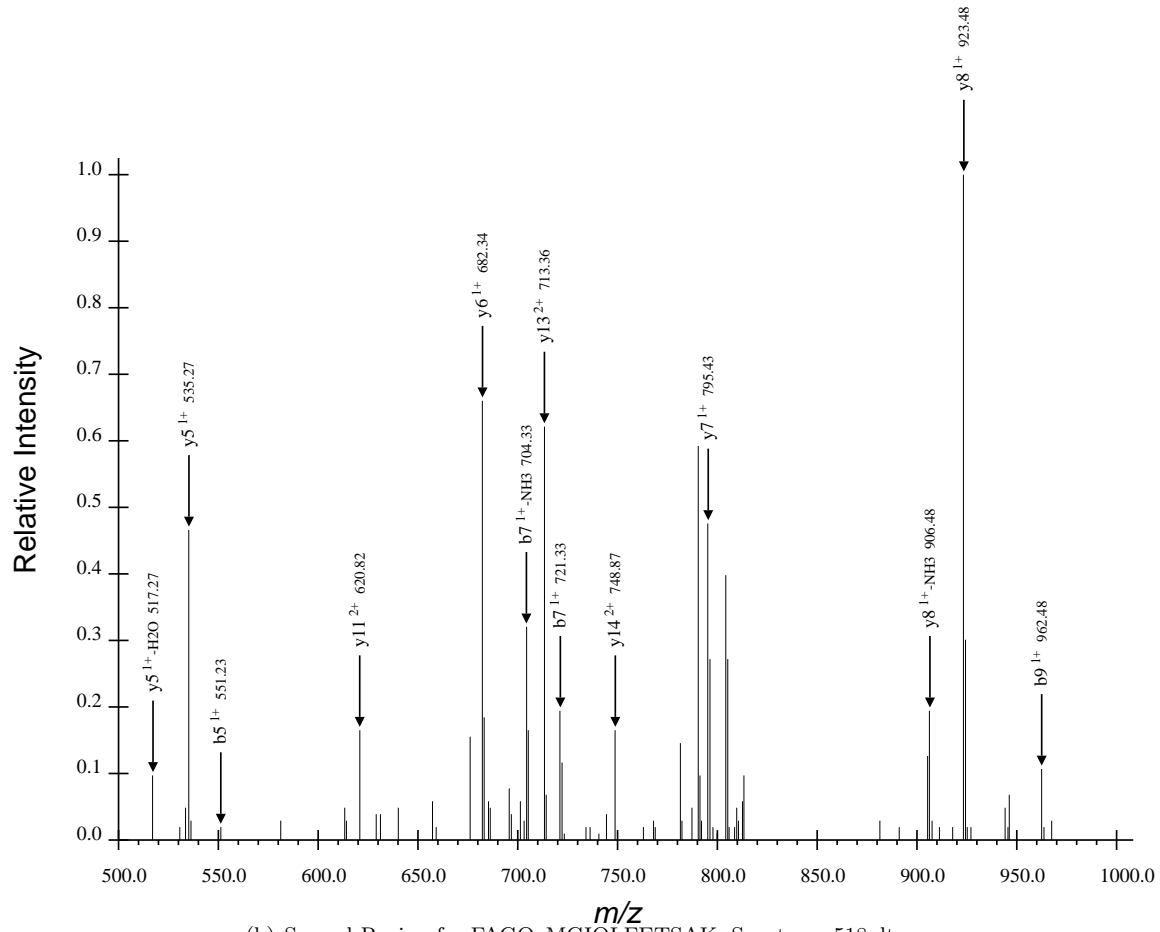

(b) Second Region for FAGQoMGIQLFETSAK, Spectrum 518.dta

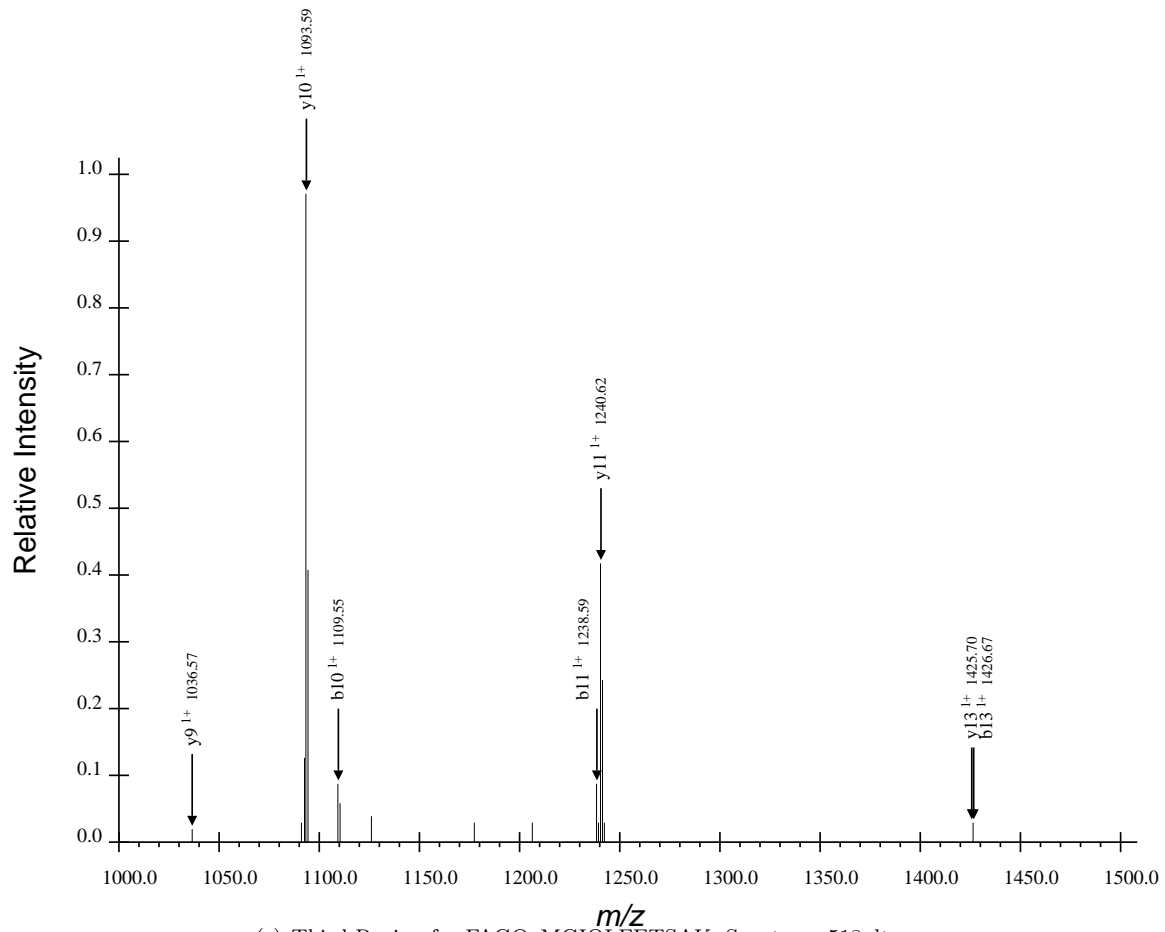

(c) Third Region for FAGQoMGIQLFETSAK, Spectrum 518.dta

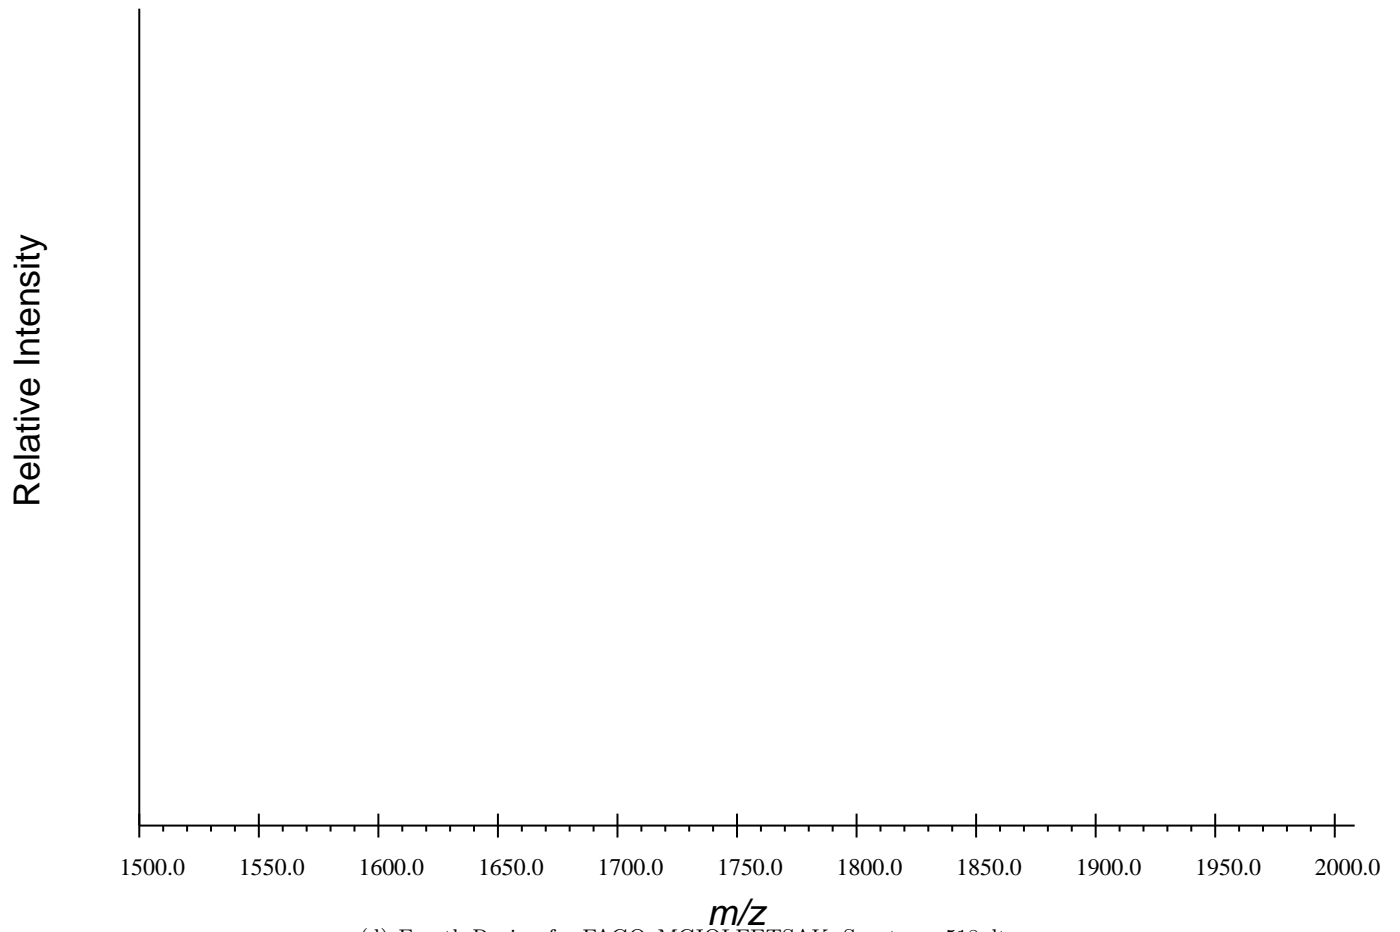

(d) Fourth Region for FAGQoMGIQLFETSAK, Spectrum 518.dta

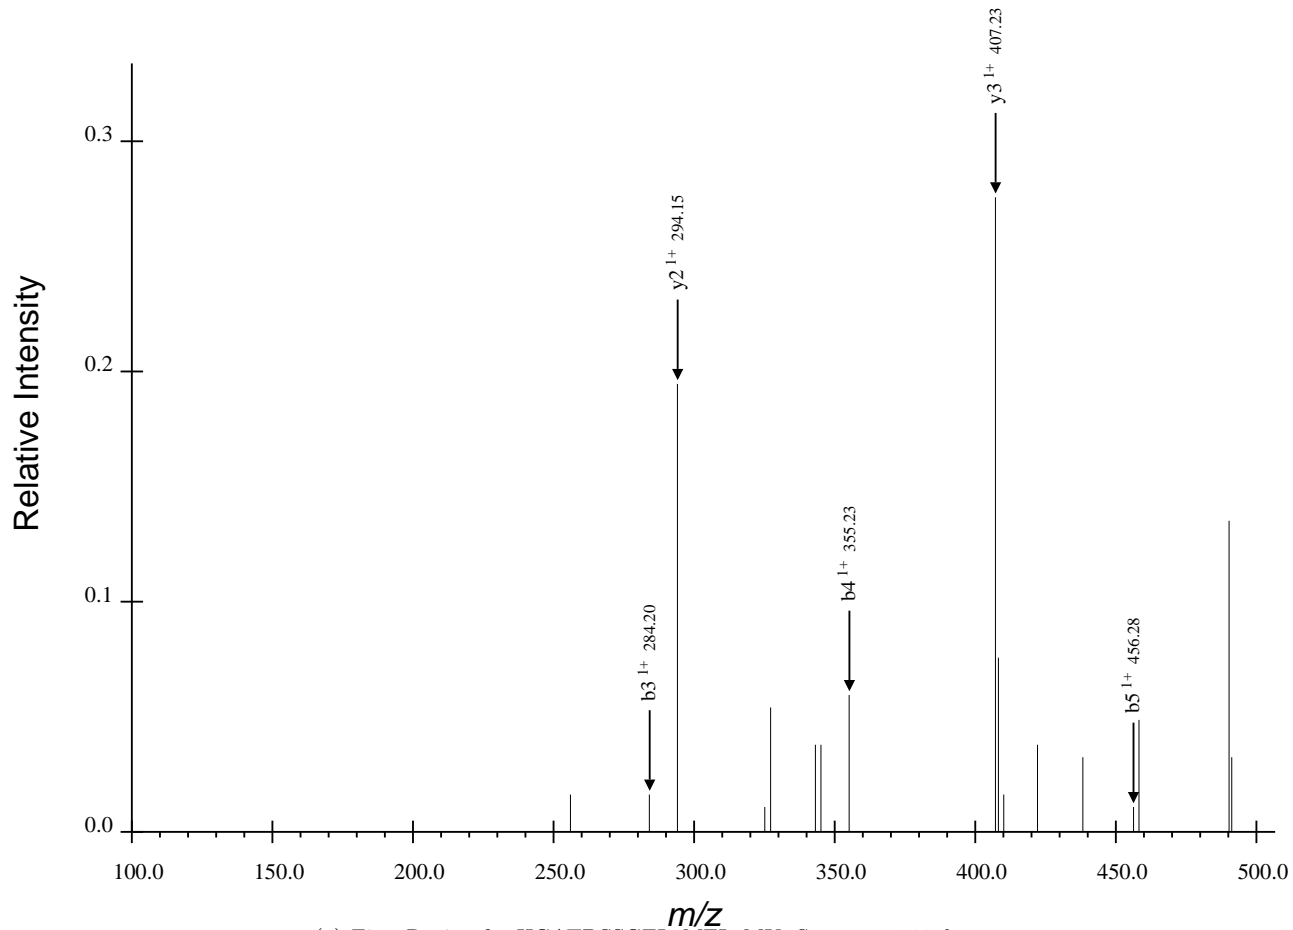

(a) First Region for IIGATDSSGELoMFLoMK, Spectrum 519.dta

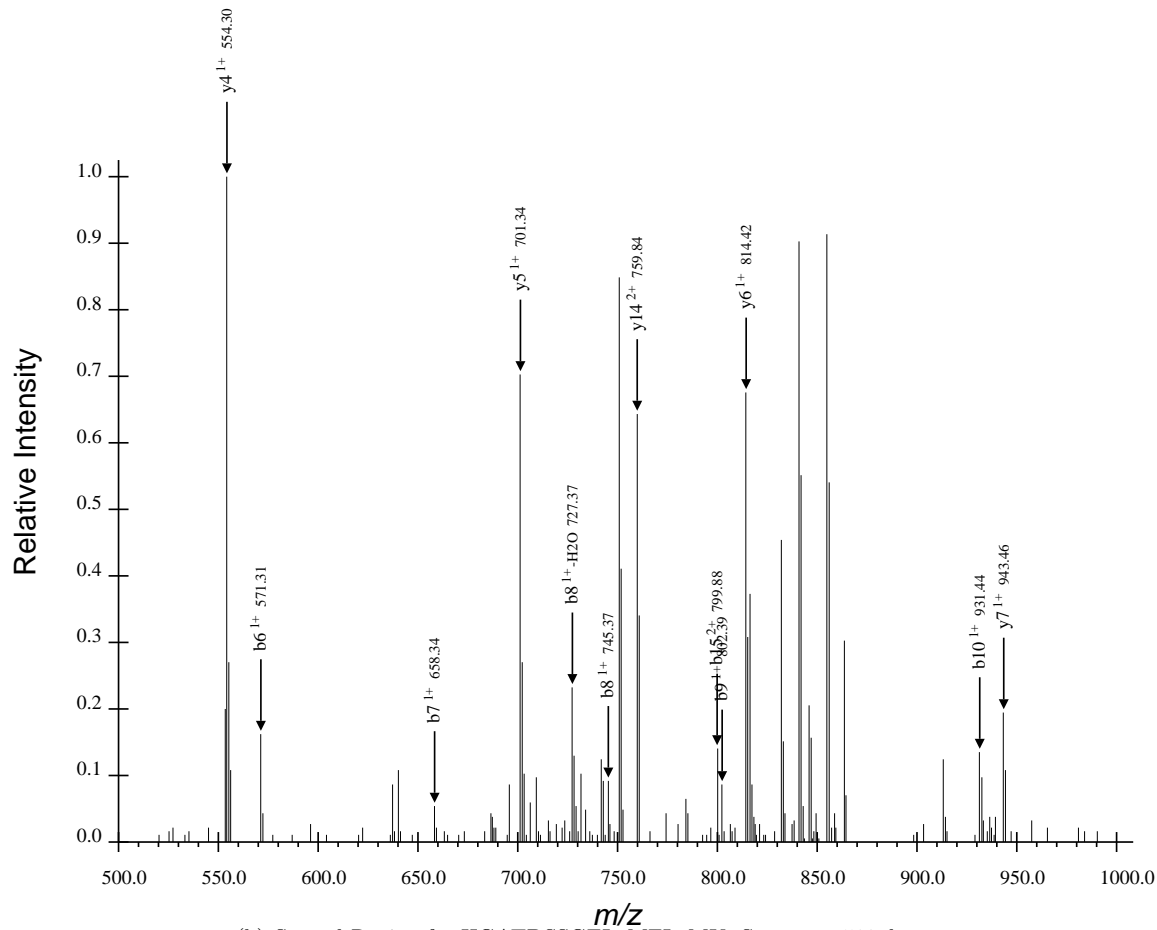

(b) Second Region for IIGATDSSGELoMFLoMK, Spectrum 519.dta

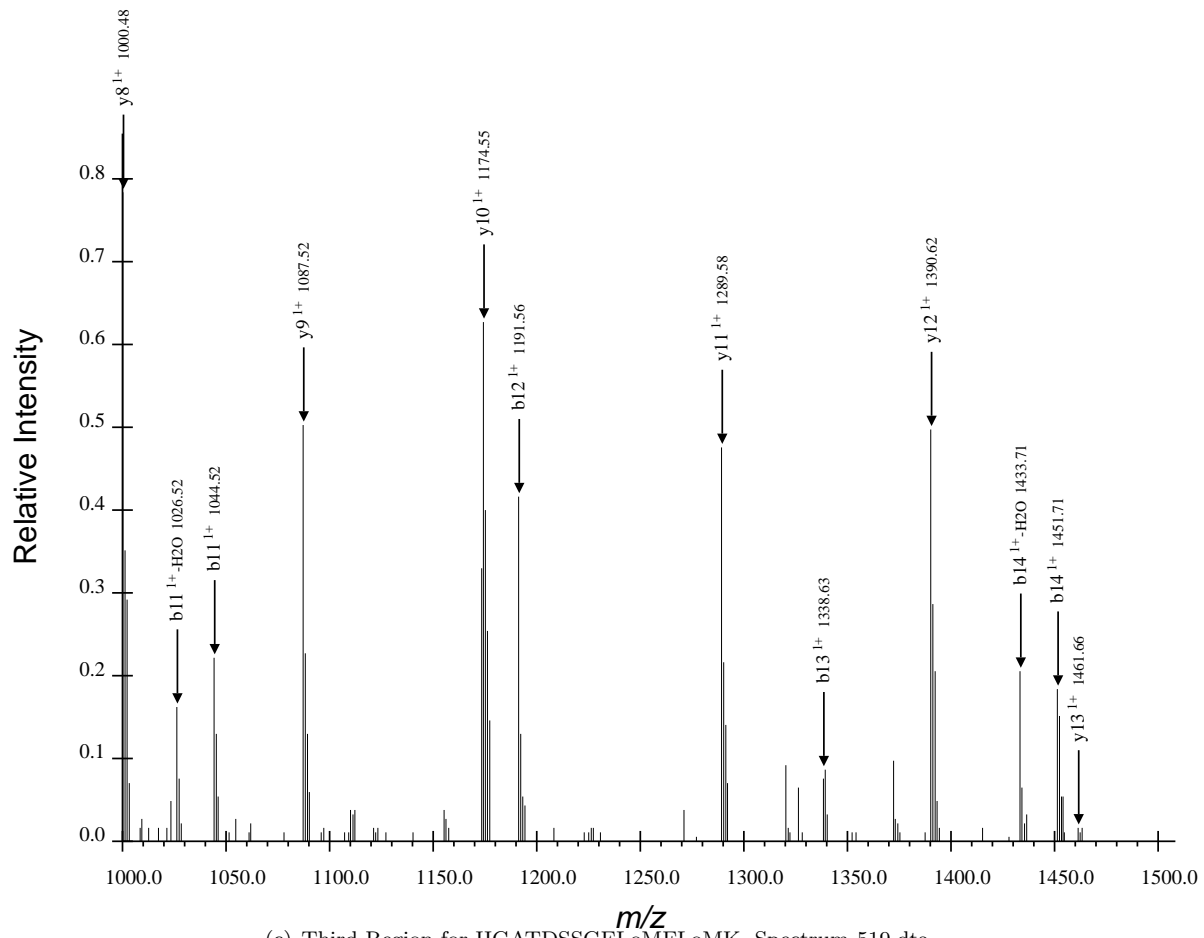

(c) Third Region for IIGATDSSGELoMFLoMK, Spectrum 519.dta

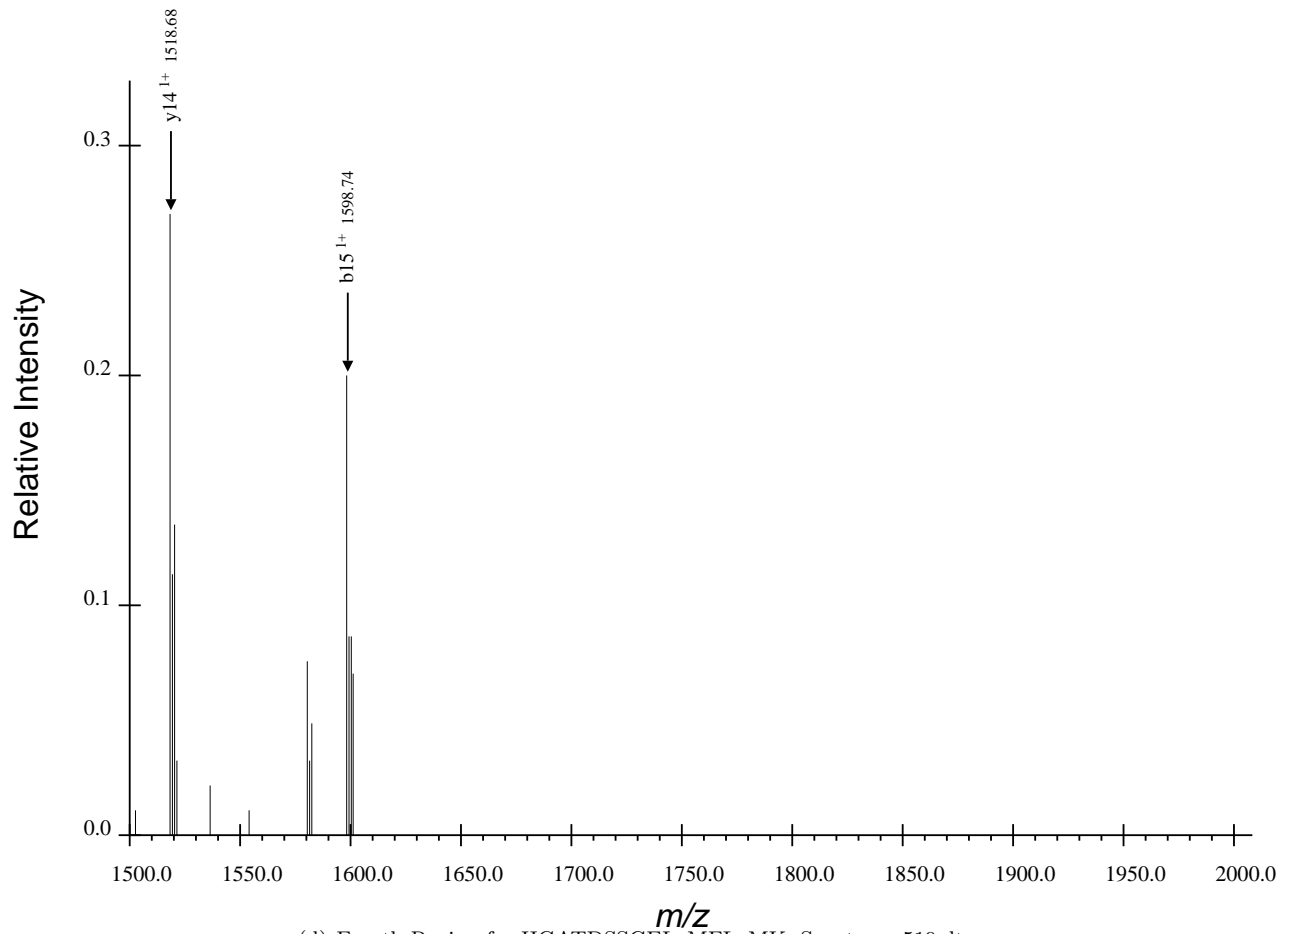

(d) Fourth Region for IIGATDSSGELoMFLoMK, Spectrum 519.dta



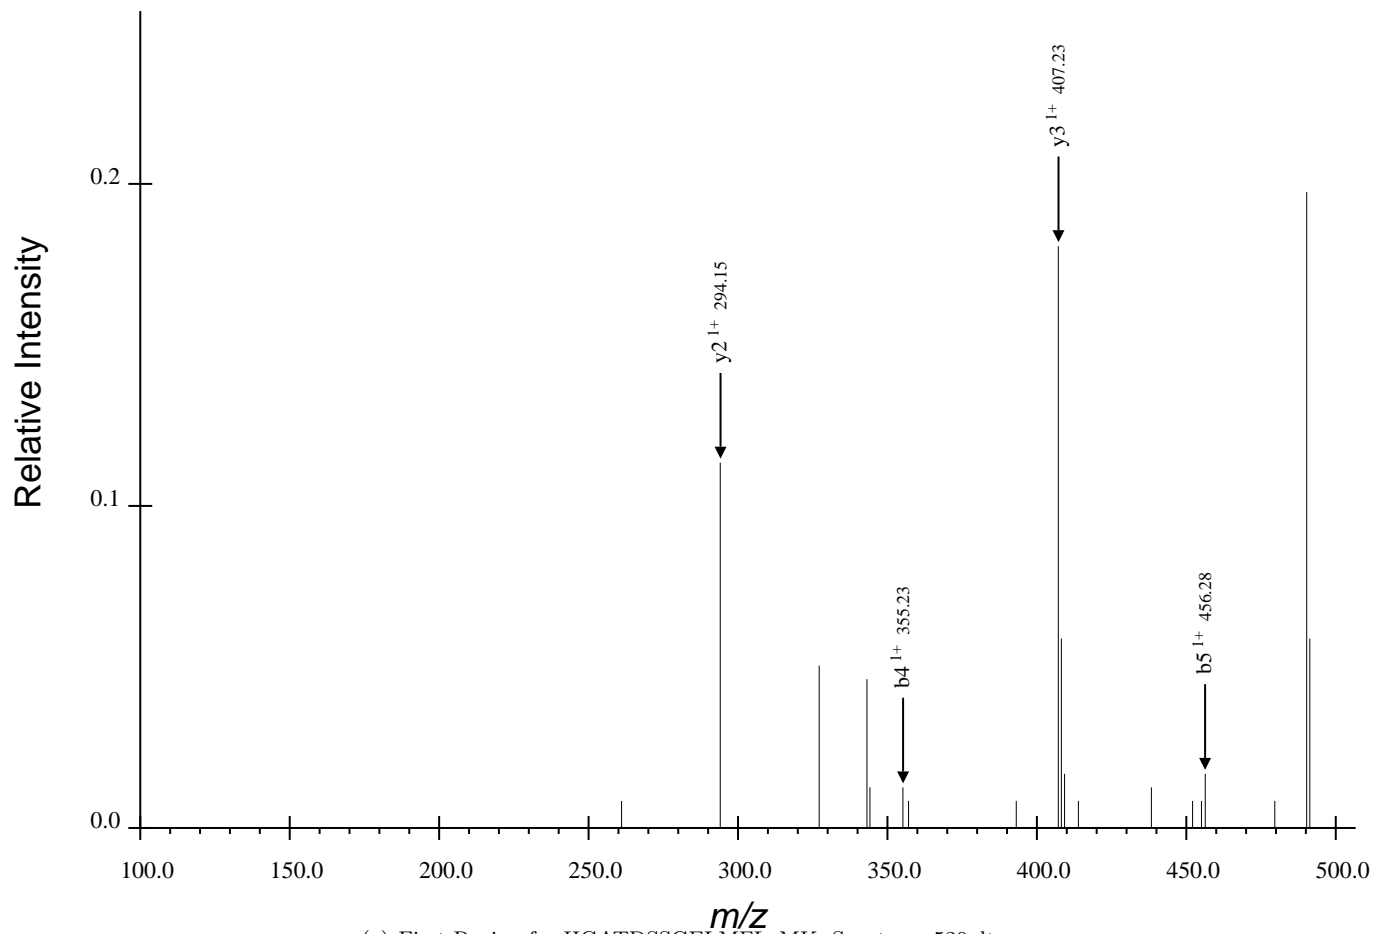

(a) First Region for IIGATDSSGELMFLoMK, Spectrum 520.dta

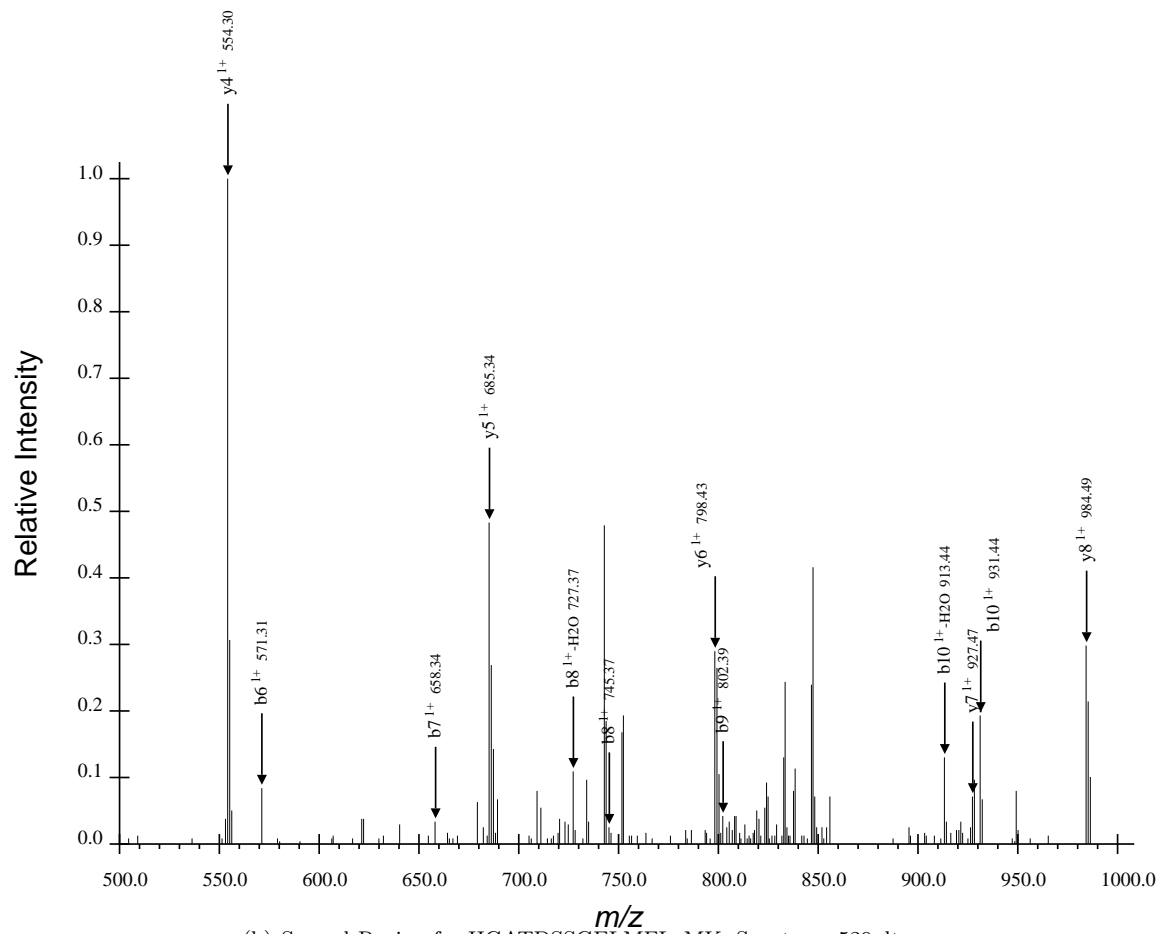

(b) Second Region for IIGATDSSGELMFLoMK, Spectrum 520.dta

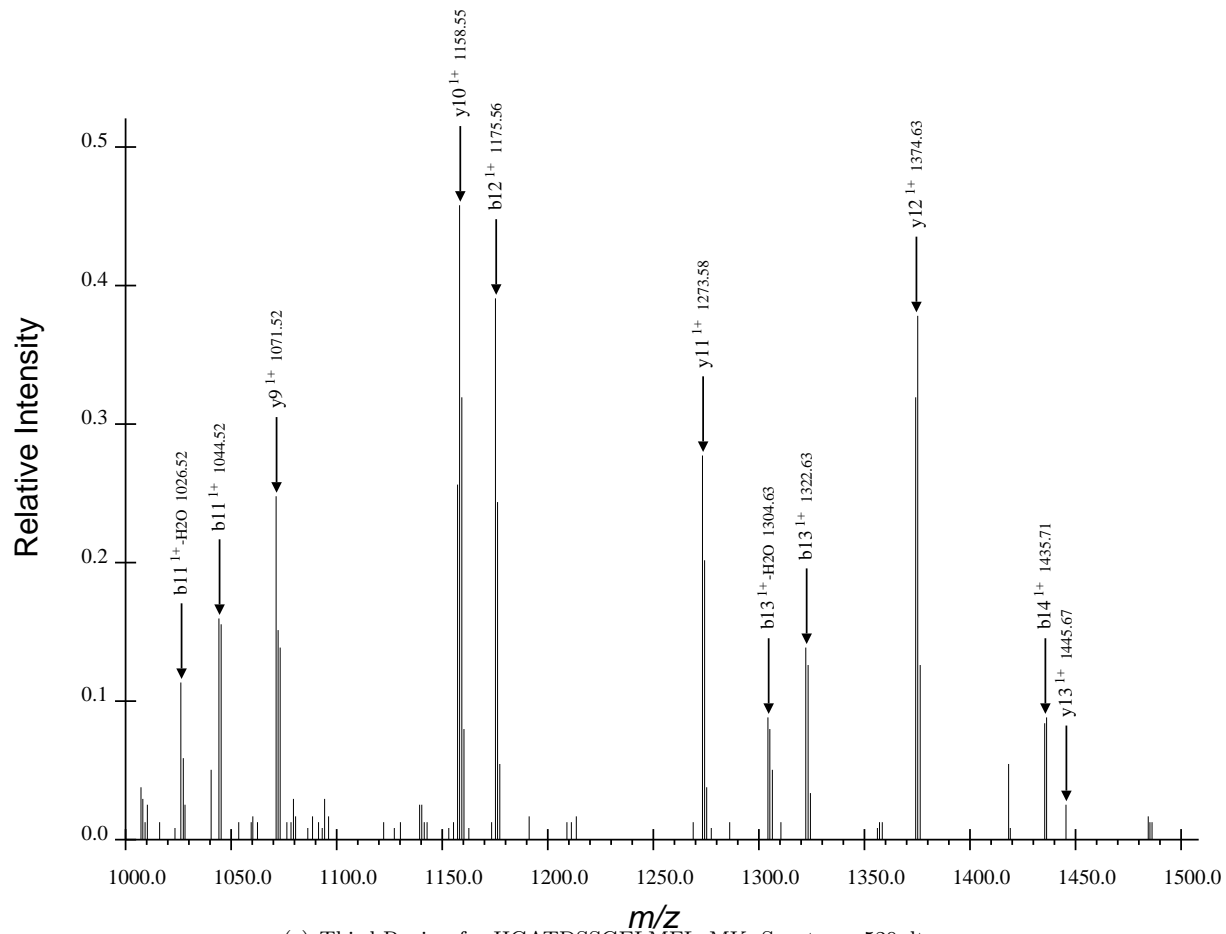

(c) Third Region for IIGATDSSGELMFLoMK, Spectrum 520.dta

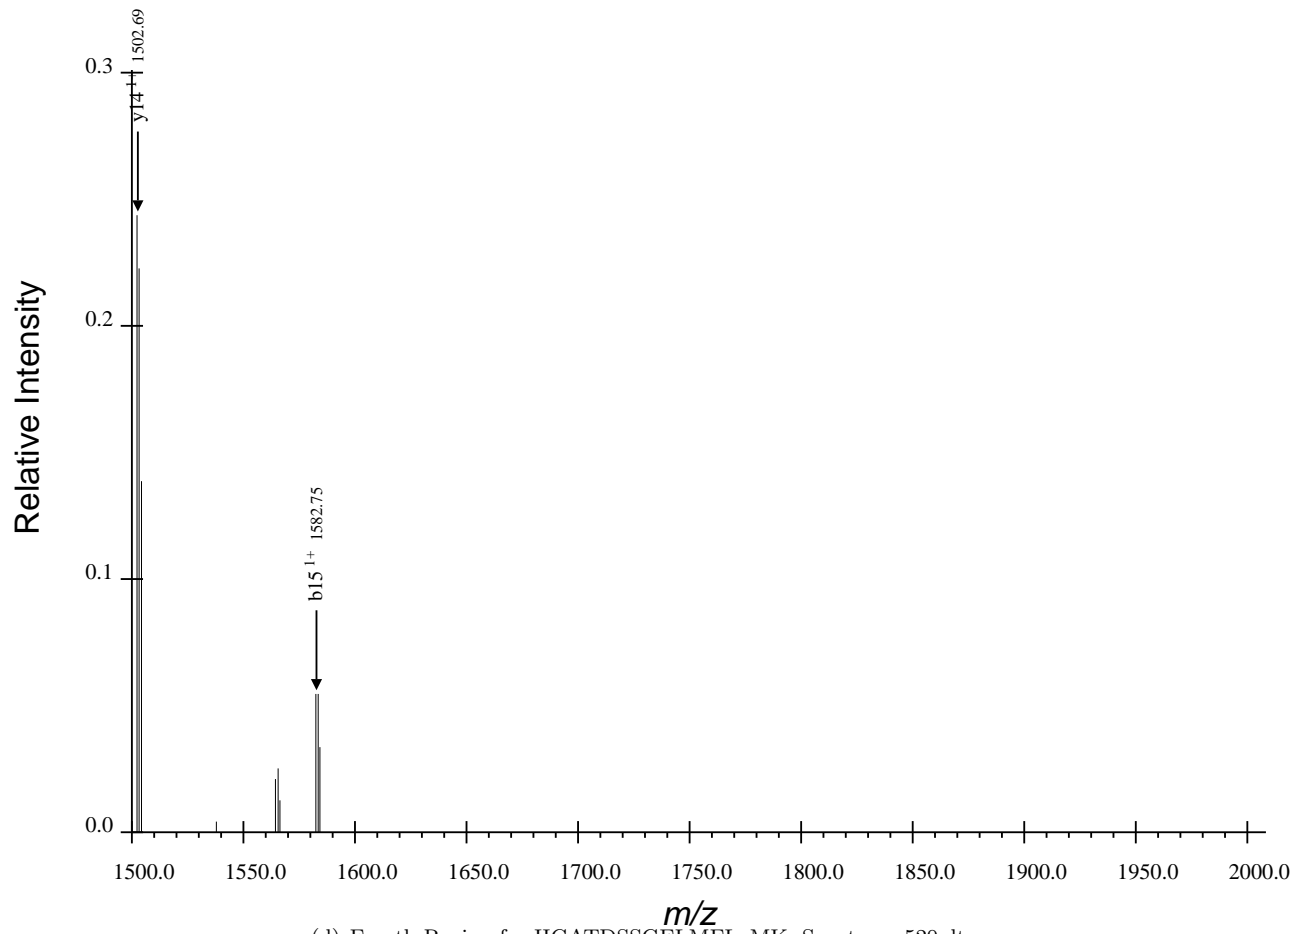

(d) Fourth Region for IIGATDSSGELMFLoMK, Spectrum 520.dta

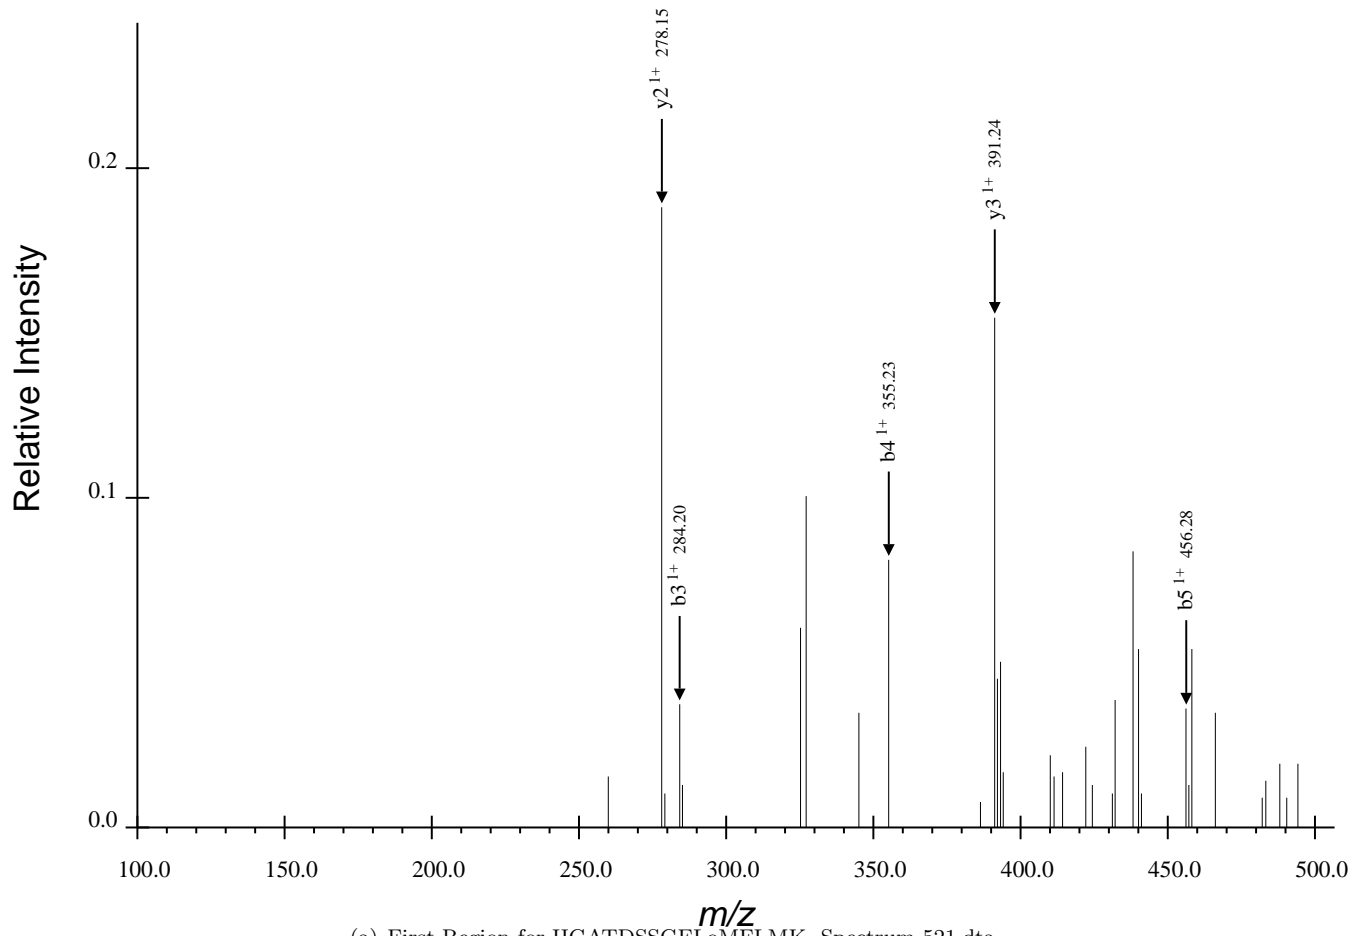

(a) First Region for IIGATDSSGELoMFLMK, Spectrum 521.dta

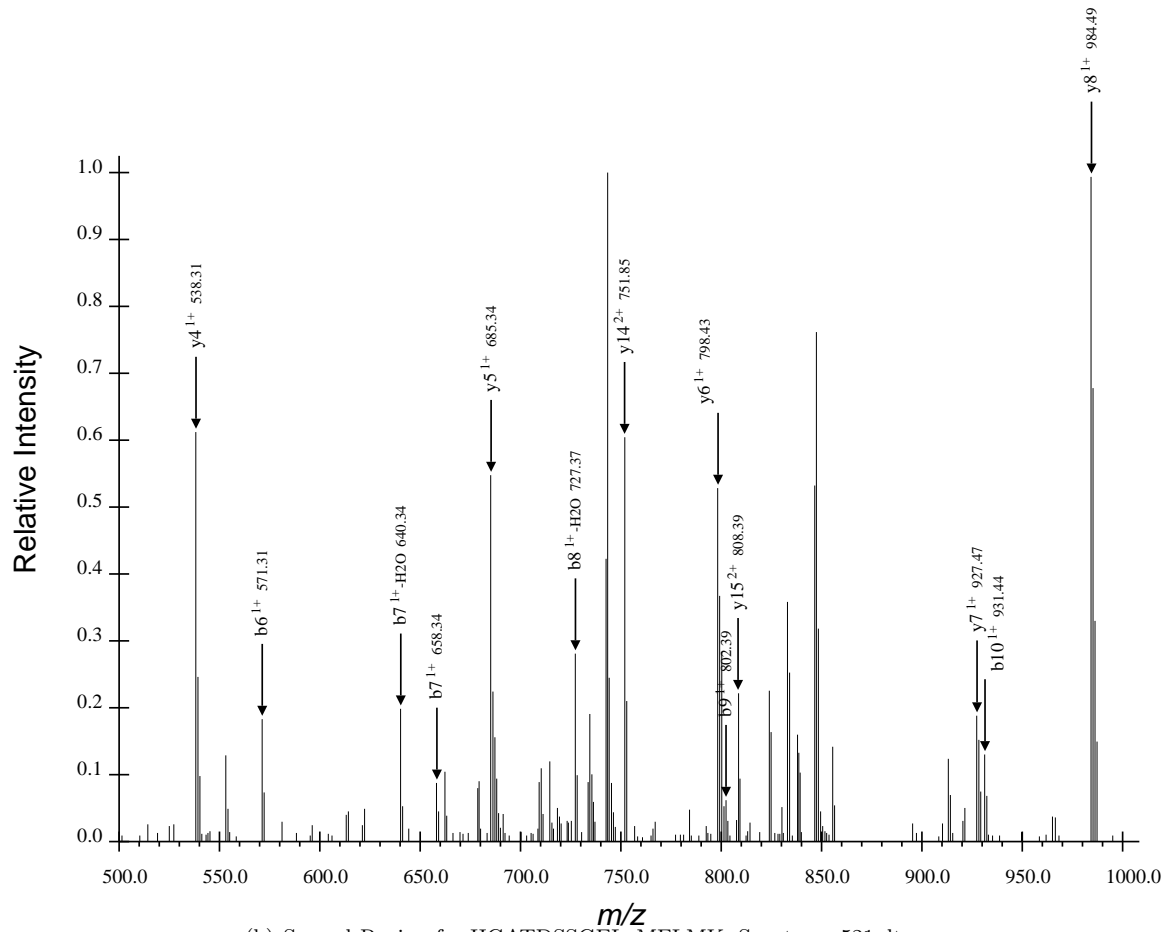

(b) Second Region for IIGATDSSGELoMFLMK, Spectrum 521.dta

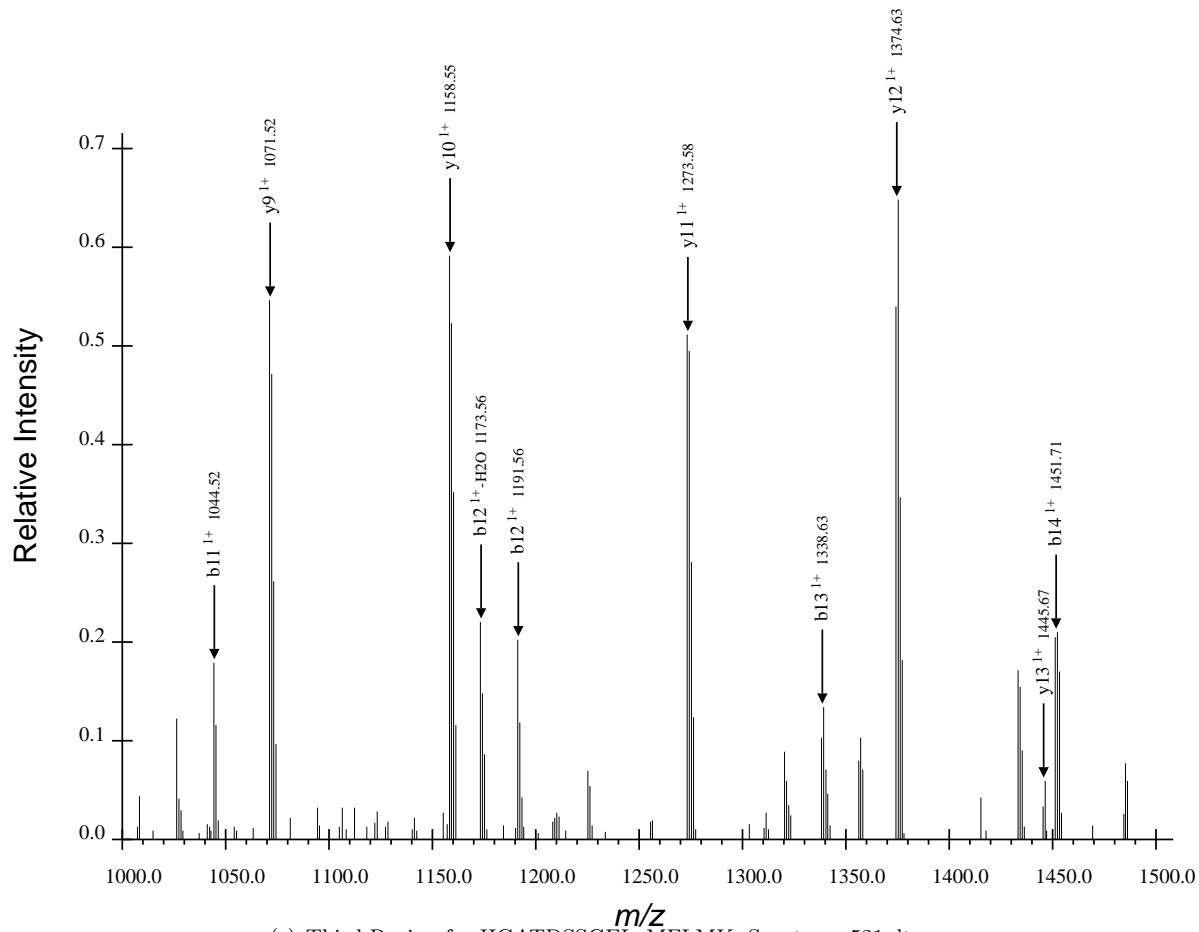

(c) Third Region for IIGATDSSGELoMFLMK, Spectrum 521.dta

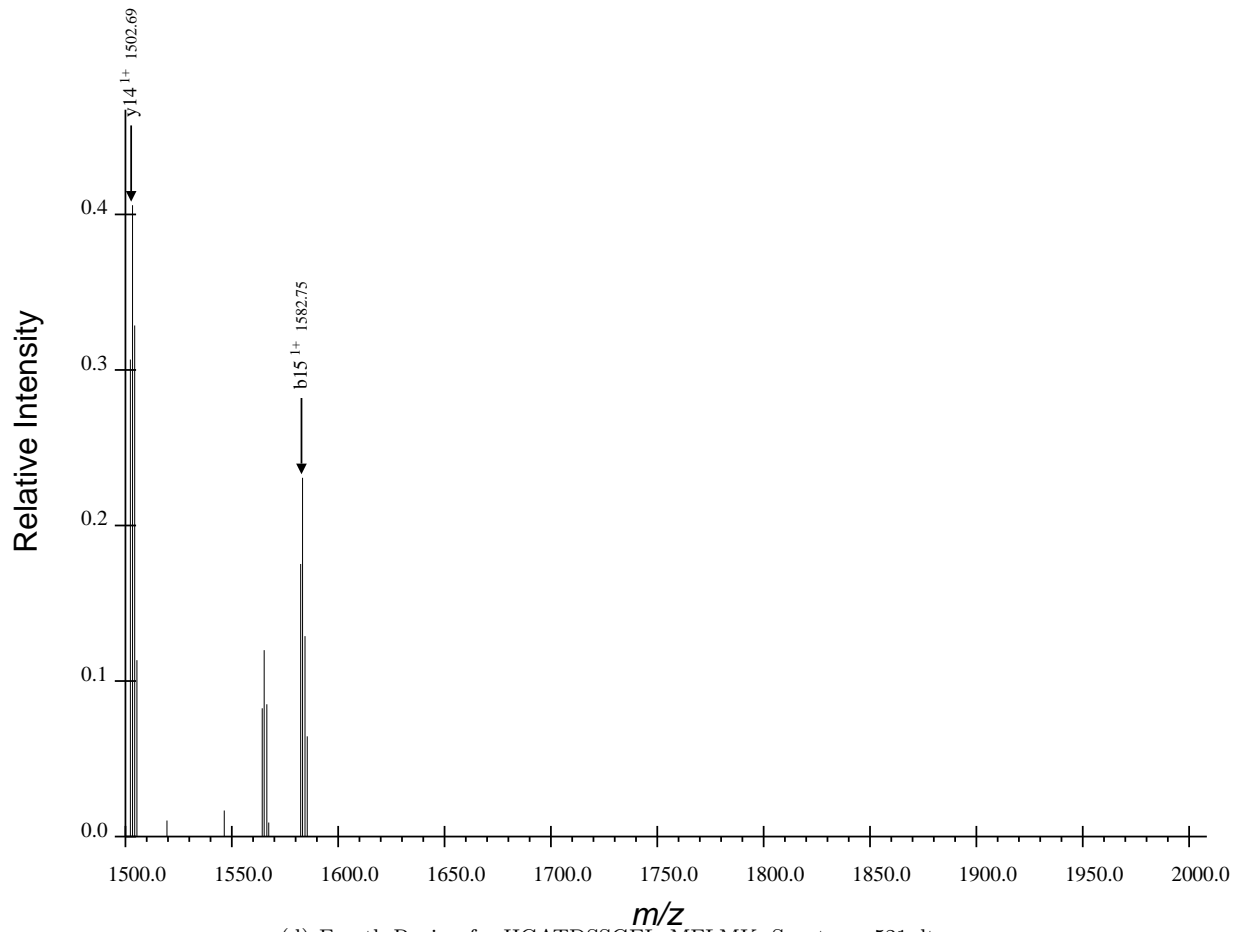

(d) Fourth Region for IIGATDSSGELoMFLMK, Spectrum 521.dta

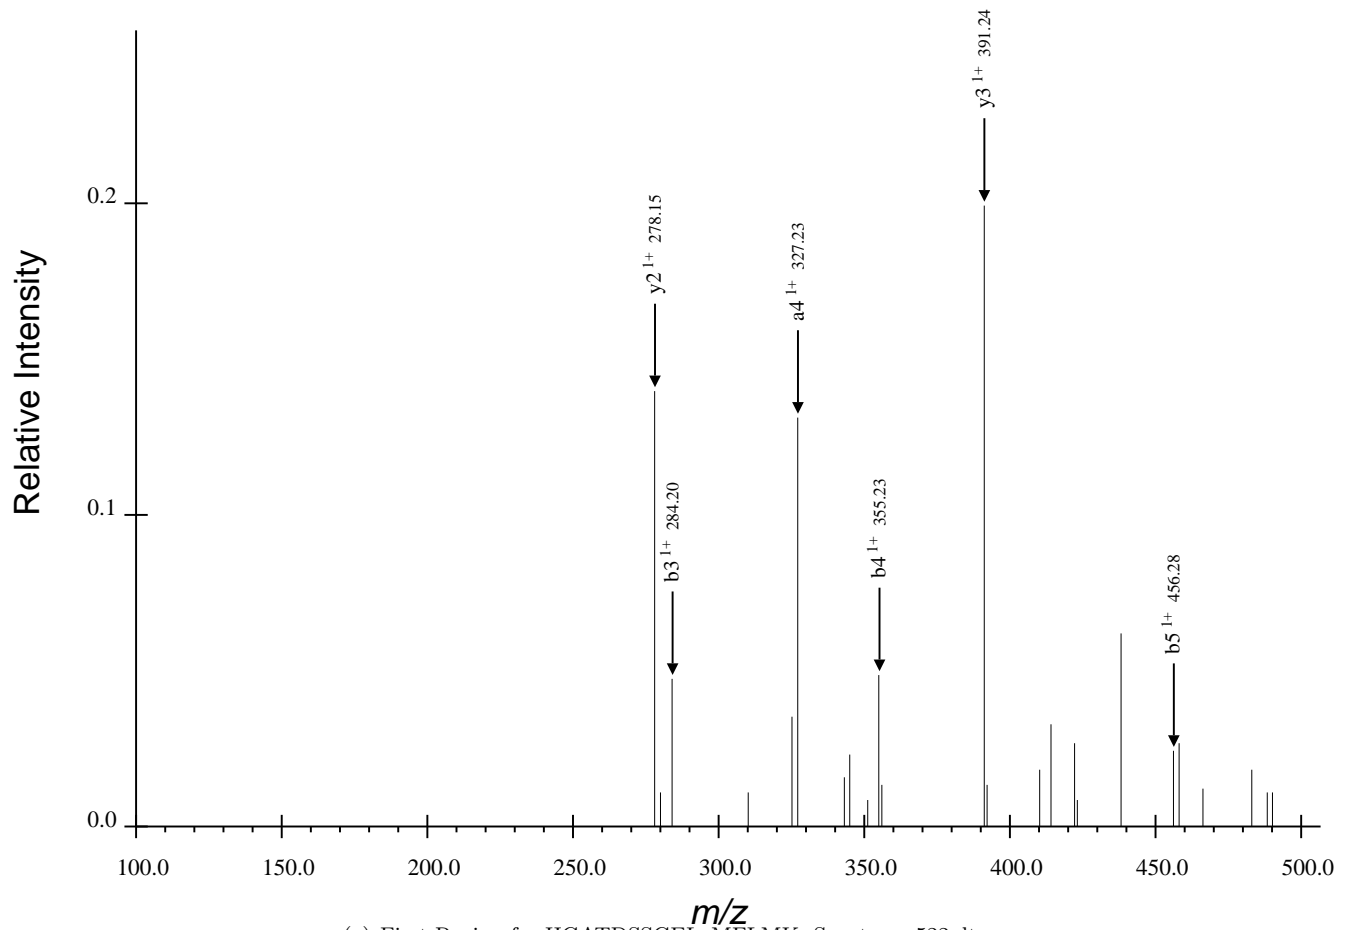

(a) First Region for IIGATDSSGELoMFLMK, Spectrum 522.dta

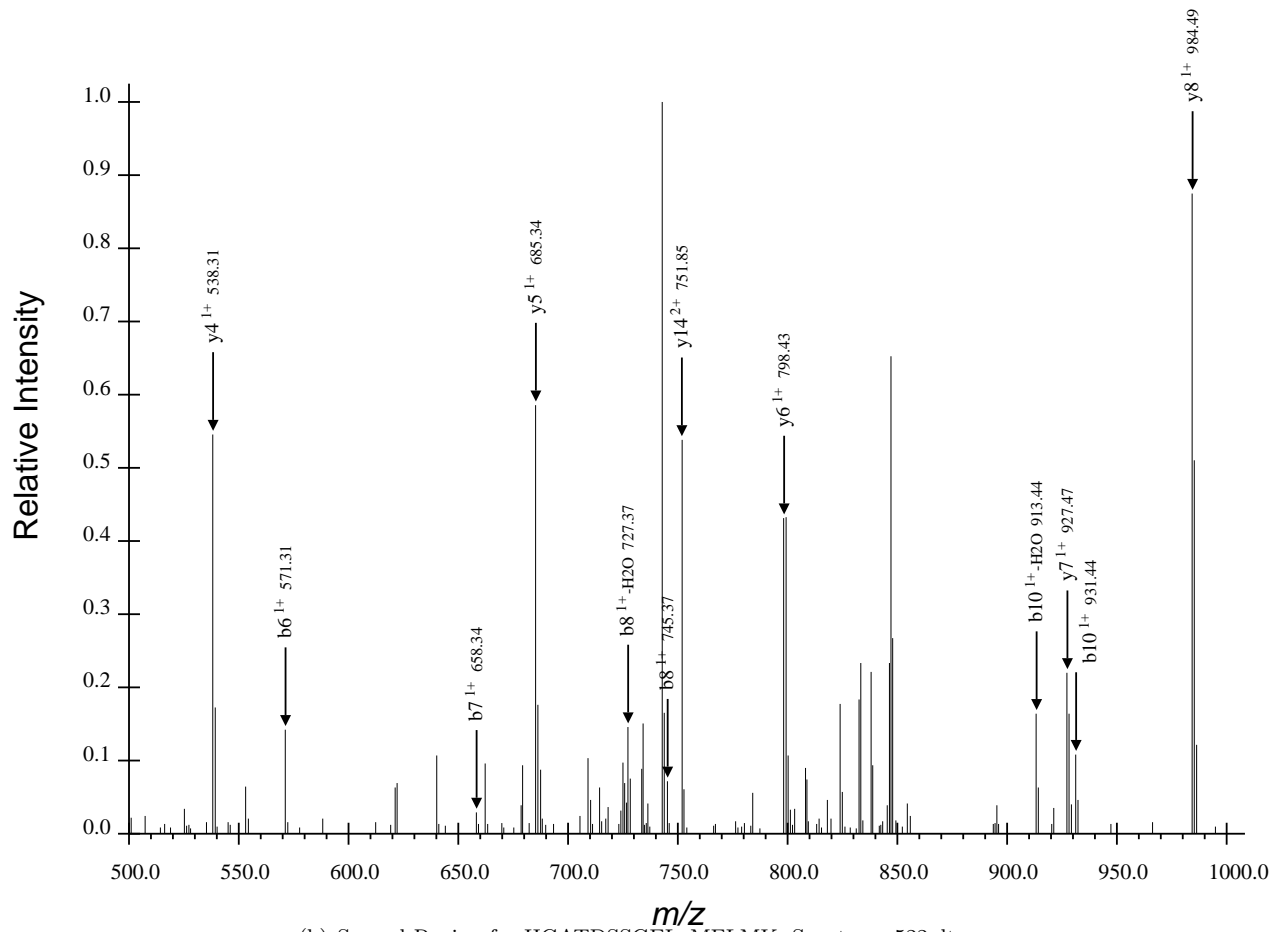

(b) Second Region for IIGATDSSGELoMFLMK, Spectrum 522.dta

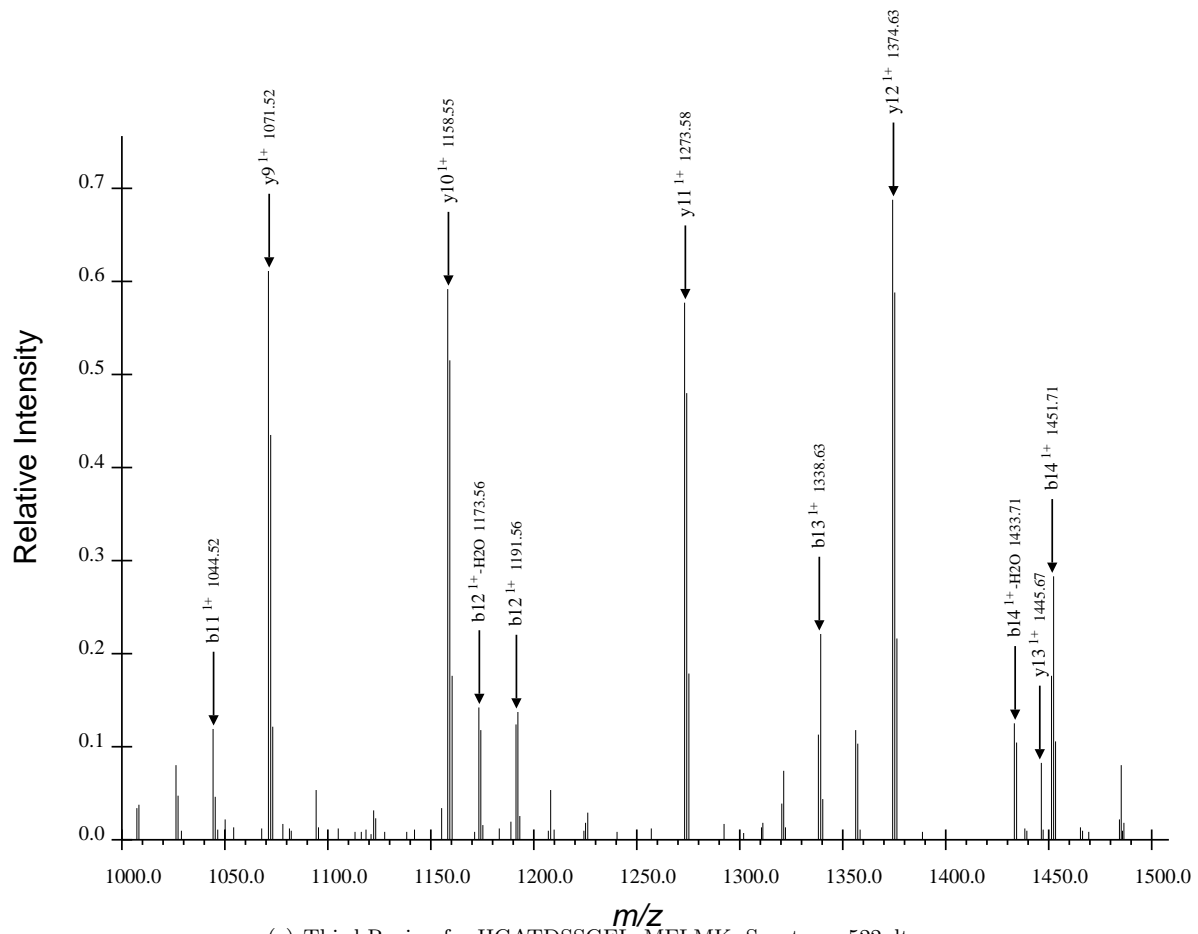

(c) Third Region for IIGATDSSGELoMFLMK, Spectrum 522.dta

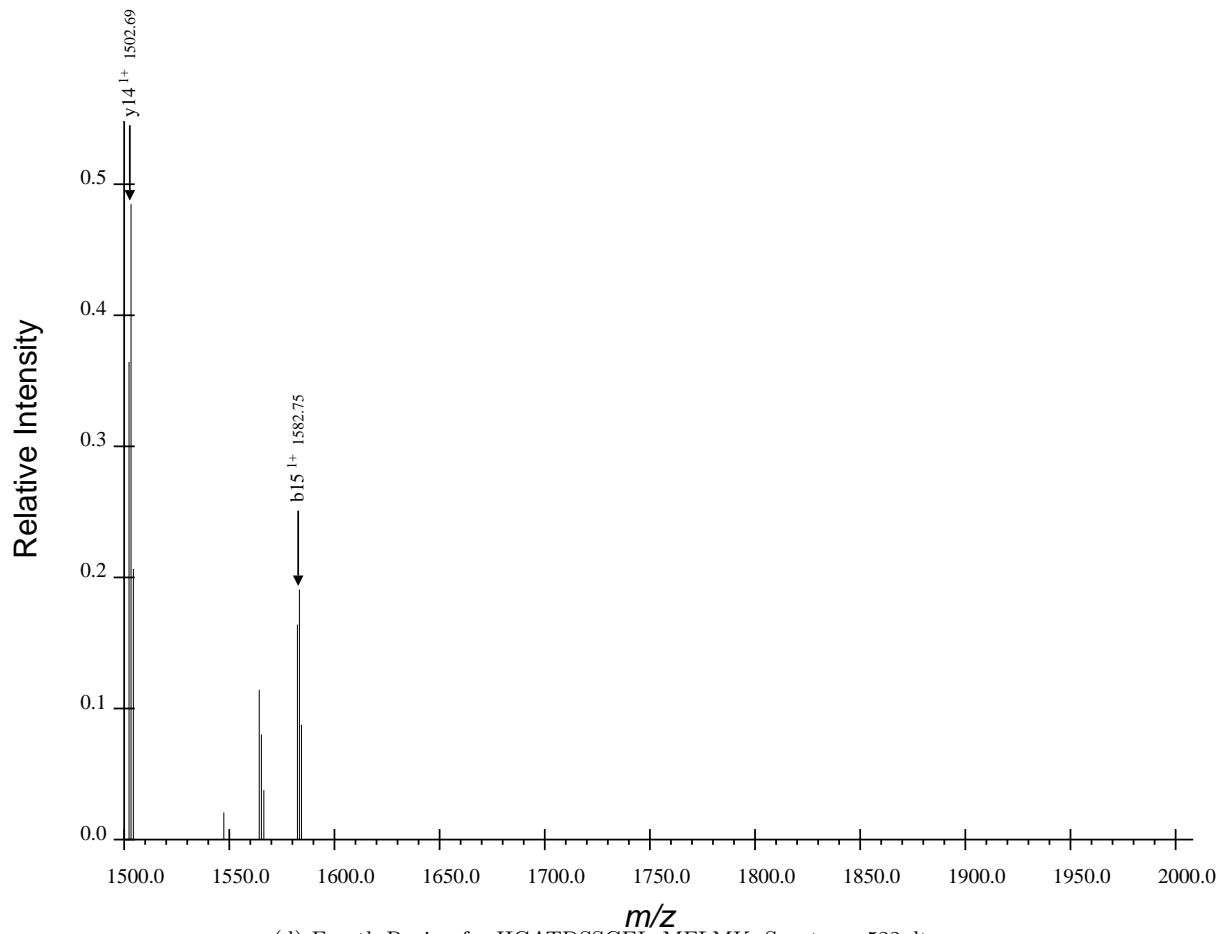

(d) Fourth Region for IIGATDSSGELoMFLMK, Spectrum 522.dta

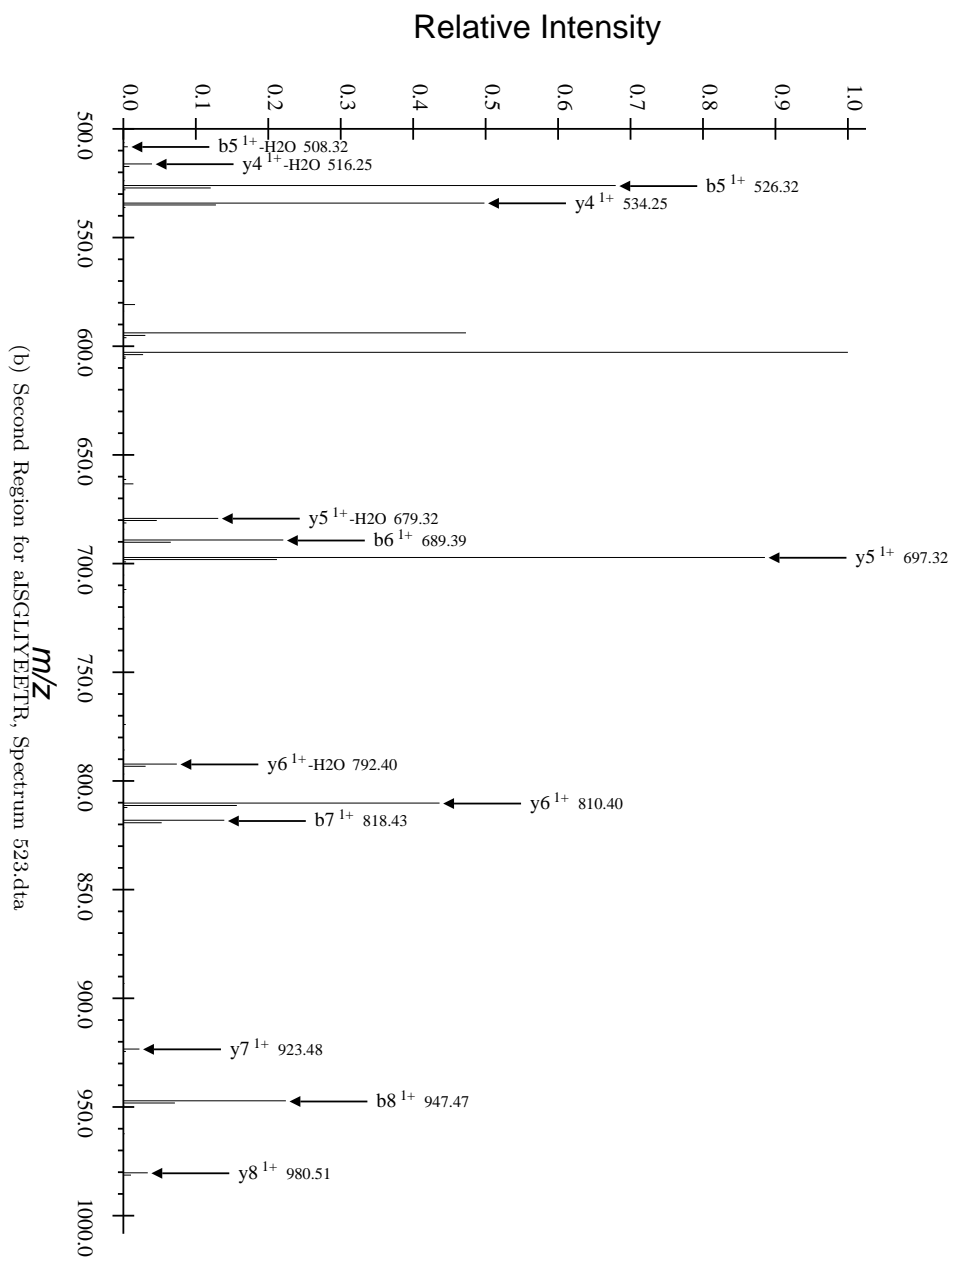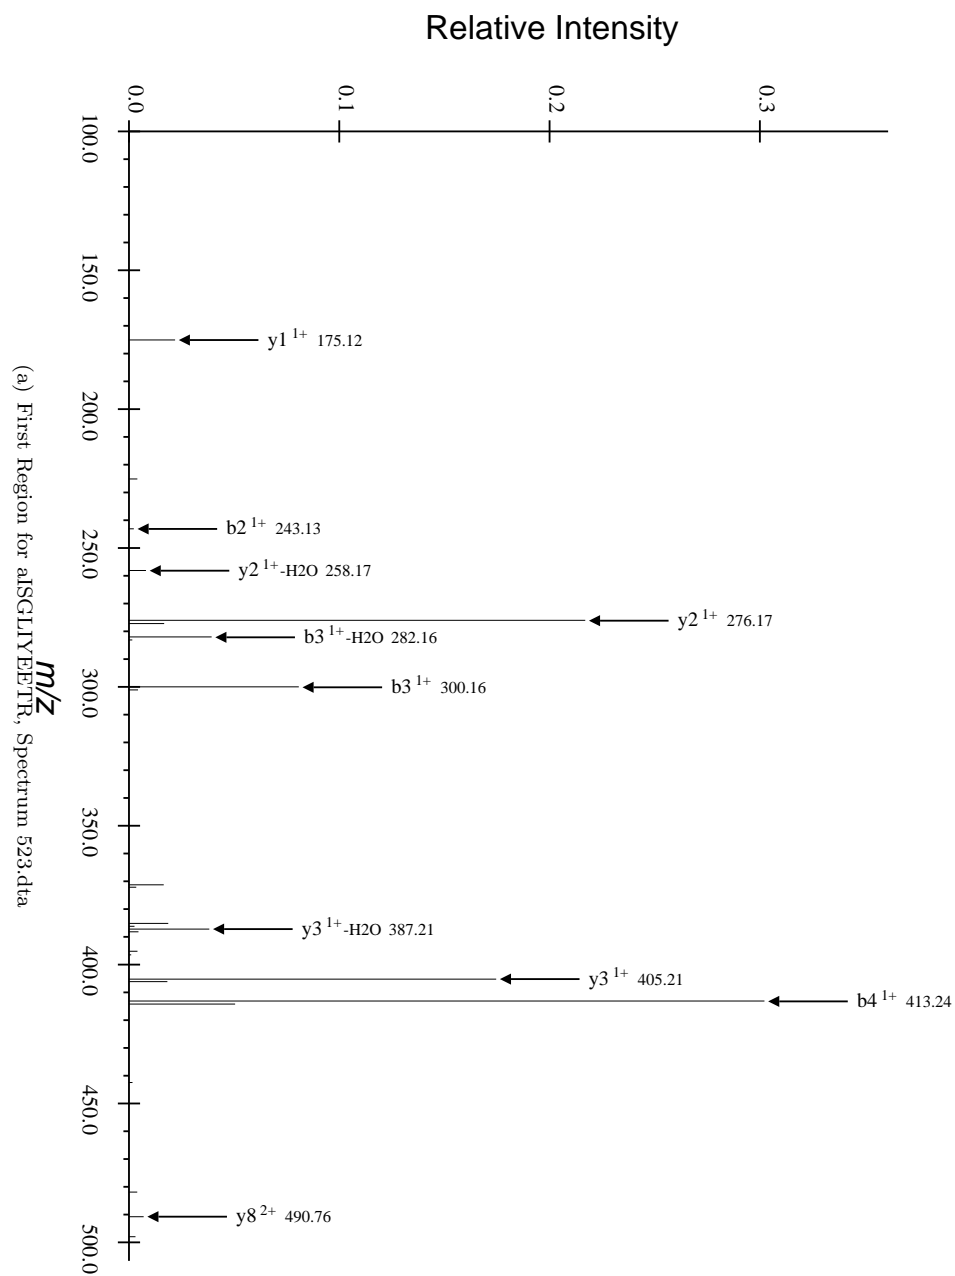

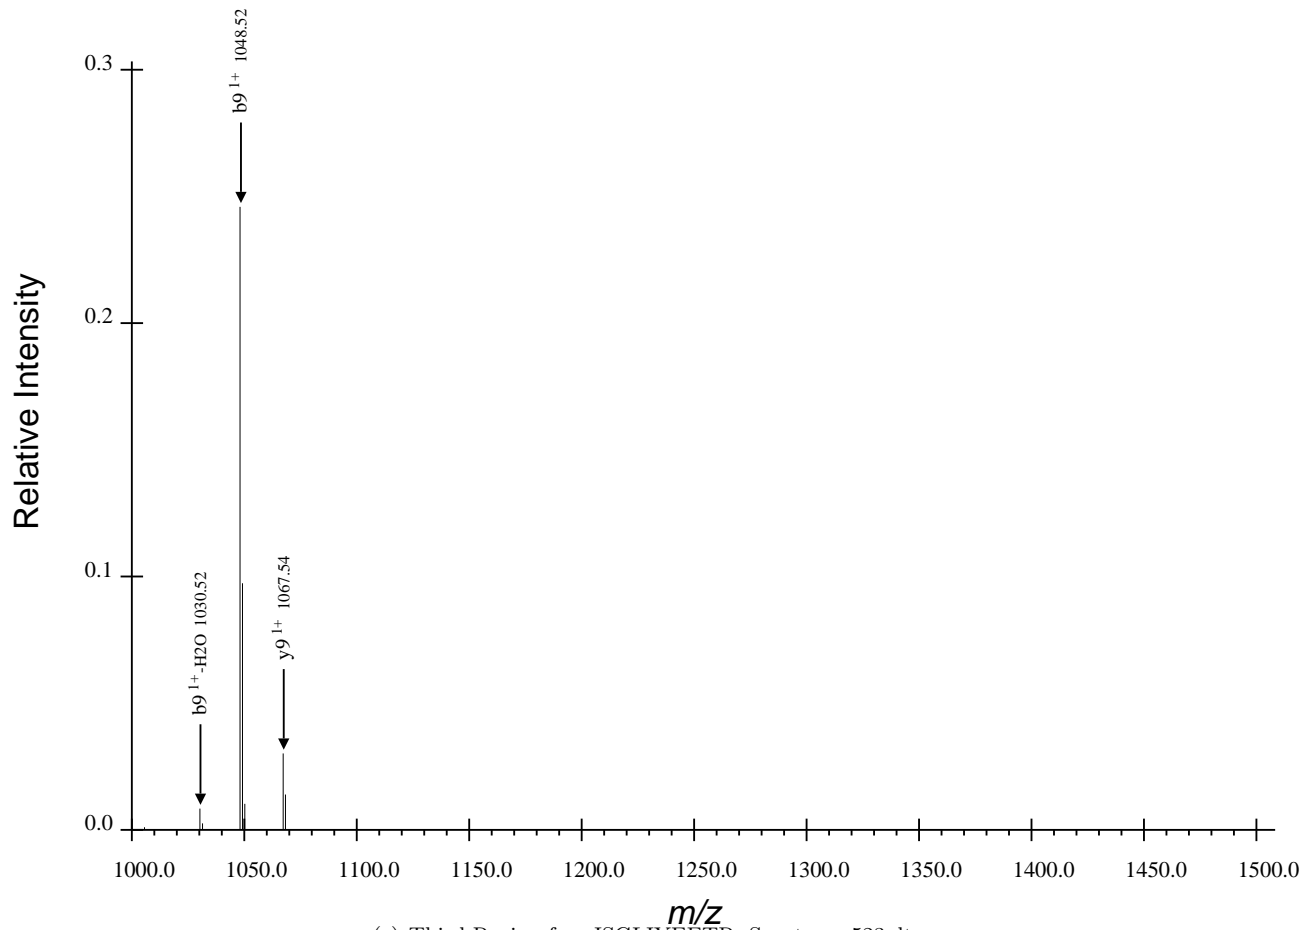

(c) Third Region for aISGLIYEETR, Spectrum 523.dta

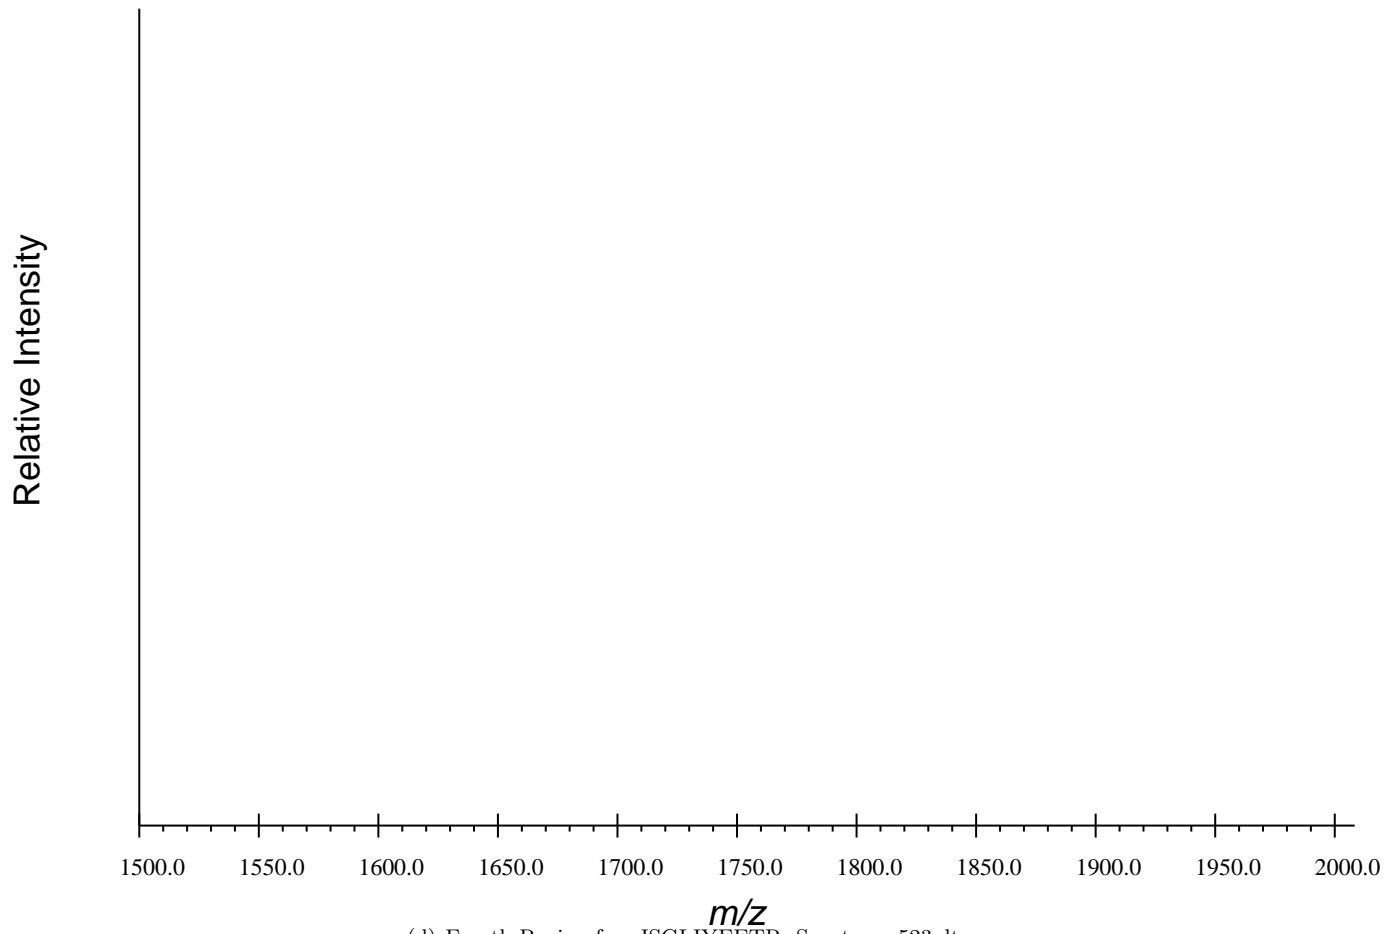

(d) Fourth Region for aISGLIYEETR, Spectrum 523.dta



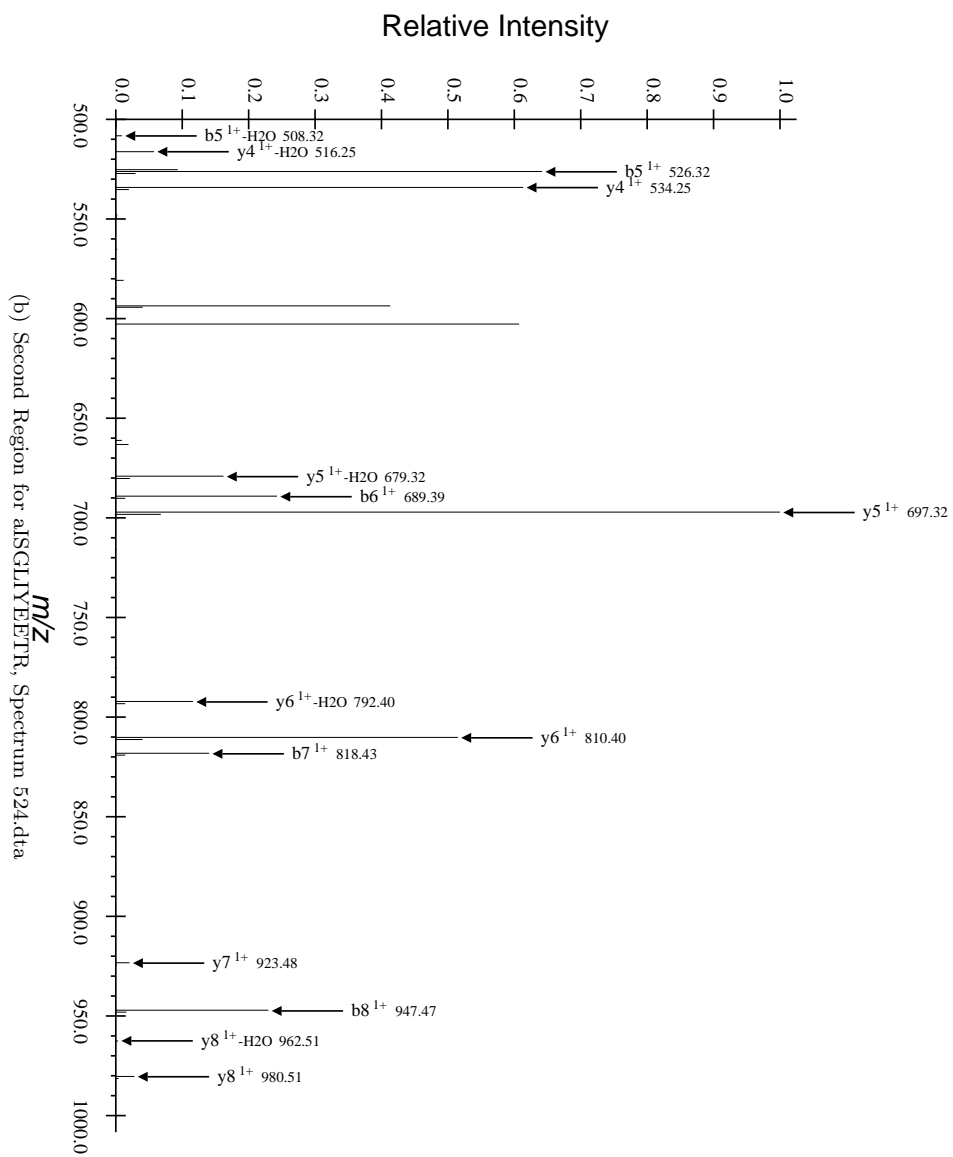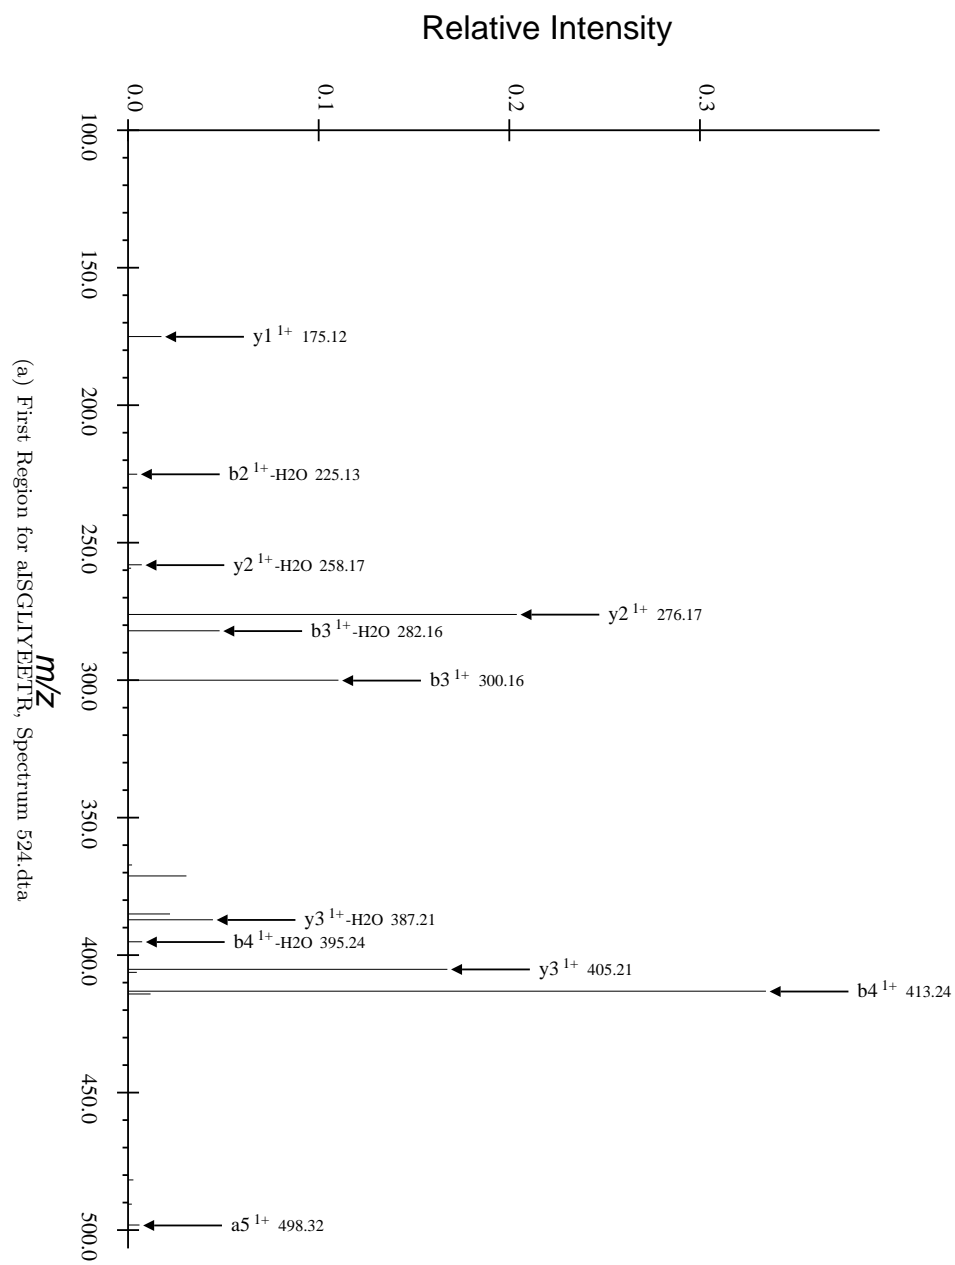

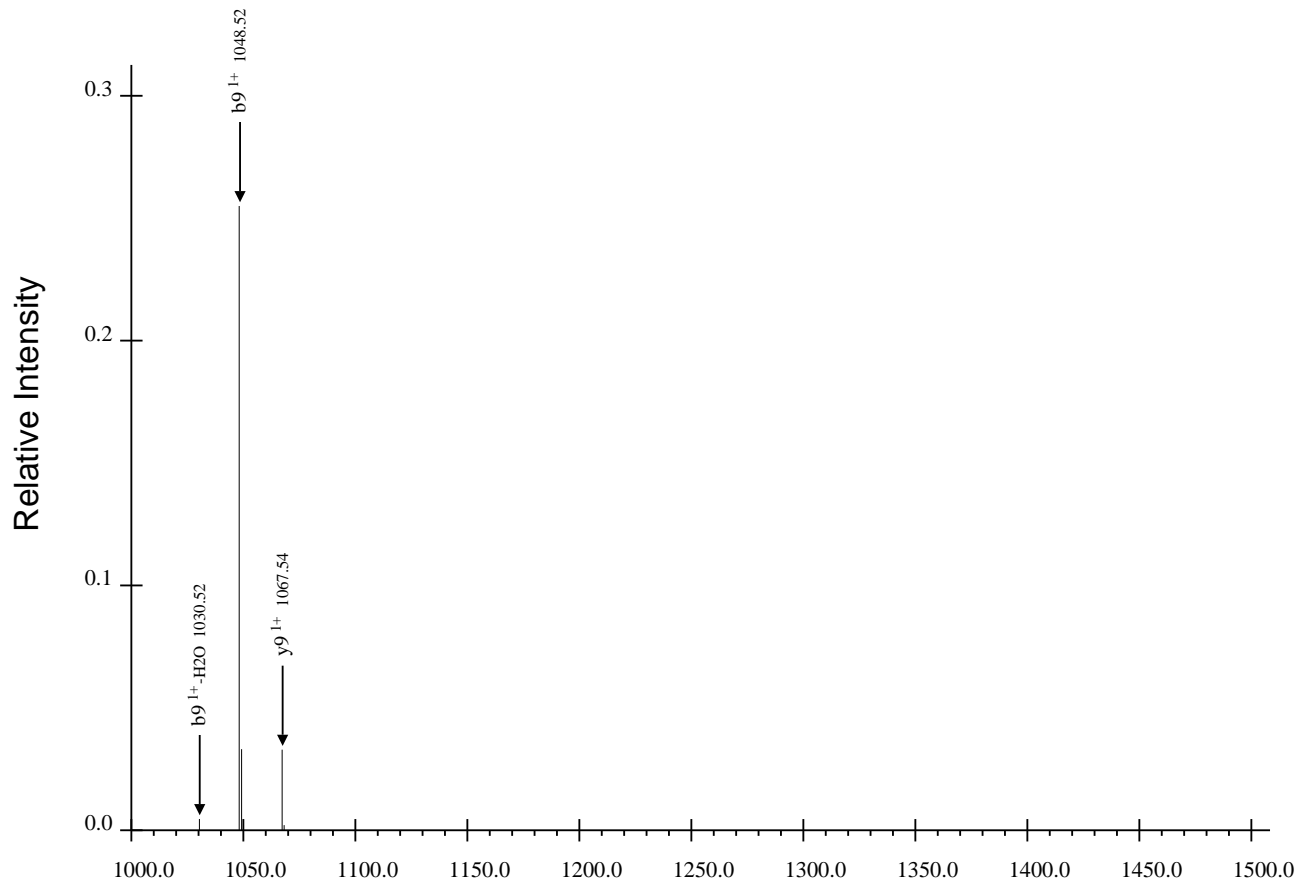

(c) Third Region for aISGLIYEETR, Spectrum 524.dta

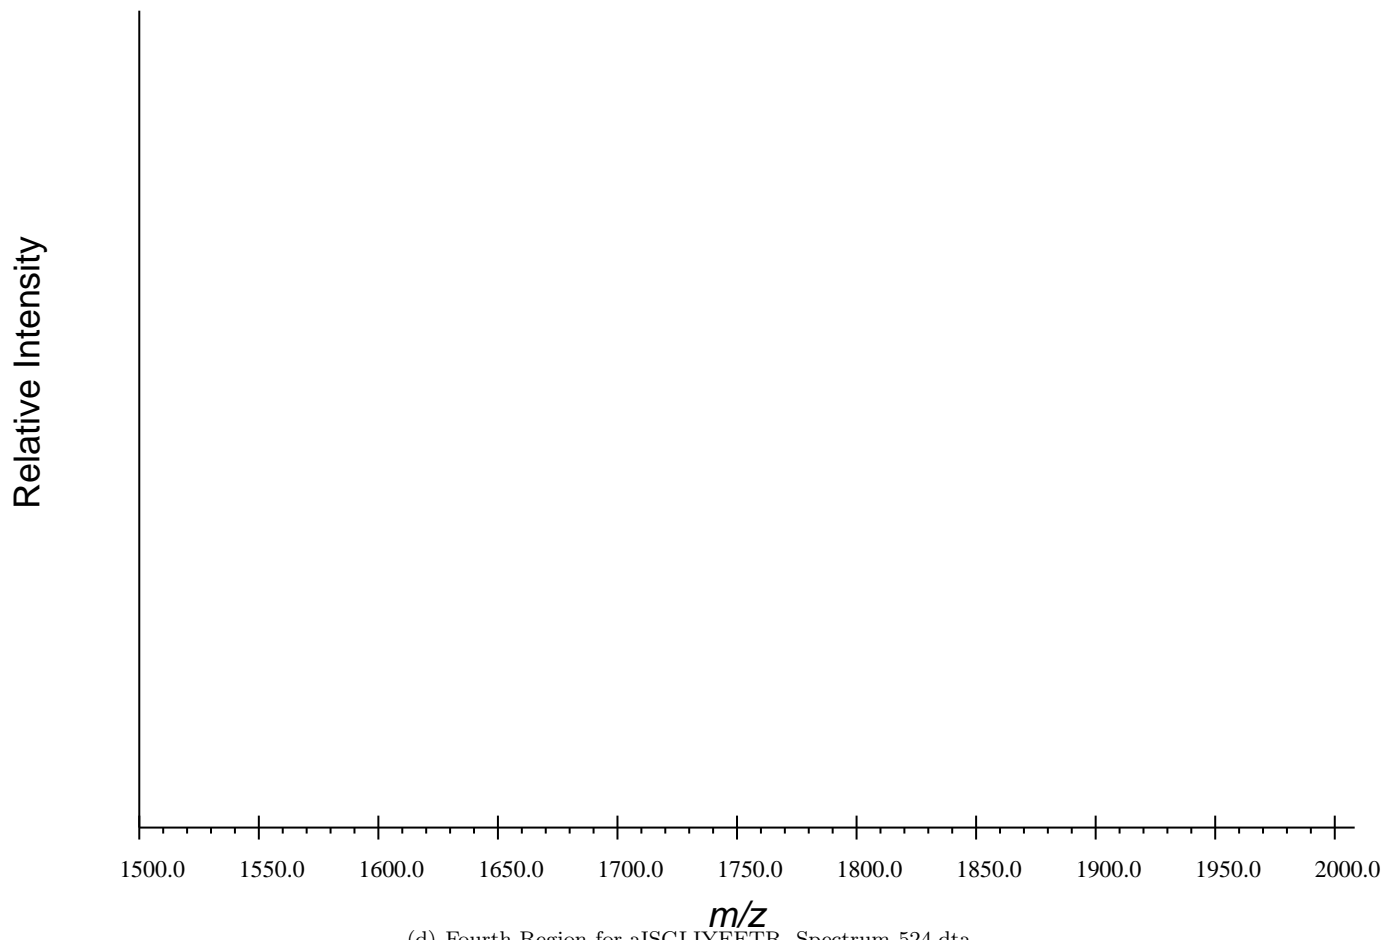

(d) Fourth Region for aISGLIYEETR, Spectrum 524.dta

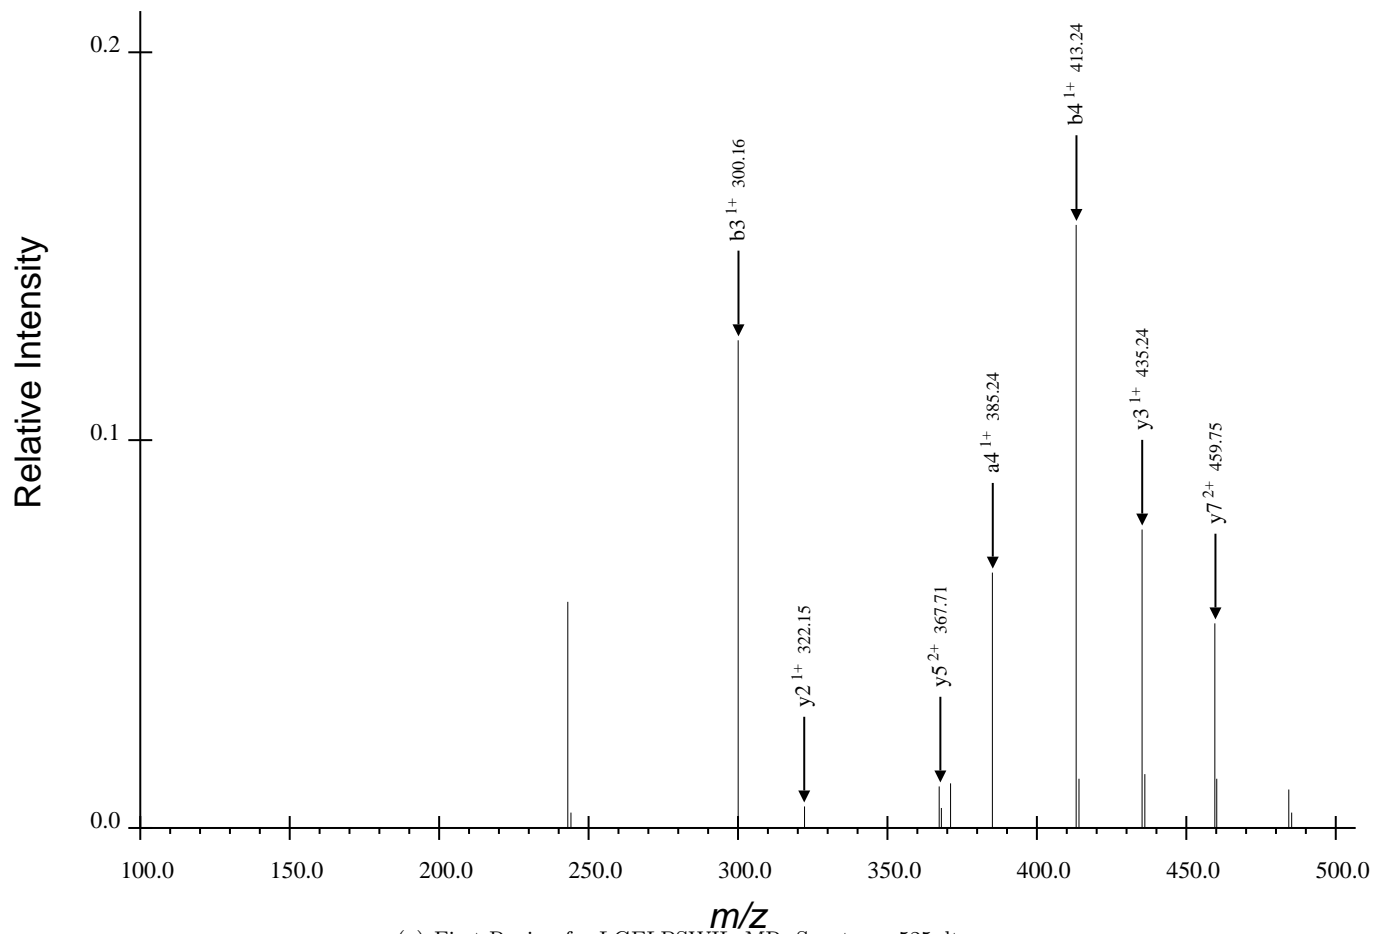

(a) First Region for LGELPSWiLoMR, Spectrum 525.dta

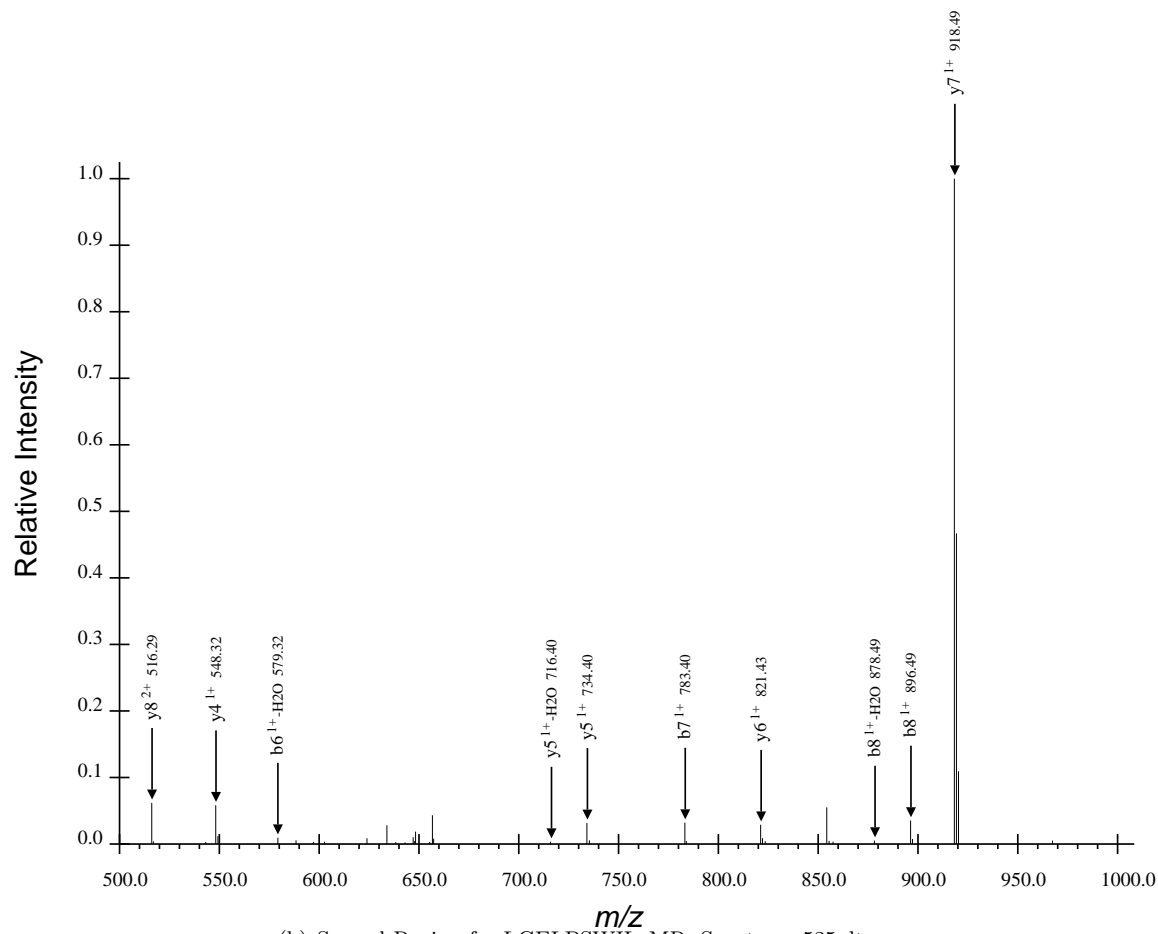

(b) Second Region for LGELPSWiLoMR, Spectrum 525.dta

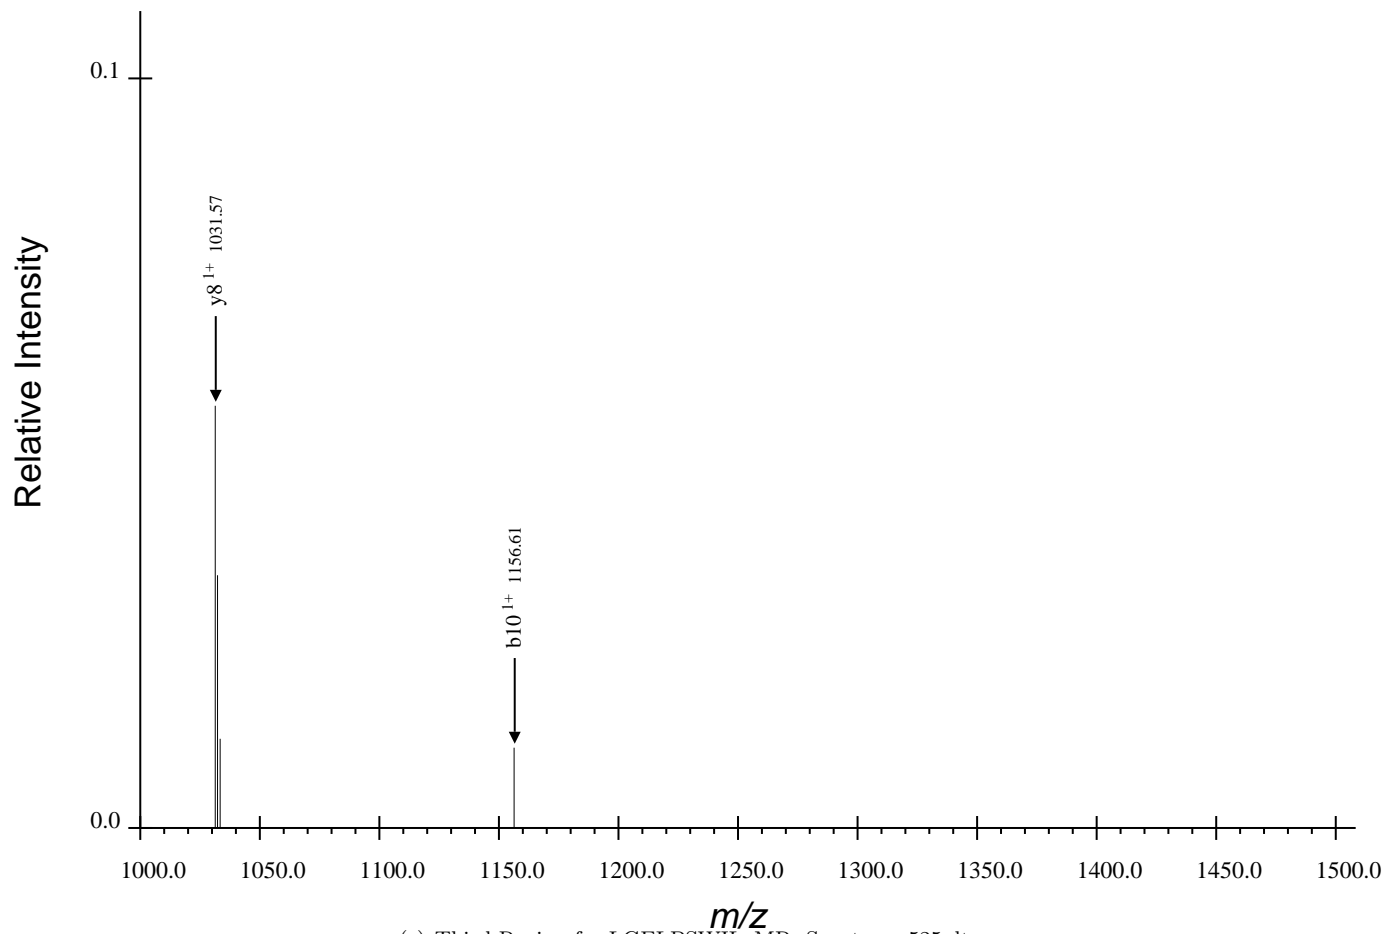

(c) Third Region for LGELPSWILoMR, Spectrum 525.dta

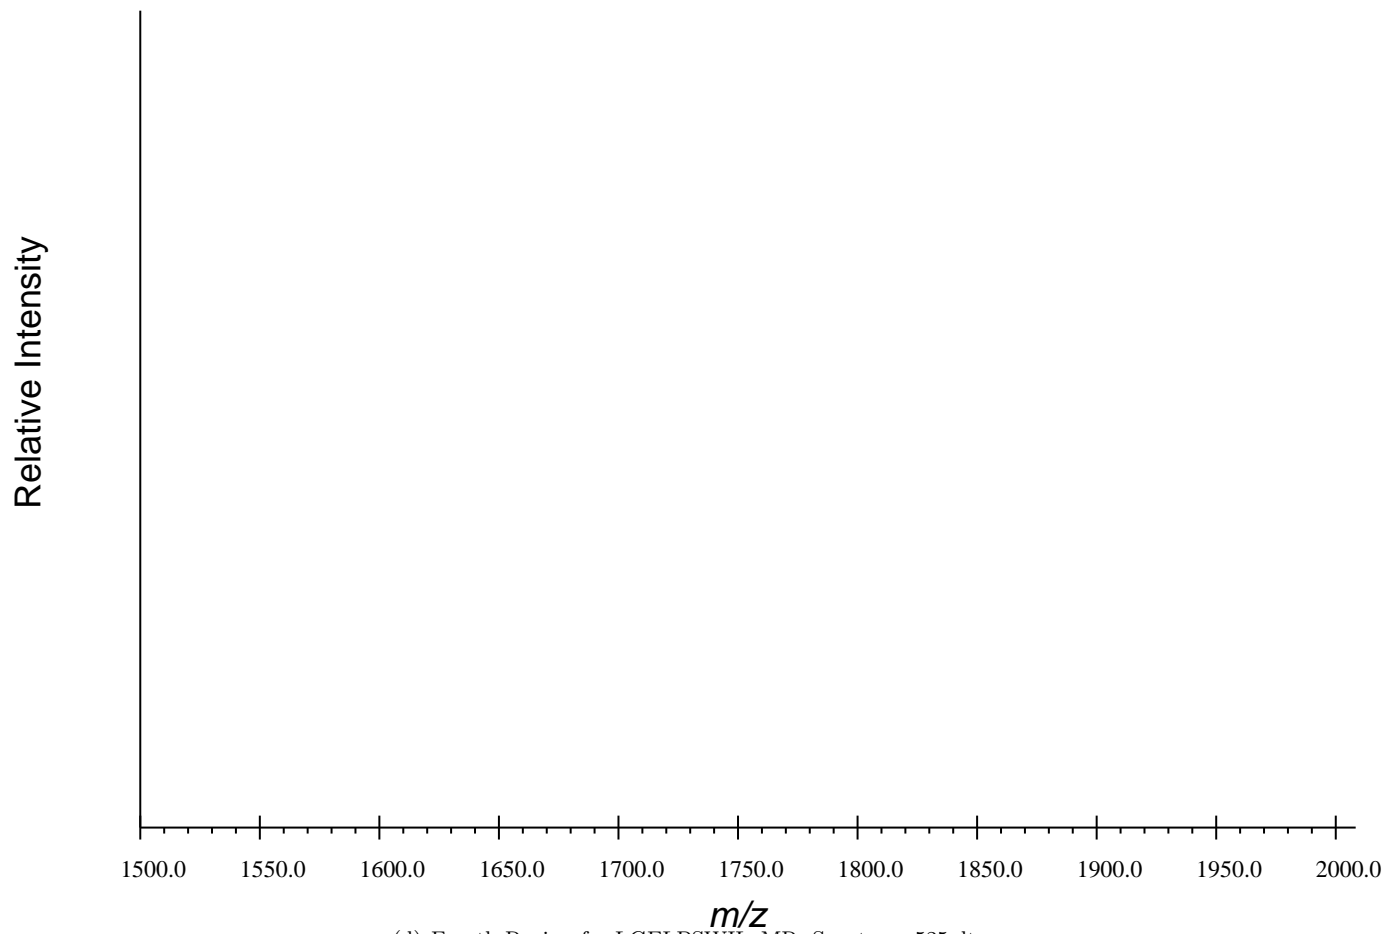

(d) Fourth Region for LGELPSWILoMR, Spectrum 525.dta
